# Supplementary material
Source: PubMed Central journal article supplement (PMC4914804)
Supplement: supp_kfw034_toxsci-15-0738-File011.pdf [file supp_kfw034_toxsci-15-0738-File011.pdf]

Chemical : 1-(Hydroxymethyl)-5,5-dimethylhydantoin  
CAS : 116-25-6

Assay ID 1508 (NHEERL\_TPO\_AUR\_dn)  
Sample ID : TP0001441A01

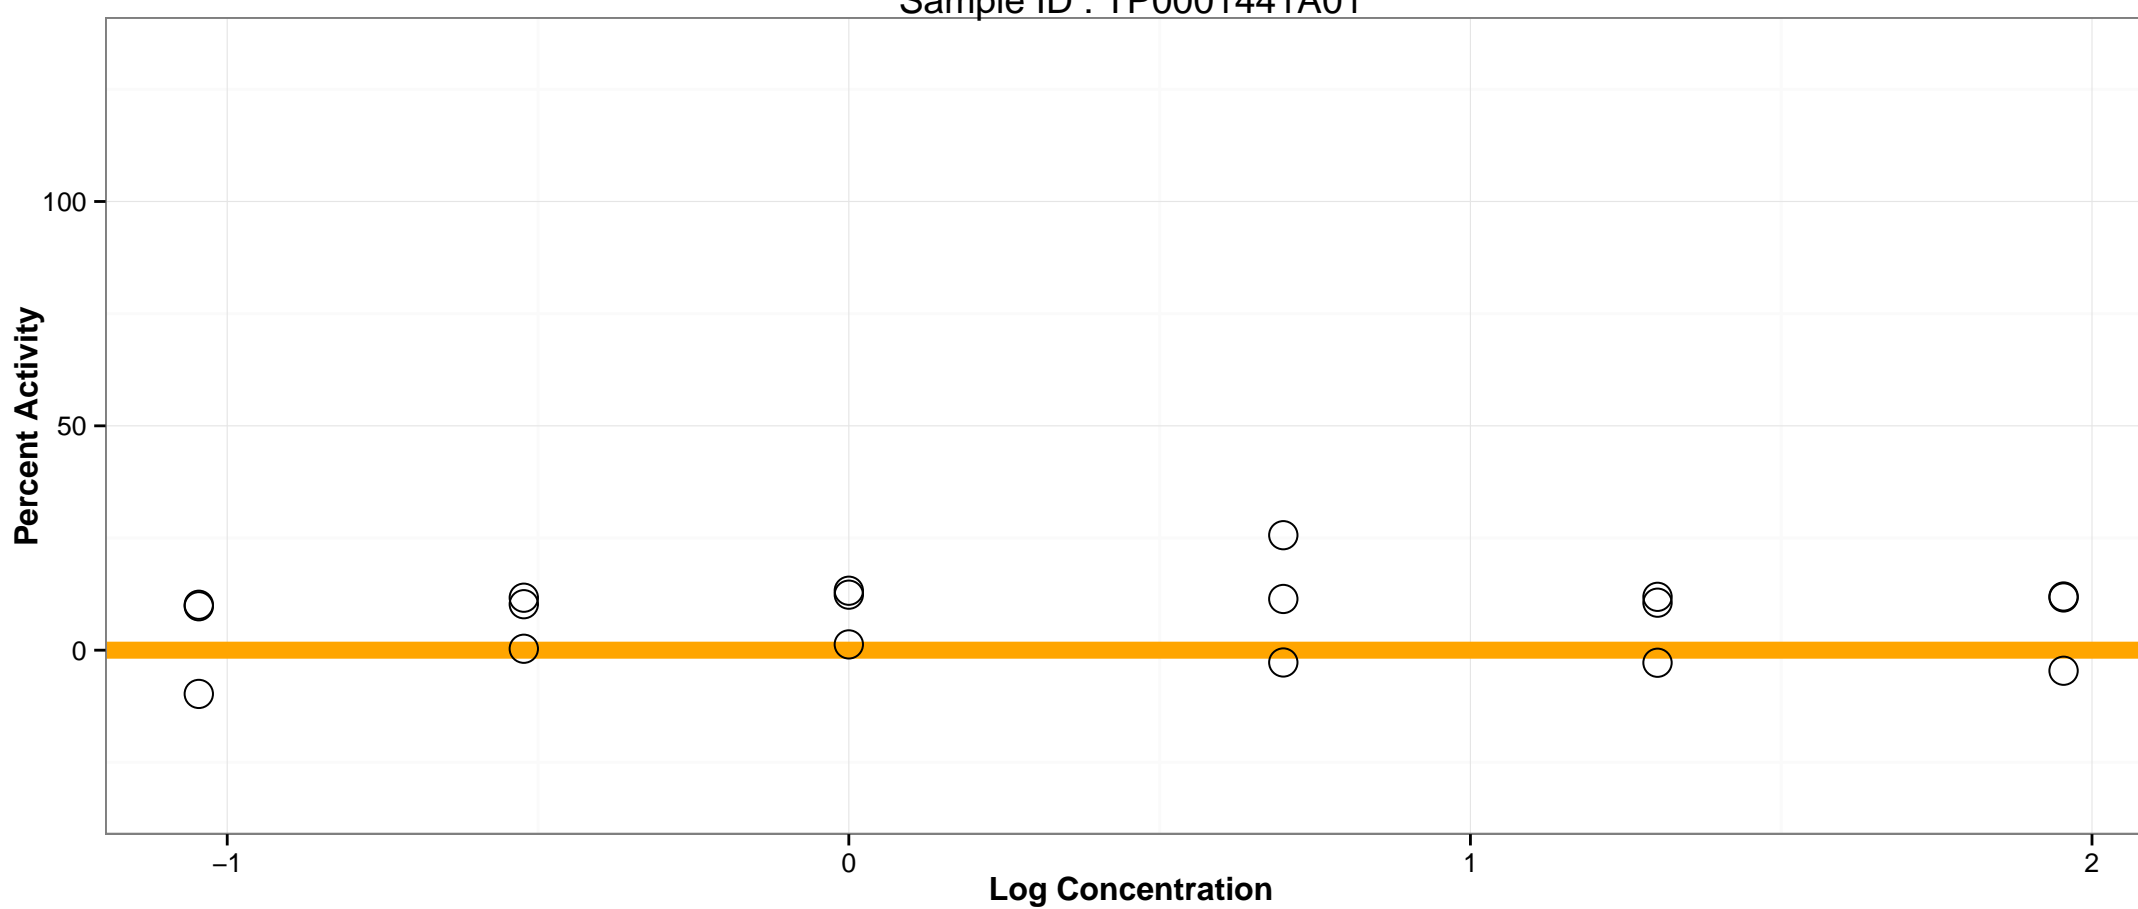

HILL MODEL

HILL MODEL: Not applicable

GAIN-LOSS MODEL

GNLS MODEL: Not applicable

|      | CNST   | HILL | GNLS |
|------|--------|------|------|
| AIC  | 142.08 | NA   | NA   |
| PROB | 1      | NA   | NA   |
| RMSE | 11.12  | NA   | NA   |

MAX\_MEAN : 11.4 MAX\_MED : 12.4 BMAD : 5.69  
COFF : 20 HIT-CALL : 0 FITC : 4 ACTP : 0  
FLAGS :

Assay ID 1509 (NHEERL\_HEK293T\_CellTiterGLO)  
Sample ID : TP0001441A01

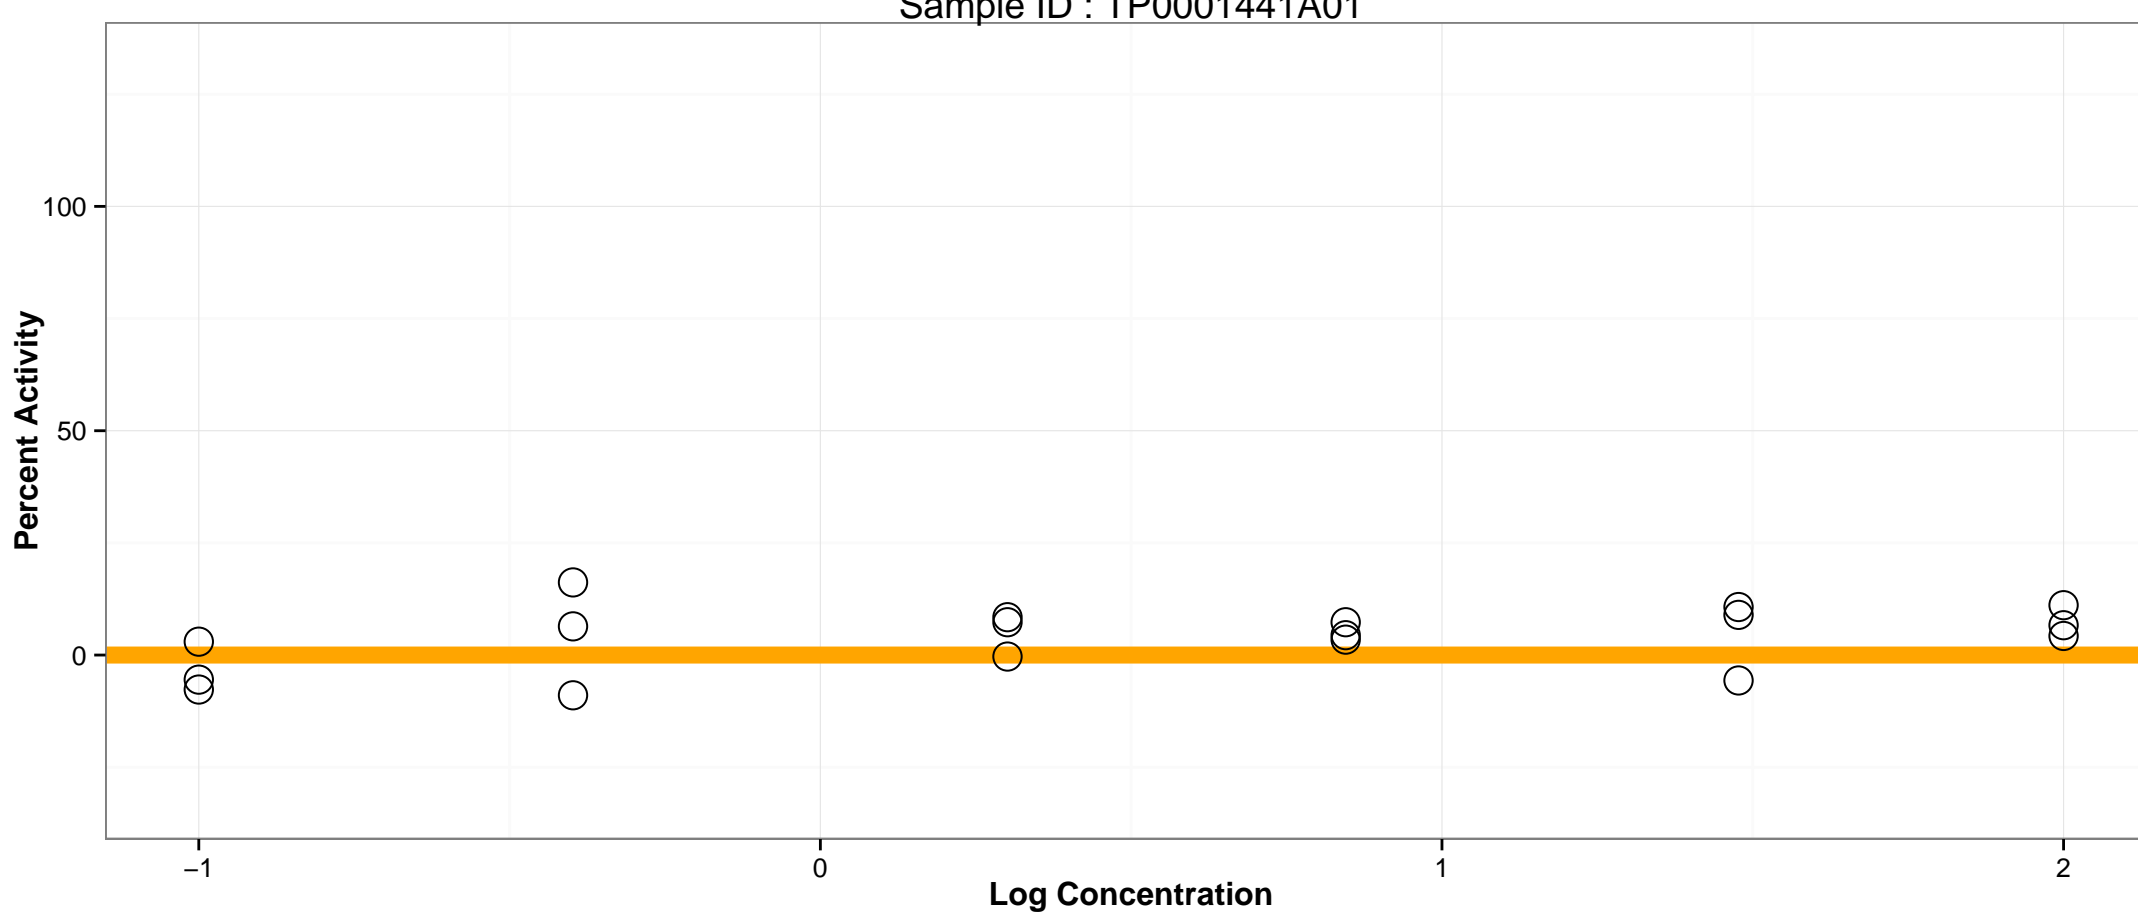

HILL MODEL

HILL MODEL: Not applicable

GAIN-LOSS MODEL

GNLS MODEL: Not applicable

|      | CNST   | HILL | GNLS |
|------|--------|------|------|
| AIC  | 129.95 | NA   | NA   |
| PROB | 1      | NA   | NA   |
| RMSE | 7.84   | NA   | NA   |

MAX\_MEAN : 7.35 MAX\_MED : 8.97 BMAD : 5.54  
COFF : 20 HIT-CALL : 0 FITC : 4 ACTP : 0  
FLAGS :

Assay ID 1848 (NHEERL\_Quantilum\_inhib\_2\_dn)  
Sample ID : TP0001441A01

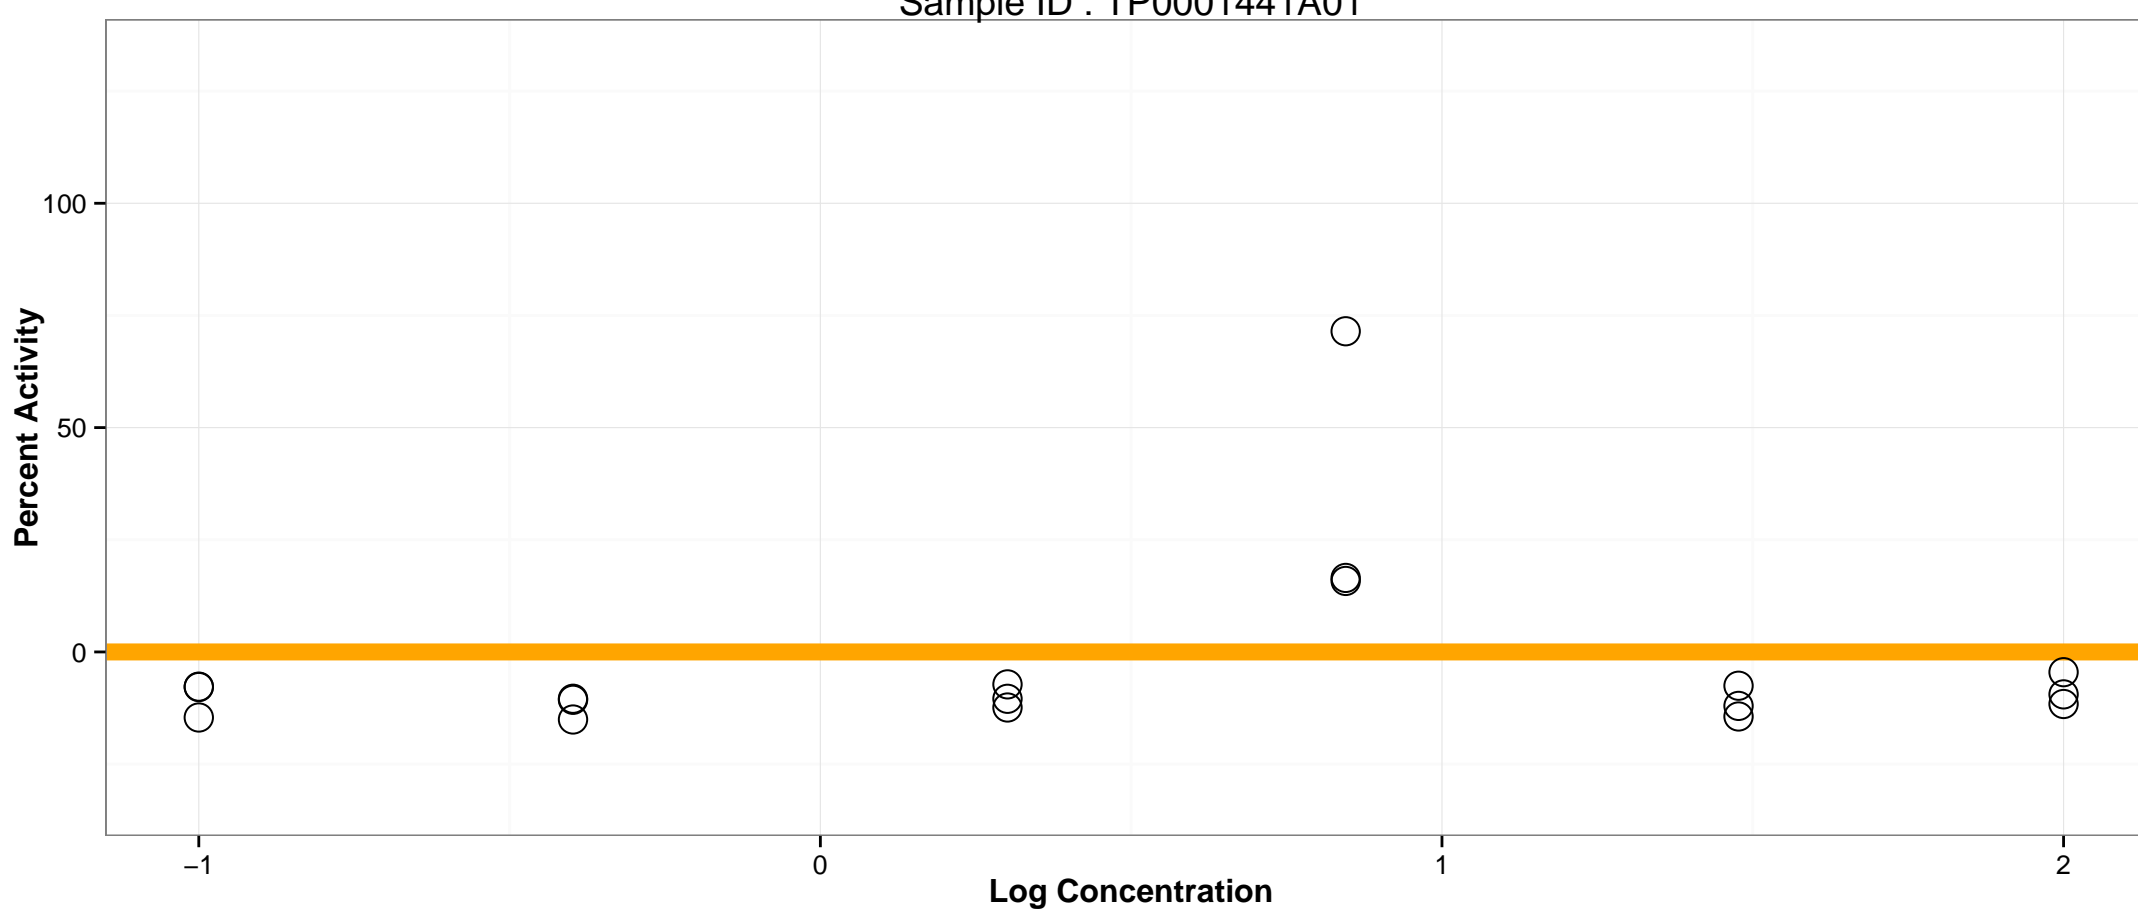

HILL MODEL

HILL MODEL: Not applicable

GAIN-LOSS MODEL

GNLS MODEL: Not applicable

|      | CNST   | HILL | GNLS |
|------|--------|------|------|
| AIC  | 155.36 | NA   | NA   |
| PROB | 1      | NA   | NA   |
| RMSE | 20.25  | NA   | NA   |

MAX\_MEAN : 34.6 MAX\_MED : 16.5 BMAD : 8.58  
COFF : 20 HIT-CALL : 0 FITC : 4 ACTP : 0  
FLAGS : 10

Chemical : 2-(8-Heptadecenyl)-2-imidazoline-1-ethanol  
CAS : 95-38-5

Assay ID 1508 (NHEERL\_TPO\_AUR\_dn)  
Sample ID : TP0001441A02

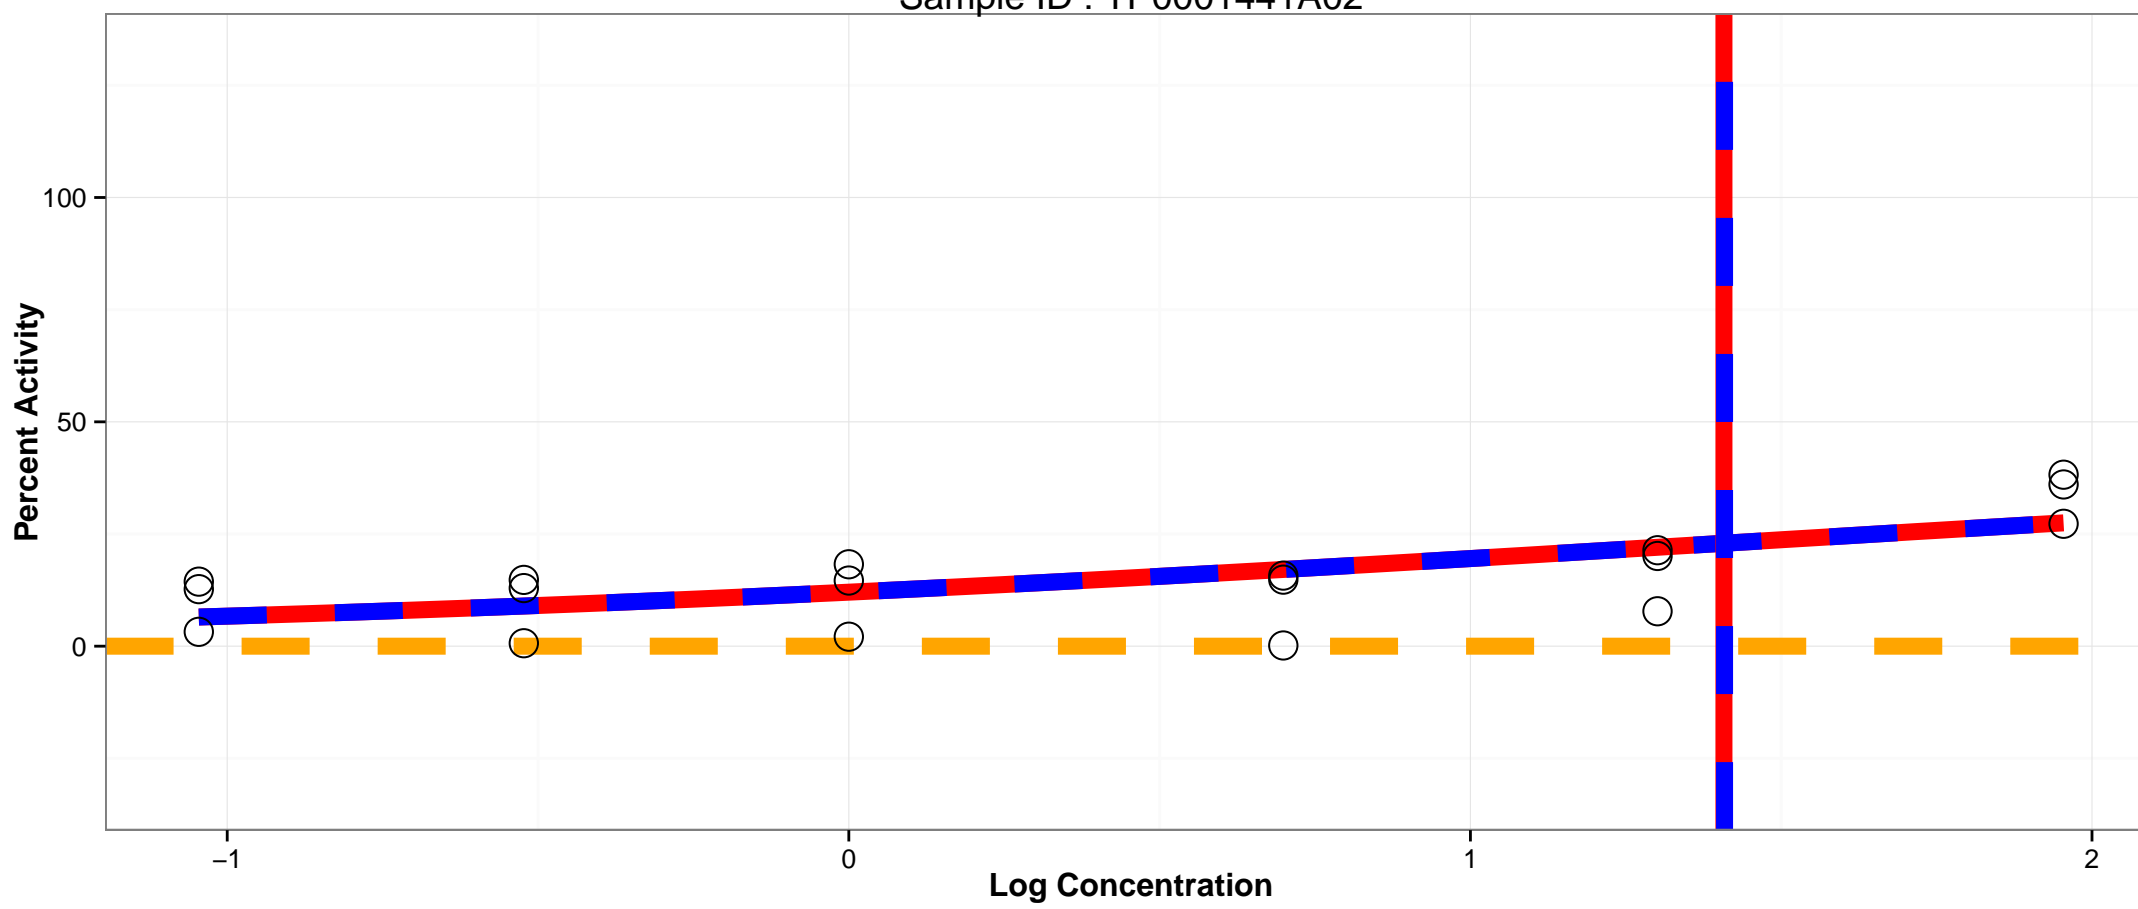

HILL MODEL

|     | tp   | ga   | gw    |
|-----|------|------|-------|
| val | 45.9 | 1.41 | 0.319 |
| sd  | 21.4 | 1.22 | 0.115 |

GAIN-LOSS MODEL

|     | tp   | ga   | gw    | la   | lw   |
|-----|------|------|-------|------|------|
| val | 45.9 | 1.41 | 0.319 | 3.44 | 5.81 |
| sd  | 21.3 | 1.22 | 0.115 | 1520 | 5950 |

|      | CNST   | HILL   | GNLS   |
|------|--------|--------|--------|
| AIC  | 160.06 | 133.85 | 137.85 |
| PROB | 0      | 0.88   | 0.12   |
| RMSE | 18.58  | 7.69   | 7.69   |

MAX\_MEAN : 33.9 MAX\_MED : 36.1 BMAD : 5.69  
COFF : 20 HIT-CALL : 1 FITC : 42 ACTP : 1  
FLAGS :

Assay ID 1509 (NHEERL\_HEK293T\_CellTiterGLO)  
Sample ID : TP0001441A02

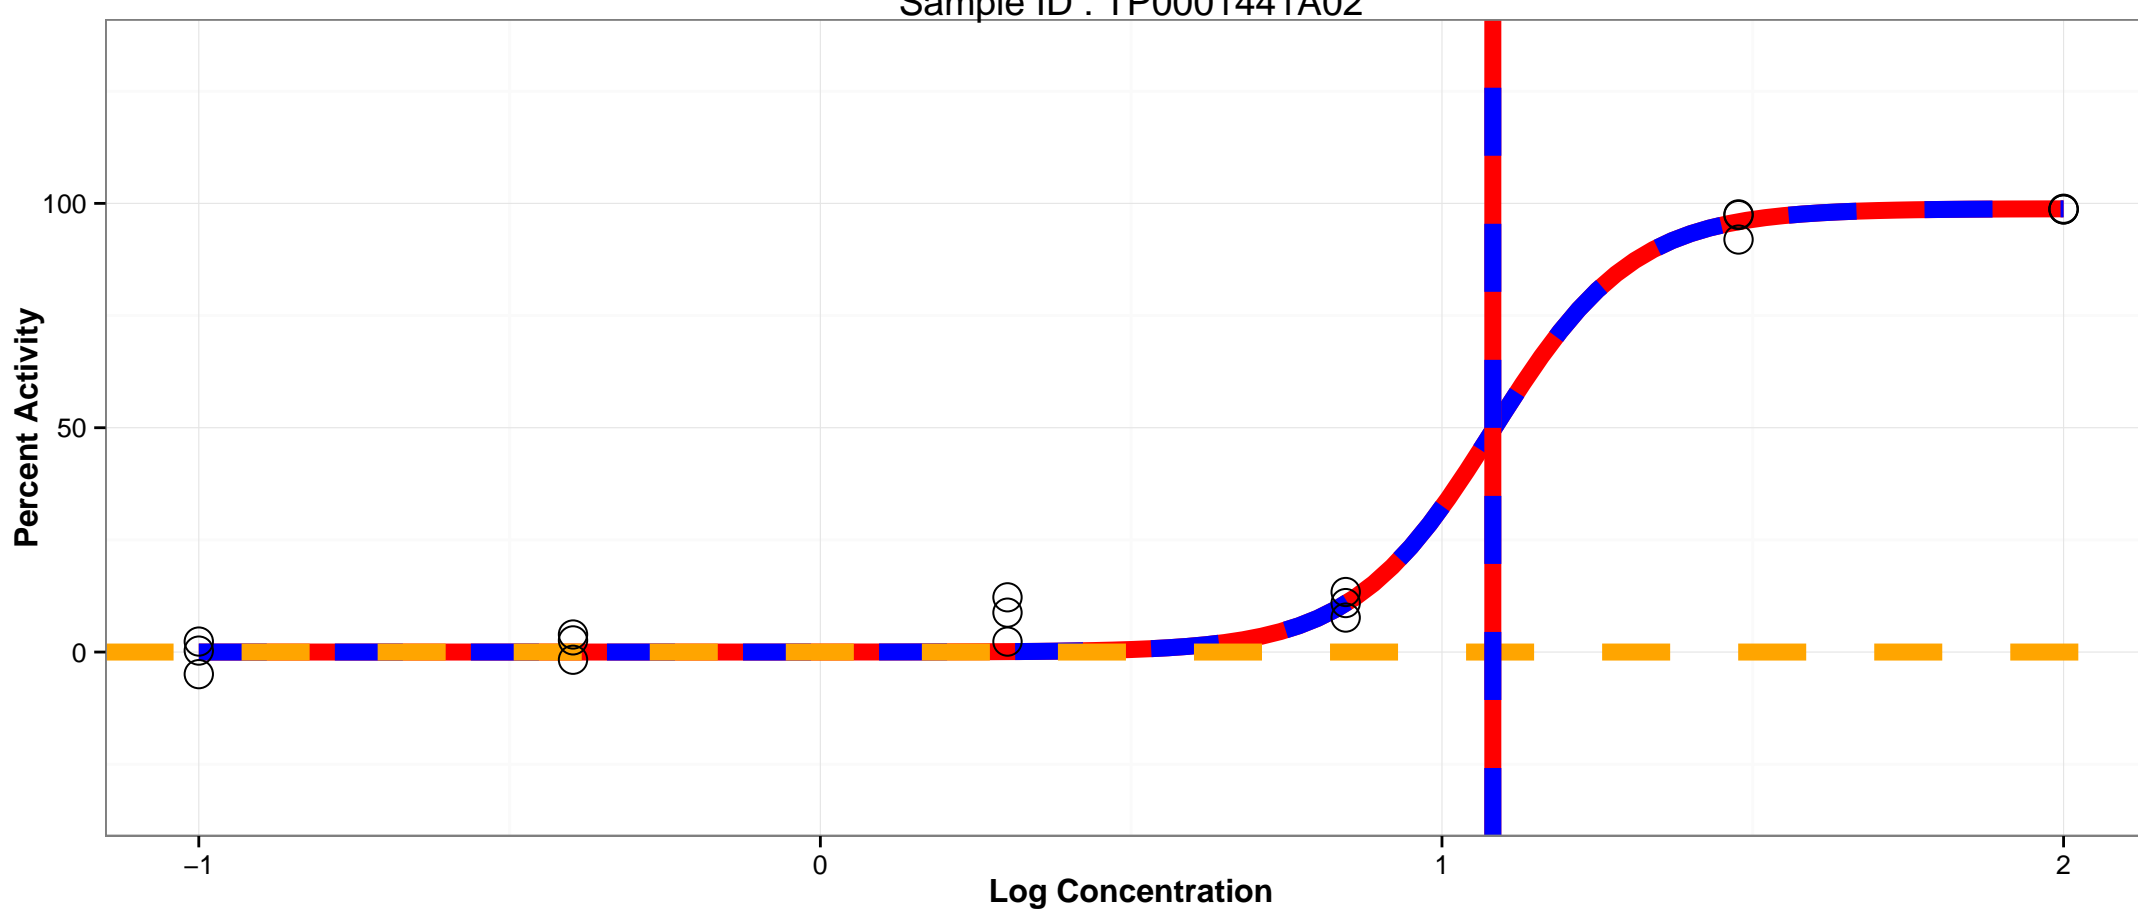

HILL MODEL

|     | tp   | ga     | gw    |
|-----|------|--------|-------|
| val | 98.8 | 1.08   | 3.85  |
| sd  | 1.53 | 0.0398 | 0.612 |

GAIN-LOSS MODEL

|     | tp   | ga   | gw   | la | lw   |
|-----|------|------|------|----|------|
| val | 98.8 | 1.08 | 3.85 | 4  | 11.6 |
| sd  | NA   | NA   | NA   | NA | NA   |

|      | CNST   | HILL   | GNLS   |
|------|--------|--------|--------|
| AIC  | 197.79 | 108.15 | 112.15 |
| PROB | 0      | 0.88   | 0.12   |
| RMSE | 56.44  | 4.21   | 4.21   |

MAX\_MEAN : 98.7 MAX\_MED : 98.7 BMAD : 5.54  
COFF : 20 HIT-CALL : 1 FITC : 41 ACTP : 1  
FLAGS :

Assay ID 1848 (NHEERL\_Quantilum\_inhib\_2\_dn)  
Sample ID : TP0001441A02

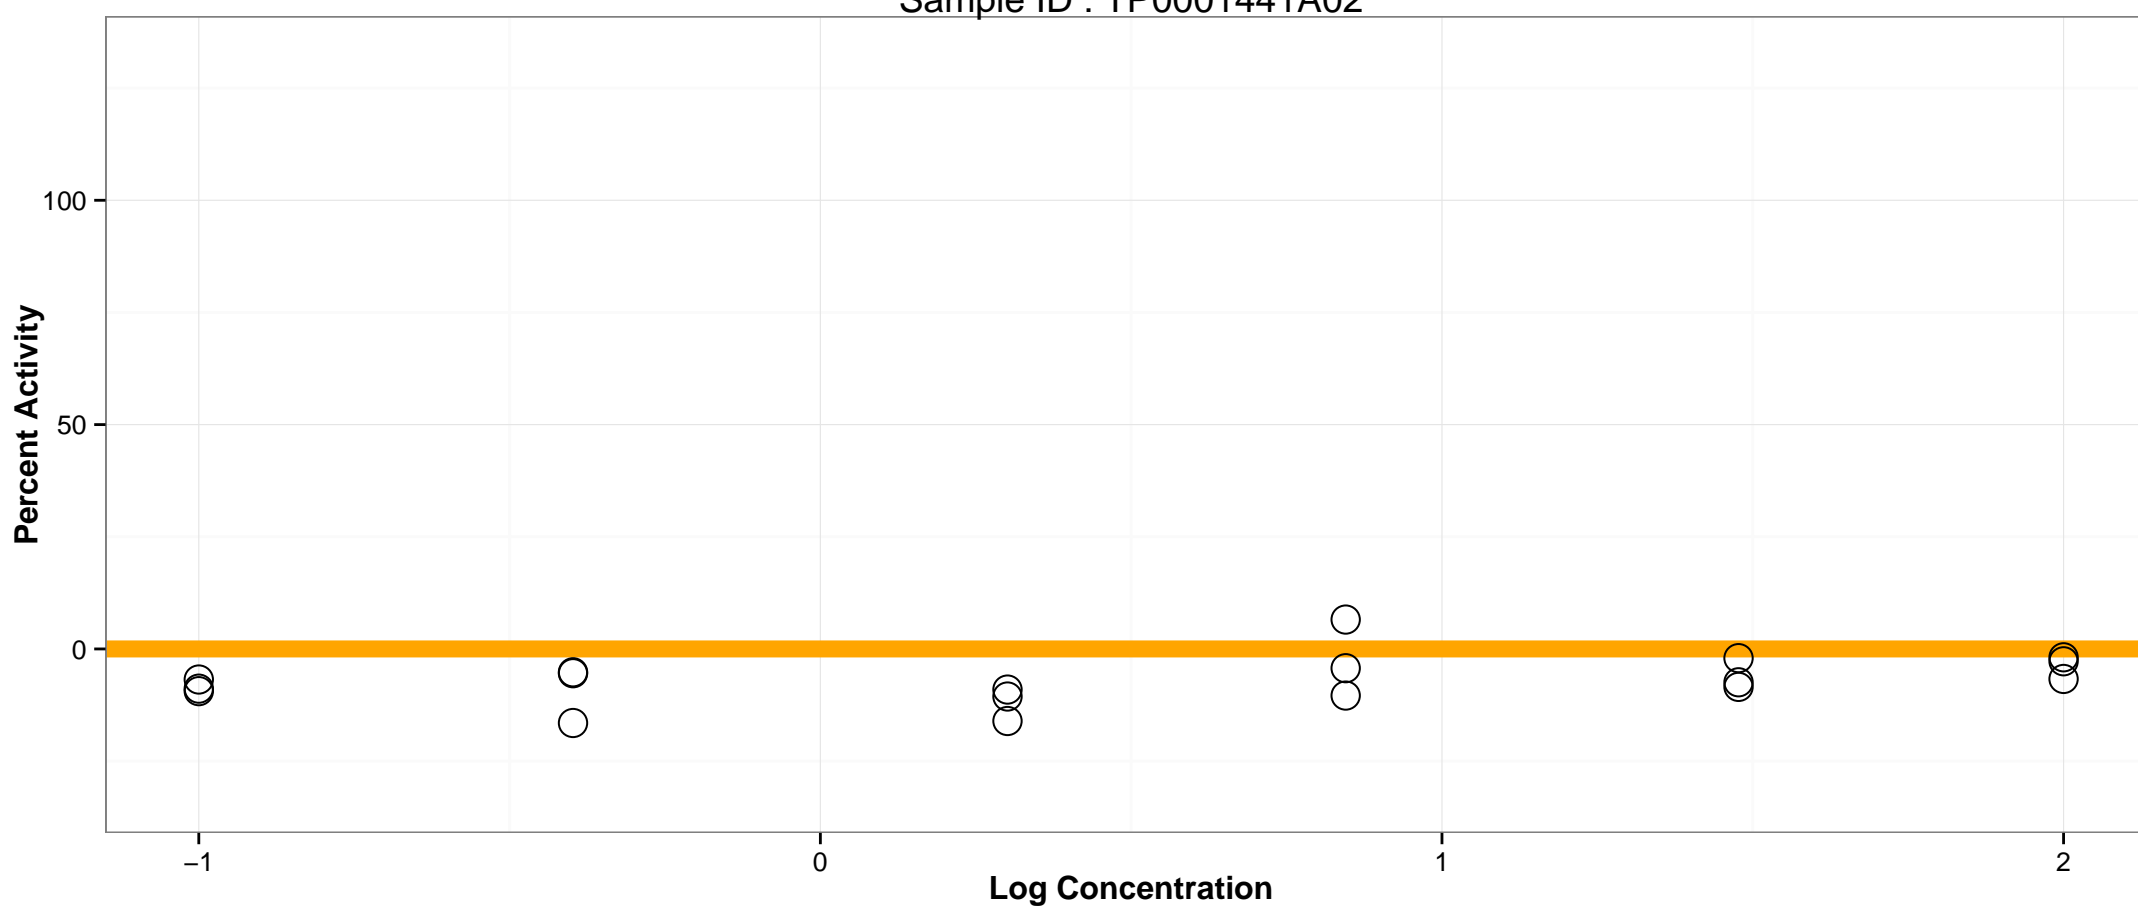

HILL MODEL

HILL MODEL: Not applicable

GAIN-LOSS MODEL

GNLS MODEL: Not applicable

|      | CNST   | HILL | GNLS |
|------|--------|------|------|
| AIC  | 133.33 | NA   | NA   |
| PROB | 1      | NA   | NA   |
| RMSE | 8.65   | NA   | NA   |

MAX\_MEAN : -2.7 MAX\_MED : -2.74 BMAD : 8.58  
COFF : 20 HIT-CALL : 0 FITC : 4 ACTP : 0  
FLAGS :

Chemical : Etridiazole  
CAS : 2593-15-9

Assay ID 1508 (NHEERL\_TPO\_AUR\_dn)  
Sample ID : TP0001441A03

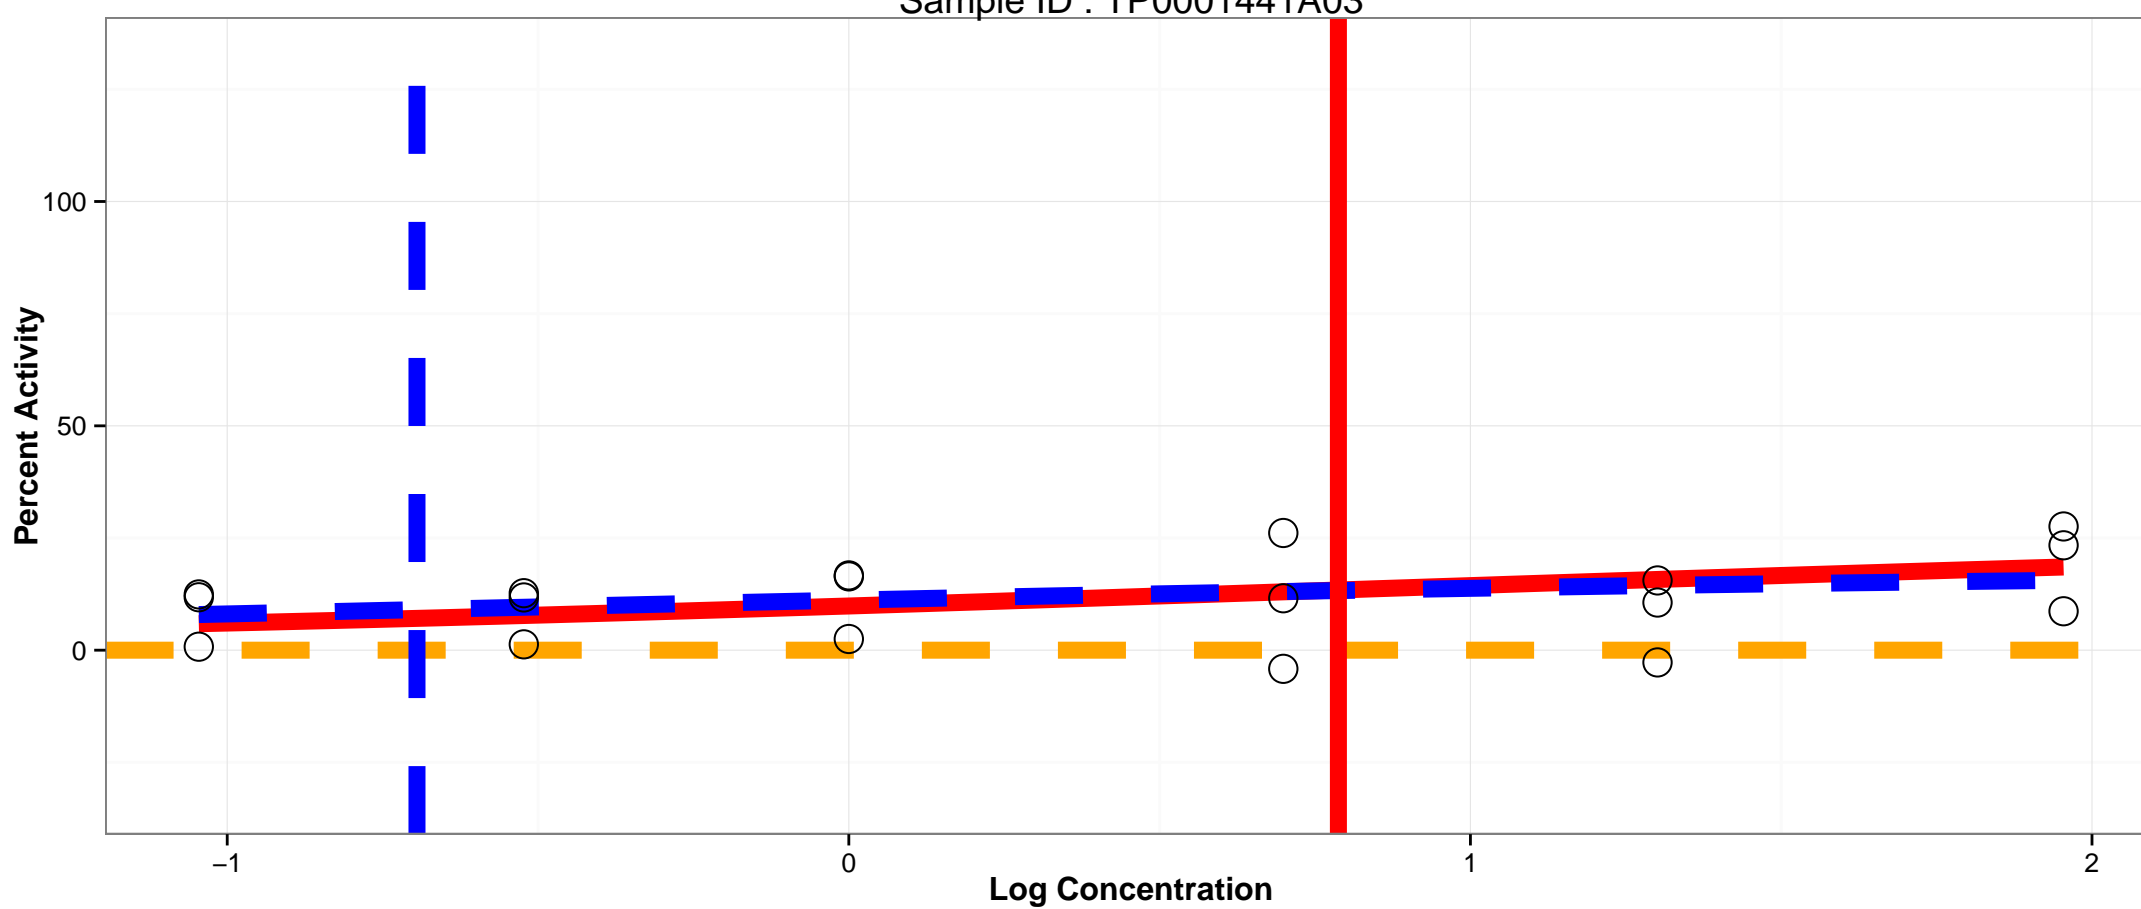

HILL MODEL

|     | tp   | ga    | gw  |
|-----|------|-------|-----|
| val | 26.8 | 0.788 | 0.3 |
| sd  | NA   | NA    | NA  |

GAIN-LOSS MODEL

|     | tp   | ga     | gw  | la   | lw   |
|-----|------|--------|-----|------|------|
| val | 18.1 | -0.695 | 0.3 | 3.36 | 5.58 |
| sd  | NA   | NA     | NA  | NA   | NA   |

|      | CNST   | HILL   | GNLS   |
|------|--------|--------|--------|
| AIC  | 151.22 | 138.69 | 142.15 |
| PROB | 0      | 0.85   | 0.15   |
| RMSE | 14.4   | 8.72   | 8.61   |

MAX\_MEAN : 19.9 MAX\_MED : 23.4 BMAD : 5.69  
COFF : 20 HIT-CALL : 1 FITC : 42 ACTP : 0.998  
FLAGS : 11; 6

Assay ID 1509 (NHEERL\_HEK293T\_CellTiterGLO)  
Sample ID : TP0001441A03

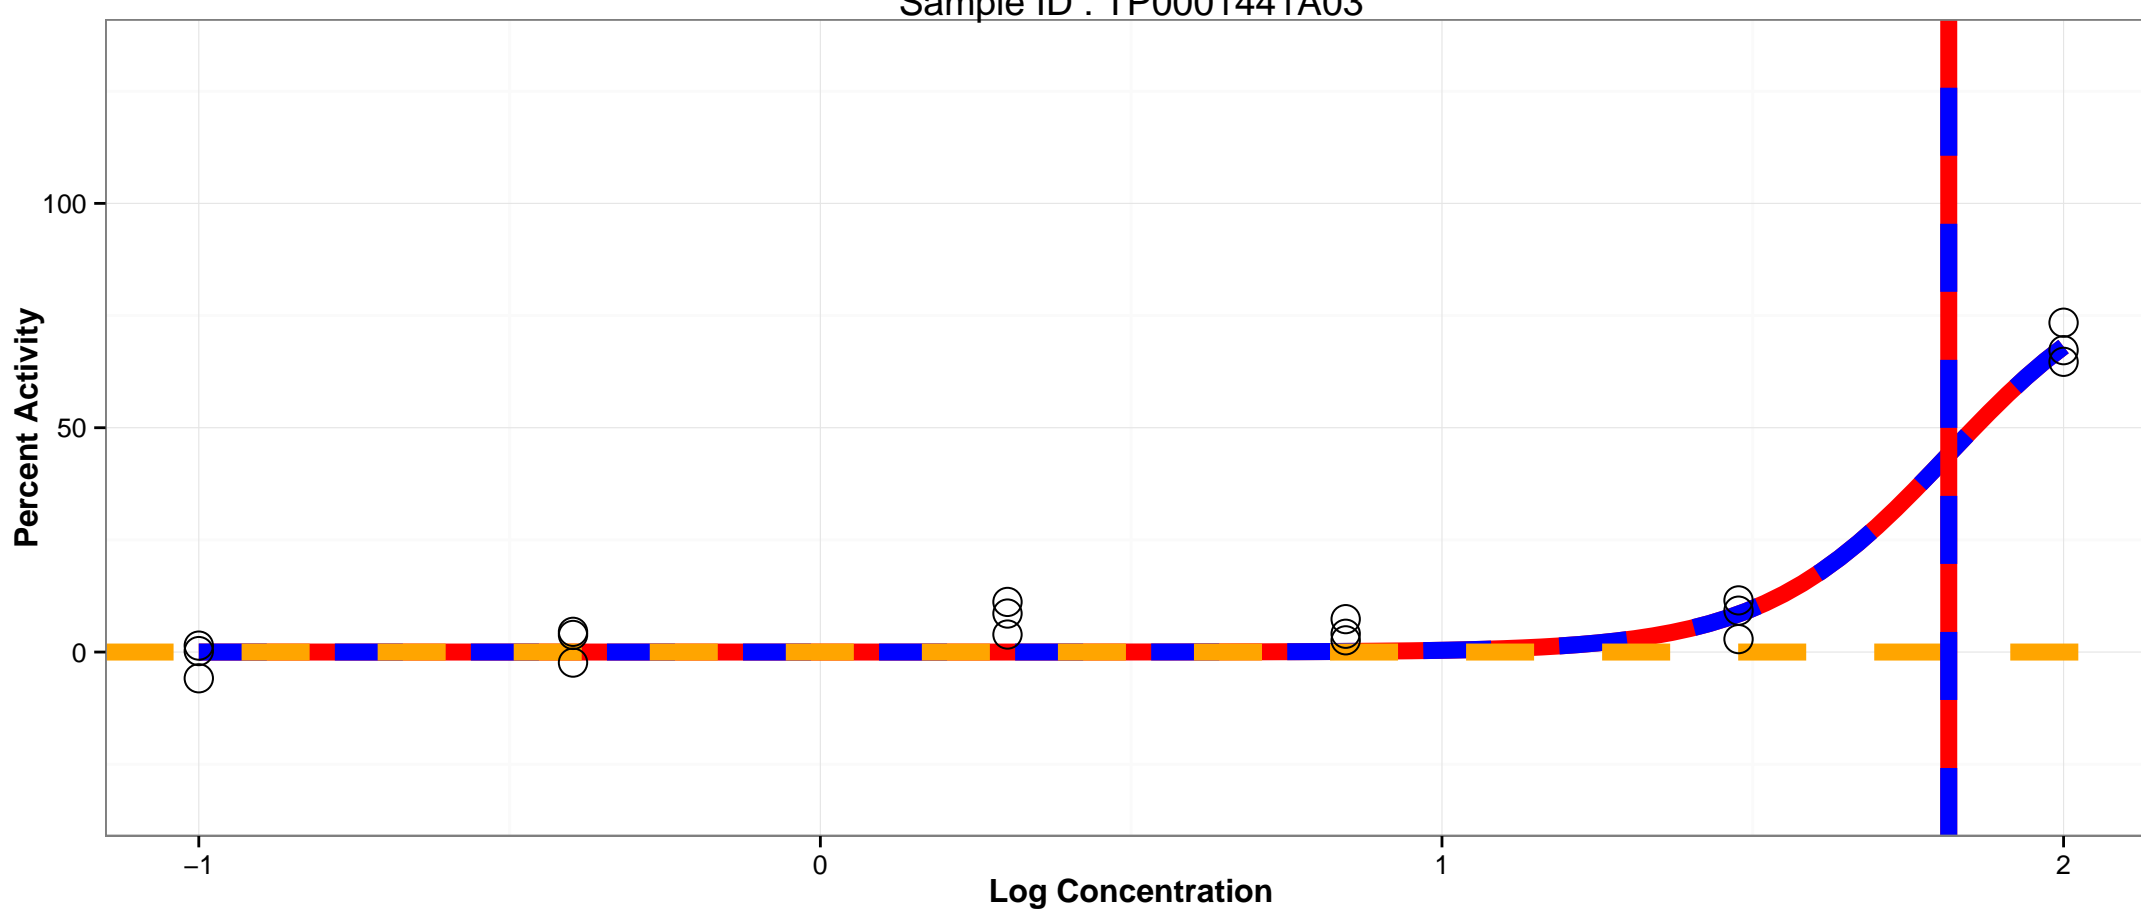

HILL MODEL

|     | tp   | ga   | gw   |
|-----|------|------|------|
| val | 88.1 | 1.82 | 2.88 |
| sd  | NA   | NA   | NA   |

GAIN-LOSS MODEL

|     | tp   | ga   | gw   | la   | lw   |
|-----|------|------|------|------|------|
| val | 88.1 | 1.82 | 2.88 | 3.83 | 3.84 |
| sd  | NA   | NA   | NA   | NA   | NA   |

|      | CNST   | HILL   | GNLS   |
|------|--------|--------|--------|
| AIC  | 164.75 | 118.48 | 122.48 |
| PROB | 0      | 0.88   | 0.12   |
| RMSE | 28.58  | 4.98   | 4.98   |

MAX\_MEAN : 68.5 MAX\_MED : 67.3 BMAD : 5.54  
COFF : 20 HIT-CALL : 1 FITC : 42 ACTP : 1  
FLAGS : 6

Assay ID 1848 (NHEERL\_Quantilum\_inhib\_2\_dn)  
Sample ID : TP0001441A03

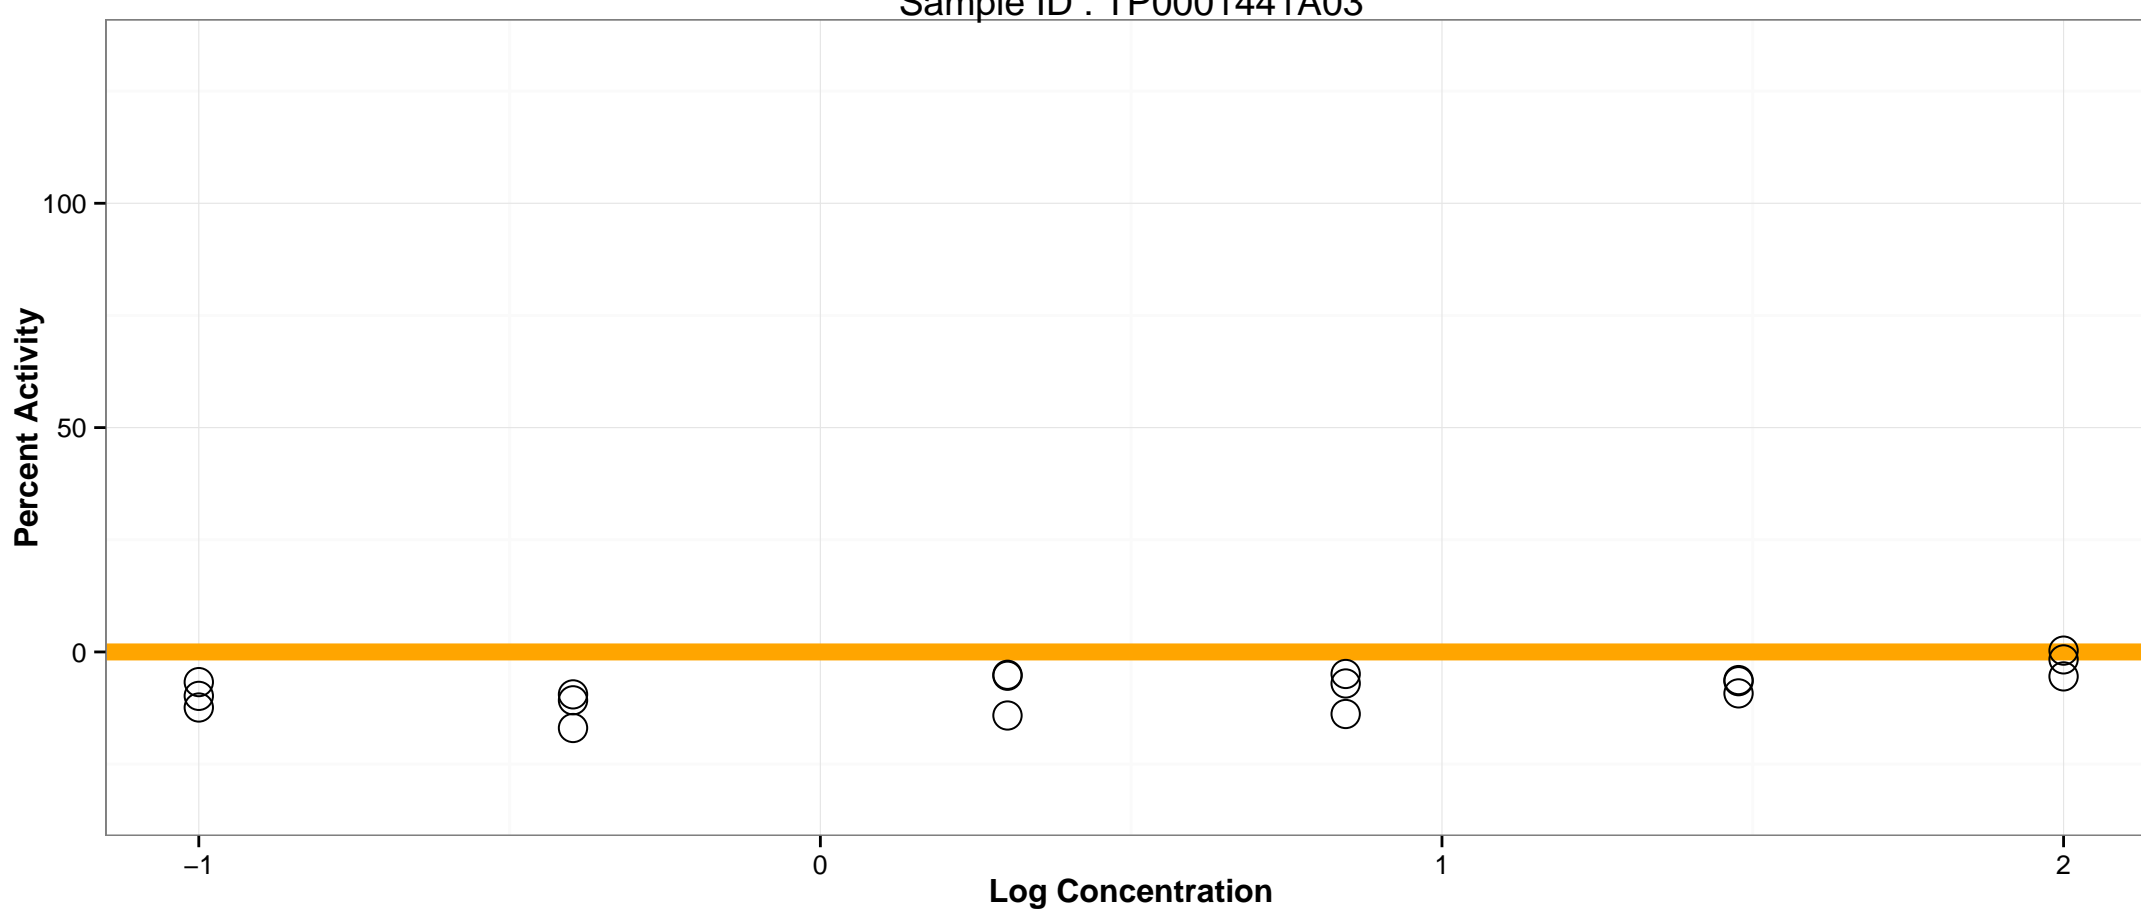

HILL MODEL  
HILL MODEL: Not applicable

GAIN-LOSS MODEL  
GNLS MODEL: Not applicable

|      | CNST  | HILL | GNLS |
|------|-------|------|------|
| AIC  | 135.5 | NA   | NA   |
| PROB | 1     | NA   | NA   |
| RMSE | 9.14  | NA   | NA   |

MAX\_MEAN : -2.26 MAX\_MED : -1.65 BMAD : 8.58  
COFF : 20 HIT-CALL : 0 FITC : 4 ACTP : 0  
FLAGS :

Chemical : Etridiazole  
CAS : 2593-15-9

Assay ID 1508 (NHEERL\_TPO\_AUR\_dn)  
Sample ID : TX000845

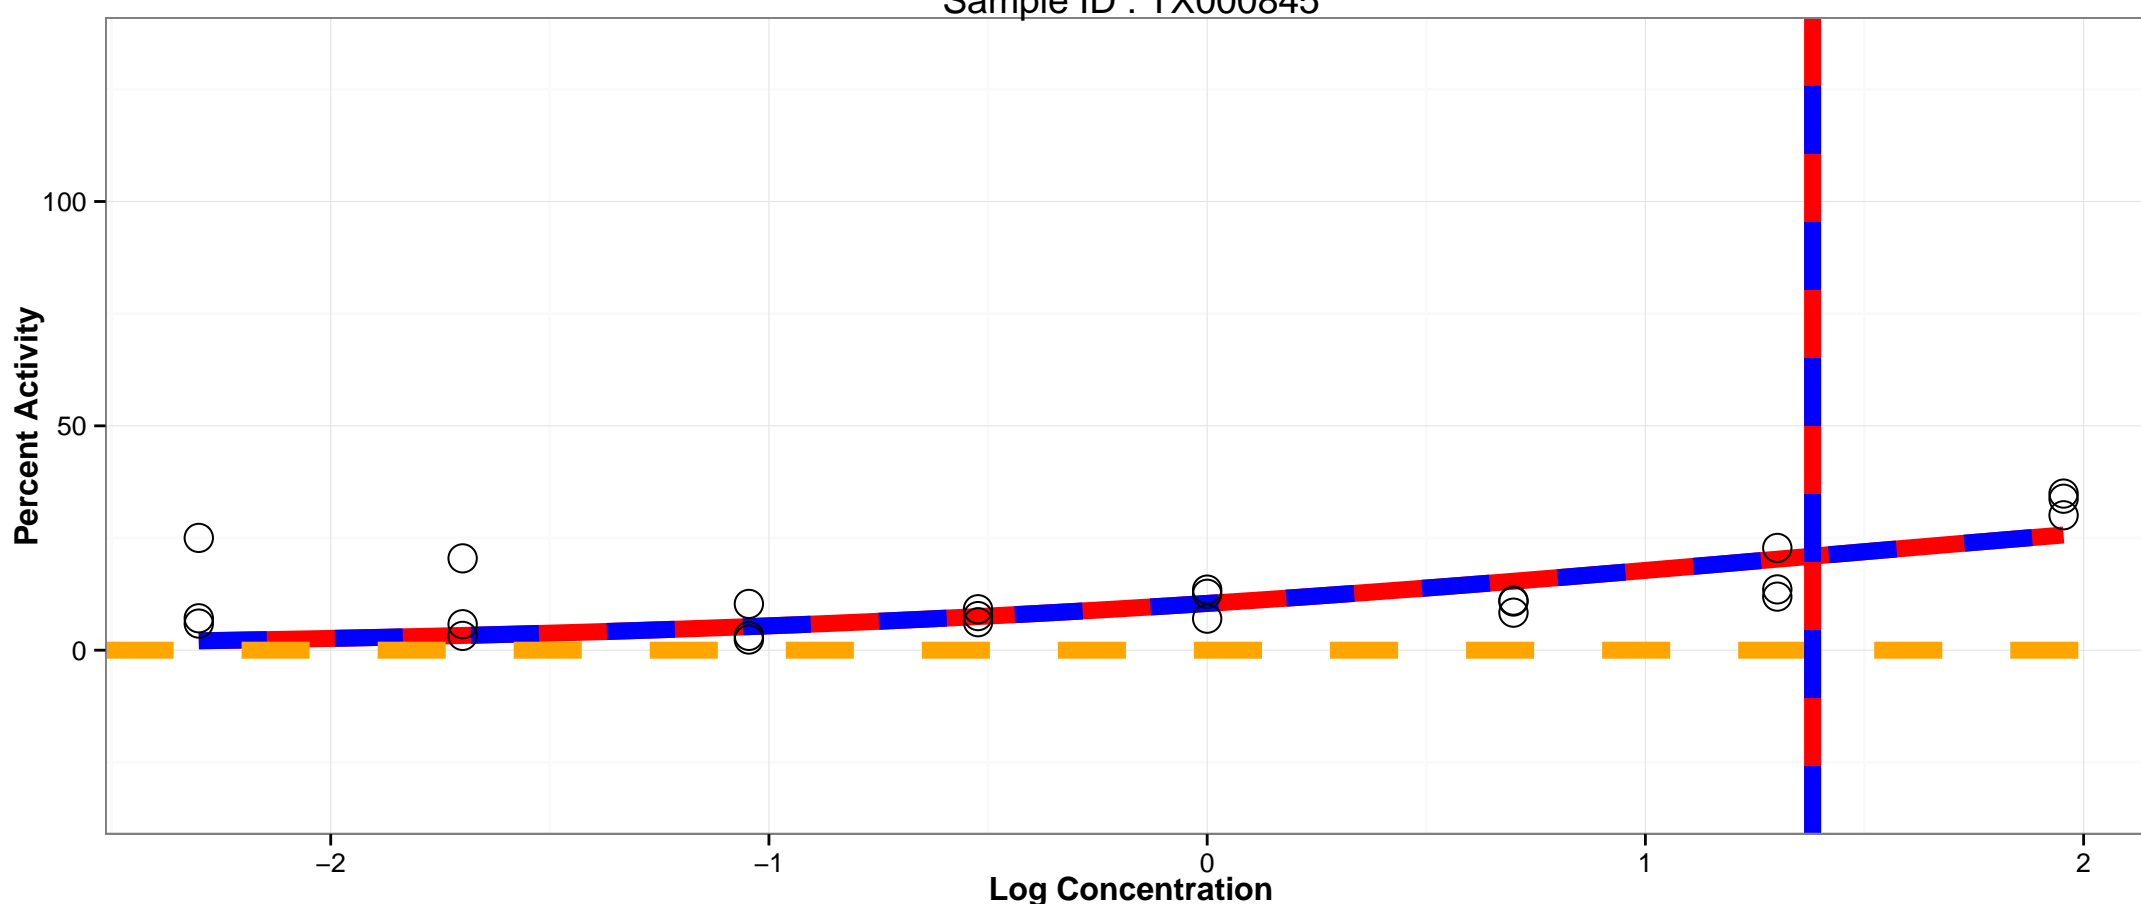

HILL MODEL

|     | tp   | ga    | gw     |
|-----|------|-------|--------|
| val | 41.9 | 1.38  | 0.348  |
| sd  | 15.5 | 0.801 | 0.0969 |

GAIN-LOSS MODEL

|     | tp   | ga    | gw     | la    | lw     |
|-----|------|-------|--------|-------|--------|
| val | 41.9 | 1.38  | 0.348  | 3.95  | 5.93   |
| sd  | 15.5 | 0.801 | 0.0969 | 56300 | 167000 |

|      | CNST  | HILL   | GNLS   |
|------|-------|--------|--------|
| AIC  | 205   | 168.73 | 172.73 |
| PROB | 0     | 0.88   | 0.12   |
| RMSE | 16.19 | 7.41   | 7.41   |

MAX\_MEAN : 32.9 MAX\_MED : 33.8 BMAD : 5.69  
COFF : 20 HIT-CALL : 1 FITC : 42 ACTP : 1  
FLAGS : 6

Assay ID 1509 (NHEERL\_HEK293T\_CellTiterGLO)  
Sample ID : TX000845

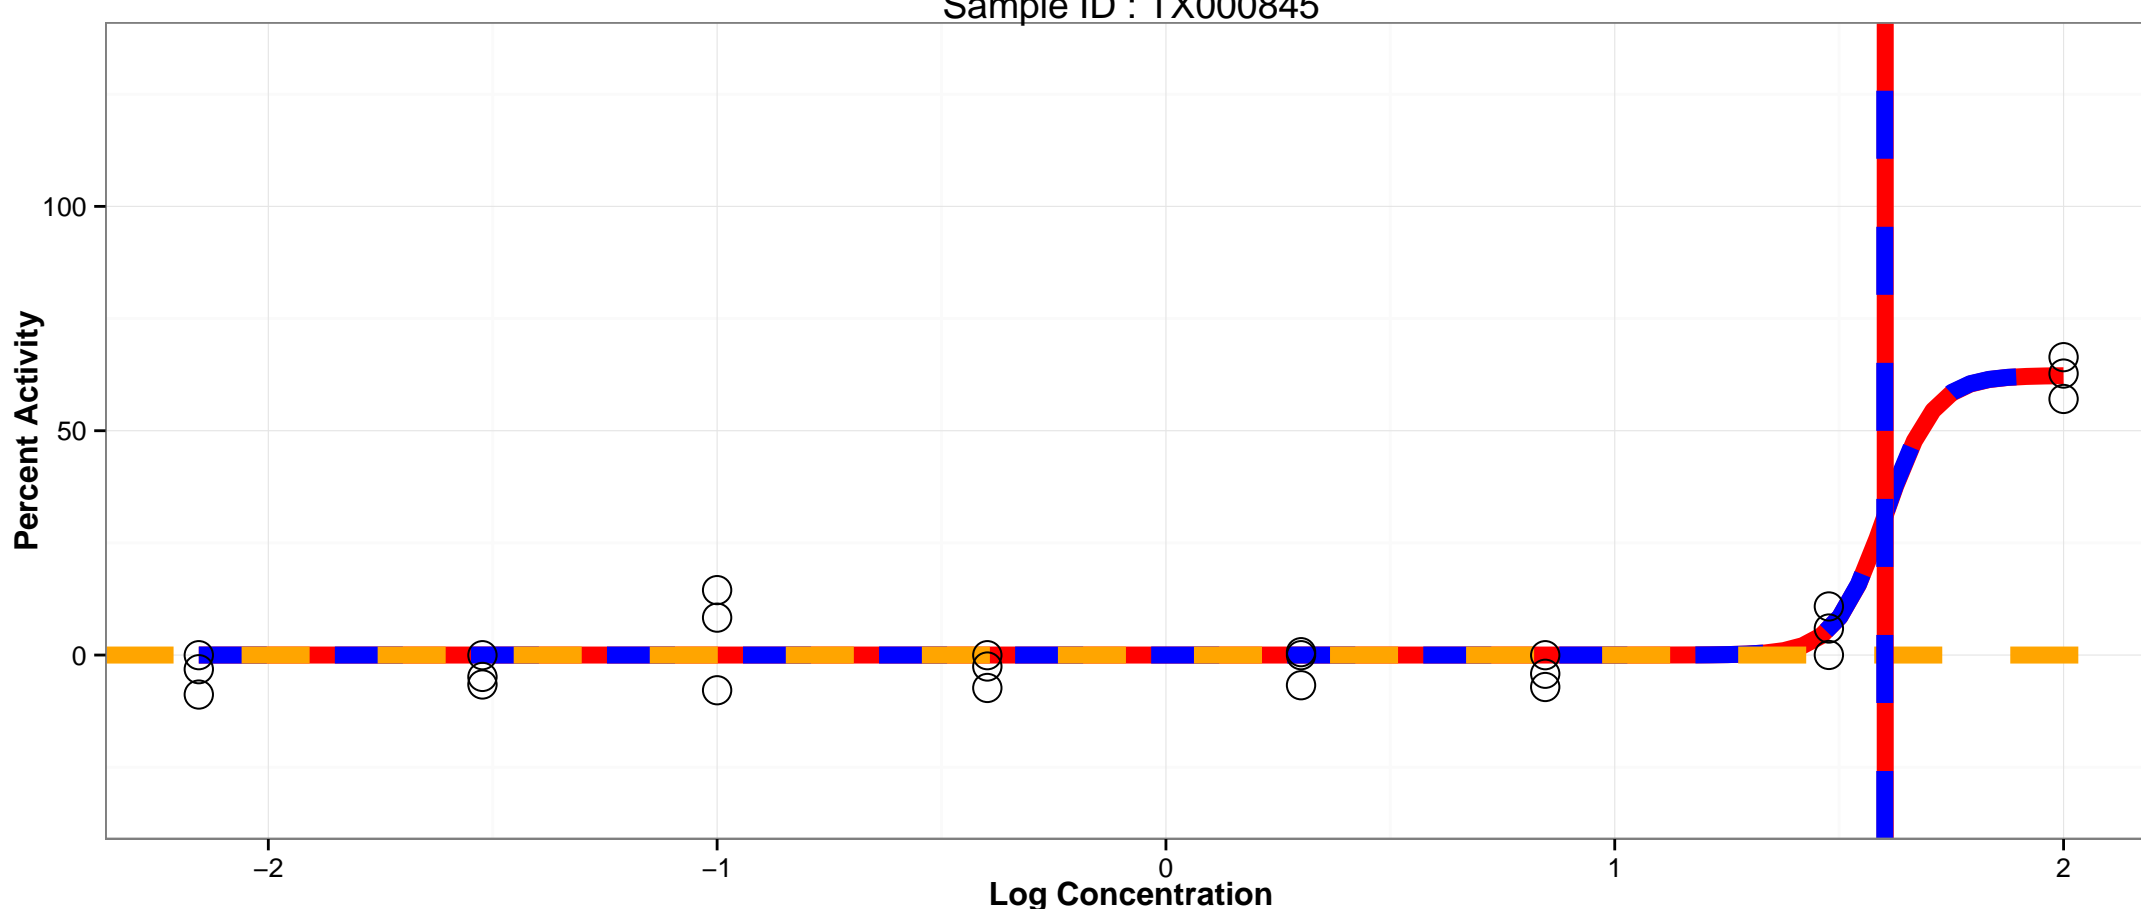

HILL MODEL

|     | tp   | ga  | gw   |
|-----|------|-----|------|
| val | 62.3 | 1.6 | 7.93 |
| sd  | NA   | NA  | NA   |

GAIN-LOSS MODEL

|     | tp   | ga  | gw   | la   | lw  |
|-----|------|-----|------|------|-----|
| val | 62.3 | 1.6 | 7.99 | 3.97 | 1.9 |
| sd  | NA   | NA  | NA   | NA   | NA  |

|      | CNST   | HILL   | GNLS   |
|------|--------|--------|--------|
| AIC  | 203.95 | 160.88 | 164.88 |
| PROB | 0      | 0.88   | 0.12   |
| RMSE | 22.76  | 5.67   | 5.67   |

MAX\_MEAN : 62.1 MAX\_MED : 62.8 BMAD : 5.54  
COFF : 20 HIT-CALL : 1 FITC : 41 ACTP : 1  
FLAGS : 6

Assay ID 1848 (NHEERL\_Quantilum\_inhib\_2\_dn)  
Sample ID : TX000845

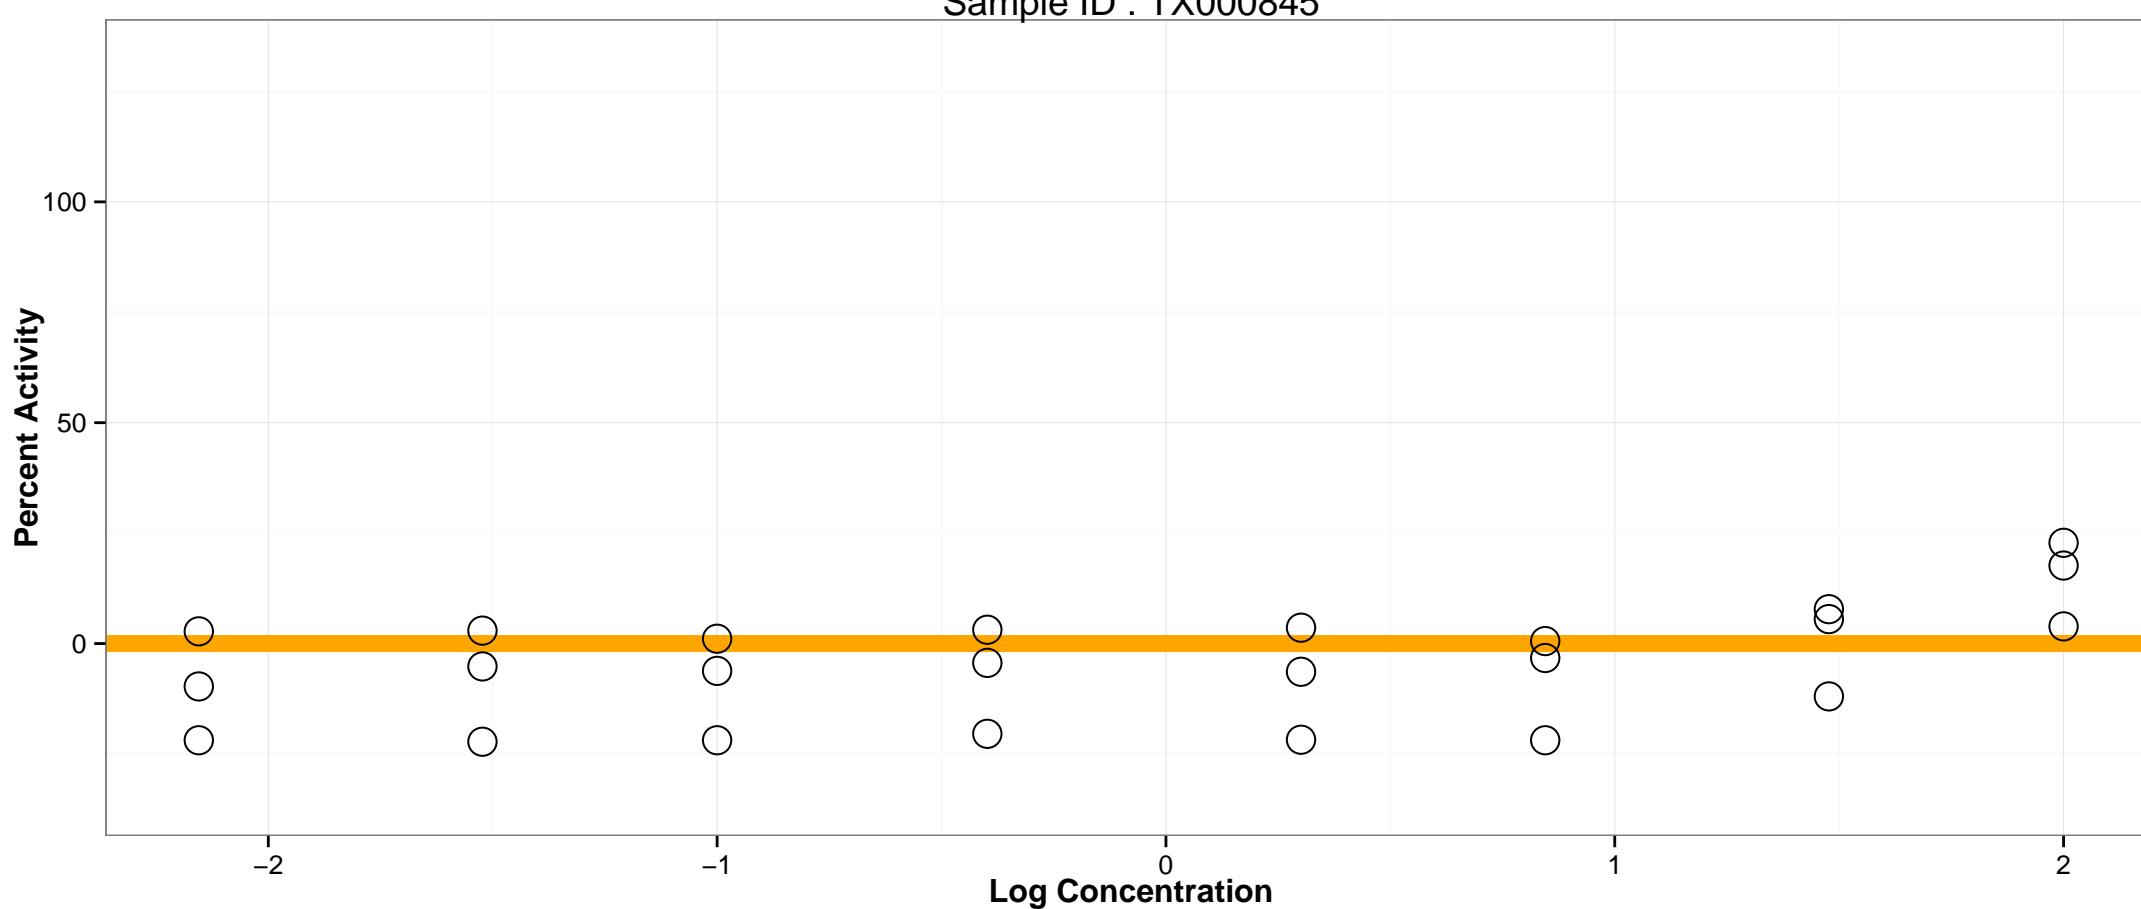

HILL MODEL

HILL MODEL: Not applicable

GAIN-LOSS MODEL

GNLS MODEL: Not applicable

|      | CNST   | HILL | GNLS |
|------|--------|------|------|
| AIC  | 195.68 | NA   | NA   |
| PROB | 1      | NA   | NA   |
| RMSE | 13.19  | NA   | NA   |

MAX\_MEAN : 14.8 MAX\_MED : 17.7 BMAD : 8.58  
COFF : 20 HIT-CALL : 0 FITC : 4 ACTP : 0  
FLAGS :

Chemical : 4-Nonylphenol  
CAS : 104-40-5

Assay ID 1508 (NHEERL\_TPO\_AUR\_dn)  
Sample ID : TP0001441A04

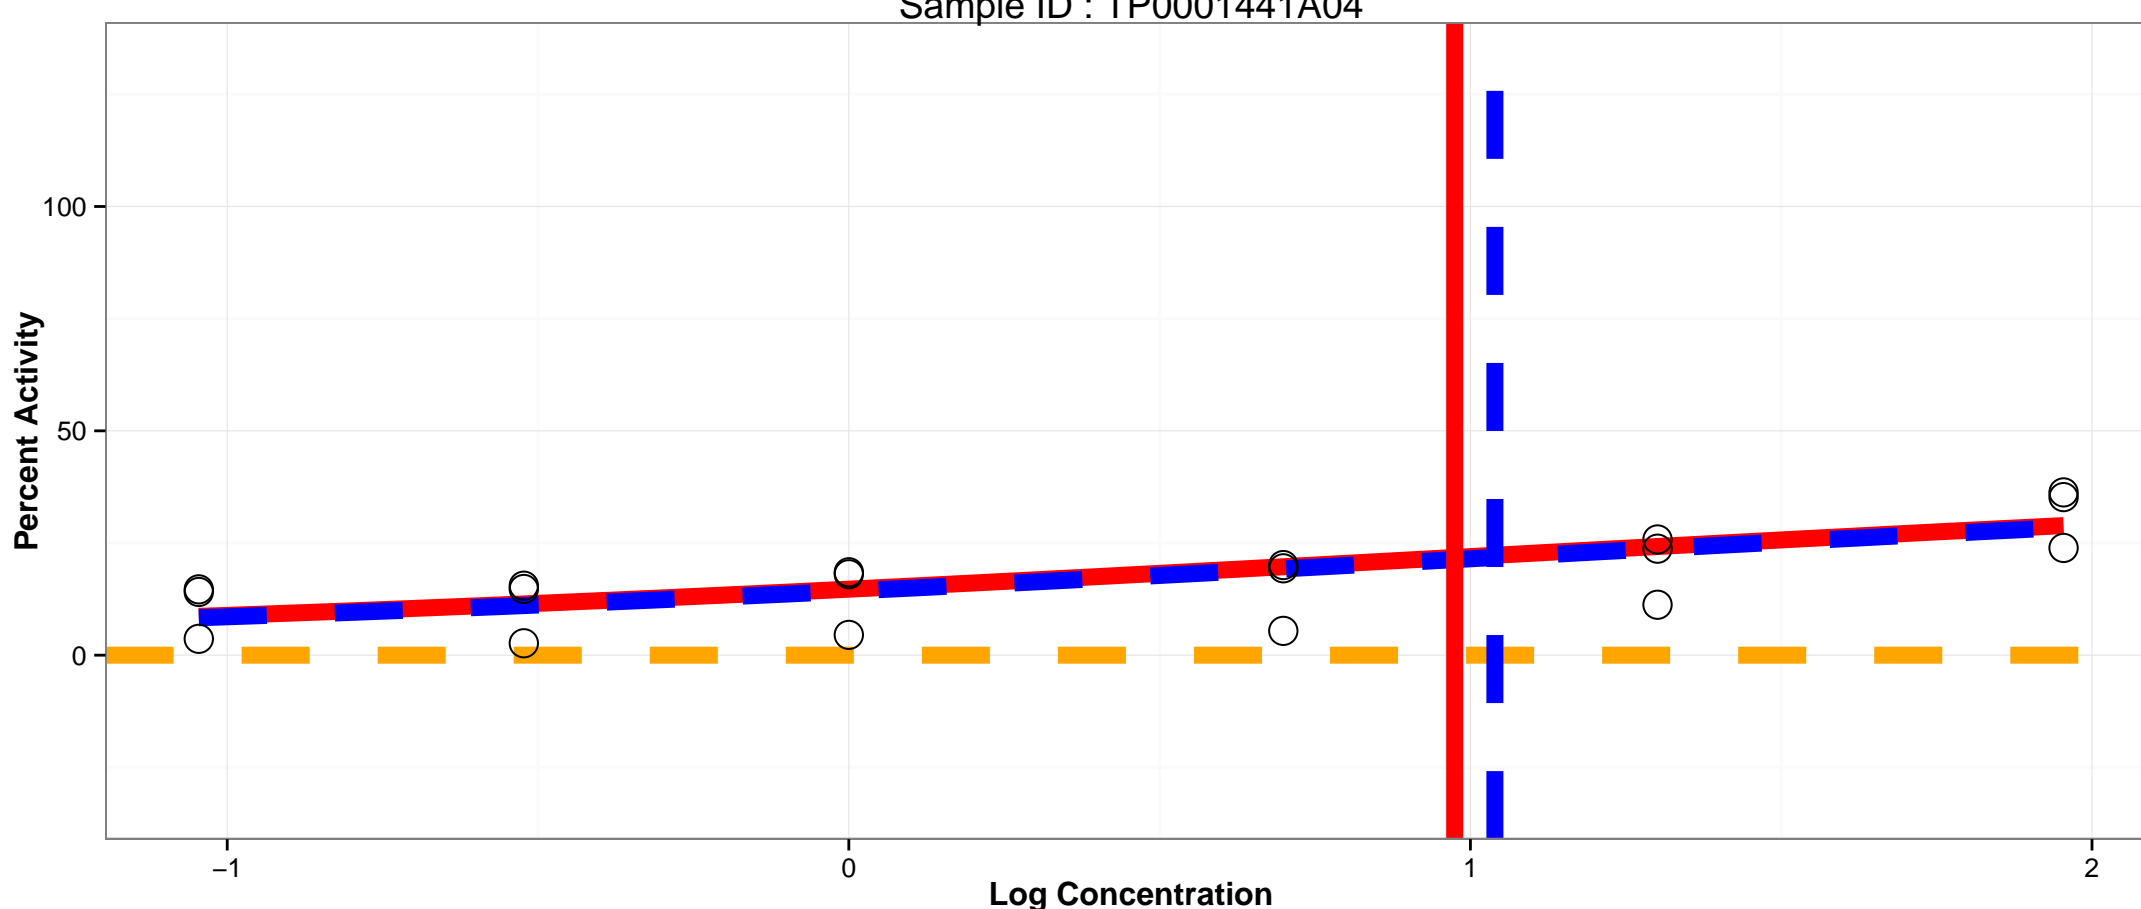

HILL MODEL

|     | tp   | ga    | gw    |
|-----|------|-------|-------|
| val | 43.6 | 0.975 | 0.3   |
| sd  | 27.5 | 1.92  | 0.156 |

GAIN-LOSS MODEL

|     | tp   | ga   | gw    | la  | lw   |
|-----|------|------|-------|-----|------|
| val | 43.6 | 1.04 | 0.3   | 2.5 | 13.5 |
| sd  | 24.3 | 1.72 | 0.171 | 160 | 3970 |

|      | CNST  | HILL   | GNLS   |
|------|-------|--------|--------|
| AIC  | 162.7 | 129.28 | 133.38 |
| PROB | 0     | 0.89   | 0.11   |
| RMSE | 19.55 | 6.75   | 6.69   |

MAX\_MEAN : 31.8 MAX\_MED : 35.2 BMAD : 5.69  
COFF : 20 HIT-CALL : 1 FITC : 42 ACTP : 1  
FLAGS :

Assay ID 1509 (NHEERL\_HEK293T\_CellTiterGLO)  
Sample ID : TP0001441A04

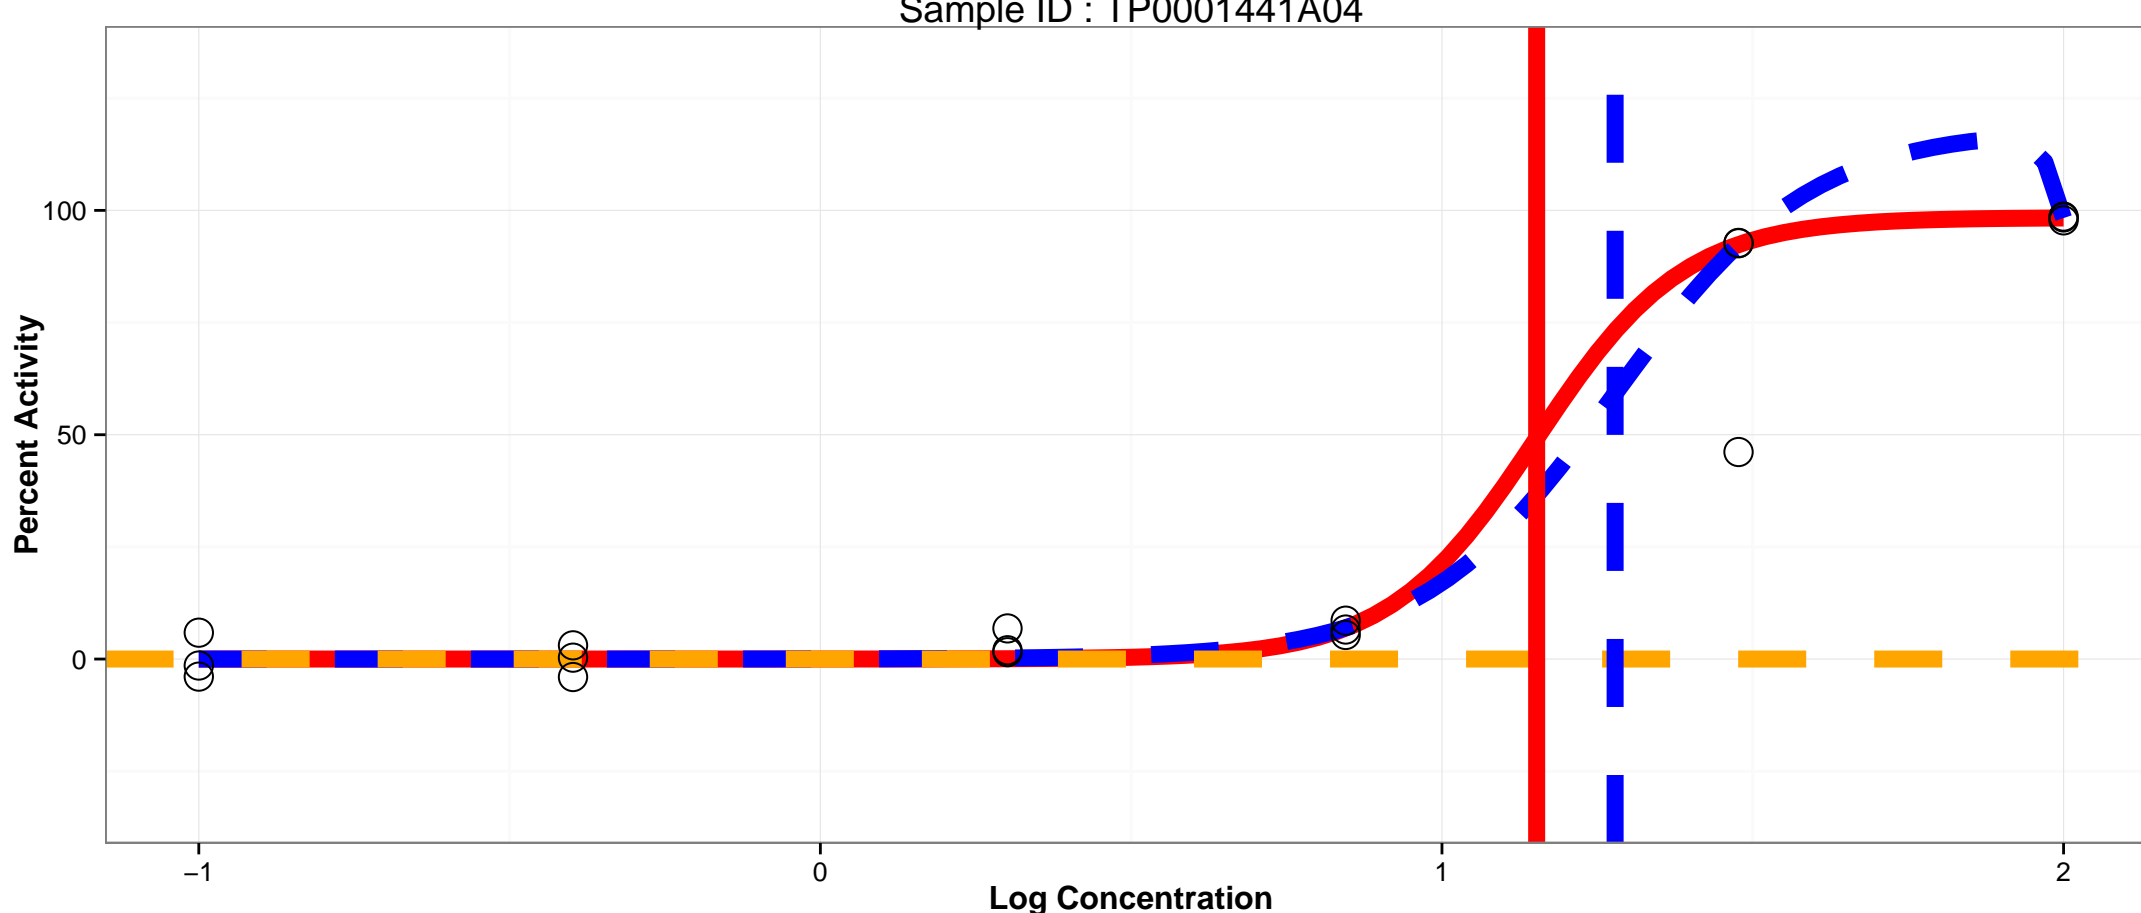

HILL MODEL

|     | tp   | ga     | gw    |
|-----|------|--------|-------|
| val | 98.4 | 1.15   | 3.66  |
| sd  | 1.4  | 0.0267 | 0.306 |

GAIN-LOSS MODEL

|     | tp   | ga     | gw    | la      | lw   |
|-----|------|--------|-------|---------|------|
| val | 118  | 1.28   | 2.78  | 2.04    | 17.9 |
| sd  | 13.6 | 0.0631 | 0.334 | 0.00382 | 7.16 |

|      | CNST   | HILL   | GNLS   |
|------|--------|--------|--------|
| AIC  | 193.86 | 117.19 | 120.89 |
| PROB | 0      | 0.86   | 0.14   |
| RMSE | 51.95  | 11.24  | 11.23  |

MAX\_MEAN : 98.3 MAX\_MED : 98.4 BMAD : 5.54  
COFF : 20 HIT-CALL : 1 FITC : 41 ACTP : 1  
FLAGS :

Assay ID 1848 (NHEERL\_Quantilum\_inhib\_2\_dn)  
Sample ID : TP0001441A04

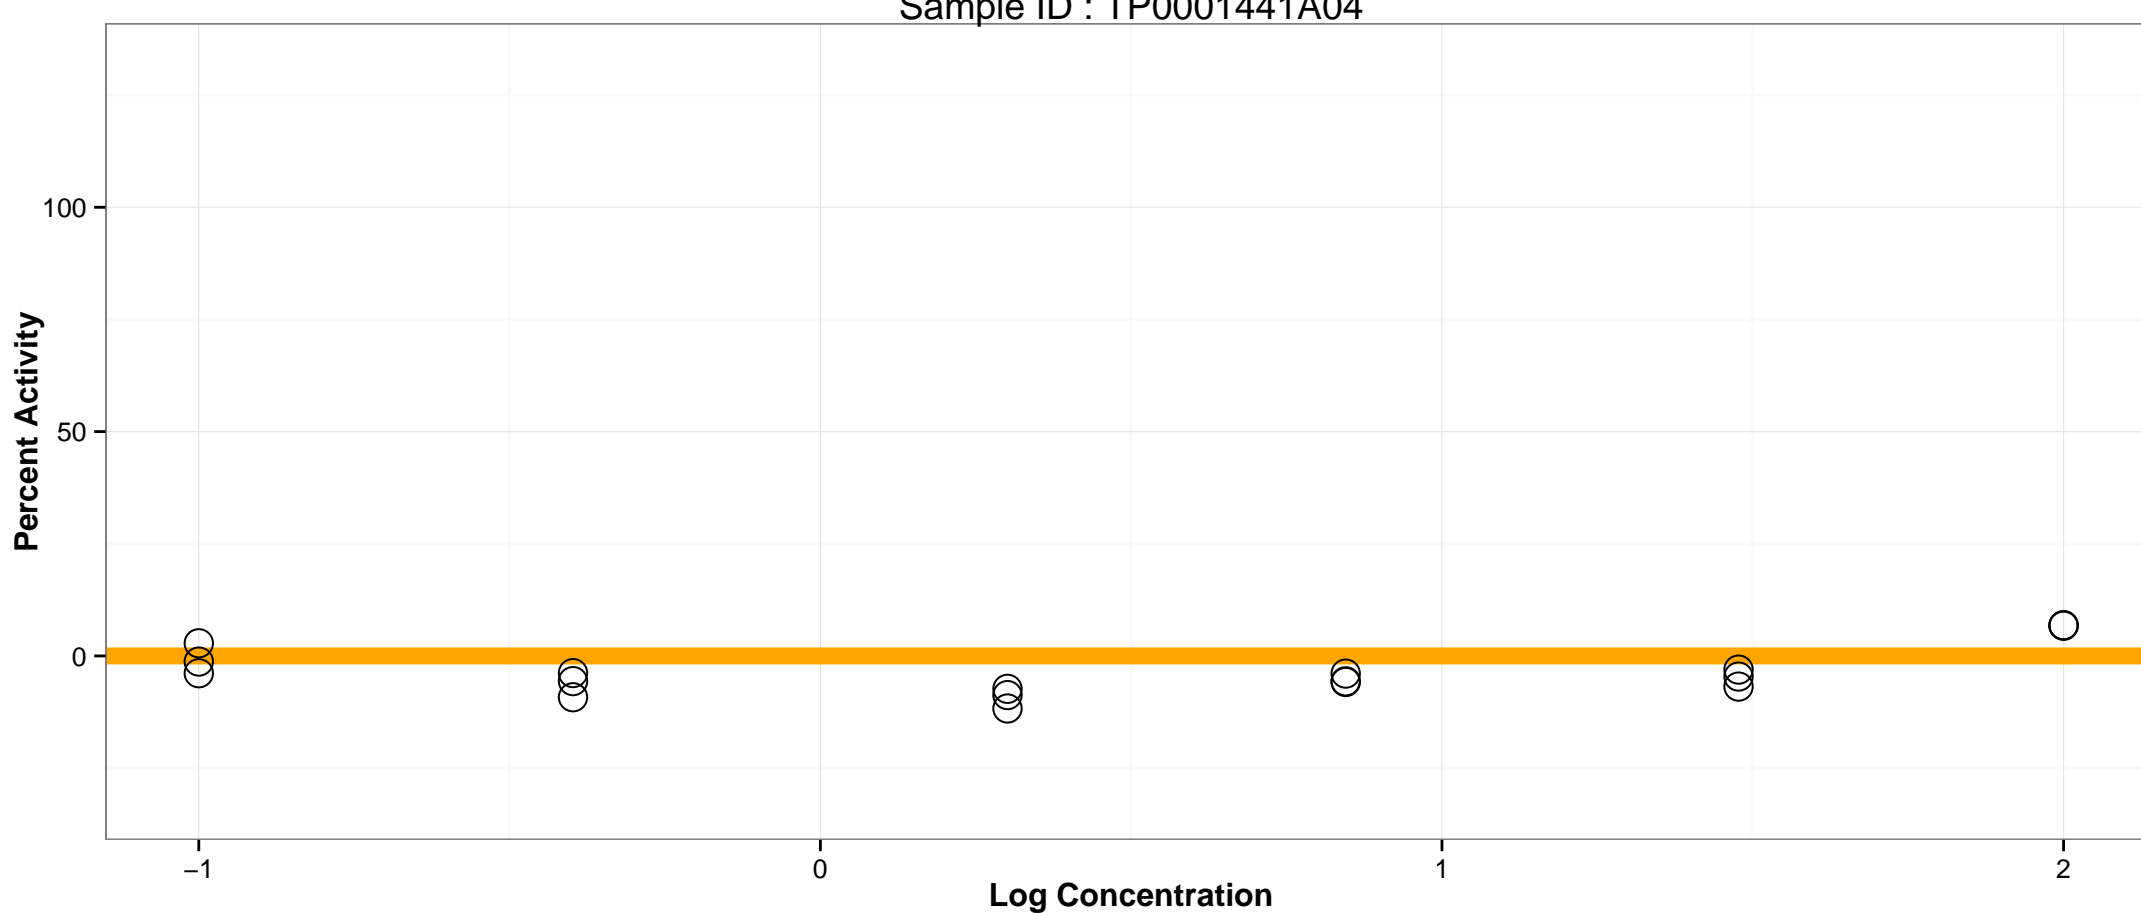

HILL MODEL

HILL MODEL: Not applicable

GAIN-LOSS MODEL

GNLS MODEL: Not applicable

|      | CNST   | HILL | GNLS |
|------|--------|------|------|
| AIC  | 122.57 | NA   | NA   |
| PROB | 1      | NA   | NA   |
| RMSE | 6.32   | NA   | NA   |

MAX\_MEAN : 6.81 MAX\_MED : 6.84 BMAD : 8.58  
COFF : 20 HIT-CALL : 0 FITC : 4 ACTP : 0  
FLAGS :

Chemical : 4-Nonylphenol  
CAS : 104-40-5

Assay ID 1508 (NHEERL\_TPO\_AUR\_dn)  
Sample ID : TX008327

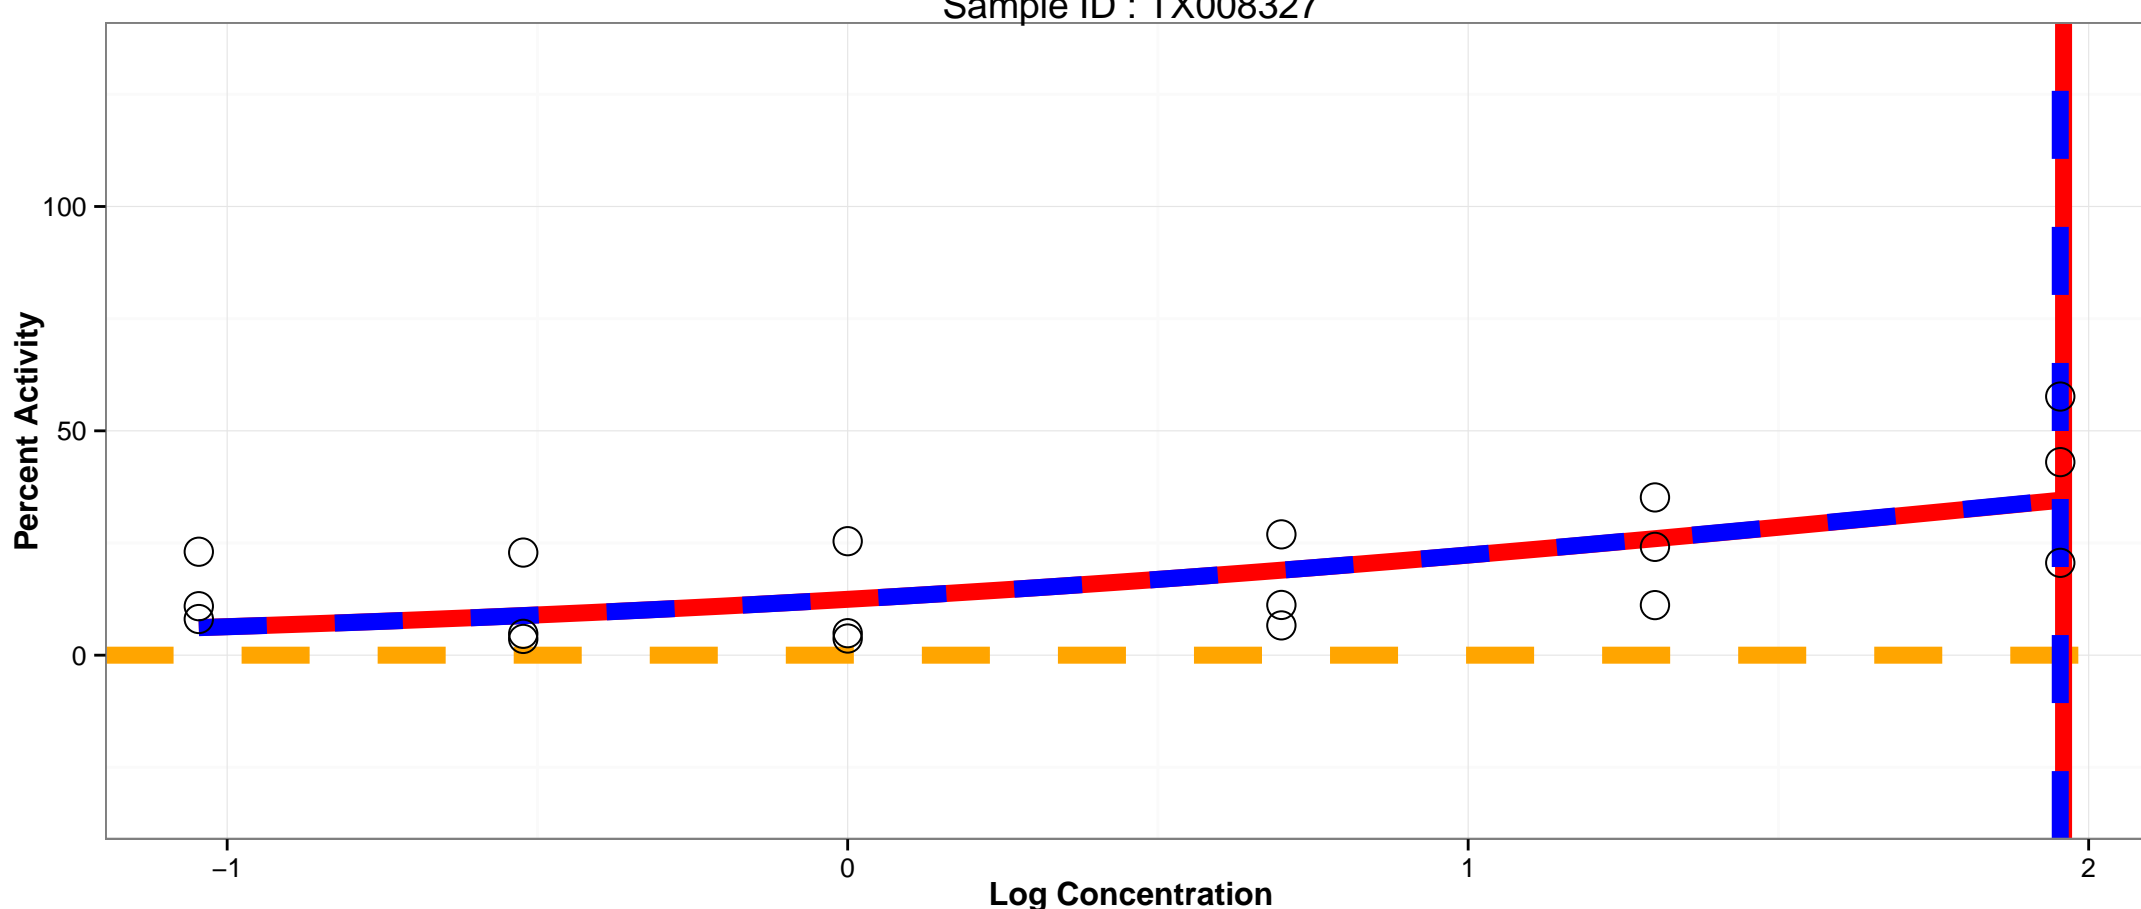

HILL MODEL

|     | tp   | ga   | gw    |
|-----|------|------|-------|
| val | 69.2 | 1.96 | 0.336 |
| sd  | 54.6 | 1.78 | 0.162 |

GAIN-LOSS MODEL

|     | tp   | ga   | gw    | la   | lw   |
|-----|------|------|-------|------|------|
| val | 69.2 | 1.95 | 0.337 | 2.98 | 16.8 |
| sd  | NA   | NA   | NA    | NA   | NA   |

|      | CNST   | HILL   | GNLS   |
|------|--------|--------|--------|
| AIC  | 168.31 | 148.33 | 152.33 |
| PROB | 0      | 0.88   | 0.12   |
| RMSE | 24.04  | 11.15  | 11.15  |

MAX\_MEAN : 40.4 MAX\_MED : 43 BMAD : 5.69  
COFF : 20 HIT-CALL : 1 FITC : 42 ACTP : 1  
FLAGS :

Assay ID 1509 (NHEERL\_HEK293T\_CellTiterGLO)  
Sample ID : TX008327

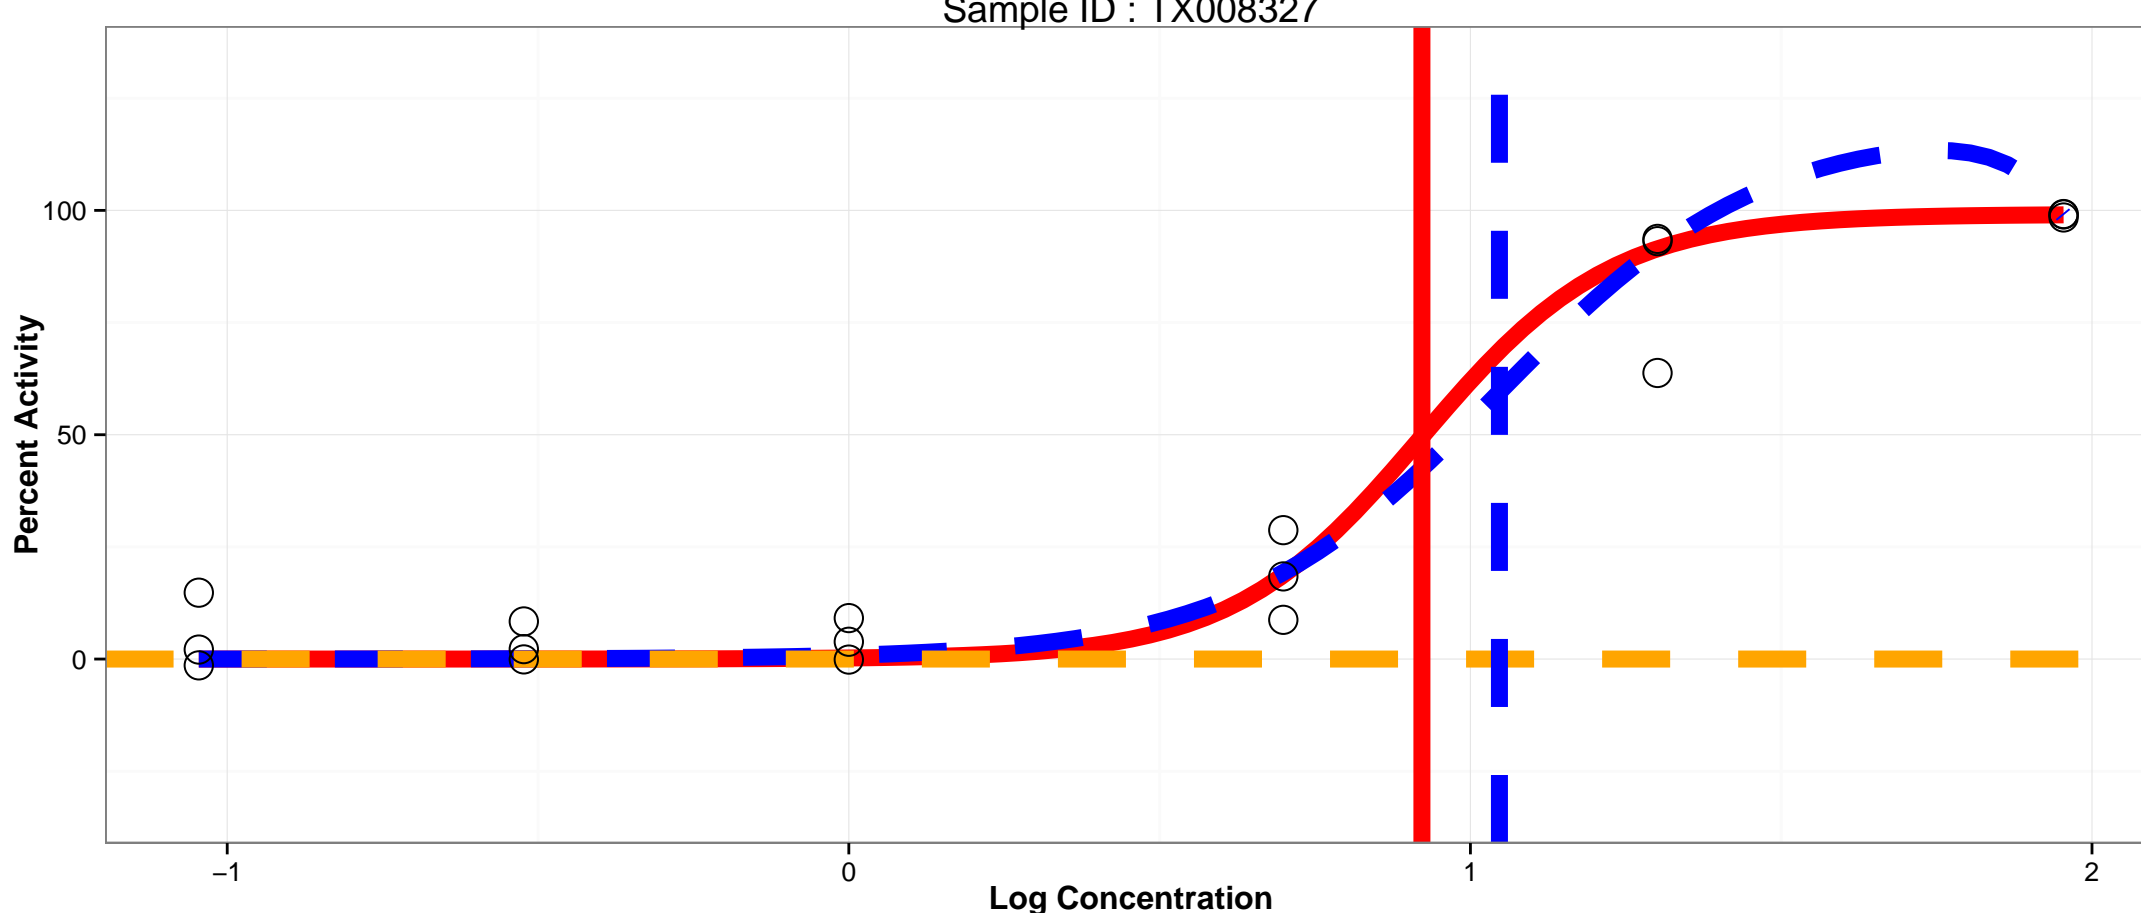

HILL MODEL

|     | tp   | ga     | gw    |
|-----|------|--------|-------|
| val | 99.1 | 0.922  | 2.84  |
| sd  | 2.79 | 0.0476 | 0.517 |

GAIN-LOSS MODEL

|     | tp  | ga   | gw   | la   | lw   |
|-----|-----|------|------|------|------|
| val | 119 | 1.05 | 2.05 | 2.08 | 5.66 |
| sd  | NA  | NA   | NA   | NA   | NA   |

|      | CNST   | HILL   | GNLS   |
|------|--------|--------|--------|
| AIC  | 196.32 | 131.92 | 135.48 |
| PROB | 0      | 0.86   | 0.14   |
| RMSE | 54.01  | 8.72   | 8.68   |

MAX\_MEAN : 98.9 MAX\_MED : 99.1 BMAD : 5.54  
COFF : 20 HIT-CALL : 1 FITC : 41 ACTP : 1  
FLAGS :

Assay ID 1848 (NHEERL\_Quantilum\_inhib\_2\_dn)  
Sample ID : TX008327

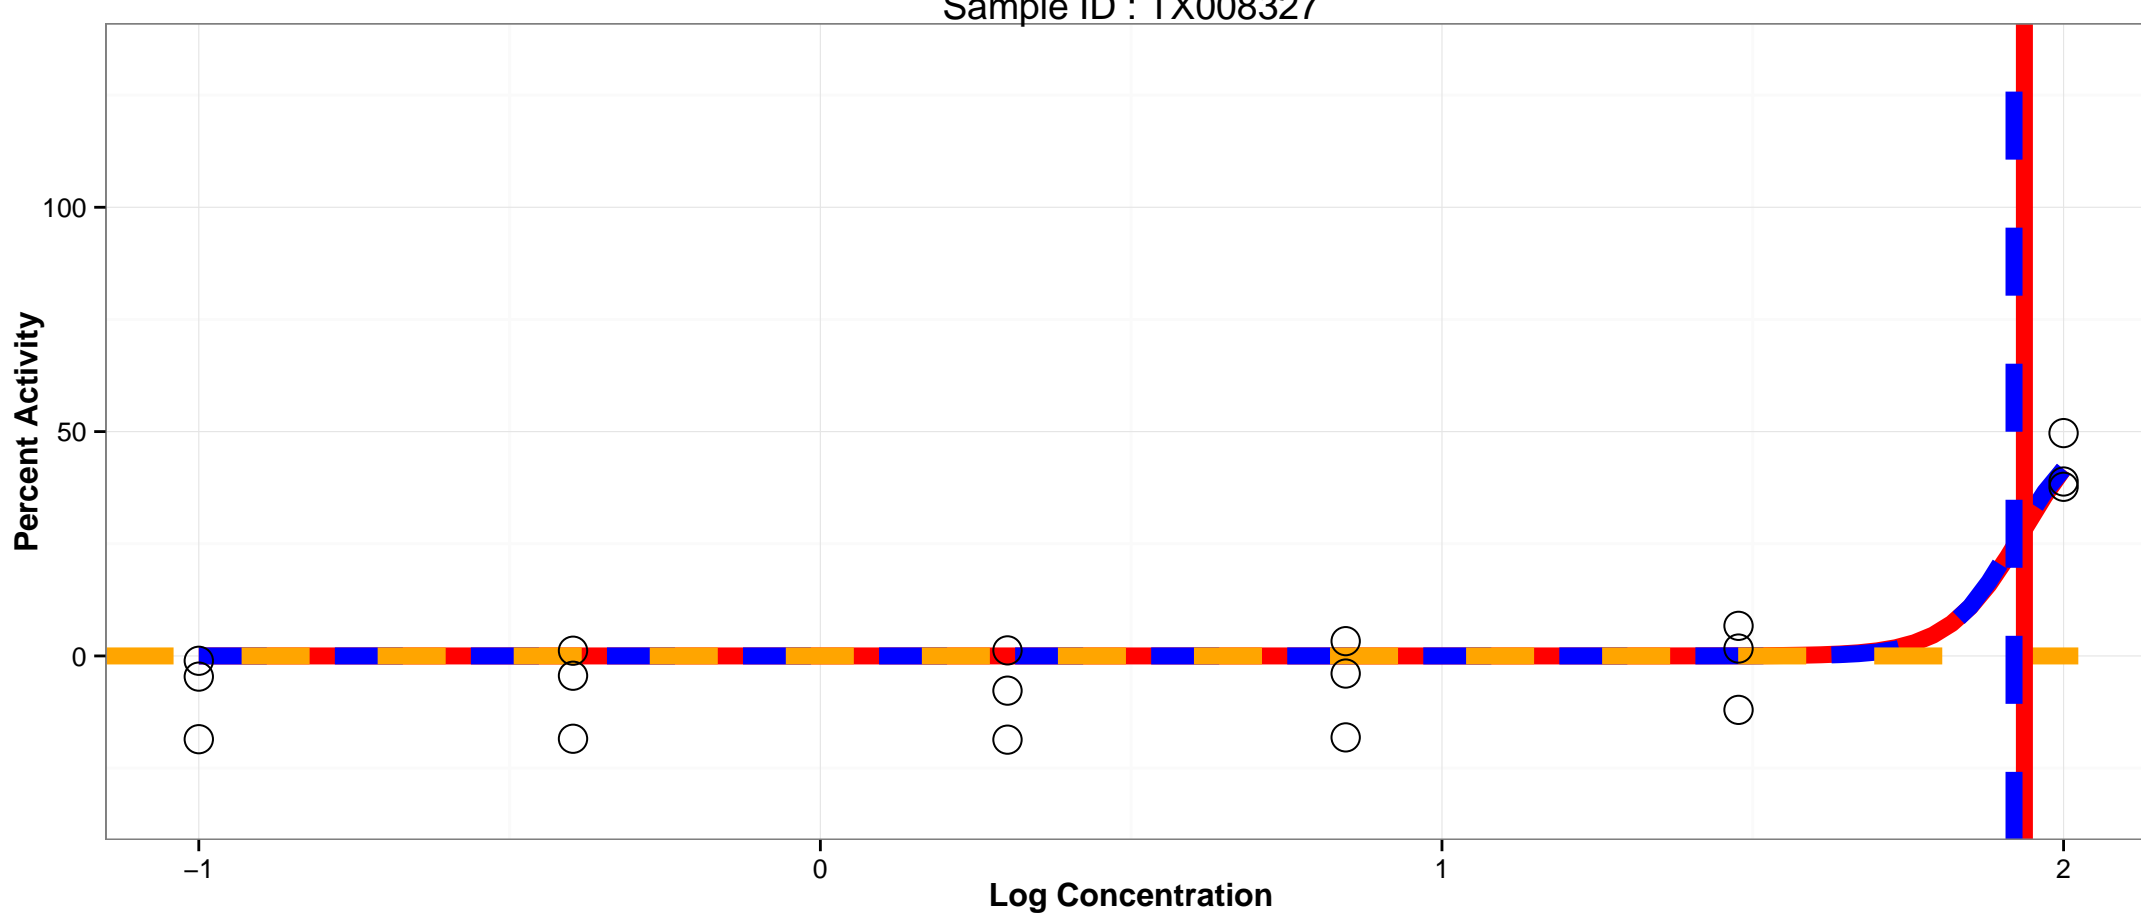

HILL MODEL

|     | tp   | ga   | gw   |
|-----|------|------|------|
| val | 56.4 | 1.94 | 7.13 |
| sd  | NA   | NA   | NA   |

GAIN-LOSS MODEL

|     | tp   | ga   | gw | la  | lw   |
|-----|------|------|----|-----|------|
| val | 51.2 | 1.92 | 8  | 3.4 | 7.53 |
| sd  | NA   | NA   | NA | NA  | NA   |

|      | CNST   | HILL   | GNLS   |
|------|--------|--------|--------|
| AIC  | 159.14 | 142.12 | 146.12 |
| PROB | 0      | 0.88   | 0.12   |
| RMSE | 19.84  | 9.92   | 9.92   |

MAX\_MEAN : 42.1 MAX\_MED : 38.9 BMAD : 8.58  
COFF : 20 HIT-CALL : 1 FITC : 42 ACTP : 1  
FLAGS : 6

Chemical : 2-Mercaptobenzimidazole  
CAS : 583-39-1

Assay ID 1508 (NHEERL\_TPO\_AUR\_dn)  
Sample ID : TP0001441A05

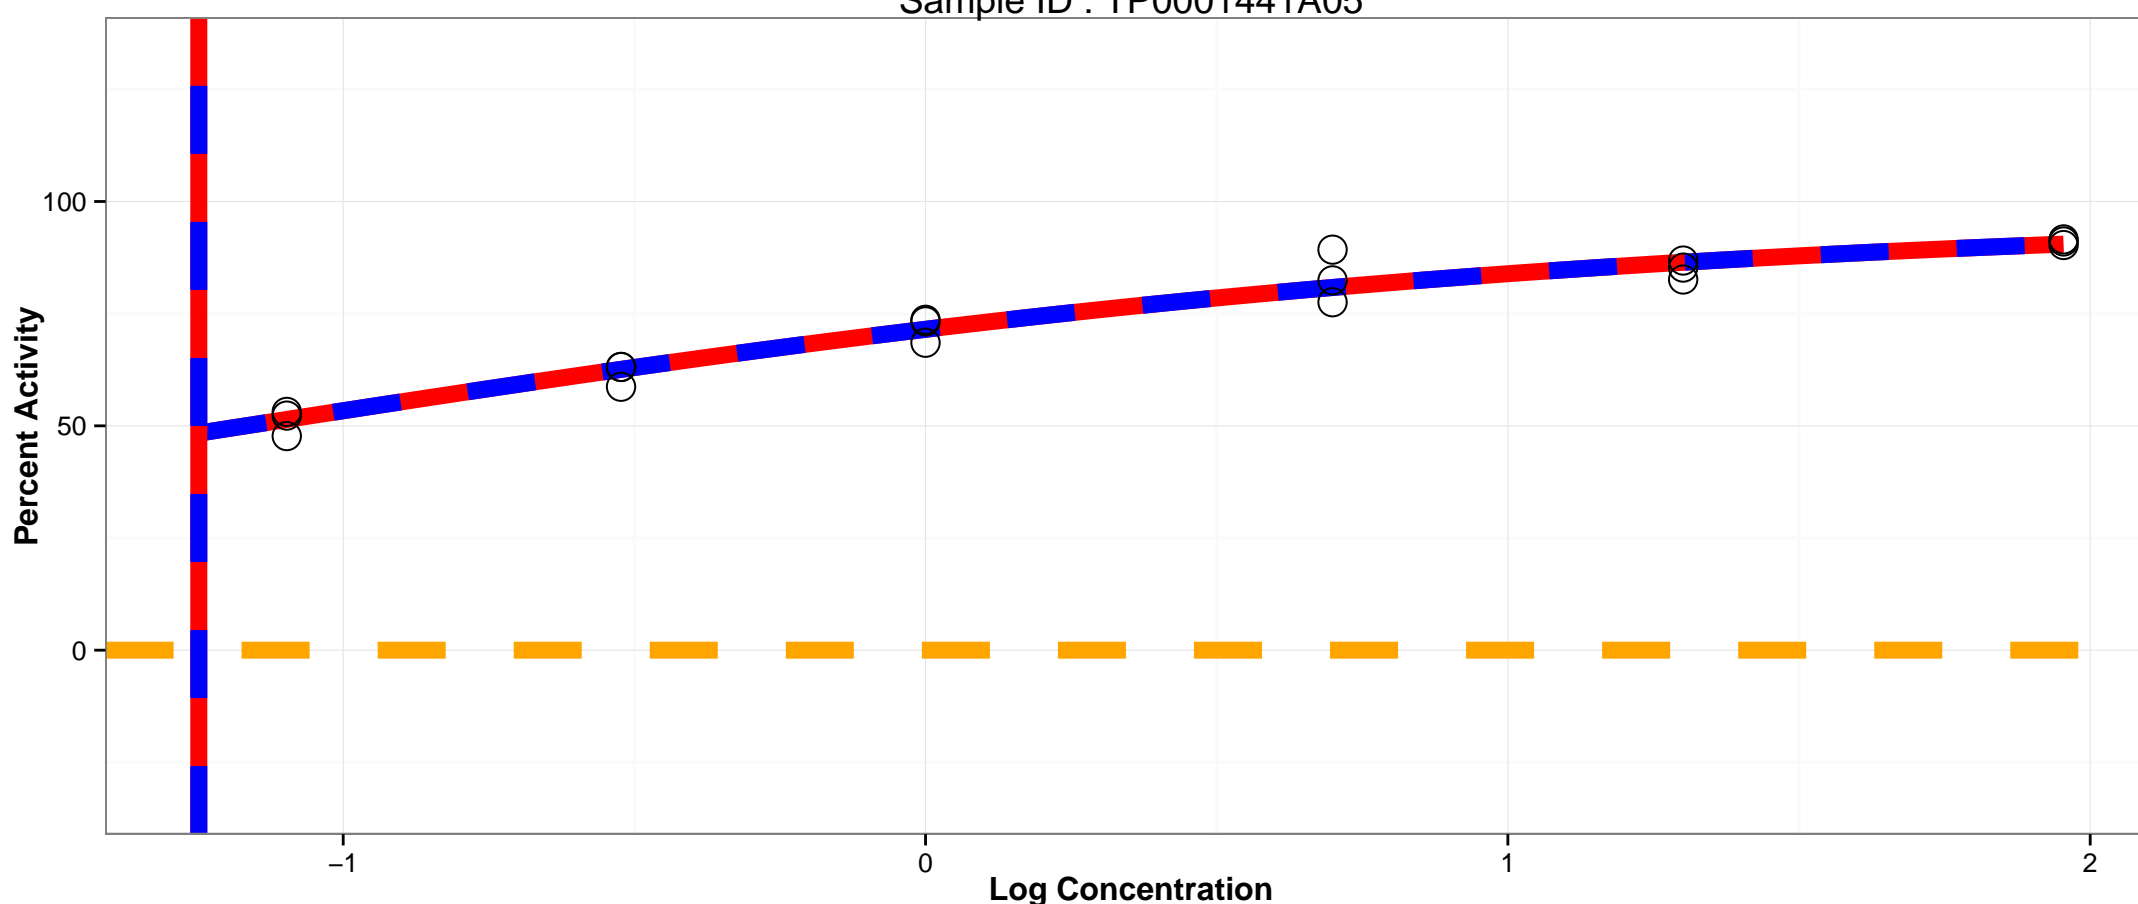

HILL MODEL

|     | tp   | ga     | gw    |
|-----|------|--------|-------|
| val | 96.7 | -1.25  | 0.363 |
| sd  | 3.37 | 0.0749 | 0.055 |

GAIN-LOSS MODEL

|     | tp   | ga    | gw    | la   | lw   |
|-----|------|-------|-------|------|------|
| val | 96.7 | -1.25 | 0.363 | 3.89 | 17.8 |
| sd  | NA   | NA    | NA    | NA   | NA   |

|      | CNST   | HILL  | GNLS   |
|------|--------|-------|--------|
| AIC  | 212.72 | 96.12 | 100.12 |
| PROB | 0      | 0.88  | 0.12   |
| RMSE | 75.28  | 2.9   | 2.9    |

MAX\_MEAN : 91 MAX\_MED : 91.1 BMAD : 5.69  
COFF : 20 HIT-CALL : 1 FITC : 40 ACTP : 1  
FLAGS :

Assay ID 1509 (NHEERL\_HEK293T\_CellTiterGLO)  
Sample ID : TP0001441A05

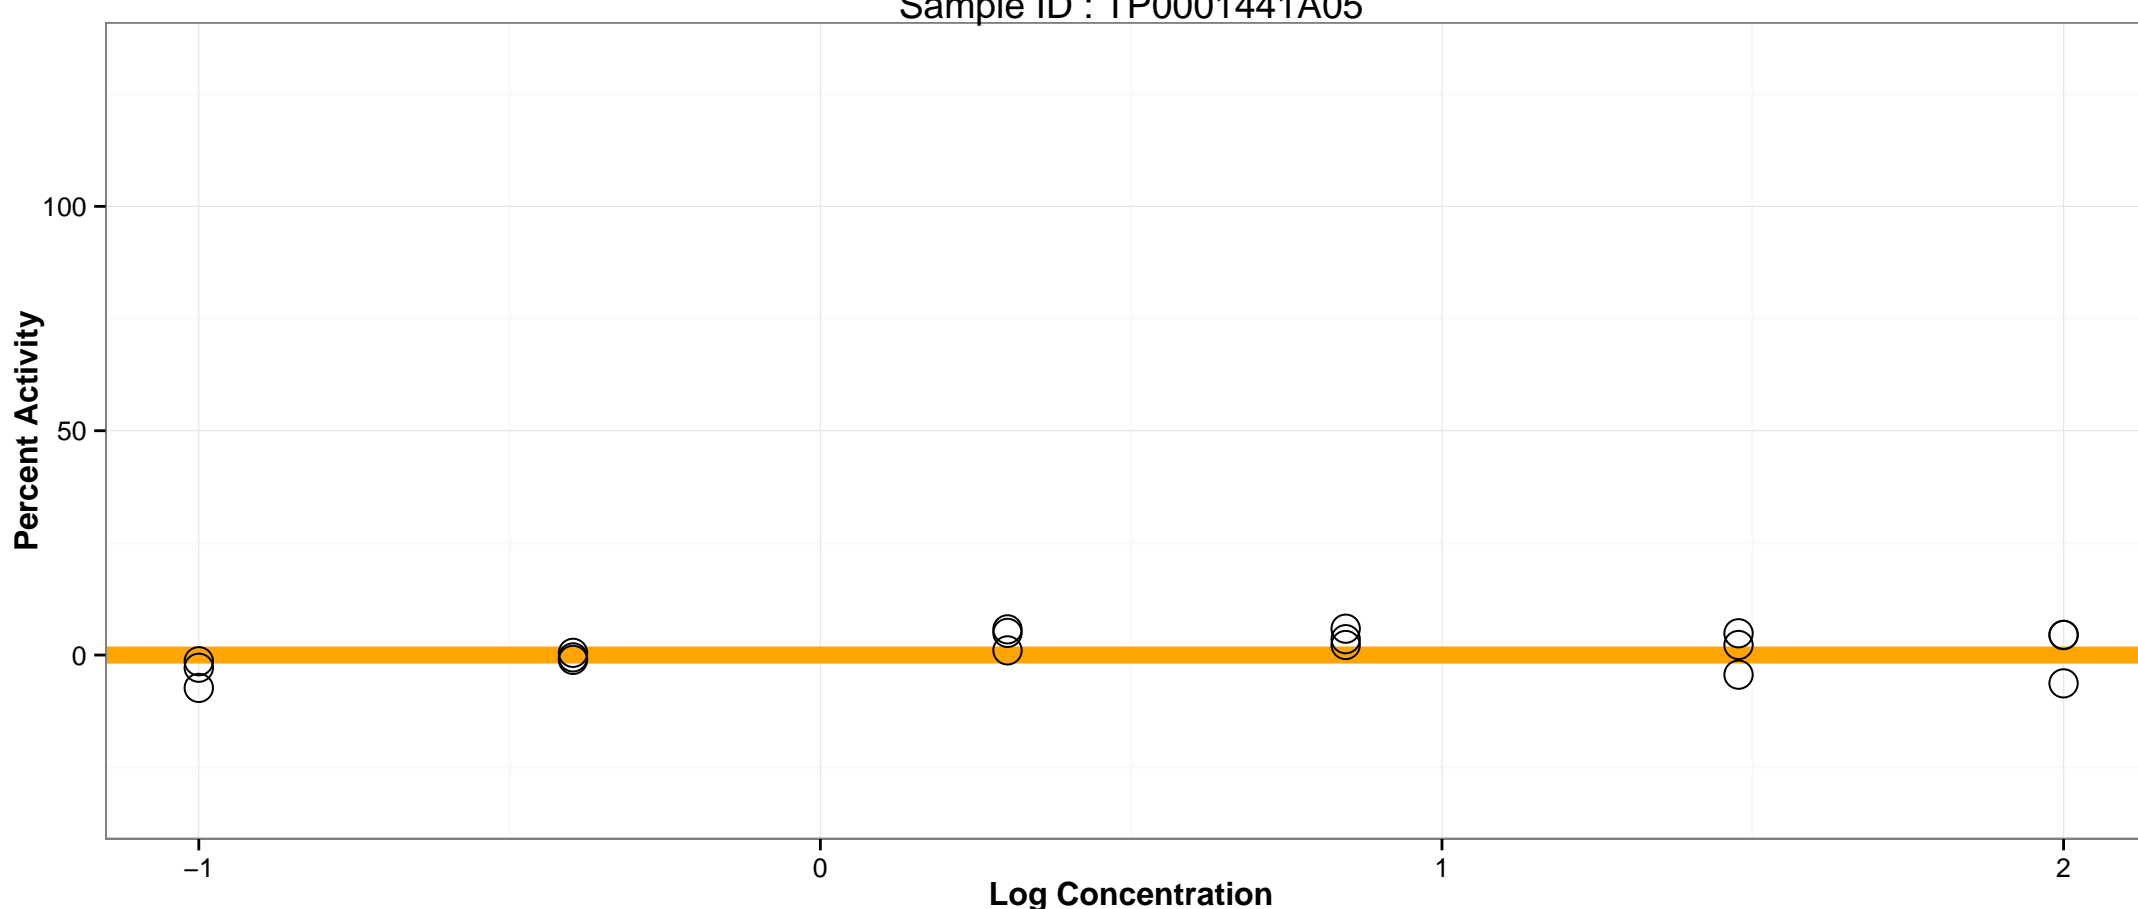

HILL MODEL

HILL MODEL: Not applicable

GAIN-LOSS MODEL

GNLS MODEL: Not applicable

|      | CNST   | HILL | GNLS |
|------|--------|------|------|
| AIC  | 106.64 | NA   | NA   |
| PROB | 1      | NA   | NA   |
| RMSE | 4.11   | NA   | NA   |

MAX\_MEAN : 3.92 MAX\_MED : 4.95 BMAD : 5.54  
COFF : 20 HIT-CALL : 0 FITC : 4 ACTP : 0  
FLAGS :

Assay ID 1848 (NHEERL\_Quantilum\_inhib\_2\_dn)  
Sample ID : TP0001441A05

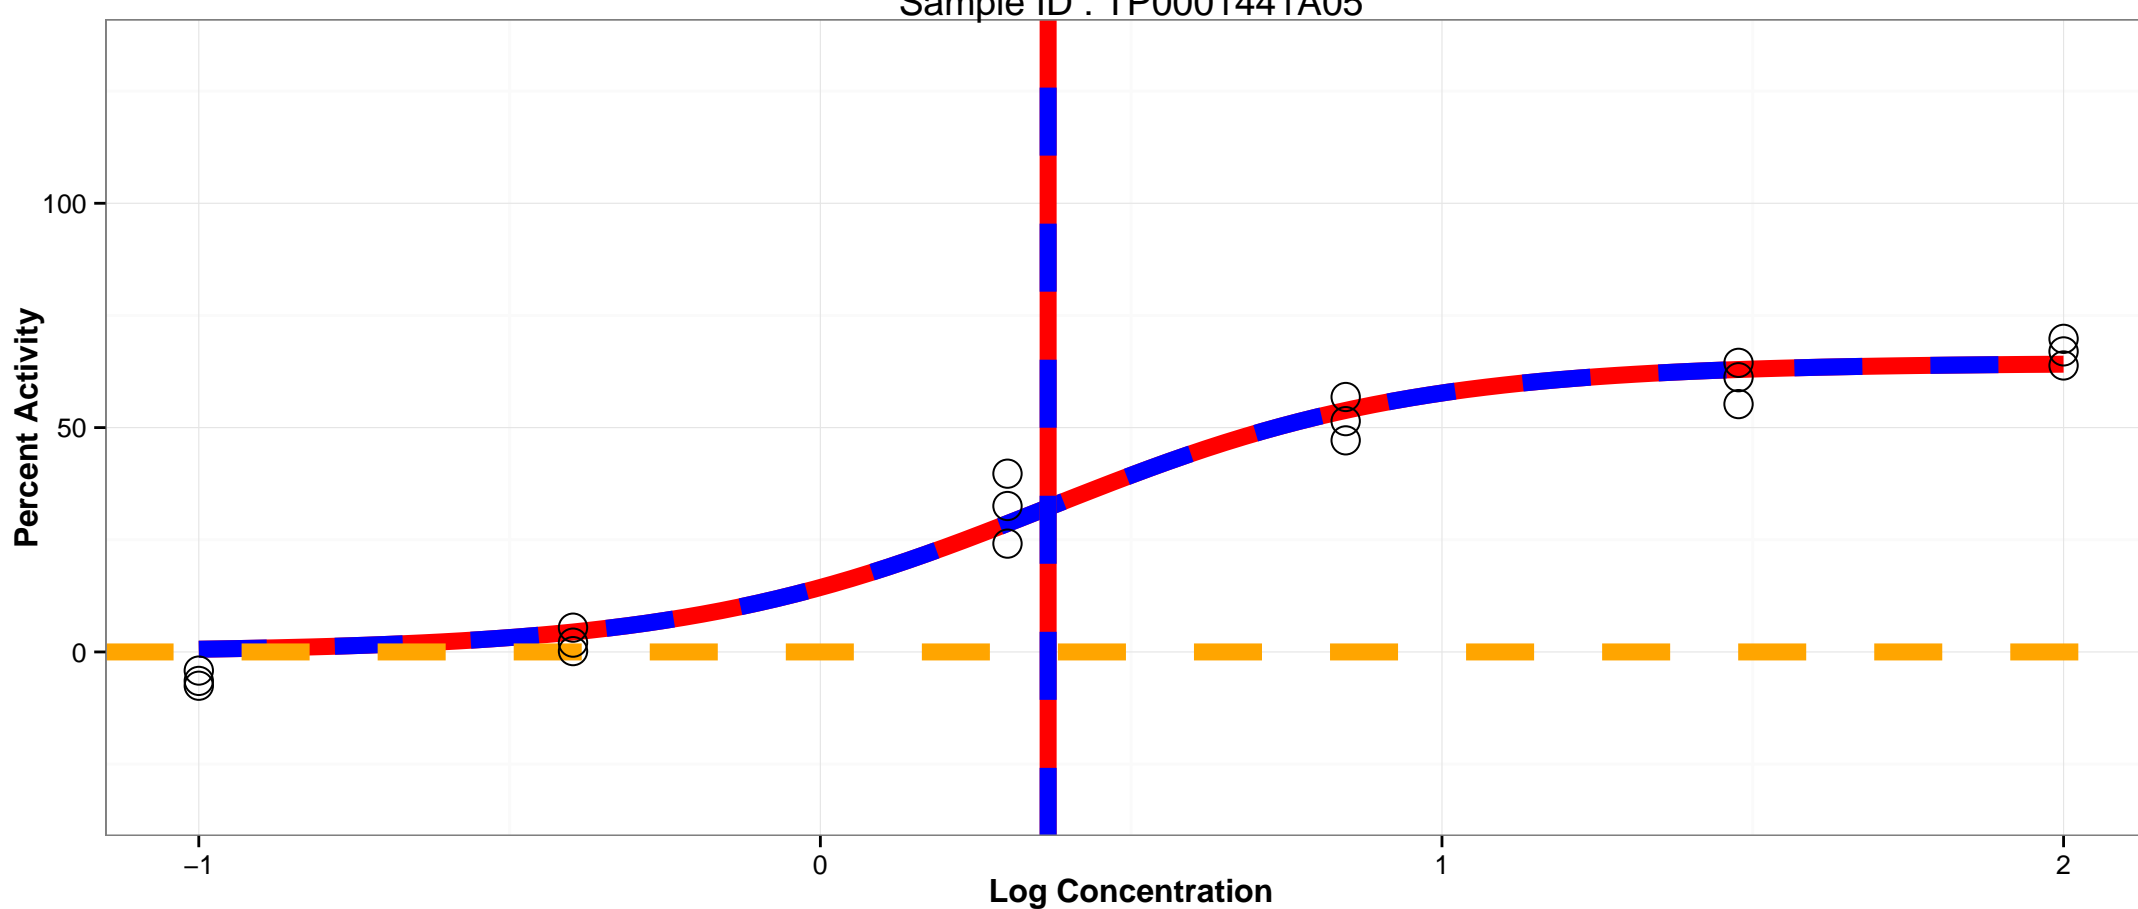

HILL MODEL

|     | tp   | ga     | gw    |
|-----|------|--------|-------|
| val | 64.4 | 0.366  | 1.48  |
| sd  | 2.49 | 0.0742 | 0.248 |

GAIN-LOSS MODEL

|     | tp   | ga     | gw    | la   | lw   |
|-----|------|--------|-------|------|------|
| val | 64.4 | 0.366  | 1.48  | 3.13 | 8.12 |
| sd  | 2.49 | 0.0742 | 0.248 | 1340 | 9640 |

|      | CNST  | HILL   | GNLS   |
|------|-------|--------|--------|
| AIC  | 192.5 | 120.32 | 124.32 |
| PROB | 0     | 0.88   | 0.12   |
| RMSE | 44.64 | 5.19   | 5.19   |

MAX\_MEAN : 66.9 MAX\_MED : 67 BMAD : 8.58  
COFF : 20 HIT-CALL : 1 FITC : 41 ACTP : 1  
FLAGS :

Assay ID 1508 (NHEERL\_TPO\_AUR\_dn)  
Sample ID : TP0001441A06

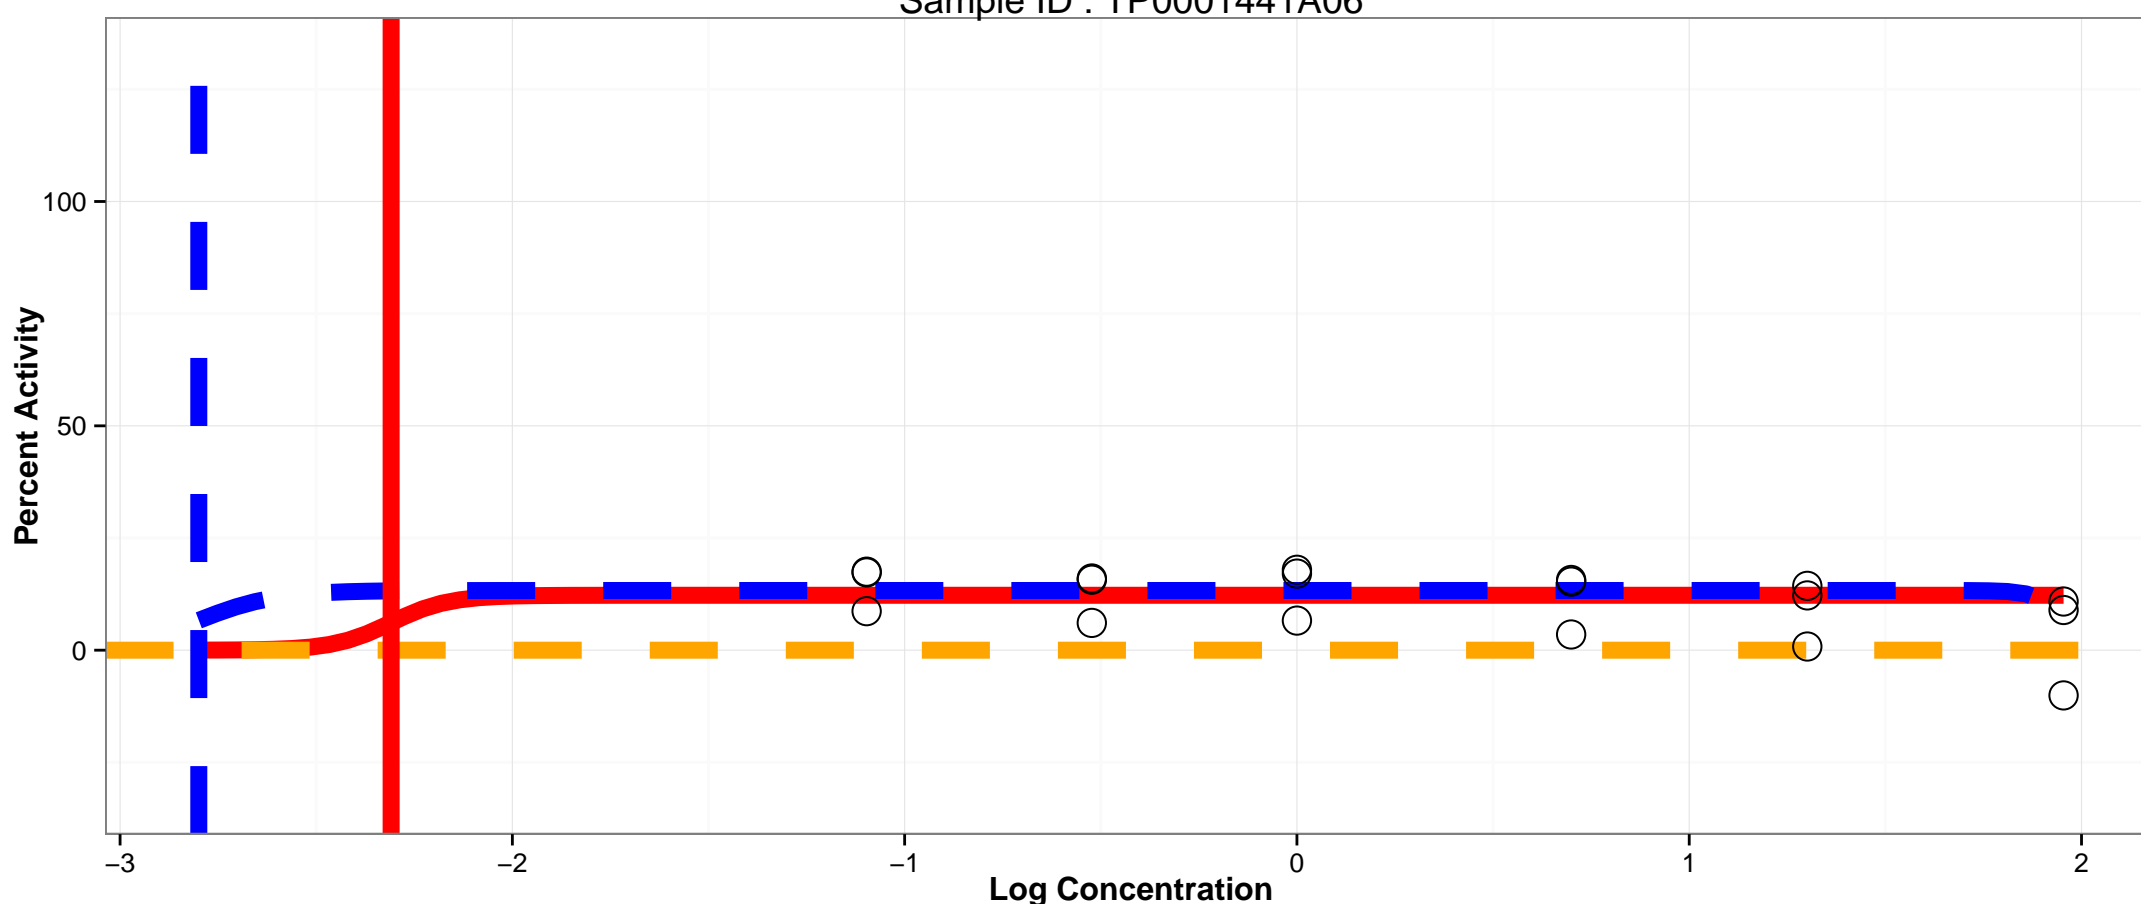

HILL MODEL

|     | tp   | ga    | gw   |
|-----|------|-------|------|
| val | 12.2 | -2.31 | 5.98 |
| sd  | 1.53 | 537   | 2650 |

GAIN-LOSS MODEL

|     | tp   | ga   | gw   | la    | lw   |
|-----|------|------|------|-------|------|
| val | 13.3 | -2.8 | 4.45 | 1.96  | 11.5 |
| sd  | 1.57 | 1240 | 3230 | 0.296 | 322  |

|      | CNST   | HILL   | GNLS   |
|------|--------|--------|--------|
| AIC  | 148.83 | 128.56 | 130.31 |
| PROB | 0      | 0.71   | 0.29   |
| RMSE | 12.97  | 7.3    | 6.62   |

MAX\_MEAN : 14.5 MAX\_MED : 17.3 BMAD : 5.69  
COFF : 20 HIT-CALL : 0 FITC : 13 ACTP : 1  
FLAGS : 8

Assay ID 1509 (NHEERL\_HEK293T\_CellTiterGLO)  
Sample ID : TP0001441A06

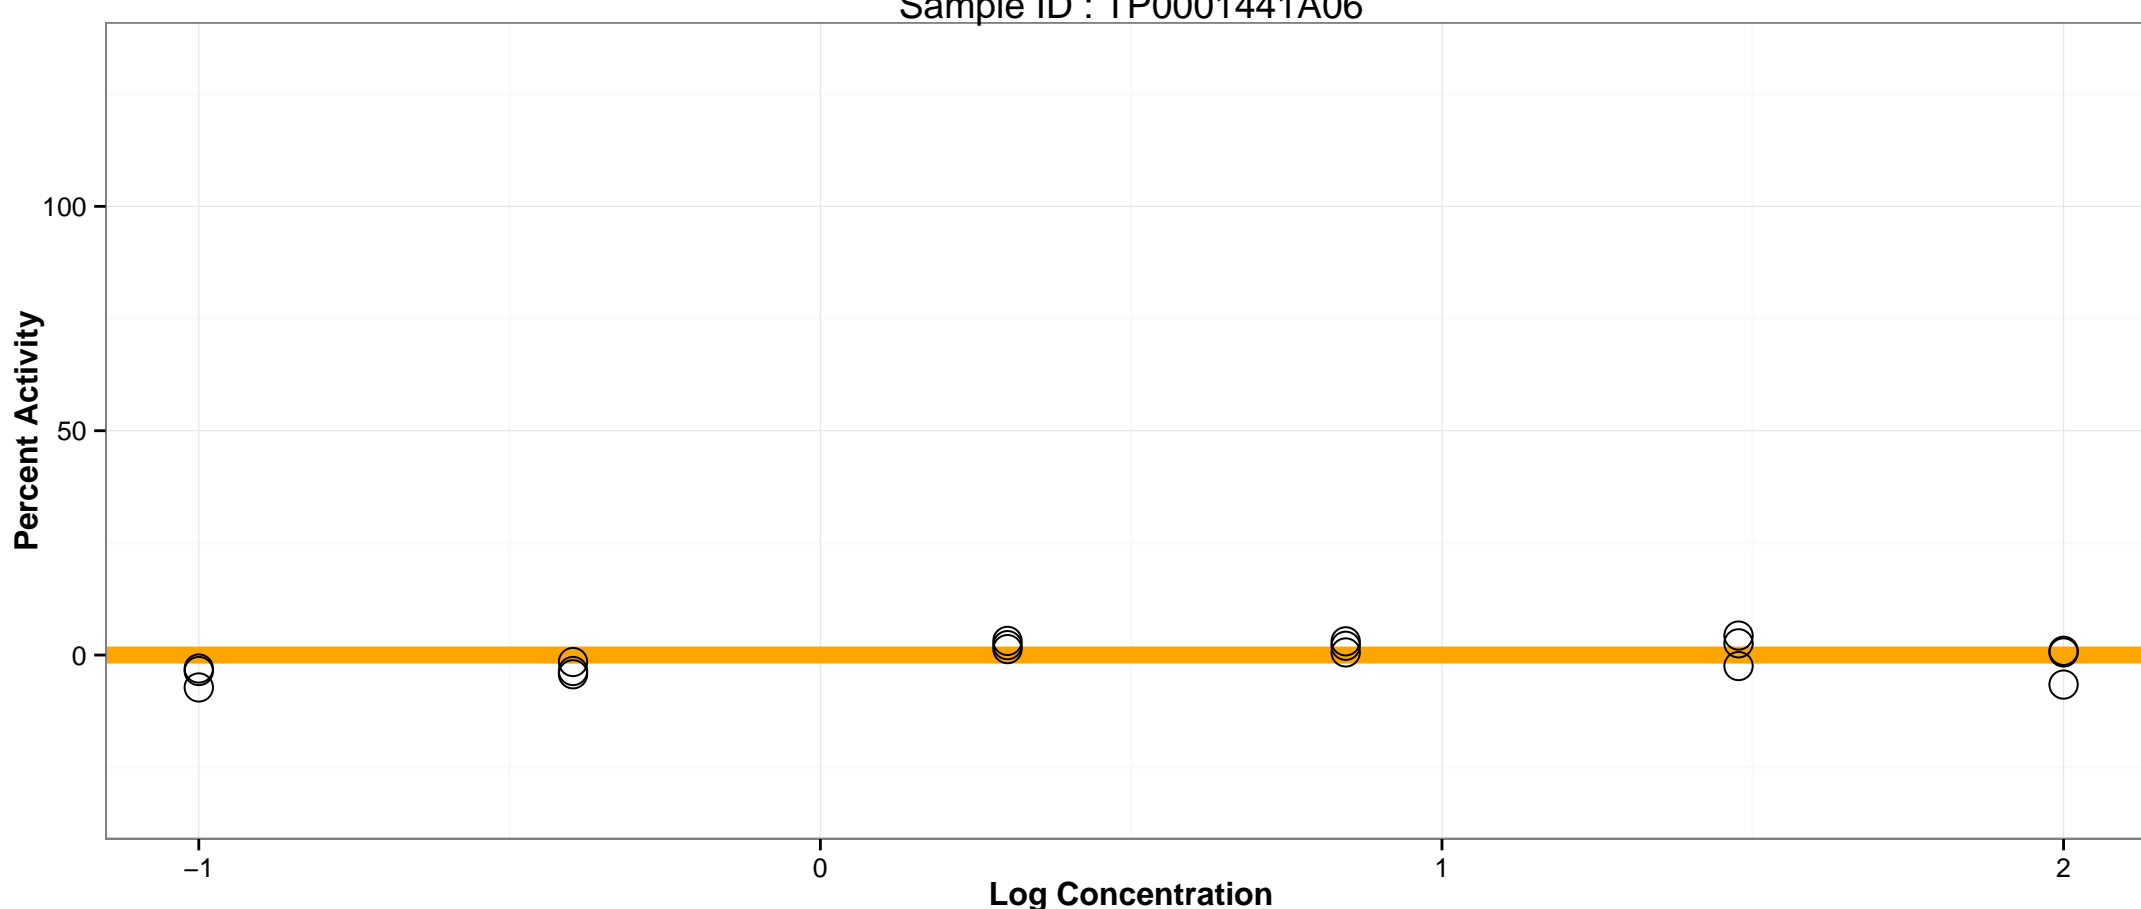

HILL MODEL

HILL MODEL: Not applicable

GAIN-LOSS MODEL

GNLS MODEL: Not applicable

|      | CNST  | HILL | GNLS |
|------|-------|------|------|
| AIC  | 99.57 | NA   | NA   |
| PROB | 1     | NA   | NA   |
| RMSE | 3.45  | NA   | NA   |

MAX\_MEAN : 2.24 MAX\_MED : 2.63 BMAD : 5.54  
COFF : 20 HIT-CALL : 0 FITC : 4 ACTP : 0  
FLAGS :

Assay ID 1848 (NHEERL\_Quantilum\_inhib\_2\_dn)  
Sample ID : TP0001441A06

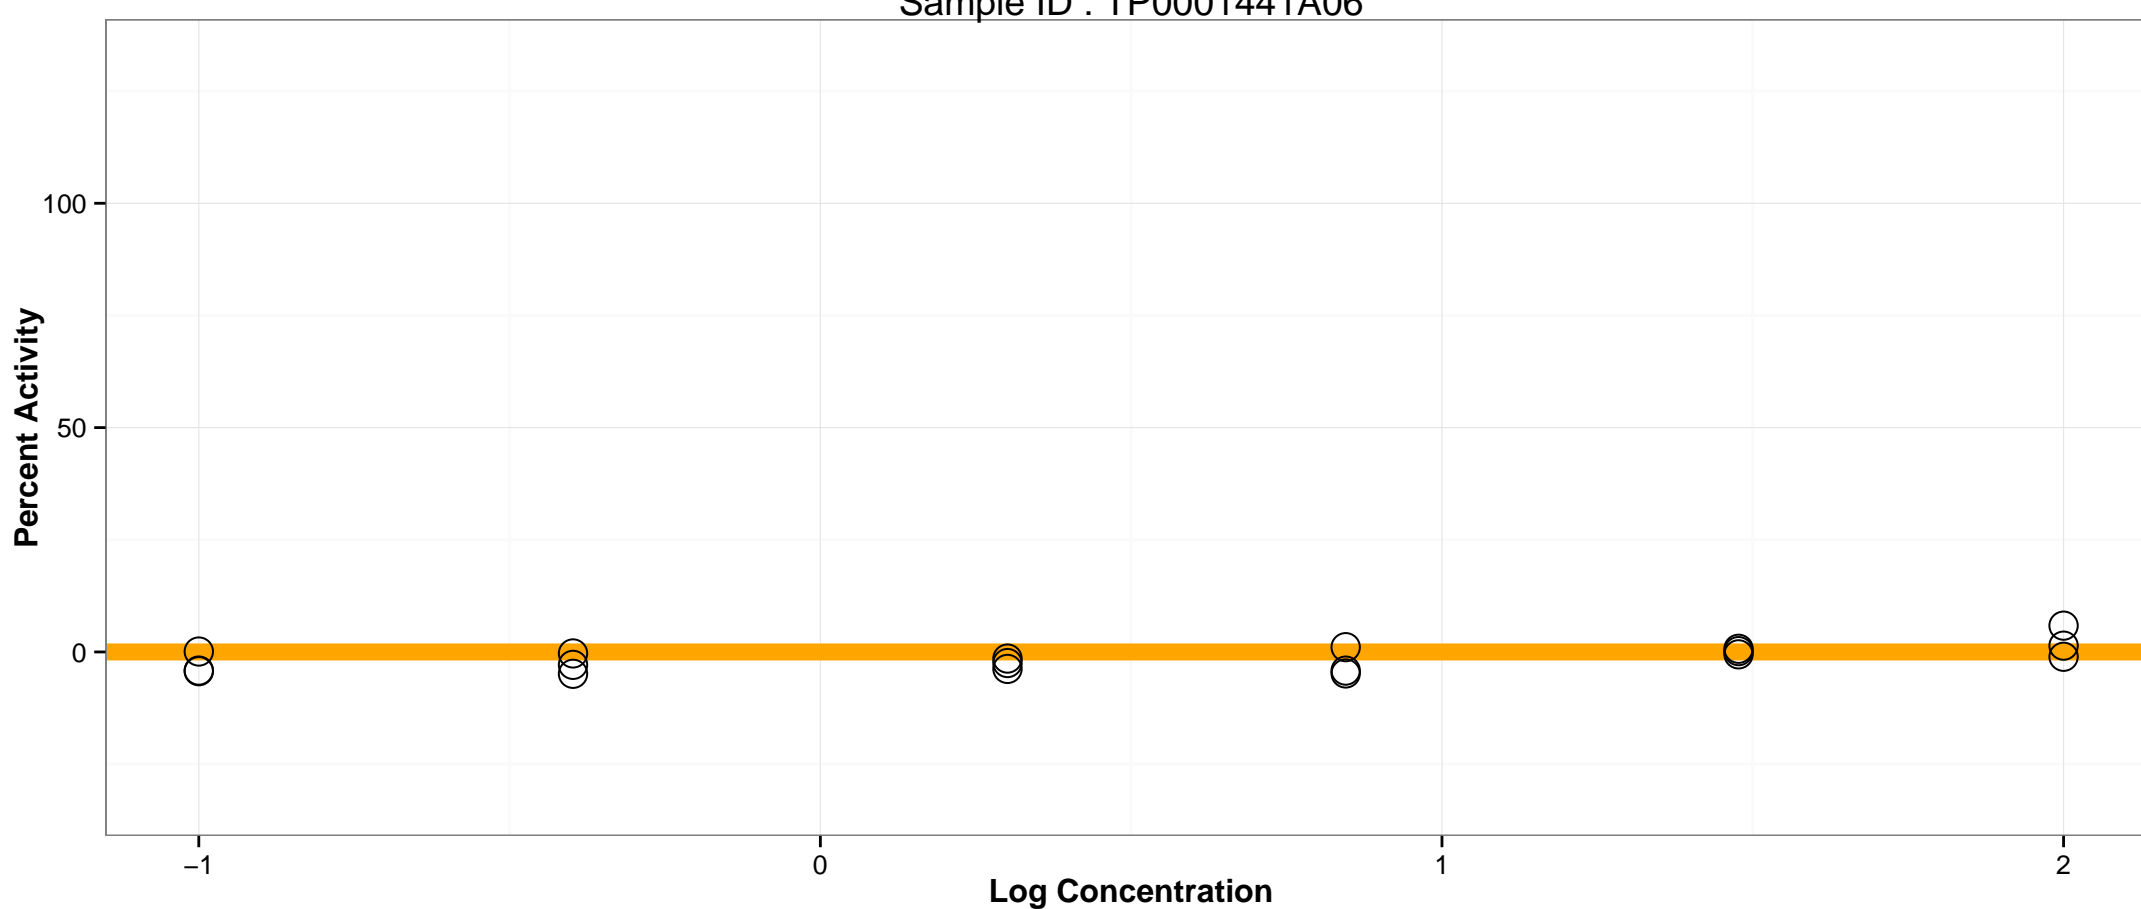

HILL MODEL

HILL MODEL: Not applicable

GAIN-LOSS MODEL

GNLS MODEL: Not applicable

|      | CNST | HILL | GNLS |
|------|------|------|------|
| AIC  | 95.3 | NA   | NA   |
| PROB | 1    | NA   | NA   |
| RMSE | 3.07 | NA   | NA   |

MAX\_MEAN : 2.07 MAX\_MED : 1.41 BMAD : 8.58  
COFF : 20 HIT-CALL : 0 FITC : 4 ACTP : 0  
FLAGS :



Chemical : 2,4-Dihydropyridine  
CAS : 626-03-9

Assay ID 1508 (NHEERL\_TPO\_AUR\_dn)  
Sample ID : TP0001441A07

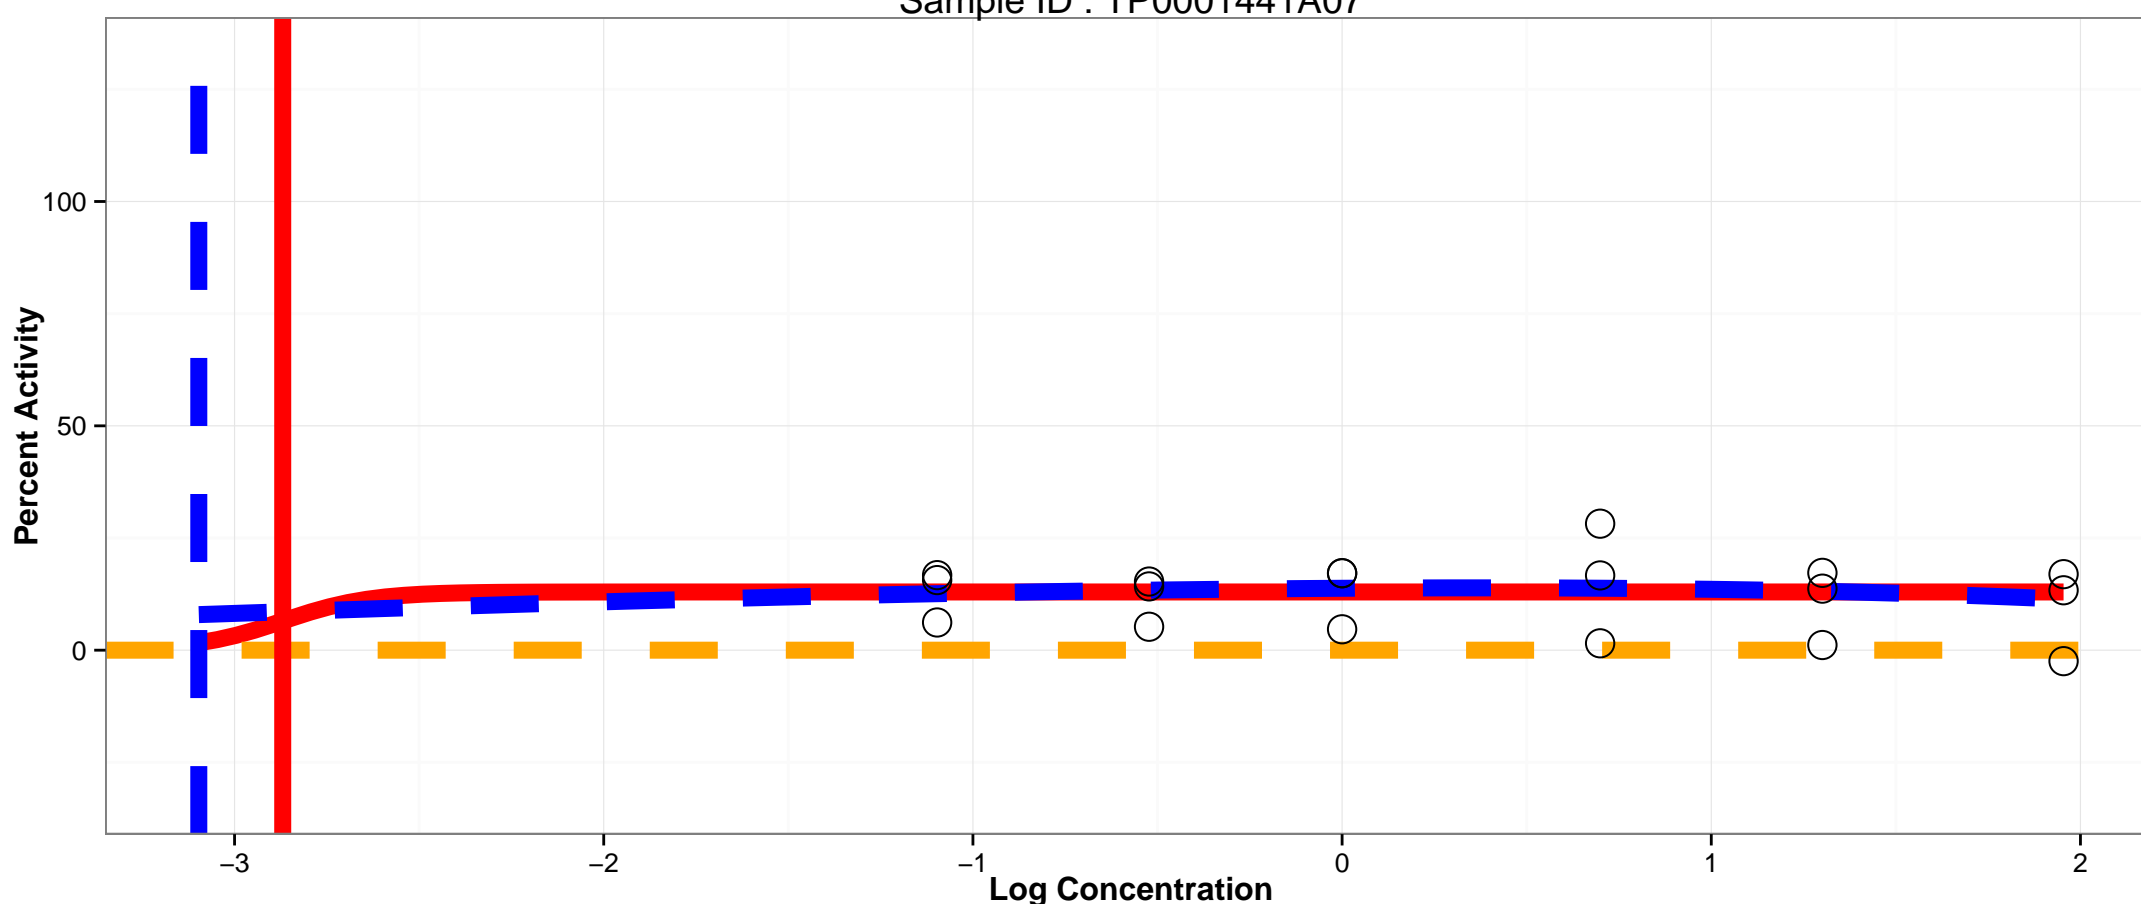

HILL MODEL

|     | tp   | ga    | gw   |
|-----|------|-------|------|
| val | 13   | -2.87 | 3.7  |
| sd  | 1.79 | 1120  | 2350 |

GAIN-LOSS MODEL

|     | tp   | ga   | gw  | la   | lw    |
|-----|------|------|-----|------|-------|
| val | 15.9 | -3.1 | 0.3 | 2.76 | 0.556 |
| sd  | NA   | NA   | NA  | NA   | NA    |

|      | CNST   | HILL   | GNLS   |
|------|--------|--------|--------|
| AIC  | 151.65 | 132.85 | 136.66 |
| PROB | 0      | 0.87   | 0.13   |
| RMSE | 14.29  | 7.55   | 7.44   |

MAX\_MEAN : 15.5 MAX\_MED : 17.2 BMAD : 5.69  
COFF : 20 HIT-CALL : 0 FITC : 13 ACTP : 1  
FLAGS :

Assay ID 1509 (NHEERL\_HEK293T\_CellTiterGLO)  
Sample ID : TP0001441A07

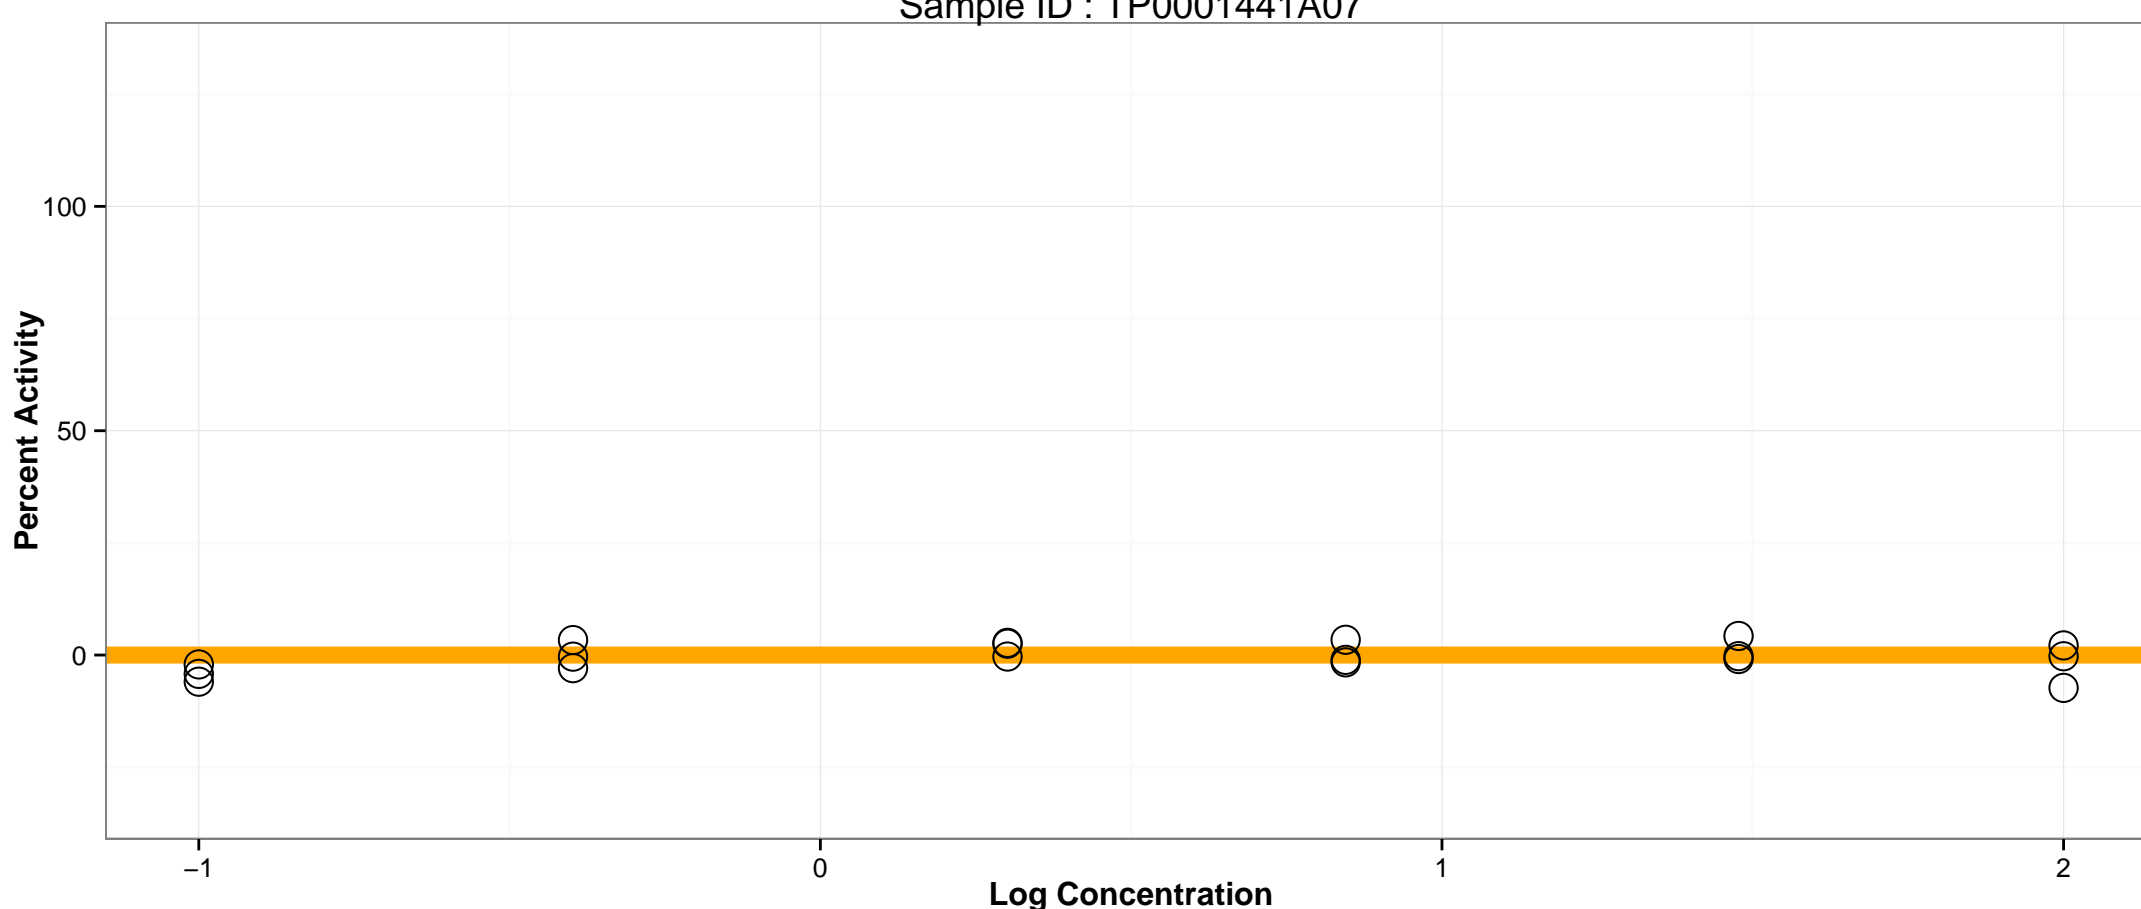

HILL MODEL

HILL MODEL: Not applicable

GAIN-LOSS MODEL

GNLS MODEL: Not applicable

|      | CNST  | HILL | GNLS |
|------|-------|------|------|
| AIC  | 95.95 | NA   | NA   |
| PROB | 1     | NA   | NA   |
| RMSE | 3.19  | NA   | NA   |

MAX\_MEAN : 1.65 MAX\_MED : 2.54 BMAD : 5.54  
COFF : 20 HIT-CALL : 0 FITC : 4 ACTP : 0  
FLAGS :

Assay ID 1848 (NHEERL\_Quantilum\_inhib\_2\_dn)  
Sample ID : TP0001441A07

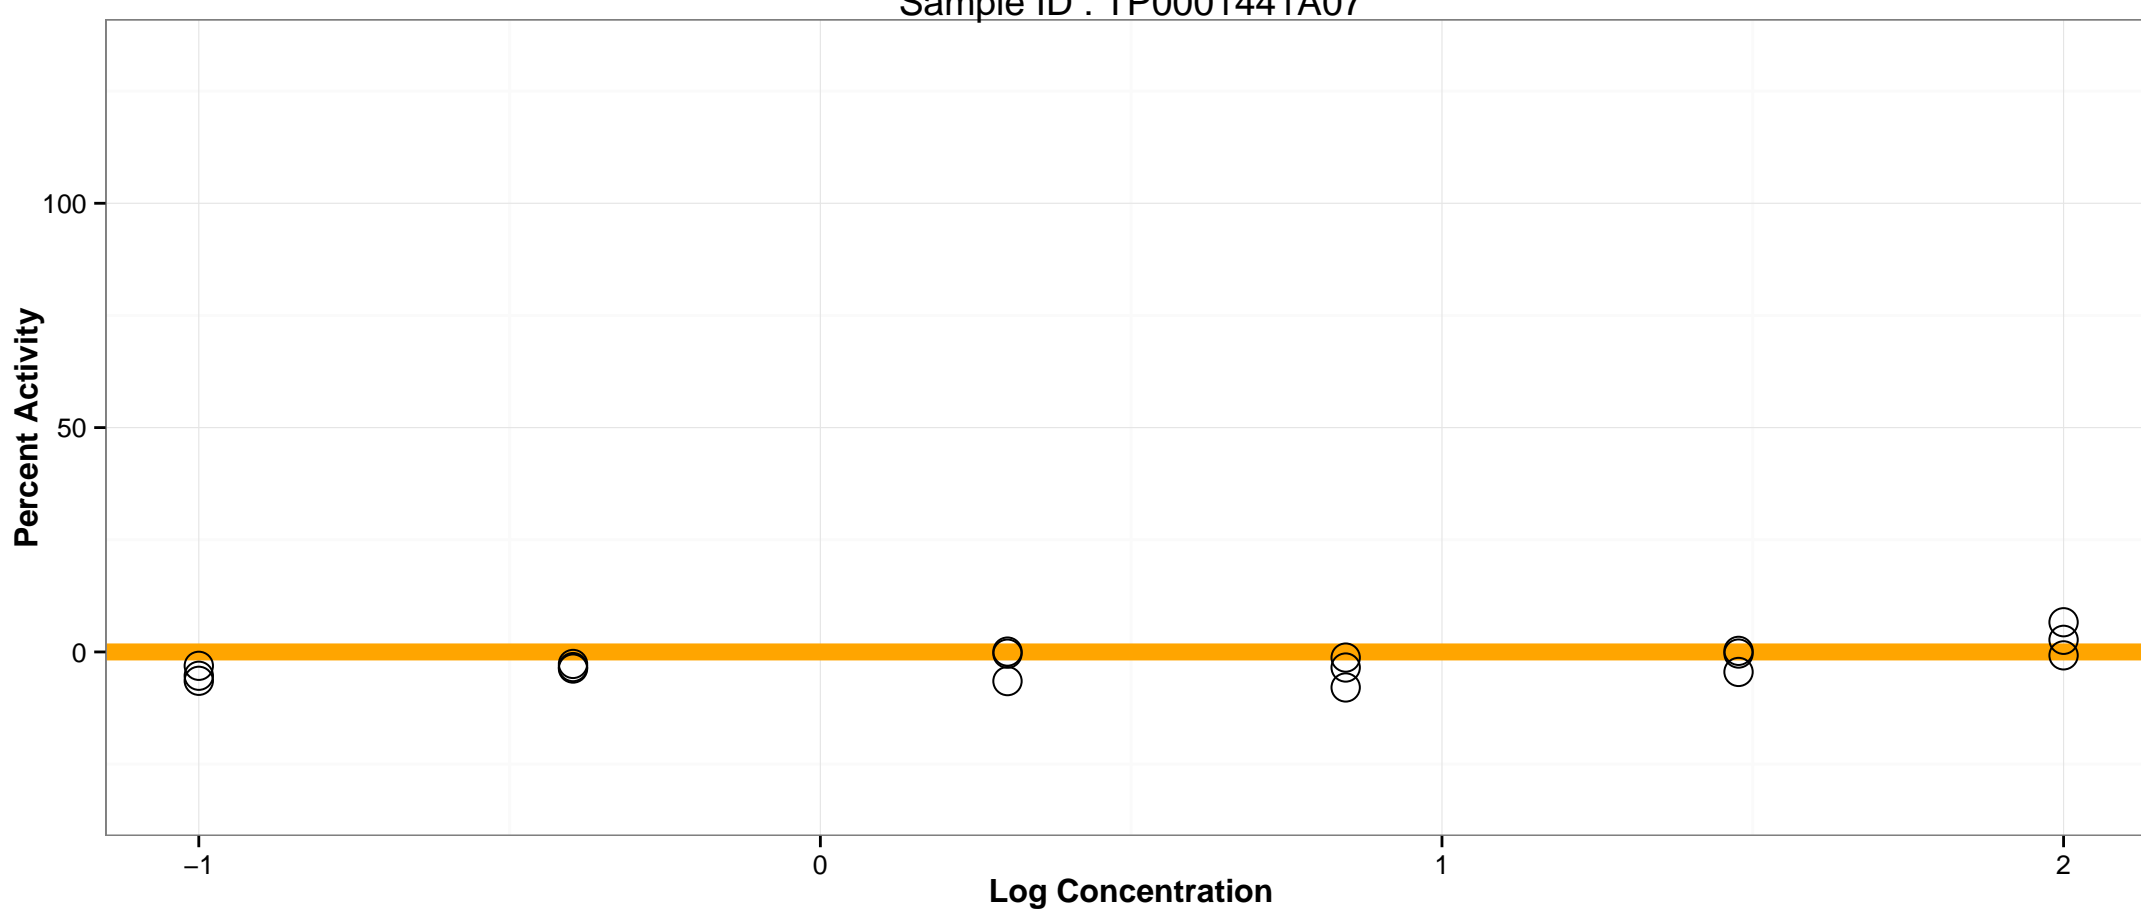

HILL MODEL

HILL MODEL: Not applicable

GAIN-LOSS MODEL

GNLS MODEL: Not applicable

|      | CNST  | HILL | GNLS |
|------|-------|------|------|
| AIC  | 105.7 | NA   | NA   |
| PROB | 1     | NA   | NA   |
| RMSE | 4.09  | NA   | NA   |

MAX\_MEAN : 2.86 MAX\_MED : 2.71 BMAD : 8.58  
COFF : 20 HIT-CALL : 0 FITC : 4 ACTP : 0  
FLAGS :

Chemical : 3-Pyridinol  
CAS : 109-00-2

Assay ID 1508 (NHEERL\_TPO\_AUR\_dn)  
Sample ID : TP0001441A08

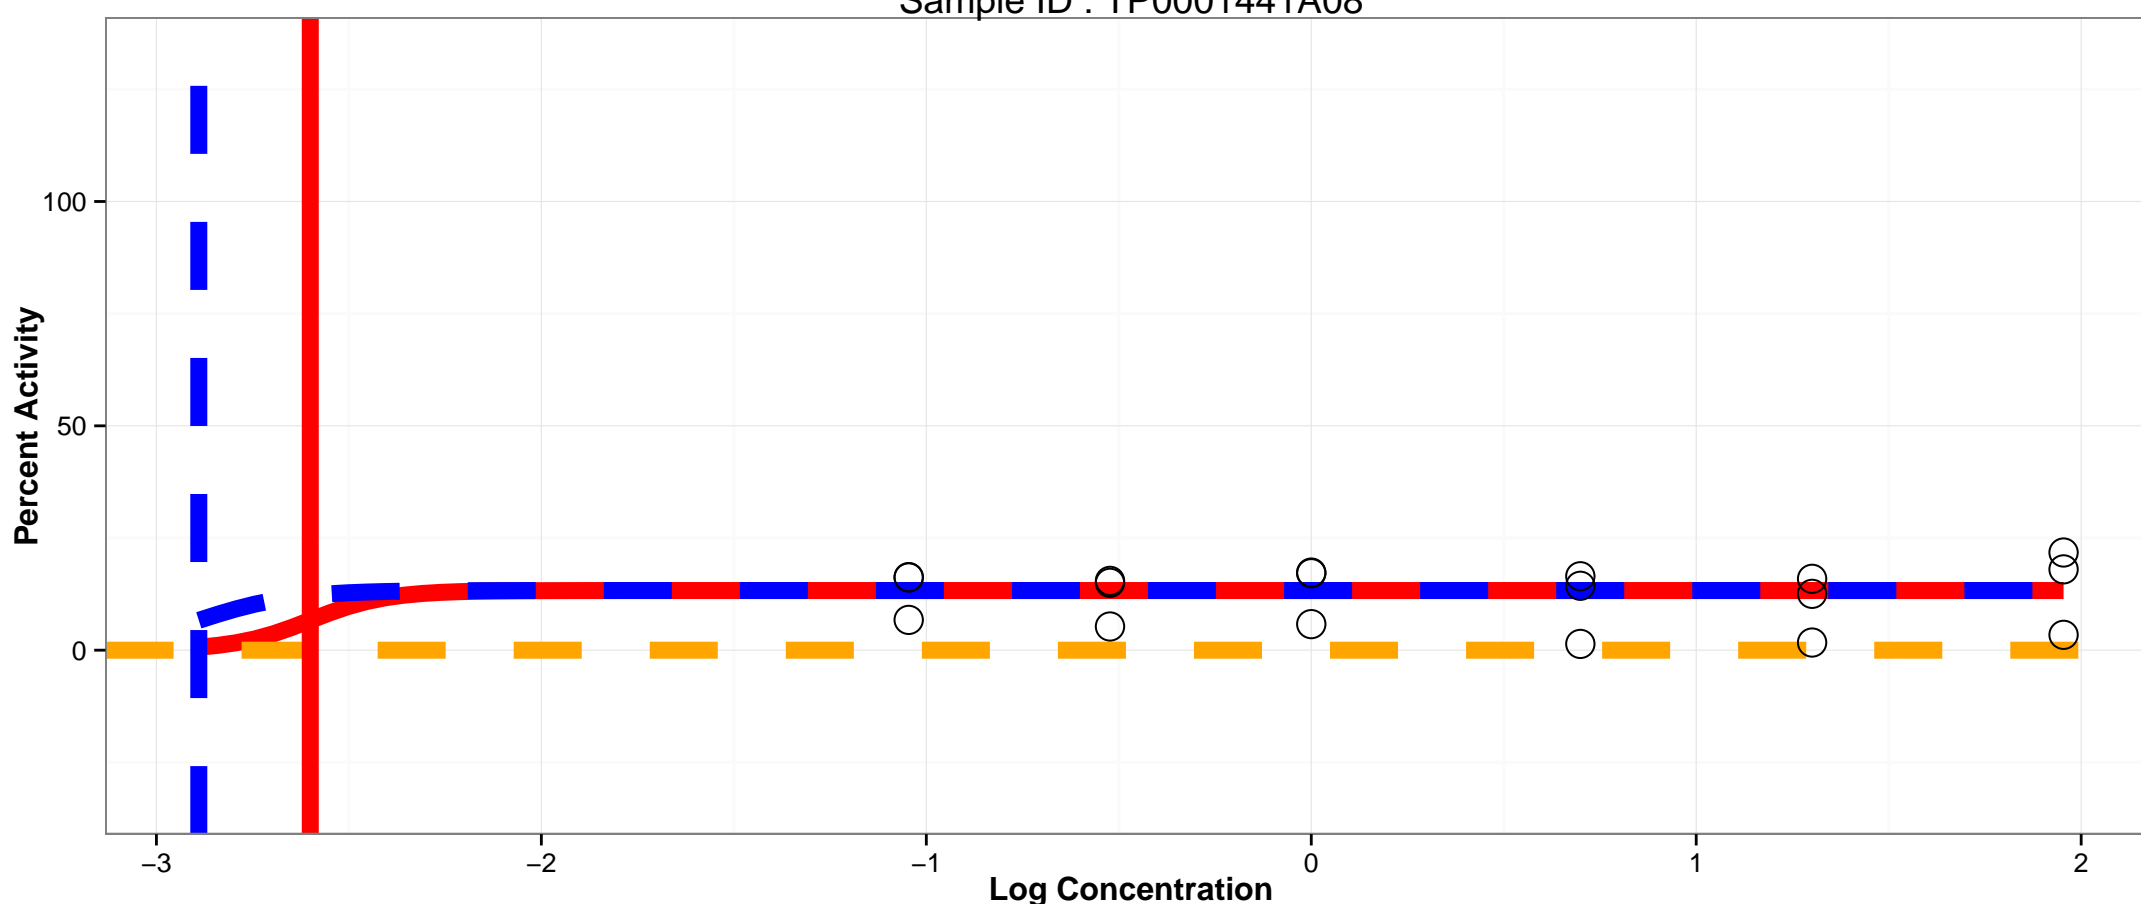

HILL MODEL

|     | tp   | ga   | gw   |
|-----|------|------|------|
| val | 13.3 | -2.6 | 4.41 |
| sd  | 1.59 | 1190 | 3390 |

GAIN-LOSS MODEL

|     | tp   | ga    | gw   | la   | lw |
|-----|------|-------|------|------|----|
| val | 13.3 | -2.89 | 3.63 | 3.63 | 10 |
| sd  | NA   | NA    | NA   | NA   | NA |

|      | CNST   | HILL   | GNLS   |
|------|--------|--------|--------|
| AIC  | 150.73 | 126.92 | 130.92 |
| PROB | 0      | 0.88   | 0.12   |
| RMSE | 13.74  | 6.26   | 6.26   |

MAX\_MEAN : 14.4 MAX\_MED : 18 BMAD : 5.69  
COFF : 20 HIT-CALL : 0 FITC : 13 ACTP : 1  
FLAGS : 8

Assay ID 1509 (NHEERL\_HEK293T\_CellTiterGLO)  
Sample ID : TP0001441A08

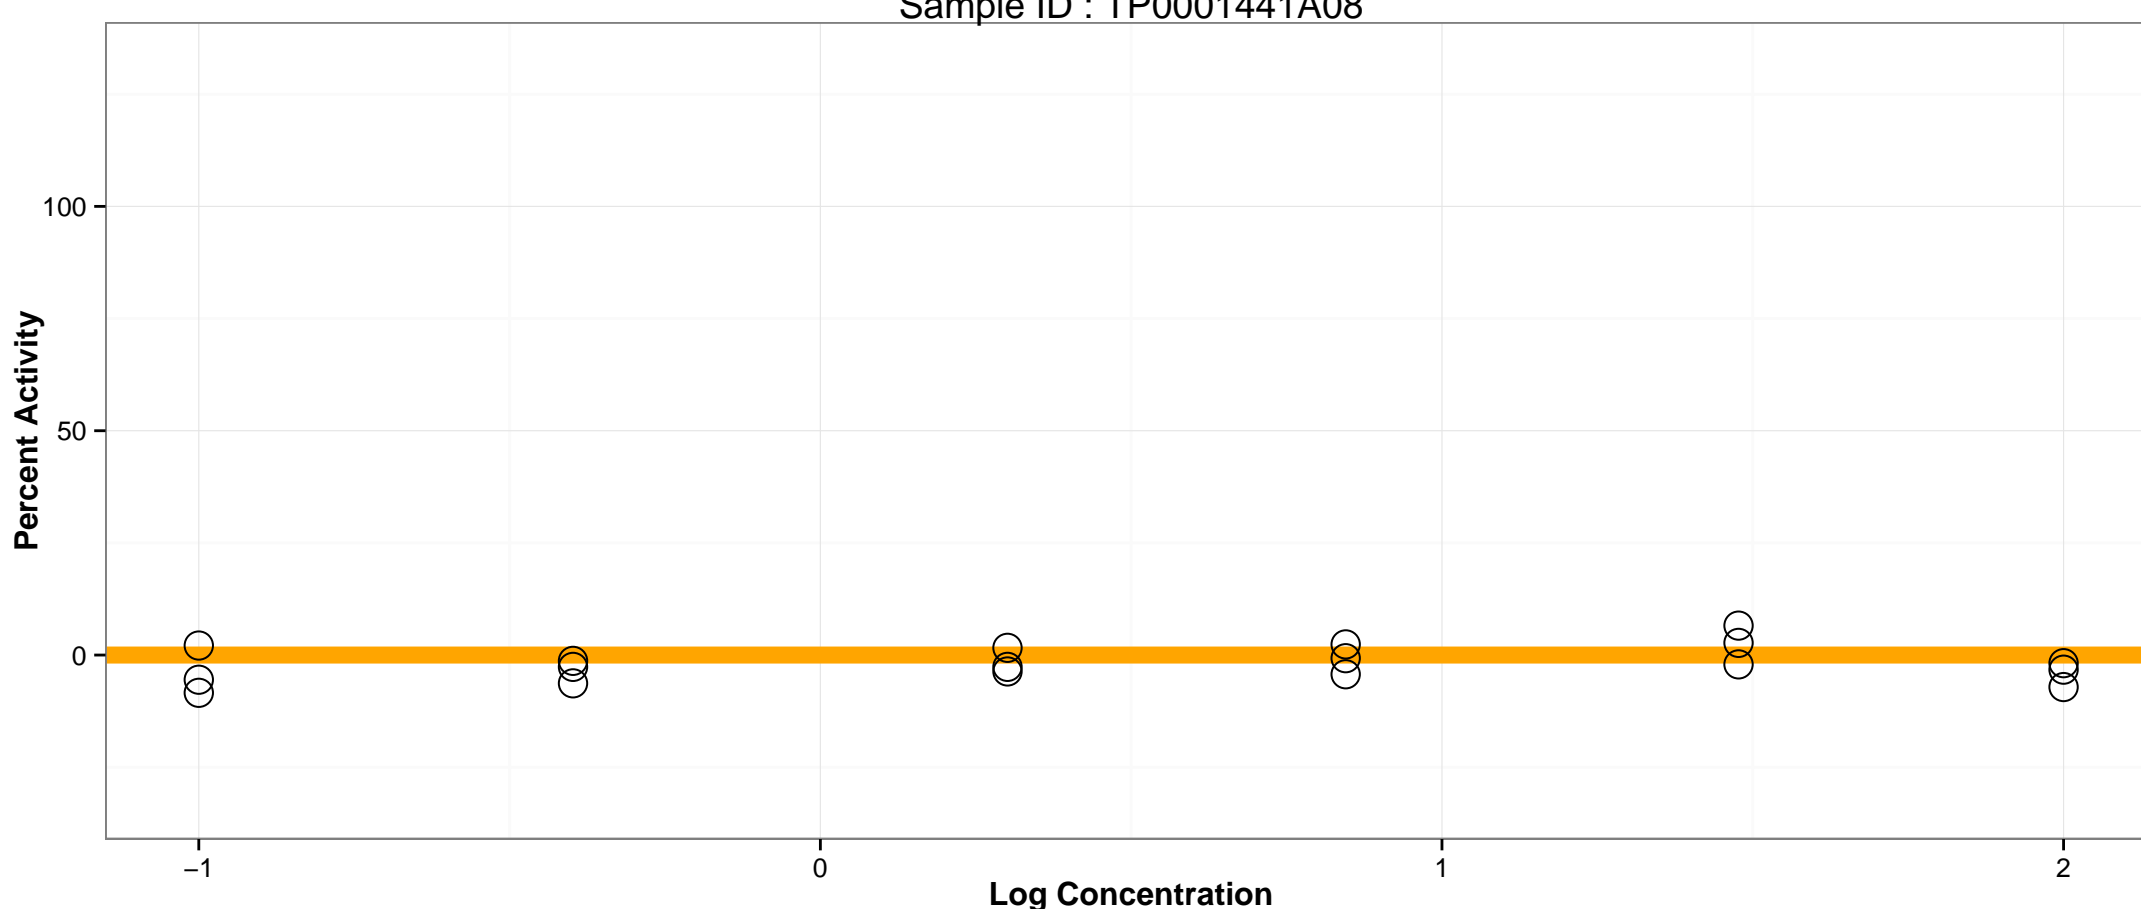

HILL MODEL

HILL MODEL: Not applicable

GAIN-LOSS MODEL

GNLS MODEL: Not applicable

|      | CNST   | HILL | GNLS |
|------|--------|------|------|
| AIC  | 106.86 | NA   | NA   |
| PROB | 1      | NA   | NA   |
| RMSE | 4.22   | NA   | NA   |

MAX\_MEAN : 2.41 MAX\_MED : 2.72 BMAD : 5.54  
COFF : 20 HIT-CALL : 0 FITC : 4 ACTP : 0  
FLAGS :

Assay ID 1848 (NHEERL\_Quantilum\_inhib\_2\_dn)  
Sample ID : TP0001441A08

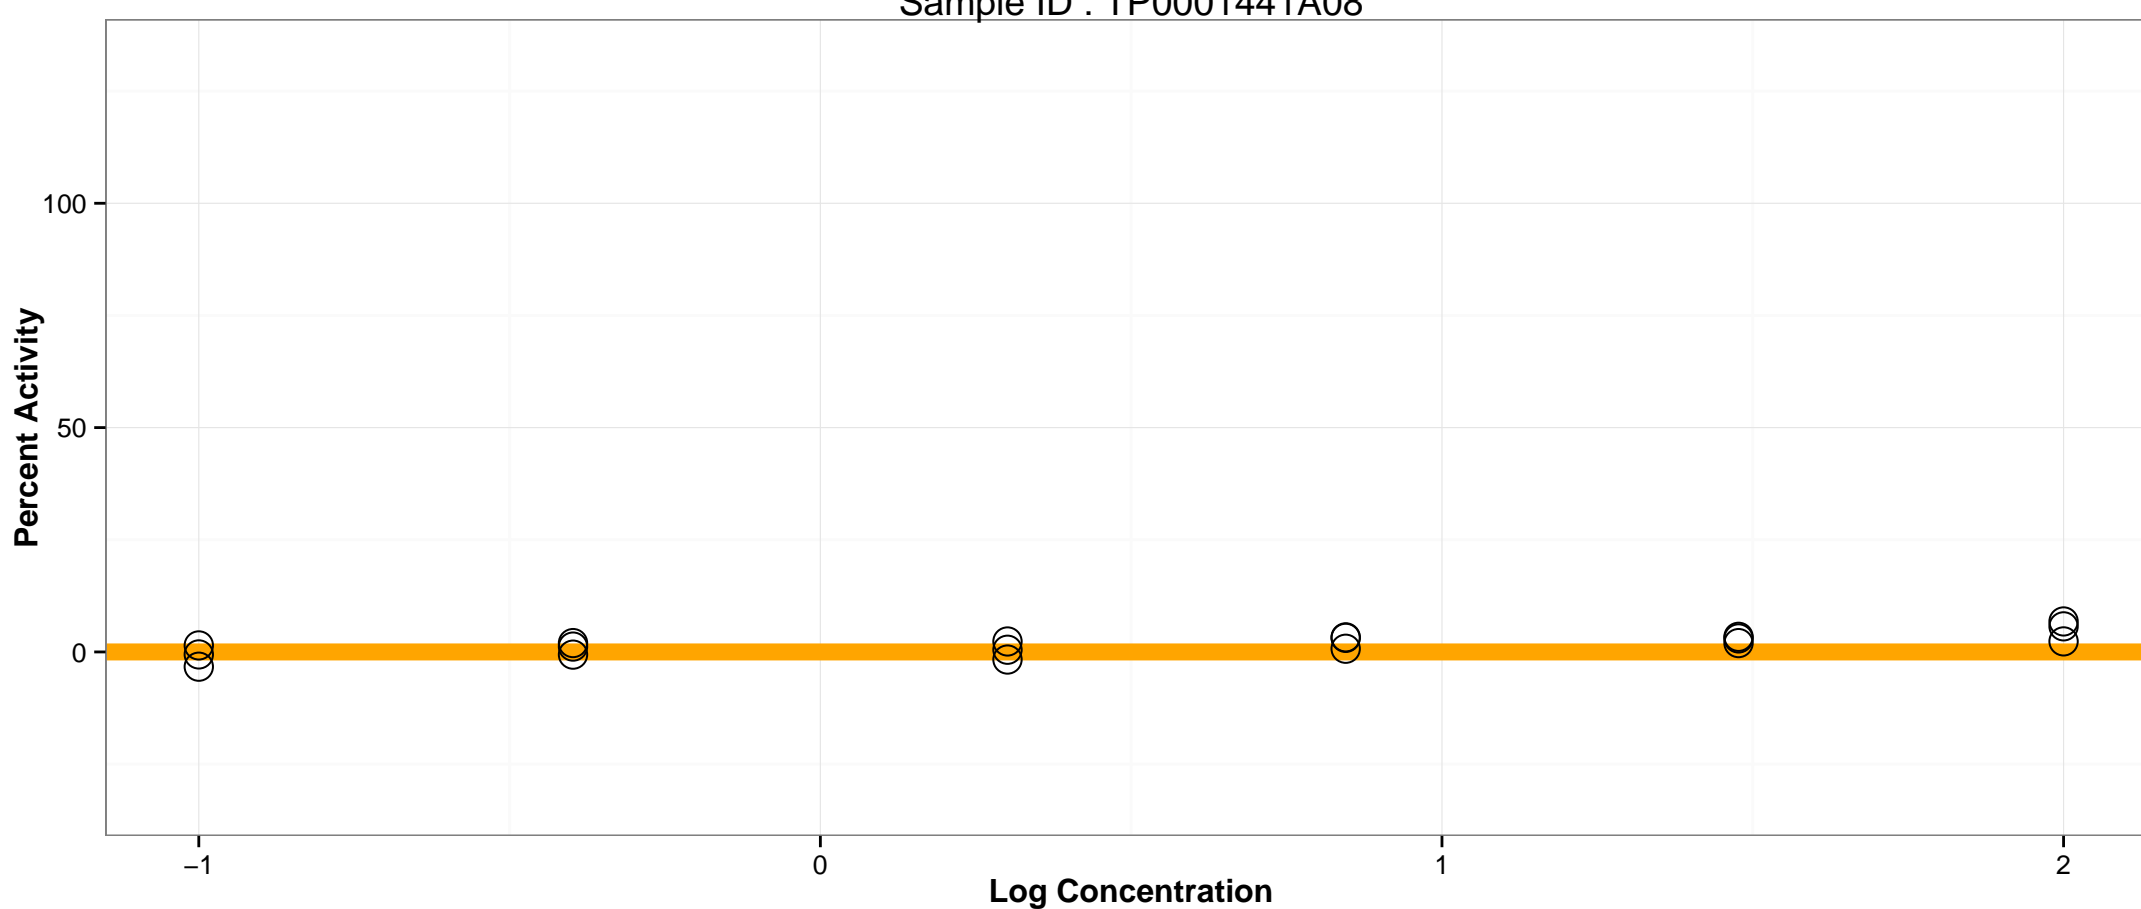

HILL MODEL

HILL MODEL: Not applicable

GAIN-LOSS MODEL

GNLS MODEL: Not applicable

|      | CNST  | HILL | GNLS |
|------|-------|------|------|
| AIC  | 93.38 | NA   | NA   |
| PROB | 1     | NA   | NA   |
| RMSE | 2.96  | NA   | NA   |

MAX\_MEAN : 4.96 MAX\_MED : 5.71 BMAD : 8.58  
COFF : 20 HIT-CALL : 0 FITC : 4 ACTP : 0  
FLAGS :

Chemical : Salicylhydroxamic acid  
CAS : 89-73-6

Assay ID 1508 (NHEERL\_TPO\_AUR\_dn)  
Sample ID : TP0001441A09

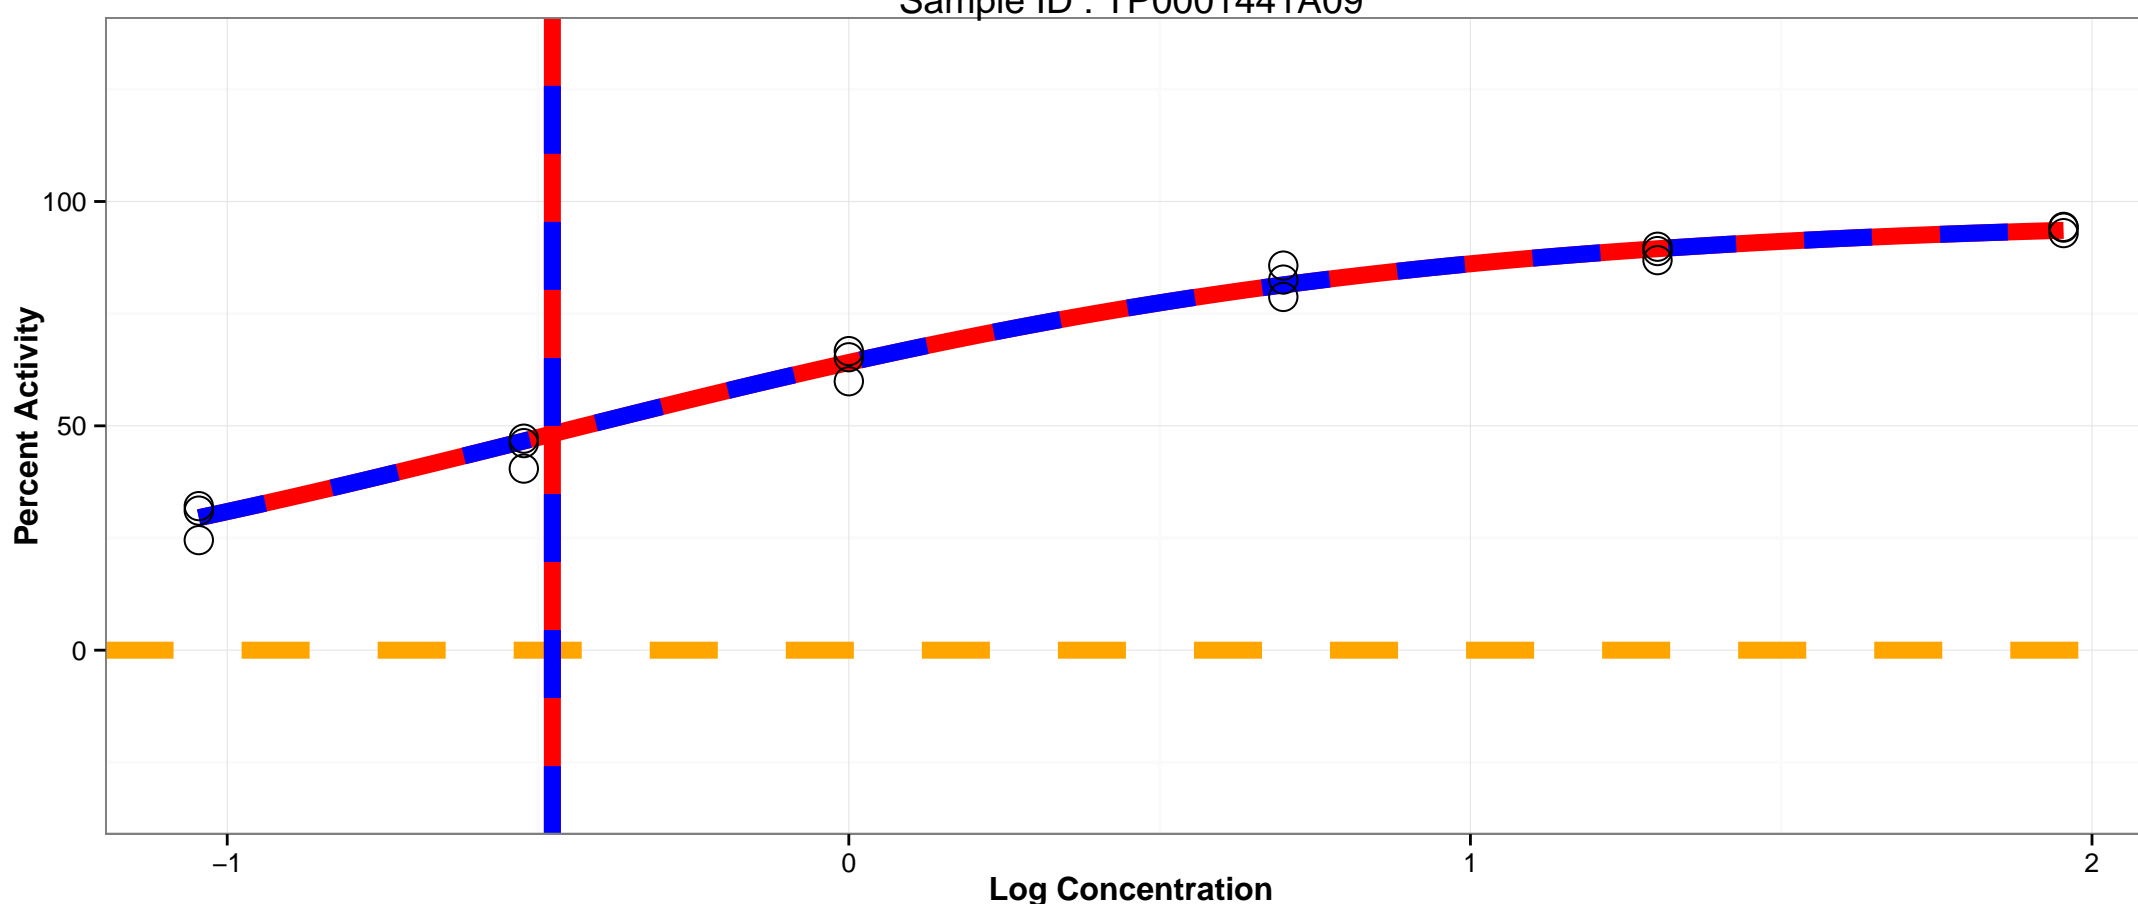

HILL MODEL

|     | tp   | ga     | gw     |
|-----|------|--------|--------|
| val | 96.4 | -0.477 | 0.625  |
| sd  | 1.68 | 0.041  | 0.0494 |

GAIN-LOSS MODEL

|     | tp   | ga     | gw     | la   | lw   |
|-----|------|--------|--------|------|------|
| val | 96.4 | -0.477 | 0.625  | 2.45 | 17.1 |
| sd  | 1.68 | 0.041  | 0.0494 | 200  | 6770 |

|      | CNST   | HILL  | GNLS  |
|------|--------|-------|-------|
| AIC  | 210.27 | 95.69 | 99.69 |
| PROB | 0      | 0.88  | 0.12  |
| RMSE | 71.2   | 2.72  | 2.72  |

MAX\_MEAN : 93.8 MAX\_MED : 94.2 BMAD : 5.69  
COFF : 20 HIT-CALL : 1 FITC : 41 ACTP : 1  
FLAGS :

Assay ID 1509 (NHEERL\_HEK293T\_CellTiterGLO)  
Sample ID : TP0001441A09

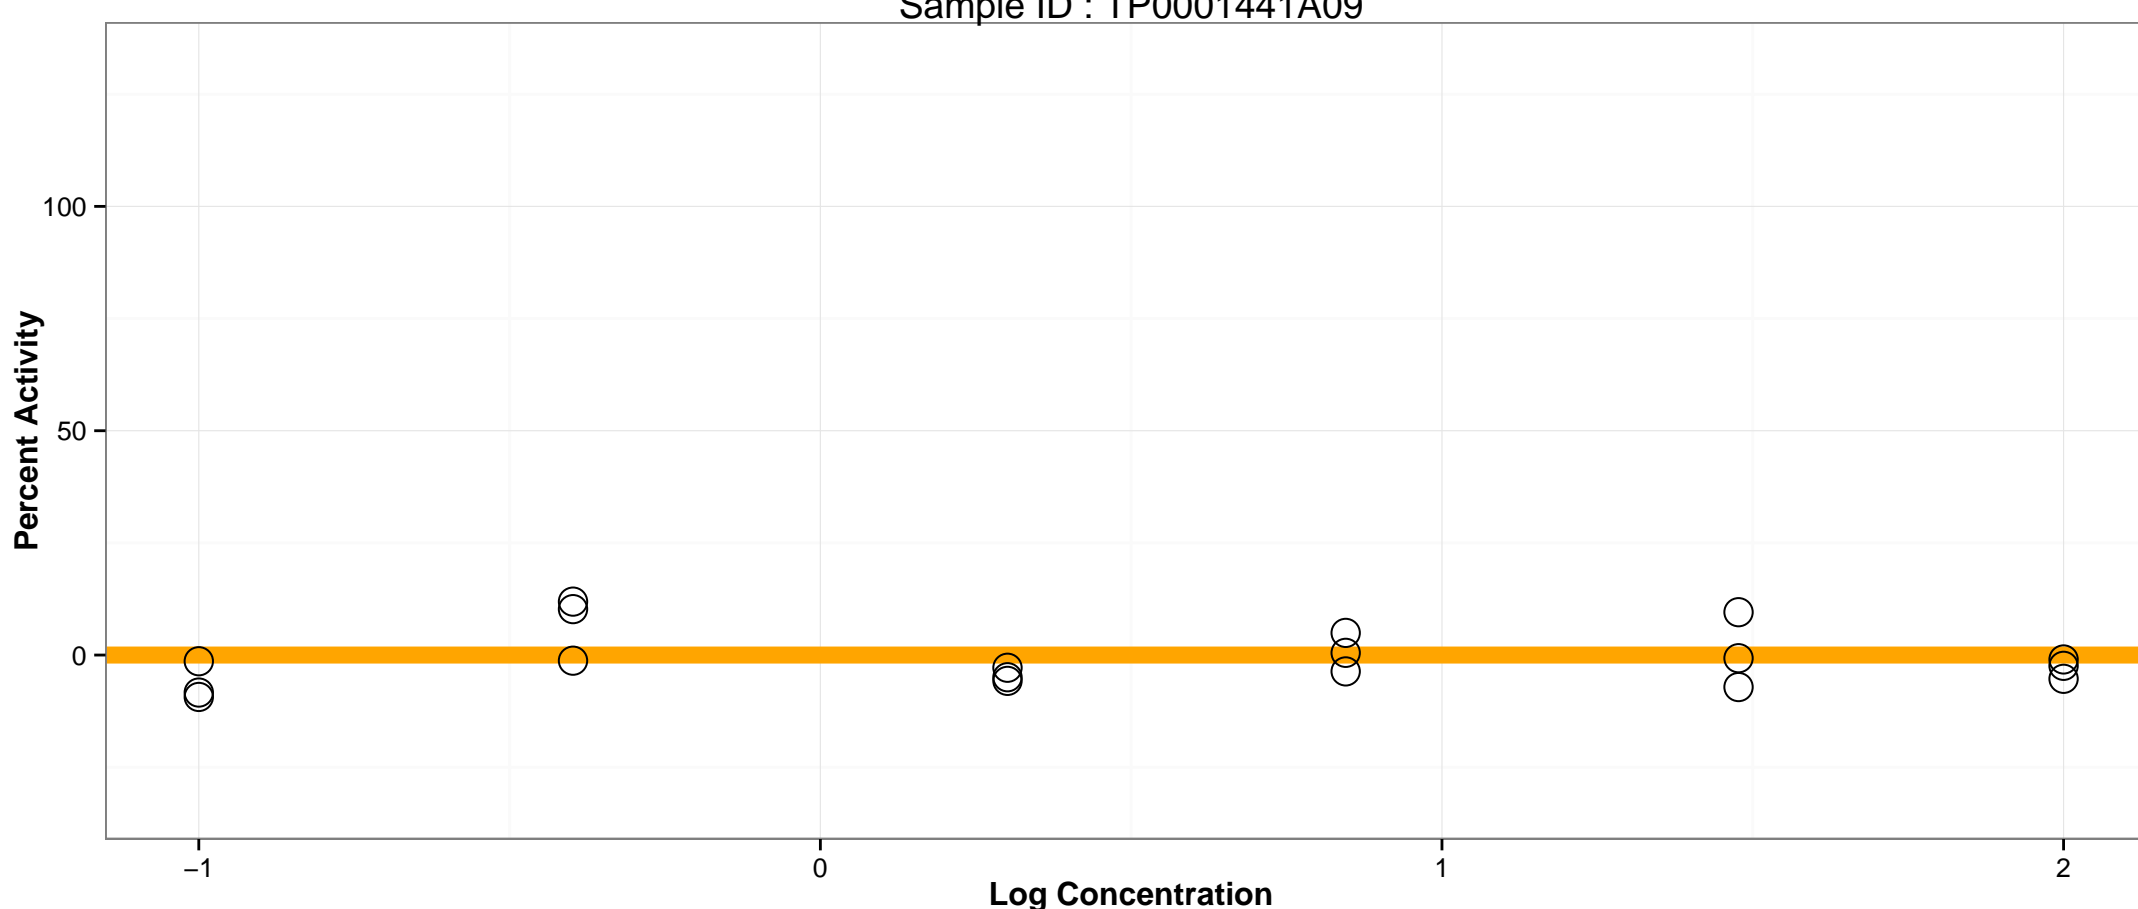

HILL MODEL

HILL MODEL: Not applicable

GAIN-LOSS MODEL

GNLS MODEL: Not applicable

|      | CNST   | HILL | GNLS |
|------|--------|------|------|
| AIC  | 120.58 | NA   | NA   |
| PROB | 1      | NA   | NA   |
| RMSE | 6.18   | NA   | NA   |

MAX\_MEAN : 6.98 MAX\_MED : 10.2 BMAD : 5.54  
COFF : 20 HIT-CALL : 0 FITC : 4 ACTP : 0  
FLAGS :

Assay ID 1848 (NHEERL\_Quantilum\_inhib\_2\_dn)  
Sample ID : TP0001441A09

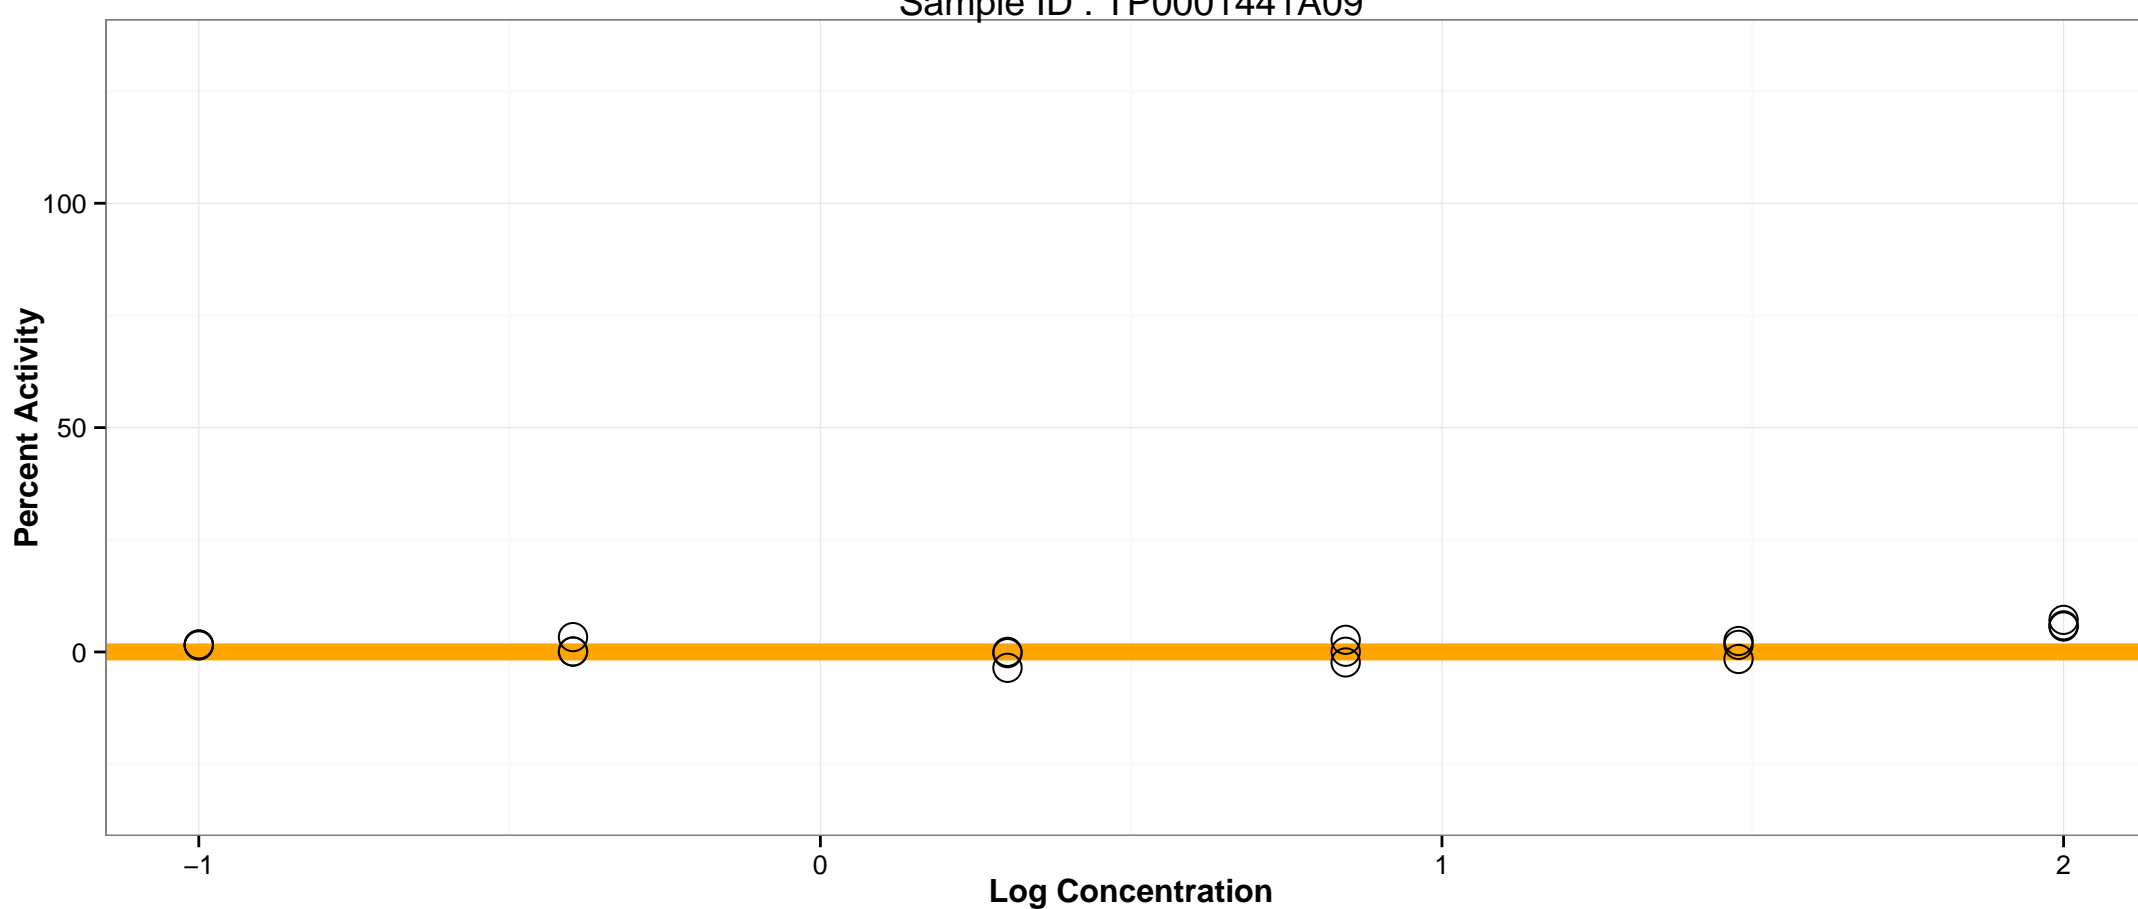

HILL MODEL

HILL MODEL: Not applicable

GAIN-LOSS MODEL

GNLS MODEL: Not applicable

|      | CNST  | HILL | GNLS |
|------|-------|------|------|
| AIC  | 94.01 | NA   | NA   |
| PROB | 1     | NA   | NA   |
| RMSE | 3.11  | NA   | NA   |

MAX\_MEAN : 6.26 MAX\_MED : 5.94 BMAD : 8.58  
COFF : 20 HIT-CALL : 0 FITC : 4 ACTP : 0  
FLAGS :

Chemical : Biphenyl  
CAS : 92-52-4

Assay ID 1508 (NHEERL\_TPO\_AUR\_dn)  
Sample ID : TP0001441A10

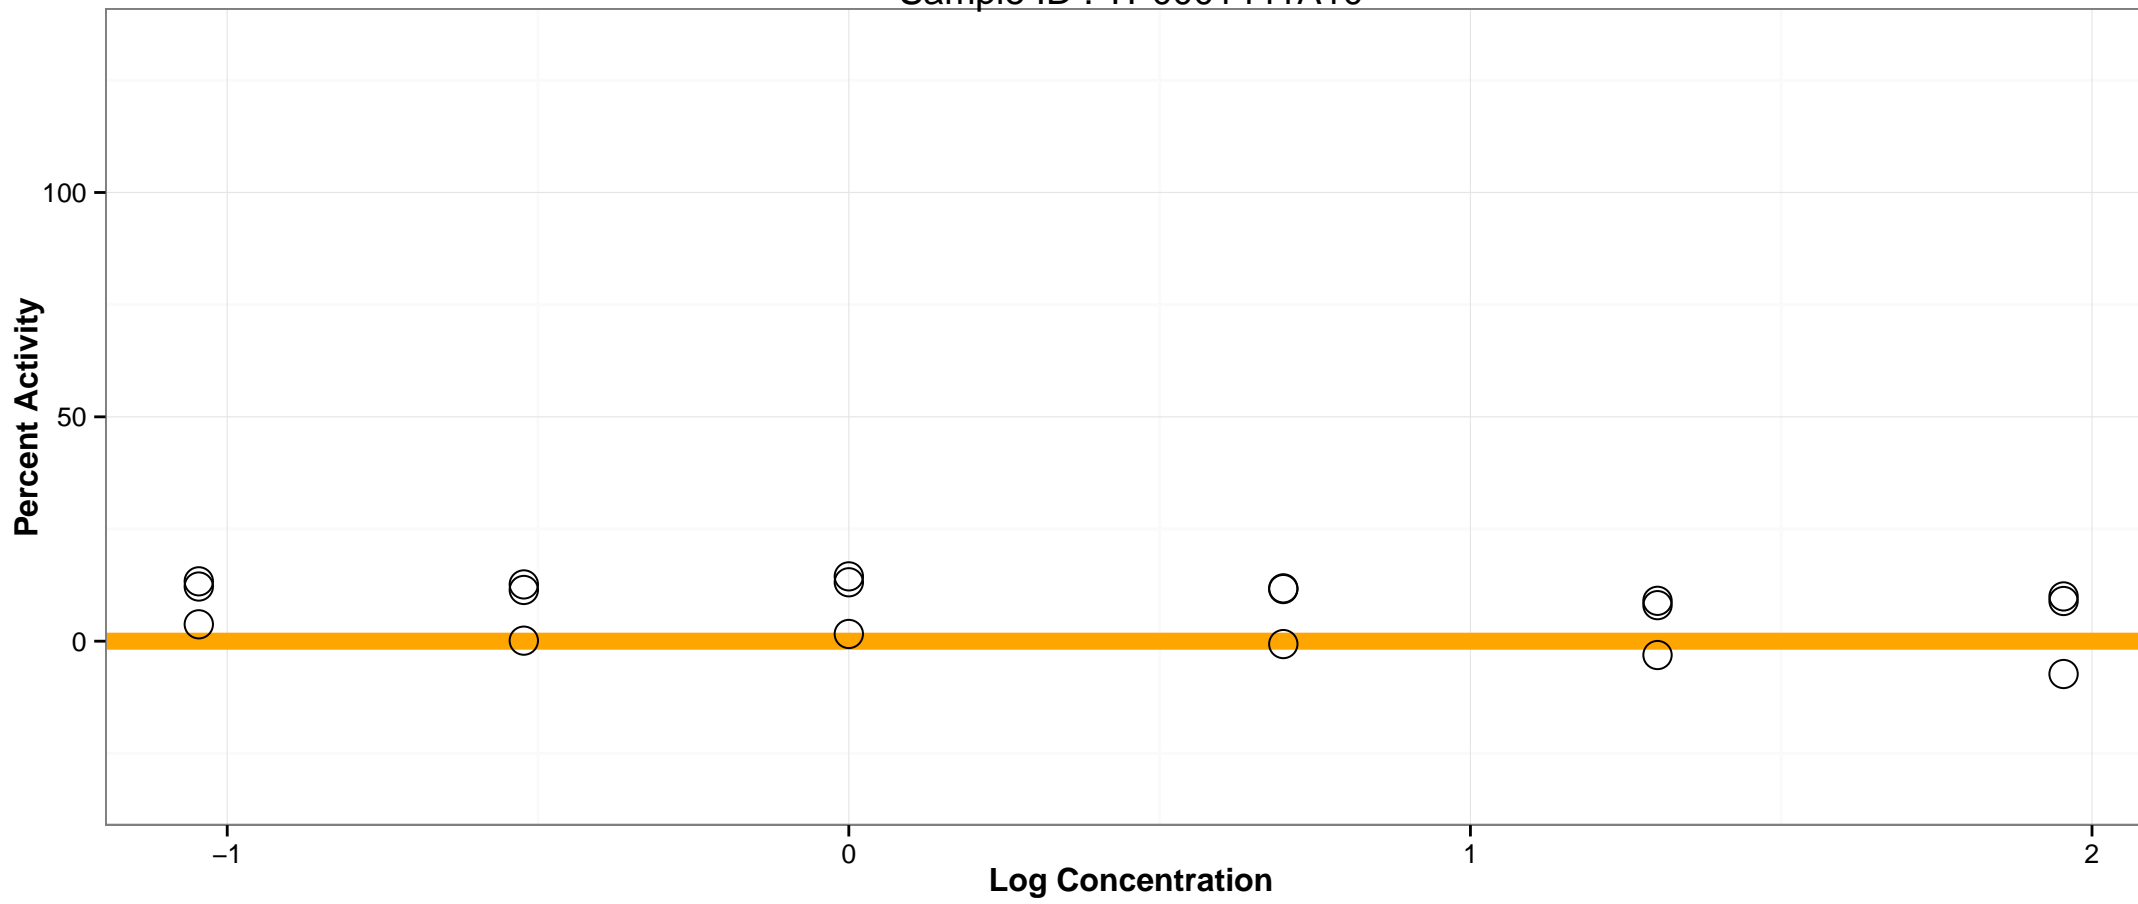

HILL MODEL

HILL MODEL: Not applicable

GAIN-LOSS MODEL

GNLS MODEL: Not applicable

|      | CNST   | HILL | GNLS |
|------|--------|------|------|
| AIC  | 137.99 | NA   | NA   |
| PROB | 1      | NA   | NA   |
| RMSE | 9.66   | NA   | NA   |

MAX\_MEAN : 9.77 MAX\_MED : 13.1 BMAD : 5.69  
COFF : 20 HIT-CALL : 0 FITC : 4 ACTP : 0  
FLAGS :

Assay ID 1509 (NHEERL\_HEK293T\_CellTiterGLO)  
Sample ID : TP0001441A10

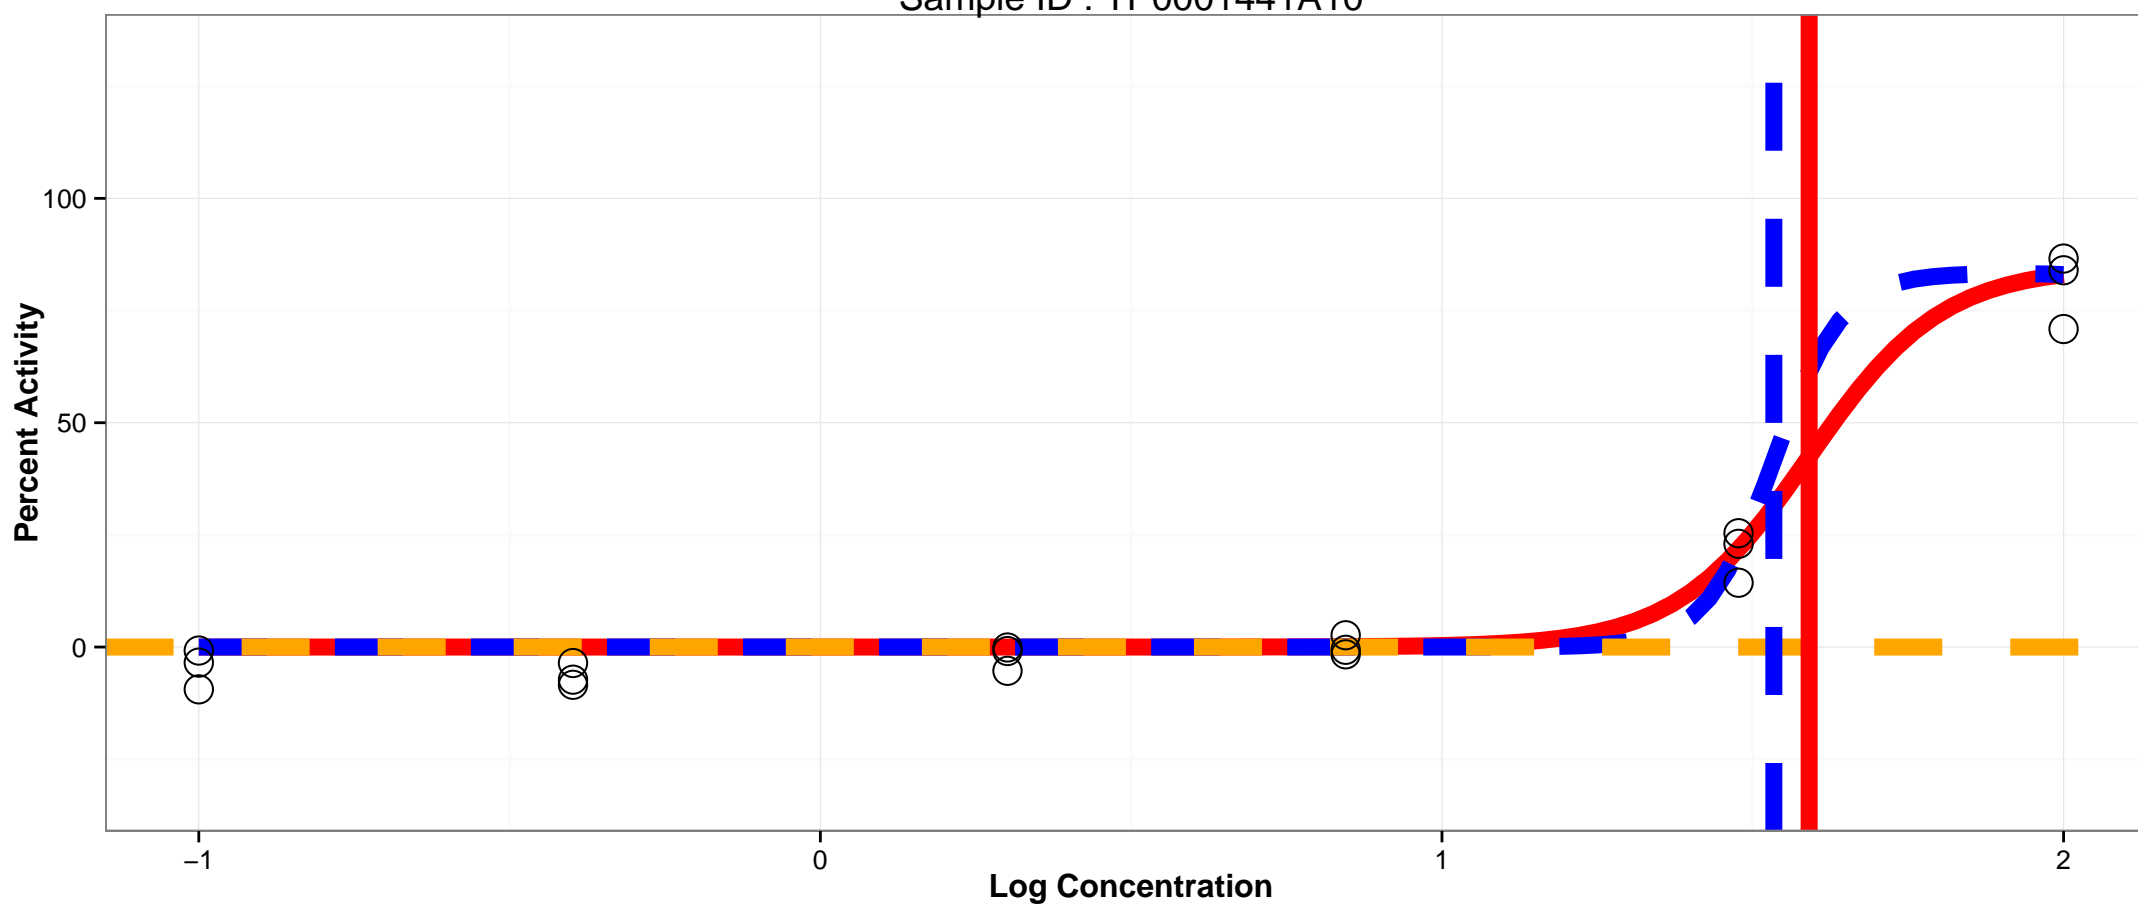

HILL MODEL

|     | tp   | ga   | gw   |
|-----|------|------|------|
| val | 84.8 | 1.59 | 4.06 |
| sd  | NA   | NA   | NA   |

GAIN-LOSS MODEL

|     | tp   | ga   | gw   | la   | lw   |
|-----|------|------|------|------|------|
| val | 83.3 | 1.53 | 7.93 | 2.21 | 11.4 |
| sd  | NA   | NA   | NA   | NA   | NA   |

|      | CNST   | HILL   | GNLS   |
|------|--------|--------|--------|
| AIC  | 173.64 | 119.71 | 123.72 |
| PROB | 0      | 0.88   | 0.12   |
| RMSE | 34.35  | 5.3    | 5.3    |

MAX\_MEAN : 80.5 MAX\_MED : 84 BMAD : 5.54  
COFF : 20 HIT-CALL : 1 FITC : 41 ACTP : 1  
FLAGS :

Assay ID 1848 (NHEERL\_Quantilum\_inhib\_2\_dn)  
Sample ID : TP0001441A10

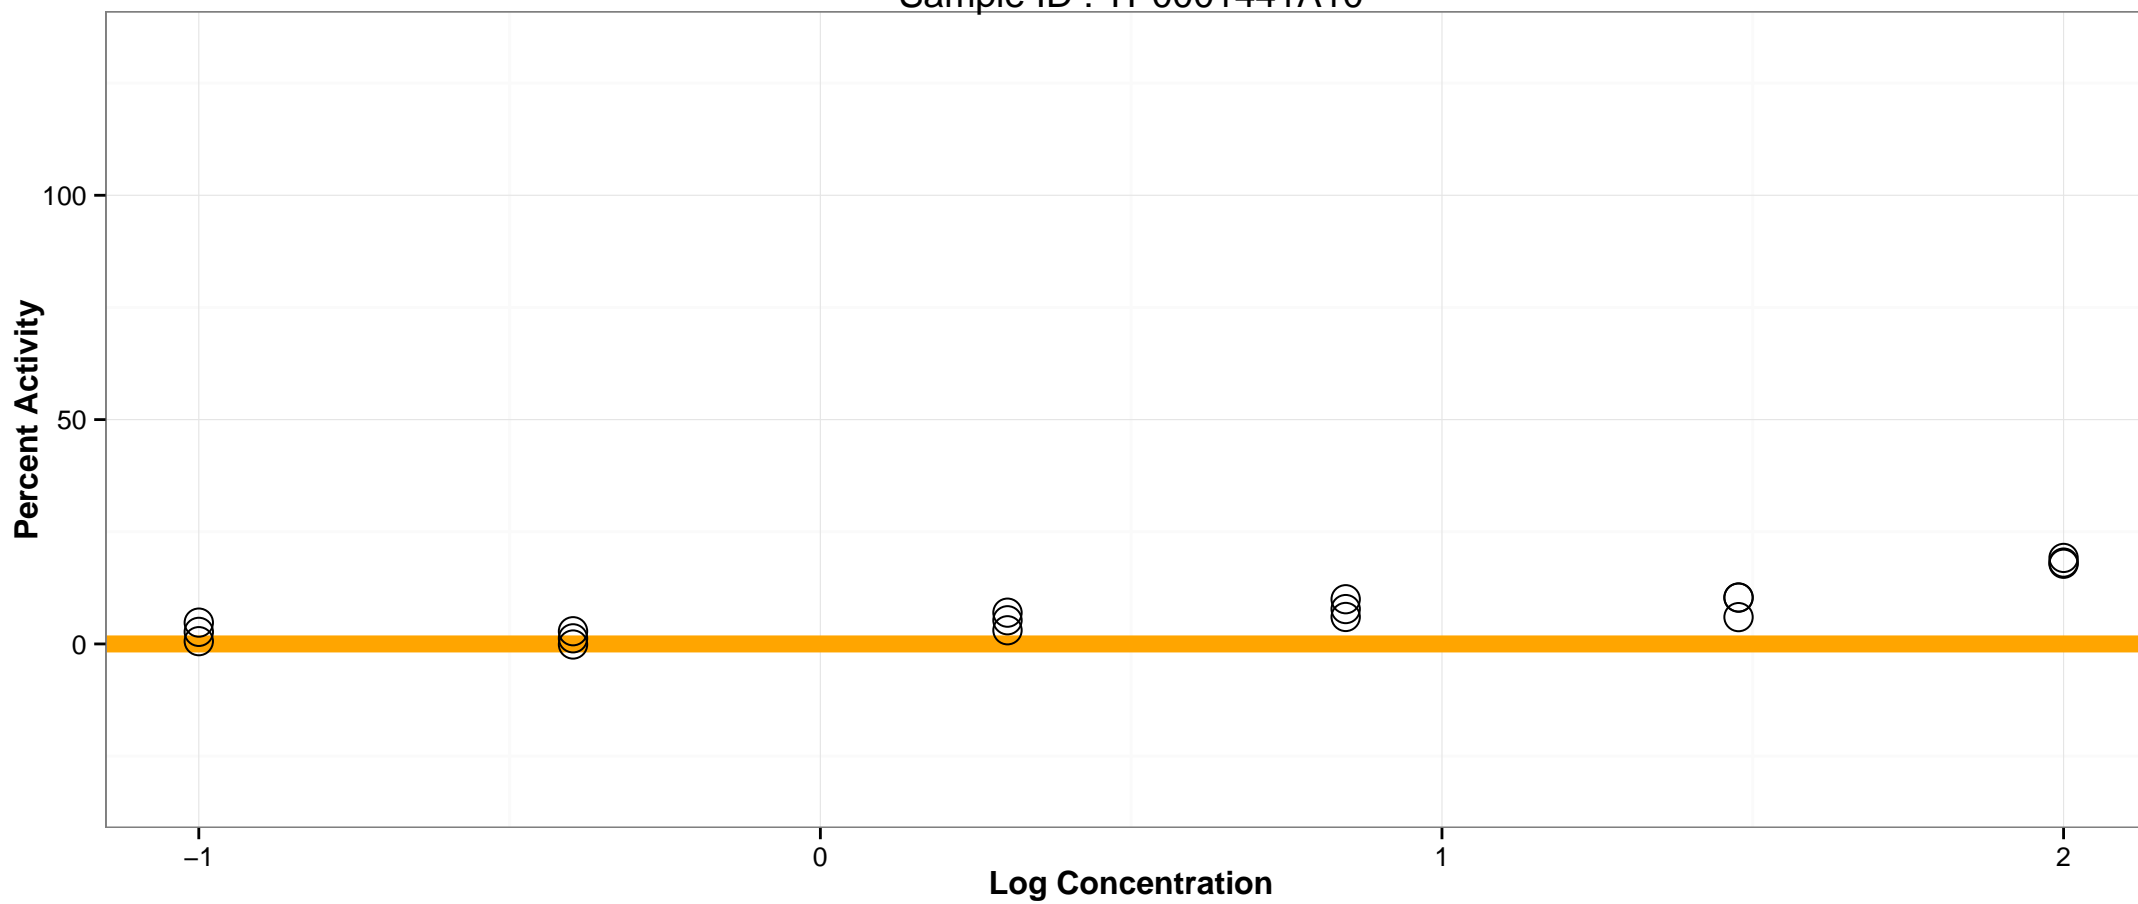

HILL MODEL

HILL MODEL: Not applicable

GAIN-LOSS MODEL

GNLS MODEL: Not applicable

|      | CNST   | HILL | GNLS |
|------|--------|------|------|
| AIC  | 134.64 | NA   | NA   |
| PROB | 1      | NA   | NA   |
| RMSE | 9.4    | NA   | NA   |

MAX\_MEAN : 18.4 MAX\_MED : 18.2 BMAD : 8.58  
COFF : 20 HIT-CALL : 0 FITC : 4 ACTP : 0  
FLAGS :

Chemical : Biphenyl  
CAS : 92-52-4

Assay ID 1508 (NHEERL\_TPO\_AUR\_dn)  
Sample ID : TX004371

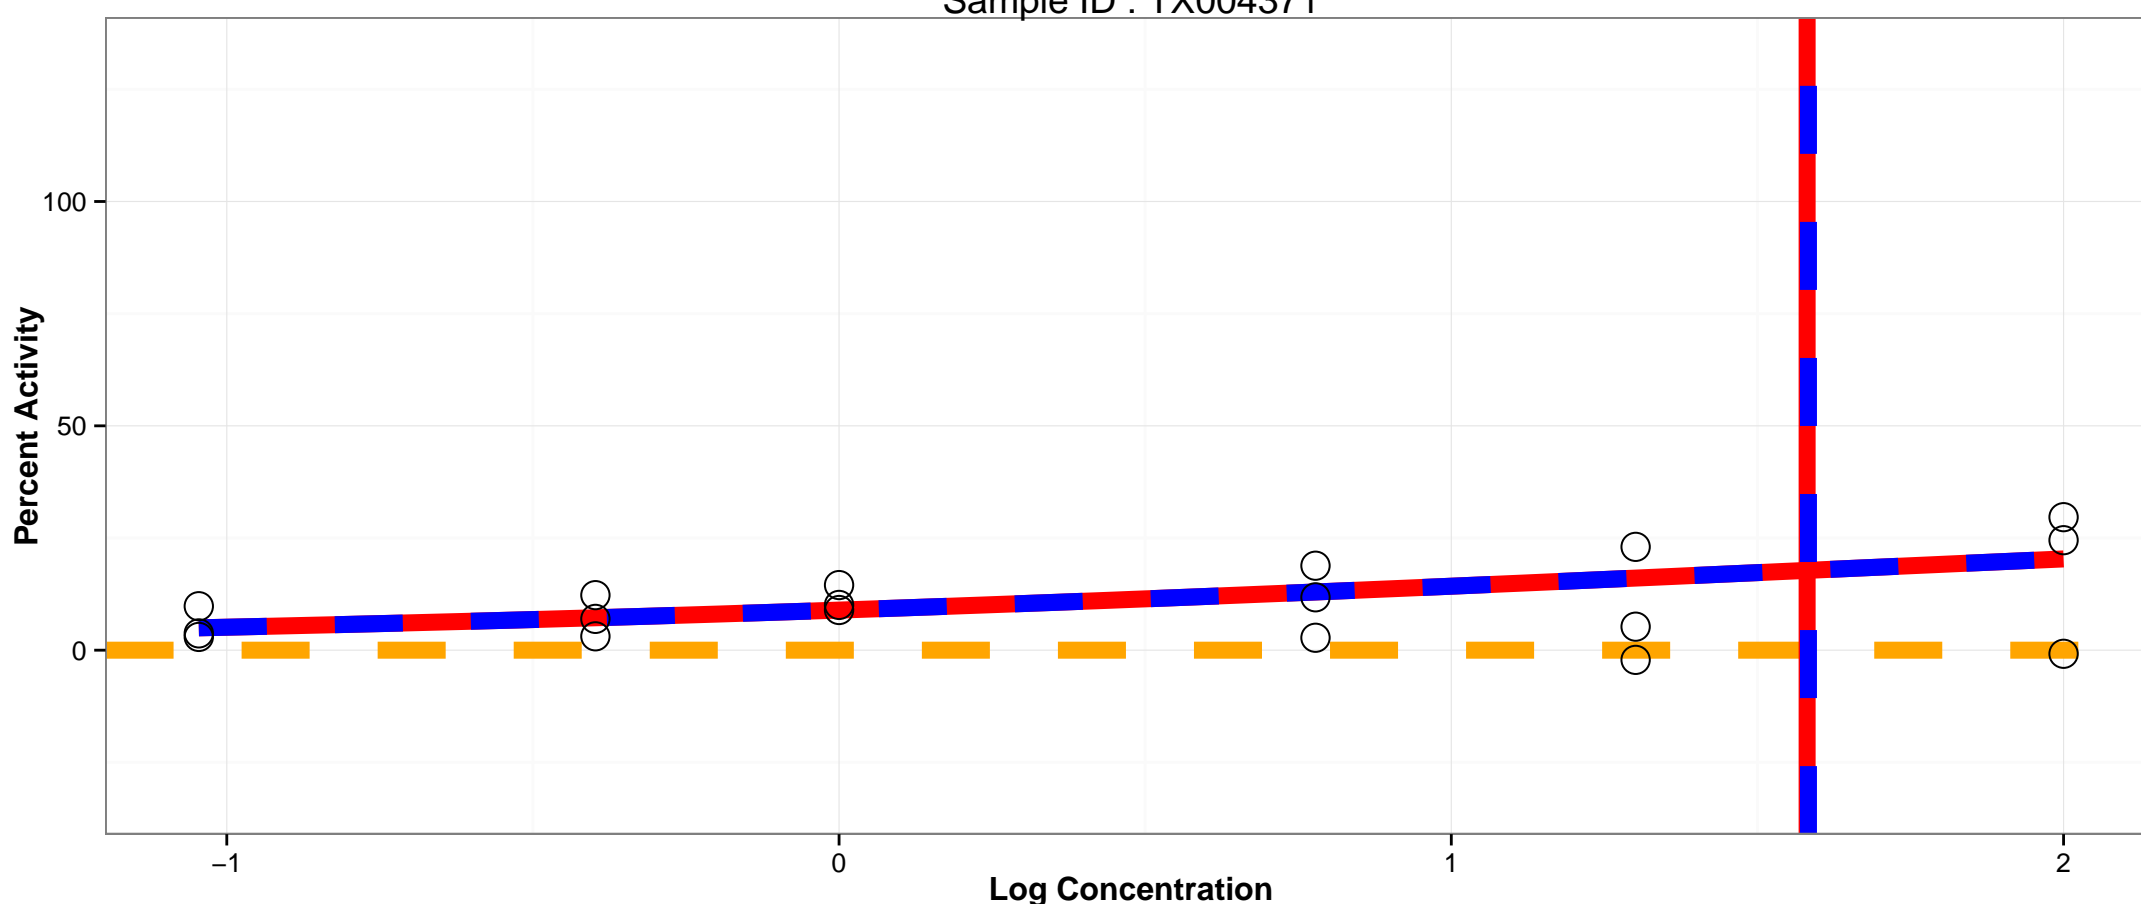

HILL MODEL

|     | tp   | ga   | gw  |
|-----|------|------|-----|
| val | 35.6 | 1.58 | 0.3 |
| sd  | NA   | NA   | NA  |

GAIN-LOSS MODEL

|     | tp   | ga   | gw  | la | lw |
|-----|------|------|-----|----|----|
| val | 35.6 | 1.58 | 0.3 | 4  | 18 |
| sd  | NA   | NA   | NA  | NA | NA |

|      | CNST   | HILL   | GNLS   |
|------|--------|--------|--------|
| AIC  | 147.58 | 135.29 | 139.29 |
| PROB | 0      | 0.88   | 0.12   |
| RMSE | 13.47  | 8.47   | 8.47   |

MAX\_MEAN : 17.8 MAX\_MED : 24.5 BMAD : 5.69  
COFF : 20 HIT-CALL : 1 FITC : 42 ACTP : 0.998  
FLAGS : 6

Assay ID 1509 (NHEERL\_HEK293T\_CellTiterGLO)  
Sample ID : TX004371

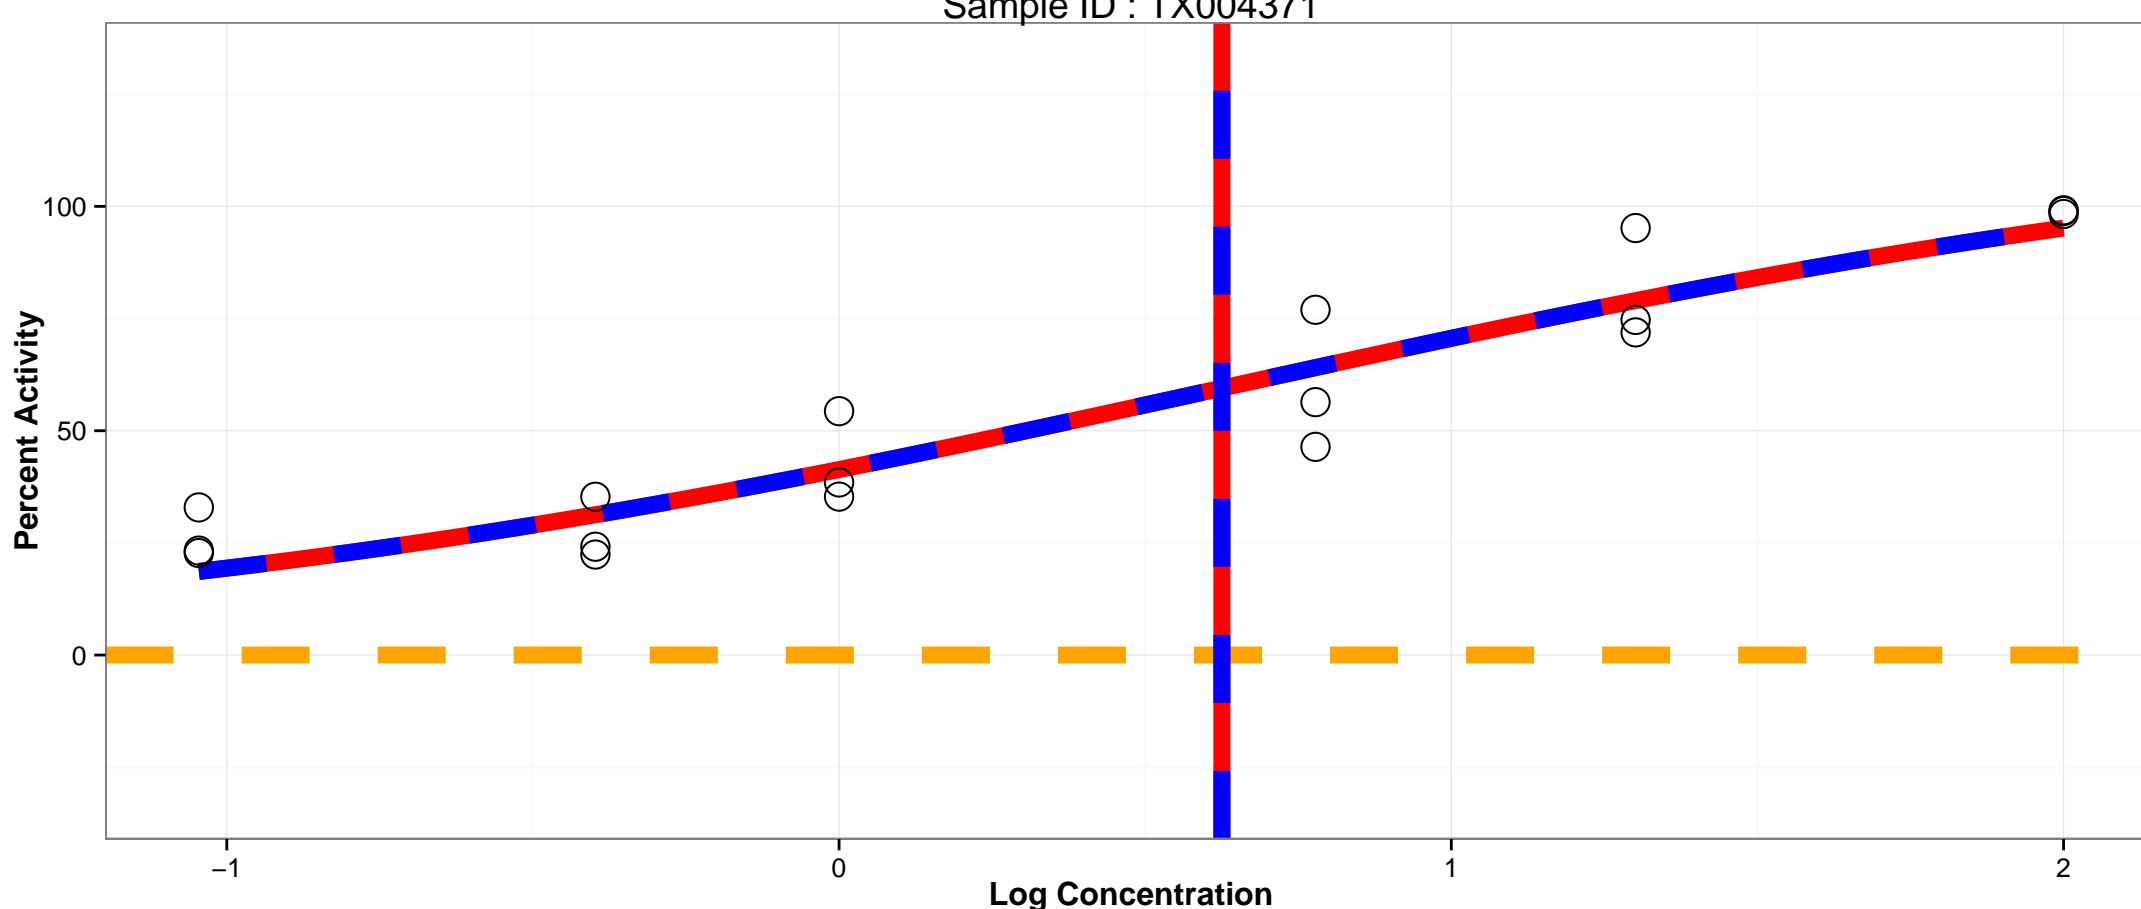

HILL MODEL

|     | tp  | ga    | gw     |
|-----|-----|-------|--------|
| val | 119 | 0.625 | 0.438  |
| sd  | 17  | 0.367 | 0.0843 |

GAIN-LOSS MODEL

|     | tp  | ga    | gw    | la   | lw   |
|-----|-----|-------|-------|------|------|
| val | 119 | 0.625 | 0.438 | 3.61 | 11.7 |
| sd  | NA  | NA    | NA    | NA   | NA   |

|      | CNST  | HILL  | GNLS  |
|------|-------|-------|-------|
| AIC  | 204.8 | 140.8 | 144.8 |
| PROB | 0     | 0.88  | 0.12  |
| RMSE | 62.59 | 9.16  | 9.16  |

MAX\_MEAN : 98.8 MAX\_MED : 99 BMAD : 5.54  
COFF : 20 HIT-CALL : 1 FITC : 42 ACTP : 1  
FLAGS :

Assay ID 1848 (NHEERL\_Quantilum\_inhib\_2\_dn)  
Sample ID : TX004371

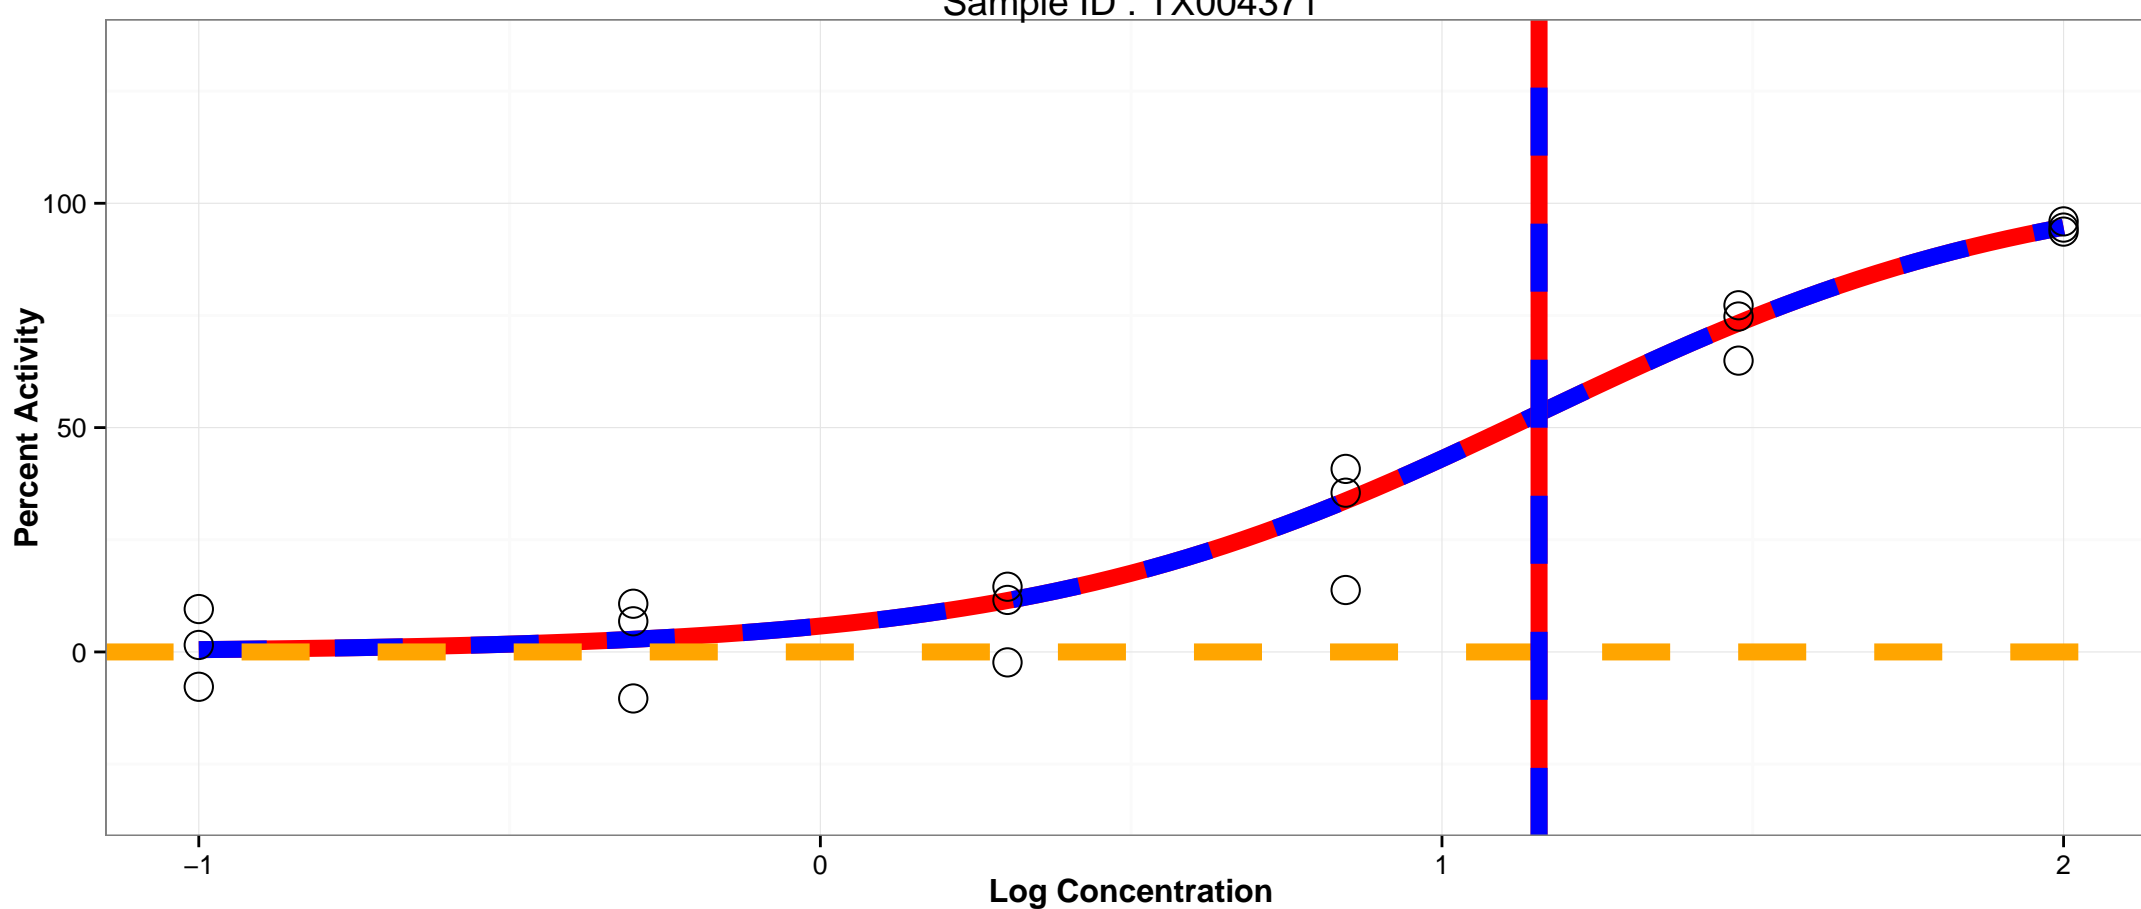

HILL MODEL

|     | tp   | ga    | gw   |
|-----|------|-------|------|
| val | 106  | 1.16  | 1.07 |
| sd  | 9.47 | 0.117 | 0.2  |

GAIN-LOSS MODEL

|     | tp  | ga   | gw   | la   | lw   |
|-----|-----|------|------|------|------|
| val | 106 | 1.16 | 1.07 | 3.92 | 17.9 |
| sd  | NA  | NA   | NA   | NA   | NA   |

|      | CNST   | HILL   | GNLS   |
|------|--------|--------|--------|
| AIC  | 195.03 | 133.73 | 137.73 |
| PROB | 0      | 0.88   | 0.12   |
| RMSE | 50.89  | 7.97   | 7.97   |

MAX\_MEAN : 94.8 MAX\_MED : 94.6 BMAD : 8.58  
COFF : 20 HIT-CALL : 1 FITC : 42 ACTP : 1  
FLAGS :

Chemical : Sunitinib malate  
CAS : 341031-54-7

Assay ID 1508 (NHEERL\_TPO\_AUR\_dn)  
Sample ID : TP0001441A11

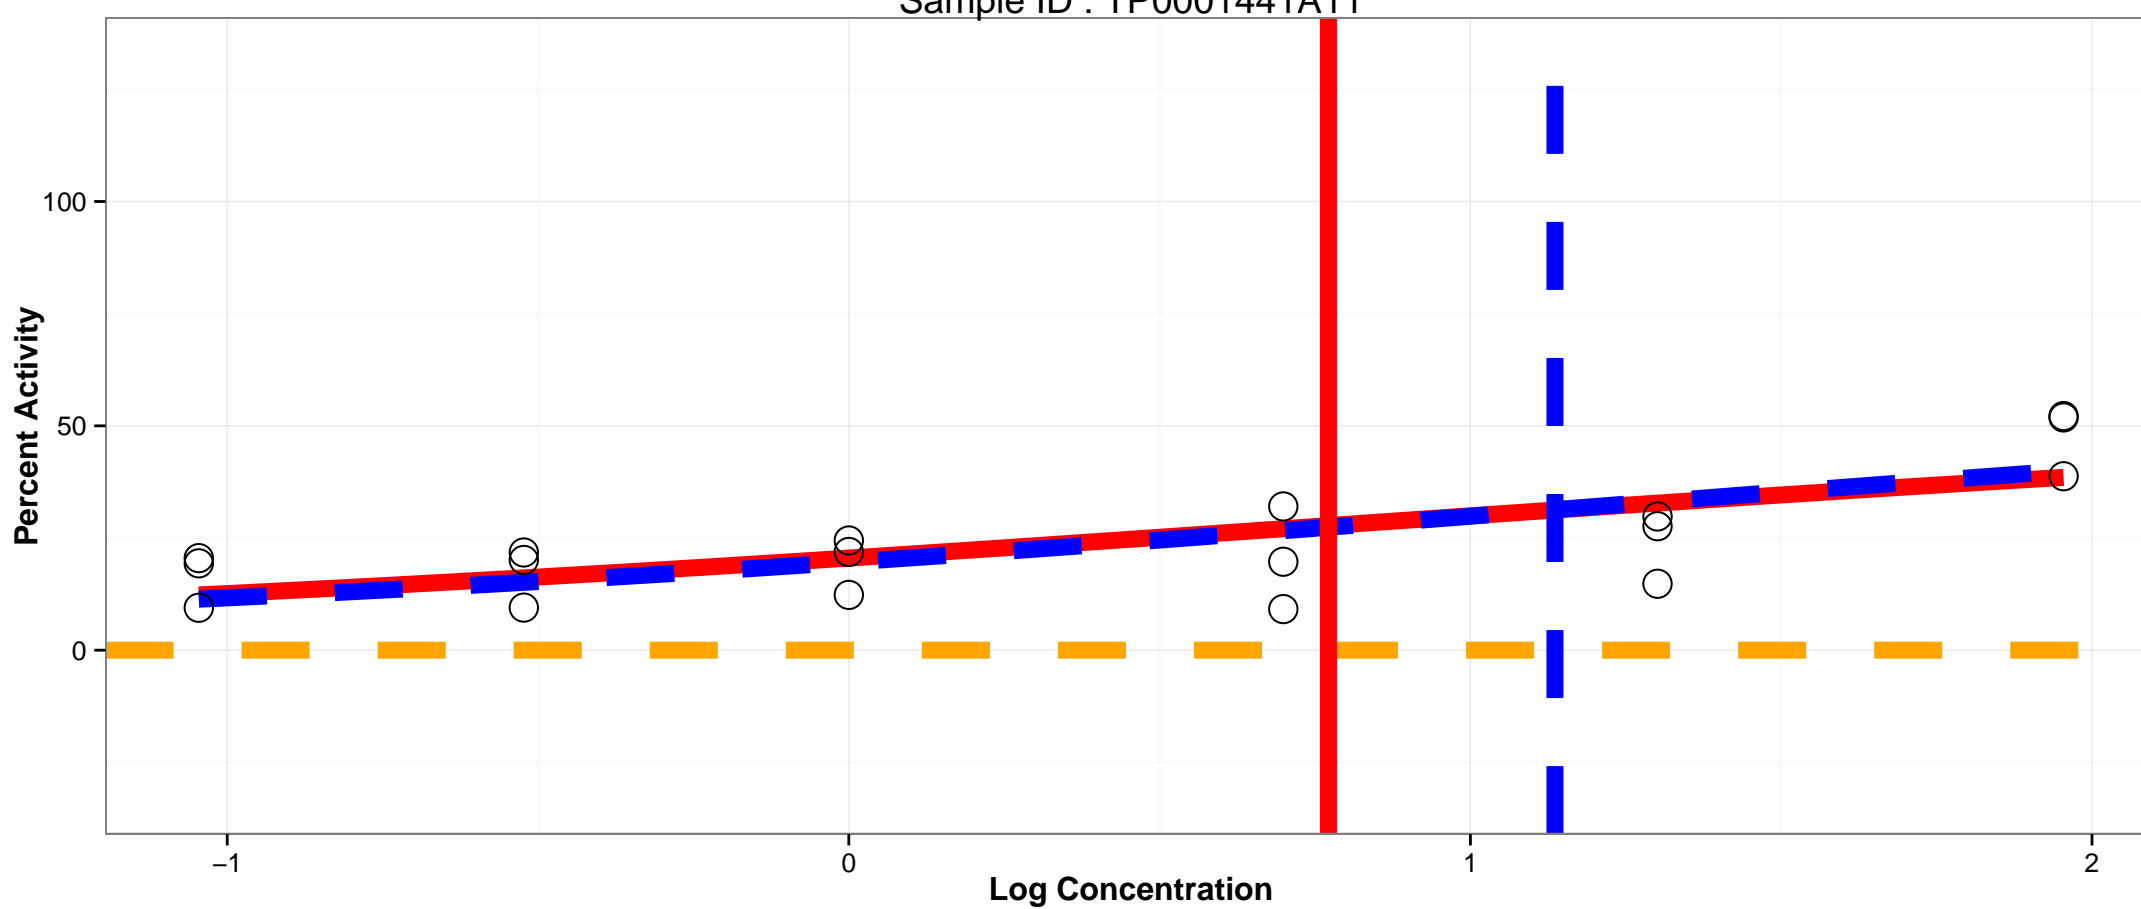

HILL MODEL

|     | tp   | ga    | gw    |
|-----|------|-------|-------|
| val | 55.5 | 0.772 | 0.3   |
| sd  | 32   | 1.75  | 0.125 |

GAIN-LOSS MODEL

|     | tp   | ga   | gw    | la   | lw   |
|-----|------|------|-------|------|------|
| val | 62.6 | 1.14 | 0.3   | 3.86 | 4.73 |
| sd  | 50.2 | 2.39 | 0.167 | 2730 | 6800 |

|      | CNST   | HILL   | GNLS   |
|------|--------|--------|--------|
| AIC  | 174.45 | 139.09 | 142.83 |
| PROB | 0      | 0.87   | 0.13   |
| RMSE | 27.26  | 8.9    | 8.77   |

MAX\_MEAN : 47.6 MAX\_MED : 51.9 BMAD : 5.69  
COFF : 20 HIT-CALL : 1 FITC : 42 ACTP : 1  
FLAGS :

Assay ID 1509 (NHEERL\_HEK293T\_CellTiterGLO)  
Sample ID : TP0001441A11

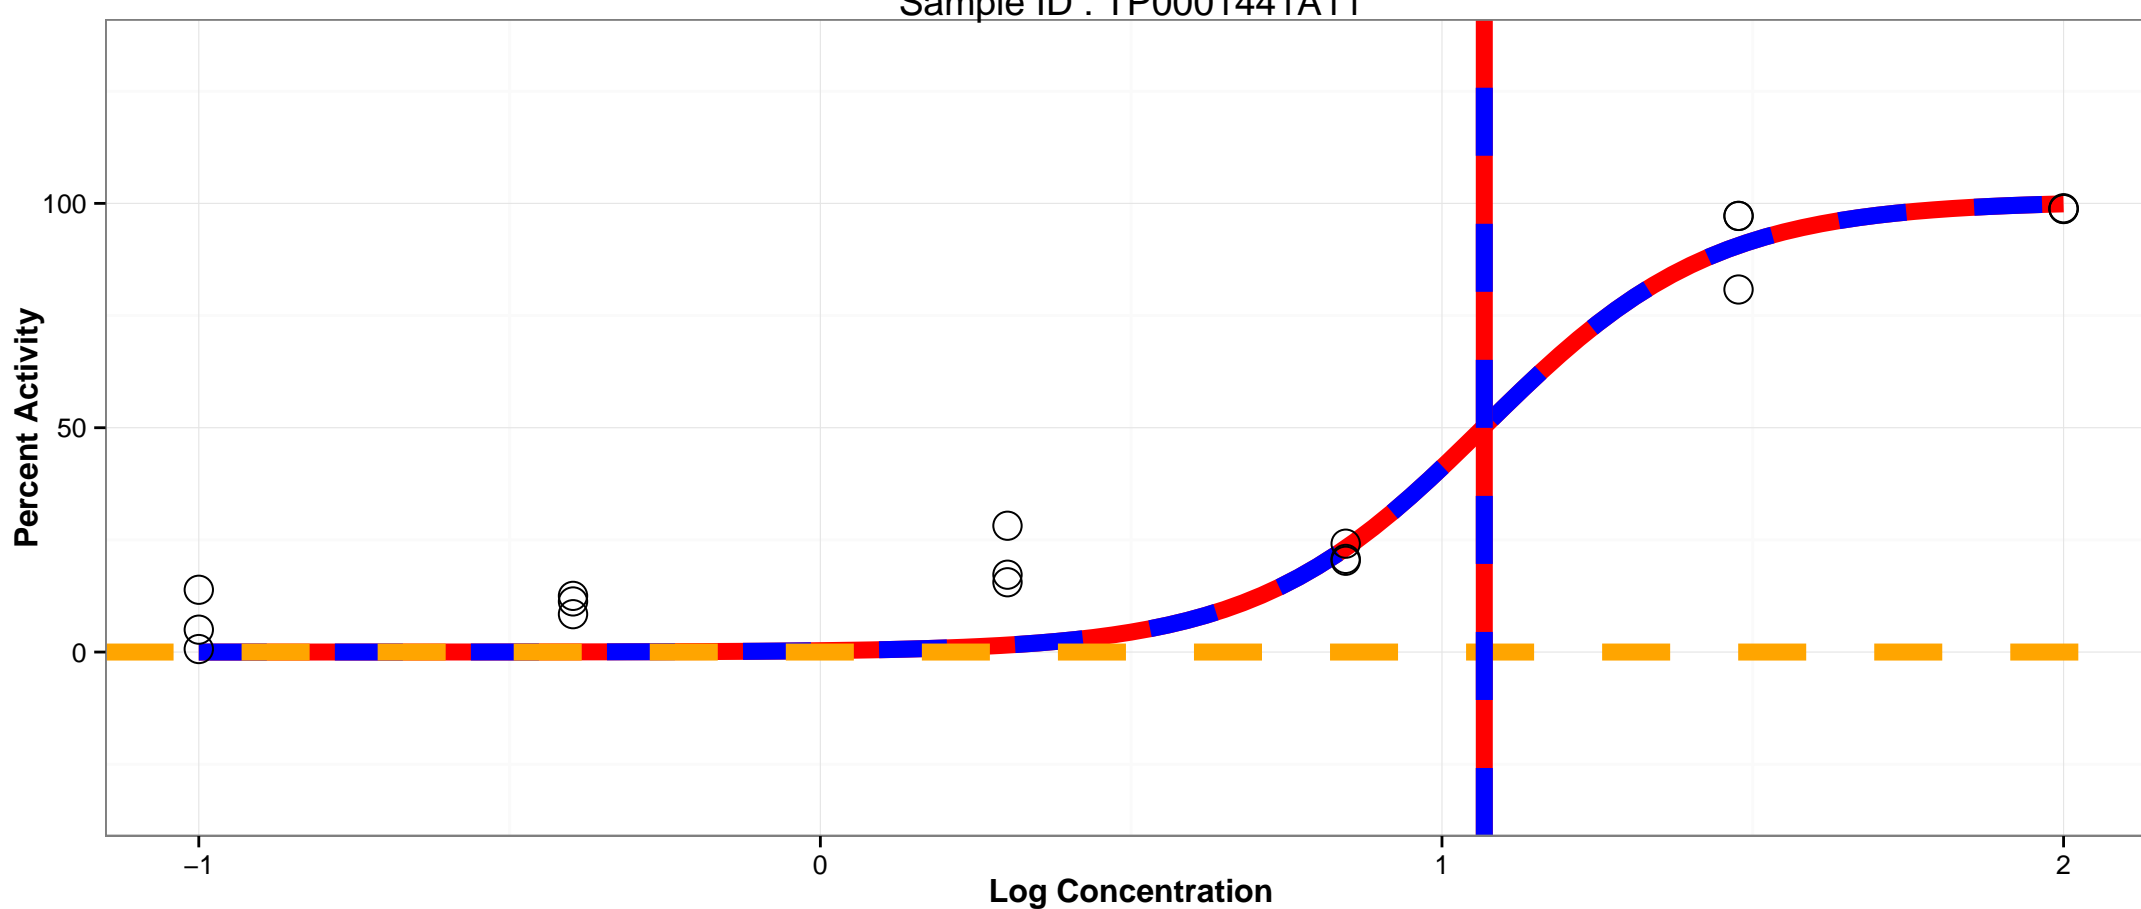

HILL MODEL

|     | tp   | ga     | gw    |
|-----|------|--------|-------|
| val | 101  | 1.07   | 2.35  |
| sd  | 4.96 | 0.0654 | 0.692 |

GAIN-LOSS MODEL

|     | tp  | ga   | gw   | la   | lw   |
|-----|-----|------|------|------|------|
| val | 101 | 1.07 | 2.35 | 2.91 | 12.6 |
| sd  | NA  | NA   | NA   | NA   | NA   |

|      | CNST   | HILL  | GNLS  |
|------|--------|-------|-------|
| AIC  | 198.91 | 143.4 | 147.4 |
| PROB | 0      | 0.88  | 0.12  |
| RMSE | 56.8   | 10.34 | 10.34 |

MAX\_MEAN : 98.8 MAX\_MED : 98.8 BMAD : 5.54  
COFF : 20 HIT-CALL : 1 FITC : 41 ACTP : 1  
FLAGS :

Assay ID 1848 (NHEERL\_Quantilum\_inhib\_2\_dn)  
Sample ID : TP0001441A11

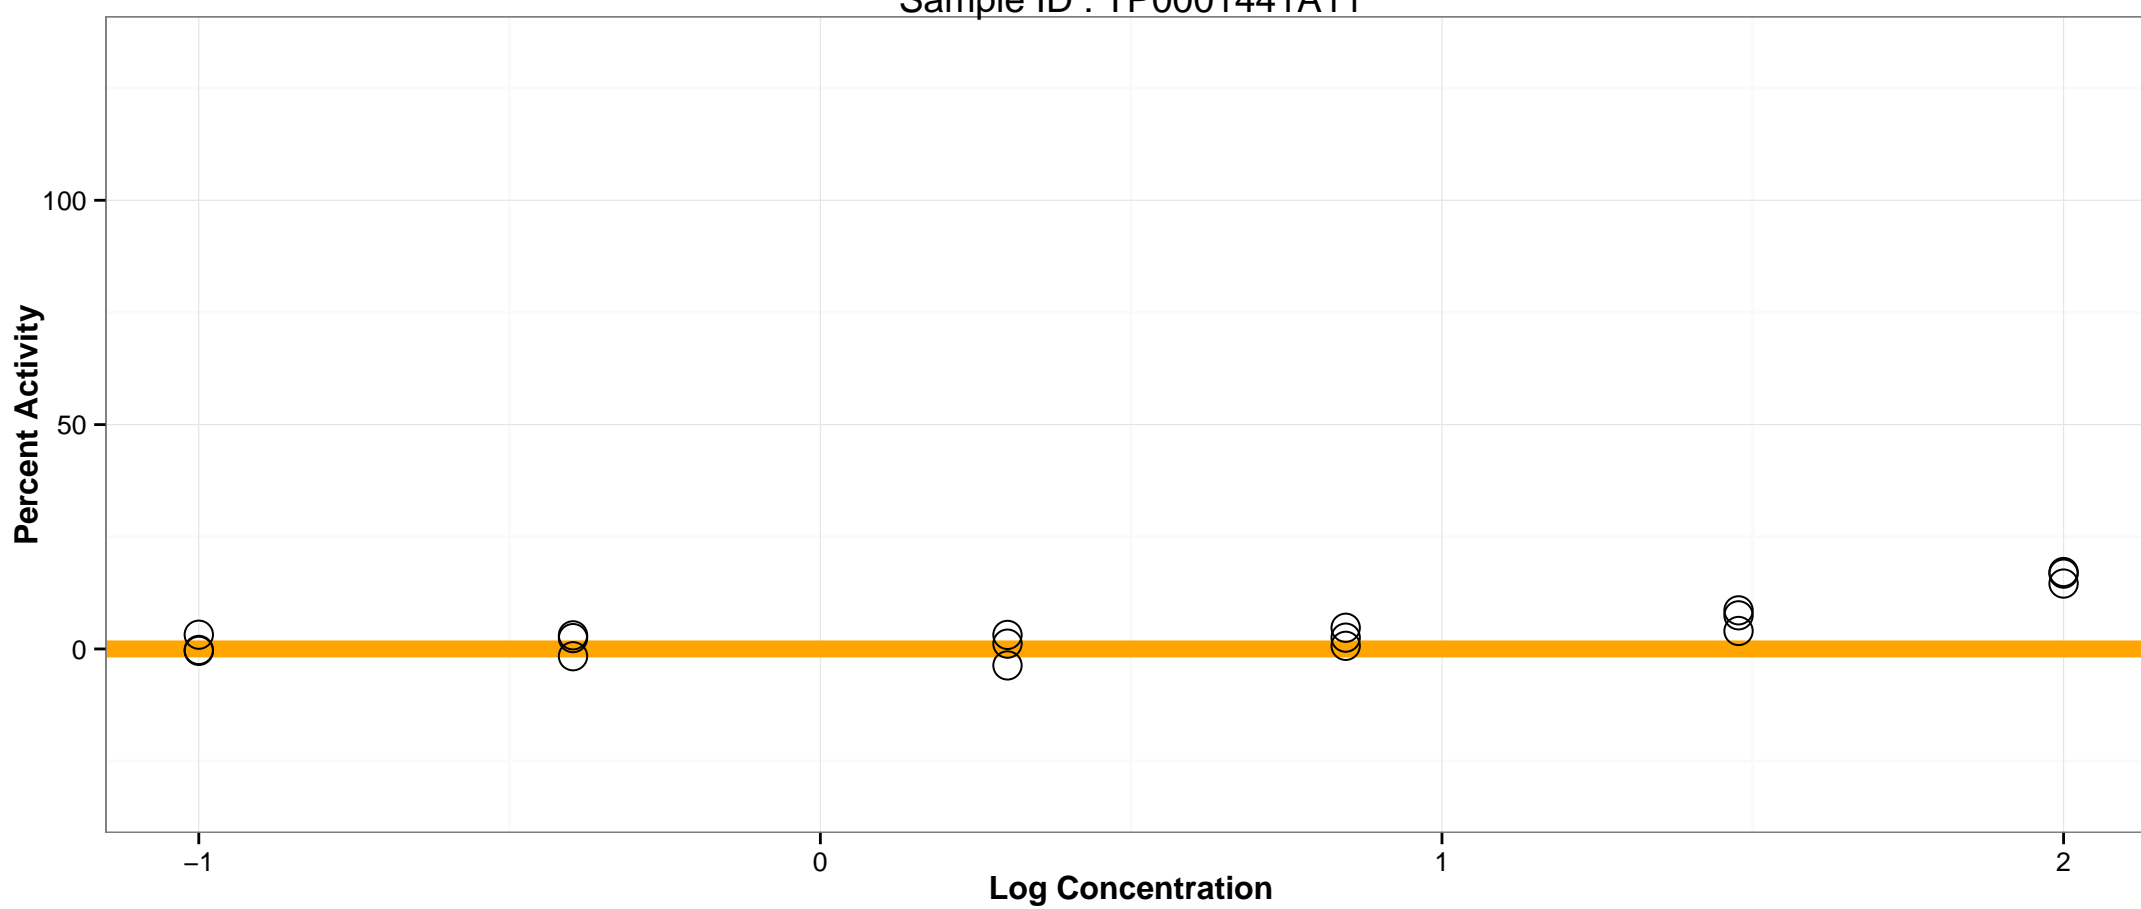

HILL MODEL

HILL MODEL: Not applicable

GAIN-LOSS MODEL

GNLS MODEL: Not applicable

|      | CNST   | HILL | GNLS |
|------|--------|------|------|
| AIC  | 124.07 | NA   | NA   |
| PROB | 1      | NA   | NA   |
| RMSE | 7.52   | NA   | NA   |

MAX\_MEAN : 16.2 MAX\_MED : 16.8 BMAD : 8.58  
COFF : 20 HIT-CALL : 0 FITC : 4 ACTP : 0  
FLAGS :

Assay ID 1508 (NHEERL\_TPO\_AUR\_dn)  
Sample ID : TP0001441B01

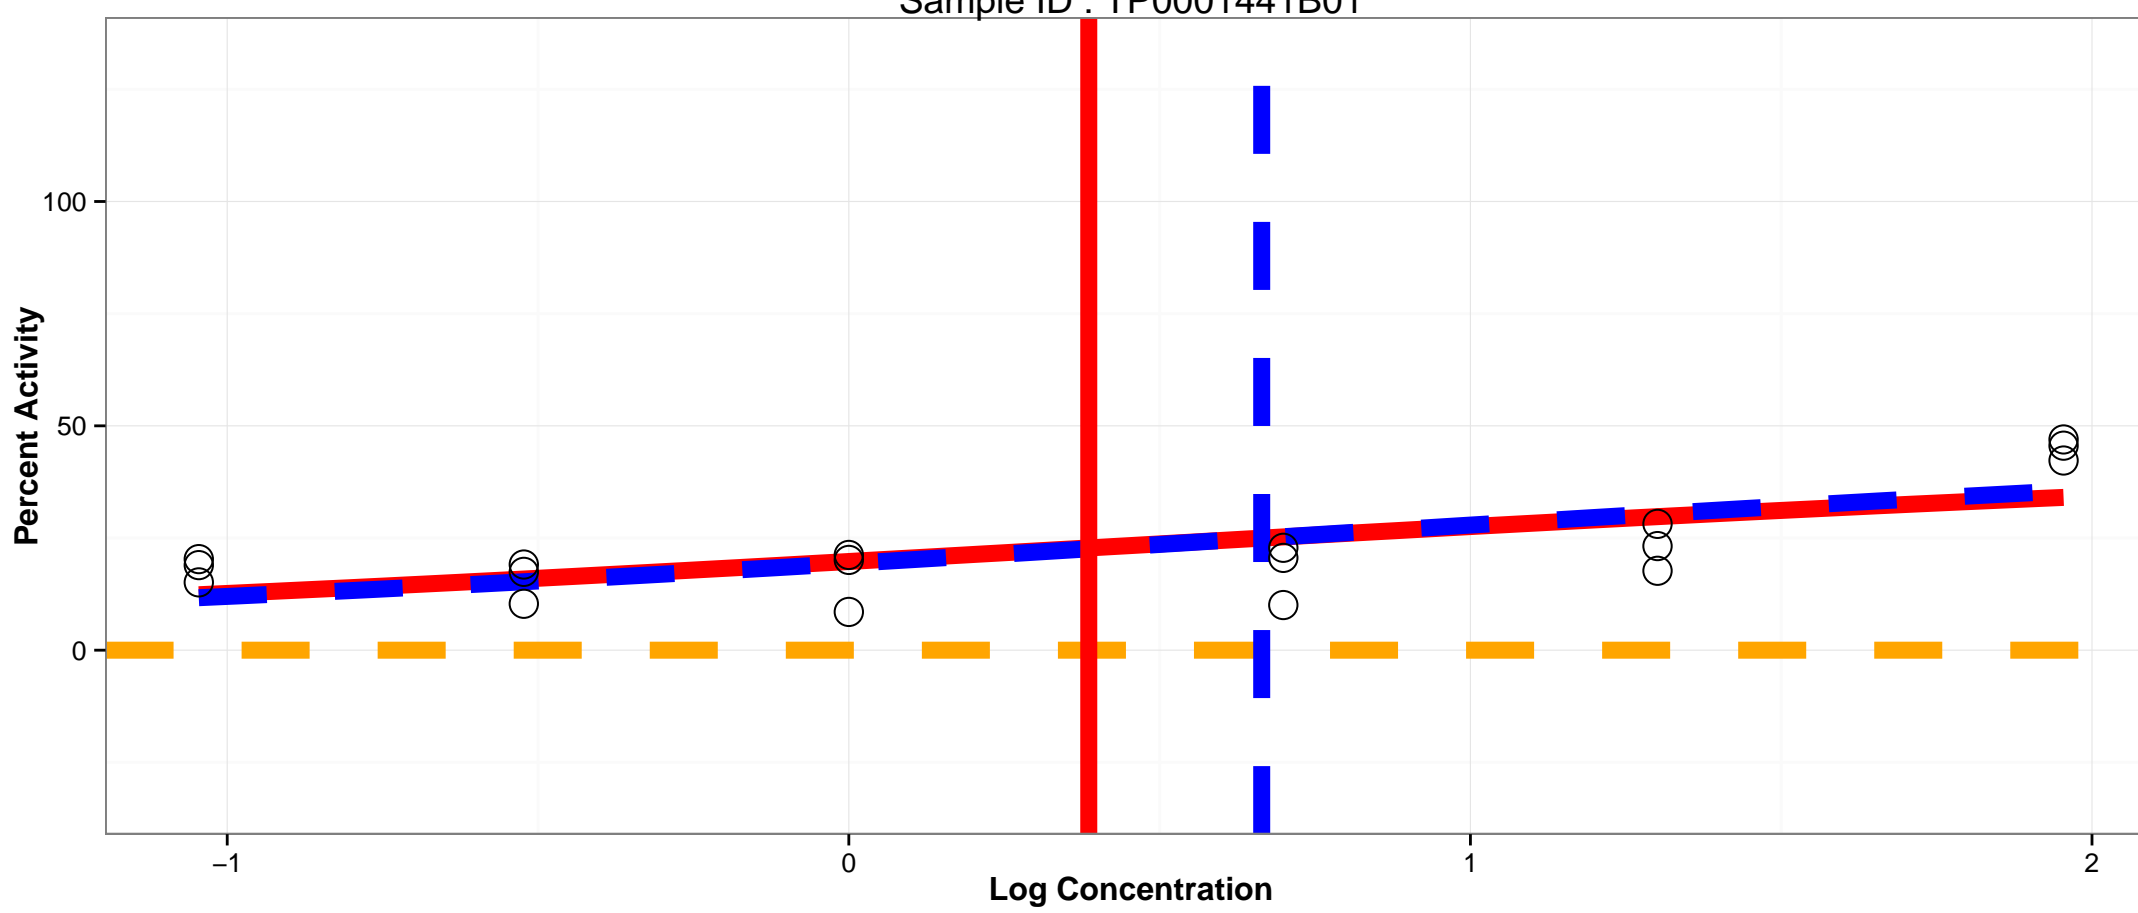

HILL MODEL

|     | tp   | ga    | gw    |
|-----|------|-------|-------|
| val | 45.6 | 0.386 | 0.3   |
| sd  | 36.8 | 2.47  | 0.109 |

GAIN-LOSS MODEL

|     | tp | ga    | gw    | la   | lw   |
|-----|----|-------|-------|------|------|
| val | 50 | 0.664 | 0.301 | 3.95 | 14.1 |
| sd  | NA | NA    | NA    | NA   | NA   |

|      | CNST   | HILL   | GNLS   |
|------|--------|--------|--------|
| AIC  | 171.82 | 135.07 | 138.57 |
| PROB | 0      | 0.85   | 0.15   |
| RMSE | 25.25  | 7.83   | 7.68   |

MAX\_MEAN : 44.9 MAX\_MED : 45.6 BMAD : 5.69  
COFF : 20 HIT-CALL : 1 FITC : 42 ACTP : 1  
FLAGS :

Assay ID 1509 (NHEERL\_HEK293T\_CellTiterGLO)  
Sample ID : TP0001441B01

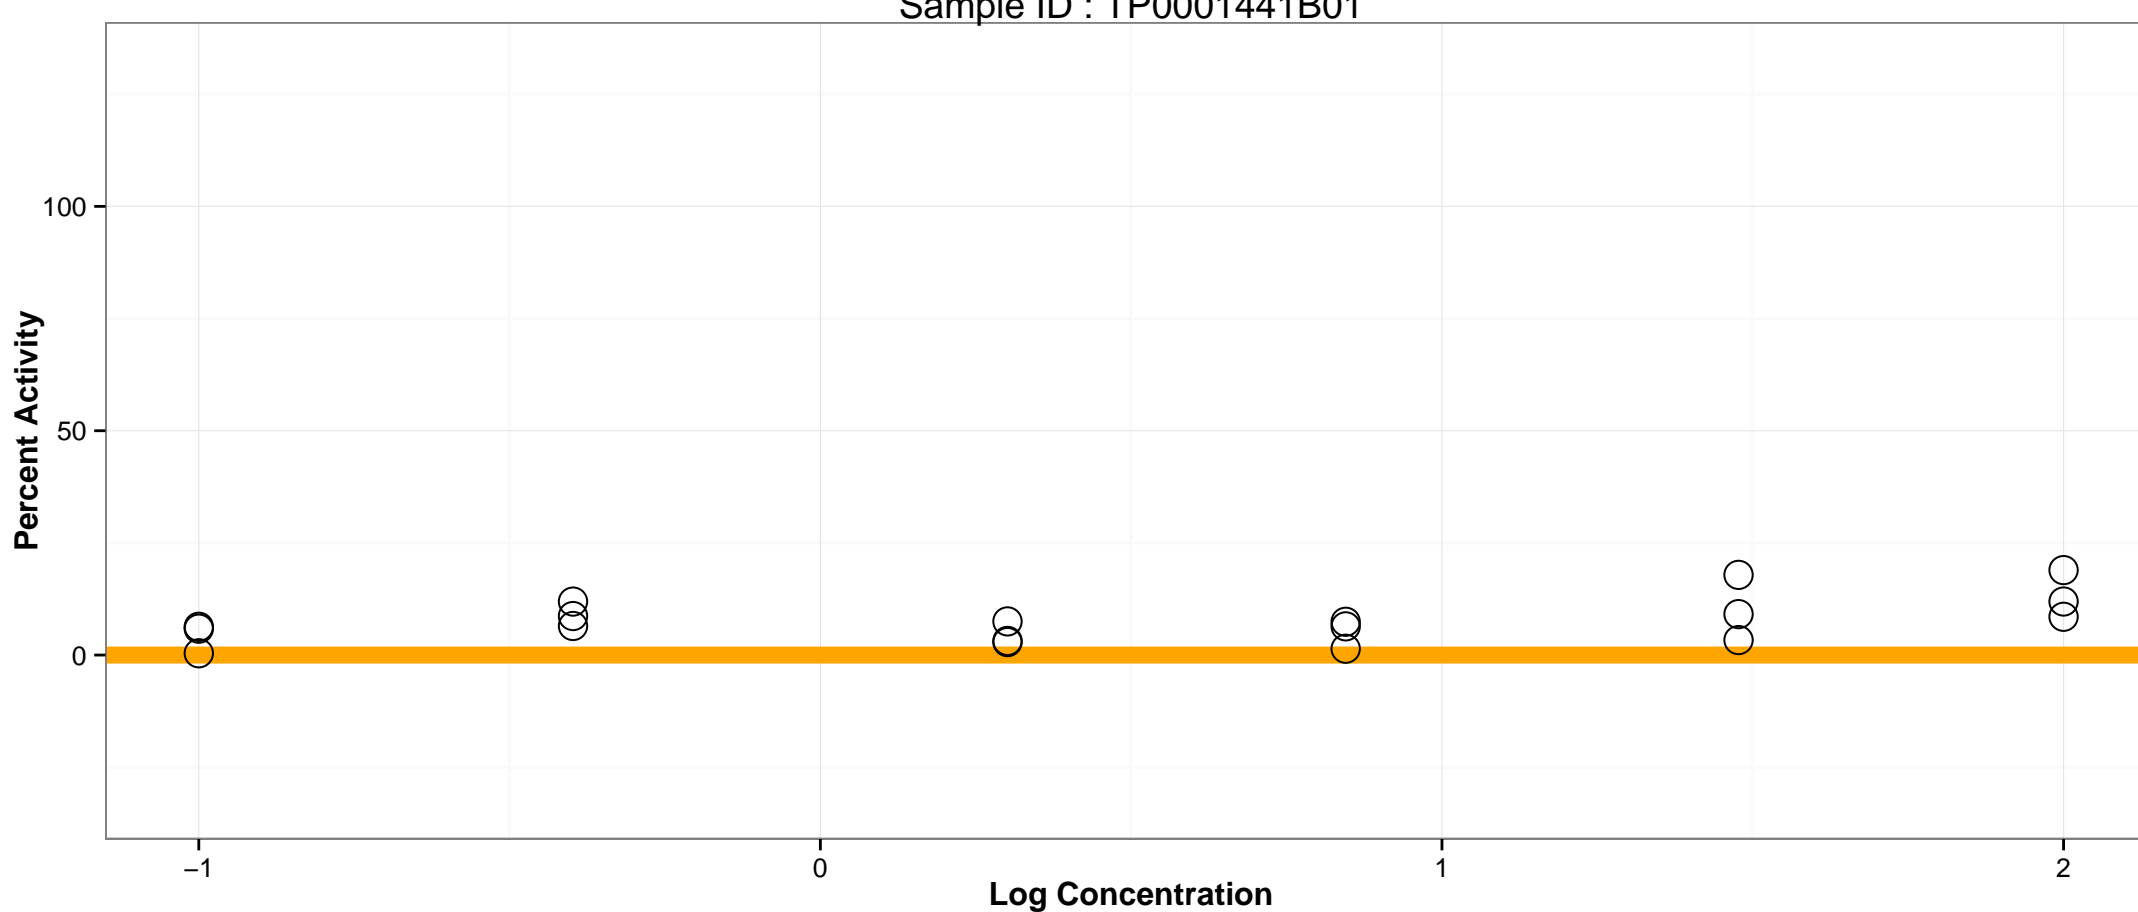

HILL MODEL

HILL MODEL: Not applicable

GAIN-LOSS MODEL

GNLS MODEL: Not applicable

|      | CNST   | HILL | GNLS |
|------|--------|------|------|
| AIC  | 134.44 | NA   | NA   |
| PROB | 1      | NA   | NA   |
| RMSE | 9.12   | NA   | NA   |

MAX\_MEAN : 13.1 MAX\_MED : 11.9 BMAD : 5.54  
COFF : 20 HIT-CALL : 0 FITC : 4 ACTP : 0  
FLAGS :

Assay ID 1848 (NHEERL\_Quantilum\_inhib\_2\_dn)  
Sample ID : TP0001441B01

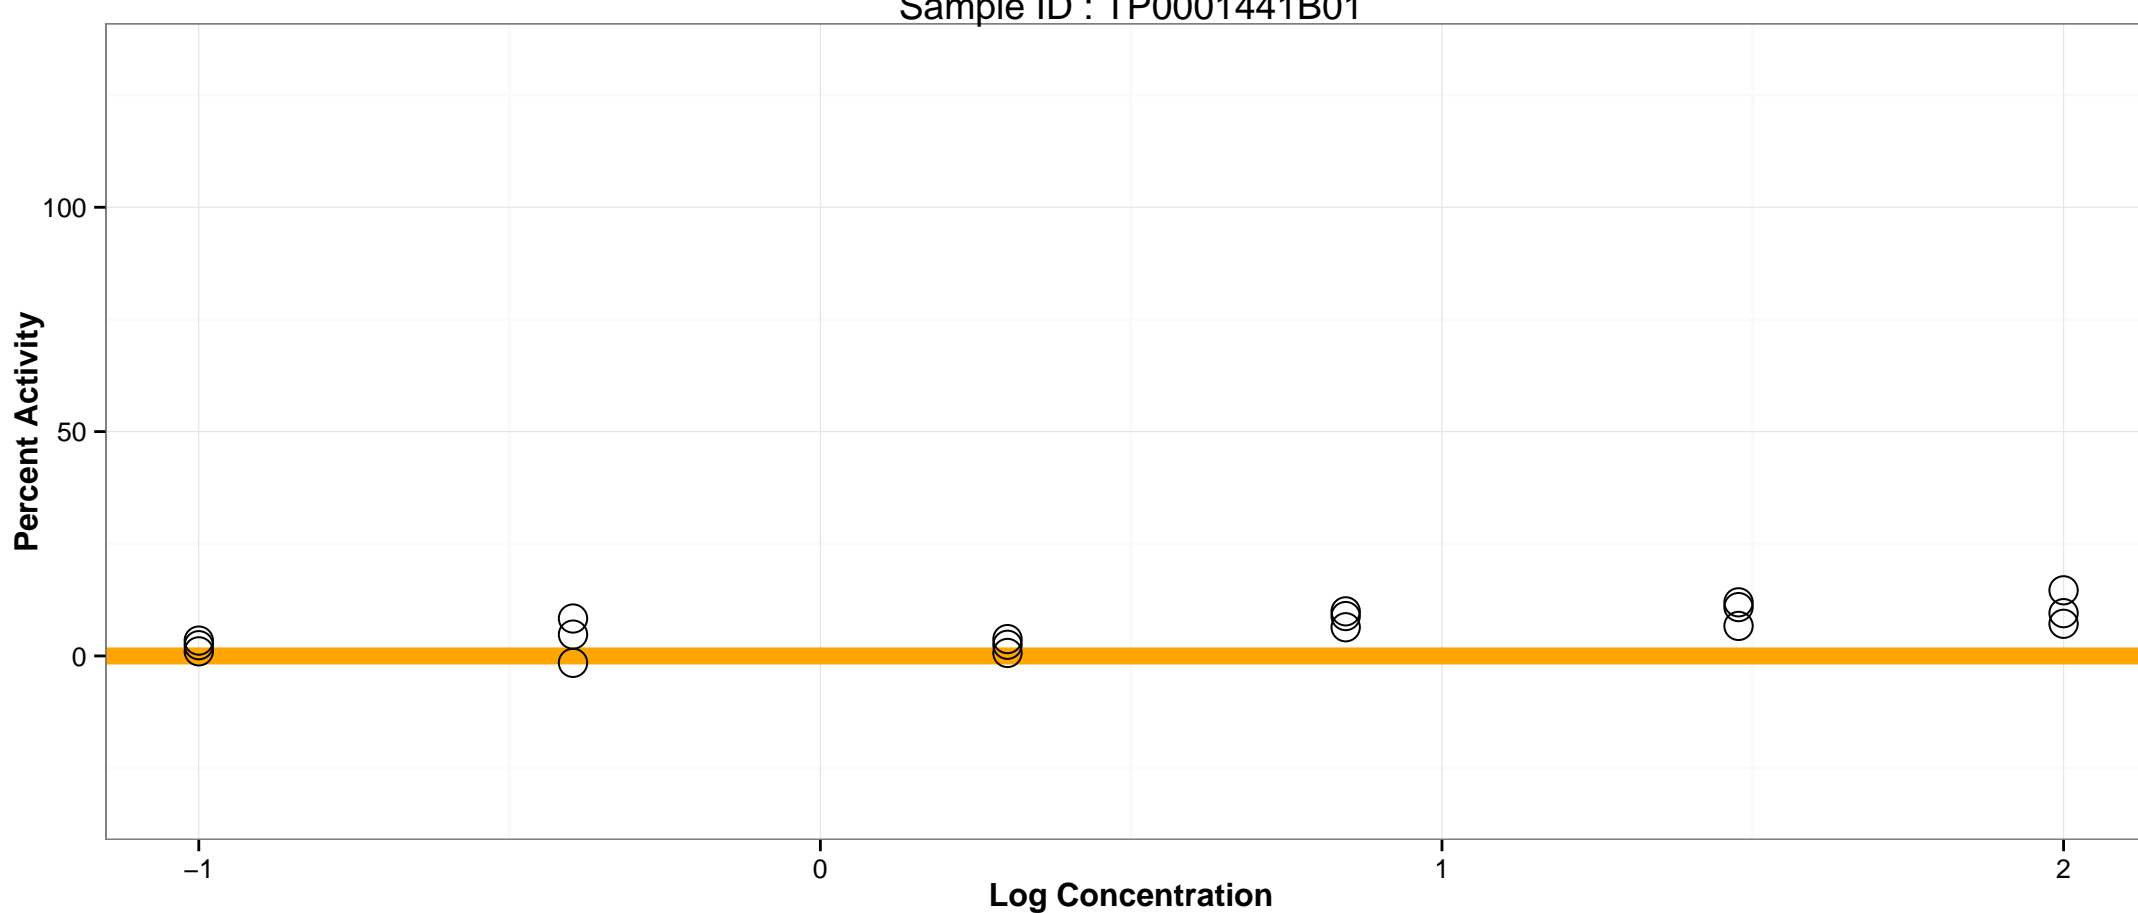

HILL MODEL

HILL MODEL: Not applicable

GAIN-LOSS MODEL

GNLS MODEL: Not applicable

|      | CNST   | HILL | GNLS |
|------|--------|------|------|
| AIC  | 128.04 | NA   | NA   |
| PROB | 1      | NA   | NA   |
| RMSE | 7.52   | NA   | NA   |

MAX\_MEAN : 10.5 MAX\_MED : 10.9 BMAD : 8.58  
COFF : 20 HIT-CALL : 0 FITC : 4 ACTP : 0  
FLAGS :

Assay ID 1508 (NHEERL\_TPO\_AUR\_dn)  
Sample ID : TX008666

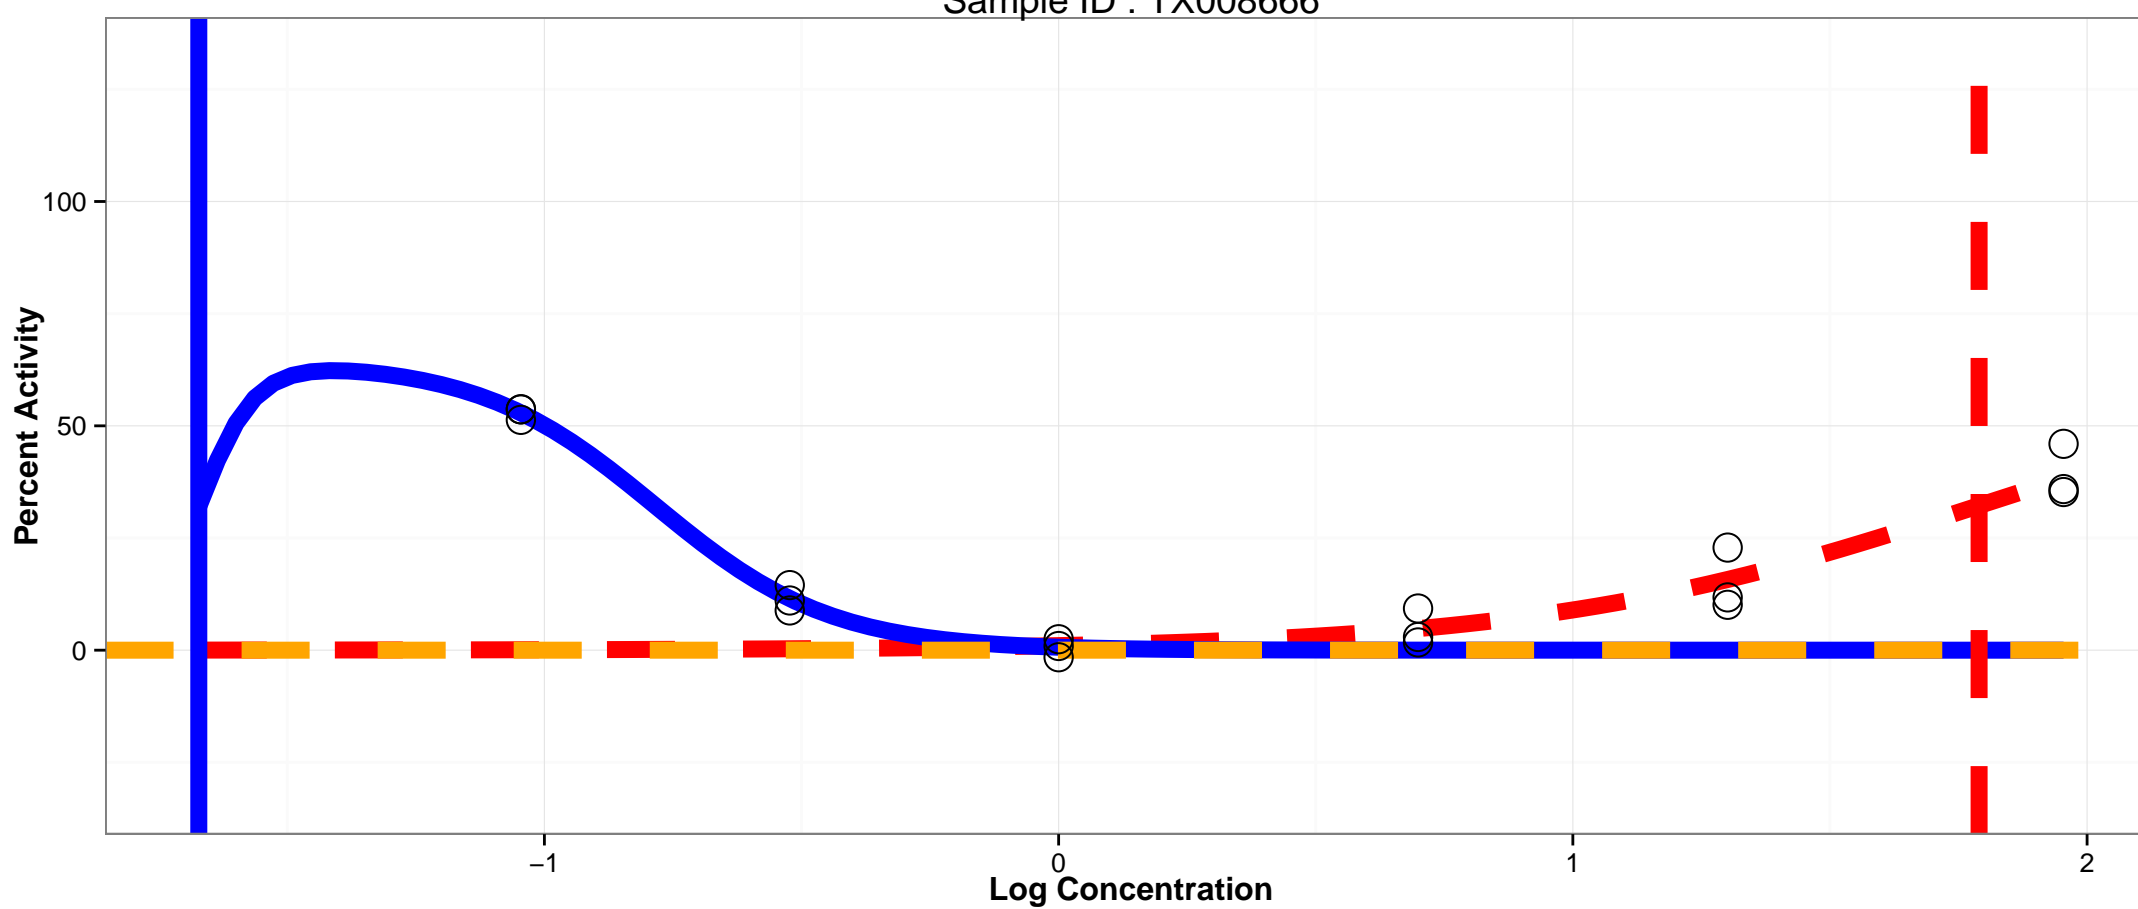

HILL MODEL

|     | tp   | ga   | gw   |
|-----|------|------|------|
| val | 64.4 | 1.79 | 1    |
| sd  | 80   | 1.17 | 1.01 |

GAIN-LOSS MODEL

|     | tp   | ga    | gw   | la     | lw   |
|-----|------|-------|------|--------|------|
| val | 64.4 | -1.67 | 8    | -0.785 | 2.53 |
| sd  | 153  | 311   | 3970 | 1.39   | 8.55 |

|      | CNST   | HILL   | GNLS   |
|------|--------|--------|--------|
| AIC  | 173.82 | 163.96 | 161.94 |
| PROB | 0      | 0.27   | 0.73   |
| RMSE | 28.22  | 22.33  | 17.54  |

MAX\_MEAN : 52.9 MAX\_MED : 53.7 BMAD : 5.69  
COFF : 20 HIT-CALL : 1 FITC : 49 ACTP : 0.998  
FLAGS : 15

Assay ID 1509 (NHEERL\_HEK293T\_CellTiterGLO)  
Sample ID : TX008666

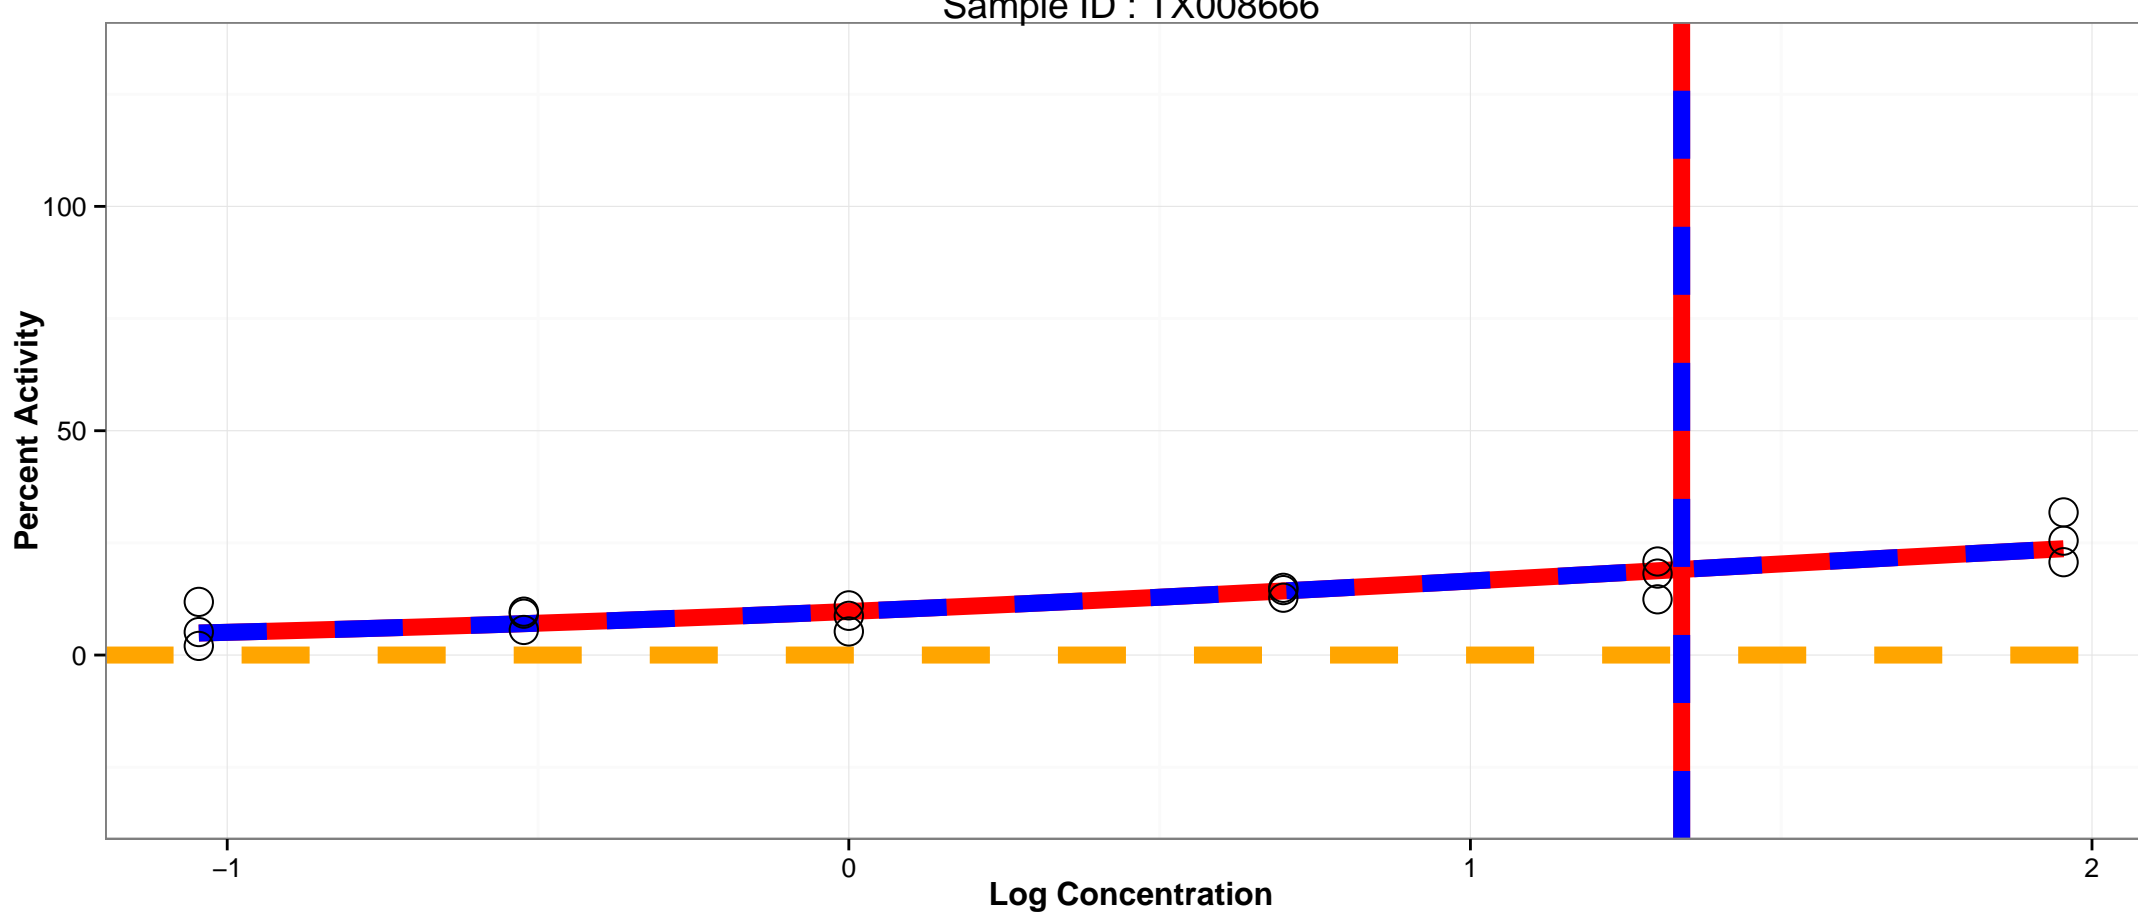

HILL MODEL

|     | tp   | ga    | gw     |
|-----|------|-------|--------|
| val | 38.2 | 1.34  | 0.348  |
| sd  | 14.5 | 0.962 | 0.0931 |

GAIN-LOSS MODEL

|     | tp   | ga    | gw     | la   | lw   |
|-----|------|-------|--------|------|------|
| val | 38.2 | 1.34  | 0.348  | 3.95 | 4.29 |
| sd  | 14.5 | 0.962 | 0.0931 | 2260 | 4860 |

|      | CNST   | HILL   | GNLS   |
|------|--------|--------|--------|
| AIC  | 153.57 | 103.81 | 107.81 |
| PROB | 0      | 0.88   | 0.12   |
| RMSE | 15.31  | 3.49   | 3.49   |

MAX\_MEAN : 26 MAX\_MED : 25.5 BMAD : 5.54  
COFF : 20 HIT-CALL : 1 FITC : 42 ACTP : 1  
FLAGS :

Assay ID 1848 (NHEERL\_Quantilum\_inhib\_2\_dn)  
Sample ID : TX008666

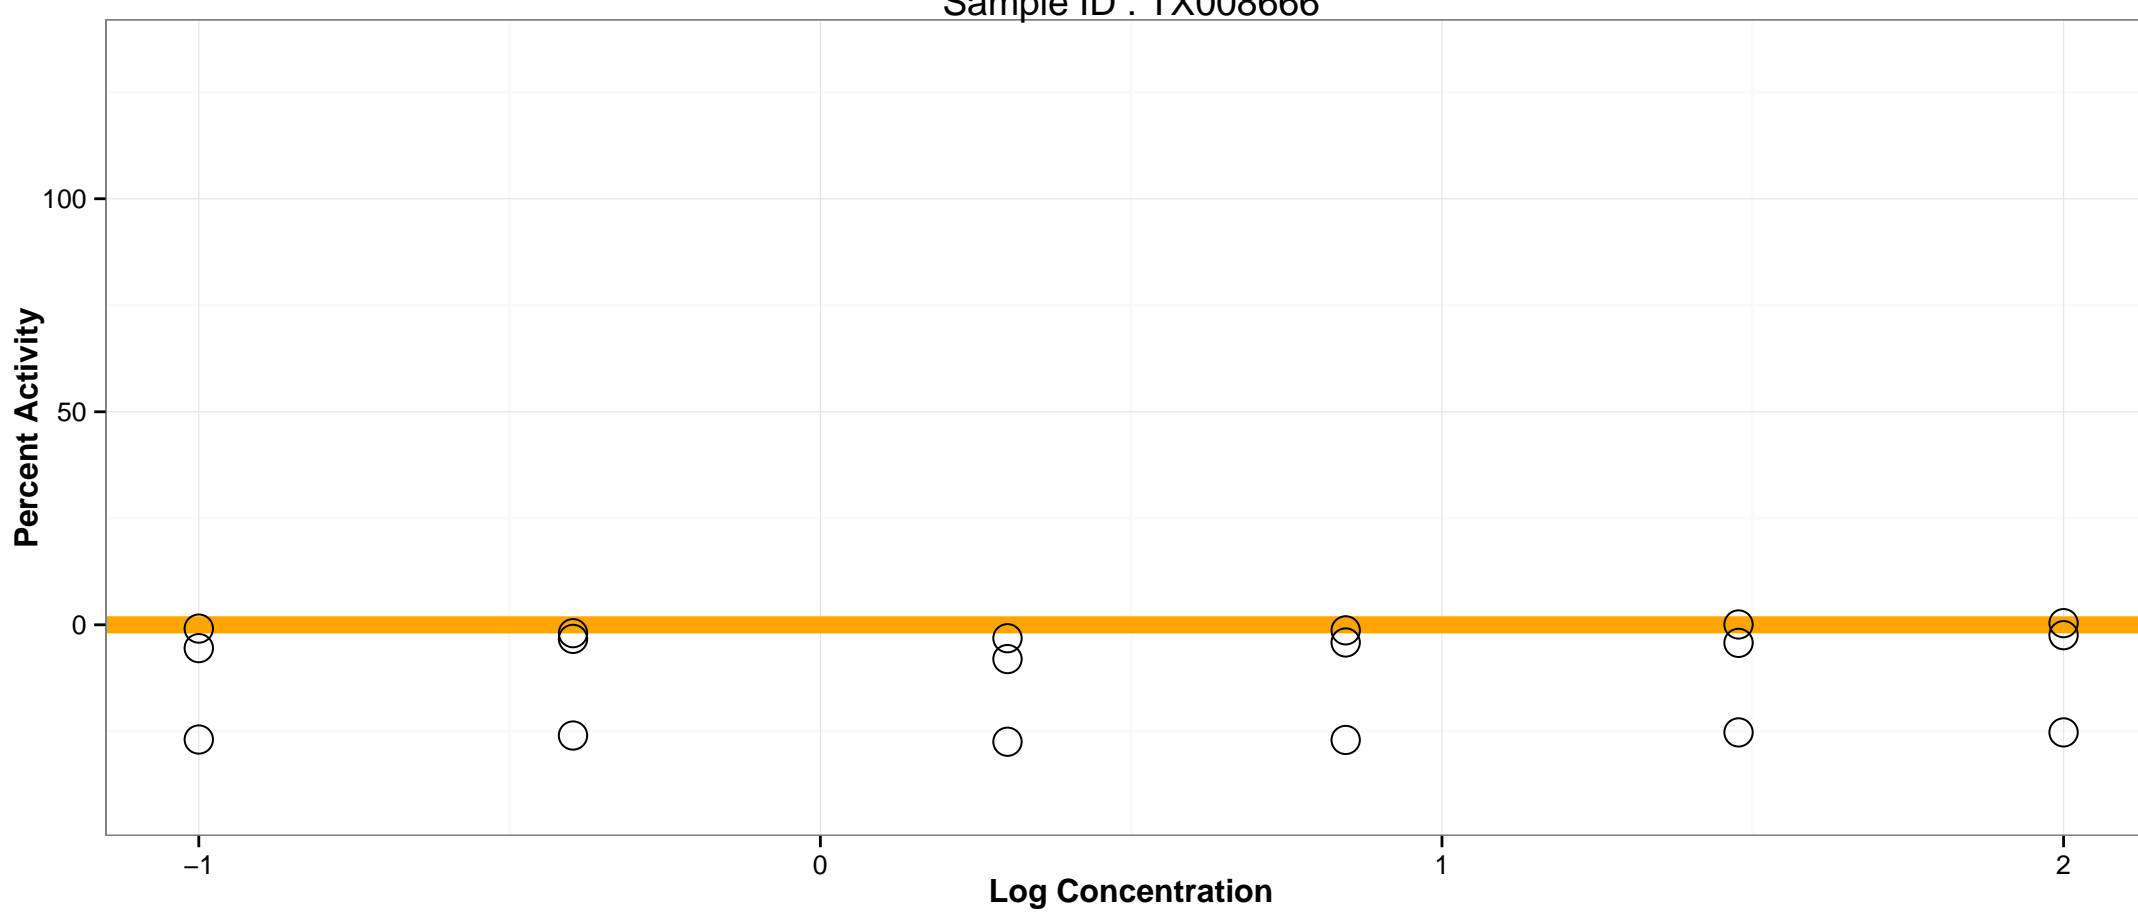

HILL MODEL

HILL MODEL: Not applicable

GAIN-LOSS MODEL

GNLS MODEL: Not applicable

|      | CNST   | HILL | GNLS |
|------|--------|------|------|
| AIC  | 151.79 | NA   | NA   |
| PROB | 1      | NA   | NA   |
| RMSE | 15.49  | NA   | NA   |

MAX\_MEAN : -9.09 MAX\_MED : -2.42 BMAD : 8.58  
COFF : 20 HIT-CALL : 0 FITC : 4 ACTP : 0  
FLAGS :



Chemical : Benzothiazole  
CAS : 95-16-9

Assay ID 1508 (NHEERL\_TPO\_AUR\_dn)  
Sample ID : TP0001441B02

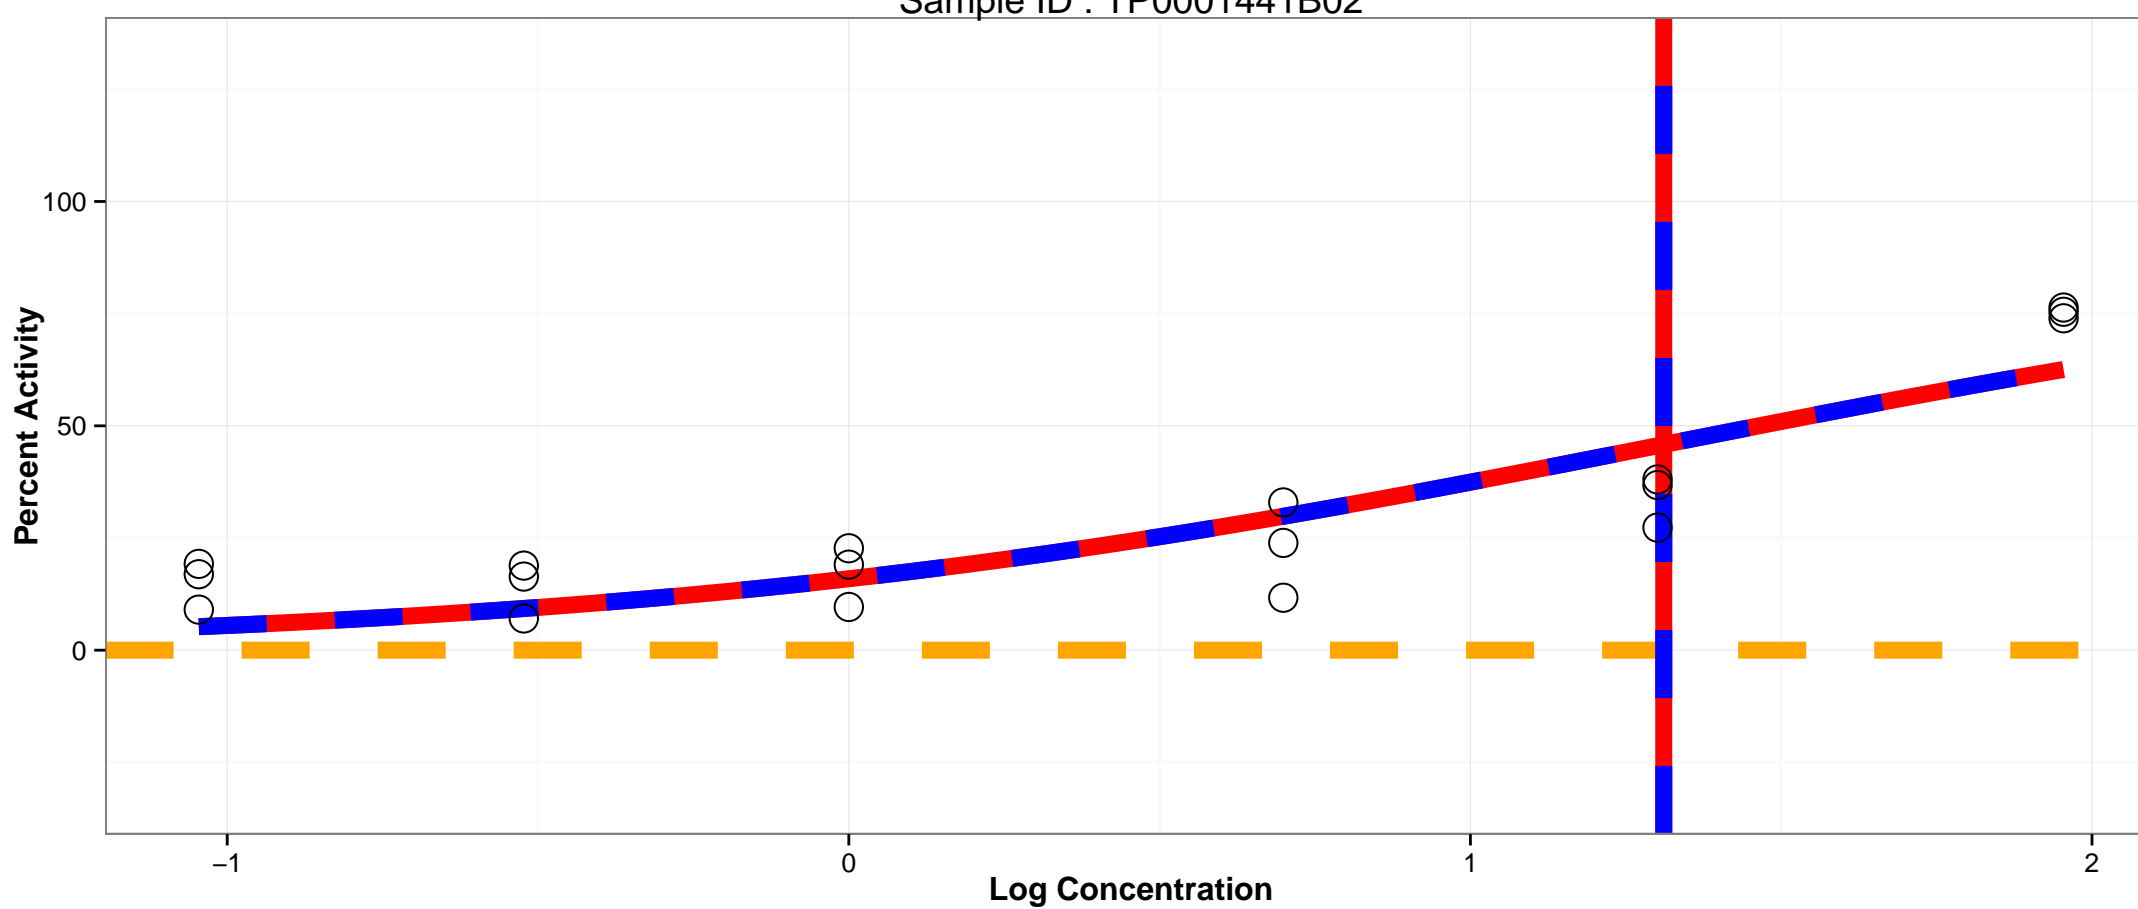

HILL MODEL

|     | tp   | ga    | gw    |
|-----|------|-------|-------|
| val | 91.7 | 1.31  | 0.517 |
| sd  | 26.3 | 0.449 | 0.126 |

GAIN-LOSS MODEL

|     | tp   | ga    | gw    | la   | lw    |
|-----|------|-------|-------|------|-------|
| val | 91.7 | 1.31  | 0.517 | 2.83 | 10.7  |
| sd  | 26.3 | 0.449 | 0.126 | 1230 | 15100 |

|      | CNST   | HILL   | GNLS   |
|------|--------|--------|--------|
| AIC  | 183.57 | 145.78 | 149.78 |
| PROB | 0      | 0.88   | 0.12   |
| RMSE | 37.07  | 10.32  | 10.32  |

MAX\_MEAN : 75.3 MAX\_MED : 75.4 BMAD : 5.69  
COFF : 20 HIT-CALL : 1 FITC : 42 ACTP : 1  
FLAGS :

Assay ID 1509 (NHEERL\_HEK293T\_CellTiterGLO)  
Sample ID : TP0001441B02

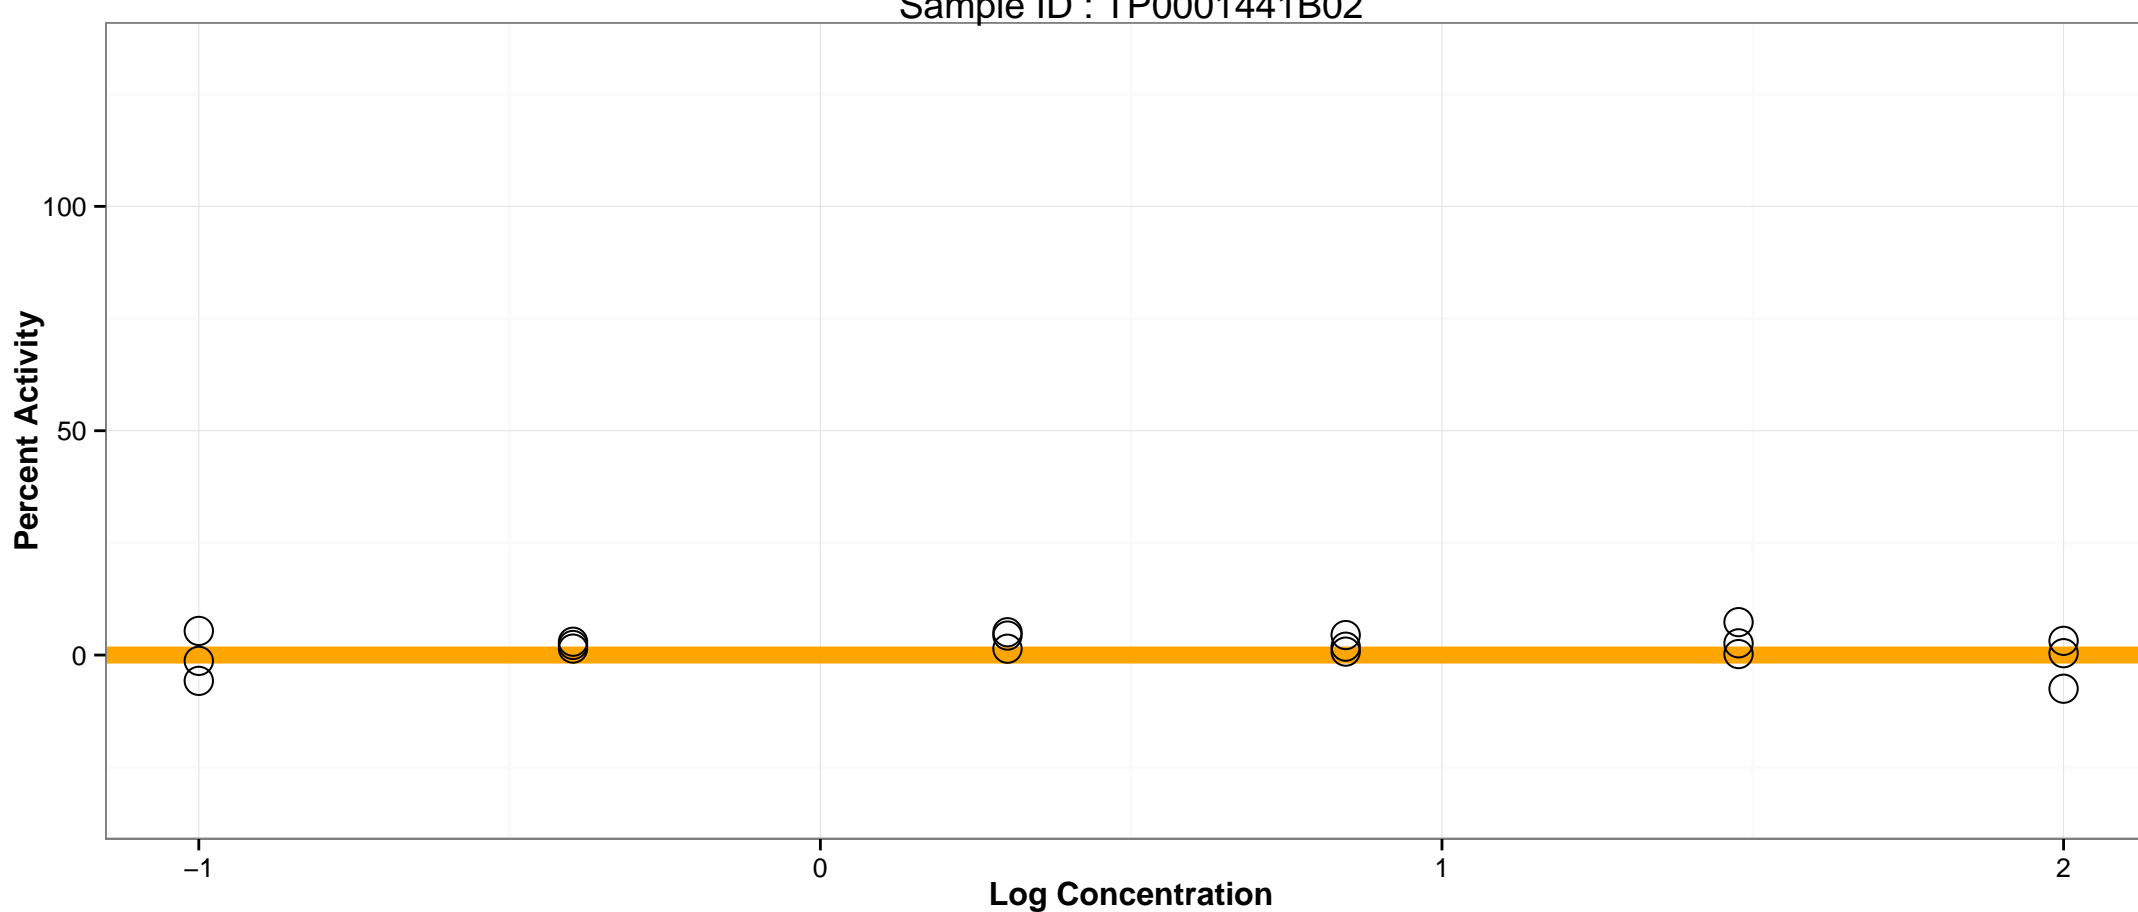

HILL MODEL

HILL MODEL: Not applicable

GAIN-LOSS MODEL

GNLS MODEL: Not applicable

|      | CNST   | HILL | GNLS |
|------|--------|------|------|
| AIC  | 104.24 | NA   | NA   |
| PROB | 1      | NA   | NA   |
| RMSE | 3.93   | NA   | NA   |

MAX\_MEAN : 3.63 MAX\_MED : 4.36 BMAD : 5.54  
COFF : 20 HIT-CALL : 0 FITC : 4 ACTP : 0  
FLAGS :

Assay ID 1848 (NHEERL\_QuantLum\_inhib\_2\_dn)  
Sample ID : TP0001441B02

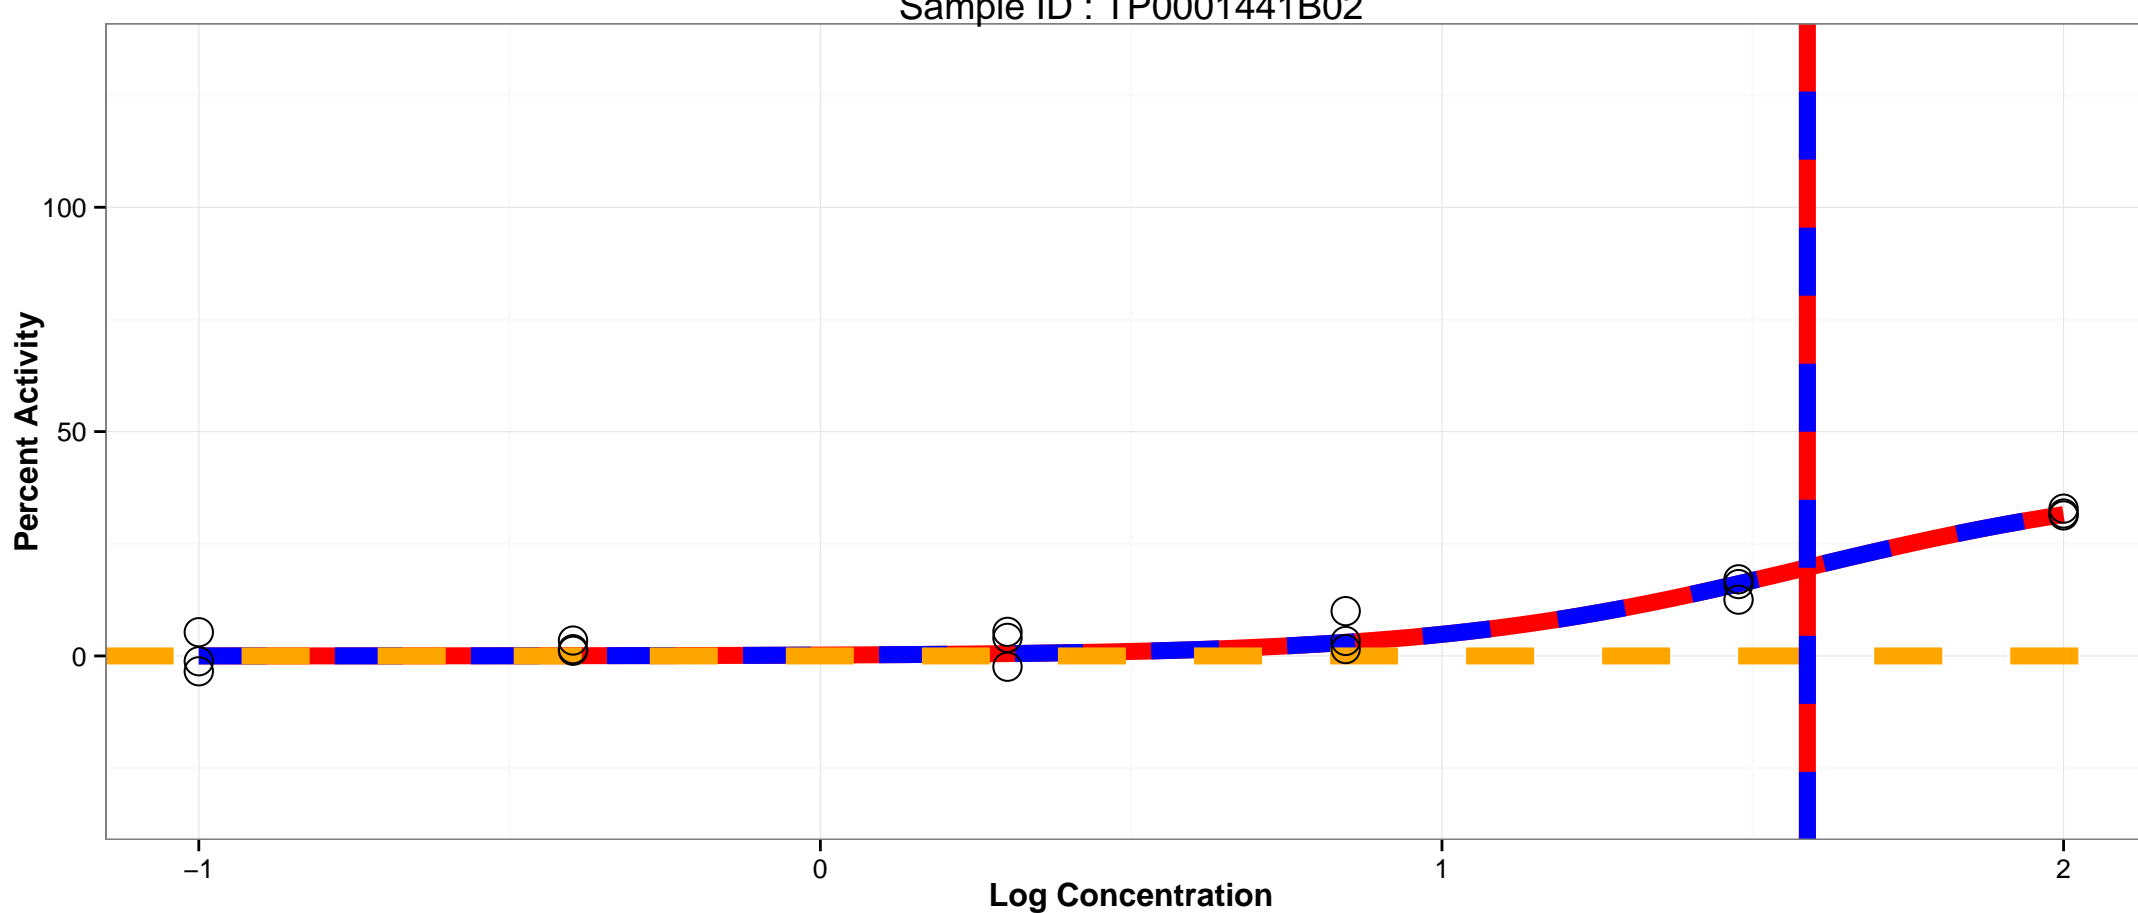

HILL MODEL

|     | tp   | ga    | gw    |
|-----|------|-------|-------|
| val | 39.4 | 1.59  | 1.46  |
| sd  | 6.64 | 0.129 | 0.434 |

GAIN-LOSS MODEL

|     | tp   | ga    | gw    | la    | lw     |
|-----|------|-------|-------|-------|--------|
| val | 39.4 | 1.59  | 1.46  | 3.06  | 10.4   |
| sd  | 6.64 | 0.129 | 0.434 | 13200 | 130000 |

|      | CNST   | HILL   | GNLS   |
|------|--------|--------|--------|
| AIC  | 148.68 | 100.05 | 104.05 |
| PROB | 0      | 0.88   | 0.12   |
| RMSE | 14.9   | 3.05   | 3.05   |

MAX\_MEAN : 32 MAX\_MED : 31.8 BMAD : 8.58  
COFF : 20 HIT-CALL : 1 FITC : 42 ACTP : 1  
FLAGS : 6

Chemical : Ethion  
CAS : 563-12-2

Assay ID 1508 (NHEERL\_TPO\_AUR\_dn)  
Sample ID : TP0001441B03

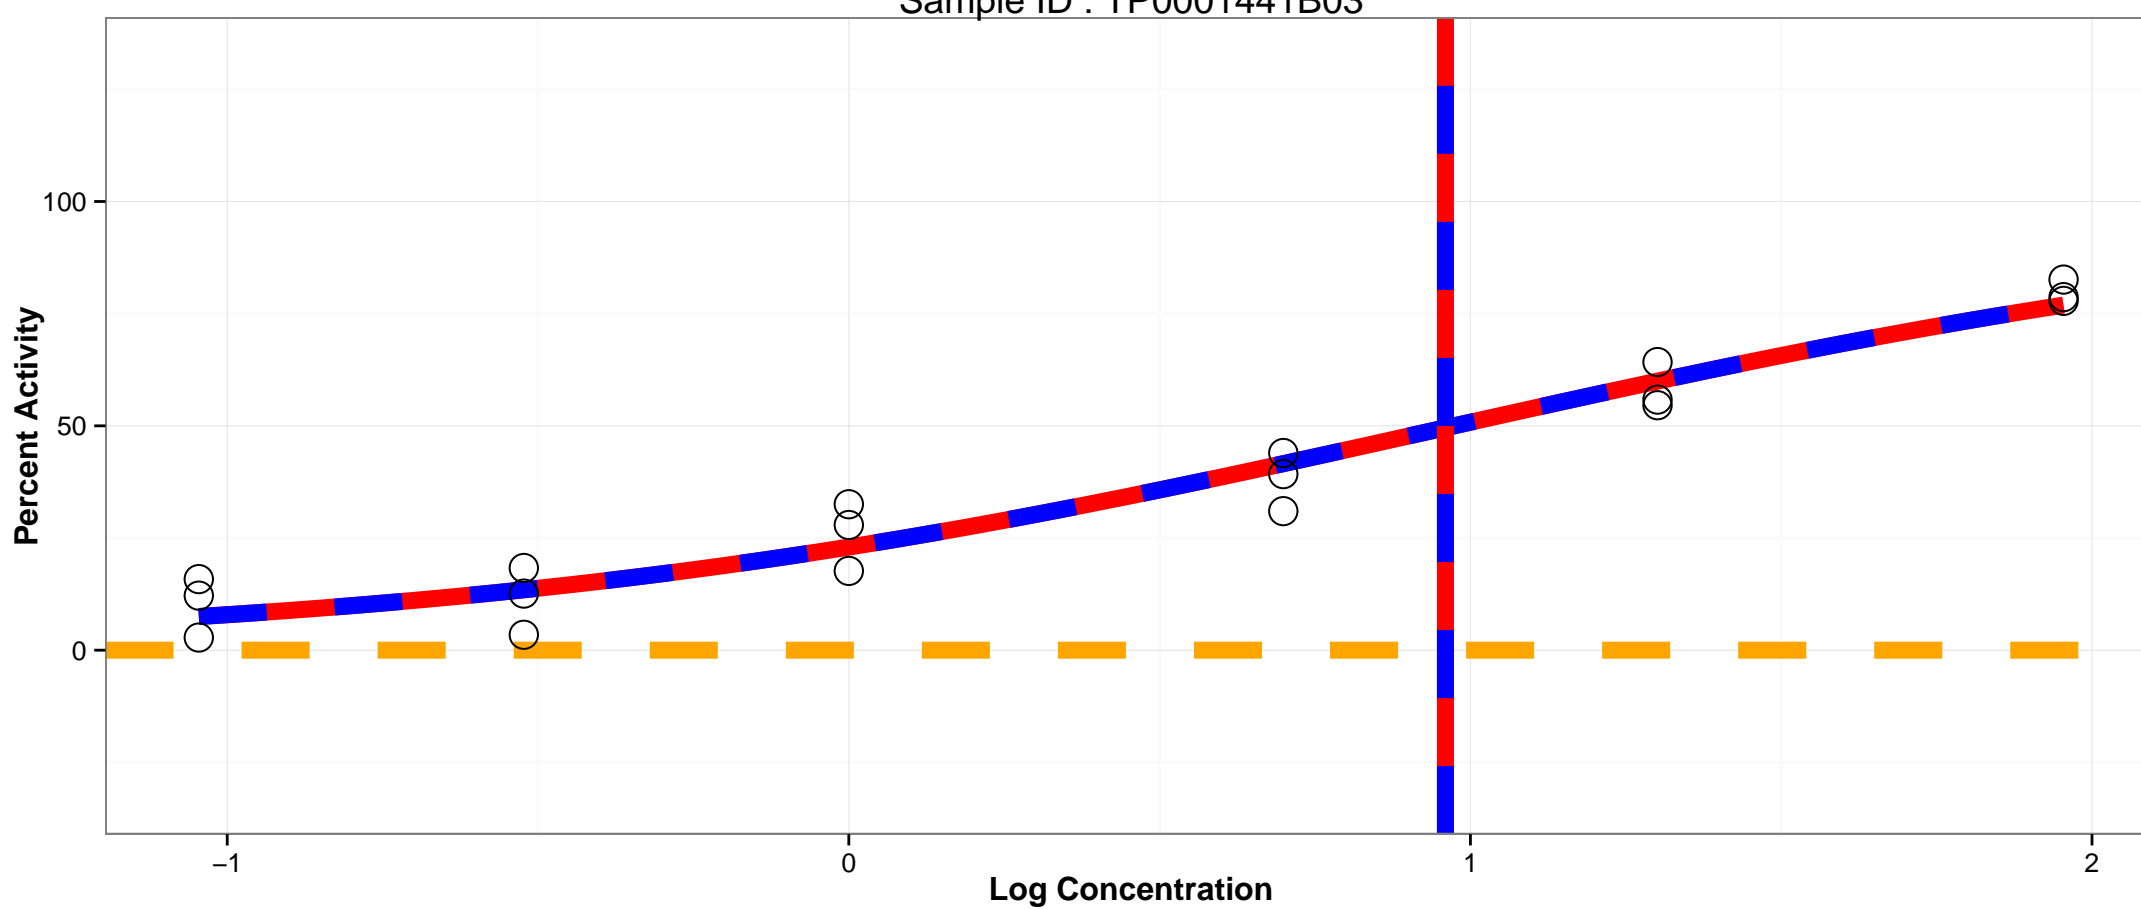

HILL MODEL

|     | tp   | ga    | gw     |
|-----|------|-------|--------|
| val | 99.1 | 0.96  | 0.542  |
| sd  | 12.4 | 0.247 | 0.0815 |

GAIN-LOSS MODEL

|     | tp   | ga    | gw     | la     | lw     |
|-----|------|-------|--------|--------|--------|
| val | 99.1 | 0.96  | 0.542  | 3.95   | 7.63   |
| sd  | 12.4 | 0.247 | 0.0815 | 365000 | 460000 |

|      | CNST   | HILL   | GNLS   |
|------|--------|--------|--------|
| AIC  | 192.21 | 124.75 | 128.75 |
| PROB | 0      | 0.88   | 0.12   |
| RMSE | 45.22  | 5.8    | 5.8    |

MAX\_MEAN : 79.7 MAX\_MED : 78.7 BMAD : 5.69  
COFF : 20 HIT-CALL : 1 FITC : 42 ACTP : 1  
FLAGS :

Assay ID 1509 (NHEERL\_HEK293T\_CellTiterGLO)  
Sample ID : TP0001441B03

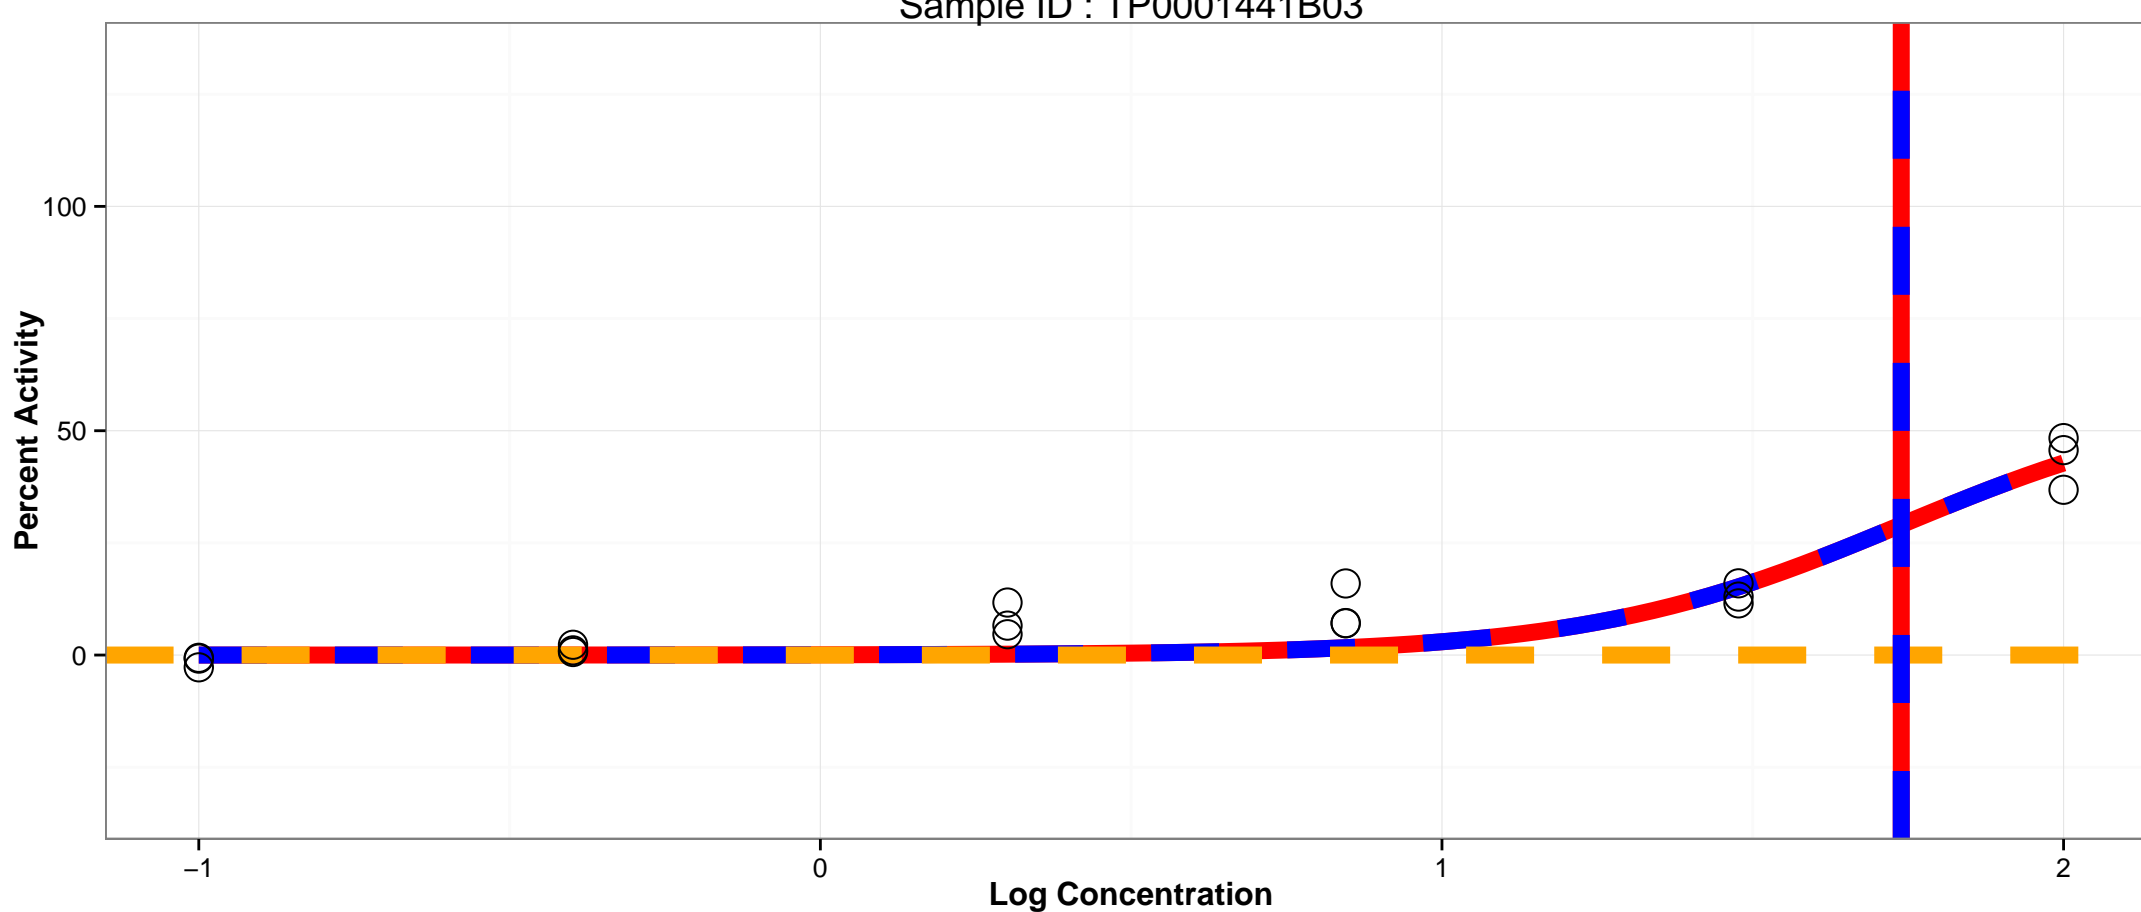

HILL MODEL

|     | tp | ga    | gw   |
|-----|----|-------|------|
| val | 58 | 1.74  | 1.72 |
| sd  | 26 | 0.278 | 1.3  |

GAIN-LOSS MODEL

|     | tp | ga   | gw   | la   | lw  |
|-----|----|------|------|------|-----|
| val | 58 | 1.74 | 1.72 | 3.71 | 8.5 |
| sd  | NA | NA   | NA   | NA   | NA  |

|      | CNST   | HILL  | GNLS  |
|------|--------|-------|-------|
| AIC  | 157.12 | 120.8 | 124.8 |
| PROB | 0      | 0.88  | 0.12  |
| RMSE | 19.6   | 5.61  | 5.61  |

MAX\_MEAN : 43.6 MAX\_MED : 45.7 BMAD : 5.54  
COFF : 20 HIT-CALL : 1 FITC : 42 ACTP : 1  
FLAGS : 6

Assay ID 1848 (NHEERL\_Quantilum\_inhib\_2\_dn)  
Sample ID : TP0001441B03

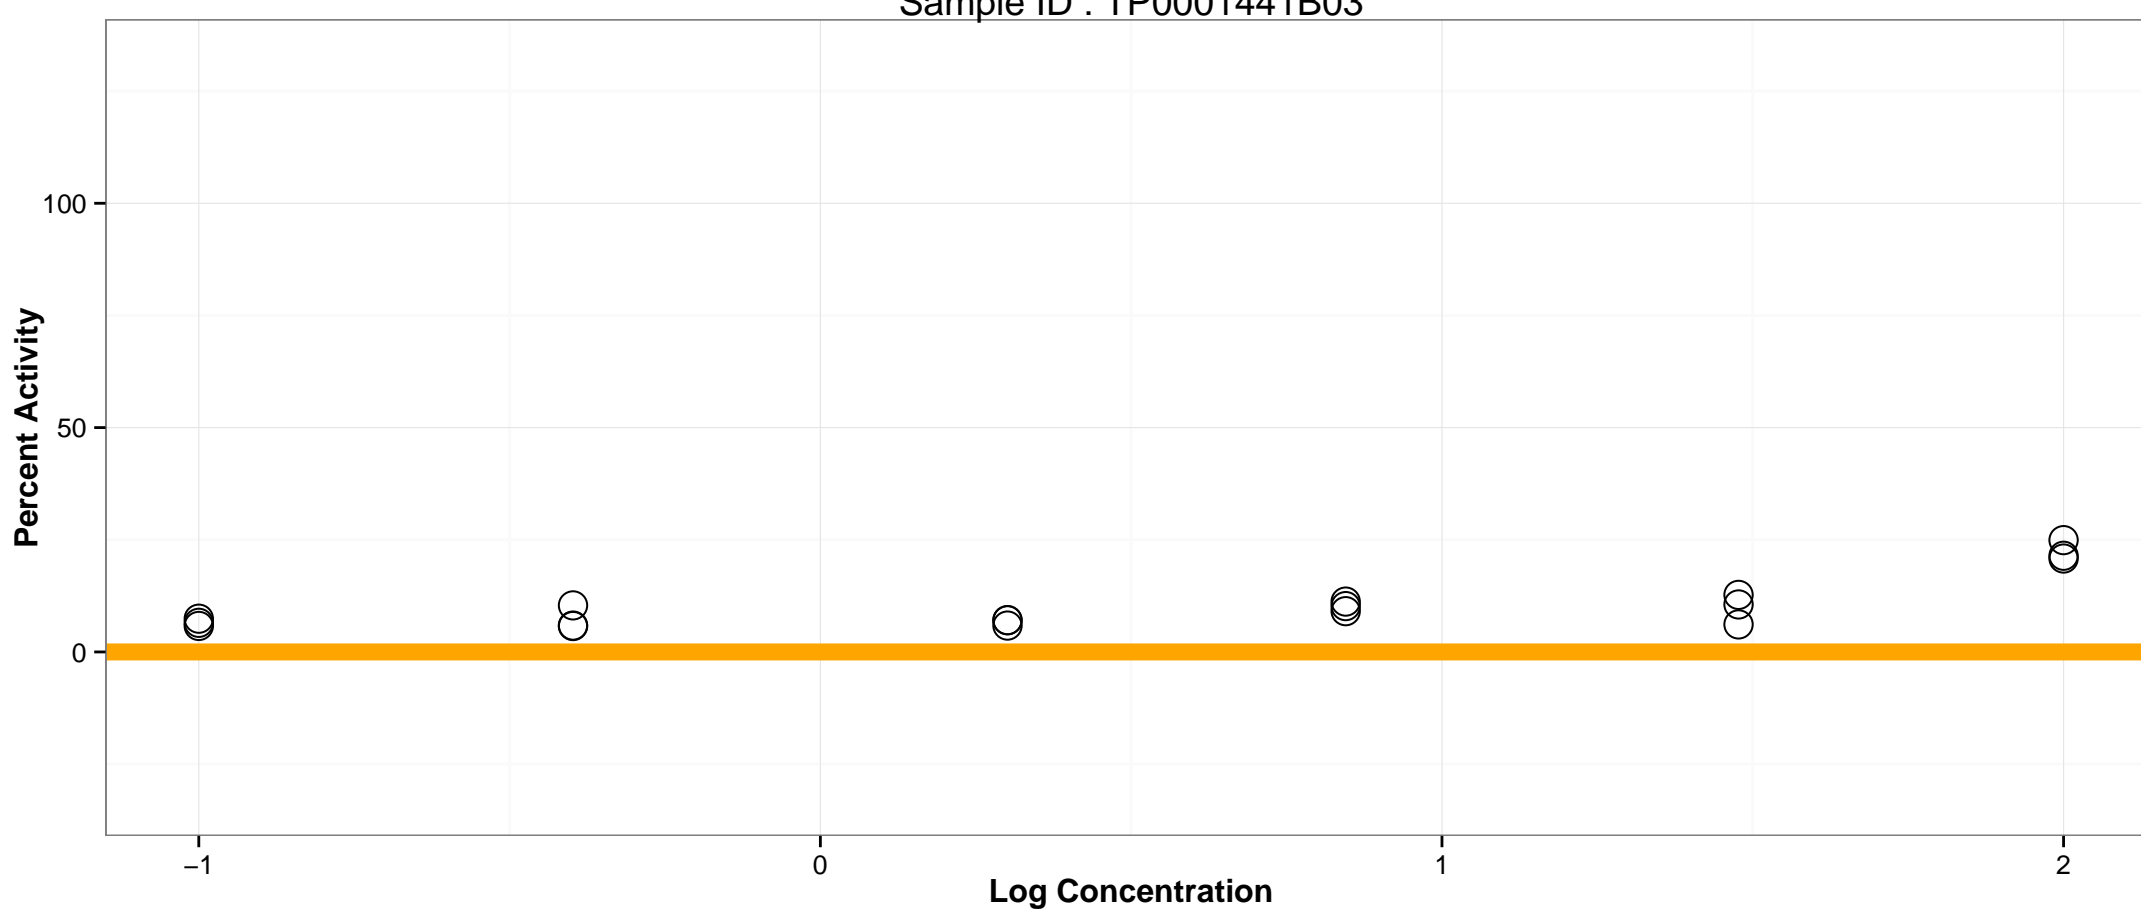

HILL MODEL

HILL MODEL: Not applicable

GAIN-LOSS MODEL

GNLS MODEL: Not applicable

|      | CNST   | HILL | GNLS |
|------|--------|------|------|
| AIC  | 144.36 | NA   | NA   |
| PROB | 1      | NA   | NA   |
| RMSE | 11.98  | NA   | NA   |

MAX\_MEAN : 22.4 MAX\_MED : 21.4 BMAD : 8.58  
COFF : 20 HIT-CALL : 0 FITC : 4 ACTP : 0  
FLAGS :

Assay ID 1824 (NHEERL\_TPO\_GUA\_dn)  
Sample ID : TP0001442E06

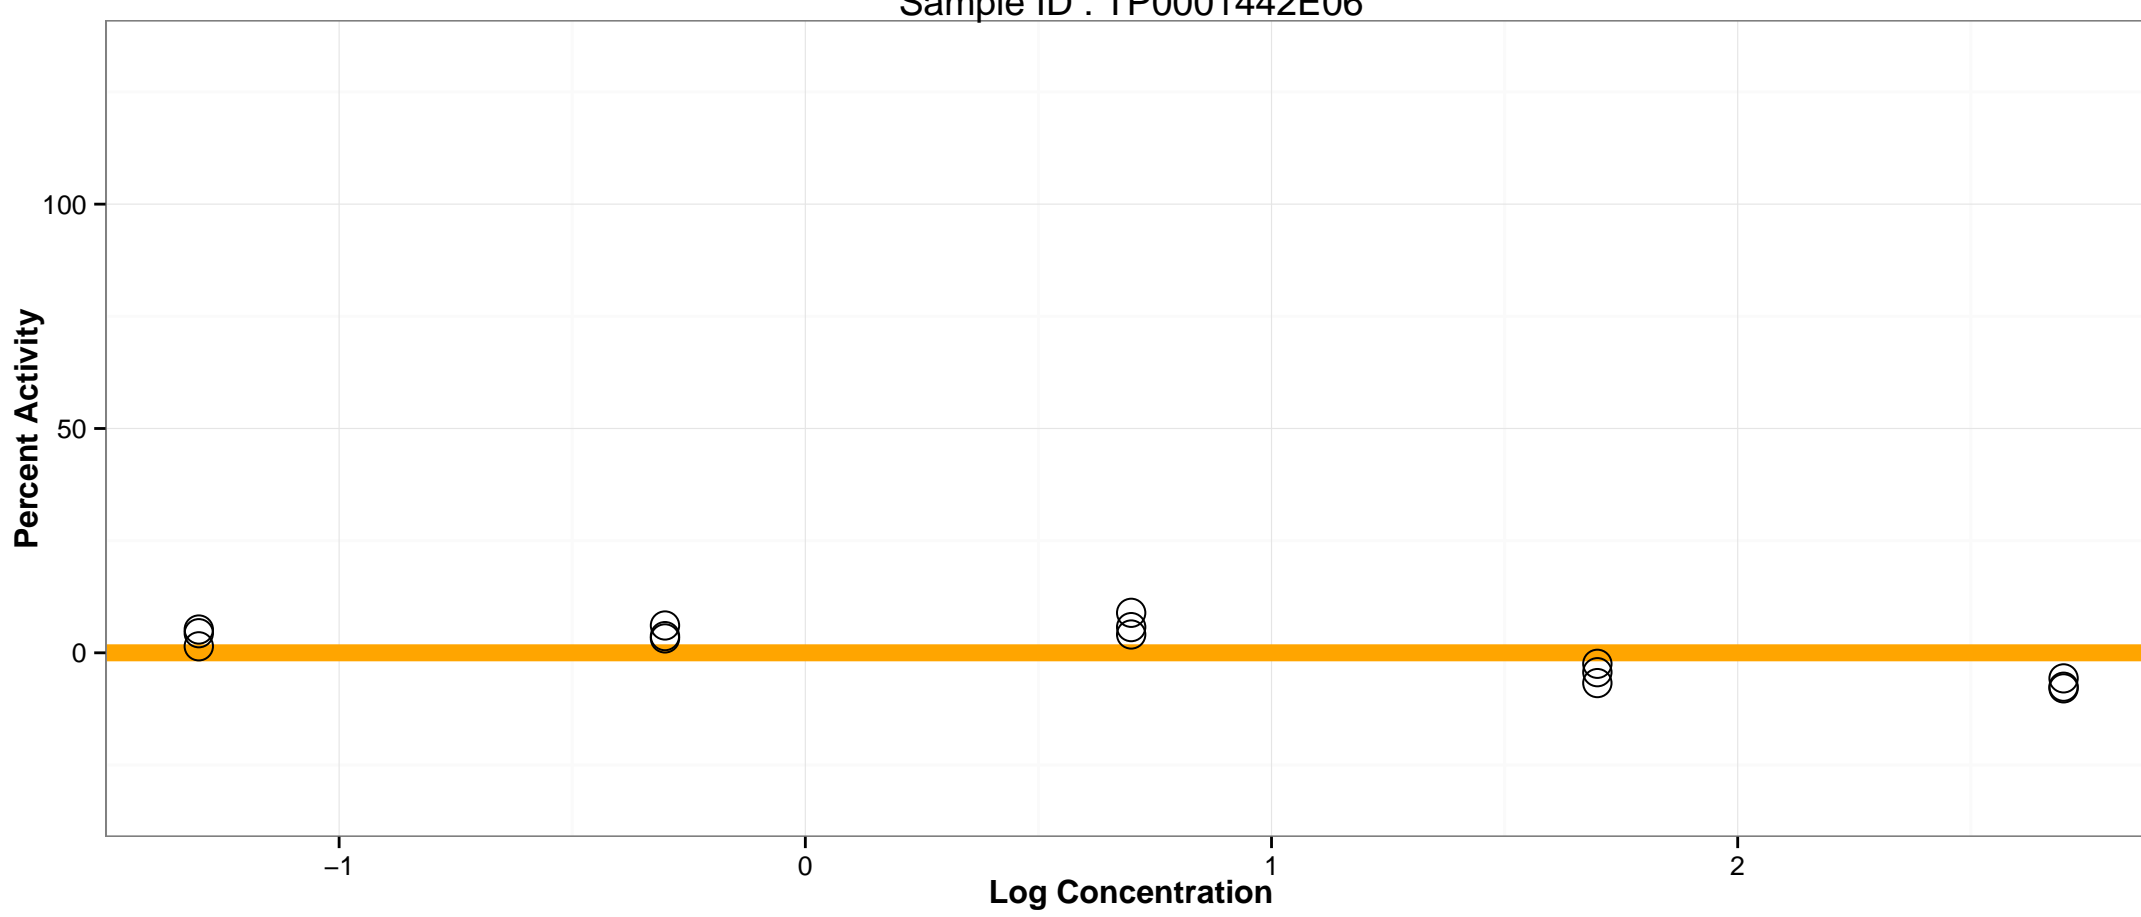

HILL MODEL

HILL MODEL: Not applicable

GAIN-LOSS MODEL

GNLS MODEL: Not applicable

|      | CNST  | HILL | GNLS |
|------|-------|------|------|
| AIC  | 98.78 | NA   | NA   |
| PROB | 1     | NA   | NA   |
| RMSE | 5.54  | NA   | NA   |

MAX\_MEAN : 6.26 MAX\_MED : 5.75 BMAD : 3.71  
COFF : 20 HIT-CALL : 0 FITC : 4 ACTP : 0  
FLAGS :

Chemical : Ethion  
CAS : 563-12-2

Assay ID 1508 (NHEERL\_TPO\_AUR\_dn)  
Sample ID : TX004536

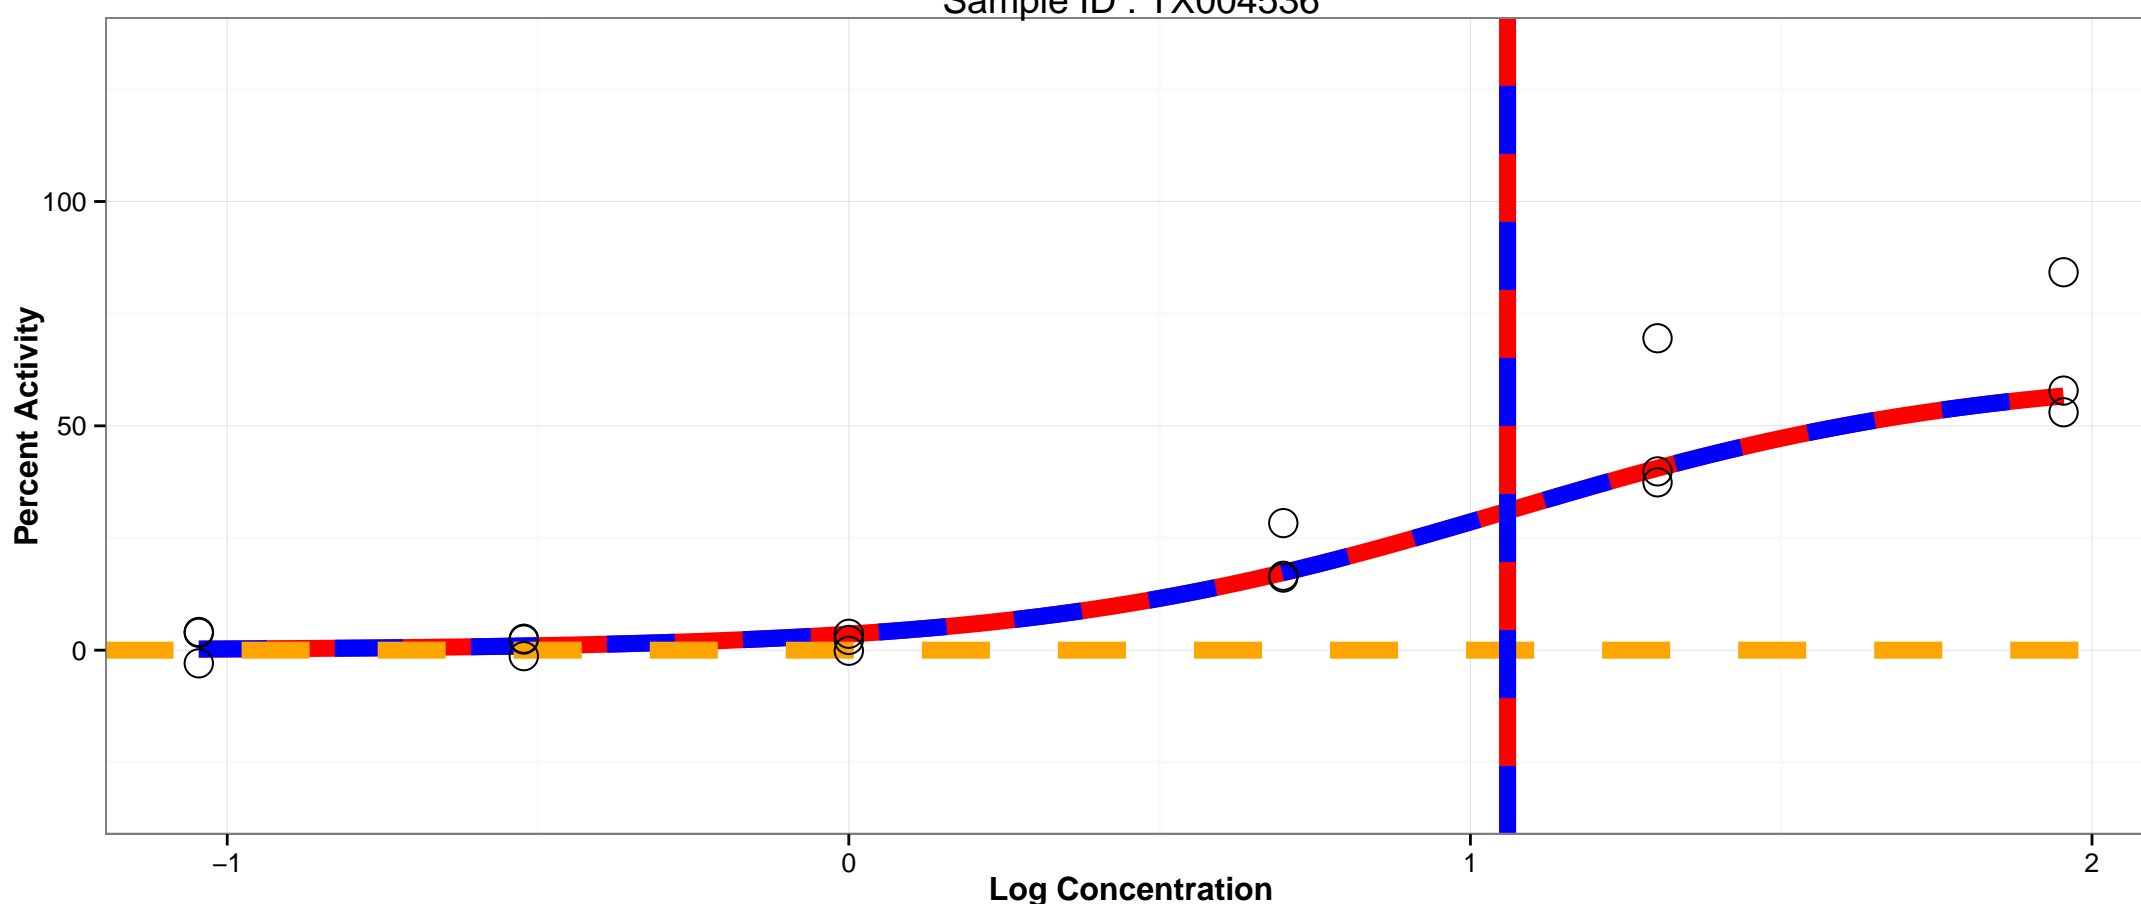

HILL MODEL

|     | tp   | ga    | gw    |
|-----|------|-------|-------|
| val | 62   | 1.06  | 1.14  |
| sd  | 6.28 | 0.123 | 0.222 |

GAIN-LOSS MODEL

|     | tp | ga   | gw   | la   | lw   |
|-----|----|------|------|------|------|
| val | 62 | 1.06 | 1.14 | 3.33 | 14.5 |
| sd  | NA | NA   | NA   | NA   | NA   |

|      | CNST   | HILL   | GNLS   |
|------|--------|--------|--------|
| AIC  | 180.54 | 131.03 | 135.03 |
| PROB | 0      | 0.88   | 0.12   |
| RMSE | 35.35  | 10.04  | 10.04  |

MAX\_MEAN : 65 MAX\_MED : 57.9 BMAD : 5.69  
COFF : 20 HIT-CALL : 1 FITC : 42 ACTP : 1  
FLAGS :

Assay ID 1509 (NHEERL\_HEK293T\_CellTiterGLO)  
Sample ID : TX004536

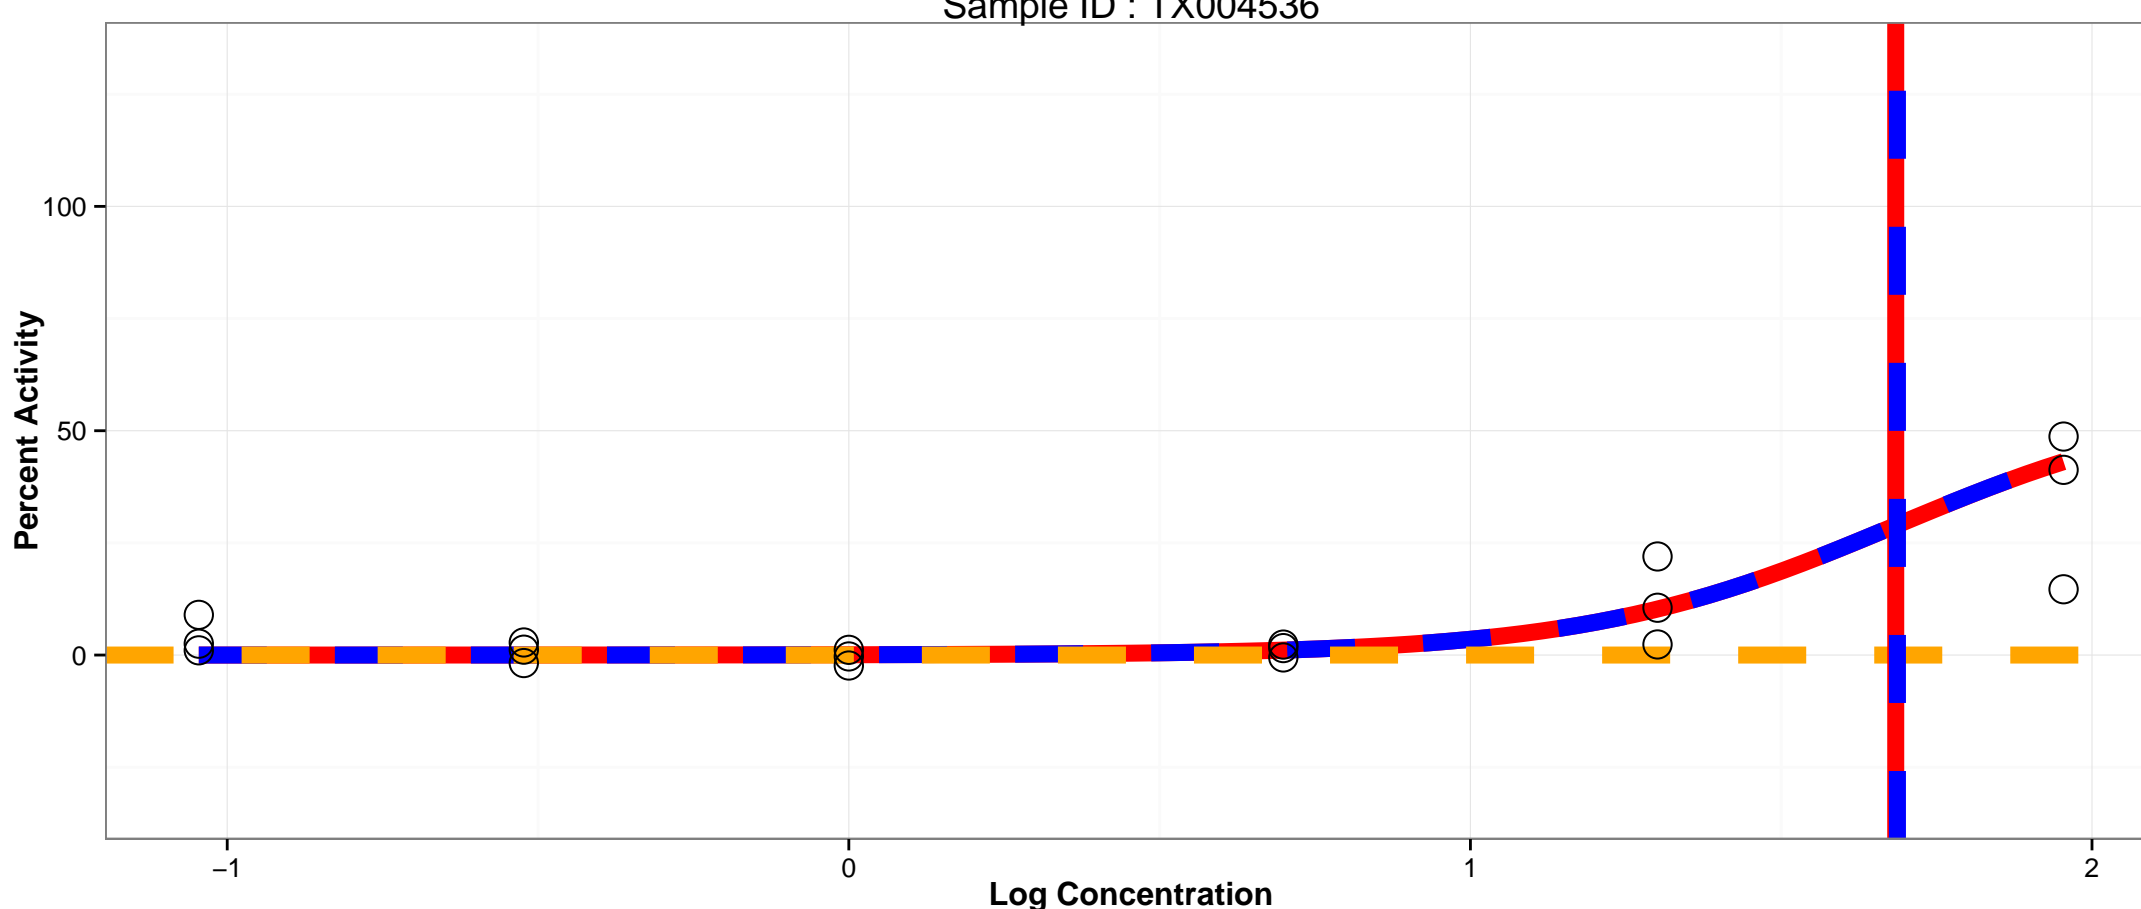

HILL MODEL

|     | tp   | ga    | gw   |
|-----|------|-------|------|
| val | 57.7 | 1.68  | 1.74 |
| sd  | 51.7 | 0.645 | 1.51 |

GAIN-LOSS MODEL

|     | tp   | ga   | gw   | la   | lw   |
|-----|------|------|------|------|------|
| val | 58.3 | 1.69 | 1.74 | 3.93 | 1.09 |
| sd  | NA   | NA   | NA   | NA   | NA   |

|      | CNST   | HILL   | GNLS   |
|------|--------|--------|--------|
| AIC  | 146.32 | 124.09 | 128.09 |
| PROB | 0      | 0.88   | 0.12   |
| RMSE | 16.68  | 8.01   | 8.01   |

MAX\_MEAN : 34.9 MAX\_MED : 41.3 BMAD : 5.54  
COFF : 20 HIT-CALL : 1 FITC : 42 ACTP : 1  
FLAGS : 6

Assay ID 1848 (NHEERL\_Quantilum\_inhib\_2\_dn)  
Sample ID : TX004536

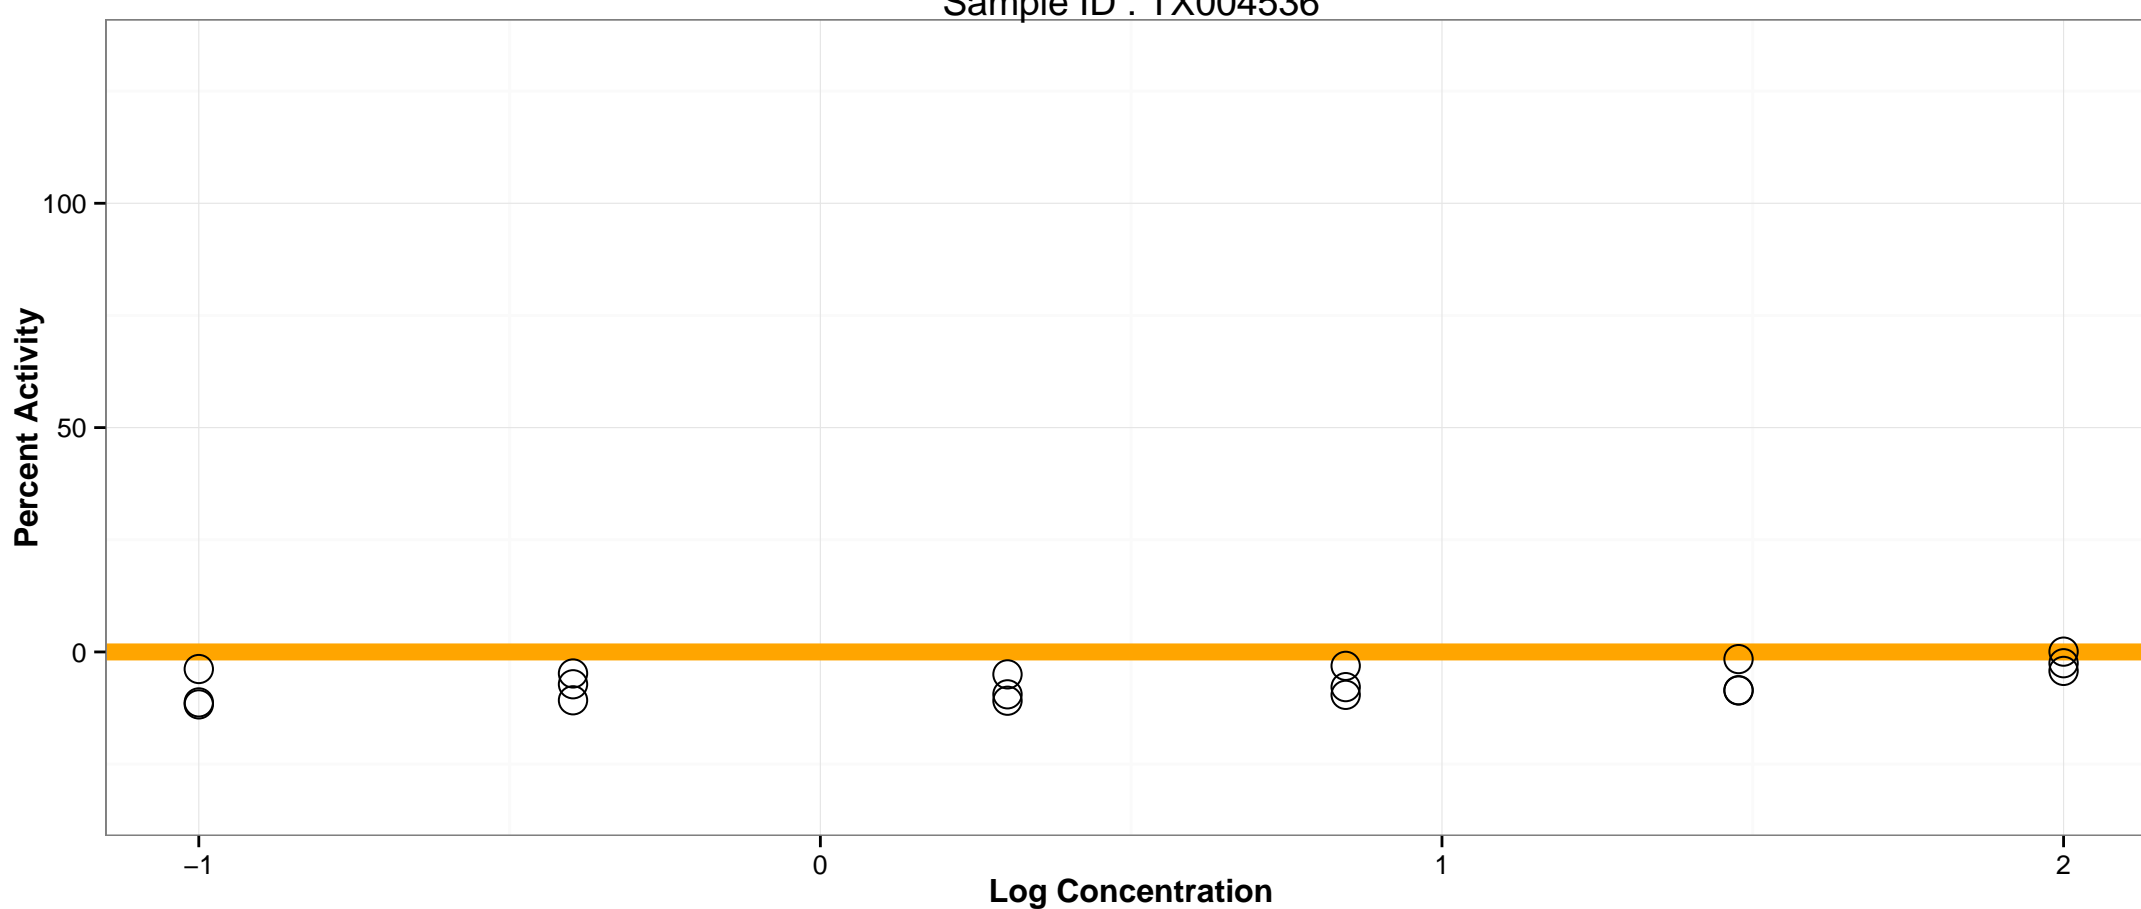

HILL MODEL

HILL MODEL: Not applicable

GAIN-LOSS MODEL

GNLS MODEL: Not applicable

|      | CNST   | HILL | GNLS |
|------|--------|------|------|
| AIC  | 129.05 | NA   | NA   |
| PROB | 1      | NA   | NA   |
| RMSE | 7.58   | NA   | NA   |

MAX\_MEAN : -2.21 MAX\_MED : -2.51 BMAD : 8.58  
COFF : 20 HIT-CALL : 0 FITC : 4 ACTP : 0  
FLAGS :

Assay ID 1824 (NHEERL\_TPO\_GUA\_dn)  
Sample ID : TP0001442E06

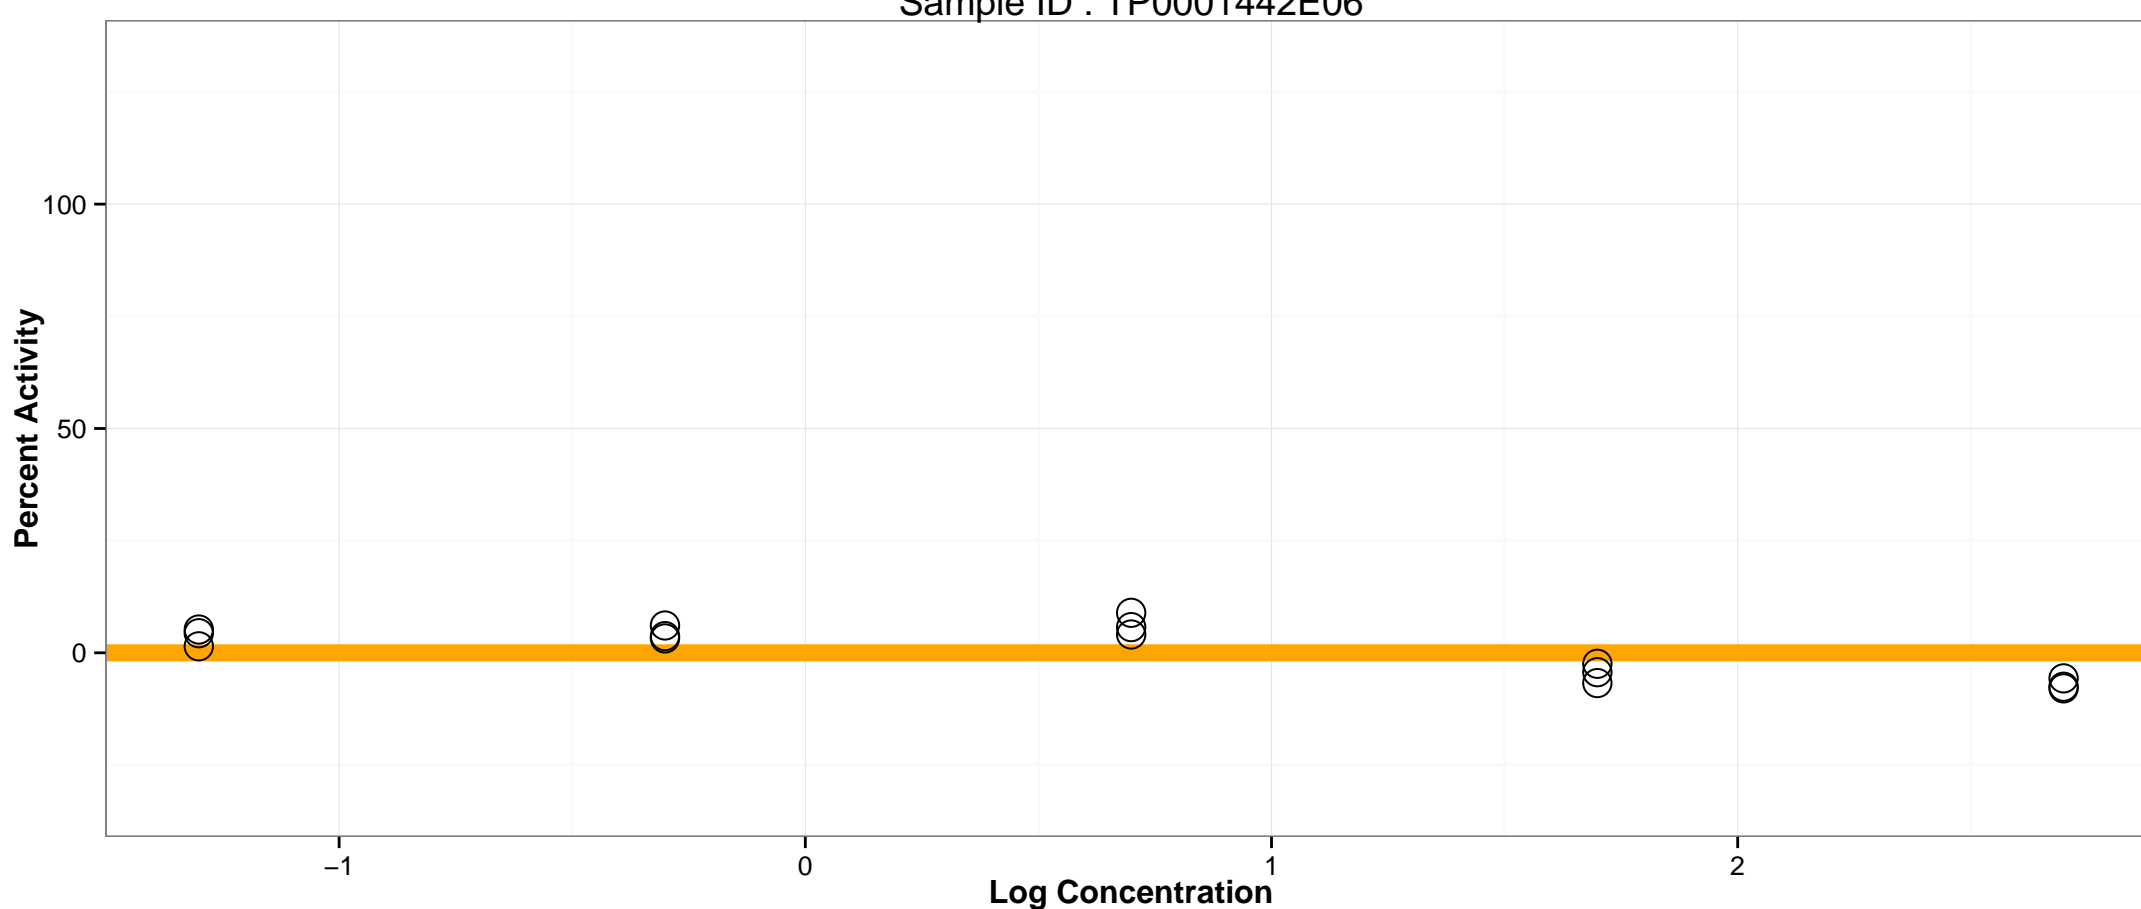

HILL MODEL

HILL MODEL: Not applicable

GAIN-LOSS MODEL

GNLS MODEL: Not applicable

|      | CNST  | HILL | GNLS |
|------|-------|------|------|
| AIC  | 98.78 | NA   | NA   |
| PROB | 1     | NA   | NA   |
| RMSE | 5.54  | NA   | NA   |

MAX\_MEAN : 6.26 MAX\_MED : 5.75 BMAD : 3.71  
COFF : 20 HIT-CALL : 0 FITC : 4 ACTP : 0  
FLAGS :

Chemical : 4-Ethylphenol

CAS : 123-07-9

Assay ID 1508 (NHEERL\_TPO\_AUR\_dn)  
Sample ID : TP0001441B04

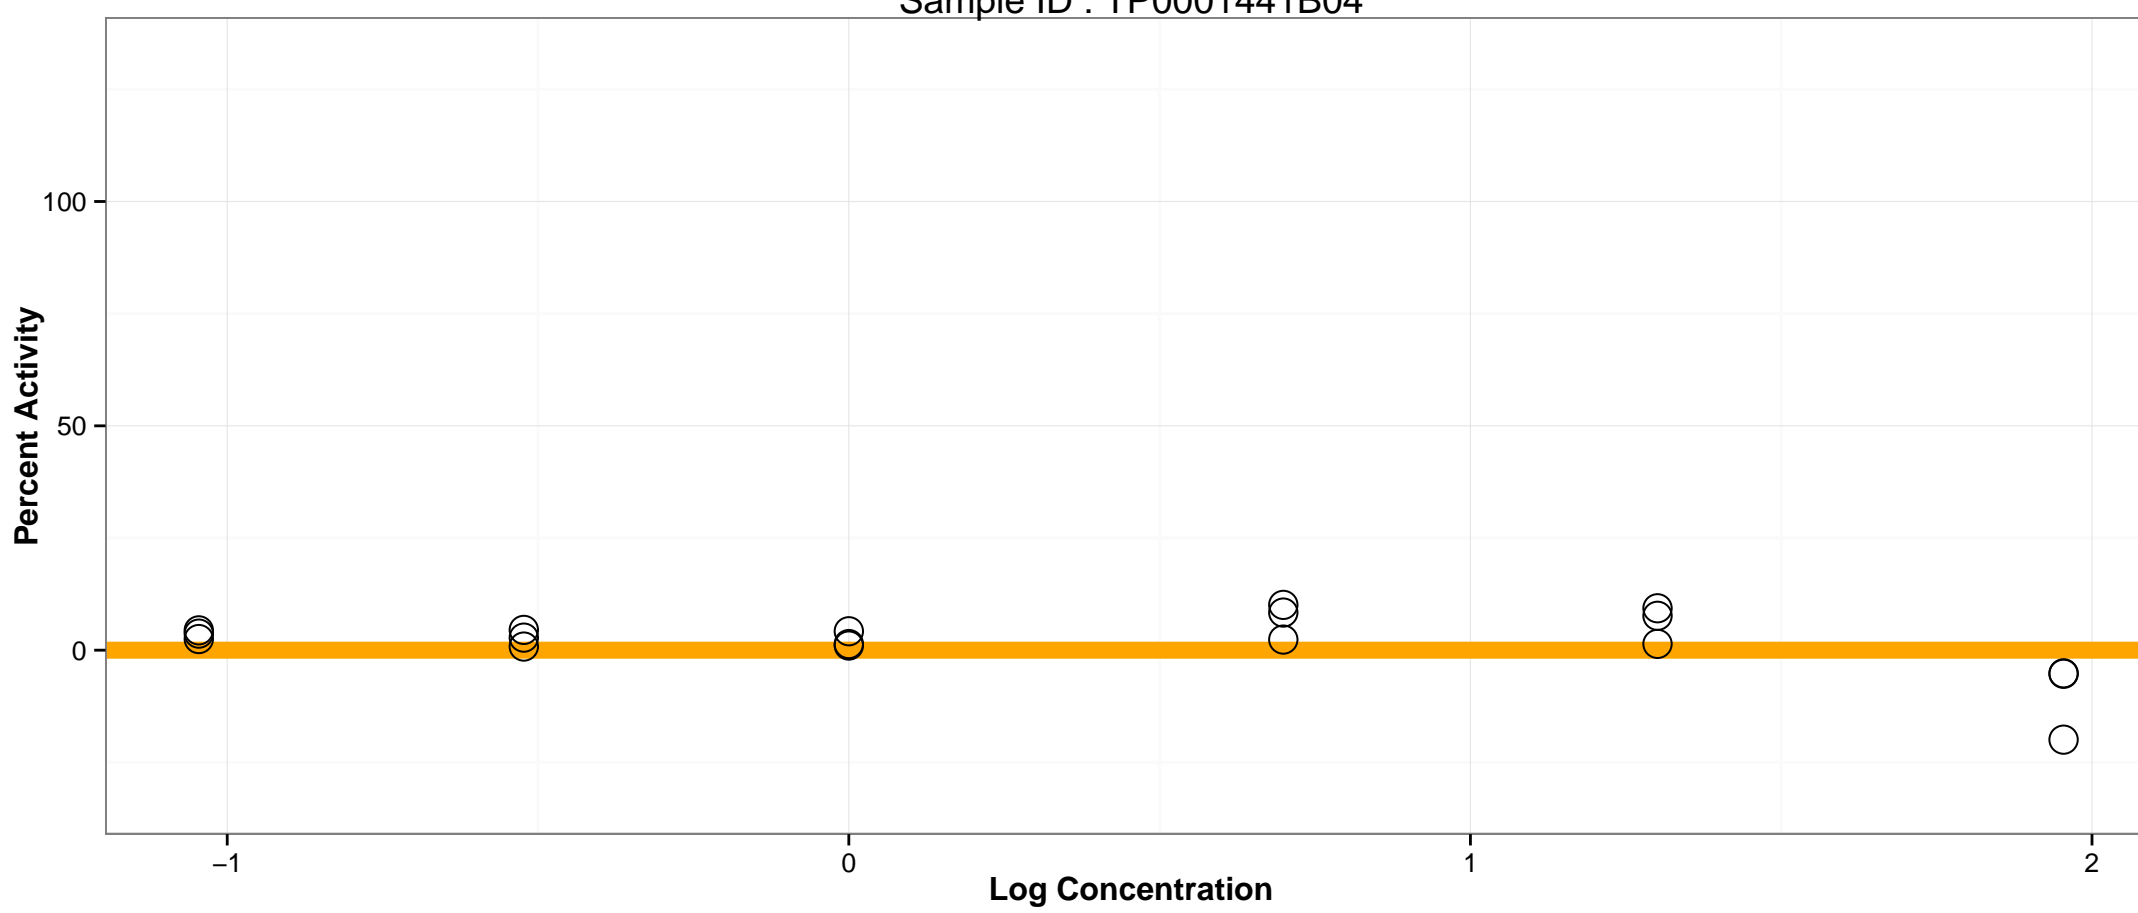

HILL MODEL

HILL MODEL: Not applicable

GAIN-LOSS MODEL

GNLS MODEL: Not applicable

|      | CNST   | HILL | GNLS |
|------|--------|------|------|
| AIC  | 121.78 | NA   | NA   |
| PROB | 1      | NA   | NA   |
| RMSE | 6.94   | NA   | NA   |

MAX\_MEAN : 6.96 MAX\_MED : 8.39 BMAD : 5.69  
COFF : 20 HIT-CALL : 0 FITC : 4 ACTP : 0  
FLAGS :

Assay ID 1509 (NHEERL\_HEK293T\_CellTiterGLO)  
Sample ID : TP0001441B04

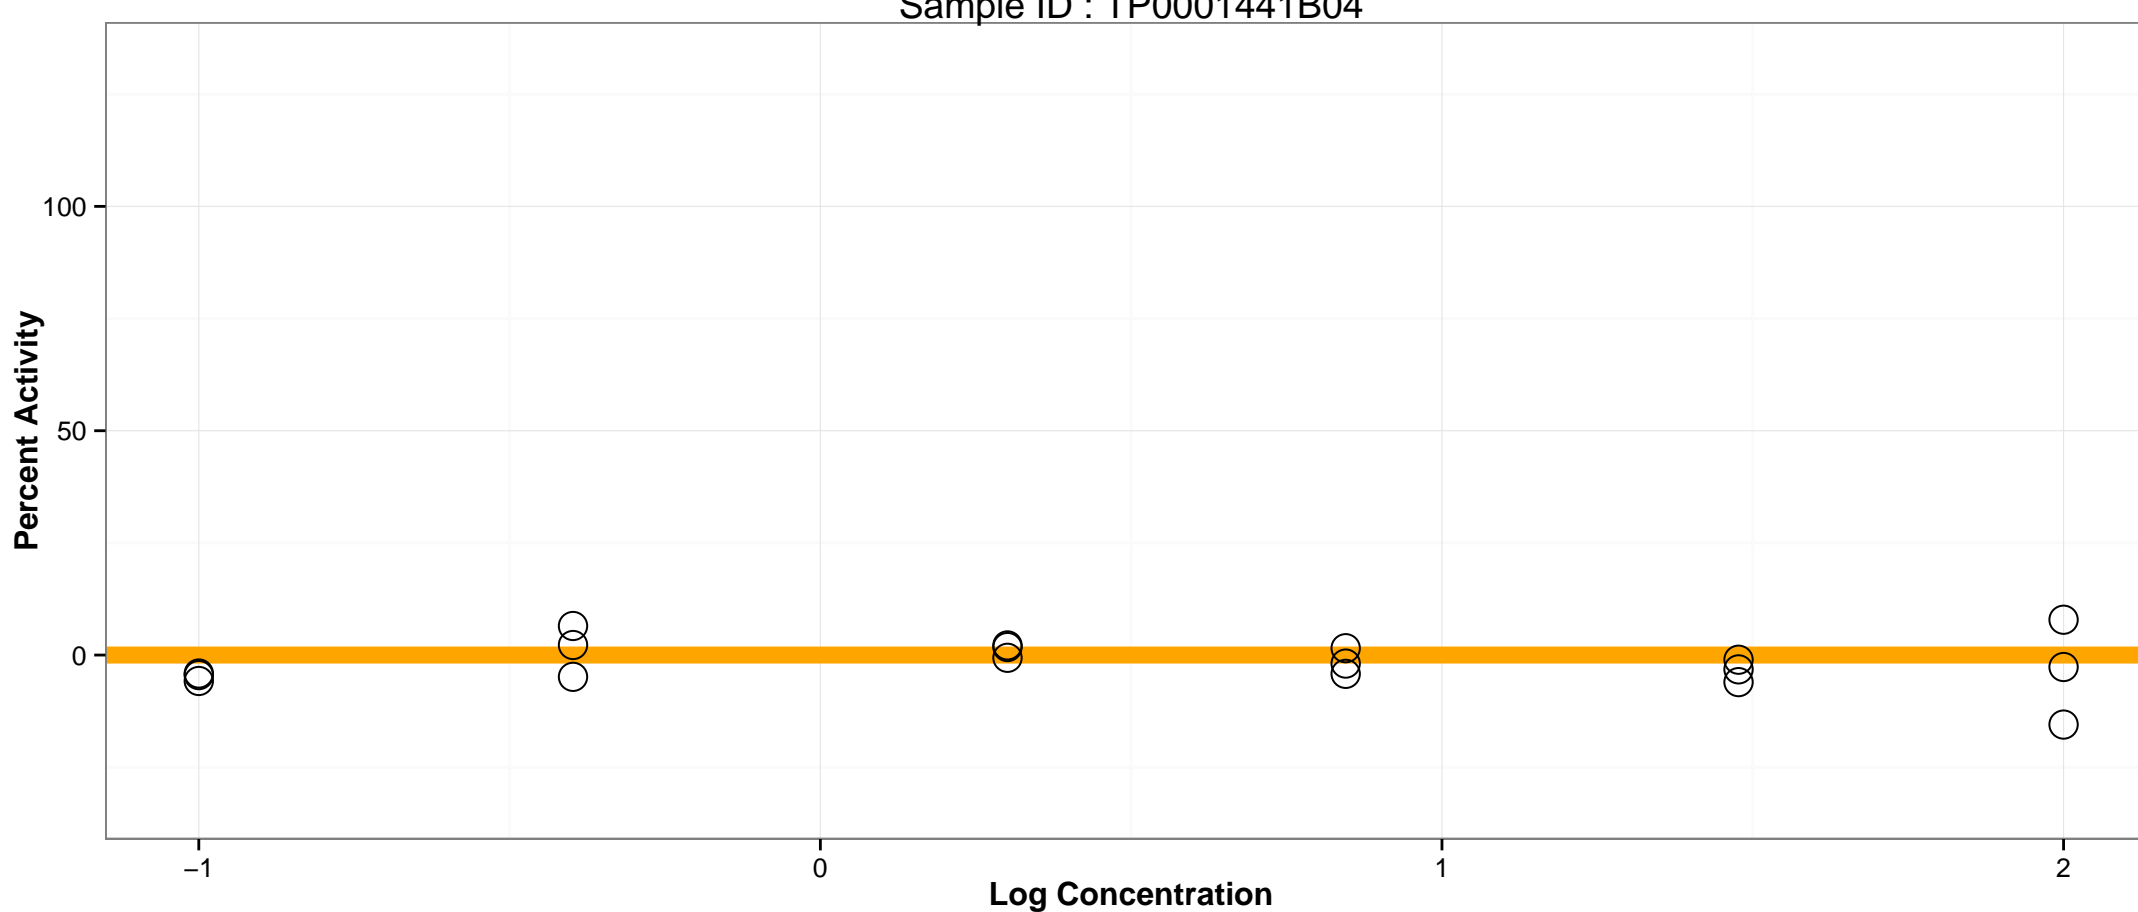

HILL MODEL

HILL MODEL: Not applicable

GAIN-LOSS MODEL

GNLS MODEL: Not applicable

|      | CNST   | HILL | GNLS |
|------|--------|------|------|
| AIC  | 113.27 | NA   | NA   |
| PROB | 1      | NA   | NA   |
| RMSE | 5.42   | NA   | NA   |

MAX\_MEAN : 1.3 MAX\_MED : 2.25 BMAD : 5.54  
COFF : 20 HIT-CALL : 0 FITC : 4 ACTP : 0  
FLAGS :

Assay ID 1848 (NHEERL\_Quantilum\_inhib\_2\_dn)  
Sample ID : TP0001441B04

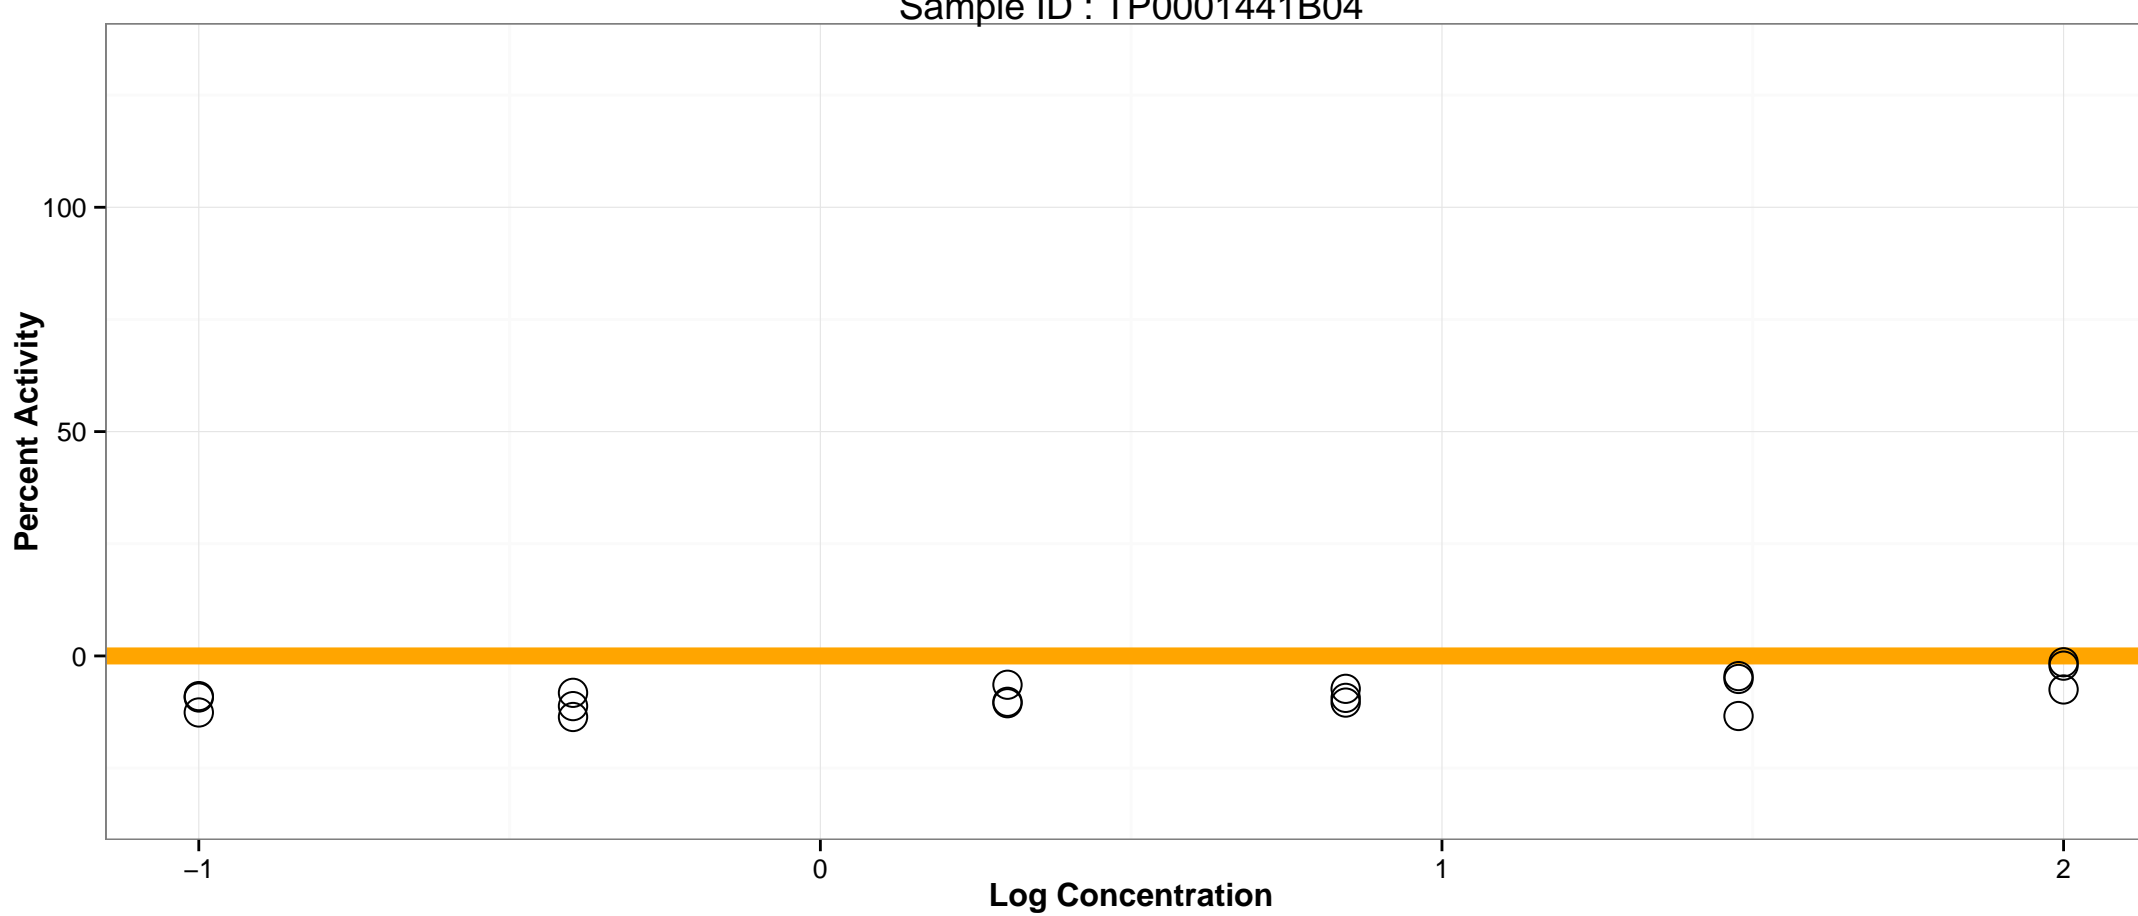

HILL MODEL

HILL MODEL: Not applicable

GAIN-LOSS MODEL

GNLS MODEL: Not applicable

|      | CNST   | HILL | GNLS |
|------|--------|------|------|
| AIC  | 136.11 | NA   | NA   |
| PROB | 1      | NA   | NA   |
| RMSE | 9.11   | NA   | NA   |

MAX\_MEAN : -3.67 MAX\_MED : -2.16 BMAD : 8.58  
COFF : 20 HIT-CALL : 0 FITC : 4 ACTP : 0  
FLAGS :

Assay ID 1508 (NHEERL\_TPO\_AUR\_dn)  
Sample ID : TP0001441B05

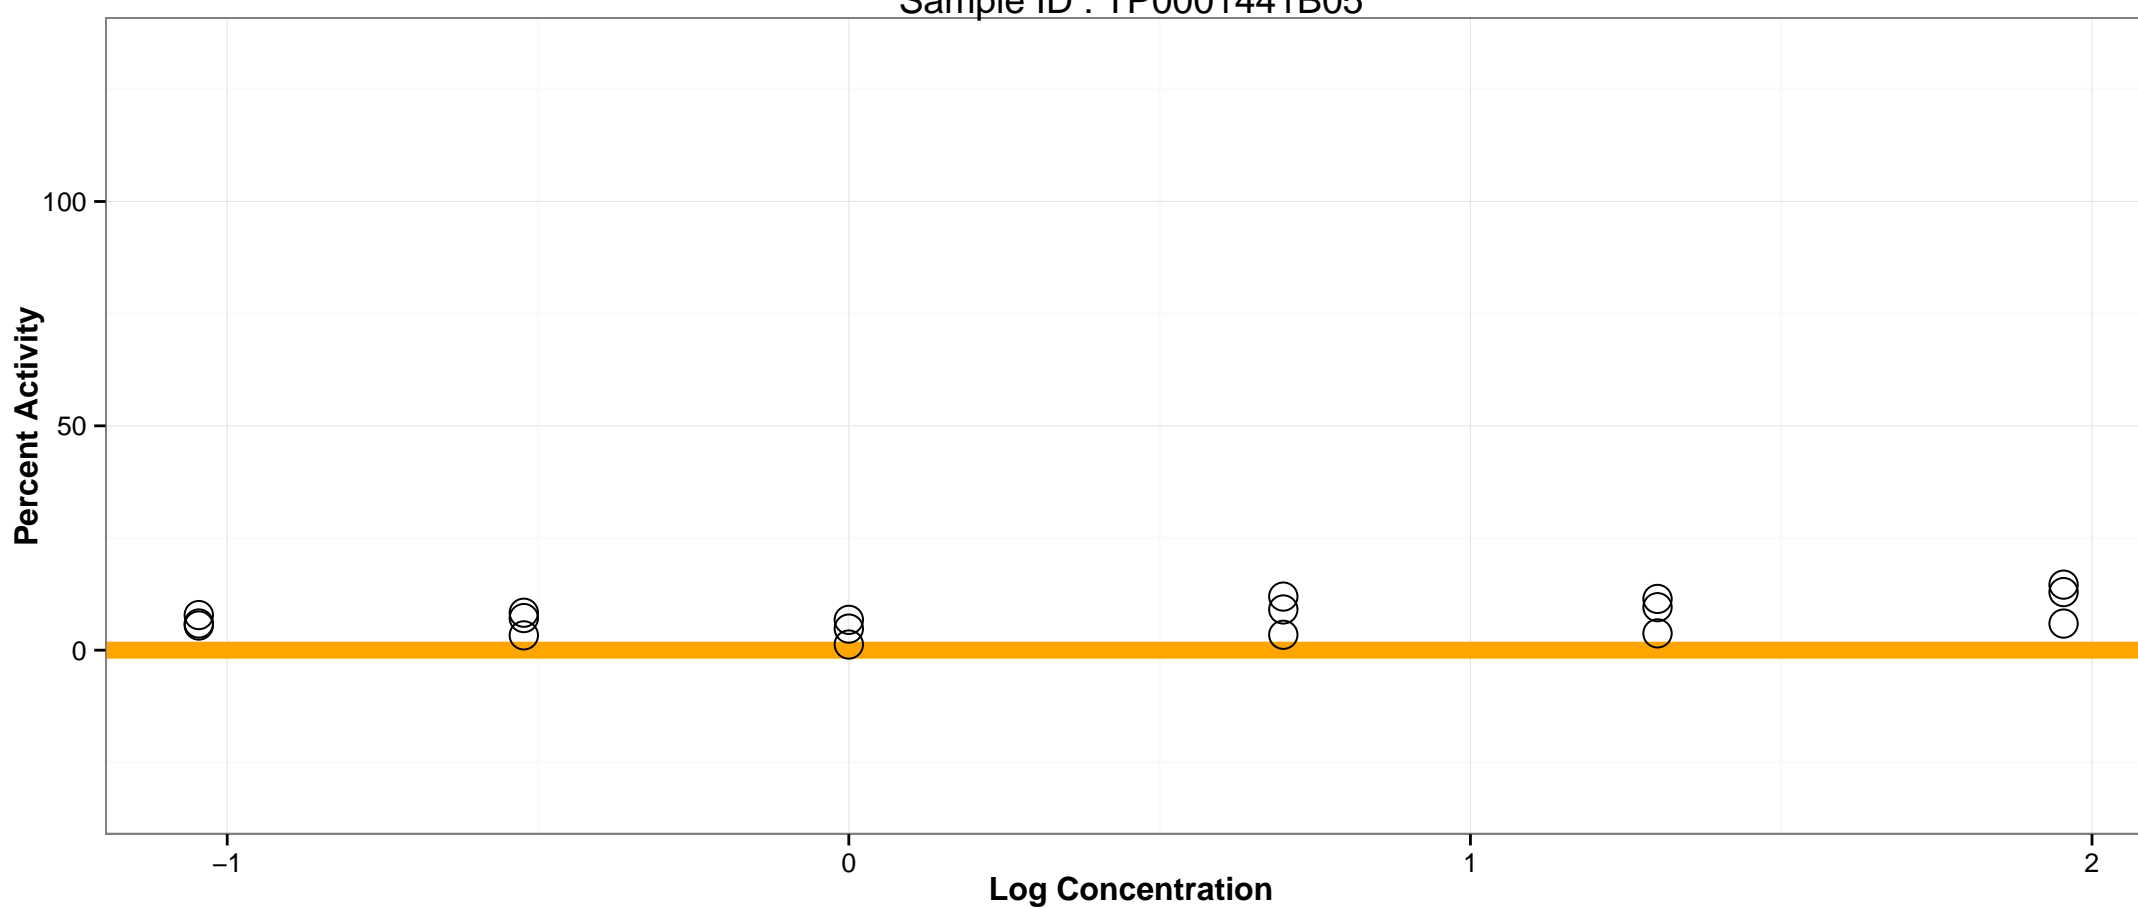

HILL MODEL

HILL MODEL: Not applicable

GAIN-LOSS MODEL

GNLS MODEL: Not applicable

|      | CNST   | HILL | GNLS |
|------|--------|------|------|
| AIC  | 131.93 | NA   | NA   |
| PROB | 1      | NA   | NA   |
| RMSE | 8.24   | NA   | NA   |

MAX\_MEAN : 11.2 MAX\_MED : 13 BMAD : 5.69  
COFF : 20 HIT-CALL : 0 FITC : 4 ACTP : 0  
FLAGS :

Assay ID 1509 (NHEERL\_HEK293T\_CellTiterGLO)  
Sample ID : TP0001441B05

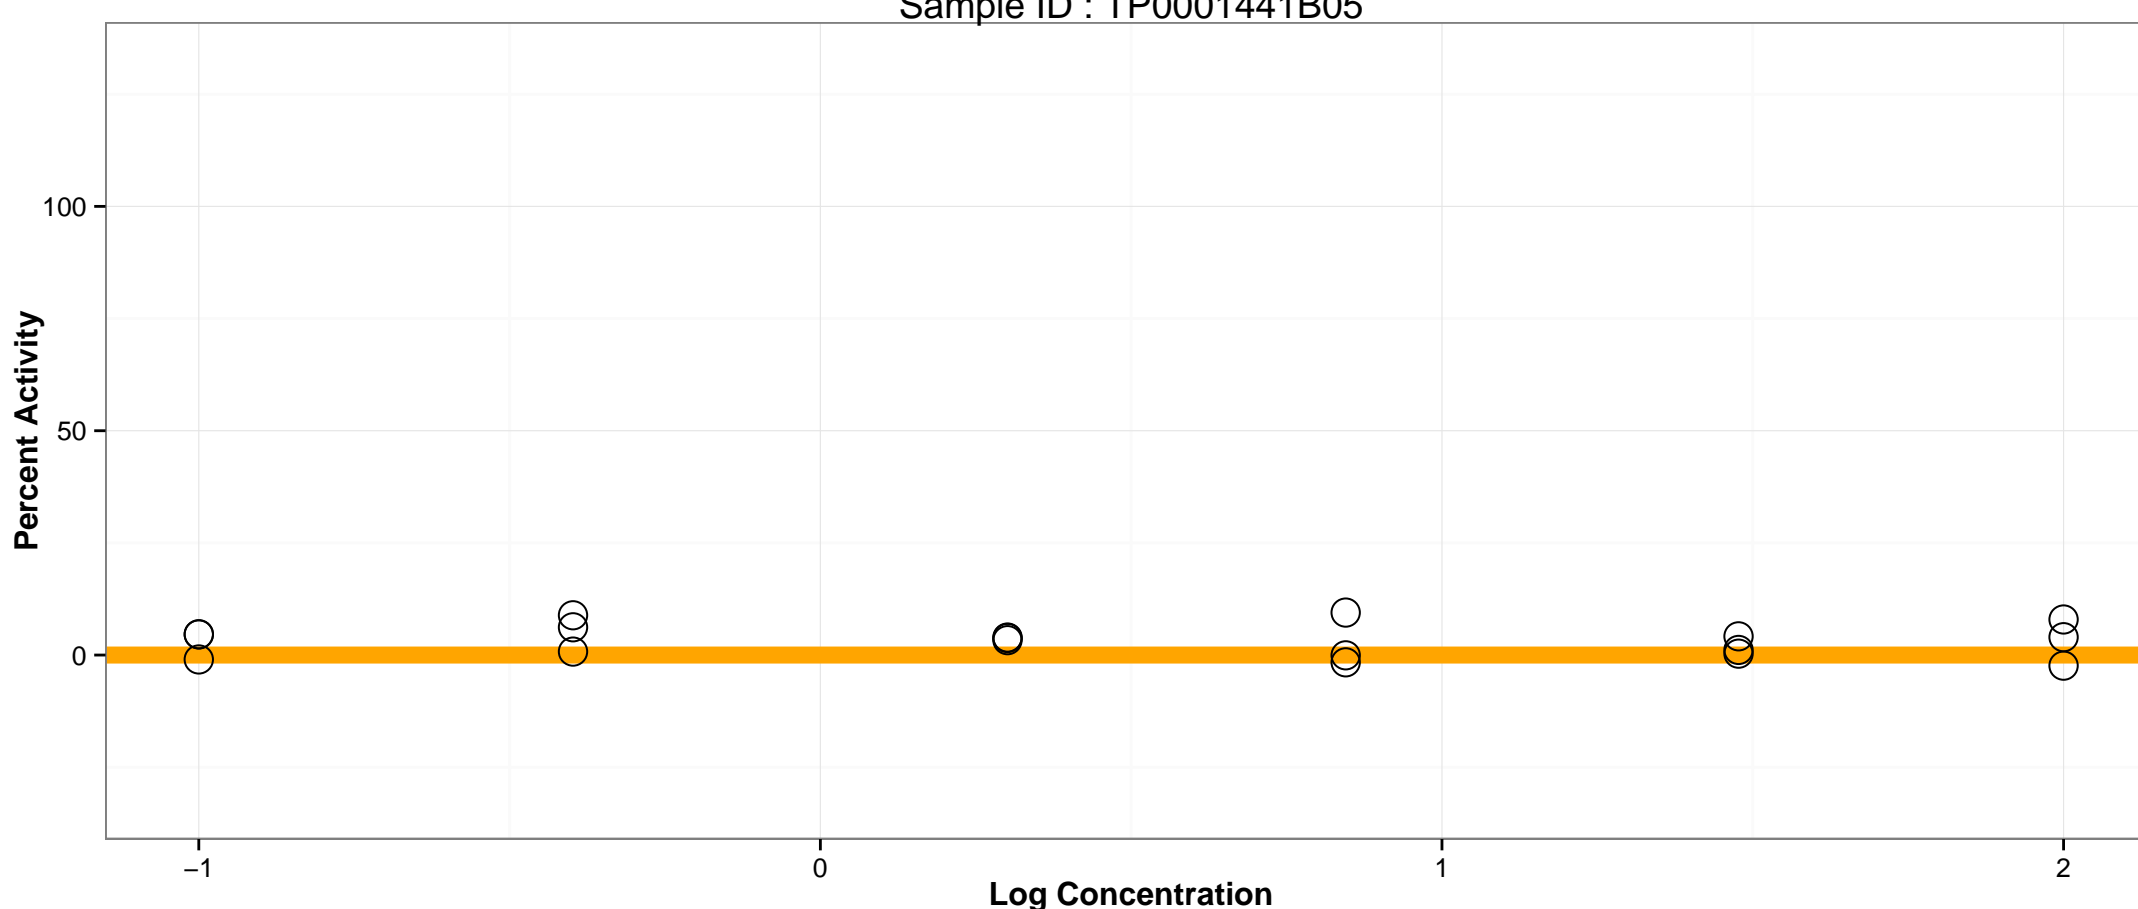

HILL MODEL

HILL MODEL: Not applicable

GAIN-LOSS MODEL

GNLS MODEL: Not applicable

|      | CNST   | HILL | GNLS |
|------|--------|------|------|
| AIC  | 110.35 | NA   | NA   |
| PROB | 1      | NA   | NA   |
| RMSE | 4.71   | NA   | NA   |

MAX\_MEAN : 5.29 MAX\_MED : 6.2 BMAD : 5.54  
COFF : 20 HIT-CALL : 0 FITC : 4 ACTP : 0  
FLAGS :

Assay ID 1848 (NHEERL\_Quantilum\_inhib\_2\_dn)  
Sample ID : TP0001441B05

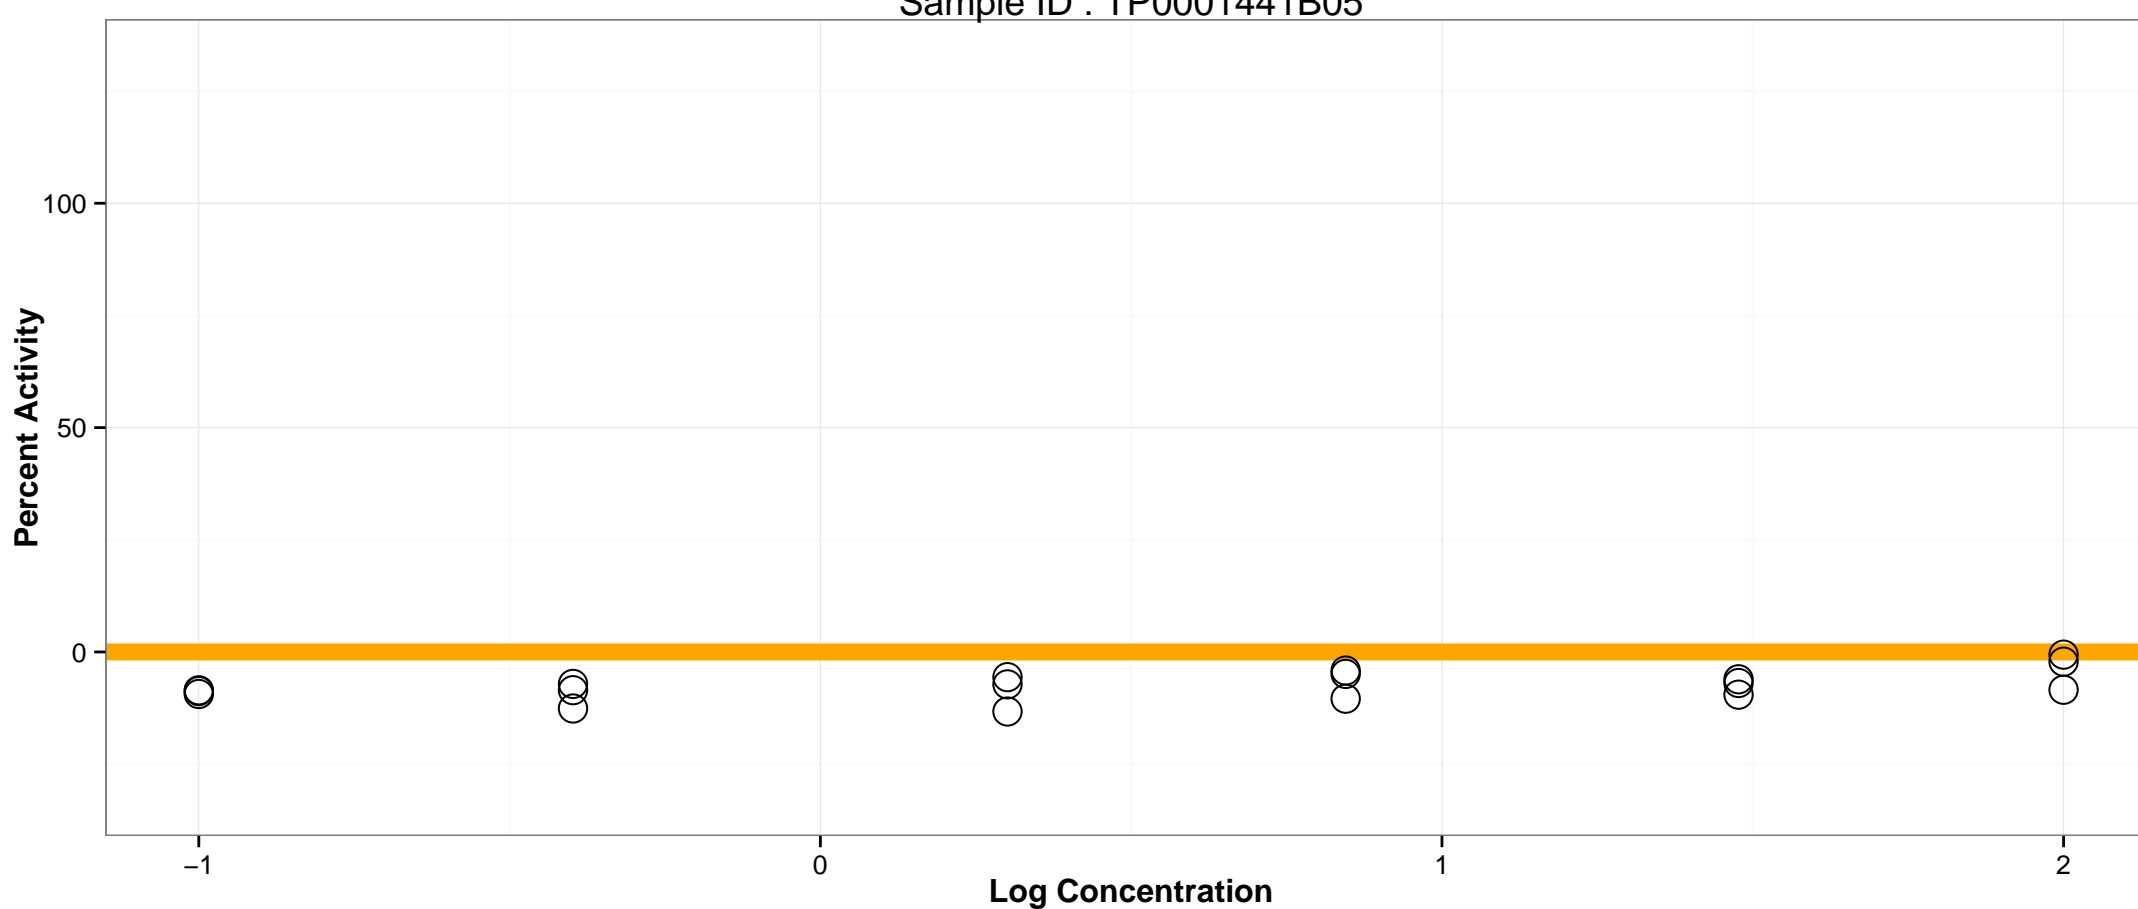

HILL MODEL

HILL MODEL: Not applicable

GAIN-LOSS MODEL

GNLS MODEL: Not applicable

|      | CNST   | HILL | GNLS |
|------|--------|------|------|
| AIC  | 131.72 | NA   | NA   |
| PROB | 1      | NA   | NA   |
| RMSE | 8.09   | NA   | NA   |

MAX\_MEAN : -3.72 MAX\_MED : -2.16 BMAD : 8.58  
COFF : 20 HIT-CALL : 0 FITC : 4 ACTP : 0  
FLAGS :

Chemical : (+/-)-Naringenin  
CAS : 67604-48-2

Assay ID 1508 (NHEERL\_TPO\_AUR\_dn)  
Sample ID : TP0001441B06

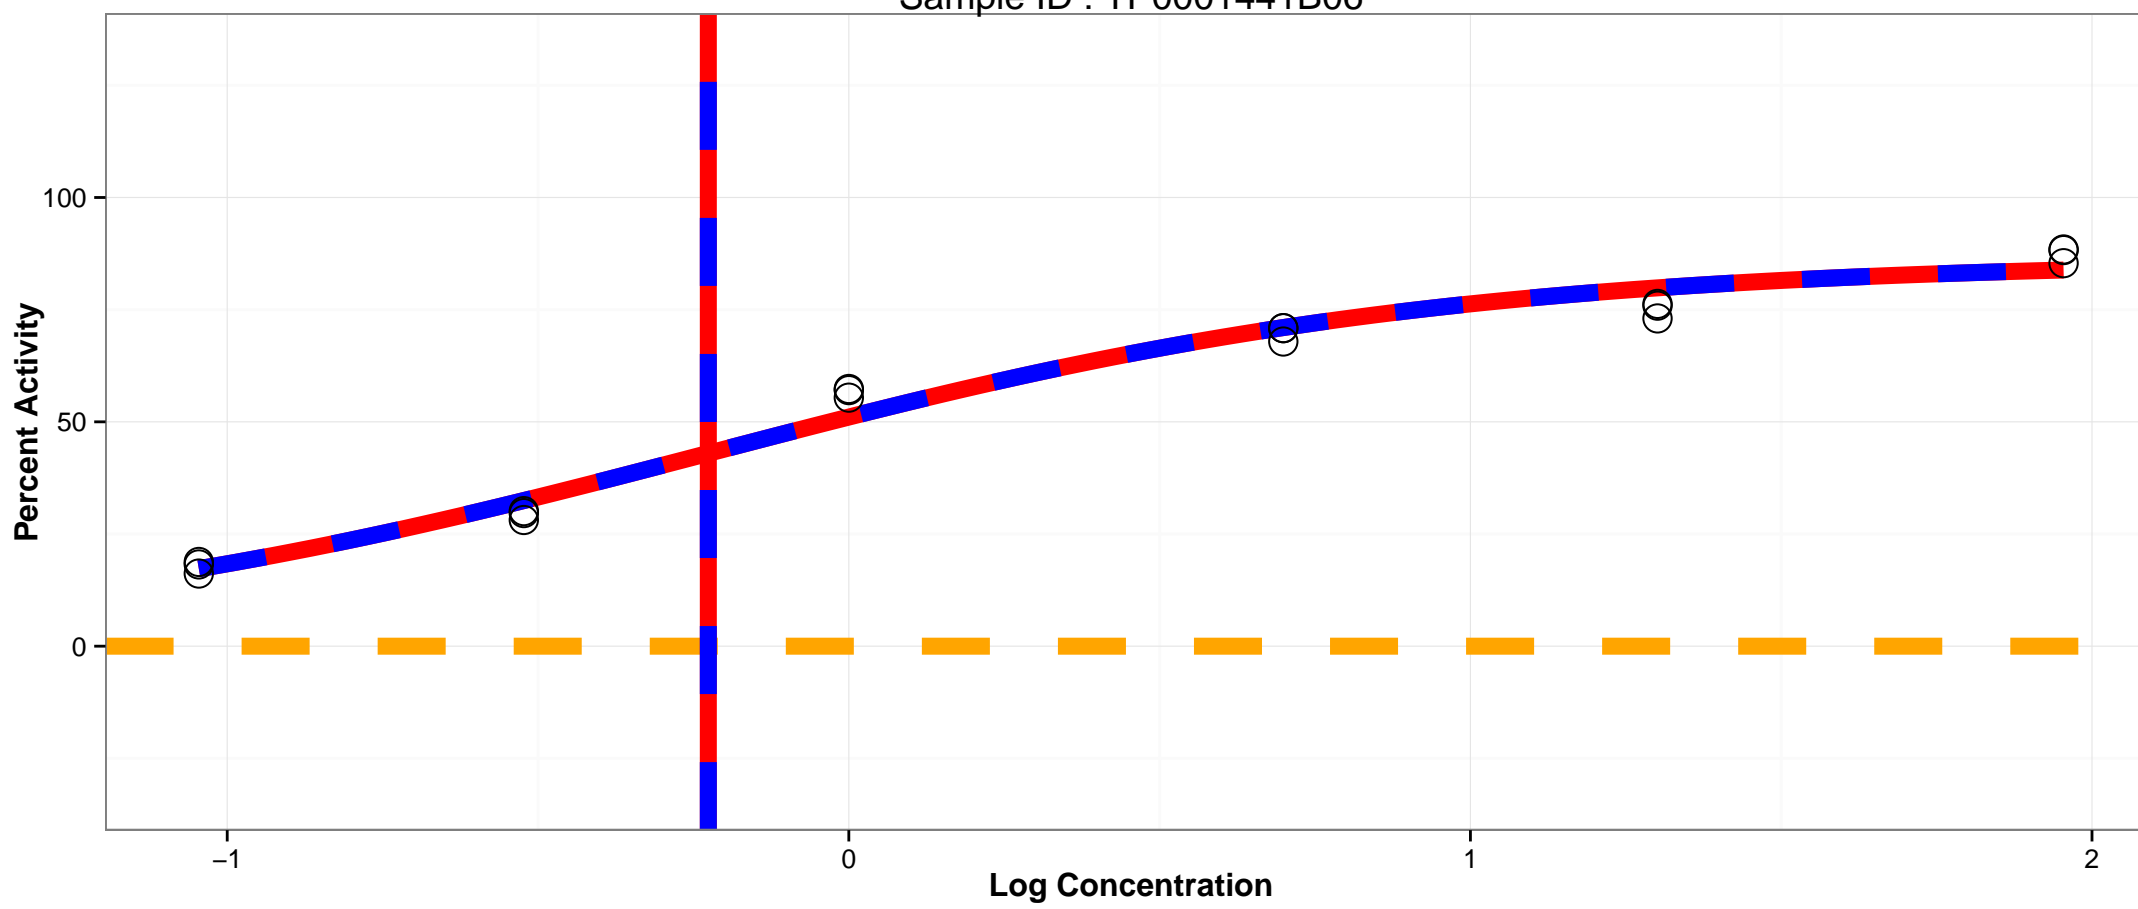

HILL MODEL

|     | tp   | ga     | gw     |
|-----|------|--------|--------|
| val | 86   | -0.226 | 0.732  |
| sd  | 3.57 | 0.0924 | 0.0866 |

GAIN-LOSS MODEL

|     | tp   | ga     | gw     | la   | lw   |
|-----|------|--------|--------|------|------|
| val | 86   | -0.226 | 0.732  | 3.95 | 4.54 |
| sd  | 3.57 | 0.0924 | 0.0866 | 1300 | 2950 |

|      | CNST  | HILL   | GNLS   |
|------|-------|--------|--------|
| AIC  | 204.6 | 109.55 | 113.55 |
| PROB | 0     | 0.88   | 0.12   |
| RMSE | 61.3  | 3.79   | 3.79   |

MAX\_MEAN : 87.4 MAX\_MED : 88.3 BMAD : 5.69  
COFF : 20 HIT-CALL : 1 FITC : 41 ACTP : 1  
FLAGS :

Assay ID 1509 (NHEERL\_HEK293T\_CellTiterGLO)  
Sample ID : TP0001441B06

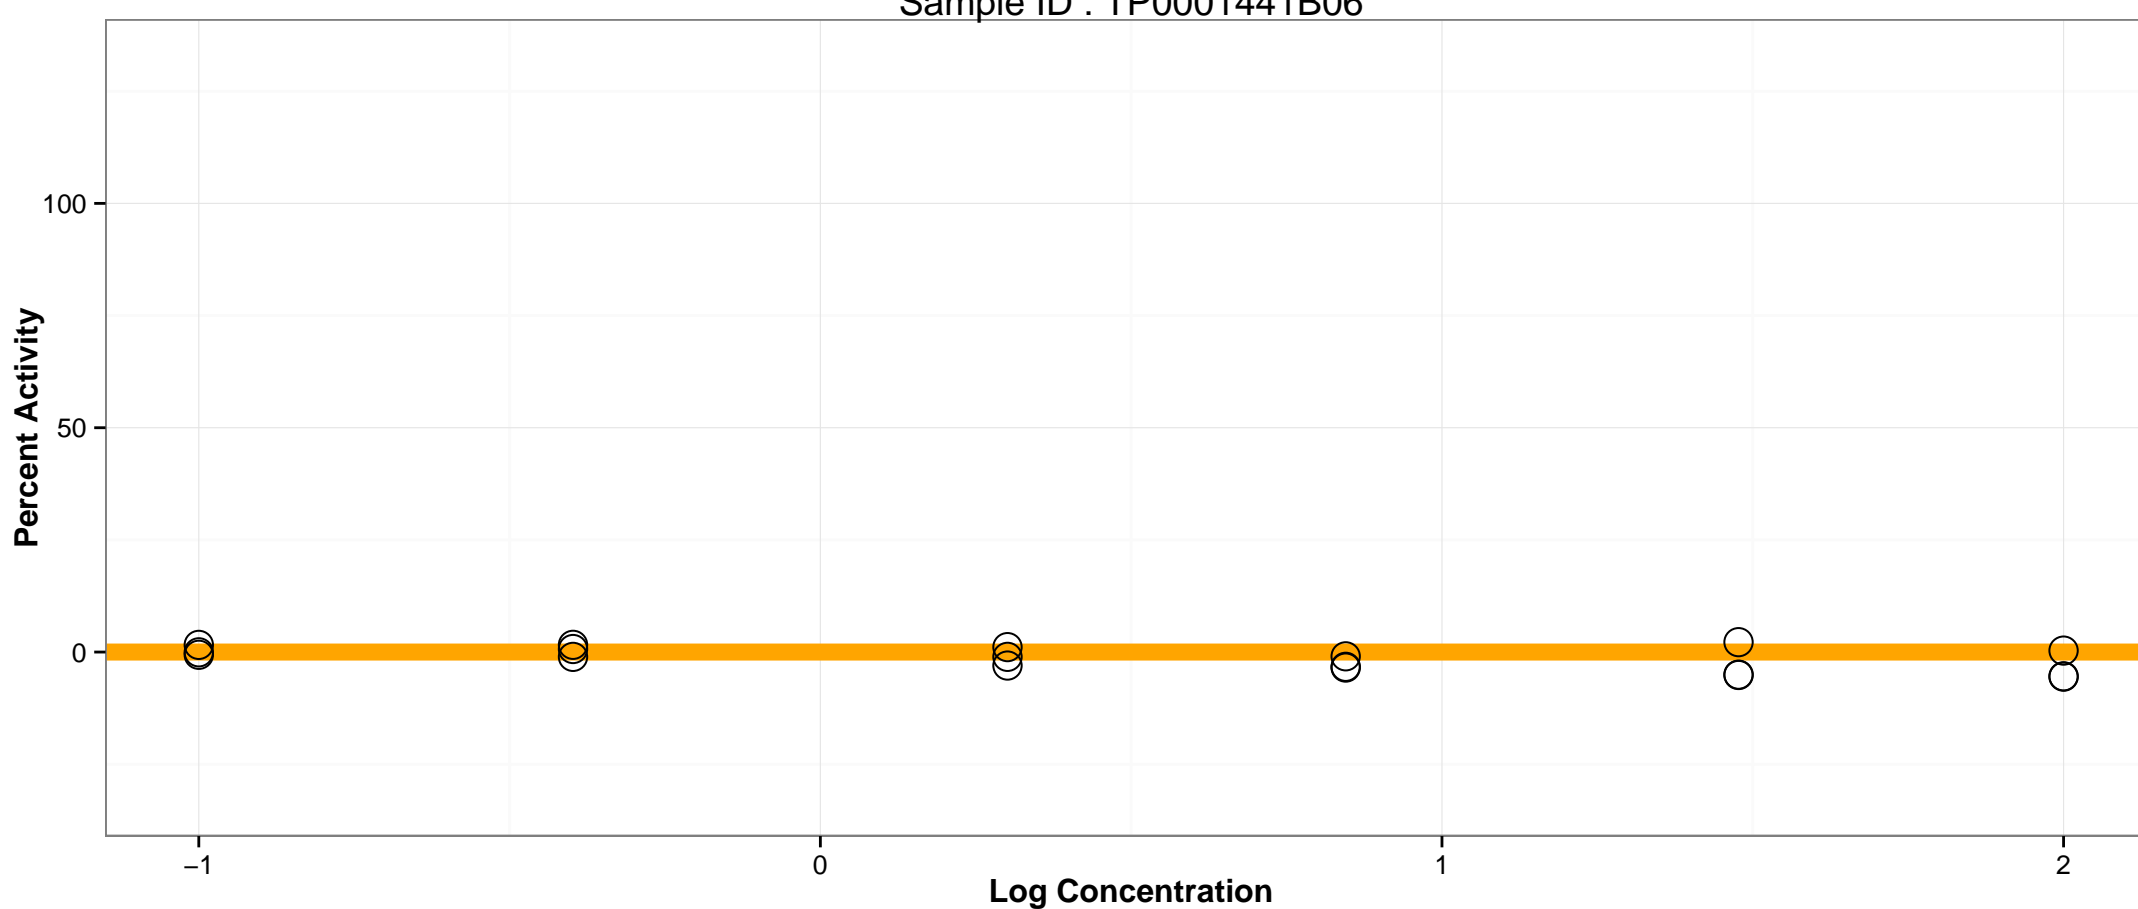

HILL MODEL

HILL MODEL: Not applicable

GAIN-LOSS MODEL

GNLS MODEL: Not applicable

|      | CNST  | HILL | GNLS |
|------|-------|------|------|
| AIC  | 93.34 | NA   | NA   |
| PROB | 1     | NA   | NA   |
| RMSE | 2.96  | NA   | NA   |

MAX\_MEAN : 0.417 MAX\_MED : 0.689 BMAD : 5.54  
COFF : 20 HIT-CALL : 0 FITC : 4 ACTP : 0  
FLAGS :

Assay ID 1848 (NHEERL\_Quantilum\_inhib\_2\_dn)  
Sample ID : TP0001441B06

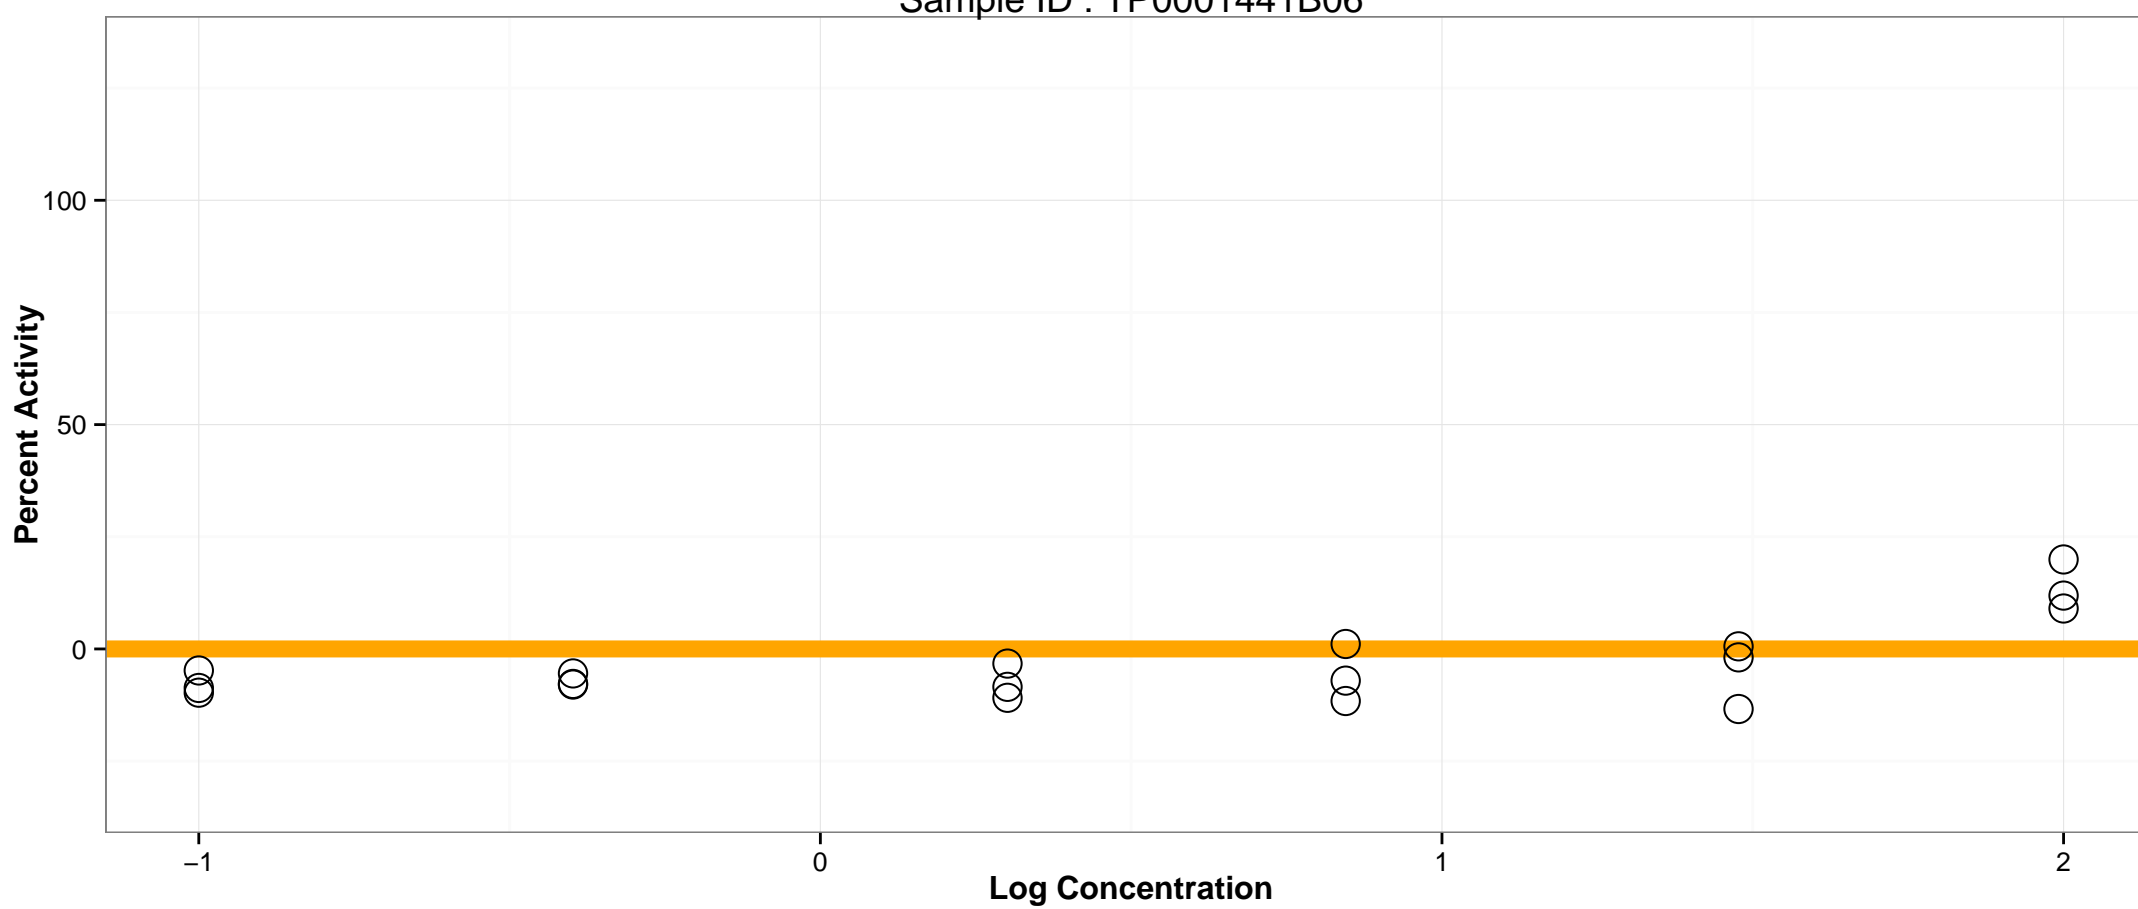

HILL MODEL

HILL MODEL: Not applicable

GAIN-LOSS MODEL

GNLS MODEL: Not applicable

|      | CNST   | HILL | GNLS |
|------|--------|------|------|
| AIC  | 135.49 | NA   | NA   |
| PROB | 1      | NA   | NA   |
| RMSE | 9.24   | NA   | NA   |

MAX\_MEAN : 13.6 MAX\_MED : 11.9 BMAD : 8.58  
COFF : 20 HIT-CALL : 0 FITC : 4 ACTP : 0  
FLAGS :

Chemical : Ethyl 3-hydroxybenzoate  
CAS : 7781-98-8

Assay ID 1508 (NHEERL\_TPO\_AUR\_dn)  
Sample ID : TP0001441B07

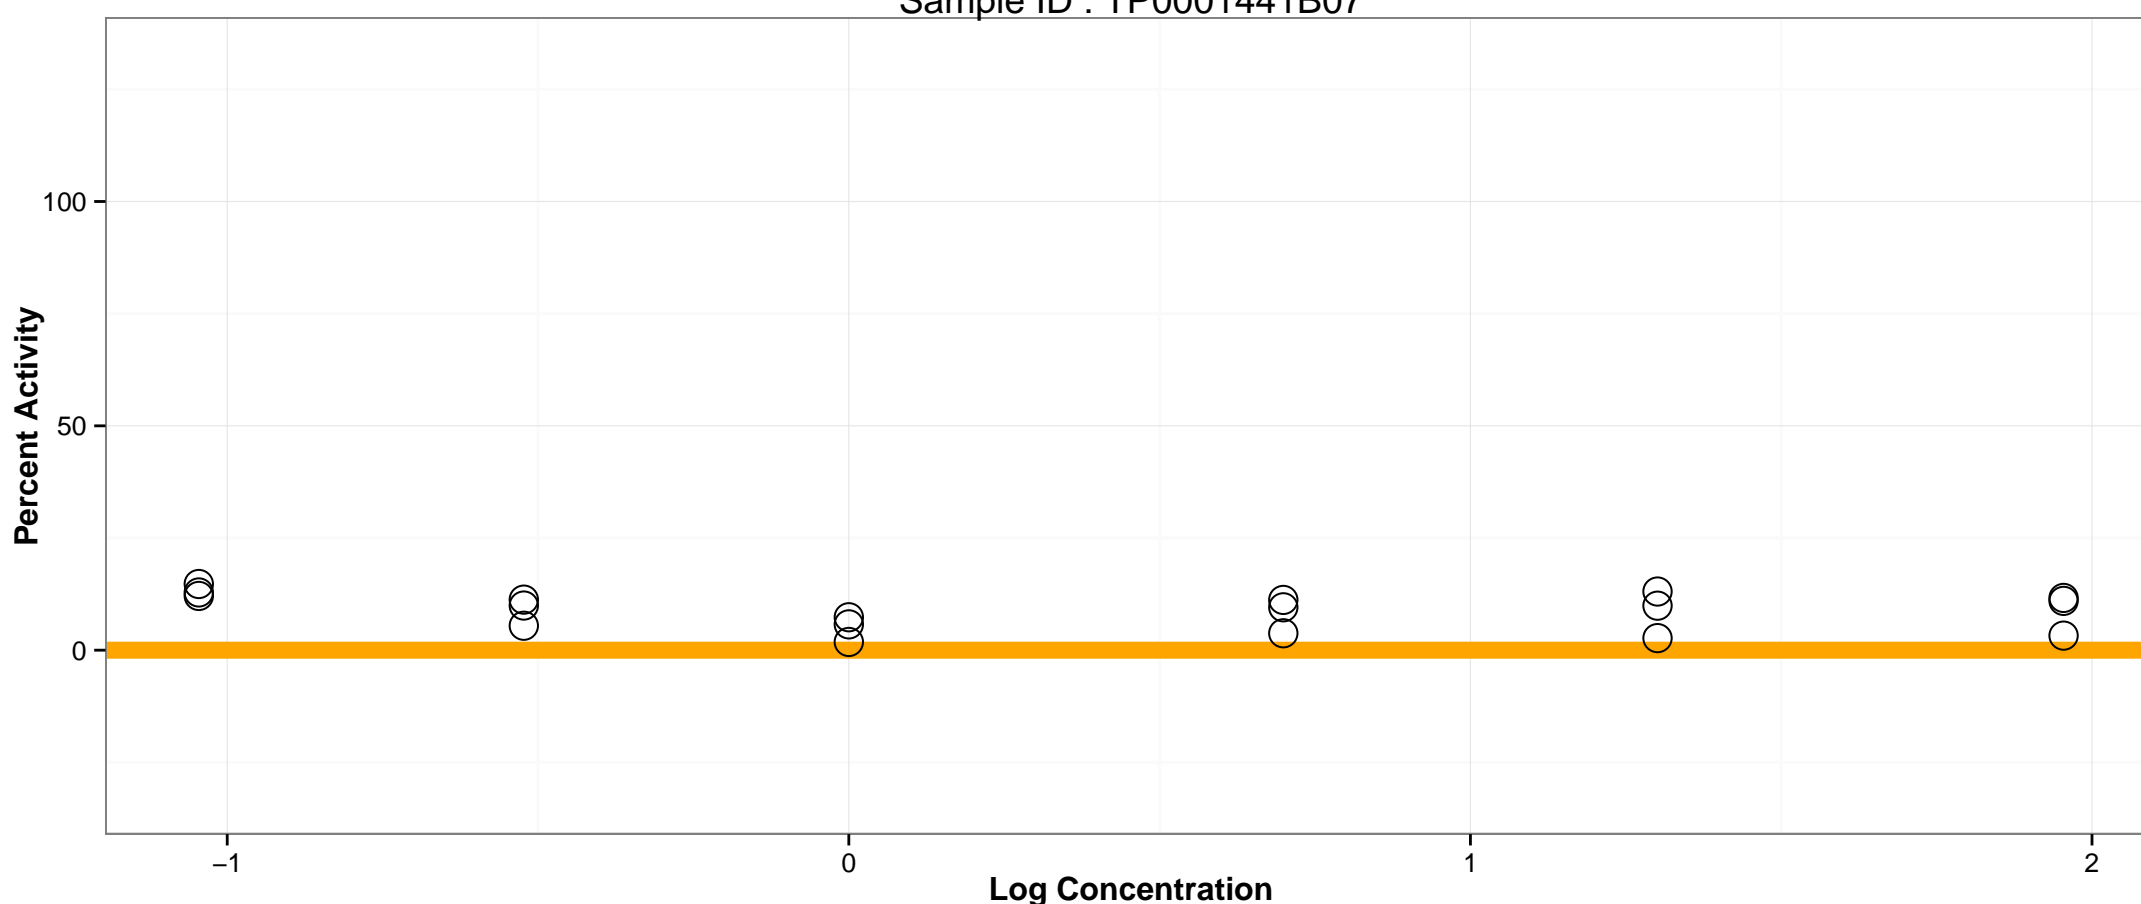

HILL MODEL

HILL MODEL: Not applicable

GAIN-LOSS MODEL

GNLS MODEL: Not applicable

|      | CNST   | HILL | GNLS |
|------|--------|------|------|
| AIC  | 137.81 | NA   | NA   |
| PROB | 1      | NA   | NA   |
| RMSE | 9.58   | NA   | NA   |

MAX\_MEAN : 13.2 MAX\_MED : 12.9 BMAD : 5.69  
COFF : 20 HIT-CALL : 0 FITC : 4 ACTP : 0  
FLAGS :

Assay ID 1509 (NHEERL\_HEK293T\_CellTiterGLO)  
Sample ID : TP0001441B07

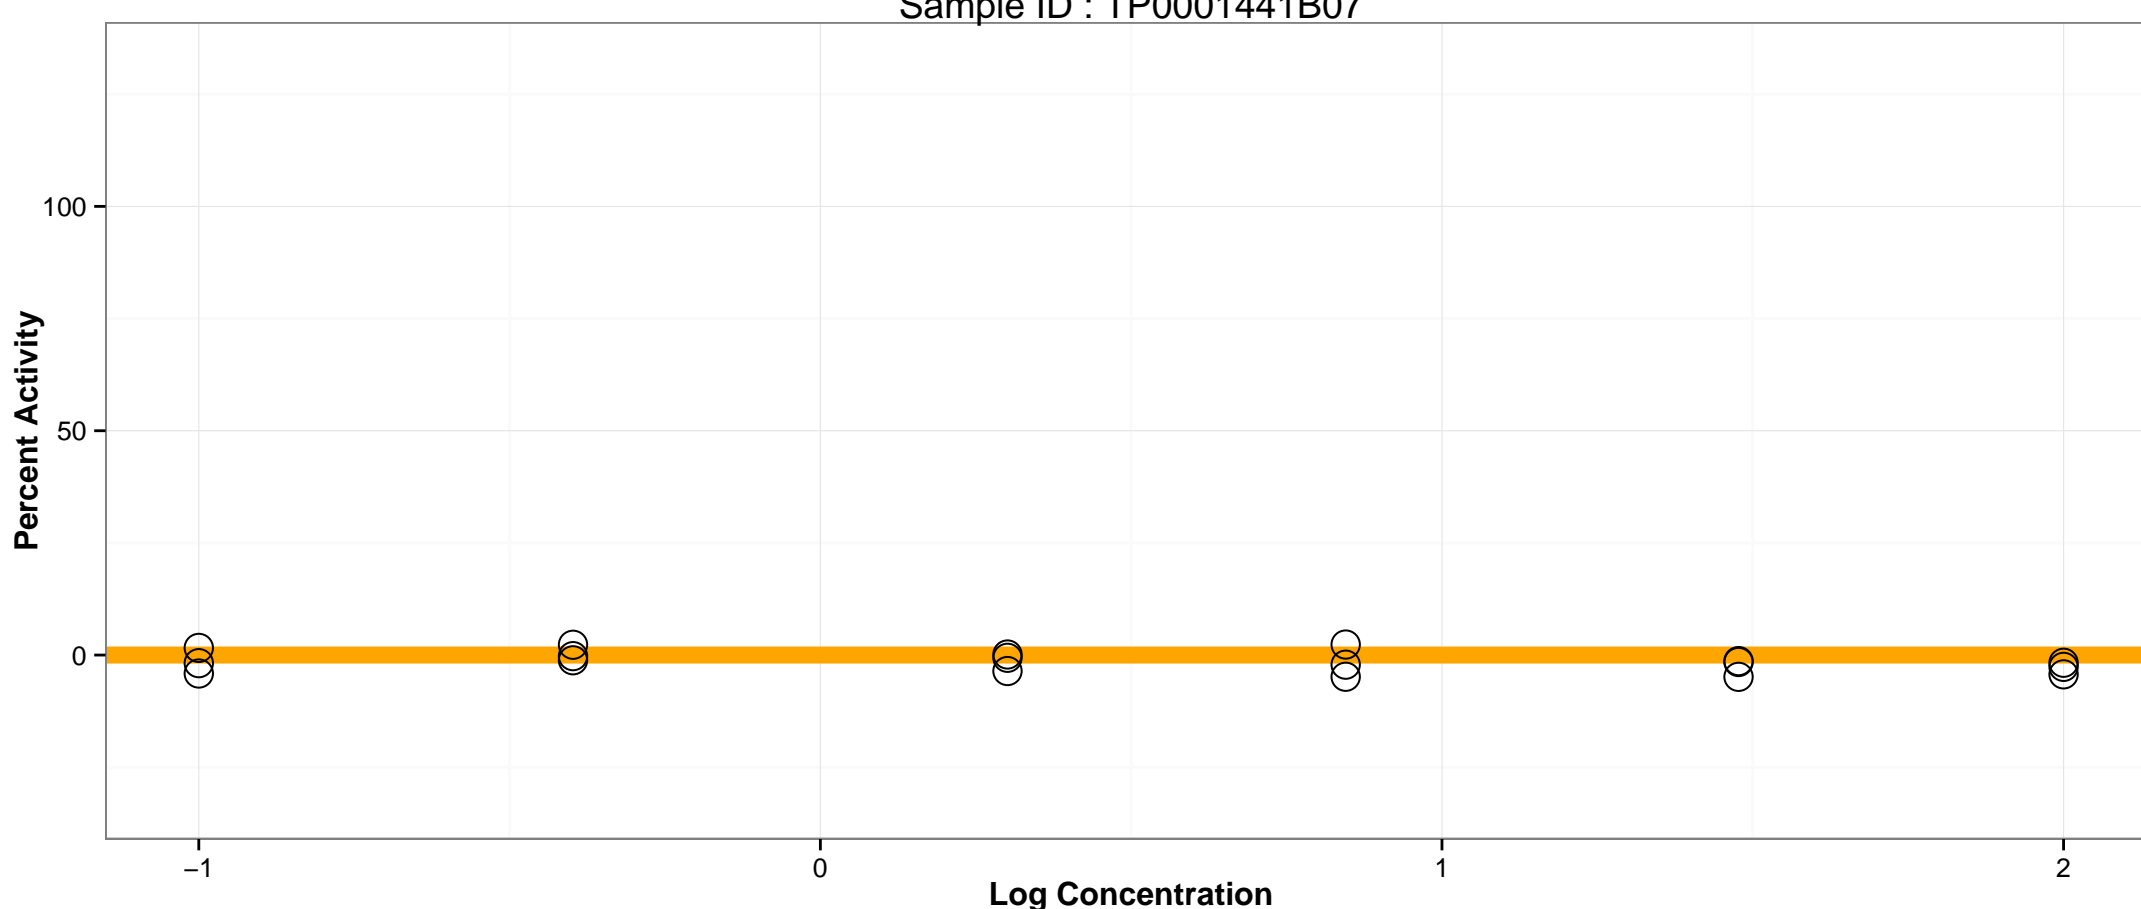

HILL MODEL

HILL MODEL: Not applicable

GAIN-LOSS MODEL

GNLS MODEL: Not applicable

|      | CNST  | HILL | GNLS |
|------|-------|------|------|
| AIC  | 91.01 | NA   | NA   |
| PROB | 1     | NA   | NA   |
| RMSE | 2.7   | NA   | NA   |

MAX\_MEAN : 0.308 MAX\_MED : -0.23 BMAD : 5.54  
COFF : 20 HIT-CALL : 0 FITC : 4 ACTP : 0  
FLAGS :

Assay ID 1848 (NHEERL\_Quantilum\_inhib\_2\_dn)  
Sample ID : TP0001441B07

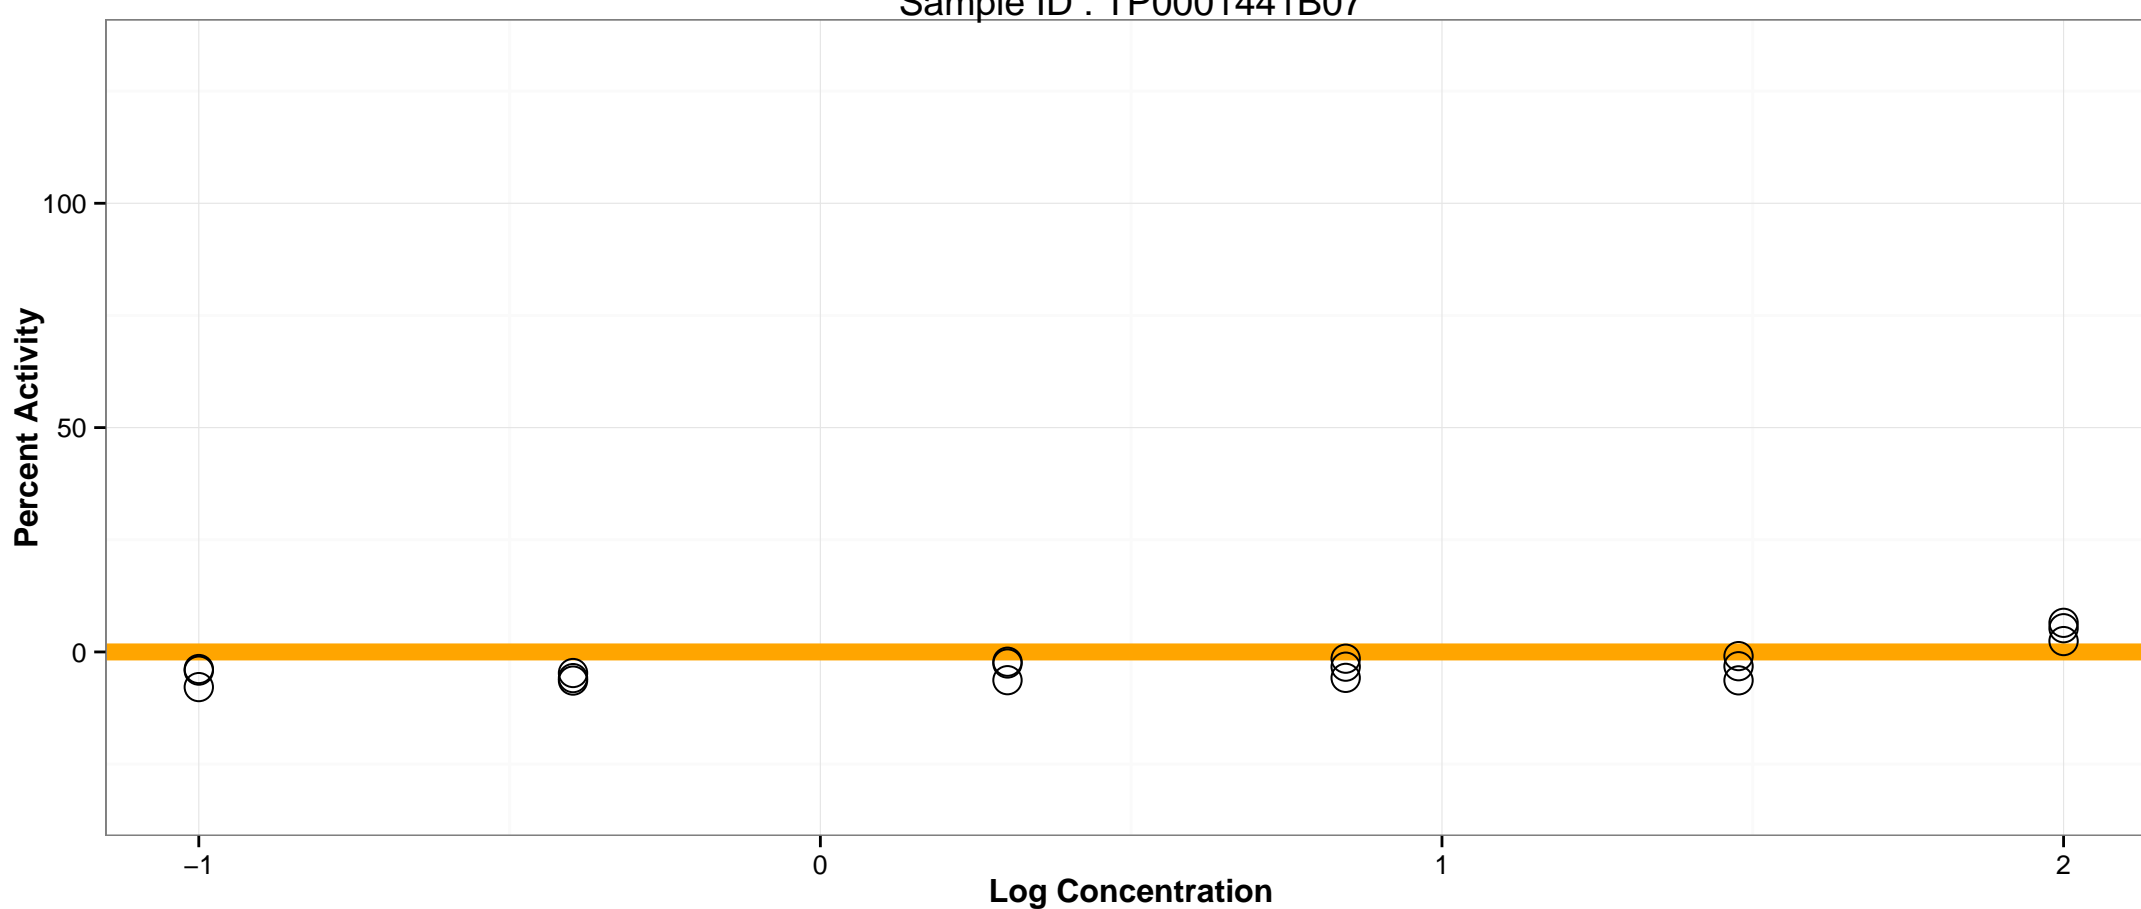

HILL MODEL

HILL MODEL: Not applicable

GAIN-LOSS MODEL

GNLS MODEL: Not applicable

|      | CNST   | HILL | GNLS |
|------|--------|------|------|
| AIC  | 112.75 | NA   | NA   |
| PROB | 1      | NA   | NA   |
| RMSE | 4.79   | NA   | NA   |

MAX\_MEAN : 4.75 MAX\_MED : 5.3 BMAD : 8.58  
COFF : 20 HIT-CALL : 0 FITC : 4 ACTP : 0  
FLAGS :

Chemical : 4-Hydroxybenzophenone  
CAS : 1137-42-4

Assay ID 1508 (NHEERL\_TPO\_AUR\_dn)  
Sample ID : TP0001441B08

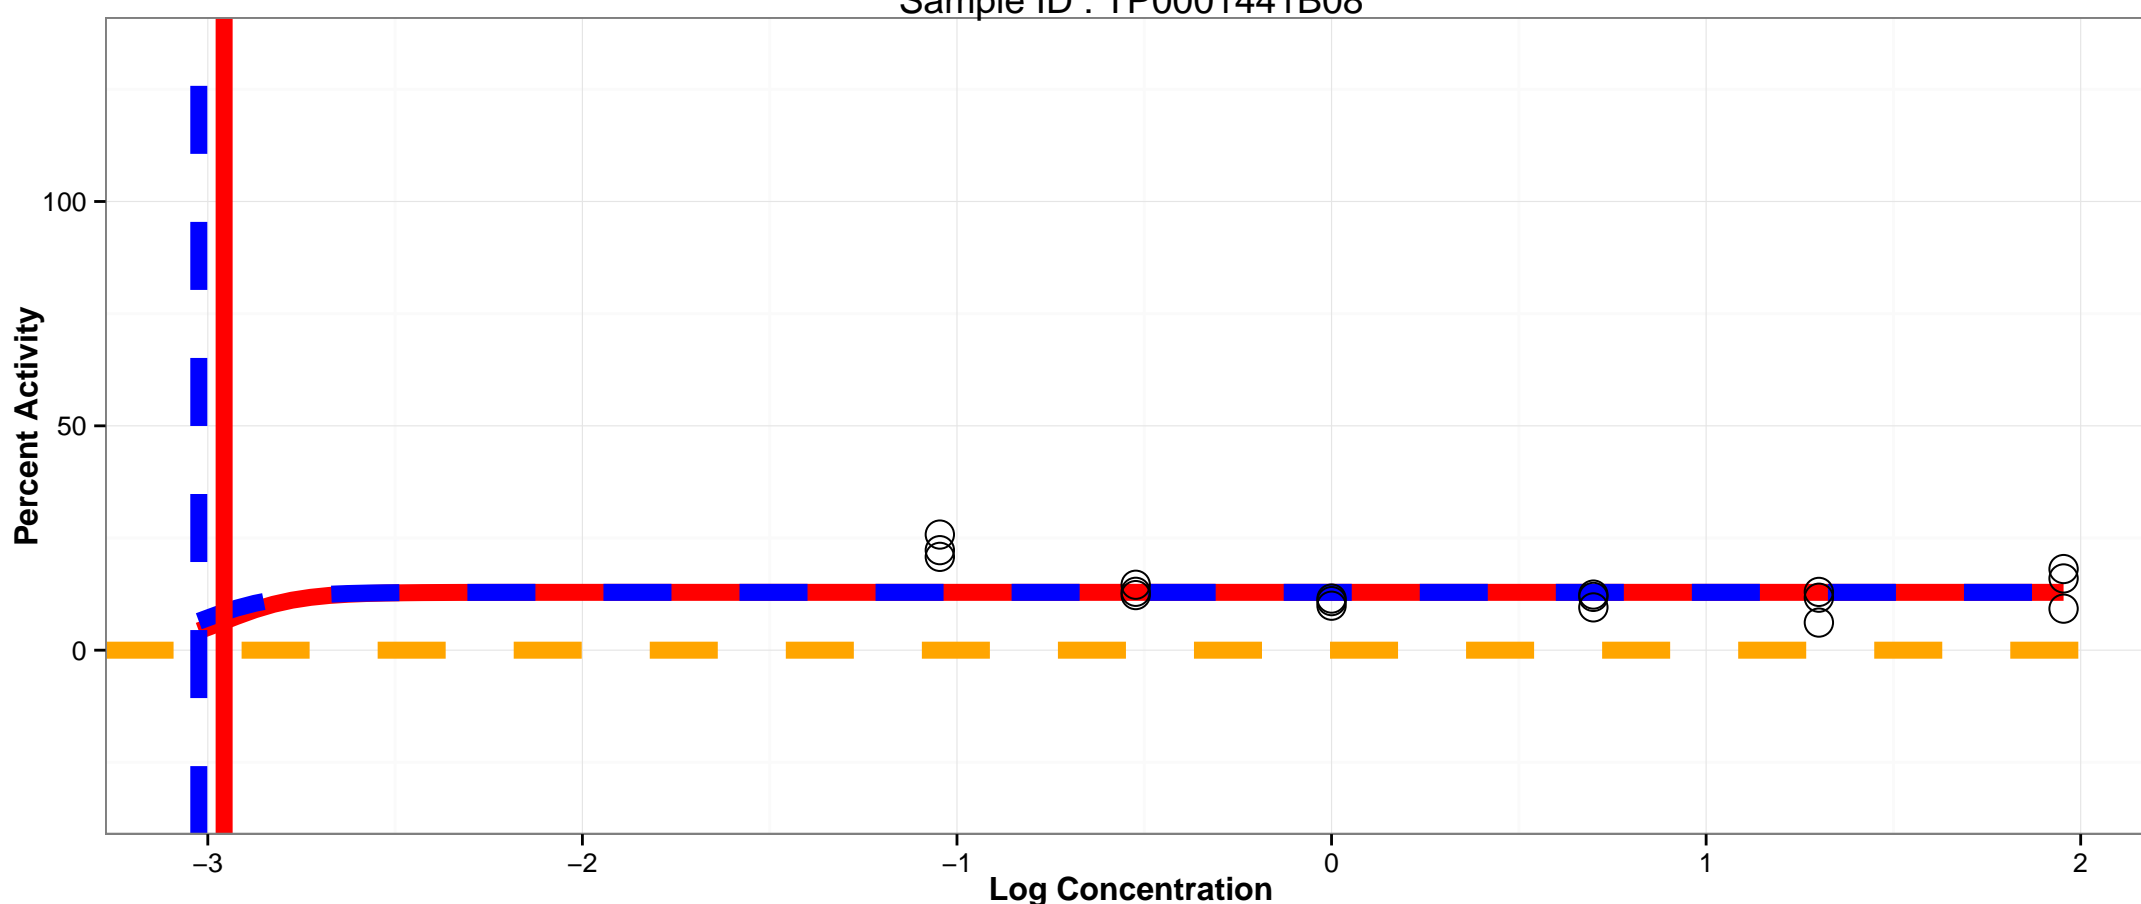

HILL MODEL

|     | tp   | ga    | gw   |
|-----|------|-------|------|
| val | 12.9 | -2.96 | 4.44 |
| sd  | 1.02 | 1530  | 3540 |

GAIN-LOSS MODEL

|     | tp   | ga    | gw   | la   | lw   |
|-----|------|-------|------|------|------|
| val | 12.9 | -3.02 | 4.22 | 2.82 | 8.88 |
| sd  | 1.02 | 1360  | 2910 | 545  | 5550 |

|      | CNST   | HILL   | GNLS   |
|------|--------|--------|--------|
| AIC  | 153.16 | 115.63 | 119.63 |
| PROB | 0      | 0.88   | 0.12   |
| RMSE | 14.68  | 4.97   | 4.97   |

MAX\_MEAN : 23 MAX\_MED : 22.3 BMAD : 5.69  
COFF : 20 HIT-CALL : 0 FITC : 13 ACTP : 1  
FLAGS :

Assay ID 1509 (NHEERL\_HEK293T\_CellTiterGLO)  
Sample ID : TP0001441B08

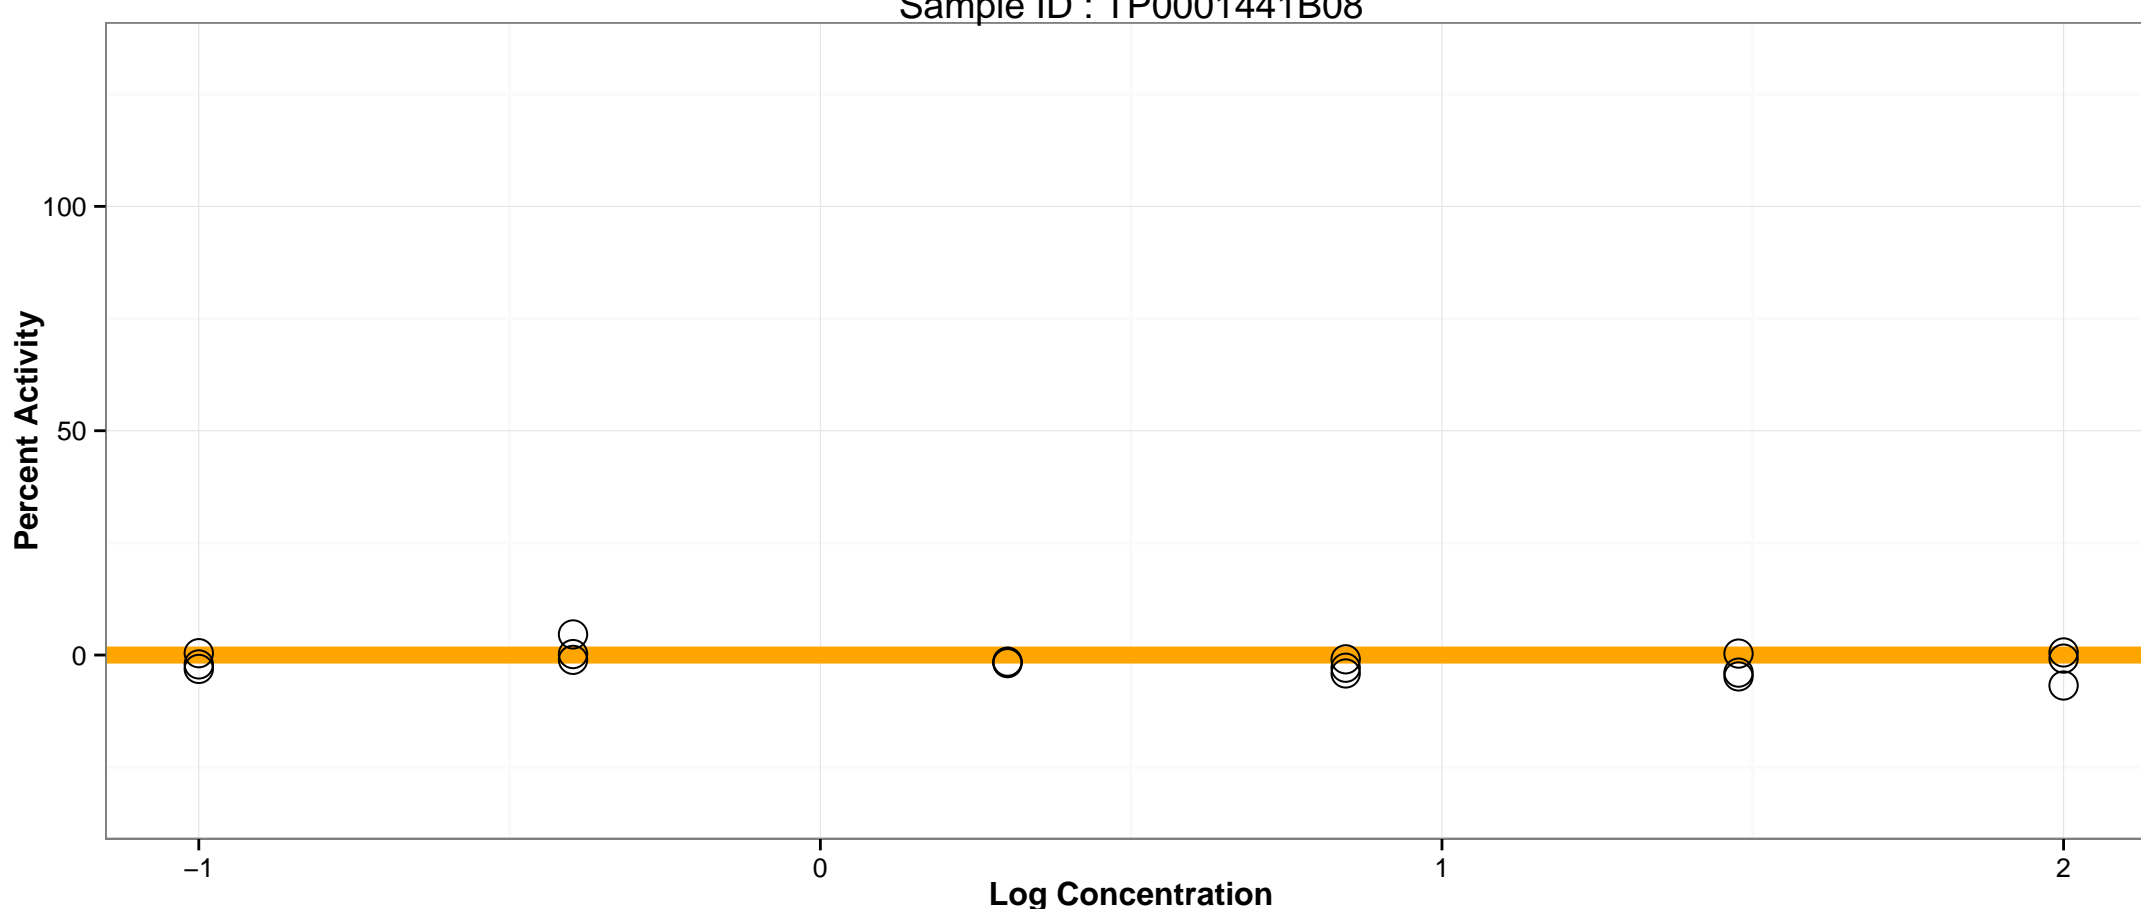

HILL MODEL

HILL MODEL: Not applicable

GAIN-LOSS MODEL

GNLS MODEL: Not applicable

|      | CNST  | HILL | GNLS |
|------|-------|------|------|
| AIC  | 92.64 | NA   | NA   |
| PROB | 1     | NA   | NA   |
| RMSE | 2.93  | NA   | NA   |

MAX\_MEAN : 1.26 MAX\_MED : 0.231 BMAD : 5.54  
COFF : 20 HIT-CALL : 0 FITC : 4 ACTP : 0  
FLAGS :

Assay ID 1848 (NHEERL\_Quantilum\_inhib\_2\_dn)  
Sample ID : TP0001441B08

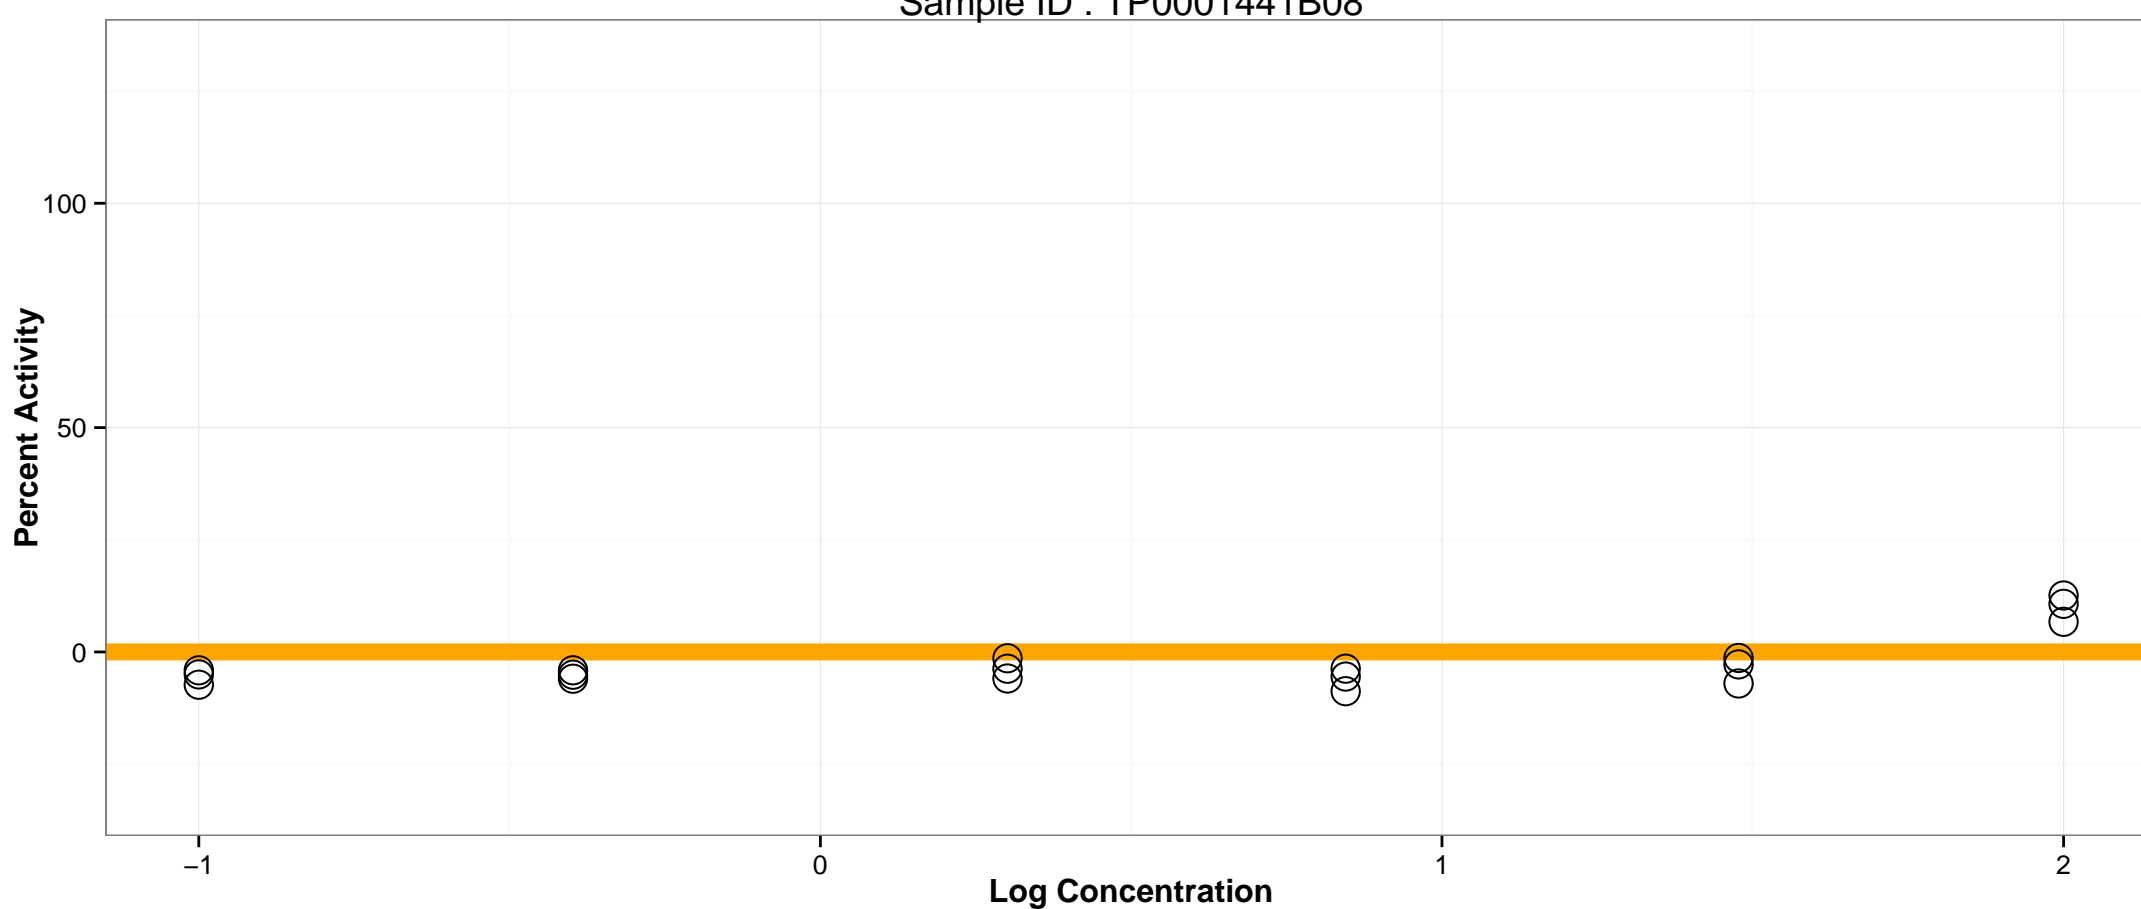

HILL MODEL

HILL MODEL: Not applicable

GAIN-LOSS MODEL

GNLS MODEL: Not applicable

|      | CNST   | HILL | GNLS |
|------|--------|------|------|
| AIC  | 122.11 | NA   | NA   |
| PROB | 1      | NA   | NA   |
| RMSE | 6.33   | NA   | NA   |

MAX\_MEAN : 10 MAX\_MED : 10.7 BMAD : 8.58  
COFF : 20 HIT-CALL : 0 FITC : 4 ACTP : 0  
FLAGS :



Assay ID 1508 (NHEERL\_TPO\_AUR\_dn)  
Sample ID : TP0001441B09

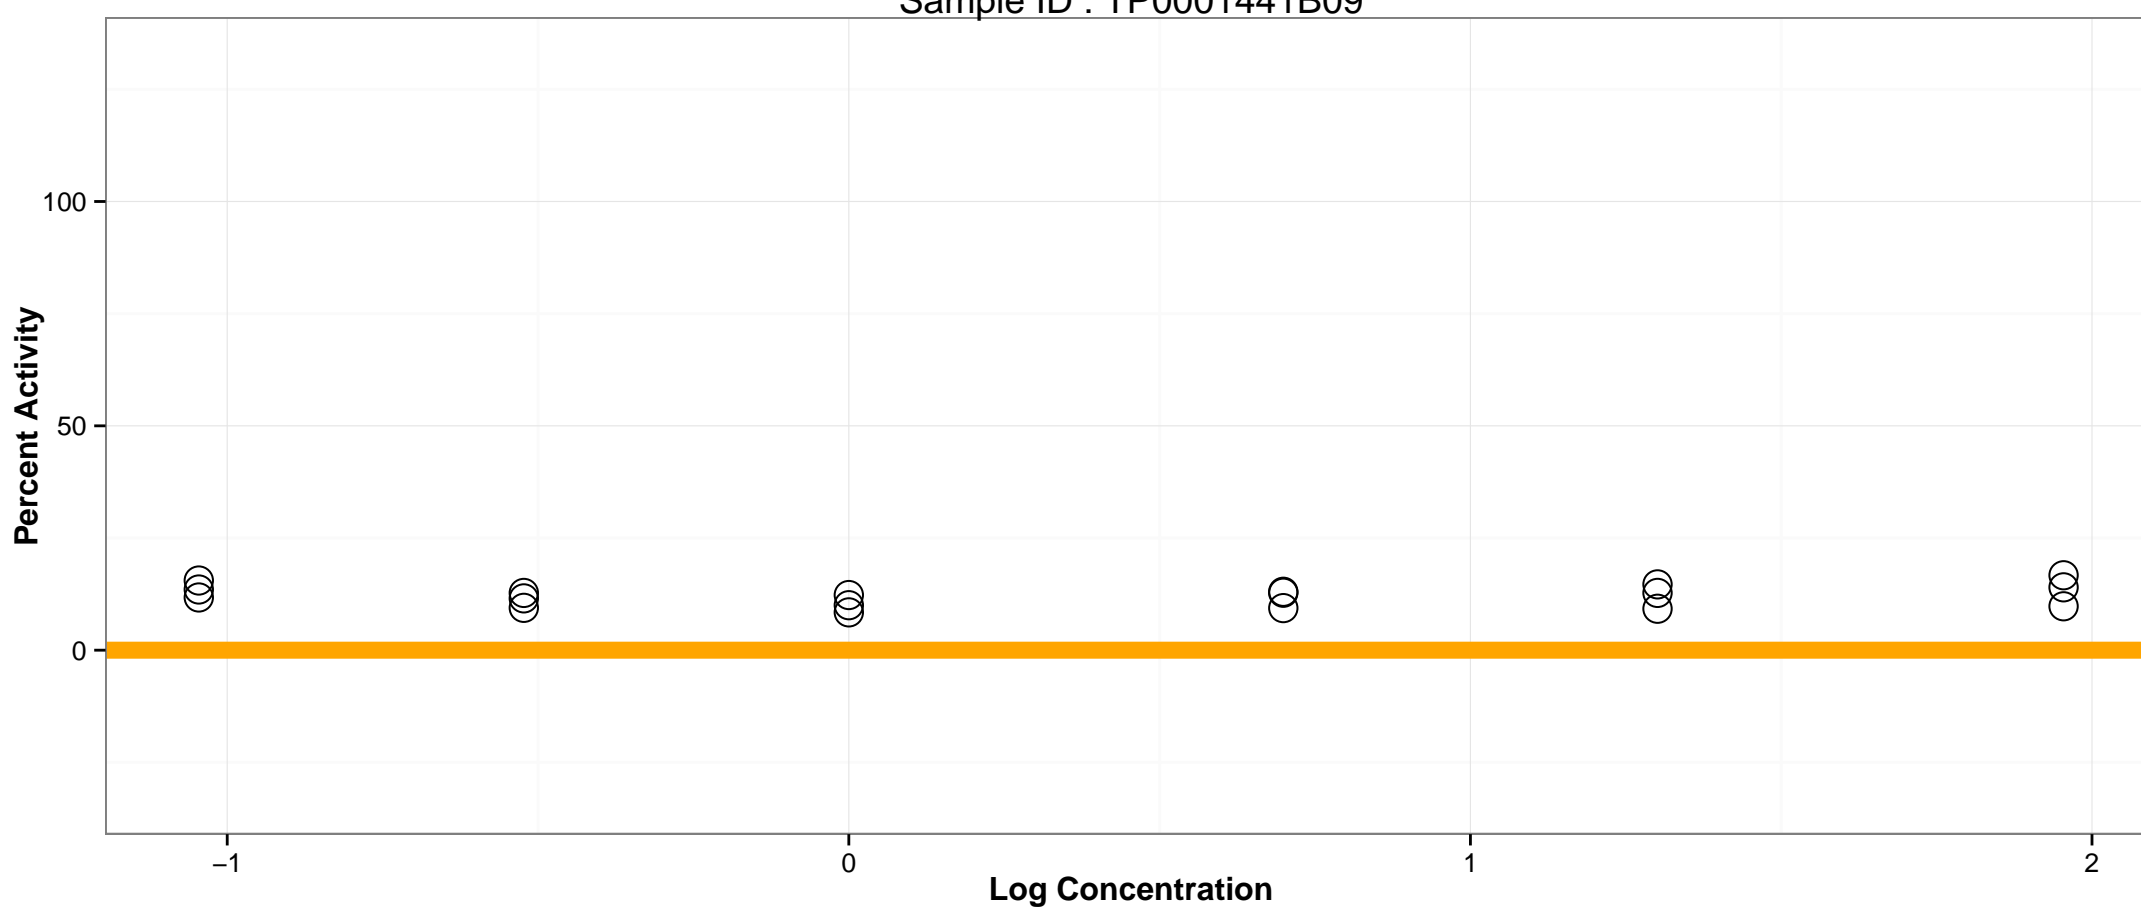

### HILL MODEL

HILL MODEL: Not applicable

### GAIN-LOSS MODEL

GNLS MODEL: Not applicable

|      | CNST   | HILL | GNLS |
|------|--------|------|------|
| AIC  | 147.53 | NA   | NA   |
| PROB | 1      | NA   | NA   |
| RMSE | 12.32  | NA   | NA   |

MAX\_MEAN : 13.6 MAX\_MED : 14 BMAD : 5.69  
COFF : 20 HIT-CALL : 0 FITC : 4 ACTP : 0  
FLAGS :

Assay ID 1509 (NHEERL\_HEK293T\_CellTiterGLO)  
Sample ID : TP0001441B09

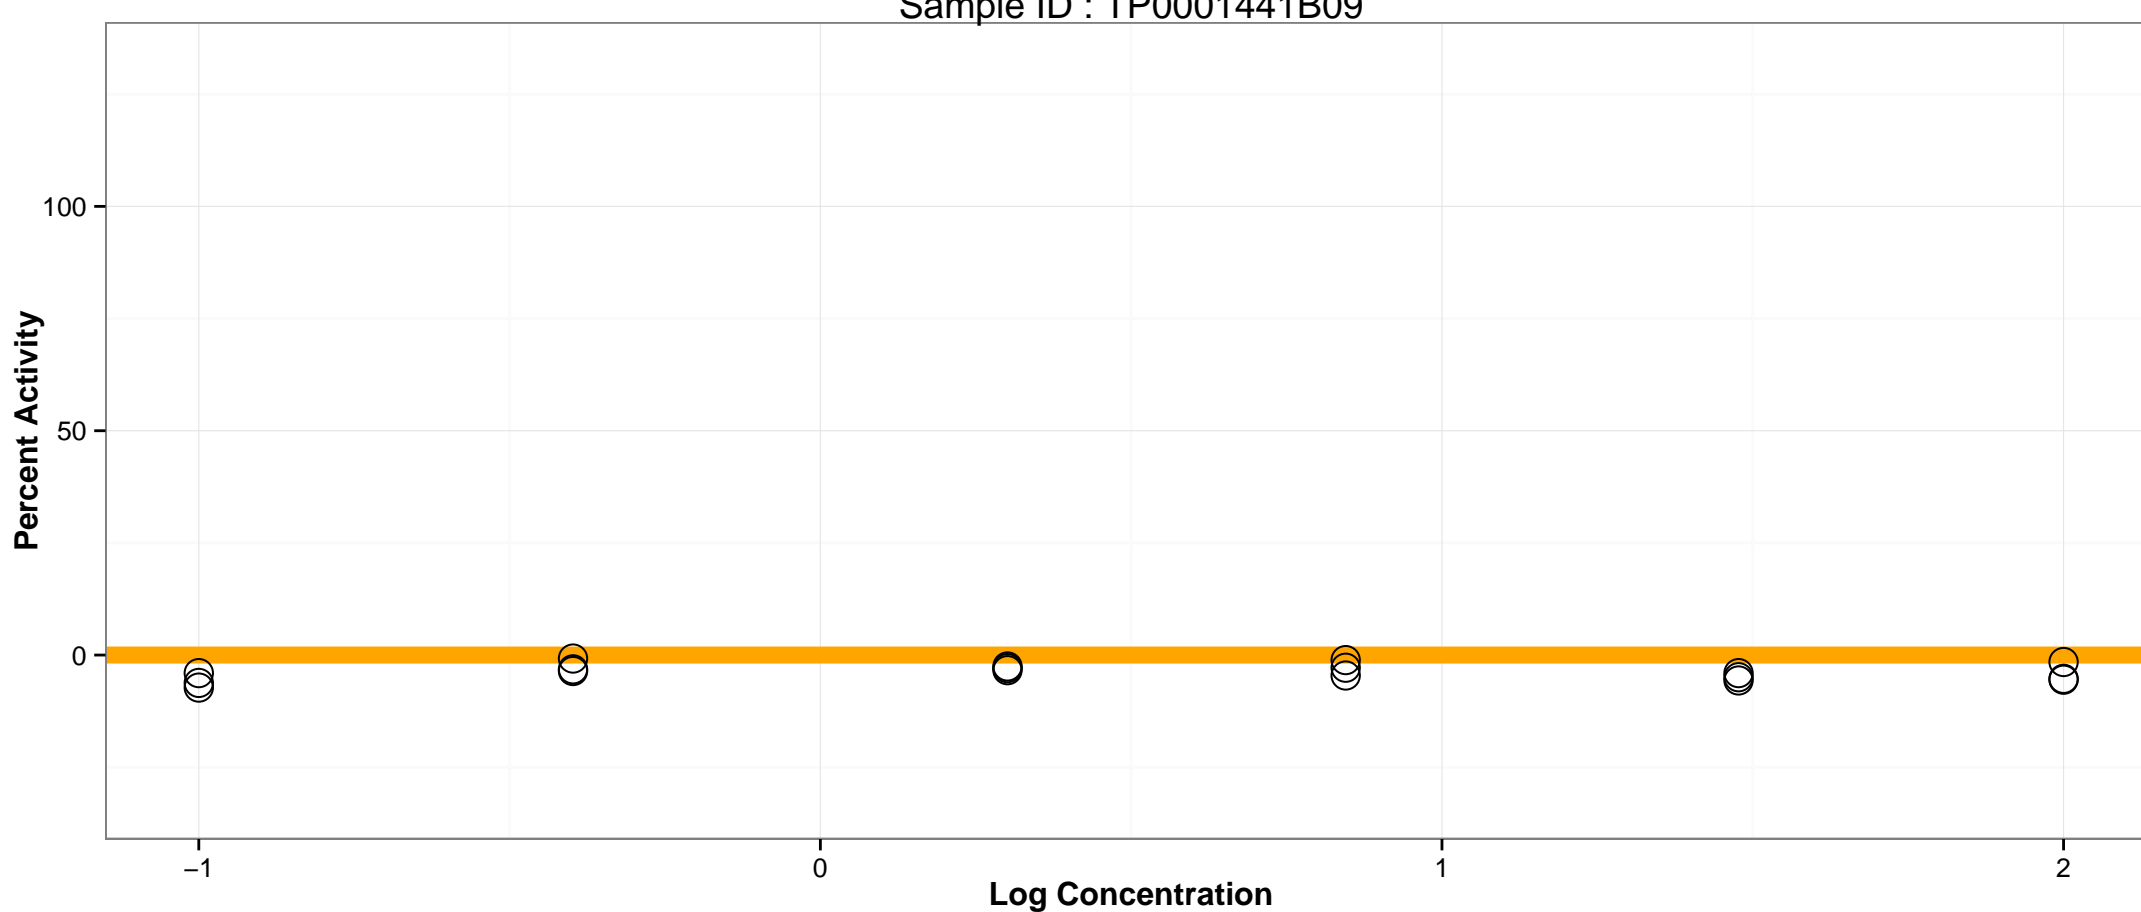

### HILL MODEL

HILL MODEL: Not applicable

### GAIN-LOSS MODEL

GNLS MODEL: Not applicable

|      | CNST   | HILL | GNLS |
|------|--------|------|------|
| AIC  | 108.01 | NA   | NA   |
| PROB | 1      | NA   | NA   |
| RMSE | 4.21   | NA   | NA   |

MAX\_MEAN : -2.5 MAX\_MED : -2.81 BMAD : 5.54  
COFF : 20 HIT-CALL : 0 FITC : 4 ACTP : 0  
FLAGS :

Assay ID 1848 (NHEERL\_Quantilum\_inhib\_2\_dn)  
Sample ID : TP0001441B09

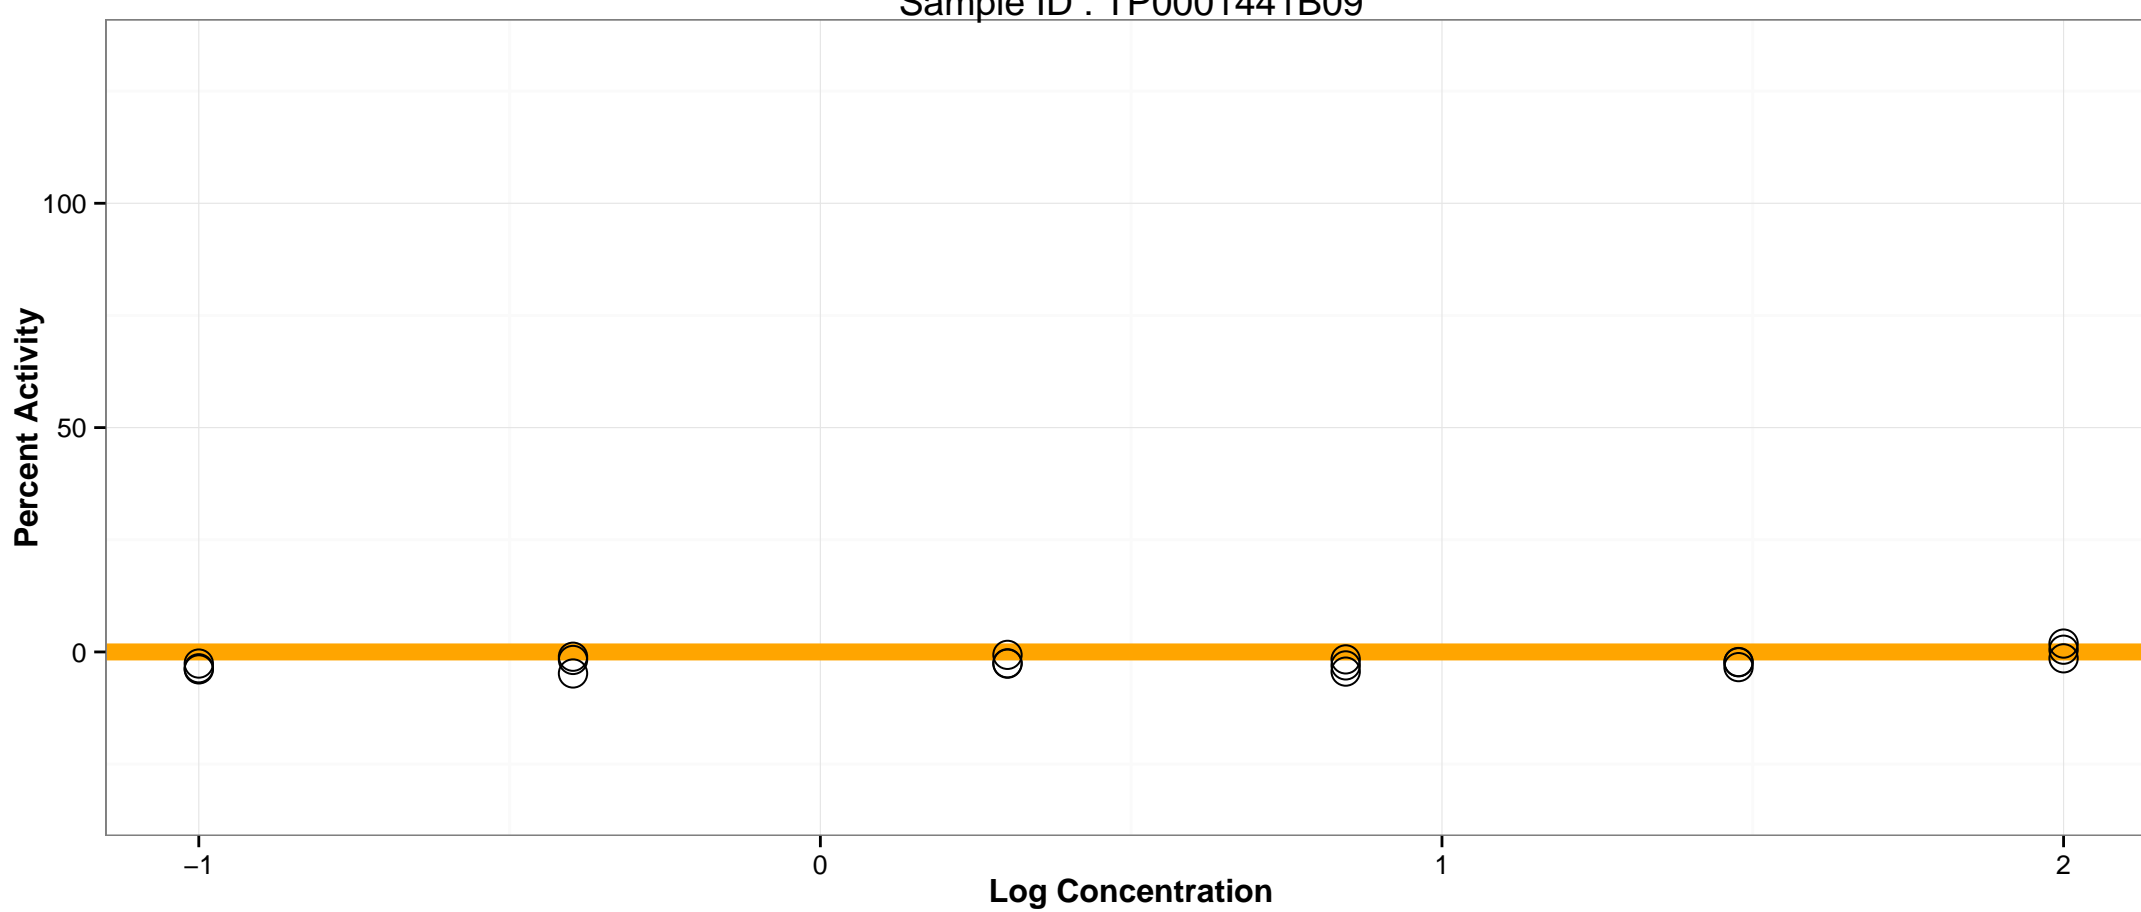

### HILL MODEL

HILL MODEL: Not applicable

### GAIN-LOSS MODEL

GNLS MODEL: Not applicable

|      | CNST  | HILL | GNLS |
|------|-------|------|------|
| AIC  | 92.11 | NA   | NA   |
| PROB | 1     | NA   | NA   |
| RMSE | 2.72  | NA   | NA   |

MAX\_MEAN : 0.325 MAX\_MED : 0.511 BMAD : 8.58  
COFF : 20 HIT-CALL : 0 FITC : 4 ACTP : 0  
FLAGS :

Chemical : Mercuric chloride  
CAS : 7487-94-7

Assay ID 1508 (NHEERL\_TPO\_AUR\_dn)  
Sample ID : TP0001441B10

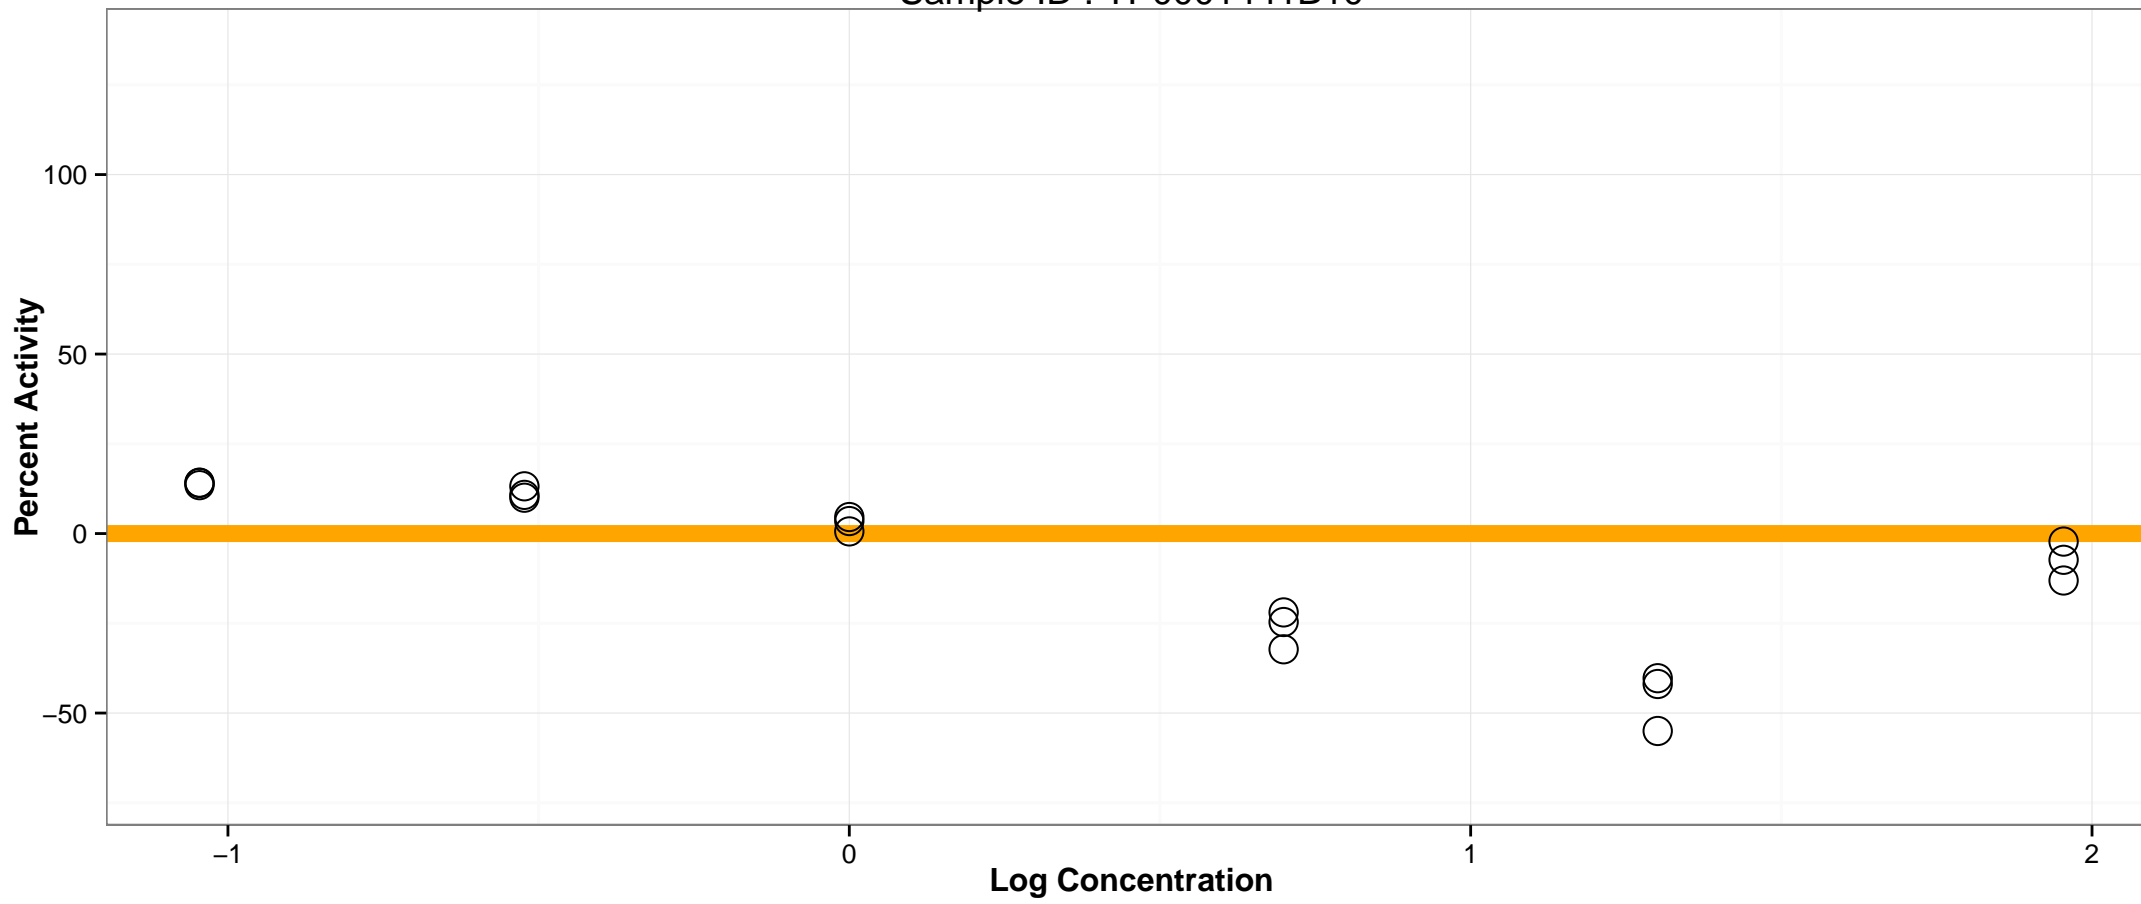

HILL MODEL

HILL MODEL: Not applicable

GAIN-LOSS MODEL

GNLS MODEL: Not applicable

|      | CNST   | HILL | GNLS |
|------|--------|------|------|
| AIC  | 166.64 | NA   | NA   |
| PROB | 1      | NA   | NA   |
| RMSE | 23.29  | NA   | NA   |

MAX\_MEAN : 13.9 MAX\_MED : 14.1 BMAD : 5.69  
COFF : 20 HIT-CALL : 0 FITC : 4 ACTP : 0  
FLAGS : 10

Assay ID 1509 (NHEERL\_HEK293T\_CellTiterGLO)  
Sample ID : TP0001441B10

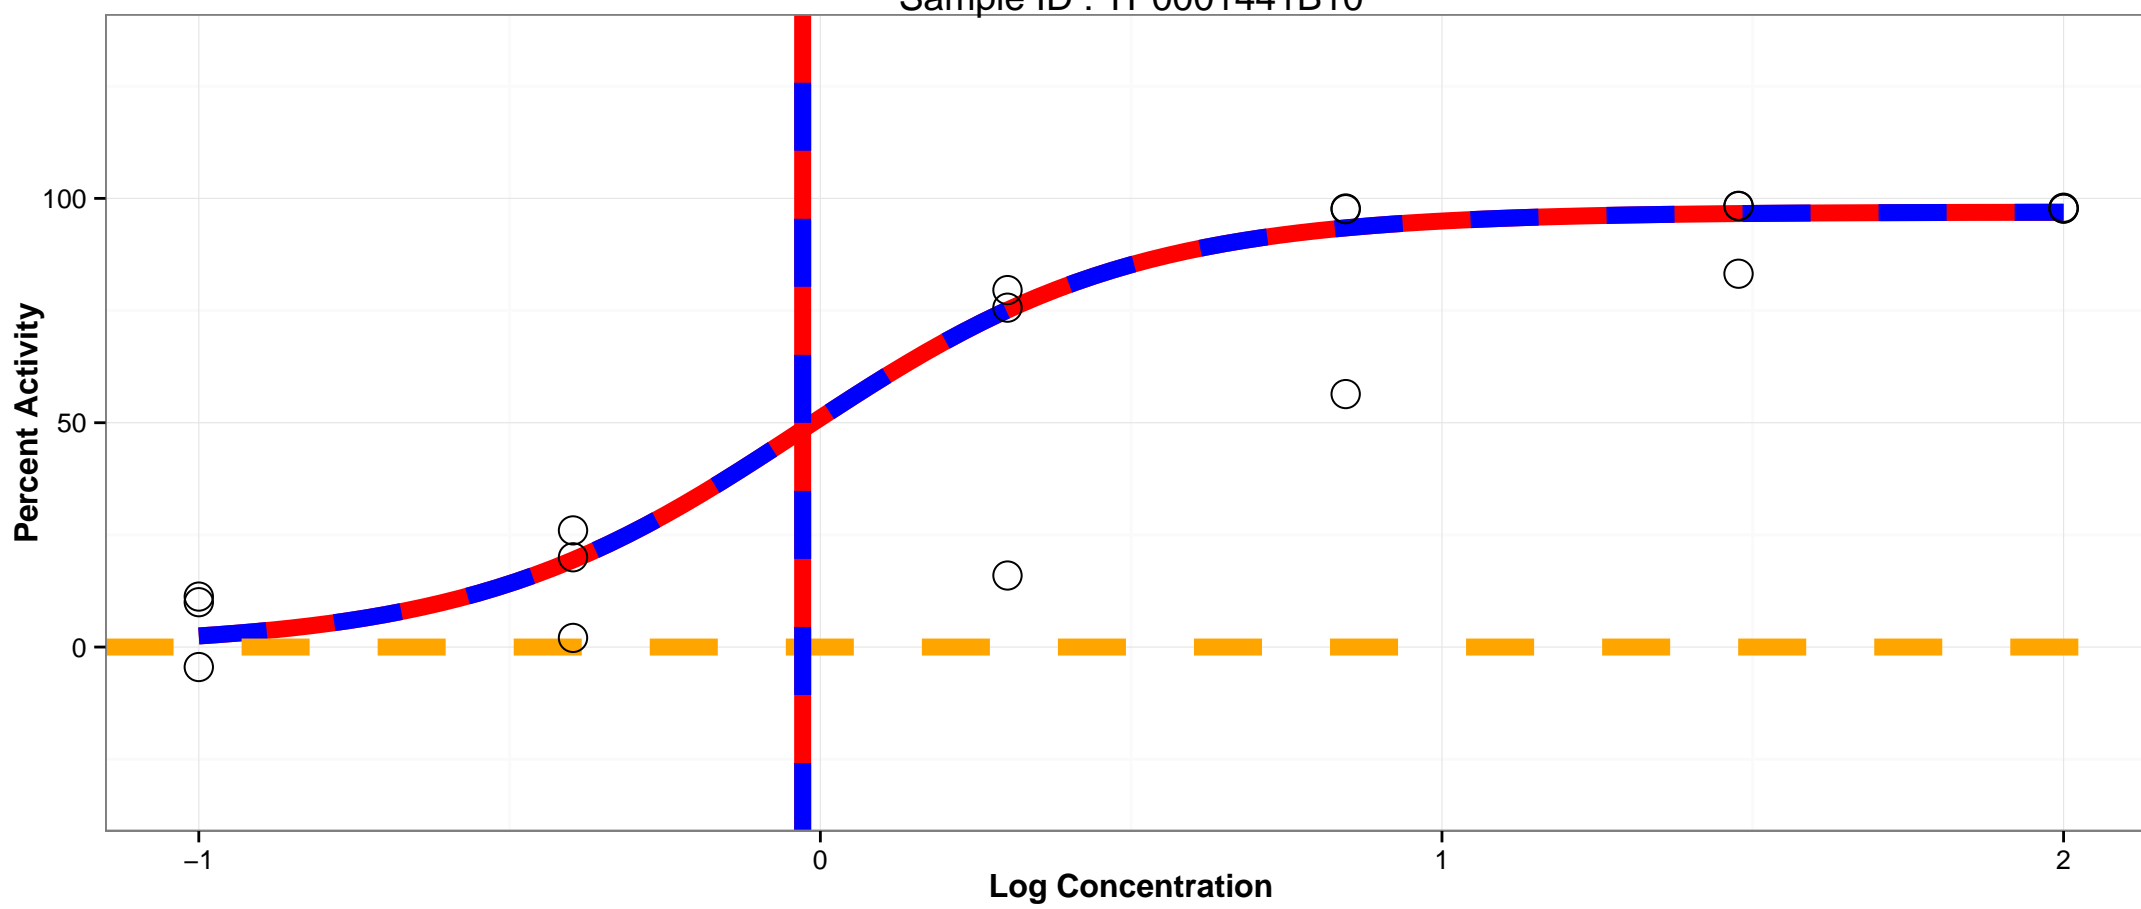

HILL MODEL

|     | tp   | ga      | gw    |
|-----|------|---------|-------|
| val | 97   | -0.0285 | 1.63  |
| sd  | 3.19 | 0.0725  | 0.318 |

GAIN-LOSS MODEL

|     | tp | ga      | gw   | la   | lw   |
|-----|----|---------|------|------|------|
| val | 97 | -0.0285 | 1.63 | 3.43 | 10.5 |
| sd  | NA | NA      | NA   | NA   | NA   |

|      | CNST   | HILL   | GNLS   |
|------|--------|--------|--------|
| AIC  | 209.41 | 152.58 | 156.58 |
| PROB | 0      | 0.88   | 0.12   |
| RMSE | 71.05  | 17.7   | 17.7   |

MAX\_MEAN : 97.8 MAX\_MED : 98.3 BMAD : 5.54  
COFF : 20 HIT-CALL : 1 FITC : 41 ACTP : 1  
FLAGS :

Assay ID 1848 (NHEERL\_Quantilum\_inhib\_2\_dn)  
Sample ID : TP0001441B10

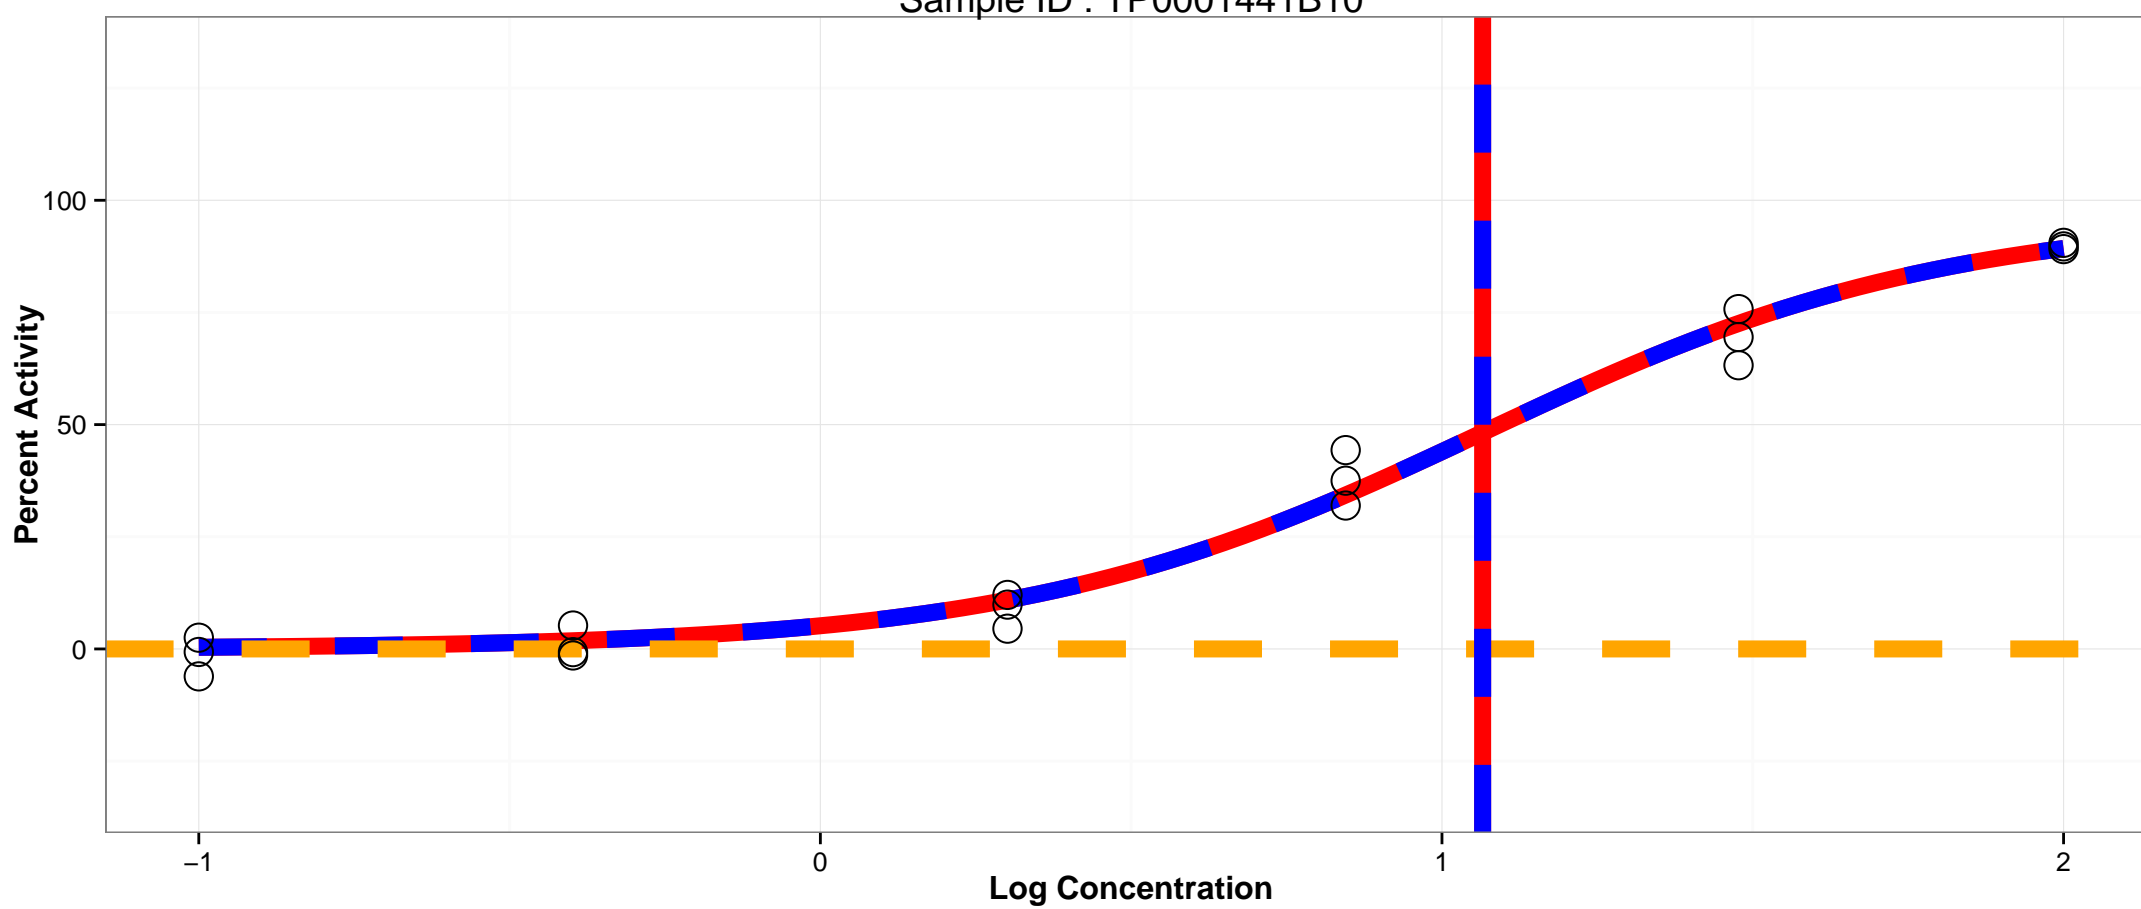

HILL MODEL

|     | tp   | ga     | gw    |
|-----|------|--------|-------|
| val | 96.4 | 1.07   | 1.17  |
| sd  | 4.33 | 0.0698 | 0.133 |

GAIN-LOSS MODEL

|     | tp   | ga   | gw   | la   | lw |
|-----|------|------|------|------|----|
| val | 96.4 | 1.07 | 1.17 | 3.83 | 14 |
| sd  | NA   | NA   | NA   | NA   | NA |

|      | CNST   | HILL  | GNLS  |
|------|--------|-------|-------|
| AIC  | 194.11 | 112.1 | 116.1 |
| PROB | 0      | 0.88  | 0.12  |
| RMSE | 49.16  | 4.37  | 4.37  |

MAX\_MEAN : 89.8 MAX\_MED : 89.7 BMAD : 8.58  
COFF : 20 HIT-CALL : 1 FITC : 42 ACTP : 1  
FLAGS :

Assay ID 1824 (NHEERL\_TPO\_GUA\_dn)  
Sample ID : TP0001442B04

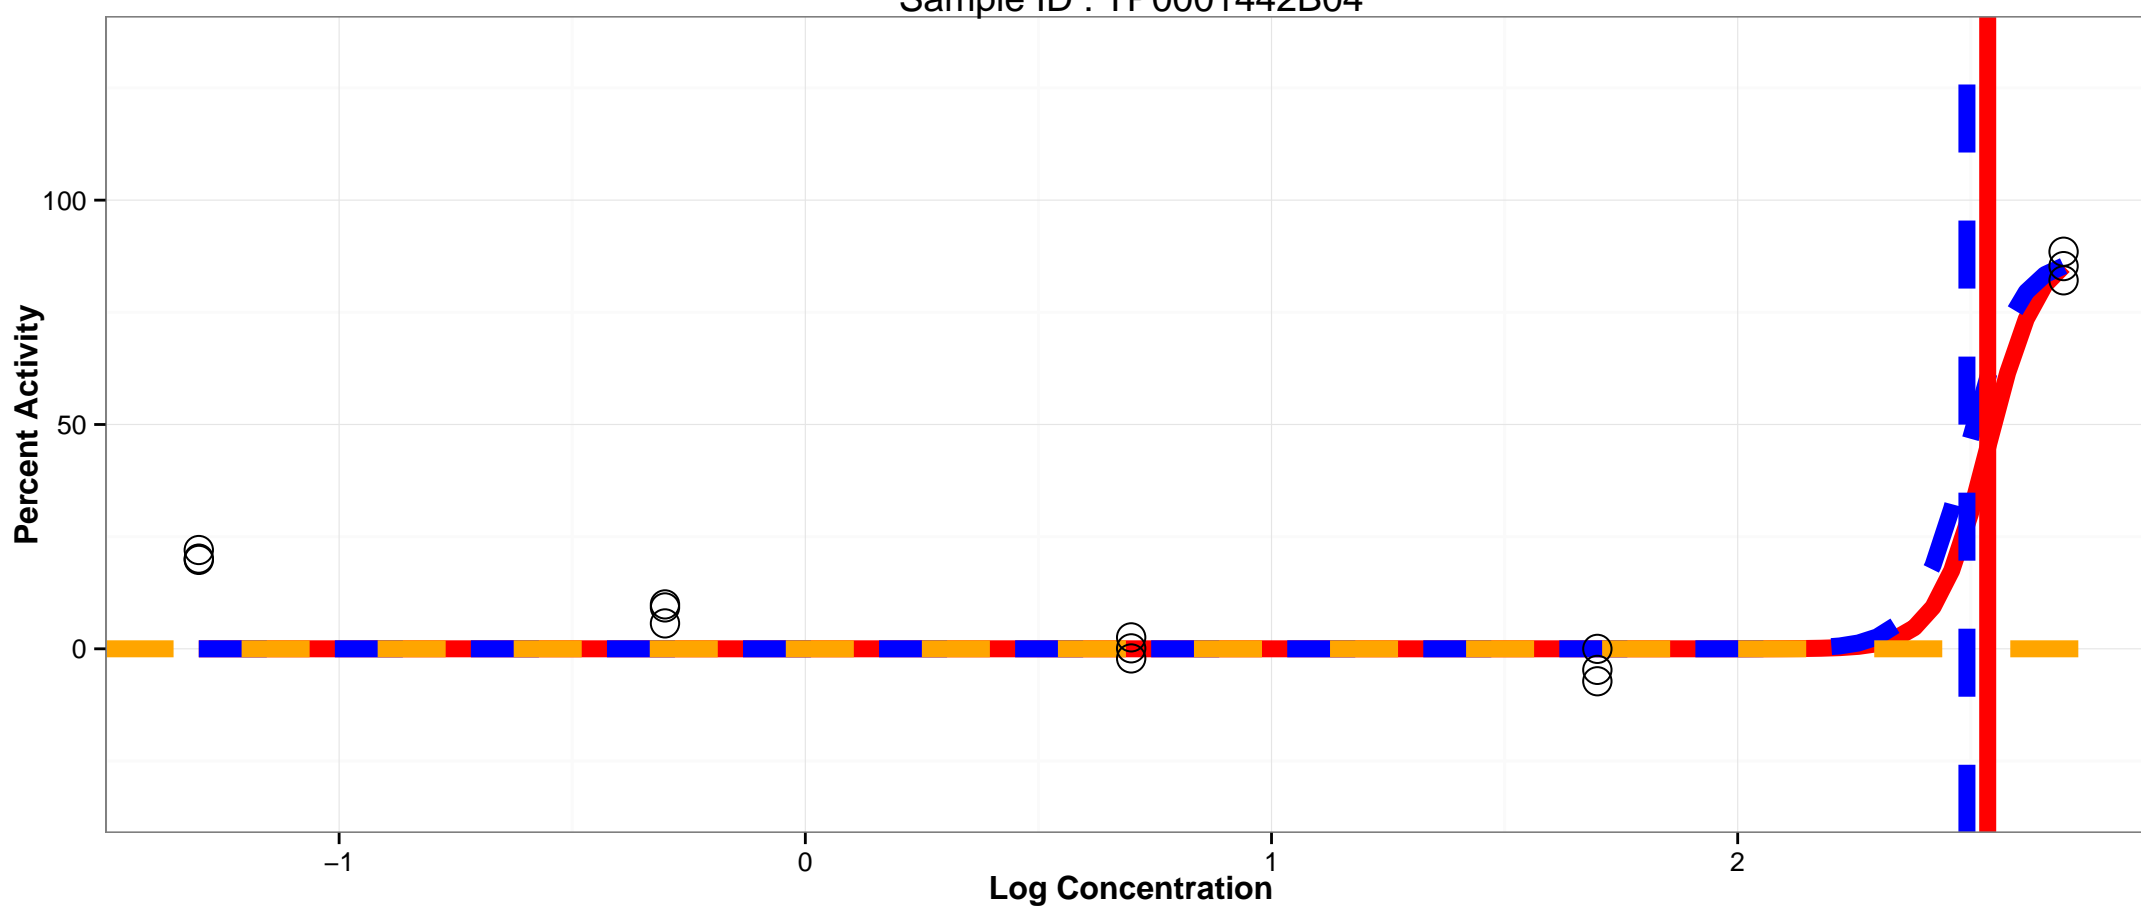

HILL MODEL

|     | tp   | ga   | gw   |
|-----|------|------|------|
| val | 89.6 | 2.54 | 7.98 |
| sd  | NA   | NA   | NA   |

GAIN-LOSS MODEL

|     | tp   | ga   | gw   | la   | lw   |
|-----|------|------|------|------|------|
| val | 87.7 | 2.49 | 7.83 | 3.23 | 4.42 |
| sd  | NA   | NA   | NA   | NA   | NA   |

|      | CNST  | HILL   | GNLS   |
|------|-------|--------|--------|
| AIC  | 151.3 | 120.09 | 124.09 |
| PROB | 0     | 0.88   | 0.12   |
| RMSE | 39.54 | 10.34  | 10.34  |

MAX\_MEAN : 85.3 MAX\_MED : 85.3 BMAD : 3.71  
COFF : 20 HIT-CALL : 1 FITC : 41 ACTP : 1  
FLAGS :

Chemical : Mercuric chloride  
CAS : 7487-94-7

Assay ID 1508 (NHEERL\_TPO\_AUR\_dn)  
Sample ID : TX007182

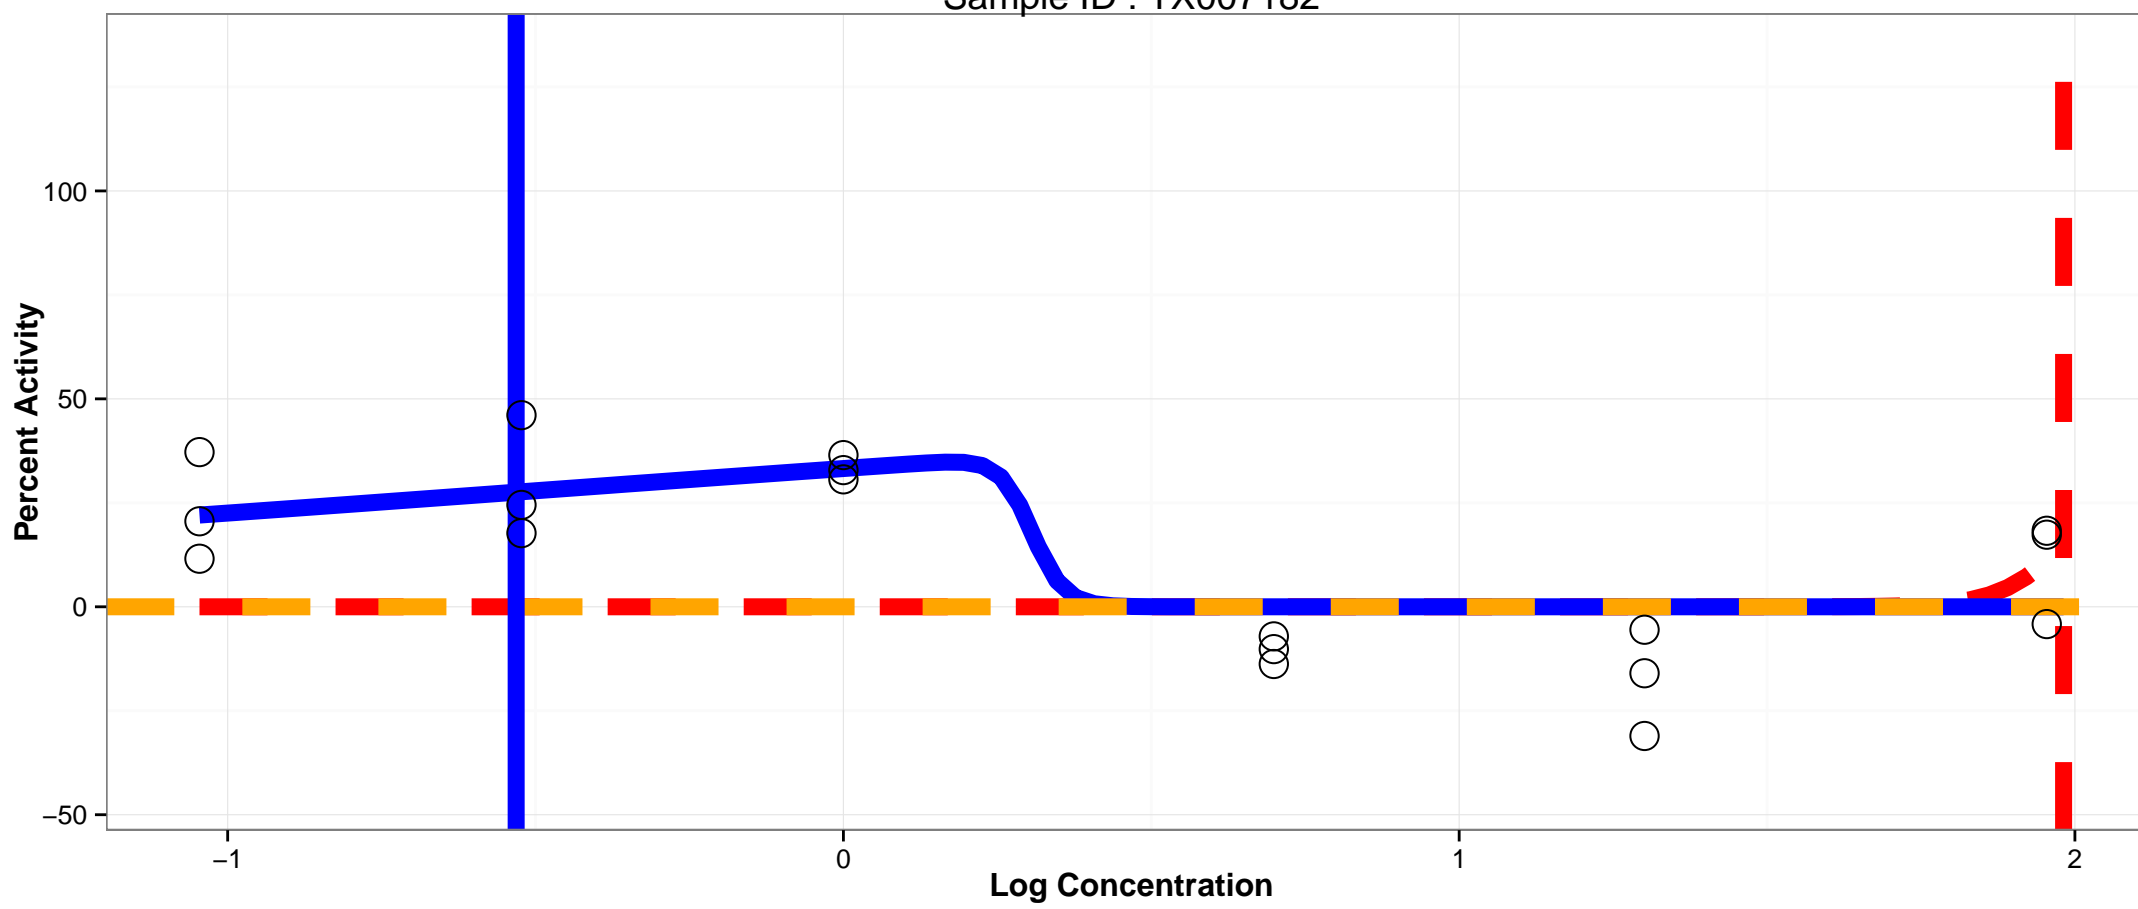

HILL MODEL

|     | tp | ga   | gw   |
|-----|----|------|------|
| val | 29 | 1.98 | 7.97 |
| sd  | NA | NA   | NA   |

GAIN-LOSS MODEL

|     | tp   | ga     | gw    | la    | lw   |
|-----|------|--------|-------|-------|------|
| val | 55.1 | -0.531 | 0.342 | 0.306 | 16.7 |
| sd  | 267  | 12.7   | 1.75  | 17.9  | 792  |

|      | CNST   | HILL   | GNLS   |
|------|--------|--------|--------|
| AIC  | 170.36 | 175.57 | 156.72 |
| PROB | 0      | 0      | 1      |
| RMSE | 24.24  | 23.86  | 13.02  |

MAX\_MEAN : 33.3 MAX\_MED : 32.9 BMAD : 5.69  
COFF : 20 HIT-CALL : 1 FITC : 51 ACTP : 0.999  
FLAGS :

Assay ID 1509 (NHEERL\_HEK293T\_CellTiterGLO)  
Sample ID : TX007182

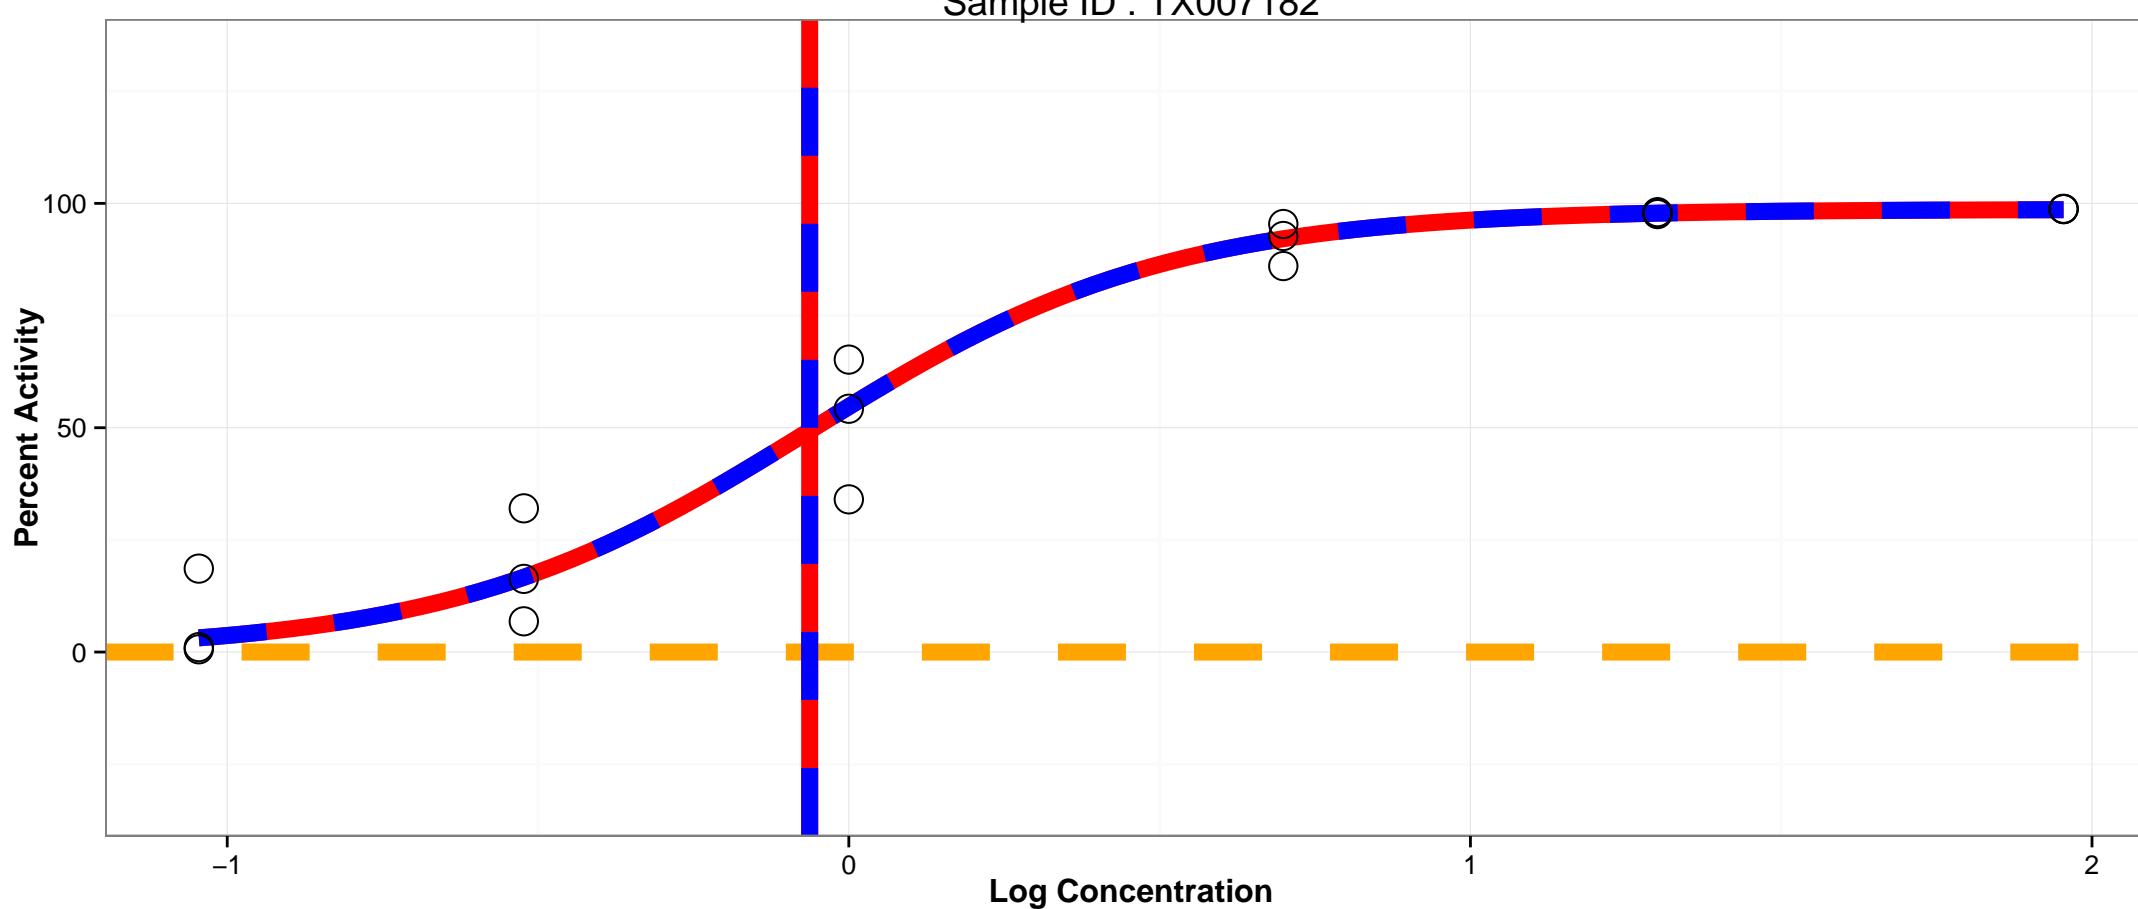

HILL MODEL

|     | tp   | ga     | gw    |
|-----|------|--------|-------|
| val | 98.7 | -0.063 | 1.51  |
| sd  | 2.01 | 0.0524 | 0.236 |

GAIN-LOSS MODEL

|     | tp   | ga     | gw   | la   | lw   |
|-----|------|--------|------|------|------|
| val | 98.7 | -0.063 | 1.51 | 3.78 | 15.3 |
| sd  | NA   | NA     | NA   | NA   | NA   |

|      | CNST   | HILL   | GNLS   |
|------|--------|--------|--------|
| AIC  | 209.92 | 131.43 | 135.43 |
| PROB | 0      | 0.88   | 0.12   |
| RMSE | 71.93  | 8.05   | 8.05   |

MAX\_MEAN : 98.8 MAX\_MED : 98.7 BMAD : 5.54  
COFF : 20 HIT-CALL : 1 FITC : 41 ACTP : 1  
FLAGS :

Assay ID 1848 (NHEERL\_Quantilum\_inhib\_2\_dn)  
Sample ID : TX007182

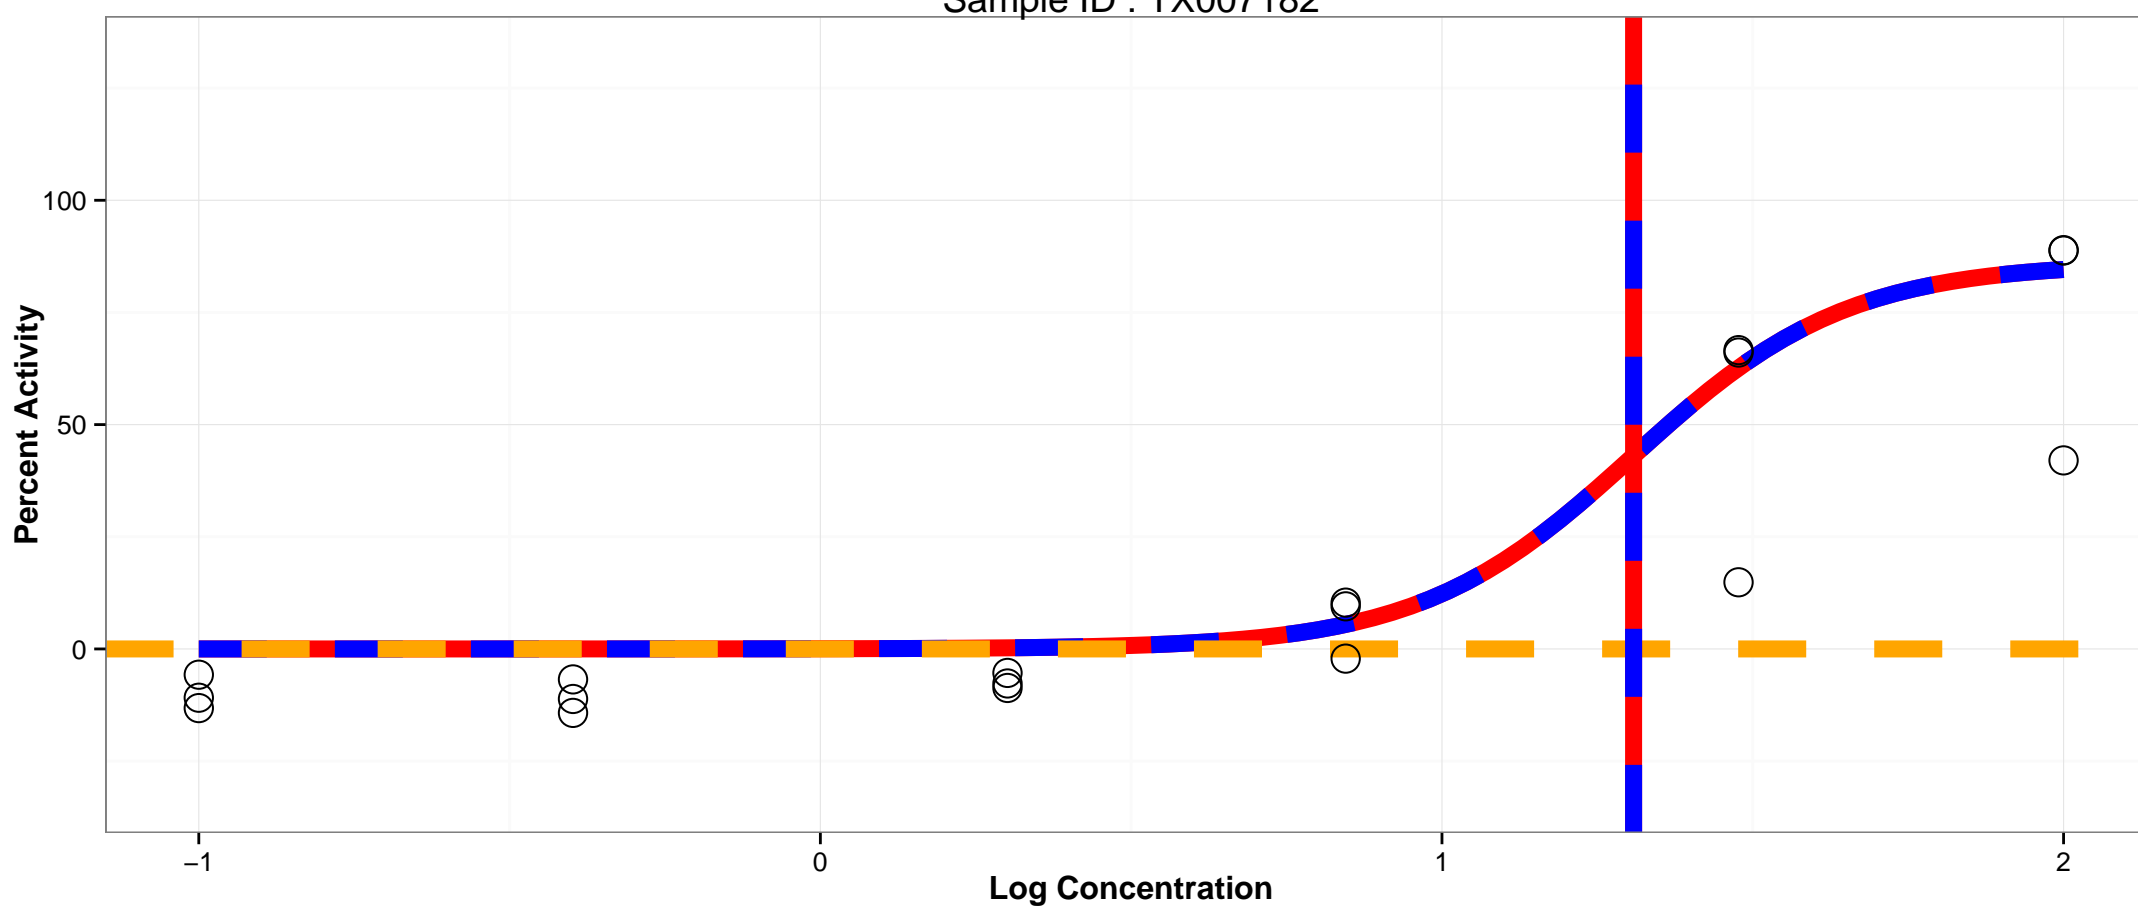

HILL MODEL

|     | tp   | ga     | gw   |
|-----|------|--------|------|
| val | 86.1 | 1.31   | 2.53 |
| sd  | 8.54 | 0.0888 | 0.83 |

GAIN-LOSS MODEL

|     | tp   | ga    | gw   | la   | lw   |
|-----|------|-------|------|------|------|
| val | 86.1 | 1.31  | 2.53 | 2.33 | 16.3 |
| sd  | 8.6  | 0.089 | 0.83 | 40.3 | 1610 |

|      | CNST   | HILL   | GNLS   |
|------|--------|--------|--------|
| AIC  | 182.75 | 155.65 | 159.65 |
| PROB | 0      | 0.88   | 0.12   |
| RMSE | 39.19  | 16.87  | 16.87  |

MAX\_MEAN : 73.2 MAX\_MED : 88.8 BMAD : 8.58  
COFF : 20 HIT-CALL : 1 FITC : 41 ACTP : 1  
FLAGS :

Assay ID 1824 (NHEERL\_TPO\_GUA\_dn)  
Sample ID : TP0001442B04

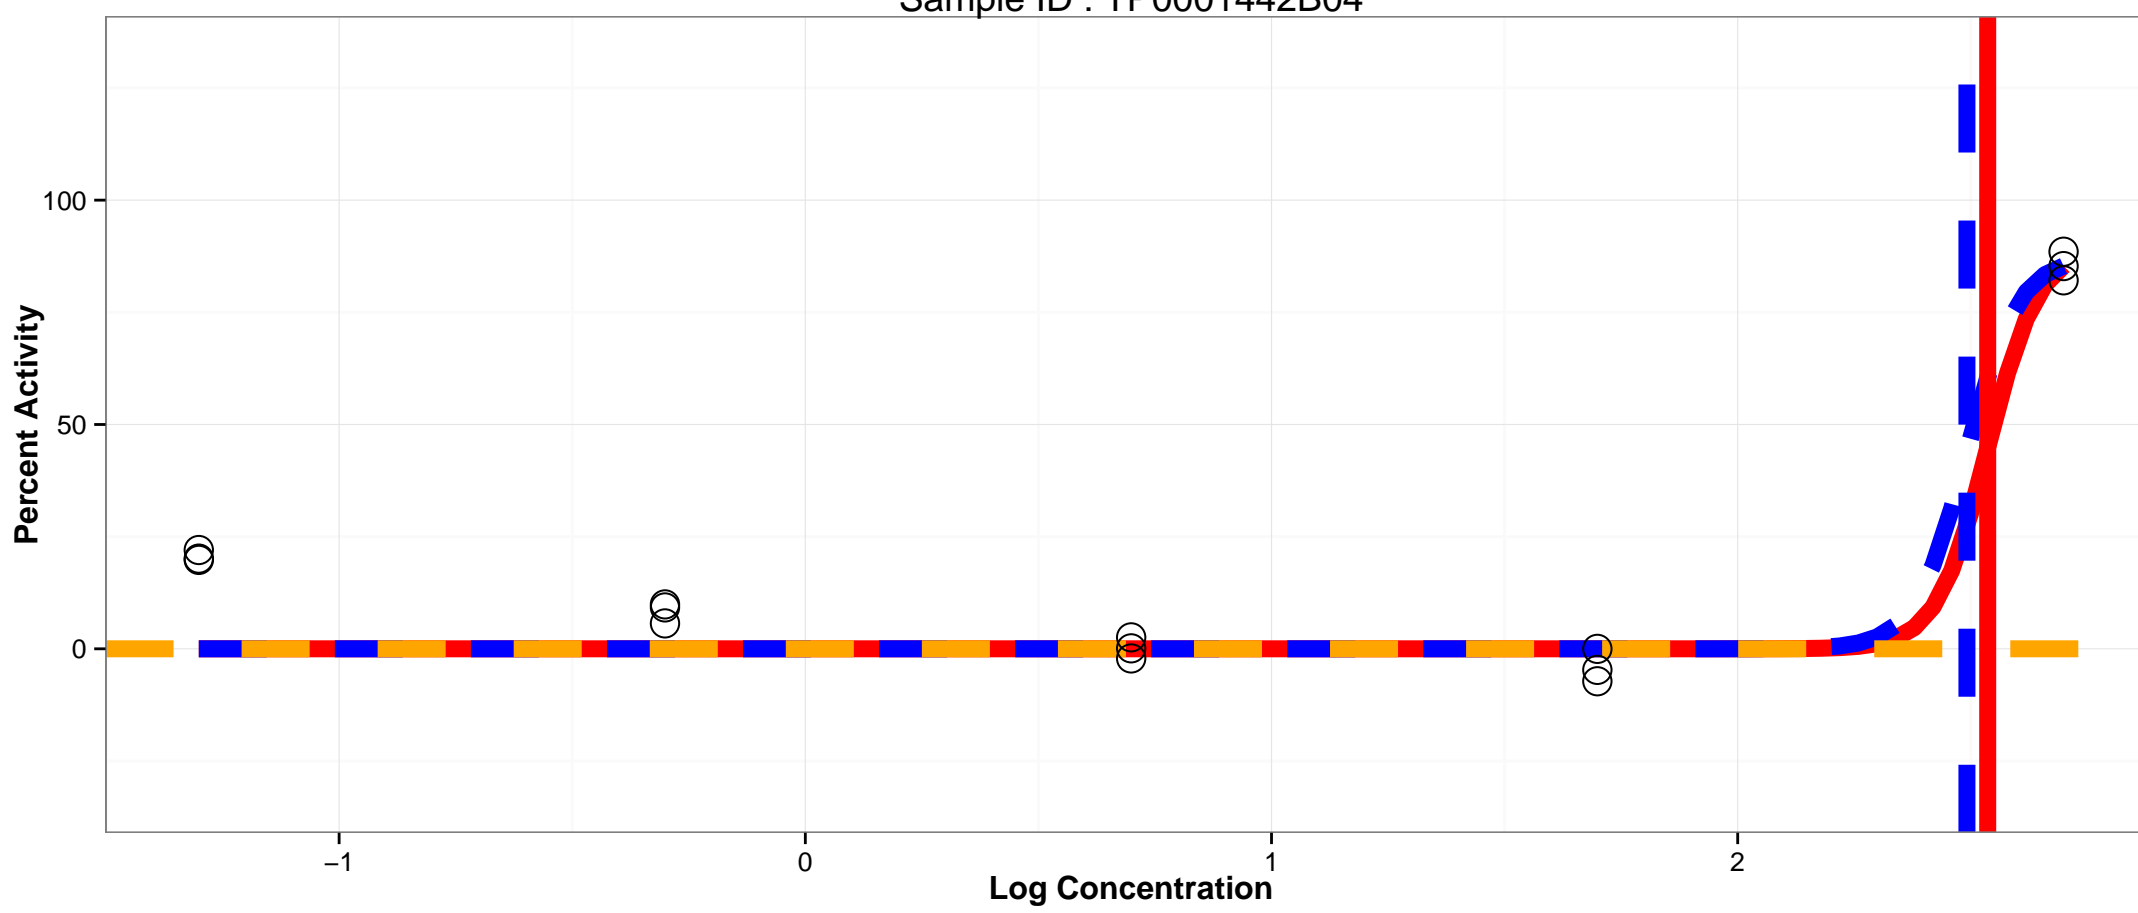

HILL MODEL

|     | tp   | ga   | gw   |
|-----|------|------|------|
| val | 89.6 | 2.54 | 7.98 |
| sd  | NA   | NA   | NA   |

GAIN-LOSS MODEL

|     | tp   | ga   | gw   | la   | lw   |
|-----|------|------|------|------|------|
| val | 87.7 | 2.49 | 7.83 | 3.23 | 4.42 |
| sd  | NA   | NA   | NA   | NA   | NA   |

|      | CNST  | HILL   | GNLS   |
|------|-------|--------|--------|
| AIC  | 151.3 | 120.09 | 124.09 |
| PROB | 0     | 0.88   | 0.12   |
| RMSE | 39.54 | 10.34  | 10.34  |

MAX\_MEAN : 85.3 MAX\_MED : 85.3 BMAD : 3.71  
COFF : 20 HIT-CALL : 1 FITC : 41 ACTP : 1  
FLAGS :

Chemical : 4-Hydroxytamoxifen  
CAS : 68392-35-8

Assay ID 1508 (NHEERL\_TPO\_AUR\_dn)  
Sample ID : TP0001441B11

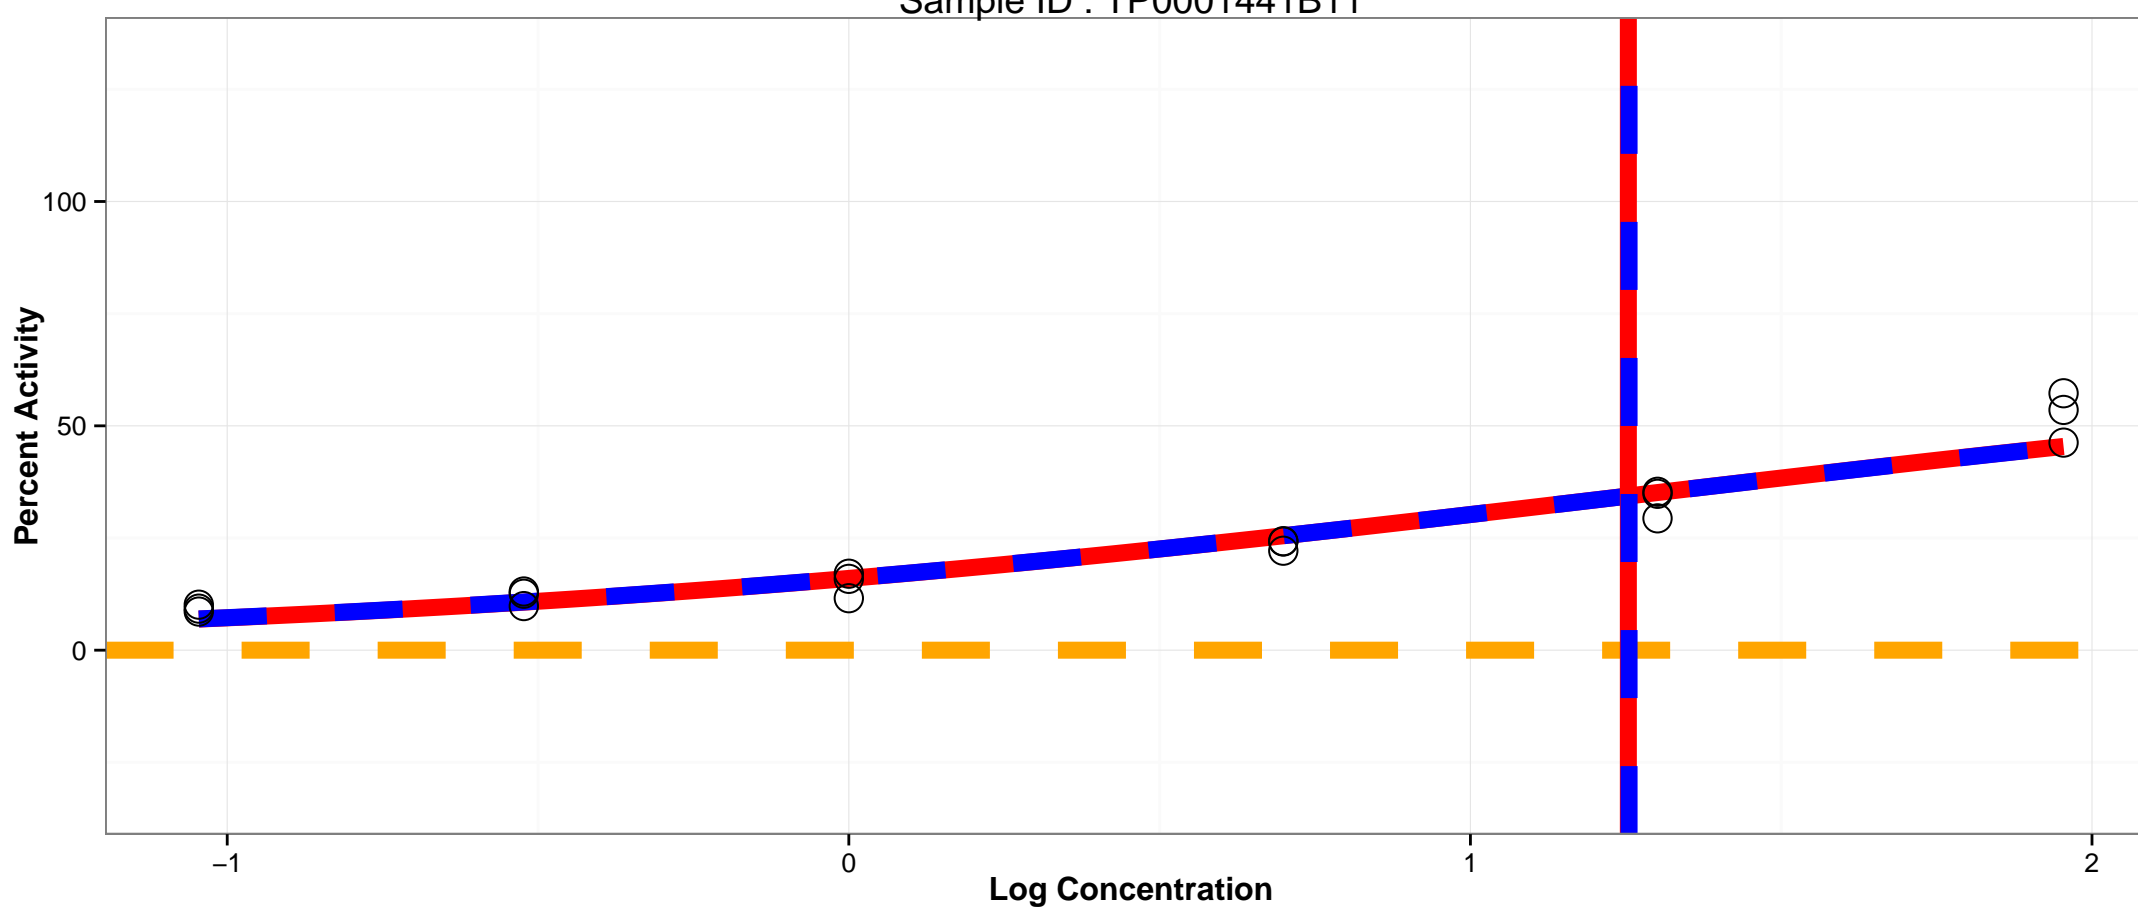

HILL MODEL

|     | tp   | ga    | gw     |
|-----|------|-------|--------|
| val | 68.7 | 1.25  | 0.413  |
| sd  | 11.8 | 0.372 | 0.0532 |

GAIN-LOSS MODEL

|     | tp   | ga    | gw    | la   | lw   |
|-----|------|-------|-------|------|------|
| val | 68.7 | 1.26  | 0.412 | 2.35 | 17.3 |
| sd  | 11.7 | 0.369 | 0.052 | 23.2 | 1010 |

|      | CNST   | HILL   | GNLS   |
|------|--------|--------|--------|
| AIC  | 175.43 | 107.03 | 111.03 |
| PROB | 0      | 0.88   | 0.12   |
| RMSE | 28.53  | 4.11   | 4.12   |

MAX\_MEAN : 52.4 MAX\_MED : 53.6 BMAD : 5.69  
COFF : 20 HIT-CALL : 1 FITC : 42 ACTP : 1  
FLAGS :

Assay ID 1509 (NHEERL\_HEK293T\_CellTiterGLO)  
Sample ID : TP0001441B11

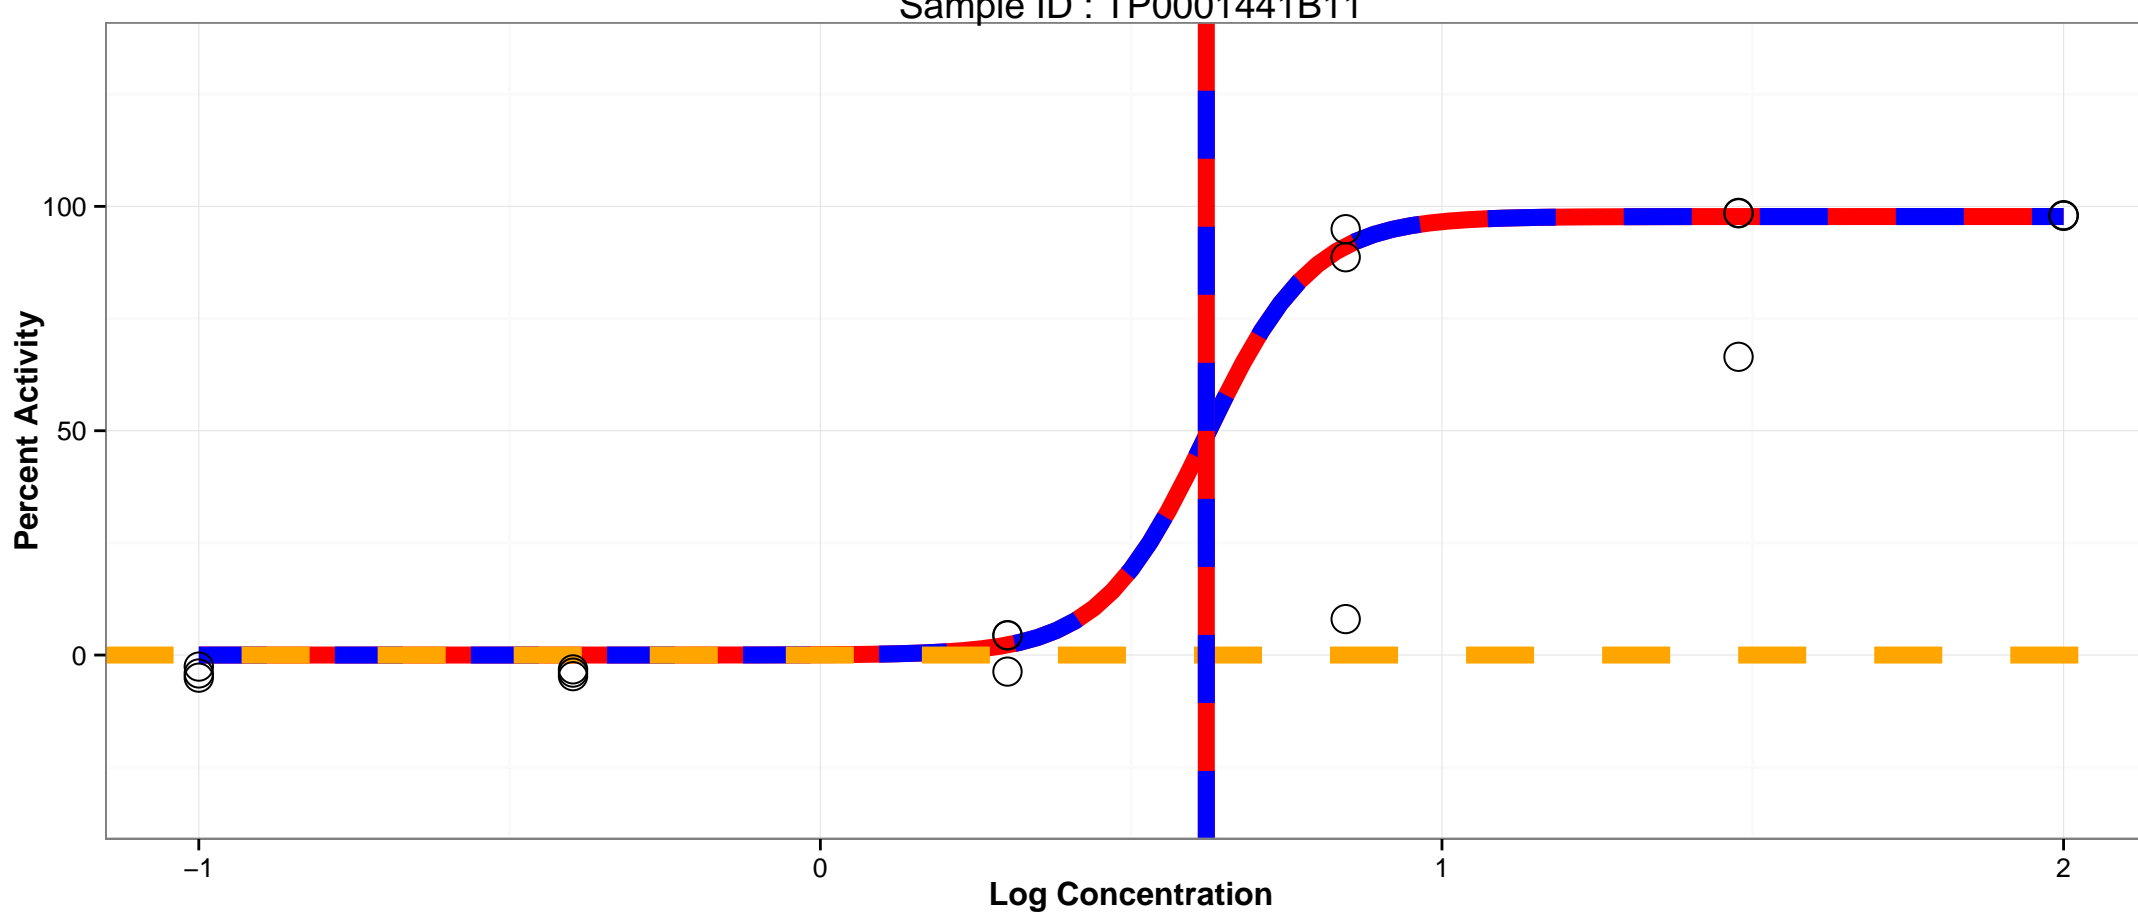

HILL MODEL

|     | tp   | ga     | gw   |
|-----|------|--------|------|
| val | 97.7 | 0.621  | 5.09 |
| sd  | 1.79 | 0.0549 | 1.14 |

GAIN-LOSS MODEL

|     | tp   | ga     | gw   | la   | lw   |
|-----|------|--------|------|------|------|
| val | 97.7 | 0.621  | 5.09 | 2.57 | 13.1 |
| sd  | 1.79 | 0.0549 | 1.14 | 231  | 5270 |

|      | CNST   | HILL   | GNLS   |
|------|--------|--------|--------|
| AIC  | 203.06 | 141.55 | 145.55 |
| PROB | 0      | 0.88   | 0.12   |
| RMSE | 62.23  | 21.14  | 21.14  |

MAX\_MEAN : 98 MAX\_MED : 98.5 BMAD : 5.54  
COFF : 20 HIT-CALL : 1 FITC : 41 ACTP : 1  
FLAGS : 10

Assay ID 1848 (NHEERL\_Quantilum\_inhib\_2\_dn)  
Sample ID : TP0001441B11

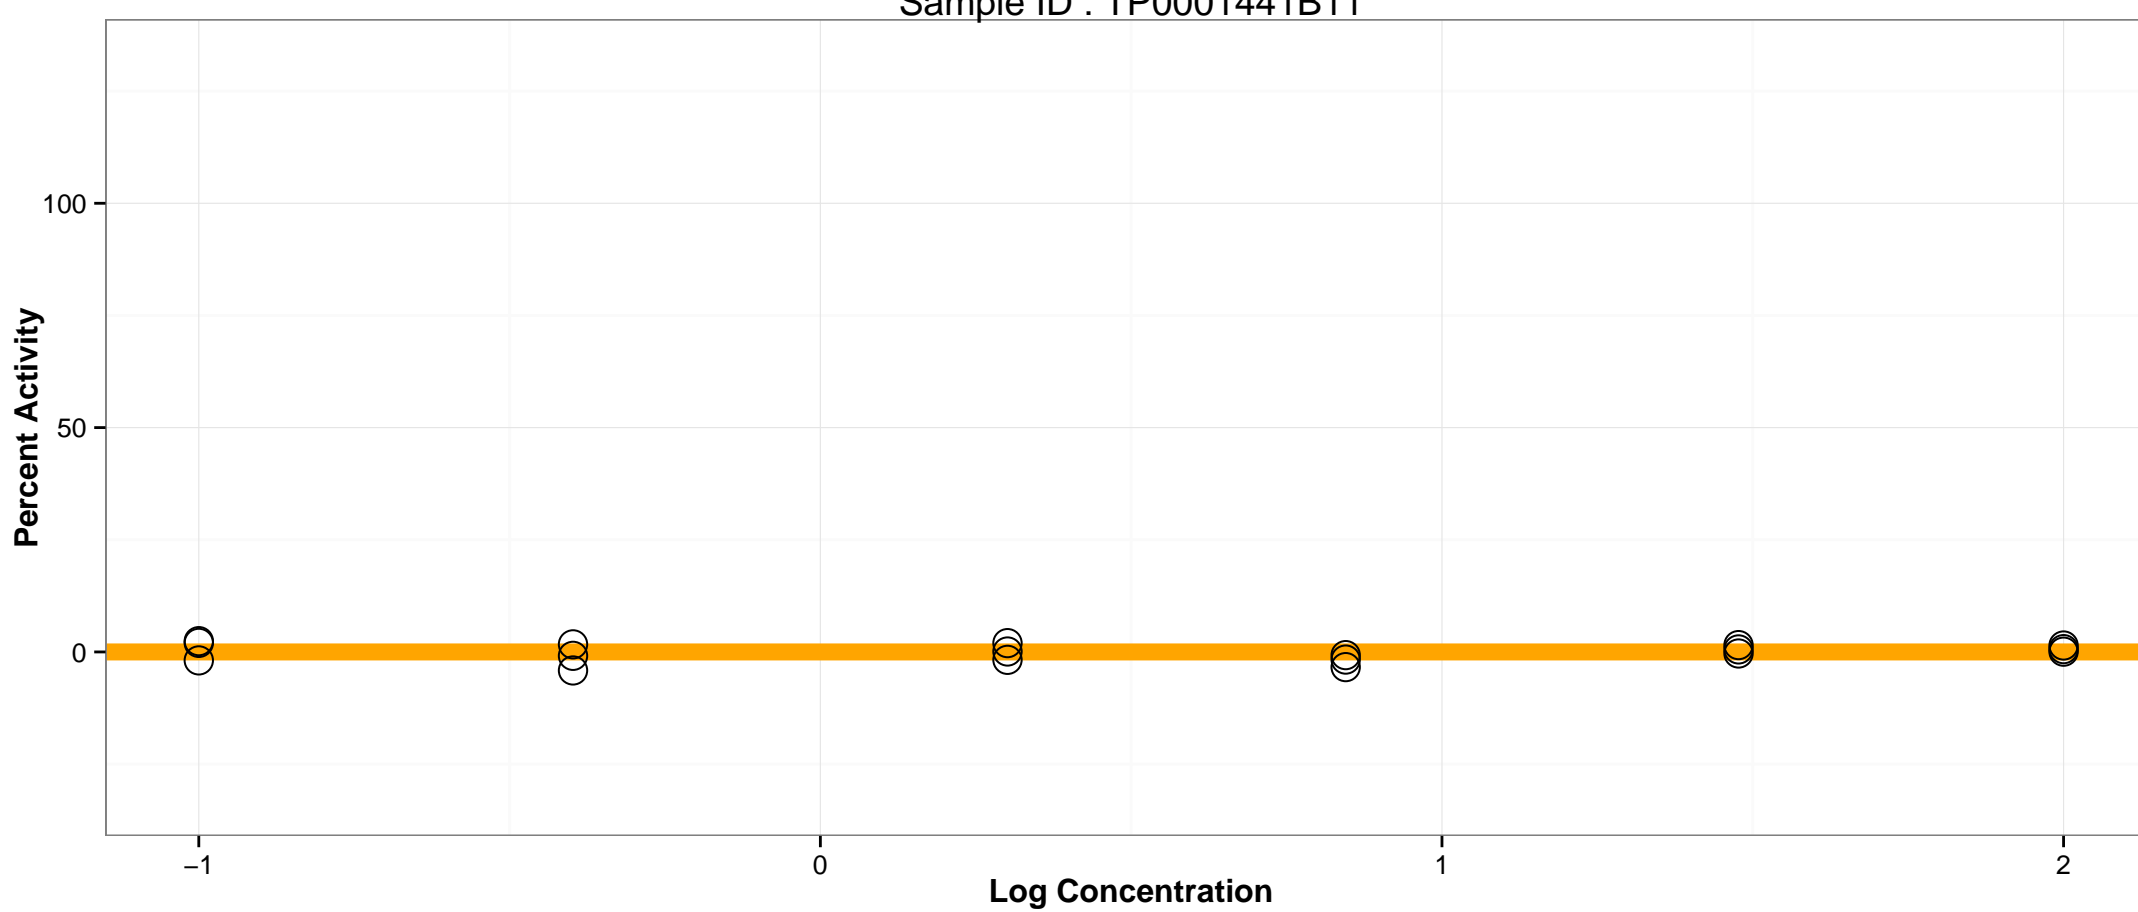

HILL MODEL

HILL MODEL: Not applicable

GAIN-LOSS MODEL

GNLS MODEL: Not applicable

|      | CNST  | HILL | GNLS |
|------|-------|------|------|
| AIC  | 76.64 | NA   | NA   |
| PROB | 1     | NA   | NA   |
| RMSE | 1.84  | NA   | NA   |

MAX\_MEAN : 0.858 MAX\_MED : 2.03 BMAD : 8.58  
COFF : 20 HIT-CALL : 0 FITC : 4 ACTP : 0  
FLAGS :

Assay ID 1508 (NHEERL\_TPO\_AUR\_dn)  
Sample ID : TX015181

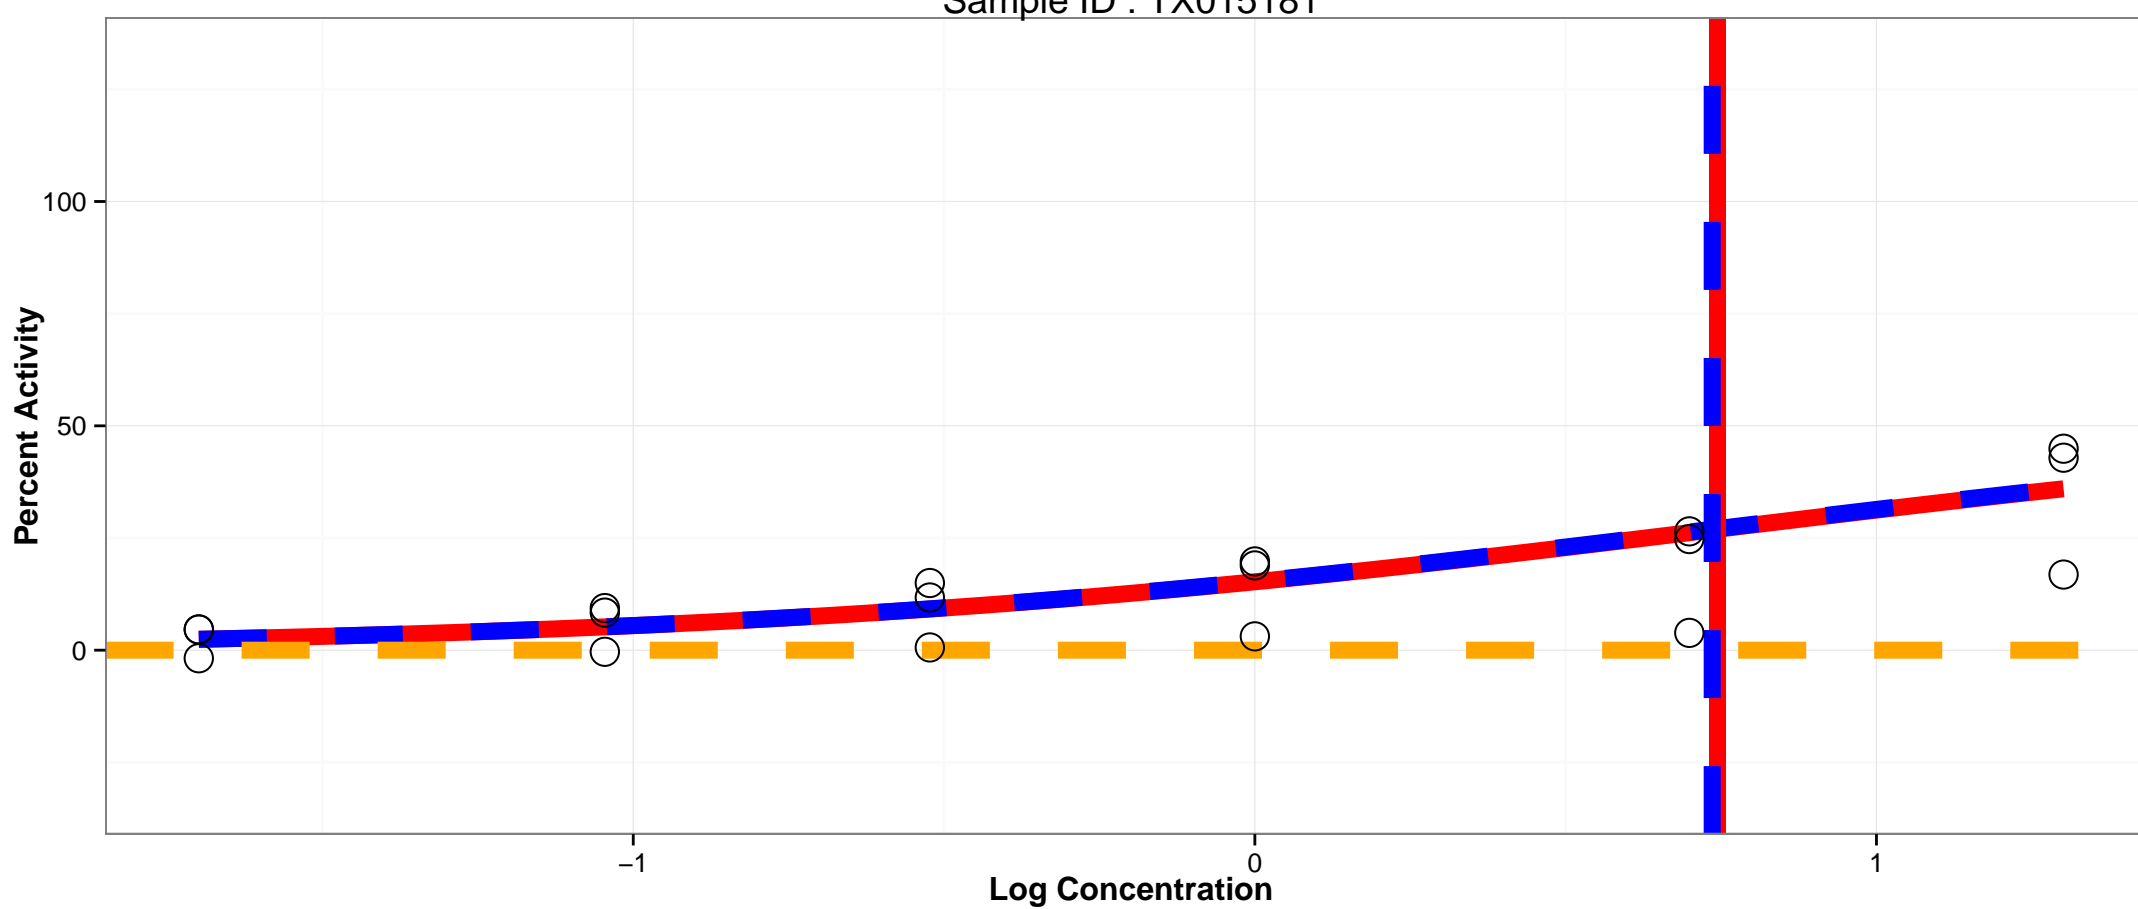

HILL MODEL

|     | tp   | ga    | gw    |
|-----|------|-------|-------|
| val | 53.9 | 0.744 | 0.543 |
| sd  | 26.7 | 0.782 | 0.173 |

GAIN-LOSS MODEL

|     | tp   | ga    | gw    | la   | lw    |
|-----|------|-------|-------|------|-------|
| val | 53.9 | 0.736 | 0.545 | 2.02 | 12.5  |
| sd  | 27.4 | 0.802 | 0.173 | 1430 | 24800 |

|      | CNST   | HILL   | GNLS   |
|------|--------|--------|--------|
| AIC  | 159.65 | 135.98 | 139.97 |
| PROB | 0      | 0.88   | 0.12   |
| RMSE | 19.44  | 8.74   | 8.77   |

MAX\_MEAN : 34.9 MAX\_MED : 42.9 BMAD : 5.69  
COFF : 20 HIT-CALL : 1 FITC : 42 ACTP : 1  
FLAGS :

Assay ID 1509 (NHEERL\_HEK293T\_CellTiterGLO)  
Sample ID : TX015181

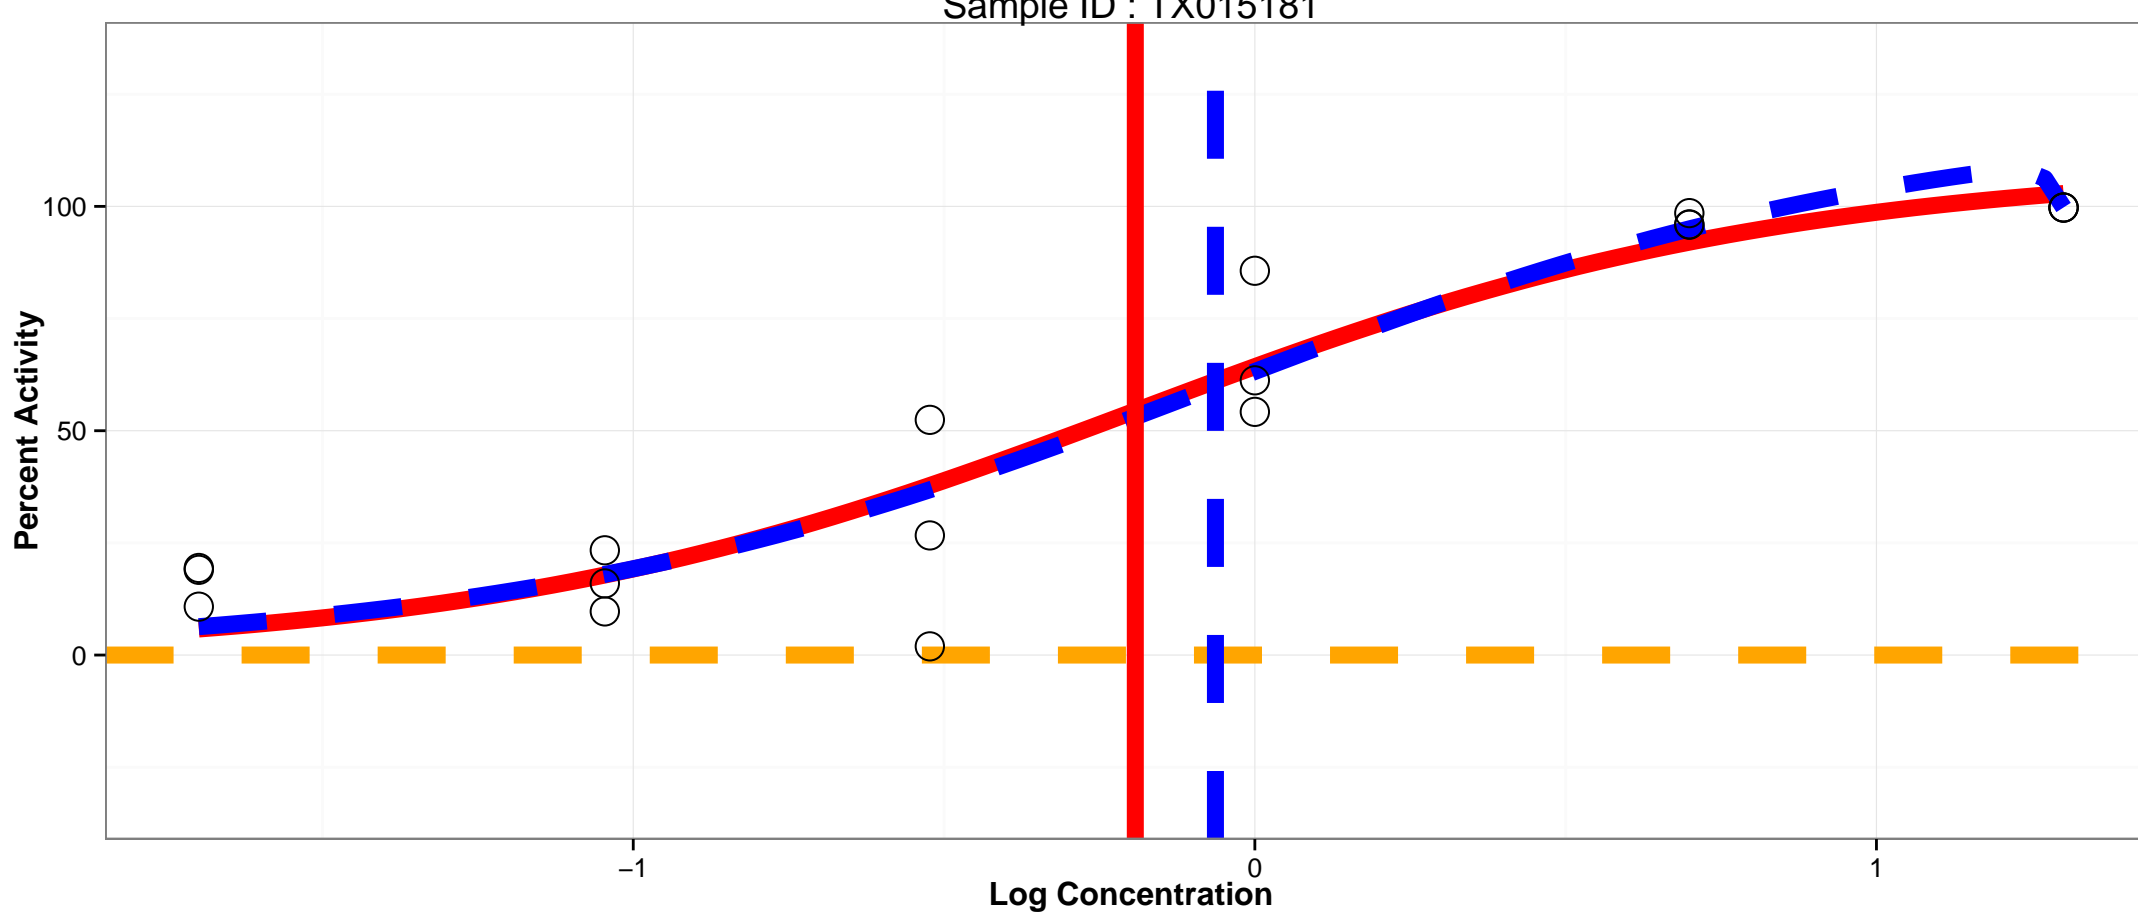

HILL MODEL

|     | tp   | ga     | gw    |
|-----|------|--------|-------|
| val | 109  | -0.192 | 0.829 |
| sd  | 8.21 | 0.144  | 0.193 |

GAIN-LOSS MODEL

|     | tp  | ga      | gw    | la   | lw   |
|-----|-----|---------|-------|------|------|
| val | 120 | -0.0634 | 0.766 | 1.36 | 17.8 |
| sd  | NA  | NA      | NA    | NA   | NA   |

|      | CNST   | HILL   | GNLS   |
|------|--------|--------|--------|
| AIC  | 205.94 | 148.21 | 150.26 |
| PROB | 0      | 0.74   | 0.26   |
| RMSE | 65.5   | 12.42  | 12.07  |

MAX\_MEAN : 99.8 MAX\_MED : 99.8 BMAD : 5.54  
COFF : 20 HIT-CALL : 1 FITC : 42 ACTP : 1  
FLAGS :

Assay ID 1848 (NHEERL\_Quantilum\_inhib\_2\_dn)  
Sample ID : TX015181

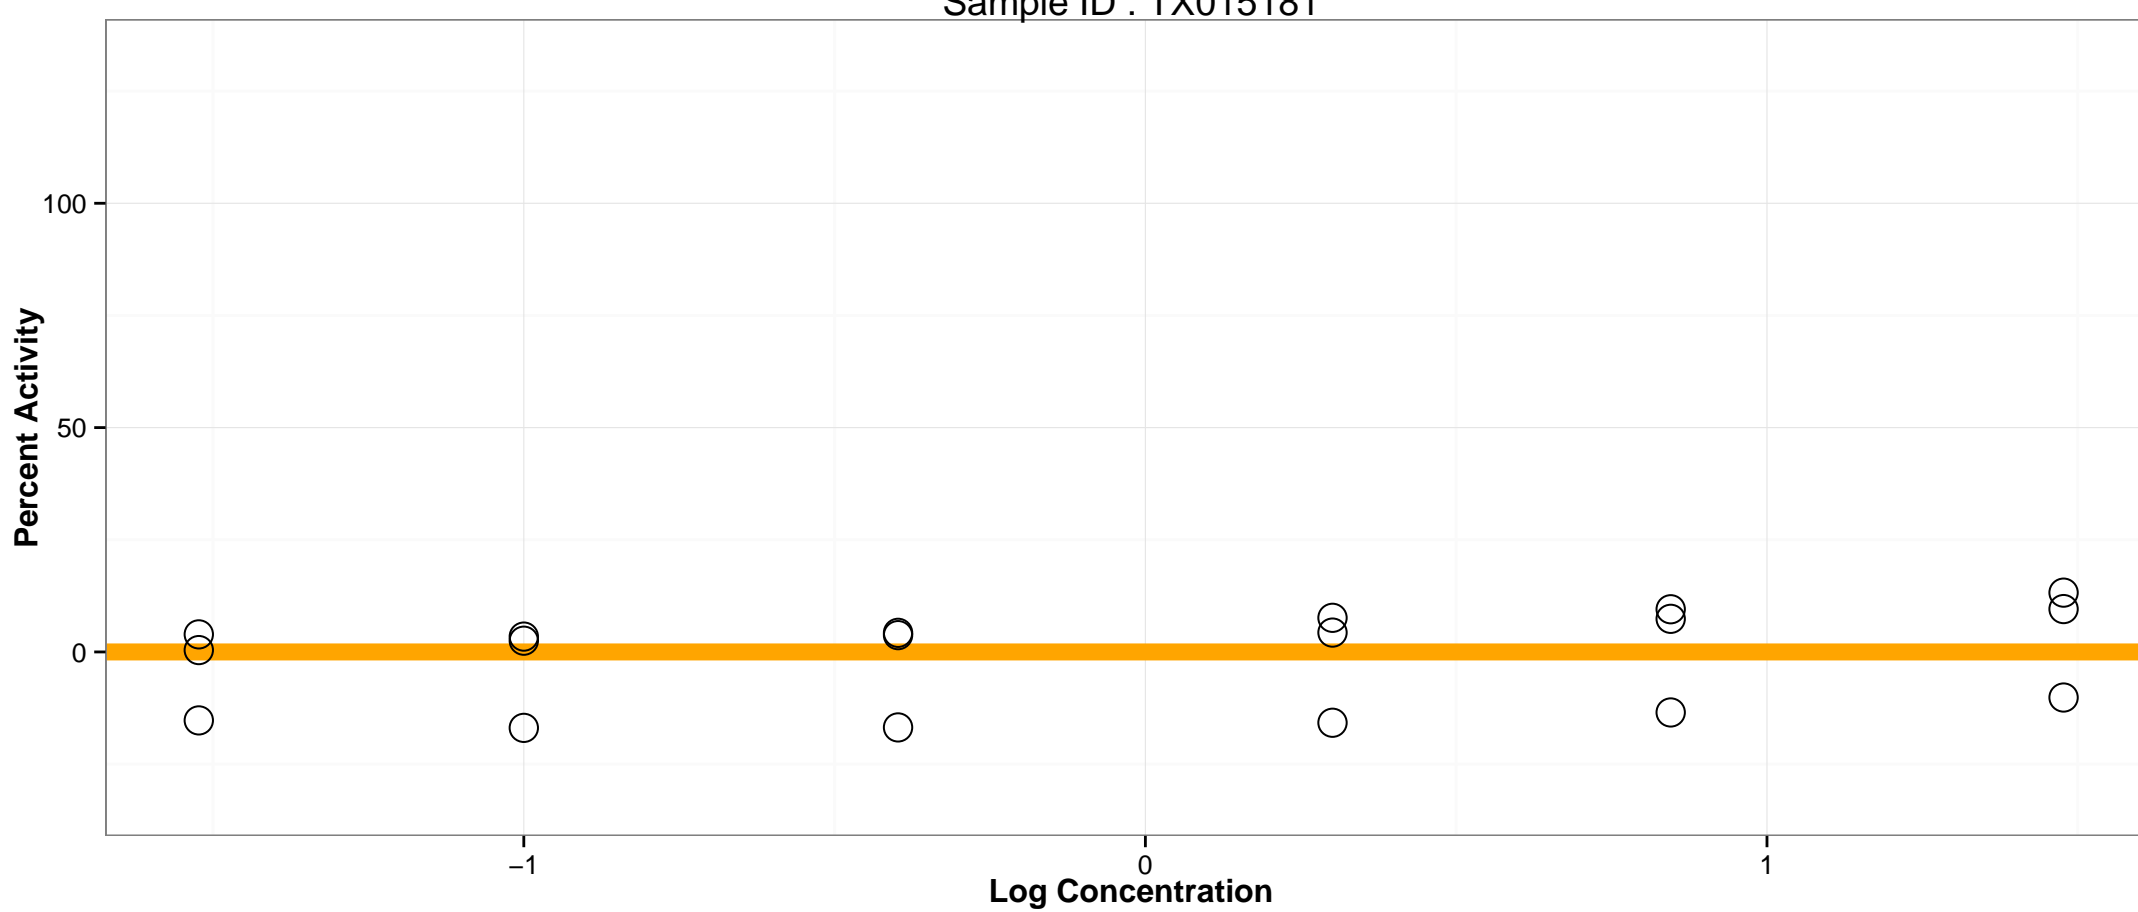

HILL MODEL

HILL MODEL: Not applicable

GAIN-LOSS MODEL

GNLS MODEL: Not applicable

|      | CNST   | HILL | GNLS |
|------|--------|------|------|
| AIC  | 139.37 | NA   | NA   |
| PROB | 1      | NA   | NA   |
| RMSE | 10.24  | NA   | NA   |

MAX\_MEAN : 4.22 MAX\_MED : 9.57 BMAD : 8.58  
COFF : 20 HIT-CALL : 0 FITC : 4 ACTP : 0  
FLAGS :

Assay ID 1508 (NHEERL\_TPO\_AUR\_dn)  
Sample ID : TP0001441C01

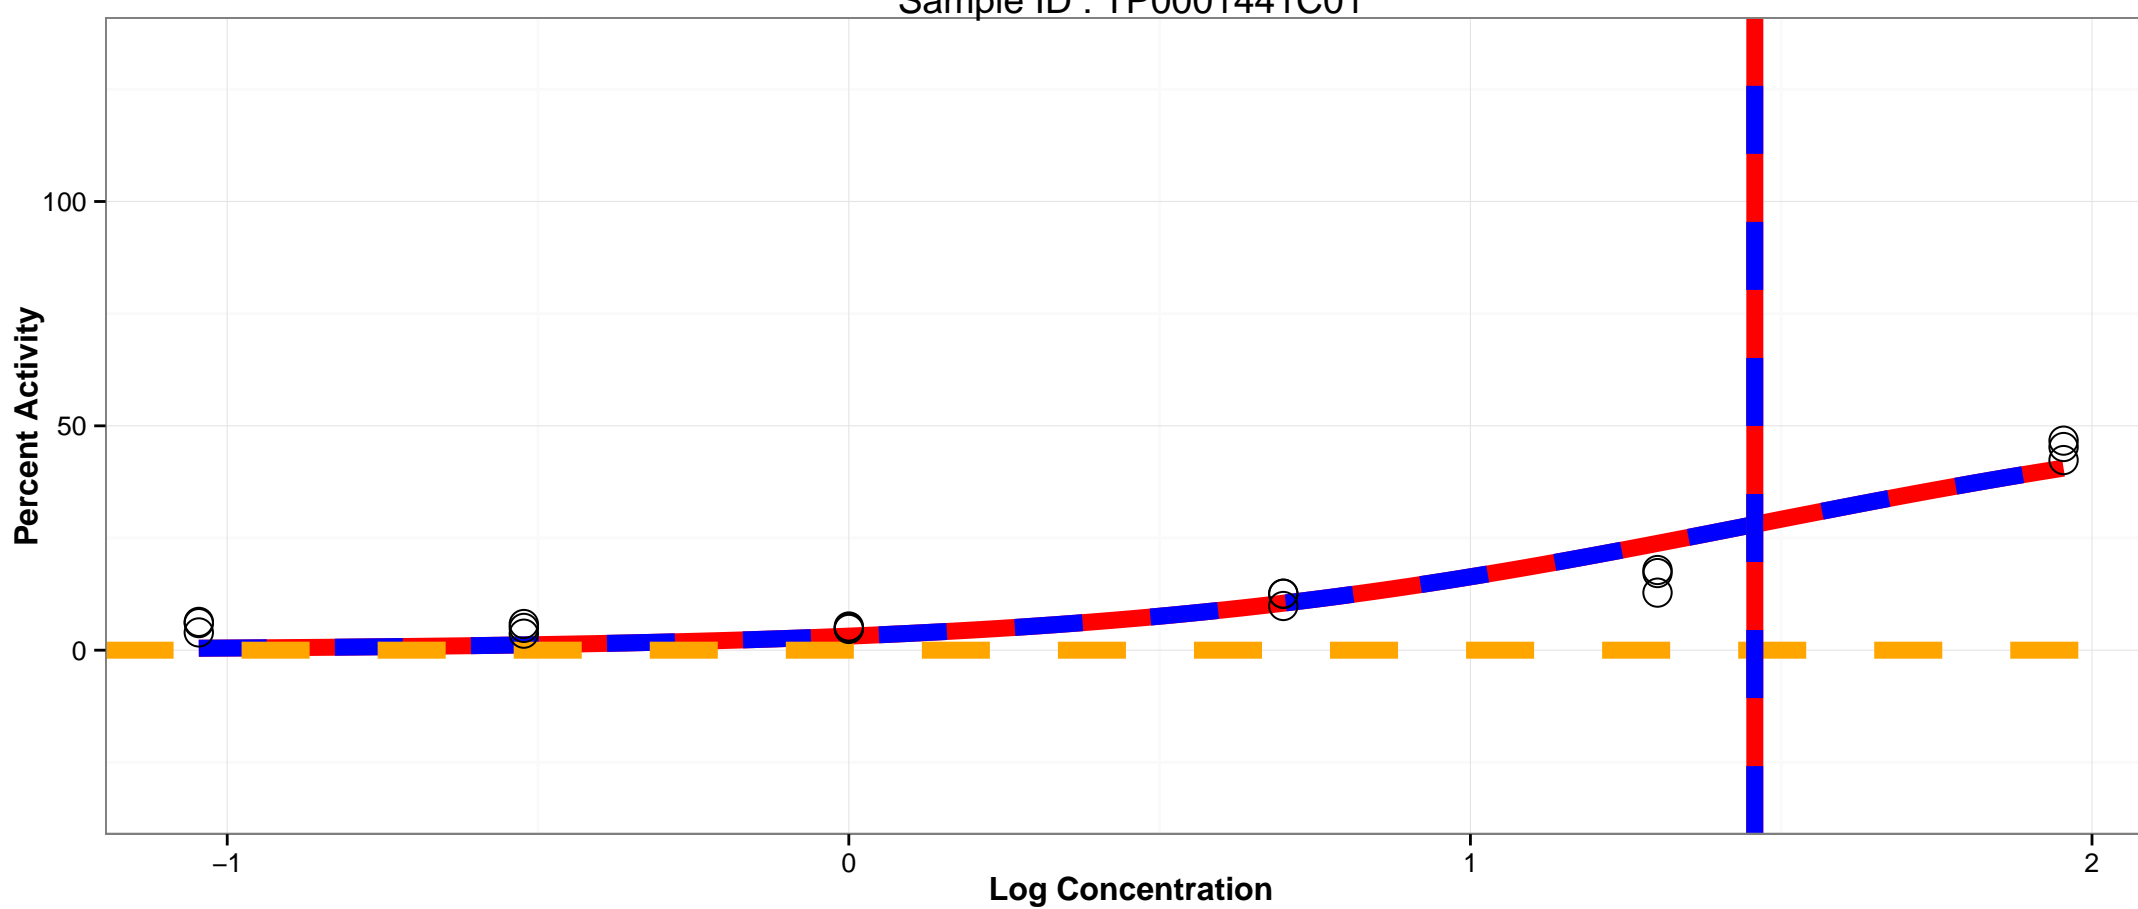

HILL MODEL

|     | tp   | ga    | gw    |
|-----|------|-------|-------|
| val | 56.1 | 1.46  | 0.842 |
| sd  | 10.4 | 0.214 | 0.181 |

GAIN-LOSS MODEL

|     | tp   | ga    | gw    | la   | lw   |
|-----|------|-------|-------|------|------|
| val | 56.1 | 1.46  | 0.842 | 3.65 | 5.04 |
| sd  | 10.4 | 0.215 | 0.181 | 986  | 2930 |

|      | CNST   | HILL   | GNLS   |
|------|--------|--------|--------|
| AIC  | 159.55 | 116.86 | 120.86 |
| PROB | 0      | 0.88   | 0.12   |
| RMSE | 20.37  | 4.74   | 4.74   |

MAX\_MEAN : 44.8 MAX\_MED : 45.3 BMAD : 5.69  
COFF : 20 HIT-CALL : 1 FITC : 42 ACTP : 1  
FLAGS :

Assay ID 1509 (NHEERL\_HEK293T\_CellTiterGLO)  
Sample ID : TP0001441C01

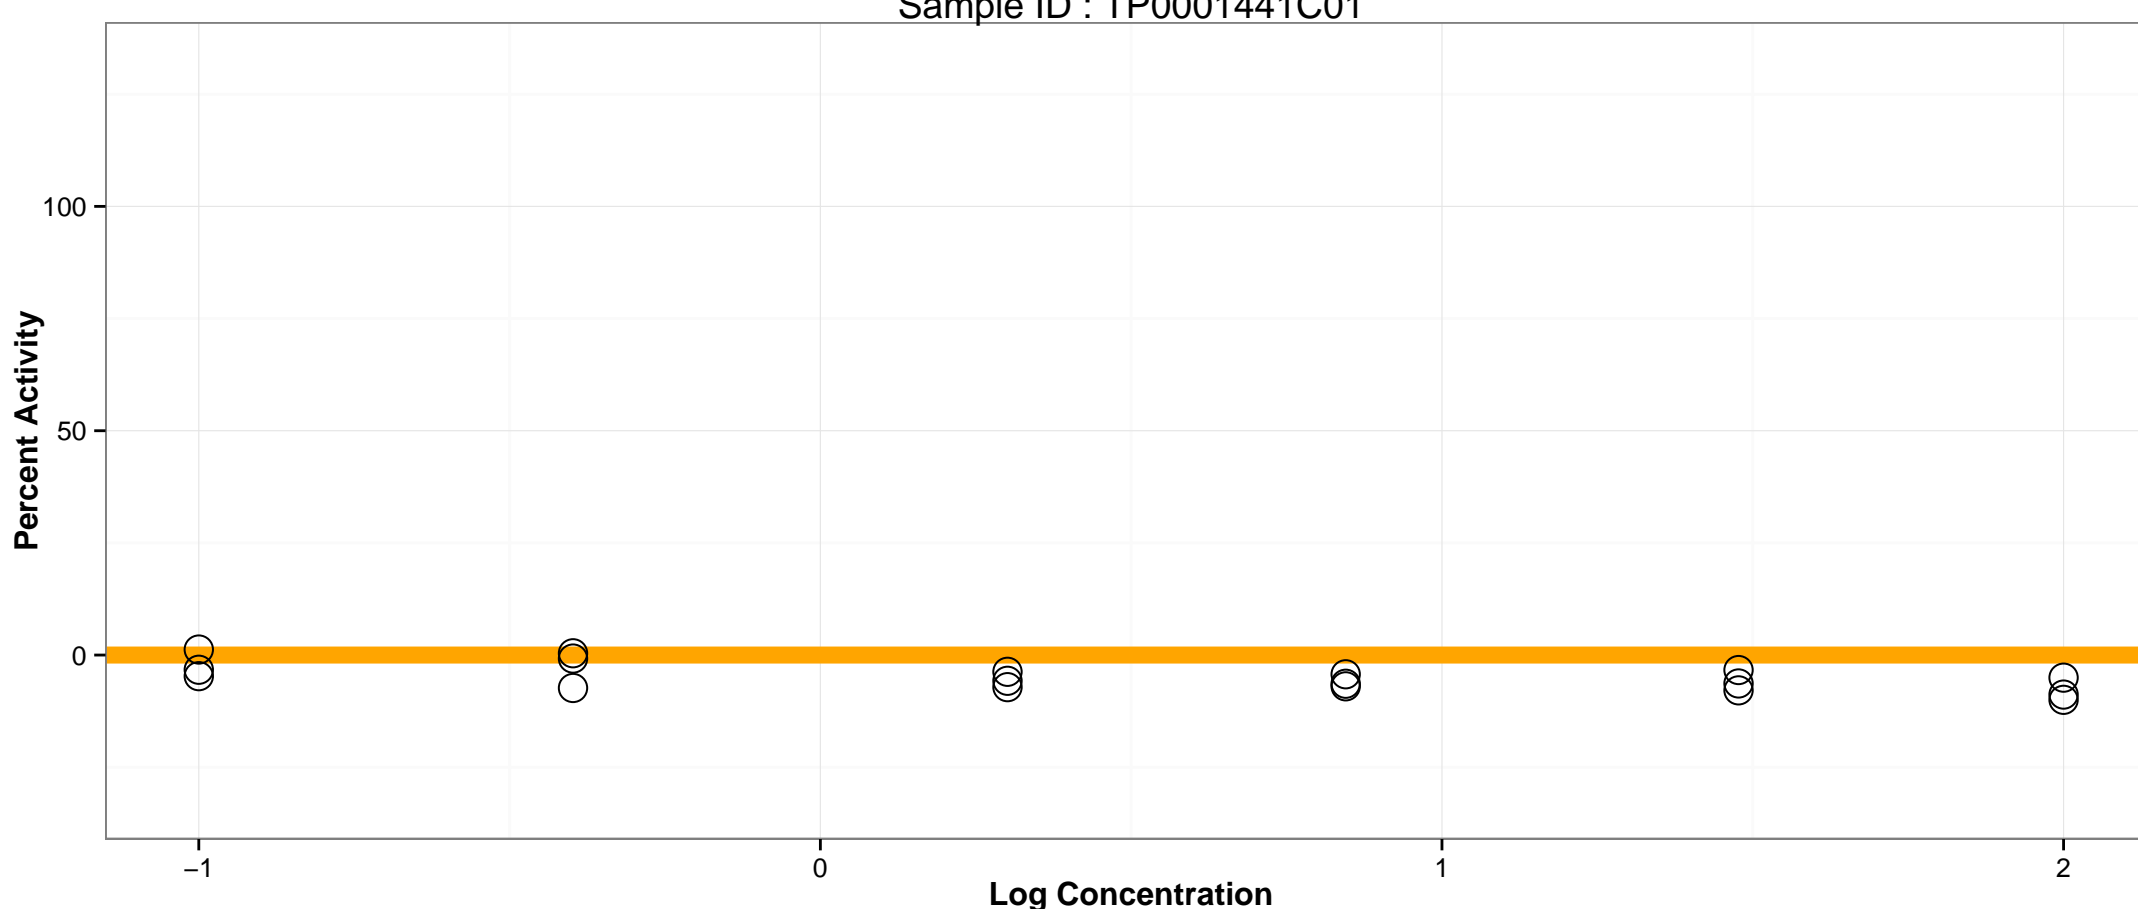

HILL MODEL

HILL MODEL: Not applicable

GAIN-LOSS MODEL

GNLS MODEL: Not applicable

|      | CNST   | HILL | GNLS |
|------|--------|------|------|
| AIC  | 119.54 | NA   | NA   |
| PROB | 1      | NA   | NA   |
| RMSE | 5.81   | NA   | NA   |

MAX\_MEAN : -2.24 MAX\_MED : -0.769 BMAD : 5.54  
COFF : 20 HIT-CALL : 0 FITC : 4 ACTP : 0  
FLAGS :

Assay ID 1848 (NHEERL\_Quantilum\_inhib\_2\_dn)  
Sample ID : TP0001441C01

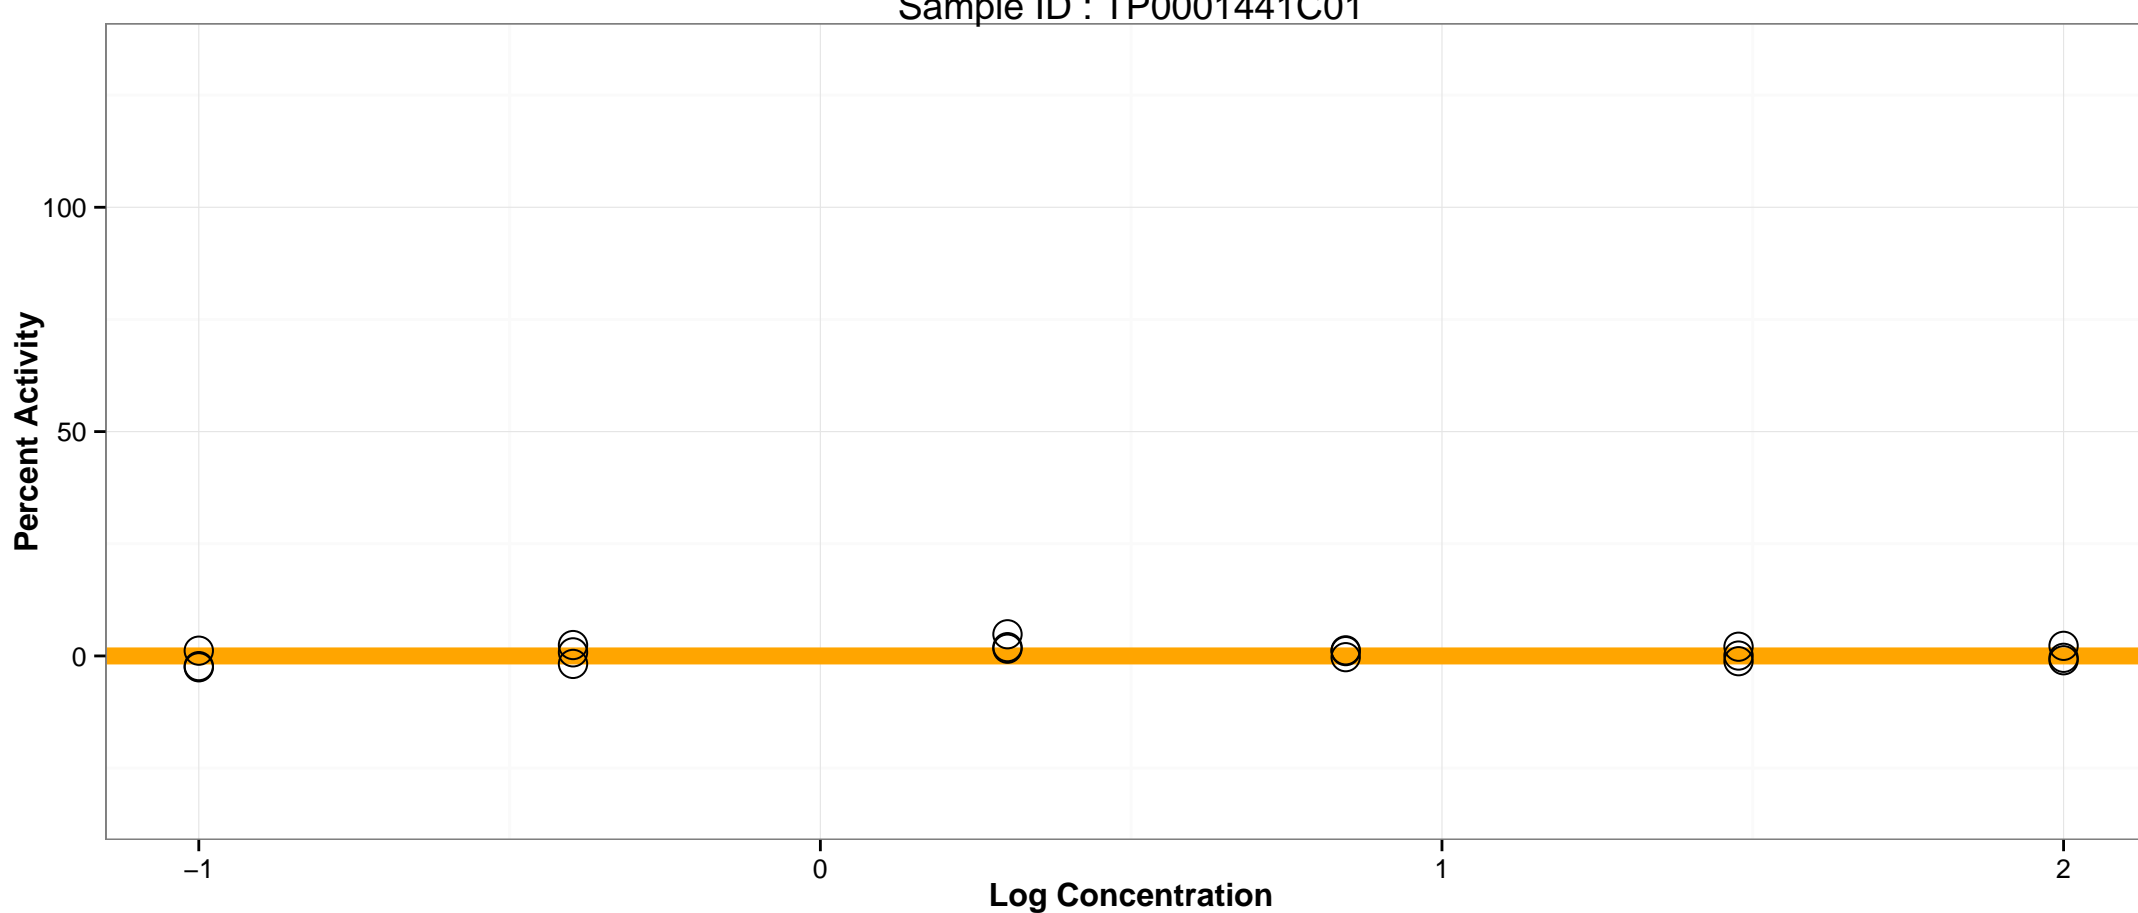

HILL MODEL

HILL MODEL: Not applicable

GAIN-LOSS MODEL

GNLS MODEL: Not applicable

|      | CNST  | HILL | GNLS |
|------|-------|------|------|
| AIC  | 78.14 | NA   | NA   |
| PROB | 1     | NA   | NA   |
| RMSE | 1.93  | NA   | NA   |

MAX\_MEAN : 2.81 MAX\_MED : 1.97 BMAD : 8.58  
COFF : 20 HIT-CALL : 0 FITC : 4 ACTP : 0  
FLAGS :

Assay ID 1508 (NHEERL\_TPO\_AUR\_dn)  
Sample ID : TX006158

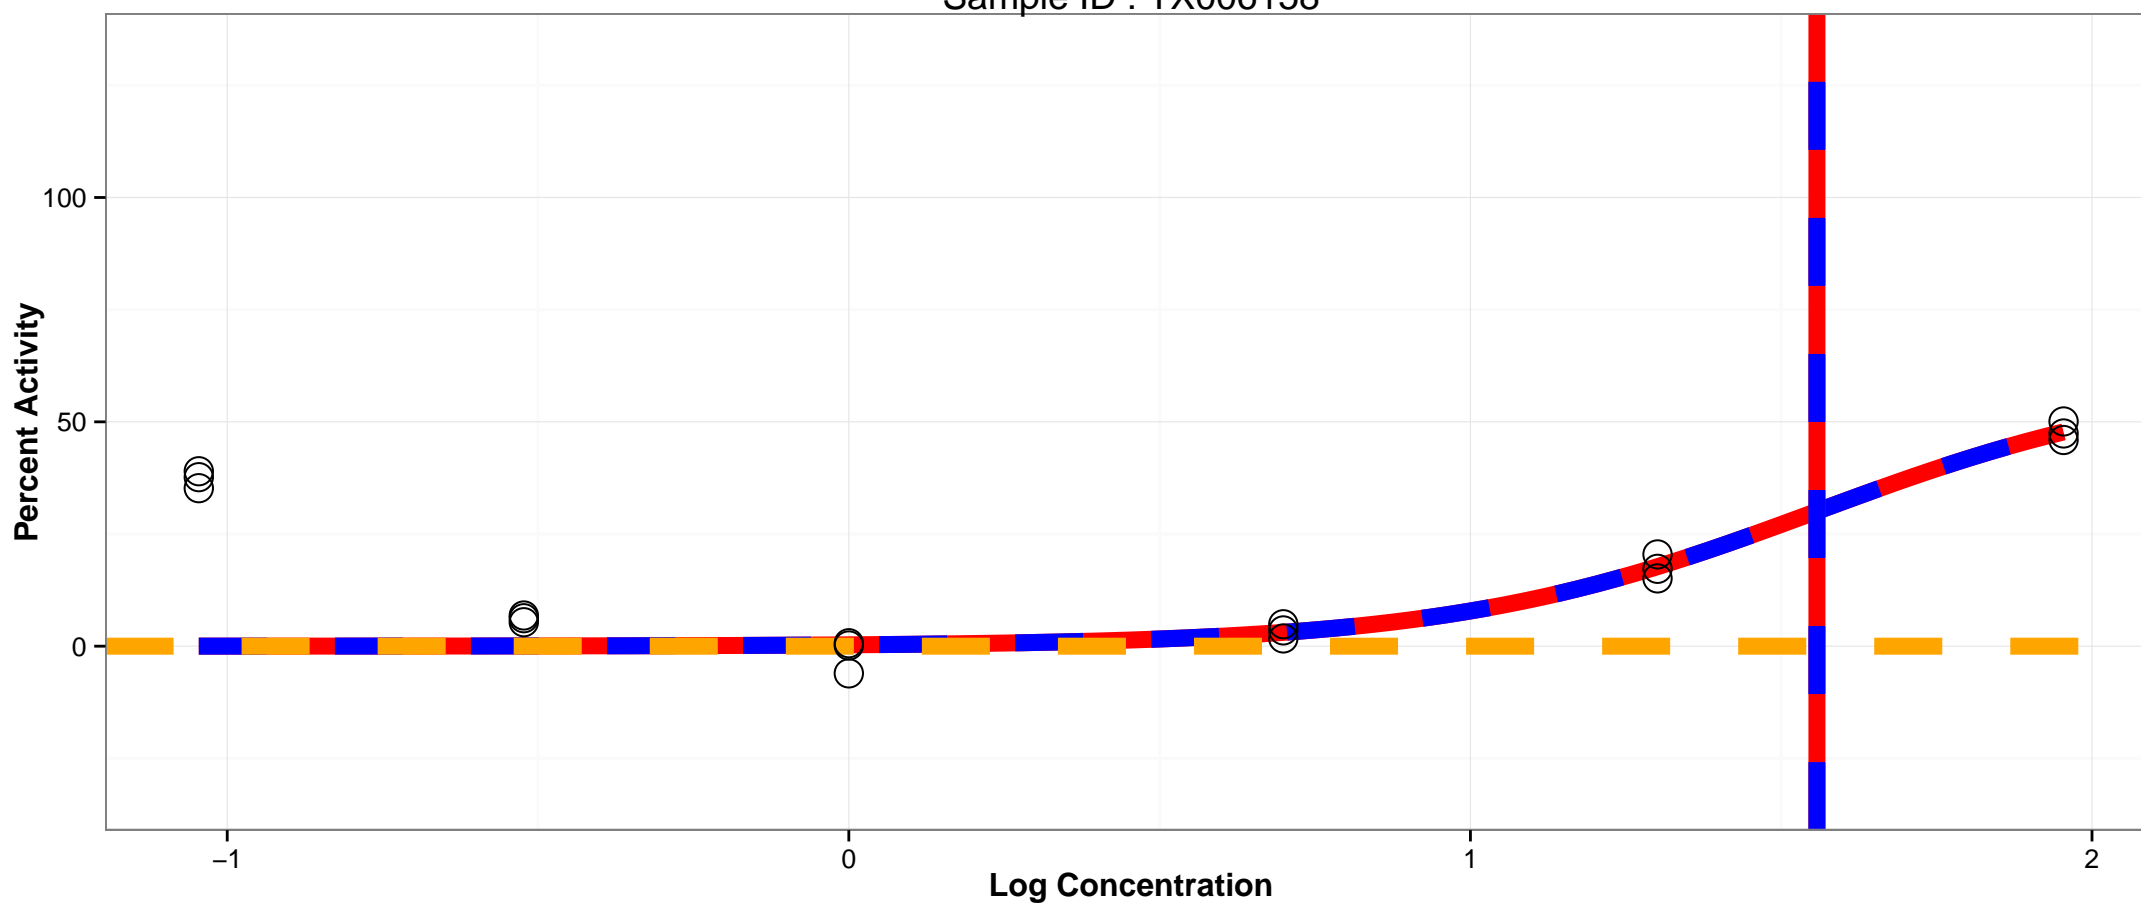

HILL MODEL

|     | tp   | ga    | gw    |
|-----|------|-------|-------|
| val | 60.1 | 1.56  | 1.48  |
| sd  | 26.5 | 0.372 | 0.929 |

GAIN-LOSS MODEL

|     | tp   | ga    | gw    | la   | lw      |
|-----|------|-------|-------|------|---------|
| val | 60.1 | 1.56  | 1.48  | 2.87 | 15.1    |
| sd  | 26.5 | 0.372 | 0.929 | 5760 | 2680000 |

|      | CNST  | HILL   | GNLS   |
|------|-------|--------|--------|
| AIC  | 171.1 | 148.93 | 152.93 |
| PROB | 0     | 0.88   | 0.12   |
| RMSE | 26.02 | 15.57  | 15.57  |

MAX\_MEAN : 47.8 MAX\_MED : 47.4 BMAD : 5.69  
COFF : 20 HIT-CALL : 1 FITC : 42 ACTP : 1  
FLAGS :

Assay ID 1509 (NHEERL\_HEK293T\_CellTiterGLO)  
Sample ID : TX006158

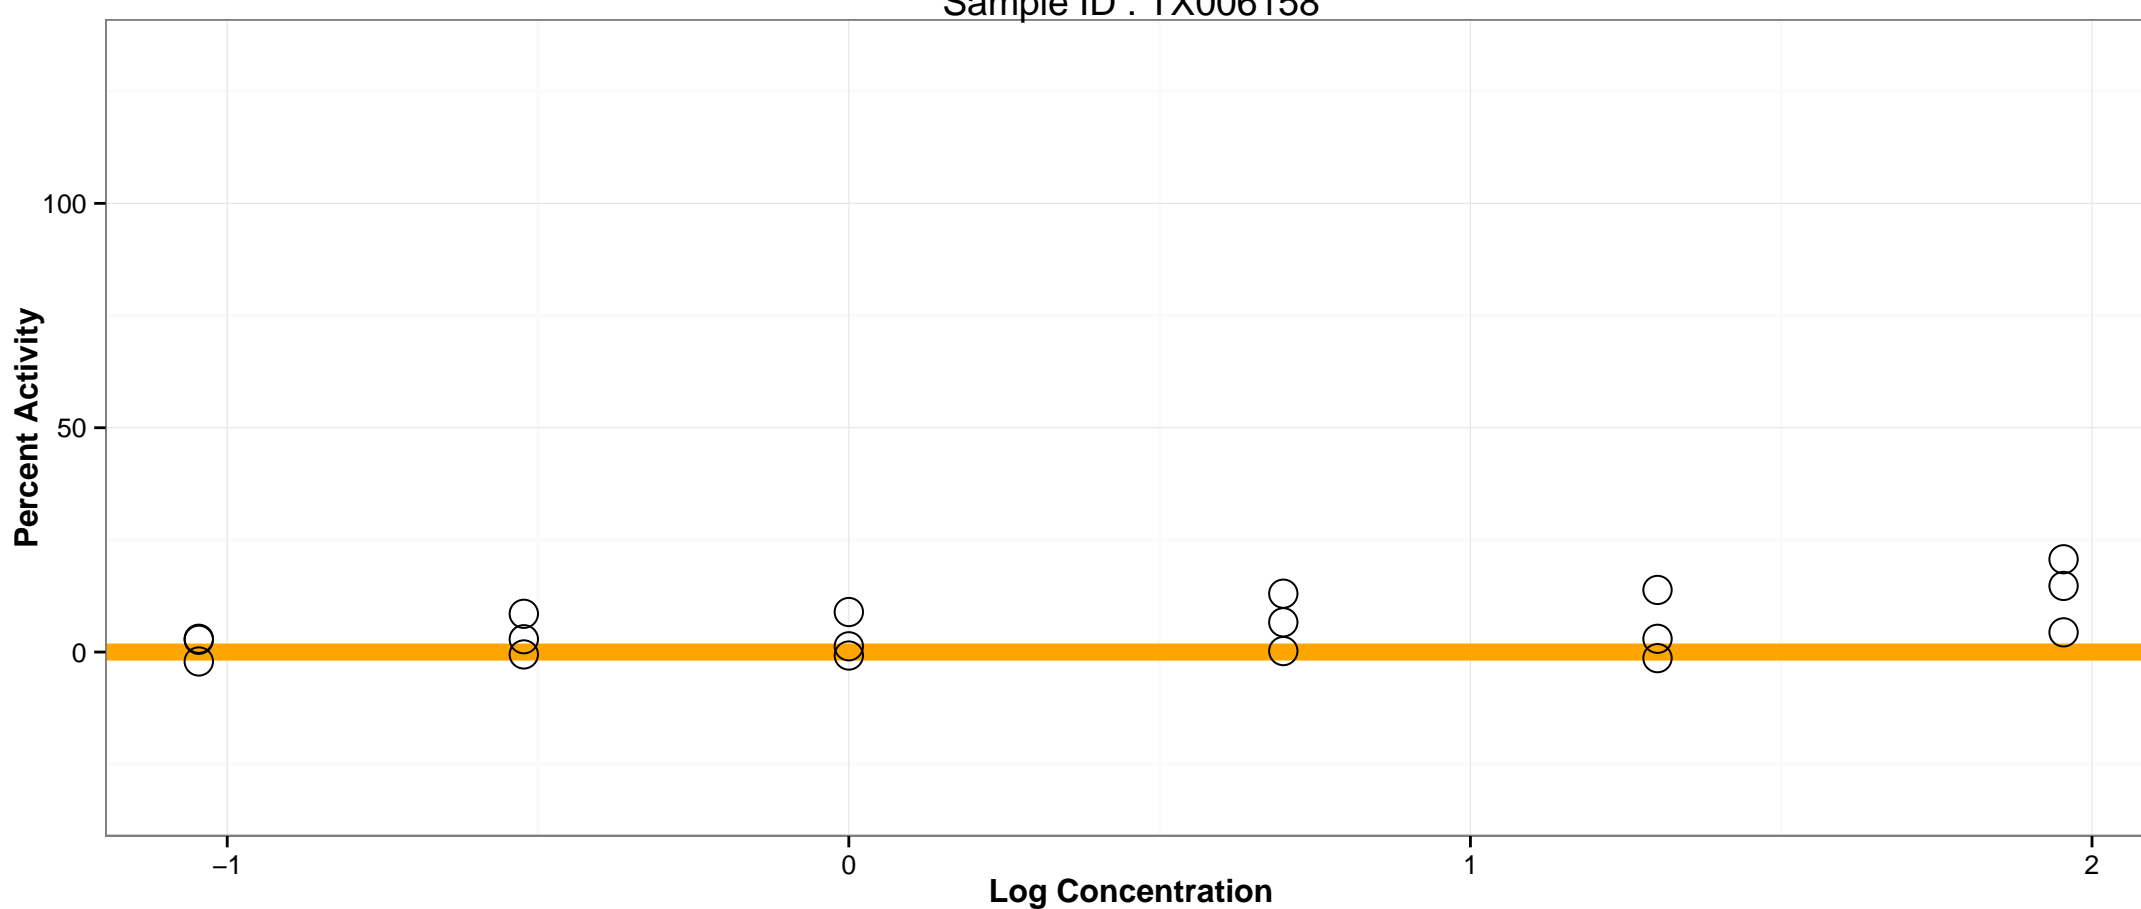

HILL MODEL

HILL MODEL: Not applicable

GAIN-LOSS MODEL

GNLS MODEL: Not applicable

|      | CNST   | HILL | GNLS |
|------|--------|------|------|
| AIC  | 129.05 | NA   | NA   |
| PROB | 1      | NA   | NA   |
| RMSE | 8.39   | NA   | NA   |

MAX\_MEAN : 13.3 MAX\_MED : 14.8 BMAD : 5.54  
COFF : 20 HIT-CALL : 0 FITC : 4 ACTP : 0  
FLAGS :

Assay ID 1848 (NHEERL\_Quantilum\_inhib\_2\_dn)  
Sample ID : TX006158

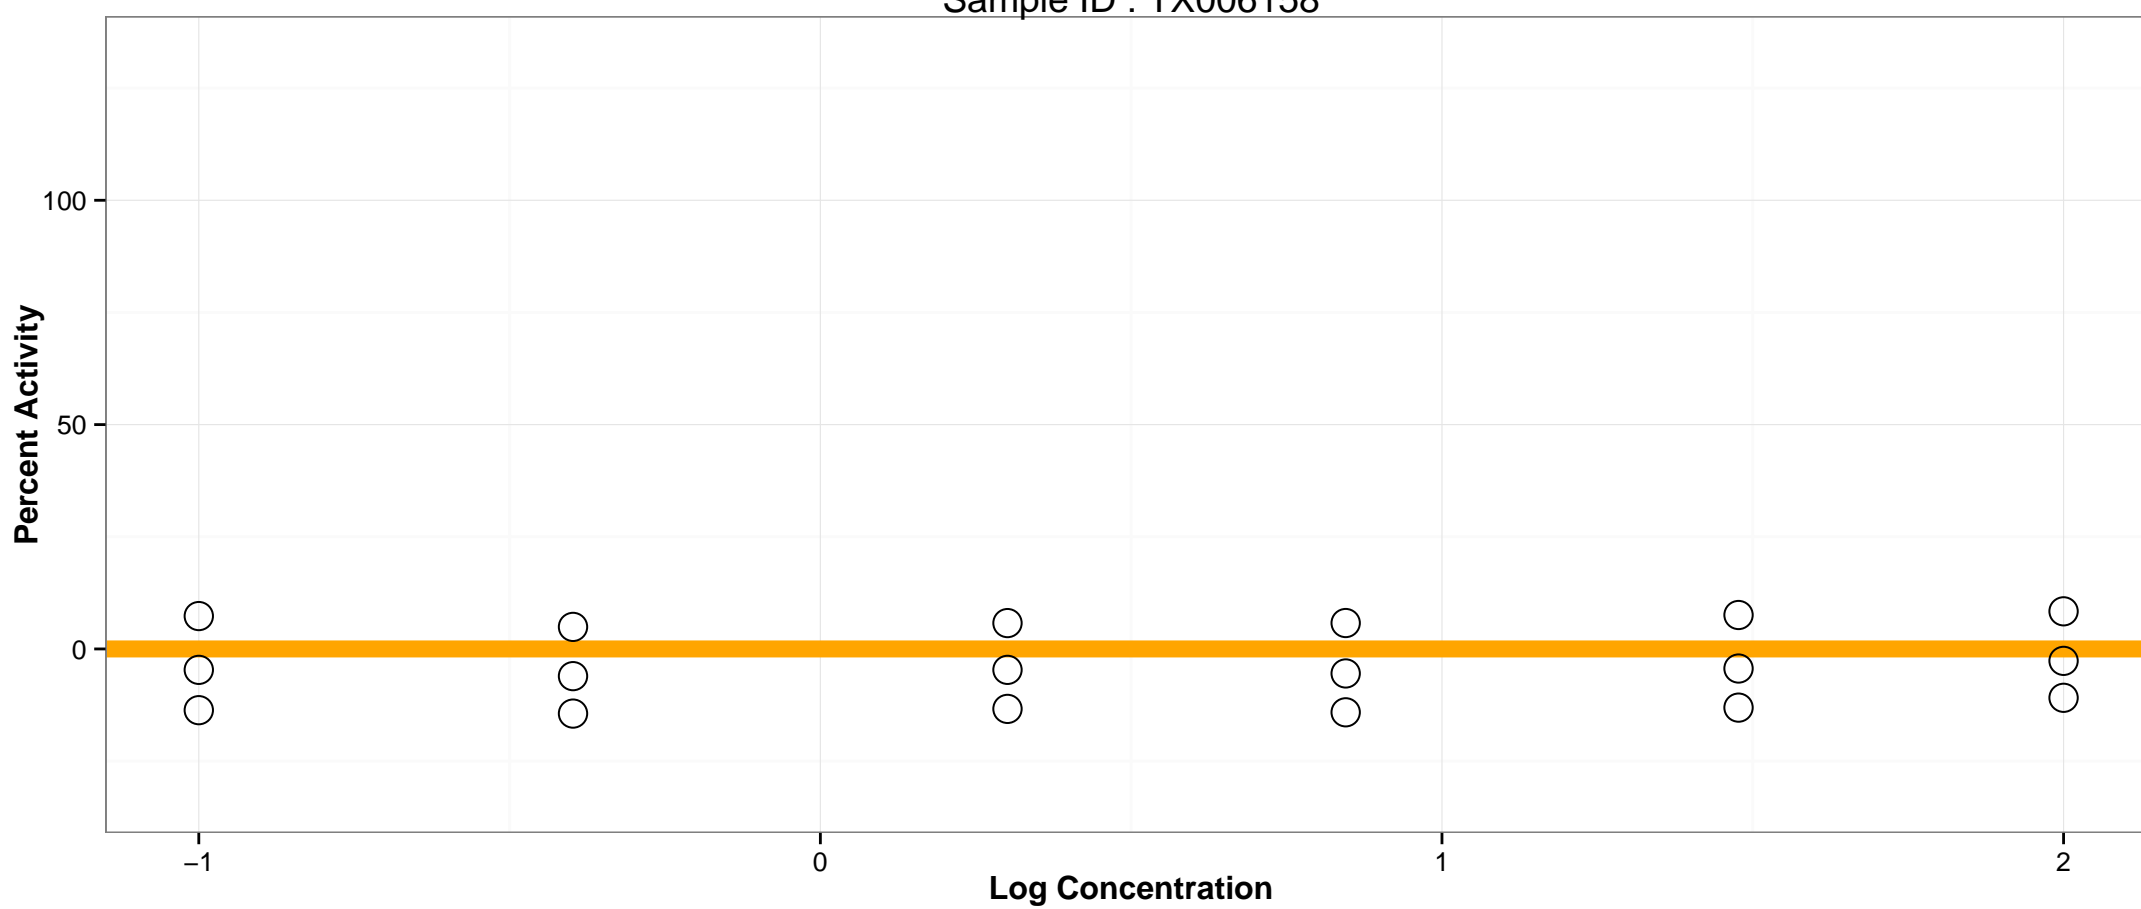

HILL MODEL

HILL MODEL: Not applicable

GAIN-LOSS MODEL

GNLS MODEL: Not applicable

|      | CNST   | HILL | GNLS |
|------|--------|------|------|
| AIC  | 135.18 | NA   | NA   |
| PROB | 1      | NA   | NA   |
| RMSE | 9.03   | NA   | NA   |

MAX\_MEAN : -1.71 MAX\_MED : -2.65 BMAD : 8.58  
COFF : 20 HIT-CALL : 0 FITC : 4 ACTP : 0  
FLAGS :

Chemical : Clorophene  
CAS : 120-32-1

Assay ID 1508 (NHEERL\_TPO\_AUR\_dn)  
Sample ID : TP0001441C02

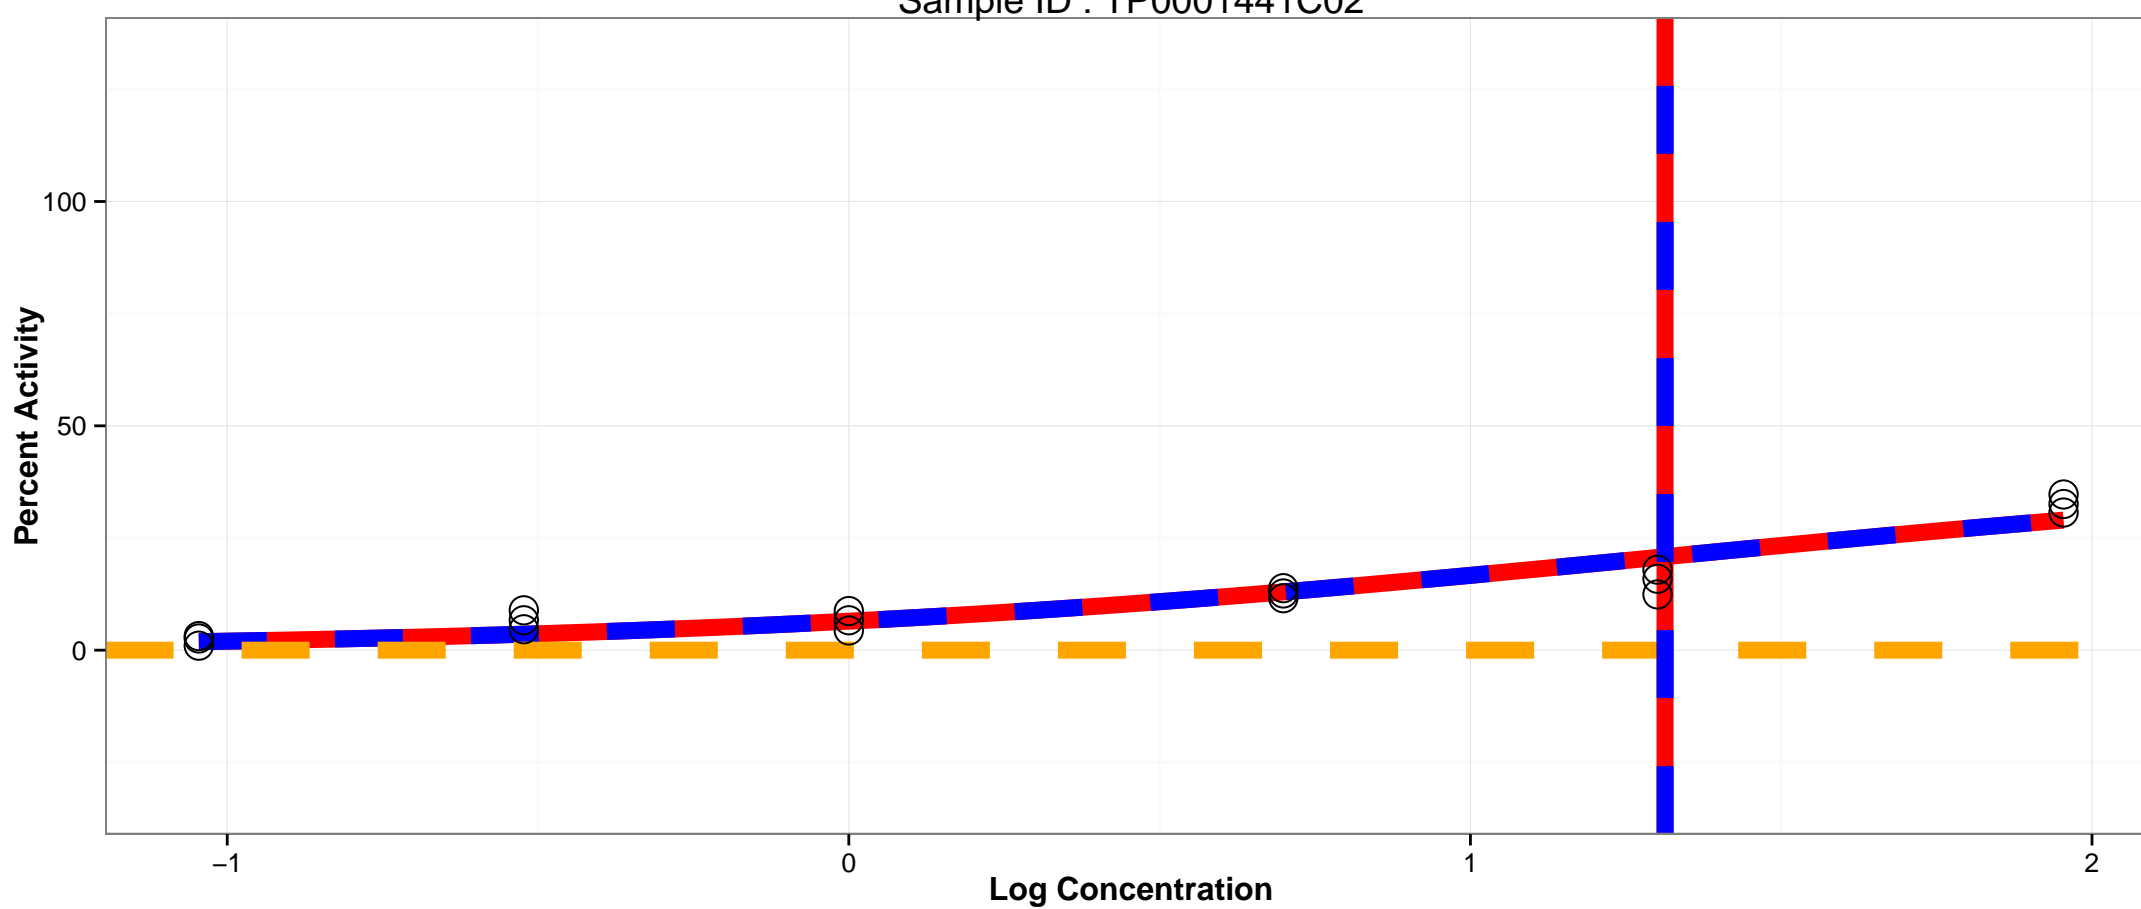

HILL MODEL

|     | tp   | ga    | gw     |
|-----|------|-------|--------|
| val | 41.7 | 1.31  | 0.561  |
| sd  | 8.35 | 0.315 | 0.0863 |

GAIN-LOSS MODEL

|     | tp   | ga    | gw     | la    | lw     |
|-----|------|-------|--------|-------|--------|
| val | 41.7 | 1.31  | 0.56   | 3.95  | 6.01   |
| sd  | 8.35 | 0.315 | 0.0862 | 41800 | 125000 |

|      | CNST   | HILL   | GNLS   |
|------|--------|--------|--------|
| AIC  | 153.79 | 102.63 | 106.63 |
| PROB | 0      | 0.88   | 0.12   |
| RMSE | 16.21  | 3.34   | 3.34   |

MAX\_MEAN : 32.7 MAX\_MED : 32.6 BMAD : 5.69  
COFF : 20 HIT-CALL : 1 FITC : 42 ACTP : 1  
FLAGS : 6

Assay ID 1509 (NHEERL\_HEK293T\_CellTiterGLO)  
Sample ID : TP0001441C02

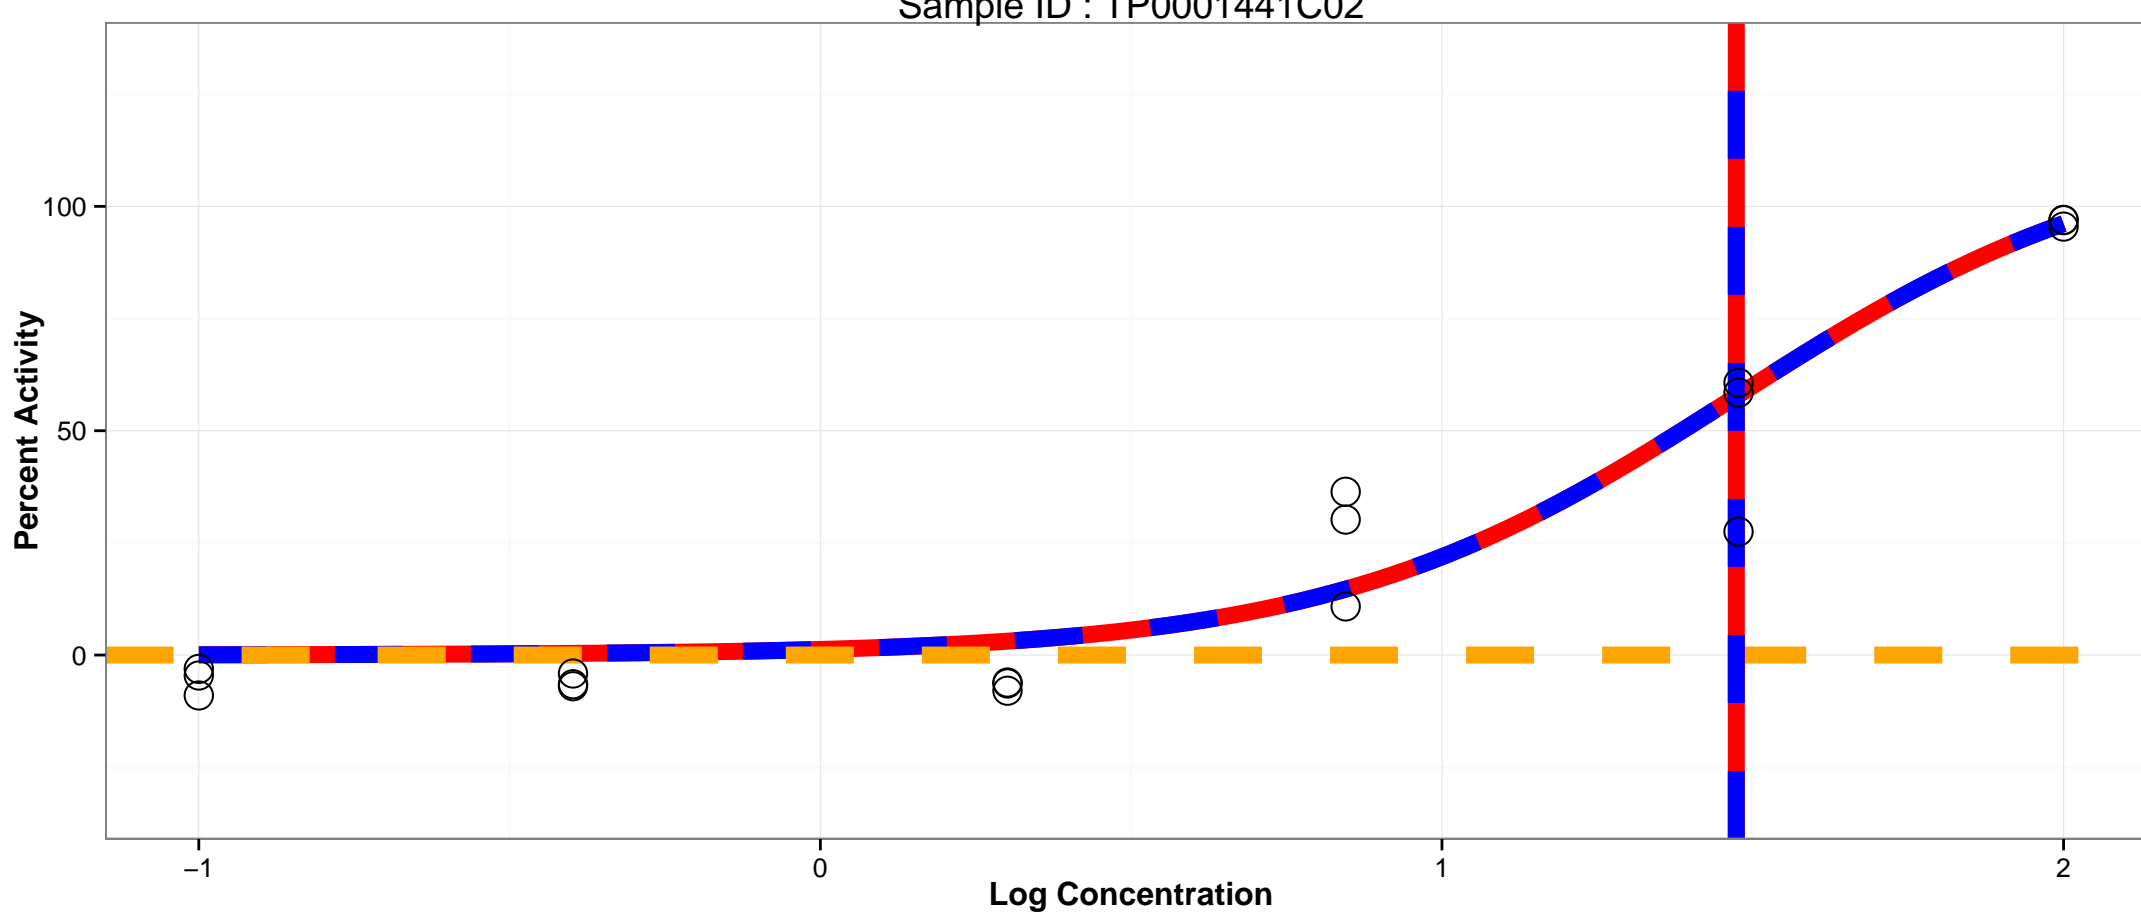

HILL MODEL

|     | tp   | ga    | gw    |
|-----|------|-------|-------|
| val | 115  | 1.47  | 1.33  |
| sd  | 16.3 | 0.136 | 0.327 |

GAIN-LOSS MODEL

|     | tp  | ga   | gw   | la   | lw |
|-----|-----|------|------|------|----|
| val | 115 | 1.47 | 1.33 | 3.95 | 18 |
| sd  | NA  | NA   | NA   | NA   | NA |

|      | CNST   | HILL   | GNLS   |
|------|--------|--------|--------|
| AIC  | 189.92 | 143.83 | 147.83 |
| PROB | 0      | 0.88   | 0.12   |
| RMSE | 46.25  | 11.04  | 11.04  |

MAX\_MEAN : 96.5 MAX\_MED : 96.9 BMAD : 5.54  
COFF : 20 HIT-CALL : 1 FITC : 42 ACTP : 1  
FLAGS :

Assay ID 1848 (NHEERL\_Quantilum\_inhib\_2\_dn)  
Sample ID : TP0001441C02

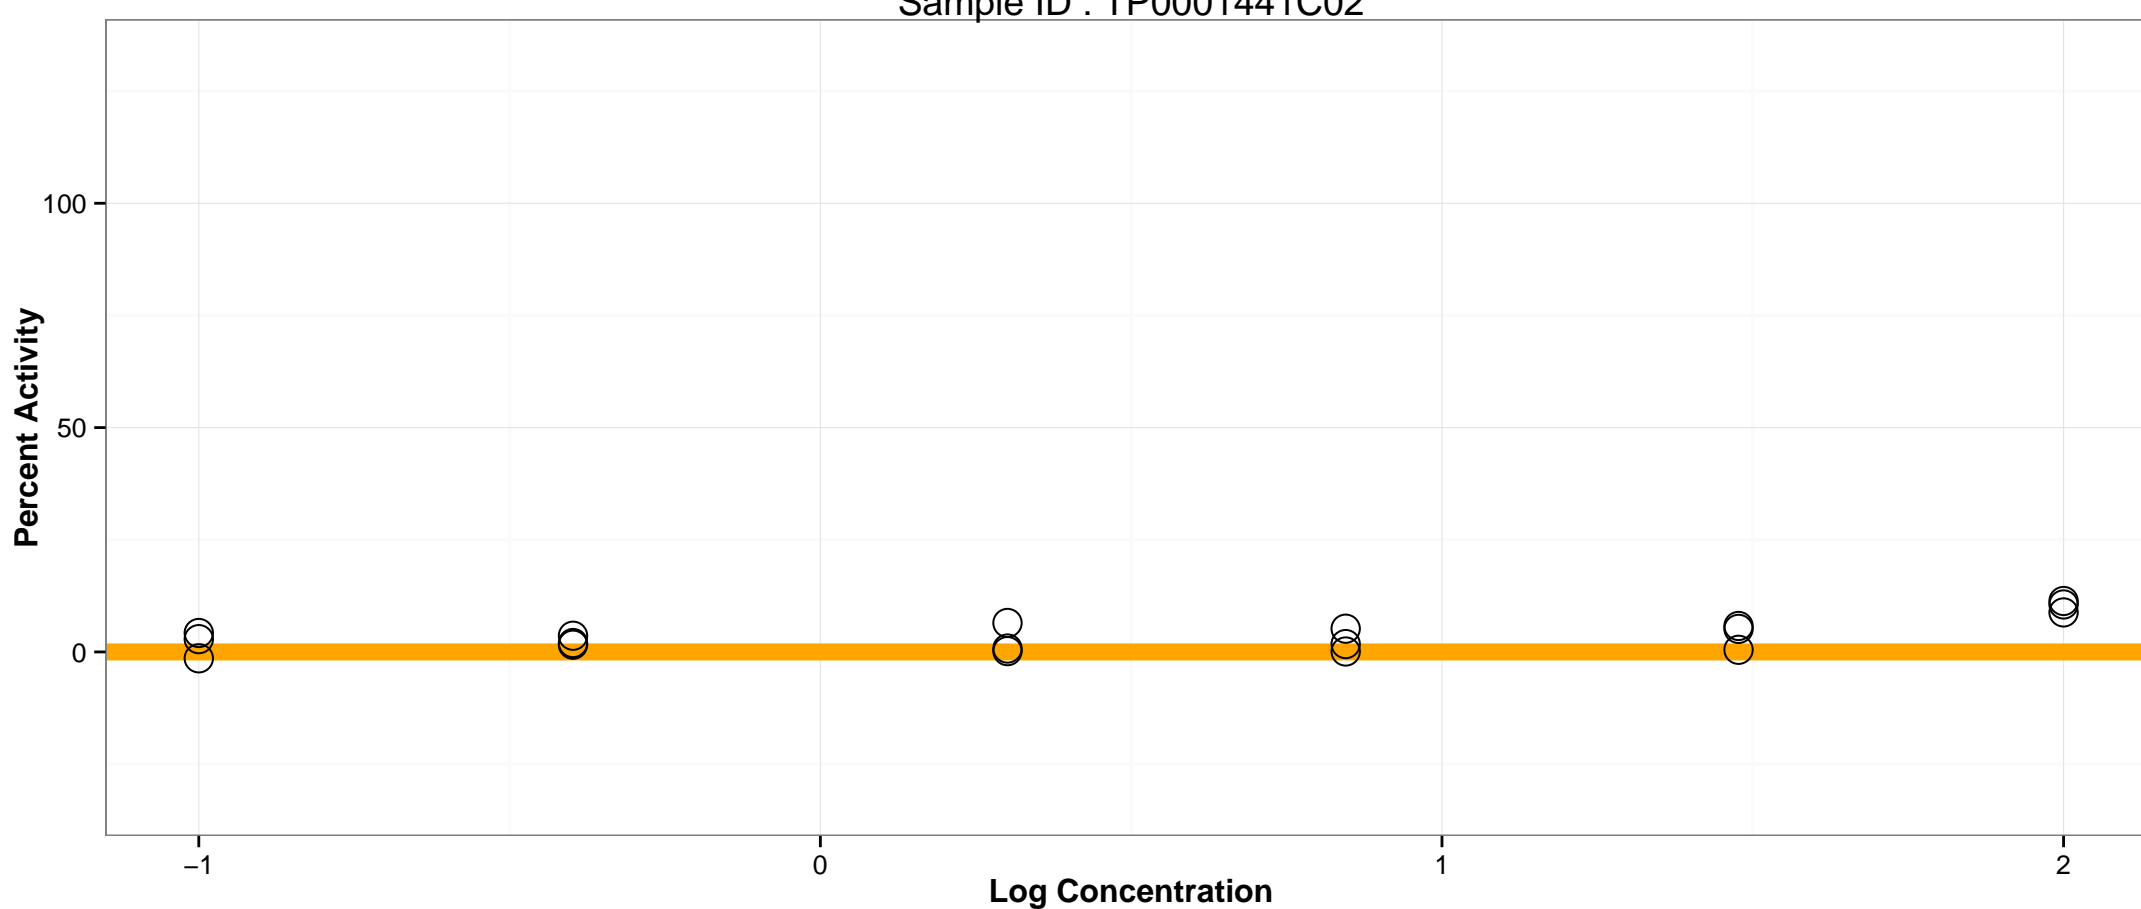

HILL MODEL

HILL MODEL: Not applicable

GAIN-LOSS MODEL

GNLS MODEL: Not applicable

|      | CNST   | HILL | GNLS |
|------|--------|------|------|
| AIC  | 113.55 | NA   | NA   |
| PROB | 1      | NA   | NA   |
| RMSE | 5.27   | NA   | NA   |

MAX\_MEAN : 10.3 MAX\_MED : 10.6 BMAD : 8.58  
COFF : 20 HIT-CALL : 0 FITC : 4 ACTP : 0  
FLAGS :



Chemical : Clorophene  
CAS : 120-32-1

Assay ID 1508 (NHEERL\_TPO\_AUR\_dn)  
Sample ID : TX009149

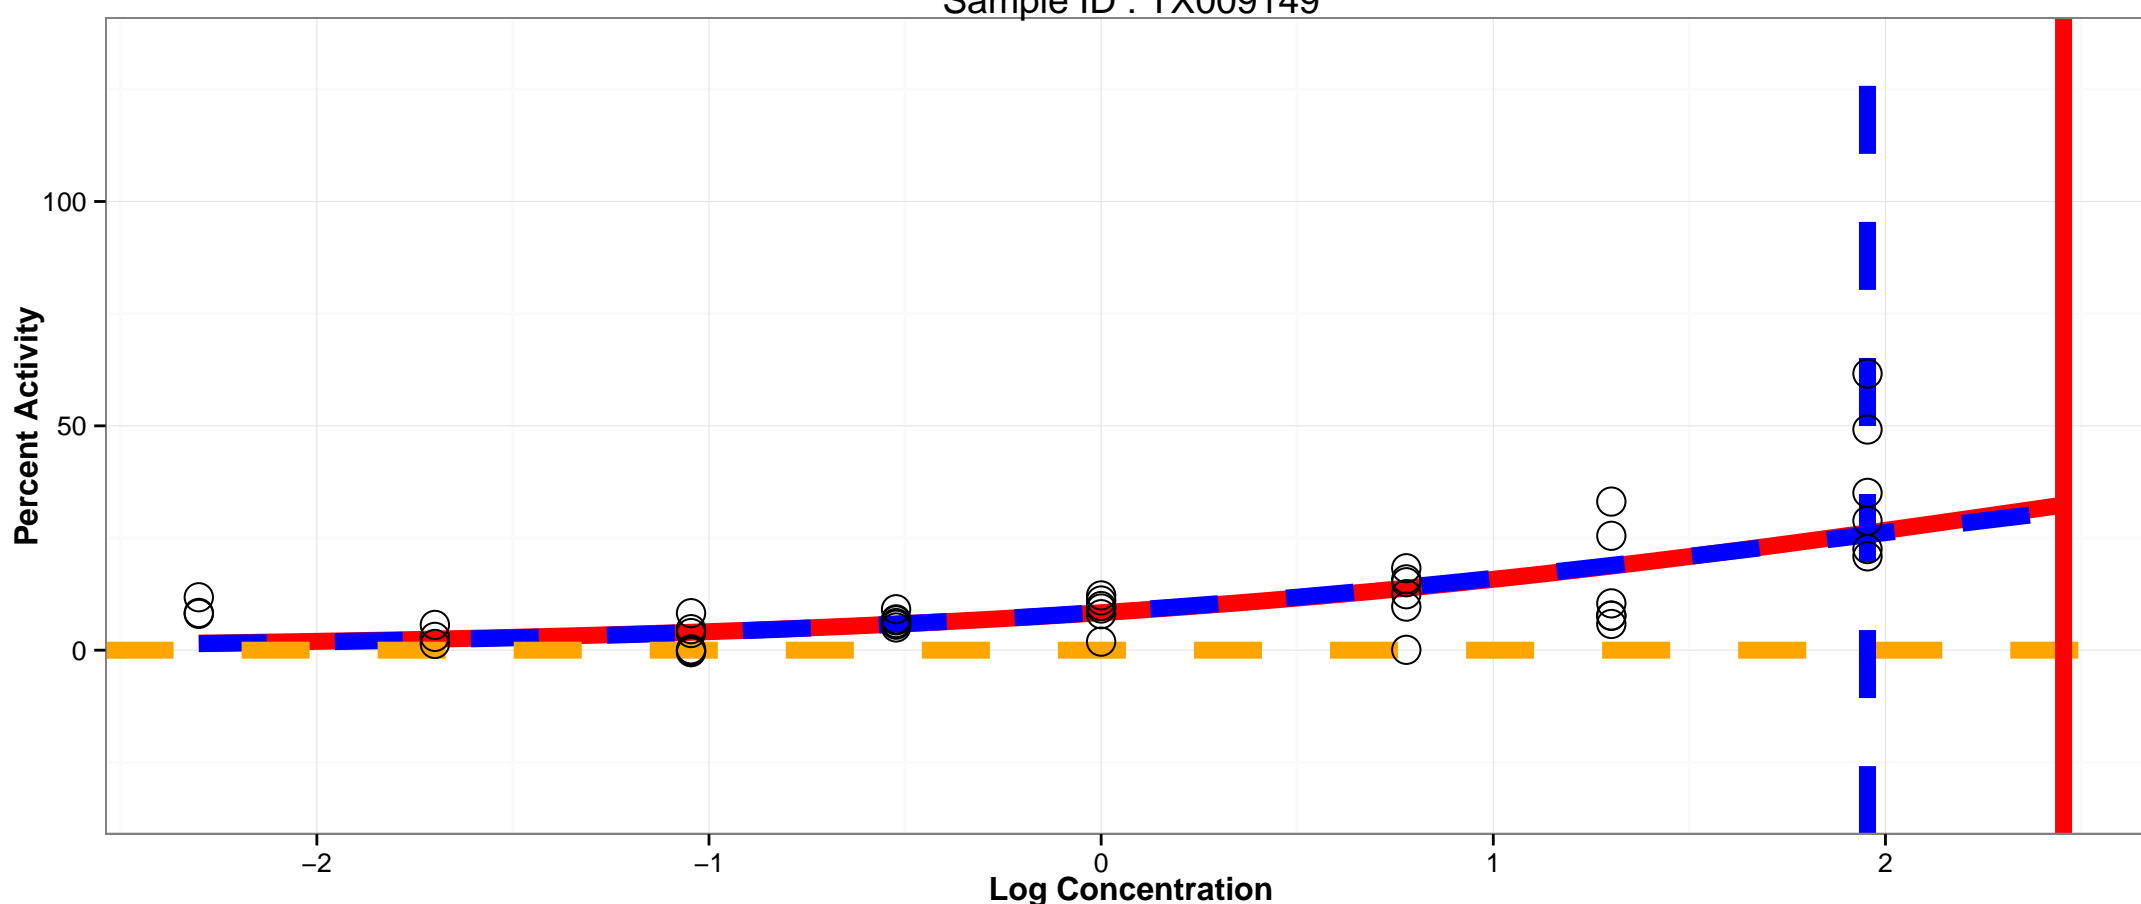

HILL MODEL

|     | tp   | ga   | gw     |
|-----|------|------|--------|
| val | 64.7 | 2.45 | 0.338  |
| sd  | 50.3 | 1.65 | 0.0833 |

GAIN-LOSS MODEL

|     | tp   | ga   | gw    | la   | lw   |
|-----|------|------|-------|------|------|
| val | 51.4 | 1.95 | 0.361 | 3.31 | 17.6 |
| sd  | NA   | NA   | NA    | NA   | NA   |

|      | CNST   | HILL  | GNLS   |
|------|--------|-------|--------|
| AIC  | 356.46 | 297.5 | 302.11 |
| PROB | 0      | 0.91  | 0.09   |
| RMSE | 17.94  | 8.78  | 8.88   |

MAX\_MEAN : 36.4 MAX\_MED : 32 BMAD : 5.69  
COFF : 20 HIT-CALL : 1 FITC : 42 ACTP : 1  
FLAGS : 6

Assay ID 1509 (NHEERL\_HEK293T\_CellTiterGLO)  
Sample ID : TX009149

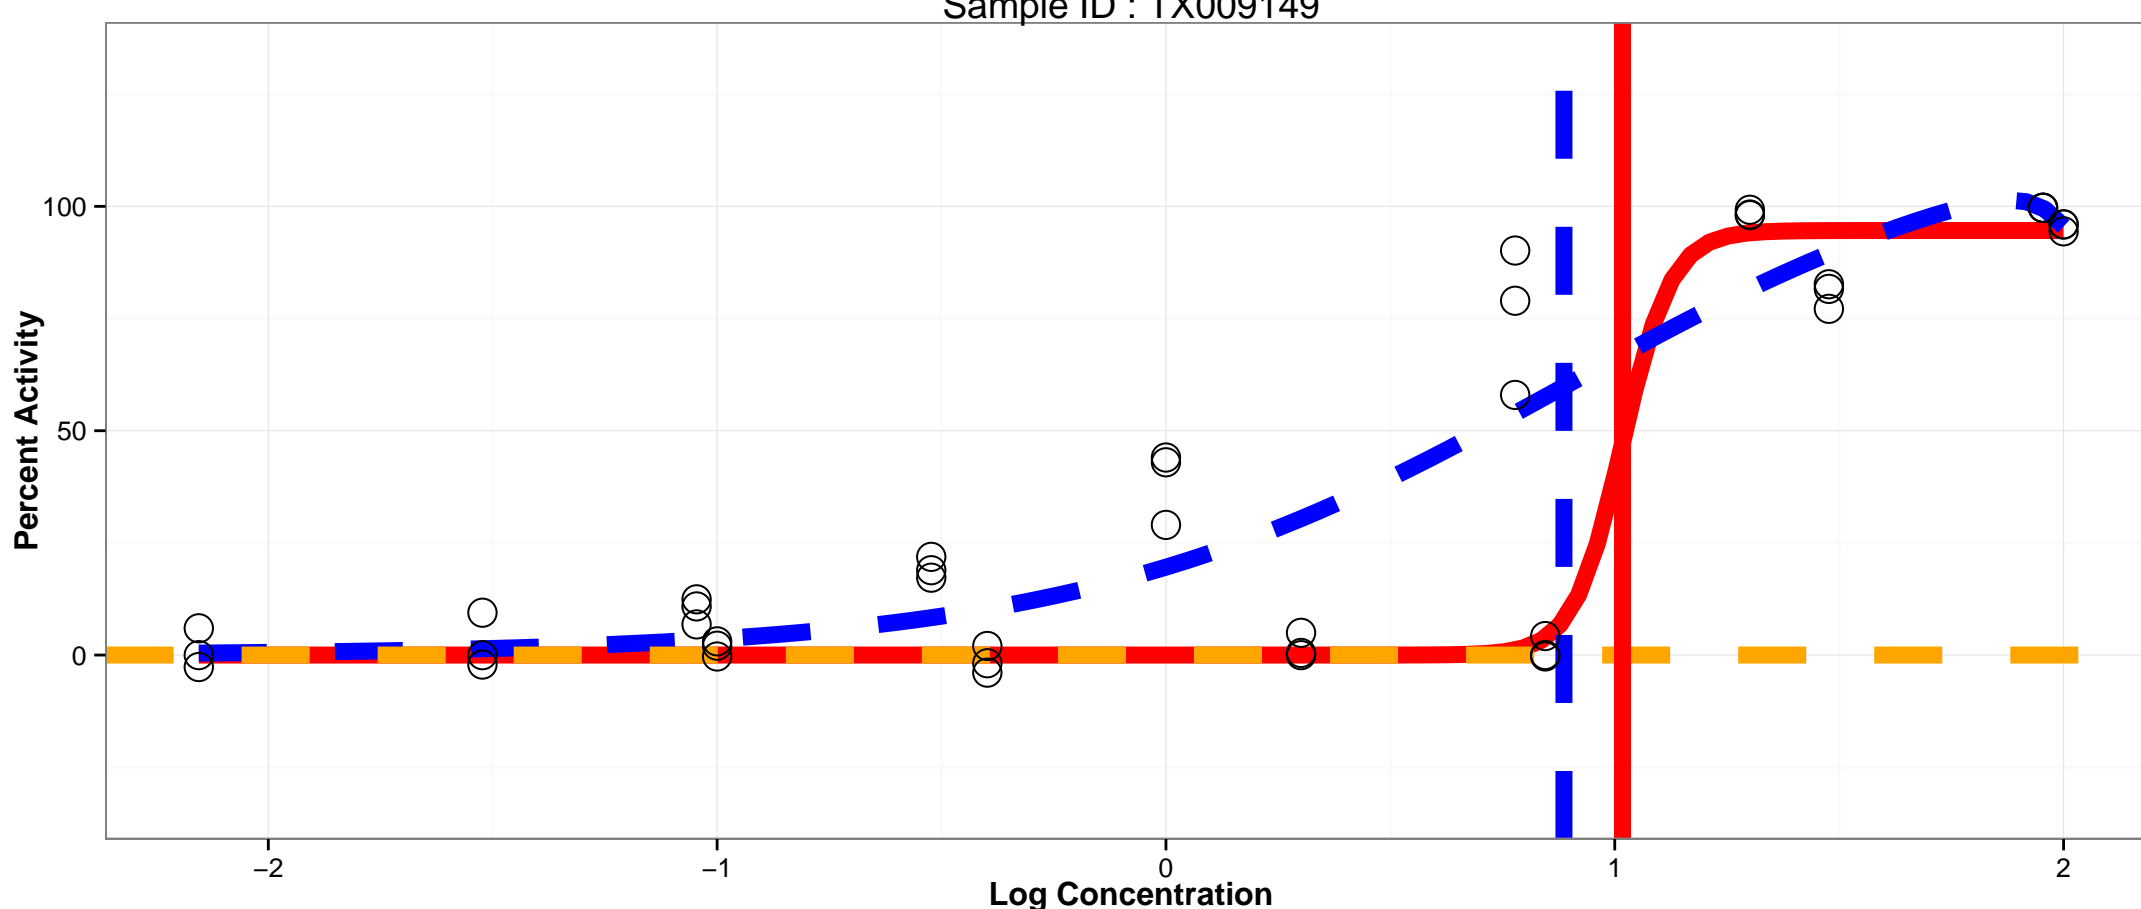

HILL MODEL

|     | tp   | ga     | gw   |
|-----|------|--------|------|
| val | 94.6 | 1.02   | 8    |
| sd  | 3.32 | 0.0942 | 5.01 |

GAIN-LOSS MODEL

|     | tp  | ga    | gw    | la   | lw   |
|-----|-----|-------|-------|------|------|
| val | 120 | 0.887 | 0.799 | 2.14 | 6.85 |
| sd  | NA  | NA    | NA    | NA   | NA   |

|      | CNST   | HILL  | GNLS   |
|------|--------|-------|--------|
| AIC  | 459.72 | 370.7 | 377.63 |
| PROB | 0      | 0.97  | 0.03   |
| RMSE | 55.58  | 24.05 | 20.33  |

MAX\_MEAN : 99.7 MAX\_MED : 99.7 BMAD : 5.54  
COFF : 20 HIT-CALL : 1 FITC : 41 ACTP : 1  
FLAGS : 10

Assay ID 1848 (NHEERL\_Quantilum\_inhib\_2\_dn)  
Sample ID : TX009149

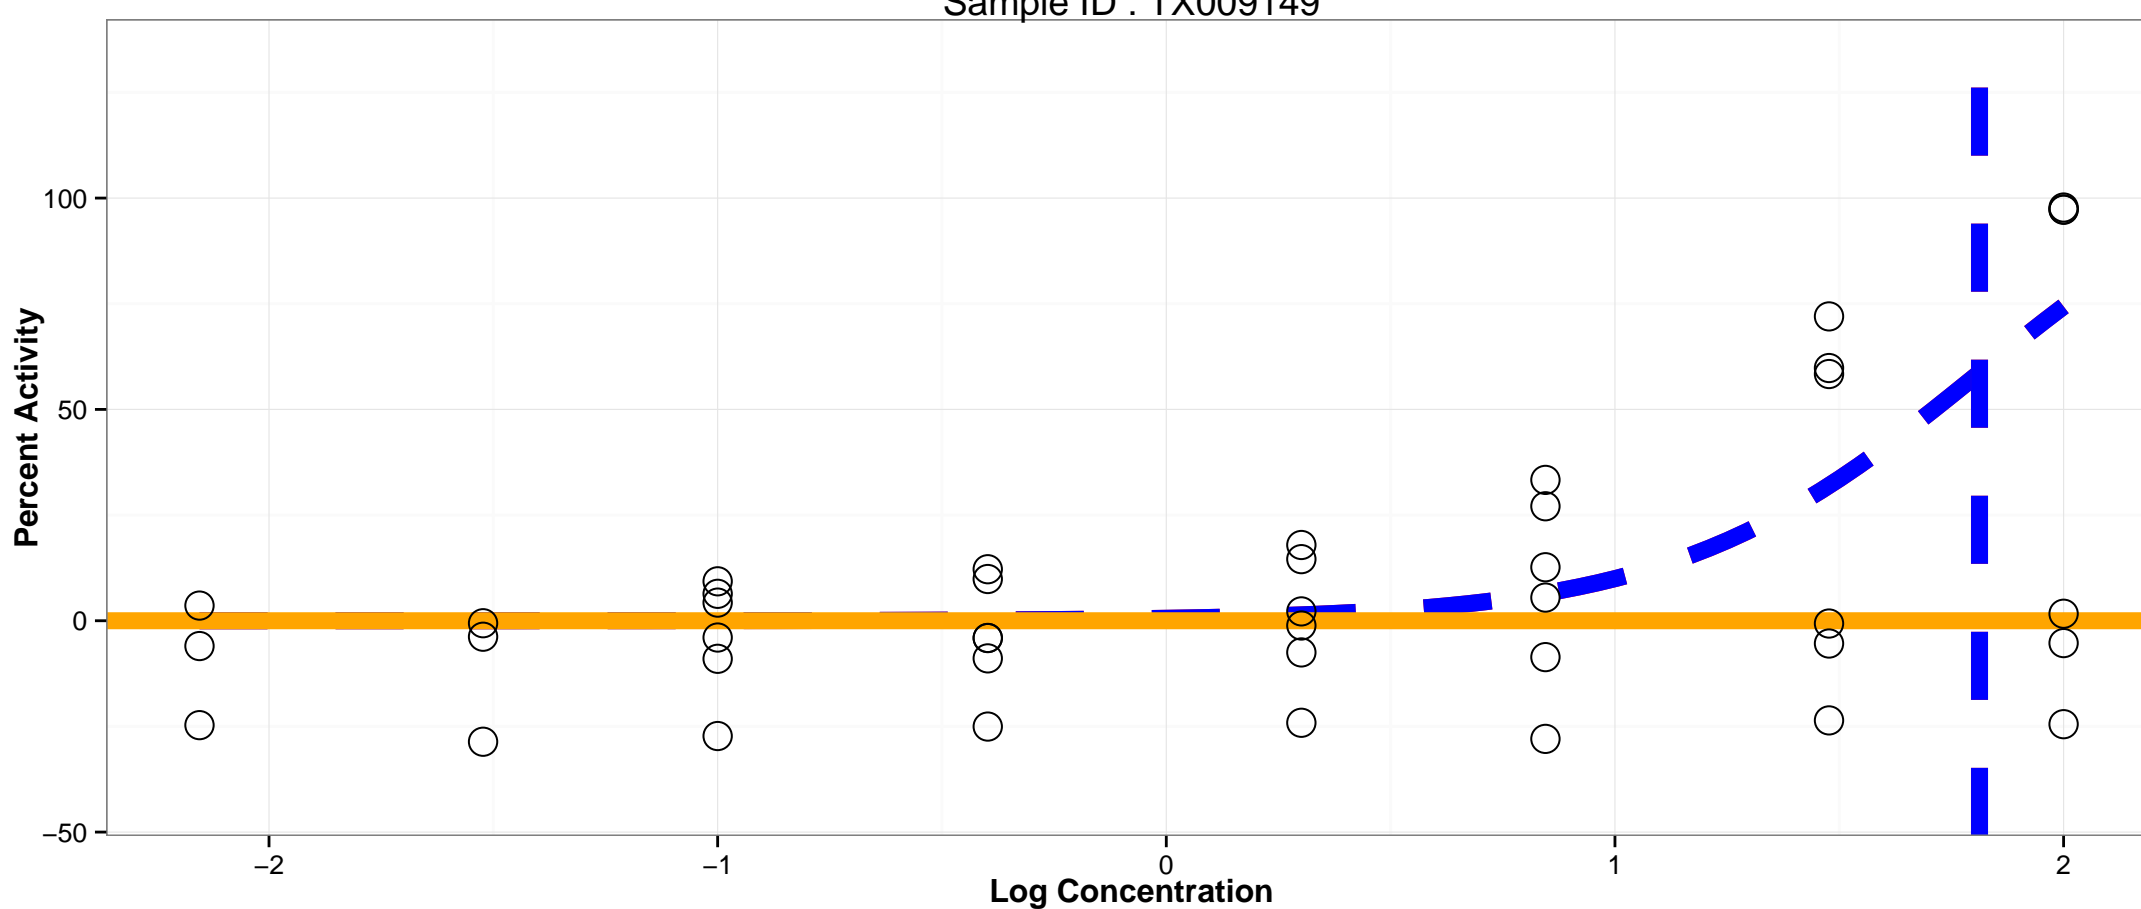

HILL MODEL

|     | tp  | ga   | gw   |
|-----|-----|------|------|
| val | 117 | 1.81 | 1.27 |
| sd  | 154 | 1.01 | 1.04 |

GAIN-LOSS MODEL

|     | tp  | ga   | gw   | la   | lw   |
|-----|-----|------|------|------|------|
| val | 117 | 1.81 | 1.27 | 3.88 | 5.55 |
| sd  | NA  | NA   | NA   | NA   | NA   |

|      | CNST   | HILL   | GNLS   |
|------|--------|--------|--------|
| AIC  | 406.95 | 408.65 | 412.65 |
| PROB | 0.67   | 0.29   | 0.04   |
| RMSE | 34.3   | 30.42  | 30.42  |

MAX\_MEAN : 44 MAX\_MED : 49.5 BMAD : 8.58  
COFF : 20 HIT-CALL : 0 FITC : 10 ACTP : 0.328  
FLAGS : 8; 10

Chemical : Clorophene  
CAS : 120-32-1

Assay ID 1508 (NHEERL\_TPO\_AUR\_dn)  
Sample ID : TX109149

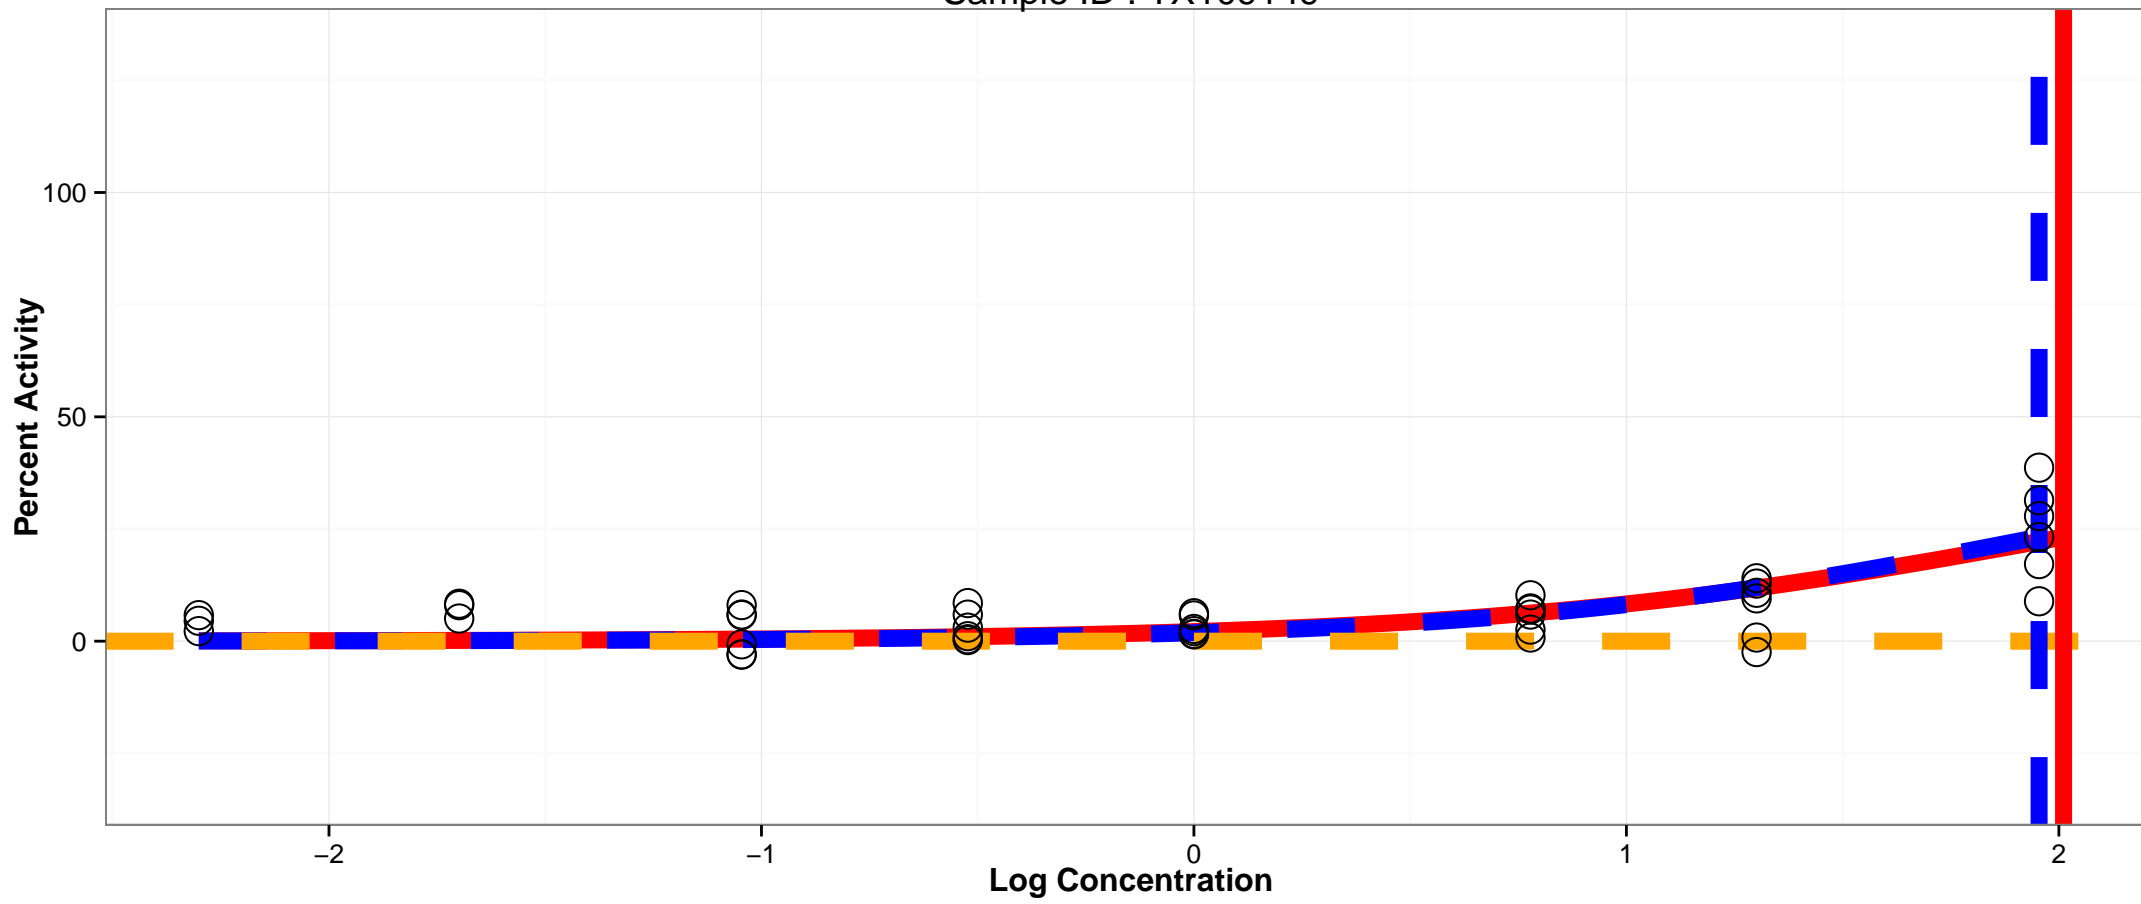

HILL MODEL

|     | tp   | ga    | gw    |
|-----|------|-------|-------|
| val | 46.4 | 2.01  | 0.655 |
| sd  | 21.3 | 0.572 | 0.224 |

GAIN-LOSS MODEL

|     | tp   | ga    | gw    | la    | lw    |
|-----|------|-------|-------|-------|-------|
| val | 46.4 | 1.95  | 0.704 | 3.39  | 7.42  |
| sd  | 26   | 0.628 | 0.228 | 16700 | 86400 |

|      | CNST   | HILL   | GNLS   |
|------|--------|--------|--------|
| AIC  | 317.94 | 274.95 | 279.03 |
| PROB | 0      | 0.88   | 0.12   |
| RMSE | 11.53  | 5.89   | 5.88   |

MAX\_MEAN : 24.5 MAX\_MED : 25.6 BMAD : 5.69  
COFF : 20 HIT-CALL : 1 FITC : 42 ACTP : 1  
FLAGS : 6

Assay ID 1509 (NHEERL\_HEK293T\_CellTiterGLO)  
Sample ID : TX109149

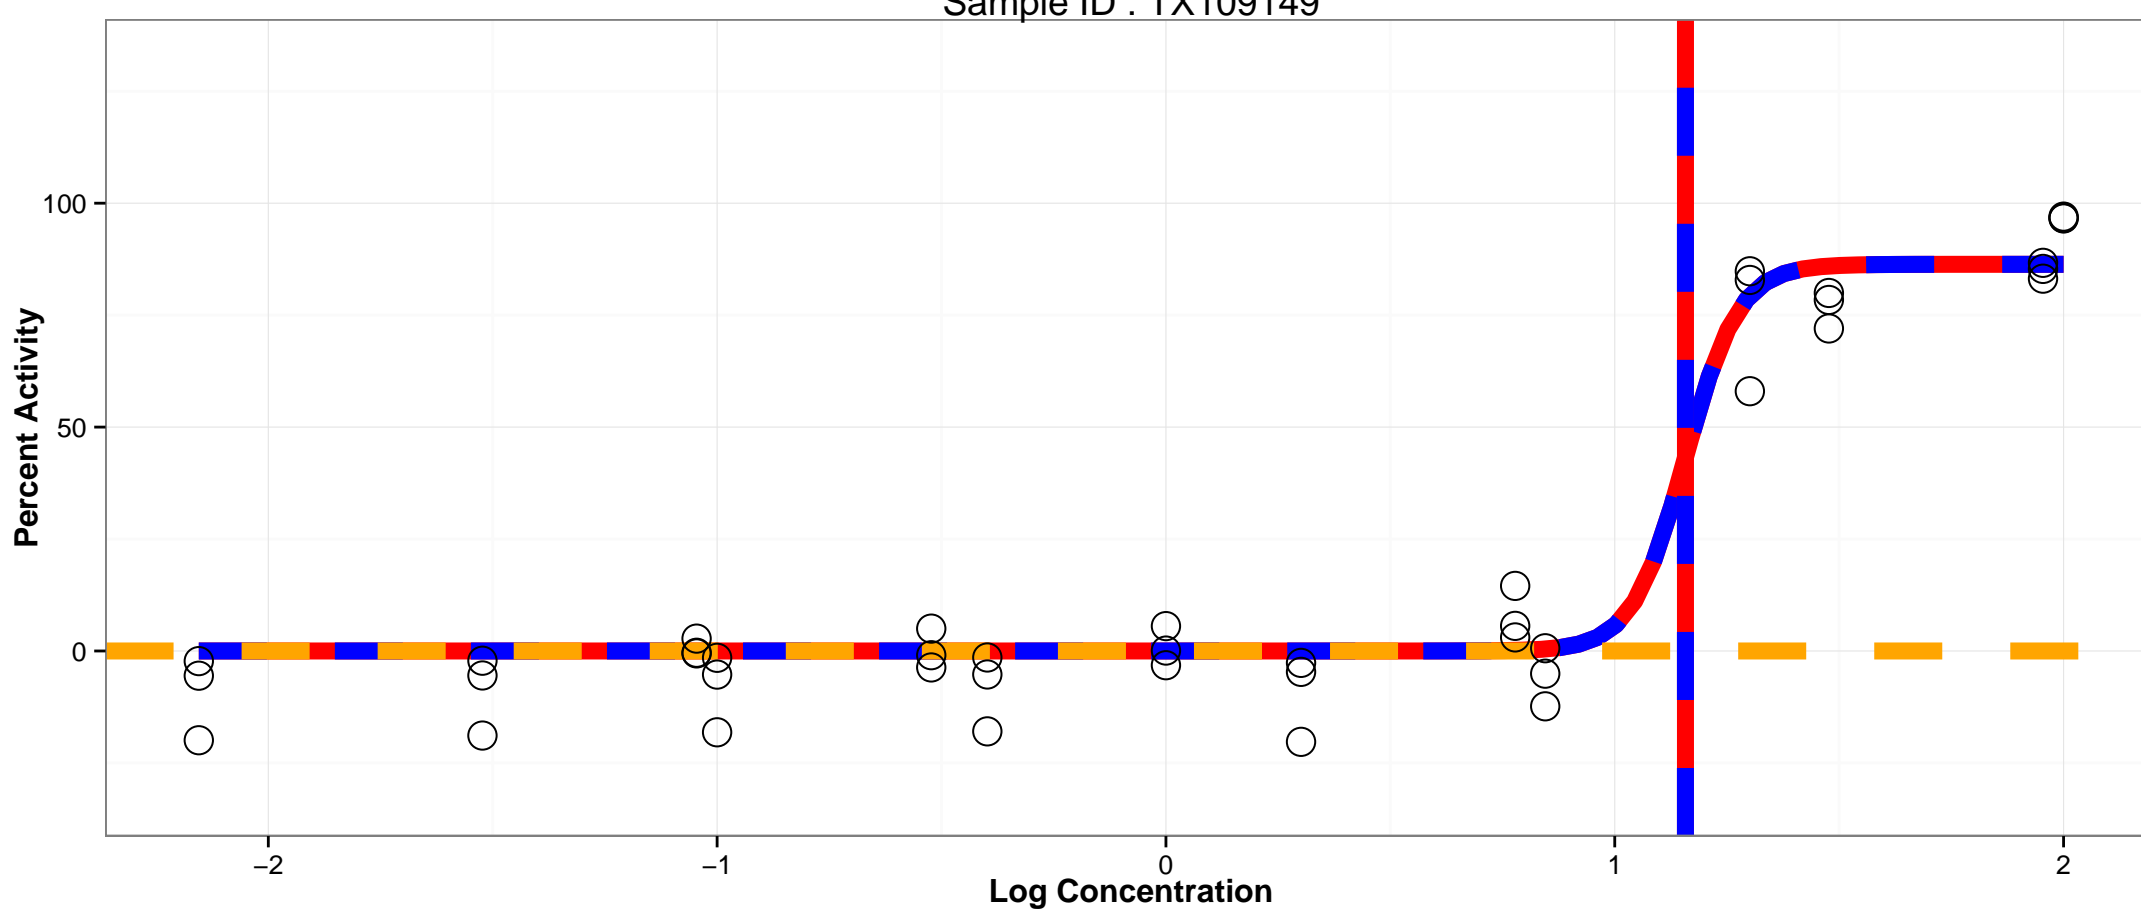

HILL MODEL

|     | tp   | ga     | gw   |
|-----|------|--------|------|
| val | 86.4 | 1.16   | 7.34 |
| sd  | 3.32 | 0.0924 | 6.26 |

GAIN-LOSS MODEL

|     | tp   | ga     | gw   | la   | lw    |
|-----|------|--------|------|------|-------|
| val | 86.4 | 1.16   | 7.34 | 2.8  | 12.2  |
| sd  | 3.32 | 0.0924 | 6.26 | 1130 | 17300 |

|      | CNST   | HILL   | GNLS   |
|------|--------|--------|--------|
| AIC  | 437.84 | 313.68 | 317.68 |
| PROB | 0      | 0.88   | 0.12   |
| RMSE | 45.63  | 9.29   | 9.29   |

MAX\_MEAN : 96.8 MAX\_MED : 96.7 BMAD : 5.54  
COFF : 20 HIT-CALL : 1 FITC : 41 ACTP : 1  
FLAGS :

Assay ID 1848 (NHEERL\_Quantilum\_inhib\_2\_dn)  
Sample ID : TX109149

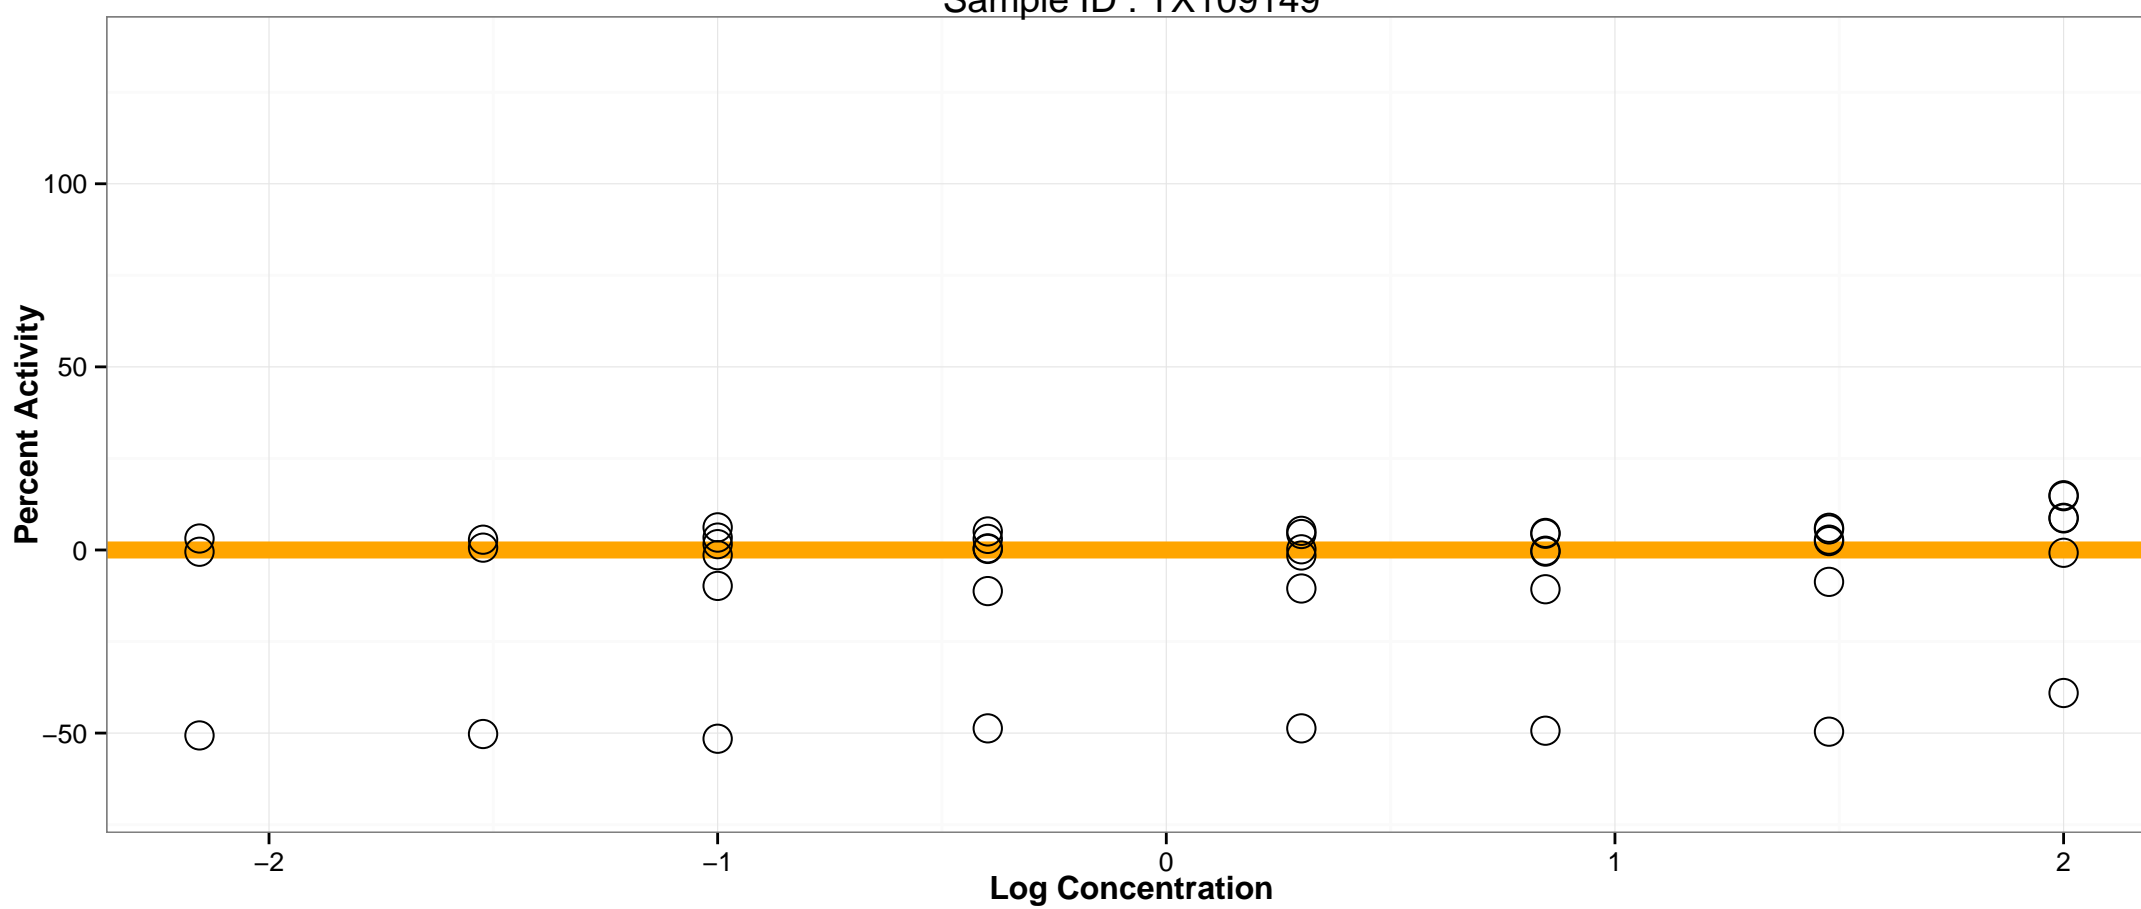

HILL MODEL

HILL MODEL: Not applicable

GAIN-LOSS MODEL

GNLS MODEL: Not applicable

|      | CNST   | HILL | GNLS |
|------|--------|------|------|
| AIC  | 369.04 | NA   | NA   |
| PROB | 1      | NA   | NA   |
| RMSE | 21.98  | NA   | NA   |

MAX\_MEAN : 1.22 MAX\_MED : 8.72 BMAD : 8.58  
COFF : 20 HIT-CALL : 0 FITC : 4 ACTP : 0  
FLAGS : 10

Chemical : Clorophene  
CAS : 120-32-1

Assay ID 1508 (NHEERL\_TPO\_AUR\_dn)  
Sample ID : TX209149

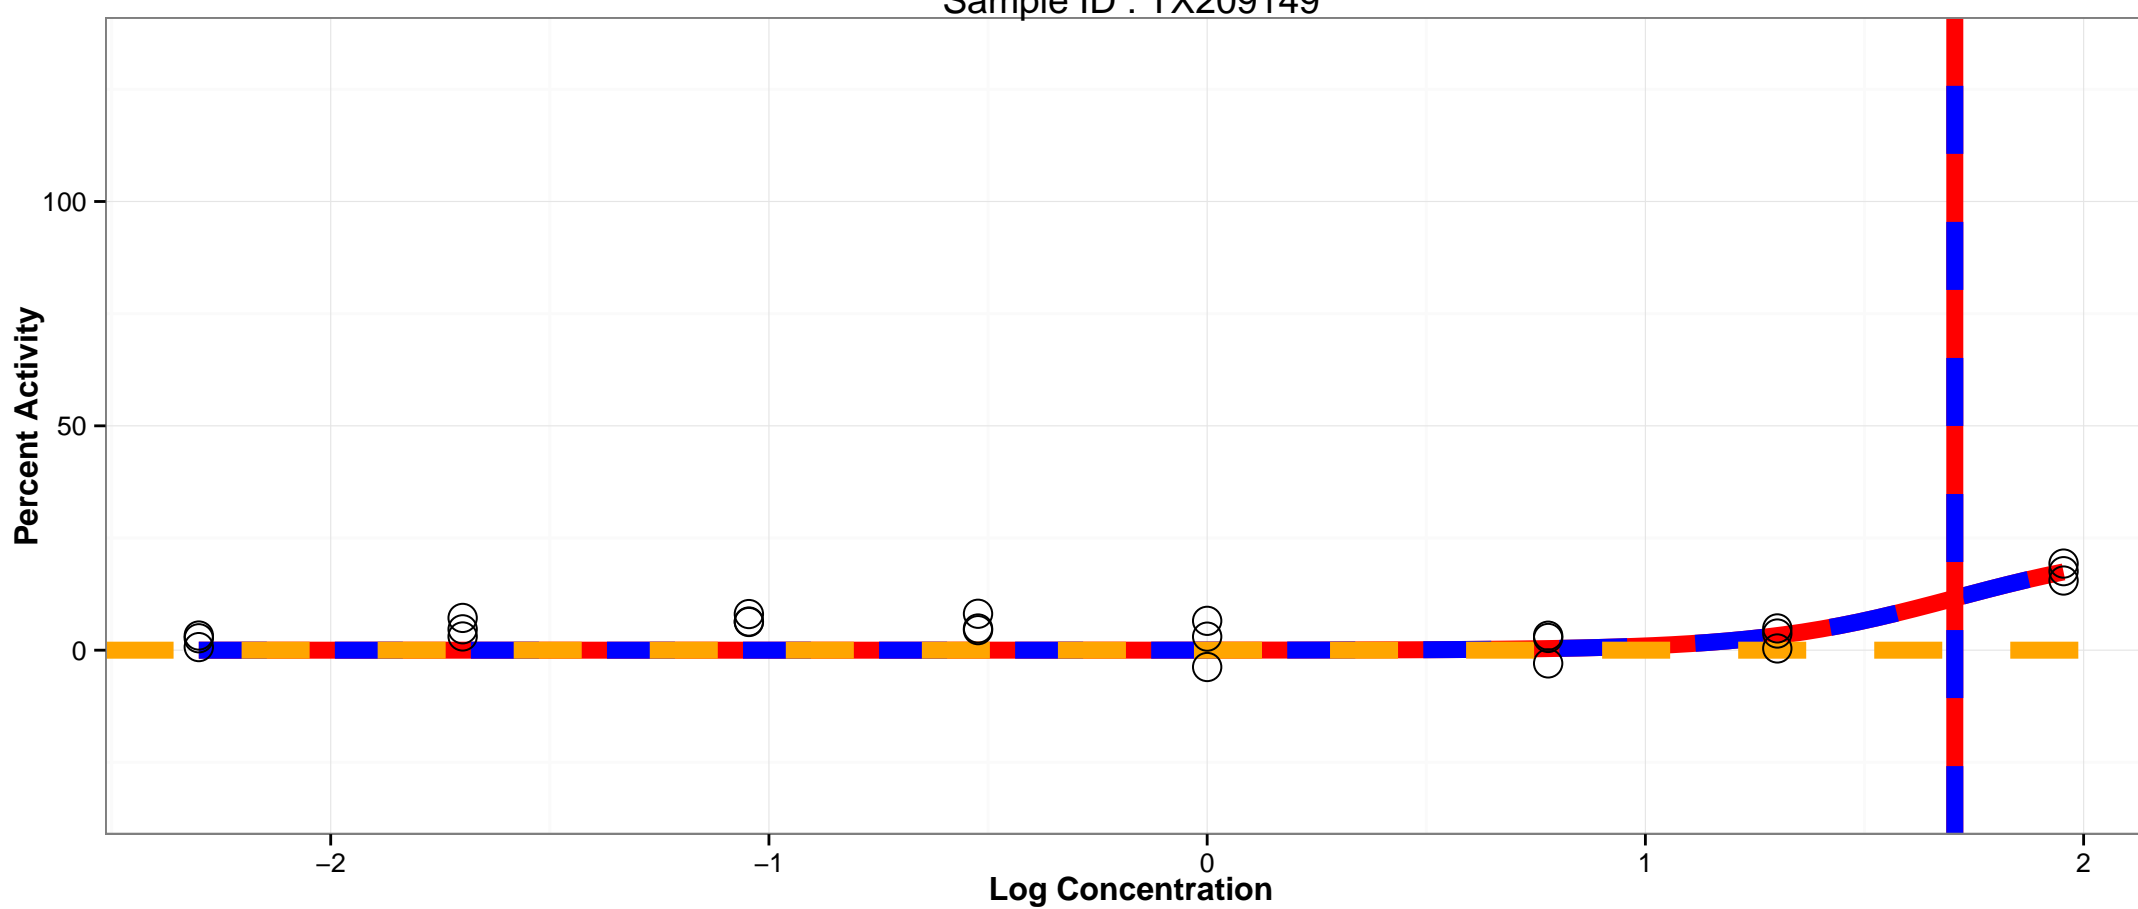

HILL MODEL

|     | tp   | ga    | gw   |
|-----|------|-------|------|
| val | 23.2 | 1.71  | 1.95 |
| sd  | 35.4 | 0.992 | 3.11 |

GAIN-LOSS MODEL

|     | tp   | ga    | gw   | la   | lw   |
|-----|------|-------|------|------|------|
| val | 23.2 | 1.71  | 1.95 | 3.62 | 4.32 |
| sd  | 35.4 | 0.992 | 3.11 | 2570 | 6650 |

|      | CNST   | HILL   | GNLS   |
|------|--------|--------|--------|
| AIC  | 167.13 | 150.32 | 154.32 |
| PROB | 0      | 0.88   | 0.12   |
| RMSE | 7.67   | 4.4    | 4.4    |

MAX\_MEAN : 17.5 MAX\_MED : 17.6 BMAD : 5.69  
COFF : 20 HIT-CALL : 0 FITC : 21 ACTP : 1  
FLAGS : 12

Assay ID 1509 (NHEERL\_HEK293T\_CellTiterGLO)  
Sample ID : TX209149

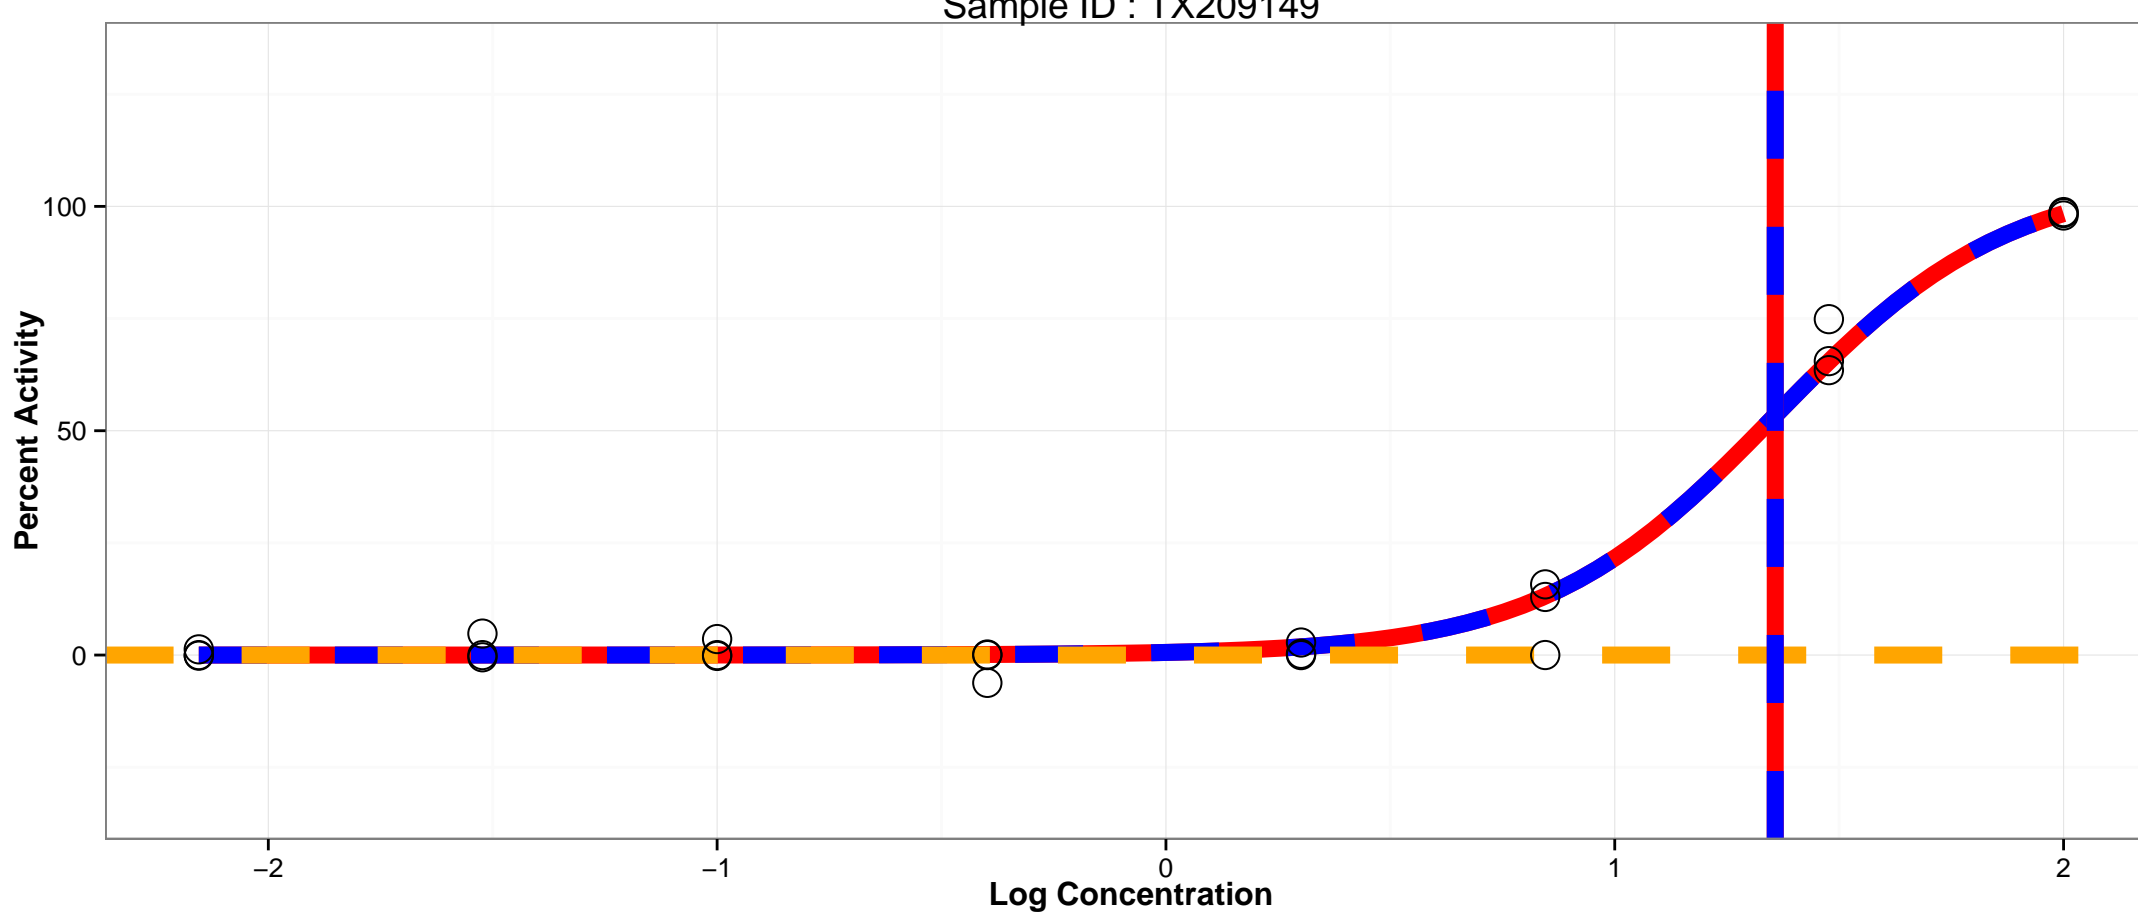

HILL MODEL

|     | tp   | ga     | gw    |
|-----|------|--------|-------|
| val | 107  | 1.36   | 1.67  |
| sd  | 2.12 | 0.0201 | 0.101 |

GAIN-LOSS MODEL

|     | tp   | ga     | gw    | la   | lw   |
|-----|------|--------|-------|------|------|
| val | 107  | 1.36   | 1.67  | 3.01 | 7.25 |
| sd  | 2.12 | 0.0201 | 0.101 | 523  | 3770 |

|      | CNST   | HILL   | GNLS   |
|------|--------|--------|--------|
| AIC  | 244.41 | 129.04 | 133.04 |
| PROB | 0      | 0.88   | 0.12   |
| RMSE | 42.57  | 3.85   | 3.85   |

MAX\_MEAN : 98.4 MAX\_MED : 98.5 BMAD : 5.54  
COFF : 20 HIT-CALL : 1 FITC : 42 ACTP : 1  
FLAGS :

Assay ID 1848 (NHEERL\_Quantilum\_inhib\_2\_dn)  
Sample ID : TX209149

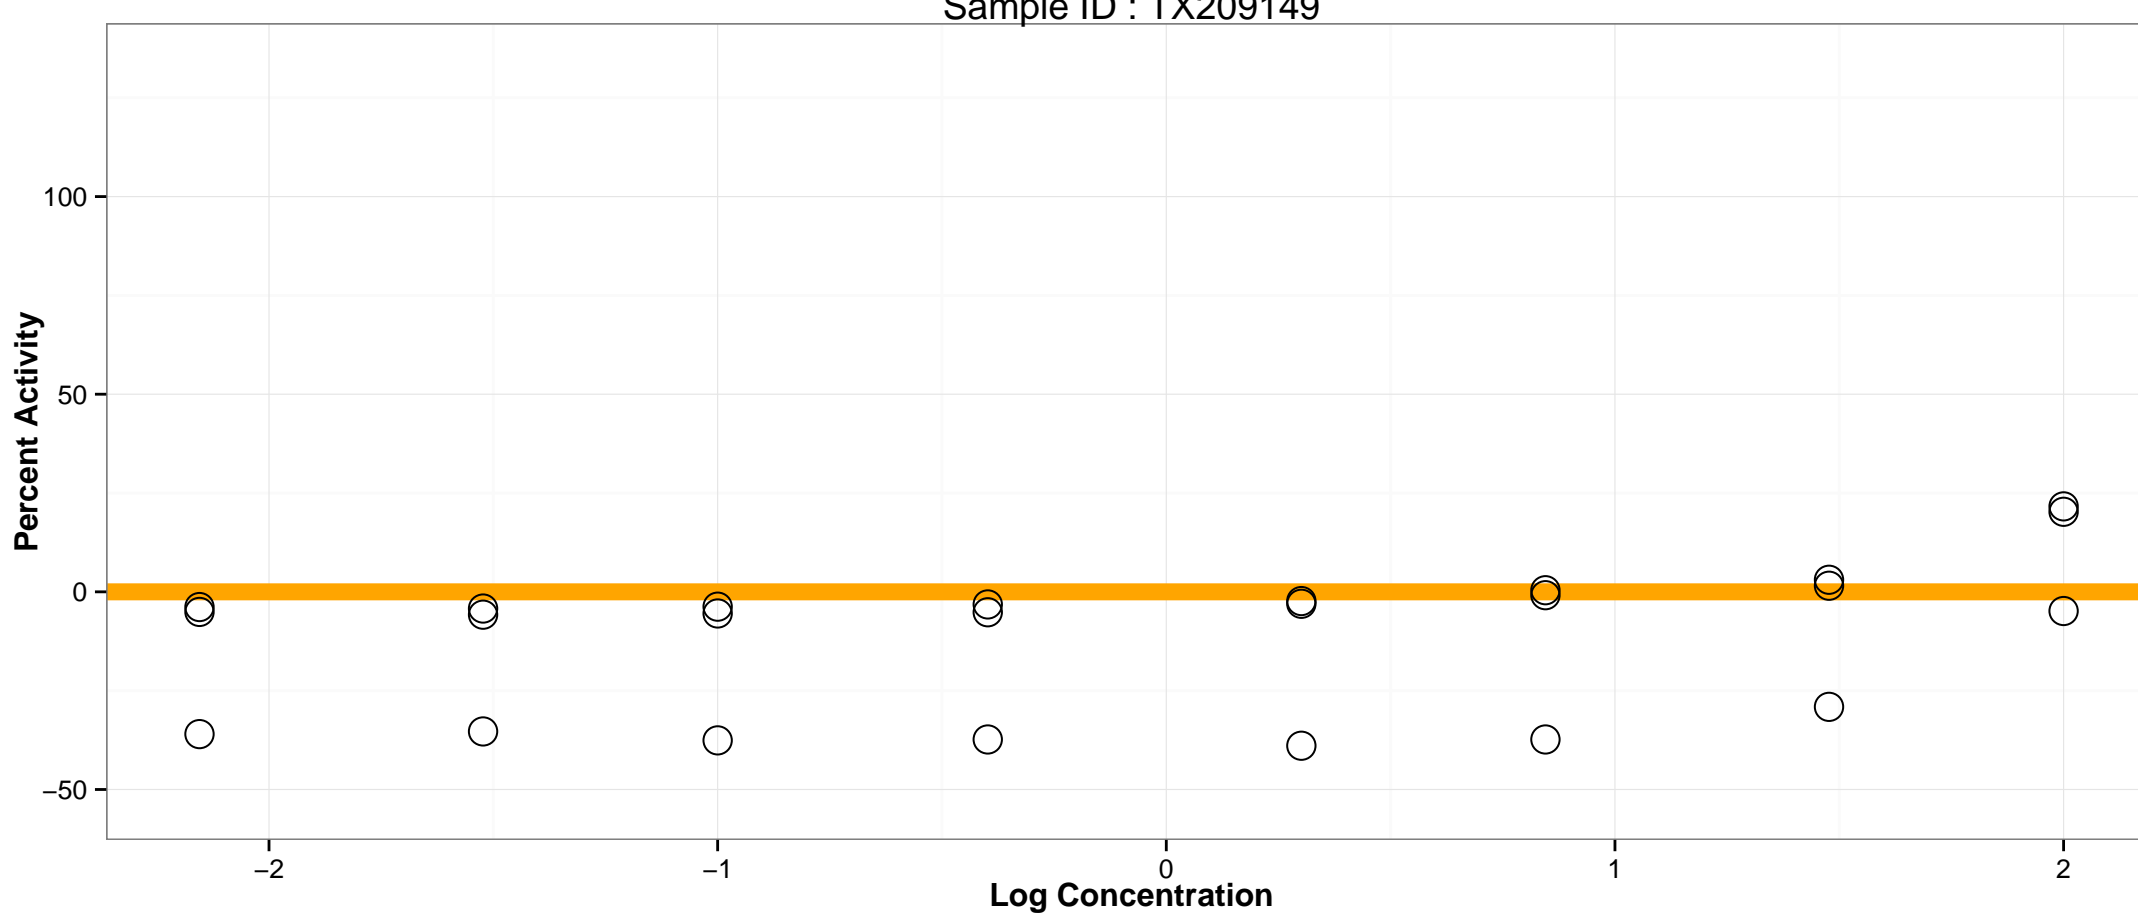

HILL MODEL

HILL MODEL: Not applicable

GAIN-LOSS MODEL

GNLS MODEL: Not applicable

|      | CNST   | HILL | GNLS |
|------|--------|------|------|
| AIC  | 215.34 | NA   | NA   |
| PROB | 1      | NA   | NA   |
| RMSE | 20.62  | NA   | NA   |

MAX\_MEAN : 12.4 MAX\_MED : 20.3 BMAD : 8.58  
COFF : 20 HIT-CALL : 0 FITC : 4 ACTP : 0  
FLAGS : 10

Chemical : Methyl 2-methylbenzoate  
CAS : 89-71-4

Assay ID 1508 (NHEERL\_TPO\_AUR\_dn)  
Sample ID : TP0001441C03

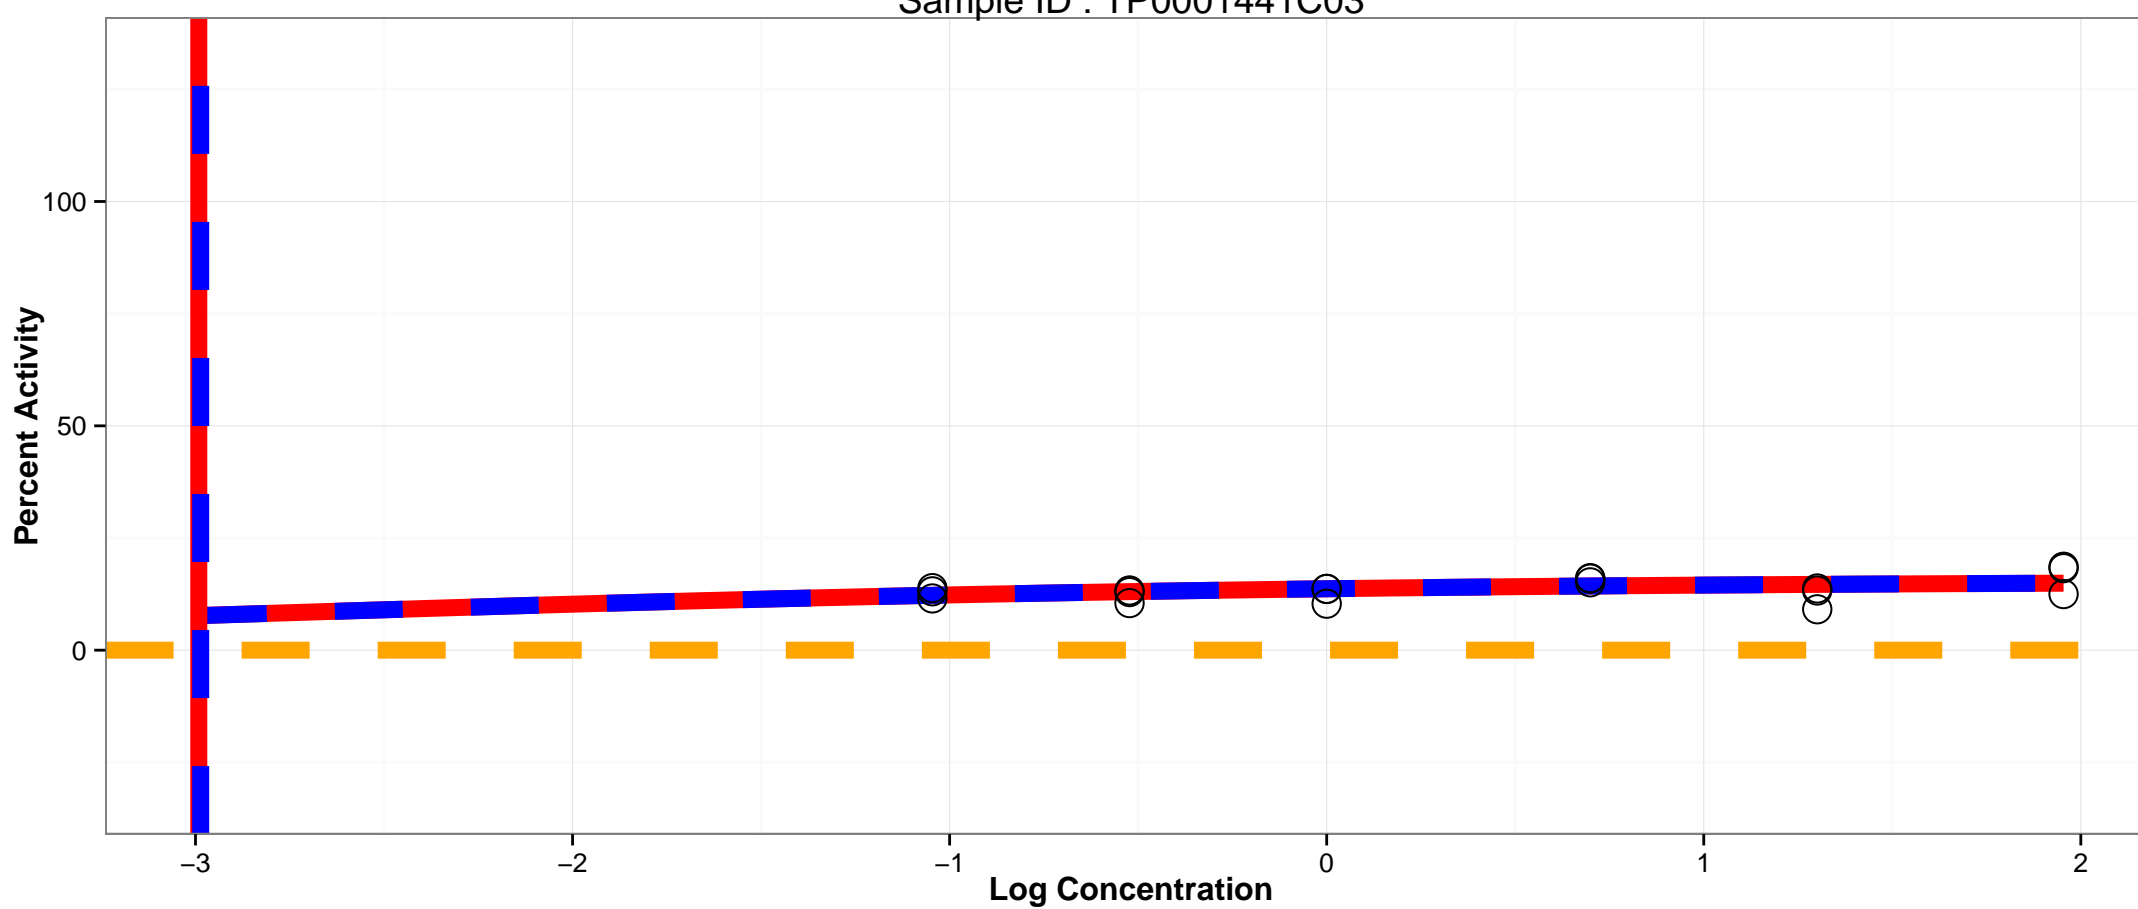

HILL MODEL

|     | tp   | ga    | gw  |
|-----|------|-------|-----|
| val | 15.4 | -2.99 | 0.3 |
| sd  | NA   | NA    | NA  |

GAIN-LOSS MODEL

|     | tp   | ga    | gw  | la   | lw   |
|-----|------|-------|-----|------|------|
| val | 15.4 | -2.99 | 0.3 | 3.48 | 5.61 |
| sd  | NA   | NA    | NA  | NA   | NA   |

|      | CNST   | HILL  | GNLS  |
|------|--------|-------|-------|
| AIC  | 151.84 | 88.89 | 92.89 |
| PROB | 0      | 0.88  | 0.12  |
| RMSE | 13.87  | 2.26  | 2.26  |

MAX\_MEAN : 16.5 MAX\_MED : 18.3 BMAD : 5.69  
COFF : 20 HIT-CALL : 0 FITC : 13 ACTP : 1  
FLAGS :

Assay ID 1509 (NHEERL\_HEK293T\_CellTiterGLO)  
Sample ID : TP0001441C03

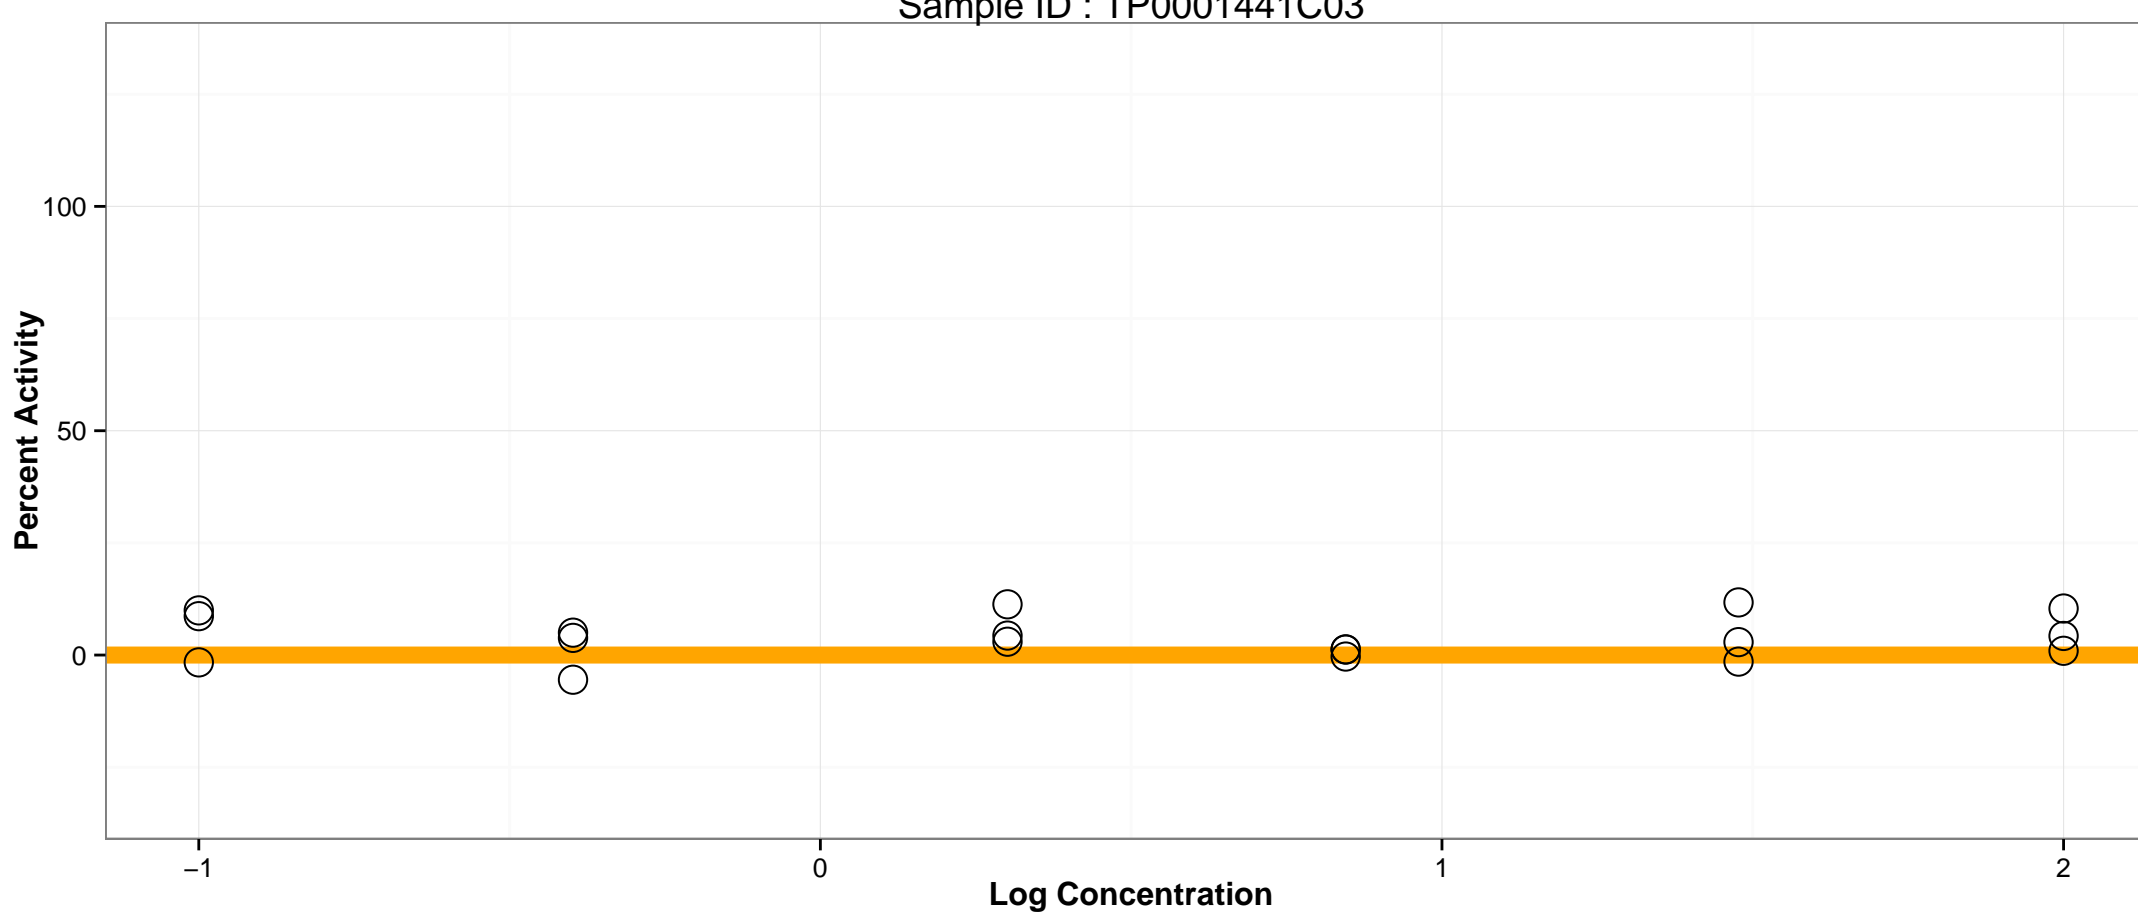

HILL MODEL

HILL MODEL: Not applicable

GAIN-LOSS MODEL

GNLS MODEL: Not applicable

|      | CNST   | HILL | GNLS |
|------|--------|------|------|
| AIC  | 119.71 | NA   | NA   |
| PROB | 1      | NA   | NA   |
| RMSE | 6.16   | NA   | NA   |

MAX\_MEAN : 6.22 MAX\_MED : 8.68 BMAD : 5.54  
COFF : 20 HIT-CALL : 0 FITC : 4 ACTP : 0  
FLAGS :

Assay ID 1848 (NHEERL\_Quantilum\_inhib\_2\_dn)  
Sample ID : TP0001441C03

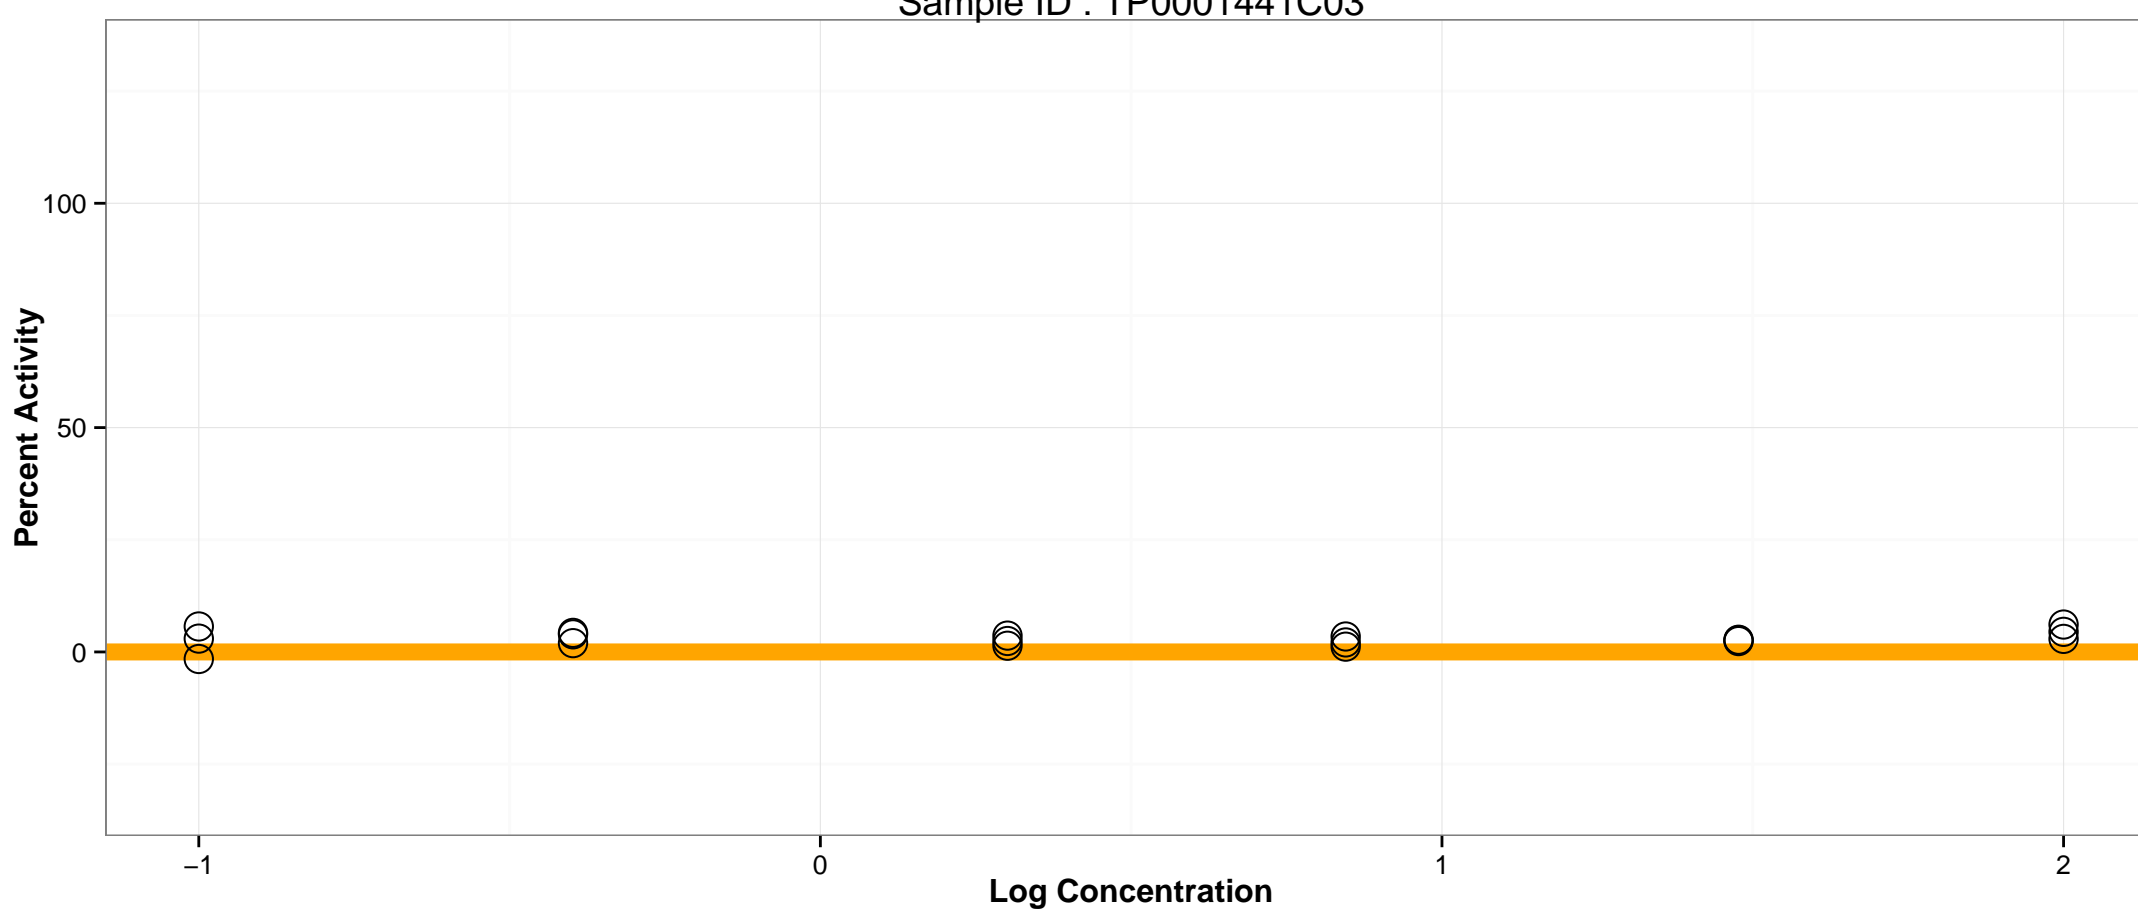

HILL MODEL

HILL MODEL: Not applicable

GAIN-LOSS MODEL

GNLS MODEL: Not applicable

|      | CNST   | HILL | GNLS |
|------|--------|------|------|
| AIC  | 100.03 | NA   | NA   |
| PROB | 1      | NA   | NA   |
| RMSE | 3.39   | NA   | NA   |

MAX\_MEAN : 4.51 MAX\_MED : 4.49 BMAD : 8.58  
COFF : 20 HIT-CALL : 0 FITC : 4 ACTP : 0  
FLAGS :

Chemical : Minocycline hydrochloride  
CAS : 13614-98-7

Assay ID 1508 (NHEERL\_TPO\_AUR\_dn)  
Sample ID : TP0001441C04

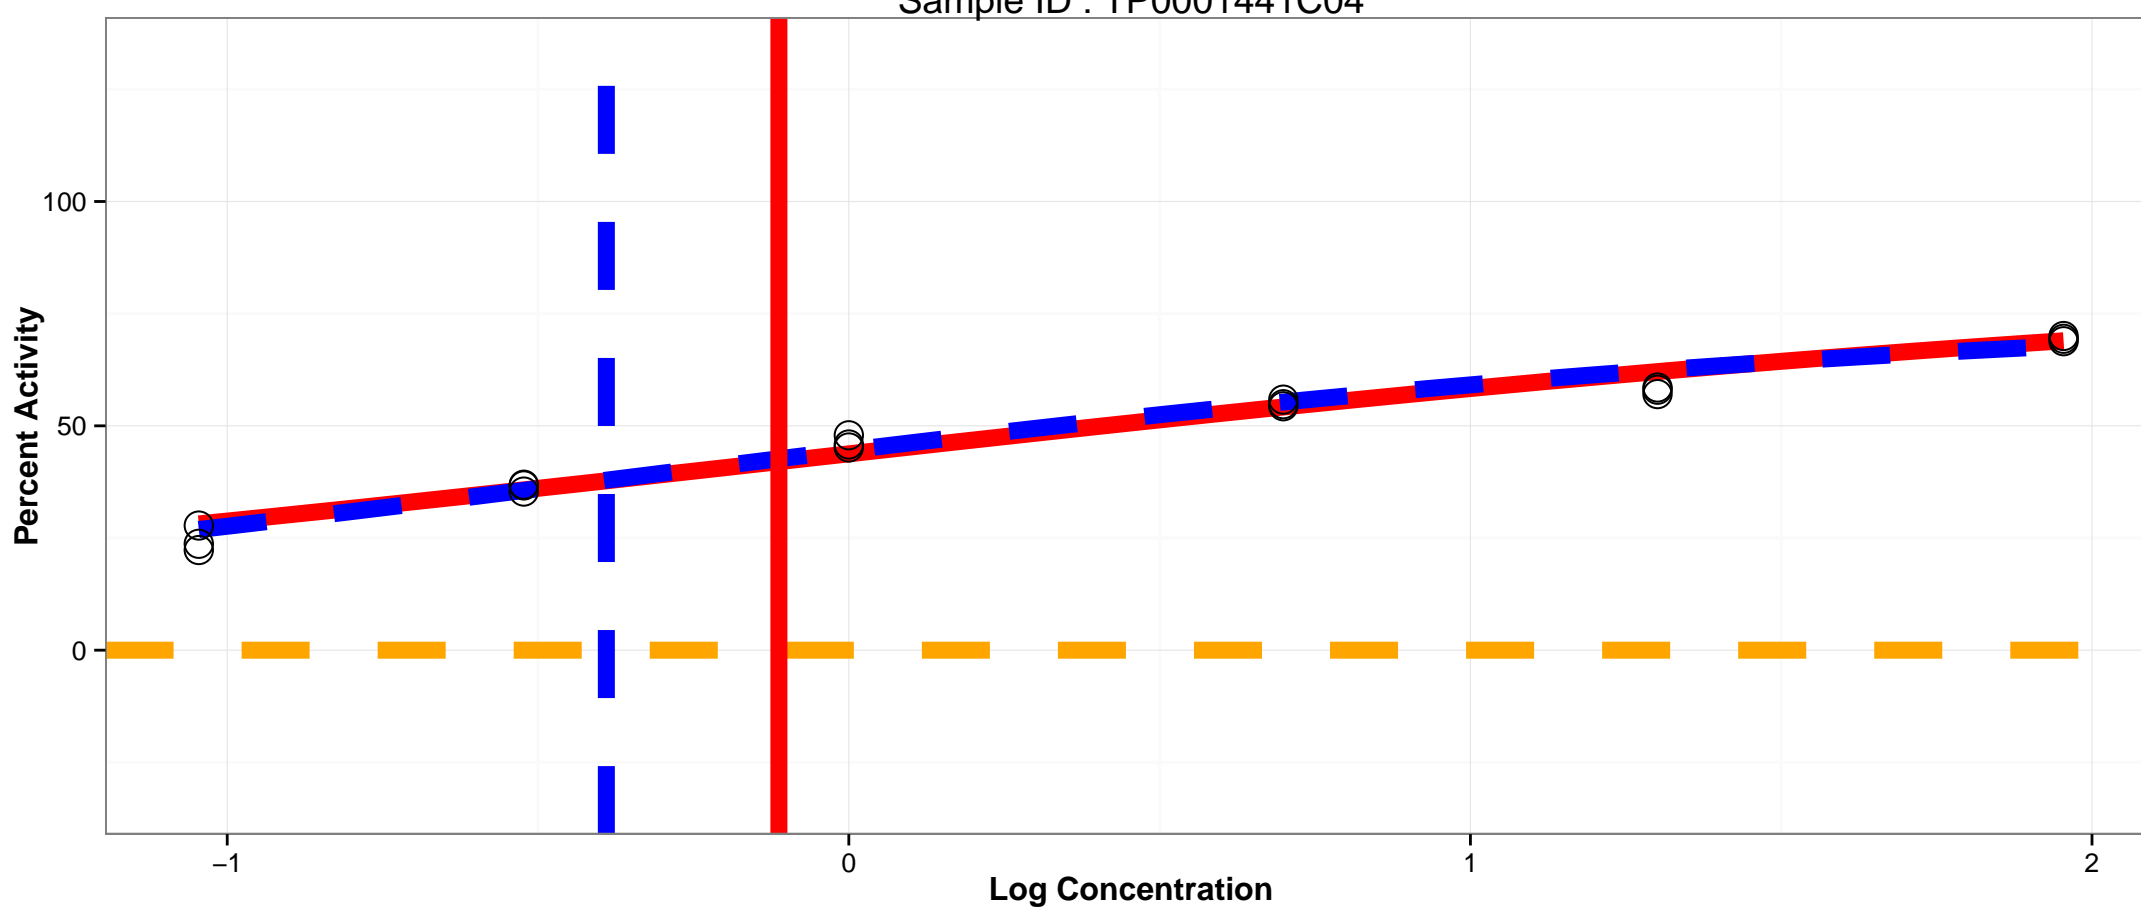

HILL MODEL

|     | tp   | ga     | gw    |
|-----|------|--------|-------|
| val | 84   | -0.112 | 0.319 |
| sd  | 38.1 | 1.37   | 0.273 |

GAIN-LOSS MODEL

|     | tp   | ga    | gw    | la   | lw   |
|-----|------|-------|-------|------|------|
| val | 75.8 | -0.39 | 0.396 | 3.92 | 8.09 |
| sd  | NA   | NA    | NA    | NA   | NA   |

|      | CNST  | HILL  | GNLS  |
|------|-------|-------|-------|
| AIC  | 198   | 96.38 | 98.41 |
| PROB | 0     | 0.73  | 0.27  |
| RMSE | 50.47 | 2.77  | 2.59  |

MAX\_MEAN : 69.4 MAX\_MED : 69.4 BMAD : 5.69  
COFF : 20 HIT-CALL : 1 FITC : 42 ACTP : 1  
FLAGS :

Assay ID 1509 (NHEERL\_HEK293T\_CellTiterGLO)  
Sample ID : TP0001441C04

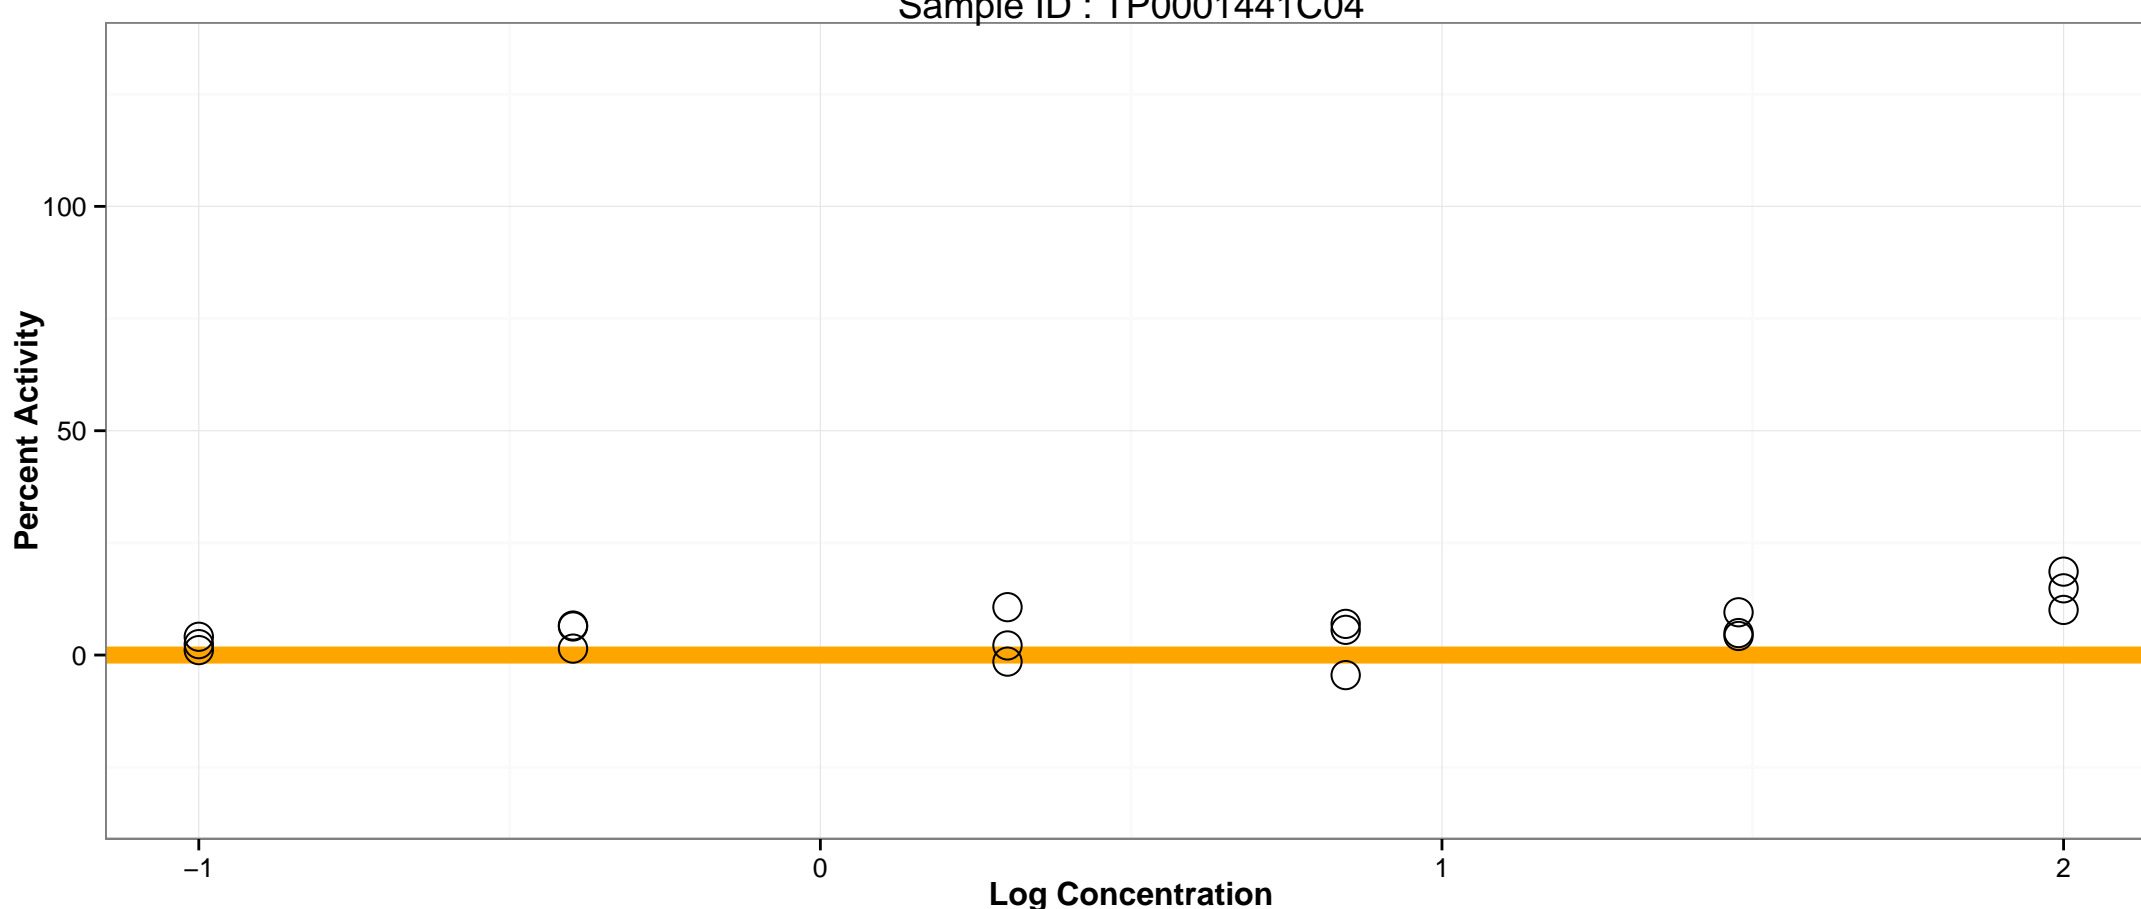

HILL MODEL

HILL MODEL: Not applicable

GAIN-LOSS MODEL

GNLS MODEL: Not applicable

|      | CNST   | HILL | GNLS |
|------|--------|------|------|
| AIC  | 128.57 | NA   | NA   |
| PROB | 1      | NA   | NA   |
| RMSE | 7.94   | NA   | NA   |

MAX\_MEAN : 14.5 MAX\_MED : 14.9 BMAD : 5.54  
COFF : 20 HIT-CALL : 0 FITC : 4 ACTP : 0  
FLAGS :

Assay ID 1848 (NHEERL\_Quantilum\_inhib\_2\_dn)  
Sample ID : TP0001441C04

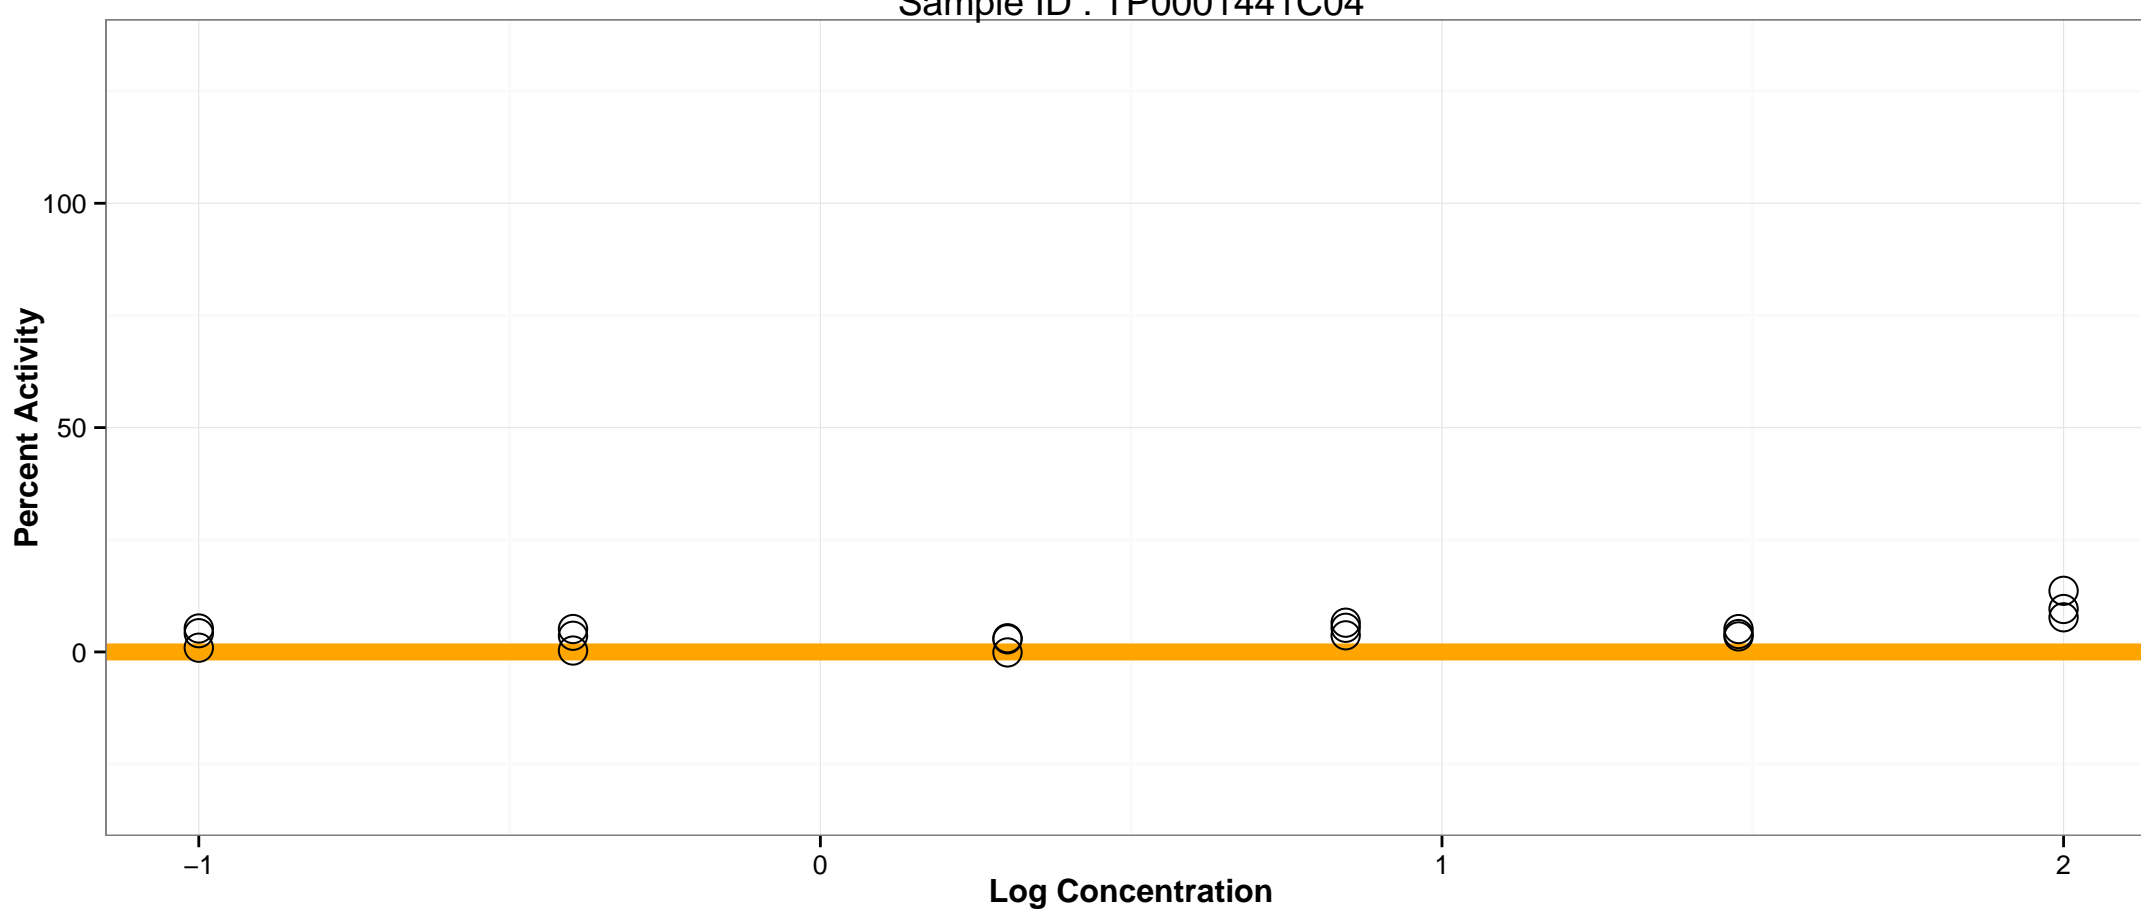

HILL MODEL

HILL MODEL: Not applicable

GAIN-LOSS MODEL

GNLS MODEL: Not applicable

|      | CNST   | HILL | GNLS |
|------|--------|------|------|
| AIC  | 116.95 | NA   | NA   |
| PROB | 1      | NA   | NA   |
| RMSE | 5.68   | NA   | NA   |

MAX\_MEAN : 10.3 MAX\_MED : 9.59 BMAD : 8.58  
COFF : 20 HIT-CALL : 0 FITC : 4 ACTP : 0  
FLAGS :

Chemical : Tiratricol  
CAS : 51-24-1

Assay ID 1508 (NHEERL\_TPO\_AUR\_dn)  
Sample ID : TP0001441C05

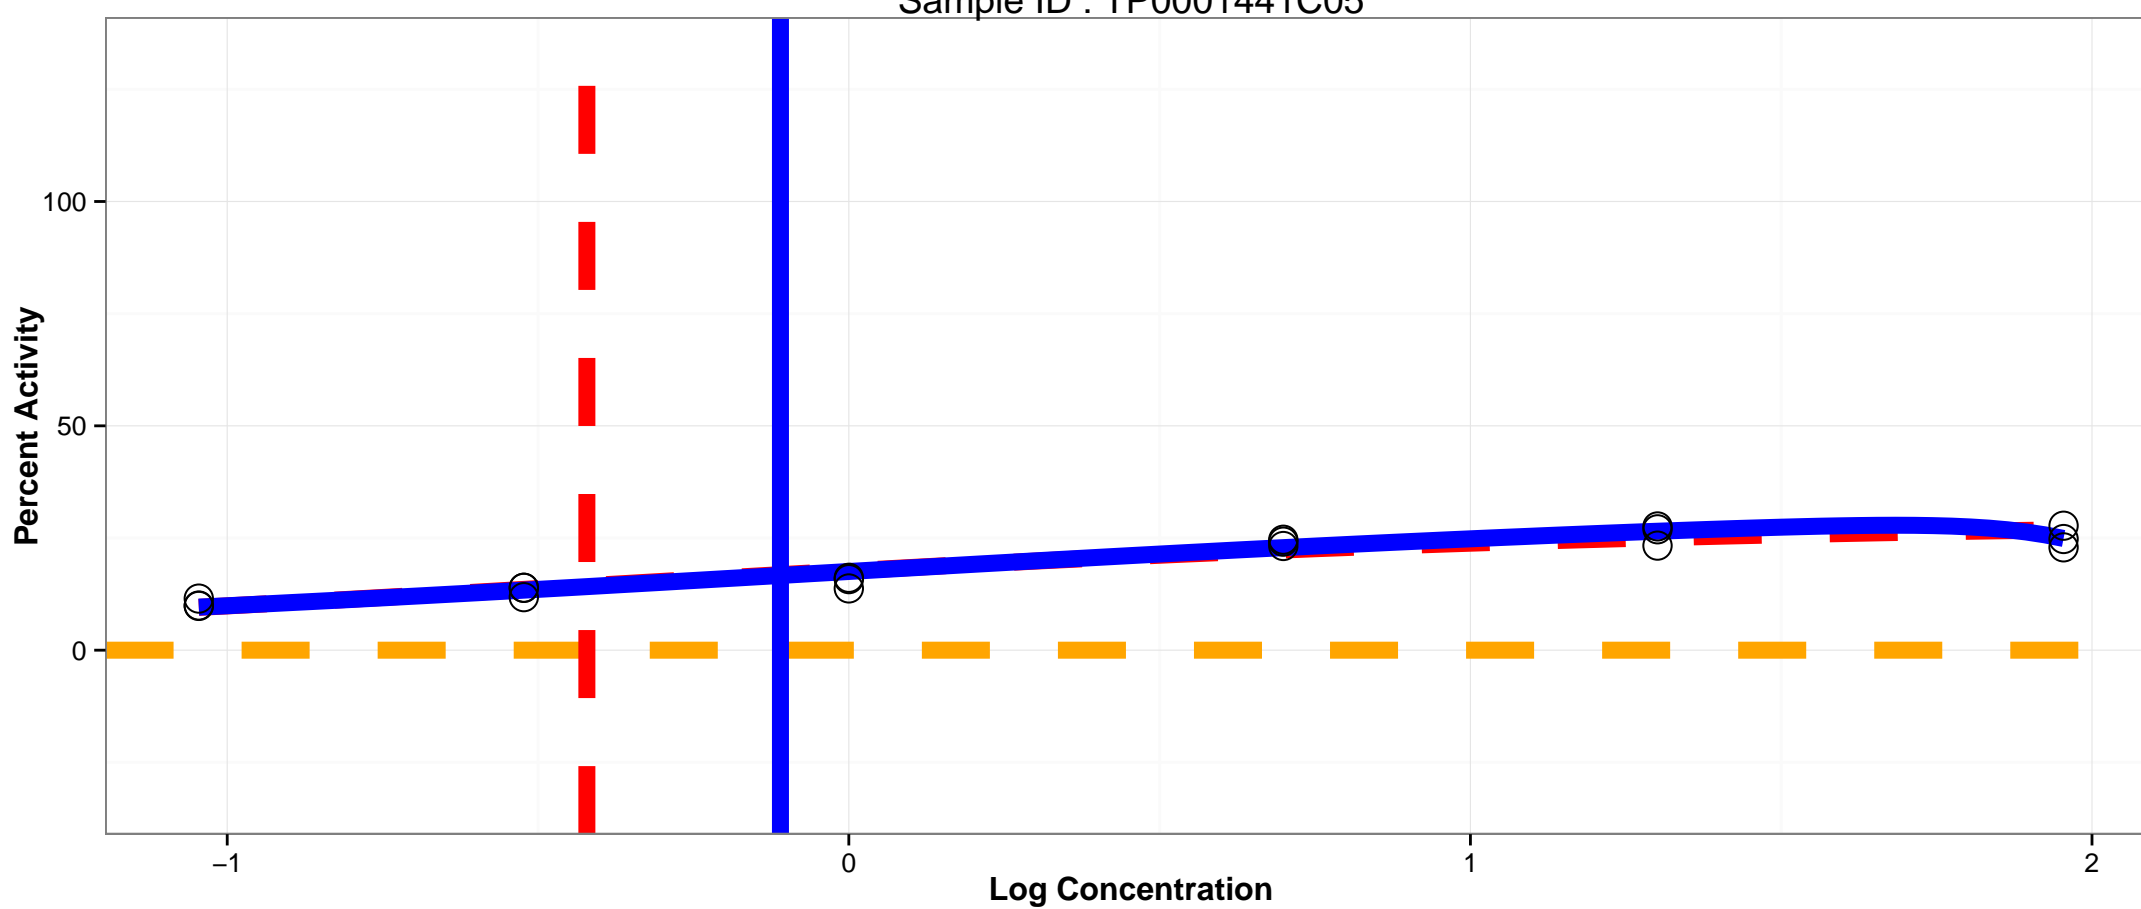

HILL MODEL

|     | tp   | ga     | gw    |
|-----|------|--------|-------|
| val | 28.7 | -0.421 | 0.485 |
| sd  | 2.24 | 0.182  | 0.096 |

GAIN-LOSS MODEL

|     | tp   | ga    | gw   | la   | lw   |
|-----|------|-------|------|------|------|
| val | 33.3 | -0.11 | 0.42 | 2.15 | 3.79 |
| sd  | NA   | NA    | NA   | NA   | NA   |

|      | CNST   | HILL  | GNLS  |
|------|--------|-------|-------|
| AIC  | 164.63 | 85.97 | 84.35 |
| PROB | 0      | 0.31  | 0.69  |
| RMSE | 20.04  | 1.99  | 1.74  |

MAX\_MEAN : 26 MAX\_MED : 27 BMAD : 5.69  
COFF : 20 HIT-CALL : 1 FITC : 51 ACTP : 1  
FLAGS :

Assay ID 1509 (NHEERL\_HEK293T\_CellTiterGLO)  
Sample ID : TP0001441C05

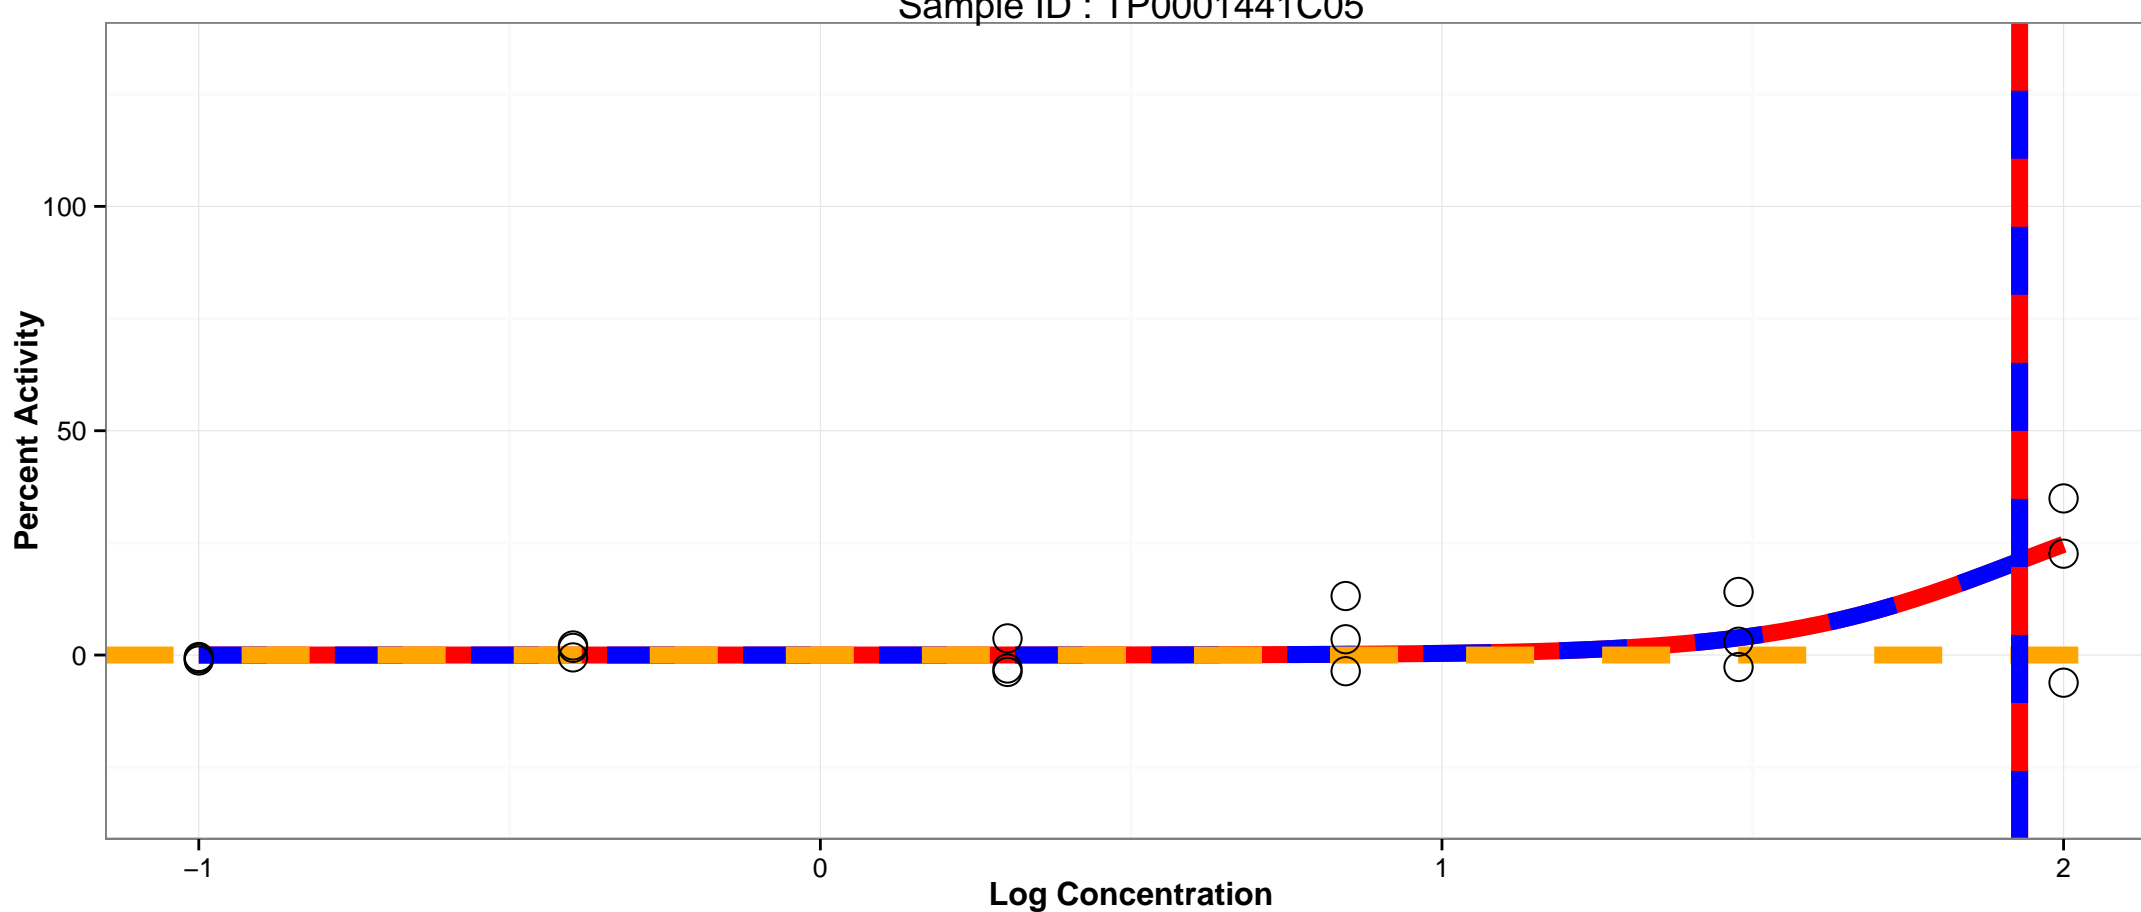

HILL MODEL

|     | tp   | ga   | gw   |
|-----|------|------|------|
| val | 41.9 | 1.93 | 2.2  |
| sd  | 127  | 1.34 | 3.92 |

GAIN-LOSS MODEL

|     | tp   | ga   | gw   | la   | lw   |
|-----|------|------|------|------|------|
| val | 41.9 | 1.93 | 2.2  | 3.74 | 3.64 |
| sd  | 127  | 1.34 | 3.92 | 1490 | 3140 |

|      | CNST   | HILL   | GNLS   |
|------|--------|--------|--------|
| AIC  | 133.02 | 130.55 | 134.55 |
| PROB | 0.2    | 0.7    | 0.09   |
| RMSE | 11.13  | 8.97   | 8.97   |

MAX\_MEAN : 17.1 MAX\_MED : 22.6 BMAD : 5.54  
COFF : 20 HIT-CALL : 1 FITC : 42 ACTP : 0.796  
FLAGS : 11; 6; 16

Assay ID 1848 (NHEERL\_Quantilum\_inhib\_2\_dn)  
Sample ID : TP0001441C05

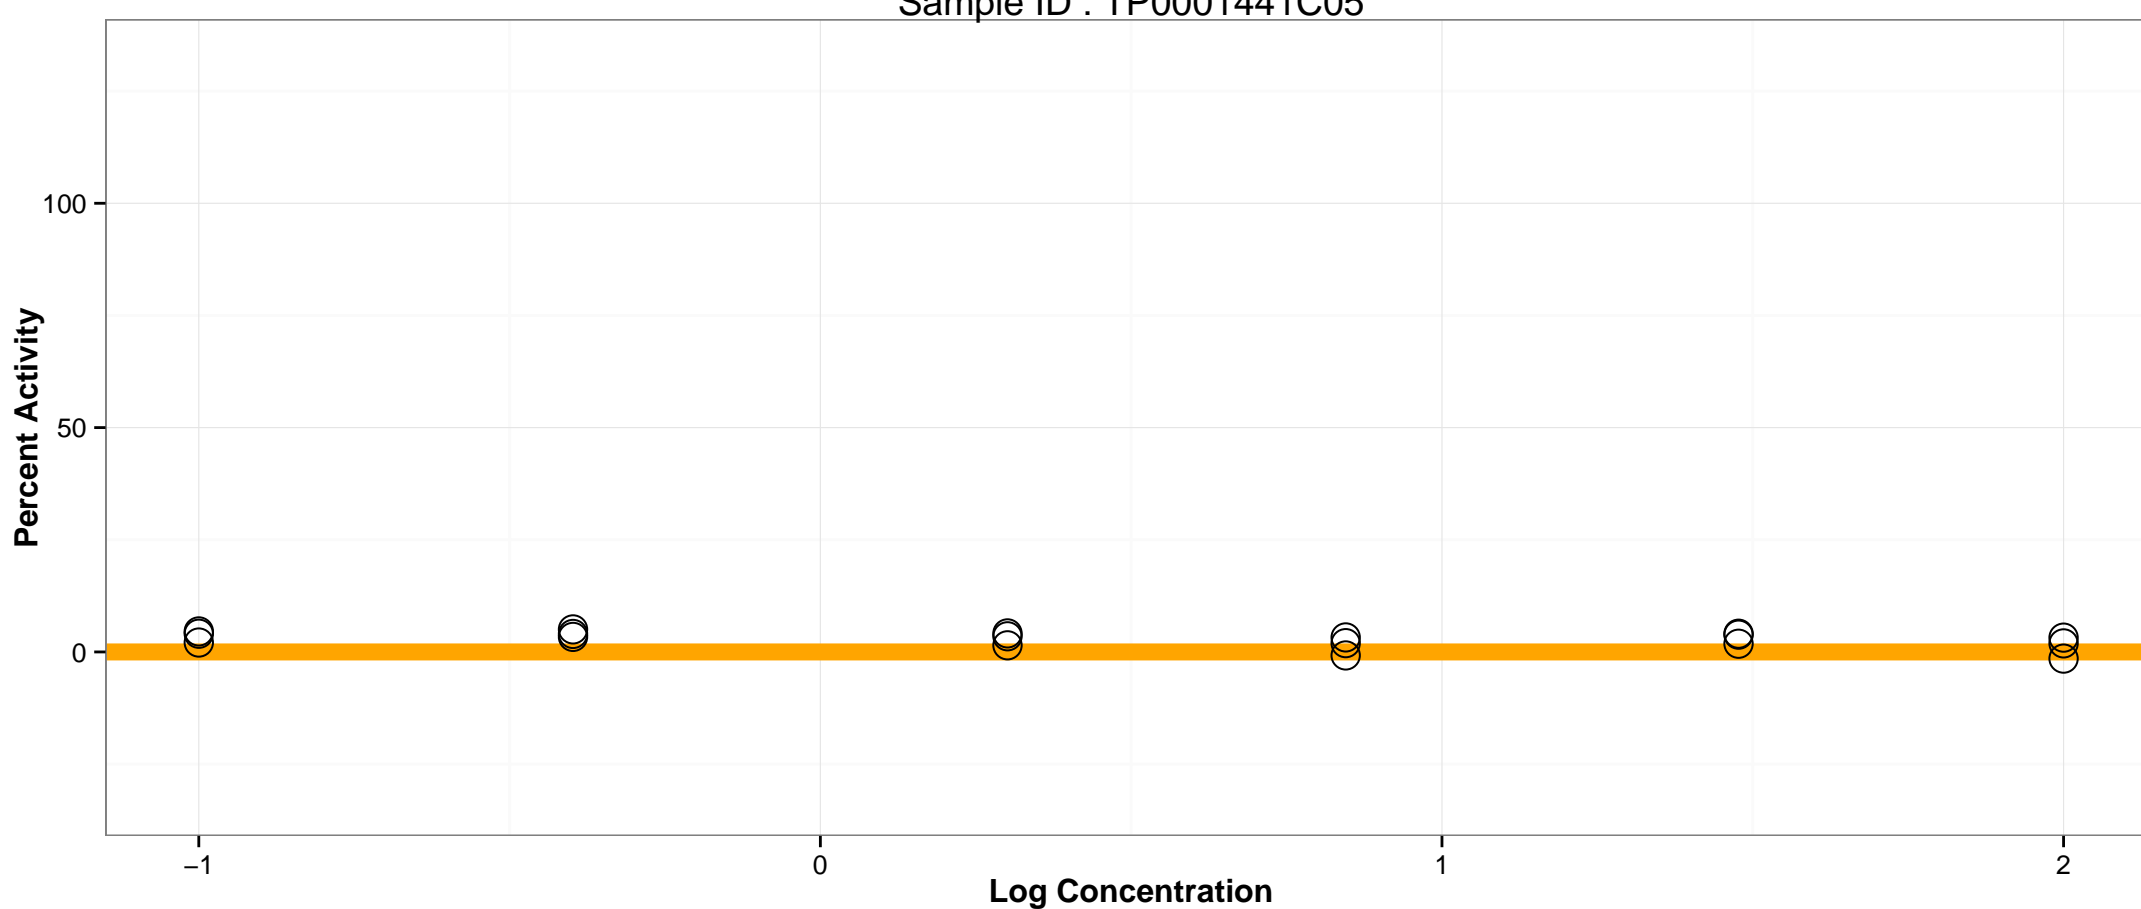

HILL MODEL

HILL MODEL: Not applicable

GAIN-LOSS MODEL

GNLS MODEL: Not applicable

|      | CNST  | HILL | GNLS |
|------|-------|------|------|
| AIC  | 99.19 | NA   | NA   |
| PROB | 1     | NA   | NA   |
| RMSE | 3.27  | NA   | NA   |

MAX\_MEAN : 4.14 MAX\_MED : 4.07 BMAD : 8.58  
COFF : 20 HIT-CALL : 0 FITC : 4 ACTP : 0  
FLAGS :

Chemical : Tiratricol  
CAS : 51-24-1

Assay ID 1508 (NHEERL\_TPO\_AUR\_dn)  
Sample ID : TX015604

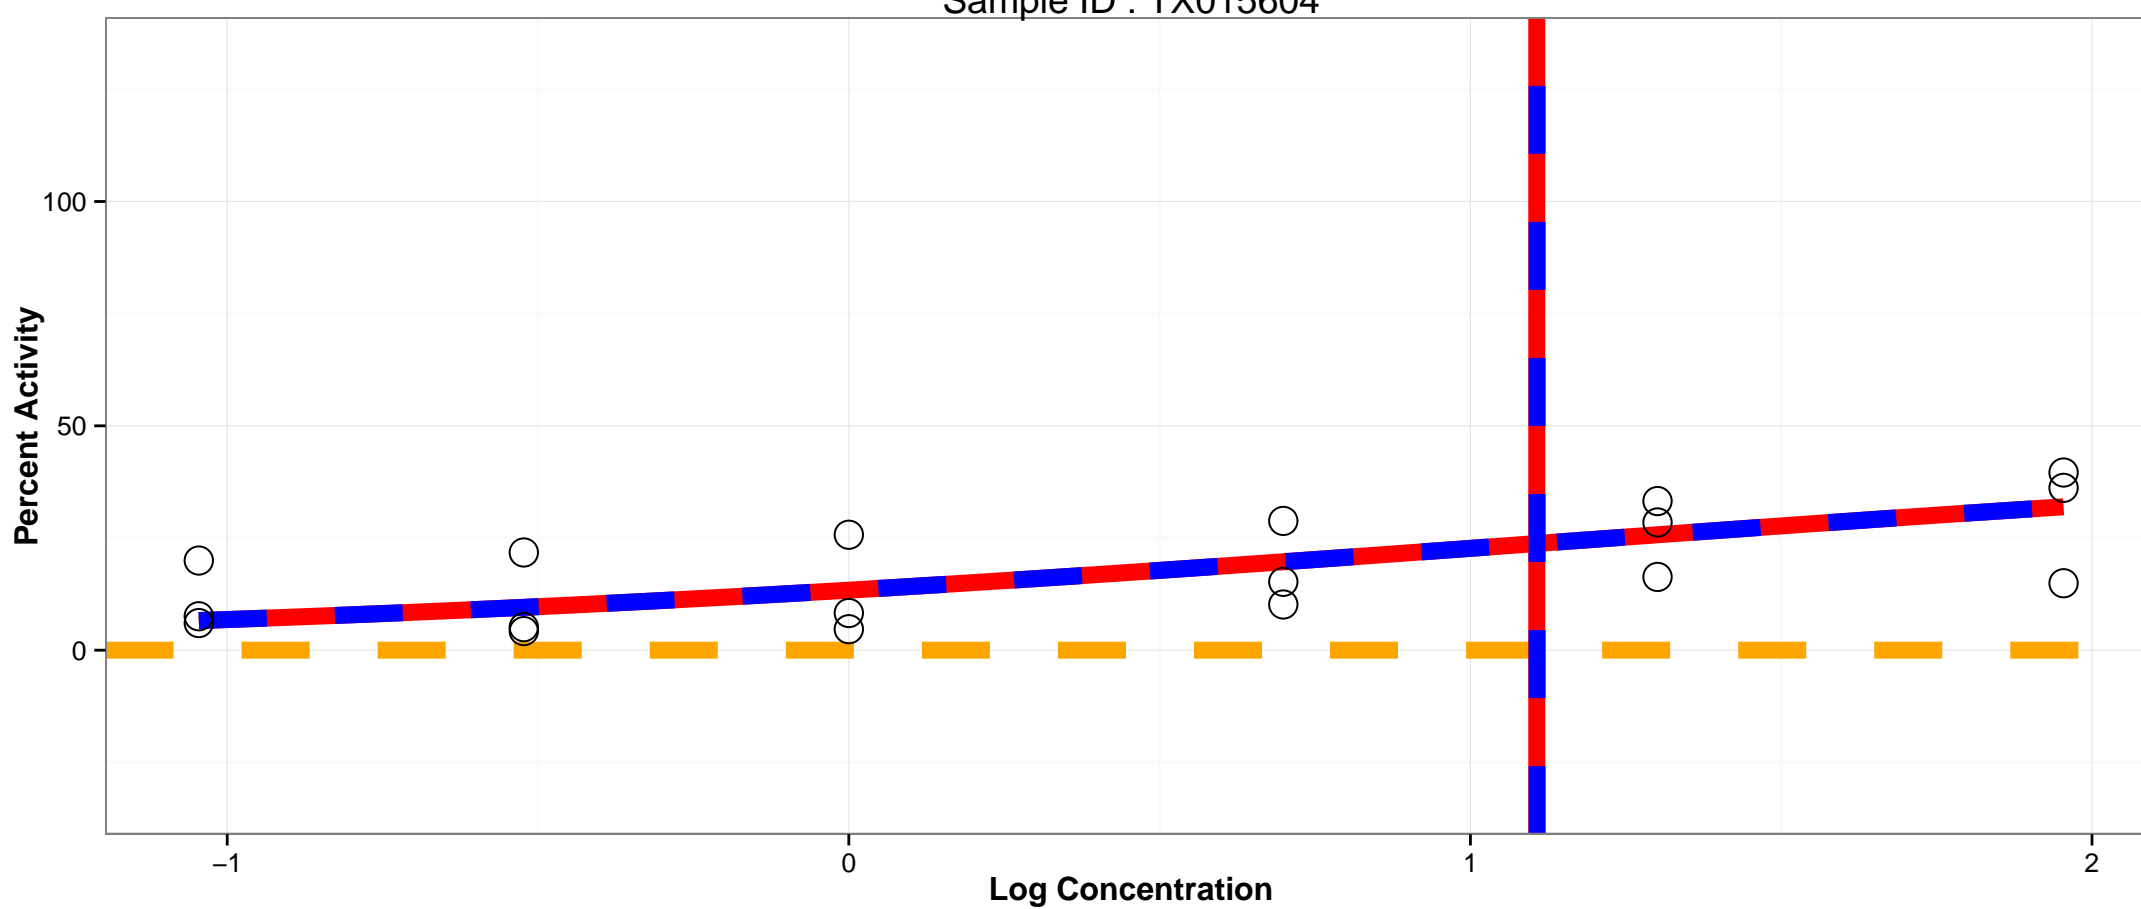

HILL MODEL

|     | tp   | ga   | gw    |
|-----|------|------|-------|
| val | 47.5 | 1.11 | 0.368 |
| sd  | 27.5 | 1.46 | 0.179 |

GAIN-LOSS MODEL

|     | tp   | ga   | gw    | la   | lw    |
|-----|------|------|-------|------|-------|
| val | 47.5 | 1.11 | 0.368 | 2.43 | 17.2  |
| sd  | 27.5 | 1.45 | 0.179 | 478  | 17100 |

|      | CNST   | HILL  | GNLS  |
|------|--------|-------|-------|
| AIC  | 165.53 | 139.2 | 143.2 |
| PROB | 0      | 0.88  | 0.12  |
| RMSE | 21.37  | 8.64  | 8.64  |

MAX\_MEAN : 30.2 MAX\_MED : 36.2 BMAD : 5.69  
COFF : 20 HIT-CALL : 1 FITC : 42 ACTP : 1  
FLAGS :

Assay ID 1509 (NHEERL\_HEK293T\_CellTiterGLO)  
Sample ID : TX015604

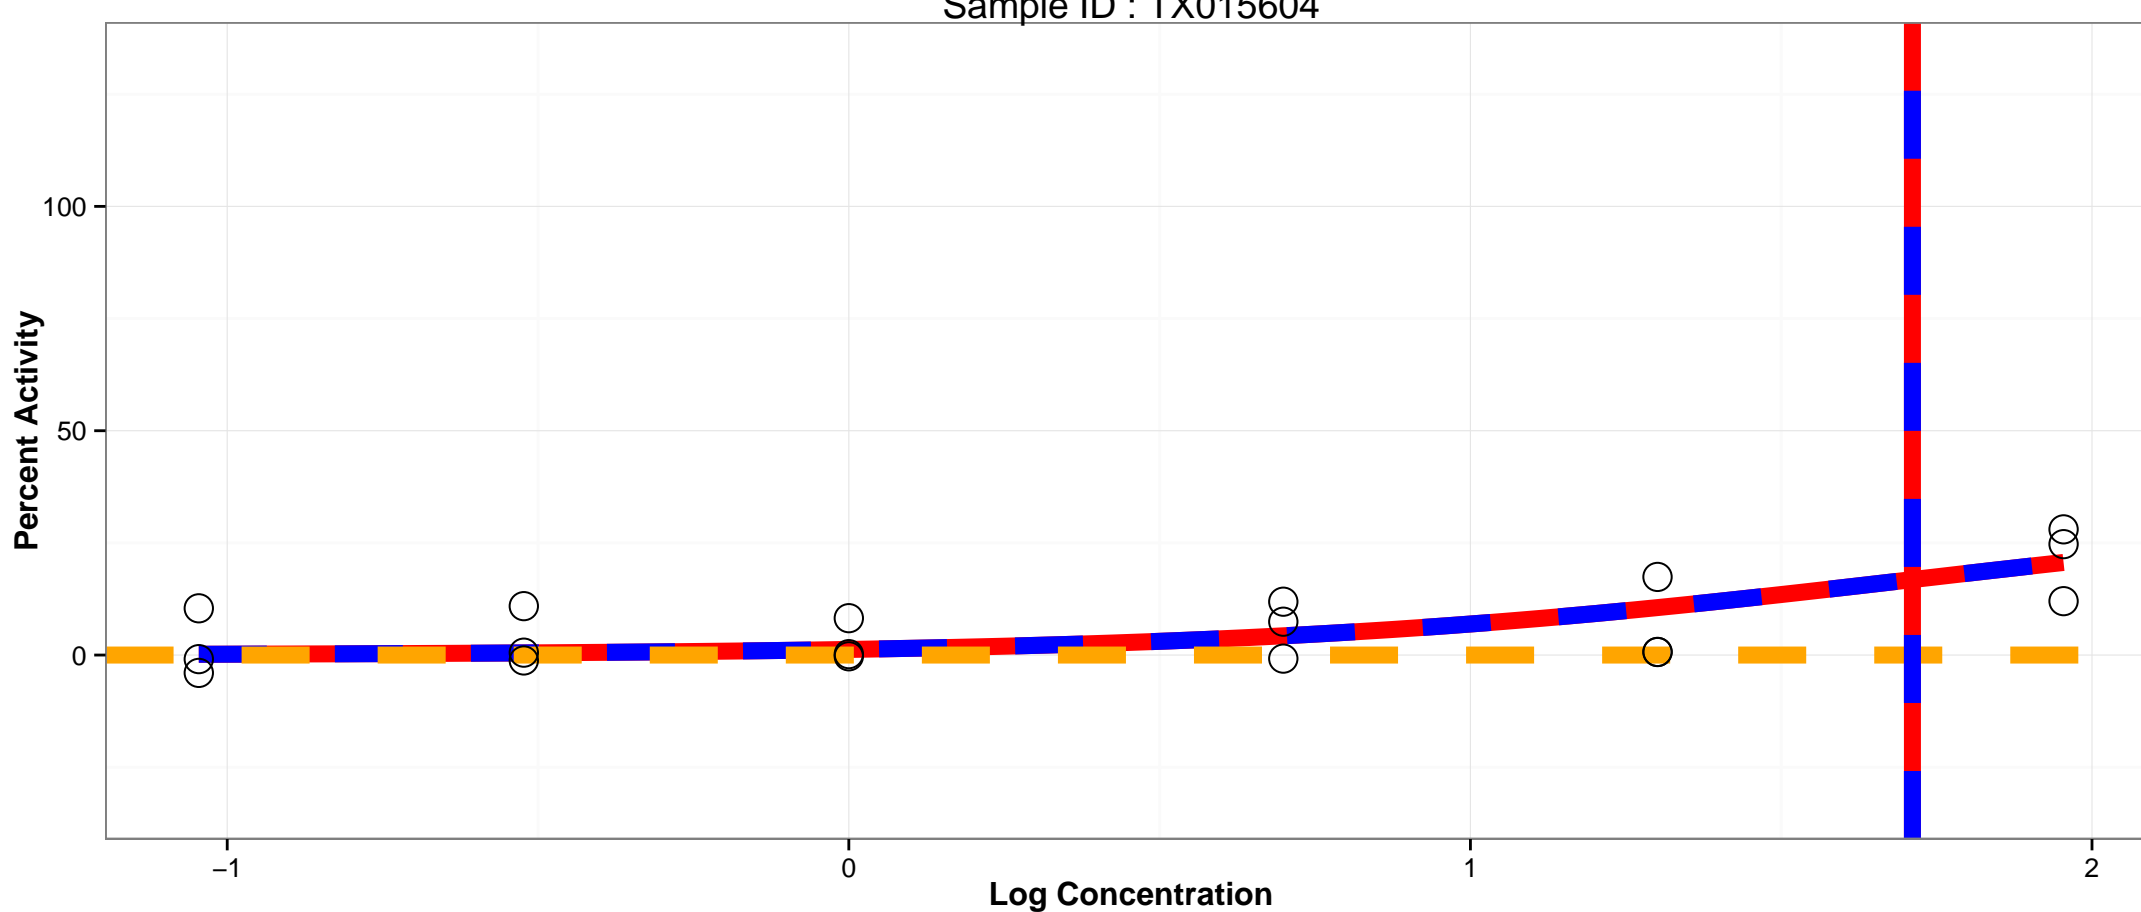

HILL MODEL

|     | tp   | ga    | gw    |
|-----|------|-------|-------|
| val | 33.6 | 1.71  | 0.825 |
| sd  | 20.8 | 0.682 | 0.582 |

GAIN-LOSS MODEL

|     | tp   | ga   | gw    | la   | lw |
|-----|------|------|-------|------|----|
| val | 33.6 | 1.71 | 0.825 | 3.01 | 18 |
| sd  | NA   | NA   | NA    | NA   | NA |

|      | CNST   | HILL   | GNLS   |
|------|--------|--------|--------|
| AIC  | 139.81 | 129.31 | 133.31 |
| PROB | 0      | 0.88   | 0.12   |
| RMSE | 11.45  | 6.53   | 6.53   |

MAX\_MEAN : 21.6 MAX\_MED : 24.7 BMAD : 5.54  
COFF : 20 HIT-CALL : 1 FITC : 42 ACTP : 0.995  
FLAGS : 6

Assay ID 1848 (NHEERL\_Quantilum\_inhib\_2\_dn)  
Sample ID : TX015604

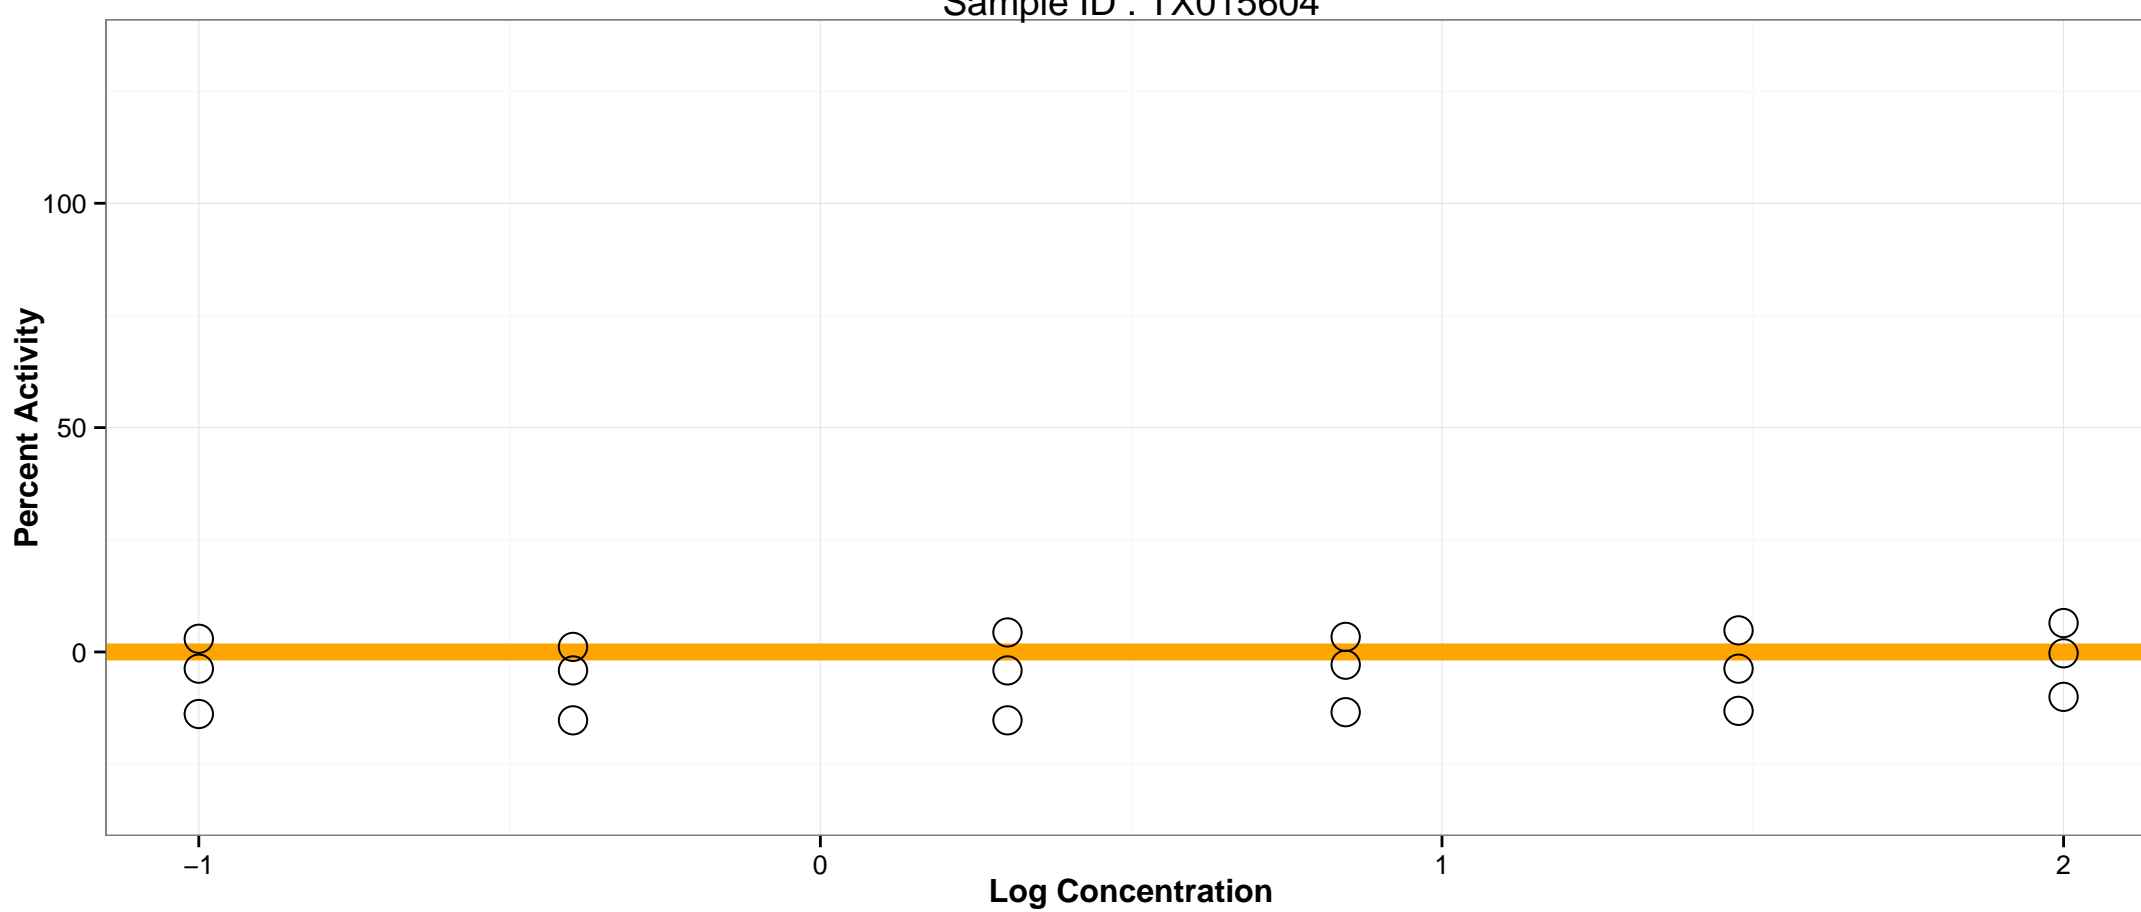

HILL MODEL

HILL MODEL: Not applicable

GAIN-LOSS MODEL

GNLS MODEL: Not applicable

|      | CNST   | HILL | GNLS |
|------|--------|------|------|
| AIC  | 131.26 | NA   | NA   |
| PROB | 1      | NA   | NA   |
| RMSE | 8.44   | NA   | NA   |

MAX\_MEAN : -1.28 MAX\_MED : -0.293 BMAD : 8.58  
COFF : 20 HIT-CALL : 0 FITC : 4 ACTP : 0  
FLAGS :

Chemical : 3-Methylcholanthrene  
CAS : 56-49-5

Assay ID 1508 (NHEERL\_TPO\_AUR\_dn)  
Sample ID : TP0001441C06

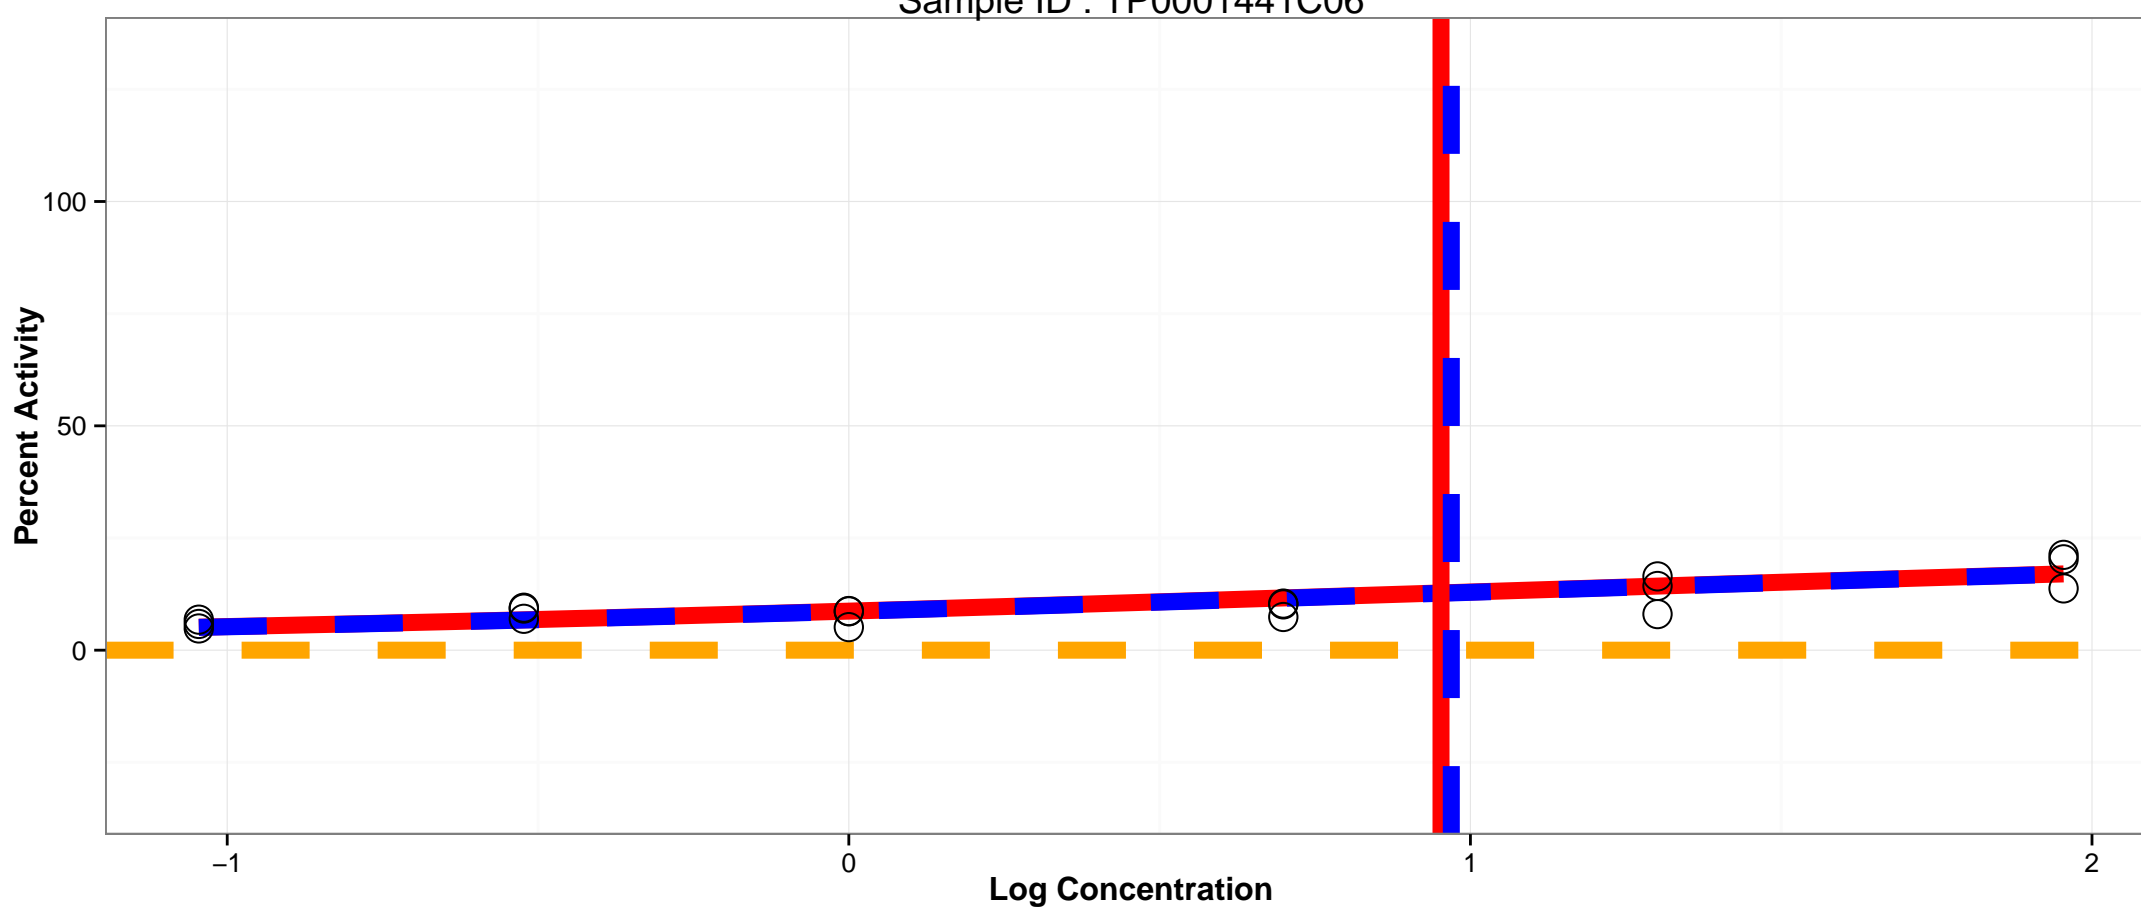

**HILL MODEL**

|     | tp   | ga    | gw    |
|-----|------|-------|-------|
| val | 25.5 | 0.953 | 0.3   |
| sd  | 21.6 | 2.46  | 0.152 |

**GAIN-LOSS MODEL**

|     | tp   | ga    | gw  | la   | lw |
|-----|------|-------|-----|------|----|
| val | 25.5 | 0.969 | 0.3 | 3.94 | 18 |
| sd  | NA   | NA    | NA  | NA   | NA |

|      | CNST   | HILL  | GNLS   |
|------|--------|-------|--------|
| AIC  | 143.66 | 96.47 | 100.45 |
| PROB | 0      | 0.88  | 0.12   |
| RMSE | 11.47  | 2.73  | 2.72   |

MAX\_MEAN : 18.4 MAX\_MED : 20.3 BMAD : 5.69  
COFF : 20 HIT-CALL : 1 FITC : 42 ACTP : 1  
FLAGS : 11; 6

Assay ID 1509 (NHEERL\_HEK293T\_CellTiterGLO)  
Sample ID : TP0001441C06

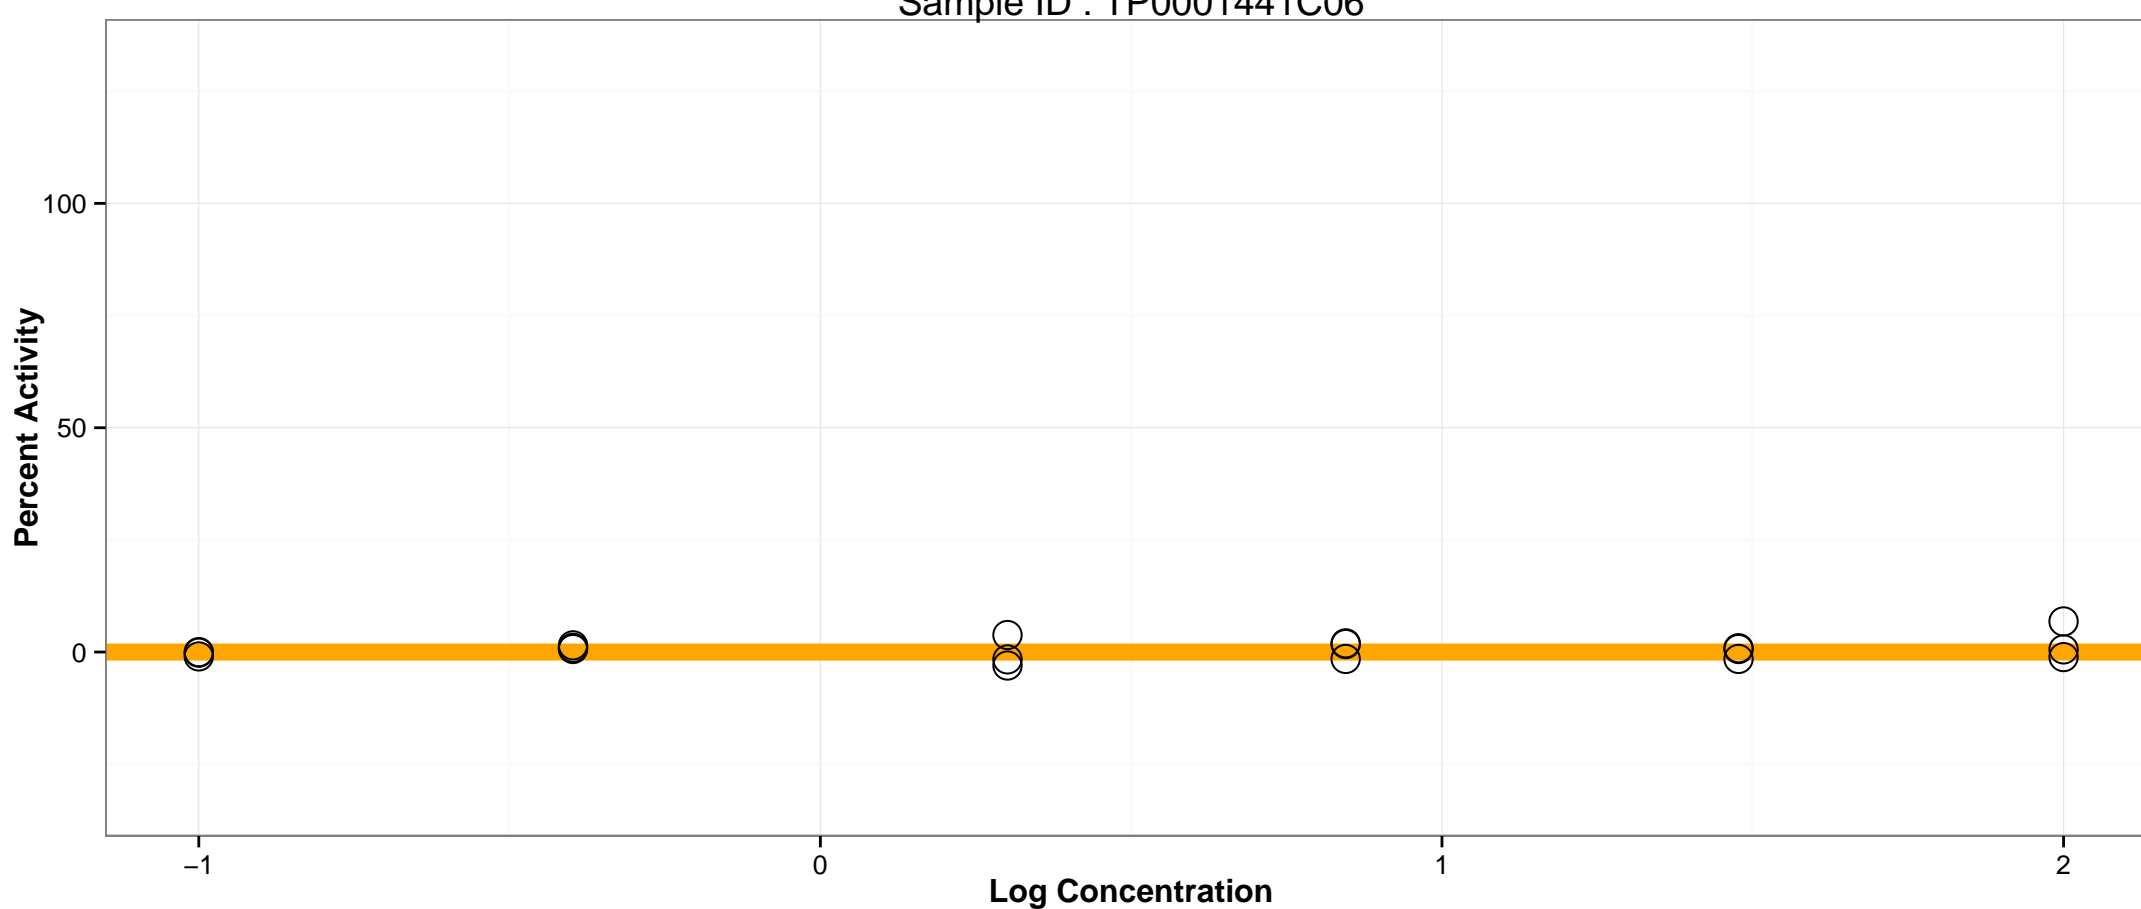

**HILL MODEL**

HILL MODEL: Not applicable

**GAIN-LOSS MODEL**

GNLS MODEL: Not applicable

|      | CNST  | HILL | GNLS |
|------|-------|------|------|
| AIC  | 79.97 | NA   | NA   |
| PROB | 1     | NA   | NA   |
| RMSE | 2.26  | NA   | NA   |

MAX\_MEAN : 2.11 MAX\_MED : 1.79 BMAD : 5.54  
COFF : 20 HIT-CALL : 0 FITC : 4 ACTP : 0  
FLAGS :

Assay ID 1848 (NHEERL\_Quantilum\_inhib\_2\_dn)  
Sample ID : TP0001441C06

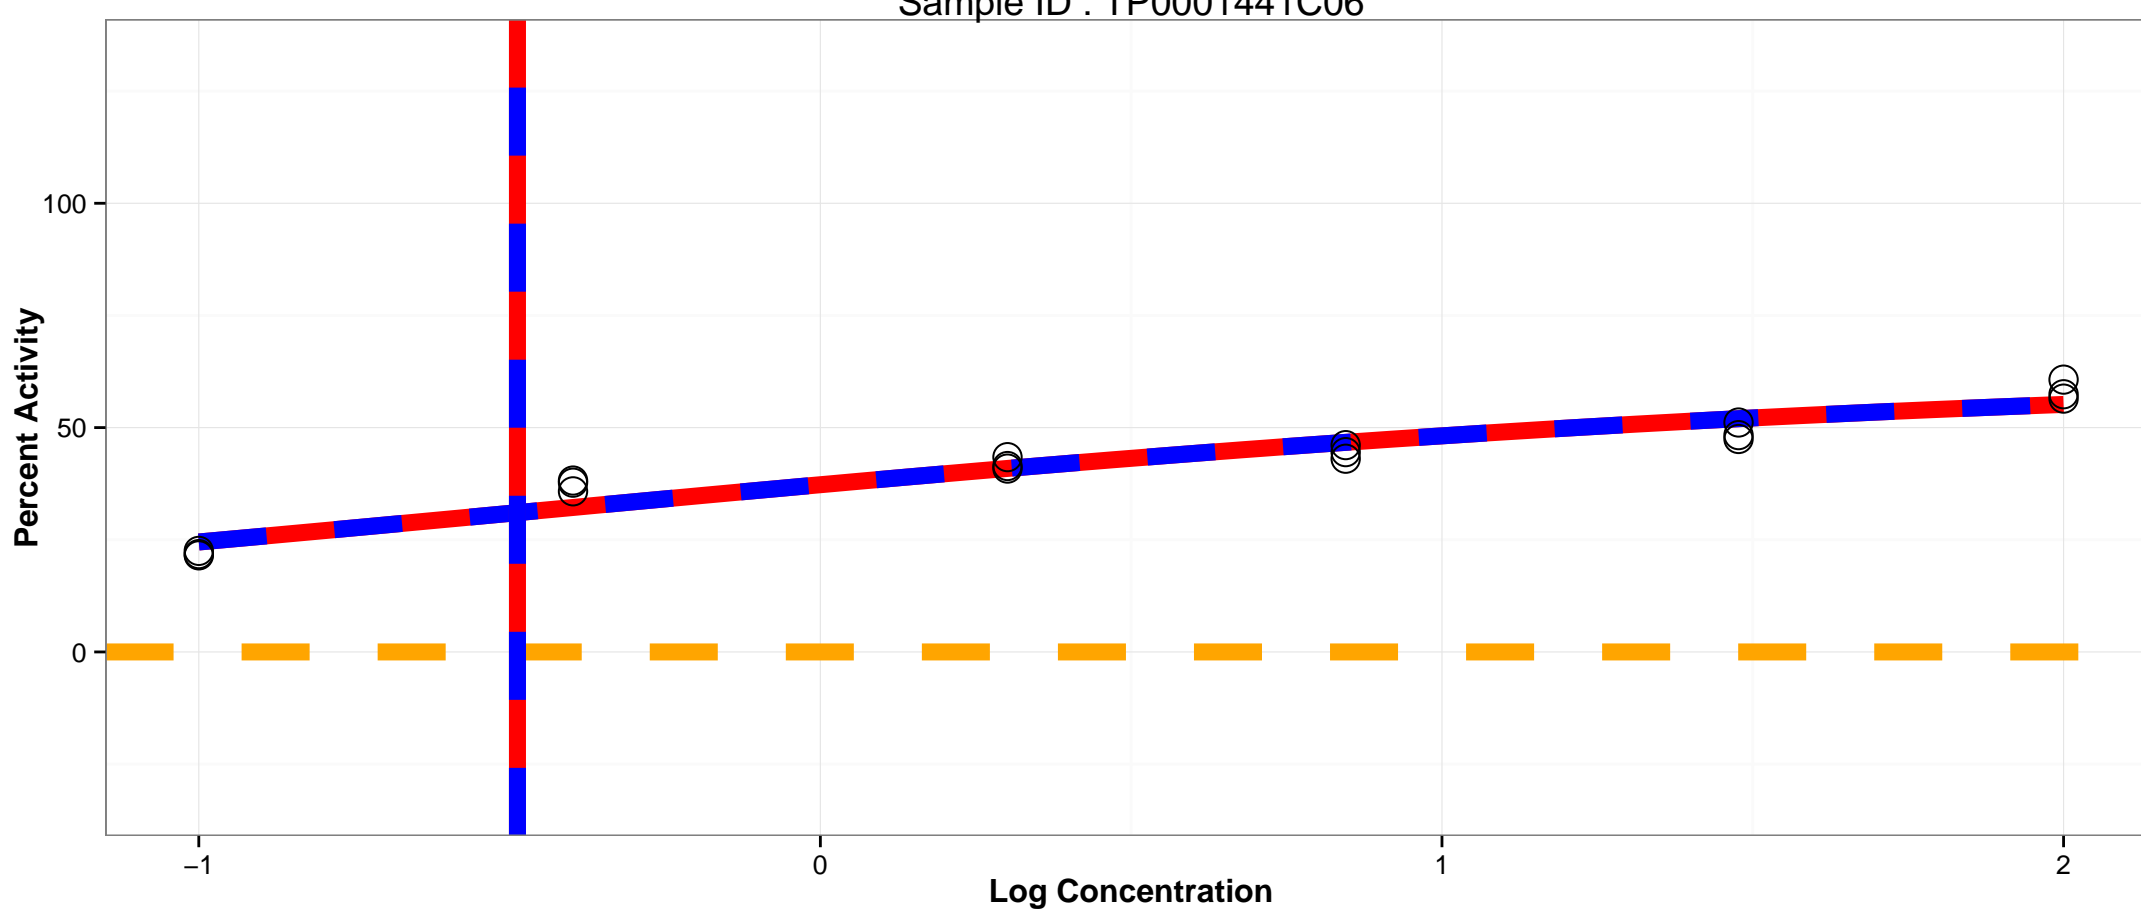

**HILL MODEL**

|     | tp   | ga     | gw    |
|-----|------|--------|-------|
| val | 62.1 | -0.487 | 0.362 |
| sd  | 8.18 | 0.346  | 0.11  |

**GAIN-LOSS MODEL**

|     | tp   | ga     | gw    | la   | lw   |
|-----|------|--------|-------|------|------|
| val | 62.1 | -0.487 | 0.362 | 3.88 | 11.3 |
| sd  | NA   | NA     | NA    | NA   | NA   |

|      | CNST   | HILL   | GNLS   |
|------|--------|--------|--------|
| AIC  | 192.88 | 104.48 | 108.48 |
| PROB | 0      | 0.88   | 0.12   |
| RMSE | 43.61  | 3.31   | 3.31   |

MAX\_MEAN : 58.2 MAX\_MED : 57.4 BMAD : 8.58  
COFF : 20 HIT-CALL : 1 FITC : 42 ACTP : 1  
FLAGS :



Chemical : 2,2'-Dihydroxy-4-methoxybenzophenone  
CAS : 131-53-3

Assay ID 1508 (NHEERL\_TPO\_AUR\_dn)  
Sample ID : TP0001441C07

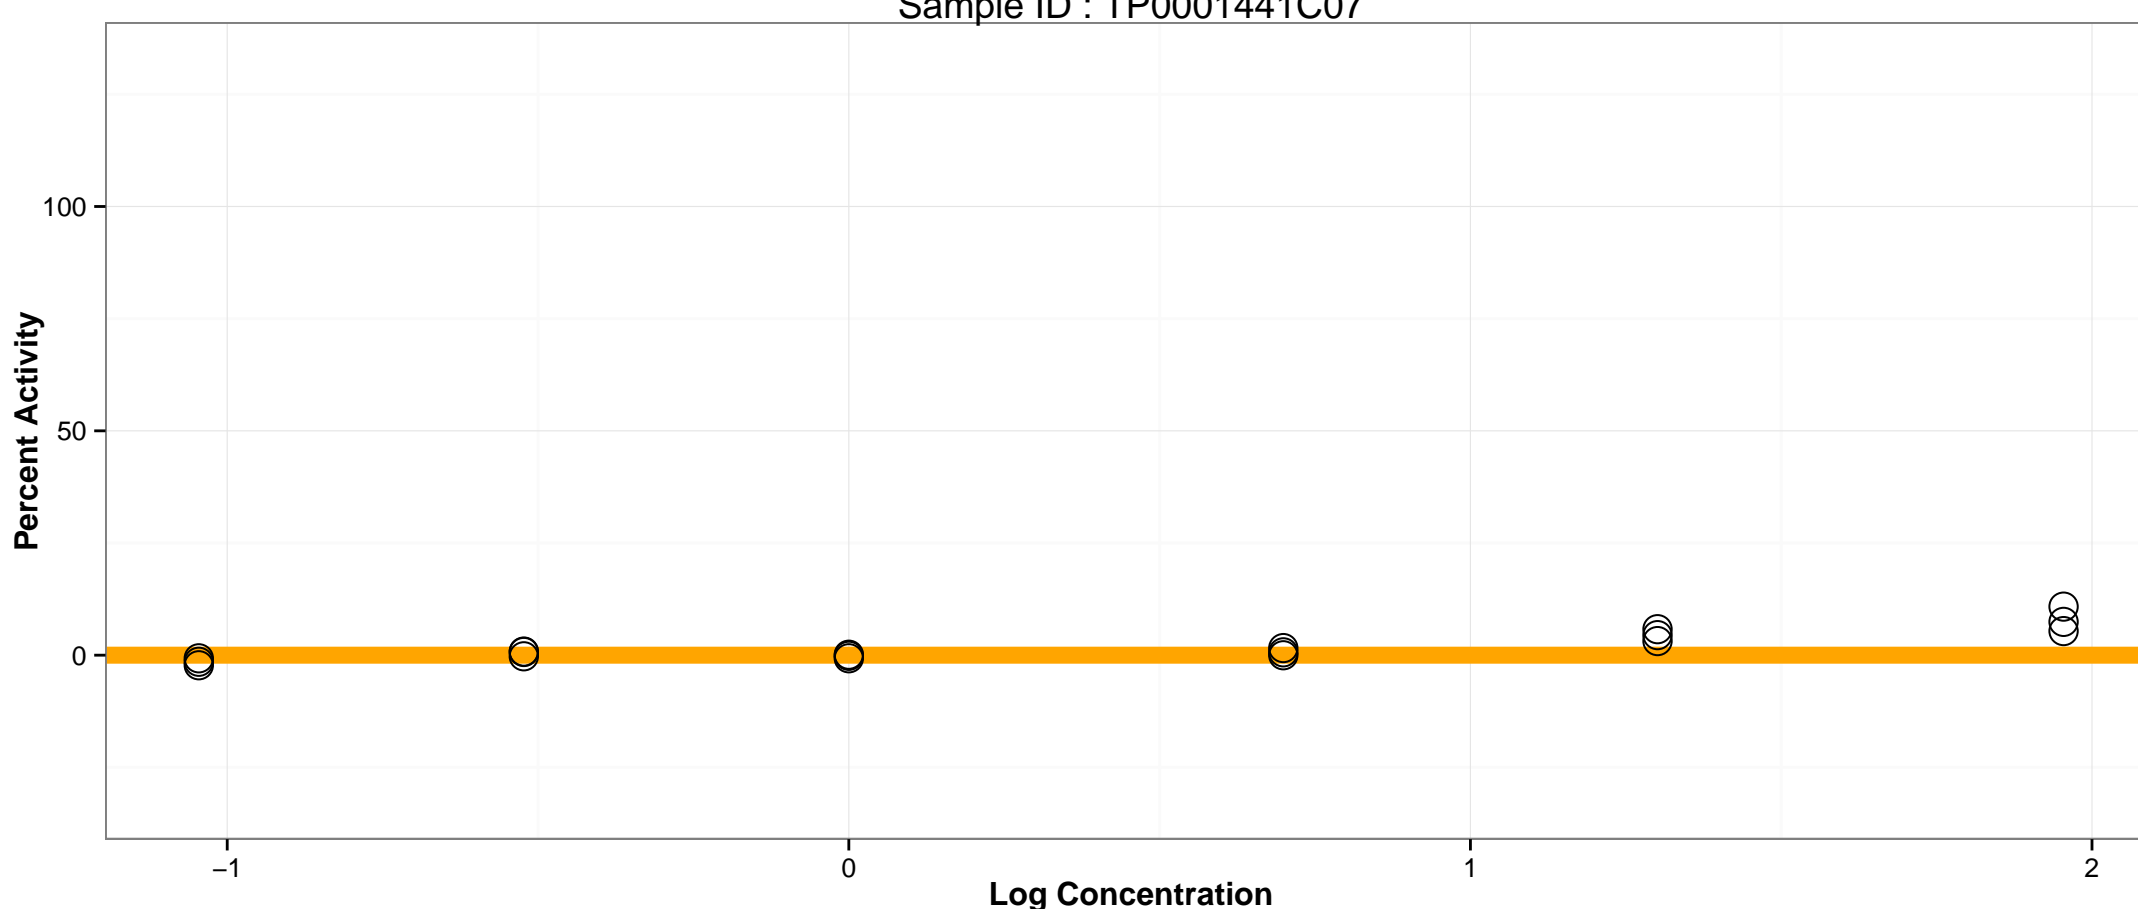

HILL MODEL

HILL MODEL: Not applicable

GAIN-LOSS MODEL

GNLS MODEL: Not applicable

|      | CNST  | HILL | GNLS |
|------|-------|------|------|
| AIC  | 99.83 | NA   | NA   |
| PROB | 1     | NA   | NA   |
| RMSE | 3.93  | NA   | NA   |

MAX\_MEAN : 7.88 MAX\_MED : 7.43 BMAD : 5.69  
COFF : 20 HIT-CALL : 0 FITC : 4 ACTP : 0  
FLAGS :

Assay ID 1509 (NHEERL\_HEK293T\_CellTiterGLO)  
Sample ID : TP0001441C07

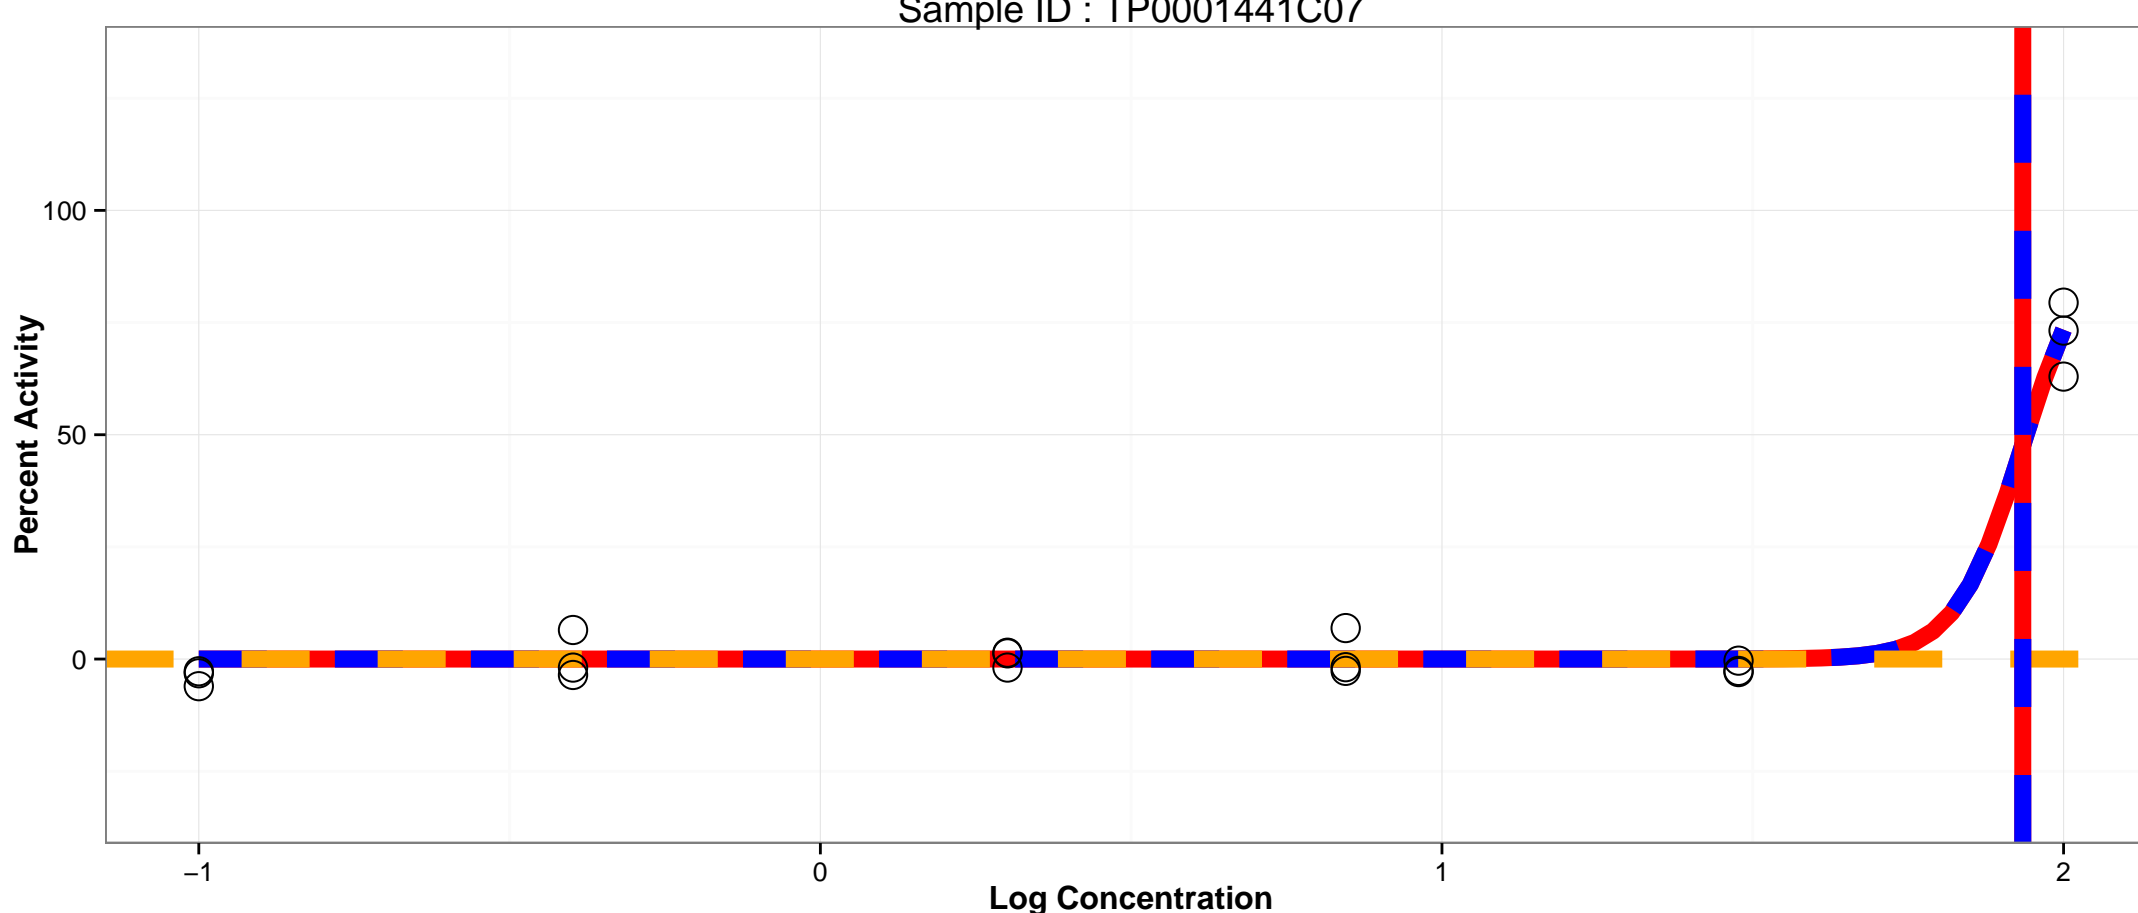

HILL MODEL

|     | tp   | ga     | gw   |
|-----|------|--------|------|
| val | 95.3 | 1.93   | 8    |
| sd  | 30.1 | 0.0297 | 8.61 |

GAIN-LOSS MODEL

|     | tp   | ga     | gw   | la   | lw  |
|-----|------|--------|------|------|-----|
| val | 95.3 | 1.93   | 8    | 3.73 | 2.8 |
| sd  | 30.3 | 0.0298 | 8.64 | 528  | 857 |

|      | CNST   | HILL   | GNLS   |
|------|--------|--------|--------|
| AIC  | 161.39 | 112.62 | 116.62 |
| PROB | 0      | 0.88   | 0.12   |
| RMSE | 29.66  | 4.34   | 4.34   |

MAX\_MEAN : 71.9 MAX\_MED : 73.2 BMAD : 5.54  
COFF : 20 HIT-CALL : 1 FITC : 42 ACTP : 1  
FLAGS : 6

Assay ID 1848 (NHEERL\_Quantilum\_inhib\_2\_dn)  
Sample ID : TP0001441C07

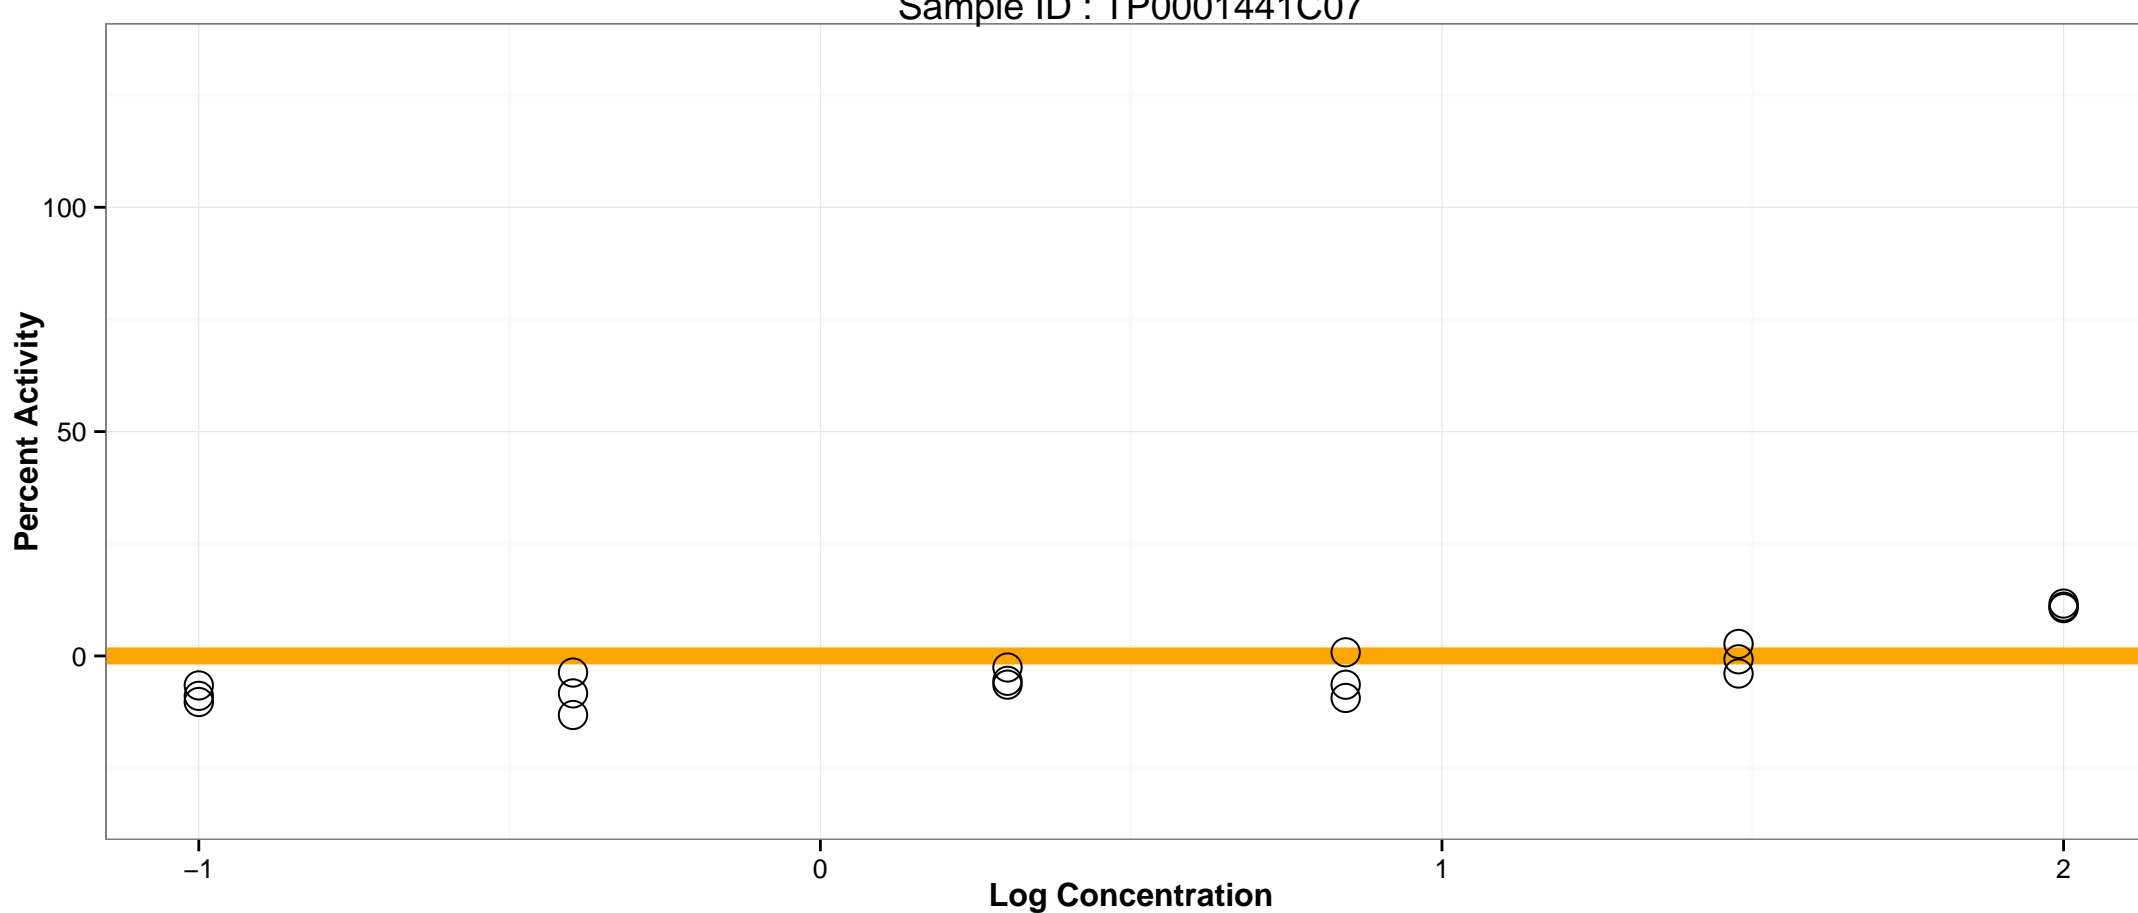

HILL MODEL

HILL MODEL: Not applicable

GAIN-LOSS MODEL

GNLS MODEL: Not applicable

|      | CNST   | HILL | GNLS |
|------|--------|------|------|
| AIC  | 129.75 | NA   | NA   |
| PROB | 1      | NA   | NA   |
| RMSE | 7.76   | NA   | NA   |

MAX\_MEAN : 11.1 MAX\_MED : 11 BMAD : 8.58  
COFF : 20 HIT-CALL : 0 FITC : 4 ACTP : 0  
FLAGS :

Assay ID 1508 (NHEERL\_TPO\_AUR\_dn)  
Sample ID : TP0001441C08

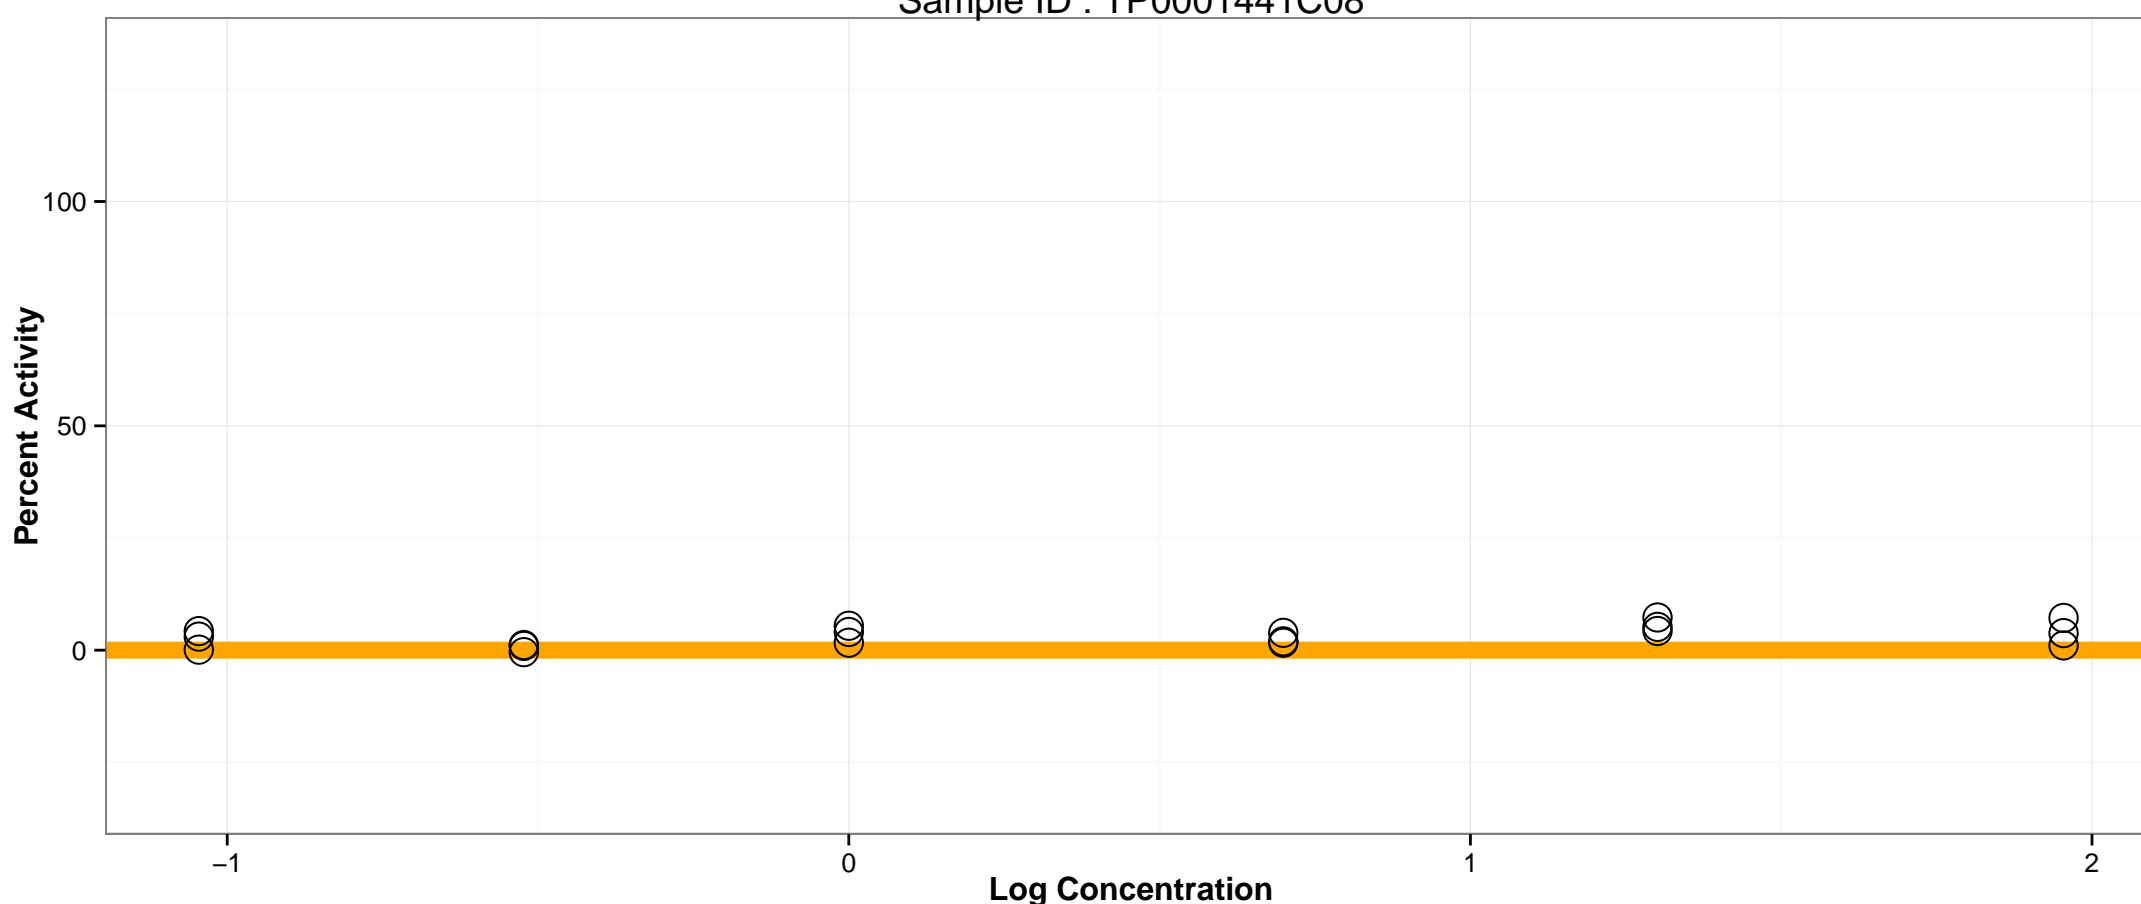

HILL MODEL

HILL MODEL: Not applicable

GAIN-LOSS MODEL

GNLS MODEL: Not applicable

|      | CNST   | HILL | GNLS |
|------|--------|------|------|
| AIC  | 103.67 | NA   | NA   |
| PROB | 1      | NA   | NA   |
| RMSE | 3.85   | NA   | NA   |

MAX\_MEAN : 5.6 MAX\_MED : 5.21 BMAD : 5.69  
COFF : 20 HIT-CALL : 0 FITC : 4 ACTP : 0  
FLAGS :

Assay ID 1509 (NHEERL\_HEK293T\_CellTiterGLO)  
Sample ID : TP0001441C08

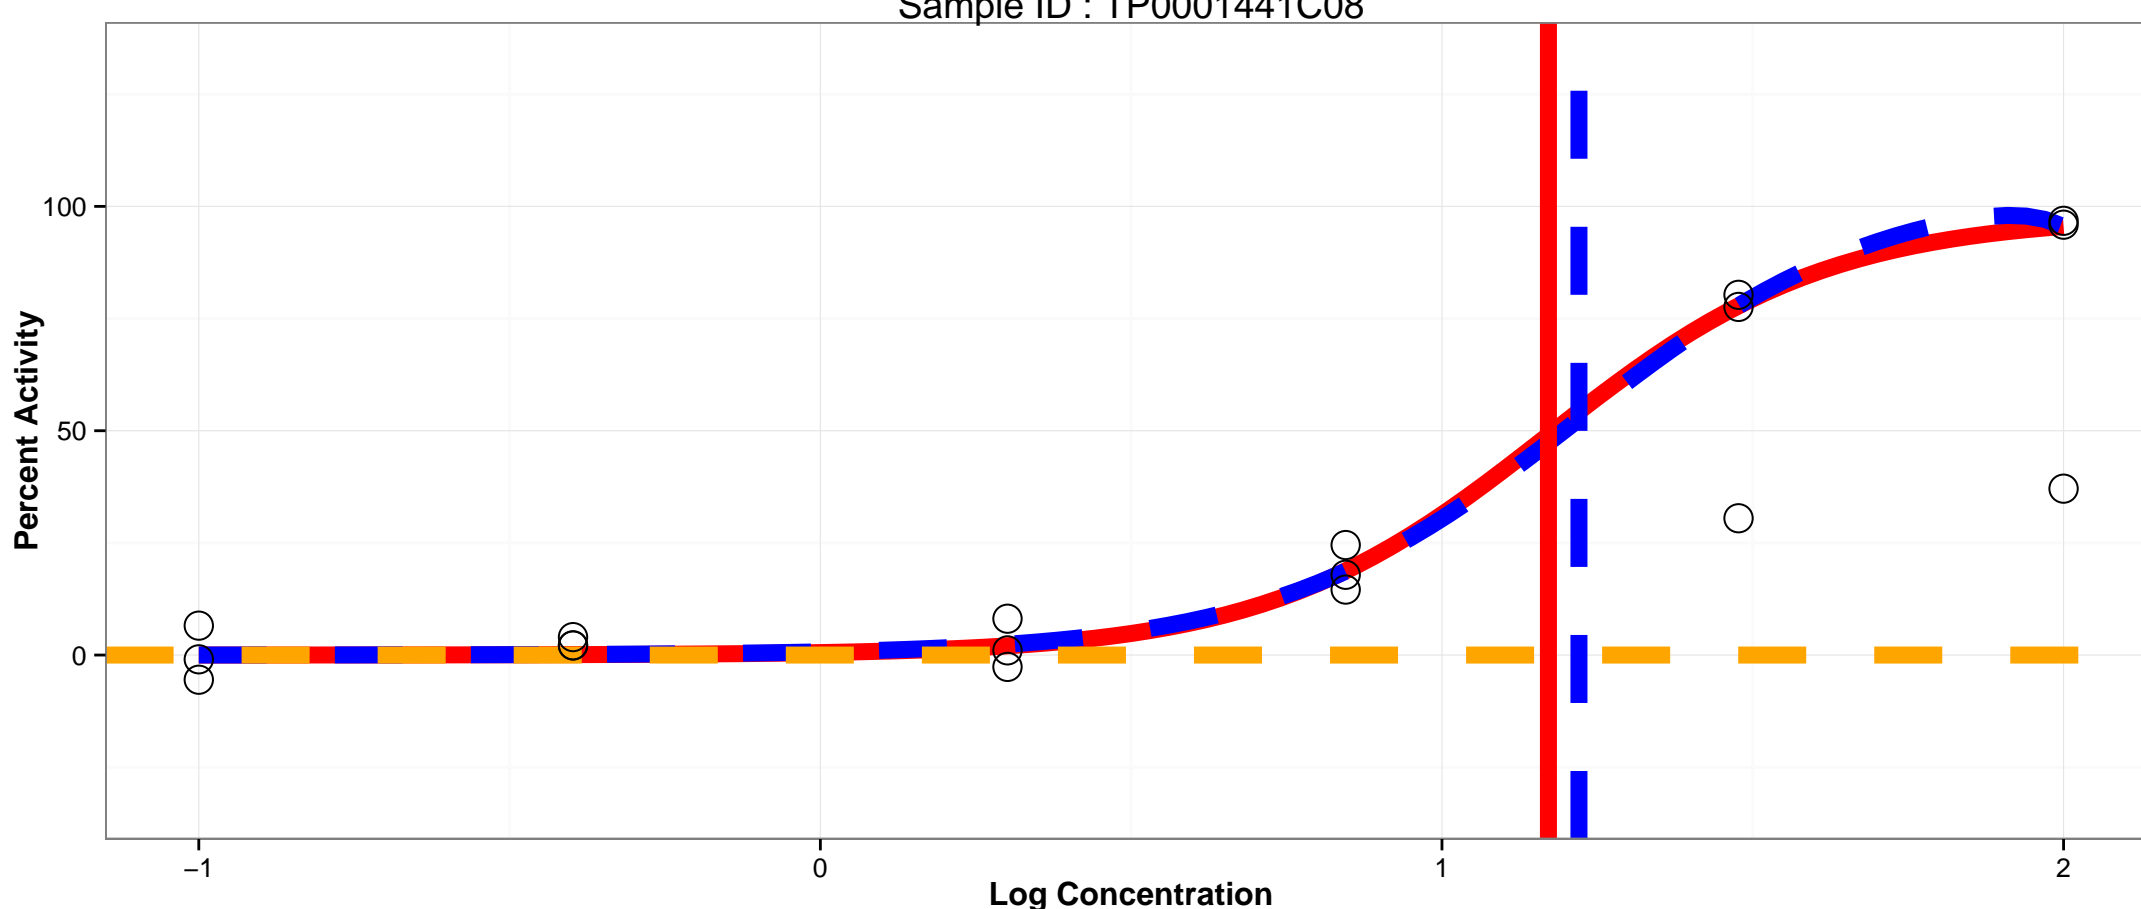

HILL MODEL

|     | tp   | ga     | gw    |
|-----|------|--------|-------|
| val | 98   | 1.17   | 1.92  |
| sd  | 4.34 | 0.0485 | 0.253 |

GAIN-LOSS MODEL

|     | tp  | ga   | gw   | la   | lw   |
|-----|-----|------|------|------|------|
| val | 105 | 1.22 | 1.77 | 2.17 | 7.32 |
| sd  | NA  | NA   | NA   | NA   | NA   |

|      | CNST   | HILL   | GNLS   |
|------|--------|--------|--------|
| AIC  | 187.04 | 144.36 | 148.35 |
| PROB | 0      | 0.88   | 0.12   |
| RMSE | 43.88  | 18.06  | 18.06  |

MAX\_MEAN : 76.6 MAX\_MED : 95.9 BMAD : 5.54  
COFF : 20 HIT-CALL : 1 FITC : 41 ACTP : 1  
FLAGS :

Assay ID 1848 (NHEERL\_Quantilum\_inhib\_2\_dn)  
Sample ID : TP0001441C08

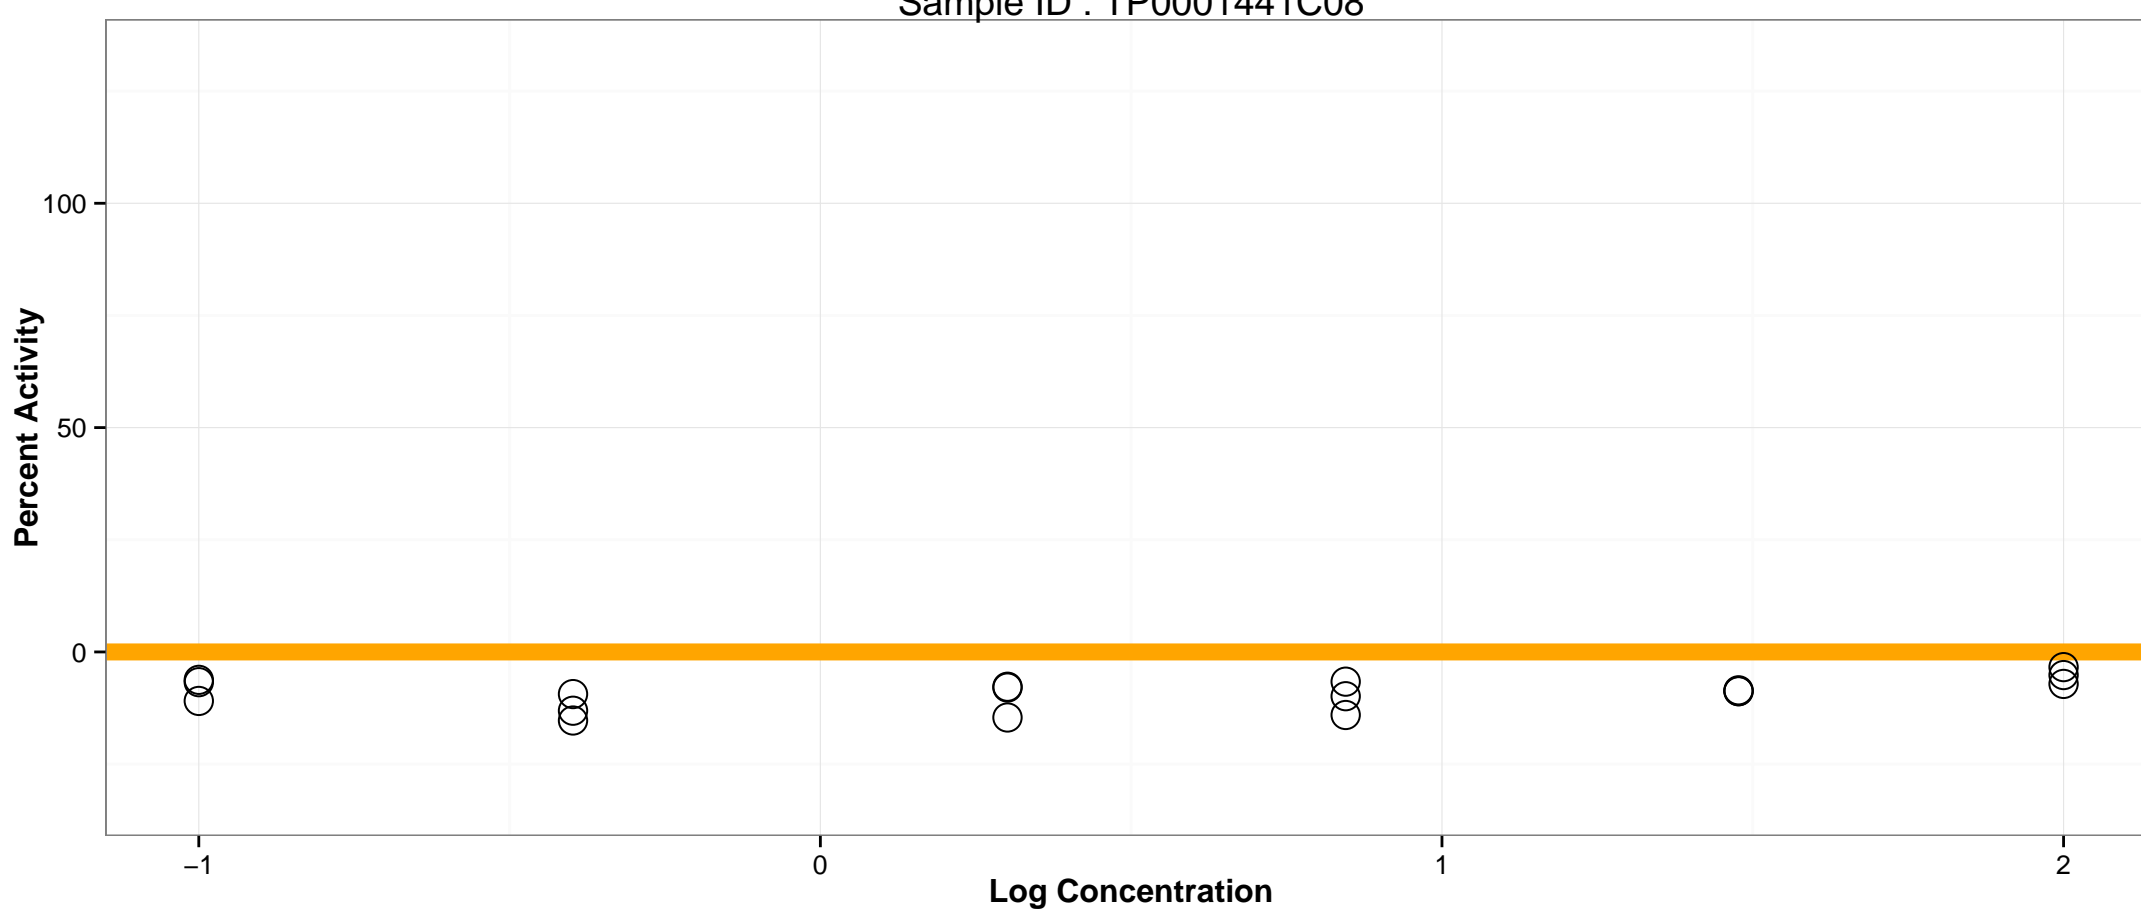

HILL MODEL

HILL MODEL: Not applicable

GAIN-LOSS MODEL

GNLS MODEL: Not applicable

|      | CNST   | HILL | GNLS |
|------|--------|------|------|
| AIC  | 138.21 | NA   | NA   |
| PROB | 1      | NA   | NA   |
| RMSE | 9.67   | NA   | NA   |

MAX\_MEAN : -5.21 MAX\_MED : -5.15 BMAD : 8.58  
COFF : 20 HIT-CALL : 0 FITC : 4 ACTP : 0  
FLAGS :

Chemical : 6-Hydroxy-2-oxopyridinium chloride  
CAS : 10357-84-3

Assay ID 1508 (NHEERL\_TPO\_AUR\_dn)  
Sample ID : TP0001441C09

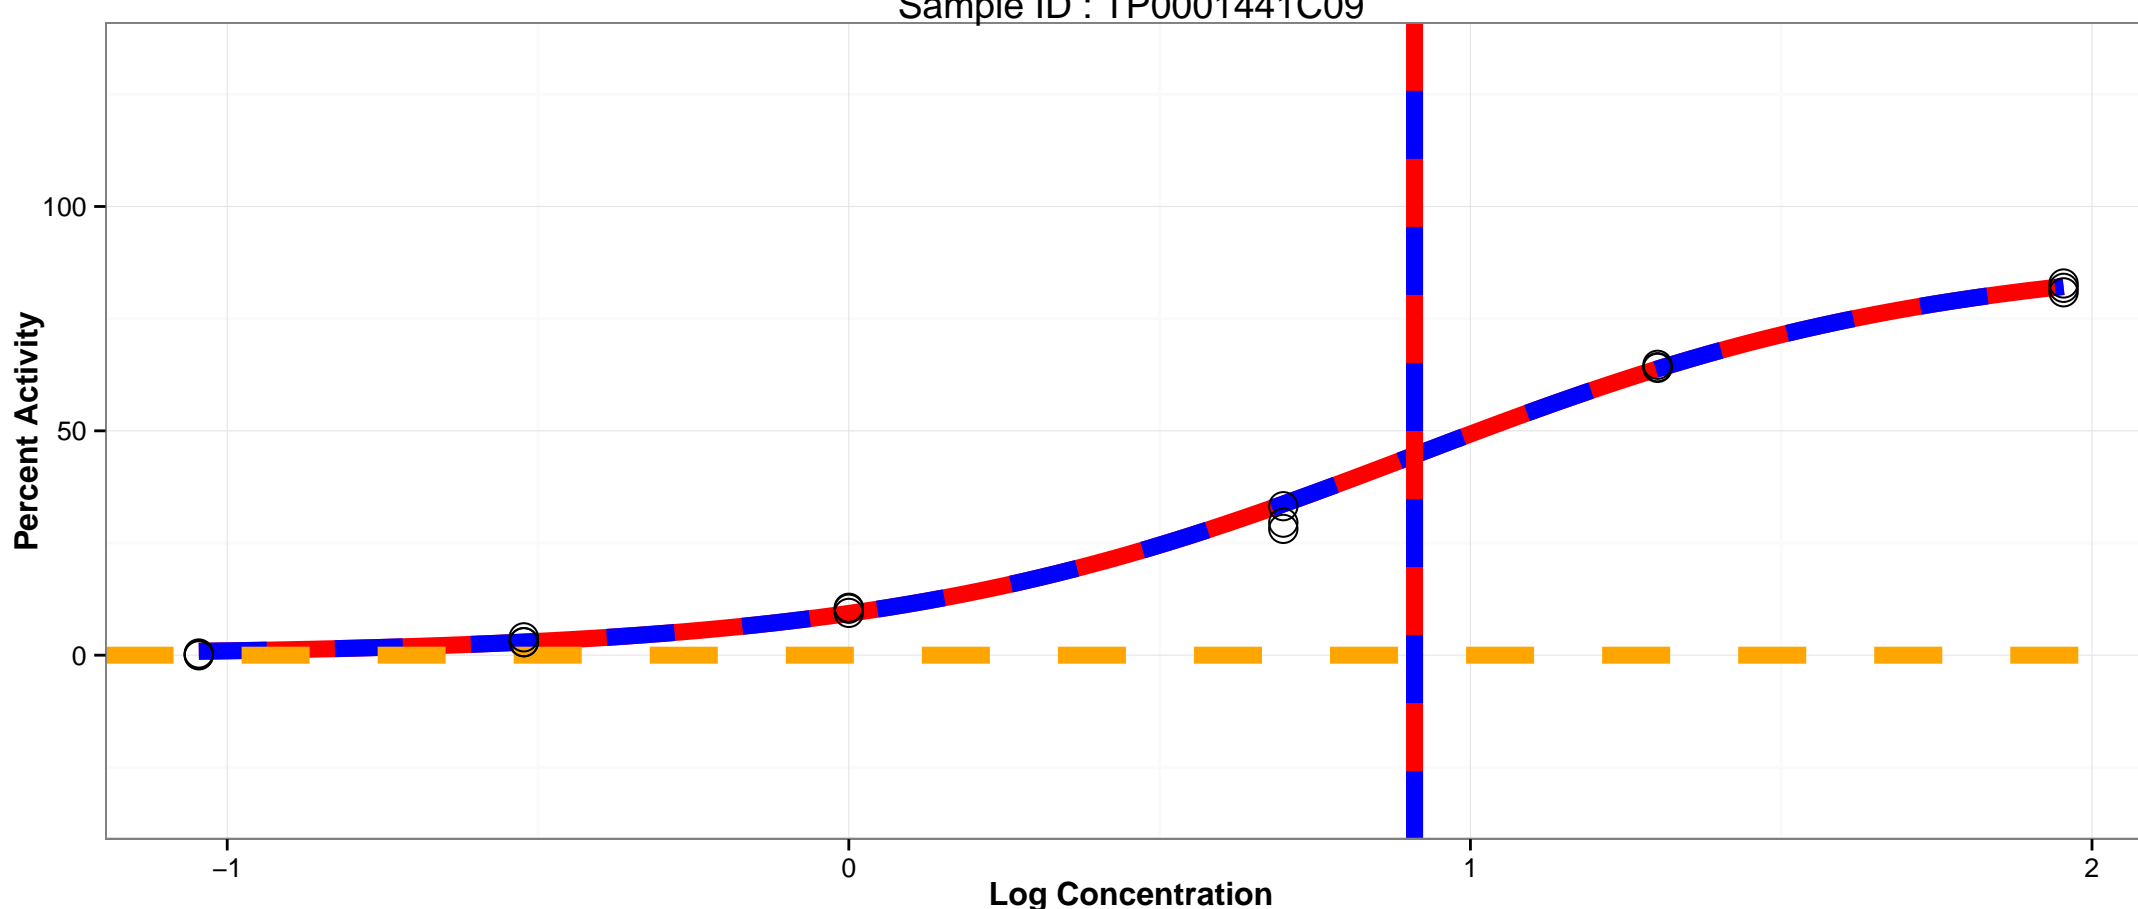

HILL MODEL

|     | tp   | ga     | gw     |
|-----|------|--------|--------|
| val | 89.1 | 0.91   | 1.03   |
| sd  | 1.18 | 0.0198 | 0.0298 |

GAIN-LOSS MODEL

|     | tp   | ga   | gw   | la   | lw   |
|-----|------|------|------|------|------|
| val | 89.1 | 0.91 | 1.03 | 3.93 | 11.5 |
| sd  | NA   | NA   | NA   | NA   | NA   |

|      | CNST   | HILL  | GNLS  |
|------|--------|-------|-------|
| AIC  | 190.34 | 72.36 | 76.36 |
| PROB | 0      | 0.88  | 0.12  |
| RMSE | 44.5   | 1.78  | 1.78  |

MAX\_MEAN : 81.9 MAX\_MED : 81.9 BMAD : 5.69  
COFF : 20 HIT-CALL : 1 FITC : 42 ACTP : 1  
FLAGS :

Assay ID 1509 (NHEERL\_HEK293T\_CellTiterGLO)  
Sample ID : TP0001441C09

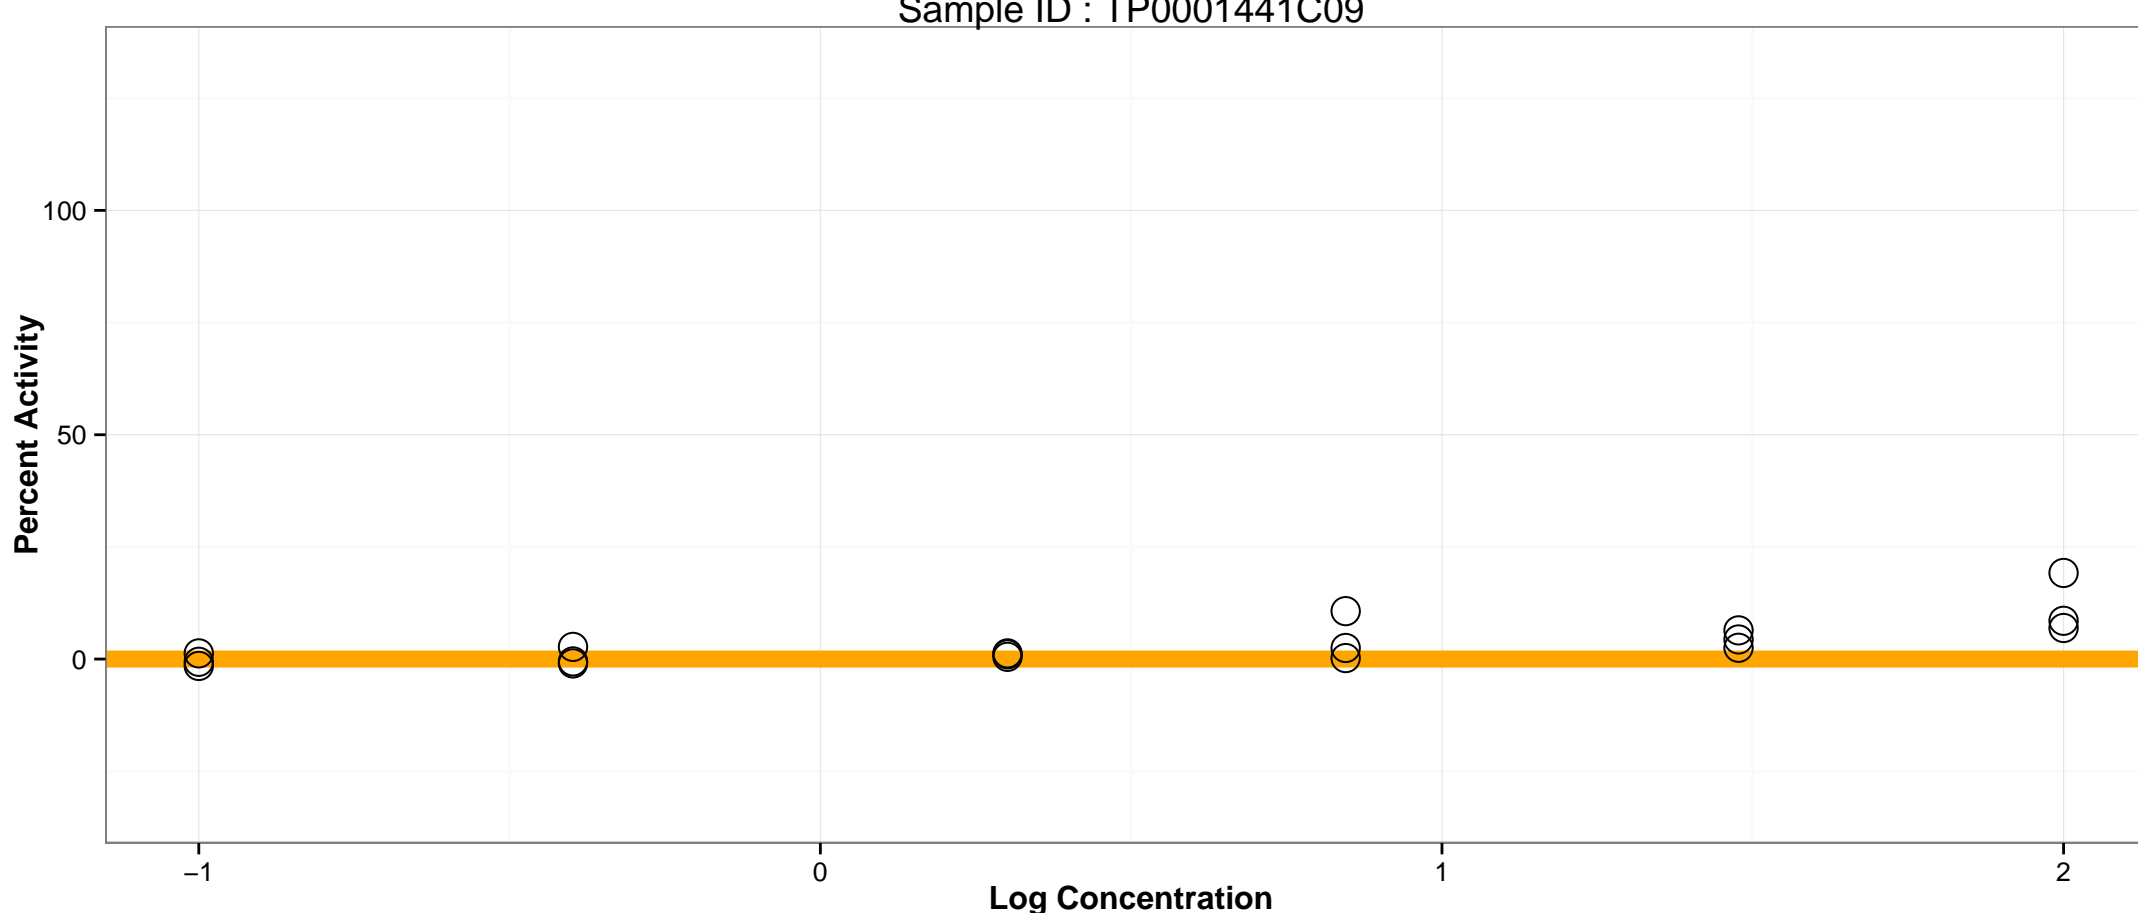

HILL MODEL

HILL MODEL: Not applicable

GAIN-LOSS MODEL

GNLS MODEL: Not applicable

|      | CNST   | HILL | GNLS |
|------|--------|------|------|
| AIC  | 114.42 | NA   | NA   |
| PROB | 1      | NA   | NA   |
| RMSE | 6.2    | NA   | NA   |

MAX\_MEAN : 11.6 MAX\_MED : 8.54 BMAD : 5.54  
COFF : 20 HIT-CALL : 0 FITC : 4 ACTP : 0  
FLAGS :

Assay ID 1848 (NHEERL\_Quantilum\_inhib\_2\_dn)  
Sample ID : TP0001441C09

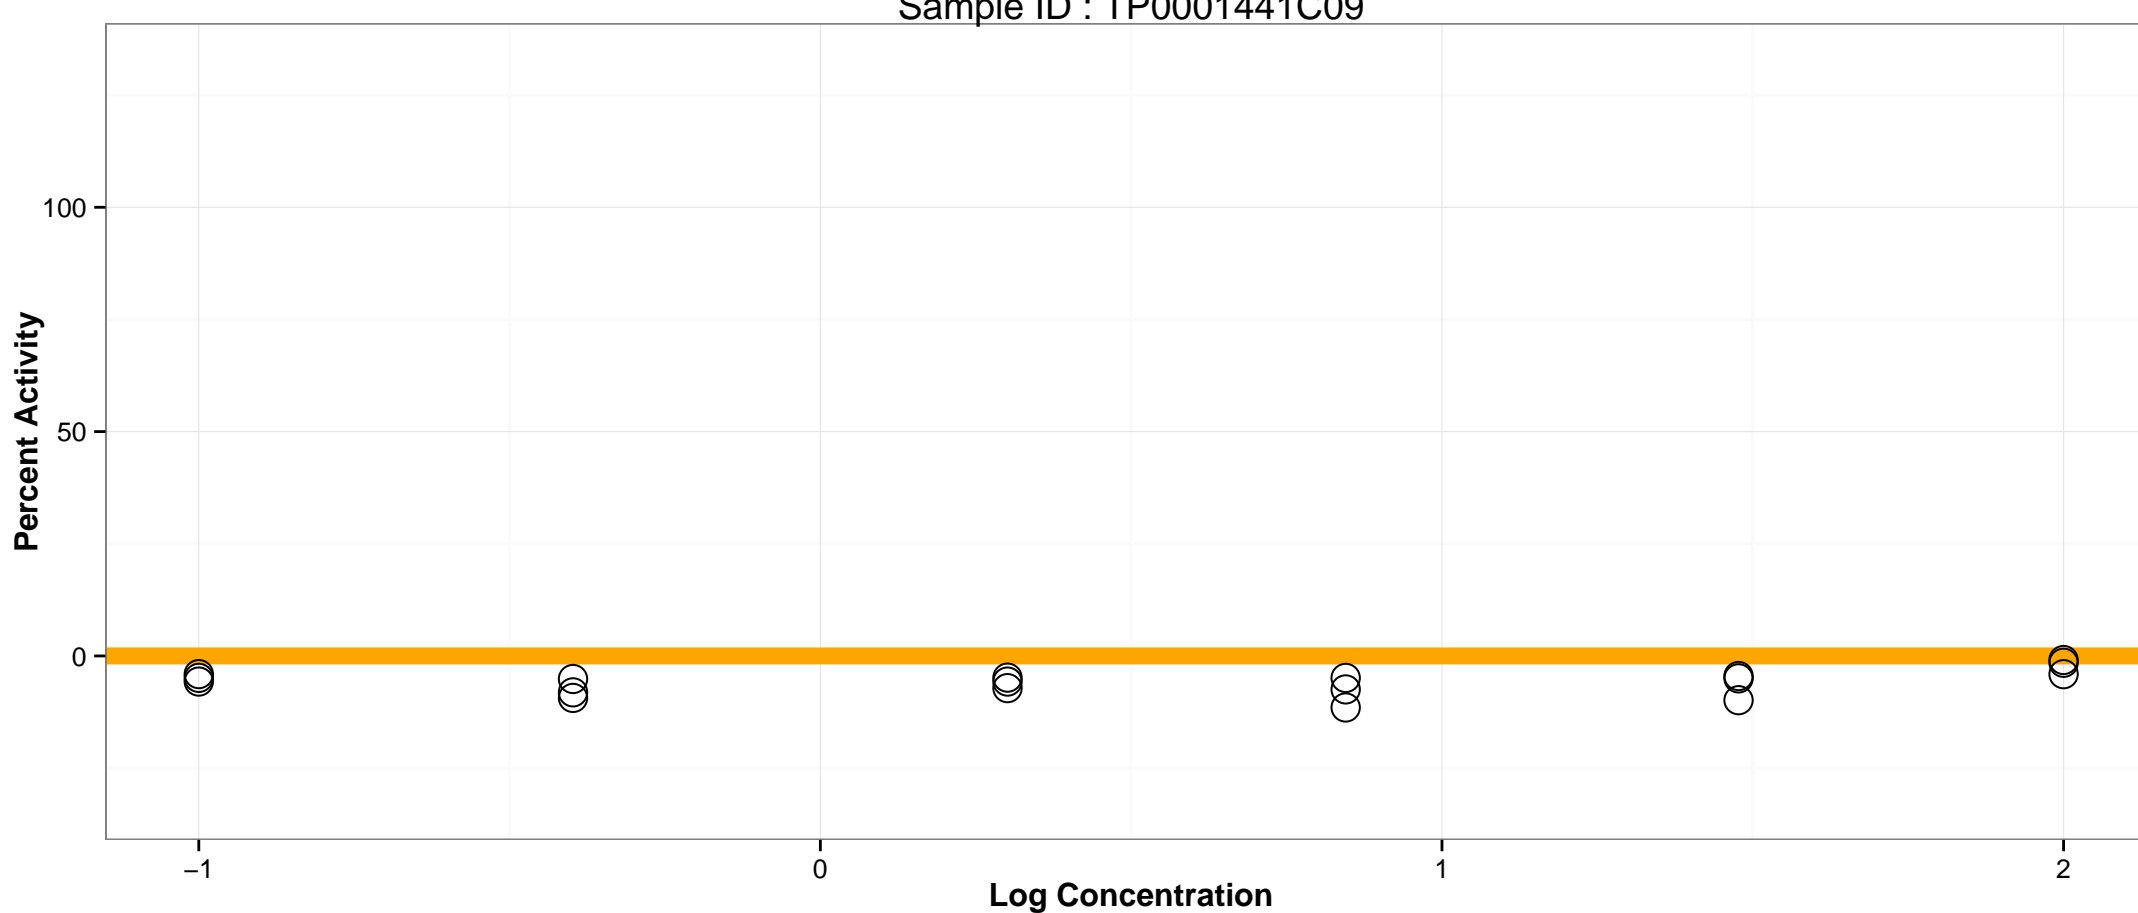

HILL MODEL

HILL MODEL: Not applicable

GAIN-LOSS MODEL

GNLS MODEL: Not applicable

|      | CNST   | HILL | GNLS |
|------|--------|------|------|
| AIC  | 122.82 | NA   | NA   |
| PROB | 1      | NA   | NA   |
| RMSE | 6.37   | NA   | NA   |

MAX\_MEAN : -2.15 MAX\_MED : -1.51 BMAD : 8.58  
COFF : 20 HIT-CALL : 0 FITC : 4 ACTP : 0  
FLAGS :

Chemical : Sodium dodecyl sulfate  
CAS : 151-21-3

Assay ID 1508 (NHEERL\_TPO\_AUR\_dn)  
Sample ID : TP0001441C10

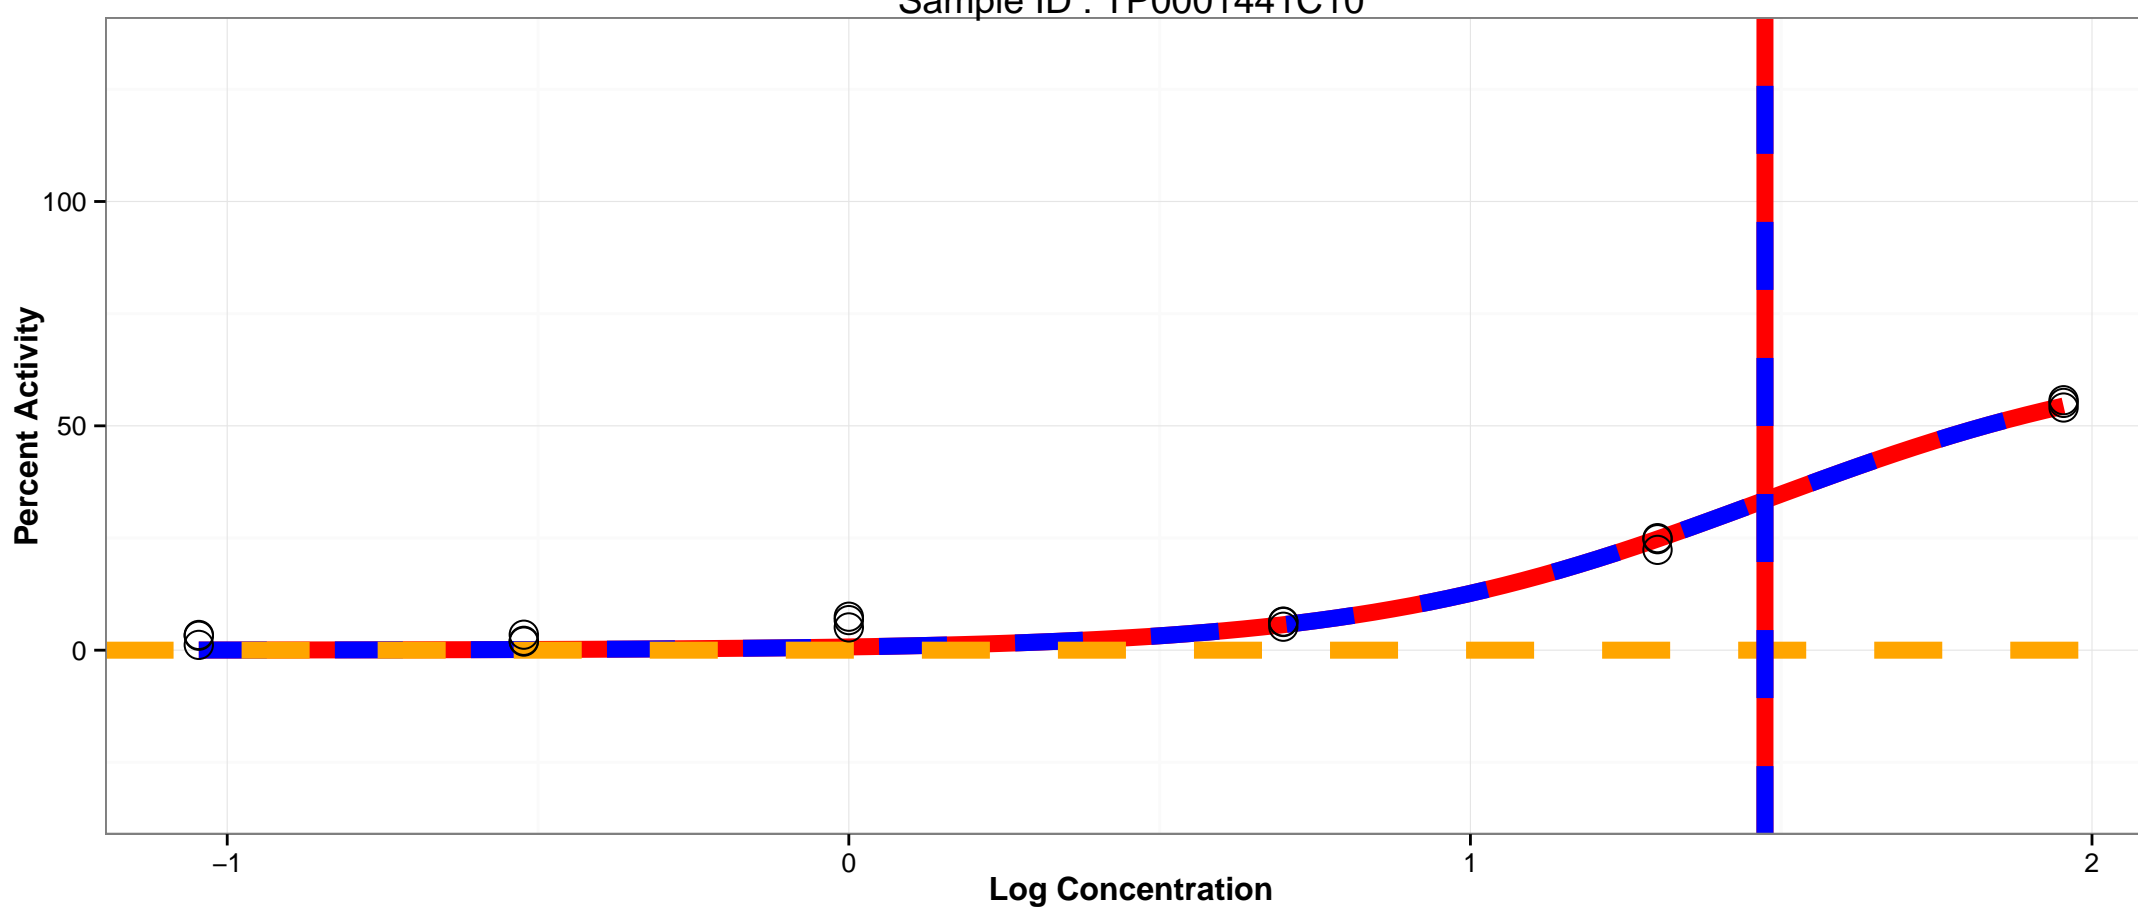

HILL MODEL

|     | tp   | ga     | gw    |
|-----|------|--------|-------|
| val | 66.9 | 1.47   | 1.33  |
| sd  | 6.06 | 0.0824 | 0.197 |

GAIN-LOSS MODEL

|     | tp   | ga     | gw    | la   | lw    |
|-----|------|--------|-------|------|-------|
| val | 66.9 | 1.47   | 1.33  | 3.95 | 4.93  |
| sd  | 6.06 | 0.0824 | 0.197 | 5240 | 13000 |

|      | CNST   | HILL  | GNLS   |
|------|--------|-------|--------|
| AIC  | 165.78 | 97.27 | 101.27 |
| PROB | 0      | 0.88  | 0.12   |
| RMSE | 24.82  | 2.9   | 2.9    |

MAX\_MEAN : 55 MAX\_MED : 55.1 BMAD : 5.69  
COFF : 20 HIT-CALL : 1 FITC : 42 ACTP : 1  
FLAGS :

Assay ID 1509 (NHEERL\_HEK293T\_CellTiterGLO)  
Sample ID : TP0001441C10

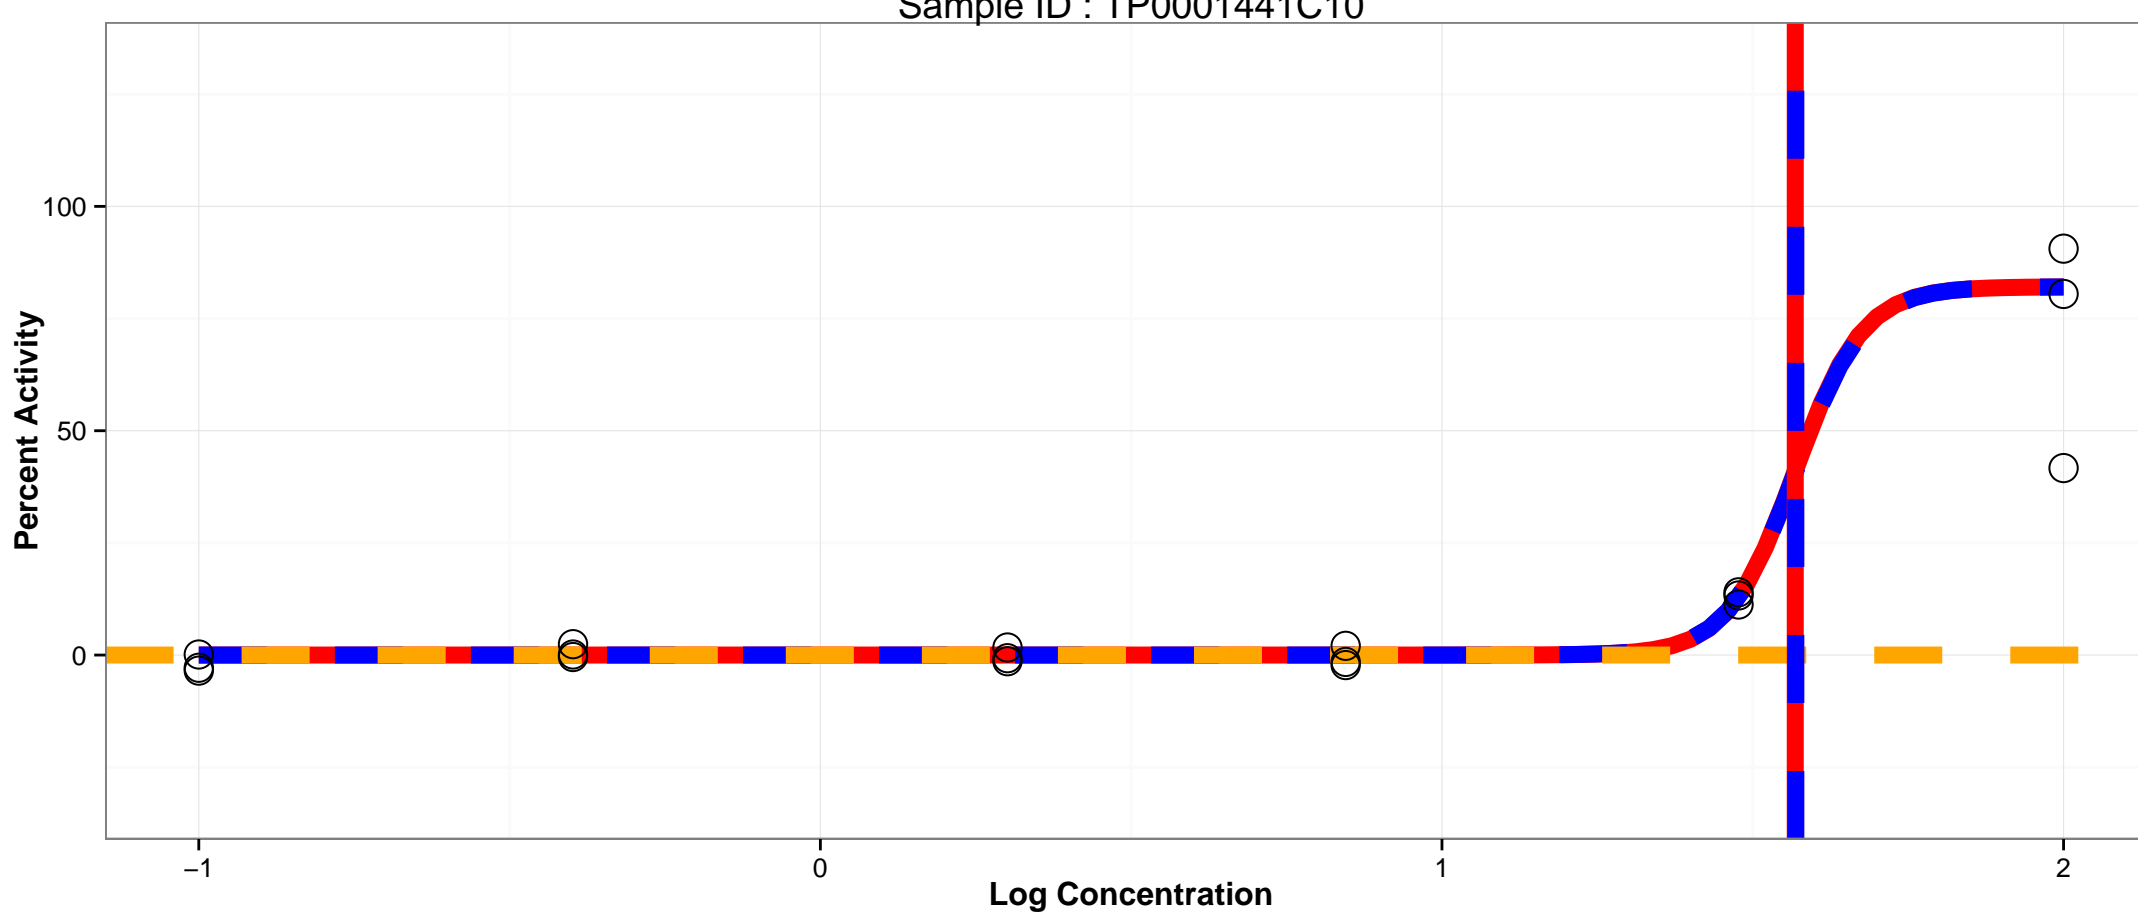

HILL MODEL

|     | tp   | ga     | gw    |
|-----|------|--------|-------|
| val | 82.1 | 1.57   | 8     |
| sd  | 2.78 | 0.0109 | 0.939 |

GAIN-LOSS MODEL

|     | tp   | ga   | gw   | la   | lw   |
|-----|------|------|------|------|------|
| val | 82.1 | 1.57 | 7.92 | 3.24 | 2.68 |
| sd  | NA   | NA   | NA   | NA   | NA   |

|      | CNST   | HILL   | GNLS   |
|------|--------|--------|--------|
| AIC  | 163.86 | 112.76 | 116.76 |
| PROB | 0      | 0.88   | 0.12   |
| RMSE | 30.7   | 9.86   | 9.86   |

MAX\_MEAN : 70.9 MAX\_MED : 80.5 BMAD : 5.54  
COFF : 20 HIT-CALL : 1 FITC : 41 ACTP : 1  
FLAGS : 6

Assay ID 1848 (NHEERL\_Quantilum\_inhib\_2\_dn)  
Sample ID : TP0001441C10

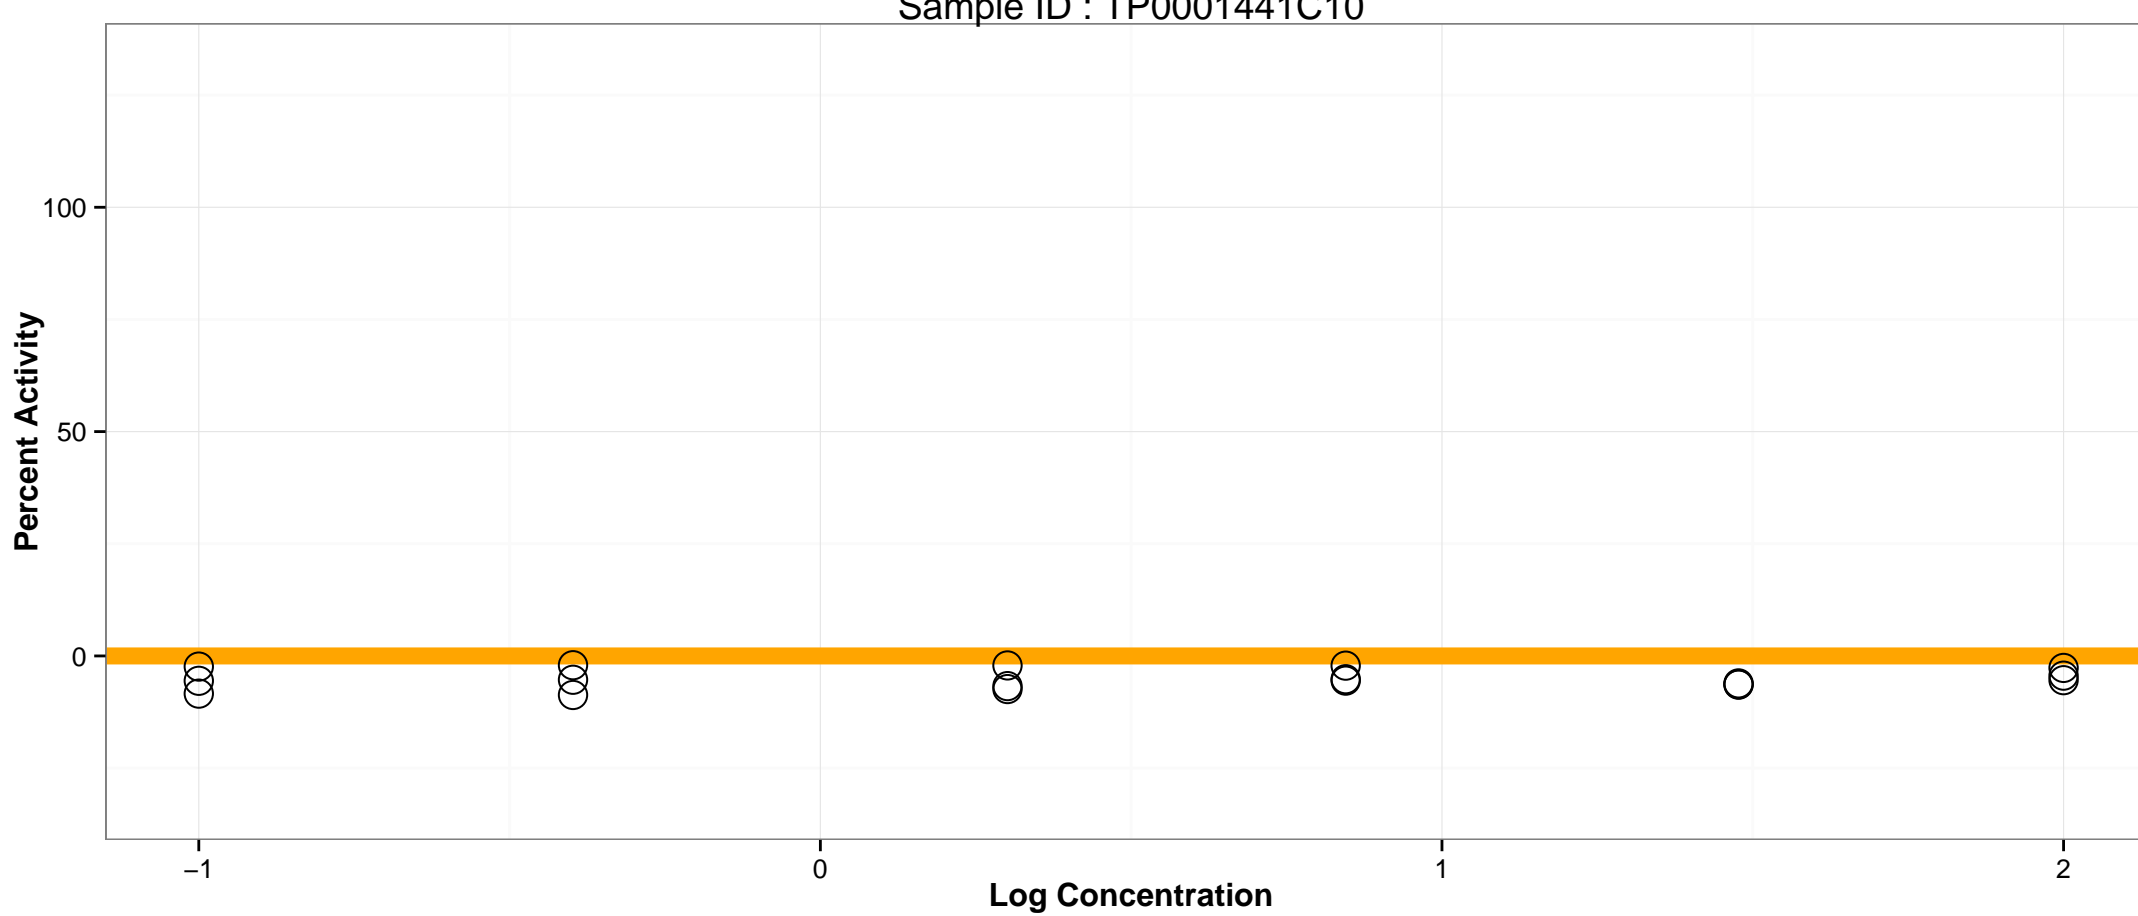

HILL MODEL

HILL MODEL: Not applicable

GAIN-LOSS MODEL

GNLS MODEL: Not applicable

|      | CNST   | HILL | GNLS |
|------|--------|------|------|
| AIC  | 118.15 | NA   | NA   |
| PROB | 1      | NA   | NA   |
| RMSE | 5.54   | NA   | NA   |

MAX\_MEAN : -4.15 MAX\_MED : -4.38 BMAD : 8.58  
COFF : 20 HIT-CALL : 0 FITC : 4 ACTP : 0  
FLAGS :

Chemical : Sodium dodecyl sulfate  
CAS : 151-21-3

Assay ID 1508 (NHEERL\_TPO\_AUR\_dn)  
Sample ID : TX003725

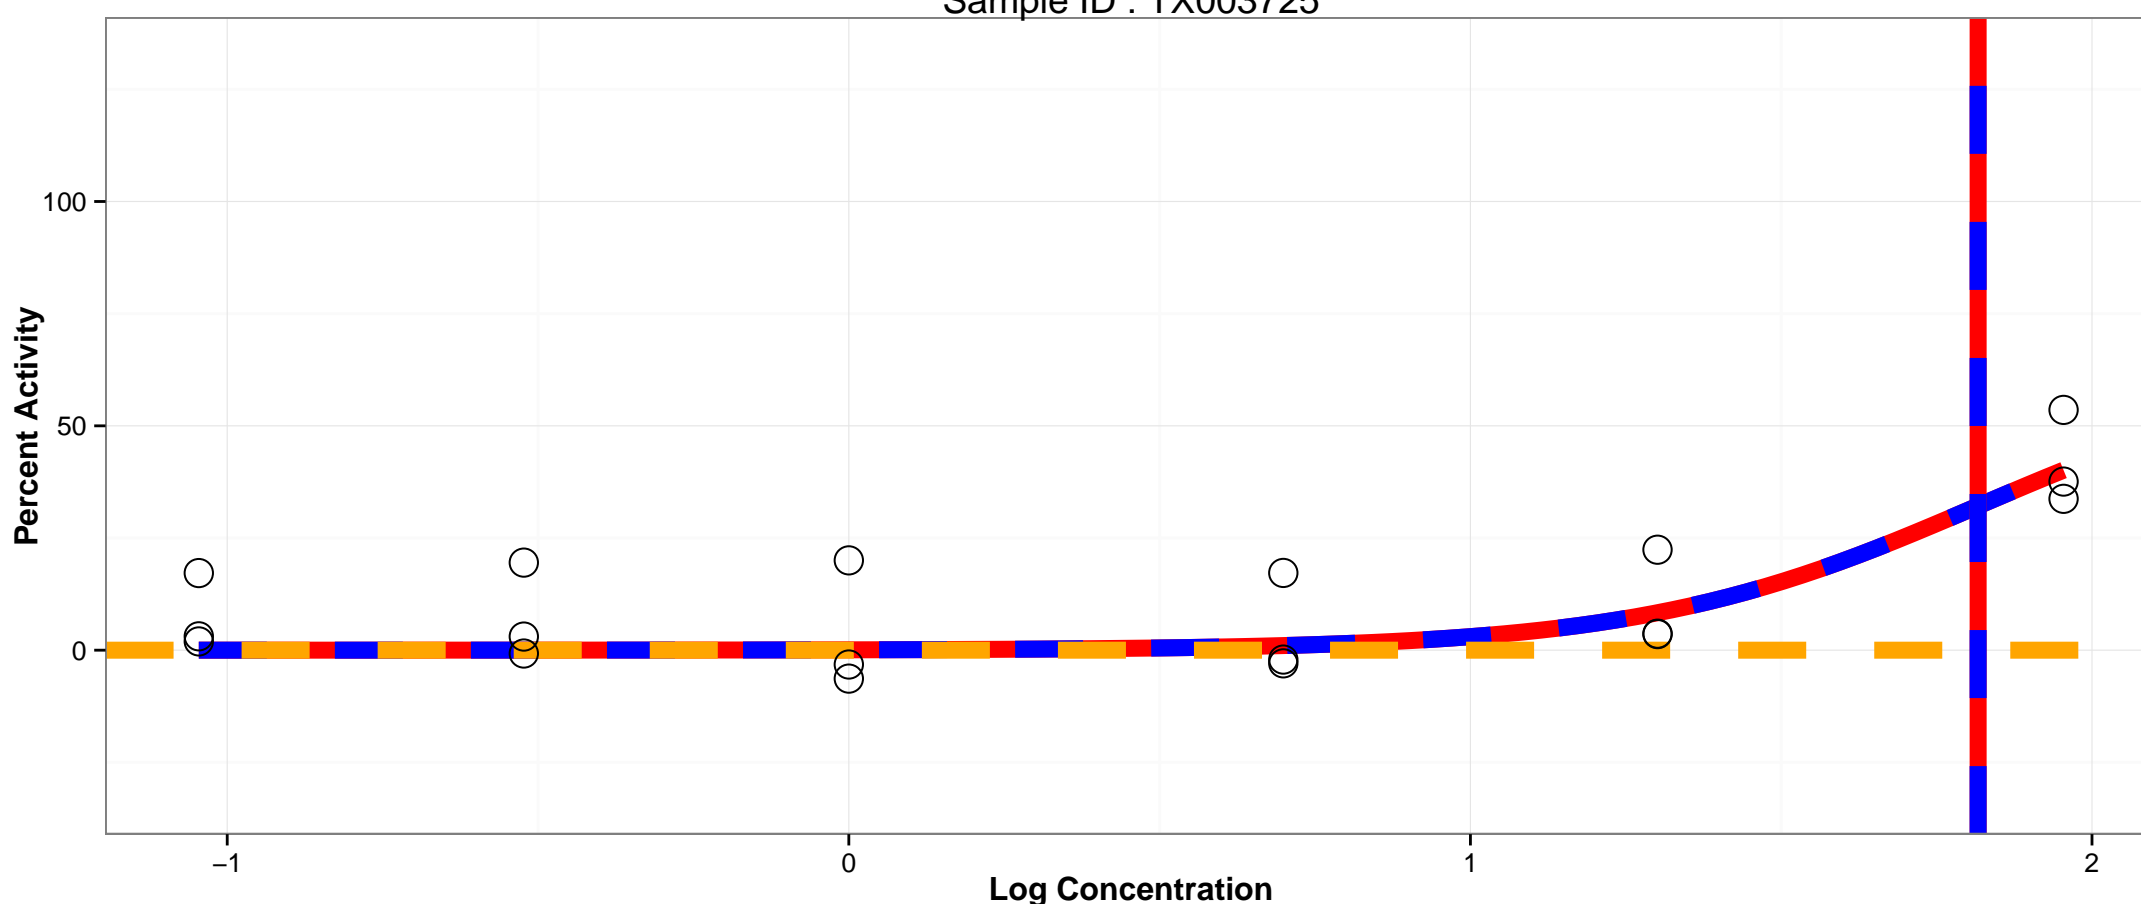

HILL MODEL

|     | tp   | ga   | gw  |
|-----|------|------|-----|
| val | 64.3 | 1.82 | 1.6 |
| sd  | 168  | 1.65 | 2.7 |

GAIN-LOSS MODEL

|     | tp   | ga   | gw   | la   | lw   |
|-----|------|------|------|------|------|
| val | 64.3 | 1.82 | 1.6  | 3.69 | 3.73 |
| sd  | 170  | 1.67 | 2.73 | 1880 | 4050 |

|      | CNST   | HILL   | GNLS   |
|------|--------|--------|--------|
| AIC  | 160.05 | 143.84 | 147.84 |
| PROB | 0      | 0.88   | 0.12   |
| RMSE | 20.29  | 10.29  | 10.29  |

MAX\_MEAN : 41.6 MAX\_MED : 37.6 BMAD : 5.69  
COFF : 20 HIT-CALL : 1 FITC : 42 ACTP : 1  
FLAGS : 6

Assay ID 1509 (NHEERL\_HEK293T\_CellTiterGLO)  
Sample ID : TX003725

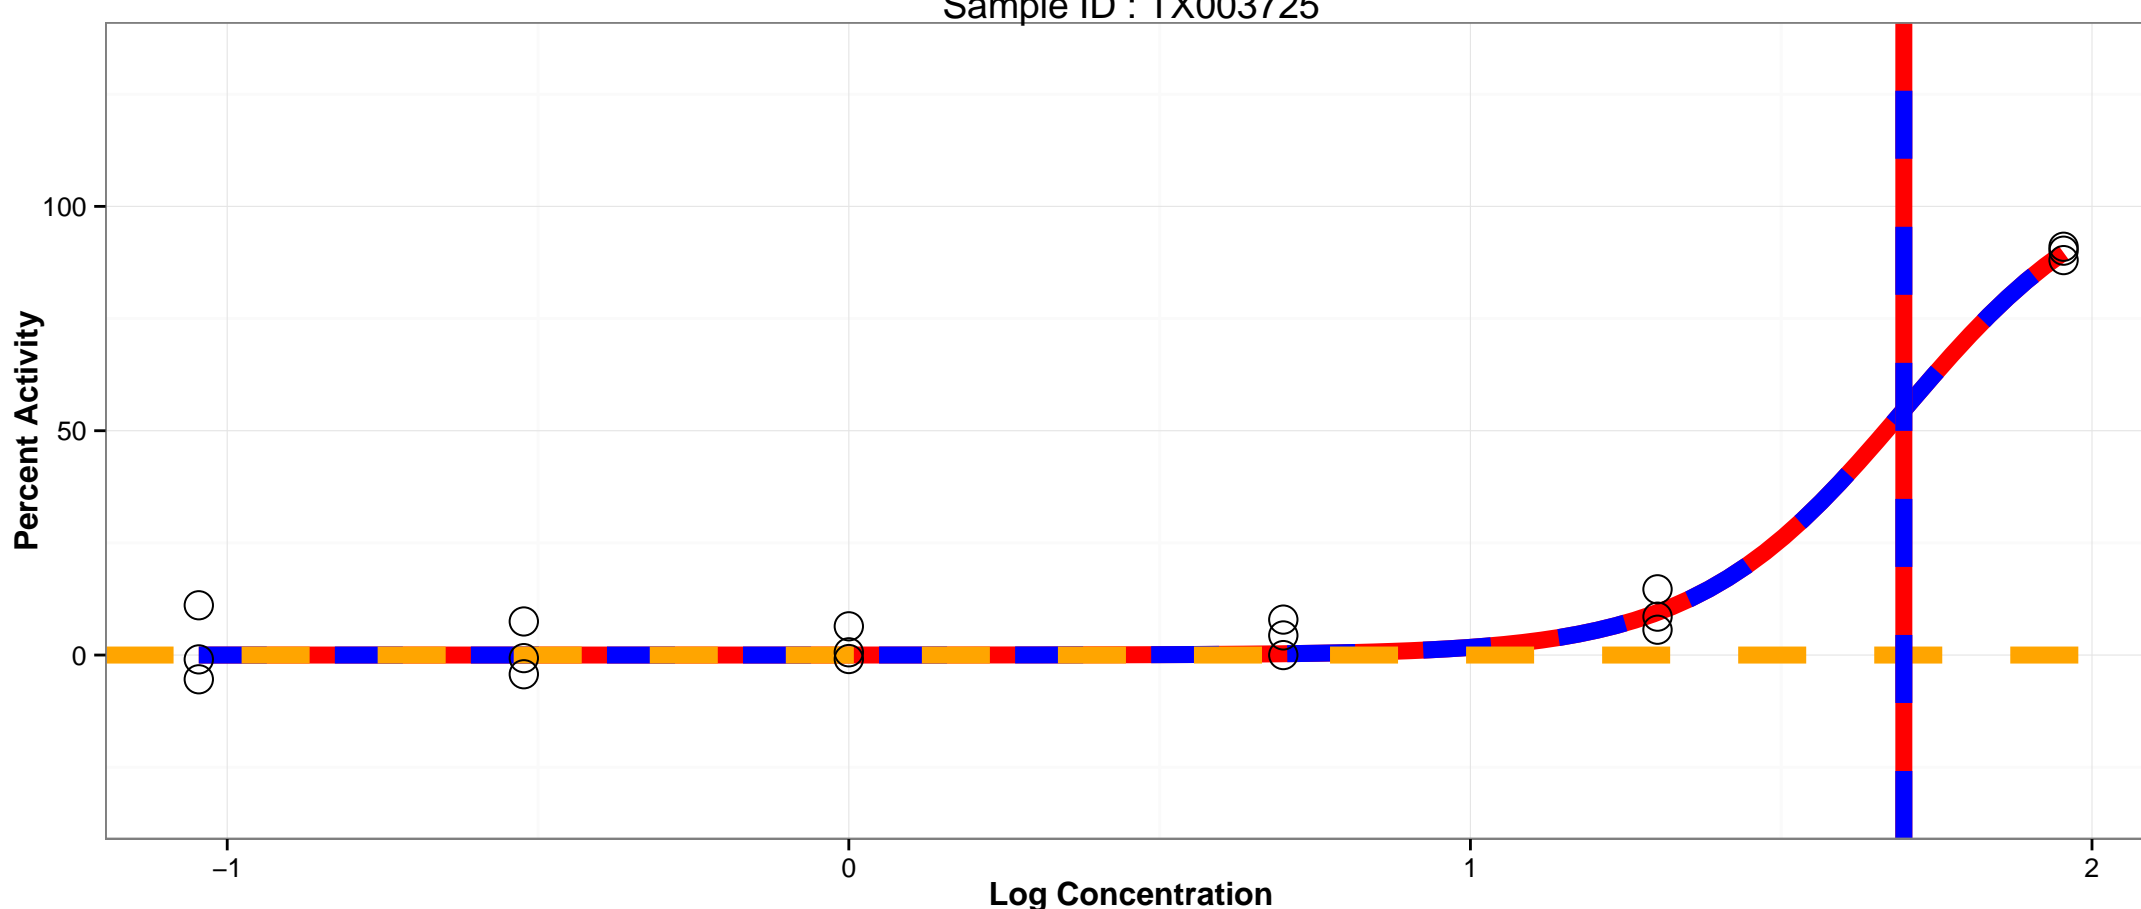

HILL MODEL

|     | tp   | ga    | gw   |
|-----|------|-------|------|
| val | 109  | 1.7   | 2.58 |
| sd  | 86.2 | 0.503 | 2.44 |

GAIN-LOSS MODEL

|     | tp  | ga  | gw   | la   | lw  |
|-----|-----|-----|------|------|-----|
| val | 109 | 1.7 | 2.58 | 3.93 | 8.2 |
| sd  | NA  | NA  | NA   | NA   | NA  |

|      | CNST   | HILL   | GNLS   |
|------|--------|--------|--------|
| AIC  | 172.62 | 115.07 | 119.07 |
| PROB | 0      | 0.88   | 0.12   |
| RMSE | 37.14  | 4.67   | 4.67   |

MAX\_MEAN : 89.7 MAX\_MED : 90.1 BMAD : 5.54  
COFF : 20 HIT-CALL : 1 FITC : 42 ACTP : 1  
FLAGS : 6

Assay ID 1848 (NHEERL\_Quantilum\_inhib\_2\_dn)  
Sample ID : TX003725

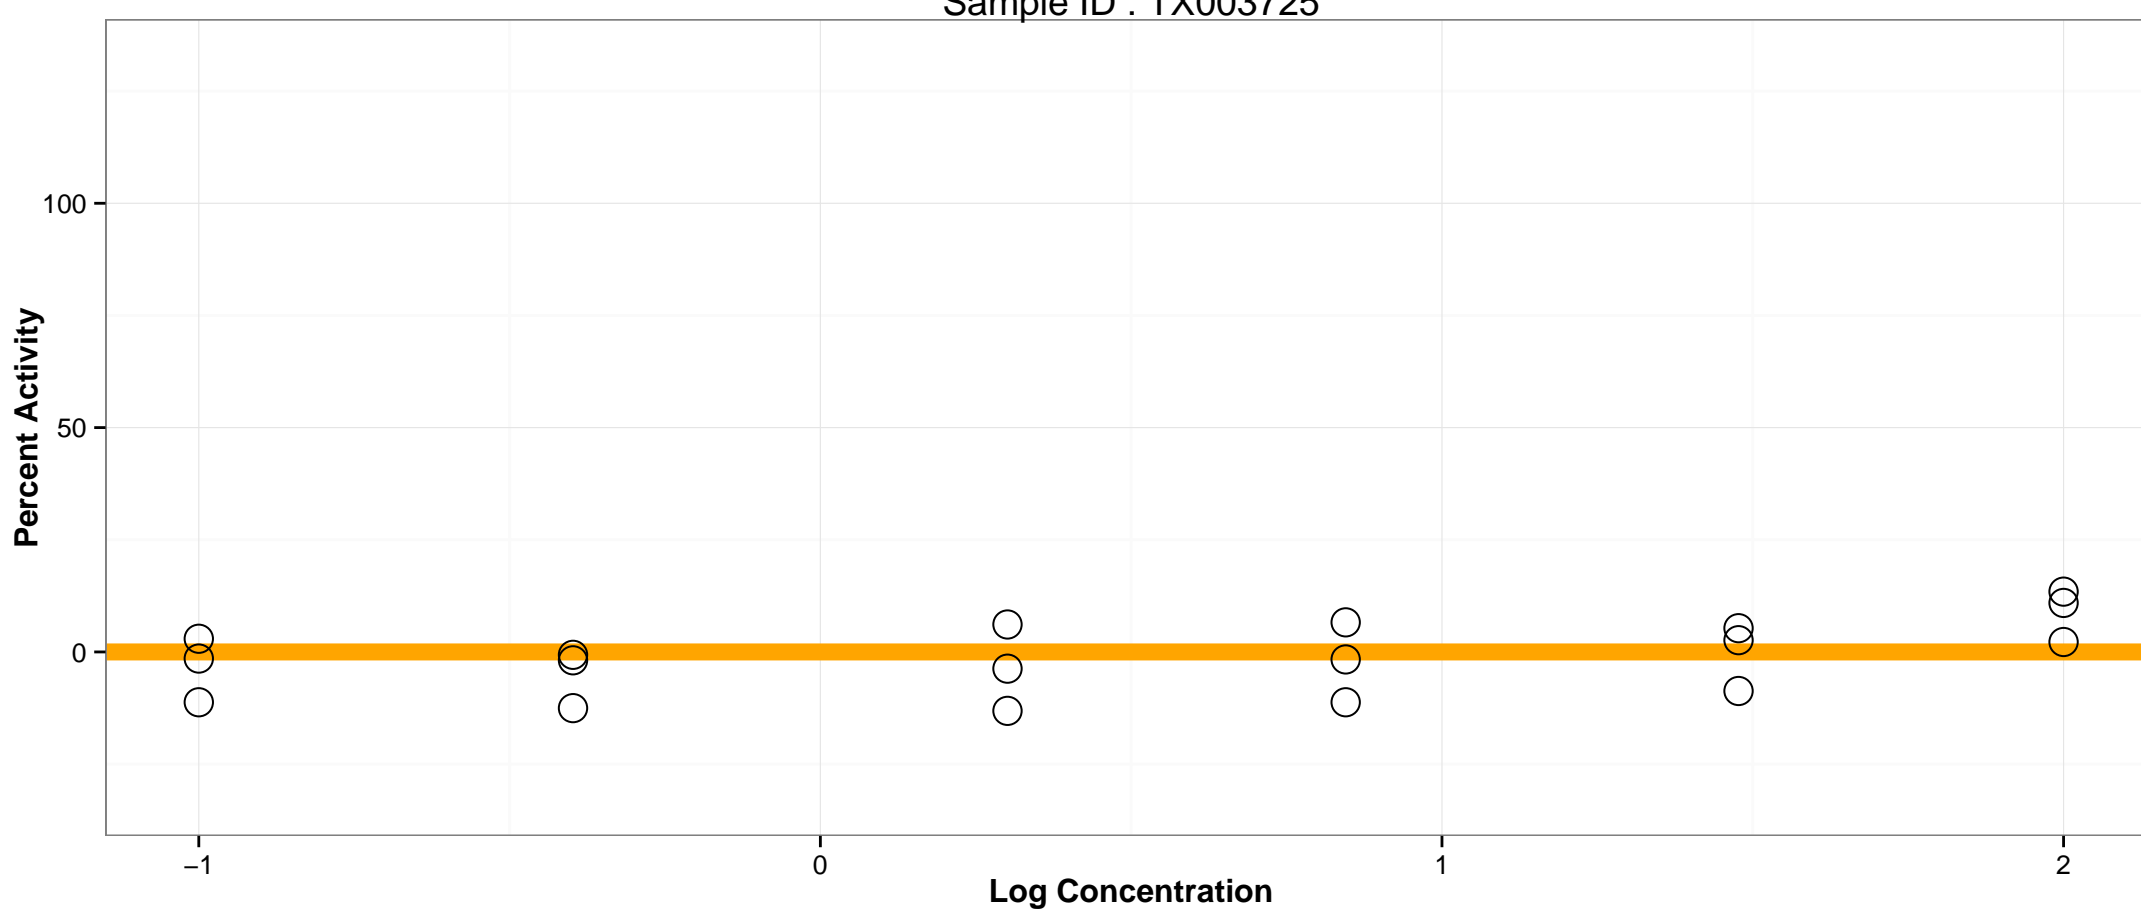

HILL MODEL

HILL MODEL: Not applicable

GAIN-LOSS MODEL

GNLS MODEL: Not applicable

|      | CNST   | HILL | GNLS |
|------|--------|------|------|
| AIC  | 129.31 | NA   | NA   |
| PROB | 1      | NA   | NA   |
| RMSE | 7.85   | NA   | NA   |

MAX\_MEAN : 8.87 MAX\_MED : 10.9 BMAD : 8.58  
COFF : 20 HIT-CALL : 0 FITC : 4 ACTP : 0  
FLAGS :

Chemical : Sodium azide  
CAS : 26628-22-8

Assay ID 1508 (NHEERL\_TPO\_AUR\_dn)  
Sample ID : TP0001441D01

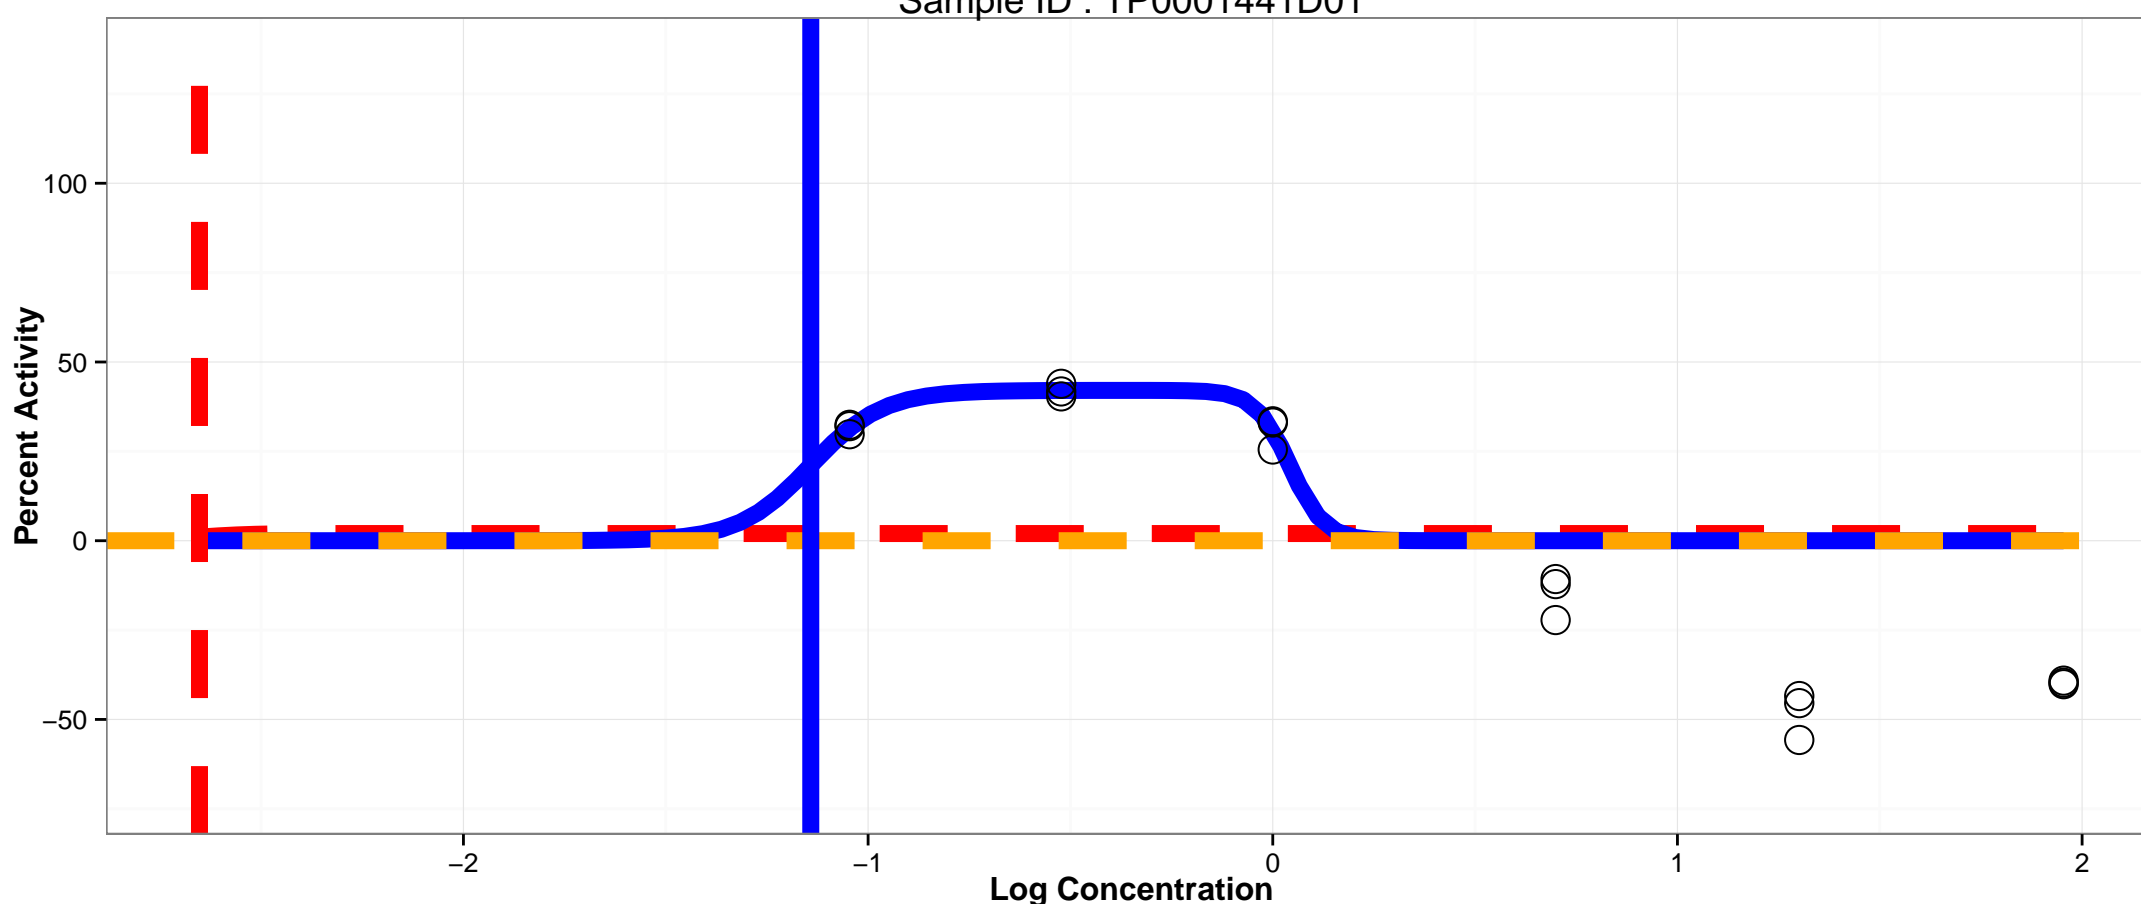

HILL MODEL

|     | tp   | ga     | gw     |
|-----|------|--------|--------|
| val | 2.01 | -2.65  | 6.69   |
| sd  | 10.5 | 124000 | 525000 |

GAIN-LOSS MODEL

|     | tp   | ga    | gw   | la    | lw   |
|-----|------|-------|------|-------|------|
| val | 42.1 | -1.14 | 4.91 | 0.042 | 10.3 |
| sd  | NA   | NA    | NA   | NA    | NA   |

|      | CNST  | HILL   | GNLS   |
|------|-------|--------|--------|
| AIC  | 186.1 | 192.06 | 181.13 |
| PROB | 0.08  | 0      | 0.92   |
| RMSE | 36.26 | 36.3   | 26.43  |

MAX\_MEAN : 42 MAX\_MED : 41.8 BMAD : 5.69  
COFF : 20 HIT-CALL : 1 FITC : 49 ACTP : 0.923  
FLAGS : 10; 15; 16

Assay ID 1509 (NHEERL\_HEK293T\_CellTiterGLO)  
Sample ID : TP0001441D01

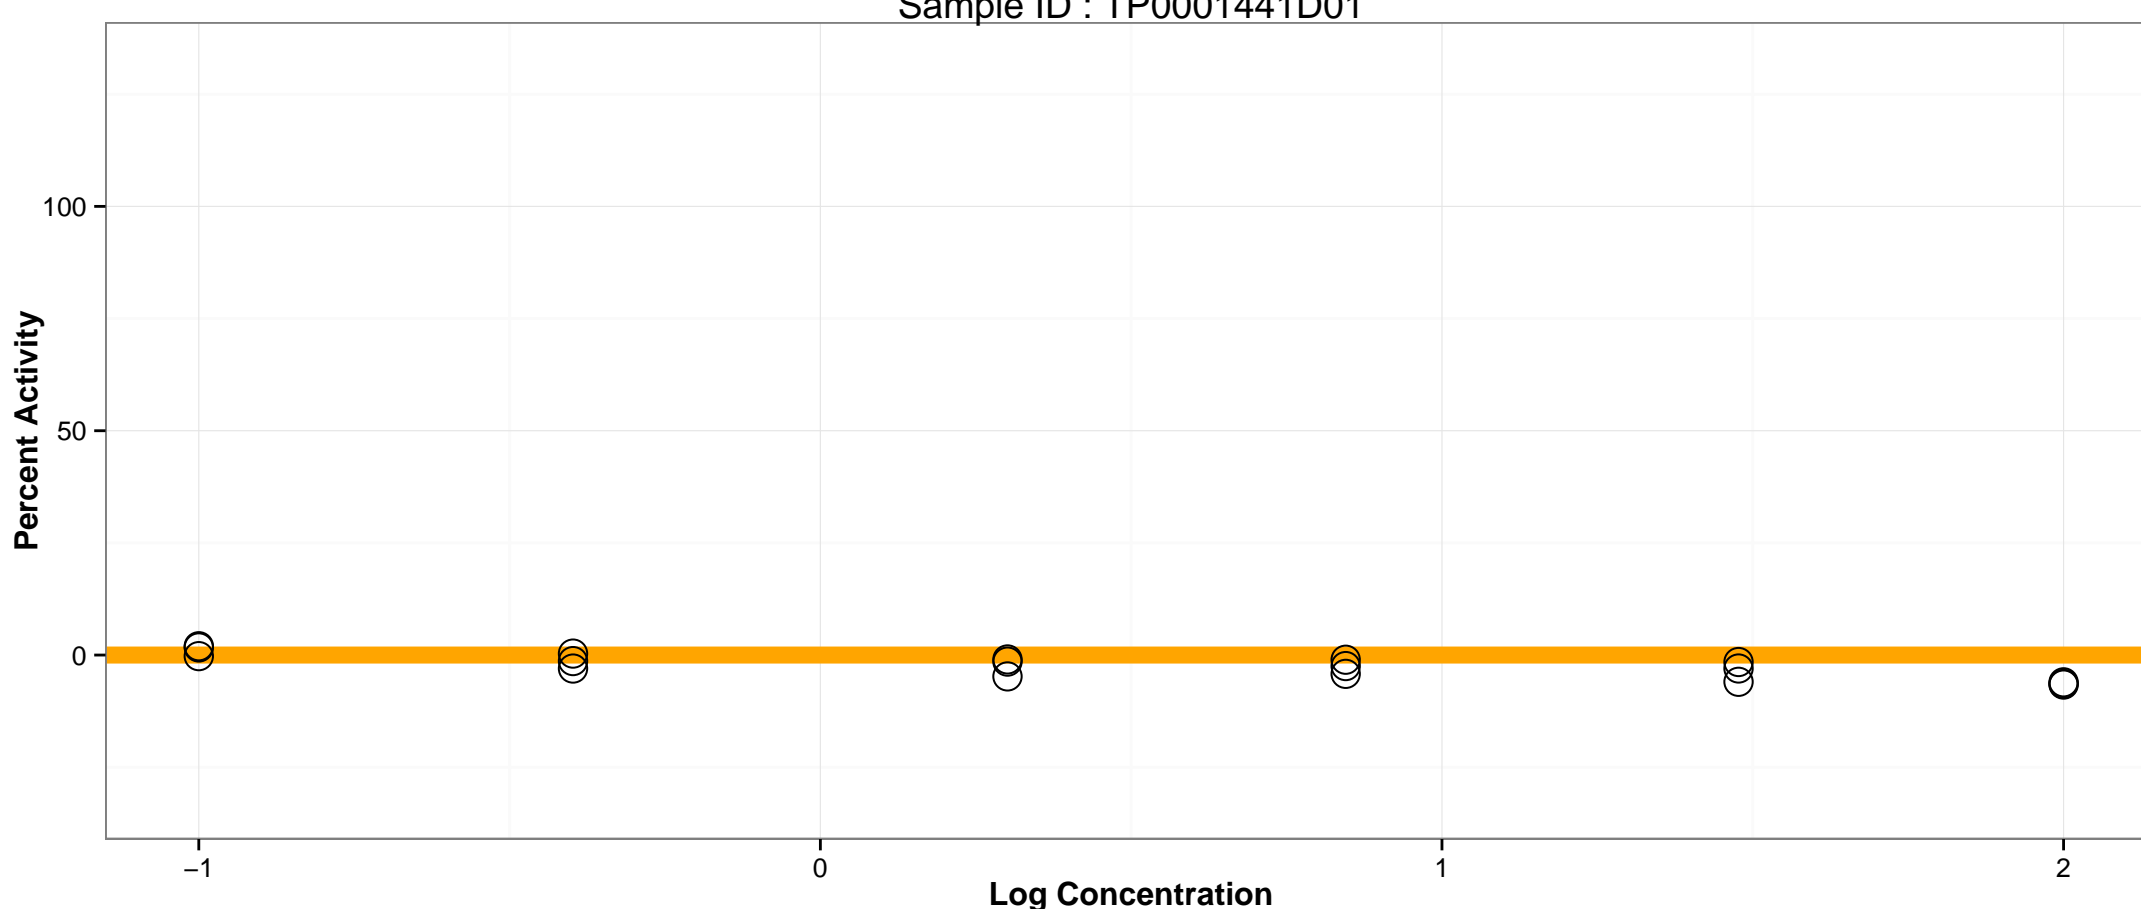

HILL MODEL

HILL MODEL: Not applicable

GAIN-LOSS MODEL

GNLS MODEL: Not applicable

|      | CNST   | HILL | GNLS |
|------|--------|------|------|
| AIC  | 100.97 | NA   | NA   |
| PROB | 1      | NA   | NA   |
| RMSE | 3.62   | NA   | NA   |

MAX\_MEAN : 1.15 MAX\_MED : 1.71 BMAD : 5.54  
COFF : 20 HIT-CALL : 0 FITC : 4 ACTP : 0  
FLAGS :

Assay ID 1848 (NHEERL\_Quantilum\_inhib\_2\_dn)  
Sample ID : TP0001441D01

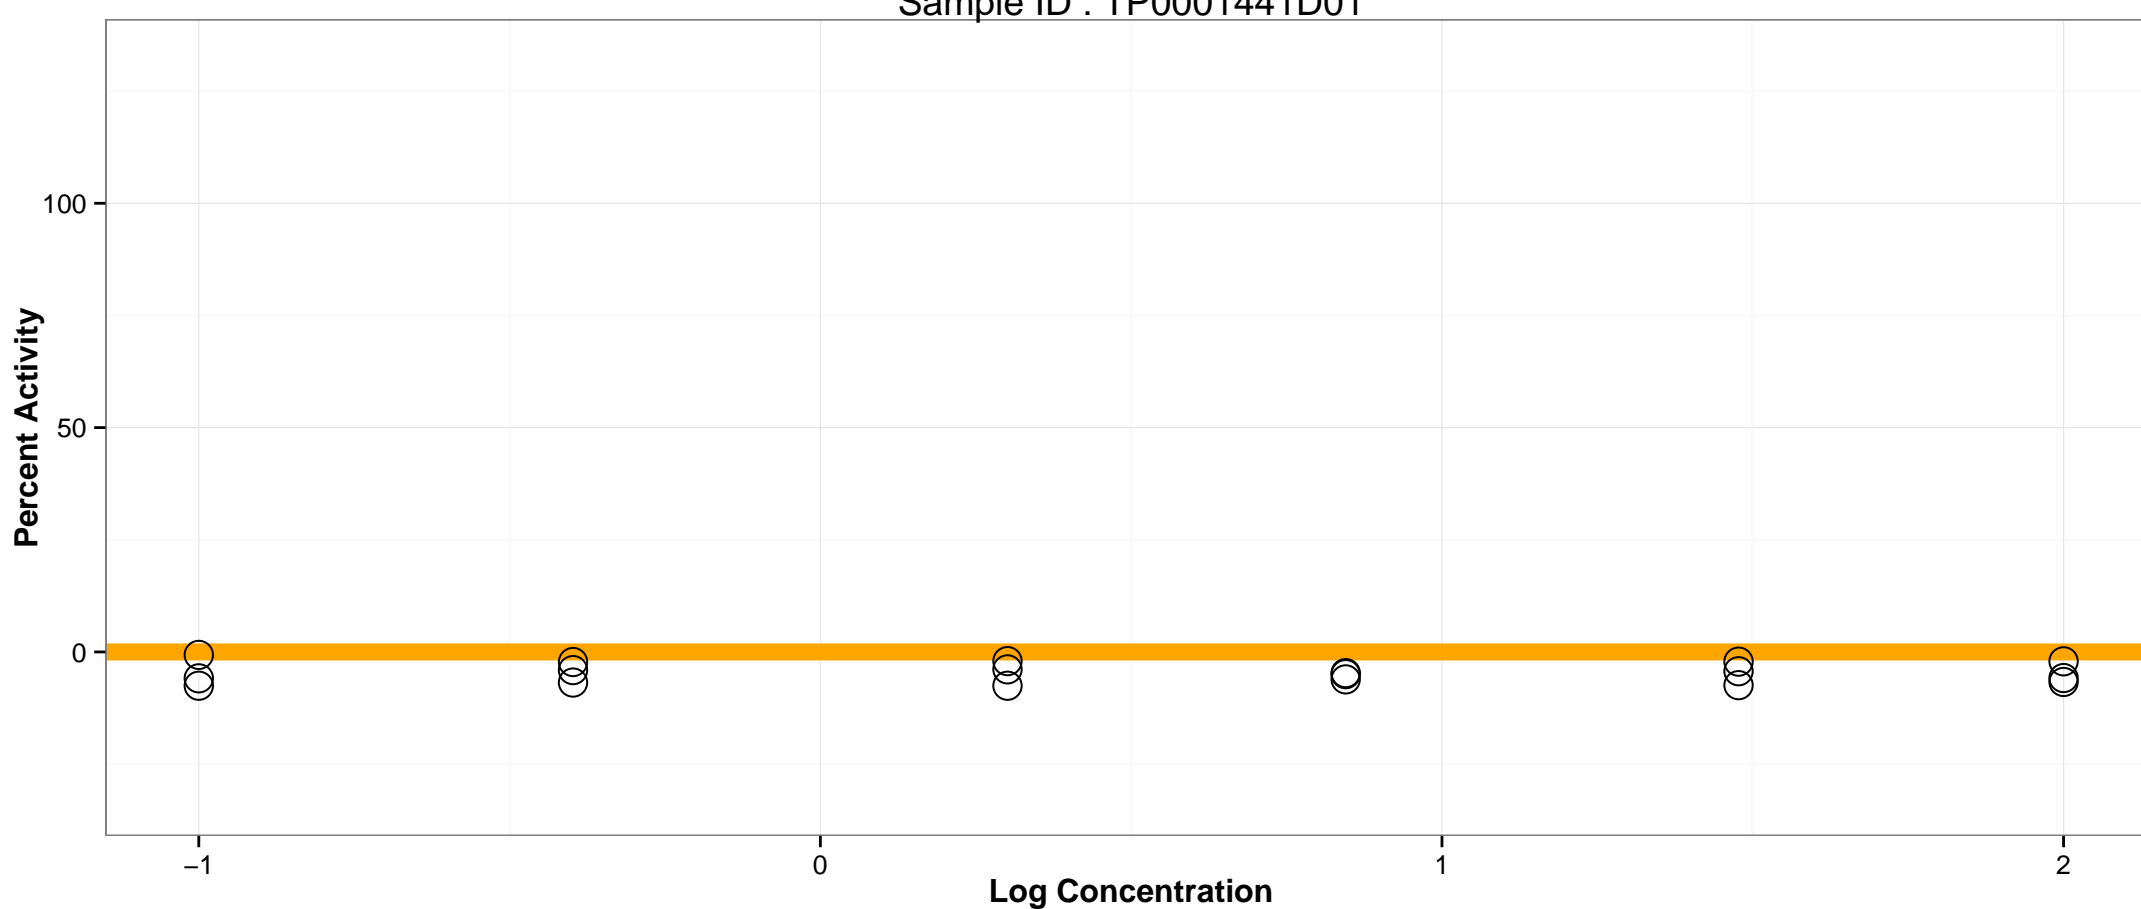

HILL MODEL

HILL MODEL: Not applicable

GAIN-LOSS MODEL

GNLS MODEL: Not applicable

|      | CNST   | HILL | GNLS |
|------|--------|------|------|
| AIC  | 115.46 | NA   | NA   |
| PROB | 1      | NA   | NA   |
| RMSE | 5.16   | NA   | NA   |

MAX\_MEAN : -4.36 MAX\_MED : -3.87 BMAD : 8.58  
COFF : 20 HIT-CALL : 0 FITC : 4 ACTP : 0  
FLAGS :

Assay ID 1824 (NHEERL\_TPO\_GUA\_dn)  
Sample ID : TP0001442H01

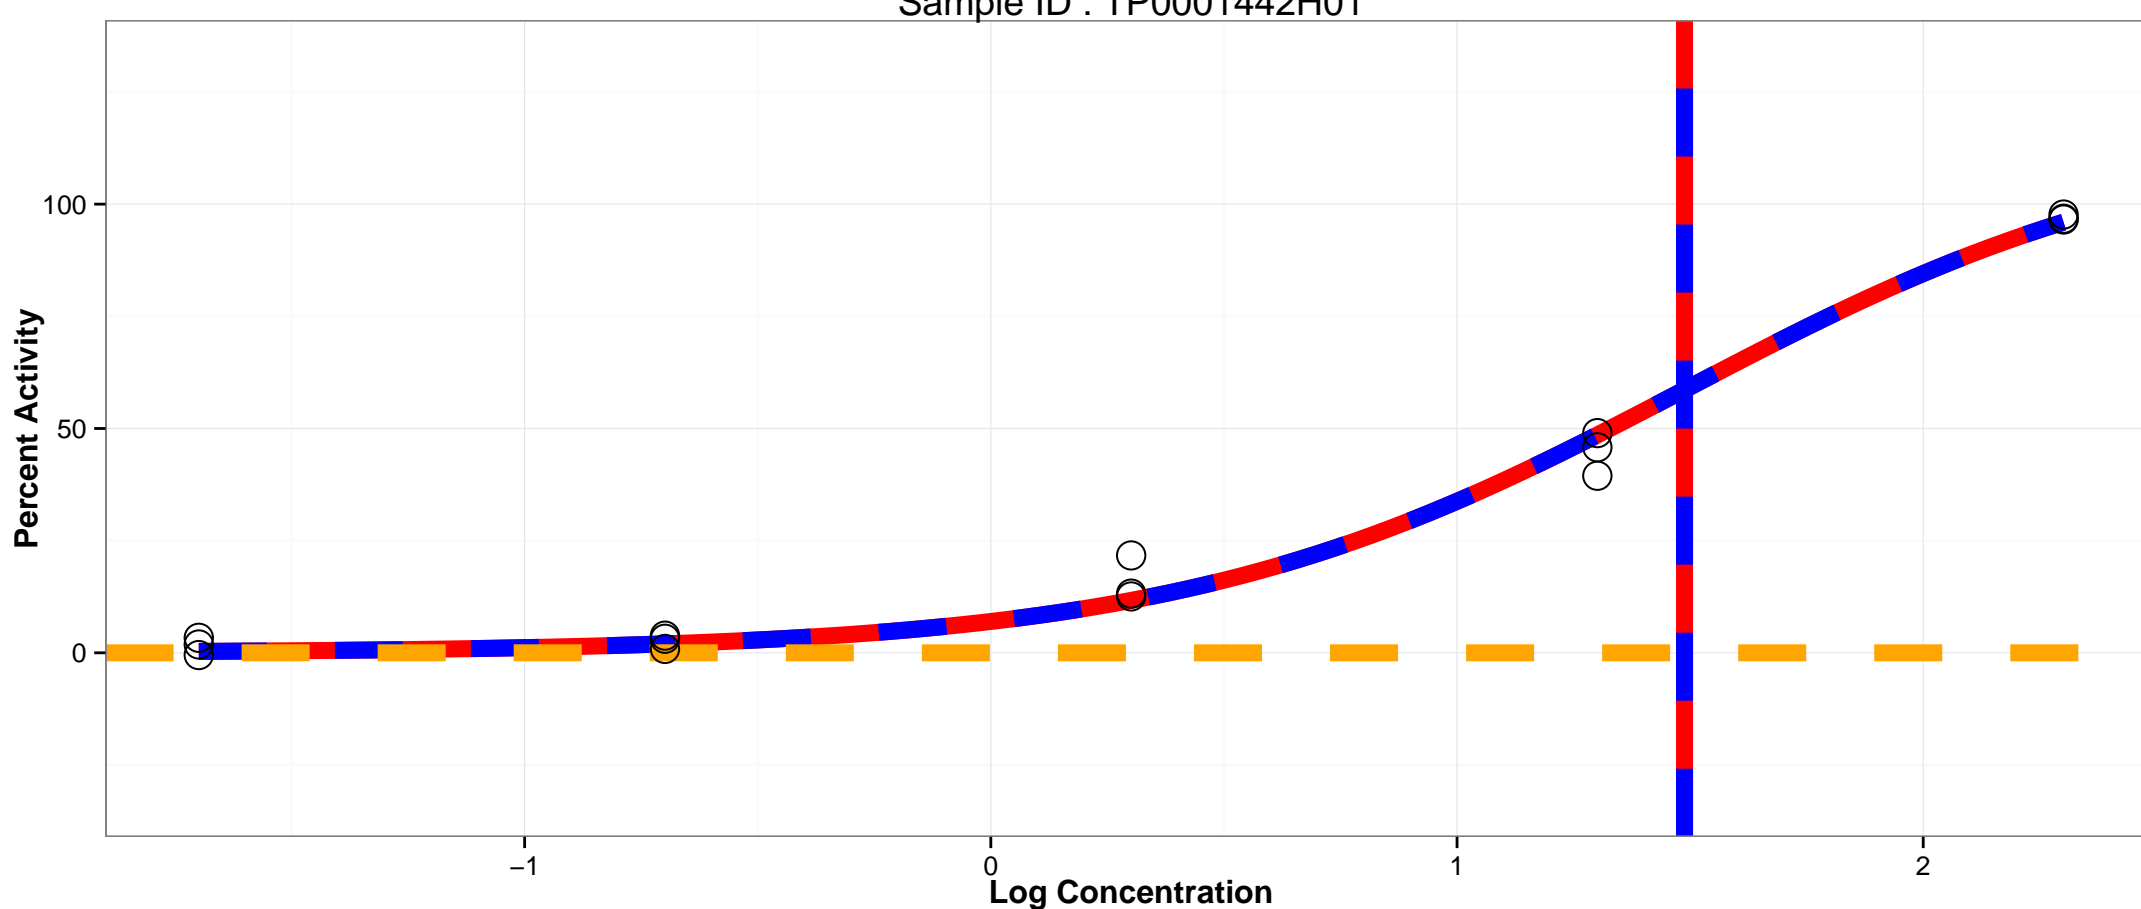

HILL MODEL

|     | tp   | ga     | gw     |
|-----|------|--------|--------|
| val | 117  | 1.49   | 0.805  |
| sd  | 6.71 | 0.0847 | 0.0734 |

GAIN-LOSS MODEL

|     | tp   | ga     | gw     | la   | lw   |
|-----|------|--------|--------|------|------|
| val | 117  | 1.49   | 0.805  | 2.85 | 17   |
| sd  | 6.71 | 0.0847 | 0.0734 | 152  | 4420 |

|      | CNST   | HILL  | GNLS  |
|------|--------|-------|-------|
| AIC  | 160.15 | 86.06 | 90.06 |
| PROB | 0      | 0.88  | 0.12  |
| RMSE | 48.4   | 3.8   | 3.8   |

MAX\_MEAN : 97 MAX\_MED : 96.8 BMAD : 3.71  
COFF : 20 HIT-CALL : 1 FITC : 42 ACTP : 1  
FLAGS :

Chemical : Sodium azide  
CAS : 26628-22-8

Assay ID 1508 (NHEERL\_TPO\_AUR\_dn)  
Sample ID : TX015590

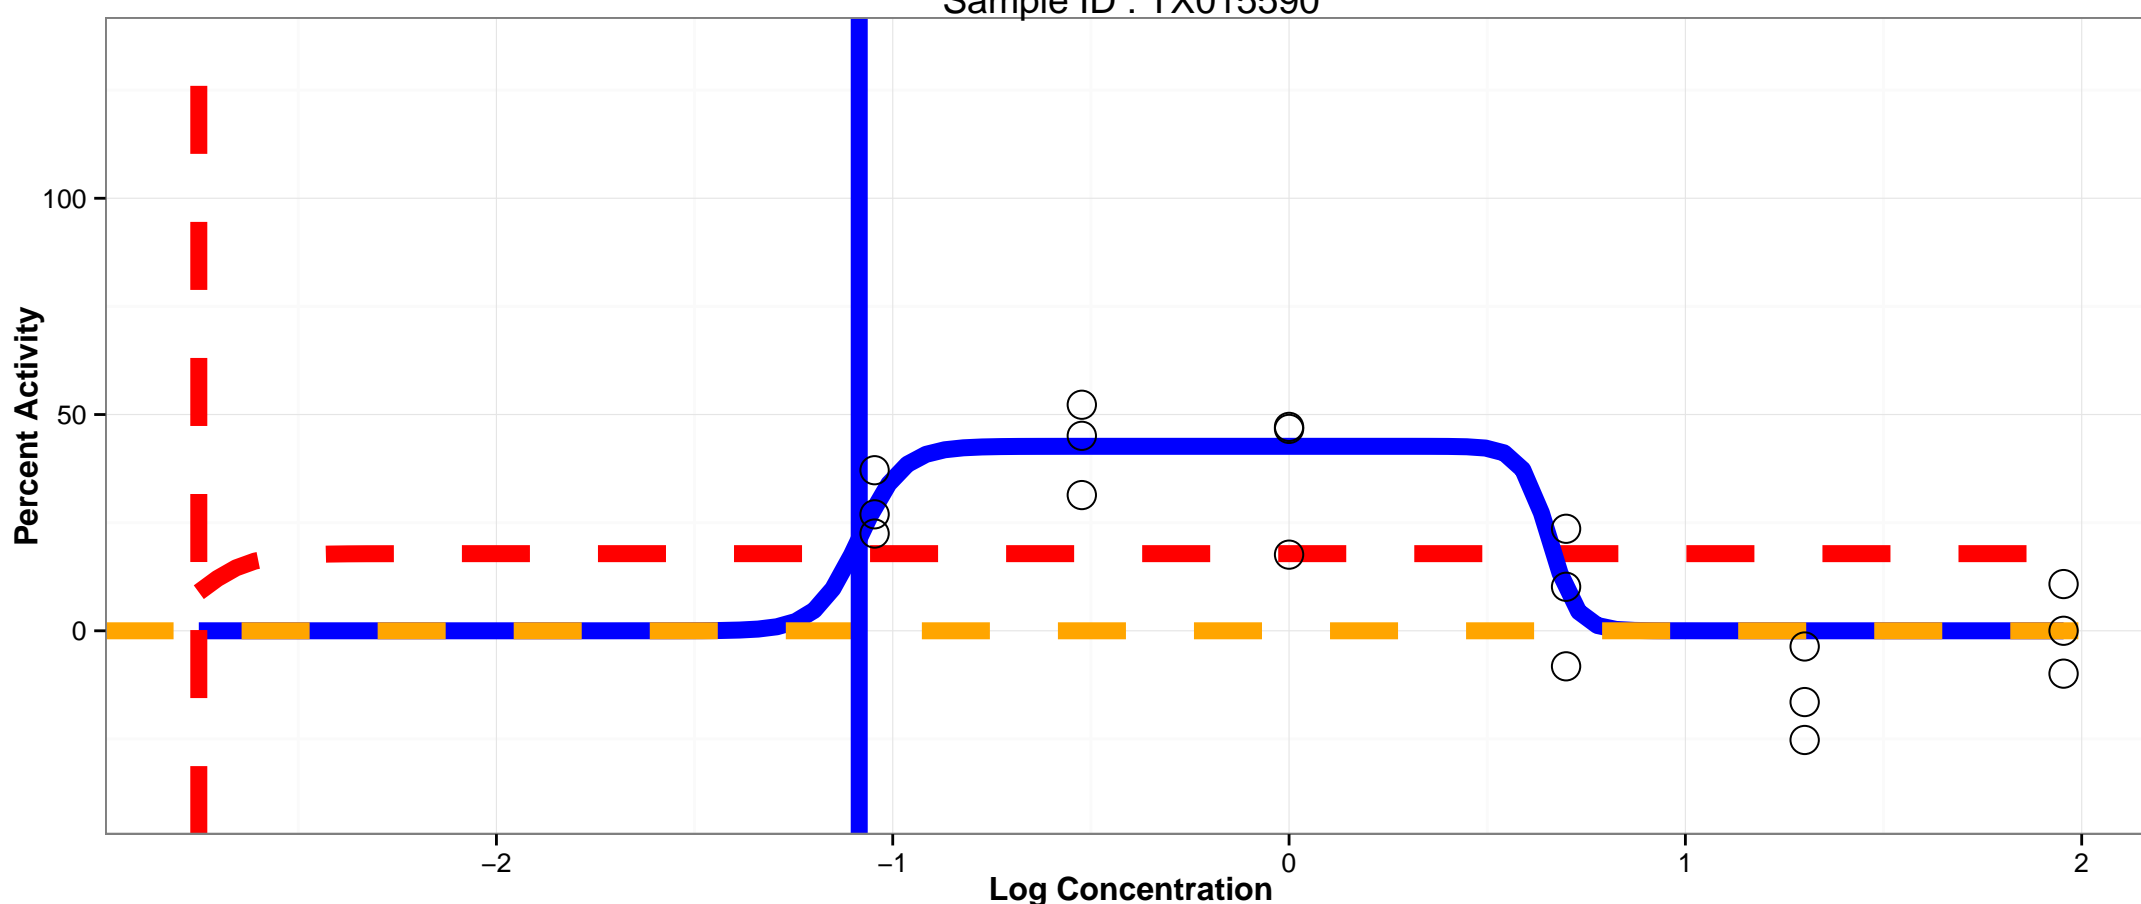

HILL MODEL

|     | tp   | ga     | gw     |
|-----|------|--------|--------|
| val | 17.8 | -2.75  | 6.87   |
| sd  | 6.1  | 120000 | 473000 |

GAIN-LOSS MODEL

|     | tp   | ga    | gw   | la    | lw   |
|-----|------|-------|------|-------|------|
| val | 42.7 | -1.08 | 7.96 | 0.656 | 12.6 |
| sd  | NA   | NA    | NA   | NA    | NA   |

|      | CNST   | HILL   | GNLS   |
|------|--------|--------|--------|
| AIC  | 176.24 | 174.87 | 153.97 |
| PROB | 0      | 0      | 1      |
| RMSE | 28.81  | 23.19  | 12.14  |

MAX\_MEAN : 42.9 MAX\_MED : 46.7 BMAD : 5.69  
COFF : 20 HIT-CALL : 1 FITC : 49 ACTP : 1  
FLAGS :

Assay ID 1509 (NHEERL\_HEK293T\_CellTiterGLO)  
Sample ID : TX015590

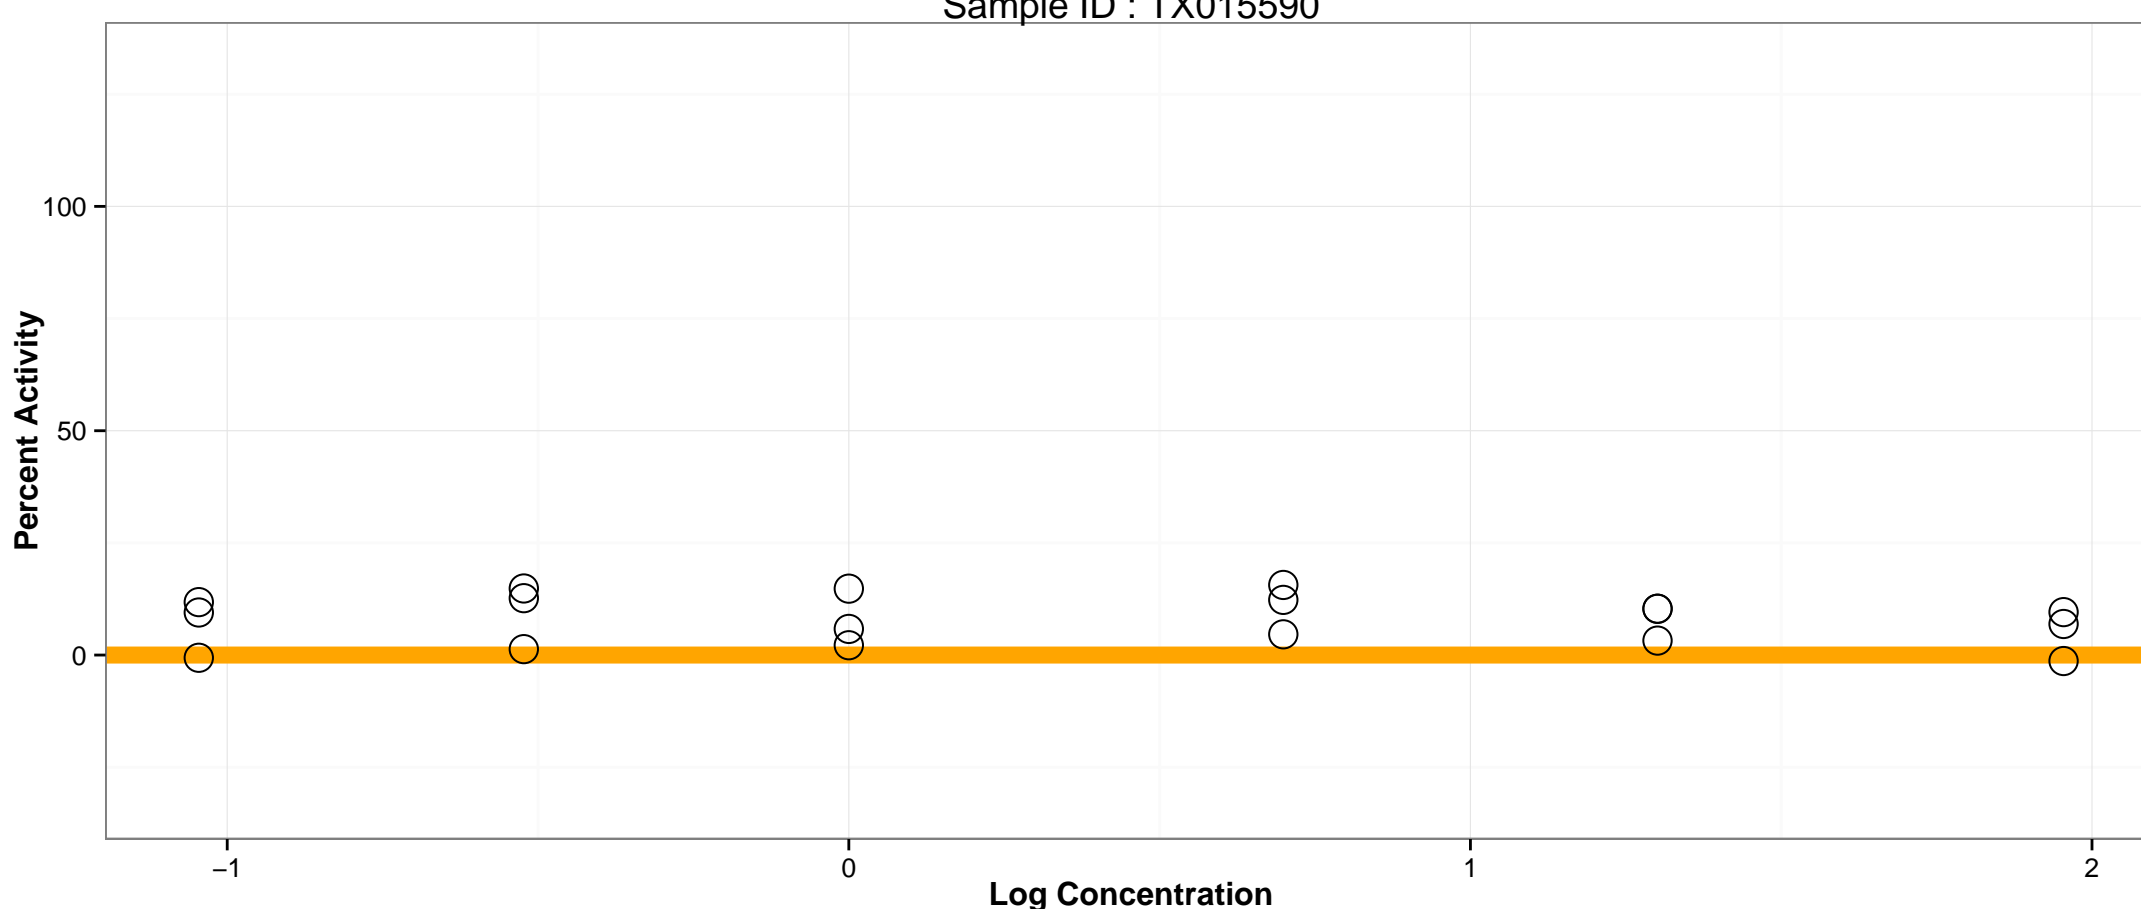

HILL MODEL

HILL MODEL: Not applicable

GAIN-LOSS MODEL

GNLS MODEL: Not applicable

|      | CNST   | HILL | GNLS |
|------|--------|------|------|
| AIC  | 137.24 | NA   | NA   |
| PROB | 1      | NA   | NA   |
| RMSE | 9.59   | NA   | NA   |

MAX\_MEAN : 10.9 MAX\_MED : 12.7 BMAD : 5.54  
COFF : 20 HIT-CALL : 0 FITC : 4 ACTP : 0  
FLAGS :

Assay ID 1848 (NHEERL\_Quantilum\_inhib\_2\_dn)  
Sample ID : TX015590

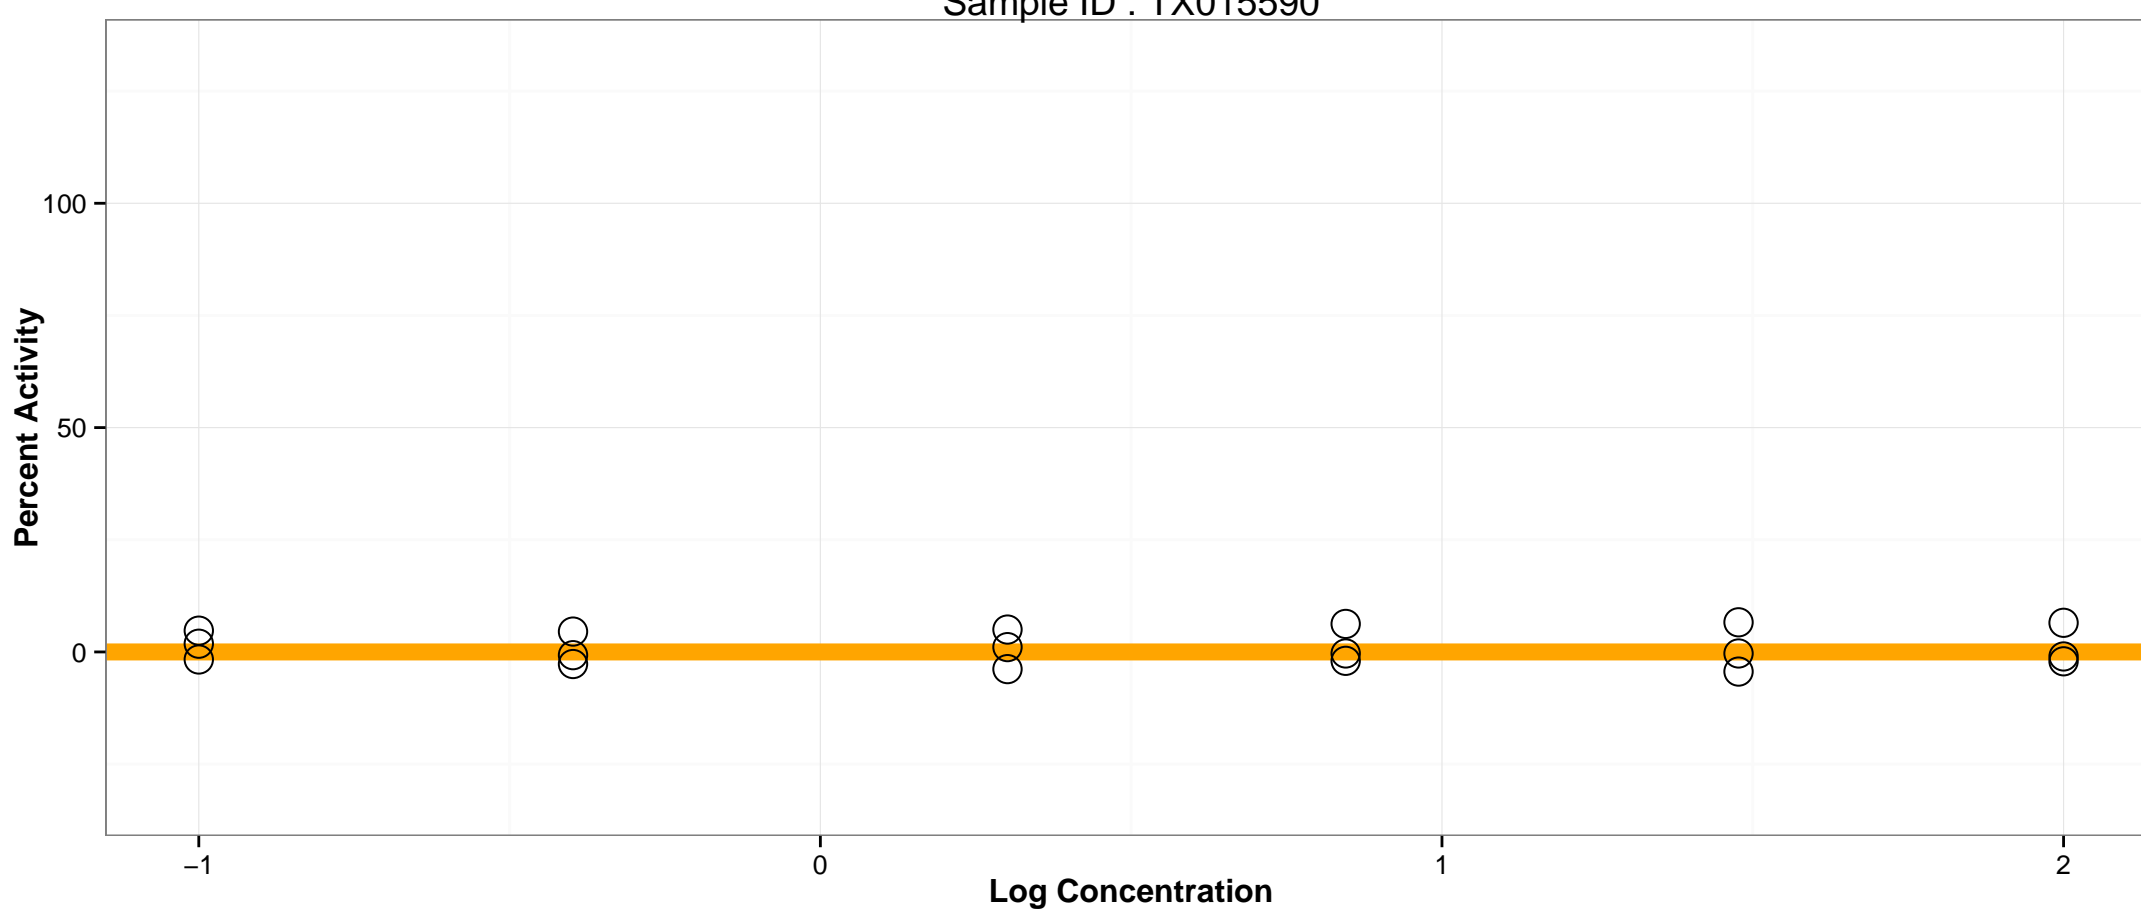

HILL MODEL

HILL MODEL: Not applicable

GAIN-LOSS MODEL

GNLS MODEL: Not applicable

|      | CNST   | HILL | GNLS |
|------|--------|------|------|
| AIC  | 102.62 | NA   | NA   |
| PROB | 1      | NA   | NA   |
| RMSE | 3.74   | NA   | NA   |

MAX\_MEAN : 1.64 MAX\_MED : 1.84 BMAD : 8.58  
COFF : 20 HIT-CALL : 0 FITC : 4 ACTP : 0  
FLAGS :

Assay ID 1824 (NHEERL\_TPO\_GUA\_dn)  
Sample ID : TP0001442H01



HILL MODEL

|     | tp   | ga     | gw     |
|-----|------|--------|--------|
| val | 117  | 1.49   | 0.805  |
| sd  | 6.71 | 0.0847 | 0.0734 |

GAIN-LOSS MODEL

|     | tp   | ga     | gw     | la   | lw   |
|-----|------|--------|--------|------|------|
| val | 117  | 1.49   | 0.805  | 2.85 | 17   |
| sd  | 6.71 | 0.0847 | 0.0734 | 152  | 4420 |

|      | CNST   | HILL  | GNLS  |
|------|--------|-------|-------|
| AIC  | 160.15 | 86.06 | 90.06 |
| PROB | 0      | 0.88  | 0.12  |
| RMSE | 48.4   | 3.8   | 3.8   |

MAX\_MEAN : 97 MAX\_MED : 96.8 BMAD : 3.71  
COFF : 20 HIT-CALL : 1 FITC : 42 ACTP : 1  
FLAGS :

Chemical : 4-Propylphenol  
CAS : 645-56-7

Assay ID 1508 (NHEERL\_TPO\_AUR\_dn)  
Sample ID : TP0001441D02

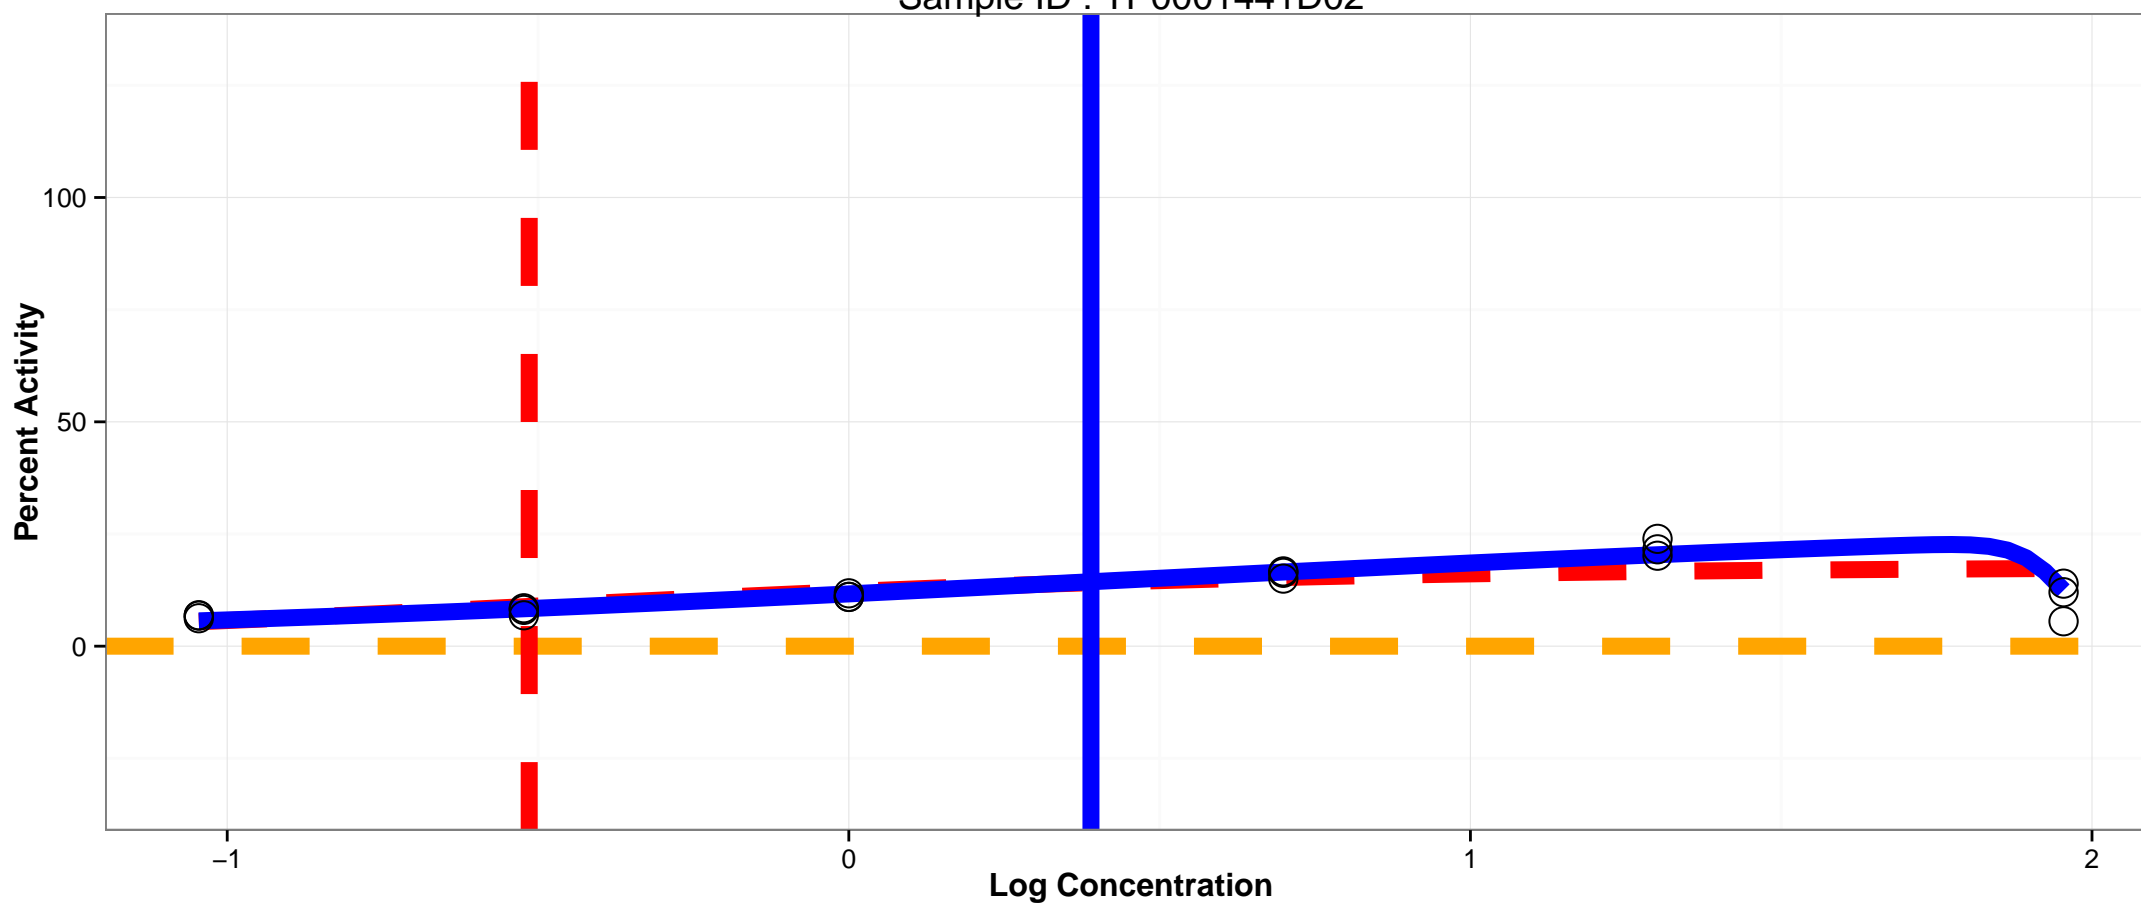

HILL MODEL

|     | tp   | ga     | gw    |
|-----|------|--------|-------|
| val | 17.7 | -0.514 | 0.663 |
| sd  | 2.59 | 0.263  | 0.2   |

GAIN-LOSS MODEL

|     | tp   | ga   | gw    | la   | lw   |
|-----|------|------|-------|------|------|
| val | 28.7 | 0.39 | 0.426 | 1.96 | 11.3 |
| sd  | NA   | NA   | NA    | NA   | NA   |

|      | CNST   | HILL   | GNLS  |
|------|--------|--------|-------|
| AIC  | 149.81 | 105.17 | 80.14 |
| PROB | 0      | 0      | 1     |
| RMSE | 13.52  | 3.95   | 2.01  |

MAX\_MEAN : 21.9 MAX\_MED : 21.6 BMAD : 5.69  
COFF : 20 HIT-CALL : 1 FITC : 51 ACTP : 1  
FLAGS : 11; 7

Assay ID 1509 (NHEERL\_HEK293T\_CellTiterGLO)  
Sample ID : TP0001441D02

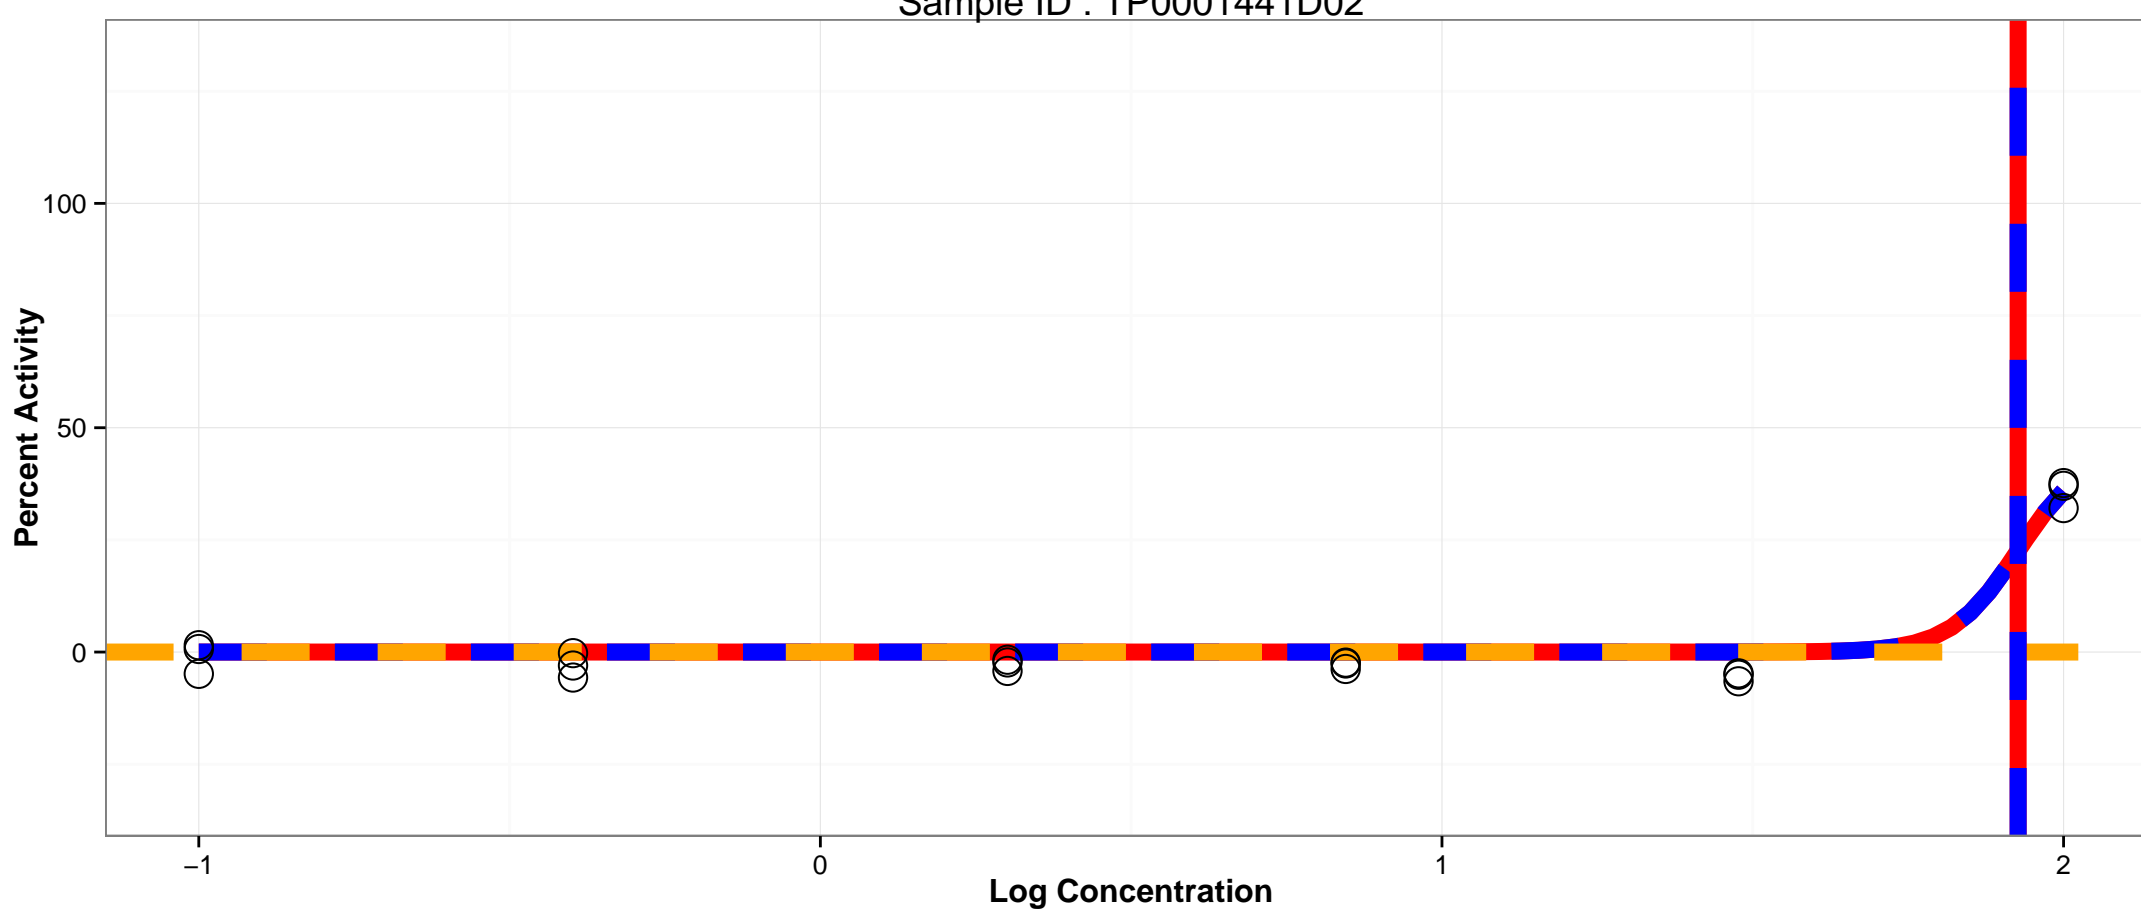

HILL MODEL

|     | tp   | ga   | gw   |
|-----|------|------|------|
| val | 45.2 | 1.93 | 8    |
| sd  | 40.1 | 0.15 | 11.4 |

GAIN-LOSS MODEL

|     | tp   | ga    | gw   | la    | lw     |
|-----|------|-------|------|-------|--------|
| val | 45.2 | 1.93  | 8    | 3.59  | 6.06   |
| sd  | 39.5 | 0.147 | 11.3 | 62300 | 238000 |

|      | CNST  | HILL   | GNLS   |
|------|-------|--------|--------|
| AIC  | 142.5 | 107.45 | 111.45 |
| PROB | 0     | 0.88   | 0.12   |
| RMSE | 14.97 | 3.56   | 3.56   |

MAX\_MEAN : 35.6 MAX\_MED : 37.1 BMAD : 5.54  
COFF : 20 HIT-CALL : 1 FITC : 42 ACTP : 1  
FLAGS : 6

Assay ID 1848 (NHEERL\_Quantilum\_inhib\_2\_dn)  
Sample ID : TP0001441D02

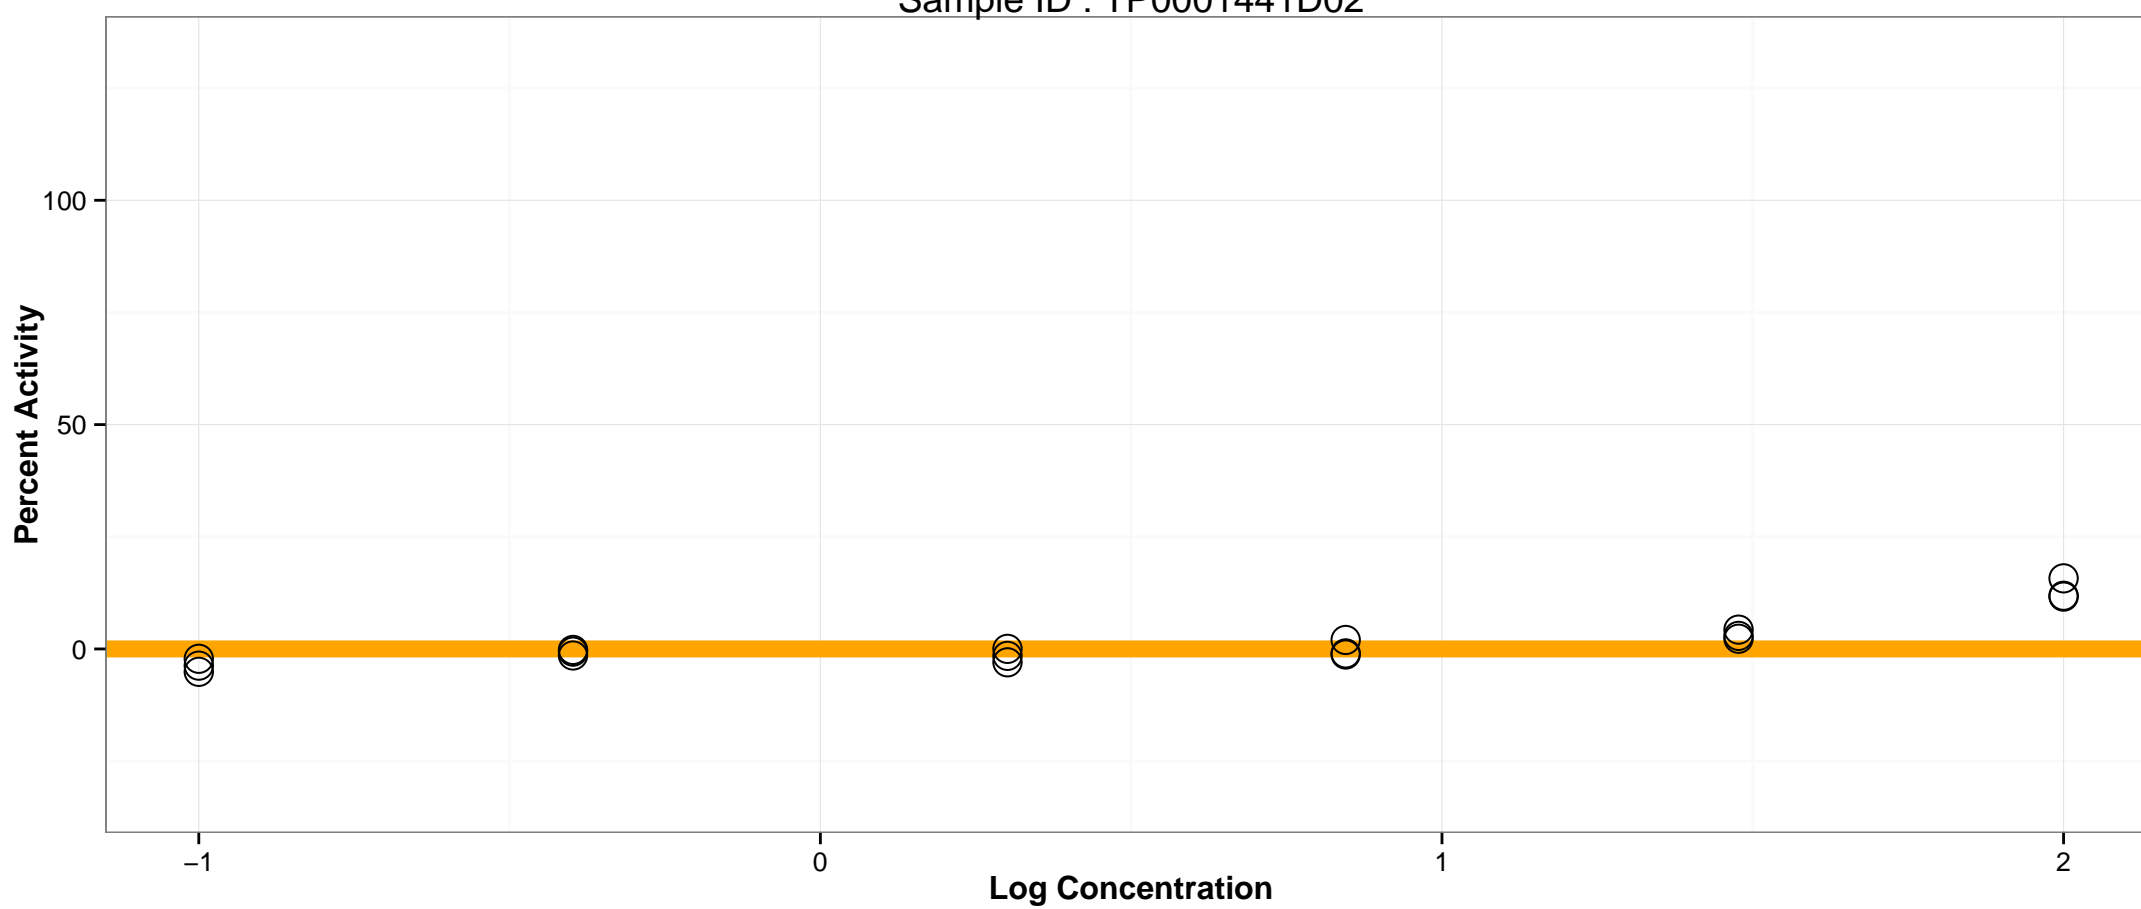

HILL MODEL

HILL MODEL: Not applicable

GAIN-LOSS MODEL

GNLS MODEL: Not applicable

|      | CNST   | HILL | GNLS |
|------|--------|------|------|
| AIC  | 113.45 | NA   | NA   |
| PROB | 1      | NA   | NA   |
| RMSE | 5.88   | NA   | NA   |

MAX\_MEAN : 13.1 MAX\_MED : 11.9 BMAD : 8.58  
COFF : 20 HIT-CALL : 0 FITC : 4 ACTP : 0  
FLAGS :



Chemical : FR900409

CAS : 138472-01-2

Assay ID 1508 (NHEERL\_TPO\_AUR\_dn)  
Sample ID : TP0001441D03

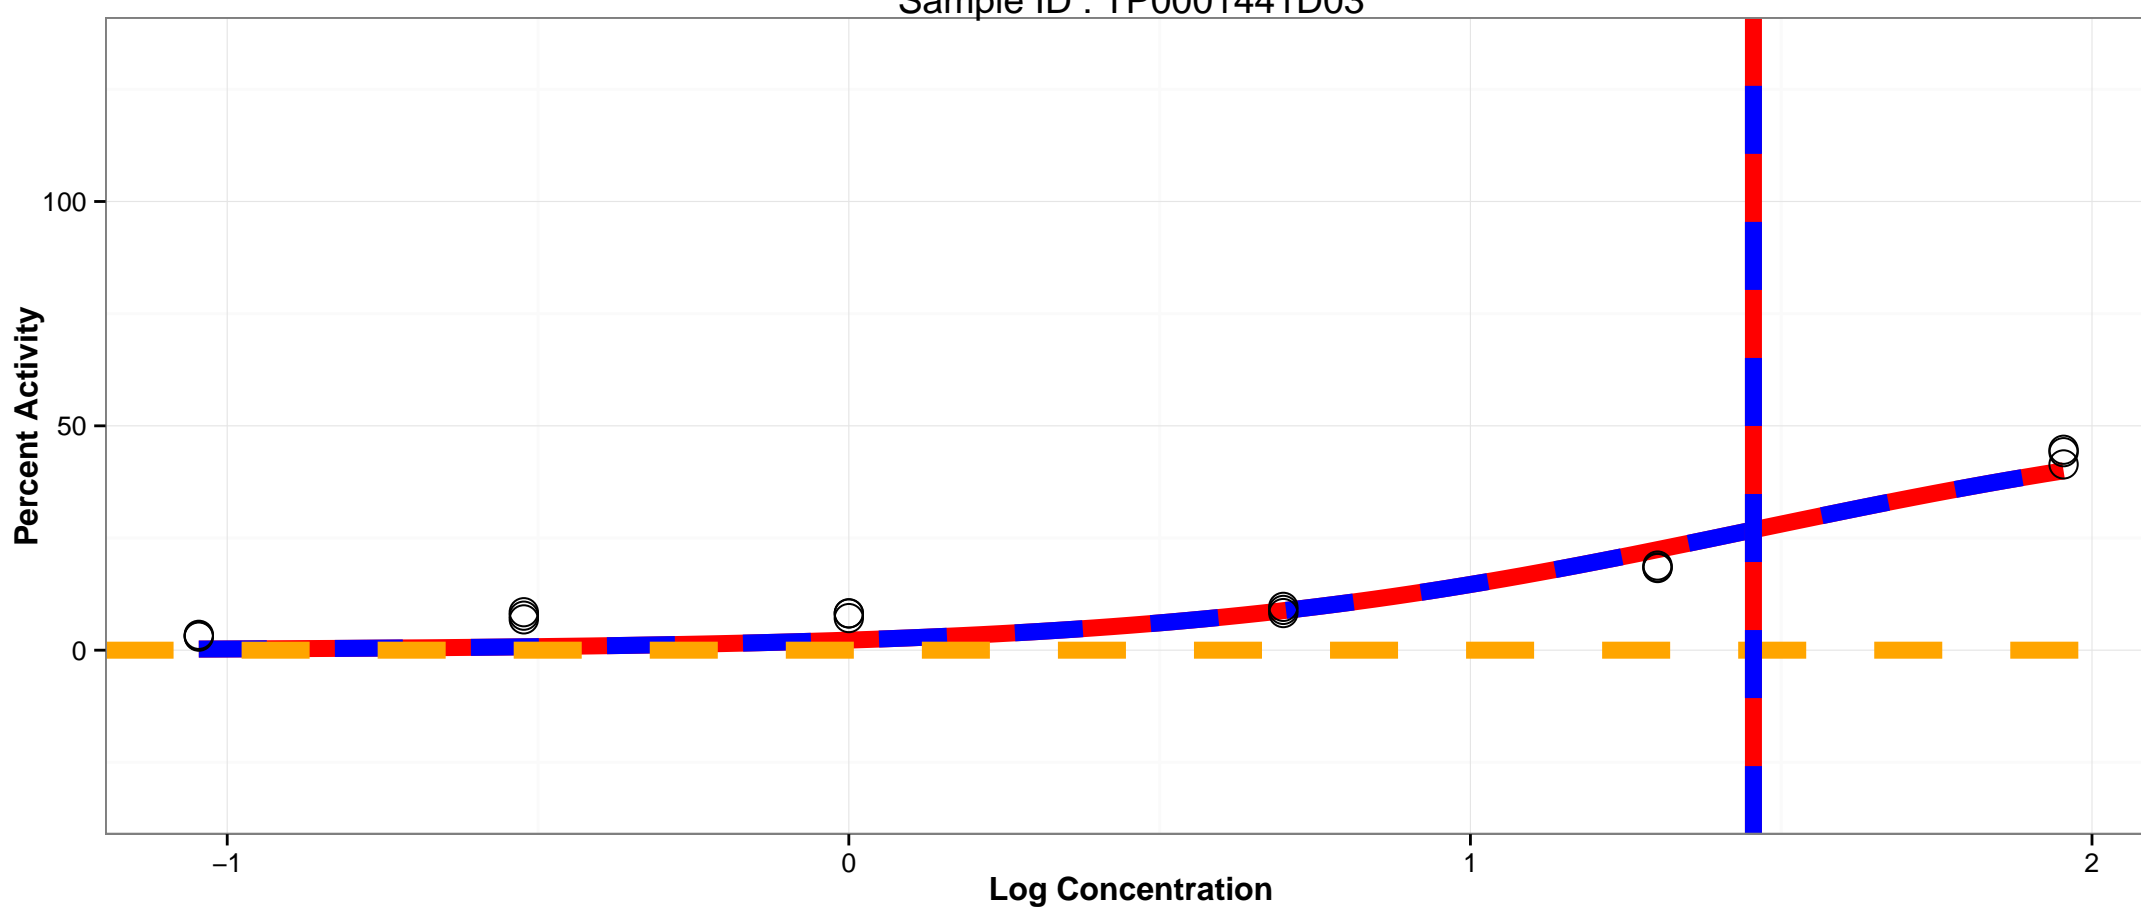

HILL MODEL

|     | tp   | ga   | gw    |
|-----|------|------|-------|
| val | 53.6 | 1.46 | 0.935 |
| sd  | 9.46 | 0.19 | 0.244 |

GAIN-LOSS MODEL

|     | tp   | ga   | gw    | la   | lw   |
|-----|------|------|-------|------|------|
| val | 53.6 | 1.46 | 0.935 | 2.63 | 13   |
| sd  | 9.46 | 0.19 | 0.244 | 439  | 8460 |

|      | CNST   | HILL   | GNLS   |
|------|--------|--------|--------|
| AIC  | 160.01 | 115.66 | 119.66 |
| PROB | 0      | 0.88   | 0.12   |
| RMSE | 20.18  | 4.44   | 4.44   |

MAX\_MEAN : 43.4 MAX\_MED : 44.1 BMAD : 5.69  
COFF : 20 HIT-CALL : 1 FITC : 42 ACTP : 1  
FLAGS :

Assay ID 1509 (NHEERL\_HEK293T\_CellTiterGLO)  
Sample ID : TP0001441D03

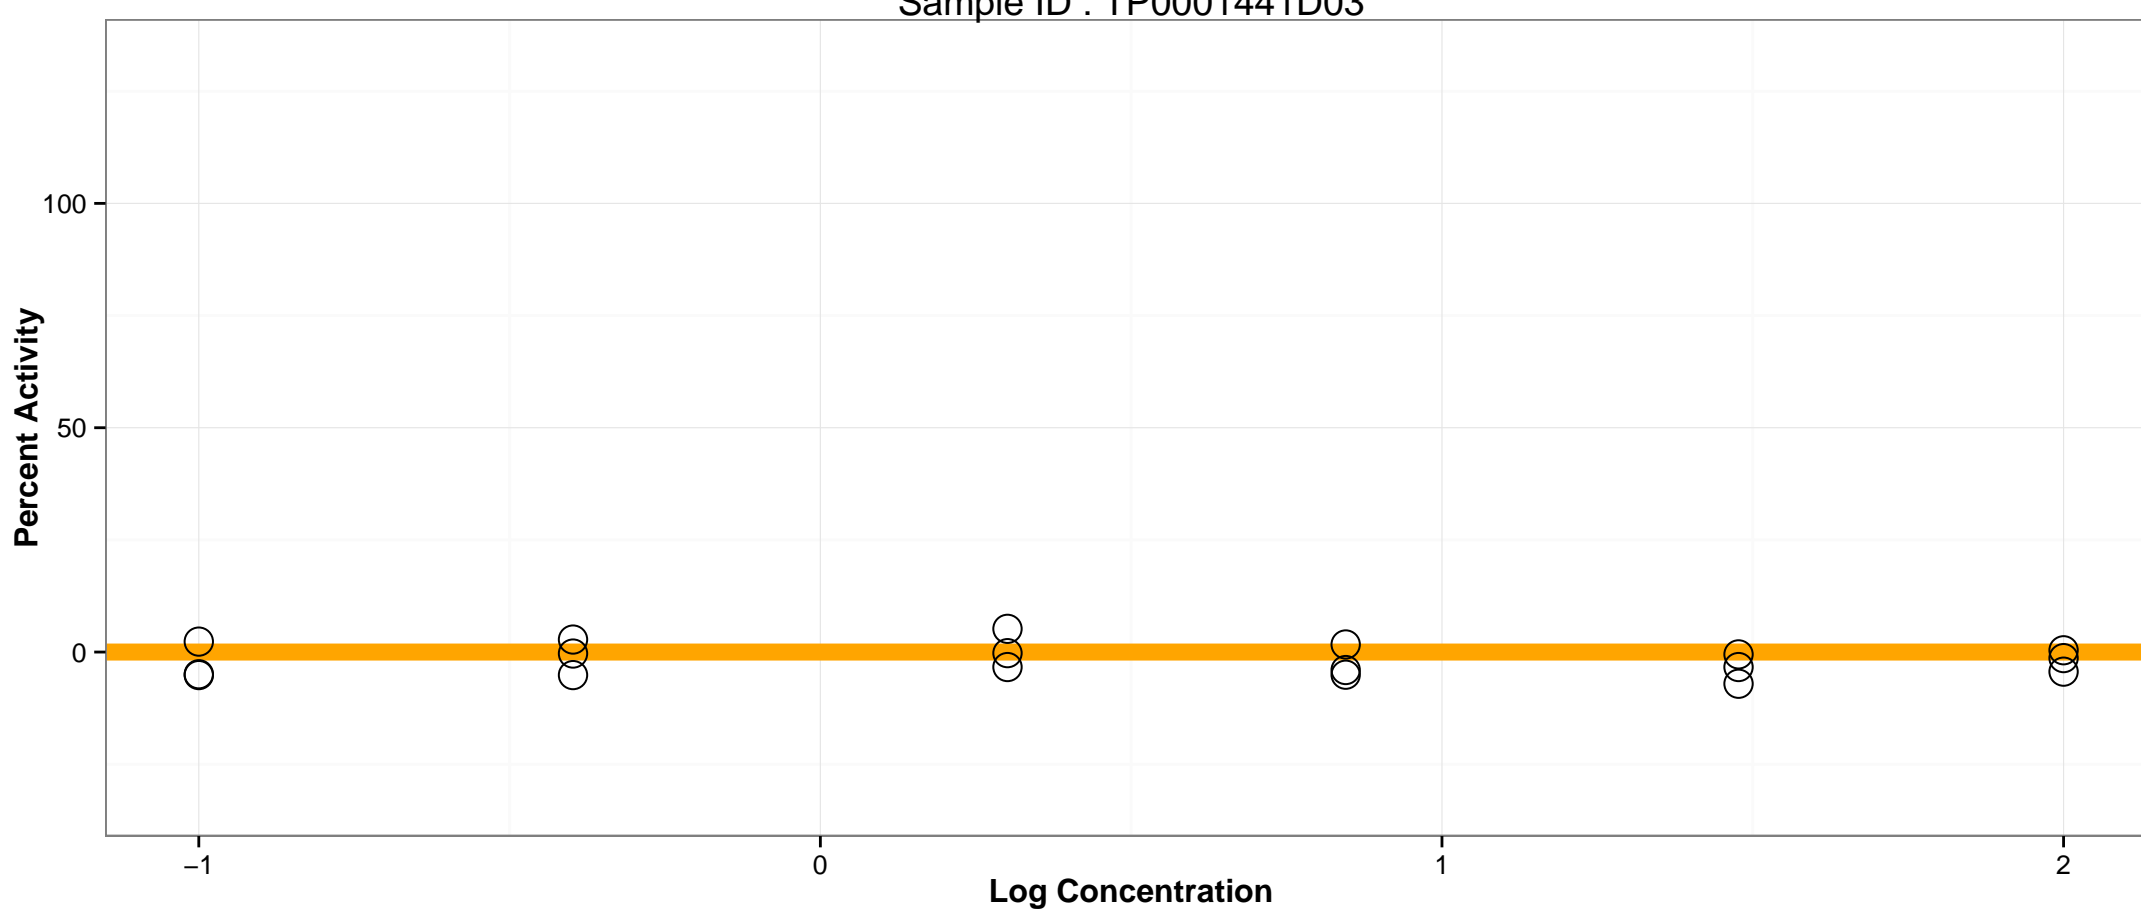

HILL MODEL

HILL MODEL: Not applicable

GAIN-LOSS MODEL

GNLS MODEL: Not applicable

|      | CNST   | HILL | GNLS |
|------|--------|------|------|
| AIC  | 103.37 | NA   | NA   |
| PROB | 1      | NA   | NA   |
| RMSE | 3.76   | NA   | NA   |

MAX\_MEAN : 0.543 MAX\_MED : -0.231 BMAD : 5.54  
COFF : 20 HIT-CALL : 0 FITC : 4 ACTP : 0  
FLAGS :

Assay ID 1848 (NHEERL\_Quantilum\_inhib\_2\_dn)  
Sample ID : TP0001441D03

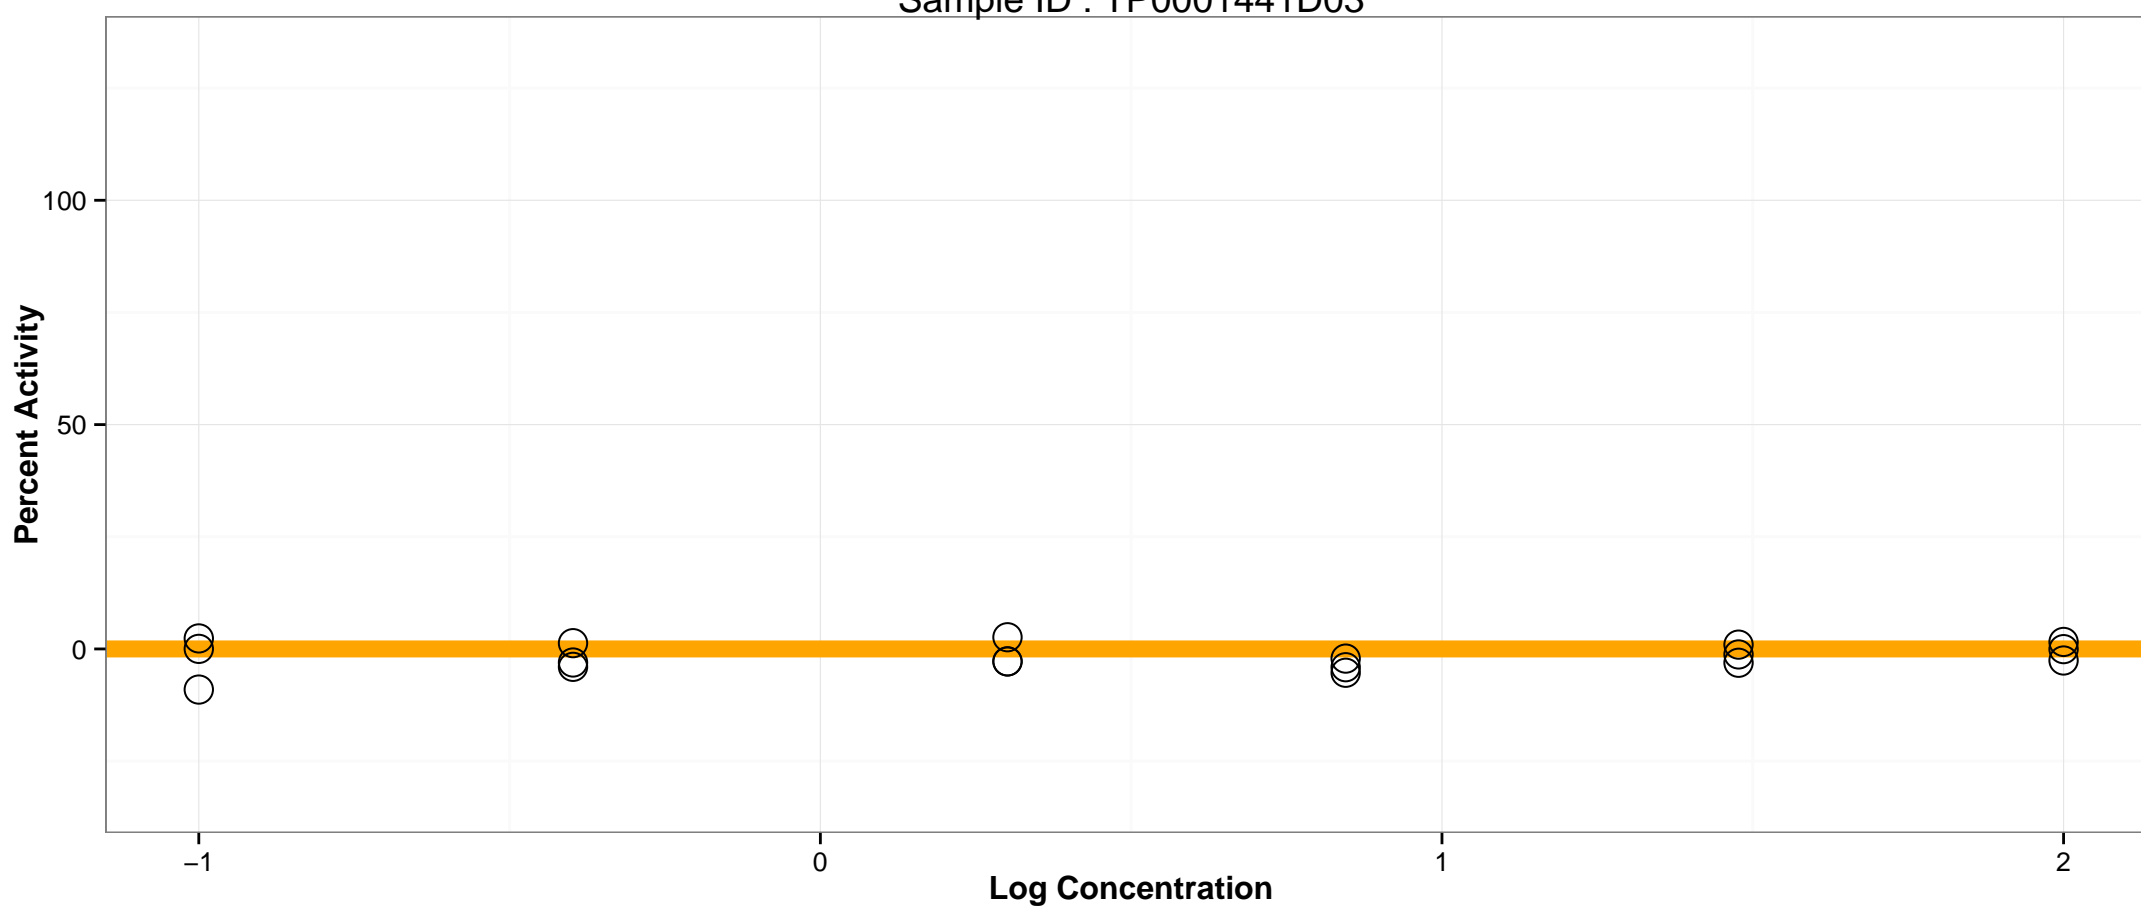

HILL MODEL

HILL MODEL: Not applicable

GAIN-LOSS MODEL

GNLS MODEL: Not applicable

|      | CNST  | HILL | GNLS |
|------|-------|------|------|
| AIC  | 97.36 | NA   | NA   |
| PROB | 1     | NA   | NA   |
| RMSE | 3.38  | NA   | NA   |

MAX\_MEAN : -0.341 MAX\_MED : 0.0282 BMAD : 8.58  
COFF : 20 HIT-CALL : 0 FITC : 4 ACTP : 0  
FLAGS :

Chemical : FR900409

CAS : 138472-01-2

Assay ID 1508 (NHEERL\_TPO\_AUR\_dn)  
Sample ID : TX011653

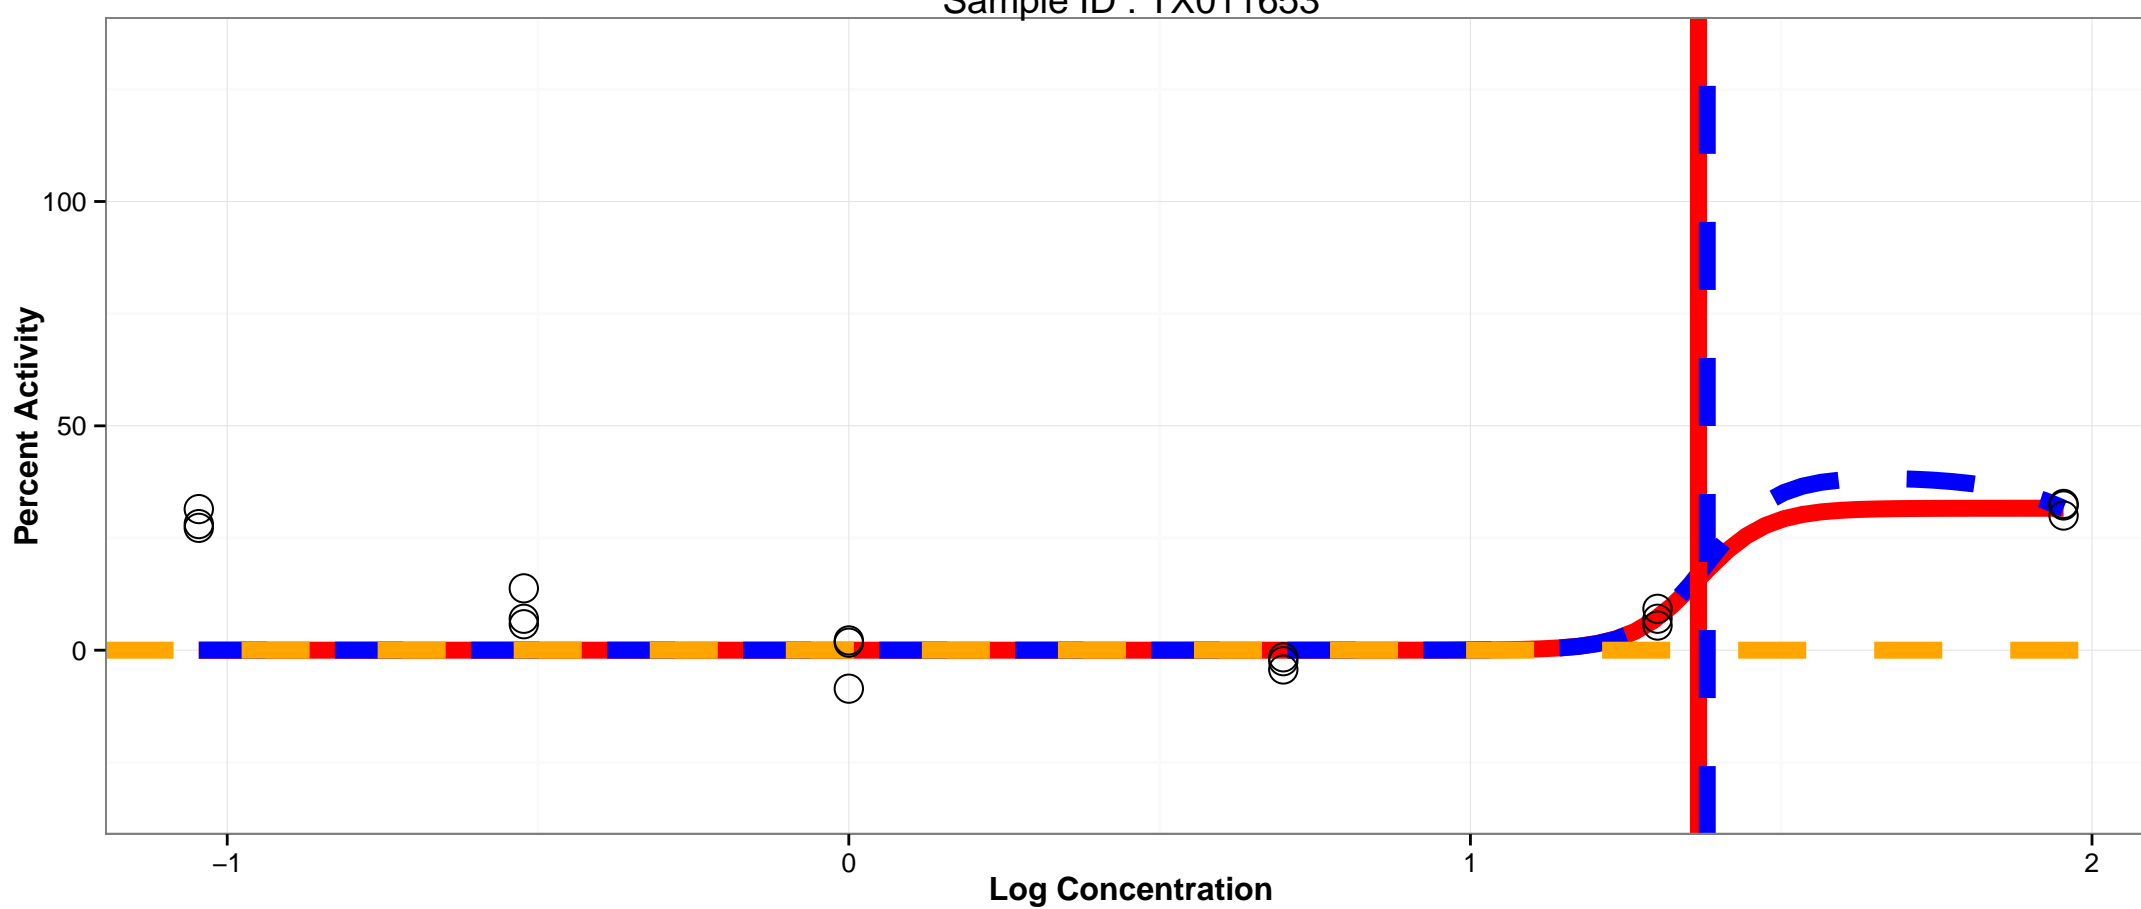

HILL MODEL

|     | tp   | ga   | gw  |
|-----|------|------|-----|
| val | 31.6 | 1.37 | 8   |
| sd  | 3.87 | 1.03 | 125 |

GAIN-LOSS MODEL

|     | tp   | ga   | gw   | la   | lw   |
|-----|------|------|------|------|------|
| val | 38.8 | 1.38 | 7.99 | 2.09 | 4.73 |
| sd  | NA   | NA   | NA   | NA   | NA   |

|      | CNST   | HILL   | GNLS   |
|------|--------|--------|--------|
| AIC  | 158.76 | 146.26 | 150.26 |
| PROB | 0      | 0.88   | 0.12   |
| RMSE | 18.37  | 12.73  | 12.73  |

MAX\_MEAN : 31.6 MAX\_MED : 32.3 BMAD : 5.69  
COFF : 20 HIT-CALL : 1 FITC : 41 ACTP : 0.998  
FLAGS :

Assay ID 1509 (NHEERL\_HEK293T\_CellTiterGLO)  
Sample ID : TX011653

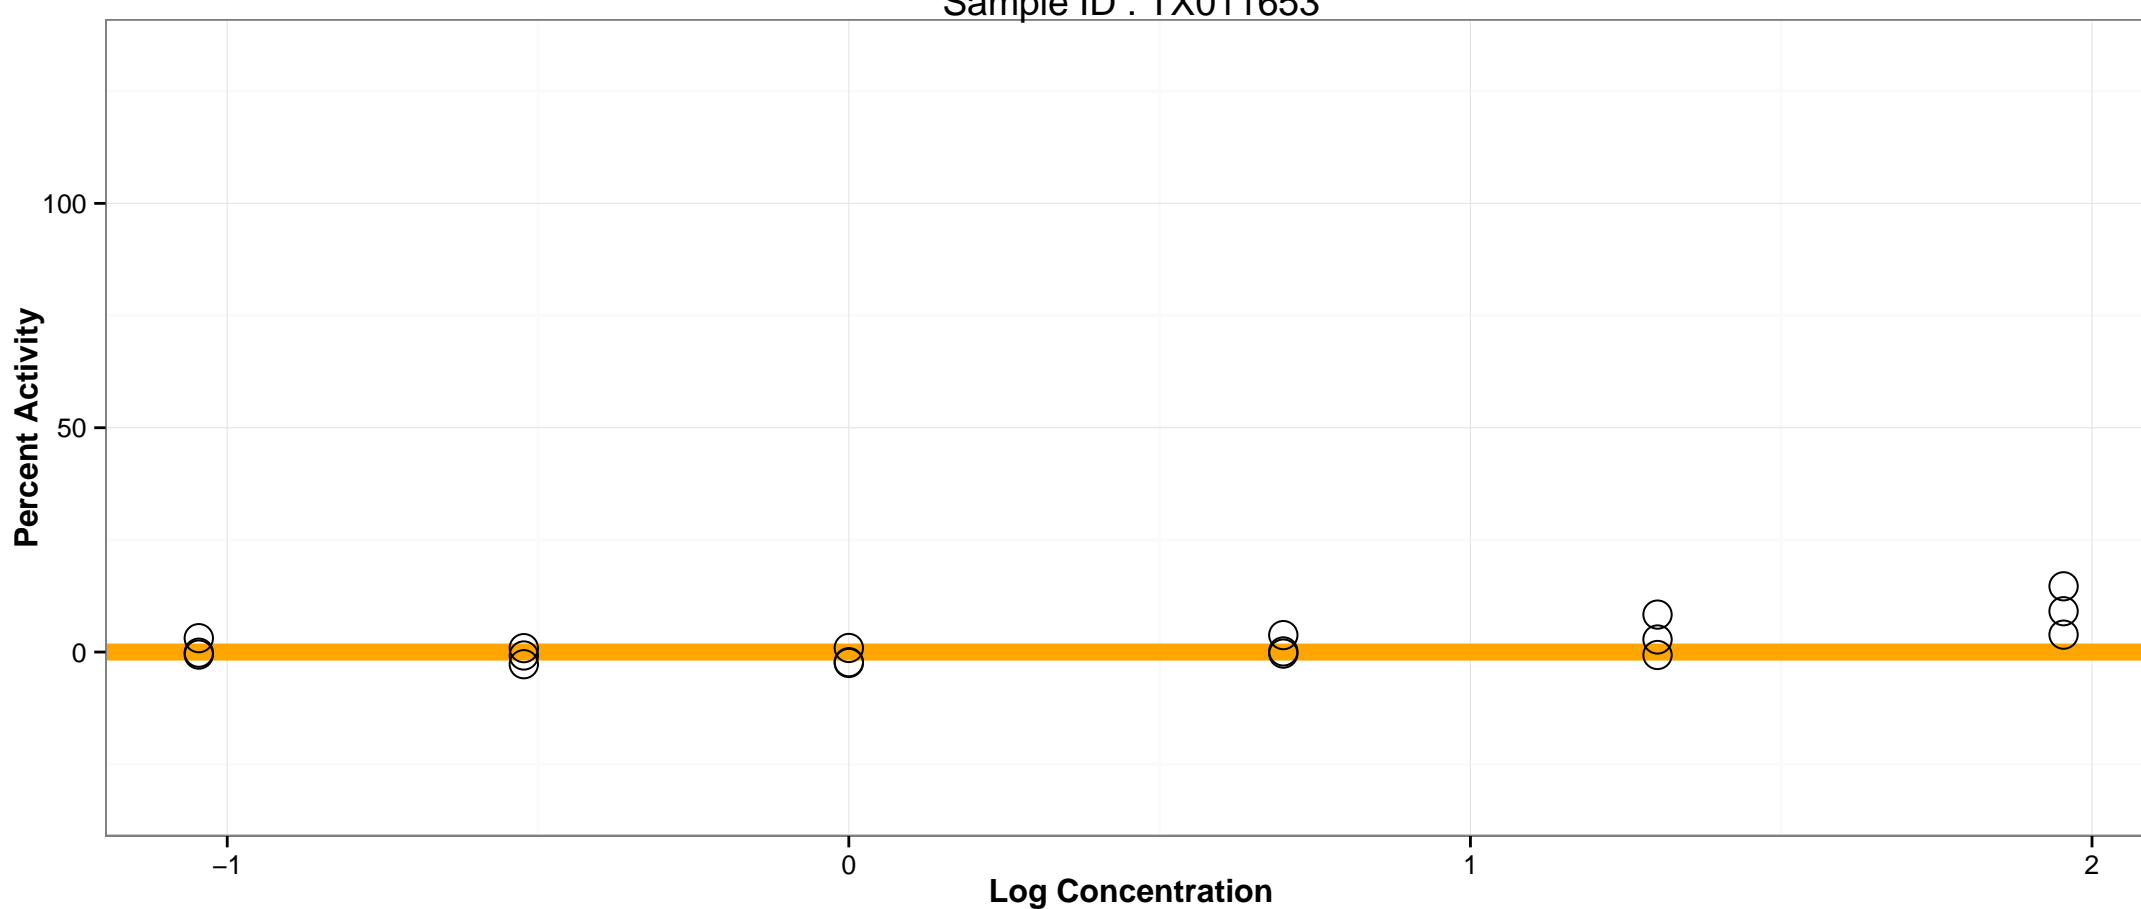

HILL MODEL

HILL MODEL: Not applicable

GAIN-LOSS MODEL

GNLS MODEL: Not applicable

|      | CNST   | HILL | GNLS |
|------|--------|------|------|
| AIC  | 106.31 | NA   | NA   |
| PROB | 1      | NA   | NA   |
| RMSE | 4.92   | NA   | NA   |

MAX\_MEAN : 9.23 MAX\_MED : 9.11 BMAD : 5.54  
COFF : 20 HIT-CALL : 0 FITC : 4 ACTP : 0  
FLAGS :

Assay ID 1848 (NHEERL\_Quantilum\_inhib\_2\_dn)  
Sample ID : TX011653

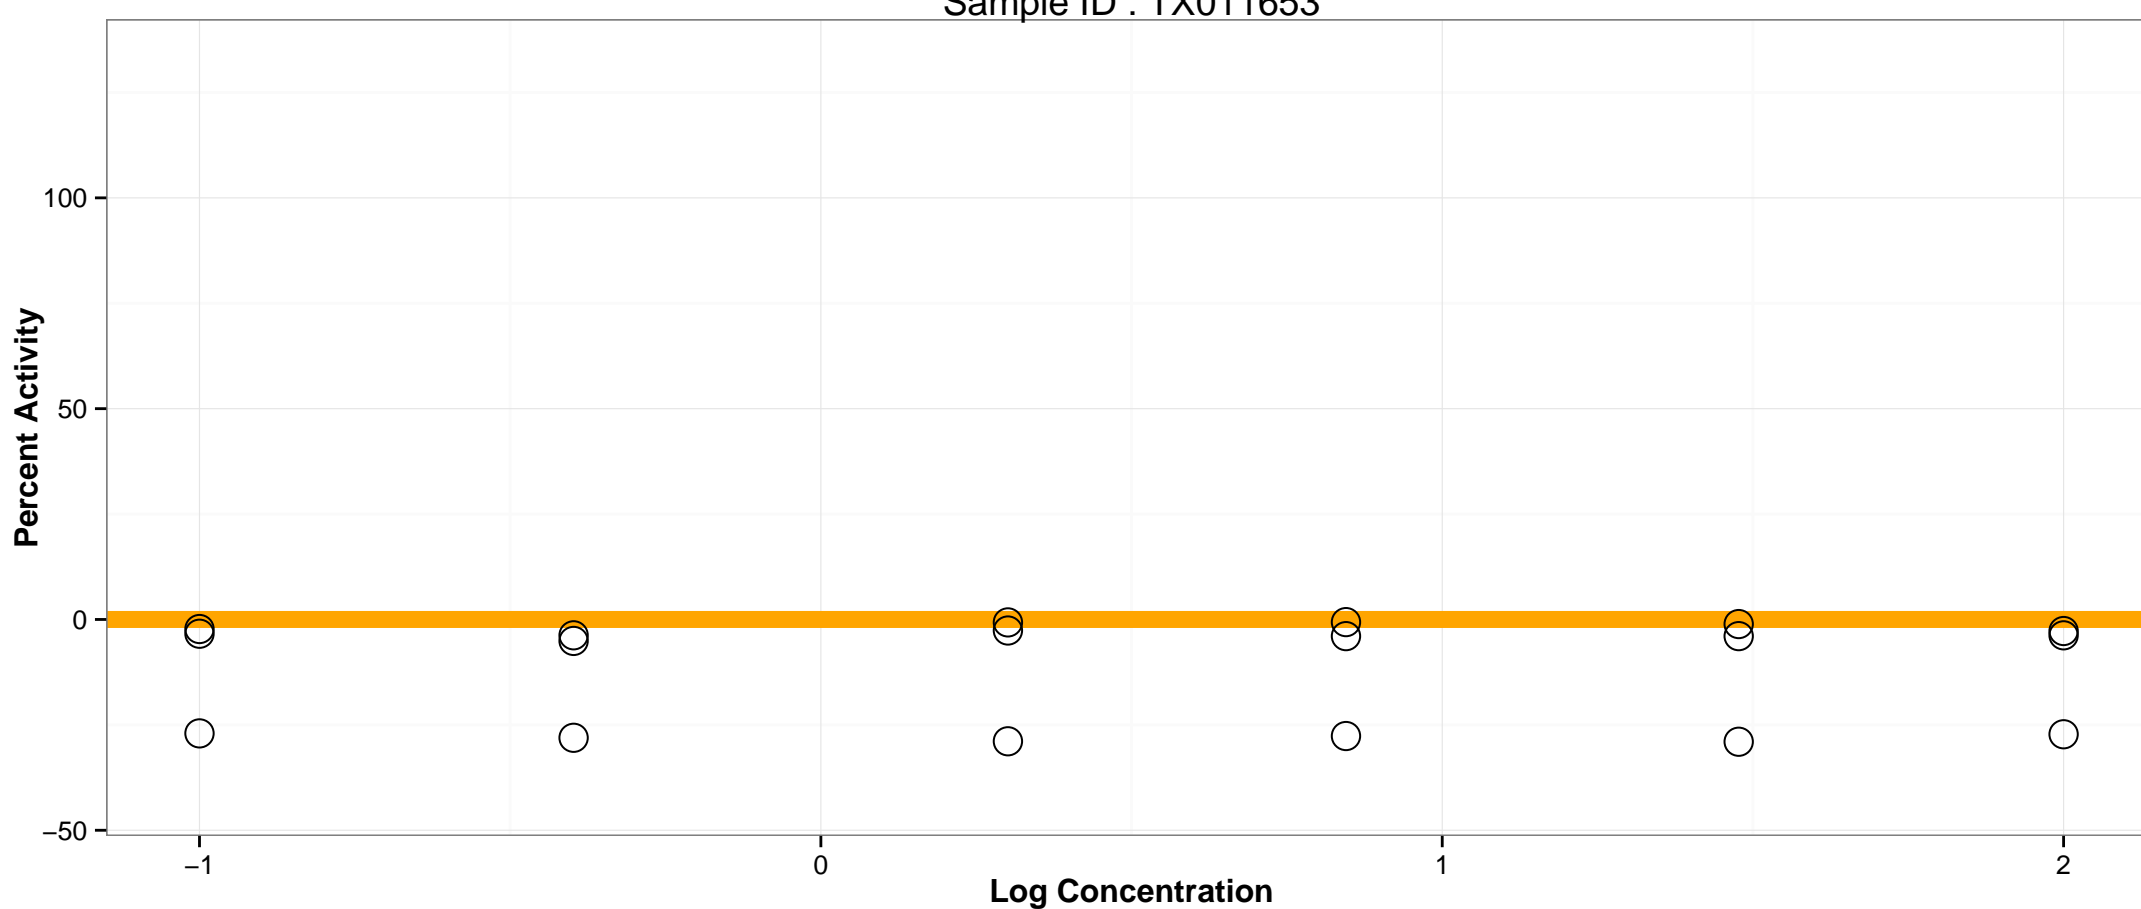

HILL MODEL

HILL MODEL: Not applicable

GAIN-LOSS MODEL

GNLS MODEL: Not applicable

|      | CNST  | HILL | GNLS |
|------|-------|------|------|
| AIC  | 153.5 | NA   | NA   |
| PROB | 1     | NA   | NA   |
| RMSE | 16.35 | NA   | NA   |

MAX\_MEAN : -10.7 MAX\_MED : -2.61 BMAD : 8.58  
COFF : 20 HIT-CALL : 0 FITC : 4 ACTP : 0  
FLAGS :

Chemical : Reserpine  
CAS : 50-55-5

Assay ID 1508 (NHEERL\_TPO\_AUR\_dn)  
Sample ID : TP0001441D04

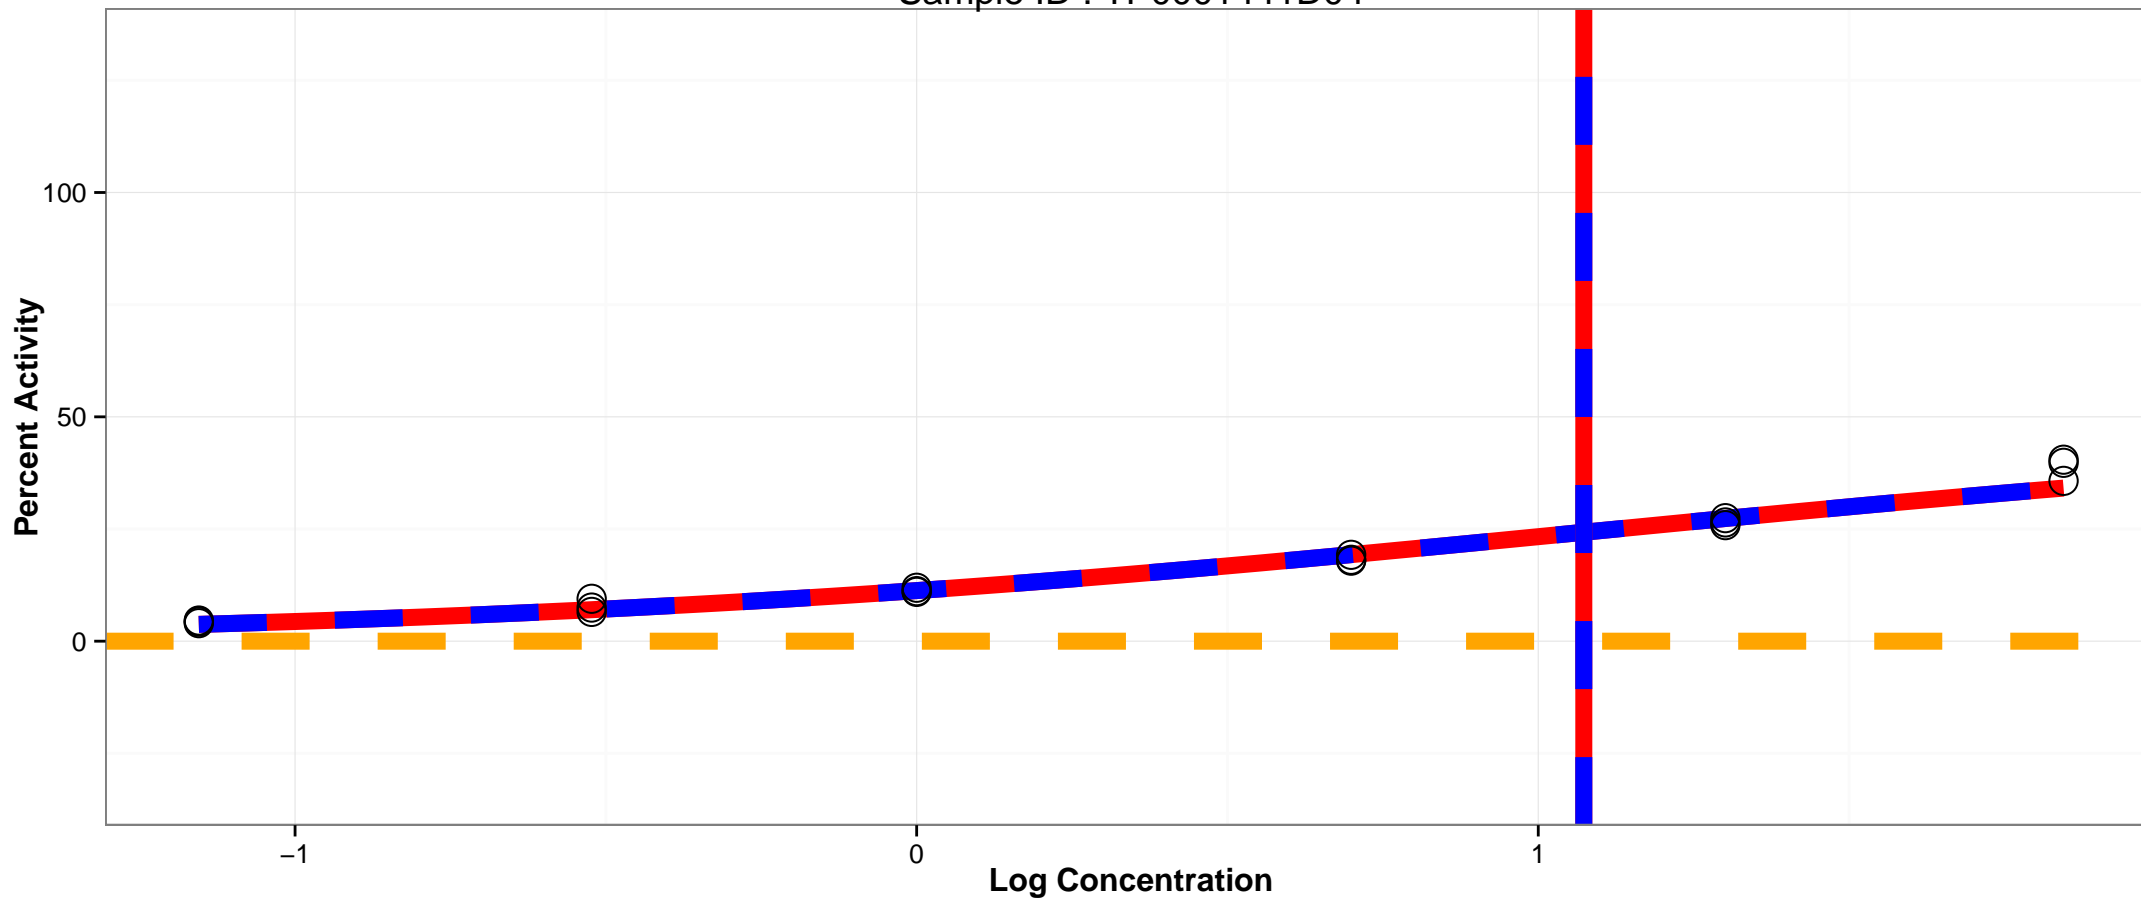

HILL MODEL

|     | tp   | ga   | gw     |
|-----|------|------|--------|
| val | 48.6 | 1.07 | 0.484  |
| sd  | 7.04 | 0.27 | 0.0458 |

GAIN-LOSS MODEL

|     | tp   | ga   | gw    | la   | lw   |
|-----|------|------|-------|------|------|
| val | 48.6 | 1.07 | 0.484 | 2.96 | 17.4 |
| sd  | NA   | NA   | NA    | NA   | NA   |

|      | CNST   | HILL  | GNLS  |
|------|--------|-------|-------|
| AIC  | 165.23 | 81.48 | 85.48 |
| PROB | 0      | 0.88  | 0.12  |
| RMSE | 21.44  | 2.22  | 2.22  |

MAX\_MEAN : 38.7 MAX\_MED : 39.8 BMAD : 5.69  
COFF : 20 HIT-CALL : 1 FITC : 42 ACTP : 1  
FLAGS :

Assay ID 1509 (NHEERL\_HEK293T\_CellTiterGLO)  
Sample ID : TP0001441D04

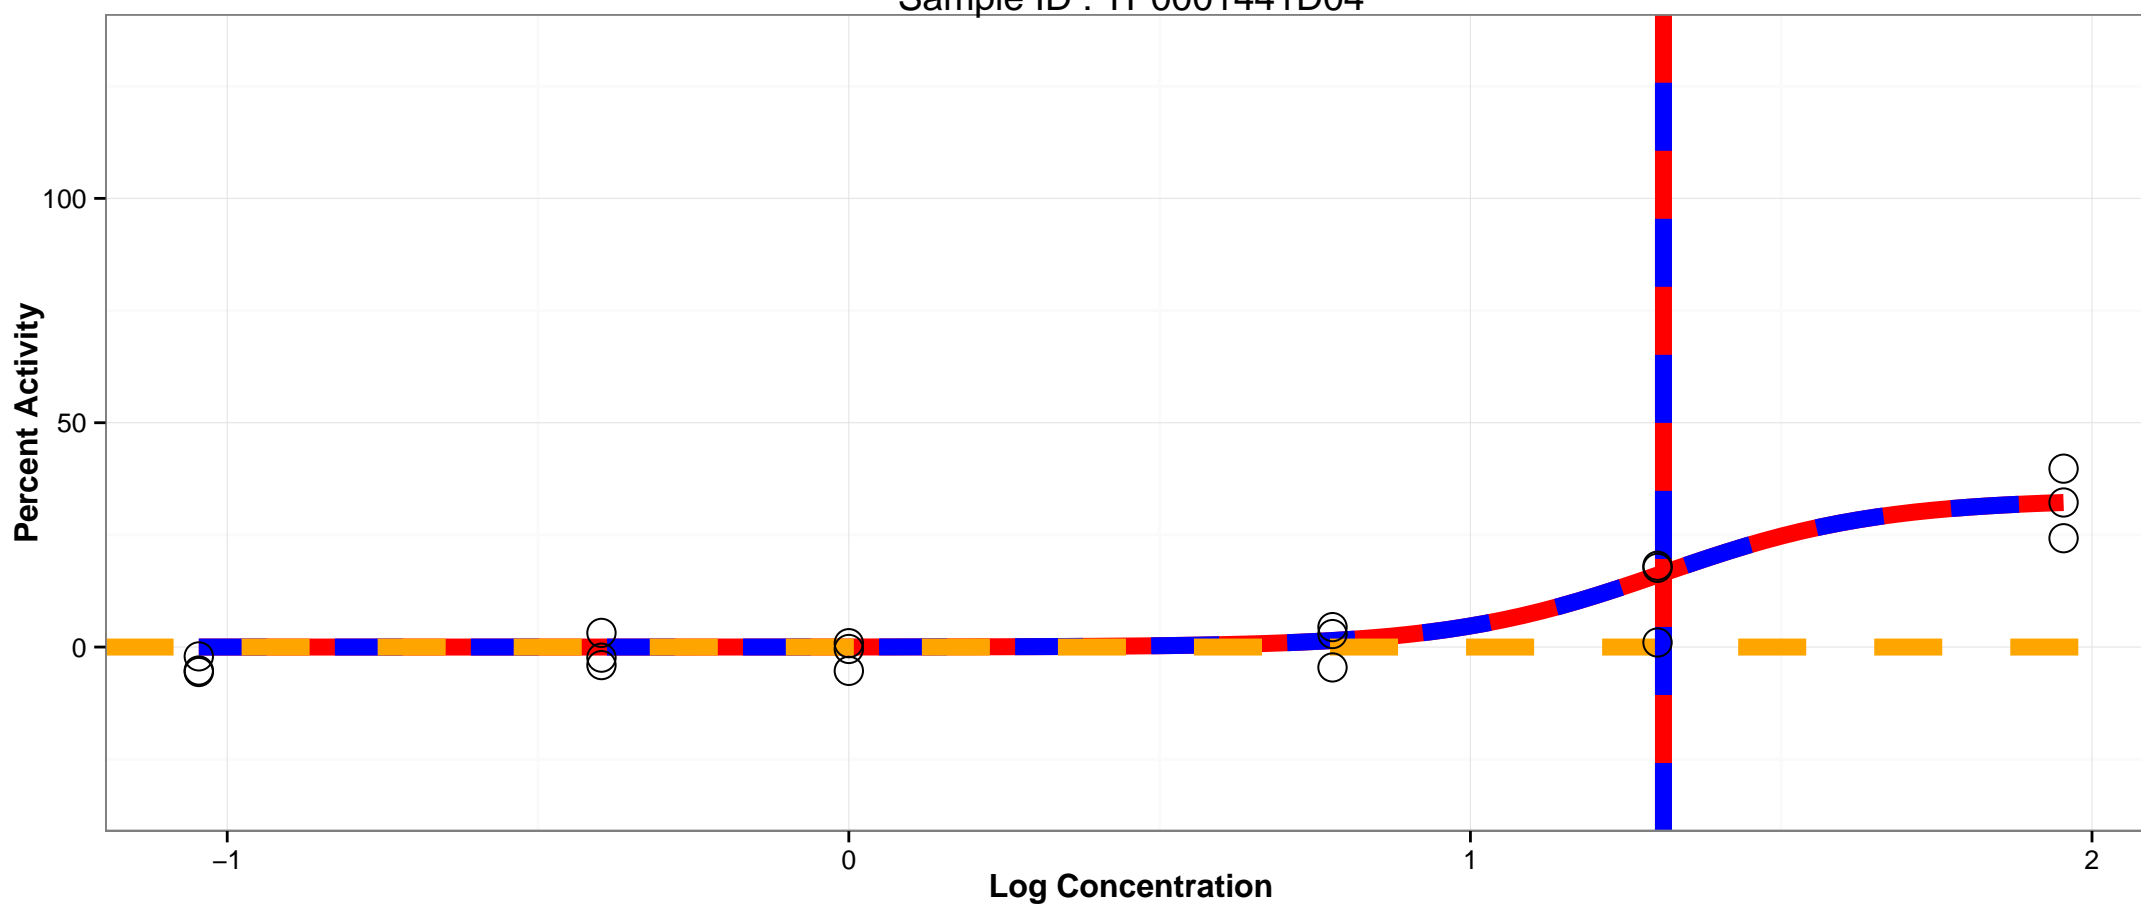

HILL MODEL

|     | tp   | ga     | gw   |
|-----|------|--------|------|
| val | 33   | 1.31   | 2.51 |
| sd  | 4.49 | 0.0862 | 1.67 |

GAIN-LOSS MODEL

|     | tp   | ga     | gw   | la   | lw   |
|-----|------|--------|------|------|------|
| val | 33   | 1.31   | 2.51 | 2.57 | 7.36 |
| sd  | 5.17 | 0.0901 | 1.67 | 262  | 3140 |

|      | CNST   | HILL   | GNLS   |
|------|--------|--------|--------|
| AIC  | 147.06 | 119.14 | 123.14 |
| PROB | 0      | 0.88   | 0.12   |
| RMSE | 14.95  | 5.39   | 5.39   |

MAX\_MEAN : 32.1 MAX\_MED : 32.2 BMAD : 5.54  
COFF : 20 HIT-CALL : 1 FITC : 41 ACTP : 1  
FLAGS :

Assay ID 1848 (NHEERL\_Quantilum\_inhib\_2\_dn)  
Sample ID : TP0001441D04

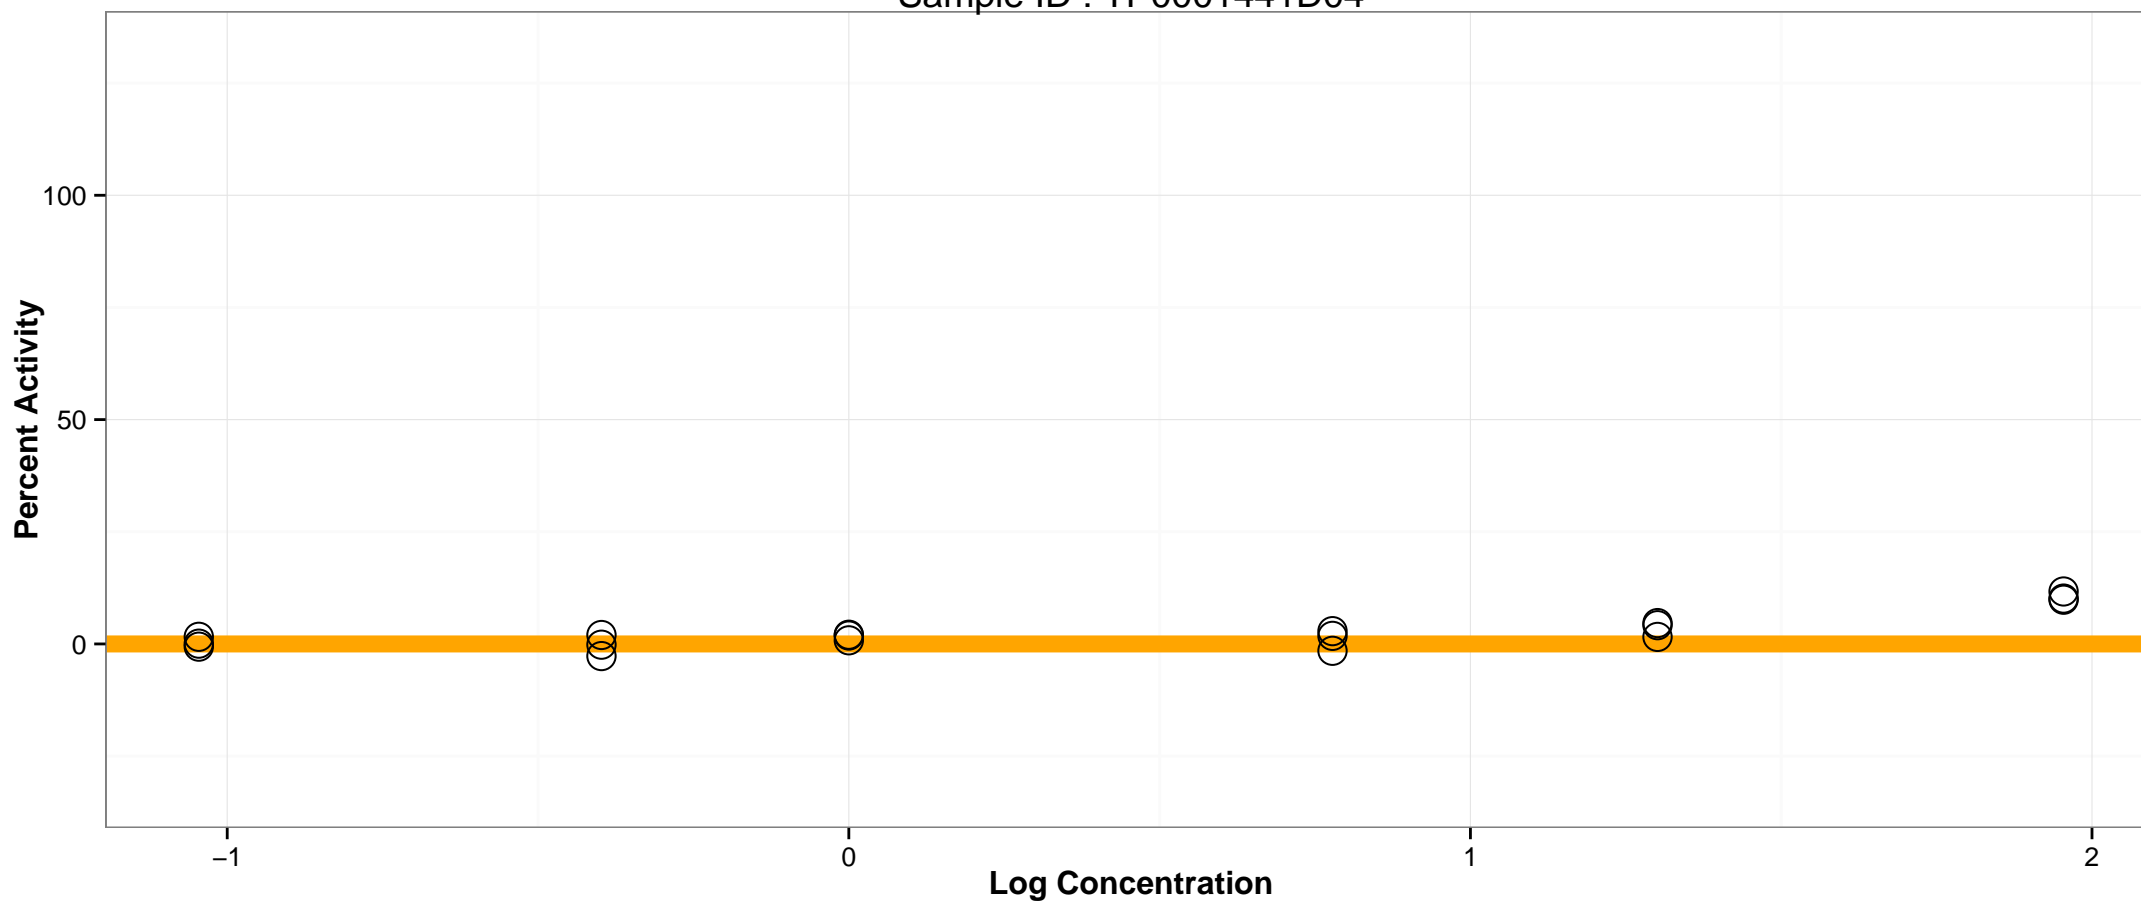

HILL MODEL

HILL MODEL: Not applicable

GAIN-LOSS MODEL

GNLS MODEL: Not applicable

|      | CNST   | HILL | GNLS |
|------|--------|------|------|
| AIC  | 107.28 | NA   | NA   |
| PROB | 1      | NA   | NA   |
| RMSE | 4.8    | NA   | NA   |

MAX\_MEAN : 10.6 MAX\_MED : 10.1 BMAD : 8.58  
COFF : 20 HIT-CALL : 0 FITC : 4 ACTP : 0  
FLAGS :

Chemical : Reserpine  
CAS : 50-55-5

Assay ID 1508 (NHEERL\_TPO\_AUR\_dn)  
Sample ID : TX008582

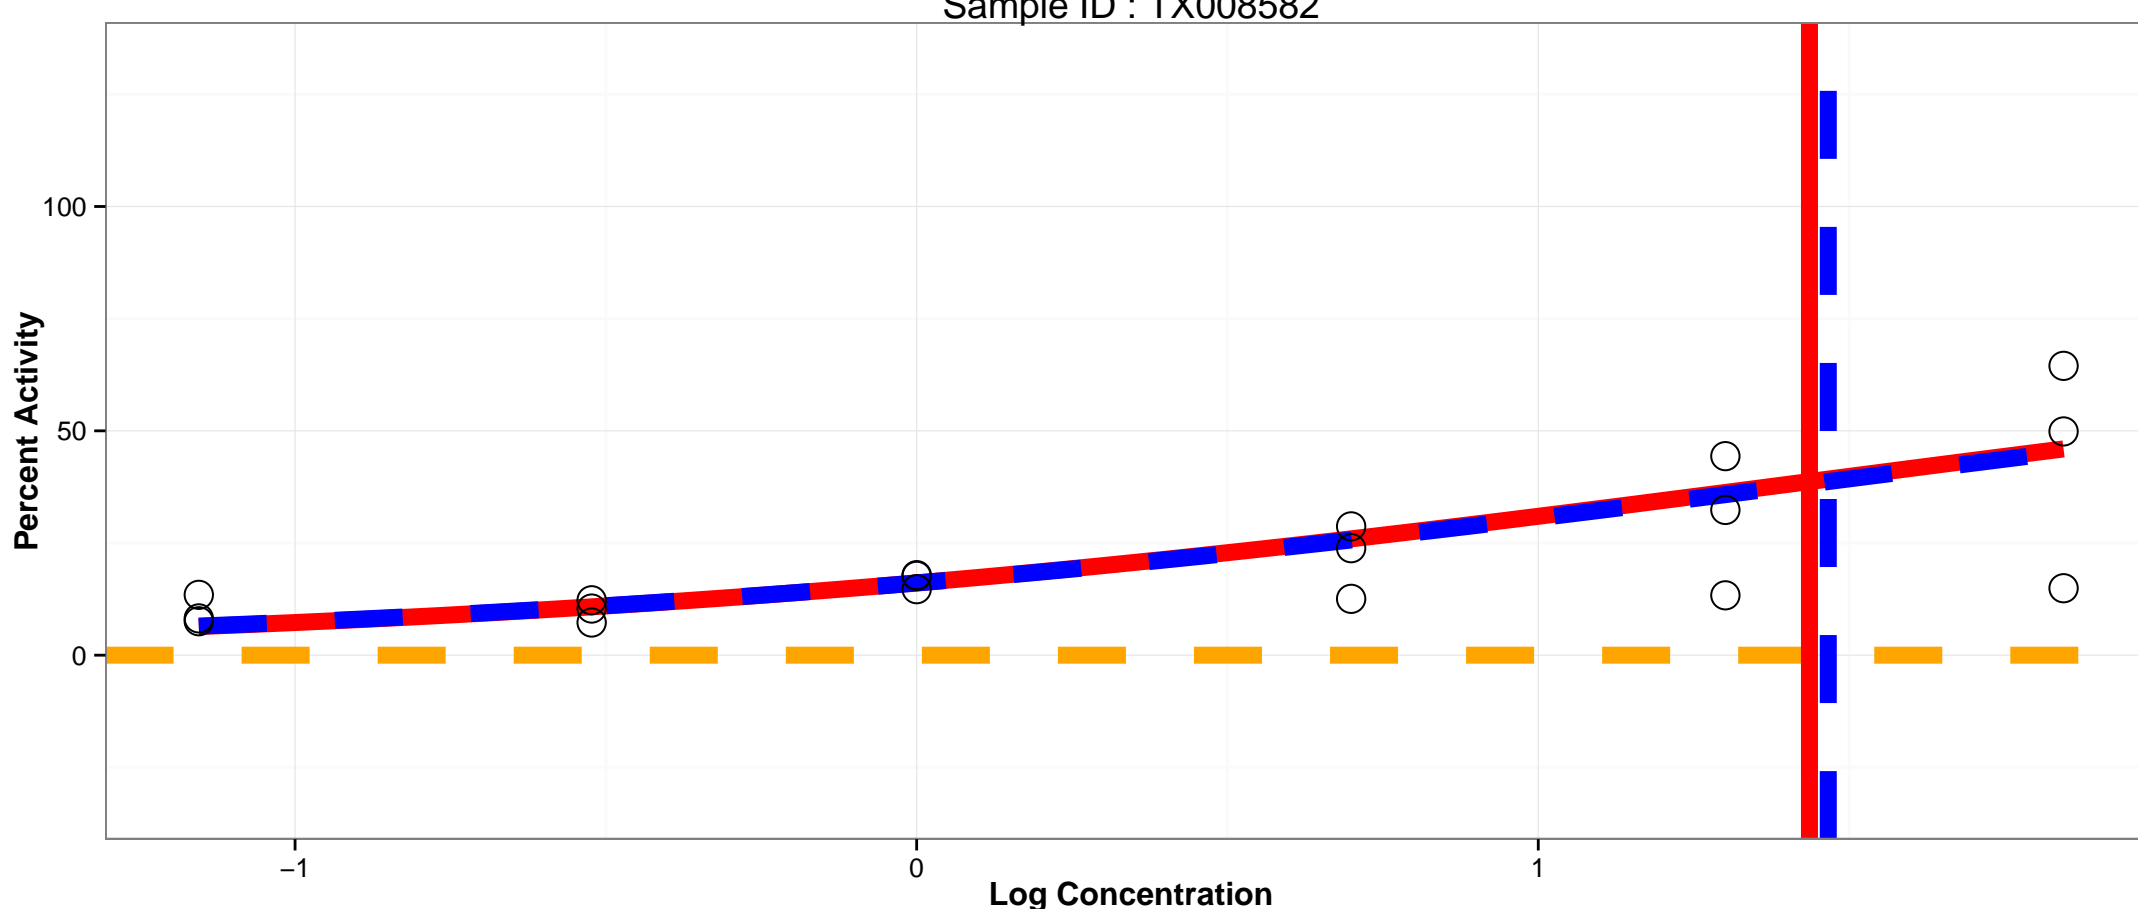

HILL MODEL

|     | tp   | ga   | gw    |
|-----|------|------|-------|
| val | 77.4 | 1.44 | 0.404 |
| sd  | 44   | 1.13 | 0.111 |

GAIN-LOSS MODEL

|     | tp   | ga   | gw    | la   | lw    |
|-----|------|------|-------|------|-------|
| val | 77.4 | 1.47 | 0.396 | 3.14 | 7.83  |
| sd  | 38.5 | 1.01 | 0.106 | 8440 | 50900 |

|      | CNST   | HILL   | GNLS   |
|------|--------|--------|--------|
| AIC  | 172.15 | 141.33 | 145.31 |
| PROB | 0      | 0.88   | 0.12   |
| RMSE | 26.96  | 11.04  | 10.95  |

MAX\_MEAN : 43.1 MAX\_MED : 49.9 BMAD : 5.69  
COFF : 20 HIT-CALL : 1 FITC : 42 ACTP : 1  
FLAGS :

Assay ID 1509 (NHEERL\_HEK293T\_CellTiterGLO)  
Sample ID : TX008582

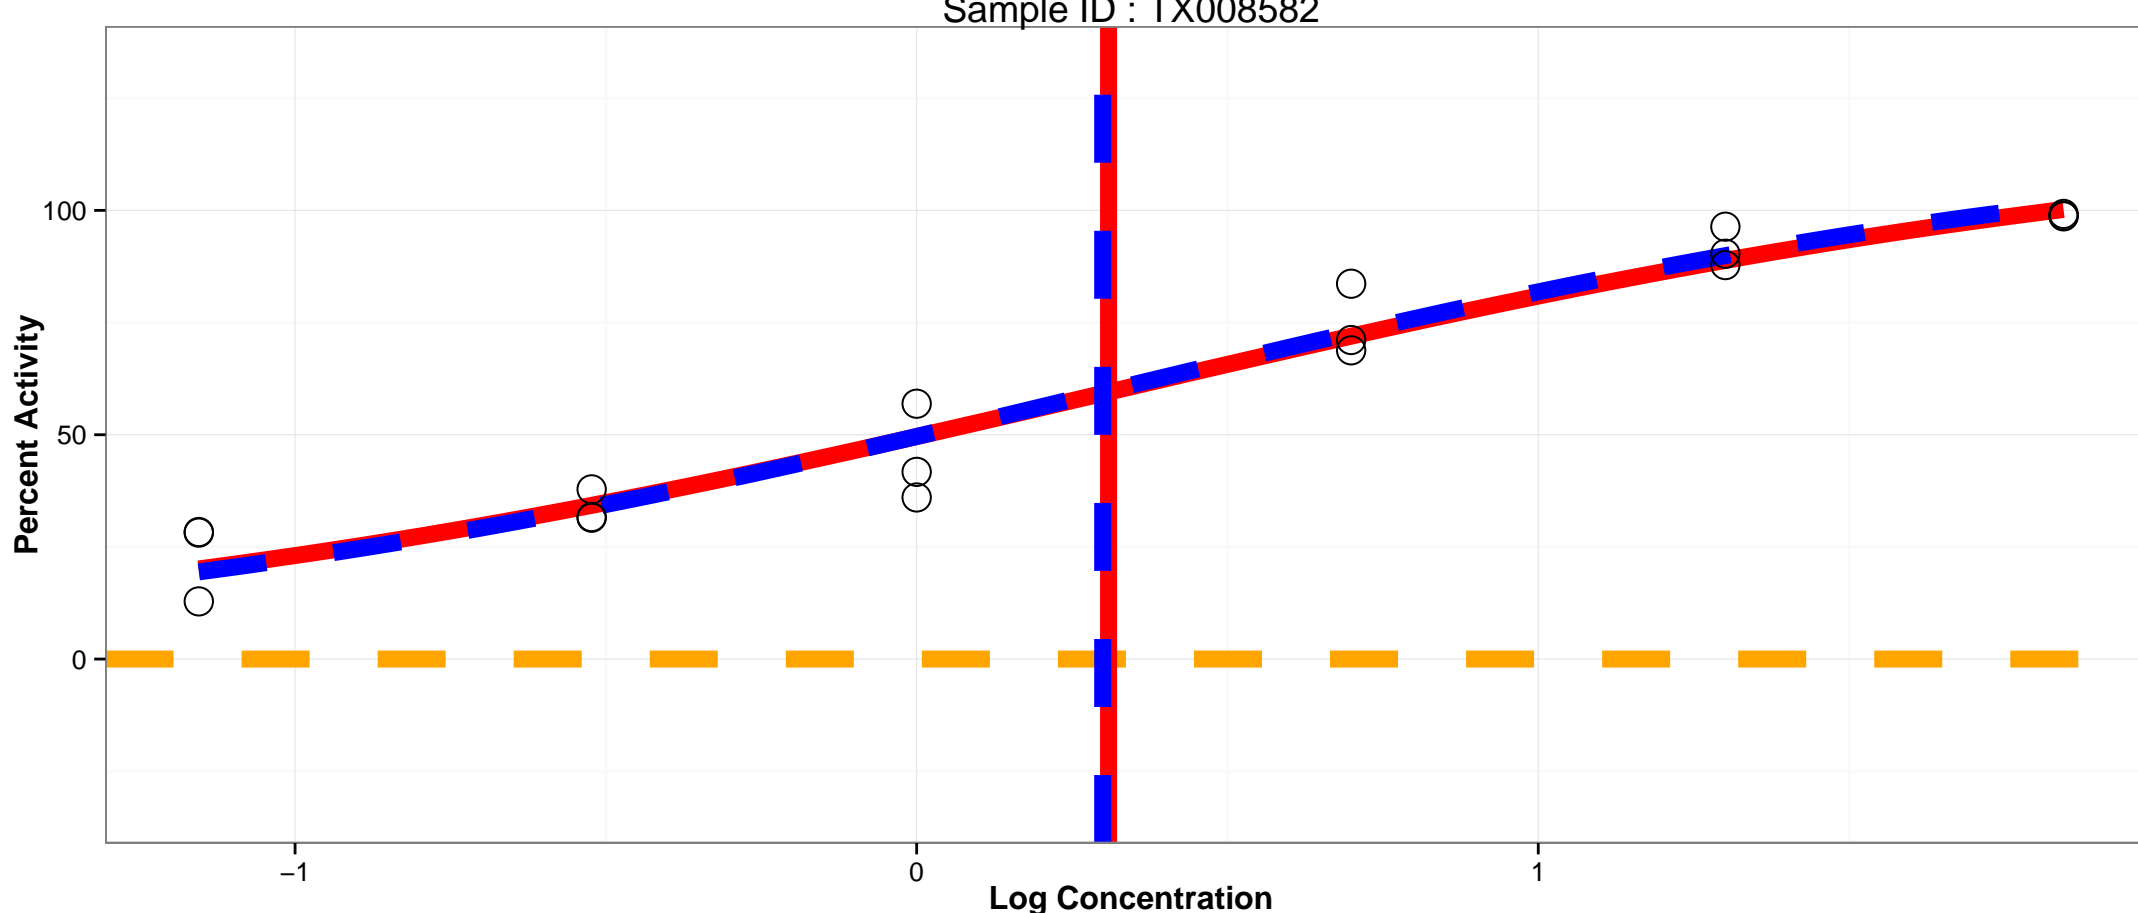

HILL MODEL

|     | tp   | ga    | gw     |
|-----|------|-------|--------|
| val | 119  | 0.309 | 0.473  |
| sd  | 11.9 | 0.241 | 0.0828 |

GAIN-LOSS MODEL

|     | tp  | ga    | gw    | la   | lw   |
|-----|-----|-------|-------|------|------|
| val | 119 | 0.299 | 0.488 | 1.94 | 17.4 |
| sd  | NA  | NA    | NA    | NA   | NA   |

|      | CNST   | HILL   | GNLS   |
|------|--------|--------|--------|
| AIC  | 207.96 | 126.92 | 130.52 |
| PROB | 0      | 0.86   | 0.14   |
| RMSE | 67.81  | 6.35   | 6.28   |

MAX\_MEAN : 98.9 MAX\_MED : 98.8 BMAD : 5.54  
COFF : 20 HIT-CALL : 1 FITC : 42 ACTP : 1  
FLAGS :

Assay ID 1848 (NHEERL\_Quantilum\_inhib\_2\_dn)  
Sample ID : TX008582

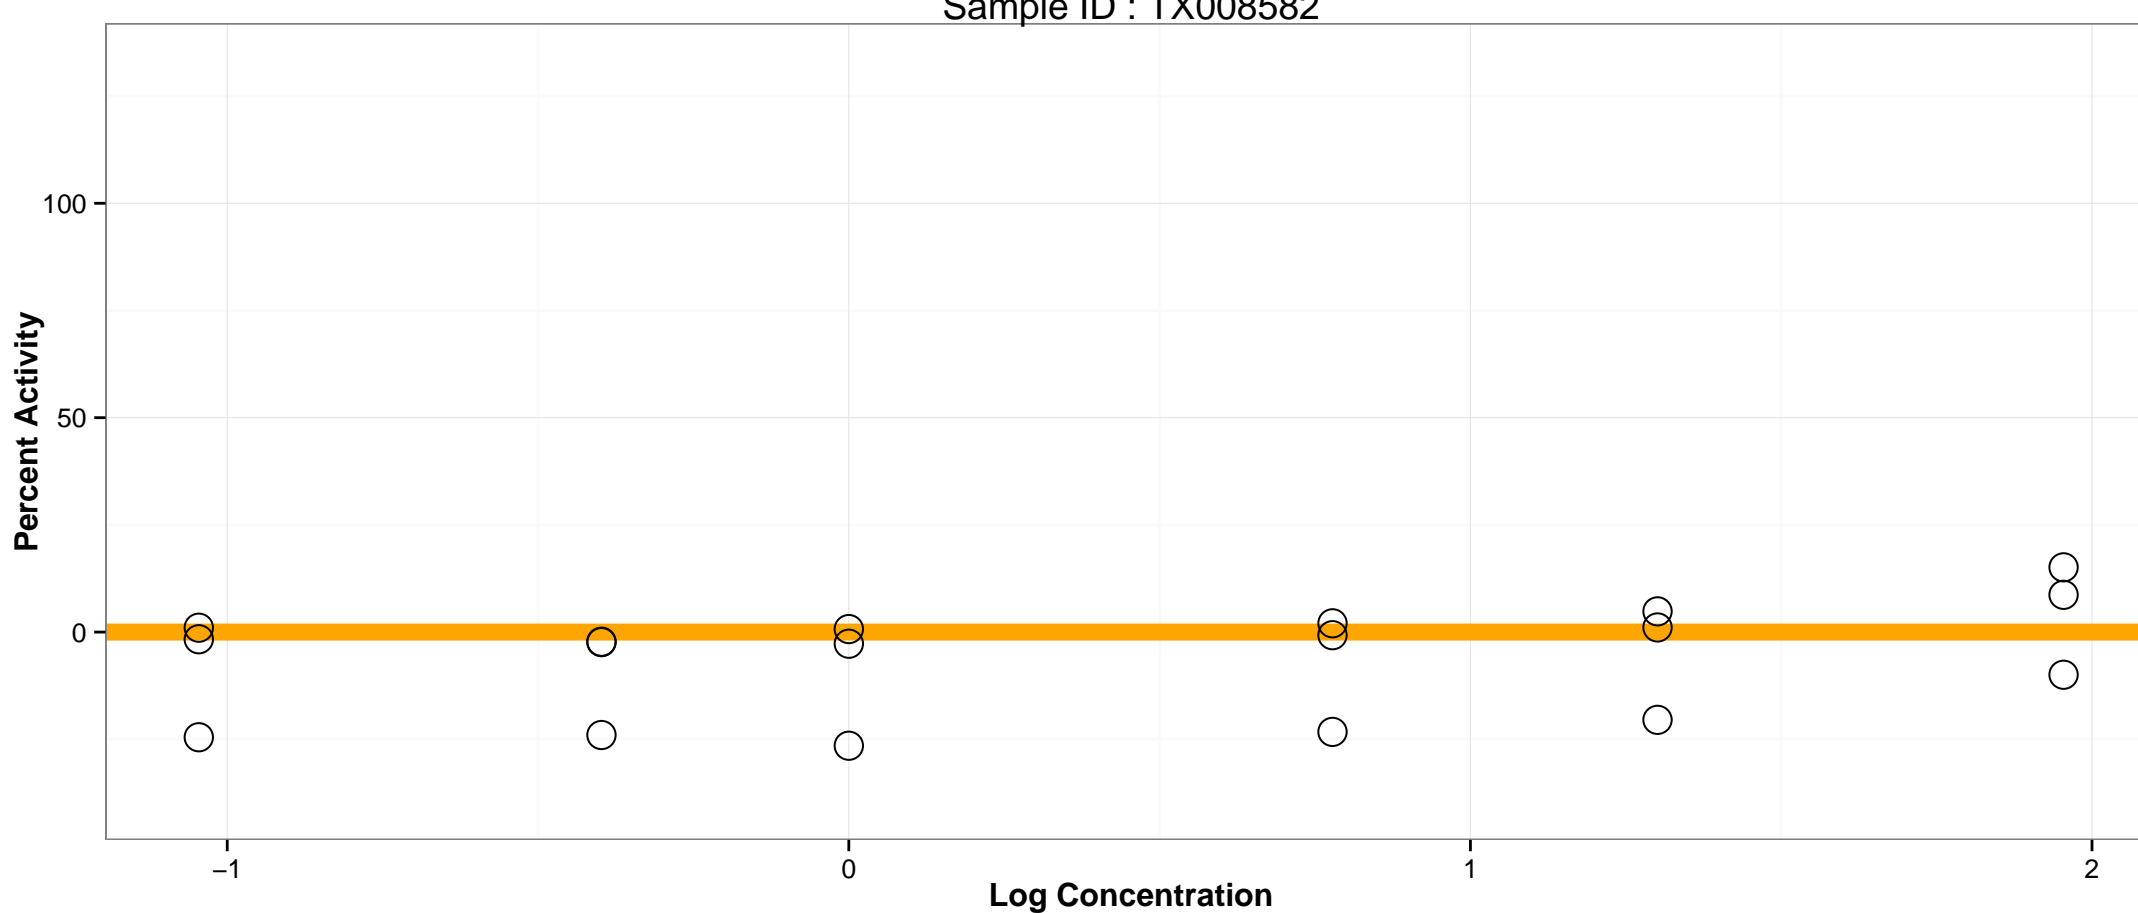

HILL MODEL

HILL MODEL: Not applicable

GAIN-LOSS MODEL

GNLS MODEL: Not applicable

|      | CNST  | HILL | GNLS |
|------|-------|------|------|
| AIC  | 147   | NA   | NA   |
| PROB | 1     | NA   | NA   |
| RMSE | 13.52 | NA   | NA   |

MAX\_MEAN : 4.62 MAX\_MED : 8.7 BMAD : 8.58  
COFF : 20 HIT-CALL : 0 FITC : 4 ACTP : 0  
FLAGS :

Chemical : 2-(2H-Benzotriazol-2-yl)-4-methylphenol  
CAS : 2440-22-4

Assay ID 1508 (NHEERL\_TPO\_AUR\_dn)  
Sample ID : TP0001441D05

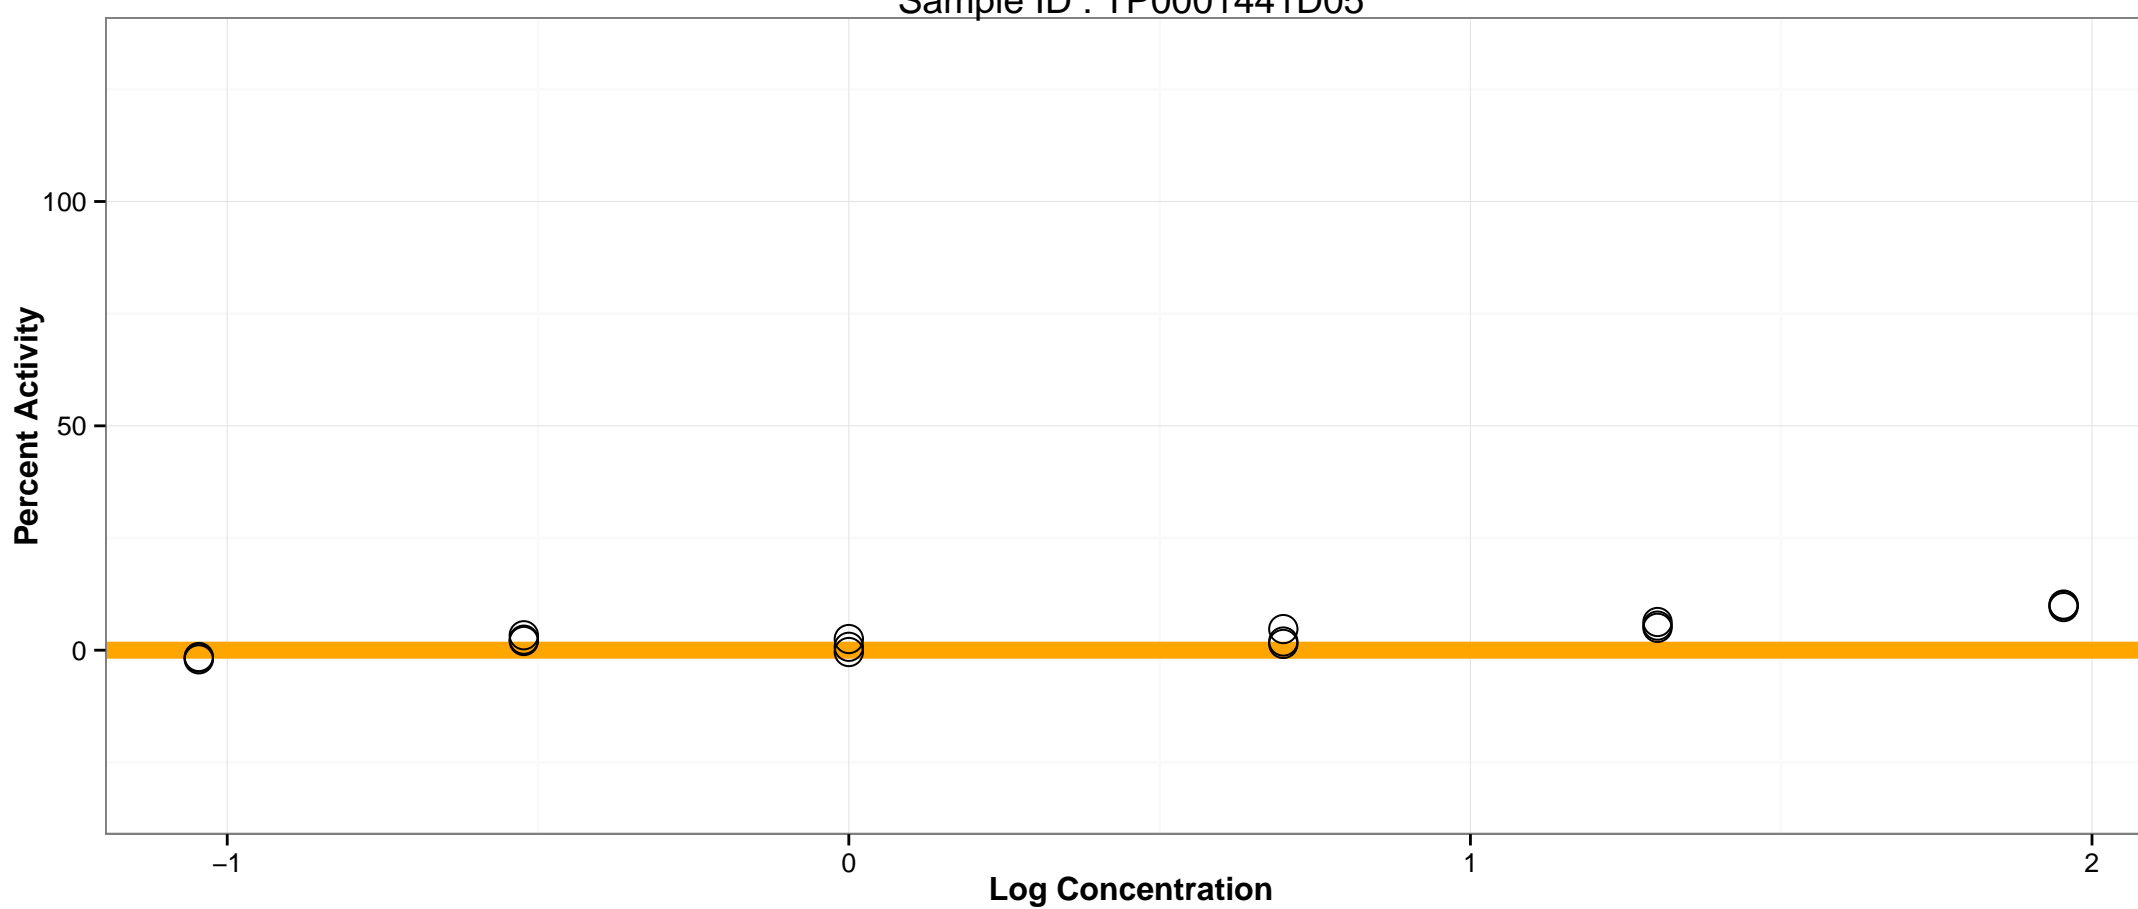

HILL MODEL

HILL MODEL: Not applicable

GAIN-LOSS MODEL

GNLS MODEL: Not applicable

|      | CNST   | HILL | GNLS |
|------|--------|------|------|
| AIC  | 111.88 | NA   | NA   |
| PROB | 1      | NA   | NA   |
| RMSE | 5.03   | NA   | NA   |

MAX\_MEAN : 9.94 MAX\_MED : 10 BMAD : 5.69  
COFF : 20 HIT-CALL : 0 FITC : 4 ACTP : 0  
FLAGS :

Assay ID 1509 (NHEERL\_HEK293T\_CellTiterGLO)  
Sample ID : TP0001441D05

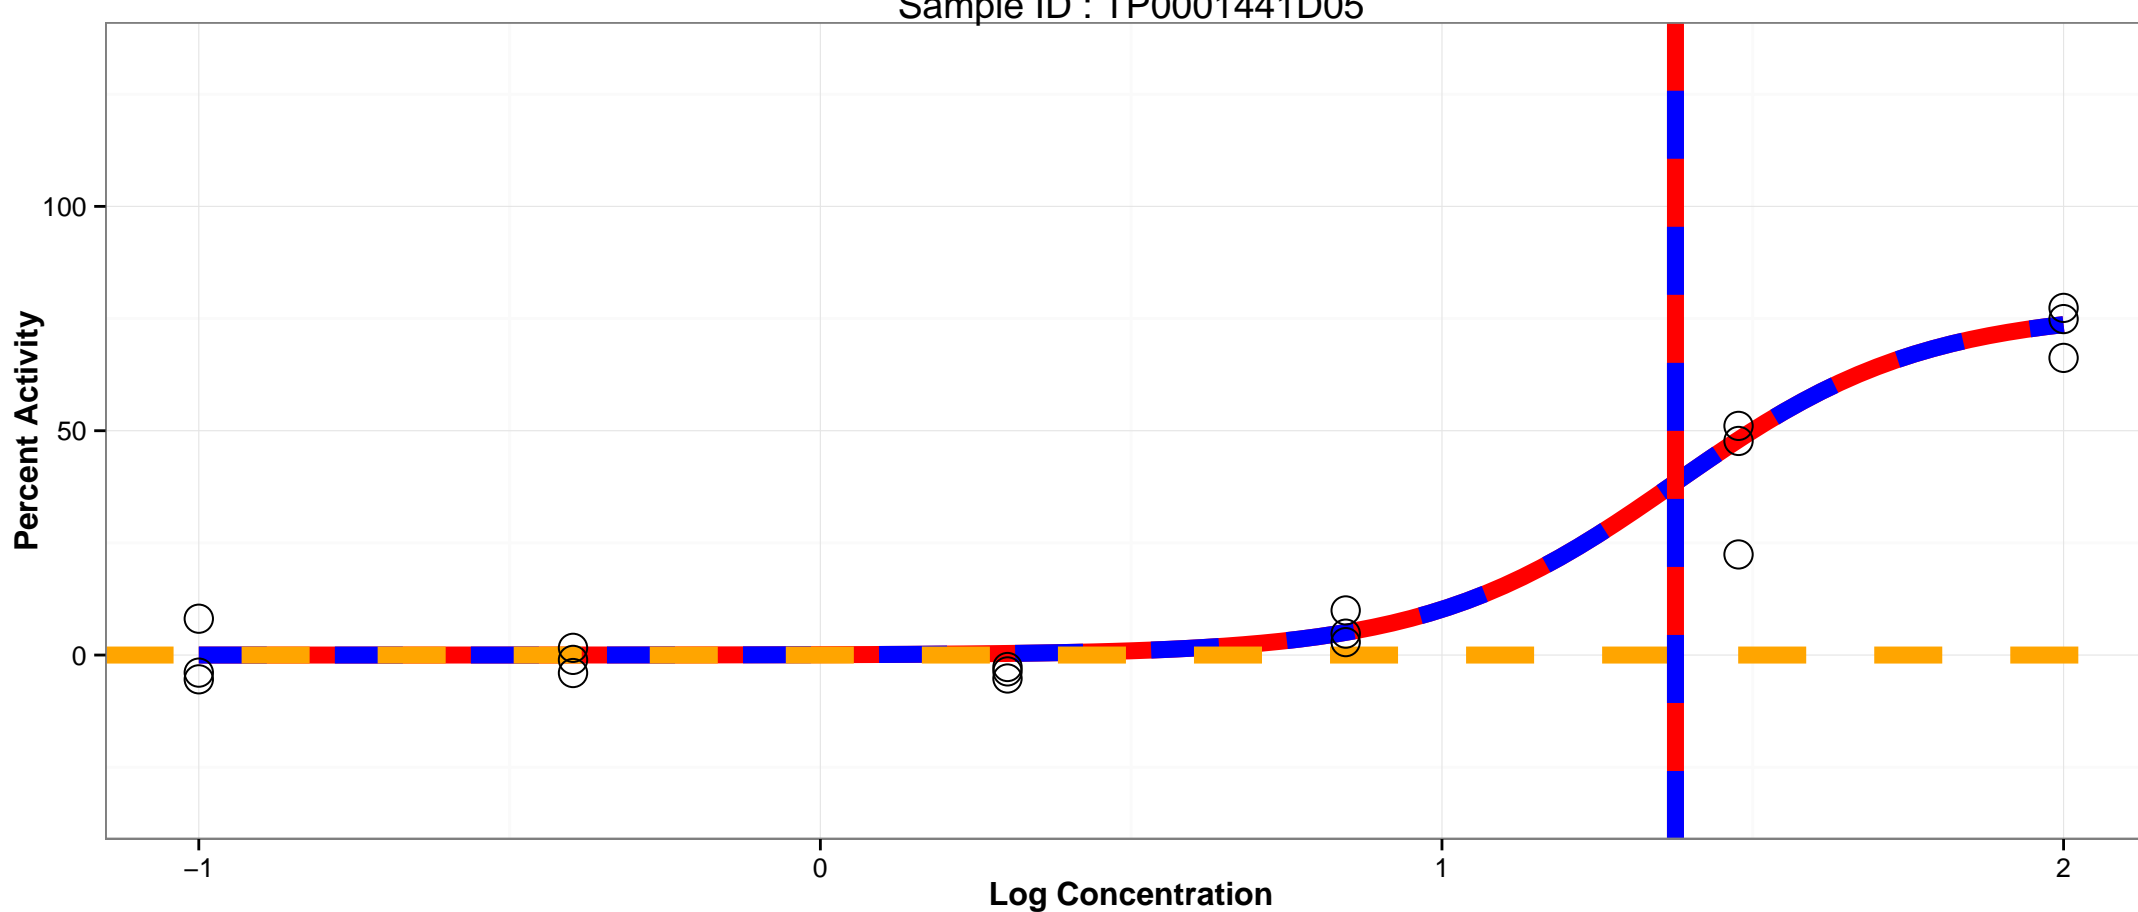

HILL MODEL

|     | tp   | ga     | gw    |
|-----|------|--------|-------|
| val | 76.9 | 1.38   | 2.17  |
| sd  | 4.32 | 0.0443 | 0.399 |

GAIN-LOSS MODEL

|     | tp   | ga     | gw   | la    | lw     |
|-----|------|--------|------|-------|--------|
| val | 76.9 | 1.38   | 2.17 | 3.67  | 6.19   |
| sd  | 4.32 | 0.0443 | 0.4  | 56500 | 210000 |

|      | CNST   | HILL   | GNLS   |
|------|--------|--------|--------|
| AIC  | 178.44 | 123.63 | 127.63 |
| PROB | 0      | 0.88   | 0.12   |
| RMSE | 34.71  | 7.26   | 7.26   |

MAX\_MEAN : 72.8 MAX\_MED : 74.9 BMAD : 5.54  
COFF : 20 HIT-CALL : 1 FITC : 41 ACTP : 1  
FLAGS :

Assay ID 1848 (NHEERL\_Quantilum\_inhib\_2\_dn)  
Sample ID : TP0001441D05

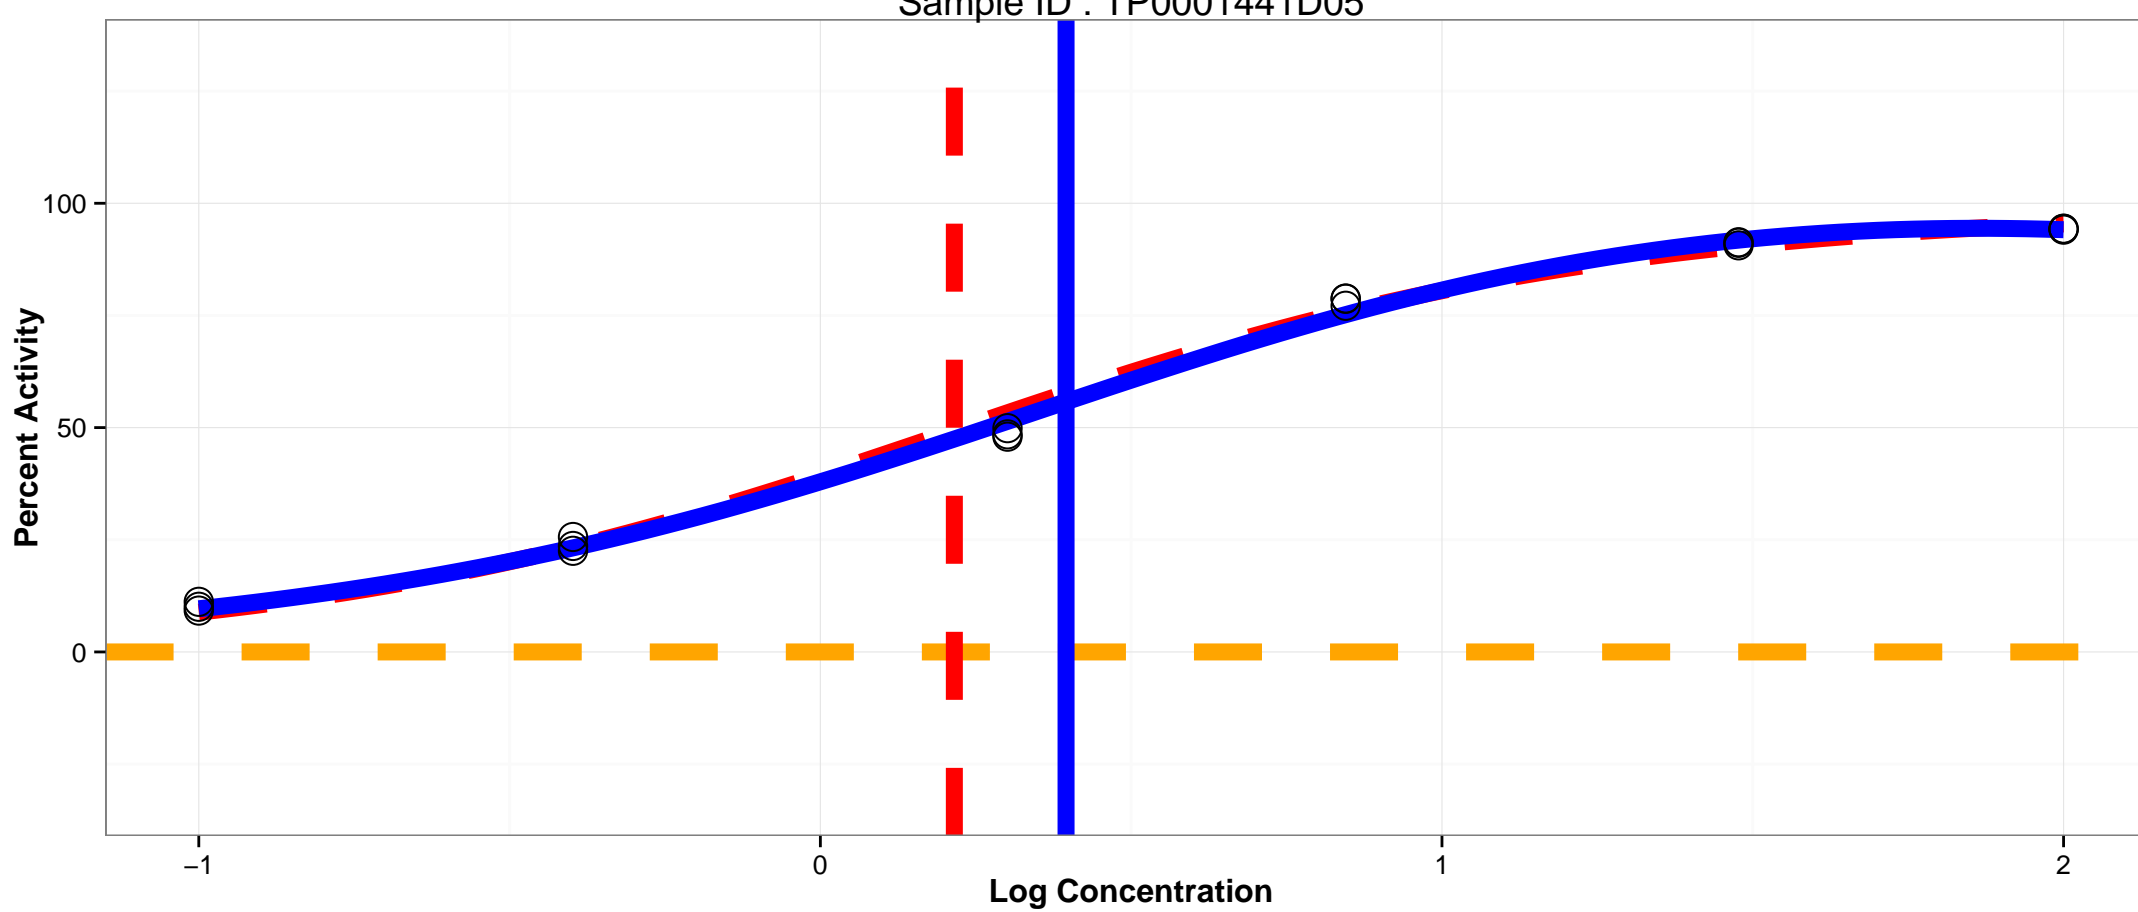

HILL MODEL

|     | tp   | ga     | gw     |
|-----|------|--------|--------|
| val | 98.6 | 0.216  | 0.827  |
| sd  | 1.55 | 0.0458 | 0.0413 |

GAIN-LOSS MODEL

|     | tp   | ga     | gw     | la    | lw    |
|-----|------|--------|--------|-------|-------|
| val | 113  | 0.395  | 0.739  | 3.54  | 0.577 |
| sd  | 6.07 | 0.0434 | 0.0308 | 0.778 | 0.401 |

|      | CNST   | HILL  | GNLS  |
|------|--------|-------|-------|
| AIC  | 207.03 | 90.75 | 86.39 |
| PROB | 0      | 0.1   | 0.9   |
| RMSE | 66.28  | 2.37  | 1.87  |

MAX\_MEAN : 94.3 MAX\_MED : 94.3 BMAD : 8.58  
COFF : 20 HIT-CALL : 1 FITC : 51 ACTP : 1  
FLAGS :

Chemical : 2(3H)-Benzothiazolone  
CAS : 934-34-9

Assay ID 1508 (NHEERL\_TPO\_AUR\_dn)  
Sample ID : TP0001441D06

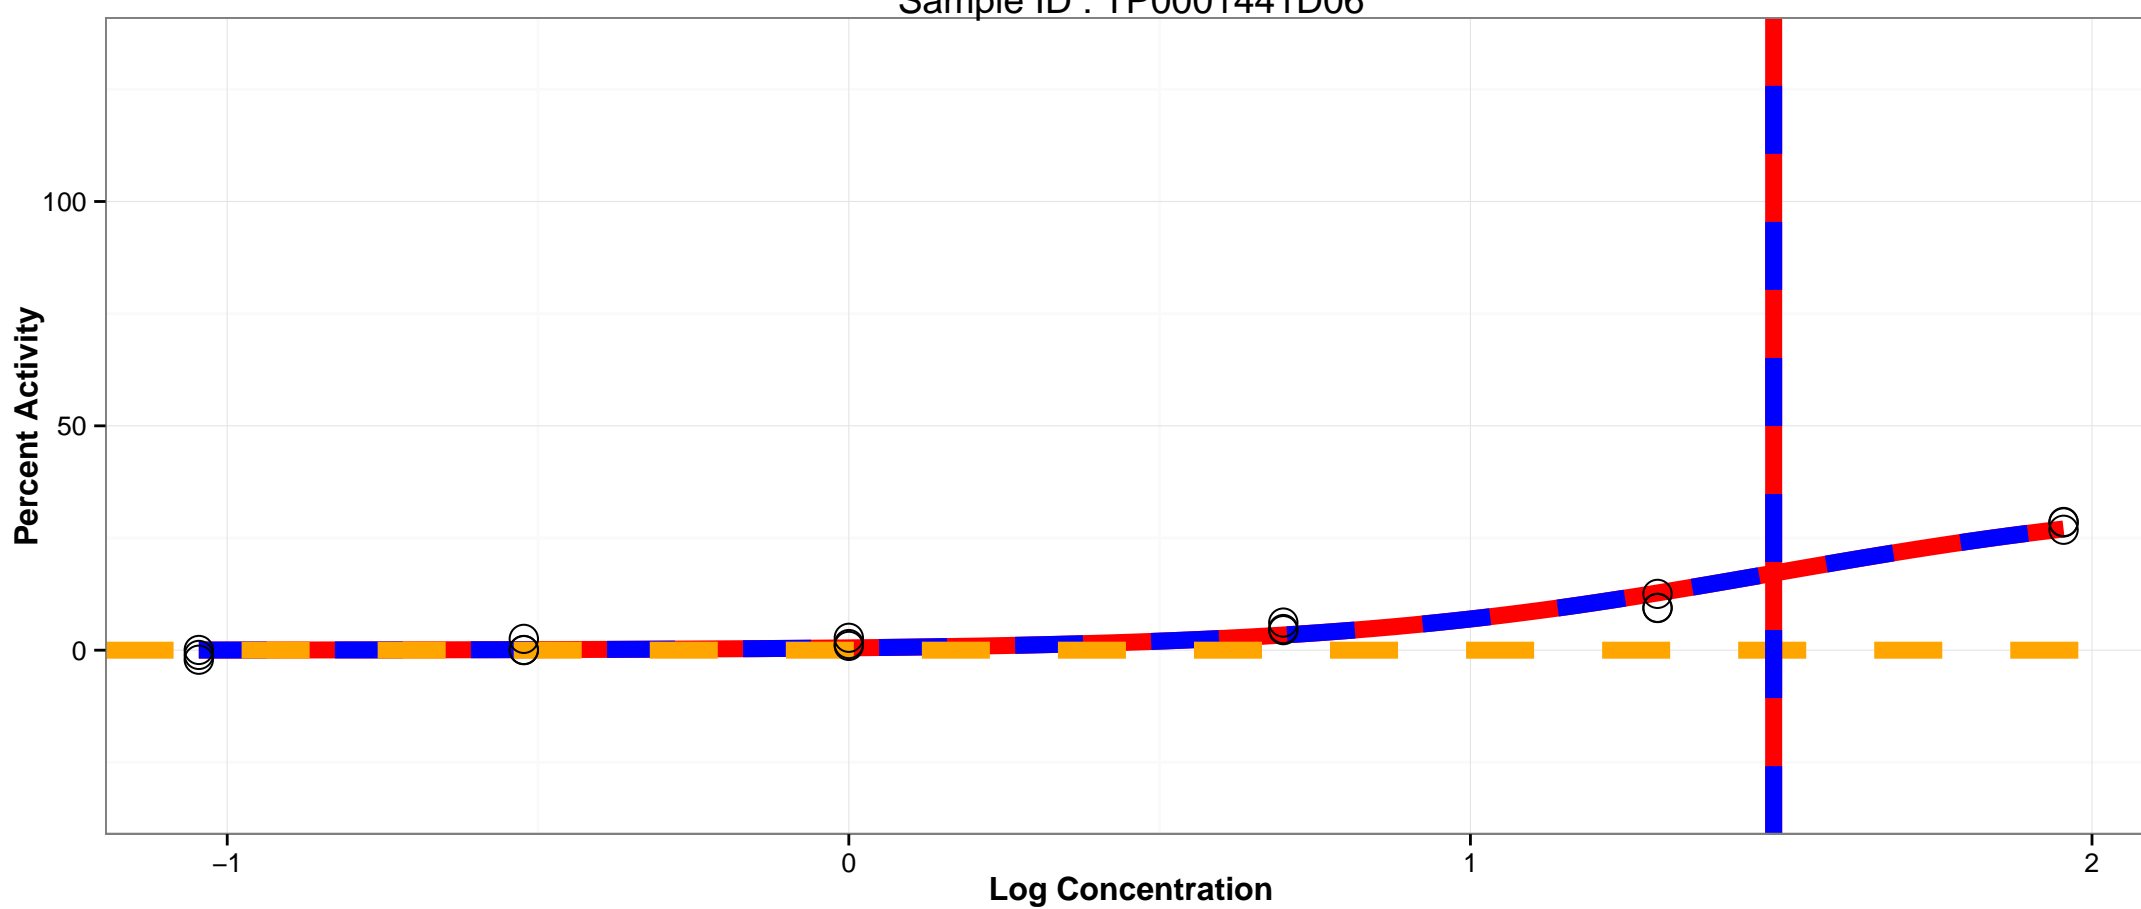

HILL MODEL

|     | tp   | ga    | gw    |
|-----|------|-------|-------|
| val | 34.3 | 1.49  | 1.22  |
| sd  | 4.03 | 0.105 | 0.251 |

GAIN-LOSS MODEL

|     | tp   | ga    | gw    | la   | lw    |
|-----|------|-------|-------|------|-------|
| val | 34.3 | 1.49  | 1.22  | 2.63 | 15    |
| sd  | 4.03 | 0.105 | 0.251 | 1060 | 23400 |

|      | CNST   | HILL  | GNLS  |
|------|--------|-------|-------|
| AIC  | 140.47 | 80.84 | 84.84 |
| PROB | 0      | 0.88  | 0.12  |
| RMSE | 12.45  | 1.75  | 1.75  |

MAX\_MEAN : 28 MAX\_MED : 28.5 BMAD : 5.69  
COFF : 20 HIT-CALL : 1 FITC : 42 ACTP : 1  
FLAGS : 6

Assay ID 1509 (NHEERL\_HEK293T\_CellTiterGLO)  
Sample ID : TP0001441D06

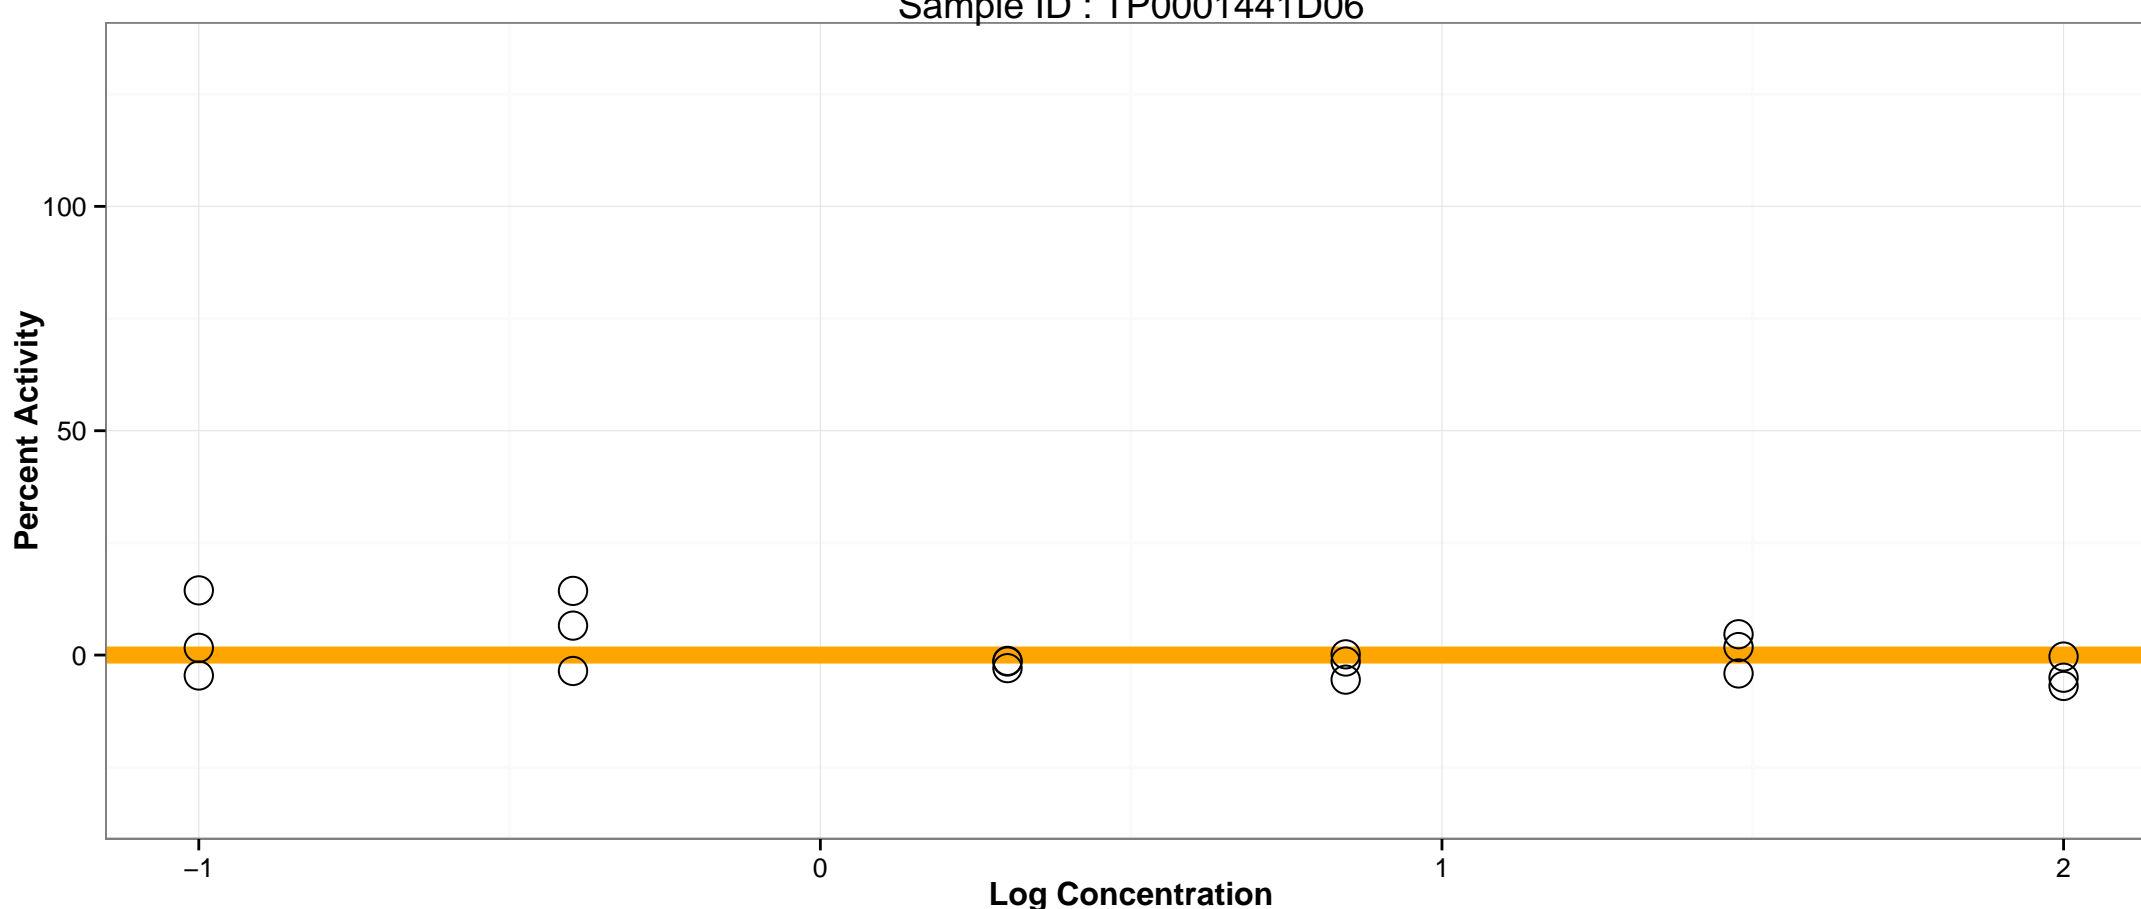

HILL MODEL

HILL MODEL: Not applicable

GAIN-LOSS MODEL

GNLS MODEL: Not applicable

|      | CNST   | HILL | GNLS |
|------|--------|------|------|
| AIC  | 116.68 | NA   | NA   |
| PROB | 1      | NA   | NA   |
| RMSE | 6.01   | NA   | NA   |

MAX\_MEAN : 5.78 MAX\_MED : 6.58 BMAD : 5.54  
COFF : 20 HIT-CALL : 0 FITC : 4 ACTP : 0  
FLAGS :

Assay ID 1848 (NHEERL\_Quantilum\_inhib\_2\_dn)  
Sample ID : TP0001441D06

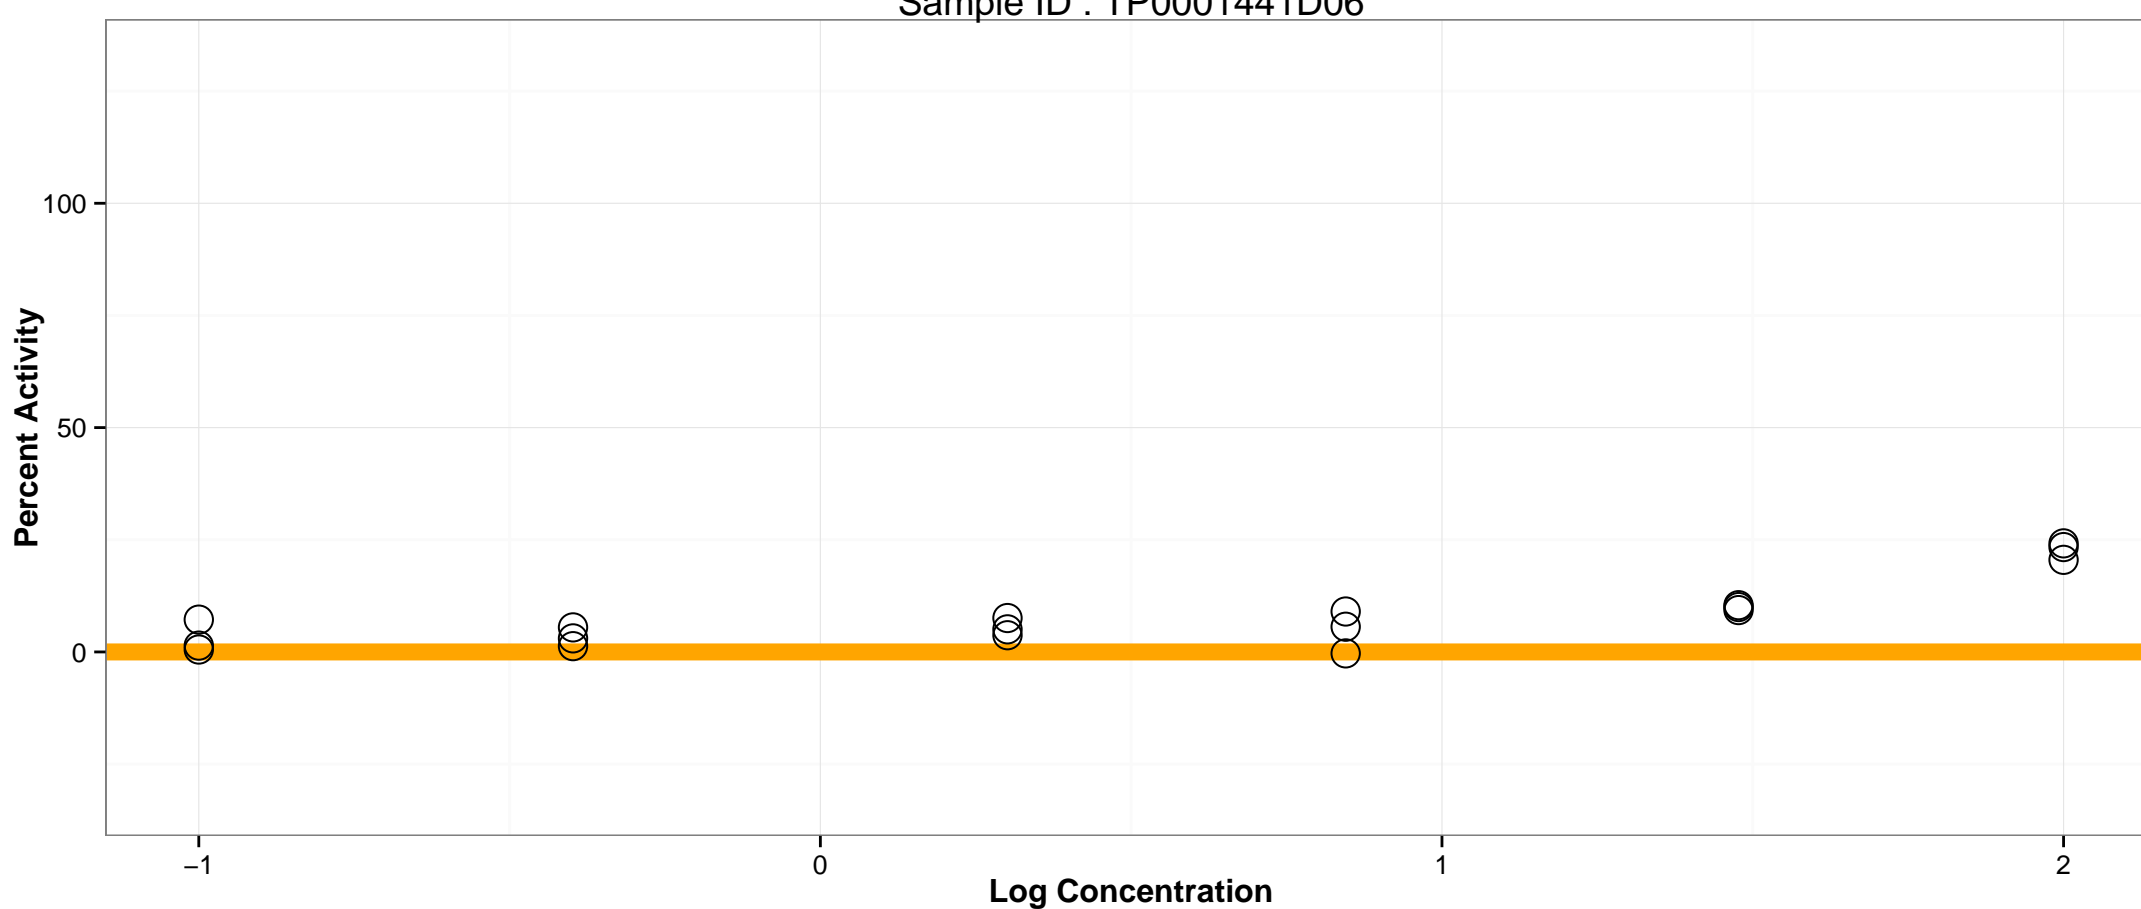

HILL MODEL

HILL MODEL: Not applicable

GAIN-LOSS MODEL

GNLS MODEL: Not applicable

|      | CNST   | HILL | GNLS |
|------|--------|------|------|
| AIC  | 138.99 | NA   | NA   |
| PROB | 1      | NA   | NA   |
| RMSE | 10.95  | NA   | NA   |

MAX\_MEAN : 22.7 MAX\_MED : 23.4 BMAD : 8.58  
COFF : 20 HIT-CALL : 0 FITC : 4 ACTP : 0  
FLAGS :

Chemical : 5-Chloro-2-mercaptobenzothiazole  
CAS : 5331-91-9

Assay ID 1508 (NHEERL\_TPO\_AUR\_dn)  
Sample ID : TP0001441D07

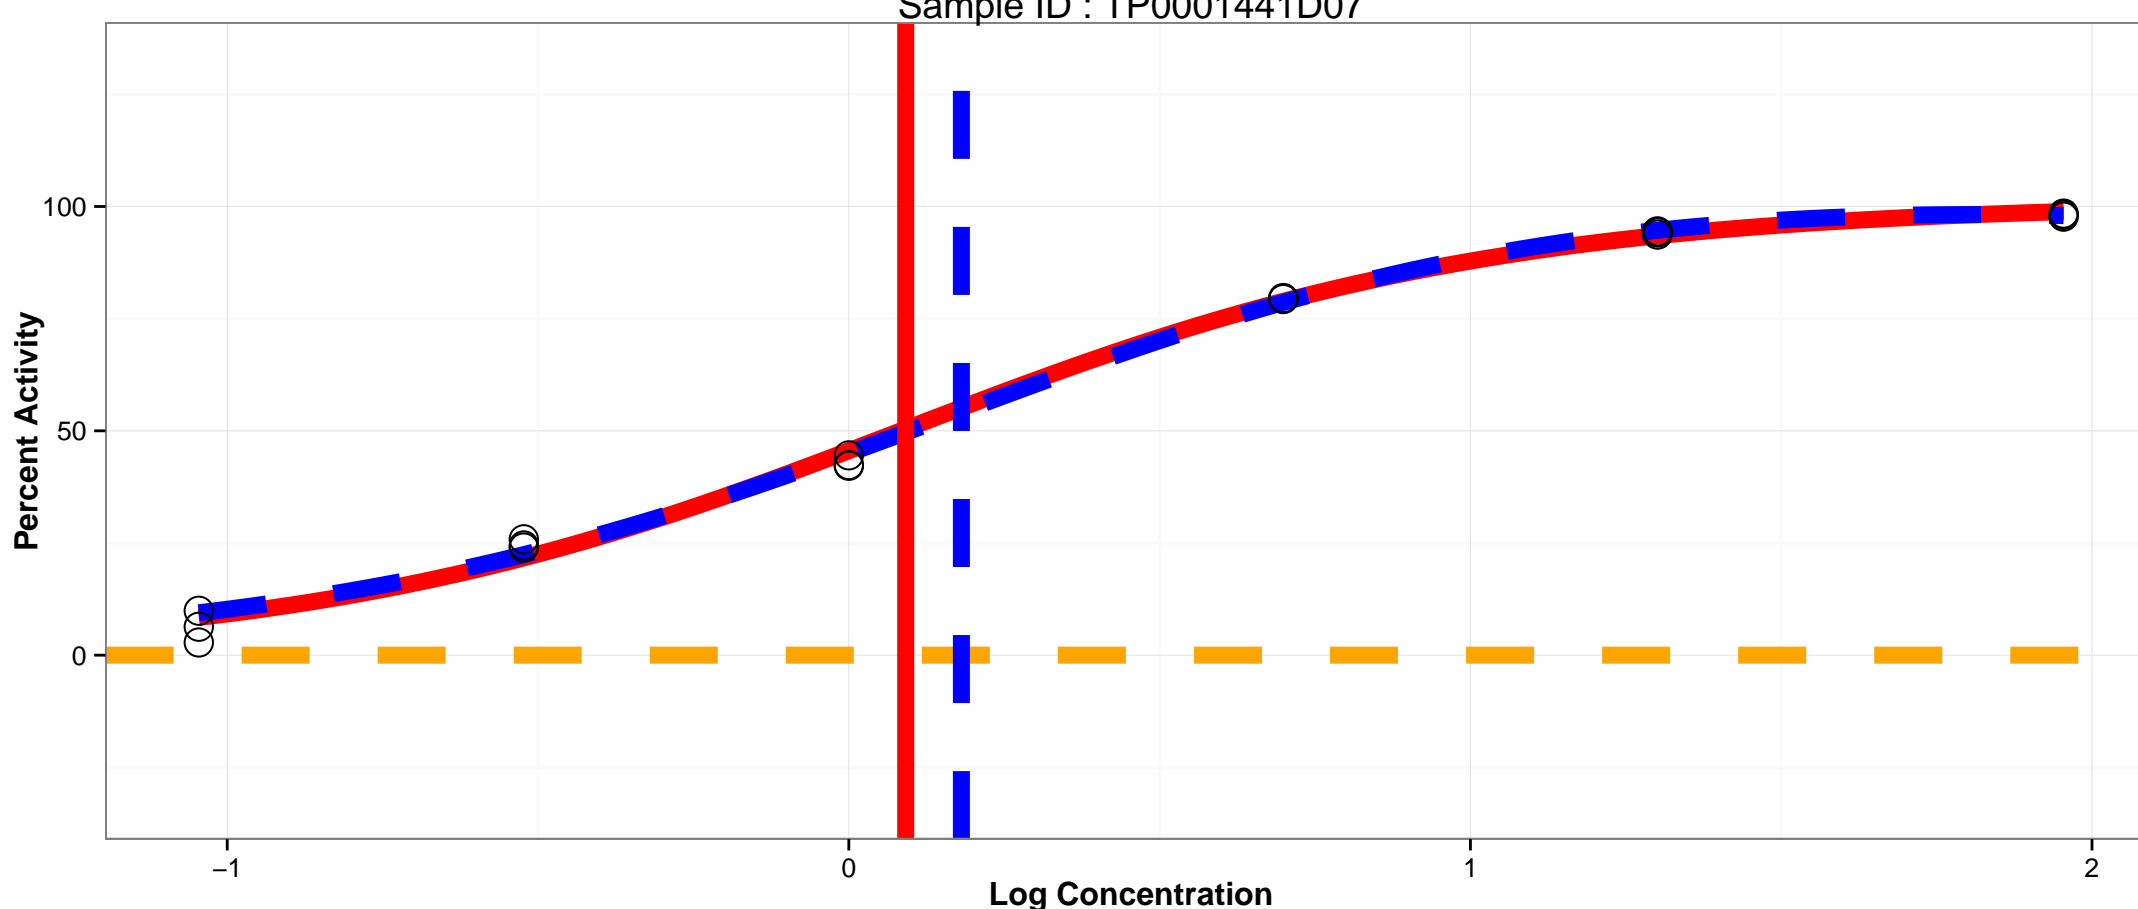

HILL MODEL

|     | tp   | ga     | gw     |
|-----|------|--------|--------|
| val | 101  | 0.0915 | 0.915  |
| sd  | 1.12 | 0.0254 | 0.0425 |

GAIN-LOSS MODEL

|     | tp   | ga     | gw     | la   | lw    |
|-----|------|--------|--------|------|-------|
| val | 110  | 0.181  | 0.835  | 3.95 | 0.542 |
| sd  | 8.26 | 0.0382 | 0.0396 | 2.79 | 0.947 |

|      | CNST   | HILL  | GNLS  |
|------|--------|-------|-------|
| AIC  | 207.51 | 89.24 | 89.87 |
| PROB | 0      | 0.58  | 0.42  |
| RMSE | 67.49  | 2.3   | 2.24  |

MAX\_MEAN : 98.1 MAX\_MED : 98.1 BMAD : 5.69  
COFF : 20 HIT-CALL : 1 FITC : 41 ACTP : 1  
FLAGS :

Assay ID 1509 (NHEERL\_HEK293T\_CellTiterGLO)  
Sample ID : TP0001441D07

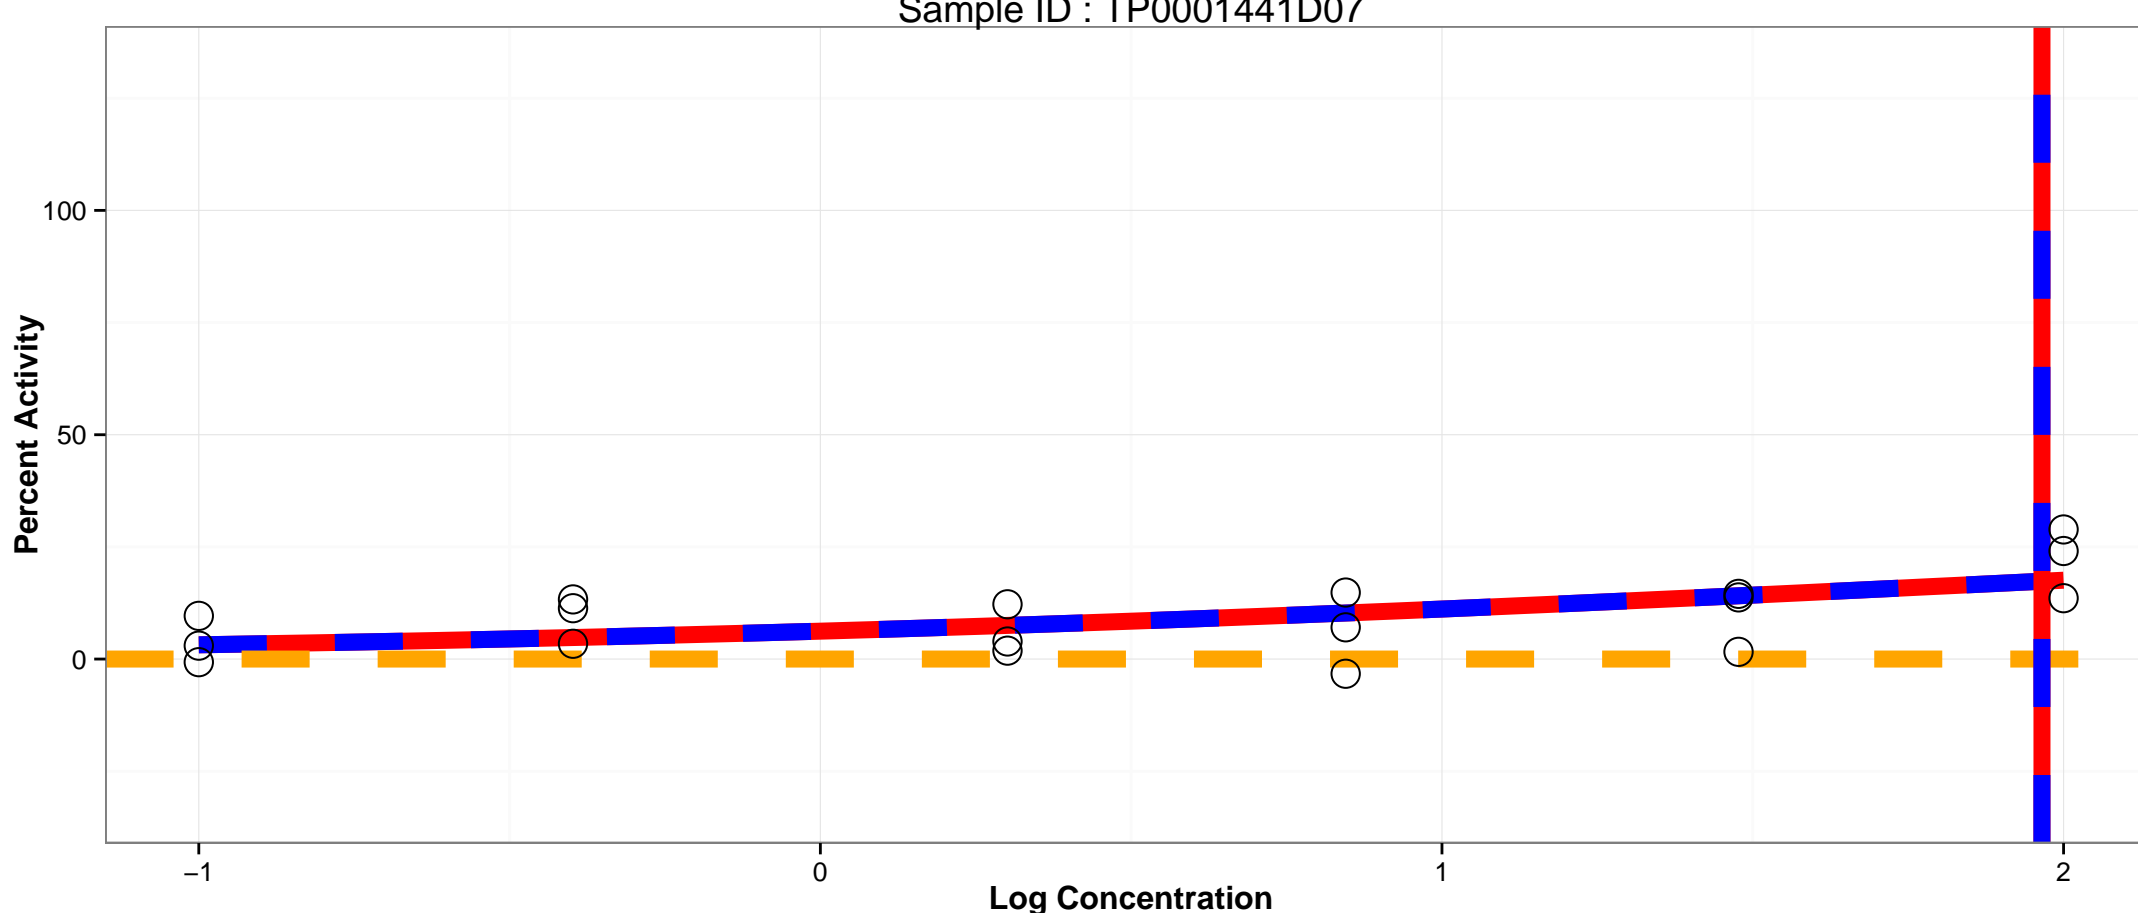

HILL MODEL

|     | tp   | ga   | gw    |
|-----|------|------|-------|
| val | 34.7 | 1.97 | 0.336 |
| sd  | 27.1 | 1.78 | 0.165 |

GAIN-LOSS MODEL

|     | tp   | ga   | gw    | la   | lw   |
|-----|------|------|-------|------|------|
| val | 34.7 | 1.97 | 0.336 | 3.89 | 14.7 |
| sd  | NA   | NA   | NA    | NA   | NA   |

|      | CNST   | HILL   | GNLS   |
|------|--------|--------|--------|
| AIC  | 145.51 | 128.85 | 132.85 |
| PROB | 0      | 0.88   | 0.12   |
| RMSE | 12.63  | 6.66   | 6.66   |

MAX\_MEAN : 22.2 MAX\_MED : 24.1 BMAD : 5.54  
COFF : 20 HIT-CALL : 1 FITC : 42 ACTP : 1  
FLAGS : 6

Assay ID 1848 (NHEERL\_QuantLum\_inhib\_2\_dn)  
Sample ID : TP0001441D07

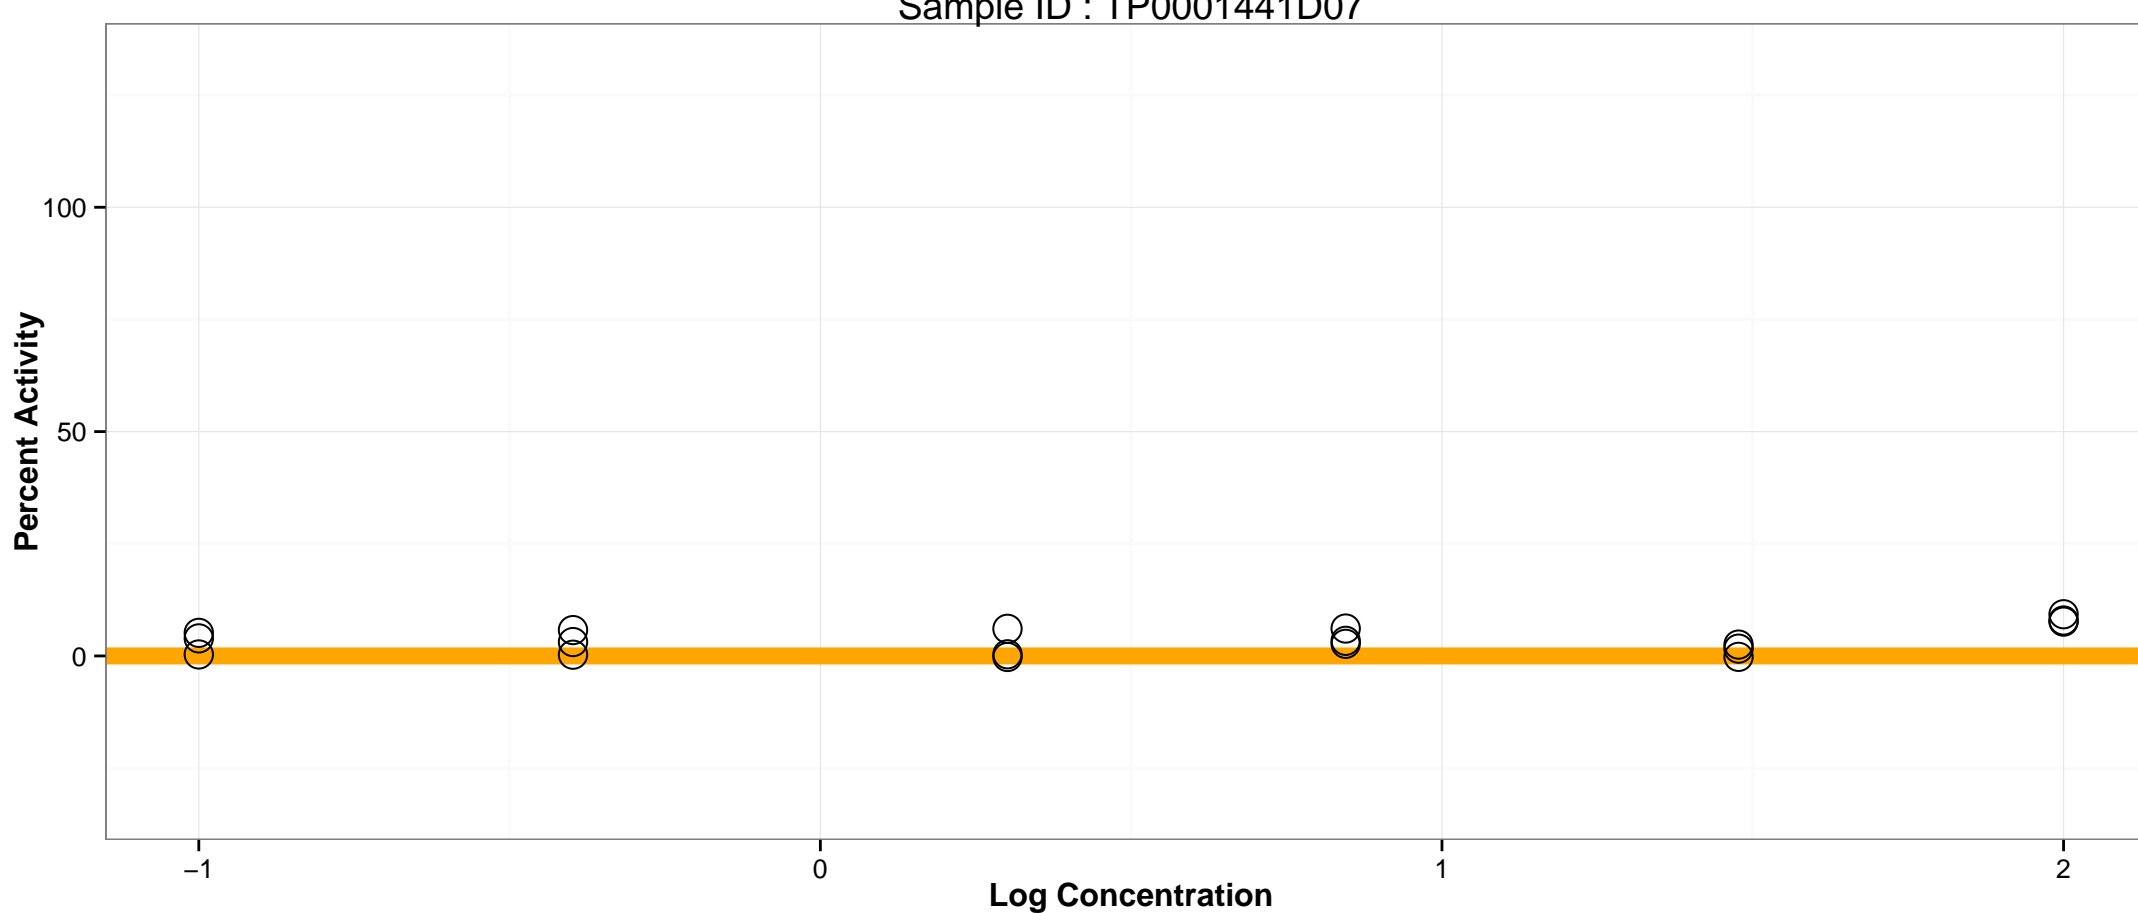

HILL MODEL

HILL MODEL: Not applicable

GAIN-LOSS MODEL

GNLS MODEL: Not applicable

|      | CNST   | HILL | GNLS |
|------|--------|------|------|
| AIC  | 110.43 | NA   | NA   |
| PROB | 1      | NA   | NA   |
| RMSE | 4.69   | NA   | NA   |

MAX\_MEAN : 8.29 MAX\_MED : 7.92 BMAD : 8.58  
COFF : 20 HIT-CALL : 0 FITC : 4 ACTP : 0  
FLAGS :

Chemical : 2-(Methylthio)benzothiazole  
CAS : 615-22-5

Assay ID 1508 (NHEERL\_TPO\_AUR\_dn)  
Sample ID : TP0001441D08

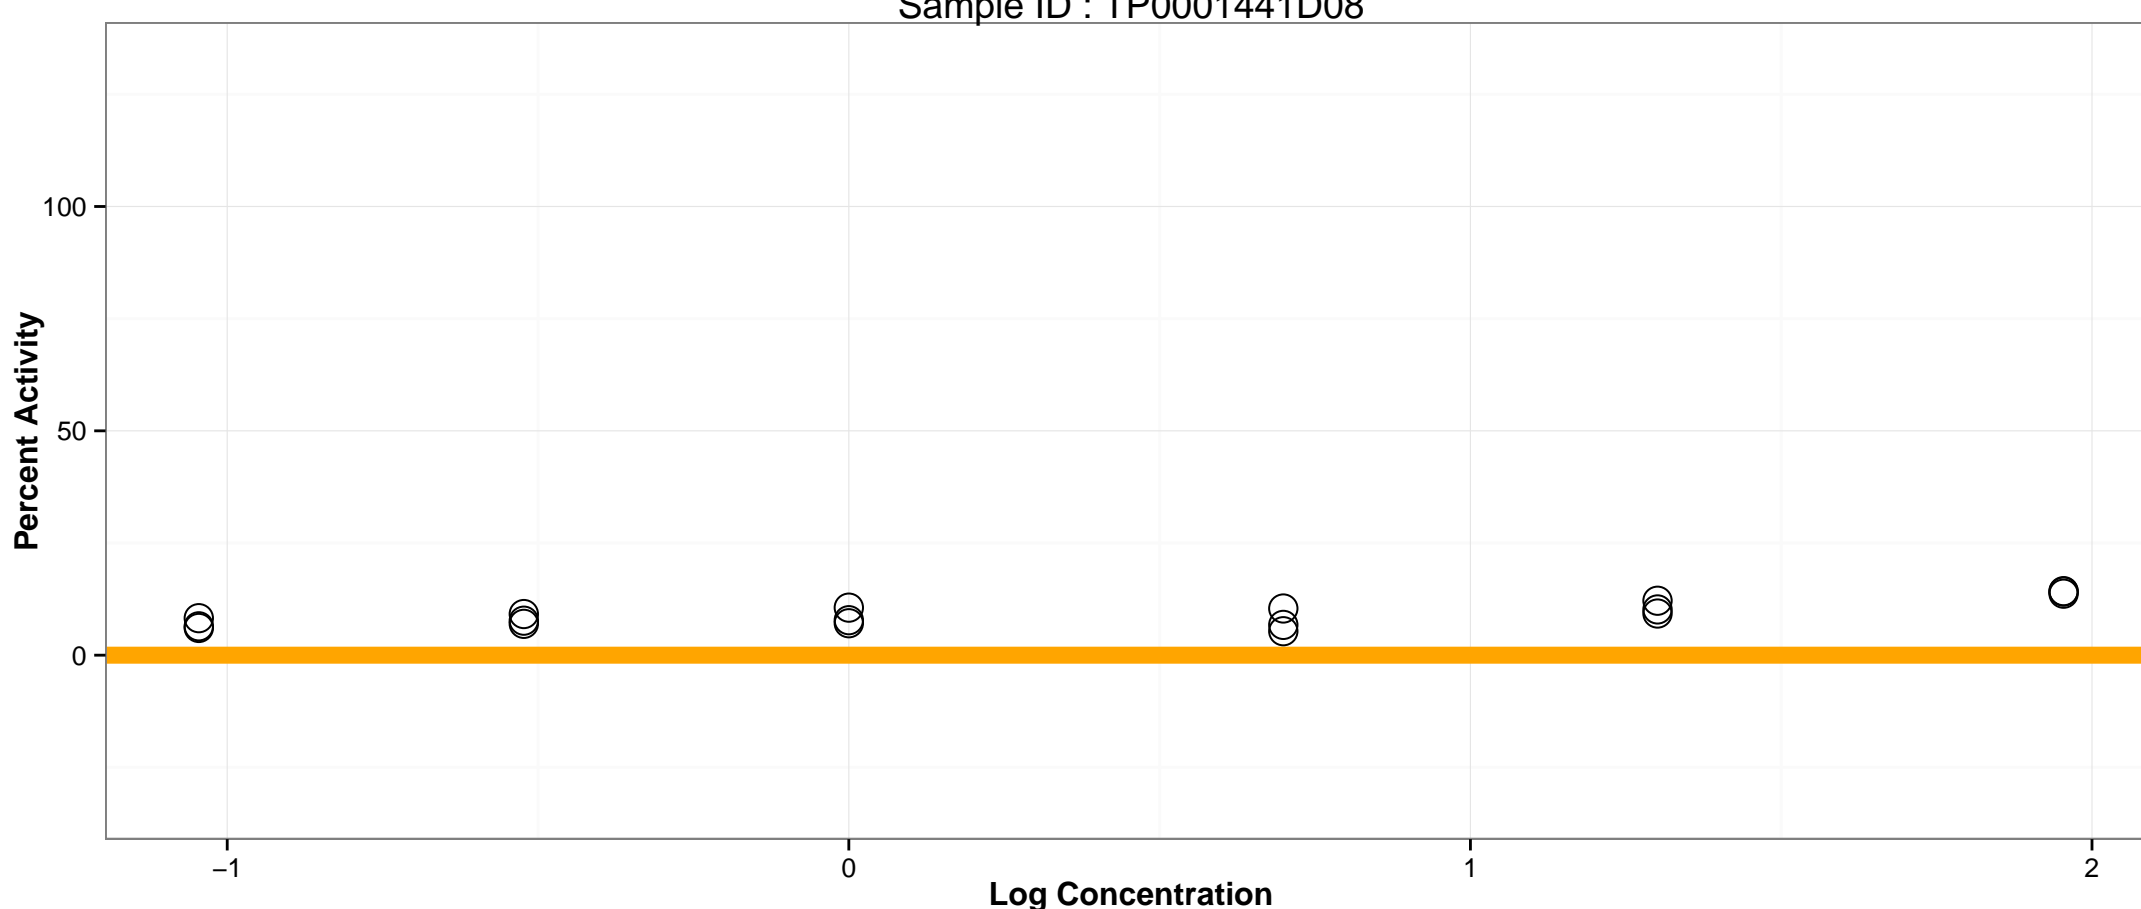

HILL MODEL

HILL MODEL: Not applicable

GAIN-LOSS MODEL

GNLS MODEL: Not applicable

|      | CNST   | HILL | GNLS |
|------|--------|------|------|
| AIC  | 138.38 | NA   | NA   |
| PROB | 1      | NA   | NA   |
| RMSE | 9.65   | NA   | NA   |

MAX\_MEAN : 14.1 MAX\_MED : 14.2 BMAD : 5.69  
COFF : 20 HIT-CALL : 0 FITC : 4 ACTP : 0  
FLAGS :

Assay ID 1509 (NHEERL\_HEK293T\_CellTiterGLO)  
Sample ID : TP0001441D08

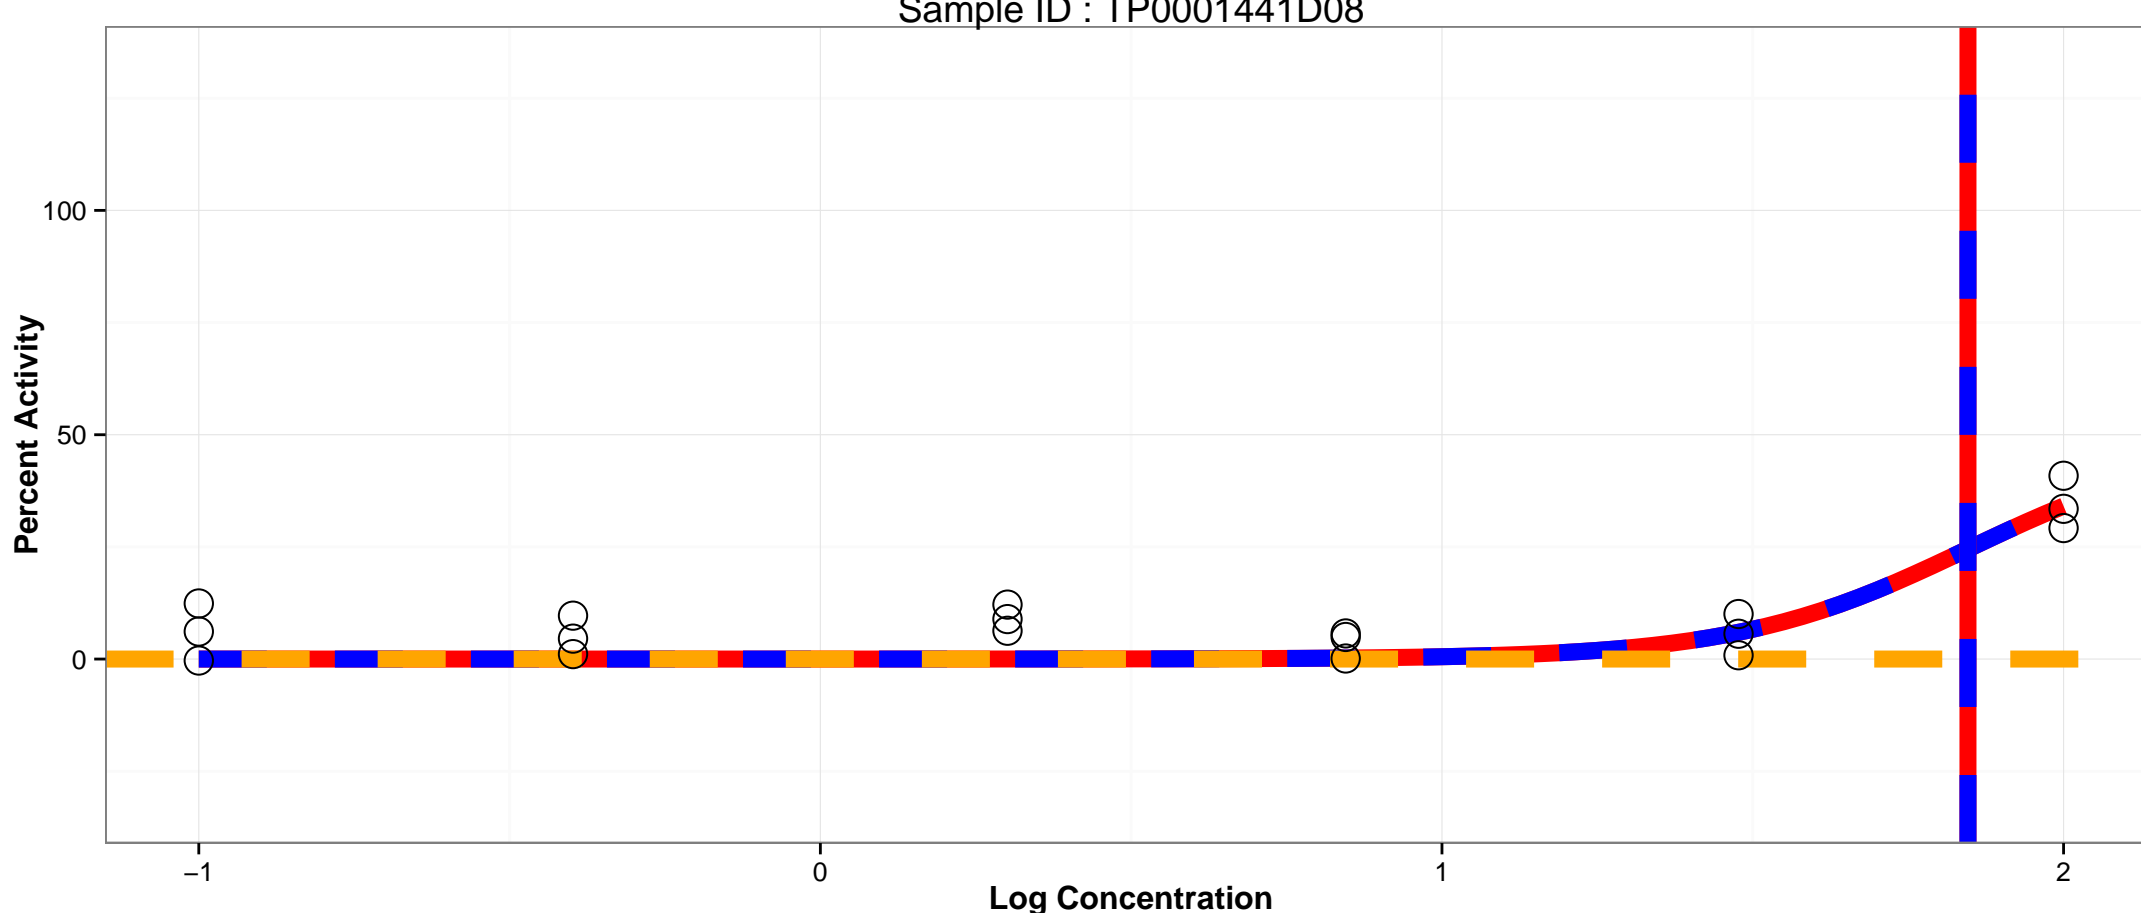

HILL MODEL

|     | tp   | ga    | gw   |
|-----|------|-------|------|
| val | 49   | 1.85  | 2.33 |
| sd  | 91.9 | 0.909 | 3.77 |

GAIN-LOSS MODEL

|     | tp   | ga    | gw   | la   | lw   |
|-----|------|-------|------|------|------|
| val | 49   | 1.85  | 2.33 | 3.67 | 4.42 |
| sd  | 91.2 | 0.901 | 3.74 | 2400 | 6370 |

|      | CNST   | HILL   | GNLS   |
|------|--------|--------|--------|
| AIC  | 149.34 | 127.88 | 131.88 |
| PROB | 0      | 0.88   | 0.12   |
| RMSE | 15.65  | 6.41   | 6.41   |

MAX\_MEAN : 34.5 MAX\_MED : 33.5 BMAD : 5.54  
COFF : 20 HIT-CALL : 1 FITC : 42 ACTP : 1  
FLAGS : 6

Assay ID 1848 (NHEERL\_Quantilum\_inhib\_2\_dn)  
Sample ID : TP0001441D08

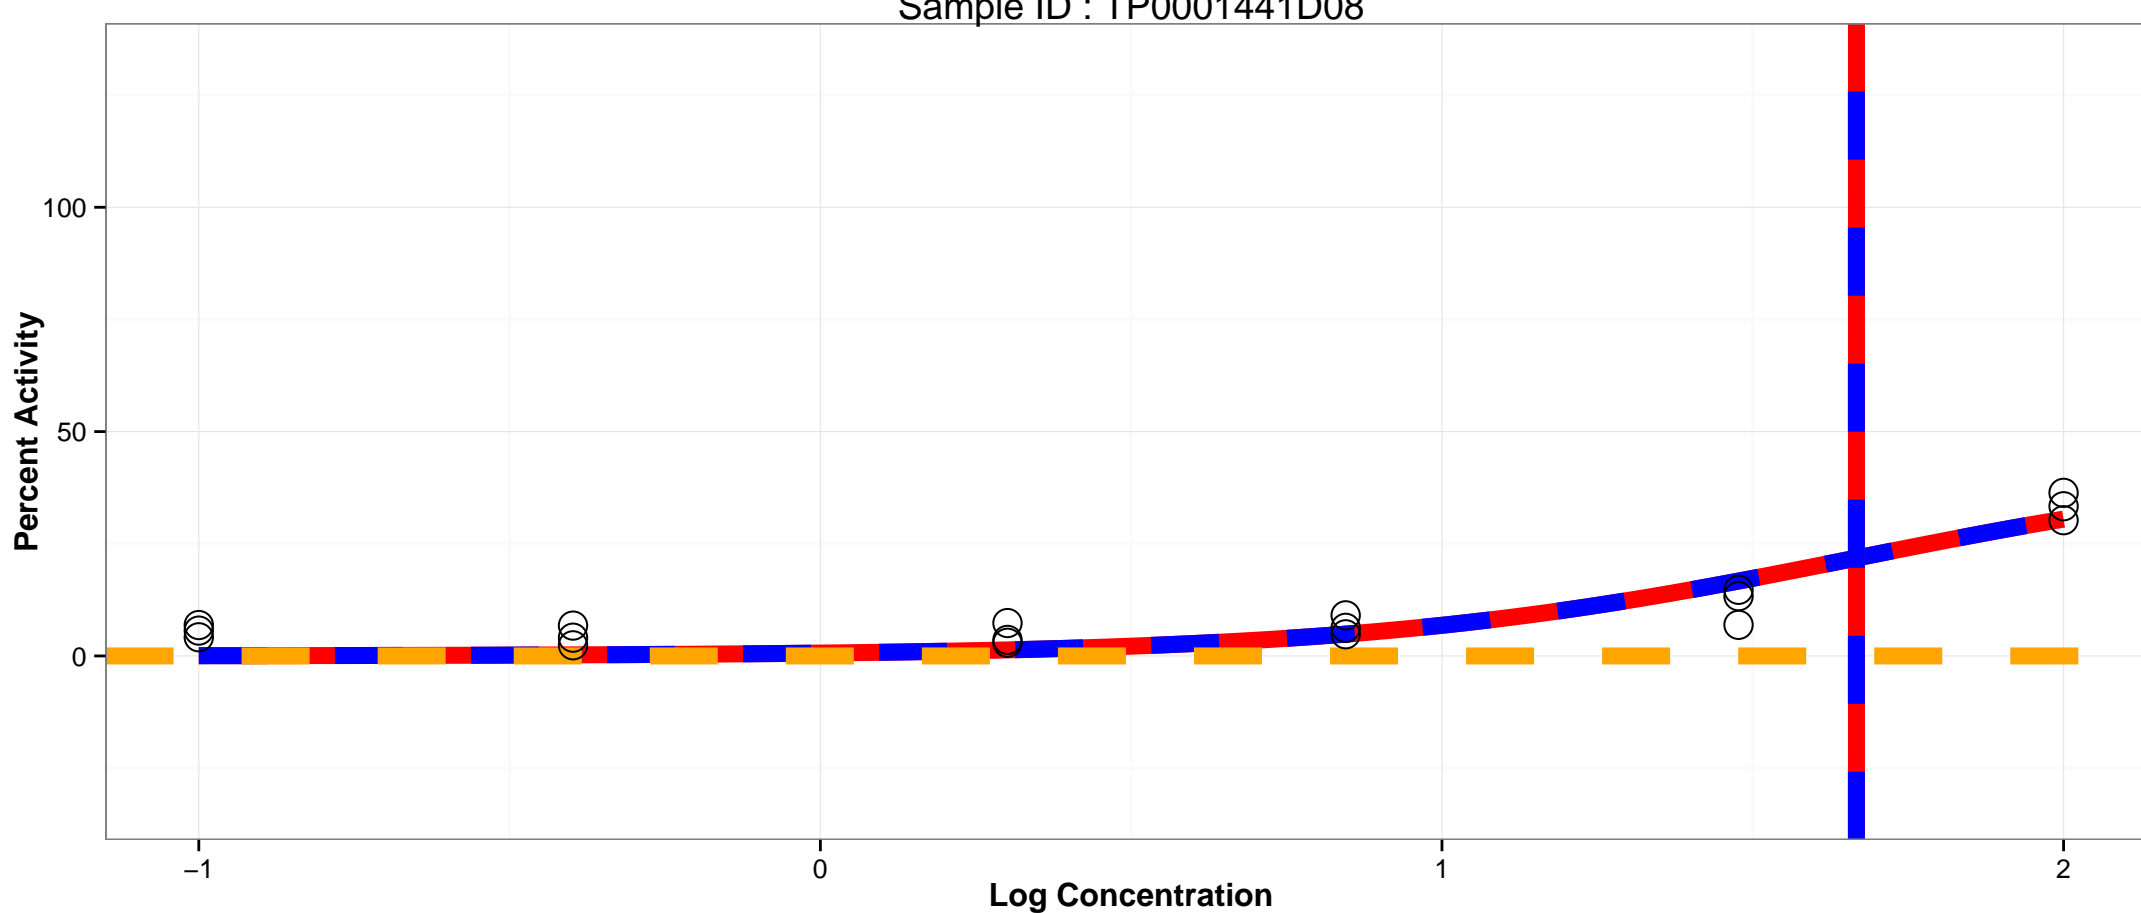

HILL MODEL

|     | tp   | ga    | gw    |
|-----|------|-------|-------|
| val | 43.6 | 1.67  | 1.1   |
| sd  | 10   | 0.204 | 0.411 |

GAIN-LOSS MODEL

|     | tp   | ga    | gw    | la   | lw    |
|-----|------|-------|-------|------|-------|
| val | 43.6 | 1.67  | 1.1   | 3.2  | 8.76  |
| sd  | 10   | 0.204 | 0.411 | 7910 | 57500 |

|      | CNST   | HILL   | GNLS   |
|------|--------|--------|--------|
| AIC  | 149.18 | 115.69 | 119.69 |
| PROB | 0      | 0.88   | 0.12   |
| RMSE | 15.24  | 4.56   | 4.56   |

MAX\_MEAN : 33.3 MAX\_MED : 33.4 BMAD : 8.58  
COFF : 20 HIT-CALL : 1 FITC : 42 ACTP : 1  
FLAGS : 6



Assay ID 1508 (NHEERL\_TPO\_AUR\_dn)  
Sample ID : TP0001441D09

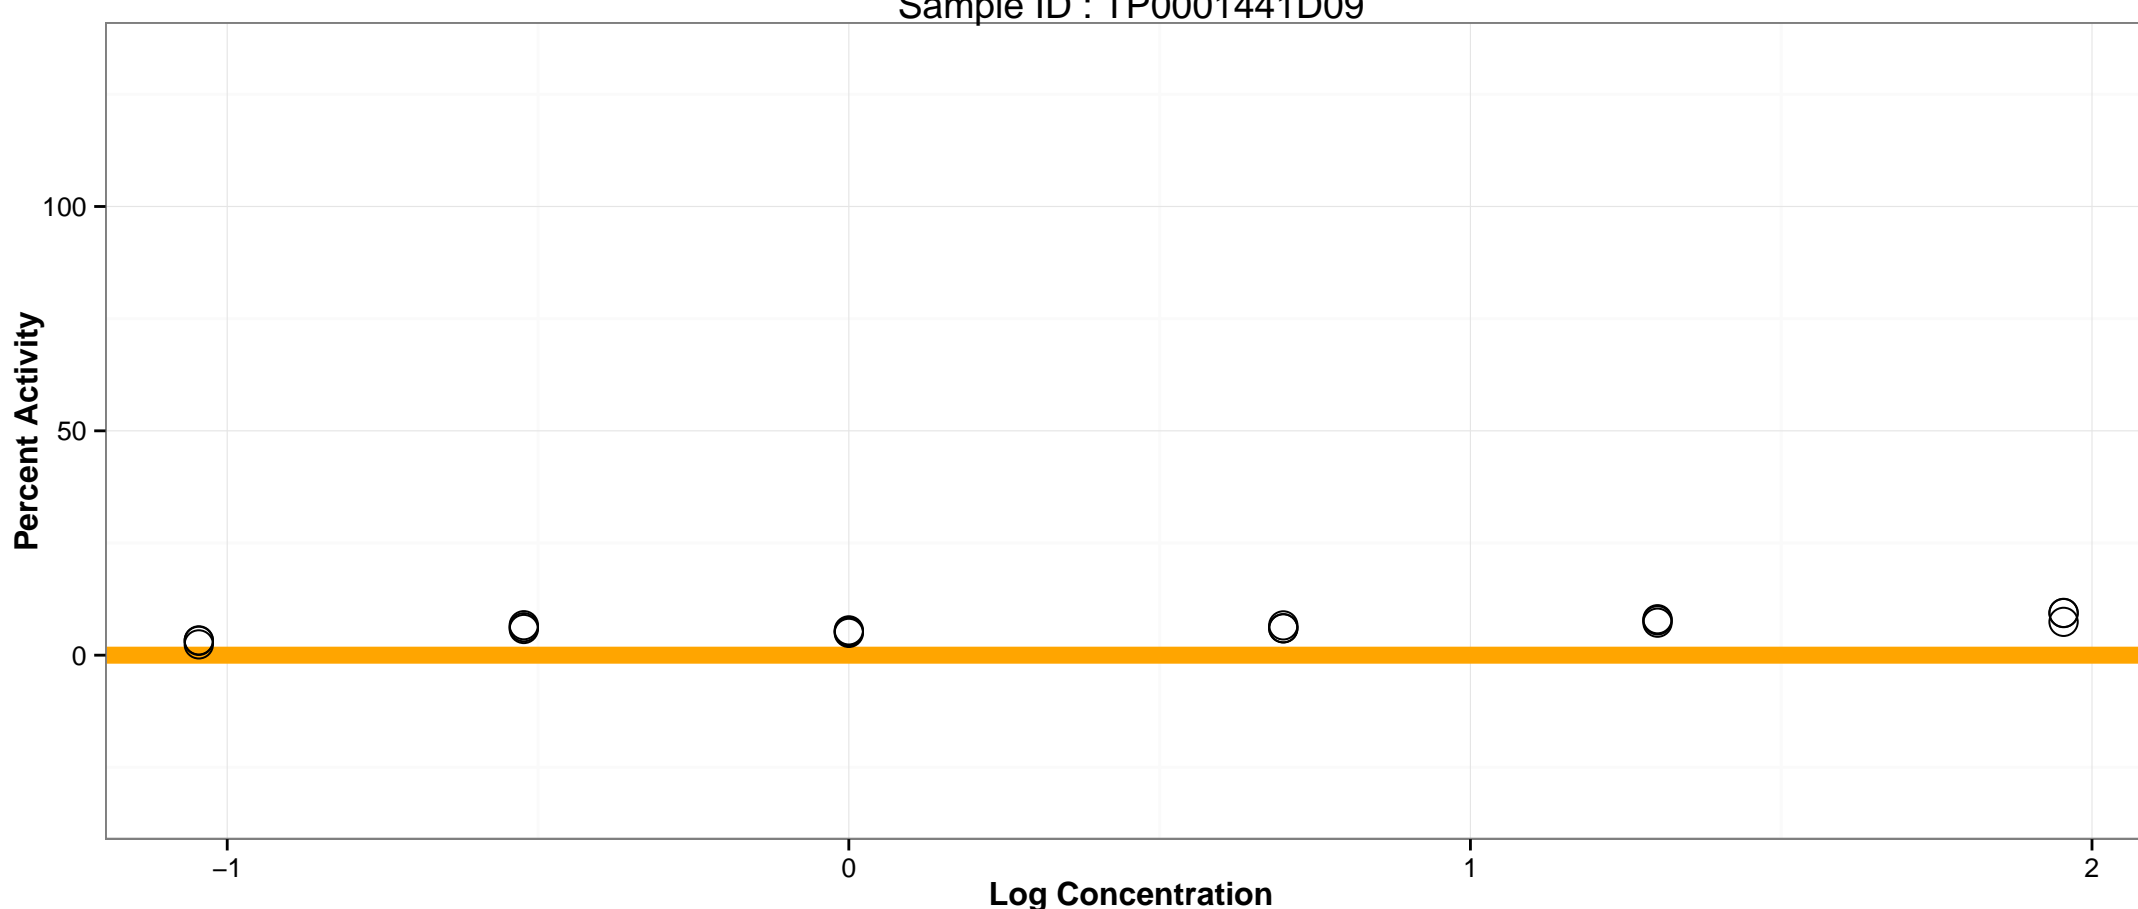

### HILL MODEL

HILL MODEL: Not applicable

### GAIN-LOSS MODEL

GNLS MODEL: Not applicable

|      | CNST   | HILL | GNLS |
|------|--------|------|------|
| AIC  | 124.08 | NA   | NA   |
| PROB | 1      | NA   | NA   |
| RMSE | 6.47   | NA   | NA   |

MAX\_MEAN : 8.76 MAX\_MED : 9.4 BMAD : 5.69  
COFF : 20 HIT-CALL : 0 FITC : 4 ACTP : 0  
FLAGS :

Assay ID 1509 (NHEERL\_HEK293T\_CellTiterGLO)  
Sample ID : TP0001441D09

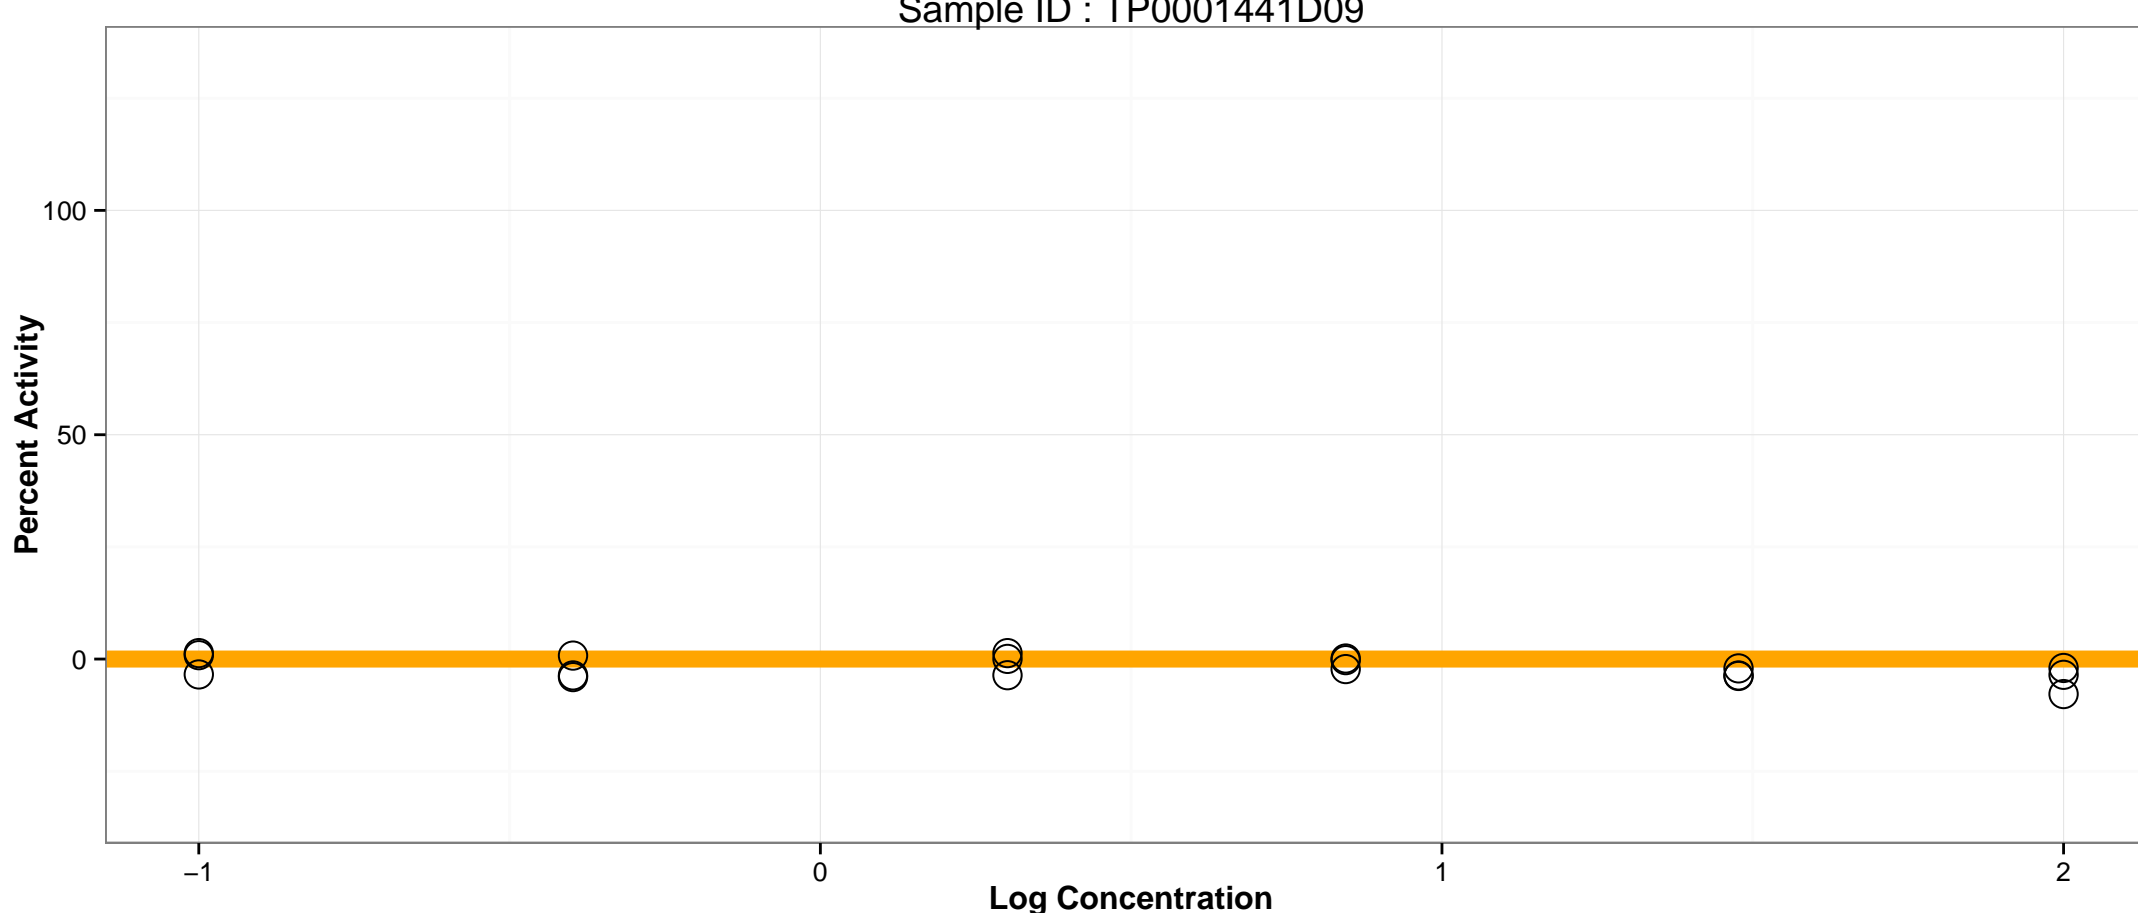

### HILL MODEL

HILL MODEL: Not applicable

### GAIN-LOSS MODEL

GNLS MODEL: Not applicable

|      | CNST  | HILL | GNLS |
|------|-------|------|------|
| AIC  | 94.77 | NA   | NA   |
| PROB | 1     | NA   | NA   |
| RMSE | 3.09  | NA   | NA   |

MAX\_MEAN : -0.402 MAX\_MED : 0.873 BMAD : 5.54  
COFF : 20 HIT-CALL : 0 FITC : 4 ACTP : 0  
FLAGS :

Assay ID 1848 (NHEERL\_Quantilum\_inhib\_2\_dn)  
Sample ID : TP0001441D09

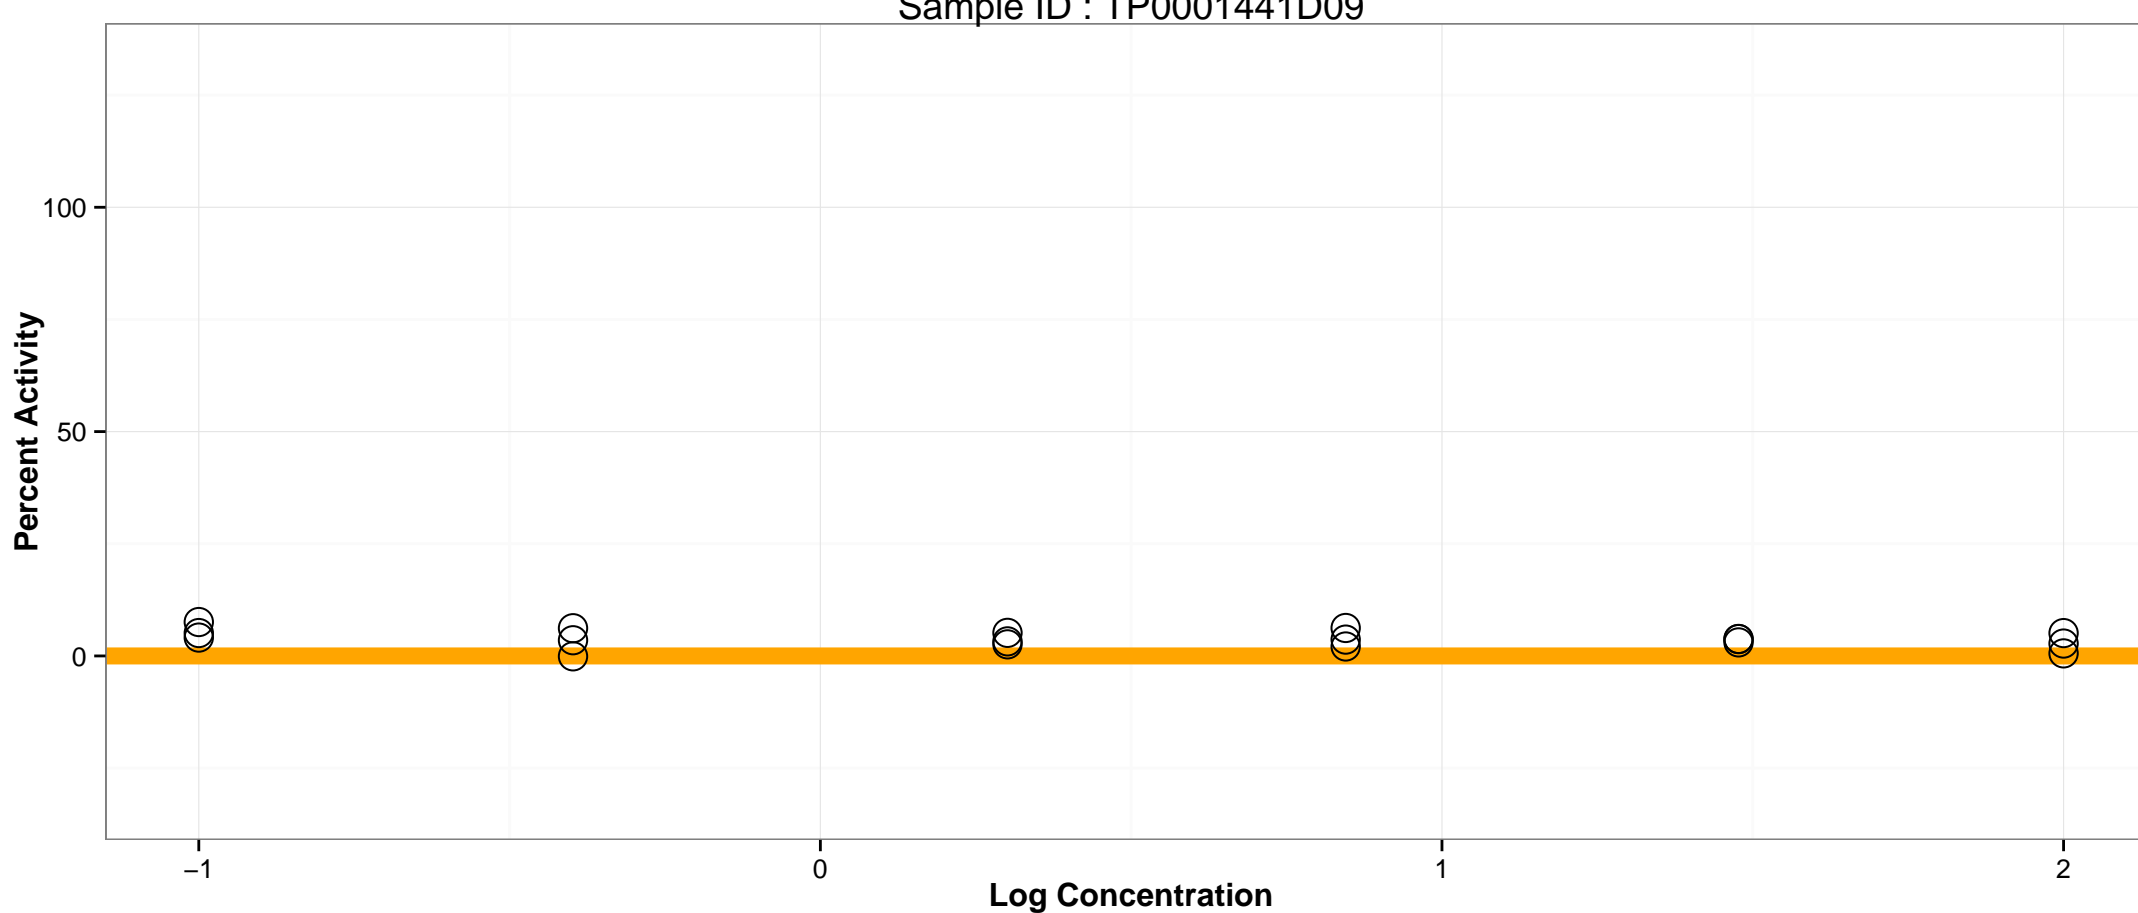

### HILL MODEL

HILL MODEL: Not applicable

### GAIN-LOSS MODEL

GNLS MODEL: Not applicable

|      | CNST   | HILL | GNLS |
|------|--------|------|------|
| AIC  | 108.18 | NA   | NA   |
| PROB | 1      | NA   | NA   |
| RMSE | 4.24   | NA   | NA   |

MAX\_MEAN : 5.6 MAX\_MED : 5.12 BMAD : 8.58  
COFF : 20 HIT-CALL : 0 FITC : 4 ACTP : 0  
FLAGS :

Chemical : 4-Nonylphenol, branched  
CAS : 84852-15-3

Assay ID 1508 (NHEERL\_TPO\_AUR\_dn)  
Sample ID : TP0001441D10

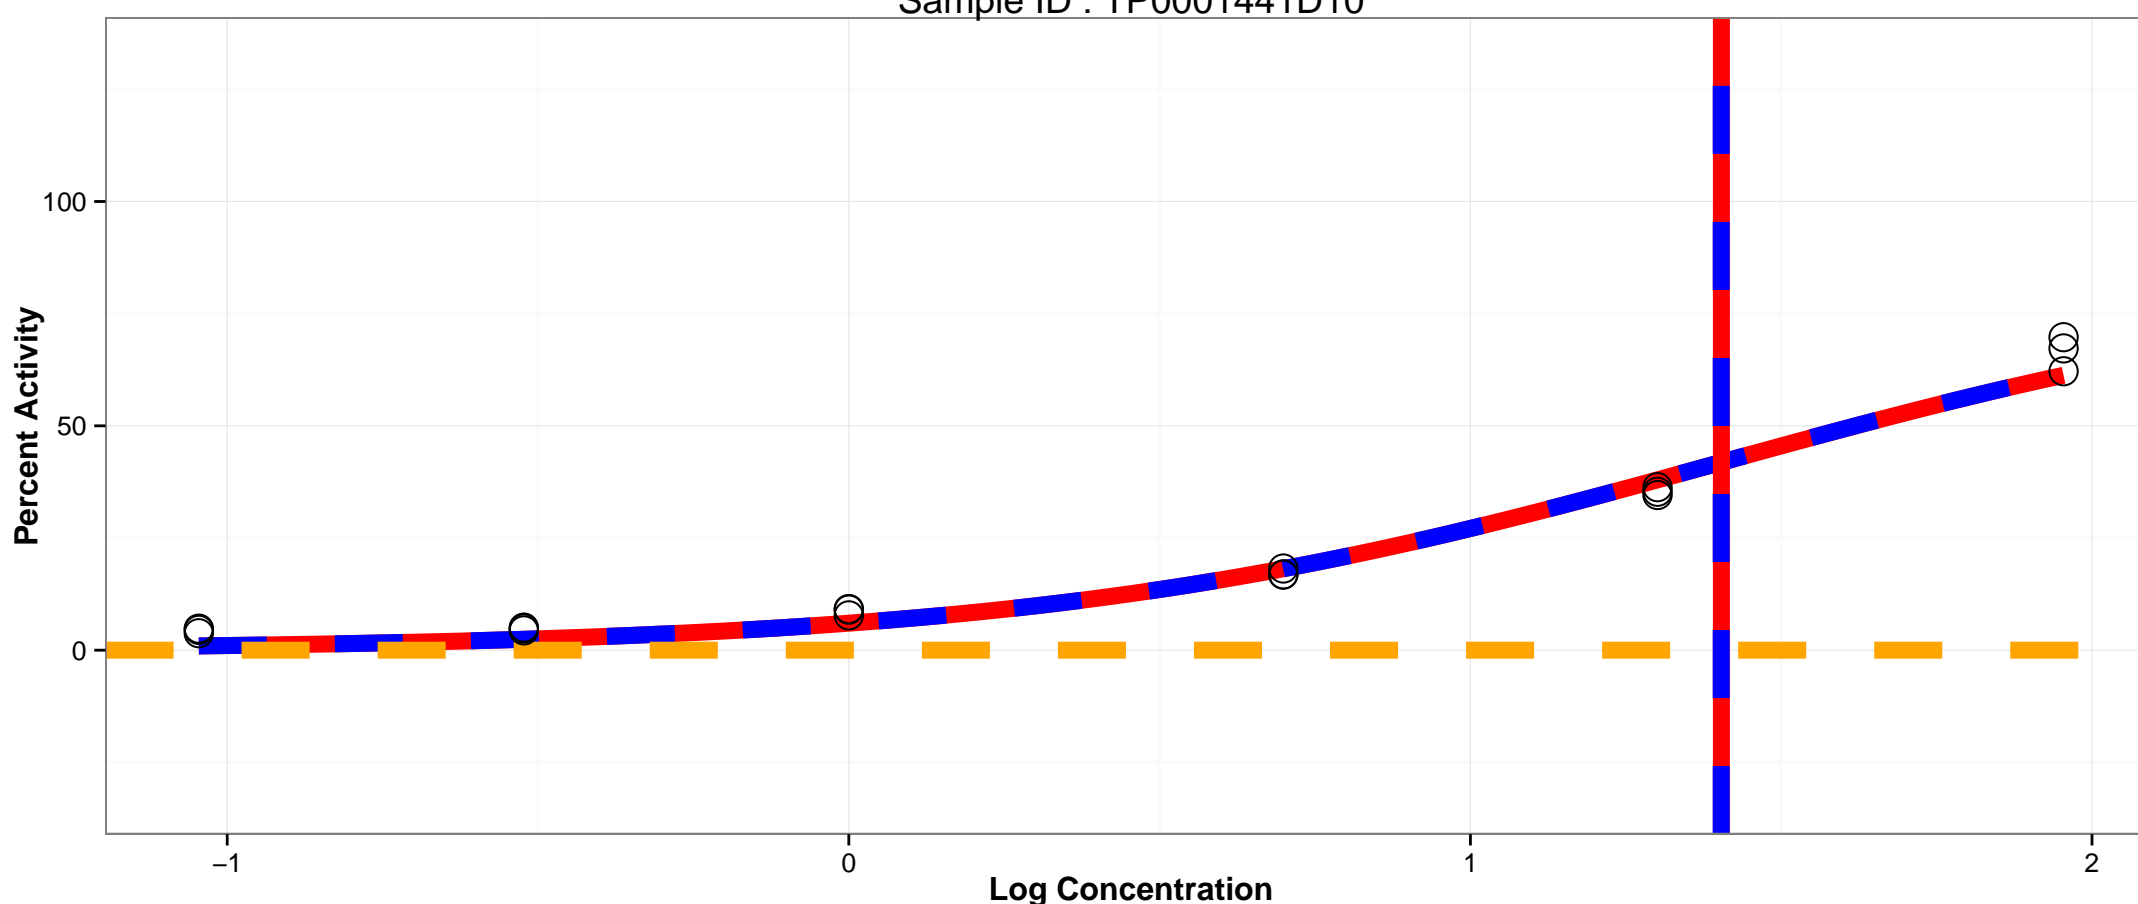

HILL MODEL

|     | tp   | ga    | gw    |
|-----|------|-------|-------|
| val | 83.7 | 1.4   | 0.792 |
| sd  | 11   | 0.164 | 0.104 |

GAIN-LOSS MODEL

|     | tp   | ga    | gw    | la    | lw     |
|-----|------|-------|-------|-------|--------|
| val | 83.7 | 1.4   | 0.792 | 3.34  | 9.31   |
| sd  | 11   | 0.164 | 0.104 | 42500 | 283000 |

|      | CNST   | HILL   | GNLS   |
|------|--------|--------|--------|
| AIC  | 176.86 | 104.12 | 108.12 |
| PROB | 0      | 0.88   | 0.12   |
| RMSE | 31.87  | 3.4    | 3.4    |

MAX\_MEAN : 66.4 MAX\_MED : 67.3 BMAD : 5.69  
COFF : 20 HIT-CALL : 1 FITC : 42 ACTP : 1  
FLAGS :

Assay ID 1509 (NHEERL\_HEK293T\_CellTiterGLO)  
Sample ID : TP0001441D10

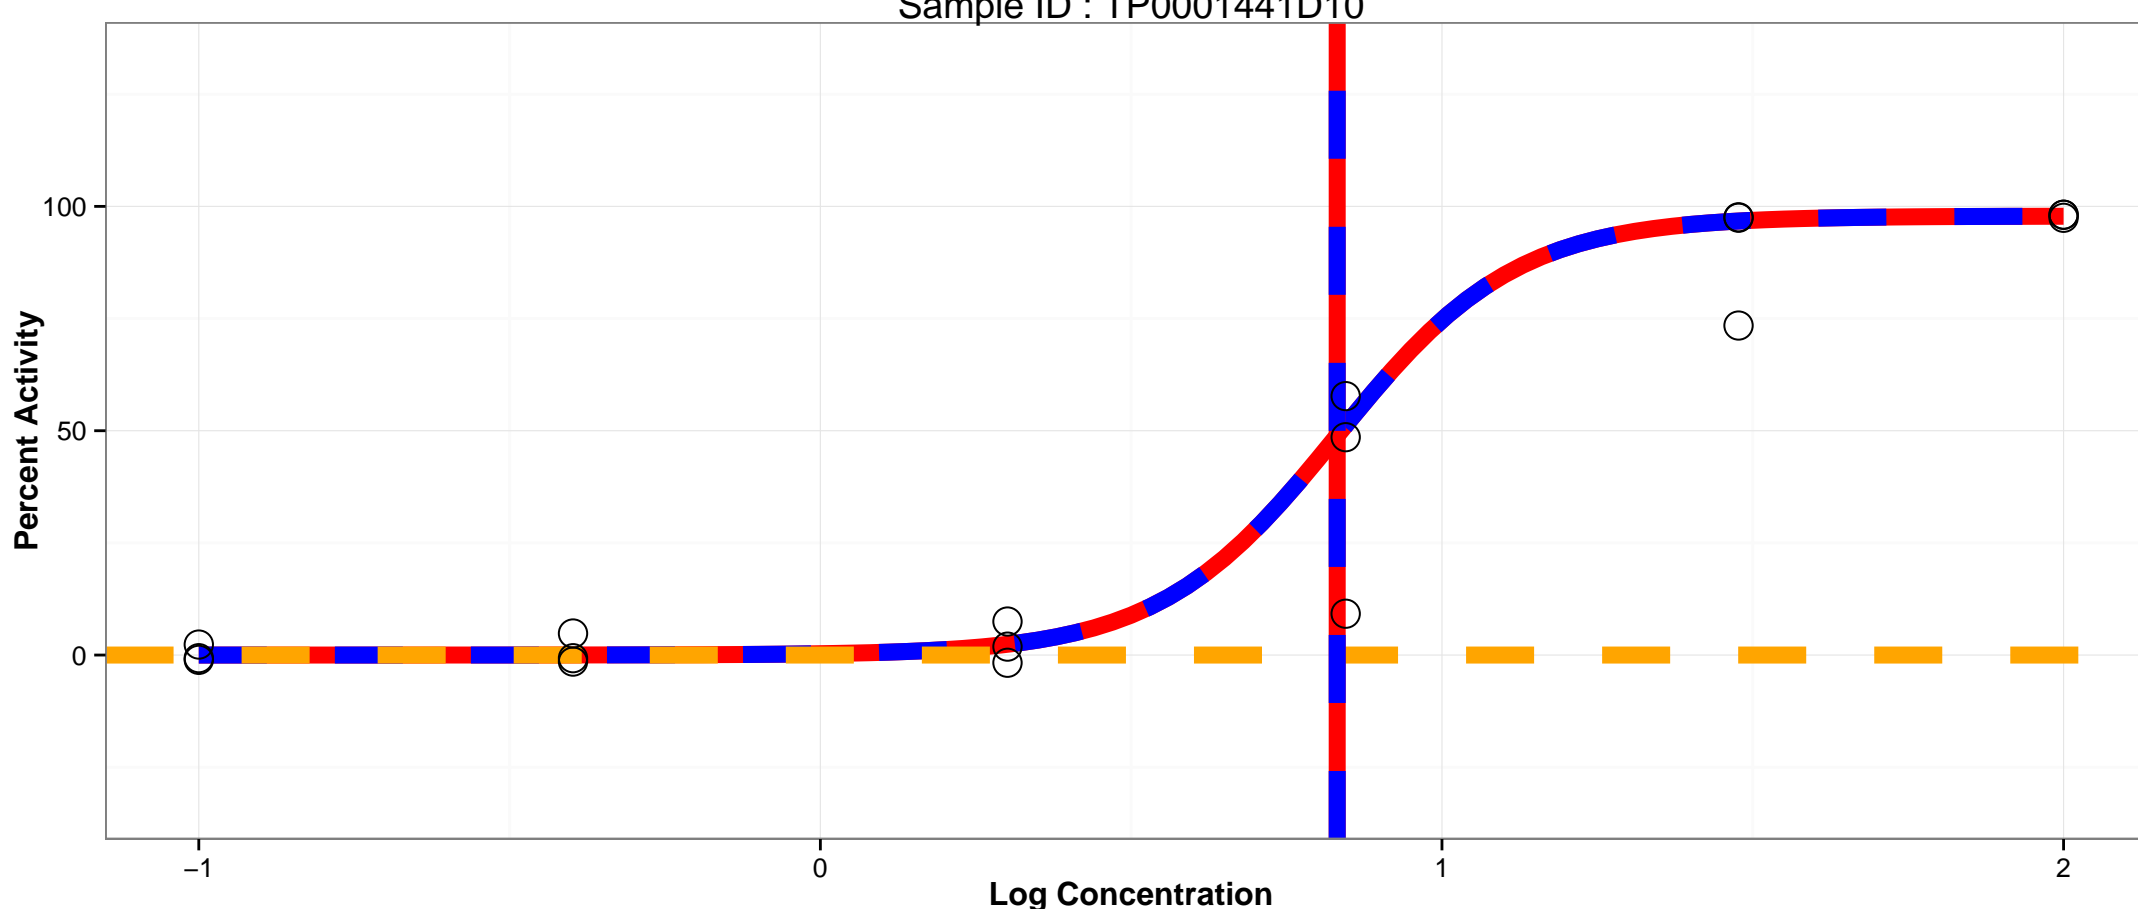

HILL MODEL

|     | tp   | ga    | gw    |
|-----|------|-------|-------|
| val | 97.8 | 0.831 | 3.02  |
| sd  | 1.57 | 0.023 | 0.811 |

GAIN-LOSS MODEL

|     | tp   | ga    | gw   | la   | lw   |
|-----|------|-------|------|------|------|
| val | 97.8 | 0.831 | 3.02 | 3.32 | 12.7 |
| sd  | NA   | NA    | NA   | NA   | NA   |

|      | CNST  | HILL   | GNLS   |
|------|-------|--------|--------|
| AIC  | 199.5 | 129.38 | 133.38 |
| PROB | 0     | 0.88   | 0.12   |
| RMSE | 57.28 | 11.63  | 11.63  |

MAX\_MEAN : 97.9 MAX\_MED : 98.1 BMAD : 5.54  
COFF : 20 HIT-CALL : 1 FITC : 41 ACTP : 1  
FLAGS :

Assay ID 1848 (NHEERL\_Quantilum\_inhib\_2\_dn)  
Sample ID : TP0001441D10

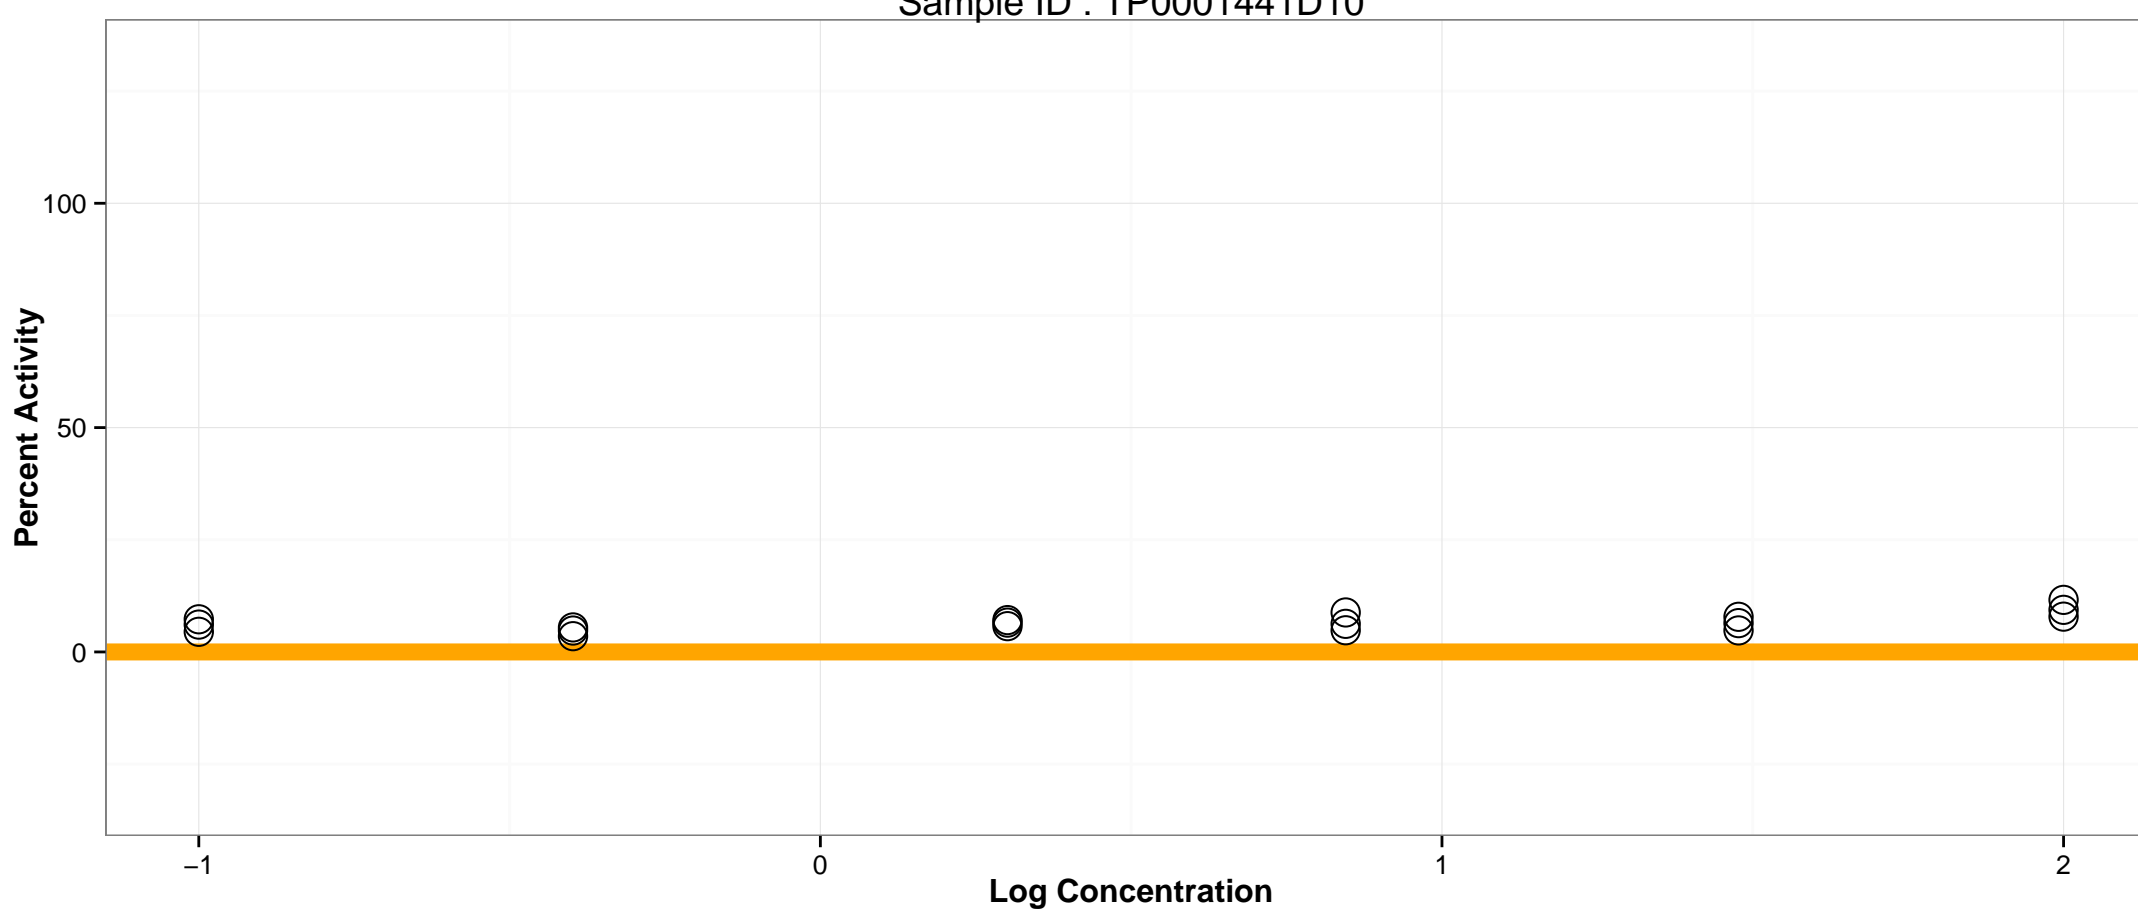

HILL MODEL

HILL MODEL: Not applicable

GAIN-LOSS MODEL

GNLS MODEL: Not applicable

|      | CNST   | HILL | GNLS |
|------|--------|------|------|
| AIC  | 126.23 | NA   | NA   |
| PROB | 1      | NA   | NA   |
| RMSE | 6.89   | NA   | NA   |

MAX\_MEAN : 9.63 MAX\_MED : 9.4 BMAD : 8.58  
COFF : 20 HIT-CALL : 0 FITC : 4 ACTP : 0  
FLAGS :

Chemical : 4-Nonylphenol, branched  
CAS : 84852-15-3

Assay ID 1508 (NHEERL\_TPO\_AUR\_dn)  
Sample ID : TX009711

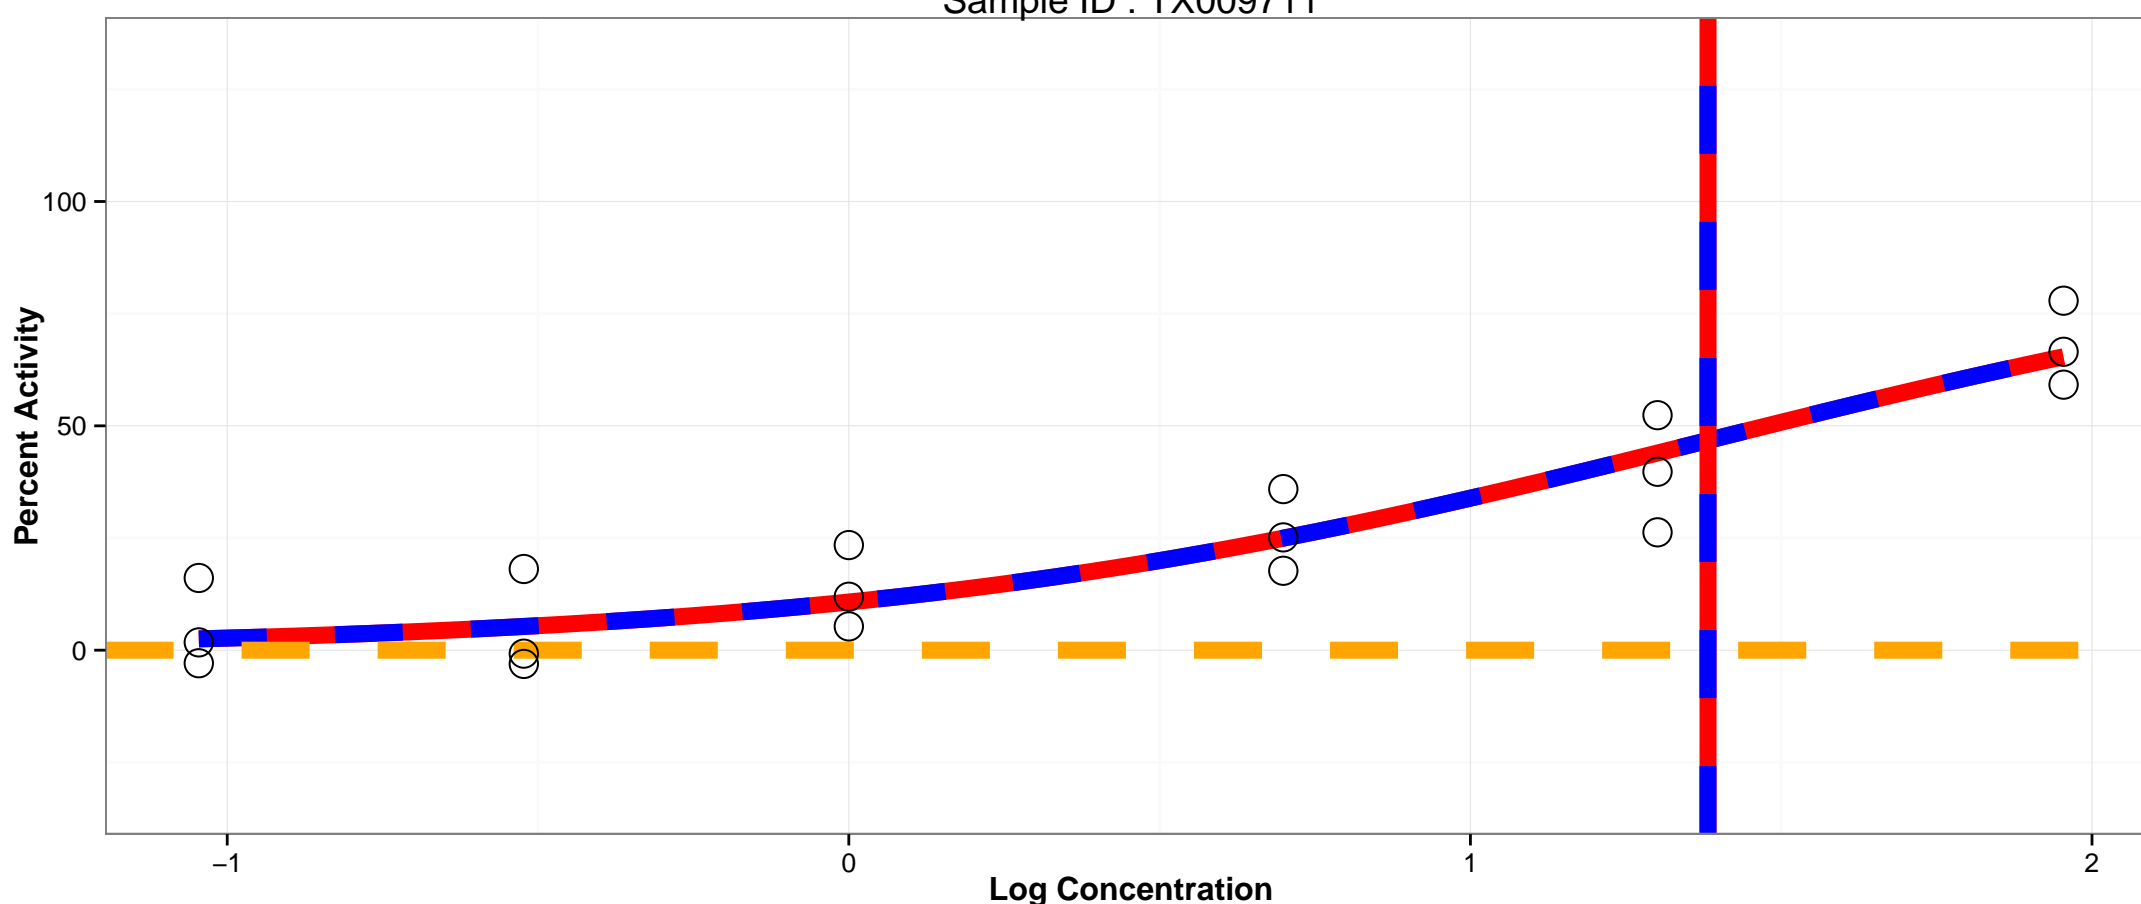

HILL MODEL

|     | tp   | ga    | gw    |
|-----|------|-------|-------|
| val | 93.5 | 1.38  | 0.642 |
| sd  | 30.5 | 0.518 | 0.186 |

GAIN-LOSS MODEL

|     | tp   | ga    | gw    | la   | lw   |
|-----|------|-------|-------|------|------|
| val | 93.5 | 1.38  | 0.642 | 3.83 | 4.49 |
| sd  | 30.4 | 0.517 | 0.186 | 2310 | 5530 |

|      | CNST  | HILL   | GNLS   |
|------|-------|--------|--------|
| AIC  | 182.1 | 140.31 | 144.31 |
| PROB | 0     | 0.88   | 0.12   |
| RMSE | 35.42 | 8.96   | 8.96   |

MAX\_MEAN : 67.9 MAX\_MED : 66.5 BMAD : 5.69  
COFF : 20 HIT-CALL : 1 FITC : 42 ACTP : 1  
FLAGS :

Assay ID 1509 (NHEERL\_HEK293T\_CellTiterGLO)  
Sample ID : TX009711

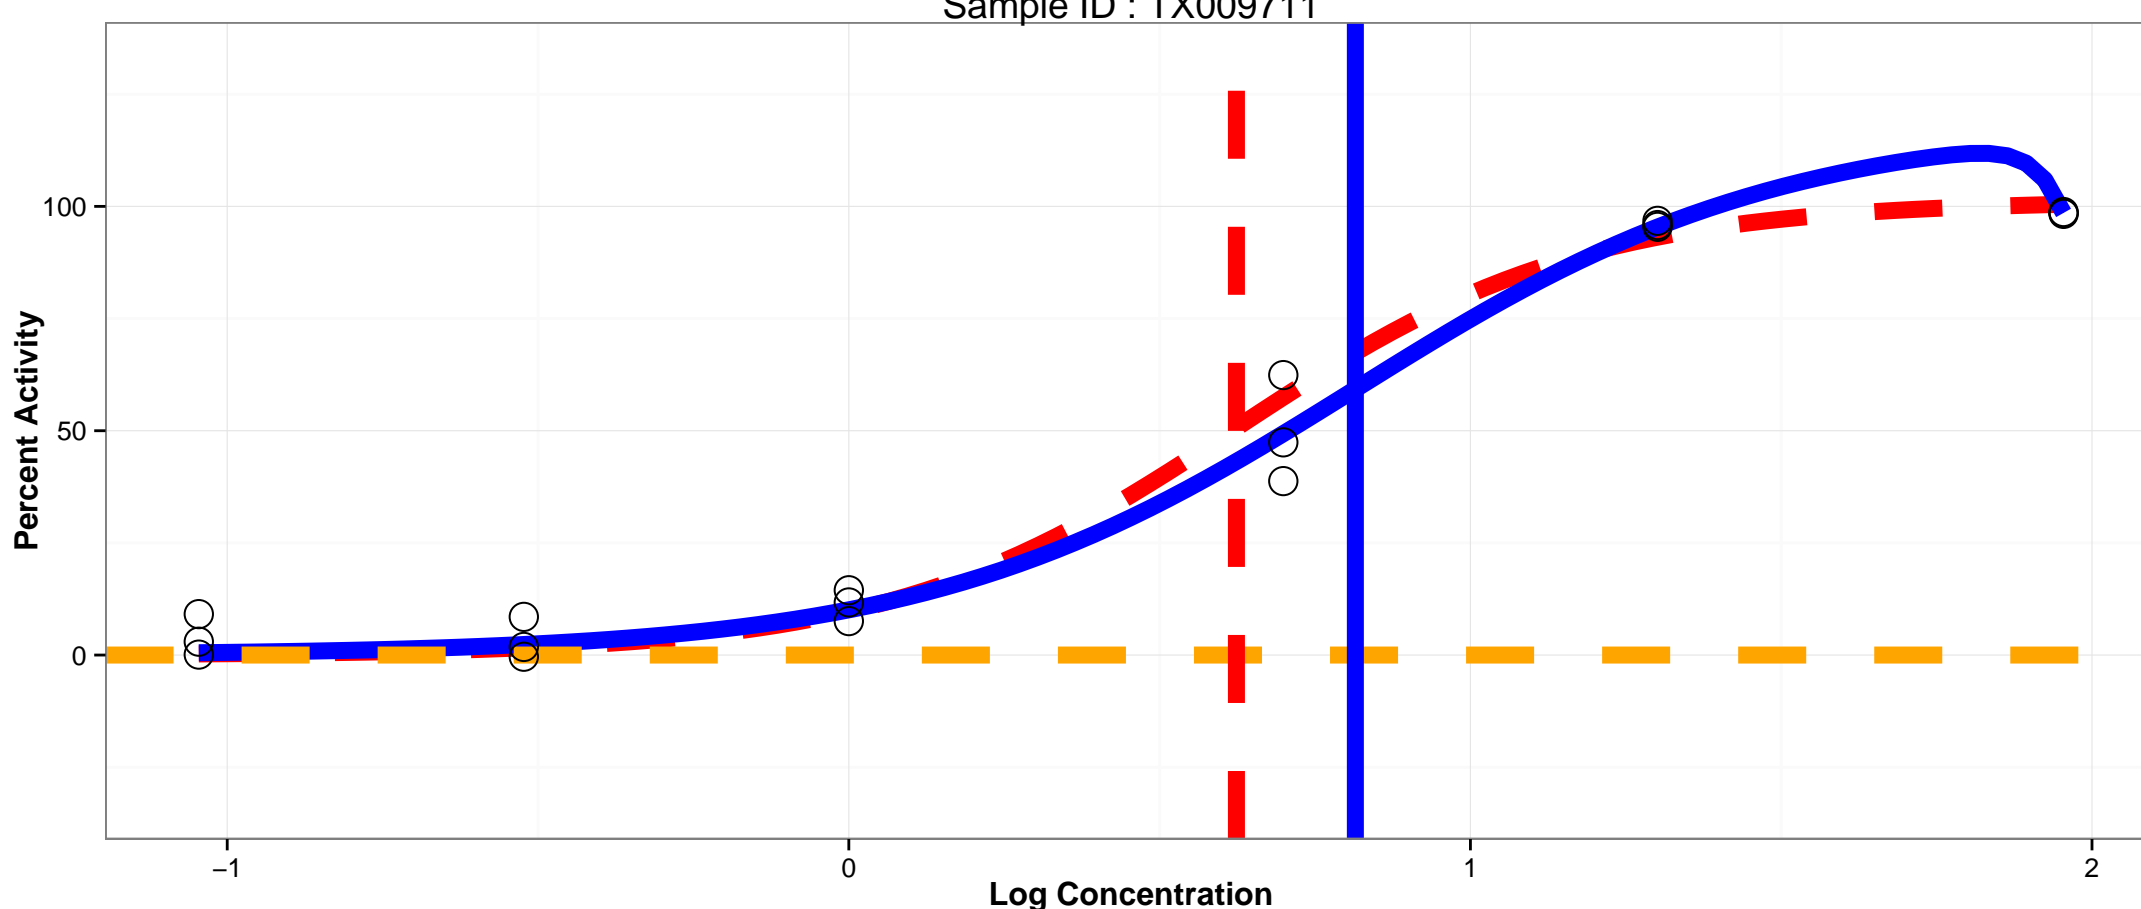

HILL MODEL

|     | tp   | ga     | gw    |
|-----|------|--------|-------|
| val | 101  | 0.624  | 1.56  |
| sd  | 2.51 | 0.0747 | 0.176 |

GAIN-LOSS MODEL

|     | tp   | ga    | gw    | la      | lw   |
|-----|------|-------|-------|---------|------|
| val | 119  | 0.815 | 1.27  | 2.03    | 10.7 |
| sd  | 10.5 | 0.096 | 0.158 | 0.00708 | 3.06 |

|      | CNST   | HILL  | GNLS   |
|------|--------|-------|--------|
| AIC  | 201.77 | 121.4 | 117.67 |
| PROB | 0      | 0.13  | 0.87   |
| RMSE | 60.1   | 6.15  | 4.96   |

MAX\_MEAN : 98.5 MAX\_MED : 98.5 BMAD : 5.54  
COFF : 20 HIT-CALL : 1 FITC : 50 ACTP : 1  
FLAGS :

Assay ID 1848 (NHEERL\_Quantilum\_inhib\_2\_dn)  
Sample ID : TX009711

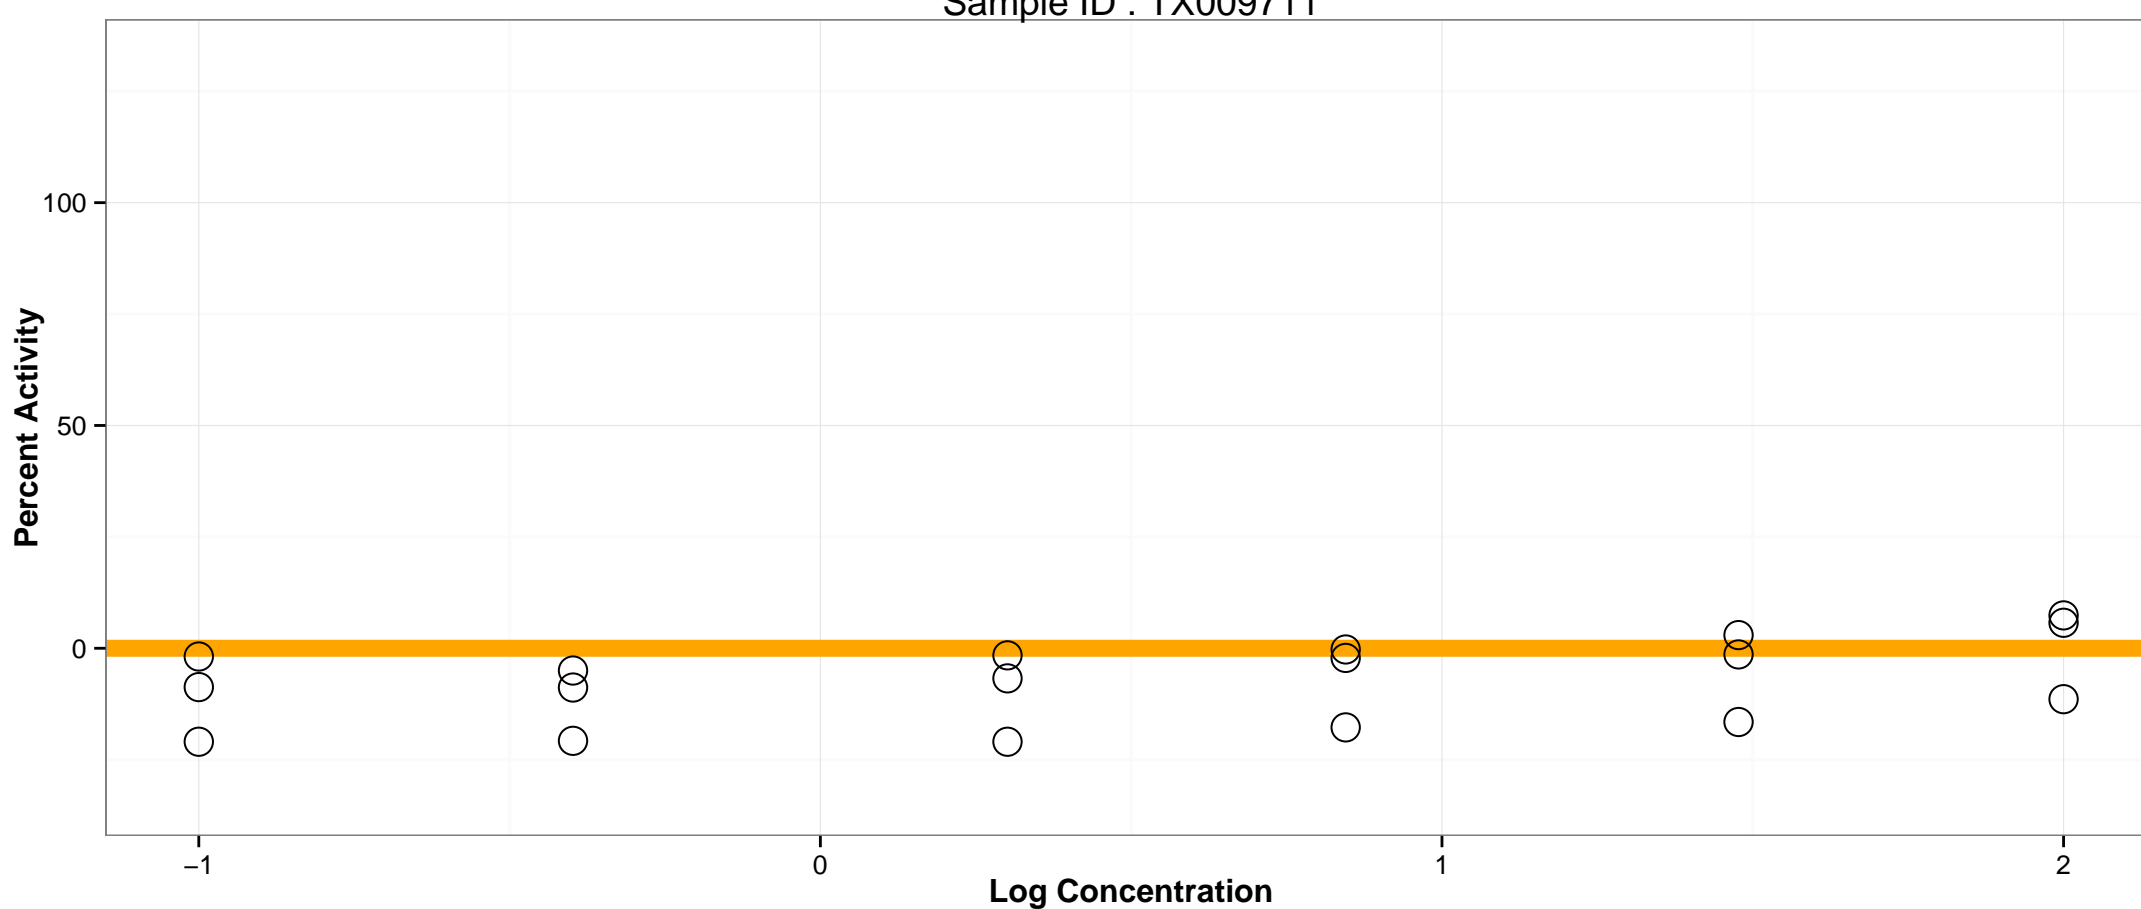

HILL MODEL

HILL MODEL: Not applicable

GAIN-LOSS MODEL

GNLS MODEL: Not applicable

|      | CNST   | HILL | GNLS |
|------|--------|------|------|
| AIC  | 142.02 | NA   | NA   |
| PROB | 1      | NA   | NA   |
| RMSE | 11.45  | NA   | NA   |

MAX\_MEAN : 0.573 MAX\_MED : 5.73 BMAD : 8.58  
COFF : 20 HIT-CALL : 0 FITC : 4 ACTP : 0  
FLAGS :

Chemical : 4-Chlorobenzotrichloride  
CAS : 5216-25-1

Assay ID 1508 (NHEERL\_TPO\_AUR\_dn)  
Sample ID : TP0001441E01

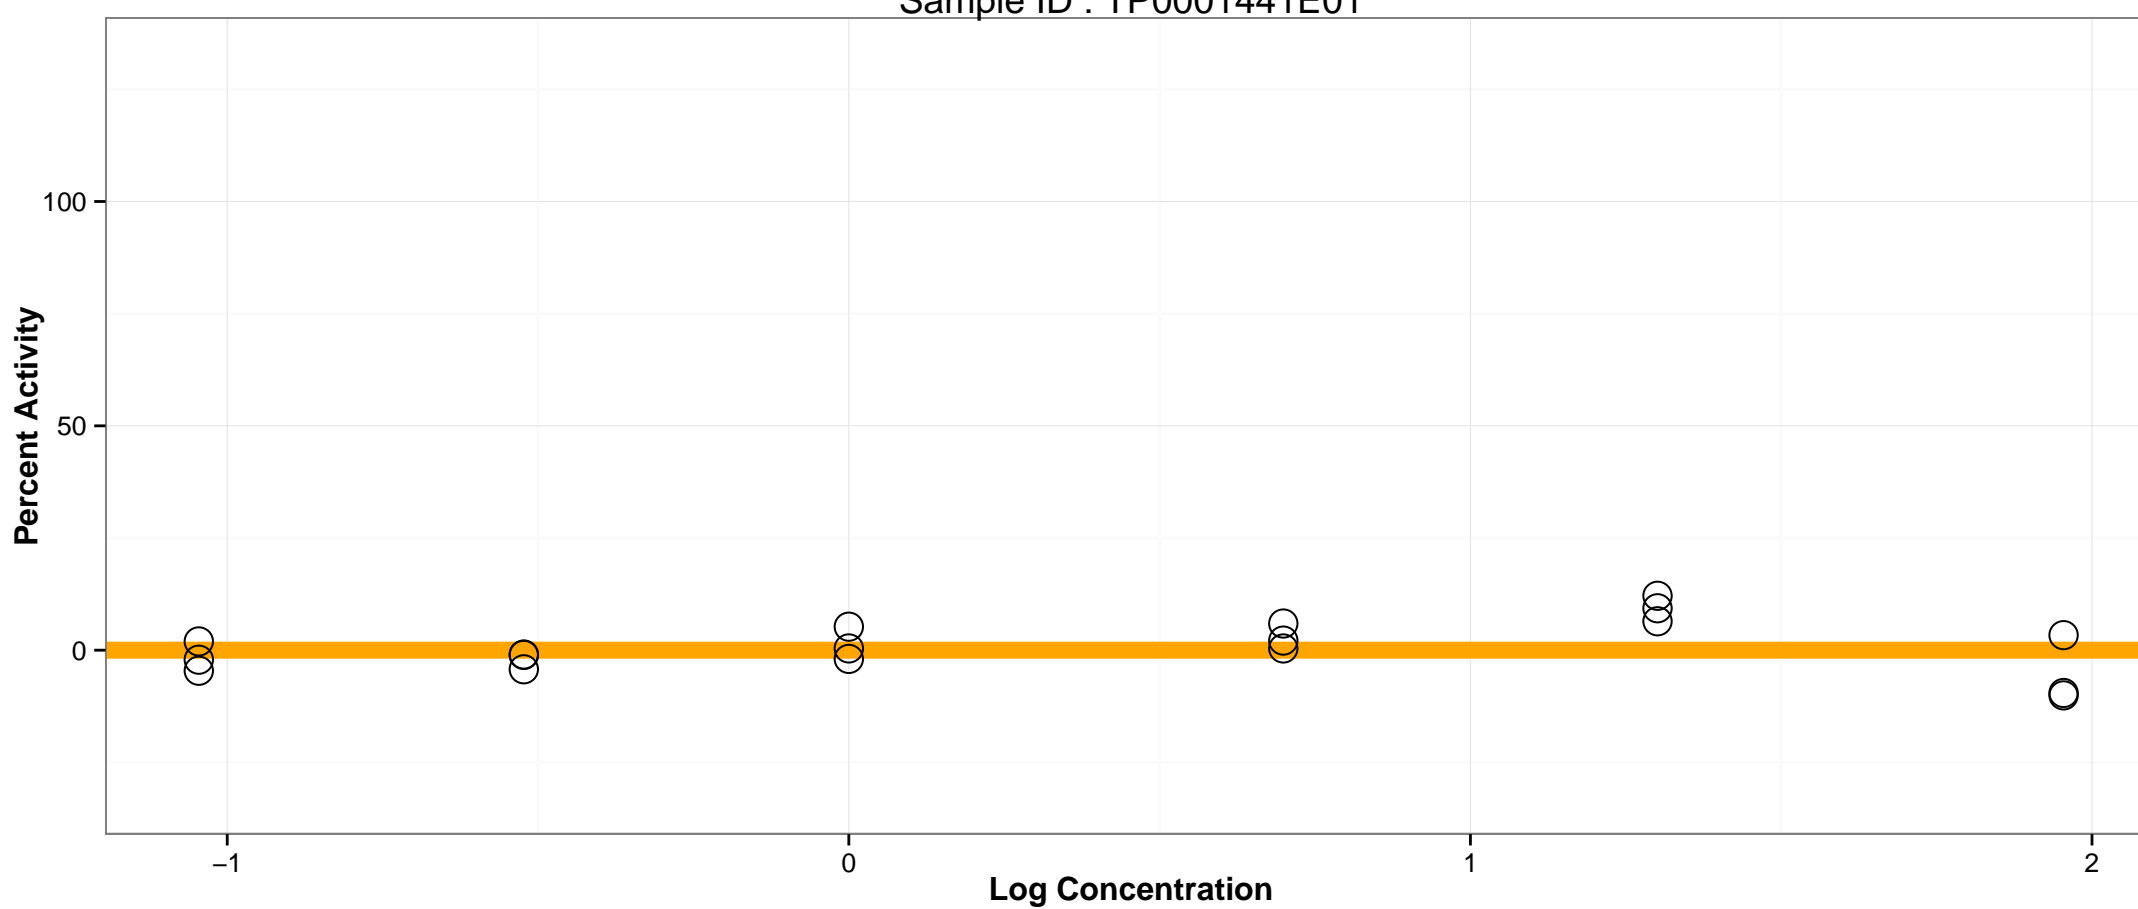

HILL MODEL

HILL MODEL: Not applicable

GAIN-LOSS MODEL

GNLS MODEL: Not applicable

|      | CNST   | HILL | GNLS |
|------|--------|------|------|
| AIC  | 117.33 | NA   | NA   |
| PROB | 1      | NA   | NA   |
| RMSE | 5.78   | NA   | NA   |

MAX\_MEAN : 9.31 MAX\_MED : 9.35 BMAD : 5.69  
COFF : 20 HIT-CALL : 0 FITC : 4 ACTP : 0  
FLAGS :

Assay ID 1509 (NHEERL\_HEK293T\_CellTiterGLO)  
Sample ID : TP0001441E01

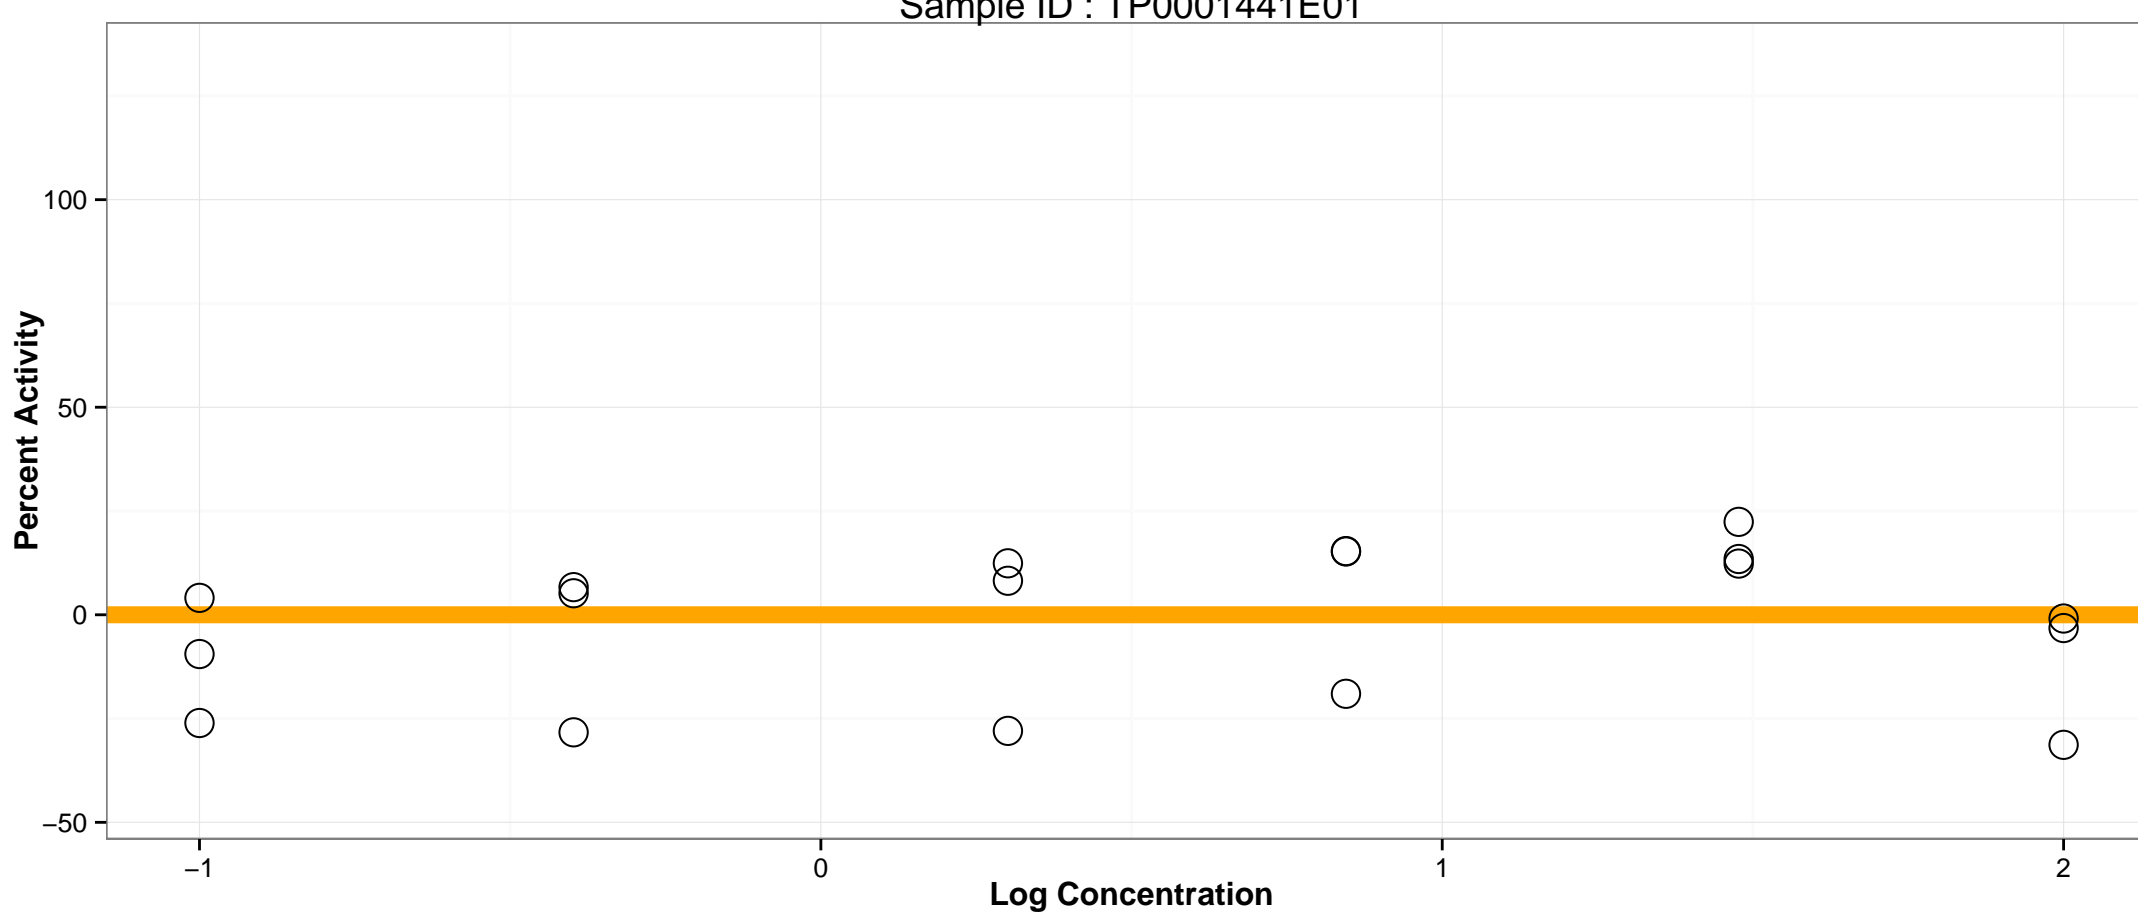

HILL MODEL

HILL MODEL: Not applicable

GAIN-LOSS MODEL

GNLS MODEL: Not applicable

|      | CNST   | HILL | GNLS |
|------|--------|------|------|
| AIC  | 157.68 | NA   | NA   |
| PROB | 1      | NA   | NA   |
| RMSE | 17.19  | NA   | NA   |

MAX\_MEAN : 16.1 MAX\_MED : 15.3 BMAD : 5.54  
COFF : 20 HIT-CALL : 0 FITC : 4 ACTP : 0  
FLAGS :

Assay ID 1848 (NHEERL\_Quantilum\_inhib\_2\_dn)  
Sample ID : TP0001441E01

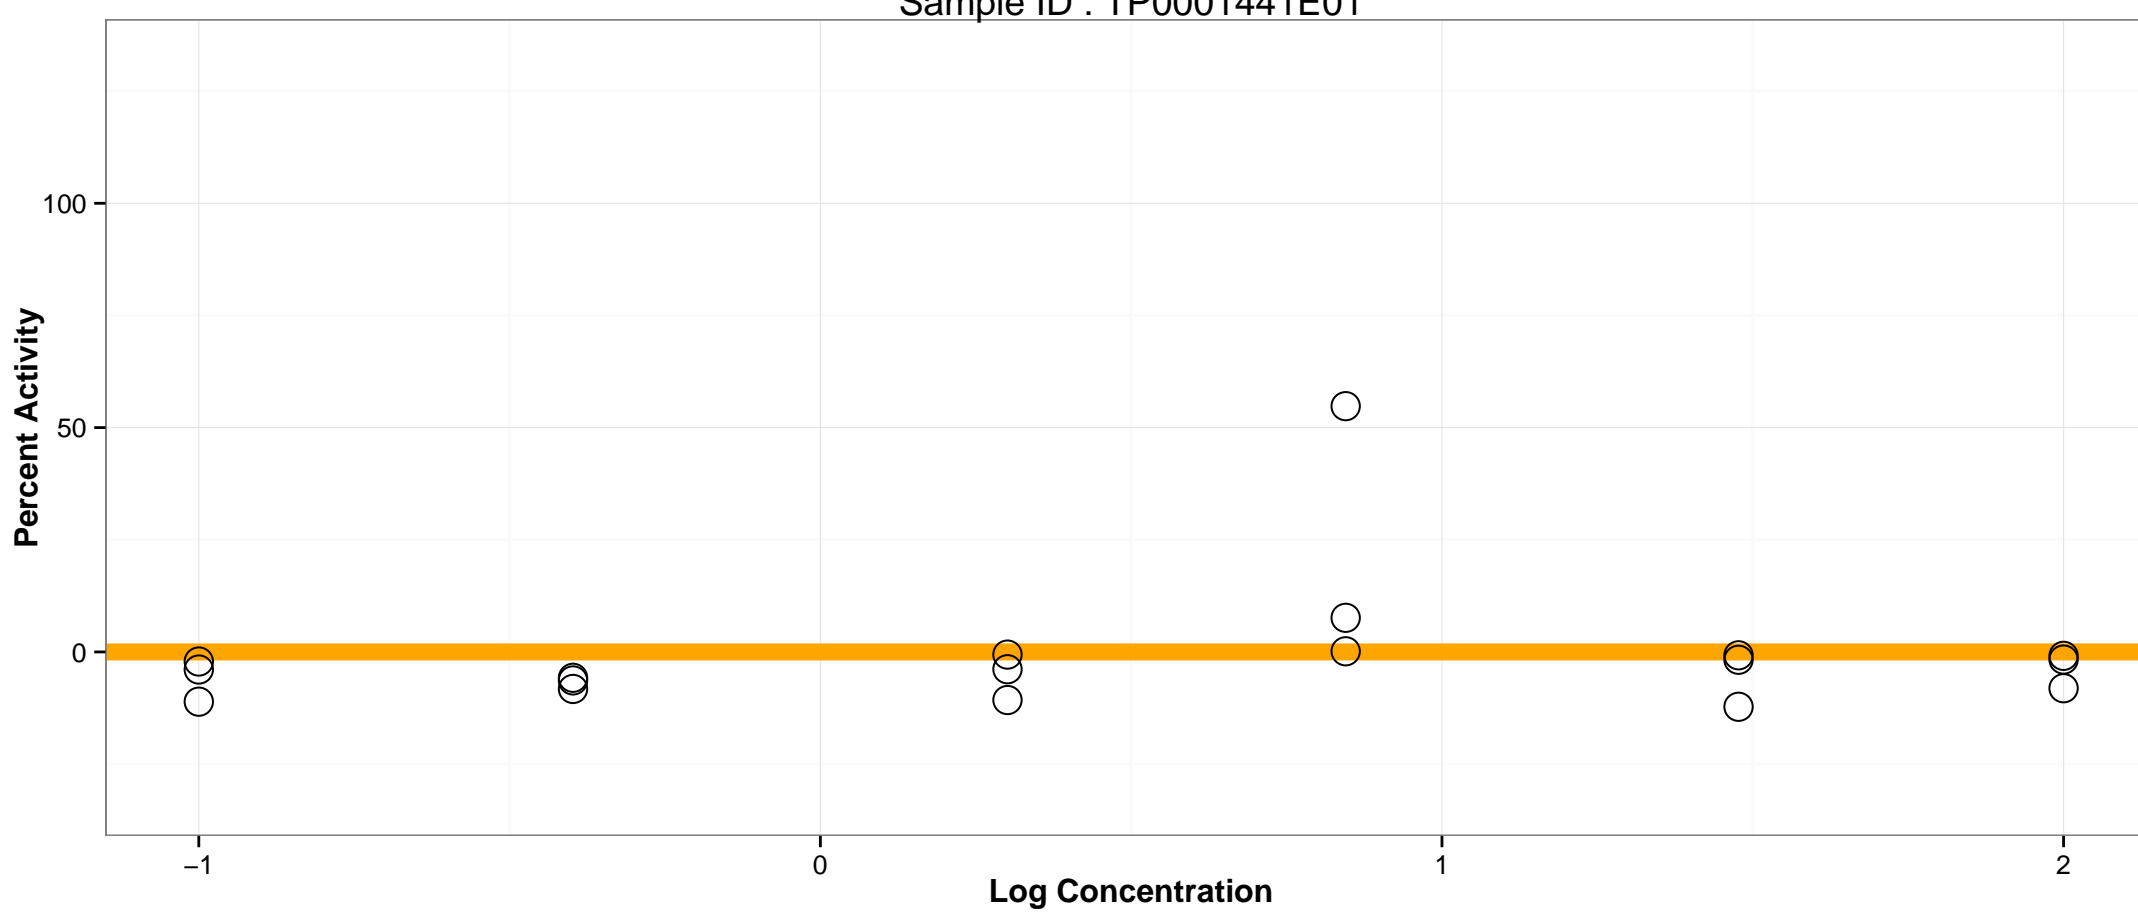

HILL MODEL

HILL MODEL: Not applicable

GAIN-LOSS MODEL

GNLS MODEL: Not applicable

|      | CNST   | HILL | GNLS |
|------|--------|------|------|
| AIC  | 135.79 | NA   | NA   |
| PROB | 1      | NA   | NA   |
| RMSE | 14.33  | NA   | NA   |

MAX\_MEAN : 20.9 MAX\_MED : 7.62 BMAD : 8.58  
COFF : 20 HIT-CALL : 0 FITC : 4 ACTP : 0  
FLAGS :

Chemical : 4-Chlorobenzotrichloride  
CAS : 5216-25-1

Assay ID 1508 (NHEERL\_TPO\_AUR\_dn)  
Sample ID : TX009328

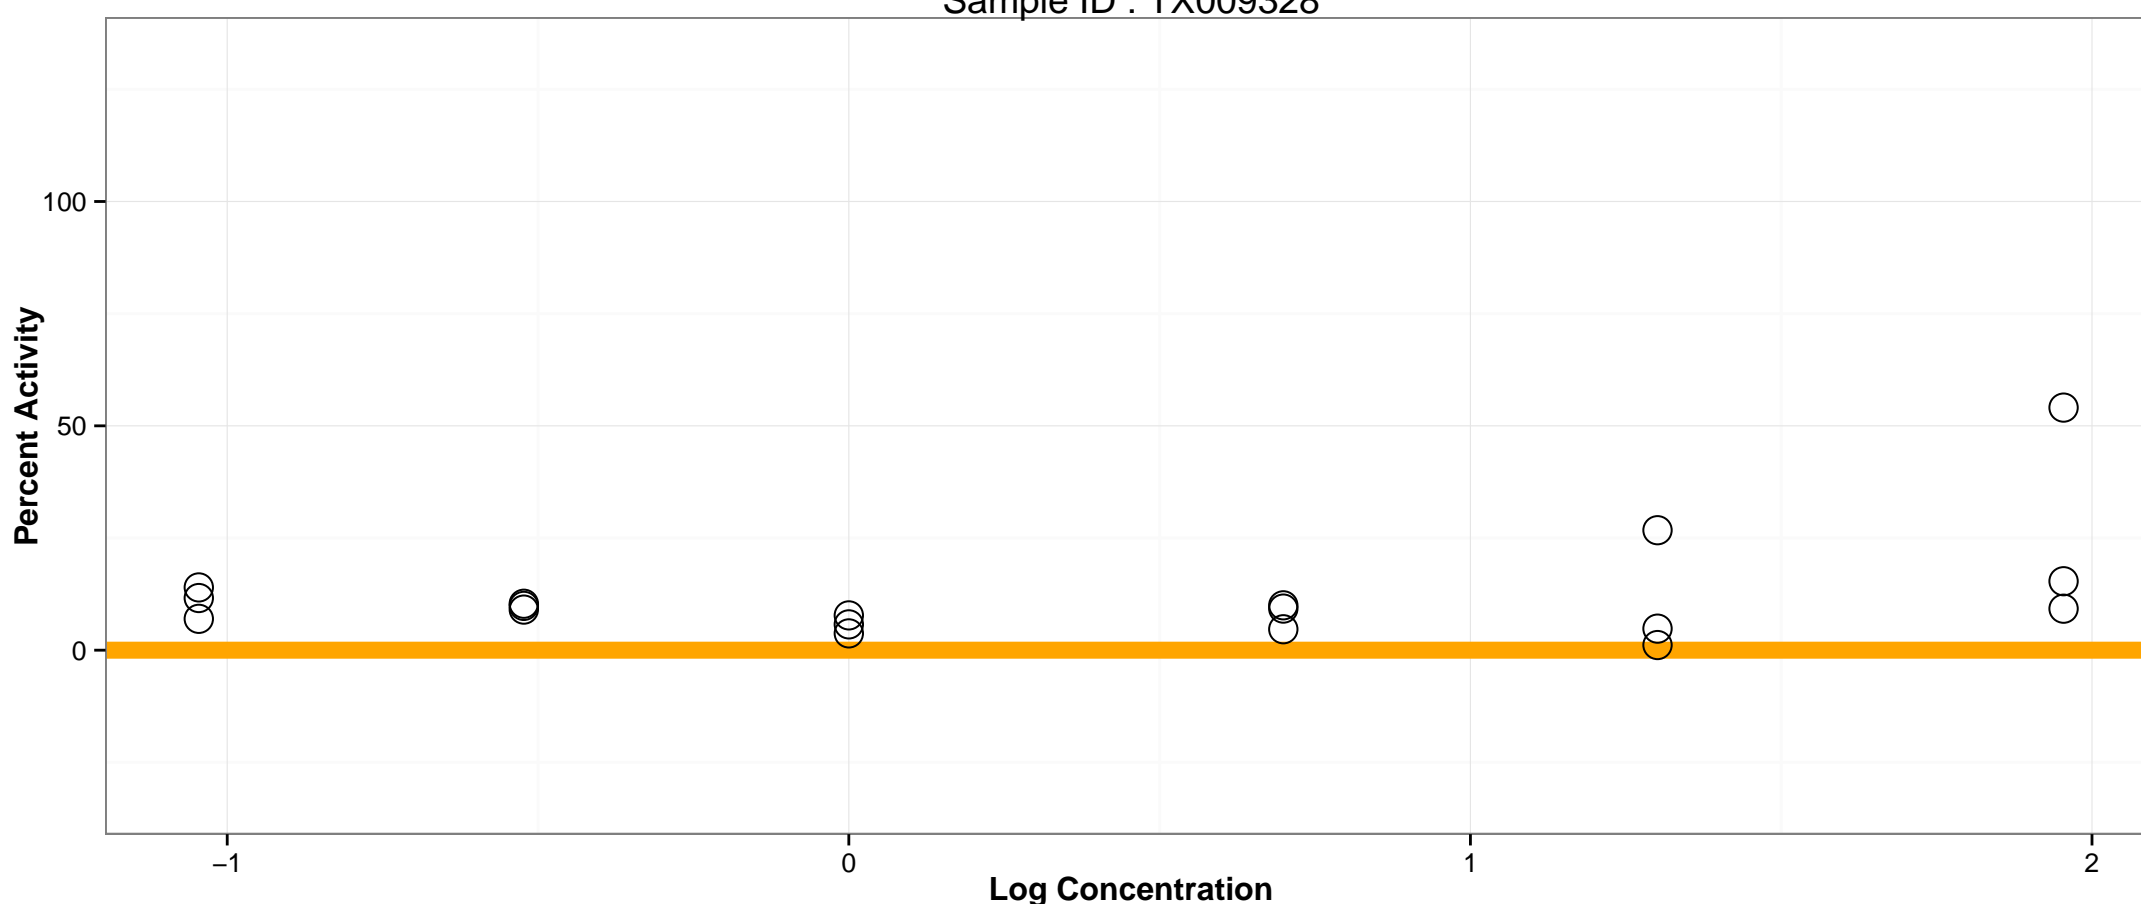

HILL MODEL

HILL MODEL: Not applicable

GAIN-LOSS MODEL

GNLS MODEL: Not applicable

|      | CNST   | HILL | GNLS |
|------|--------|------|------|
| AIC  | 150.14 | NA   | NA   |
| PROB | 1      | NA   | NA   |
| RMSE | 16.62  | NA   | NA   |

MAX\_MEAN : 26.2 MAX\_MED : 15.4 BMAD : 5.69  
COFF : 20 HIT-CALL : 0 FITC : 4 ACTP : 0  
FLAGS :

Assay ID 1509 (NHEERL\_HEK293T\_CellTiterGLO)  
Sample ID : TX009328

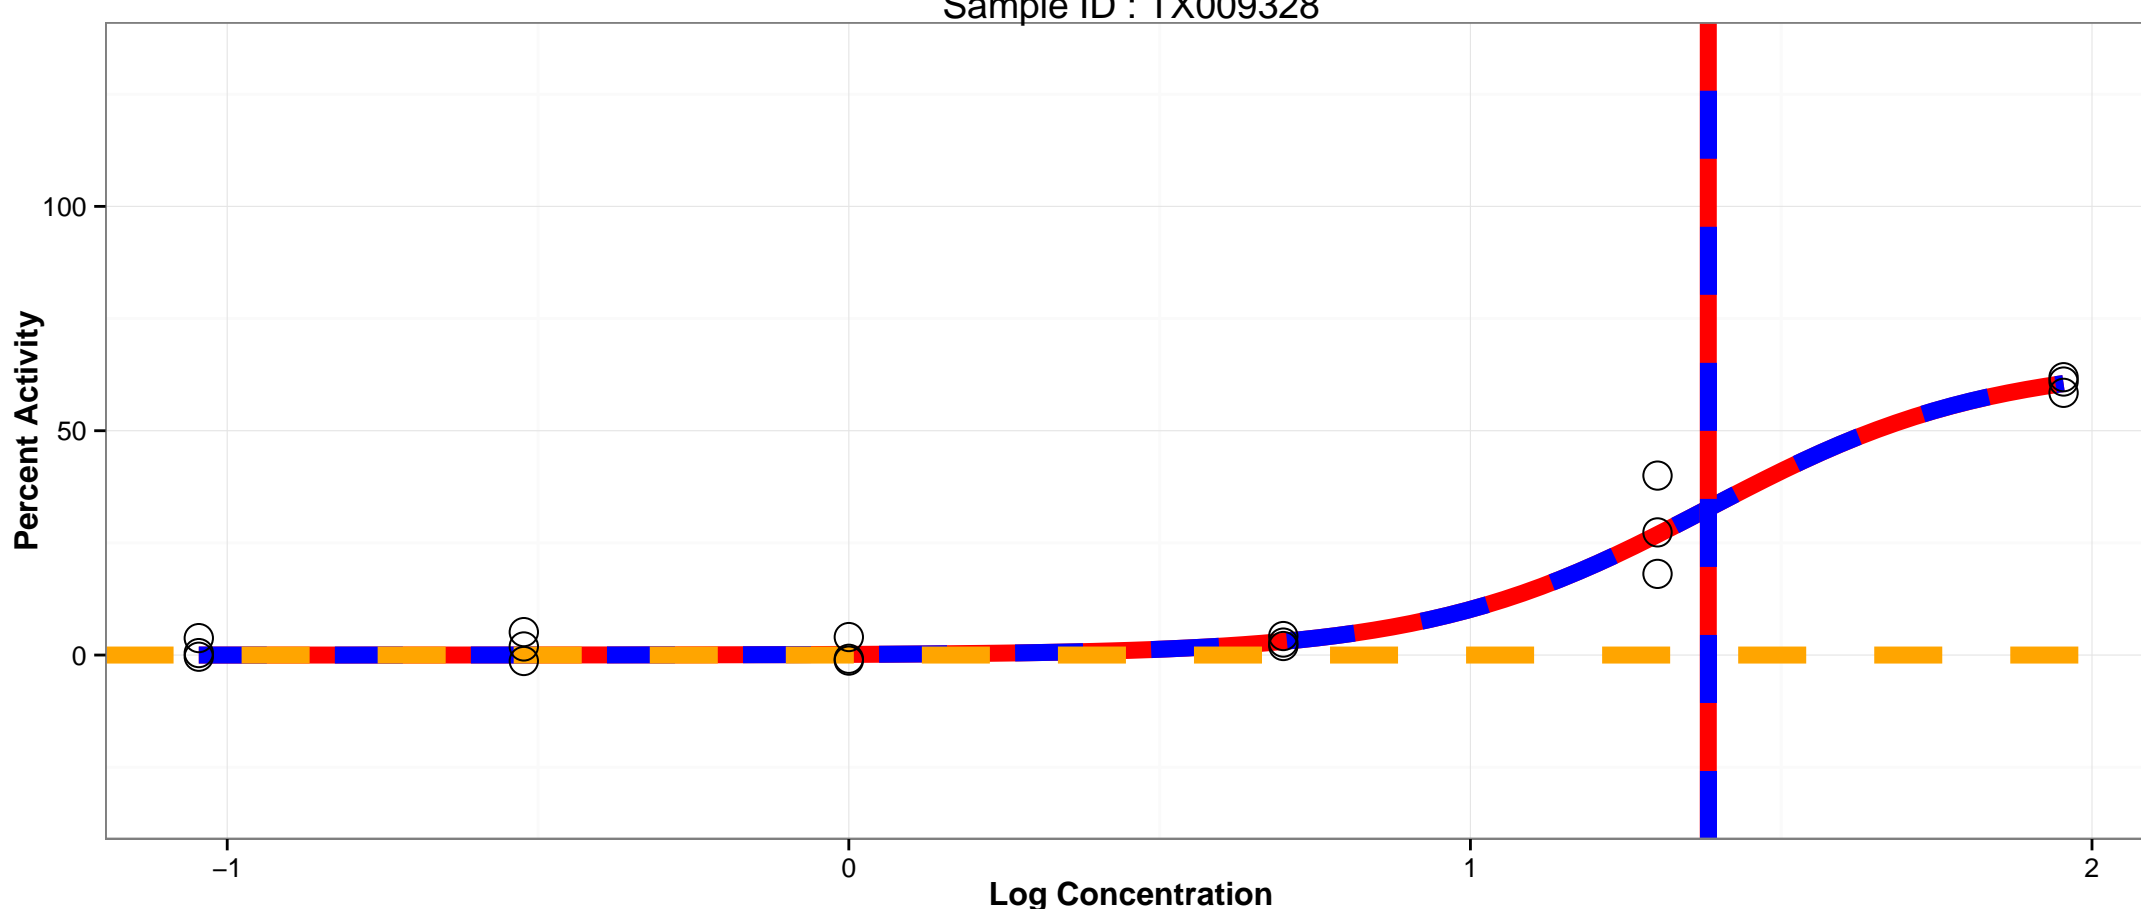

HILL MODEL

|     | tp   | ga     | gw    |
|-----|------|--------|-------|
| val | 65.4 | 1.38   | 1.92  |
| sd  | 3.99 | 0.0631 | 0.376 |

GAIN-LOSS MODEL

|     | tp   | ga   | gw   | la   | lw   |
|-----|------|------|------|------|------|
| val | 65.4 | 1.38 | 1.92 | 2.18 | 13.9 |
| sd  | NA   | NA   | NA   | NA   | NA   |

|      | CNST   | HILL   | GNLS   |
|------|--------|--------|--------|
| AIC  | 169.18 | 105.25 | 109.25 |
| PROB | 0      | 0.88   | 0.12   |
| RMSE | 27.63  | 4.24   | 4.24   |

MAX\_MEAN : 60.5 MAX\_MED : 61 BMAD : 5.54  
COFF : 20 HIT-CALL : 1 FITC : 42 ACTP : 1  
FLAGS :

Assay ID 1848 (NHEERL\_Quantilum\_inhib\_2\_dn)  
Sample ID : TX009328

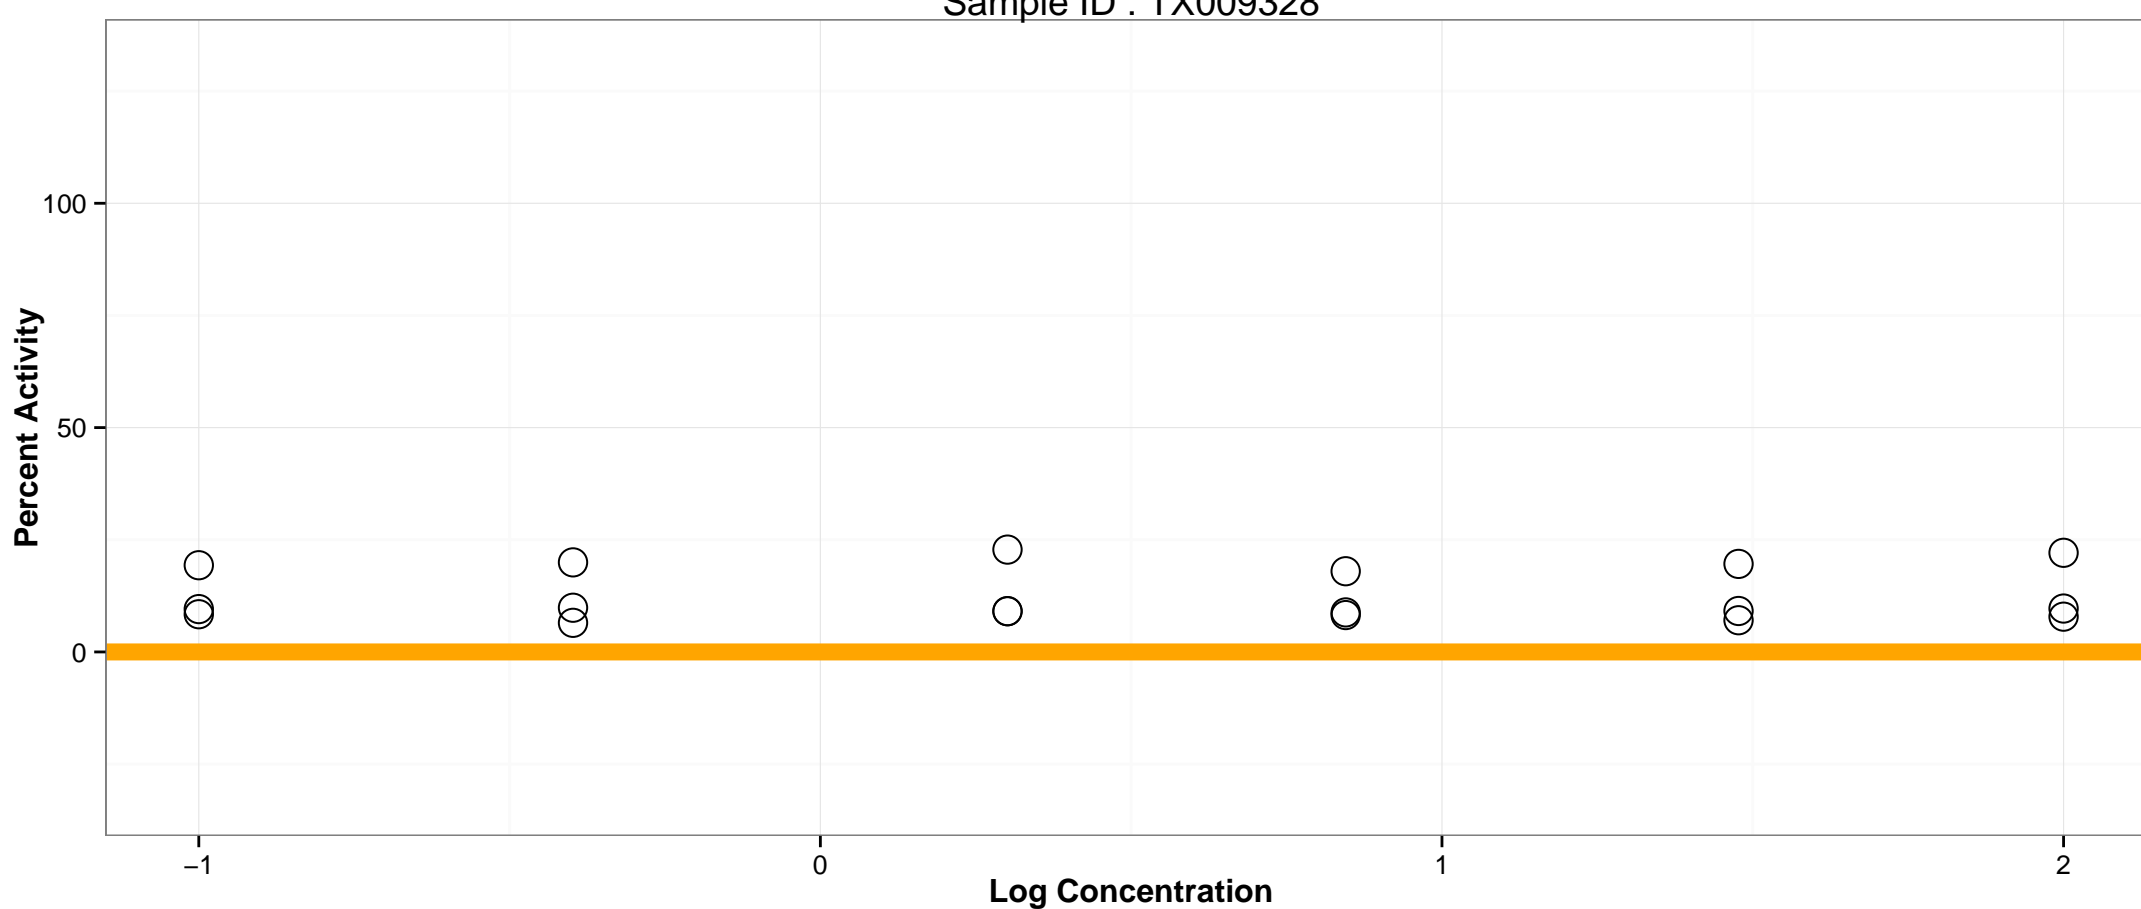

HILL MODEL

HILL MODEL: Not applicable

GAIN-LOSS MODEL

GNLS MODEL: Not applicable

|      | CNST   | HILL | GNLS |
|------|--------|------|------|
| AIC  | 150.25 | NA   | NA   |
| PROB | 1      | NA   | NA   |
| RMSE | 13.73  | NA   | NA   |

MAX\_MEAN : 13.7 MAX\_MED : 9.86 BMAD : 8.58  
COFF : 20 HIT-CALL : 0 FITC : 4 ACTP : 0  
FLAGS :

Chemical : Sodium dichloroisocyanurate  
CAS : 2893-78-9

Assay ID 1508 (NHEERL\_TPO\_AUR\_dn)  
Sample ID : TP0001441E02

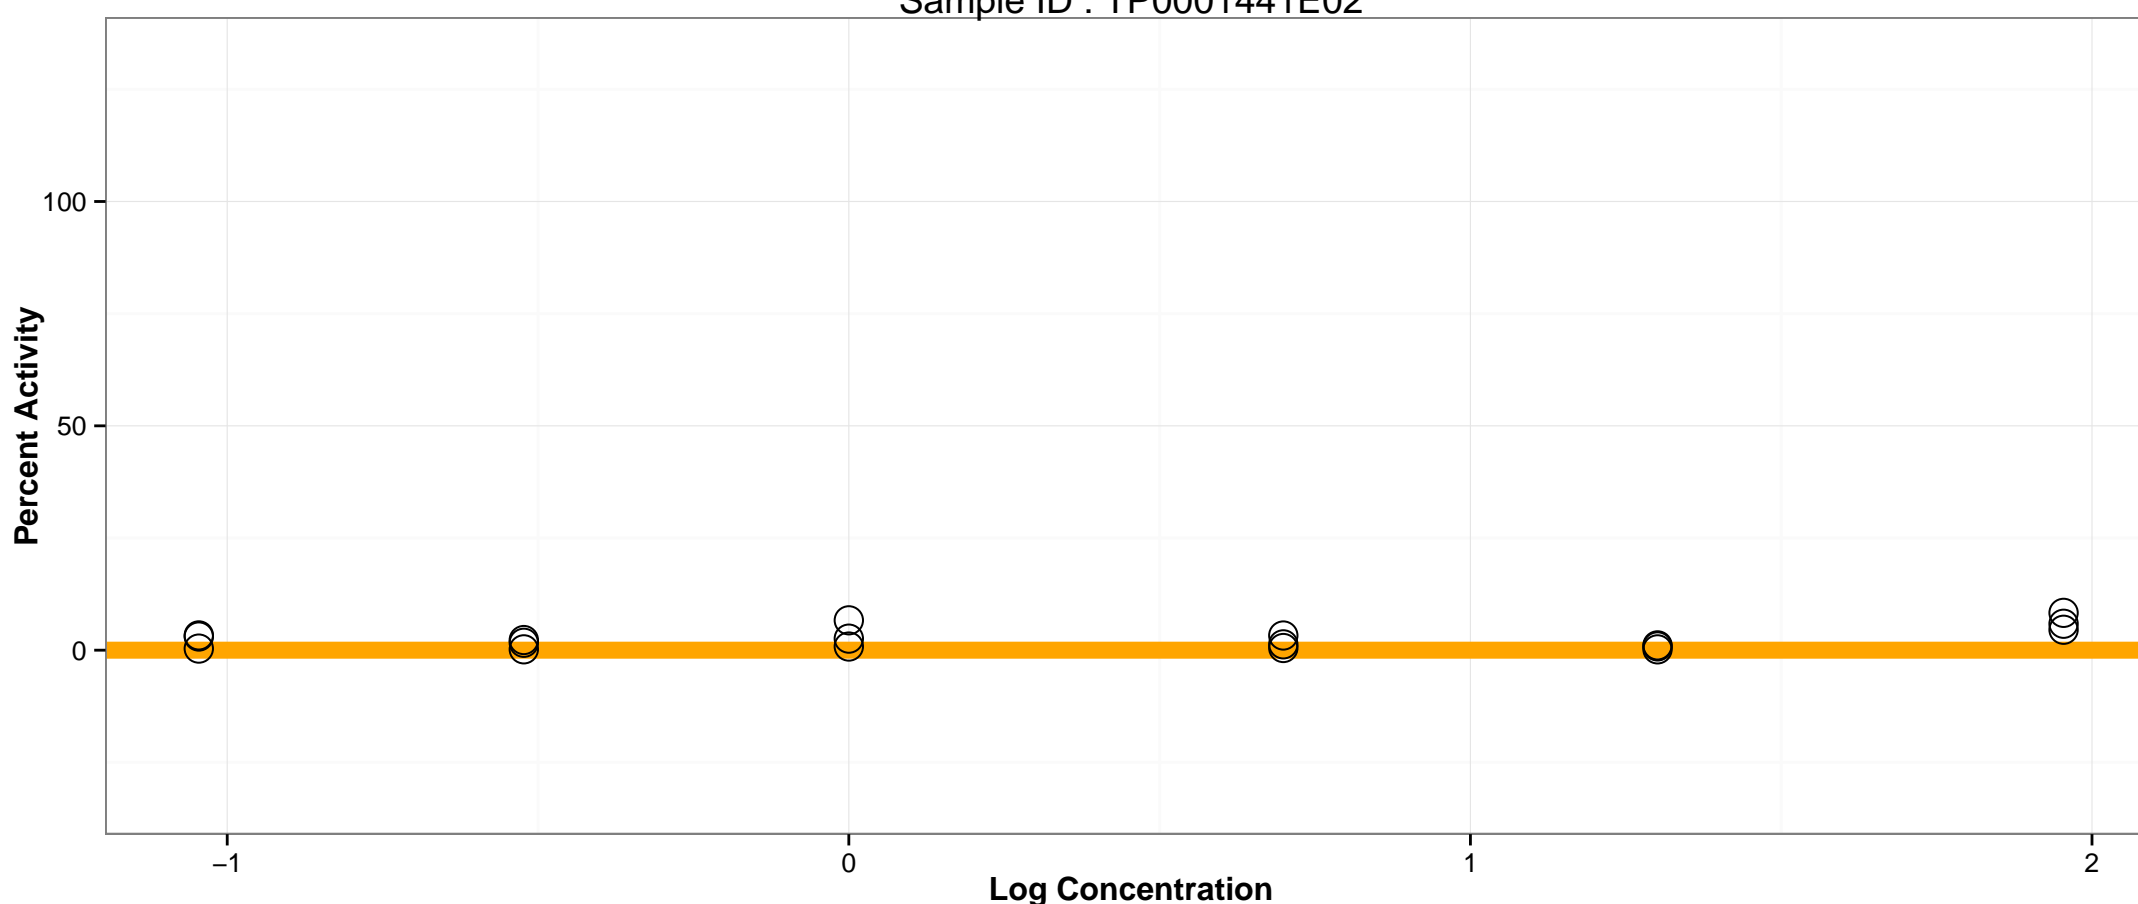

HILL MODEL

HILL MODEL: Not applicable

GAIN-LOSS MODEL

GNLS MODEL: Not applicable

|      | CNST  | HILL | GNLS |
|------|-------|------|------|
| AIC  | 98.05 | NA   | NA   |
| PROB | 1     | NA   | NA   |
| RMSE | 3.49  | NA   | NA   |

MAX\_MEAN : 6.26 MAX\_MED : 5.9 BMAD : 5.69  
COFF : 20 HIT-CALL : 0 FITC : 4 ACTP : 0  
FLAGS :

Assay ID 1509 (NHEERL\_HEK293T\_CellTiterGLO)  
Sample ID : TP0001441E02

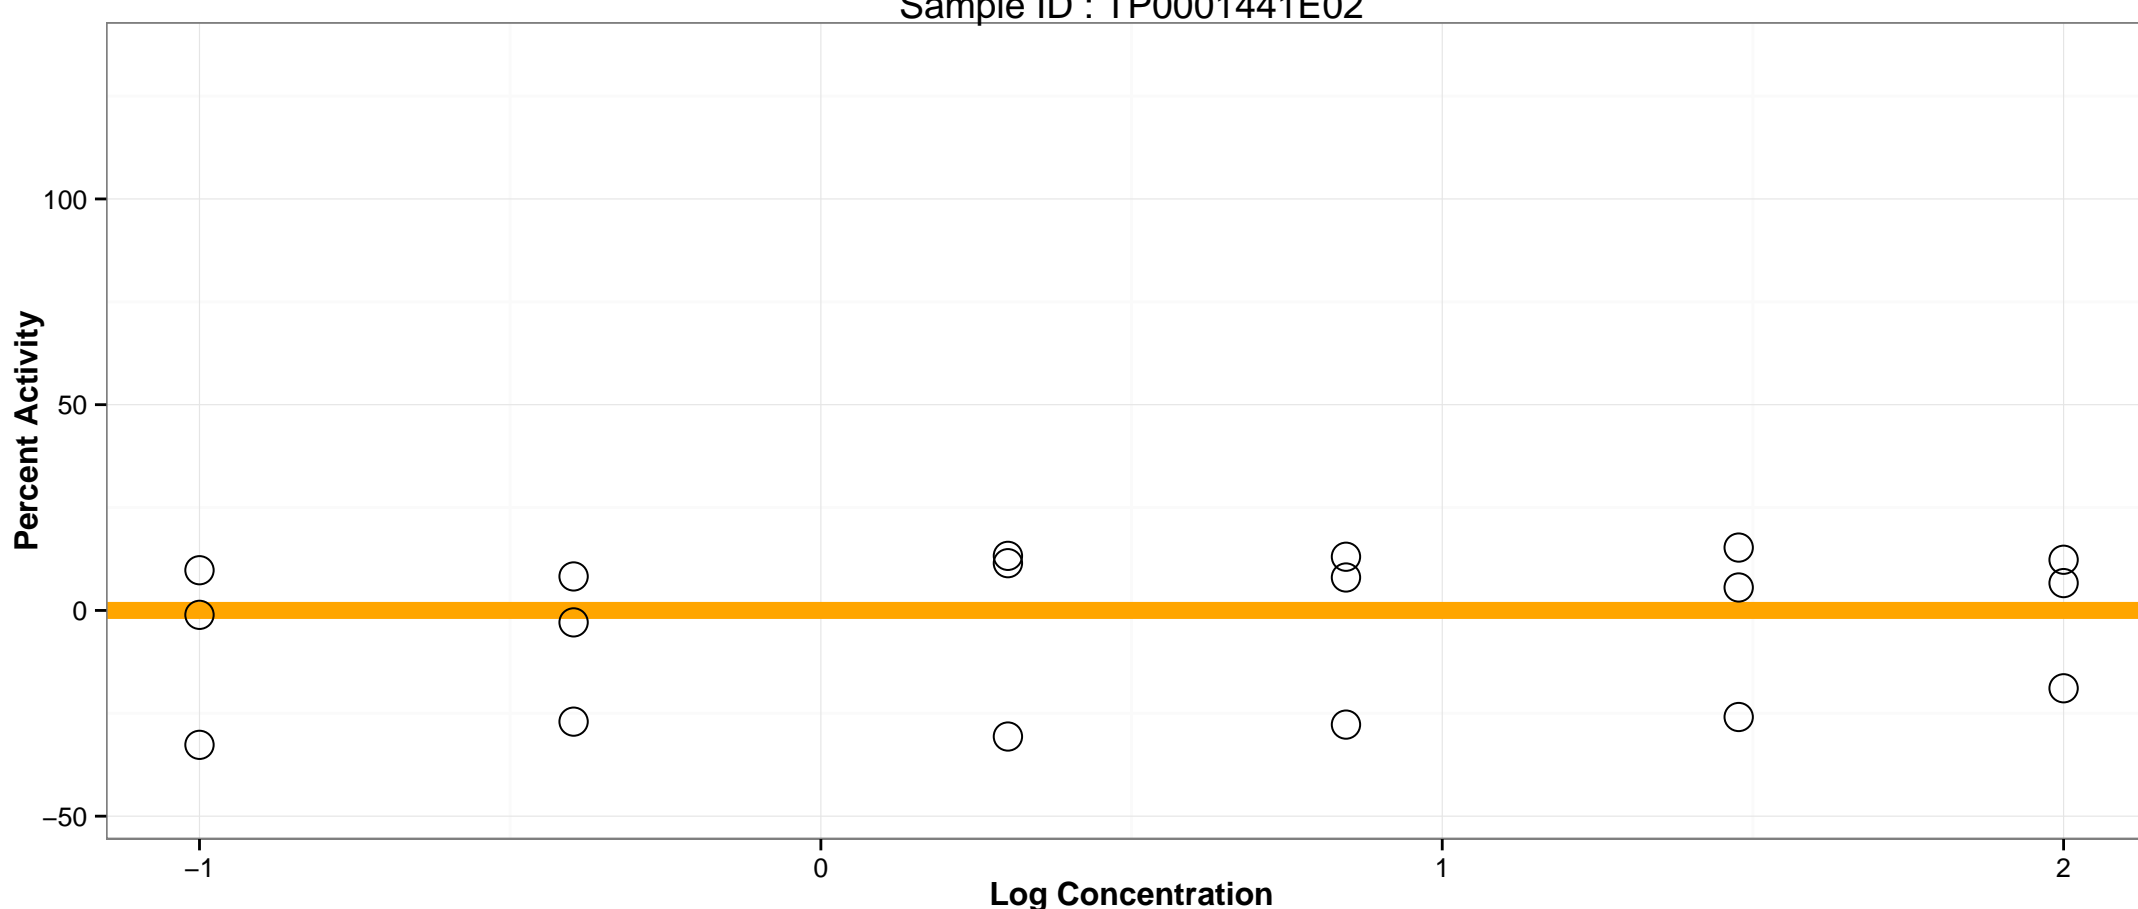

HILL MODEL

HILL MODEL: Not applicable

GAIN-LOSS MODEL

GNLS MODEL: Not applicable

|      | CNST   | HILL | GNLS |
|------|--------|------|------|
| AIC  | 158.81 | NA   | NA   |
| PROB | 1      | NA   | NA   |
| RMSE | 17.81  | NA   | NA   |

MAX\_MEAN : 0.0295 MAX\_MED : 11.5 BMAD : 5.54  
COFF : 20 HIT-CALL : 0 FITC : 4 ACTP : 0  
FLAGS :

Assay ID 1848 (NHEERL\_Quantilum\_inhib\_2\_dn)  
Sample ID : TP0001441E02

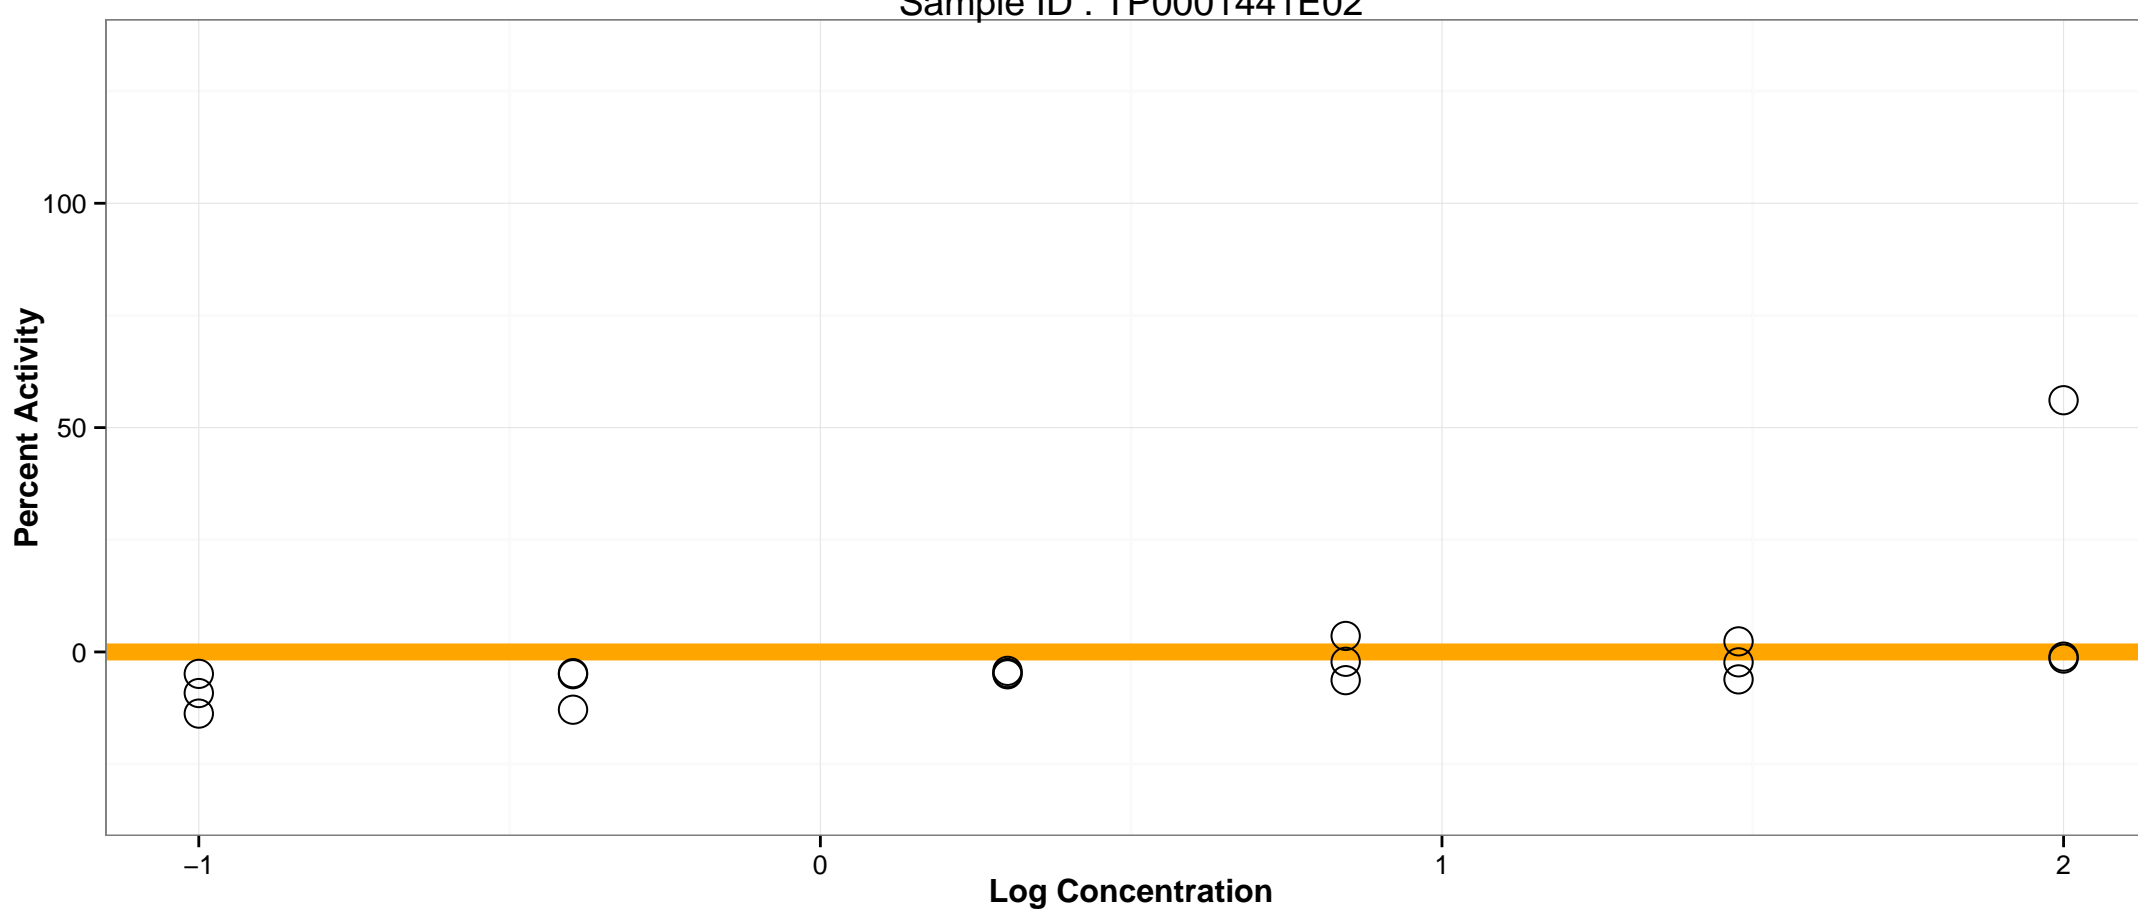

HILL MODEL

HILL MODEL: Not applicable

GAIN-LOSS MODEL

GNLS MODEL: Not applicable

|      | CNST   | HILL | GNLS |
|------|--------|------|------|
| AIC  | 135.46 | NA   | NA   |
| PROB | 1      | NA   | NA   |
| RMSE | 14.59  | NA   | NA   |

MAX\_MEAN : 17.9 MAX\_MED : -1.03 BMAD : 8.58  
COFF : 20 HIT-CALL : 0 FITC : 4 ACTP : 0  
FLAGS :

Chemical : Cymoxanil  
CAS : 57966-95-7

Assay ID 1508 (NHEERL\_TPO\_AUR\_dn)  
Sample ID : TP0001441E03

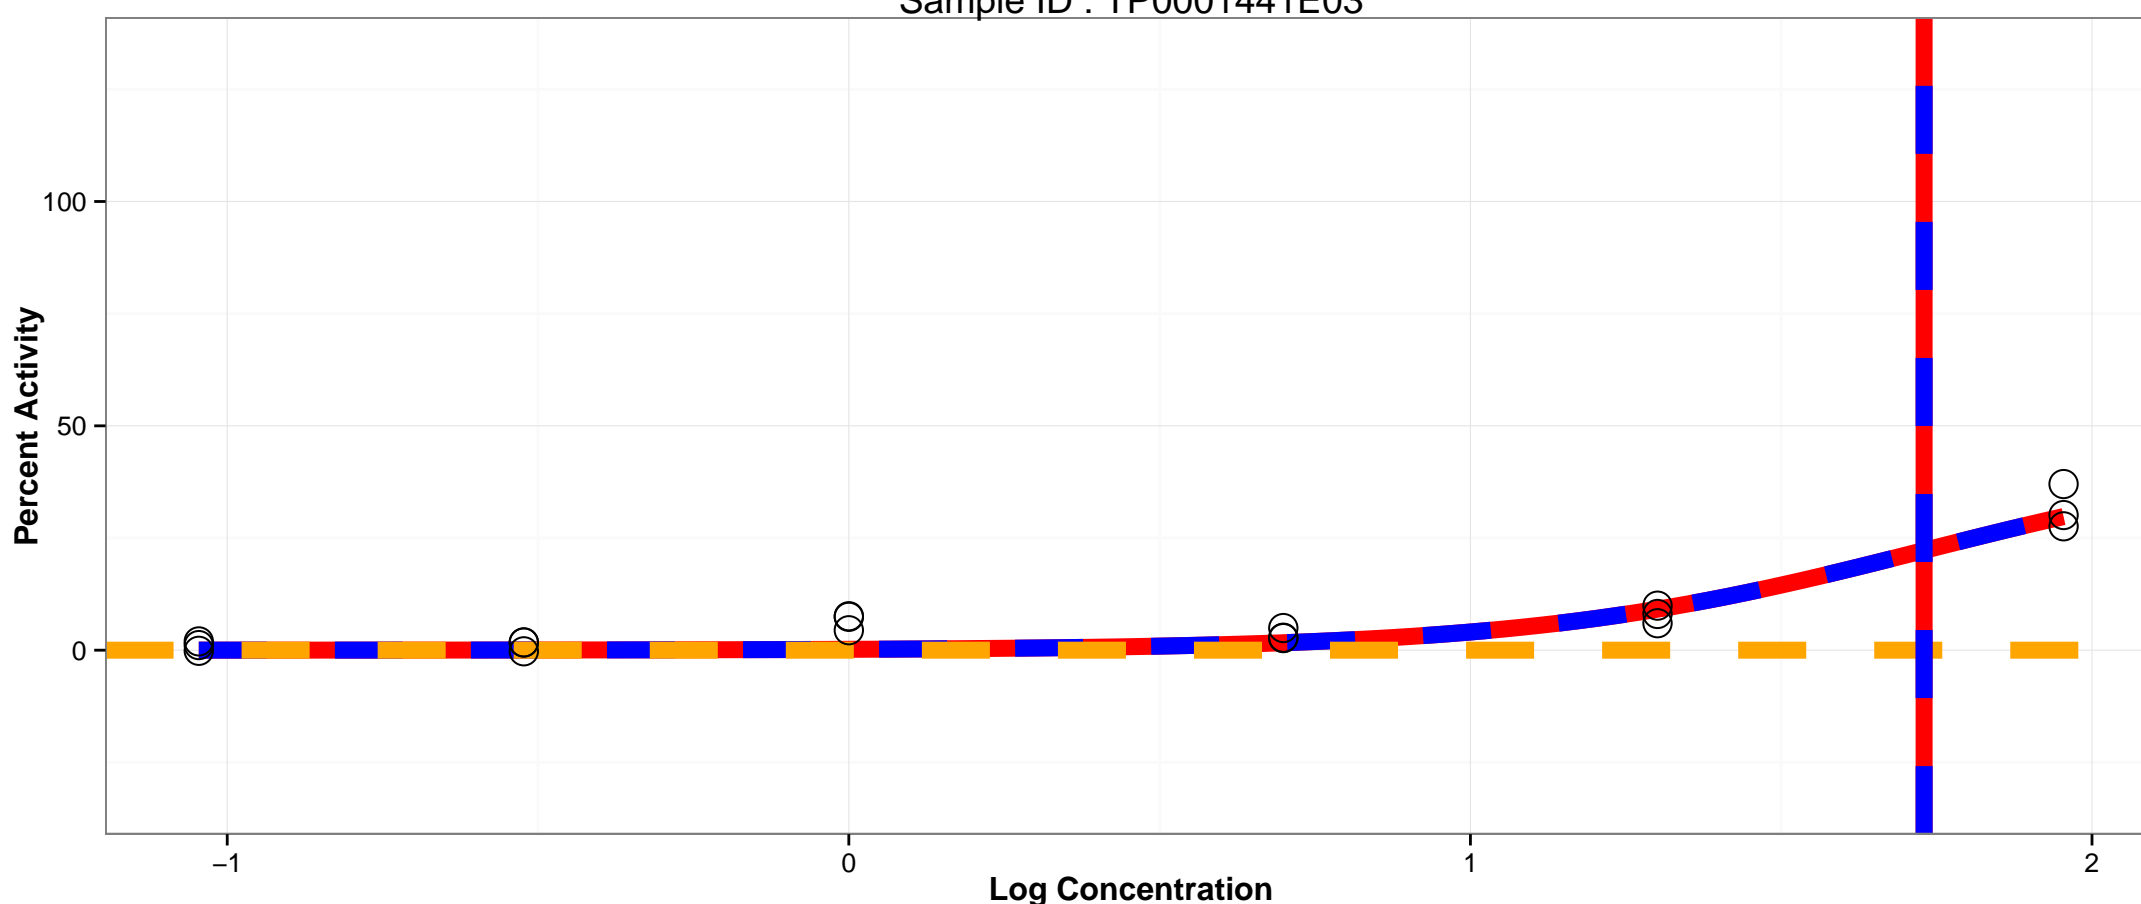

HILL MODEL

|     | tp   | ga    | gw    |
|-----|------|-------|-------|
| val | 44.4 | 1.73  | 1.37  |
| sd  | 16.2 | 0.277 | 0.508 |

GAIN-LOSS MODEL

|     | tp   | ga    | gw    | la   | lw    |
|-----|------|-------|-------|------|-------|
| val | 44.4 | 1.73  | 1.37  | 2.45 | 17.6  |
| sd  | 16.2 | 0.277 | 0.508 | 375  | 13200 |

|      | CNST   | HILL   | GNLS   |
|------|--------|--------|--------|
| AIC  | 142.65 | 103.33 | 107.33 |
| PROB | 0      | 0.88   | 0.12   |
| RMSE | 13.8   | 3.48   | 3.48   |

MAX\_MEAN : 31.6 MAX\_MED : 30.1 BMAD : 5.69  
COFF : 20 HIT-CALL : 1 FITC : 42 ACTP : 1  
FLAGS : 6

Assay ID 1509 (NHEERL\_HEK293T\_CellTiterGLO)  
Sample ID : TP0001441E03

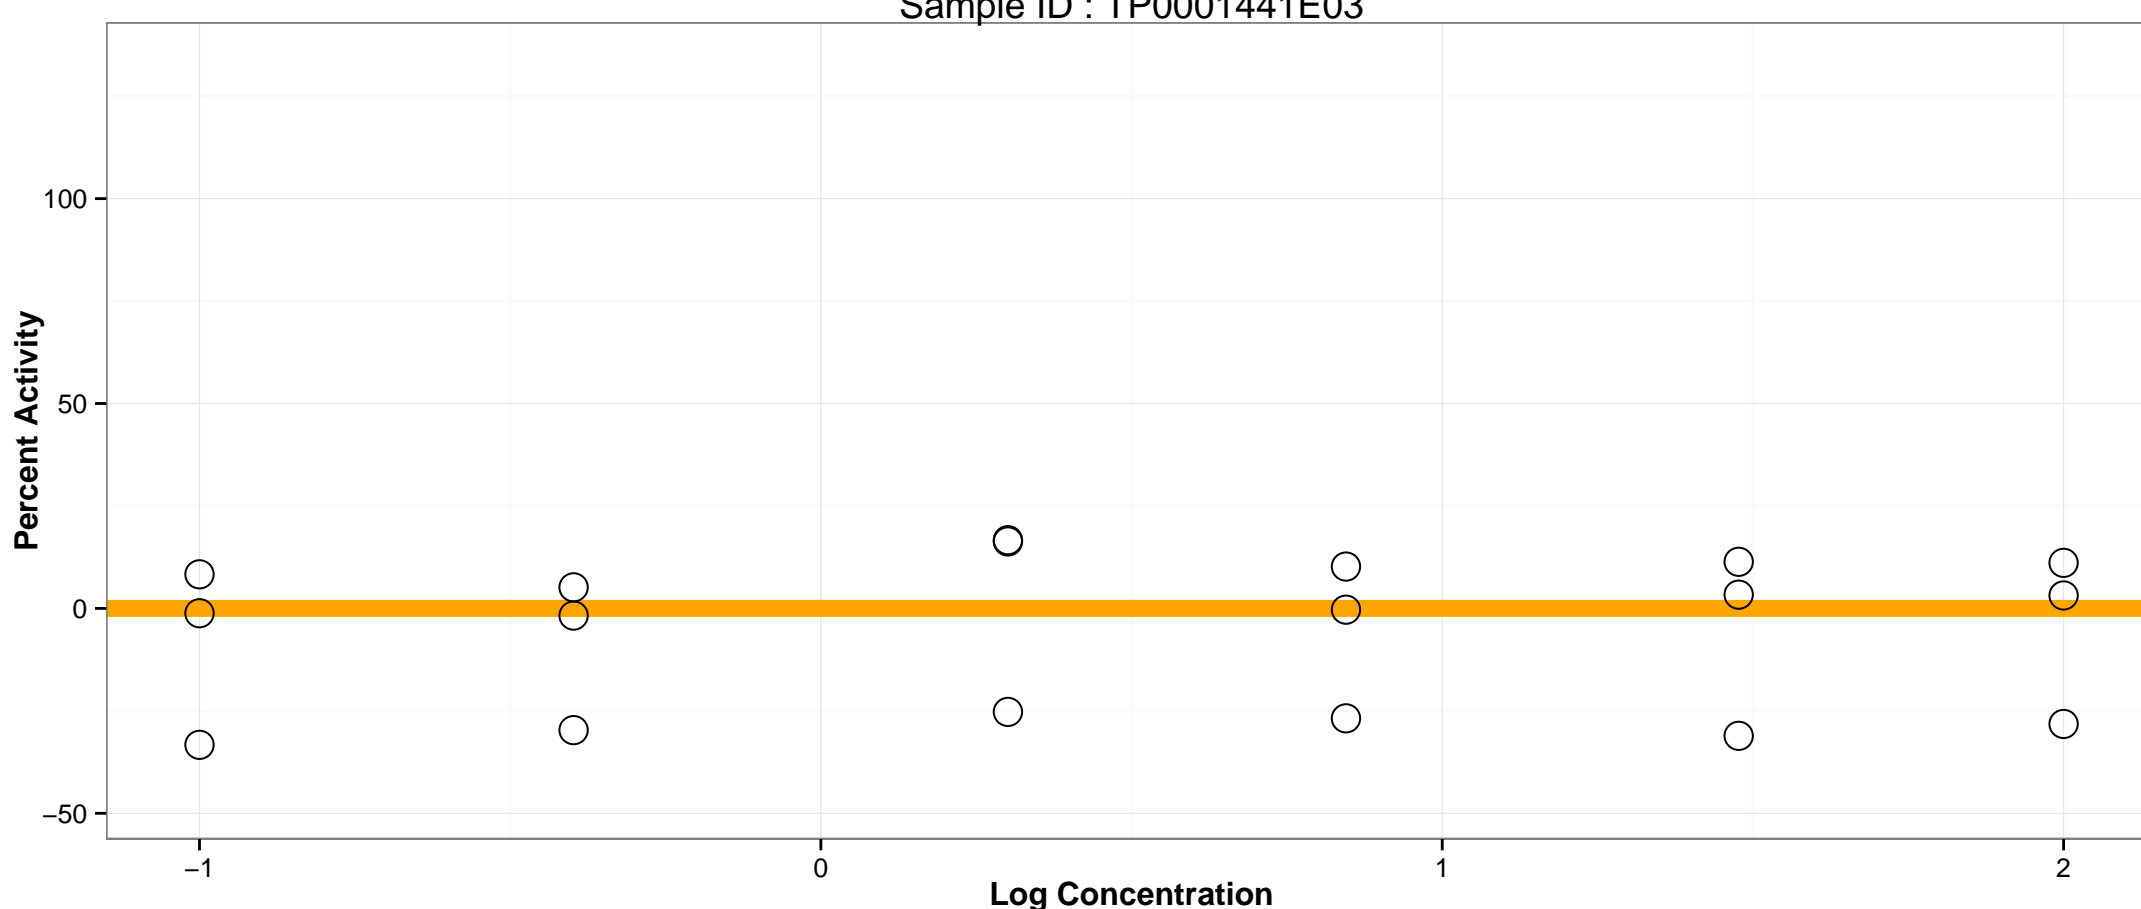

HILL MODEL

HILL MODEL: Not applicable

GAIN-LOSS MODEL

GNLS MODEL: Not applicable

|      | CNST   | HILL | GNLS |
|------|--------|------|------|
| AIC  | 159.76 | NA   | NA   |
| PROB | 1      | NA   | NA   |
| RMSE | 18.45  | NA   | NA   |

MAX\_MEAN : 2.6 MAX\_MED : 16.4 BMAD : 5.54  
COFF : 20 HIT-CALL : 0 FITC : 4 ACTP : 0  
FLAGS :

Assay ID 1848 (NHEERL\_Quantilum\_inhib\_2\_dn)  
Sample ID : TP0001441E03

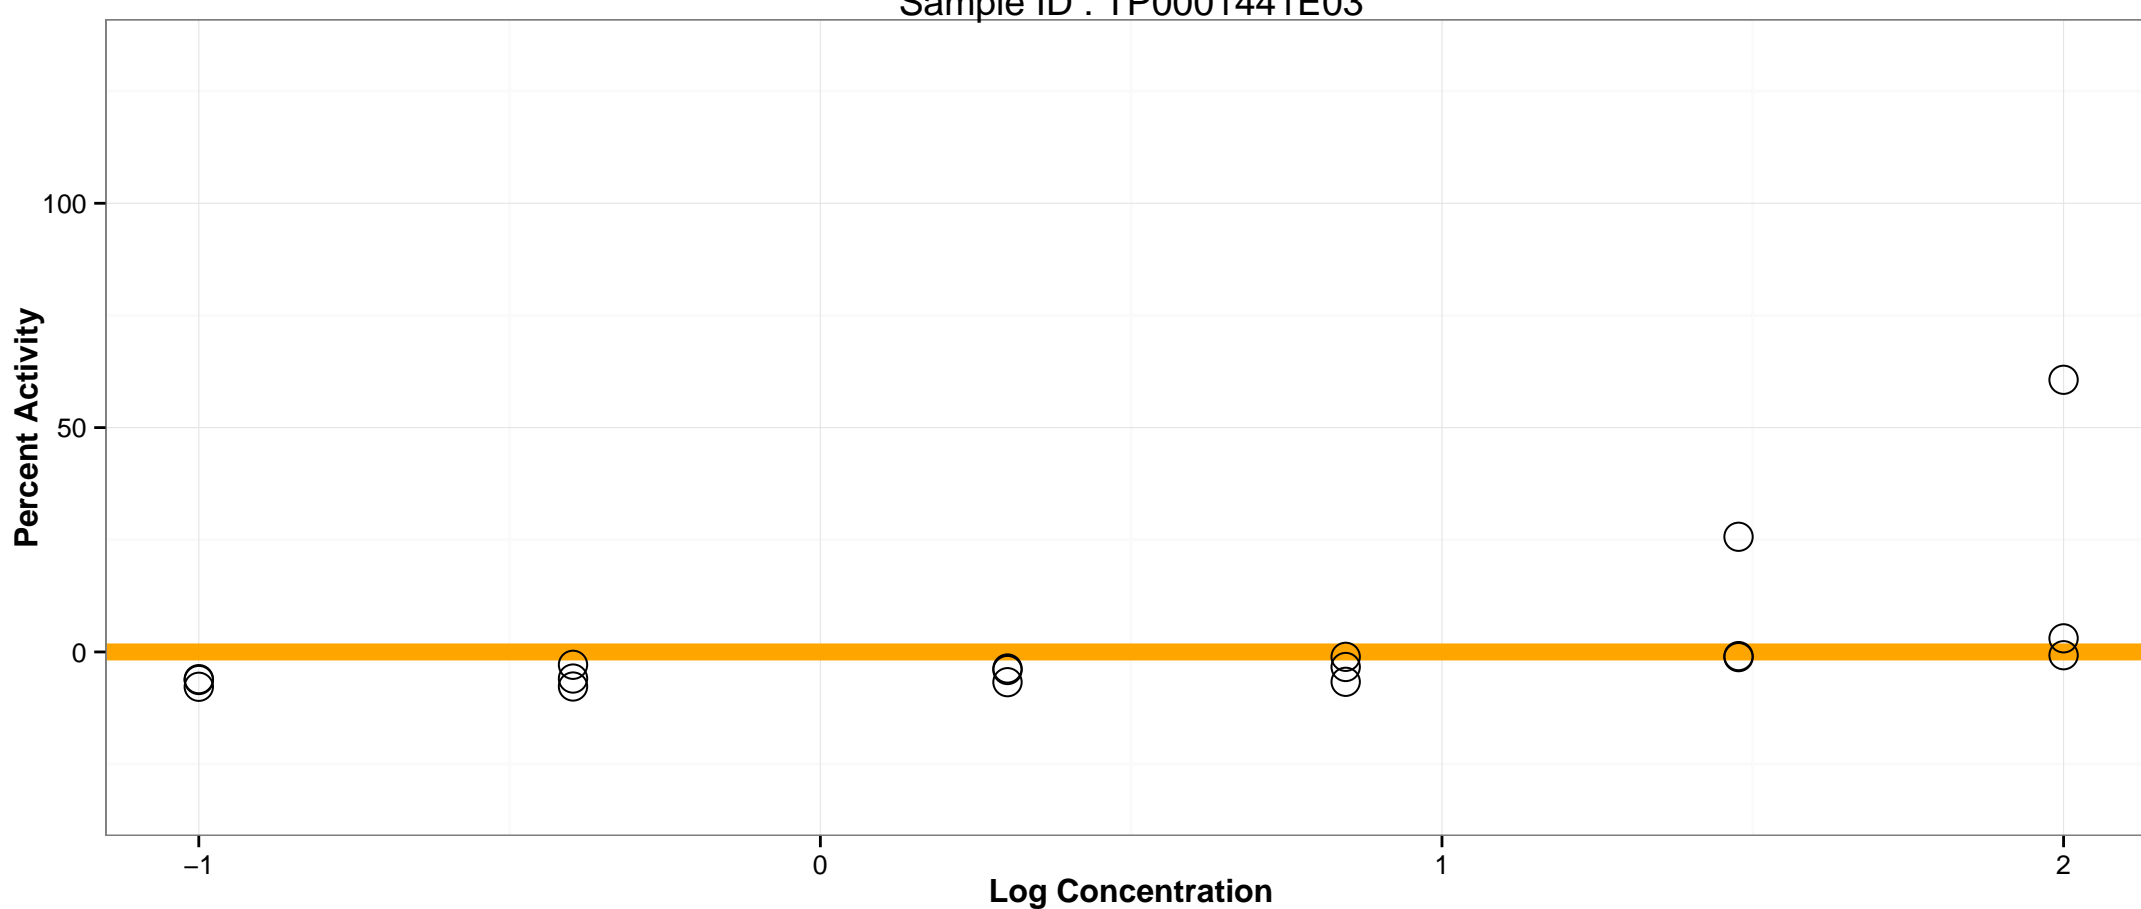

HILL MODEL

HILL MODEL: Not applicable

GAIN-LOSS MODEL

GNLS MODEL: Not applicable

|      | CNST   | HILL | GNLS |
|------|--------|------|------|
| AIC  | 138.38 | NA   | NA   |
| PROB | 1      | NA   | NA   |
| RMSE | 16.2   | NA   | NA   |

MAX\_MEAN : 21 MAX\_MED : 3.05 BMAD : 8.58  
COFF : 20 HIT-CALL : 0 FITC : 4 ACTP : 0  
FLAGS :

Chemical : Cymoxanil  
CAS : 57966-95-7

Assay ID 1508 (NHEERL\_TPO\_AUR\_dn)  
Sample ID : TX001425

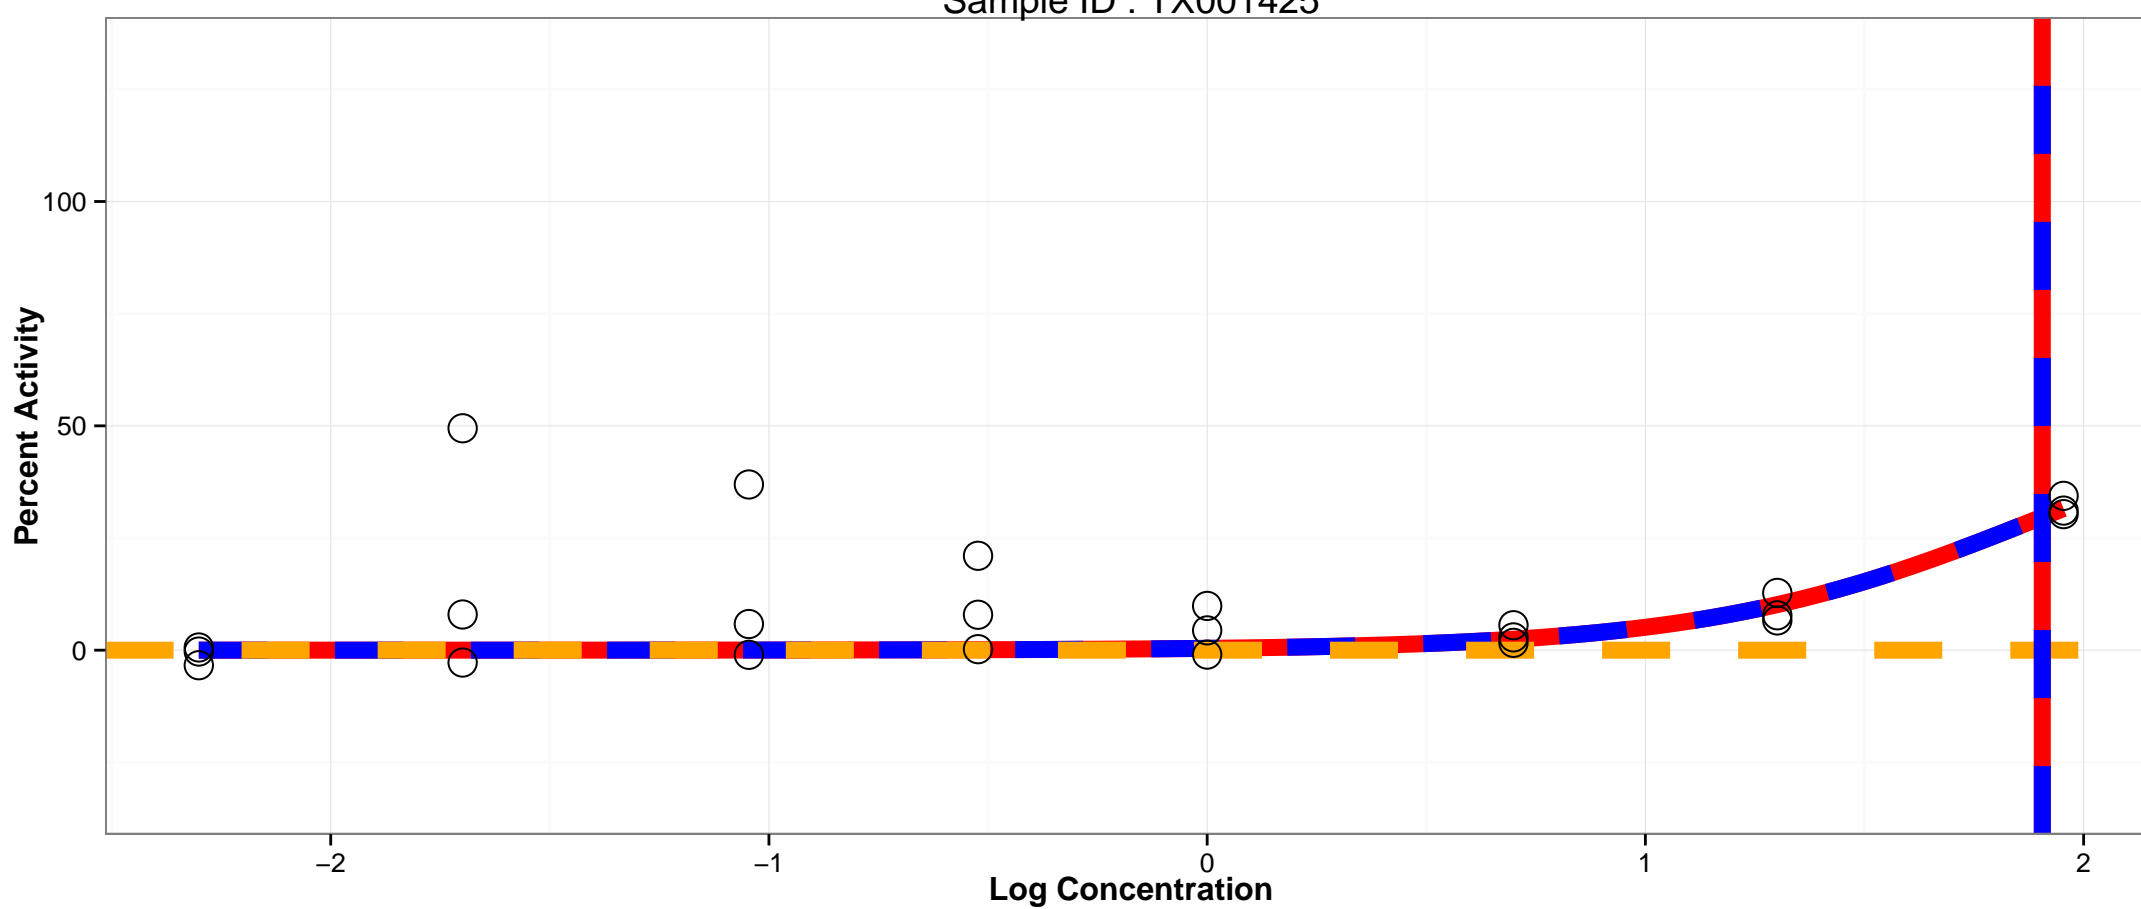

HILL MODEL

|     | tp   | ga    | gw    |
|-----|------|-------|-------|
| val | 59.4 | 1.91  | 1.13  |
| sd  | 50.4 | 0.672 | 0.604 |

GAIN-LOSS MODEL

|     | tp   | ga    | gw    | la   | lw   |
|-----|------|-------|-------|------|------|
| val | 59.4 | 1.91  | 1.13  | 2.35 | 16.1 |
| sd  | 50.3 | 0.671 | 0.603 | 84.4 | 3370 |

|      | CNST   | HILL   | GNLS   |
|------|--------|--------|--------|
| AIC  | 205.79 | 183.79 | 187.79 |
| PROB | 0      | 0.88   | 0.12   |
| RMSE | 18.18  | 13.81  | 13.81  |

MAX\_MEAN : 32 MAX\_MED : 31.1 BMAD : 5.69  
COFF : 20 HIT-CALL : 1 FITC : 42 ACTP : 1  
FLAGS : 6

Assay ID 1509 (NHEERL\_HEK293T\_CellTiterGLO)  
Sample ID : TX001425

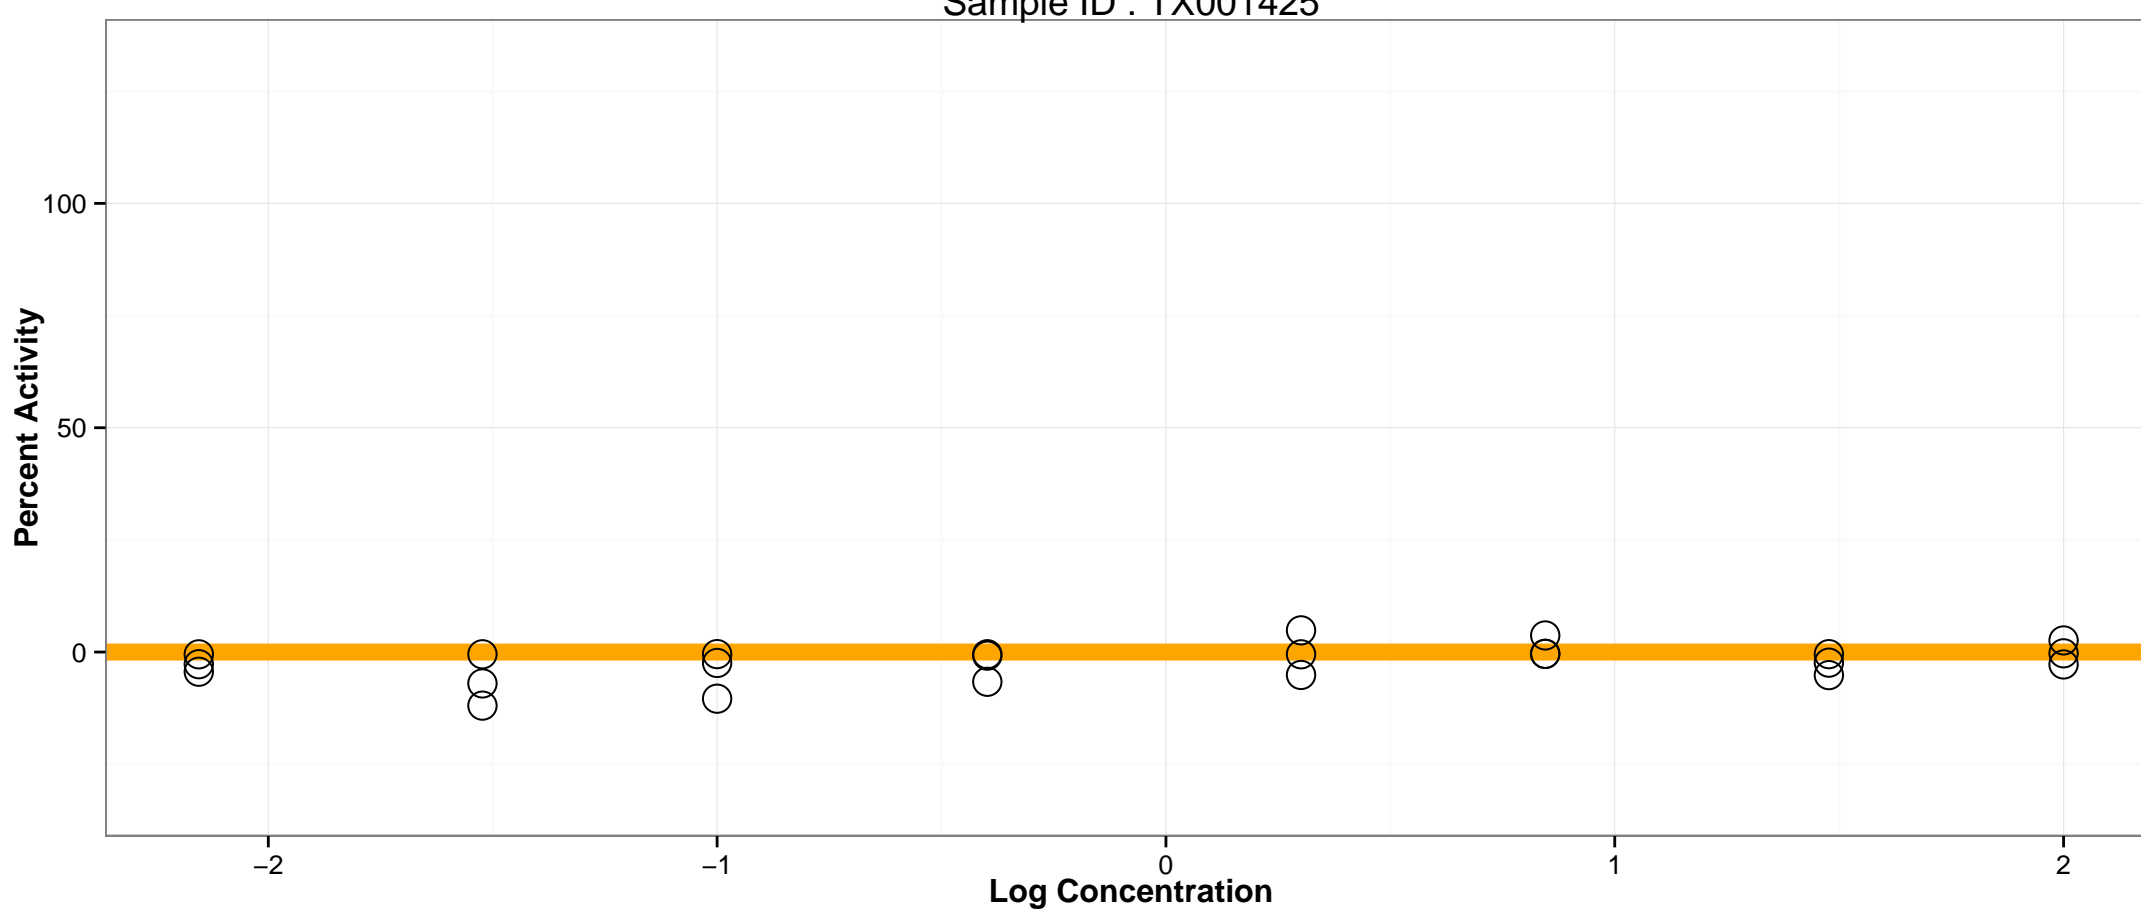

HILL MODEL

HILL MODEL: Not applicable

GAIN-LOSS MODEL

GNLS MODEL: Not applicable

|      | CNST   | HILL | GNLS |
|------|--------|------|------|
| AIC  | 140.94 | NA   | NA   |
| PROB | 1      | NA   | NA   |
| RMSE | 4.5    | NA   | NA   |

MAX\_MEAN : 0.979 MAX\_MED : -0.267 BMAD : 5.54  
COFF : 20 HIT-CALL : 0 FITC : 4 ACTP : 0  
FLAGS :

Assay ID 1848 (NHEERL\_Quantilum\_inhib\_2\_dn)  
Sample ID : TX001425

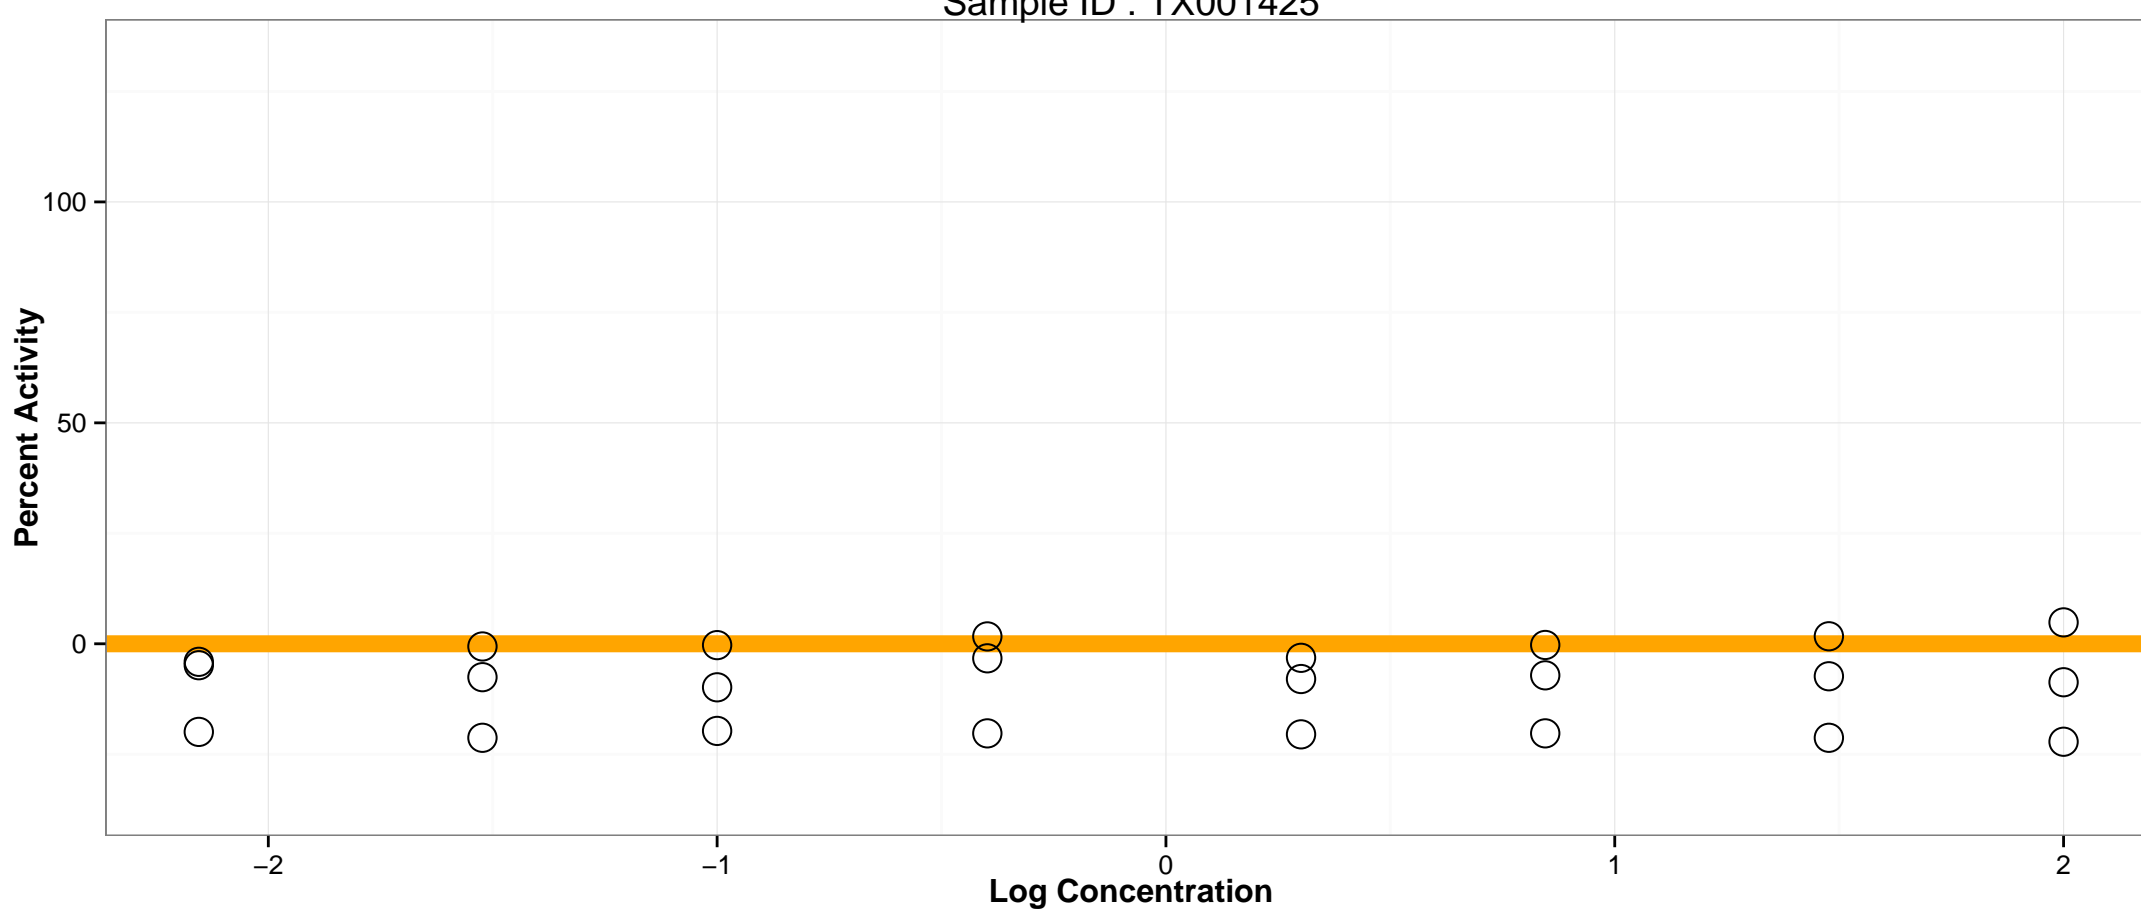

HILL MODEL

HILL MODEL: Not applicable

GAIN-LOSS MODEL

GNLS MODEL: Not applicable

|      | CNST   | HILL | GNLS |
|------|--------|------|------|
| AIC  | 194.21 | NA   | NA   |
| PROB | 1      | NA   | NA   |
| RMSE | 12.76  | NA   | NA   |

MAX\_MEAN : -7.28 MAX\_MED : -3.28 BMAD : 8.58  
COFF : 20 HIT-CALL : 0 FITC : 4 ACTP : 0  
FLAGS :



Chemical : Phenol red  
CAS : 143-74-8

Assay ID 1508 (NHEERL\_TPO\_AUR\_dn)  
Sample ID : TP0001441E04

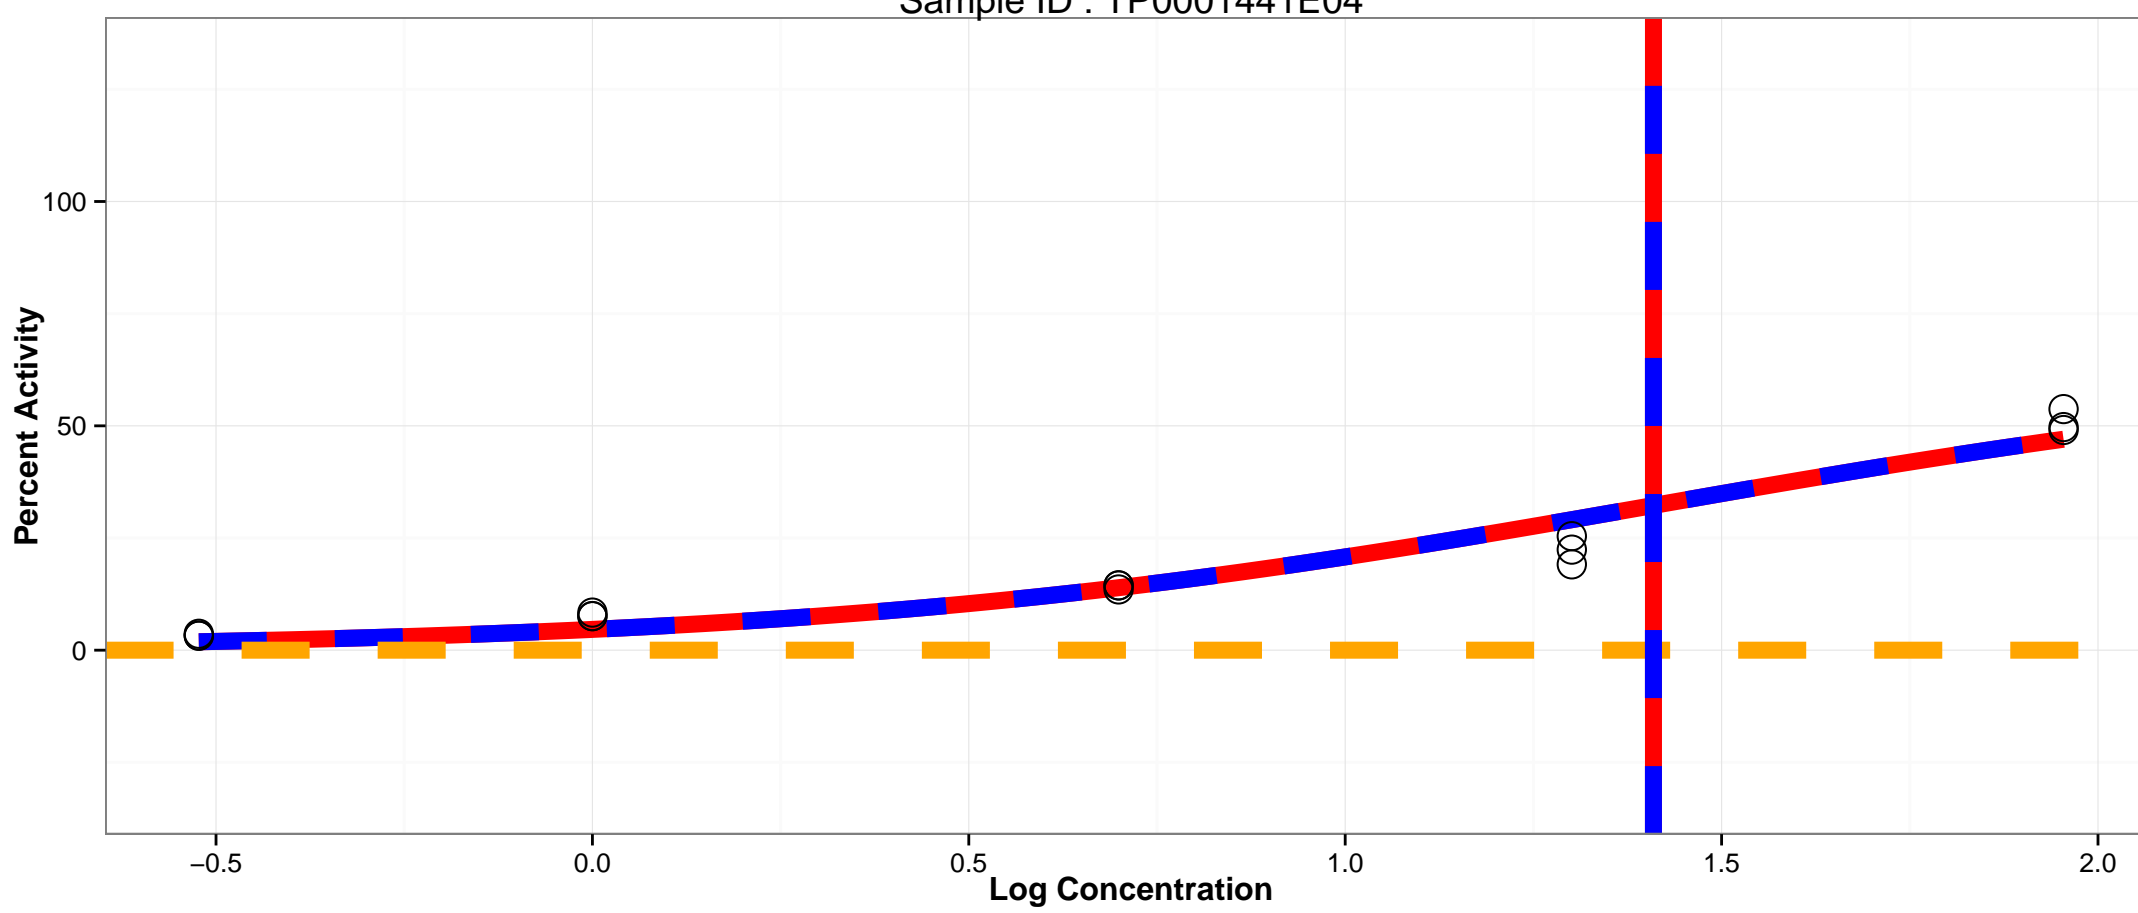

HILL MODEL

|     | tp   | ga    | gw    |
|-----|------|-------|-------|
| val | 64.5 | 1.41  | 0.789 |
| sd  | 10.6 | 0.202 | 0.122 |

GAIN-LOSS MODEL

|     | tp   | ga    | gw    | la    | lw     |
|-----|------|-------|-------|-------|--------|
| val | 64.5 | 1.41  | 0.789 | 2.78  | 16.1   |
| sd  | 10.6 | 0.202 | 0.122 | 19900 | 374000 |

|      | CNST   | HILL  | GNLS  |
|------|--------|-------|-------|
| AIC  | 142.26 | 92.94 | 96.94 |
| PROB | 0      | 0.88  | 0.12  |
| RMSE | 25.96  | 4.11  | 4.11  |

MAX\_MEAN : 50.9 MAX\_MED : 49.7 BMAD : 5.69  
COFF : 20 HIT-CALL : 1 FITC : 42 ACTP : 1  
FLAGS :

Assay ID 1509 (NHEERL\_HEK293T\_CellTiterGLO)  
Sample ID : TP0001441E04

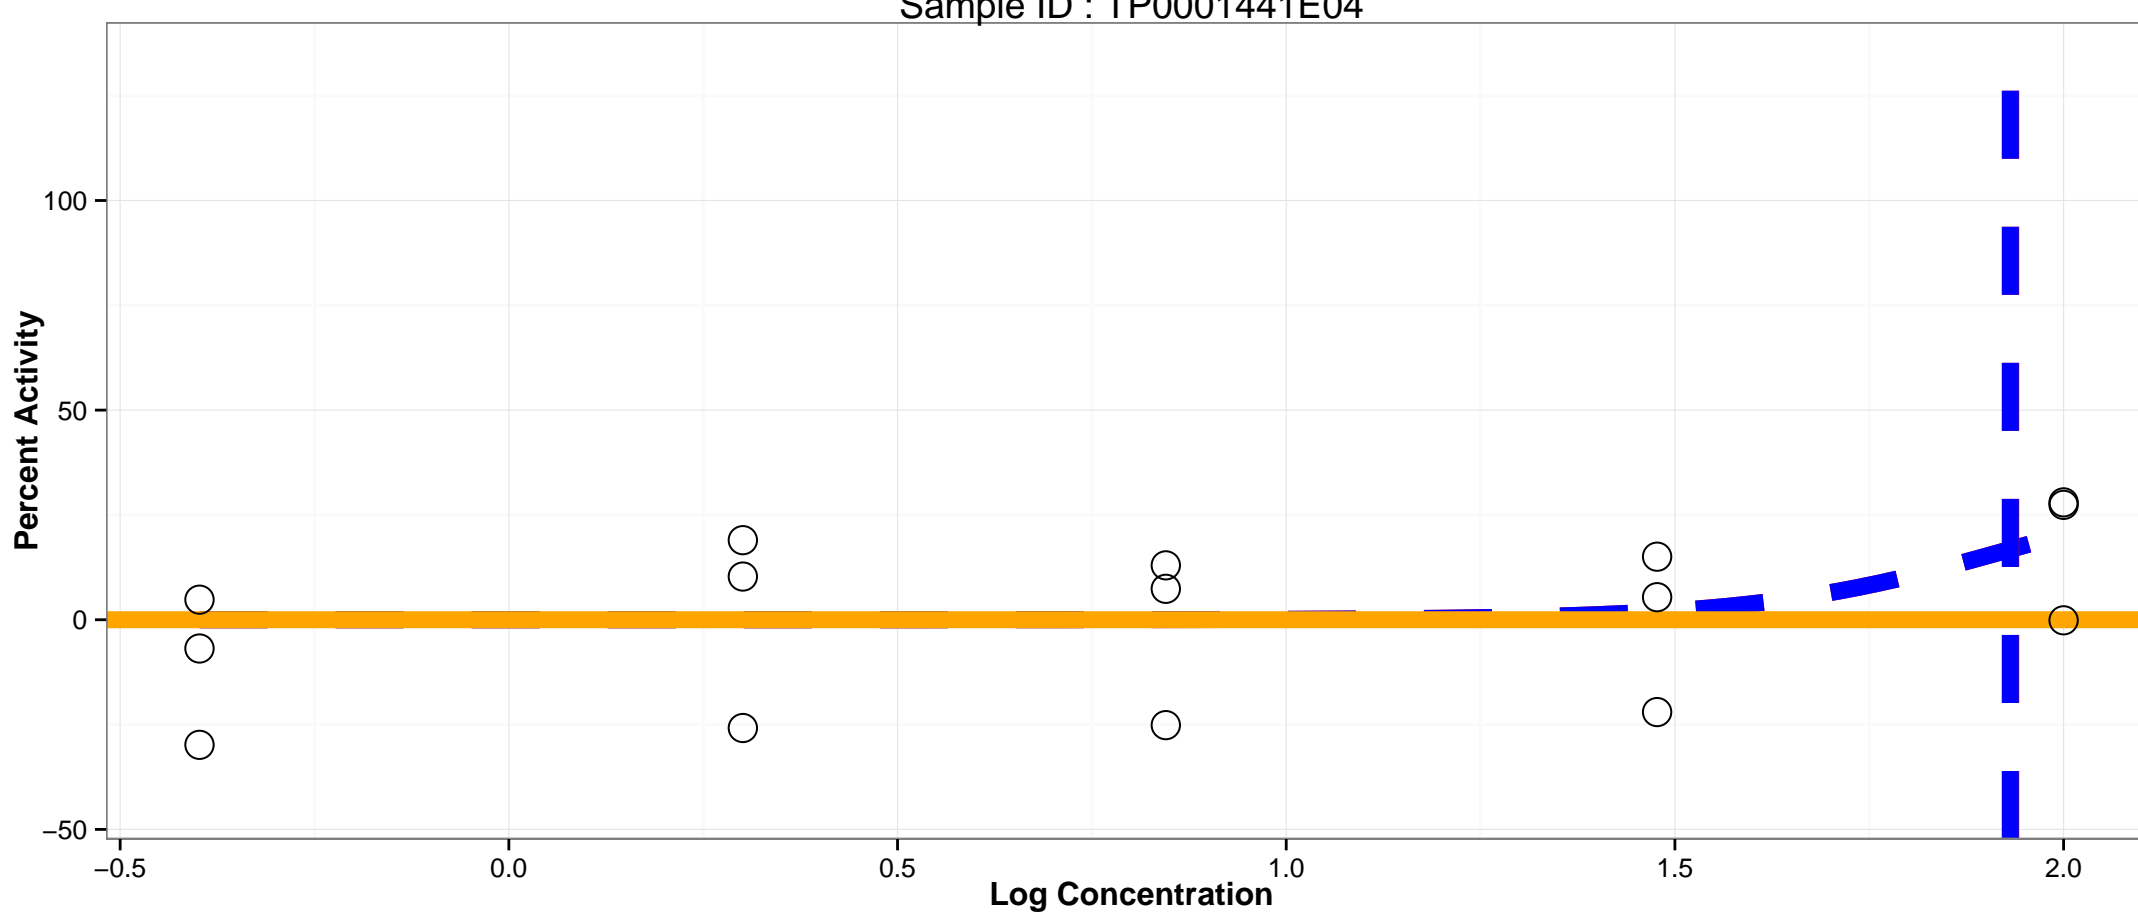

HILL MODEL

|     | tp   | ga   | gw   |
|-----|------|------|------|
| val | 33.6 | 1.93 | 2.68 |
| sd  | 735  | 8.2  | 29.1 |

GAIN-LOSS MODEL

|     | tp   | ga   | gw   | la   | lw   |
|-----|------|------|------|------|------|
| val | 33.6 | 1.93 | 2.69 | 2.25 | 17.1 |
| sd  | NA   | NA   | NA   | NA   | NA   |

|      | CNST  | HILL   | GNLS   |
|------|-------|--------|--------|
| AIC  | 134.6 | 137.21 | 141.21 |
| PROB | 0.76  | 0.21   | 0.03   |
| RMSE | 18.66 | 16.8   | 16.79  |

MAX\_MEAN : 18.4 MAX\_MED : 27.4 BMAD : 5.54  
COFF : 20 HIT-CALL : 0 FITC : 10 ACTP : 0.236  
FLAGS :

Assay ID 1848 (NHEERL\_Quantilum\_inhib\_2\_dn)  
Sample ID : TP0001441E04

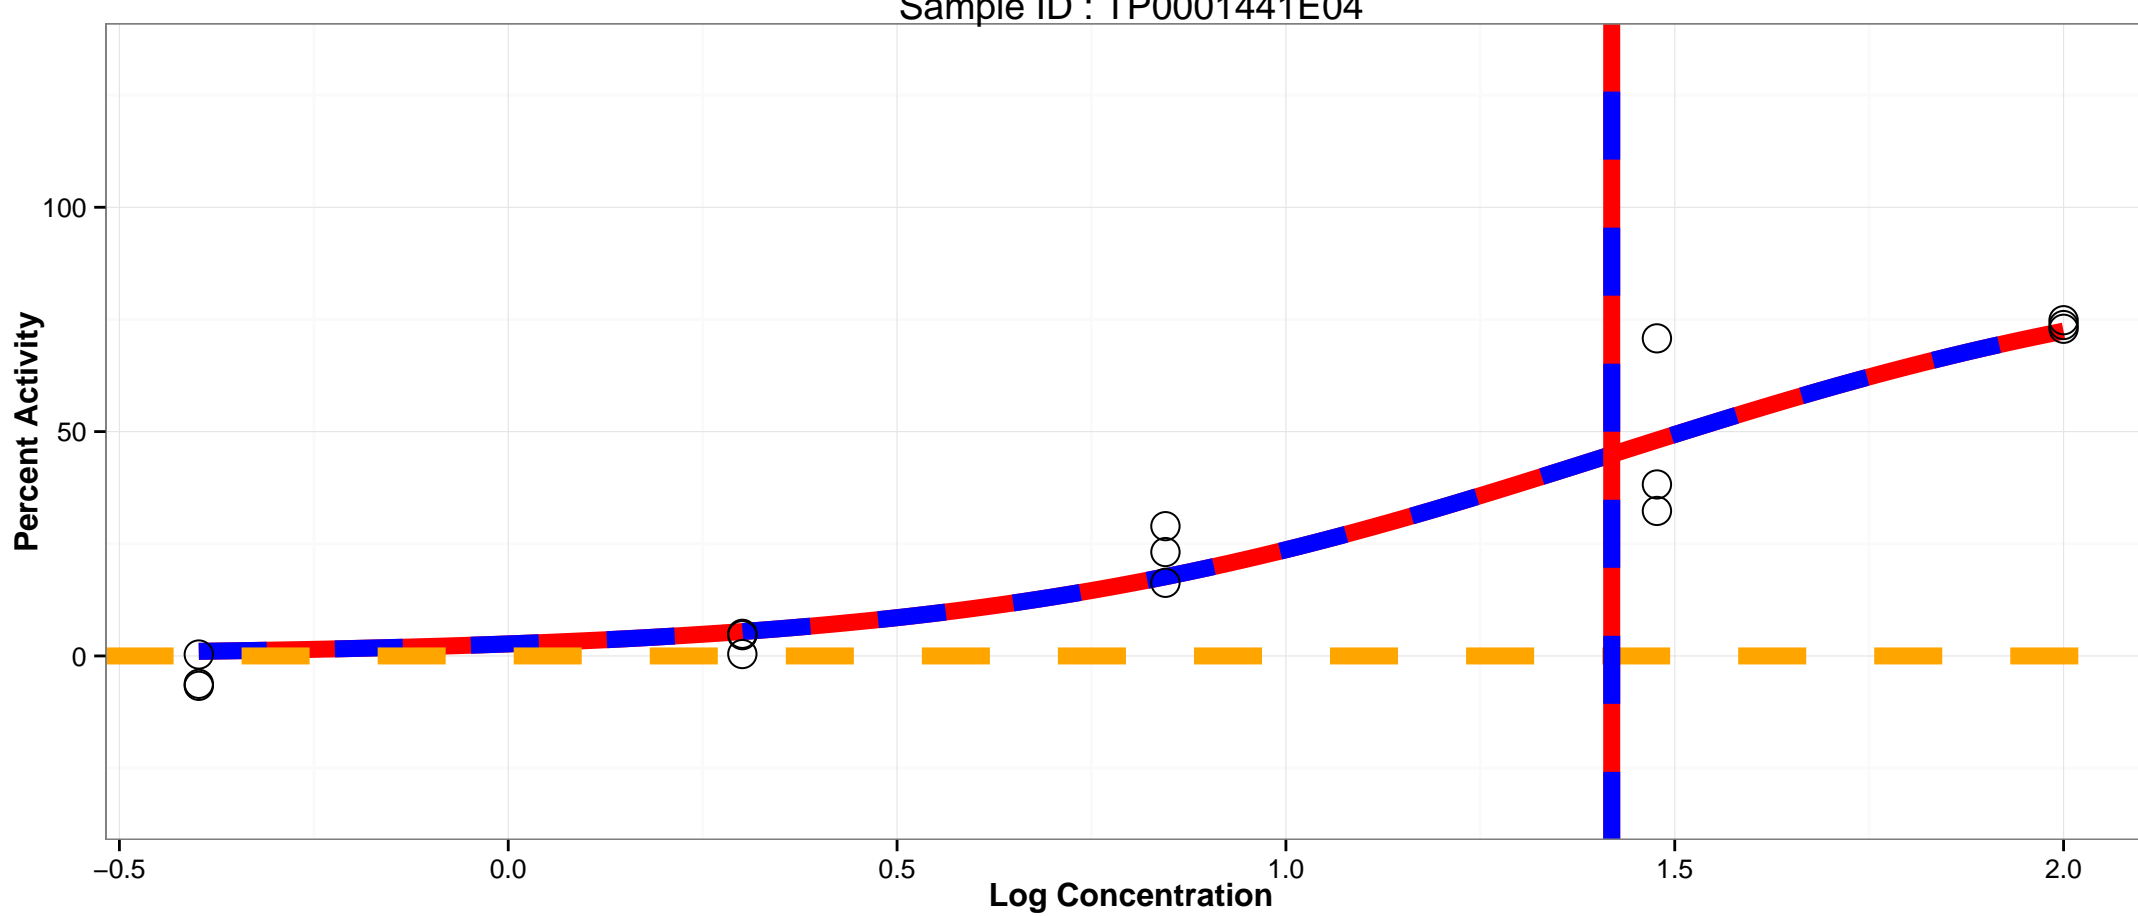

HILL MODEL

|     | tp   | ga    | gw    |
|-----|------|-------|-------|
| val | 89.8 | 1.42  | 1.07  |
| sd  | 21.6 | 0.346 | 0.283 |

GAIN-LOSS MODEL

|     | tp   | ga    | gw    | la   | lw    |
|-----|------|-------|-------|------|-------|
| val | 89.8 | 1.42  | 1.07  | 2.75 | 13.6  |
| sd  | 21.7 | 0.347 | 0.284 | 3170 | 57000 |

|      | CNST   | HILL   | GNLS   |
|------|--------|--------|--------|
| AIC  | 156.75 | 114.87 | 118.87 |
| PROB | 0      | 0.88   | 0.12   |
| RMSE | 41.35  | 8.82   | 8.82   |

MAX\_MEAN : 73.8 MAX\_MED : 73.8 BMAD : 8.58  
COFF : 20 HIT-CALL : 1 FITC : 42 ACTP : 1  
FLAGS :

Chemical : Dibenz(a,h)anthracene  
CAS : 53-70-3

Assay ID 1508 (NHEERL\_TPO\_AUR\_dn)  
Sample ID : TP0001441E05

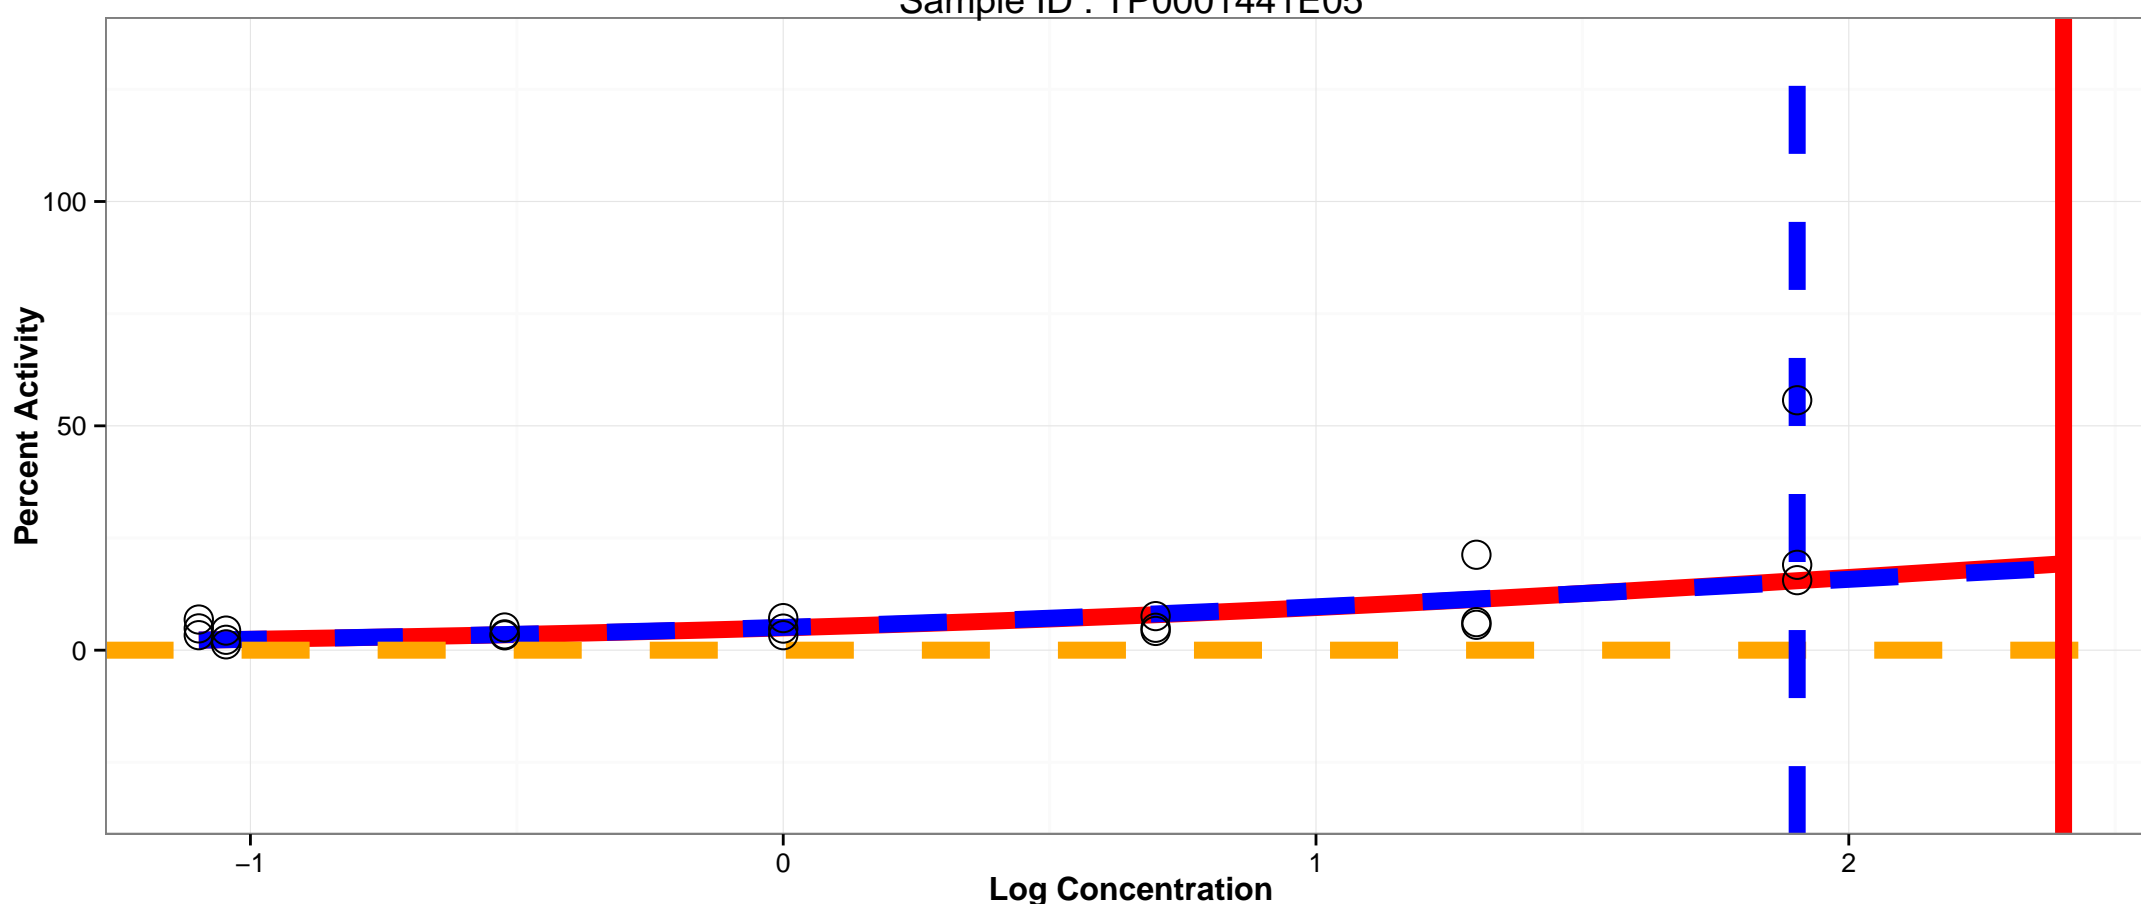

HILL MODEL

|     | tp   | ga   | gw     |
|-----|------|------|--------|
| val | 38.5 | 2.4  | 0.345  |
| sd  | 32   | 1.69 | 0.0912 |

GAIN-LOSS MODEL

|     | tp   | ga   | gw    | la   | lw   |
|-----|------|------|-------|------|------|
| val | 30.3 | 1.9  | 0.366 | 3.23 | 6.29 |
| sd  | 20.5 | 1.38 | 0.099 | 1170 | 5530 |

|      | CNST   | HILL   | GNLS   |
|------|--------|--------|--------|
| AIC  | 163.86 | 136.44 | 141.06 |
| PROB | 0      | 0.91   | 0.09   |
| RMSE | 14.77  | 9.4    | 9.47   |

MAX\_MEAN : 30.1 MAX\_MED : 19 BMAD : 5.69  
COFF : 20 HIT-CALL : 0 FITC : 21 ACTP : 1  
FLAGS : 12

Assay ID 1509 (NHEERL\_HEK293T\_CellTiterGLO)  
Sample ID : TP0001441E05

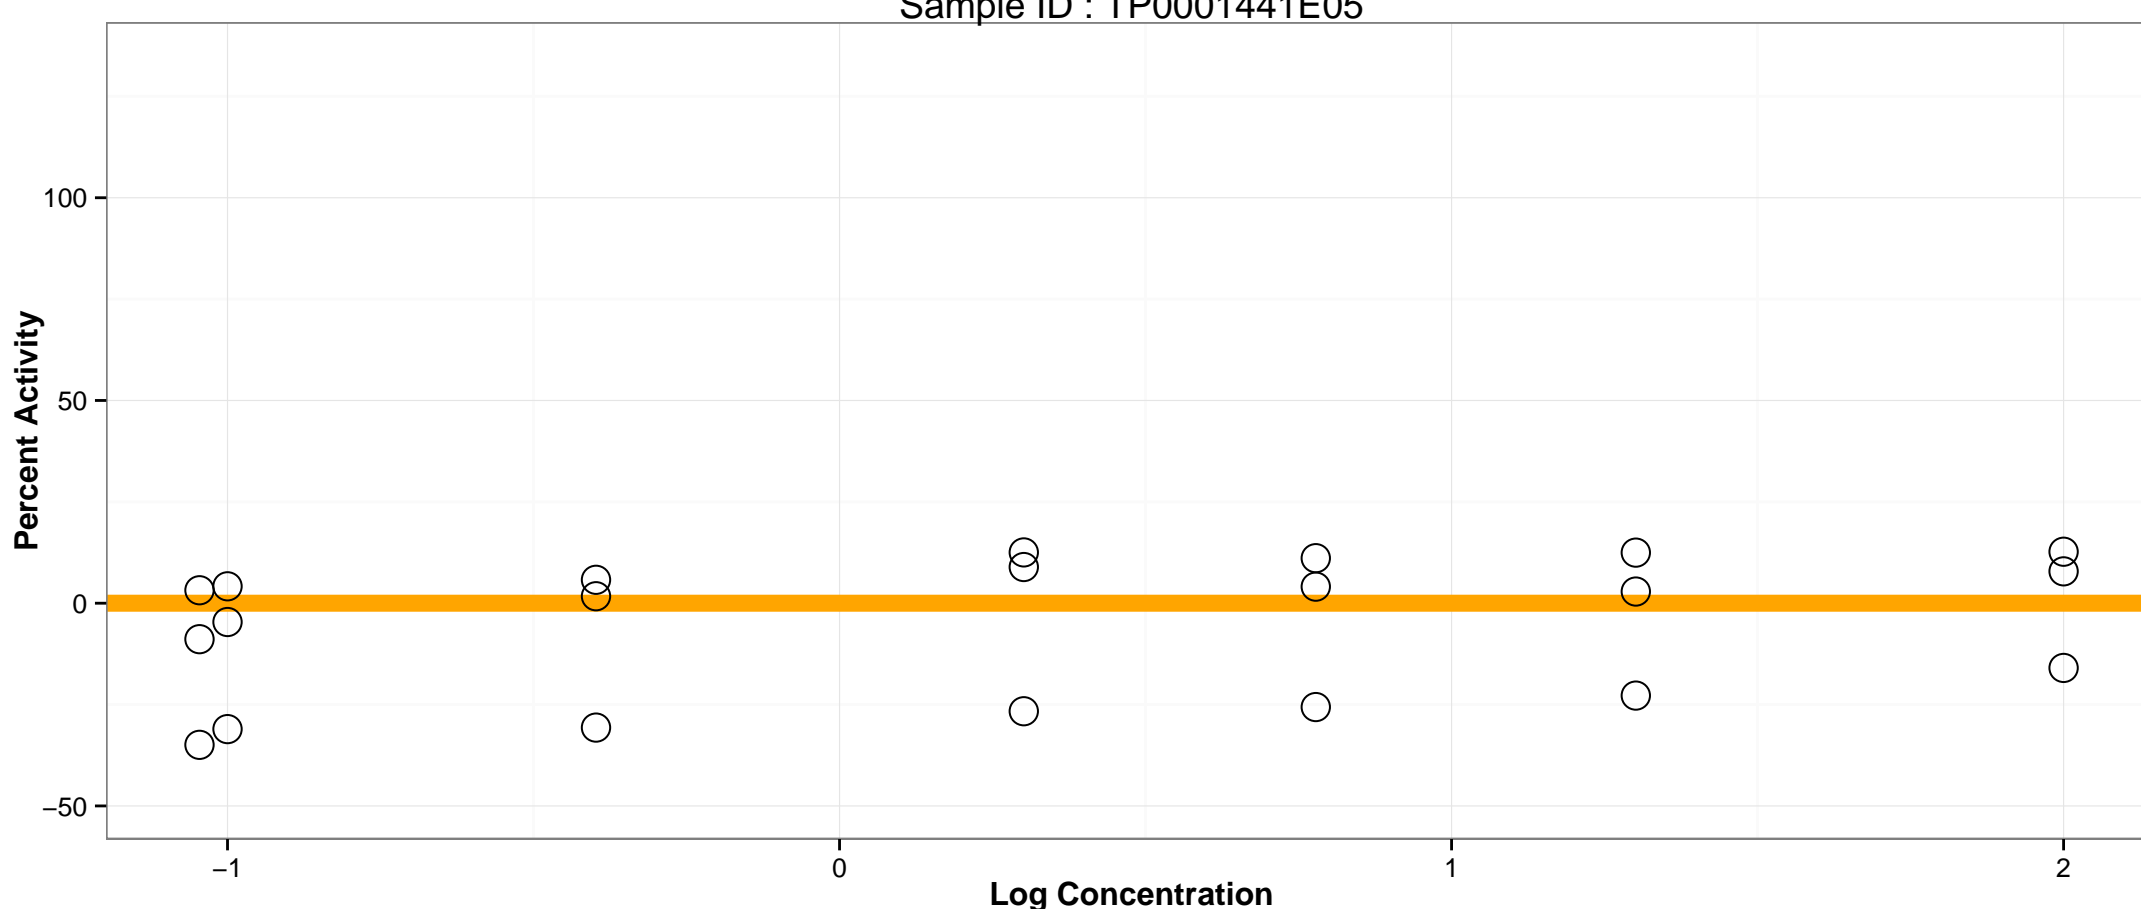

HILL MODEL

HILL MODEL: Not applicable

GAIN-LOSS MODEL

GNLS MODEL: Not applicable

|      | CNST   | HILL | GNLS |
|------|--------|------|------|
| AIC  | 182.39 | NA   | NA   |
| PROB | 1      | NA   | NA   |
| RMSE | 17.17  | NA   | NA   |

MAX\_MEAN : 1.54 MAX\_MED : 8.93 BMAD : 5.54  
COFF : 20 HIT-CALL : 0 FITC : 4 ACTP : 0  
FLAGS :

Assay ID 1848 (NHEERL\_QuantLum\_inhib\_2\_dn)  
Sample ID : TP0001441E05

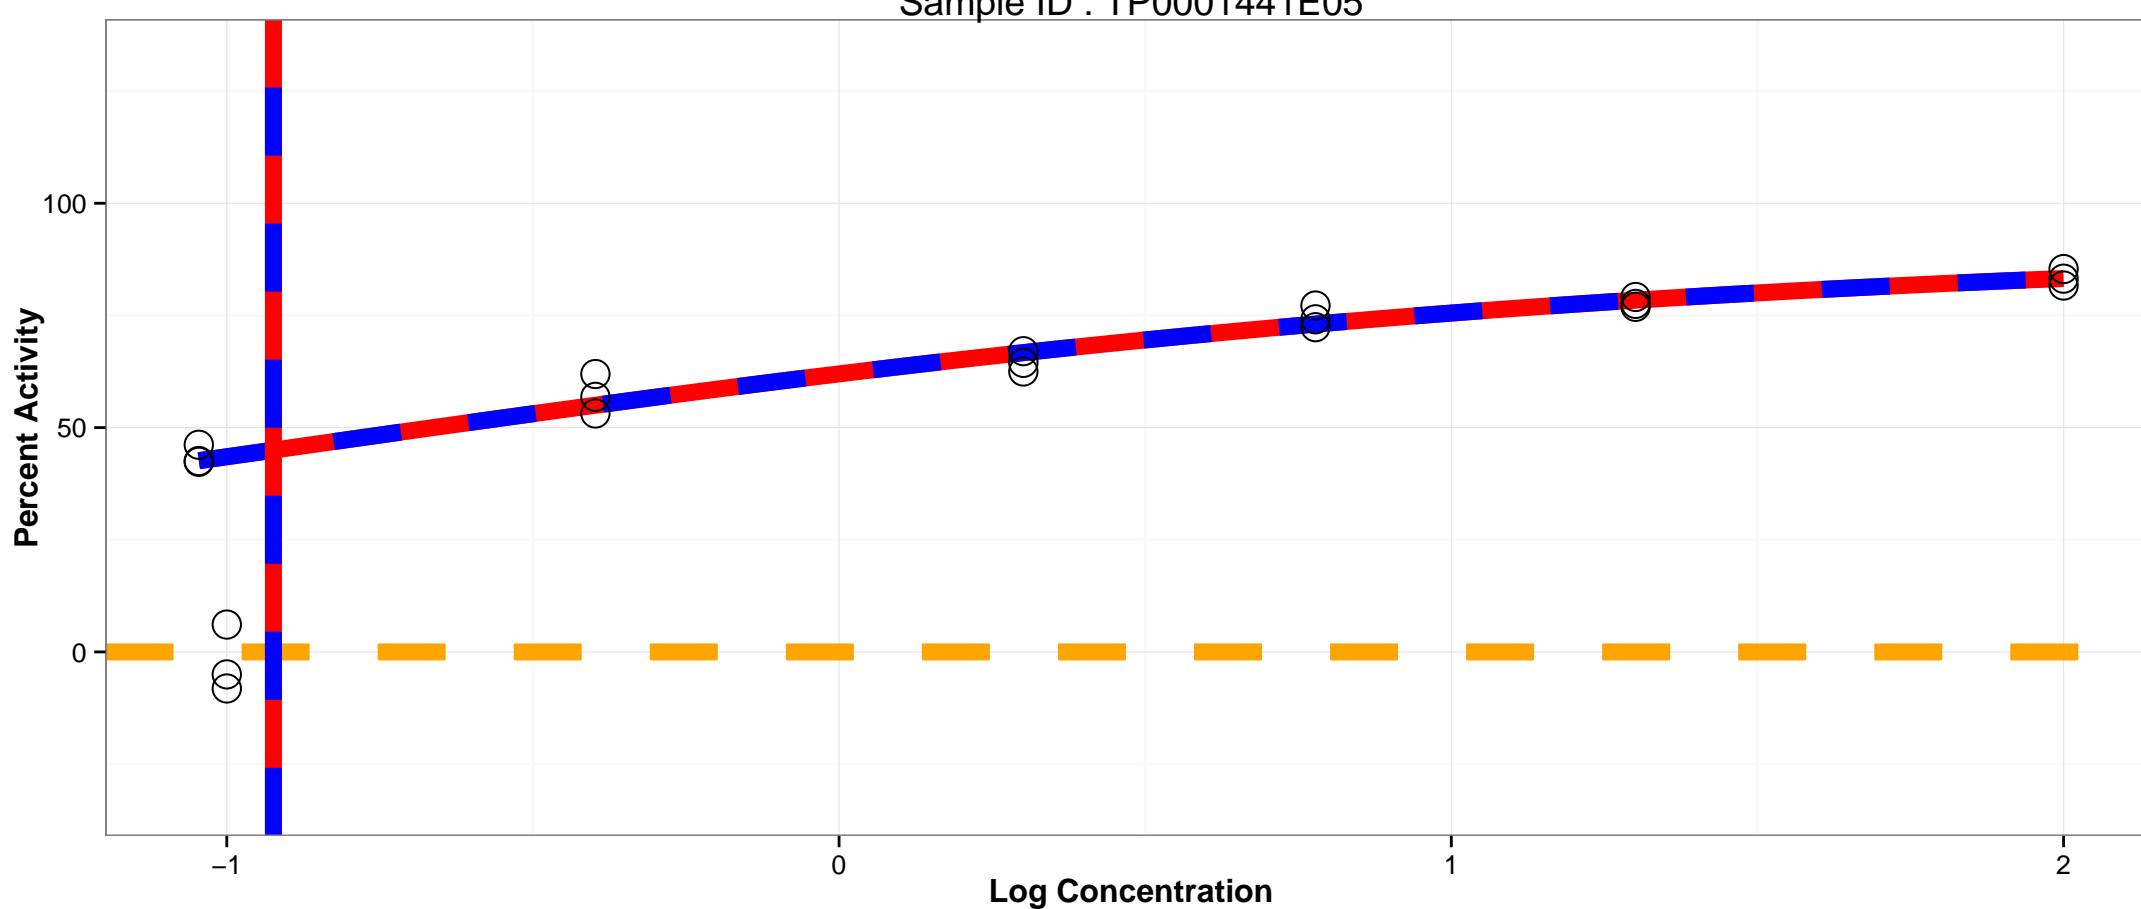

HILL MODEL

|     | tp   | ga     | gw     |
|-----|------|--------|--------|
| val | 90   | -0.924 | 0.374  |
| sd  | 5.95 | 0.159  | 0.0814 |

GAIN-LOSS MODEL

|     | tp   | ga     | gw     | la   | lw   |
|-----|------|--------|--------|------|------|
| val | 90   | -0.924 | 0.374  | 2.45 | 16.3 |
| sd  | 5.95 | 0.159  | 0.0814 | 157  | 5590 |

|      | CNST   | HILL   | GNLS   |
|------|--------|--------|--------|
| AIC  | 240.07 | 167.94 | 171.94 |
| PROB | 0      | 0.88   | 0.12   |
| RMSE | 63.28  | 17.64  | 17.64  |

MAX\_MEAN : 83.4 MAX\_MED : 83.2 BMAD : 8.58  
COFF : 20 HIT-CALL : 1 FITC : 42 ACTP : 1  
FLAGS :

Assay ID 1508 (NHEERL\_TPO\_AUR\_dn)  
Sample ID : TP0001441E06

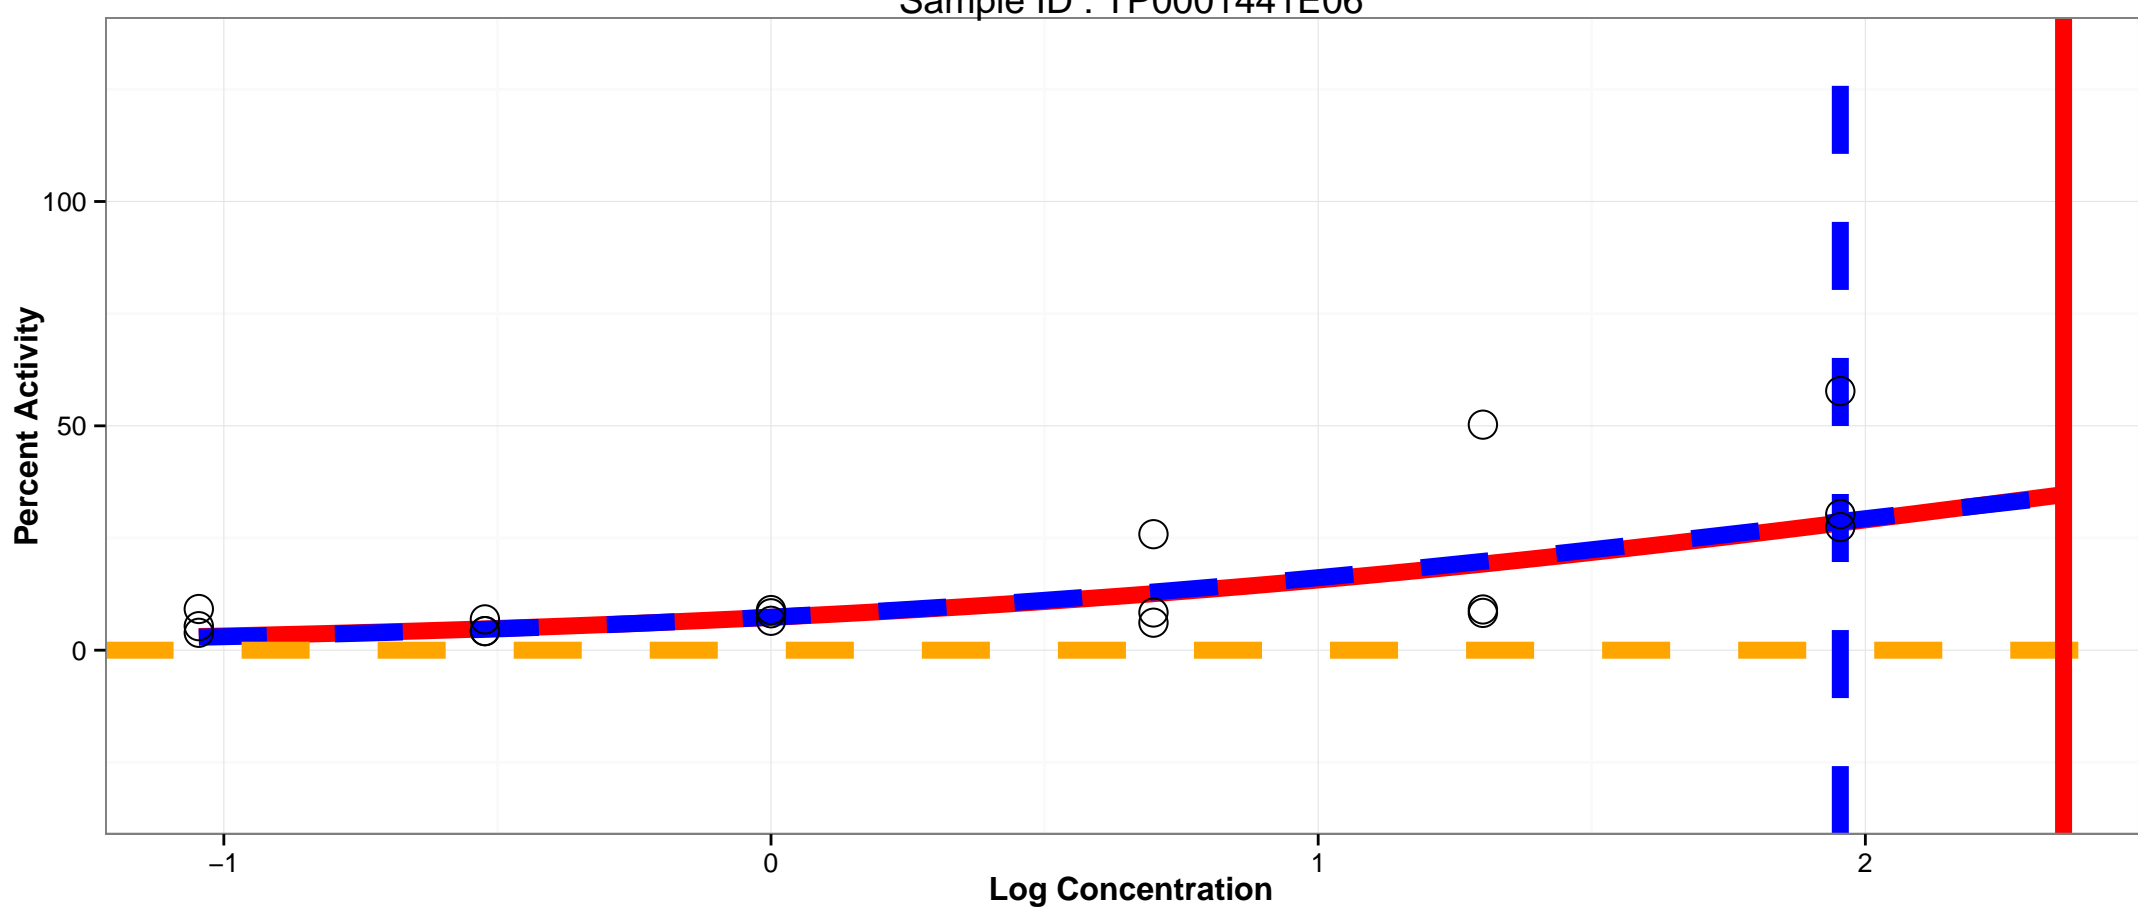

**HILL MODEL**

|     | tp   | ga   | gw    |
|-----|------|------|-------|
| val | 69.3 | 2.36 | 0.393 |
| sd  | 53   | 1.48 | 0.126 |

**GAIN-LOSS MODEL**

|     | tp   | ga   | gw    | la   | lw   |
|-----|------|------|-------|------|------|
| val | 57.3 | 1.95 | 0.426 | 3.94 | 17.8 |
| sd  | NA   | NA   | NA    | NA   | NA   |

|      | CNST   | HILL   | GNLS   |
|------|--------|--------|--------|
| AIC  | 162.14 | 141.05 | 145.37 |
| PROB | 0      | 0.9    | 0.1    |
| RMSE | 22.2   | 11.42  | 11.35  |

MAX\_MEAN : 38.5 MAX\_MED : 30.3 BMAD : 5.69  
COFF : 20 HIT-CALL : 1 FITC : 42 ACTP : 1  
FLAGS : 6

Assay ID 1509 (NHEERL\_HEK293T\_CellTiterGLO)  
Sample ID : TP0001441E06

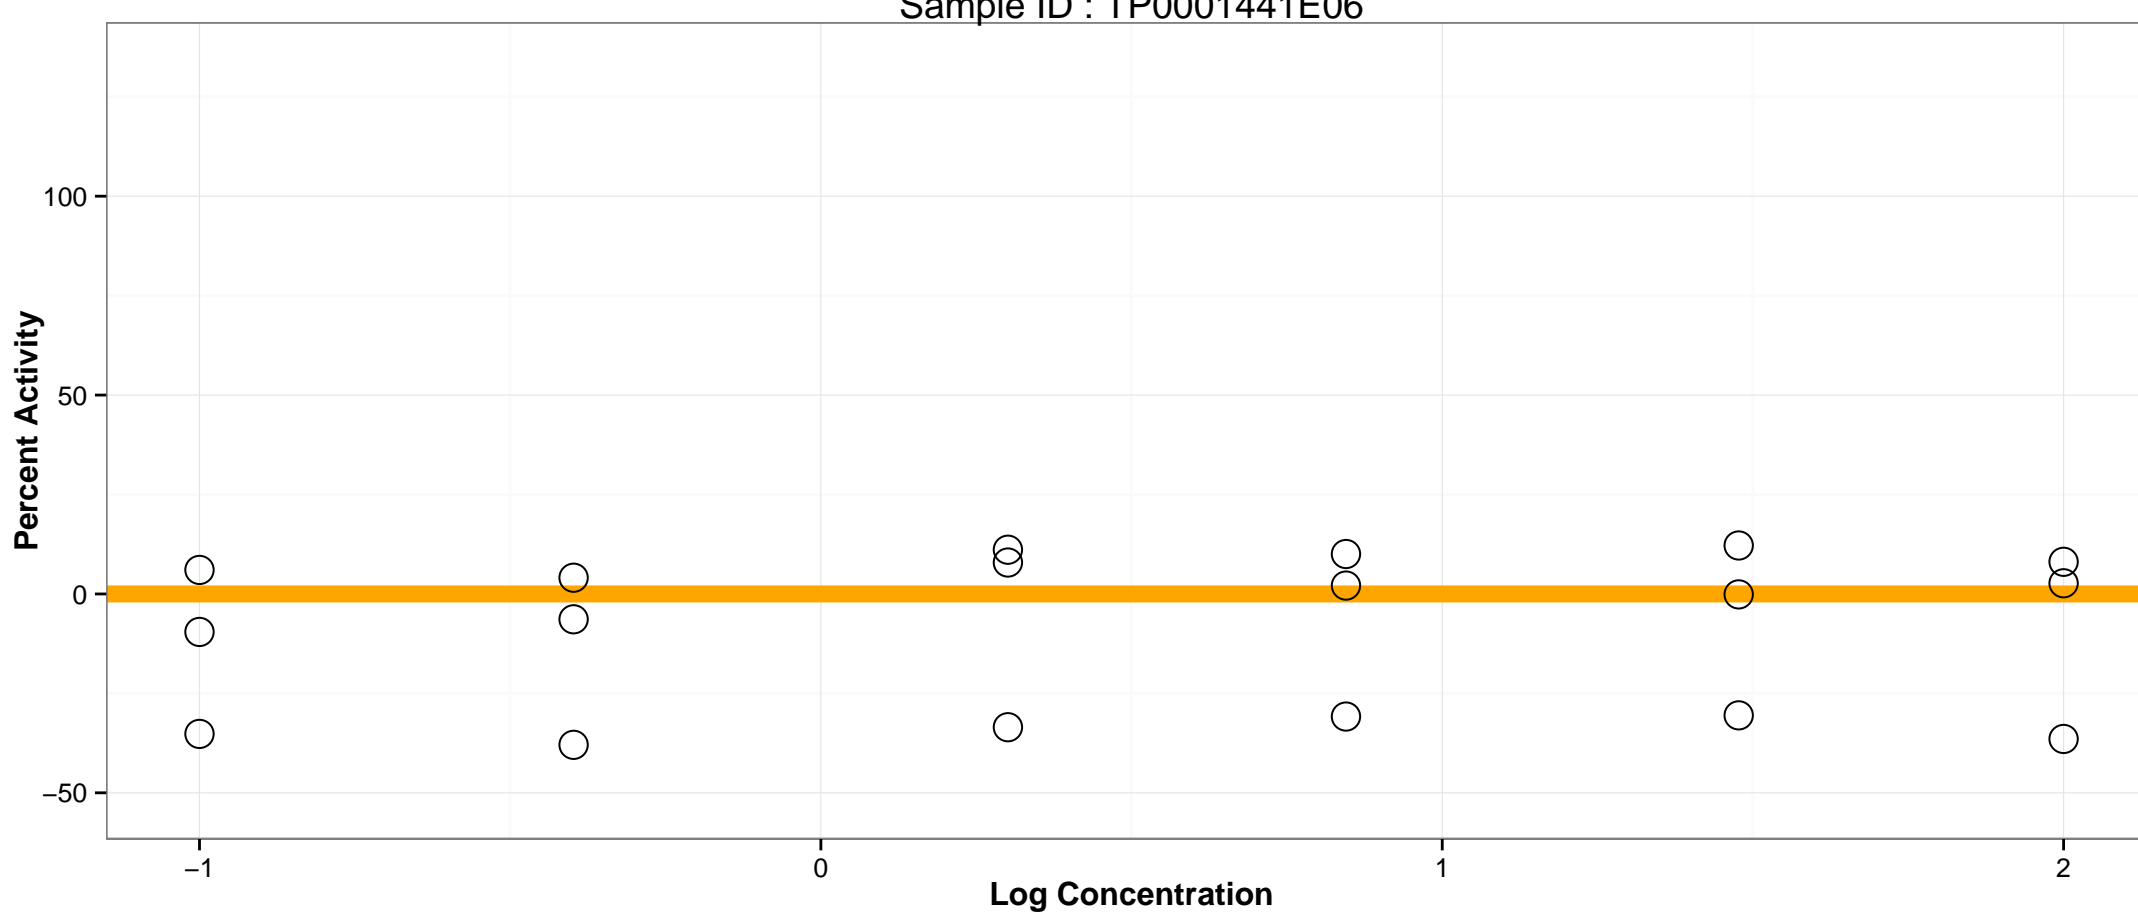

**HILL MODEL**  
HILL MODEL: Not applicable

**GAIN-LOSS MODEL**  
GNLS MODEL: Not applicable

|      | CNST   | HILL | GNLS |
|------|--------|------|------|
| AIC  | 163.05 | NA   | NA   |
| PROB | 1      | NA   | NA   |
| RMSE | 20.69  | NA   | NA   |

MAX\_MEAN : -4.82 MAX\_MED : 7.91 BMAD : 5.54  
COFF : 20 HIT-CALL : 0 FITC : 4 ACTP : 0  
FLAGS : 10

Assay ID 1848 (NHEERL\_Quantilum\_inhib\_2\_dn)  
Sample ID : TP0001441E06

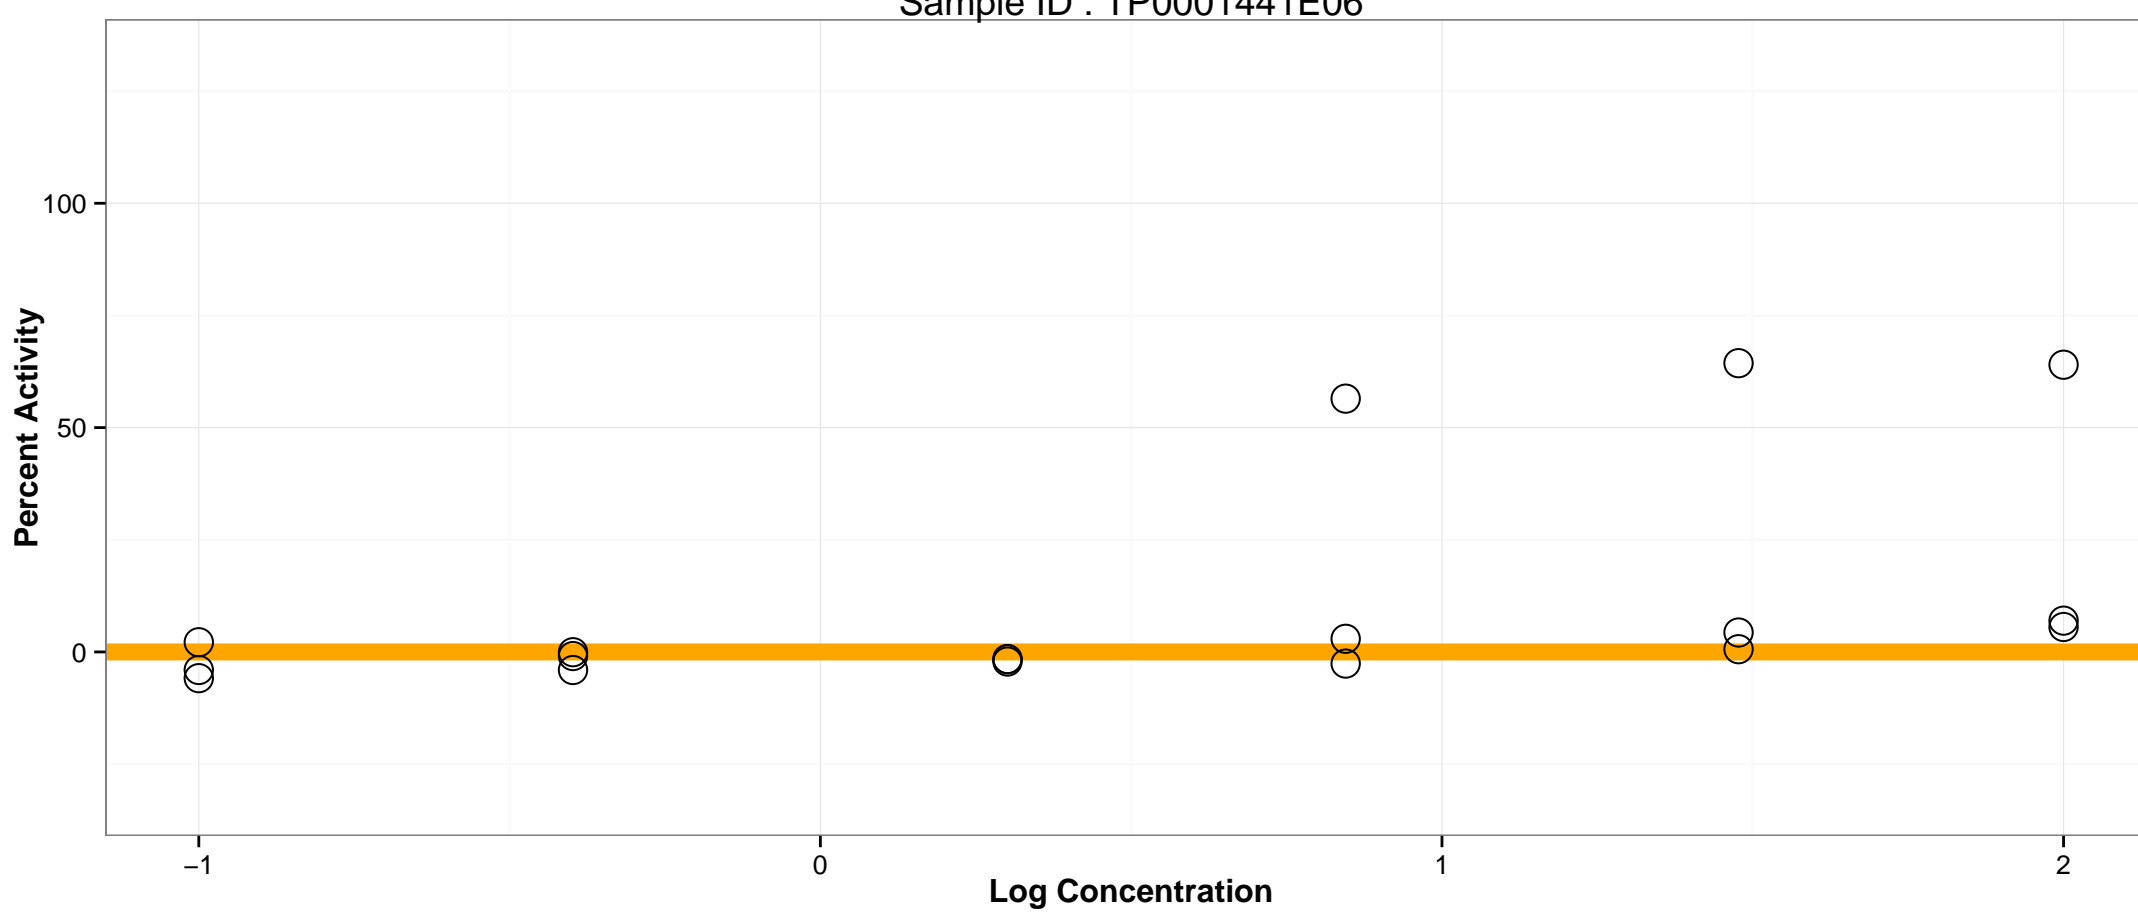

**HILL MODEL**  
HILL MODEL: Not applicable

**GAIN-LOSS MODEL**  
GNLS MODEL: Not applicable

|      | CNST   | HILL | GNLS |
|------|--------|------|------|
| AIC  | 157.16 | NA   | NA   |
| PROB | 1      | NA   | NA   |
| RMSE | 25.42  | NA   | NA   |

MAX\_MEAN : 25.5 MAX\_MED : 6.99 BMAD : 8.58  
COFF : 20 HIT-CALL : 0 FITC : 4 ACTP : 0  
FLAGS : 10

Assay ID 1508 (NHEERL\_TPO\_AUR\_dn)  
Sample ID : TP0001441E07

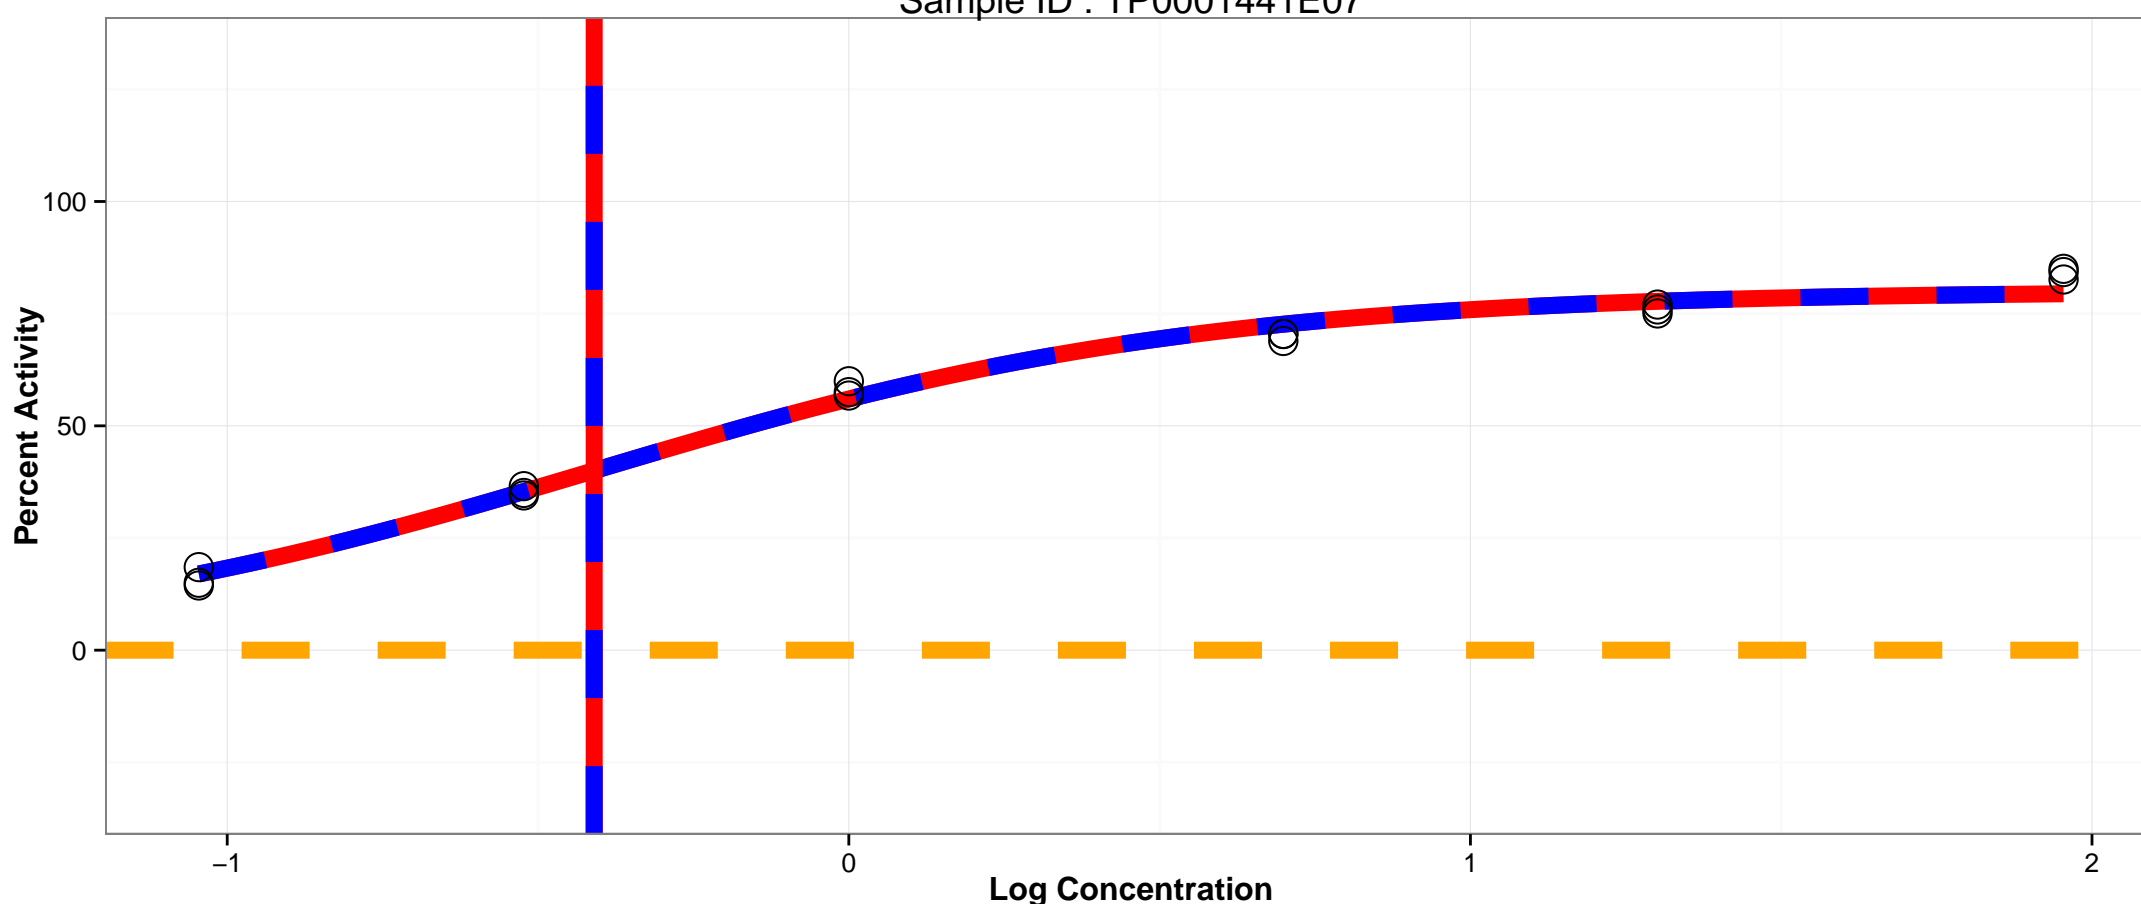

HILL MODEL

|     | tp   | ga     | gw     |
|-----|------|--------|--------|
| val | 80   | -0.41  | 0.895  |
| sd  | 2.14 | 0.0427 | 0.0864 |

GAIN-LOSS MODEL

|     | tp | ga    | gw    | la   | lw   |
|-----|----|-------|-------|------|------|
| val | 80 | -0.41 | 0.895 | 2.96 | 15.6 |
| sd  | NA | NA    | NA    | NA   | NA   |

|      | CNST  | HILL  | GNLS   |
|------|-------|-------|--------|
| AIC  | 204.8 | 97.02 | 101.02 |
| PROB | 0     | 0.88  | 0.12   |
| RMSE | 61.39 | 2.72  | 2.72   |

MAX\_MEAN : 84 MAX\_MED : 84.3 BMAD : 5.69  
COFF : 20 HIT-CALL : 1 FITC : 41 ACTP : 1  
FLAGS :

Assay ID 1509 (NHEERL\_HEK293T\_CellTiterGLO)  
Sample ID : TP0001441E07

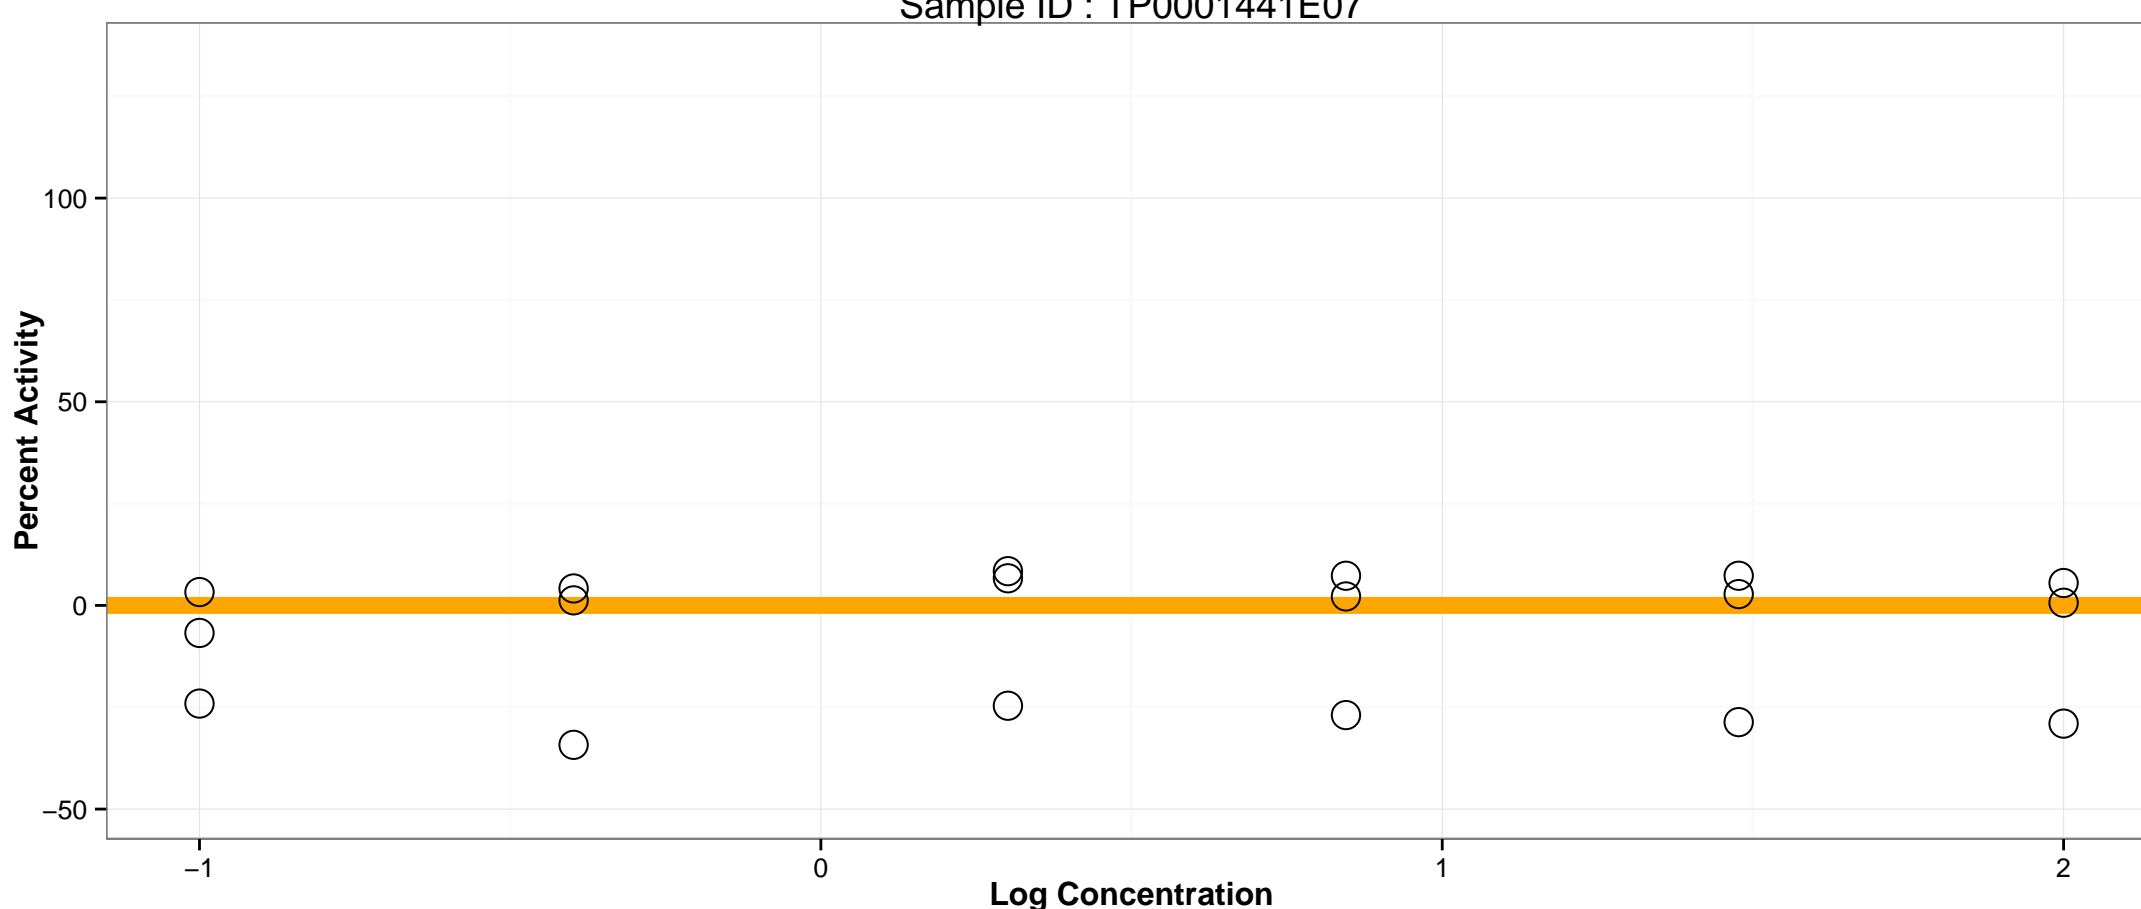

HILL MODEL

HILL MODEL: Not applicable

GAIN-LOSS MODEL

GNLS MODEL: Not applicable

|      | CNST   | HILL | GNLS |
|------|--------|------|------|
| AIC  | 155.06 | NA   | NA   |
| PROB | 1      | NA   | NA   |
| RMSE | 16.81  | NA   | NA   |

MAX\_MEAN : -3.18 MAX\_MED : 6.67 BMAD : 5.54  
COFF : 20 HIT-CALL : 0 FITC : 4 ACTP : 0  
FLAGS :

Assay ID 1848 (NHEERL\_Quantilum\_inhib\_2\_dn)  
Sample ID : TP0001441E07

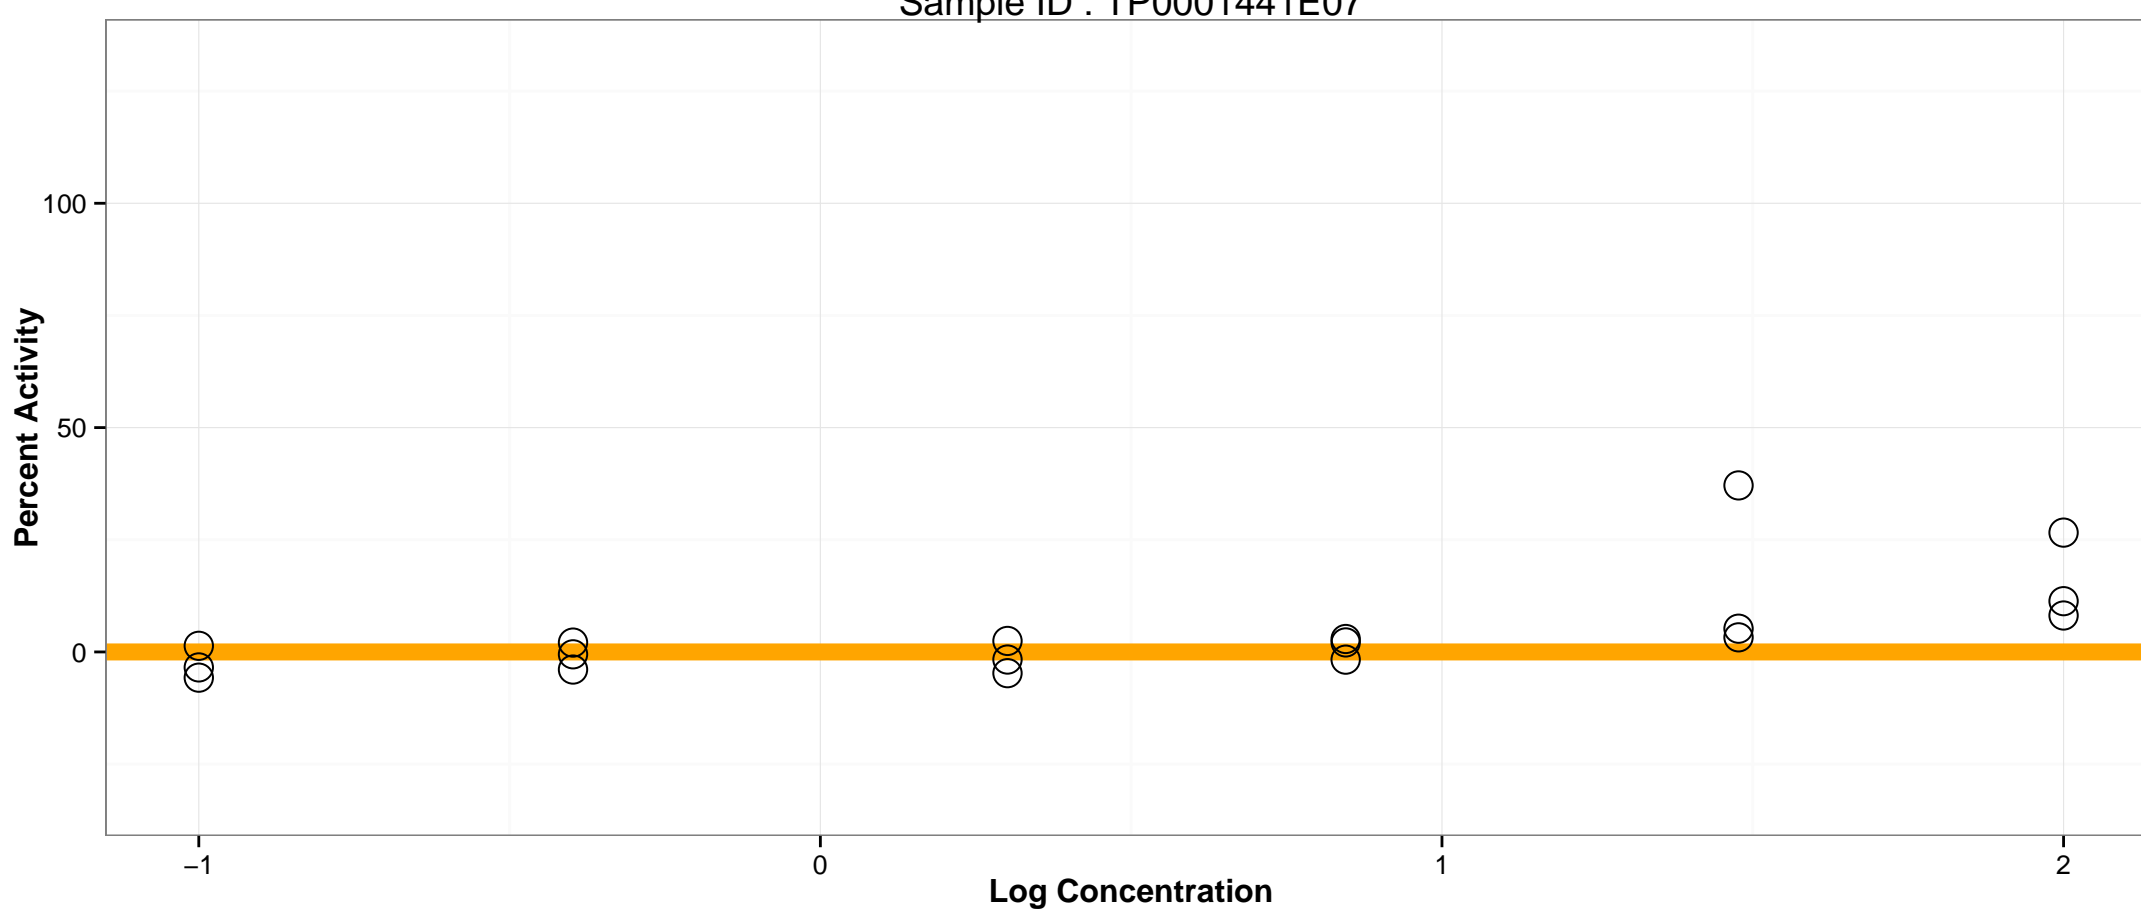

HILL MODEL

HILL MODEL: Not applicable

GAIN-LOSS MODEL

GNLS MODEL: Not applicable

|      | CNST   | HILL | GNLS |
|------|--------|------|------|
| AIC  | 132.46 | NA   | NA   |
| PROB | 1      | NA   | NA   |
| RMSE | 11.62  | NA   | NA   |

MAX\_MEAN : 15.4 MAX\_MED : 11.3 BMAD : 8.58  
COFF : 20 HIT-CALL : 0 FITC : 4 ACTP : 0  
FLAGS :

Assay ID 1508 (NHEERL\_TPO\_AUR\_dn)  
Sample ID : TP0001441E08

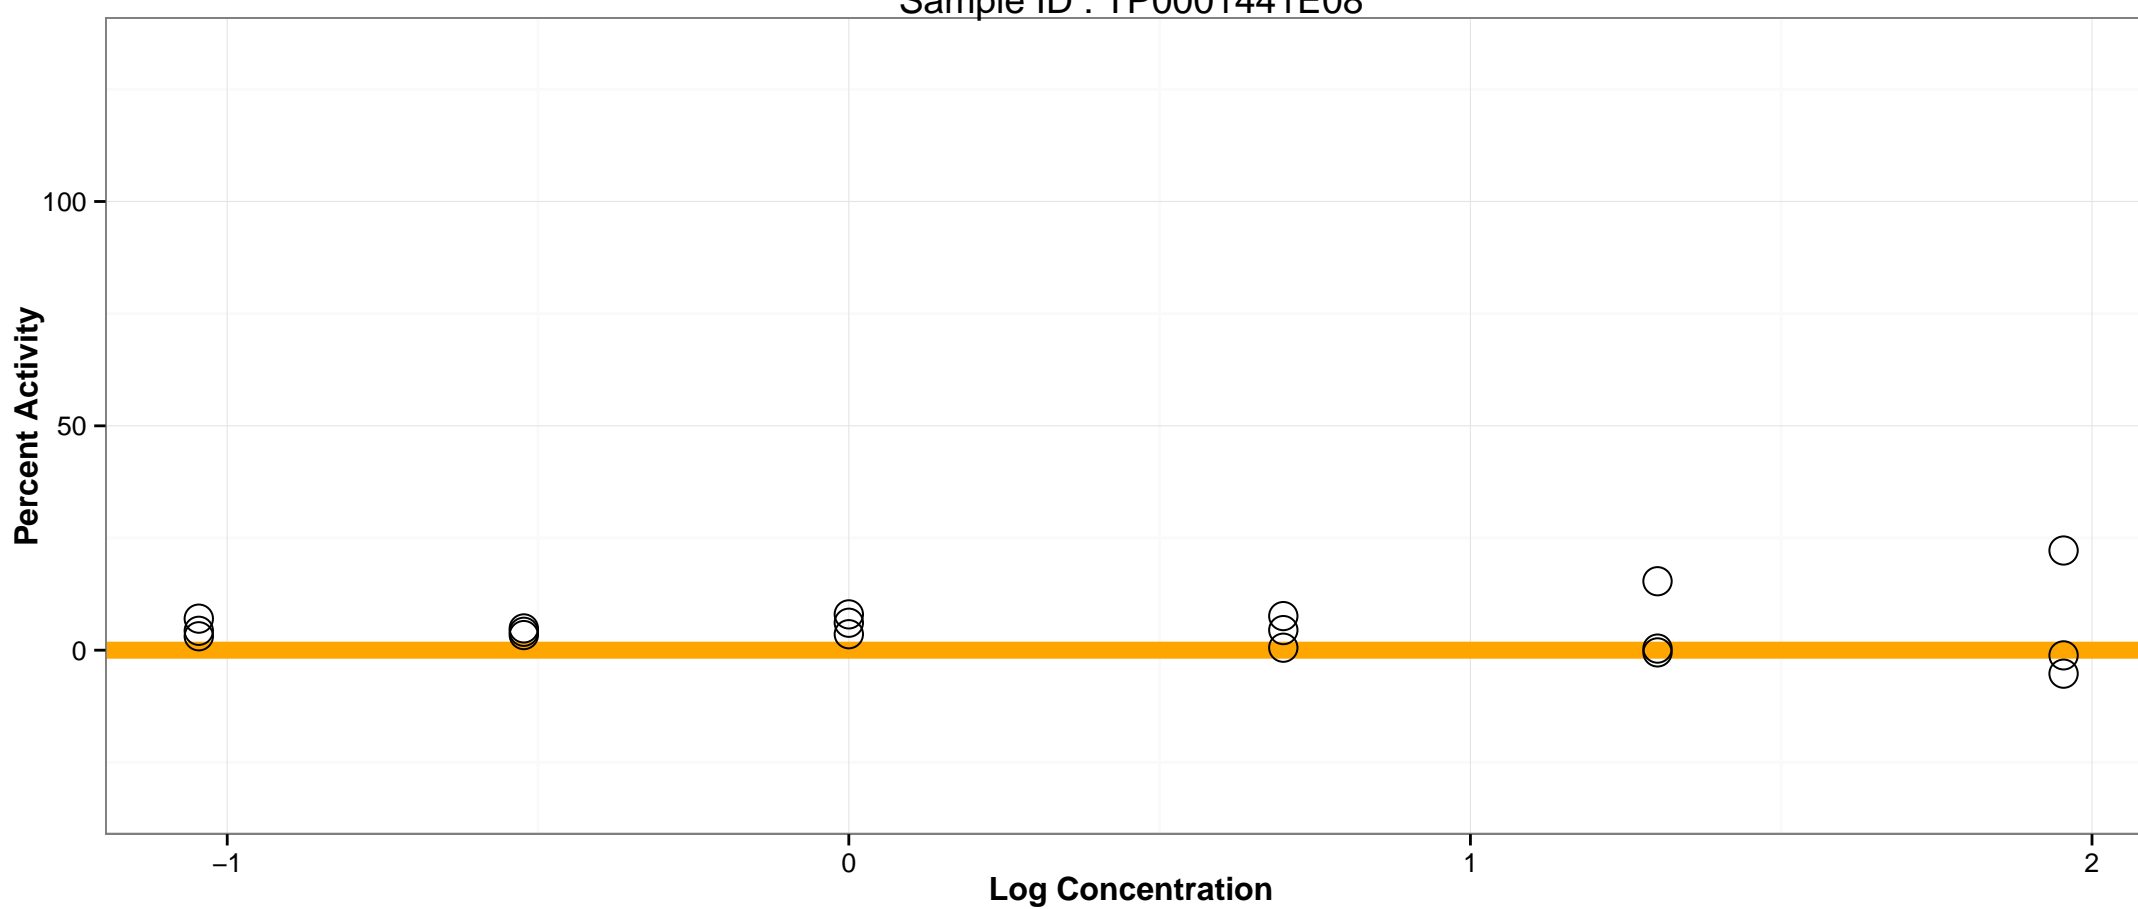

HILL MODEL

HILL MODEL: Not applicable

GAIN-LOSS MODEL

GNLS MODEL: Not applicable

|      | CNST   | HILL | GNLS |
|------|--------|------|------|
| AIC  | 124.83 | NA   | NA   |
| PROB | 1      | NA   | NA   |
| RMSE | 7.75   | NA   | NA   |

MAX\_MEAN : 5.9 MAX\_MED : 6.13 BMAD : 5.69  
COFF : 20 HIT-CALL : 0 FITC : 4 ACTP : 0  
FLAGS :

Assay ID 1509 (NHEERL\_HEK293T\_CellTiterGLO)  
Sample ID : TP0001441E08

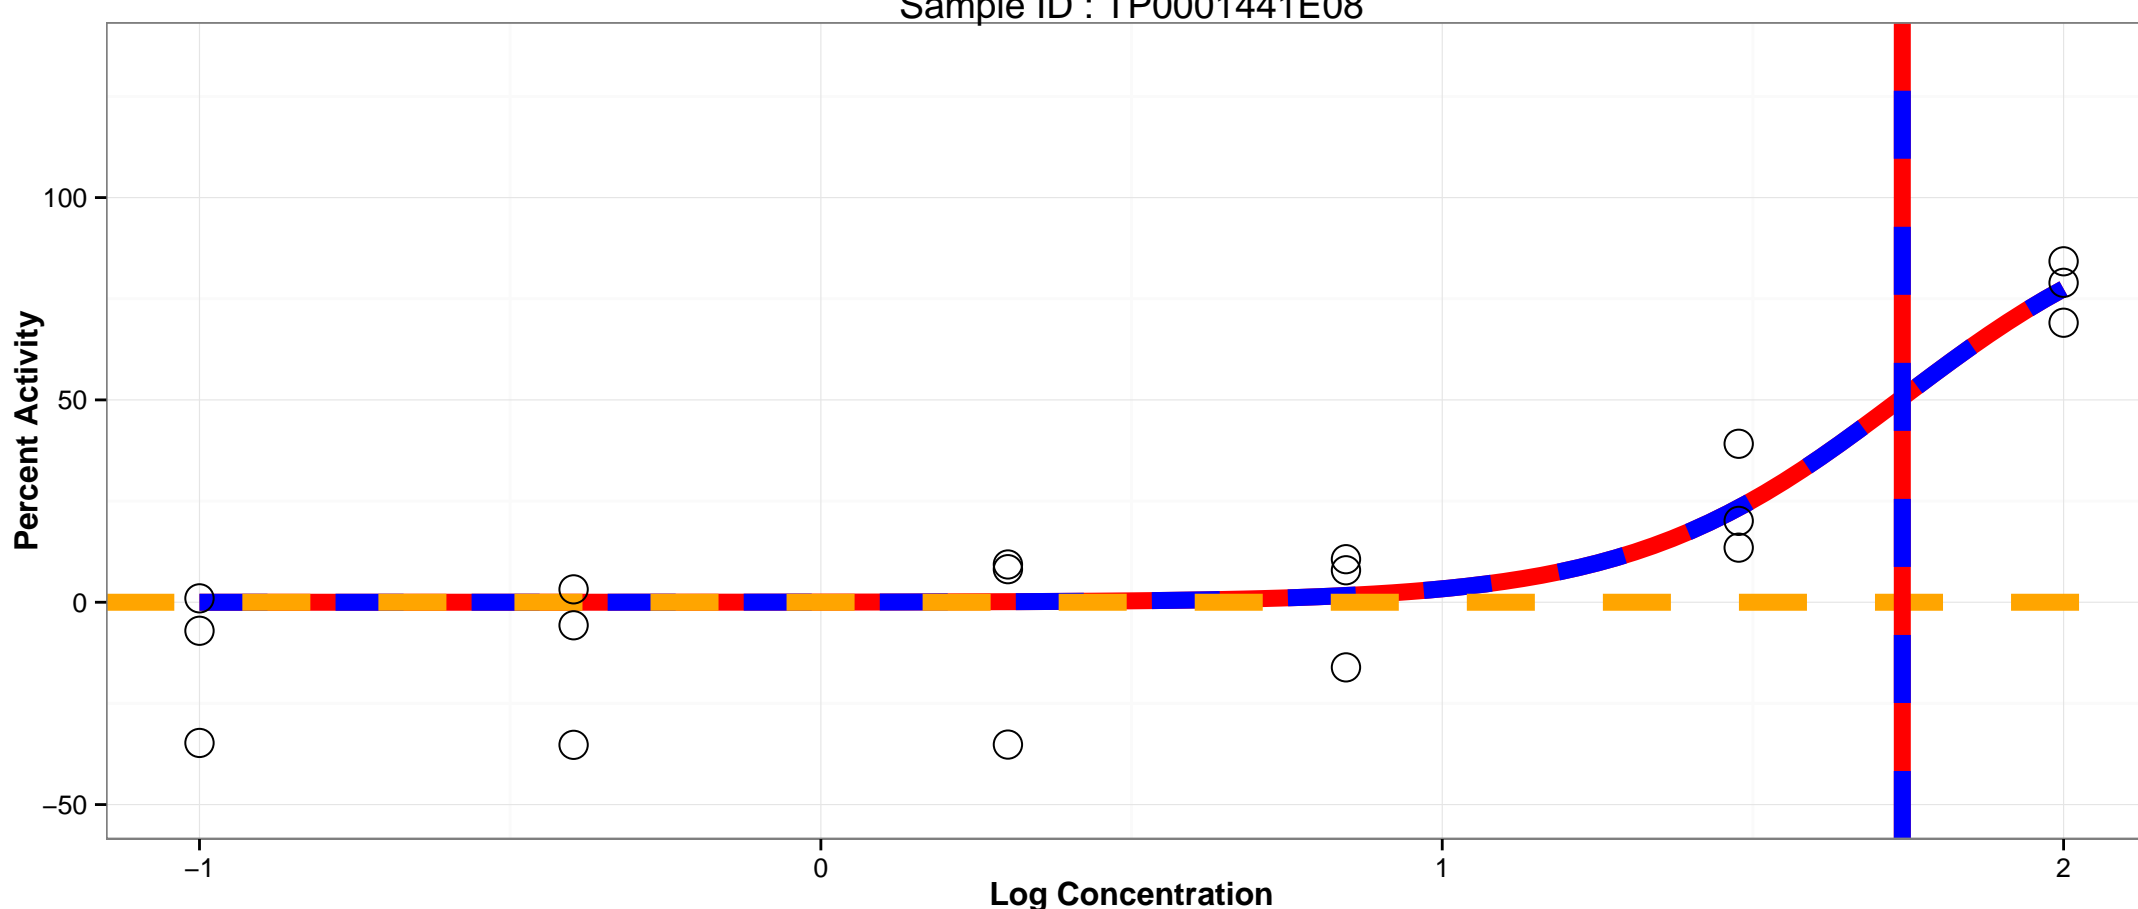

HILL MODEL

|     | tp  | ga    | gw   |
|-----|-----|-------|------|
| val | 101 | 1.74  | 1.98 |
| sd  | 120 | 0.725 | 2.93 |

GAIN-LOSS MODEL

|     | tp  | ga   | gw   | la   | lw   |
|-----|-----|------|------|------|------|
| val | 101 | 1.74 | 1.98 | 3.04 | 6.68 |
| sd  | 120 | 0.73 | 2.96 | 1210 | 7810 |

|      | CNST   | HILL   | GNLS   |
|------|--------|--------|--------|
| AIC  | 182.18 | 158.74 | 162.74 |
| PROB | 0      | 0.88   | 0.12   |
| RMSE | 36.97  | 16.41  | 16.41  |

MAX\_MEAN : 77.4 MAX\_MED : 79 BMAD : 5.54  
COFF : 20 HIT-CALL : 1 FITC : 42 ACTP : 1  
FLAGS :

Assay ID 1848 (NHEERL\_Quantilum\_inhib\_2\_dn)  
Sample ID : TP0001441E08

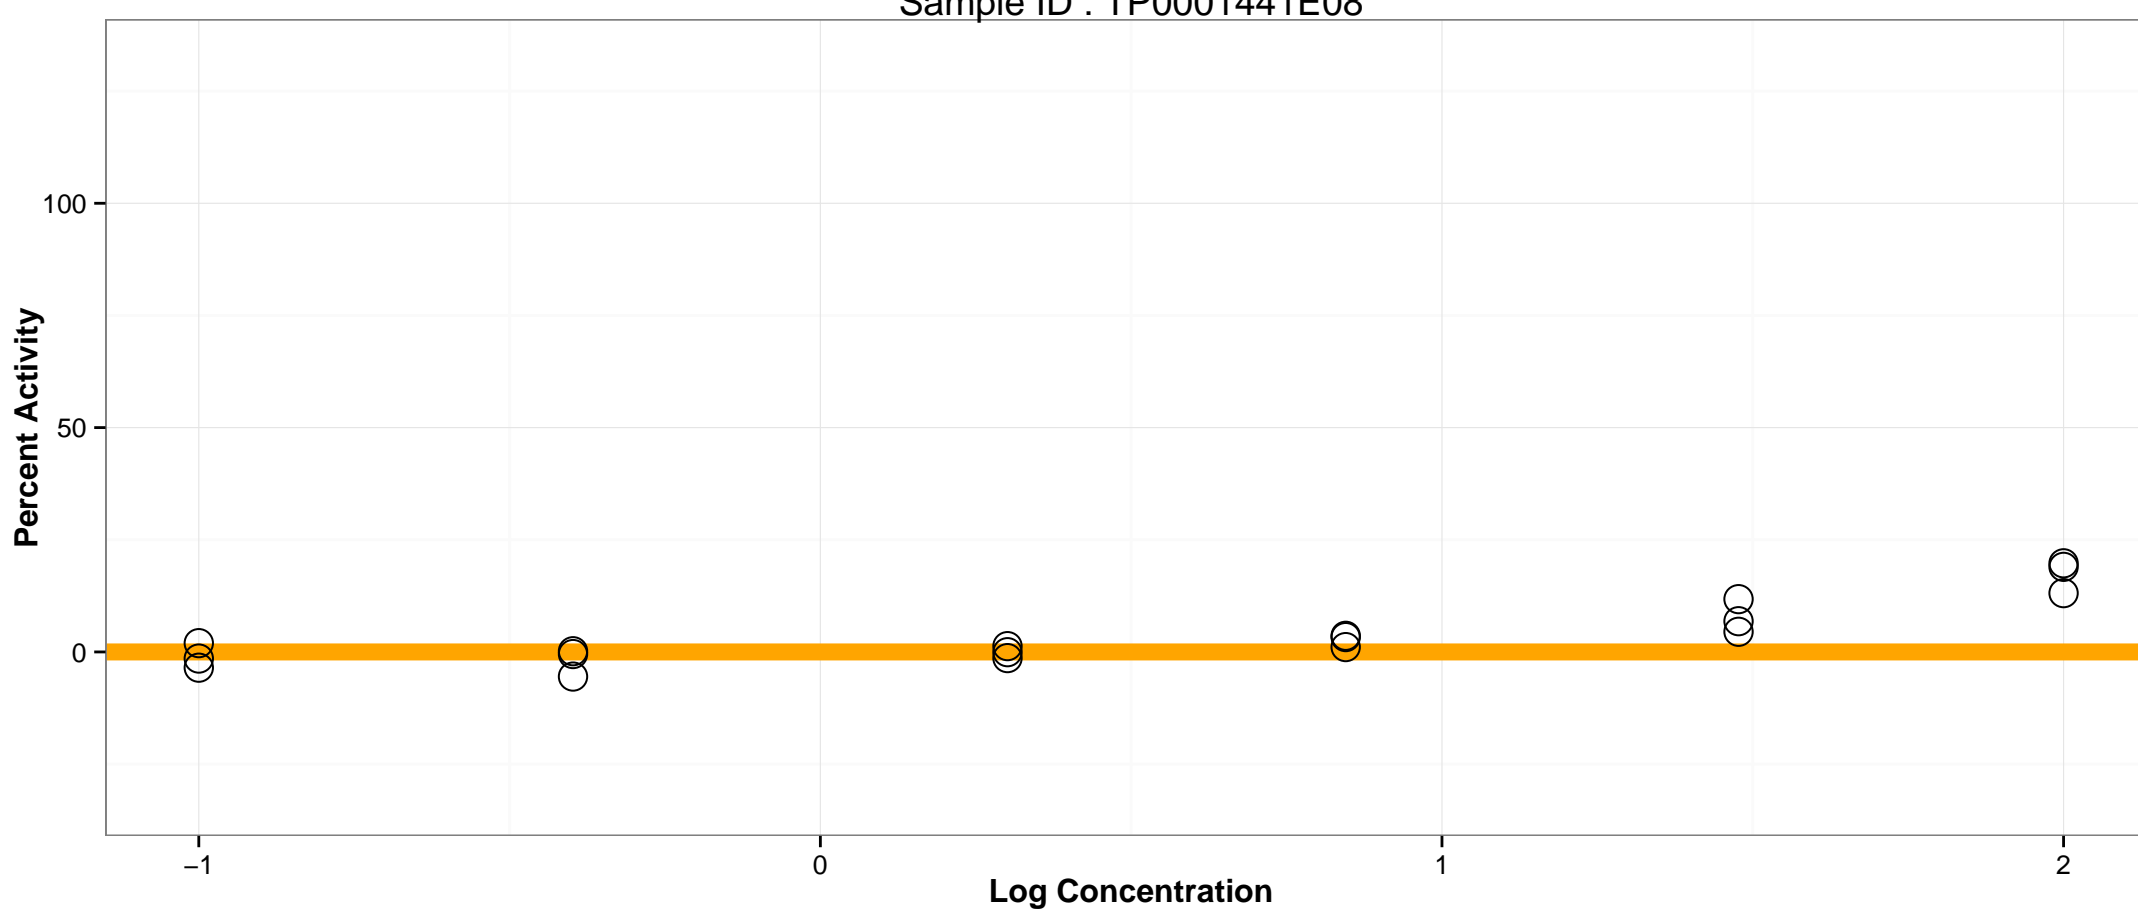

HILL MODEL

HILL MODEL: Not applicable

GAIN-LOSS MODEL

GNLS MODEL: Not applicable

|      | CNST   | HILL | GNLS |
|------|--------|------|------|
| AIC  | 126.44 | NA   | NA   |
| PROB | 1      | NA   | NA   |
| RMSE | 8.19   | NA   | NA   |

MAX\_MEAN : 17.3 MAX\_MED : 19 BMAD : 8.58  
COFF : 20 HIT-CALL : 0 FITC : 4 ACTP : 0  
FLAGS :

Assay ID 1508 (NHEERL\_TPO\_AUR\_dn)  
Sample ID : TP0001441E09

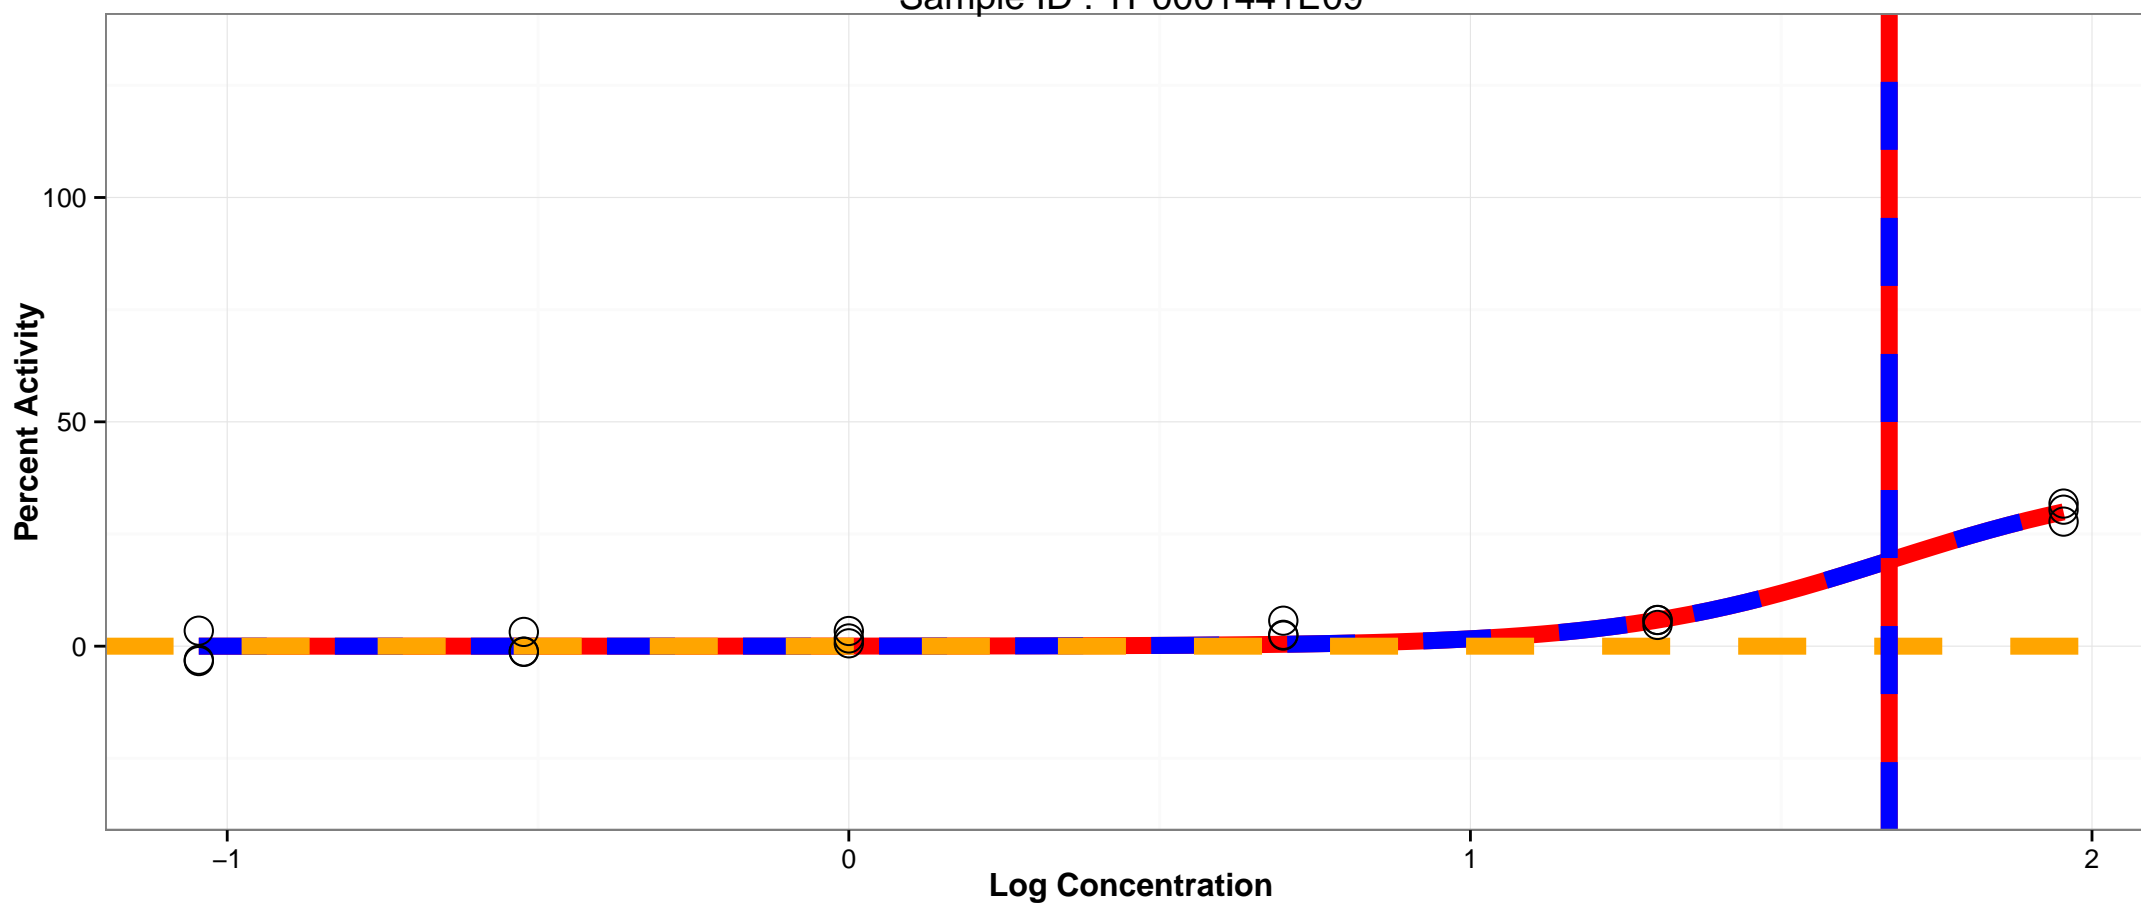

**HILL MODEL**

|     | tp   | ga    | gw   |
|-----|------|-------|------|
| val | 38.2 | 1.67  | 2    |
| sd  | 16.8 | 0.295 | 1.09 |

**GAIN-LOSS MODEL**

|     | tp   | ga    | gw   | la   | lw   |
|-----|------|-------|------|------|------|
| val | 38.2 | 1.67  | 2    | 3.95 | 4.06 |
| sd  | 16.8 | 0.296 | 1.09 | 2250 | 4570 |

|      | CNST   | HILL  | GNLS  |
|------|--------|-------|-------|
| AIC  | 137.76 | 92.87 | 96.87 |
| PROB | 0      | 0.88  | 0.12  |
| RMSE | 12.7   | 2.42  | 2.42  |

MAX\_MEAN : 30 MAX\_MED : 30.4 BMAD : 5.69  
COFF : 20 HIT-CALL : 1 FITC : 42 ACTP : 1  
FLAGS : 6

Assay ID 1509 (NHEERL\_HEK293T\_CellTiterGLO)  
Sample ID : TP0001441E09

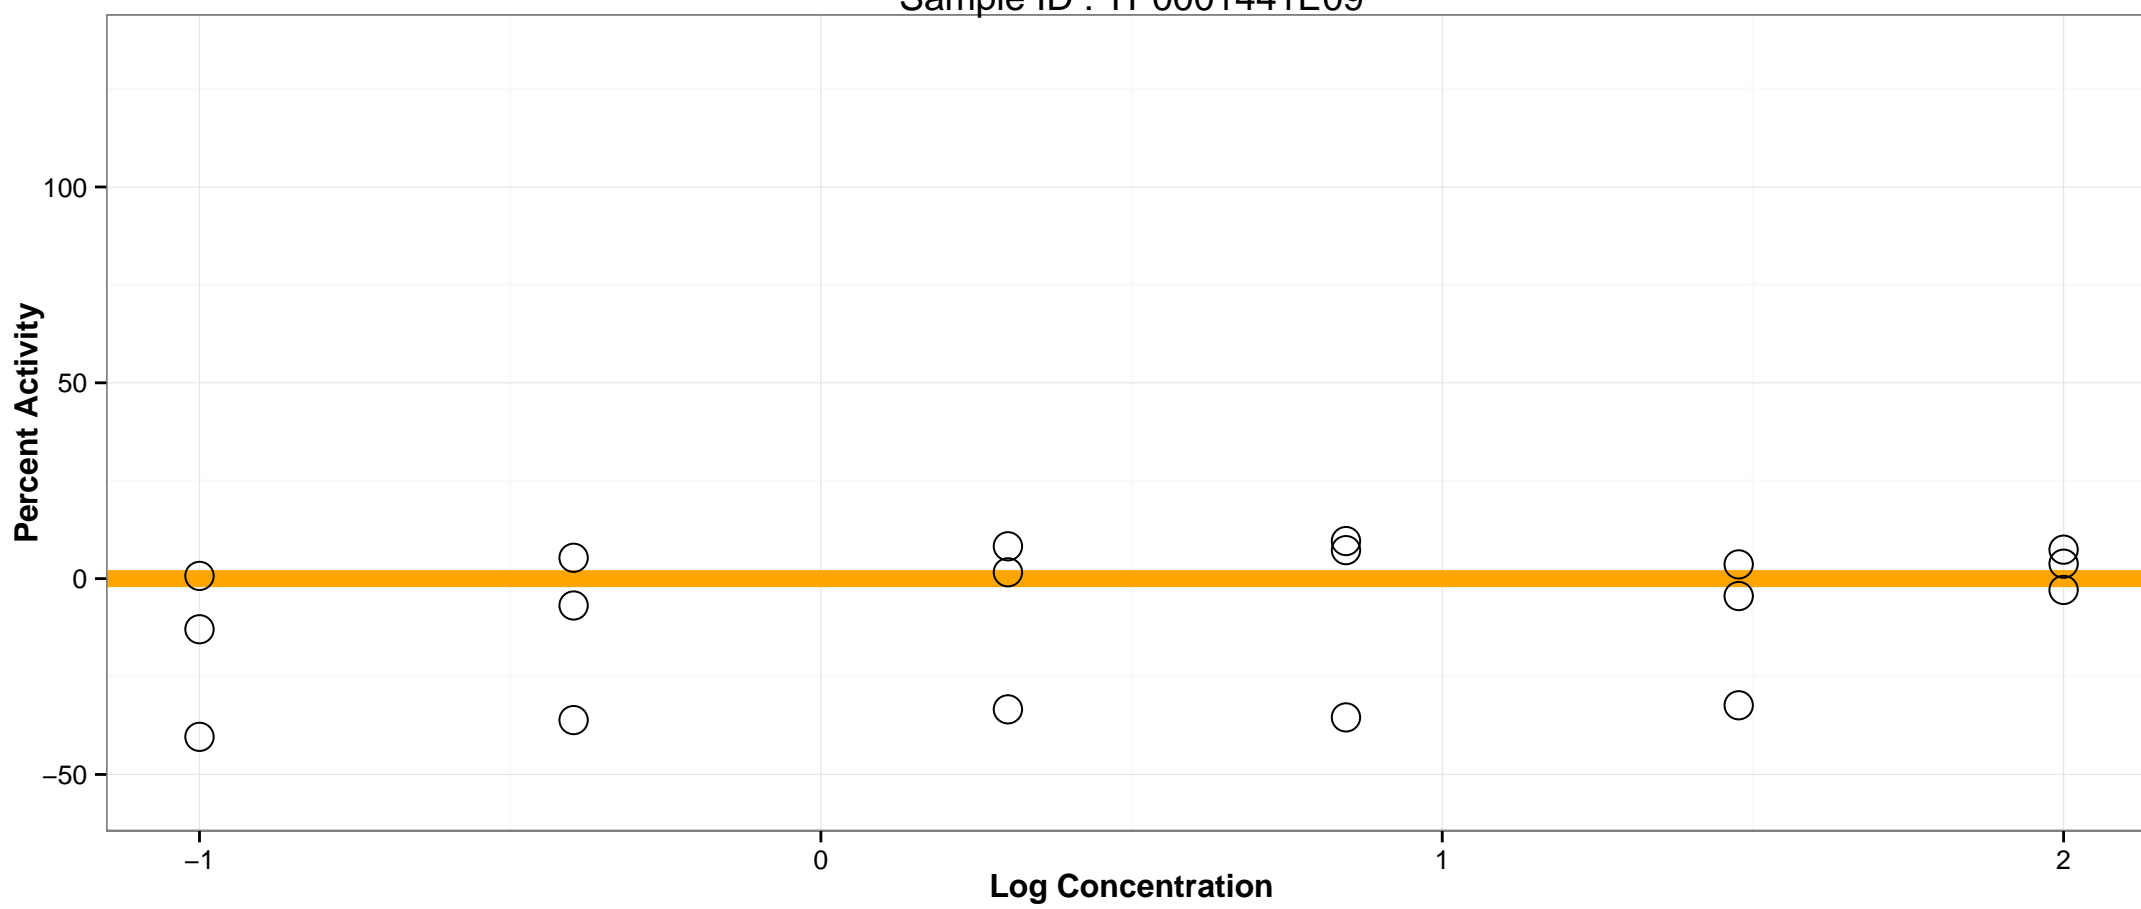

**HILL MODEL**

HILL MODEL: Not applicable

**GAIN-LOSS MODEL**

GNLS MODEL: Not applicable

|      | CNST   | HILL | GNLS |
|------|--------|------|------|
| AIC  | 159.69 | NA   | NA   |
| PROB | 1      | NA   | NA   |
| RMSE | 19.6   | NA   | NA   |

MAX\_MEAN : 2.79 MAX\_MED : 7.3 BMAD : 5.54  
COFF : 20 HIT-CALL : 0 FITC : 4 ACTP : 0  
FLAGS :

Assay ID 1848 (NHEERL\_Quantilum\_inhib\_2\_dn)  
Sample ID : TP0001441E09

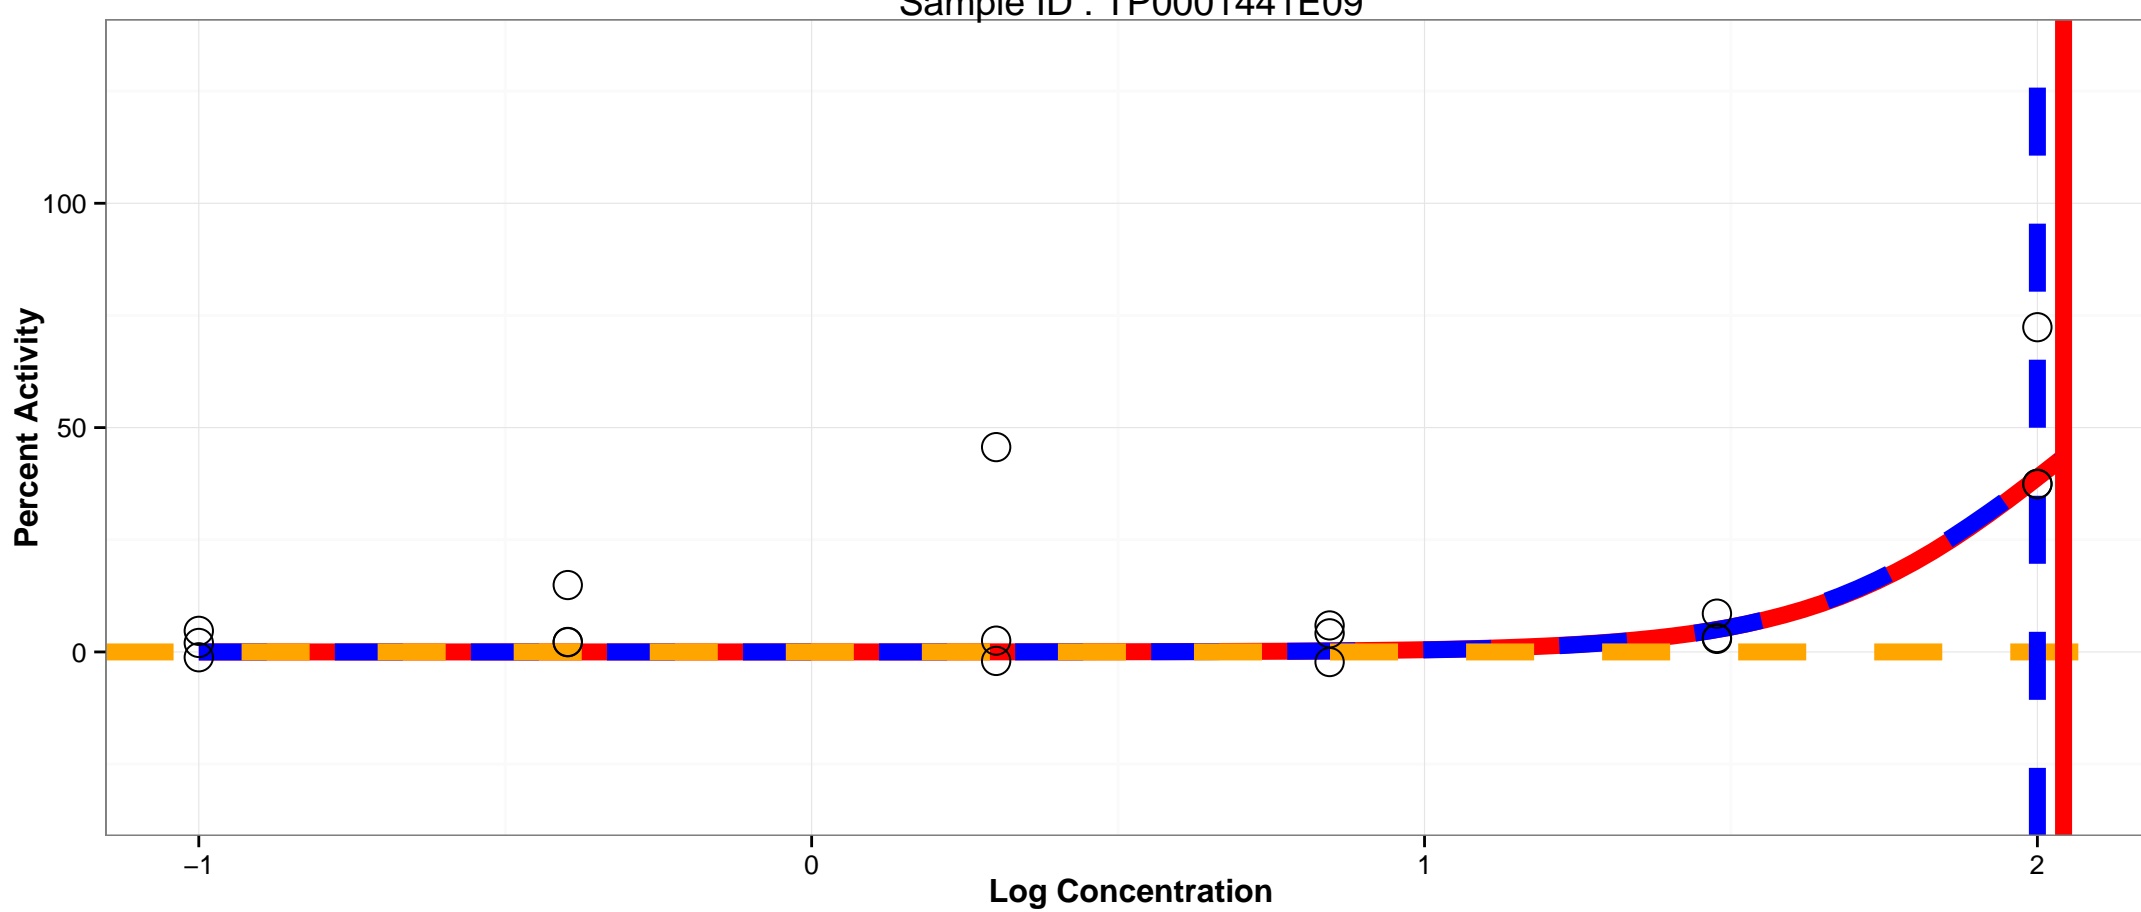

**HILL MODEL**

|     | tp   | ga    | gw    |
|-----|------|-------|-------|
| val | 86.9 | 2.04  | 2.15  |
| sd  | 96.4 | 0.422 | 0.919 |

**GAIN-LOSS MODEL**

|     | tp   | ga    | gw   | la     | lw     |
|-----|------|-------|------|--------|--------|
| val | 77.8 | 2     | 2.23 | 4      | 5.6    |
| sd  | 129  | 0.646 | 1.48 | 146000 | 345000 |

|      | CNST   | HILL   | GNLS  |
|------|--------|--------|-------|
| AIC  | 161.59 | 140.89 | 144.9 |
| PROB | 0      | 0.88   | 0.12  |
| RMSE | 24.21  | 14.06  | 14.05 |

MAX\_MEAN : 49.1 MAX\_MED : 37.5 BMAD : 8.58  
COFF : 20 HIT-CALL : 1 FITC : 42 ACTP : 1  
FLAGS : 6

Chemical : Fenoxaprop-ethyl  
CAS : 66441-23-4

Assay ID 1508 (NHEERL\_TPO\_AUR\_dn)  
Sample ID : TX000781

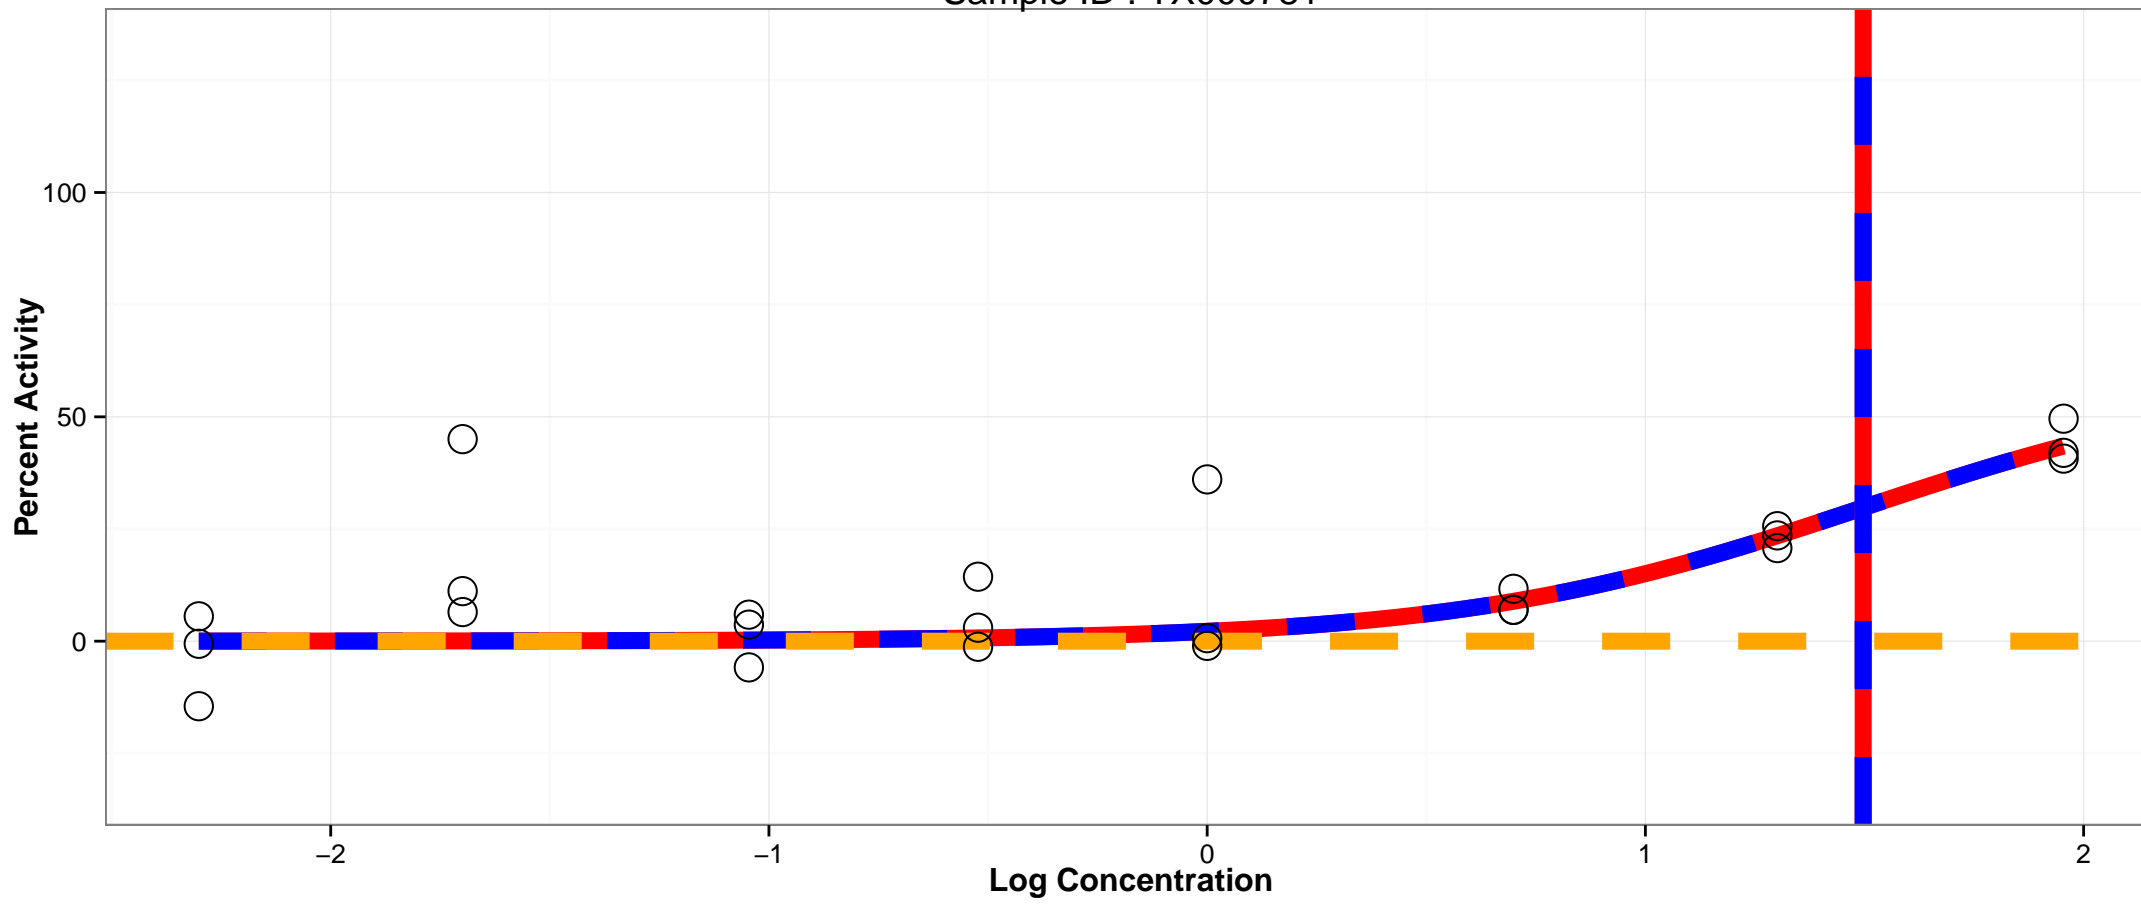

HILL MODEL

|     | tp   | ga    | gw    |
|-----|------|-------|-------|
| val | 59.5 | 1.5   | 0.947 |
| sd  | 24.3 | 0.454 | 0.442 |

GAIN-LOSS MODEL

|     | tp   | ga  | gw    | la   | lw   |
|-----|------|-----|-------|------|------|
| val | 59.5 | 1.5 | 0.947 | 3.41 | 12.5 |
| sd  | NA   | NA  | NA    | NA   | NA   |

|      | CNST   | HILL  | GNLS  |
|------|--------|-------|-------|
| AIC  | 218.34 | 185.3 | 189.3 |
| PROB | 0      | 0.88  | 0.12  |
| RMSE | 22.17  | 12.82 | 12.82 |

MAX\_MEAN : 44.1 MAX\_MED : 42 BMAD : 5.69  
COFF : 20 HIT-CALL : 1 FITC : 42 ACTP : 1  
FLAGS :

Assay ID 1509 (NHEERL\_HEK293T\_CellTiterGLO)  
Sample ID : TX000781

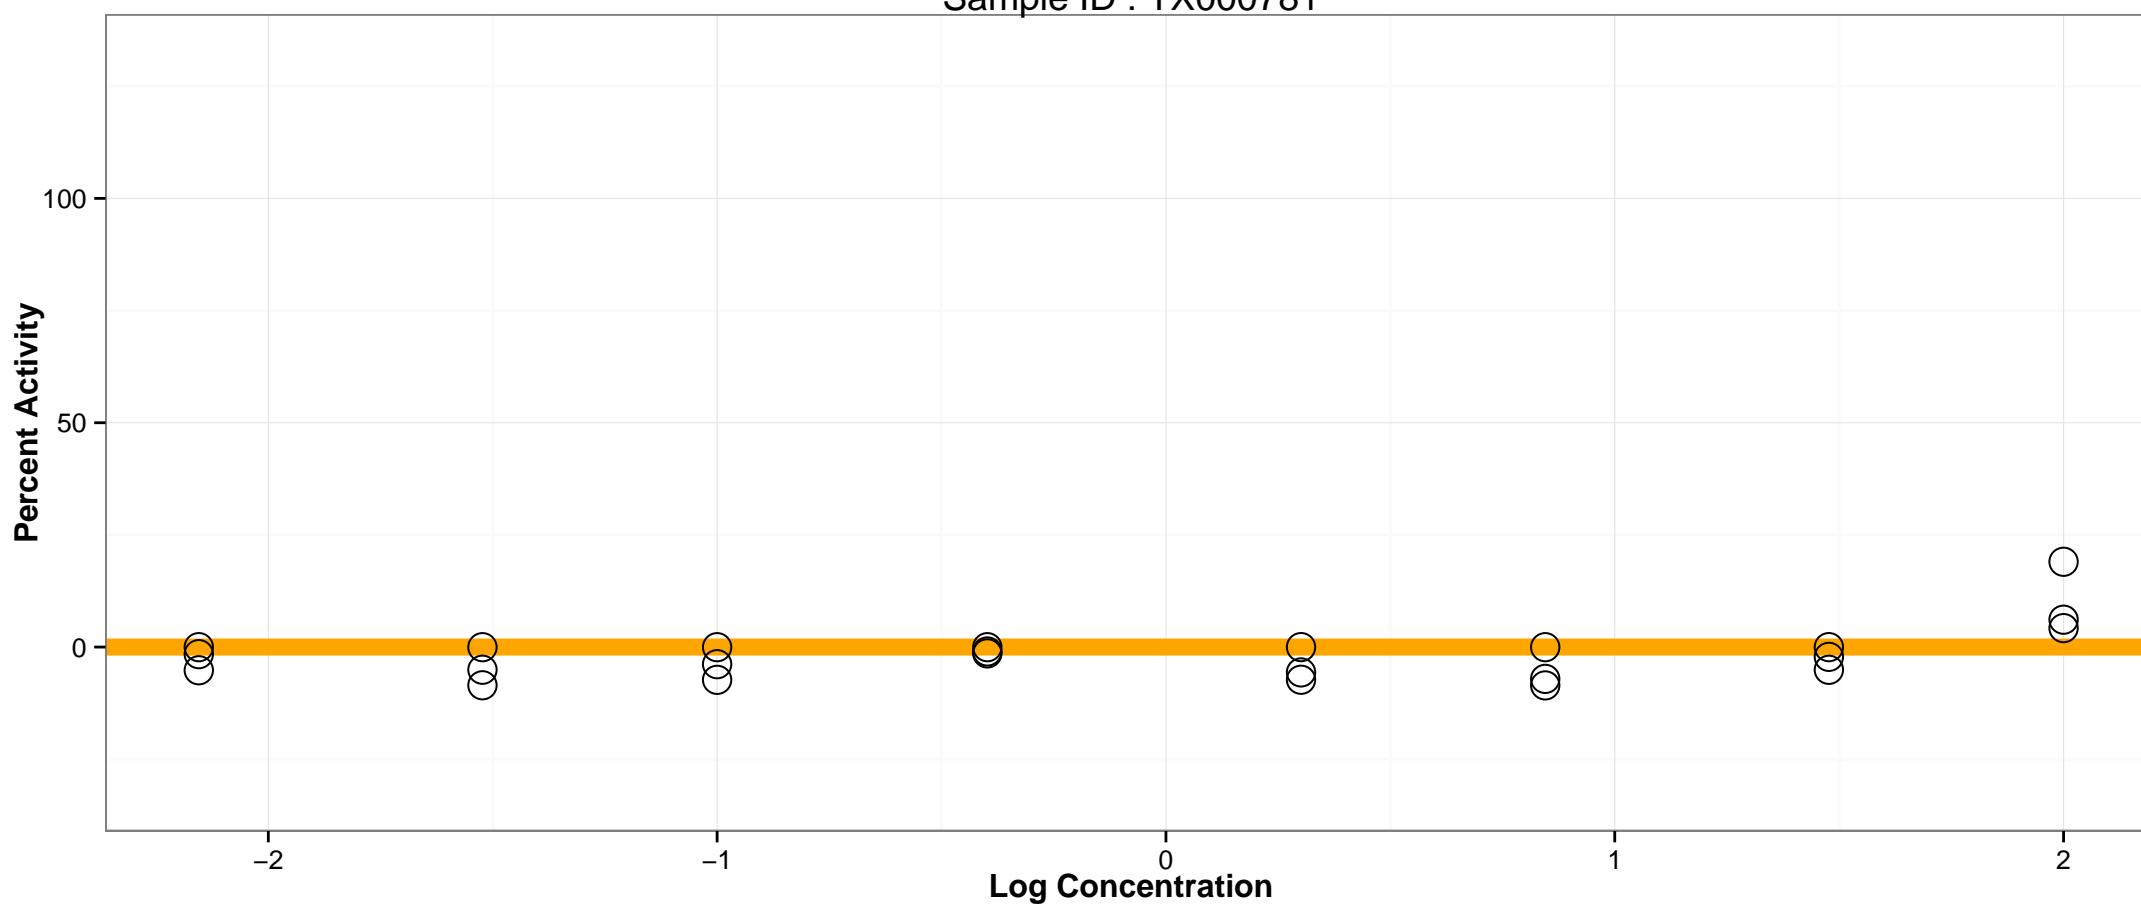

HILL MODEL

HILL MODEL: Not applicable

GAIN-LOSS MODEL

GNLS MODEL: Not applicable

|      | CNST   | HILL | GNLS |
|------|--------|------|------|
| AIC  | 153.76 | NA   | NA   |
| PROB | 1      | NA   | NA   |
| RMSE | 5.96   | NA   | NA   |

MAX\_MEAN : 9.79 MAX\_MED : 6.11 BMAD : 5.54  
COFF : 20 HIT-CALL : 0 FITC : 4 ACTP : 0  
FLAGS :

Assay ID 1848 (NHEERL\_Quantilum\_inhib\_2\_dn)  
Sample ID : TX000781

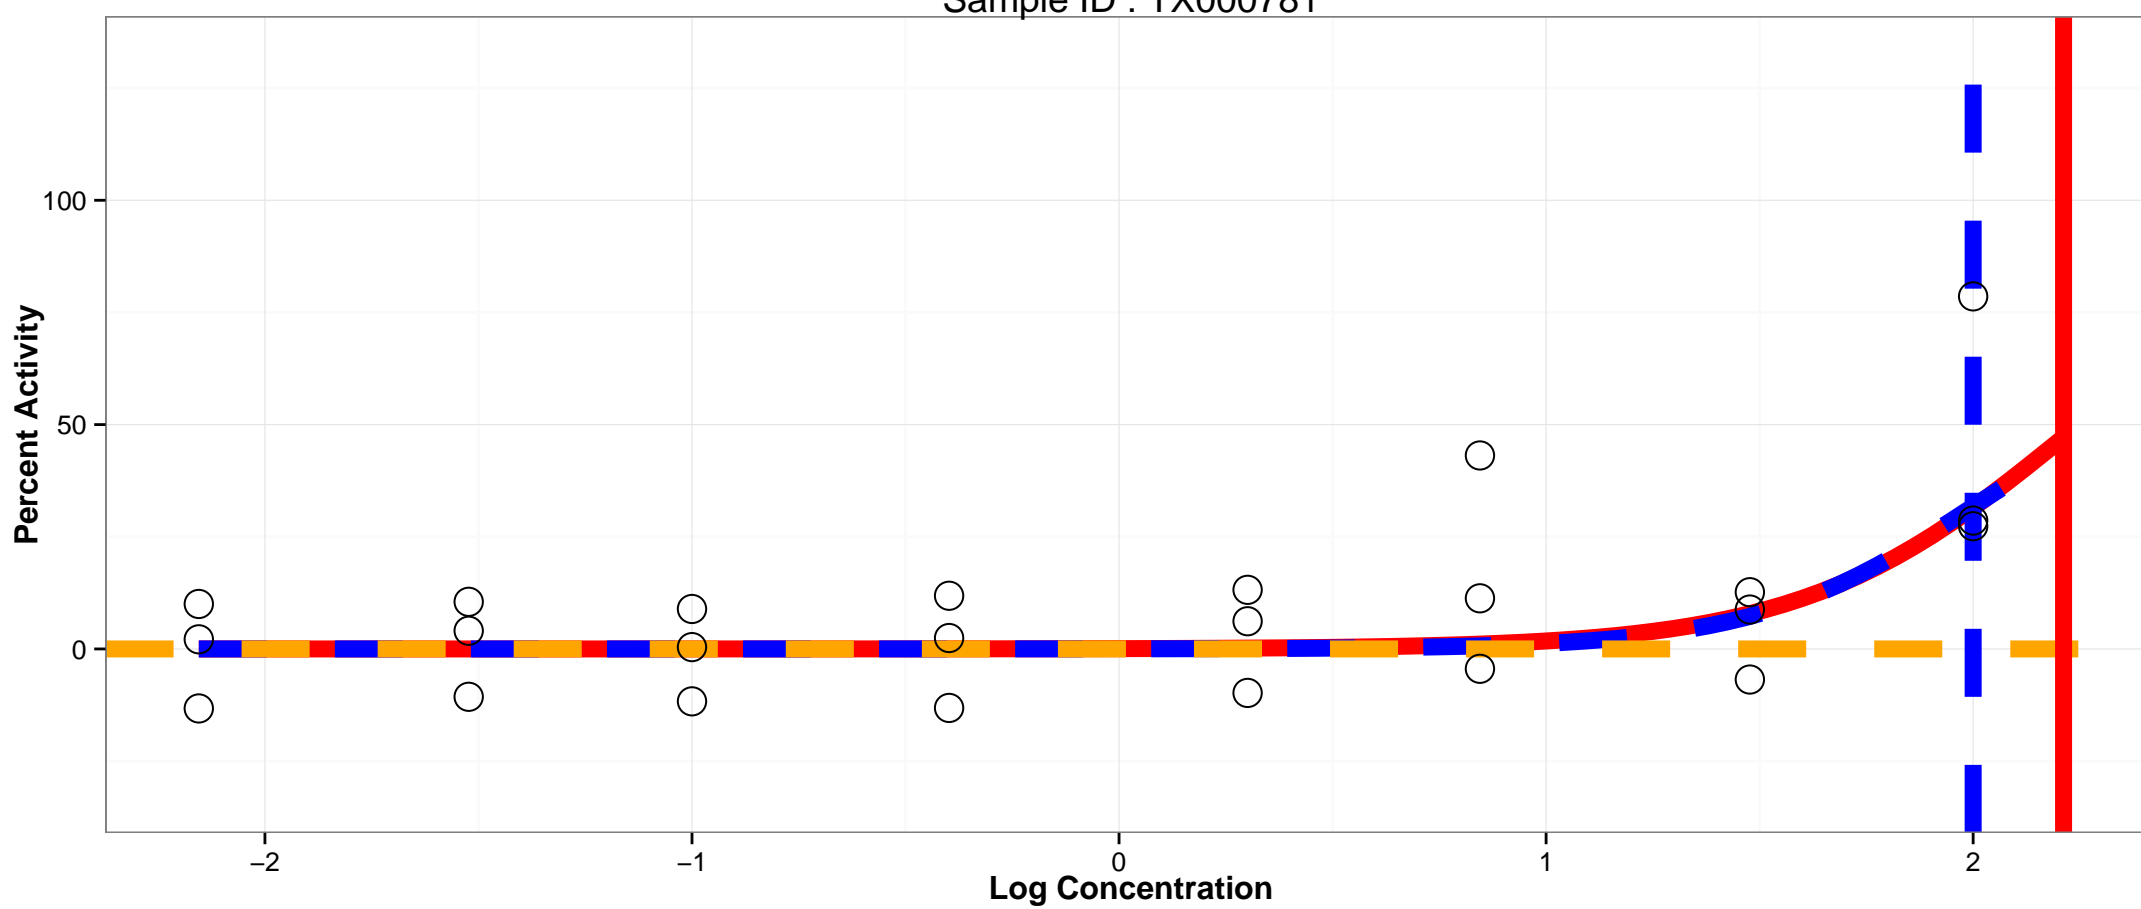

HILL MODEL

|     | tp   | ga   | gw   |
|-----|------|------|------|
| val | 94.3 | 2.21 | 1.42 |
| sd  | 253  | 1.45 | 1.64 |

GAIN-LOSS MODEL

|     | tp   | ga   | gw   | la   | lw   |
|-----|------|------|------|------|------|
| val | 63.5 | 2    | 1.7  | 2.57 | 9.34 |
| sd  | 225  | 1.82 | 3.38 | 145  | 2350 |

|      | CNST   | HILL   | GNLS   |
|------|--------|--------|--------|
| AIC  | 210.23 | 202.42 | 206.49 |
| PROB | 0.02   | 0.87   | 0.11   |
| RMSE | 21.79  | 15.48  | 15.49  |

MAX\_MEAN : 44.9 MAX\_MED : 28.6 BMAD : 8.58  
COFF : 20 HIT-CALL : 1 FITC : 42 ACTP : 0.982  
FLAGS : 6

Chemical : Phenylbutazone  
CAS : 50-33-9

Assay ID 1508 (NHEERL\_TPO\_AUR\_dn)  
Sample ID : TP0001441E10

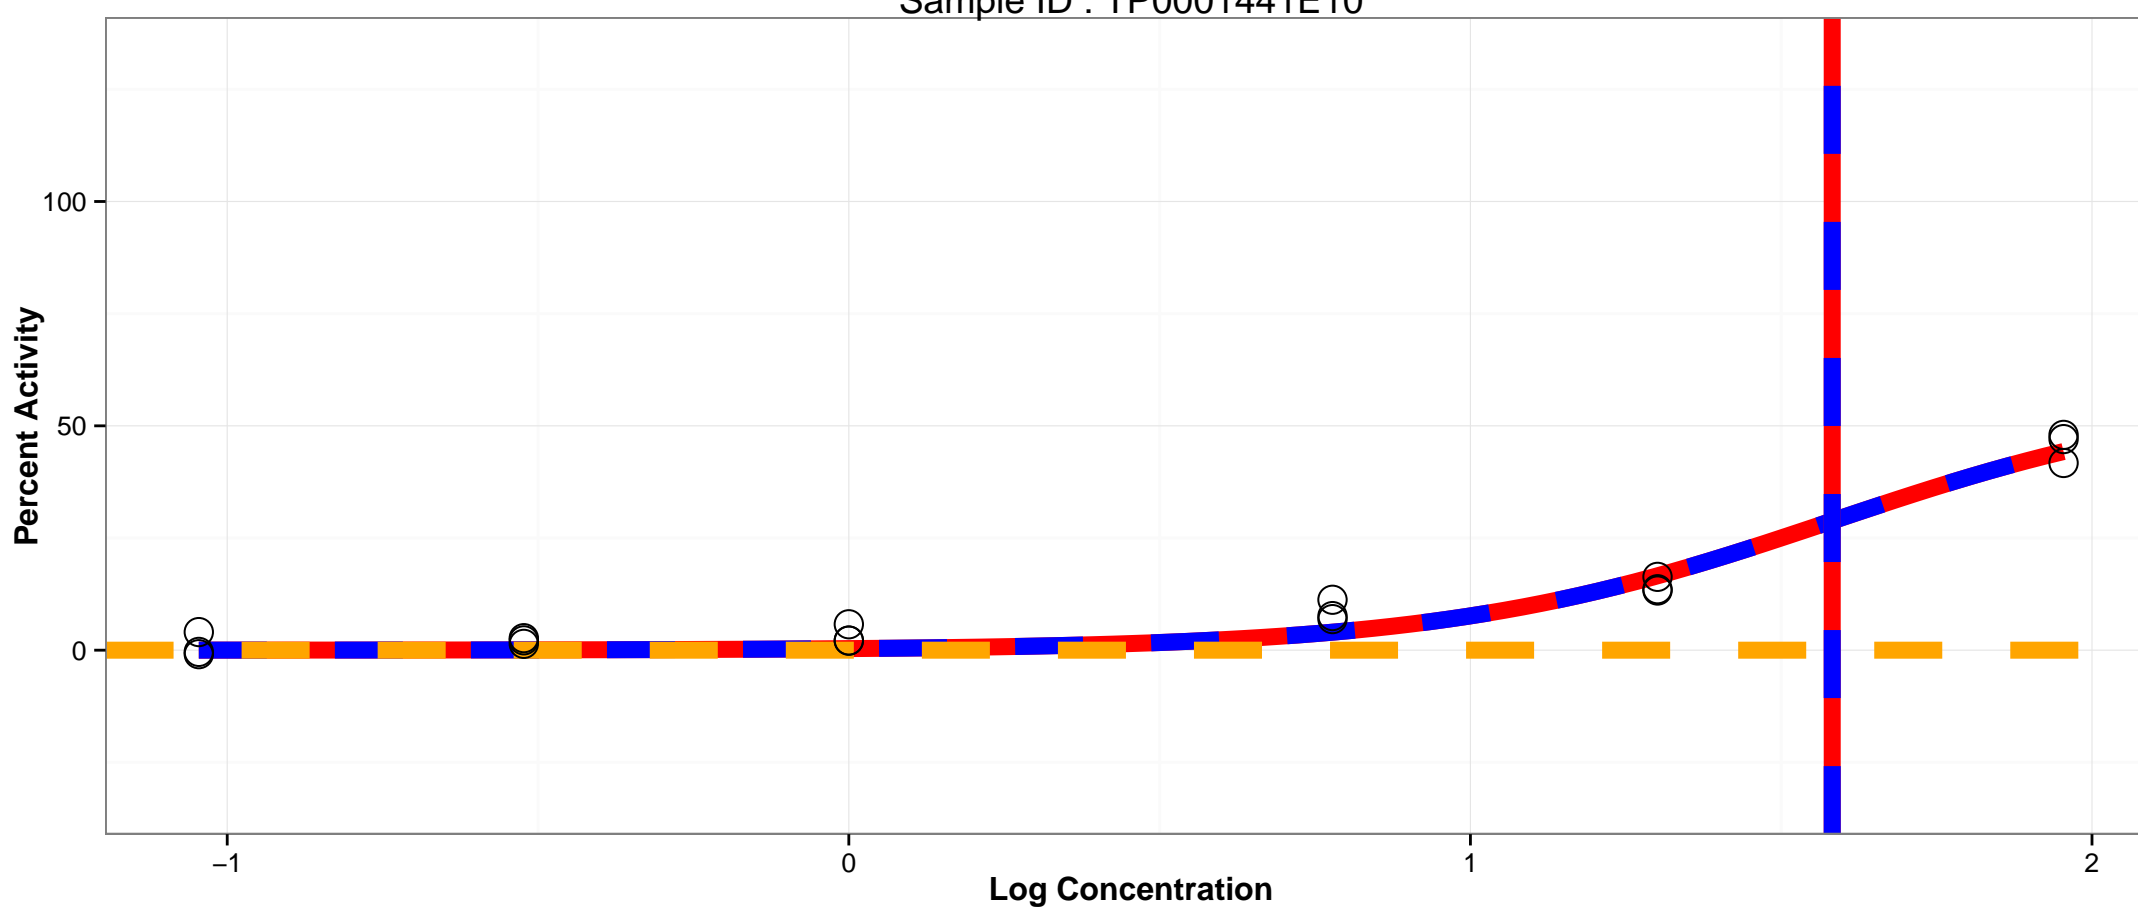

HILL MODEL

|     | tp   | ga    | gw    |
|-----|------|-------|-------|
| val | 57.6 | 1.58  | 1.4   |
| sd  | 10   | 0.135 | 0.405 |

GAIN-LOSS MODEL

|     | tp   | ga    | gw    | la   | lw    |
|-----|------|-------|-------|------|-------|
| val | 57.6 | 1.58  | 1.4   | 3.11 | 8.61  |
| sd  | 10   | 0.135 | 0.405 | 3430 | 25700 |

|      | CNST   | HILL   | GNLS   |
|------|--------|--------|--------|
| AIC  | 156.81 | 103.31 | 107.31 |
| PROB | 0      | 0.88   | 0.12   |
| RMSE | 19.99  | 3.23   | 3.23   |

MAX\_MEAN : 45.6 MAX\_MED : 47.1 BMAD : 5.69  
COFF : 20 HIT-CALL : 1 FITC : 42 ACTP : 1  
FLAGS : 6

Assay ID 1509 (NHEERL\_HEK293T\_CellTiterGLO)  
Sample ID : TP0001441E10

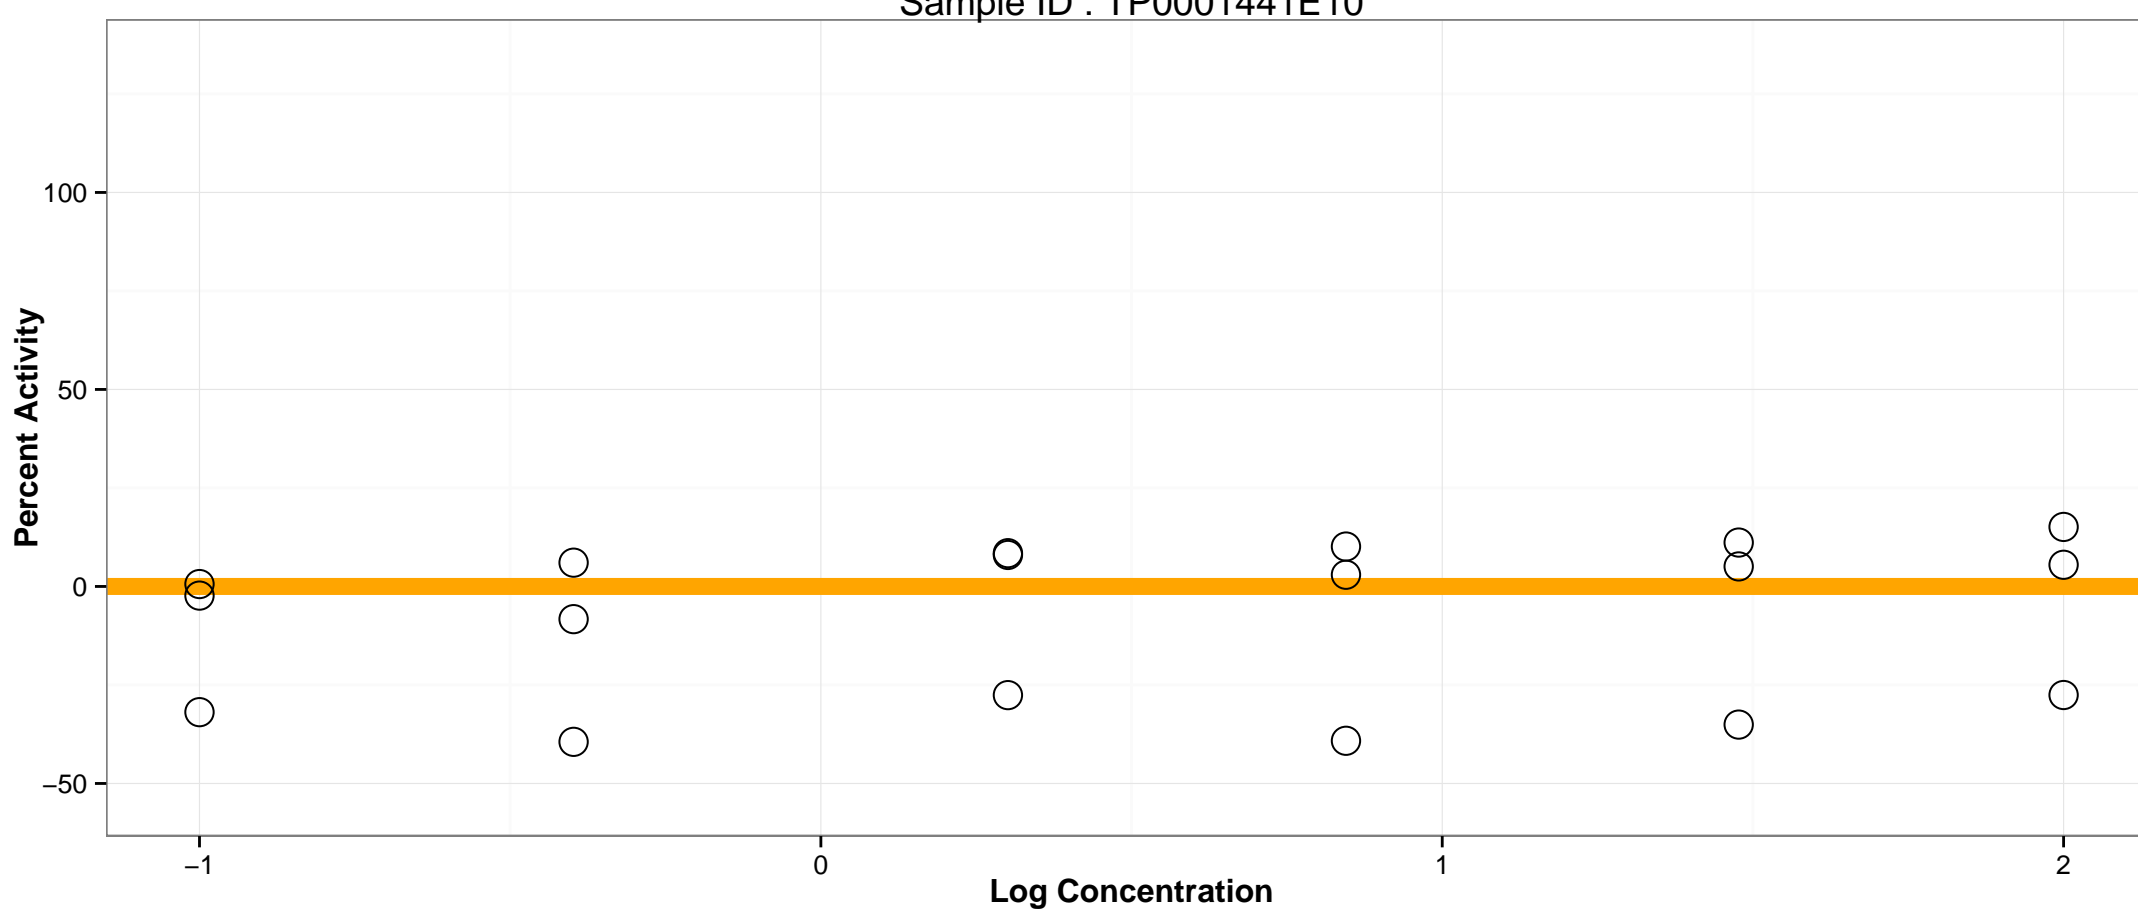

HILL MODEL

HILL MODEL: Not applicable

GAIN-LOSS MODEL

GNLS MODEL: Not applicable

|      | CNST   | HILL | GNLS |
|------|--------|------|------|
| AIC  | 162.76 | NA   | NA   |
| PROB | 1      | NA   | NA   |
| RMSE | 20.57  | NA   | NA   |

MAX\_MEAN : -2.3 MAX\_MED : 8.01 BMAD : 5.54  
COFF : 20 HIT-CALL : 0 FITC : 4 ACTP : 0  
FLAGS : 10

Assay ID 1848 (NHEERL\_Quantilum\_inhib\_2\_dn)  
Sample ID : TP0001441E10

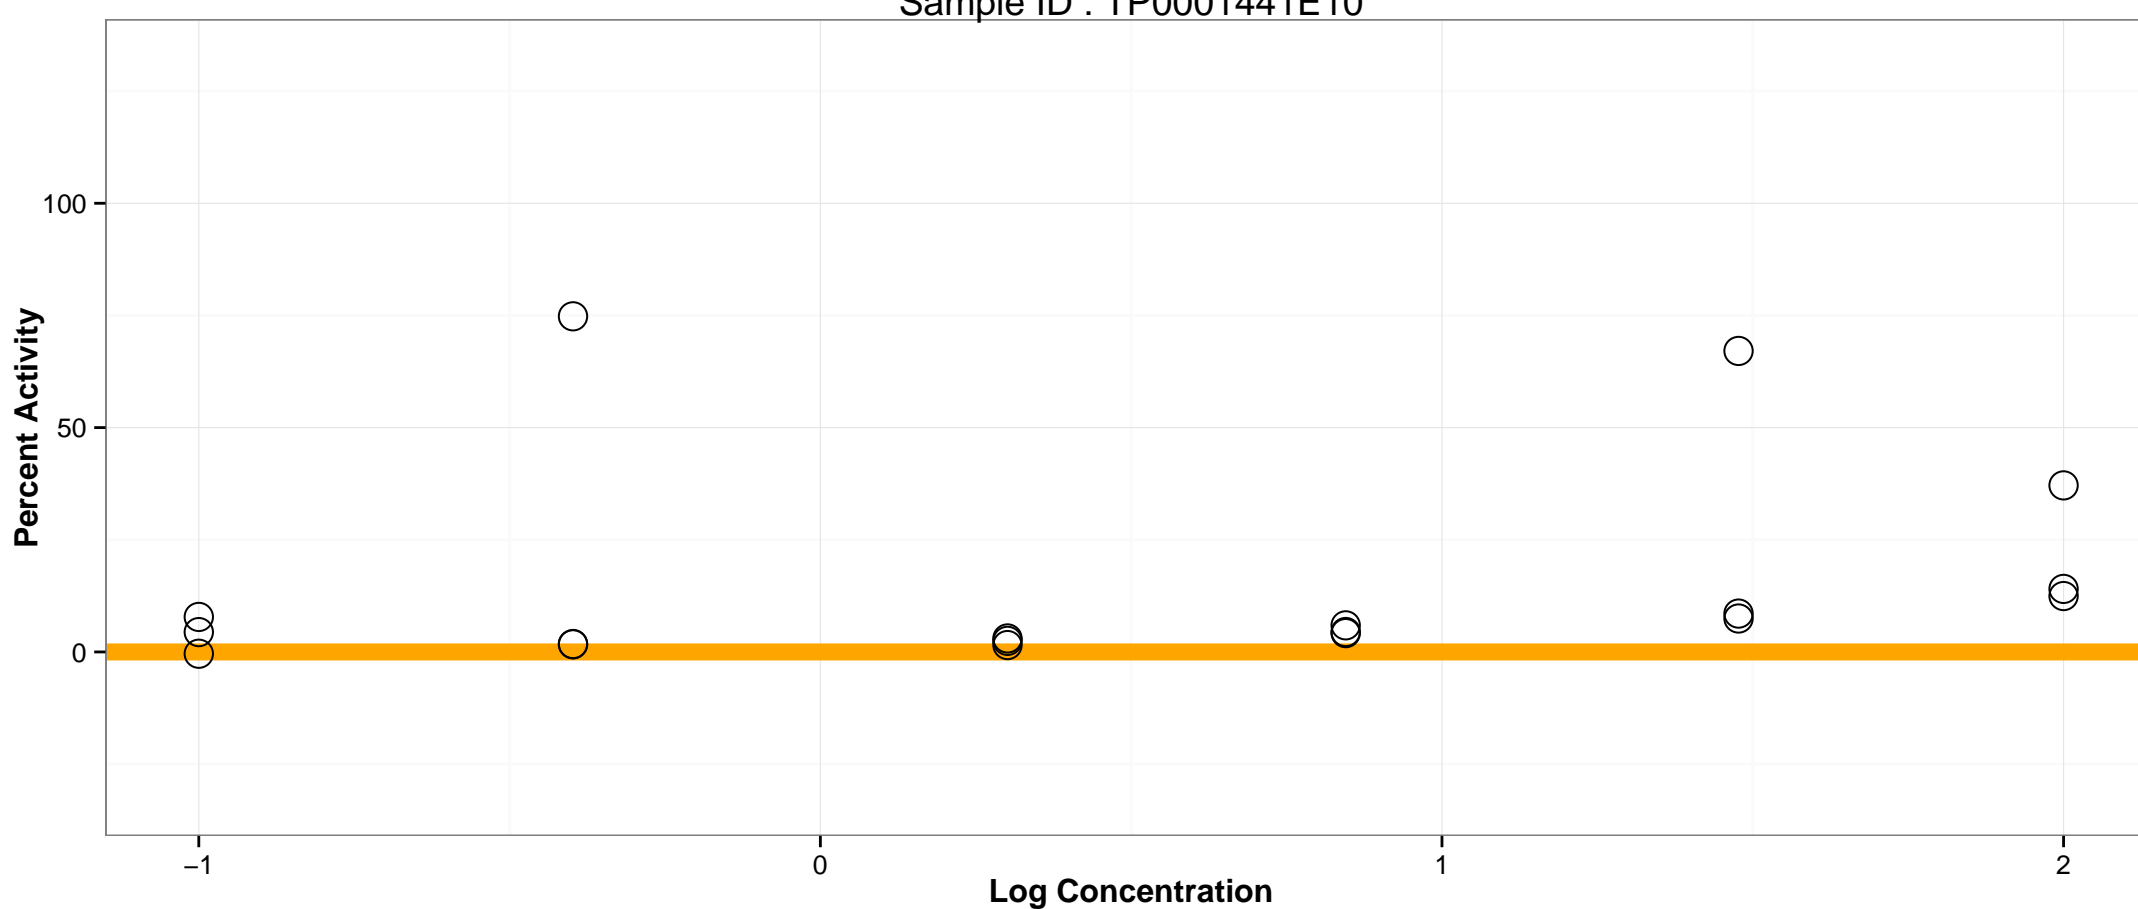

HILL MODEL

HILL MODEL: Not applicable

GAIN-LOSS MODEL

GNLS MODEL: Not applicable

|      | CNST  | HILL | GNLS |
|------|-------|------|------|
| AIC  | 160.8 | NA   | NA   |
| PROB | 1     | NA   | NA   |
| RMSE | 25.97 | NA   | NA   |

MAX\_MEAN : 27.7 MAX\_MED : 14.1 BMAD : 8.58  
COFF : 20 HIT-CALL : 0 FITC : 4 ACTP : 0  
FLAGS : 10



Assay ID 1508 (NHEERL\_TPO\_AUR\_dn)  
Sample ID : TP0001441F01

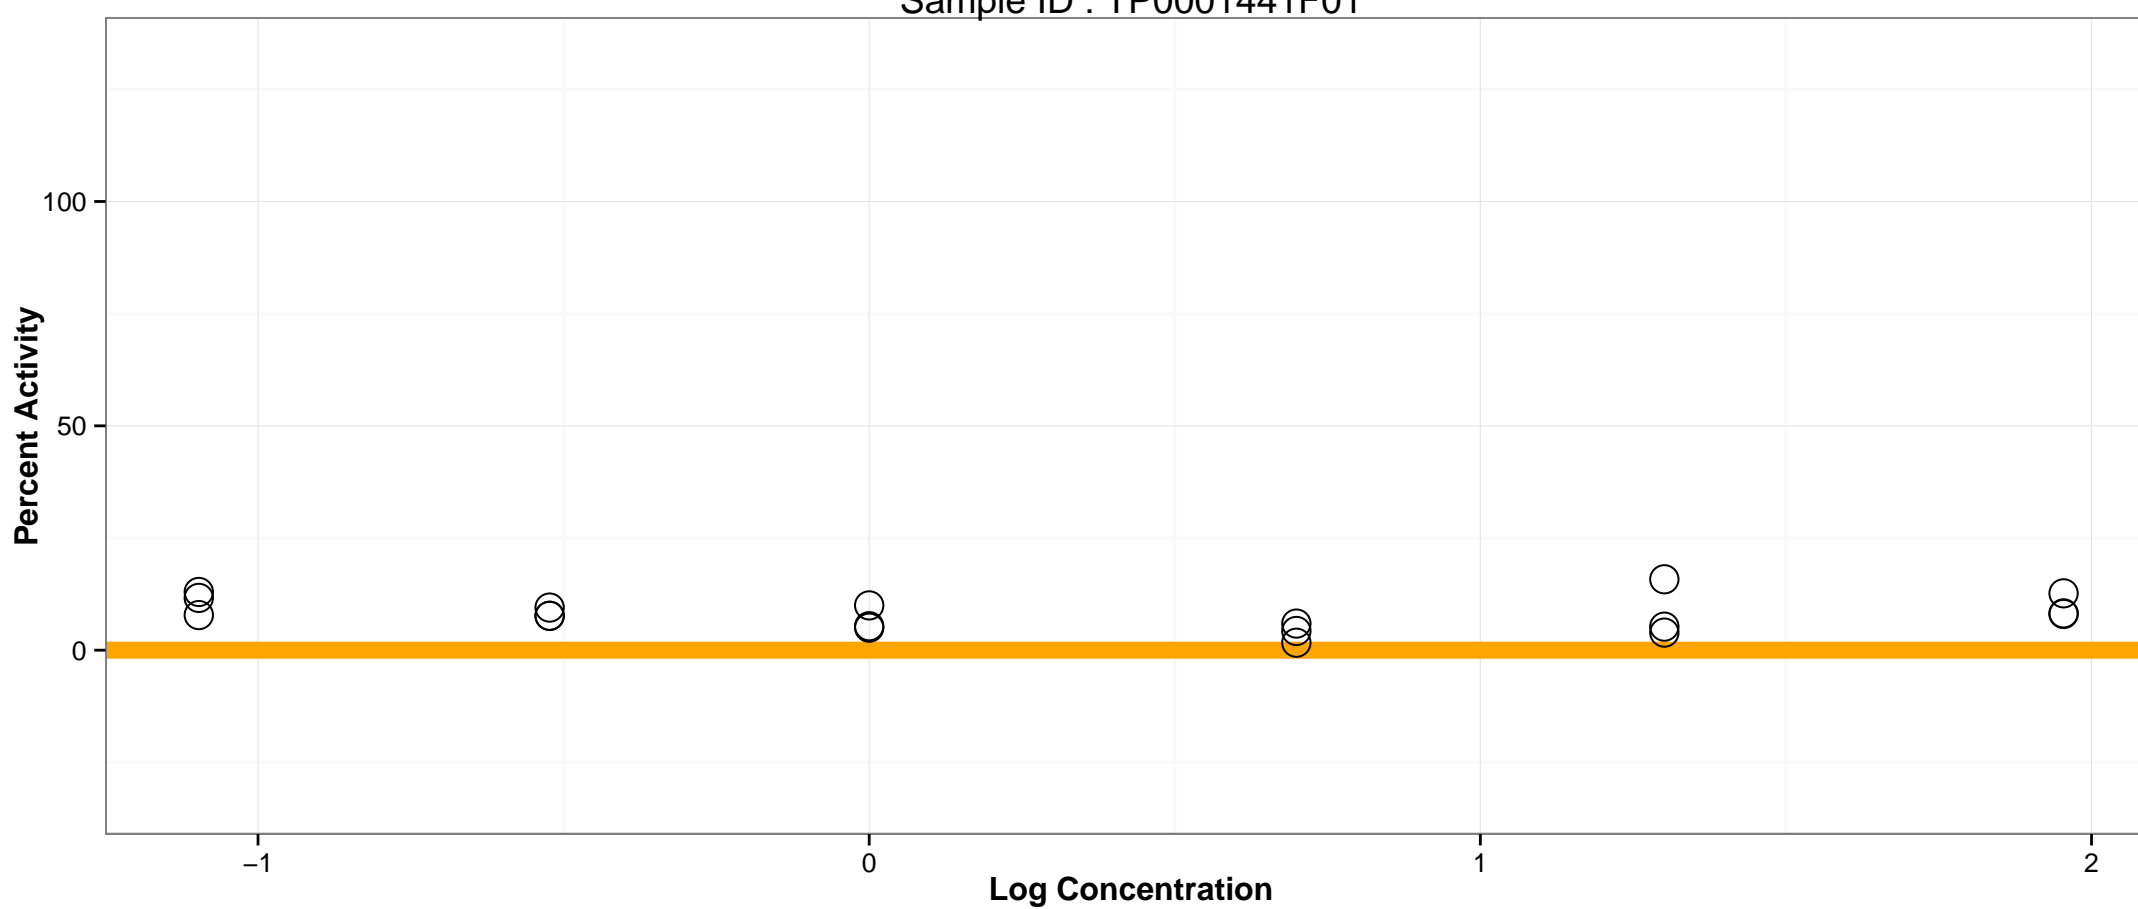

HILL MODEL

HILL MODEL: Not applicable

GAIN-LOSS MODEL

GNLS MODEL: Not applicable

|      | CNST   | HILL | GNLS |
|------|--------|------|------|
| AIC  | 134.12 | NA   | NA   |
| PROB | 1      | NA   | NA   |
| RMSE | 8.73   | NA   | NA   |

MAX\_MEAN : 10.8 MAX\_MED : 11.7 BMAD : 5.69  
COFF : 20 HIT-CALL : 0 FITC : 4 ACTP : 0  
FLAGS :

Assay ID 1509 (NHEERL\_HEK293T\_CellTiterGLO)  
Sample ID : TP0001441F01

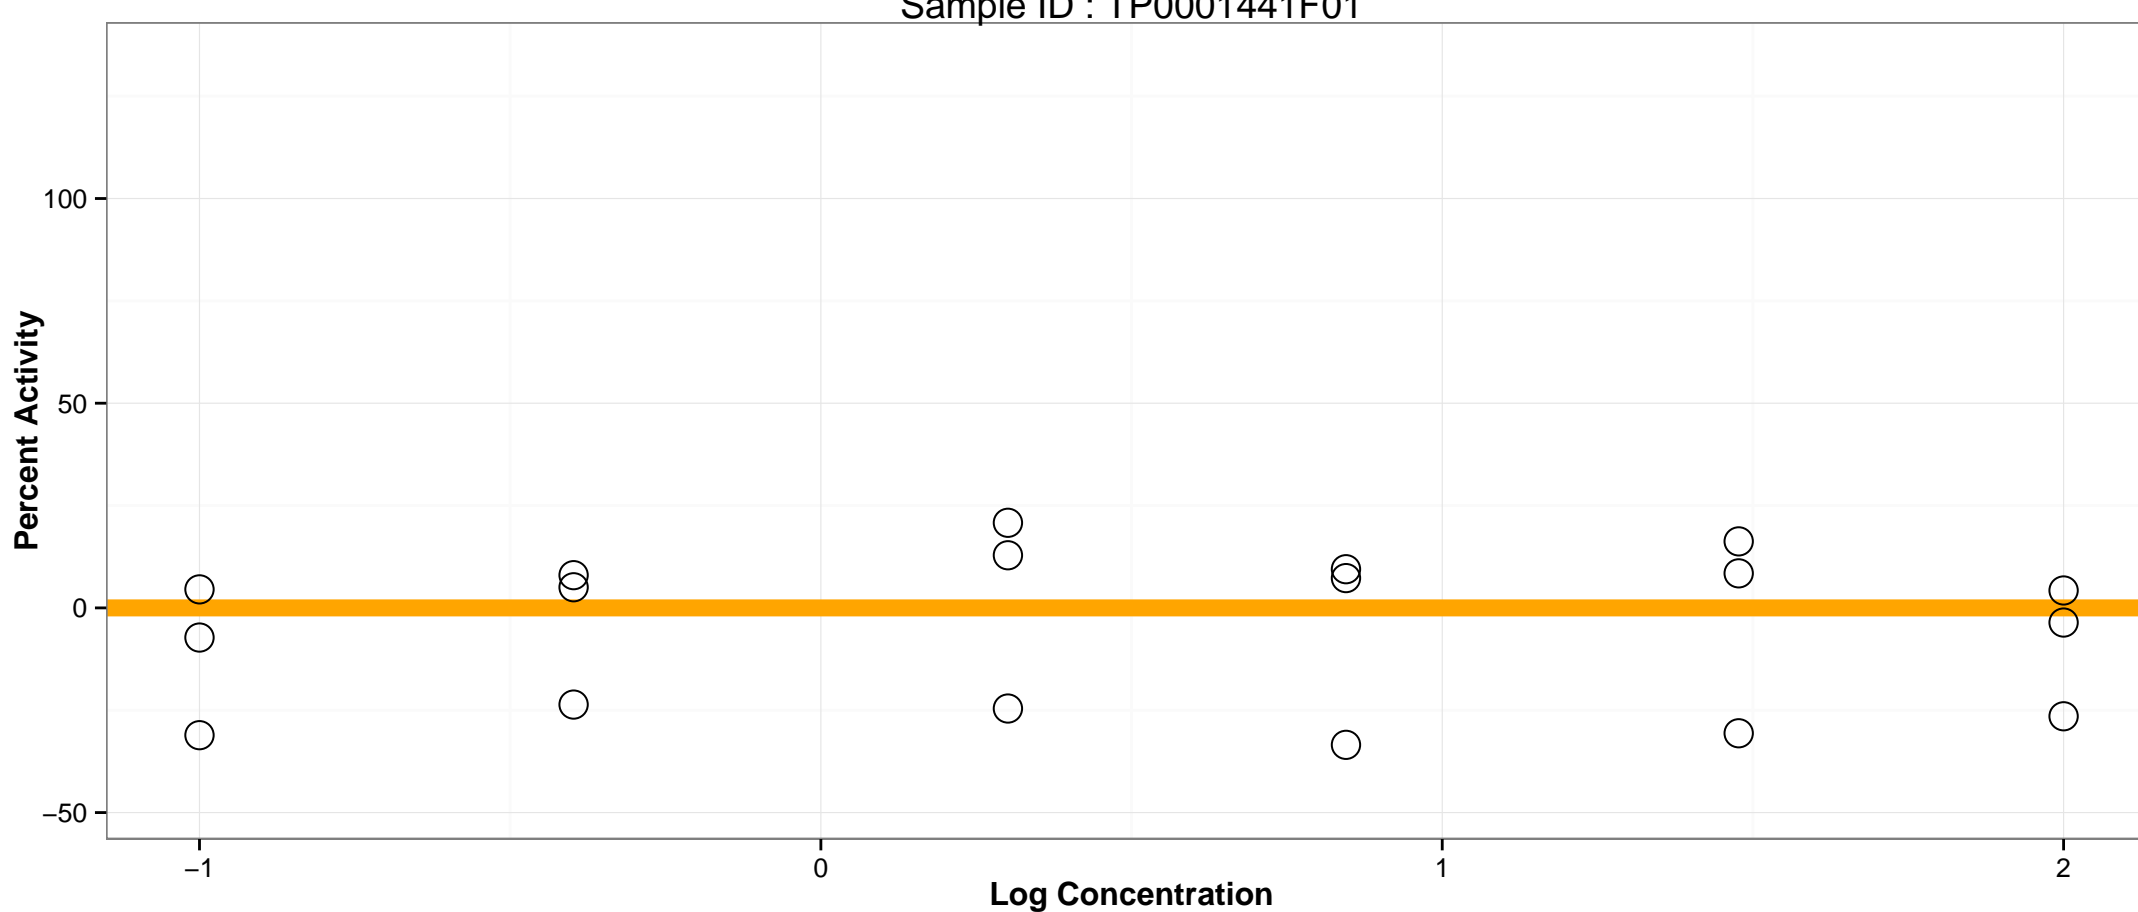

HILL MODEL

HILL MODEL: Not applicable

GAIN-LOSS MODEL

GNLS MODEL: Not applicable

|      | CNST   | HILL | GNLS |
|------|--------|------|------|
| AIC  | 160.07 | NA   | NA   |
| PROB | 1      | NA   | NA   |
| RMSE | 18.49  | NA   | NA   |

MAX\_MEAN : 3.03 MAX\_MED : 12.9 BMAD : 5.54  
COFF : 20 HIT-CALL : 0 FITC : 4 ACTP : 0  
FLAGS :

Assay ID 1848 (NHEERL\_Quantilum\_inhib\_2\_dn)  
Sample ID : TP0001441F01

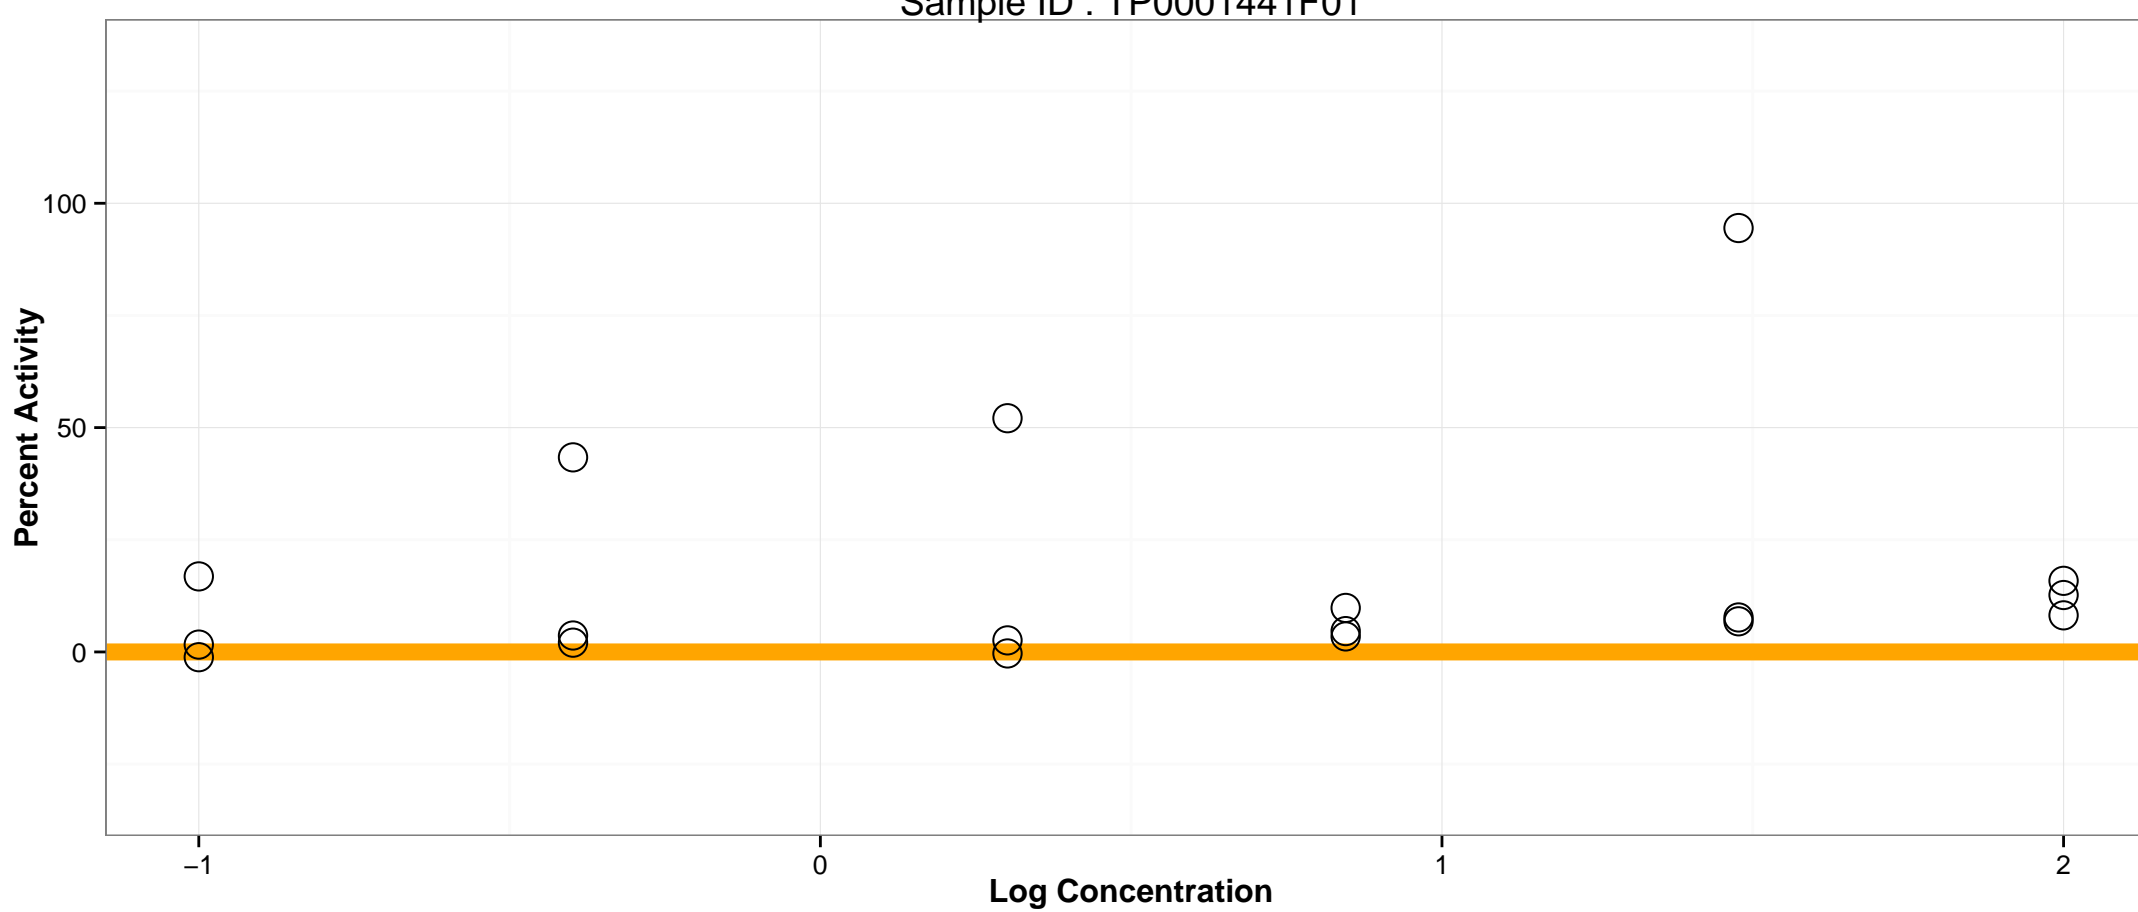

HILL MODEL

HILL MODEL: Not applicable

GAIN-LOSS MODEL

GNLS MODEL: Not applicable

|      | CNST   | HILL | GNLS |
|------|--------|------|------|
| AIC  | 164.38 | NA   | NA   |
| PROB | 1      | NA   | NA   |
| RMSE | 28.44  | NA   | NA   |

MAX\_MEAN : 36.3 MAX\_MED : 12.7 BMAD : 8.58  
COFF : 20 HIT-CALL : 0 FITC : 4 ACTP : 0  
FLAGS : 10

Chemical : 1,3-Propane sultone  
CAS : 1120-71-4

Assay ID 1508 (NHEERL\_TPO\_AUR\_dn)  
Sample ID : TX002339

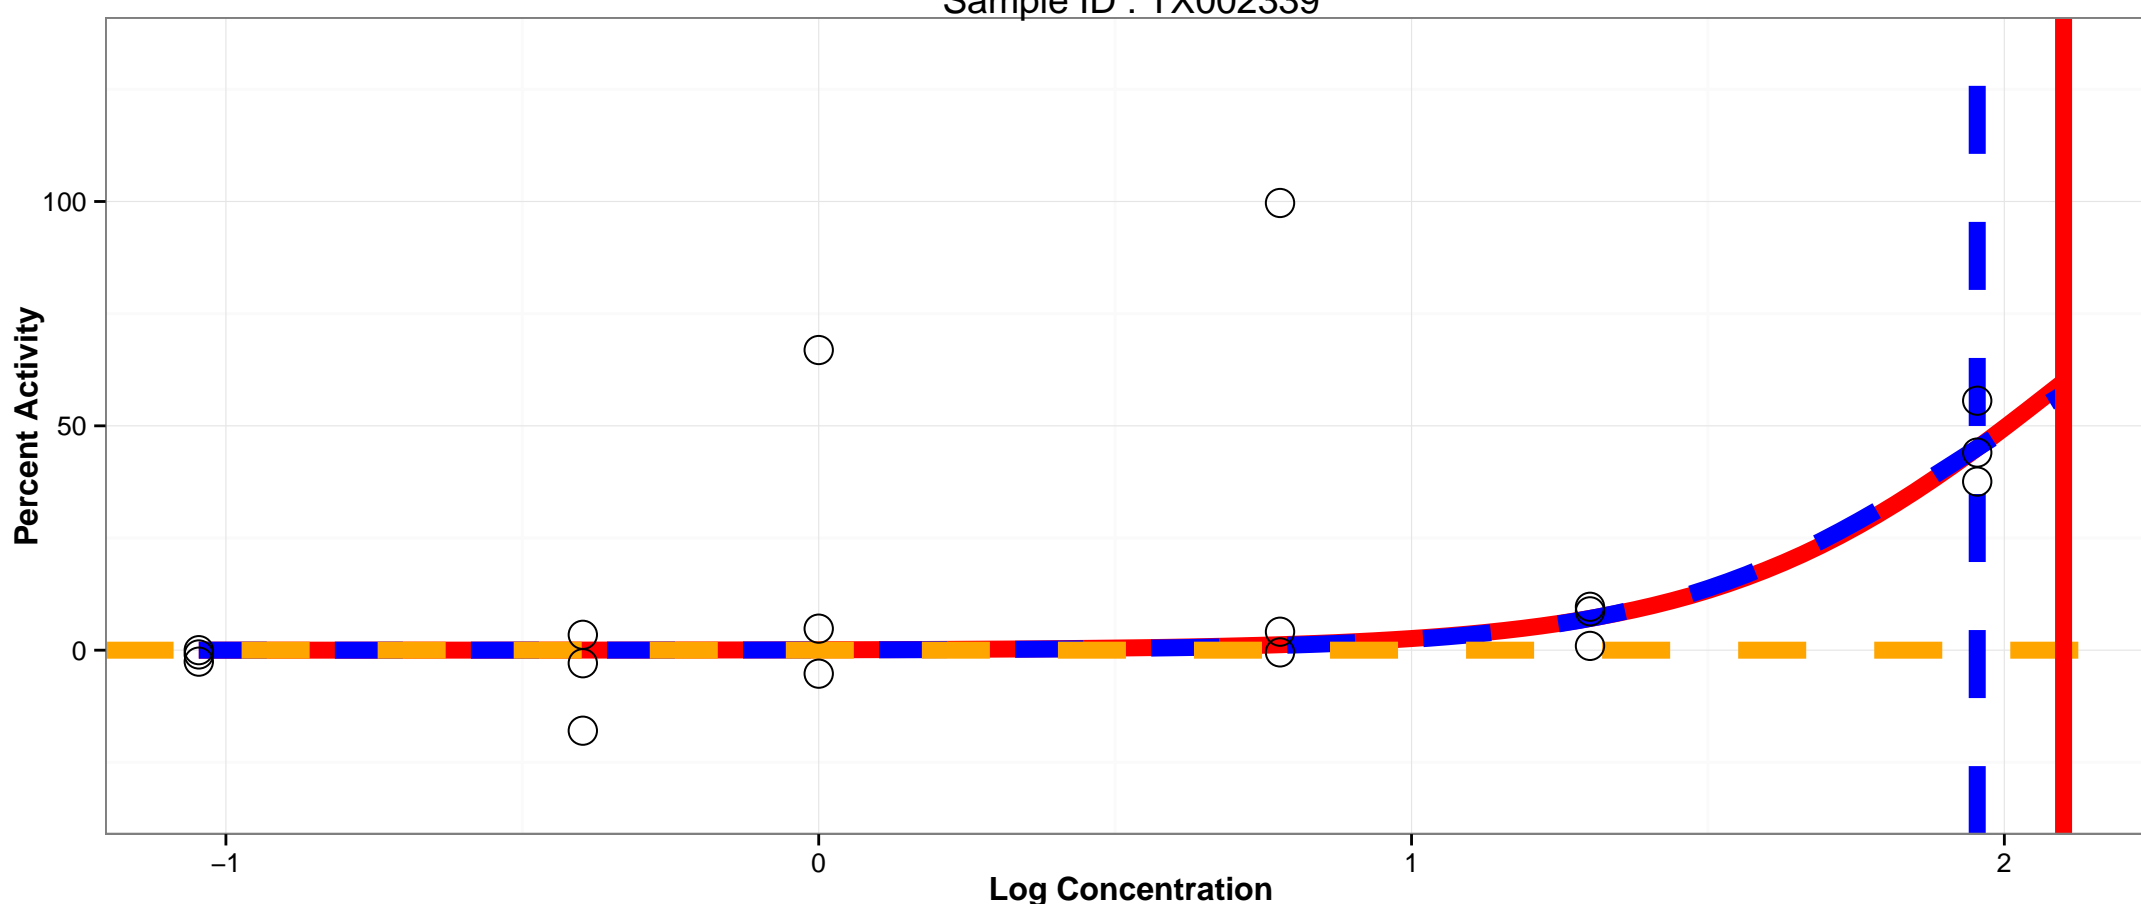

HILL MODEL

|     | tp  | ga   | gw   |
|-----|-----|------|------|
| val | 120 | 2.1  | 1.5  |
| sd  | 355 | 1.48 | 1.16 |

GAIN-LOSS MODEL

|     | tp   | ga   | gw   | la   | lw |
|-----|------|------|------|------|----|
| val | 90.1 | 1.95 | 1.64 | 3.95 | 14 |
| sd  | NA   | NA   | NA   | NA   | NA |

|      | CNST   | HILL   | GNLS   |
|------|--------|--------|--------|
| AIC  | 175.95 | 160.44 | 164.46 |
| PROB | 0      | 0.88   | 0.12   |
| RMSE | 34.52  | 28.66  | 28.7   |

MAX\_MEAN : 45.7 MAX\_MED : 44.1 BMAD : 5.69  
COFF : 20 HIT-CALL : 1 FITC : 42 ACTP : 1  
FLAGS : 10; 6

Assay ID 1509 (NHEERL\_HEK293T\_CellTiterGLO)  
Sample ID : TX002339

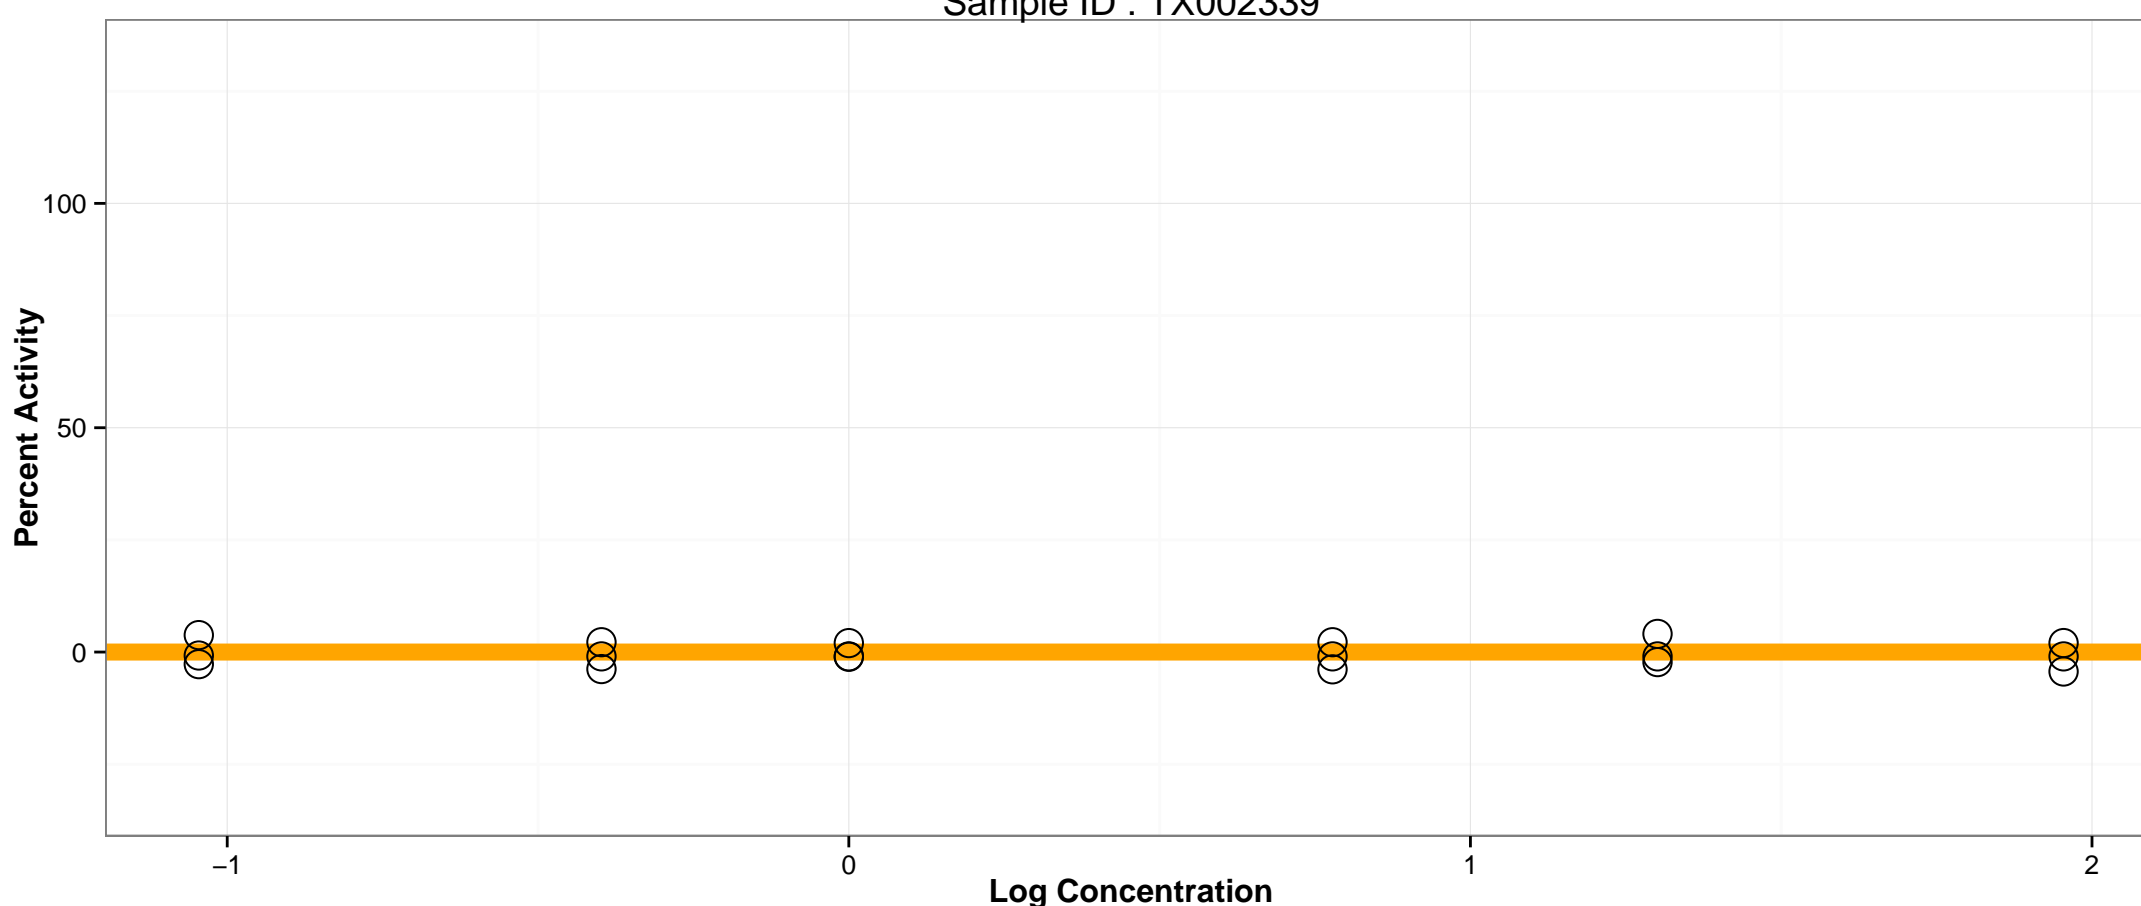

HILL MODEL

HILL MODEL: Not applicable

GAIN-LOSS MODEL

GNLS MODEL: Not applicable

|      | CNST  | HILL | GNLS |
|------|-------|------|------|
| AIC  | 88.93 | NA   | NA   |
| PROB | 1     | NA   | NA   |
| RMSE | 2.53  | NA   | NA   |

MAX\_MEAN : 0.294 MAX\_MED : -0.759 BMAD : 5.54  
COFF : 20 HIT-CALL : 0 FITC : 4 ACTP : 0  
FLAGS :

Assay ID 1848 (NHEERL\_Quantilum\_inhib\_2\_dn)  
Sample ID : TX002339

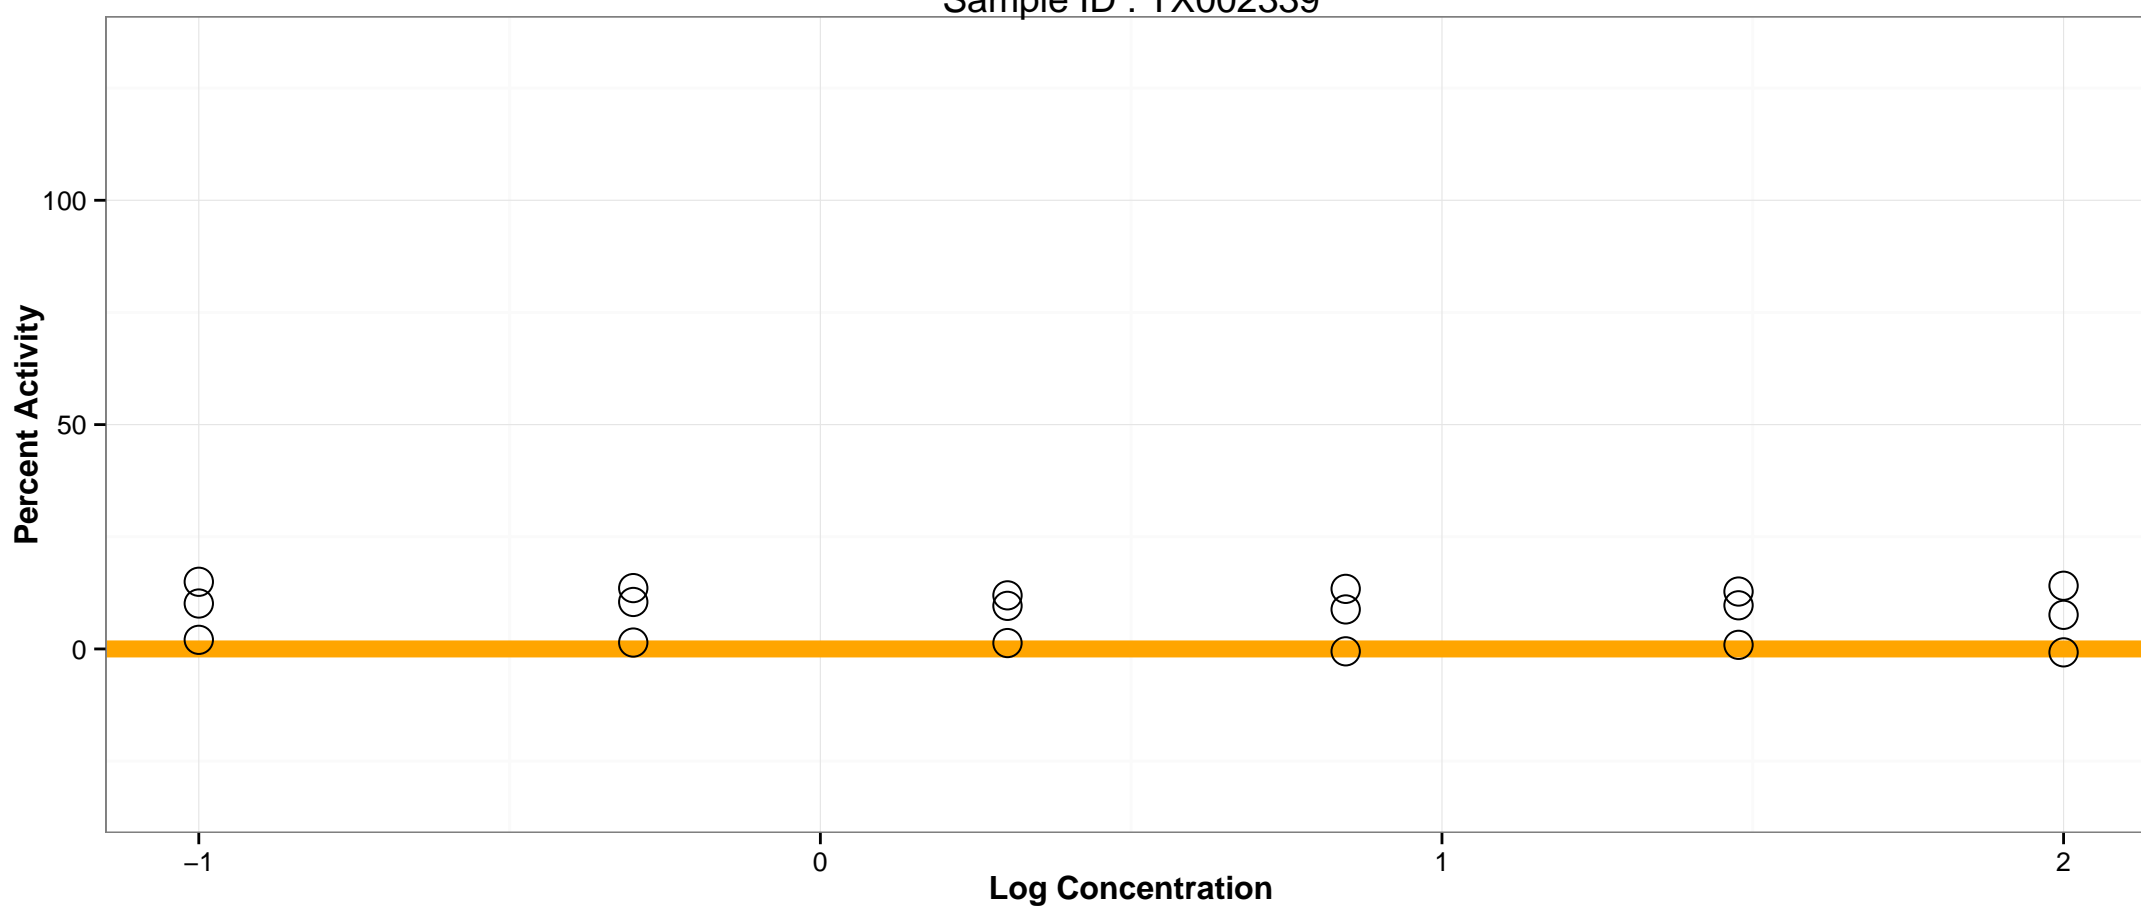

HILL MODEL

HILL MODEL: Not applicable

GAIN-LOSS MODEL

GNLS MODEL: Not applicable

|      | CNST   | HILL | GNLS |
|------|--------|------|------|
| AIC  | 137.17 | NA   | NA   |
| PROB | 1      | NA   | NA   |
| RMSE | 9.54   | NA   | NA   |

MAX\_MEAN : 9.05 MAX\_MED : 10.5 BMAD : 8.58  
COFF : 20 HIT-CALL : 0 FITC : 4 ACTP : 0  
FLAGS :

Chemical : Raloxifene hydrochloride  
CAS : 82640-04-8

Assay ID 1508 (NHEERL\_TPO\_AUR\_dn)  
Sample ID : TP0001441F02

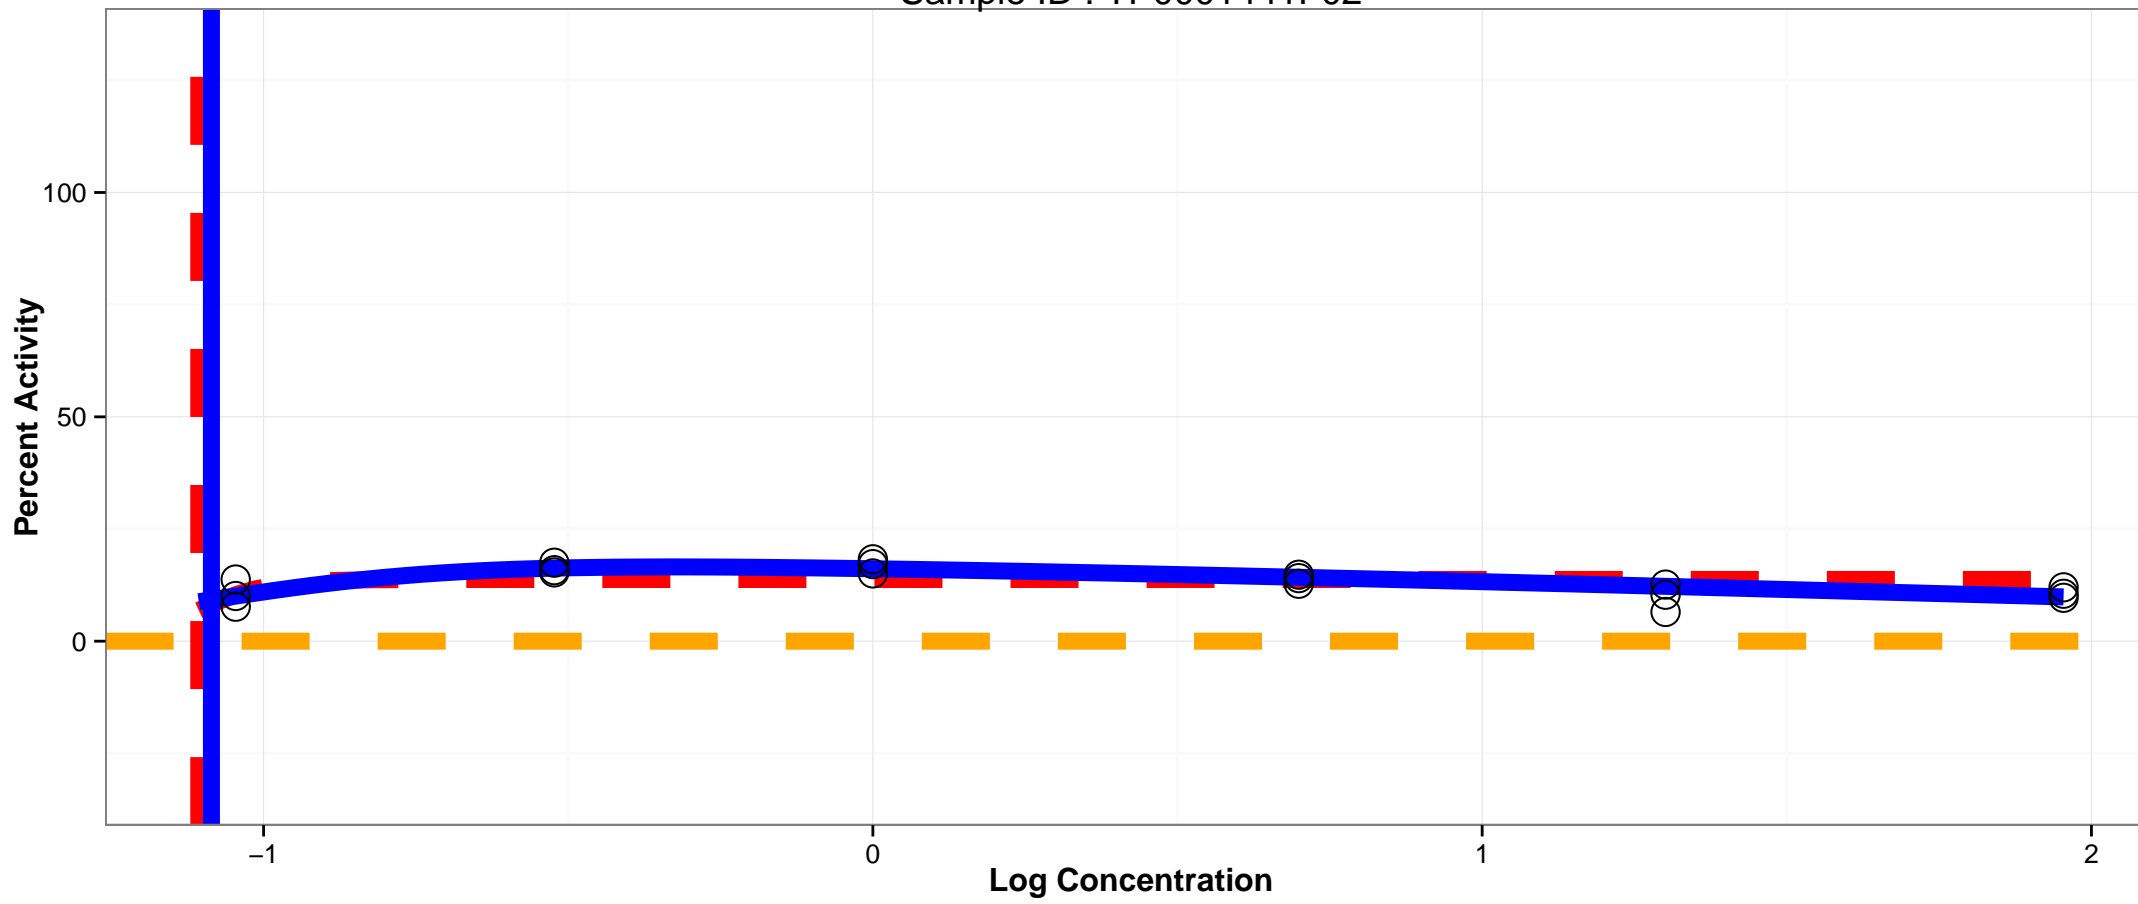

HILL MODEL

|     | tp    | ga    | gw   |
|-----|-------|-------|------|
| val | 13.8  | -1.11 | 8    |
| sd  | 0.846 | 0.384 | 50.3 |

GAIN-LOSS MODEL

|     | tp   | ga     | gw   | la   | lw    |
|-----|------|--------|------|------|-------|
| val | 21   | -1.09  | 2.04 | 1.78 | 0.3   |
| sd  | 10.6 | 0.0972 | 1.37 | 1.5  | 0.246 |

|      | CNST   | HILL   | GNLS |
|------|--------|--------|------|
| AIC  | 150.47 | 101.17 | 86.4 |
| PROB | 0      | 0      | 1    |
| RMSE | 13.42  | 3.08   | 2    |

MAX\_MEAN : 16.9 MAX\_MED : 17.2 BMAD : 5.69  
COFF : 20 HIT-CALL : 0 FITC : 29 ACTP : 1  
FLAGS : 12

Assay ID 1509 (NHEERL\_HEK293T\_CellTiterGLO)  
Sample ID : TP0001441F02

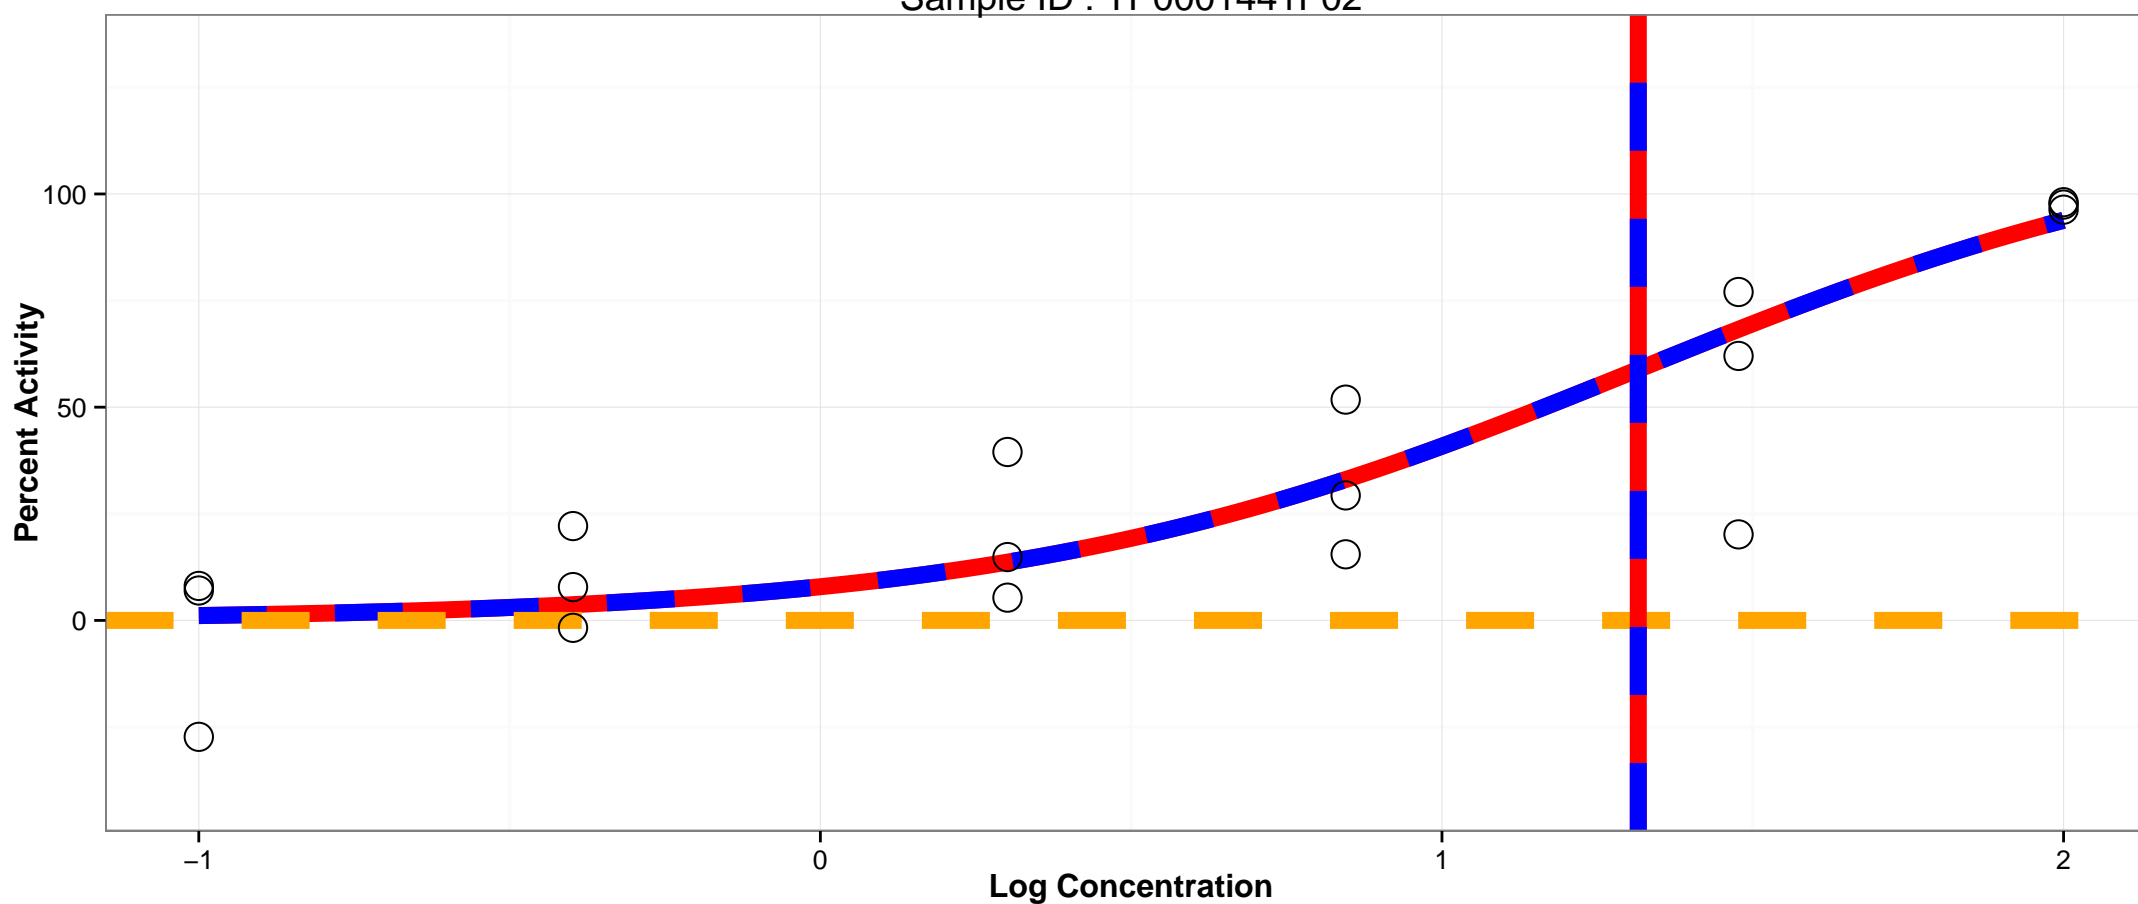

HILL MODEL

|     | tp   | ga    | gw    |
|-----|------|-------|-------|
| val | 118  | 1.32  | 0.869 |
| sd  | 23.5 | 0.272 | 0.248 |

GAIN-LOSS MODEL

|     | tp   | ga    | gw    | la   | lw   |
|-----|------|-------|-------|------|------|
| val | 118  | 1.32  | 0.869 | 2.53 | 13.5 |
| sd  | 23.5 | 0.272 | 0.248 | 113  | 2870 |

|      | CNST   | HILL   | GNLS   |
|------|--------|--------|--------|
| AIC  | 194.58 | 158.96 | 162.96 |
| PROB | 0      | 0.88   | 0.12   |
| RMSE | 50.33  | 16.92  | 16.92  |

MAX\_MEAN : 97.3 MAX\_MED : 97.5 BMAD : 5.54  
COFF : 20 HIT-CALL : 1 FITC : 42 ACTP : 1  
FLAGS :

Assay ID 1848 (NHEERL\_Quantilum\_inhib\_2\_dn)  
Sample ID : TP0001441F02

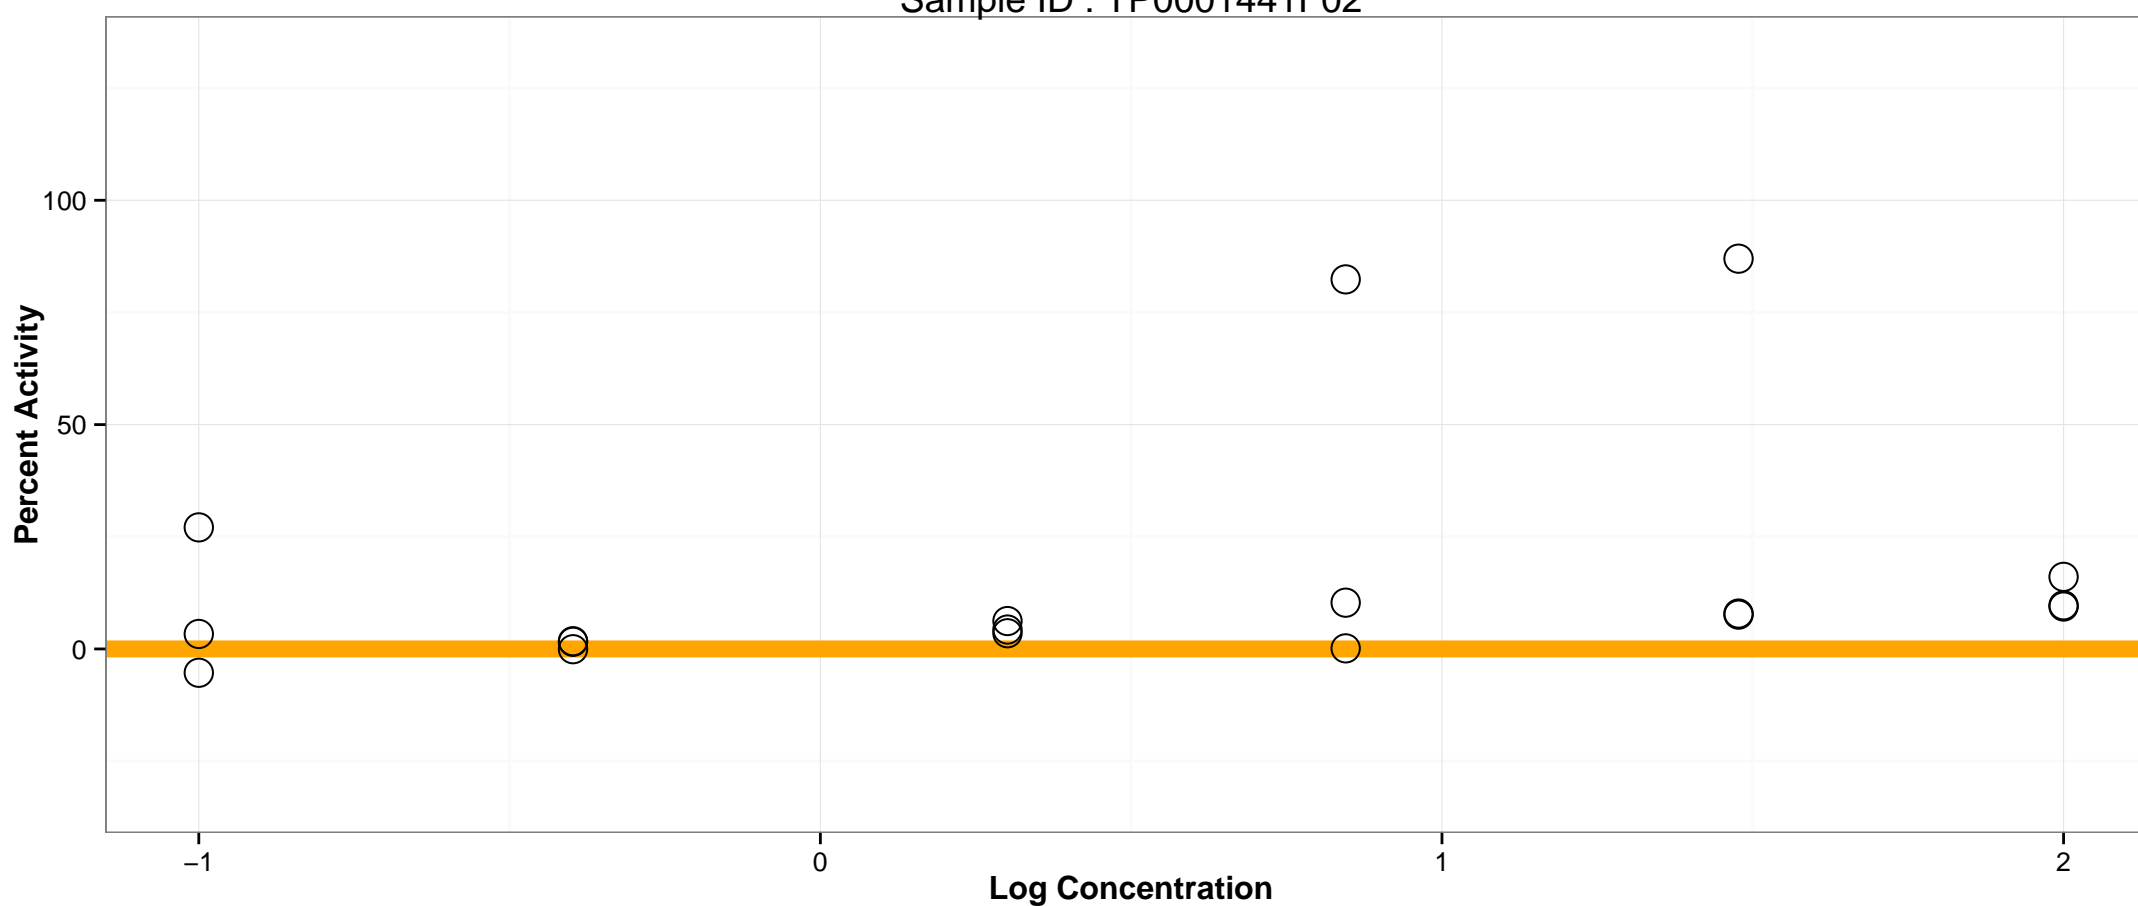

HILL MODEL

HILL MODEL: Not applicable

GAIN-LOSS MODEL

GNLS MODEL: Not applicable

|      | CNST   | HILL | GNLS |
|------|--------|------|------|
| AIC  | 163.02 | NA   | NA   |
| PROB | 1      | NA   | NA   |
| RMSE | 29.7   | NA   | NA   |

MAX\_MEAN : 34.2 MAX\_MED : 10.3 BMAD : 8.58  
COFF : 20 HIT-CALL : 0 FITC : 4 ACTP : 0  
FLAGS : 10

Chemical : Raloxifene hydrochloride  
CAS : 82640-04-8

Assay ID 1508 (NHEERL\_TPO\_AUR\_dn)  
Sample ID : TX015273

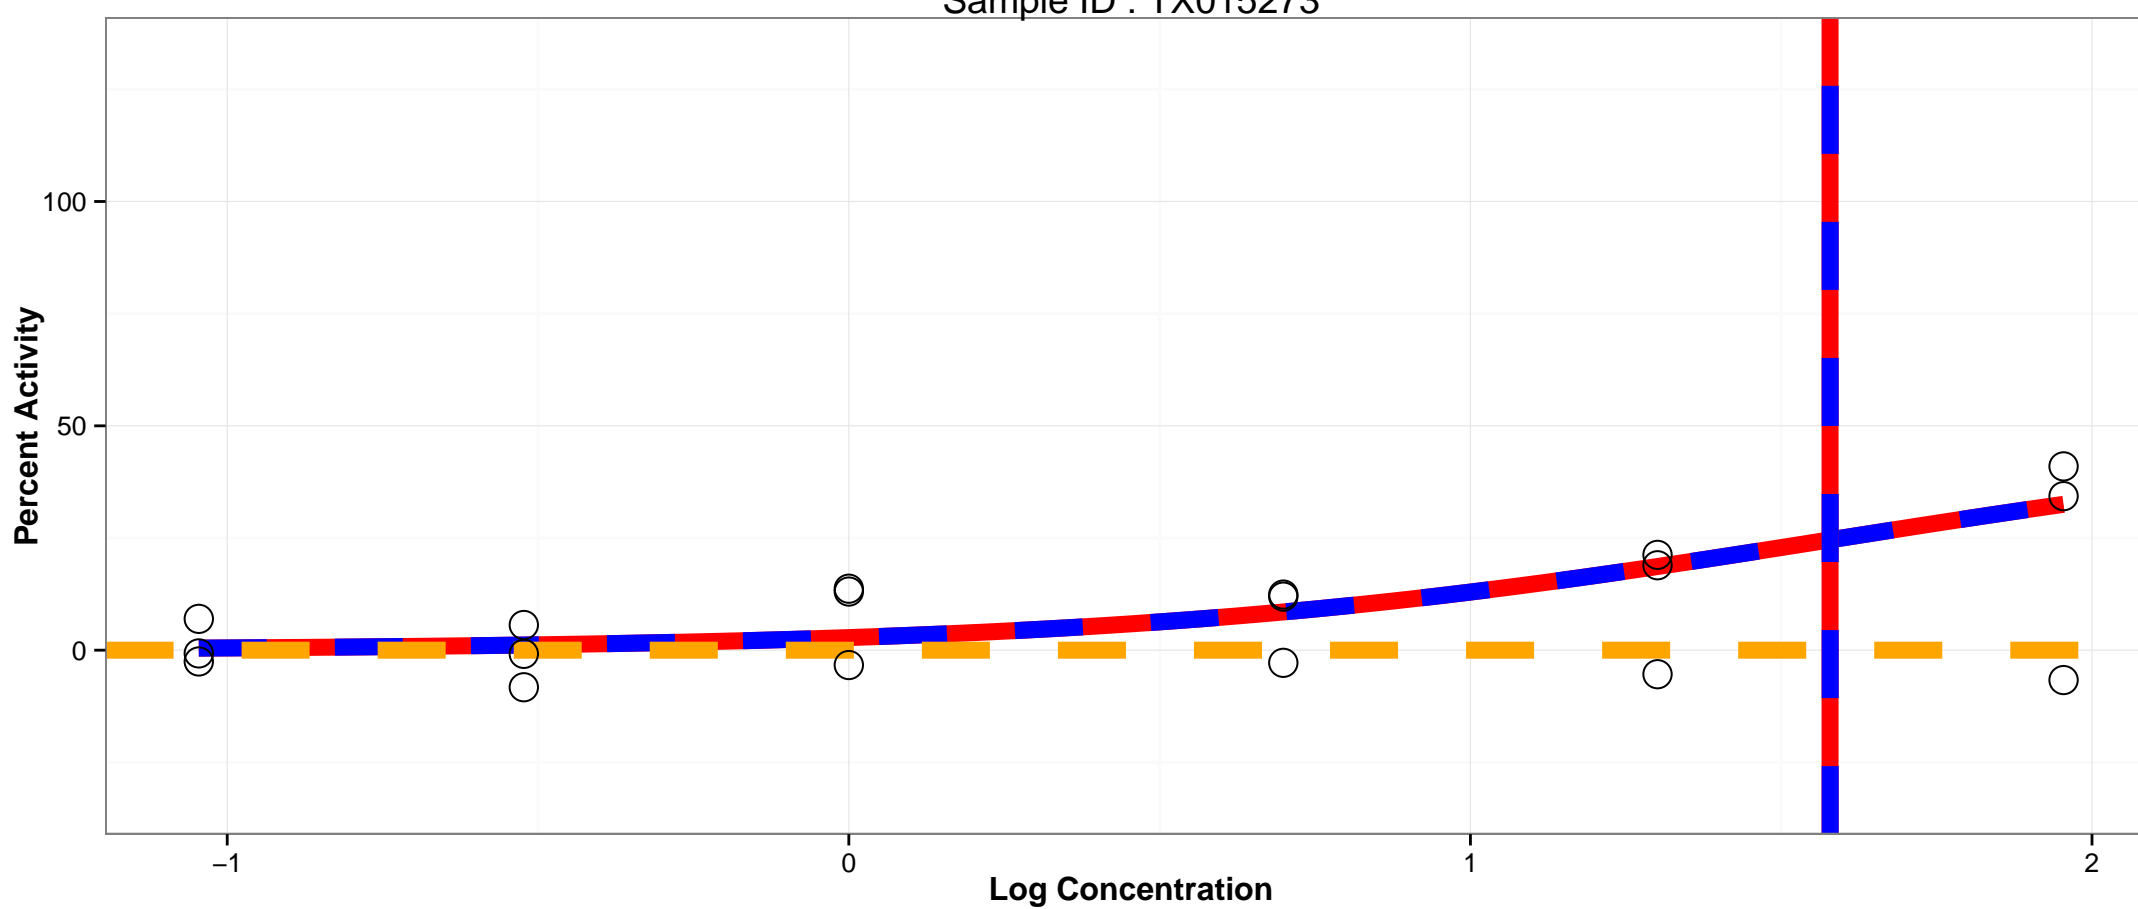

HILL MODEL

|     | tp   | ga    | gw    |
|-----|------|-------|-------|
| val | 49.2 | 1.58  | 0.772 |
| sd  | 28.3 | 0.693 | 0.401 |

GAIN-LOSS MODEL

|     | tp   | ga    | gw    | la   | lw    |
|-----|------|-------|-------|------|-------|
| val | 49.2 | 1.58  | 0.772 | 2.88 | 8.62  |
| sd  | 28.3 | 0.693 | 0.401 | 1100 | 10200 |

|      | CNST   | HILL   | GNLS   |
|------|--------|--------|--------|
| AIC  | 151.54 | 144.96 | 148.96 |
| PROB | 0.03   | 0.85   | 0.12   |
| RMSE | 15.94  | 12.41  | 12.41  |

MAX\_MEAN : 22.9 MAX\_MED : 34.3 BMAD : 5.69  
COFF : 20 HIT-CALL : 1 FITC : 42 ACTP : 0.968  
FLAGS :

Assay ID 1509 (NHEERL\_HEK293T\_CellTiterGLO)  
Sample ID : TX015273

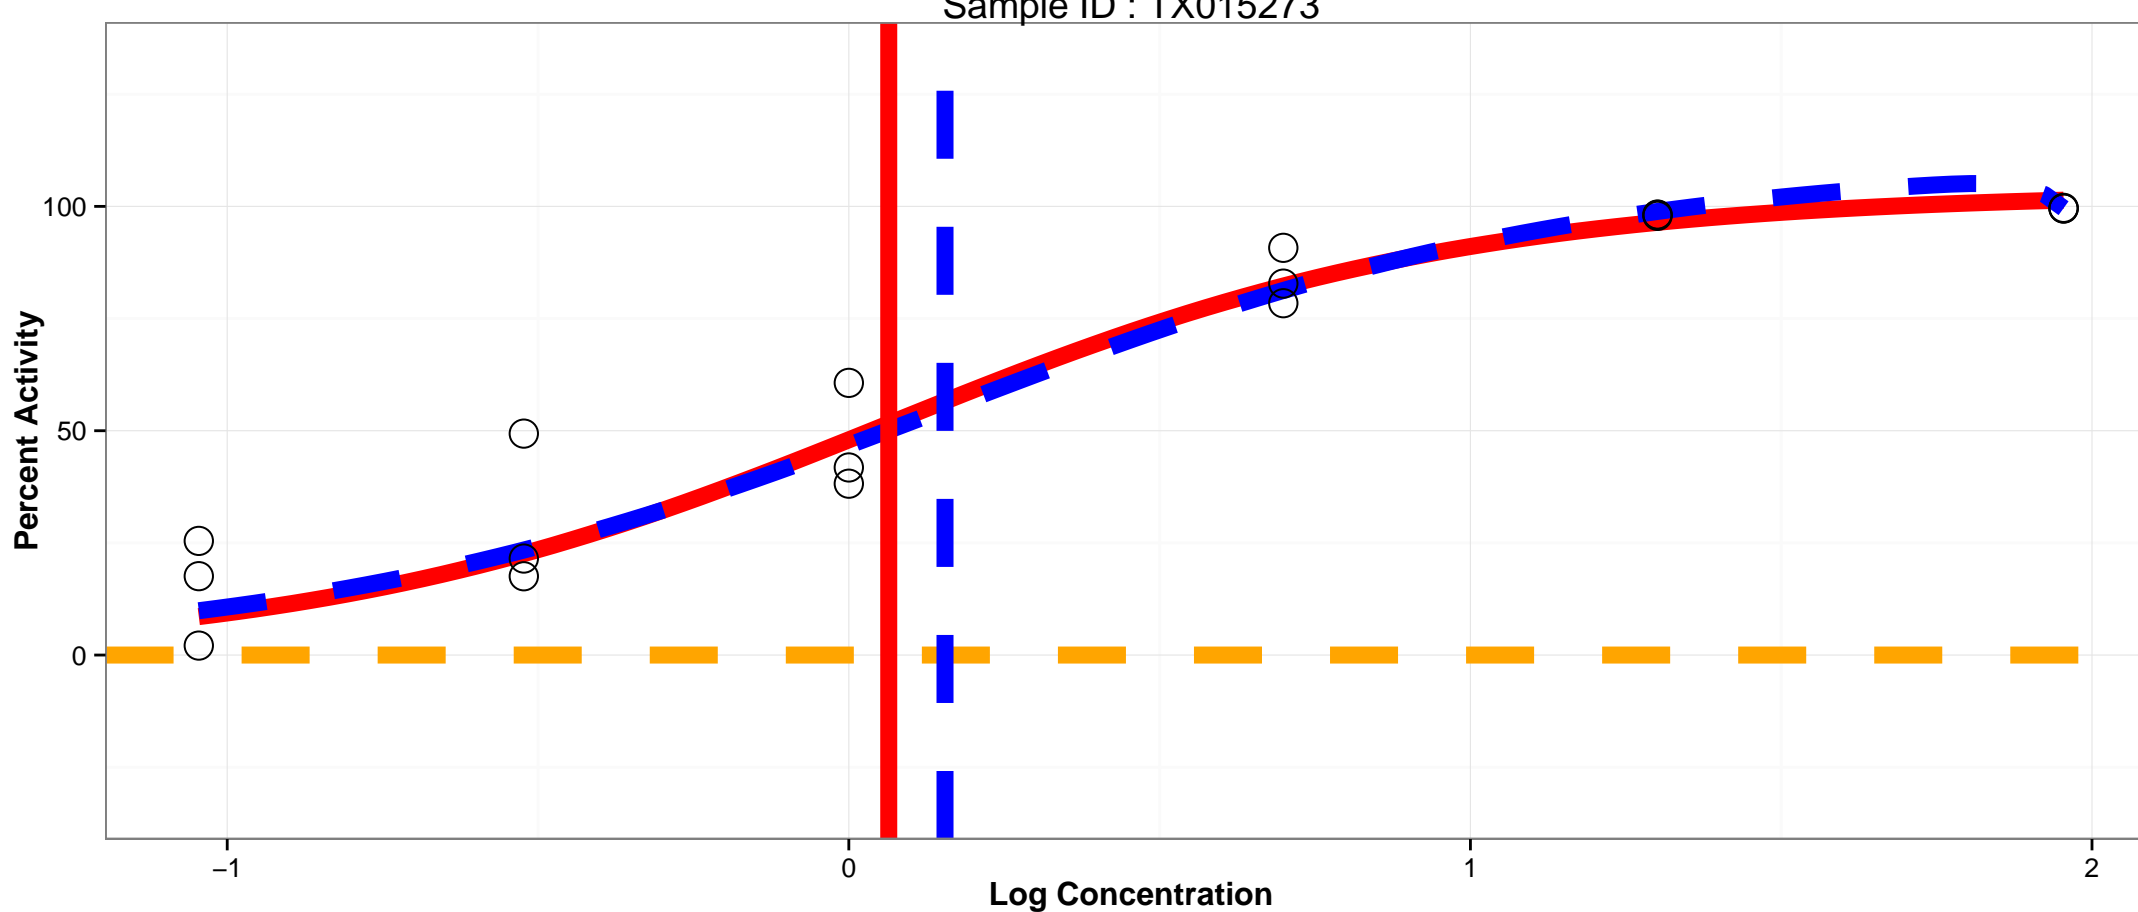

HILL MODEL

|     | tp   | ga     | gw    |
|-----|------|--------|-------|
| val | 103  | 0.0642 | 0.939 |
| sd  | 3.74 | 0.0859 | 0.148 |

GAIN-LOSS MODEL

|     | tp  | ga    | gw    | la   | lw   |
|-----|-----|-------|-------|------|------|
| val | 110 | 0.155 | 0.837 | 2.08 | 9.62 |
| sd  | NA  | NA    | NA    | NA   | NA   |

|      | CNST   | HILL   | GNLS   |
|------|--------|--------|--------|
| AIC  | 209.58 | 137.05 | 140.01 |
| PROB | 0      | 0.81   | 0.19   |
| RMSE | 71.07  | 9.28   | 9.03   |

MAX\_MEAN : 99.6 MAX\_MED : 99.5 BMAD : 5.54  
COFF : 20 HIT-CALL : 1 FITC : 41 ACTP : 1  
FLAGS :

Assay ID 1848 (NHEERL\_Quantilum\_inhib\_2\_dn)  
Sample ID : TX015273

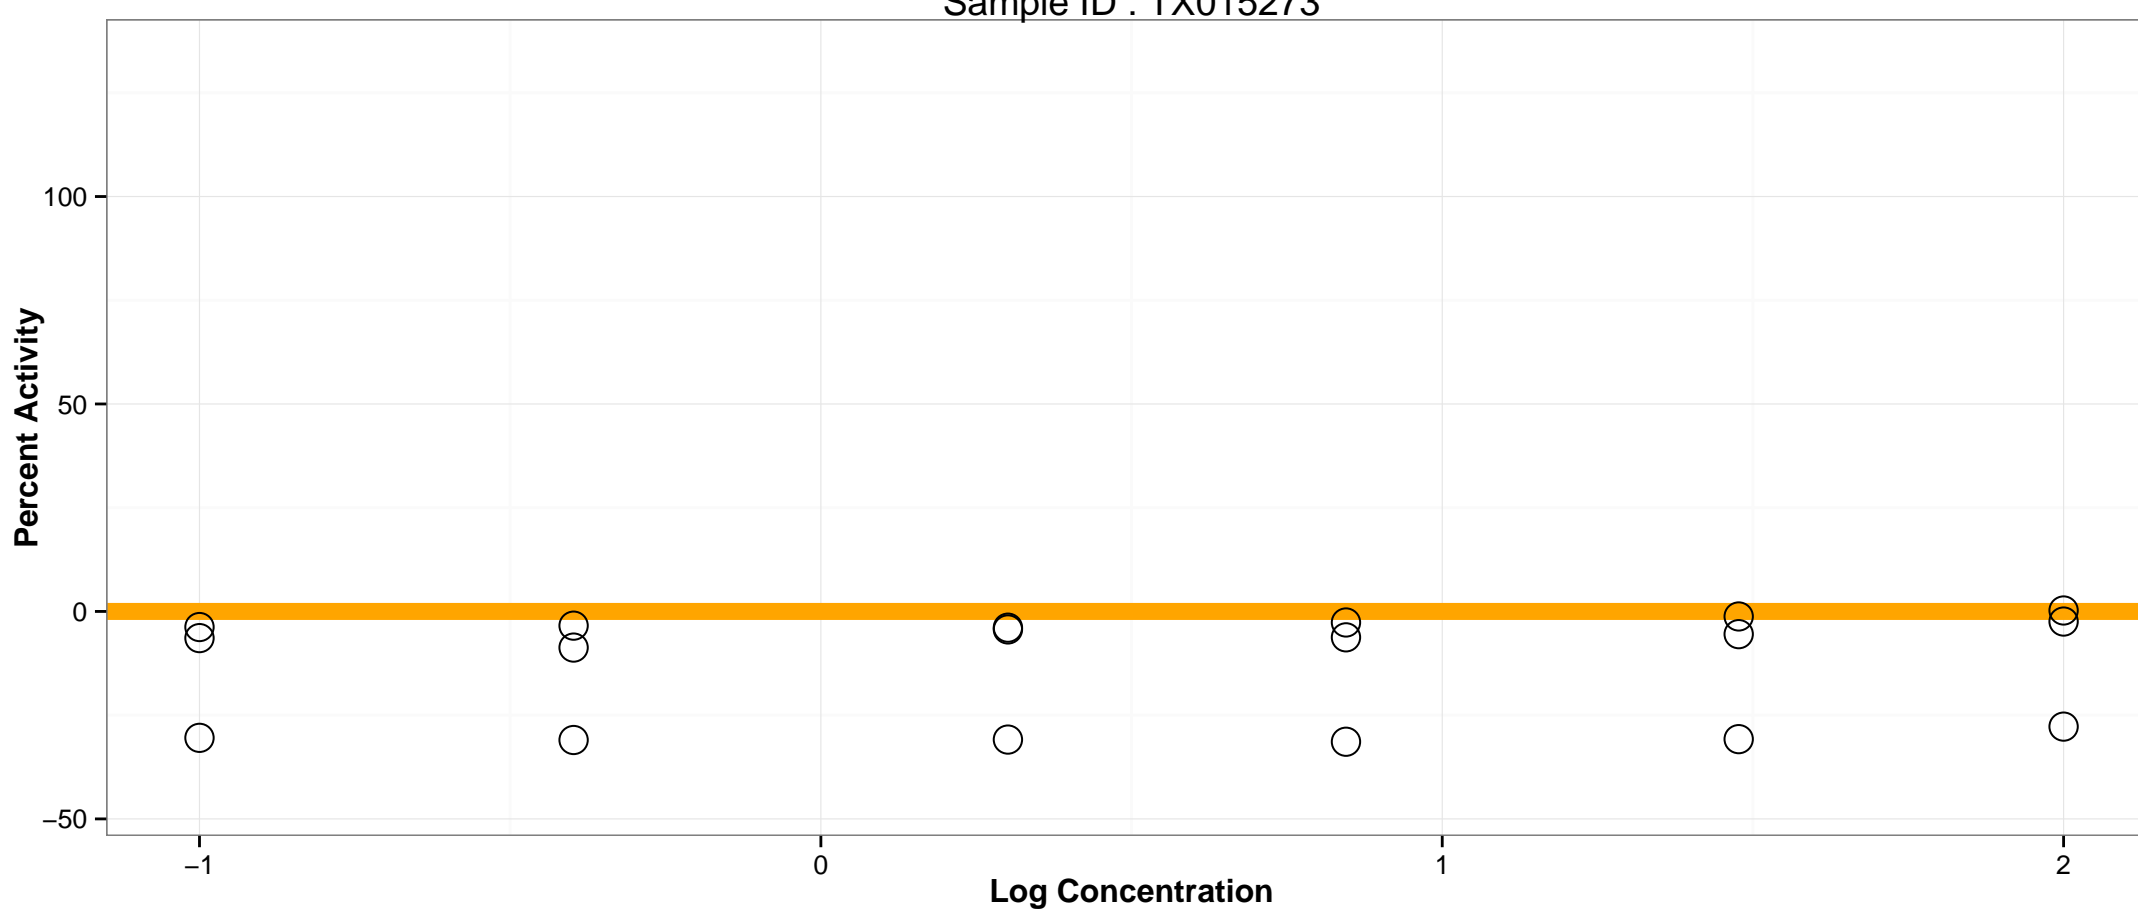

HILL MODEL

HILL MODEL: Not applicable

GAIN-LOSS MODEL

GNLS MODEL: Not applicable

|      | CNST   | HILL | GNLS |
|------|--------|------|------|
| AIC  | 157.24 | NA   | NA   |
| PROB | 1      | NA   | NA   |
| RMSE | 17.95  | NA   | NA   |

MAX\_MEAN : -9.97 MAX\_MED : -2.42 BMAD : 8.58  
COFF : 20 HIT-CALL : 0 FITC : 4 ACTP : 0  
FLAGS :

Assay ID 1508 (NHEERL\_TPO\_AUR\_dn)  
Sample ID : TP0001441F03

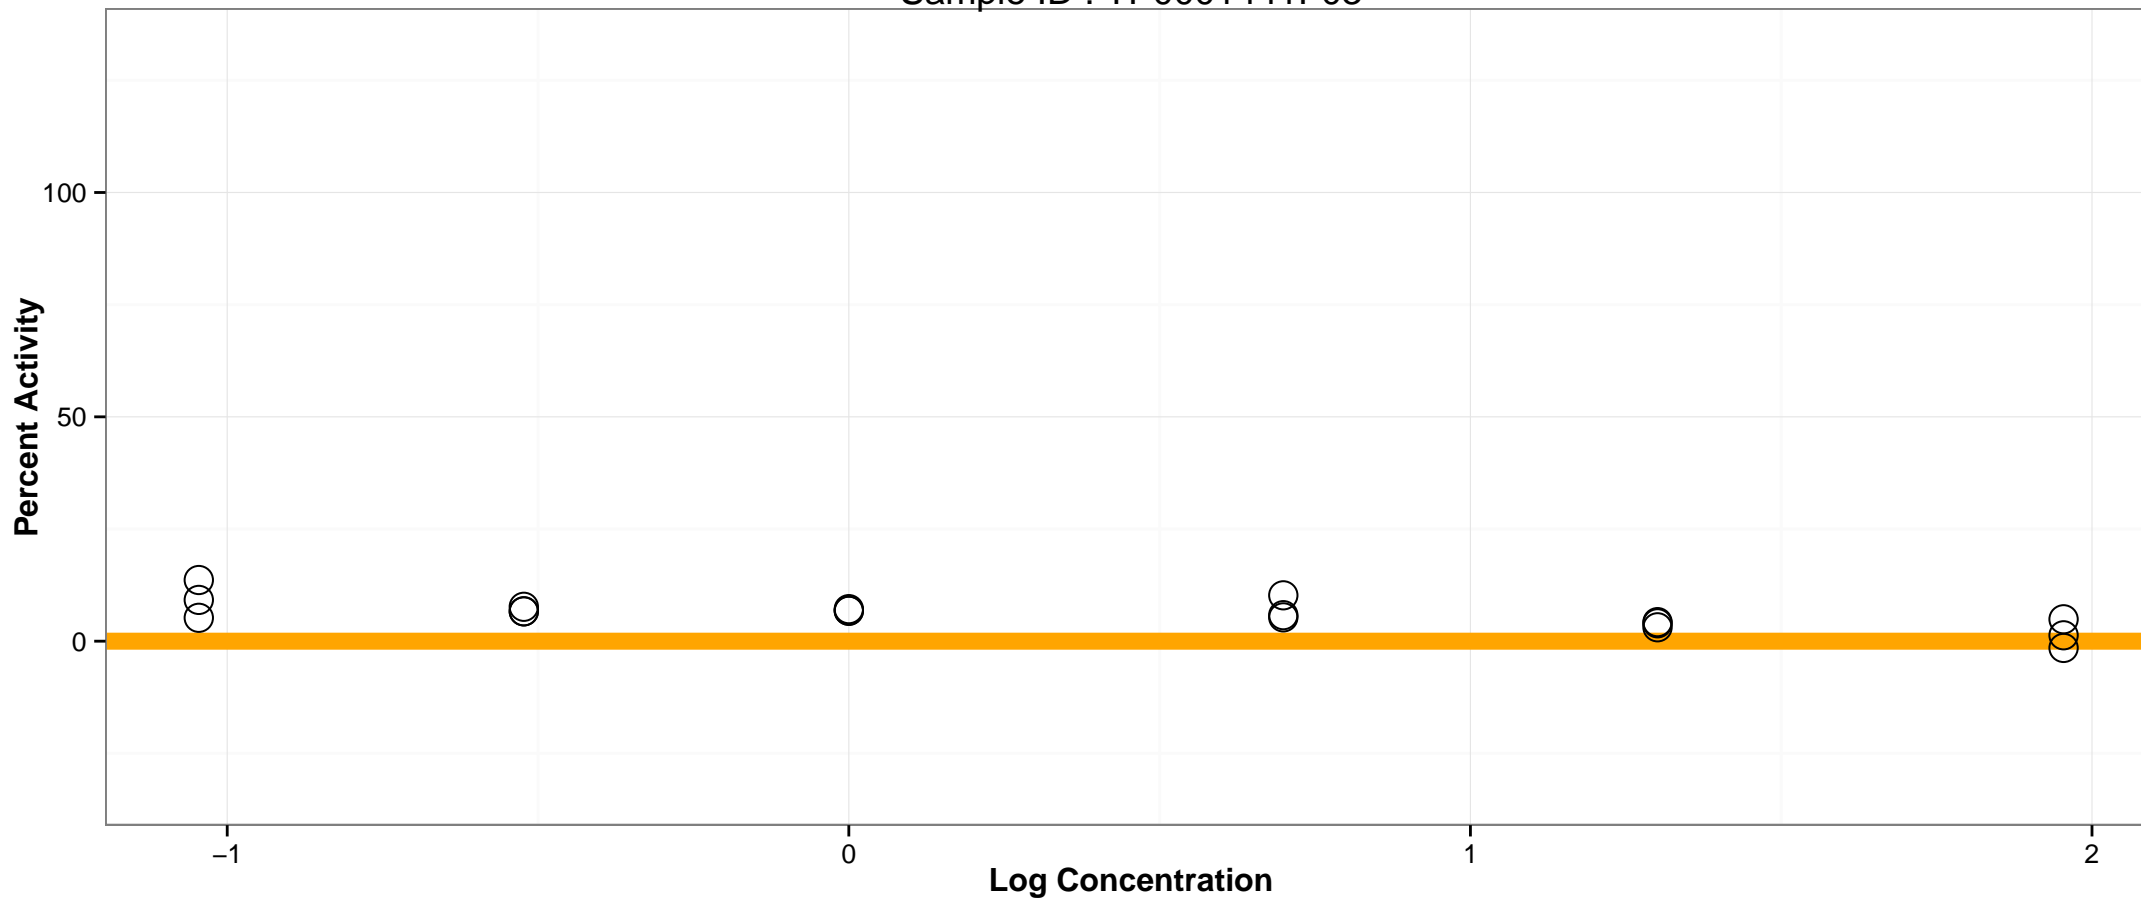

HILL MODEL

HILL MODEL: Not applicable

GAIN-LOSS MODEL

GNLS MODEL: Not applicable

|      | CNST   | HILL | GNLS |
|------|--------|------|------|
| AIC  | 124.83 | NA   | NA   |
| PROB | 1      | NA   | NA   |
| RMSE | 6.78   | NA   | NA   |

MAX\_MEAN : 9.36 MAX\_MED : 9.21 BMAD : 5.69  
COFF : 20 HIT-CALL : 0 FITC : 4 ACTP : 0  
FLAGS :

Assay ID 1509 (NHEERL\_HEK293T\_CellTiterGLO)  
Sample ID : TP0001441F03

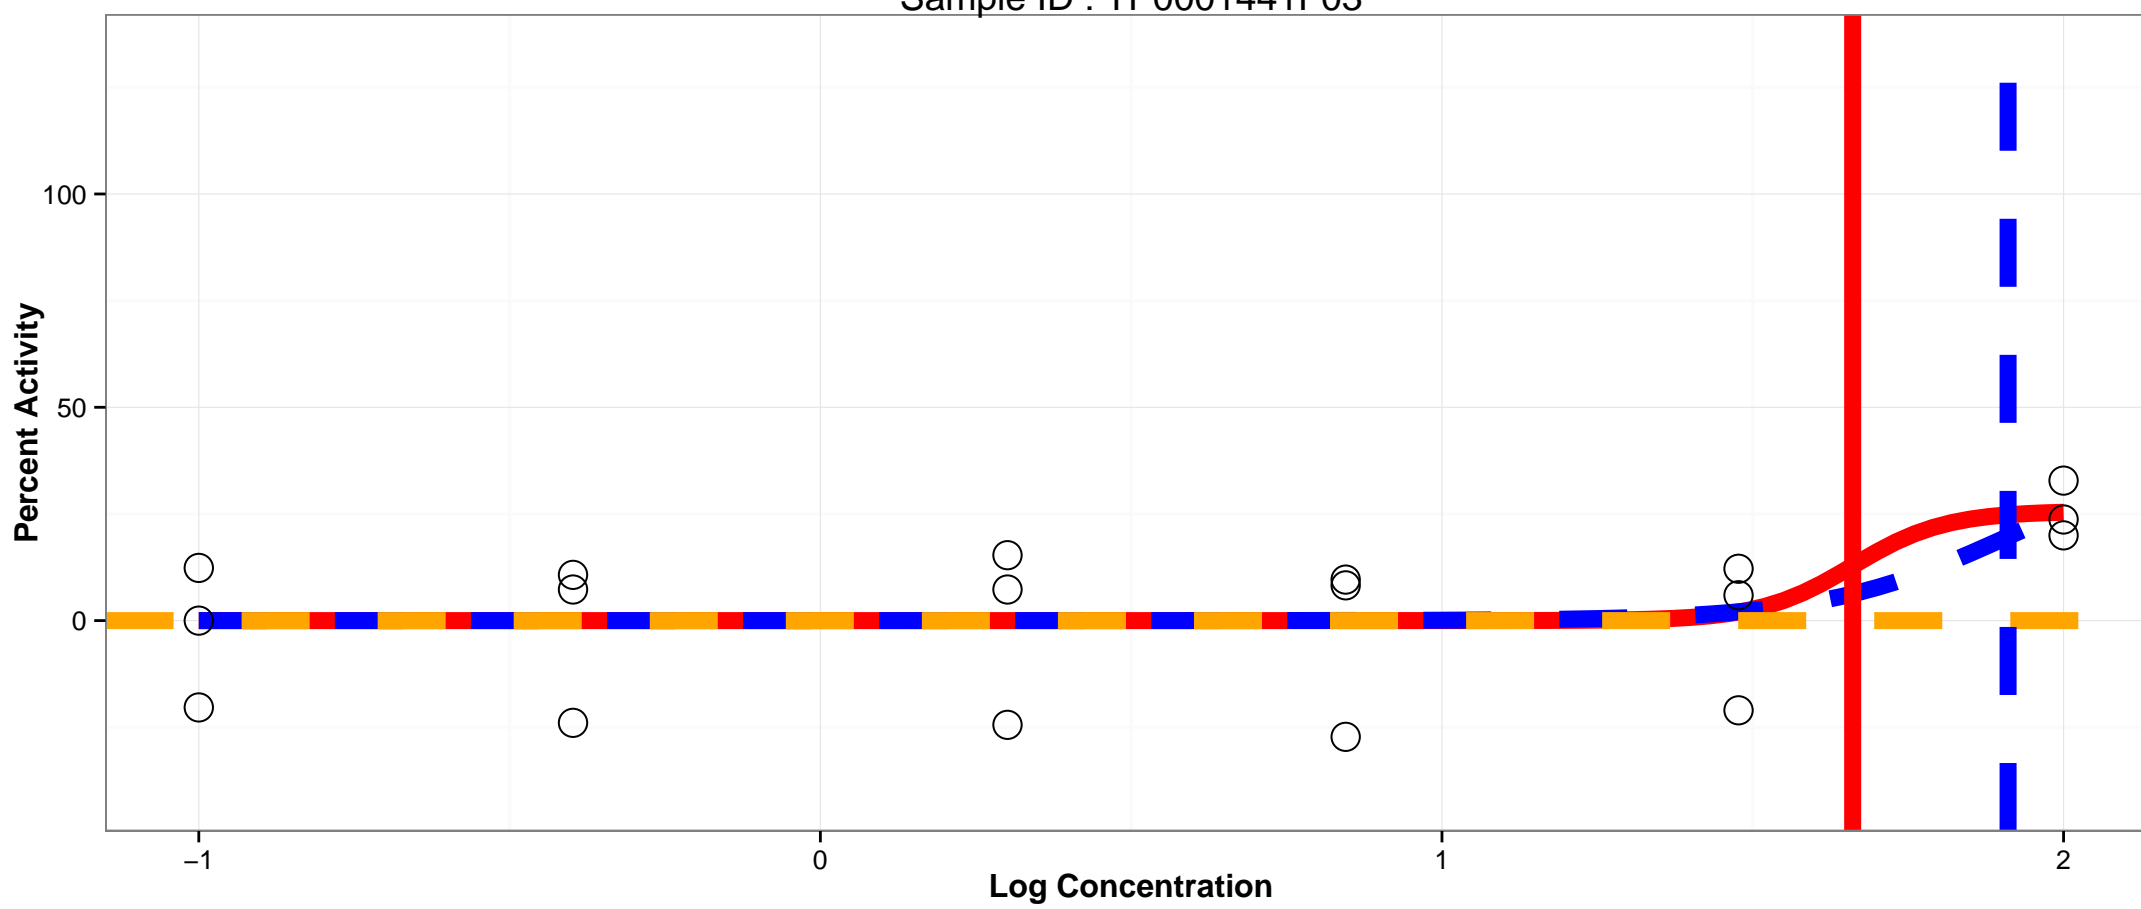

HILL MODEL

|     | tp   | ga   | gw   |
|-----|------|------|------|
| val | 25.7 | 1.66 | 5.85 |
| sd  | NA   | NA   | NA   |

GAIN-LOSS MODEL

|     | tp   | ga   | gw  | la   | lw   |
|-----|------|------|-----|------|------|
| val | 39.4 | 1.91 | 2.9 | 3.68 | 7.63 |
| sd  | NA   | NA   | NA  | NA   | NA   |

|      | CNST   | HILL   | GNLS   |
|------|--------|--------|--------|
| AIC  | 159.65 | 157.49 | 161.49 |
| PROB | 0.23   | 0.68   | 0.09   |
| RMSE | 17.89  | 14.59  | 14.6   |

MAX\_MEAN : 25.5 MAX\_MED : 23.7 BMAD : 5.54  
COFF : 20 HIT-CALL : 1 FITC : 41 ACTP : 0.77  
FLAGS : 11; 6; 16

Assay ID 1848 (NHEERL\_Quantilum\_inhib\_2\_dn)  
Sample ID : TP0001441F03

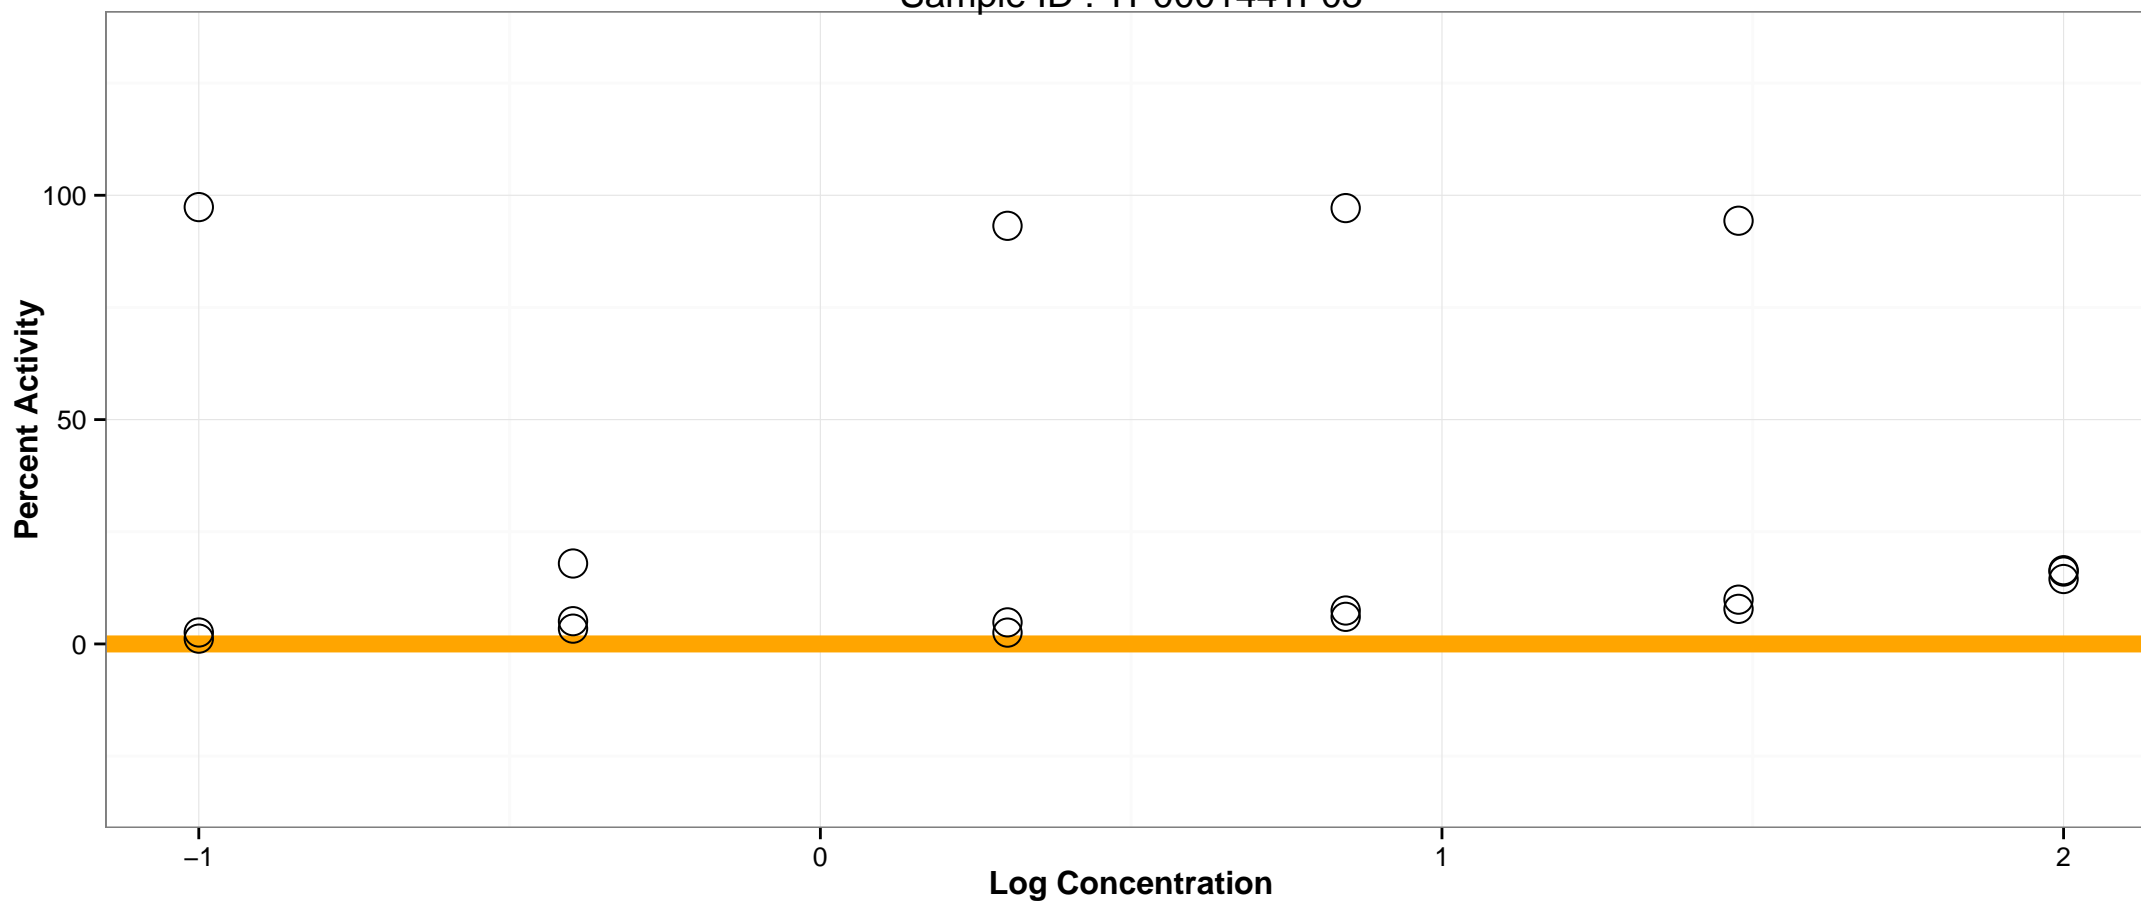

HILL MODEL

HILL MODEL: Not applicable

GAIN-LOSS MODEL

GNLS MODEL: Not applicable

|      | CNST   | HILL | GNLS |
|------|--------|------|------|
| AIC  | 186.58 | NA   | NA   |
| PROB | 1      | NA   | NA   |
| RMSE | 45.88  | NA   | NA   |

MAX\_MEAN : 37.4 MAX\_MED : 16.1 BMAD : 8.58  
COFF : 20 HIT-CALL : 0 FITC : 4 ACTP : 0  
FLAGS : 10

Chemical : 4-Butylphenol  
CAS : 1638-22-8

Assay ID 1508 (NHEERL\_TPO\_AUR\_dn)  
Sample ID : TP0001441F04

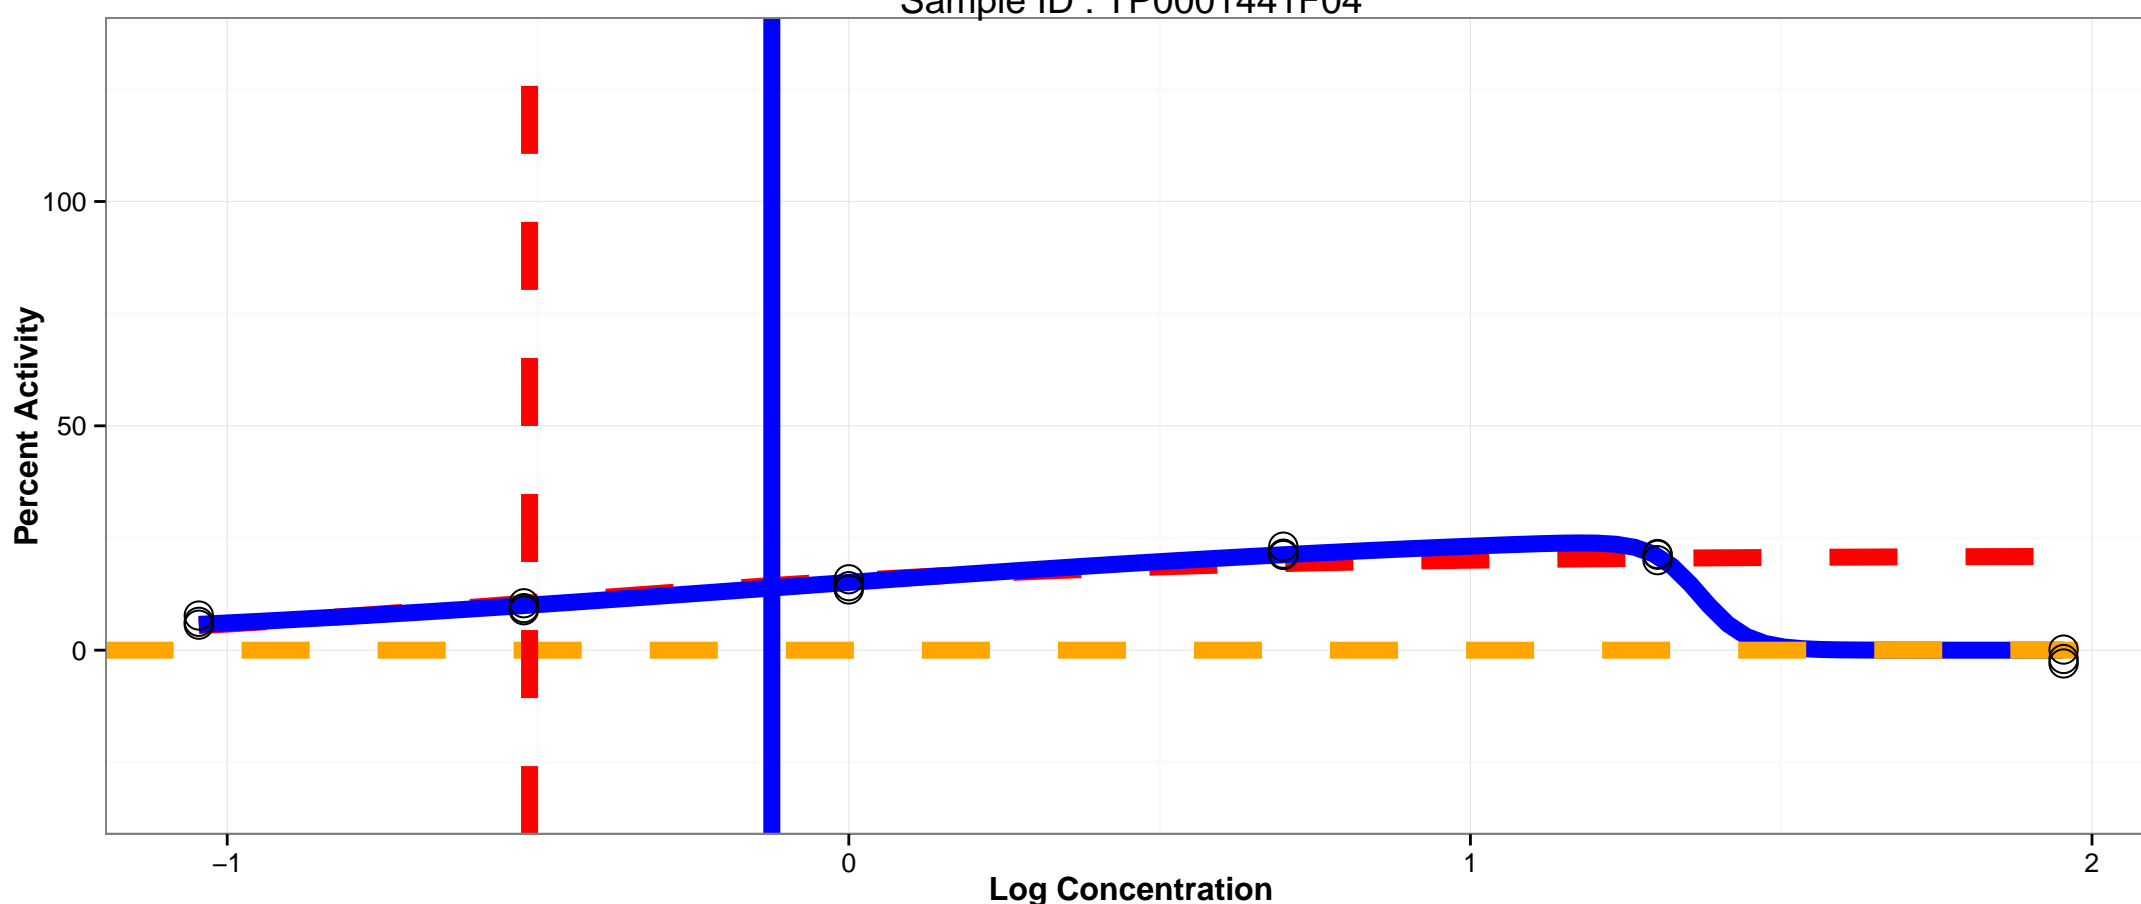

HILL MODEL

|     | tp  | ga     | gw    |
|-----|-----|--------|-------|
| val | 21  | -0.514 | 0.86  |
| sd  | 2.2 | 0.173  | 0.248 |

GAIN-LOSS MODEL

|     | tp   | ga     | gw     | la     | lw   |
|-----|------|--------|--------|--------|------|
| val | 27.7 | -0.124 | 0.631  | 1.37   | 11.3 |
| sd  | 3.12 | 0.187  | 0.0911 | 0.0166 | 4.12 |

|      | CNST   | HILL   | GNLS  |
|------|--------|--------|-------|
| AIC  | 152.25 | 128.44 | 70.37 |
| PROB | 0      | 0      | 1     |
| RMSE | 14.57  | 9.31   | 1.22  |

MAX\_MEAN : 21.9 MAX\_MED : 21.5 BMAD : 5.69  
COFF : 20 HIT-CALL : 1 FITC : 50 ACTP : 1  
FLAGS : 11

Assay ID 1509 (NHEERL\_HEK293T\_CellTiterGLO)  
Sample ID : TP0001441F04

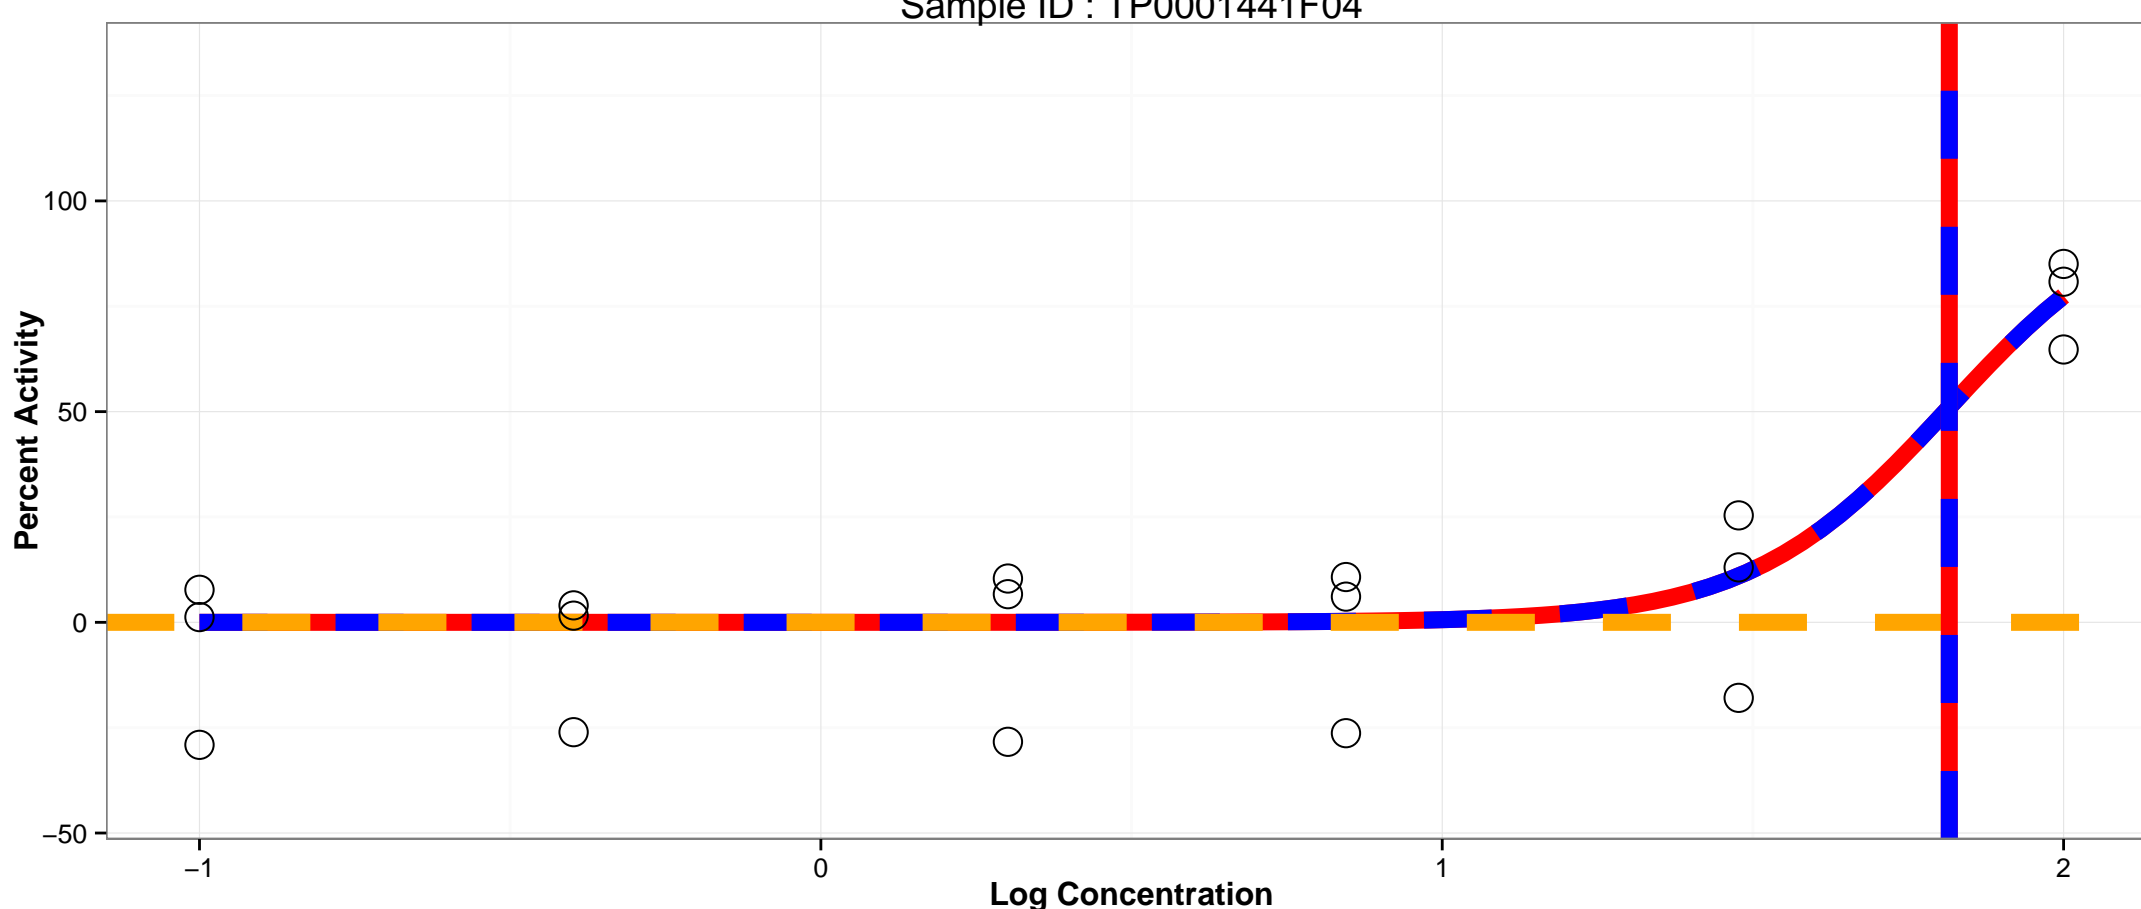

HILL MODEL

|     | tp  | ga   | gw   |
|-----|-----|------|------|
| val | 102 | 1.82 | 2.71 |
| sd  | 577 | 2.79 | 14.3 |

GAIN-LOSS MODEL

|     | tp  | ga   | gw   | la   | lw   |
|-----|-----|------|------|------|------|
| val | 102 | 1.82 | 2.71 | 3.49 | 2.96 |
| sd  | 788 | 3.81 | 19.6 | 523  | 1050 |

|      | CNST   | HILL   | GNLS   |
|------|--------|--------|--------|
| AIC  | 179.44 | 160.25 | 164.25 |
| PROB | 0      | 0.88   | 0.12   |
| RMSE | 35.36  | 16.14  | 16.14  |

MAX\_MEAN : 76.9 MAX\_MED : 80.8 BMAD : 5.54  
COFF : 20 HIT-CALL : 1 FITC : 42 ACTP : 1  
FLAGS : 6

Assay ID 1848 (NHEERL\_QuantLum\_inhib\_2\_dn)  
Sample ID : TP0001441F04

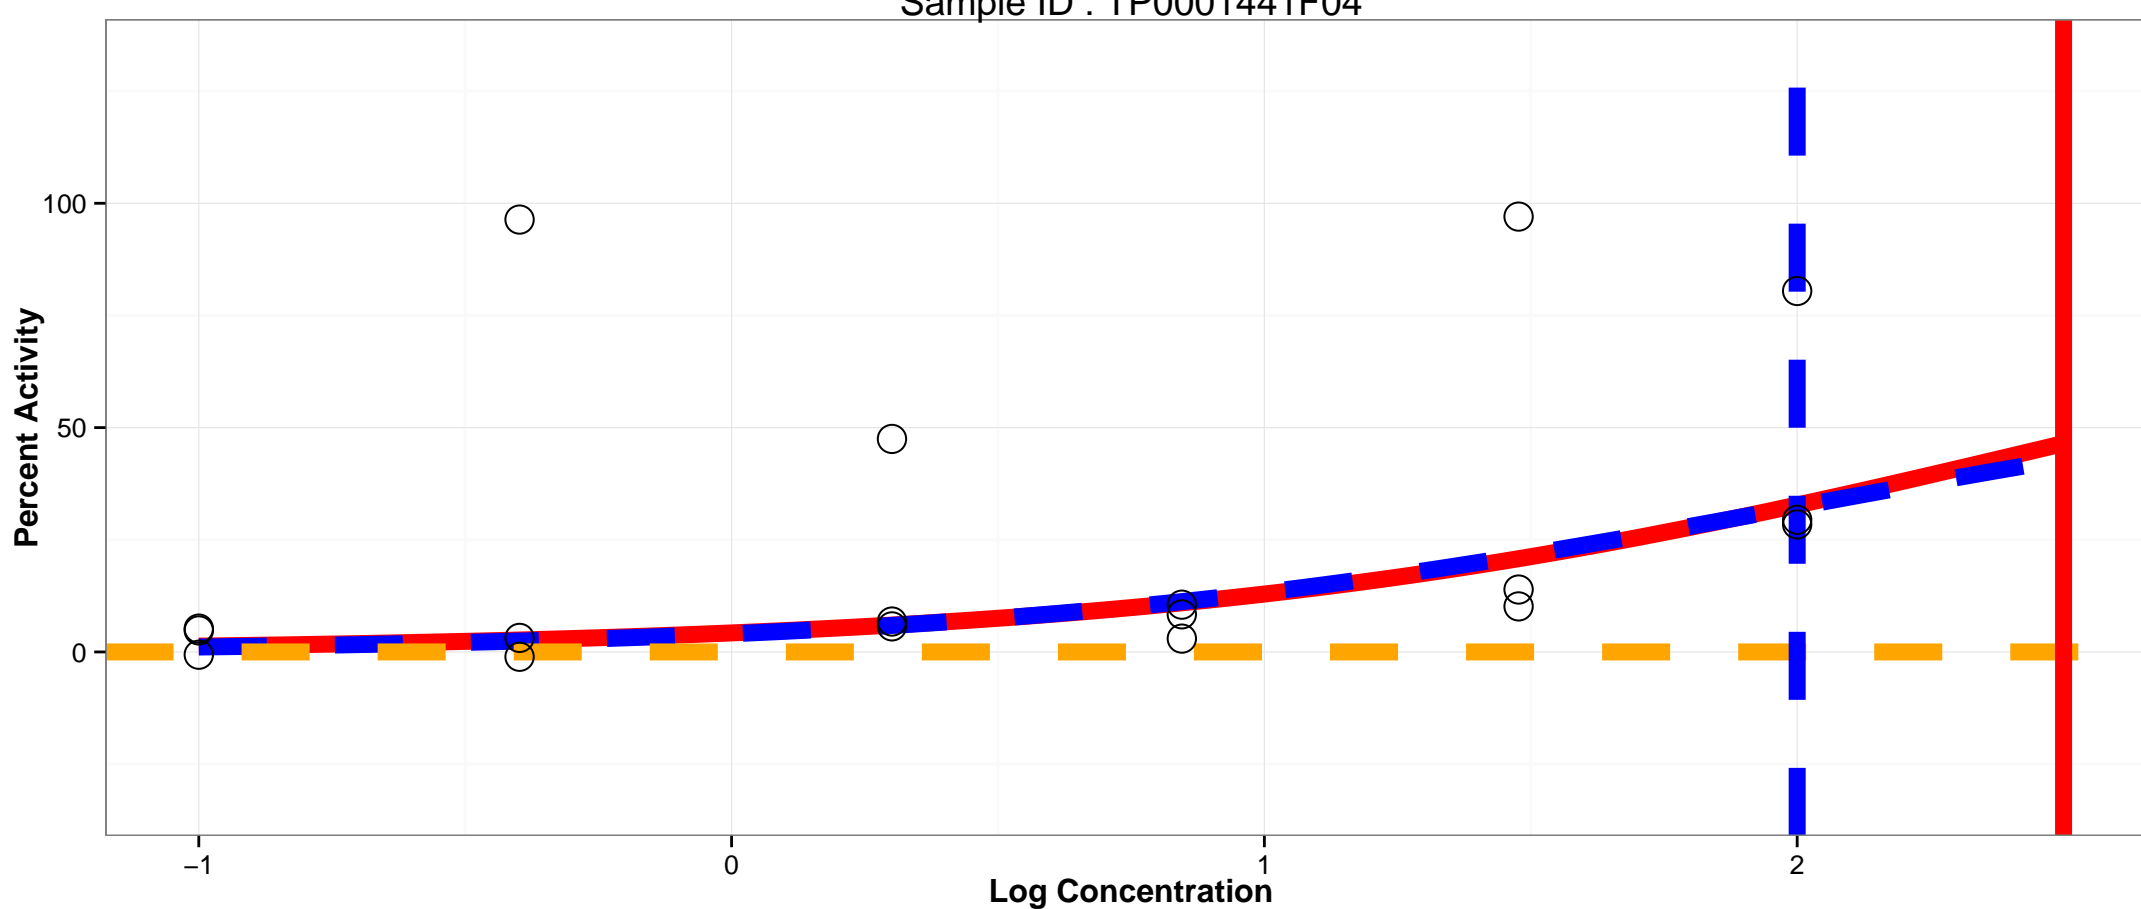

HILL MODEL

|     | tp   | ga   | gw    |
|-----|------|------|-------|
| val | 92.9 | 2.5  | 0.528 |
| sd  | 193  | 2.74 | 0.356 |

GAIN-LOSS MODEL

|     | tp   | ga   | gw    | la     | lw     |
|-----|------|------|-------|--------|--------|
| val | 64.7 | 2    | 0.588 | 3.98   | 5.79   |
| sd  | 88.5 | 1.86 | 0.415 | 176000 | 513000 |

|      | CNST   | HILL   | GNLS   |
|------|--------|--------|--------|
| AIC  | 182.46 | 175.97 | 180.13 |
| PROB | 0.03   | 0.86   | 0.11   |
| RMSE | 40.65  | 32.41  | 32.42  |

MAX\_MEAN : 46.1 MAX\_MED : 29.5 BMAD : 8.58  
COFF : 20 HIT-CALL : 1 FITC : 42 ACTP : 0.967  
FLAGS : 6; 10

Chemical : Triclosan  
CAS : 3380-34-5

Assay ID 1508 (NHEERL\_TPO\_AUR\_dn)  
Sample ID : TP0001441F05

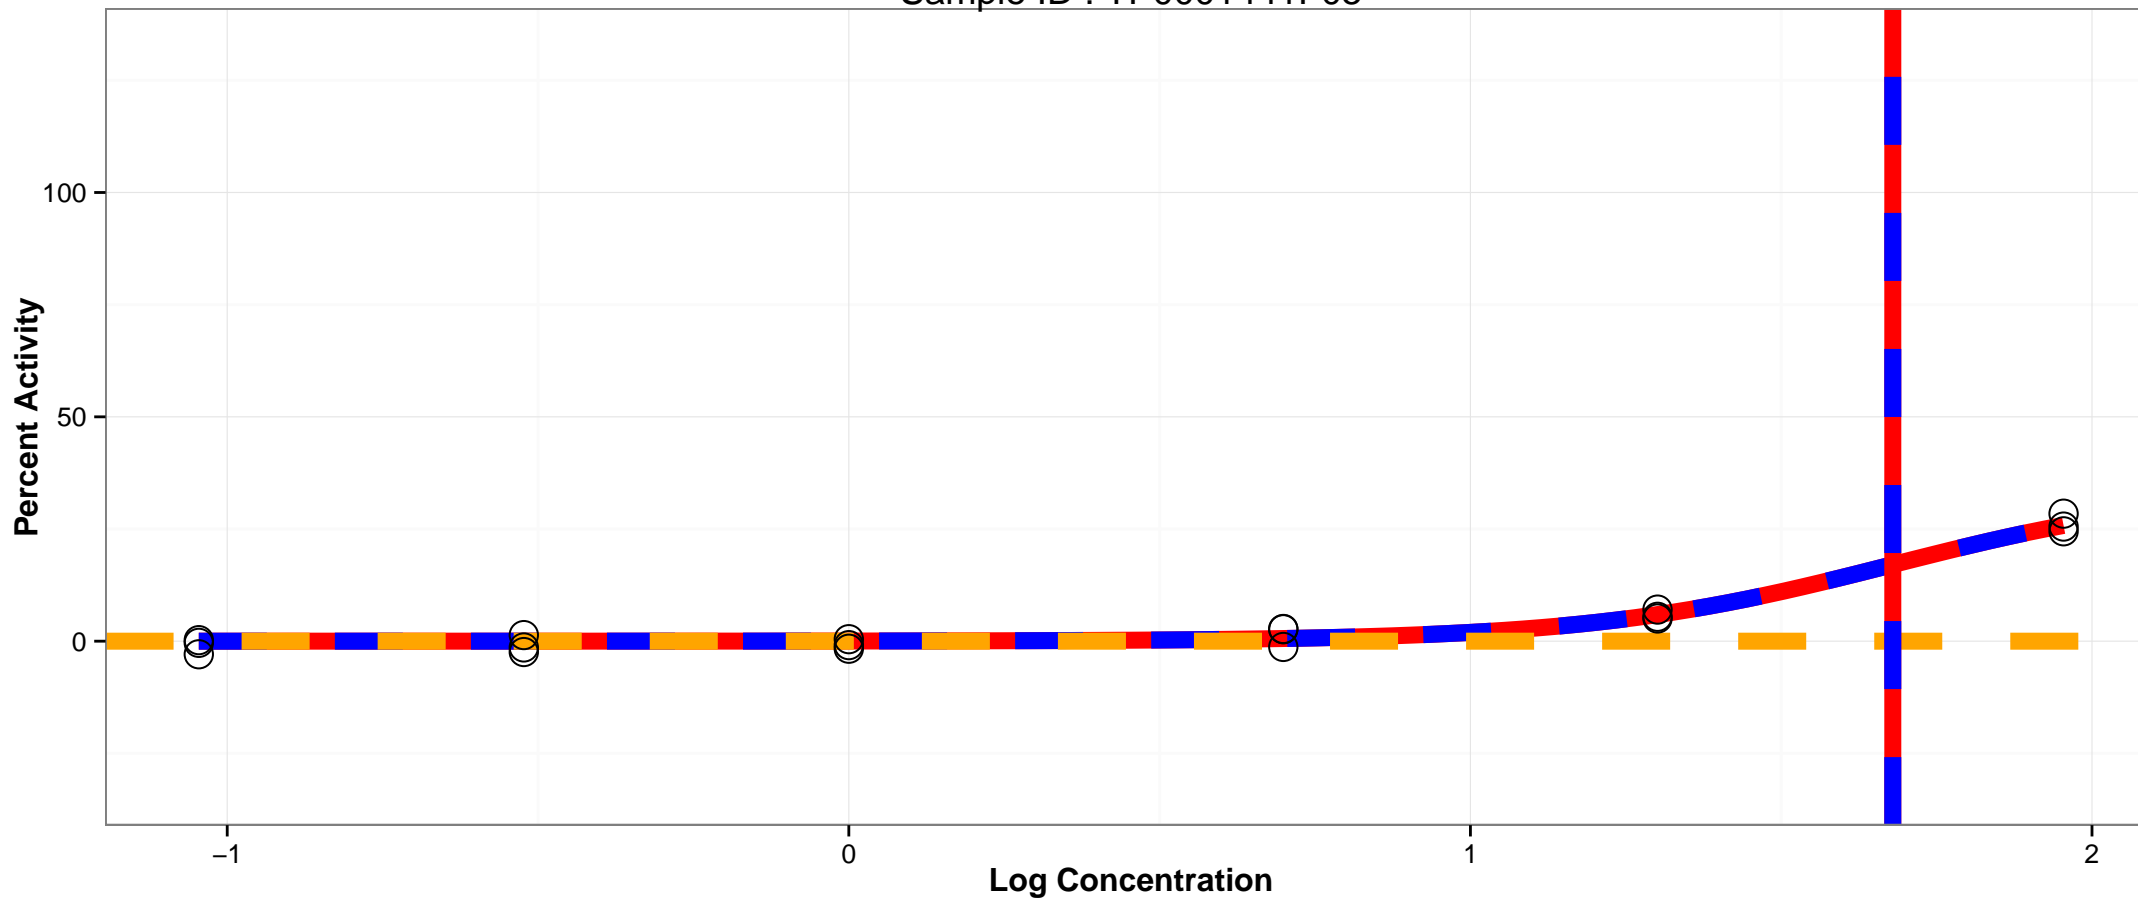

HILL MODEL

|     | tp   | ga    | gw    |
|-----|------|-------|-------|
| val | 34.1 | 1.68  | 1.79  |
| sd  | 15.6 | 0.319 | 0.893 |

GAIN-LOSS MODEL

|     | tp   | ga   | gw   | la   | lw |
|-----|------|------|------|------|----|
| val | 34.1 | 1.68 | 1.79 | 3.02 | 18 |
| sd  | NA   | NA   | NA   | NA   | NA |

|      | CNST   | HILL  | GNLS  |
|------|--------|-------|-------|
| AIC  | 132.39 | 78.21 | 82.21 |
| PROB | 0      | 0.88  | 0.12  |
| RMSE | 11.07  | 1.59  | 1.59  |

MAX\_MEAN : 26.2 MAX\_MED : 25.6 BMAD : 5.69  
COFF : 20 HIT-CALL : 1 FITC : 42 ACTP : 1  
FLAGS : 6

Assay ID 1509 (NHEERL\_HEK293T\_CellTiterGLO)  
Sample ID : TP0001441F05

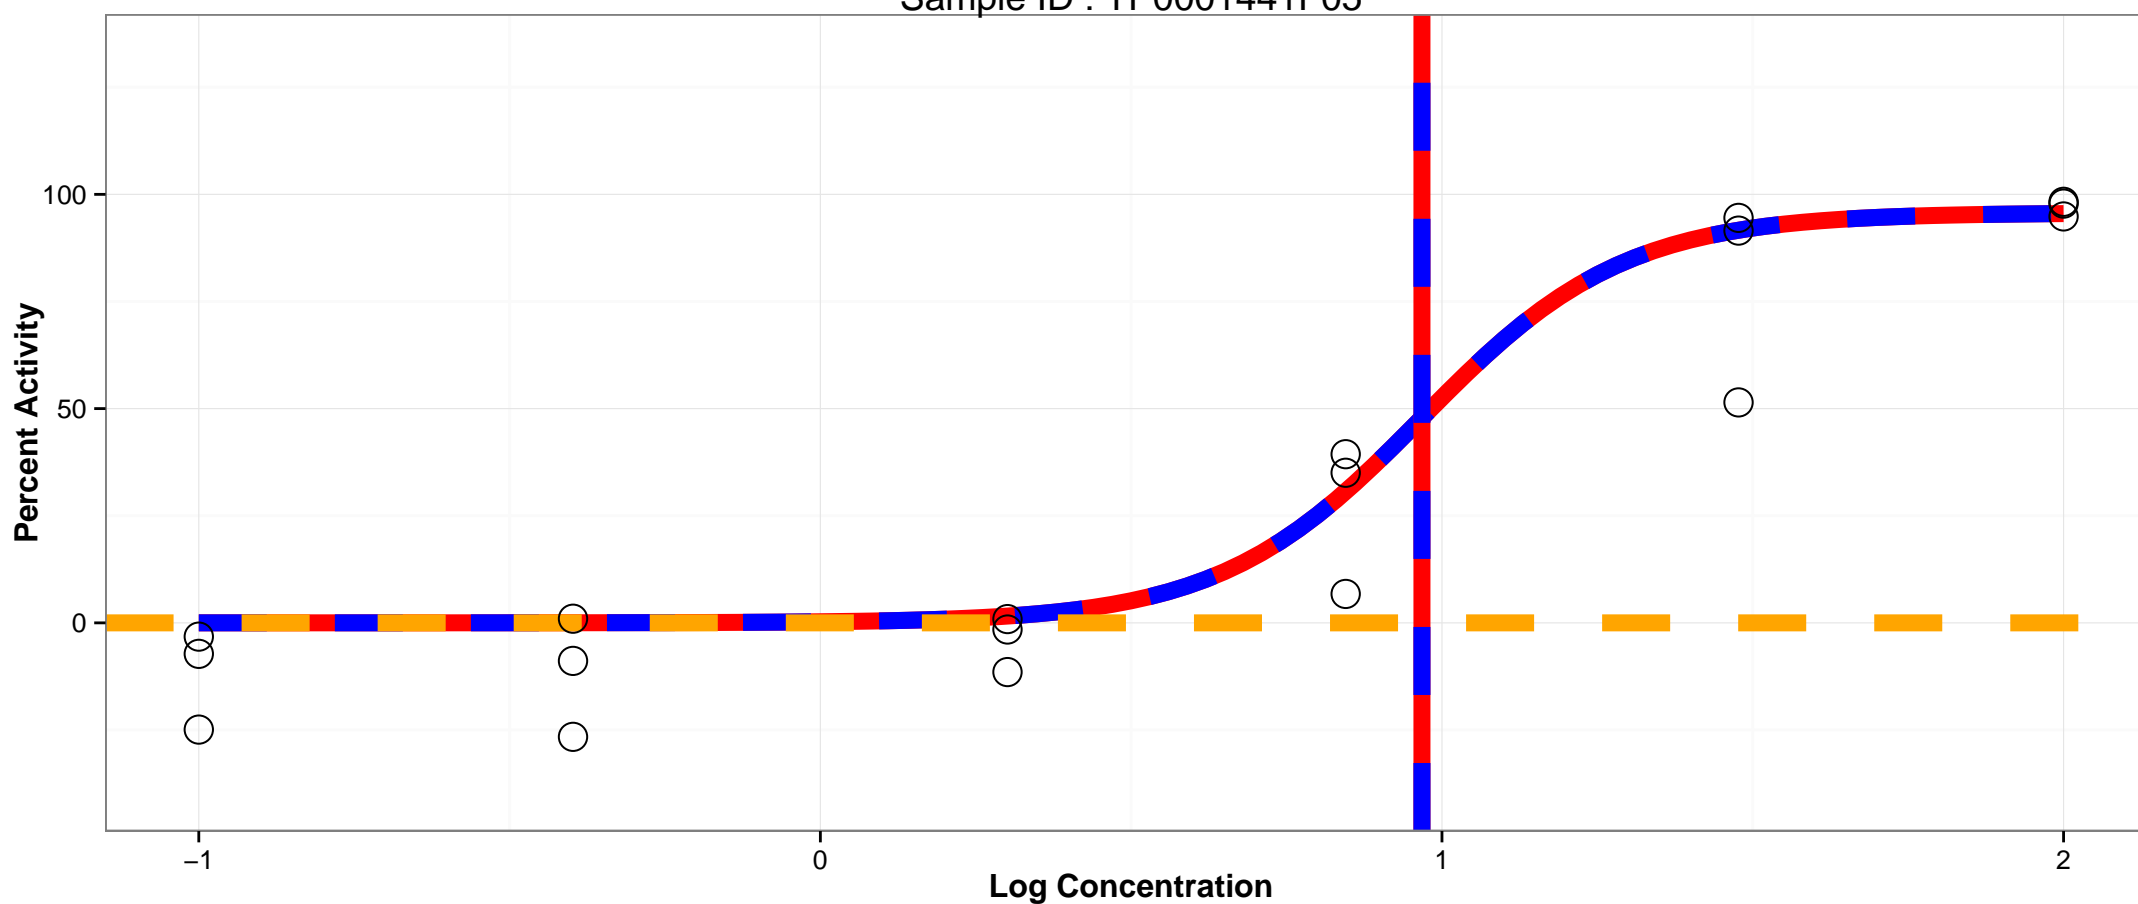

HILL MODEL

|     | tp   | ga    | gw   |
|-----|------|-------|------|
| val | 95.7 | 0.968 | 2.66 |
| sd  | 5.77 | 0.114 | 1.48 |

GAIN-LOSS MODEL

|     | tp   | ga    | gw   | la    | lw     |
|-----|------|-------|------|-------|--------|
| val | 95.7 | 0.968 | 2.66 | 2.74  | 16.9   |
| sd  | 5.76 | 0.114 | 1.48 | 20300 | 449000 |

|      | CNST   | HILL   | GNLS   |
|------|--------|--------|--------|
| AIC  | 197.09 | 153.41 | 157.41 |
| PROB | 0      | 0.88   | 0.12   |
| RMSE | 54.07  | 14.82  | 14.82  |

MAX\_MEAN : 97 MAX\_MED : 97.8 BMAD : 5.54  
COFF : 20 HIT-CALL : 1 FITC : 41 ACTP : 1  
FLAGS :

Assay ID 1848 (NHEERL\_Quantilum\_inhib\_2\_dn)  
Sample ID : TP0001441F05

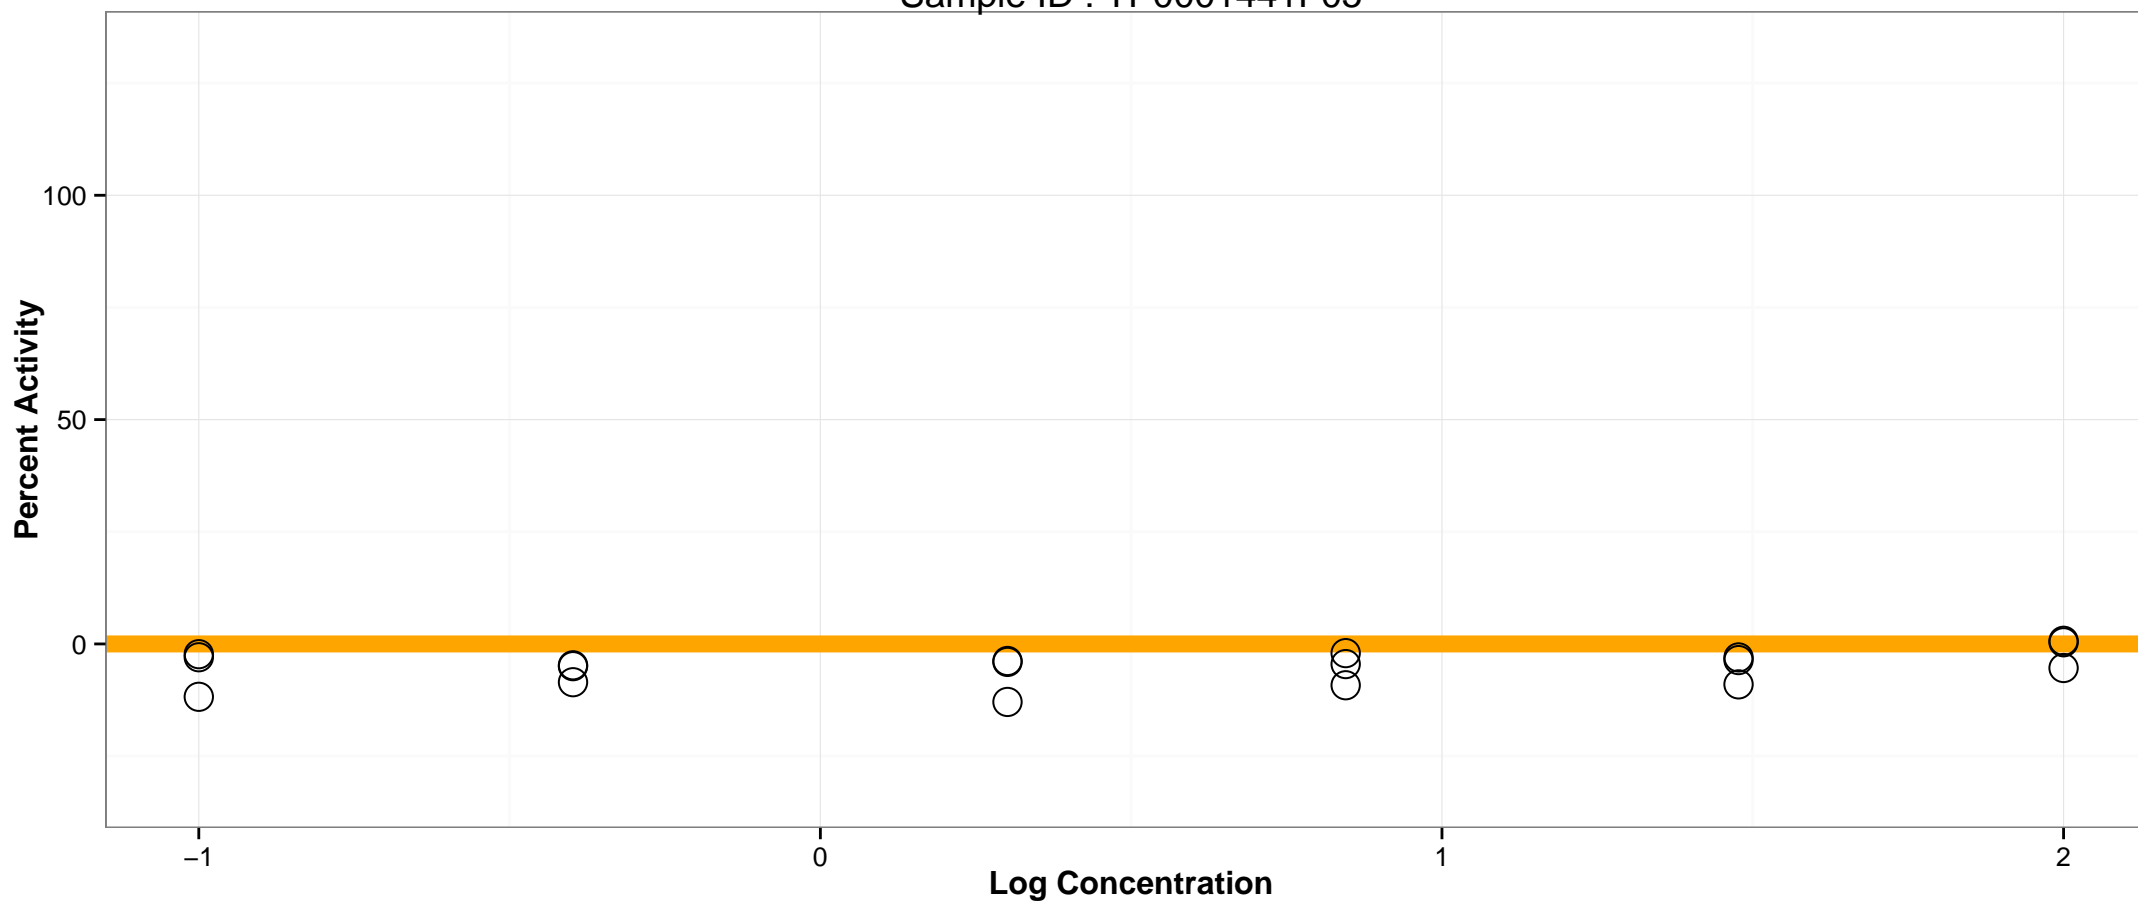

HILL MODEL

HILL MODEL: Not applicable

GAIN-LOSS MODEL

GNLS MODEL: Not applicable

|      | CNST   | HILL | GNLS |
|------|--------|------|------|
| AIC  | 120.77 | NA   | NA   |
| PROB | 1      | NA   | NA   |
| RMSE | 6.28   | NA   | NA   |

MAX\_MEAN : -1.42 MAX\_MED : 0.381 BMAD : 8.58  
COFF : 20 HIT-CALL : 0 FITC : 4 ACTP : 0  
FLAGS :

Assay ID 1508 (NHEERL\_TPO\_AUR\_dn)  
Sample ID : TX011587

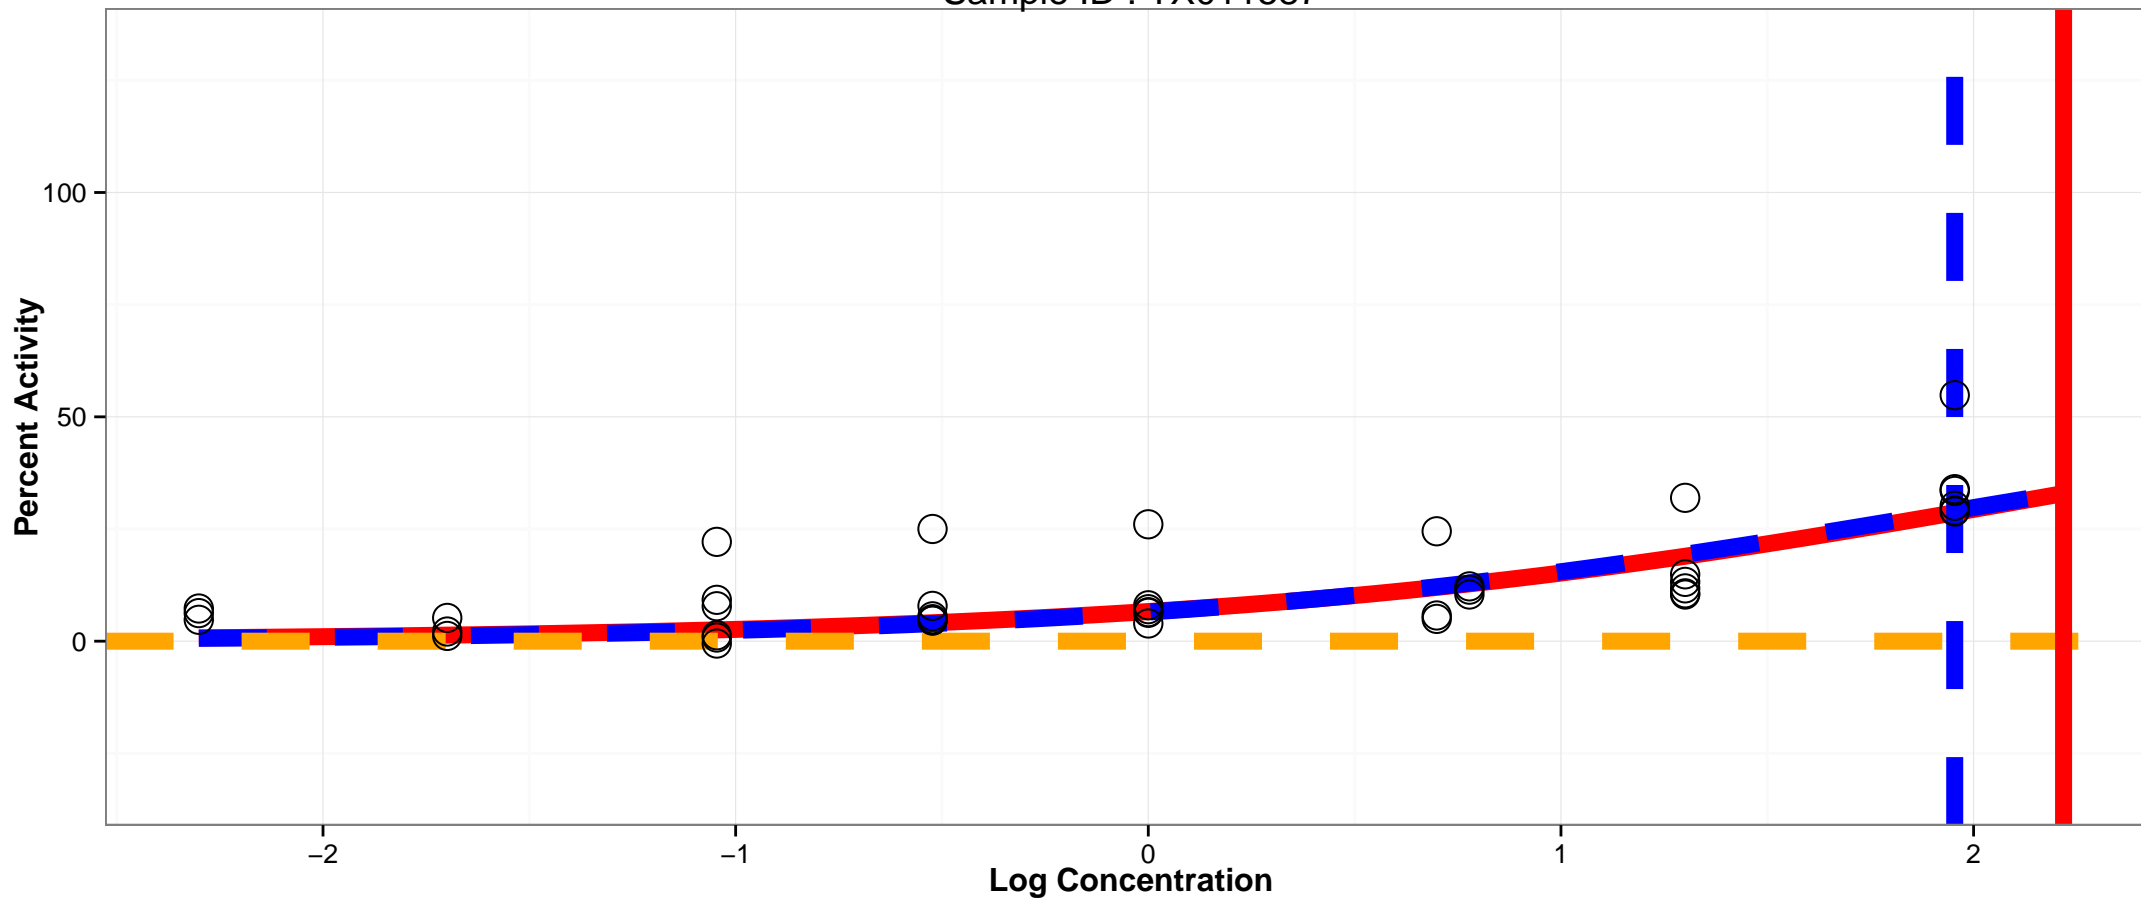

HILL MODEL

|     | tp   | ga   | gw     |
|-----|------|------|--------|
| val | 65.8 | 2.22 | 0.429  |
| sd  | 23.9 | 0.65 | 0.0847 |

GAIN-LOSS MODEL

|     | tp   | ga   | gw    | la   | lw   |
|-----|------|------|-------|------|------|
| val | 58.1 | 1.95 | 0.461 | 3.72 | 17.2 |
| sd  | NA   | NA   | NA    | NA   | NA   |

|      | CNST   | HILL   | GNLS   |
|------|--------|--------|--------|
| AIC  | 360.65 | 295.18 | 300.08 |
| PROB | 0      | 0.92   | 0.08   |
| RMSE | 17.71  | 8.2    | 8.23   |

MAX\_MEAN : 35.1 MAX\_MED : 31.8 BMAD : 5.69  
COFF : 20 HIT-CALL : 1 FITC : 42 ACTP : 1  
FLAGS : 6

Assay ID 1509 (NHEERL\_HEK293T\_CellTiterGLO)  
Sample ID : TX011587

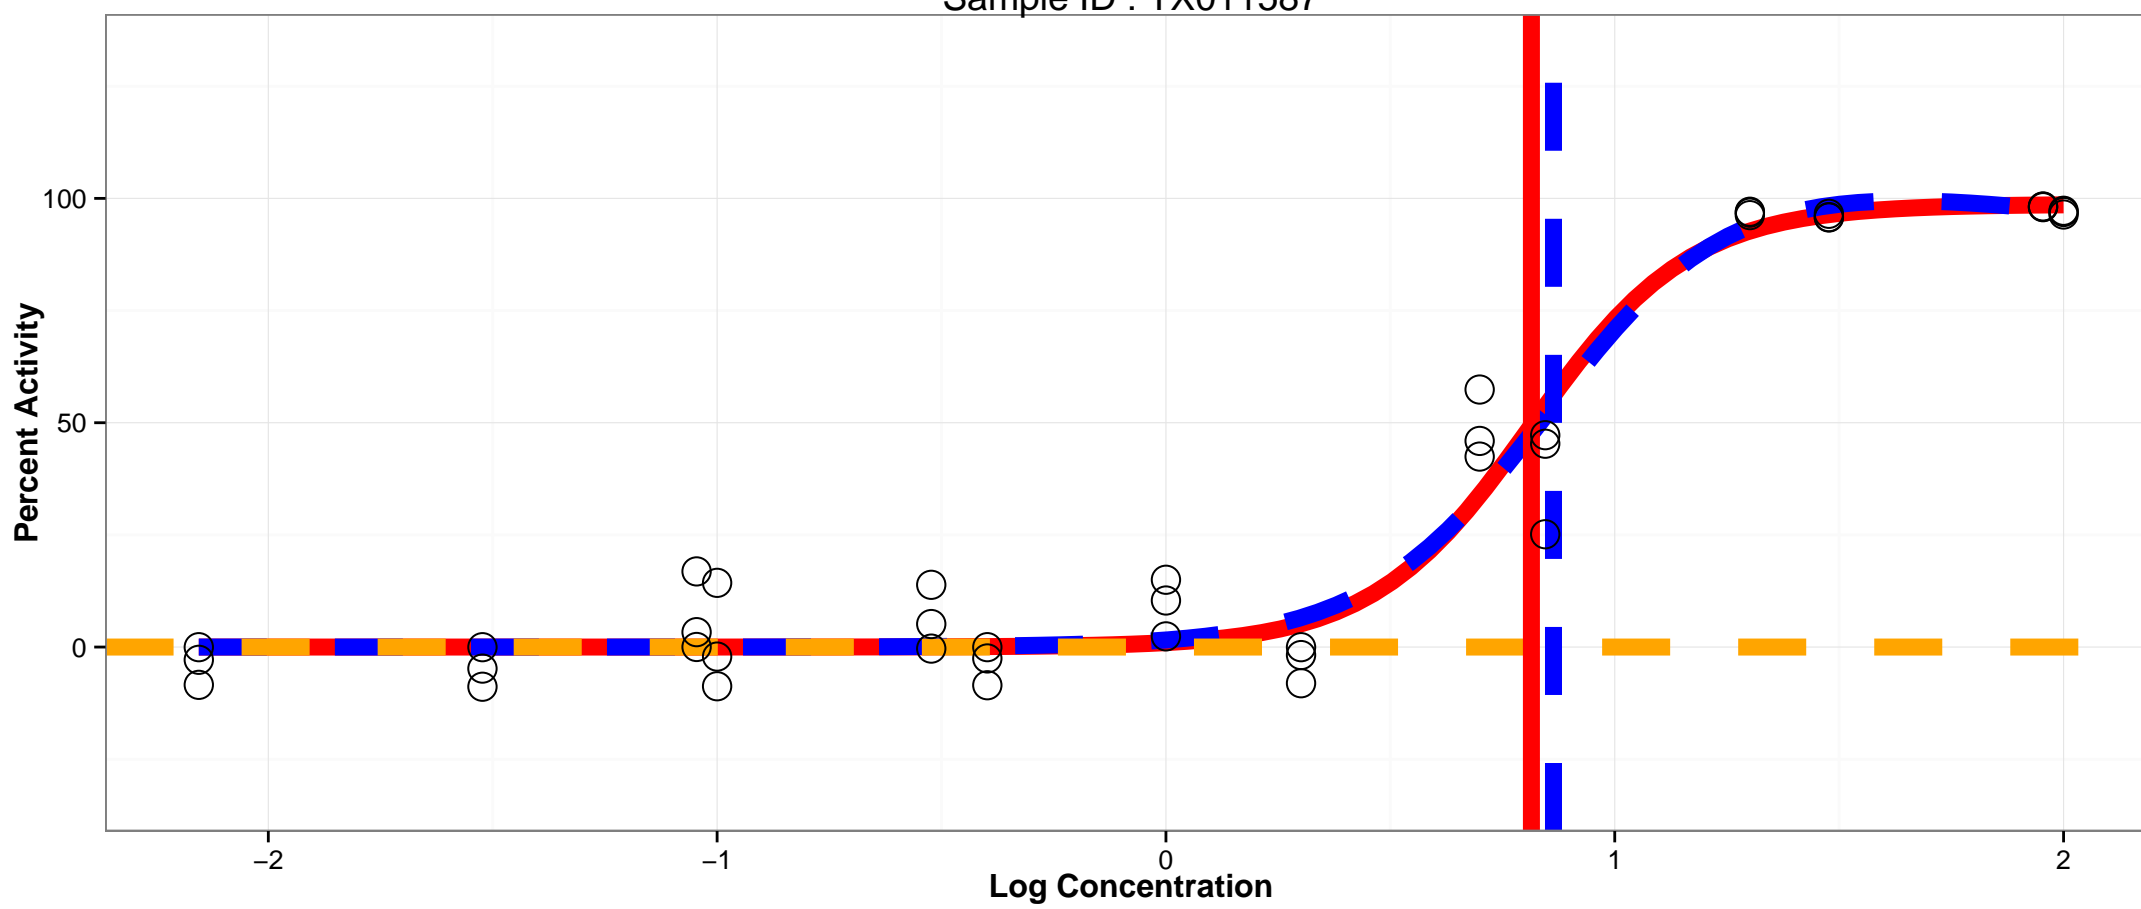

HILL MODEL

|     | tp   | ga     | gw   |
|-----|------|--------|------|
| val | 98.7 | 0.814  | 2.45 |
| sd  | 2.07 | 0.0477 | 0.4  |

GAIN-LOSS MODEL

|     | tp  | ga    | gw   | la   | lw   |
|-----|-----|-------|------|------|------|
| val | 115 | 0.864 | 2.13 | 3.97 | 0.38 |
| sd  | NA  | NA    | NA   | NA   | NA   |

|      | CNST   | HILL   | GNLS   |
|------|--------|--------|--------|
| AIC  | 457.63 | 306.88 | 309.88 |
| PROB | 0      | 0.82   | 0.18   |
| RMSE | 54.86  | 8.93   | 8.79   |

MAX\_MEAN : 98.1 MAX\_MED : 98.1 BMAD : 5.54  
COFF : 20 HIT-CALL : 1 FITC : 41 ACTP : 1  
FLAGS :

Assay ID 1848 (NHEERL\_Quantilum\_inhib\_2\_dn)  
Sample ID : TX011587

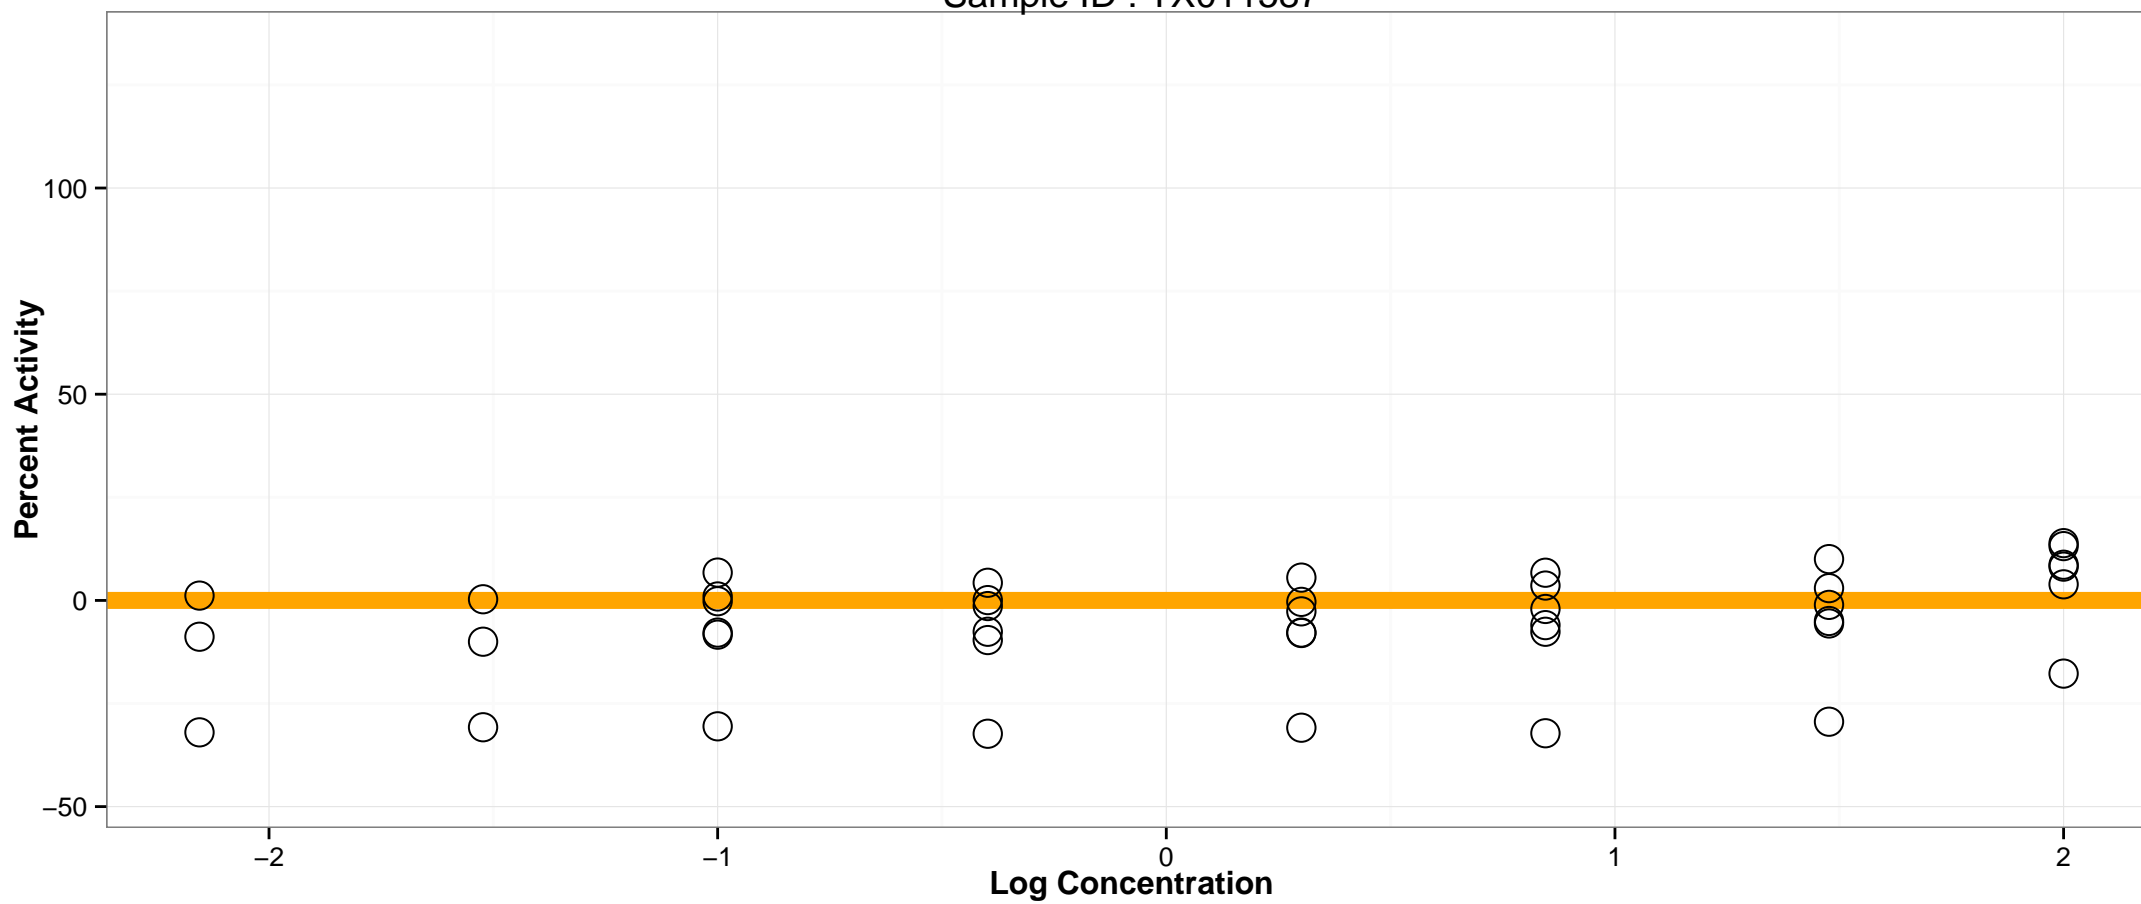

HILL MODEL

HILL MODEL: Not applicable

GAIN-LOSS MODEL

GNLS MODEL: Not applicable

|      | CNST   | HILL | GNLS |
|------|--------|------|------|
| AIC  | 341.05 | NA   | NA   |
| PROB | 1      | NA   | NA   |
| RMSE | 14.35  | NA   | NA   |

MAX\_MEAN : 5.02 MAX\_MED : 8.44 BMAD : 8.58  
COFF : 20 HIT-CALL : 0 FITC : 4 ACTP : 0  
FLAGS :



Chemical : Triclosan  
CAS : 3380-34-5

Assay ID 1508 (NHEERL\_TPO\_AUR\_dn)  
Sample ID : TX111587

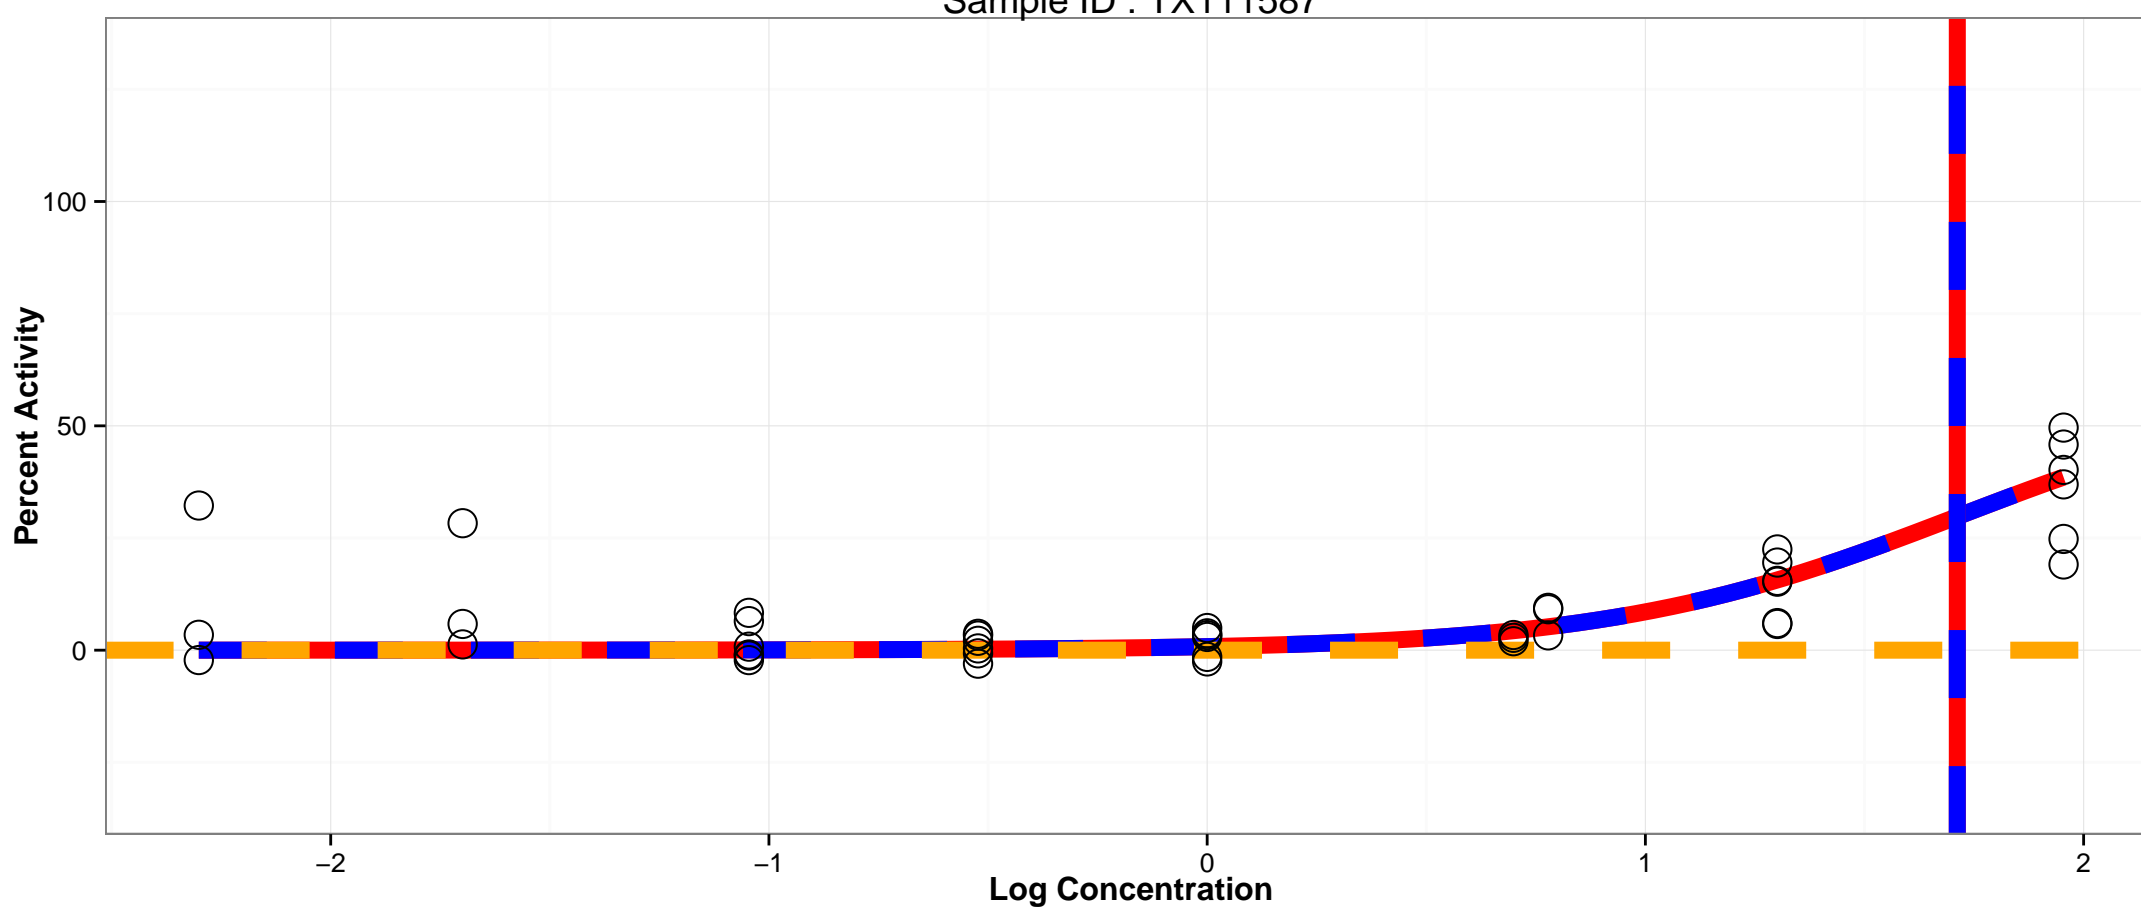

HILL MODEL

|     | tp   | ga    | gw    |
|-----|------|-------|-------|
| val | 59.5 | 1.71  | 1.09  |
| sd  | 24.9 | 0.382 | 0.355 |

GAIN-LOSS MODEL

|     | tp   | ga    | gw    | la   | lw    |
|-----|------|-------|-------|------|-------|
| val | 59.5 | 1.71  | 1.09  | 3.43 | 6.13  |
| sd  | 25   | 0.382 | 0.355 | 5190 | 21500 |

|      | CNST   | HILL   | GNLS   |
|------|--------|--------|--------|
| AIC  | 350.66 | 290.92 | 294.92 |
| PROB | 0      | 0.88   | 0.12   |
| RMSE | 17.1   | 8.65   | 8.65   |

MAX\_MEAN : 36.1 MAX\_MED : 38.6 BMAD : 5.69  
COFF : 20 HIT-CALL : 1 FITC : 42 ACTP : 1  
FLAGS : 6

Assay ID 1509 (NHEERL\_HEK293T\_CellTiterGLO)  
Sample ID : TX111587

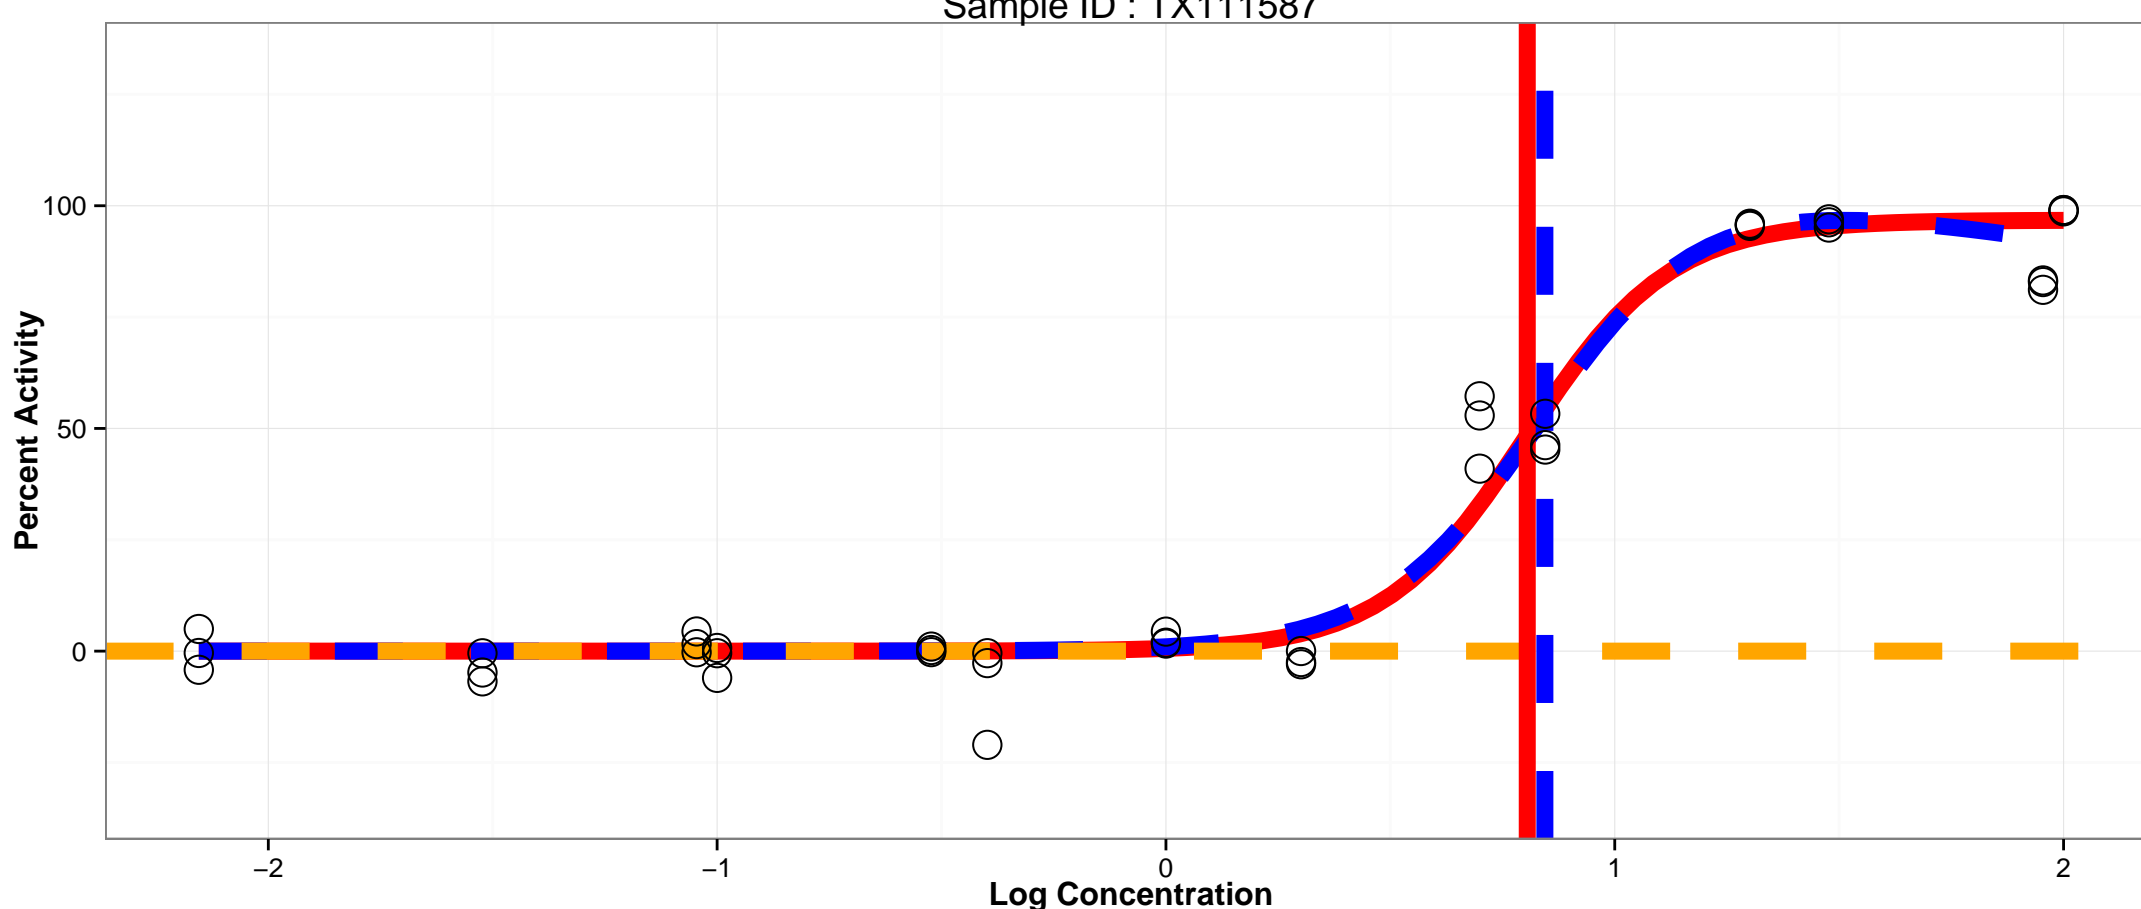

HILL MODEL

|     | tp   | ga     | gw    |
|-----|------|--------|-------|
| val | 96.8 | 0.805  | 2.73  |
| sd  | 2.03 | 0.0341 | 0.402 |

GAIN-LOSS MODEL

|     | tp  | ga    | gw   | la   | lw    |
|-----|-----|-------|------|------|-------|
| val | 119 | 0.844 | 2.43 | 3.58 | 0.338 |
| sd  | NA  | NA    | NA   | NA   | NA    |

|      | CNST   | HILL   | GNLS   |
|------|--------|--------|--------|
| AIC  | 455.94 | 291.98 | 294.03 |
| PROB | 0      | 0.74   | 0.26   |
| RMSE | 53.54  | 7.9    | 7.58   |

MAX\_MEAN : 98.9 MAX\_MED : 99 BMAD : 5.54  
COFF : 20 HIT-CALL : 1 FITC : 41 ACTP : 1  
FLAGS :

Assay ID 1848 (NHEERL\_Quantilum\_inhib\_2\_dn)  
Sample ID : TX111587

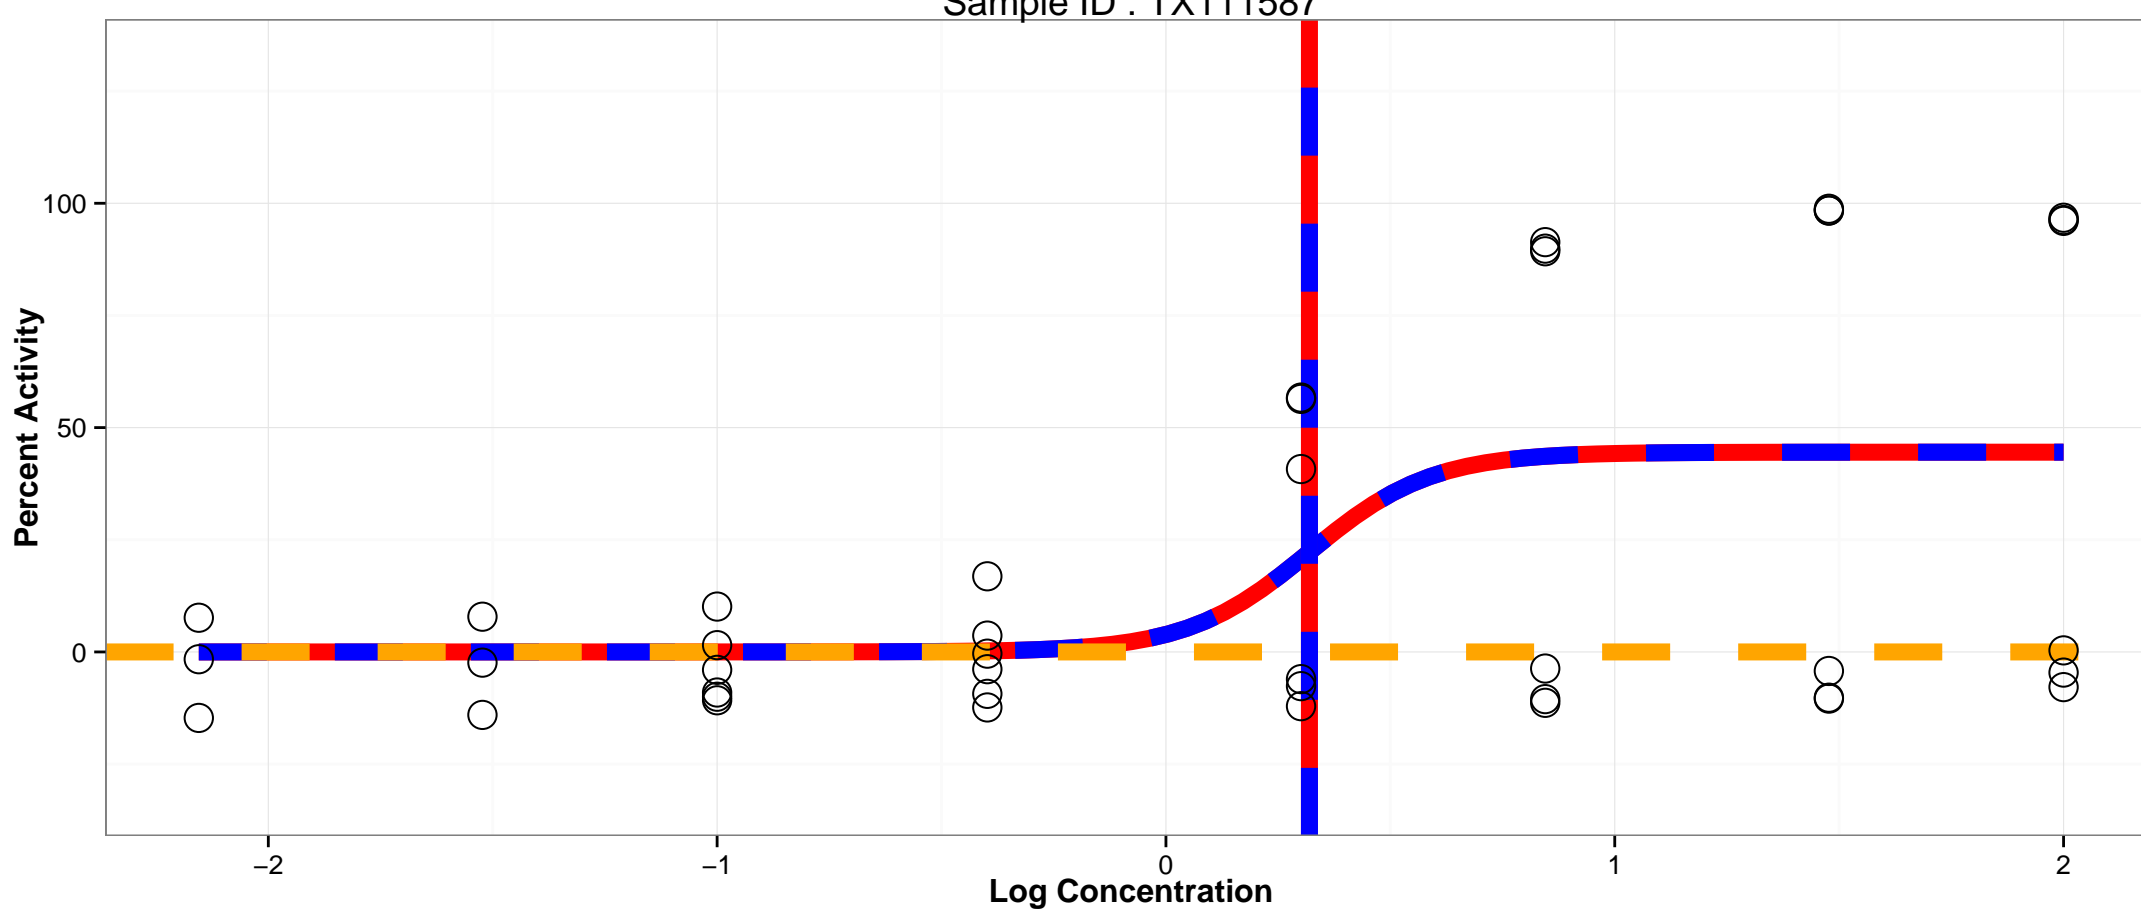

HILL MODEL

|     | tp   | ga    | gw   |
|-----|------|-------|------|
| val | 44.5 | 0.32  | 3.19 |
| sd  | 20.8 | 0.297 | 17.8 |

GAIN-LOSS MODEL

|     | tp   | ga    | gw   | la   | lw   |
|-----|------|-------|------|------|------|
| val | 44.5 | 0.32  | 3.19 | 2.42 | 12.9 |
| sd  | 20.8 | 0.298 | 17.8 | 144  | 4440 |

|      | CNST   | HILL   | GNLS   |
|------|--------|--------|--------|
| AIC  | 437.96 | 433.65 | 437.65 |
| PROB | 0.09   | 0.8    | 0.11   |
| RMSE | 46.74  | 35.88  | 35.88  |

MAX\_MEAN : 46.2 MAX\_MED : 48.2 BMAD : 8.58  
COFF : 20 HIT-CALL : 1 FITC : 41 ACTP : 0.907  
FLAGS : 10

Chemical : Triclosan  
CAS : 3380-34-5

Assay ID 1508 (NHEERL\_TPO\_AUR\_dn)  
Sample ID : TX211587

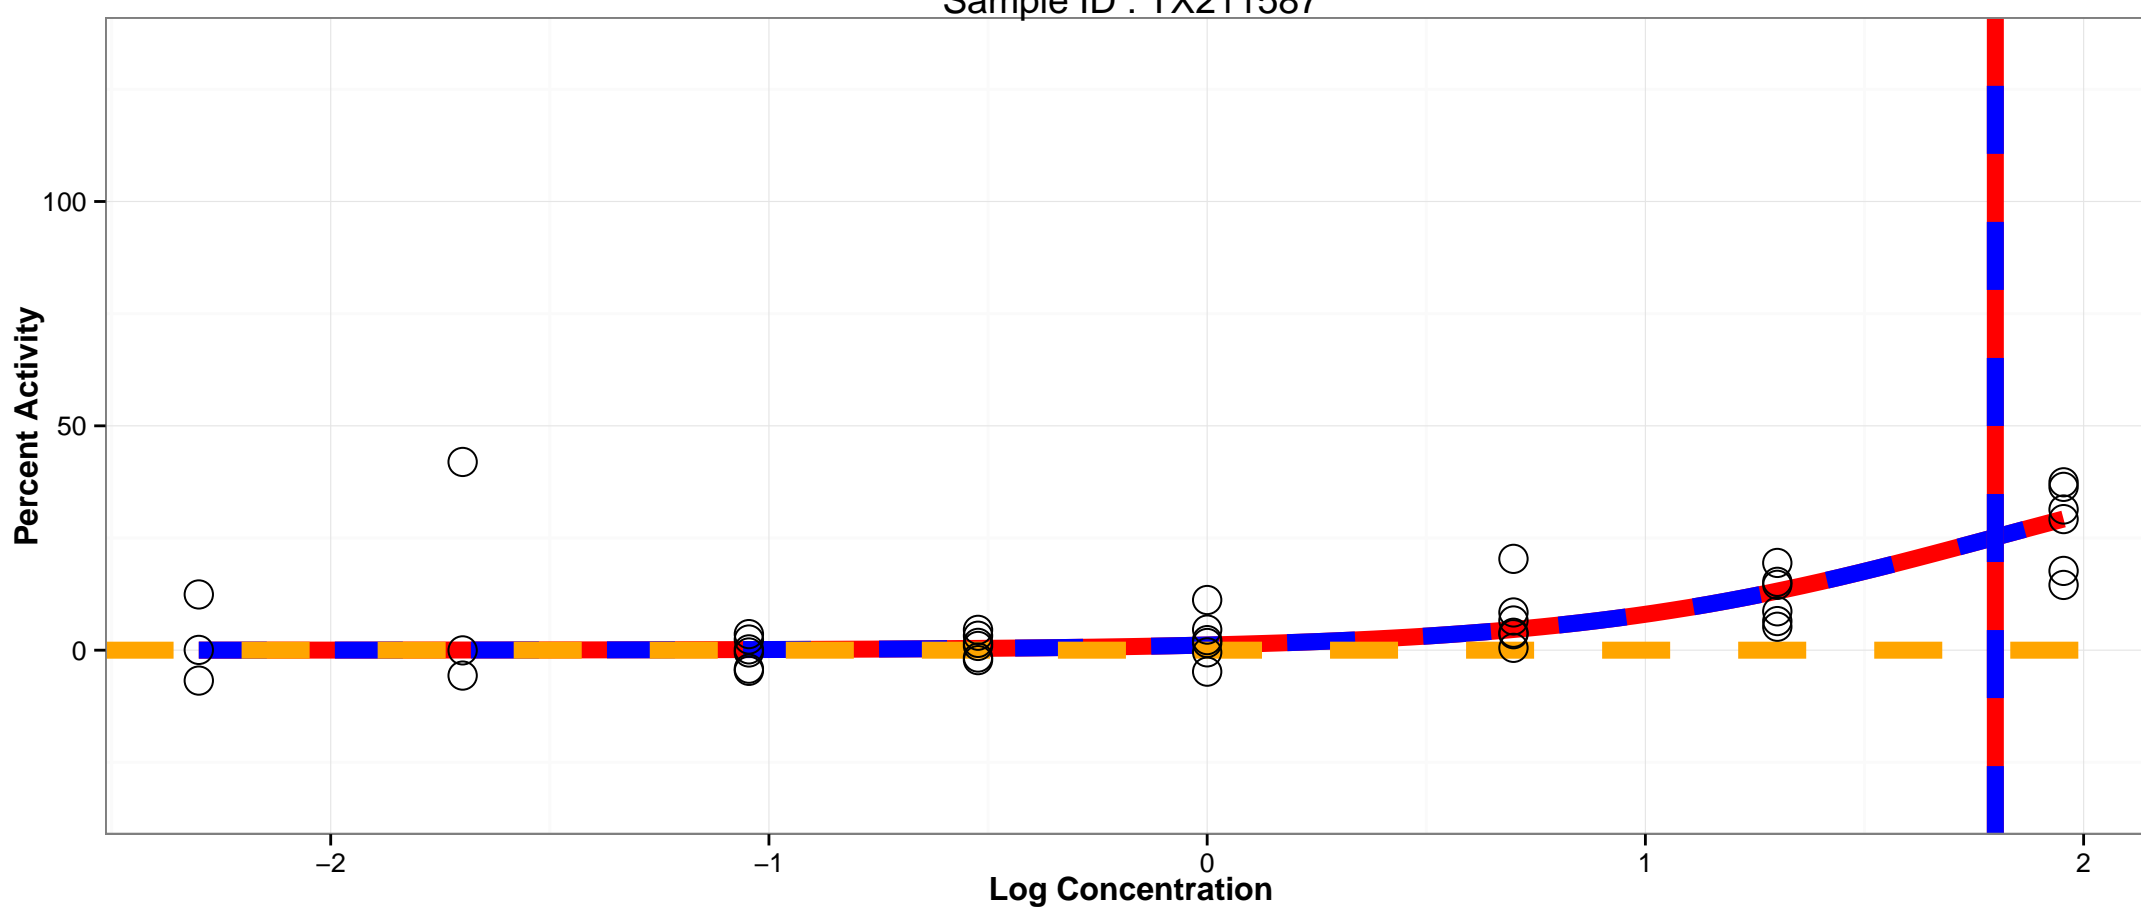

HILL MODEL

|     | tp   | ga    | gw    |
|-----|------|-------|-------|
| val | 50.4 | 1.8   | 0.907 |
| sd  | 23.1 | 0.458 | 0.28  |

GAIN-LOSS MODEL

|     | tp   | ga    | gw    | la   | lw    |
|-----|------|-------|-------|------|-------|
| val | 50.4 | 1.8   | 0.907 | 2.57 | 14.9  |
| sd  | 23.1 | 0.458 | 0.28  | 1310 | 31700 |

|      | CNST   | HILL   | GNLS   |
|------|--------|--------|--------|
| AIC  | 338.32 | 288.33 | 292.33 |
| PROB | 0      | 0.88   | 0.12   |
| RMSE | 14.54  | 8.69   | 8.69   |

MAX\_MEAN : 27.8 MAX\_MED : 30.3 BMAD : 5.69  
COFF : 20 HIT-CALL : 1 FITC : 42 ACTP : 1  
FLAGS : 6

Assay ID 1509 (NHEERL\_HEK293T\_CellTiterGLO)  
Sample ID : TX211587

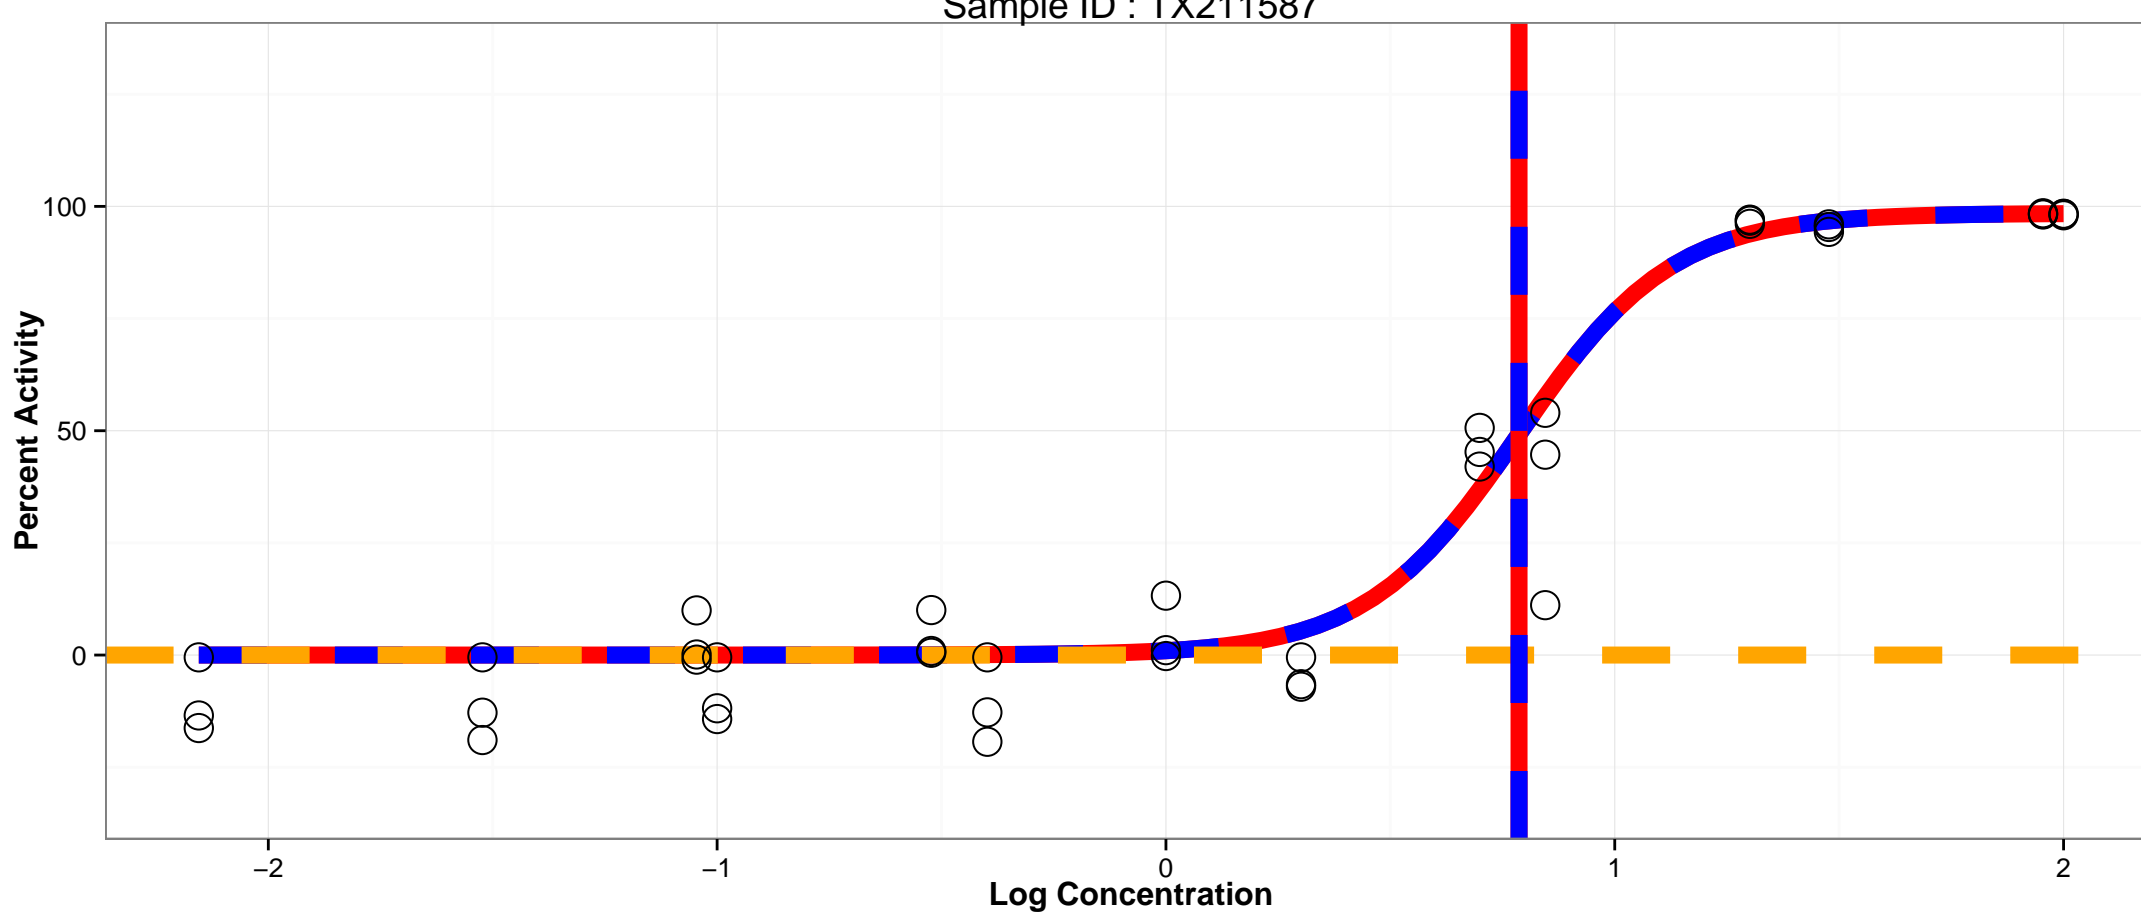

HILL MODEL

|     | tp   | ga     | gw    |
|-----|------|--------|-------|
| val | 98.5 | 0.787  | 2.55  |
| sd  | 2.28 | 0.0377 | 0.442 |

GAIN-LOSS MODEL

|     | tp   | ga    | gw   | la   | lw   |
|-----|------|-------|------|------|------|
| val | 98.5 | 0.787 | 2.55 | 3.13 | 12.7 |
| sd  | NA   | NA    | NA   | NA   | NA   |

|      | CNST  | HILL   | GNLS   |
|------|-------|--------|--------|
| AIC  | 457.9 | 319.94 | 323.94 |
| PROB | 0     | 0.88   | 0.12   |
| RMSE | 54.98 | 11.12  | 11.12  |

MAX\_MEAN : 98.3 MAX\_MED : 98.3 BMAD : 5.54  
COFF : 20 HIT-CALL : 1 FITC : 41 ACTP : 1  
FLAGS :

Assay ID 1848 (NHEERL\_Quantilum\_inhib\_2\_dn)  
Sample ID : TX211587

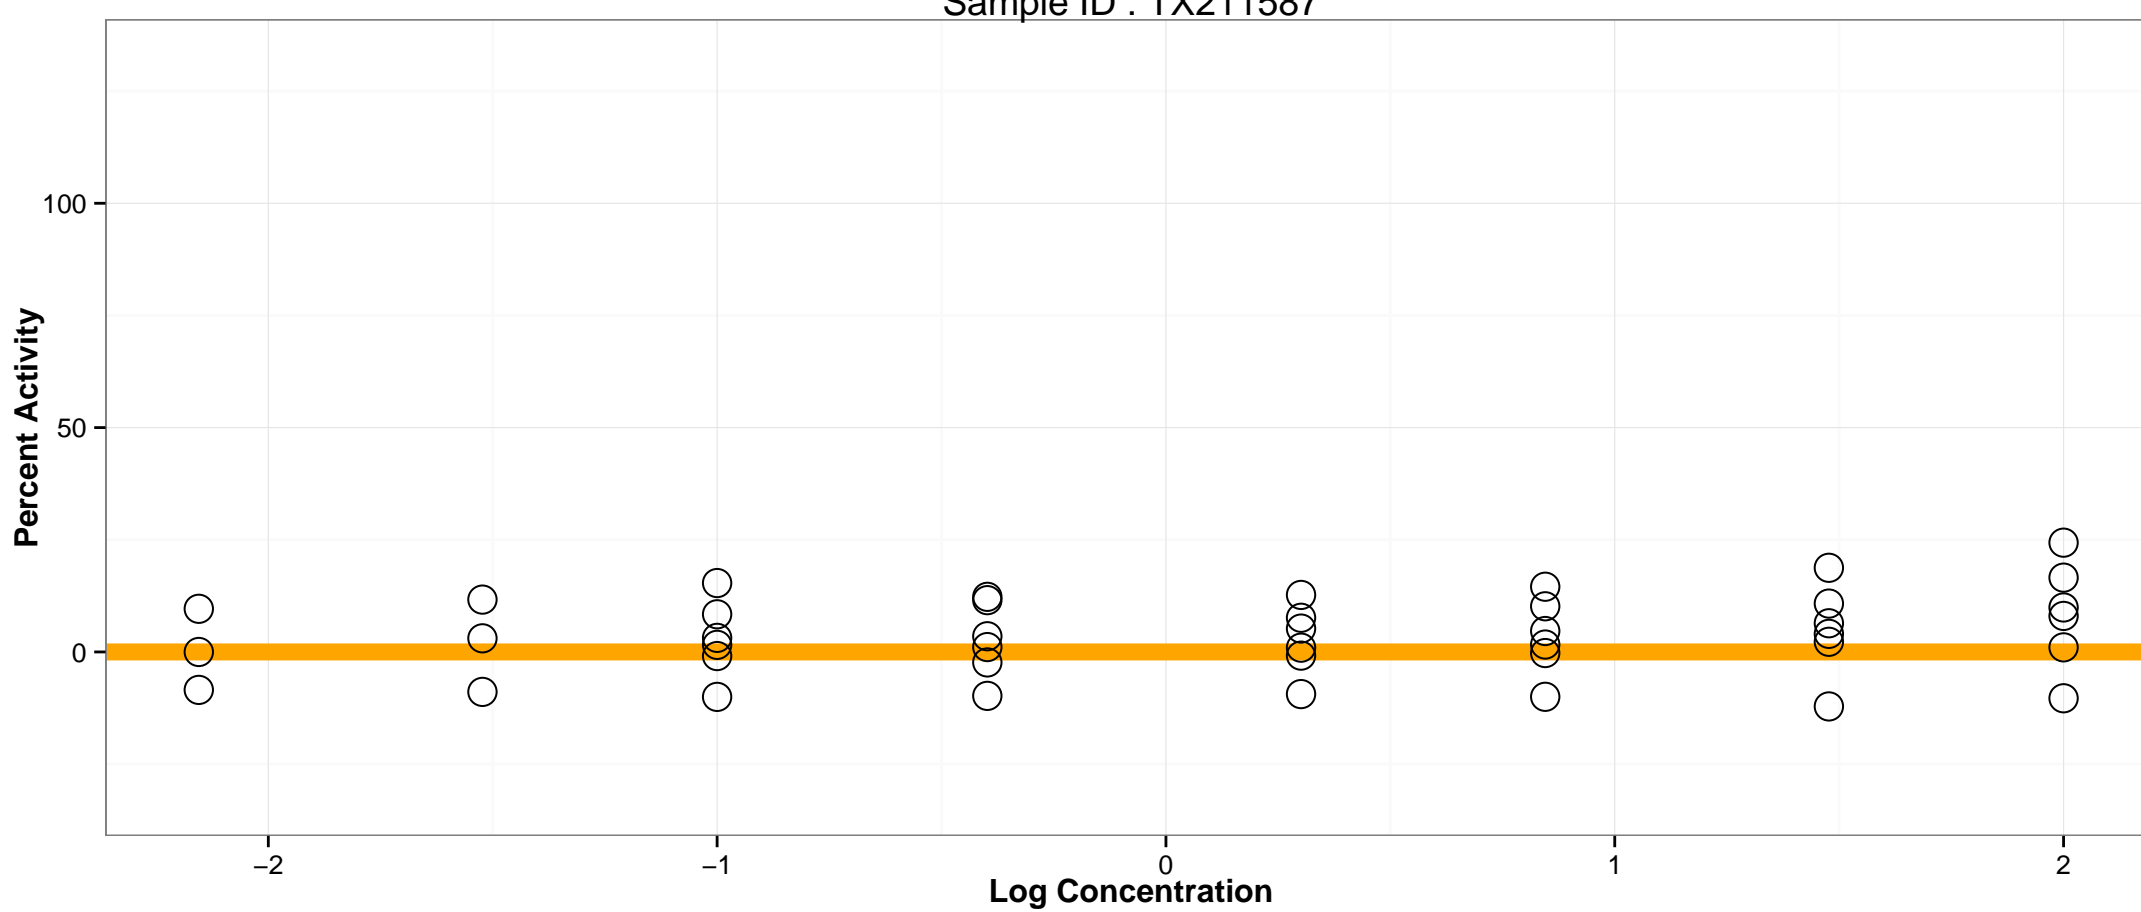

HILL MODEL

HILL MODEL: Not applicable

GAIN-LOSS MODEL

GNLS MODEL: Not applicable

|      | CNST  | HILL | GNLS |
|------|-------|------|------|
| AIC  | 314.3 | NA   | NA   |
| PROB | 1     | NA   | NA   |
| RMSE | 9.51  | NA   | NA   |

MAX\_MEAN : 8.27 MAX\_MED : 8.98 BMAD : 8.58  
COFF : 20 HIT-CALL : 0 FITC : 4 ACTP : 0  
FLAGS :

Chemical : Benzo(k)fluoranthene  
CAS : 207-08-9

Assay ID 1508 (NHEERL\_TPO\_AUR\_dn)  
Sample ID : TP0001441F06

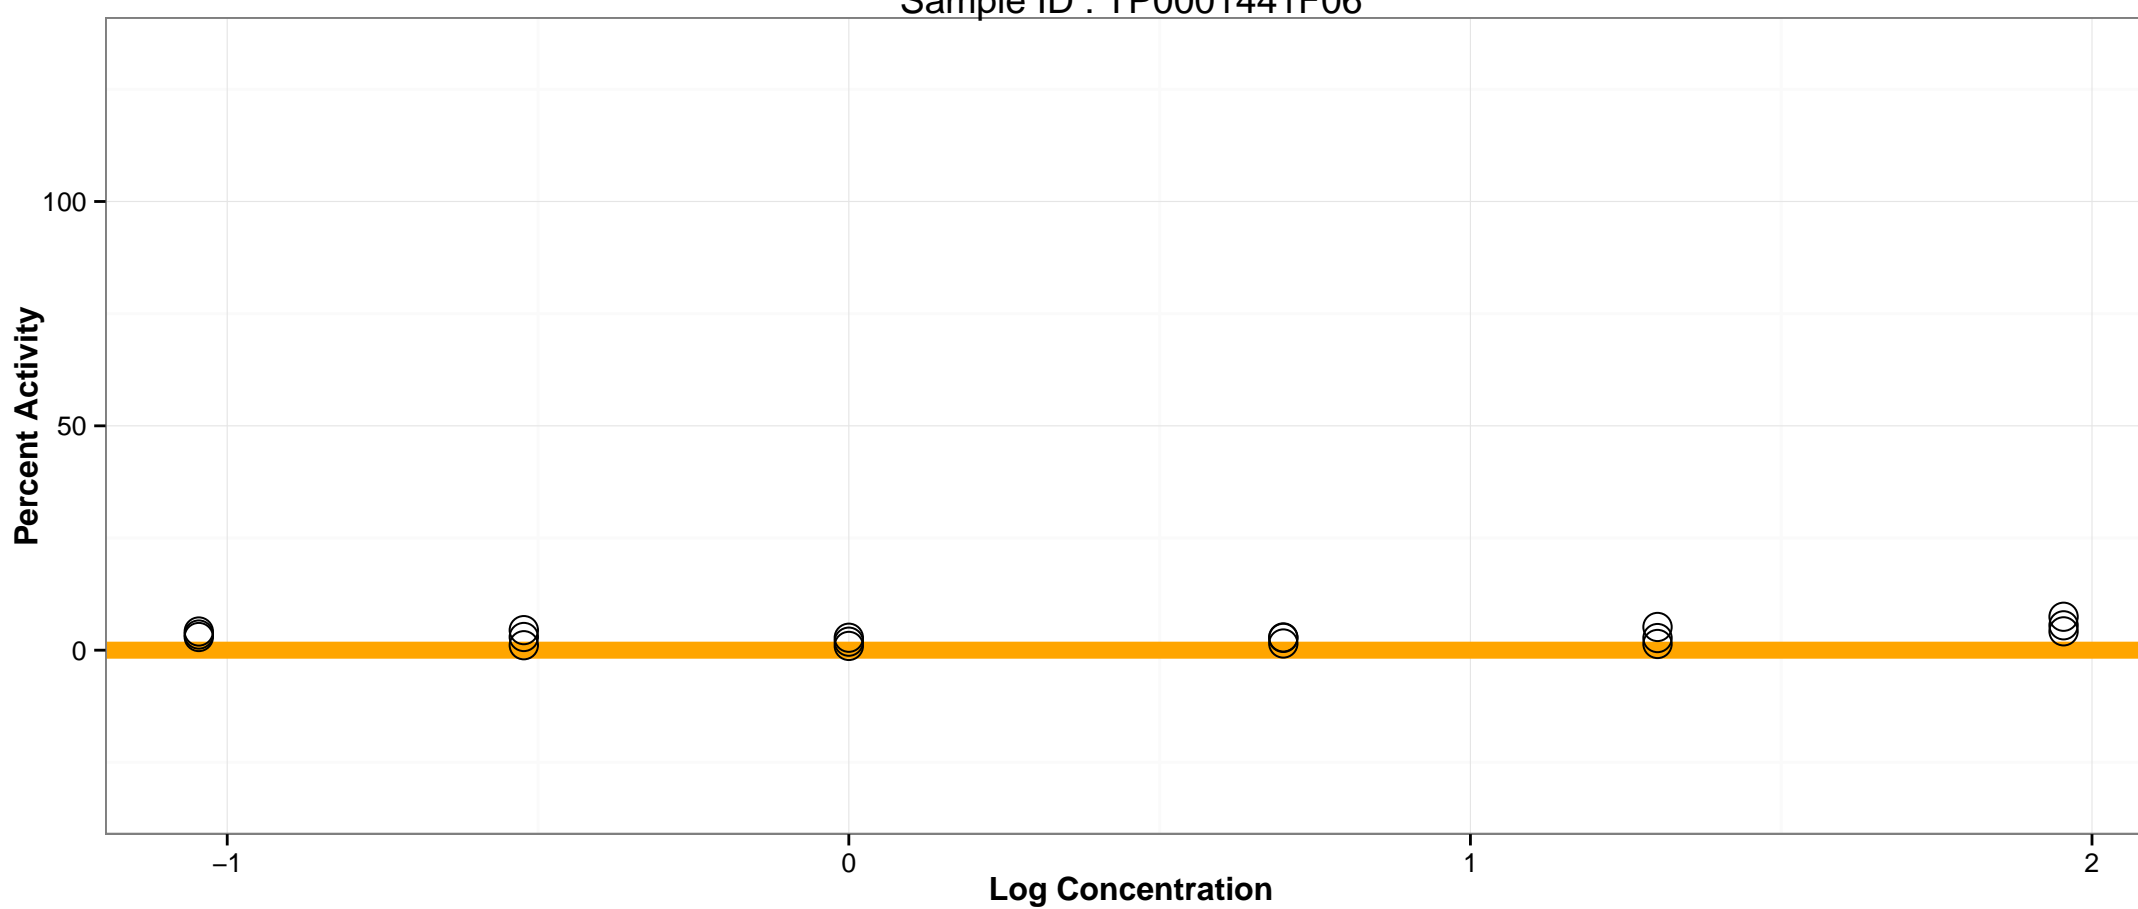

HILL MODEL

HILL MODEL: Not applicable

GAIN-LOSS MODEL

GNLS MODEL: Not applicable

|      | CNST   | HILL | GNLS |
|------|--------|------|------|
| AIC  | 102.21 | NA   | NA   |
| PROB | 1      | NA   | NA   |
| RMSE | 3.64   | NA   | NA   |

MAX\_MEAN : 5.74 MAX\_MED : 5.55 BMAD : 5.69  
COFF : 20 HIT-CALL : 0 FITC : 4 ACTP : 0  
FLAGS :

Assay ID 1509 (NHEERL\_HEK293T\_CellTiterGLO)  
Sample ID : TP0001441F06

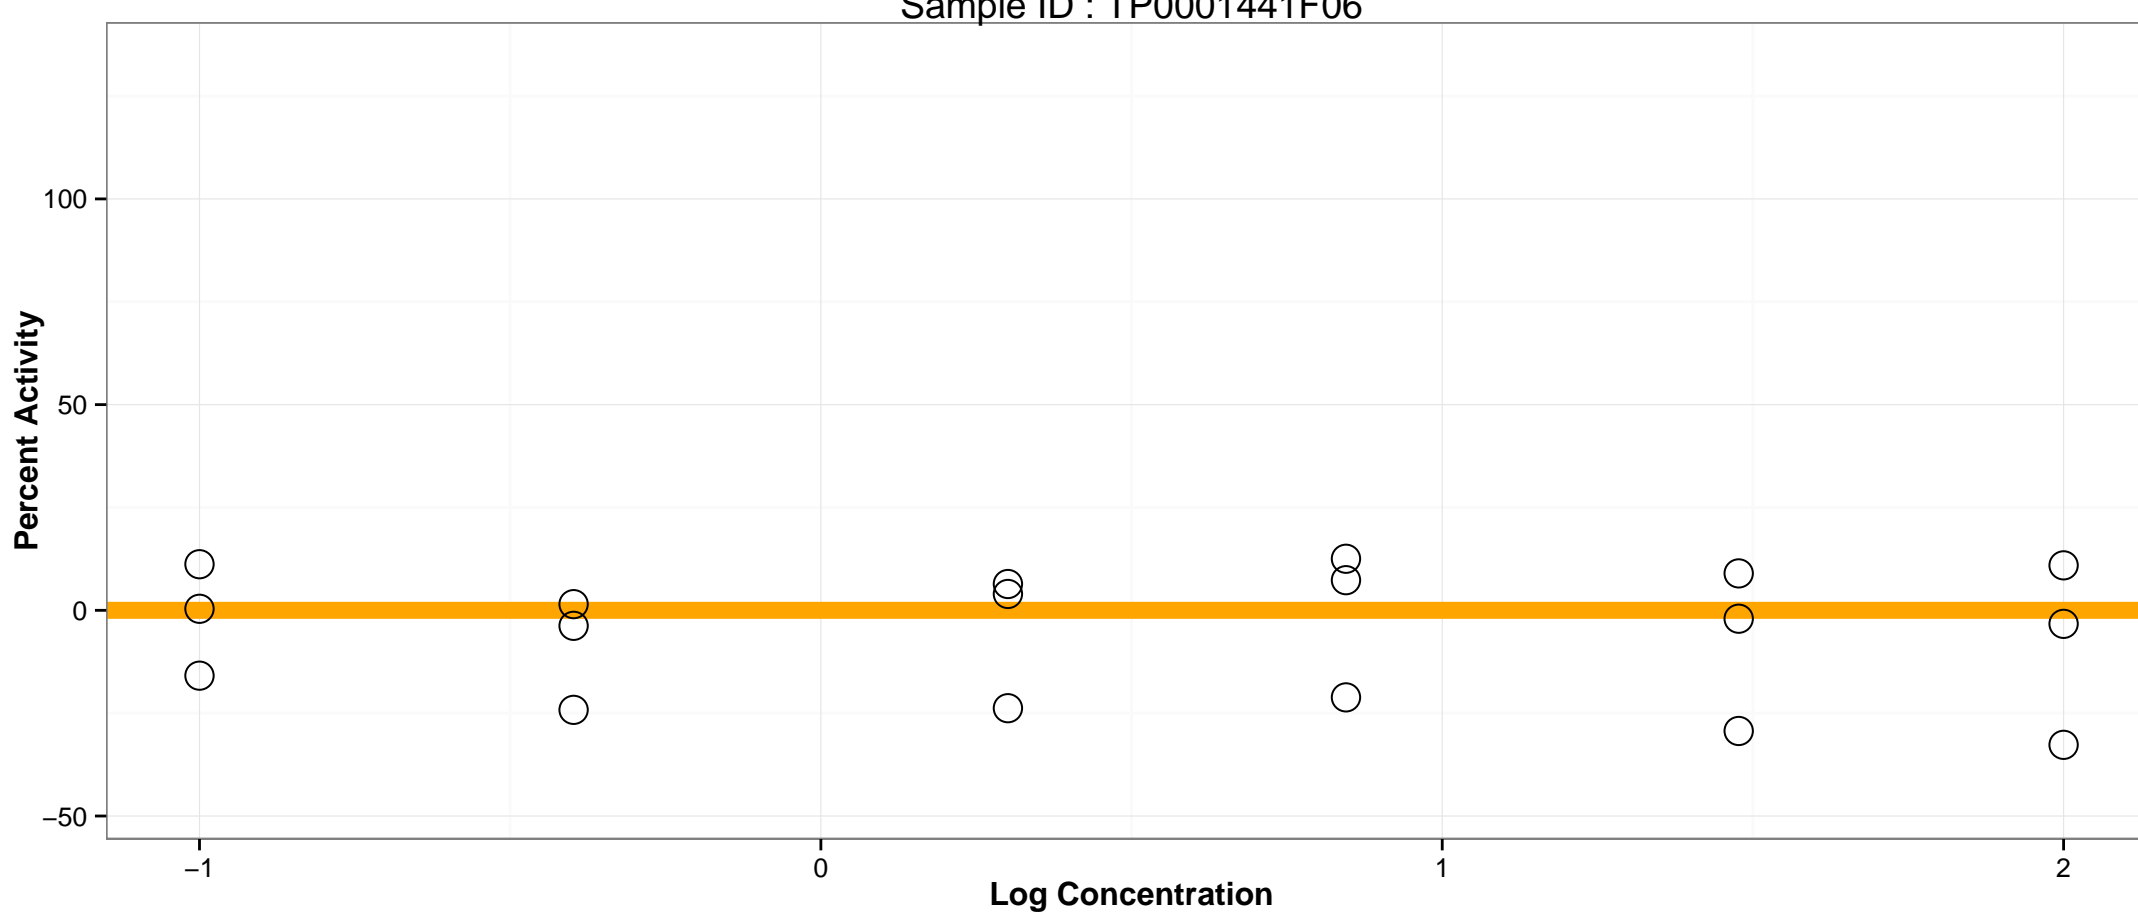

HILL MODEL

HILL MODEL: Not applicable

GAIN-LOSS MODEL

GNLS MODEL: Not applicable

|      | CNST   | HILL | GNLS |
|------|--------|------|------|
| AIC  | 153.07 | NA   | NA   |
| PROB | 1      | NA   | NA   |
| RMSE | 15.64  | NA   | NA   |

MAX\_MEAN : -0.422 MAX\_MED : 7.34 BMAD : 5.54  
COFF : 20 HIT-CALL : 0 FITC : 4 ACTP : 0  
FLAGS :

Assay ID 1848 (NHEERL\_Quantilum\_inhib\_2\_dn)  
Sample ID : TP0001441F06

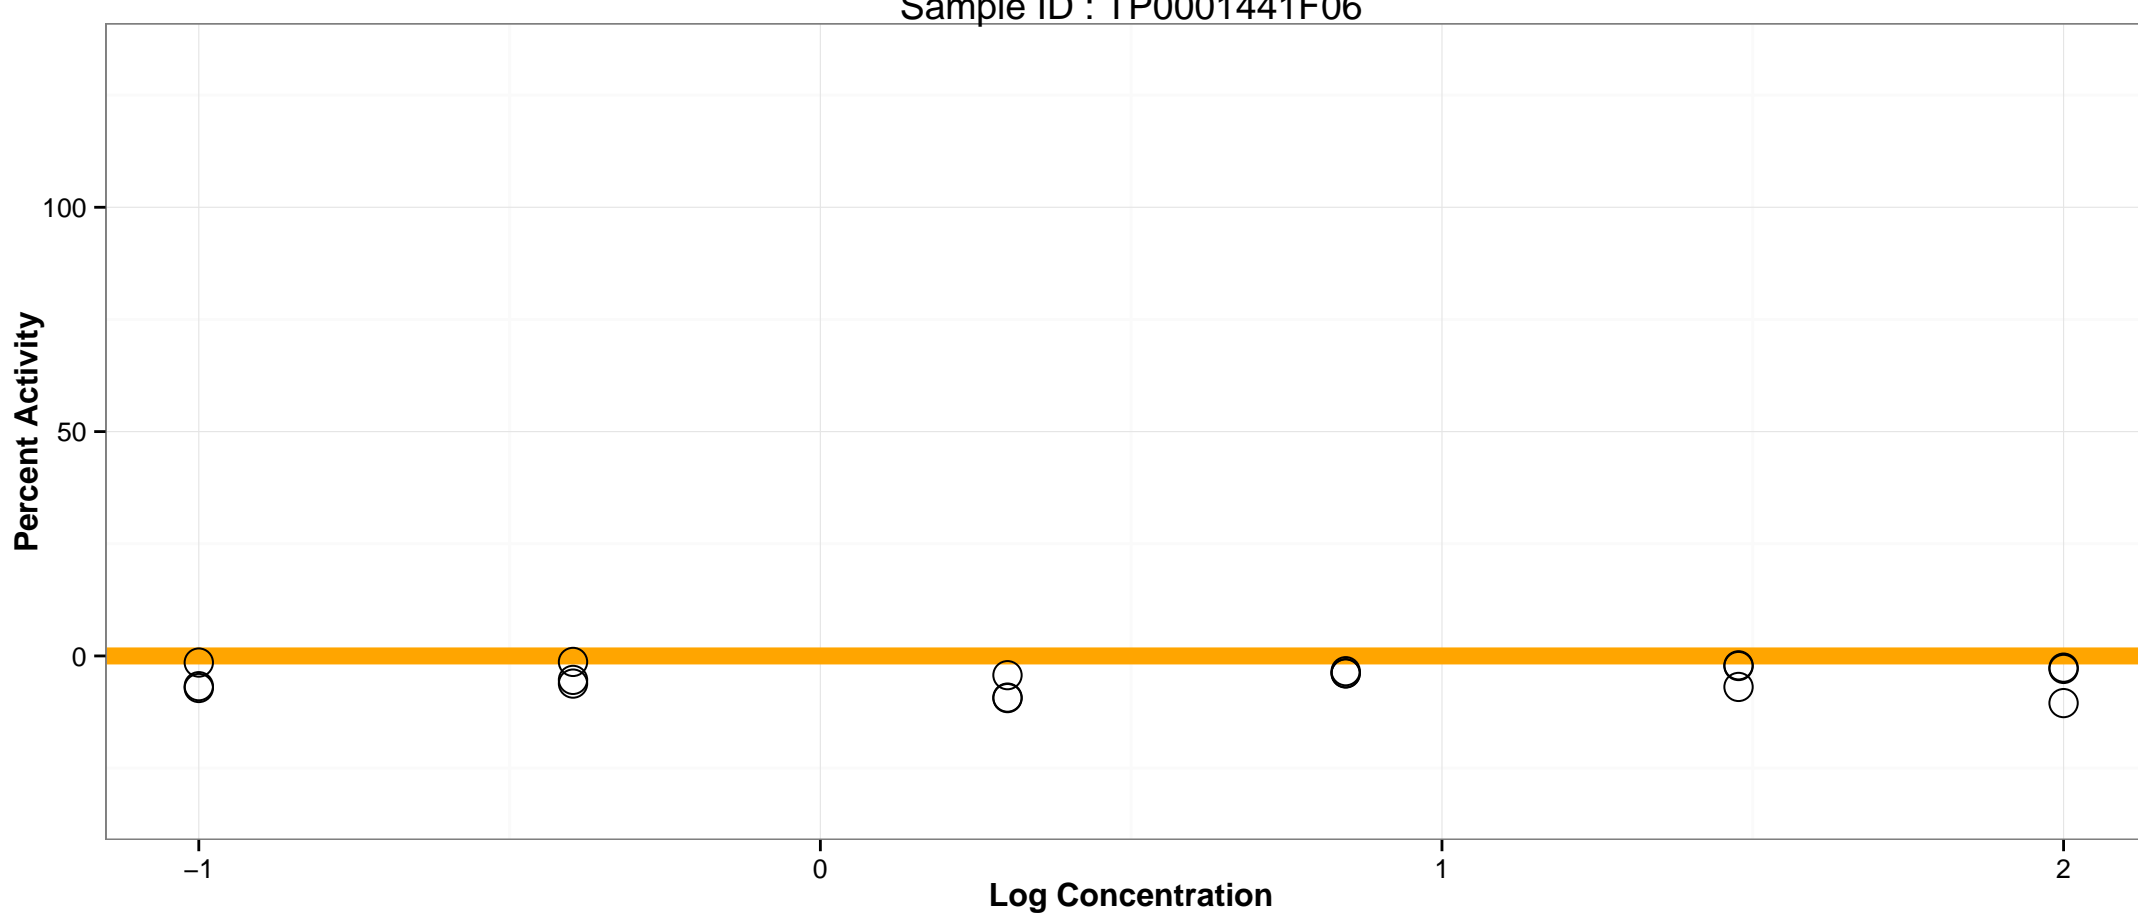

HILL MODEL

HILL MODEL: Not applicable

GAIN-LOSS MODEL

GNLS MODEL: Not applicable

|      | CNST   | HILL | GNLS |
|------|--------|------|------|
| AIC  | 118.08 | NA   | NA   |
| PROB | 1      | NA   | NA   |
| RMSE | 5.69   | NA   | NA   |

MAX\_MEAN : -3.71 MAX\_MED : -2.24 BMAD : 8.58  
COFF : 20 HIT-CALL : 0 FITC : 4 ACTP : 0  
FLAGS :

Chemical : 5-Nitro-2-mercaptobenzimidazole

CAS : 6325-91-3

Assay ID 1508 (NHEERL\_TPO\_AUR\_dn)  
Sample ID : TP0001441F07

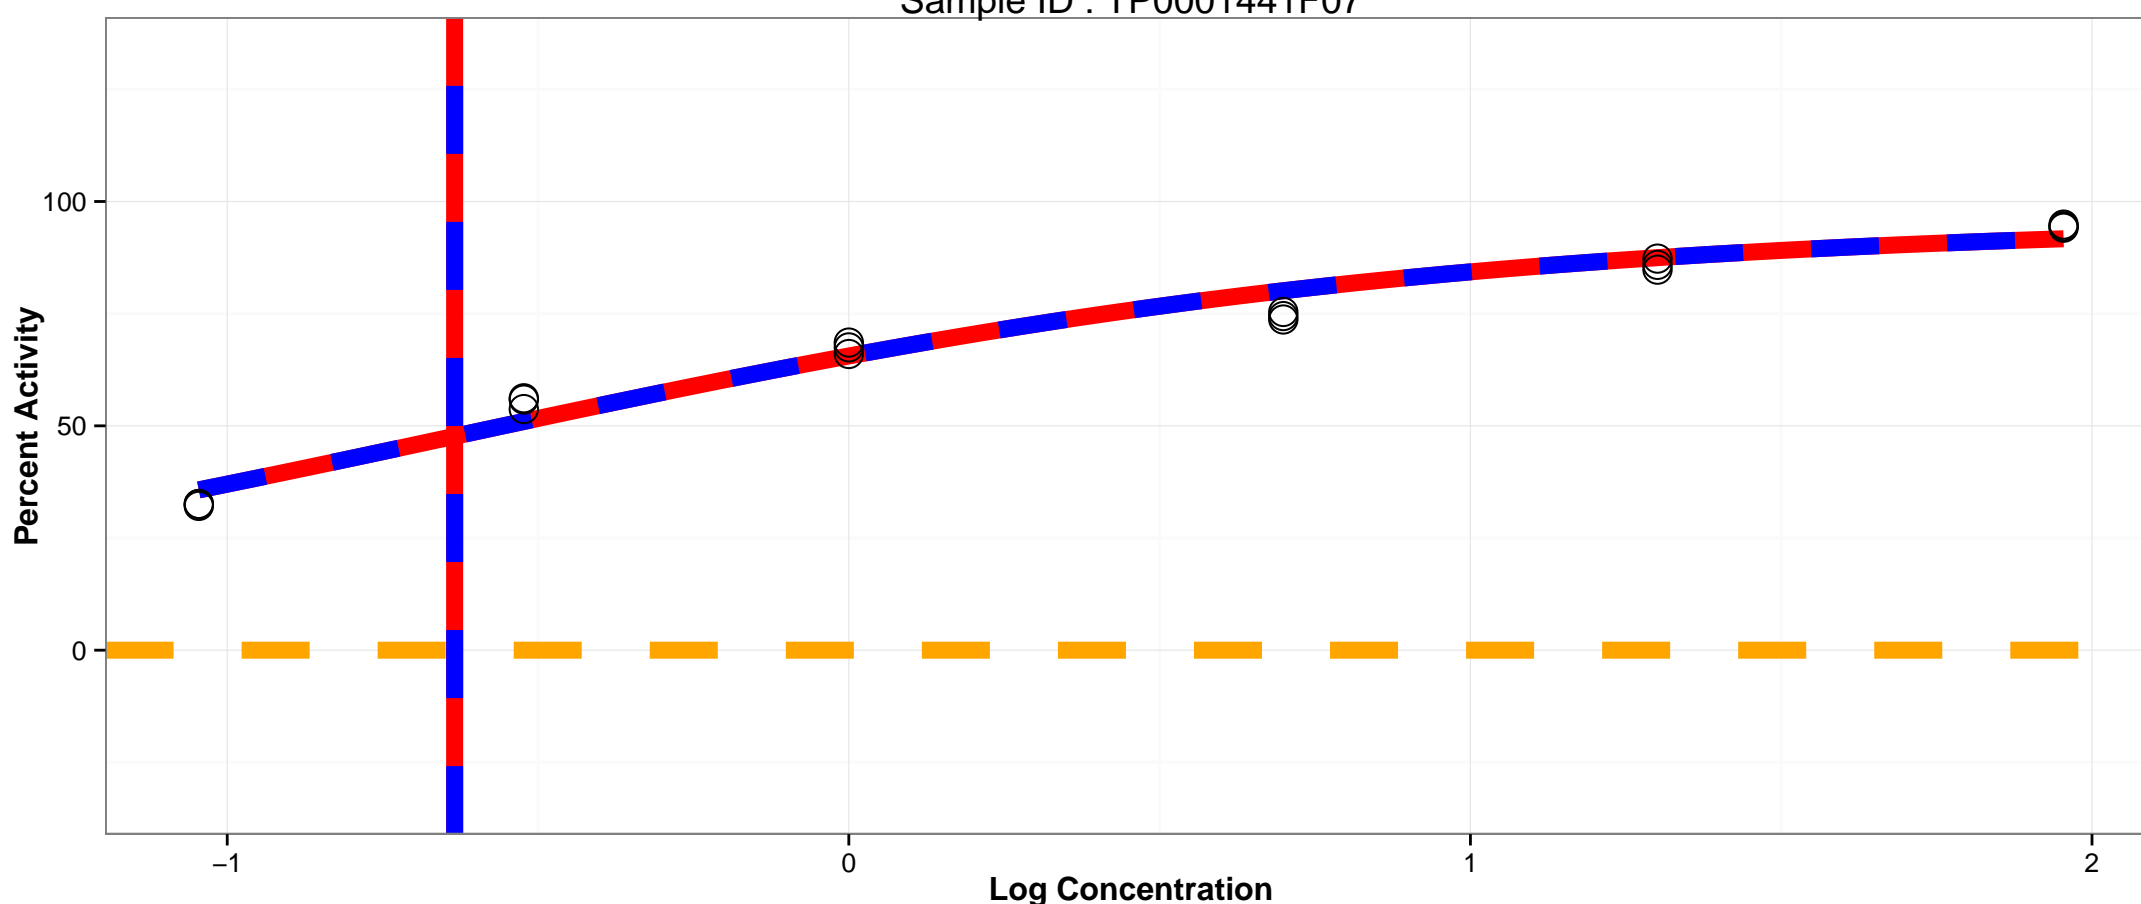

HILL MODEL

|     | tp   | ga     | gw     |
|-----|------|--------|--------|
| val | 95.3 | -0.634 | 0.541  |
| sd  | 3.97 | 0.0859 | 0.0901 |

GAIN-LOSS MODEL

|     | tp   | ga     | gw    | la   | lw   |
|-----|------|--------|-------|------|------|
| val | 95.3 | -0.634 | 0.541 | 3.94 | 15.2 |
| sd  | NA   | NA     | NA    | NA   | NA   |

|      | CNST   | HILL   | GNLS   |
|------|--------|--------|--------|
| AIC  | 210.51 | 108.06 | 112.06 |
| PROB | 0      | 0.88   | 0.12   |
| RMSE | 71.33  | 3.59   | 3.59   |

MAX\_MEAN : 94.5 MAX\_MED : 94.5 BMAD : 5.69  
COFF : 20 HIT-CALL : 1 FITC : 41 ACTP : 1  
FLAGS :

Assay ID 1509 (NHEERL\_HEK293T\_CellTiterGLO)  
Sample ID : TP0001441F07

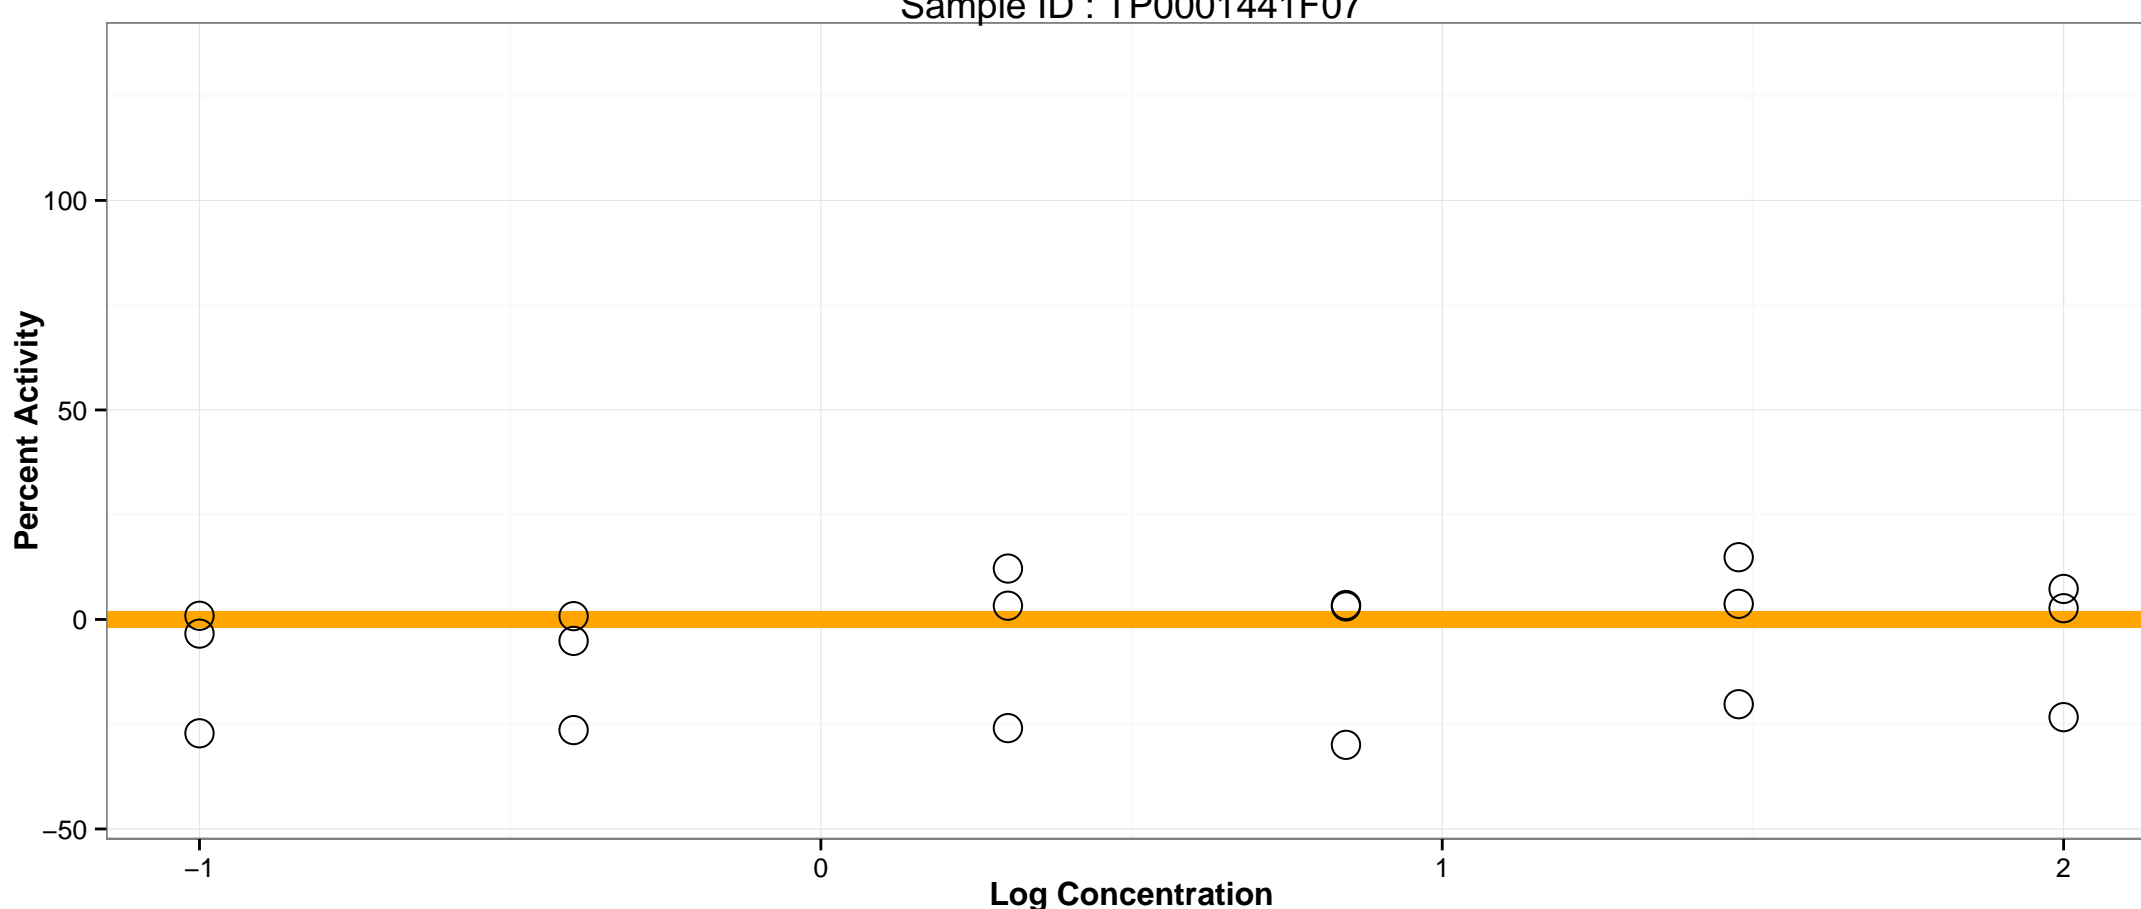

HILL MODEL

HILL MODEL: Not applicable

GAIN-LOSS MODEL

GNLS MODEL: Not applicable

|      | CNST   | HILL | GNLS |
|------|--------|------|------|
| AIC  | 153.32 | NA   | NA   |
| PROB | 1      | NA   | NA   |
| RMSE | 15.75  | NA   | NA   |

MAX\_MEAN : -0.539 MAX\_MED : 3.74 BMAD : 5.54  
COFF : 20 HIT-CALL : 0 FITC : 4 ACTP : 0  
FLAGS :

Assay ID 1848 (NHEERL\_QuantLum\_inhib\_2\_dn)  
Sample ID : TP0001441F07

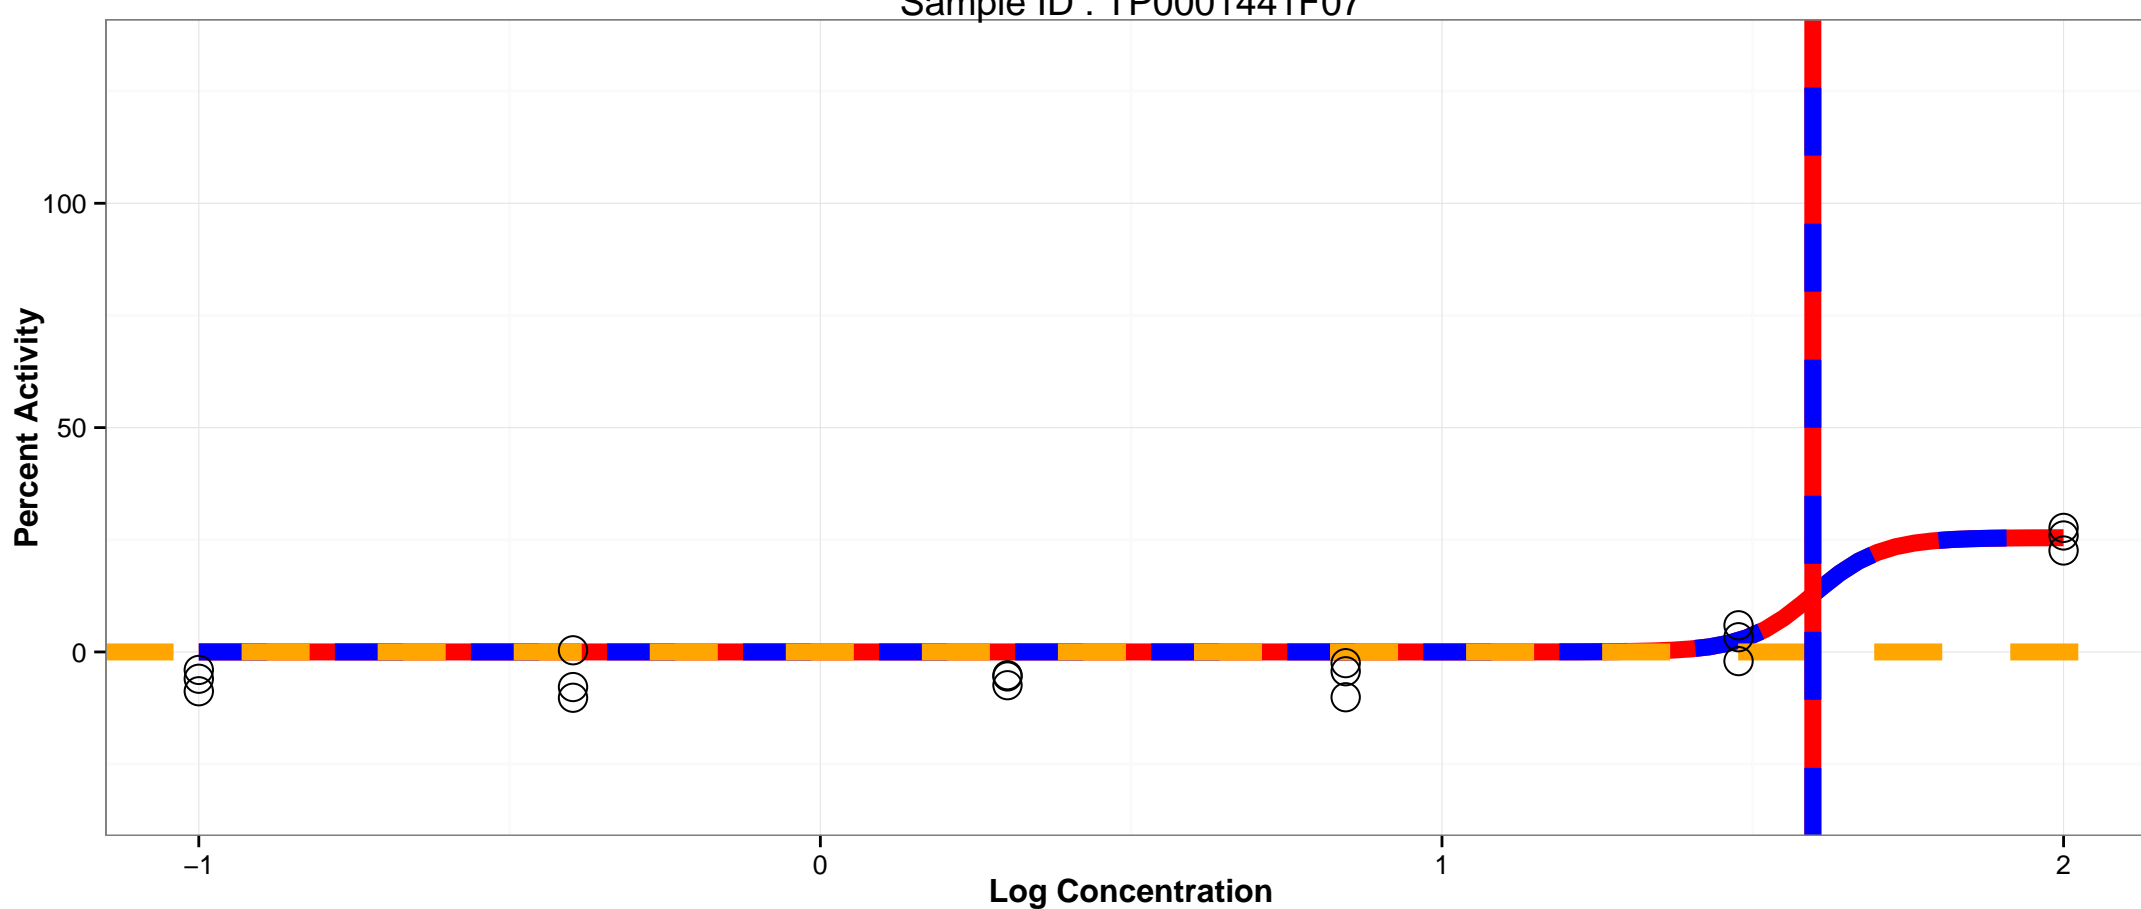

HILL MODEL

|     | tp   | ga  | gw   |
|-----|------|-----|------|
| val | 25.5 | 1.6 | 7.98 |
| sd  | NA   | NA  | NA   |

GAIN-LOSS MODEL

|     | tp   | ga  | gw   | la   | lw   |
|-----|------|-----|------|------|------|
| val | 25.5 | 1.6 | 7.98 | 2.87 | 9.73 |
| sd  | NA   | NA  | NA   | NA   | NA   |

|      | CNST   | HILL   | GNLS   |
|------|--------|--------|--------|
| AIC  | 141.01 | 123.81 | 127.81 |
| PROB | 0      | 0.88   | 0.12   |
| RMSE | 11.86  | 5.66   | 5.66   |

MAX\_MEAN : 25.4 MAX\_MED : 26 BMAD : 8.58  
COFF : 20 HIT-CALL : 1 FITC : 41 ACTP : 1  
FLAGS : 6

Assay ID 1508 (NHEERL\_TPO\_AUR\_dn)  
Sample ID : TP0001441F08

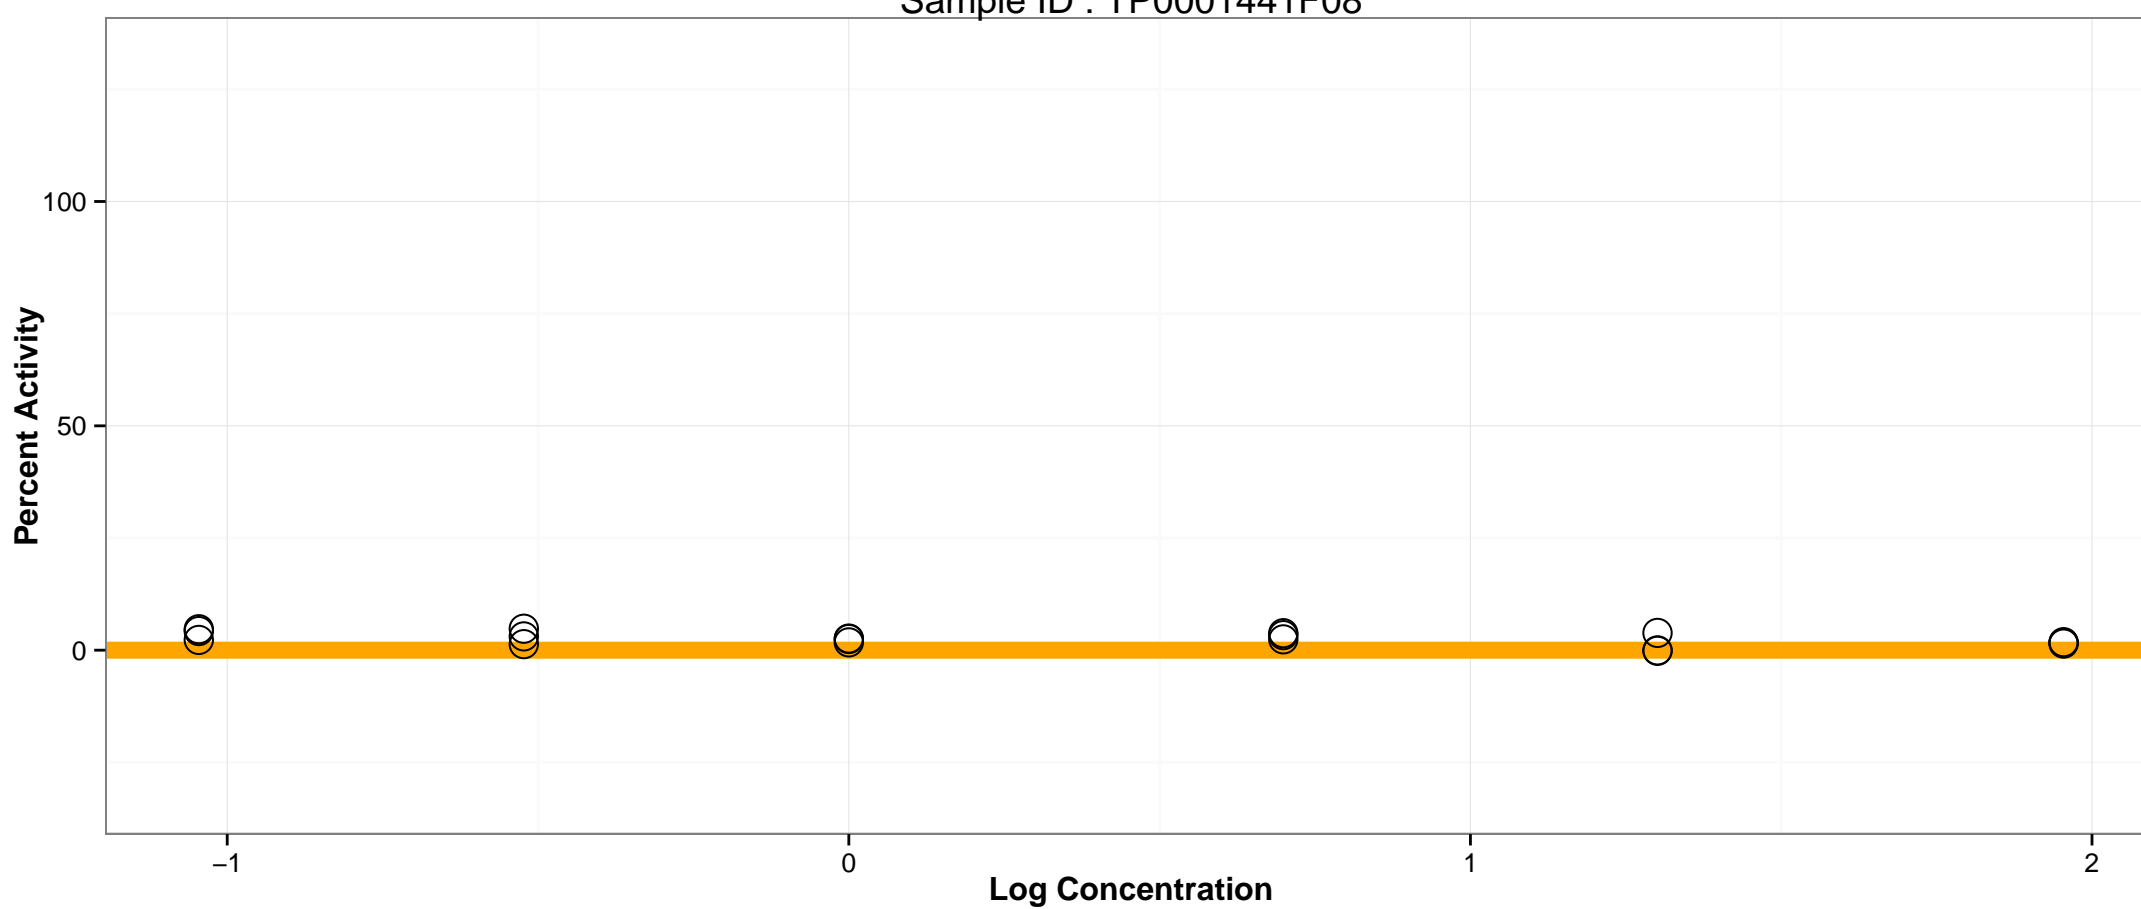

HILL MODEL

HILL MODEL: Not applicable

GAIN-LOSS MODEL

GNLS MODEL: Not applicable

|      | CNST  | HILL | GNLS |
|------|-------|------|------|
| AIC  | 94.23 | NA   | NA   |
| PROB | 1     | NA   | NA   |
| RMSE | 2.89  | NA   | NA   |

MAX\_MEAN : 3.75 MAX\_MED : 4.27 BMAD : 5.69  
COFF : 20 HIT-CALL : 0 FITC : 4 ACTP : 0  
FLAGS :

Assay ID 1509 (NHEERL\_HEK293T\_CellTiterGLO)  
Sample ID : TP0001441F08

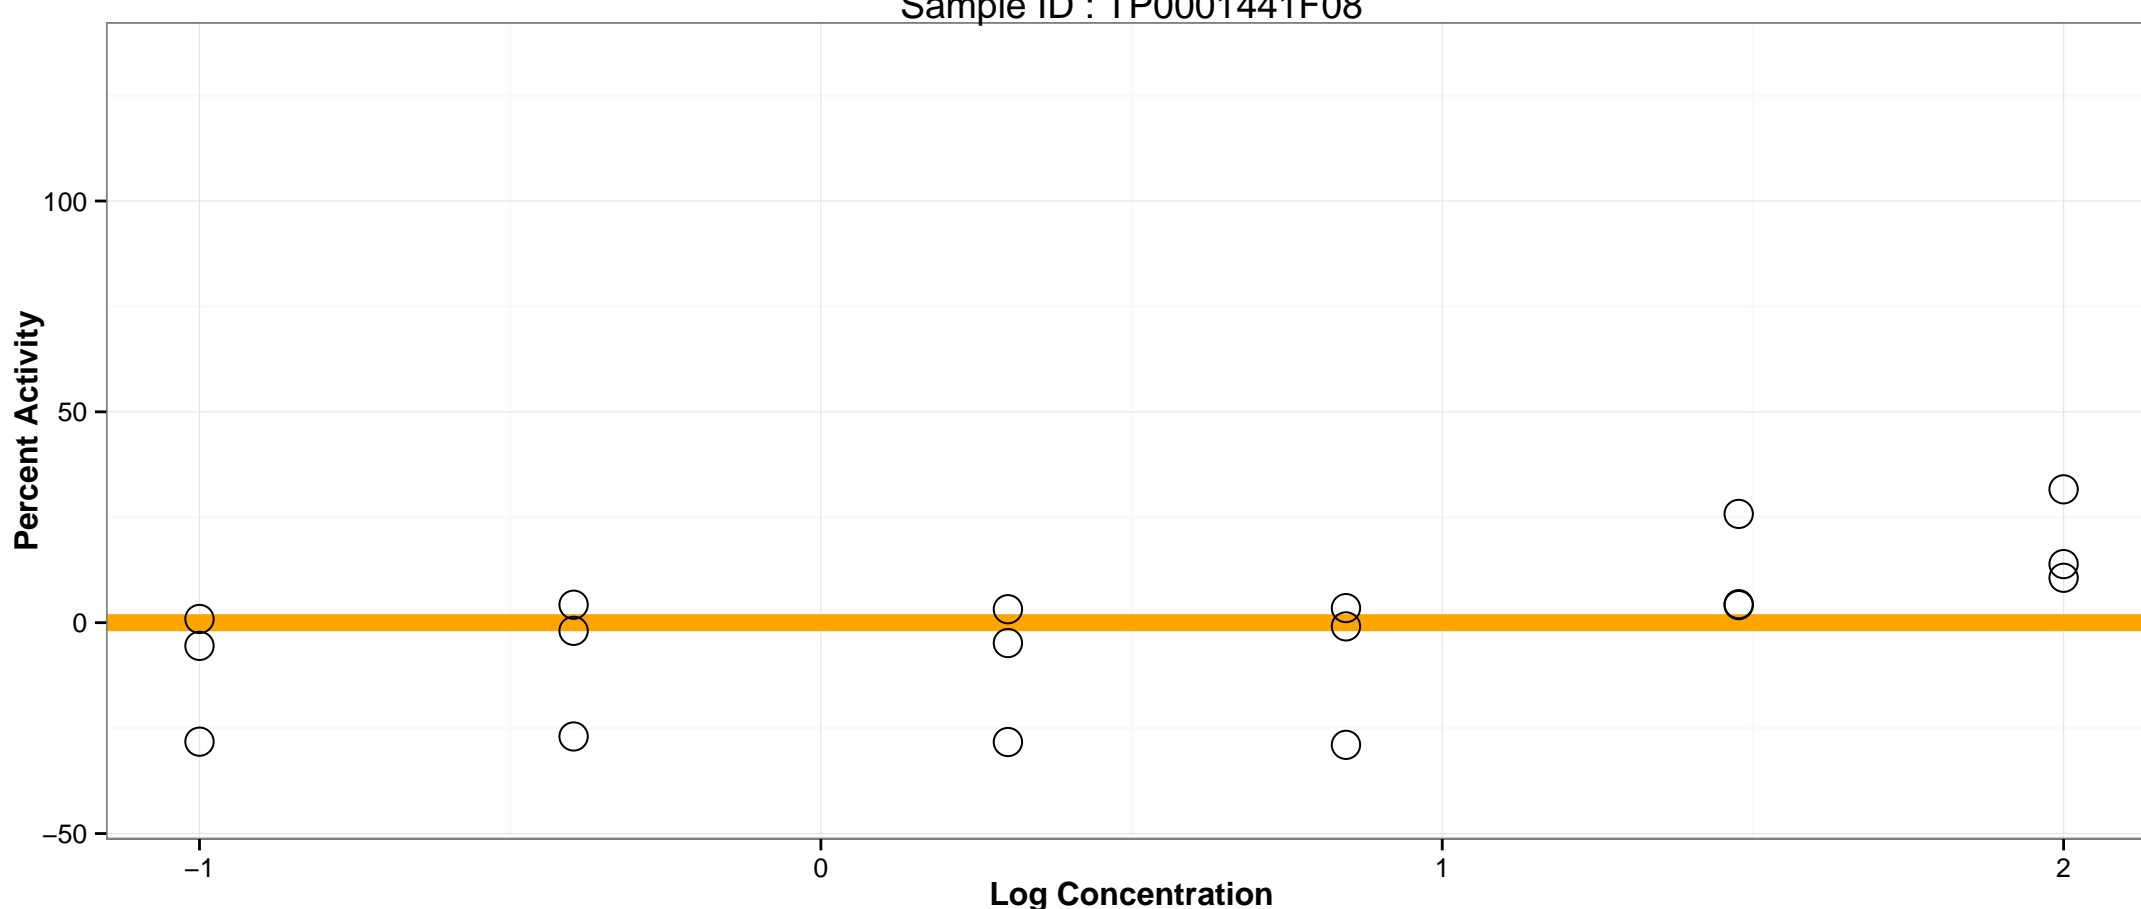

HILL MODEL

HILL MODEL: Not applicable

GAIN-LOSS MODEL

GNLS MODEL: Not applicable

|      | CNST   | HILL | GNLS |
|------|--------|------|------|
| AIC  | 156.07 | NA   | NA   |
| PROB | 1      | NA   | NA   |
| RMSE | 17.11  | NA   | NA   |

MAX\_MEAN : 18.7 MAX\_MED : 13.9 BMAD : 5.54  
COFF : 20 HIT-CALL : 0 FITC : 4 ACTP : 0  
FLAGS :

Assay ID 1848 (NHEERL\_Quantilum\_inhib\_2\_dn)  
Sample ID : TP0001441F08

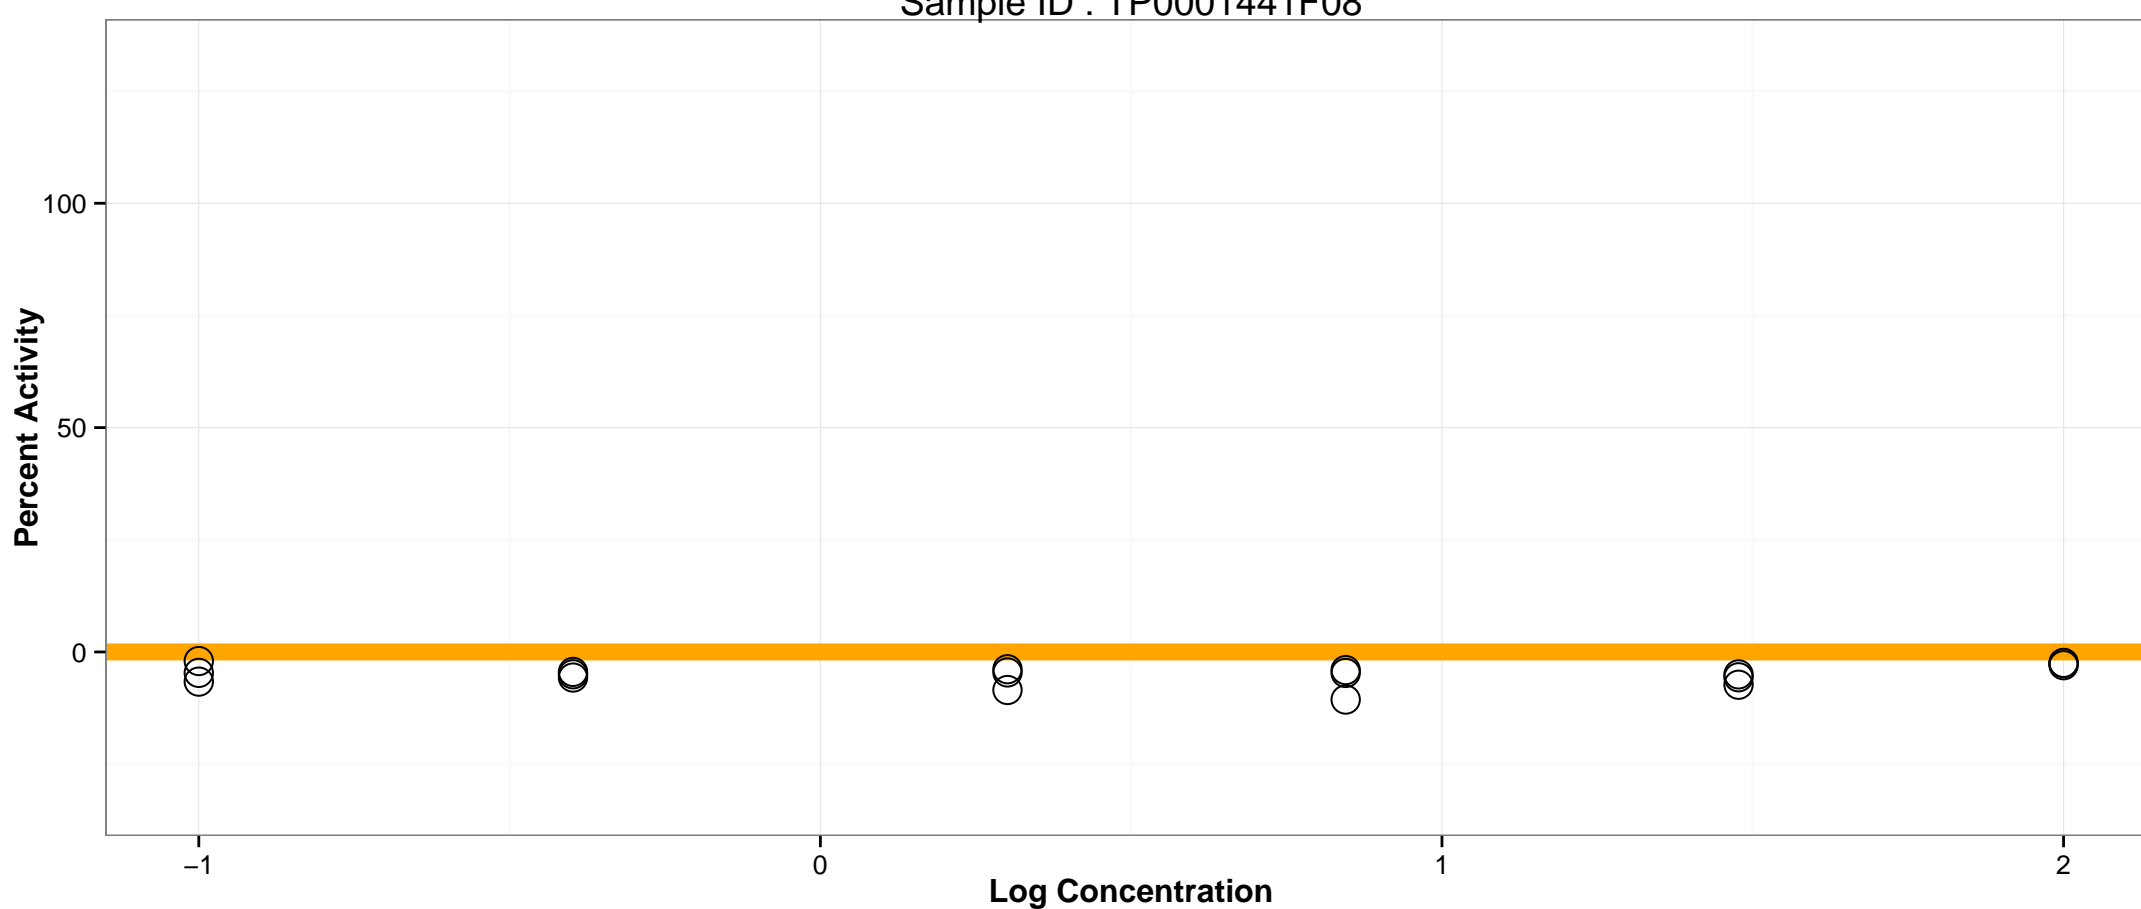

HILL MODEL

HILL MODEL: Not applicable

GAIN-LOSS MODEL

GNLS MODEL: Not applicable

|      | CNST   | HILL | GNLS |
|------|--------|------|------|
| AIC  | 117.12 | NA   | NA   |
| PROB | 1      | NA   | NA   |
| RMSE | 5.45   | NA   | NA   |

MAX\_MEAN : -2.62 MAX\_MED : -2.47 BMAD : 8.58  
COFF : 20 HIT-CALL : 0 FITC : 4 ACTP : 0  
FLAGS :

Chemical : 4-Octylphenol  
CAS : 1806-26-4

Assay ID 1508 (NHEERL\_TPO\_AUR\_dn)  
Sample ID : TP0001441F09

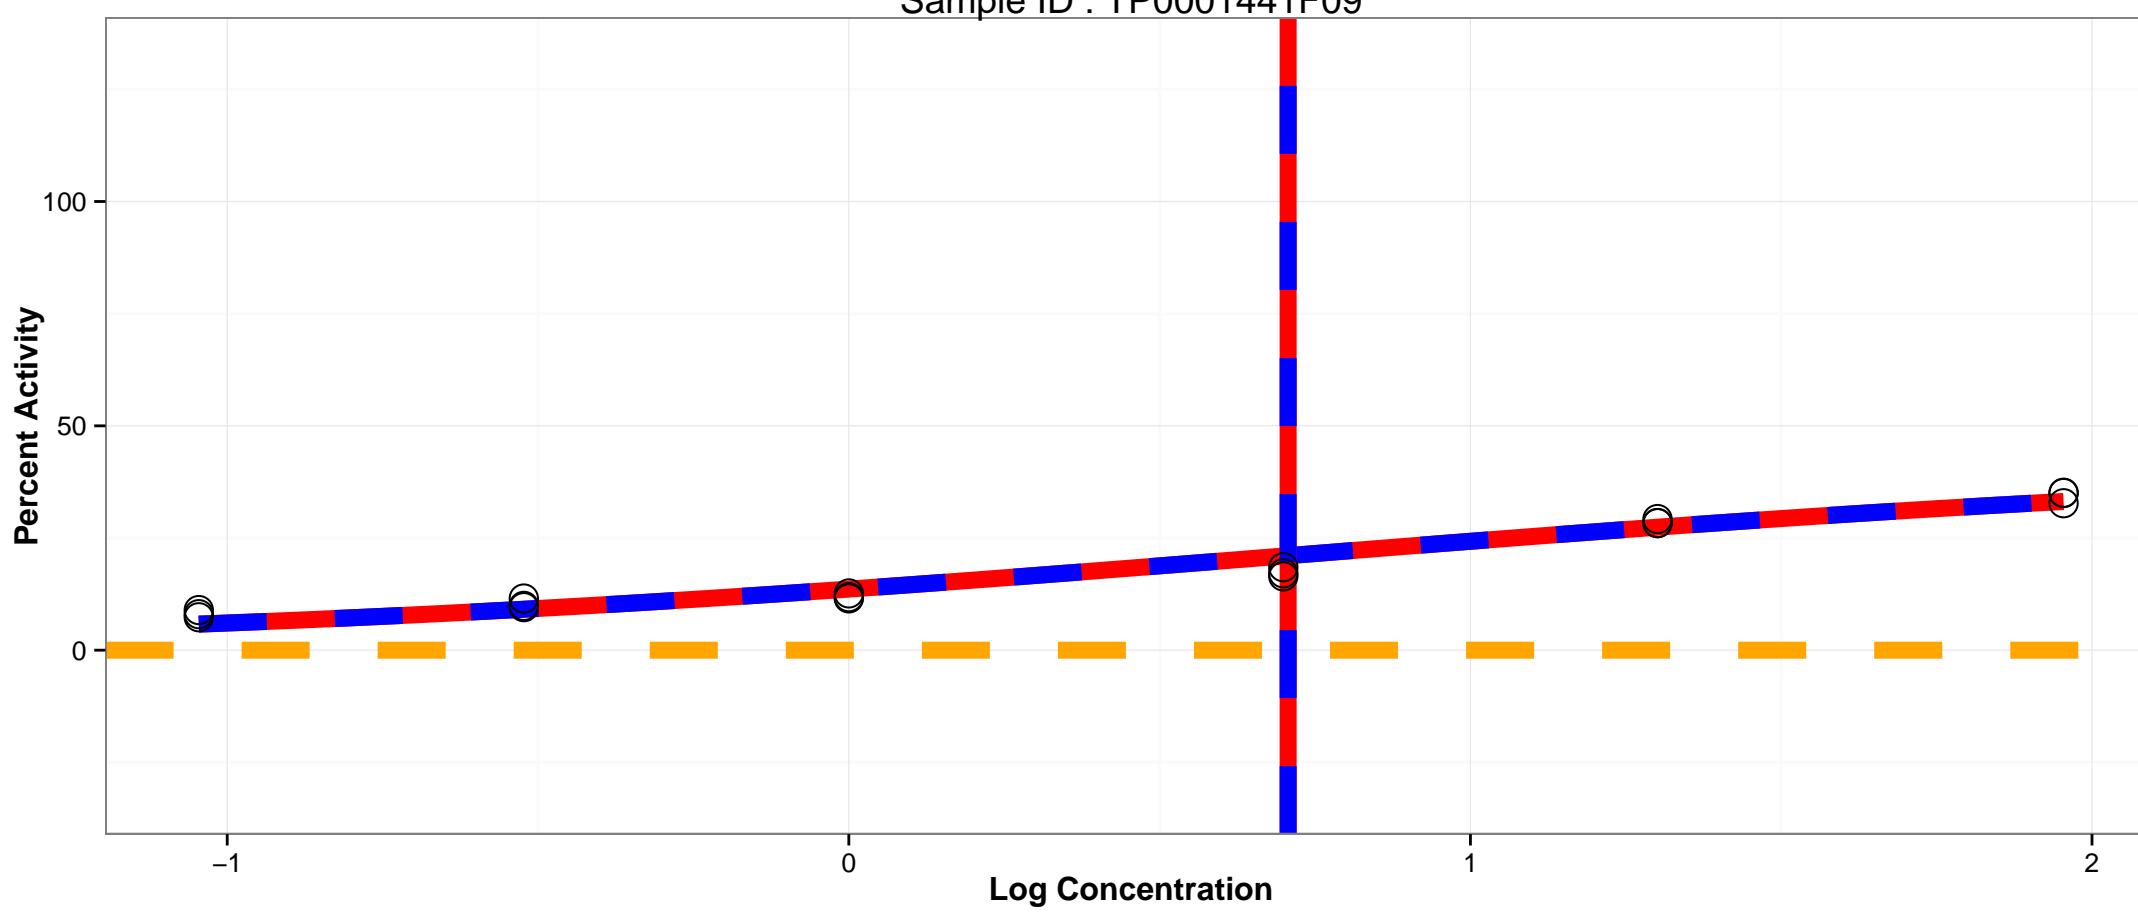

HILL MODEL

|     | tp   | ga    | gw     |
|-----|------|-------|--------|
| val | 42.1 | 0.707 | 0.454  |
| sd  | 4.43 | 0.244 | 0.0563 |

GAIN-LOSS MODEL

|     | tp   | ga    | gw    | la   | lw   |
|-----|------|-------|-------|------|------|
| val | 42.1 | 0.707 | 0.454 | 3.78 | 8.07 |
| sd  | NA   | NA    | NA    | NA   | NA   |

|      | CNST   | HILL  | GNLS  |
|------|--------|-------|-------|
| AIC  | 165.02 | 89.46 | 93.46 |
| PROB | 0      | 0.88  | 0.12  |
| RMSE | 20.89  | 2.19  | 2.19  |

MAX\_MEAN : 34.3 MAX\_MED : 35 BMAD : 5.69  
COFF : 20 HIT-CALL : 1 FITC : 42 ACTP : 1  
FLAGS :

Assay ID 1509 (NHEERL\_HEK293T\_CellTiterGLO)  
Sample ID : TP0001441F09

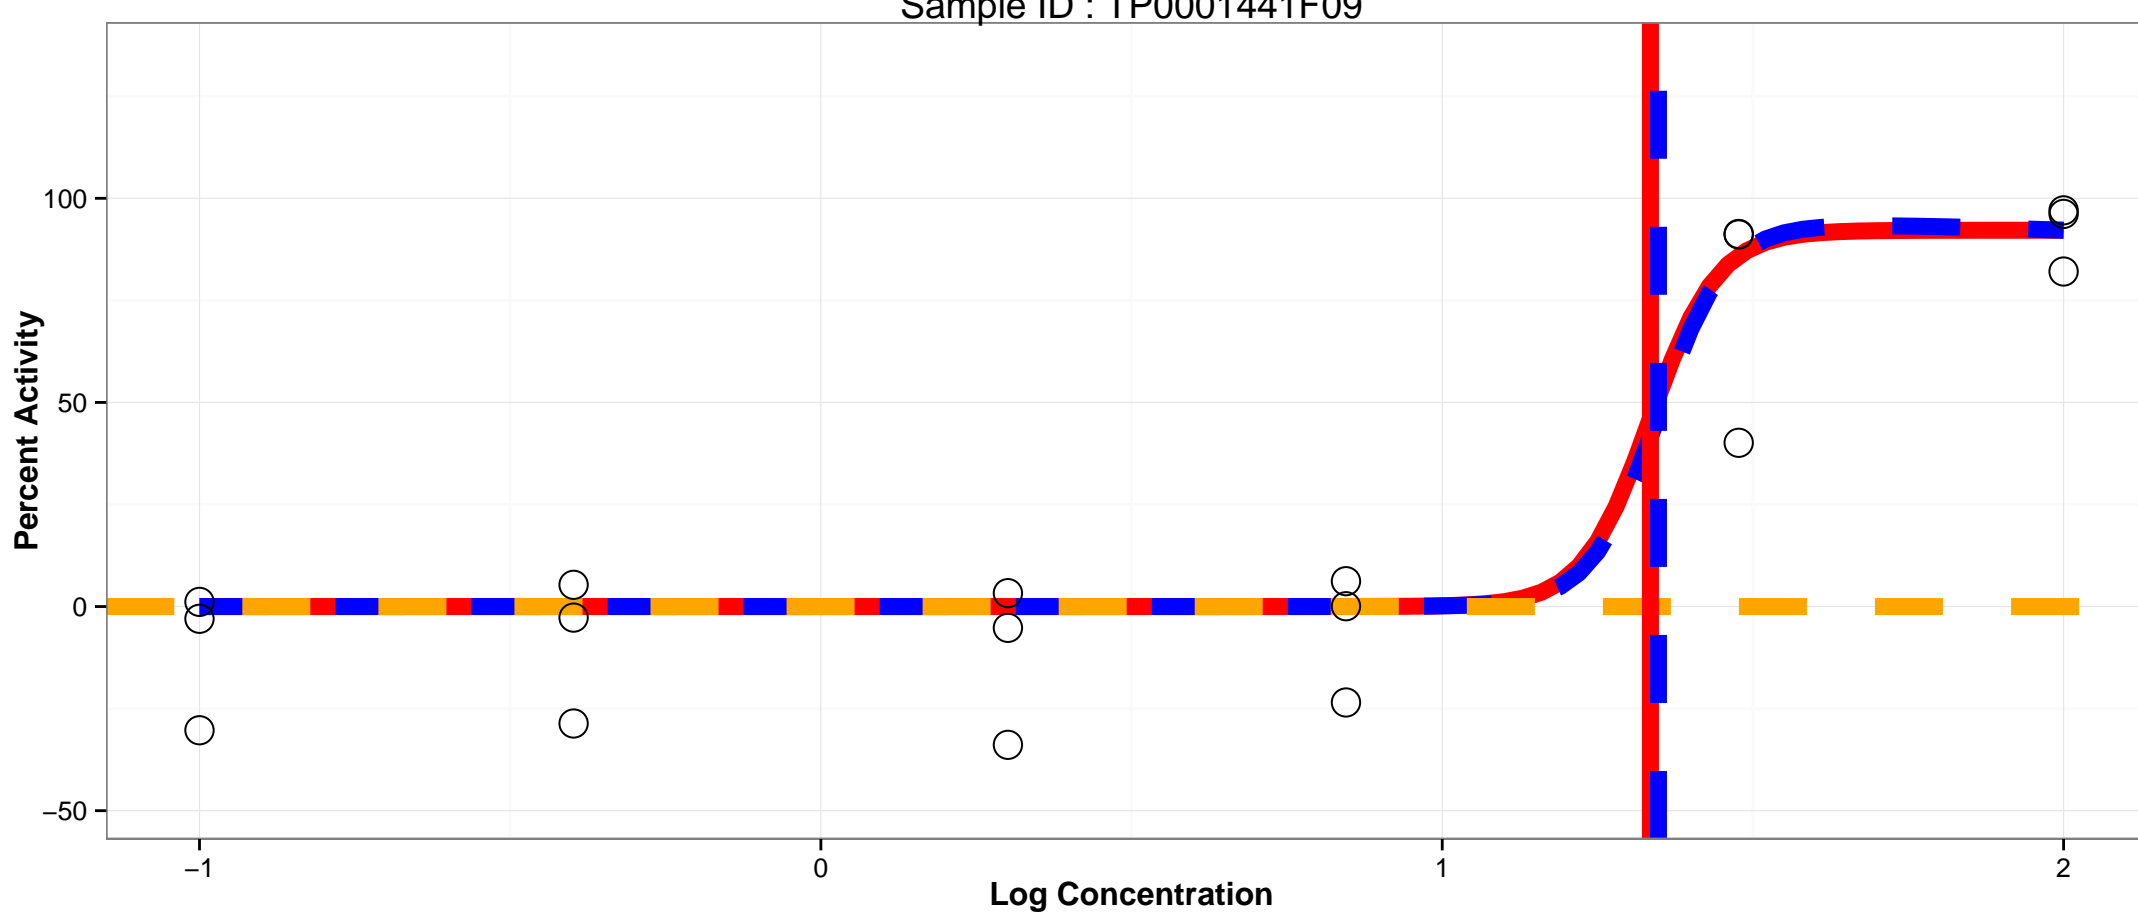

HILL MODEL

|     | tp   | ga    | gw   |
|-----|------|-------|------|
| val | 92.2 | 1.34  | 8    |
| sd  | 7.03 | 0.522 | 29.1 |

GAIN-LOSS MODEL

|     | tp   | ga   | gw   | la   | lw    |
|-----|------|------|------|------|-------|
| val | 94.8 | 1.35 | 7.97 | 3.66 | 0.931 |
| sd  | 257  | 1.17 | 34.1 | 73.5 | 34.8  |

|      | CNST   | HILL   | GNLS   |
|------|--------|--------|--------|
| AIC  | 194.75 | 161.14 | 165.14 |
| PROB | 0      | 0.88   | 0.12   |
| RMSE | 51.22  | 18.03  | 18.03  |

MAX\_MEAN : 91.8 MAX\_MED : 96.2 BMAD : 5.54  
COFF : 20 HIT-CALL : 1 FITC : 41 ACTP : 1  
FLAGS :

Assay ID 1848 (NHEERL\_QuantLum\_inhib\_2\_dn)  
Sample ID : TP0001441F09

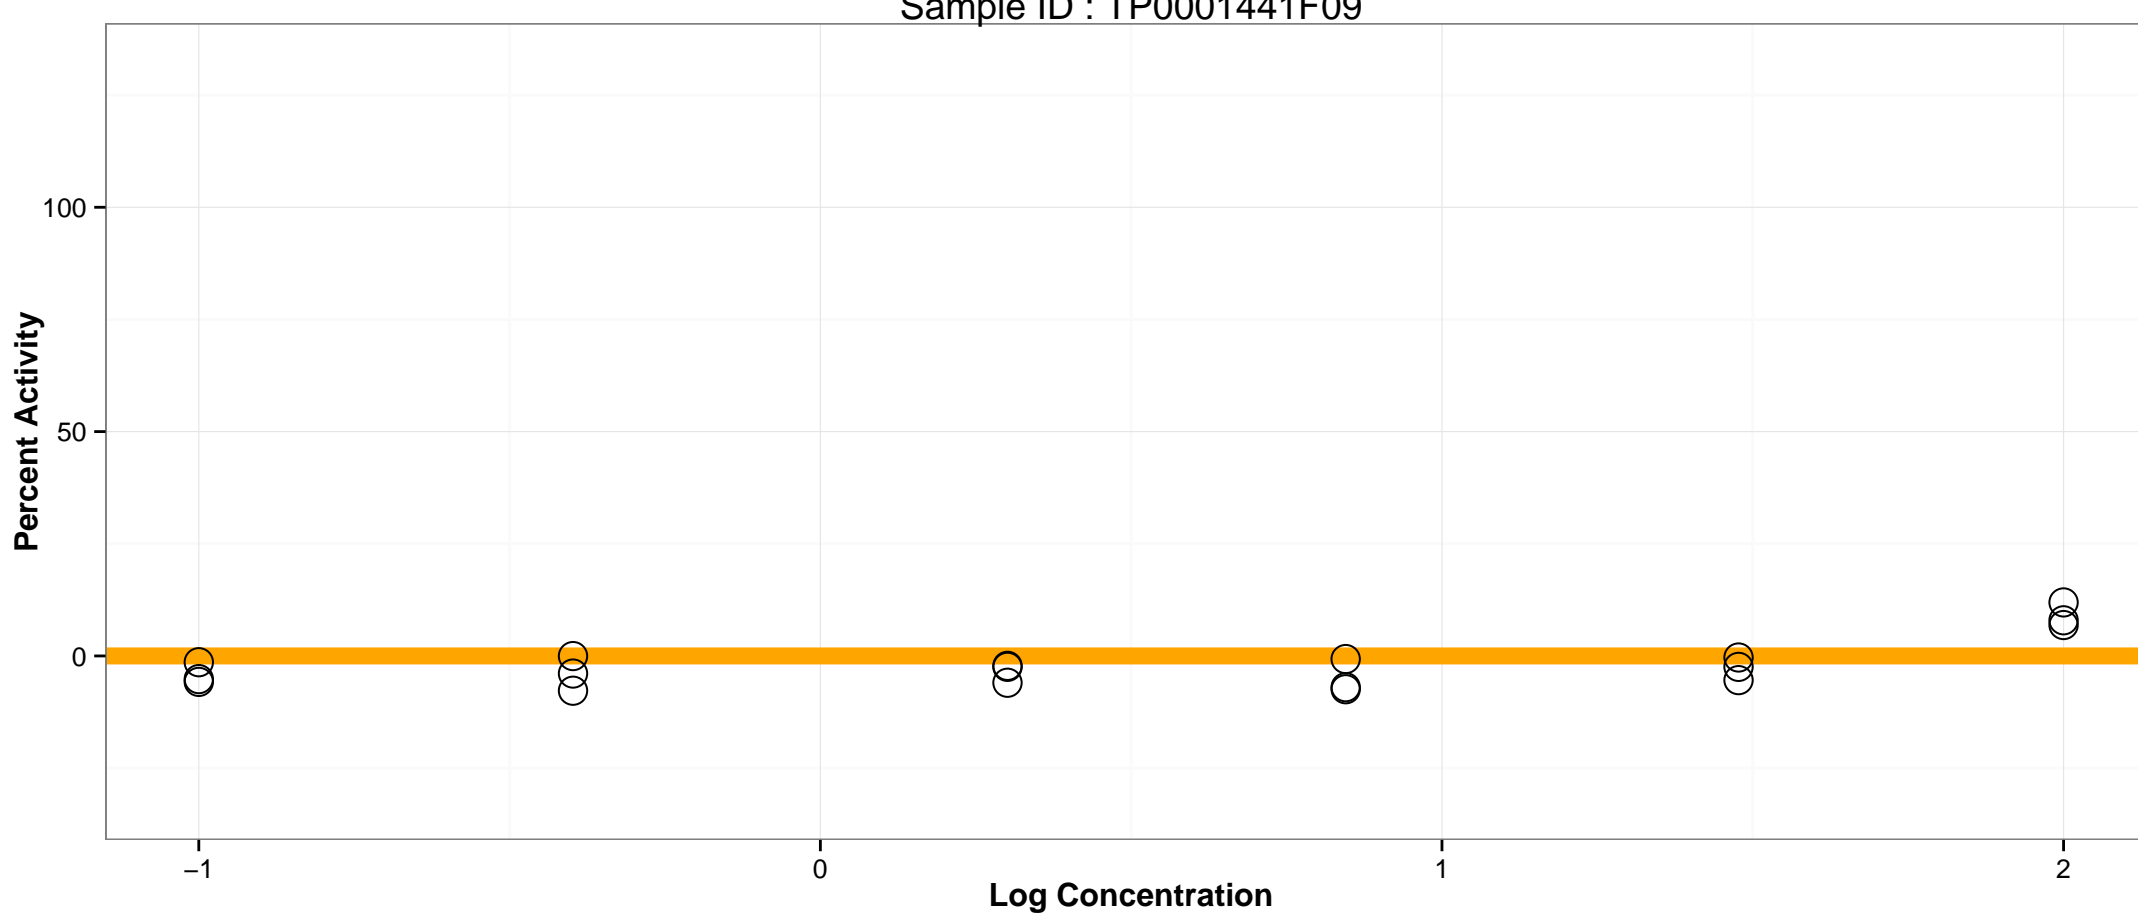

HILL MODEL

HILL MODEL: Not applicable

GAIN-LOSS MODEL

GNLS MODEL: Not applicable

|      | CNST   | HILL | GNLS |
|------|--------|------|------|
| AIC  | 117.64 | NA   | NA   |
| PROB | 1      | NA   | NA   |
| RMSE | 5.65   | NA   | NA   |

MAX\_MEAN : 8.93 MAX\_MED : 7.96 BMAD : 8.58  
COFF : 20 HIT-CALL : 0 FITC : 4 ACTP : 0  
FLAGS :

Chemical : 4-Octylphenol  
CAS : 1806-26-4

Assay ID 1508 (NHEERL\_TPO\_AUR\_dn)  
Sample ID : TX003444

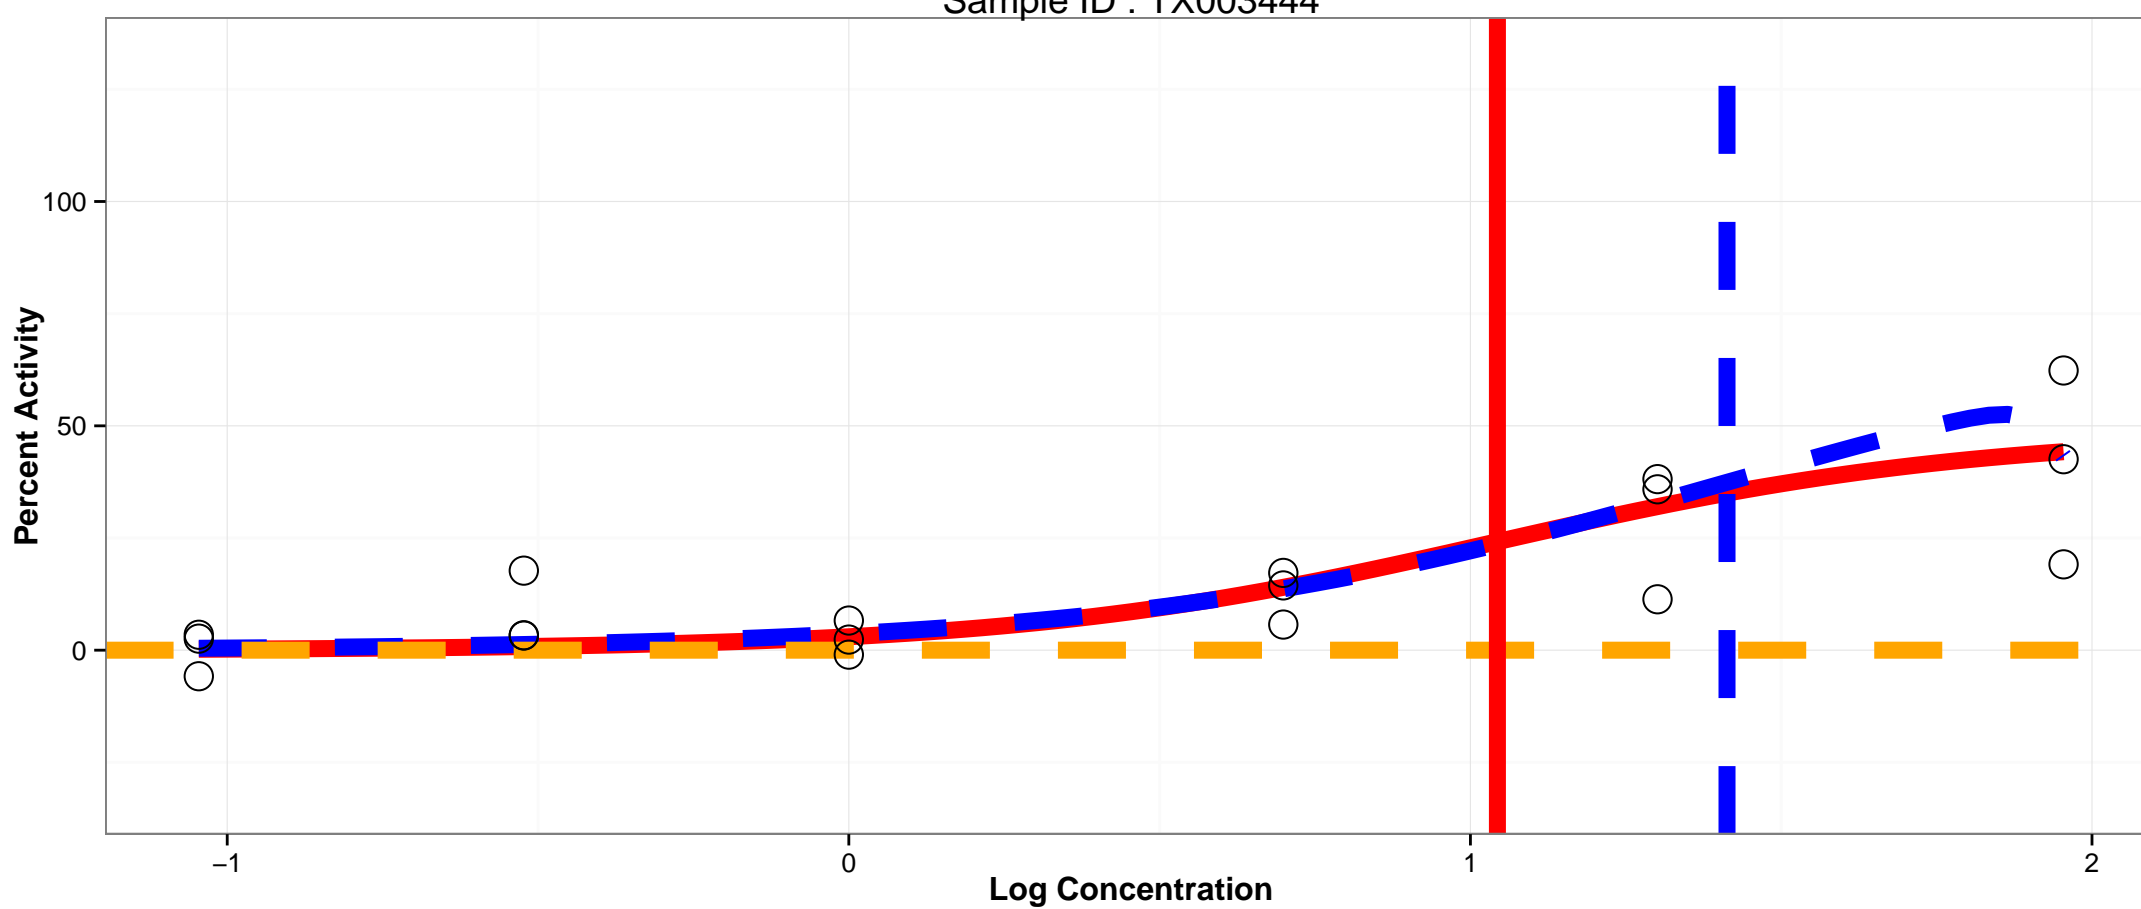

HILL MODEL

|     | tp   | ga    | gw    |
|-----|------|-------|-------|
| val | 48.4 | 1.04  | 1.13  |
| sd  | 14.5 | 0.333 | 0.697 |

GAIN-LOSS MODEL

|     | tp   | ga   | gw    | la     | lw   |
|-----|------|------|-------|--------|------|
| val | 74.8 | 1.41 | 0.912 | 2      | 12   |
| sd  | 94.5 | 1.12 | 0.525 | 0.0402 | 26.4 |

|      | CNST   | HILL   | GNLS   |
|------|--------|--------|--------|
| AIC  | 164.94 | 141.12 | 144.77 |
| PROB | 0      | 0.86   | 0.14   |
| RMSE | 23.47  | 10.27  | 10.25  |

MAX\_MEAN : 41.4 MAX\_MED : 42.6 BMAD : 5.69  
COFF : 20 HIT-CALL : 1 FITC : 42 ACTP : 1  
FLAGS :

Assay ID 1509 (NHEERL\_HEK293T\_CellTiterGLO)  
Sample ID : TX003444

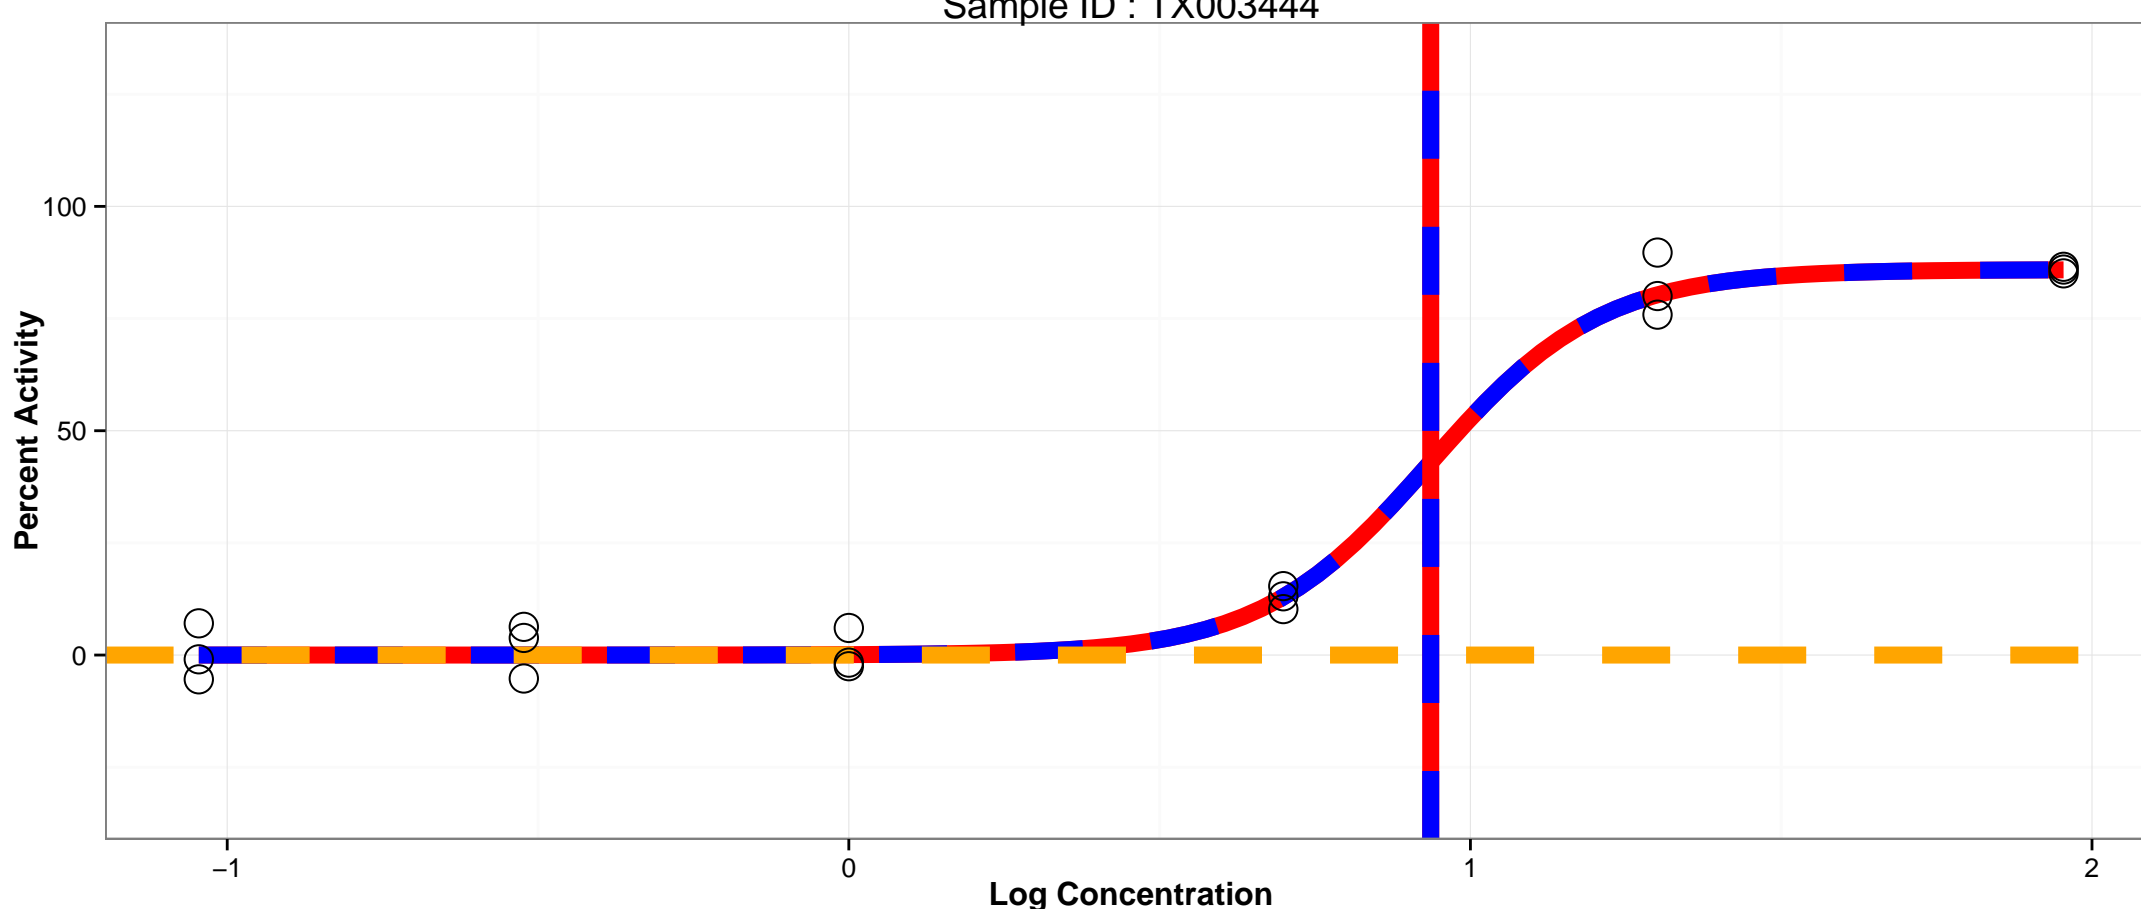

HILL MODEL

|     | tp   | ga     | gw   |
|-----|------|--------|------|
| val | 85.9 | 0.936  | 3.17 |
| sd  | 1.91 | 0.0403 | 0.49 |

GAIN-LOSS MODEL

|     | tp   | ga    | gw   | la   | lw   |
|-----|------|-------|------|------|------|
| val | 85.9 | 0.936 | 3.17 | 3.93 | 9.31 |
| sd  | NA   | NA    | NA   | NA   | NA   |

|      | CNST   | HILL   | GNLS   |
|------|--------|--------|--------|
| AIC  | 192.71 | 112.71 | 116.71 |
| PROB | 0      | 0.88   | 0.12   |
| RMSE | 48.9   | 4.28   | 4.28   |

MAX\_MEAN : 85.9 MAX\_MED : 85.9 BMAD : 5.54  
COFF : 20 HIT-CALL : 1 FITC : 41 ACTP : 1  
FLAGS :

Assay ID 1848 (NHEERL\_Quantilum\_inhib\_2\_dn)  
Sample ID : TX003444

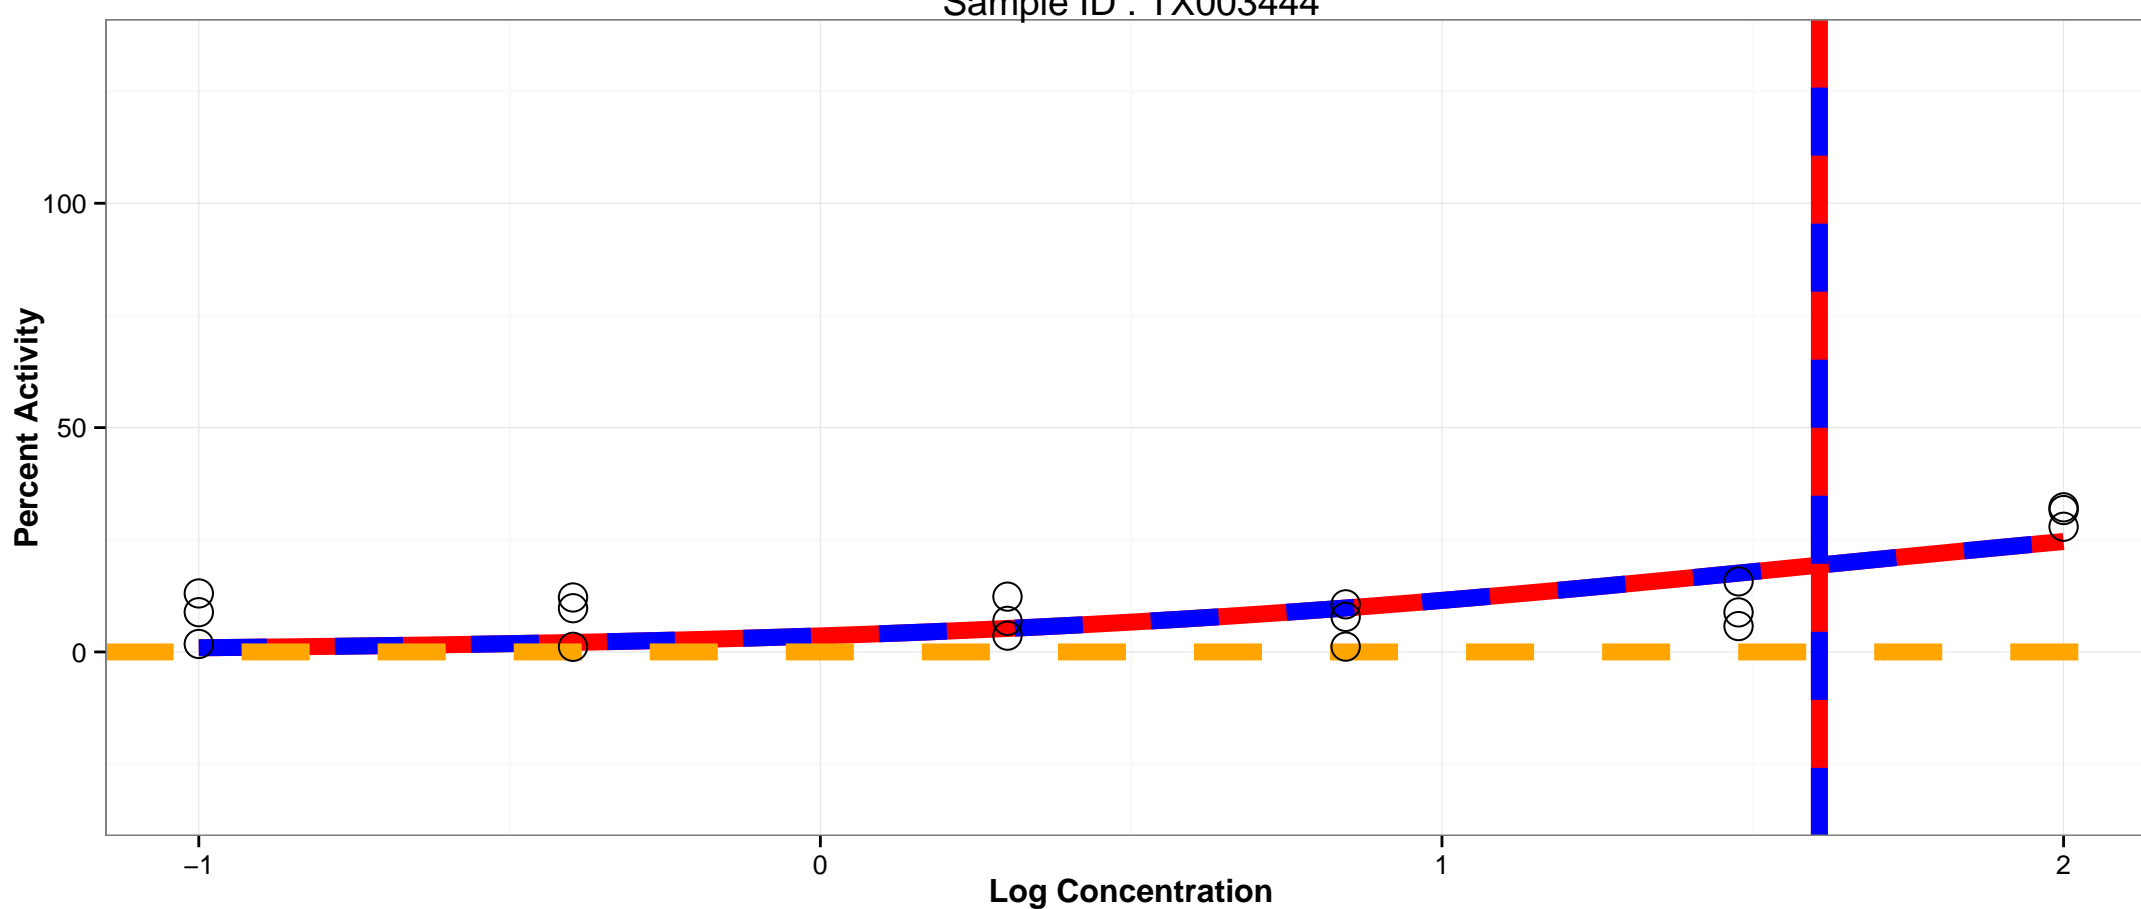

HILL MODEL

|     | tp   | ga   | gw    |
|-----|------|------|-------|
| val | 38.7 | 1.61 | 0.617 |
| sd  | 15.7 | 0.52 | 0.444 |

GAIN-LOSS MODEL

|     | tp   | ga   | gw    | la   | lw   |
|-----|------|------|-------|------|------|
| val | 38.7 | 1.61 | 0.617 | 3.26 | 6.49 |
| sd  | 15.7 | 0.52 | 0.444 | 770  | 3960 |

|      | CNST   | HILL   | GNLS   |
|------|--------|--------|--------|
| AIC  | 150.92 | 130.63 | 134.63 |
| PROB | 0      | 0.88   | 0.12   |
| RMSE | 15.03  | 6.84   | 6.84   |

MAX\_MEAN : 30.6 MAX\_MED : 31.6 BMAD : 8.58  
COFF : 20 HIT-CALL : 1 FITC : 42 ACTP : 1  
FLAGS : 6

Chemical : Sulfamethazine  
CAS : 57-68-1

Assay ID 1508 (NHEERL\_TPO\_AUR\_dn)  
Sample ID : TP0001441F10

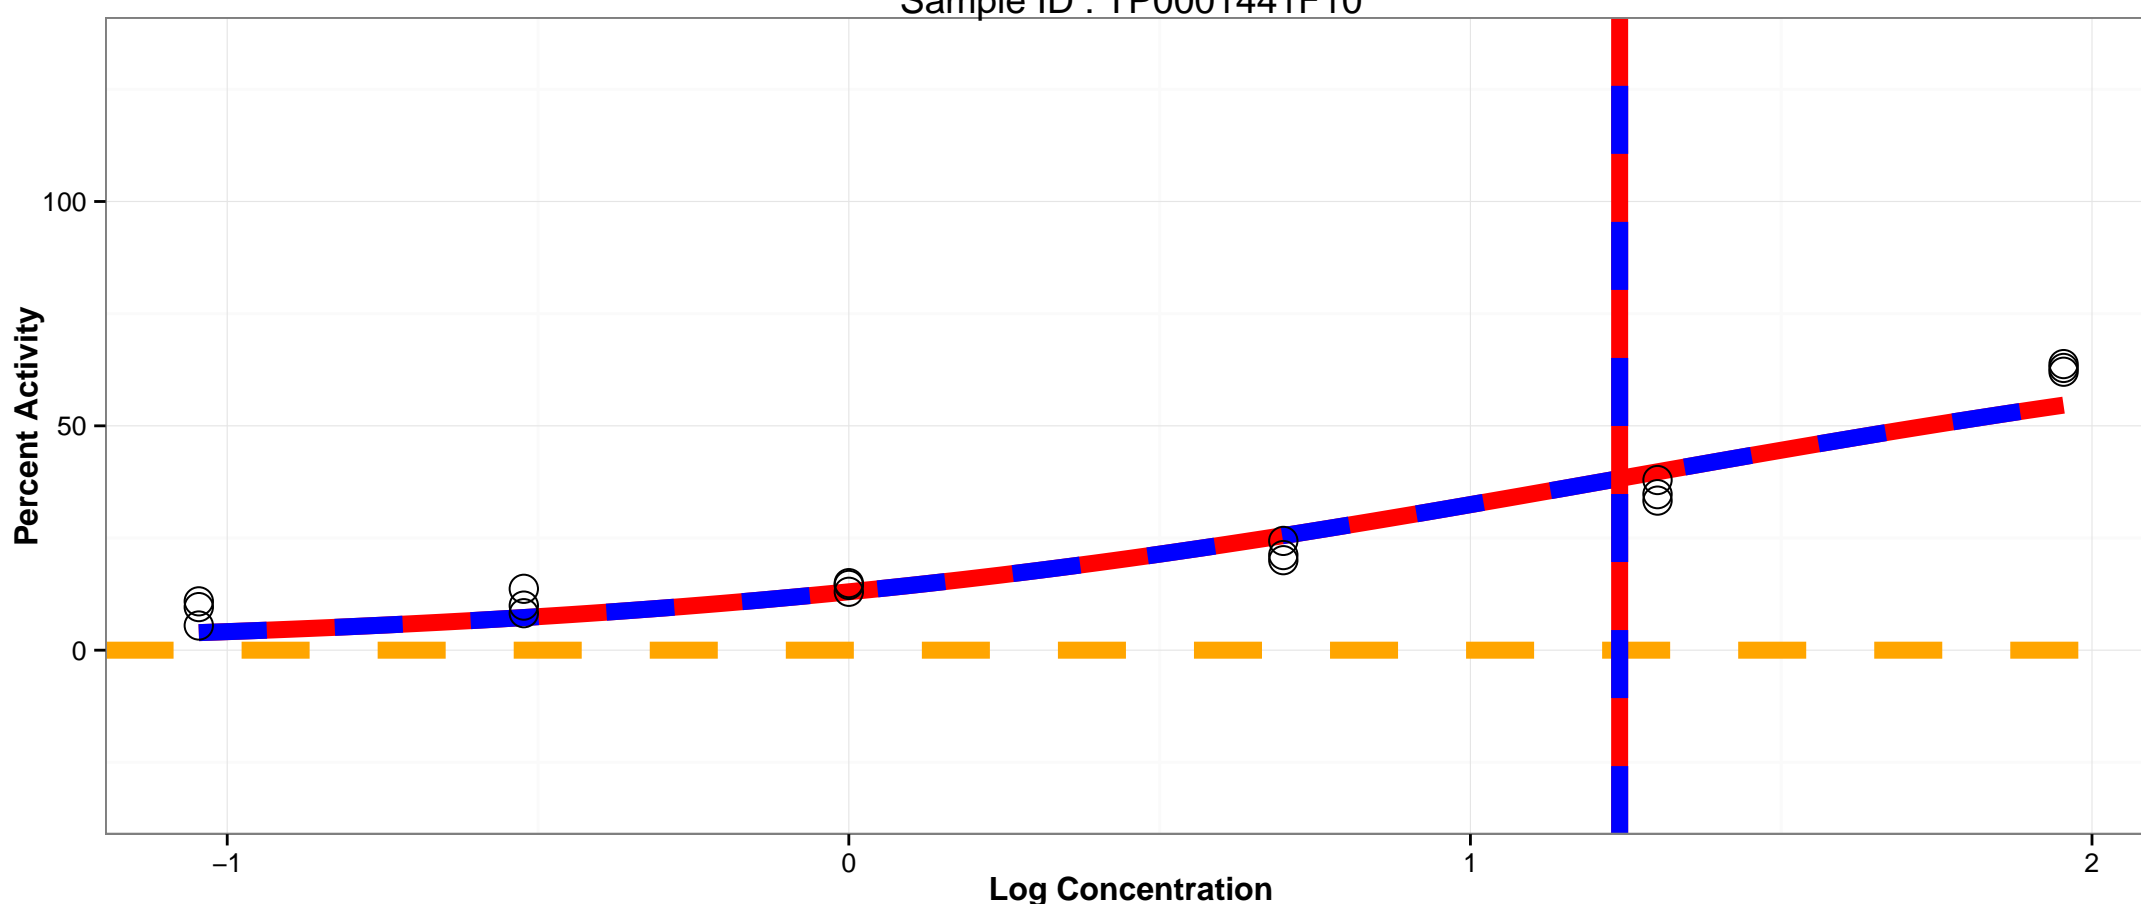

HILL MODEL

|     | tp   | ga    | gw     |
|-----|------|-------|--------|
| val | 76.5 | 1.24  | 0.555  |
| sd  | 18.5 | 0.343 | 0.0813 |

GAIN-LOSS MODEL

|     | tp   | ga    | gw     | la    | lw     |
|-----|------|-------|--------|-------|--------|
| val | 76.5 | 1.24  | 0.555  | 3.95  | 6.17   |
| sd  | 18.4 | 0.343 | 0.0813 | 54800 | 169000 |

|      | CNST   | HILL   | GNLS   |
|------|--------|--------|--------|
| AIC  | 178.45 | 120.09 | 124.09 |
| PROB | 0      | 0.88   | 0.12   |
| RMSE | 31.87  | 5.09   | 5.09   |

MAX\_MEAN : 62.9 MAX\_MED : 62.9 BMAD : 5.69  
COFF : 20 HIT-CALL : 1 FITC : 42 ACTP : 1  
FLAGS :

Assay ID 1509 (NHEERL\_HEK293T\_CellTiterGLO)  
Sample ID : TP0001441F10

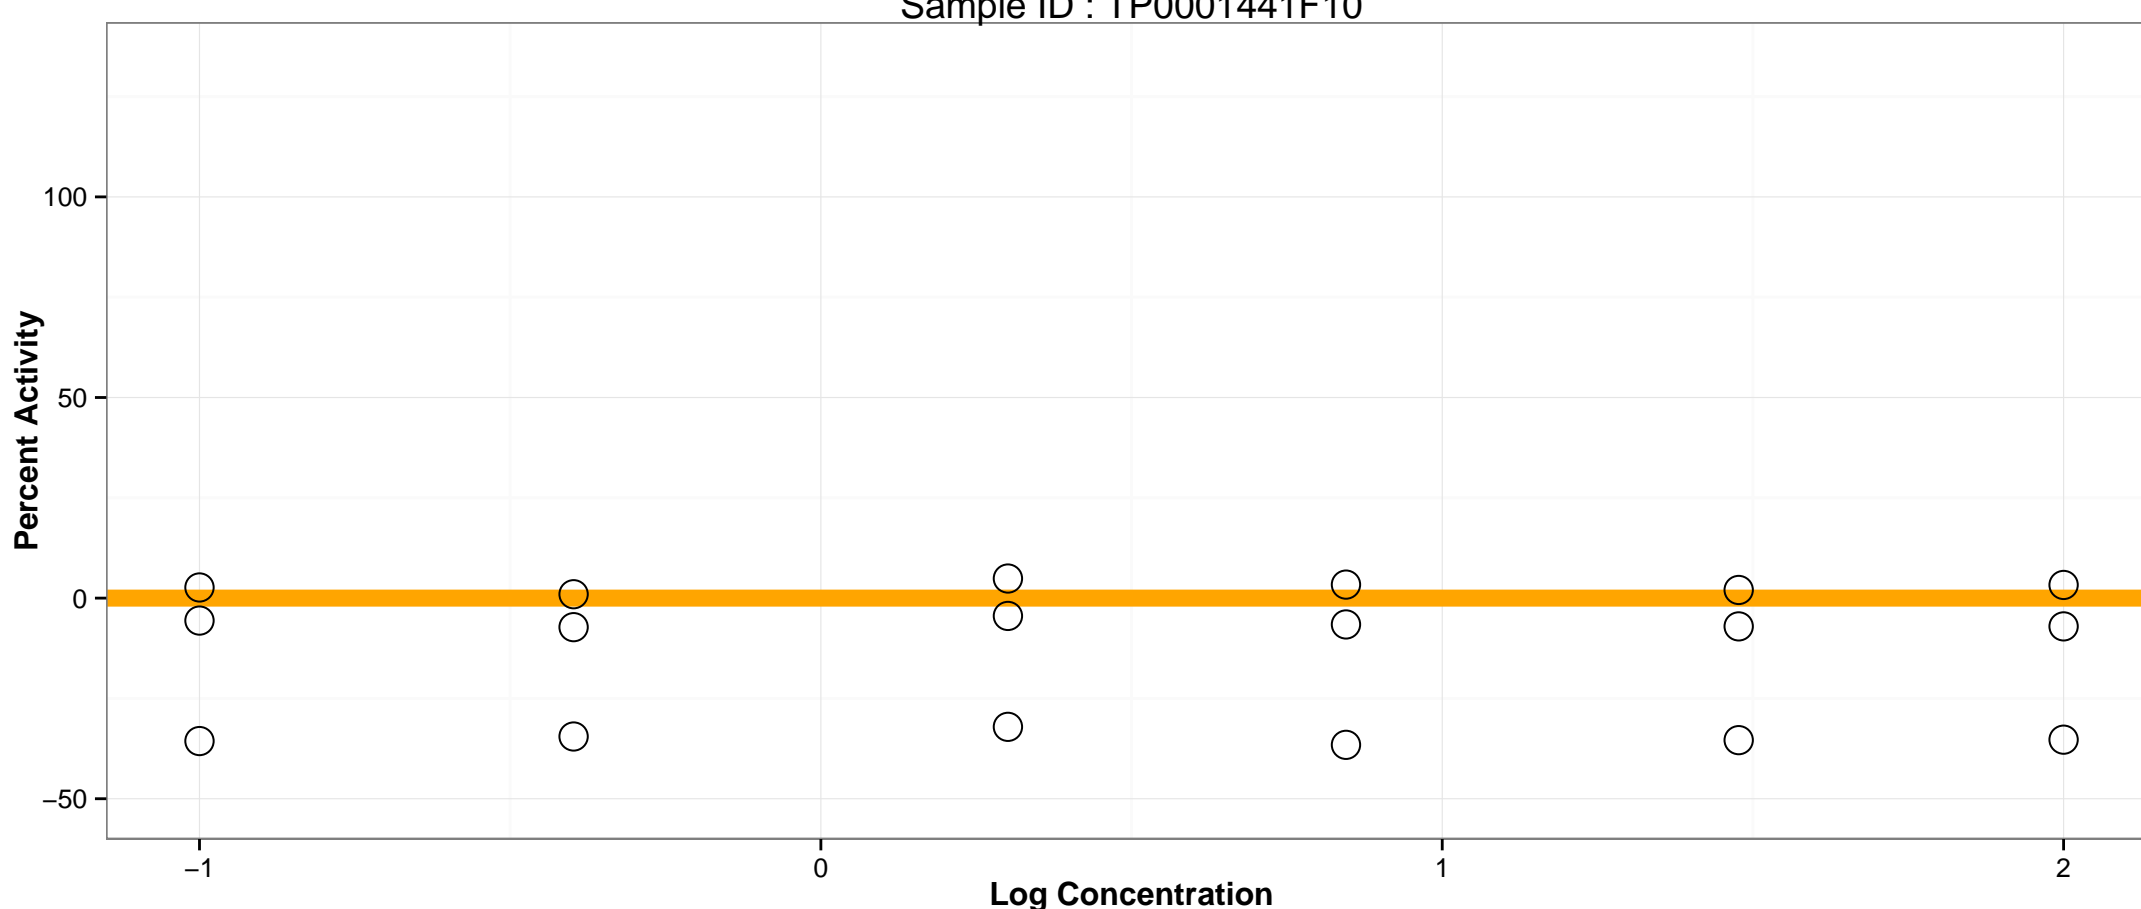

HILL MODEL

HILL MODEL: Not applicable

GAIN-LOSS MODEL

GNLS MODEL: Not applicable

|      | CNST   | HILL | GNLS |
|------|--------|------|------|
| AIC  | 162.08 | NA   | NA   |
| PROB | 1      | NA   | NA   |
| RMSE | 20.58  | NA   | NA   |

MAX\_MEAN : -10.5 MAX\_MED : -4.43 BMAD : 5.54  
COFF : 20 HIT-CALL : 0 FITC : 4 ACTP : 0  
FLAGS : 10

Assay ID 1848 (NHEERL\_Quantilum\_inhib\_2\_dn)  
Sample ID : TP0001441F10

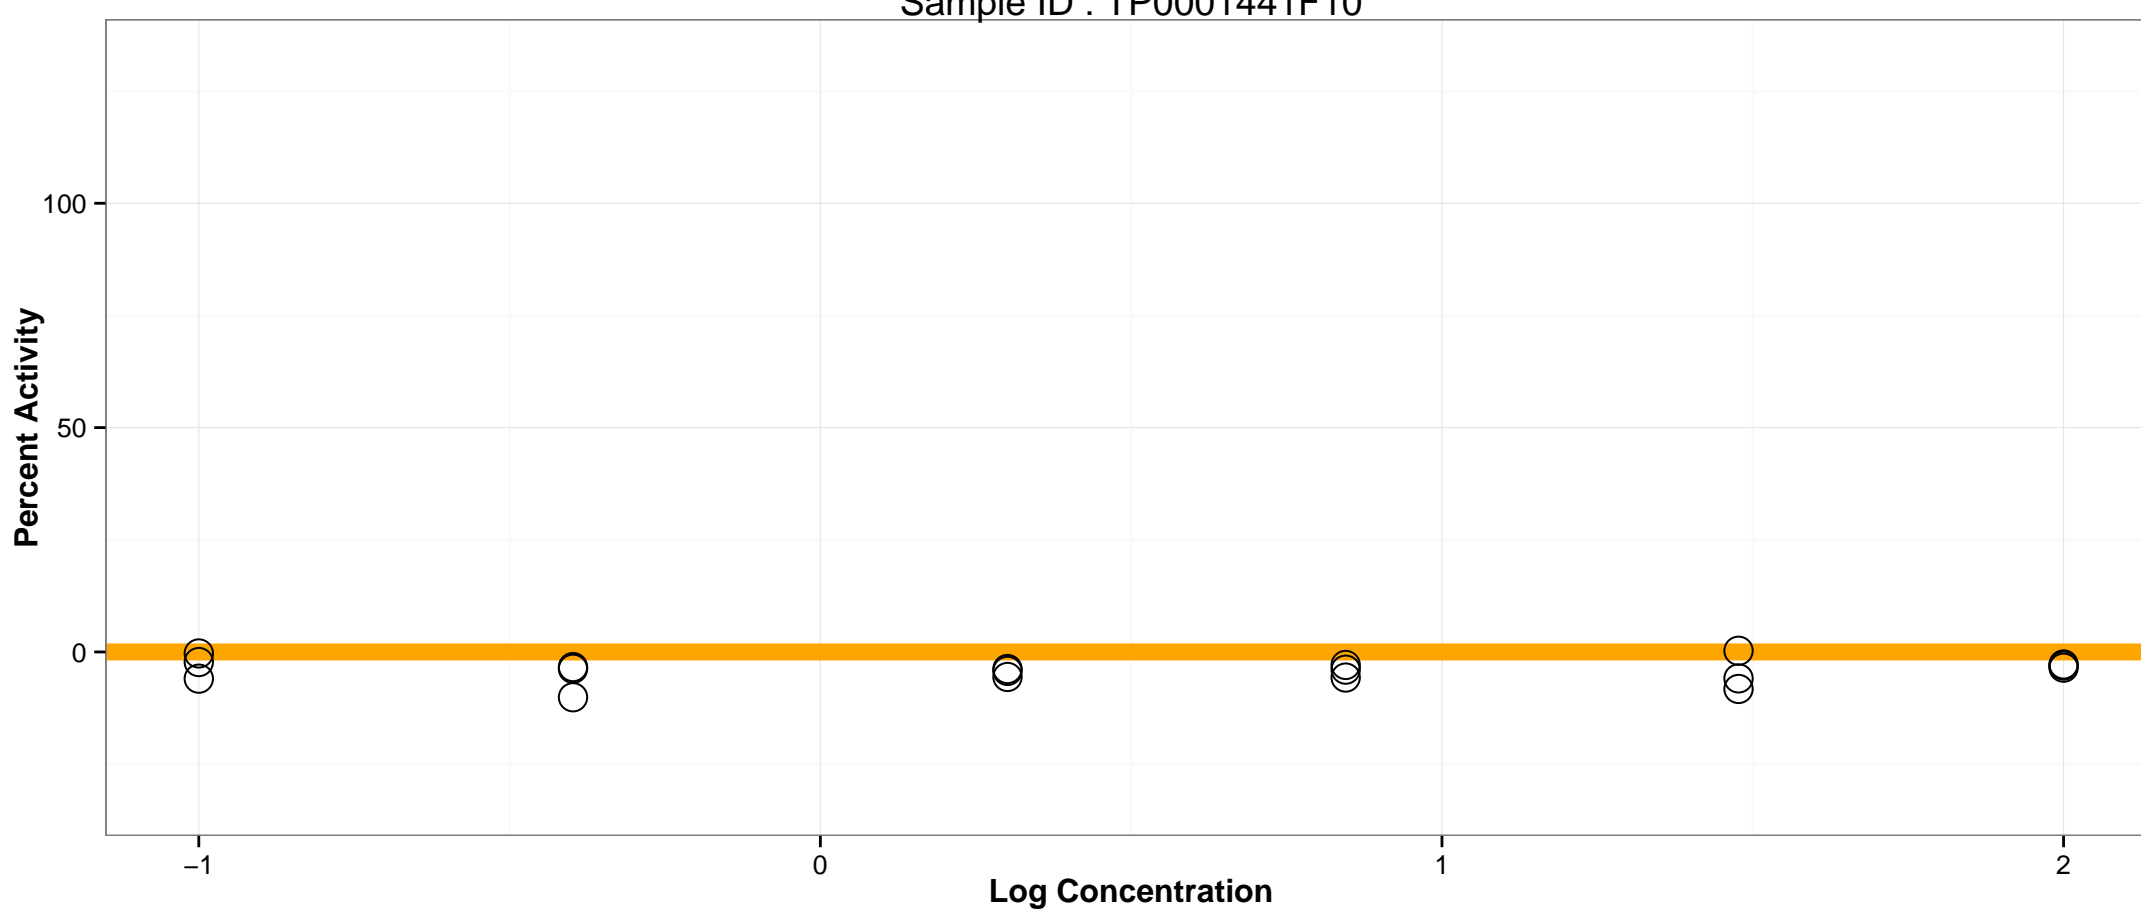

HILL MODEL

HILL MODEL: Not applicable

GAIN-LOSS MODEL

GNLS MODEL: Not applicable

|      | CNST   | HILL | GNLS |
|------|--------|------|------|
| AIC  | 112.06 | NA   | NA   |
| PROB | 1      | NA   | NA   |
| RMSE | 4.82   | NA   | NA   |

MAX\_MEAN : -2.84 MAX\_MED : -2.24 BMAD : 8.58  
COFF : 20 HIT-CALL : 0 FITC : 4 ACTP : 0  
FLAGS :



Chemical : 7,12-Dimethylbenz(a)anthracene  
CAS : 57-97-6

Assay ID 1508 (NHEERL\_TPO\_AUR\_dn)  
Sample ID : TP0001441G01

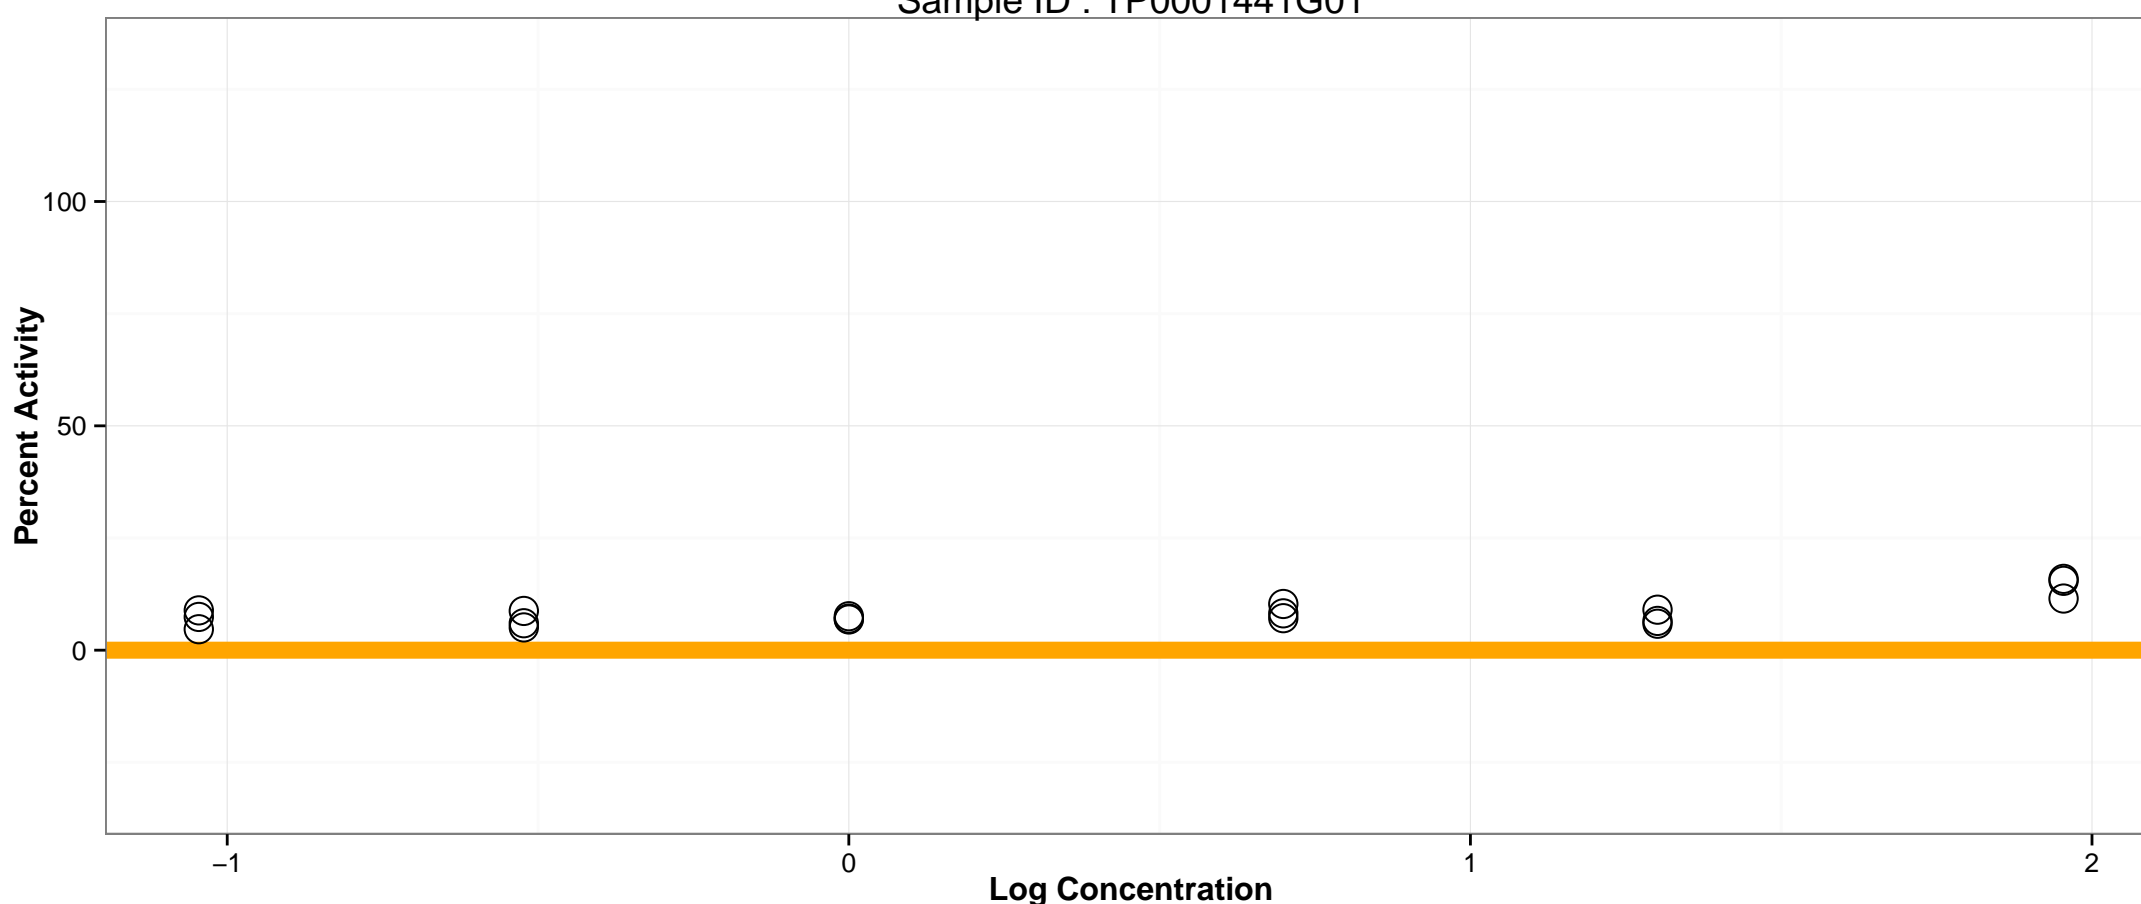

HILL MODEL

HILL MODEL: Not applicable

GAIN-LOSS MODEL

GNLS MODEL: Not applicable

|      | CNST   | HILL | GNLS |
|------|--------|------|------|
| AIC  | 135.43 | NA   | NA   |
| PROB | 1      | NA   | NA   |
| RMSE | 9      | NA   | NA   |

MAX\_MEAN : 14.3 MAX\_MED : 15.5 BMAD : 5.69  
COFF : 20 HIT-CALL : 0 FITC : 4 ACTP : 0  
FLAGS :

Assay ID 1509 (NHEERL\_HEK293T\_CellTiterGLO)  
Sample ID : TP0001441G01

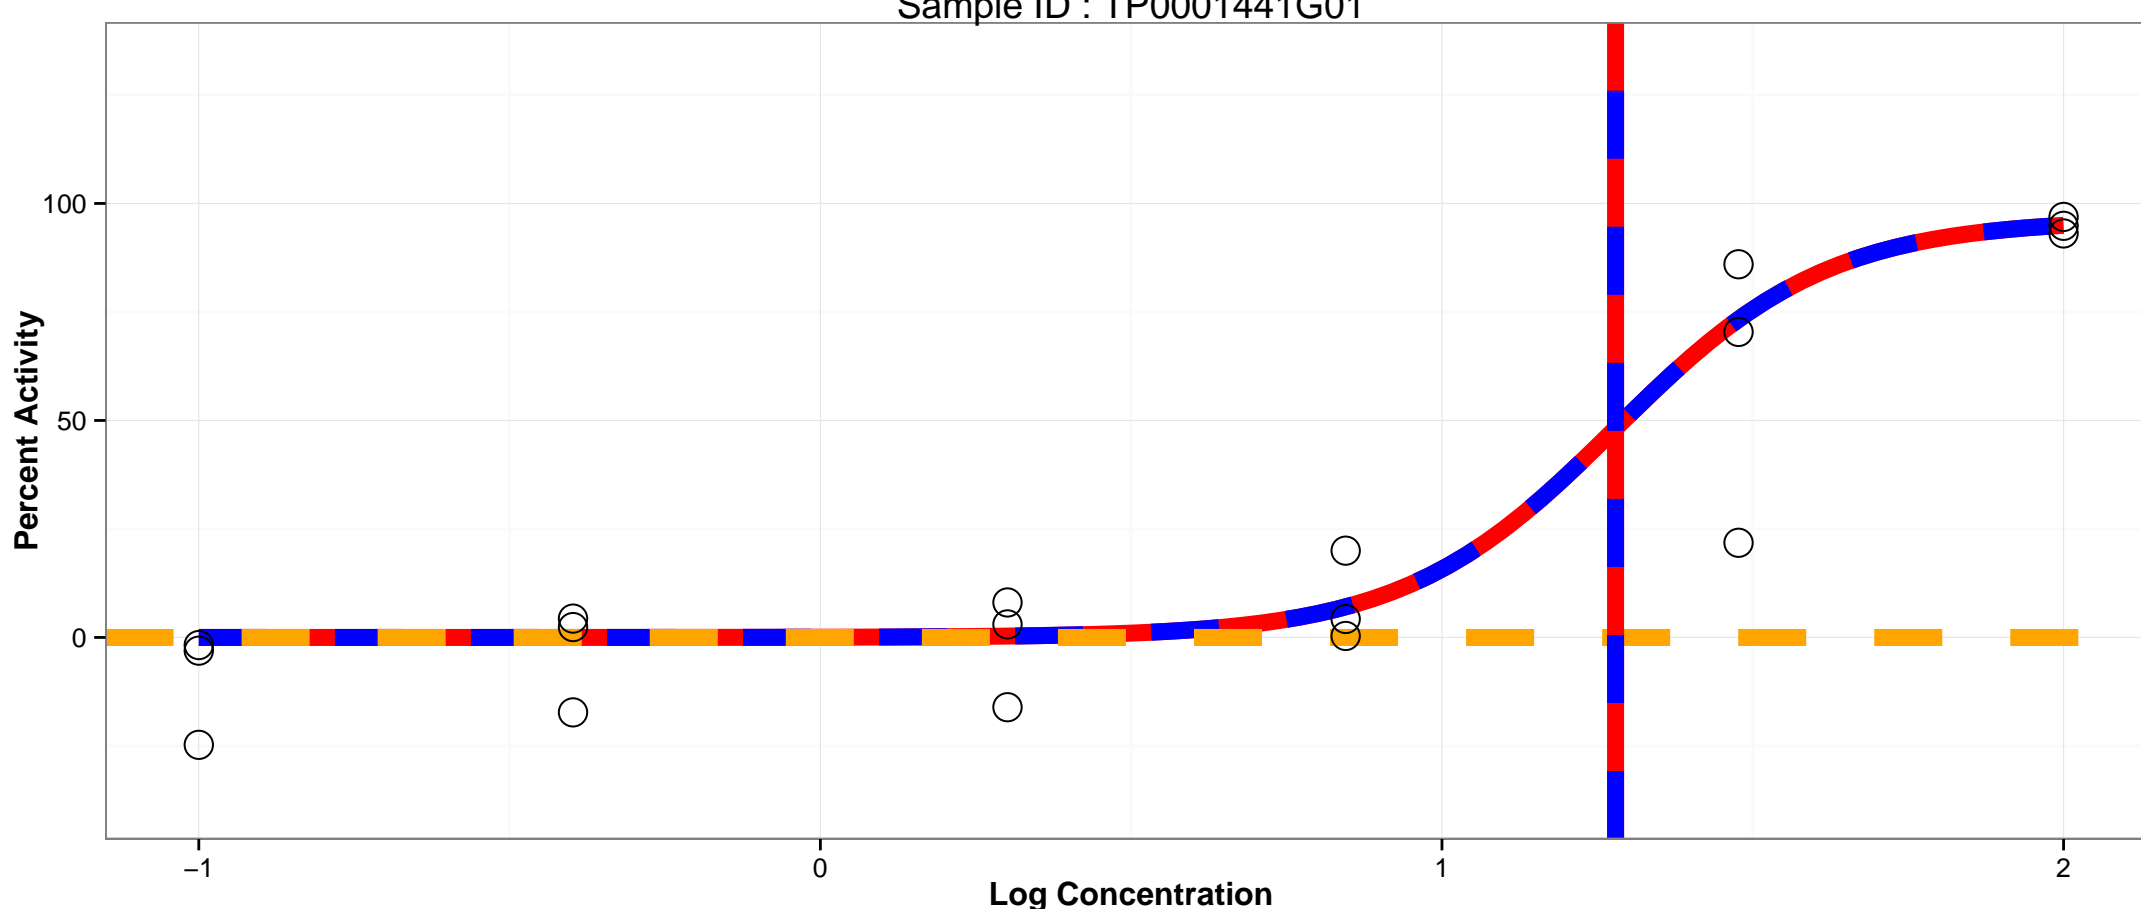

HILL MODEL

|     | tp   | ga     | gw    |
|-----|------|--------|-------|
| val | 96.4 | 1.28   | 2.54  |
| sd  | 5.61 | 0.0796 | 0.754 |

GAIN-LOSS MODEL

|     | tp   | ga   | gw   | la   | lw   |
|-----|------|------|------|------|------|
| val | 96.4 | 1.28 | 2.54 | 3.81 | 10.1 |
| sd  | NA   | NA   | NA   | NA   | NA   |

|      | CNST   | HILL   | GNLS   |
|------|--------|--------|--------|
| AIC  | 191.15 | 151.71 | 155.71 |
| PROB | 0      | 0.88   | 0.12   |
| RMSE | 48.06  | 15.51  | 15.51  |

MAX\_MEAN : 95 MAX\_MED : 94.9 BMAD : 5.54  
COFF : 20 HIT-CALL : 1 FITC : 41 ACTP : 1  
FLAGS :

Assay ID 1848 (NHEERL\_Quantilum\_inhib\_2\_dn)  
Sample ID : TP0001441G01

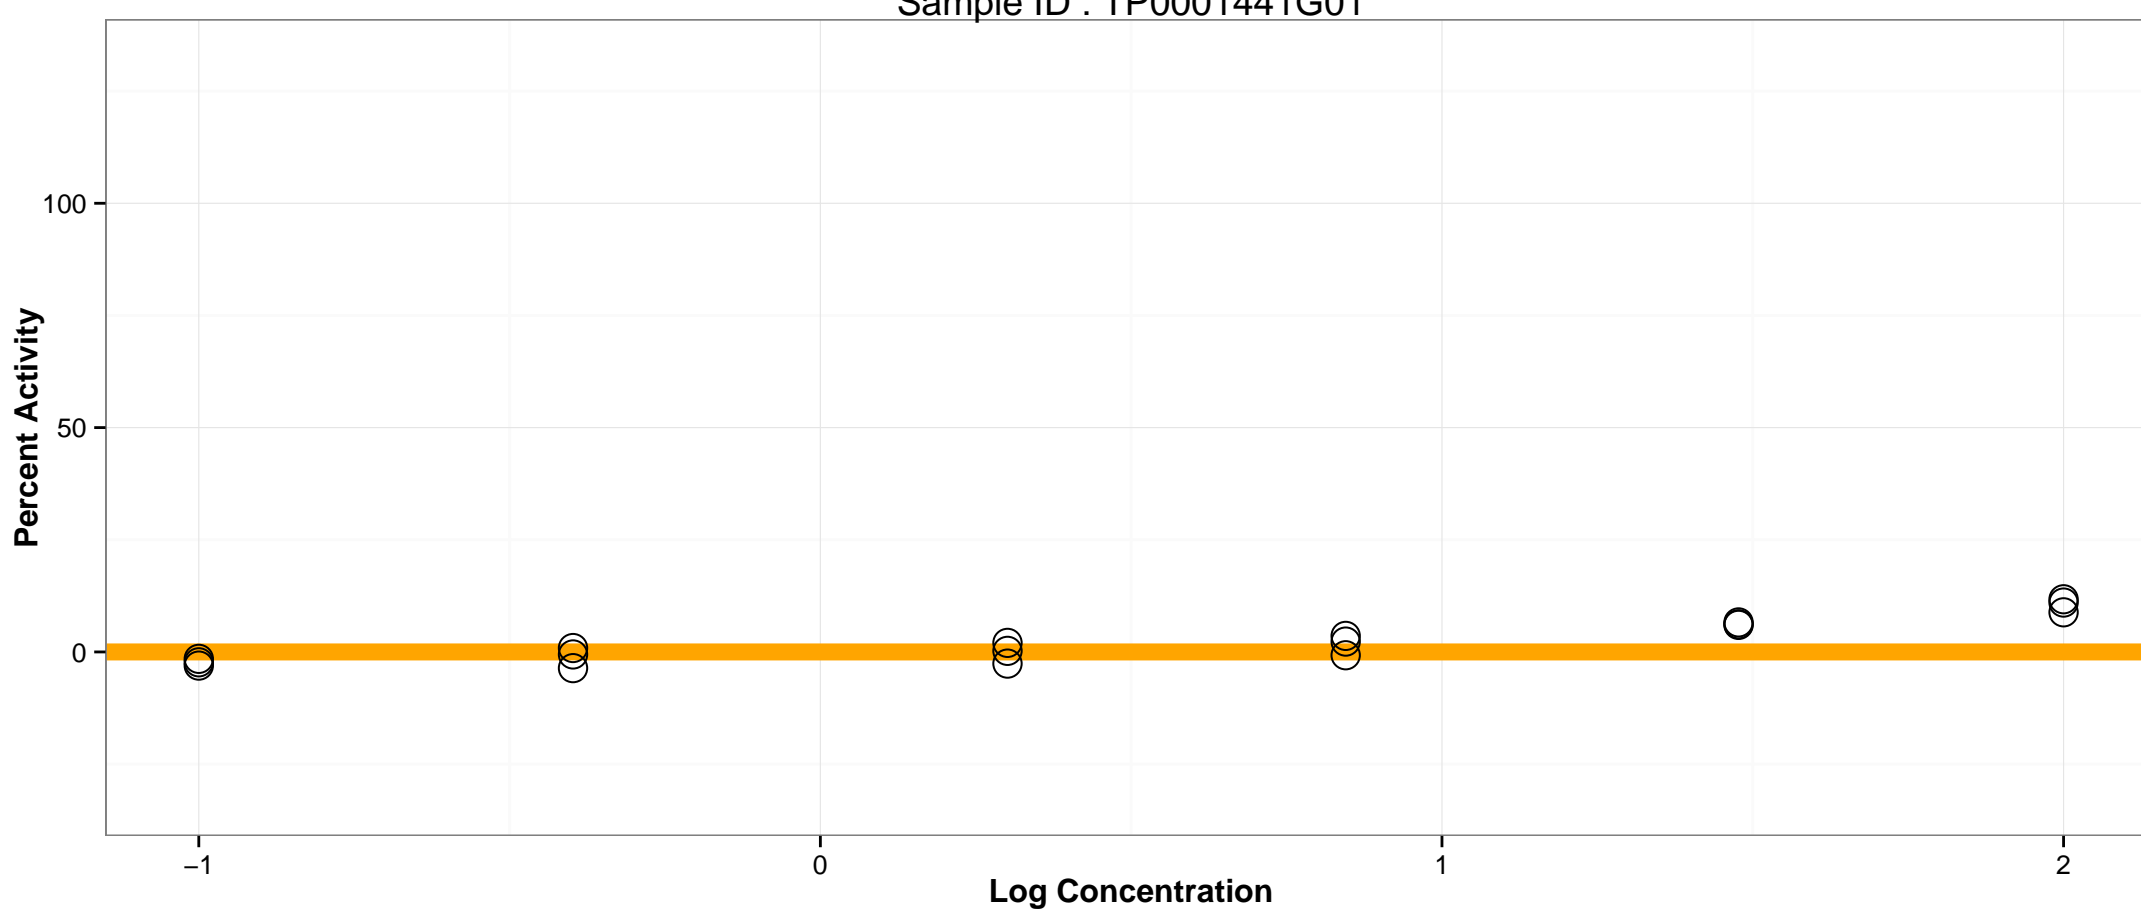

HILL MODEL

HILL MODEL: Not applicable

GAIN-LOSS MODEL

GNLS MODEL: Not applicable

|      | CNST   | HILL | GNLS |
|------|--------|------|------|
| AIC  | 113.82 | NA   | NA   |
| PROB | 1      | NA   | NA   |
| RMSE | 5.36   | NA   | NA   |

MAX\_MEAN : 10.5 MAX\_MED : 11 BMAD : 8.58  
COFF : 20 HIT-CALL : 0 FITC : 4 ACTP : 0  
FLAGS :

Assay ID 1824 (NHEERL\_TPO\_GUA\_dn)  
Sample ID : TP0001442E04

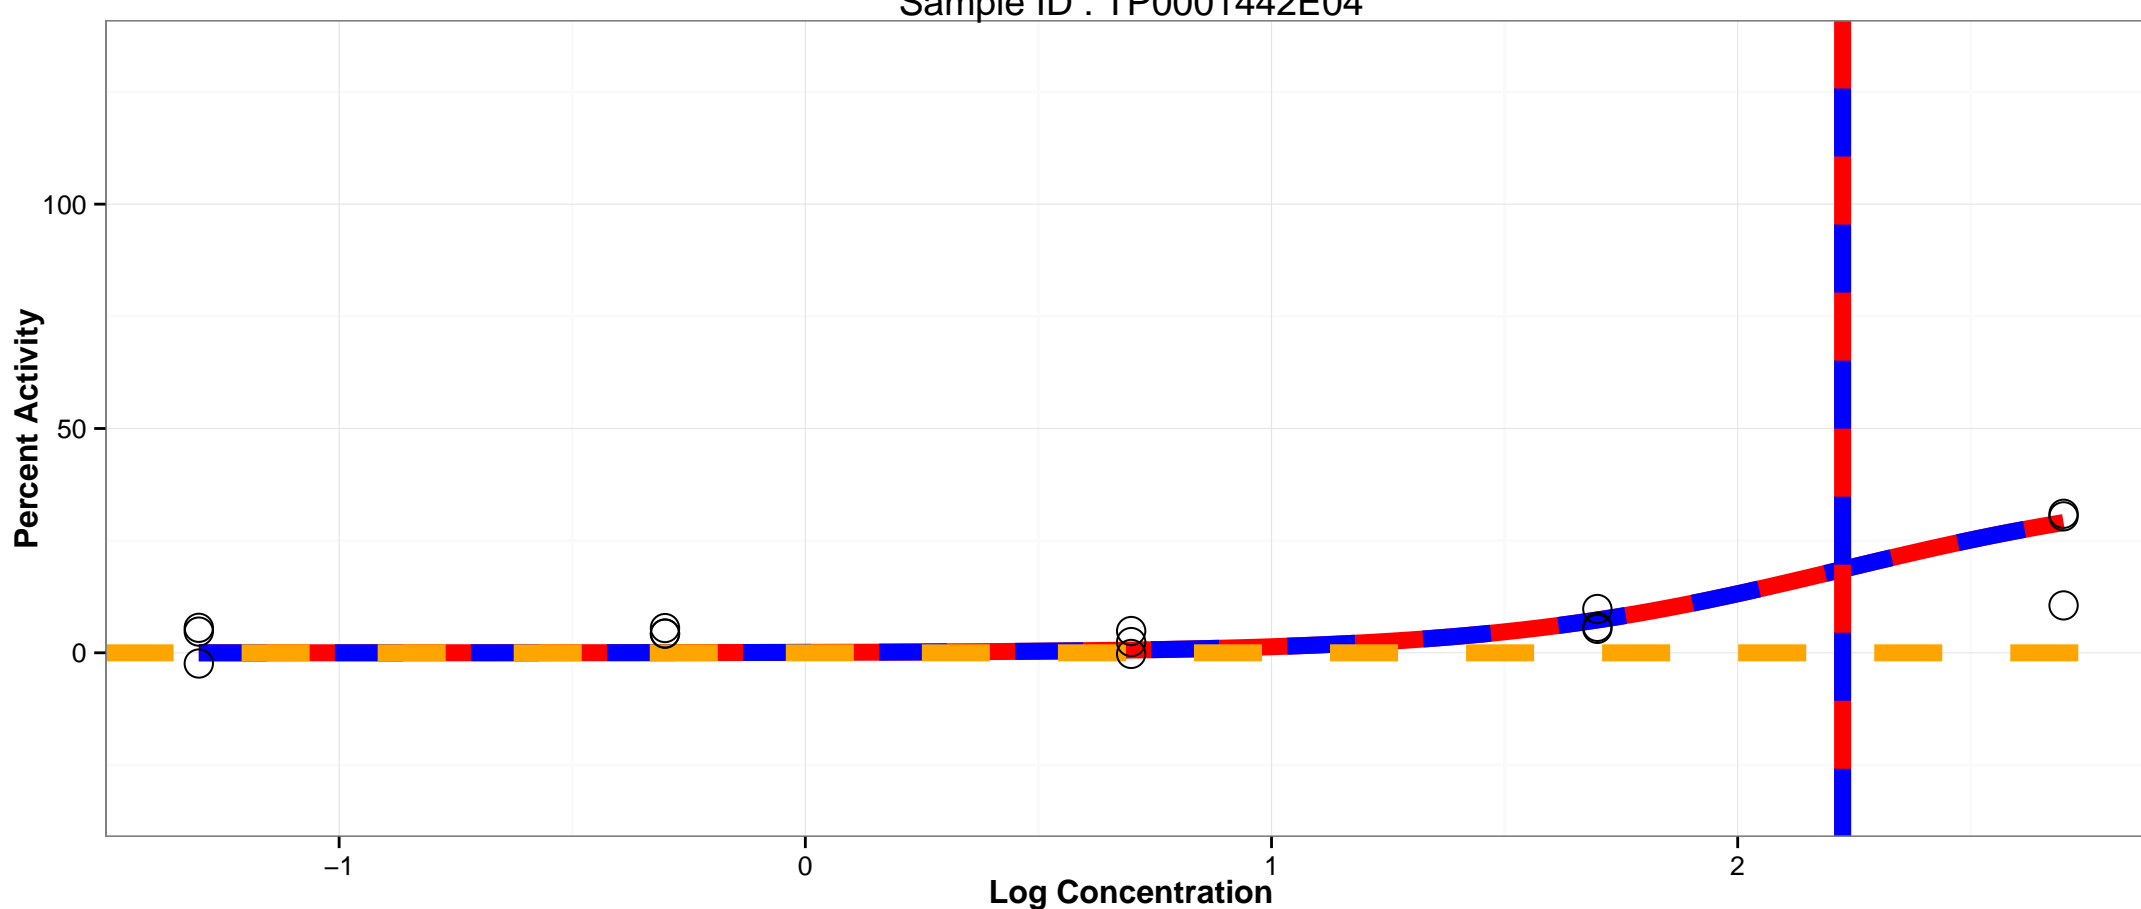

HILL MODEL

|     | tp   | ga    | gw   |
|-----|------|-------|------|
| val | 37.2 | 2.23  | 1.16 |
| sd  | 25.6 | 0.743 | 1.07 |

GAIN-LOSS MODEL

|     | tp   | ga    | gw   | la    | lw     |
|-----|------|-------|------|-------|--------|
| val | 37.2 | 2.22  | 1.16 | 3.95  | 9.28   |
| sd  | 25.6 | 0.743 | 1.07 | 49900 | 363000 |

|      | CNST   | HILL  | GNLS   |
|------|--------|-------|--------|
| AIC  | 116.72 | 99.44 | 103.44 |
| PROB | 0      | 0.88  | 0.12   |
| RMSE | 12.42  | 5.81  | 5.81   |

MAX\_MEAN : 24 MAX\_MED : 30.4 BMAD : 3.71  
COFF : 20 HIT-CALL : 1 FITC : 42 ACTP : 1  
FLAGS : 6

Chemical : 7,12-Dimethylbenz(a)anthracene  
CAS : 57-97-6

Assay ID 1508 (NHEERL\_TPO\_AUR\_dn)  
Sample ID : TX007242

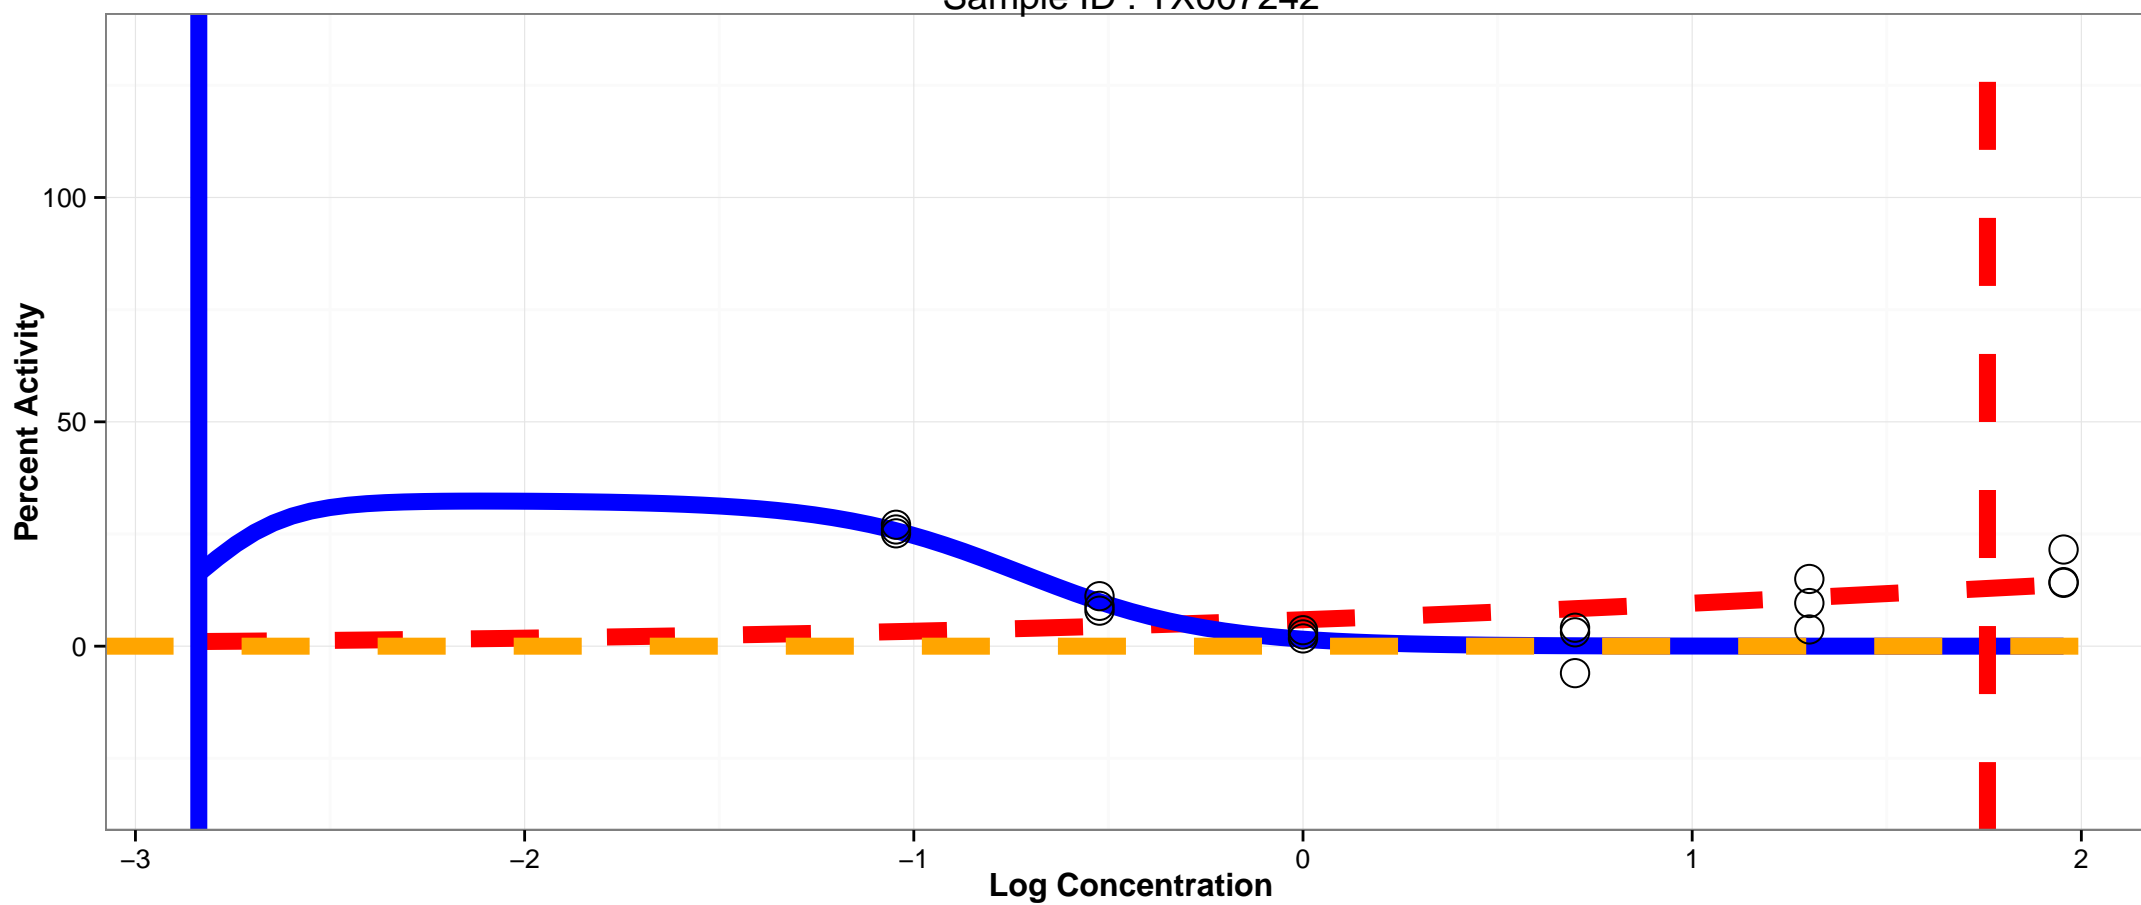

HILL MODEL

|     | tp   | ga   | gw  |
|-----|------|------|-----|
| val | 25.7 | 1.76 | 0.3 |
| sd  | NA   | NA   | NA  |

GAIN-LOSS MODEL

|     | tp   | ga    | gw   | la     | lw   |
|-----|------|-------|------|--------|------|
| val | 32.5 | -2.84 | 3.84 | -0.723 | 1.8  |
| sd  | 17   | 897   | 1930 | 0.347  | 1.47 |

|      | CNST   | HILL   | GNLS   |
|------|--------|--------|--------|
| AIC  | 149.82 | 143.02 | 137.86 |
| PROB | 0      | 0.07   | 0.93   |
| RMSE | 14.14  | 10.7   | 8.42   |

MAX\_MEAN: 26.1 MAX\_MED: 26 BMAD: 5.69  
COFF: 20 HIT-CALL: 1 FITC: 49 ACTP: 0.998  
FLAGS: 7; 15

Assay ID 1509 (NHEERL\_HEK293T\_CellTiterGLO)  
Sample ID : TX007242

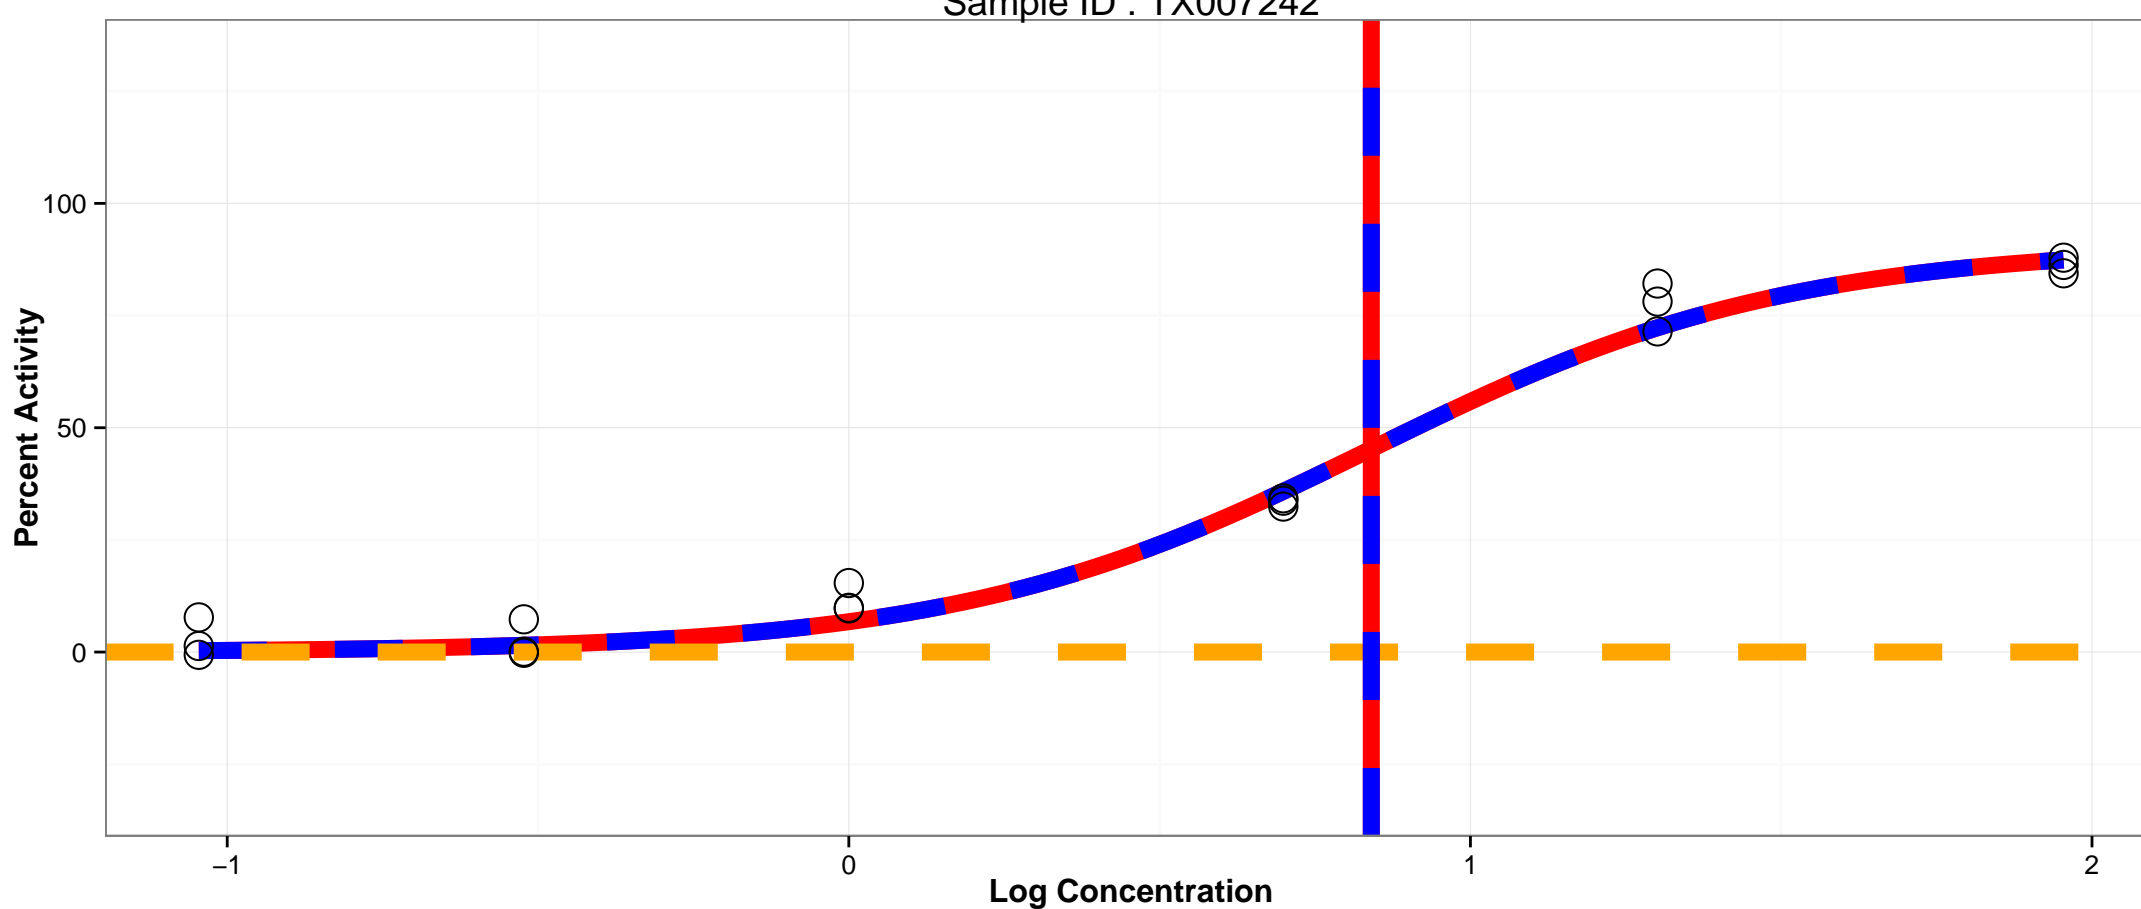

HILL MODEL

|     | tp   | ga     | gw    |
|-----|------|--------|-------|
| val | 90.5 | 0.841  | 1.3   |
| sd  | 3.09 | 0.0428 | 0.209 |

GAIN-LOSS MODEL

|     | tp   | ga    | gw  | la   | lw |
|-----|------|-------|-----|------|----|
| val | 90.5 | 0.841 | 1.3 | 3.45 | 18 |
| sd  | NA   | NA    | NA  | NA   | NA |

|      | CNST  | HILL   | GNLS   |
|------|-------|--------|--------|
| AIC  | 194.4 | 112.64 | 116.64 |
| PROB | 0     | 0.88   | 0.12   |
| RMSE | 49.54 | 4.4    | 4.4    |

MAX\_MEAN: 86.2 MAX\_MED: 86.3 BMAD: 5.54  
COFF: 20 HIT-CALL: 1 FITC: 41 ACTP: 1  
FLAGS:

Assay ID 1848 (NHEERL\_Quantilum\_inhib\_2\_dn)  
Sample ID : TX007242

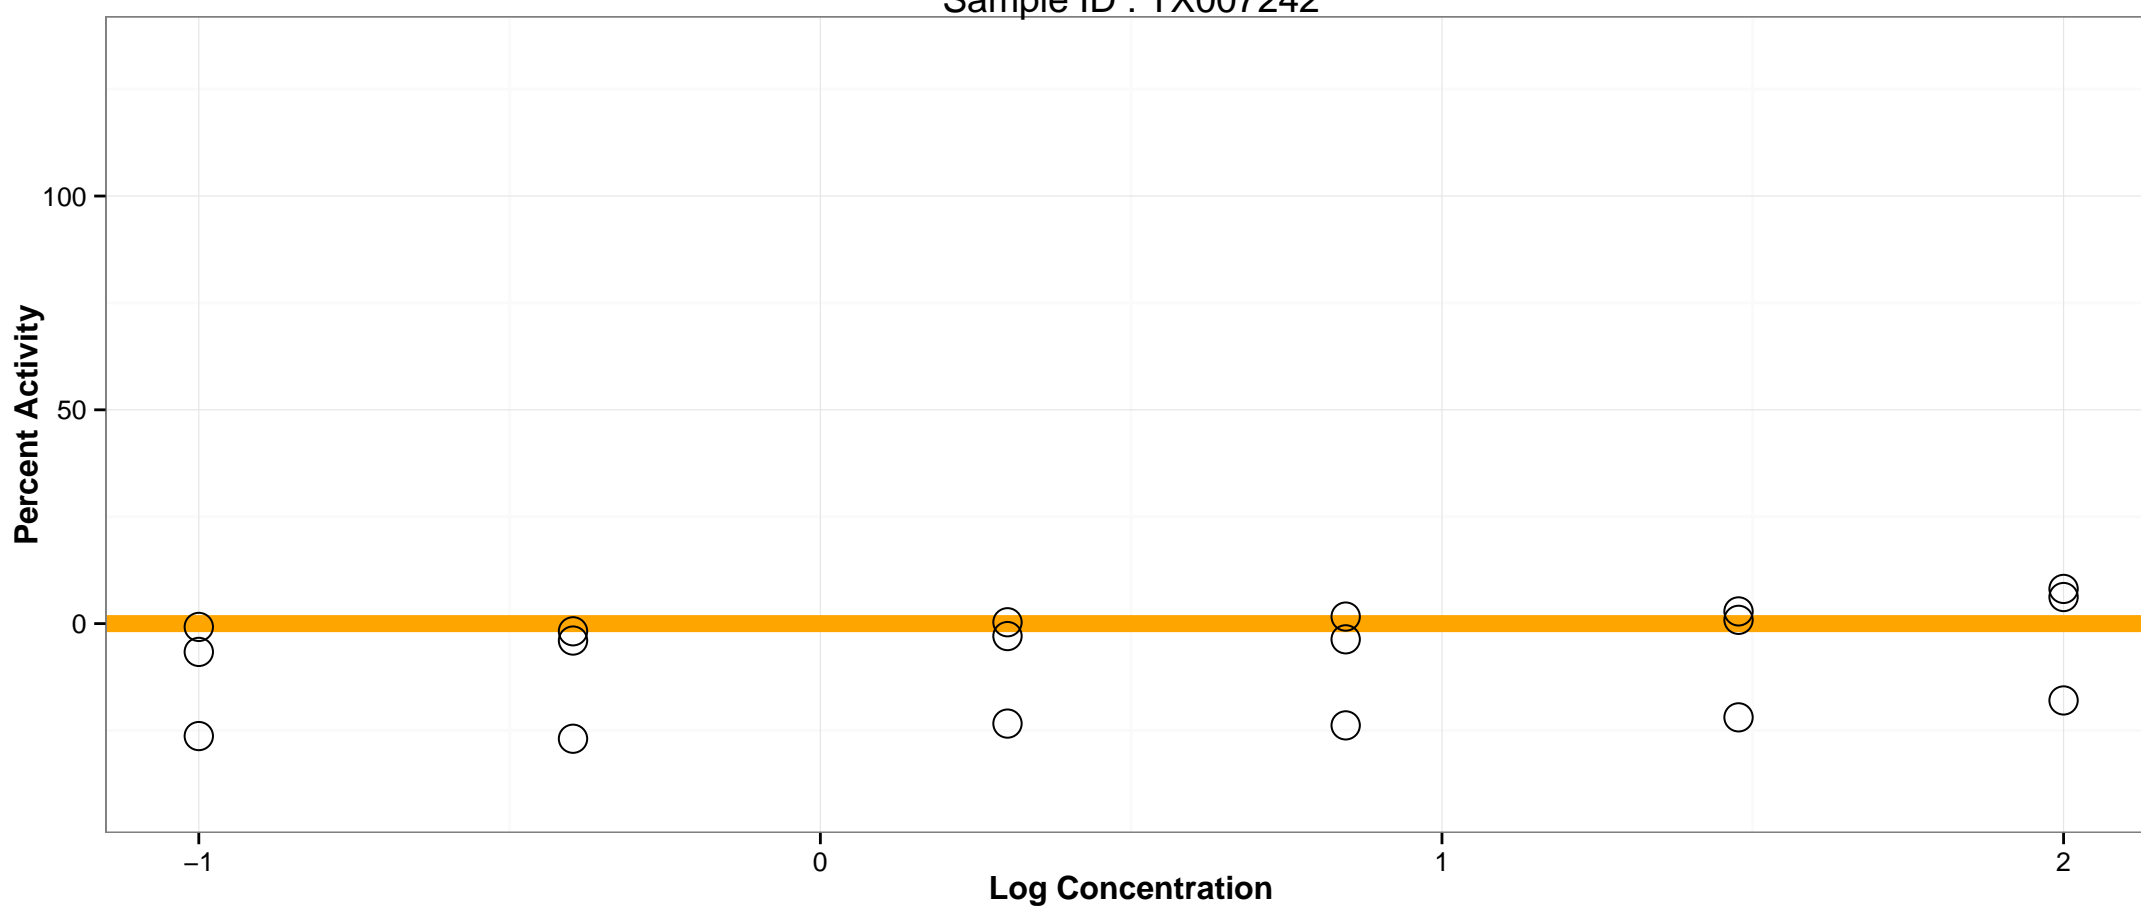

HILL MODEL

HILL MODEL: Not applicable

GAIN-LOSS MODEL

GNLS MODEL: Not applicable

|      | CNST   | HILL | GNLS |
|------|--------|------|------|
| AIC  | 148.28 | NA   | NA   |
| PROB | 1      | NA   | NA   |
| RMSE | 14.01  | NA   | NA   |

MAX\_MEAN: -1.2 MAX\_MED: 6.23 BMAD: 8.58  
COFF: 20 HIT-CALL: 0 FITC: 4 ACTP: 0  
FLAGS:

Assay ID 1824 (NHEERL\_TPO\_GUA\_dn)  
Sample ID : TP0001442E04



HILL MODEL

|     | tp   | ga    | gw   |
|-----|------|-------|------|
| val | 37.2 | 2.23  | 1.16 |
| sd  | 25.6 | 0.743 | 1.07 |

GAIN-LOSS MODEL

|     | tp   | ga    | gw   | la    | lw     |
|-----|------|-------|------|-------|--------|
| val | 37.2 | 2.22  | 1.16 | 3.95  | 9.28   |
| sd  | 25.6 | 0.743 | 1.07 | 49900 | 363000 |

|      | CNST   | HILL  | GNLS   |
|------|--------|-------|--------|
| AIC  | 116.72 | 99.44 | 103.44 |
| PROB | 0      | 0.88  | 0.12   |
| RMSE | 12.42  | 5.81  | 5.81   |

MAX\_MEAN: 24 MAX\_MED: 30.4 BMAD: 3.71  
COFF: 20 HIT-CALL: 1 FITC: 42 ACTP: 1  
FLAGS: 6

Chemical : 2,3,4-Trihydroxbenzophenone  
CAS : 1143-72-2

Assay ID 1508 (NHEERL\_TPO\_AUR\_dn)  
Sample ID : TP0001441G02

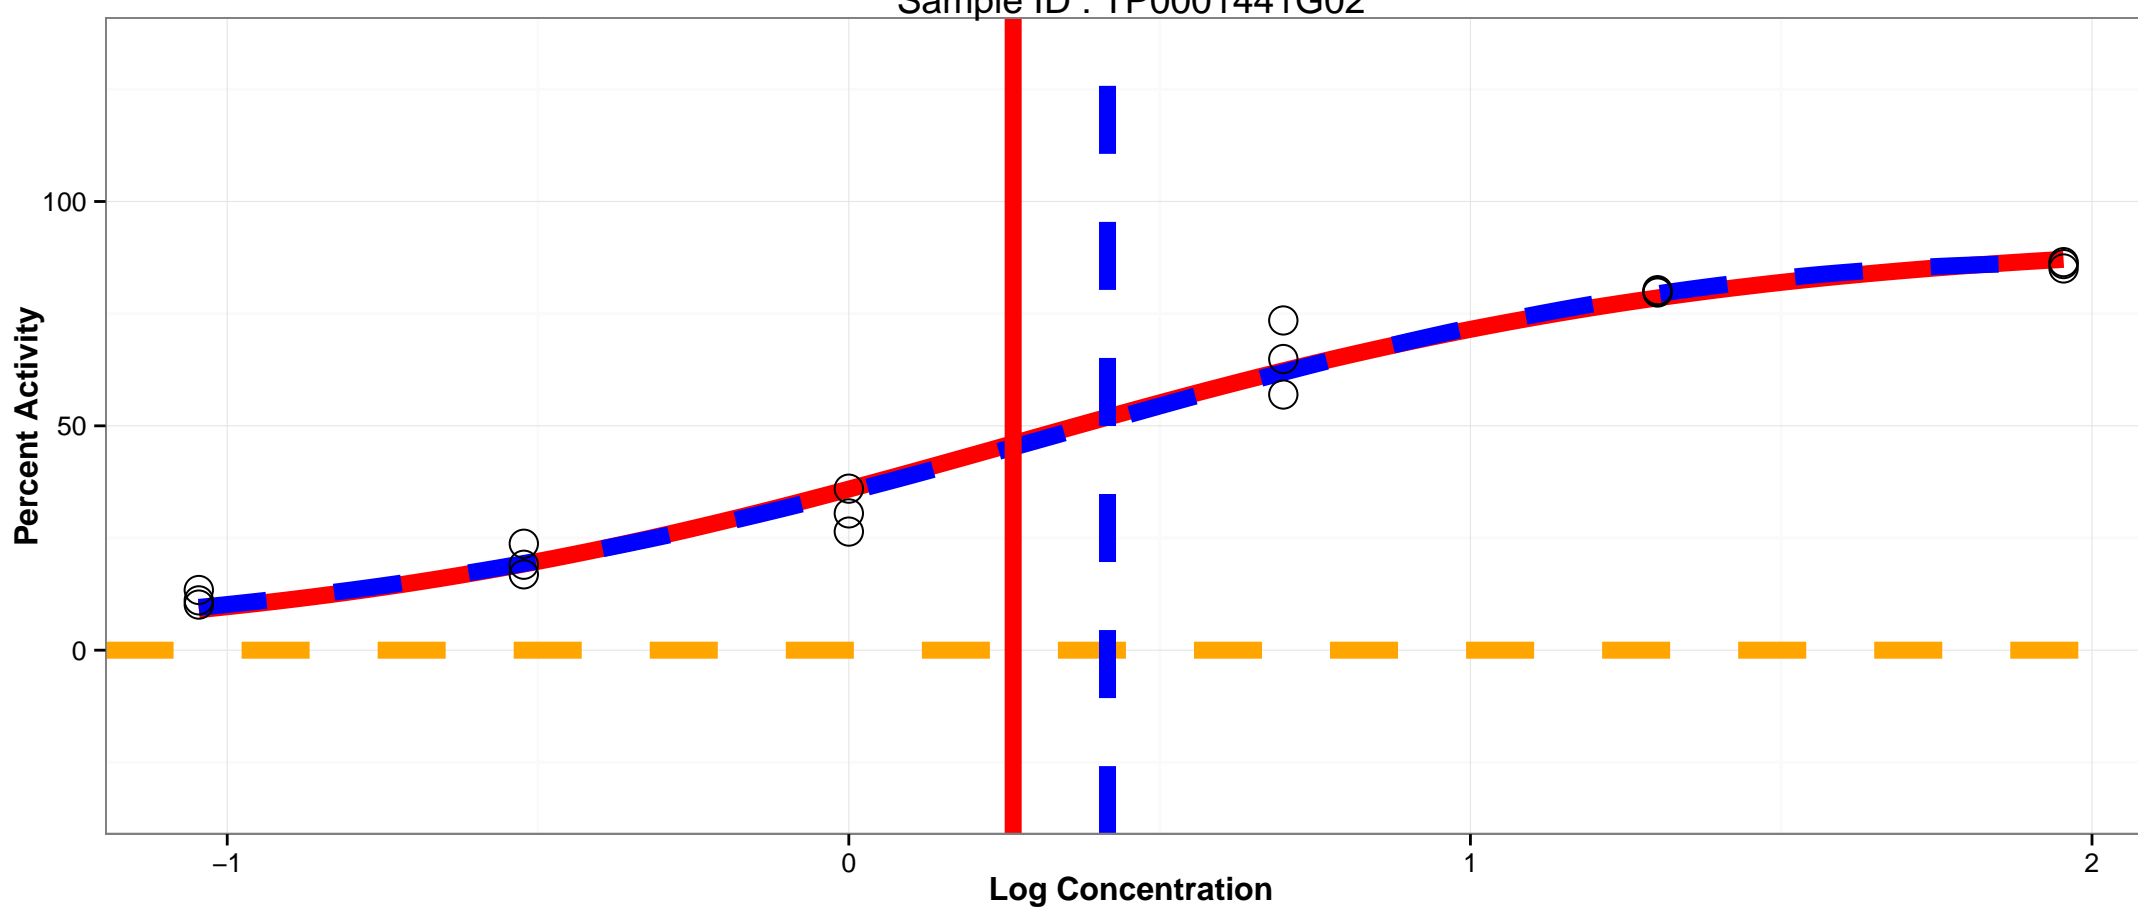

HILL MODEL

|     | tp   | ga     | gw     |
|-----|------|--------|--------|
| val | 92.1 | 0.264  | 0.736  |
| sd  | 2.99 | 0.0763 | 0.0645 |

GAIN-LOSS MODEL

|     | tp  | ga    | gw   | la   | lw    |
|-----|-----|-------|------|------|-------|
| val | 104 | 0.416 | 0.68 | 3.73 | 0.555 |
| sd  | NA  | NA    | NA   | NA   | NA    |

|      | CNST   | HILL   | GNLS   |
|------|--------|--------|--------|
| AIC  | 201.33 | 110.74 | 111.95 |
| PROB | 0      | 0.65   | 0.35   |
| RMSE | 57.12  | 4.36   | 4.18   |

MAX\_MEAN : 85.9 MAX\_MED : 86.1 BMAD : 5.69  
COFF : 20 HIT-CALL : 1 FITC : 42 ACTP : 1  
FLAGS :

Assay ID 1509 (NHEERL\_HEK293T\_CellTiterGLO)  
Sample ID : TP0001441G02

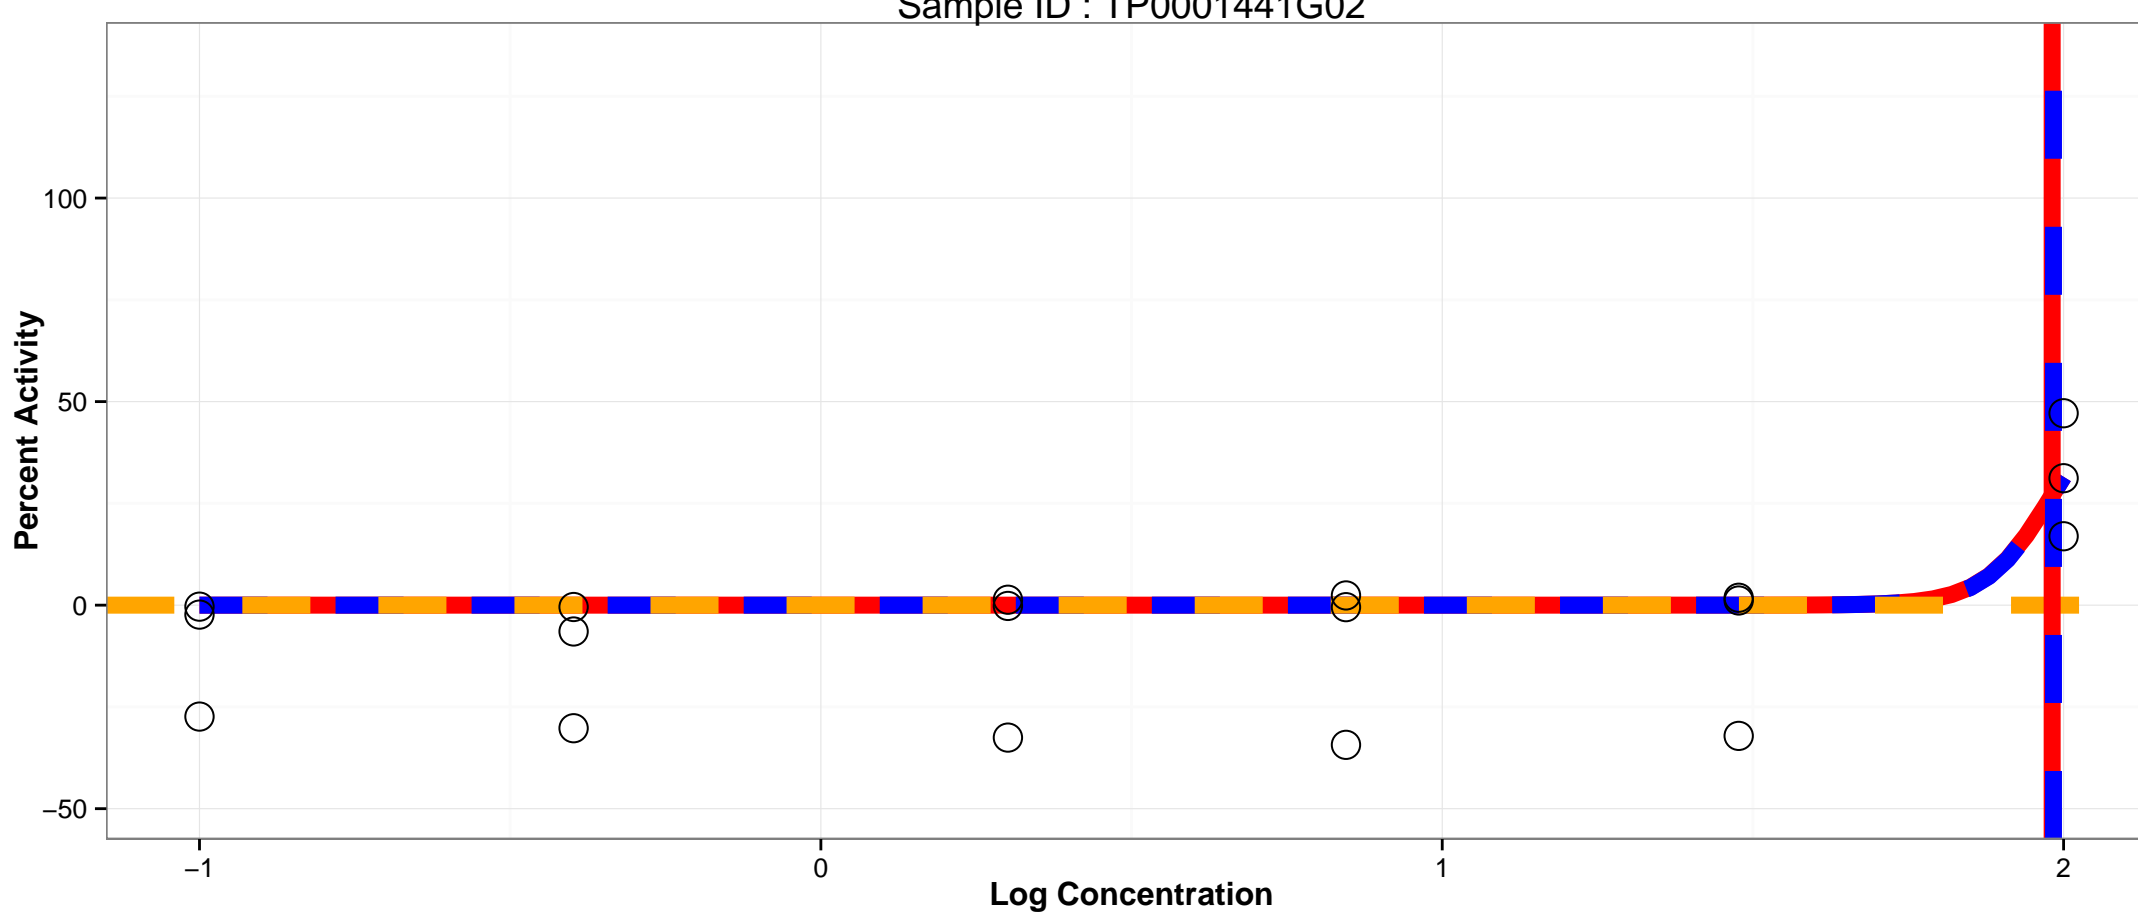

HILL MODEL

|     | tp | ga   | gw |
|-----|----|------|----|
| val | 54 | 1.98 | 8  |
| sd  | NA | NA   | NA |

GAIN-LOSS MODEL

|     | tp   | ga   | gw | la   | lw   |
|-----|------|------|----|------|------|
| val | 54.9 | 1.98 | 8  | 3.93 | 2.94 |
| sd  | NA   | NA   | NA | NA   | NA   |

|      | CNST   | HILL   | GNLS   |
|------|--------|--------|--------|
| AIC  | 164.44 | 161.37 | 165.37 |
| PROB | 0.16   | 0.74   | 0.1    |
| RMSE | 21.69  | 17.39  | 17.39  |

MAX\_MEAN : 31.8 MAX\_MED : 31.2 BMAD : 5.54  
COFF : 20 HIT-CALL : 1 FITC : 42 ACTP : 0.84  
FLAGS : 11; 6

Assay ID 1848 (NHEERL\_QuantLum\_inhib\_2\_dn)  
Sample ID : TP0001441G02

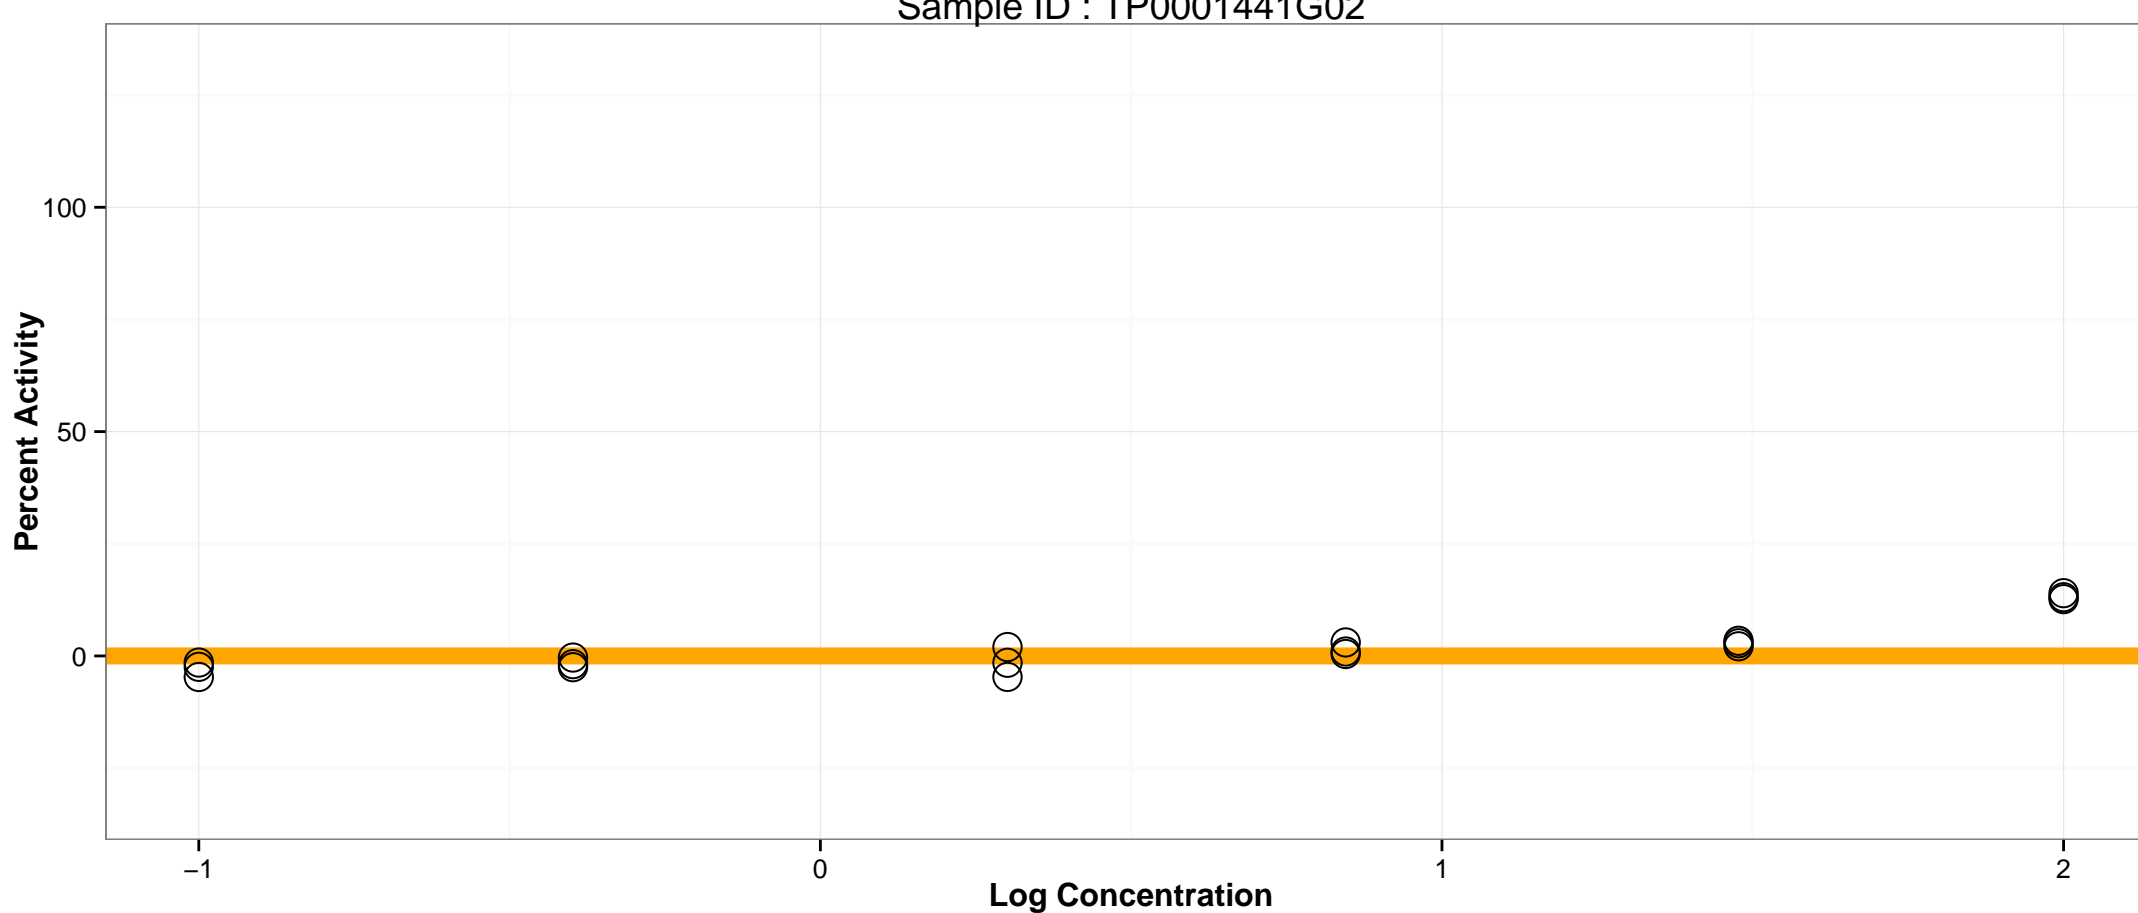

HILL MODEL

HILL MODEL: Not applicable

GAIN-LOSS MODEL

GNLS MODEL: Not applicable

|      | CNST   | HILL | GNLS |
|------|--------|------|------|
| AIC  | 114.29 | NA   | NA   |
| PROB | 1      | NA   | NA   |
| RMSE | 5.92   | NA   | NA   |

MAX\_MEAN : 13.3 MAX\_MED : 13.1 BMAD : 8.58  
COFF : 20 HIT-CALL : 0 FITC : 4 ACTP : 0  
FLAGS :

Chemical : Genistein  
CAS : 446-72-0

Assay ID 1508 (NHEERL\_TPO\_AUR\_dn)  
Sample ID : TP0001441G03

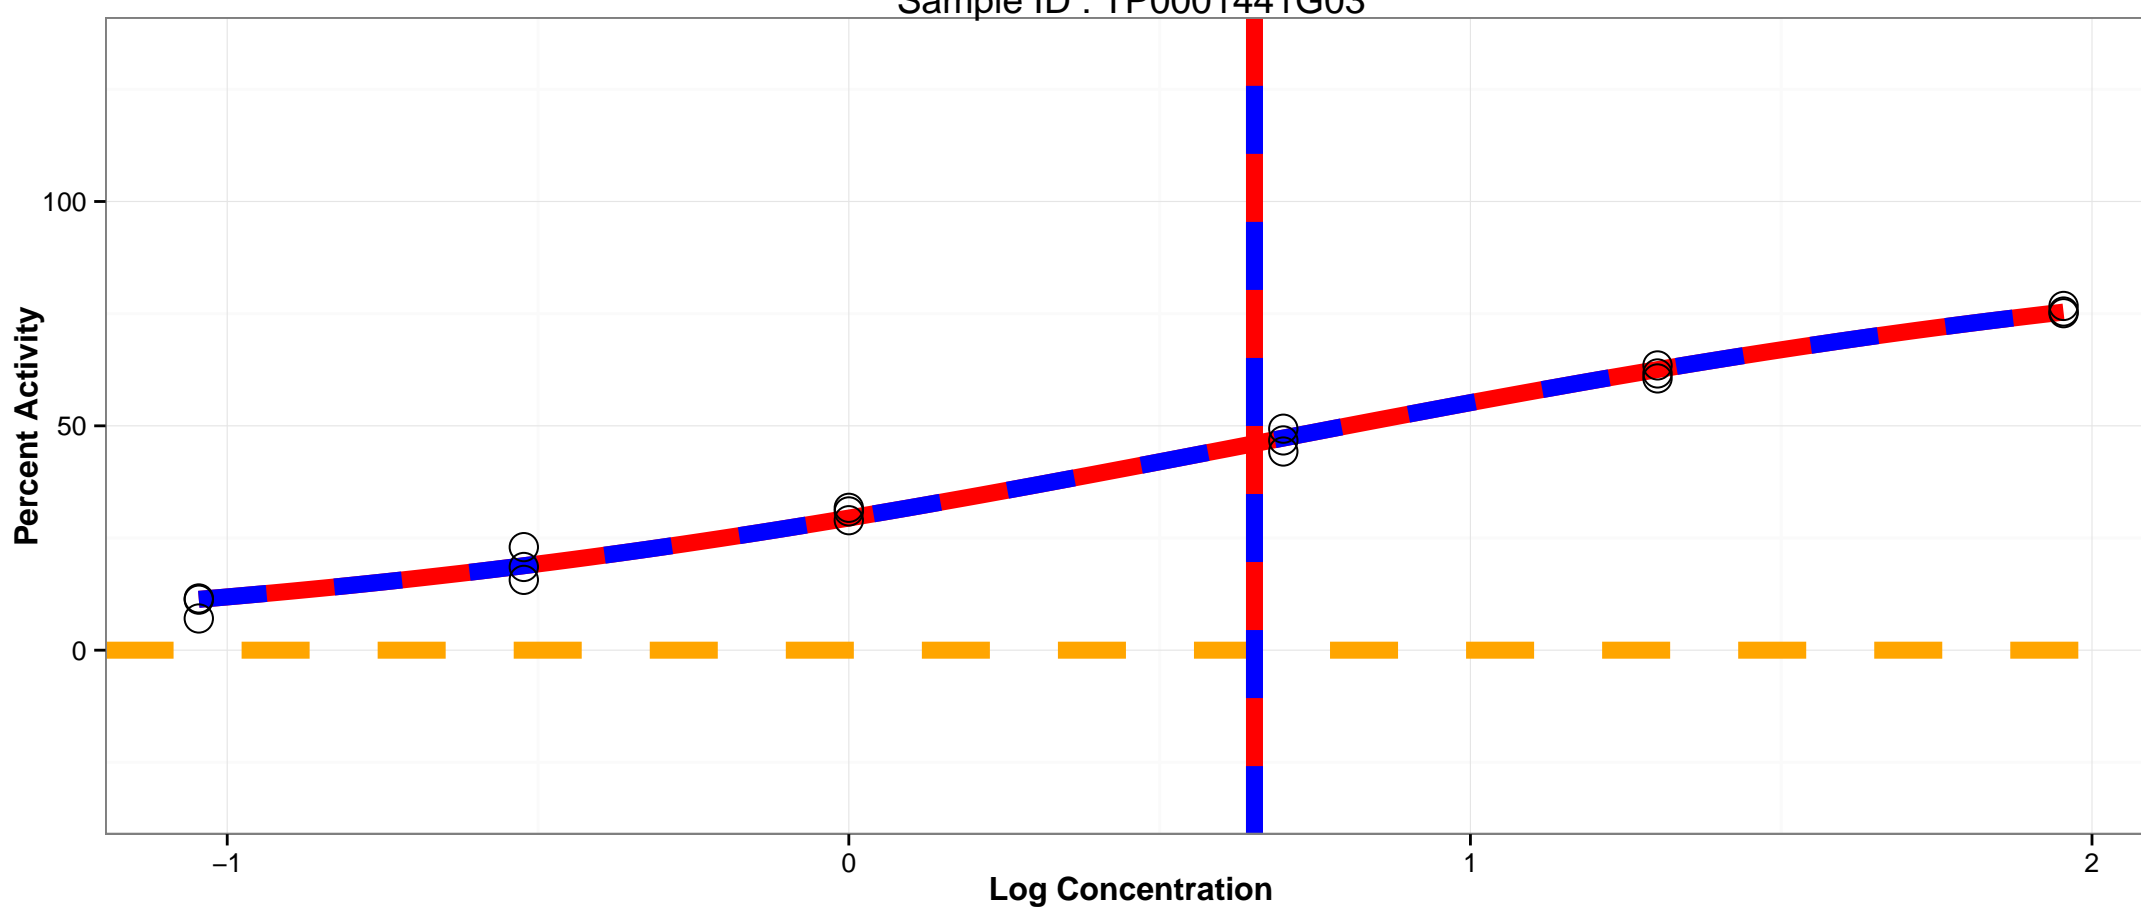

HILL MODEL

|     | tp   | ga     | gw     |
|-----|------|--------|--------|
| val | 92.1 | 0.653  | 0.502  |
| sd  | 3.84 | 0.0953 | 0.0295 |

GAIN-LOSS MODEL

|     | tp   | ga    | gw    | la   | lw |
|-----|------|-------|-------|------|----|
| val | 92.1 | 0.653 | 0.502 | 3.78 | 18 |
| sd  | NA   | NA    | NA    | NA   | NA |

|      | CNST   | HILL  | GNLS  |
|------|--------|-------|-------|
| AIC  | 194.22 | 85.12 | 89.12 |
| PROB | 0      | 0.88  | 0.12  |
| RMSE | 46.88  | 2.03  | 2.03  |

MAX\_MEAN : 75.8 MAX\_MED : 75.5 BMAD : 5.69  
COFF : 20 HIT-CALL : 1 FITC : 42 ACTP : 1  
FLAGS :

Assay ID 1509 (NHEERL\_HEK293T\_CellTiterGLO)  
Sample ID : TP0001441G03

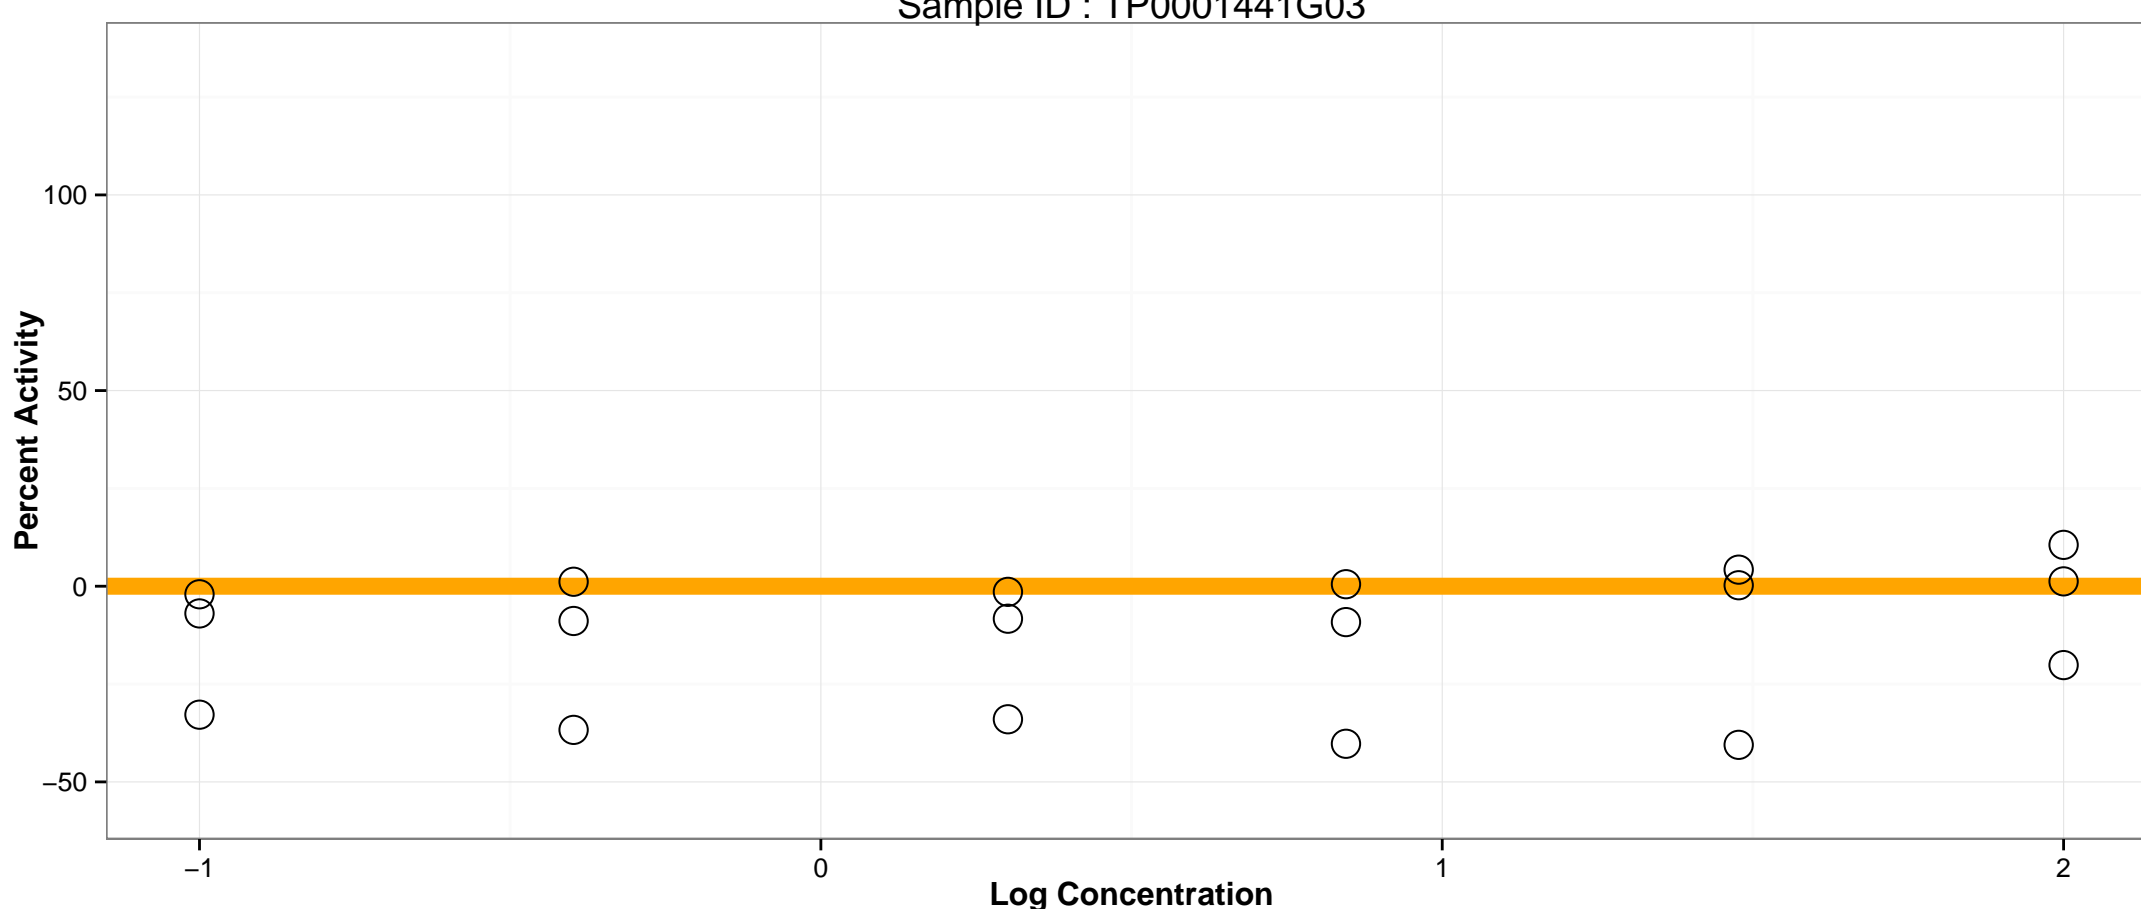

HILL MODEL

HILL MODEL: Not applicable

GAIN-LOSS MODEL

GNLS MODEL: Not applicable

|      | CNST   | HILL | GNLS |
|------|--------|------|------|
| AIC  | 161.84 | NA   | NA   |
| PROB | 1      | NA   | NA   |
| RMSE | 20.63  | NA   | NA   |

MAX\_MEAN : -2.77 MAX\_MED : 1.25 BMAD : 5.54  
COFF : 20 HIT-CALL : 0 FITC : 4 ACTP : 0  
FLAGS : 10

Assay ID 1848 (NHEERL\_QuantLum\_inhib\_2\_dn)  
Sample ID : TP0001441G03

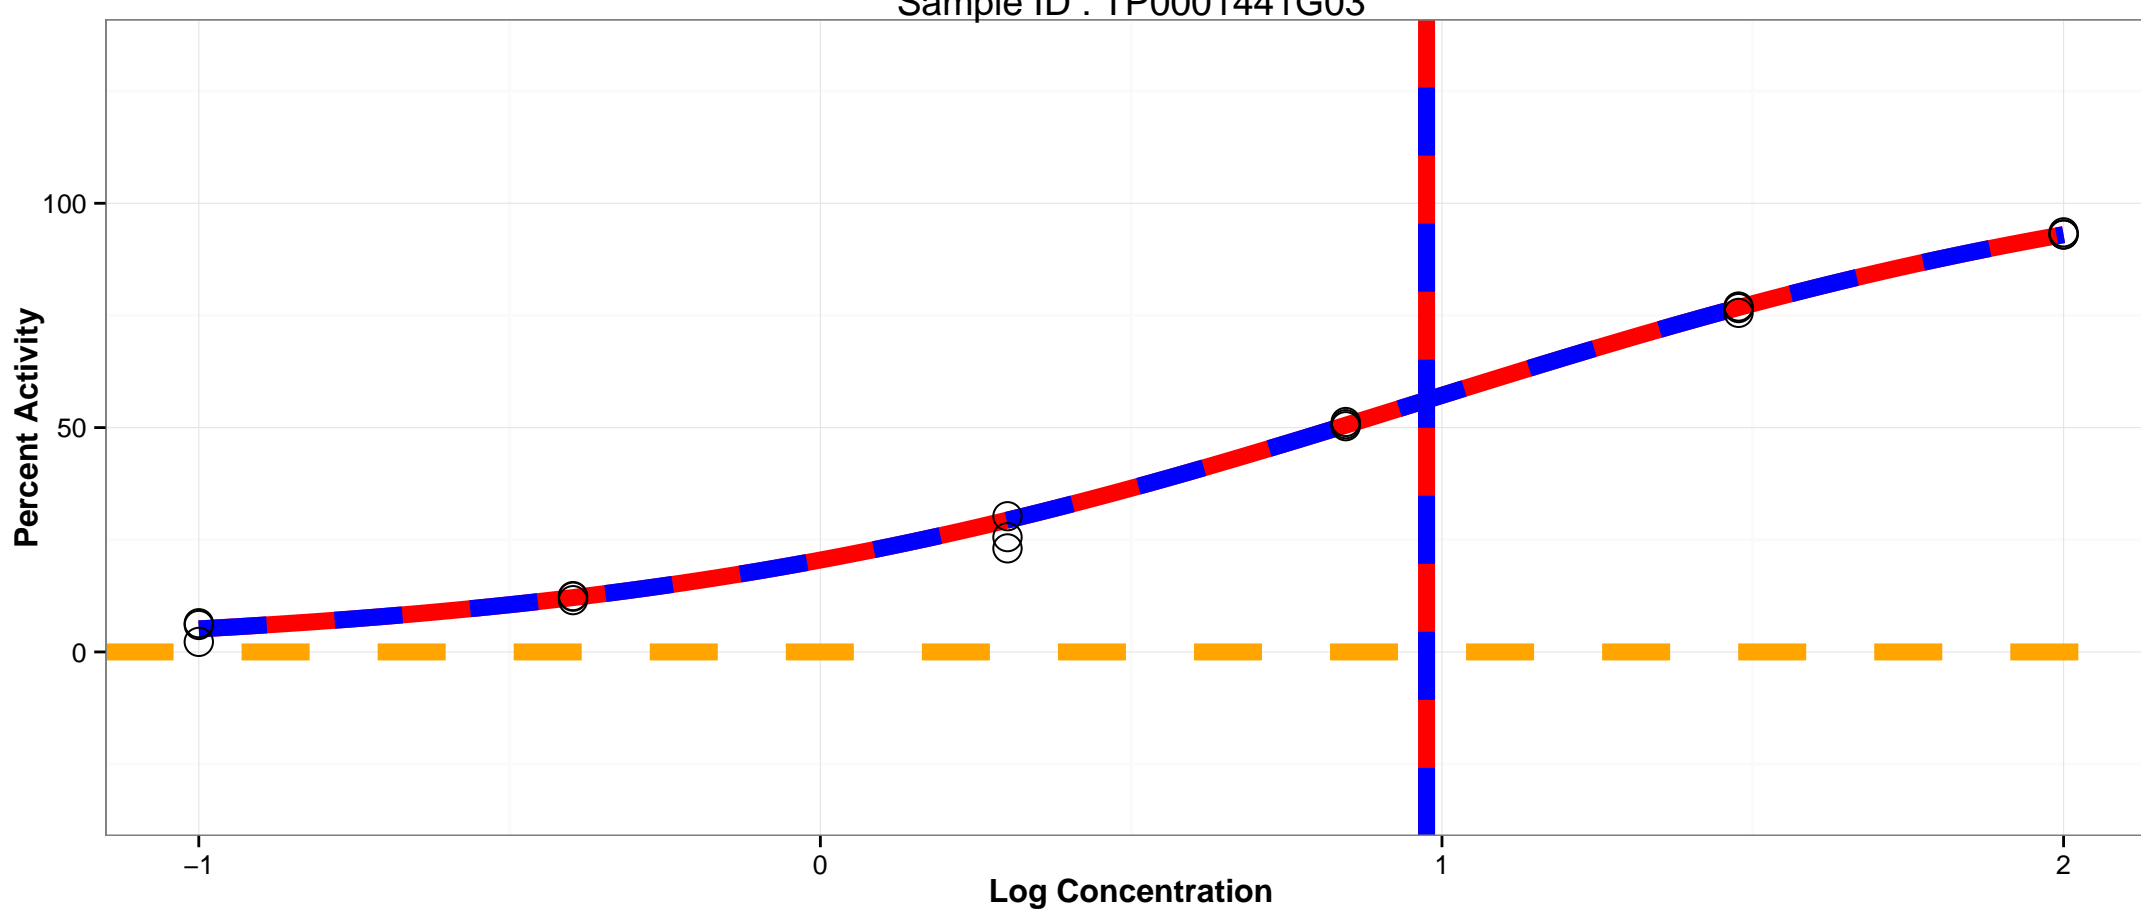

HILL MODEL

|     | tp   | ga     | gw     |
|-----|------|--------|--------|
| val | 112  | 0.975  | 0.668  |
| sd  | 1.32 | 0.0211 | 0.0127 |

GAIN-LOSS MODEL

|     | tp  | ga    | gw    | la   | lw   |
|-----|-----|-------|-------|------|------|
| val | 112 | 0.975 | 0.668 | 2.91 | 17.9 |
| sd  | NA  | NA    | NA    | NA   | NA   |

|      | CNST   | HILL  | GNLS  |
|------|--------|-------|-------|
| AIC  | 199.07 | 75.24 | 79.24 |
| PROB | 0      | 0.88  | 0.12  |
| RMSE | 54.74  | 1.95  | 1.95  |

MAX\_MEAN : 93.2 MAX\_MED : 93.1 BMAD : 8.58  
COFF : 20 HIT-CALL : 1 FITC : 42 ACTP : 1  
FLAGS :

Chemical : Genistein  
CAS : 446-72-0

Assay ID 1508 (NHEERL\_TPO\_AUR\_dn)  
Sample ID : TX009779

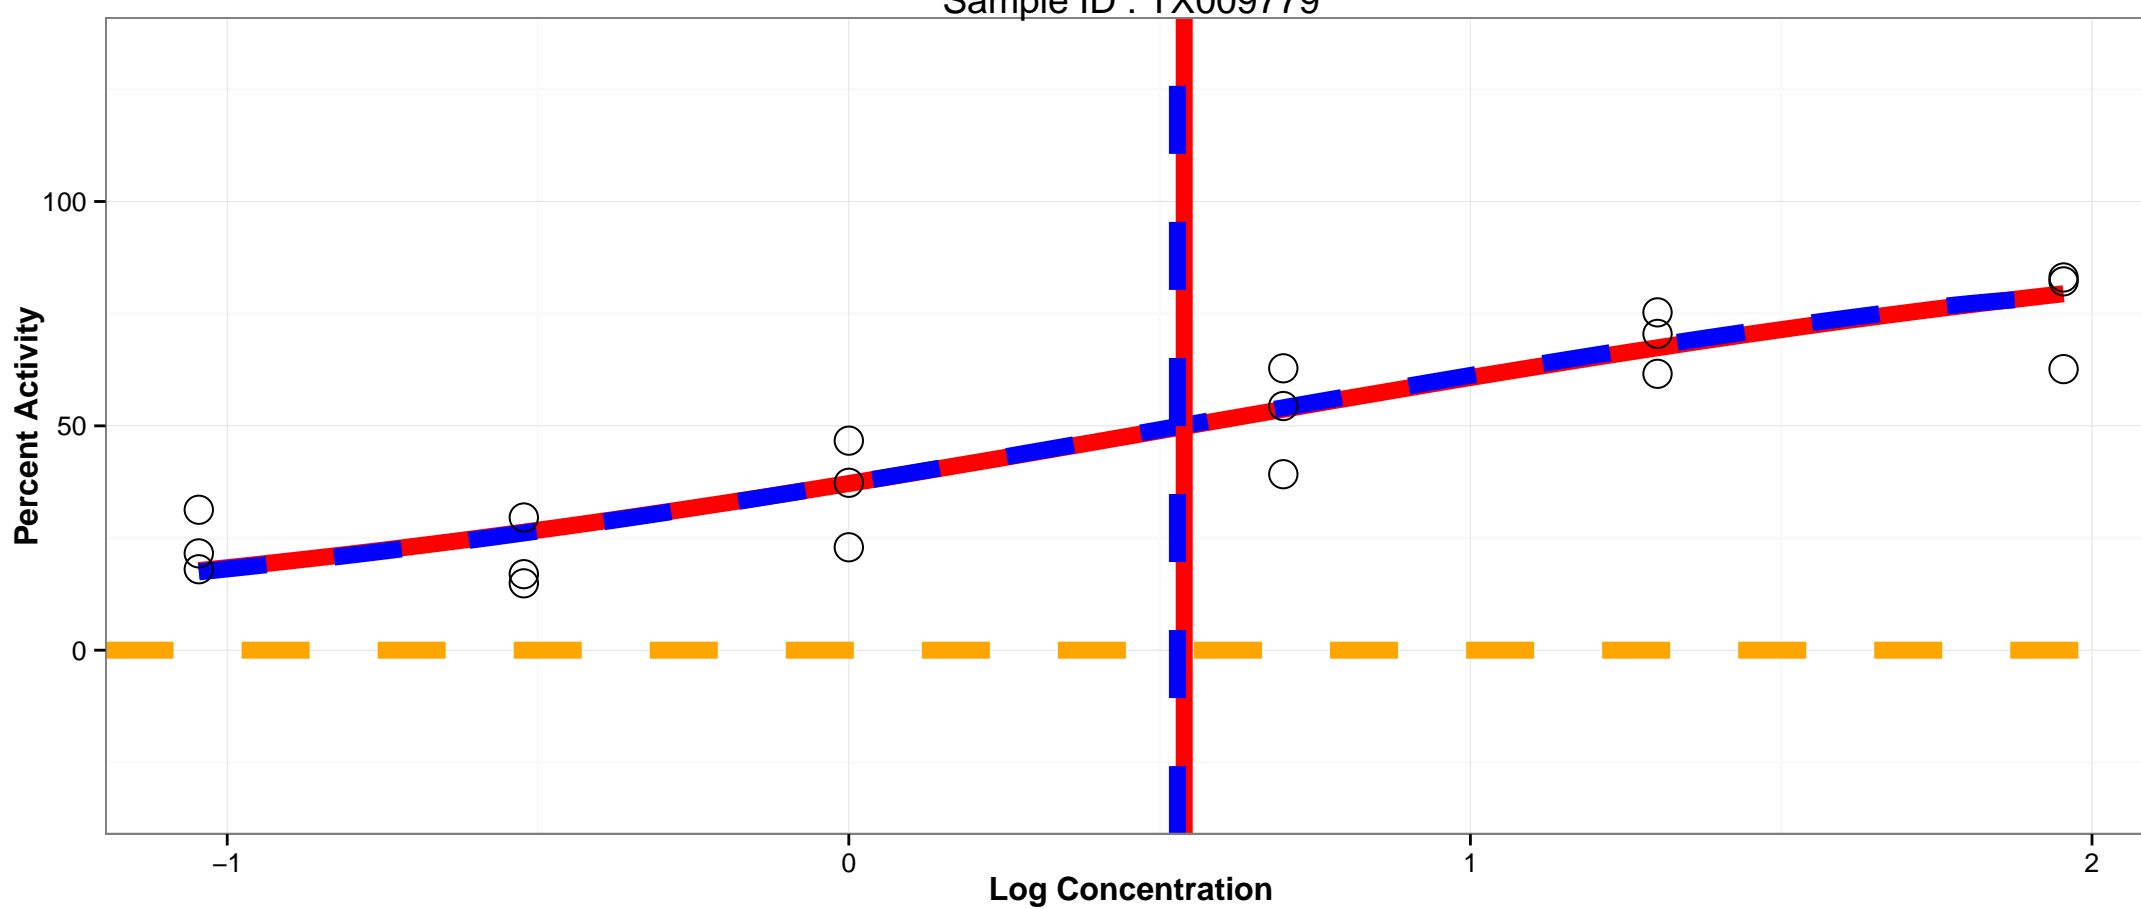

HILL MODEL

|     | tp   | ga    | gw    |
|-----|------|-------|-------|
| val | 99.7 | 0.54  | 0.419 |
| sd  | 22.4 | 0.567 | 0.123 |

GAIN-LOSS MODEL

|     | tp   | ga    | gw    | la   | lw  |
|-----|------|-------|-------|------|-----|
| val | 99.7 | 0.529 | 0.428 | 2.35 | 4.3 |
| sd  | 35.9 | 0.815 | 0.143 | 19.7 | 210 |

|      | CNST   | HILL   | GNLS   |
|------|--------|--------|--------|
| AIC  | 197.91 | 139.71 | 143.66 |
| PROB | 0      | 0.88   | 0.12   |
| RMSE | 51.5   | 8.89   | 8.84   |

MAX\_MEAN : 76 MAX\_MED : 82.2 BMAD : 5.69  
COFF : 20 HIT-CALL : 1 FITC : 42 ACTP : 1  
FLAGS :

Assay ID 1509 (NHEERL\_HEK293T\_CellTiterGLO)  
Sample ID : TX009779

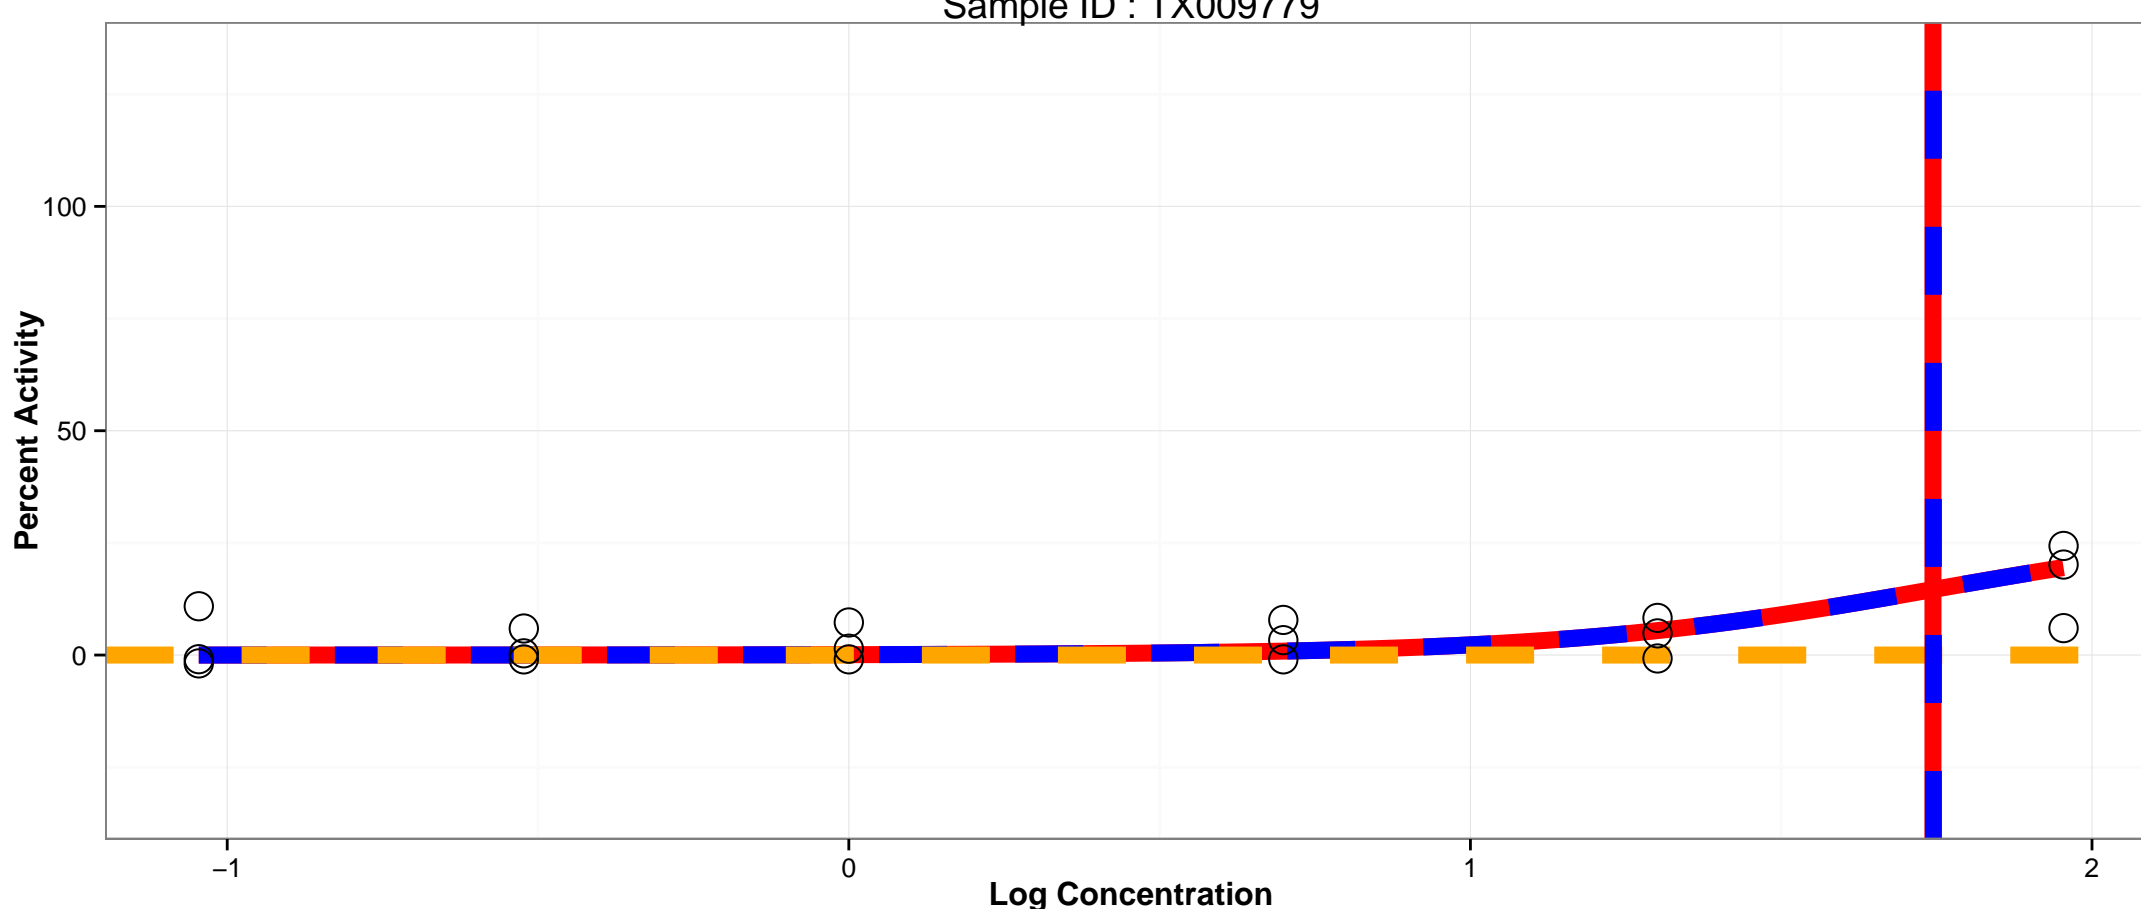

HILL MODEL

|     | tp   | ga    | gw   |
|-----|------|-------|------|
| val | 29.2 | 1.74  | 1.44 |
| sd  | 25.8 | 0.627 | 1.37 |

GAIN-LOSS MODEL

|     | tp   | ga    | gw   | la   | lw   |
|-----|------|-------|------|------|------|
| val | 29.2 | 1.74  | 1.44 | 3.84 | 3.94 |
| sd  | 25.2 | 0.613 | 1.35 | 1730 | 3620 |

|      | CNST   | HILL   | GNLS   |
|------|--------|--------|--------|
| AIC  | 128.66 | 119.05 | 123.05 |
| PROB | 0.01   | 0.87   | 0.12   |
| RMSE | 8.87   | 5.39   | 5.39   |

MAX\_MEAN : 16.8 MAX\_MED : 20.2 BMAD : 5.54  
COFF : 20 HIT-CALL : 1 FITC : 42 ACTP : 0.993  
FLAGS : 11; 6

Assay ID 1848 (NHEERL\_QuantLum\_inhib\_2\_dn)  
Sample ID : TX009779

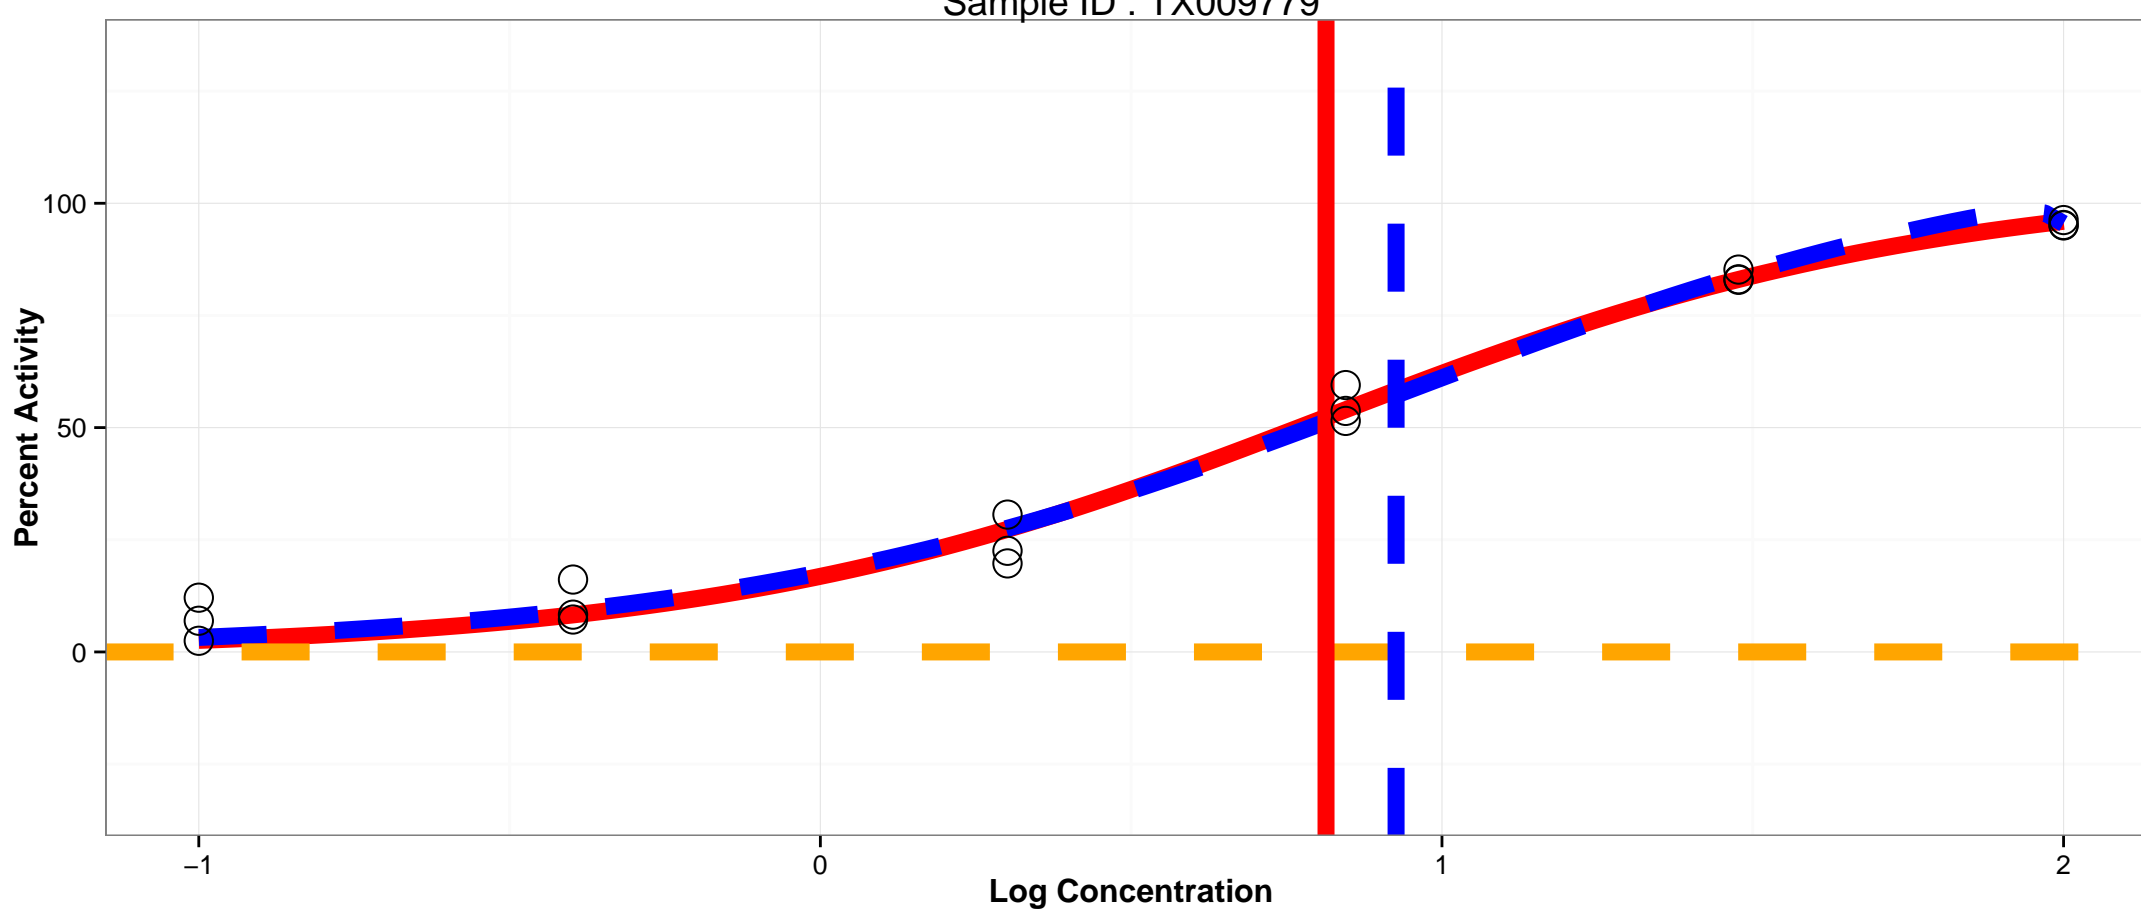

HILL MODEL

|     | tp   | ga    | gw     |
|-----|------|-------|--------|
| val | 105  | 0.813 | 0.881  |
| sd  | 3.81 | 0.055 | 0.0854 |

GAIN-LOSS MODEL

|     | tp  | ga    | gw    | la   | lw   |
|-----|-----|-------|-------|------|------|
| val | 114 | 0.926 | 0.798 | 2.09 | 13.9 |
| sd  | NA  | NA    | NA    | NA   | NA   |

|      | CNST   | HILL   | GNLS   |
|------|--------|--------|--------|
| AIC  | 200.97 | 109.69 | 112.84 |
| PROB | 0      | 0.83   | 0.17   |
| RMSE | 57.69  | 4.13   | 4.02   |

MAX\_MEAN : 95.5 MAX\_MED : 95.2 BMAD : 8.58  
COFF : 20 HIT-CALL : 1 FITC : 42 ACTP : 1  
FLAGS :

Chemical : Benzo(e)pyrene  
CAS : 192-97-2

Assay ID 1508 (NHEERL\_TPO\_AUR\_dn)  
Sample ID : TP0001441G04

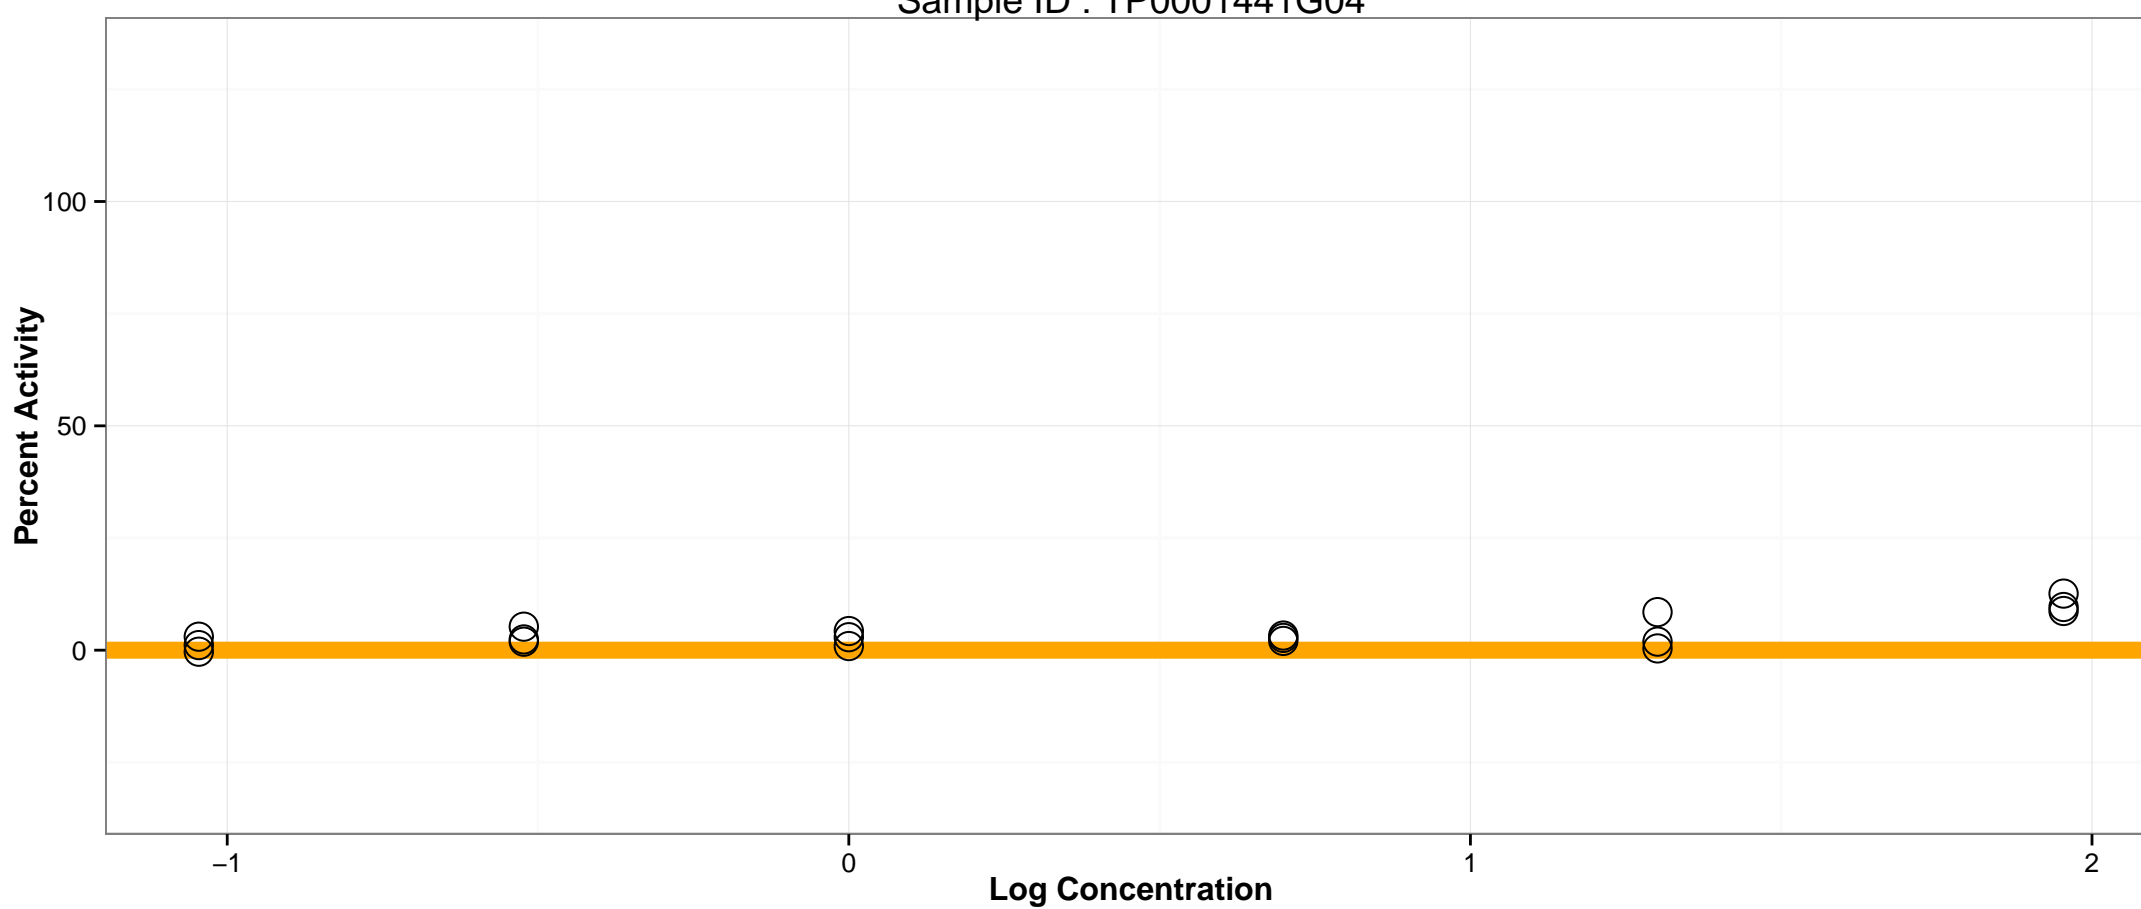

HILL MODEL

HILL MODEL: Not applicable

GAIN-LOSS MODEL

GNLS MODEL: Not applicable

|      | CNST   | HILL | GNLS |
|------|--------|------|------|
| AIC  | 112.81 | NA   | NA   |
| PROB | 1      | NA   | NA   |
| RMSE | 5.28   | NA   | NA   |

MAX\_MEAN : 10.3 MAX\_MED : 9.64 BMAD : 5.69  
COFF : 20 HIT-CALL : 0 FITC : 4 ACTP : 0  
FLAGS :

Assay ID 1509 (NHEERL\_HEK293T\_CellTiterGLO)  
Sample ID : TP0001441G04

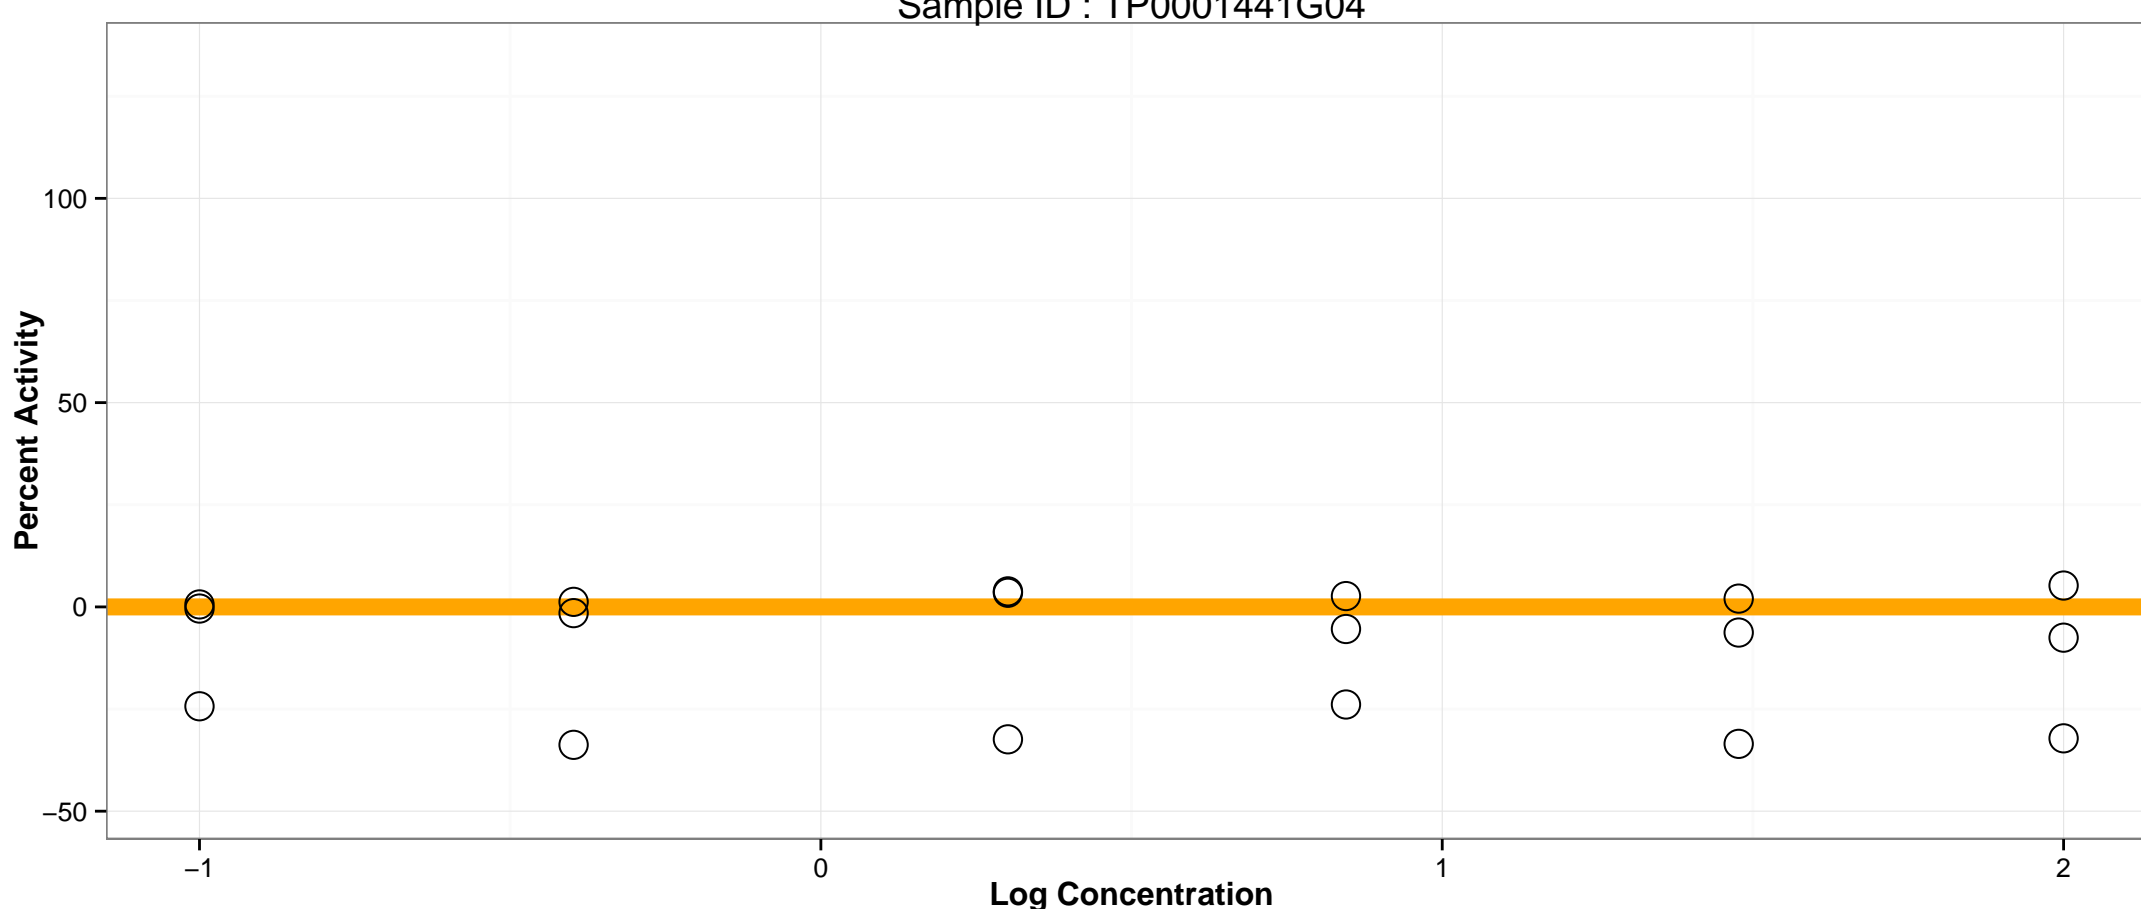

HILL MODEL

HILL MODEL: Not applicable

GAIN-LOSS MODEL

GNLS MODEL: Not applicable

|      | CNST  | HILL | GNLS |
|------|-------|------|------|
| AIC  | 156.4 | NA   | NA   |
| PROB | 1     | NA   | NA   |
| RMSE | 17.8  | NA   | NA   |

MAX\_MEAN : -8.02 MAX\_MED : 3.47 BMAD : 5.54  
COFF : 20 HIT-CALL : 0 FITC : 4 ACTP : 0  
FLAGS :

Assay ID 1848 (NHEERL\_Quantilum\_inhib\_2\_dn)  
Sample ID : TP0001441G04

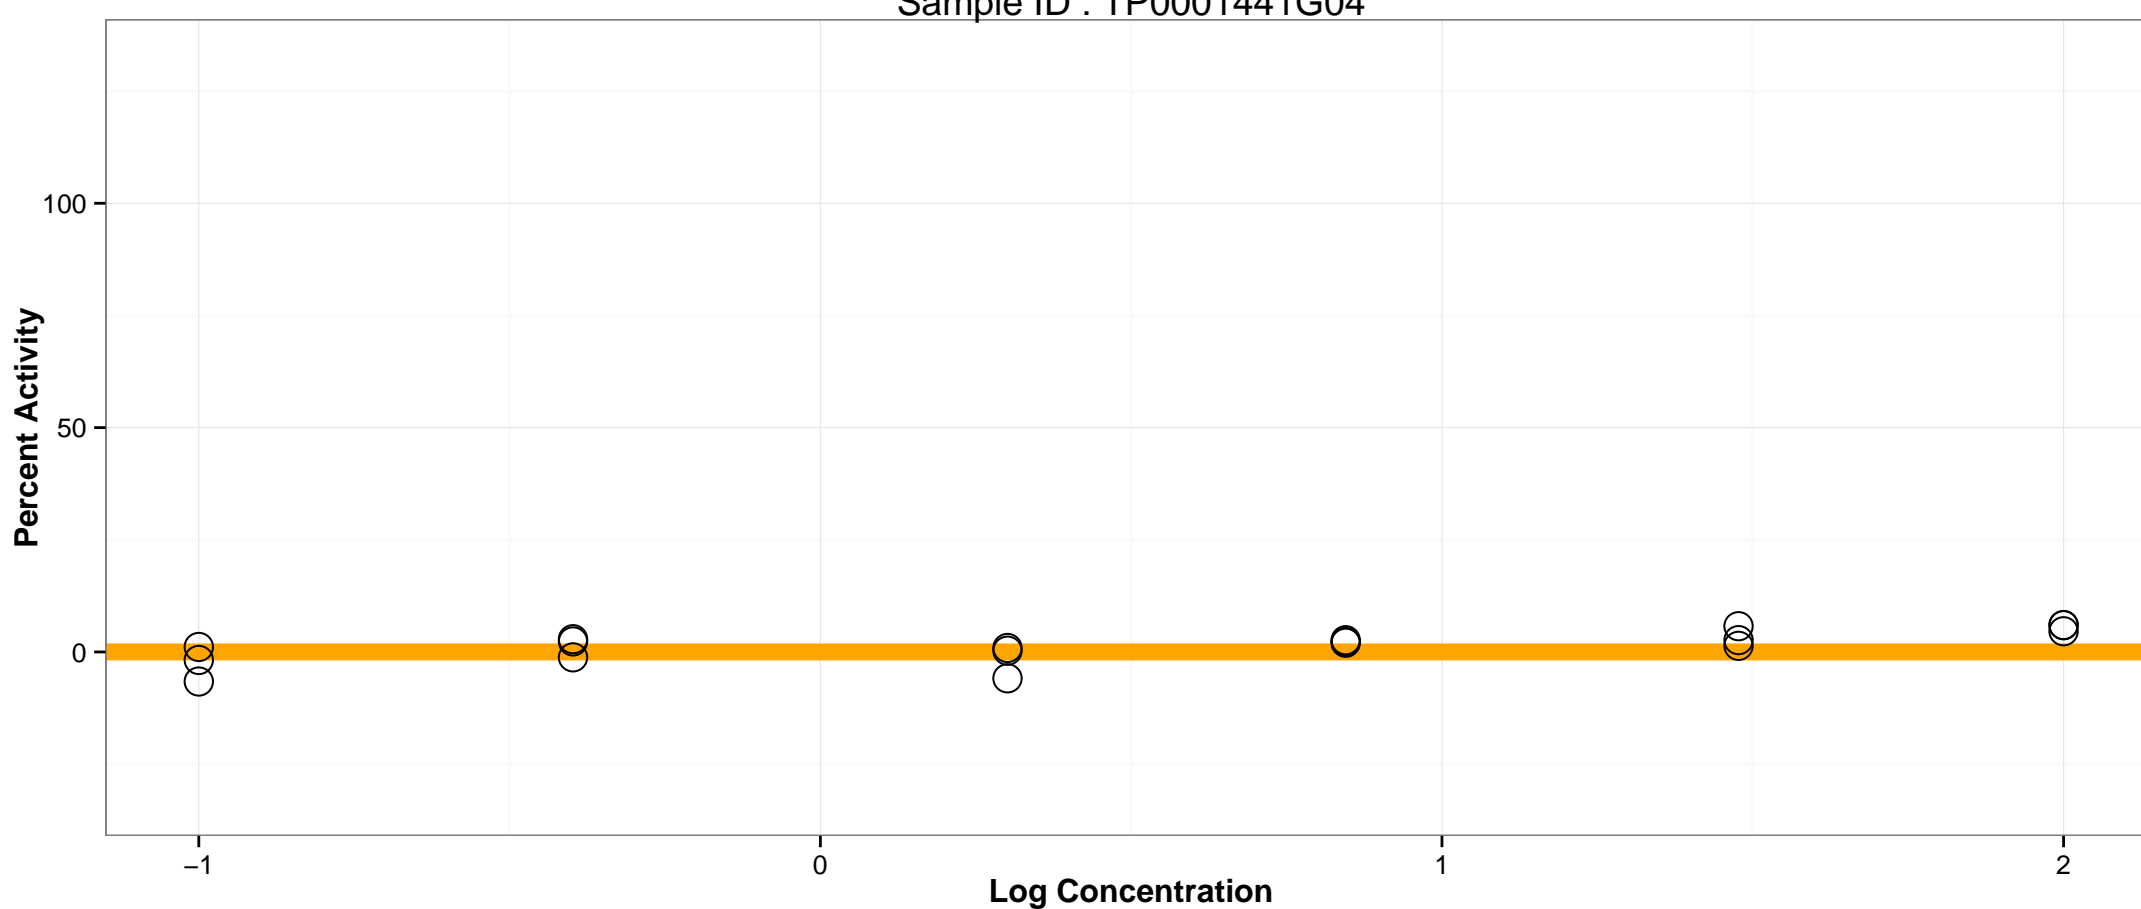

HILL MODEL

HILL MODEL: Not applicable

GAIN-LOSS MODEL

GNLS MODEL: Not applicable

|      | CNST   | HILL | GNLS |
|------|--------|------|------|
| AIC  | 102.38 | NA   | NA   |
| PROB | 1      | NA   | NA   |
| RMSE | 3.72   | NA   | NA   |

MAX\_MEAN : 5.53 MAX\_MED : 5.97 BMAD : 8.58  
COFF : 20 HIT-CALL : 0 FITC : 4 ACTP : 0  
FLAGS :

Chemical : 2,4-Dihydroxybenzophenone  
CAS : 131-56-6

Assay ID 1508 (NHEERL\_TPO\_AUR\_dn)  
Sample ID : TP0001441G05

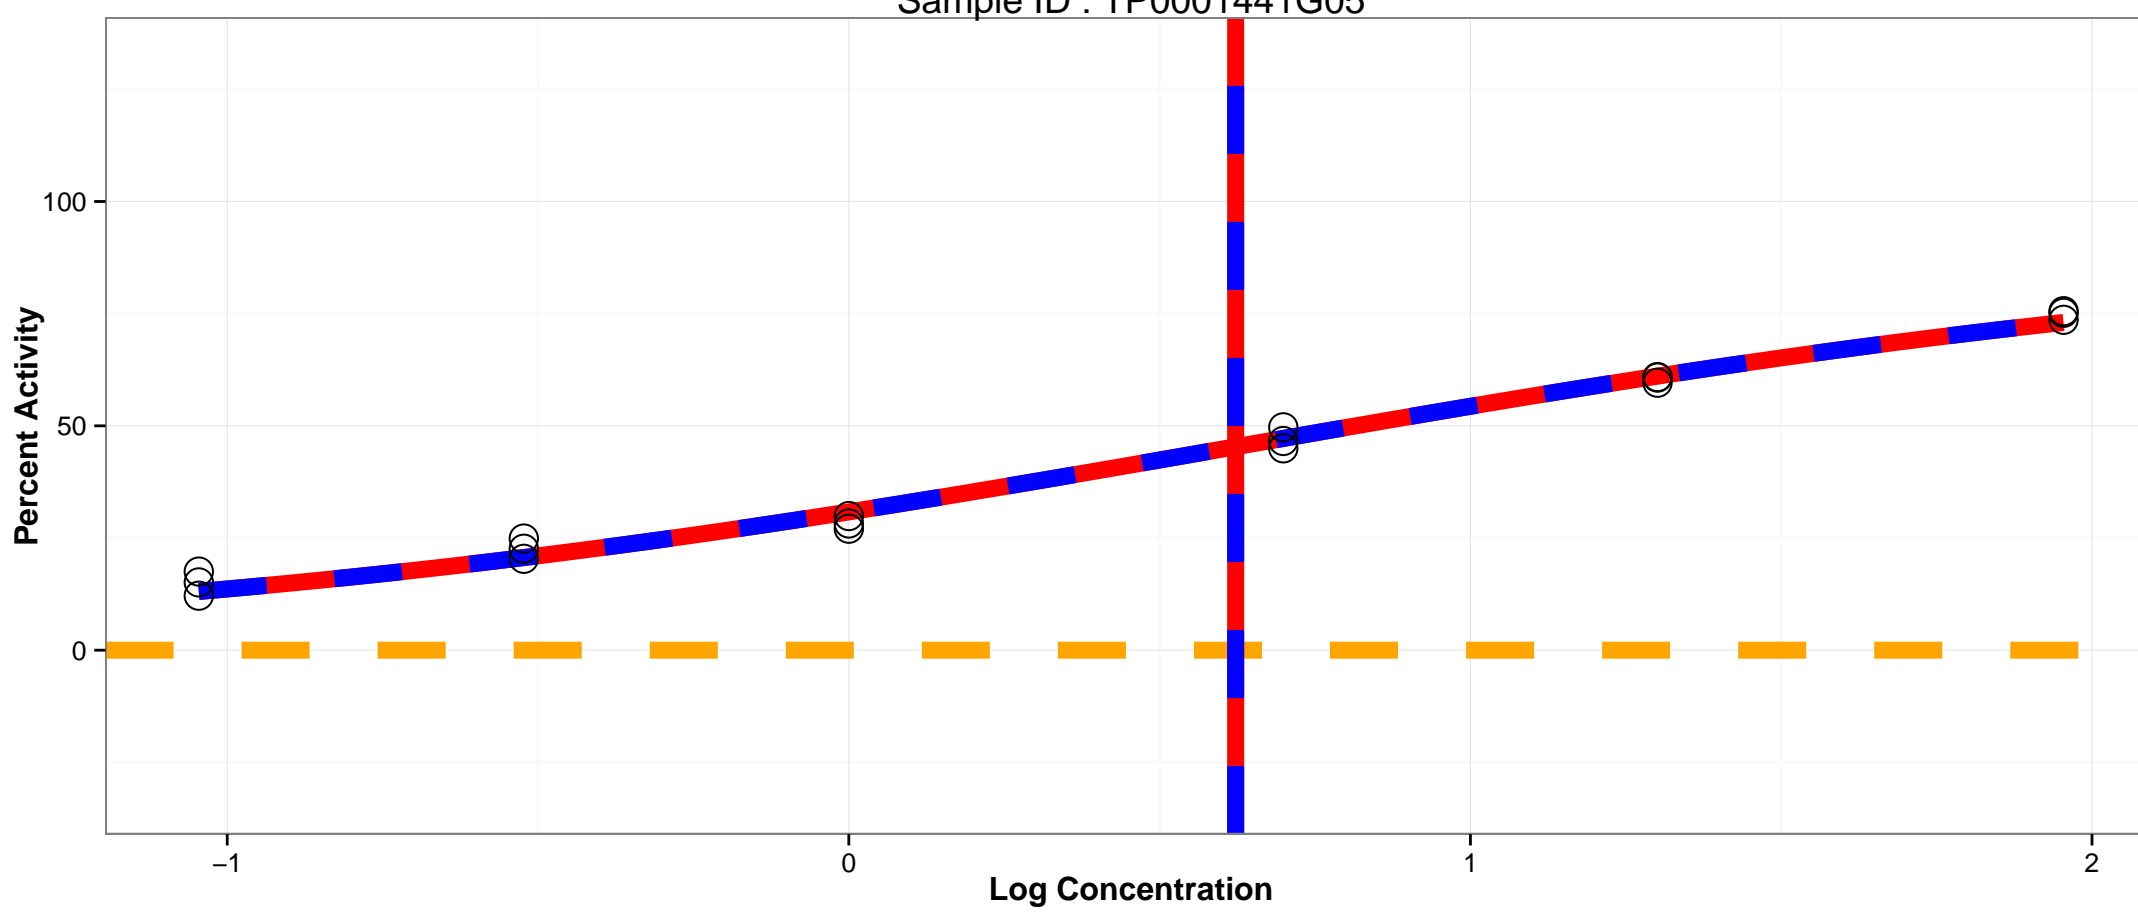

HILL MODEL

|     | tp   | ga    | gw     |
|-----|------|-------|--------|
| val | 90.7 | 0.622 | 0.463  |
| sd  | 5.82 | 0.148 | 0.0355 |

GAIN-LOSS MODEL

|     | tp   | ga    | gw    | la   | lw   |
|-----|------|-------|-------|------|------|
| val | 90.7 | 0.622 | 0.463 | 3.95 | 6.81 |
| sd  | NA   | NA    | NA    | NA   | NA   |

|      | CNST   | HILL  | GNLS  |
|------|--------|-------|-------|
| AIC  | 194.14 | 90.48 | 94.48 |
| PROB | 0      | 0.88  | 0.12  |
| RMSE | 46.59  | 2.27  | 2.27  |

MAX\_MEAN : 74.8 MAX\_MED : 75.2 BMAD : 5.69  
COFF : 20 HIT-CALL : 1 FITC : 42 ACTP : 1  
FLAGS :

Assay ID 1509 (NHEERL\_HEK293T\_CellTiterGLO)  
Sample ID : TP0001441G05

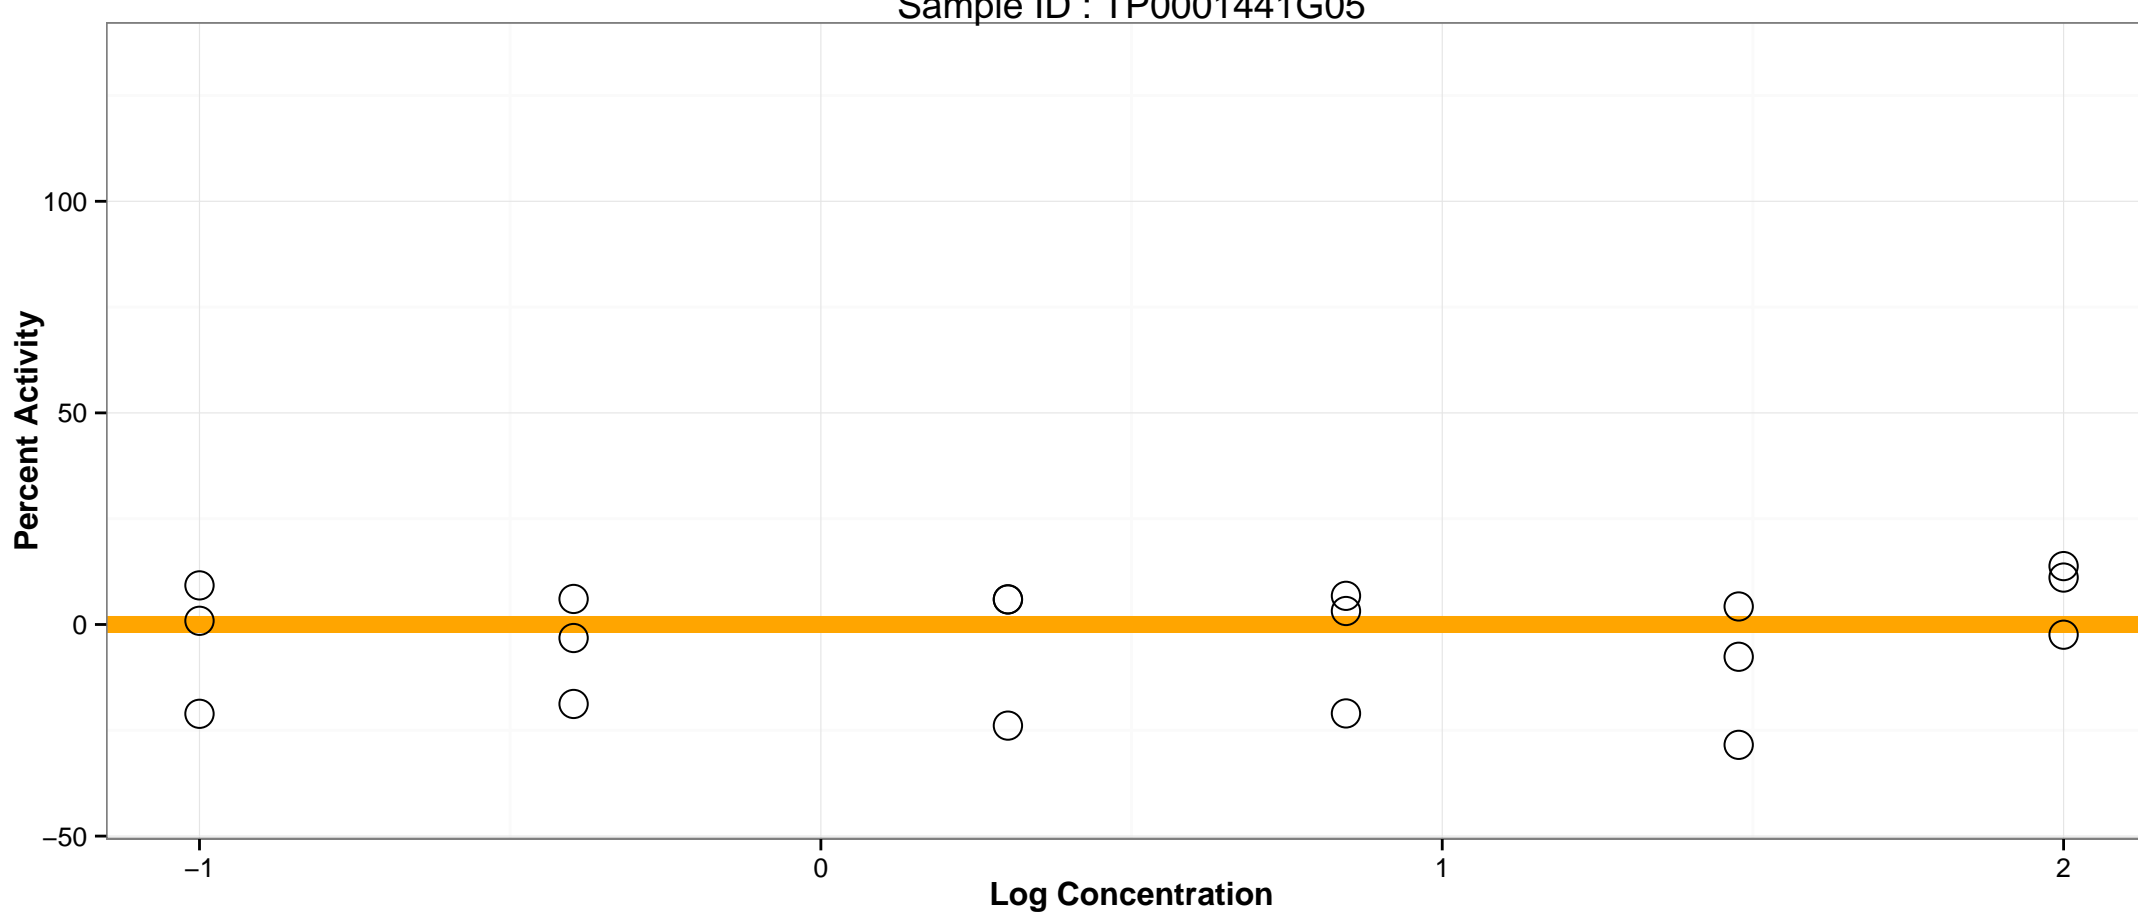

HILL MODEL  
HILL MODEL: Not applicable

GAIN-LOSS MODEL  
GNLS MODEL: Not applicable

|      | CNST   | HILL | GNLS |
|------|--------|------|------|
| AIC  | 147.82 | NA   | NA   |
| PROB | 1      | NA   | NA   |
| RMSE | 13.48  | NA   | NA   |

MAX\_MEAN : 7.51 MAX\_MED : 11.1 BMAD : 5.54  
COFF : 20 HIT-CALL : 0 FITC : 4 ACTP : 0  
FLAGS :

Assay ID 1848 (NHEERL\_Quantilum\_inhib\_2\_dn)  
Sample ID : TP0001441G05

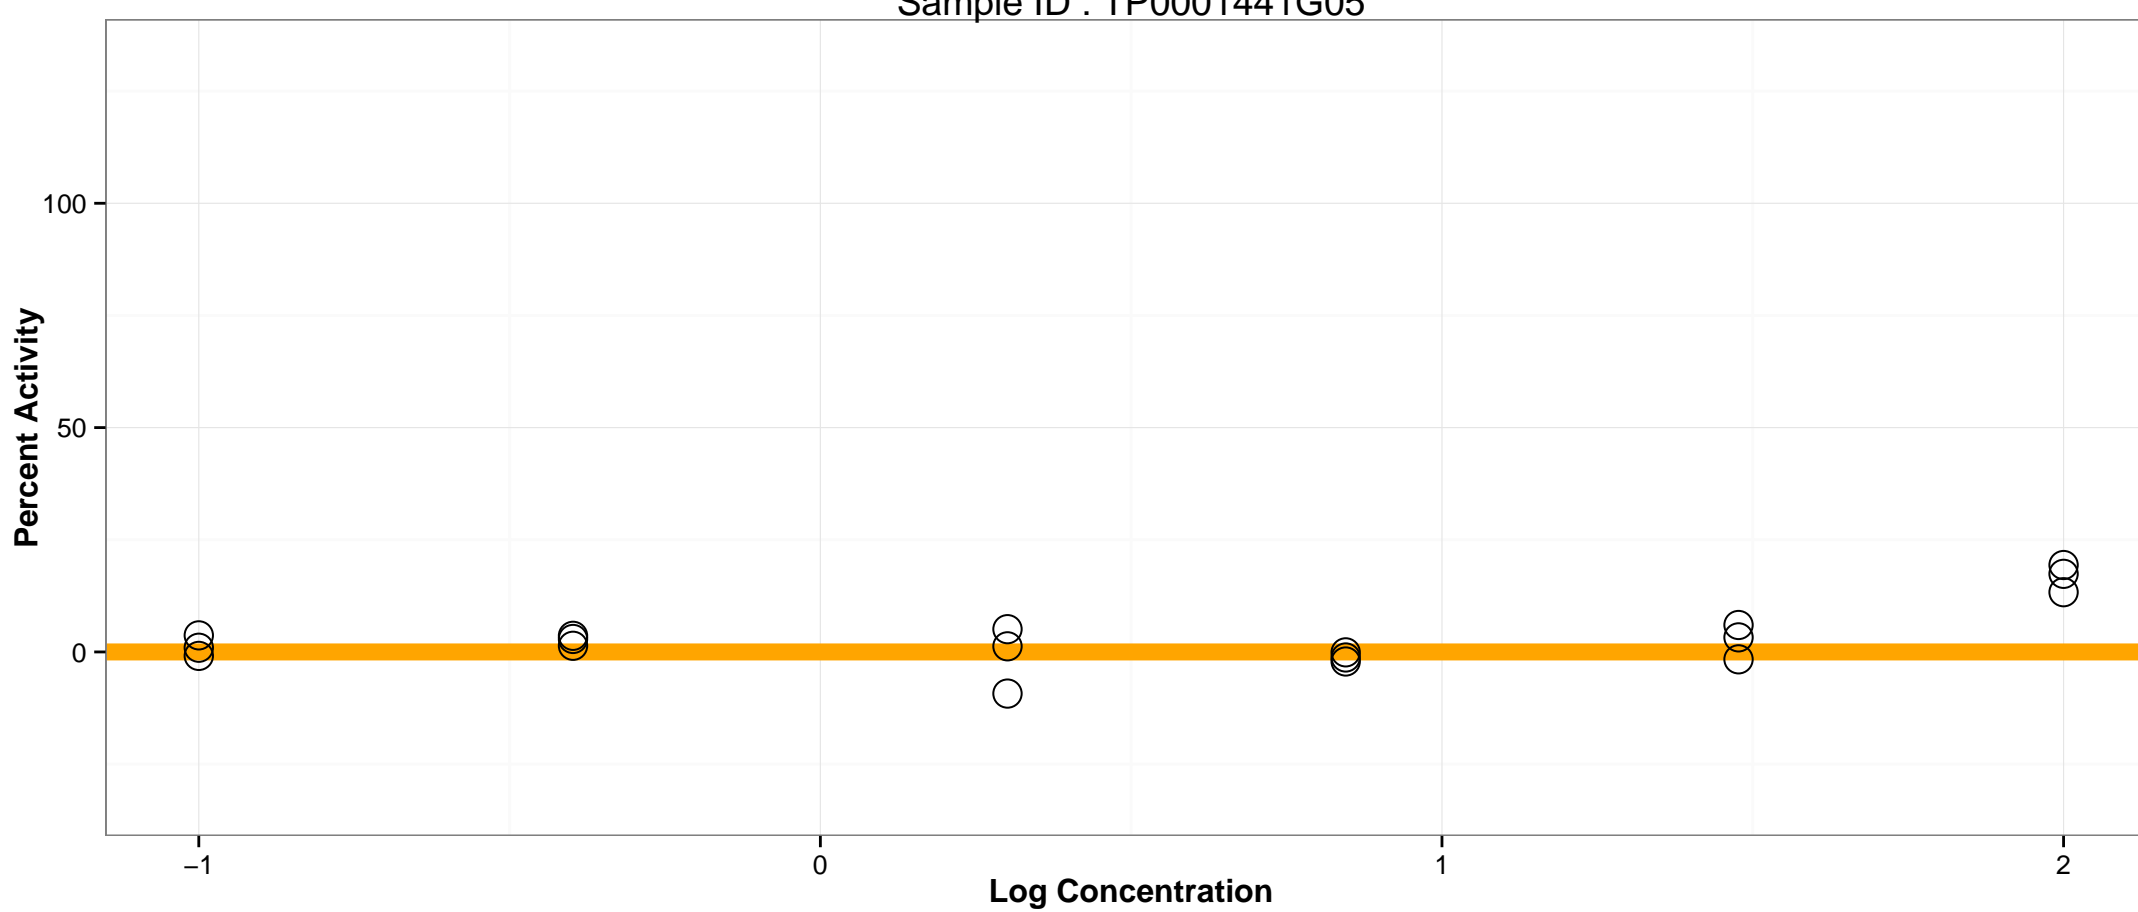

HILL MODEL  
HILL MODEL: Not applicable

GAIN-LOSS MODEL  
GNLS MODEL: Not applicable

|      | CNST   | HILL | GNLS |
|------|--------|------|------|
| AIC  | 123.76 | NA   | NA   |
| PROB | 1      | NA   | NA   |
| RMSE | 7.69   | NA   | NA   |

MAX\_MEAN : 16.7 MAX\_MED : 17.4 BMAD : 8.58  
COFF : 20 HIT-CALL : 0 FITC : 4 ACTP : 0  
FLAGS :

Chemical : Dipyrone monohydrate  
CAS : 5907-38-0

Assay ID 1508 (NHEERL\_TPO\_AUR\_dn)  
Sample ID : TP0001441G06

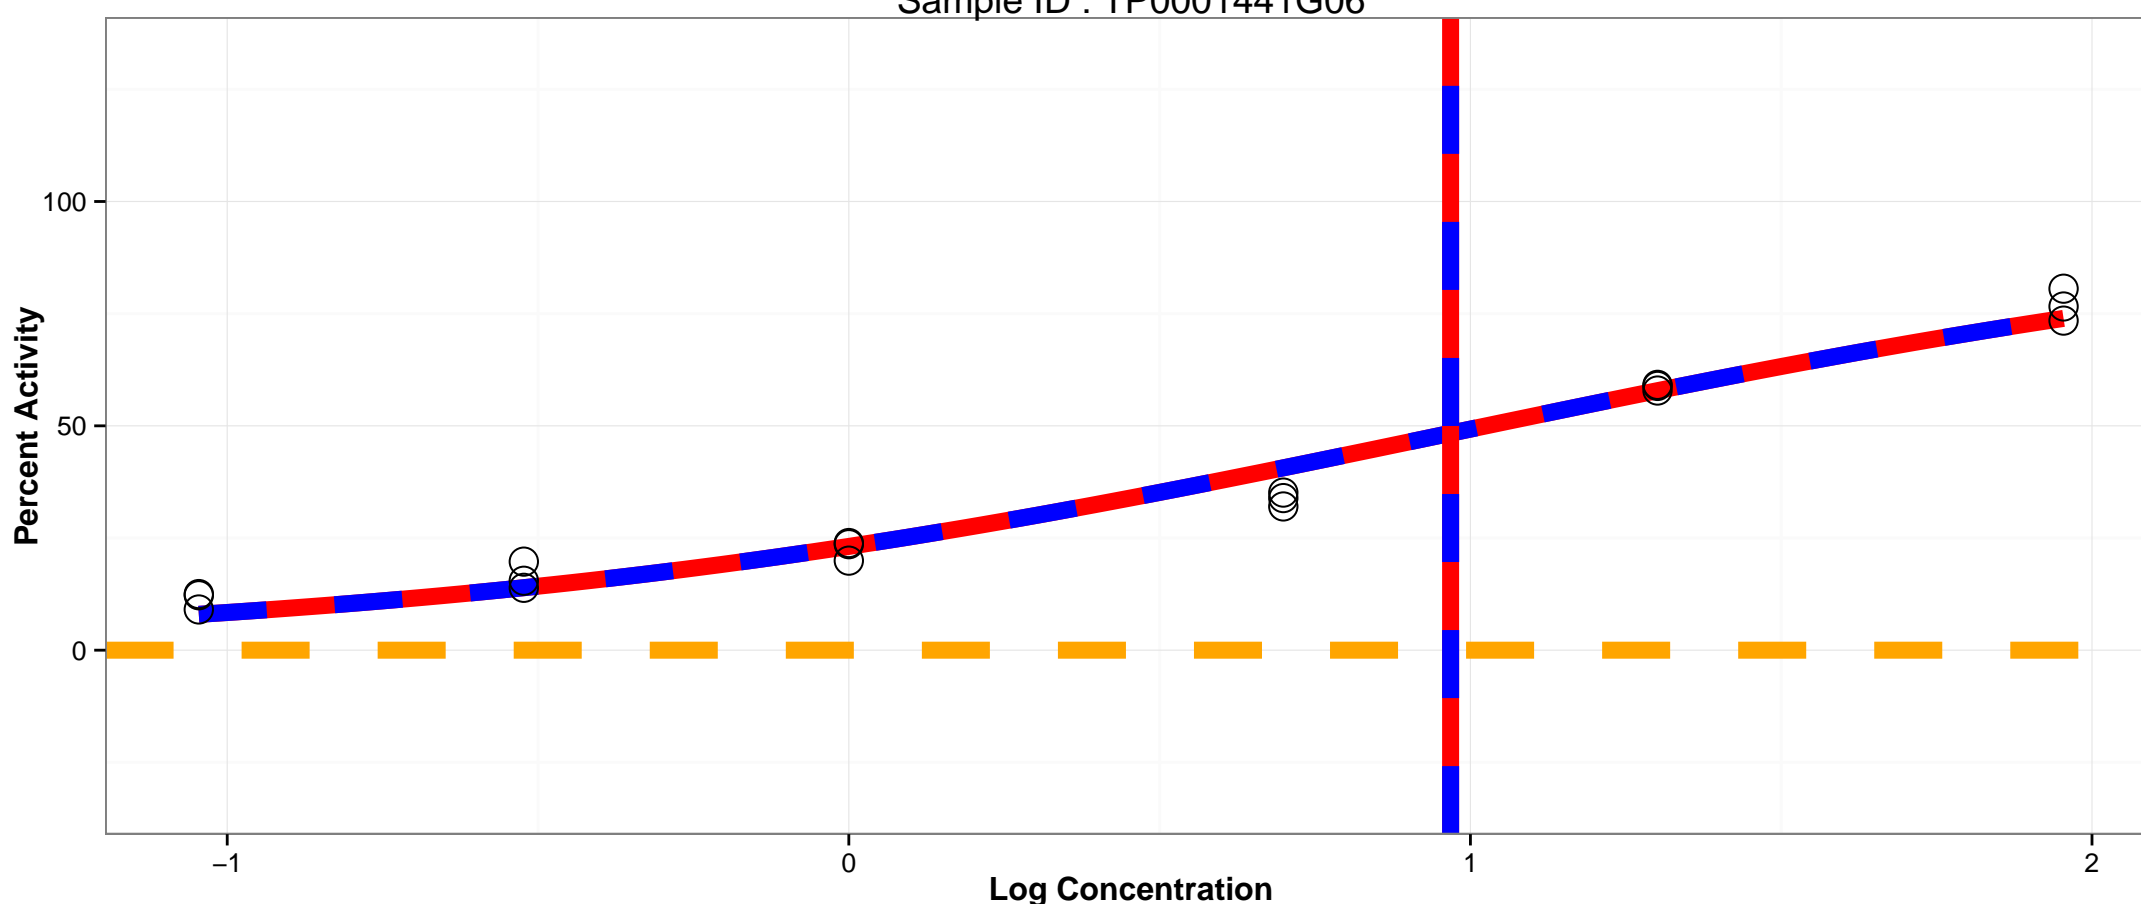

HILL MODEL

|     | tp   | ga    | gw     |
|-----|------|-------|--------|
| val | 96.7 | 0.968 | 0.519  |
| sd  | 9.24 | 0.189 | 0.0499 |

GAIN-LOSS MODEL

|     | tp   | ga    | gw    | la   | lw |
|-----|------|-------|-------|------|----|
| val | 96.7 | 0.968 | 0.519 | 3.95 | 18 |
| sd  | NA   | NA    | NA    | NA   | NA |

|      | CNST   | HILL   | GNLS   |
|------|--------|--------|--------|
| AIC  | 190.83 | 110.13 | 114.13 |
| PROB | 0      | 0.88   | 0.12   |
| RMSE | 43.61  | 4.02   | 4.02   |

MAX\_MEAN : 76.9 MAX\_MED : 76.6 BMAD : 5.69  
COFF : 20 HIT-CALL : 1 FITC : 42 ACTP : 1  
FLAGS :

Assay ID 1509 (NHEERL\_HEK293T\_CellTiterGLO)  
Sample ID : TP0001441G06

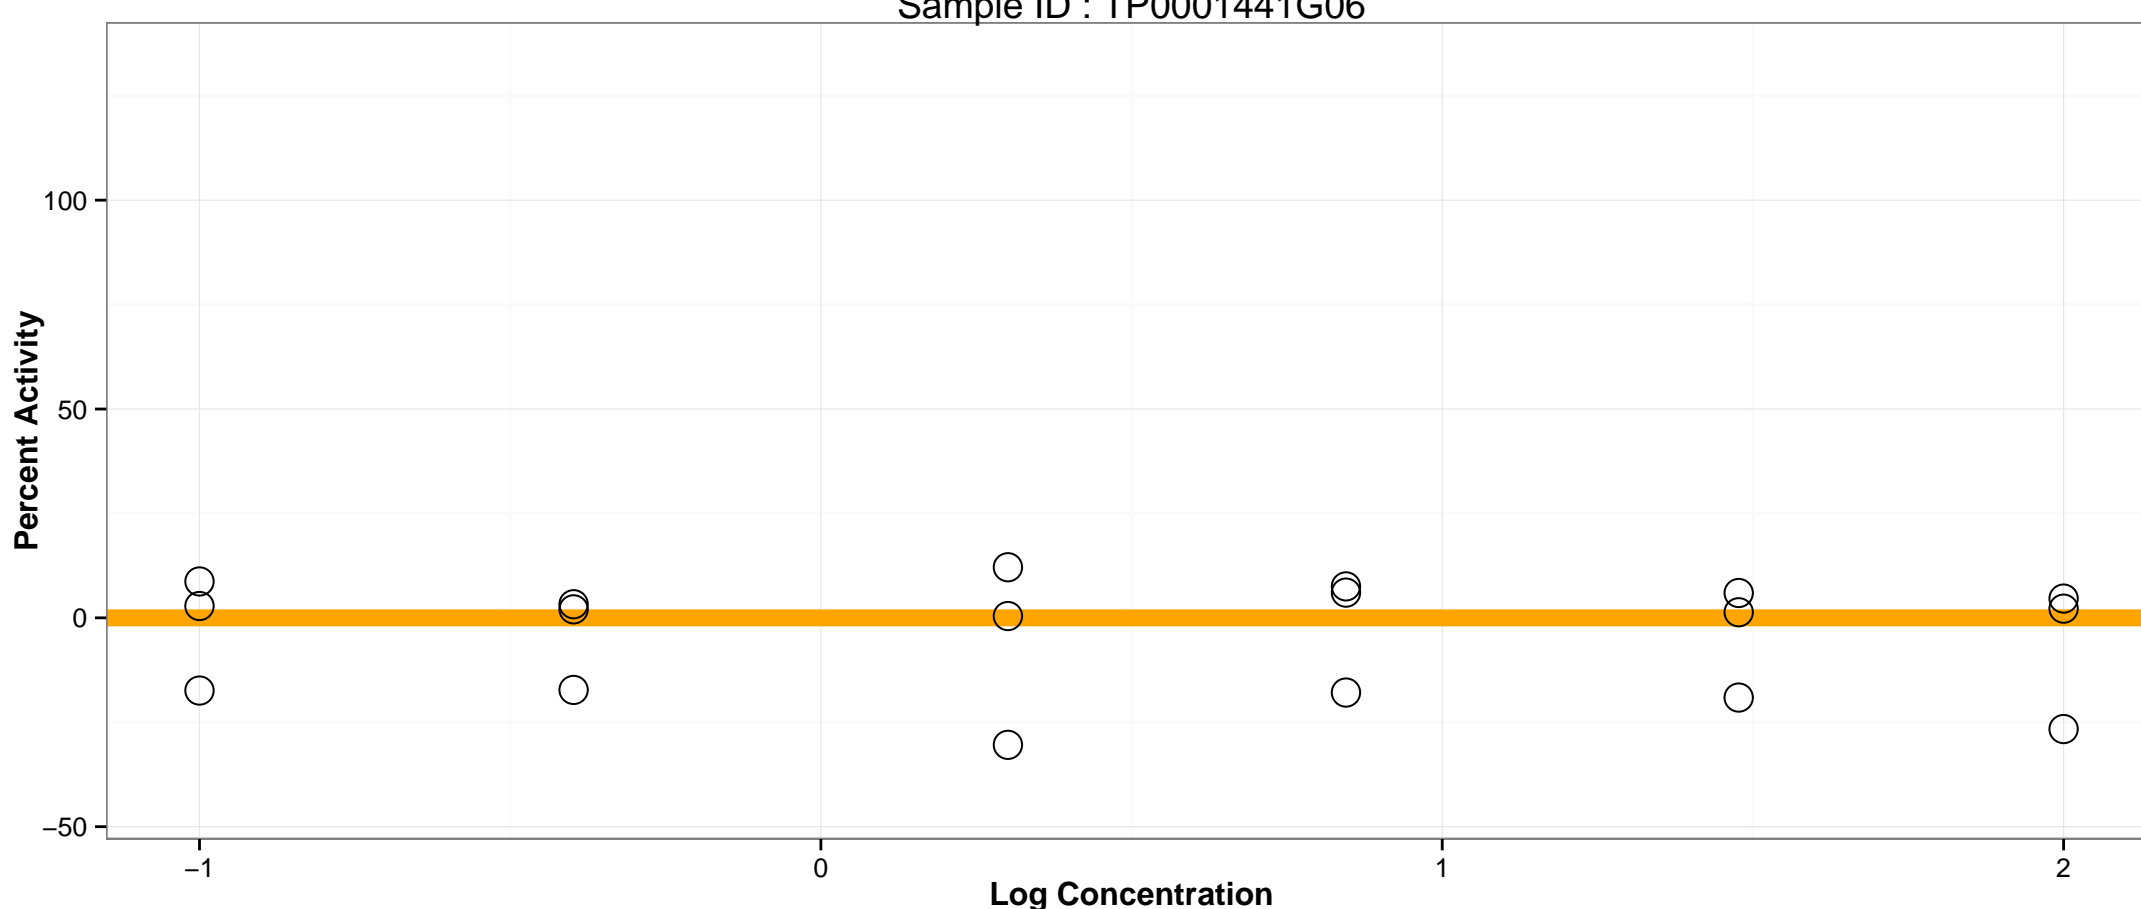

HILL MODEL

HILL MODEL: Not applicable

GAIN-LOSS MODEL

GNLS MODEL: Not applicable

|      | CNST  | HILL | GNLS |
|------|-------|------|------|
| AIC  | 147.5 | NA   | NA   |
| PROB | 1     | NA   | NA   |
| RMSE | 13.58 | NA   | NA   |

MAX\_MEAN : -1.43 MAX\_MED : 6.05 BMAD : 5.54  
COFF : 20 HIT-CALL : 0 FITC : 4 ACTP : 0  
FLAGS :

Assay ID 1848 (NHEERL\_Quantilum\_inhib\_2\_dn)  
Sample ID : TP0001441G06

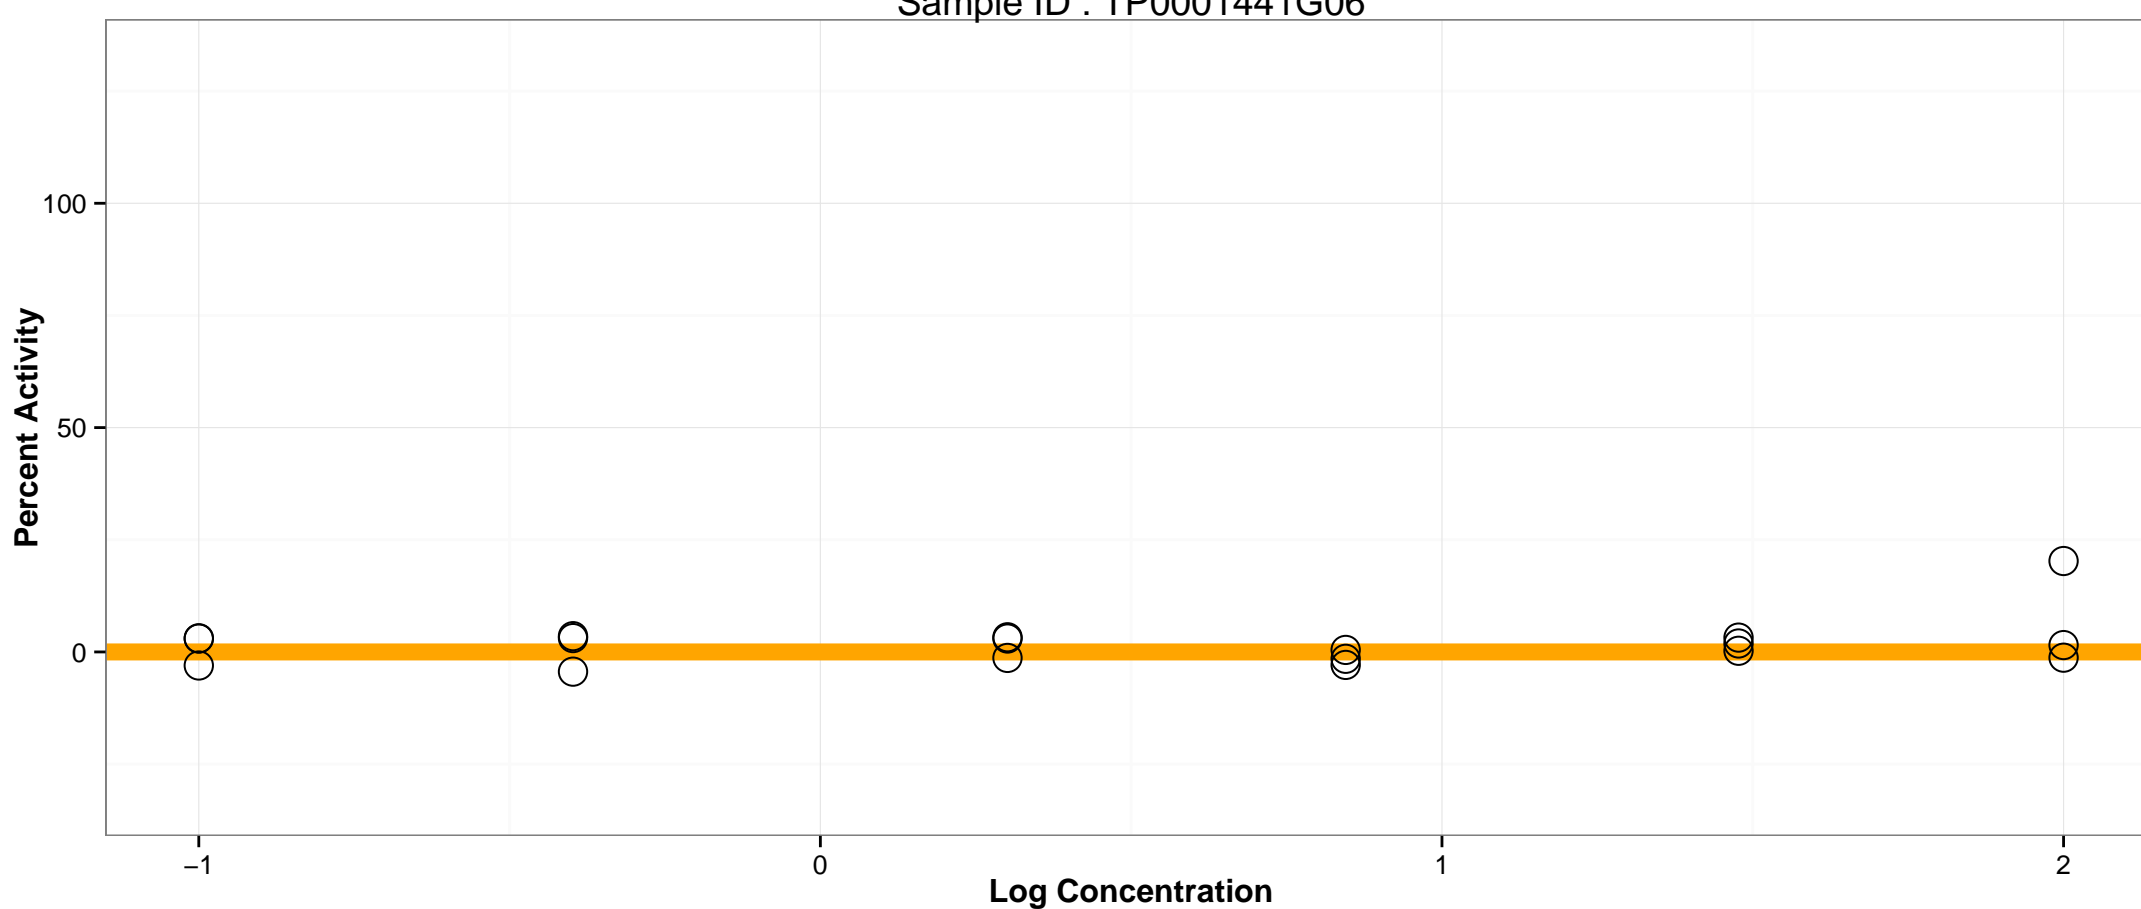

HILL MODEL

HILL MODEL: Not applicable

GAIN-LOSS MODEL

GNLS MODEL: Not applicable

|      | CNST   | HILL | GNLS |
|------|--------|------|------|
| AIC  | 103.96 | NA   | NA   |
| PROB | 1      | NA   | NA   |
| RMSE | 5.43   | NA   | NA   |

MAX\_MEAN : 6.85 MAX\_MED : 3.1 BMAD : 8.58  
COFF : 20 HIT-CALL : 0 FITC : 4 ACTP : 0  
FLAGS :



Chemical : 2-Aminobenzothiazole  
CAS : 136-95-8

Assay ID 1508 (NHEERL\_TPO\_AUR\_dn)  
Sample ID : TP0001441G07

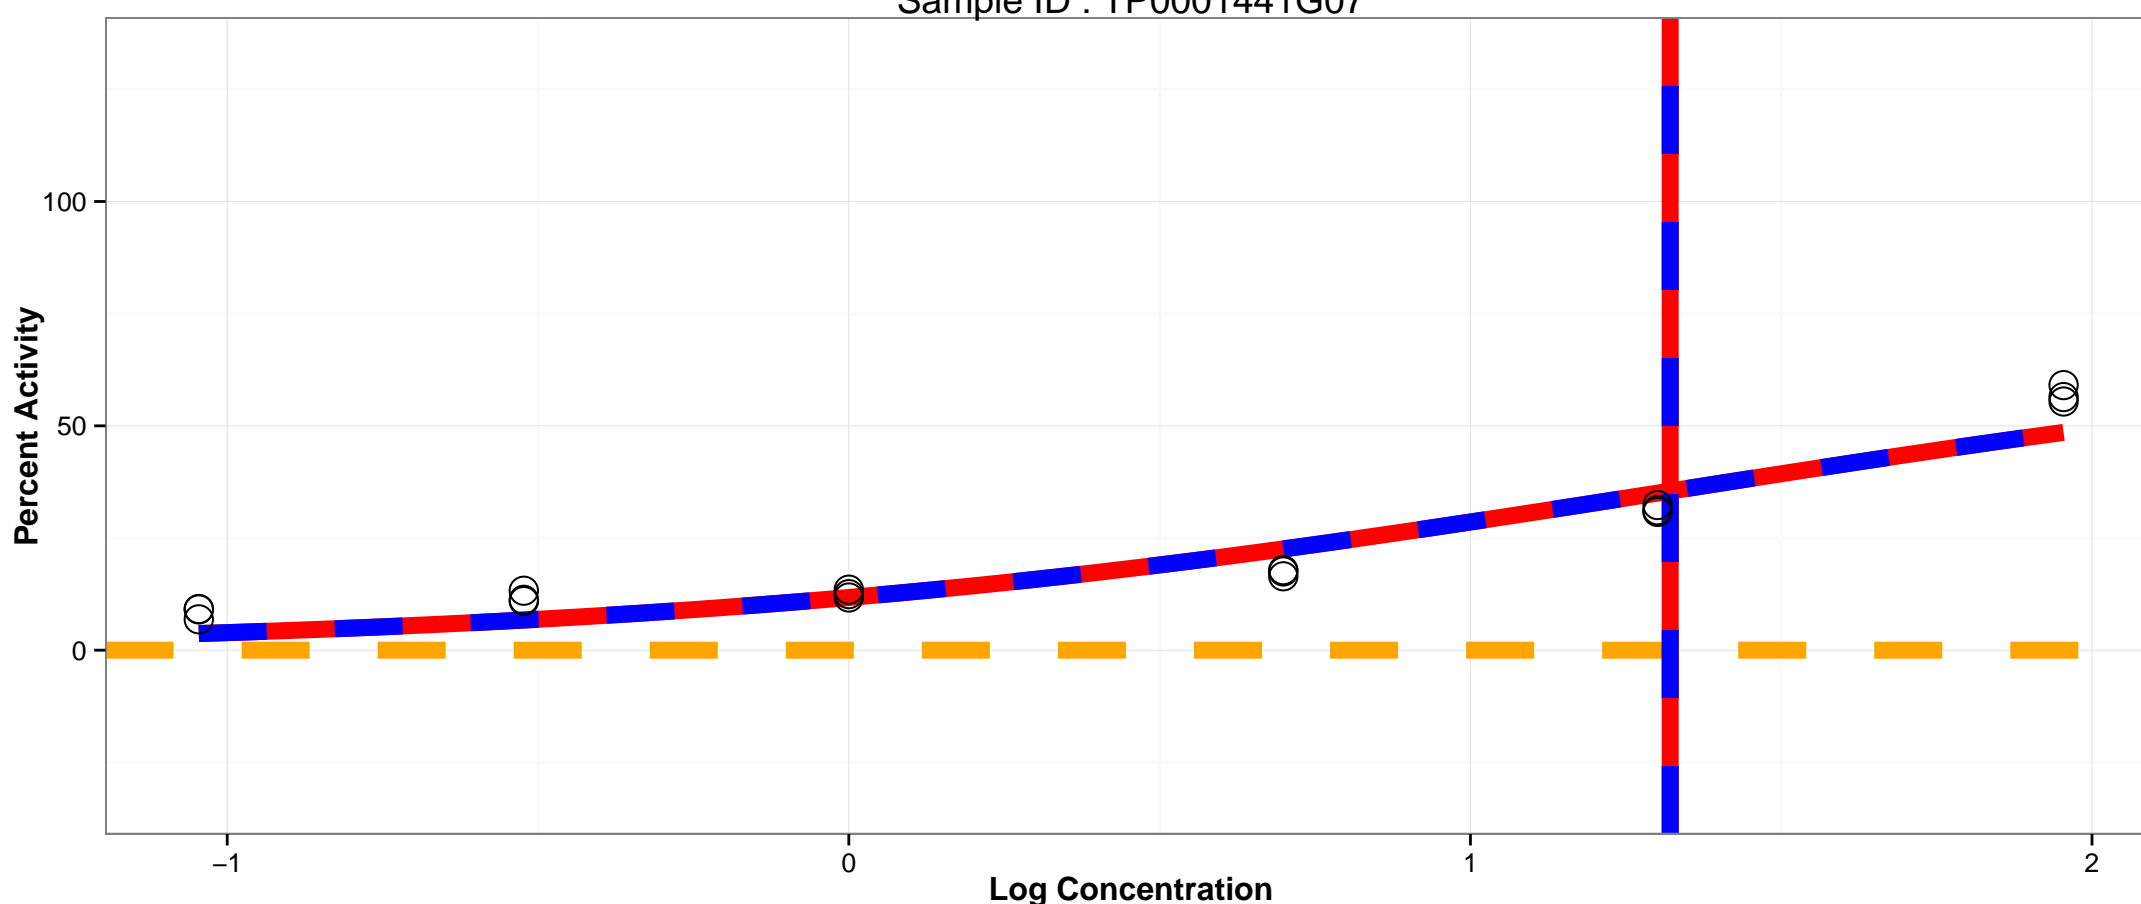

HILL MODEL

|     | tp   | ga    | gw     |
|-----|------|-------|--------|
| val | 70.9 | 1.32  | 0.532  |
| sd  | 17.1 | 0.361 | 0.0973 |

GAIN-LOSS MODEL

|     | tp   | ga    | gw     | la   | lw   |
|-----|------|-------|--------|------|------|
| val | 70.9 | 1.32  | 0.532  | 3.92 | 4.72 |
| sd  | 17.1 | 0.361 | 0.0973 | 2160 | 5190 |

|      | CNST   | HILL   | GNLS   |
|------|--------|--------|--------|
| AIC  | 174.42 | 121.64 | 125.64 |
| PROB | 0      | 0.88   | 0.12   |
| RMSE | 28.61  | 5.26   | 5.26   |

MAX\_MEAN : 57 MAX\_MED : 56.4 BMAD : 5.69  
COFF : 20 HIT-CALL : 1 FITC : 42 ACTP : 1  
FLAGS :

Assay ID 1509 (NHEERL\_HEK293T\_CellTiterGLO)  
Sample ID : TP0001441G07

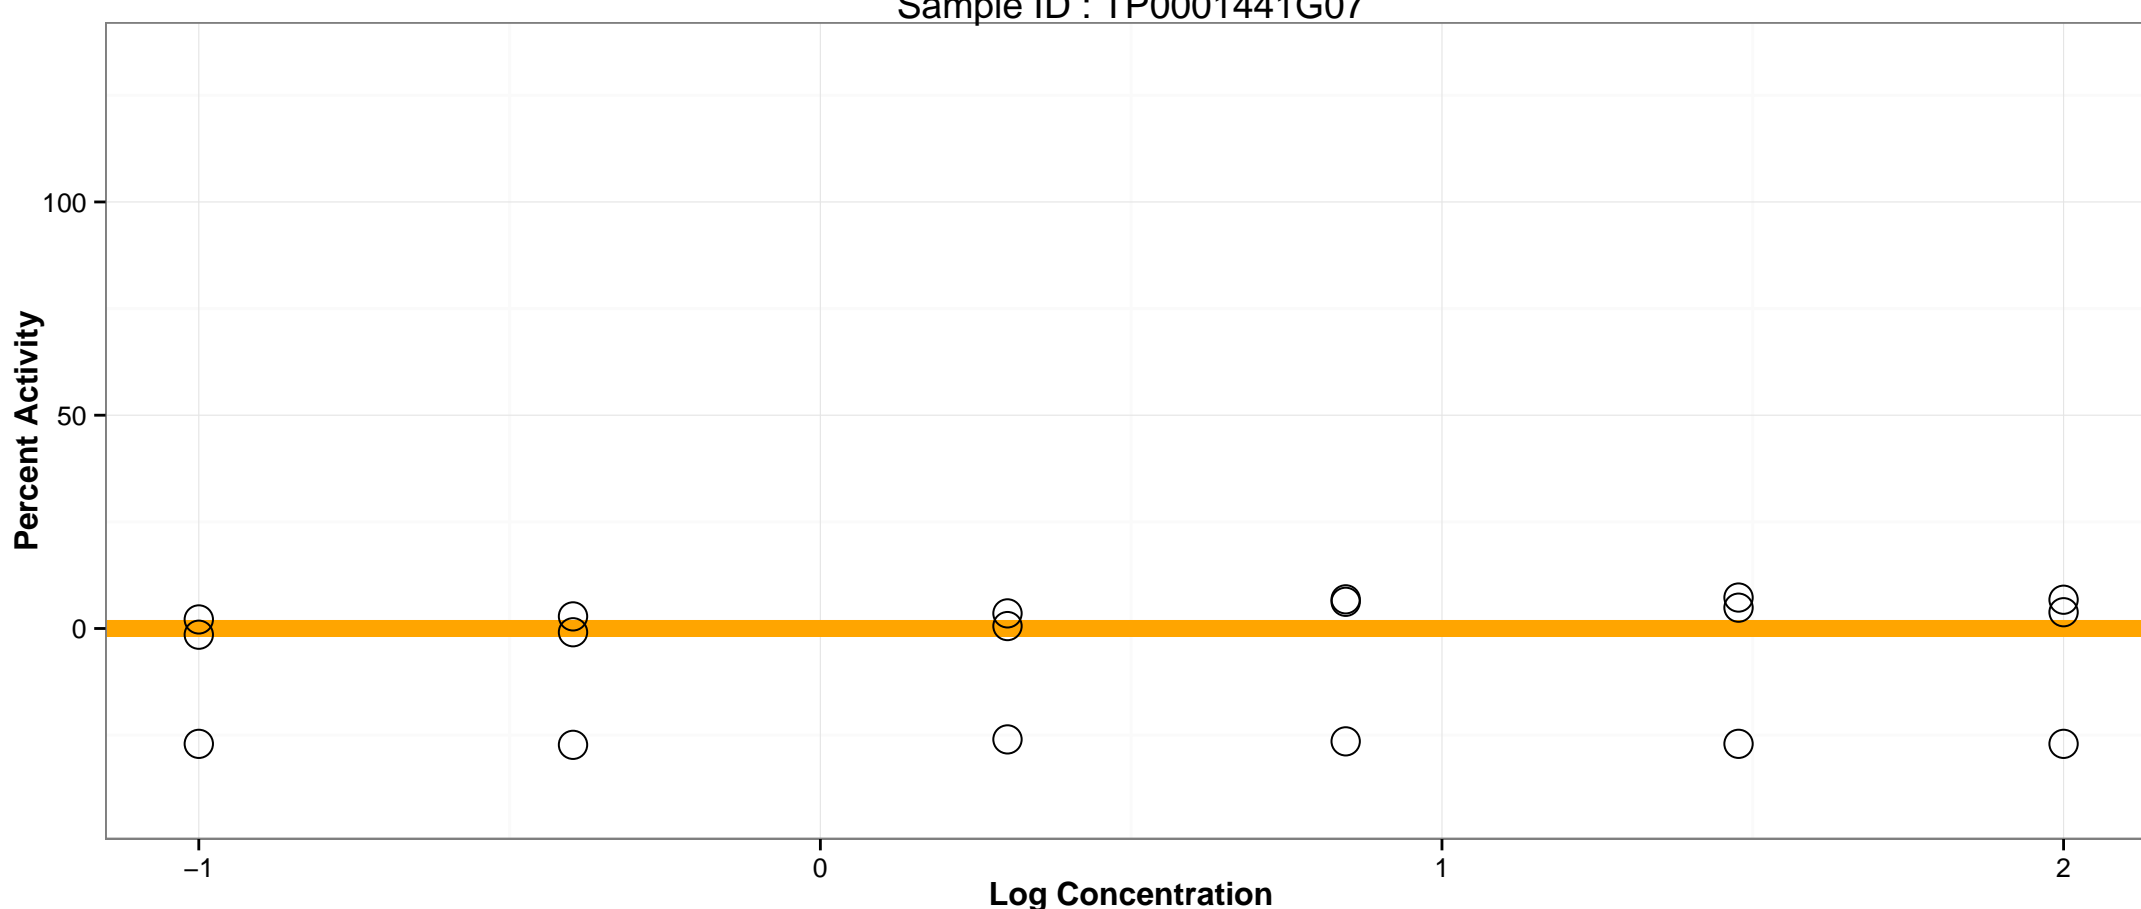

HILL MODEL

HILL MODEL: Not applicable

GAIN-LOSS MODEL

GNLS MODEL: Not applicable

|      | CNST   | HILL | GNLS |
|------|--------|------|------|
| AIC  | 153.14 | NA   | NA   |
| PROB | 1      | NA   | NA   |
| RMSE | 15.92  | NA   | NA   |

MAX\_MEAN : -4.44 MAX\_MED : 6.27 BMAD : 5.54  
COFF : 20 HIT-CALL : 0 FITC : 4 ACTP : 0  
FLAGS :

Assay ID 1848 (NHEERL\_Quantilum\_inhib\_2\_dn)  
Sample ID : TP0001441G07

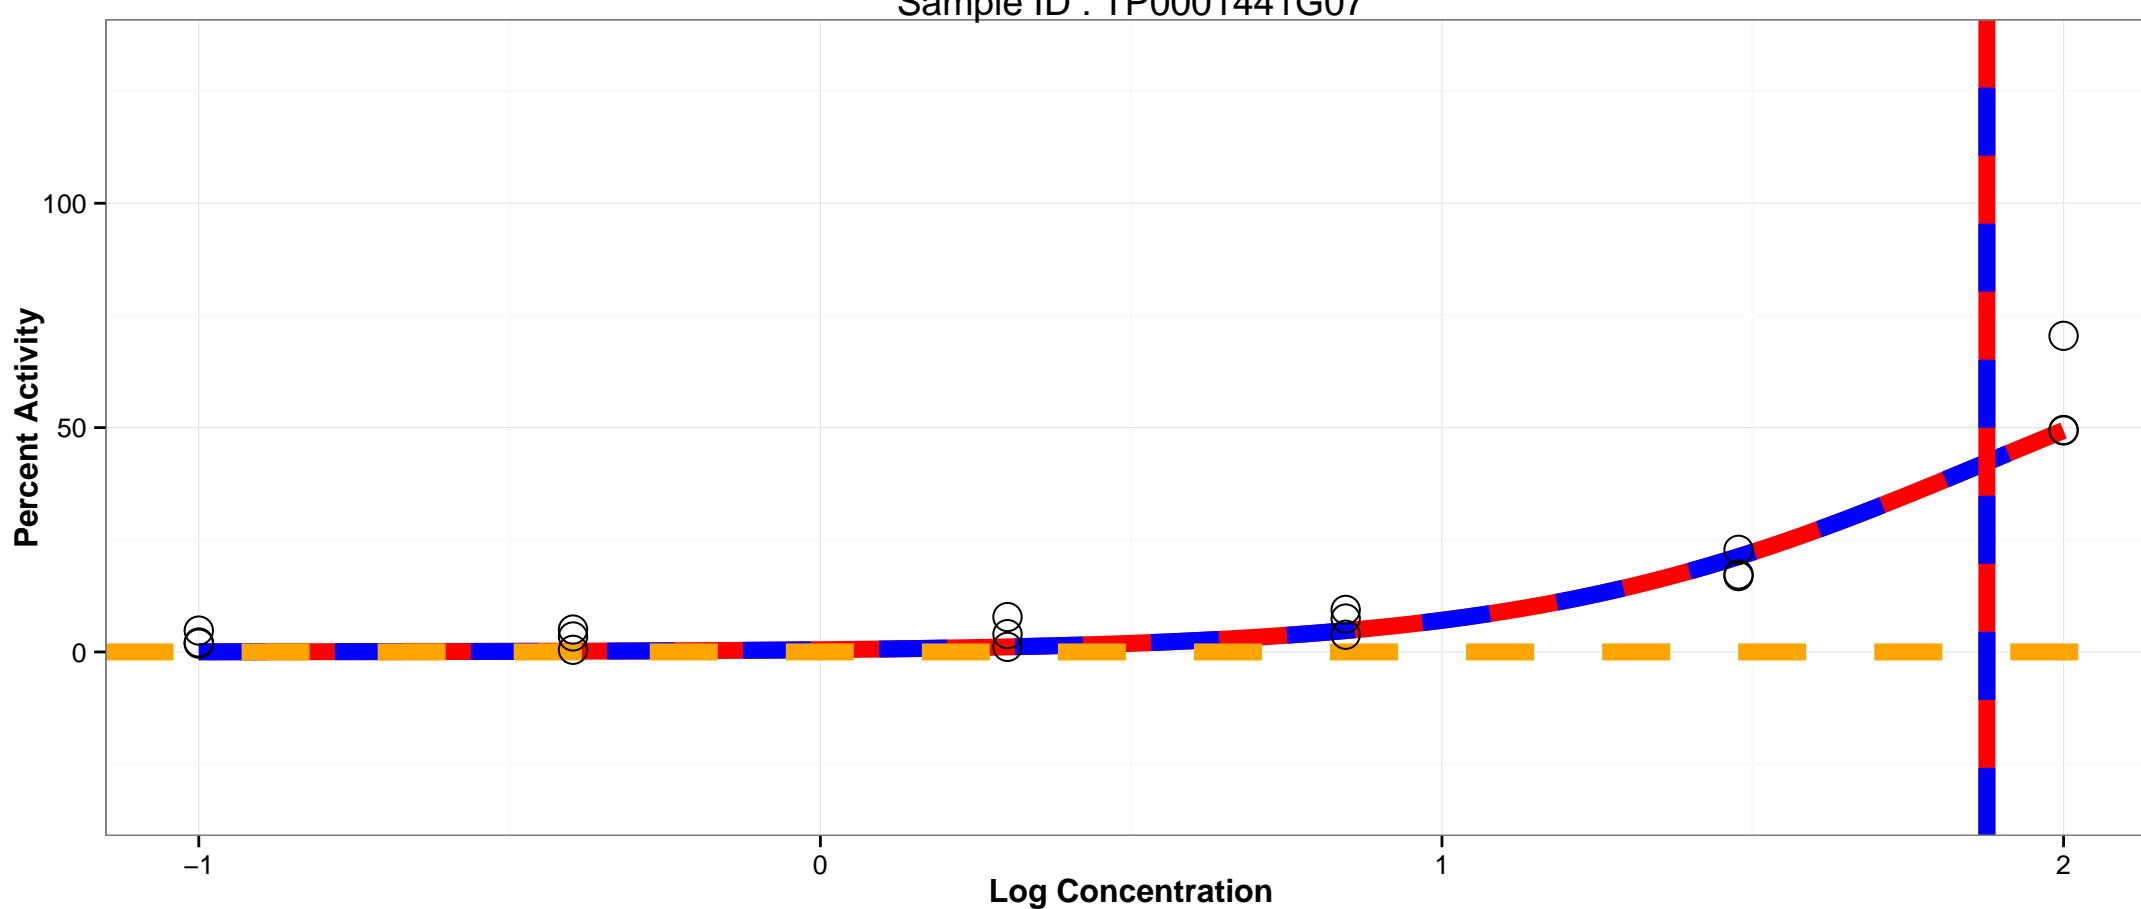

HILL MODEL

|     | tp   | ga    | gw    |
|-----|------|-------|-------|
| val | 84.6 | 1.88  | 1.19  |
| sd  | 23.5 | 0.219 | 0.278 |

GAIN-LOSS MODEL

|     | tp   | ga    | gw    | la    | lw    |
|-----|------|-------|-------|-------|-------|
| val | 84.6 | 1.88  | 1.19  | 3.86  | 5.68  |
| sd  | 23.6 | 0.219 | 0.278 | 15200 | 46200 |

|      | CNST  | HILL   | GNLS   |
|------|-------|--------|--------|
| AIC  | 164   | 115.41 | 119.41 |
| PROB | 0     | 0.88   | 0.12   |
| RMSE | 25.01 | 5.92   | 5.92   |

MAX\_MEAN : 56.4 MAX\_MED : 49.5 BMAD : 8.58  
COFF : 20 HIT-CALL : 1 FITC : 42 ACTP : 1  
FLAGS : 6

Chemical : Thiourea  
CAS : 62-56-6

Assay ID 1508 (NHEERL\_TPO\_AUR\_dn)  
Sample ID : TP0001441G08

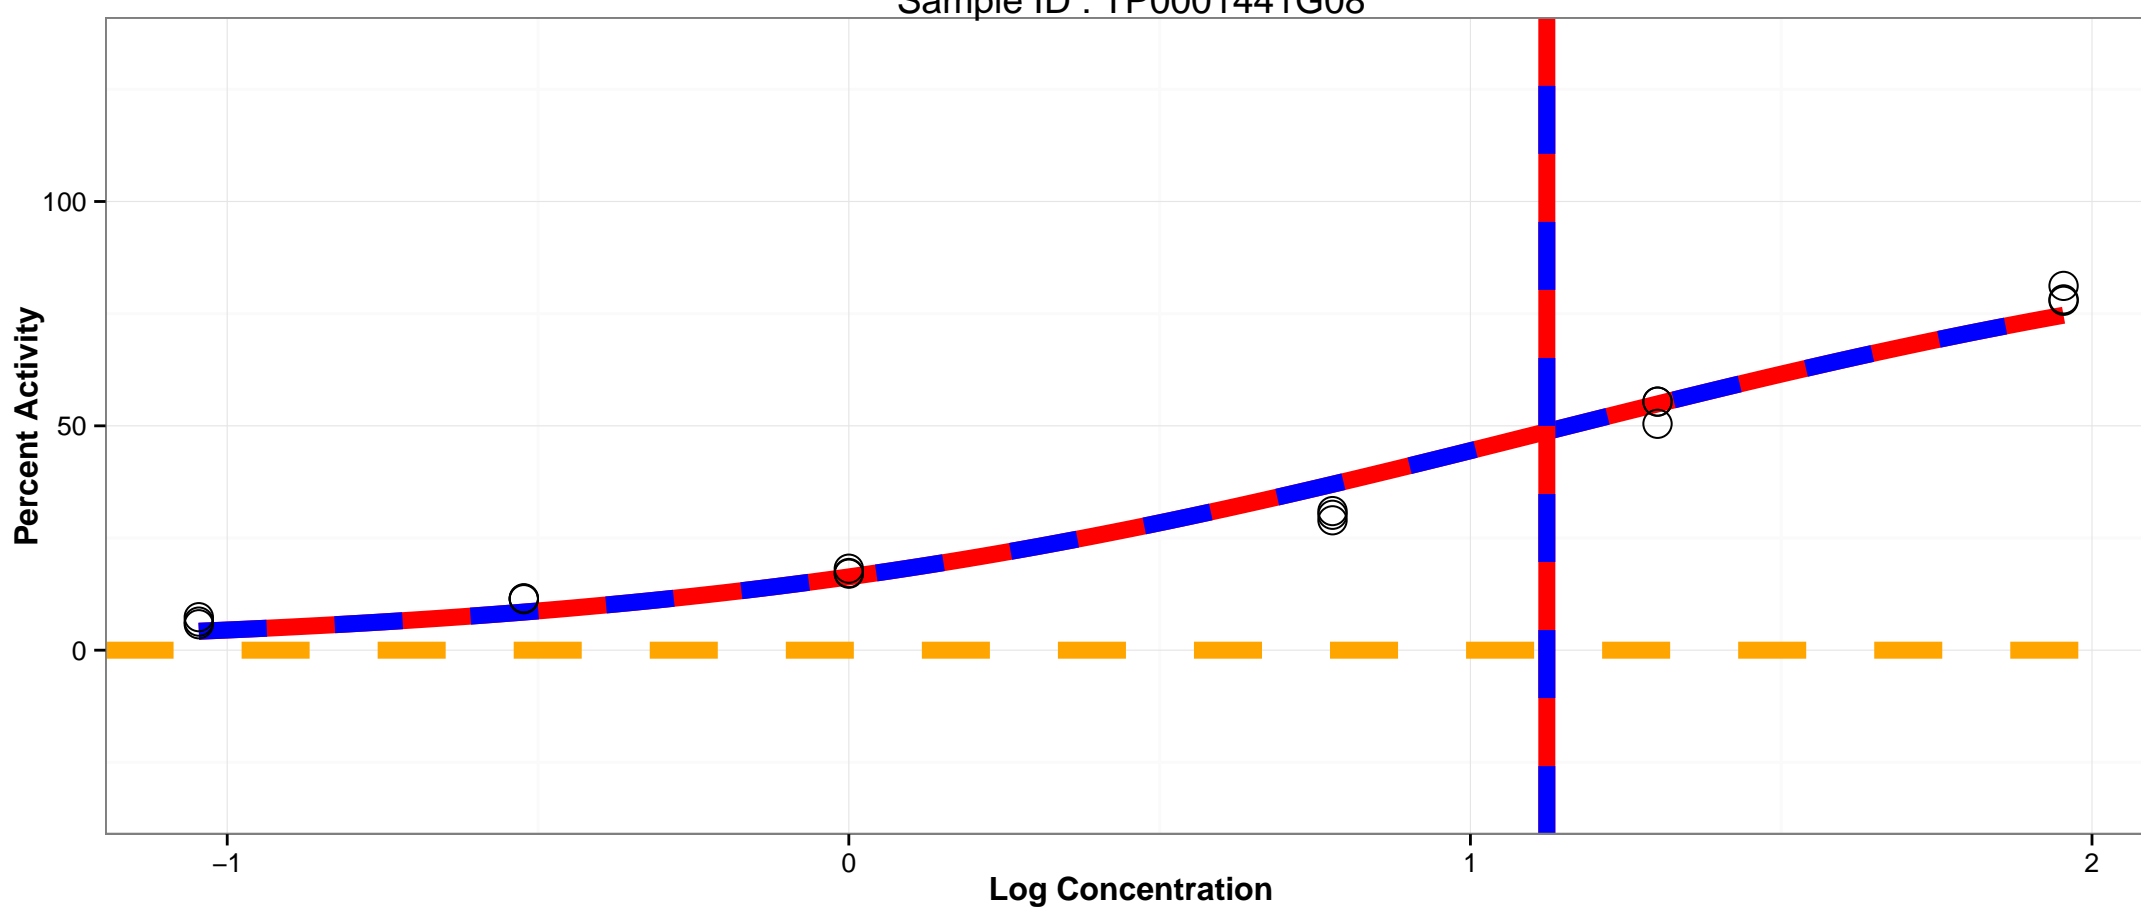

HILL MODEL

|     | tp   | ga    | gw     |
|-----|------|-------|--------|
| val | 97.4 | 1.12  | 0.62   |
| sd  | 13.1 | 0.205 | 0.0716 |

GAIN-LOSS MODEL

|     | tp   | ga   | gw   | la   | lw   |
|-----|------|------|------|------|------|
| val | 97.4 | 1.12 | 0.62 | 2.81 | 17.6 |
| sd  | NA   | NA   | NA   | NA   | NA   |

|      | CNST   | HILL   | GNLS   |
|------|--------|--------|--------|
| AIC  | 188.57 | 110.21 | 114.21 |
| PROB | 0      | 0.88   | 0.12   |
| RMSE | 41.91  | 3.95   | 3.95   |

MAX\_MEAN : 79.1 MAX\_MED : 78.2 BMAD : 5.69  
COFF : 20 HIT-CALL : 1 FITC : 42 ACTP : 1  
FLAGS :

Assay ID 1509 (NHEERL\_HEK293T\_CellTiterGLO)  
Sample ID : TP0001441G08

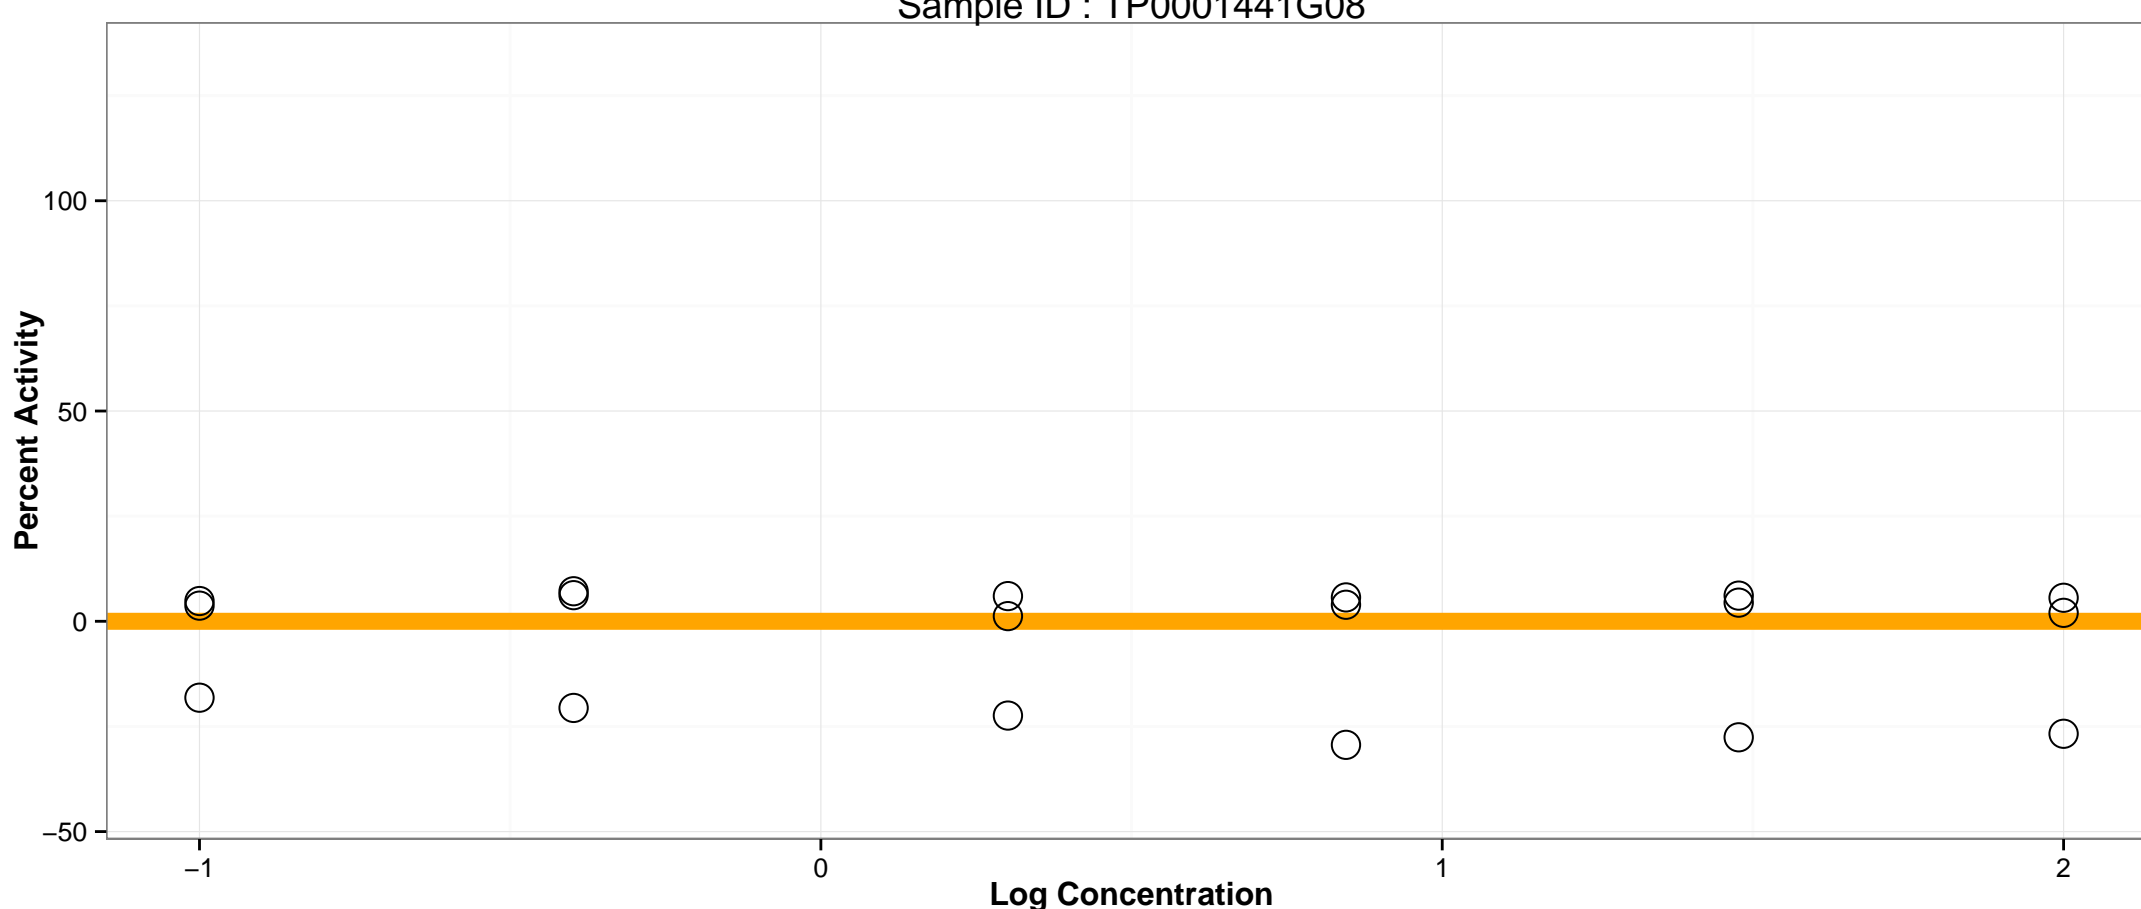

HILL MODEL

HILL MODEL: Not applicable

GAIN-LOSS MODEL

GNLS MODEL: Not applicable

|      | CNST  | HILL | GNLS |
|------|-------|------|------|
| AIC  | 150.3 | NA   | NA   |
| PROB | 1     | NA   | NA   |
| RMSE | 14.72 | NA   | NA   |

MAX\_MEAN : -2.4 MAX\_MED : 6.23 BMAD : 5.54  
COFF : 20 HIT-CALL : 0 FITC : 4 ACTP : 0  
FLAGS :

Assay ID 1848 (NHEERL\_QuantLum\_inhib\_2\_dn)  
Sample ID : TP0001441G08

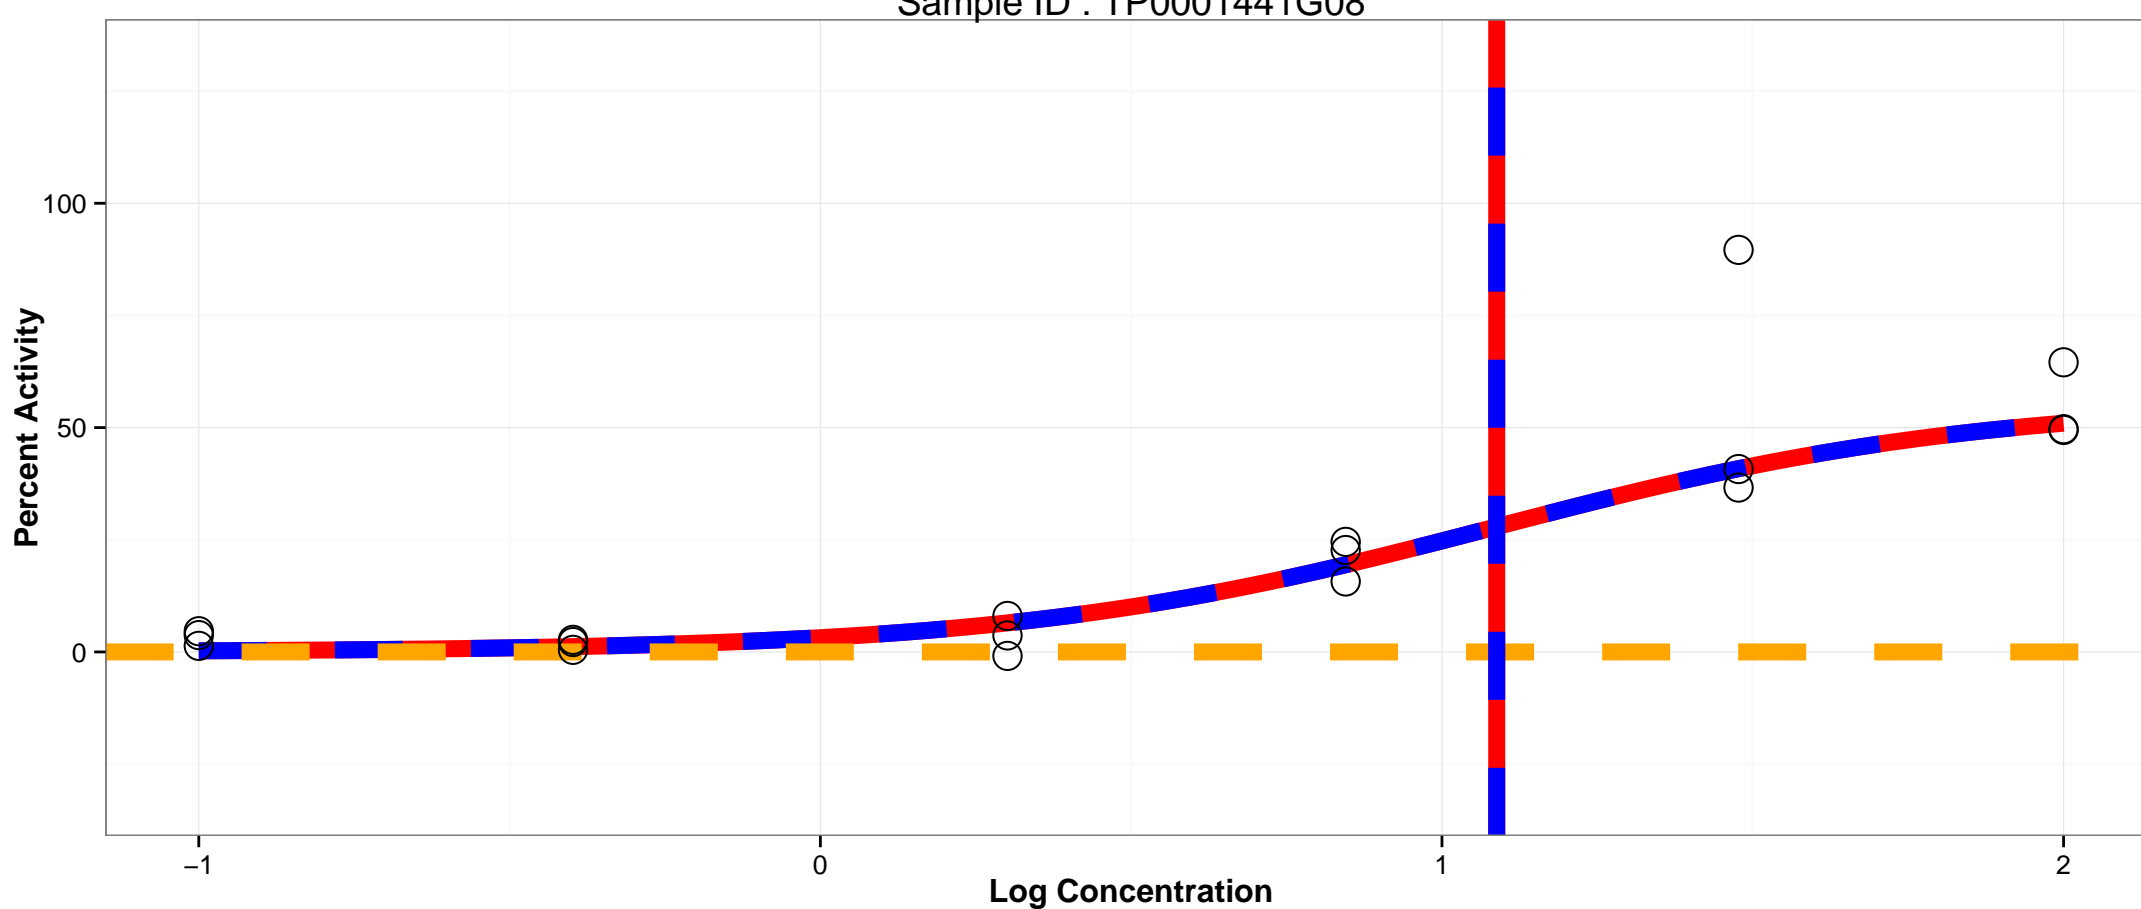

HILL MODEL

|     | tp   | ga    | gw    |
|-----|------|-------|-------|
| val | 55.8 | 1.09  | 1.12  |
| sd  | 6.87 | 0.159 | 0.286 |

GAIN-LOSS MODEL

|     | tp   | ga   | gw   | la   | lw   |
|-----|------|------|------|------|------|
| val | 55.8 | 1.09 | 1.12 | 3.89 | 17.6 |
| sd  | NA   | NA   | NA   | NA   | NA   |

|      | CNST   | HILL  | GNLS  |
|------|--------|-------|-------|
| AIC  | 179.58 | 129.6 | 133.6 |
| PROB | 0      | 0.88  | 0.12  |
| RMSE | 34.66  | 12.33 | 12.33 |

MAX\_MEAN : 55.7 MAX\_MED : 49.7 BMAD : 8.58  
COFF : 20 HIT-CALL : 1 FITC : 42 ACTP : 1  
FLAGS :

Assay ID 1508 (NHEERL\_TPO\_AUR\_dn)  
Sample ID : TP0001441G09

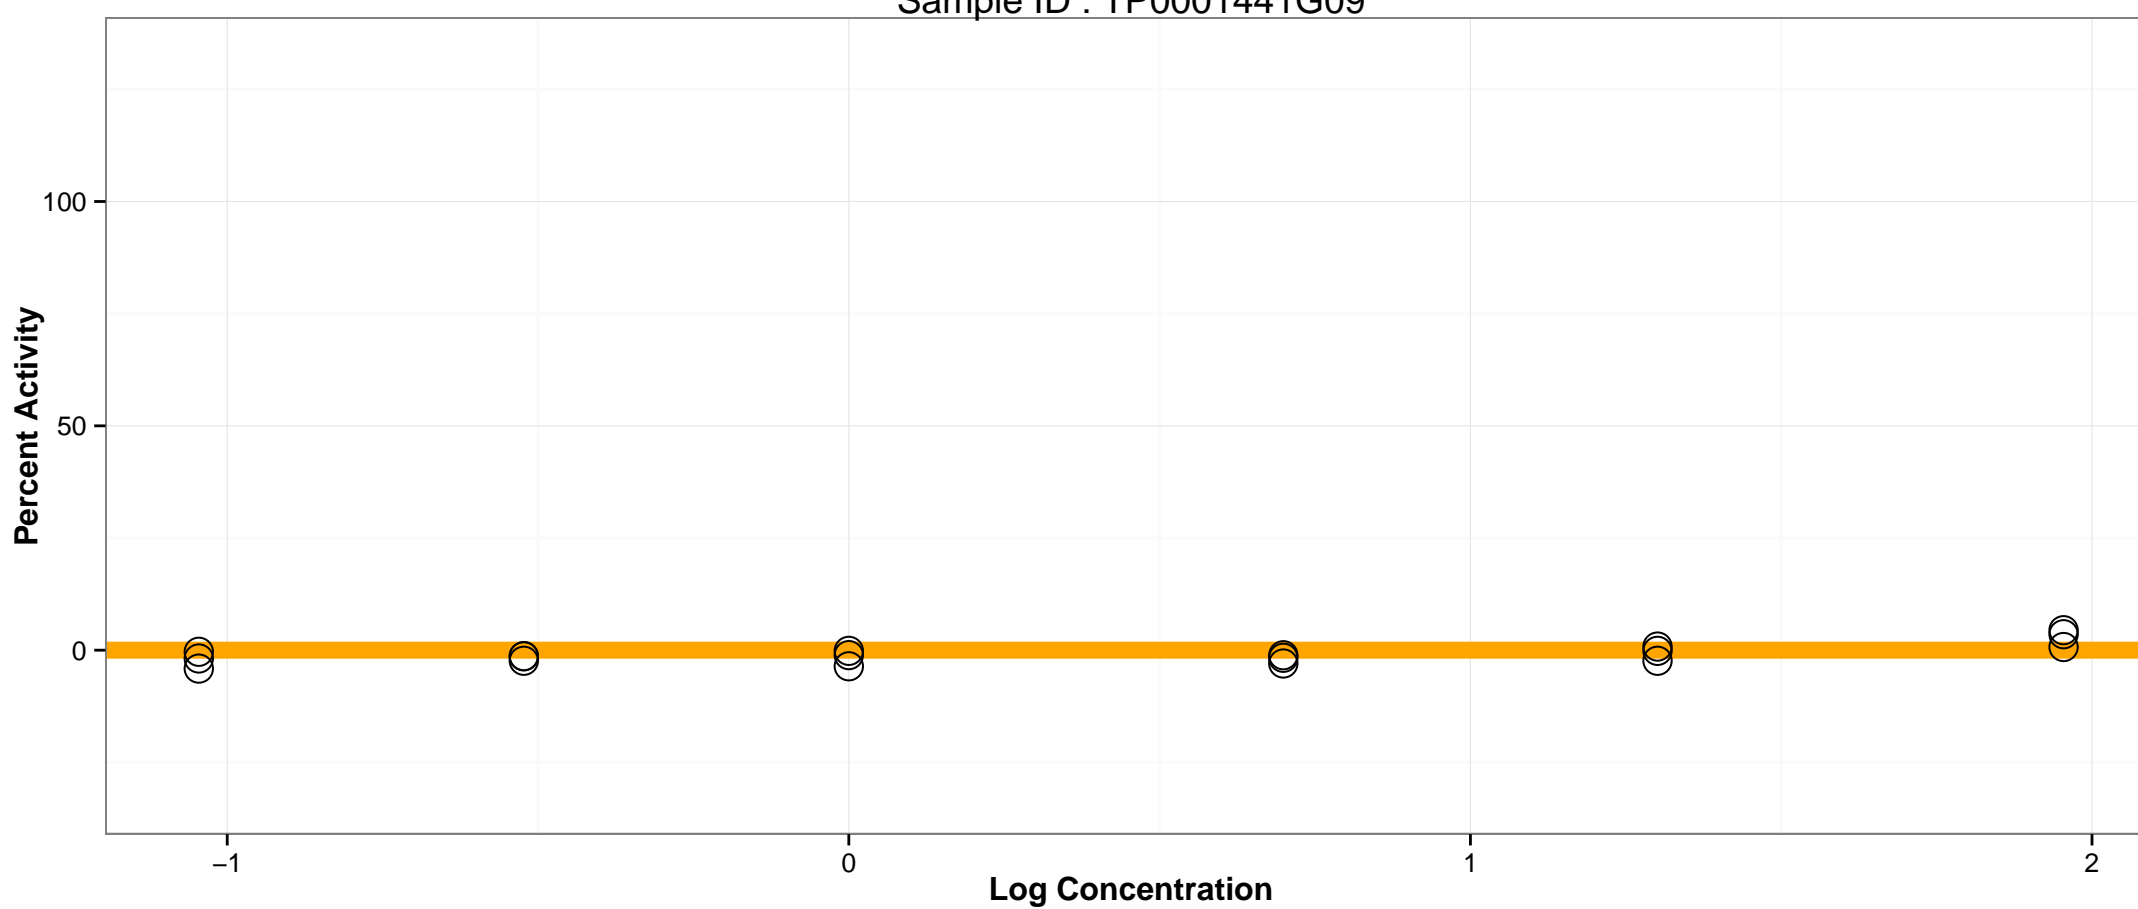

HILL MODEL

HILL MODEL: Not applicable

GAIN-LOSS MODEL

GNLS MODEL: Not applicable

|      | CNST  | HILL | GNLS |
|------|-------|------|------|
| AIC  | 84.89 | NA   | NA   |
| PROB | 1     | NA   | NA   |
| RMSE | 2.31  | NA   | NA   |

MAX\_MEAN : 2.92 MAX\_MED : 3.56 BMAD : 5.69  
COFF : 20 HIT-CALL : 0 FITC : 4 ACTP : 0  
FLAGS :

Assay ID 1509 (NHEERL\_HEK293T\_CellTiterGLO)  
Sample ID : TP0001441G09

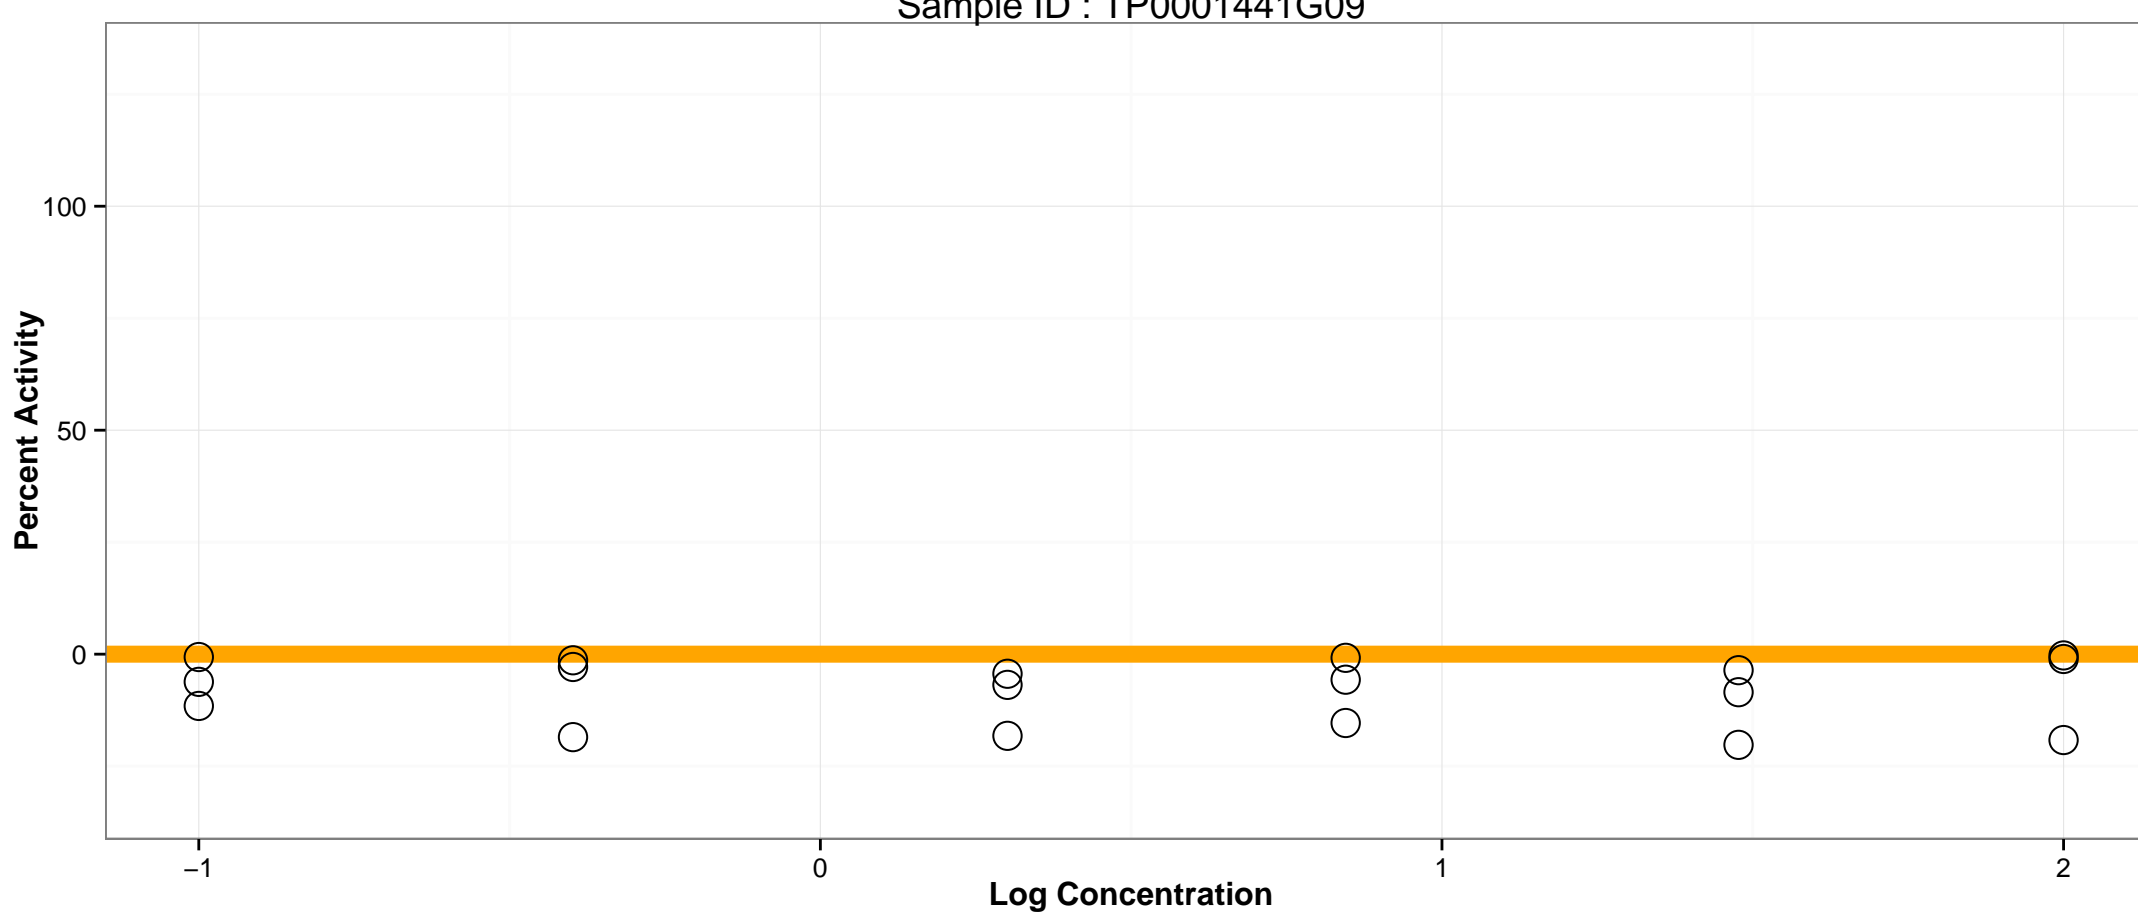

HILL MODEL

HILL MODEL: Not applicable

GAIN-LOSS MODEL

GNLS MODEL: Not applicable

|      | CNST   | HILL | GNLS |
|------|--------|------|------|
| AIC  | 139.21 | NA   | NA   |
| PROB | 1      | NA   | NA   |
| RMSE | 10.68  | NA   | NA   |

MAX\_MEAN : -6.11 MAX\_MED : -1.06 BMAD : 5.54  
COFF : 20 HIT-CALL : 0 FITC : 4 ACTP : 0  
FLAGS :

Assay ID 1848 (NHEERL\_Quantilum\_inhib\_2\_dn)  
Sample ID : TP0001441G09

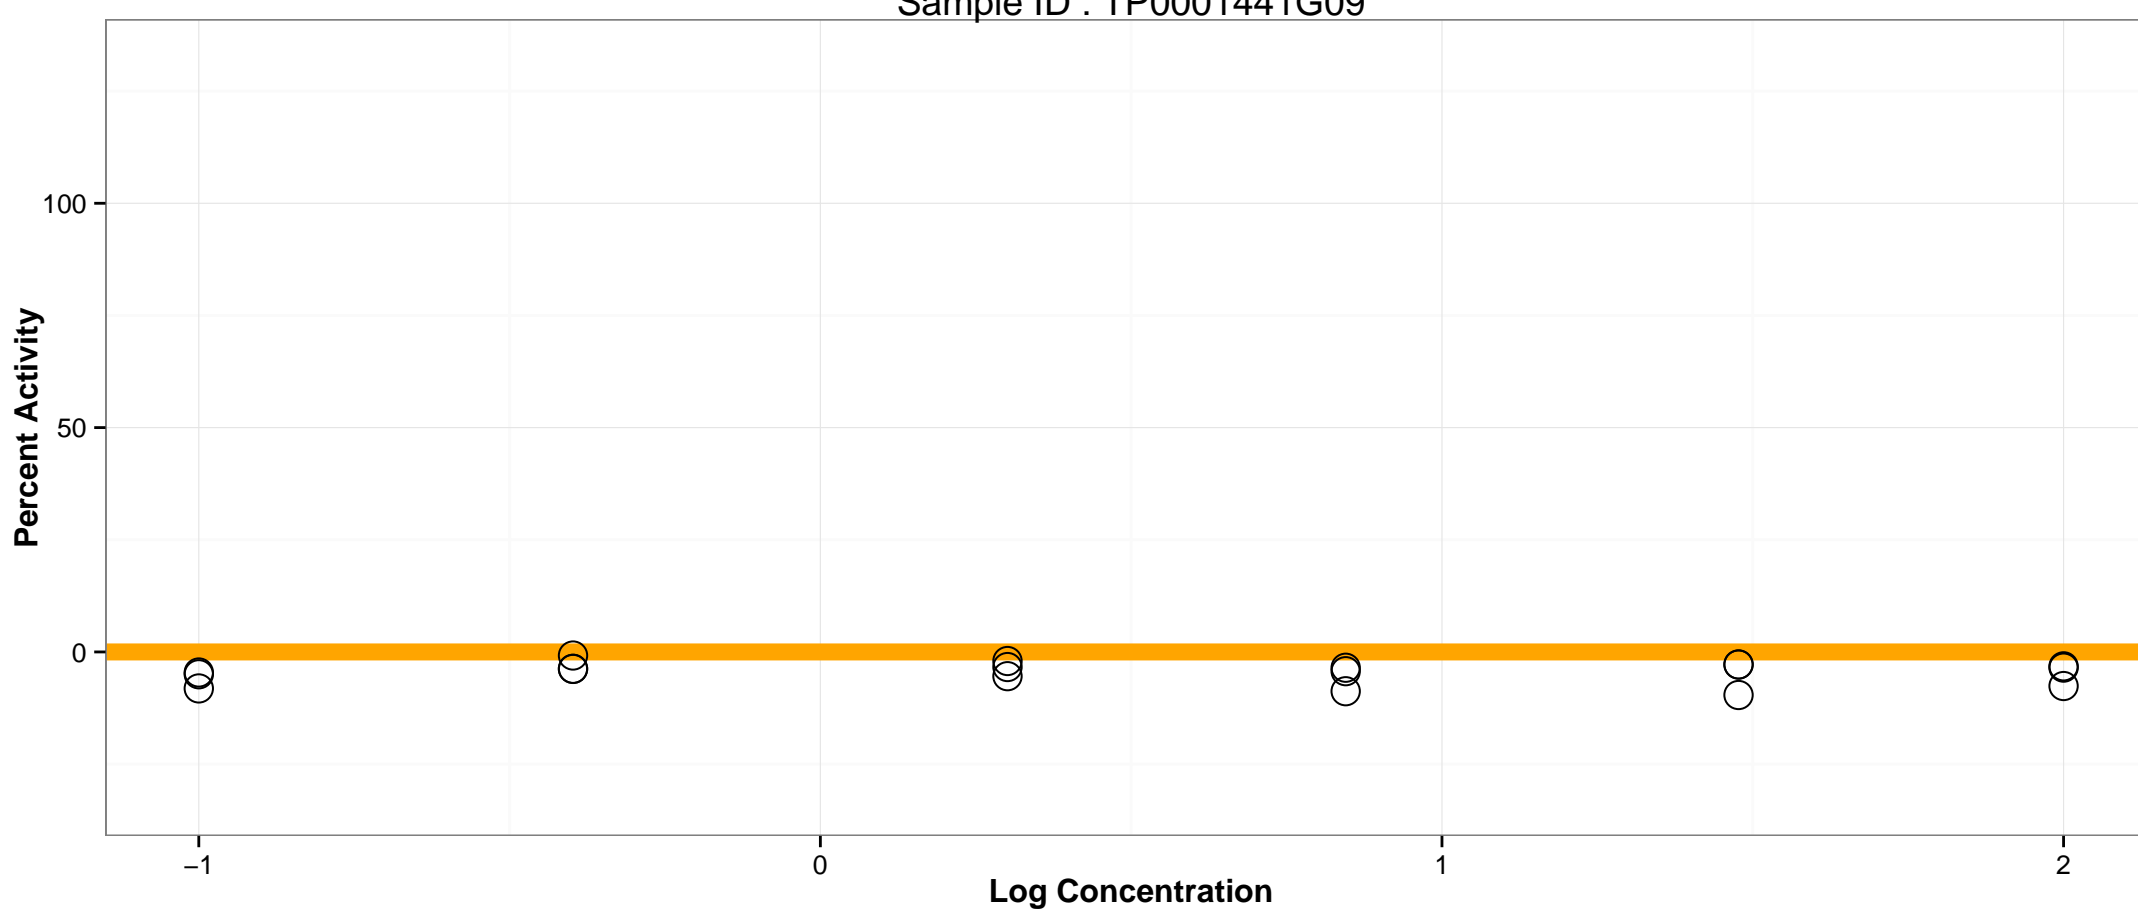

HILL MODEL

HILL MODEL: Not applicable

GAIN-LOSS MODEL

GNLS MODEL: Not applicable

|      | CNST   | HILL | GNLS |
|------|--------|------|------|
| AIC  | 114.69 | NA   | NA   |
| PROB | 1      | NA   | NA   |
| RMSE | 5.16   | NA   | NA   |

MAX\_MEAN : -2.77 MAX\_MED : -2.79 BMAD : 8.58  
COFF : 20 HIT-CALL : 0 FITC : 4 ACTP : 0  
FLAGS :

Chemical : Allethrin  
CAS : 584-79-2

Assay ID 1508 (NHEERL\_TPO\_AUR\_dn)  
Sample ID : TP0001441G10

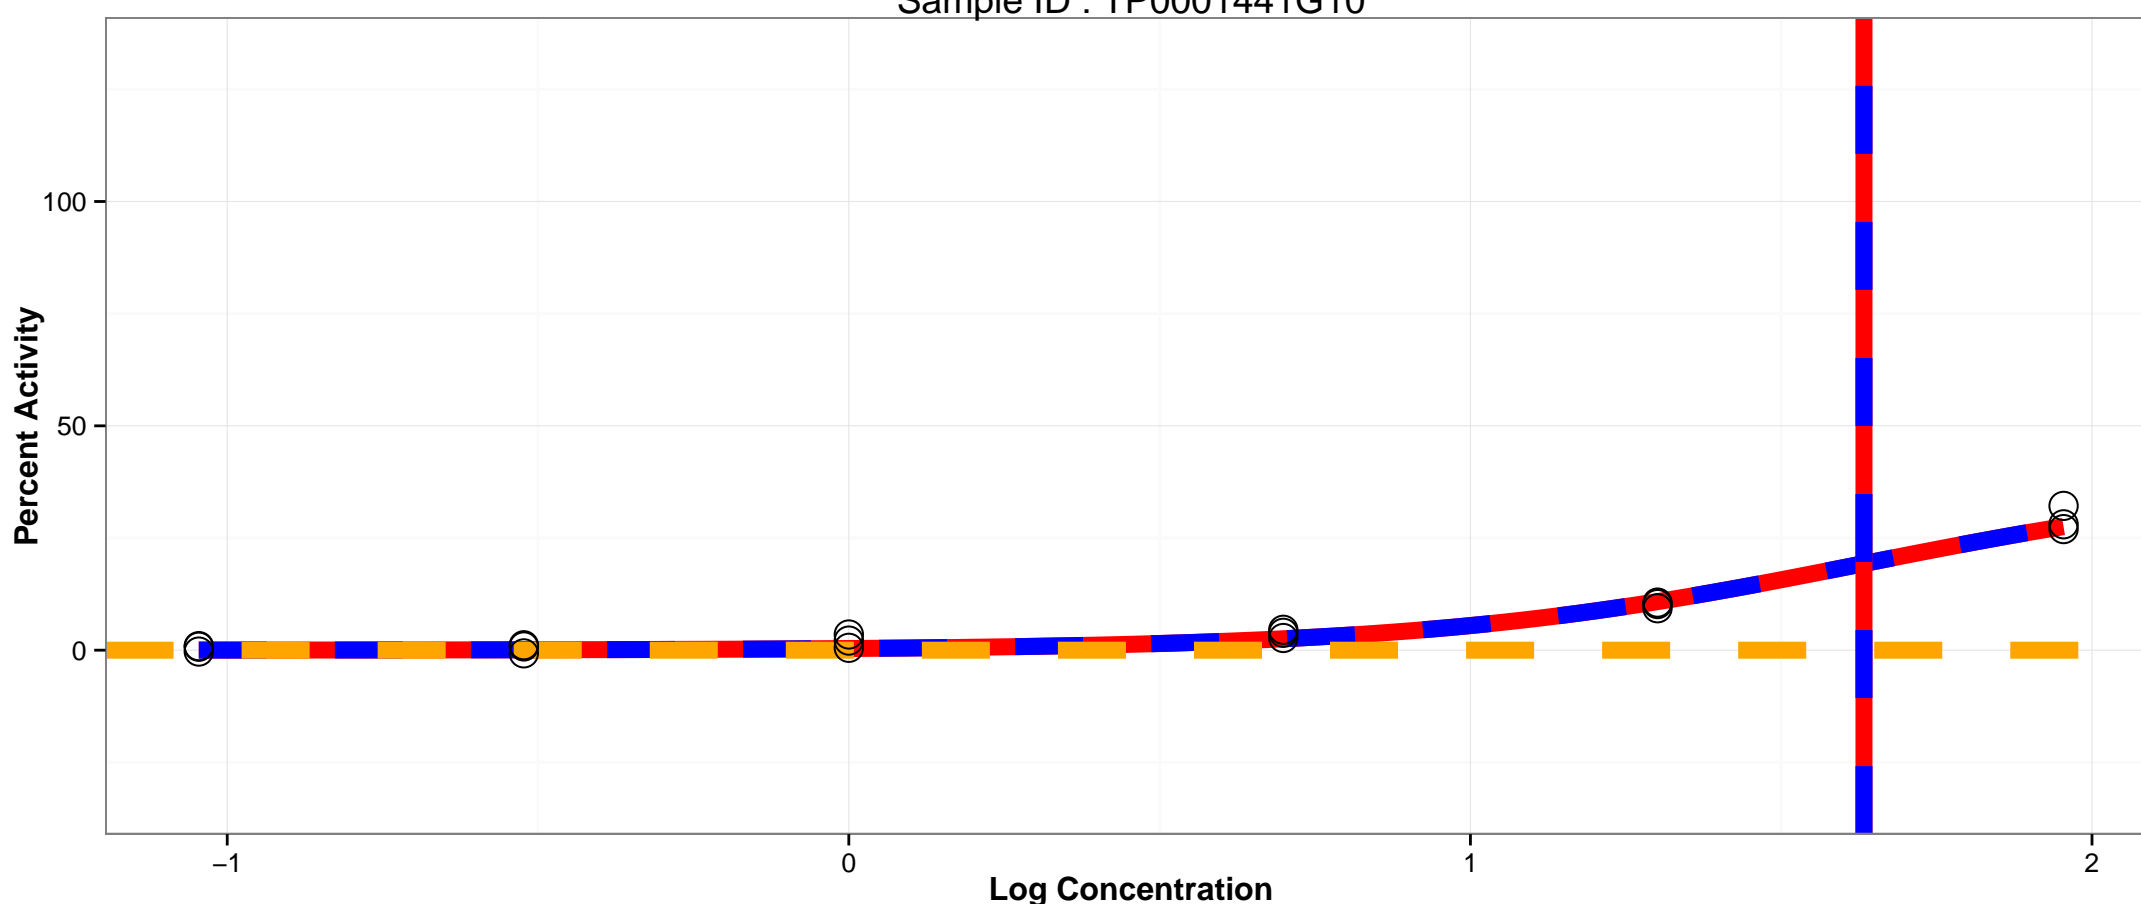

HILL MODEL

|     | tp   | ga   | gw    |
|-----|------|------|-------|
| val | 38.6 | 1.63 | 1.23  |
| sd  | 5.75 | 0.13 | 0.212 |

GAIN-LOSS MODEL

|     | tp   | ga   | gw   | la  | lw |
|-----|------|------|------|-----|----|
| val | 38.6 | 1.63 | 1.23 | 3.6 | 18 |
| sd  | NA   | NA   | NA   | NA  | NA |

|      | CNST   | HILL  | GNLS  |
|------|--------|-------|-------|
| AIC  | 140.19 | 74.27 | 78.27 |
| PROB | 0      | 0.88  | 0.12  |
| RMSE | 12.74  | 1.62  | 1.62  |

MAX\_MEAN : 29.1 MAX\_MED : 28.1 BMAD : 5.69  
COFF : 20 HIT-CALL : 1 FITC : 42 ACTP : 1  
FLAGS : 6

Assay ID 1509 (NHEERL\_HEK293T\_CellTiterGLO)  
Sample ID : TP0001441G10

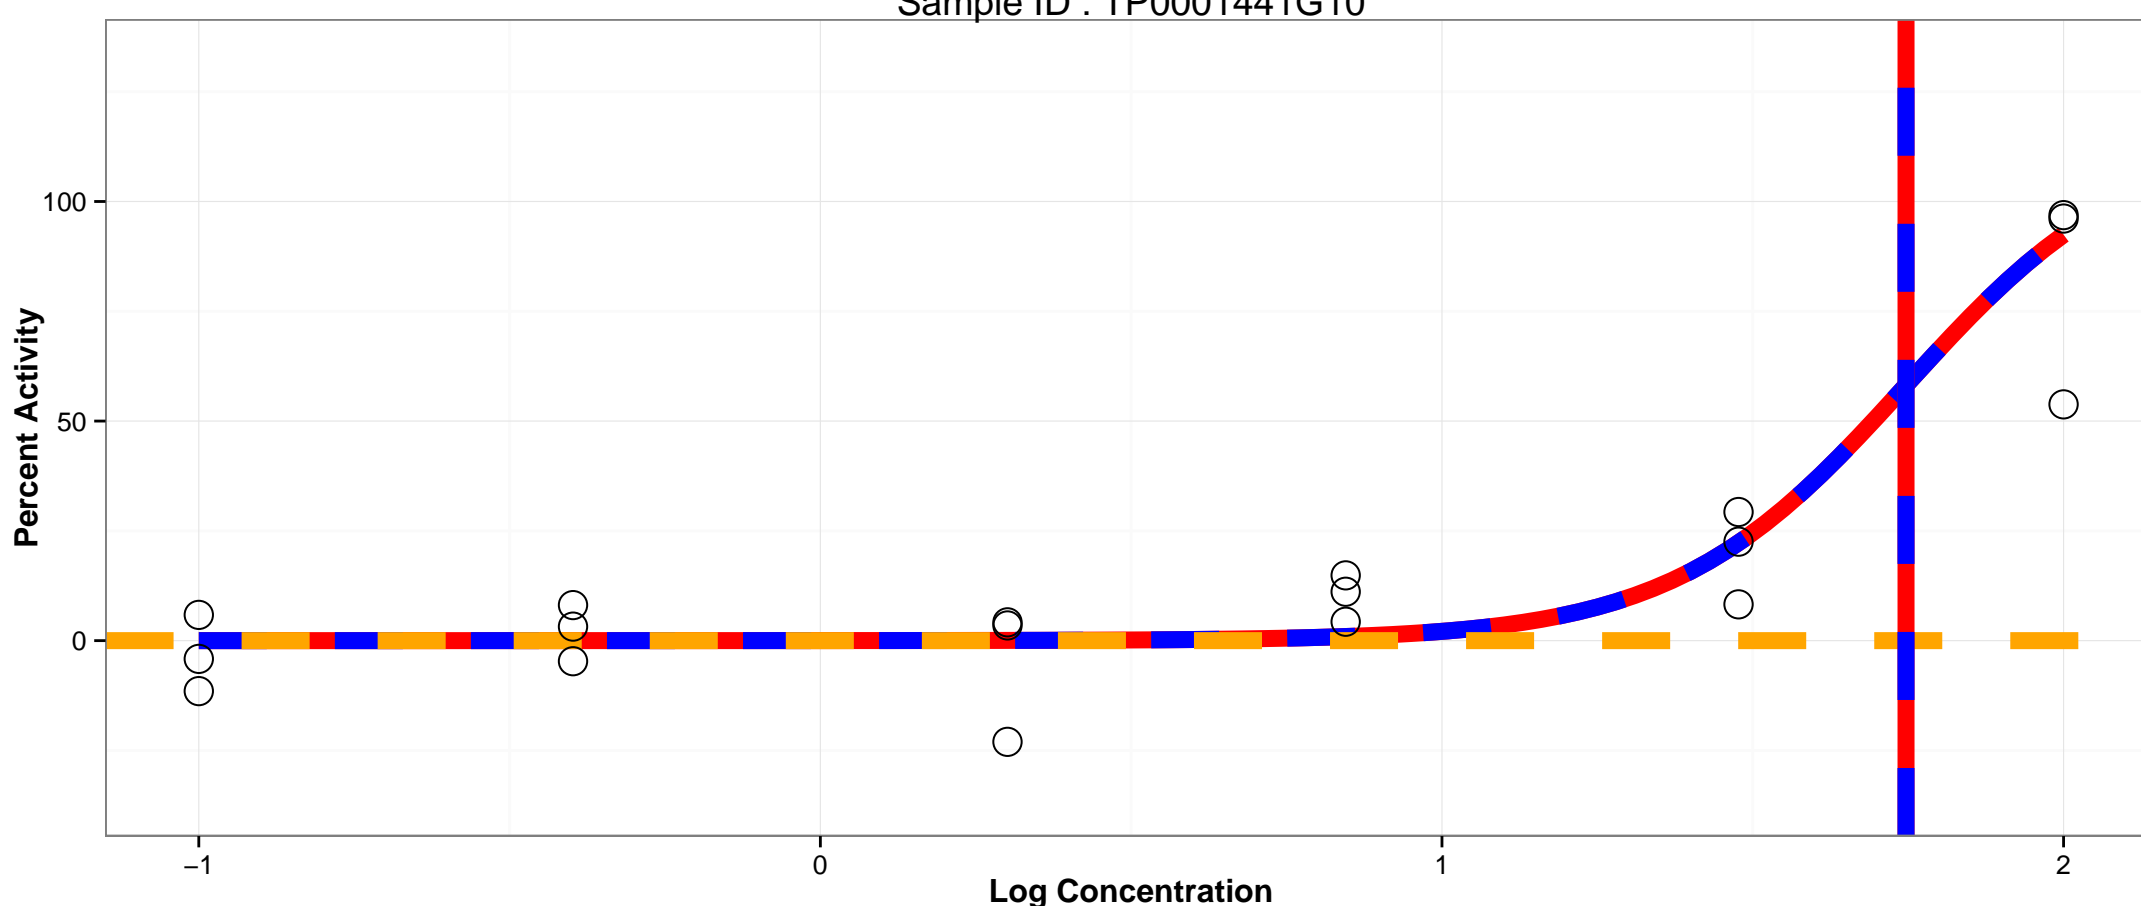

HILL MODEL

|     | tp   | ga    | gw   |
|-----|------|-------|------|
| val | 116  | 1.75  | 2.32 |
| sd  | 77.8 | 0.373 | 2.21 |

GAIN-LOSS MODEL

|     | tp  | ga   | gw   | la   | lw   |
|-----|-----|------|------|------|------|
| val | 116 | 1.75 | 2.32 | 3.98 | 17.3 |
| sd  | NA  | NA   | NA   | NA   | NA   |

|      | CNST   | HILL   | GNLS   |
|------|--------|--------|--------|
| AIC  | 176.72 | 147.69 | 151.69 |
| PROB | 0      | 0.88   | 0.12   |
| RMSE | 36.64  | 12.75  | 12.75  |

MAX\_MEAN : 82.3 MAX\_MED : 96.1 BMAD : 5.54  
COFF : 20 HIT-CALL : 1 FITC : 42 ACTP : 1  
FLAGS :

Assay ID 1848 (NHEERL\_Quantilum\_inhib\_2\_dn)  
Sample ID : TP0001441G10

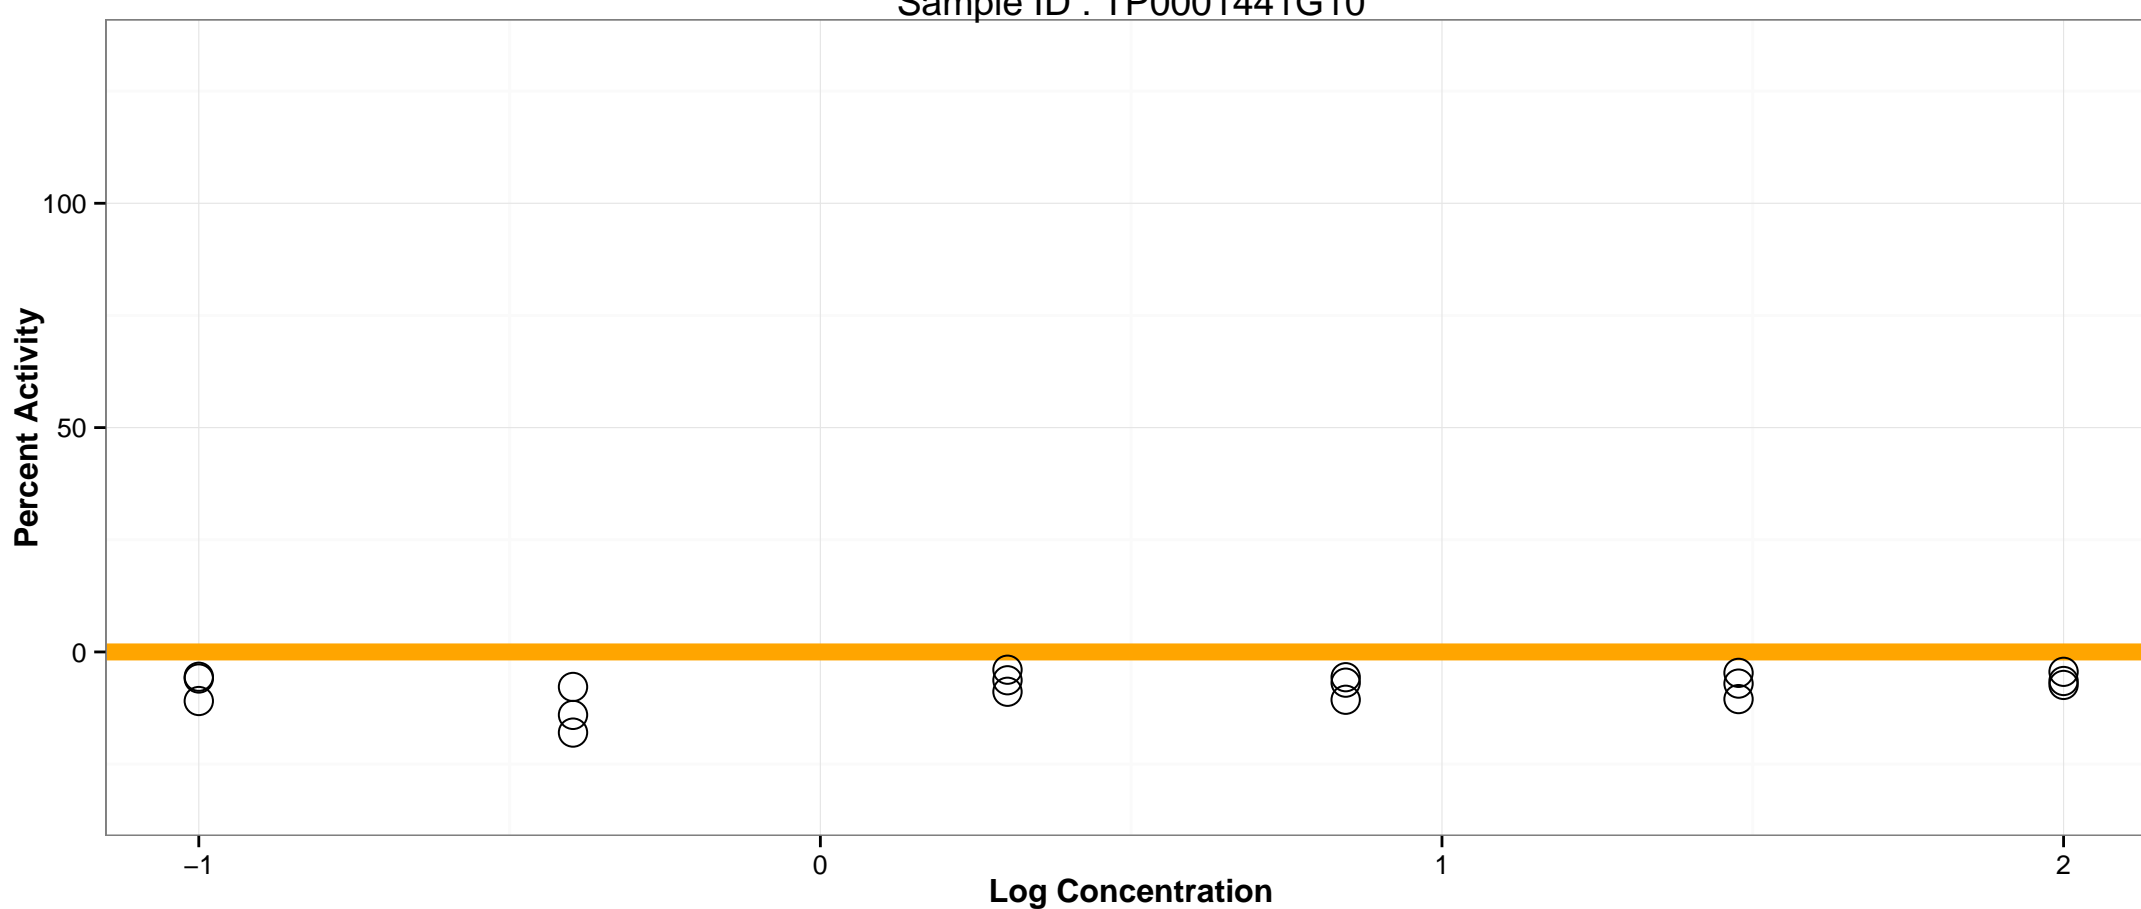

HILL MODEL

HILL MODEL: Not applicable

GAIN-LOSS MODEL

GNLS MODEL: Not applicable

|      | CNST   | HILL | GNLS |
|------|--------|------|------|
| AIC  | 134.04 | NA   | NA   |
| PROB | 1      | NA   | NA   |
| RMSE | 8.78   | NA   | NA   |

MAX\_MEAN : -6.07 MAX\_MED : -5.91 BMAD : 8.58  
COFF : 20 HIT-CALL : 0 FITC : 4 ACTP : 0  
FLAGS :

Chemical : Allethrin  
CAS : 584-79-2

Assay ID 1508 (NHEERL\_TPO\_AUR\_dn)  
Sample ID : TX011582

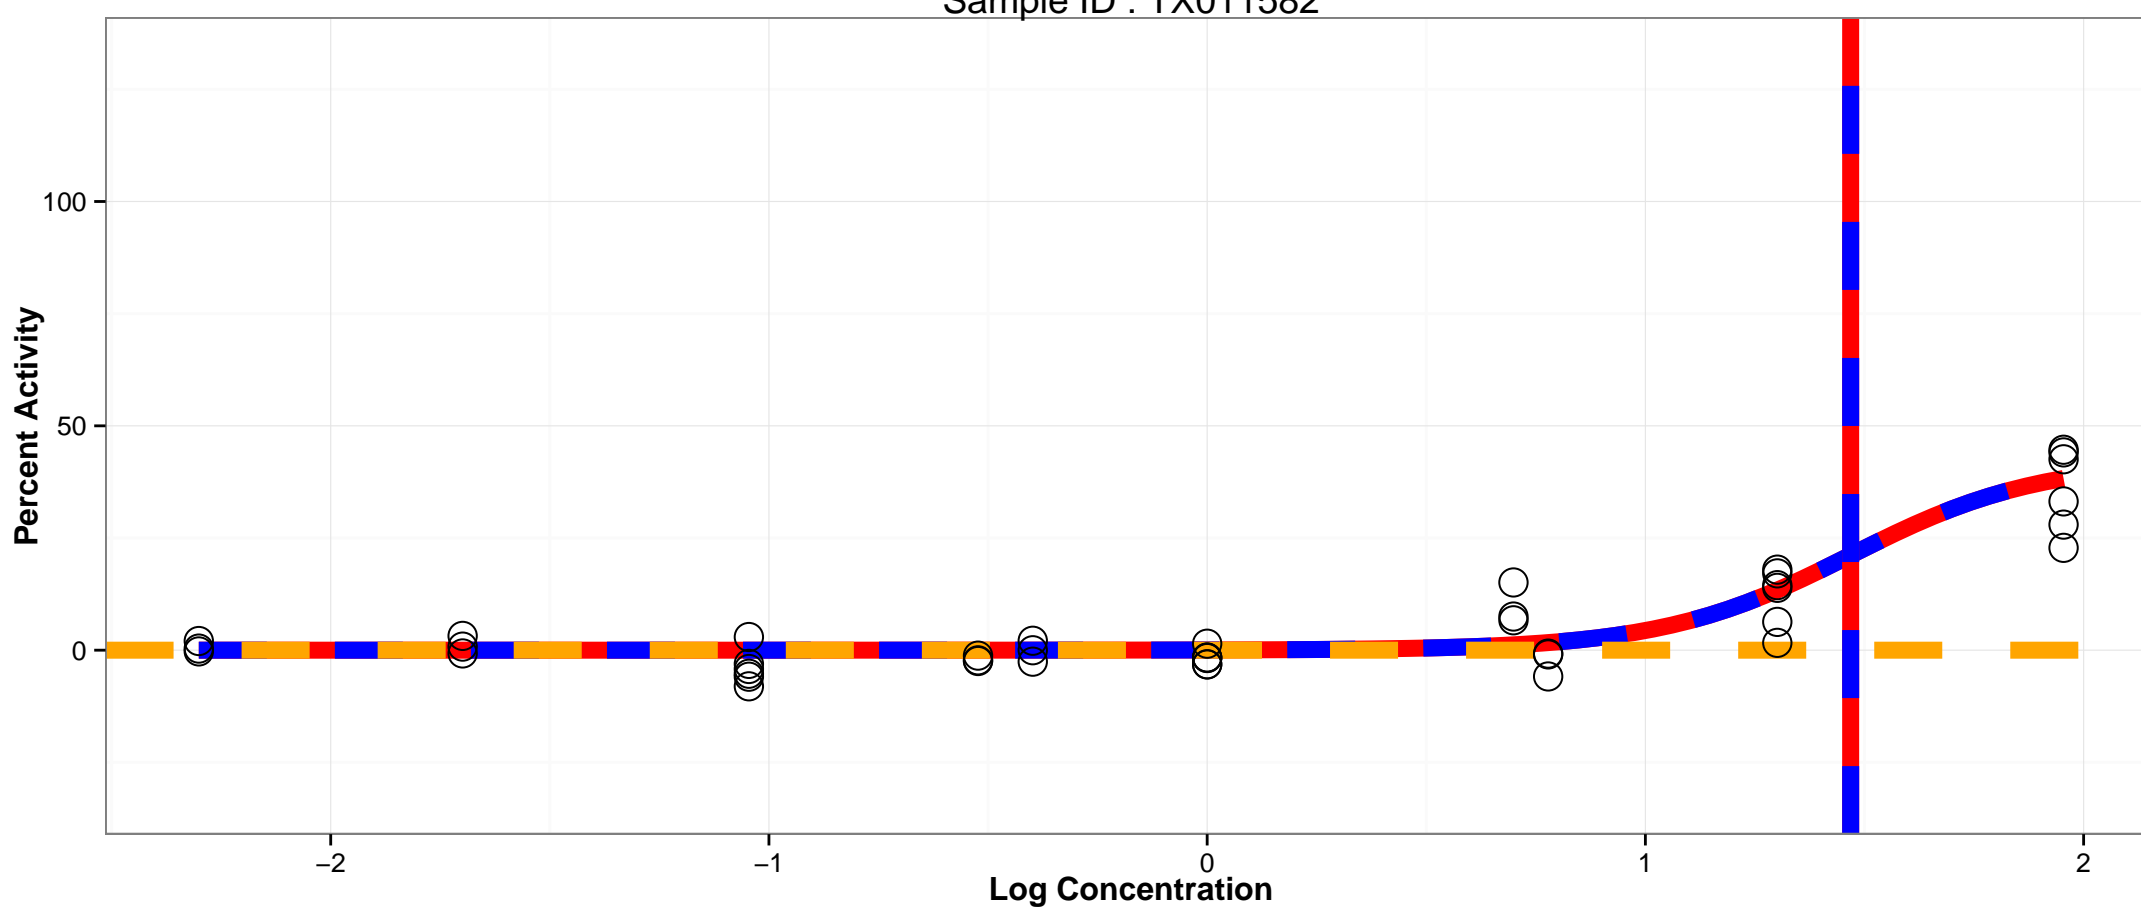

HILL MODEL

|     | tp   | ga    | gw   |
|-----|------|-------|------|
| val | 42.3 | 1.47  | 2    |
| sd  | 12.8 | 0.243 | 1.63 |

GAIN-LOSS MODEL

|     | tp   | ga   | gw | la   | lw   |
|-----|------|------|----|------|------|
| val | 42.3 | 1.47 | 2  | 3.37 | 6.49 |
| sd  | NA   | NA   | NA | NA   | NA   |

|      | CNST   | HILL   | GNLS   |
|------|--------|--------|--------|
| AIC  | 336.35 | 268.72 | 272.72 |
| PROB | 0      | 0.88   | 0.12   |
| RMSE | 15.29  | 5.46   | 5.46   |

MAX\_MEAN : 35.9 MAX\_MED : 37.9 BMAD : 5.69  
COFF : 20 HIT-CALL : 1 FITC : 42 ACTP : 1  
FLAGS : 6

Assay ID 1509 (NHEERL\_HEK293T\_CellTiterGLO)  
Sample ID : TX011582

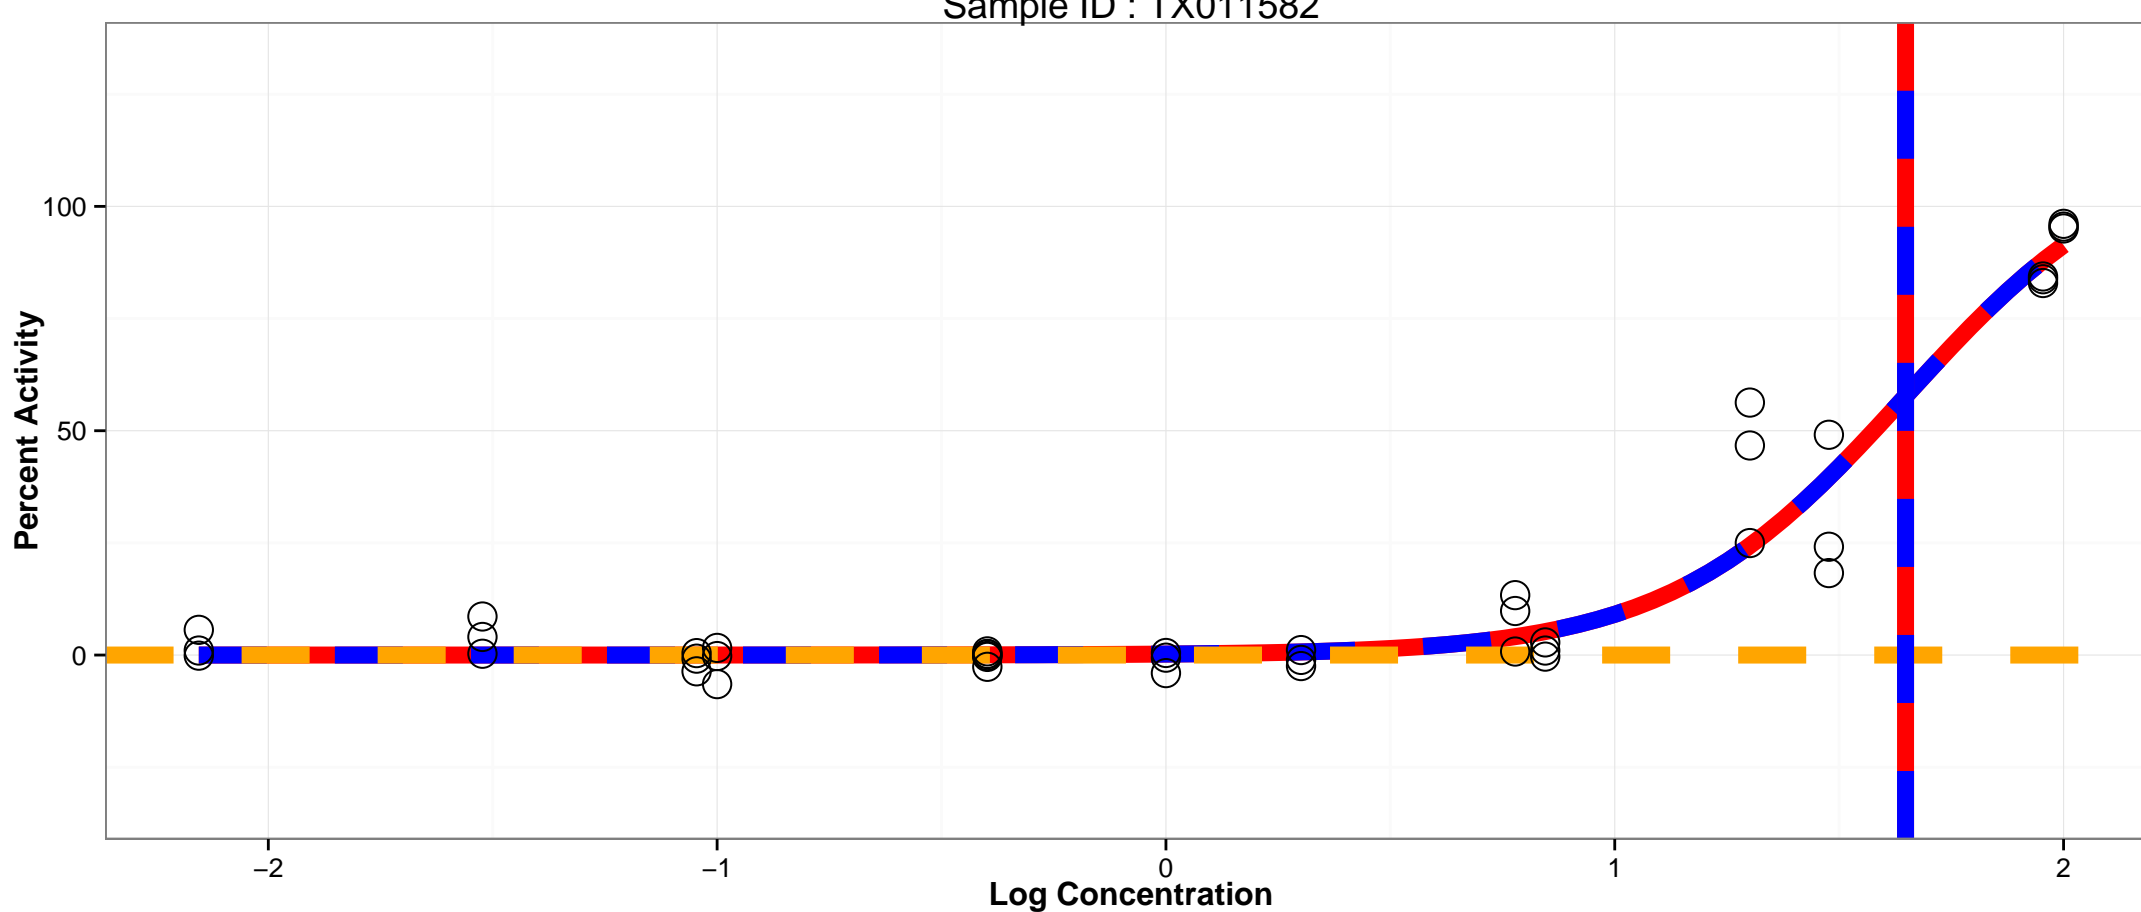

HILL MODEL

|     | tp  | ga    | gw   |
|-----|-----|-------|------|
| val | 115 | 1.65  | 1.65 |
| sd  | 40  | 0.313 | 0.5  |

GAIN-LOSS MODEL

|     | tp   | ga    | gw    | la   | lw   |
|-----|------|-------|-------|------|------|
| val | 115  | 1.65  | 1.65  | 3.31 | 6.87 |
| sd  | 39.9 | 0.313 | 0.499 | 1160 | 6250 |

|      | CNST   | HILL   | GNLS   |
|------|--------|--------|--------|
| AIC  | 409.52 | 285.79 | 289.79 |
| PROB | 0      | 0.88   | 0.12   |
| RMSE | 37.23  | 8.19   | 8.19   |

MAX\_MEAN : 95.6 MAX\_MED : 95.5 BMAD : 5.54  
COFF : 20 HIT-CALL : 1 FITC : 42 ACTP : 1  
FLAGS :

Assay ID 1848 (NHEERL\_Quantilum\_inhib\_2\_dn)  
Sample ID : TX011582

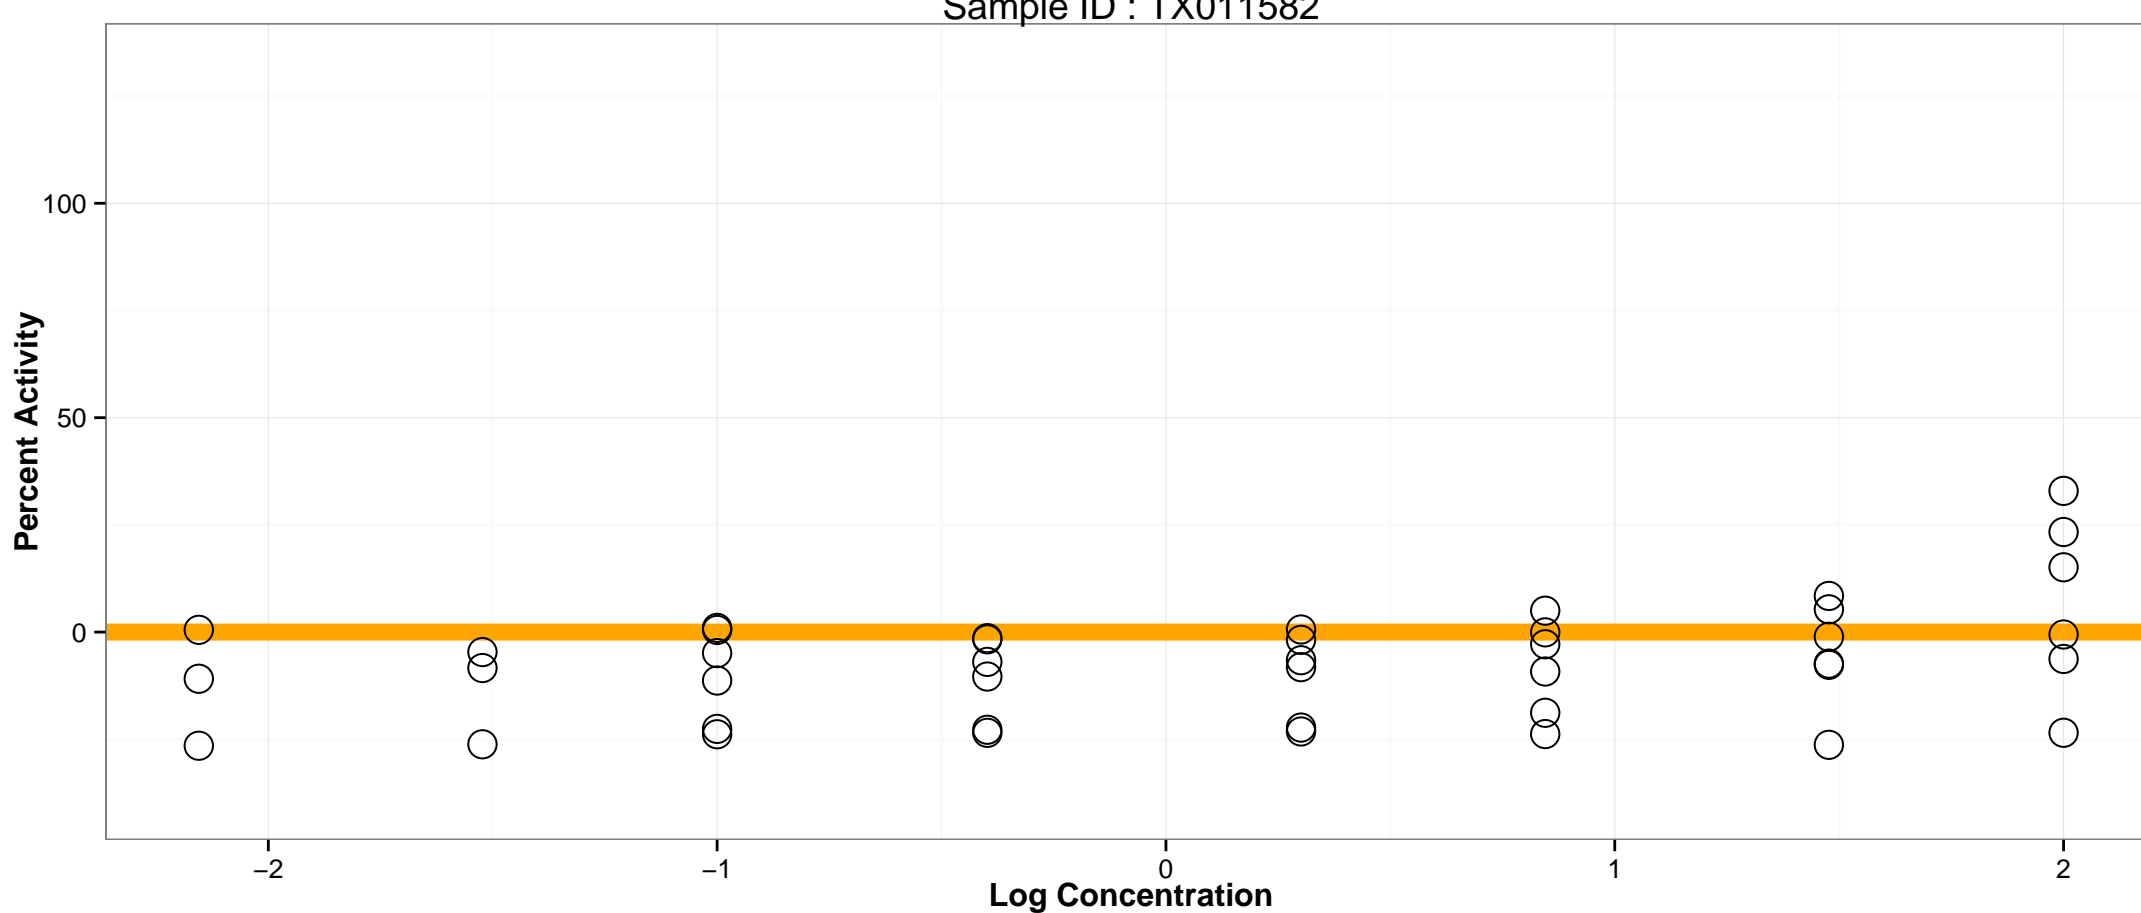

HILL MODEL

HILL MODEL: Not applicable

GAIN-LOSS MODEL

GNLS MODEL: Not applicable

|      | CNST  | HILL | GNLS |
|------|-------|------|------|
| AIC  | 352.1 | NA   | NA   |
| PROB | 1     | NA   | NA   |
| RMSE | 15.11 | NA   | NA   |

MAX\_MEAN : 6.85 MAX\_MED : 7.29 BMAD : 8.58  
COFF : 20 HIT-CALL : 0 FITC : 4 ACTP : 0  
FLAGS :

Chemical : Allethrin  
CAS : 584-79-2

Assay ID 1508 (NHEERL\_TPO\_AUR\_dn)  
Sample ID : TX111582

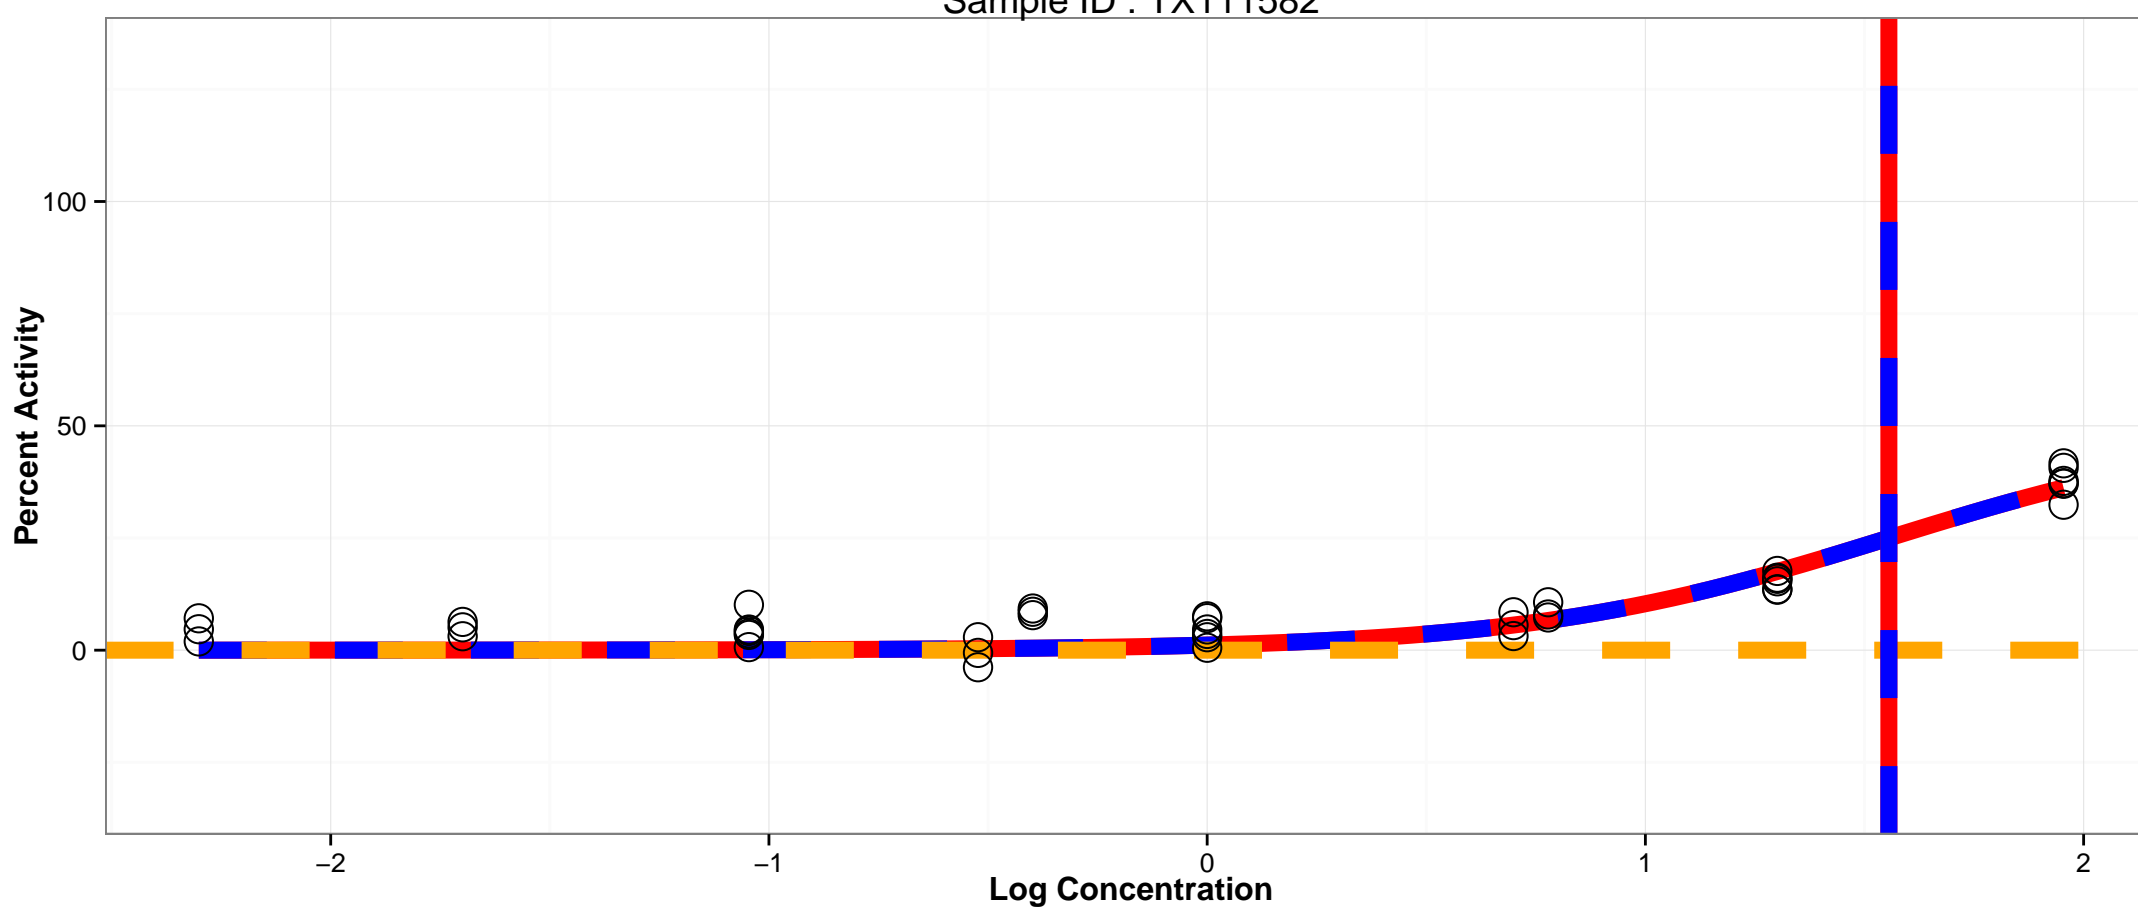

HILL MODEL

|     | tp  | ga    | gw    |
|-----|-----|-------|-------|
| val | 50  | 1.56  | 1.05  |
| sd  | 7.6 | 0.149 | 0.207 |

GAIN-LOSS MODEL

|     | tp | ga   | gw   | la   | lw   |
|-----|----|------|------|------|------|
| val | 50 | 1.56 | 1.05 | 3.18 | 17.6 |
| sd  | NA | NA   | NA   | NA   | NA   |

|      | CNST   | HILL   | GNLS   |
|------|--------|--------|--------|
| AIC  | 349.24 | 253.73 | 257.73 |
| PROB | 0      | 0.88   | 0.12   |
| RMSE | 16.27  | 4.31   | 4.31   |

MAX\_MEAN : 37.8 MAX\_MED : 37.5 BMAD : 5.69  
COFF : 20 HIT-CALL : 1 FITC : 42 ACTP : 1  
FLAGS : 6

Assay ID 1509 (NHEERL\_HEK293T\_CellTiterGLO)  
Sample ID : TX111582

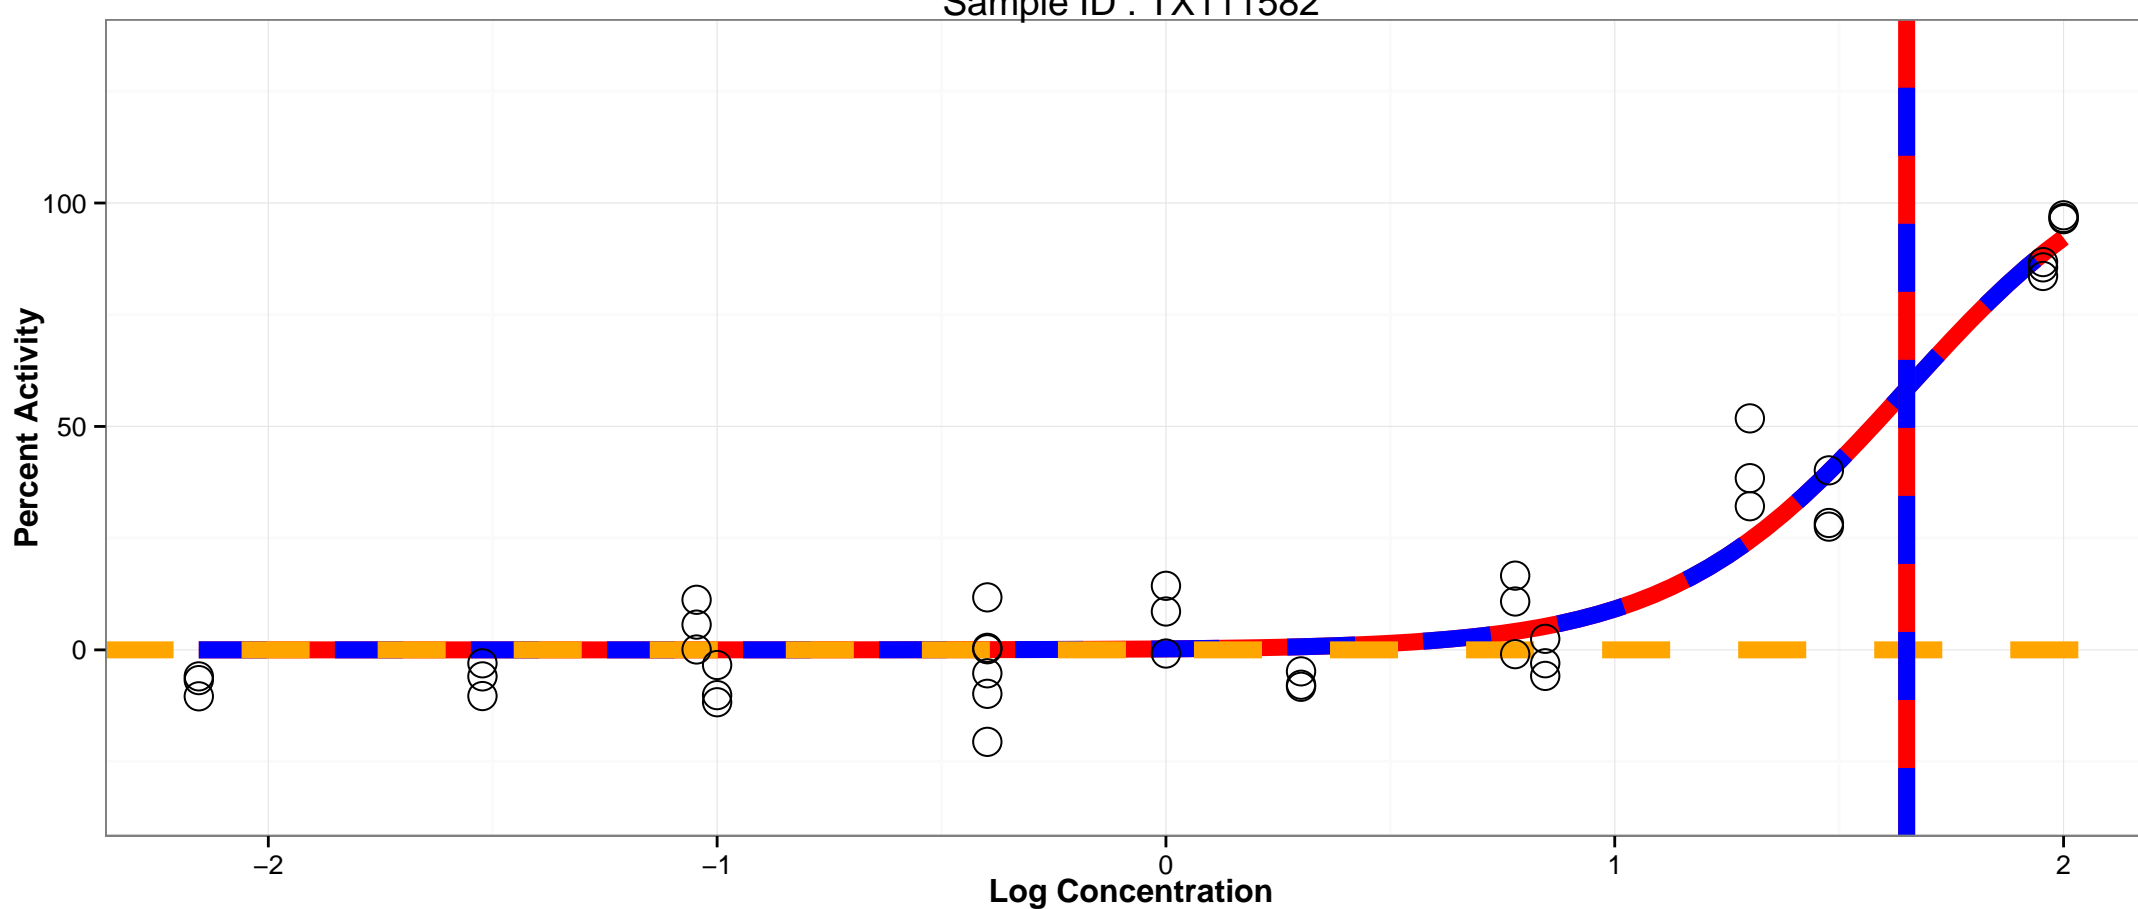

HILL MODEL

|     | tp   | ga    | gw    |
|-----|------|-------|-------|
| val | 117  | 1.65  | 1.65  |
| sd  | 19.9 | 0.132 | 0.357 |

GAIN-LOSS MODEL

|     | tp  | ga   | gw   | la   | lw |
|-----|-----|------|------|------|----|
| val | 117 | 1.65 | 1.65 | 3.19 | 18 |
| sd  | NA  | NA   | NA   | NA   | NA |

|      | CNST   | HILL   | GNLS   |
|------|--------|--------|--------|
| AIC  | 415.37 | 317.81 | 321.81 |
| PROB | 0      | 0.88   | 0.12   |
| RMSE | 38     | 9.38   | 9.38   |

MAX\_MEAN : 96.8 MAX\_MED : 96.7 BMAD : 5.54  
COFF : 20 HIT-CALL : 1 FITC : 42 ACTP : 1  
FLAGS :

Assay ID 1848 (NHEERL\_QuantLum\_inhib\_2\_dn)  
Sample ID : TX111582

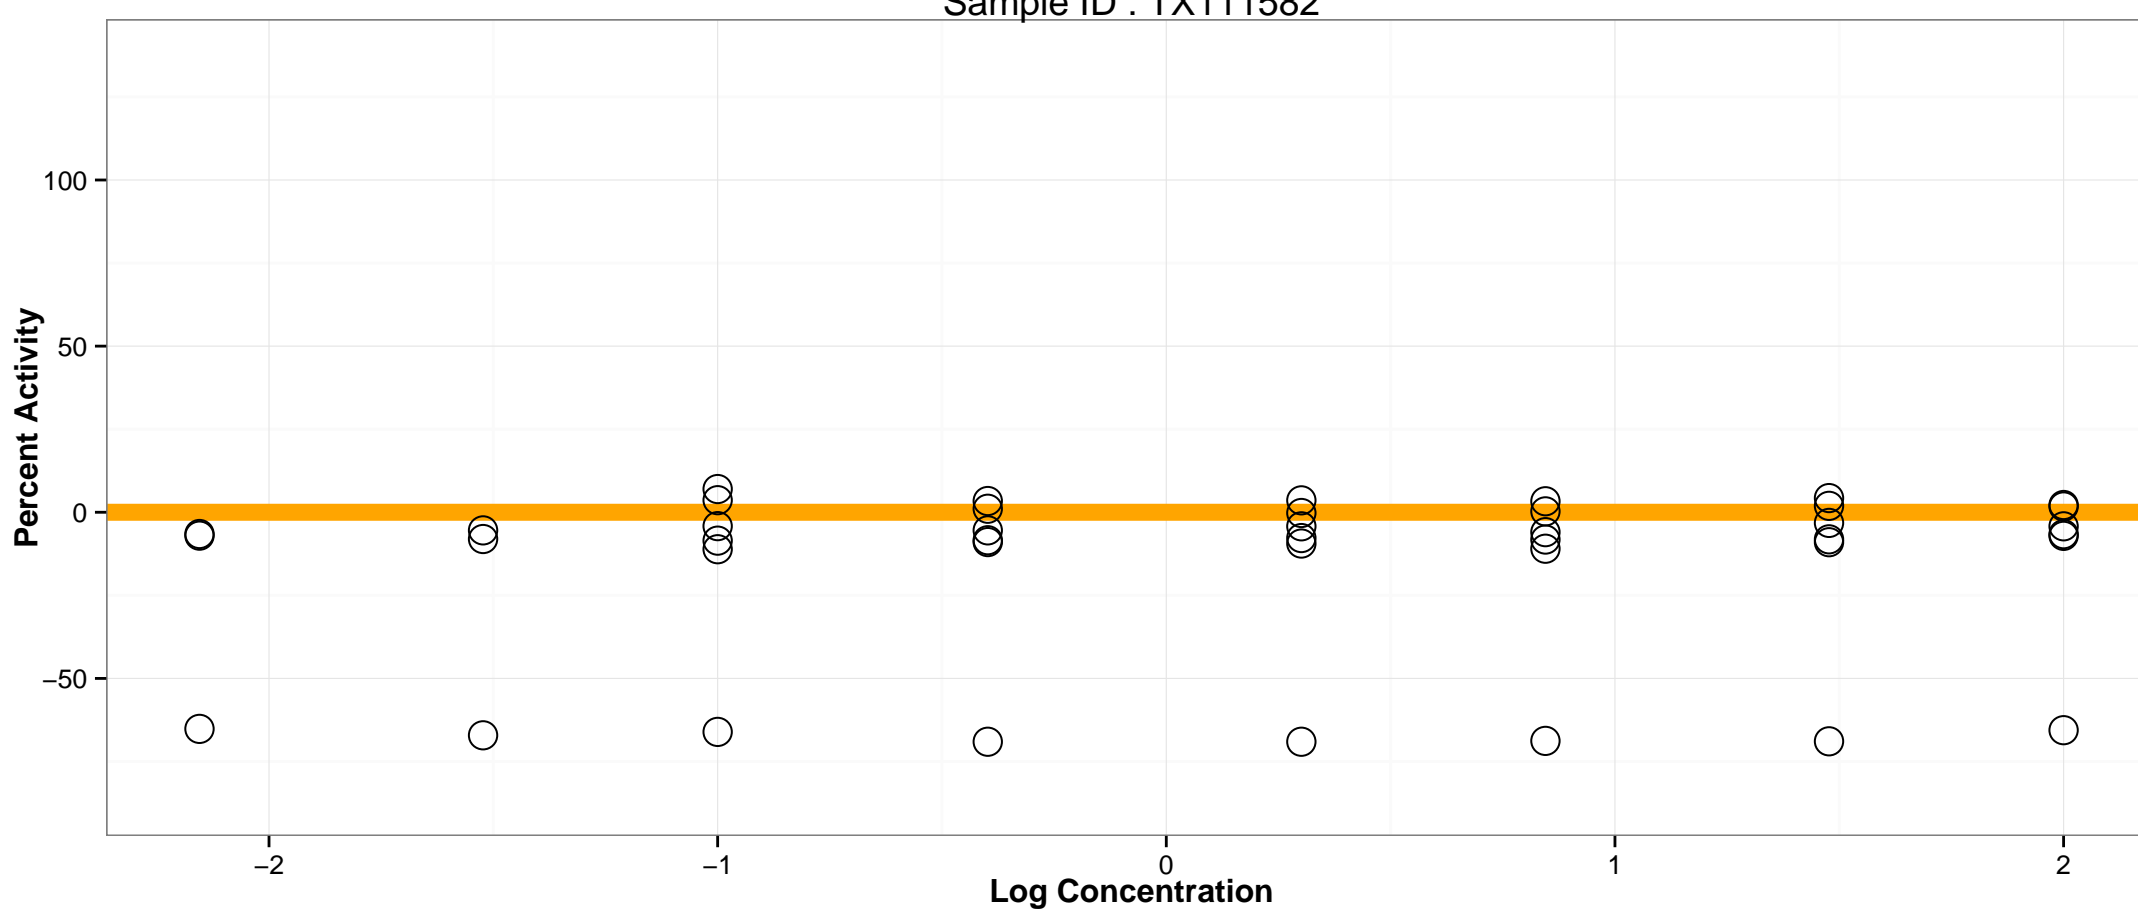

HILL MODEL

HILL MODEL: Not applicable

GAIN-LOSS MODEL

GNLS MODEL: Not applicable

|      | CNST   | HILL | GNLS |
|------|--------|------|------|
| AIC  | 391.12 | NA   | NA   |
| PROB | 1      | NA   | NA   |
| RMSE | 30     | NA   | NA   |

MAX\_MEAN : -13.2 MAX\_MED : -5.4 BMAD : 8.58  
COFF : 20 HIT-CALL : 0 FITC : 4 ACTP : 0  
FLAGS : 10

Chemical : Allethrin  
CAS : 584-79-2

Assay ID 1508 (NHEERL\_TPO\_AUR\_dn)  
Sample ID : TX211582

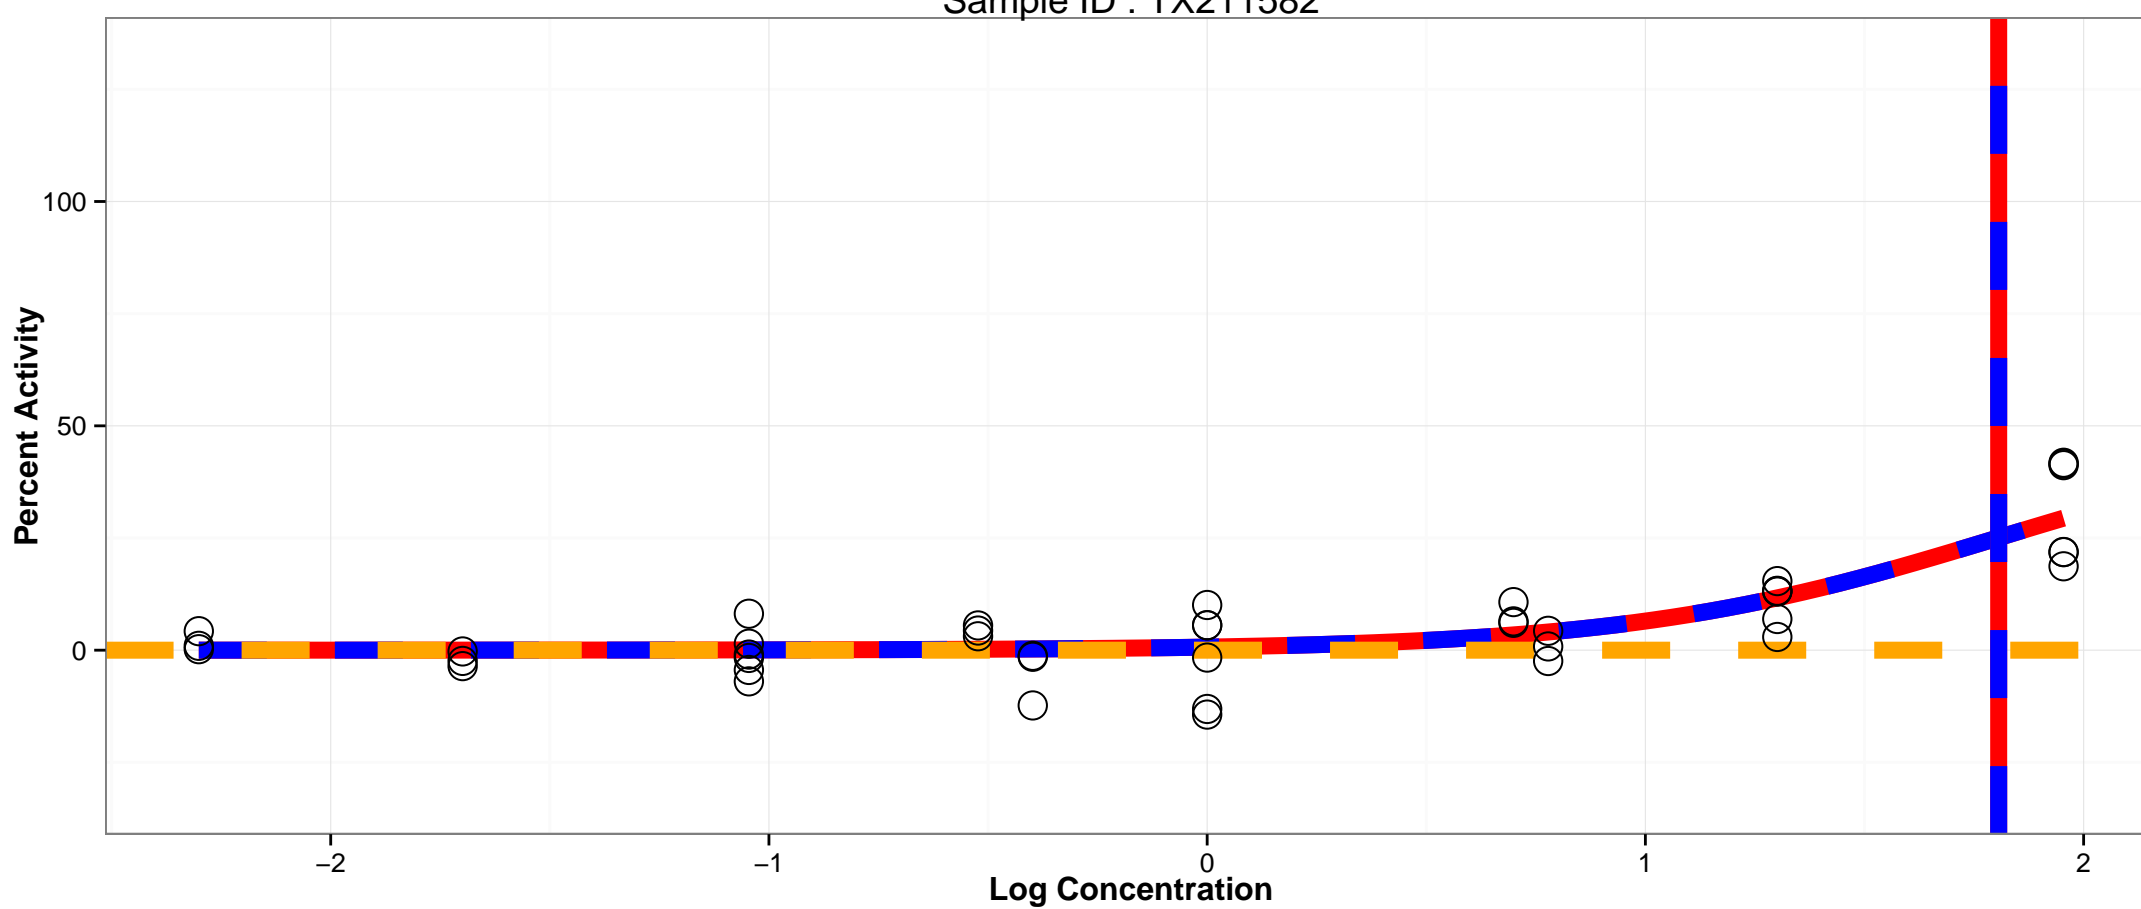

HILL MODEL

|     | tp   | ga    | gw   |
|-----|------|-------|------|
| val | 50.1 | 1.81  | 1.03 |
| sd  | 42.4 | 0.697 | 0.51 |

GAIN-LOSS MODEL

|     | tp   | ga    | gw    | la   | lw    |
|-----|------|-------|-------|------|-------|
| val | 50.1 | 1.81  | 1.03  | 2.92 | 8.05  |
| sd  | 42.4 | 0.697 | 0.511 | 1480 | 12300 |

|      | CNST   | HILL   | GNLS   |
|------|--------|--------|--------|
| AIC  | 334.72 | 288.71 | 292.71 |
| PROB | 0      | 0.88   | 0.12   |
| RMSE | 14.18  | 6.66   | 6.66   |

MAX\_MEAN : 31.2 MAX\_MED : 31.6 BMAD : 5.69  
COFF : 20 HIT-CALL : 1 FITC : 42 ACTP : 1  
FLAGS : 6

Assay ID 1509 (NHEERL\_HEK293T\_CellTiterGLO)  
Sample ID : TX211582

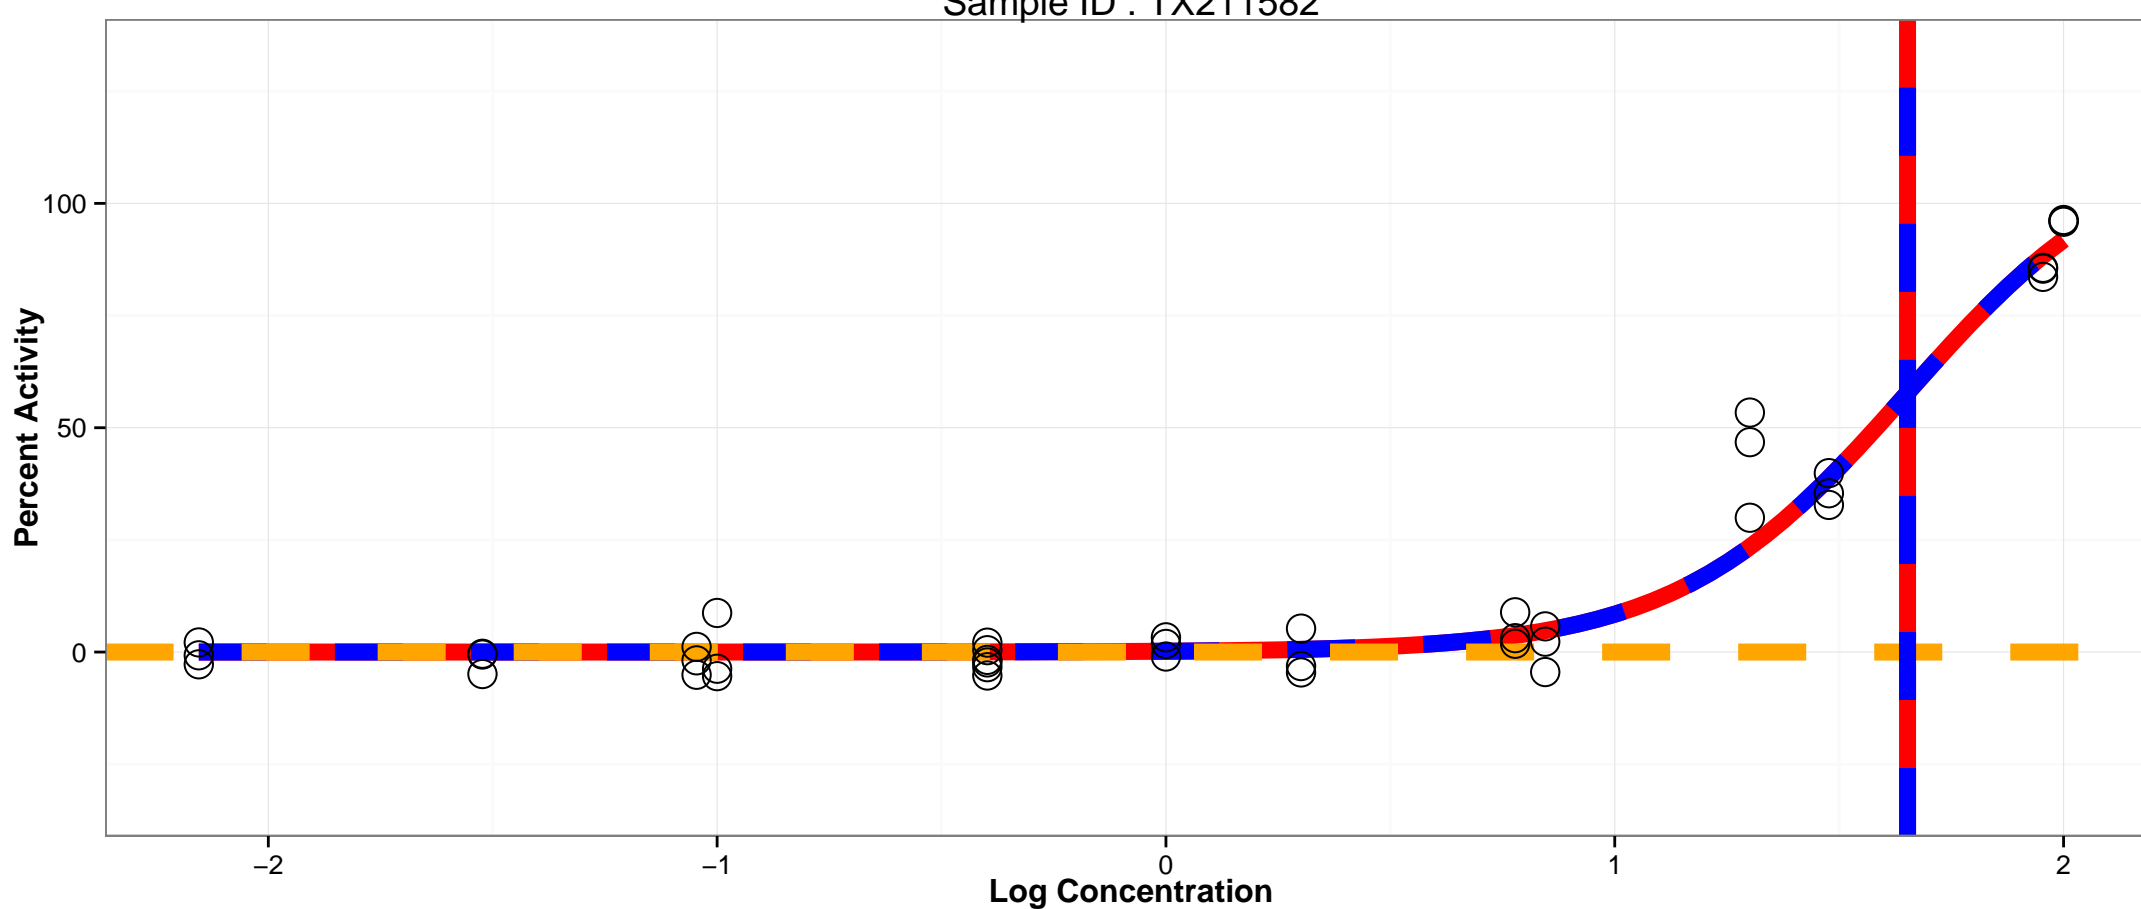

HILL MODEL

|     | tp   | ga     | gw   |
|-----|------|--------|------|
| val | 116  | 1.65   | 1.69 |
| sd  | 11.9 | 0.0746 | 0.23 |

GAIN-LOSS MODEL

|     | tp   | ga     | gw   | la   | lw   |
|-----|------|--------|------|------|------|
| val | 116  | 1.65   | 1.69 | 2.53 | 17.7 |
| sd  | 11.9 | 0.0746 | 0.23 | 223  | 7290 |

|      | CNST   | HILL   | GNLS   |
|------|--------|--------|--------|
| AIC  | 412.27 | 270.57 | 274.57 |
| PROB | 0      | 0.88   | 0.12   |
| RMSE | 37.69  | 7.01   | 7.01   |

MAX\_MEAN : 96.1 MAX\_MED : 96.1 BMAD : 5.54  
COFF : 20 HIT-CALL : 1 FITC : 42 ACTP : 1  
FLAGS :

Assay ID 1848 (NHEERL\_Quantilum\_inhib\_2\_dn)  
Sample ID : TX211582

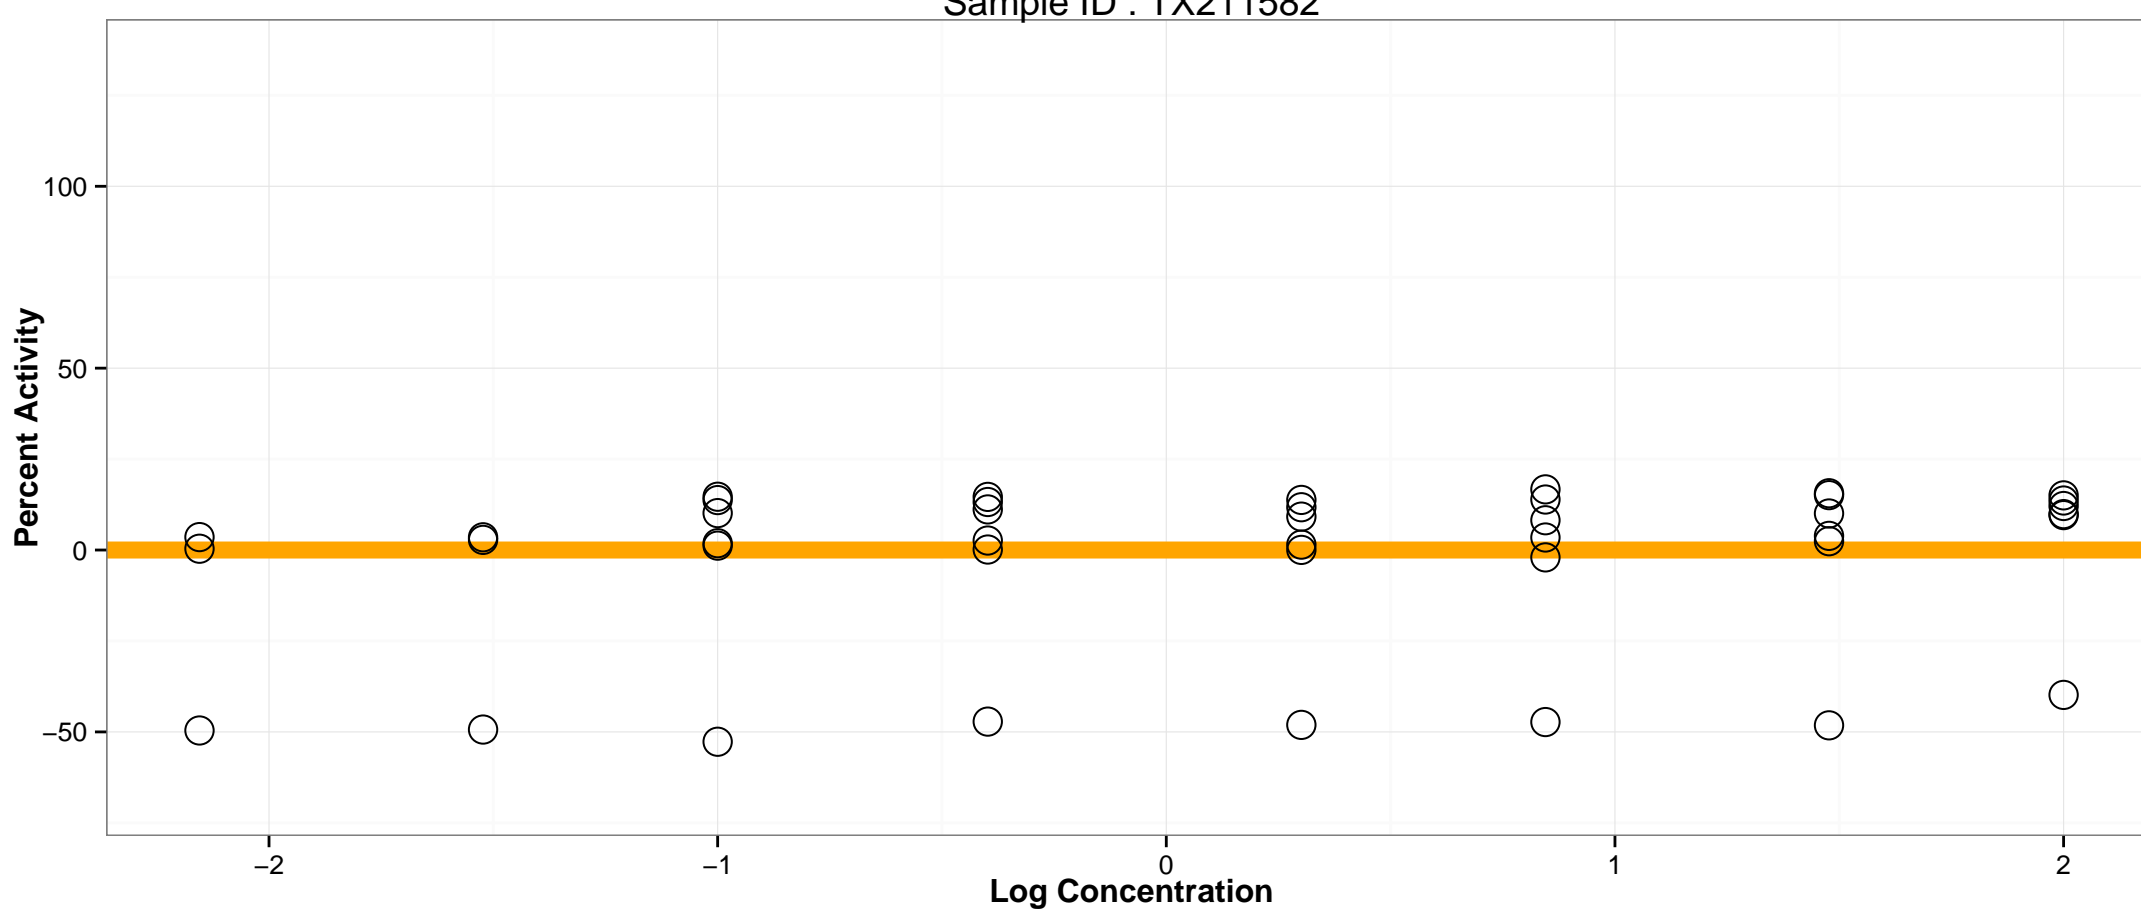

HILL MODEL

HILL MODEL: Not applicable

GAIN-LOSS MODEL

GNLS MODEL: Not applicable

|      | CNST   | HILL | GNLS |
|------|--------|------|------|
| AIC  | 379.32 | NA   | NA   |
| PROB | 1      | NA   | NA   |
| RMSE | 22.74  | NA   | NA   |

MAX\_MEAN : 3.42 MAX\_MED : 11 BMAD : 8.58  
COFF : 20 HIT-CALL : 0 FITC : 4 ACTP : 0  
FLAGS : 10

Chemical : 2-Bromo-4-hydroxyacetophenone  
CAS : 2491-38-5

Assay ID 1508 (NHEERL\_TPO\_AUR\_dn)  
Sample ID : TP0001441H01

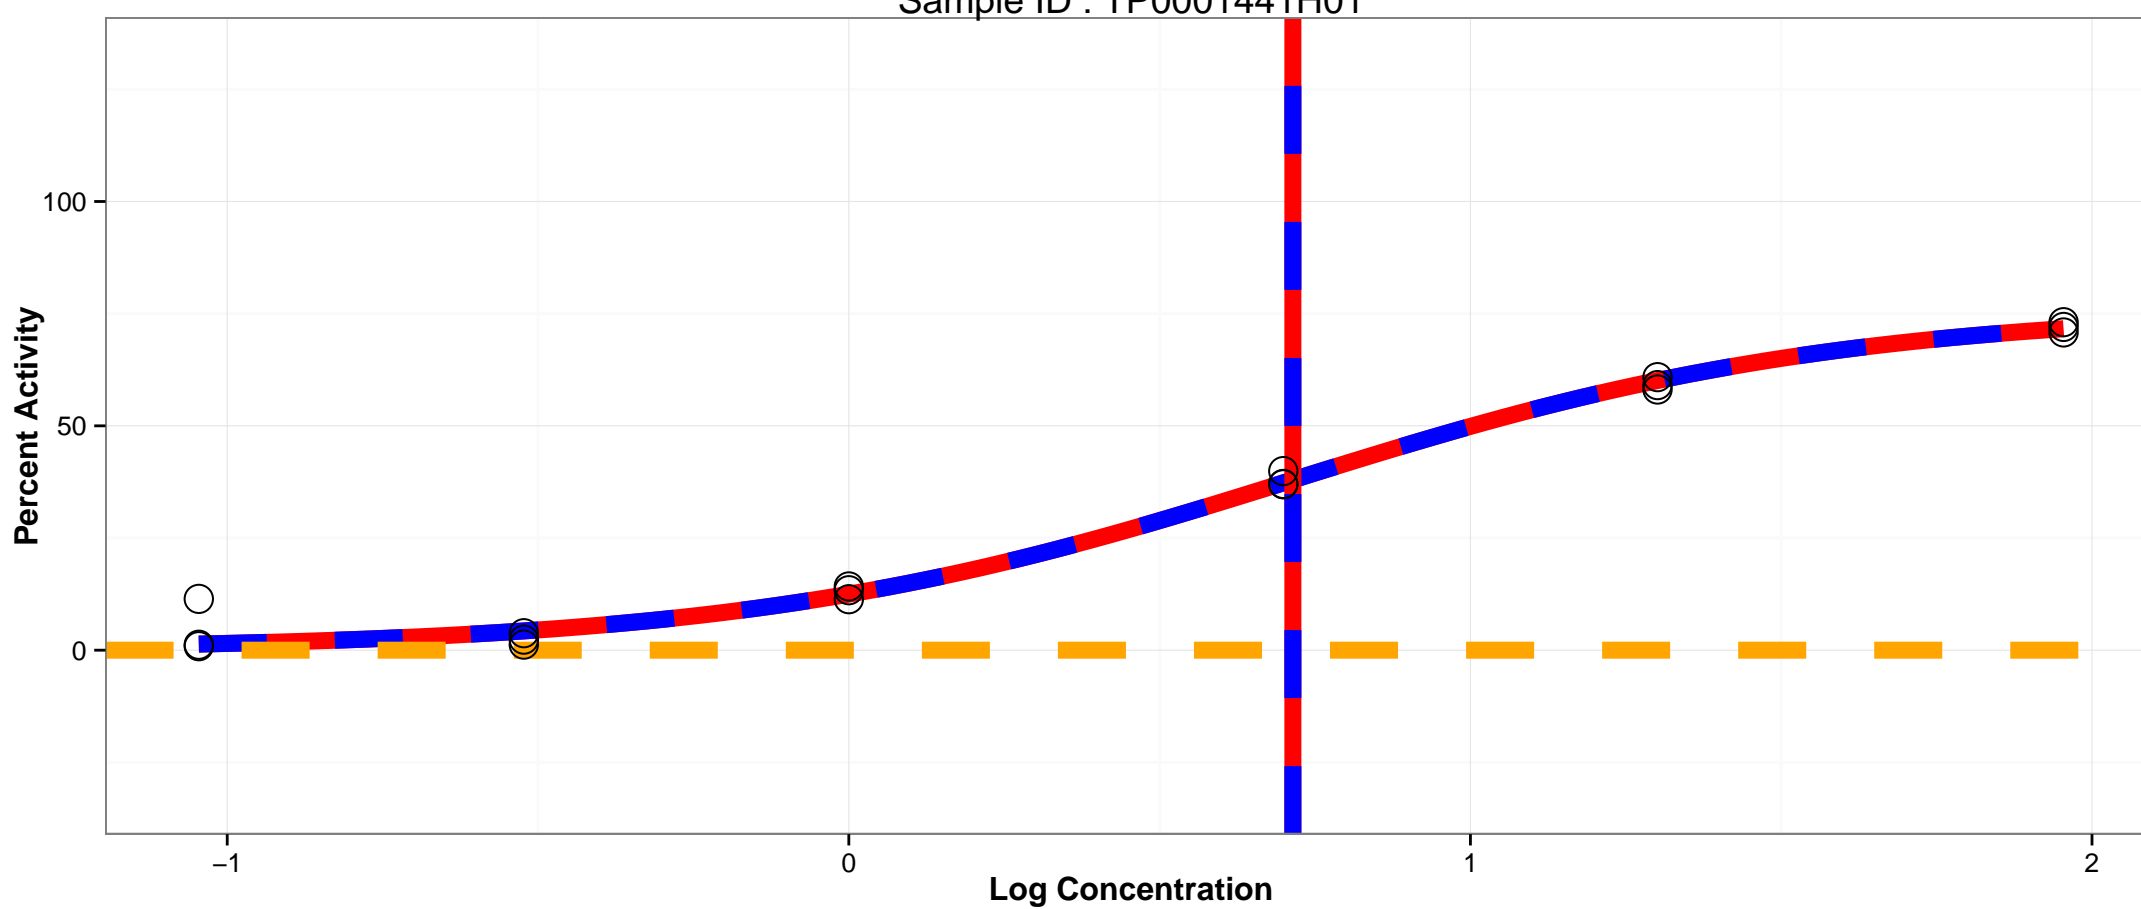

HILL MODEL

|     | tp   | ga    | gw     |
|-----|------|-------|--------|
| val | 75.9 | 0.714 | 0.988  |
| sd  | 1.46 | 0.029 | 0.0484 |

GAIN-LOSS MODEL

|     | tp   | ga    | gw    | la   | lw   |
|-----|------|-------|-------|------|------|
| val | 75.9 | 0.714 | 0.988 | 3.84 | 10.1 |
| sd  | NA   | NA    | NA    | NA   | NA   |

|      | CNST  | HILL  | GNLS  |
|------|-------|-------|-------|
| AIC  | 188.8 | 85.57 | 89.57 |
| PROB | 0     | 0.88  | 0.12  |
| RMSE | 41.58 | 2.75  | 2.75  |

MAX\_MEAN : 72 MAX\_MED : 72.1 BMAD : 5.69  
COFF : 20 HIT-CALL : 1 FITC : 42 ACTP : 1  
FLAGS :

Assay ID 1509 (NHEERL\_HEK293T\_CellTiterGLO)  
Sample ID : TP0001441H01

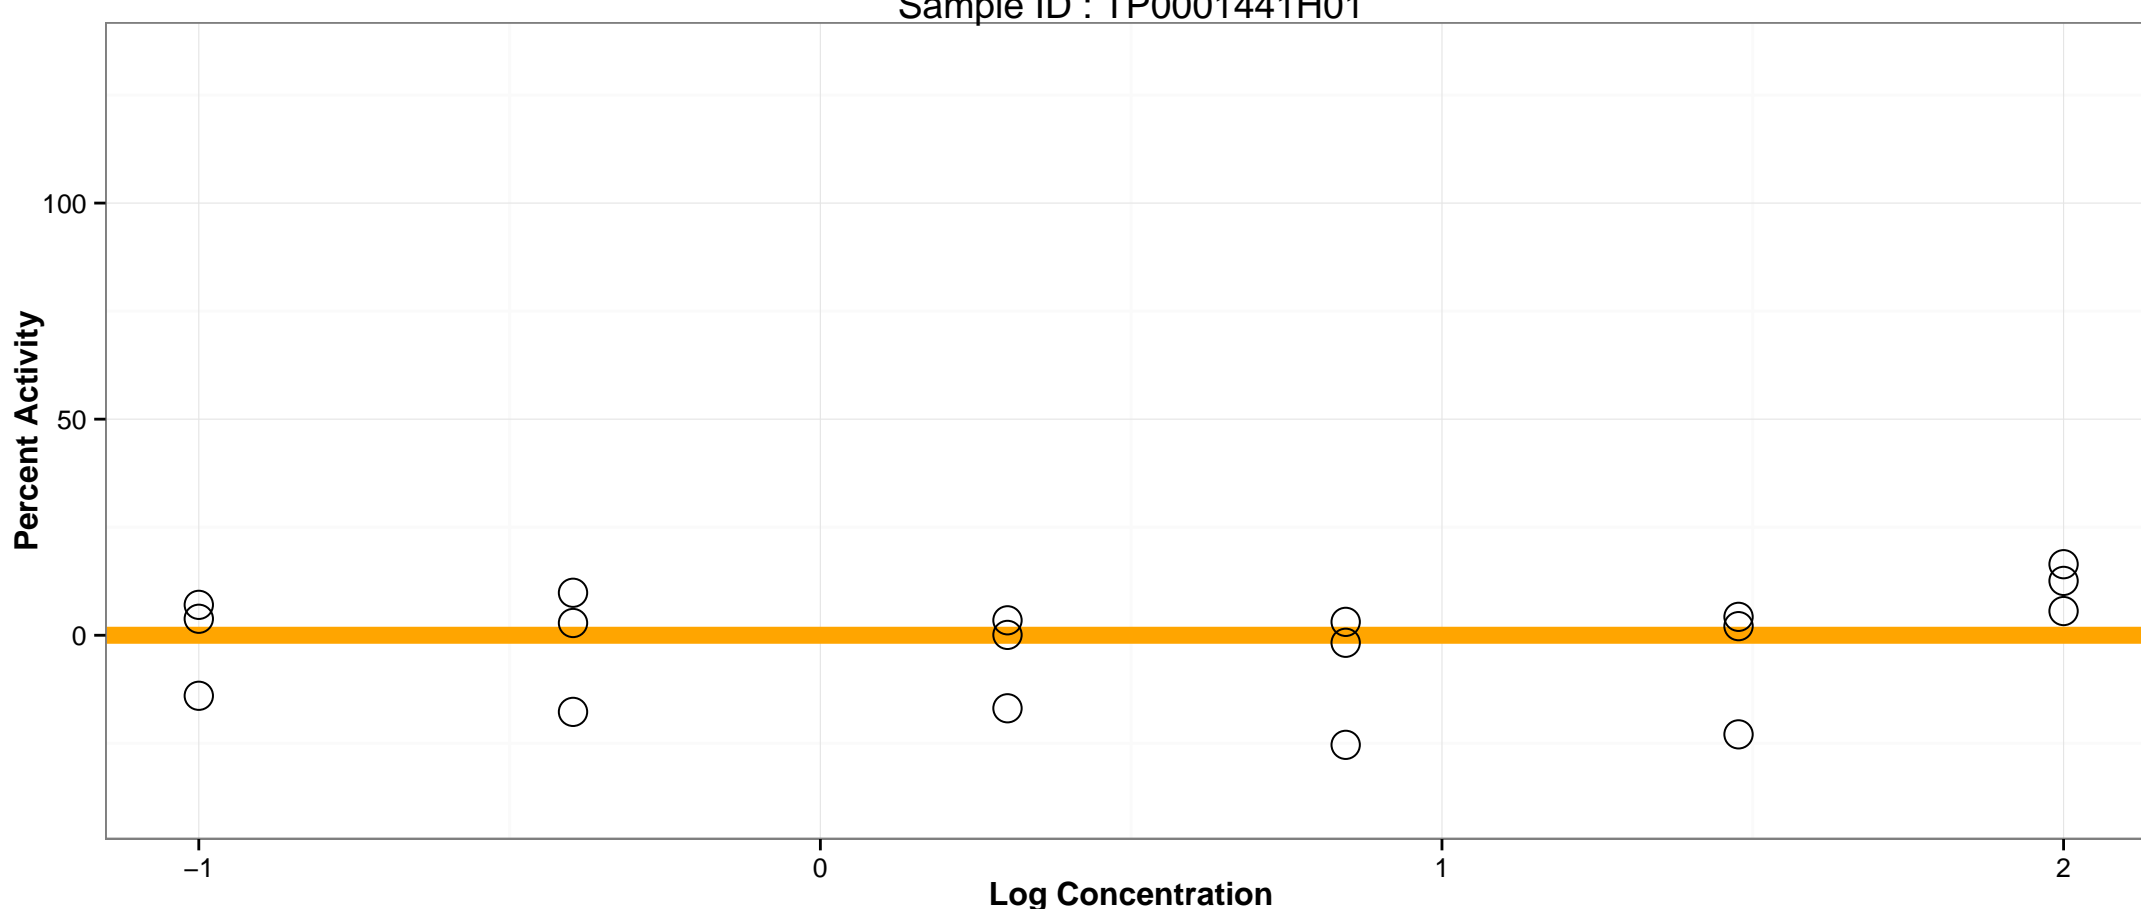

HILL MODEL

HILL MODEL: Not applicable

GAIN-LOSS MODEL

GNLS MODEL: Not applicable

|      | CNST   | HILL | GNLS |
|------|--------|------|------|
| AIC  | 143.93 | NA   | NA   |
| PROB | 1      | NA   | NA   |
| RMSE | 12.11  | NA   | NA   |

MAX\_MEAN : 11.6 MAX\_MED : 12.6 BMAD : 5.54  
COFF : 20 HIT-CALL : 0 FITC : 4 ACTP : 0  
FLAGS :

Assay ID 1848 (NHEERL\_Quantilum\_inhib\_2\_dn)  
Sample ID : TP0001441H01

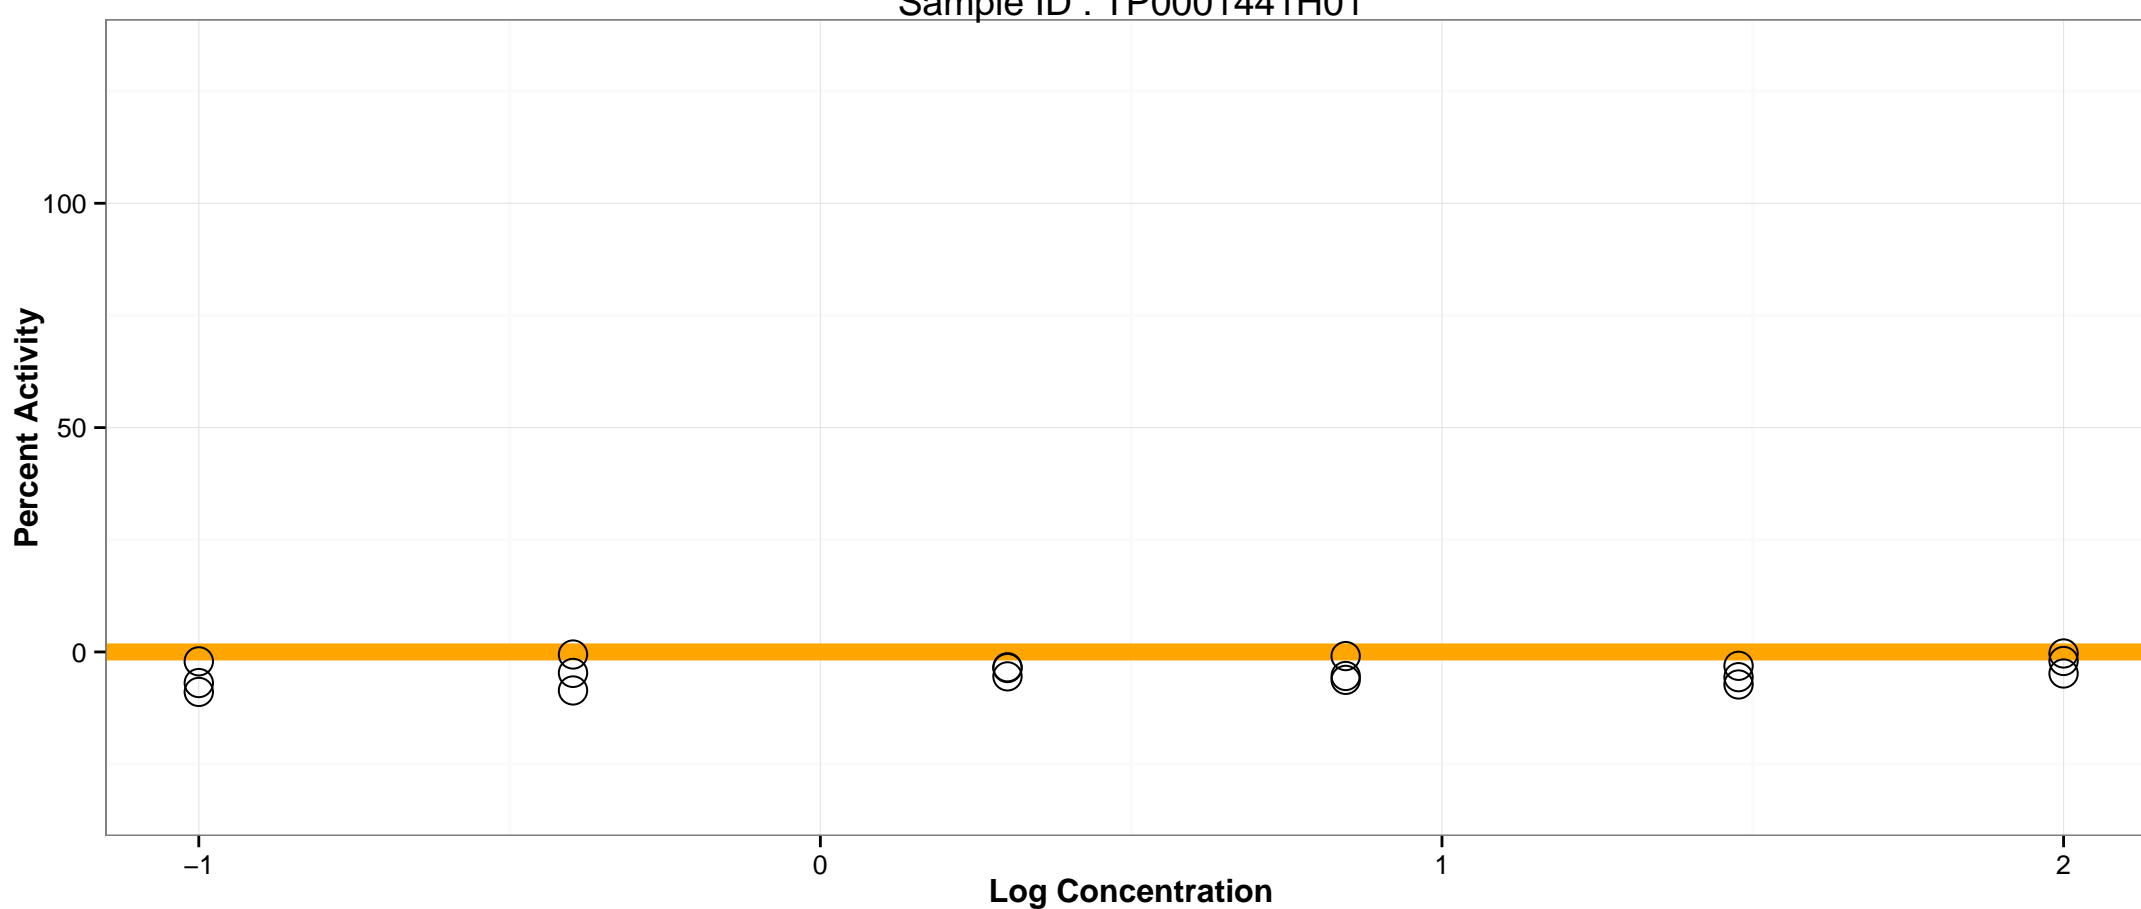

HILL MODEL

HILL MODEL: Not applicable

GAIN-LOSS MODEL

GNLS MODEL: Not applicable

|      | CNST  | HILL | GNLS |
|------|-------|------|------|
| AIC  | 114.5 | NA   | NA   |
| PROB | 1     | NA   | NA   |
| RMSE | 5.11  | NA   | NA   |

MAX\_MEAN : -2.38 MAX\_MED : -2 BMAD : 8.58  
COFF : 20 HIT-CALL : 0 FITC : 4 ACTP : 0  
FLAGS :



Chemical : Sodium thiocyanate  
CAS : 540-72-7

Assay ID 1508 (NHEERL\_TPO\_AUR\_dn)  
Sample ID : TP0001441H02

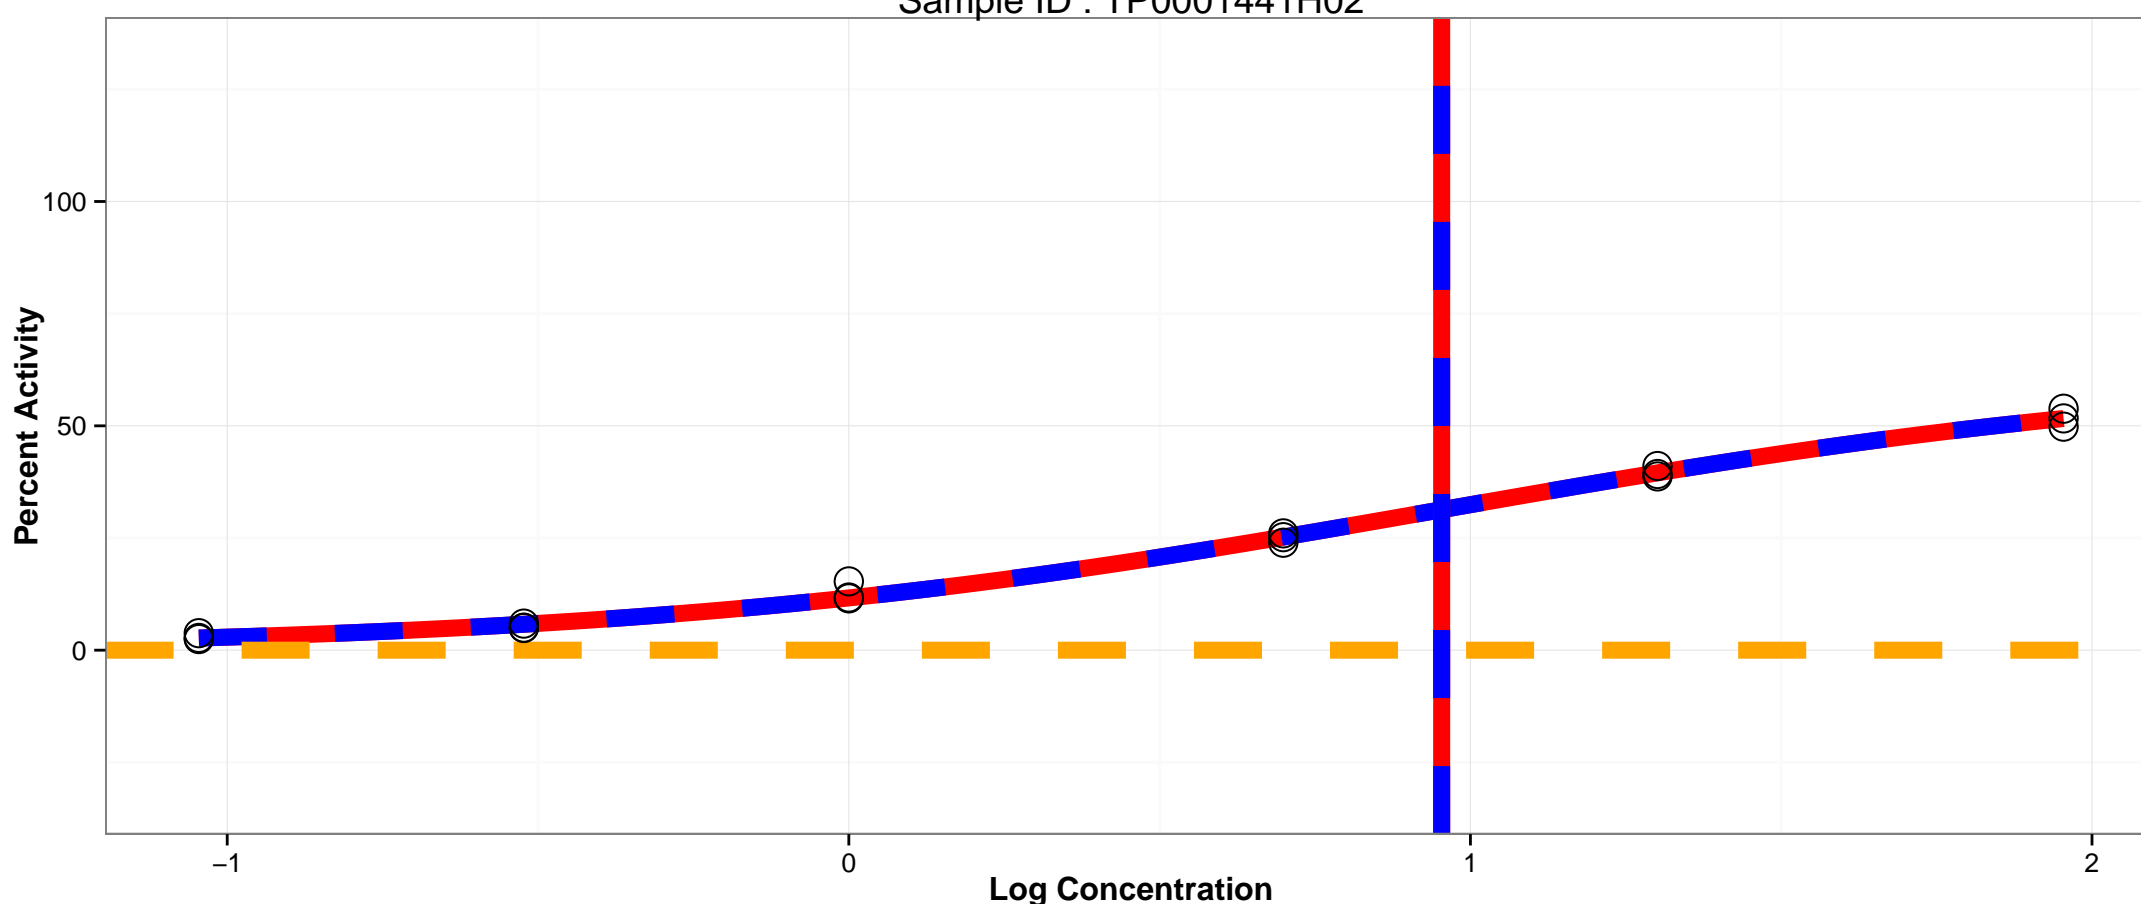

HILL MODEL

|     | tp   | ga     | gw     |
|-----|------|--------|--------|
| val | 62.6 | 0.954  | 0.672  |
| sd  | 2.29 | 0.0596 | 0.0278 |

GAIN-LOSS MODEL

|     | tp   | ga    | gw    | la   | lw   |
|-----|------|-------|-------|------|------|
| val | 62.6 | 0.954 | 0.672 | 3.95 | 8.09 |
| sd  | NA   | NA    | NA    | NA   | NA   |

|      | CNST   | HILL | GNLS |
|------|--------|------|------|
| AIC  | 176.02 | 65.9 | 69.9 |
| PROB | 0      | 0.88 | 0.12 |
| RMSE | 29.14  | 1.28 | 1.28 |

MAX\_MEAN : 51.8 MAX\_MED : 51.7 BMAD : 5.69  
COFF : 20 HIT-CALL : 1 FITC : 42 ACTP : 1  
FLAGS :

Assay ID 1509 (NHEERL\_HEK293T\_CellTiterGLO)  
Sample ID : TP0001441H02

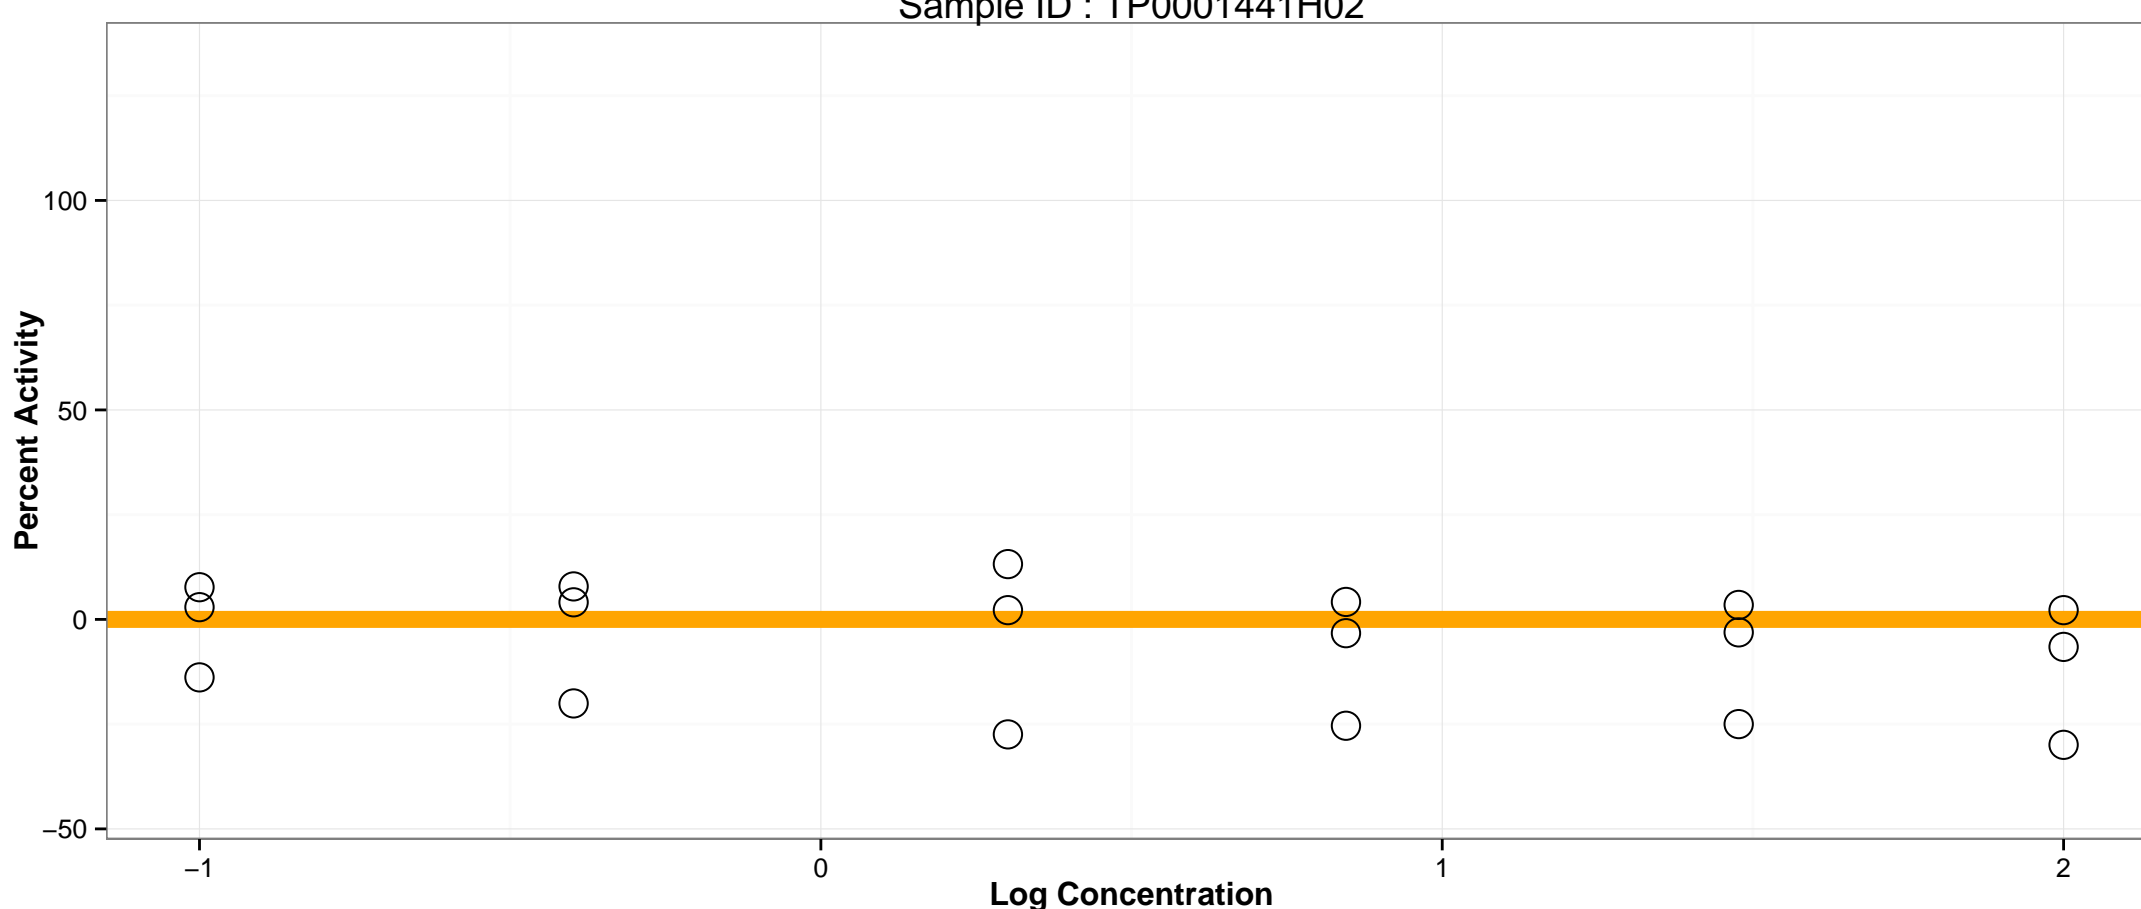

HILL MODEL

HILL MODEL: Not applicable

GAIN-LOSS MODEL

GNLS MODEL: Not applicable

|      | CNST   | HILL | GNLS |
|------|--------|------|------|
| AIC  | 150.54 | NA   | NA   |
| PROB | 1      | NA   | NA   |
| RMSE | 14.78  | NA   | NA   |

MAX\_MEAN : -1.06 MAX\_MED : 4.09 BMAD : 5.54  
COFF : 20 HIT-CALL : 0 FITC : 4 ACTP : 0  
FLAGS :

Assay ID 1848 (NHEERL\_Quantilum\_inhib\_2\_dn)  
Sample ID : TP0001441H02

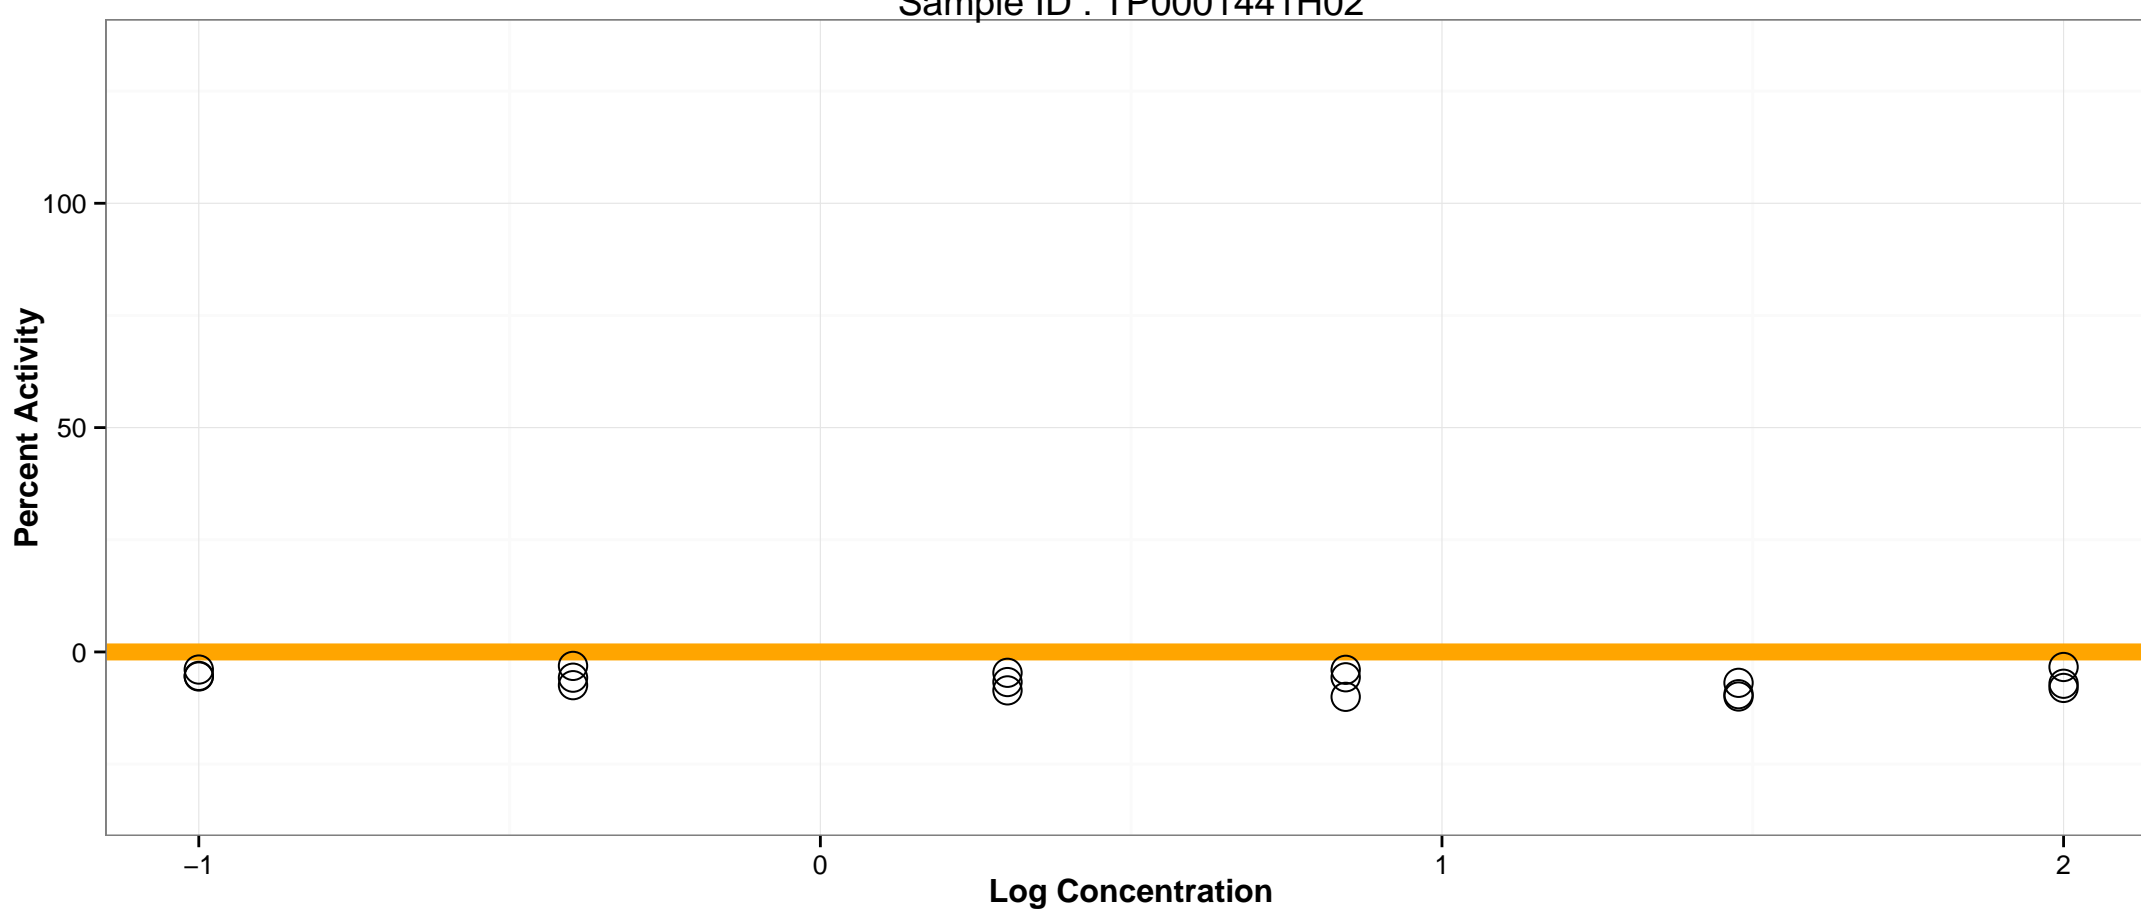

HILL MODEL

HILL MODEL: Not applicable

GAIN-LOSS MODEL

GNLS MODEL: Not applicable

|      | CNST   | HILL | GNLS |
|------|--------|------|------|
| AIC  | 125.35 | NA   | NA   |
| PROB | 1      | NA   | NA   |
| RMSE | 6.74   | NA   | NA   |

MAX\_MEAN : -4.9 MAX\_MED : -5.33 BMAD : 8.58  
COFF : 20 HIT-CALL : 0 FITC : 4 ACTP : 0  
FLAGS :

Assay ID 1508 (NHEERL\_TPO\_AUR\_dn)  
 Sample ID : TP0001441H03

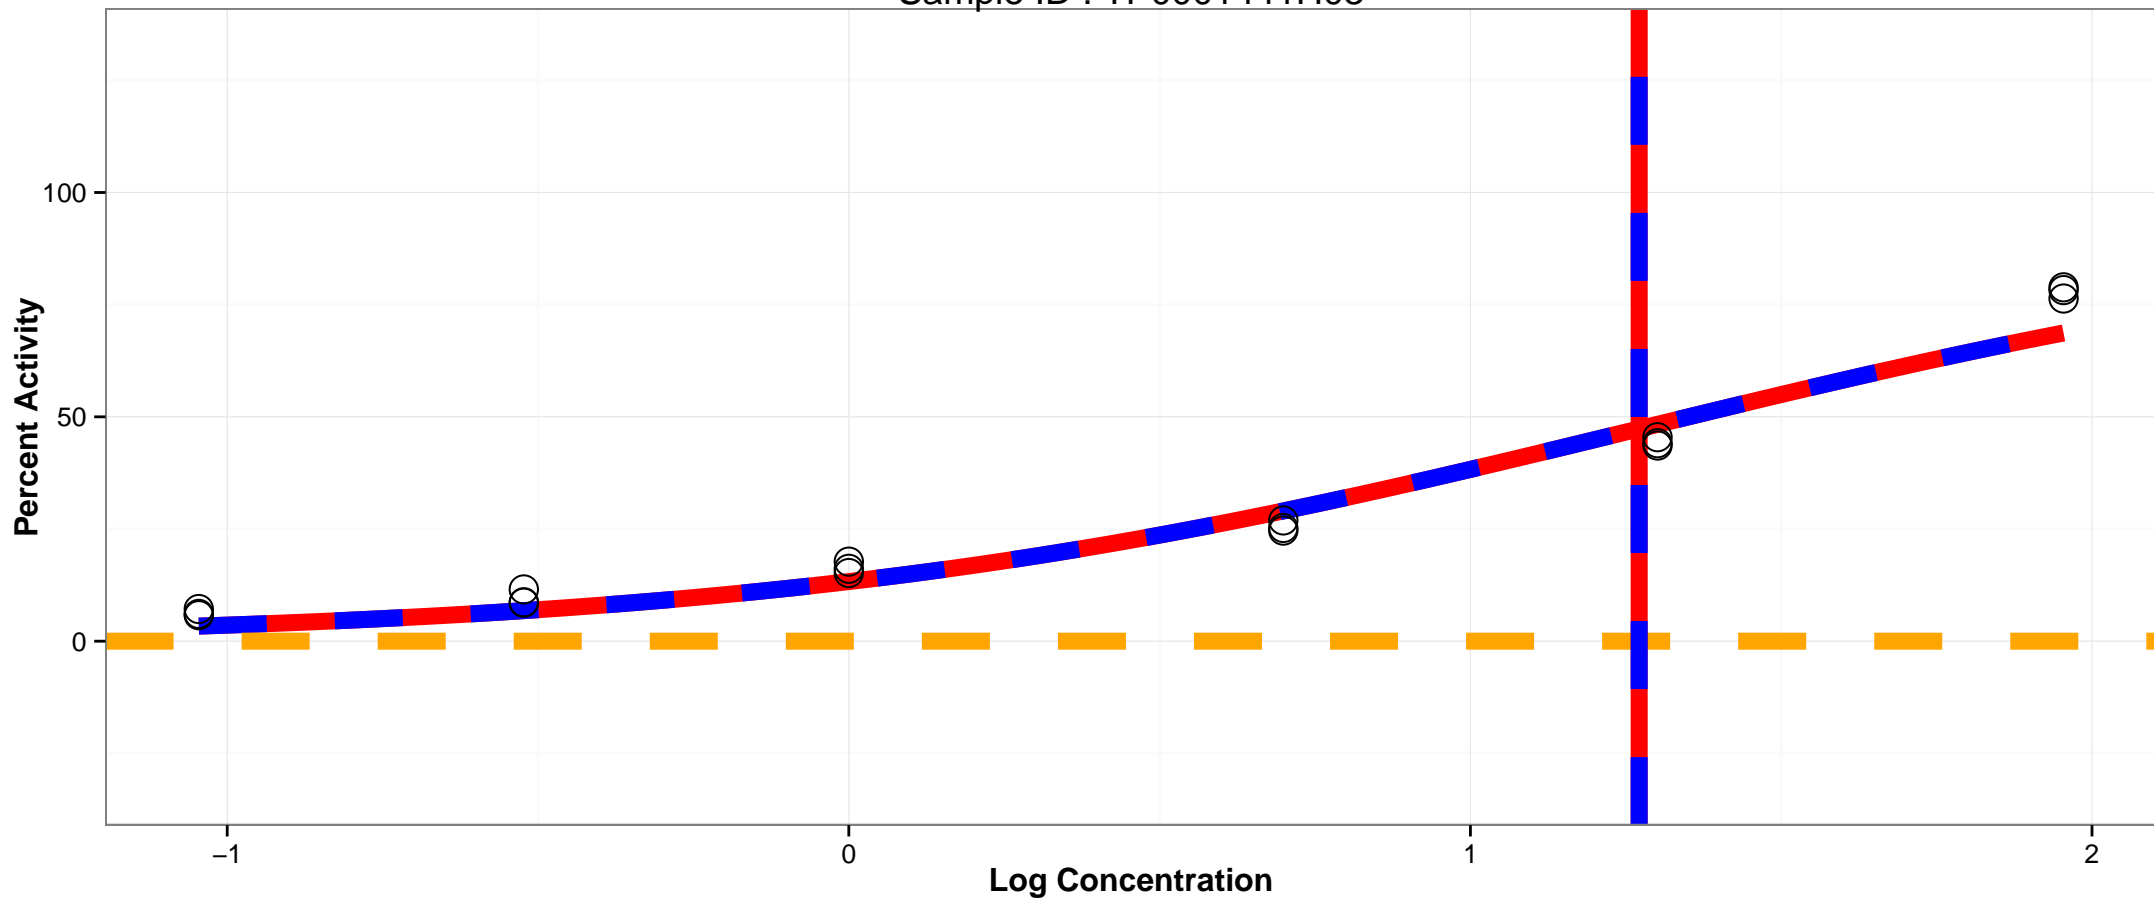

**HILL MODEL**

|     | tp   | ga    | gw    |
|-----|------|-------|-------|
| val | 94.7 | 1.27  | 0.619 |
| sd  | 29.2 | 0.369 | 0.082 |

**GAIN-LOSS MODEL**

|     | tp   | ga   | gw    | la    | lw     |
|-----|------|------|-------|-------|--------|
| val | 94.7 | 1.27 | 0.619 | 3.05  | 12.6   |
| sd  | 29.3 | 0.37 | 0.082 | 54200 | 632000 |

|      | CNST   | HILL   | GNLS   |
|------|--------|--------|--------|
| AIC  | 185.24 | 117.85 | 121.85 |
| PROB | 0      | 0.88   | 0.12   |
| RMSE | 38.93  | 4.88   | 4.88   |

MAX\_MEAN : 77.8 MAX\_MED : 78.3 BMAD : 5.69  
 COFF : 20 HIT-CALL : 1 FITC : 42 ACTP : 1  
 FLAGS :

Assay ID 1509 (NHEERL\_HEK293T\_CellTiterGLO)  
 Sample ID : TP0001441H03

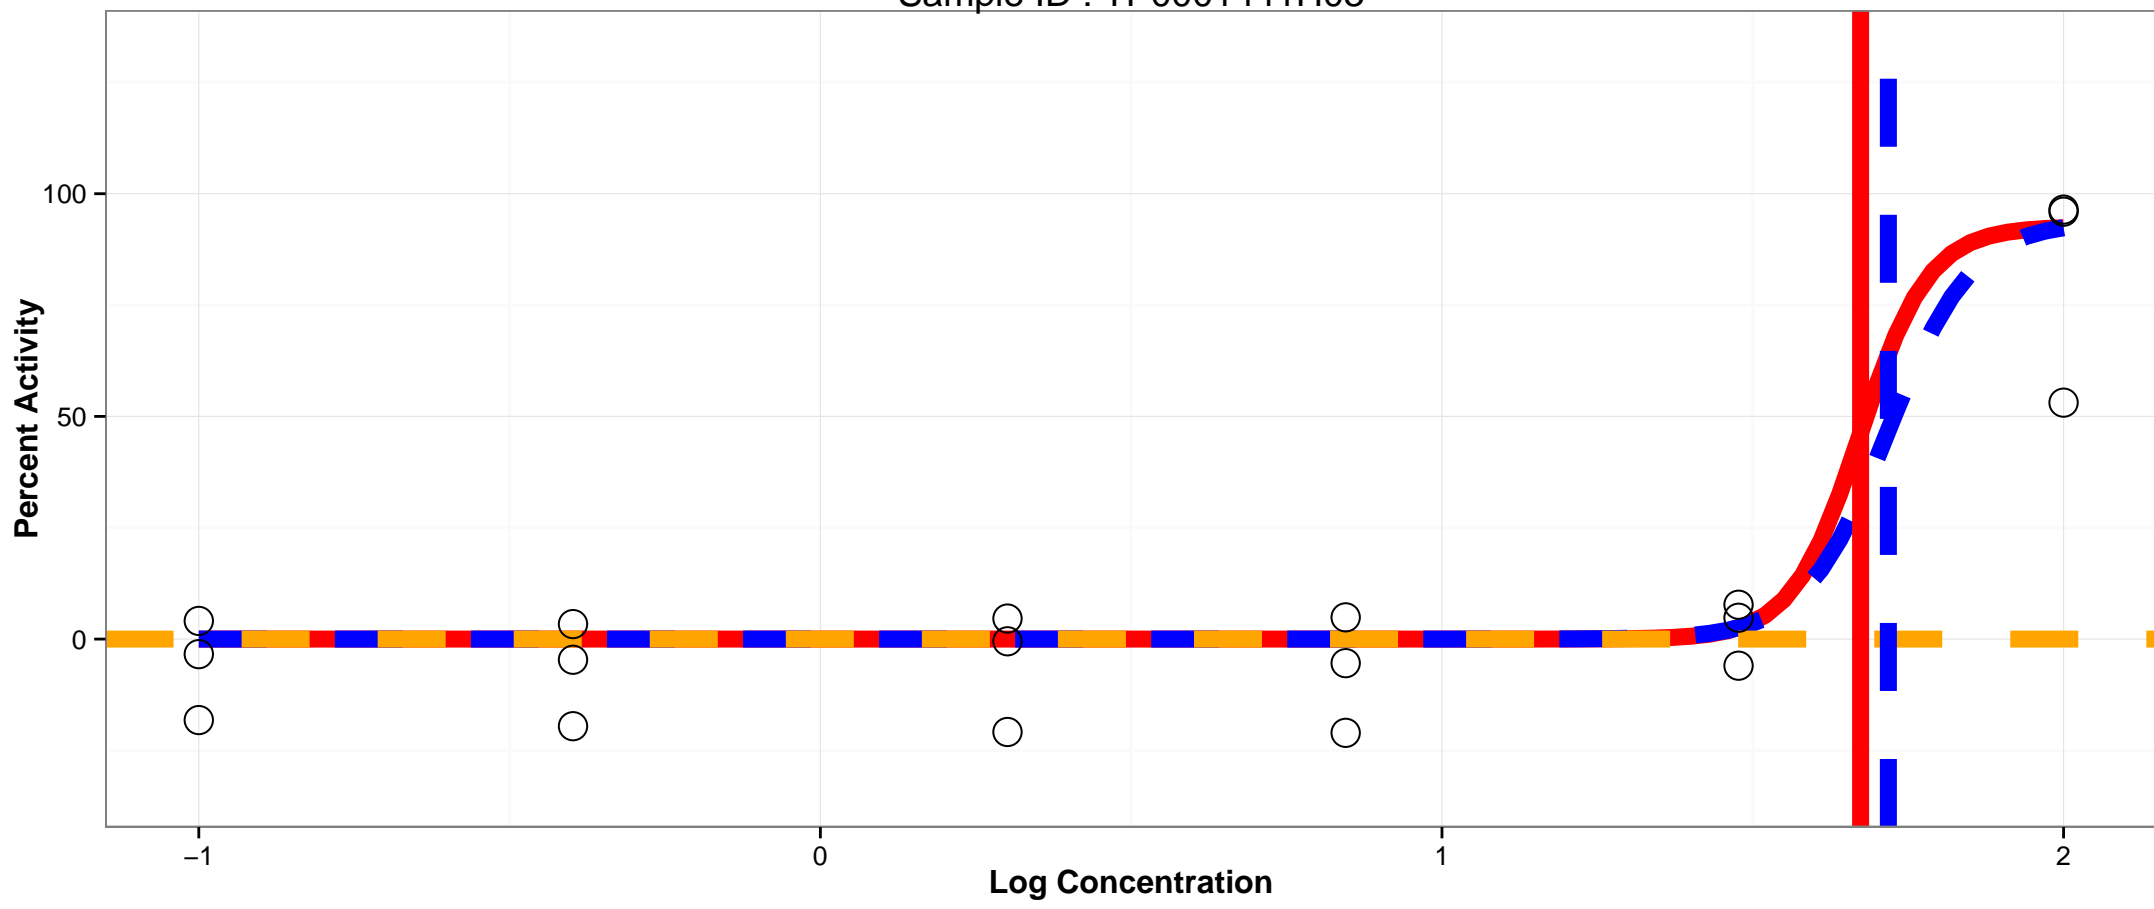

**HILL MODEL**

|     | tp   | ga   | gw   |
|-----|------|------|------|
| val | 92.6 | 1.67 | 7.9  |
| sd  | 18.1 | 1.42 | 56.8 |

**GAIN-LOSS MODEL**

|     | tp   | ga   | gw   | la   | lw   |
|-----|------|------|------|------|------|
| val | 93.8 | 1.72 | 6.46 | 3.89 | 9.36 |
| sd  | NA   | NA   | NA   | NA   | NA   |

|      | CNST   | HILL   | GNLS   |
|------|--------|--------|--------|
| AIC  | 174.42 | 151.05 | 155.05 |
| PROB | 0      | 0.88   | 0.12   |
| RMSE | 35.88  | 13.74  | 13.74  |

MAX\_MEAN : 81.8 MAX\_MED : 96 BMAD : 5.54  
 COFF : 20 HIT-CALL : 1 FITC : 41 ACTP : 1  
 FLAGS : 6

Assay ID 1848 (NHEERL\_Quantilum\_inhib\_2\_dn)  
 Sample ID : TP0001441H03

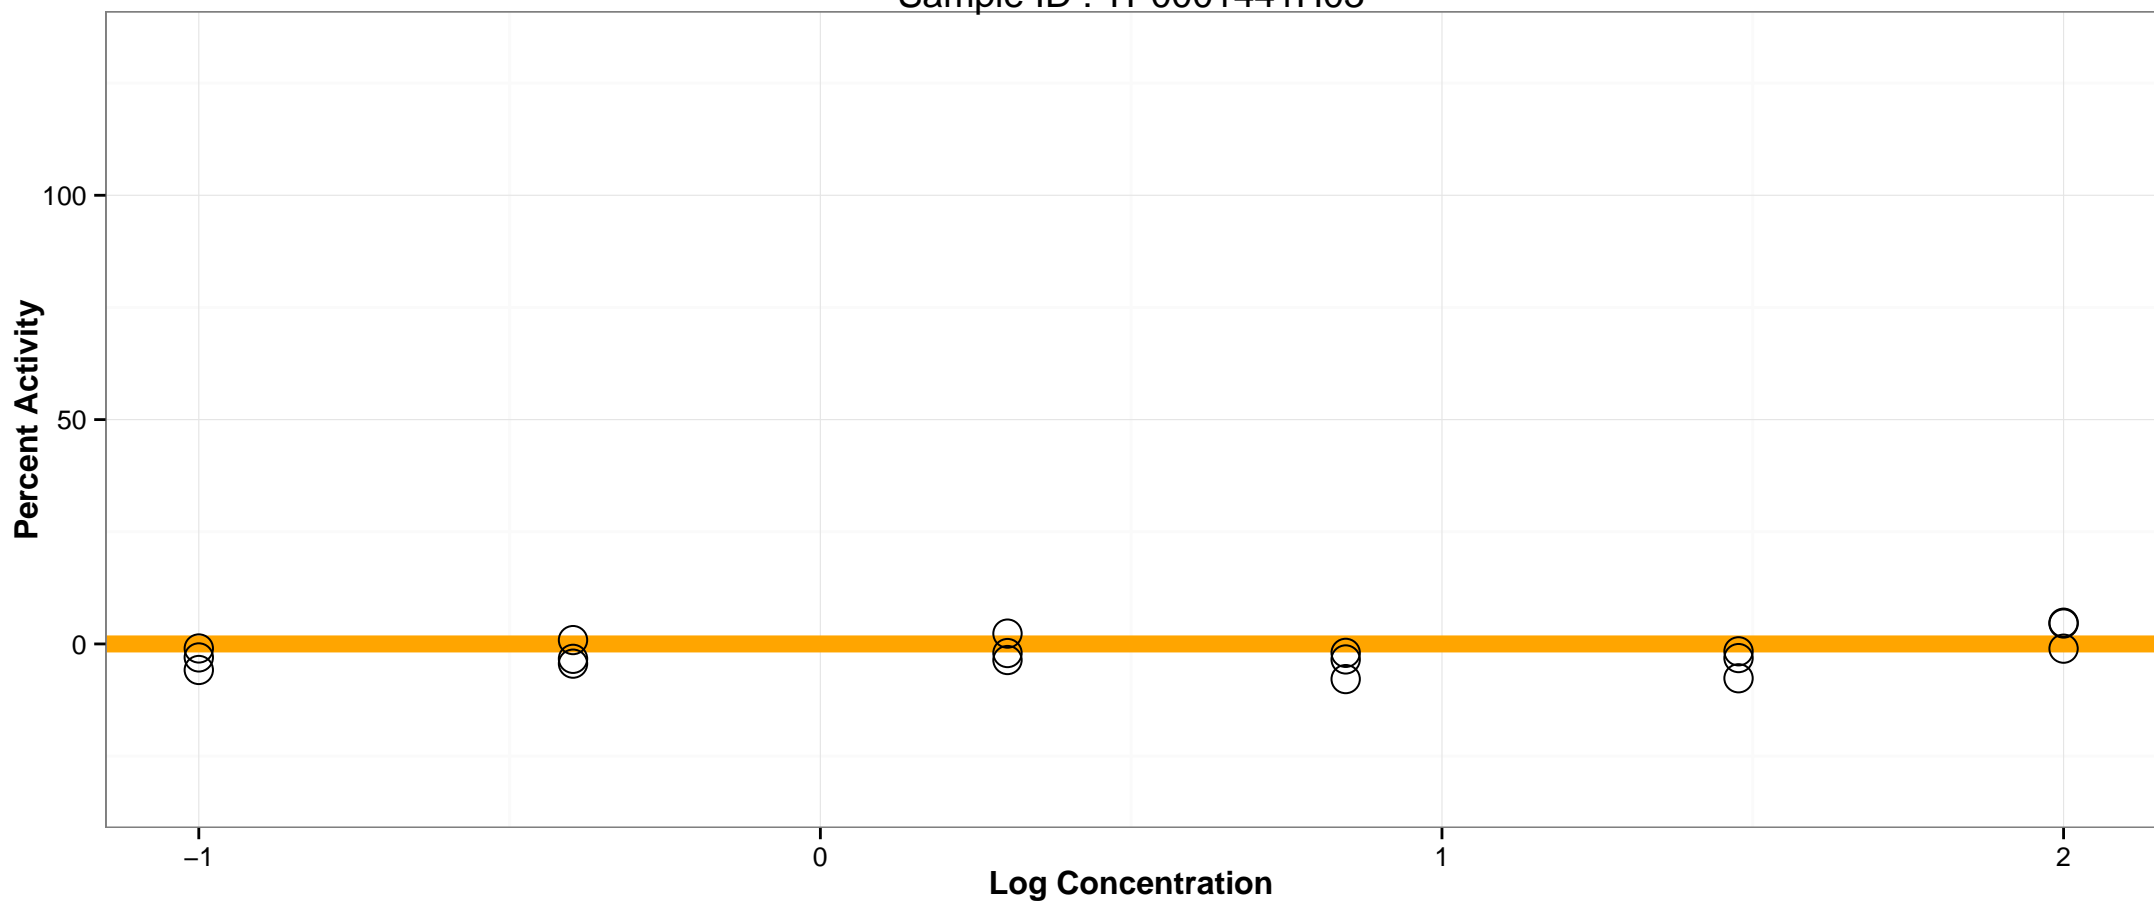

**HILL MODEL**  
 HILL MODEL: Not applicable

**GAIN-LOSS MODEL**  
 GNLS MODEL: Not applicable

|      | CNST   | HILL | GNLS |
|------|--------|------|------|
| AIC  | 105.15 | NA   | NA   |
| PROB | 1      | NA   | NA   |
| RMSE | 4.01   | NA   | NA   |

MAX\_MEAN : 2.76 MAX\_MED : 4.56 BMAD : 8.58  
 COFF : 20 HIT-CALL : 0 FITC : 4 ACTP : 0  
 FLAGS :

Assay ID 1508 (NHEERL\_TPO\_AUR\_dn)  
Sample ID : TX011630

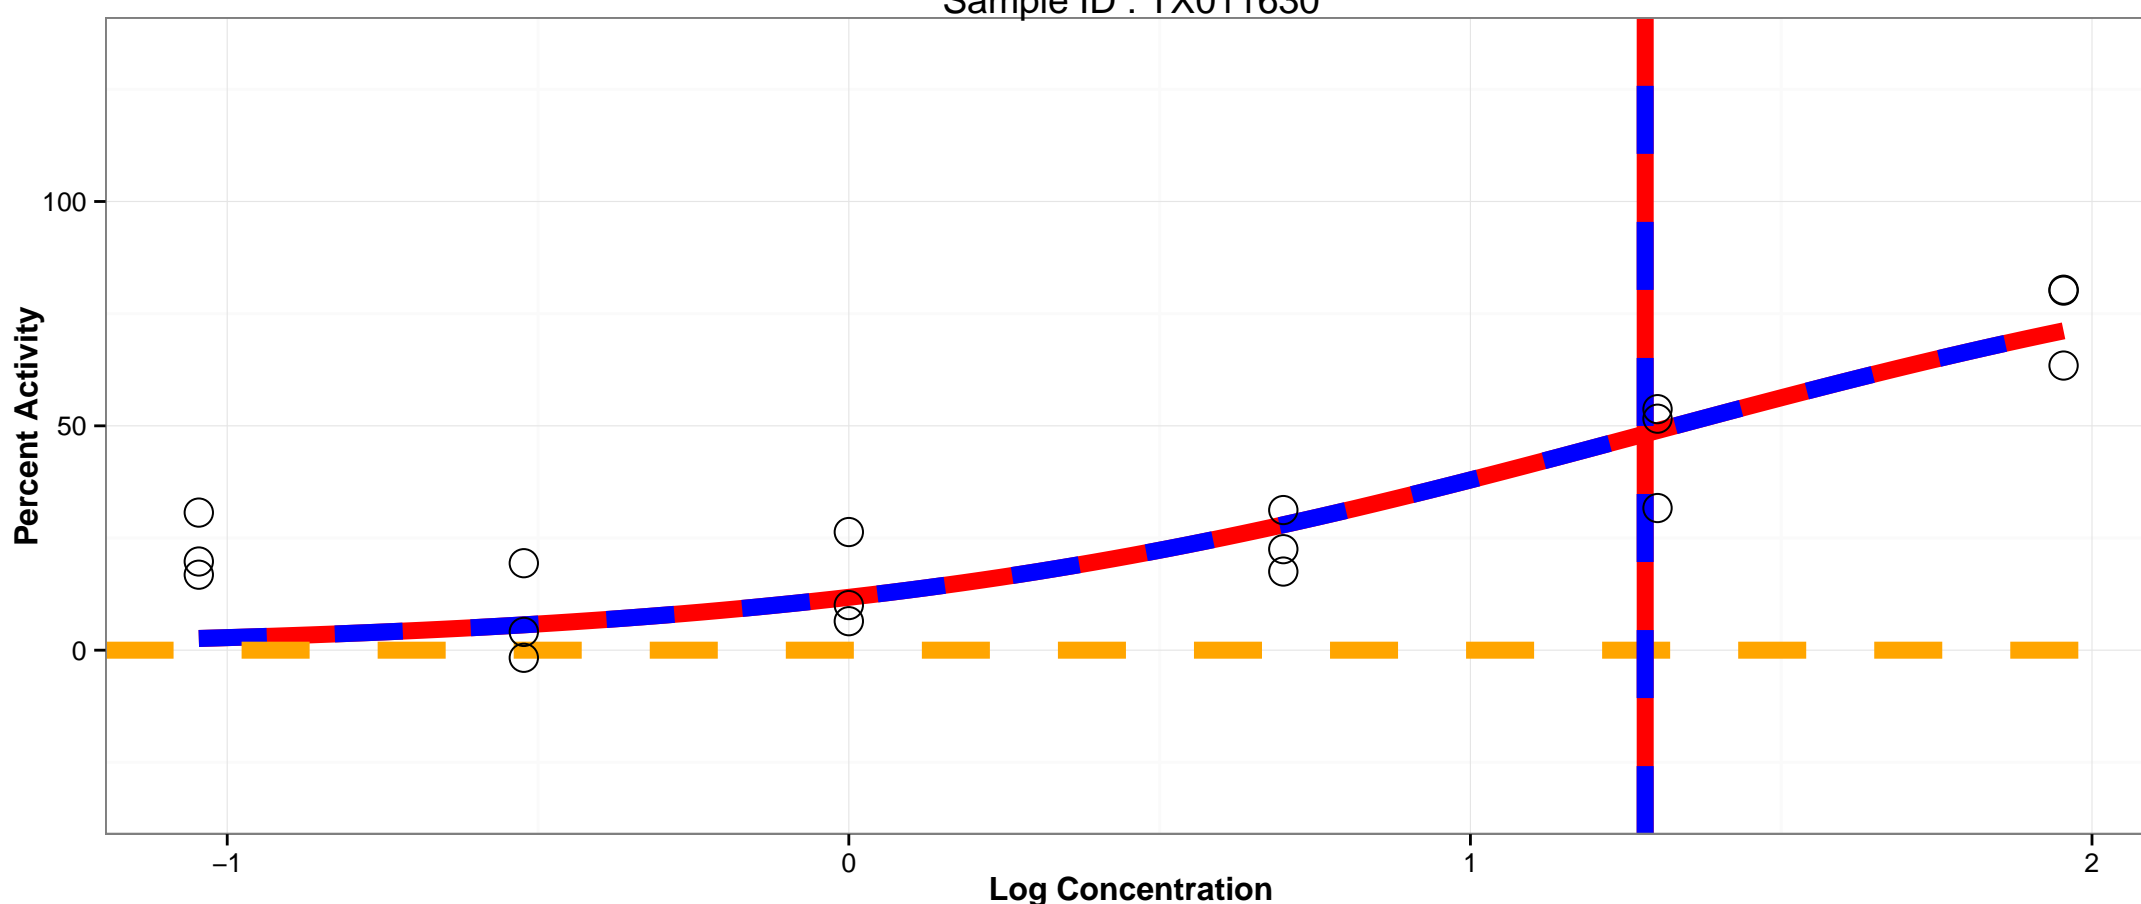

HILL MODEL

|     | tp   | ga   | gw    |
|-----|------|------|-------|
| val | 96.4 | 1.28 | 0.669 |
| sd  | 23.8 | 0.37 | 0.207 |

GAIN-LOSS MODEL

|     | tp   | ga   | gw    | la   | lw   |
|-----|------|------|-------|------|------|
| val | 96.4 | 1.28 | 0.669 | 3.95 | 16.4 |
| sd  | NA   | NA   | NA    | NA   | NA   |

|      | CNST   | HILL   | GNLS   |
|------|--------|--------|--------|
| AIC  | 186.46 | 148.95 | 152.95 |
| PROB | 0      | 0.88   | 0.12   |
| RMSE | 39.51  | 11.72  | 11.72  |

MAX\_MEAN : 74.6 MAX\_MED : 80.1 BMAD : 5.69  
COFF : 20 HIT-CALL : 1 FITC : 42 ACTP : 1  
FLAGS :

Assay ID 1509 (NHEERL\_HEK293T\_CellTiterGLO)  
Sample ID : TX011630

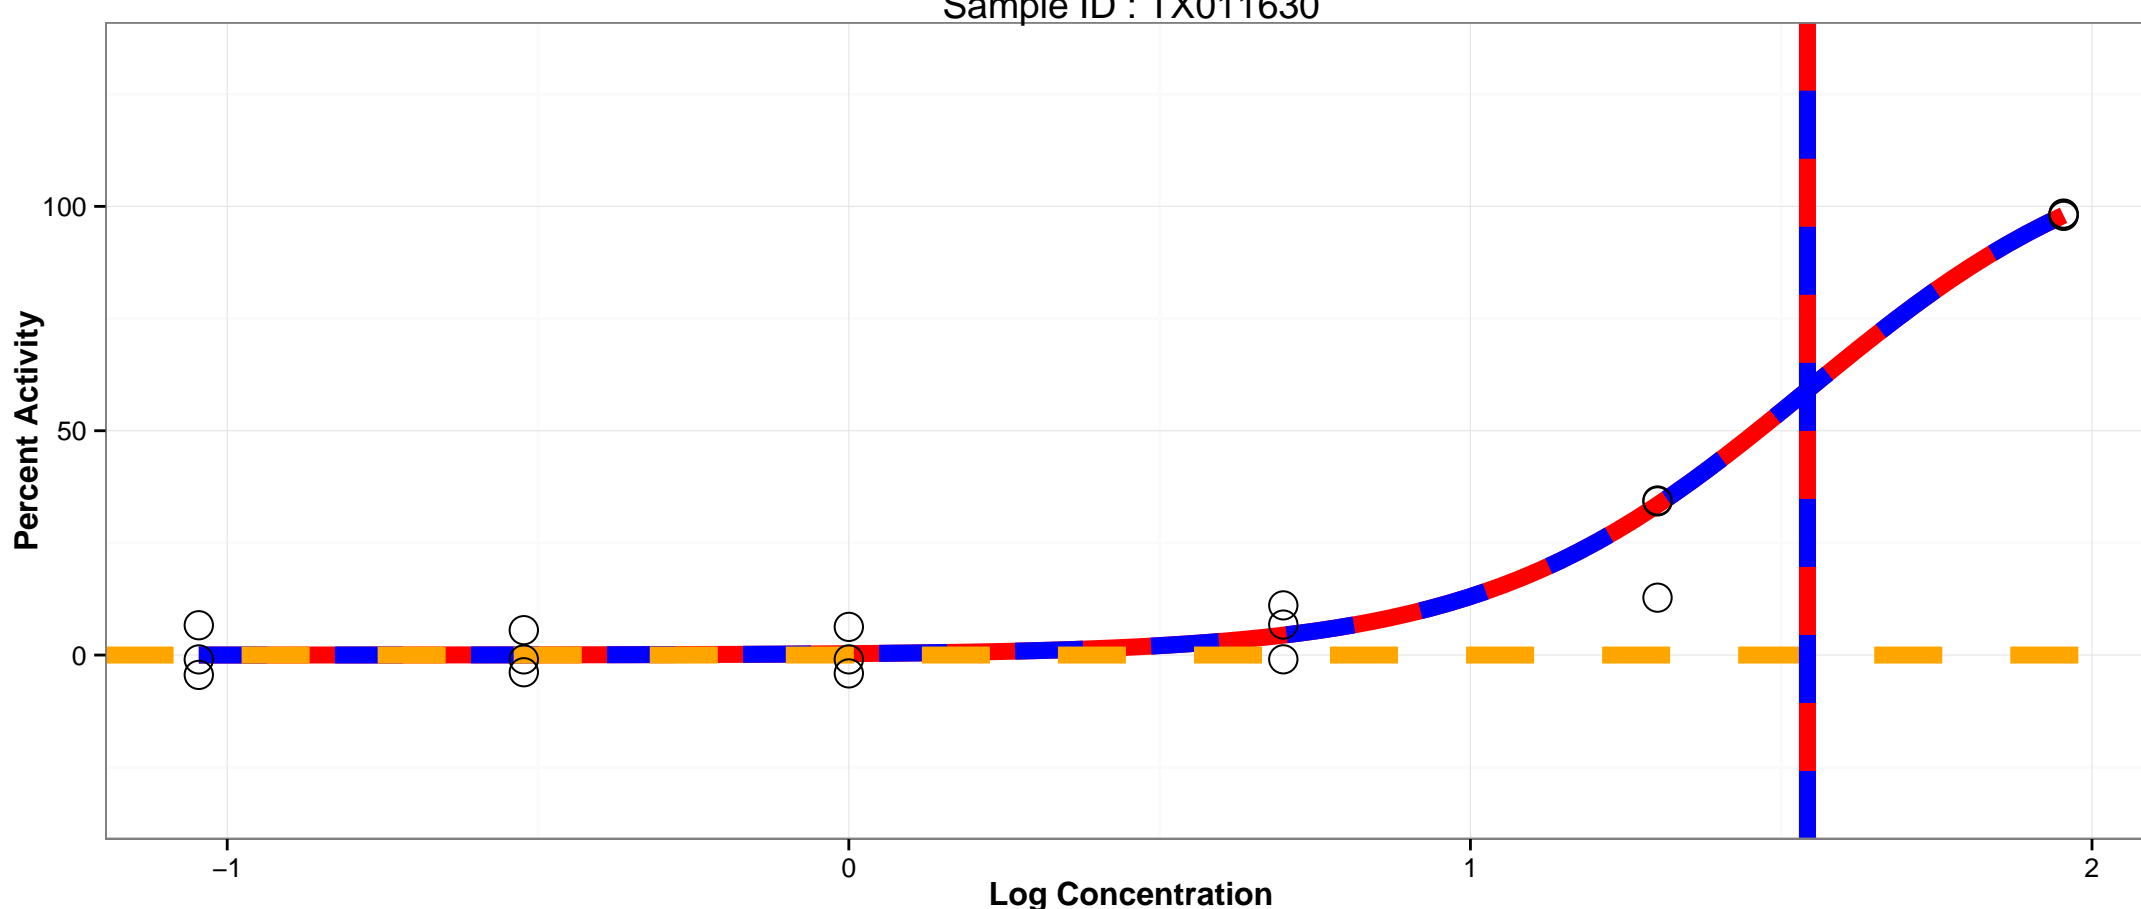

HILL MODEL

|     | tp   | ga    | gw    |
|-----|------|-------|-------|
| val | 118  | 1.54  | 1.67  |
| sd  | 18.4 | 0.125 | 0.458 |

GAIN-LOSS MODEL

|     | tp  | ga   | gw   | la   | lw   |
|-----|-----|------|------|------|------|
| val | 118 | 1.54 | 1.67 | 3.66 | 17.8 |
| sd  | NA  | NA   | NA   | NA   | NA   |

|      | CNST   | HILL  | GNLS  |
|------|--------|-------|-------|
| AIC  | 181.42 | 119.2 | 123.2 |
| PROB | 0      | 0.88  | 0.12  |
| RMSE | 42.03  | 6.12  | 6.12  |

MAX\_MEAN : 98.2 MAX\_MED : 98.3 BMAD : 5.54  
COFF : 20 HIT-CALL : 1 FITC : 42 ACTP : 1  
FLAGS :

Assay ID 1848 (NHEERL\_Quantilum\_inhib\_2\_dn)  
Sample ID : TX011630

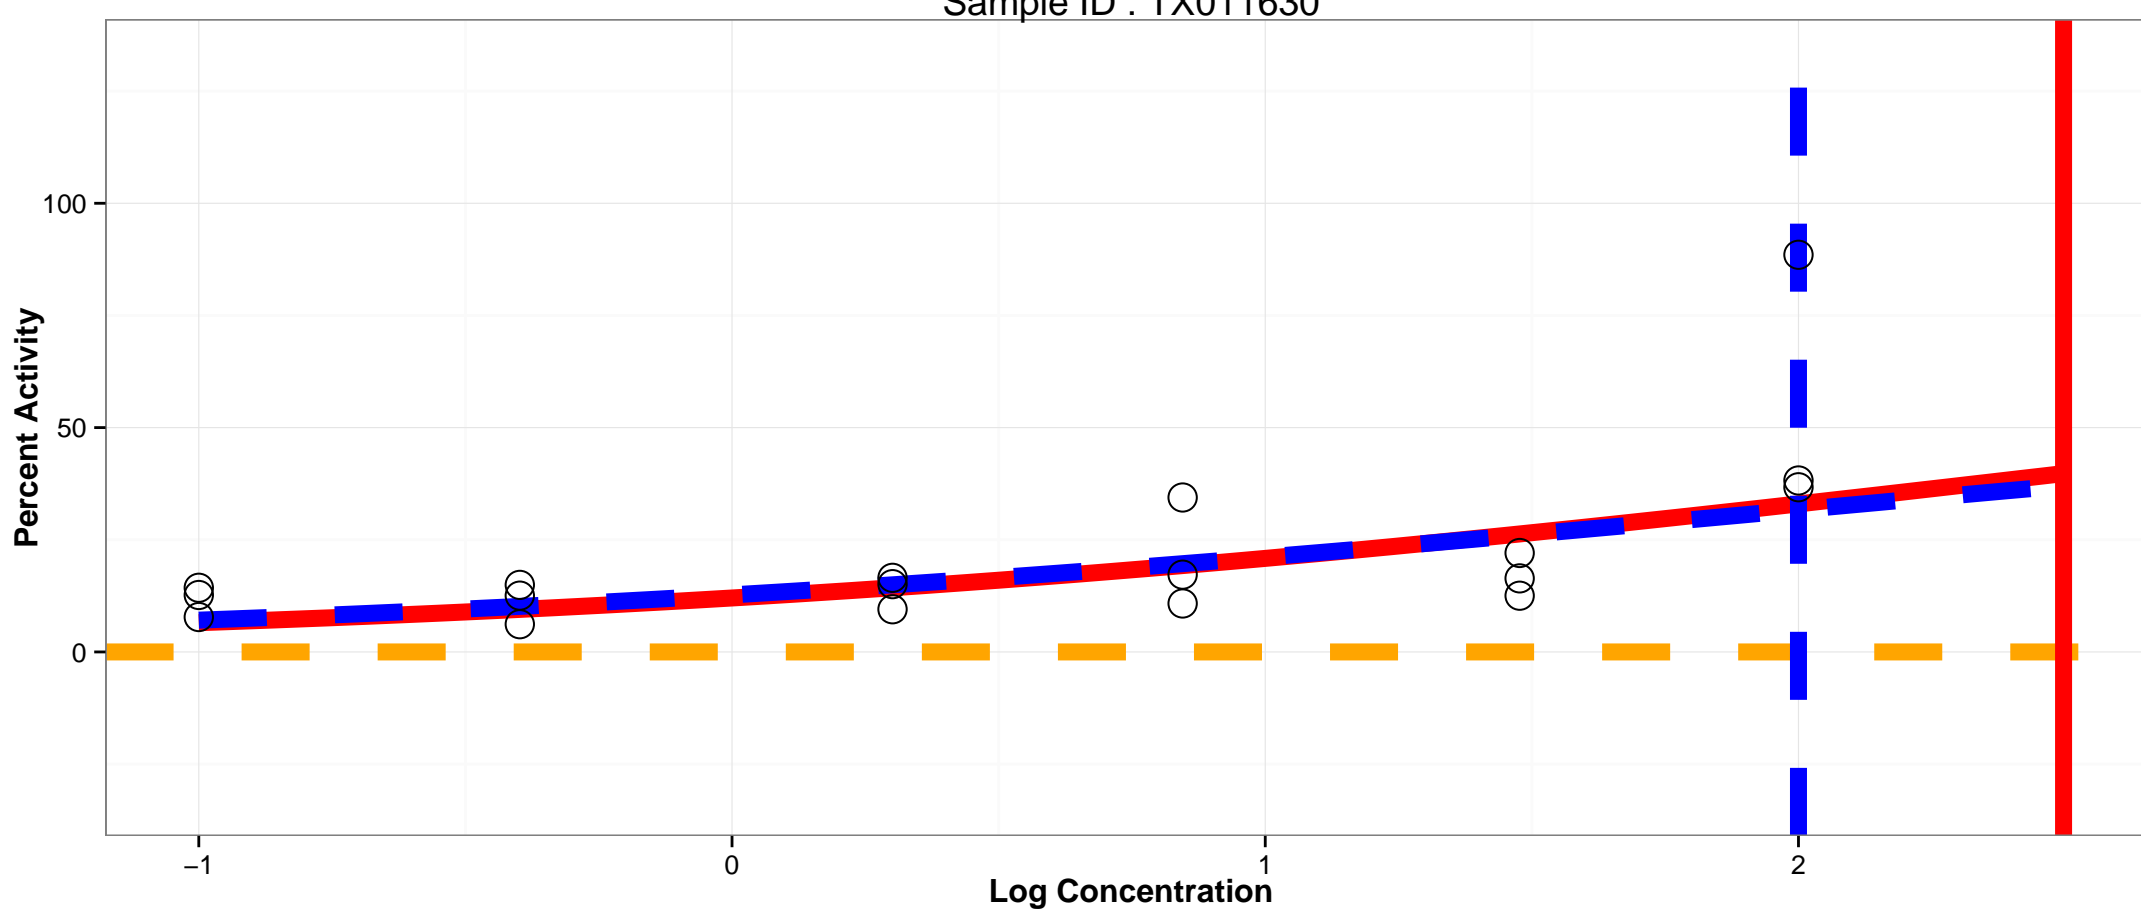

HILL MODEL

|     | tp   | ga   | gw    |
|-----|------|------|-------|
| val | 79.5 | 2.5  | 0.3   |
| sd  | 127  | 3.93 | 0.155 |

GAIN-LOSS MODEL

|     | tp   | ga   | gw    | la   | lw    |
|-----|------|------|-------|------|-------|
| val | 63.3 | 2    | 0.3   | 2.69 | 13.4  |
| sd  | 62.3 | 2.51 | 0.119 | 1070 | 20800 |

|      | CNST   | HILL   | GNLS   |
|------|--------|--------|--------|
| AIC  | 171.12 | 144.02 | 148.23 |
| PROB | 0      | 0.89   | 0.11   |
| RMSE | 28.48  | 14.75  | 15.01  |

MAX\_MEAN : 54.5 MAX\_MED : 38.2 BMAD : 8.58  
COFF : 20 HIT-CALL : 1 FITC : 42 ACTP : 1  
FLAGS : 6

Chemical : 2-Hydroxy-4-methoxybenzophenone  
CAS : 131-57-7

Assay ID 1508 (NHEERL\_TPO\_AUR\_dn)  
Sample ID : TP0001441H04

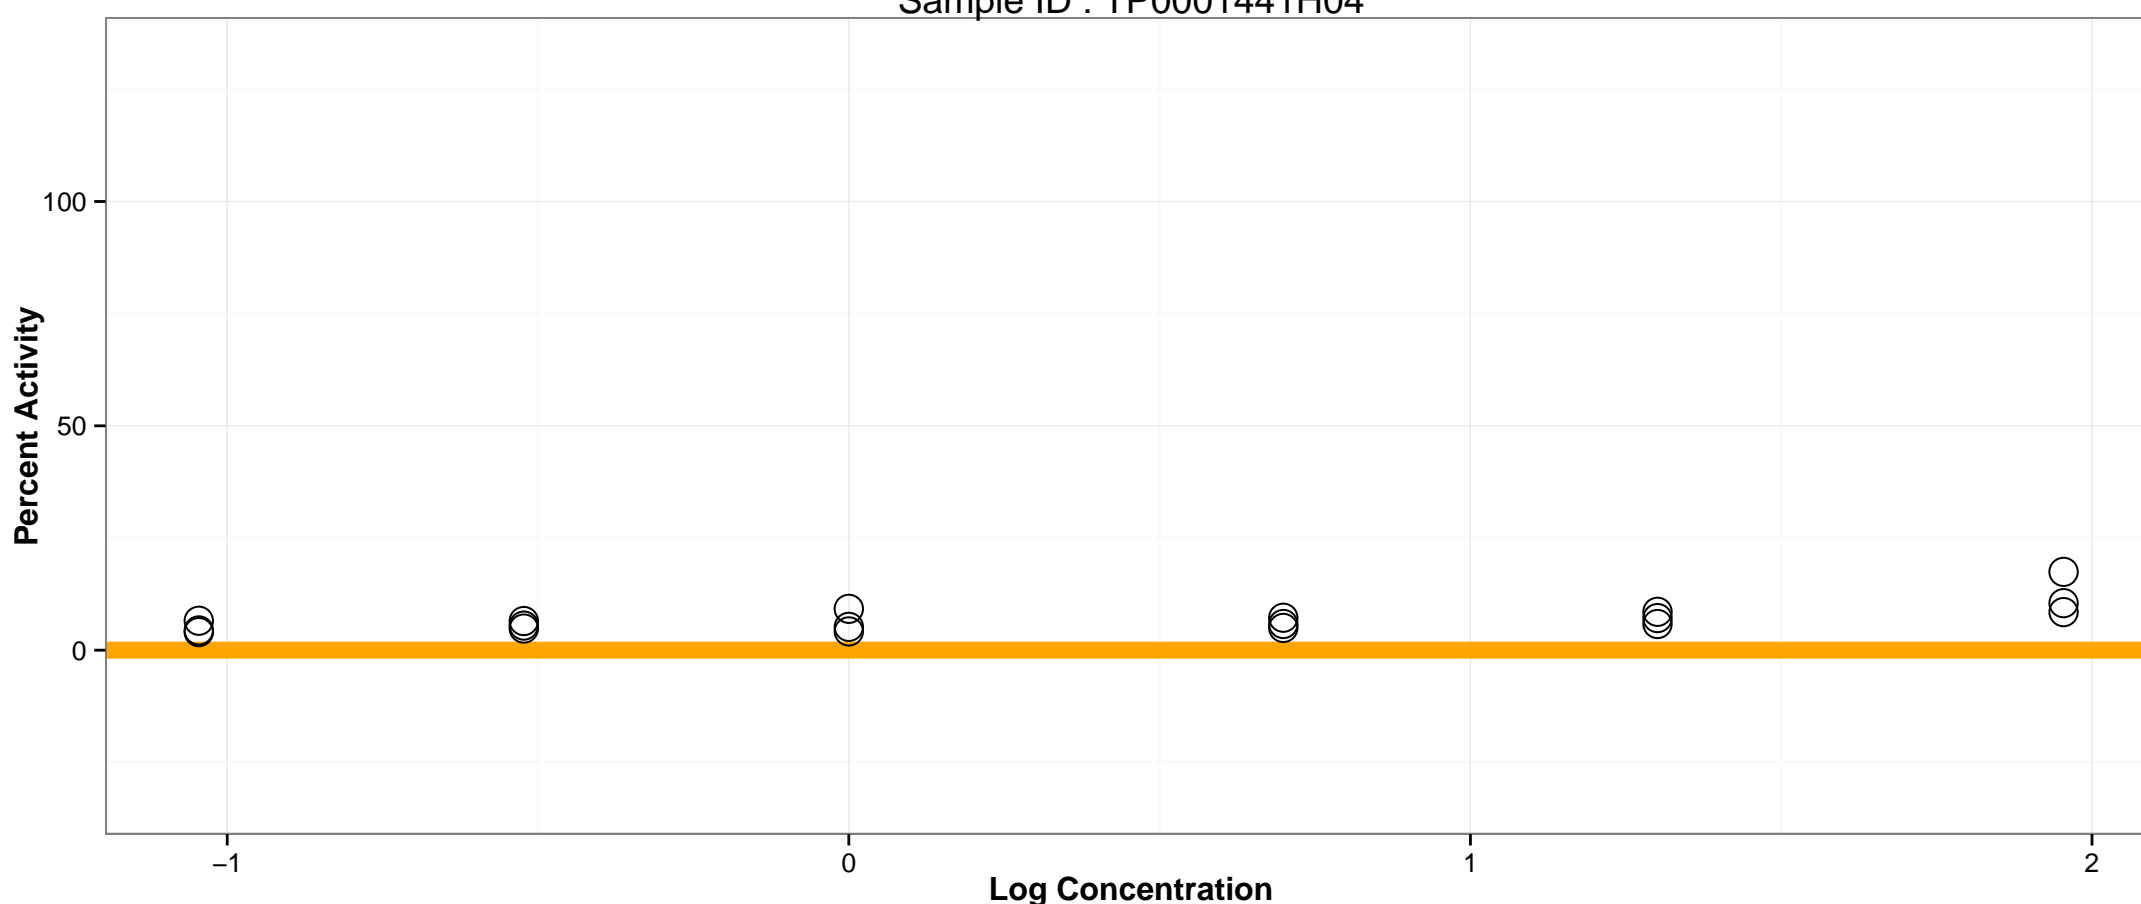

HILL MODEL

HILL MODEL: Not applicable

GAIN-LOSS MODEL

GNLS MODEL: Not applicable

|      | CNST   | HILL | GNLS |
|------|--------|------|------|
| AIC  | 128.99 | NA   | NA   |
| PROB | 1      | NA   | NA   |
| RMSE | 7.68   | NA   | NA   |

MAX\_MEAN : 12.2 MAX\_MED : 10.5 BMAD : 5.69  
COFF : 20 HIT-CALL : 0 FITC : 4 ACTP : 0  
FLAGS :

Assay ID 1509 (NHEERL\_HEK293T\_CellTiterGLO)  
Sample ID : TP0001441H04

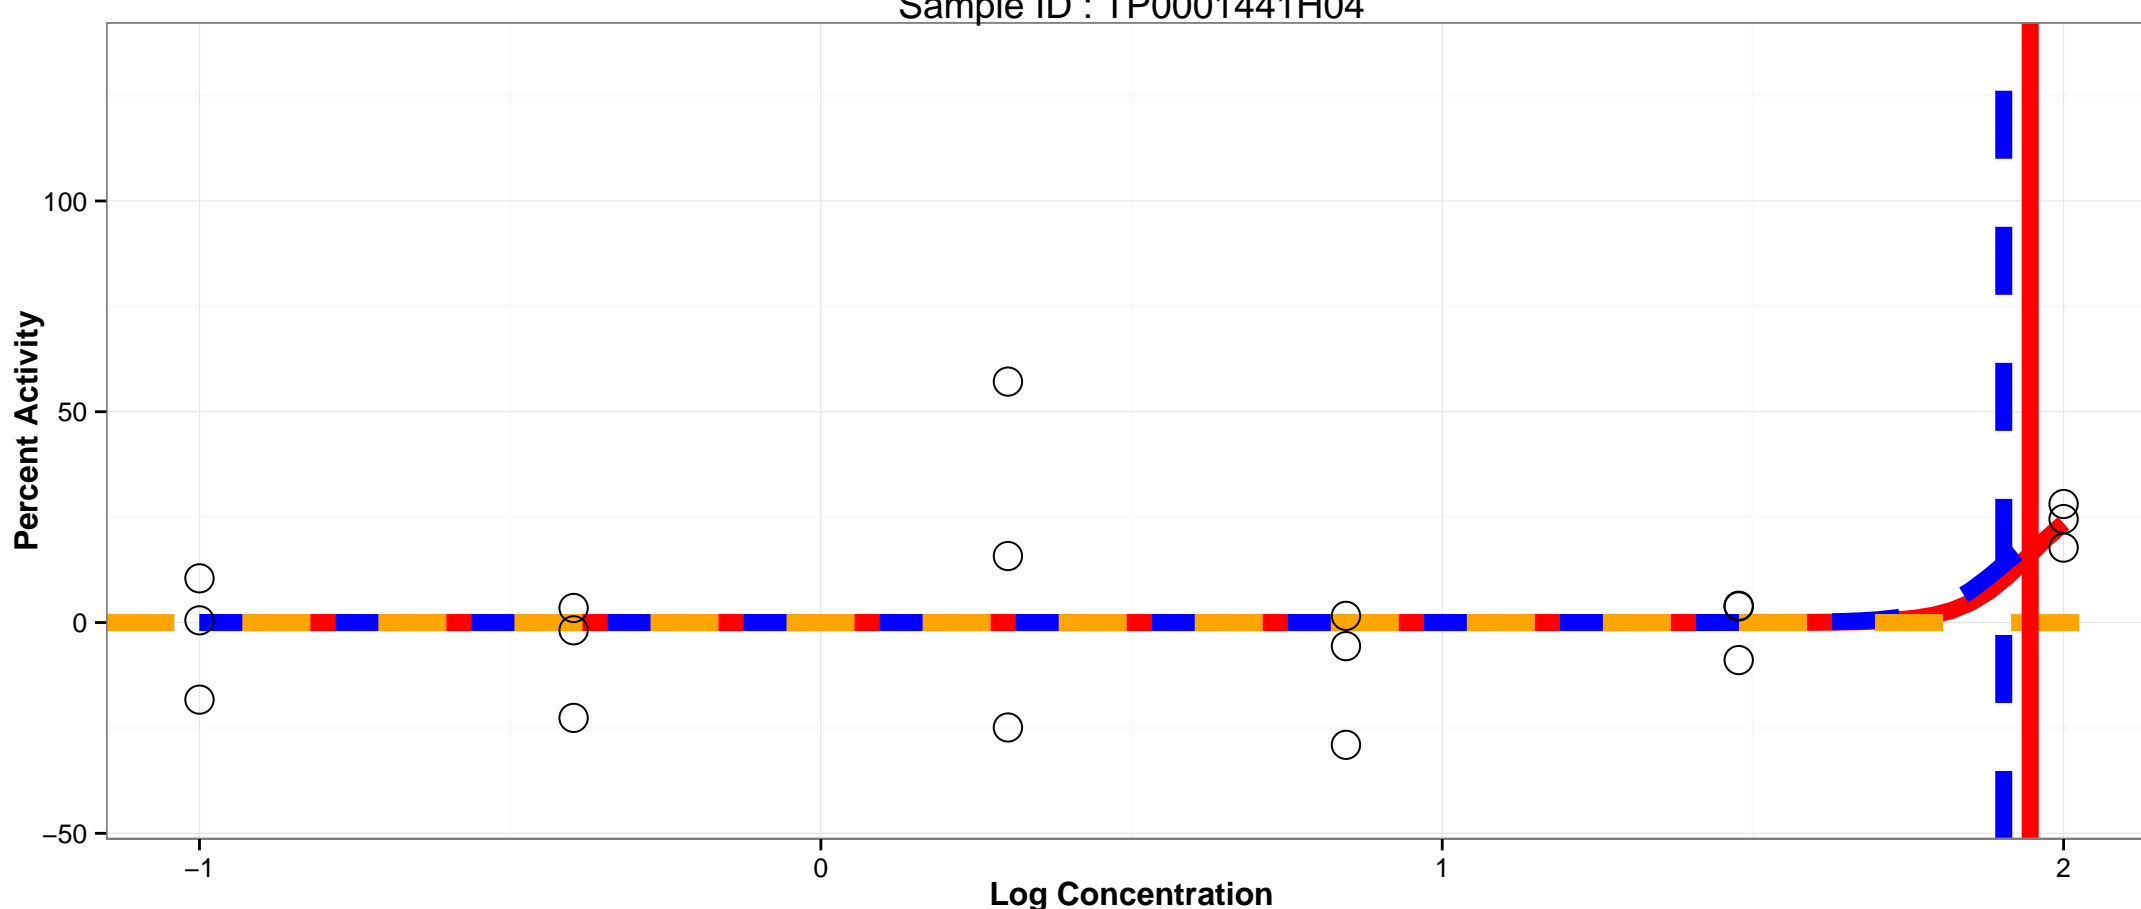

HILL MODEL

|     | tp   | ga   | gw |
|-----|------|------|----|
| val | 32.3 | 1.95 | 8  |
| sd  | NA   | NA   | NA |

GAIN-LOSS MODEL

|     | tp   | ga  | gw   | la   | lw   |
|-----|------|-----|------|------|------|
| val | 27.7 | 1.9 | 7.91 | 3.67 | 1.47 |
| sd  | NA   | NA  | NA   | NA   | NA   |

|      | CNST   | HILL   | GNLS   |
|------|--------|--------|--------|
| AIC  | 161.97 | 160.34 | 164.34 |
| PROB | 0.28   | 0.63   | 0.09   |
| RMSE | 20.82  | 18.48  | 18.48  |

MAX\_MEAN : 23.5 MAX\_MED : 24.6 BMAD : 5.54  
COFF : 20 HIT-CALL : 1 FITC : 42 ACTP : 0.719  
FLAGS : 11; 6; 16

Assay ID 1848 (NHEERL\_QuantLum\_inhib\_2\_dn)  
Sample ID : TP0001441H04

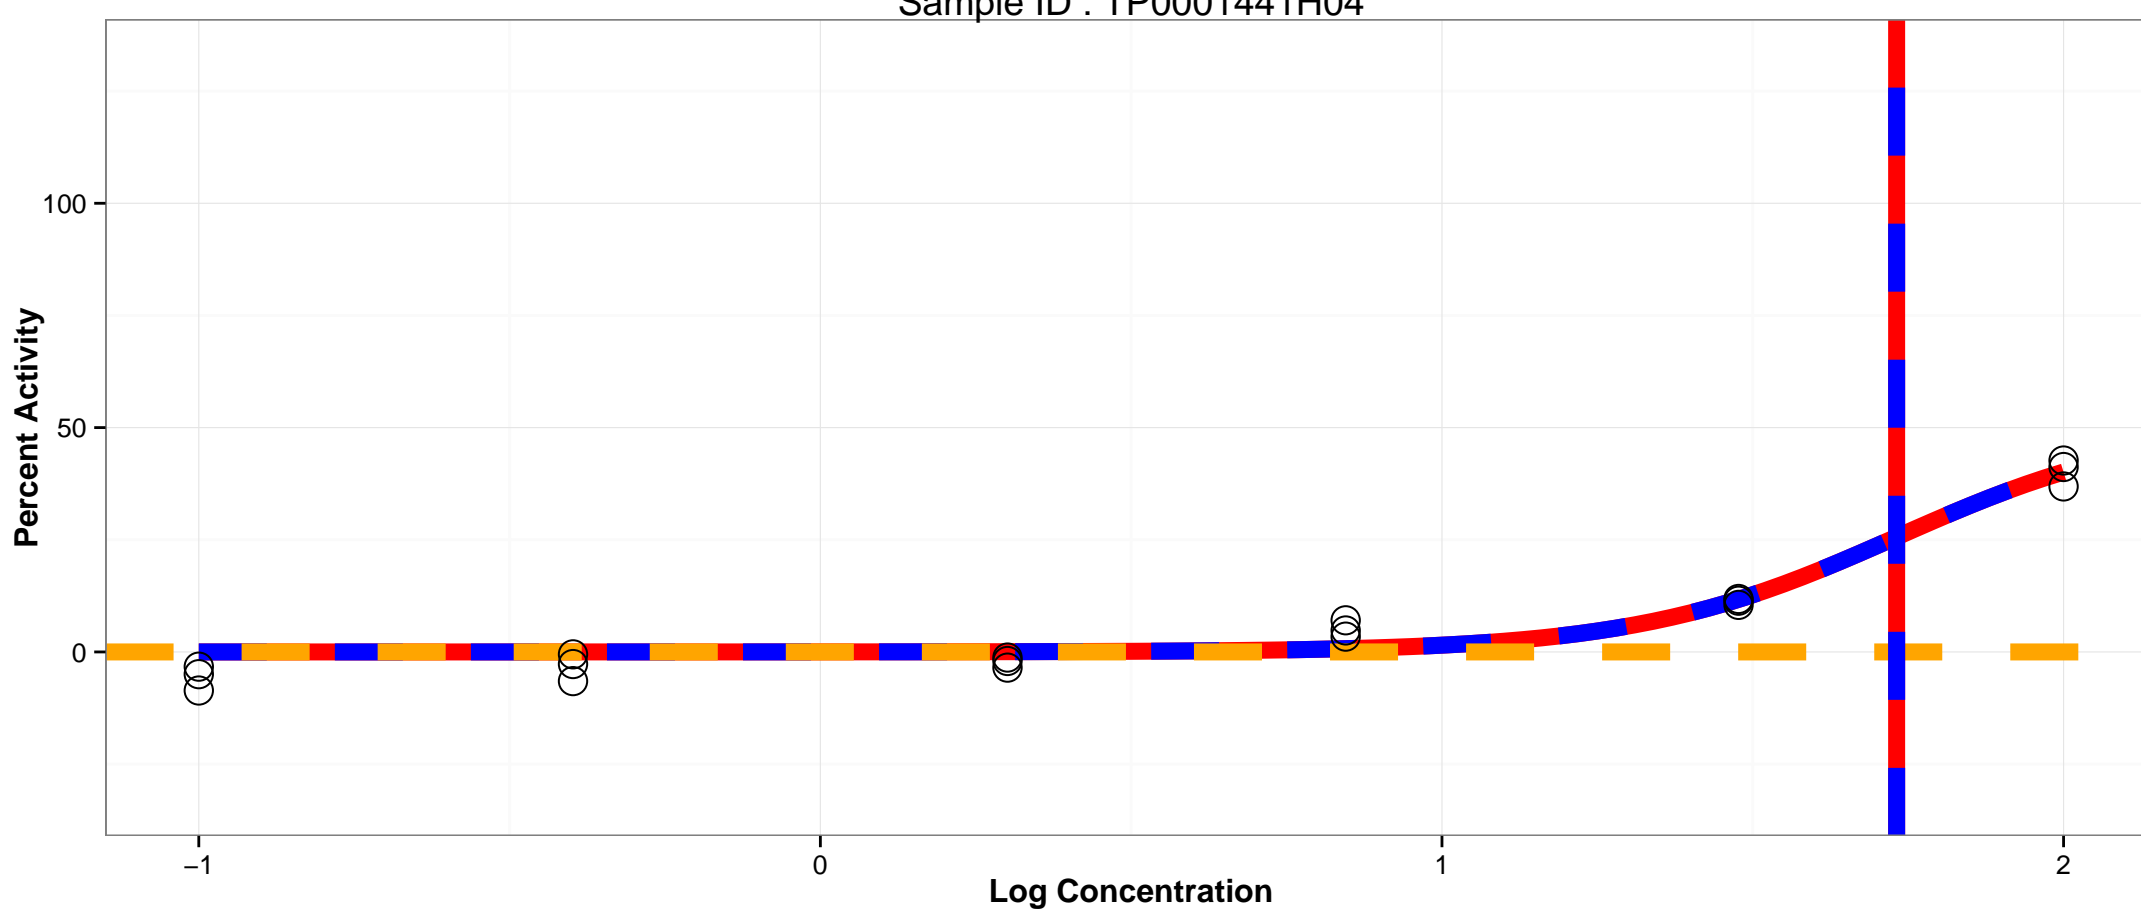

HILL MODEL

|     | tp   | ga   | gw   |
|-----|------|------|------|
| val | 51.2 | 1.73 | 2.08 |
| sd  | 18.9 | 0.22 | 1.08 |

GAIN-LOSS MODEL

|     | tp   | ga   | gw   | la   | lw   |
|-----|------|------|------|------|------|
| val | 51.2 | 1.73 | 2.08 | 3.75 | 4.59 |
| sd  | 18.9 | 0.22 | 1.08 | 1540 | 4050 |

|      | CNST   | HILL   | GNLS   |
|------|--------|--------|--------|
| AIC  | 151.68 | 108.38 | 112.38 |
| PROB | 0      | 0.88   | 0.12   |
| RMSE | 17.52  | 3.81   | 3.81   |

MAX\_MEAN : 40.3 MAX\_MED : 41.2 BMAD : 8.58  
COFF : 20 HIT-CALL : 1 FITC : 42 ACTP : 1  
FLAGS : 6

Chemical : Leucomalachite green  
CAS : 129-73-7

Assay ID 1508 (NHEERL\_TPO\_AUR\_dn)  
Sample ID : TP0001441H05

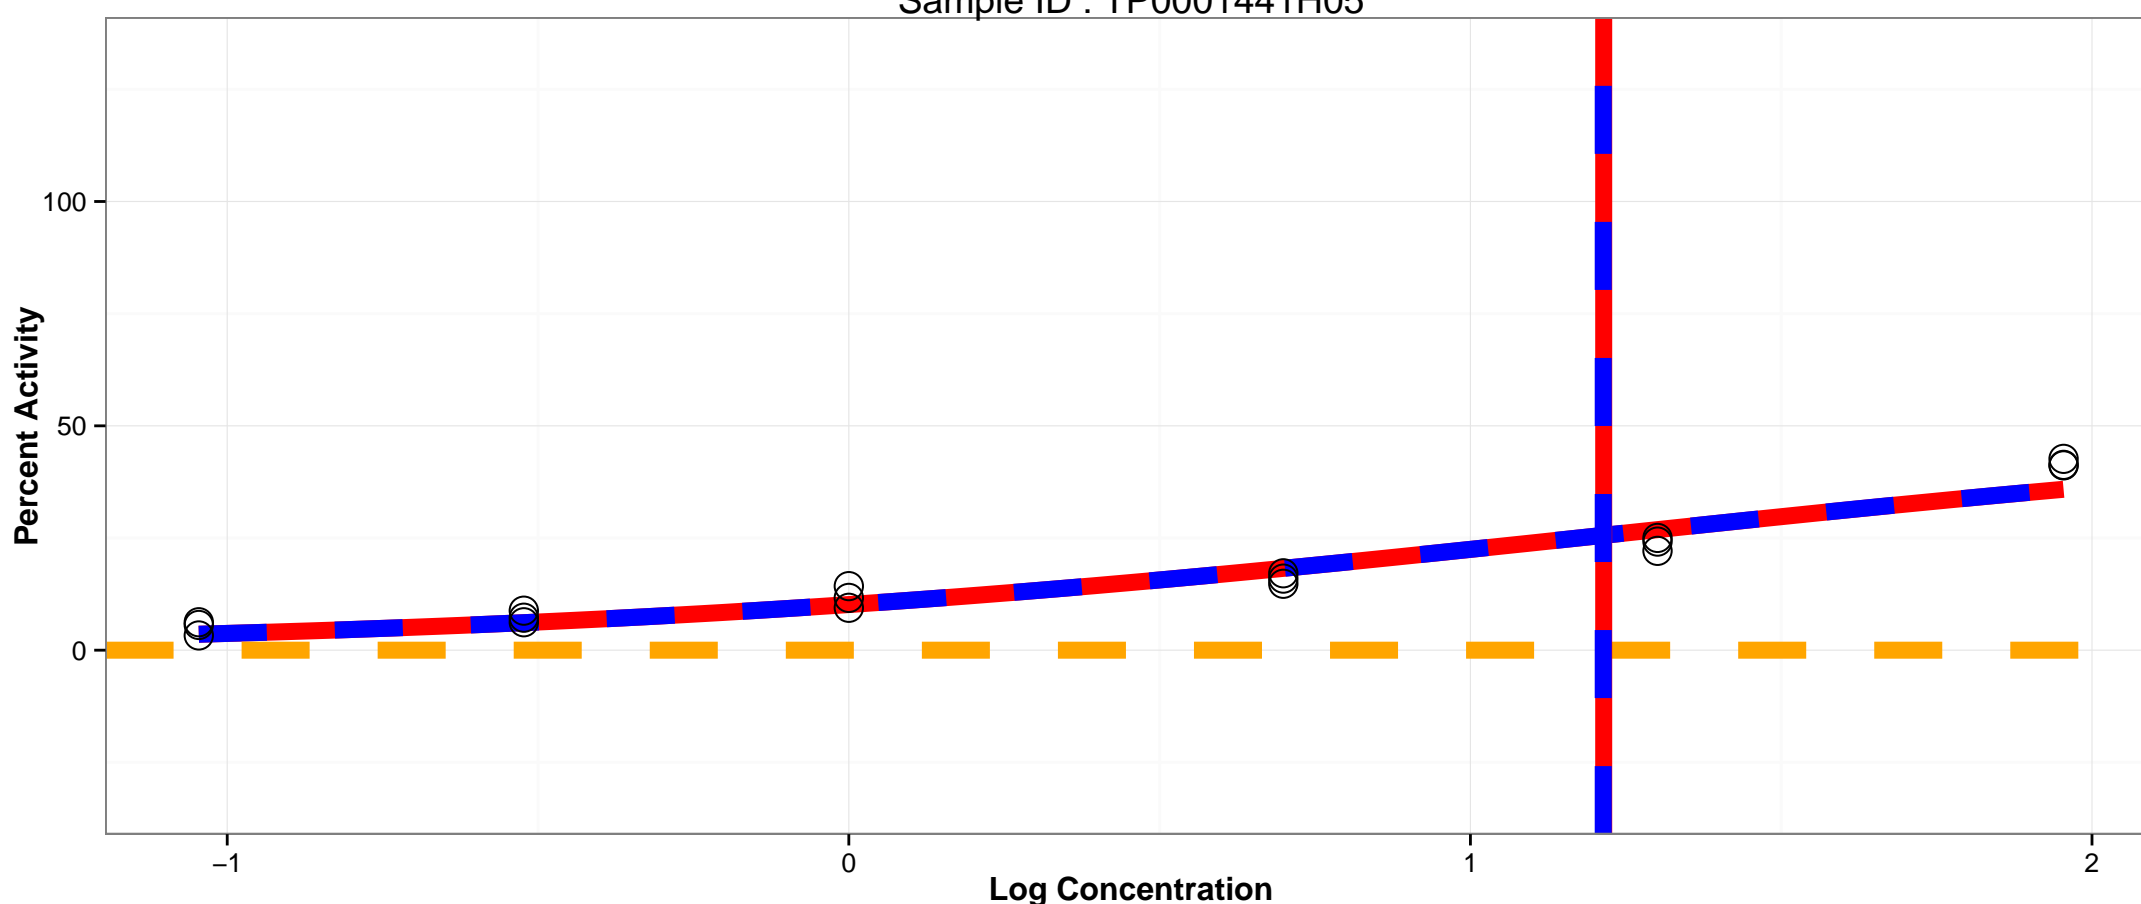

HILL MODEL

|     | tp   | ga    | gw     |
|-----|------|-------|--------|
| val | 51.2 | 1.21  | 0.499  |
| sd  | 13.9 | 0.415 | 0.0675 |

GAIN-LOSS MODEL

|     | tp   | ga    | gw     | la   | lw   |
|-----|------|-------|--------|------|------|
| val | 51.2 | 1.21  | 0.499  | 2.84 | 9.81 |
| sd  | 14   | 0.417 | 0.0675 | 450  | 4980 |

|      | CNST   | HILL   | GNLS   |
|------|--------|--------|--------|
| AIC  | 164.79 | 103.72 | 107.72 |
| PROB | 0      | 0.88   | 0.12   |
| RMSE | 21.57  | 3.29   | 3.29   |

MAX\_MEAN : 41.7 MAX\_MED : 41.3 BMAD : 5.69  
COFF : 20 HIT-CALL : 1 FITC : 42 ACTP : 1  
FLAGS :

Assay ID 1509 (NHEERL\_HEK293T\_CellTiterGLO)  
Sample ID : TP0001441H05

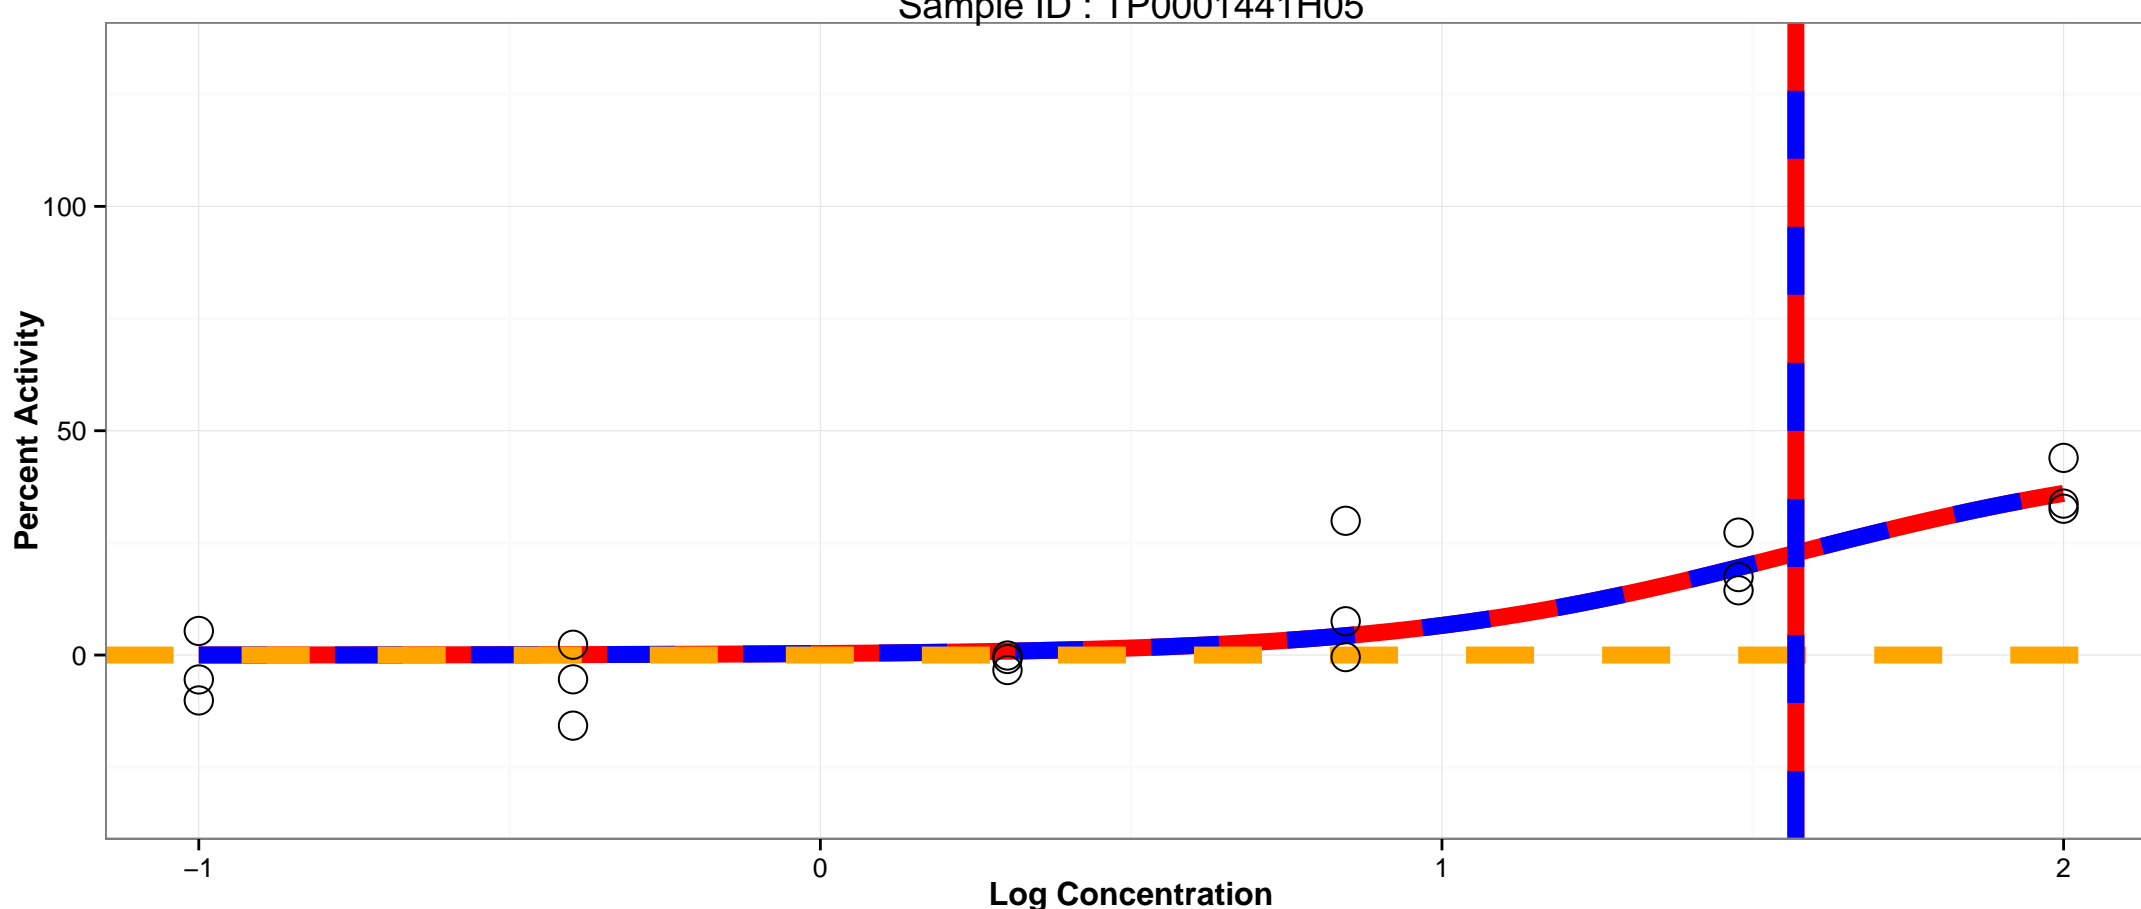

HILL MODEL

|     | tp   | ga    | gw    |
|-----|------|-------|-------|
| val | 45.5 | 1.57  | 1.35  |
| sd  | 16.9 | 0.322 | 0.677 |

GAIN-LOSS MODEL

|     | tp   | ga    | gw    | la   | lw   |
|-----|------|-------|-------|------|------|
| val | 45.5 | 1.57  | 1.35  | 3.46 | 4.95 |
| sd  | 16.9 | 0.322 | 0.677 | 2160 | 7350 |

|      | CNST   | HILL   | GNLS   |
|------|--------|--------|--------|
| AIC  | 160.12 | 133.97 | 137.97 |
| PROB | 0      | 0.88   | 0.12   |
| RMSE | 19.44  | 8.59   | 8.59   |

MAX\_MEAN : 36.8 MAX\_MED : 33.8 BMAD : 5.54  
COFF : 20 HIT-CALL : 1 FITC : 42 ACTP : 1  
FLAGS :

Assay ID 1848 (NHEERL\_Quantilum\_inhib\_2\_dn)  
Sample ID : TP0001441H05

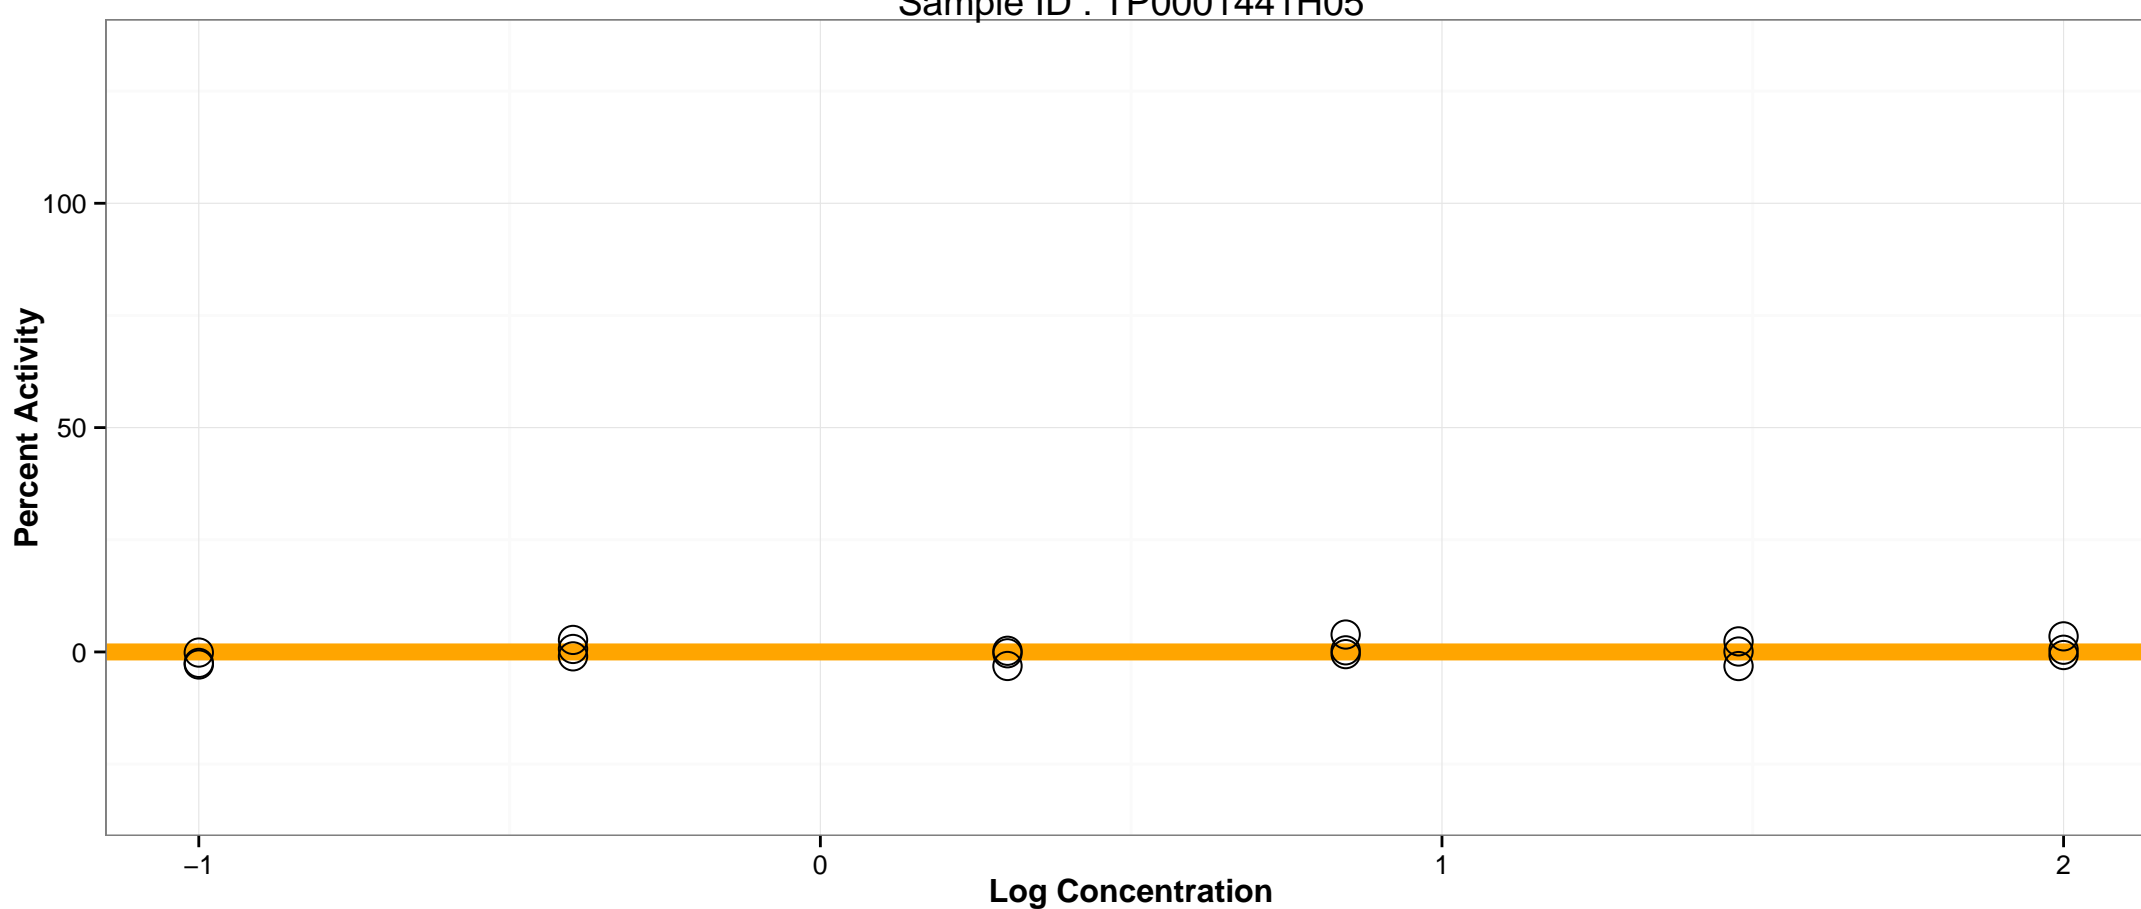

HILL MODEL

HILL MODEL: Not applicable

GAIN-LOSS MODEL

GNLS MODEL: Not applicable

|      | CNST  | HILL | GNLS |
|------|-------|------|------|
| AIC  | 80.49 | NA   | NA   |
| PROB | 1     | NA   | NA   |
| RMSE | 2.06  | NA   | NA   |

MAX\_MEAN : 1.26 MAX\_MED : 0.676 BMAD : 8.58  
COFF : 20 HIT-CALL : 0 FITC : 4 ACTP : 0  
FLAGS :

Chemical : Methylmercuric(II) chloride  
CAS : 115-09-3

Assay ID 1508 (NHEERL\_TPO\_AUR\_dn)  
Sample ID : TP0001441H06

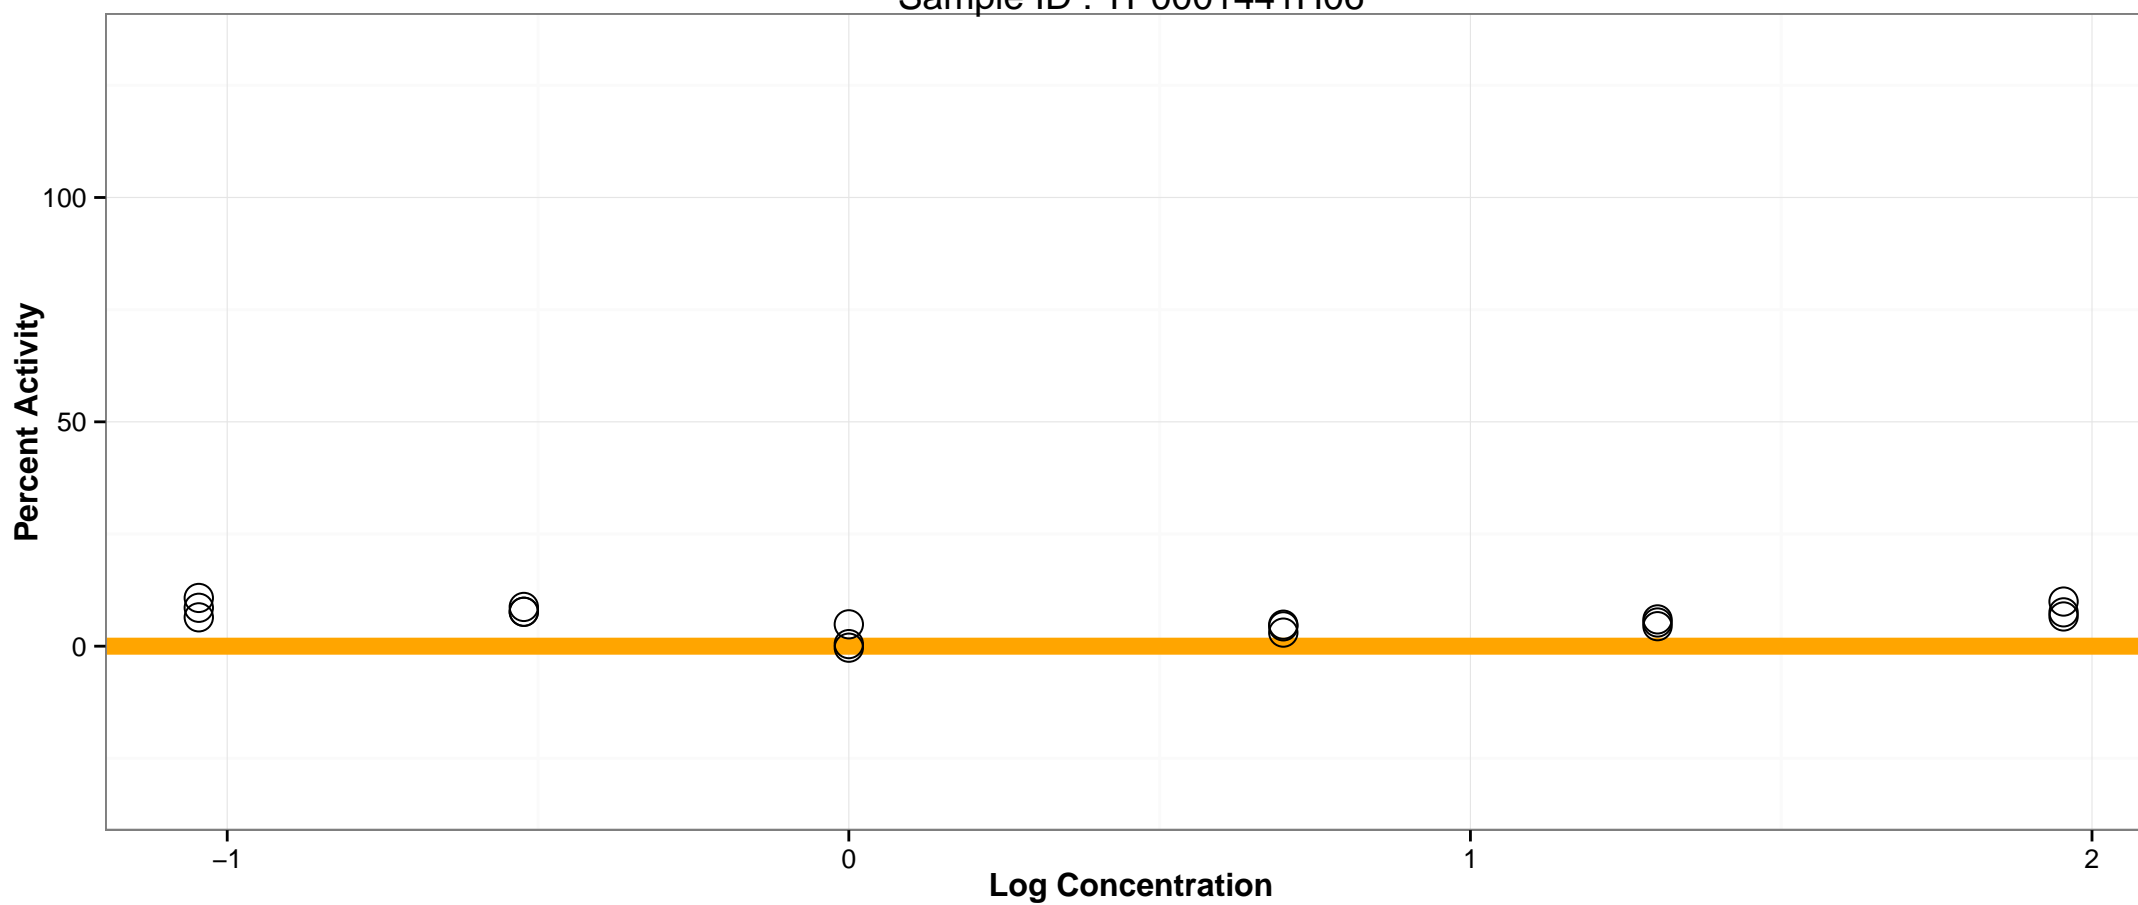

HILL MODEL

HILL MODEL: Not applicable

GAIN-LOSS MODEL

GNLS MODEL: Not applicable

|      | CNST   | HILL | GNLS |
|------|--------|------|------|
| AIC  | 124.35 | NA   | NA   |
| PROB | 1      | NA   | NA   |
| RMSE | 6.61   | NA   | NA   |

MAX\_MEAN : 8.59 MAX\_MED : 8.57 BMAD : 5.69  
COFF : 20 HIT-CALL : 0 FITC : 4 ACTP : 0  
FLAGS :

Assay ID 1509 (NHEERL\_HEK293T\_CellTiterGLO)  
Sample ID : TP0001441H06

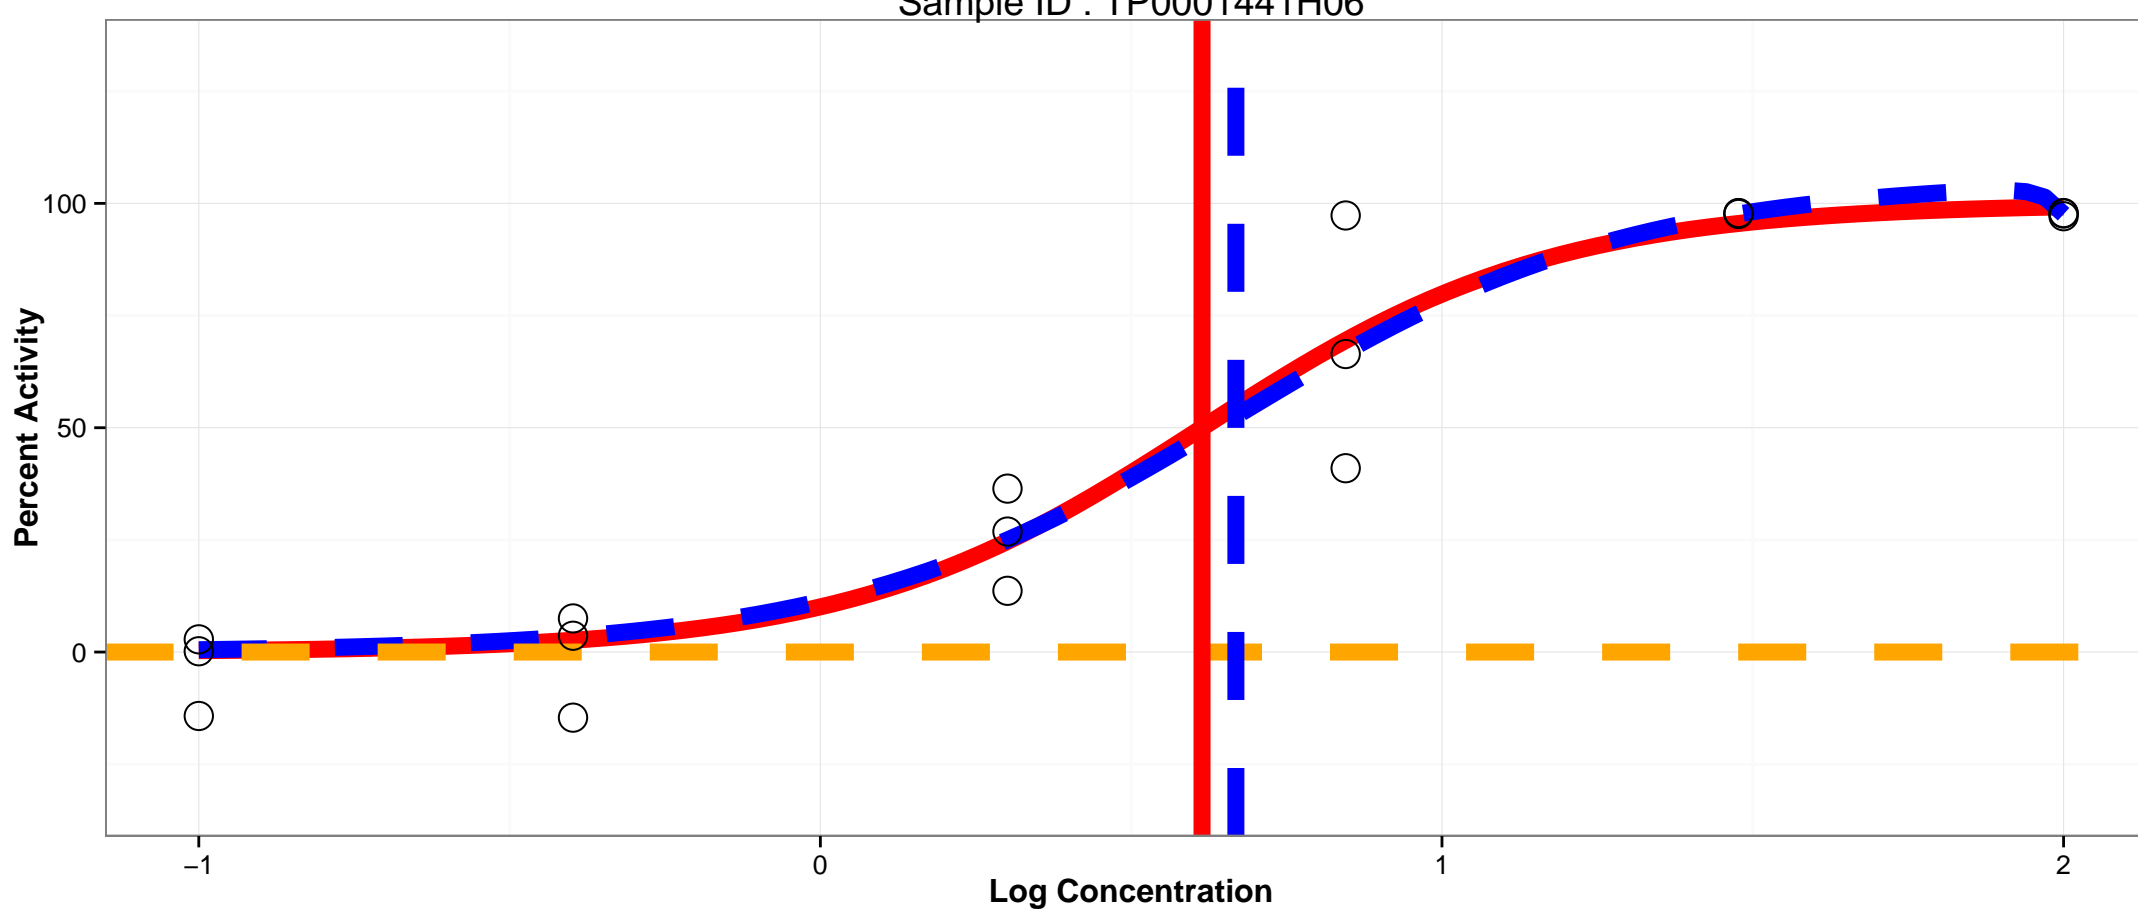

HILL MODEL

|     | tp   | ga     | gw    |
|-----|------|--------|-------|
| val | 99.9 | 0.614  | 1.55  |
| sd  | 3.76 | 0.0809 | 0.315 |

GAIN-LOSS MODEL

|     | tp  | ga    | gw   | la   | lw   |
|-----|-----|-------|------|------|------|
| val | 105 | 0.668 | 1.38 | 2.08 | 15.8 |
| sd  | NA  | NA    | NA   | NA   | NA   |

|      | CNST   | HILL   | GNLS   |
|------|--------|--------|--------|
| AIC  | 205.19 | 144.51 | 147.87 |
| PROB | 0      | 0.84   | 0.16   |
| RMSE | 64.78  | 11.6   | 11.61  |

MAX\_MEAN : 97.8 MAX\_MED : 97.8 BMAD : 5.54  
COFF : 20 HIT-CALL : 1 FITC : 41 ACTP : 1  
FLAGS :

Assay ID 1848 (NHEERL\_QuantLum\_inhib\_2\_dn)  
Sample ID : TP0001441H06

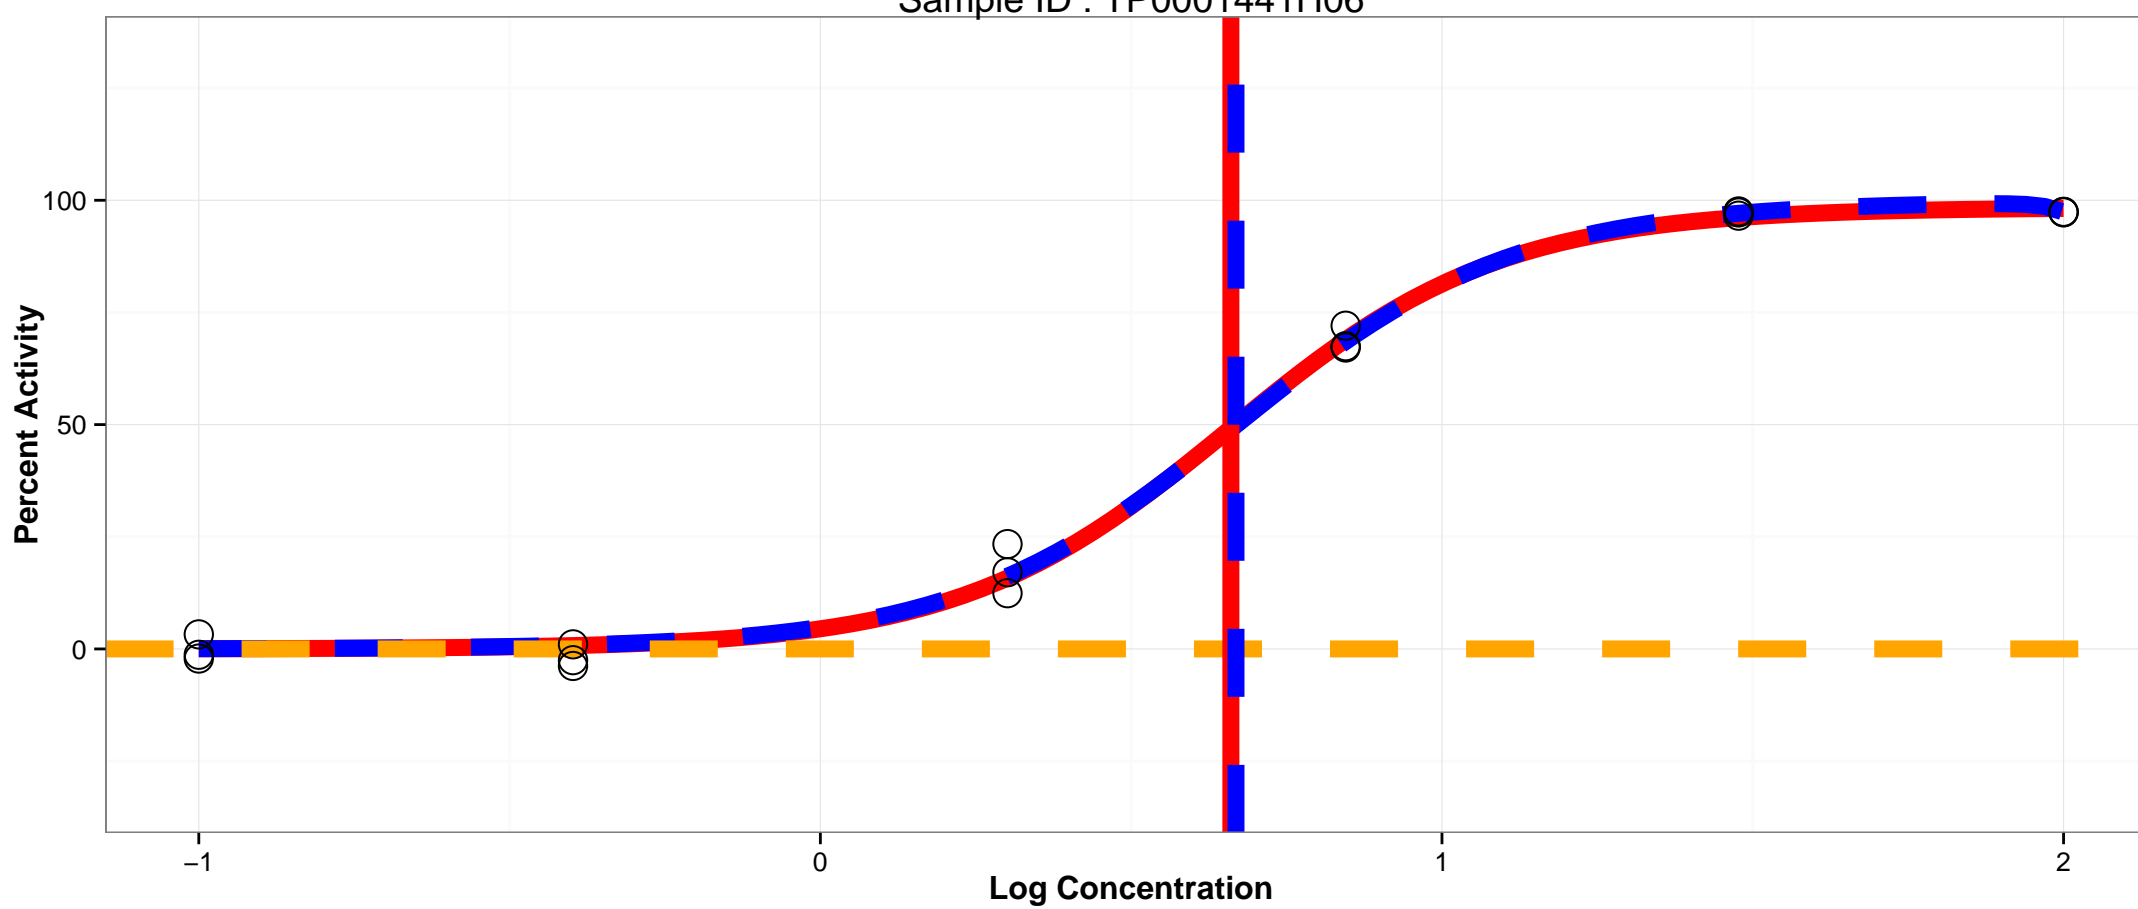

HILL MODEL

|     | tp    | ga     | gw    |
|-----|-------|--------|-------|
| val | 98.4  | 0.66   | 2     |
| sd  | 0.955 | 0.0171 | 0.134 |

GAIN-LOSS MODEL

|     | tp   | ga    | gw   | la   | lw   |
|-----|------|-------|------|------|------|
| val | 99.7 | 0.669 | 1.94 | 2.12 | 13.8 |
| sd  | NA   | NA    | NA   | NA   | NA   |

|      | CNST   | HILL | GNLS  |
|------|--------|------|-------|
| AIC  | 204.29 | 95.4 | 98.01 |
| PROB | 0      | 0.79 | 0.21  |
| RMSE | 63.26  | 2.78 | 2.71  |

MAX\_MEAN : 97.4 MAX\_MED : 97.4 BMAD : 8.58  
COFF : 20 HIT-CALL : 1 FITC : 41 ACTP : 1  
FLAGS :

Chemical : 1,1,3,3-Tetramethyl-2-thiourea  
CAS : 2782-91-4

Assay ID 1508 (NHEERL\_TPO\_AUR\_dn)  
Sample ID : TP0001441H07

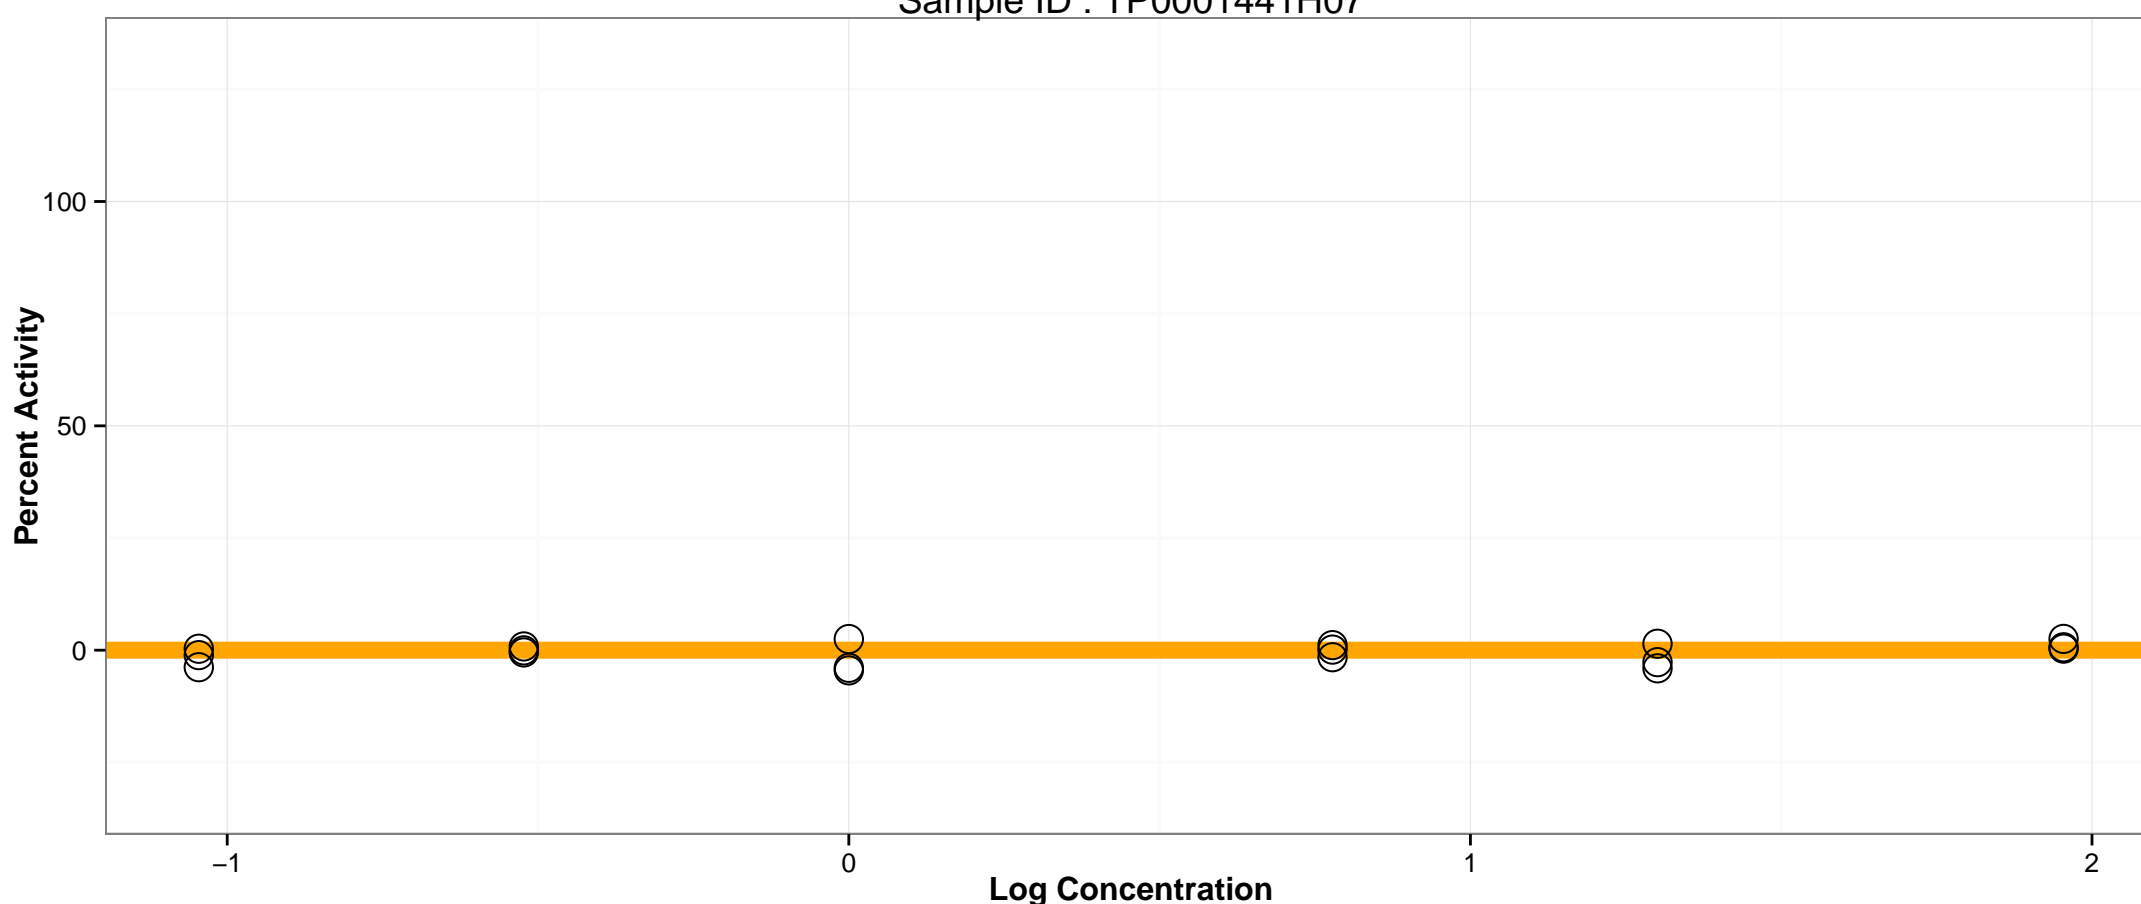

HILL MODEL

HILL MODEL: Not applicable

GAIN-LOSS MODEL

GNLS MODEL: Not applicable

|      | CNST  | HILL | GNLS |
|------|-------|------|------|
| AIC  | 84.08 | NA   | NA   |
| PROB | 1     | NA   | NA   |
| RMSE | 2.29  | NA   | NA   |

MAX\_MEAN : 1.18 MAX\_MED : 0.66 BMAD : 5.69  
COFF : 20 HIT-CALL : 0 FITC : 4 ACTP : 0  
FLAGS :

Assay ID 1509 (NHEERL\_HEK293T\_CellTiterGLO)  
Sample ID : TP0001441H07

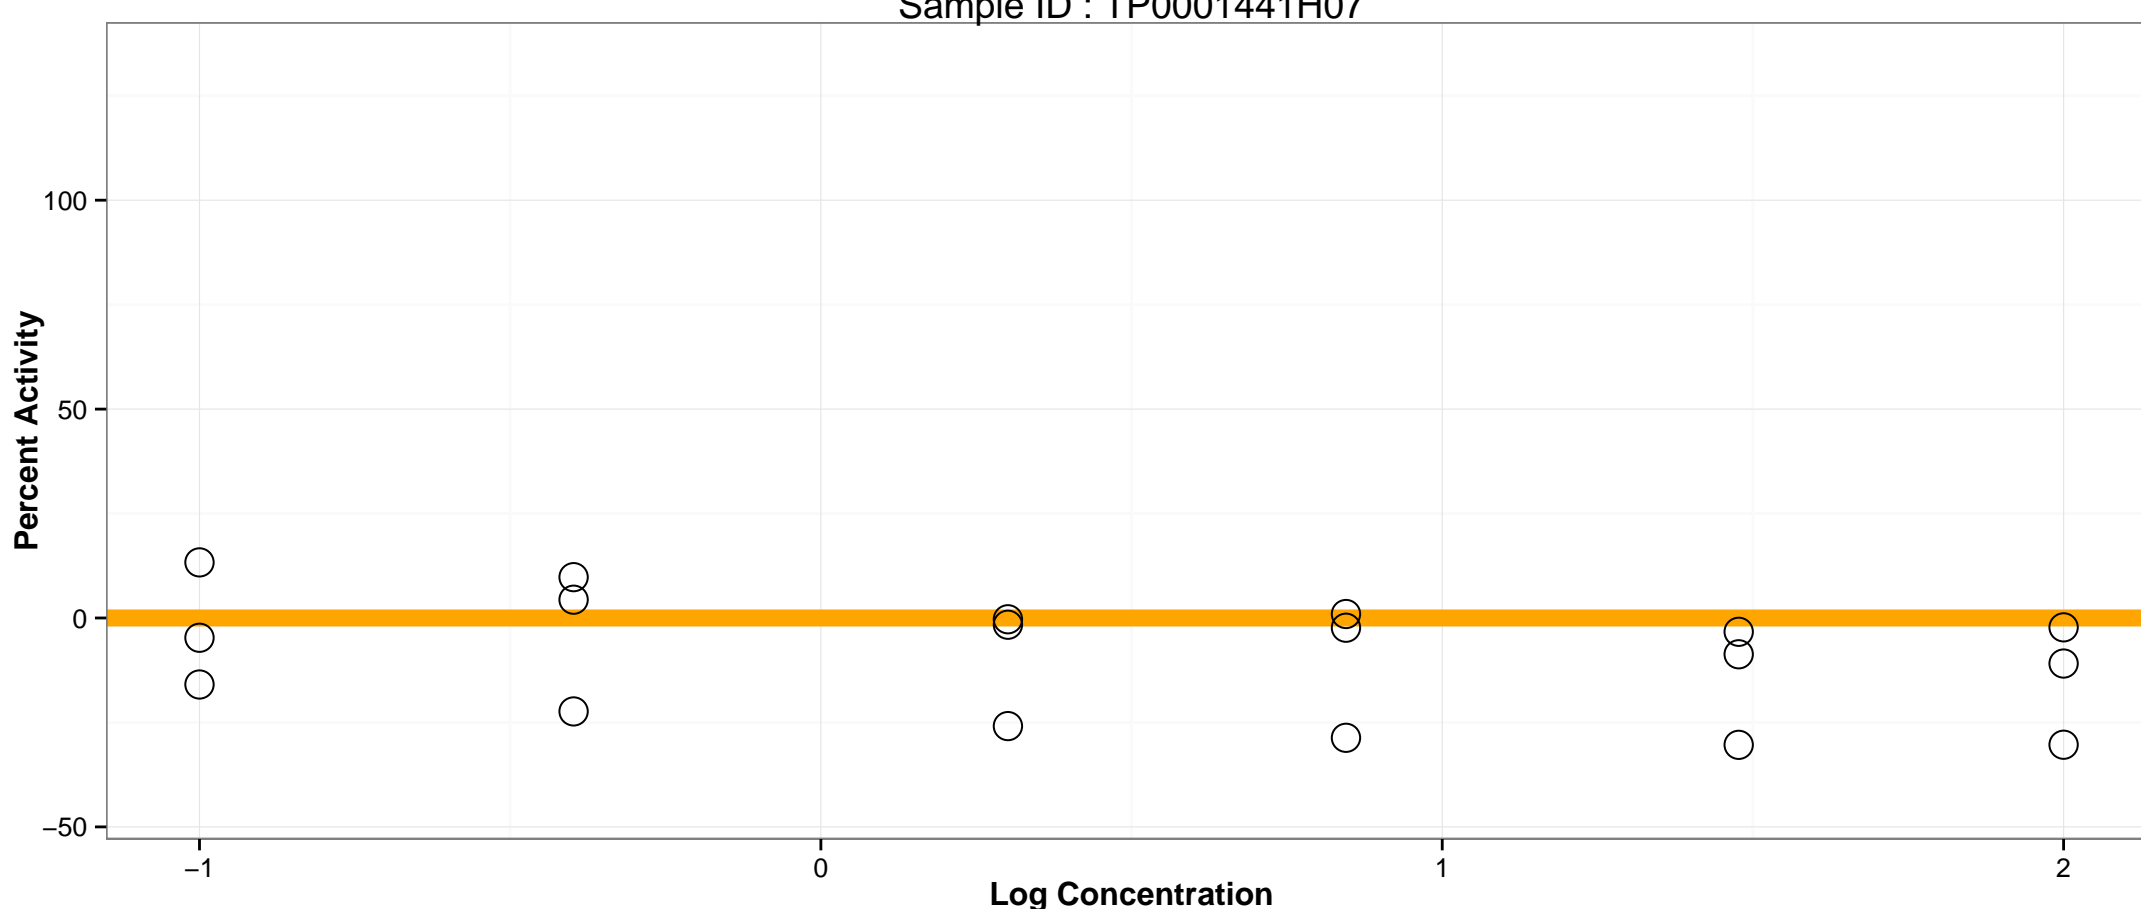

HILL MODEL

HILL MODEL: Not applicable

GAIN-LOSS MODEL

GNLS MODEL: Not applicable

|      | CNST   | HILL | GNLS |
|------|--------|------|------|
| AIC  | 153.66 | NA   | NA   |
| PROB | 1      | NA   | NA   |
| RMSE | 16.02  | NA   | NA   |

MAX\_MEAN : -2.43 MAX\_MED : 4.39 BMAD : 5.54  
COFF : 20 HIT-CALL : 0 FITC : 4 ACTP : 0  
FLAGS :

Assay ID 1848 (NHEERL\_QuantLum\_inhib\_2\_dn)  
Sample ID : TP0001441H07

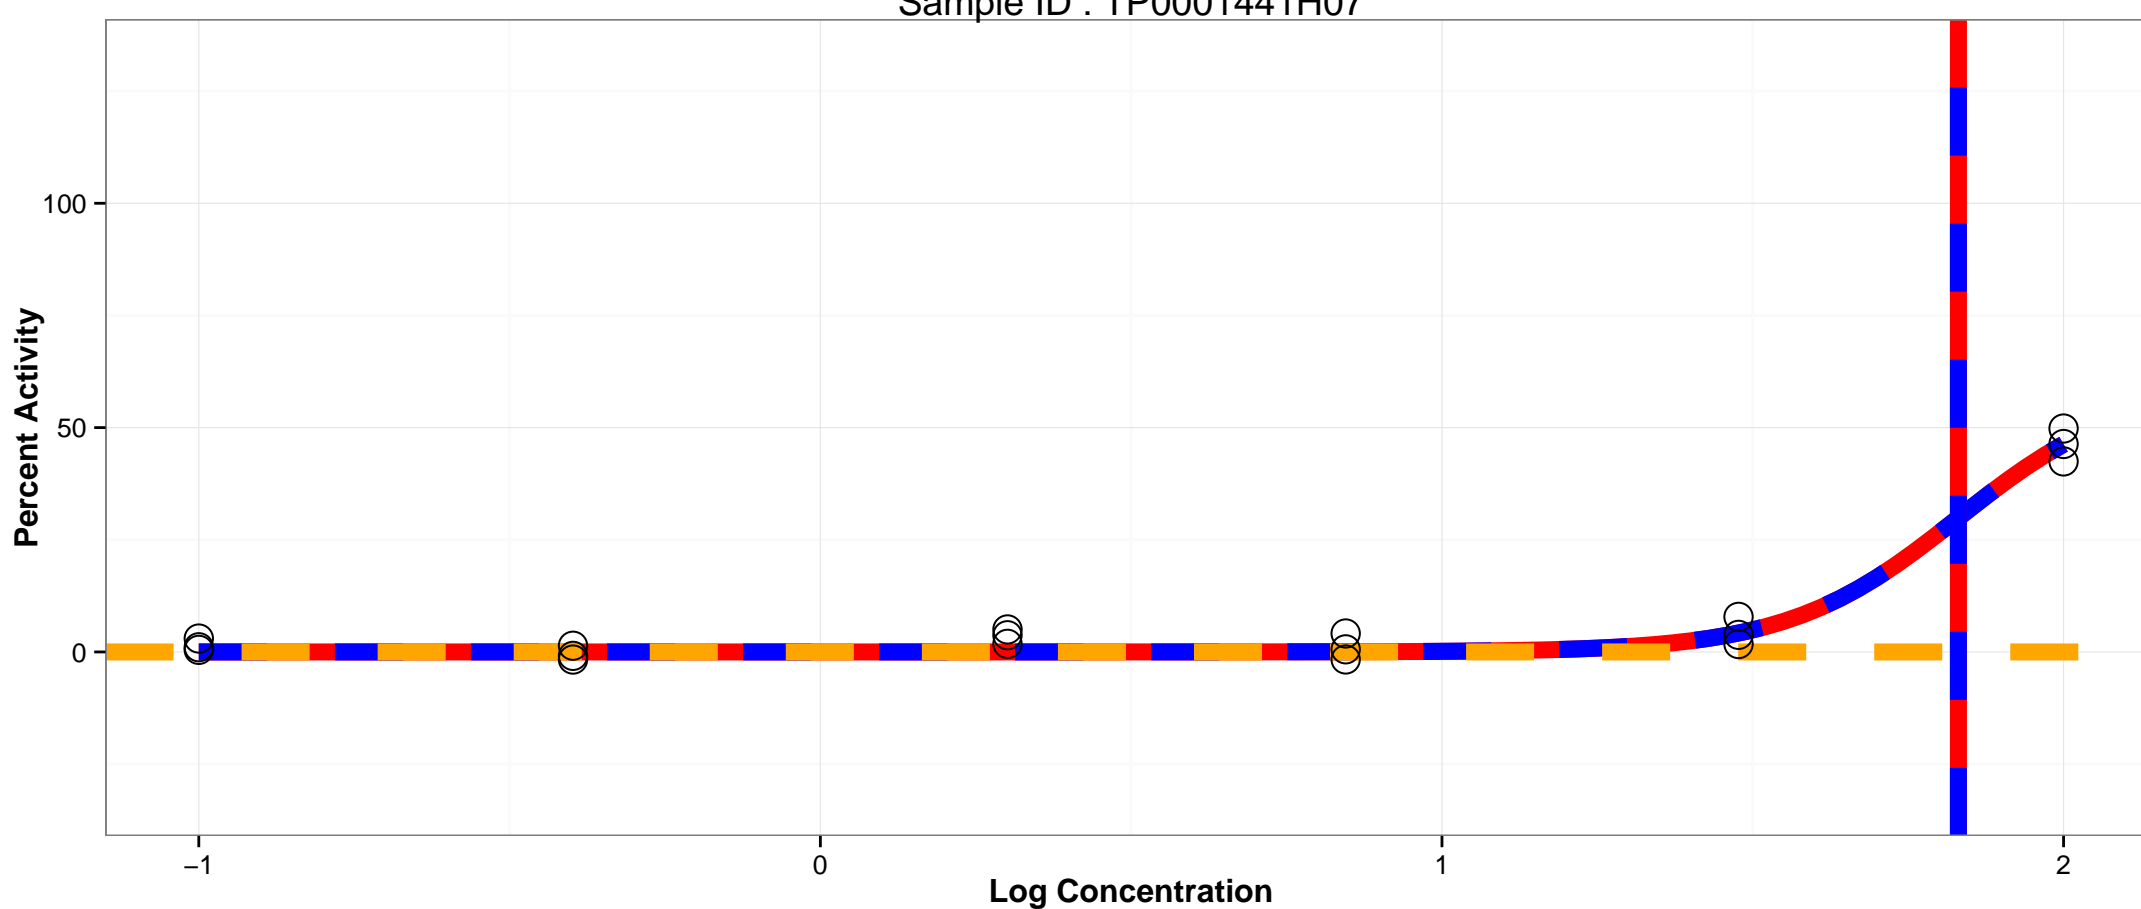

HILL MODEL

|     | tp   | ga    | gw   |
|-----|------|-------|------|
| val | 59.8 | 1.83  | 3.17 |
| sd  | 31.1 | 0.238 | 1.55 |

GAIN-LOSS MODEL

|     | tp   | ga    | gw   | la   | lw   |
|-----|------|-------|------|------|------|
| val | 59.8 | 1.83  | 3.17 | 2.55 | 7.59 |
| sd  | 31   | 0.236 | 1.55 | 41.9 | 578  |

|      | CNST   | HILL  | GNLS   |
|------|--------|-------|--------|
| AIC  | 148.11 | 96.06 | 100.06 |
| PROB | 0      | 0.88  | 0.12   |
| RMSE | 19.14  | 2.63  | 2.63   |

MAX\_MEAN : 46.2 MAX\_MED : 46.4 BMAD : 8.58  
COFF : 20 HIT-CALL : 1 FITC : 42 ACTP : 1  
FLAGS : 6

Assay ID 1508 (NHEERL\_TPO\_AUR\_dn)  
Sample ID : TP0001441H08

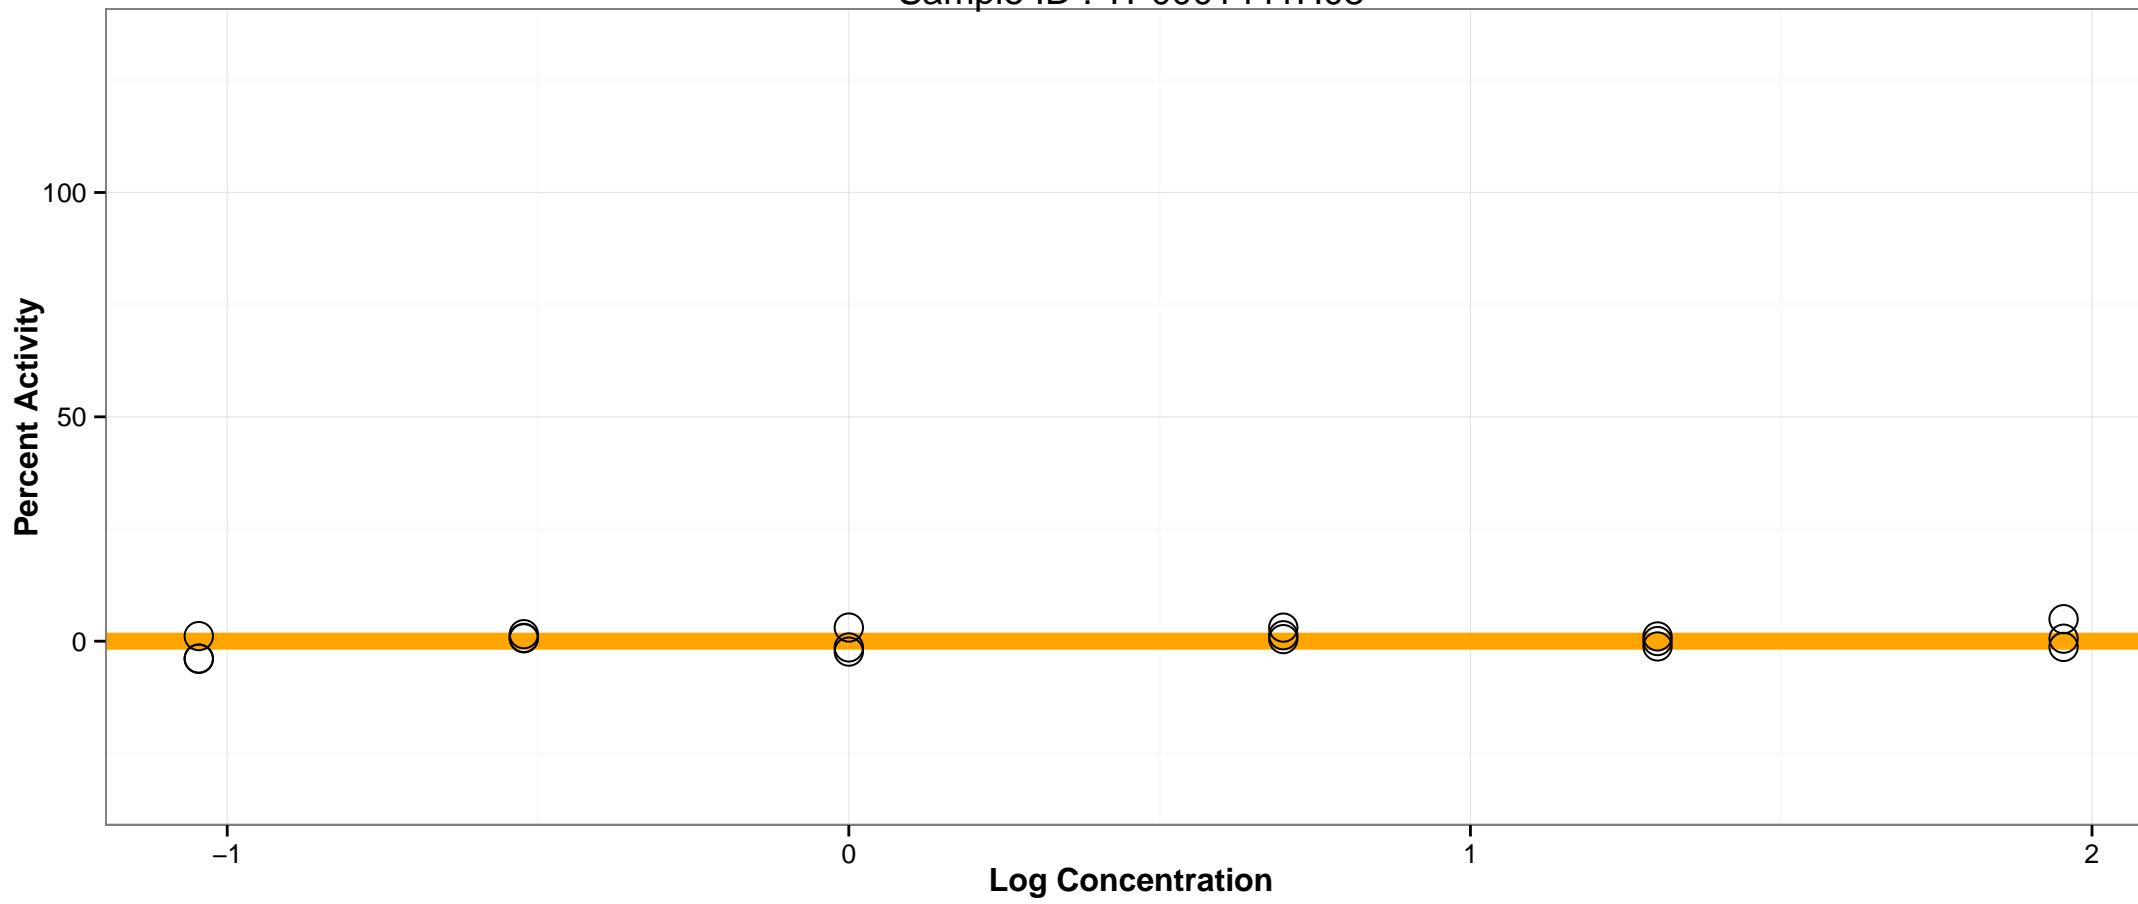

HILL MODEL

HILL MODEL: Not applicable

GAIN-LOSS MODEL

GNLS MODEL: Not applicable

|      | CNST  | HILL | GNLS |
|------|-------|------|------|
| AIC  | 83.33 | NA   | NA   |
| PROB | 1     | NA   | NA   |
| RMSE | 2.25  | NA   | NA   |

MAX\_MEAN : 1.62 MAX\_MED : 1.34 BMAD : 5.69  
COFF : 20 HIT-CALL : 0 FITC : 4 ACTP : 0  
FLAGS :

Assay ID 1509 (NHEERL\_HEK293T\_CellTiterGLO)  
Sample ID : TP0001441H08

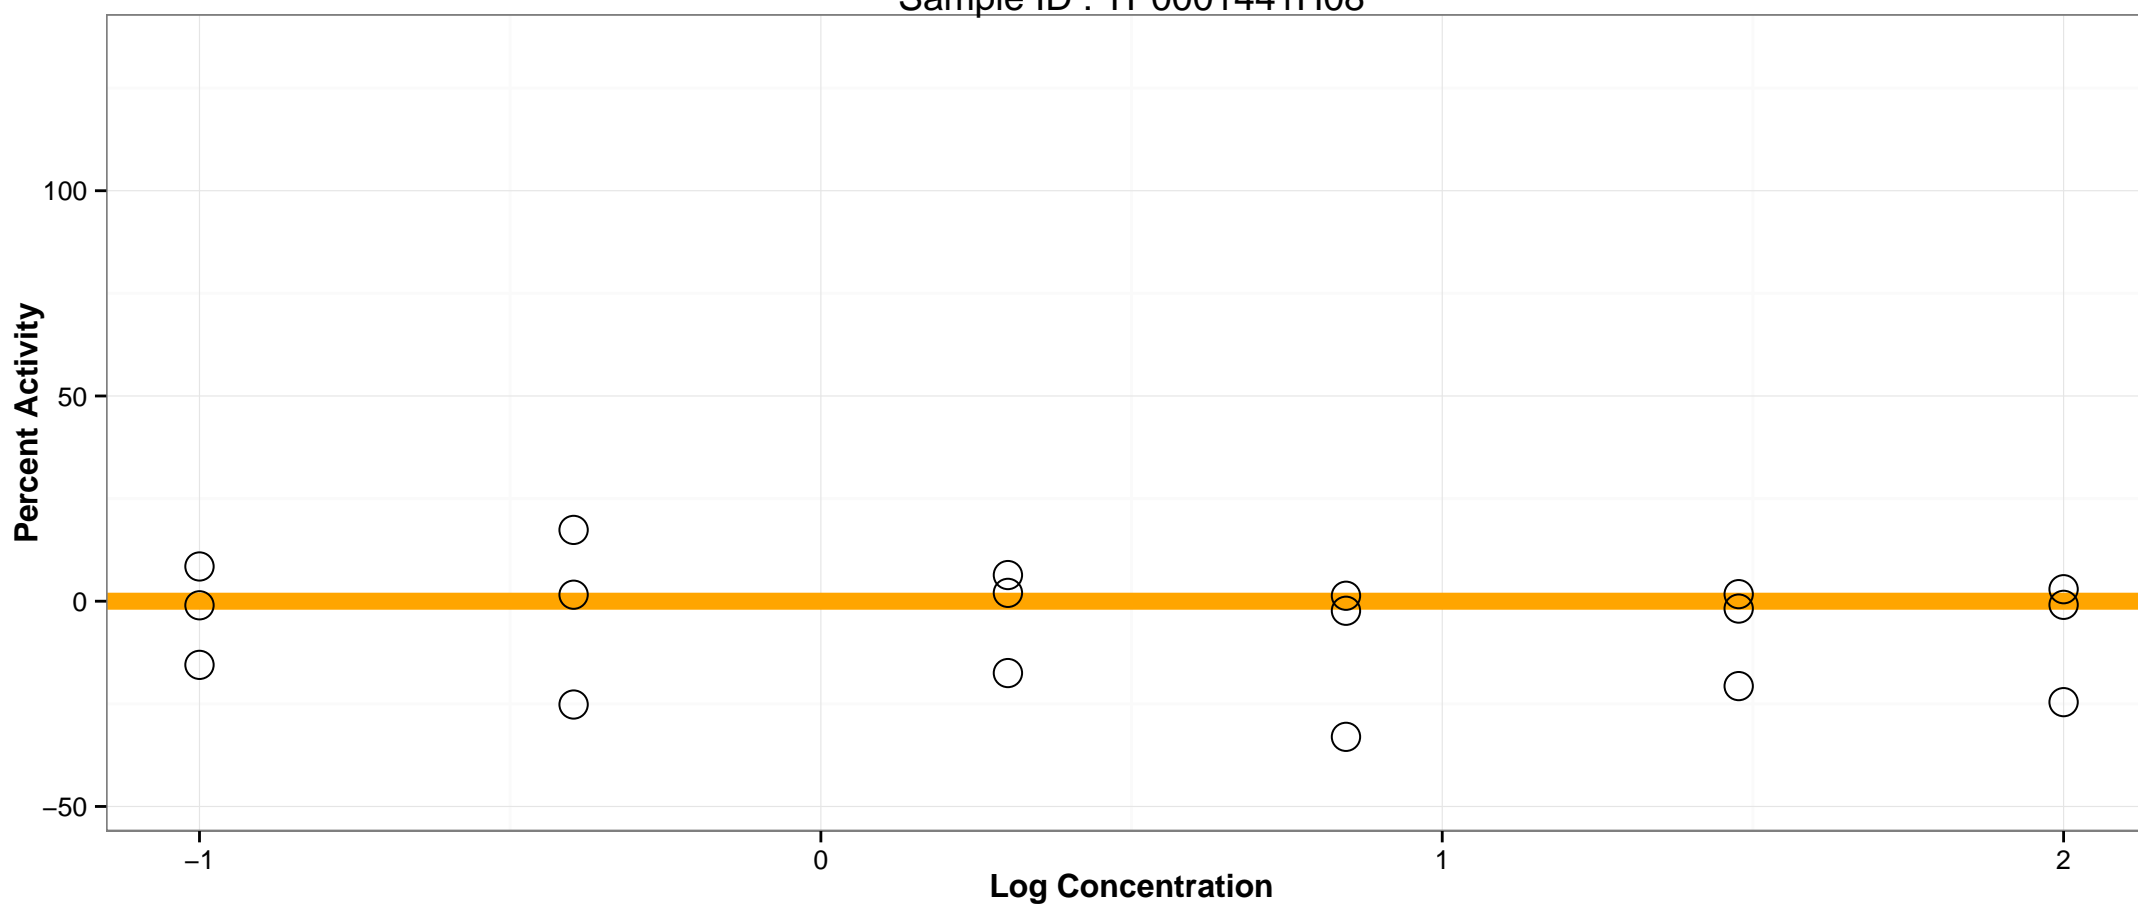

HILL MODEL

HILL MODEL: Not applicable

GAIN-LOSS MODEL

GNLS MODEL: Not applicable

|      | CNST   | HILL | GNLS |
|------|--------|------|------|
| AIC  | 149.22 | NA   | NA   |
| PROB | 1      | NA   | NA   |
| RMSE | 14.43  | NA   | NA   |

MAX\_MEAN : -2.05 MAX\_MED : 2.05 BMAD : 5.54  
COFF : 20 HIT-CALL : 0 FITC : 4 ACTP : 0  
FLAGS :

Assay ID 1848 (NHEERL\_Quantilum\_inhib\_2\_dn)  
Sample ID : TP0001441H08

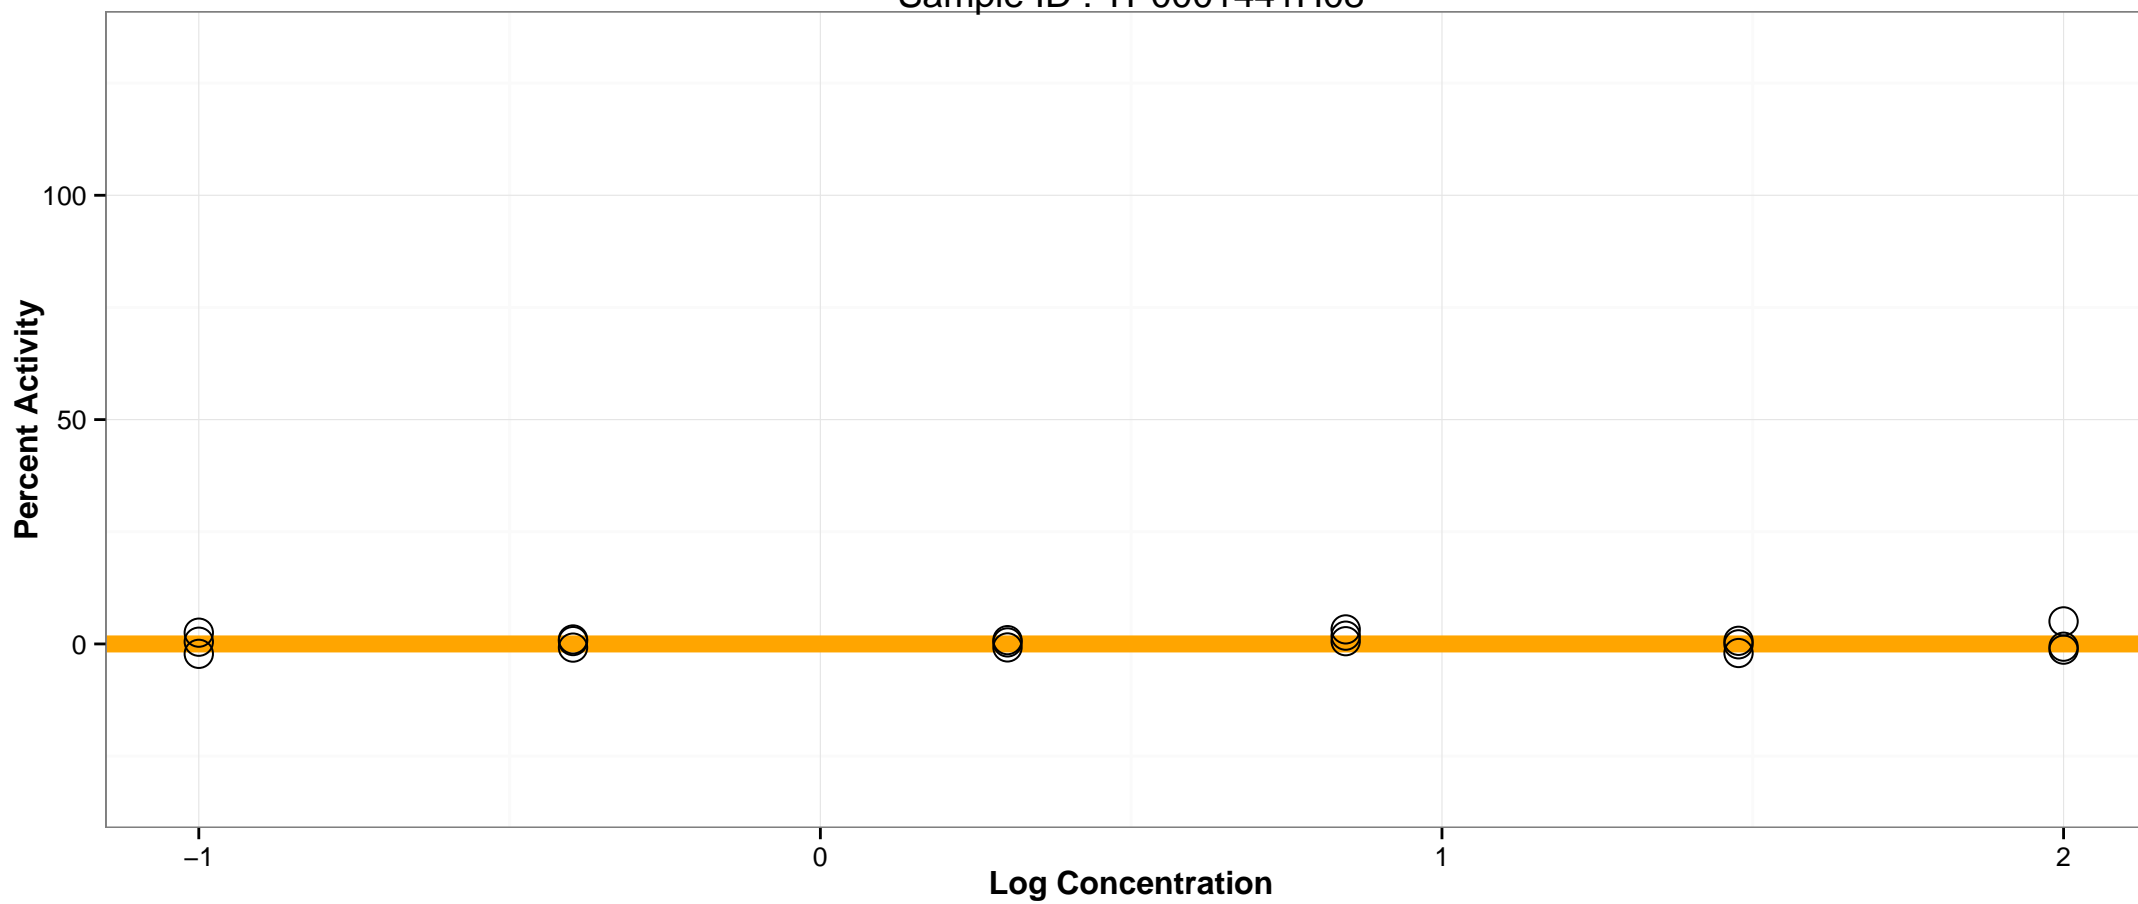

HILL MODEL

HILL MODEL: Not applicable

GAIN-LOSS MODEL

GNLS MODEL: Not applicable

|      | CNST  | HILL | GNLS |
|------|-------|------|------|
| AIC  | 74.26 | NA   | NA   |
| PROB | 1     | NA   | NA   |
| RMSE | 1.85  | NA   | NA   |

MAX\_MEAN : 1.91 MAX\_MED : 1.86 BMAD : 8.58  
COFF : 20 HIT-CALL : 0 FITC : 4 ACTP : 0  
FLAGS :



Chemical : 3-Hydroxy-2-pyridone  
CAS : 16867-04-2

Assay ID 1508 (NHEERL\_TPO\_AUR\_dn)  
Sample ID : TP0001441H09

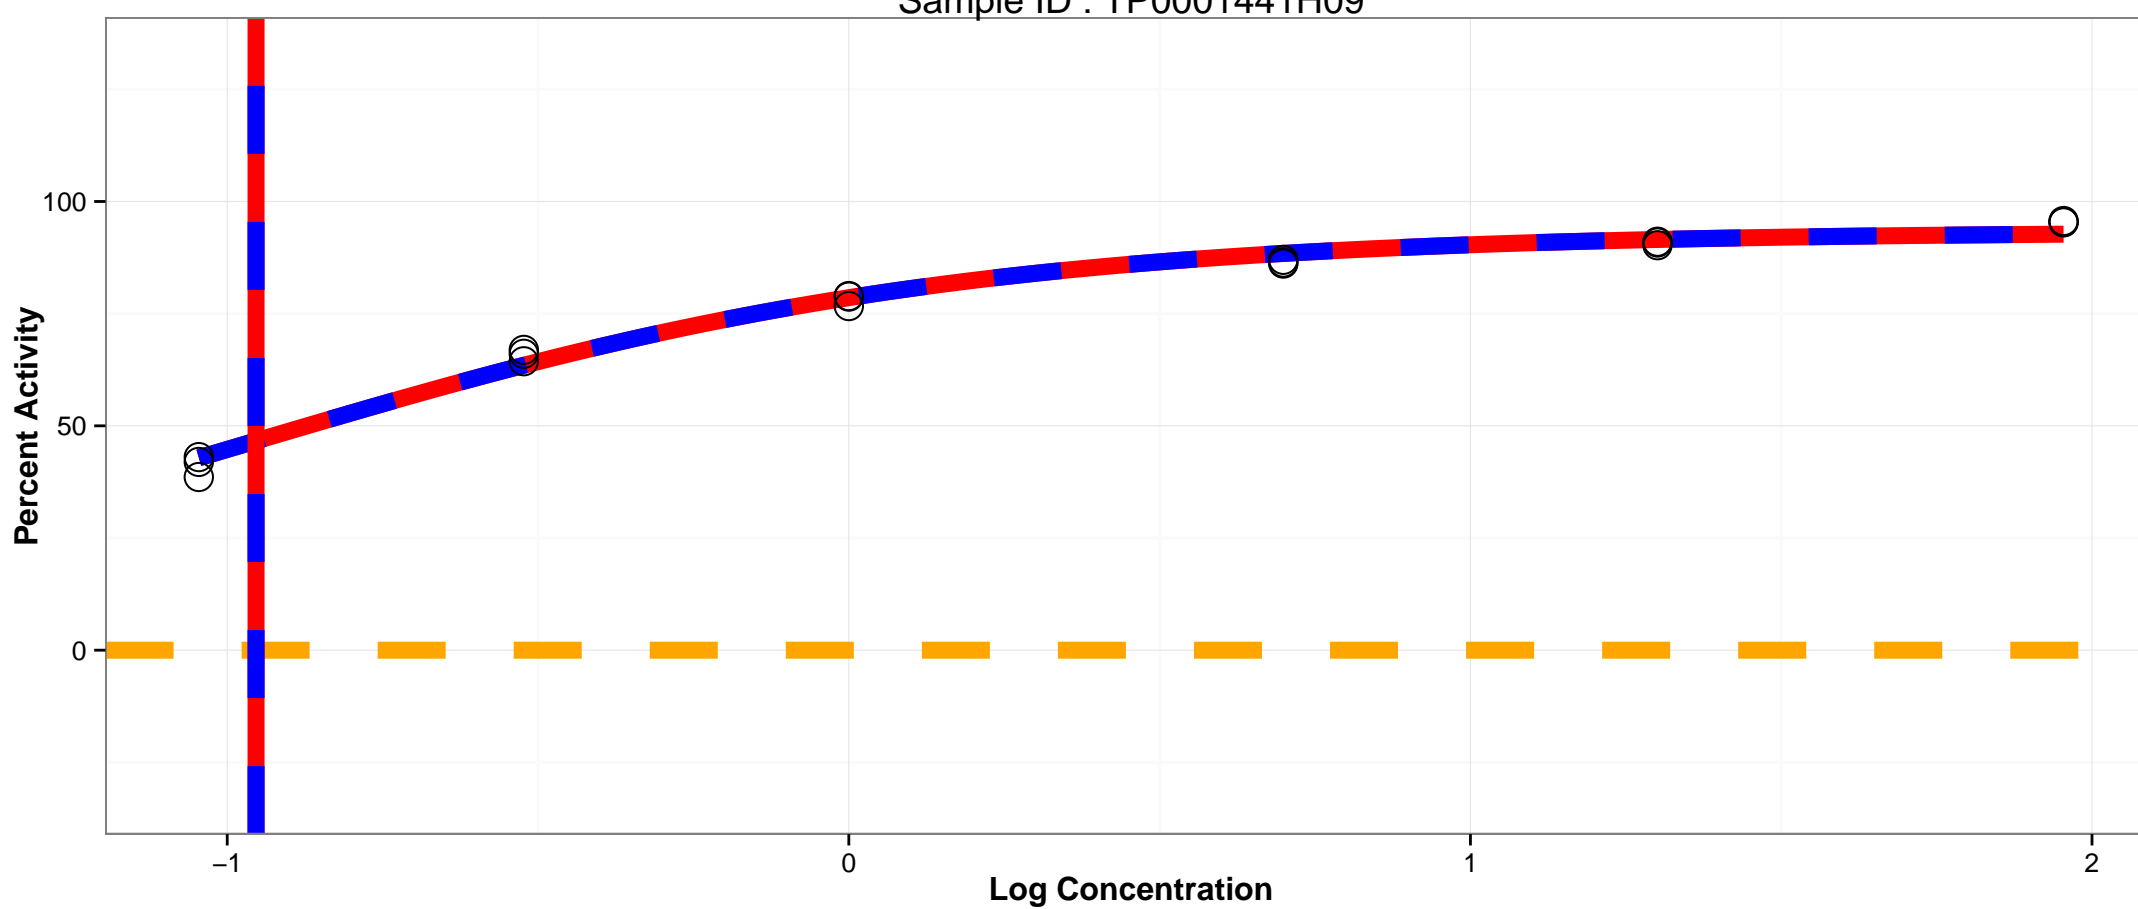

HILL MODEL

|     | tp   | ga     | gw     |
|-----|------|--------|--------|
| val | 93.3 | -0.954 | 0.763  |
| sd  | 1.28 | 0.0283 | 0.0588 |

GAIN-LOSS MODEL

|     | tp   | ga     | gw    | la   | lw |
|-----|------|--------|-------|------|----|
| val | 93.3 | -0.954 | 0.763 | 3.84 | 18 |
| sd  | NA   | NA     | NA    | NA   | NA |

|      | CNST   | HILL | GNLS |
|------|--------|------|------|
| AIC  | 214.14 | 87.7 | 91.7 |
| PROB | 0      | 0.88 | 0.12 |
| RMSE | 78.51  | 2.09 | 2.09 |

MAX\_MEAN : 95.5 MAX\_MED : 95.5 BMAD : 5.69  
COFF : 20 HIT-CALL : 1 FITC : 41 ACTP : 1  
FLAGS :

Assay ID 1509 (NHEERL\_HEK293T\_CellTiterGLO)  
Sample ID : TP0001441H09

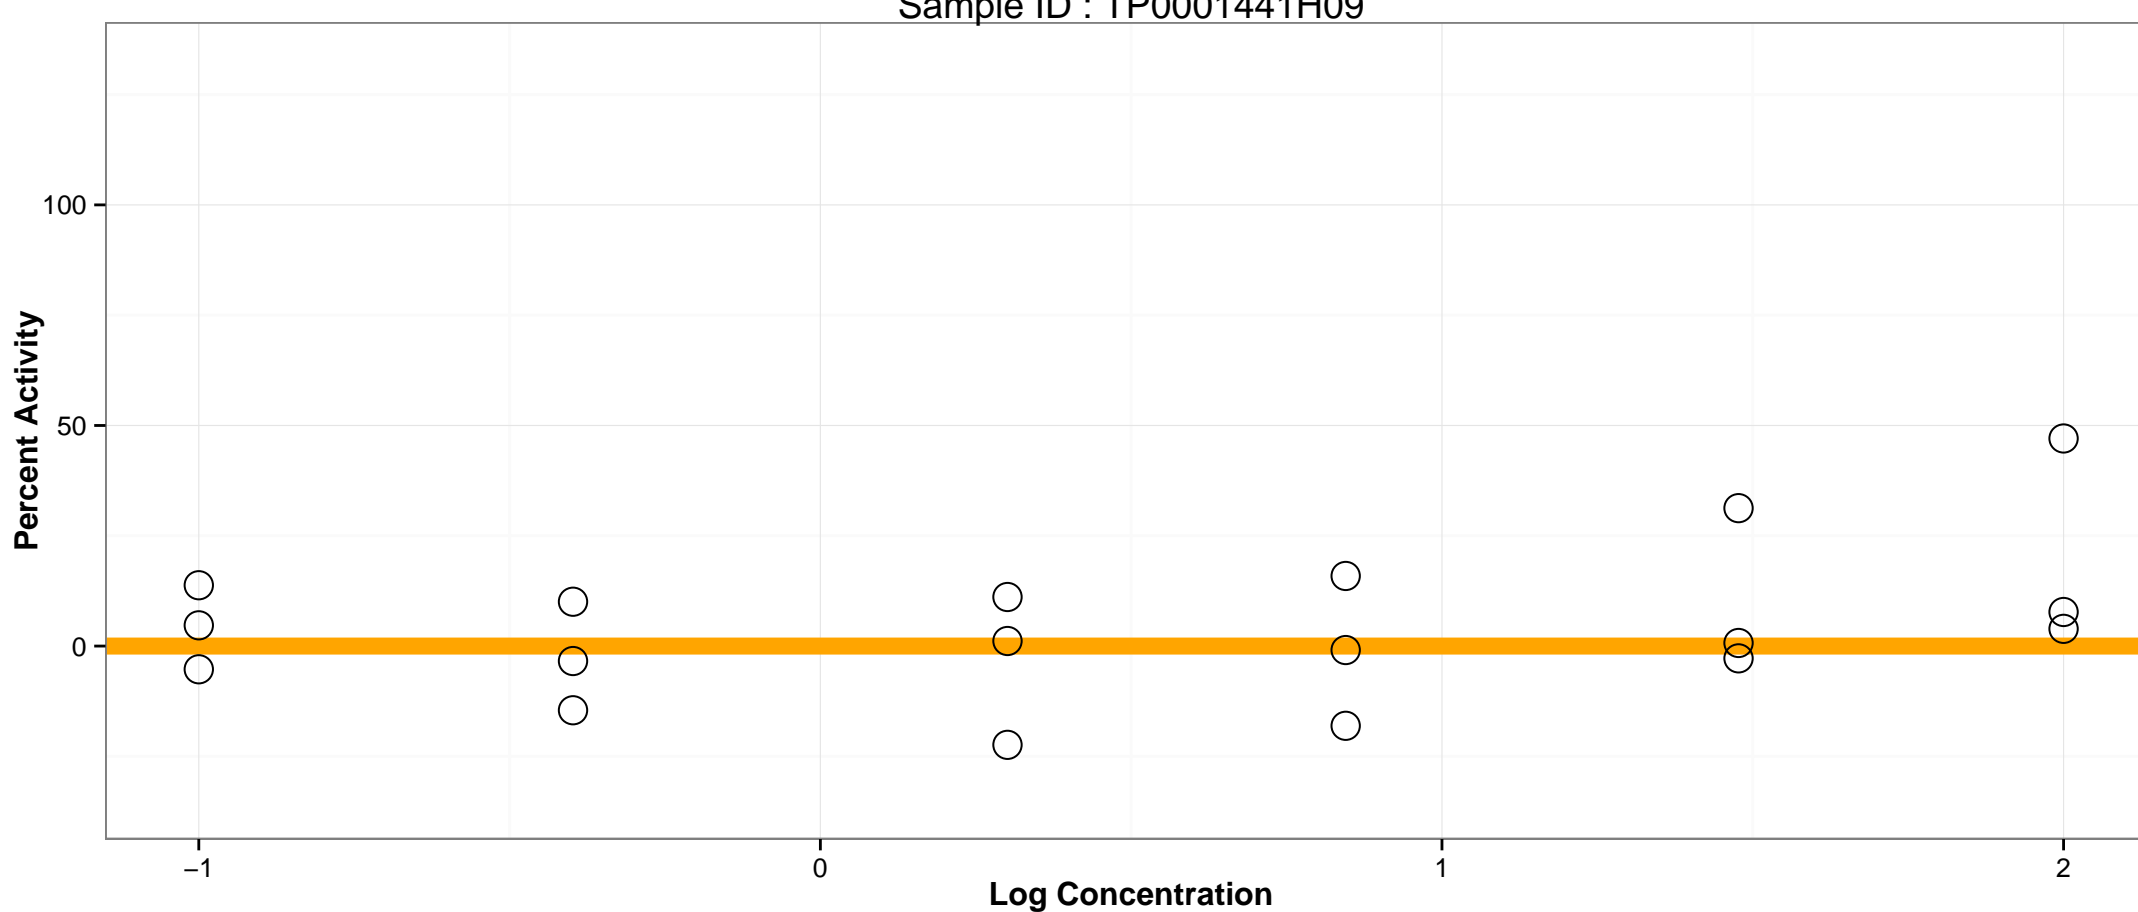

HILL MODEL

HILL MODEL: Not applicable

GAIN-LOSS MODEL

GNLS MODEL: Not applicable

|      | CNST   | HILL | GNLS |
|------|--------|------|------|
| AIC  | 152.82 | NA   | NA   |
| PROB | 1      | NA   | NA   |
| RMSE | 16.75  | NA   | NA   |

MAX\_MEAN : 19.6 MAX\_MED : 7.74 BMAD : 5.54  
COFF : 20 HIT-CALL : 0 FITC : 4 ACTP : 0  
FLAGS :

Assay ID 1848 (NHEERL\_Quantilum\_inhib\_2\_dn)  
Sample ID : TP0001441H09

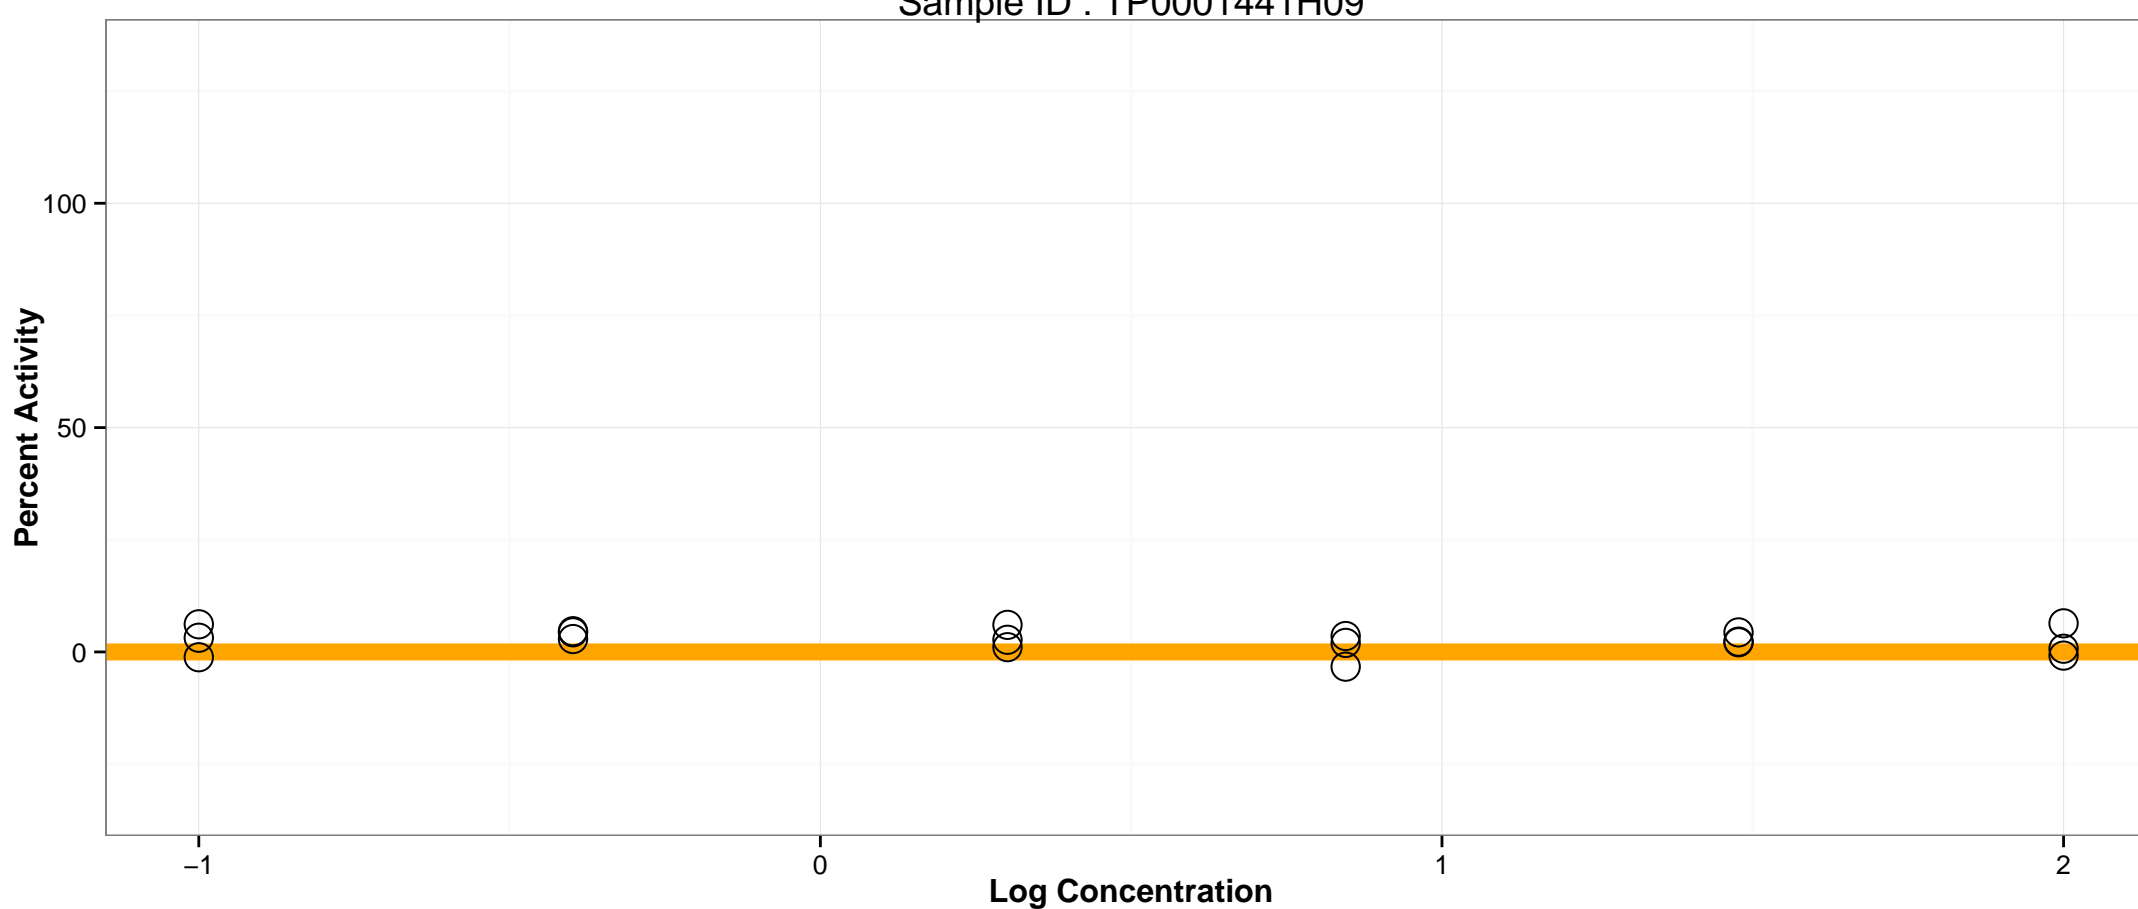

HILL MODEL

HILL MODEL: Not applicable

GAIN-LOSS MODEL

GNLS MODEL: Not applicable

|      | CNST   | HILL | GNLS |
|------|--------|------|------|
| AIC  | 102.47 | NA   | NA   |
| PROB | 1      | NA   | NA   |
| RMSE | 3.67   | NA   | NA   |

MAX\_MEAN : 3.97 MAX\_MED : 4.38 BMAD : 8.58  
COFF : 20 HIT-CALL : 0 FITC : 4 ACTP : 0  
FLAGS :

Chemical : Ricinine  
CAS : 524-40-3

Assay ID 1508 (NHEERL\_TPO\_AUR\_dn)  
Sample ID : TP0001441H10

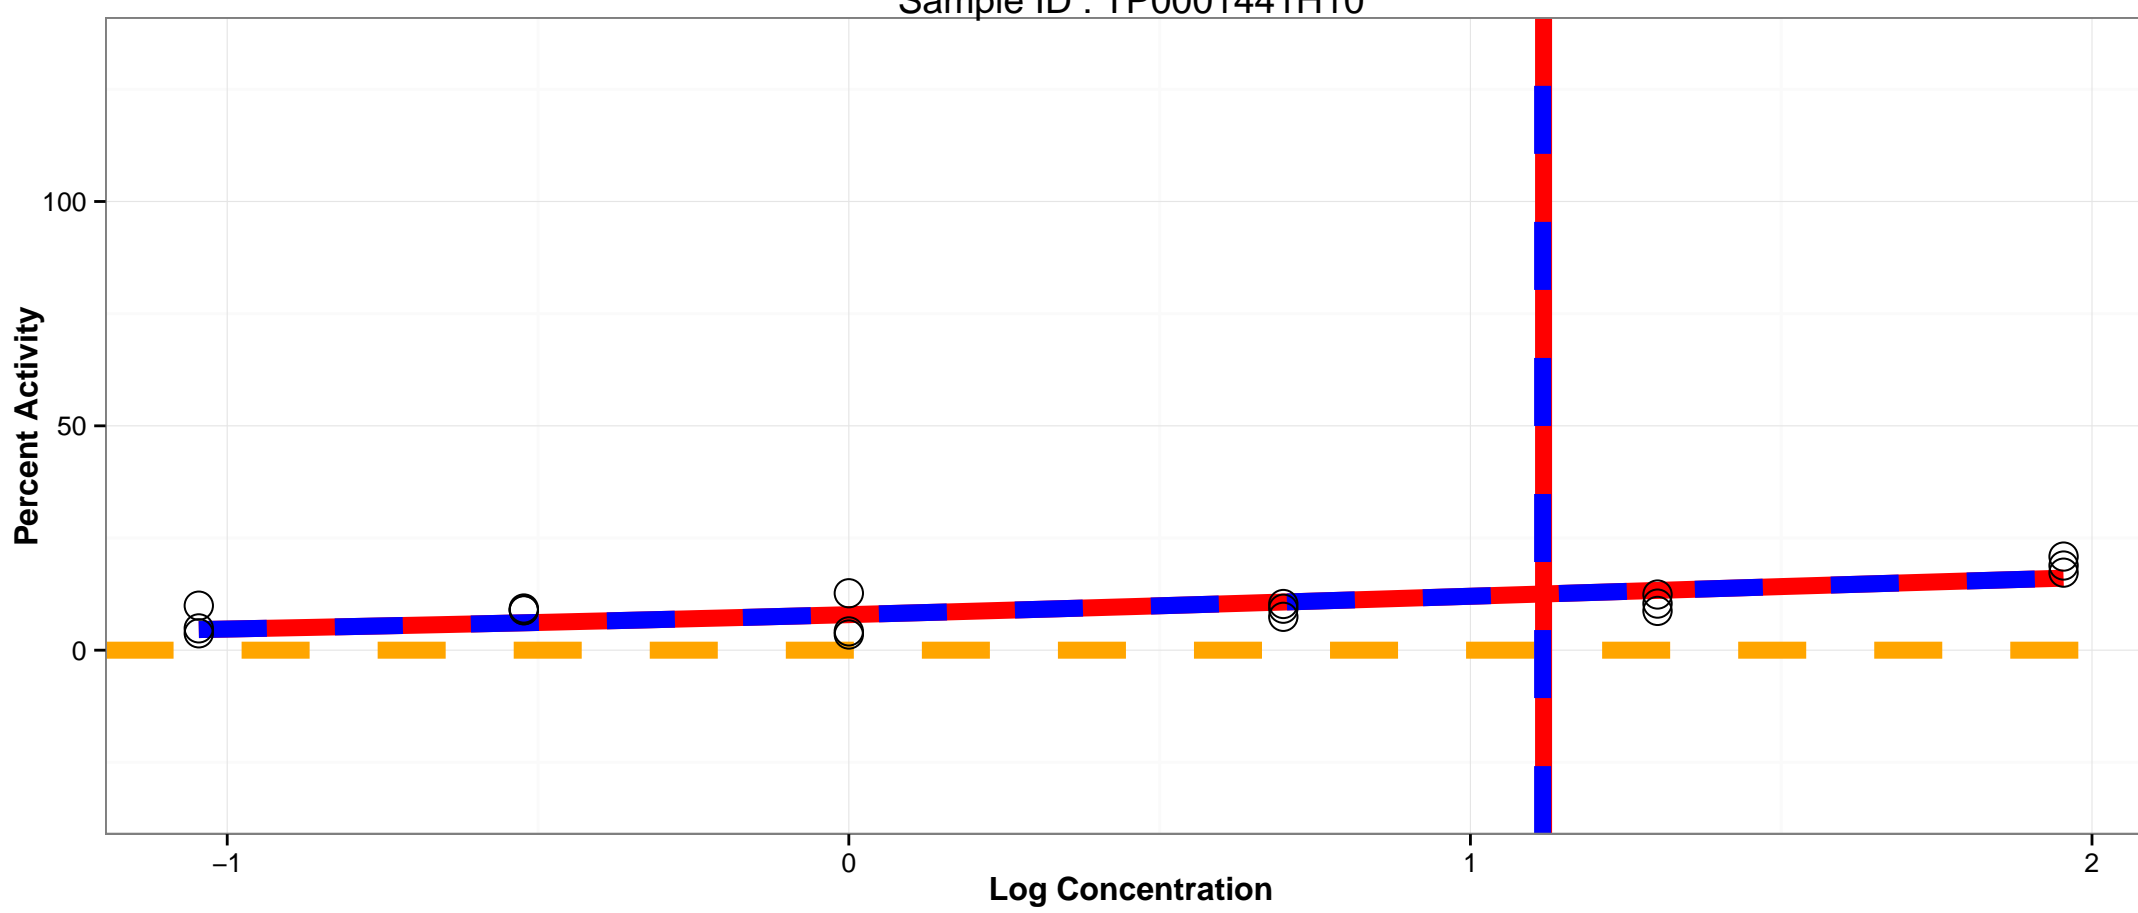

HILL MODEL

|     | tp   | ga   | gw   |
|-----|------|------|------|
| val | 25.1 | 1.12 | 0.3  |
| sd  | 14.2 | 1.69 | 0.12 |

GAIN-LOSS MODEL

|     | tp | ga   | gw  | la   | lw |
|-----|----|------|-----|------|----|
| val | 25 | 1.12 | 0.3 | 3.18 | 18 |
| sd  | NA | NA   | NA  | NA   | NA |

|      | CNST   | HILL   | GNLS   |
|------|--------|--------|--------|
| AIC  | 142.77 | 104.17 | 108.17 |
| PROB | 0      | 0.88   | 0.12   |
| RMSE | 11.18  | 3.23   | 3.23   |

MAX\_MEAN : 19 MAX\_MED : 18.9 BMAD : 5.69  
COFF : 20 HIT-CALL : 0 FITC : 21 ACTP : 1  
FLAGS : 12

Assay ID 1509 (NHEERL\_HEK293T\_CellTiterGLO)  
Sample ID : TP0001441H10

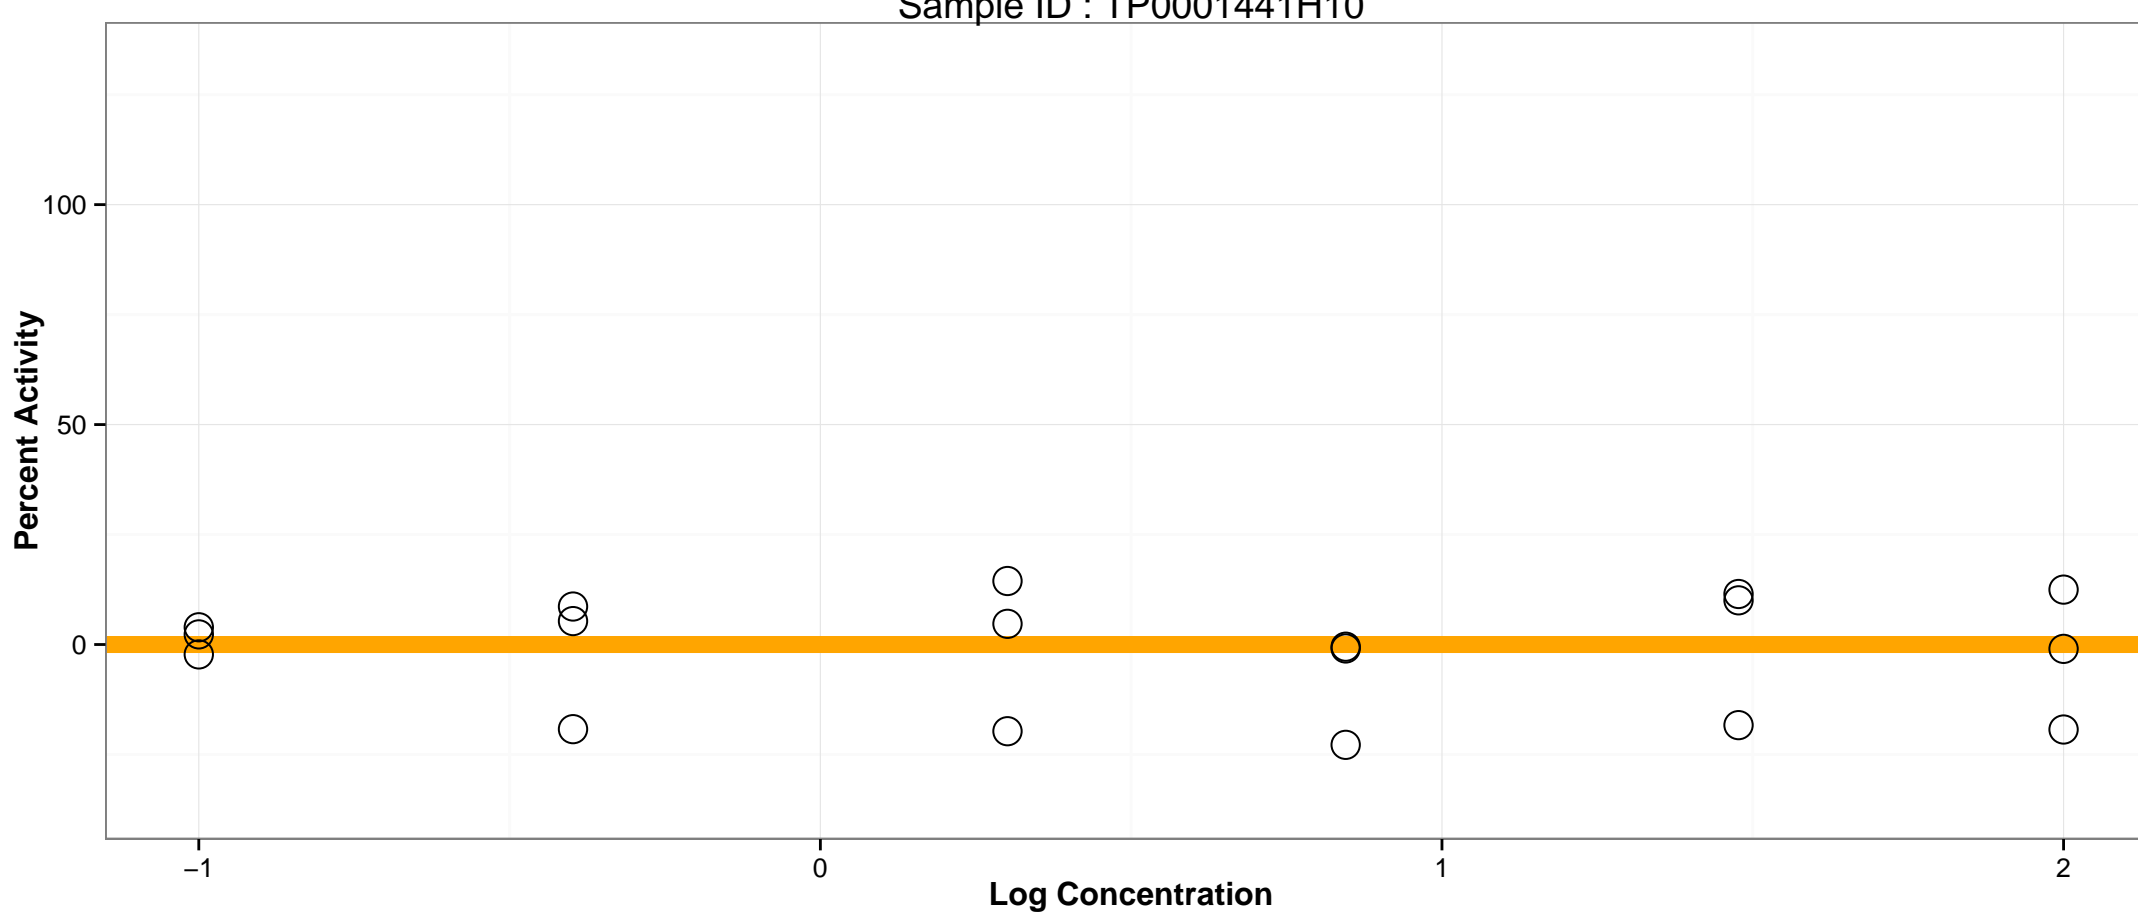

HILL MODEL

HILL MODEL: Not applicable

GAIN-LOSS MODEL

GNLS MODEL: Not applicable

|      | CNST   | HILL | GNLS |
|------|--------|------|------|
| AIC  | 145.39 | NA   | NA   |
| PROB | 1      | NA   | NA   |
| RMSE | 12.33  | NA   | NA   |

MAX\_MEAN : 1.34 MAX\_MED : 10.1 BMAD : 5.54  
COFF : 20 HIT-CALL : 0 FITC : 4 ACTP : 0  
FLAGS :

Assay ID 1848 (NHEERL\_Quantilum\_inhib\_2\_dn)  
Sample ID : TP0001441H10

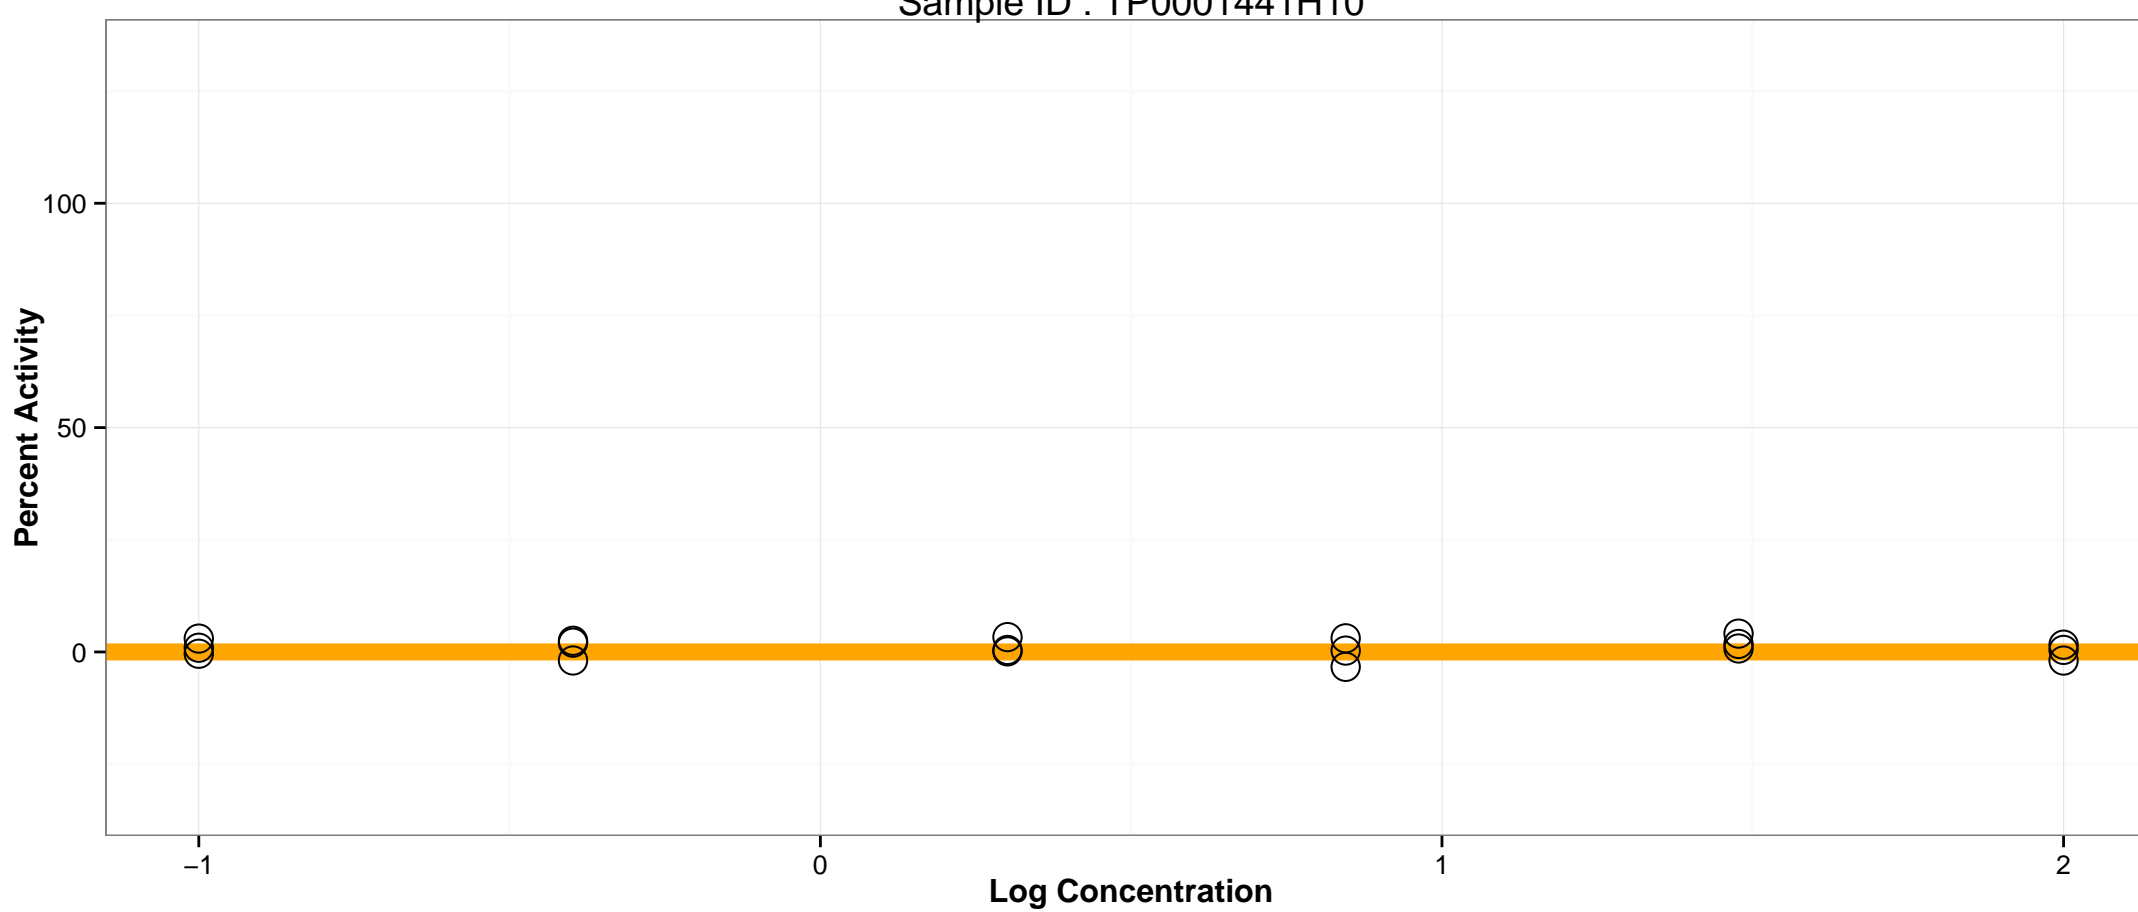

HILL MODEL

HILL MODEL: Not applicable

GAIN-LOSS MODEL

GNLS MODEL: Not applicable

|      | CNST  | HILL | GNLS |
|------|-------|------|------|
| AIC  | 82.77 | NA   | NA   |
| PROB | 1     | NA   | NA   |
| RMSE | 2.15  | NA   | NA   |

MAX\_MEAN : 2.23 MAX\_MED : 2.07 BMAD : 8.58  
COFF : 20 HIT-CALL : 0 FITC : 4 ACTP : 0  
FLAGS :

Assay ID 1508 (NHEERL\_TPO\_AUR\_dn)  
Sample ID : TX006173

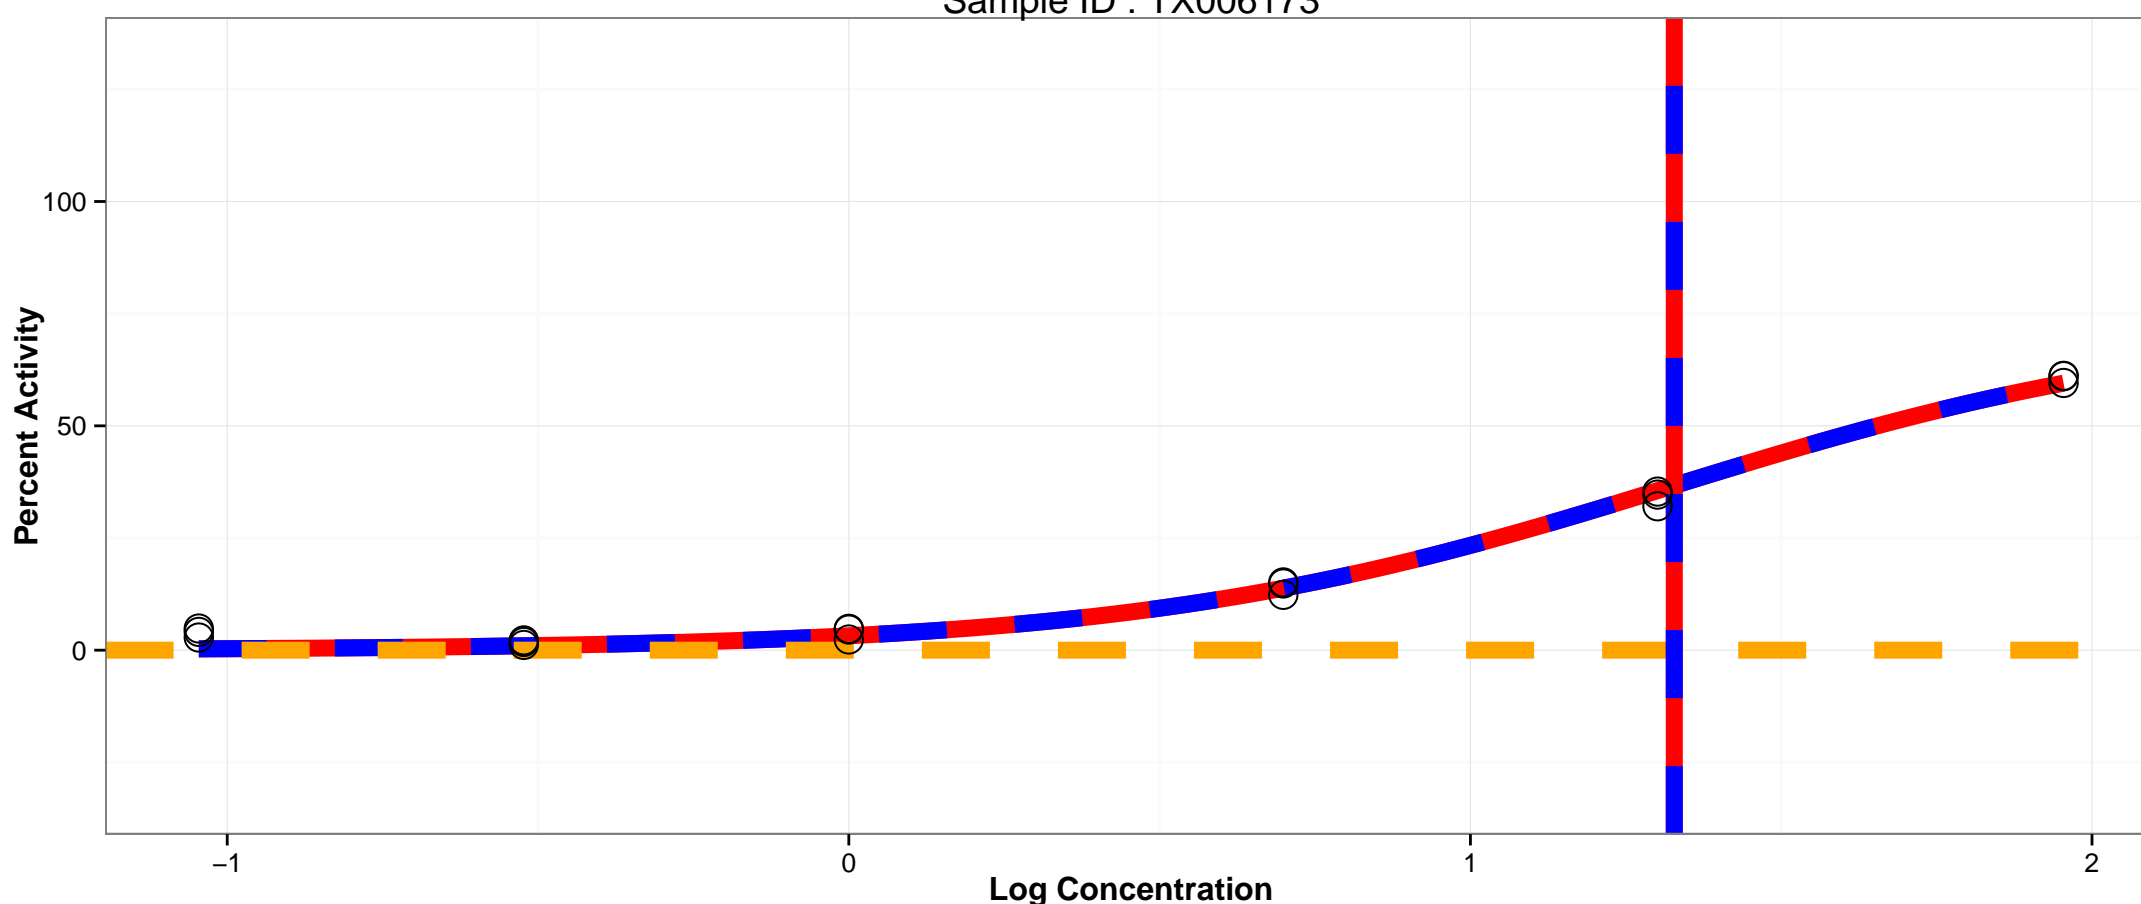

HILL MODEL

|     | tp   | ga     | gw     |
|-----|------|--------|--------|
| val | 73.4 | 1.33   | 1.01   |
| sd  | 4.64 | 0.0705 | 0.0888 |

GAIN-LOSS MODEL

|     | tp   | ga     | gw     | la   | lw   |
|-----|------|--------|--------|------|------|
| val | 73.4 | 1.33   | 1.01   | 3.41 | 6.13 |
| sd  | 4.64 | 0.0705 | 0.0889 | 751  | 3170 |

|      | CNST   | HILL  | GNLS  |
|------|--------|-------|-------|
| AIC  | 173.29 | 84.65 | 88.65 |
| PROB | 0      | 0.88  | 0.12  |
| RMSE | 29.07  | 2     | 2     |

MAX\_MEAN : 60.6 MAX\_MED : 61.1 BMAD : 5.69  
COFF : 20 HIT-CALL : 1 FITC : 42 ACTP : 1  
FLAGS :

Assay ID 1509 (NHEERL\_HEK293T\_CellTiterGLO)  
Sample ID : TX006173

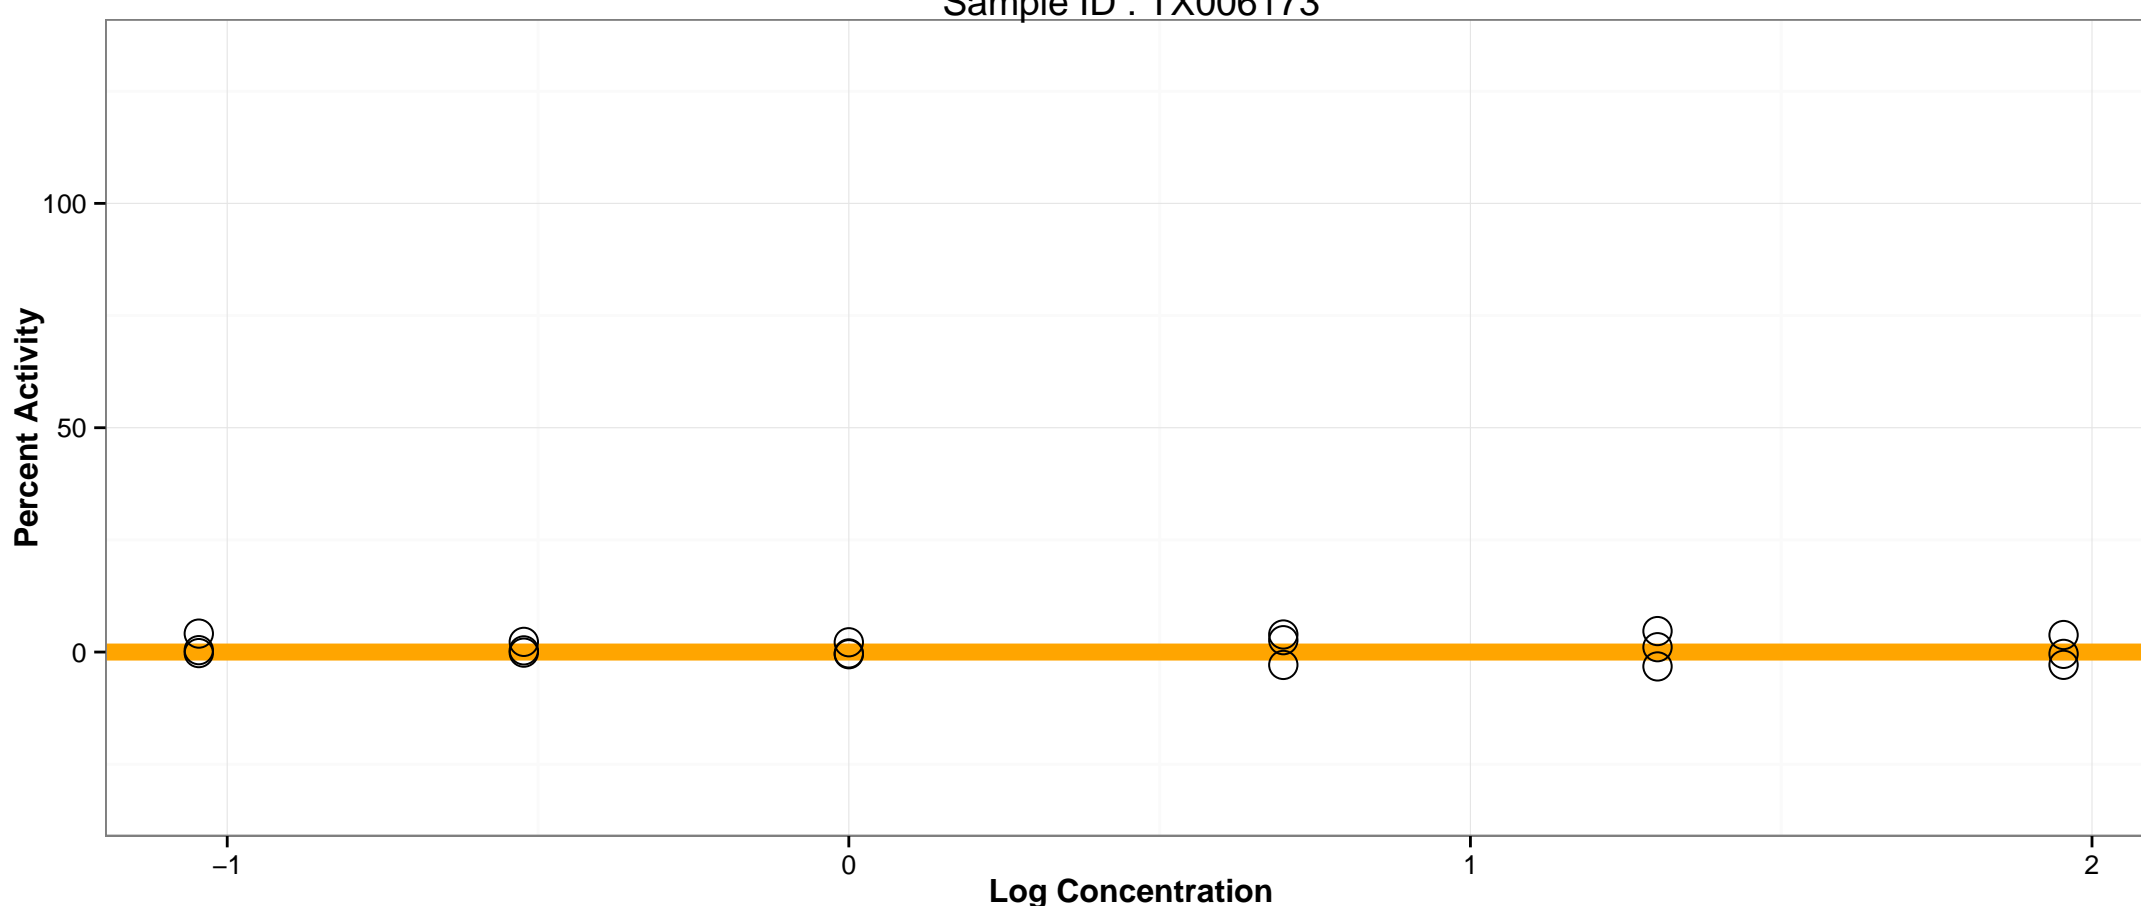

HILL MODEL

HILL MODEL: Not applicable

GAIN-LOSS MODEL

GNLS MODEL: Not applicable

|      | CNST  | HILL | GNLS |
|------|-------|------|------|
| AIC  | 88.37 | NA   | NA   |
| PROB | 1     | NA   | NA   |
| RMSE | 2.52  | NA   | NA   |

MAX\_MEAN : 1.45 MAX\_MED : 2.66 BMAD : 5.54  
COFF : 20 HIT-CALL : 0 FITC : 4 ACTP : 0  
FLAGS :

Assay ID 1848 (NHEERL\_Quantilum\_inhib\_2\_dn)  
Sample ID : TX006173

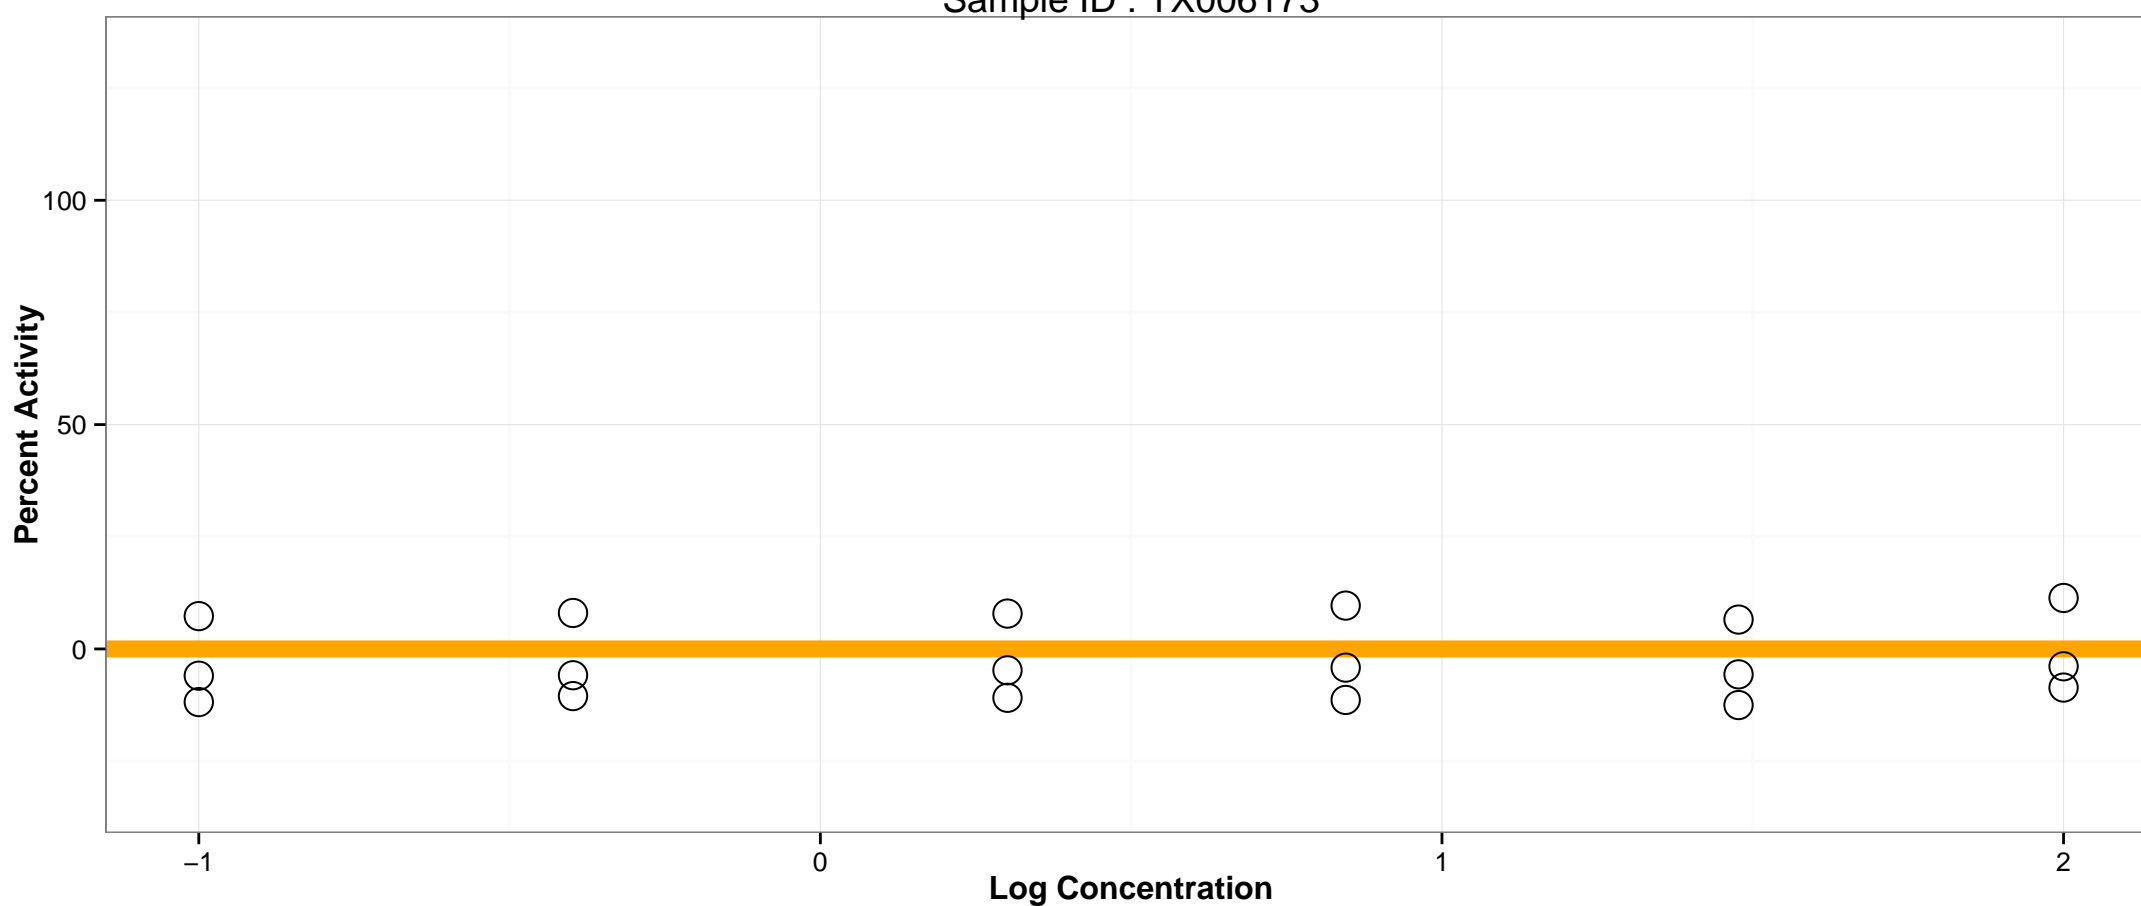

HILL MODEL

HILL MODEL: Not applicable

GAIN-LOSS MODEL

GNLS MODEL: Not applicable

|      | CNST   | HILL | GNLS |
|------|--------|------|------|
| AIC  | 134.14 | NA   | NA   |
| PROB | 1      | NA   | NA   |
| RMSE | 8.6    | NA   | NA   |

MAX\_MEAN : -0.358 MAX\_MED : -3.85 BMAD : 8.58  
COFF : 20 HIT-CALL : 0 FITC : 4 ACTP : 0  
FLAGS :

Assay ID 1824 (NHEERL\_TPO\_GUA\_dn)  
Sample ID : TP0001442A01

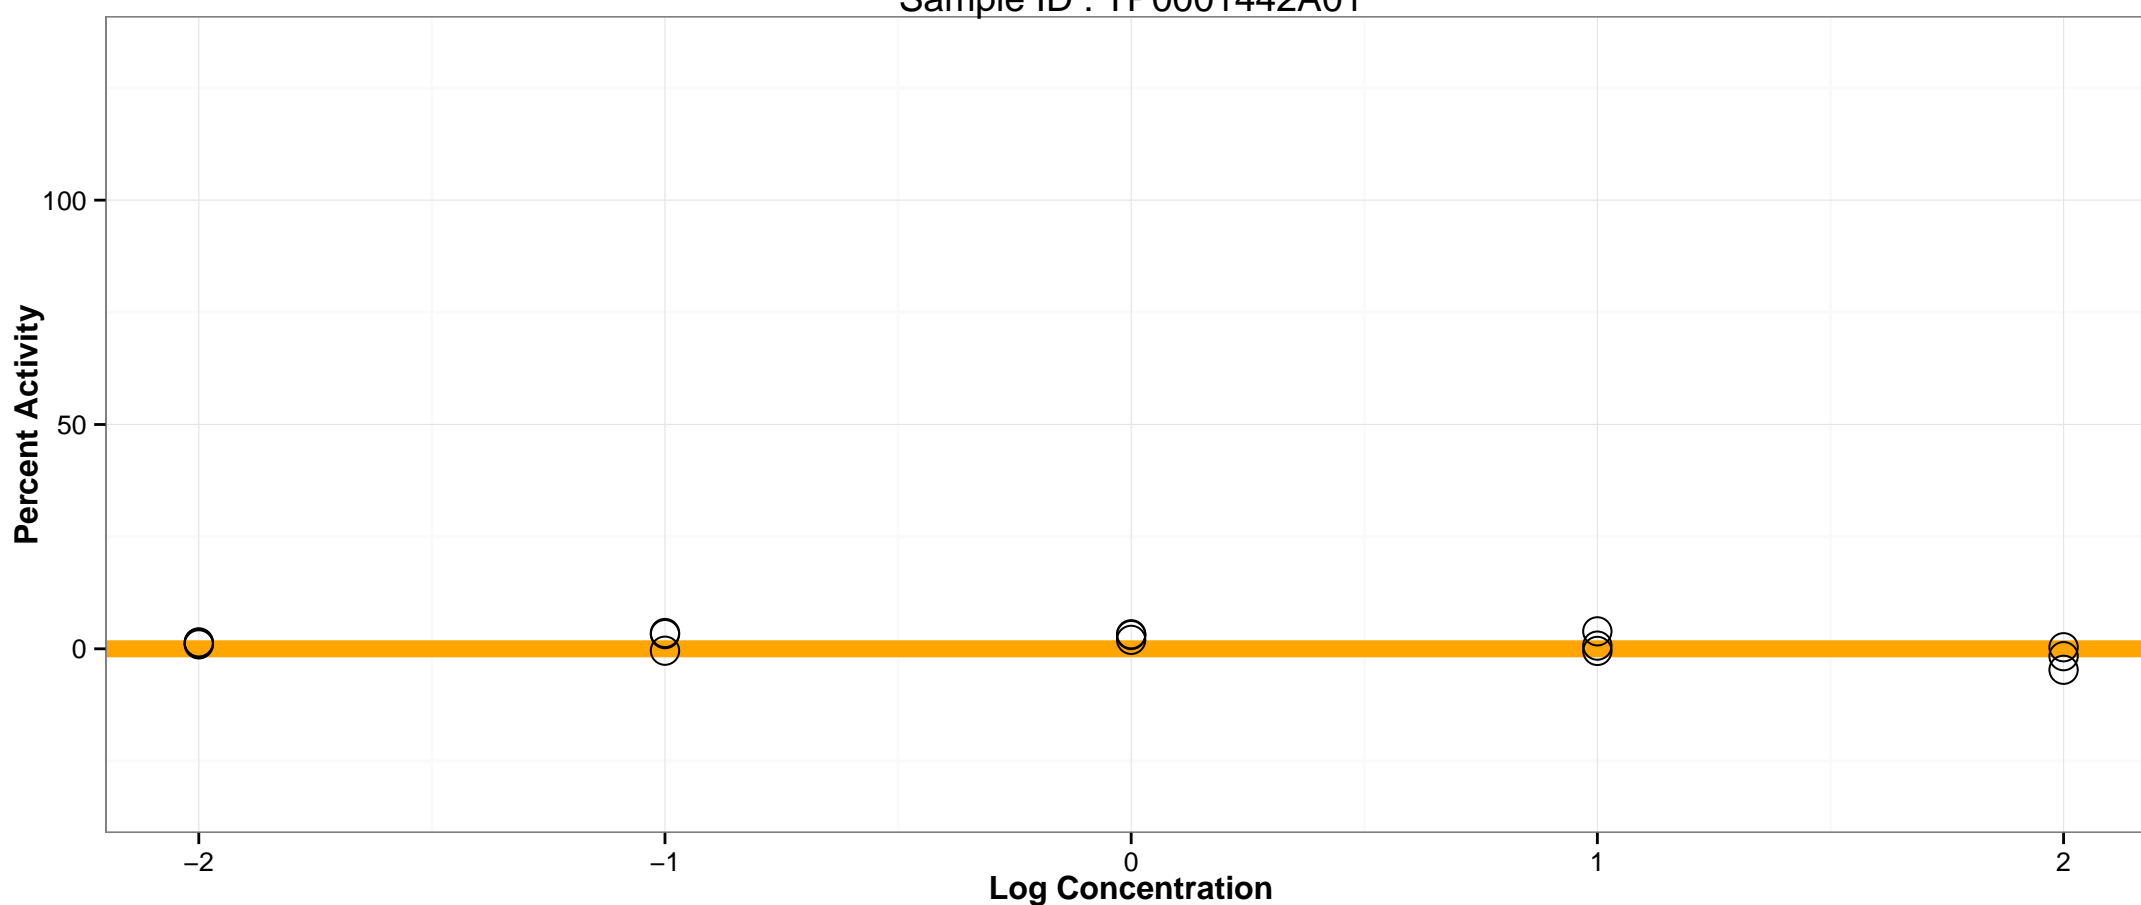

HILL MODEL

HILL MODEL: Not applicable

GAIN-LOSS MODEL

GNLS MODEL: Not applicable

|      | CNST  | HILL | GNLS |
|------|-------|------|------|
| AIC  | 73.68 | NA   | NA   |
| PROB | 1     | NA   | NA   |
| RMSE | 2.49  | NA   | NA   |

MAX\_MEAN : 2.78 MAX\_MED : 3.29 BMAD : 3.71  
COFF : 20 HIT-CALL : 0 FITC : 4 ACTP : 0  
FLAGS :

Assay ID 1508 (NHEERL\_TPO\_AUR\_dn)  
Sample ID : TX006182

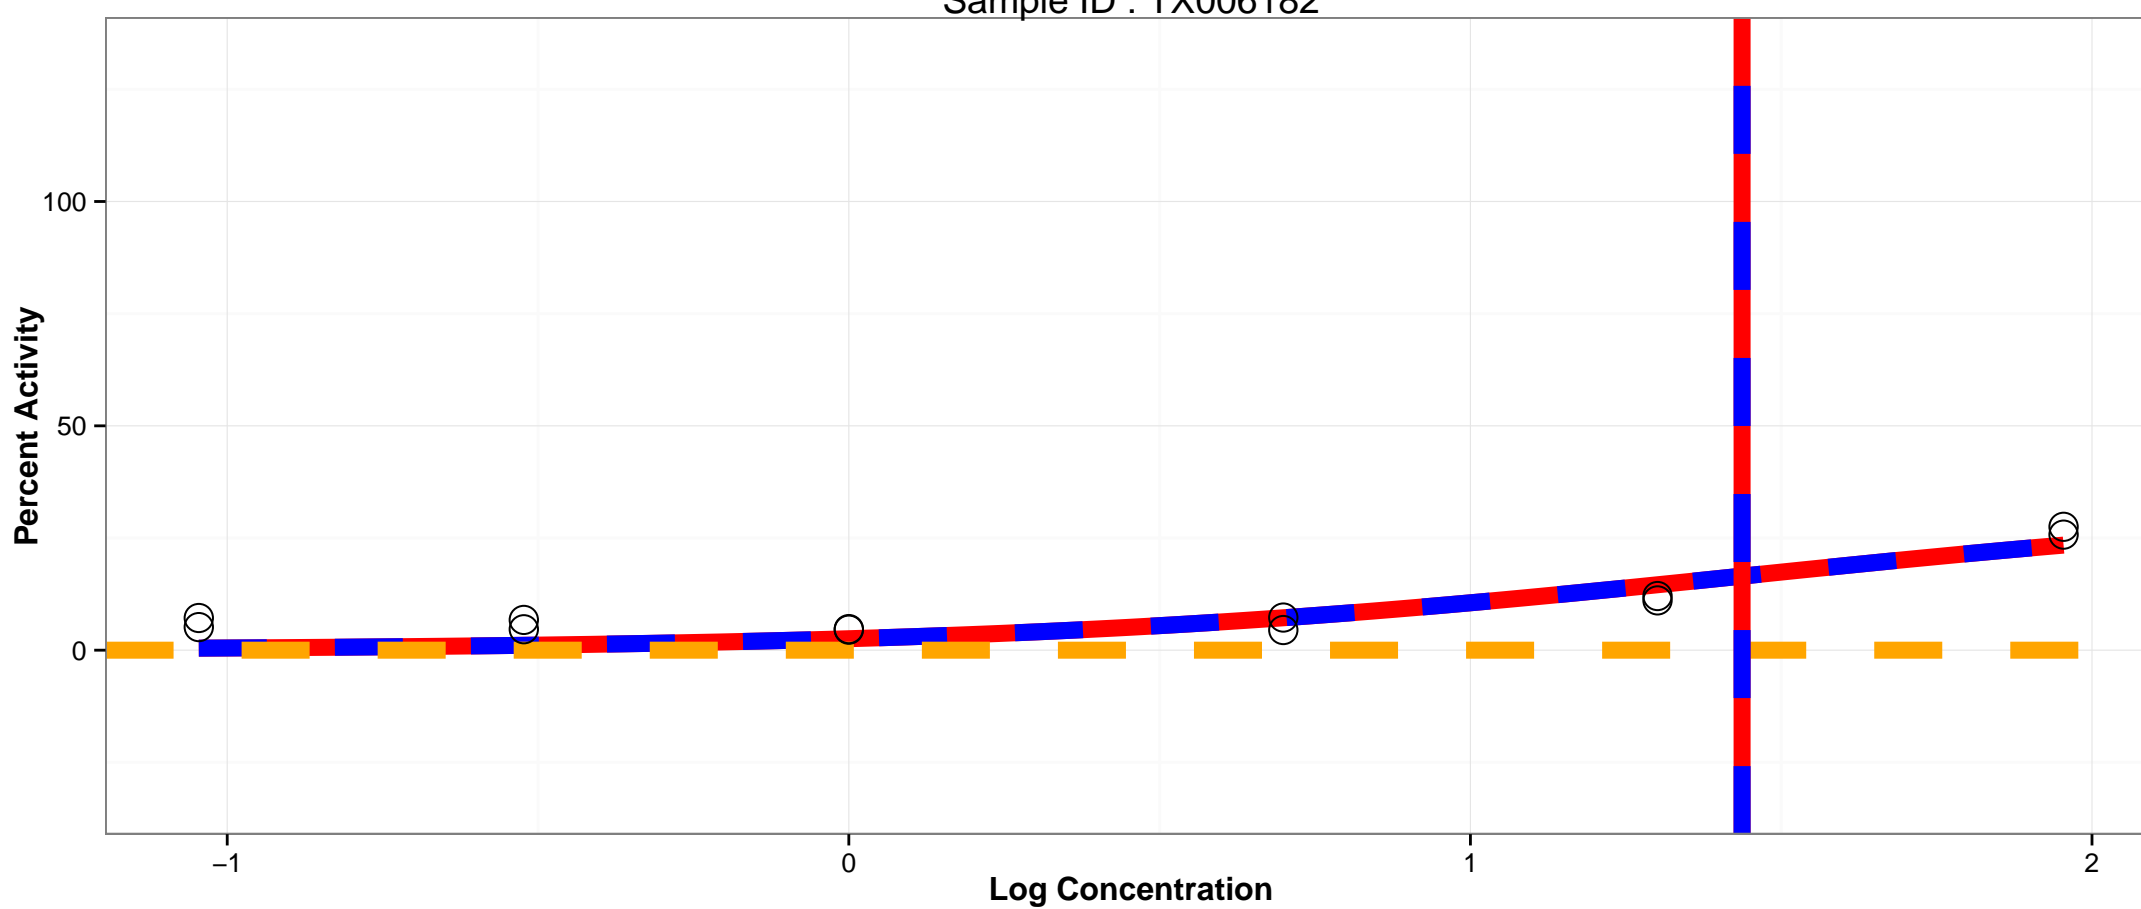

HILL MODEL

|     | tp   | ga    | gw    |
|-----|------|-------|-------|
| val | 33   | 1.44  | 0.749 |
| sd  | 9.15 | 0.343 | 0.377 |

GAIN-LOSS MODEL

|     | tp   | ga    | gw    | la   | lw   |
|-----|------|-------|-------|------|------|
| val | 33   | 1.44  | 0.749 | 3.95 | 4.04 |
| sd  | 9.15 | 0.343 | 0.377 | 1020 | 2060 |

|      | CNST  | HILL  | GNLS  |
|------|-------|-------|-------|
| AIC  | 97.03 | 75.69 | 79.69 |
| PROB | 0     | 0.88  | 0.12  |
| RMSE | 12.75 | 3.76  | 3.76  |

MAX\_MEAN : 26.6 MAX\_MED : 26.6 BMAD : 5.69  
COFF : 20 HIT-CALL : 1 FITC : 42 ACTP : 1  
FLAGS : 6

Assay ID 1509 (NHEERL\_HEK293T\_CellTiterGLO)  
Sample ID : TX006182

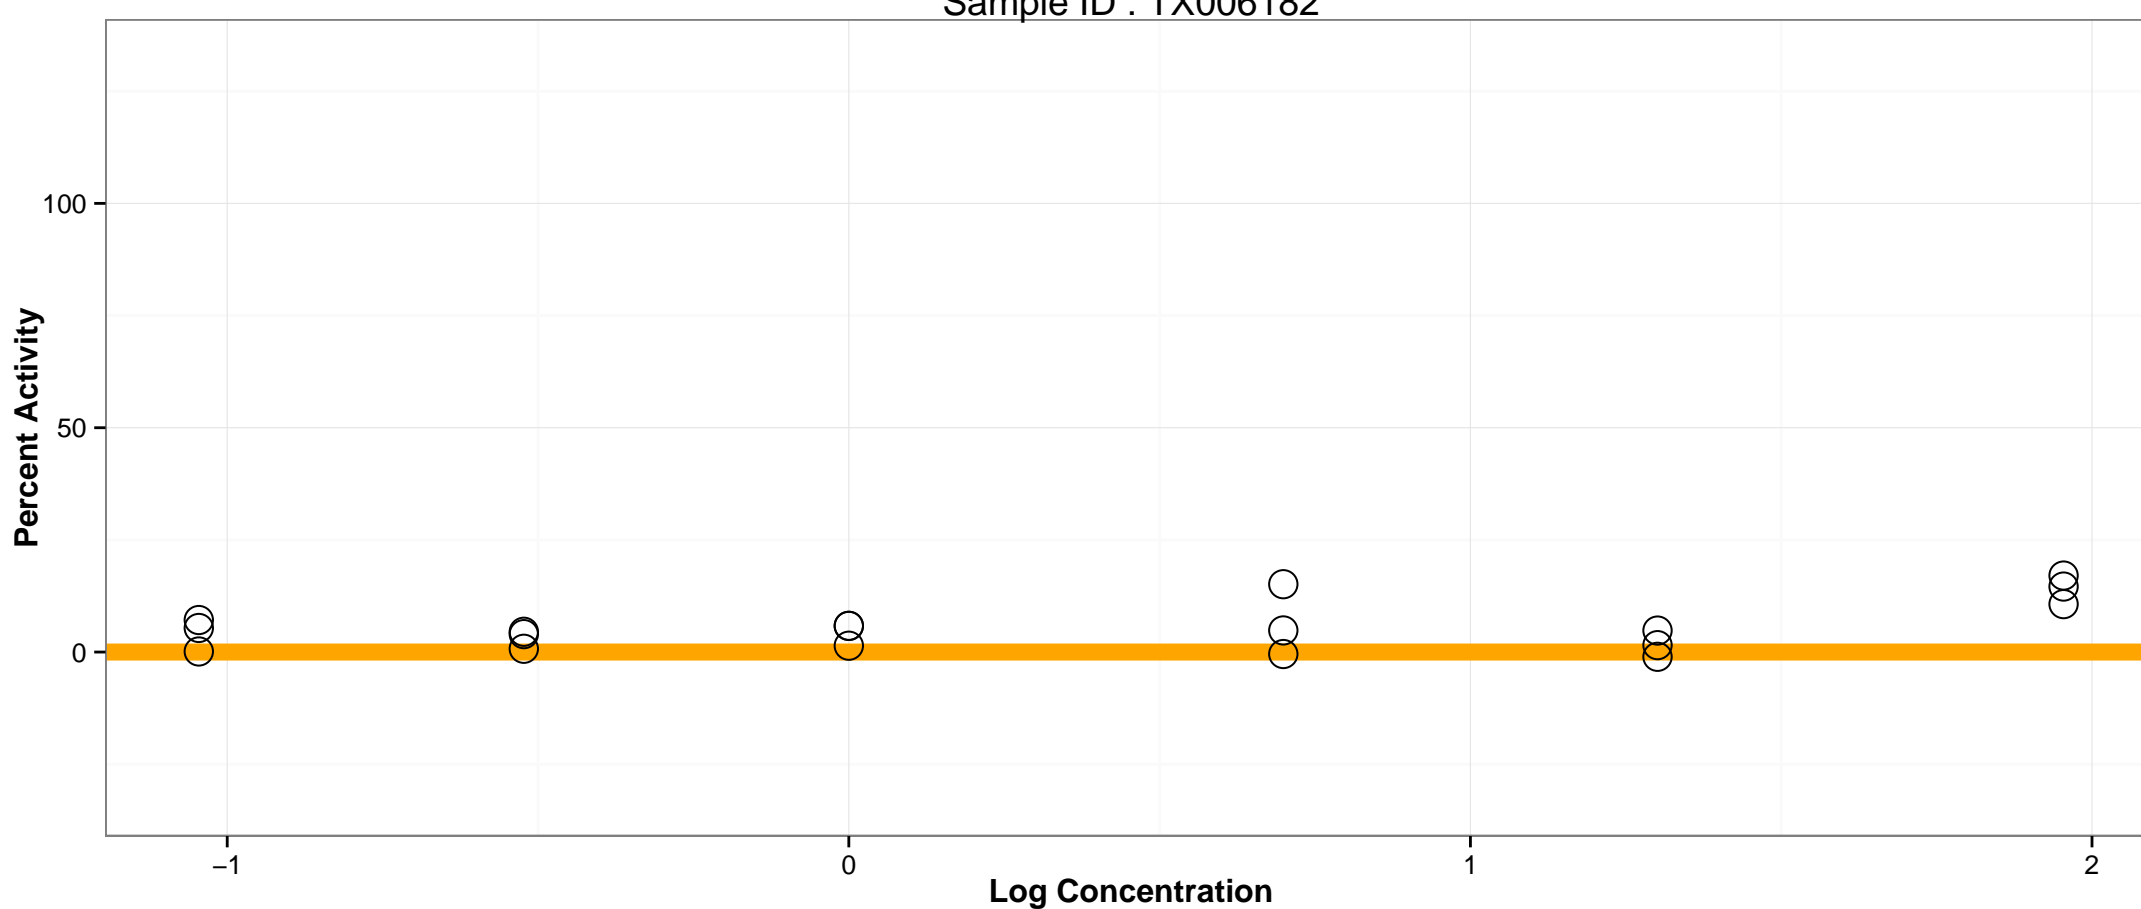

HILL MODEL

HILL MODEL: Not applicable

GAIN-LOSS MODEL

GNLS MODEL: Not applicable

|      | CNST   | HILL | GNLS |
|------|--------|------|------|
| AIC  | 127.04 | NA   | NA   |
| PROB | 1      | NA   | NA   |
| RMSE | 7.77   | NA   | NA   |

MAX\_MEAN : 14.1 MAX\_MED : 14.6 BMAD : 5.54  
COFF : 20 HIT-CALL : 0 FITC : 4 ACTP : 0  
FLAGS :

Assay ID 1848 (NHEERL\_Quantilum\_inhib\_2\_dn)  
Sample ID : TX006182

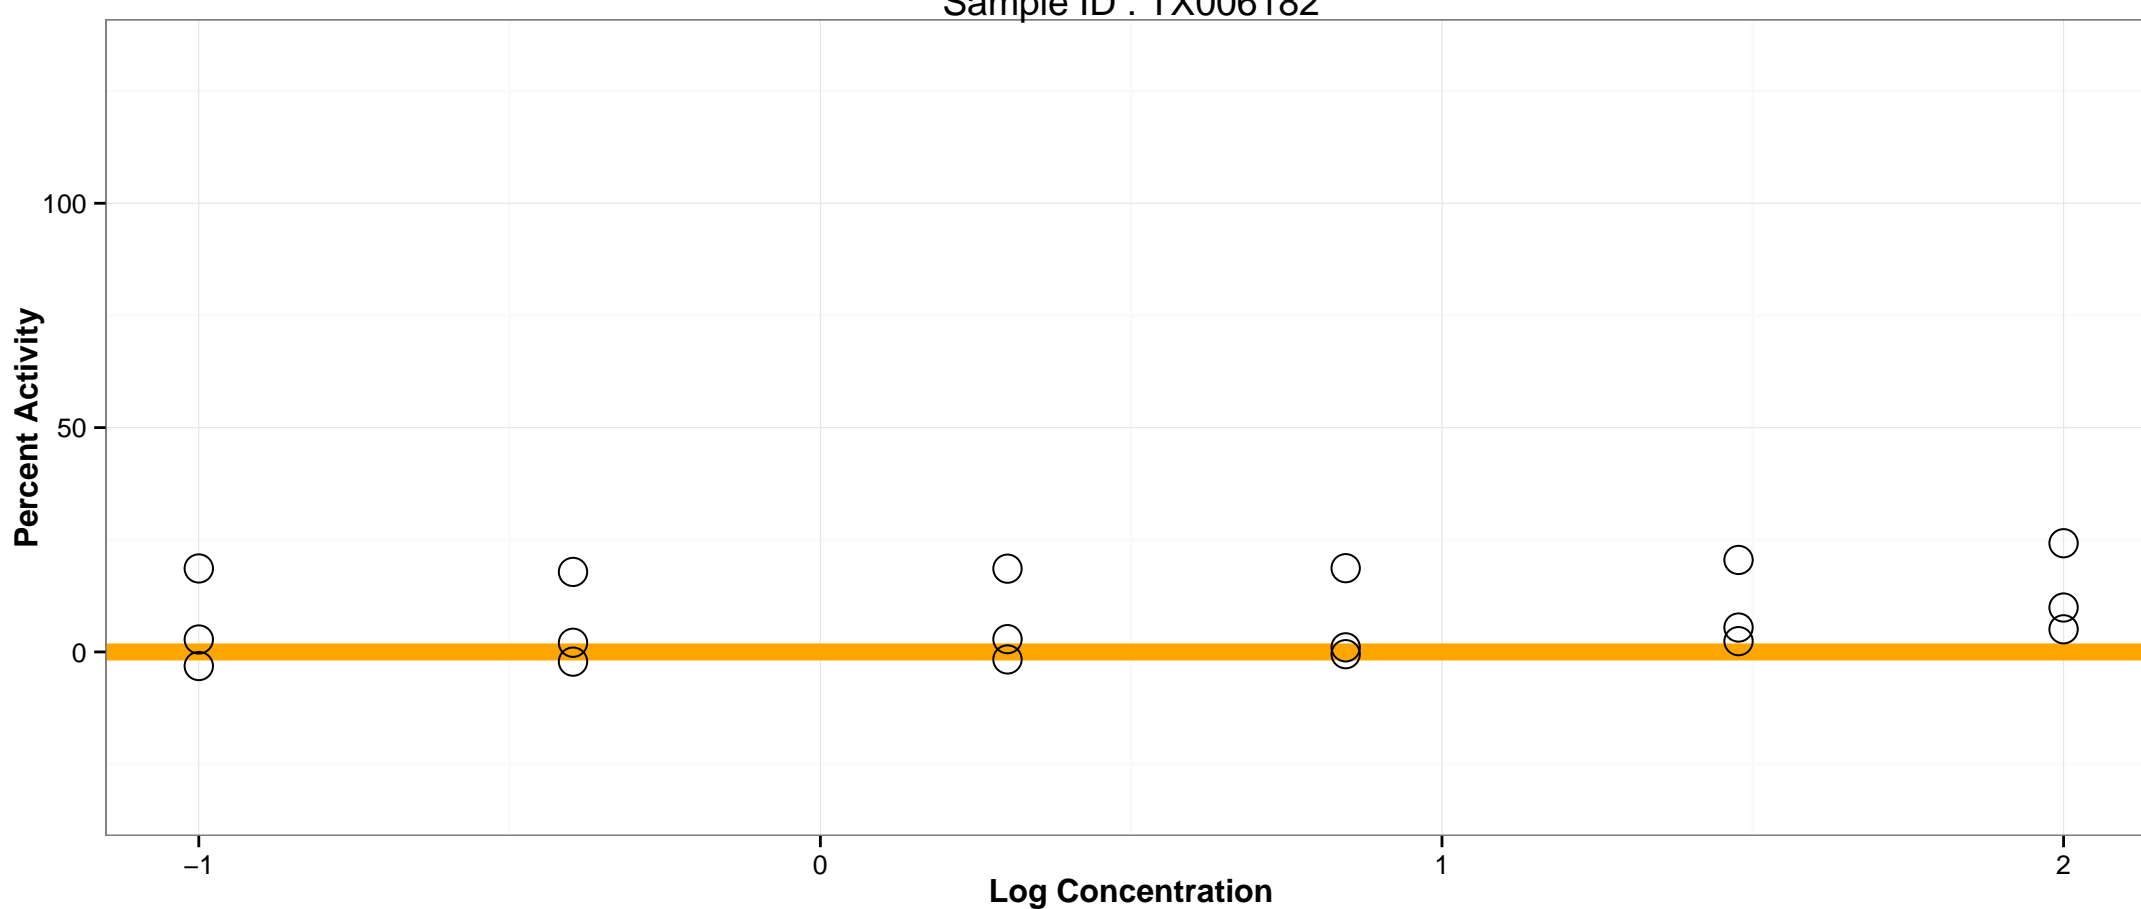

HILL MODEL

HILL MODEL: Not applicable

GAIN-LOSS MODEL

GNLS MODEL: Not applicable

|      | CNST   | HILL | GNLS |
|------|--------|------|------|
| AIC  | 142.87 | NA   | NA   |
| PROB | 1      | NA   | NA   |
| RMSE | 11.94  | NA   | NA   |

MAX\_MEAN : 13.1 MAX\_MED : 9.91 BMAD : 8.58  
COFF : 20 HIT-CALL : 0 FITC : 4 ACTP : 0  
FLAGS :

Assay ID 1824 (NHEERL\_TPO\_GUA\_dn)  
Sample ID : TP0001442A02

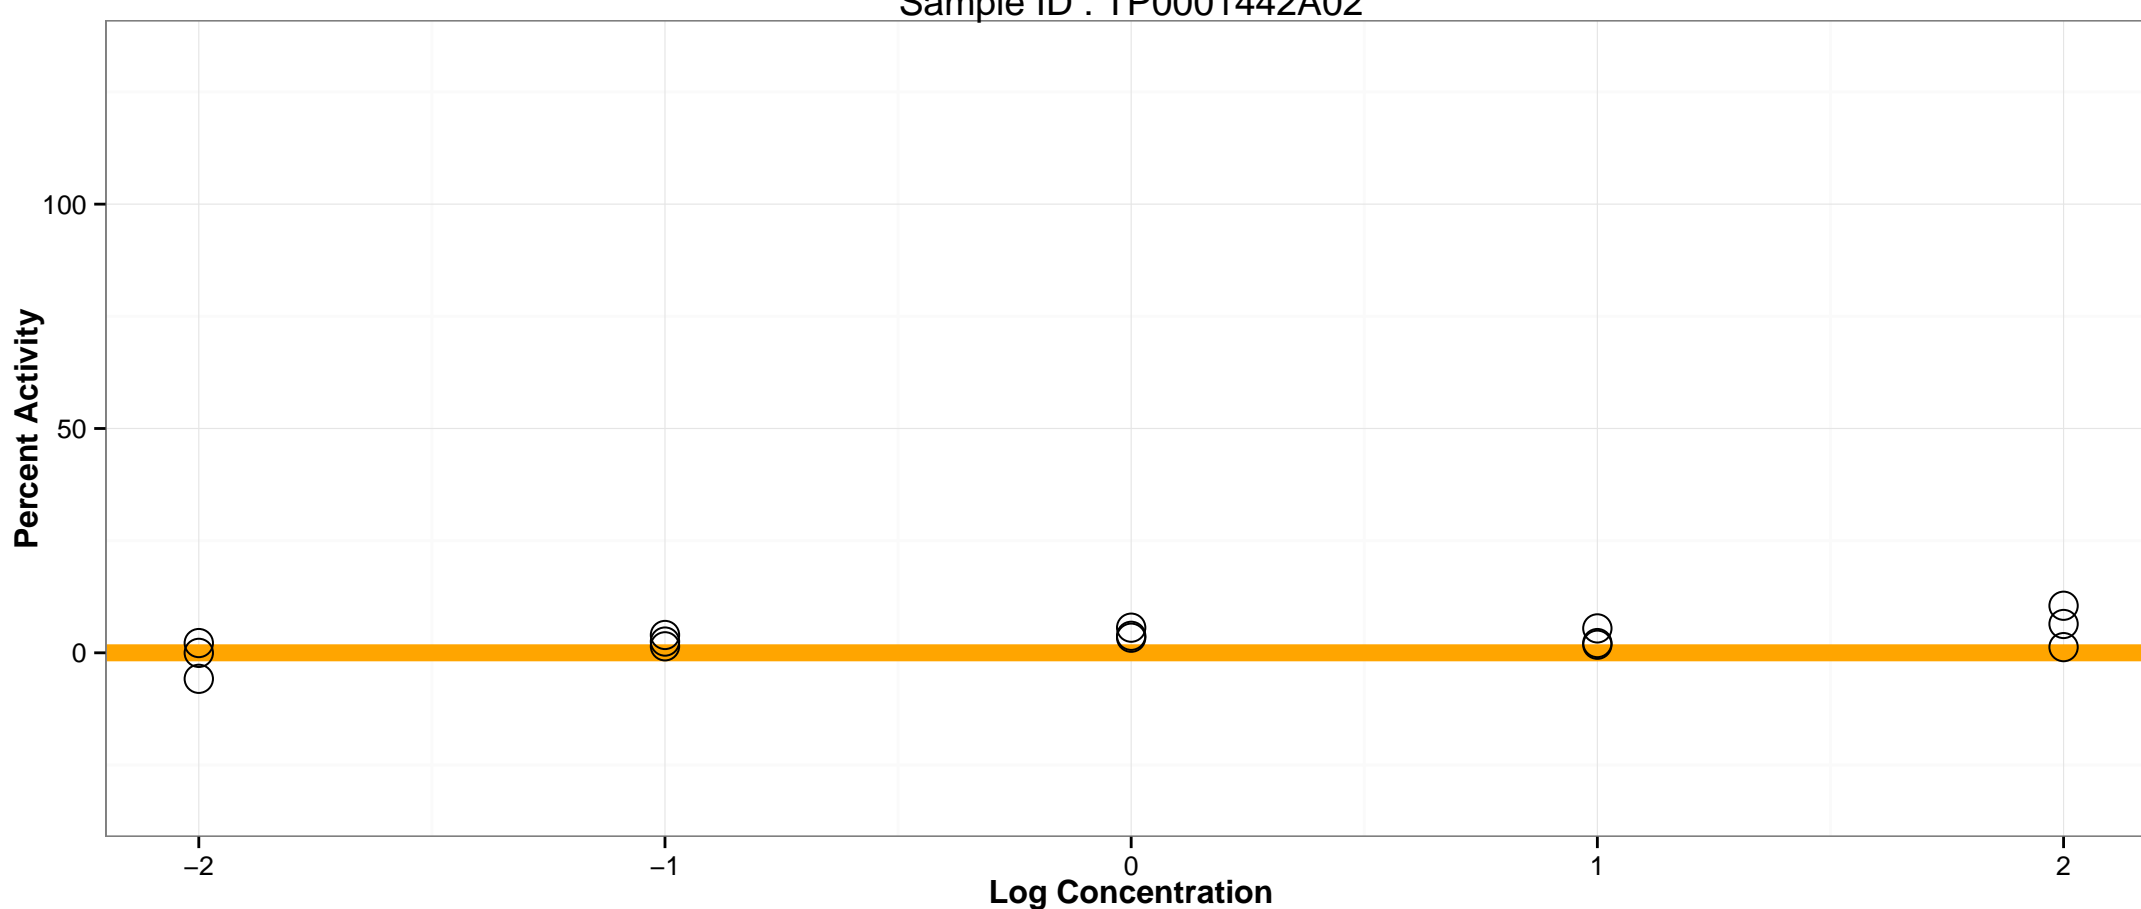

HILL MODEL

HILL MODEL: Not applicable

GAIN-LOSS MODEL

GNLS MODEL: Not applicable

|      | CNST  | HILL | GNLS |
|------|-------|------|------|
| AIC  | 91.21 | NA   | NA   |
| PROB | 1     | NA   | NA   |
| RMSE | 4.56  | NA   | NA   |

MAX\_MEAN : 6.07 MAX\_MED : 6.44 BMAD : 3.71  
COFF : 20 HIT-CALL : 0 FITC : 4 ACTP : 0  
FLAGS :

Chemical : Malaoxon  
CAS : 1634-78-2

Assay ID 1508 (NHEERL\_TPO\_AUR\_dn)  
Sample ID : TX000799

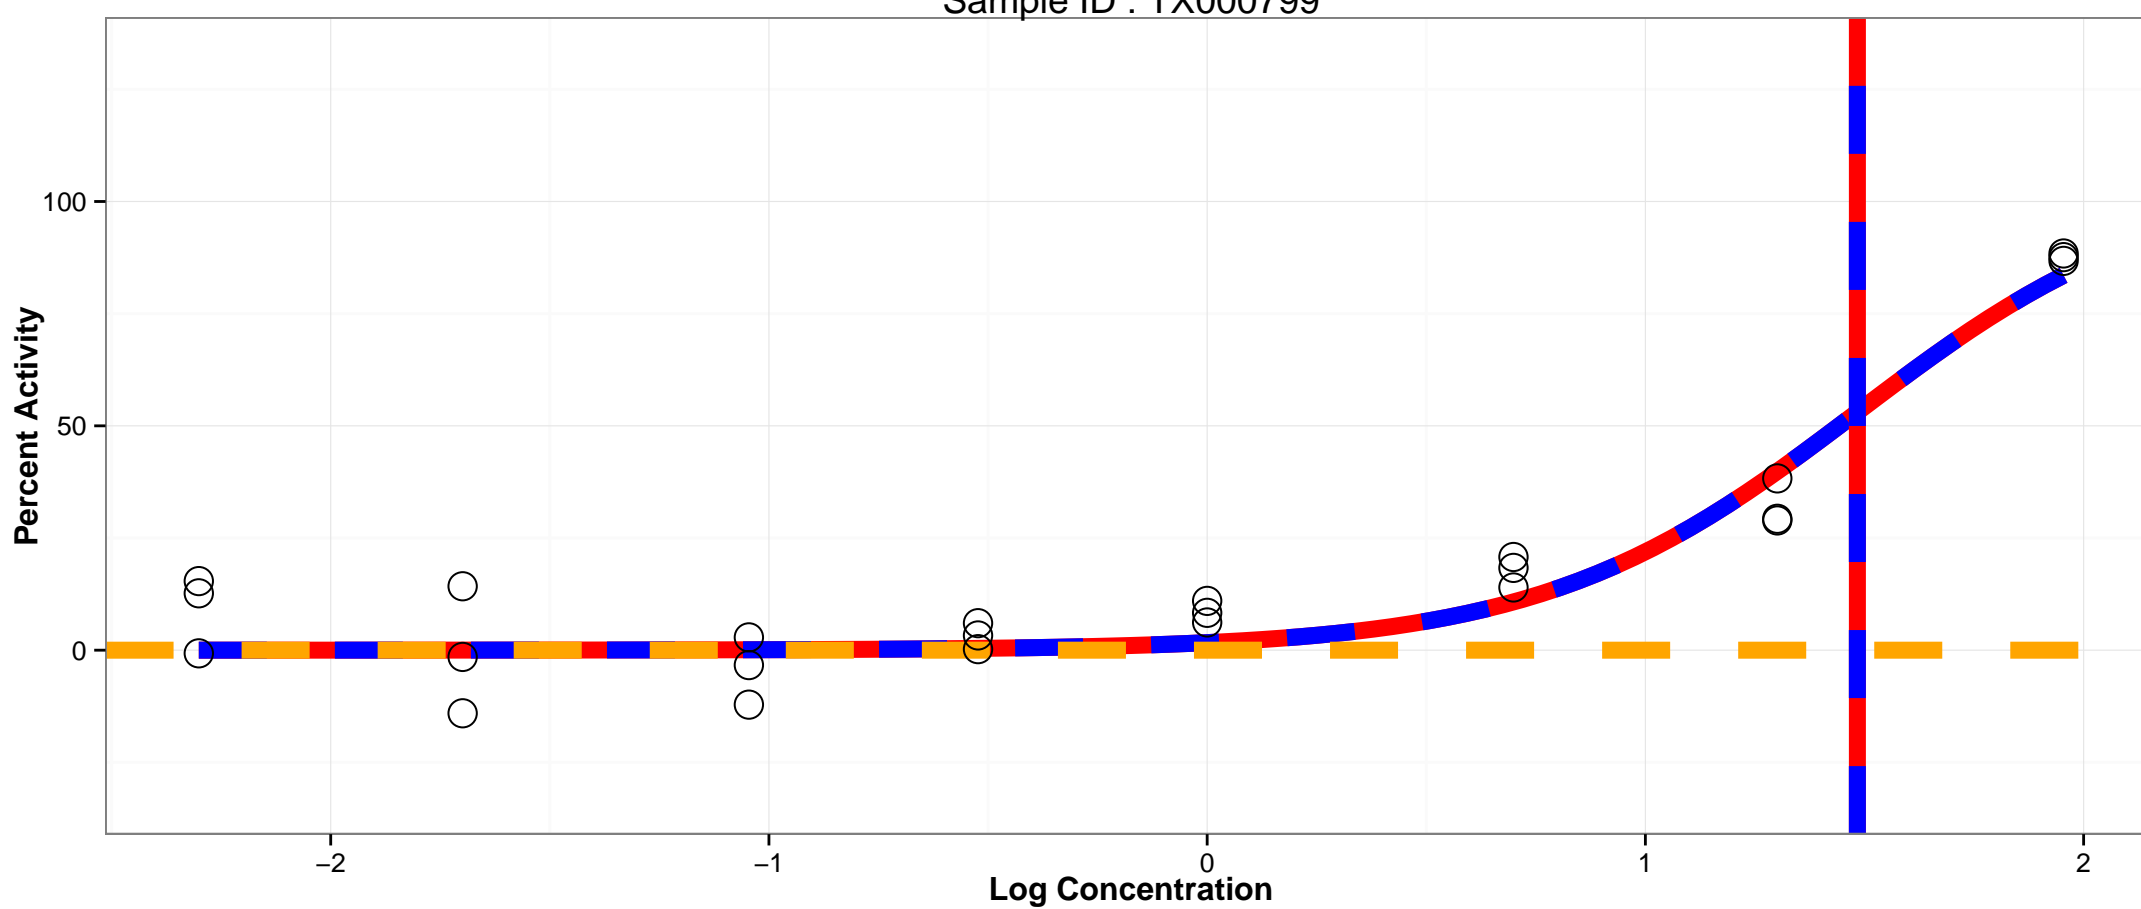

HILL MODEL

|     | tp   | ga    | gw    |
|-----|------|-------|-------|
| val | 106  | 1.48  | 1.21  |
| sd  | 15.2 | 0.128 | 0.338 |

GAIN-LOSS MODEL

|     | tp   | ga    | gw    | la     | lw     |
|-----|------|-------|-------|--------|--------|
| val | 106  | 1.48  | 1.21  | 3.92   | 6.54   |
| sd  | 15.2 | 0.128 | 0.337 | 120000 | 404000 |

|      | CNST   | HILL   | GNLS   |
|------|--------|--------|--------|
| AIC  | 233.16 | 179.72 | 183.72 |
| PROB | 0      | 0.88   | 0.12   |
| RMSE | 34.4   | 8.2    | 8.2    |

MAX\_MEAN : 87.6 MAX\_MED : 87.6 BMAD : 5.69  
COFF : 20 HIT-CALL : 1 FITC : 42 ACTP : 1  
FLAGS :

Assay ID 1509 (NHEERL\_HEK293T\_CellTiterGLO)  
Sample ID : TX000799

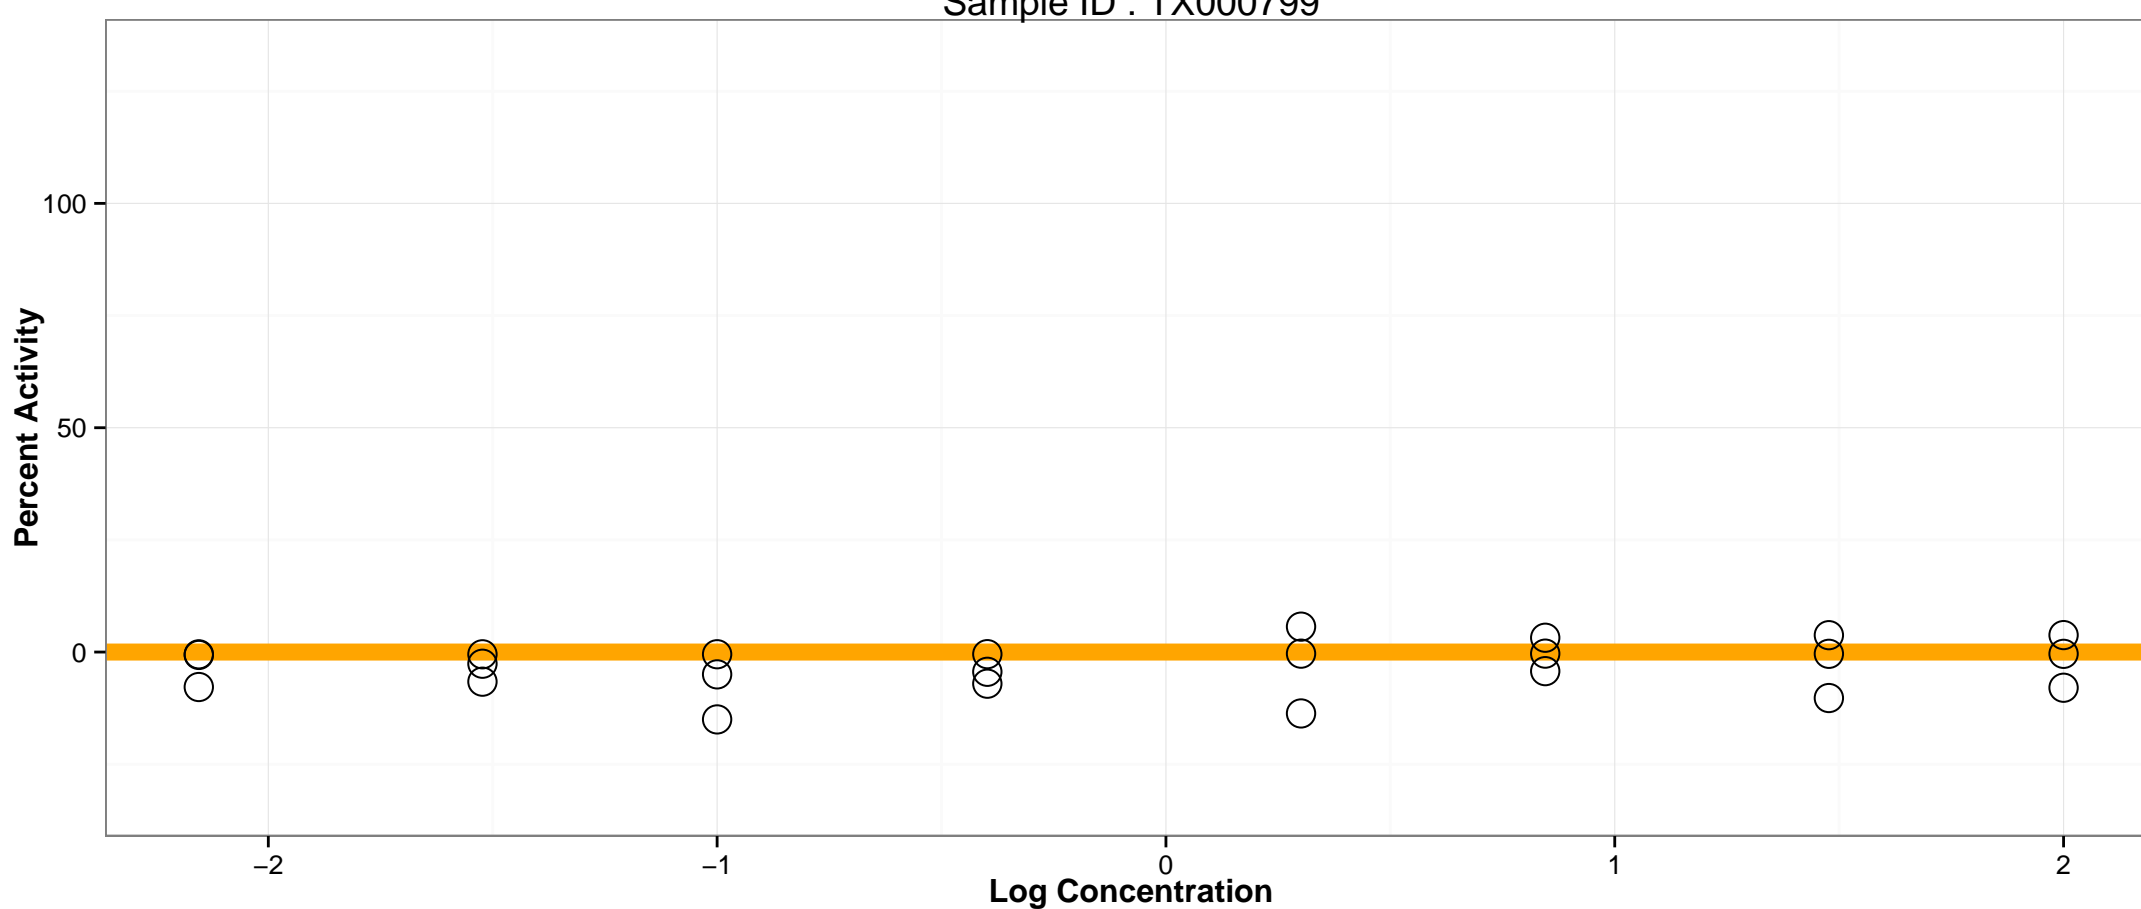

HILL MODEL

HILL MODEL: Not applicable

GAIN-LOSS MODEL

GNLS MODEL: Not applicable

|      | CNST   | HILL | GNLS |
|------|--------|------|------|
| AIC  | 156.03 | NA   | NA   |
| PROB | 1      | NA   | NA   |
| RMSE | 6.04   | NA   | NA   |

MAX\_MEAN : -0.462 MAX\_MED : -0.341 BMAD : 5.54  
COFF : 20 HIT-CALL : 0 FITC : 4 ACTP : 0  
FLAGS :

Assay ID 1848 (NHEERL\_Quantilum\_inhib\_2\_dn)  
Sample ID : TX000799

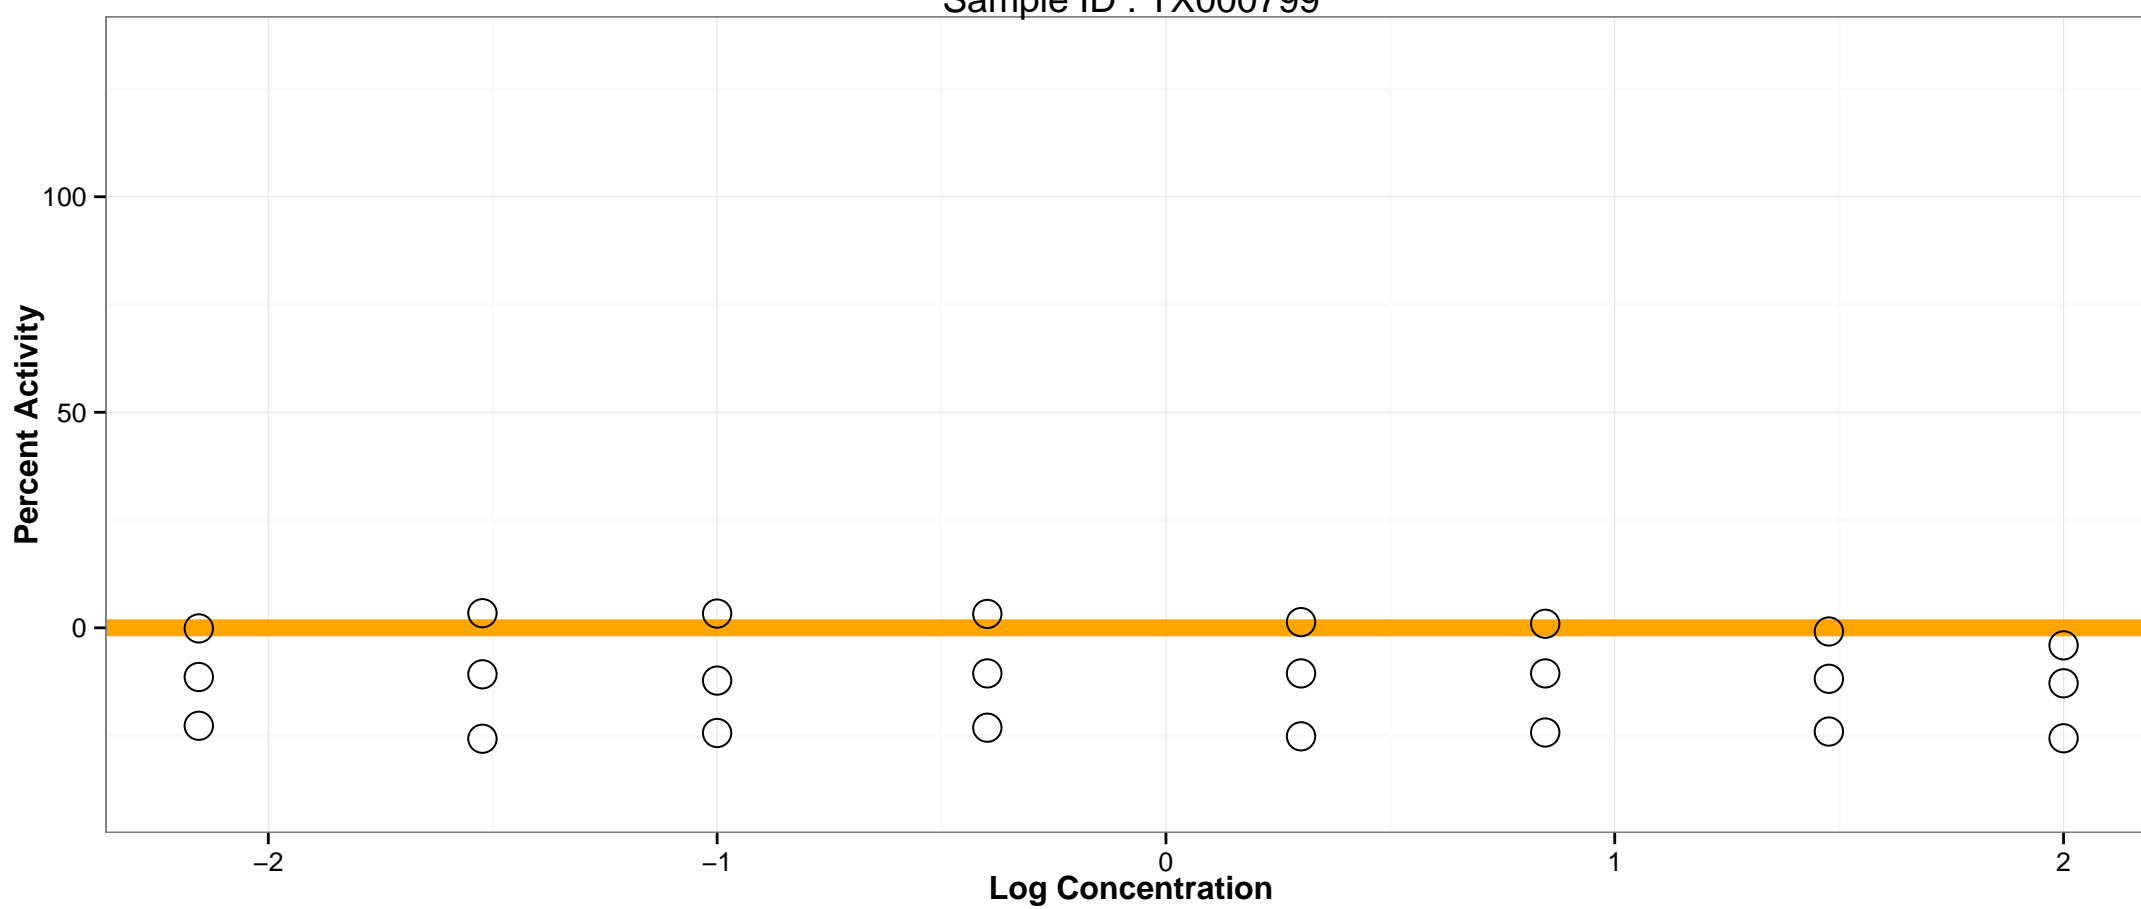

HILL MODEL

HILL MODEL: Not applicable

GAIN-LOSS MODEL

GNLS MODEL: Not applicable

|      | CNST   | HILL | GNLS |
|------|--------|------|------|
| AIC  | 204.74 | NA   | NA   |
| PROB | 1      | NA   | NA   |
| RMSE | 15.61  | NA   | NA   |

MAX\_MEAN : -10.2 MAX\_MED : -10.6 BMAD : 8.58  
COFF : 20 HIT-CALL : 0 FITC : 4 ACTP : 0  
FLAGS :

Assay ID 1824 (NHEERL\_TPO\_GUA\_dn)  
Sample ID : TP0001442A03

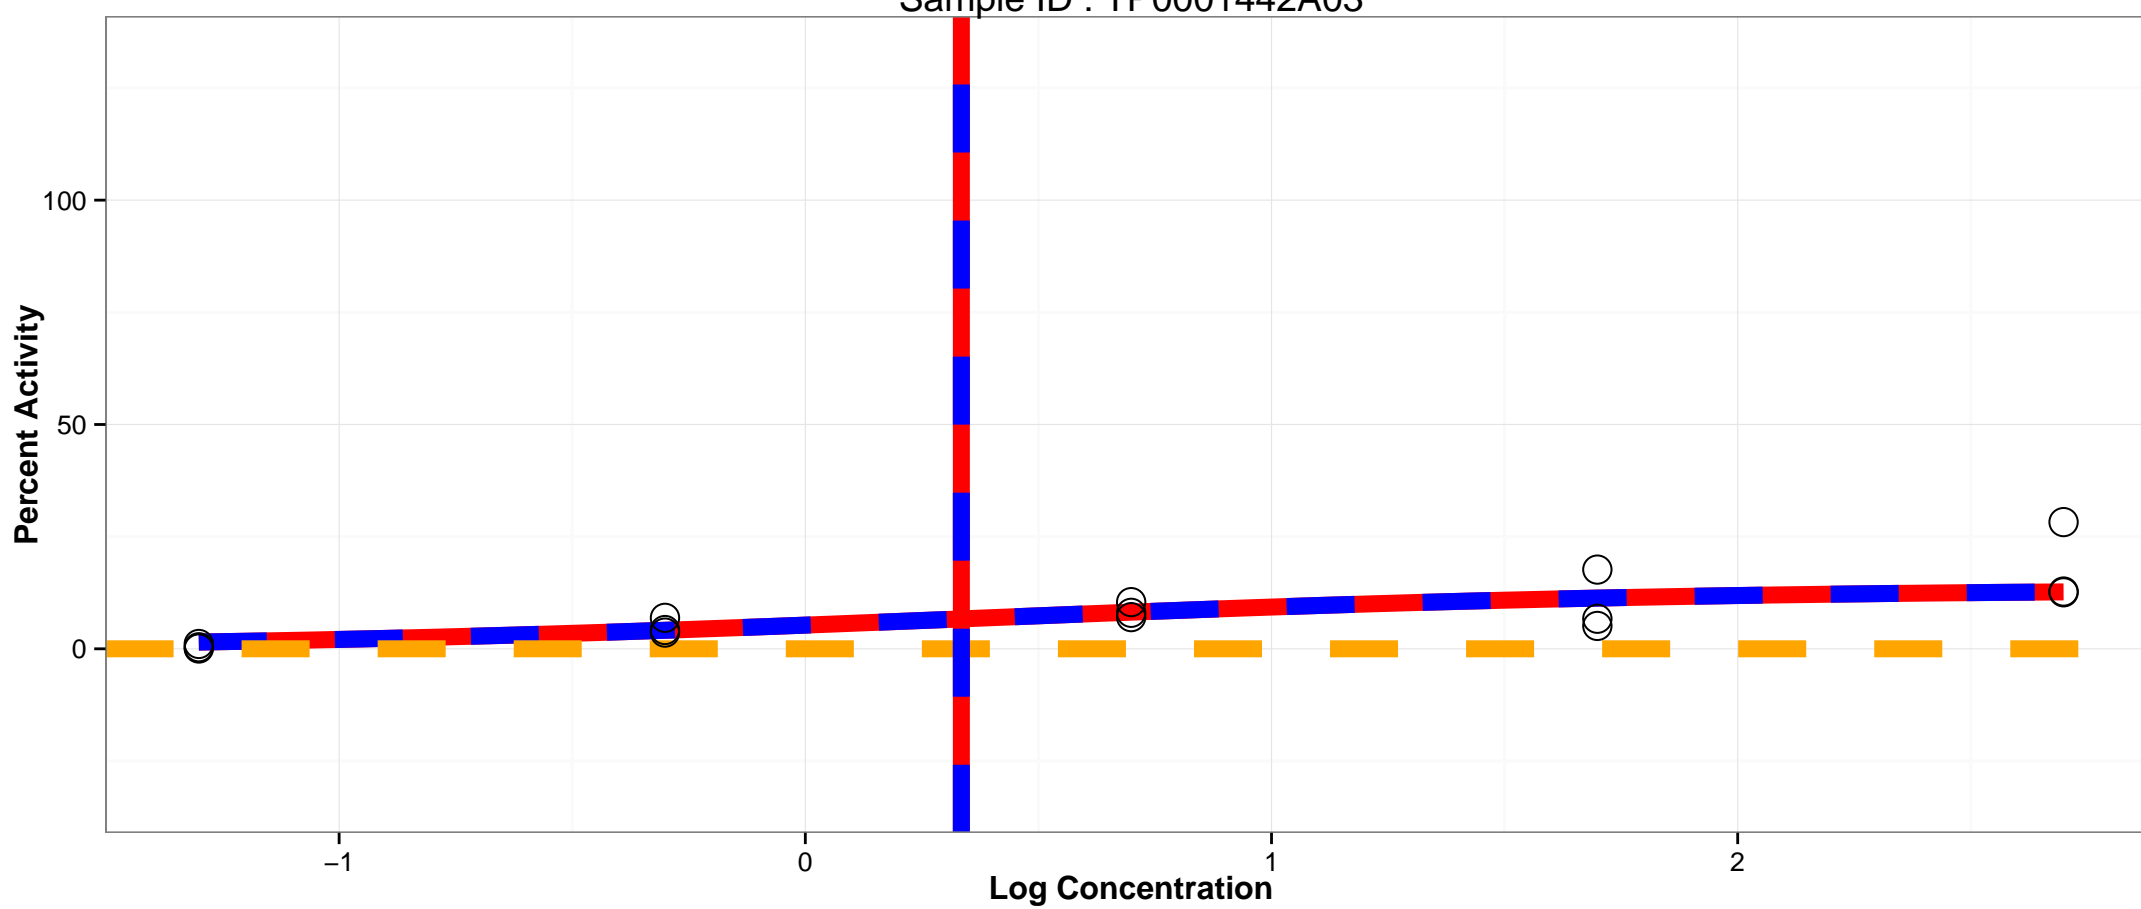

HILL MODEL

|     | tp   | ga    | gw    |
|-----|------|-------|-------|
| val | 13.3 | 0.335 | 0.547 |
| sd  | 3.05 | 0.613 | 0.293 |

GAIN-LOSS MODEL

|     | tp   | ga    | gw    | la   | lw   |
|-----|------|-------|-------|------|------|
| val | 13.3 | 0.335 | 0.547 | 4.28 | 4.99 |
| sd  | 3.05 | 0.613 | 0.293 | 1260 | 3980 |

|      | CNST   | HILL  | GNLS  |
|------|--------|-------|-------|
| AIC  | 116.21 | 92.48 | 96.48 |
| PROB | 0      | 0.88  | 0.12  |
| RMSE | 10.98  | 4.9   | 4.9   |

MAX\_MEAN : 17.9 MAX\_MED : 12.8 BMAD : 3.71  
COFF : 20 HIT-CALL : 0 FITC : 13 ACTP : 1  
FLAGS :

Chemical : 4-Methylaniline  
CAS : 106-49-0

Assay ID 1508 (NHEERL\_TPO\_AUR\_dn)  
Sample ID : TX015562

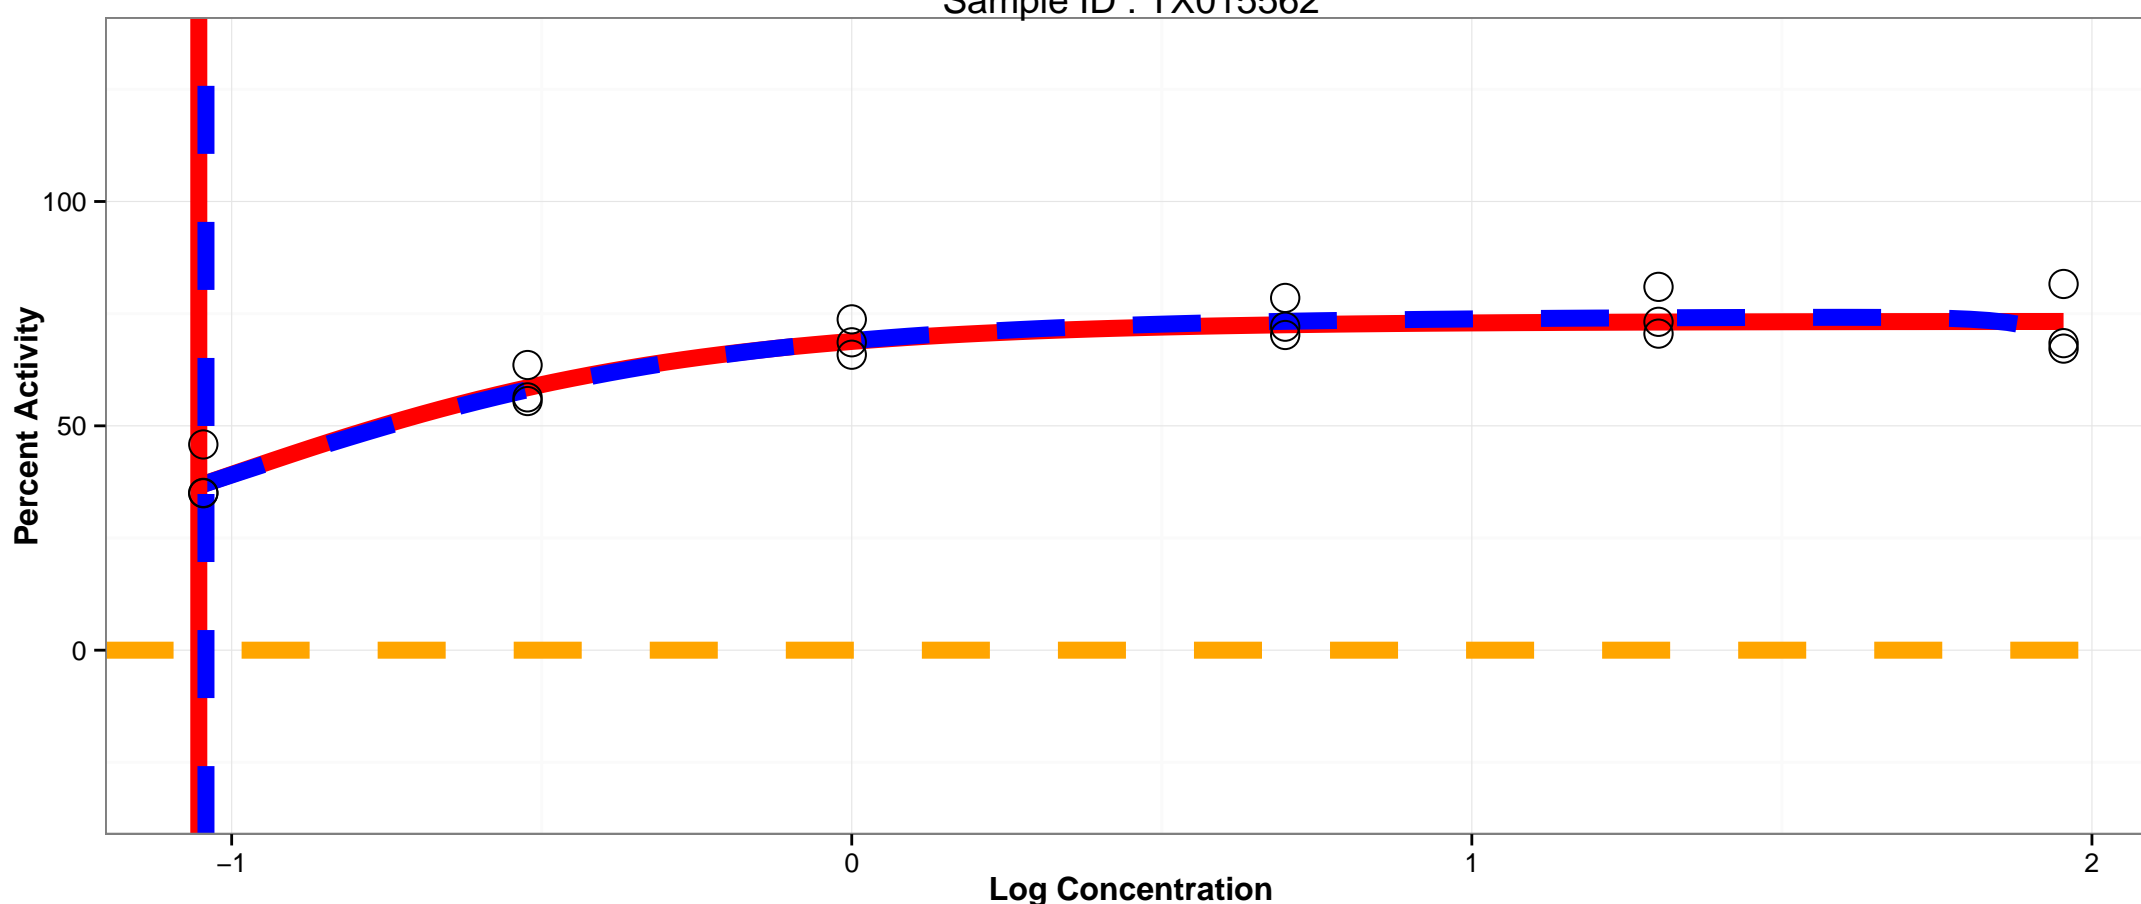

HILL MODEL

|     | tp   | ga     | gw    |
|-----|------|--------|-------|
| val | 73.3 | -1.05  | 1.13  |
| sd  | 1.91 | 0.0611 | 0.214 |

GAIN-LOSS MODEL

|     | tp   | ga    | gw   | la   | lw   |
|-----|------|-------|------|------|------|
| val | 74.3 | -1.04 | 1.07 | 2.13 | 6.62 |
| sd  | NA   | NA    | NA   | NA   | NA   |

|      | CNST   | HILL   | GNLS   |
|------|--------|--------|--------|
| AIC  | 208.68 | 116.72 | 119.33 |
| PROB | 0      | 0.79   | 0.21   |
| RMSE | 66     | 4.7    | 4.76   |

MAX\_MEAN : 74.9 MAX\_MED : 73.2 BMAD : 5.69  
COFF : 20 HIT-CALL : 1 FITC : 40 ACTP : 1  
FLAGS :

Assay ID 1509 (NHEERL\_HEK293T\_CellTiterGLO)  
Sample ID : TX015562

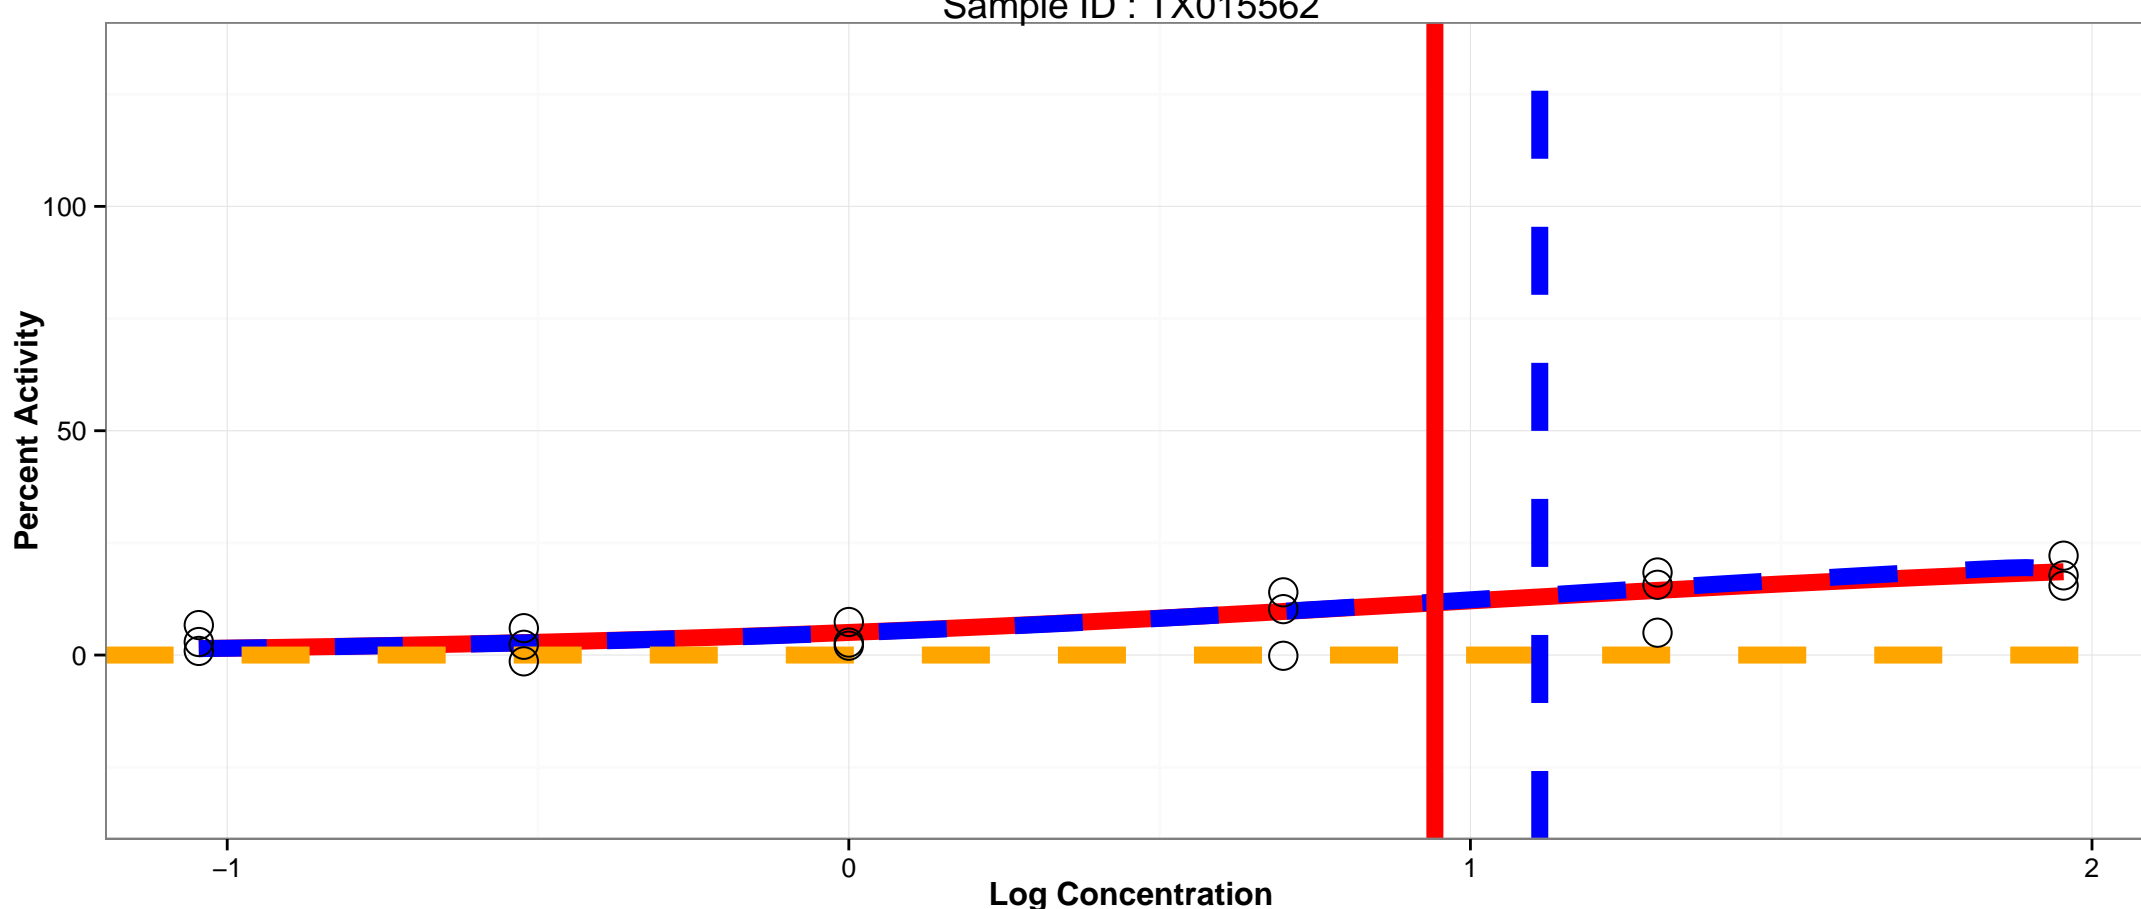

HILL MODEL

|     | tp   | ga    | gw    |
|-----|------|-------|-------|
| val | 23.2 | 0.943 | 0.592 |
| sd  | 10.3 | 0.869 | 0.345 |

GAIN-LOSS MODEL

|     | tp   | ga   | gw    | la   | lw |
|-----|------|------|-------|------|----|
| val | 26.6 | 1.11 | 0.577 | 2.01 | 18 |
| sd  | NA   | NA   | NA    | NA   | NA |

|      | CNST   | HILL   | GNLS   |
|------|--------|--------|--------|
| AIC  | 140.13 | 111.14 | 114.99 |
| PROB | 0      | 0.87   | 0.13   |
| RMSE | 10.86  | 4.23   | 4.27   |

MAX\_MEAN : 18.5 MAX\_MED : 17.8 BMAD : 5.54  
COFF : 20 HIT-CALL : 0 FITC : 21 ACTP : 1  
FLAGS : 12

Assay ID 1848 (NHEERL\_Quantilum\_inhib\_2\_dn)  
Sample ID : TX015562

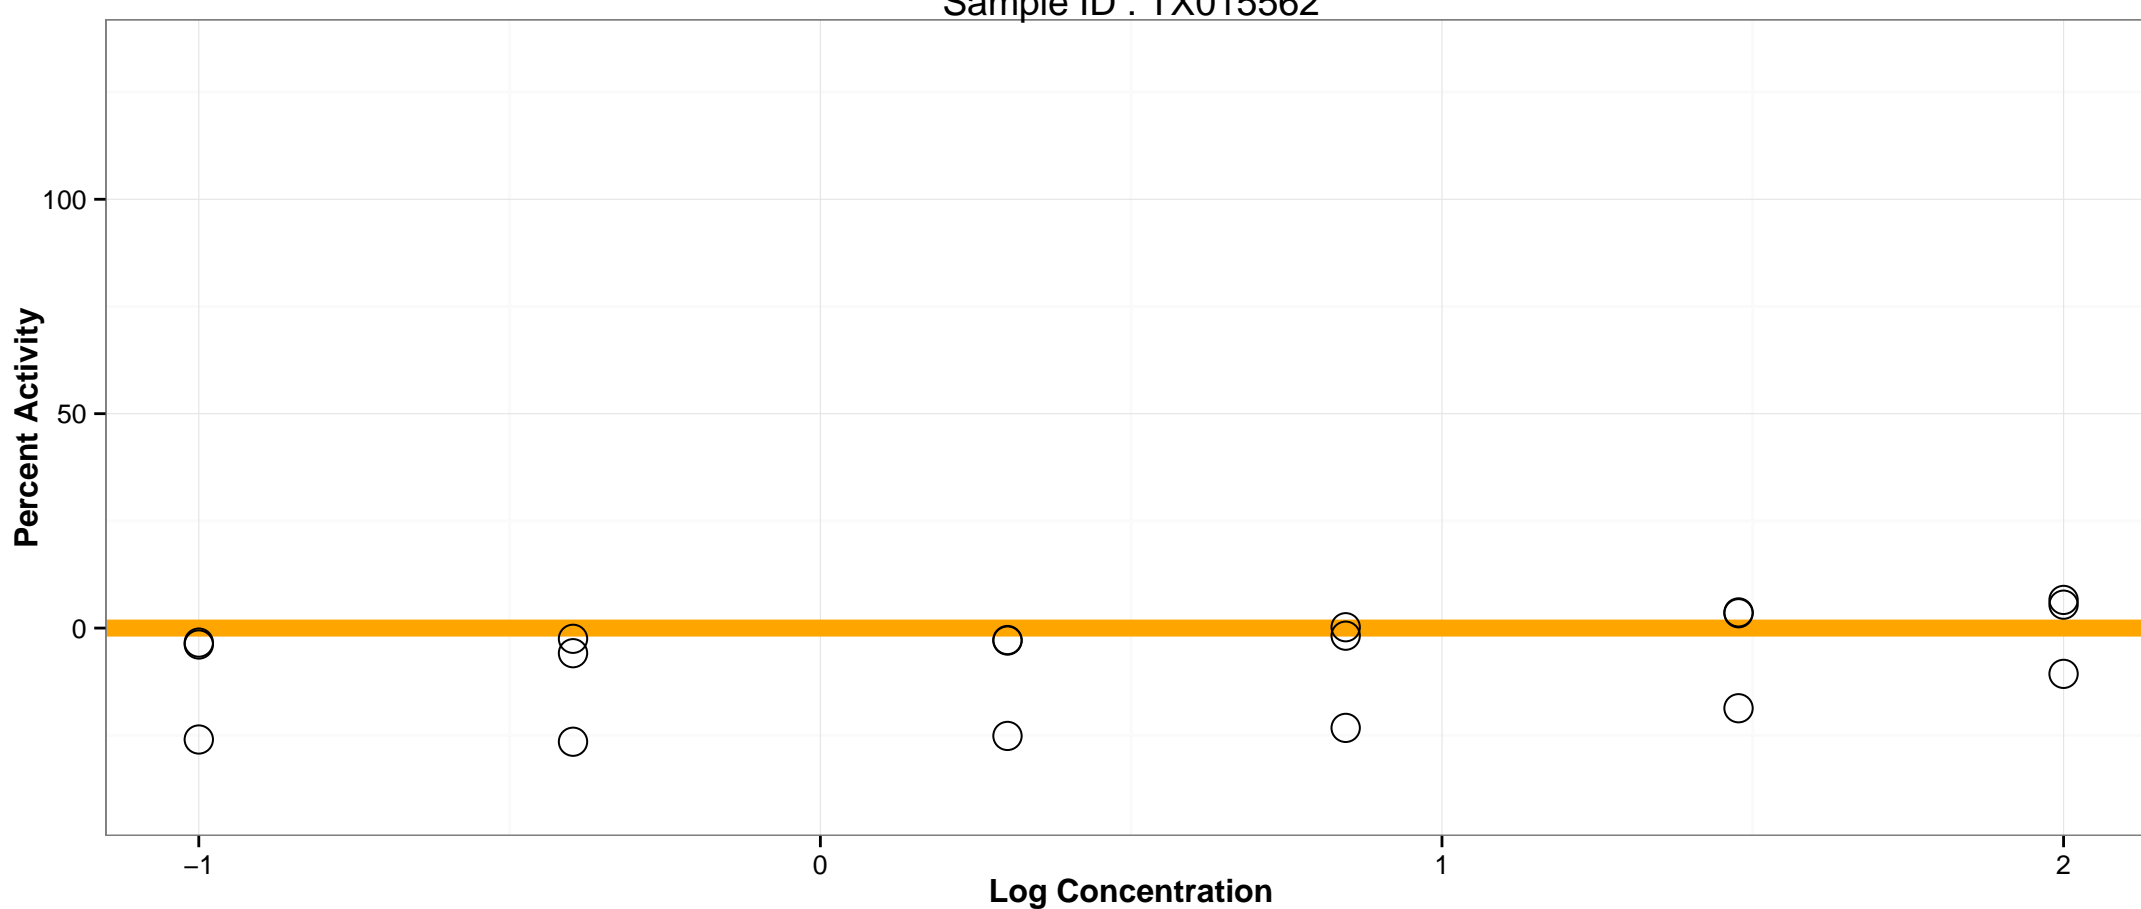

HILL MODEL

HILL MODEL: Not applicable

GAIN-LOSS MODEL

GNLS MODEL: Not applicable

|      | CNST   | HILL | GNLS |
|------|--------|------|------|
| AIC  | 145.85 | NA   | NA   |
| PROB | 1      | NA   | NA   |
| RMSE | 13.33  | NA   | NA   |

MAX\_MEAN : 0.462 MAX\_MED : 5.47 BMAD : 8.58  
COFF : 20 HIT-CALL : 0 FITC : 4 ACTP : 0  
FLAGS :

Assay ID 1824 (NHEERL\_TPO\_GUA\_dn)  
Sample ID : TP0001442A04

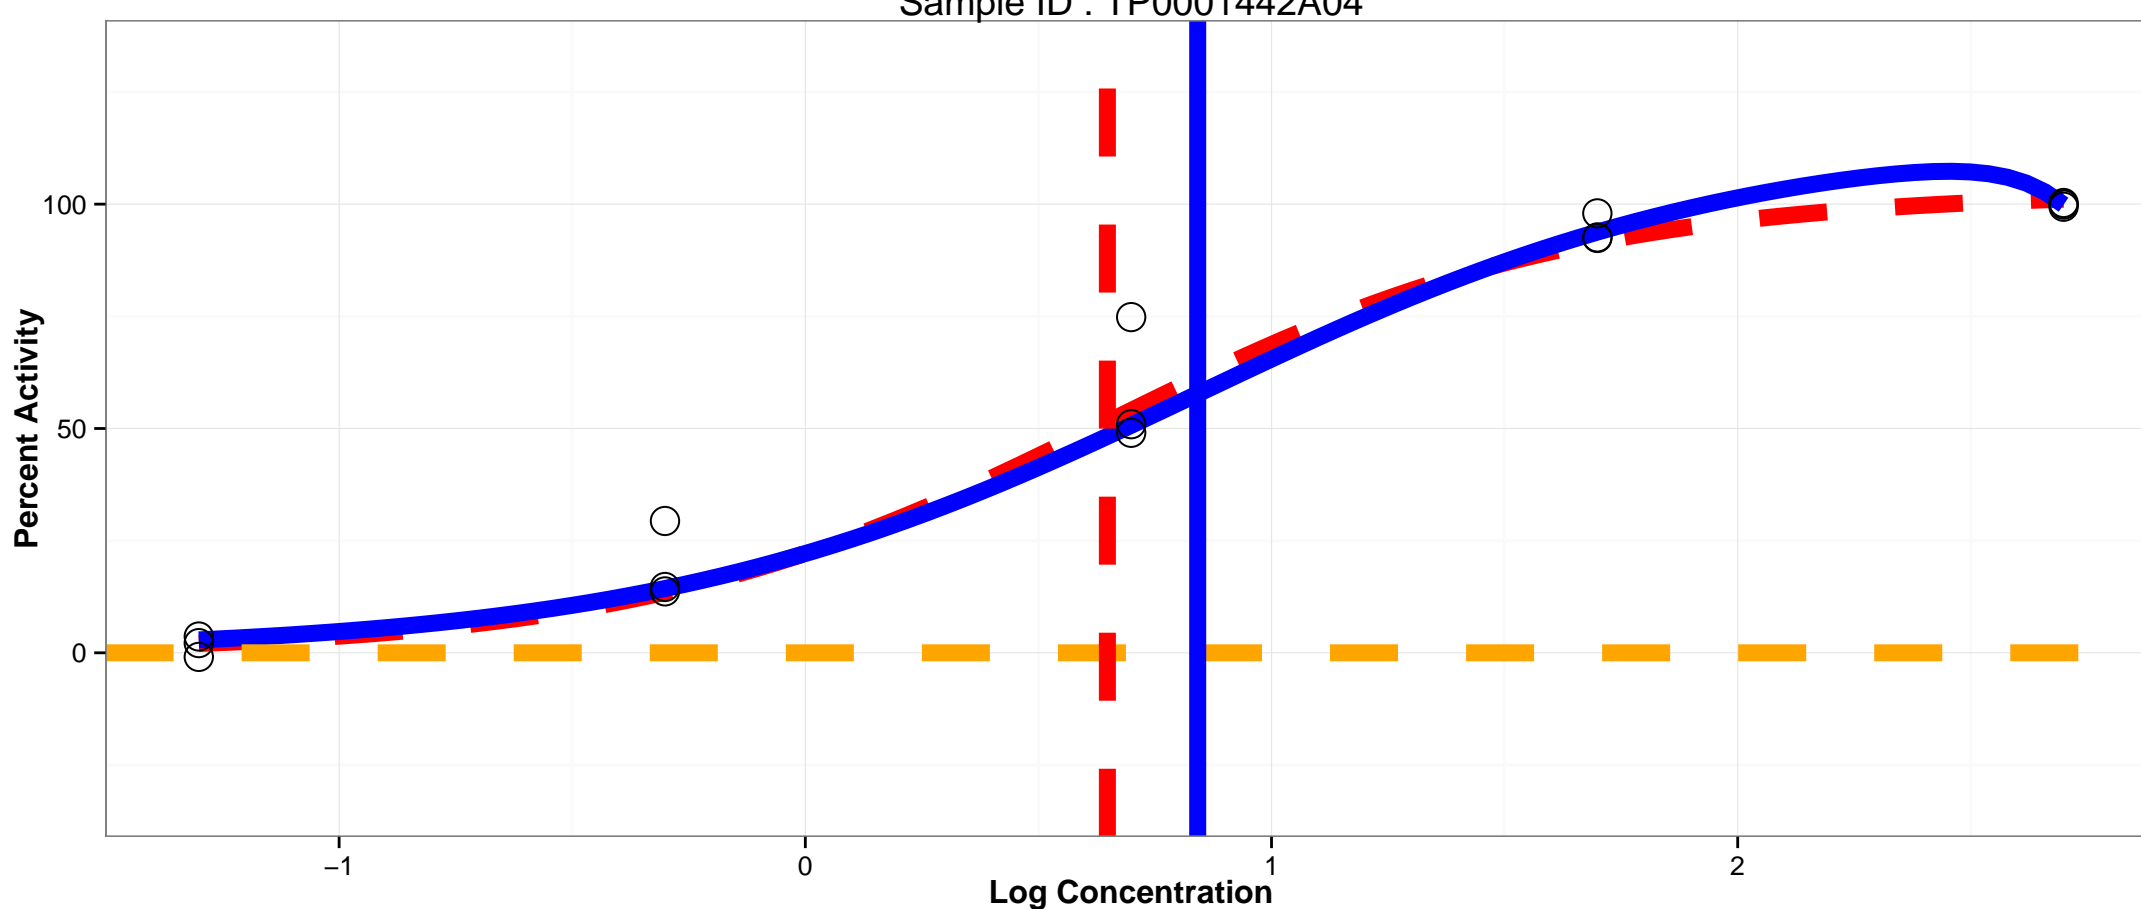

HILL MODEL

|     | tp   | ga     | gw     |
|-----|------|--------|--------|
| val | 103  | 0.648  | 0.865  |
| sd  | 2.22 | 0.0668 | 0.0761 |

GAIN-LOSS MODEL

|     | tp   | ga    | gw     | la    | lw   |
|-----|------|-------|--------|-------|------|
| val | 115  | 0.842 | 0.742  | 2.94  | 4.03 |
| sd  | 10.6 | 0.148 | 0.0931 | 0.044 | 1.75 |

|      | CNST   | HILL   | GNLS   |
|------|--------|--------|--------|
| AIC  | 173.05 | 103.43 | 102.85 |
| PROB | 0      | 0.43   | 0.57   |
| RMSE | 67.6   | 7.22   | 7.52   |

MAX\_MEAN : 99.9 MAX\_MED : 99.9 BMAD : 3.71  
COFF : 20 HIT-CALL : 1 FITC : 50 ACTP : 1  
FLAGS :

Chemical : Sodium (2-pyridylthio)-N-oxide  
CAS : 3811-73-2

Assay ID 1508 (NHEERL\_TPO\_AUR\_dn)  
Sample ID : TX003327

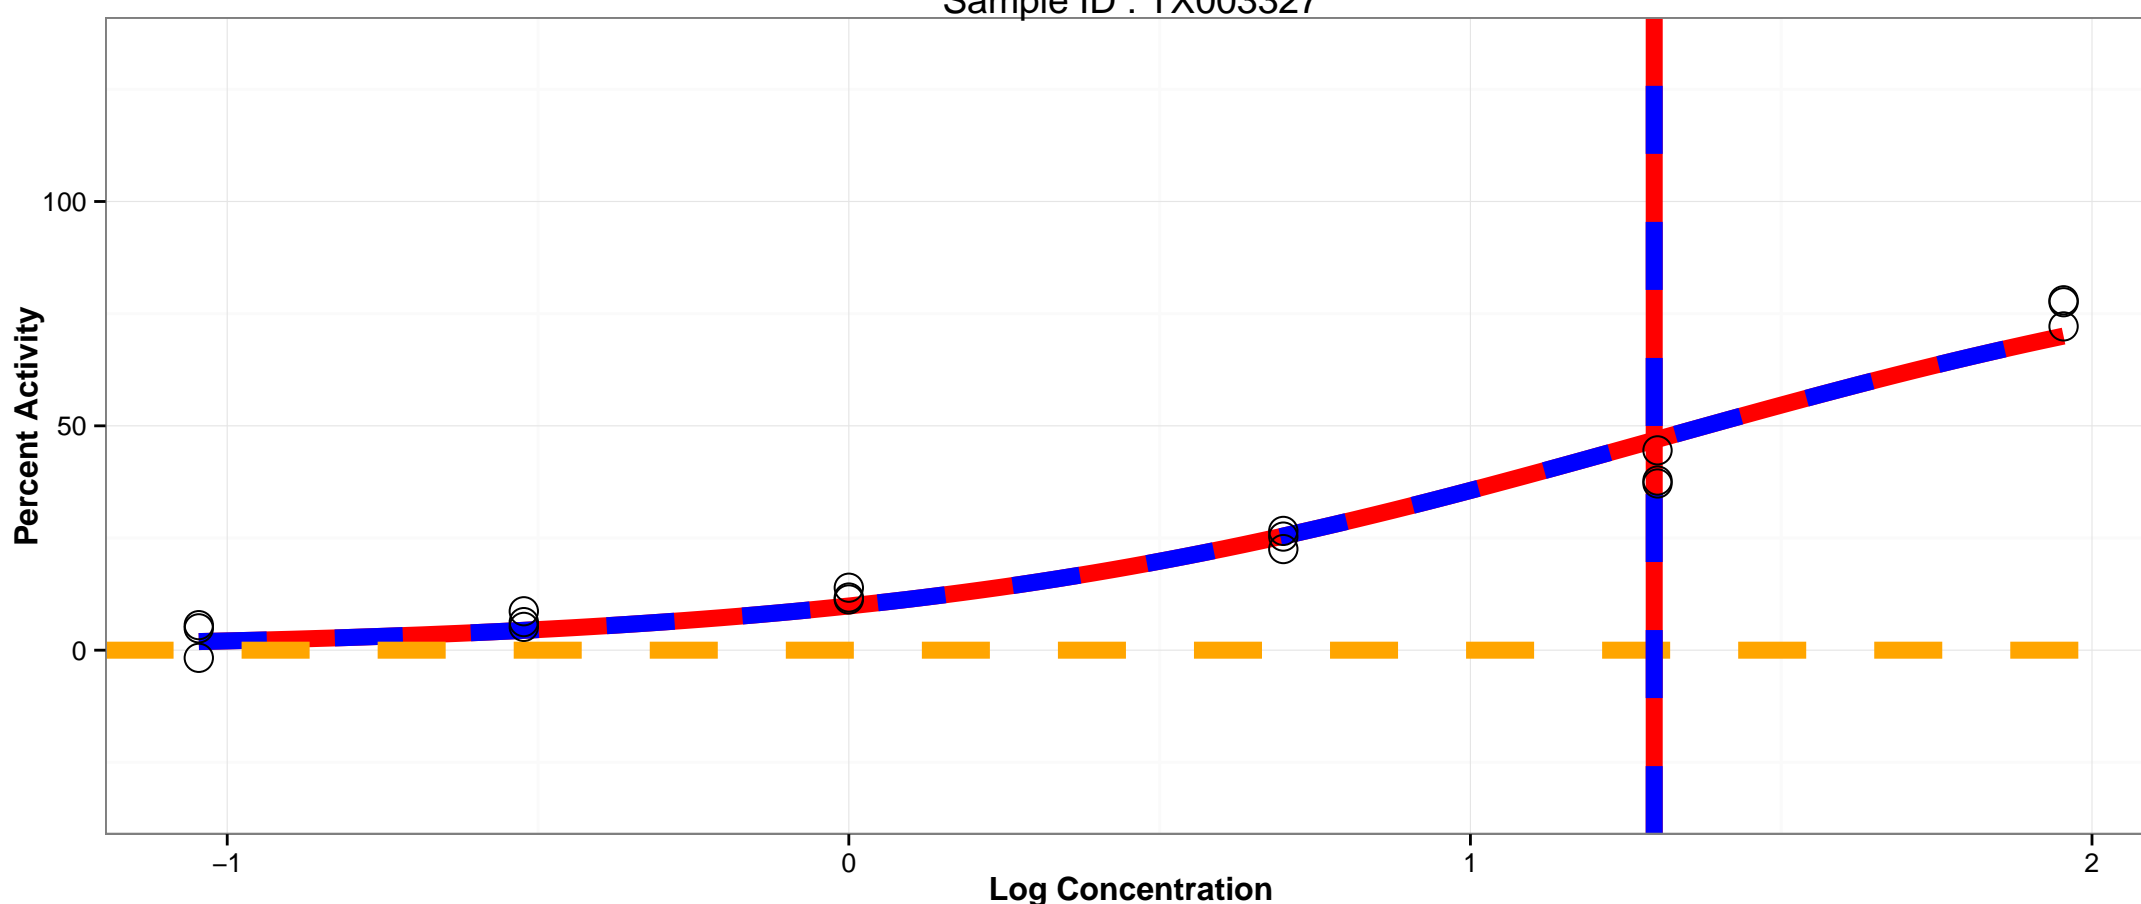

HILL MODEL

|     | tp   | ga    | gw    |
|-----|------|-------|-------|
| val | 93.6 | 1.3   | 0.717 |
| sd  | 13.2 | 0.185 | 0.087 |

GAIN-LOSS MODEL

|     | tp   | ga    | gw    | la    | lw     |
|-----|------|-------|-------|-------|--------|
| val | 93.6 | 1.3   | 0.717 | 3.16  | 11.3   |
| sd  | 13.2 | 0.185 | 0.087 | 60200 | 564000 |

|      | CNST   | HILL   | GNLS   |
|------|--------|--------|--------|
| AIC  | 182.79 | 115.85 | 119.85 |
| PROB | 0      | 0.88   | 0.12   |
| RMSE | 36.98  | 4.73   | 4.73   |

MAX\_MEAN : 75.9 MAX\_MED : 77.6 BMAD : 5.69  
COFF : 20 HIT-CALL : 1 FITC : 42 ACTP : 1  
FLAGS :

Assay ID 1509 (NHEERL\_HEK293T\_CellTiterGLO)  
Sample ID : TX003327

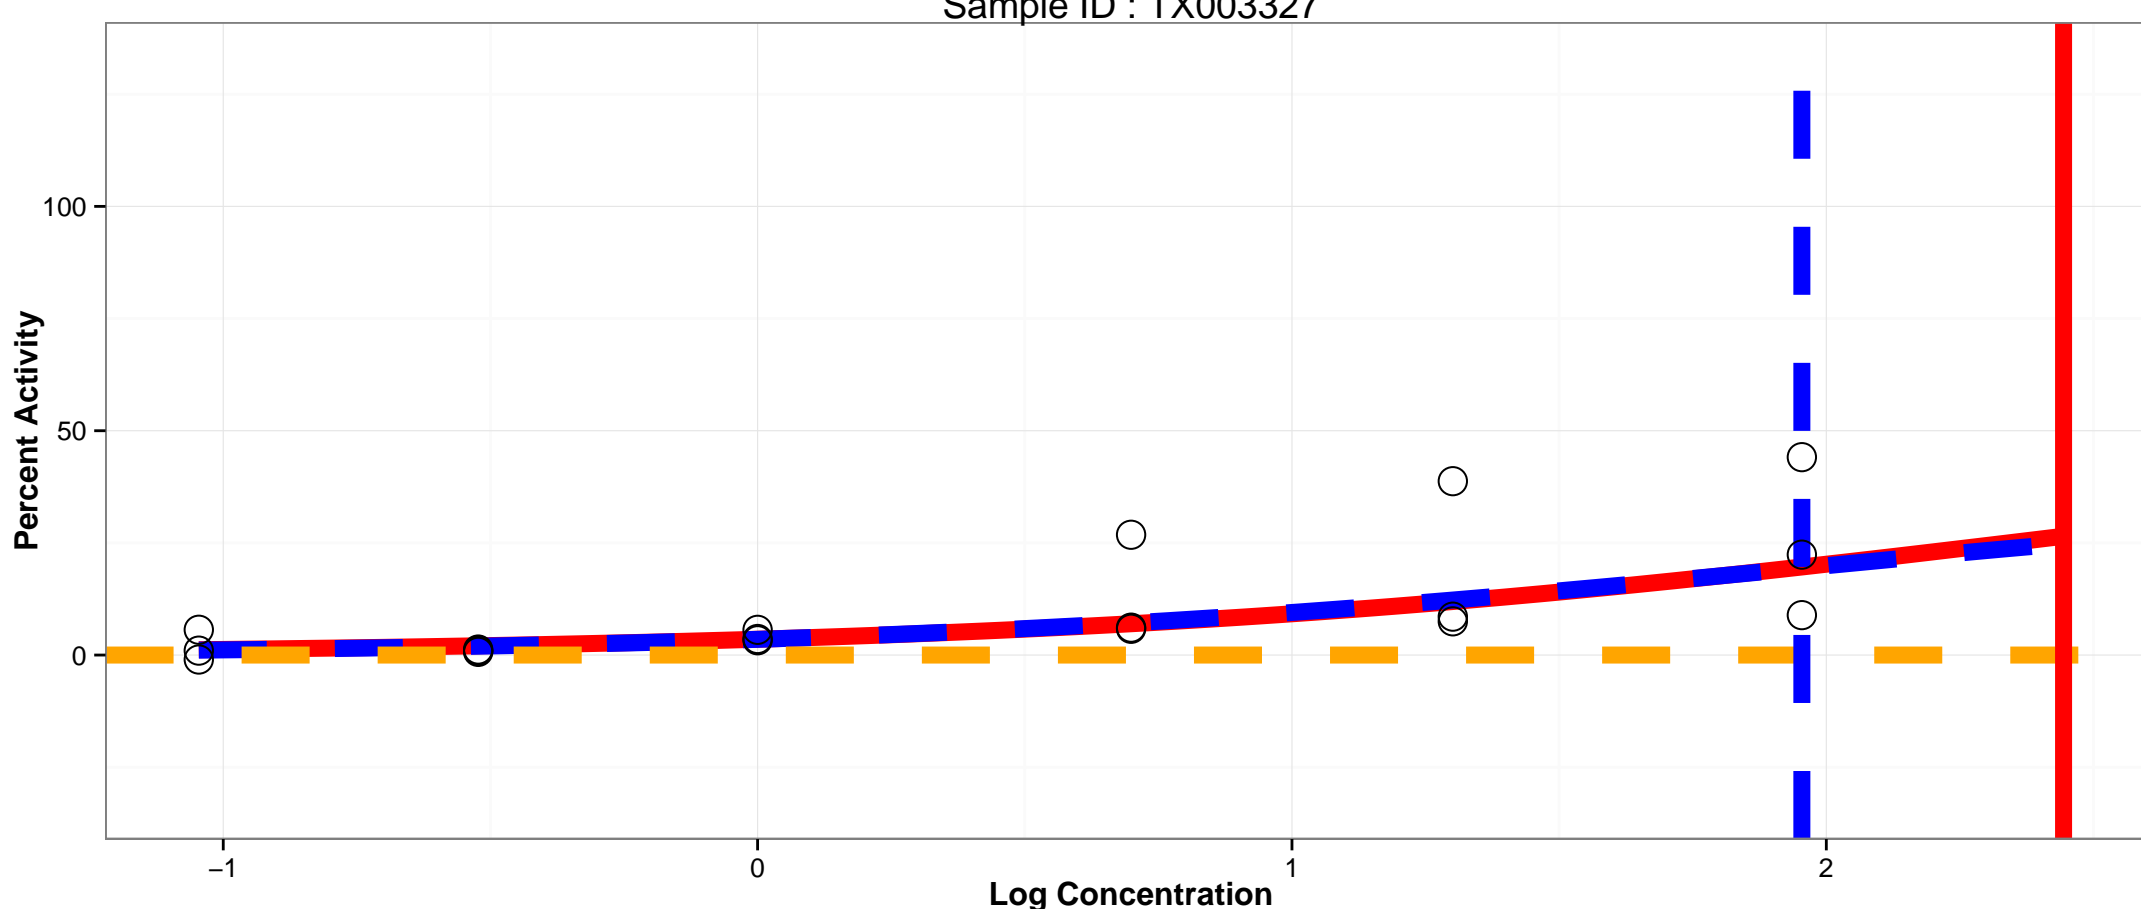

HILL MODEL

|     | tp   | ga   | gw    |
|-----|------|------|-------|
| val | 52.9 | 2.44 | 0.469 |
| sd  | 102  | 2.92 | 0.243 |

GAIN-LOSS MODEL

|     | tp   | ga   | gw    | la   | lw   |
|-----|------|------|-------|------|------|
| val | 38.8 | 1.95 | 0.513 | 2.72 | 8.76 |
| sd  | 63   | 2.49 | 0.297 | 302  | 3440 |

|      | CNST   | HILL   | GNLS   |
|------|--------|--------|--------|
| AIC  | 150.45 | 136.71 | 140.79 |
| PROB | 0      | 0.88   | 0.11   |
| RMSE | 16.74  | 10.28  | 10.25  |

MAX\_MEAN : 25.1 MAX\_MED : 22.4 BMAD : 5.54  
COFF : 20 HIT-CALL : 1 FITC : 42 ACTP : 0.999  
FLAGS : 11; 6

Assay ID 1848 (NHEERL\_Quantilum\_inhib\_2\_dn)  
Sample ID : TX003327

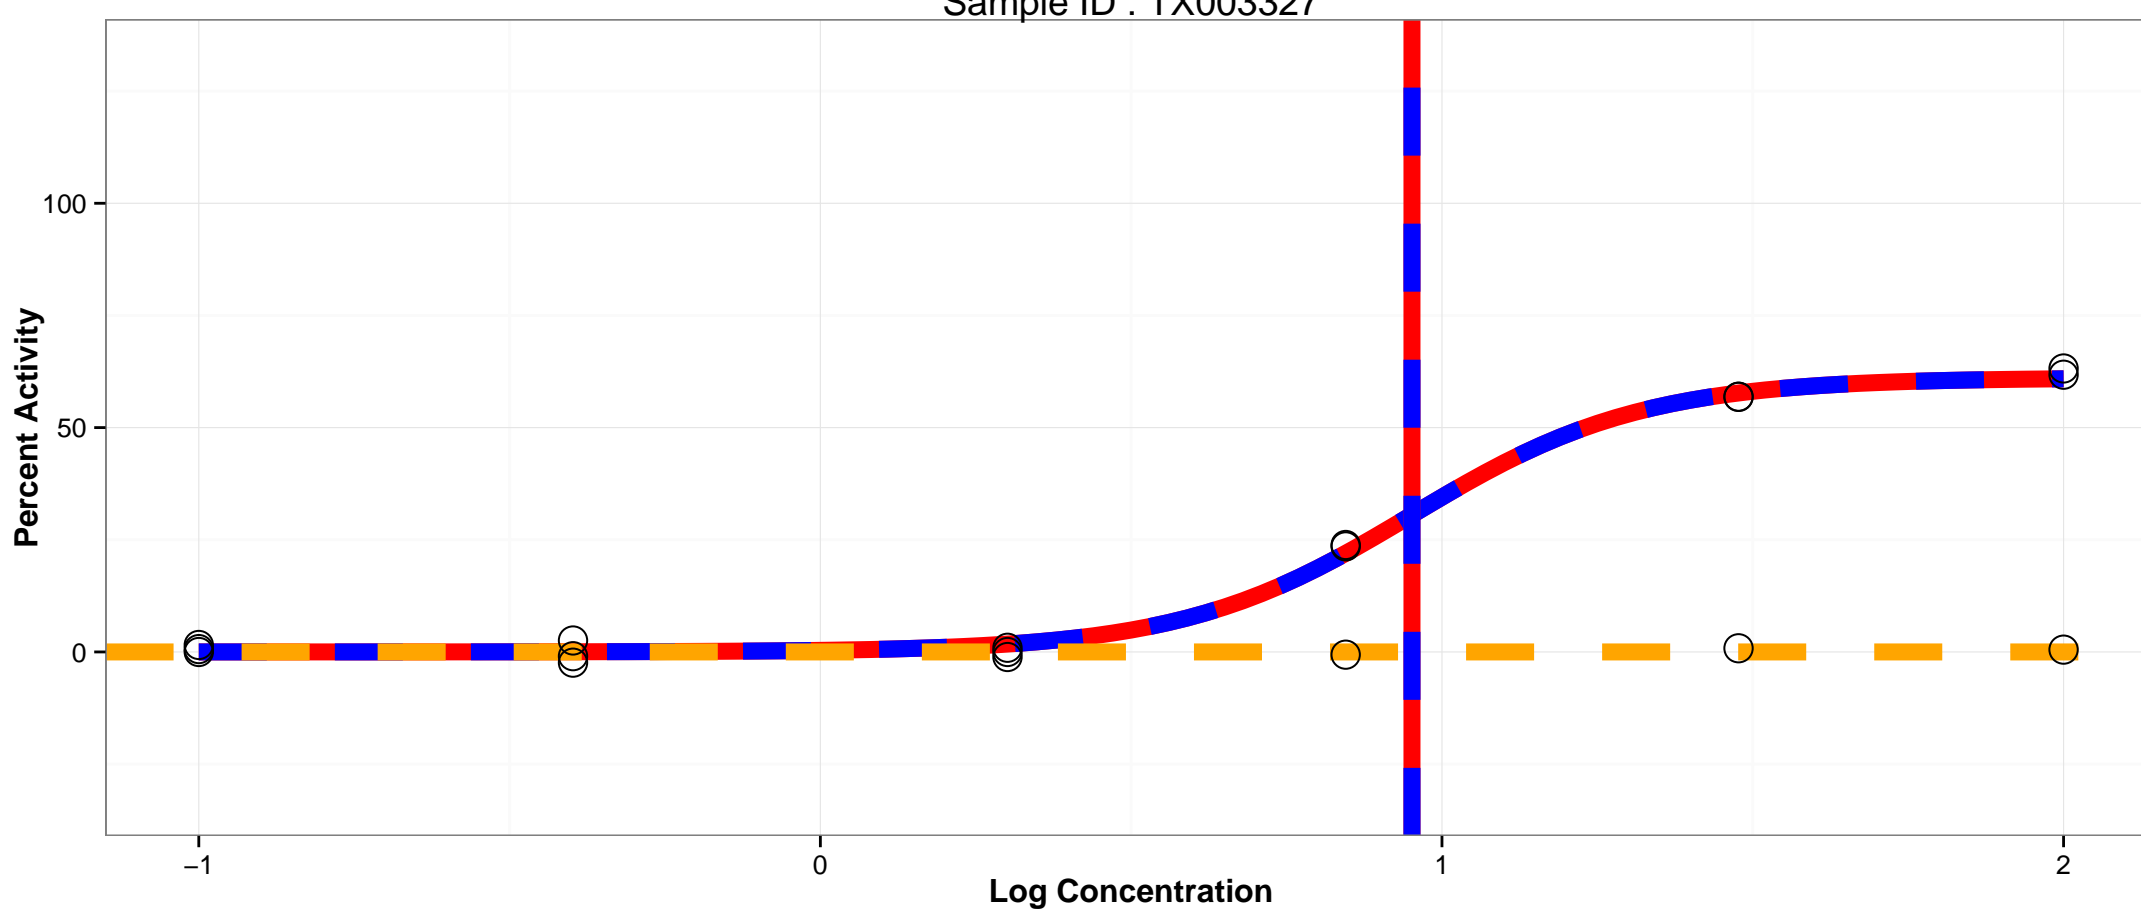

HILL MODEL

|     | tp   | ga     | gw    |
|-----|------|--------|-------|
| val | 61.1 | 0.952  | 2.35  |
| sd  | 2.74 | 0.0584 | 0.649 |

GAIN-LOSS MODEL

|     | tp   | ga     | gw    | la   | lw    |
|-----|------|--------|-------|------|-------|
| val | 61.1 | 0.952  | 2.35  | 3.08 | 9.33  |
| sd  | 2.74 | 0.0584 | 0.649 | 4720 | 40700 |

|      | CNST   | HILL   | GNLS   |
|------|--------|--------|--------|
| AIC  | 171.45 | 147.26 | 151.26 |
| PROB | 0      | 0.88   | 0.12   |
| RMSE | 29.28  | 20.32  | 20.32  |

MAX\_MEAN : 41.8 MAX\_MED : 61.8 BMAD : 8.58  
COFF : 20 HIT-CALL : 1 FITC : 41 ACTP : 1  
FLAGS : 10

Assay ID 1824 (NHEERL\_TPO\_GUA\_dn)  
Sample ID : TP0001442A05

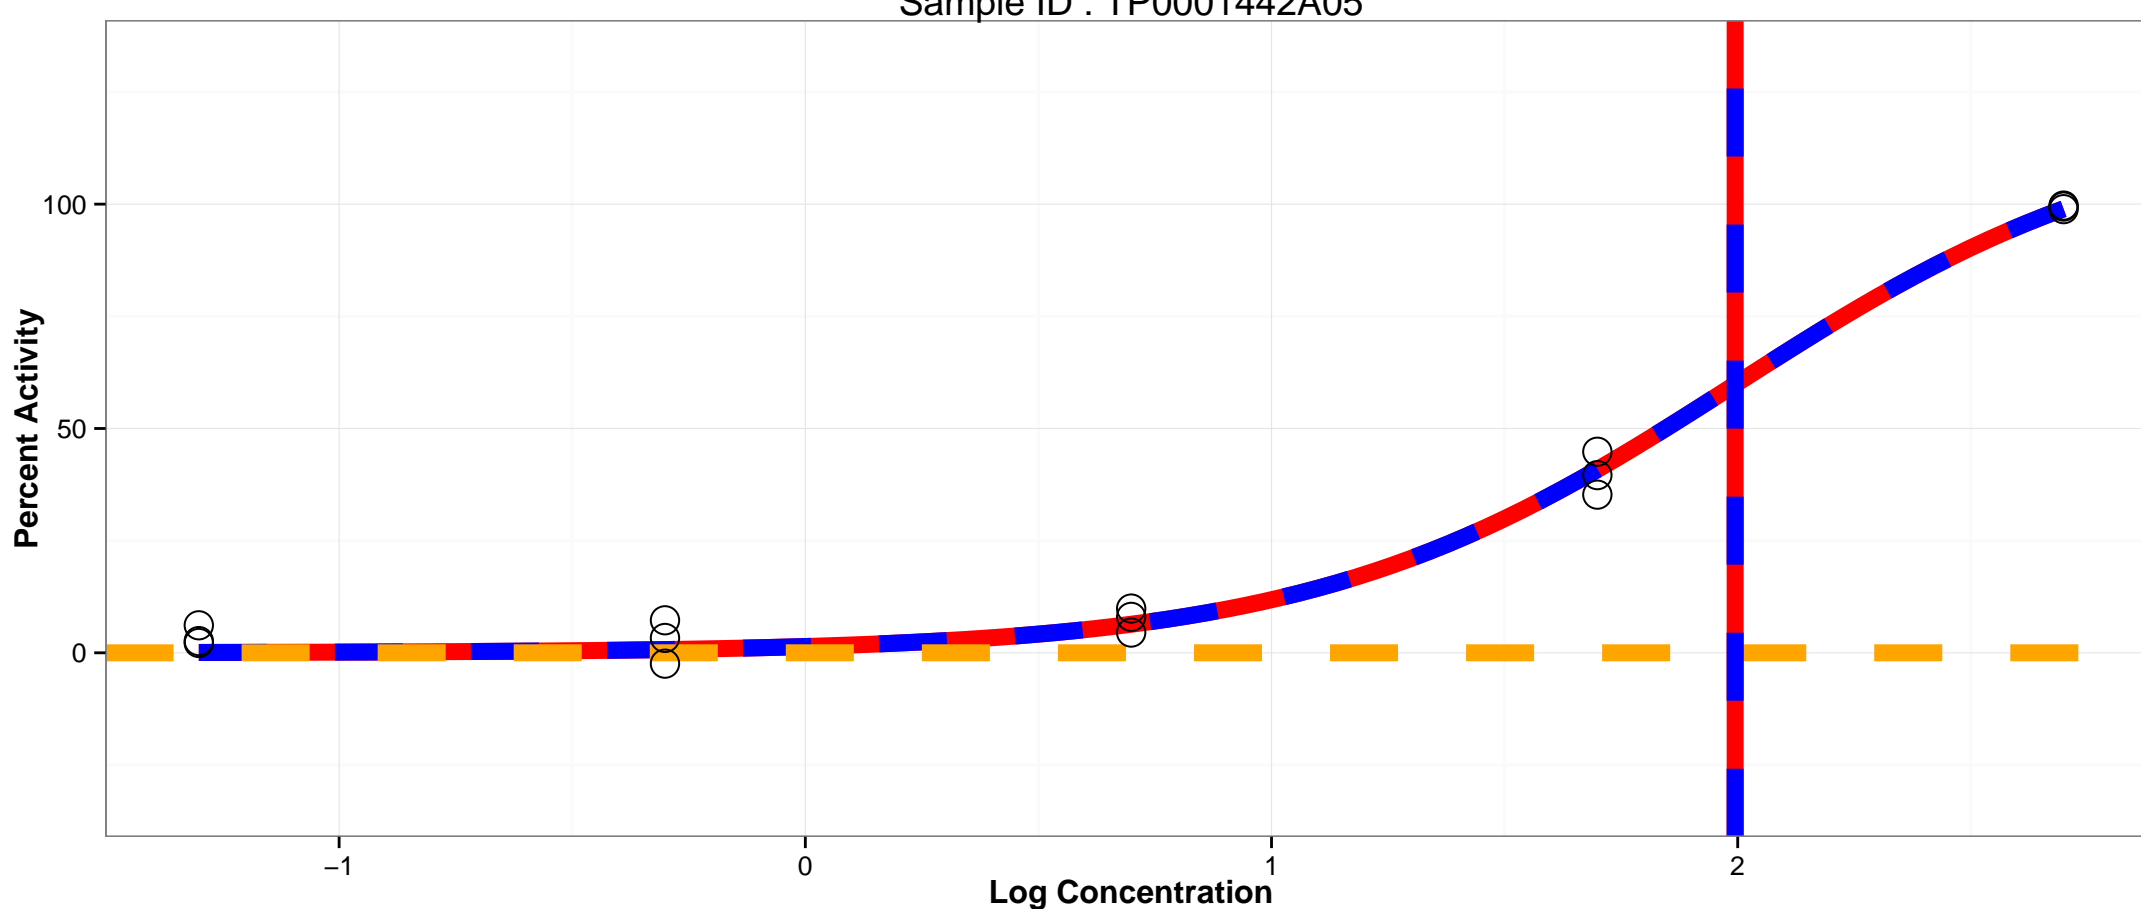

HILL MODEL

|     | tp   | ga    | gw    |
|-----|------|-------|-------|
| val | 120  | 1.99  | 0.965 |
| sd  | 9.74 | 0.112 | 0.138 |

GAIN-LOSS MODEL

|     | tp   | ga    | gw    | la   | lw   |
|-----|------|-------|-------|------|------|
| val | 120  | 1.99  | 0.965 | 4.12 | 6.21 |
| sd  | 9.74 | 0.111 | 0.138 | 1340 | 5860 |

|      | CNST   | HILL  | GNLS  |
|------|--------|-------|-------|
| AIC  | 159.11 | 88.87 | 92.87 |
| PROB | 0      | 0.88  | 0.12  |
| RMSE | 48.12  | 3.42  | 3.42  |

MAX\_MEAN : 99.4 MAX\_MED : 99.5 BMAD : 3.71  
COFF : 20 HIT-CALL : 1 FITC : 42 ACTP : 1  
FLAGS :

Chemical : Bensulide  
CAS : 741-58-2

Assay ID 1508 (NHEERL\_TPO\_AUR\_dn)  
Sample ID : TV000620

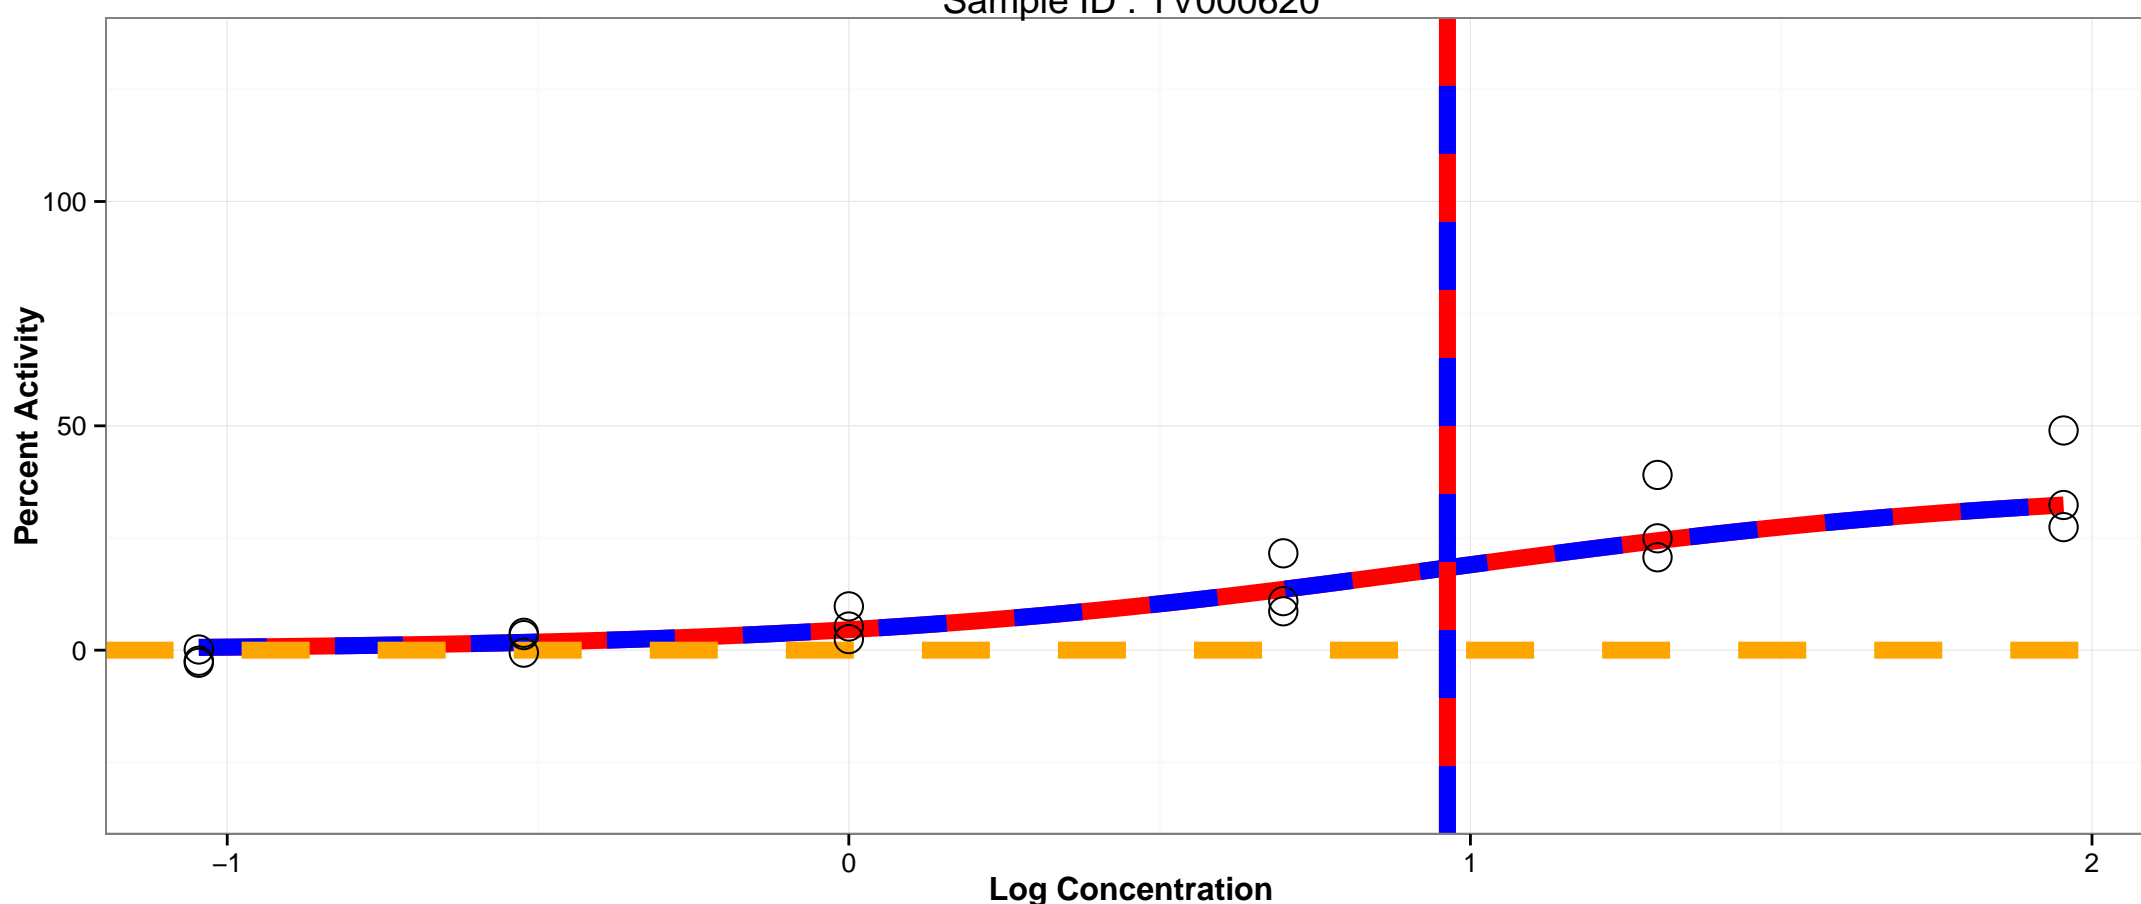

HILL MODEL

|     | tp   | ga    | gw    |
|-----|------|-------|-------|
| val | 36.7 | 0.963 | 0.879 |
| sd  | 7.37 | 0.295 | 0.267 |

GAIN-LOSS MODEL

|     | tp   | ga    | gw    | la   | lw   |
|-----|------|-------|-------|------|------|
| val | 36.7 | 0.963 | 0.879 | 3.94 | 17.5 |
| sd  | NA   | NA    | NA    | NA   | NA   |

|      | CNST   | HILL   | GNLS   |
|------|--------|--------|--------|
| AIC  | 161.71 | 121.67 | 125.67 |
| PROB | 0      | 0.88   | 0.12   |
| RMSE | 20.56  | 6.19   | 6.19   |

MAX\_MEAN : 36.3 MAX\_MED : 32.4 BMAD : 5.69  
COFF : 20 HIT-CALL : 1 FITC : 42 ACTP : 1  
FLAGS :

Assay ID 1509 (NHEERL\_HEK293T\_CellTiterGLO)  
Sample ID : TV000620

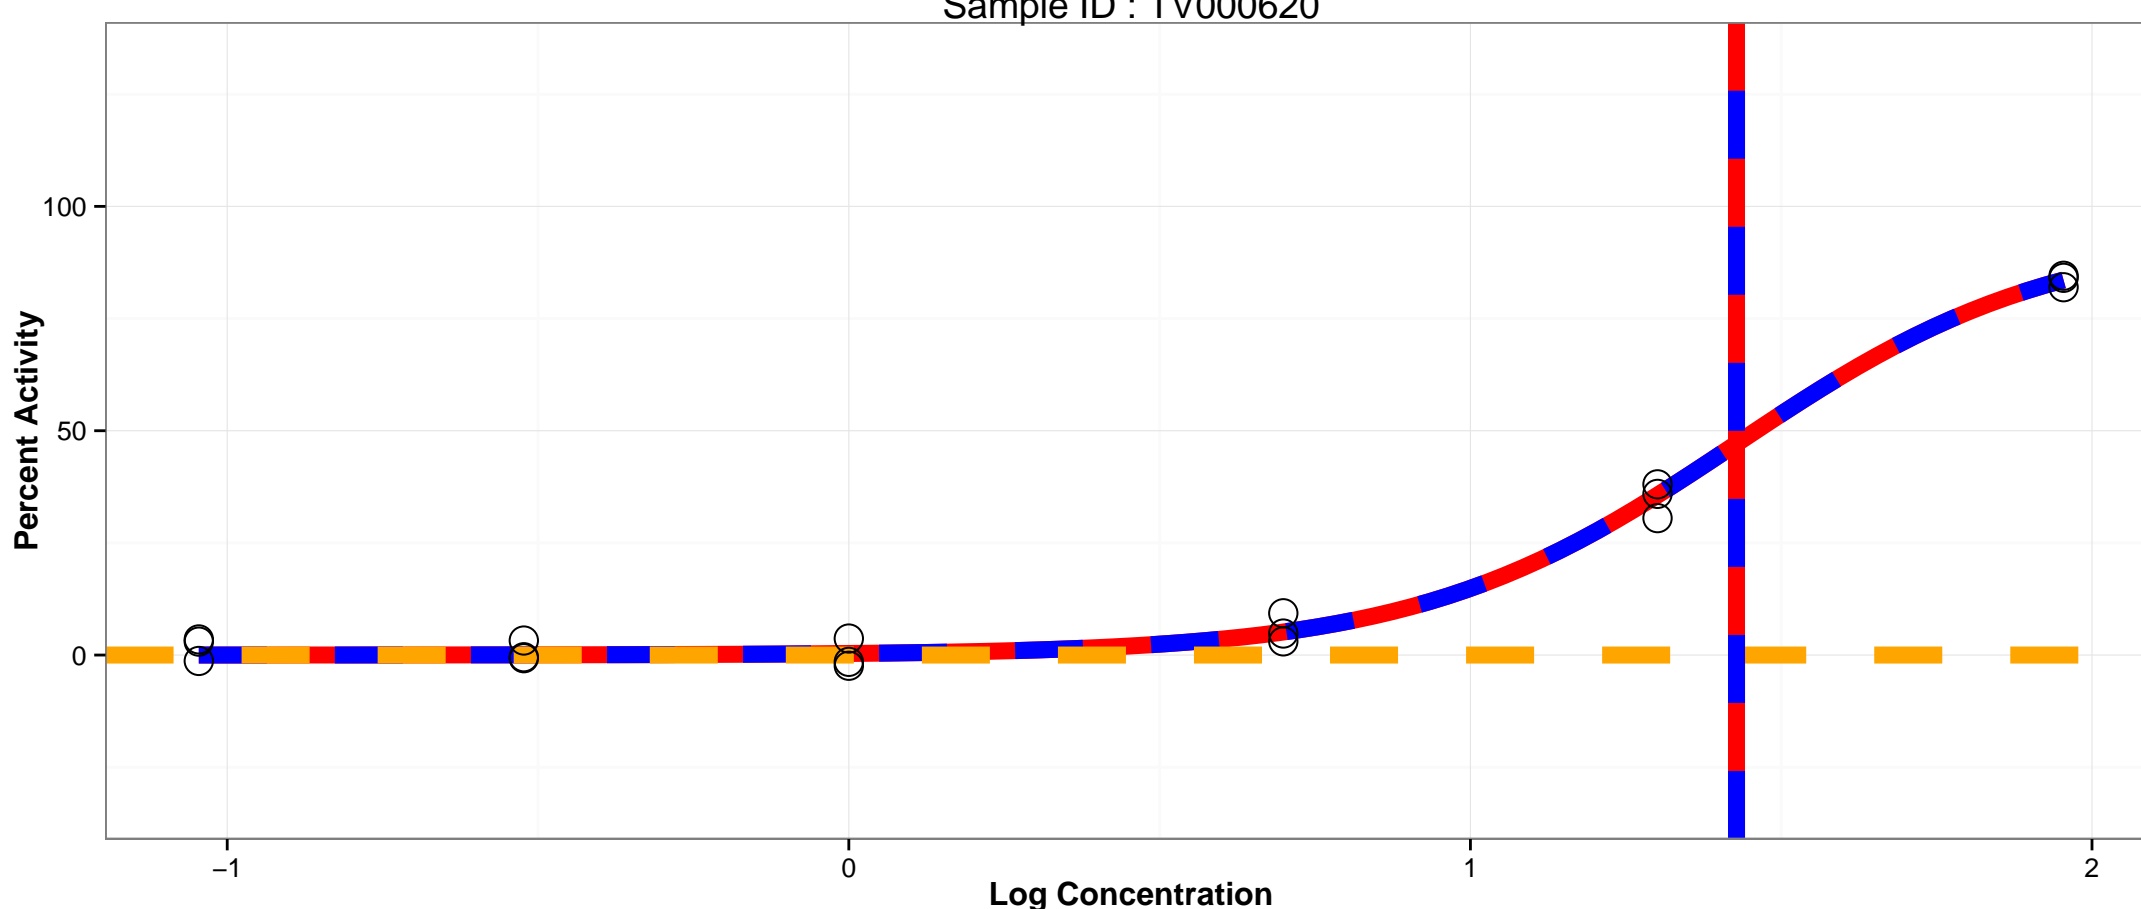

HILL MODEL

|     | tp   | ga     | gw    |
|-----|------|--------|-------|
| val | 94.2 | 1.43   | 1.7   |
| sd  | 5.57 | 0.0523 | 0.253 |

GAIN-LOSS MODEL

|     | tp   | ga   | gw  | la   | lw   |
|-----|------|------|-----|------|------|
| val | 94.2 | 1.43 | 1.7 | 2.25 | 15.9 |
| sd  | NA   | NA   | NA  | NA   | NA   |

|      | CNST   | HILL  | GNLS  |
|------|--------|-------|-------|
| AIC  | 179.25 | 94.35 | 98.35 |
| PROB | 0      | 0.88  | 0.12  |
| RMSE | 37.11  | 2.52  | 2.52  |

MAX\_MEAN : 83.5 MAX\_MED : 84.1 BMAD : 5.54  
COFF : 20 HIT-CALL : 1 FITC : 42 ACTP : 1  
FLAGS :

Assay ID 1848 (NHEERL\_Quantilum\_inhib\_2\_dn)  
Sample ID : TV000620

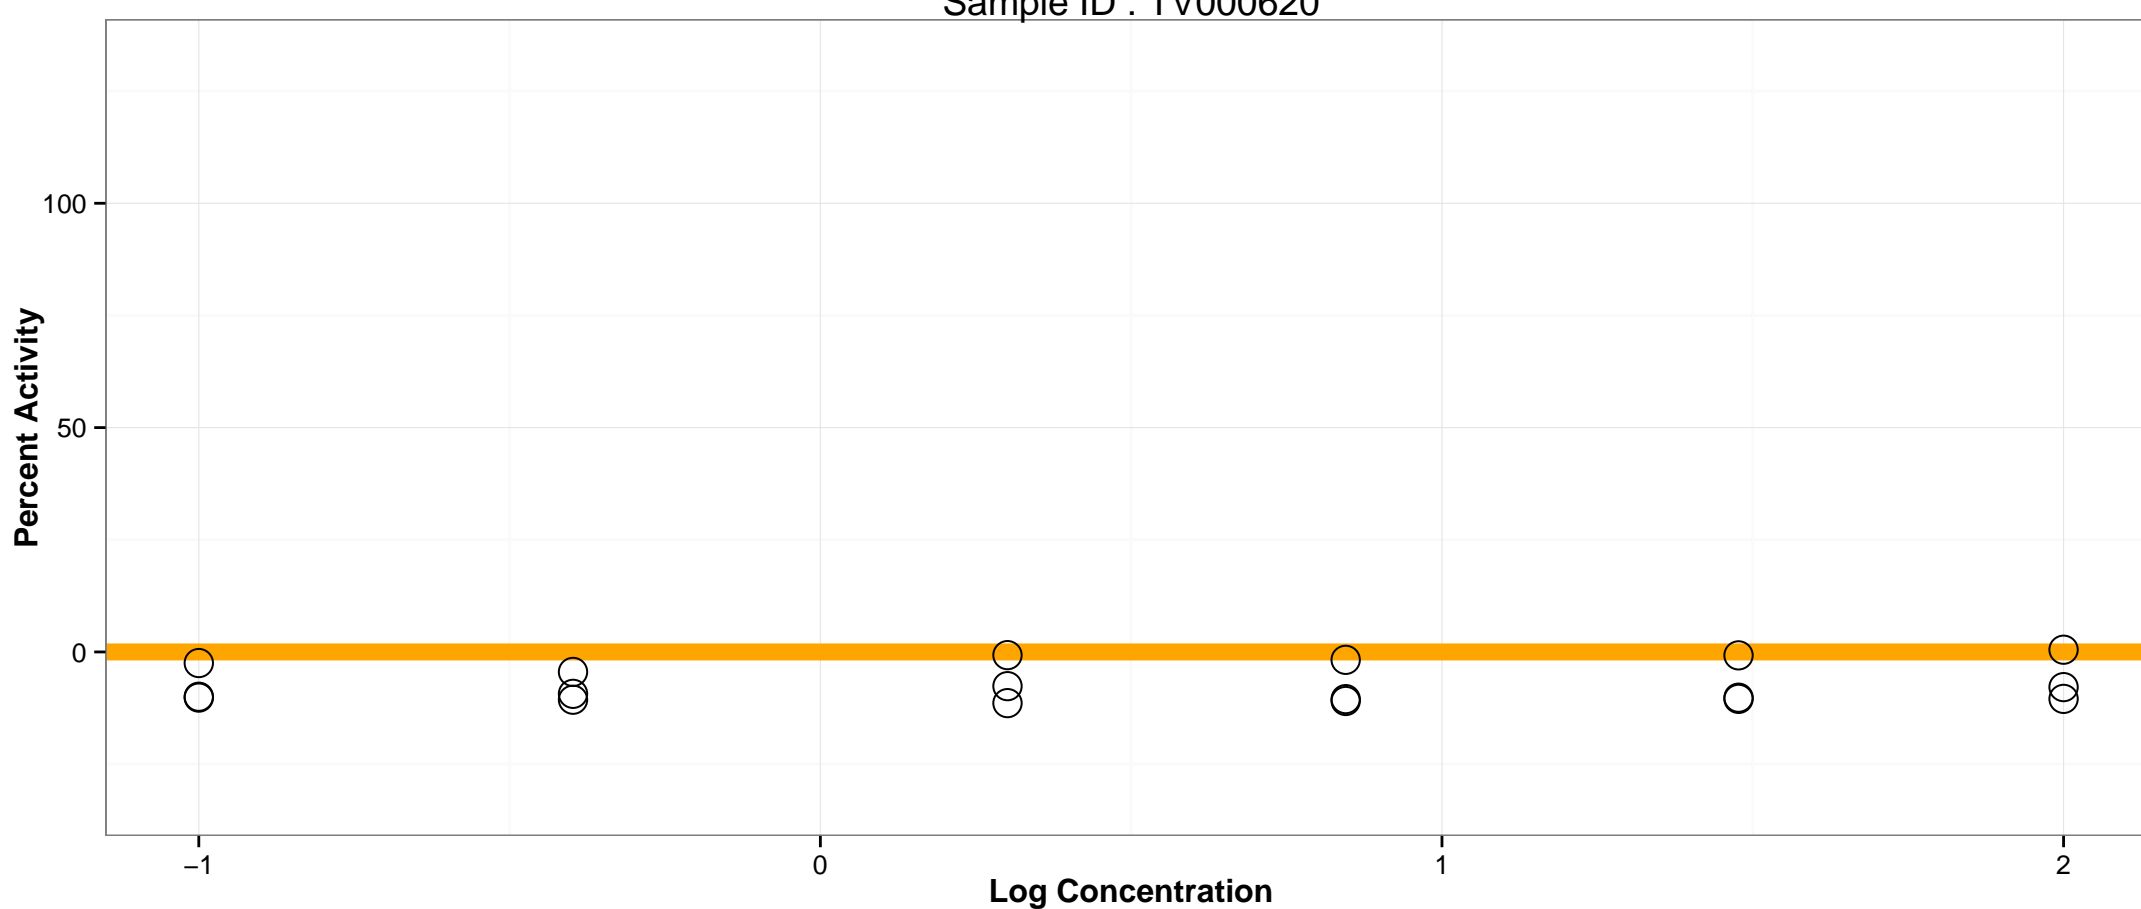

HILL MODEL

HILL MODEL: Not applicable

GAIN-LOSS MODEL

GNLS MODEL: Not applicable

|      | CNST   | HILL | GNLS |
|------|--------|------|------|
| AIC  | 132.46 | NA   | NA   |
| PROB | 1      | NA   | NA   |
| RMSE | 8.28   | NA   | NA   |

MAX\_MEAN : -5.92 MAX\_MED : -7.62 BMAD : 8.58  
COFF : 20 HIT-CALL : 0 FITC : 4 ACTP : 0  
FLAGS :

Assay ID 1824 (NHEERL\_TPO\_GUA\_dn)  
Sample ID : TP0001442A06

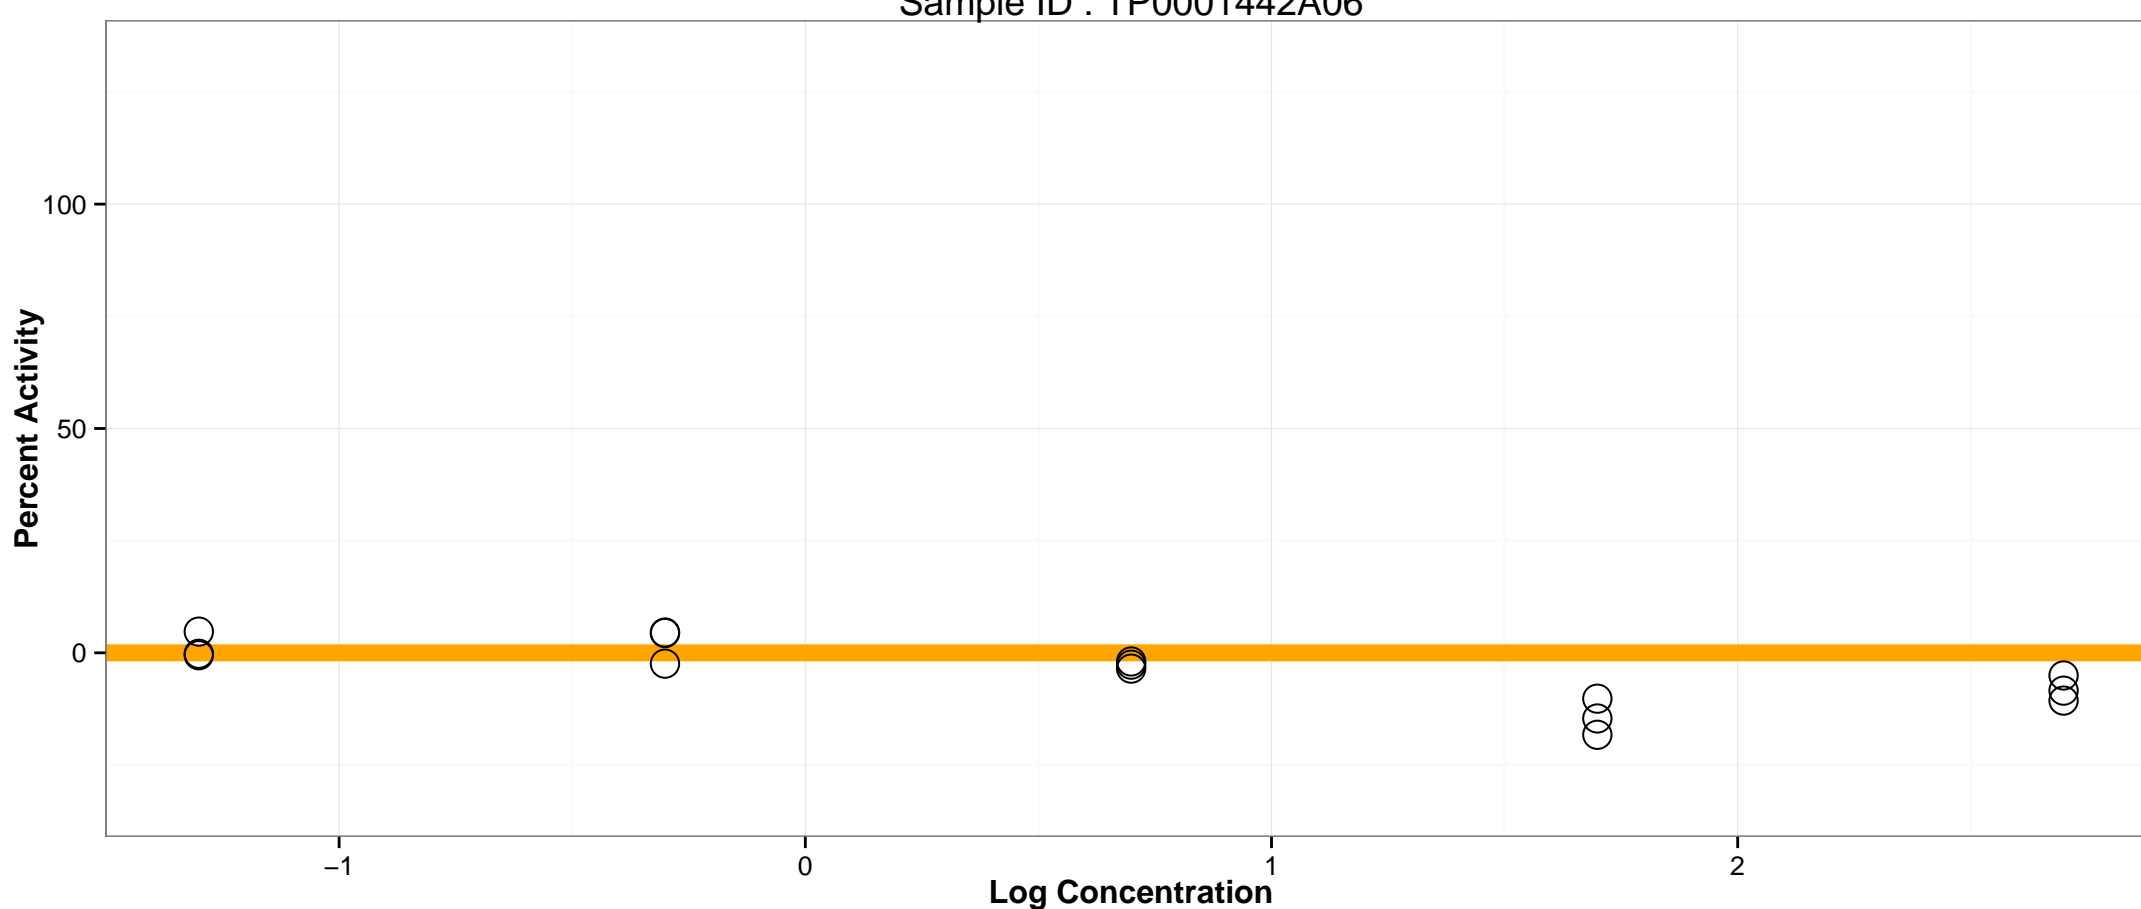

HILL MODEL

HILL MODEL: Not applicable

GAIN-LOSS MODEL

GNLS MODEL: Not applicable

|      | CNST  | HILL | GNLS |
|------|-------|------|------|
| AIC  | 107.1 | NA   | NA   |
| PROB | 1     | NA   | NA   |
| RMSE | 7.97  | NA   | NA   |

MAX\_MEAN : 2.18 MAX\_MED : 4.42 BMAD : 3.71  
COFF : 20 HIT-CALL : 0 FITC : 4 ACTP : 0  
FLAGS :



Chemical : Bensulide  
CAS : 741-58-2

Assay ID 1508 (NHEERL\_TPO\_AUR\_dn)  
Sample ID : TX000710

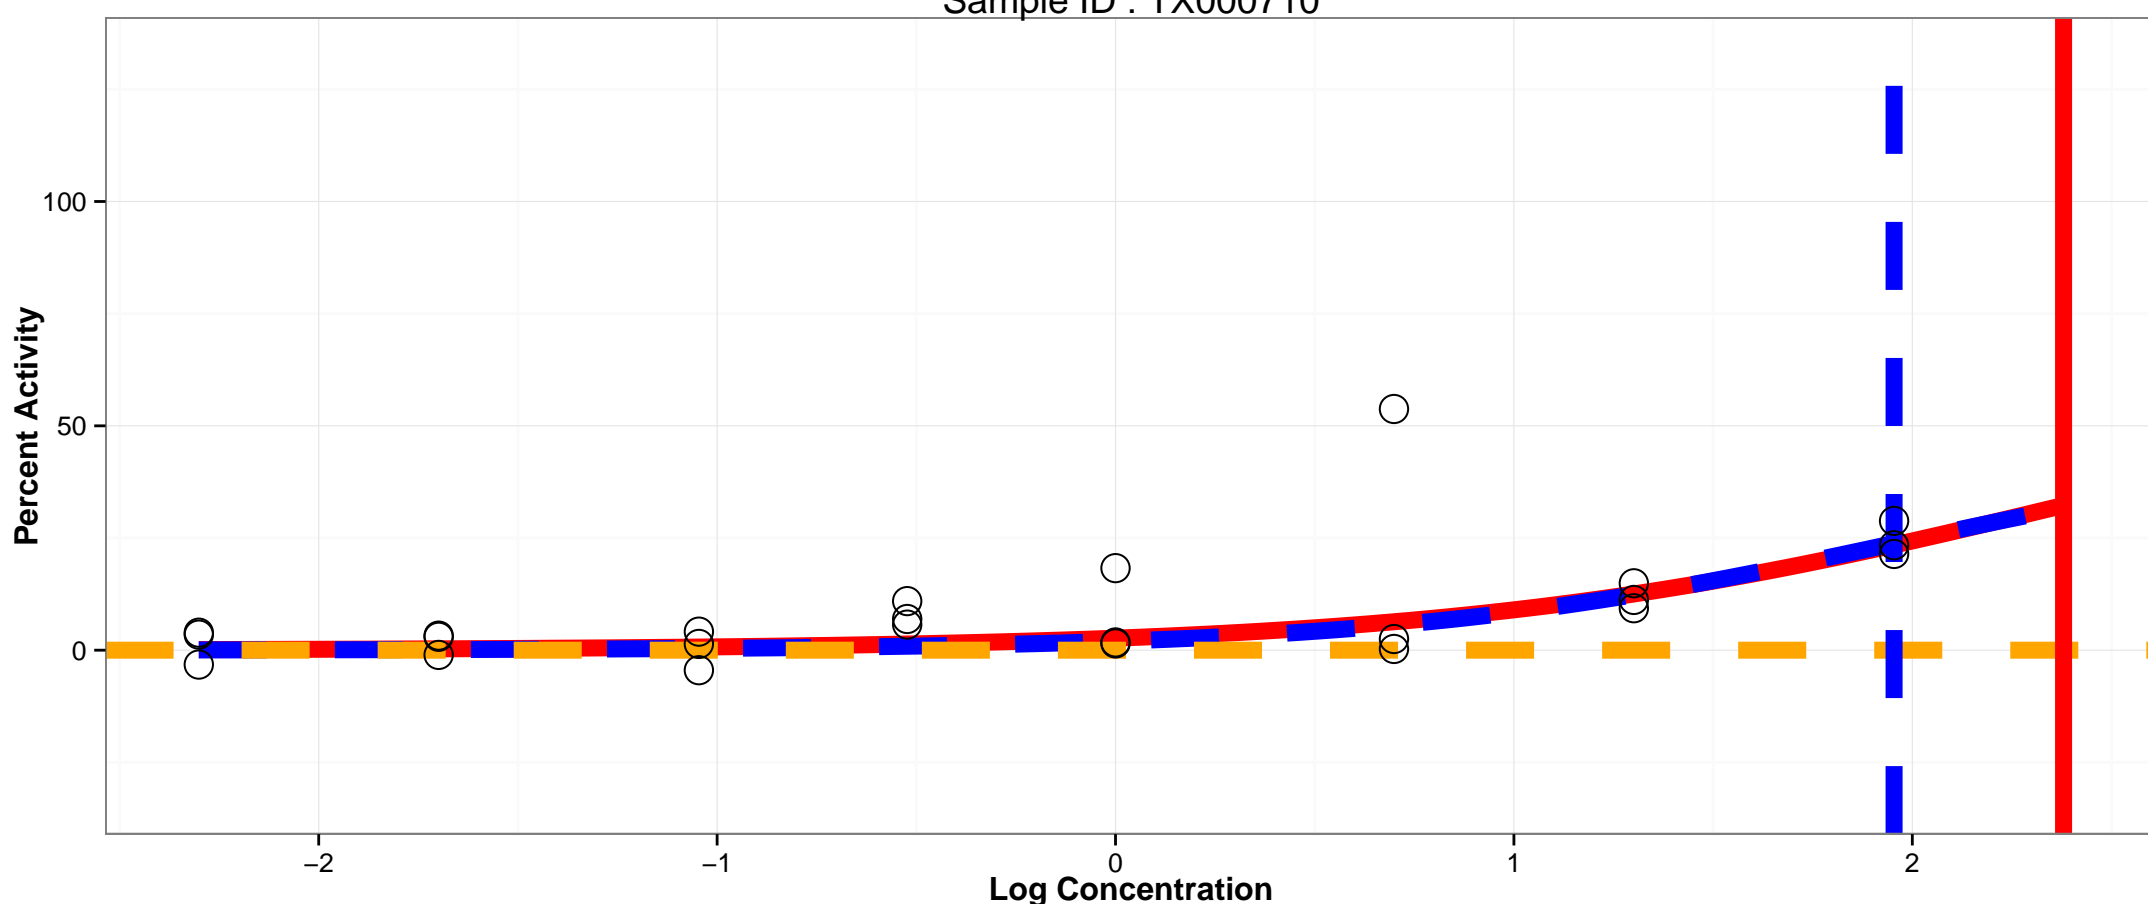

HILL MODEL

|     | tp   | ga   | gw    |
|-----|------|------|-------|
| val | 64.5 | 2.38 | 0.573 |
| sd  | 53.5 | 1.16 | 0.282 |

GAIN-LOSS MODEL

|     | tp   | ga   | gw    | la   | lw   |
|-----|------|------|-------|------|------|
| val | 47.6 | 1.95 | 0.697 | 3.95 | 15.4 |
| sd  | NA   | NA   | NA    | NA   | NA   |

|      | CNST   | HILL   | GNLS   |
|------|--------|--------|--------|
| AIC  | 195.07 | 168.38 | 172.86 |
| PROB | 0      | 0.9    | 0.1    |
| RMSE | 15.56  | 10.86  | 11.05  |

MAX\_MEAN : 24.6 MAX\_MED : 23.4 BMAD : 5.69  
COFF : 20 HIT-CALL : 1 FITC : 42 ACTP : 1  
FLAGS : 11; 6

Assay ID 1509 (NHEERL\_HEK293T\_CellTiterGLO)  
Sample ID : TX000710

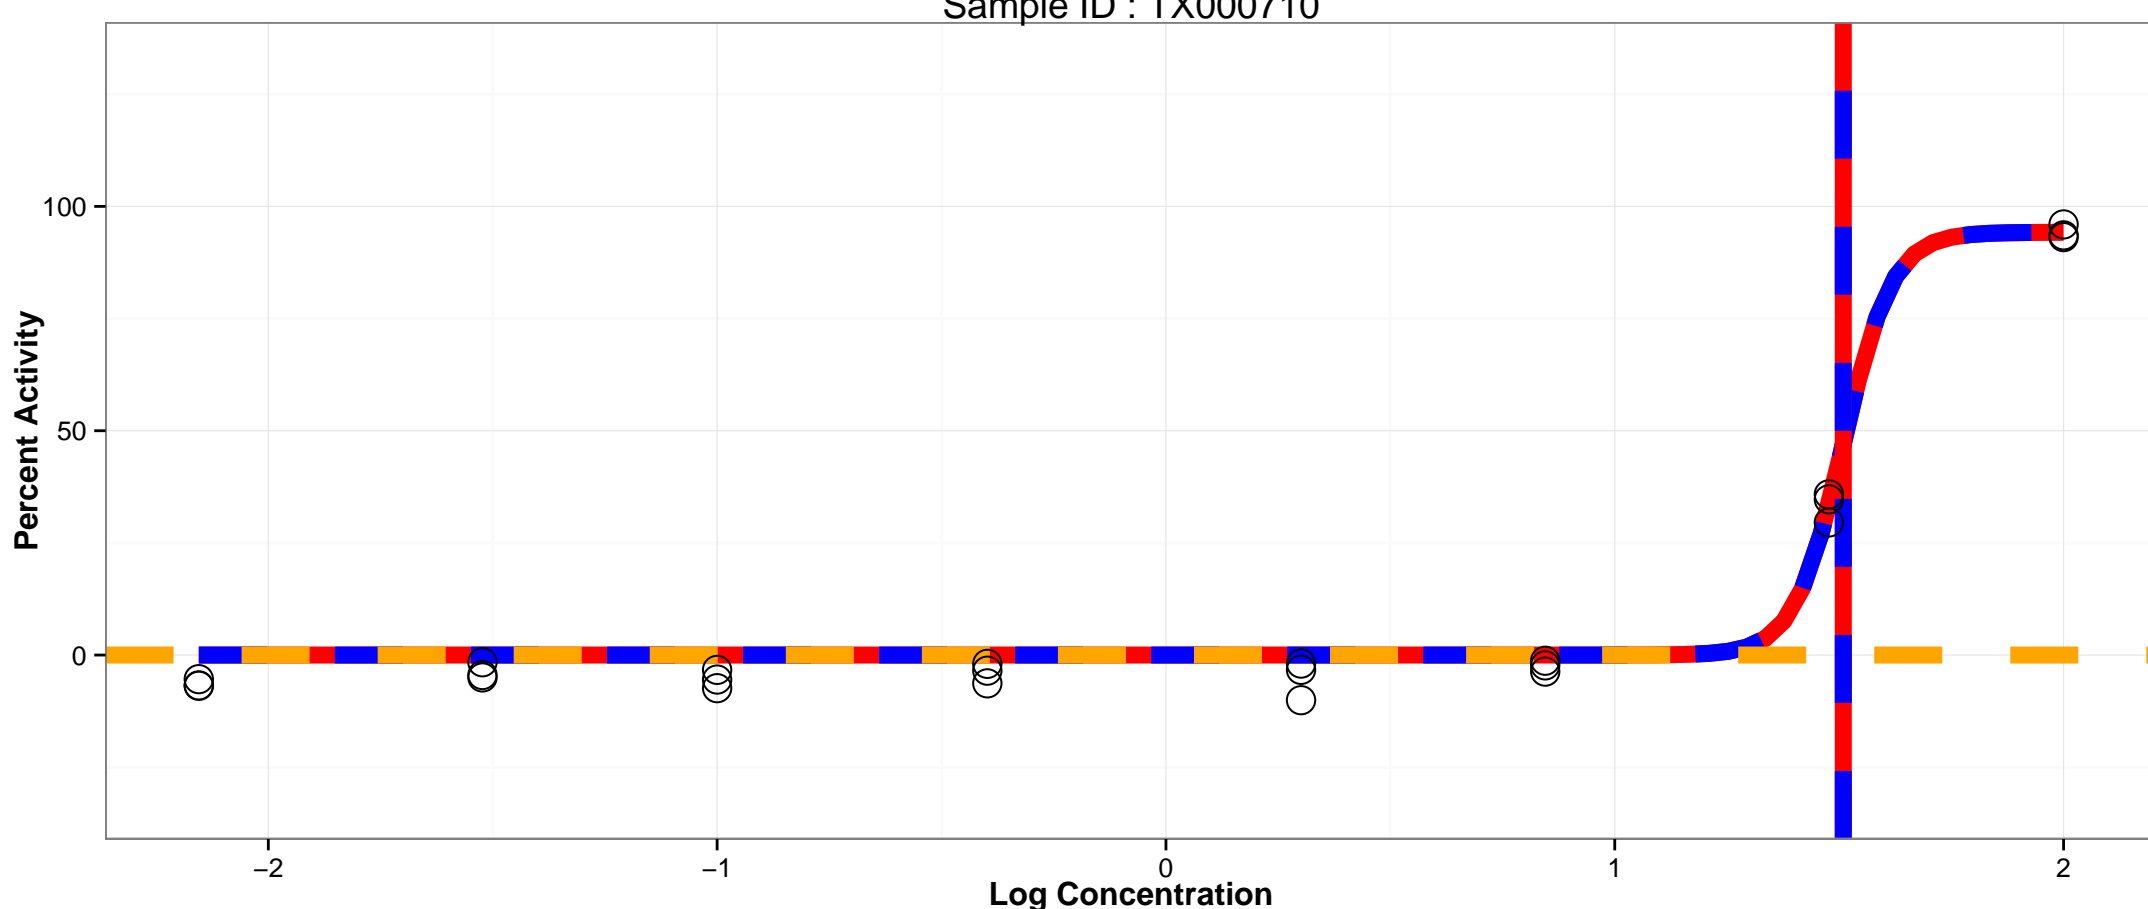

HILL MODEL

|     | tp   | ga      | gw   |
|-----|------|---------|------|
| val | 94.2 | 1.51    | 8    |
| sd  | 2.1  | 0.00978 | 2.37 |

GAIN-LOSS MODEL

|     | tp   | ga   | gw | la   | lw   |
|-----|------|------|----|------|------|
| val | 94.2 | 1.51 | 8  | 2.85 | 17.8 |
| sd  | NA   | NA   | NA | NA   | NA   |

|      | CNST   | HILL   | GNLS   |
|------|--------|--------|--------|
| AIC  | 229.38 | 150.61 | 154.61 |
| PROB | 0      | 0.88   | 0.12   |
| RMSE | 35.63  | 4.48   | 4.48   |

MAX\_MEAN : 94.2 MAX\_MED : 93.6 BMAD : 5.54  
COFF : 20 HIT-CALL : 1 FITC : 41 ACTP : 1  
FLAGS :

Assay ID 1848 (NHEERL\_Quantilum\_inhib\_2\_dn)  
Sample ID : TX000710

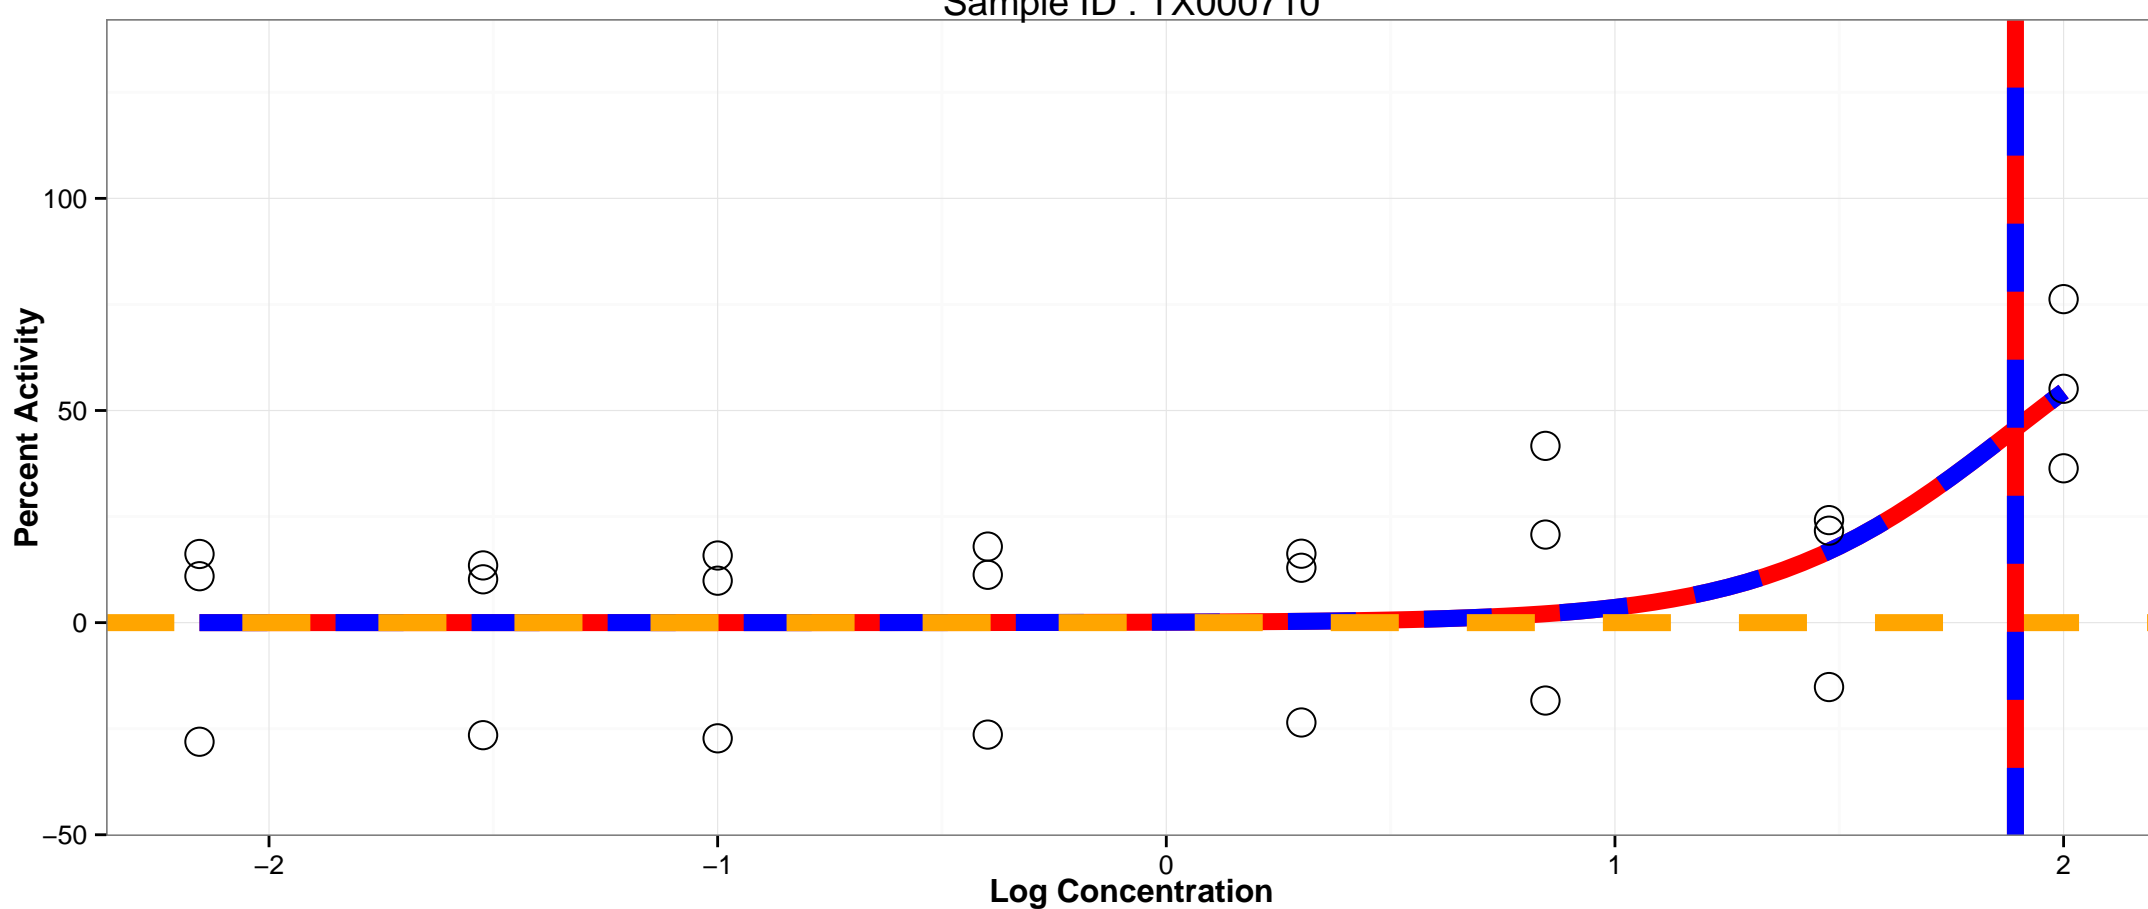

HILL MODEL

|     | tp   | ga   | gw   |
|-----|------|------|------|
| val | 91.5 | 1.89 | 1.56 |
| sd  | 152  | 1.01 | 2.61 |

GAIN-LOSS MODEL

|     | tp   | ga   | gw   | la  | lw   |
|-----|------|------|------|-----|------|
| val | 91.5 | 1.89 | 1.56 | 3.2 | 5.6  |
| sd  | 153  | 1.01 | 2.61 | 748 | 3500 |

|      | CNST   | HILL   | GNLS   |
|------|--------|--------|--------|
| AIC  | 231.82 | 223.73 | 227.73 |
| PROB | 0.02   | 0.87   | 0.12   |
| RMSE | 28.4   | 20.02  | 20.02  |

MAX\_MEAN : 55.9 MAX\_MED : 55.1 BMAD : 8.58  
COFF : 20 HIT-CALL : 1 FITC : 42 ACTP : 0.985  
FLAGS : 6; 10

Assay ID 1824 (NHEERL\_TPO\_GUA\_dn)  
Sample ID : TP0001442A06

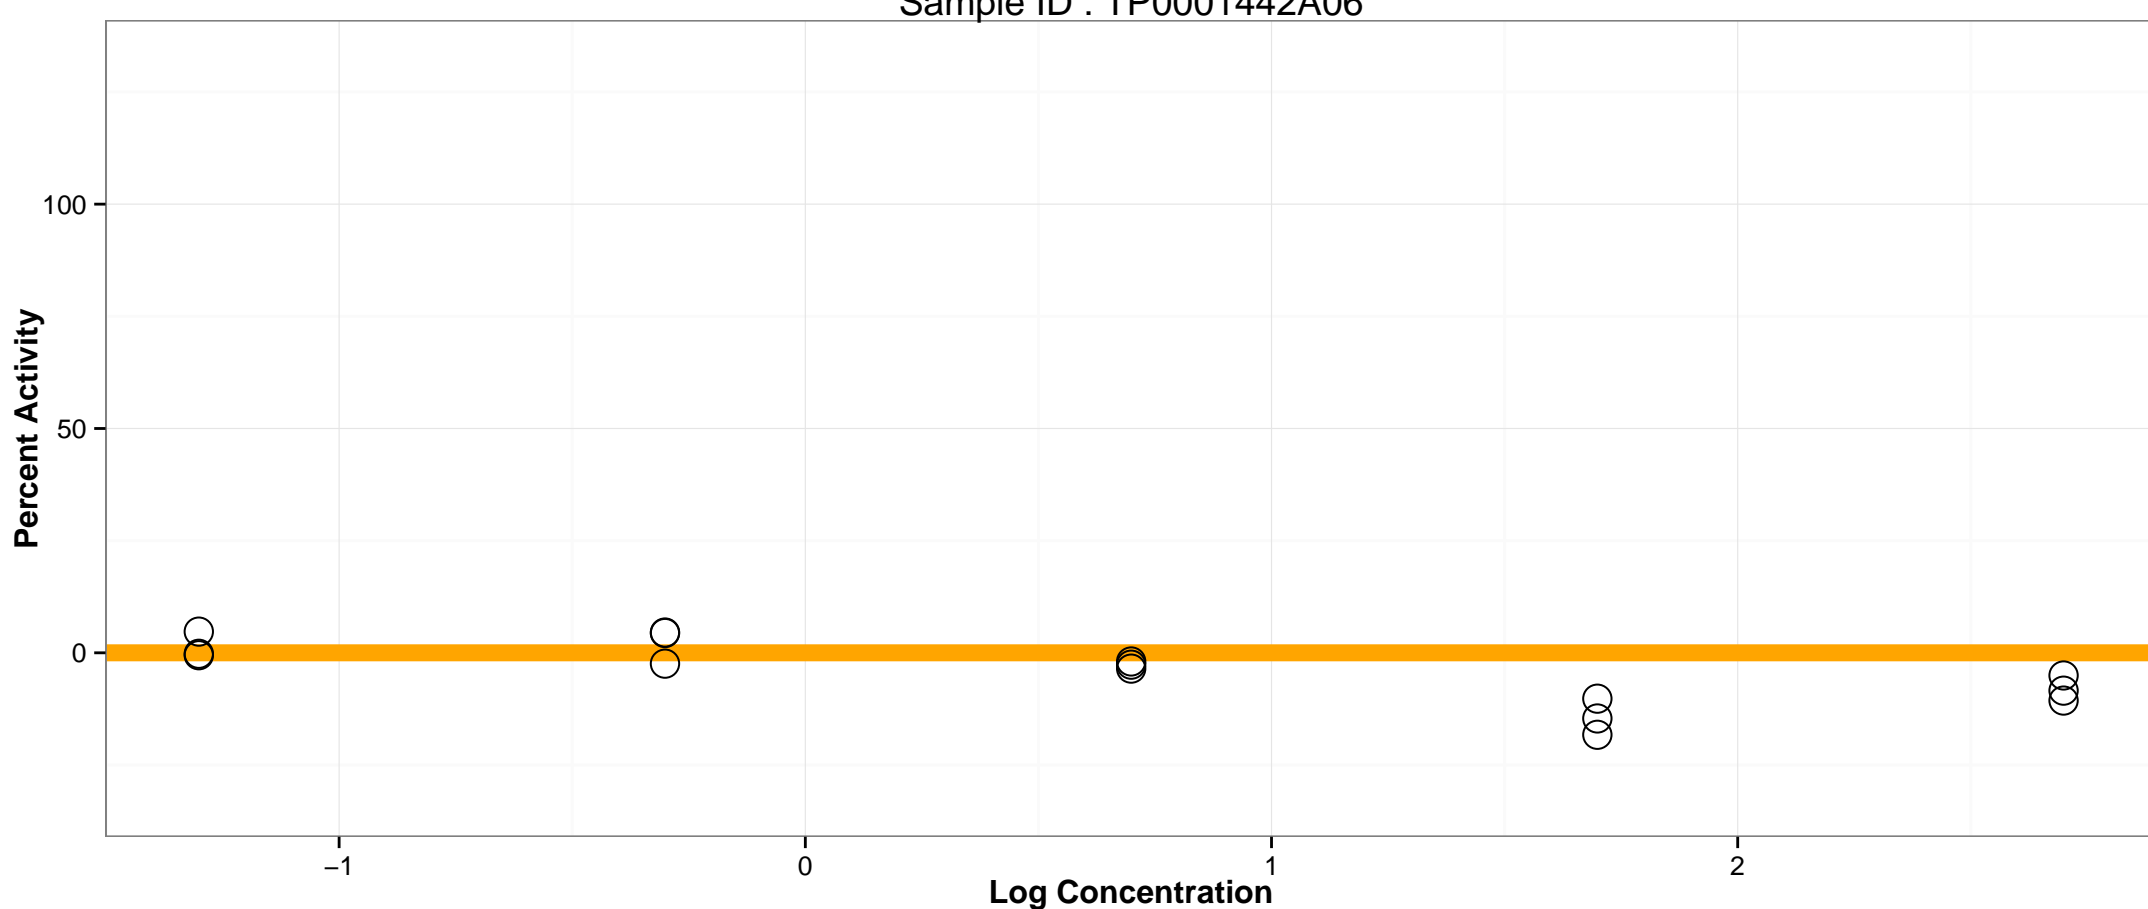

HILL MODEL

HILL MODEL: Not applicable

GAIN-LOSS MODEL

GNLS MODEL: Not applicable

|      | CNST  | HILL | GNLS |
|------|-------|------|------|
| AIC  | 107.1 | NA   | NA   |
| PROB | 1     | NA   | NA   |
| RMSE | 7.97  | NA   | NA   |

MAX\_MEAN : 2.18 MAX\_MED : 4.42 BMAD : 3.71  
COFF : 20 HIT-CALL : 0 FITC : 4 ACTP : 0  
FLAGS :

Chemical : 4-(Butan-2-yl)phenol  
CAS : 99-71-8

Assay ID 1508 (NHEERL\_TPO\_AUR\_dn)  
Sample ID : TX002581

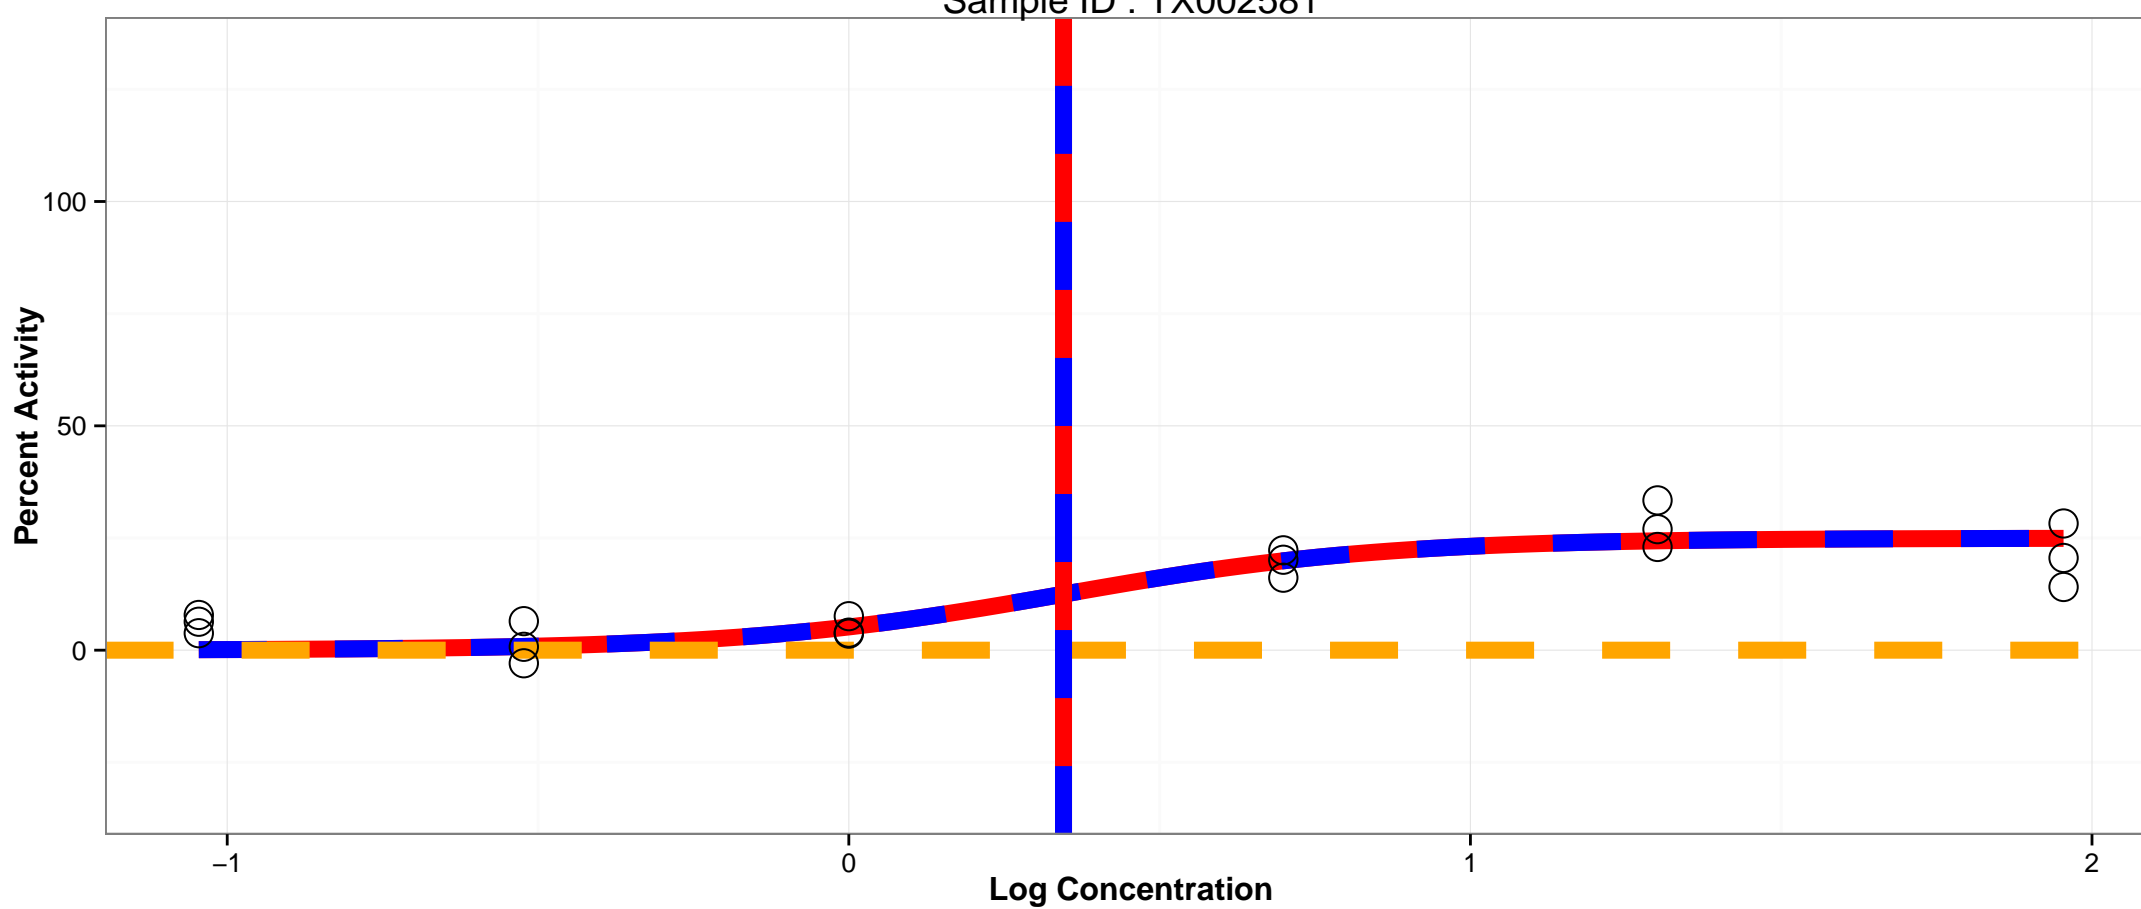

HILL MODEL

|     | tp   | ga    | gw    |
|-----|------|-------|-------|
| val | 25   | 0.345 | 1.69  |
| sd  | 2.54 | 0.131 | 0.558 |

GAIN-LOSS MODEL

|     | tp | ga    | gw   | la   | lw   |
|-----|----|-------|------|------|------|
| val | 25 | 0.345 | 1.69 | 3.51 | 10.9 |
| sd  | NA | NA    | NA   | NA   | NA   |

|      | CNST   | HILL   | GNLS   |
|------|--------|--------|--------|
| AIC  | 156.91 | 117.06 | 121.06 |
| PROB | 0      | 0.88   | 0.12   |
| RMSE | 17.02  | 4.86   | 4.86   |

MAX\_MEAN : 27.8 MAX\_MED : 27 BMAD : 5.69  
COFF : 20 HIT-CALL : 1 FITC : 41 ACTP : 1  
FLAGS :

Assay ID 1509 (NHEERL\_HEK293T\_CellTiterGLO)  
Sample ID : TX002581

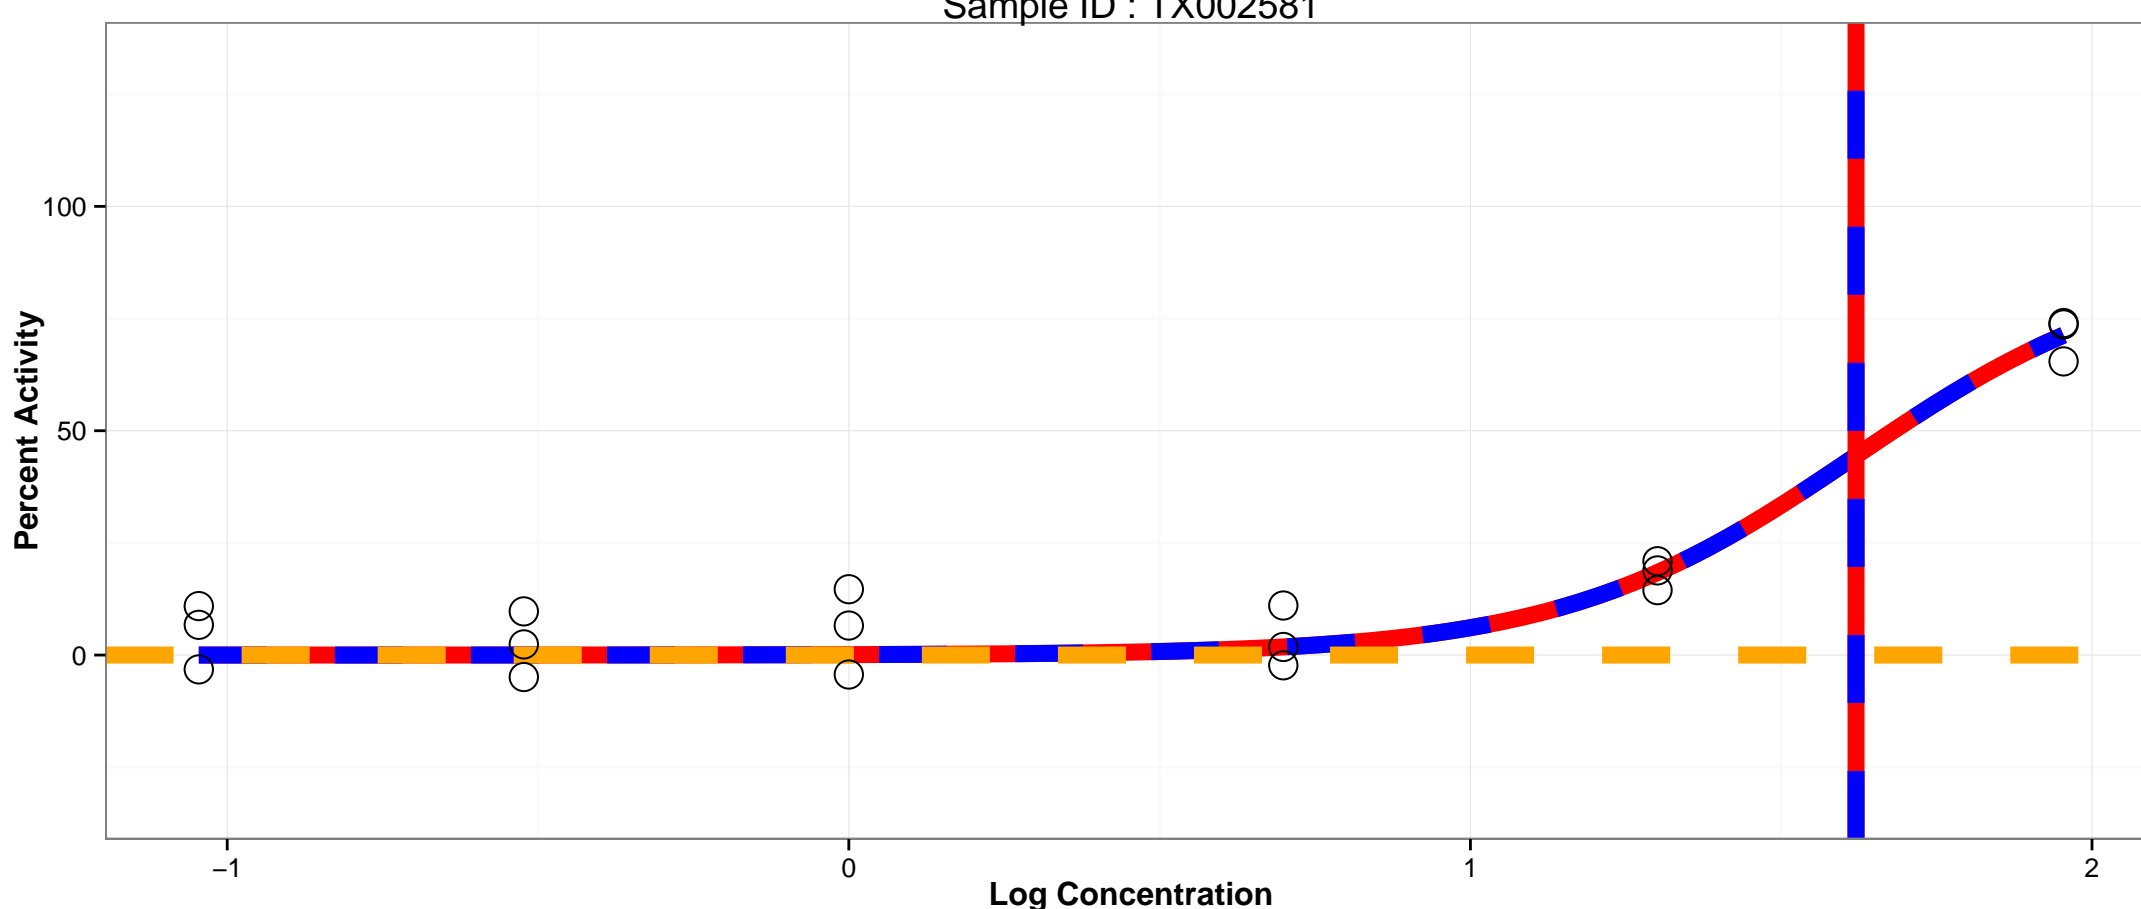

HILL MODEL

|     | tp   | ga    | gw   |
|-----|------|-------|------|
| val | 88.8 | 1.62  | 1.83 |
| sd  | 46.1 | 0.385 | 1.32 |

GAIN-LOSS MODEL

|     | tp   | ga   | gw   | la   | lw   |
|-----|------|------|------|------|------|
| val | 88.8 | 1.62 | 1.83 | 3.45 | 17.7 |
| sd  | NA   | NA   | NA   | NA   | NA   |

|      | CNST   | HILL  | GNLS  |
|------|--------|-------|-------|
| AIC  | 171.18 | 127.4 | 131.4 |
| PROB | 0      | 0.88  | 0.12  |
| RMSE | 30.65  | 6.43  | 6.43  |

MAX\_MEAN : 71.1 MAX\_MED : 73.7 BMAD : 5.54  
COFF : 20 HIT-CALL : 1 FITC : 42 ACTP : 1  
FLAGS :

Assay ID 1848 (NHEERL\_Quantilum\_inhib\_2\_dn)  
Sample ID : TX002581

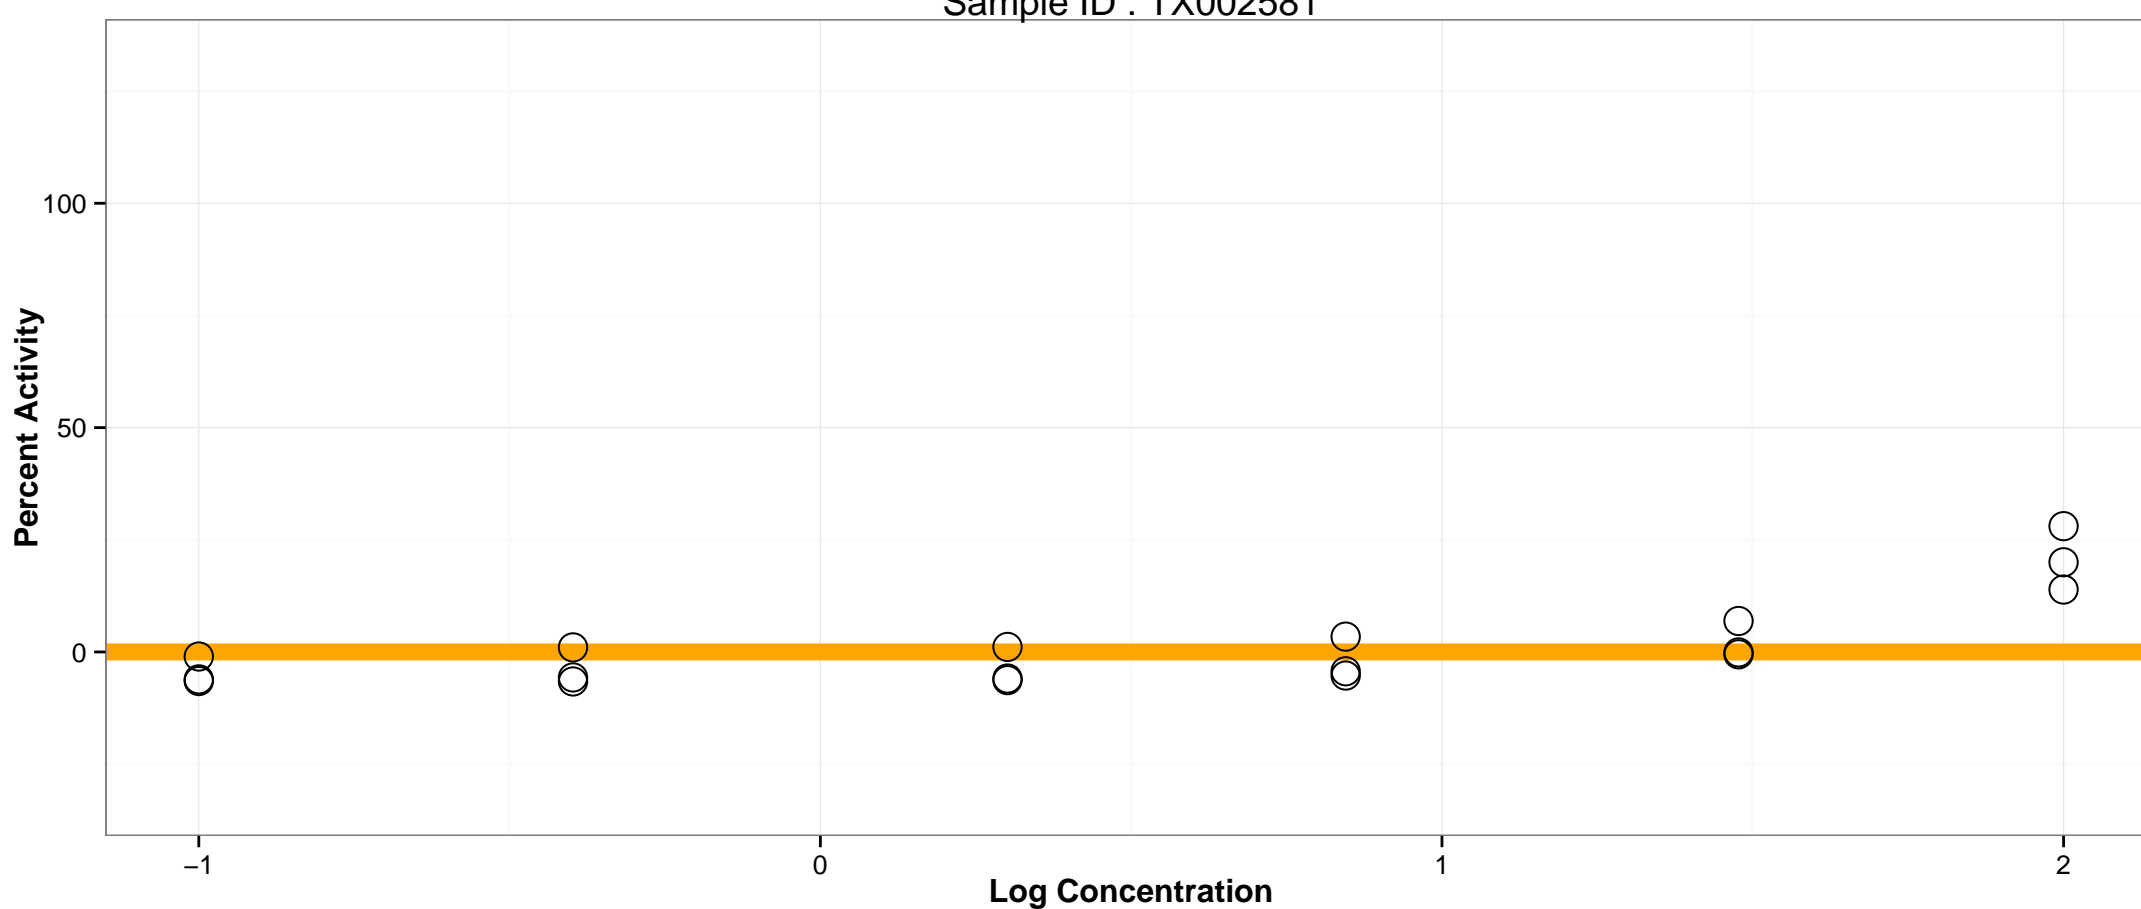

HILL MODEL

HILL MODEL: Not applicable

GAIN-LOSS MODEL

GNLS MODEL: Not applicable

|      | CNST   | HILL | GNLS |
|------|--------|------|------|
| AIC  | 132.29 | NA   | NA   |
| PROB | 1      | NA   | NA   |
| RMSE | 9.77   | NA   | NA   |

MAX\_MEAN : 20.7 MAX\_MED : 20 BMAD : 8.58  
COFF : 20 HIT-CALL : 0 FITC : 4 ACTP : 0  
FLAGS :

Assay ID 1824 (NHEERL\_TPO\_GUA\_dn)  
Sample ID : TP0001442A07

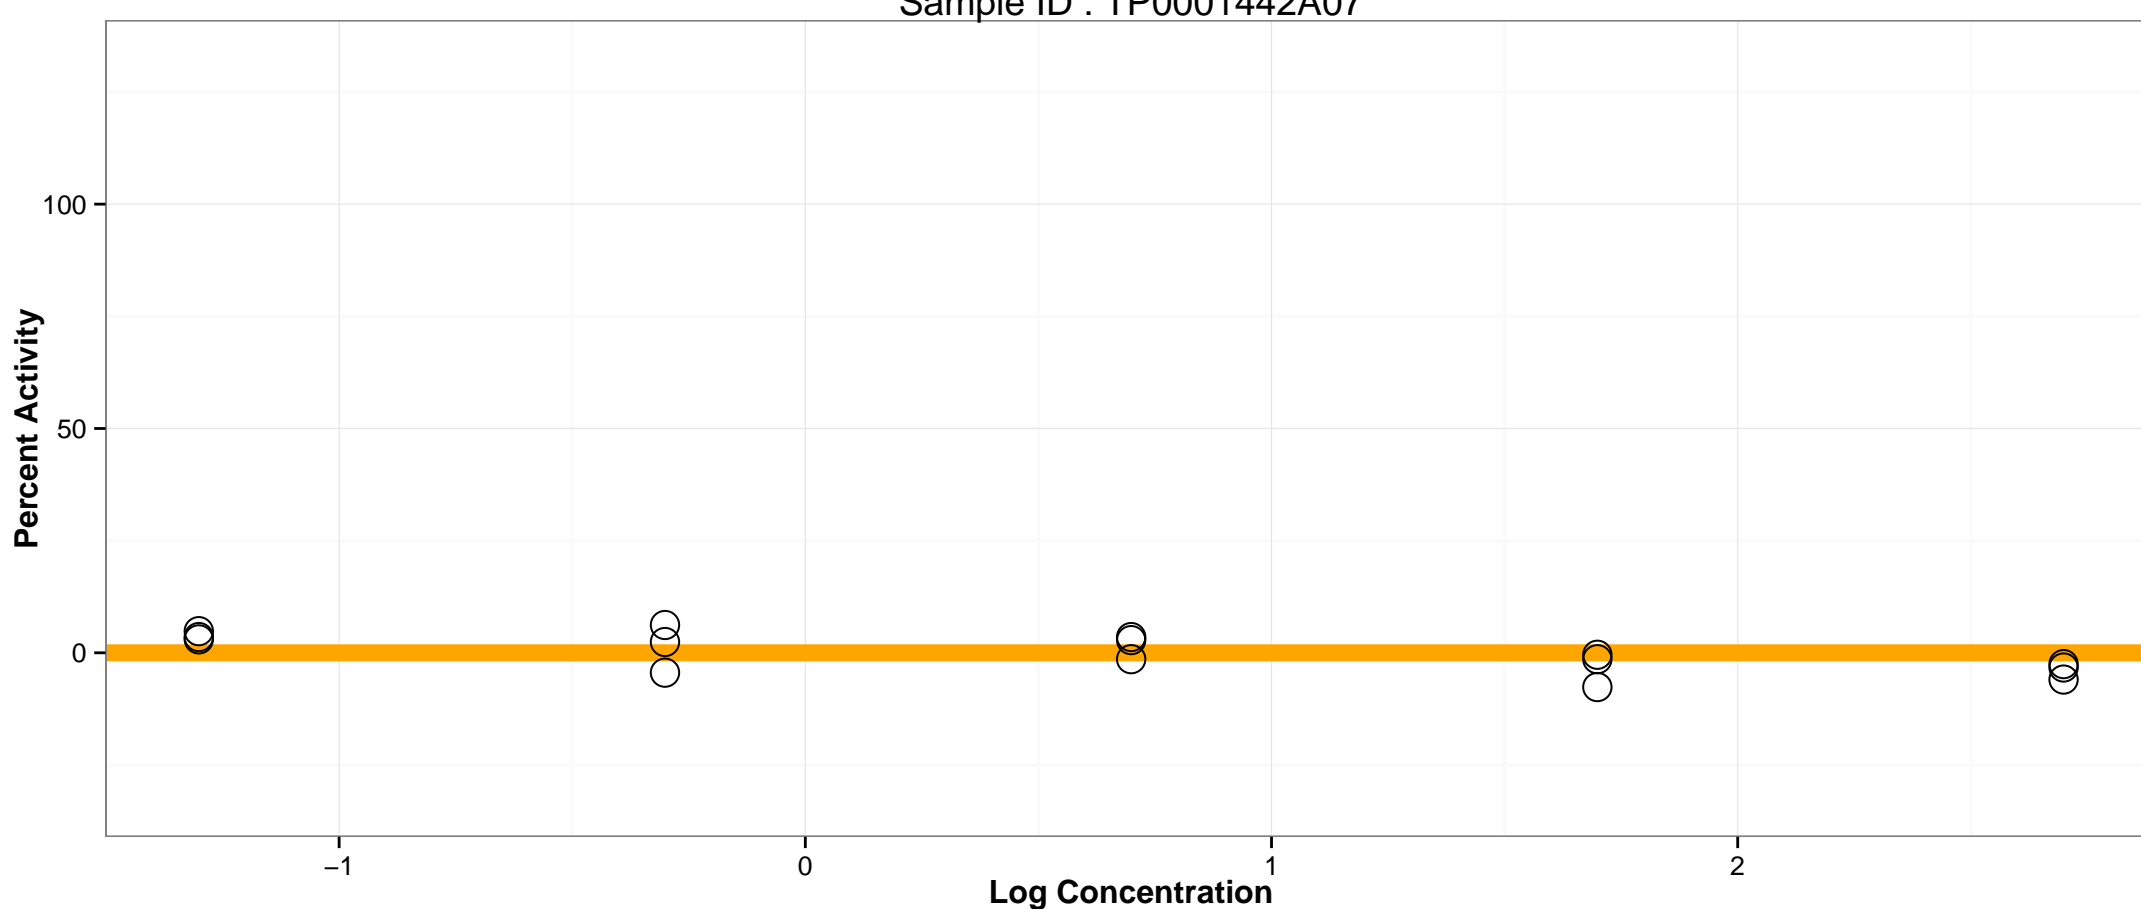

HILL MODEL

HILL MODEL: Not applicable

GAIN-LOSS MODEL

GNLS MODEL: Not applicable

|      | CNST  | HILL | GNLS |
|------|-------|------|------|
| AIC  | 88.56 | NA   | NA   |
| PROB | 1     | NA   | NA   |
| RMSE | 4.03  | NA   | NA   |

MAX\_MEAN : 3.79 MAX\_MED : 3.53 BMAD : 3.71  
COFF : 20 HIT-CALL : 0 FITC : 4 ACTP : 0  
FLAGS :

Assay ID 1508 (NHEERL\_TPO\_AUR\_dn)  
Sample ID : TX012272

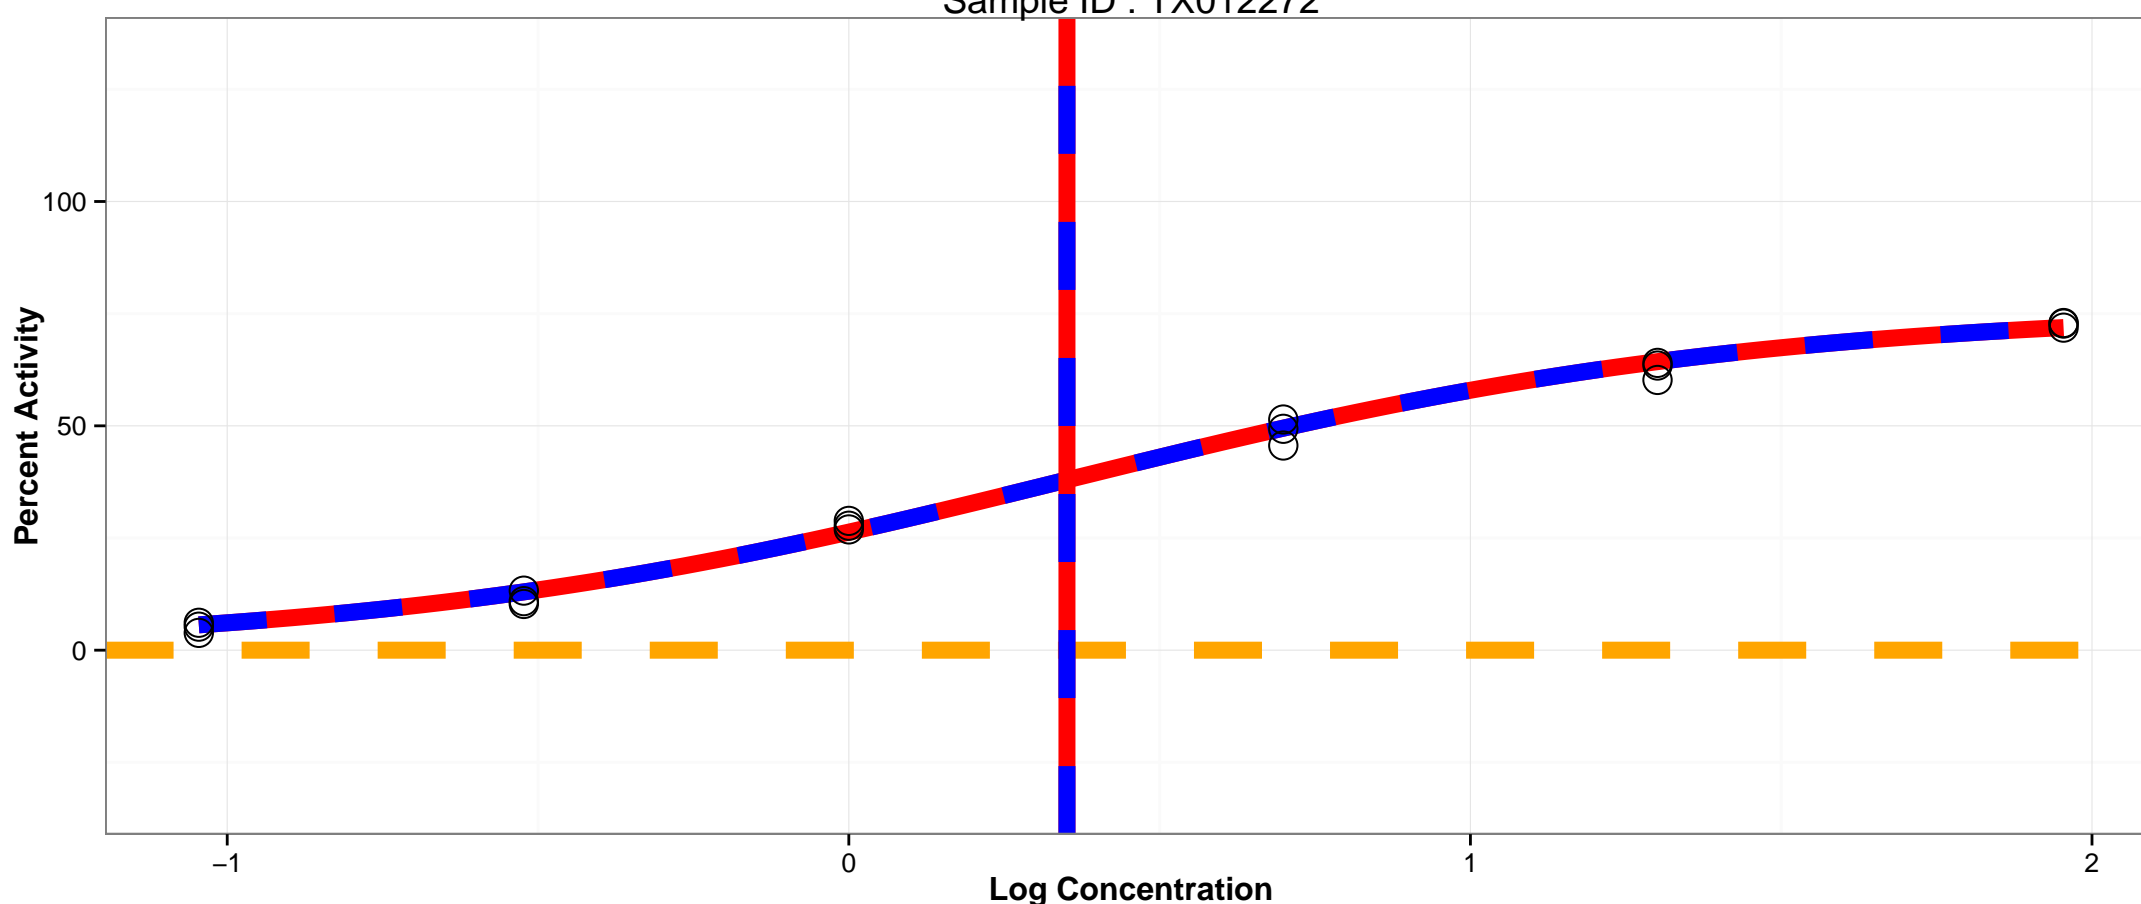

HILL MODEL

|     | tp   | ga     | gw     |
|-----|------|--------|--------|
| val | 75.9 | 0.351  | 0.784  |
| sd  | 1.43 | 0.0403 | 0.0382 |

GAIN-LOSS MODEL

|     | tp   | ga    | gw    | la   | lw   |
|-----|------|-------|-------|------|------|
| val | 75.9 | 0.351 | 0.784 | 3.87 | 17.7 |
| sd  | NA   | NA    | NA    | NA   | NA   |

|      | CNST  | HILL | GNLS |
|------|-------|------|------|
| AIC  | 193.1 | 81.7 | 85.7 |
| PROB | 0     | 0.88 | 0.12 |
| RMSE | 45.65 | 1.85 | 1.85 |

MAX\_MEAN : 72.5 MAX\_MED : 72.8 BMAD : 5.69  
COFF : 20 HIT-CALL : 1 FITC : 42 ACTP : 1  
FLAGS :

Assay ID 1509 (NHEERL\_HEK293T\_CellTiterGLO)  
Sample ID : TX012272

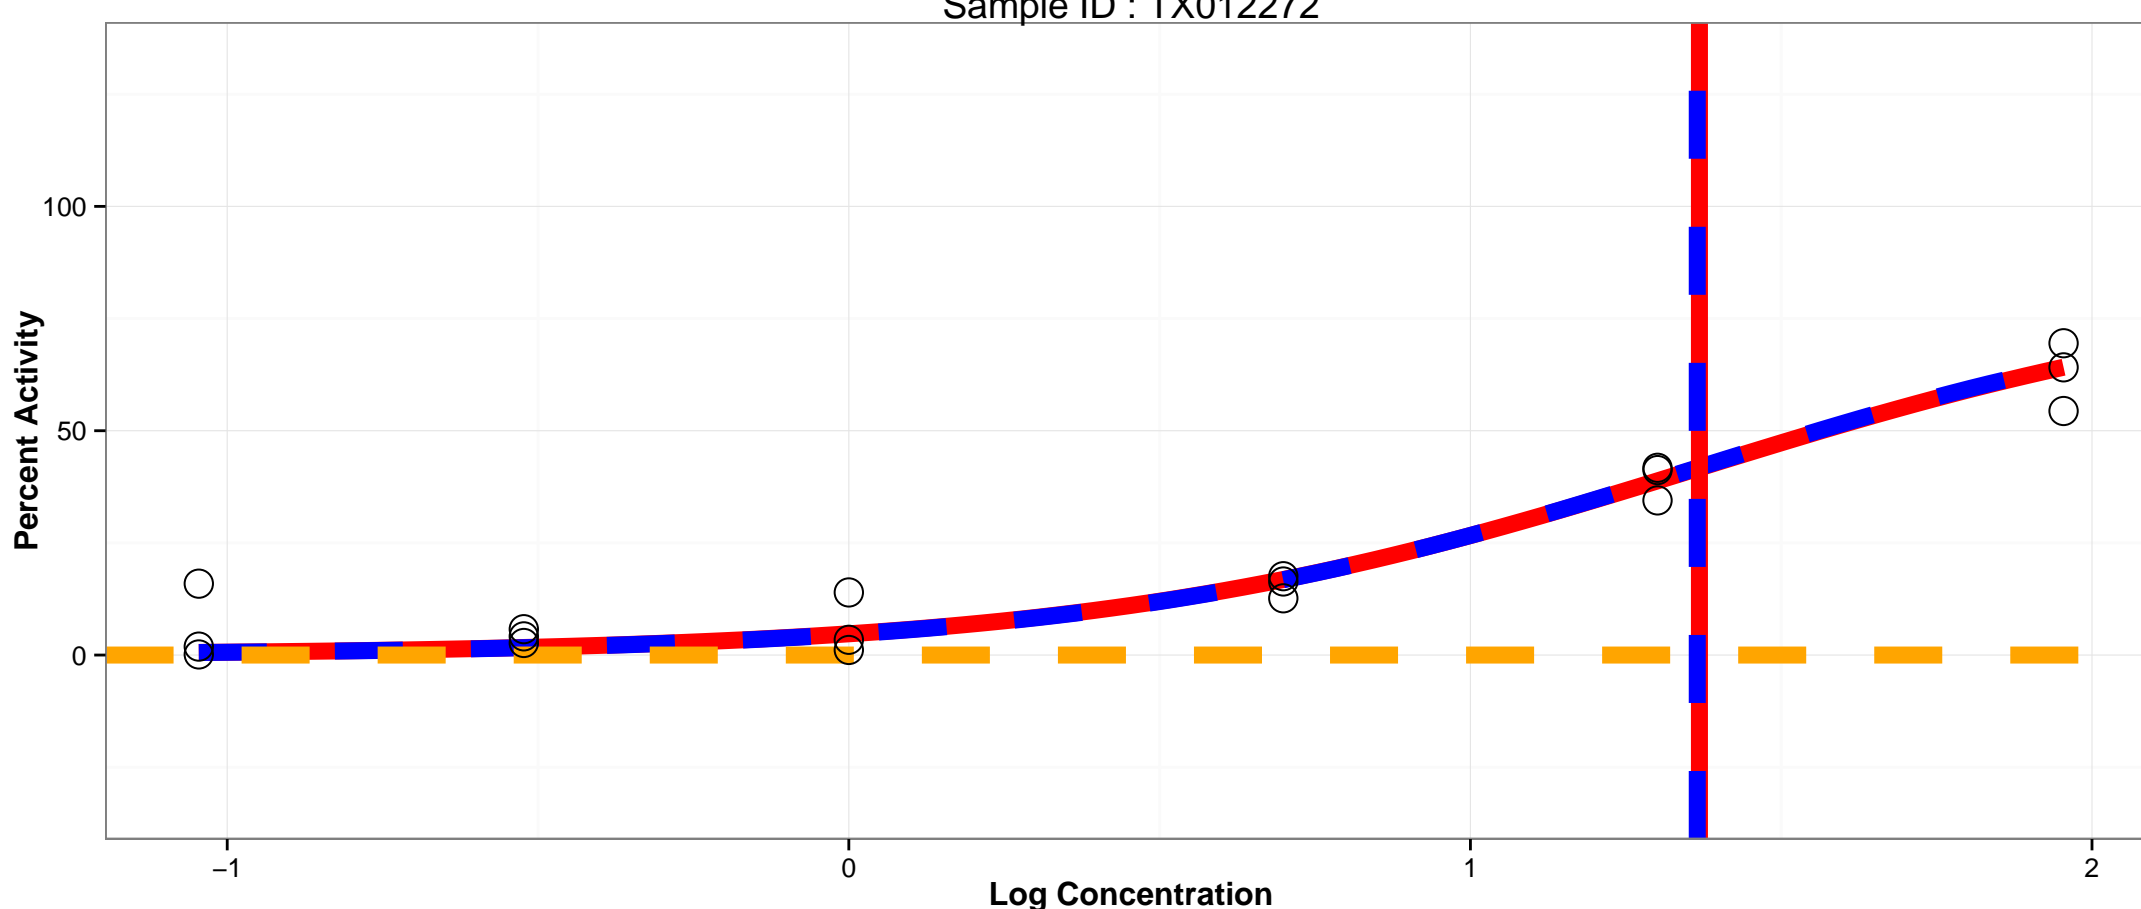

HILL MODEL

|     | tp   | ga    | gw    |
|-----|------|-------|-------|
| val | 83.4 | 1.37  | 0.892 |
| sd  | 15.7 | 0.227 | 0.199 |

GAIN-LOSS MODEL

|     | tp   | ga    | gw    | la   | lw   |
|-----|------|-------|-------|------|------|
| val | 83.4 | 1.36  | 0.899 | 2.22 | 8.34 |
| sd  | 46.1 | 0.512 | 0.262 | 7.71 | 234  |

|      | CNST  | HILL   | GNLS   |
|------|-------|--------|--------|
| AIC  | 176.9 | 118.07 | 122.06 |
| PROB | 0     | 0.88   | 0.12   |
| RMSE | 31.45 | 5.46   | 5.46   |

MAX\_MEAN : 62.7 MAX\_MED : 64.1 BMAD : 5.54  
COFF : 20 HIT-CALL : 1 FITC : 42 ACTP : 1  
FLAGS :

Assay ID 1848 (NHEERL\_Quantilum\_inhib\_2\_dn)  
Sample ID : TX012272

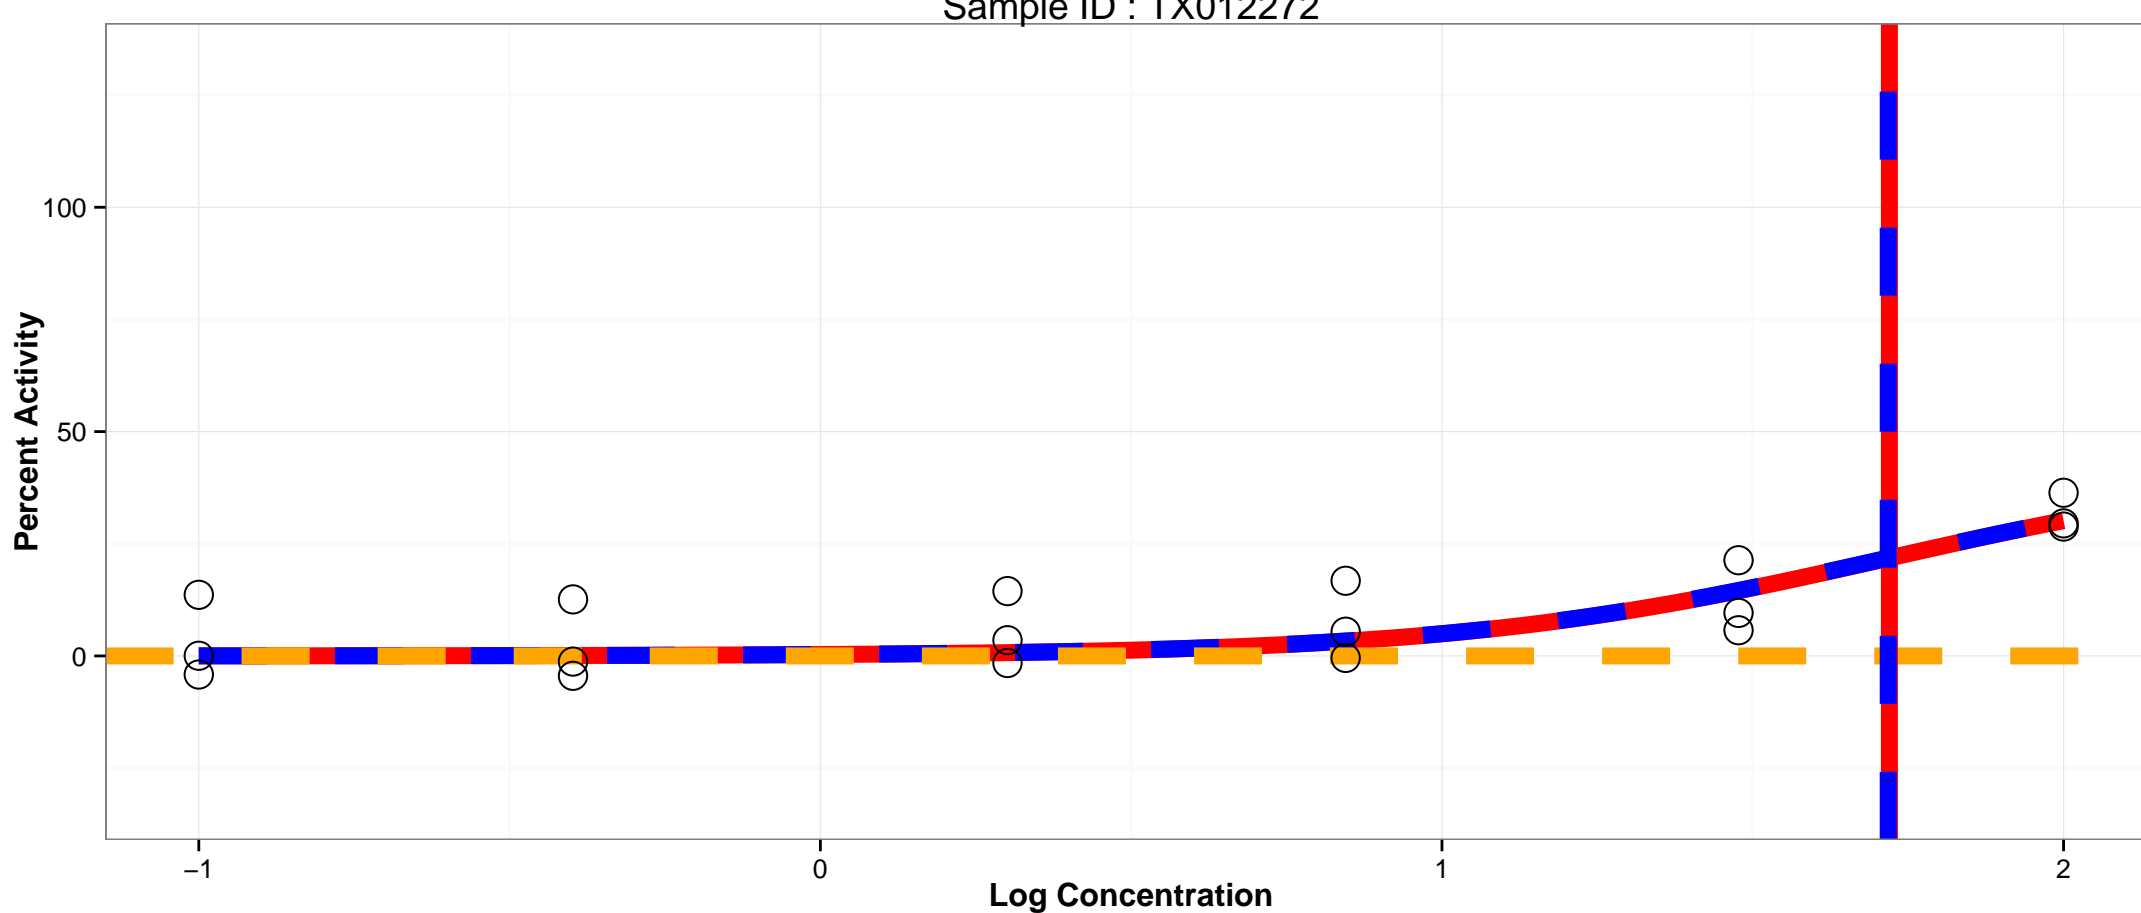

HILL MODEL

|     | tp   | ga    | gw    |
|-----|------|-------|-------|
| val | 43.7 | 1.72  | 1.24  |
| sd  | 18.7 | 0.344 | 0.825 |

GAIN-LOSS MODEL

|     | tp   | ga    | gw    | la   | lw   |
|-----|------|-------|-------|------|------|
| val | 43.7 | 1.72  | 1.24  | 3.31 | 6.36 |
| sd  | 18.7 | 0.348 | 0.816 | 1790 | 8680 |

|      | CNST   | HILL   | GNLS   |
|------|--------|--------|--------|
| AIC  | 152.59 | 131.84 | 135.84 |
| PROB | 0      | 0.88   | 0.12   |
| RMSE | 15.86  | 7.35   | 7.35   |

MAX\_MEAN : 31.6 MAX\_MED : 29.6 BMAD : 8.58  
COFF : 20 HIT-CALL : 1 FITC : 42 ACTP : 1  
FLAGS : 6

Assay ID 1824 (NHEERL\_TPO\_GUA\_dn)  
Sample ID : TP0001442B01

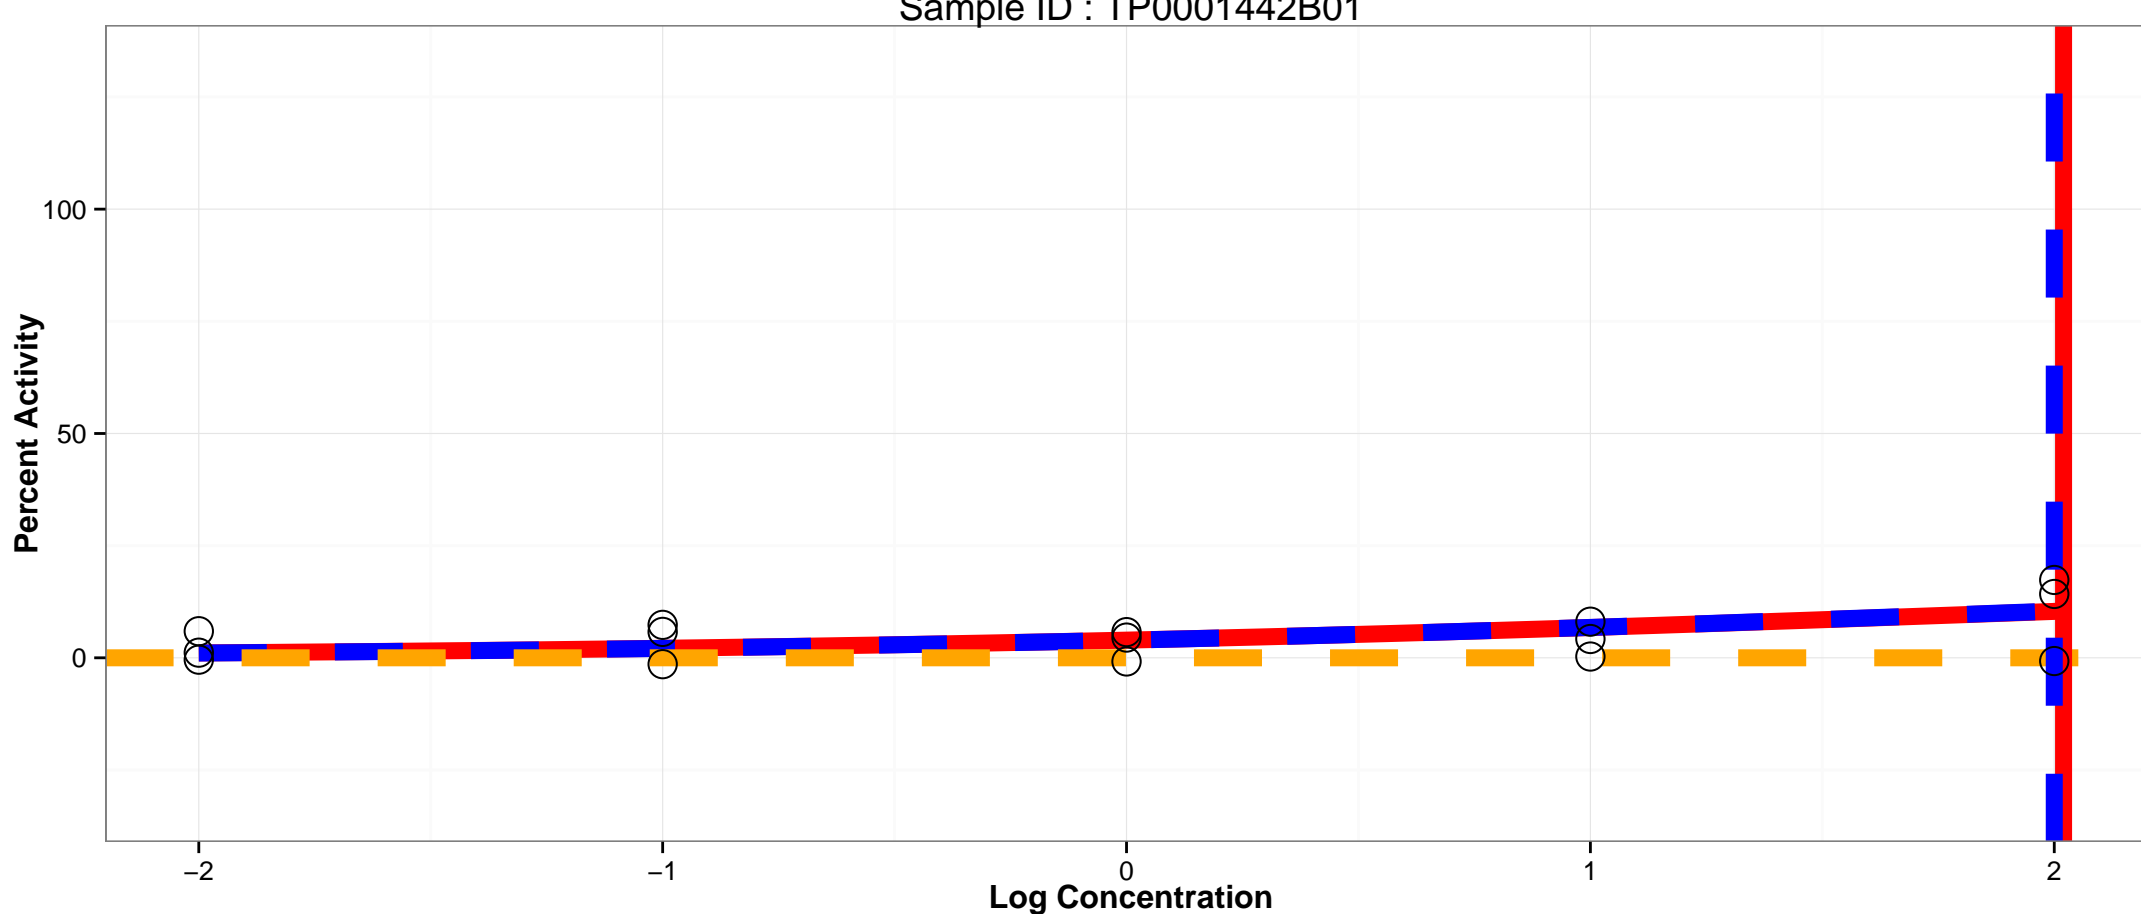

HILL MODEL

|     | tp   | ga   | gw    |
|-----|------|------|-------|
| val | 20.8 | 2.02 | 0.313 |
| sd  | 24.5 | 2.32 | 0.269 |

GAIN-LOSS MODEL

|     | tp   | ga | gw    | la   | lw   |
|-----|------|----|-------|------|------|
| val | 20.8 | 2  | 0.317 | 2.78 | 17.9 |
| sd  | NA   | NA | NA    | NA   | NA   |

|      | CNST   | HILL  | GNLS   |
|------|--------|-------|--------|
| AIC  | 103.11 | 98.54 | 102.54 |
| PROB | 0.08   | 0.81  | 0.11   |
| RMSE | 7.16   | 4.77  | 4.78   |

MAX\_MEAN : 10.3 MAX\_MED : 14.2 BMAD : 3.71  
COFF : 20 HIT-CALL : 0 FITC : 21 ACTP : 0.918  
FLAGS : 12

Chemical : Thiophanate-methyl  
CAS : 23564-05-8

Assay ID 1508 (NHEERL\_TPO\_AUR\_dn)  
Sample ID : TX001001

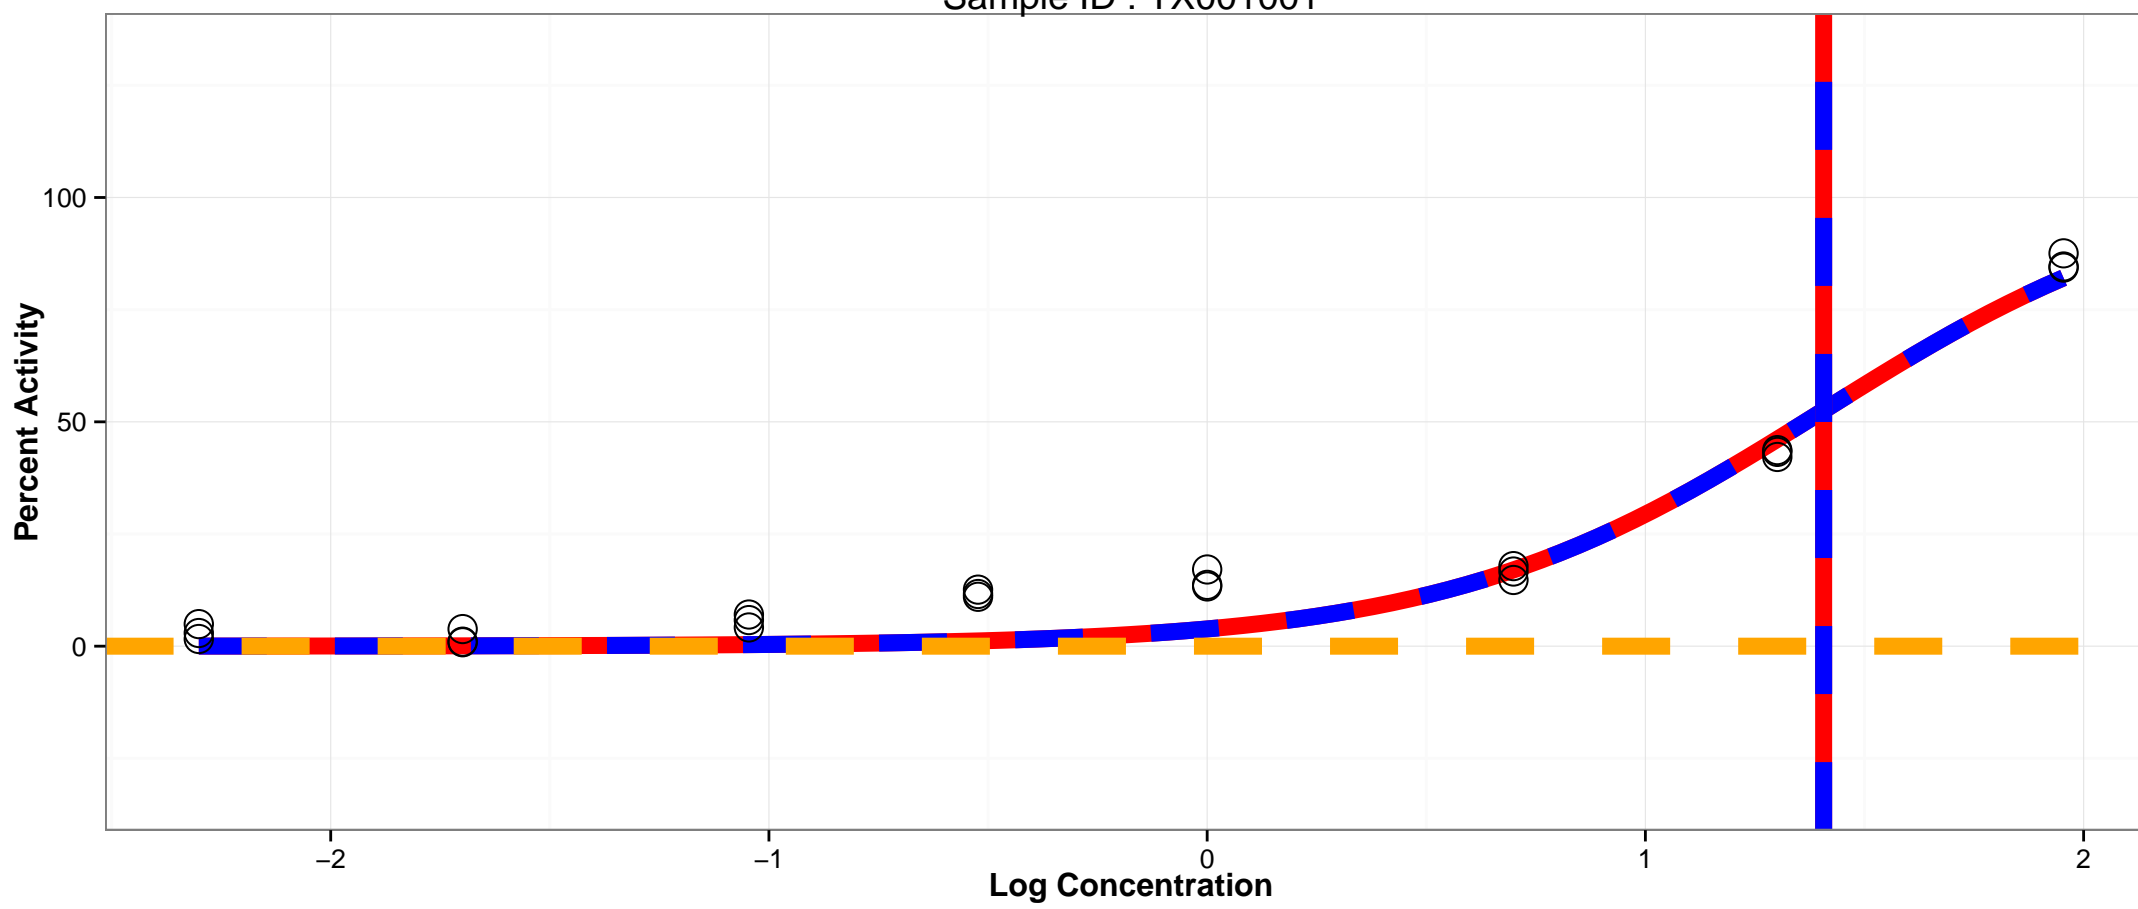

HILL MODEL

|     | tp   | ga    | gw    |
|-----|------|-------|-------|
| val | 105  | 1.41  | 1.01  |
| sd  | 12.7 | 0.128 | 0.181 |

GAIN-LOSS MODEL

|     | tp   | ga    | gw    | la   | lw   |
|-----|------|-------|-------|------|------|
| val | 105  | 1.41  | 1.01  | 2.91 | 9.63 |
| sd  | 12.7 | 0.128 | 0.181 | 967  | 9740 |

|      | CNST   | HILL   | GNLS   |
|------|--------|--------|--------|
| AIC  | 235.99 | 165.01 | 169.01 |
| PROB | 0      | 0.88   | 0.12   |
| RMSE | 35.1   | 6.18   | 6.18   |

MAX\_MEAN : 85.5 MAX\_MED : 84.6 BMAD : 5.69  
COFF : 20 HIT-CALL : 1 FITC : 42 ACTP : 1  
FLAGS :

Assay ID 1509 (NHEERL\_HEK293T\_CellTiterGLO)  
Sample ID : TX001001

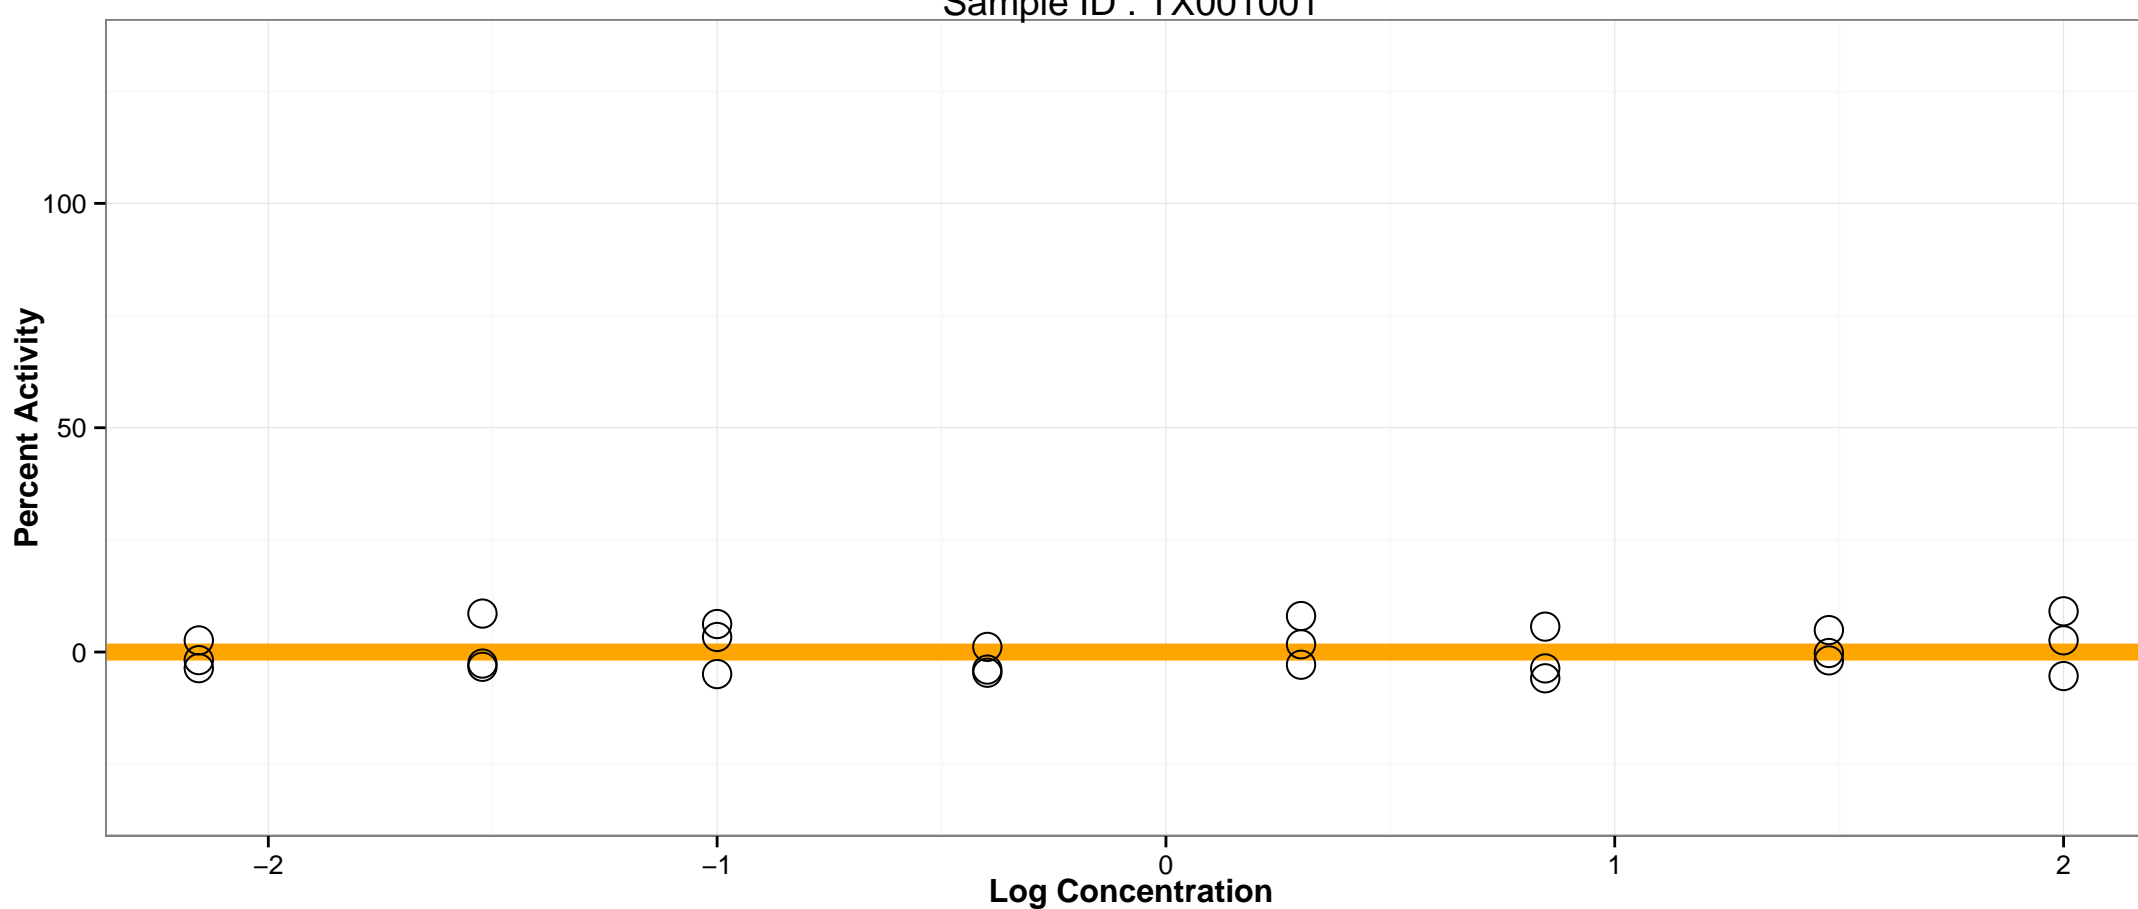

HILL MODEL

HILL MODEL: Not applicable

GAIN-LOSS MODEL

GNLS MODEL: Not applicable

|      | CNST   | HILL | GNLS |
|------|--------|------|------|
| AIC  | 147.46 | NA   | NA   |
| PROB | 1      | NA   | NA   |
| RMSE | 4.69   | NA   | NA   |

MAX\_MEAN : 2.32 MAX\_MED : 3.37 BMAD : 5.54  
COFF : 20 HIT-CALL : 0 FITC : 4 ACTP : 0  
FLAGS :

Assay ID 1848 (NHEERL\_Quantilum\_inhib\_2\_dn)  
Sample ID : TX001001

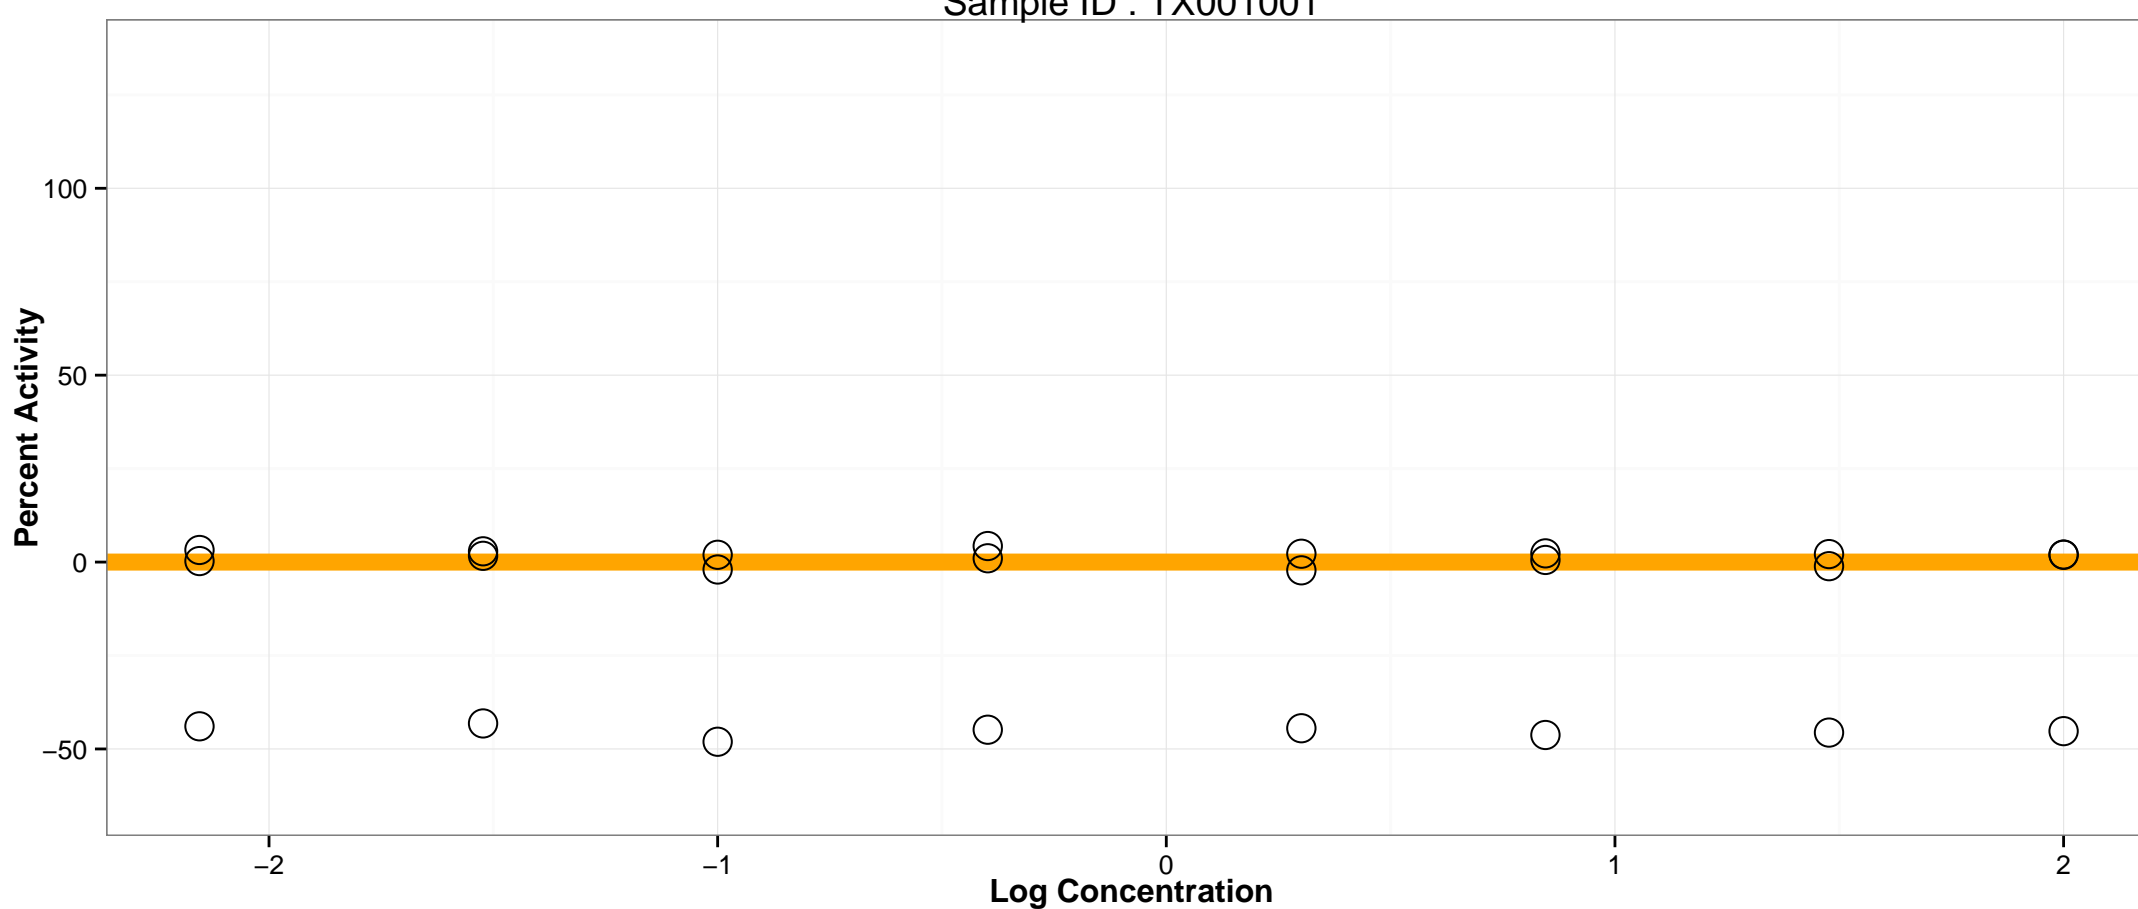

HILL MODEL

HILL MODEL: Not applicable

GAIN-LOSS MODEL

GNLS MODEL: Not applicable

|      | CNST   | HILL | GNLS |
|------|--------|------|------|
| AIC  | 225.93 | NA   | NA   |
| PROB | 1      | NA   | NA   |
| RMSE | 26.16  | NA   | NA   |

MAX\_MEAN : -12.9 MAX\_MED : 1.97 BMAD : 8.58  
COFF : 20 HIT-CALL : 0 FITC : 4 ACTP : 0  
FLAGS : 10

Assay ID 1824 (NHEERL\_TPO\_GUA\_dn)  
Sample ID : TP0001442B03

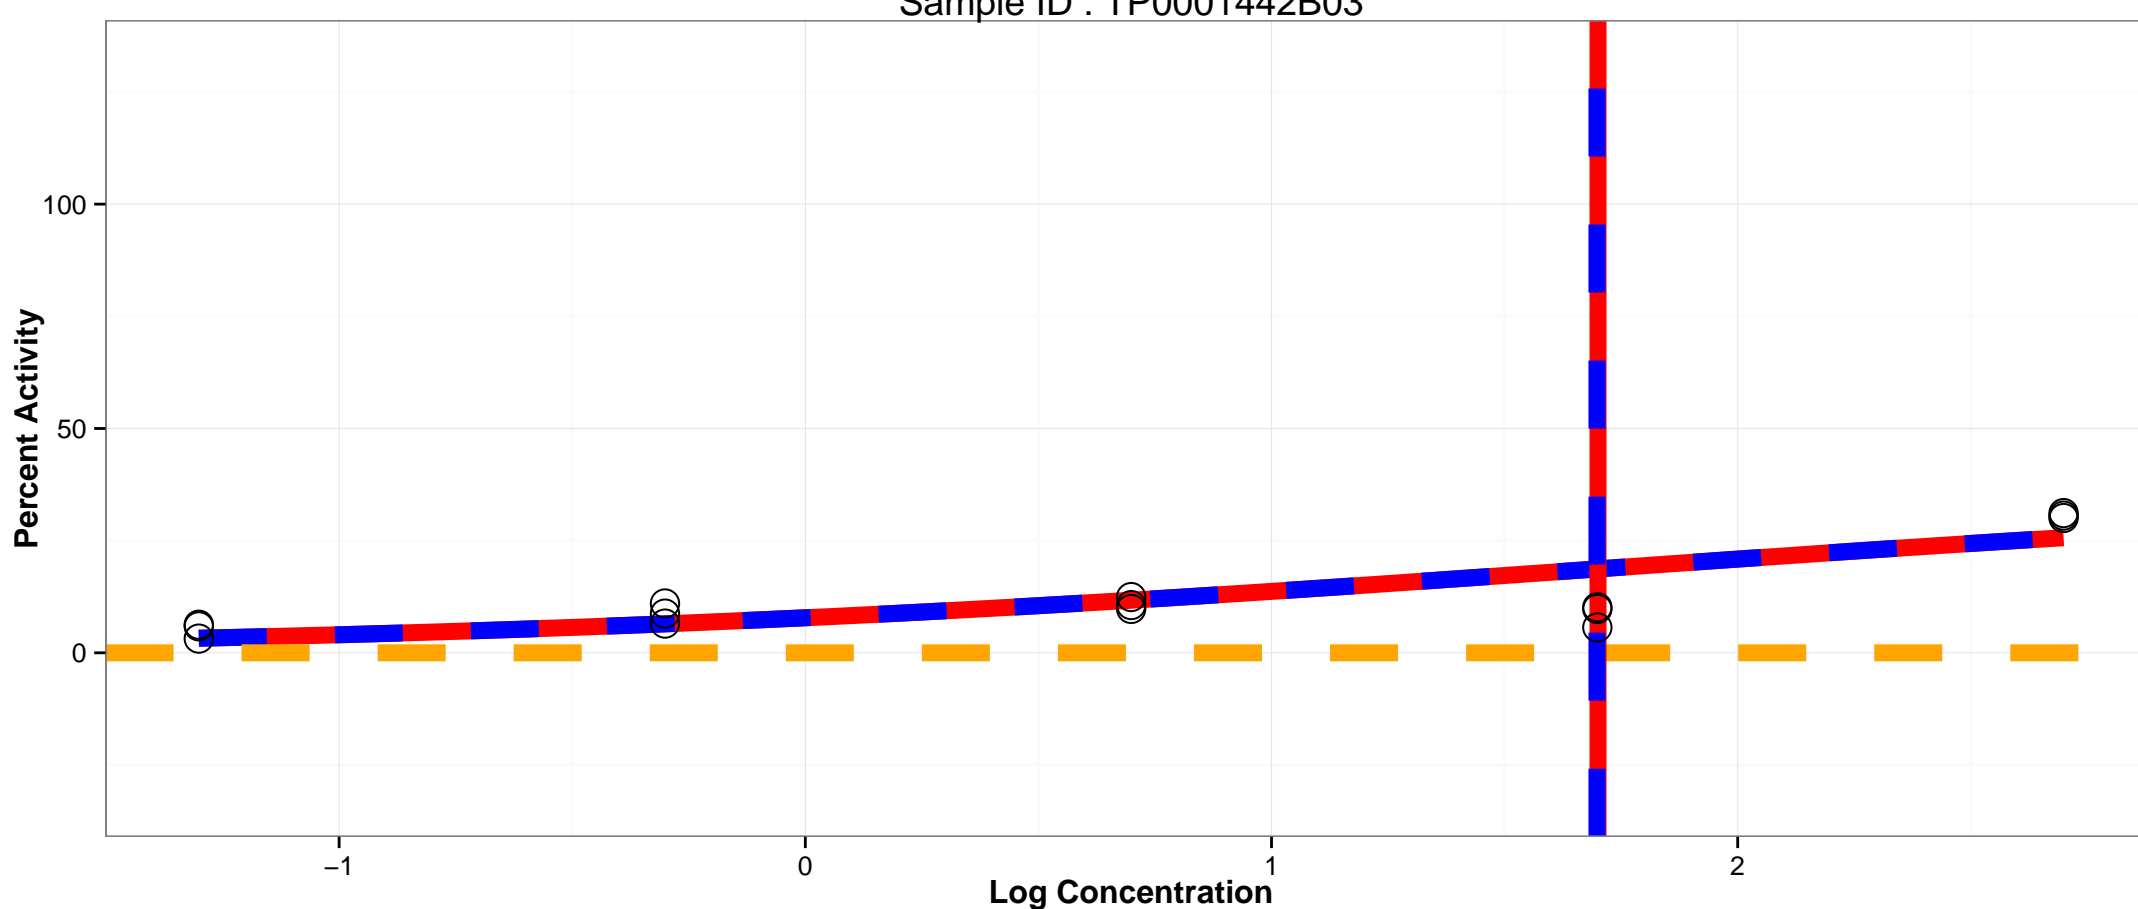

HILL MODEL

|     | tp   | ga    | gw     |
|-----|------|-------|--------|
| val | 37.4 | 1.7   | 0.34   |
| sd  | 12.4 | 0.781 | 0.0832 |

GAIN-LOSS MODEL

|     | tp   | ga  | gw    | la   | lw   |
|-----|------|-----|-------|------|------|
| val | 37.4 | 1.7 | 0.341 | 4.25 | 11.3 |
| sd  | NA   | NA  | NA    | NA   | NA   |

|      | CNST   | HILL   | GNLS   |
|------|--------|--------|--------|
| AIC  | 127.76 | 101.48 | 105.48 |
| PROB | 0      | 0.88   | 0.12   |
| RMSE | 15.77  | 5.43   | 5.44   |

MAX\_MEAN : 30.6 MAX\_MED : 30.6 BMAD : 3.71  
COFF : 20 HIT-CALL : 1 FITC : 42 ACTP : 1  
FLAGS : 6

Chemical : Phosmet  
CAS : 732-11-6

Assay ID 1508 (NHEERL\_TPO\_AUR\_dn)  
Sample ID : TX002705

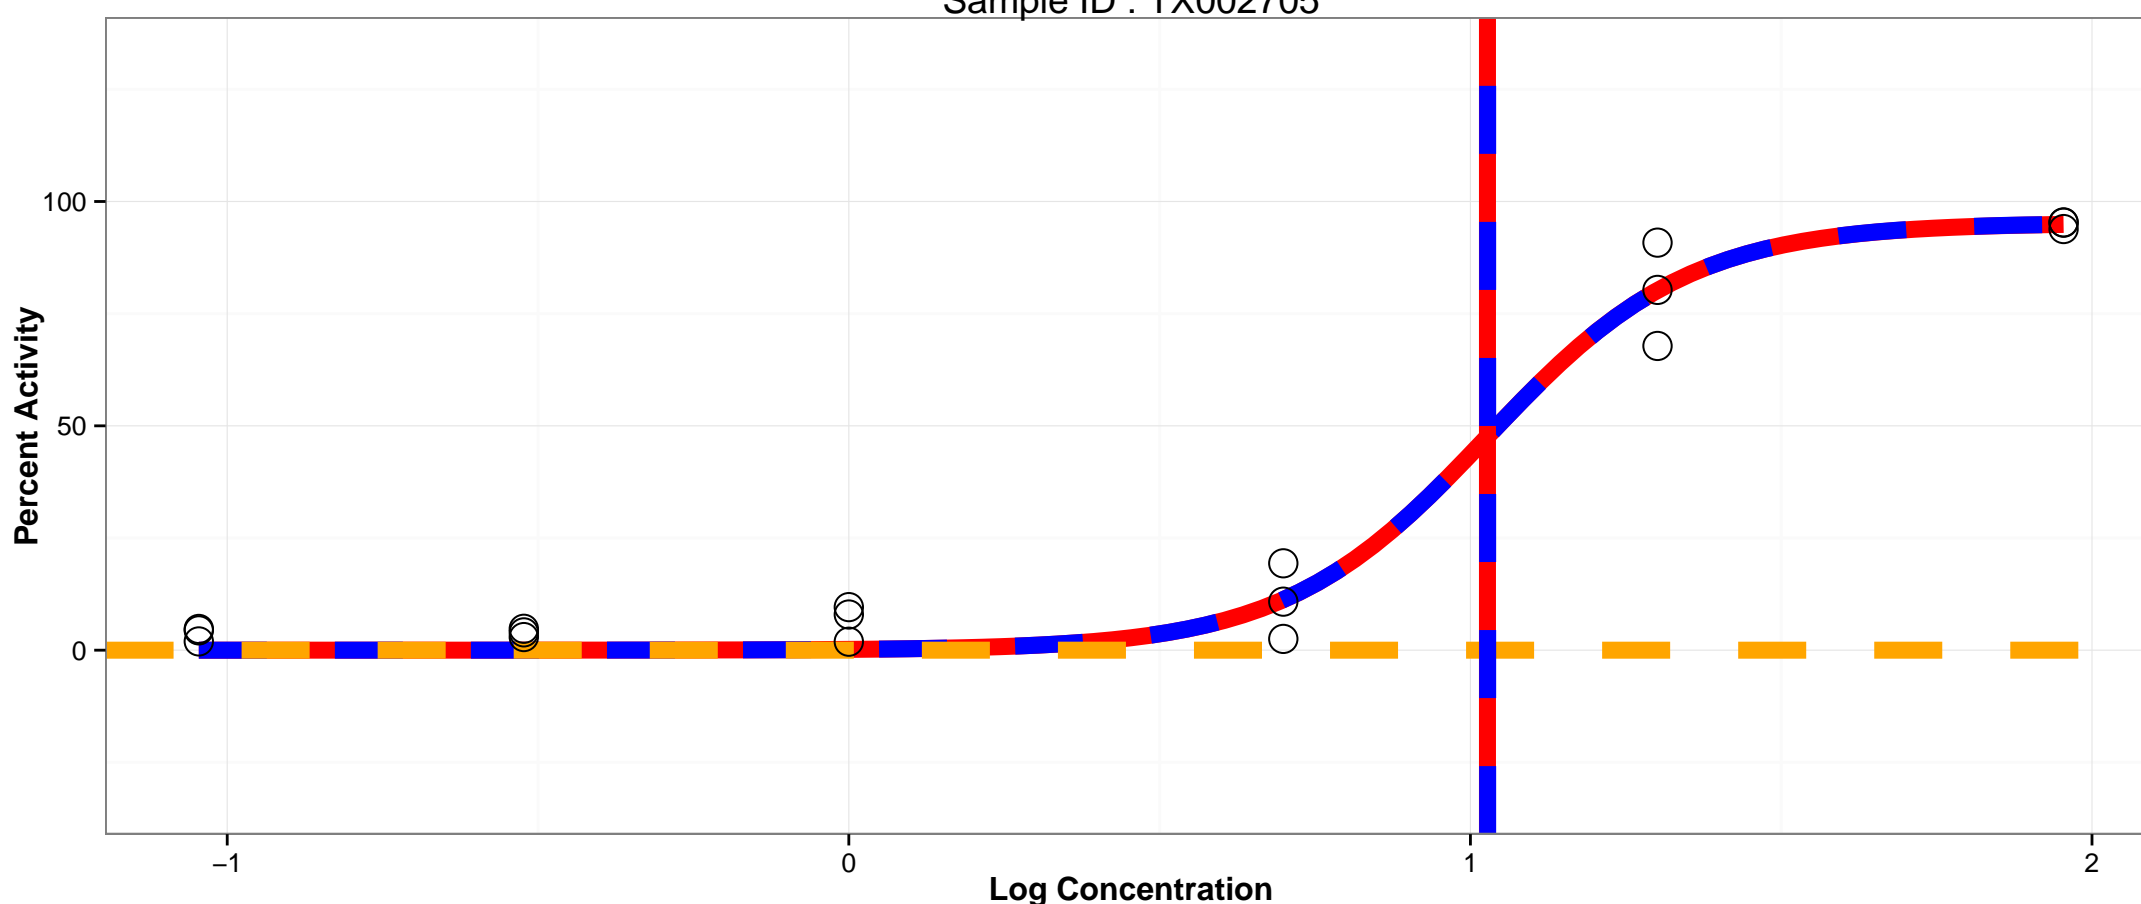

HILL MODEL

|     | tp   | ga     | gw    |
|-----|------|--------|-------|
| val | 95.2 | 1.03   | 2.66  |
| sd  | 2.77 | 0.0495 | 0.449 |

GAIN-LOSS MODEL

|     | tp   | ga   | gw   | la   | lw |
|-----|------|------|------|------|----|
| val | 95.3 | 1.03 | 2.65 | 2.13 | 17 |
| sd  | NA   | NA   | NA   | NA   | NA |

|      | CNST   | HILL   | GNLS   |
|------|--------|--------|--------|
| AIC  | 194.09 | 125.09 | 129.09 |
| PROB | 0      | 0.88   | 0.12   |
| RMSE | 51.12  | 6.04   | 6.04   |

MAX\_MEAN : 94.8 MAX\_MED : 95.3 BMAD : 5.69  
COFF : 20 HIT-CALL : 1 FITC : 41 ACTP : 1  
FLAGS :

Assay ID 1509 (NHEERL\_HEK293T\_CellTiterGLO)  
Sample ID : TX002705

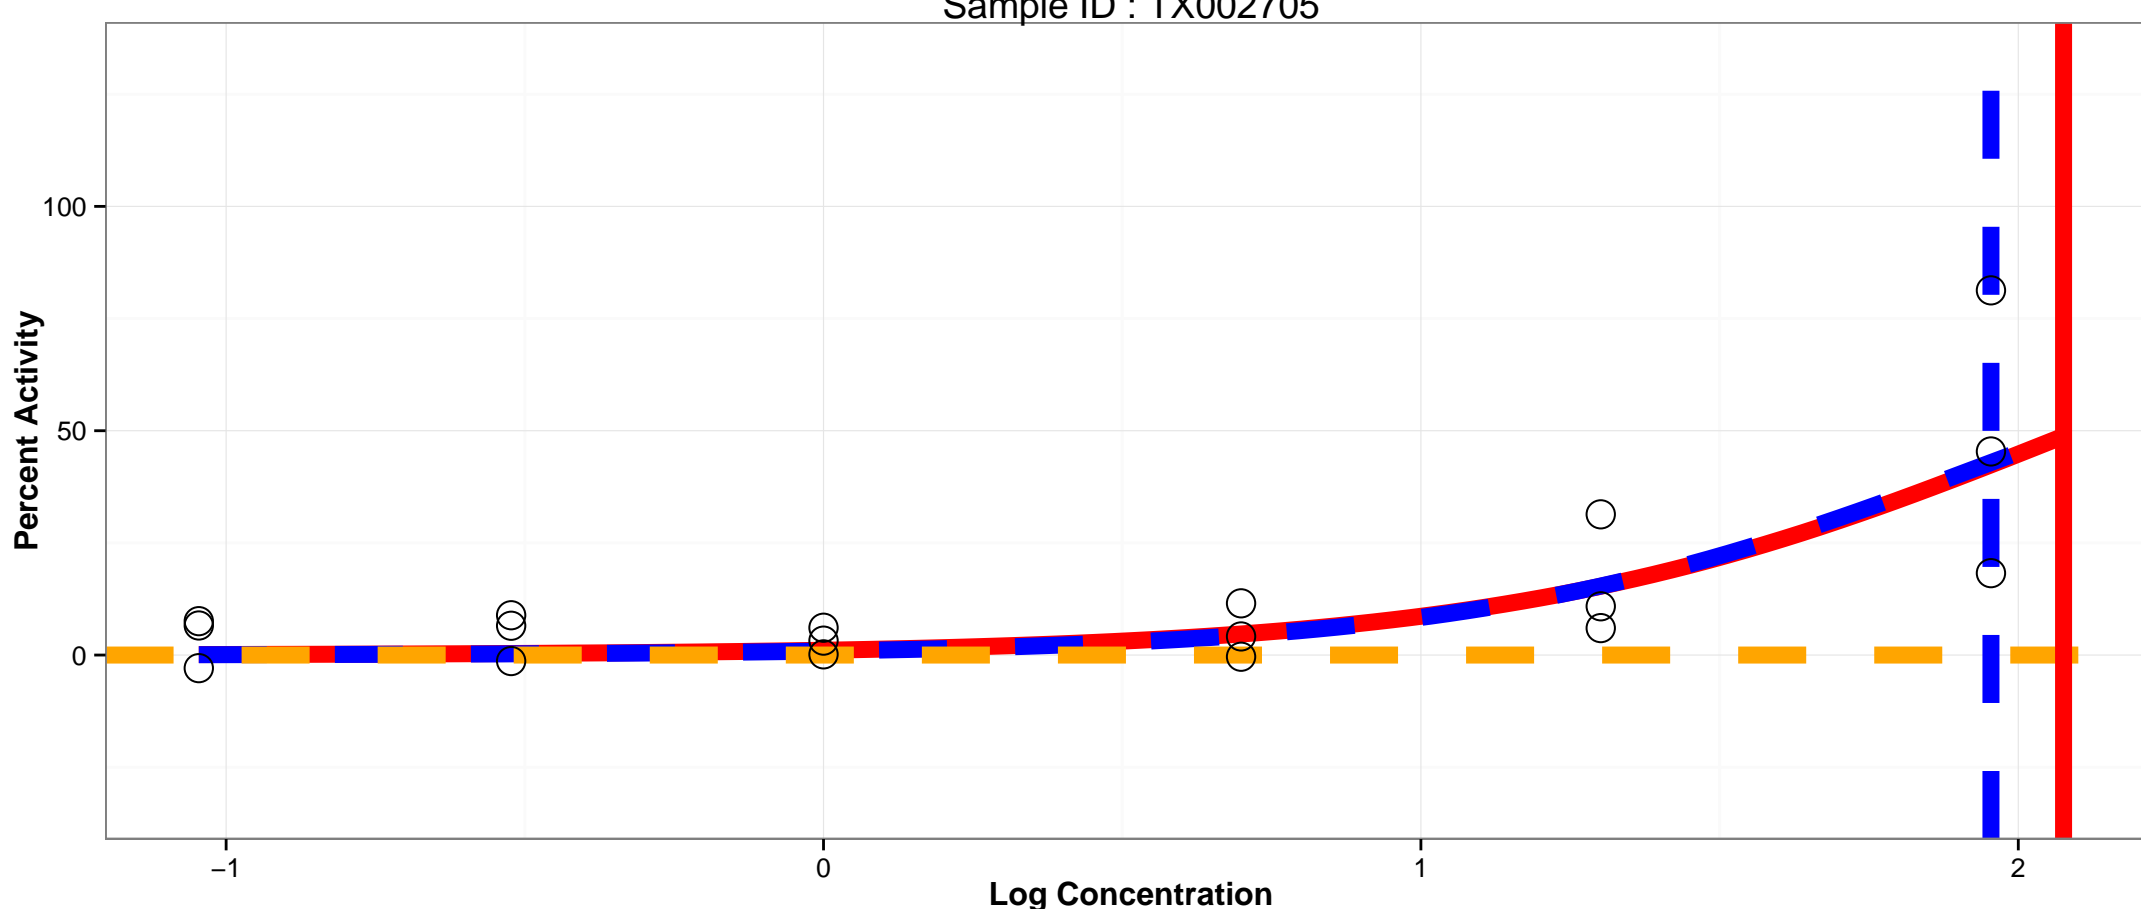

HILL MODEL

|     | tp   | ga   | gw    |
|-----|------|------|-------|
| val | 97.6 | 2.08 | 0.941 |
| sd  | 113  | 1    | 0.543 |

GAIN-LOSS MODEL

|     | tp   | ga   | gw    | la   | lw   |
|-----|------|------|-------|------|------|
| val | 85.8 | 1.95 | 1.01  | 2.27 | 17   |
| sd  | 112  | 1.09 | 0.679 | 33.3 | 1750 |

|      | CNST   | HILL   | GNLS   |
|------|--------|--------|--------|
| AIC  | 159.02 | 145.06 | 149.14 |
| PROB | 0      | 0.88   | 0.11   |
| RMSE | 24.24  | 12.46  | 12.43  |

MAX\_MEAN : 48.3 MAX\_MED : 45.4 BMAD : 5.54  
COFF : 20 HIT-CALL : 1 FITC : 42 ACTP : 0.999  
FLAGS : 6

Assay ID 1848 (NHEERL\_Quantilum\_inhib\_2\_dn)  
Sample ID : TX002705

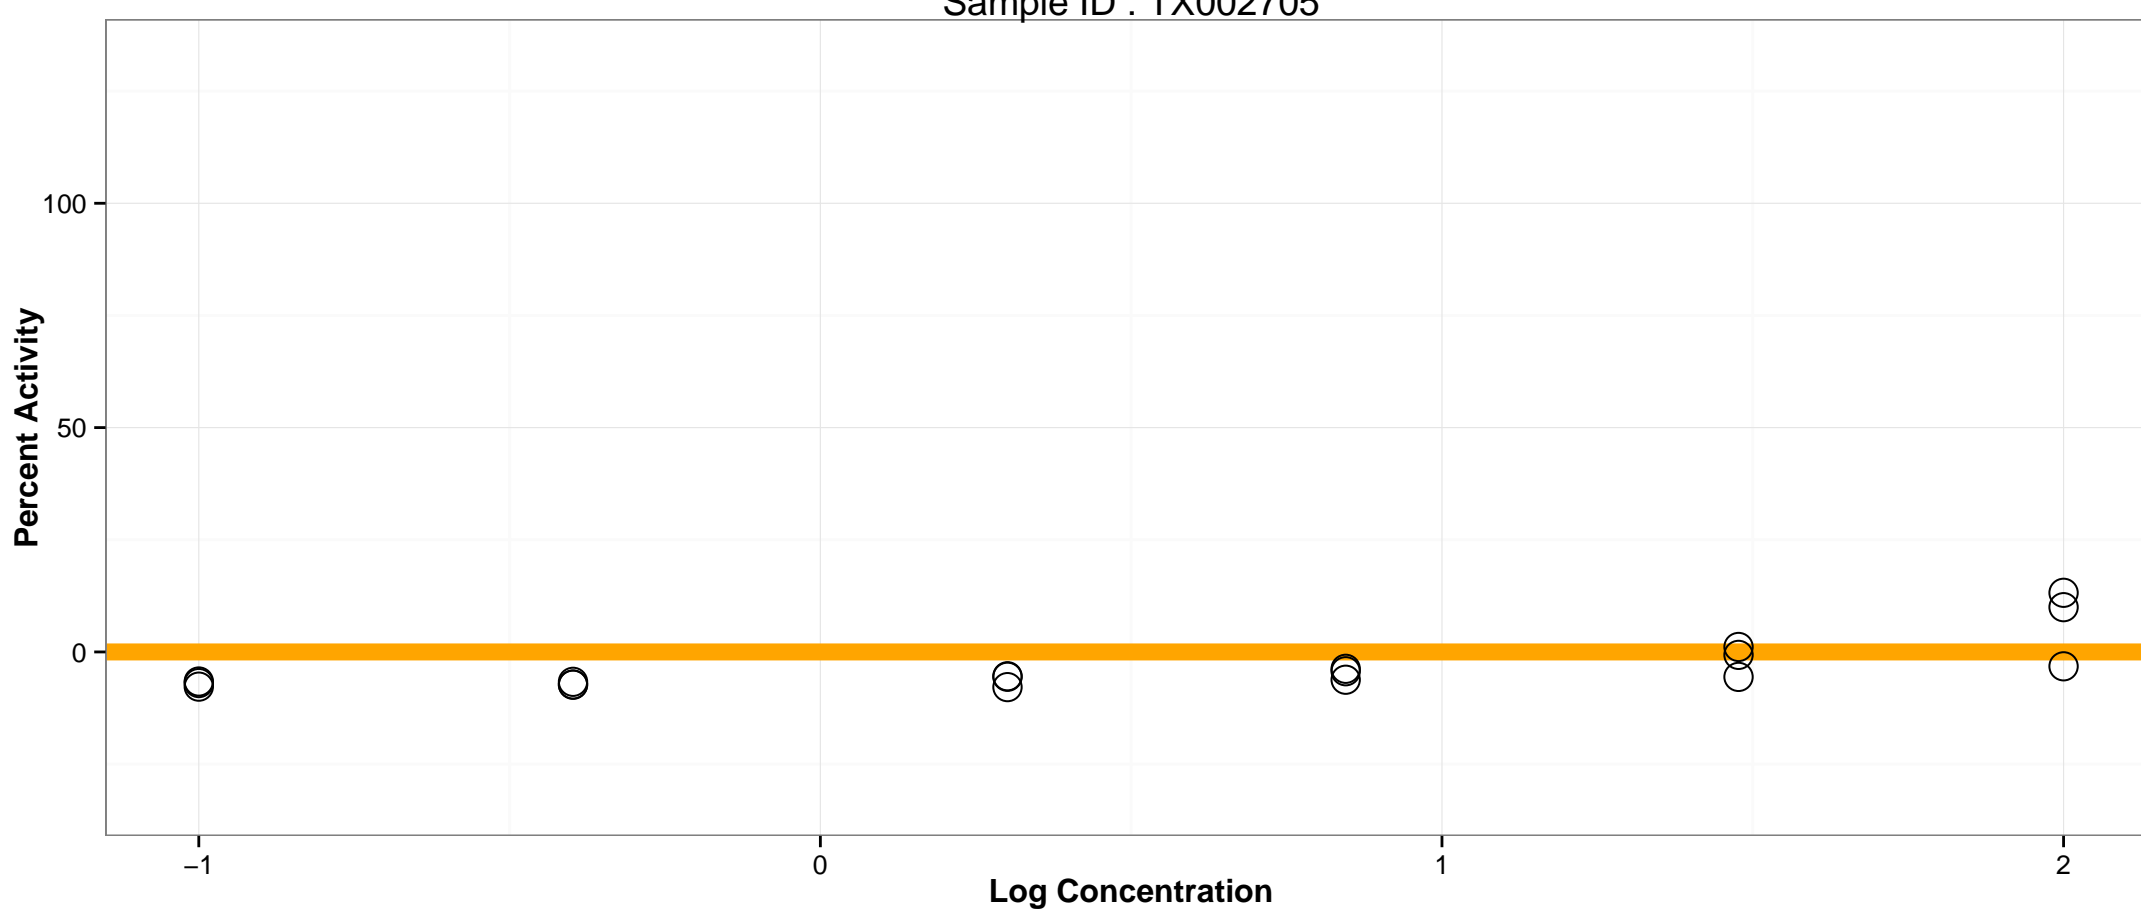

HILL MODEL

HILL MODEL: Not applicable

GAIN-LOSS MODEL

GNLS MODEL: Not applicable

|      | CNST   | HILL | GNLS |
|------|--------|------|------|
| AIC  | 124.59 | NA   | NA   |
| PROB | 1      | NA   | NA   |
| RMSE | 6.71   | NA   | NA   |

MAX\_MEAN : 6.66 MAX\_MED : 9.99 BMAD : 8.58  
COFF : 20 HIT-CALL : 0 FITC : 4 ACTP : 0  
FLAGS :

Assay ID 1824 (NHEERL\_TPO\_GUA\_dn)  
Sample ID : TP0001442B05

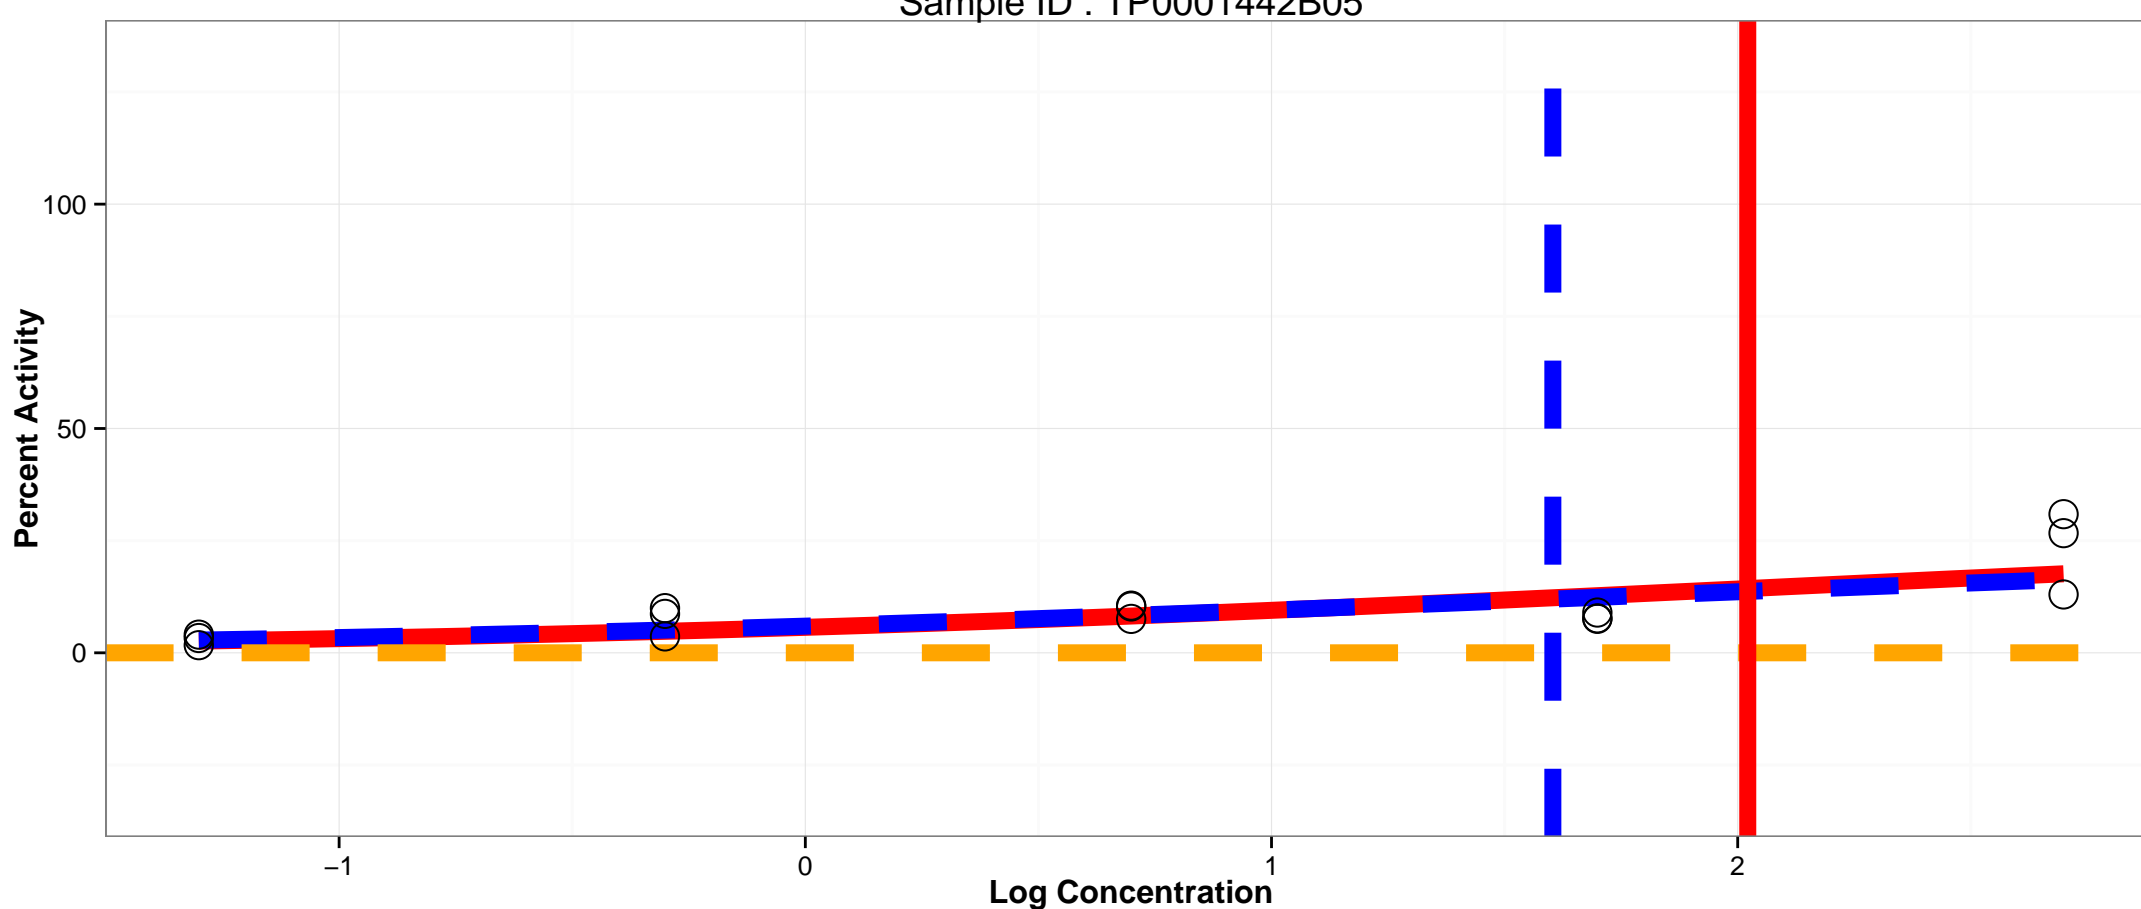

HILL MODEL

|     | tp   | ga   | gw  |
|-----|------|------|-----|
| val | 28.6 | 2.02 | 0.3 |
| sd  | NA   | NA   | NA  |

GAIN-LOSS MODEL

|     | tp   | ga  | gw  | la   | lw   |
|-----|------|-----|-----|------|------|
| val | 23.9 | 1.6 | 0.3 | 3.13 | 16.4 |
| sd  | NA   | NA  | NA  | NA   | NA   |

|      | CNST   | HILL  | GNLS   |
|------|--------|-------|--------|
| AIC  | 121.35 | 99.55 | 103.47 |
| PROB | 0      | 0.88  | 0.12   |
| RMSE | 12.98  | 5.18  | 5.41   |

MAX\_MEAN : 23.5 MAX\_MED : 26.7 BMAD : 3.71  
COFF : 20 HIT-CALL : 1 FITC : 42 ACTP : 1  
FLAGS : 6

Chemical : Diclosulam  
CAS : 145701-21-9

Assay ID 1508 (NHEERL\_TPO\_AUR\_dn)  
Sample ID : TX001540

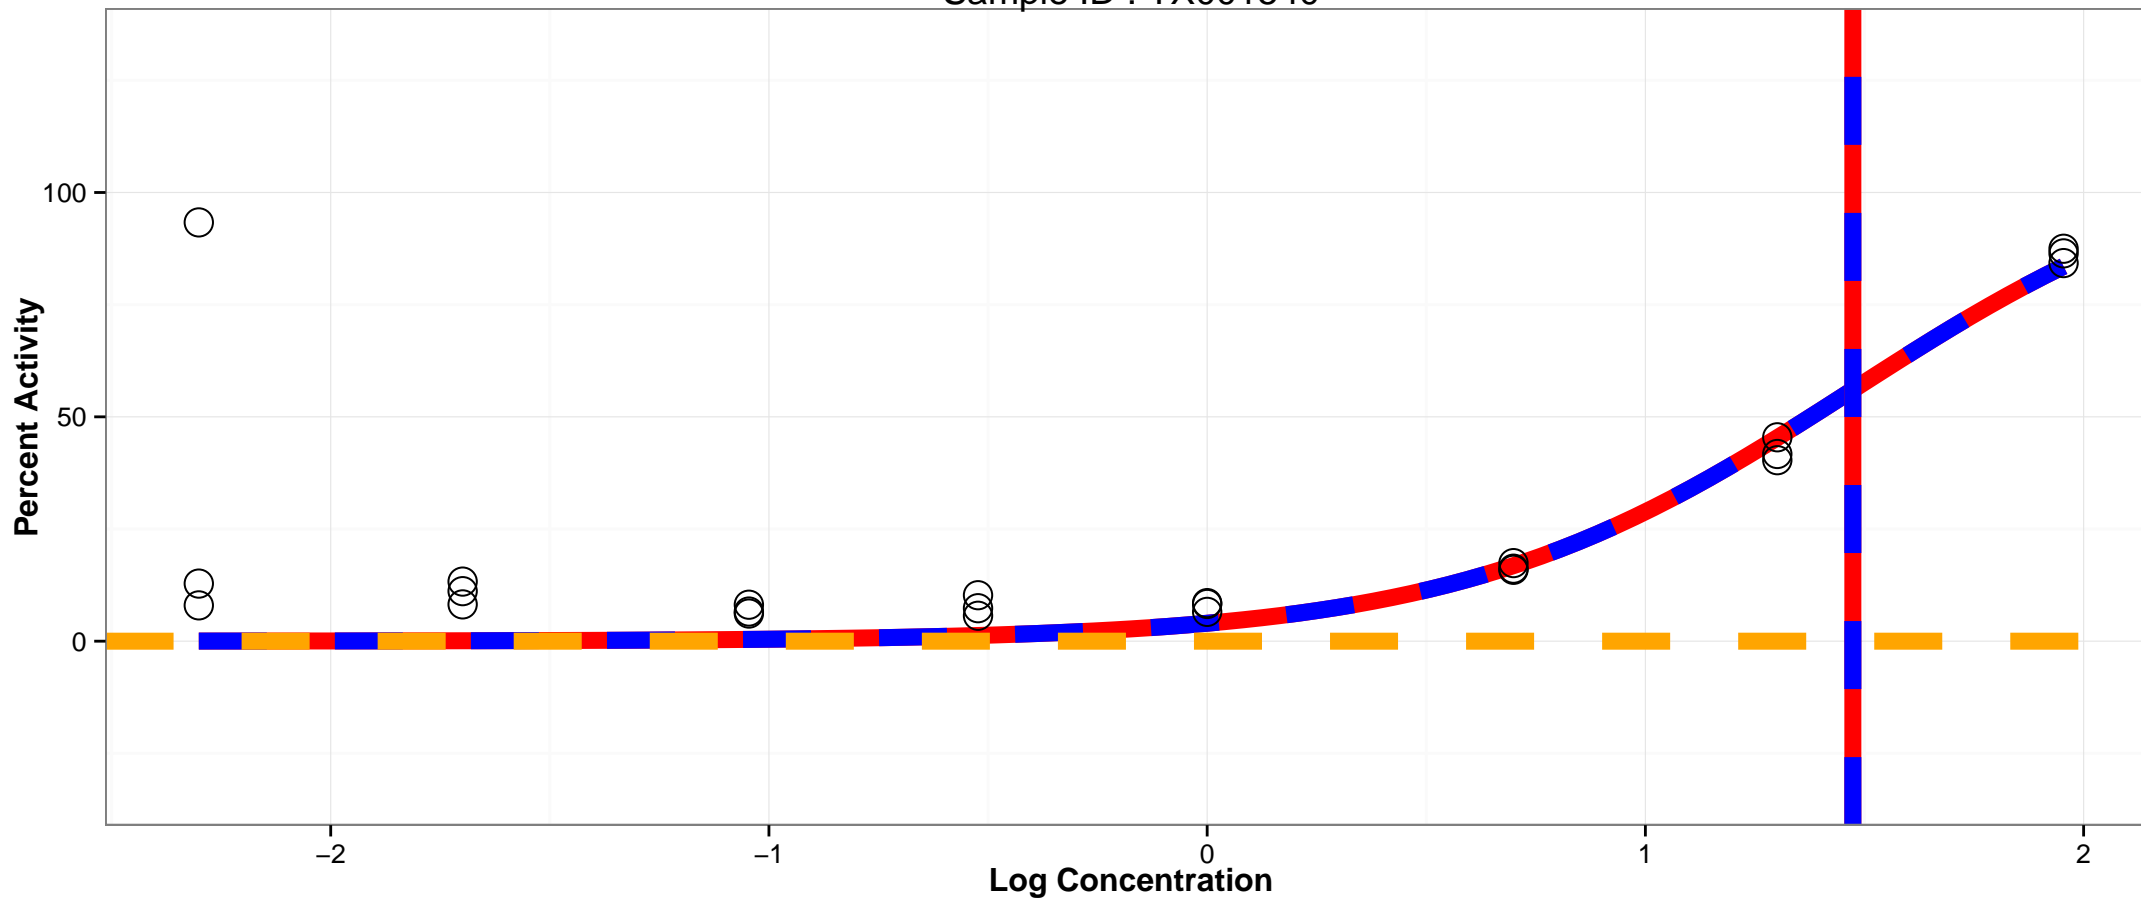

HILL MODEL

|     | tp   | ga    | gw    |
|-----|------|-------|-------|
| val | 112  | 1.47  | 0.972 |
| sd  | 18.2 | 0.177 | 0.199 |

GAIN-LOSS MODEL

|     | tp  | ga   | gw    | la   | lw   |
|-----|-----|------|-------|------|------|
| val | 112 | 1.47 | 0.972 | 3.95 | 15.2 |
| sd  | NA  | NA   | NA    | NA   | NA   |

|      | CNST   | HILL   | GNLS   |
|------|--------|--------|--------|
| AIC  | 243.61 | 187.66 | 191.66 |
| PROB | 0      | 0.88   | 0.12   |
| RMSE | 39.96  | 20.08  | 20.08  |

MAX\_MEAN : 86.1 MAX\_MED : 86.4 BMAD : 5.69  
COFF : 20 HIT-CALL : 1 FITC : 42 ACTP : 1  
FLAGS : 10

Assay ID 1509 (NHEERL\_HEK293T\_CellTiterGLO)  
Sample ID : TX001540

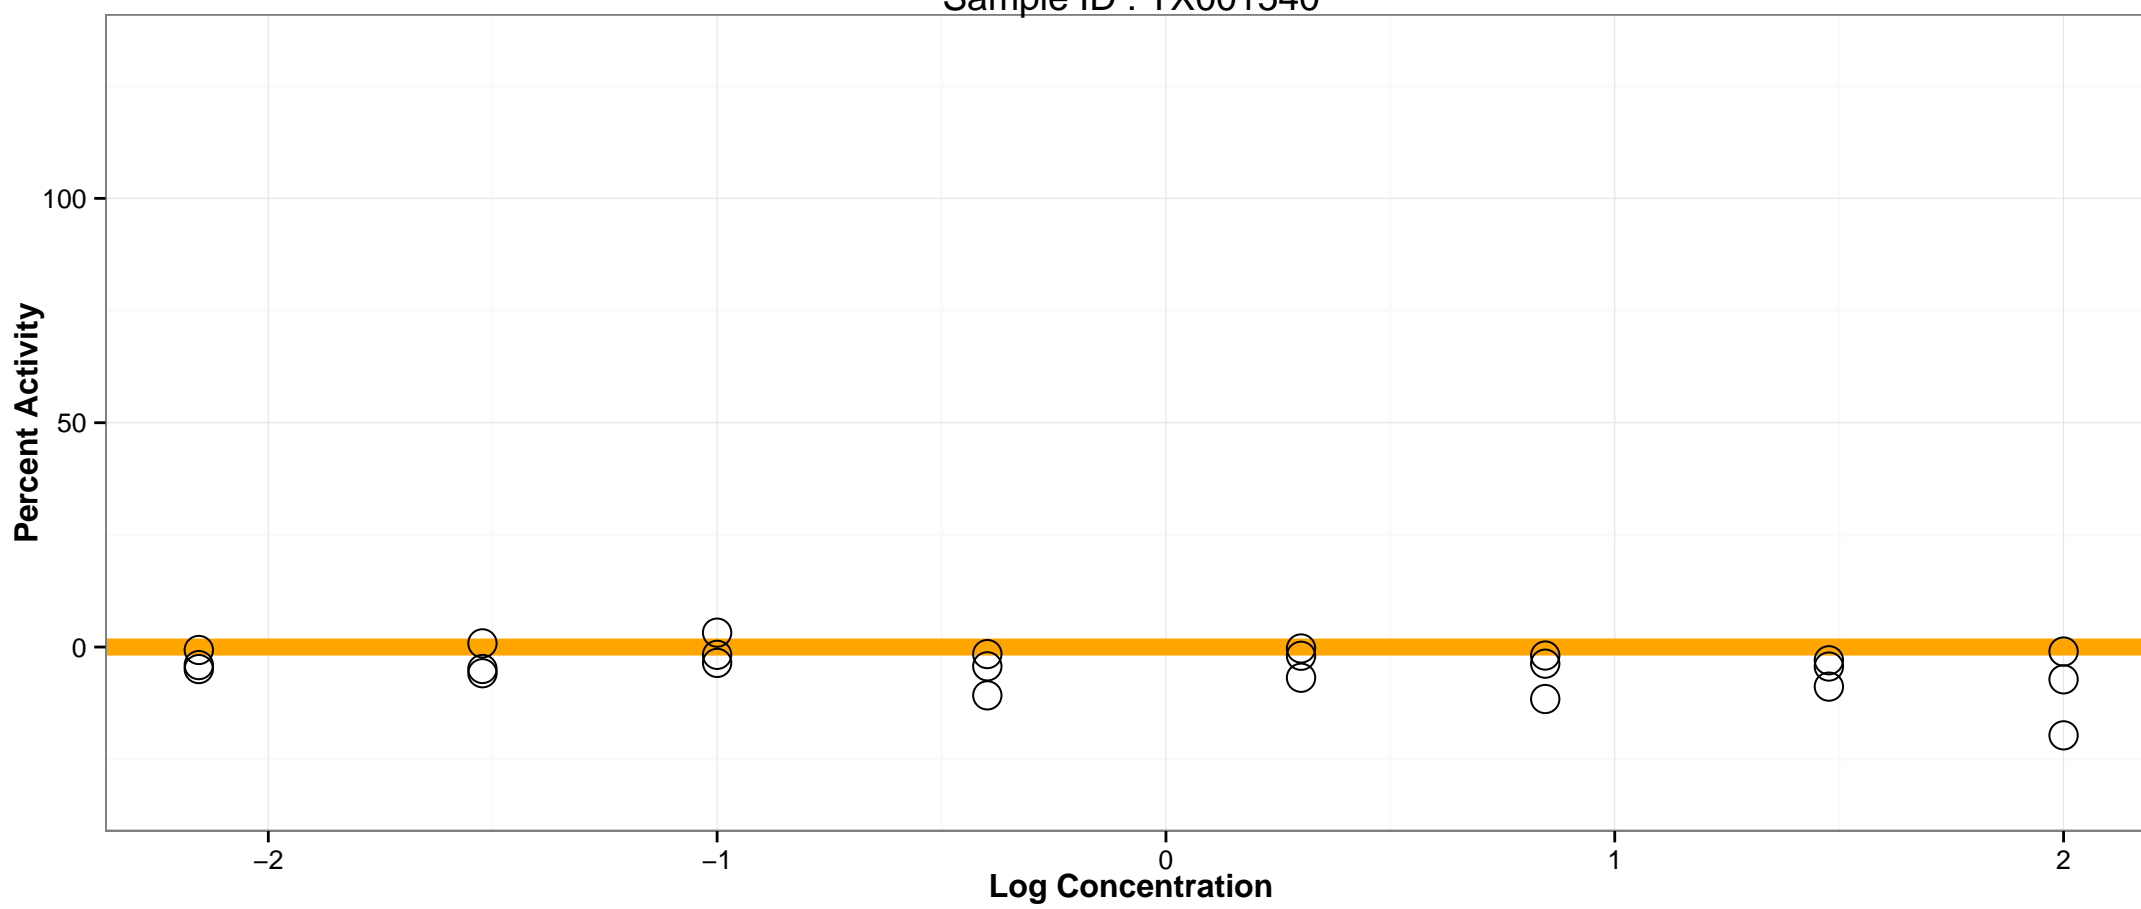

HILL MODEL

HILL MODEL: Not applicable

GAIN-LOSS MODEL

GNLS MODEL: Not applicable

|      | CNST   | HILL | GNLS |
|------|--------|------|------|
| AIC  | 158.08 | NA   | NA   |
| PROB | 1      | NA   | NA   |
| RMSE | 6.48   | NA   | NA   |

MAX\_MEAN : -0.674 MAX\_MED : -1.72 BMAD : 5.54  
COFF : 20 HIT-CALL : 0 FITC : 4 ACTP : 0  
FLAGS :

Assay ID 1848 (NHEERL\_Quantilum\_inhib\_2\_dn)  
Sample ID : TX001540

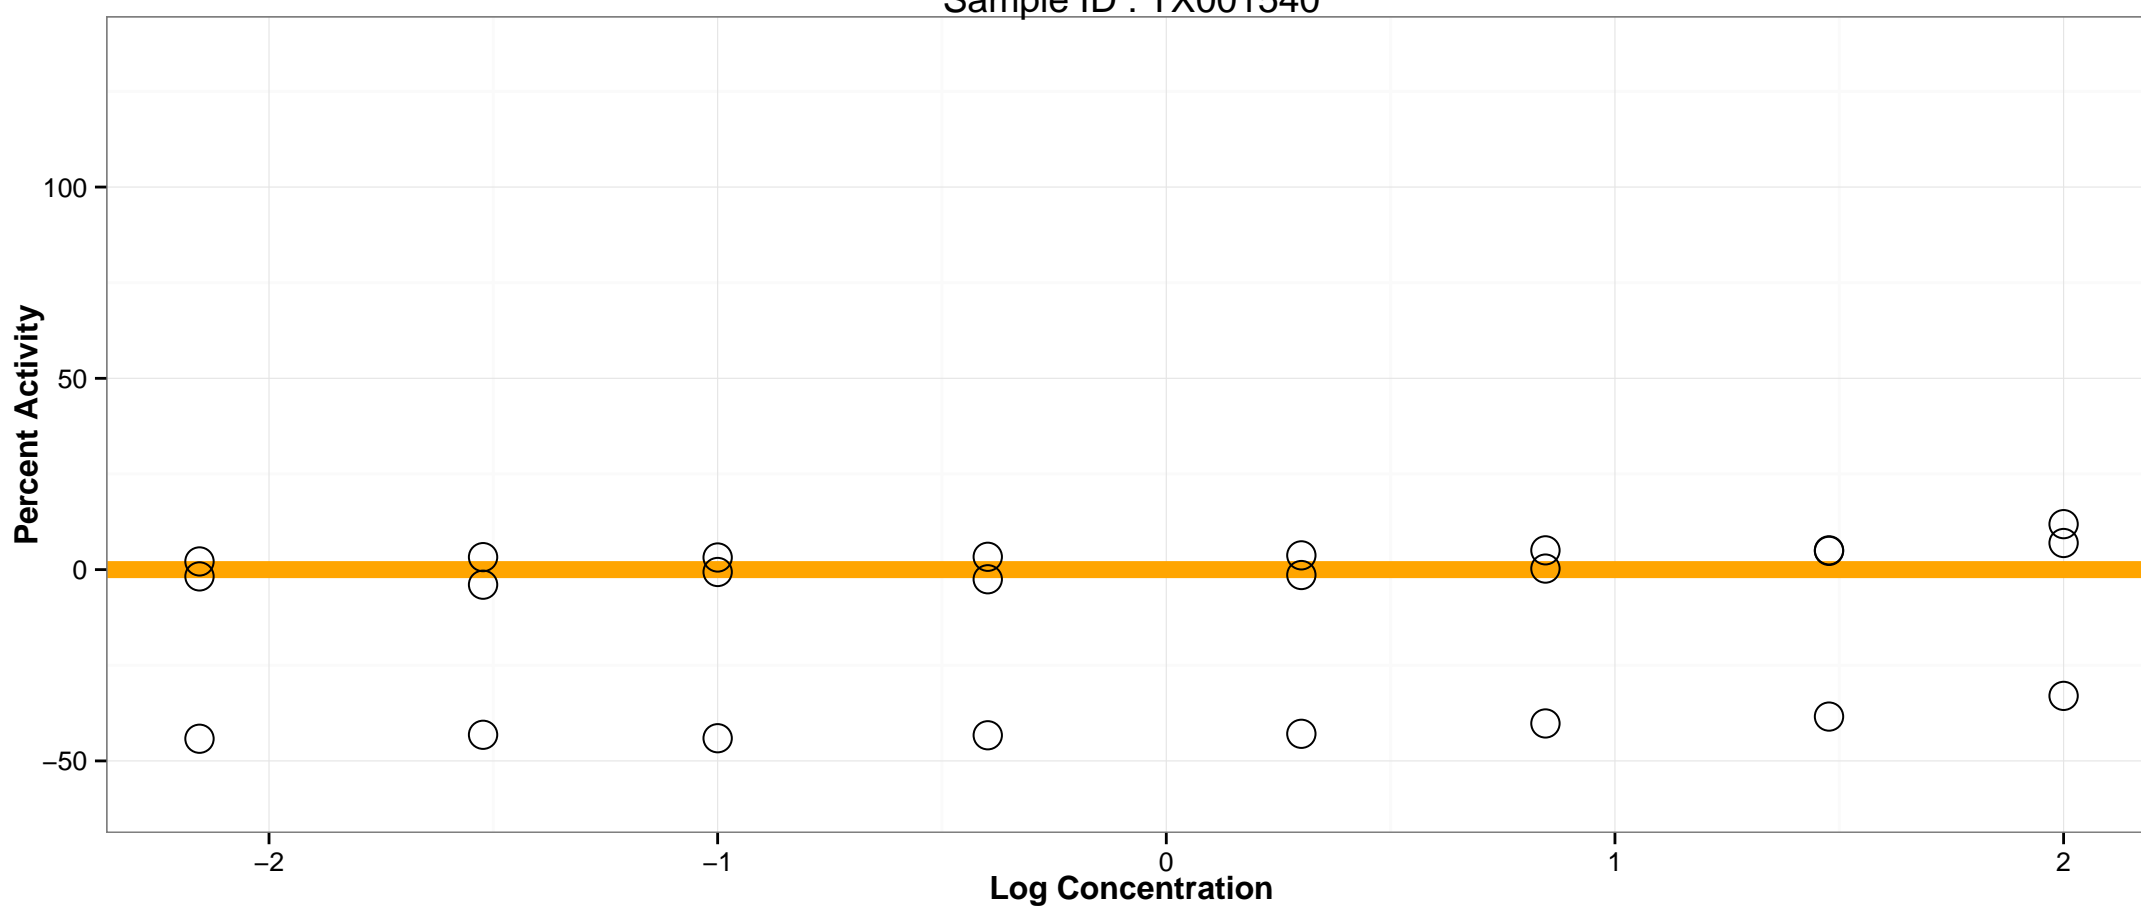

HILL MODEL

HILL MODEL: Not applicable

GAIN-LOSS MODEL

GNLS MODEL: Not applicable

|      | CNST   | HILL | GNLS |
|------|--------|------|------|
| AIC  | 222.52 | NA   | NA   |
| PROB | 1      | NA   | NA   |
| RMSE | 24.15  | NA   | NA   |

MAX\_MEAN : -4.7 MAX\_MED : 6.97 BMAD : 8.58  
COFF : 20 HIT-CALL : 0 FITC : 4 ACTP : 0  
FLAGS : 10

Assay ID 1824 (NHEERL\_TPO\_GUA\_dn)  
Sample ID : TP0001442B06

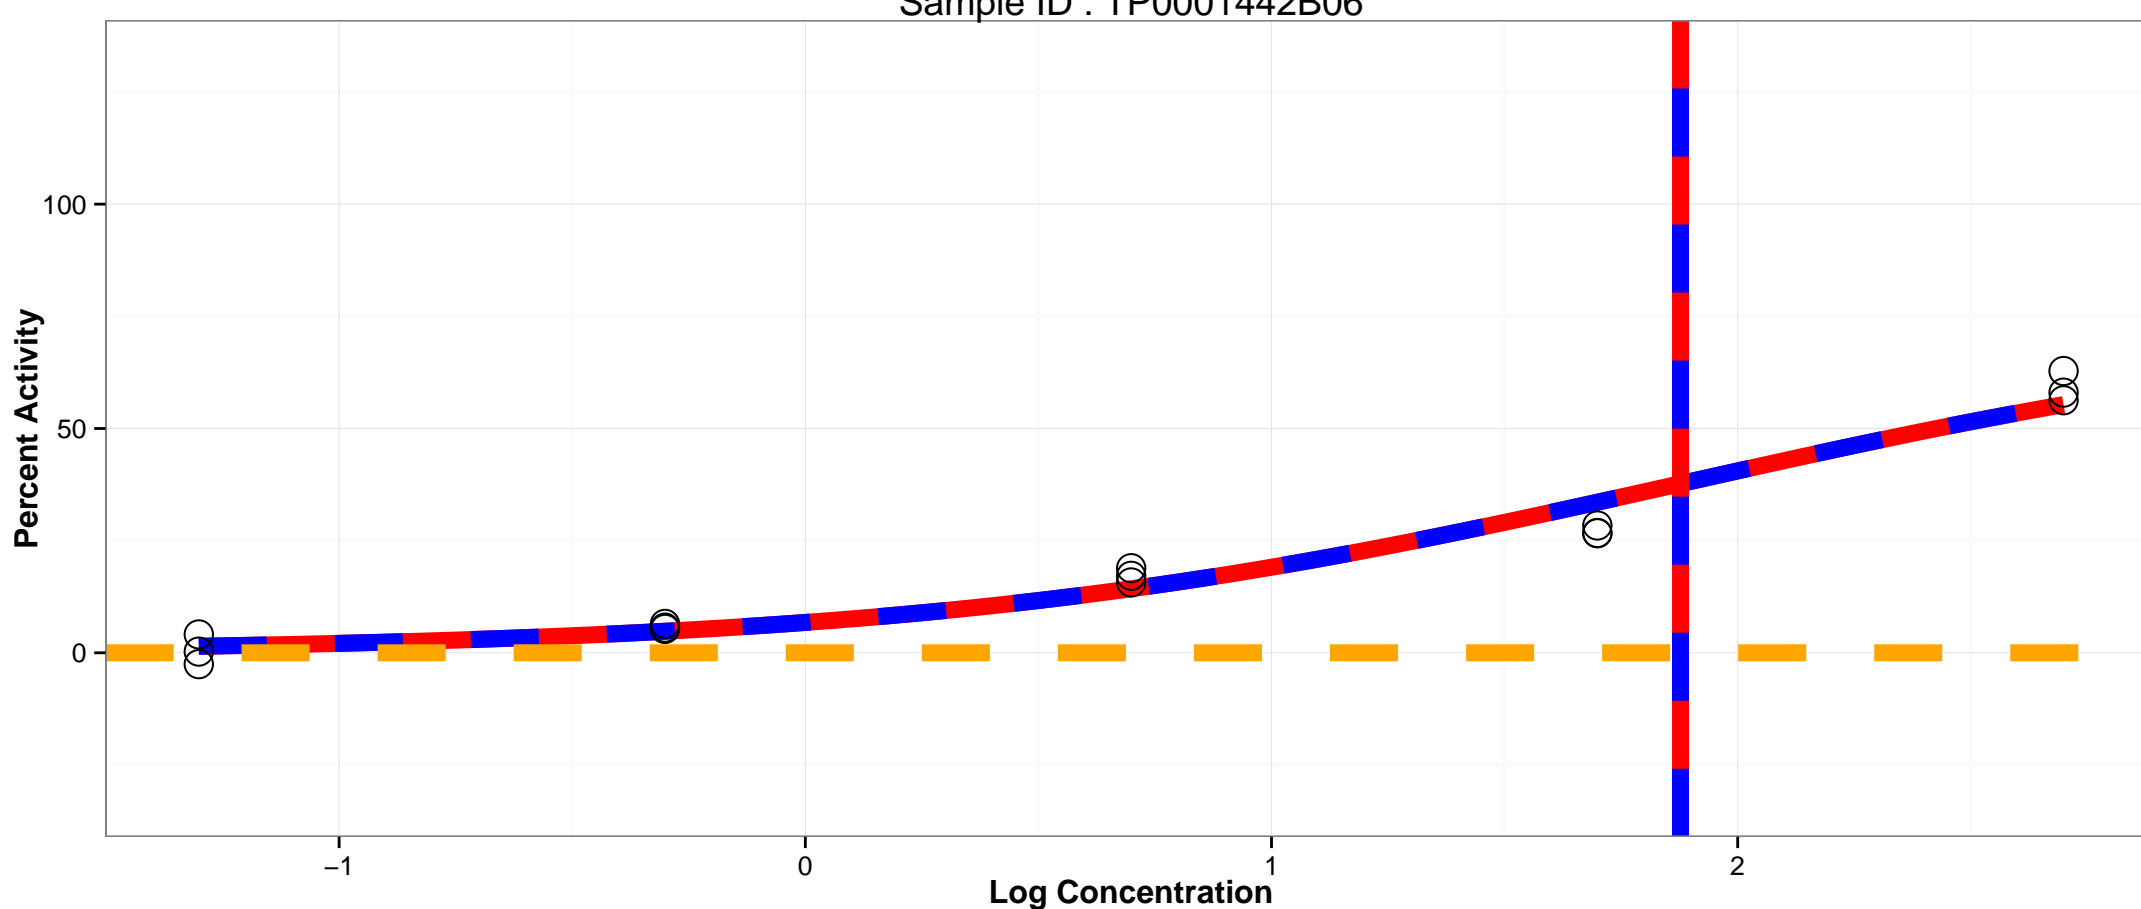

HILL MODEL

|     | tp   | ga    | gw     |
|-----|------|-------|--------|
| val | 75.4 | 1.88  | 0.536  |
| sd  | 10.7 | 0.293 | 0.0705 |

GAIN-LOSS MODEL

|     | tp   | ga   | gw    | la  | lw   |
|-----|------|------|-------|-----|------|
| val | 75.4 | 1.88 | 0.536 | 4.5 | 17.9 |
| sd  | NA   | NA   | NA    | NA  | NA   |

|      | CNST   | HILL  | GNLS  |
|------|--------|-------|-------|
| AIC  | 146.87 | 93.91 | 97.91 |
| PROB | 0      | 0.88  | 0.12  |
| RMSE | 30.26  | 4.04  | 4.04  |

MAX\_MEAN : 59 MAX\_MED : 58 BMAD : 3.71  
COFF : 20 HIT-CALL : 1 FITC : 42 ACTP : 1  
FLAGS :

Chemical : N,N-Dimethylaniline  
CAS : 121-69-7

Assay ID 1508 (NHEERL\_TPO\_AUR\_dn)  
Sample ID : TX001882

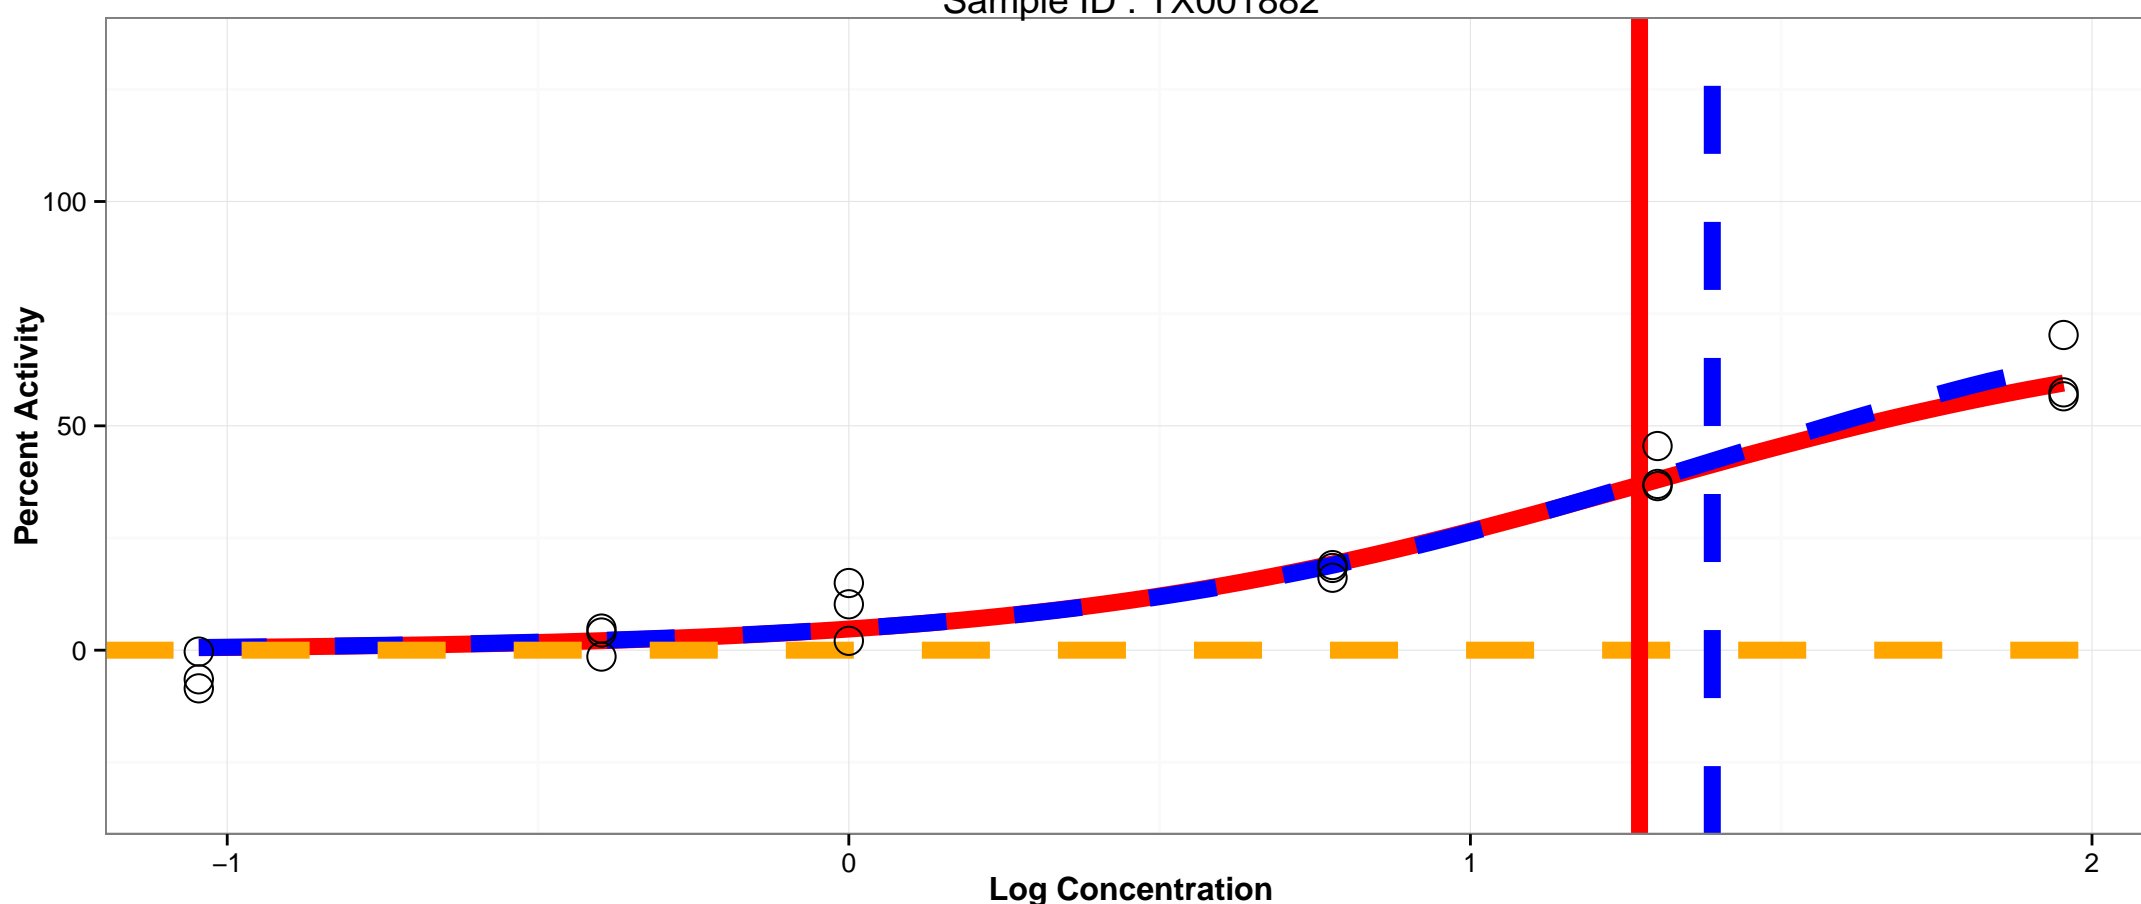

HILL MODEL

|     | tp   | ga   | gw    |
|-----|------|------|-------|
| val | 73.7 | 1.27 | 0.916 |
| sd  | 12.3 | 0.2  | 0.212 |

GAIN-LOSS MODEL

|     | tp   | ga   | gw    | la   | lw |
|-----|------|------|-------|------|----|
| val | 84.3 | 1.39 | 0.881 | 2.01 | 18 |
| sd  | NA   | NA   | NA    | NA   | NA |

|      | CNST   | HILL   | GNLS   |
|------|--------|--------|--------|
| AIC  | 177.06 | 119.44 | 123.22 |
| PROB | 0      | 0.87   | 0.13   |
| RMSE | 31.33  | 5.25   | 5.24   |

MAX\_MEAN : 61.4 MAX\_MED : 57.5 BMAD : 5.69  
COFF : 20 HIT-CALL : 1 FITC : 42 ACTP : 1  
FLAGS :

Assay ID 1509 (NHEERL\_HEK293T\_CellTiterGLO)  
Sample ID : TX001882

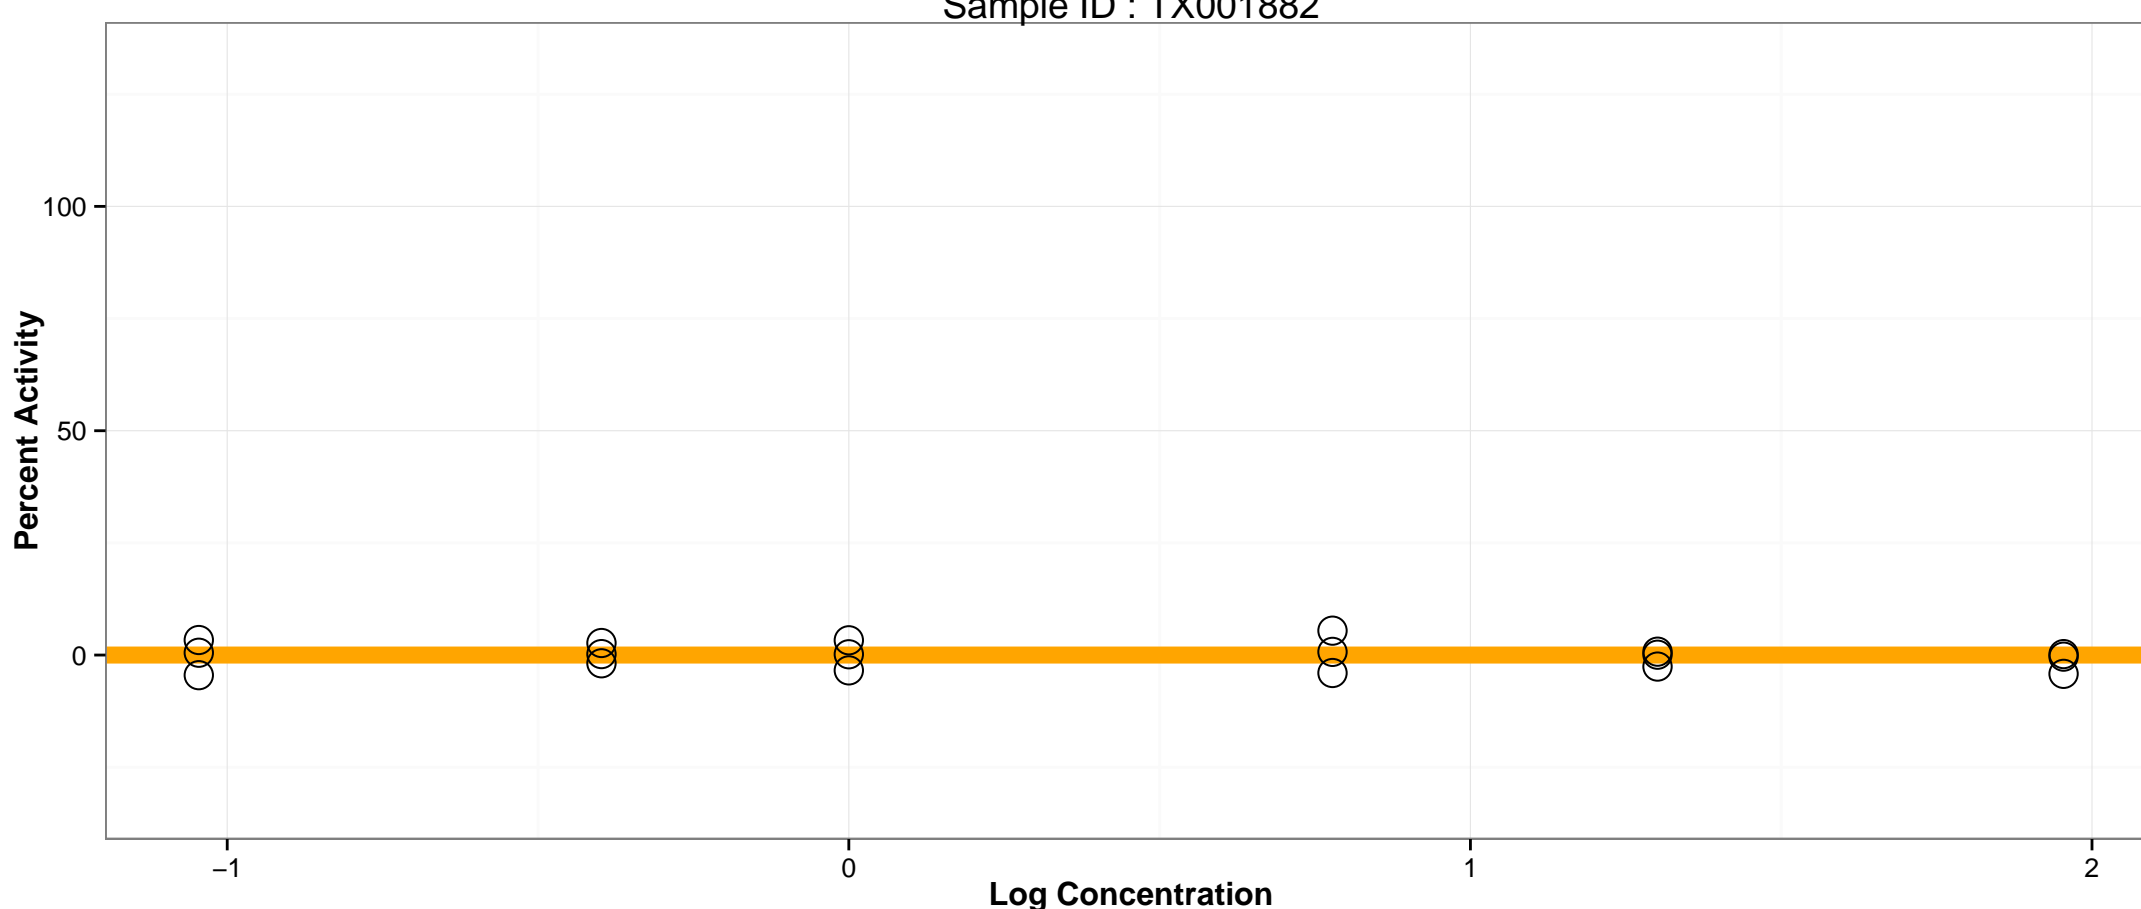

HILL MODEL

HILL MODEL: Not applicable

GAIN-LOSS MODEL

GNLS MODEL: Not applicable

|      | CNST  | HILL | GNLS |
|------|-------|------|------|
| AIC  | 91.16 | NA   | NA   |
| PROB | 1     | NA   | NA   |
| RMSE | 2.75  | NA   | NA   |

MAX\_MEAN : 0.728 MAX\_MED : 0.719 BMAD : 5.54  
COFF : 20 HIT-CALL : 0 FITC : 4 ACTP : 0  
FLAGS :

Assay ID 1848 (NHEERL\_Quantilum\_inhib\_2\_dn)  
Sample ID : TX001882

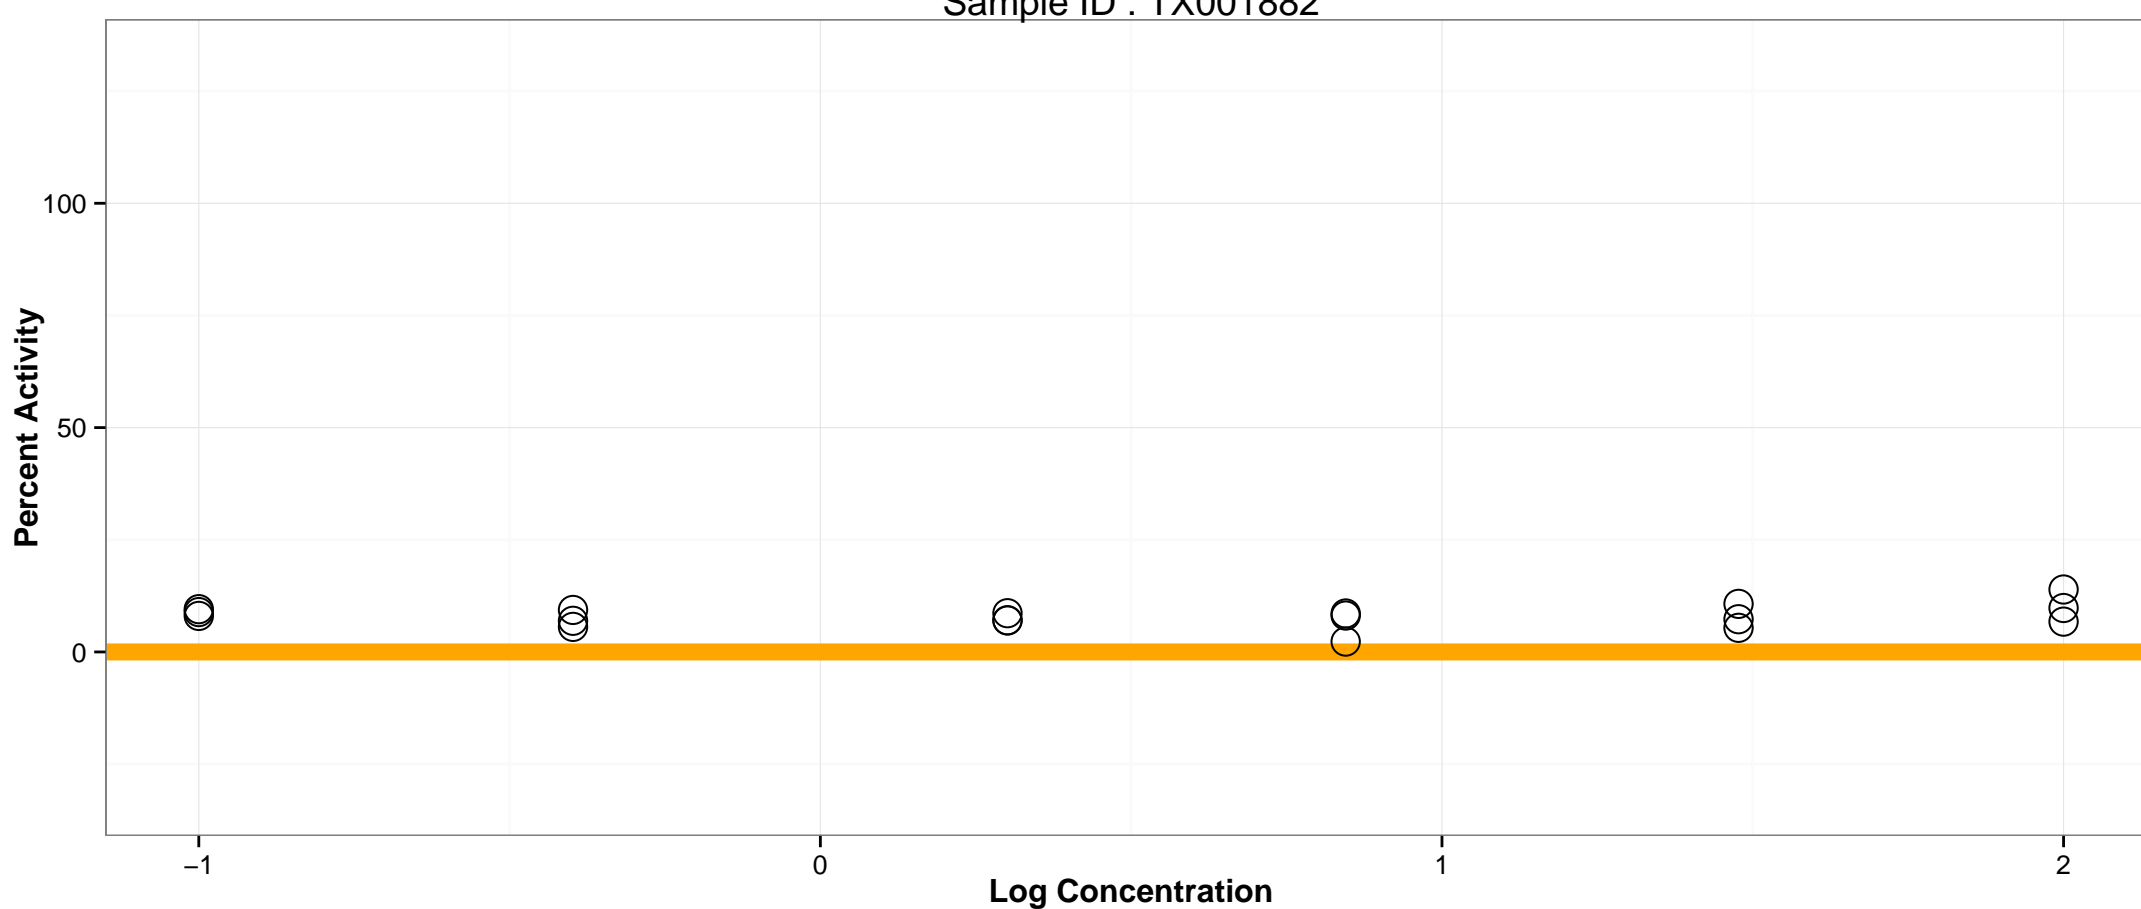

HILL MODEL

HILL MODEL: Not applicable

GAIN-LOSS MODEL

GNLS MODEL: Not applicable

|      | CNST   | HILL | GNLS |
|------|--------|------|------|
| AIC  | 133.23 | NA   | NA   |
| PROB | 1      | NA   | NA   |
| RMSE | 8.35   | NA   | NA   |

MAX\_MEAN : 10.2 MAX\_MED : 9.81 BMAD : 8.58  
COFF : 20 HIT-CALL : 0 FITC : 4 ACTP : 0  
FLAGS :

Assay ID 1824 (NHEERL\_TPO\_GUA\_dn)  
Sample ID : TP0001442C01

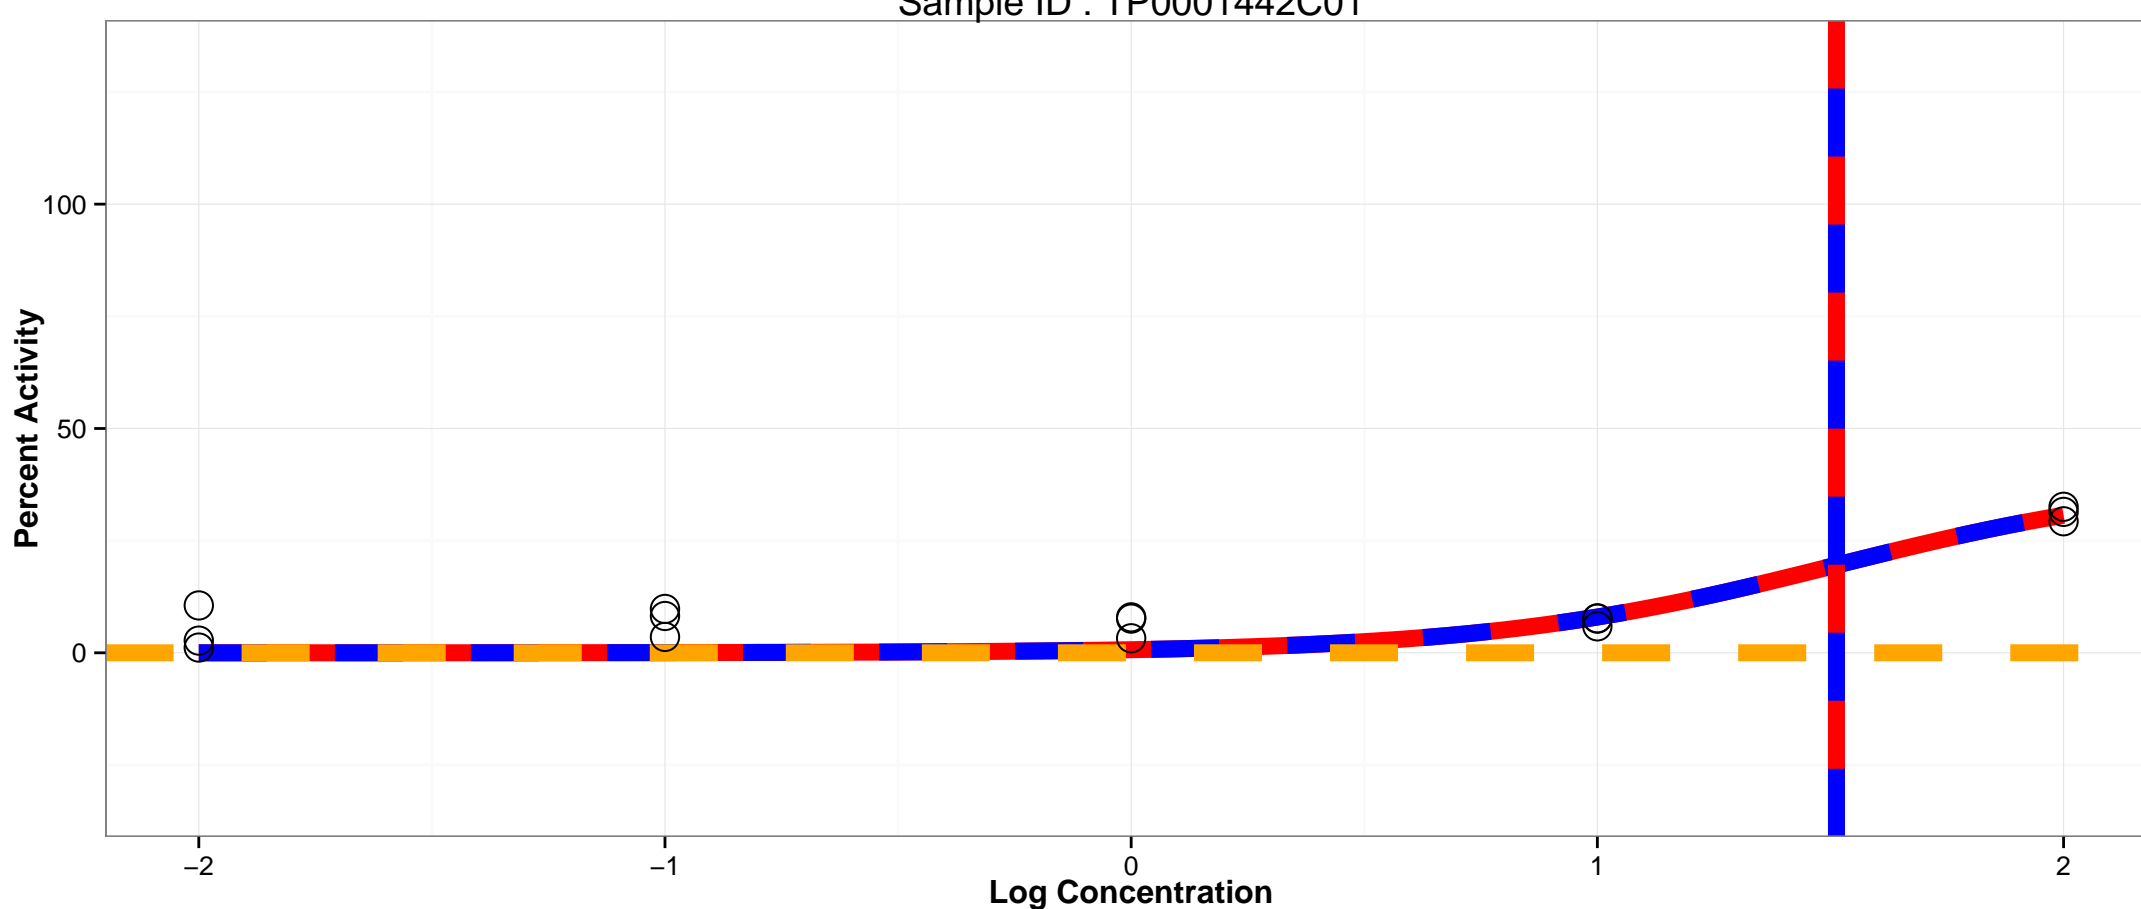

HILL MODEL

|     | tp   | ga    | gw   |
|-----|------|-------|------|
| val | 39.1 | 1.51  | 1.15 |
| sd  | 22.6 | 0.608 | 1.03 |

GAIN-LOSS MODEL

|     | tp   | ga    | gw   | la   | lw    |
|-----|------|-------|------|------|-------|
| val | 39.1 | 1.51  | 1.15 | 3.15 | 8.54  |
| sd  | 22.6 | 0.609 | 1.03 | 7980 | 59300 |

|      | CNST   | HILL   | GNLS   |
|------|--------|--------|--------|
| AIC  | 125.43 | 100.77 | 104.77 |
| PROB | 0      | 0.88   | 0.12   |
| RMSE | 15.25  | 5.24   | 5.24   |

MAX\_MEAN : 31.1 MAX\_MED : 31.4 BMAD : 3.71  
COFF : 20 HIT-CALL : 1 FITC : 42 ACTP : 1  
FLAGS : 6

Chemical : Isoniazid  
CAS : 54-85-3

Assay ID 1508 (NHEERL\_TPO\_AUR\_dn)  
Sample ID : TX005751

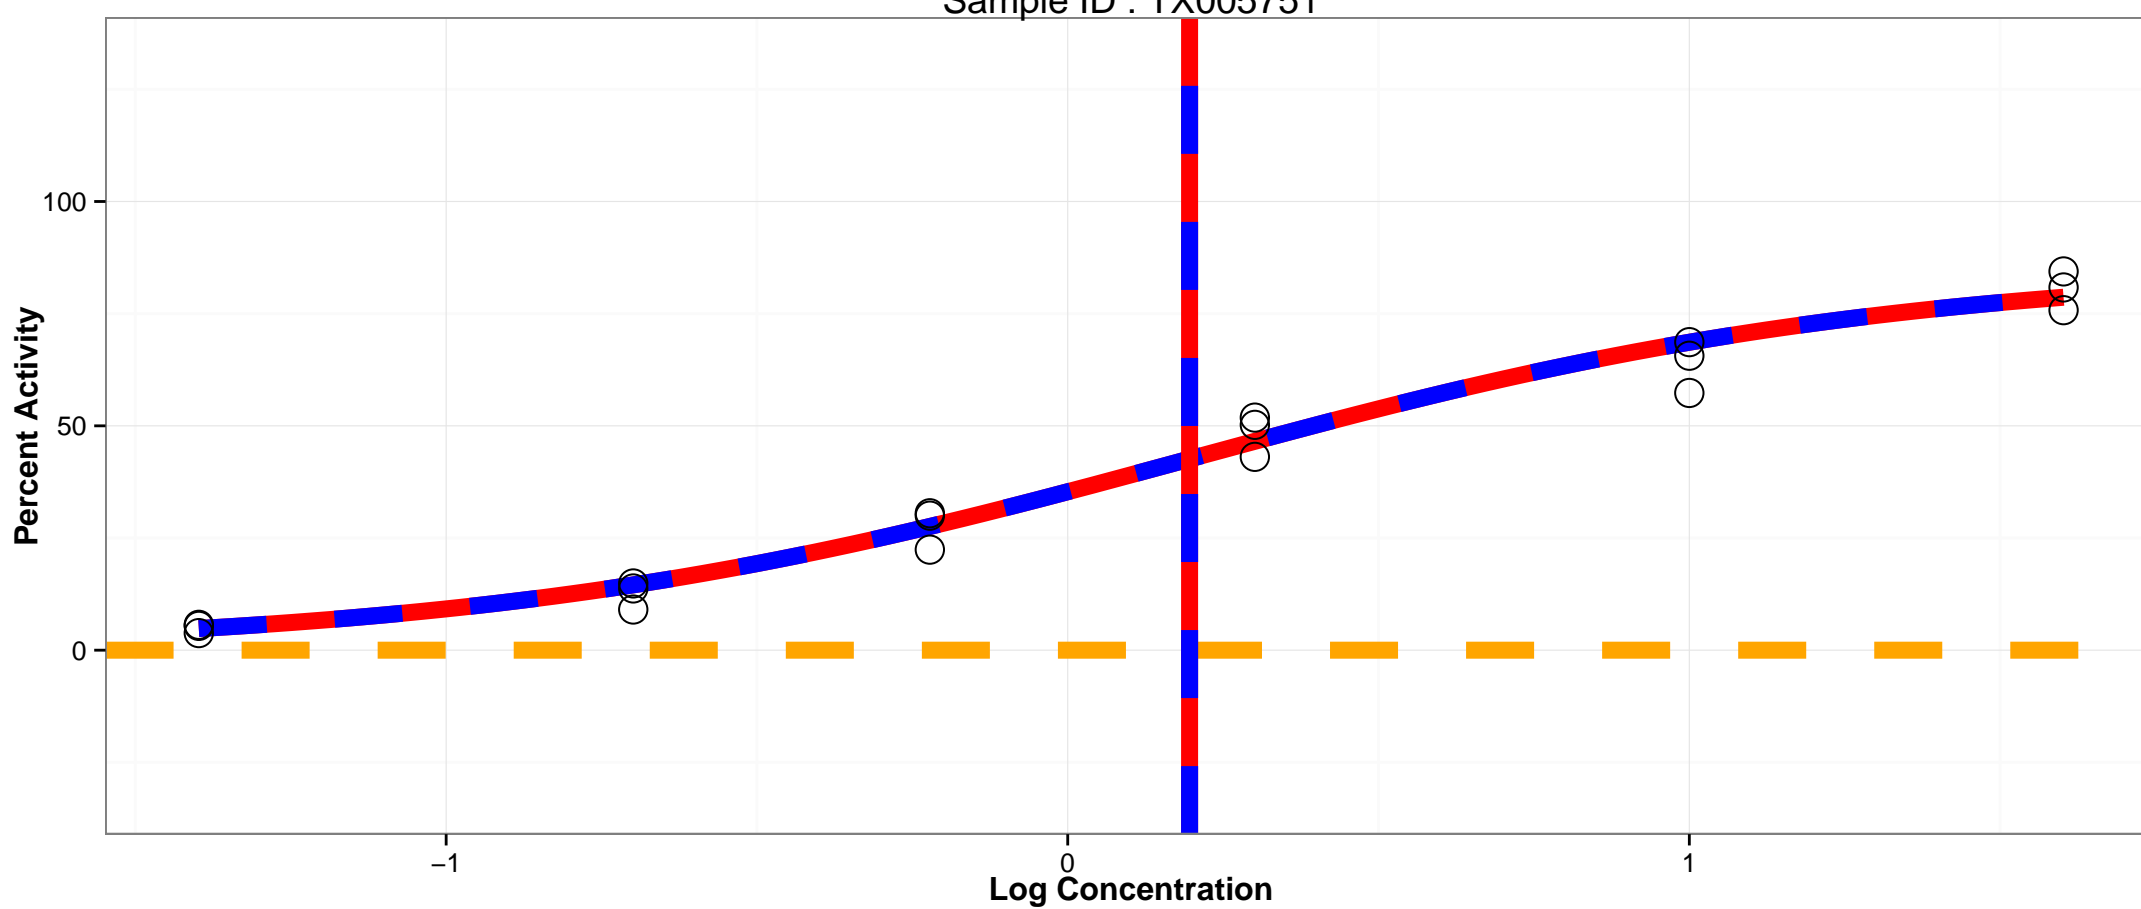

HILL MODEL

|     | tp   | ga    | gw     |
|-----|------|-------|--------|
| val | 85.2 | 0.196 | 0.767  |
| sd  | 5.05 | 0.112 | 0.0884 |

GAIN-LOSS MODEL

|     | tp   | ga    | gw     | la    | lw     |
|-----|------|-------|--------|-------|--------|
| val | 85.2 | 0.196 | 0.767  | 2.43  | 14.3   |
| sd  | 5.05 | 0.112 | 0.0884 | 11000 | 190000 |

|      | CNST   | HILL   | GNLS   |
|------|--------|--------|--------|
| AIC  | 194.74 | 110.22 | 114.22 |
| PROB | 0      | 0.88   | 0.12   |
| RMSE | 48.13  | 4.15   | 4.15   |

MAX\_MEAN : 80.4 MAX\_MED : 80.9 BMAD : 5.69  
COFF : 20 HIT-CALL : 1 FITC : 42 ACTP : 1  
FLAGS :

Assay ID 1509 (NHEERL\_HEK293T\_CellTiterGLO)  
Sample ID : TX005751

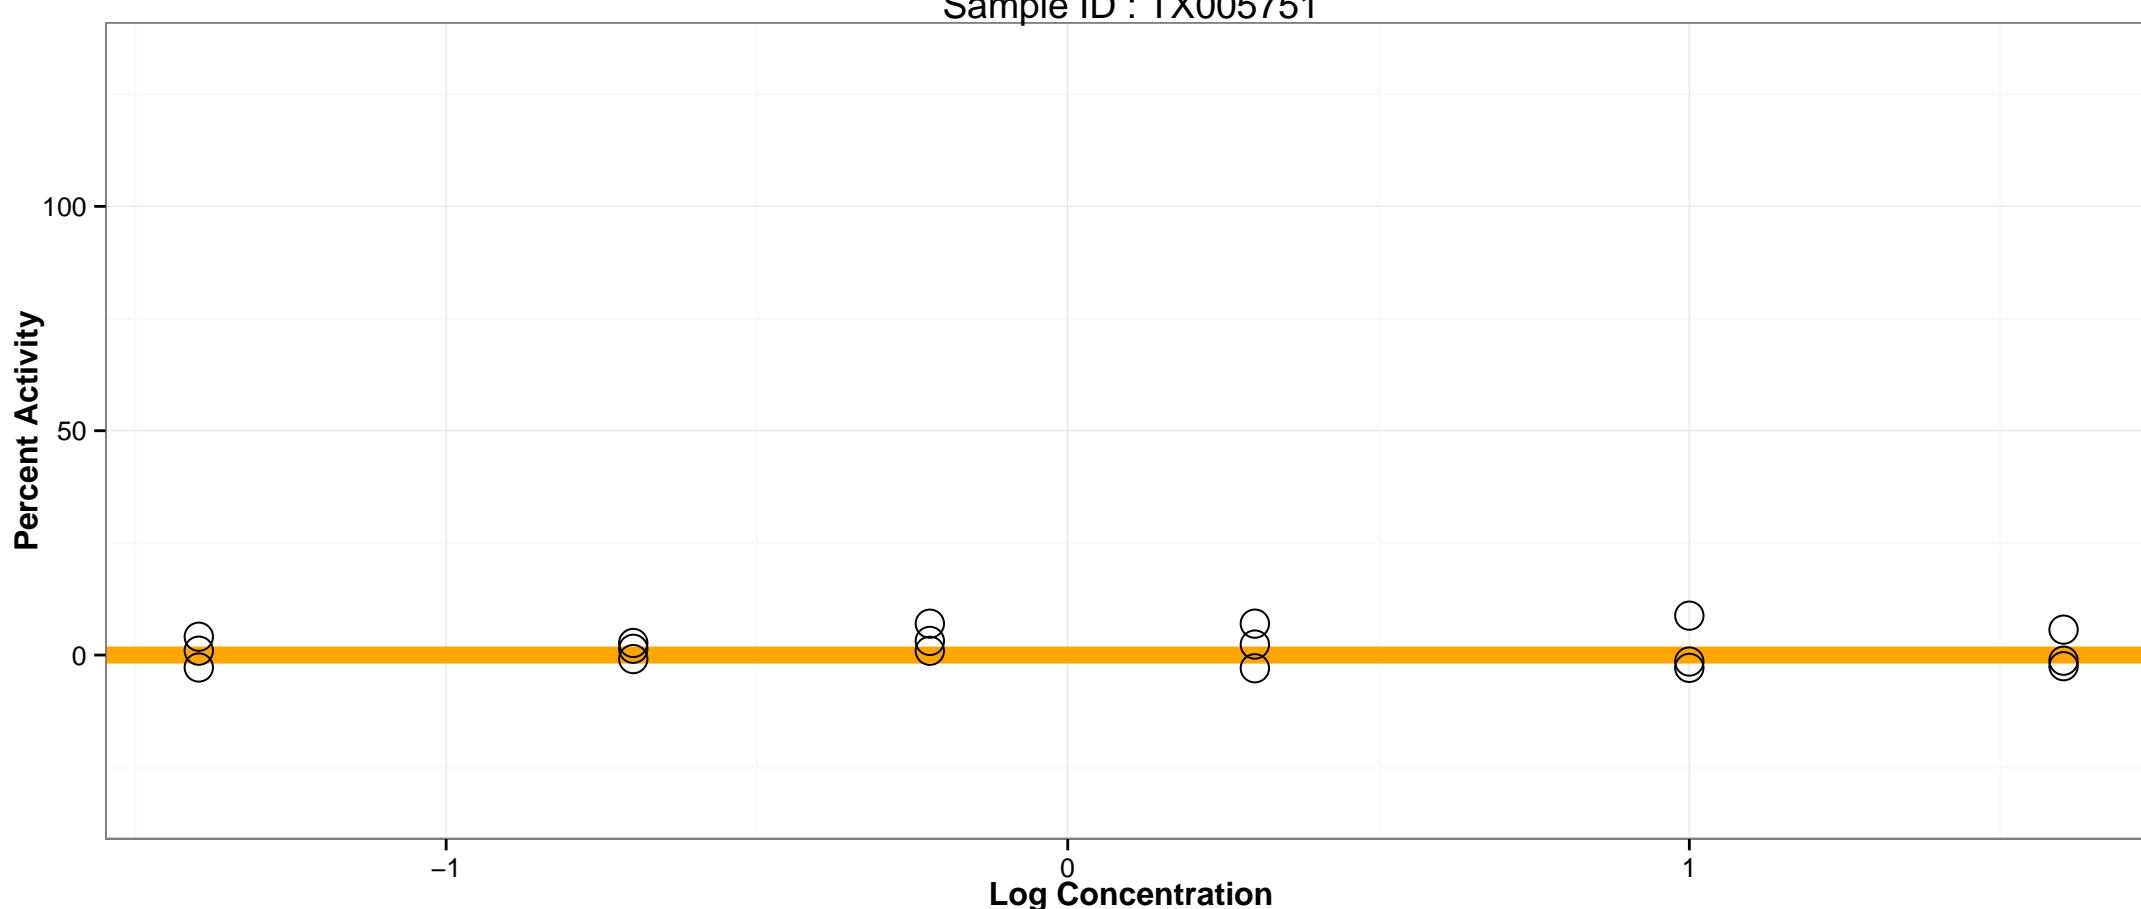

HILL MODEL

HILL MODEL: Not applicable

GAIN-LOSS MODEL

GNLS MODEL: Not applicable

|      | CNST  | HILL | GNLS |
|------|-------|------|------|
| AIC  | 103.9 | NA   | NA   |
| PROB | 1     | NA   | NA   |
| RMSE | 3.99  | NA   | NA   |

MAX\_MEAN : 3.71 MAX\_MED : 3.16 BMAD : 5.54  
COFF : 20 HIT-CALL : 0 FITC : 4 ACTP : 0  
FLAGS :

Assay ID 1848 (NHEERL\_QuantiLum\_inhib\_2\_dn)  
Sample ID : TX005751

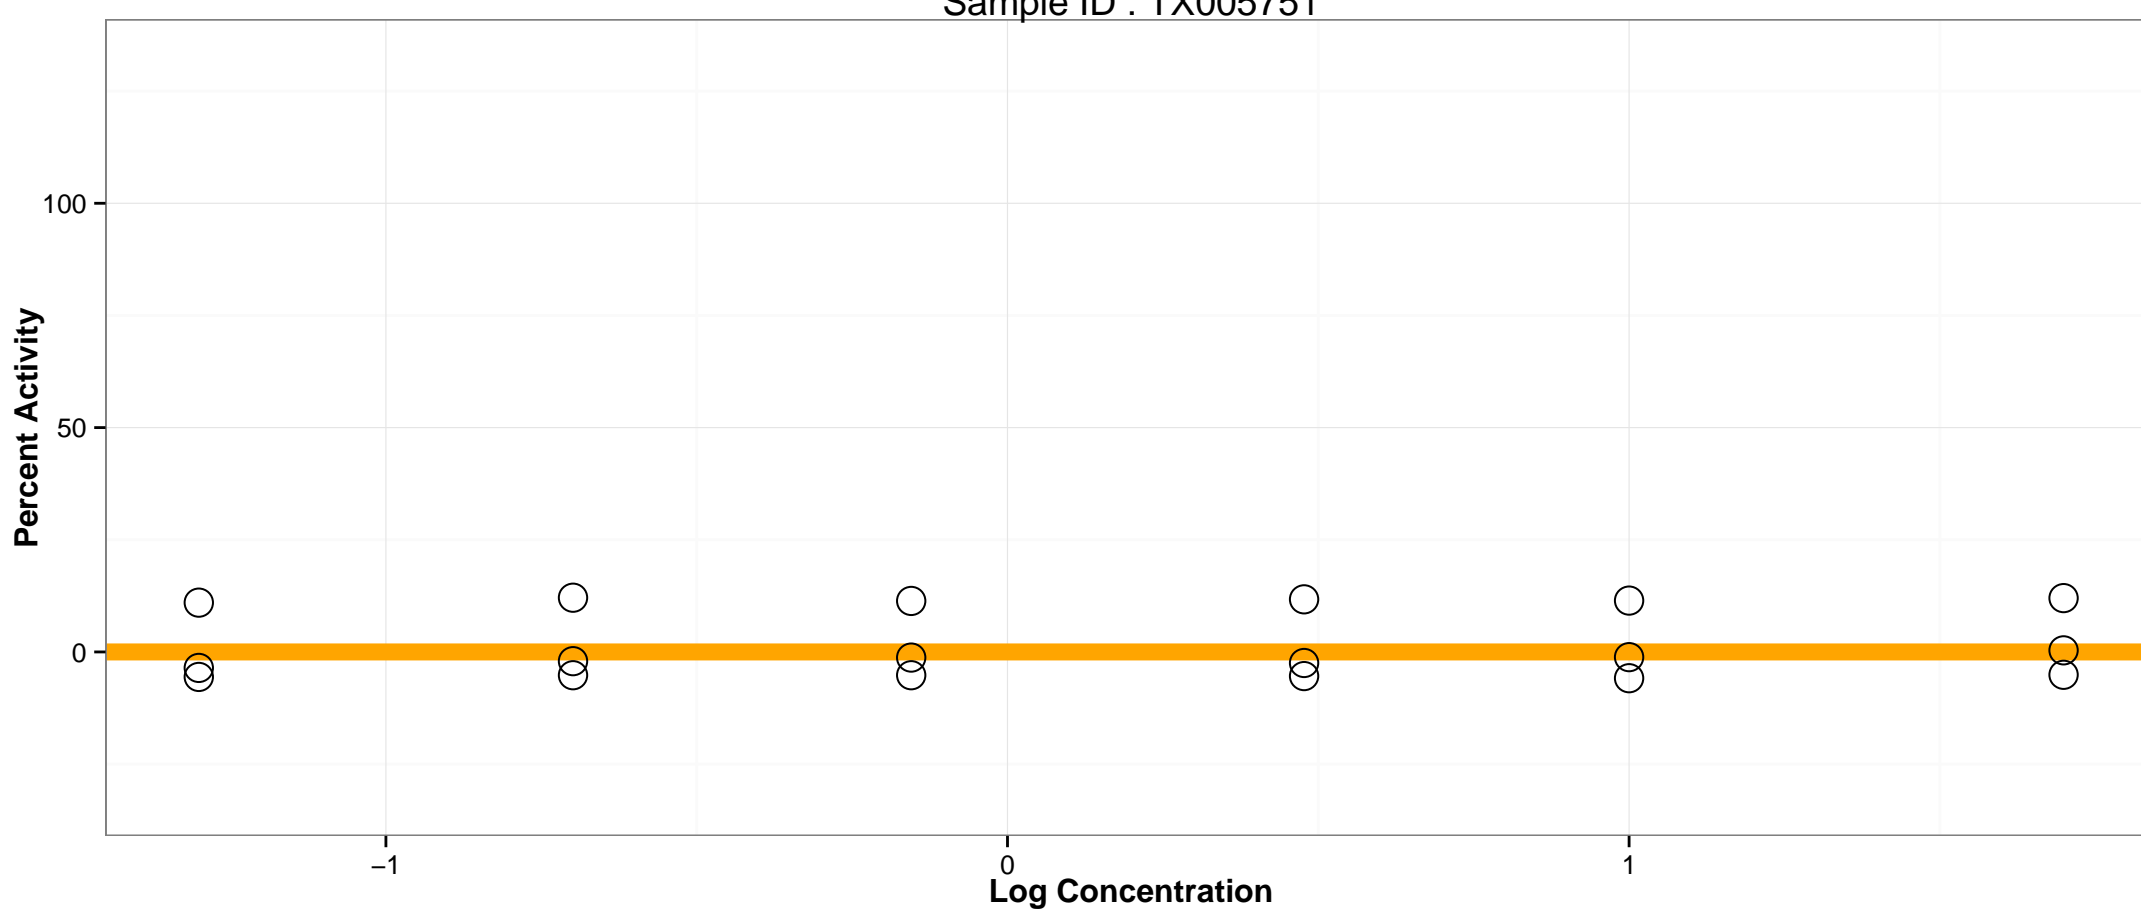

HILL MODEL

HILL MODEL: Not applicable

GAIN-LOSS MODEL

GNLS MODEL: Not applicable

|      | CNST   | HILL | GNLS |
|------|--------|------|------|
| AIC  | 127.76 | NA   | NA   |
| PROB | 1      | NA   | NA   |
| RMSE | 7.49   | NA   | NA   |

MAX\_MEAN : 2.43 MAX\_MED : 0.366 BMAD : 8.58  
COFF : 20 HIT-CALL : 0 FITC : 4 ACTP : 0  
FLAGS :

Assay ID 1824 (NHEERL\_TPO\_GUA\_dn)  
Sample ID : TP0001442C02

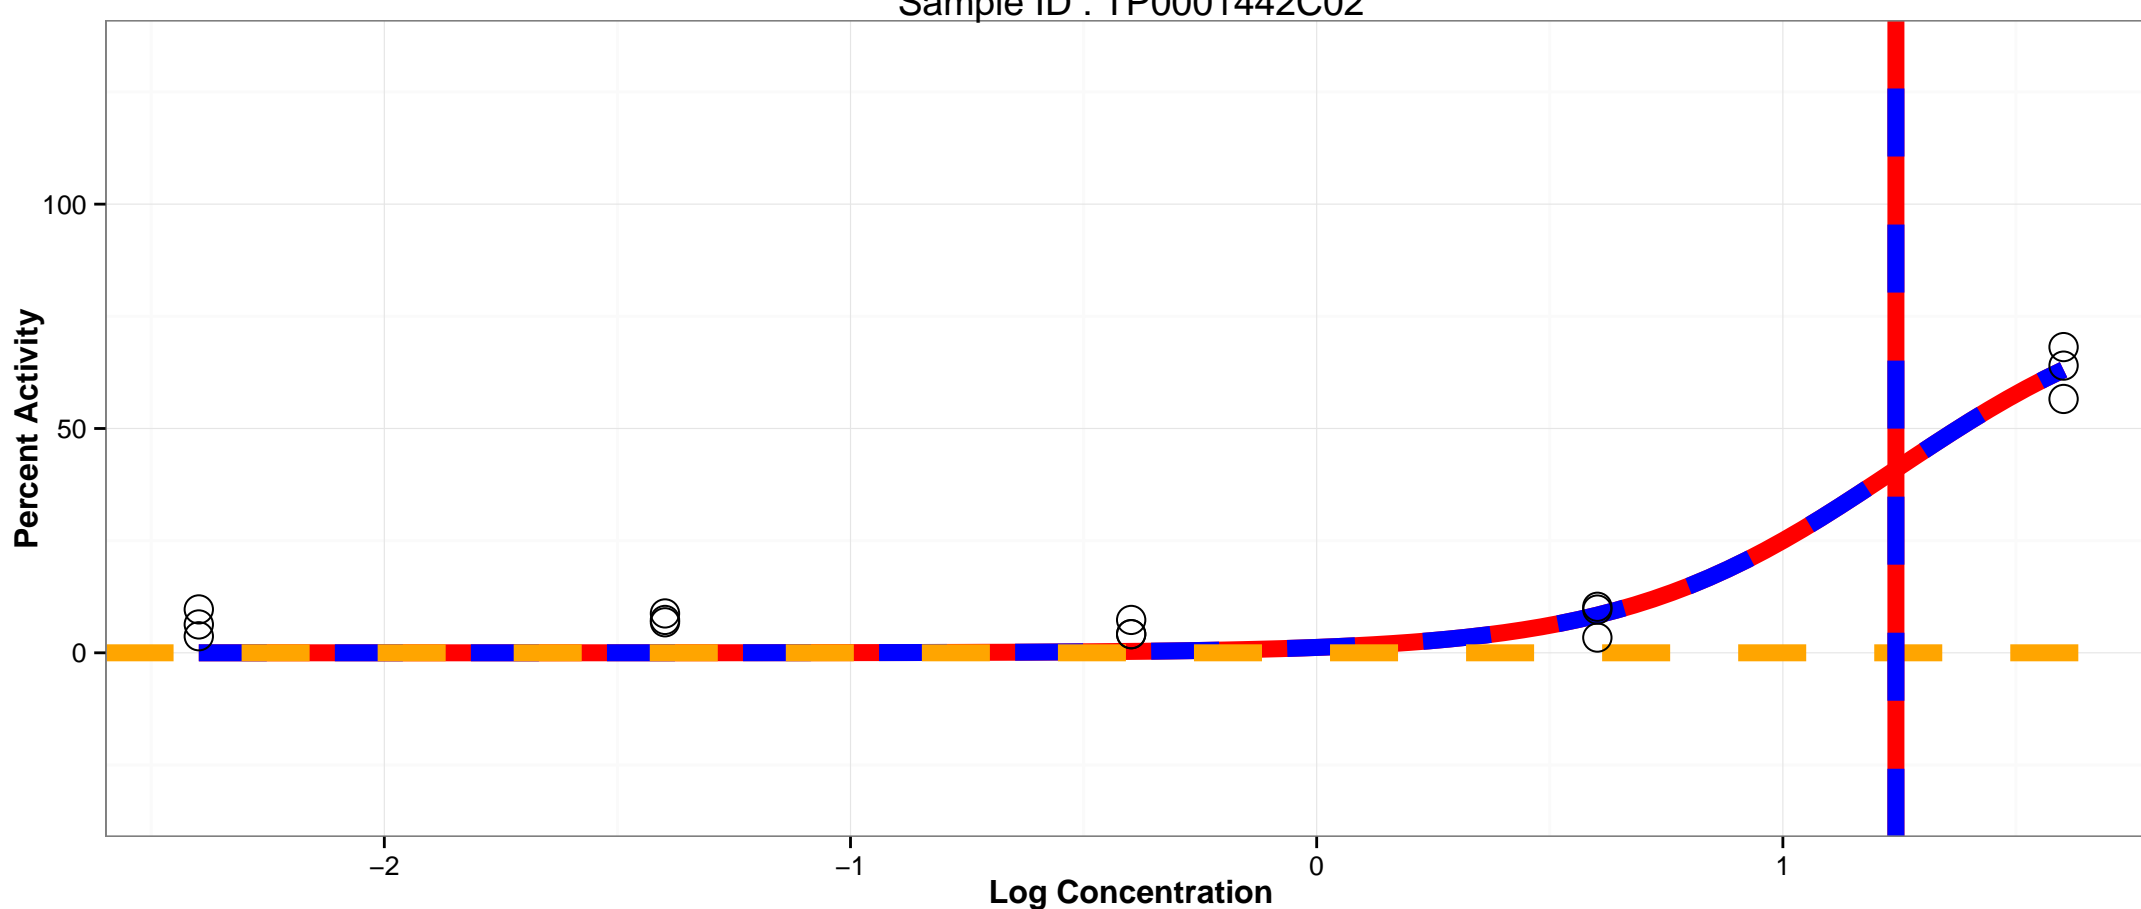

HILL MODEL

|     | tp   | ga    | gw   |
|-----|------|-------|------|
| val | 81.8 | 1.24  | 1.47 |
| sd  | 81   | 0.919 | 1.5  |

GAIN-LOSS MODEL

|     | tp   | ga    | gw   | la   | lw   |
|-----|------|-------|------|------|------|
| val | 81.8 | 1.24  | 1.47 | 3.32 | 4.5  |
| sd  | 81.7 | 0.928 | 1.52 | 2450 | 6410 |

|      | CNST   | HILL   | GNLS   |
|------|--------|--------|--------|
| AIC  | 141.24 | 105.83 | 109.83 |
| PROB | 0      | 0.88   | 0.12   |
| RMSE | 28.95  | 5.79   | 5.79   |

MAX\_MEAN : 62.9 MAX\_MED : 64 BMAD : 3.71  
COFF : 20 HIT-CALL : 1 FITC : 42 ACTP : 1  
FLAGS : 6



Chemical : Acephate  
CAS : 30560-19-1

Assay ID 1508 (NHEERL\_TPO\_AUR\_dn)  
Sample ID : TX000715

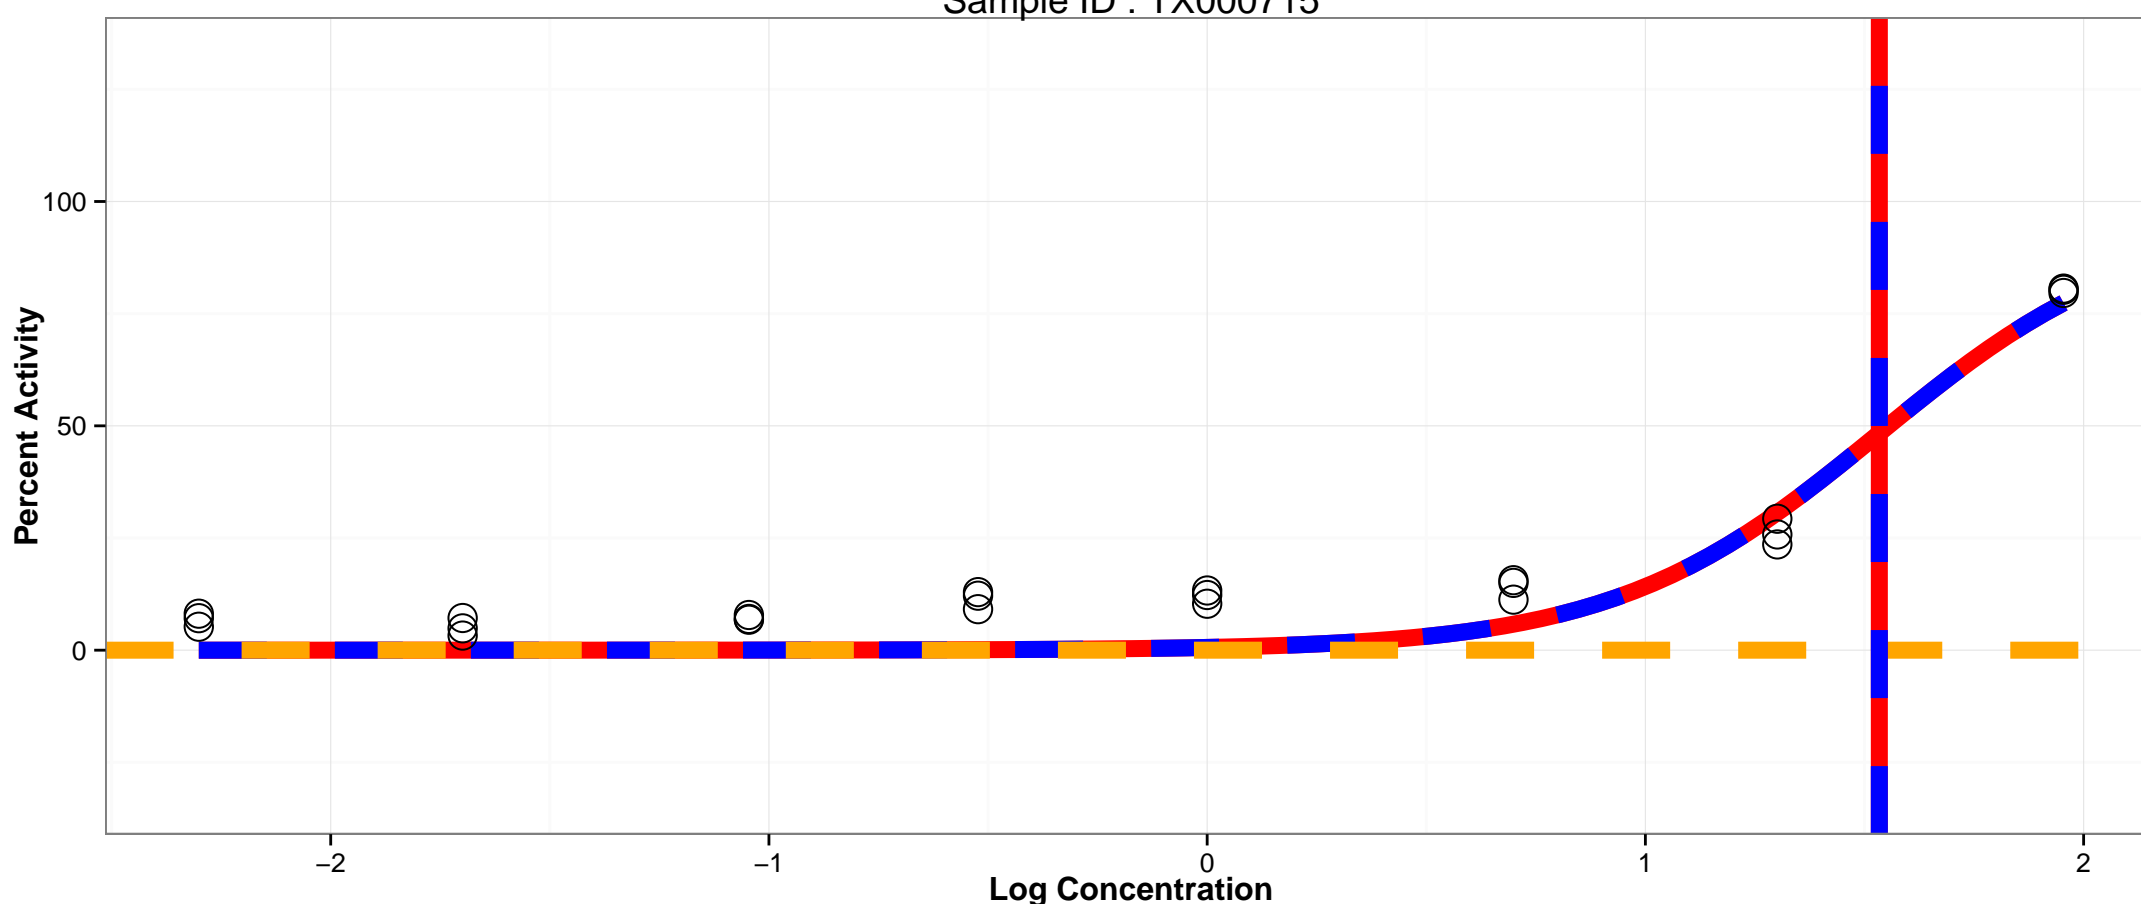

HILL MODEL

|     | tp   | ga    | gw    |
|-----|------|-------|-------|
| val | 96.7 | 1.53  | 1.43  |
| sd  | 21.1 | 0.158 | 0.681 |

GAIN-LOSS MODEL

|     | tp   | ga    | gw    | la   | lw   |
|-----|------|-------|-------|------|------|
| val | 96.7 | 1.53  | 1.43  | 2.78 | 10.5 |
| sd  | 21.1 | 0.158 | 0.681 | 728  | 9250 |

|      | CNST   | HILL   | GNLS   |
|------|--------|--------|--------|
| AIC  | 227.65 | 179.26 | 183.26 |
| PROB | 0      | 0.88   | 0.12   |
| RMSE | 31.08  | 7.86   | 7.86   |

MAX\_MEAN : 80.2 MAX\_MED : 80.3 BMAD : 5.69  
COFF : 20 HIT-CALL : 1 FITC : 42 ACTP : 1  
FLAGS :

Assay ID 1509 (NHEERL\_HEK293T\_CellTiterGLO)  
Sample ID : TX000715

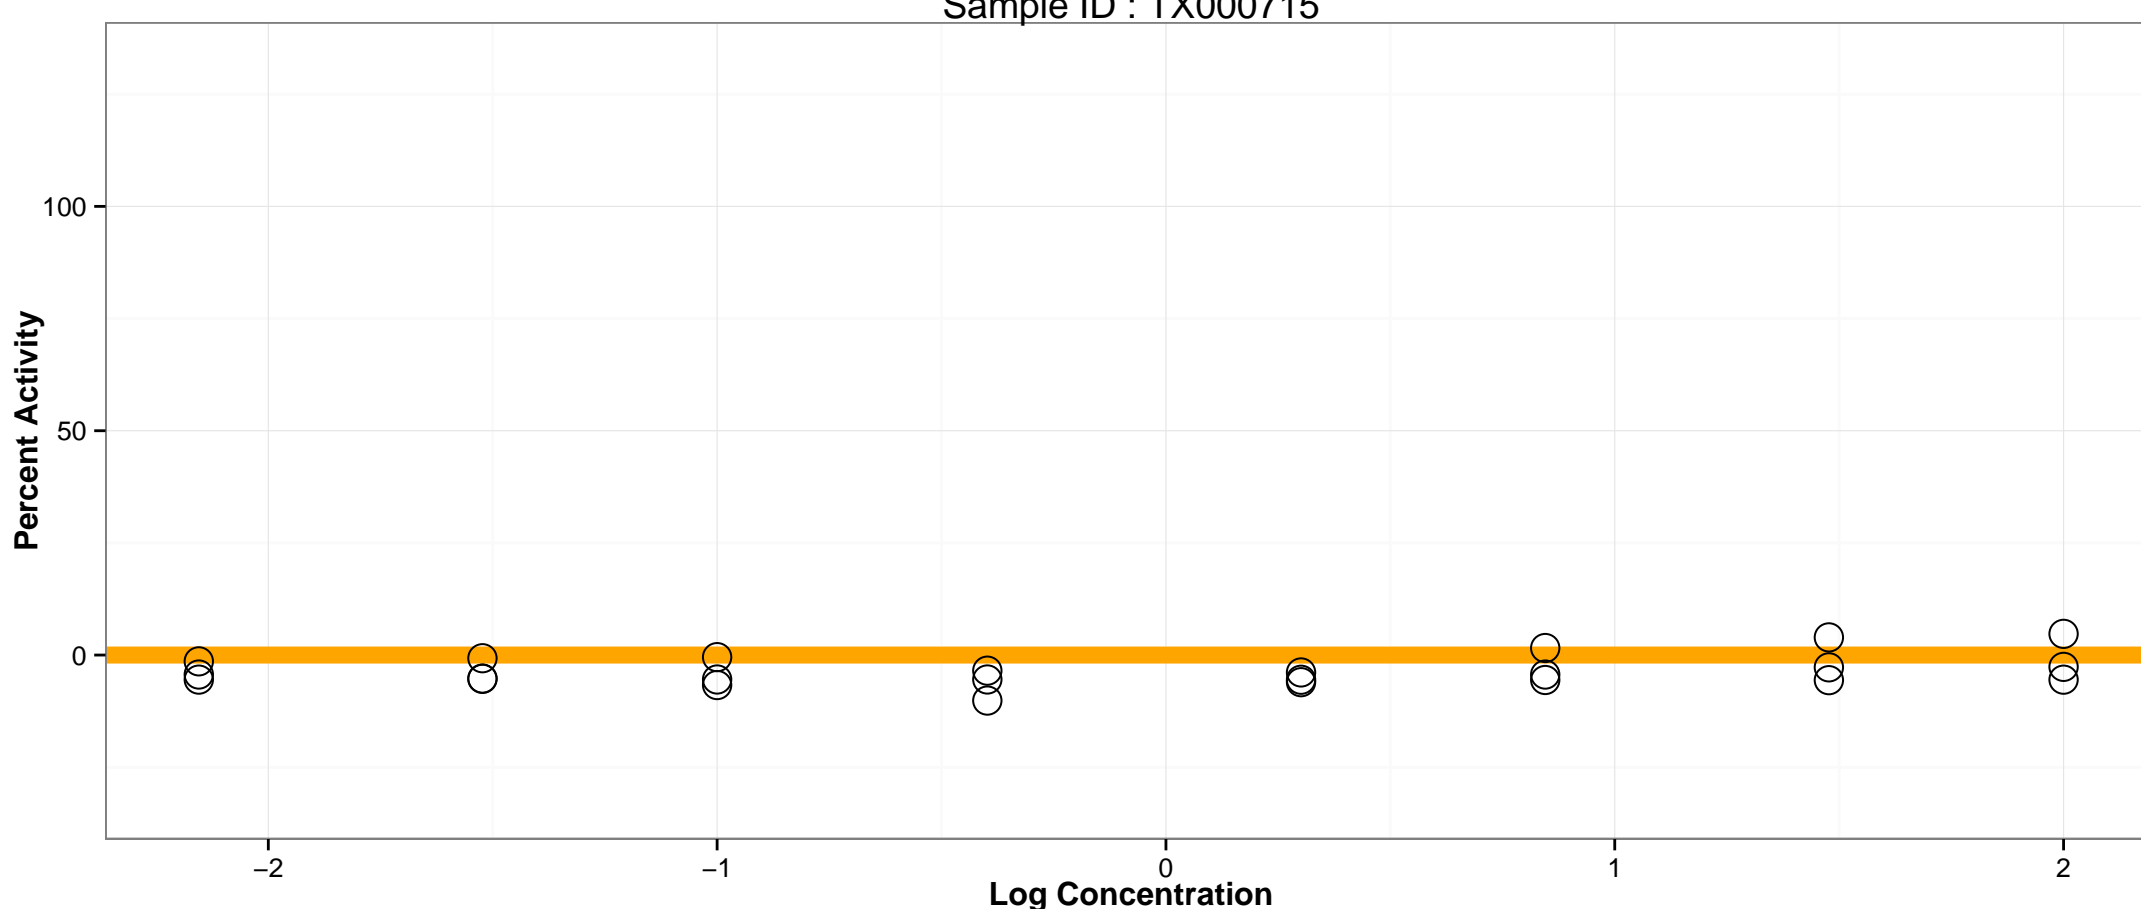

HILL MODEL

HILL MODEL: Not applicable

GAIN-LOSS MODEL

GNLS MODEL: Not applicable

|      | CNST  | HILL | GNLS |
|------|-------|------|------|
| AIC  | 150.3 | NA   | NA   |
| PROB | 1     | NA   | NA   |
| RMSE | 4.88  | NA   | NA   |

MAX\_MEAN : -1.12 MAX\_MED : -2.62 BMAD : 5.54  
COFF : 20 HIT-CALL : 0 FITC : 4 ACTP : 0  
FLAGS :

Assay ID 1848 (NHEERL\_Quantilum\_inhib\_2\_dn)  
Sample ID : TX000715

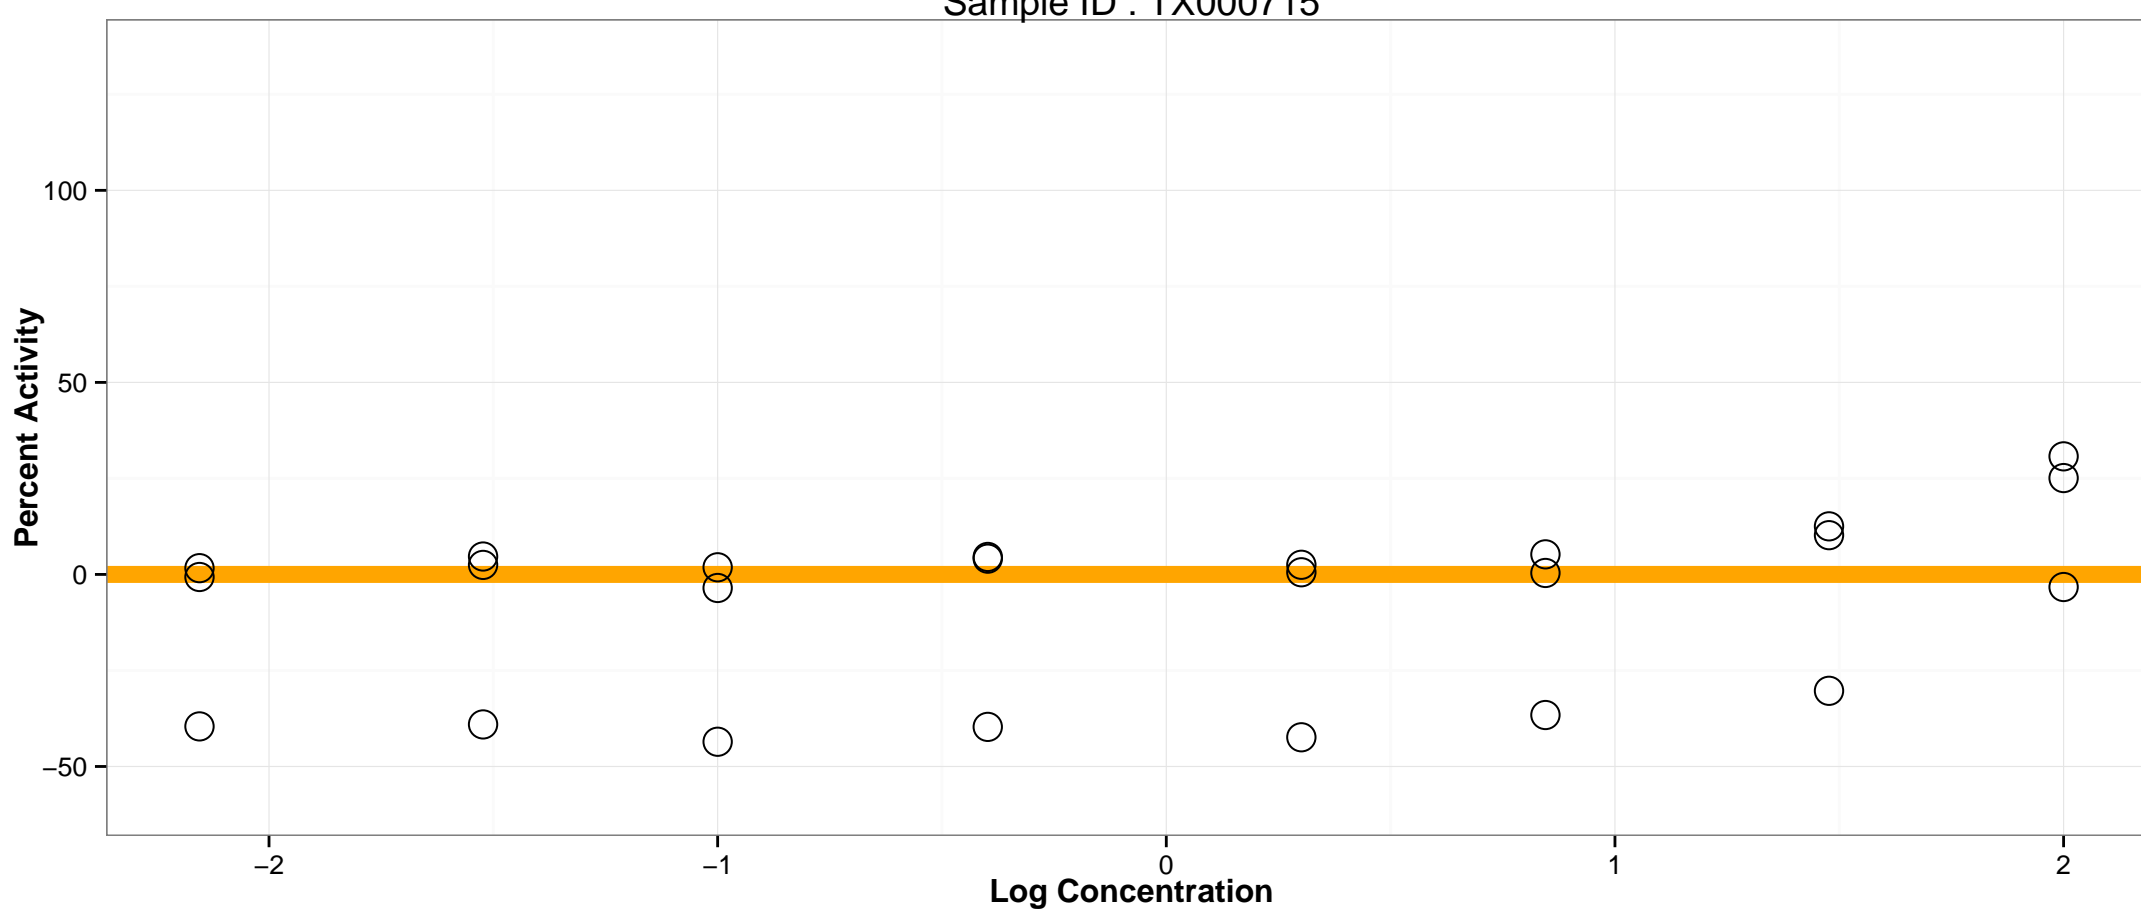

HILL MODEL

HILL MODEL: Not applicable

GAIN-LOSS MODEL

GNLS MODEL: Not applicable

|      | CNST  | HILL | GNLS |
|------|-------|------|------|
| AIC  | 220.9 | NA   | NA   |
| PROB | 1     | NA   | NA   |
| RMSE | 22.89 | NA   | NA   |

MAX\_MEAN : 17.5 MAX\_MED : 25.1 BMAD : 8.58  
COFF : 20 HIT-CALL : 0 FITC : 4 ACTP : 0  
FLAGS : 10

Assay ID 1824 (NHEERL\_TPO\_GUA\_dn)  
Sample ID : TP0001442C03

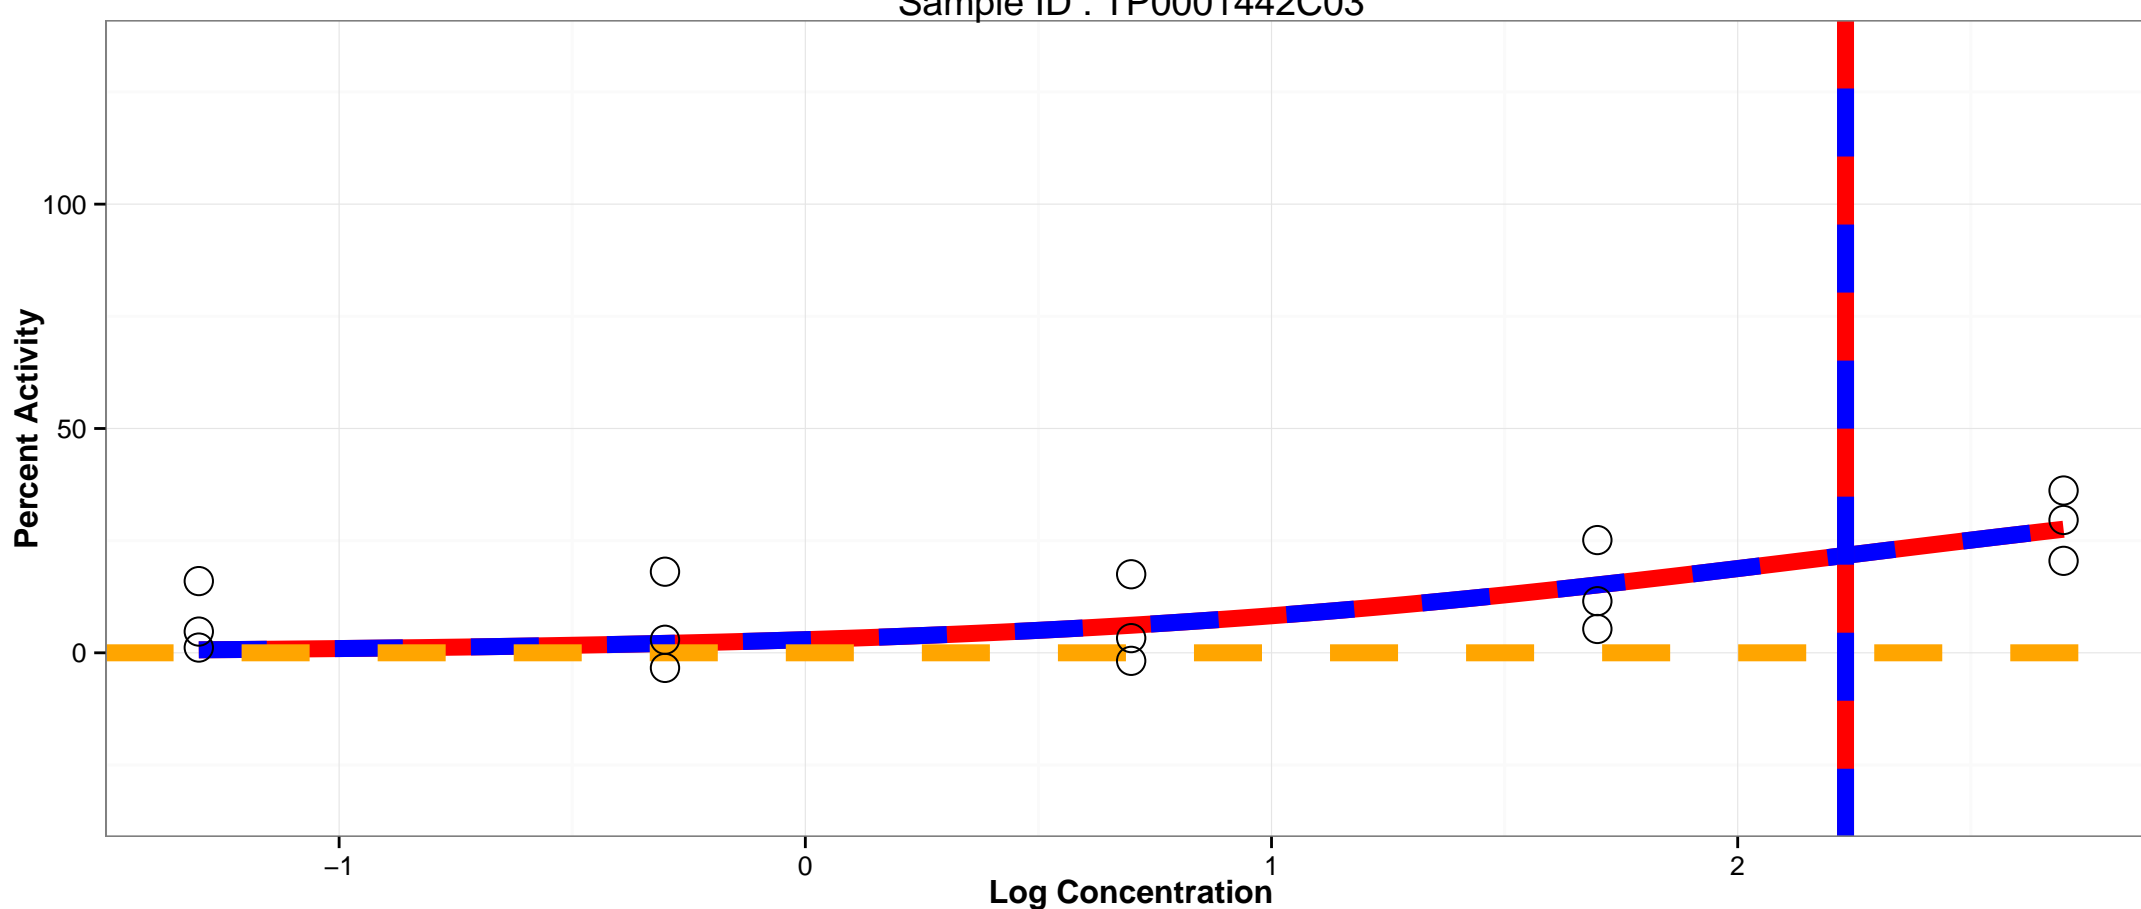

HILL MODEL

|     | tp   | ga   | gw    |
|-----|------|------|-------|
| val | 43.4 | 2.23 | 0.511 |
| sd  | 29.2 | 1.25 | 0.4   |

GAIN-LOSS MODEL

|     | tp   | ga   | gw    | la   | lw   |
|-----|------|------|-------|------|------|
| val | 43.4 | 2.23 | 0.511 | 3.19 | 15.4 |
| sd  | 29.2 | 1.25 | 0.399 | 174  | 5050 |

|      | CNST  | HILL   | GNLS   |
|------|-------|--------|--------|
| AIC  | 130.5 | 116.35 | 120.35 |
| PROB | 0     | 0.88   | 0.12   |
| RMSE | 17.03 | 8.47   | 8.47   |

MAX\_MEAN : 28.8 MAX\_MED : 29.6 BMAD : 3.71  
COFF : 20 HIT-CALL : 1 FITC : 42 ACTP : 0.999  
FLAGS :

Chemical : N-Ethyl-3-methylaniline  
CAS : 102-27-2

Assay ID 1508 (NHEERL\_TPO\_AUR\_dn)  
Sample ID : TX015570

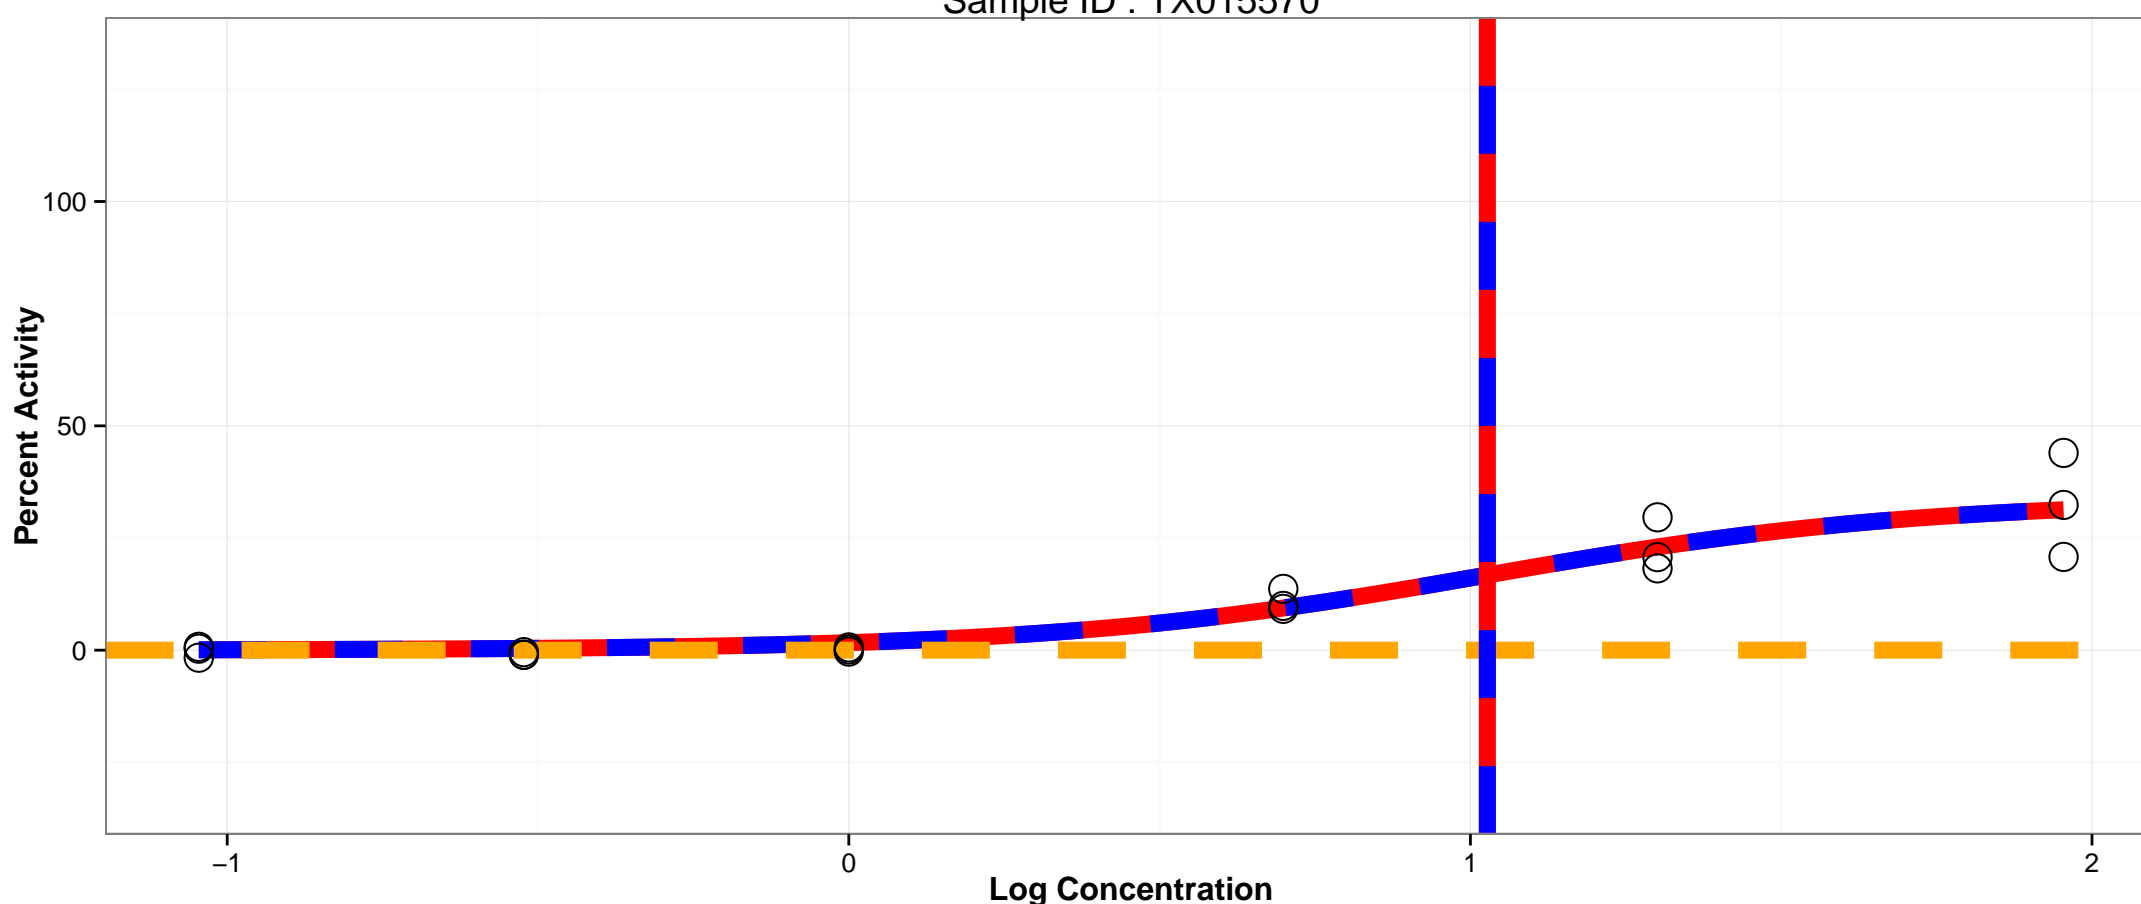

HILL MODEL

|     | tp   | ga    | gw    |
|-----|------|-------|-------|
| val | 33.5 | 1.03  | 1.25  |
| sd  | 5.45 | 0.193 | 0.335 |

GAIN-LOSS MODEL

|     | tp   | ga    | gw    | la   | lw   |
|-----|------|-------|-------|------|------|
| val | 33.5 | 1.03  | 1.25  | 3.17 | 6.3  |
| sd  | 5.45 | 0.193 | 0.335 | 716  | 3710 |

|      | CNST  | HILL   | GNLS   |
|------|-------|--------|--------|
| AIC  | 154.7 | 109.71 | 113.71 |
| PROB | 0     | 0.88   | 0.12   |
| RMSE | 17.37 | 4.58   | 4.58   |

MAX\_MEAN : 32.4 MAX\_MED : 32.4 BMAD : 5.69  
COFF : 20 HIT-CALL : 1 FITC : 42 ACTP : 1  
FLAGS :

Assay ID 1509 (NHEERL\_HEK293T\_CellTiterGLO)  
Sample ID : TX015570

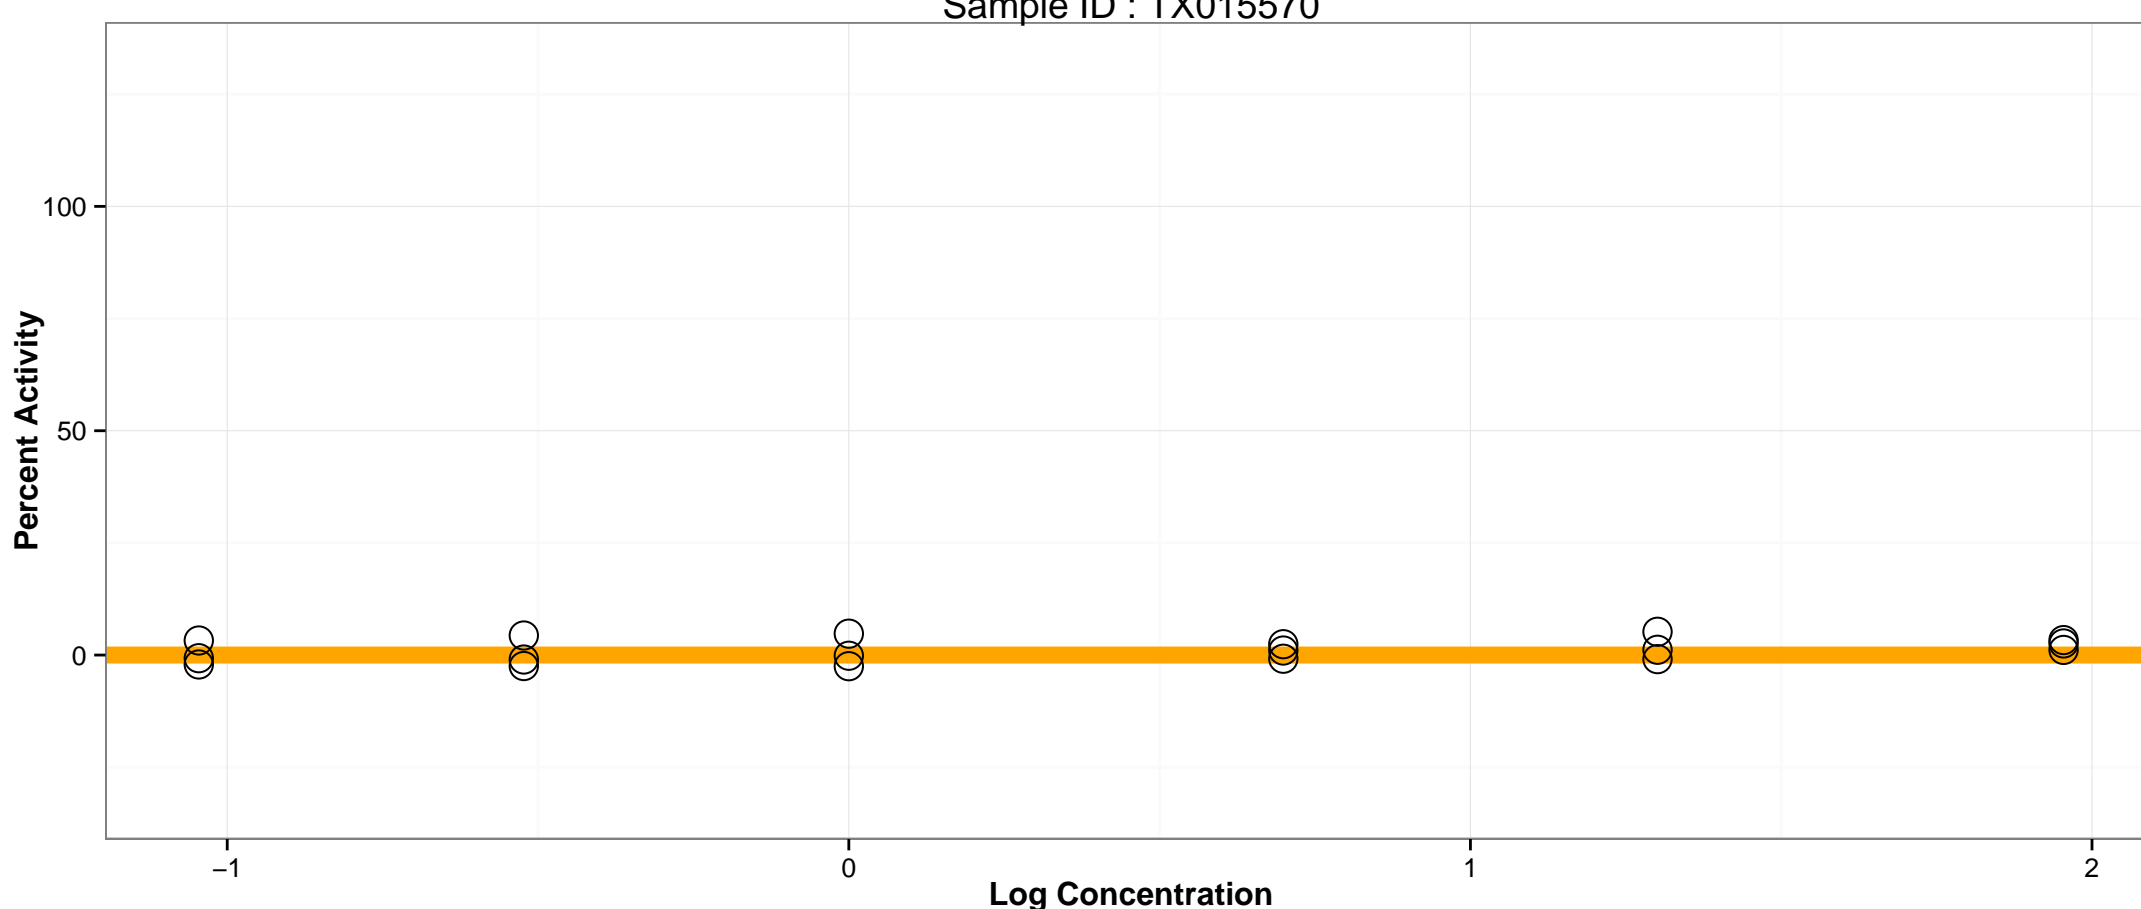

HILL MODEL

HILL MODEL: Not applicable

GAIN-LOSS MODEL

GNLS MODEL: Not applicable

|      | CNST  | HILL | GNLS |
|------|-------|------|------|
| AIC  | 90.06 | NA   | NA   |
| PROB | 1     | NA   | NA   |
| RMSE | 2.65  | NA   | NA   |

MAX\_MEAN : 2.37 MAX\_MED : 2.6 BMAD : 5.54  
COFF : 20 HIT-CALL : 0 FITC : 4 ACTP : 0  
FLAGS :

Assay ID 1848 (NHEERL\_Quantilum\_inhib\_2\_dn)  
Sample ID : TX015570

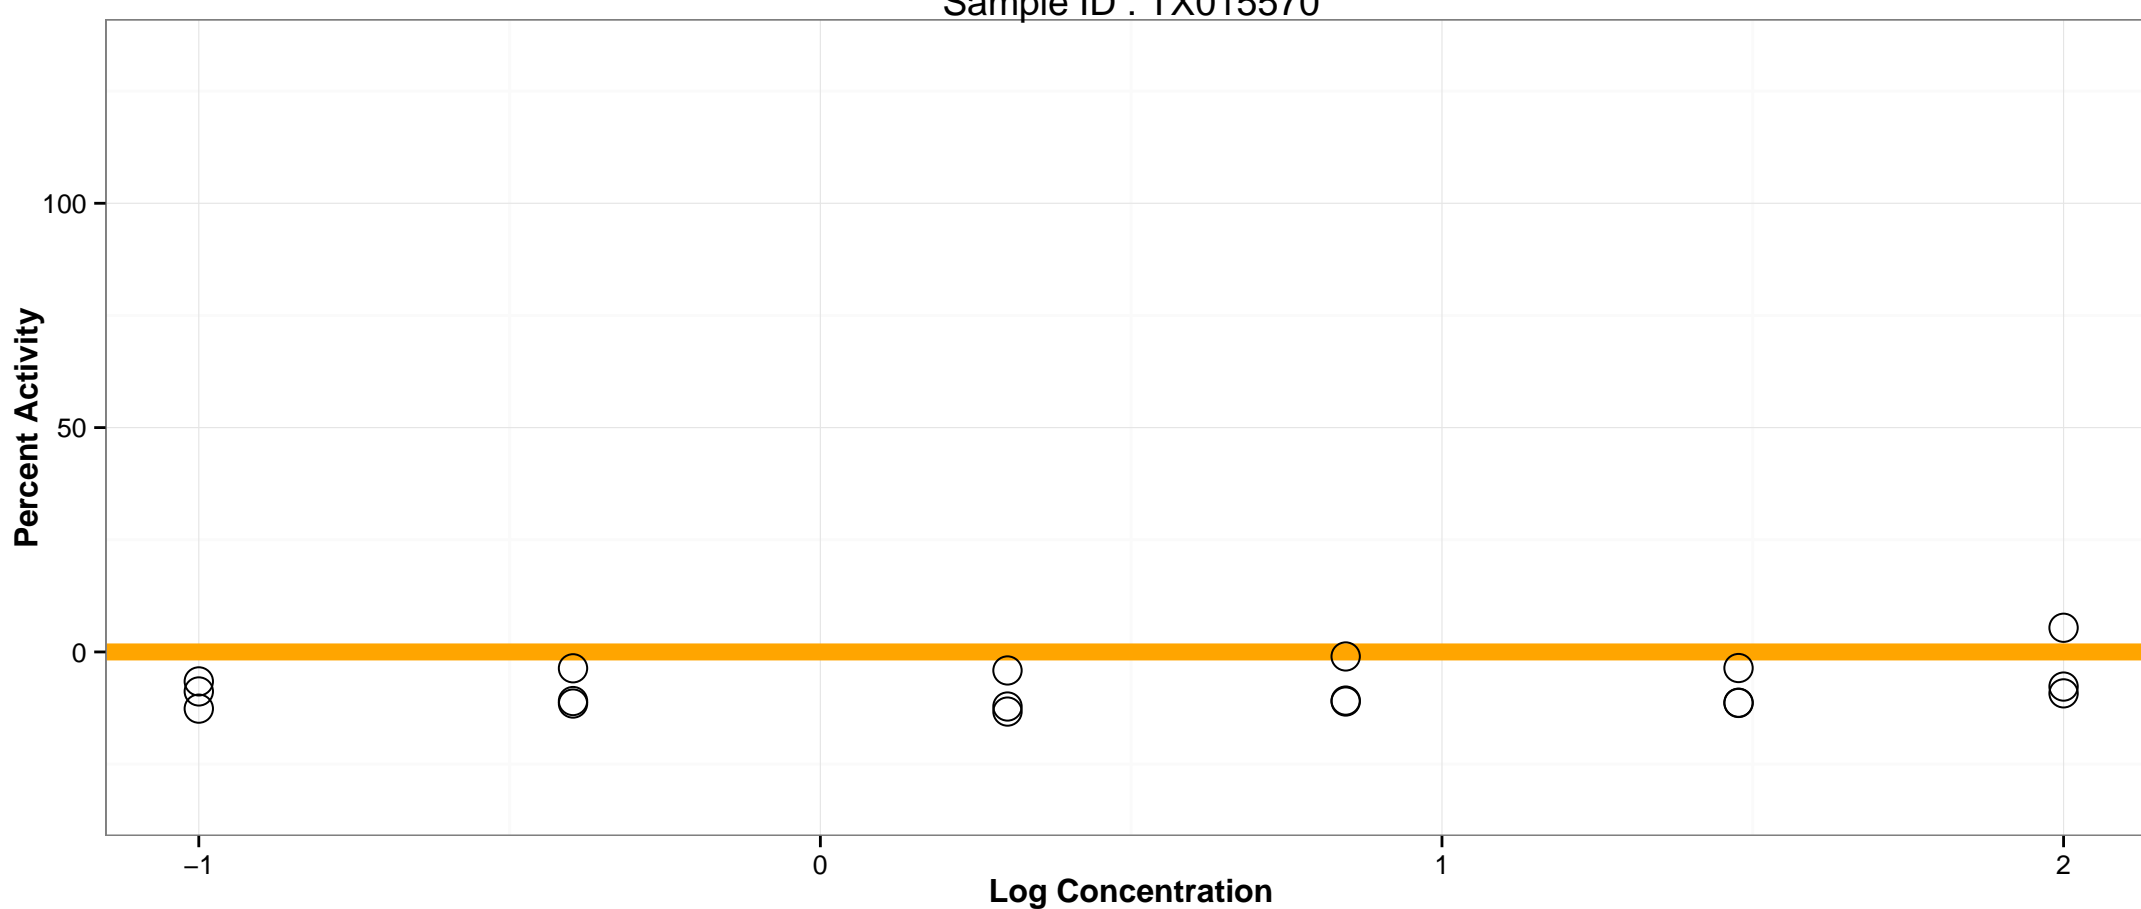

HILL MODEL

HILL MODEL: Not applicable

GAIN-LOSS MODEL

GNLS MODEL: Not applicable

|      | CNST   | HILL | GNLS |
|------|--------|------|------|
| AIC  | 137.01 | NA   | NA   |
| PROB | 1      | NA   | NA   |
| RMSE | 9.33   | NA   | NA   |

MAX\_MEAN : -3.84 MAX\_MED : -7.71 BMAD : 8.58  
COFF : 20 HIT-CALL : 0 FITC : 4 ACTP : 0  
FLAGS :

Assay ID 1824 (NHEERL\_TPO\_GUA\_dn)  
Sample ID : TP0001442C04

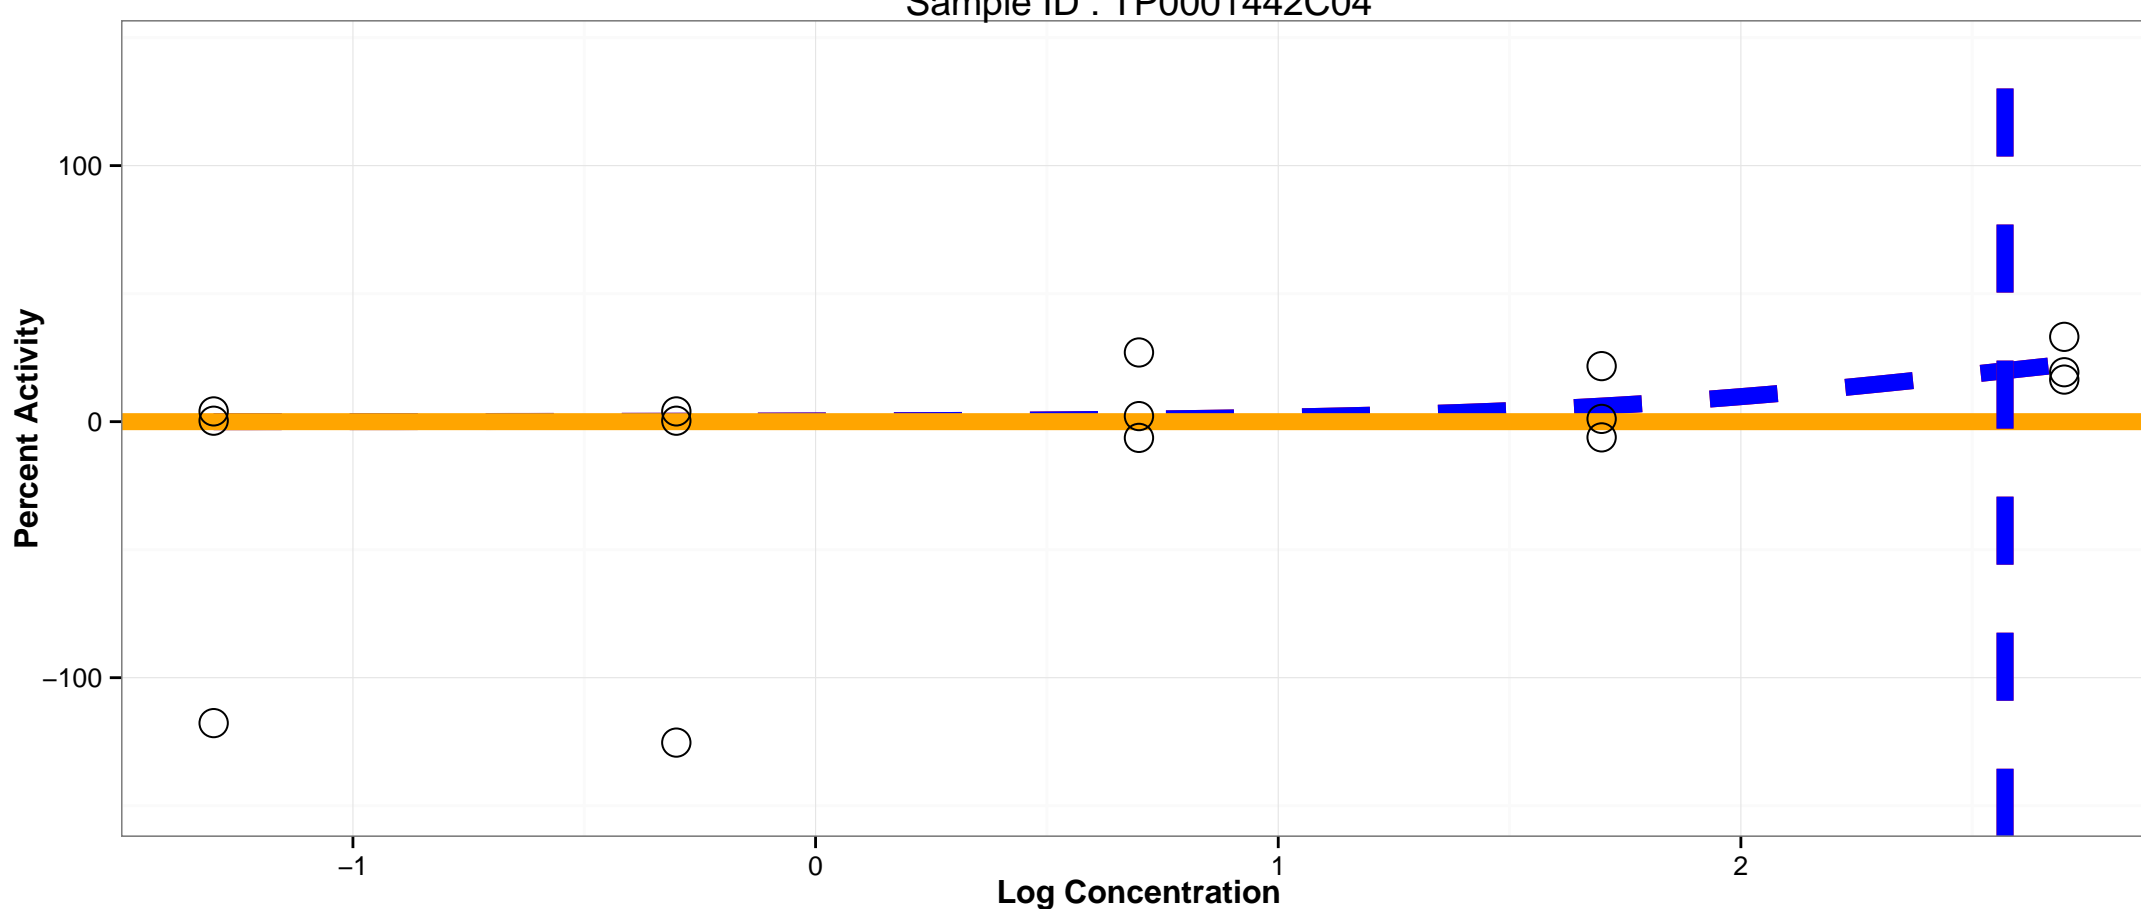

HILL MODEL

|     | tp   | ga   | gw    |
|-----|------|------|-------|
| val | 39.8 | 2.57 | 0.854 |
| sd  | 113  | 3.07 | 1.83  |

GAIN-LOSS MODEL

|     | tp   | ga   | gw    | la   | lw   |
|-----|------|------|-------|------|------|
| val | 39.8 | 2.57 | 0.854 | 4.68 | 3.4  |
| sd  | 113  | 3.06 | 1.83  | 2610 | 4500 |

|      | CNST   | HILL   | GNLS   |
|------|--------|--------|--------|
| AIC  | 152.47 | 153.46 | 157.46 |
| PROB | 0.59   | 0.36   | 0.05   |
| RMSE | 46.64  | 45.42  | 45.42  |

MAX\_MEAN : 23 MAX\_MED : 19.3 BMAD : 3.71  
COFF : 20 HIT-CALL : 0 FITC : 10 ACTP : 0.408  
FLAGS : 10

Chemical : Isoproterenol hydrochloride  
CAS : 51-30-9

Assay ID 1508 (NHEERL\_TPO\_AUR\_dn)  
Sample ID : TX008876

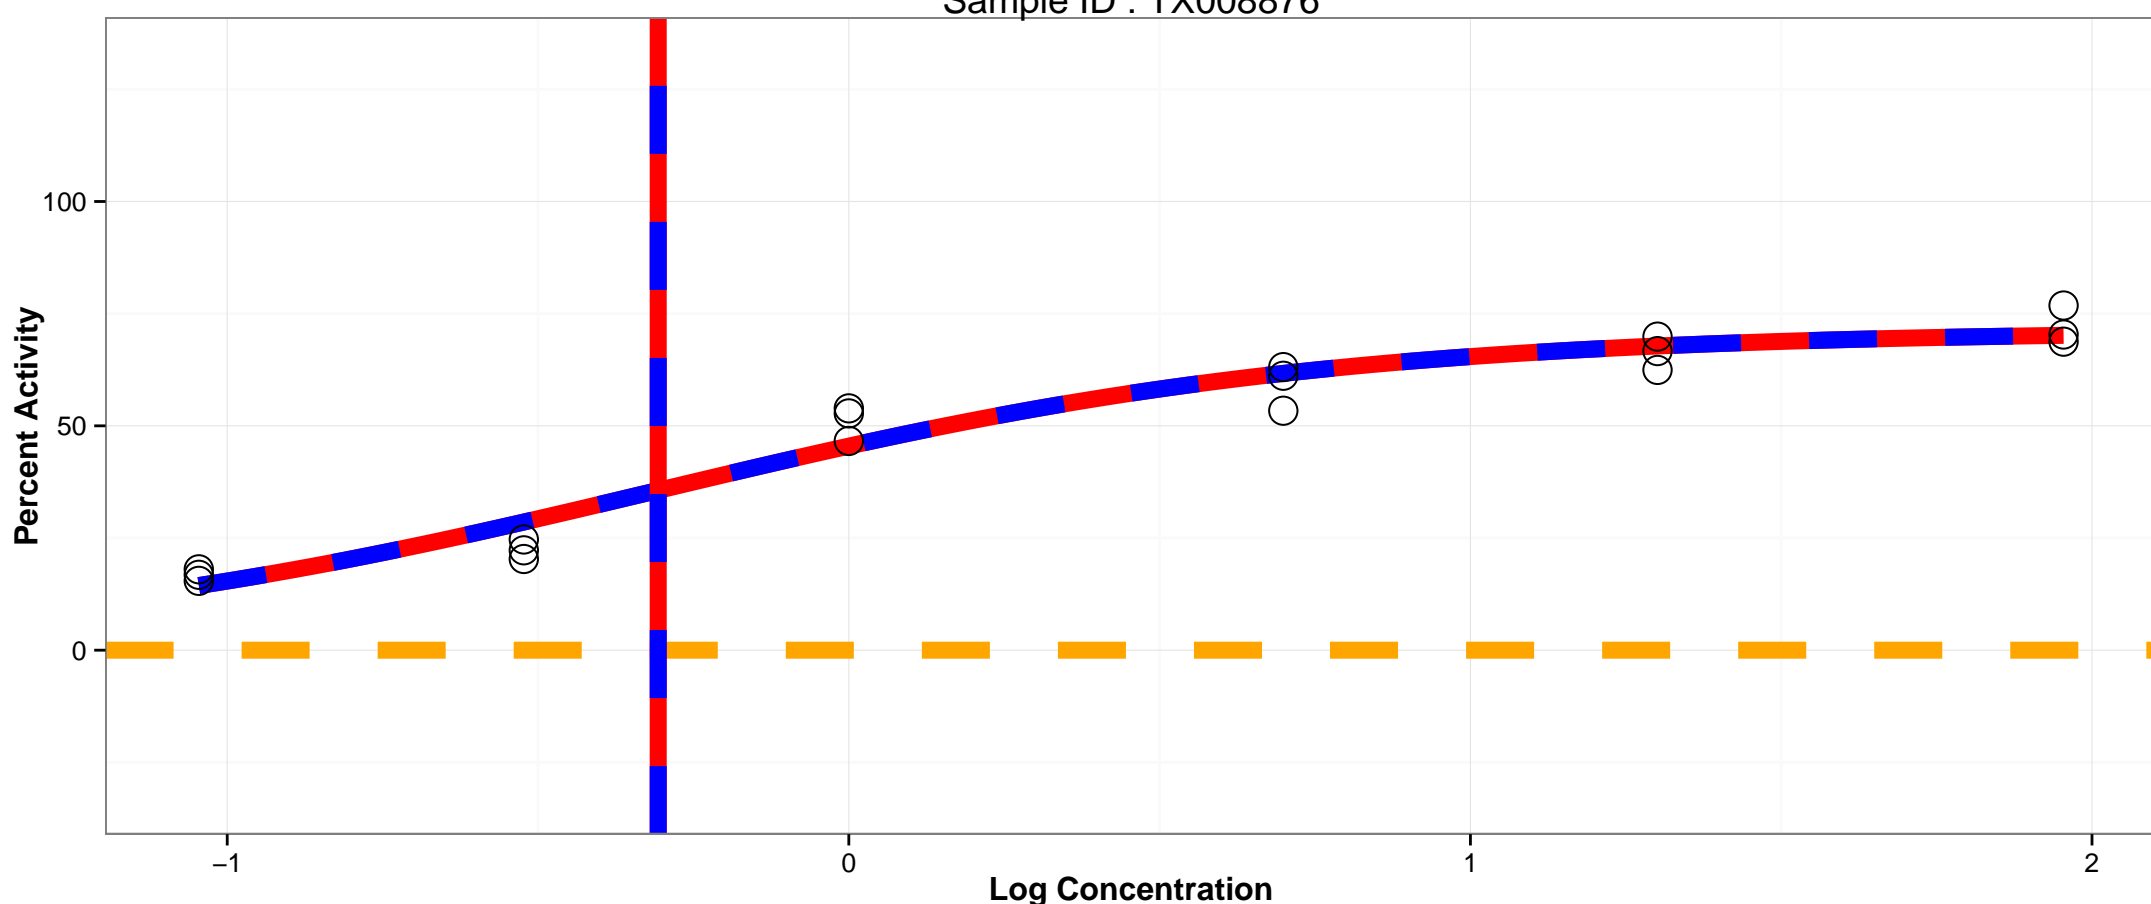

HILL MODEL

|     | tp   | ga     | gw    |
|-----|------|--------|-------|
| val | 71.2 | -0.307 | 0.806 |
| sd  | 2.69 | 0.0927 | 0.124 |

GAIN-LOSS MODEL

|     | tp   | ga     | gw    | la  | lw   |
|-----|------|--------|-------|-----|------|
| val | 71.2 | -0.307 | 0.806 | 3.9 | 8.83 |
| sd  | NA   | NA     | NA    | NA  | NA   |

|      | CNST   | HILL   | GNLS   |
|------|--------|--------|--------|
| AIC  | 199.05 | 117.47 | 121.47 |
| PROB | 0      | 0.88   | 0.12   |
| RMSE | 52.51  | 4.83   | 4.83   |

MAX\_MEAN : 72 MAX\_MED : 70.4 BMAD : 5.69  
COFF : 20 HIT-CALL : 1 FITC : 41 ACTP : 1  
FLAGS :

Assay ID 1509 (NHEERL\_HEK293T\_CellTiterGLO)  
Sample ID : TX008876

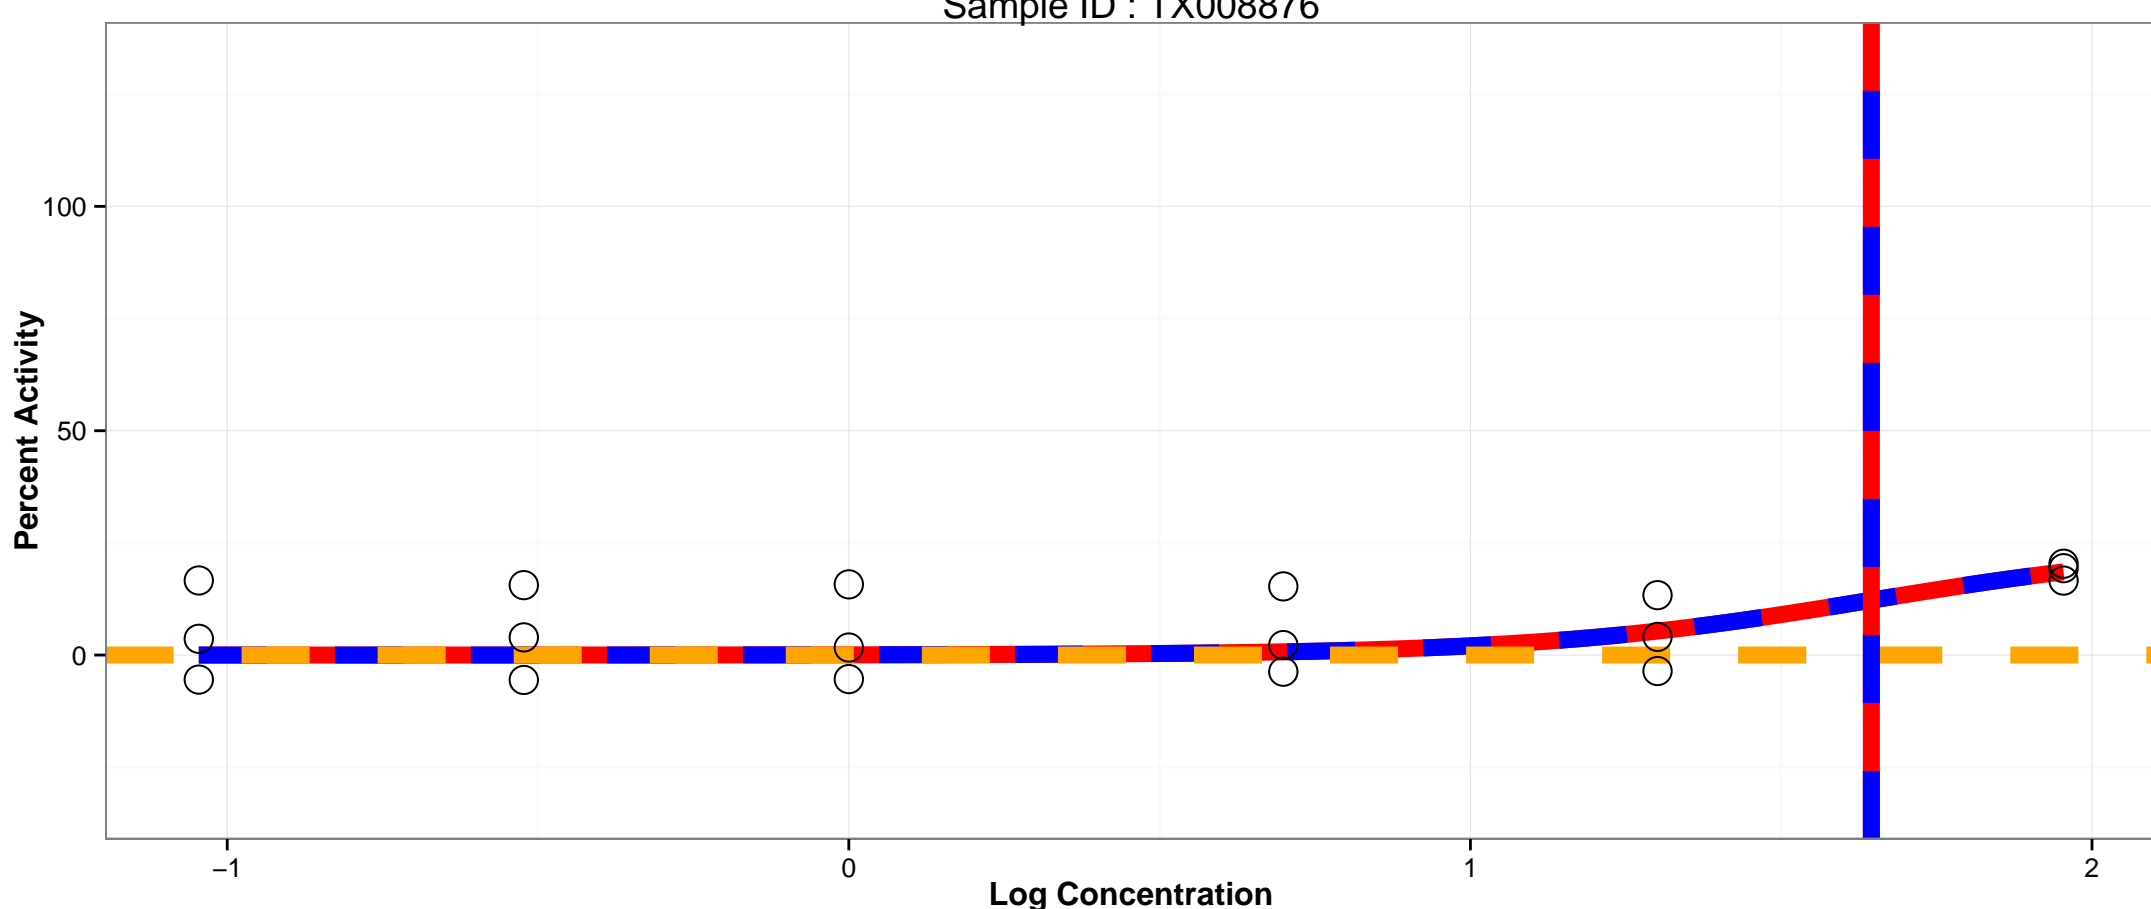

HILL MODEL

|     | tp   | ga    | gw   |
|-----|------|-------|------|
| val | 24.4 | 1.65  | 1.61 |
| sd  | 32   | 0.913 | 3.18 |

GAIN-LOSS MODEL

|     | tp   | ga    | gw   | la   | lw   |
|-----|------|-------|------|------|------|
| val | 24.4 | 1.65  | 1.61 | 3.38 | 4.99 |
| sd  | 32   | 0.914 | 3.18 | 1500 | 5260 |

|      | CNST   | HILL   | GNLS   |
|------|--------|--------|--------|
| AIC  | 143.31 | 136.31 | 140.31 |
| PROB | 0.03   | 0.86   | 0.12   |
| RMSE | 11.58  | 8.42   | 8.42   |

MAX\_MEAN : 18.8 MAX\_MED : 19.4 BMAD : 5.54  
COFF : 20 HIT-CALL : 0 FITC : 21 ACTP : 0.974  
FLAGS : 12

Assay ID 1848 (NHEERL\_Quantilum\_inhib\_2\_dn)  
Sample ID : TX008876

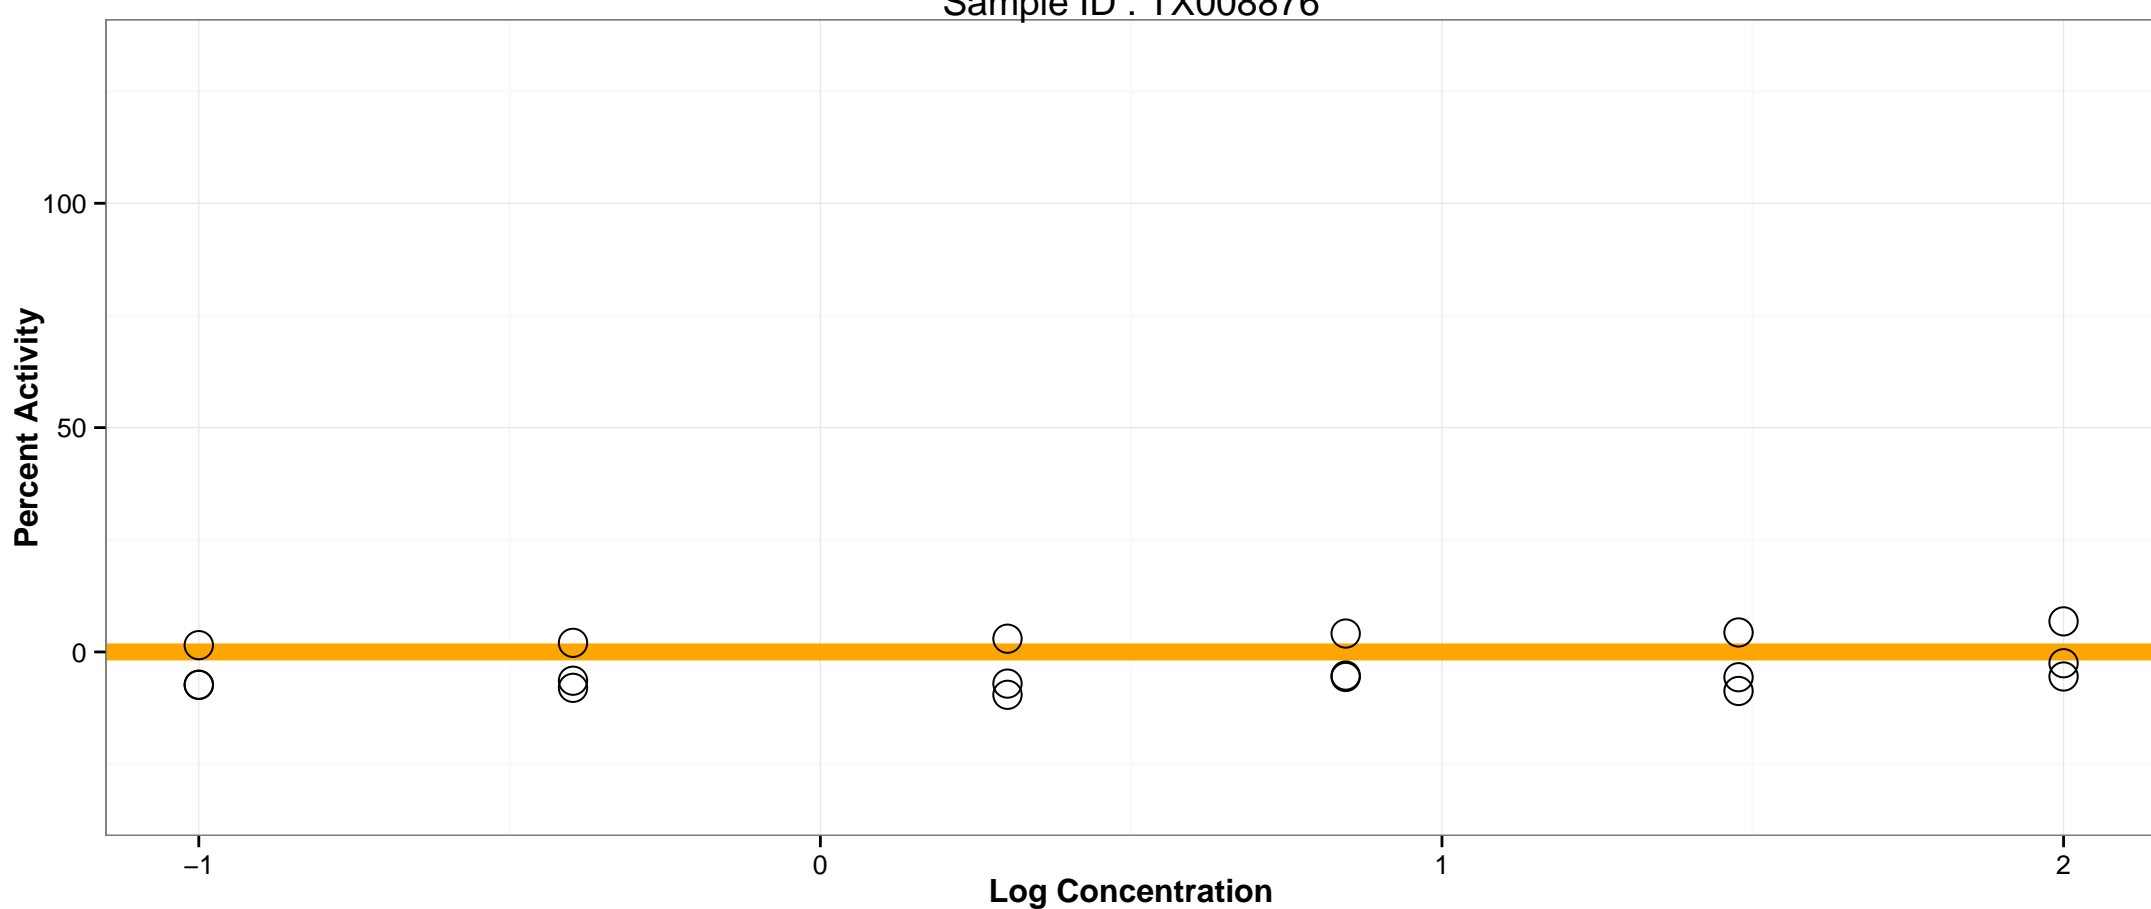

HILL MODEL

HILL MODEL: Not applicable

GAIN-LOSS MODEL

GNLS MODEL: Not applicable

|      | CNST   | HILL | GNLS |
|------|--------|------|------|
| AIC  | 121.13 | NA   | NA   |
| PROB | 1      | NA   | NA   |
| RMSE | 6.02   | NA   | NA   |

MAX\_MEAN : -0.379 MAX\_MED : -2.51 BMAD : 8.58  
COFF : 20 HIT-CALL : 0 FITC : 4 ACTP : 0  
FLAGS :

Assay ID 1824 (NHEERL\_TPO\_GUA\_dn)  
Sample ID : TP0001442C05

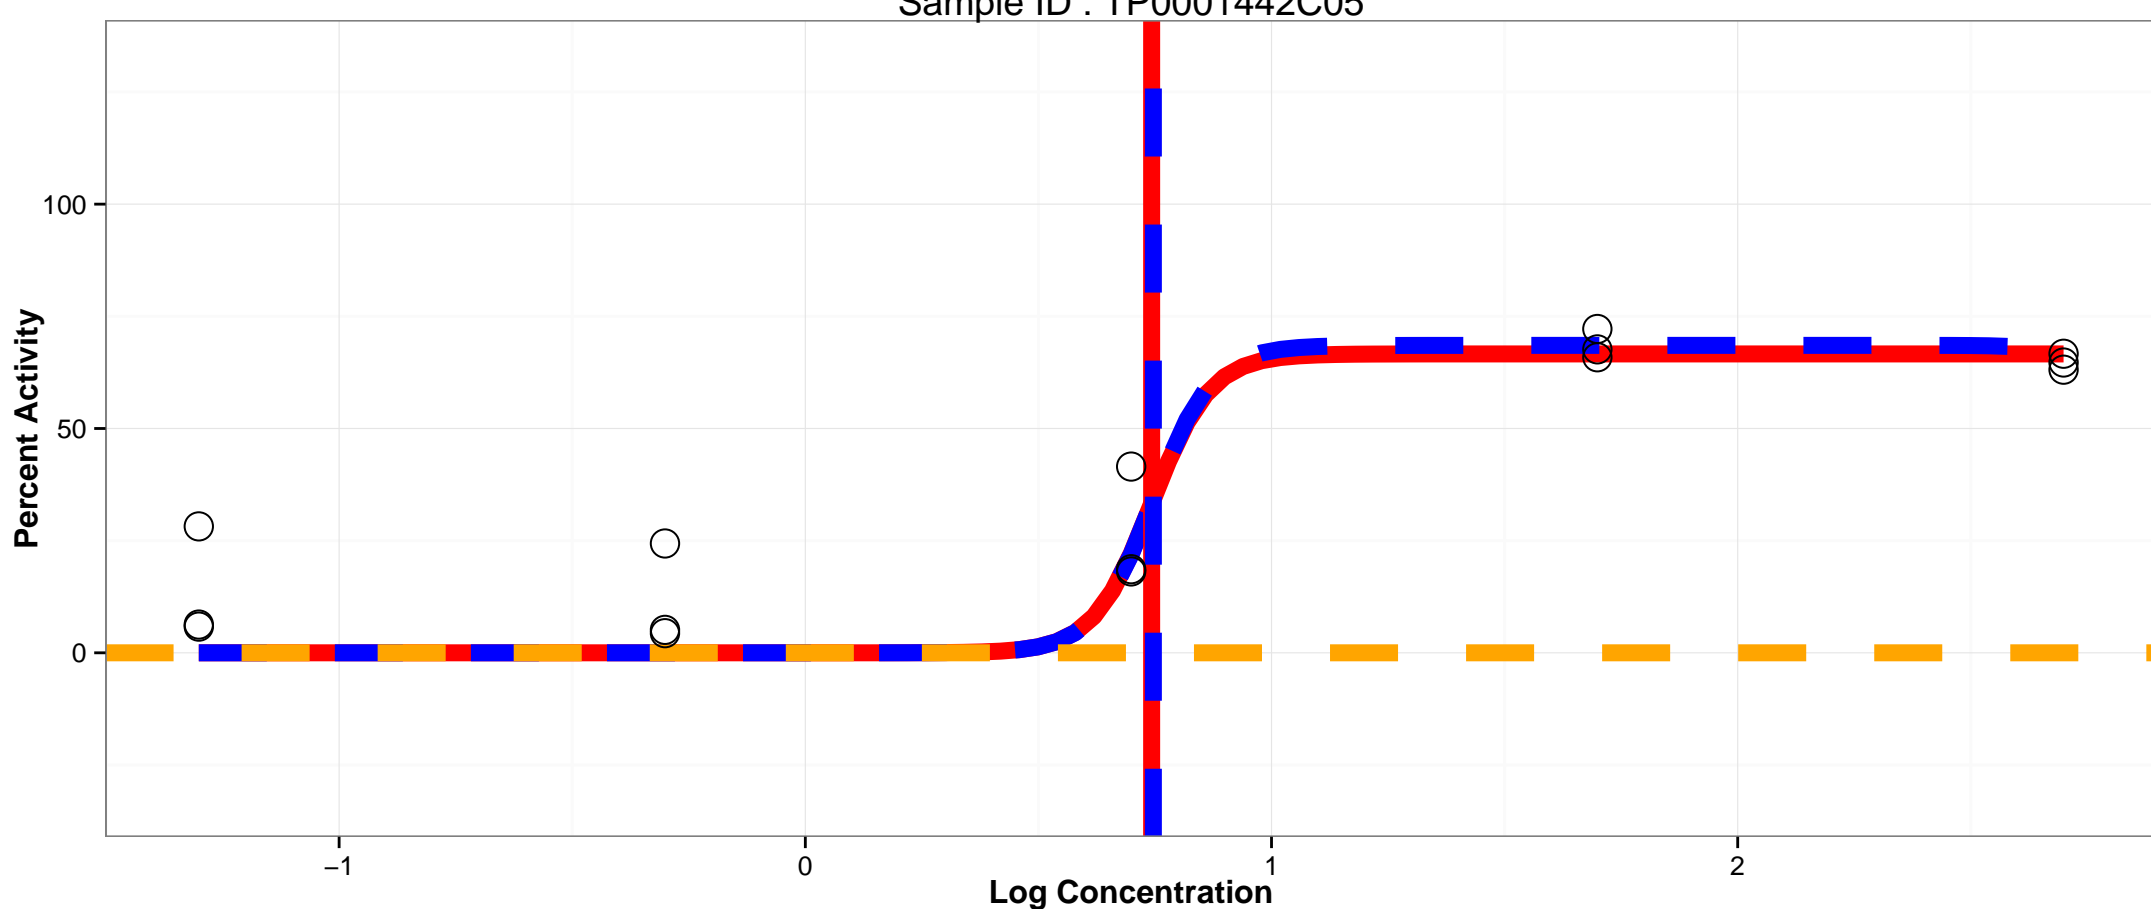

HILL MODEL

|     | tp   | ga    | gw   |
|-----|------|-------|------|
| val | 66.6 | 0.743 | 6.93 |
| sd  | NA   | NA    | NA   |

GAIN-LOSS MODEL

|     | tp   | ga    | gw   | la   | lw   |
|-----|------|-------|------|------|------|
| val | 68.5 | 0.747 | 6.89 | 2.82 | 10.4 |
| sd  | NA   | NA    | NA   | NA   | NA   |

|      | CNST   | HILL  | GNLS   |
|------|--------|-------|--------|
| AIC  | 160.76 | 120.9 | 124.43 |
| PROB | 0      | 0.85  | 0.15   |
| RMSE | 45.21  | 11.44 | 11.39  |

MAX\_MEAN : 68.6 MAX\_MED : 67.6 BMAD : 3.71  
COFF : 20 HIT-CALL : 1 FITC : 41 ACTP : 1  
FLAGS :

Chemical : Dimethoate  
CAS : 60-51-5

Assay ID 1508 (NHEERL\_TPO\_AUR\_dn)  
Sample ID : TX001423

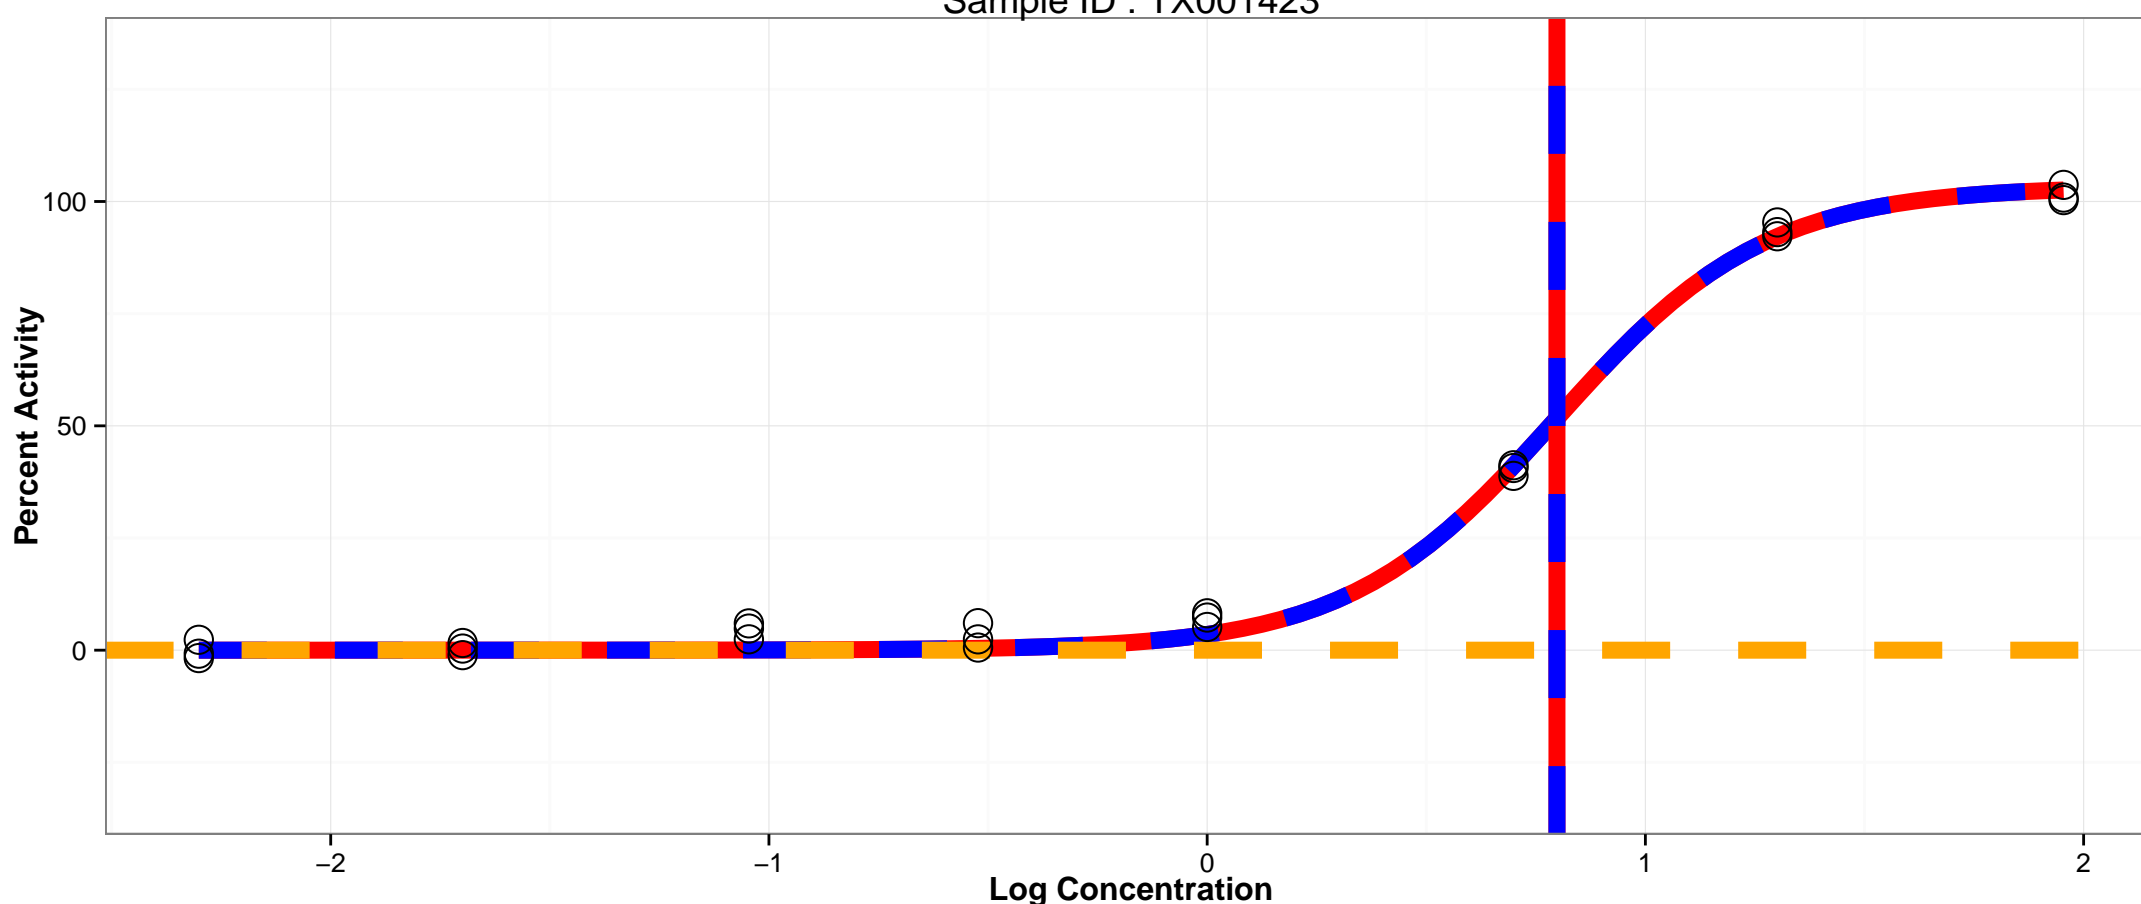

HILL MODEL

|     | tp   | ga     | gw    |
|-----|------|--------|-------|
| val | 103  | 0.798  | 1.82  |
| sd  | 1.64 | 0.0157 | 0.152 |

GAIN-LOSS MODEL

|     | tp  | ga    | gw   | la   | lw   |
|-----|-----|-------|------|------|------|
| val | 103 | 0.798 | 1.82 | 3.42 | 11.3 |
| sd  | NA  | NA    | NA   | NA   | NA   |

|      | CNST   | HILL   | GNLS   |
|------|--------|--------|--------|
| AIC  | 256.68 | 125.18 | 129.18 |
| PROB | 0      | 0.88   | 0.12   |
| RMSE | 51     | 2.72   | 2.72   |

MAX\_MEAN : 102 MAX\_MED : 101 BMAD : 5.69  
COFF : 20 HIT-CALL : 1 FITC : 41 ACTP : 1  
FLAGS :

Assay ID 1509 (NHEERL\_HEK293T\_CellTiterGLO)  
Sample ID : TX001423

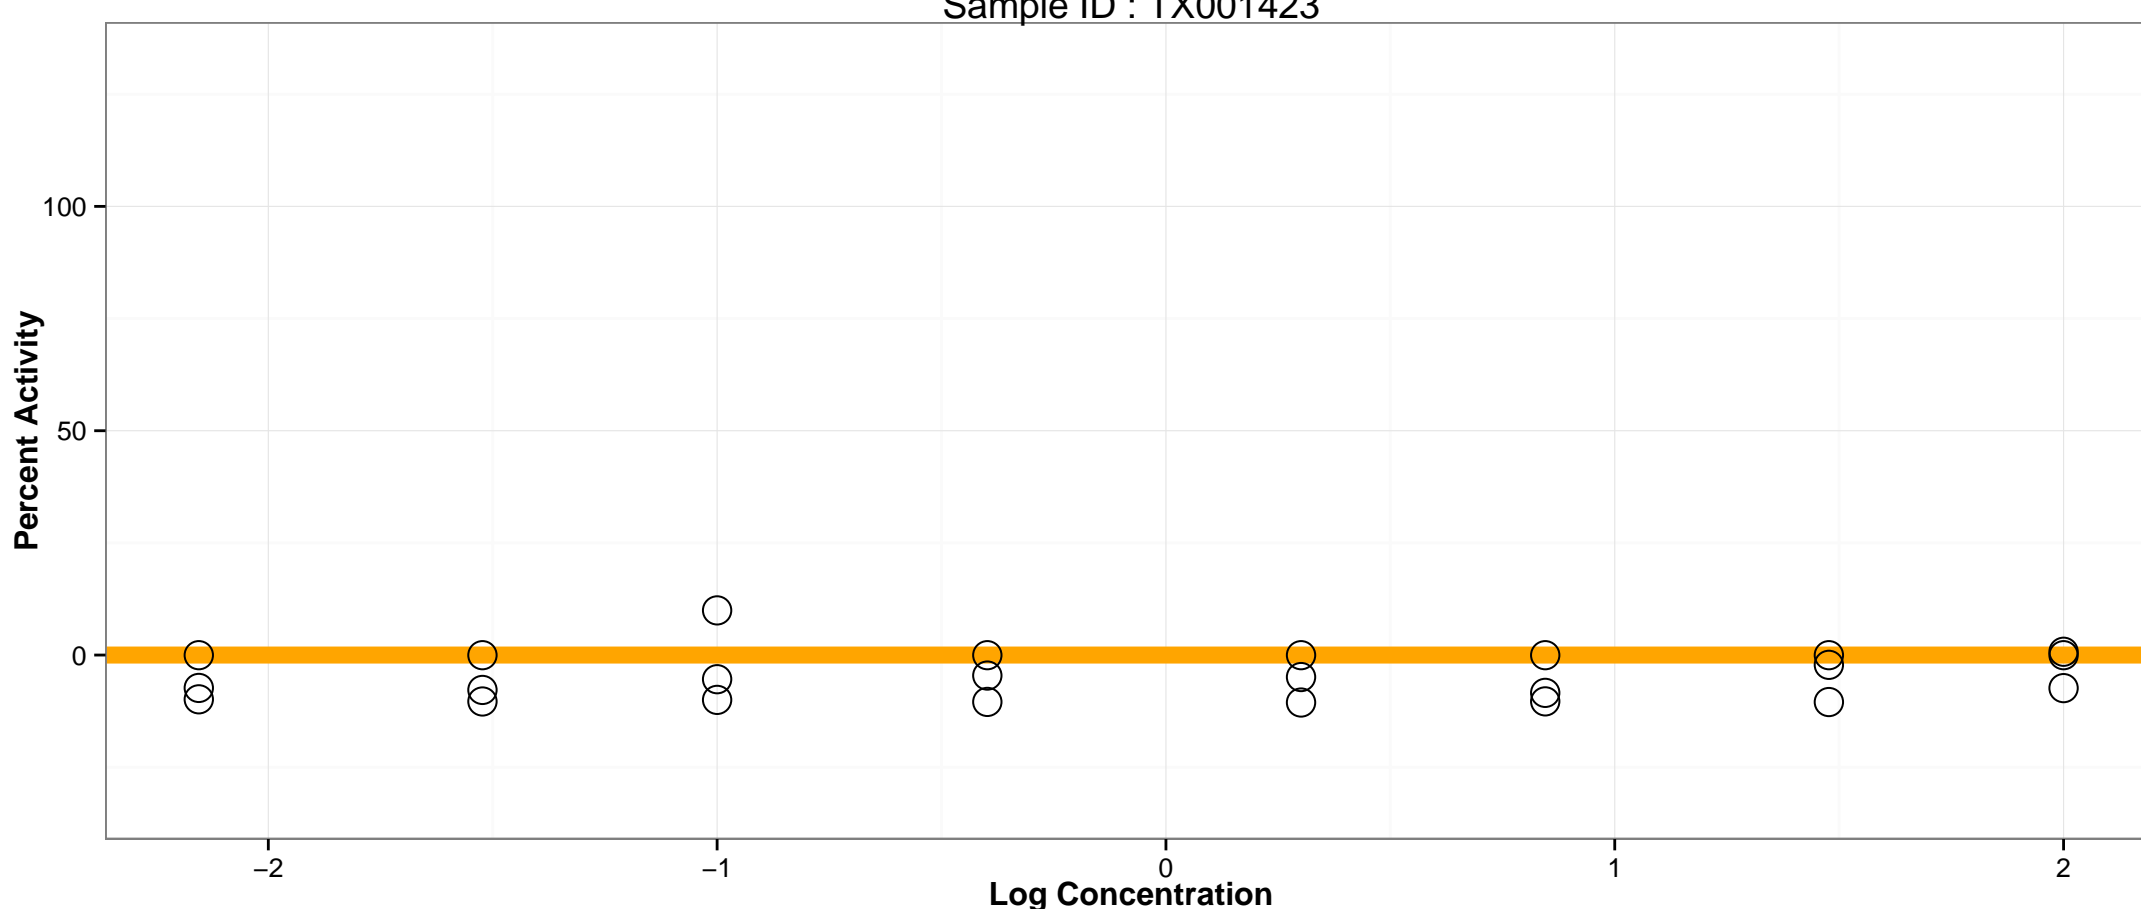

HILL MODEL

HILL MODEL: Not applicable

GAIN-LOSS MODEL

GNLS MODEL: Not applicable

|      | CNST   | HILL | GNLS |
|------|--------|------|------|
| AIC  | 166.39 | NA   | NA   |
| PROB | 1      | NA   | NA   |
| RMSE | 6.94   | NA   | NA   |

MAX\_MEAN : -1.8 MAX\_MED : -0.0165 BMAD : 5.54  
COFF : 20 HIT-CALL : 0 FITC : 4 ACTP : 0  
FLAGS :

Assay ID 1848 (NHEERL\_Quantilum\_inhib\_2\_dn)  
Sample ID : TX001423

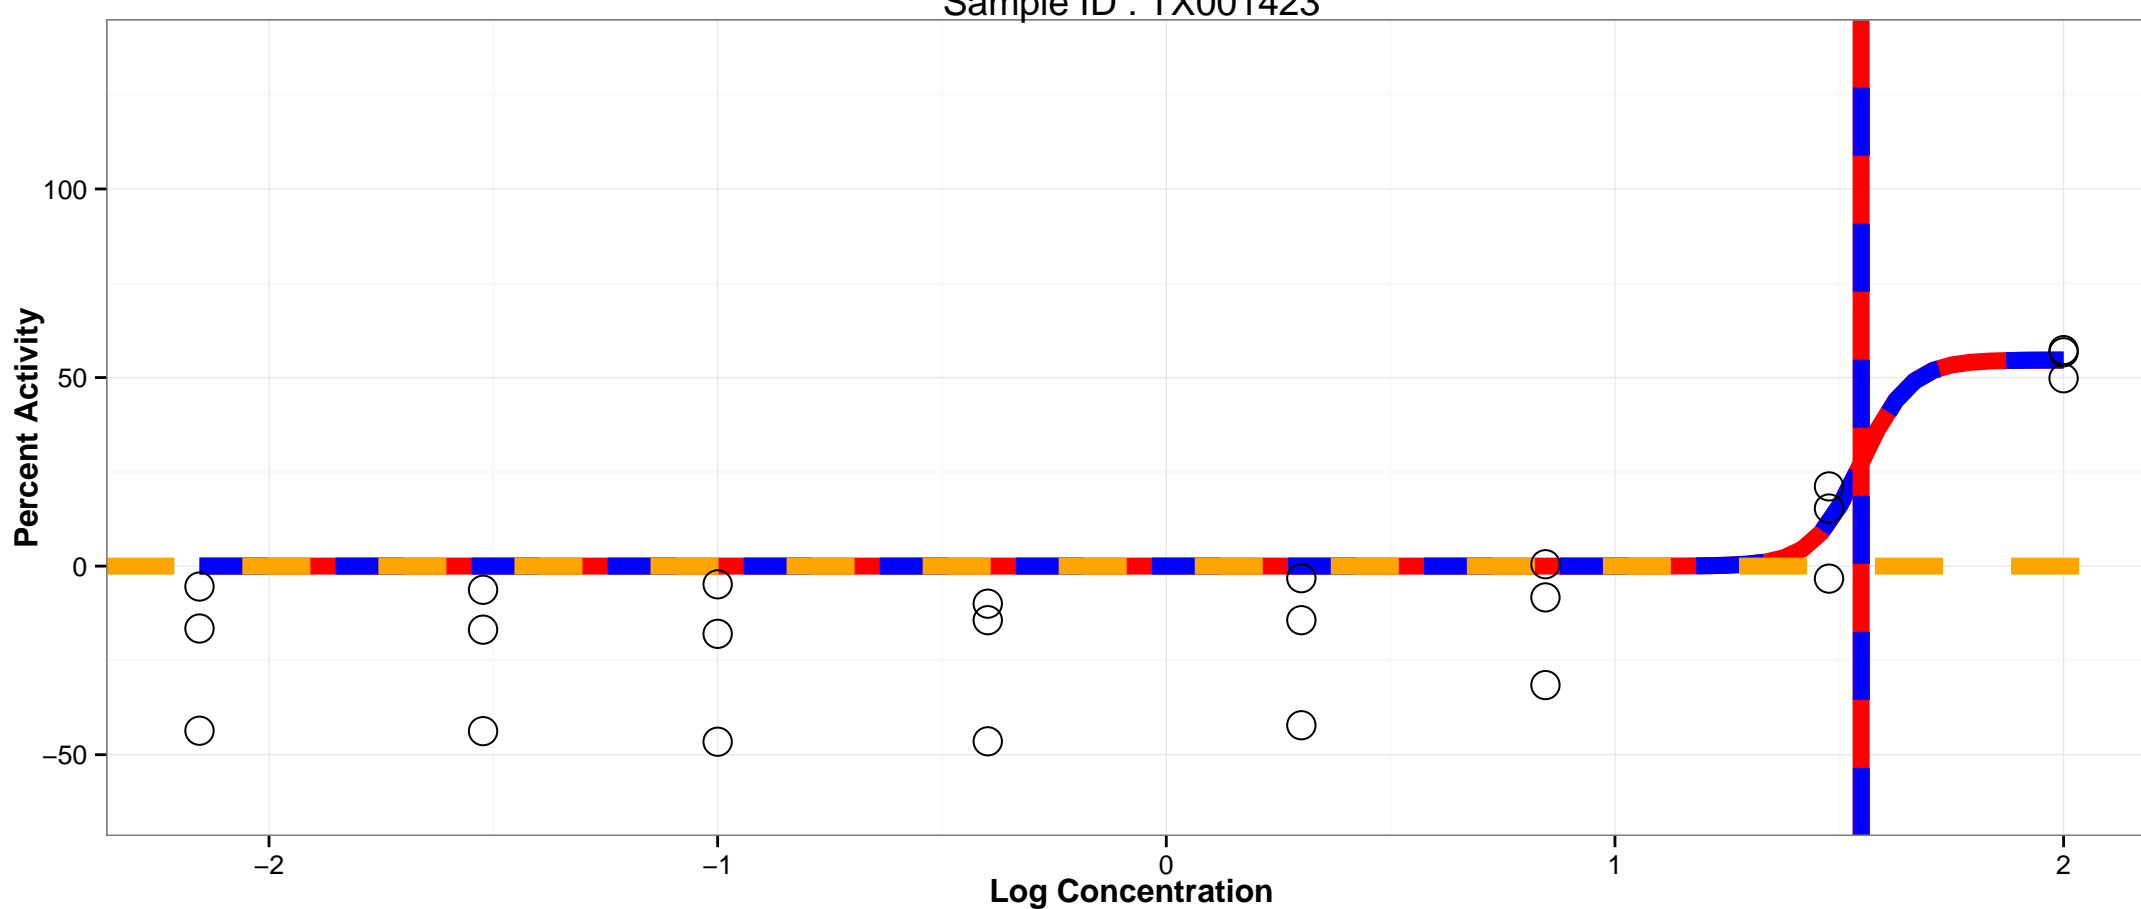

HILL MODEL

|     | tp   | ga   | gw   |
|-----|------|------|------|
| val | 54.6 | 1.55 | 7.99 |
| sd  | NA   | NA   | NA   |

GAIN-LOSS MODEL

|     | tp   | ga   | gw   | la   | lw   |
|-----|------|------|------|------|------|
| val | 54.6 | 1.55 | 7.93 | 3.89 | 5.61 |
| sd  | NA   | NA   | NA   | NA   | NA   |

|      | CNST   | HILL  | GNLS  |
|------|--------|-------|-------|
| AIC  | 235.89 | 226.7 | 230.7 |
| PROB | 0.01   | 0.87  | 0.12  |
| RMSE | 30.38  | 23.13 | 23.13 |

MAX\_MEAN : 54.6 MAX\_MED : 56.7 BMAD : 8.58  
COFF : 20 HIT-CALL : 1 FITC : 41 ACTP : 0.991  
FLAGS : 6; 10

Assay ID 1824 (NHEERL\_TPO\_GUA\_dn)  
Sample ID : TP0001442C06

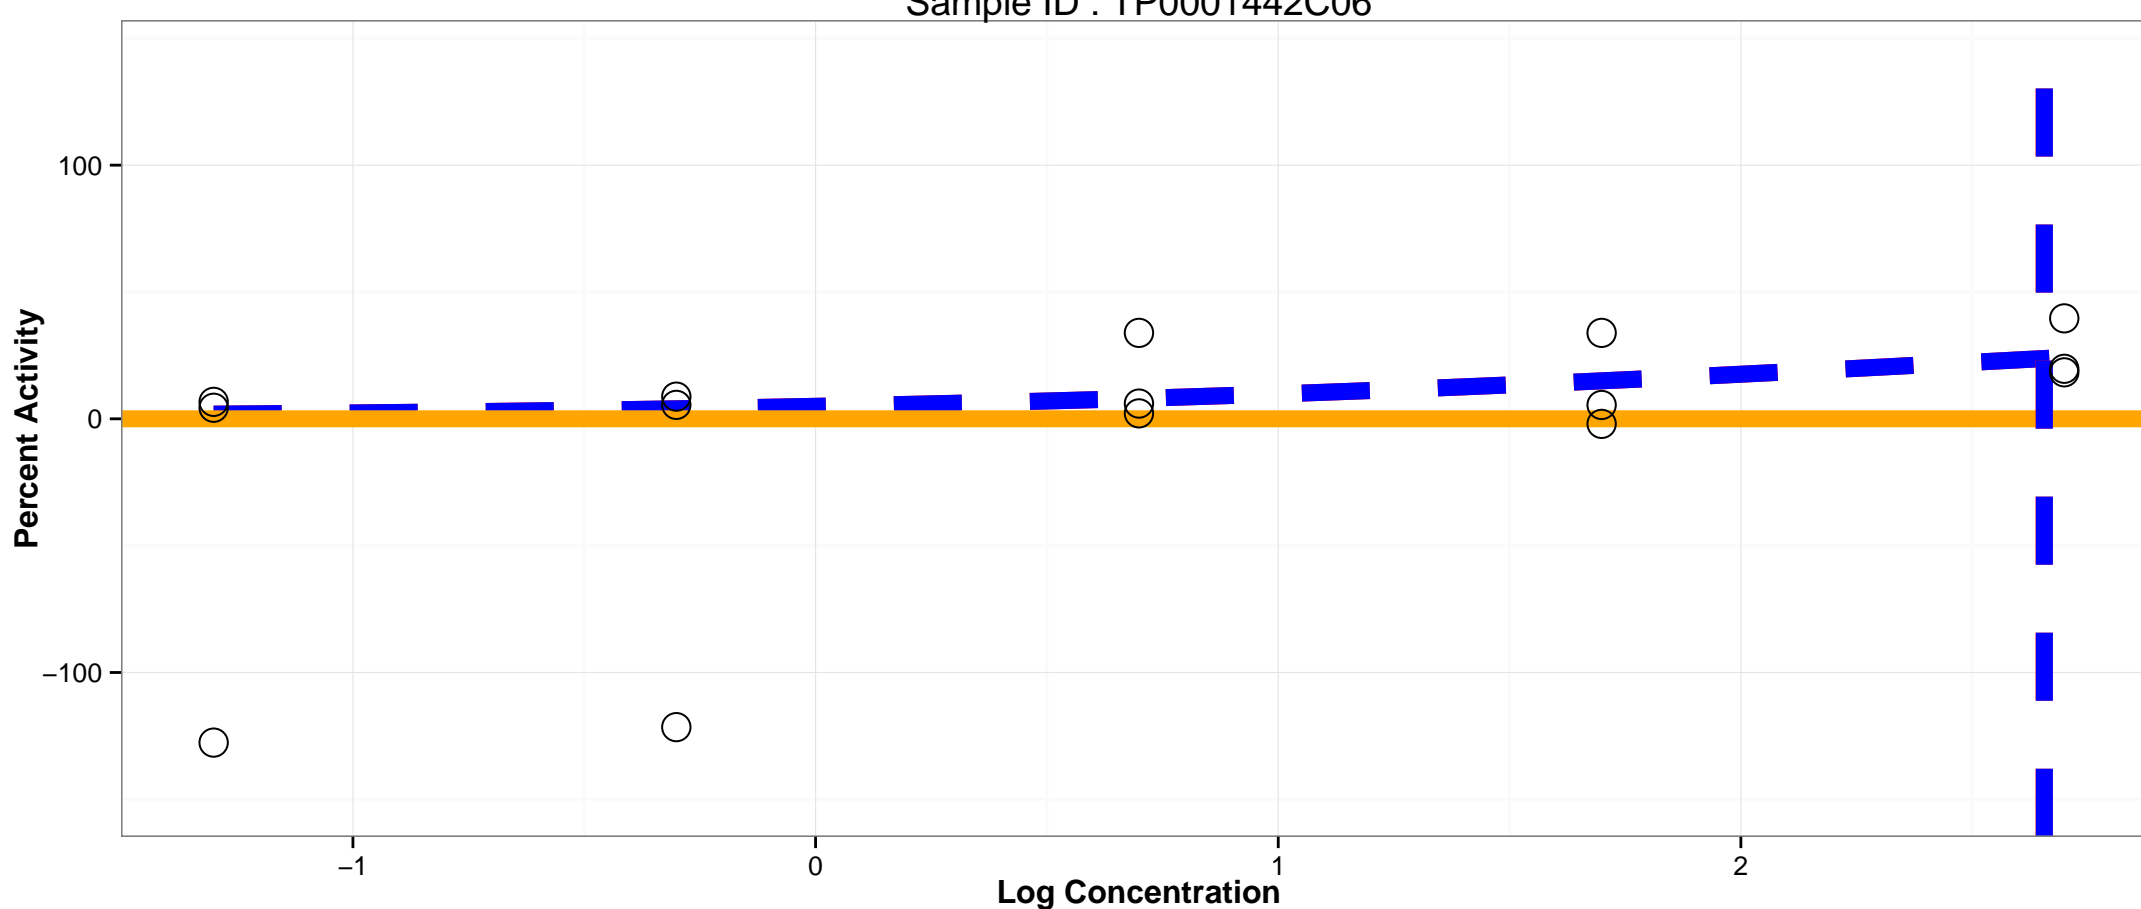

HILL MODEL

|     | tp   | ga   | gw    |
|-----|------|------|-------|
| val | 47.5 | 2.66 | 0.353 |
| sd  | 130  | 6.54 | 0.485 |

GAIN-LOSS MODEL

|     | tp   | ga   | gw    | la   | lw    |
|-----|------|------|-------|------|-------|
| val | 47.5 | 2.66 | 0.353 | 4.16 | 5.6   |
| sd  | 130  | 6.5  | 0.483 | 5500 | 21100 |

|      | CNST   | HILL   | GNLS   |
|------|--------|--------|--------|
| AIC  | 155.79 | 156.22 | 160.22 |
| PROB | 0.52   | 0.42   | 0.06   |
| RMSE | 48.92  | 47.81  | 47.81  |

MAX\_MEAN : 25.9 MAX\_MED : 19.7 BMAD : 3.71  
COFF : 20 HIT-CALL : 0 FITC : 10 ACTP : 0.478  
FLAGS : 10

Chemical : Phenothiazine  
CAS : 92-84-2

Assay ID 1508 (NHEERL\_TPO\_AUR\_dn)  
Sample ID : TX002554

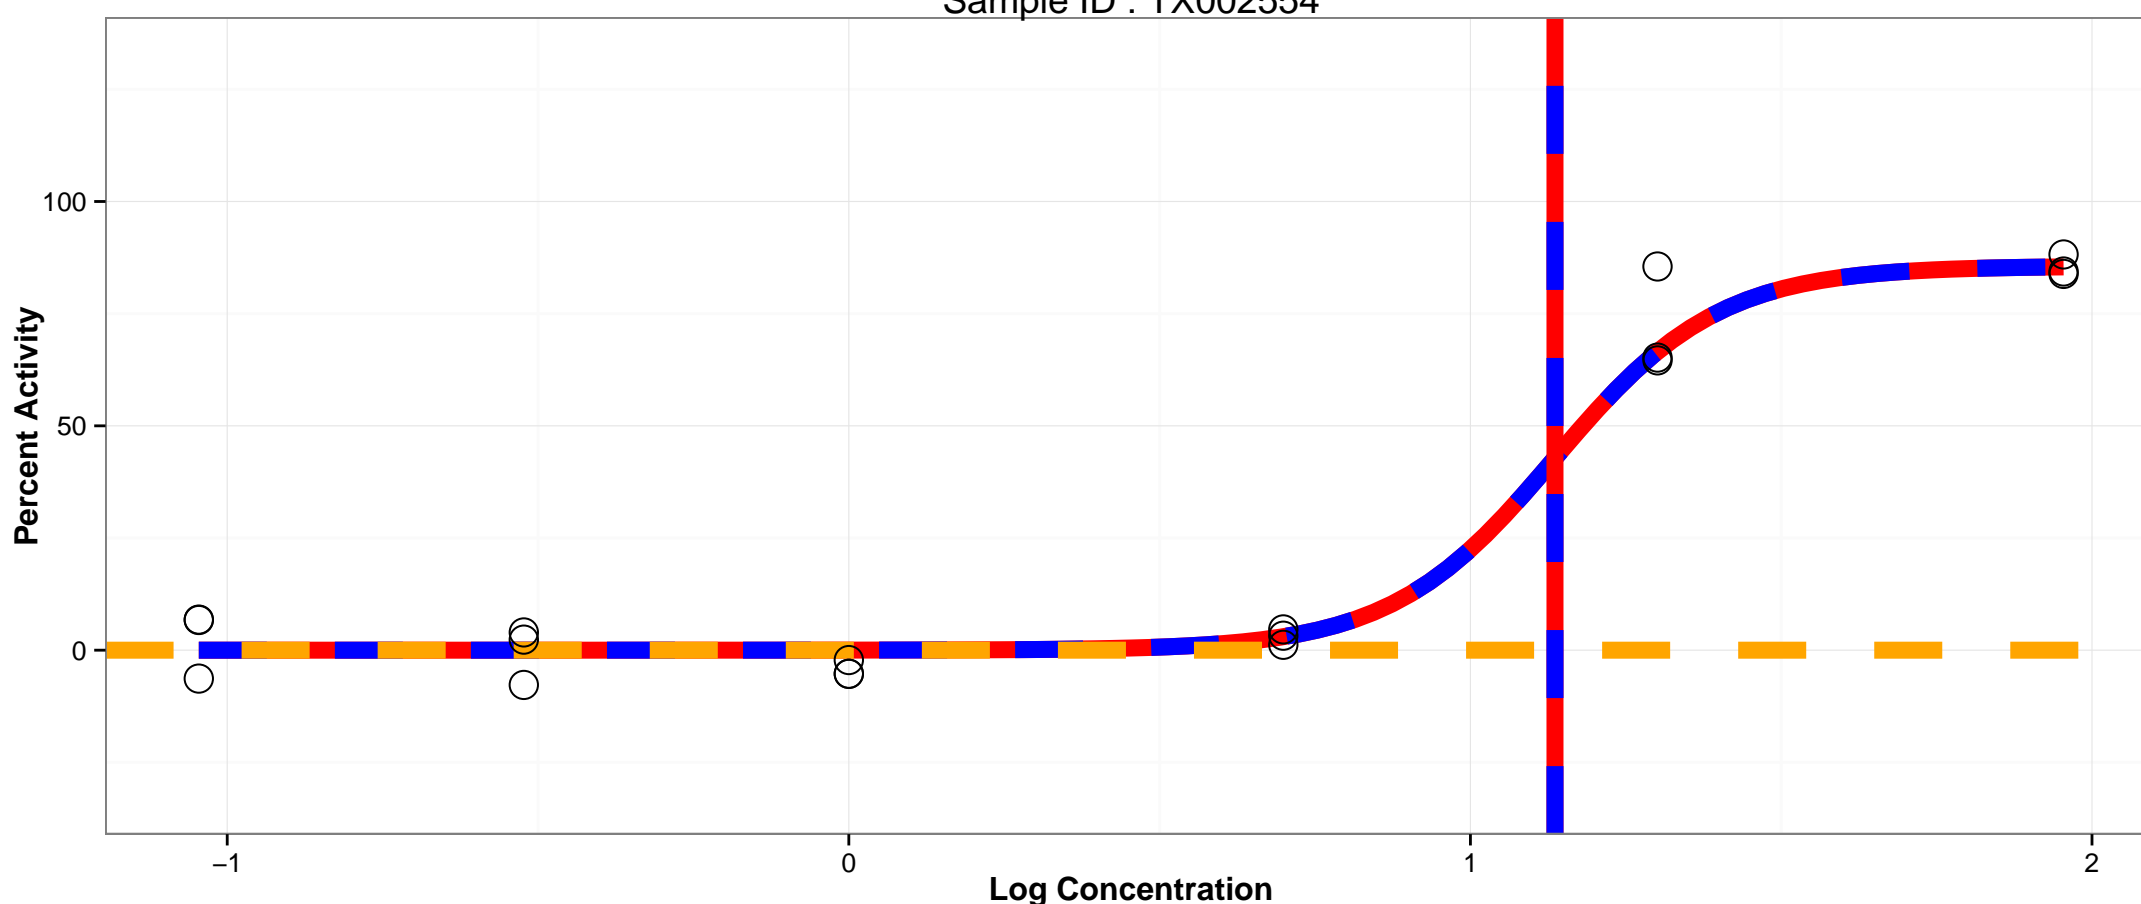

HILL MODEL

|     | tp   | ga     | gw   |
|-----|------|--------|------|
| val | 85.6 | 1.14   | 3.29 |
| sd  | 2.41 | 0.0363 | 0.59 |

GAIN-LOSS MODEL

|     | tp   | ga   | gw   | la   | lw   |
|-----|------|------|------|------|------|
| val | 85.6 | 1.14 | 3.29 | 2.38 | 12.4 |
| sd  | NA   | NA   | NA   | NA   | NA   |

|      | CNST  | HILL   | GNLS   |
|------|-------|--------|--------|
| AIC  | 190   | 120.96 | 124.96 |
| PROB | 0     | 0.88   | 0.12   |
| RMSE | 45.94 | 6.04   | 6.04   |

MAX\_MEAN : 85.5 MAX\_MED : 84.4 BMAD : 5.69  
COFF : 20 HIT-CALL : 1 FITC : 41 ACTP : 1  
FLAGS :

Assay ID 1509 (NHEERL\_HEK293T\_CellTiterGLO)  
Sample ID : TX002554

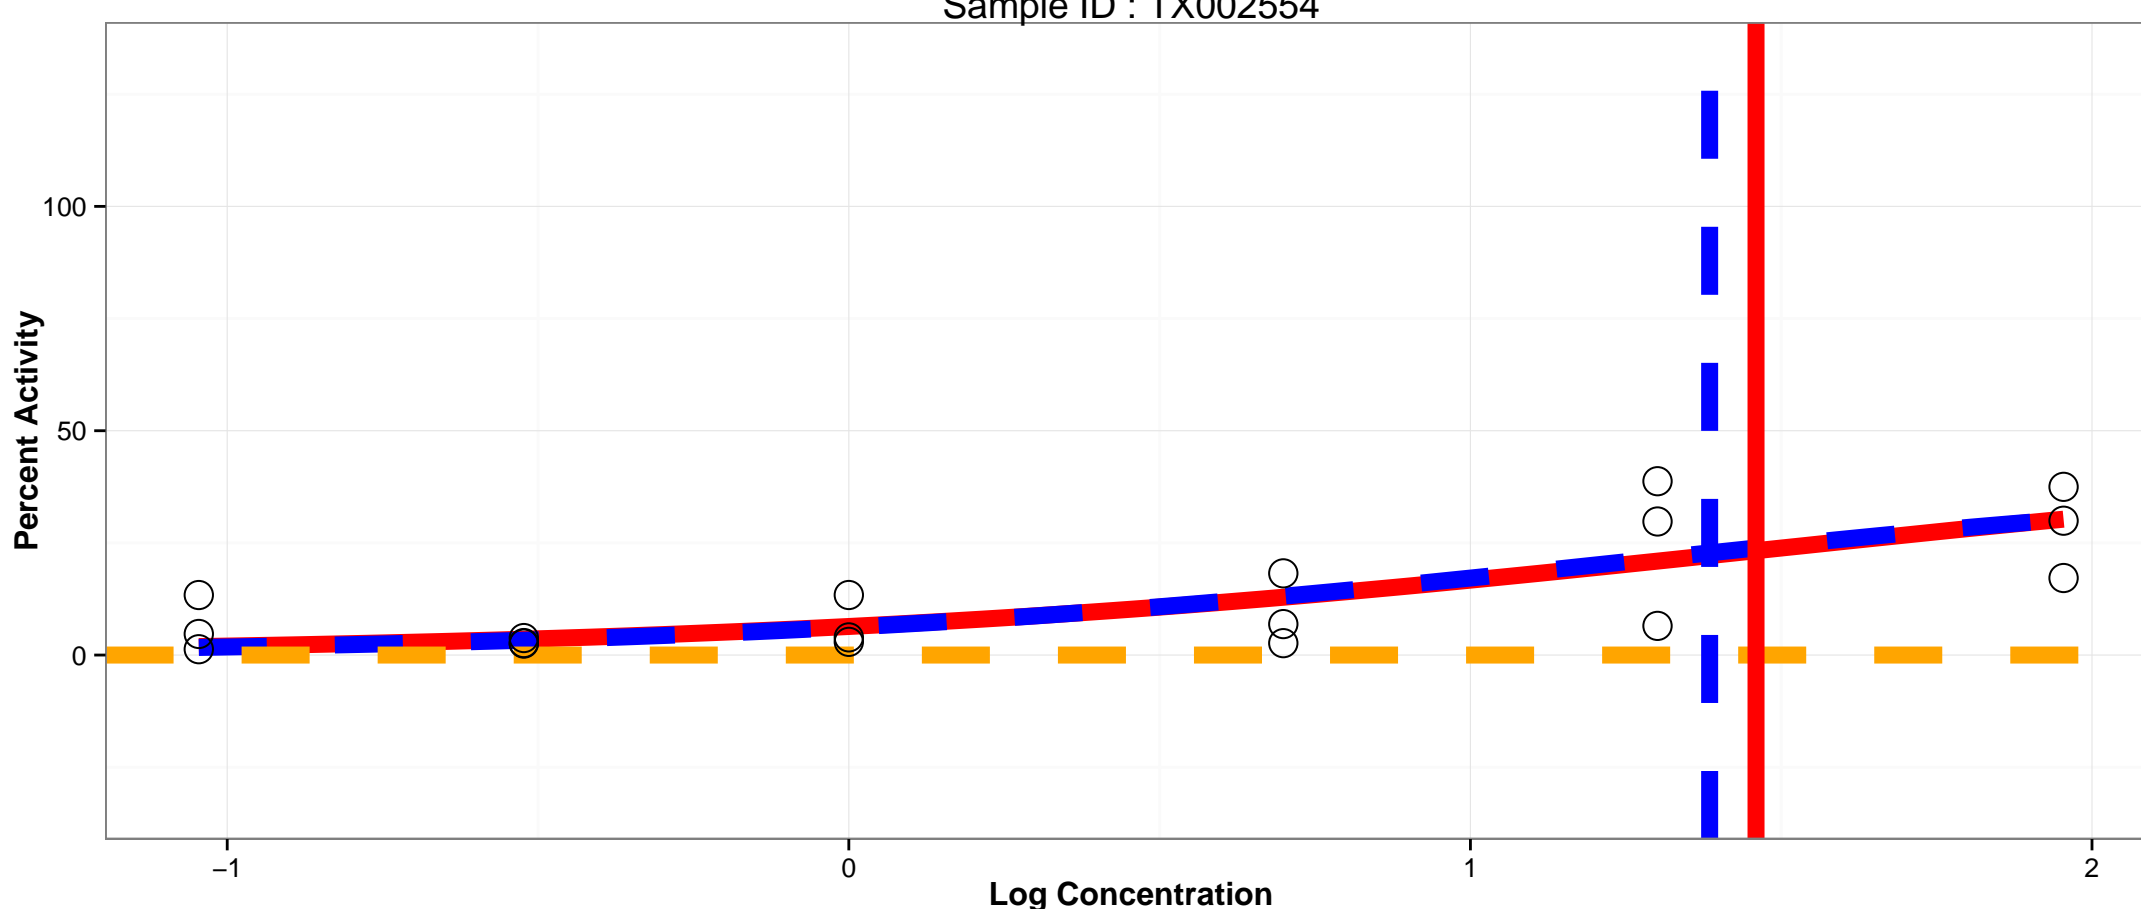

HILL MODEL

|     | tp   | ga   | gw    |
|-----|------|------|-------|
| val | 46.5 | 1.46 | 0.548 |
| sd  | 45.8 | 1.82 | 0.424 |

GAIN-LOSS MODEL

|     | tp   | ga   | gw    | la   | lw    |
|-----|------|------|-------|------|-------|
| val | 46.5 | 1.38 | 0.585 | 3.84 | 0.683 |
| sd  | NA   | NA   | NA    | NA   | NA    |

|      | CNST   | HILL   | GNLS   |
|------|--------|--------|--------|
| AIC  | 156.91 | 135.82 | 139.79 |
| PROB | 0      | 0.88   | 0.12   |
| RMSE | 18.03  | 8.18   | 8.17   |

MAX\_MEAN : 28.2 MAX\_MED : 30 BMAD : 5.54  
COFF : 20 HIT-CALL : 1 FITC : 42 ACTP : 1  
FLAGS :

Assay ID 1848 (NHEERL\_Quantilum\_inhib\_2\_dn)  
Sample ID : TX002554

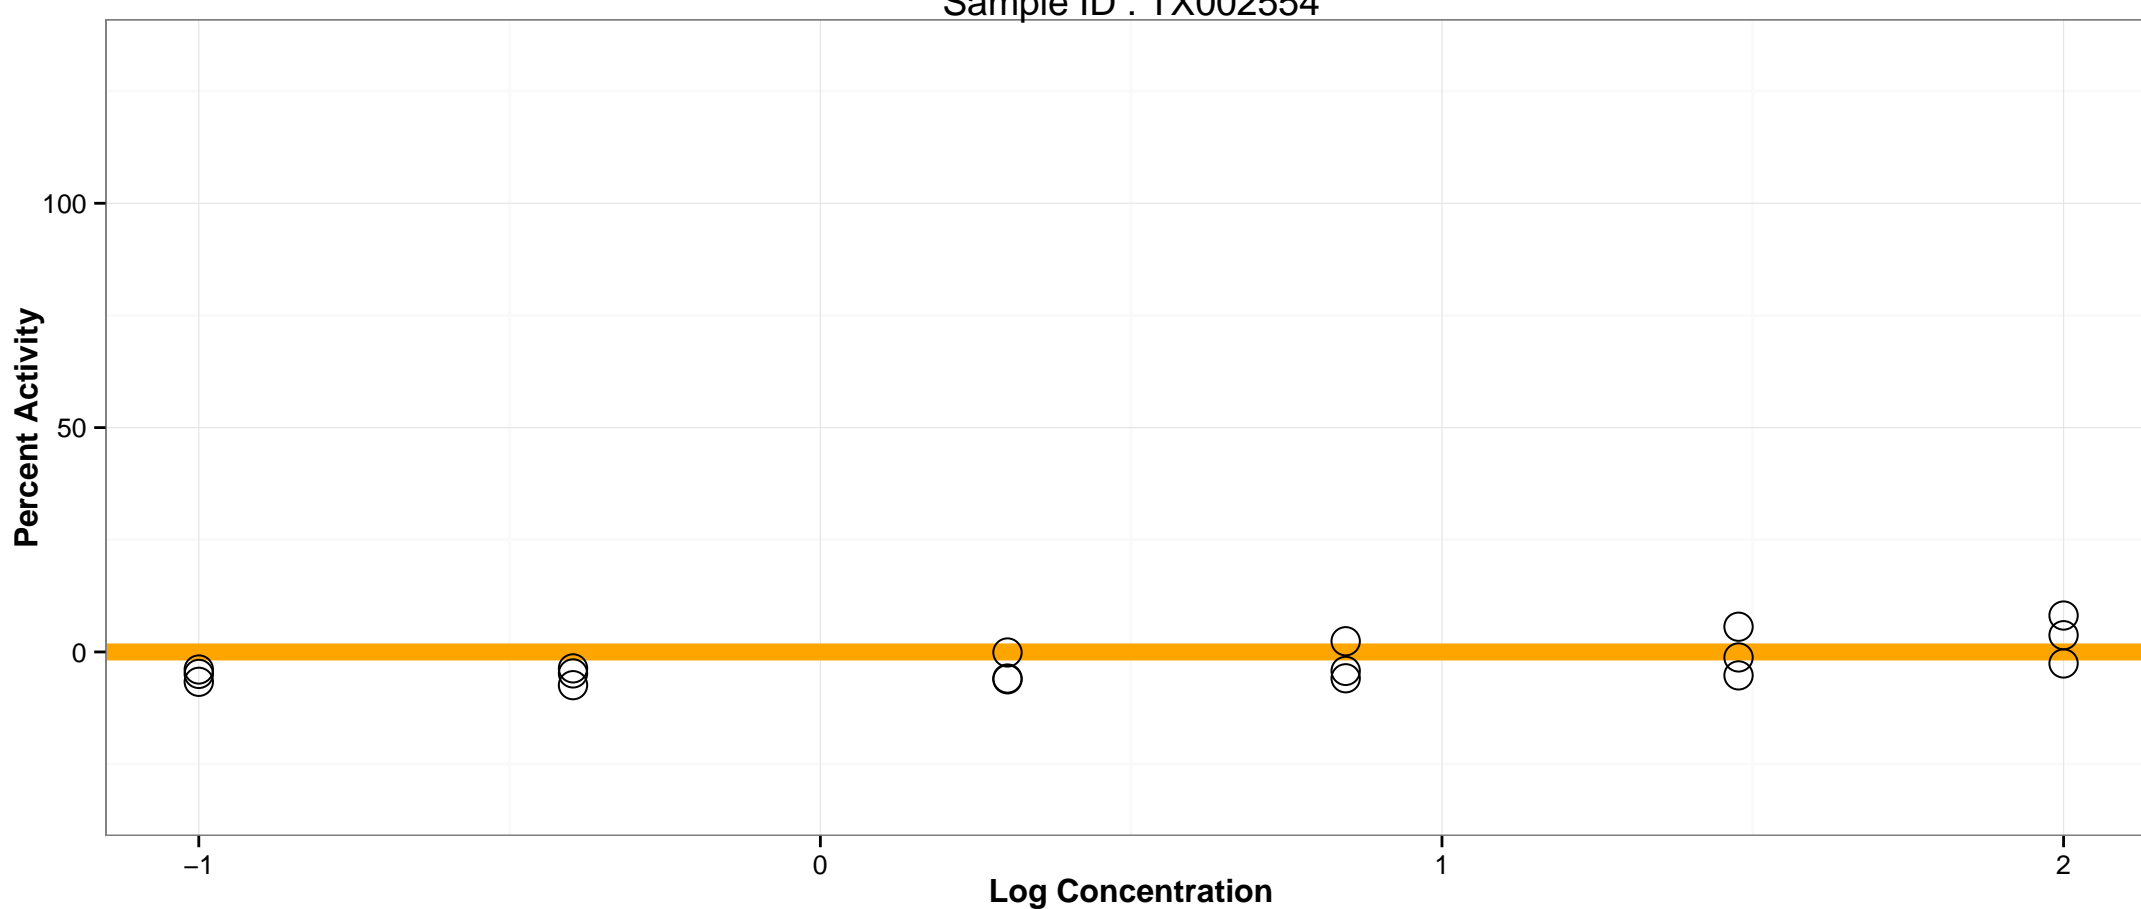

HILL MODEL

HILL MODEL: Not applicable

GAIN-LOSS MODEL

GNLS MODEL: Not applicable

|      | CNST   | HILL | GNLS |
|------|--------|------|------|
| AIC  | 114.43 | NA   | NA   |
| PROB | 1      | NA   | NA   |
| RMSE | 5.01   | NA   | NA   |

MAX\_MEAN : 3.11 MAX\_MED : 3.75 BMAD : 8.58  
COFF : 20 HIT-CALL : 0 FITC : 4 ACTP : 0  
FLAGS :

Assay ID 1824 (NHEERL\_TPO\_GUA\_dn)  
Sample ID : TP0001442C07

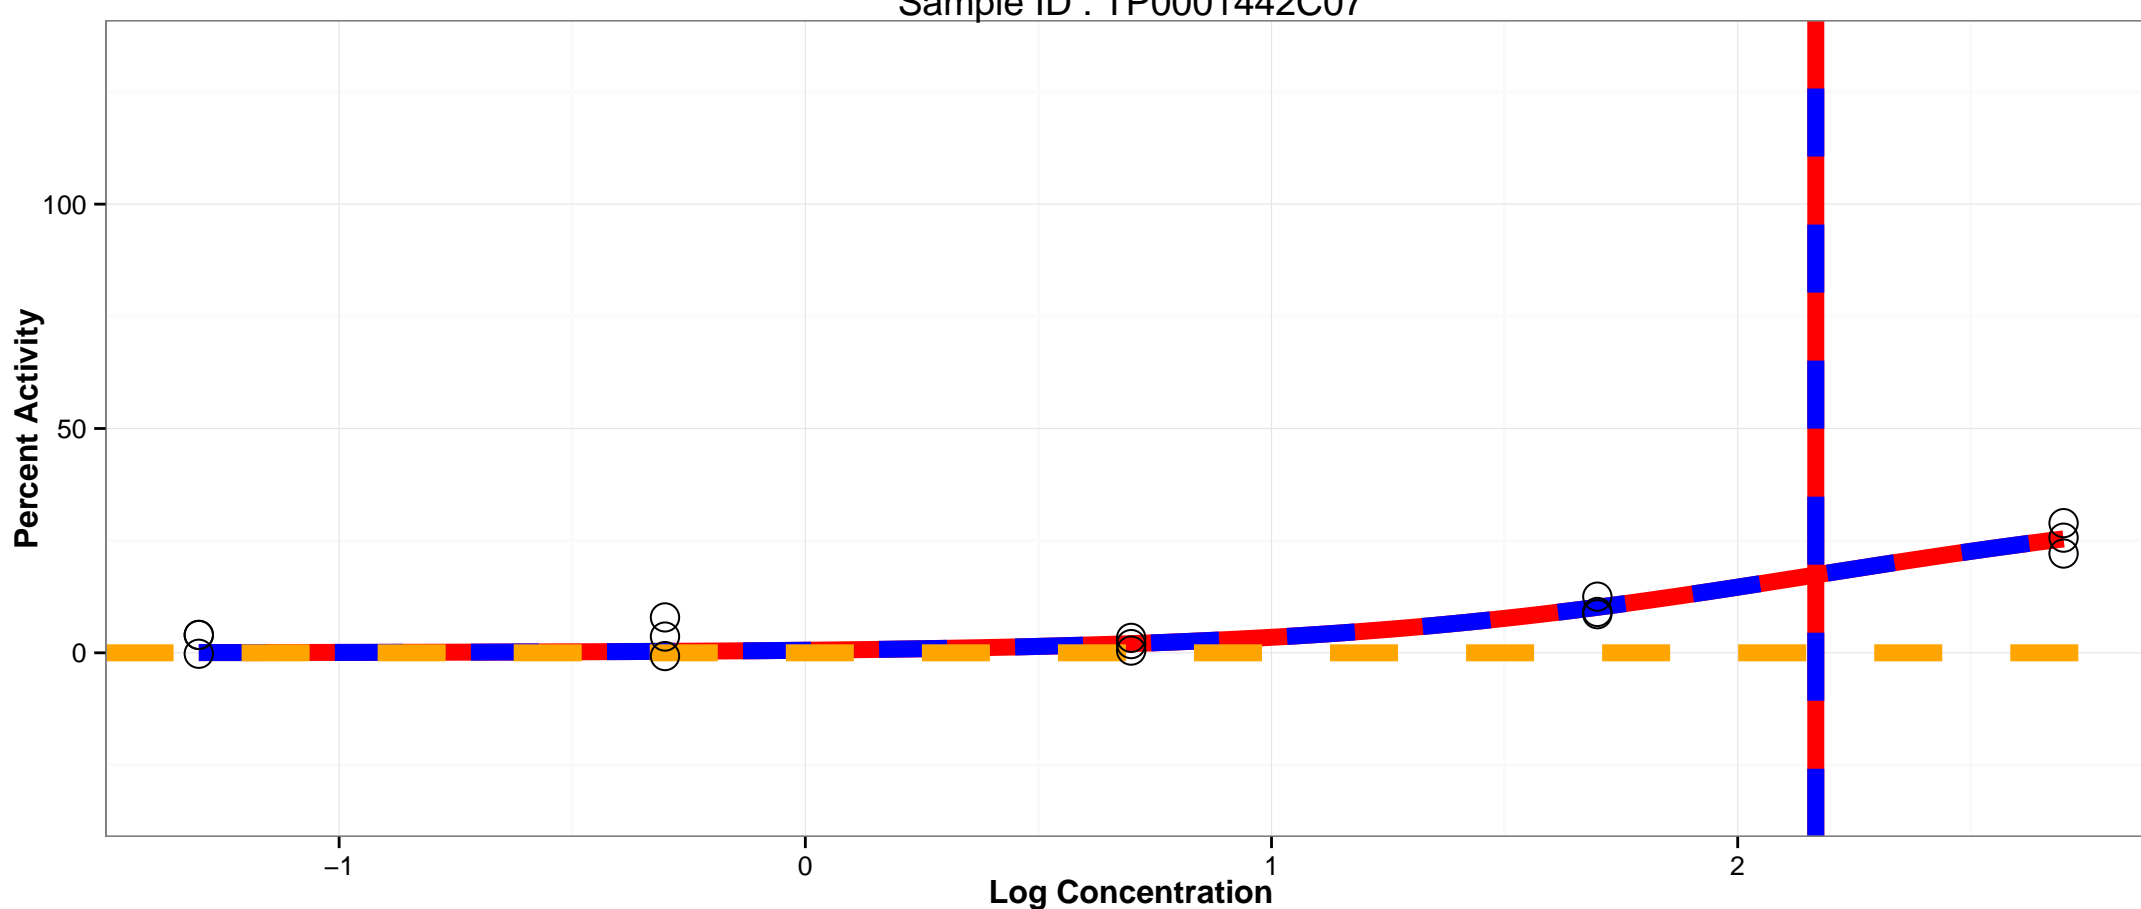

HILL MODEL

|     | tp   | ga    | gw    |
|-----|------|-------|-------|
| val | 34.7 | 2.17  | 0.819 |
| sd  | 13.1 | 0.509 | 0.354 |

GAIN-LOSS MODEL

|     | tp   | ga   | gw    | la   | lw   |
|-----|------|------|-------|------|------|
| val | 34.7 | 2.17 | 0.819 | 4.35 | 4.82 |
| sd  | 13.2 | 0.51 | 0.355 | 1940 | 5660 |

|      | CNST   | HILL  | GNLS  |
|------|--------|-------|-------|
| AIC  | 119.83 | 84.03 | 88.03 |
| PROB | 0      | 0.88  | 0.12  |
| RMSE | 12.71  | 3.02  | 3.02  |

MAX\_MEAN : 25.6 MAX\_MED : 25.7 BMAD : 3.71  
COFF : 20 HIT-CALL : 1 FITC : 42 ACTP : 1  
FLAGS : 6

Chemical : 3-Methylaniline  
CAS : 108-44-1

Assay ID 1508 (NHEERL\_TPO\_AUR\_dn)  
Sample ID : TX015561

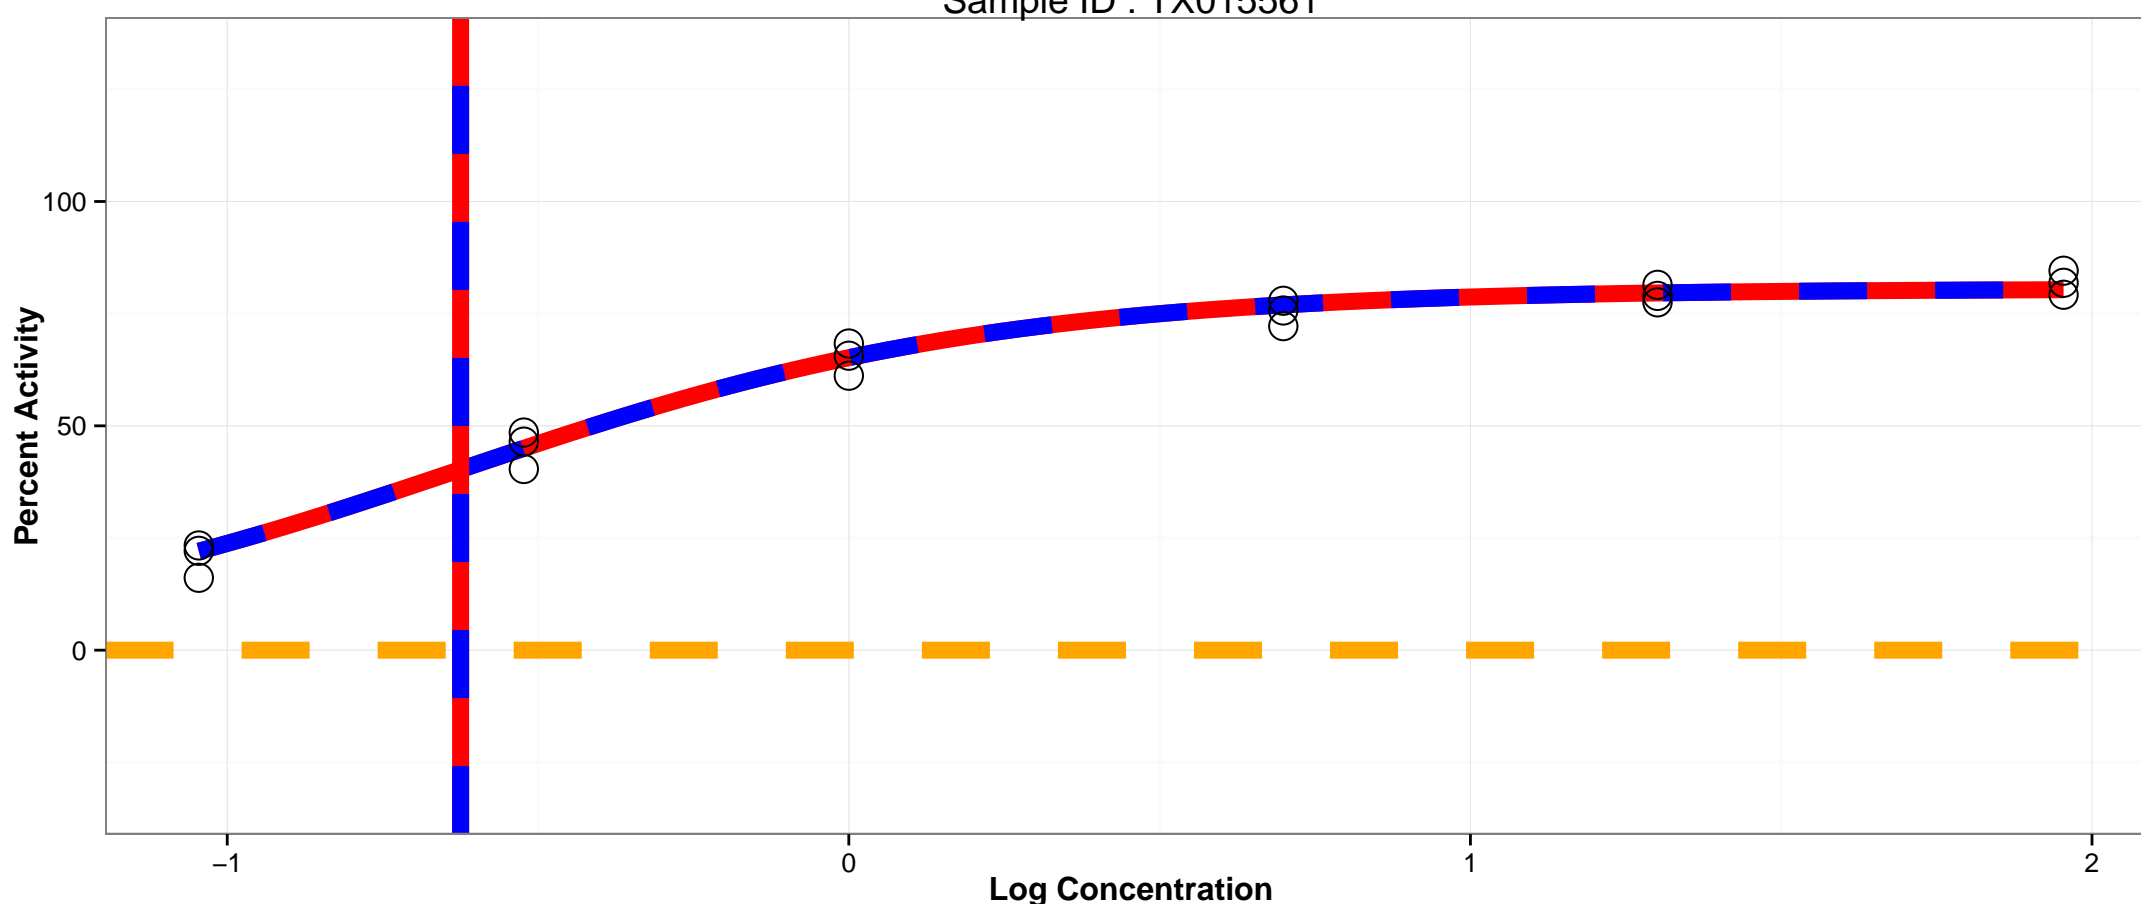

HILL MODEL

|     | tp   | ga     | gw     |
|-----|------|--------|--------|
| val | 80.5 | -0.625 | 1.01   |
| sd  | 1.19 | 0.0354 | 0.0842 |

GAIN-LOSS MODEL

|     | tp   | ga     | gw     | la    | lw     |
|-----|------|--------|--------|-------|--------|
| val | 80.5 | -0.625 | 1.01   | 2.97  | 12.3   |
| sd  | 1.19 | 0.0354 | 0.0842 | 17700 | 215000 |

|      | CNST   | HILL | GNLS  |
|------|--------|------|-------|
| AIC  | 207.11 | 99.3 | 103.3 |
| PROB | 0      | 0.88 | 0.12  |
| RMSE | 65.07  | 2.92 | 2.92  |

MAX\_MEAN : 81.9 MAX\_MED : 81.9 BMAD : 5.69  
COFF : 20 HIT-CALL : 1 FITC : 41 ACTP : 1  
FLAGS :

Assay ID 1509 (NHEERL\_HEK293T\_CellTiterGLO)  
Sample ID : TX015561

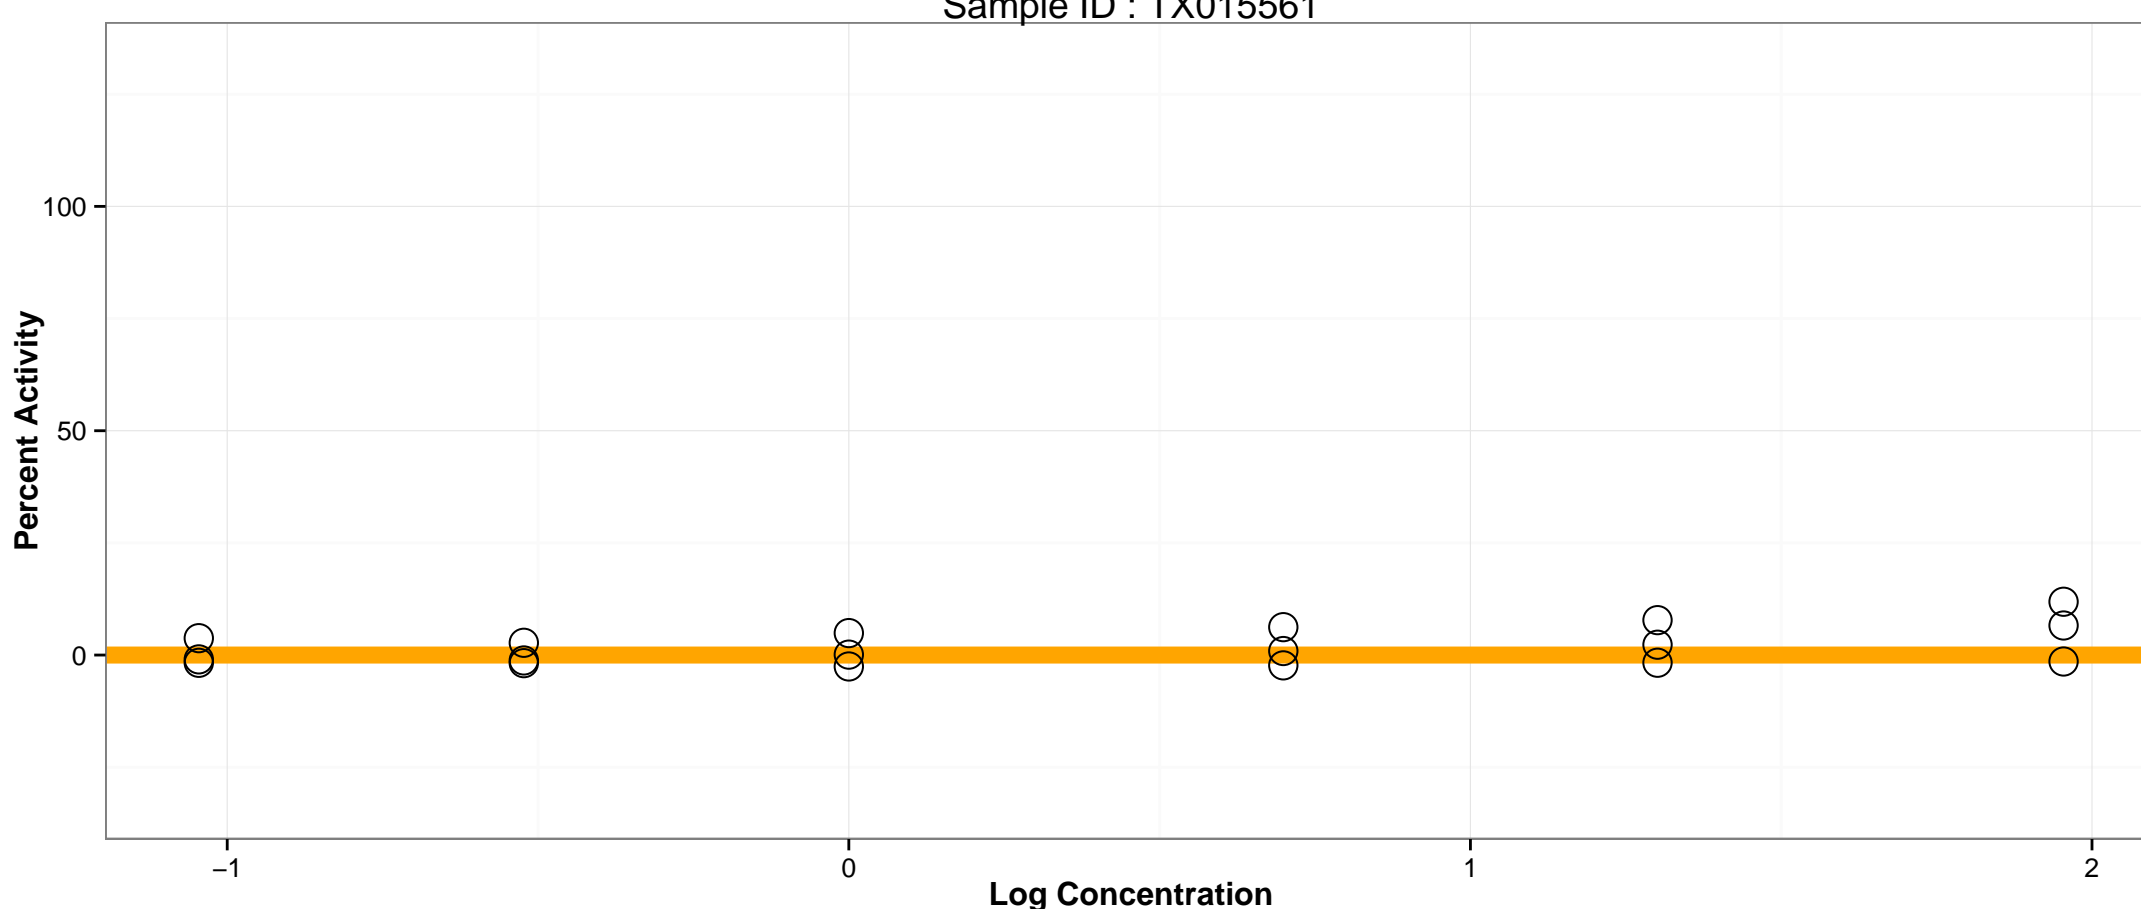

HILL MODEL

HILL MODEL: Not applicable

GAIN-LOSS MODEL

GNLS MODEL: Not applicable

|      | CNST   | HILL | GNLS |
|------|--------|------|------|
| AIC  | 106.36 | NA   | NA   |
| PROB | 1      | NA   | NA   |
| RMSE | 4.48   | NA   | NA   |

MAX\_MEAN : 5.69 MAX\_MED : 6.6 BMAD : 5.54  
COFF : 20 HIT-CALL : 0 FITC : 4 ACTP : 0  
FLAGS :

Assay ID 1848 (NHEERL\_Quantilum\_inhib\_2\_dn)  
Sample ID : TX015561

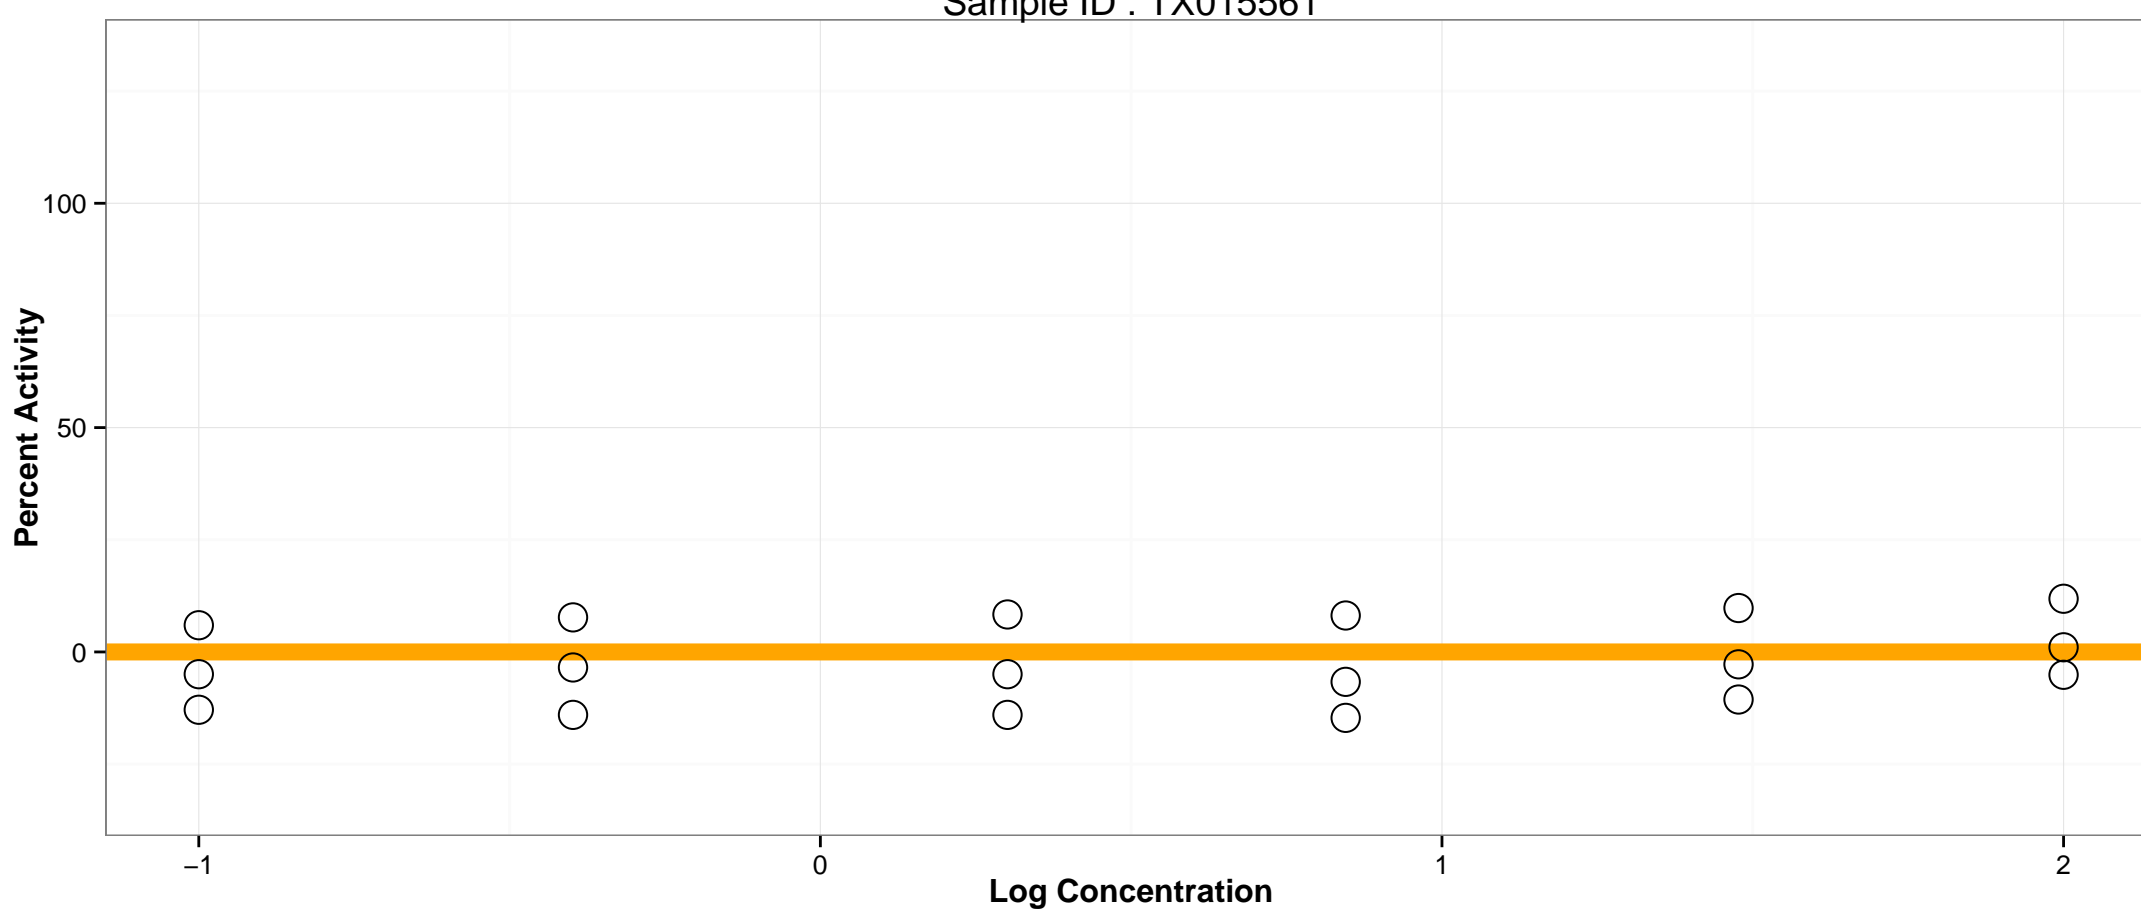

HILL MODEL

HILL MODEL: Not applicable

GAIN-LOSS MODEL

GNLS MODEL: Not applicable

|      | CNST   | HILL | GNLS |
|------|--------|------|------|
| AIC  | 135.58 | NA   | NA   |
| PROB | 1      | NA   | NA   |
| RMSE | 9.11   | NA   | NA   |

MAX\_MEAN : 2.61 MAX\_MED : 1.05 BMAD : 8.58  
COFF : 20 HIT-CALL : 0 FITC : 4 ACTP : 0  
FLAGS :

Assay ID 1824 (NHEERL\_TPO\_GUA\_dn)  
Sample ID : TP0001442D01

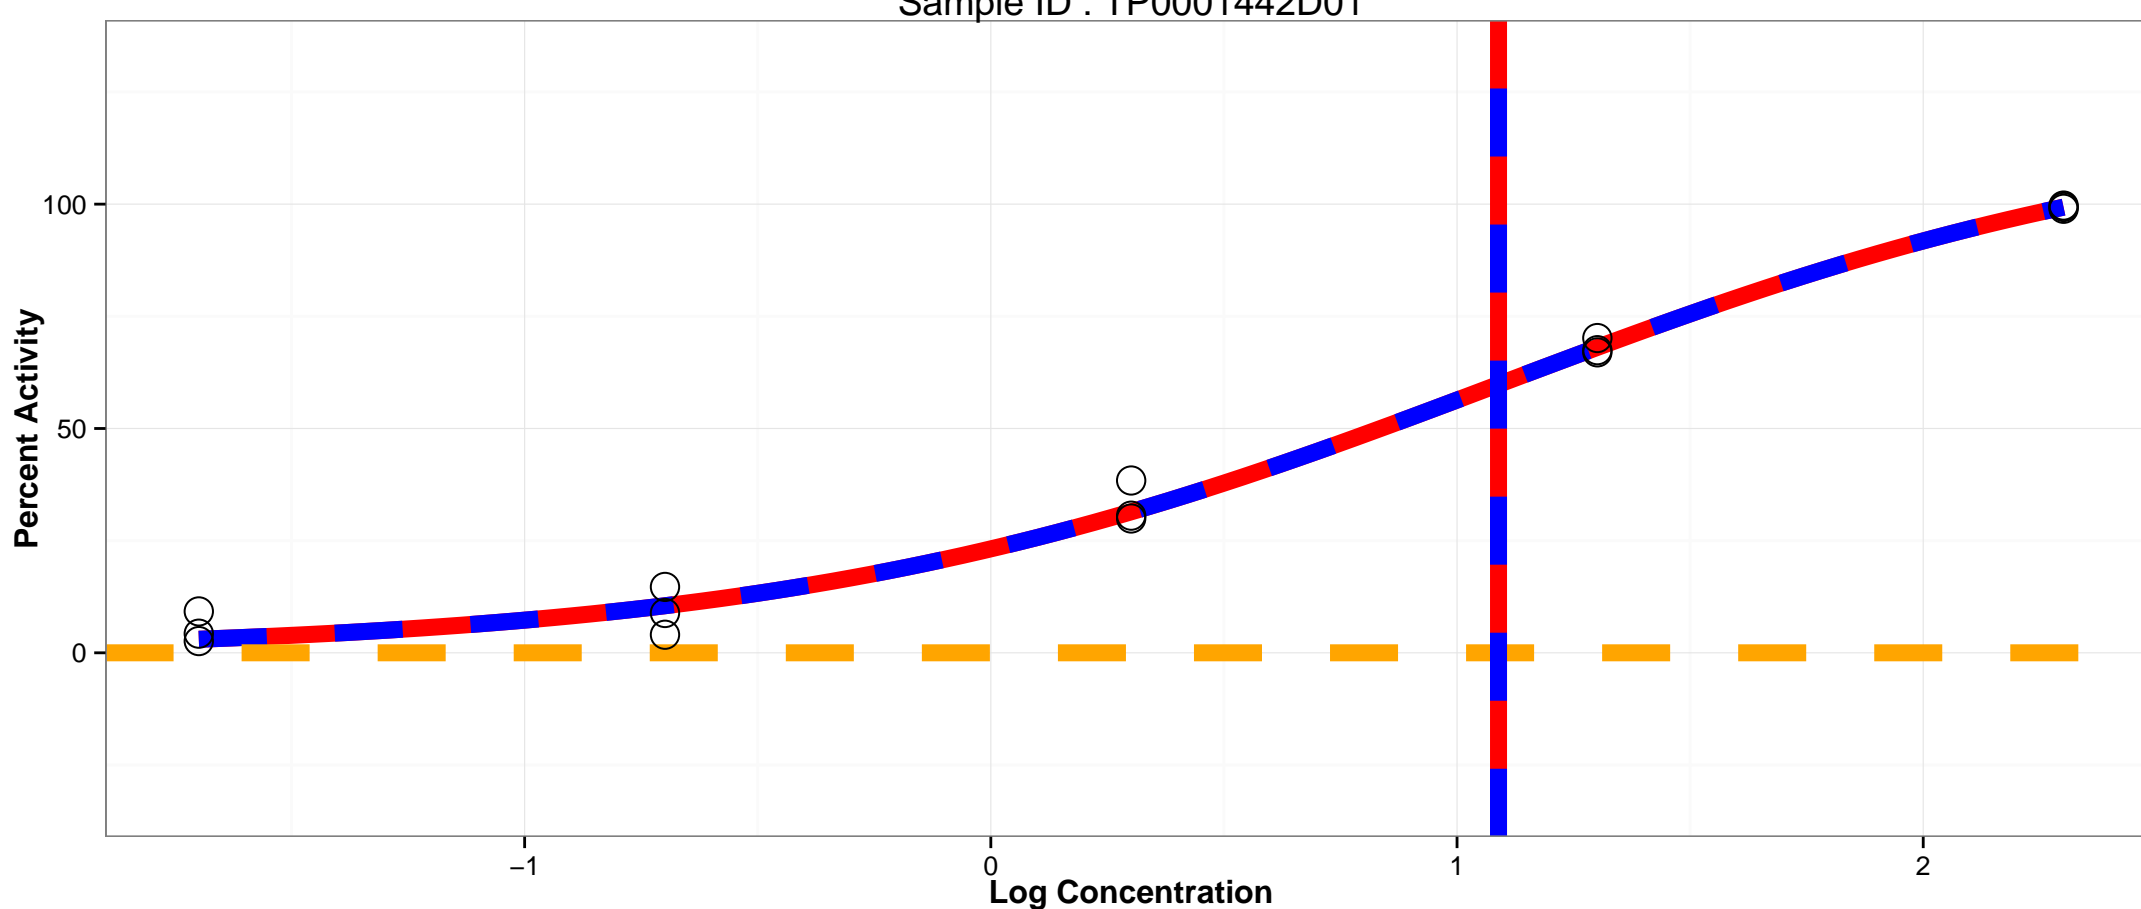

HILL MODEL

|     | tp   | ga     | gw     |
|-----|------|--------|--------|
| val | 120  | 1.09   | 0.569  |
| sd  | 4.99 | 0.0847 | 0.0418 |

GAIN-LOSS MODEL

|     | tp   | ga     | gw     | la   | lw    |
|-----|------|--------|--------|------|-------|
| val | 120  | 1.09   | 0.569  | 3.03 | 10.9  |
| sd  | 4.99 | 0.0847 | 0.0418 | 825  | 12300 |

|      | CNST   | HILL  | GNLS  |
|------|--------|-------|-------|
| AIC  | 166.52 | 85.06 | 89.06 |
| PROB | 0      | 0.88  | 0.12  |
| RMSE | 56.16  | 3.27  | 3.27  |

MAX\_MEAN : 99.4 MAX\_MED : 99.4 BMAD : 3.71  
COFF : 20 HIT-CALL : 1 FITC : 42 ACTP : 1  
FLAGS :

Chemical : 3,5,3'-Triiodothyronine  
CAS : 6893-02-3

Assay ID 1508 (NHEERL\_TPO\_AUR\_dn)  
Sample ID : TX015605

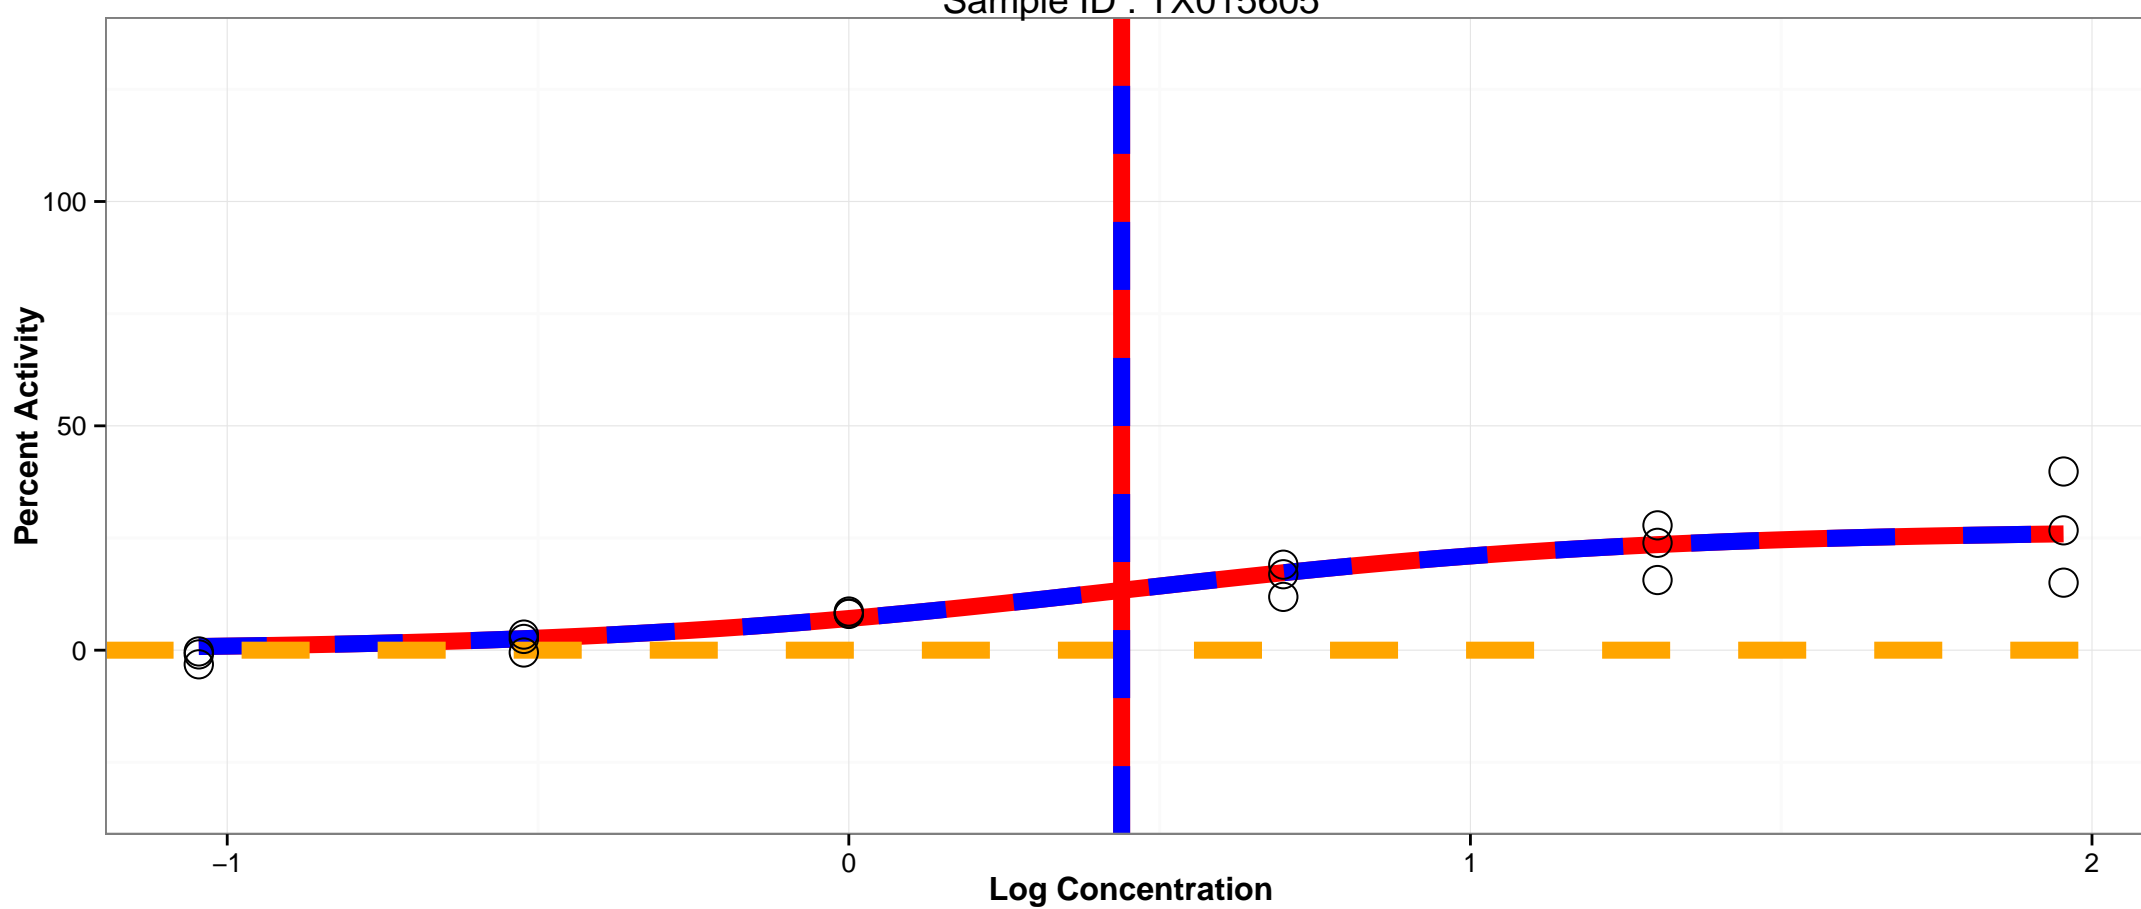

HILL MODEL

|     | tp   | ga    | gw    |
|-----|------|-------|-------|
| val | 26.7 | 0.439 | 1.01  |
| sd  | 3.78 | 0.206 | 0.256 |

GAIN-LOSS MODEL

|     | tp   | ga    | gw    | la   | lw    |
|-----|------|-------|-------|------|-------|
| val | 26.7 | 0.439 | 1.01  | 3.38 | 6.43  |
| sd  | 3.78 | 0.206 | 0.256 | 7450 | 33700 |

|      | CNST   | HILL   | GNLS   |
|------|--------|--------|--------|
| AIC  | 155.64 | 114.16 | 118.16 |
| PROB | 0      | 0.88   | 0.12   |
| RMSE | 16.91  | 5.06   | 5.06   |

MAX\_MEAN : 27.2 MAX\_MED : 26.7 BMAD : 5.69  
COFF : 20 HIT-CALL : 1 FITC : 41 ACTP : 1  
FLAGS :

Assay ID 1509 (NHEERL\_HEK293T\_CellTiterGLO)  
Sample ID : TX015605

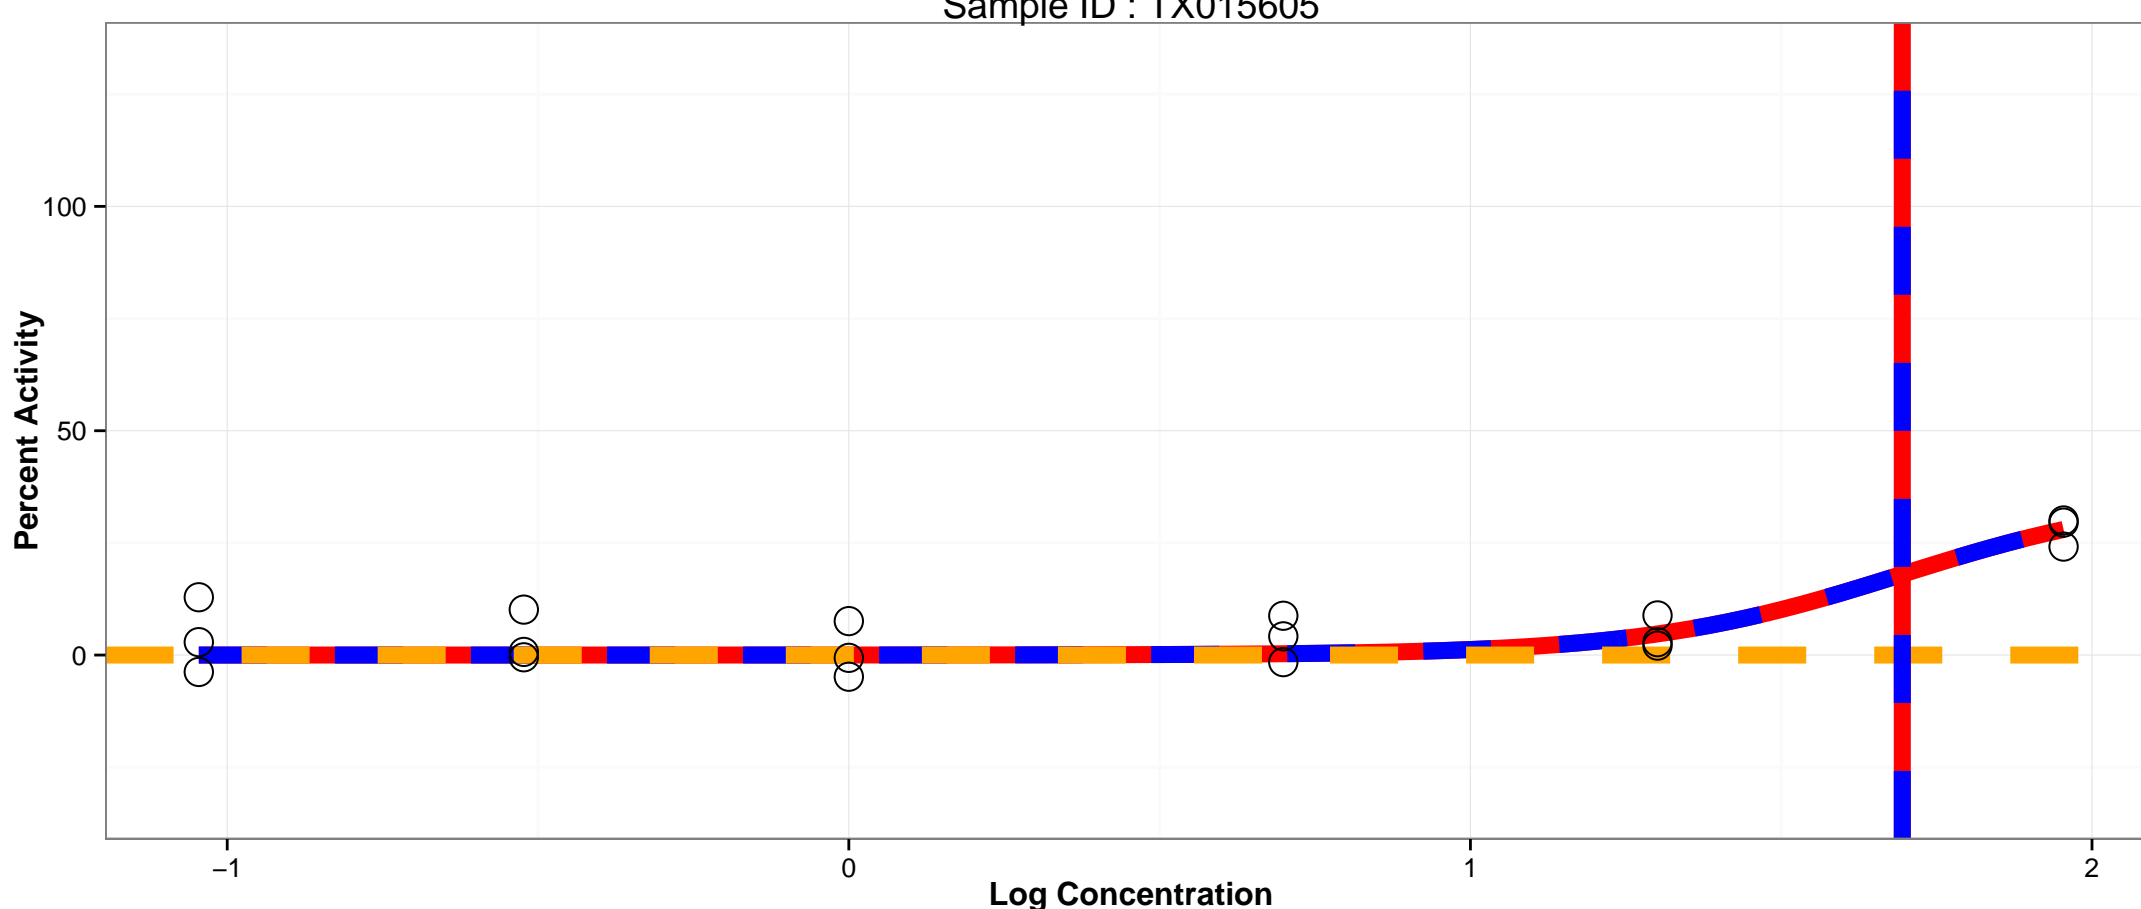

HILL MODEL

|     | tp   | ga    | gw   |
|-----|------|-------|------|
| val | 36   | 1.69  | 2.09 |
| sd  | 37.7 | 0.669 | 2.55 |

GAIN-LOSS MODEL

|     | tp | ga   | gw   | la   | lw   |
|-----|----|------|------|------|------|
| val | 36 | 1.69 | 2.09 | 3.91 | 9.41 |
| sd  | NA | NA   | NA   | NA   | NA   |

|      | CNST   | HILL   | GNLS   |
|------|--------|--------|--------|
| AIC  | 142.33 | 119.35 | 123.35 |
| PROB | 0      | 0.88   | 0.12   |
| RMSE | 12.73  | 5.33   | 5.33   |

MAX\_MEAN : 27.9 MAX\_MED : 29.5 BMAD : 5.54  
COFF : 20 HIT-CALL : 1 FITC : 42 ACTP : 1  
FLAGS : 6

Assay ID 1848 (NHEERL\_Quantilum\_inhib\_2\_dn)  
Sample ID : TX015605

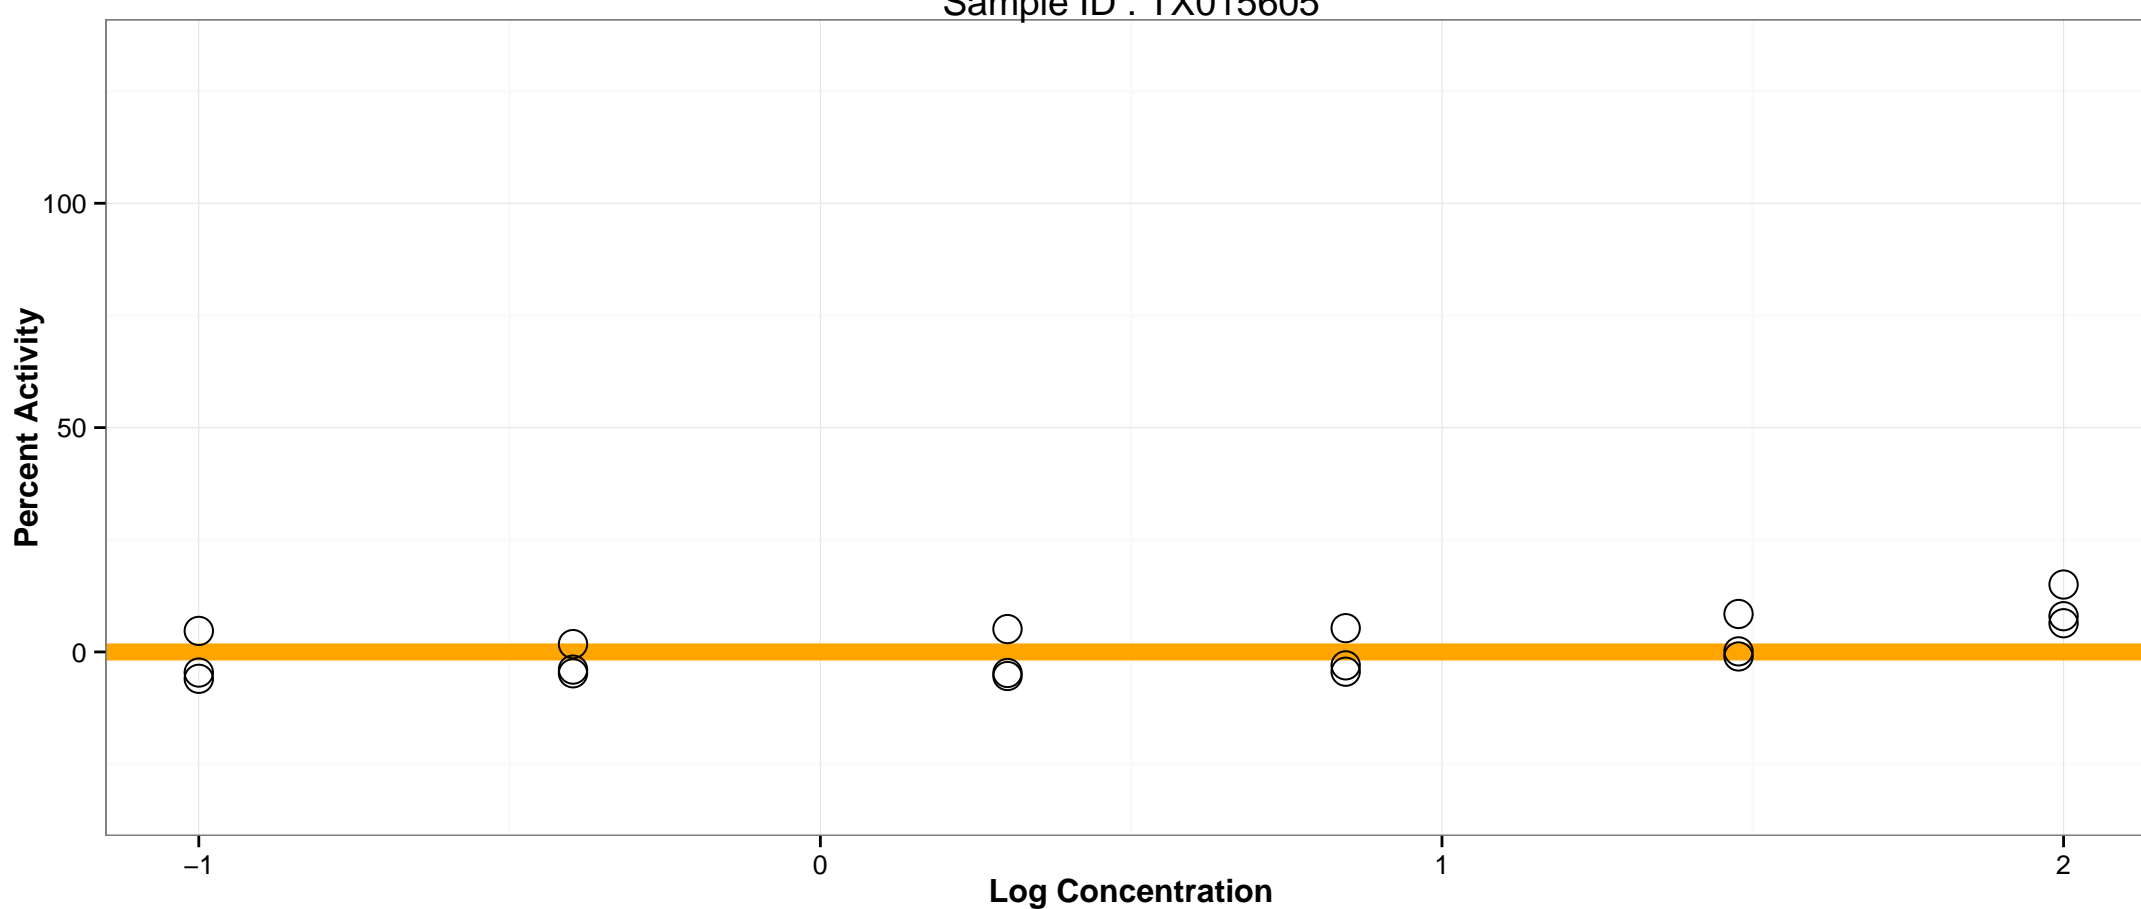

HILL MODEL

HILL MODEL: Not applicable

GAIN-LOSS MODEL

GNLS MODEL: Not applicable

|      | CNST   | HILL | GNLS |
|------|--------|------|------|
| AIC  | 119.37 | NA   | NA   |
| PROB | 1      | NA   | NA   |
| RMSE | 6.04   | NA   | NA   |

MAX\_MEAN : 9.81 MAX\_MED : 7.98 BMAD : 8.58  
COFF : 20 HIT-CALL : 0 FITC : 4 ACTP : 0  
FLAGS :

Assay ID 1824 (NHEERL\_TPO\_GUA\_dn)  
Sample ID : TP0001442D02

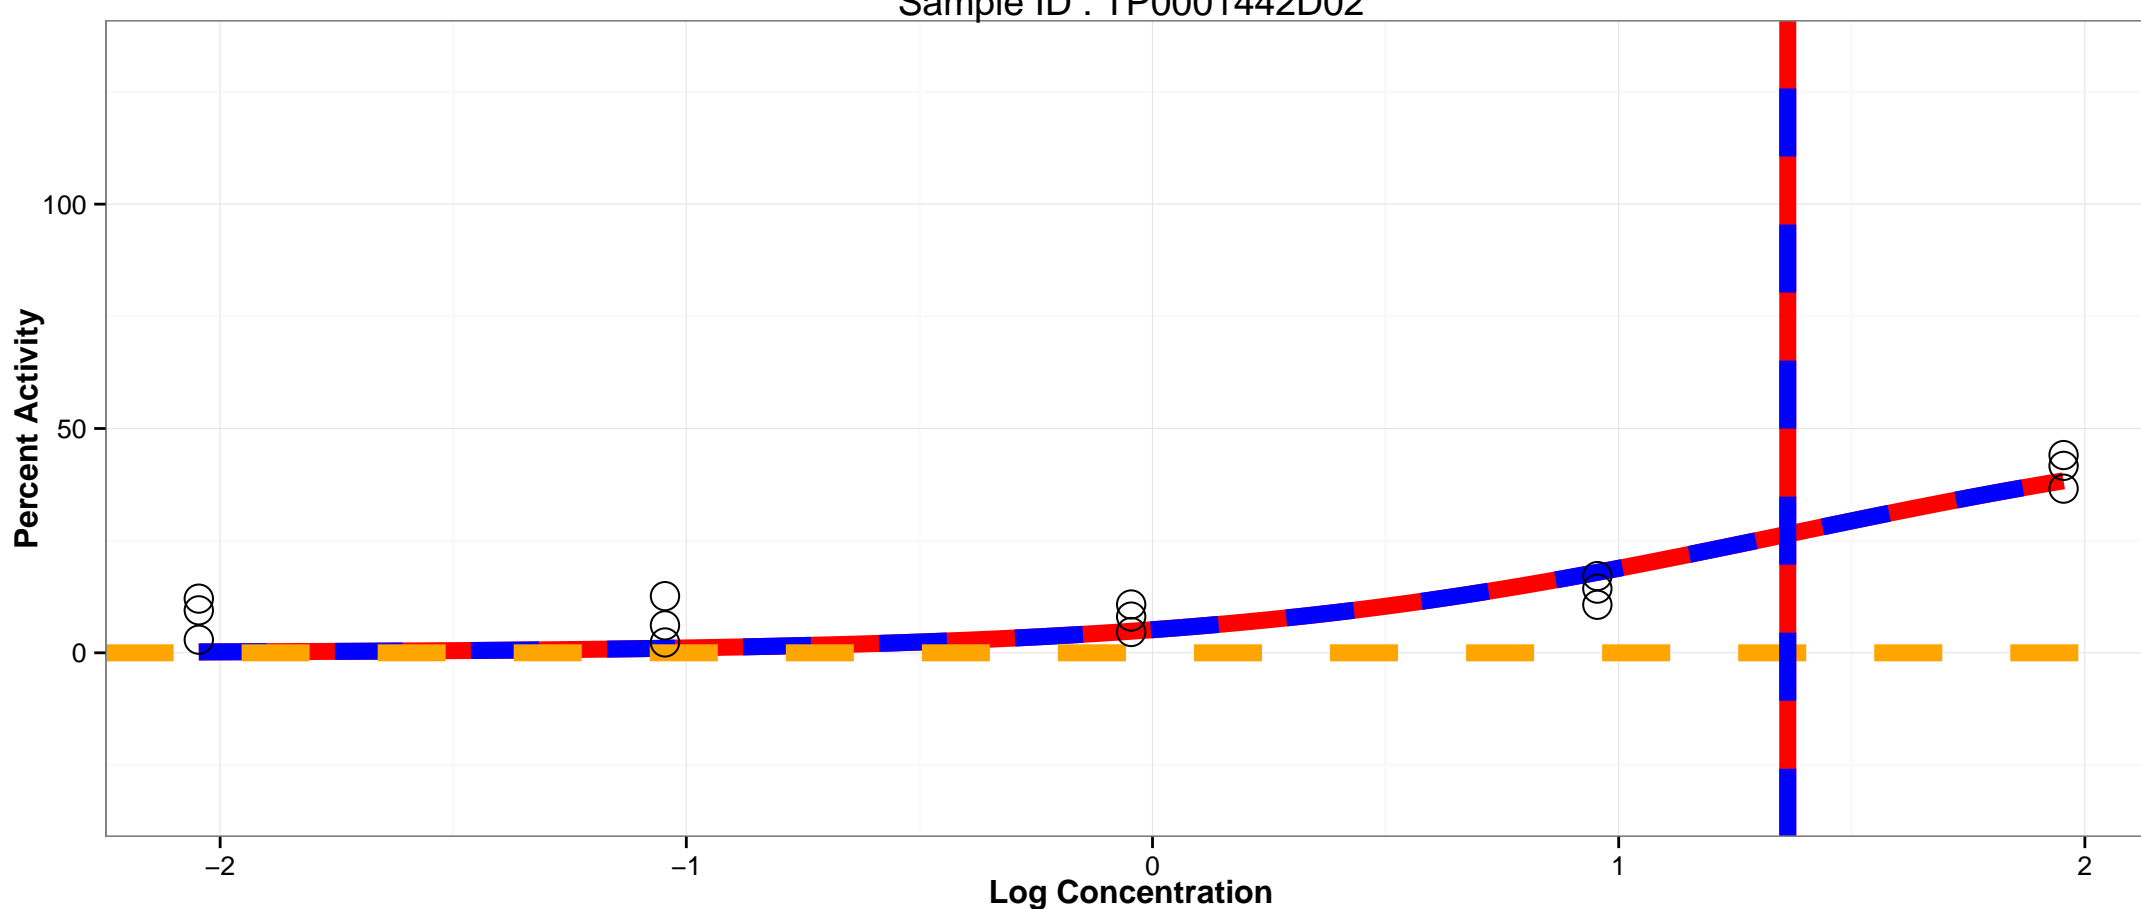

HILL MODEL

|     | tp   | ga    | gw    |
|-----|------|-------|-------|
| val | 52.9 | 1.36  | 0.71  |
| sd  | 13.3 | 0.353 | 0.306 |

GAIN-LOSS MODEL

|     | tp   | ga    | gw    | la   | lw   |
|-----|------|-------|-------|------|------|
| val | 52.9 | 1.36  | 0.71  | 3.95 | 4.55 |
| sd  | 13.3 | 0.353 | 0.306 | 3430 | 7790 |

|      | CNST   | HILL   | GNLS   |
|------|--------|--------|--------|
| AIC  | 134.77 | 105.99 | 109.99 |
| PROB | 0      | 0.88   | 0.12   |
| RMSE | 20.47  | 6.1    | 6.1    |

MAX\_MEAN : 40.8 MAX\_MED : 41.7 BMAD : 3.71  
COFF : 20 HIT-CALL : 1 FITC : 42 ACTP : 1  
FLAGS :

Chemical : Fenitrothion  
CAS : 122-14-5

Assay ID 1508 (NHEERL\_TPO\_AUR\_dn)  
Sample ID : TX000916

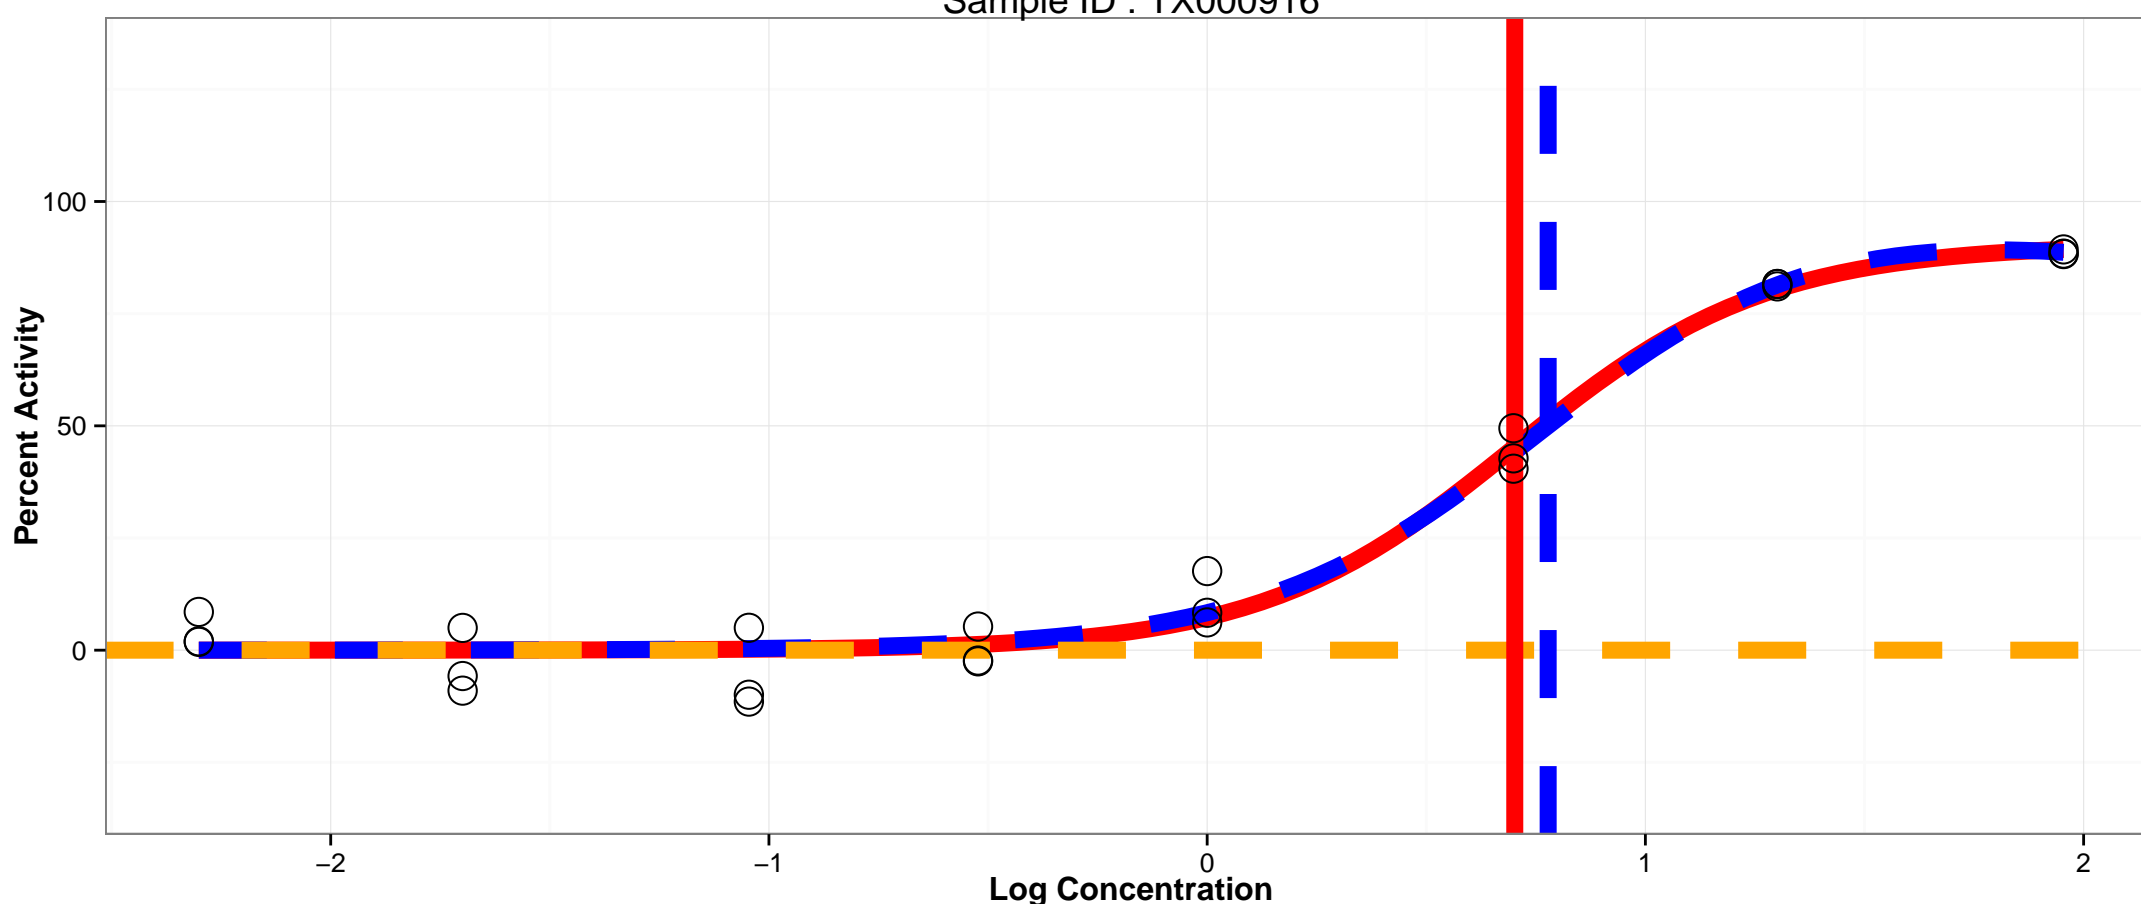

HILL MODEL

|     | tp   | ga     | gw    |
|-----|------|--------|-------|
| val | 90.5 | 0.702  | 1.51  |
| sd  | 2.51 | 0.0397 | 0.189 |

GAIN-LOSS MODEL

|     | tp  | ga    | gw   | la   | lw    |
|-----|-----|-------|------|------|-------|
| val | 103 | 0.778 | 1.35 | 3.48 | 0.585 |
| sd  | NA  | NA    | NA   | NA   | NA    |

|      | CNST   | HILL   | GNLS   |
|------|--------|--------|--------|
| AIC  | 252.89 | 157.34 | 160.73 |
| PROB | 0      | 0.85   | 0.15   |
| RMSE | 45.8   | 5.34   | 5.28   |

MAX\_MEAN : 88.7 MAX\_MED : 88.4 BMAD : 5.69  
COFF : 20 HIT-CALL : 1 FITC : 41 ACTP : 1  
FLAGS :

Assay ID 1509 (NHEERL\_HEK293T\_CellTiterGLO)  
Sample ID : TX000916

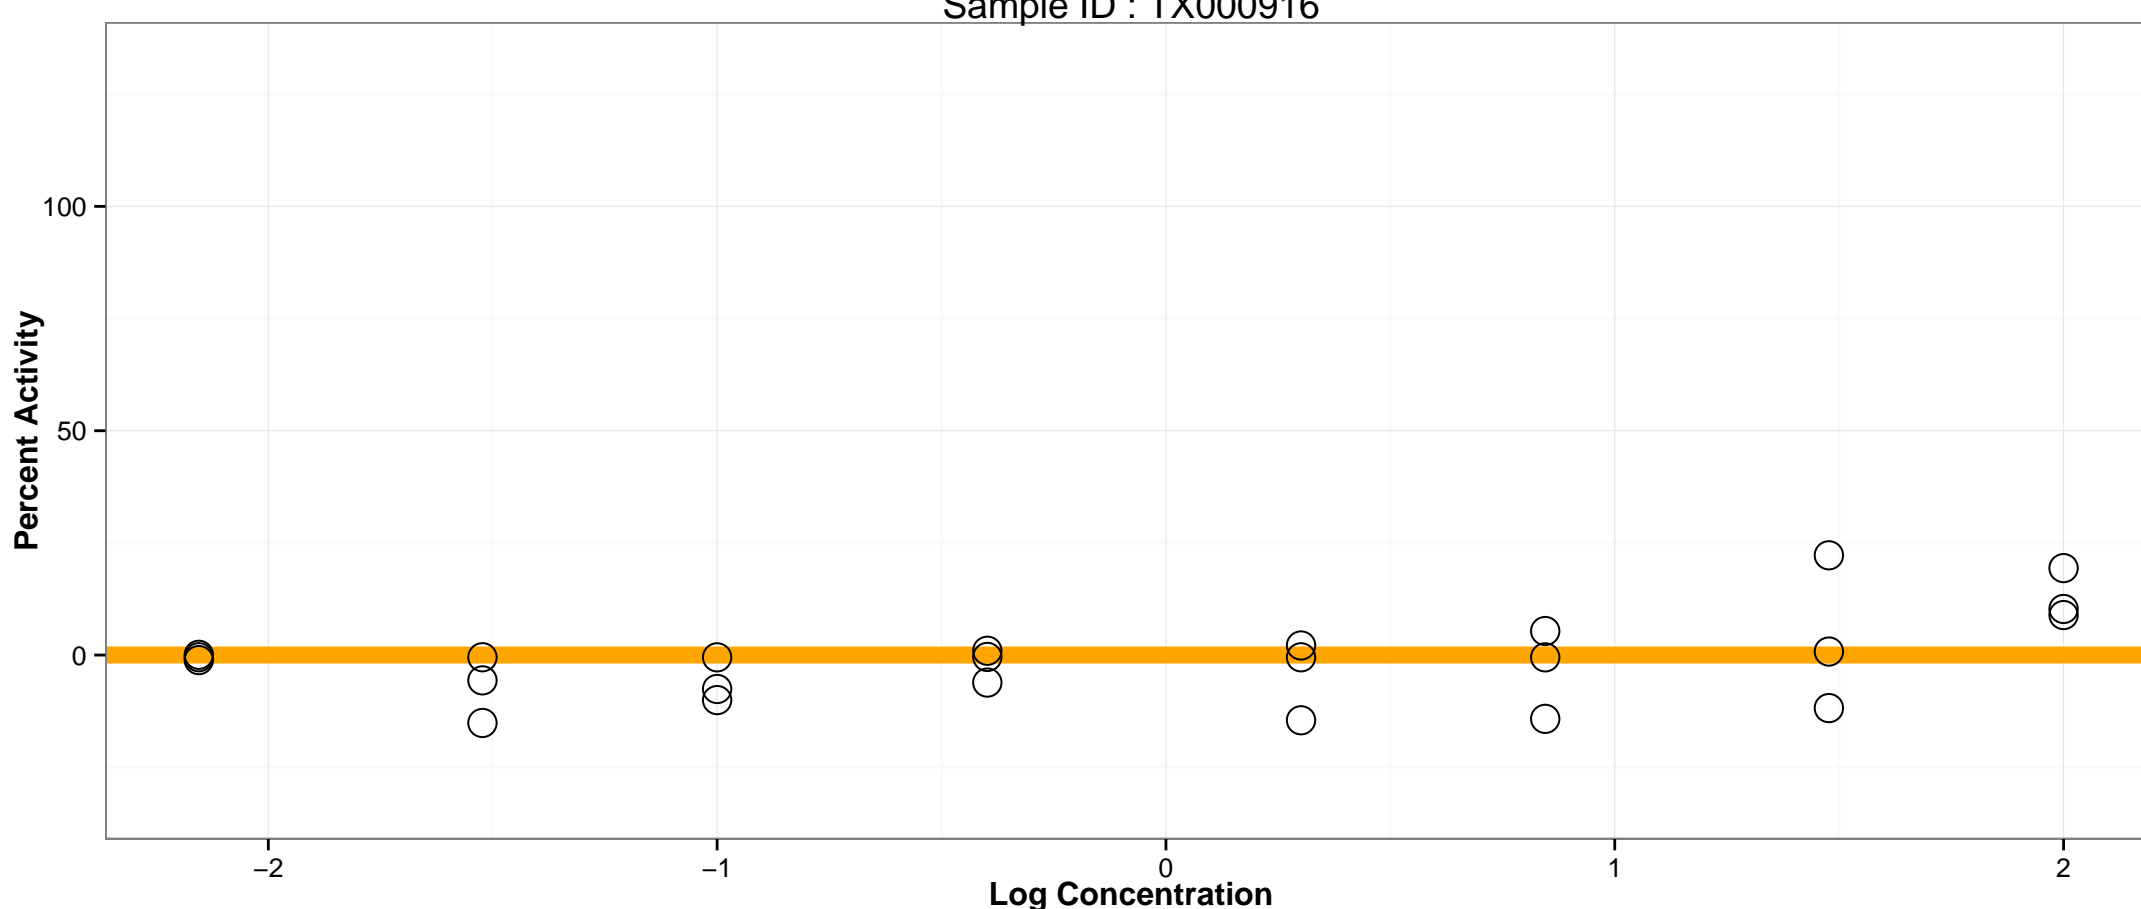

HILL MODEL

HILL MODEL: Not applicable

GAIN-LOSS MODEL

GNLS MODEL: Not applicable

|      | CNST   | HILL | GNLS |
|------|--------|------|------|
| AIC  | 177.58 | NA   | NA   |
| PROB | 1      | NA   | NA   |
| RMSE | 9.36   | NA   | NA   |

MAX\_MEAN : 12.9 MAX\_MED : 10.3 BMAD : 5.54  
COFF : 20 HIT-CALL : 0 FITC : 4 ACTP : 0  
FLAGS :

Assay ID 1848 (NHEERL\_Quantilum\_inhib\_2\_dn)  
Sample ID : TX000916

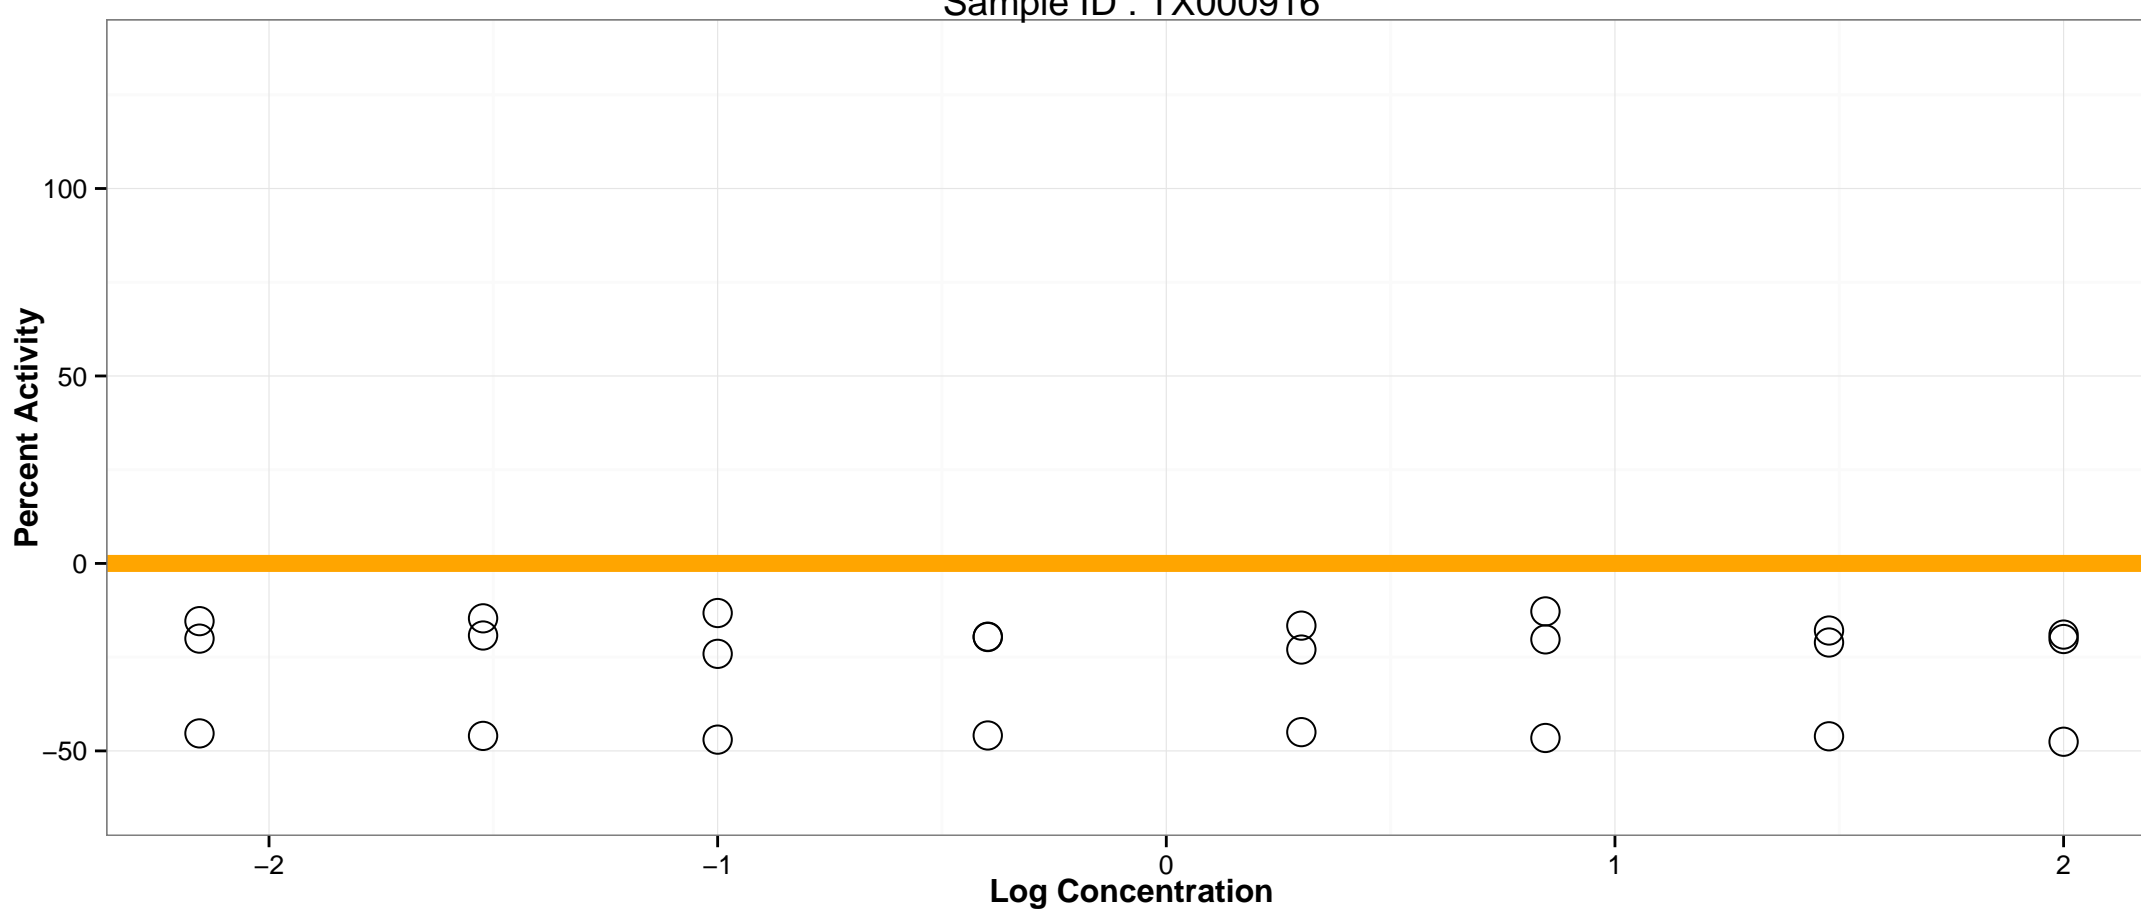

HILL MODEL

HILL MODEL: Not applicable

GAIN-LOSS MODEL

GNLS MODEL: Not applicable

|      | CNST   | HILL | GNLS |
|------|--------|------|------|
| AIC  | 238.25 | NA   | NA   |
| PROB | 1      | NA   | NA   |
| RMSE | 30.75  | NA   | NA   |

MAX\_MEAN : -26.5 MAX\_MED : -19.2 BMAD : 8.58  
COFF : 20 HIT-CALL : 0 FITC : 4 ACTP : 0  
FLAGS : 10

Assay ID 1824 (NHEERL\_TPO\_GUA\_dn)  
Sample ID : TP0001442D03

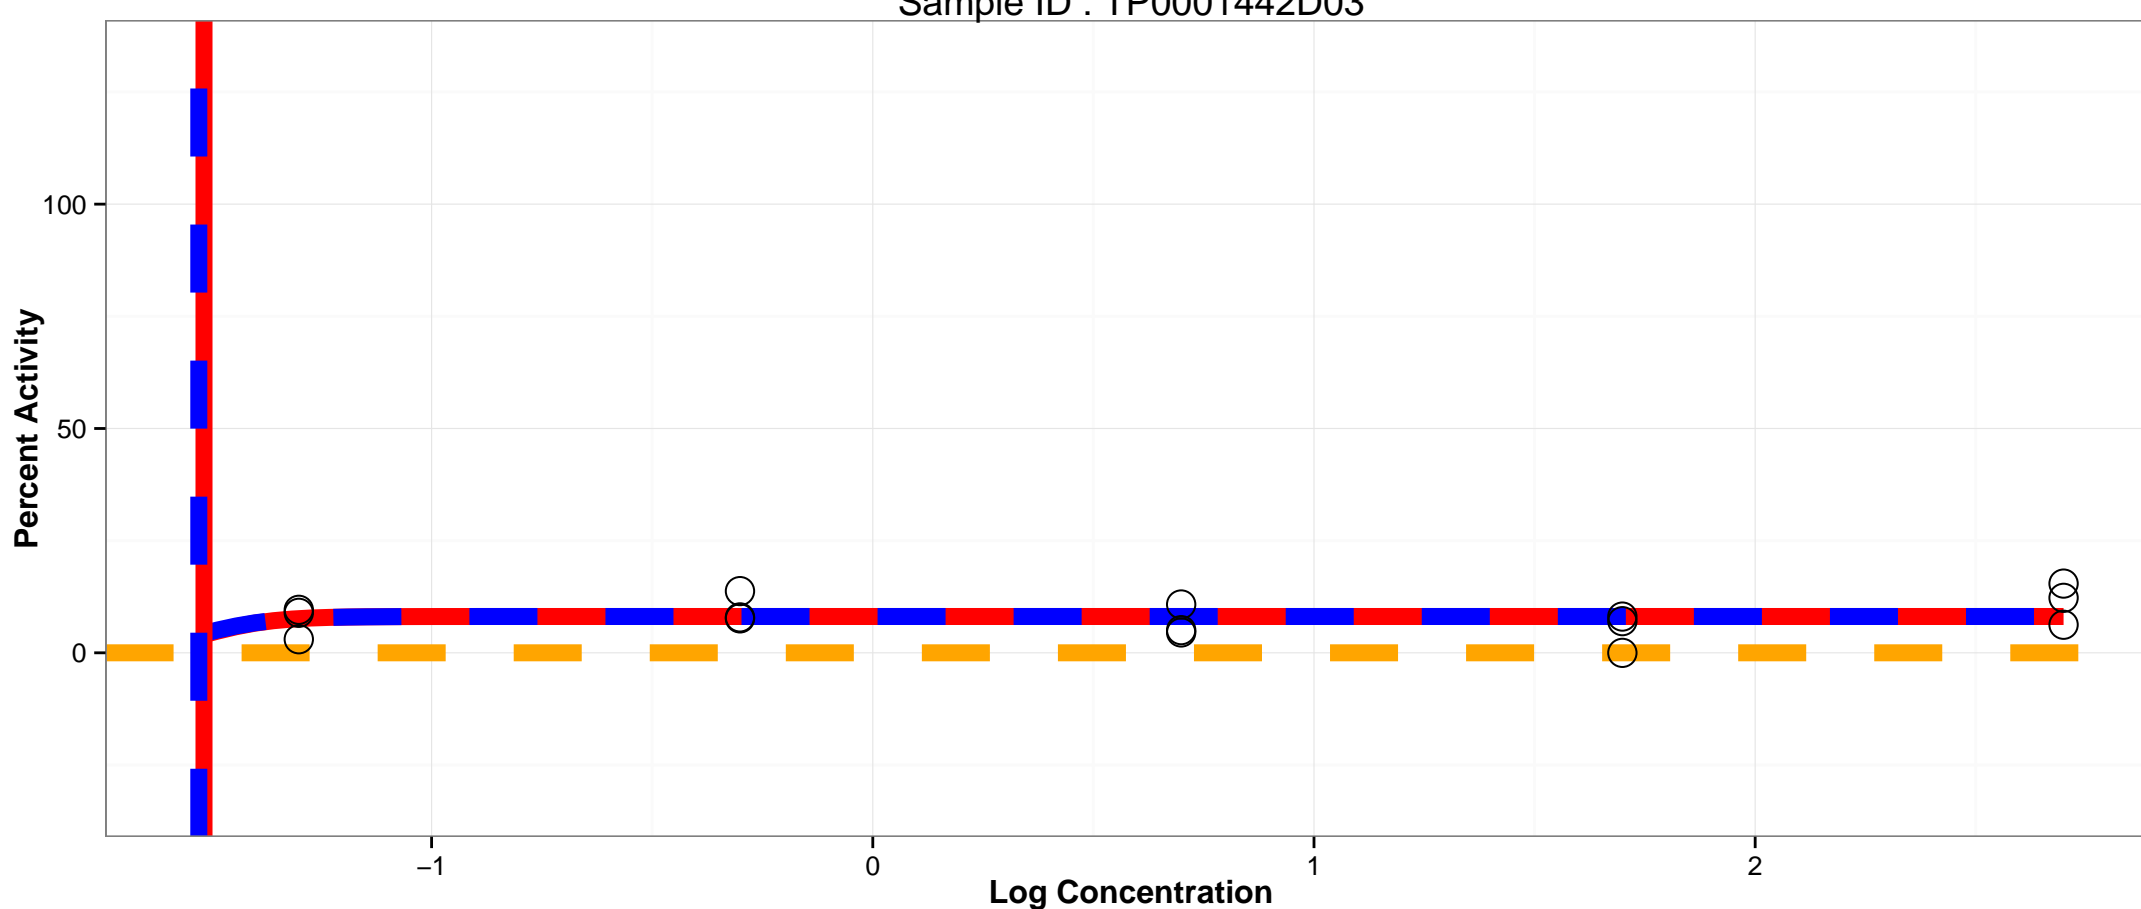

HILL MODEL

|     | tp   | ga    | gw   |
|-----|------|-------|------|
| val | 8.1  | -1.52 | 5.61 |
| sd  | 1.15 | 13.8  | 360  |

GAIN-LOSS MODEL

|     | tp   | ga    | gw   | la   | lw   |
|-----|------|-------|------|------|------|
| val | 8.1  | -1.53 | 5.32 | 4.04 | 5.5  |
| sd  | 1.15 | 17.8  | 417  | 546  | 2240 |

|      | CNST   | HILL  | GNLS  |
|------|--------|-------|-------|
| AIC  | 112.83 | 92.41 | 96.41 |
| PROB | 0      | 0.88  | 0.12  |
| RMSE | 8.94   | 3.91  | 3.91  |

MAX\_MEAN : 11.3 MAX\_MED : 12.3 BMAD : 3.71  
COFF : 20 HIT-CALL : 0 FITC : 13 ACTP : 1  
FLAGS :



Chemical : 6-Methyl-2-thiouracil  
CAS : 56-04-2

Assay ID 1508 (NHEERL\_TPO\_AUR\_dn)  
Sample ID : TX007216

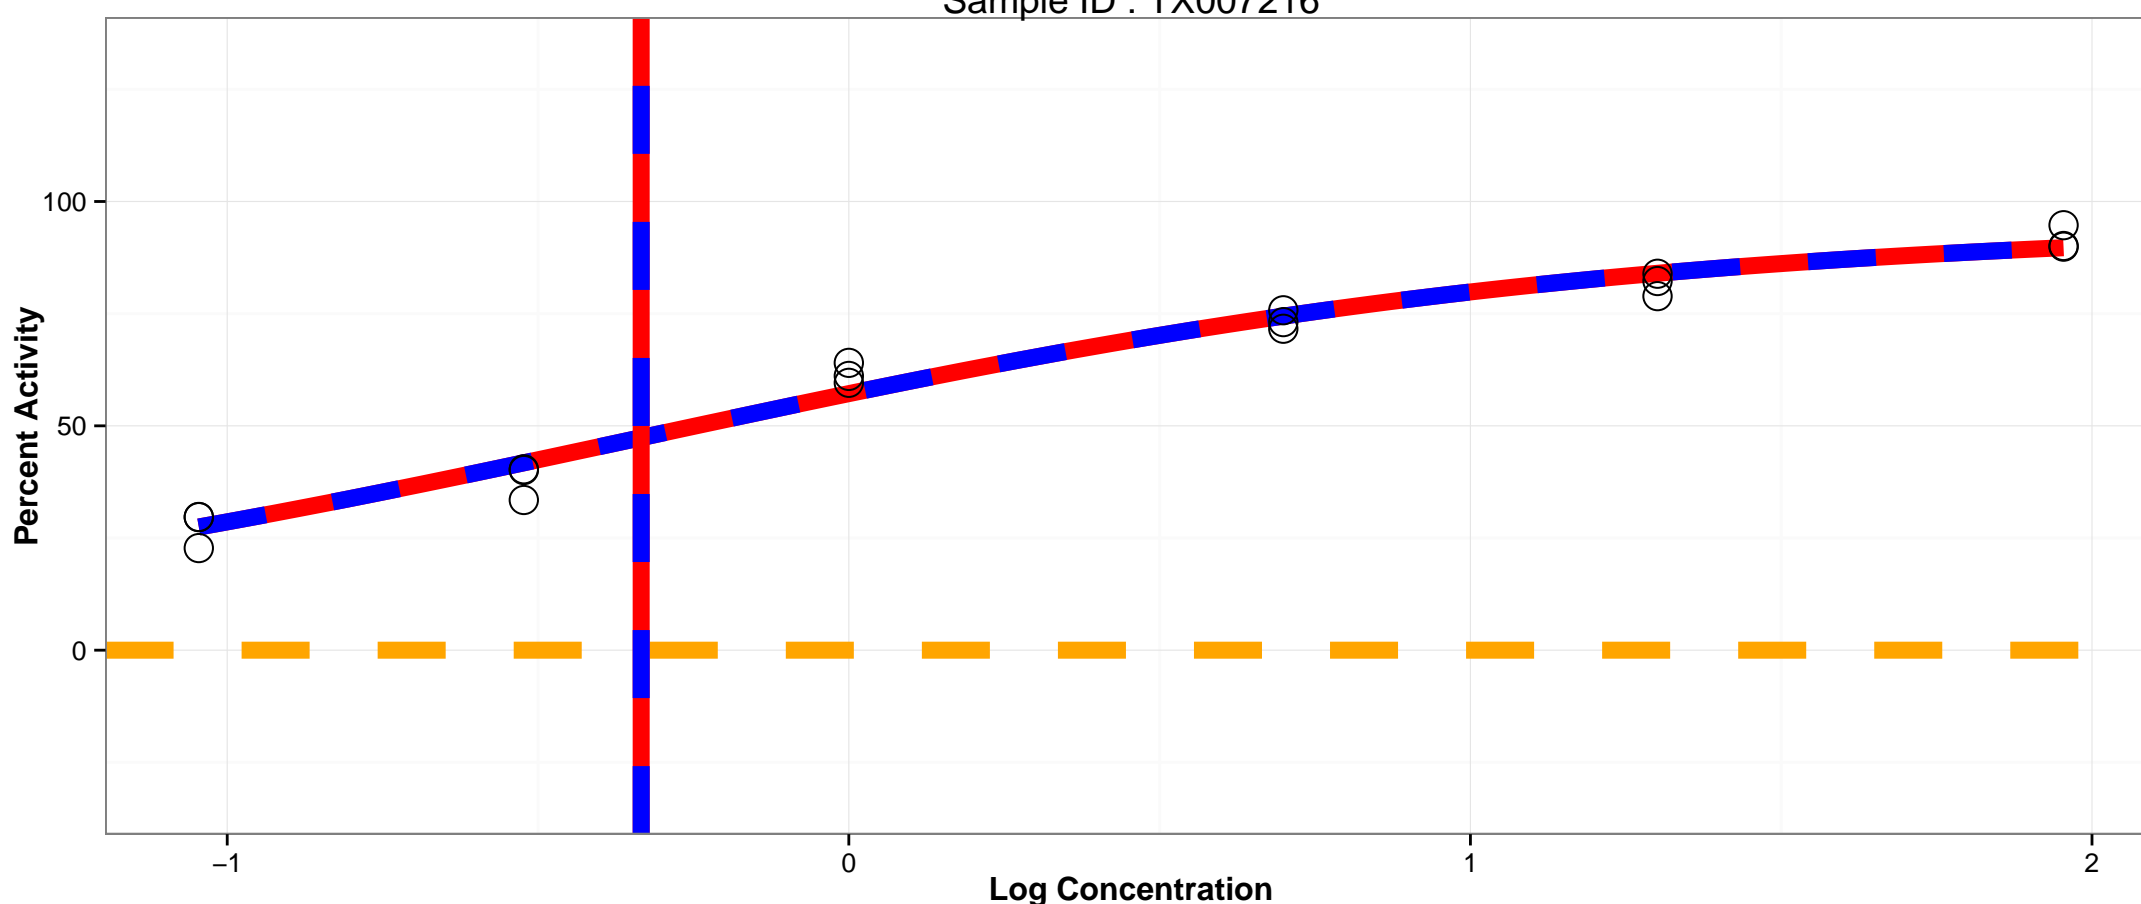

HILL MODEL

|     | tp   | ga     | gw     |
|-----|------|--------|--------|
| val | 94.7 | -0.334 | 0.547  |
| sd  | 3.49 | 0.0859 | 0.0607 |

GAIN-LOSS MODEL

|     | tp   | ga     | gw     | la   | lw   |
|-----|------|--------|--------|------|------|
| val | 94.7 | -0.334 | 0.547  | 2.92 | 9.61 |
| sd  | 3.49 | 0.0859 | 0.0607 | 899  | 8970 |

|      | CNST   | HILL   | GNLS   |
|------|--------|--------|--------|
| AIC  | 207.72 | 106.48 | 110.48 |
| PROB | 0      | 0.88   | 0.12   |
| RMSE | 66.45  | 3.65   | 3.65   |

MAX\_MEAN : 91.6 MAX\_MED : 90.1 BMAD : 5.69  
COFF : 20 HIT-CALL : 1 FITC : 42 ACTP : 1  
FLAGS :

Assay ID 1509 (NHEERL\_HEK293T\_CellTiterGLO)  
Sample ID : TX007216

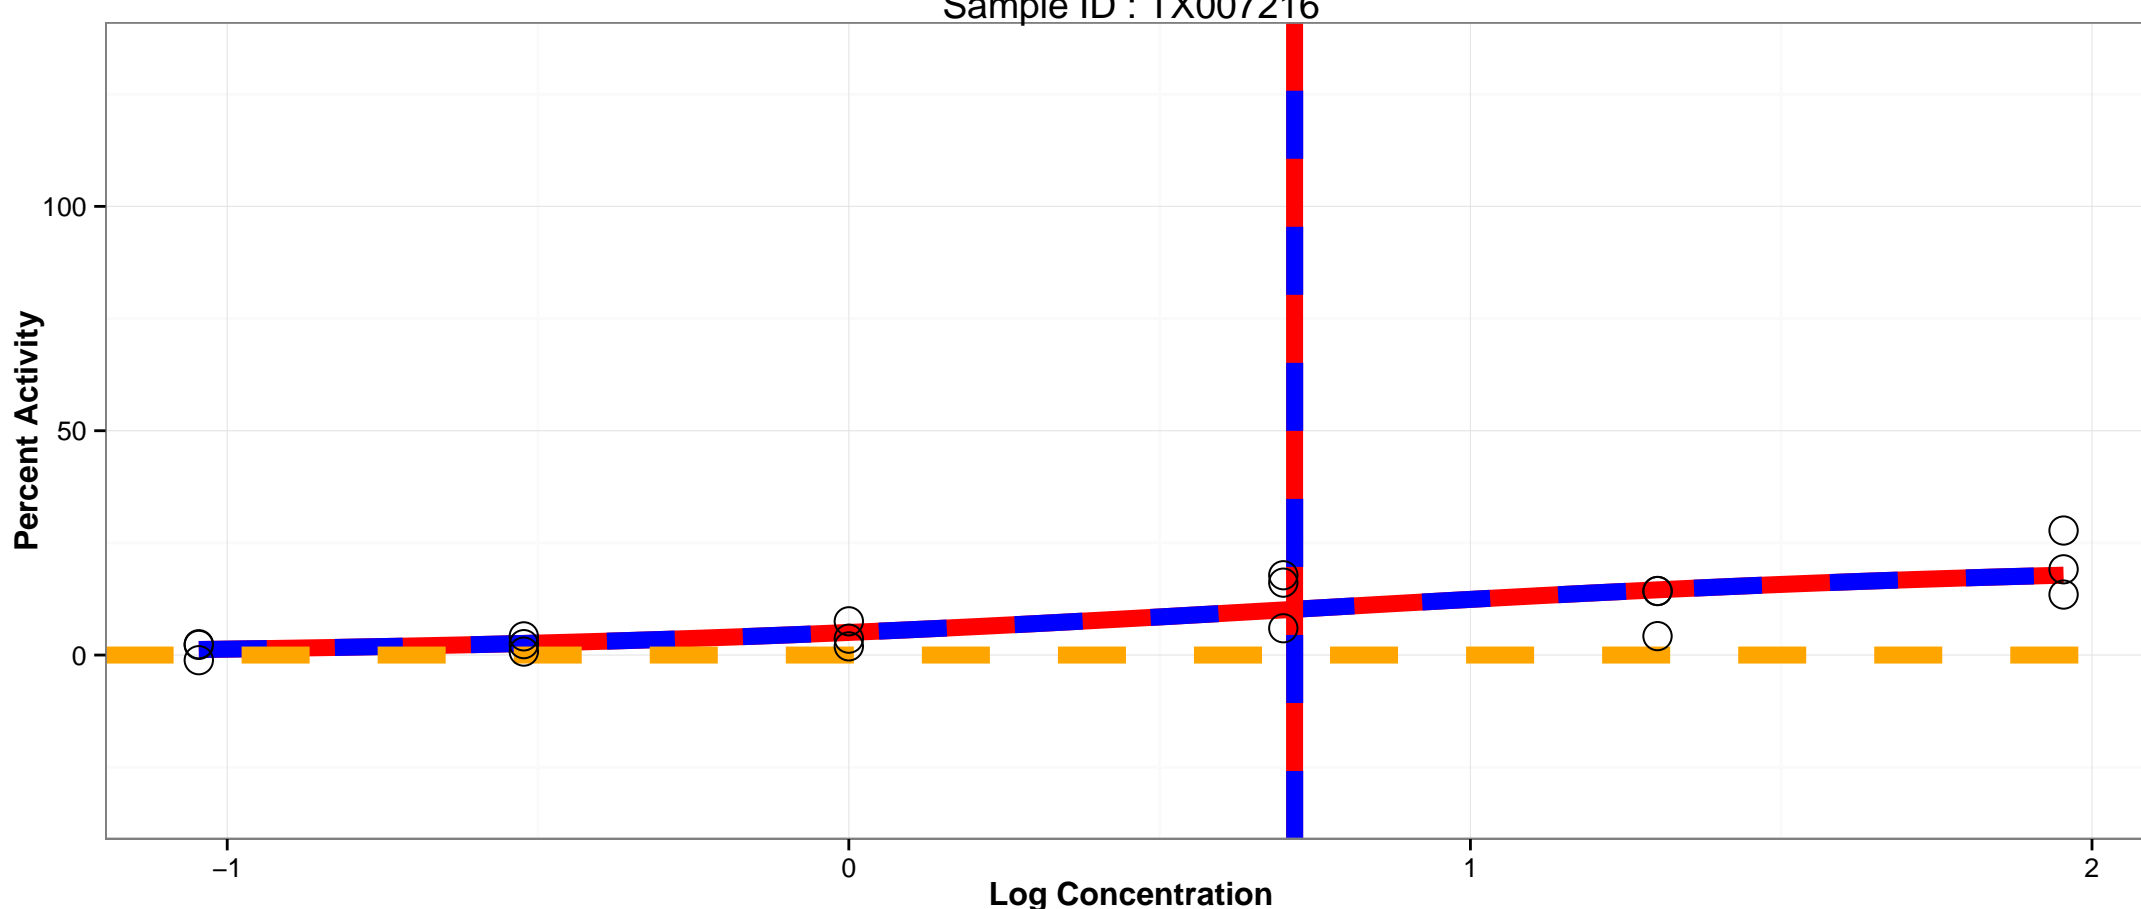

HILL MODEL

|     | tp   | ga    | gw    |
|-----|------|-------|-------|
| val | 20.4 | 0.717 | 0.675 |
| sd  | 10.7 | 1.02  | 0.458 |

GAIN-LOSS MODEL

|     | tp   | ga    | gw    | la   | lw   |
|-----|------|-------|-------|------|------|
| val | 20.4 | 0.717 | 0.675 | 2.53 | 11.9 |
| sd  | 10.7 | 1.02  | 0.458 | 174  | 3590 |

|      | CNST   | HILL   | GNLS   |
|------|--------|--------|--------|
| AIC  | 142.14 | 112.81 | 116.81 |
| PROB | 0      | 0.88   | 0.12   |
| RMSE | 11.71  | 4.54   | 4.54   |

MAX\_MEAN : 20.1 MAX\_MED : 19.1 BMAD : 5.54  
COFF : 20 HIT-CALL : 0 FITC : 21 ACTP : 1  
FLAGS : 12

Assay ID 1848 (NHEERL\_Quantilum\_inhib\_2\_dn)  
Sample ID : TX007216

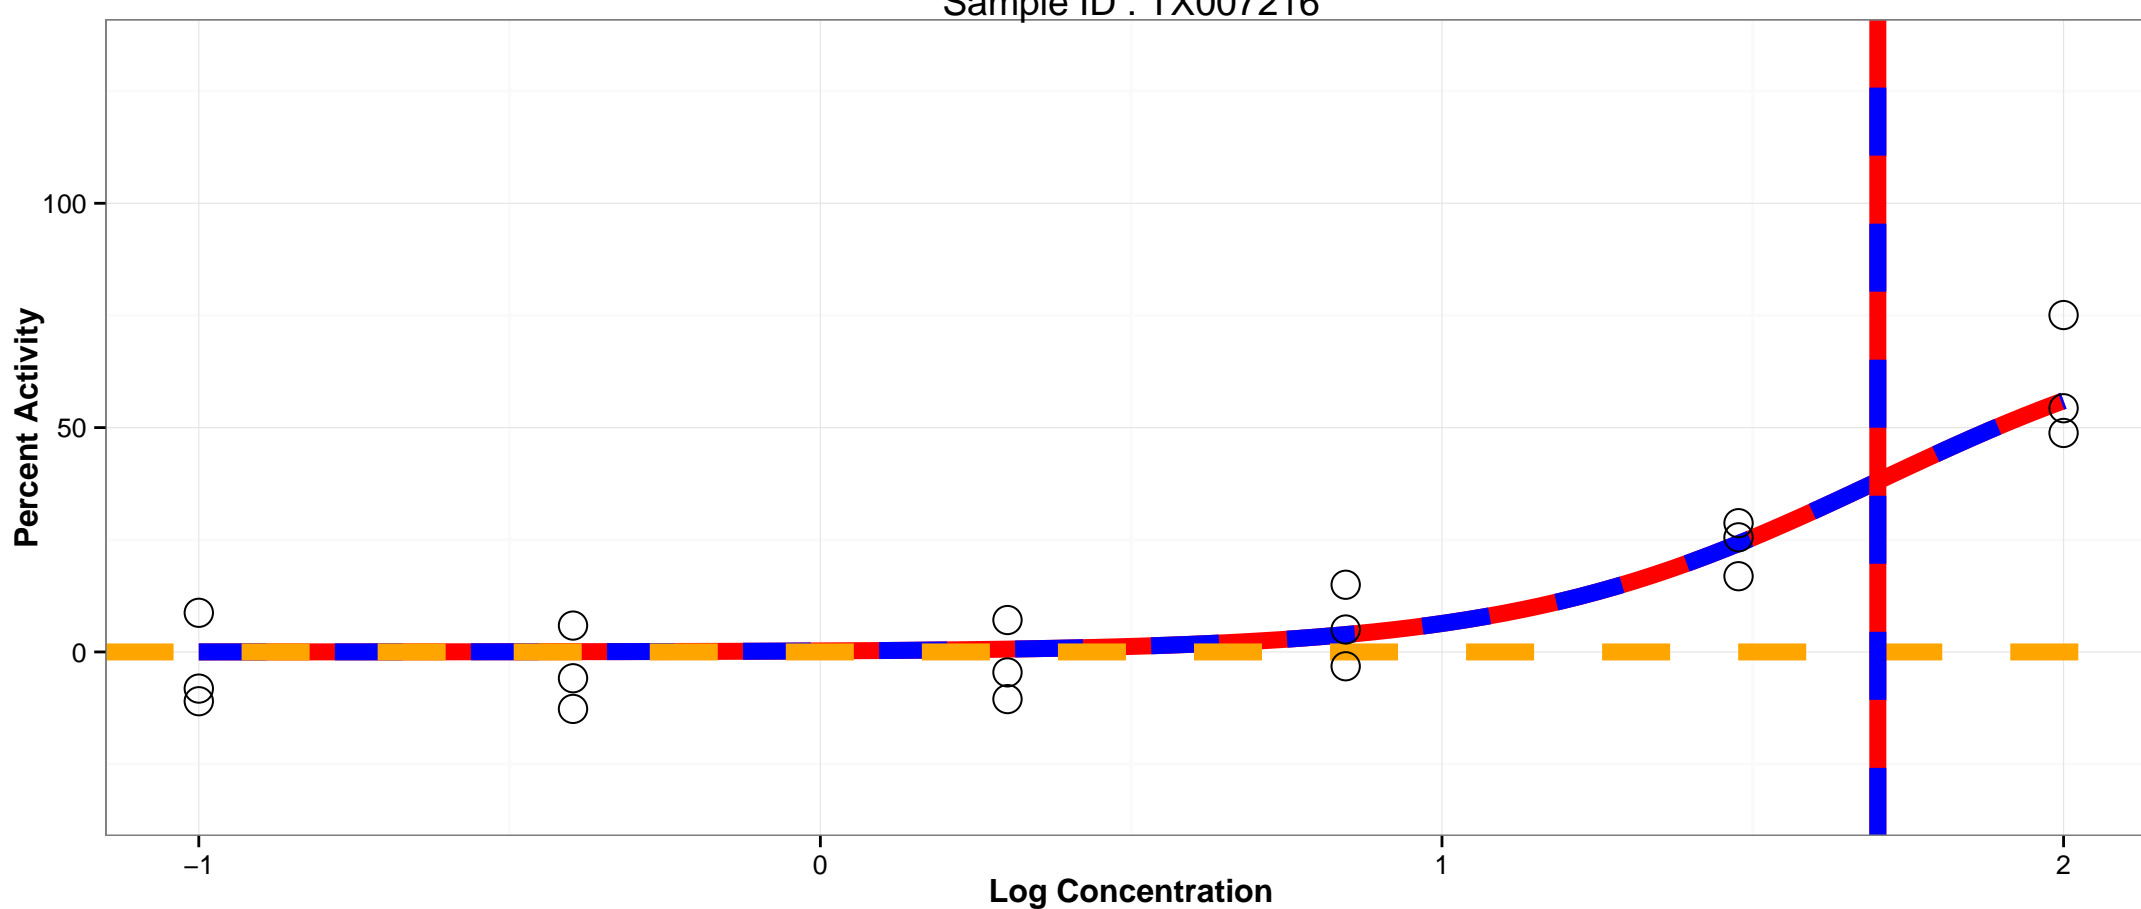

HILL MODEL

|     | tp   | ga    | gw    |
|-----|------|-------|-------|
| val | 76.1 | 1.7   | 1.49  |
| sd  | 41.7 | 0.399 | 0.912 |

GAIN-LOSS MODEL

|     | tp   | ga    | gw    | la   | lw   |
|-----|------|-------|-------|------|------|
| val | 76.1 | 1.7   | 1.49  | 3.29 | 5.12 |
| sd  | 41.7 | 0.399 | 0.912 | 1880 | 7480 |

|      | CNST   | HILL   | GNLS   |
|------|--------|--------|--------|
| AIC  | 169.82 | 139.14 | 143.14 |
| PROB | 0      | 0.88   | 0.12   |
| RMSE | 27.56  | 8.68   | 8.68   |

MAX\_MEAN : 59.4 MAX\_MED : 54.3 BMAD : 8.58  
COFF : 20 HIT-CALL : 1 FITC : 42 ACTP : 1  
FLAGS : 6

Assay ID 1824 (NHEERL\_TPO\_GUA\_dn)  
Sample ID : TP0001442D04

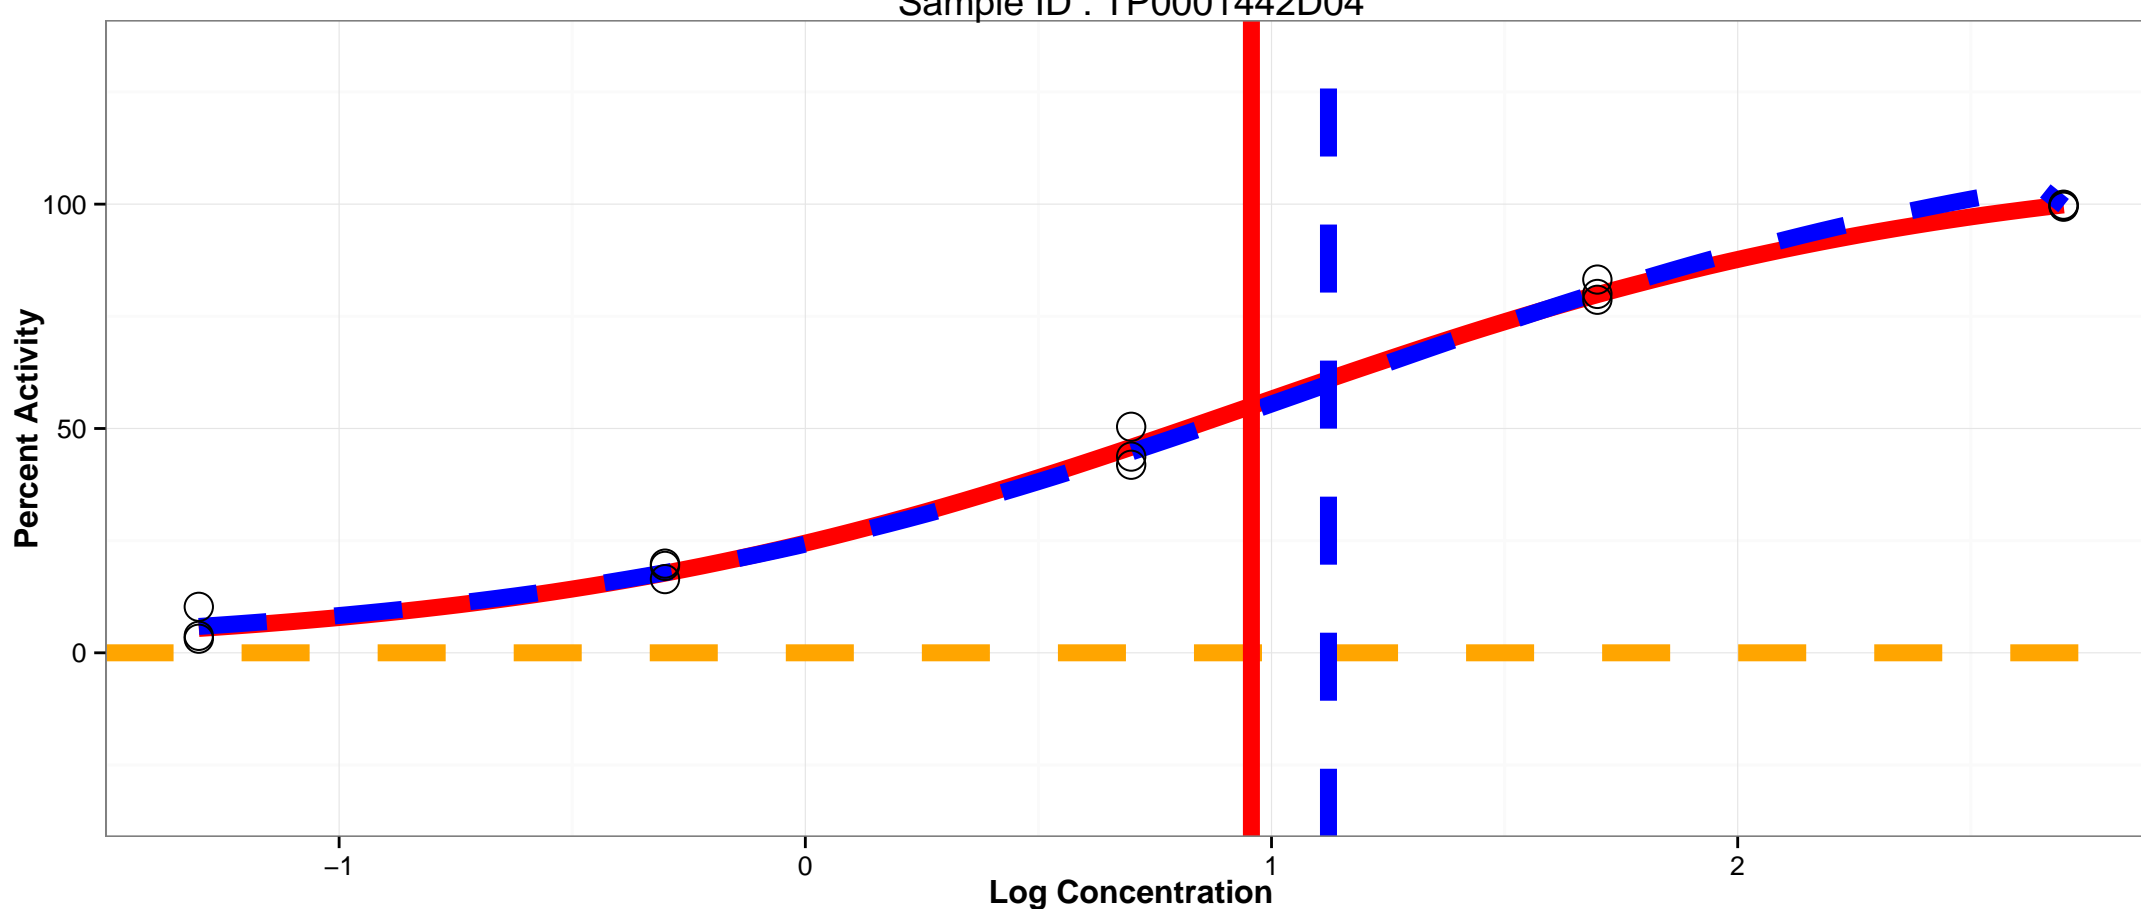

HILL MODEL

|     | tp   | ga     | gw     |
|-----|------|--------|--------|
| val | 110  | 0.957  | 0.569  |
| sd  | 2.64 | 0.0658 | 0.0306 |

GAIN-LOSS MODEL

|     | tp   | ga    | gw     | la      | lw   |
|-----|------|-------|--------|---------|------|
| val | 120  | 1.12  | 0.531  | 2.77    | 17.8 |
| sd  | 8.63 | 0.144 | 0.0357 | 0.00867 | 5.1  |

|      | CNST   | HILL  | GNLS  |
|------|--------|-------|-------|
| AIC  | 169.93 | 79.21 | 82.41 |
| PROB | 0      | 0.83  | 0.17  |
| RMSE | 61.49  | 2.5   | 2.47  |

MAX\_MEAN : 99.7 MAX\_MED : 99.7 BMAD : 3.71  
COFF : 20 HIT-CALL : 1 FITC : 42 ACTP : 1  
FLAGS :

Chemical : 2-Naphthalenol  
CAS : 135-19-3

Assay ID 1508 (NHEERL\_TPO\_AUR\_dn)  
Sample ID : TX003890

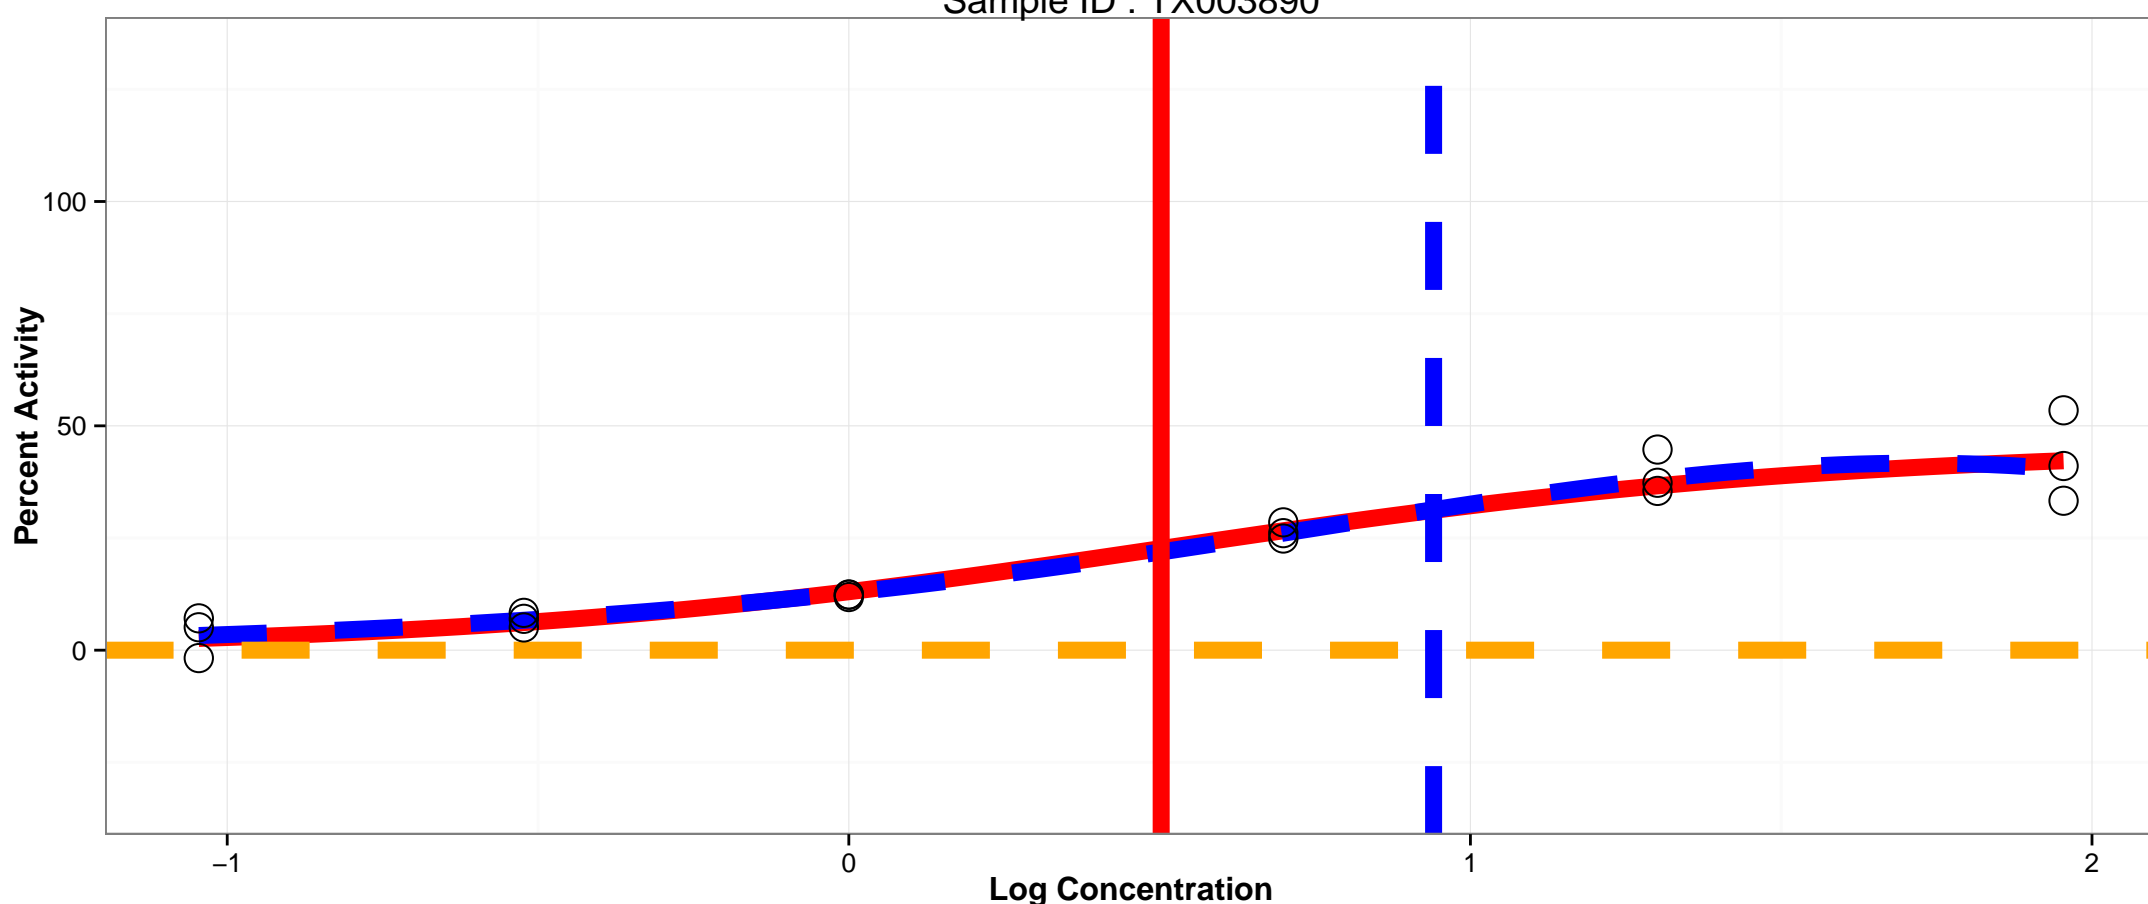

HILL MODEL

|     | tp   | ga    | gw    |
|-----|------|-------|-------|
| val | 45.3 | 0.503 | 0.784 |
| sd  | 4.29 | 0.143 | 0.124 |

GAIN-LOSS MODEL

|     | tp   | ga    | gw    | la    | lw   |
|-----|------|-------|-------|-------|------|
| val | 64.2 | 0.941 | 0.639 | 2.44  | 1.07 |
| sd  | 53.1 | 0.898 | 0.166 | 0.539 | 2.37 |

|      | CNST   | HILL   | GNLS   |
|------|--------|--------|--------|
| AIC  | 173.54 | 109.03 | 111.48 |
| PROB | 0      | 0.77   | 0.23   |
| RMSE | 26.97  | 4.32   | 4.29   |

MAX\_MEAN : 42.6 MAX\_MED : 41.1 BMAD : 5.69  
COFF : 20 HIT-CALL : 1 FITC : 42 ACTP : 1  
FLAGS :

Assay ID 1509 (NHEERL\_HEK293T\_CellTiterGLO)  
Sample ID : TX003890

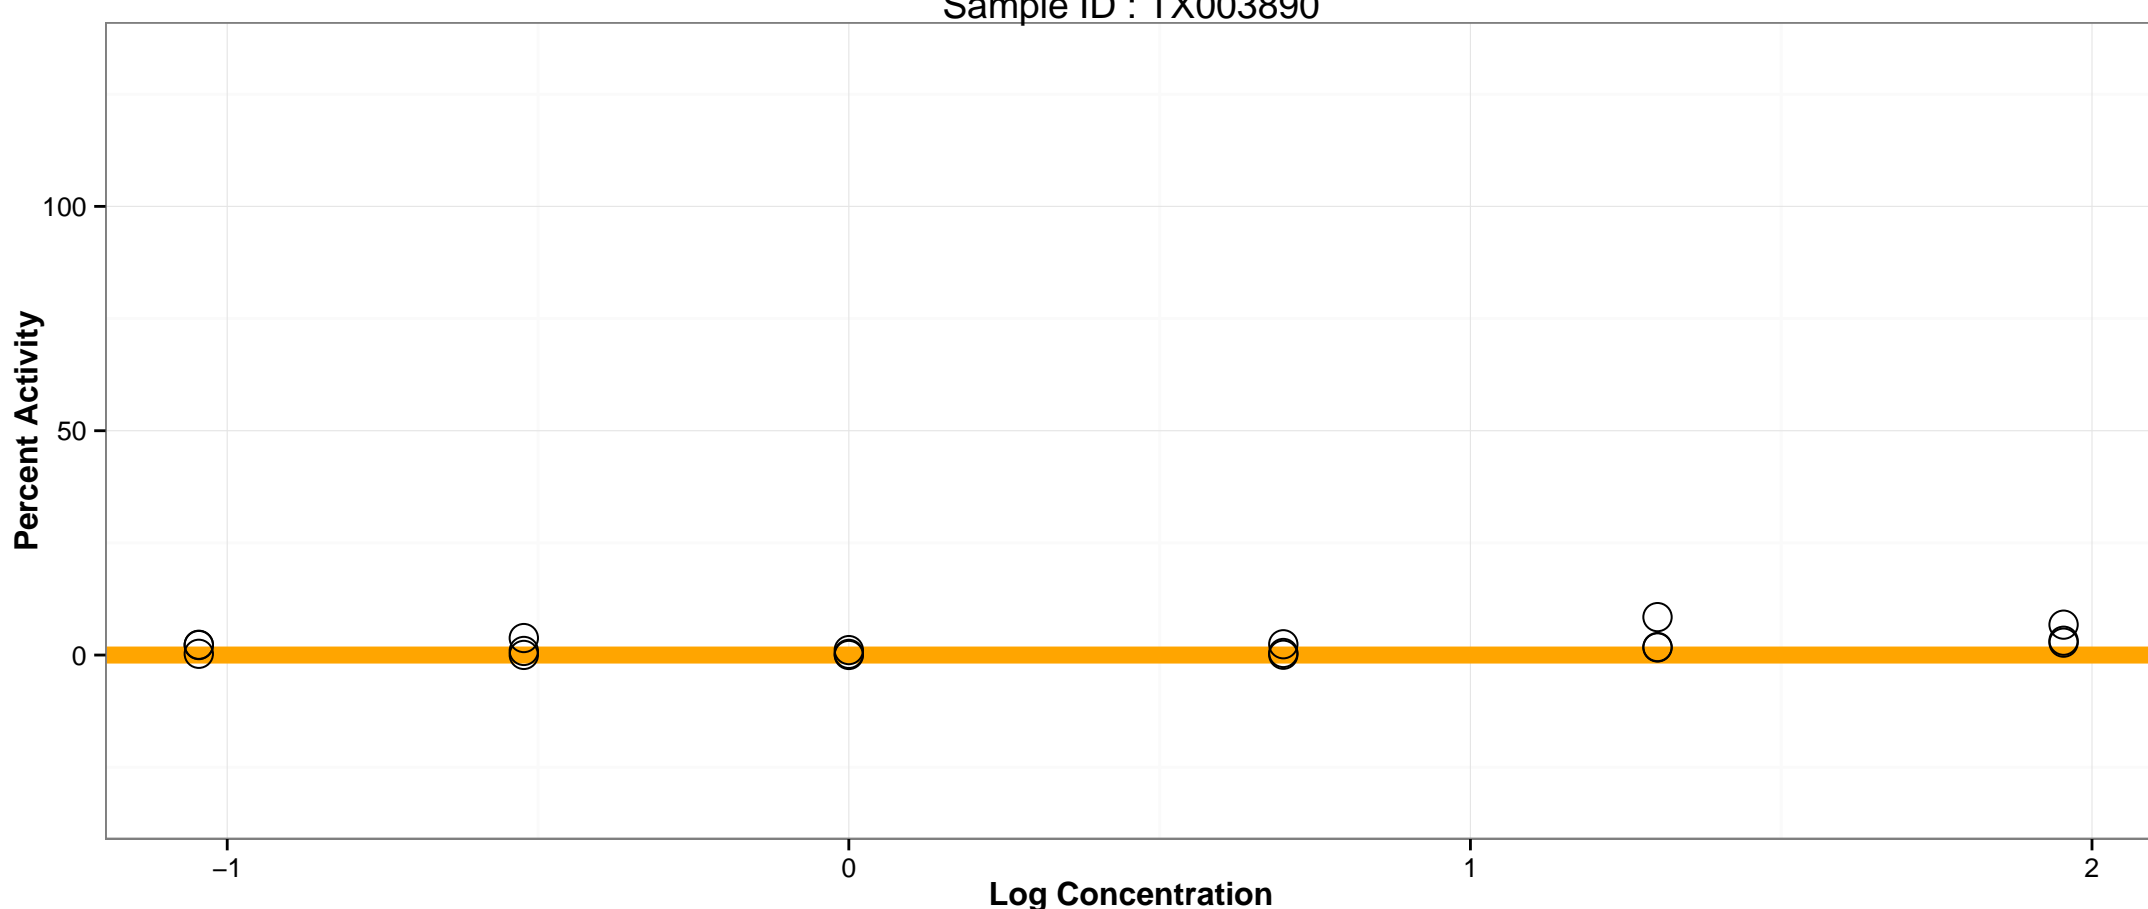

HILL MODEL

HILL MODEL: Not applicable

GAIN-LOSS MODEL

GNLS MODEL: Not applicable

|      | CNST  | HILL | GNLS |
|------|-------|------|------|
| AIC  | 91.93 | NA   | NA   |
| PROB | 1     | NA   | NA   |
| RMSE | 3.12  | NA   | NA   |

MAX\_MEAN : 4.26 MAX\_MED : 3.21 BMAD : 5.54  
COFF : 20 HIT-CALL : 0 FITC : 4 ACTP : 0  
FLAGS :

Assay ID 1848 (NHEERL\_Quantilum\_inhib\_2\_dn)  
Sample ID : TX003890

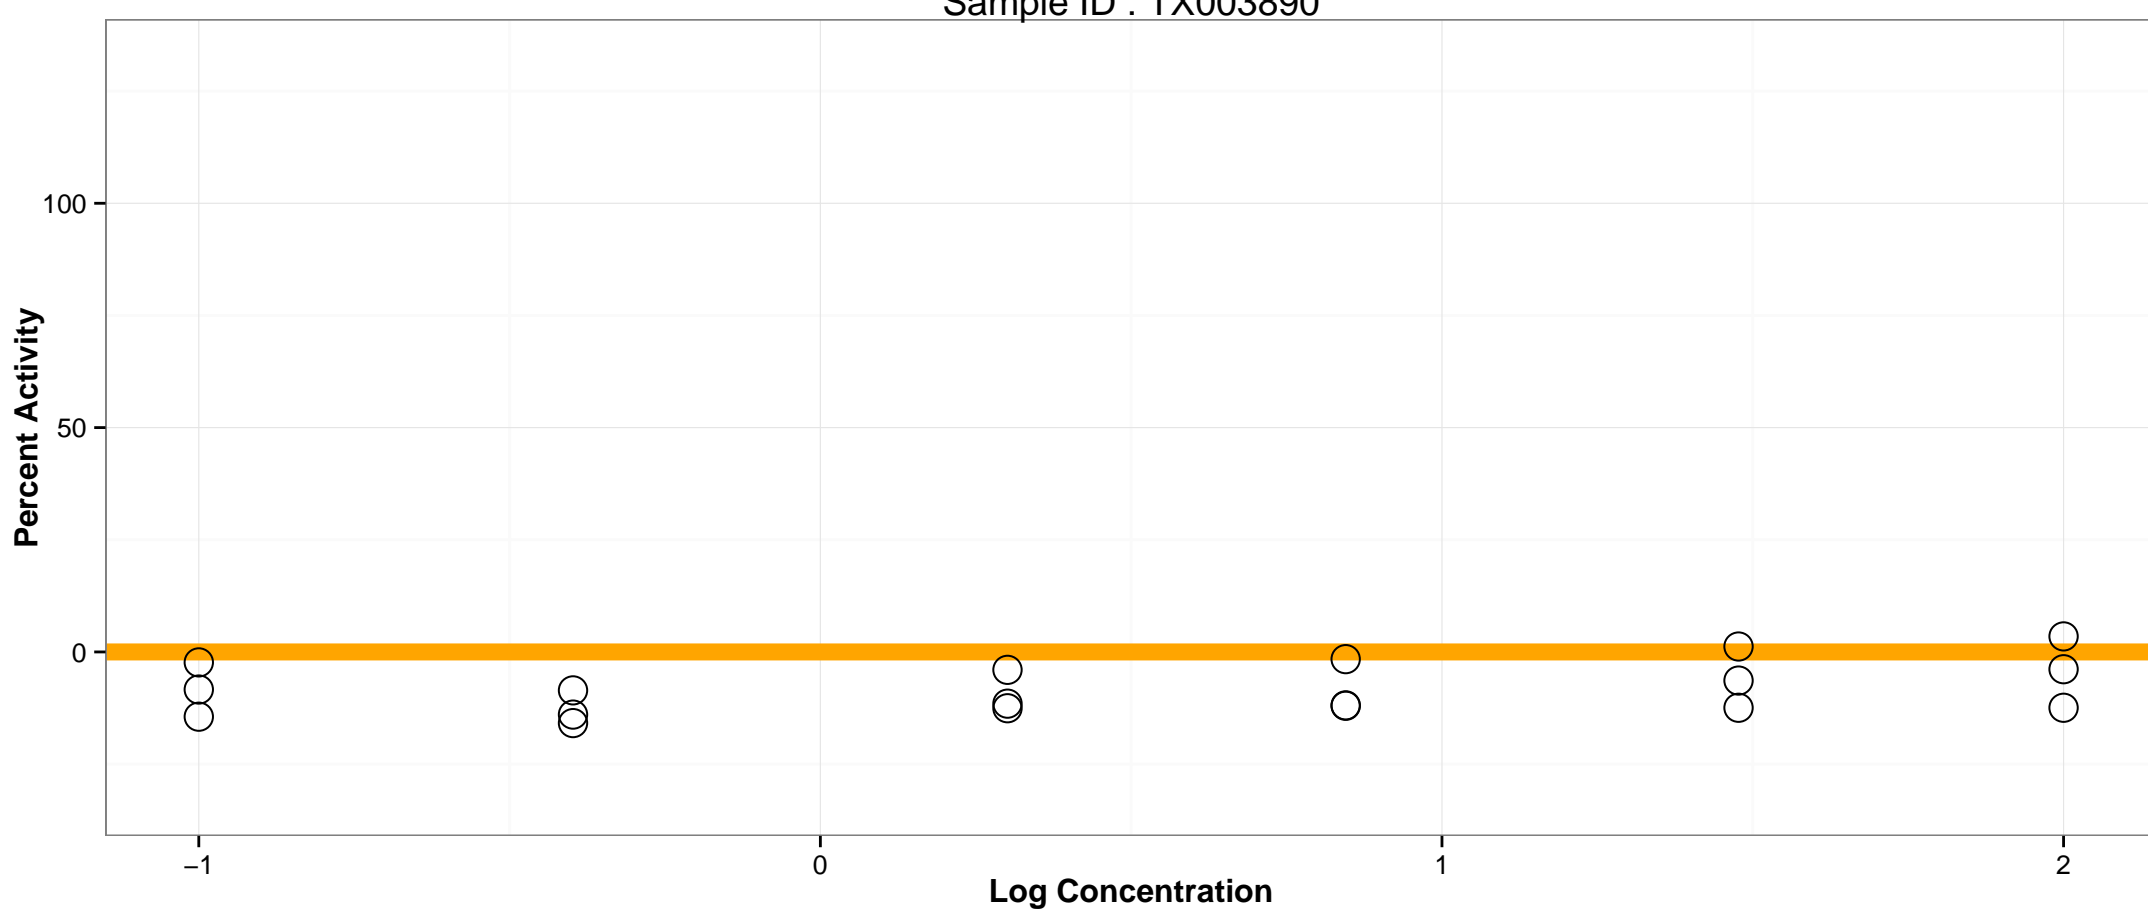

HILL MODEL

HILL MODEL: Not applicable

GAIN-LOSS MODEL

GNLS MODEL: Not applicable

|      | CNST   | HILL | GNLS |
|------|--------|------|------|
| AIC  | 138.71 | NA   | NA   |
| PROB | 1      | NA   | NA   |
| RMSE | 9.93   | NA   | NA   |

MAX\_MEAN : -4.26 MAX\_MED : -3.84 BMAD : 8.58  
COFF : 20 HIT-CALL : 0 FITC : 4 ACTP : 0  
FLAGS :

Assay ID 1824 (NHEERL\_TPO\_GUA\_dn)  
Sample ID : TP0001442D05

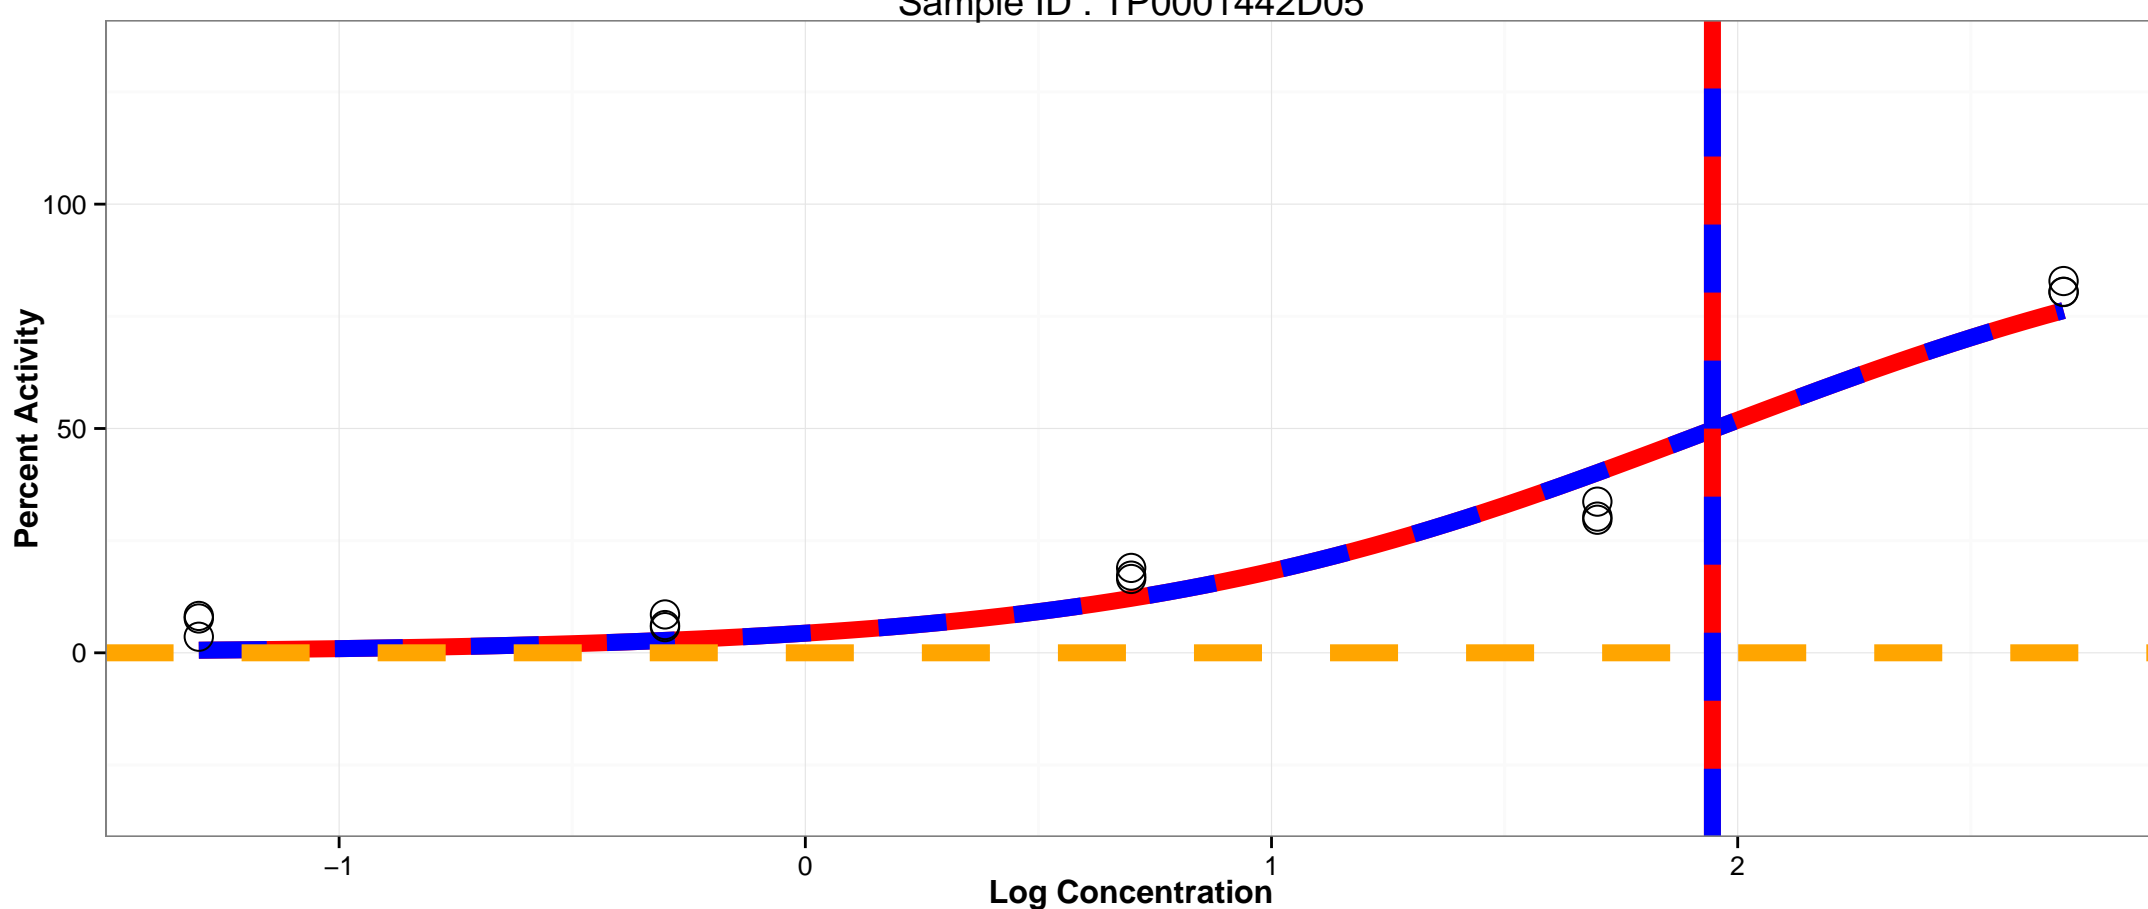

HILL MODEL

|     | tp   | ga    | gw    |
|-----|------|-------|-------|
| val | 99.5 | 1.95  | 0.687 |
| sd  | 15.1 | 0.233 | 0.178 |

GAIN-LOSS MODEL

|     | tp   | ga   | gw    | la  | lw   |
|-----|------|------|-------|-----|------|
| val | 99.5 | 1.95 | 0.687 | 4.7 | 7.42 |
| sd  | NA   | NA   | NA    | NA  | NA   |

|      | CNST  | HILL   | GNLS   |
|------|-------|--------|--------|
| AIC  | 154.3 | 108.35 | 112.35 |
| PROB | 0     | 0.88   | 0.12   |
| RMSE | 39.97 | 6.26   | 6.26   |

MAX\_MEAN : 81.3 MAX\_MED : 80.5 BMAD : 3.71  
COFF : 20 HIT-CALL : 1 FITC : 42 ACTP : 1  
FLAGS :

Assay ID 1508 (NHEERL\_TPO\_AUR\_dn)  
Sample ID : TX006132

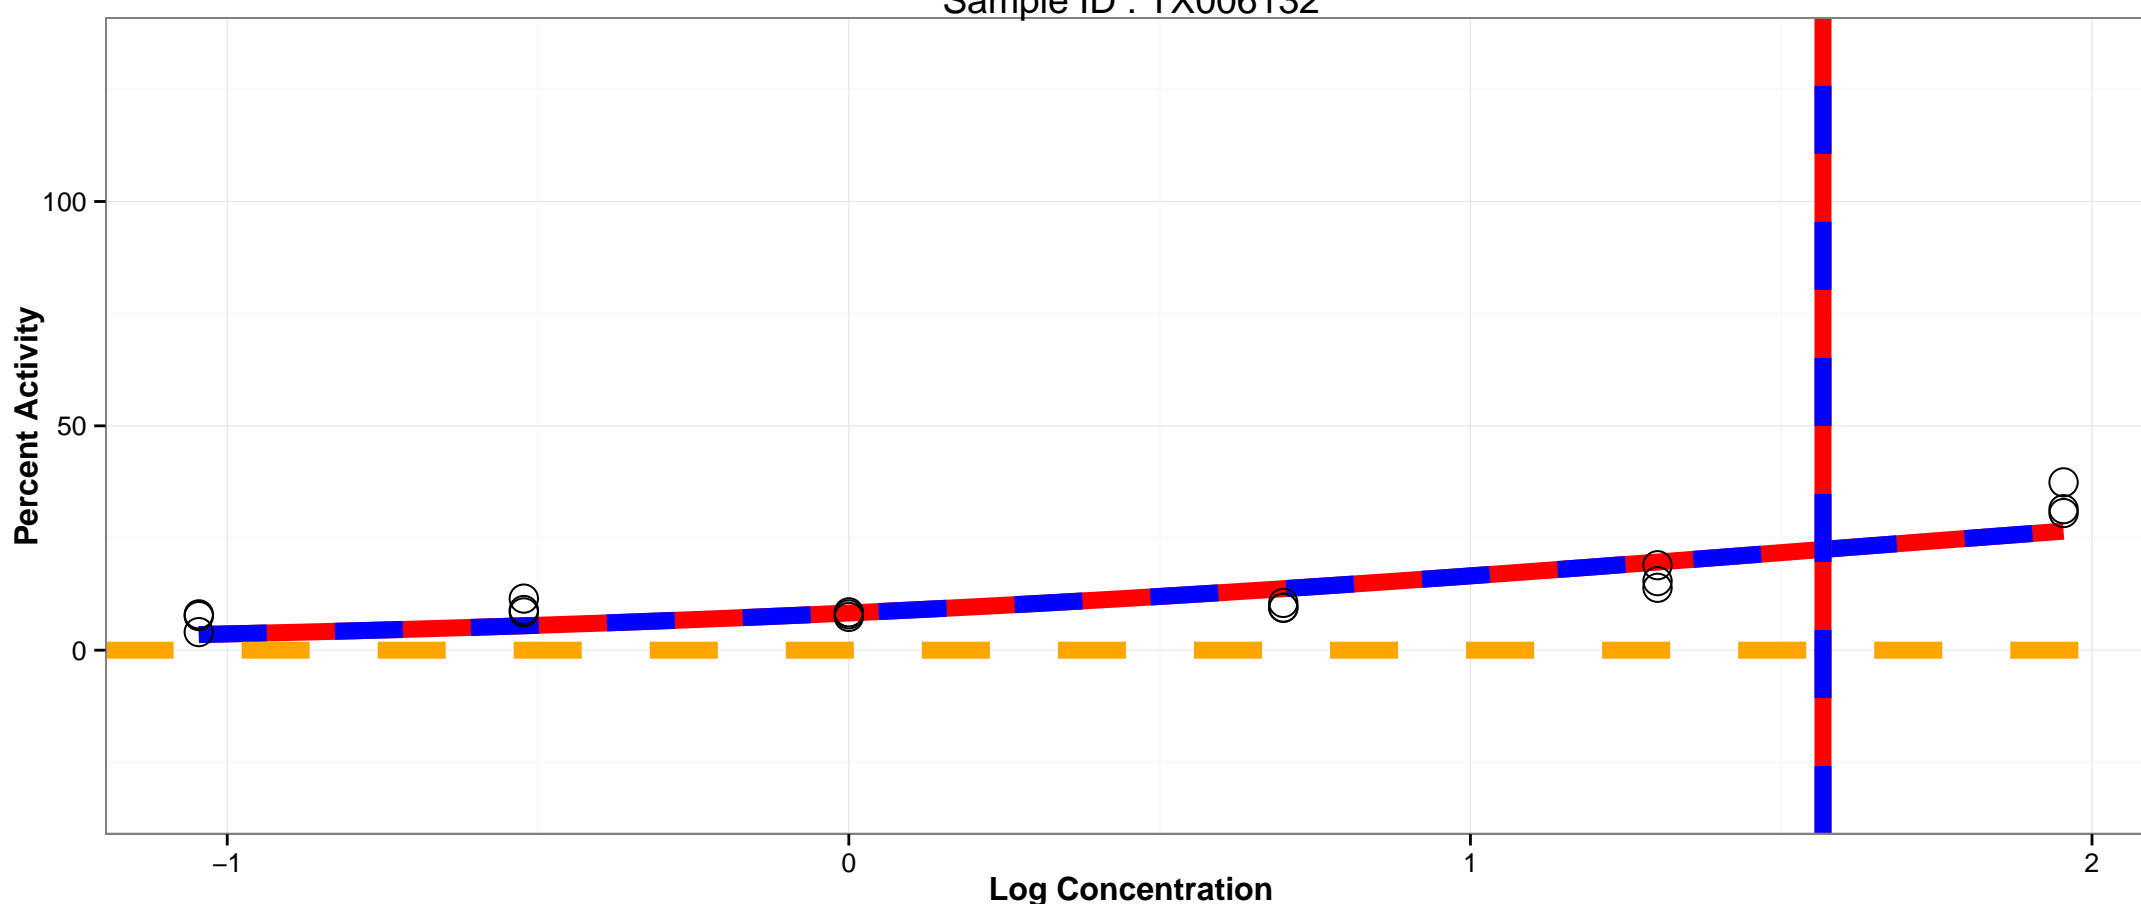

HILL MODEL

|     | tp   | ga    | gw     |
|-----|------|-------|--------|
| val | 44.9 | 1.57  | 0.412  |
| sd  | 14.3 | 0.581 | 0.0962 |

GAIN-LOSS MODEL

|     | tp   | ga    | gw     | la   | lw   |
|-----|------|-------|--------|------|------|
| val | 44.9 | 1.57  | 0.412  | 3.87 | 4.8  |
| sd  | 14.3 | 0.581 | 0.0962 | 2510 | 6270 |

|      | CNST   | HILL   | GNLS   |
|------|--------|--------|--------|
| AIC  | 155.21 | 114.13 | 118.13 |
| PROB | 0      | 0.88   | 0.12   |
| RMSE | 16.69  | 4.43   | 4.43   |

MAX\_MEAN : 33.1 MAX\_MED : 31.4 BMAD : 5.69  
COFF : 20 HIT-CALL : 1 FITC : 42 ACTP : 1  
FLAGS : 6

Assay ID 1509 (NHEERL\_HEK293T\_CellTiterGLO)  
Sample ID : TX006132

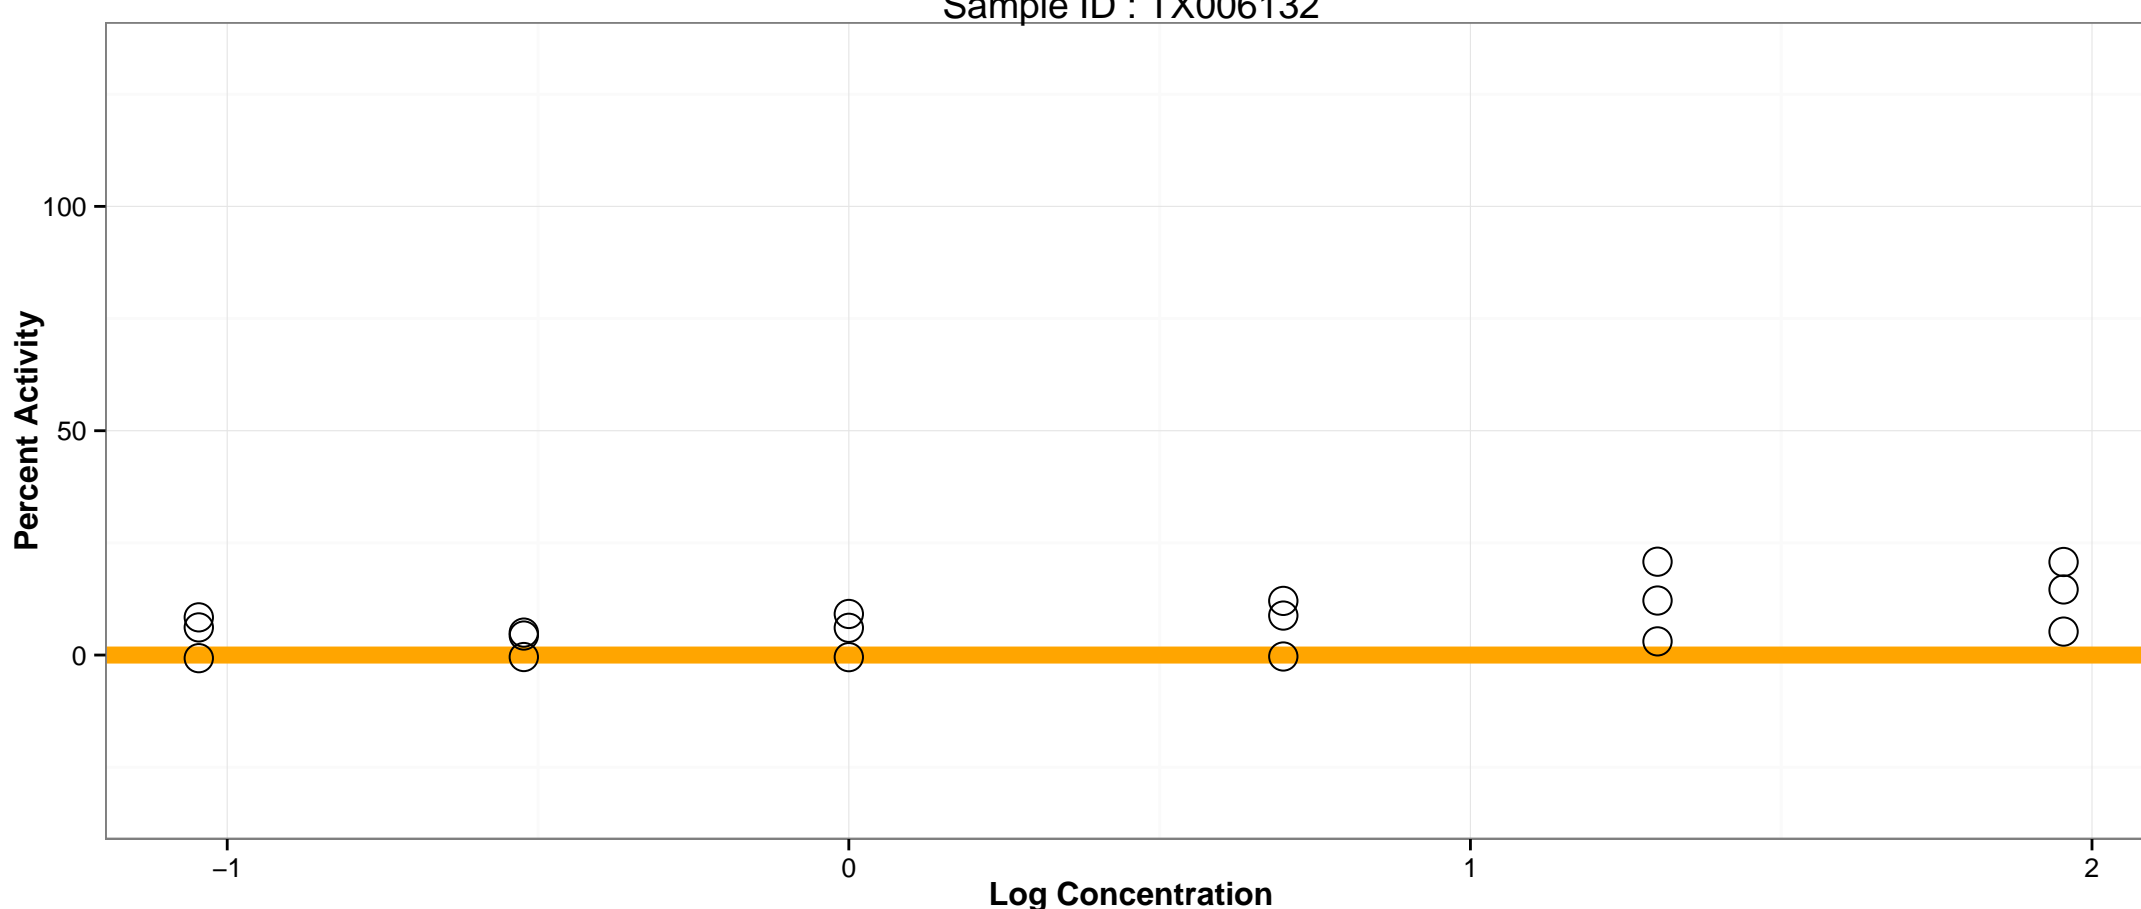

HILL MODEL

HILL MODEL: Not applicable

GAIN-LOSS MODEL

GNLS MODEL: Not applicable

|      | CNST  | HILL | GNLS |
|------|-------|------|------|
| AIC  | 136.5 | NA   | NA   |
| PROB | 1     | NA   | NA   |
| RMSE | 9.89  | NA   | NA   |

MAX\_MEAN : 13.5 MAX\_MED : 14.6 BMAD : 5.54  
COFF : 20 HIT-CALL : 0 FITC : 4 ACTP : 0  
FLAGS :

Assay ID 1848 (NHEERL\_Quantilum\_inhib\_2\_dn)  
Sample ID : TX006132

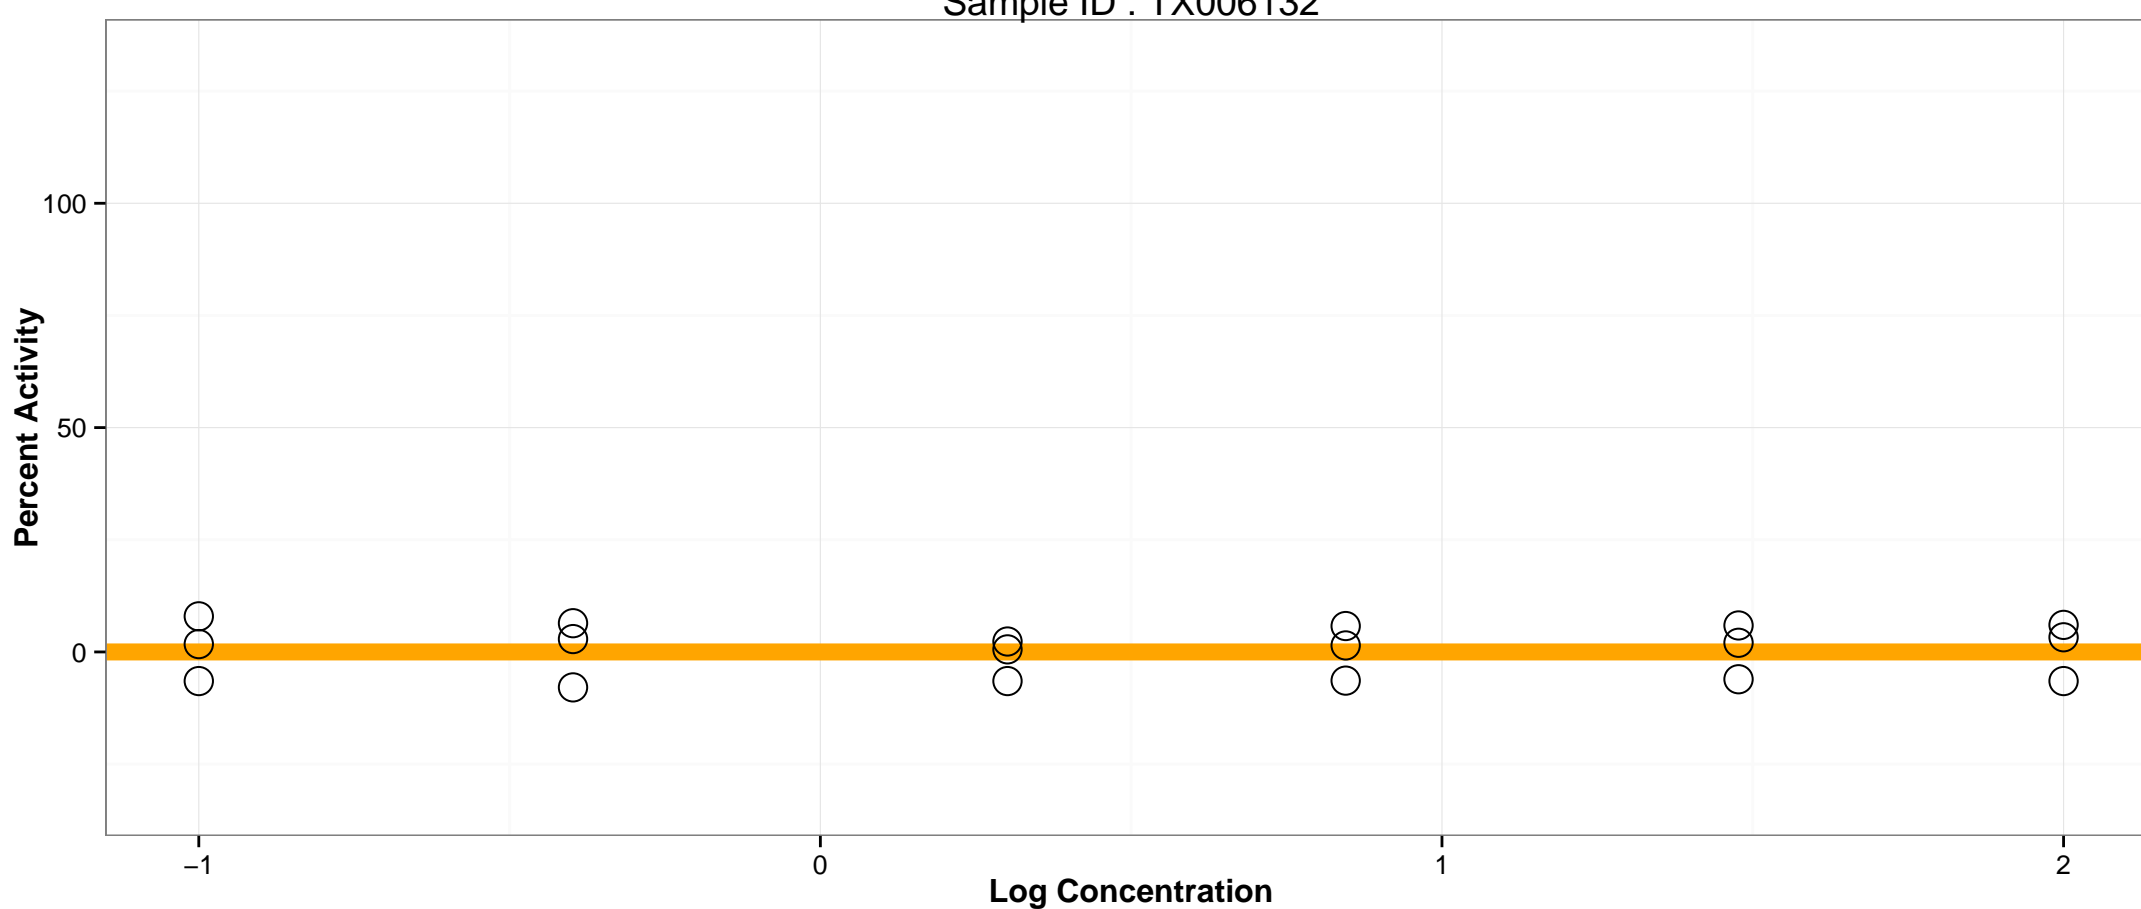

HILL MODEL

HILL MODEL: Not applicable

GAIN-LOSS MODEL

GNLS MODEL: Not applicable

|      | CNST   | HILL | GNLS |
|------|--------|------|------|
| AIC  | 116.54 | NA   | NA   |
| PROB | 1      | NA   | NA   |
| RMSE | 5.32   | NA   | NA   |

MAX\_MEAN : 1.08 MAX\_MED : 3.28 BMAD : 8.58  
COFF : 20 HIT-CALL : 0 FITC : 4 ACTP : 0  
FLAGS :

Assay ID 1824 (NHEERL\_TPO\_GUA\_dn)  
Sample ID : TP0001442D07

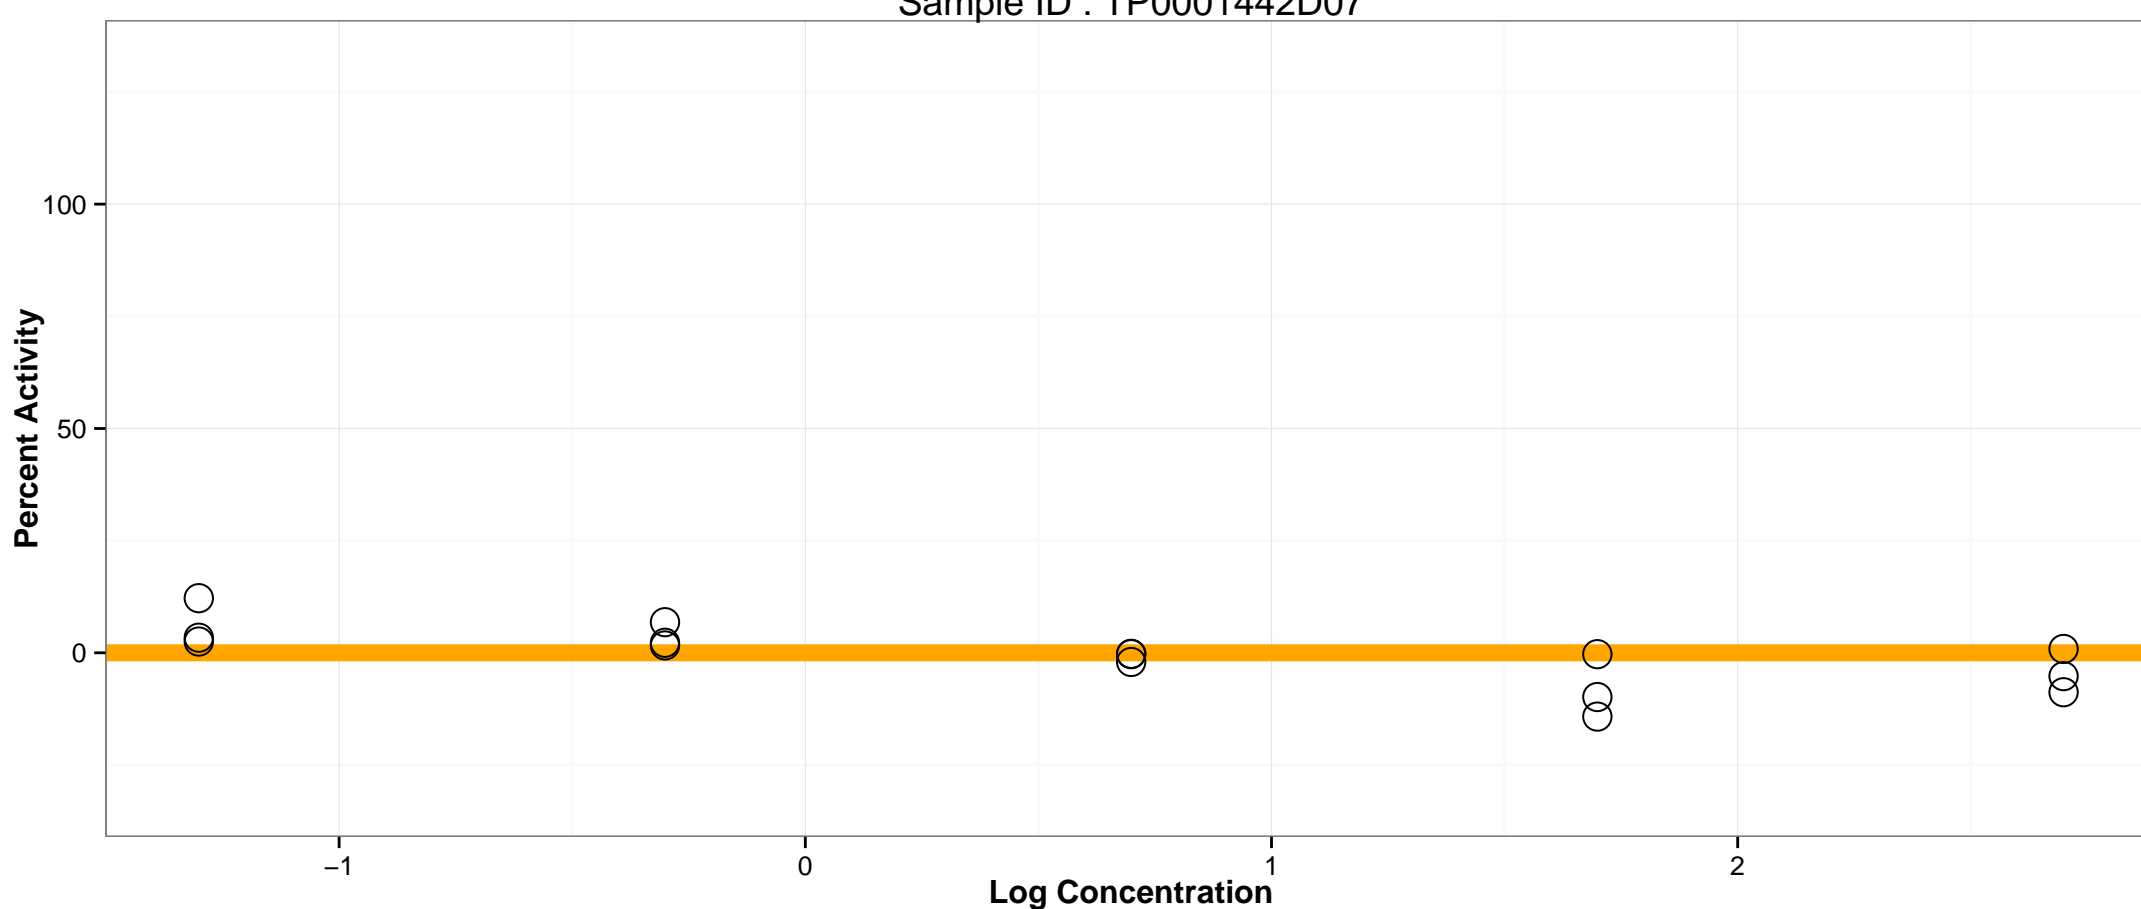

HILL MODEL

HILL MODEL: Not applicable

GAIN-LOSS MODEL

GNLS MODEL: Not applicable

|      | CNST   | HILL | GNLS |
|------|--------|------|------|
| AIC  | 100.62 | NA   | NA   |
| PROB | 1      | NA   | NA   |
| RMSE | 6.47   | NA   | NA   |

MAX\_MEAN : 6.03 MAX\_MED : 3.38 BMAD : 3.71  
COFF : 20 HIT-CALL : 0 FITC : 4 ACTP : 0  
FLAGS :

Chemical : 2,6-Dimethylphenol  
CAS : 576-26-1

Assay ID 1508 (NHEERL\_TPO\_AUR\_dn)  
Sample ID : TX015600

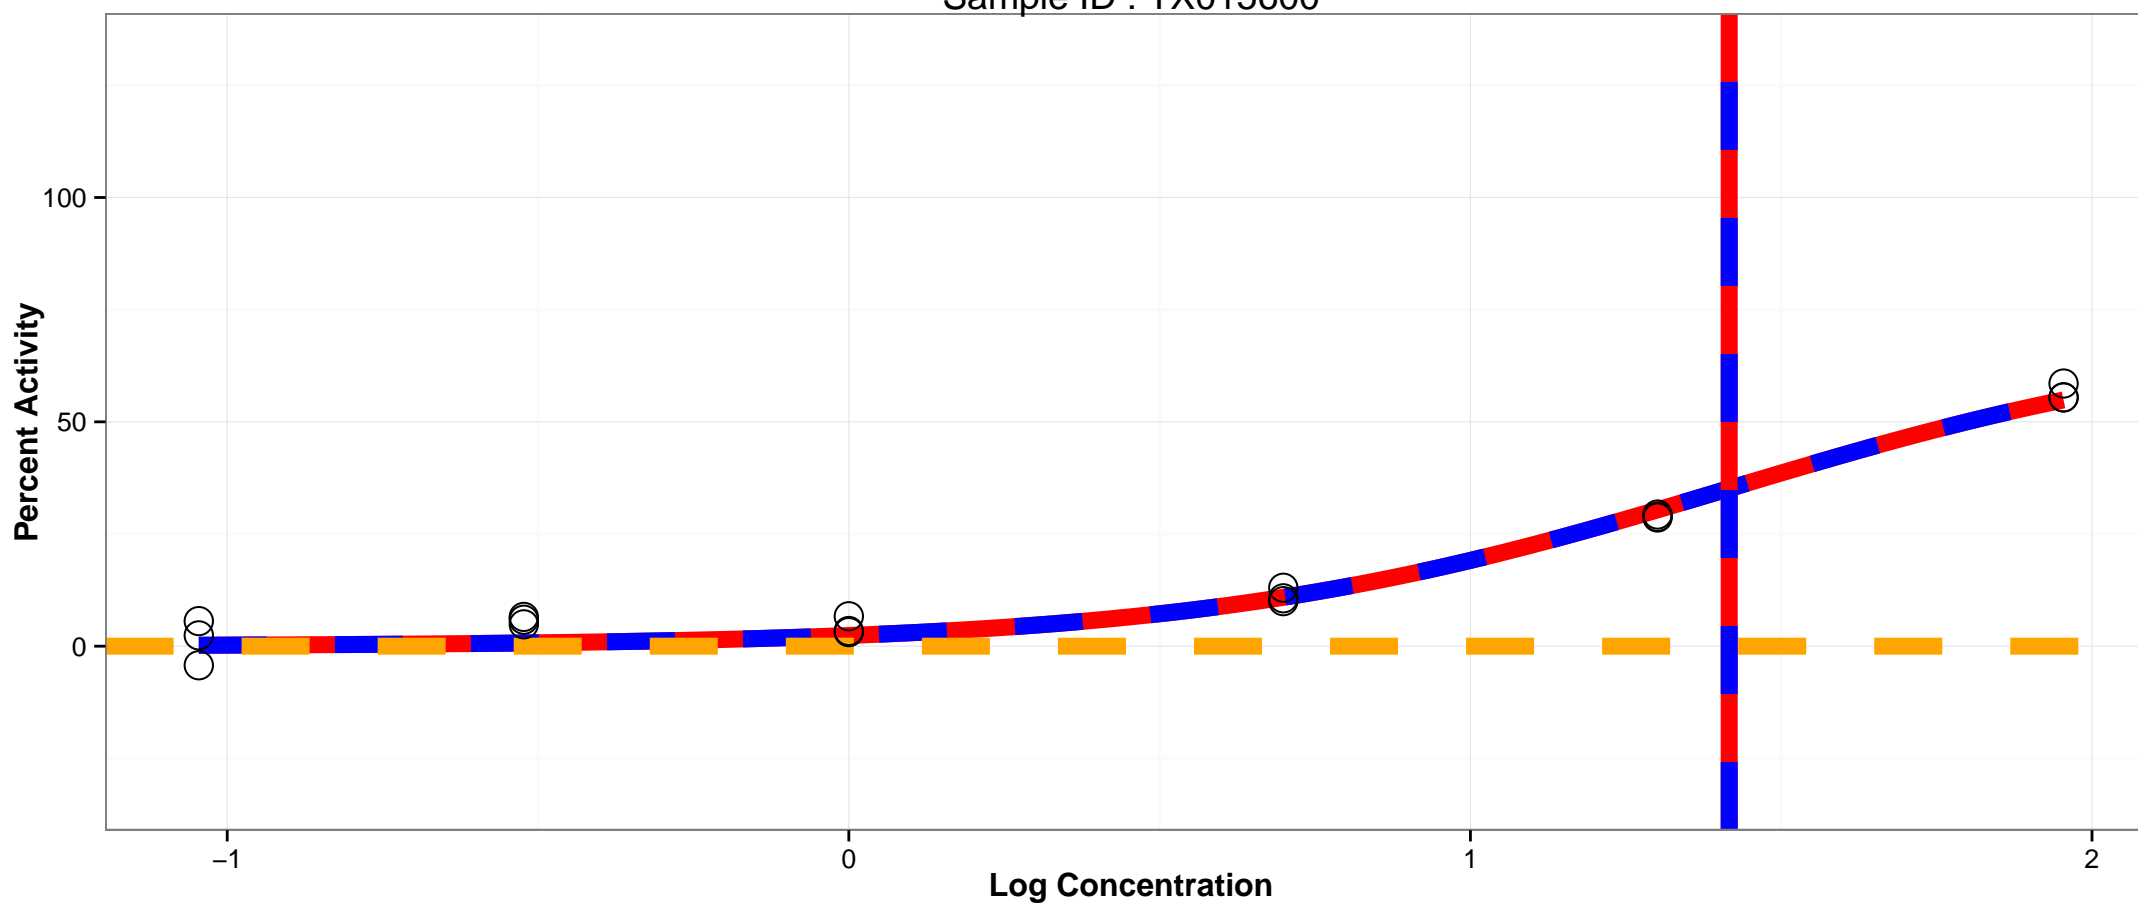

HILL MODEL

|     | tp   | ga   | gw    |
|-----|------|------|-------|
| val | 70.3 | 1.42 | 1.03  |
| sd  | 7.23 | 0.11 | 0.141 |

GAIN-LOSS MODEL

|     | tp   | ga   | gw    | la   | lw    |
|-----|------|------|-------|------|-------|
| val | 70.3 | 1.42 | 1.03  | 2.76 | 12    |
| sd  | 7.23 | 0.11 | 0.141 | 1150 | 17200 |

|      | CNST   | HILL | GNLS |
|------|--------|------|------|
| AIC  | 169.71 | 102  | 106  |
| PROB | 0      | 0.88 | 0.12 |
| RMSE | 26.57  | 3.14 | 3.14 |

MAX\_MEAN : 56.5 MAX\_MED : 55.5 BMAD : 5.69  
COFF : 20 HIT-CALL : 1 FITC : 42 ACTP : 1  
FLAGS :

Assay ID 1509 (NHEERL\_HEK293T\_CellTiterGLO)  
Sample ID : TX015600

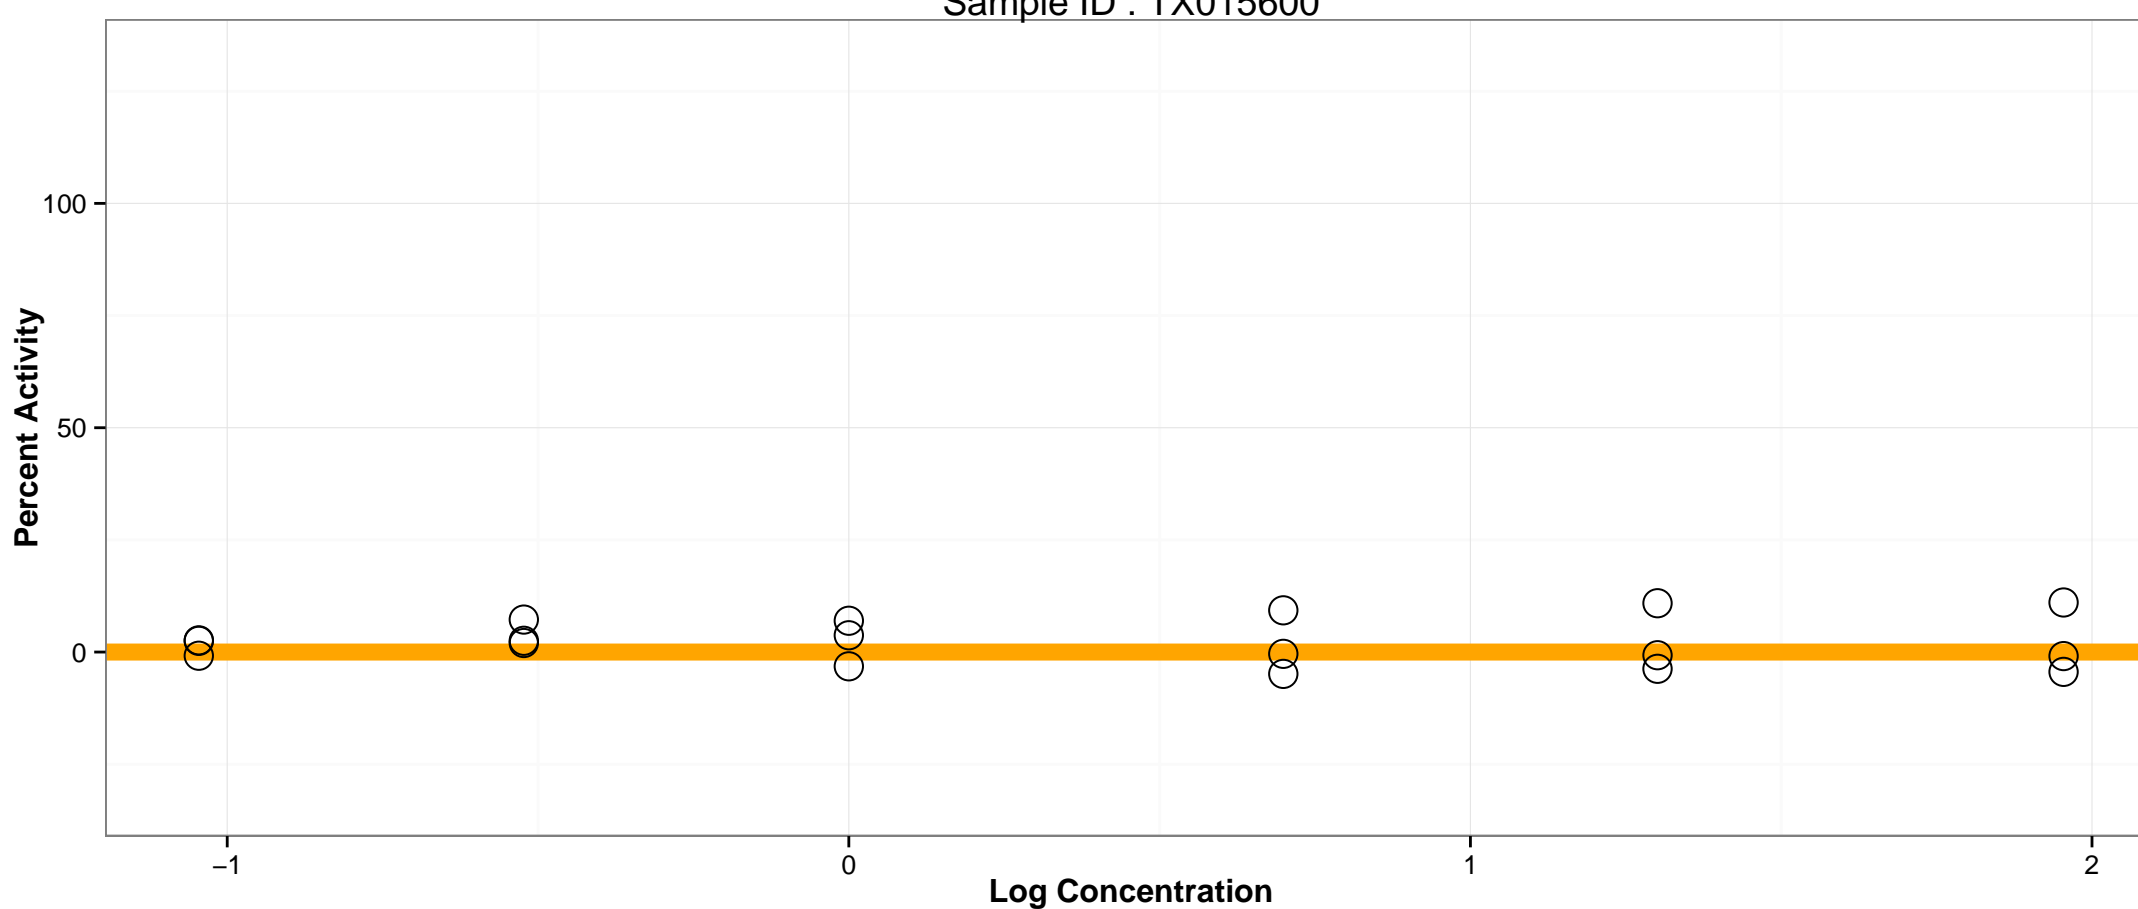

HILL MODEL

HILL MODEL: Not applicable

GAIN-LOSS MODEL

GNLS MODEL: Not applicable

|      | CNST   | HILL | GNLS |
|------|--------|------|------|
| AIC  | 115.14 | NA   | NA   |
| PROB | 1      | NA   | NA   |
| RMSE | 5.46   | NA   | NA   |

MAX\_MEAN : 3.94 MAX\_MED : 3.76 BMAD : 5.54  
COFF : 20 HIT-CALL : 0 FITC : 4 ACTP : 0  
FLAGS :

Assay ID 1848 (NHEERL\_Quantilum\_inhib\_2\_dn)  
Sample ID : TX015600

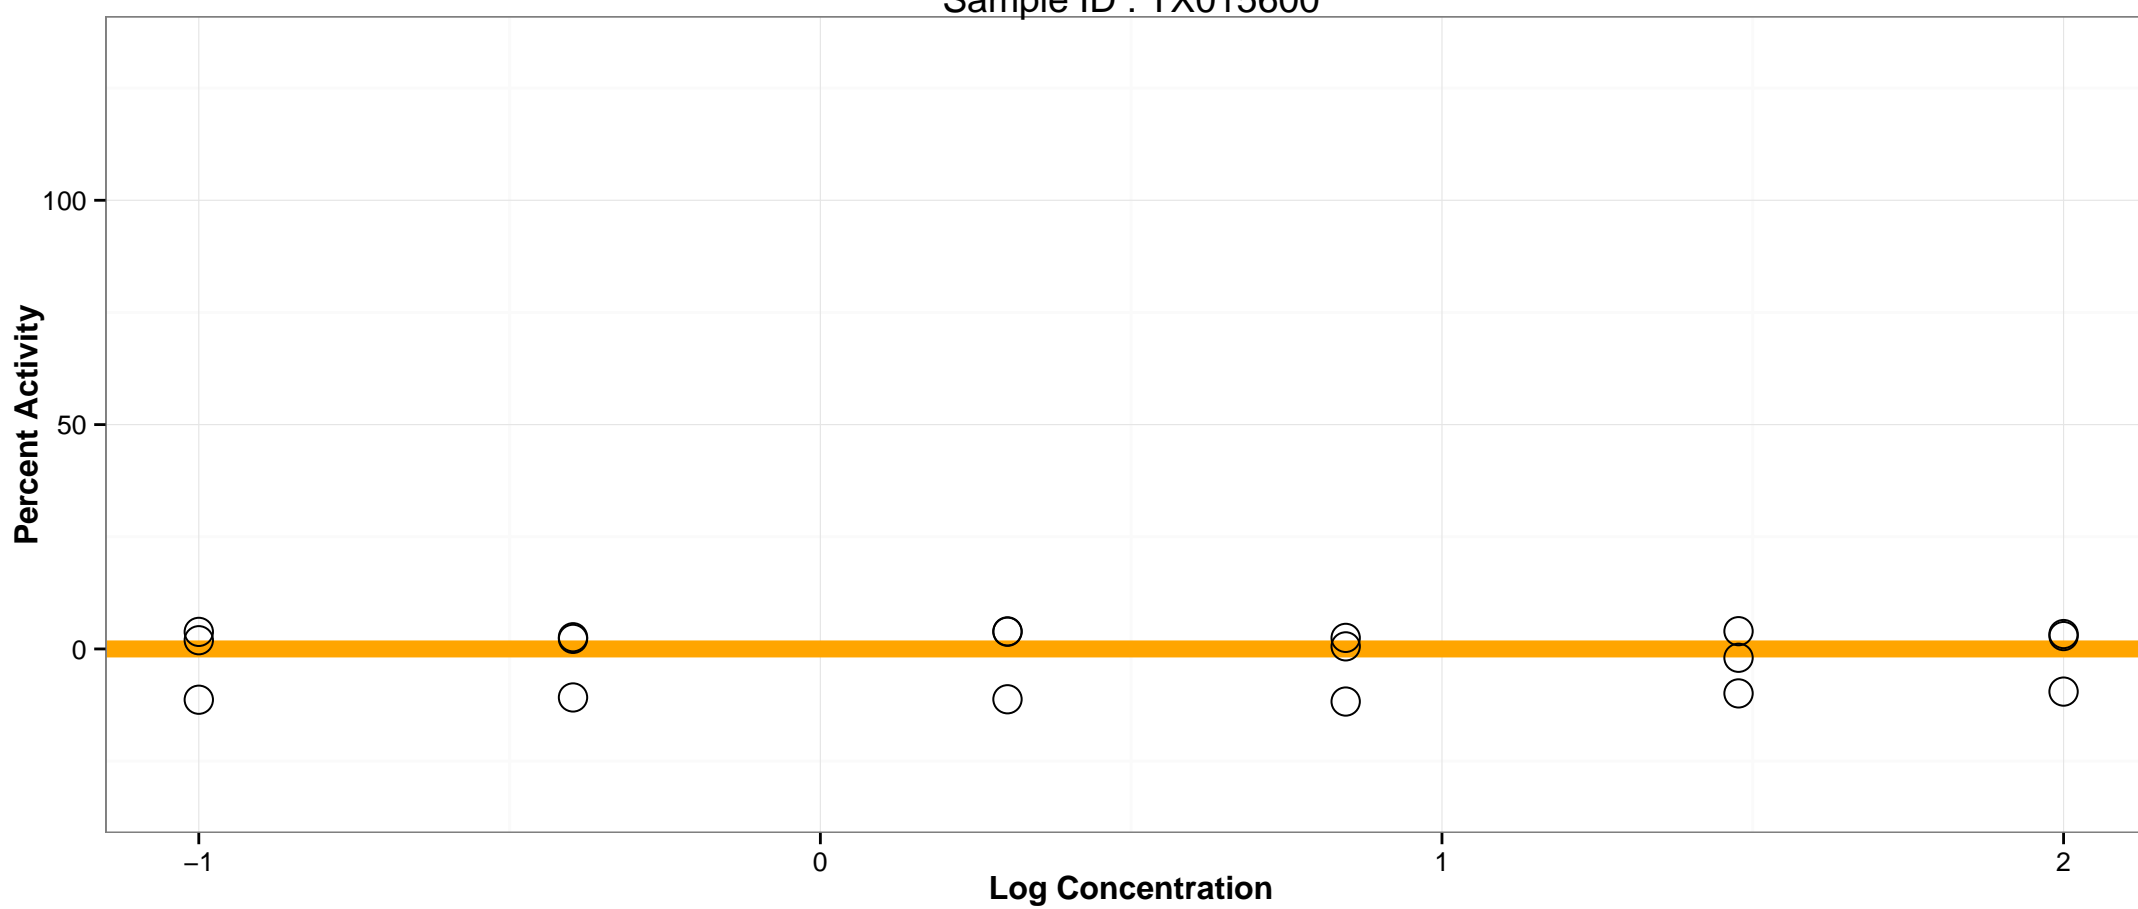

HILL MODEL

HILL MODEL: Not applicable

GAIN-LOSS MODEL

GNLS MODEL: Not applicable

|      | CNST   | HILL | GNLS |
|------|--------|------|------|
| AIC  | 122.93 | NA   | NA   |
| PROB | 1      | NA   | NA   |
| RMSE | 6.67   | NA   | NA   |

MAX\_MEAN : -1.09 MAX\_MED : 3.85 BMAD : 8.58  
COFF : 20 HIT-CALL : 0 FITC : 4 ACTP : 0  
FLAGS :

Assay ID 1824 (NHEERL\_TPO\_GUA\_dn)  
Sample ID : TP0001442E01

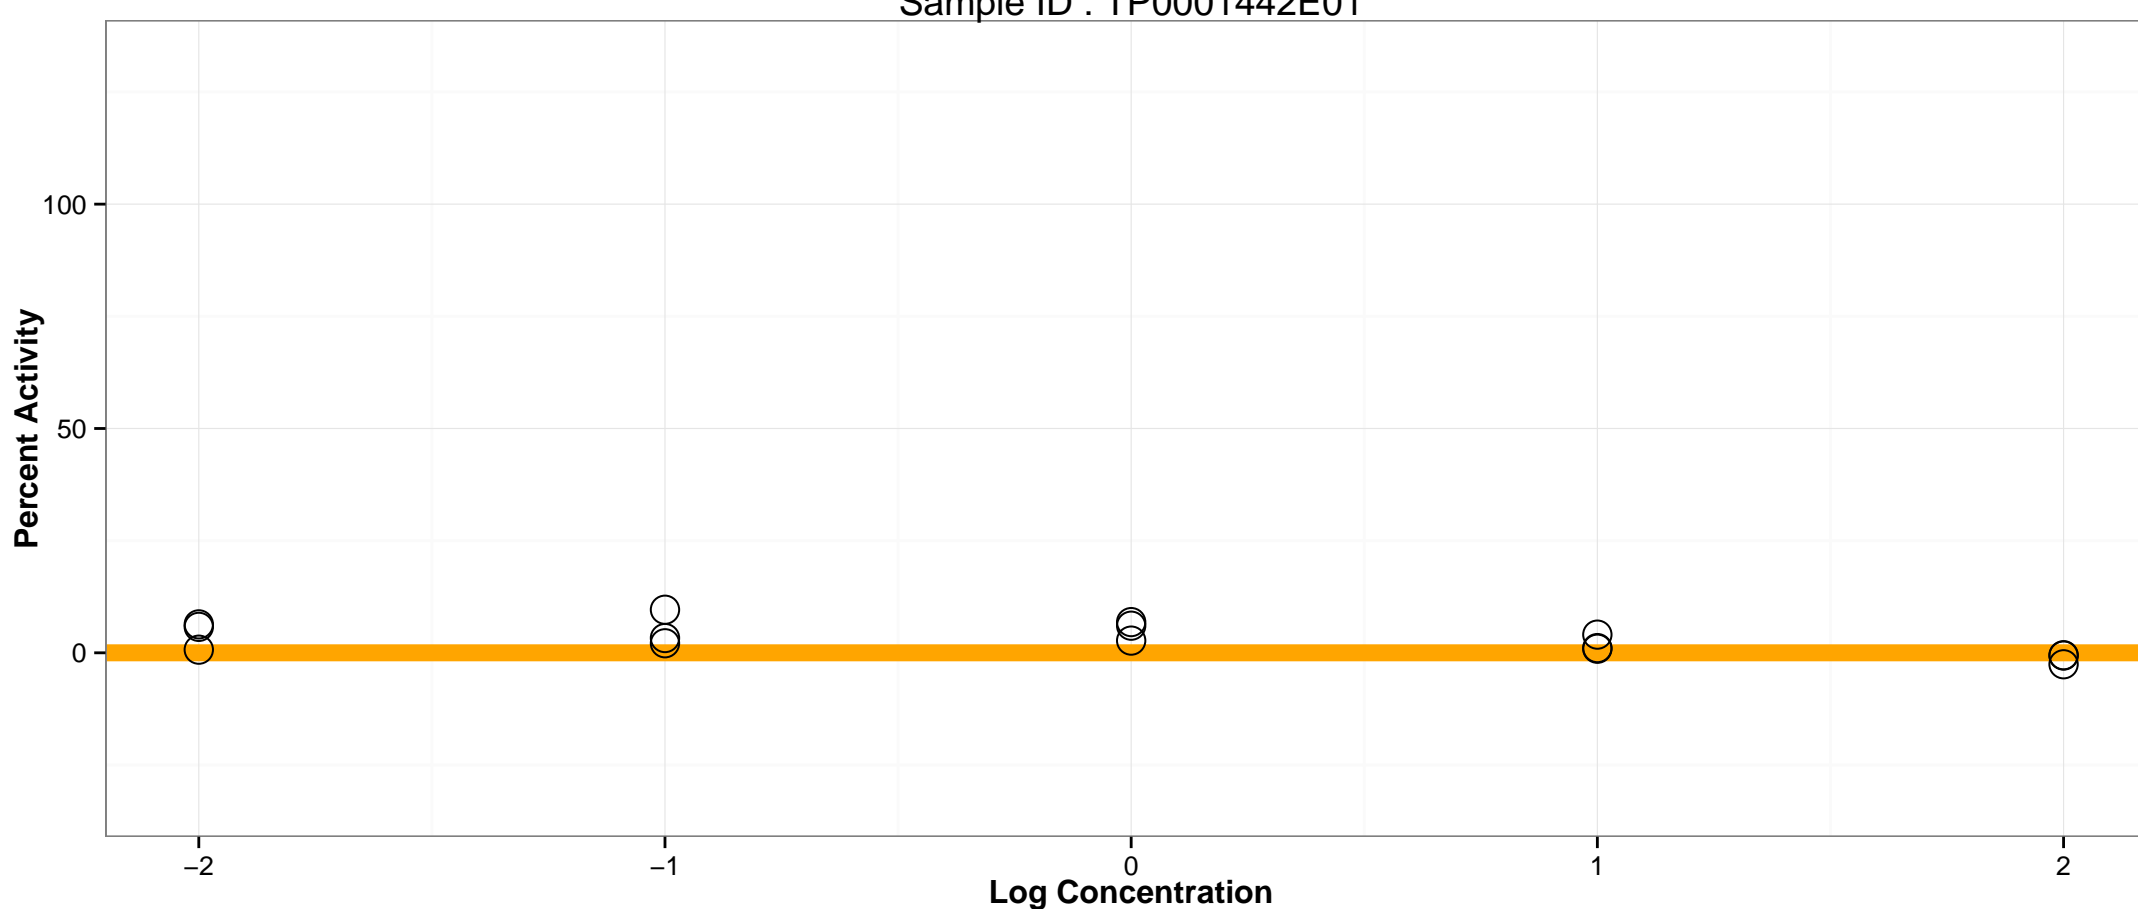

HILL MODEL

HILL MODEL: Not applicable

GAIN-LOSS MODEL

GNLS MODEL: Not applicable

|      | CNST  | HILL | GNLS |
|------|-------|------|------|
| AIC  | 90.55 | NA   | NA   |
| PROB | 1     | NA   | NA   |
| RMSE | 4.47  | NA   | NA   |

MAX\_MEAN : 5.22 MAX\_MED : 6.06 BMAD : 3.71  
COFF : 20 HIT-CALL : 0 FITC : 4 ACTP : 0  
FLAGS :

Chemical : Folic acid  
CAS : 59-30-3

Assay ID 1508 (NHEERL\_TPO\_AUR\_dn)  
Sample ID : TX003323

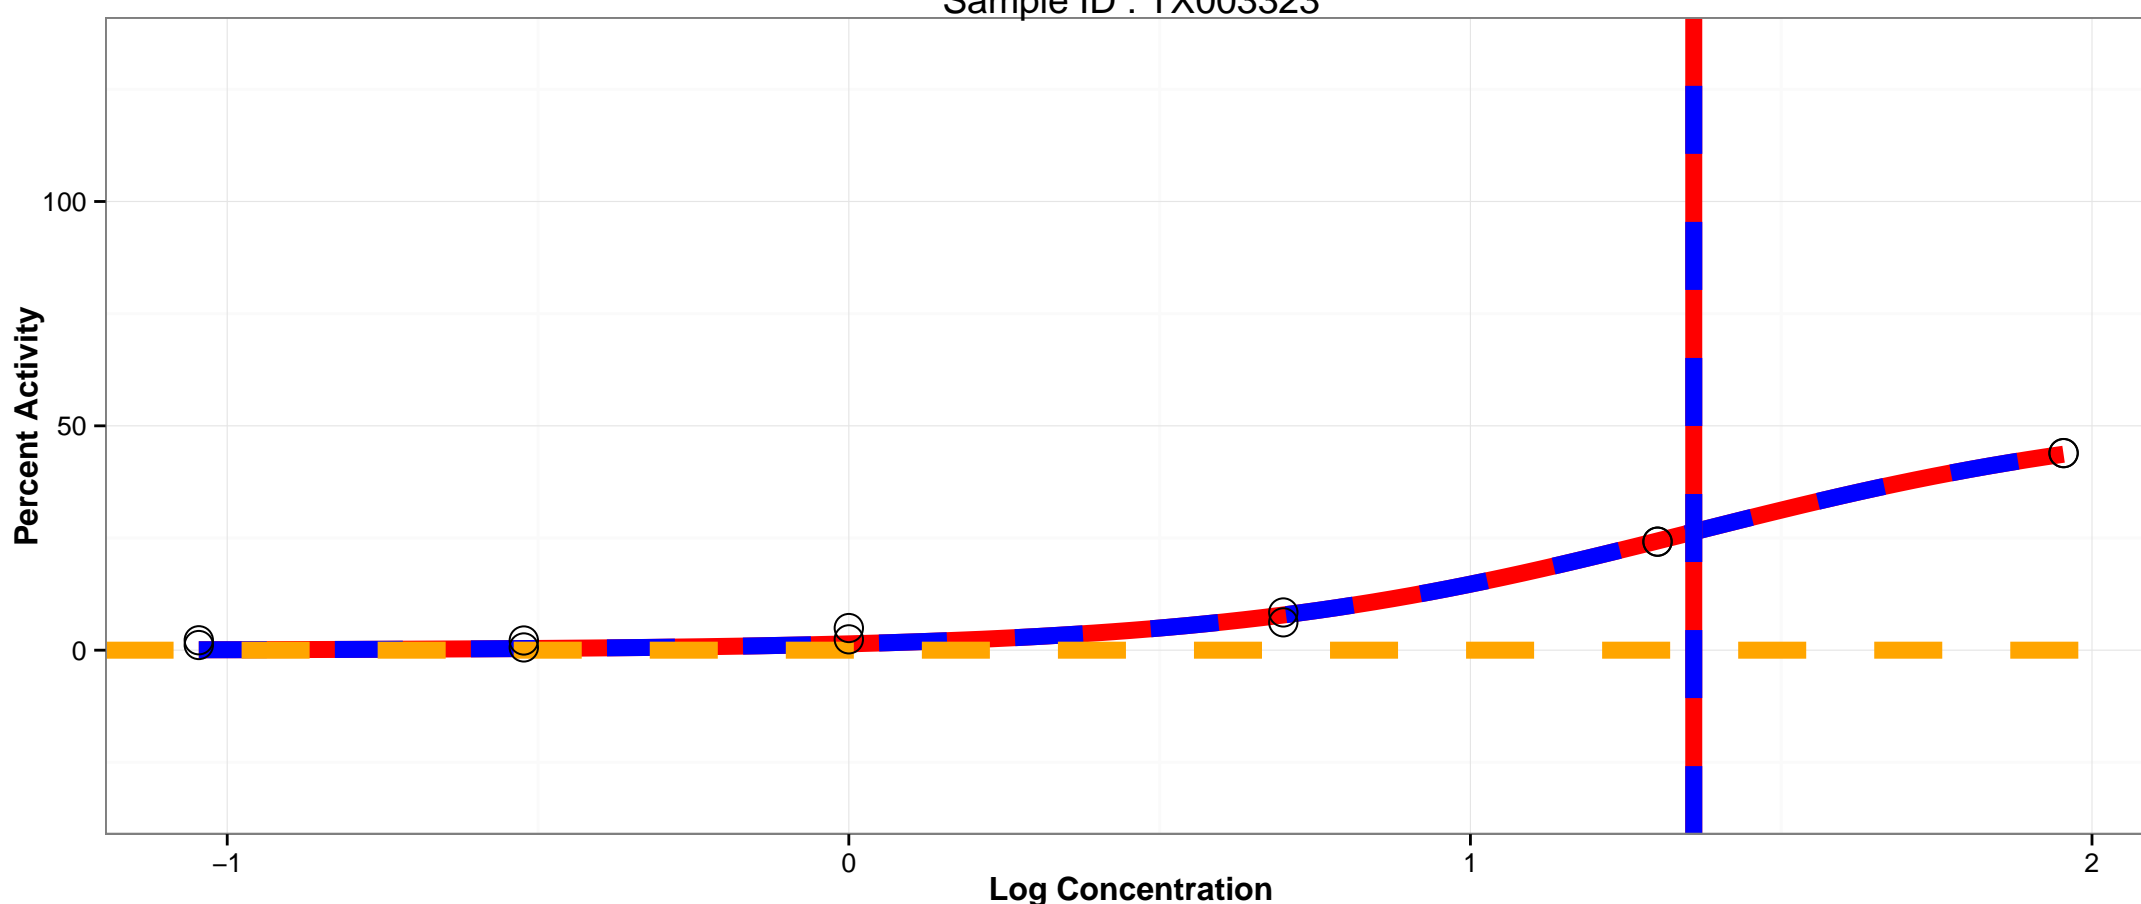

HILL MODEL

|     | tp   | ga     | gw   |
|-----|------|--------|------|
| val | 52.7 | 1.36   | 1.15 |
| sd  | 3.42 | 0.0633 | 0.14 |

GAIN-LOSS MODEL

|     | tp   | ga     | gw   | la   | lw    |
|-----|------|--------|------|------|-------|
| val | 52.7 | 1.36   | 1.15 | 2.82 | 12    |
| sd  | 3.42 | 0.0633 | 0.14 | 3180 | 43900 |

|      | CNST  | HILL  | GNLS  |
|------|-------|-------|-------|
| AIC  | 107.8 | 50.88 | 54.88 |
| PROB | 0     | 0.88  | 0.12  |
| RMSE | 20.78 | 1.46  | 1.46  |

MAX\_MEAN : 43.9 MAX\_MED : 43.9 BMAD : 5.69  
COFF : 20 HIT-CALL : 1 FITC : 42 ACTP : 1  
FLAGS :

Assay ID 1509 (NHEERL\_HEK293T\_CellTiterGLO)  
Sample ID : TX003323

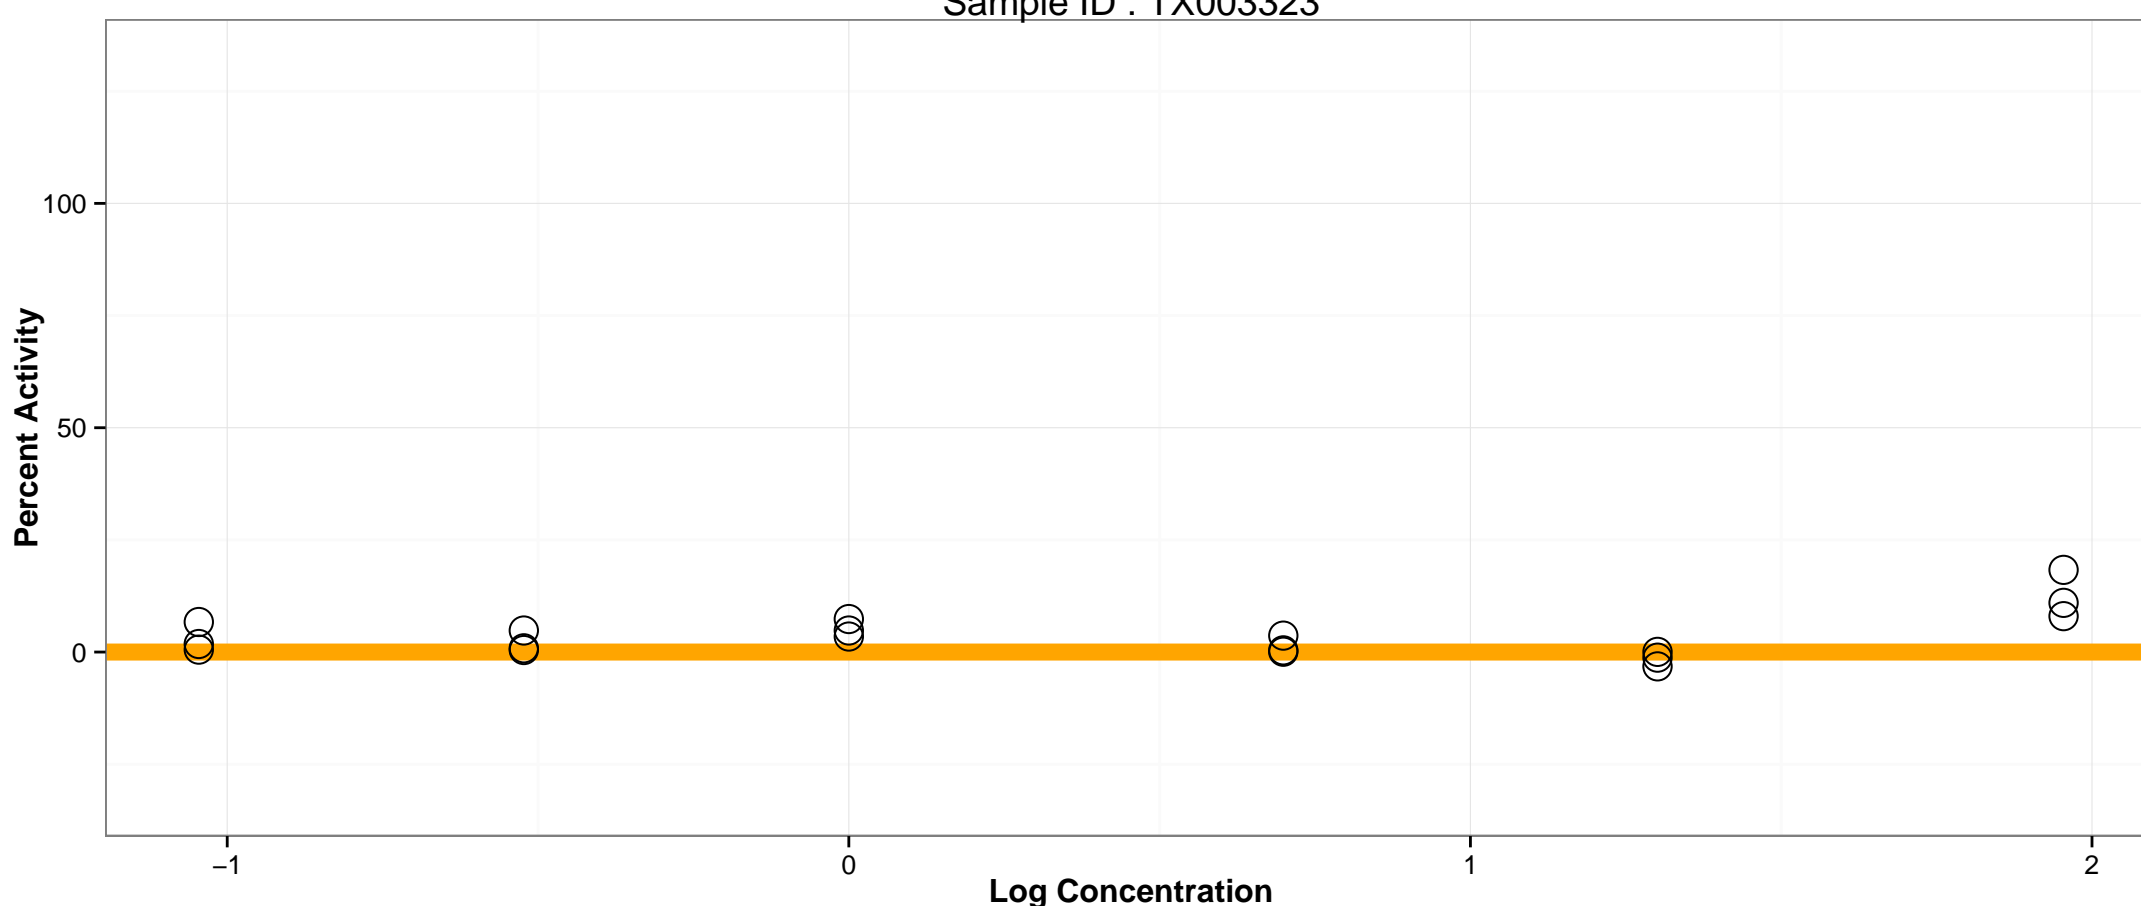

HILL MODEL

HILL MODEL: Not applicable

GAIN-LOSS MODEL

GNLS MODEL: Not applicable

|      | CNST   | HILL | GNLS |
|------|--------|------|------|
| AIC  | 116.83 | NA   | NA   |
| PROB | 1      | NA   | NA   |
| RMSE | 6.27   | NA   | NA   |

MAX\_MEAN : 12.4 MAX\_MED : 11 BMAD : 5.54  
COFF : 20 HIT-CALL : 0 FITC : 4 ACTP : 0  
FLAGS :

Assay ID 1848 (NHEERL\_Quantilum\_inhib\_2\_dn)  
Sample ID : TX003323

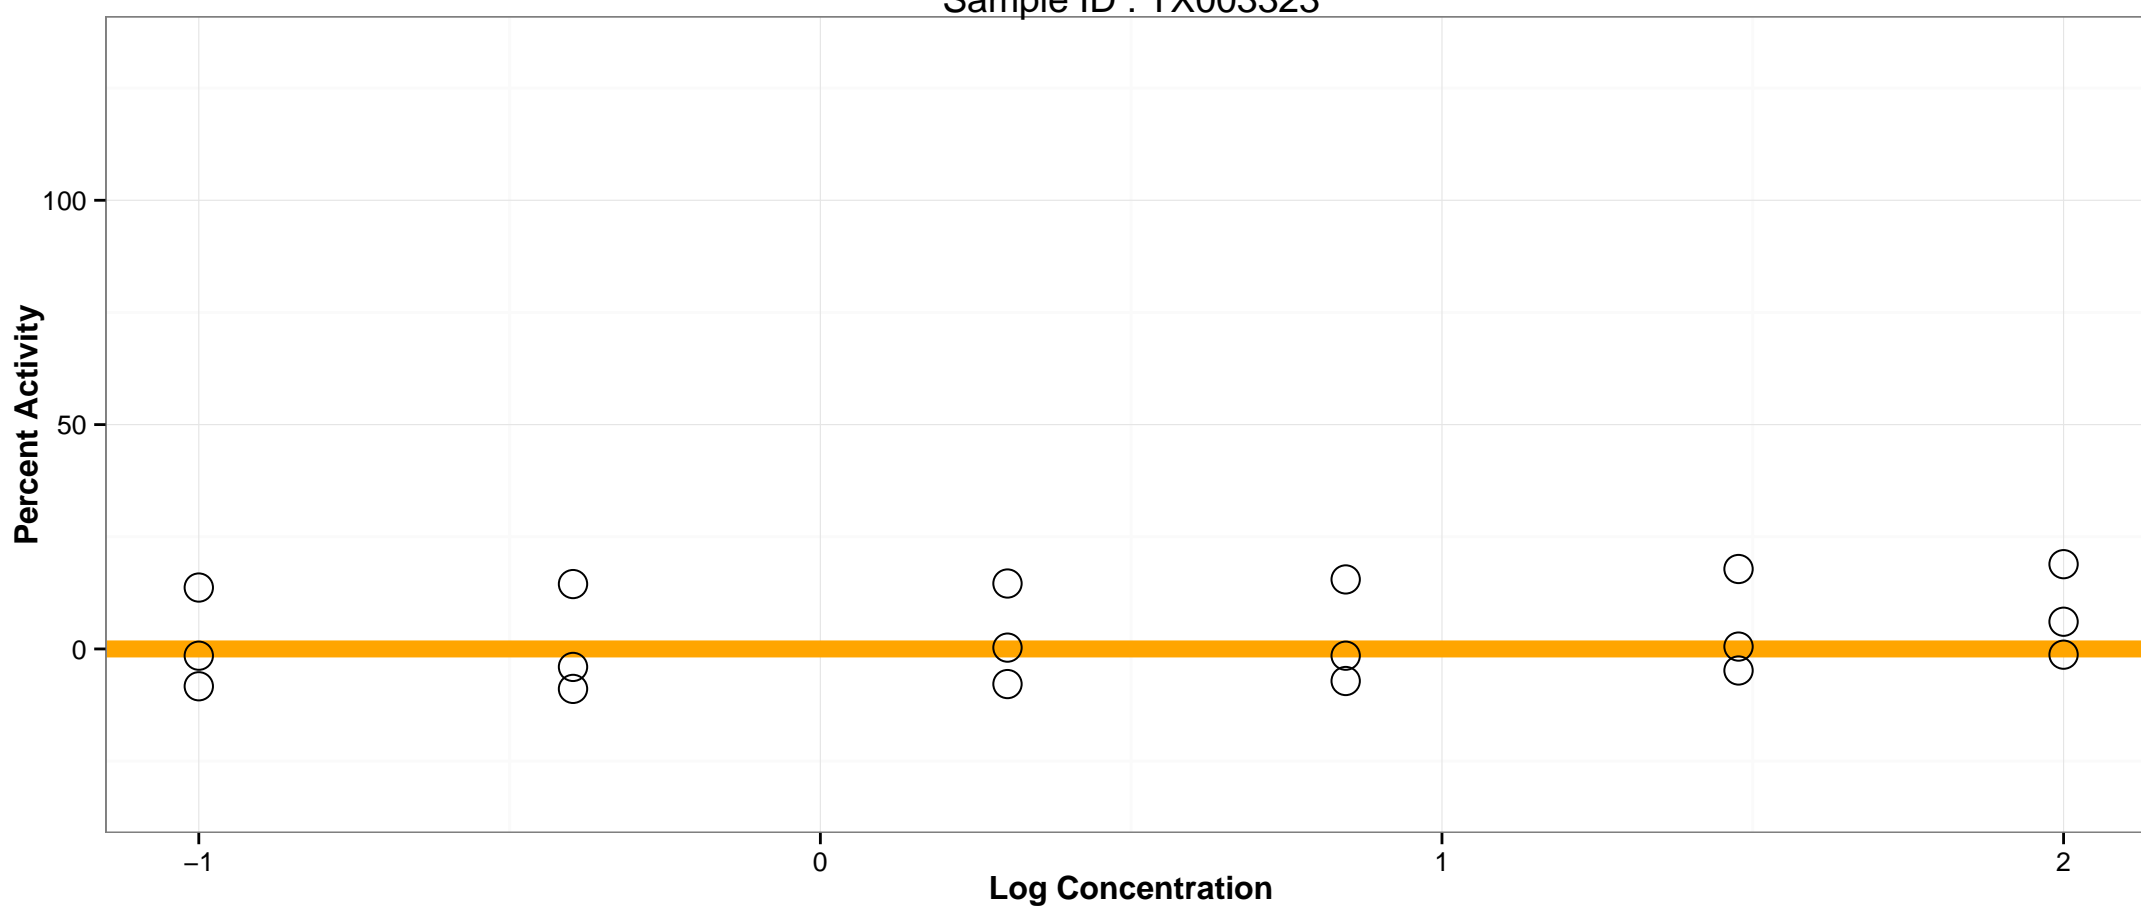

HILL MODEL

HILL MODEL: Not applicable

GAIN-LOSS MODEL

GNLS MODEL: Not applicable

|      | CNST   | HILL | GNLS |
|------|--------|------|------|
| AIC  | 138.49 | NA   | NA   |
| PROB | 1      | NA   | NA   |
| RMSE | 10.19  | NA   | NA   |

MAX\_MEAN : 7.9 MAX\_MED : 6.08 BMAD : 8.58  
COFF : 20 HIT-CALL : 0 FITC : 4 ACTP : 0  
FLAGS :

Assay ID 1824 (NHEERL\_TPO\_GUA\_dn)  
Sample ID : TP0001442E02

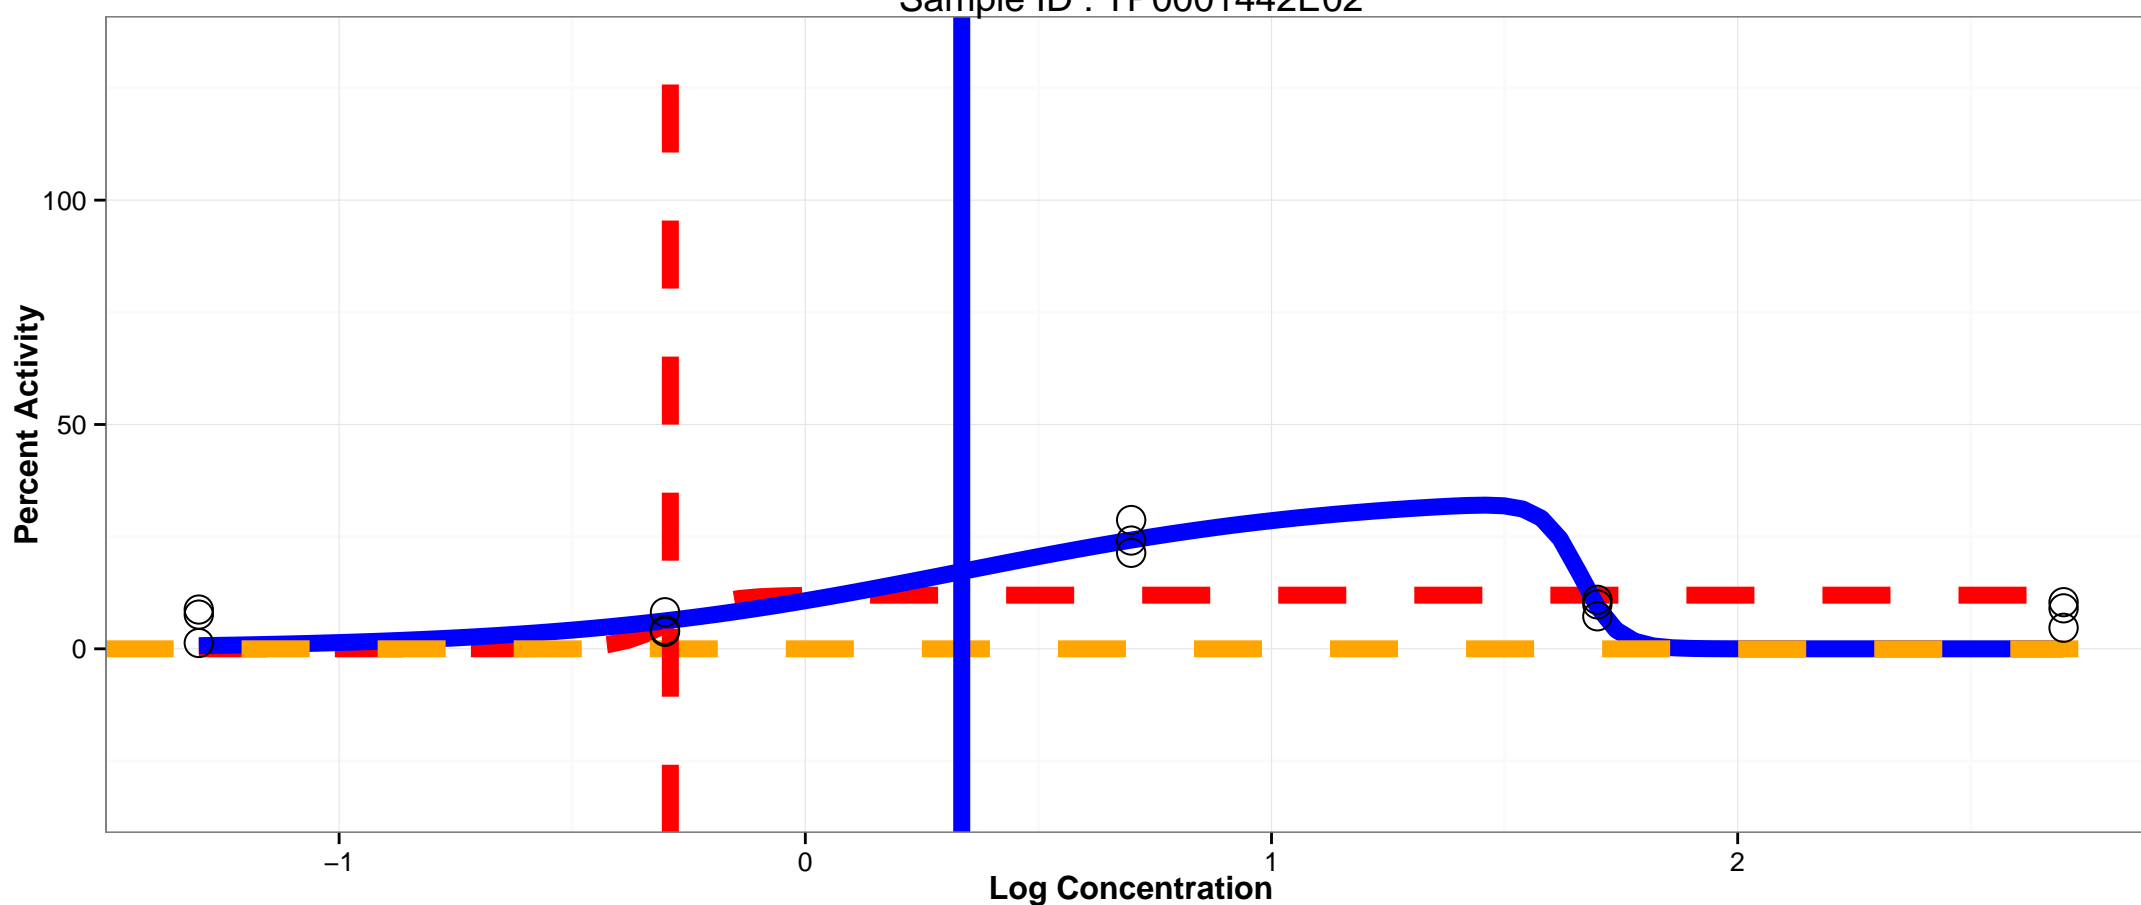

HILL MODEL

|     | tp   | ga    | gw   |
|-----|------|-------|------|
| val | 12   | -0.29 | 8    |
| sd  | 2.49 | 2.16  | 1500 |

GAIN-LOSS MODEL

|     | tp   | ga    | gw    | la     | lw   |
|-----|------|-------|-------|--------|------|
| val | 34.5 | 0.336 | 1.03  | 1.66   | 10.9 |
| sd  | 28.9 | 0.878 | 0.945 | 0.0376 | 10.1 |

|      | CNST   | HILL   | GNLS   |
|------|--------|--------|--------|
| AIC  | 122.46 | 109.59 | 103.46 |
| PROB | 0      | 0.04   | 0.96   |
| RMSE | 13.13  | 7.11   | 5      |

MAX\_MEAN : 24.8 MAX\_MED : 24.1 BMAD : 3.71  
COFF : 20 HIT-CALL : 1 FITC : 50 ACTP : 1  
FLAGS : 16; 7

Chemical : Azinphos-methyl  
CAS : 86-50-0

Assay ID 1508 (NHEERL\_TPO\_AUR\_dn)  
Sample ID : TX003365

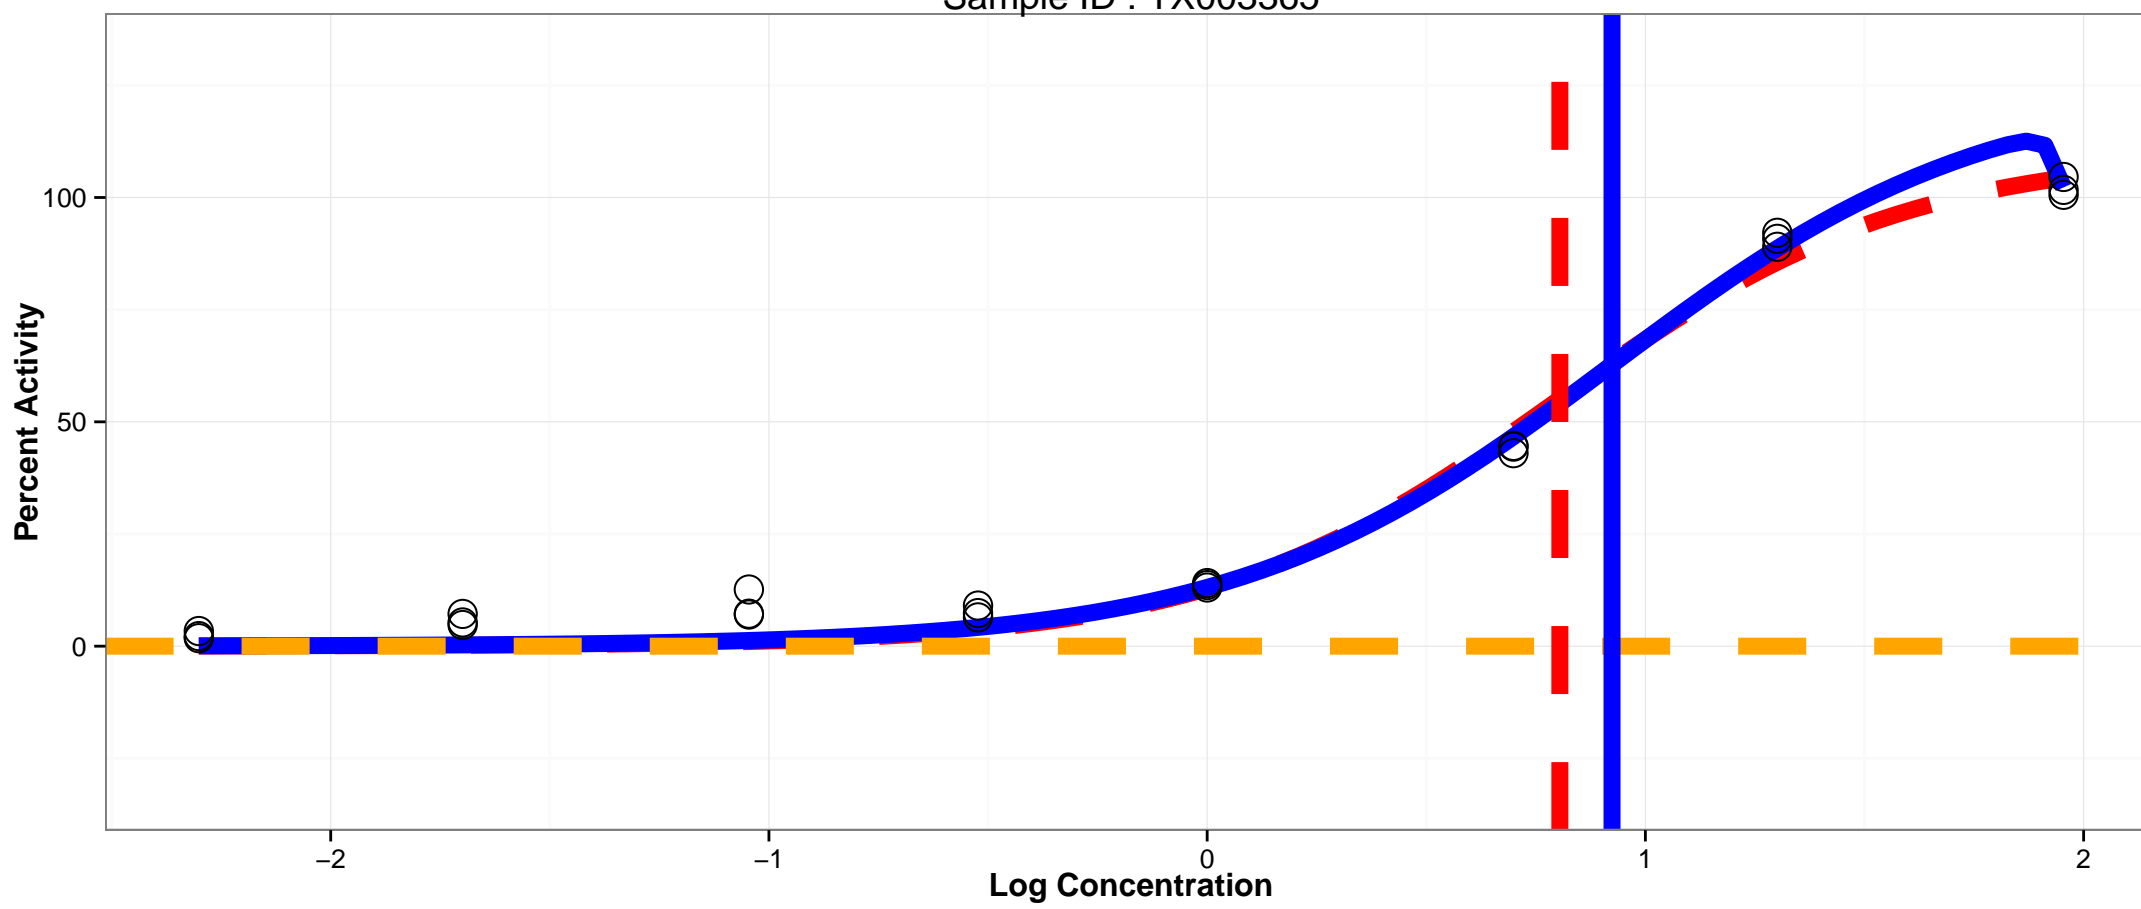

HILL MODEL

|     | tp  | ga     | gw    |
|-----|-----|--------|-------|
| val | 110 | 0.805  | 1.09  |
| sd  | 3.9 | 0.0517 | 0.123 |

GAIN-LOSS MODEL

|     | tp   | ga    | gw    | la      | lw   |
|-----|------|-------|-------|---------|------|
| val | 126  | 0.924 | 1.01  | 2       | 17.8 |
| sd  | 13.8 | 0.113 | 0.111 | 0.00541 | 5.77 |

|      | CNST   | HILL  | GNLS   |
|------|--------|-------|--------|
| AIC  | 257.74 | 152.4 | 147.95 |
| PROB | 0      | 0.1   | 0.9    |
| RMSE | 51.24  | 4.66  | 4.08   |

MAX\_MEAN : 102 MAX\_MED : 102 BMAD : 5.69  
COFF : 20 HIT-CALL : 1 FITC : 51 ACTP : 1  
FLAGS :

Assay ID 1509 (NHEERL\_HEK293T\_CellTiterGLO)  
Sample ID : TX003365

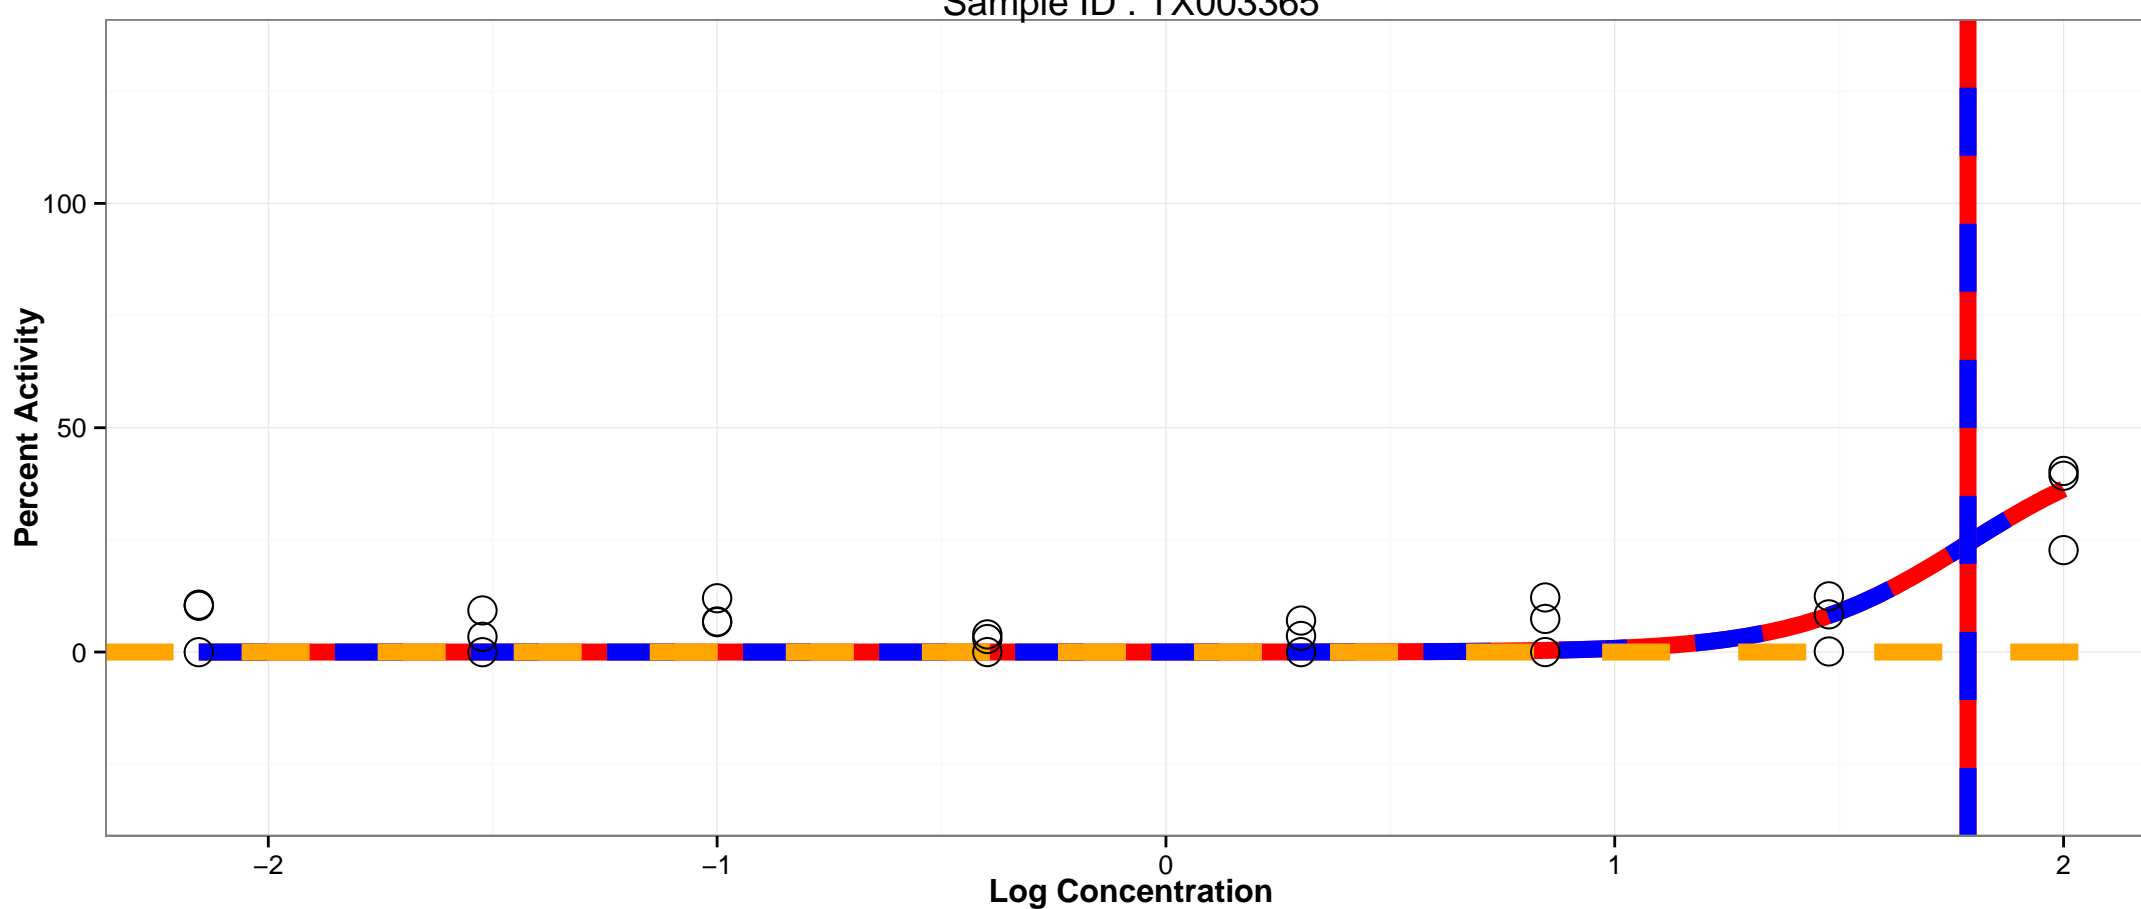

HILL MODEL

|     | tp   | ga   | gw   |
|-----|------|------|------|
| val | 48.5 | 1.79 | 2.24 |
| sd  | 61.2 | 0.67 | 3.46 |

GAIN-LOSS MODEL

|     | tp   | ga    | gw   | la   | lw   |
|-----|------|-------|------|------|------|
| val | 48.5 | 1.79  | 2.24 | 3.72 | 4.16 |
| sd  | 61.4 | 0.673 | 3.47 | 1350 | 3260 |

|      | CNST   | HILL   | GNLS   |
|------|--------|--------|--------|
| AIC  | 191.36 | 170.64 | 174.64 |
| PROB | 0      | 0.88   | 0.12   |
| RMSE | 14.08  | 6.83   | 6.83   |

MAX\_MEAN : 34.1 MAX\_MED : 39.3 BMAD : 5.54  
COFF : 20 HIT-CALL : 1 FITC : 42 ACTP : 1  
FLAGS : 6

Assay ID 1848 (NHEERL\_Quantilum\_inhib\_2\_dn)  
Sample ID : TX003365

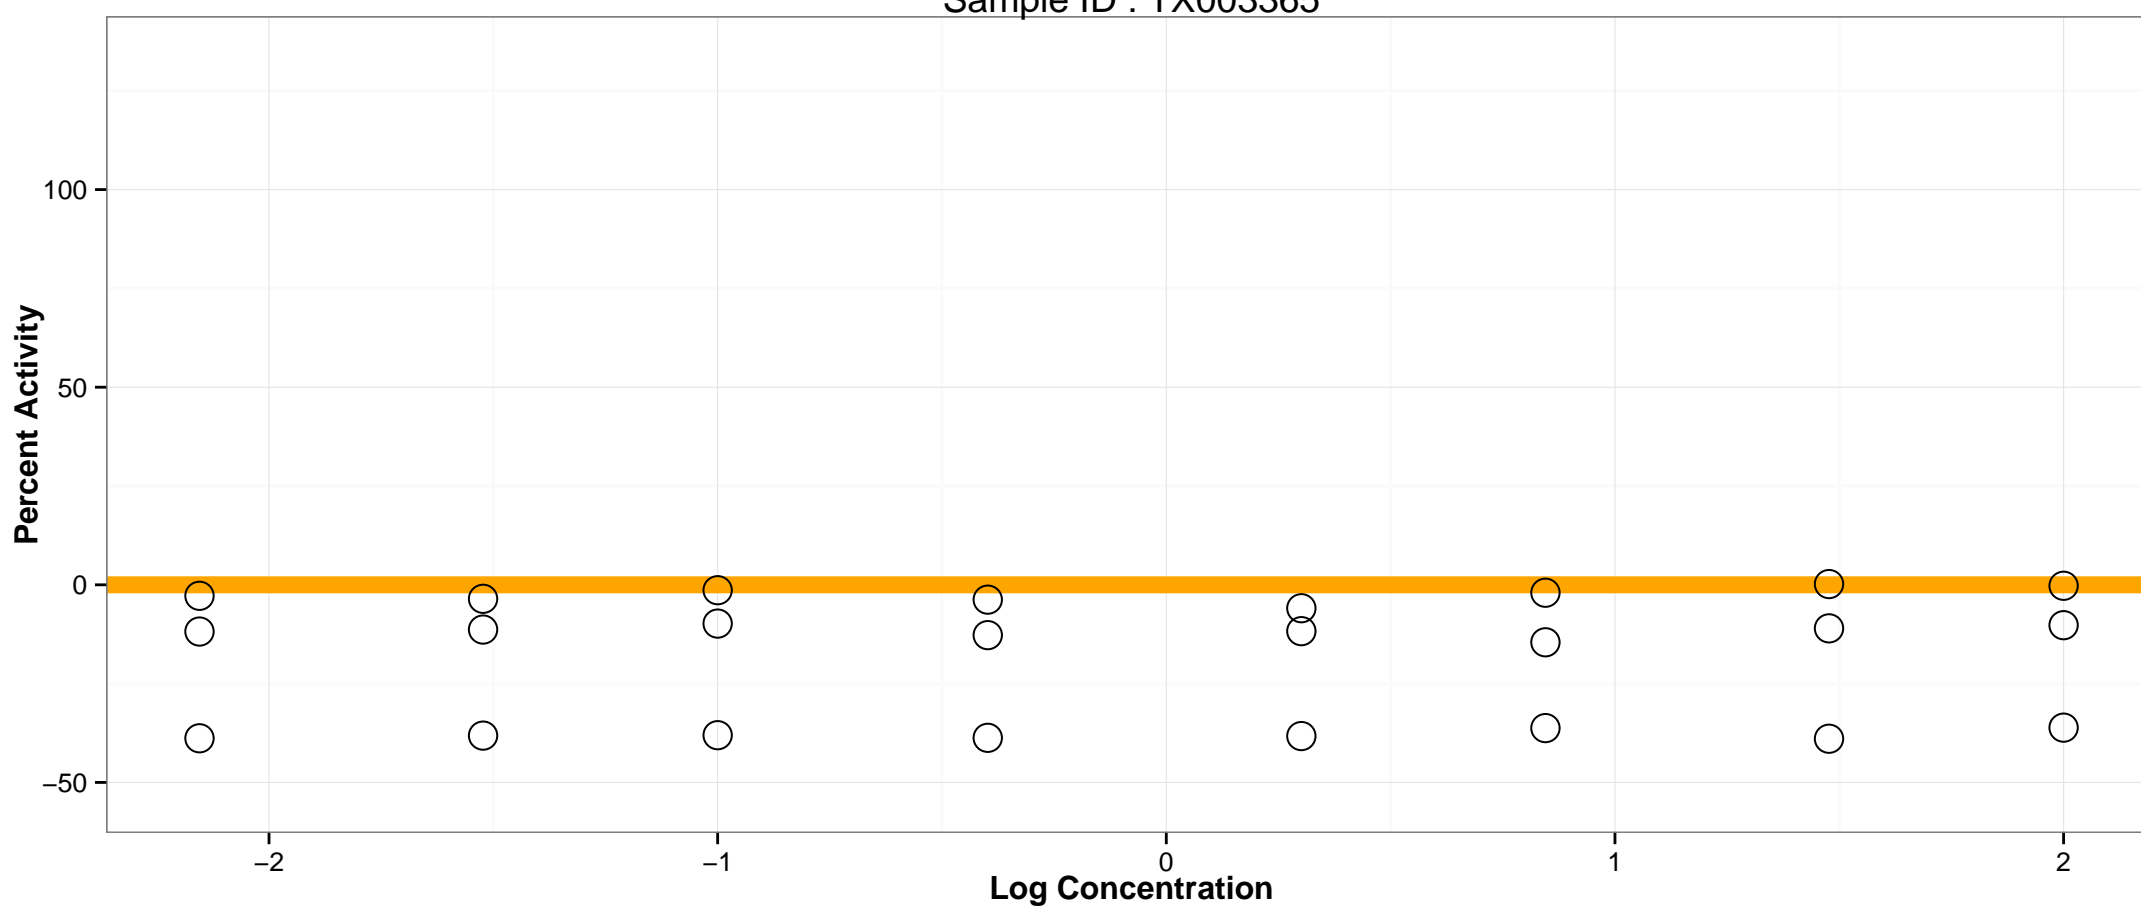

HILL MODEL

HILL MODEL: Not applicable

GAIN-LOSS MODEL

GNLS MODEL: Not applicable

|      | CNST   | HILL | GNLS |
|------|--------|------|------|
| AIC  | 221.91 | NA   | NA   |
| PROB | 1      | NA   | NA   |
| RMSE | 22.98  | NA   | NA   |

MAX\_MEAN : -15.5 MAX\_MED : -9.8 BMAD : 8.58  
COFF : 20 HIT-CALL : 0 FITC : 4 ACTP : 0  
FLAGS : 10

Assay ID 1824 (NHEERL\_TPO\_GUA\_dn)  
Sample ID : TP0001442E03

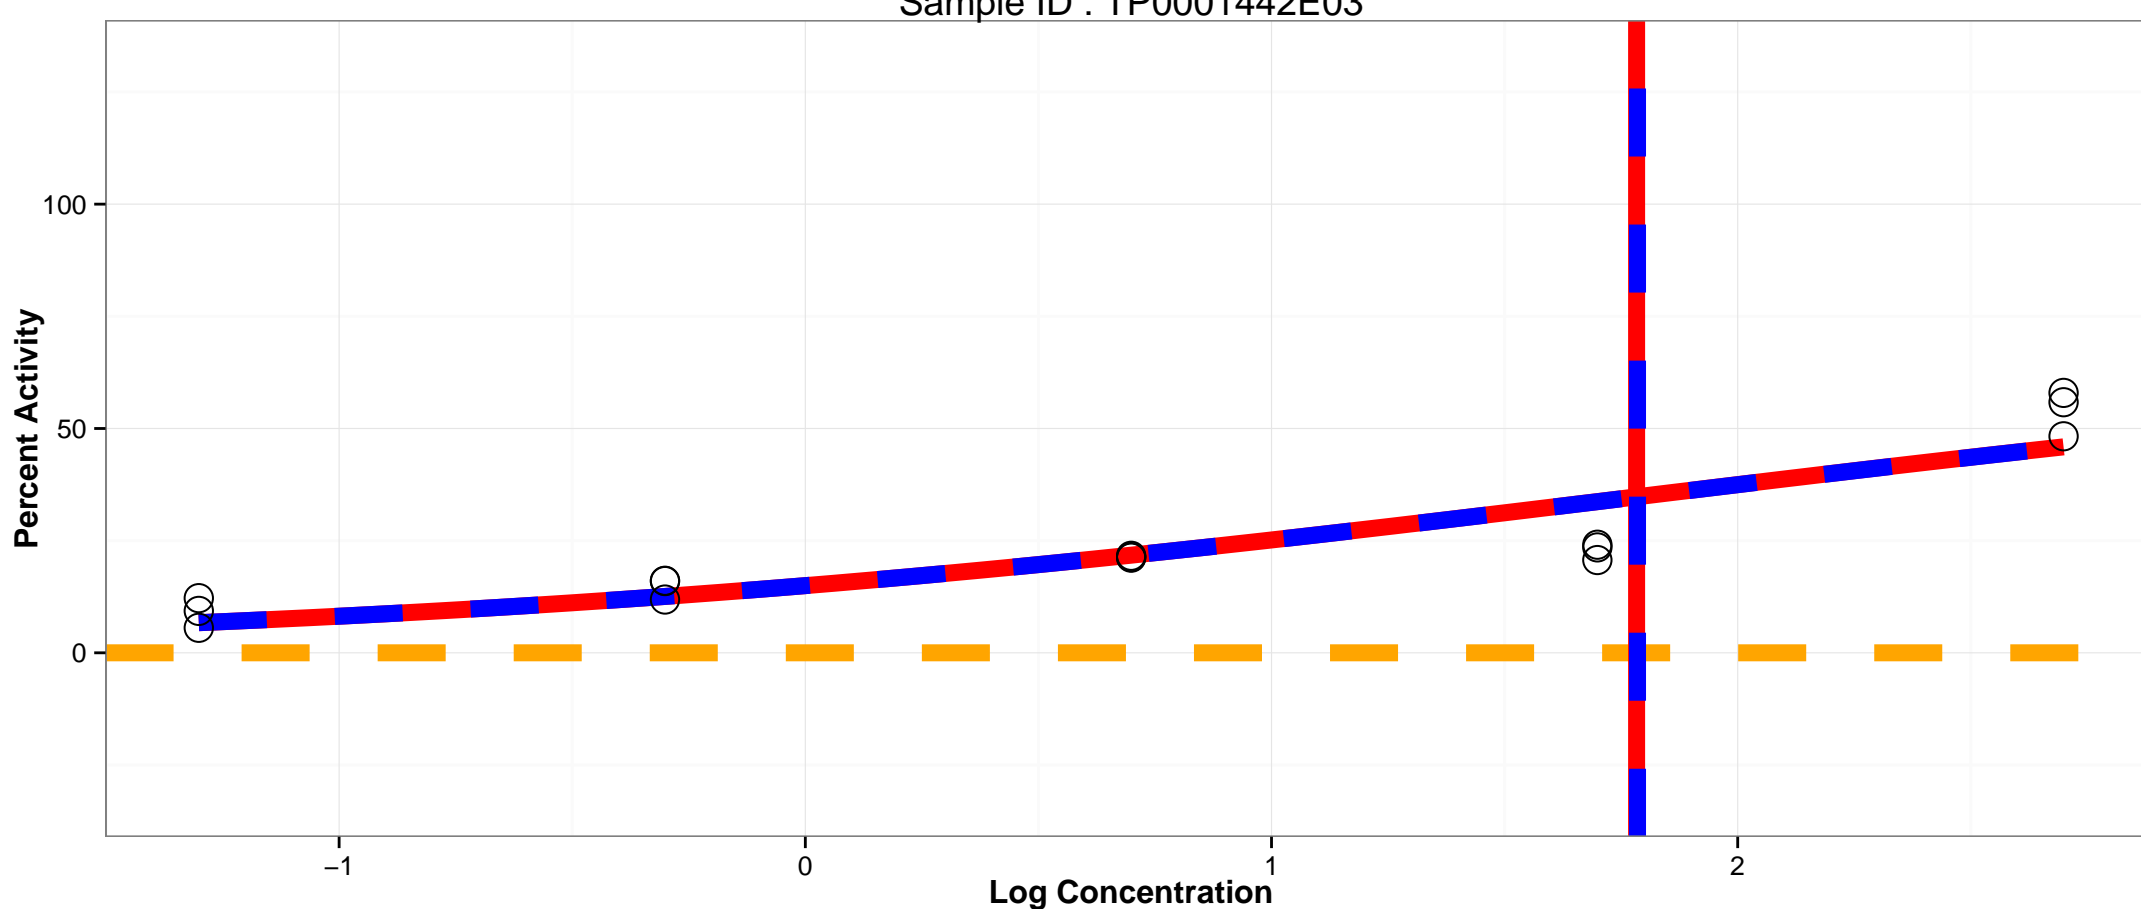

HILL MODEL

|     | tp   | ga    | gw    |
|-----|------|-------|-------|
| val | 69.5 | 1.78  | 0.315 |
| sd  | 18.7 | 0.719 | 0.062 |

GAIN-LOSS MODEL

|     | tp   | ga    | gw    | la   | lw    |
|-----|------|-------|-------|------|-------|
| val | 69.5 | 1.79  | 0.315 | 3.75 | 9.63  |
| sd  | 18.7 | 0.719 | 0.062 | 2390 | 21900 |

|      | CNST   | HILL   | GNLS   |
|------|--------|--------|--------|
| AIC  | 146.72 | 108.47 | 112.47 |
| PROB | 0      | 0.88   | 0.12   |
| RMSE | 29.06  | 6.73   | 6.73   |

MAX\_MEAN : 54 MAX\_MED : 55.9 BMAD : 3.71  
COFF : 20 HIT-CALL : 1 FITC : 42 ACTP : 1  
FLAGS :

Assay ID 1508 (NHEERL\_TPO\_AUR\_dn)  
Sample ID : TX002811

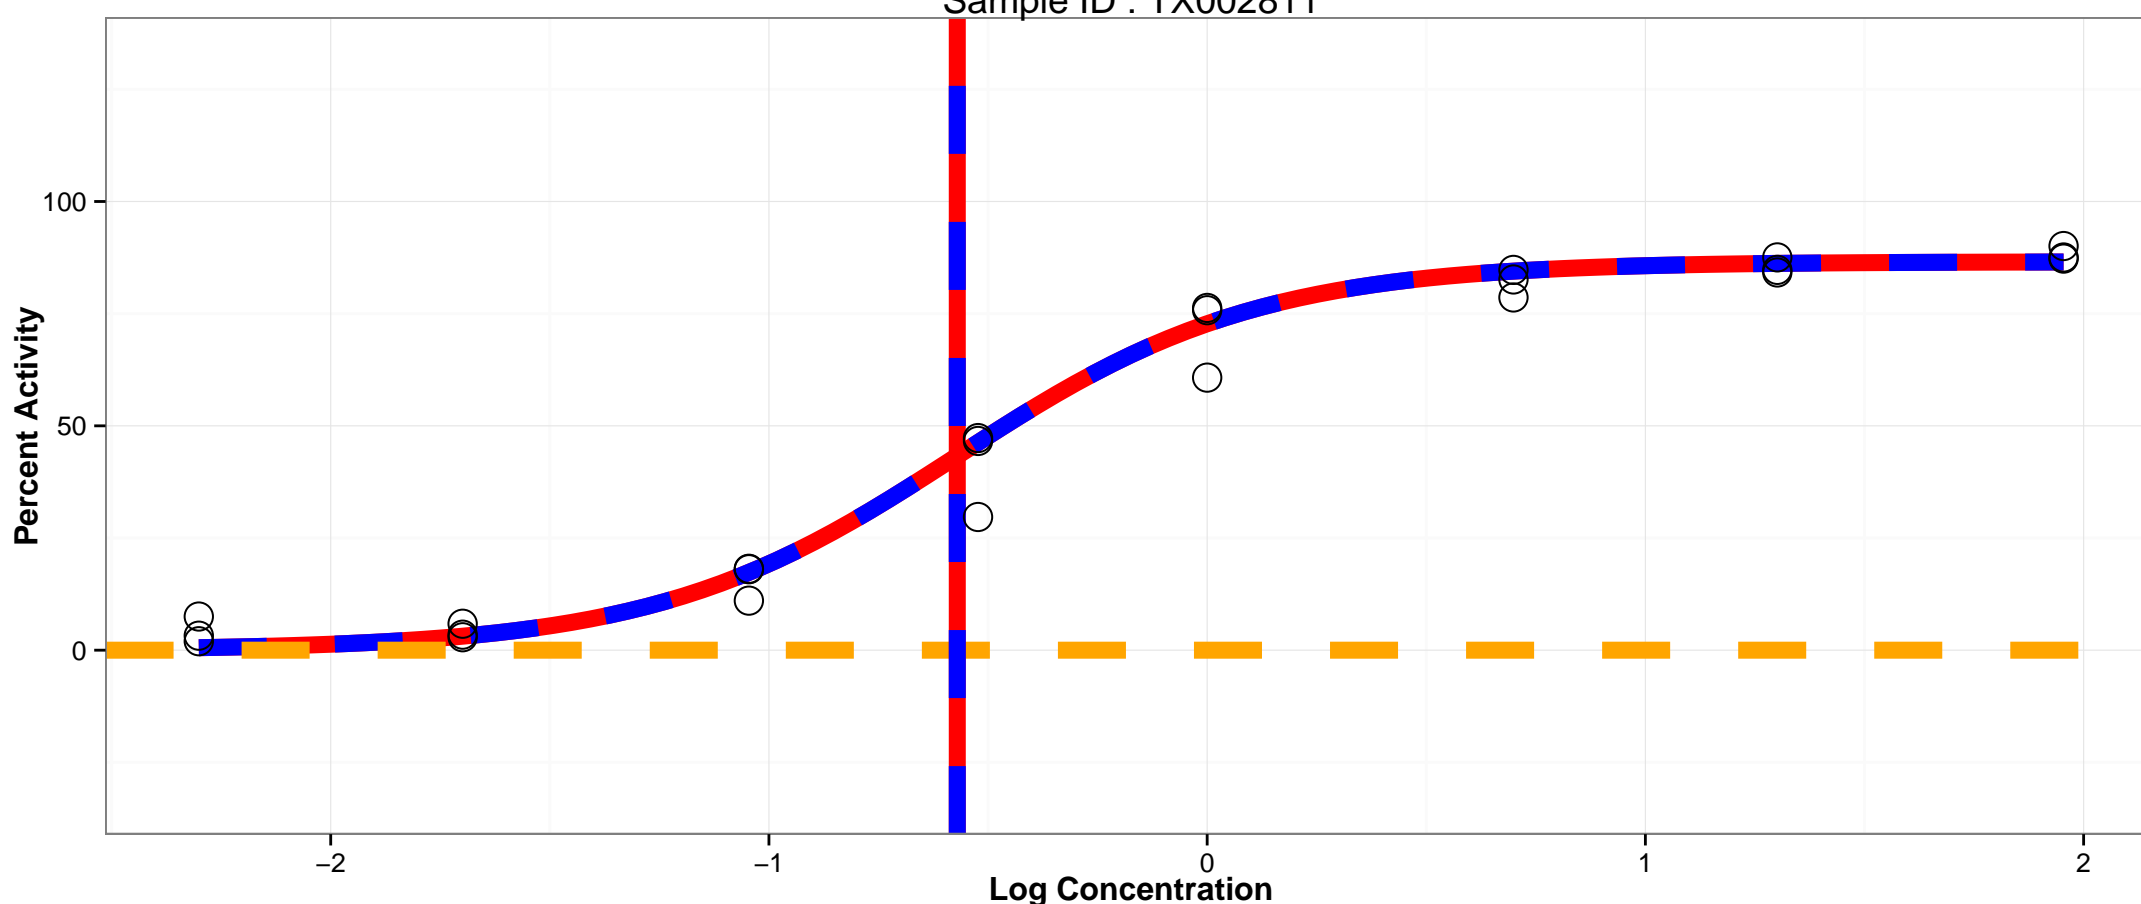

HILL MODEL

|     | tp   | ga    | gw    |
|-----|------|-------|-------|
| val | 86.6 | -0.57 | 1.27  |
| sd  | 1.16 | 0.03  | 0.112 |

GAIN-LOSS MODEL

|     | tp   | ga    | gw   | la   | lw   |
|-----|------|-------|------|------|------|
| val | 86.6 | -0.57 | 1.27 | 3.95 | 17.5 |
| sd  | NA   | NA    | NA   | NA   | NA   |

|      | CNST   | HILL   | GNLS   |
|------|--------|--------|--------|
| AIC  | 270.24 | 146.35 | 150.35 |
| PROB | 0      | 0.88   | 0.12   |
| RMSE | 60.2   | 5.03   | 5.03   |

MAX\_MEAN : 88.3 MAX\_MED : 87.5 BMAD : 5.69  
COFF : 20 HIT-CALL : 1 FITC : 41 ACTP : 1  
FLAGS :

Assay ID 1509 (NHEERL\_HEK293T\_CellTiterGLO)  
Sample ID : TX002811

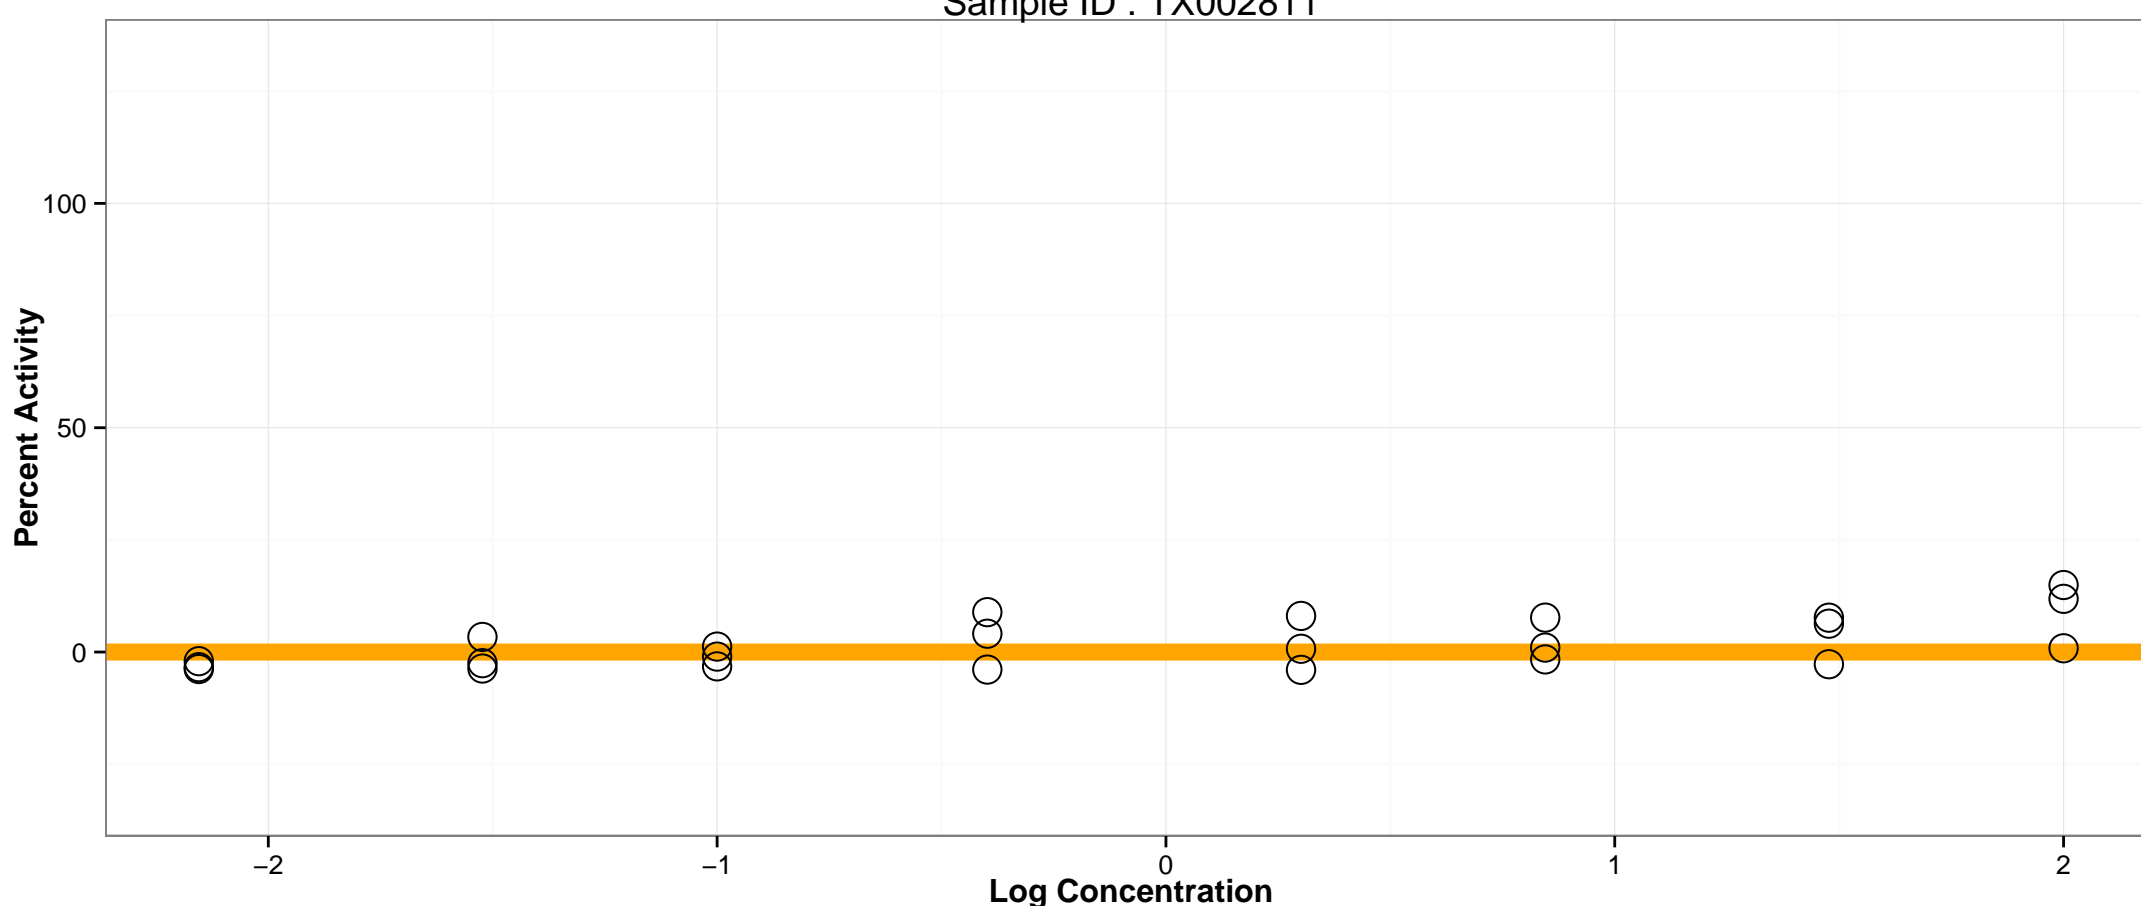

HILL MODEL

HILL MODEL: Not applicable

GAIN-LOSS MODEL

GNLS MODEL: Not applicable

|      | CNST   | HILL | GNLS |
|------|--------|------|------|
| AIC  | 154.42 | NA   | NA   |
| PROB | 1      | NA   | NA   |
| RMSE | 5.77   | NA   | NA   |

MAX\_MEAN : 9.23 MAX\_MED : 11.9 BMAD : 5.54  
COFF : 20 HIT-CALL : 0 FITC : 4 ACTP : 0  
FLAGS :

Assay ID 1848 (NHEERL\_Quantilum\_inhib\_2\_dn)  
Sample ID : TX002811

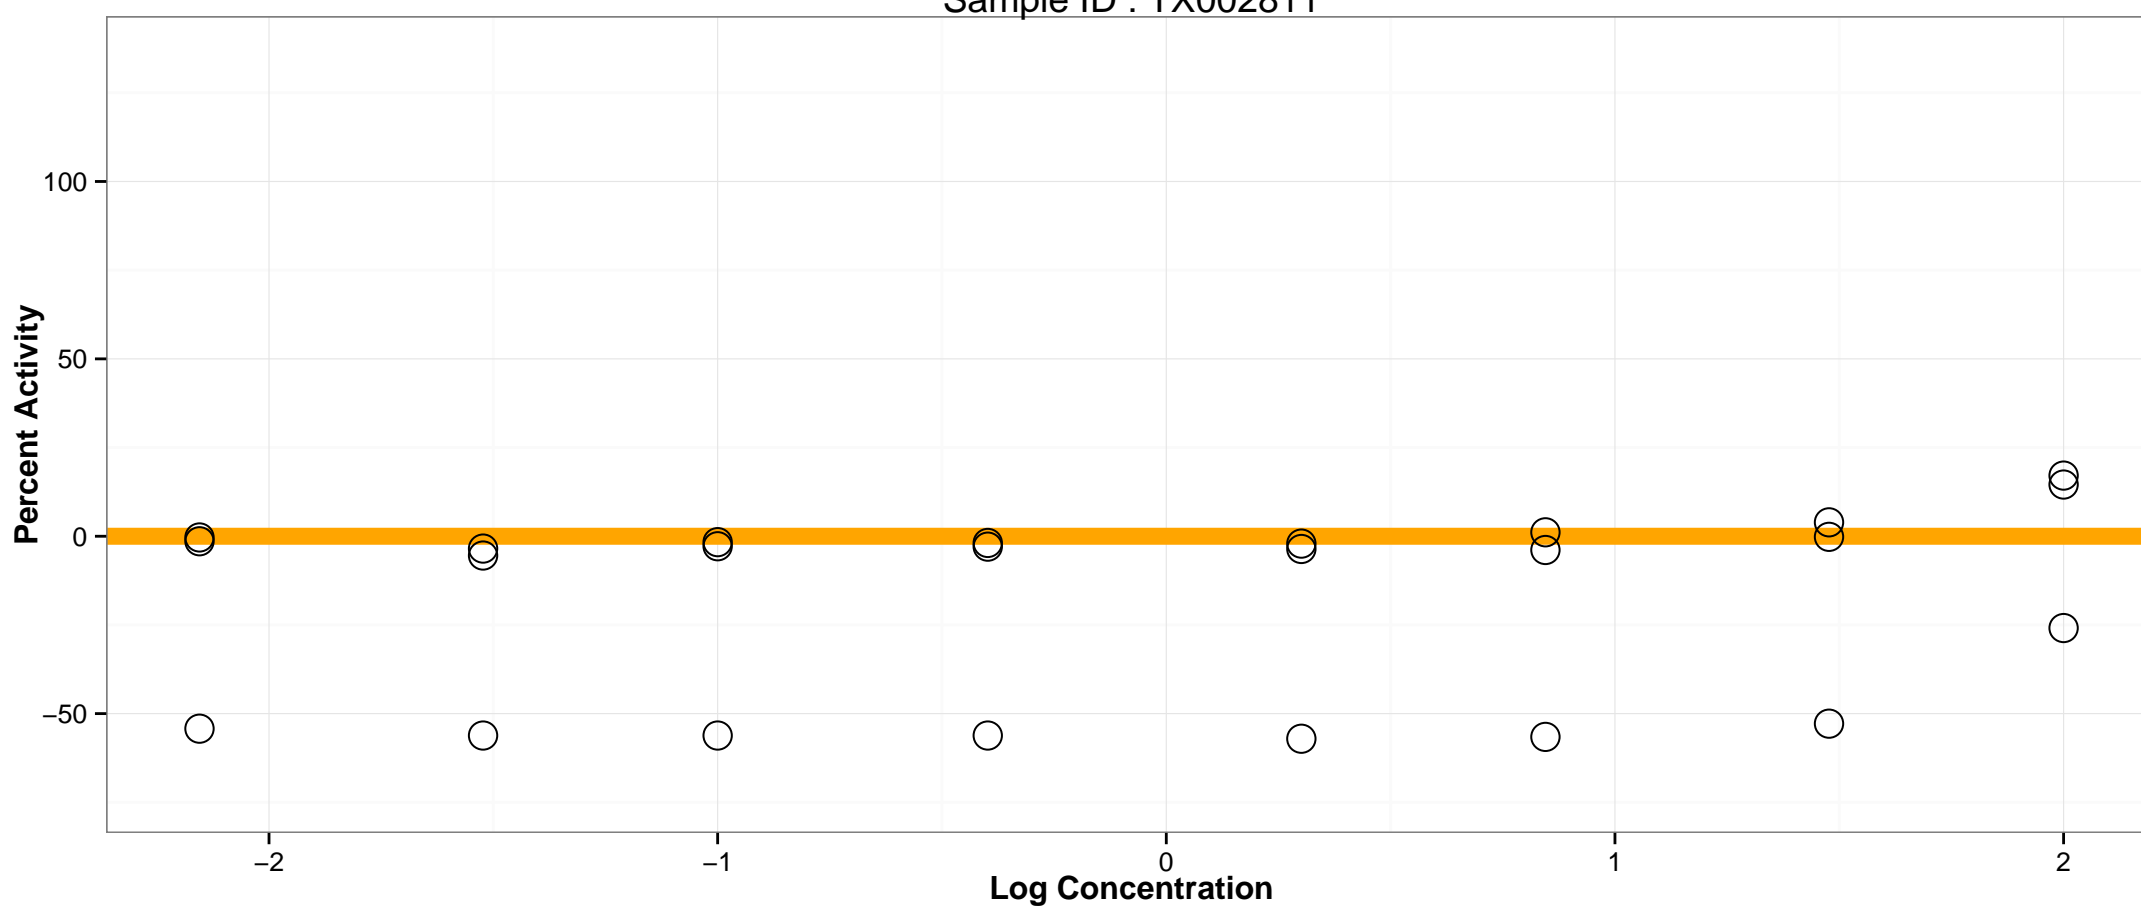

HILL MODEL

HILL MODEL: Not applicable

GAIN-LOSS MODEL

GNLS MODEL: Not applicable

|      | CNST   | HILL | GNLS |
|------|--------|------|------|
| AIC  | 233.84 | NA   | NA   |
| PROB | 1      | NA   | NA   |
| RMSE | 30.91  | NA   | NA   |

MAX\_MEAN : 1.94 MAX\_MED : 14.6 BMAD : 8.58  
COFF : 20 HIT-CALL : 0 FITC : 4 ACTP : 0  
FLAGS : 10

Assay ID 1824 (NHEERL\_TPO\_GUA\_dn)  
Sample ID : TP0001442E05

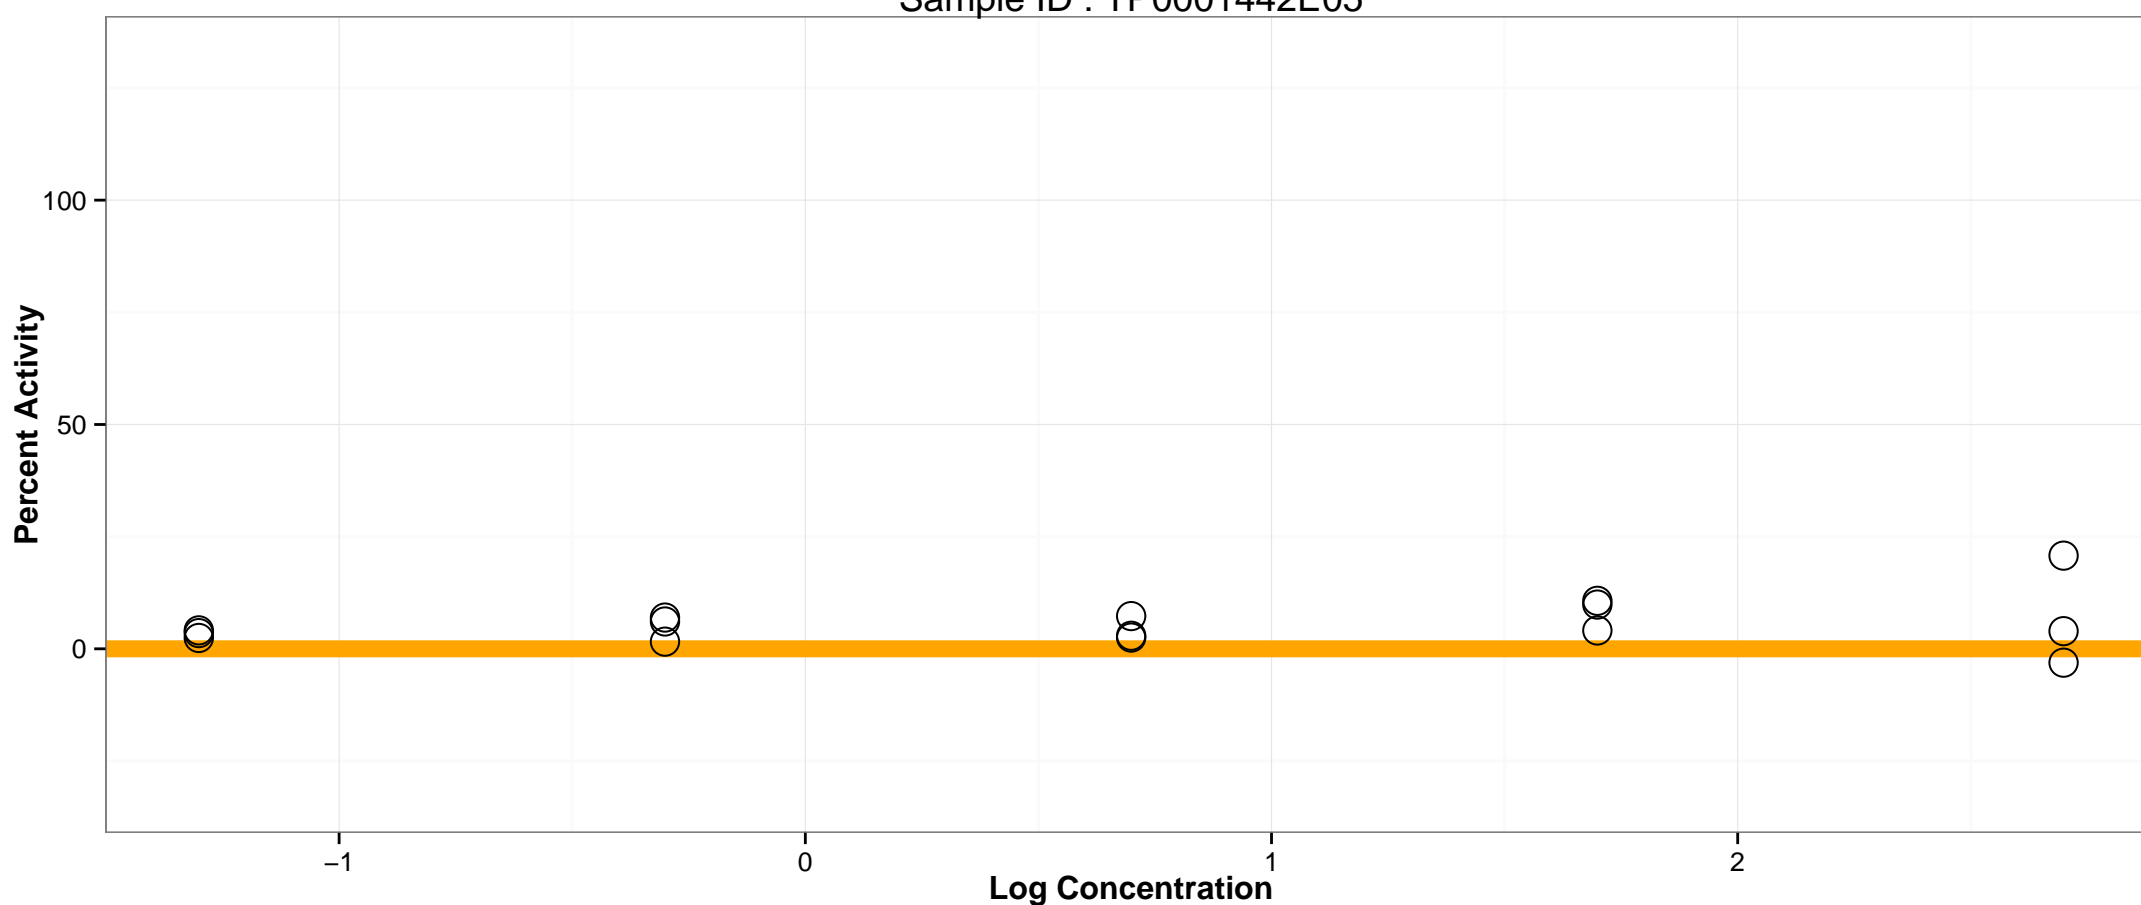

HILL MODEL

HILL MODEL: Not applicable

GAIN-LOSS MODEL

GNLS MODEL: Not applicable

|      | CNST   | HILL | GNLS |
|------|--------|------|------|
| AIC  | 104.95 | NA   | NA   |
| PROB | 1      | NA   | NA   |
| RMSE | 7.65   | NA   | NA   |

MAX\_MEAN : 8.23 MAX\_MED : 9.87 BMAD : 3.71  
COFF : 20 HIT-CALL : 0 FITC : 4 ACTP : 0  
FLAGS :

Chemical : Tetracycline  
CAS : 60-54-8

Assay ID 1508 (NHEERL\_TPO\_AUR\_dn)  
Sample ID : TX003731

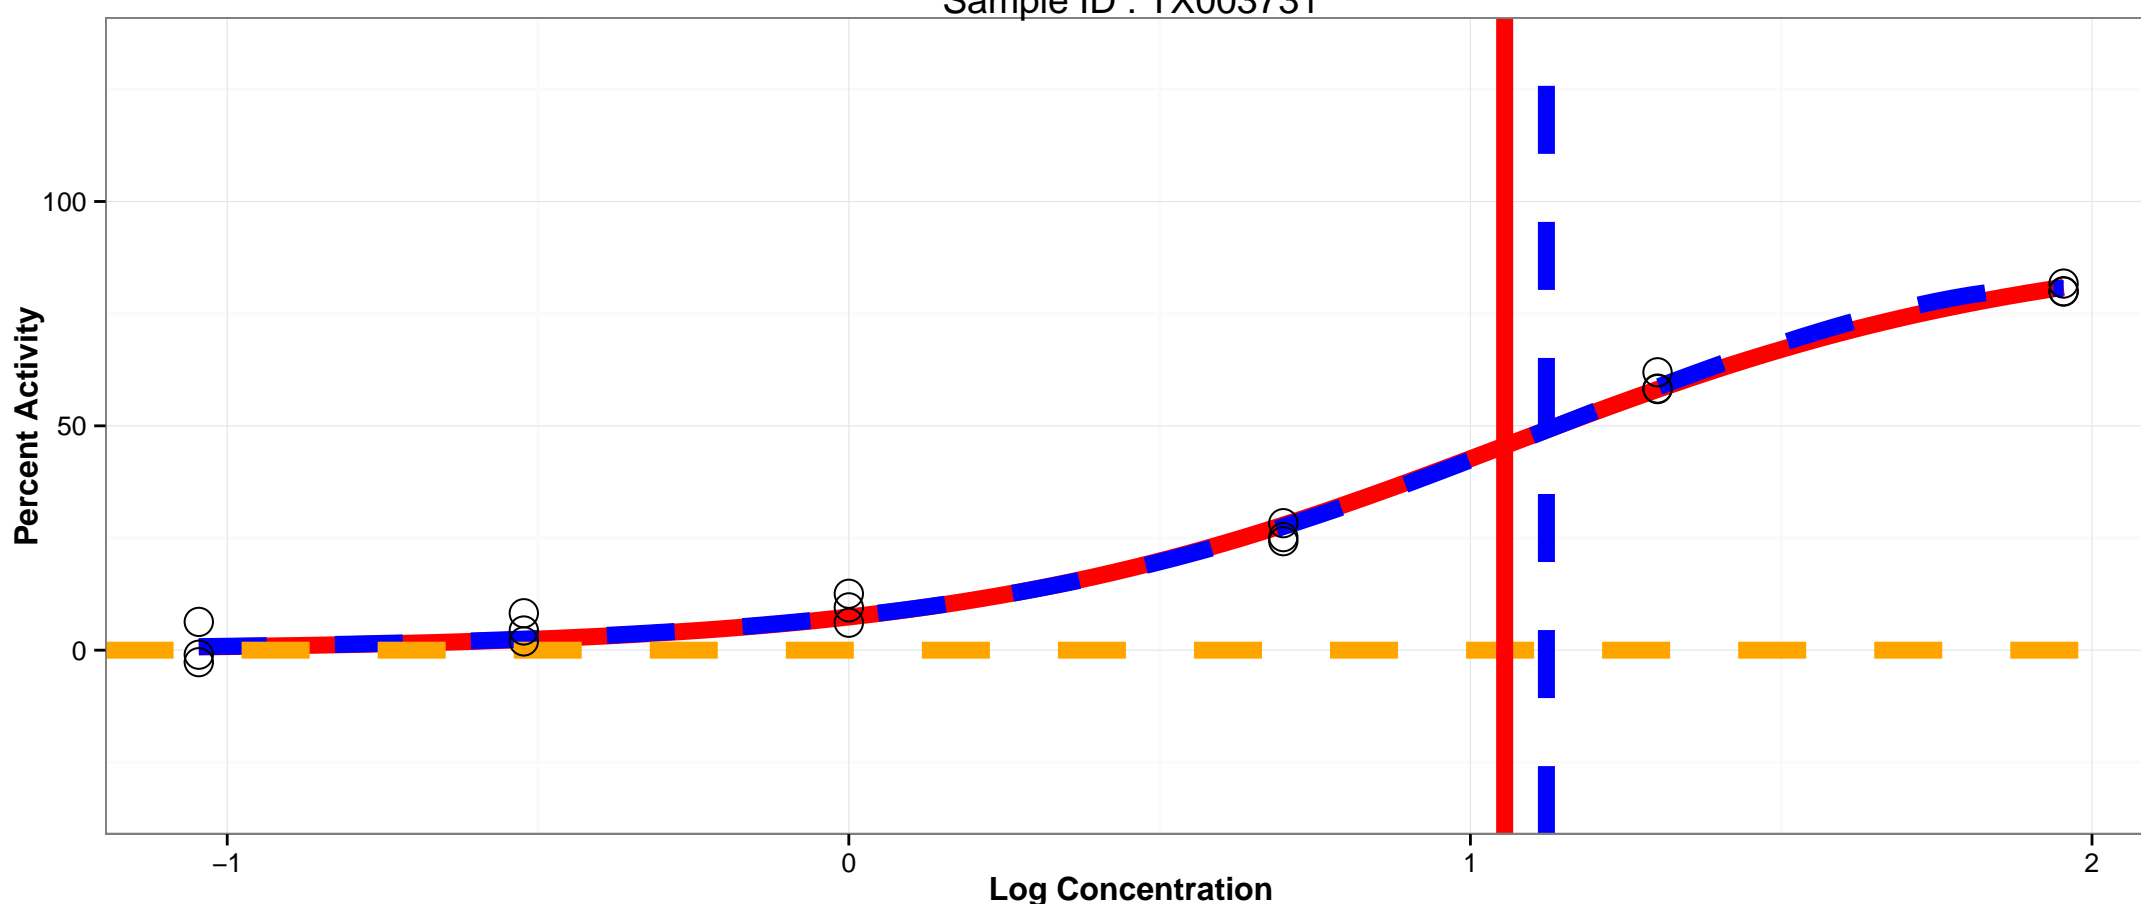

HILL MODEL

|     | tp   | ga     | gw     |
|-----|------|--------|--------|
| val | 91.1 | 1.06   | 0.999  |
| sd  | 3.76 | 0.0519 | 0.0939 |

GAIN-LOSS MODEL

|     | tp   | ga   | gw    | la   | lw   |
|-----|------|------|-------|------|------|
| val | 98.1 | 1.12 | 0.965 | 2.32 | 3.48 |
| sd  | NA   | NA   | NA    | NA   | NA   |

|      | CNST   | HILL  | GNLS   |
|------|--------|-------|--------|
| AIC  | 188.43 | 98.92 | 101.57 |
| PROB | 0      | 0.79  | 0.21   |
| RMSE | 42.52  | 2.94  | 2.84   |

MAX\_MEAN : 80.6 MAX\_MED : 80 BMAD : 5.69  
COFF : 20 HIT-CALL : 1 FITC : 42 ACTP : 1  
FLAGS :

Assay ID 1509 (NHEERL\_HEK293T\_CellTiterGLO)  
Sample ID : TX003731

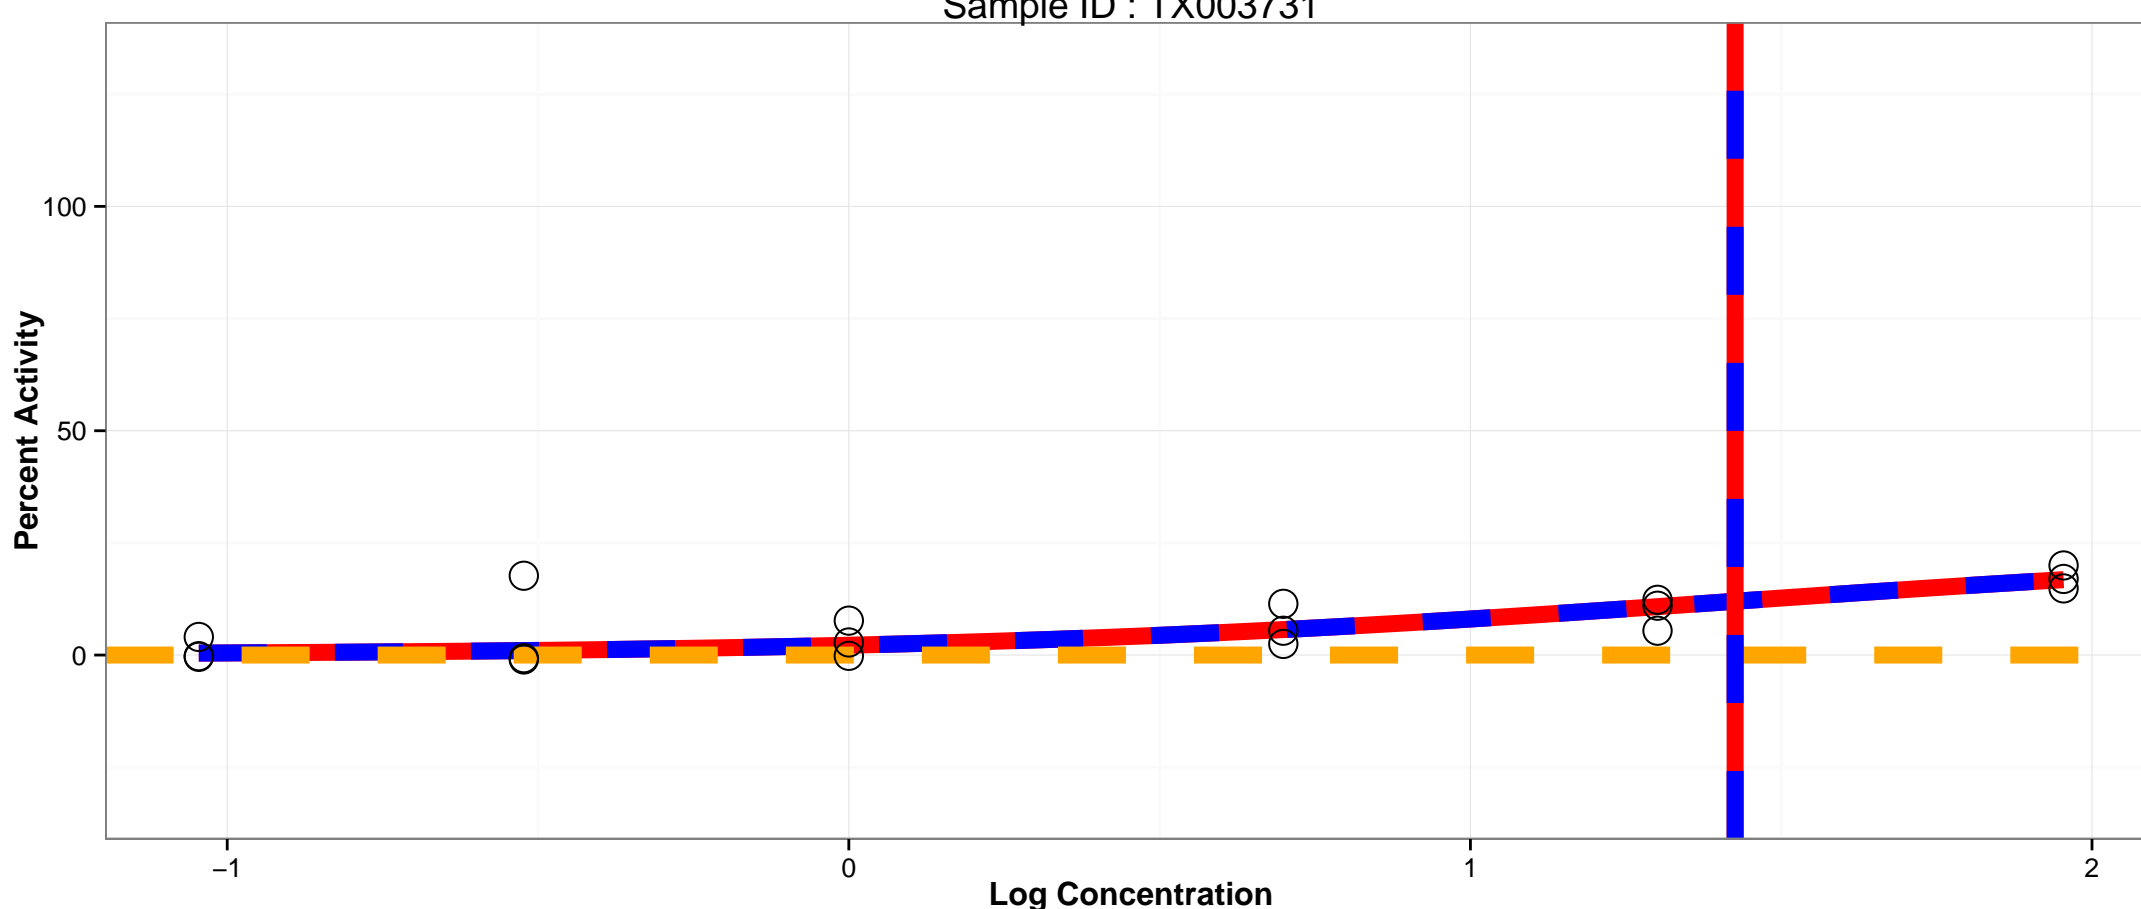

HILL MODEL

|     | tp   | ga    | gw    |
|-----|------|-------|-------|
| val | 24   | 1.43  | 0.699 |
| sd  | 10.2 | 0.618 | 0.287 |

GAIN-LOSS MODEL

|     | tp | ga   | gw    | la   | lw   |
|-----|----|------|-------|------|------|
| val | 24 | 1.43 | 0.699 | 3.95 | 6.43 |
| sd  | NA | NA   | NA    | NA   | NA   |

|      | CNST  | HILL   | GNLS   |
|------|-------|--------|--------|
| AIC  | 136.8 | 109.57 | 113.57 |
| PROB | 0     | 0.88   | 0.12   |
| RMSE | 9.93  | 4.85   | 4.85   |

MAX\_MEAN : 17.3 MAX\_MED : 17 BMAD : 5.54  
COFF : 20 HIT-CALL : 0 FITC : 21 ACTP : 1  
FLAGS : 12

Assay ID 1848 (NHEERL\_Quantilum\_inhib\_2\_dn)  
Sample ID : TX003731

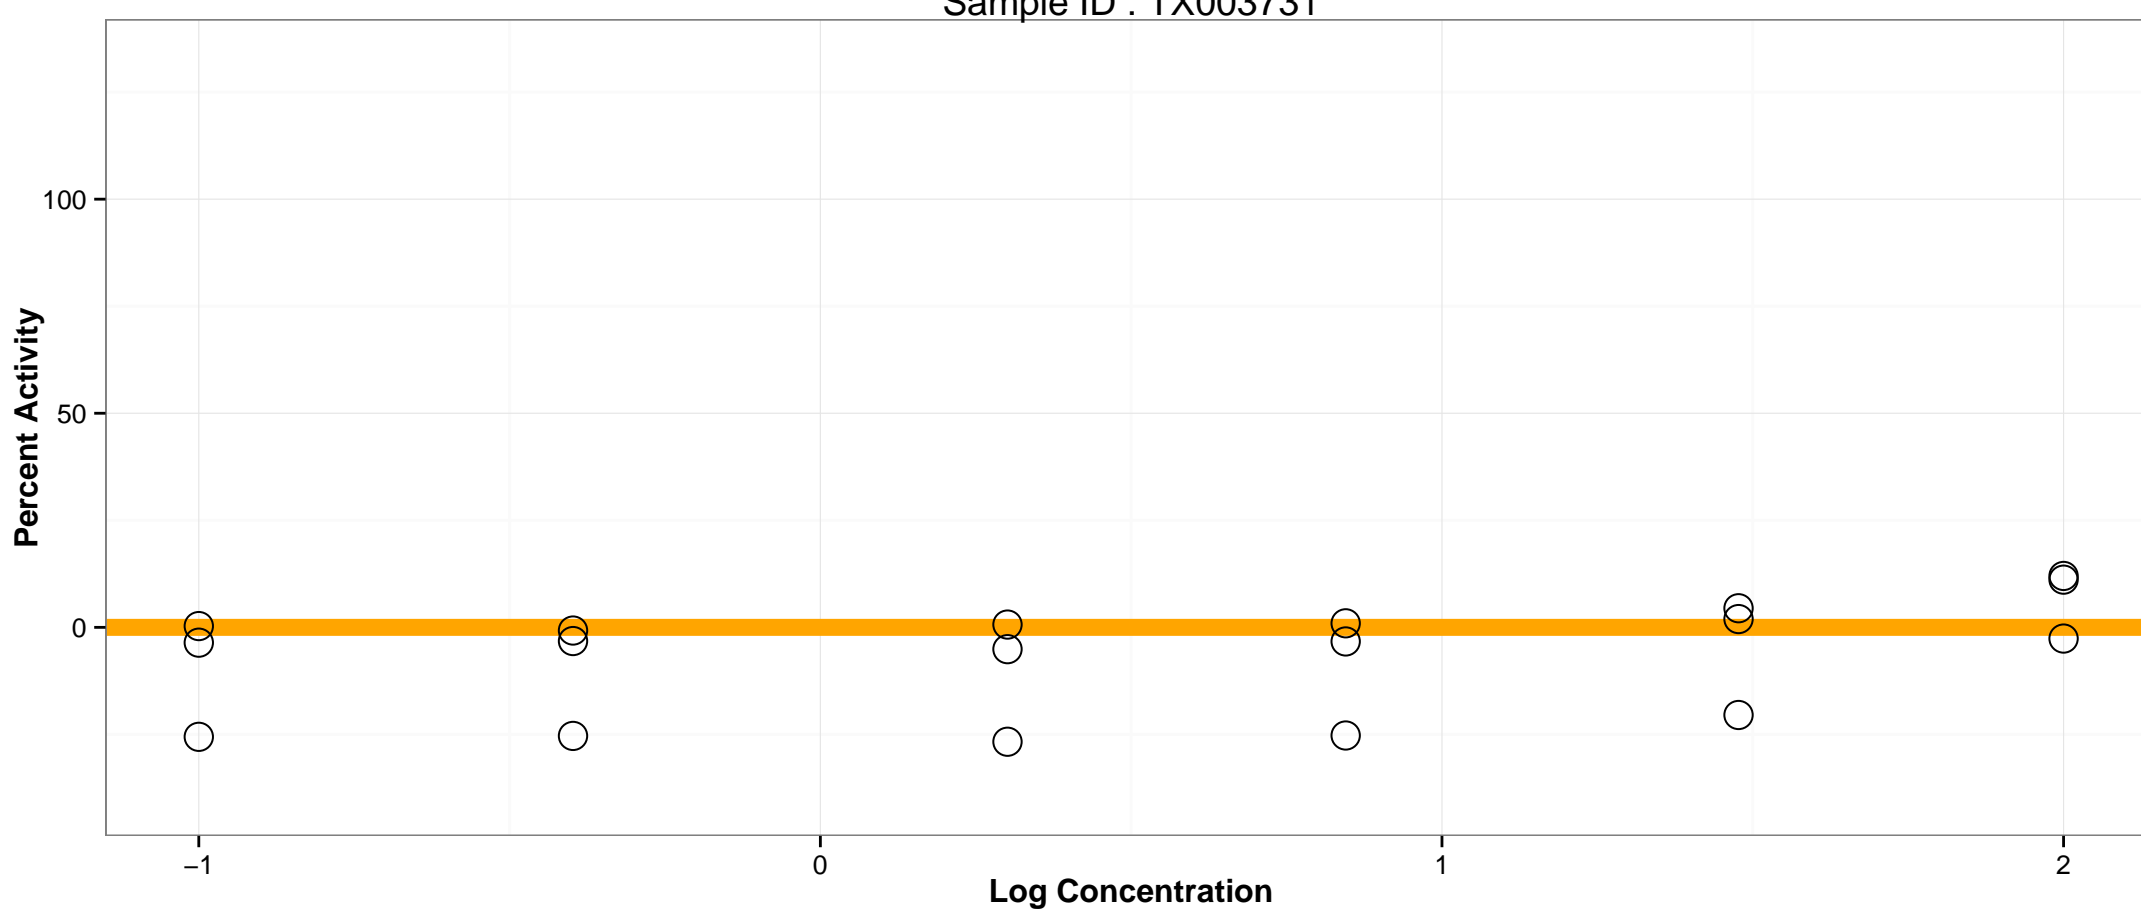

HILL MODEL  
HILL MODEL: Not applicable

GAIN-LOSS MODEL  
GNLS MODEL: Not applicable

|      | CNST   | HILL | GNLS |
|------|--------|------|------|
| AIC  | 147.29 | NA   | NA   |
| PROB | 1      | NA   | NA   |
| RMSE | 13.79  | NA   | NA   |

MAX\_MEAN : 6.85 MAX\_MED : 11.2 BMAD : 8.58  
COFF : 20 HIT-CALL : 0 FITC : 4 ACTP : 0  
FLAGS :

Assay ID 1824 (NHEERL\_TPO\_GUA\_dn)  
Sample ID : TP0001442E07

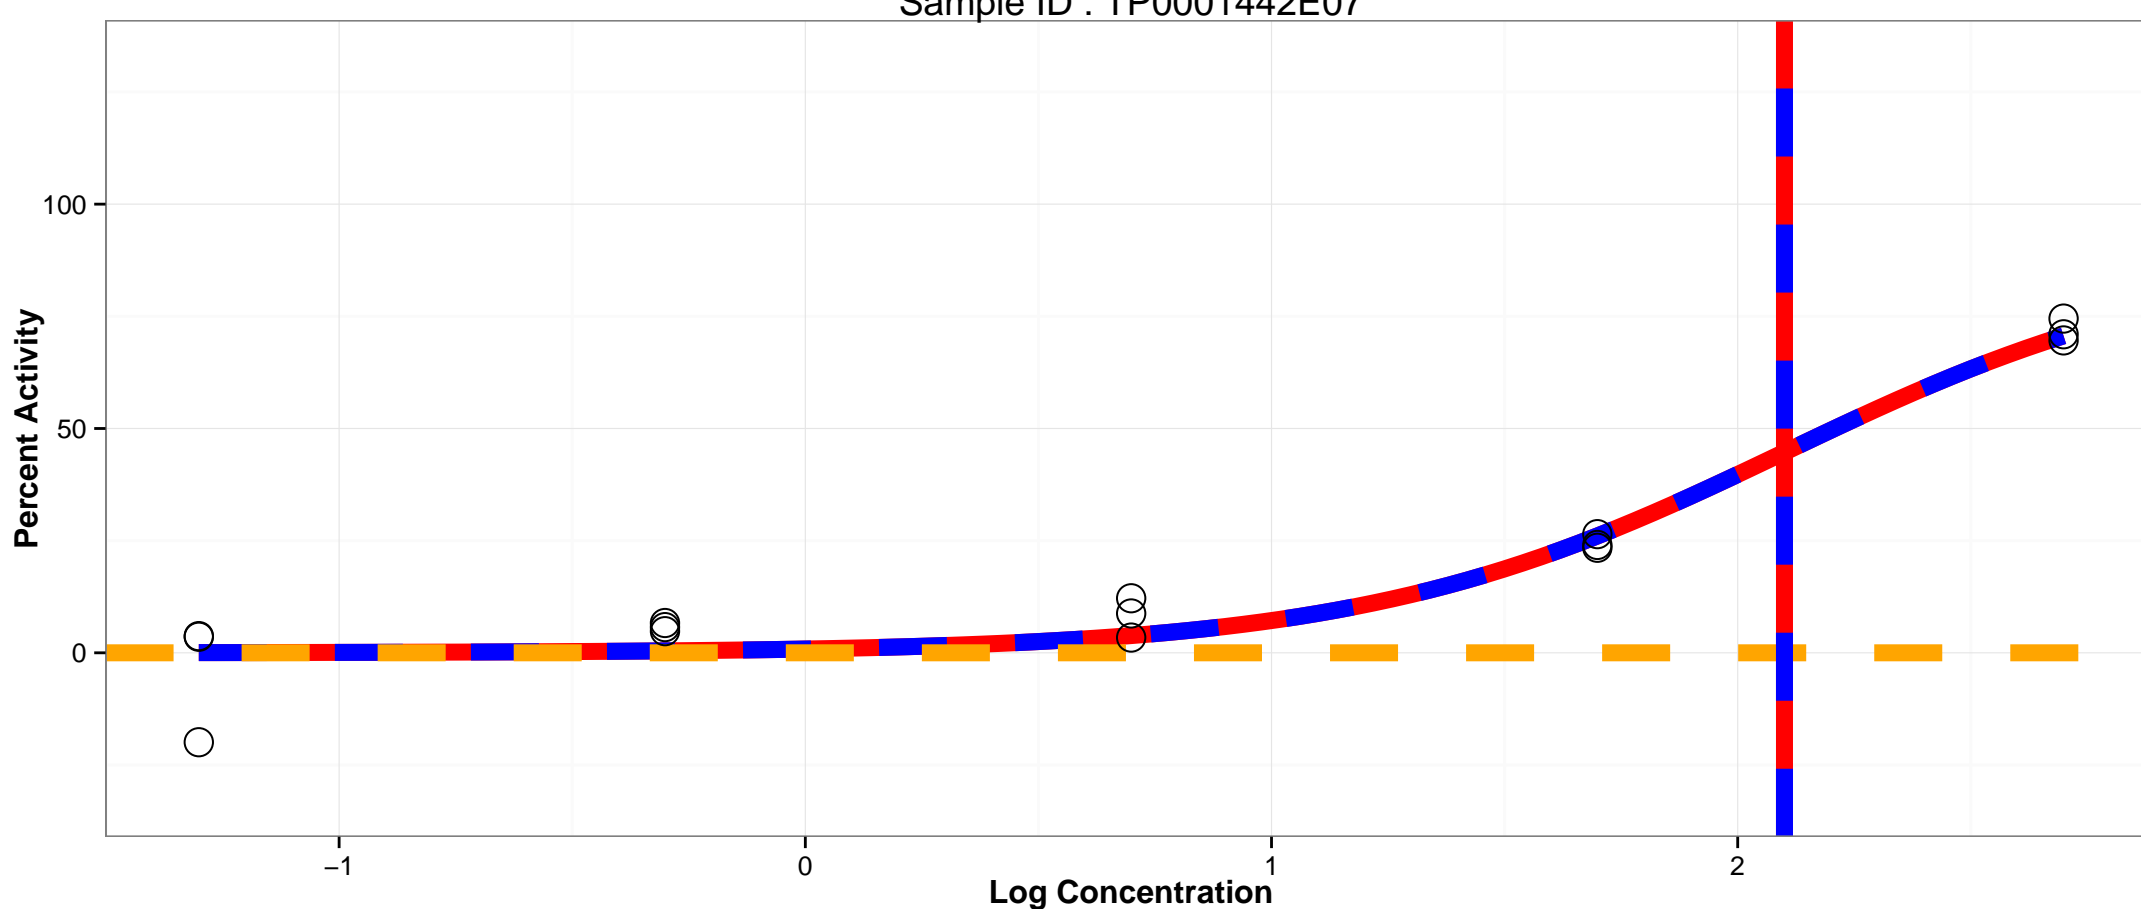

HILL MODEL

|     | tp   | ga   | gw    |
|-----|------|------|-------|
| val | 89.4 | 2.1  | 0.962 |
| sd  | 17.5 | 0.24 | 0.3   |

GAIN-LOSS MODEL

|     | tp   | ga    | gw    | la   | lw   |
|-----|------|-------|-------|------|------|
| val | 89.4 | 2.1   | 0.962 | 4.17 | 6.09 |
| sd  | 17.5 | 0.239 | 0.3   | 2000 | 8240 |

|      | CNST   | HILL   | GNLS   |
|------|--------|--------|--------|
| AIC  | 149.45 | 103.42 | 107.42 |
| PROB | 0      | 0.88   | 0.12   |
| RMSE | 34.67  | 6.49   | 6.49   |

MAX\_MEAN : 71.7 MAX\_MED : 71 BMAD : 3.71  
COFF : 20 HIT-CALL : 1 FITC : 42 ACTP : 1  
FLAGS :



Chemical : N,N,4-Trimethylaniline  
CAS : 99-97-8

Assay ID 1508 (NHEERL\_TPO\_AUR\_dn)  
Sample ID : TX002297

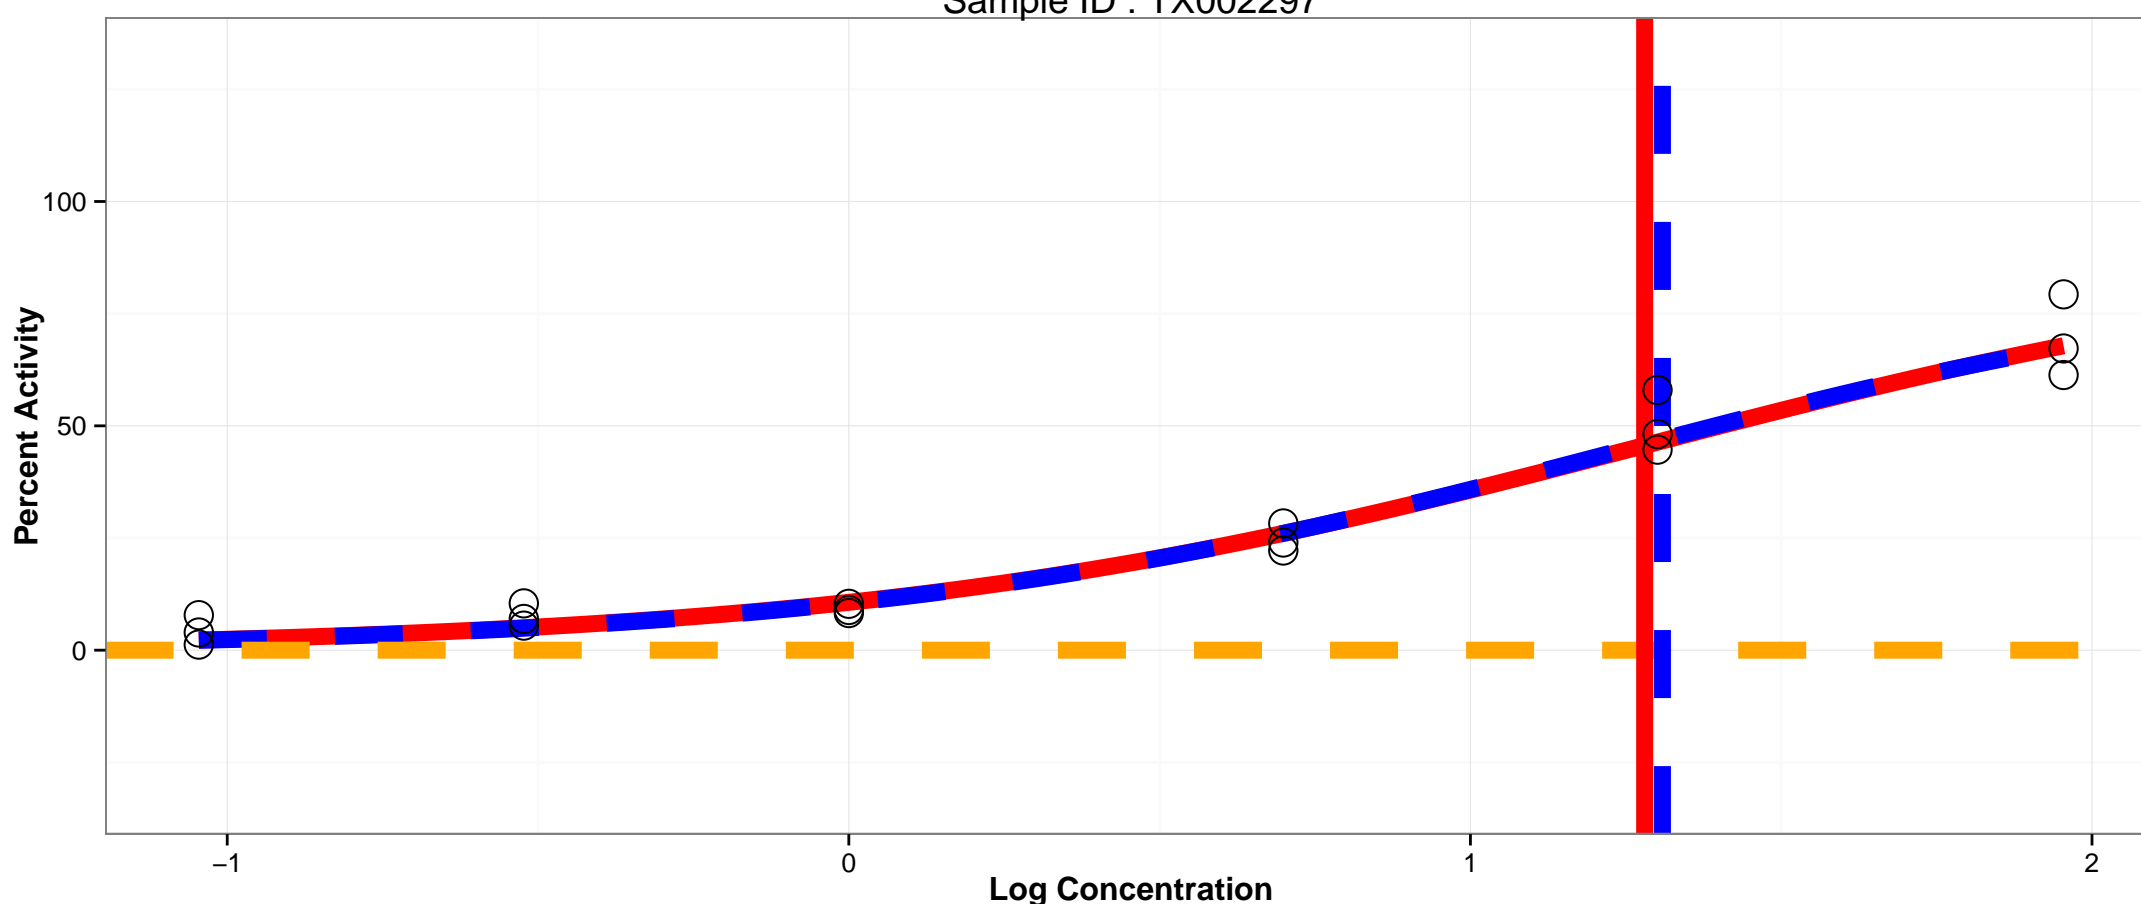

HILL MODEL

|     | tp   | ga    | gw    |
|-----|------|-------|-------|
| val | 91.2 | 1.28  | 0.686 |
| sd  | 15.2 | 0.247 | 0.107 |

GAIN-LOSS MODEL

|     | tp   | ga   | gw    | la   | lw    |
|-----|------|------|-------|------|-------|
| val | 95.2 | 1.31 | 0.691 | 3.95 | 0.701 |
| sd  | NA   | NA   | NA    | NA   | NA    |

|      | CNST   | HILL   | GNLS   |
|------|--------|--------|--------|
| AIC  | 183.54 | 113.94 | 117.75 |
| PROB | 0      | 0.87   | 0.13   |
| RMSE | 37.01  | 4.81   | 4.81   |

MAX\_MEAN : 69.3 MAX\_MED : 67.3 BMAD : 5.69  
COFF : 20 HIT-CALL : 1 FITC : 42 ACTP : 1  
FLAGS :

Assay ID 1509 (NHEERL\_HEK293T\_CellTiterGLO)  
Sample ID : TX002297

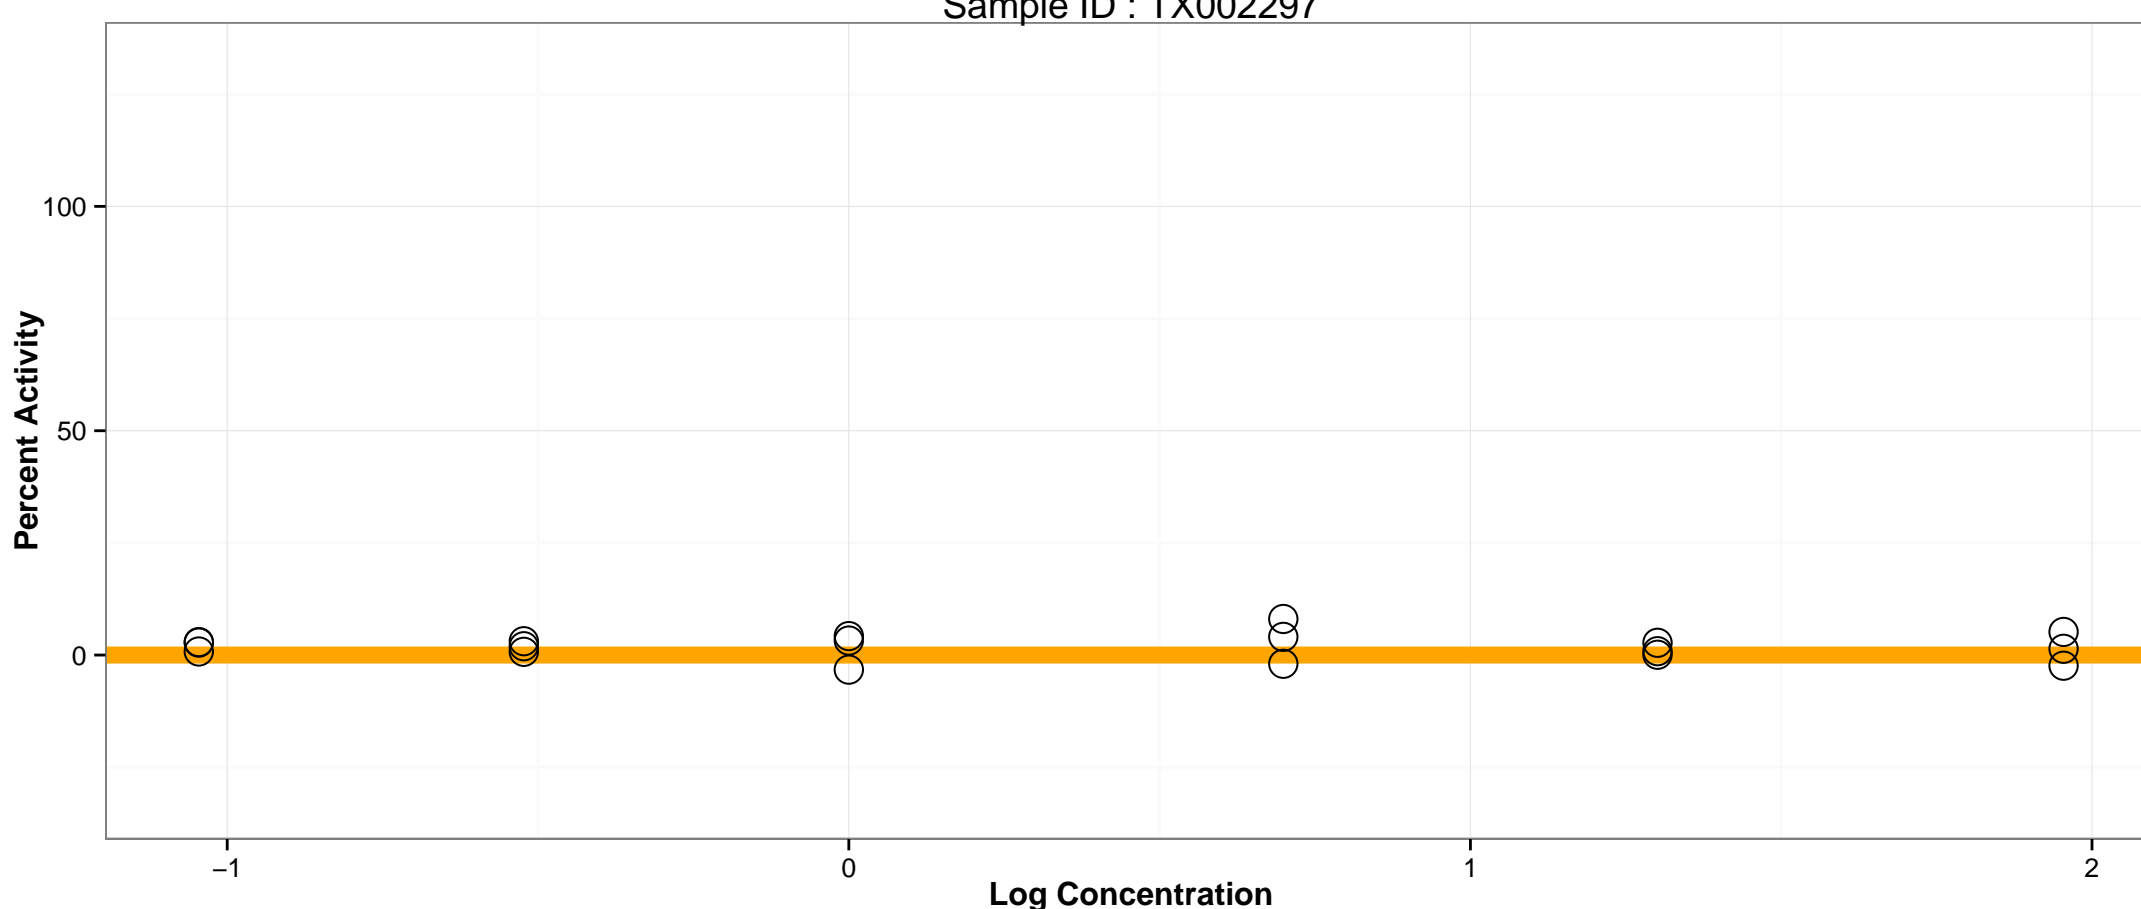

HILL MODEL

HILL MODEL: Not applicable

GAIN-LOSS MODEL

GNLS MODEL: Not applicable

|      | CNST  | HILL | GNLS |
|------|-------|------|------|
| AIC  | 97.62 | NA   | NA   |
| PROB | 1     | NA   | NA   |
| RMSE | 3.31  | NA   | NA   |

MAX\_MEAN : 3.39 MAX\_MED : 4.07 BMAD : 5.54  
COFF : 20 HIT-CALL : 0 FITC : 4 ACTP : 0  
FLAGS :

Assay ID 1848 (NHEERL\_Quantilum\_inhib\_2\_dn)  
Sample ID : TX002297

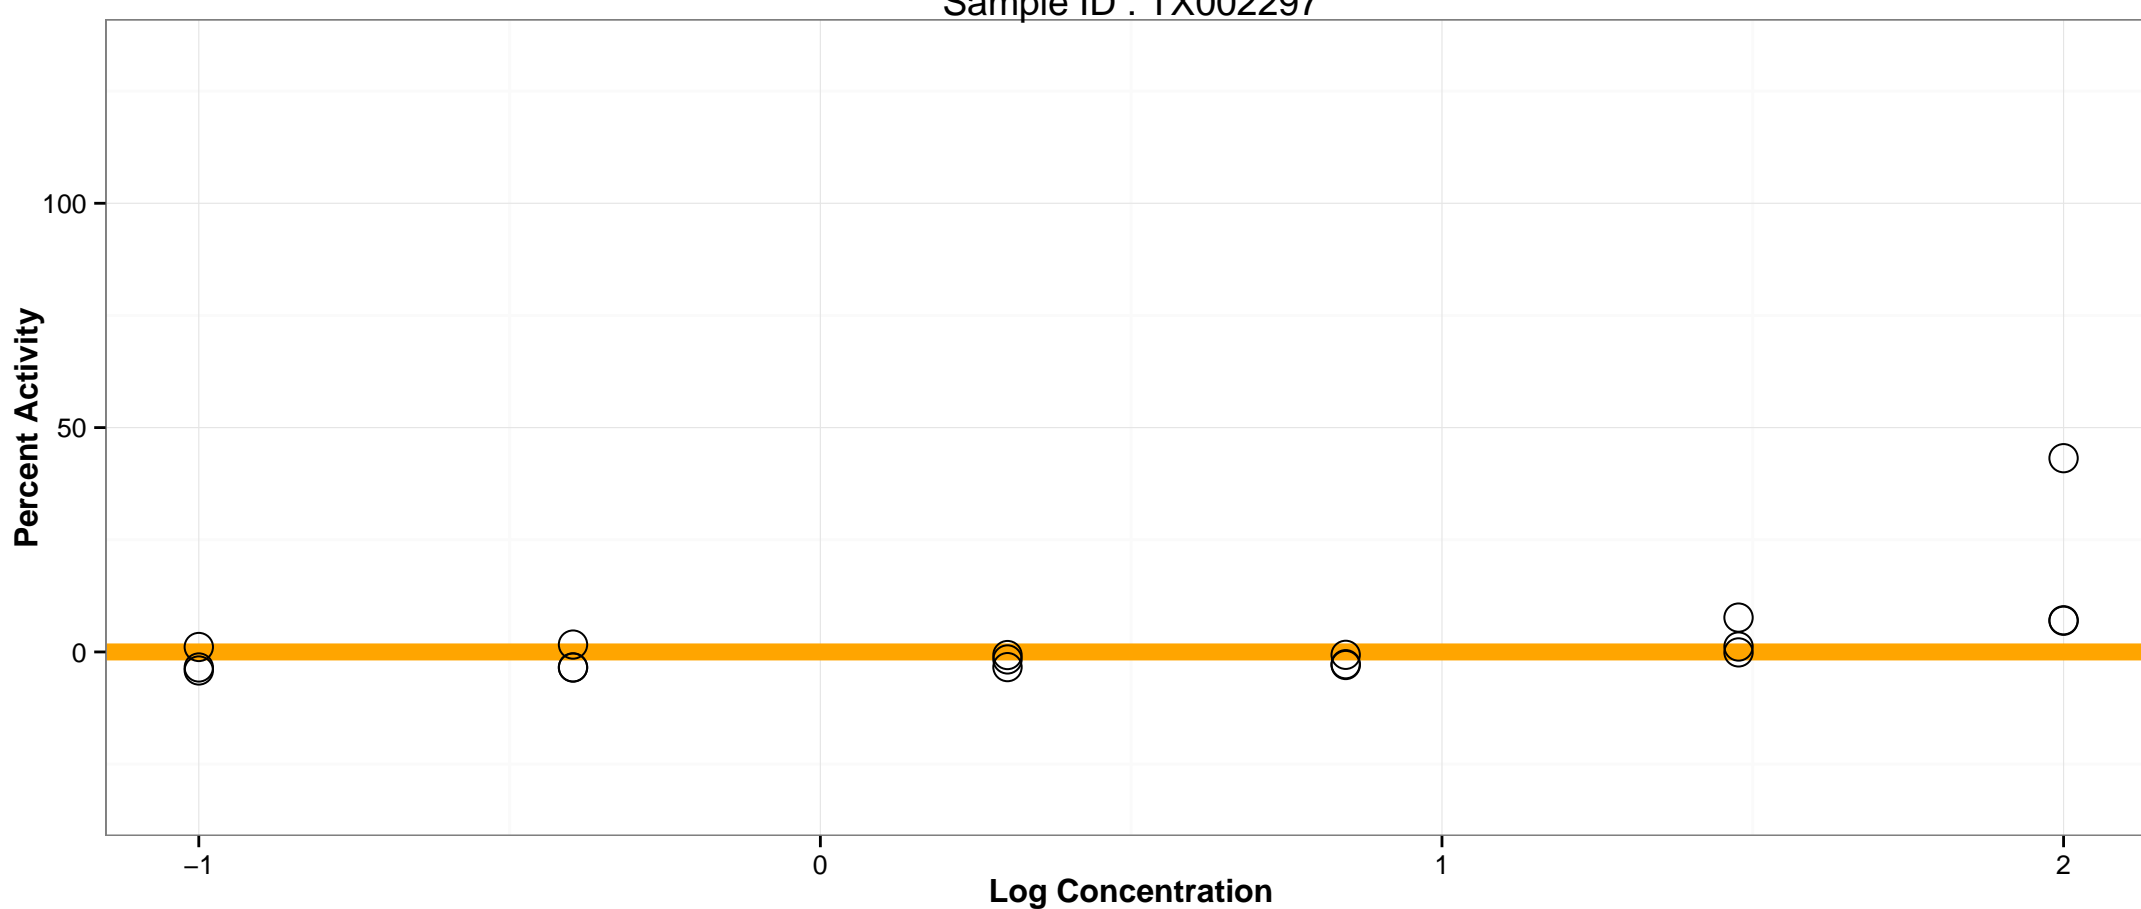

HILL MODEL

HILL MODEL: Not applicable

GAIN-LOSS MODEL

GNLS MODEL: Not applicable

|      | CNST   | HILL | GNLS |
|------|--------|------|------|
| AIC  | 119.62 | NA   | NA   |
| PROB | 1      | NA   | NA   |
| RMSE | 10.83  | NA   | NA   |

MAX\_MEAN : 19.1 MAX\_MED : 7.07 BMAD : 8.58  
COFF : 20 HIT-CALL : 0 FITC : 4 ACTP : 0  
FLAGS :

Assay ID 1824 (NHEERL\_TPO\_GUA\_dn)  
Sample ID : TP0001442F01

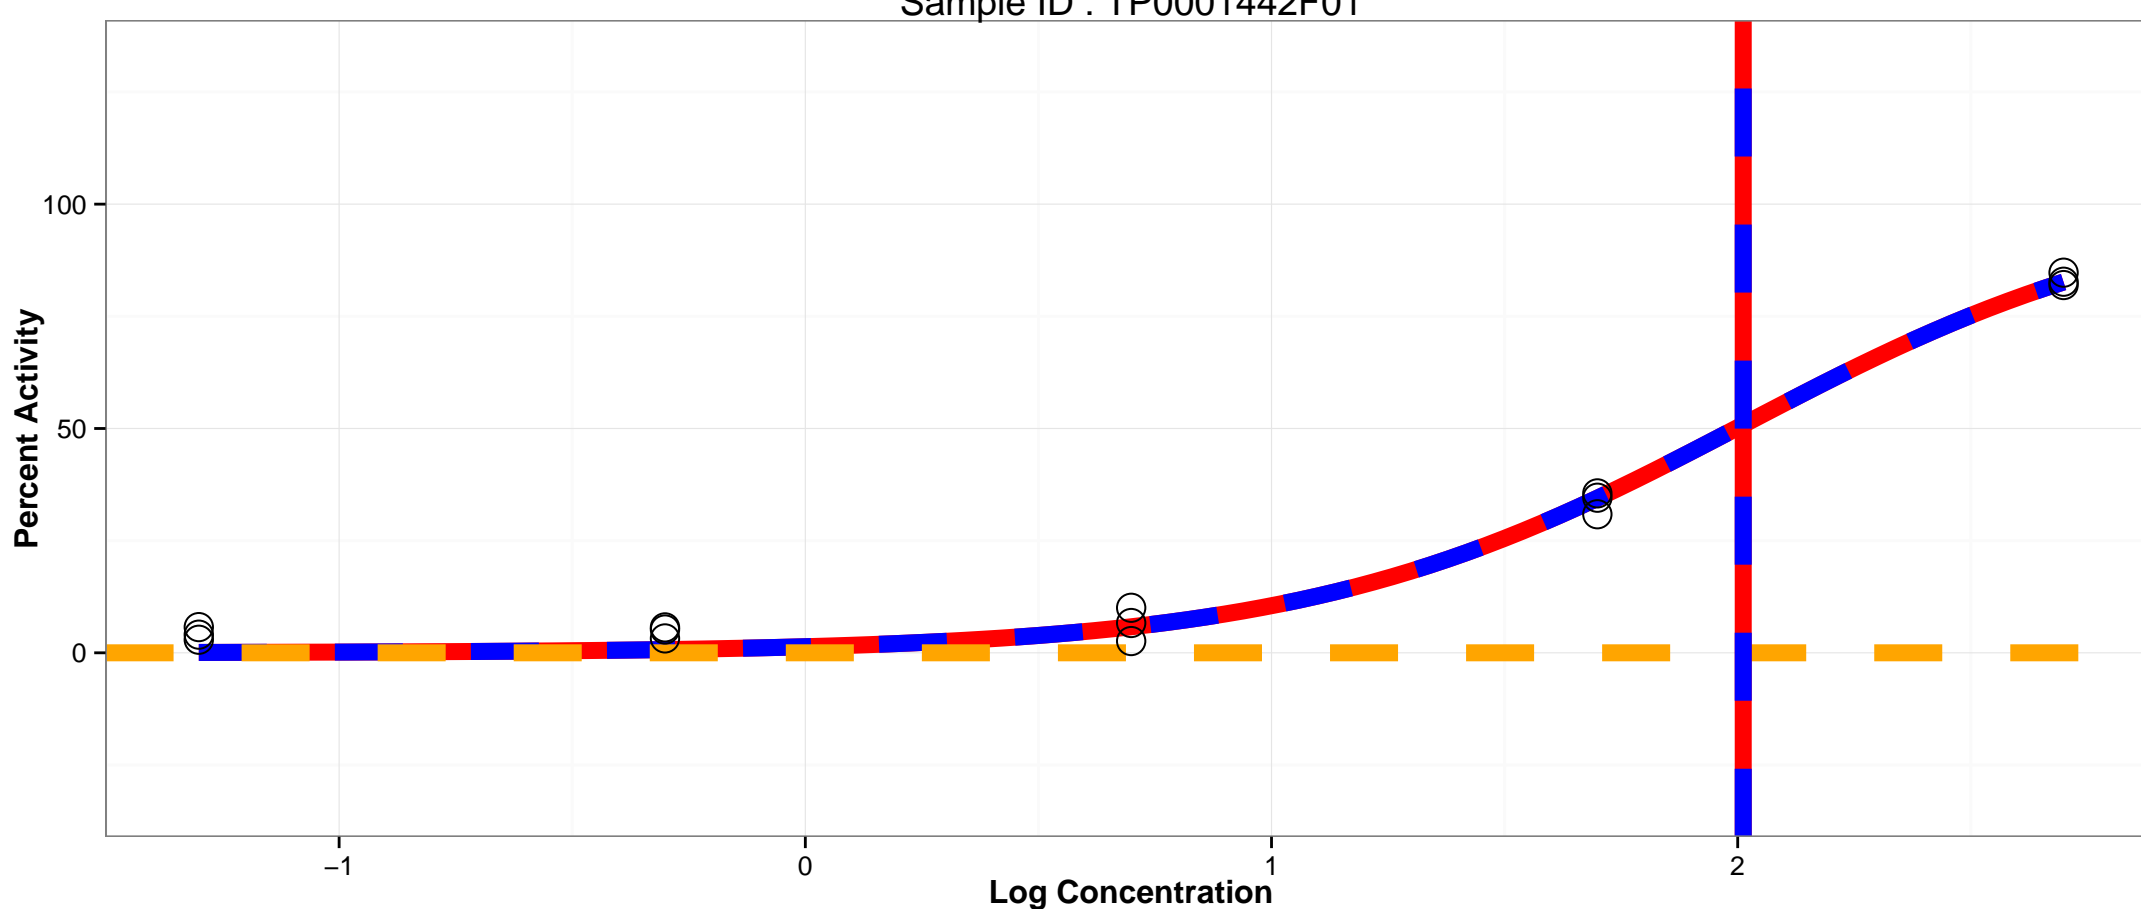

HILL MODEL

|     | tp   | ga    | gw    |
|-----|------|-------|-------|
| val | 102  | 2.01  | 0.928 |
| sd  | 11.3 | 0.145 | 0.178 |

GAIN-LOSS MODEL

|     | tp  | ga   | gw    | la   | lw   |
|-----|-----|------|-------|------|------|
| val | 102 | 2.01 | 0.928 | 4.59 | 13.4 |
| sd  | NA  | NA   | NA    | NA   | NA   |

|      | CNST   | HILL  | GNLS  |
|------|--------|-------|-------|
| AIC  | 153.93 | 87.67 | 91.67 |
| PROB | 0      | 0.88  | 0.12  |
| RMSE | 40.36  | 3.21  | 3.21  |

MAX\_MEAN : 83.1 MAX\_MED : 82.7 BMAD : 3.71  
COFF : 20 HIT-CALL : 1 FITC : 42 ACTP : 1  
FLAGS :

Chemical : Asulam  
CAS : 3337-71-1

Assay ID 1508 (NHEERL\_TPO\_AUR\_dn)  
Sample ID : TX000986

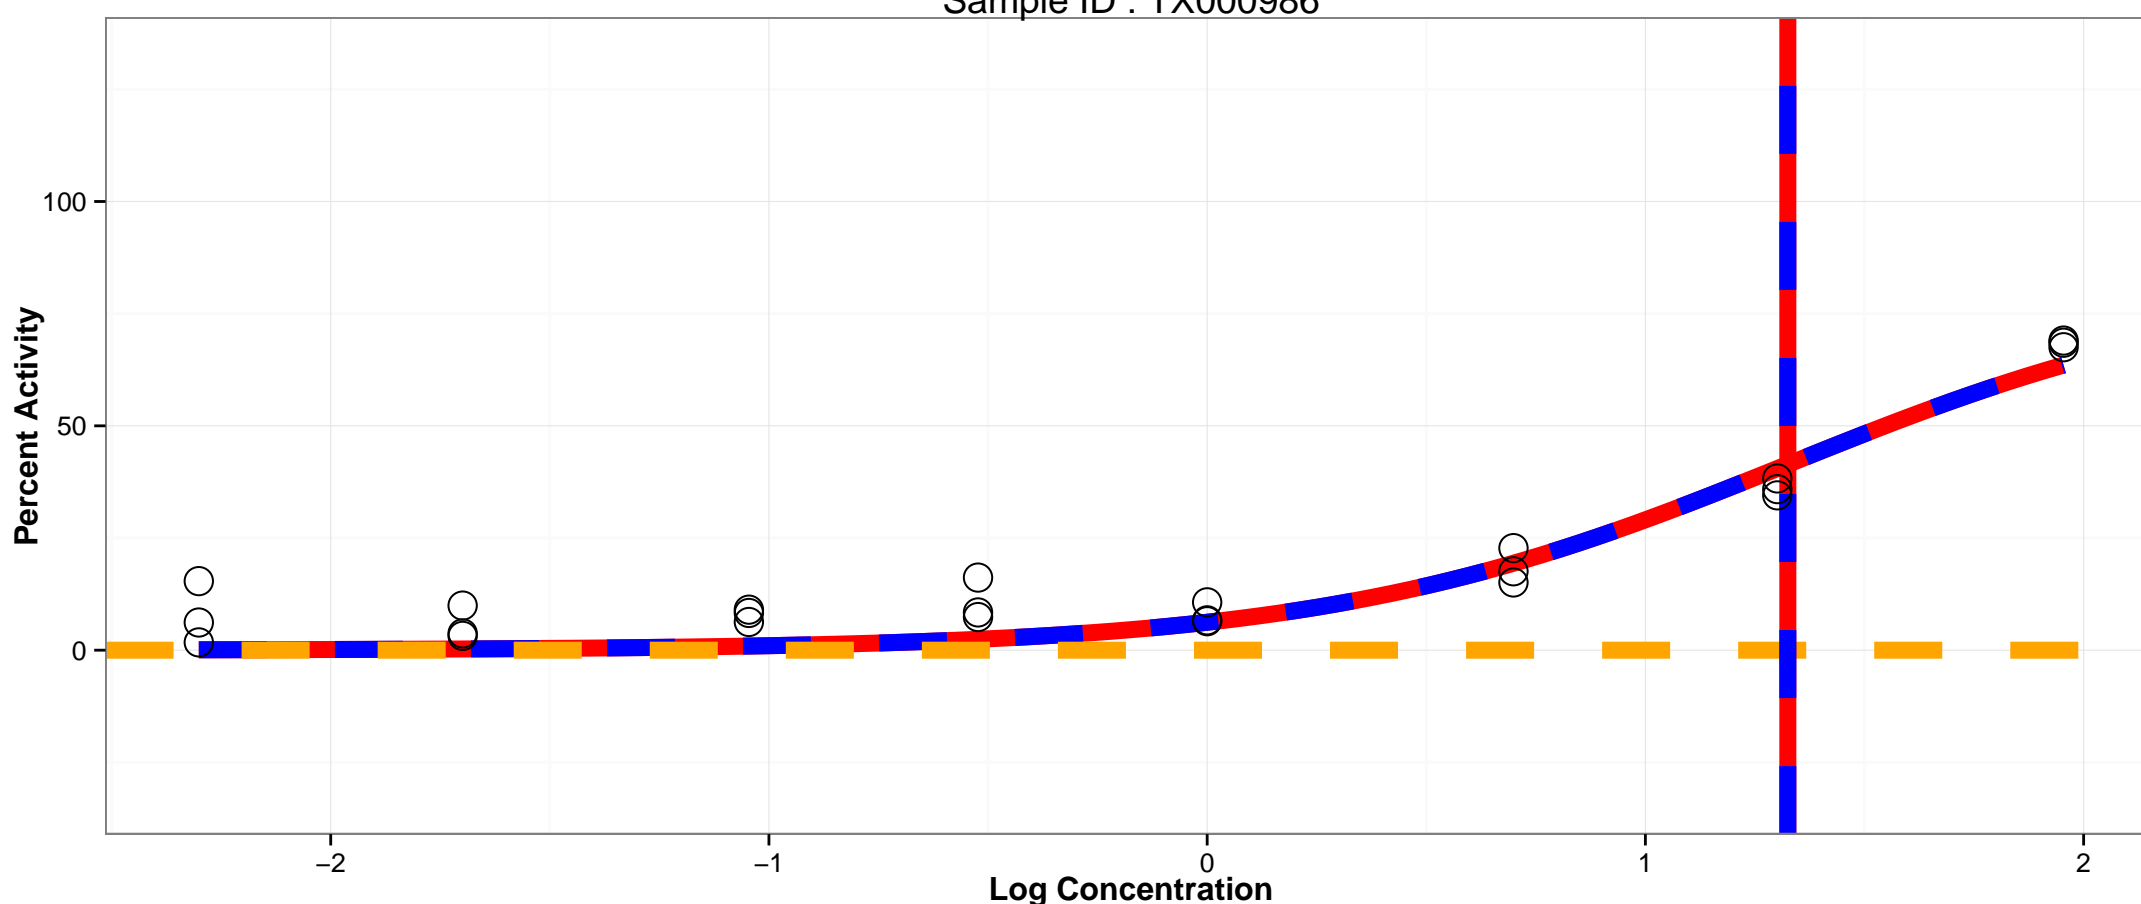

**HILL MODEL**

|     | tp   | ga    | gw    |
|-----|------|-------|-------|
| val | 82.8 | 1.33  | 0.823 |
| sd  | 12.3 | 0.182 | 0.159 |

**GAIN-LOSS MODEL**

|     | tp   | ga    | gw    | la   | lw   |
|-----|------|-------|-------|------|------|
| val | 82.8 | 1.33  | 0.823 | 3.77 | 5.19 |
| sd  | 12.3 | 0.182 | 0.159 | 2410 | 6900 |

|      | CNST   | HILL   | GNLS   |
|------|--------|--------|--------|
| AIC  | 228.84 | 166.47 | 170.47 |
| PROB | 0      | 0.88   | 0.12   |
| RMSE | 29.02  | 6.37   | 6.37   |

MAX\_MEAN : 68.4 MAX\_MED : 68.5 BMAD : 5.69  
COFF : 20 HIT-CALL : 1 FITC : 42 ACTP : 1  
FLAGS :

Assay ID 1509 (NHEERL\_HEK293T\_CellTiterGLO)  
Sample ID : TX000986

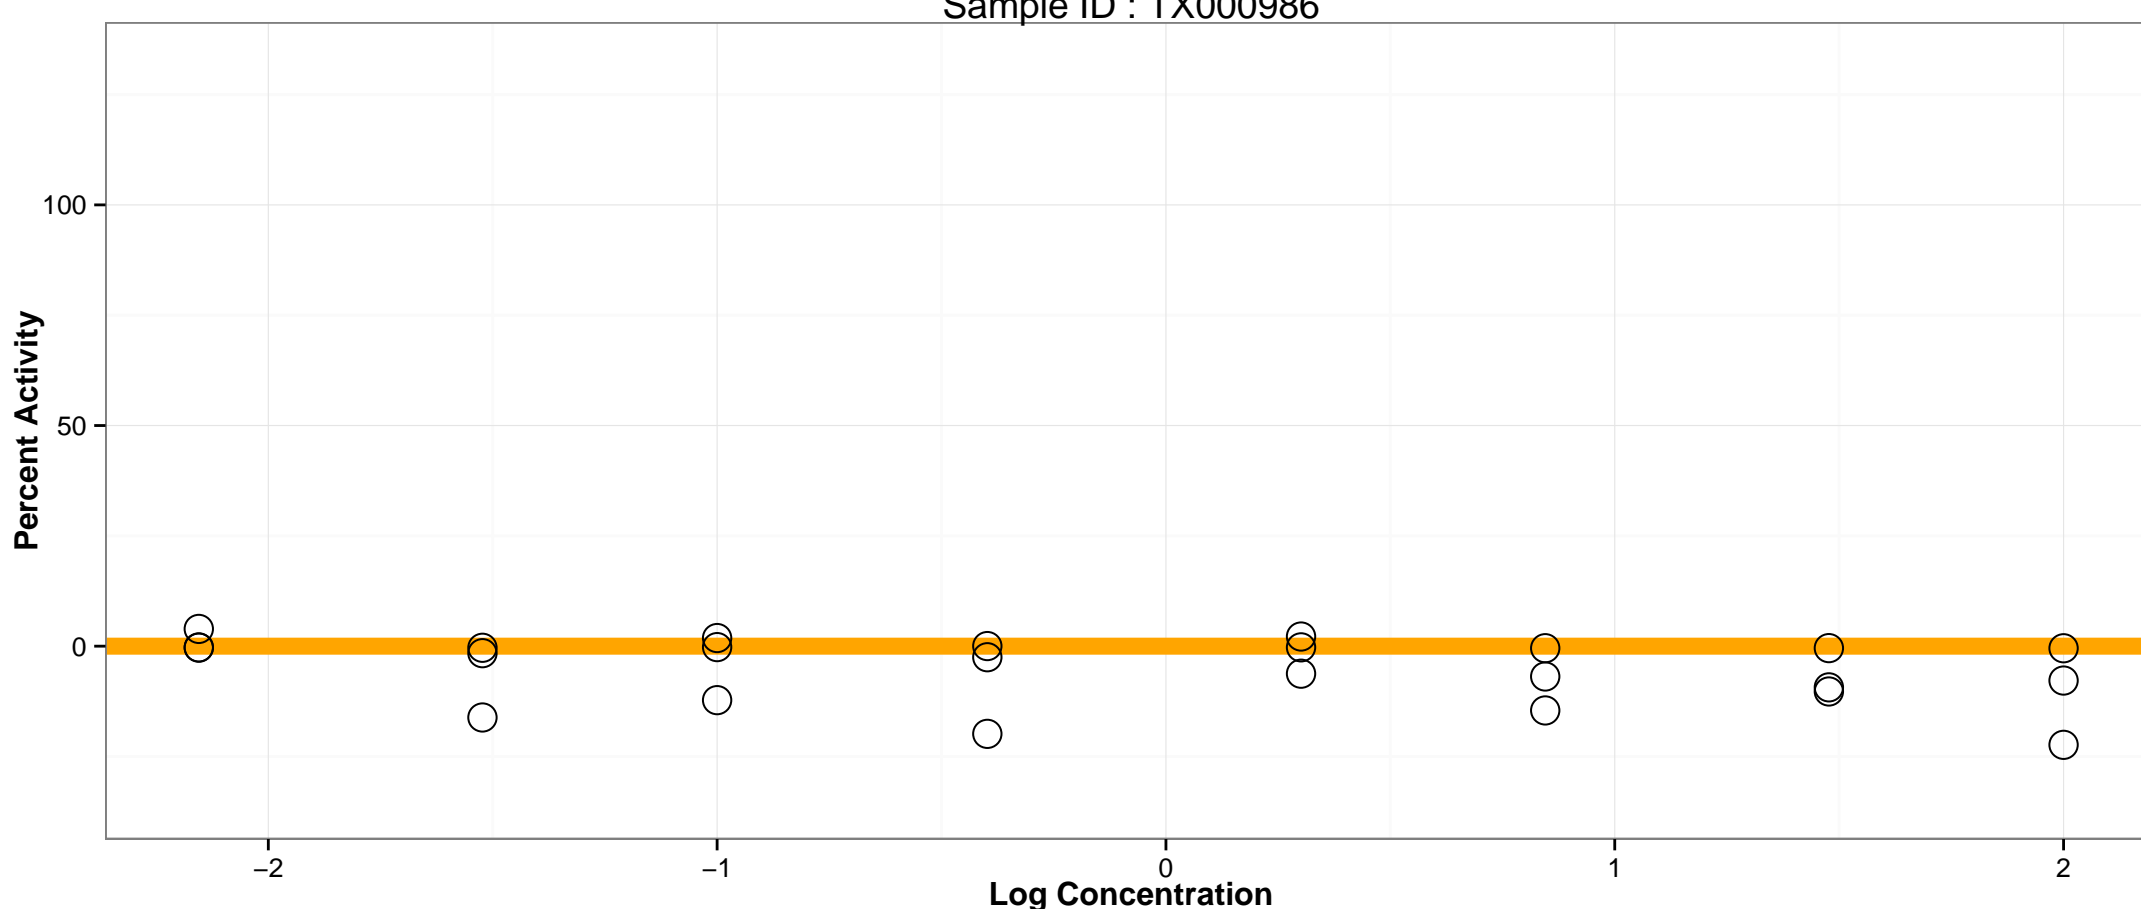

**HILL MODEL**

HILL MODEL: Not applicable

**GAIN-LOSS MODEL**

GNLS MODEL: Not applicable

|      | CNST   | HILL | GNLS |
|------|--------|------|------|
| AIC  | 172.94 | NA   | NA   |
| PROB | 1      | NA   | NA   |
| RMSE | 8.87   | NA   | NA   |

MAX\_MEAN : 1.11 MAX\_MED : -0.196 BMAD : 5.54  
COFF : 20 HIT-CALL : 0 FITC : 4 ACTP : 0  
FLAGS :

Assay ID 1848 (NHEERL\_Quantilum\_inhib\_2\_dn)  
Sample ID : TX000986

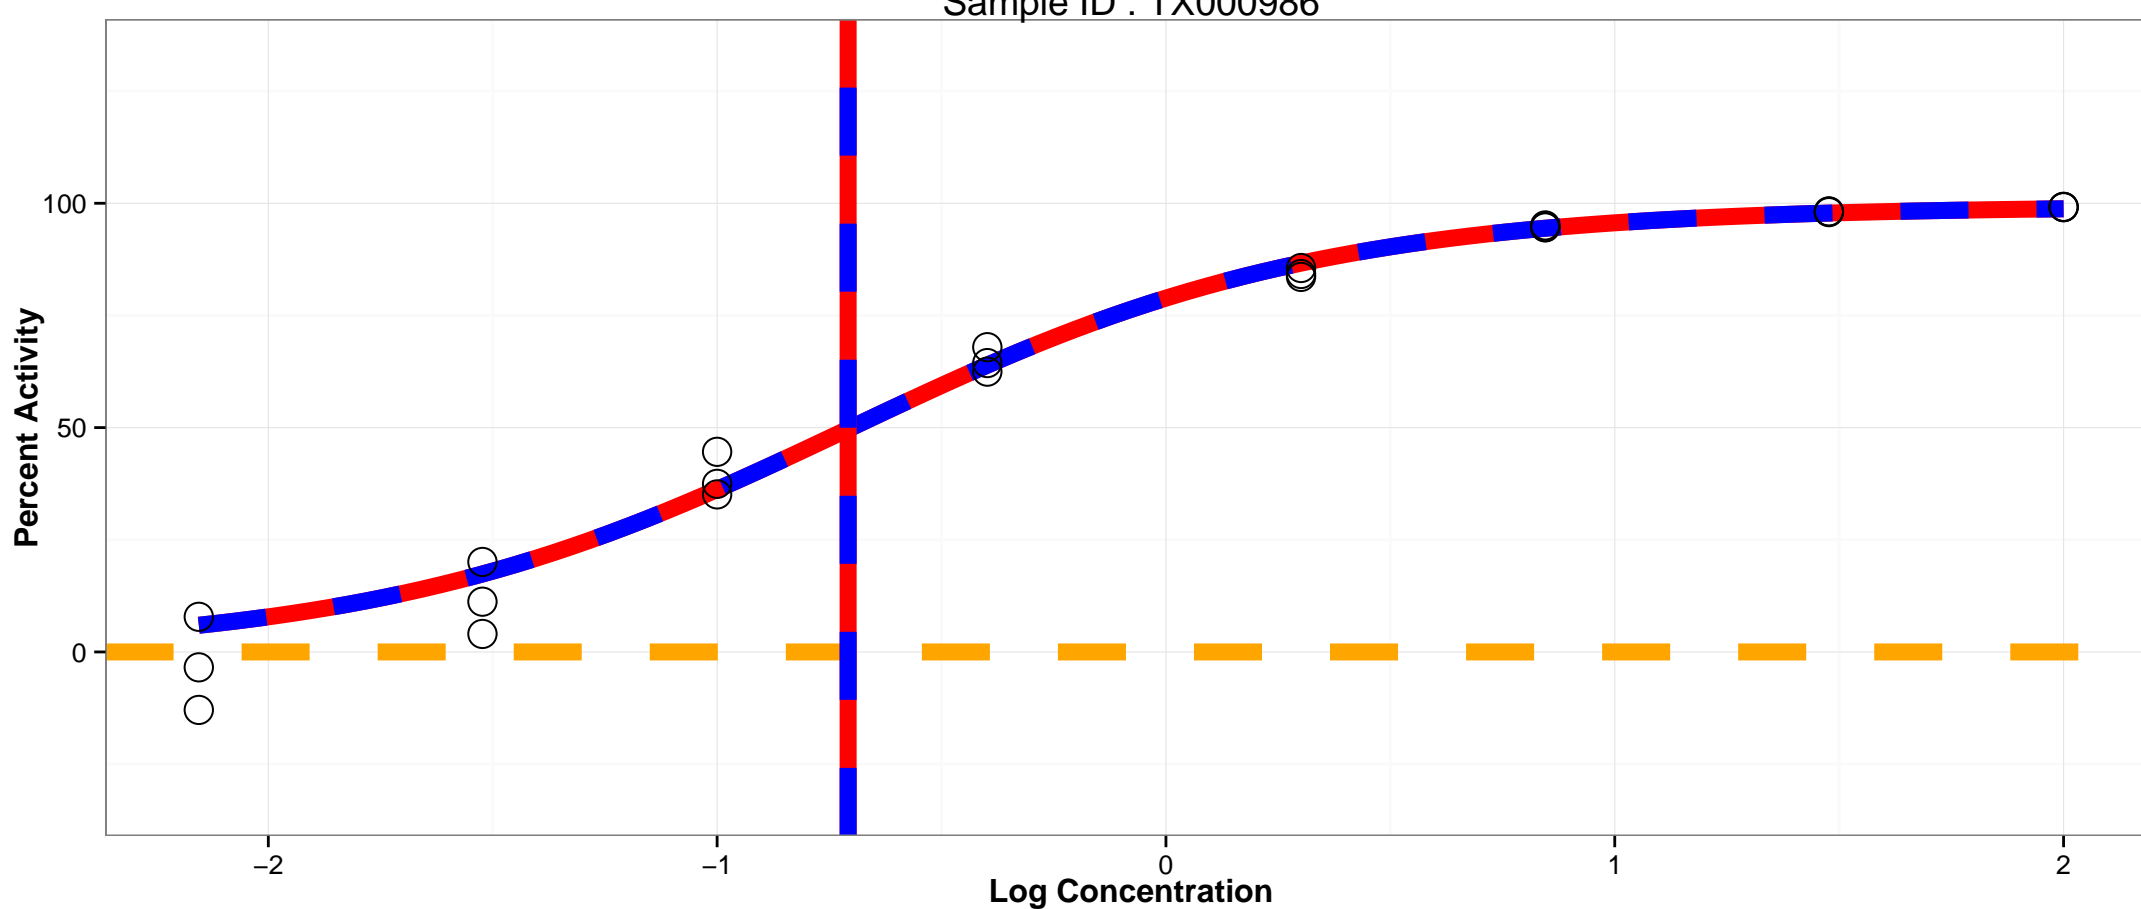

**HILL MODEL**

|     | tp   | ga     | gw     |
|-----|------|--------|--------|
| val | 99.3 | -0.708 | 0.827  |
| sd  | 1.25 | 0.0339 | 0.0614 |

**GAIN-LOSS MODEL**

|     | tp   | ga     | gw     | la   | lw   |
|-----|------|--------|--------|------|------|
| val | 99.3 | -0.708 | 0.827  | 3.52 | 5.69 |
| sd  | 1.25 | 0.0339 | 0.0614 | 1250 | 4660 |

|      | CNST   | HILL   | GNLS   |
|------|--------|--------|--------|
| AIC  | 279.62 | 150.04 | 154.04 |
| PROB | 0      | 0.88   | 0.12   |
| RMSE | 72.13  | 5.7    | 5.7    |

MAX\_MEAN : 99.2 MAX\_MED : 99.2 BMAD : 8.58  
COFF : 20 HIT-CALL : 1 FITC : 41 ACTP : 1  
FLAGS :

Assay ID 1824 (NHEERL\_TPO\_GUA\_dn)  
Sample ID : TP0001442F02

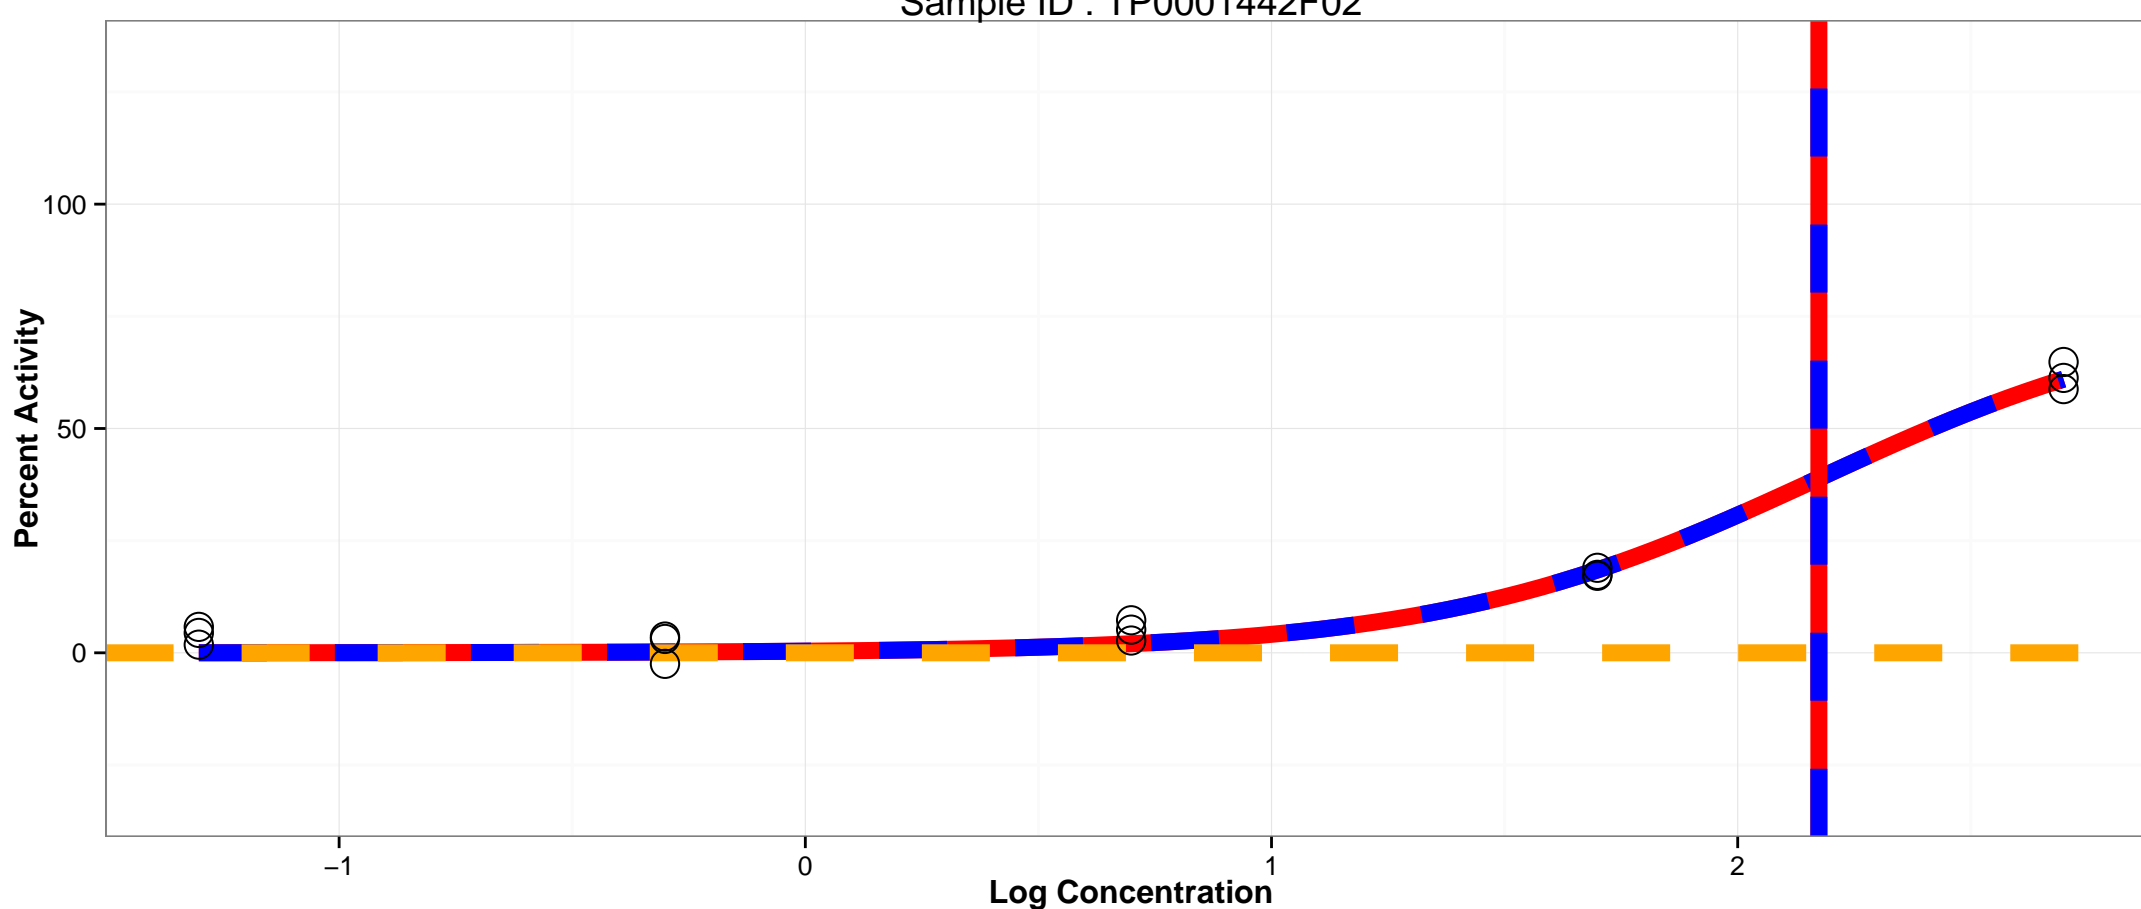

**HILL MODEL**

|     | tp   | ga    | gw   |
|-----|------|-------|------|
| val | 77.8 | 2.17  | 1.07 |
| sd  | 16.2 | 0.242 | 0.31 |

**GAIN-LOSS MODEL**

|     | tp   | ga   | gw   | la   | lw |
|-----|------|------|------|------|----|
| val | 77.8 | 2.17 | 1.07 | 3.44 | 18 |
| sd  | NA   | NA   | NA   | NA   | NA |

|      | CNST   | HILL  | GNLS  |
|------|--------|-------|-------|
| AIC  | 142.61 | 86.44 | 90.44 |
| PROB | 0      | 0.88  | 0.12  |
| RMSE | 28.92  | 3.1   | 3.1   |

MAX\_MEAN : 61.6 MAX\_MED : 61.3 BMAD : 3.71  
COFF : 20 HIT-CALL : 1 FITC : 42 ACTP : 1  
FLAGS :

Chemical : Sodium dimethyldithiocarbamate  
CAS : 128-04-1

Assay ID 1508 (NHEERL\_TPO\_AUR\_dn)  
Sample ID : TX004202

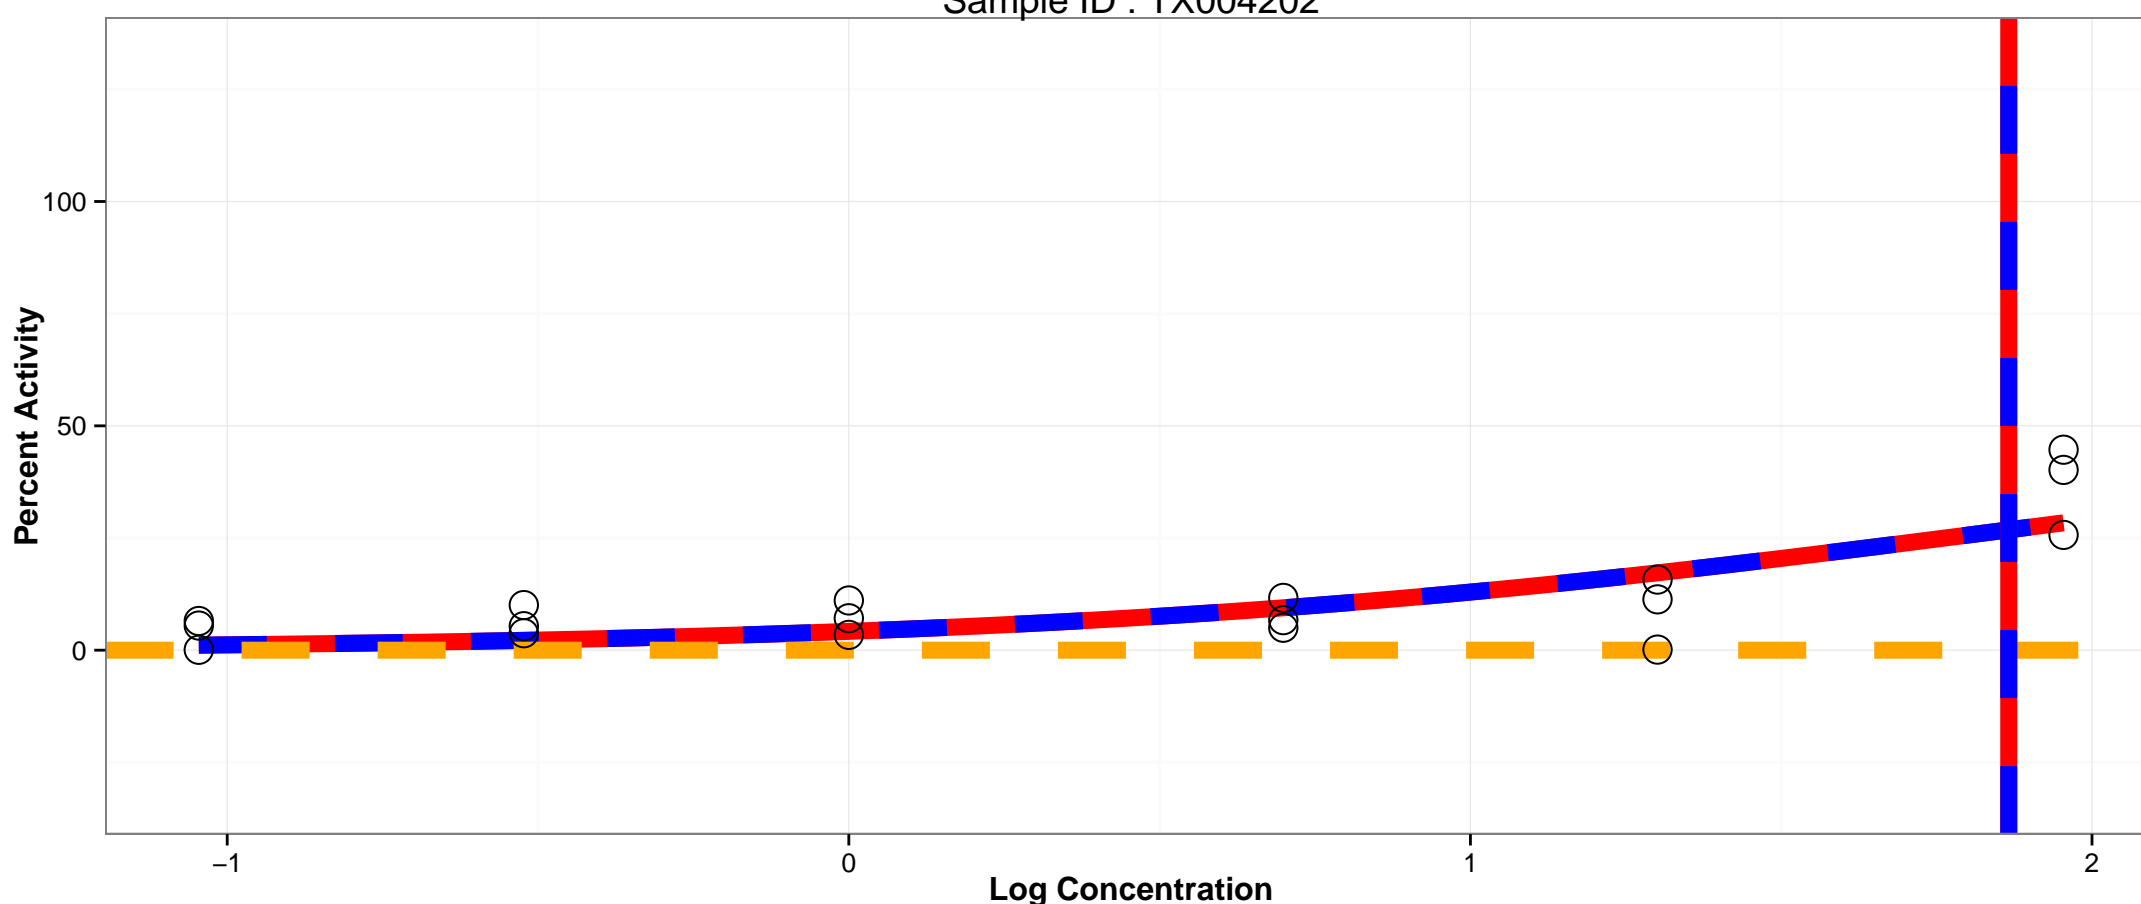

HILL MODEL

|     | tp   | ga    | gw    |
|-----|------|-------|-------|
| val | 53.6 | 1.87  | 0.574 |
| sd  | 23.9 | 0.577 | 0.287 |

GAIN-LOSS MODEL

|     | tp   | ga    | gw    | la   | lw    |
|-----|------|-------|-------|------|-------|
| val | 53.6 | 1.87  | 0.574 | 3.52 | 6.42  |
| sd  | 23.9 | 0.577 | 0.287 | 7710 | 31700 |

|      | CNST   | HILL   | GNLS   |
|------|--------|--------|--------|
| AIC  | 152.45 | 129.83 | 133.83 |
| PROB | 0      | 0.88   | 0.12   |
| RMSE | 17.09  | 7.29   | 7.29   |

MAX\_MEAN : 36.9 MAX\_MED : 40.2 BMAD : 5.69  
COFF : 20 HIT-CALL : 1 FITC : 42 ACTP : 1  
FLAGS : 6

Assay ID 1509 (NHEERL\_HEK293T\_CellTiterGLO)  
Sample ID : TX004202

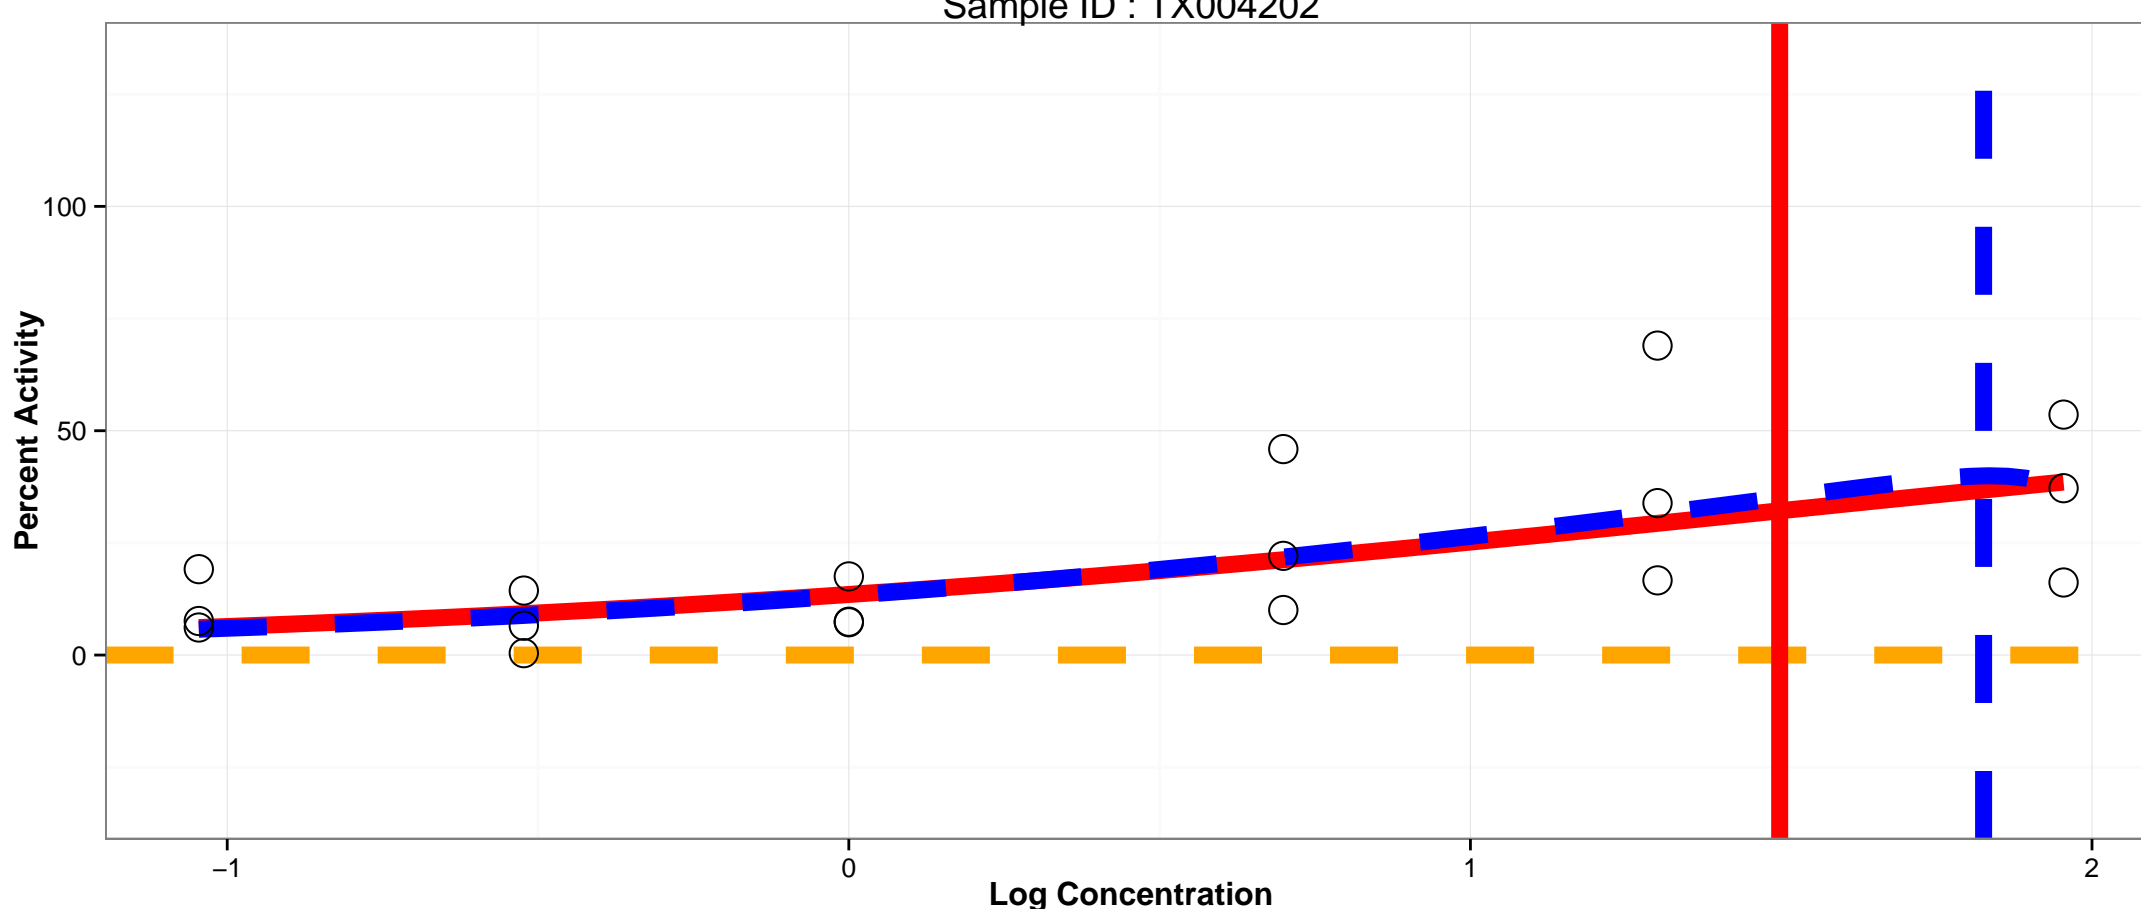

HILL MODEL

|     | tp   | ga   | gw    |
|-----|------|------|-------|
| val | 64.3 | 1.5  | 0.384 |
| sd  | 98.7 | 3.64 | 0.377 |

GAIN-LOSS MODEL

|     | tp   | ga   | gw    | la   | lw   |
|-----|------|------|-------|------|------|
| val | 82.1 | 1.83 | 0.391 | 2.08 | 6.24 |
| sd  | NA   | NA   | NA    | NA   | NA   |

|      | CNST   | HILL   | GNLS   |
|------|--------|--------|--------|
| AIC  | 173.48 | 152.62 | 156.46 |
| PROB | 0      | 0.87   | 0.13   |
| RMSE | 28.41  | 14.12  | 13.82  |

MAX\_MEAN : 39.8 MAX\_MED : 37.2 BMAD : 5.54  
COFF : 20 HIT-CALL : 1 FITC : 42 ACTP : 1  
FLAGS :

Assay ID 1848 (NHEERL\_Quantilum\_inhib\_2\_dn)  
Sample ID : TX004202

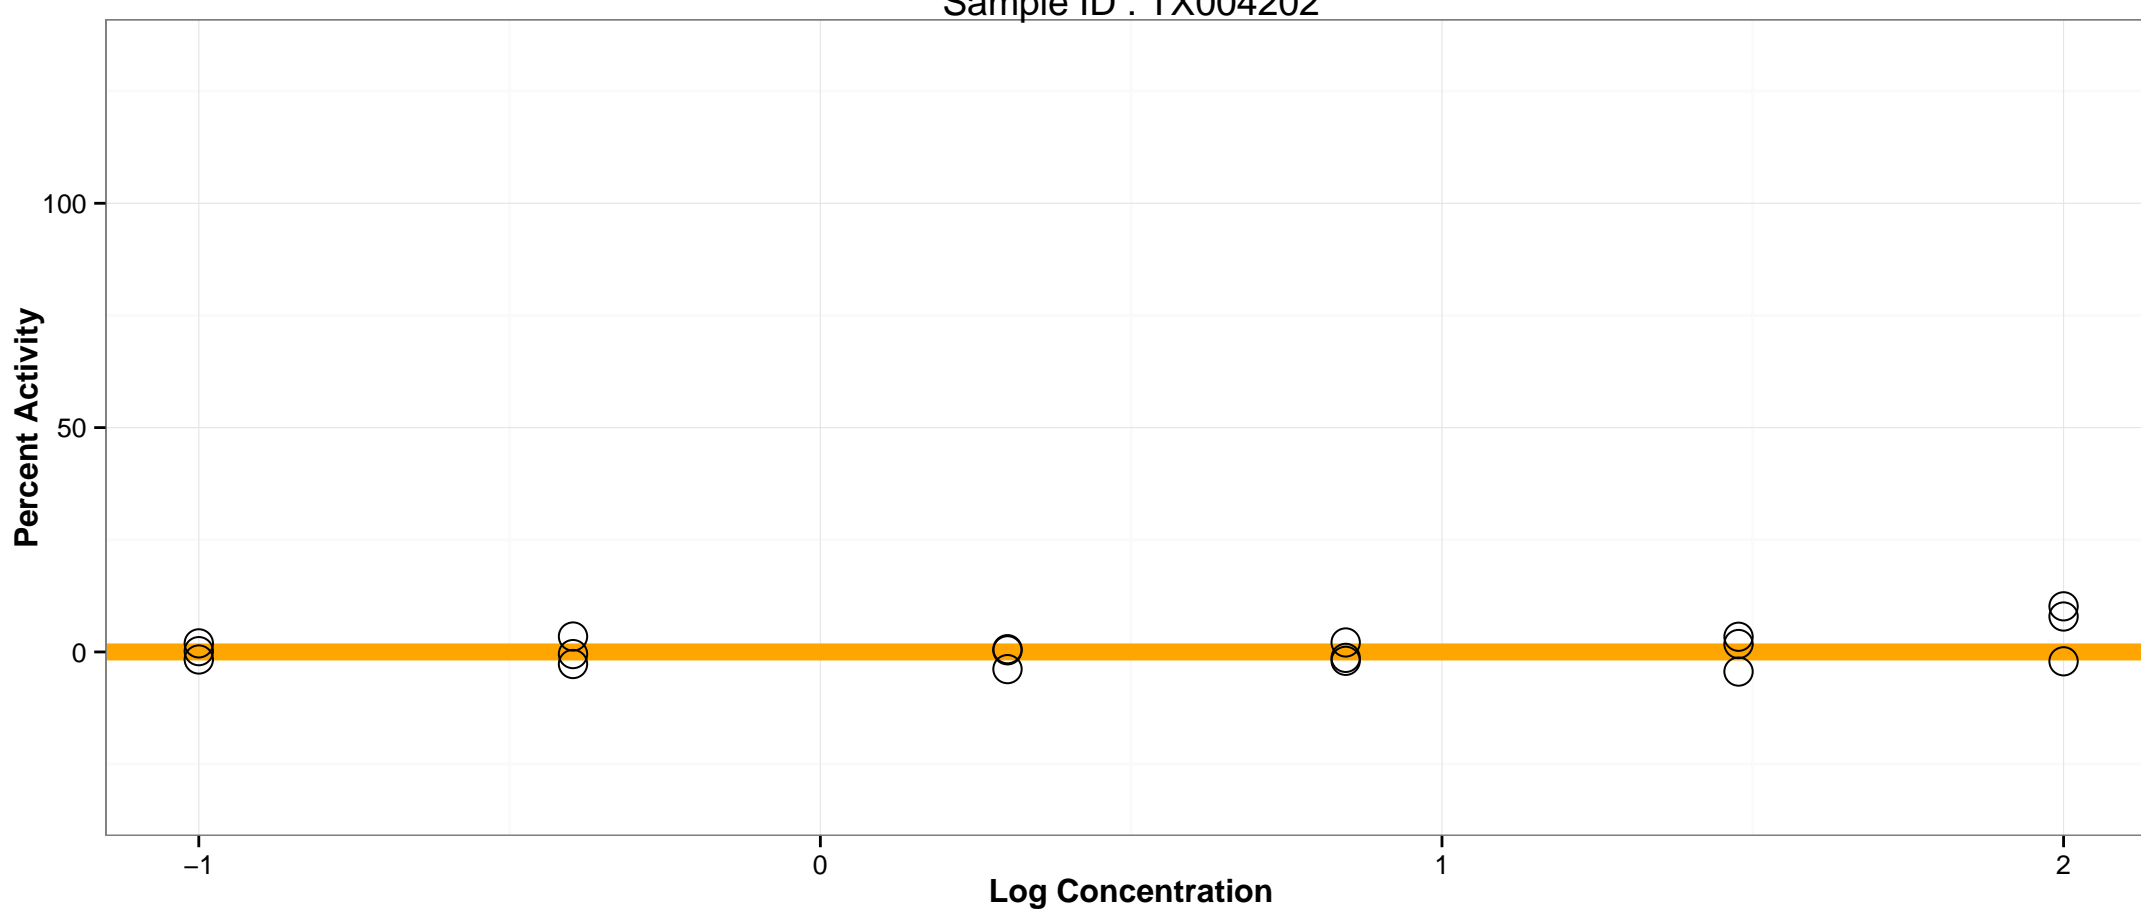

HILL MODEL

HILL MODEL: Not applicable

GAIN-LOSS MODEL

GNLS MODEL: Not applicable

|      | CNST  | HILL | GNLS |
|------|-------|------|------|
| AIC  | 99.41 | NA   | NA   |
| PROB | 1     | NA   | NA   |
| RMSE | 3.77  | NA   | NA   |

MAX\_MEAN : 5.34 MAX\_MED : 7.91 BMAD : 8.58  
COFF : 20 HIT-CALL : 0 FITC : 4 ACTP : 0  
FLAGS :

Assay ID 1824 (NHEERL\_TPO\_GUA\_dn)  
Sample ID : TP0001442F03

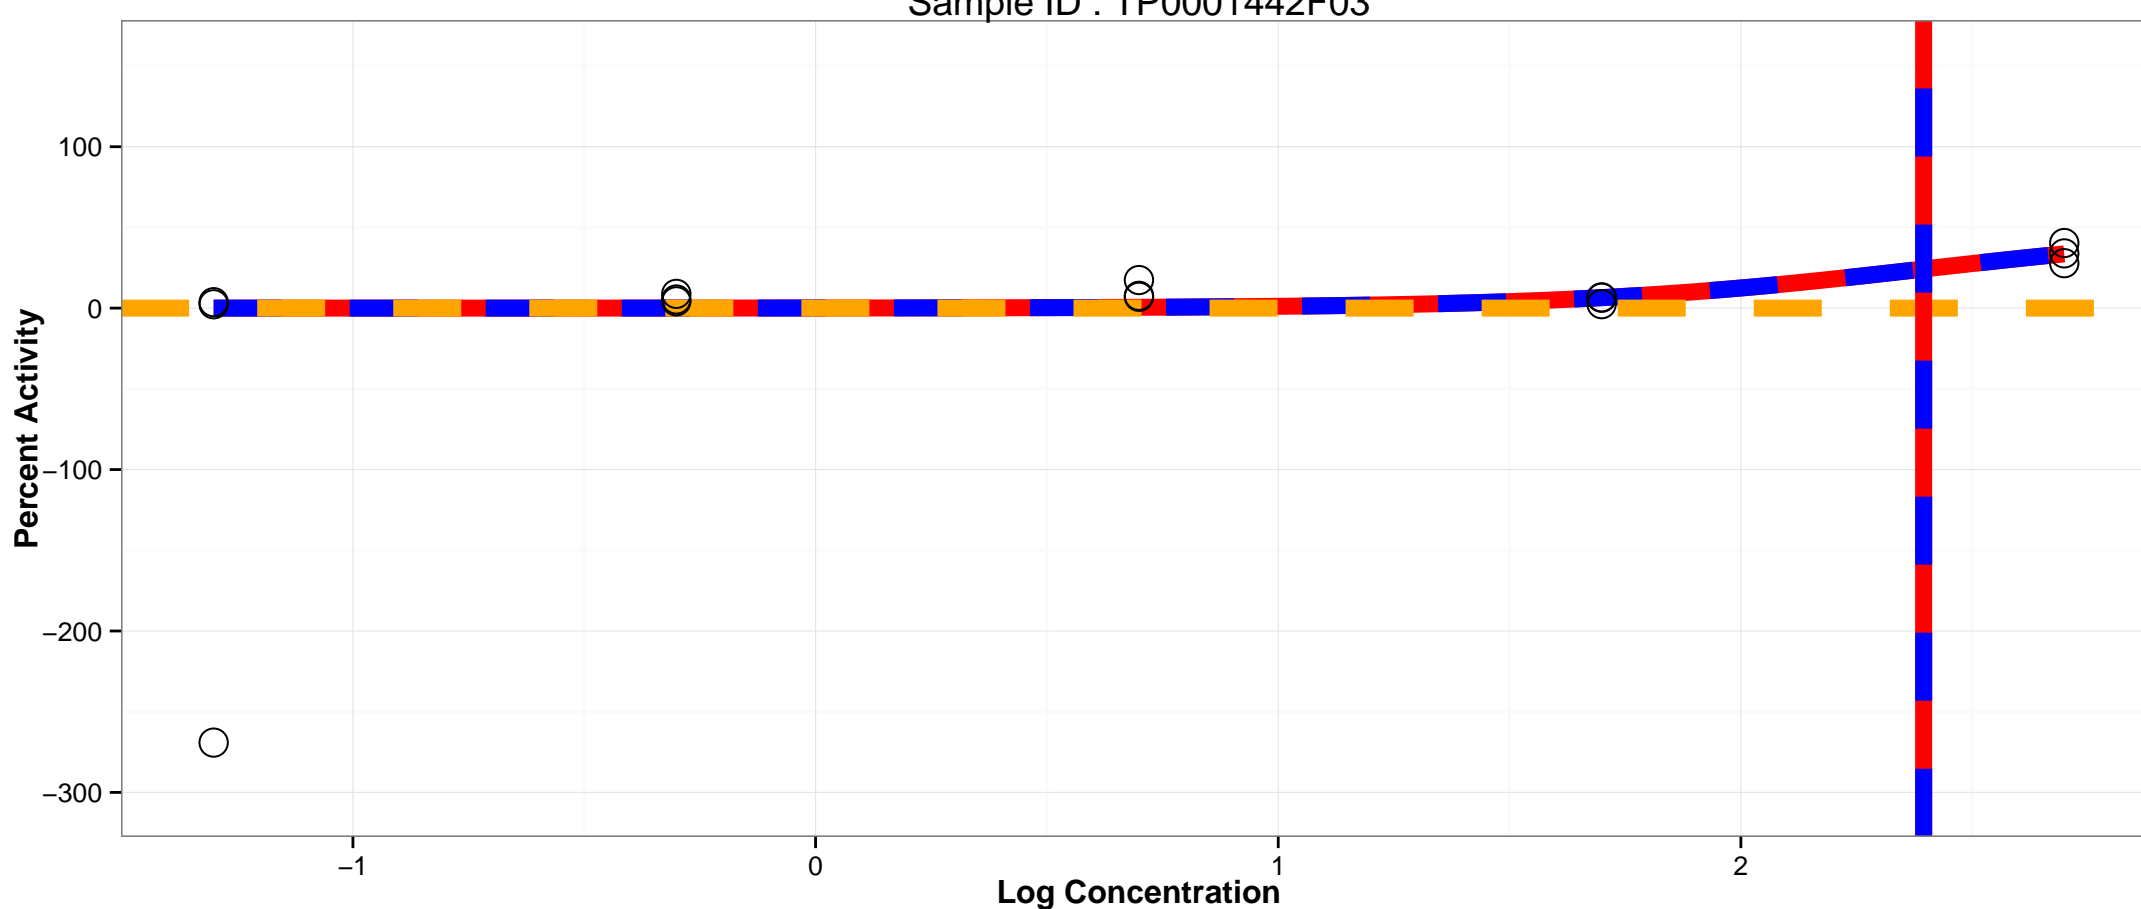

HILL MODEL

|     | tp   | ga   | gw   |
|-----|------|------|------|
| val | 48.4 | 2.4  | 1.17 |
| sd  | 60.6 | 1.16 | 1.55 |

GAIN-LOSS MODEL

|     | tp   | ga   | gw   | la   | lw   |
|-----|------|------|------|------|------|
| val | 48.4 | 2.4  | 1.17 | 4.3  | 5.04 |
| sd  | 60.6 | 1.16 | 1.56 | 3130 | 9830 |

|      | CNST   | HILL   | GNLS   |
|------|--------|--------|--------|
| AIC  | 150.25 | 137.53 | 141.53 |
| PROB | 0      | 0.88   | 0.12   |
| RMSE | 71.48  | 69.78  | 69.78  |

MAX\_MEAN : 34.1 MAX\_MED : 34 BMAD : 3.71  
COFF : 20 HIT-CALL : 1 FITC : 42 ACTP : 0.998  
FLAGS : 10; 6

Chemical : Diocetyl phthalate  
CAS : 117-84-0

Assay ID 1508 (NHEERL\_TPO\_AUR\_dn)  
Sample ID : TX009038

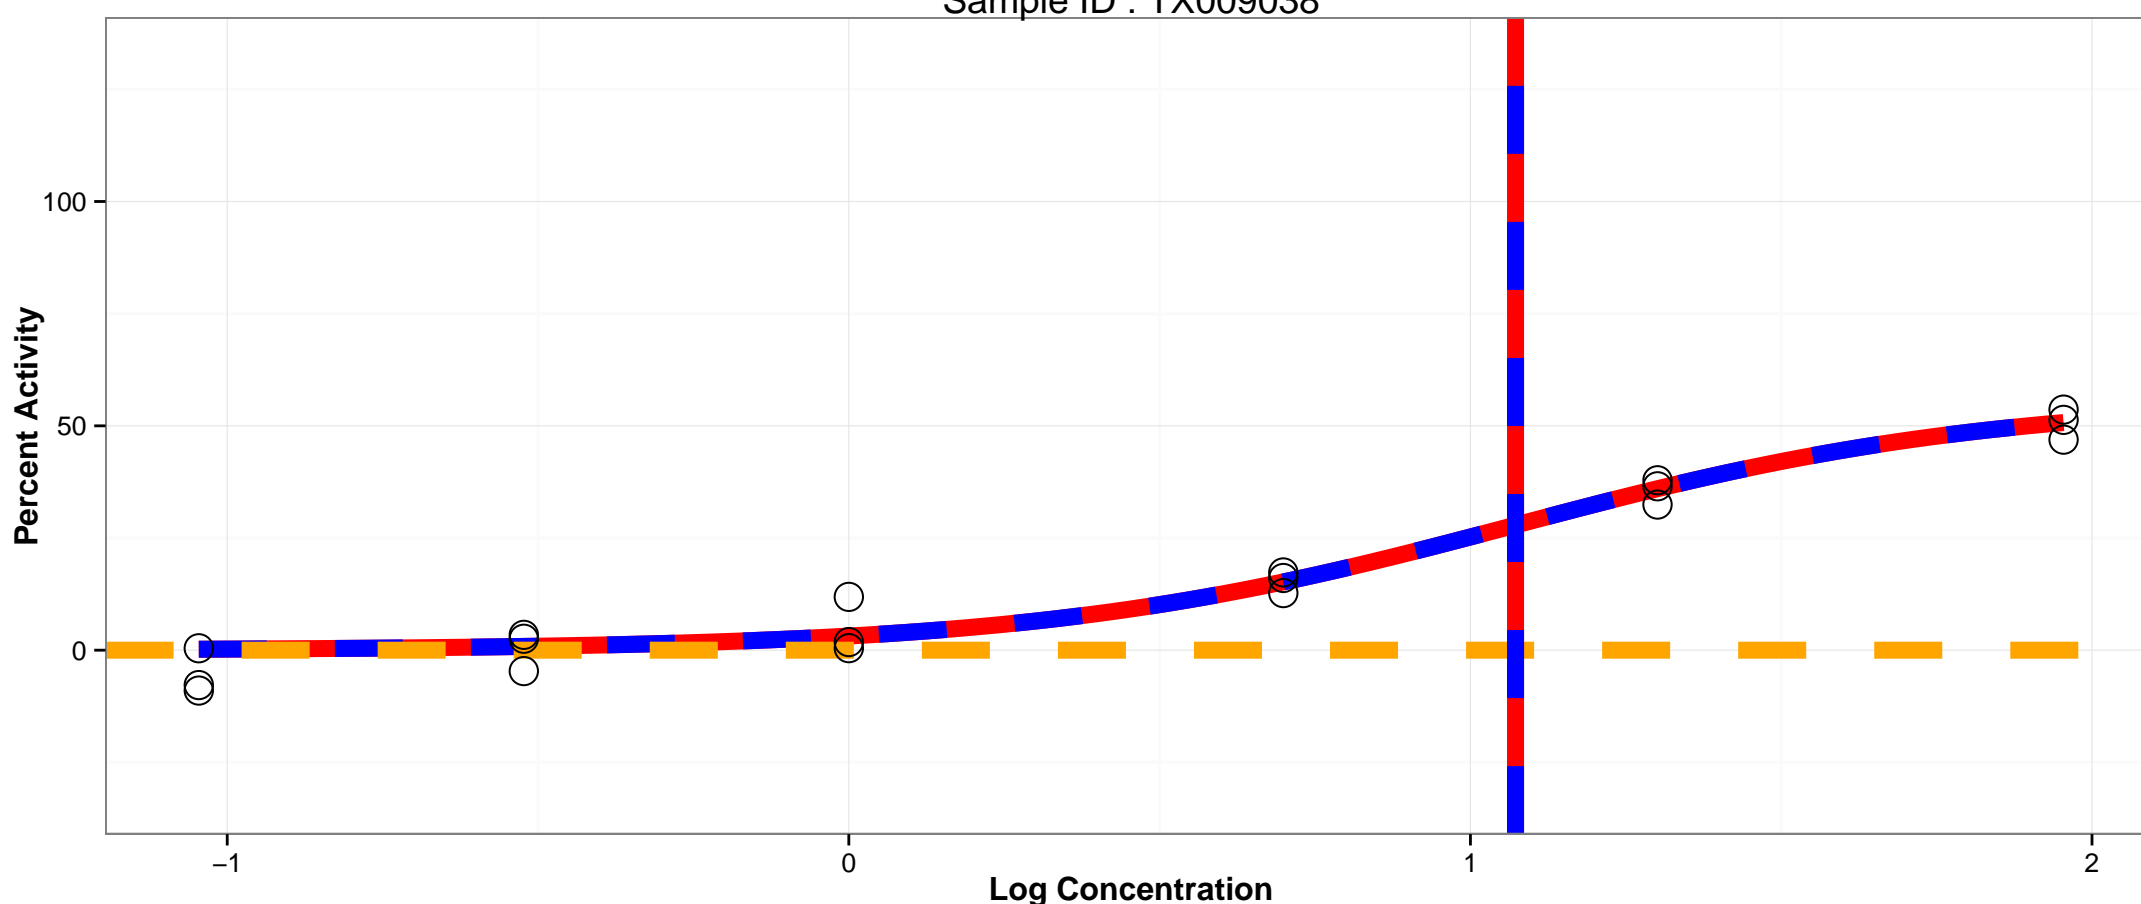

HILL MODEL

|     | tp   | ga     | gw    |
|-----|------|--------|-------|
| val | 55.7 | 1.07   | 1.14  |
| sd  | 4.54 | 0.0947 | 0.193 |

GAIN-LOSS MODEL

|     | tp   | ga   | gw   | la   | lw   |
|-----|------|------|------|------|------|
| val | 55.7 | 1.07 | 1.14 | 2.93 | 15.7 |
| sd  | NA   | NA   | NA   | NA   | NA   |

|      | CNST   | HILL   | GNLS   |
|------|--------|--------|--------|
| AIC  | 171.32 | 111.19 | 115.19 |
| PROB | 0      | 0.88   | 0.12   |
| RMSE | 26.44  | 4.25   | 4.25   |

MAX\_MEAN : 50.6 MAX\_MED : 51.3 BMAD : 5.69  
COFF : 20 HIT-CALL : 1 FITC : 42 ACTP : 1  
FLAGS :

Assay ID 1509 (NHEERL\_HEK293T\_CellTiterGLO)  
Sample ID : TX009038

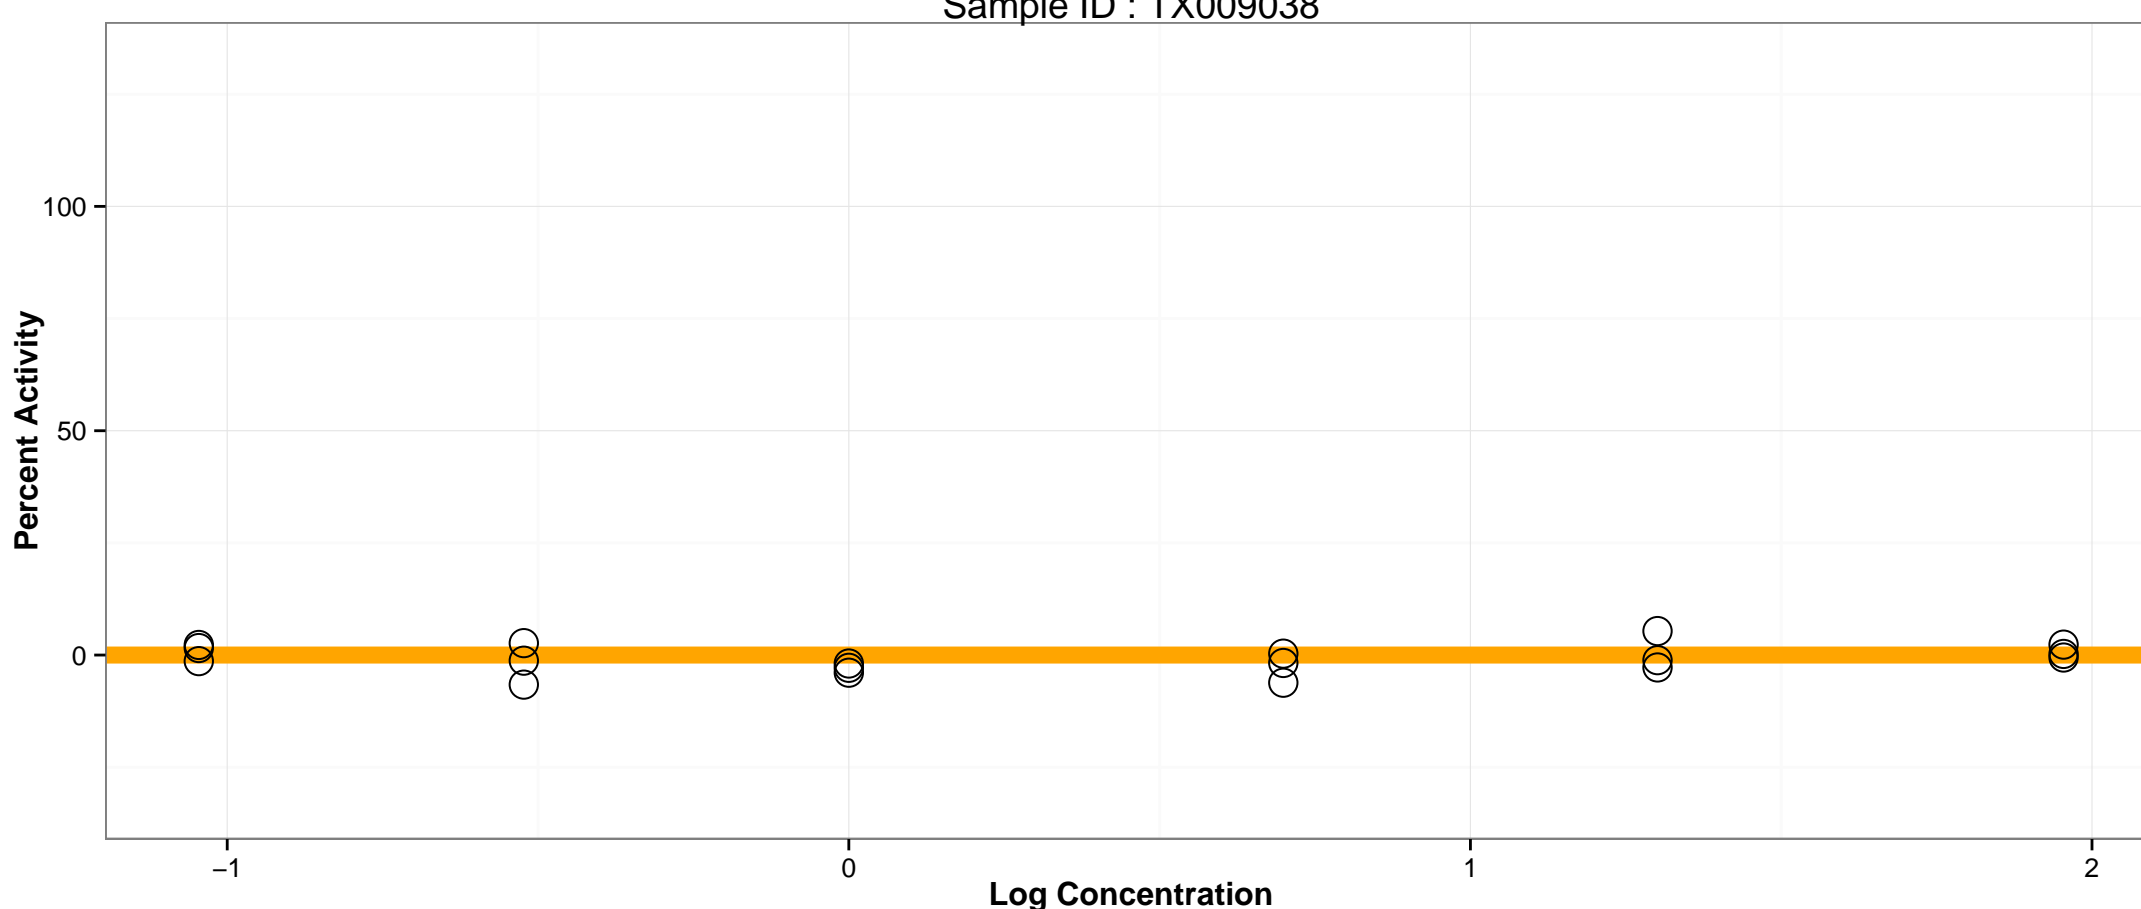

HILL MODEL

HILL MODEL: Not applicable

GAIN-LOSS MODEL

GNLS MODEL: Not applicable

|      | CNST  | HILL | GNLS |
|------|-------|------|------|
| AIC  | 94.74 | NA   | NA   |
| PROB | 1     | NA   | NA   |
| RMSE | 3.1   | NA   | NA   |

MAX\_MEAN : 0.834 MAX\_MED : 1.58 BMAD : 5.54  
COFF : 20 HIT-CALL : 0 FITC : 4 ACTP : 0  
FLAGS :

Assay ID 1848 (NHEERL\_Quantilum\_inhib\_2\_dn)  
Sample ID : TX009038

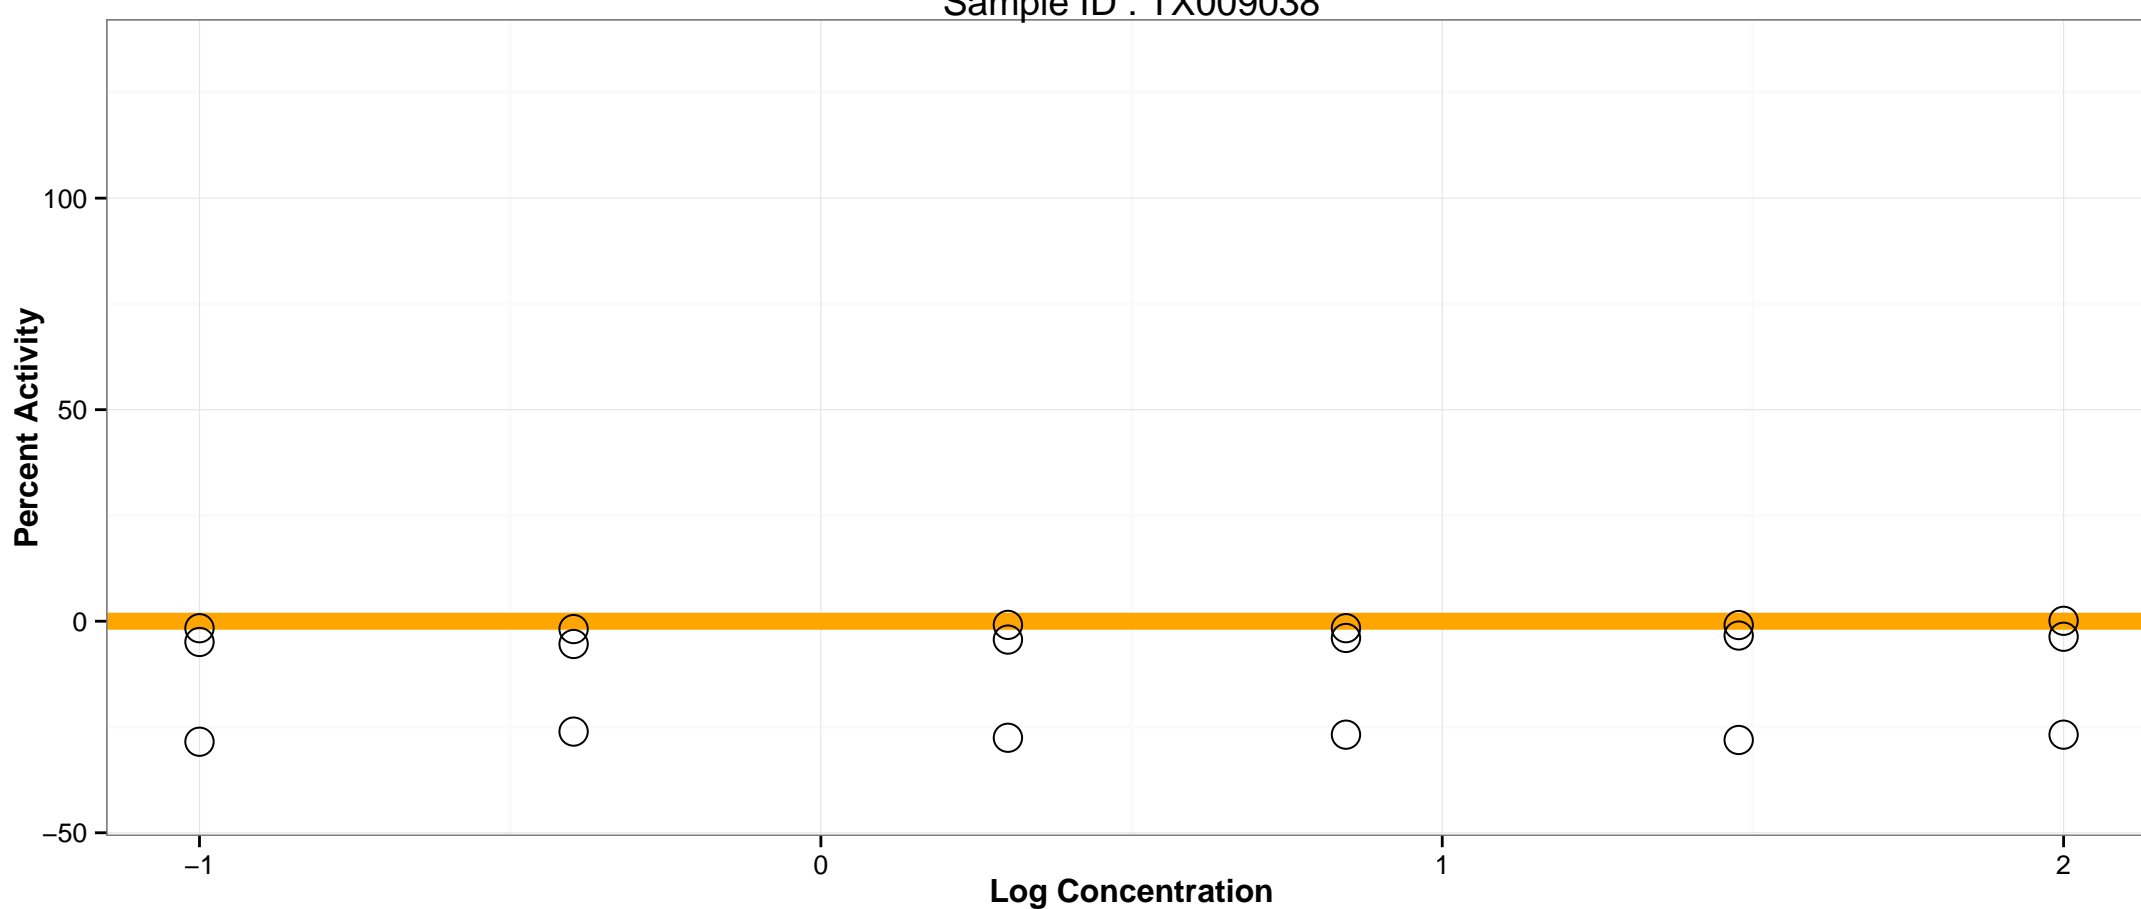

HILL MODEL

HILL MODEL: Not applicable

GAIN-LOSS MODEL

GNLS MODEL: Not applicable

|      | CNST  | HILL | GNLS |
|------|-------|------|------|
| AIC  | 152.7 | NA   | NA   |
| PROB | 1     | NA   | NA   |
| RMSE | 15.98 | NA   | NA   |

MAX\_MEAN : -10.1 MAX\_MED : -3.37 BMAD : 8.58  
COFF : 20 HIT-CALL : 0 FITC : 4 ACTP : 0  
FLAGS :

Assay ID 1824 (NHEERL\_TPO\_GUA\_dn)  
Sample ID : TP0001442F04

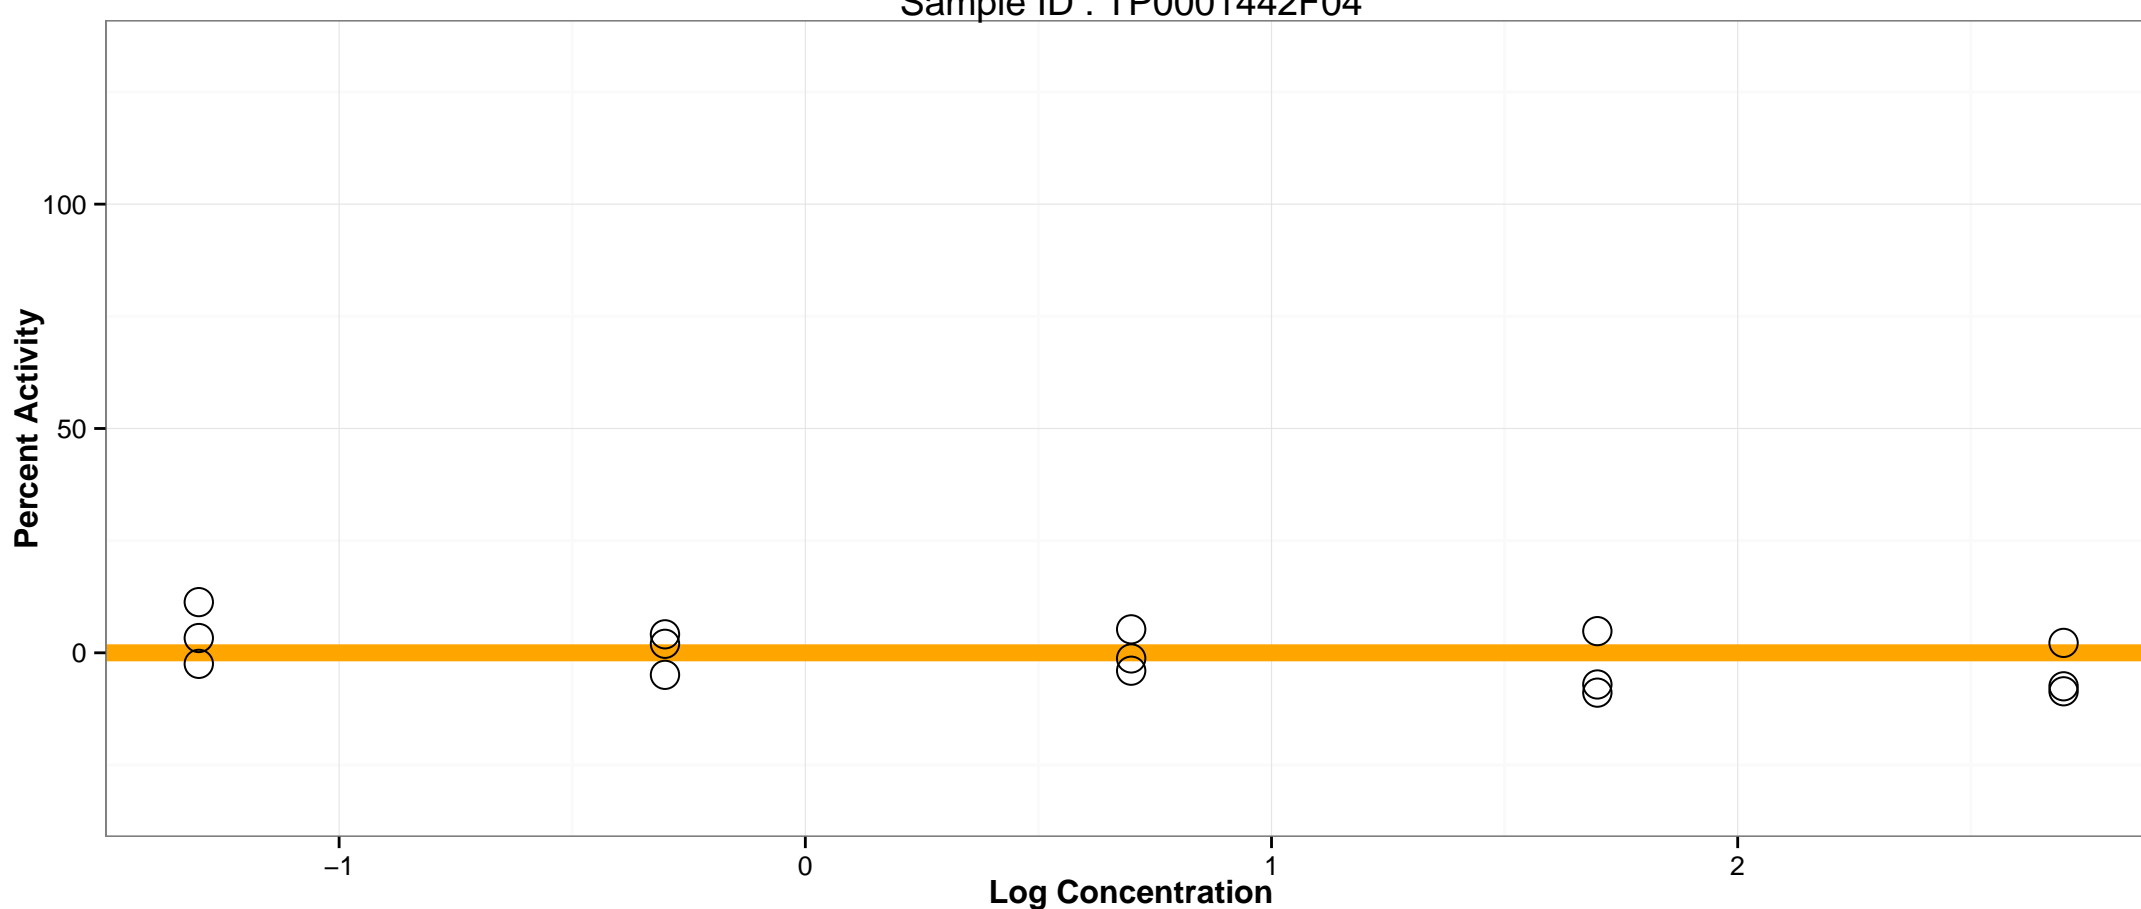

HILL MODEL

HILL MODEL: Not applicable

GAIN-LOSS MODEL

GNLS MODEL: Not applicable

|      | CNST  | HILL | GNLS |
|------|-------|------|------|
| AIC  | 99.83 | NA   | NA   |
| PROB | 1     | NA   | NA   |
| RMSE | 5.89  | NA   | NA   |

MAX\_MEAN : 4.06 MAX\_MED : 3.31 BMAD : 3.71  
COFF : 20 HIT-CALL : 0 FITC : 4 ACTP : 0  
FLAGS :

Chemical : 4,4'-Oxydianiline  
CAS : 101-80-4

Assay ID 1508 (NHEERL\_TPO\_AUR\_dn)  
Sample ID : TX003357

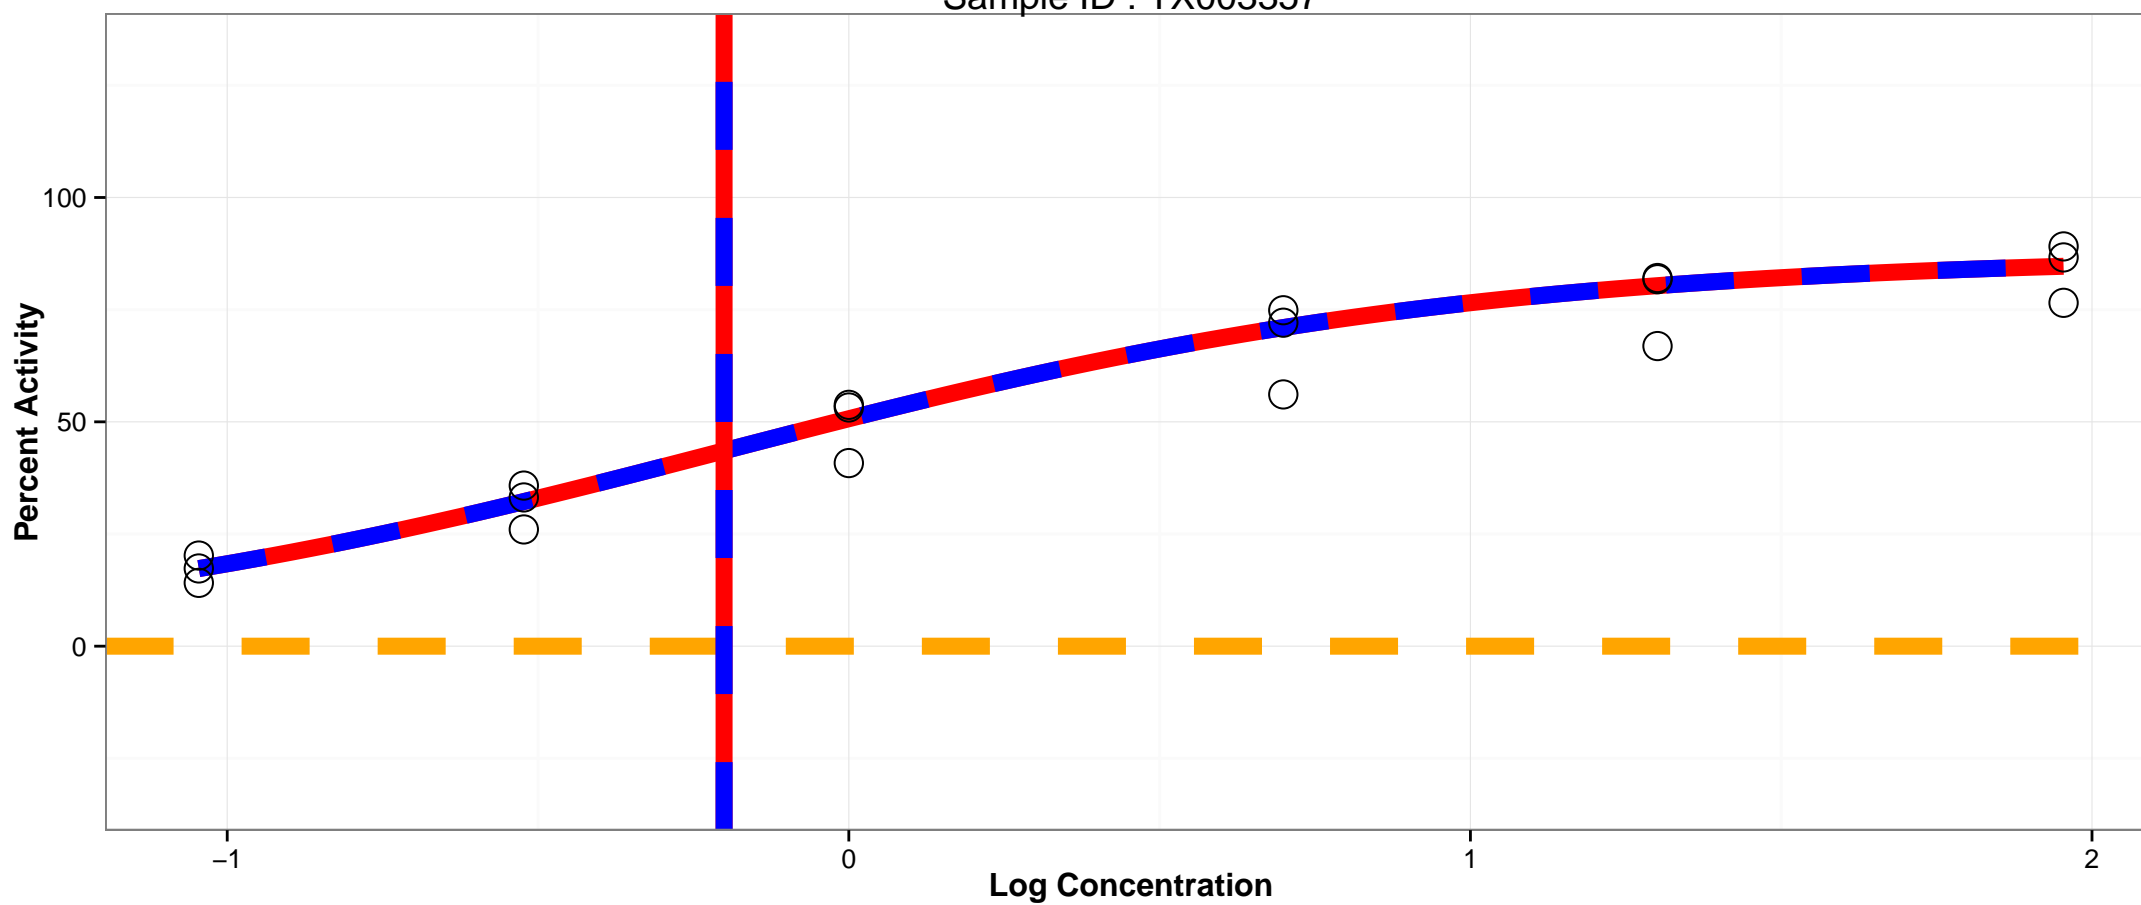

HILL MODEL

|     | tp   | ga     | gw     |
|-----|------|--------|--------|
| val | 87.1 | -0.201 | 0.717  |
| sd  | 3.95 | 0.0973 | 0.0976 |

GAIN-LOSS MODEL

|     | tp   | ga     | gw    | la   | lw |
|-----|------|--------|-------|------|----|
| val | 87.1 | -0.201 | 0.717 | 3.95 | 18 |
| sd  | NA   | NA     | NA    | NA   | NA |

|      | CNST   | HILL   | GNLS   |
|------|--------|--------|--------|
| AIC  | 203.66 | 124.13 | 128.13 |
| PROB | 0      | 0.88   | 0.12   |
| RMSE | 59.87  | 6.23   | 6.23   |

MAX\_MEAN : 84.1 MAX\_MED : 86.7 BMAD : 5.69  
COFF : 20 HIT-CALL : 1 FITC : 41 ACTP : 1  
FLAGS :

Assay ID 1509 (NHEERL\_HEK293T\_CellTiterGLO)  
Sample ID : TX003357

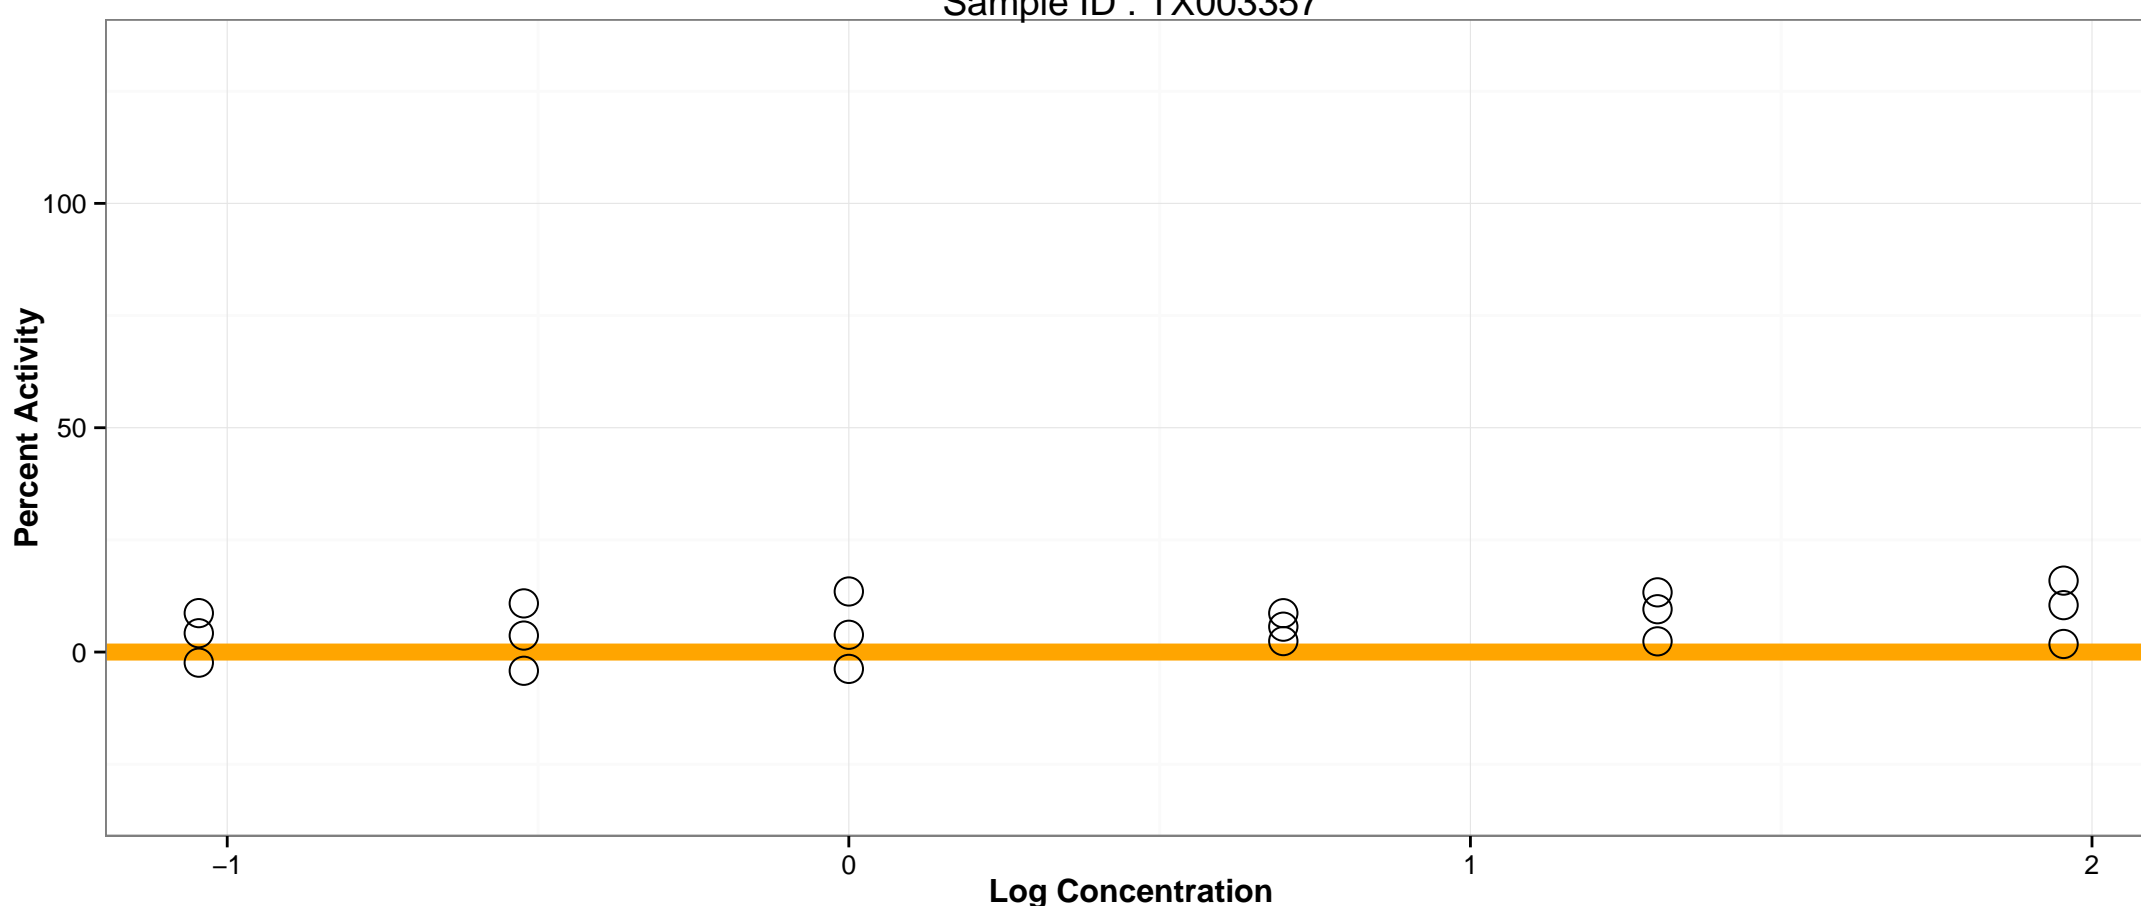

HILL MODEL

HILL MODEL: Not applicable

GAIN-LOSS MODEL

GNLS MODEL: Not applicable

|      | CNST   | HILL | GNLS |
|------|--------|------|------|
| AIC  | 130.93 | NA   | NA   |
| PROB | 1      | NA   | NA   |
| RMSE | 8.21   | NA   | NA   |

MAX\_MEAN : 9.4 MAX\_MED : 10.5 BMAD : 5.54  
COFF : 20 HIT-CALL : 0 FITC : 4 ACTP : 0  
FLAGS :

Assay ID 1848 (NHEERL\_Quantilum\_inhib\_2\_dn)  
Sample ID : TX003357

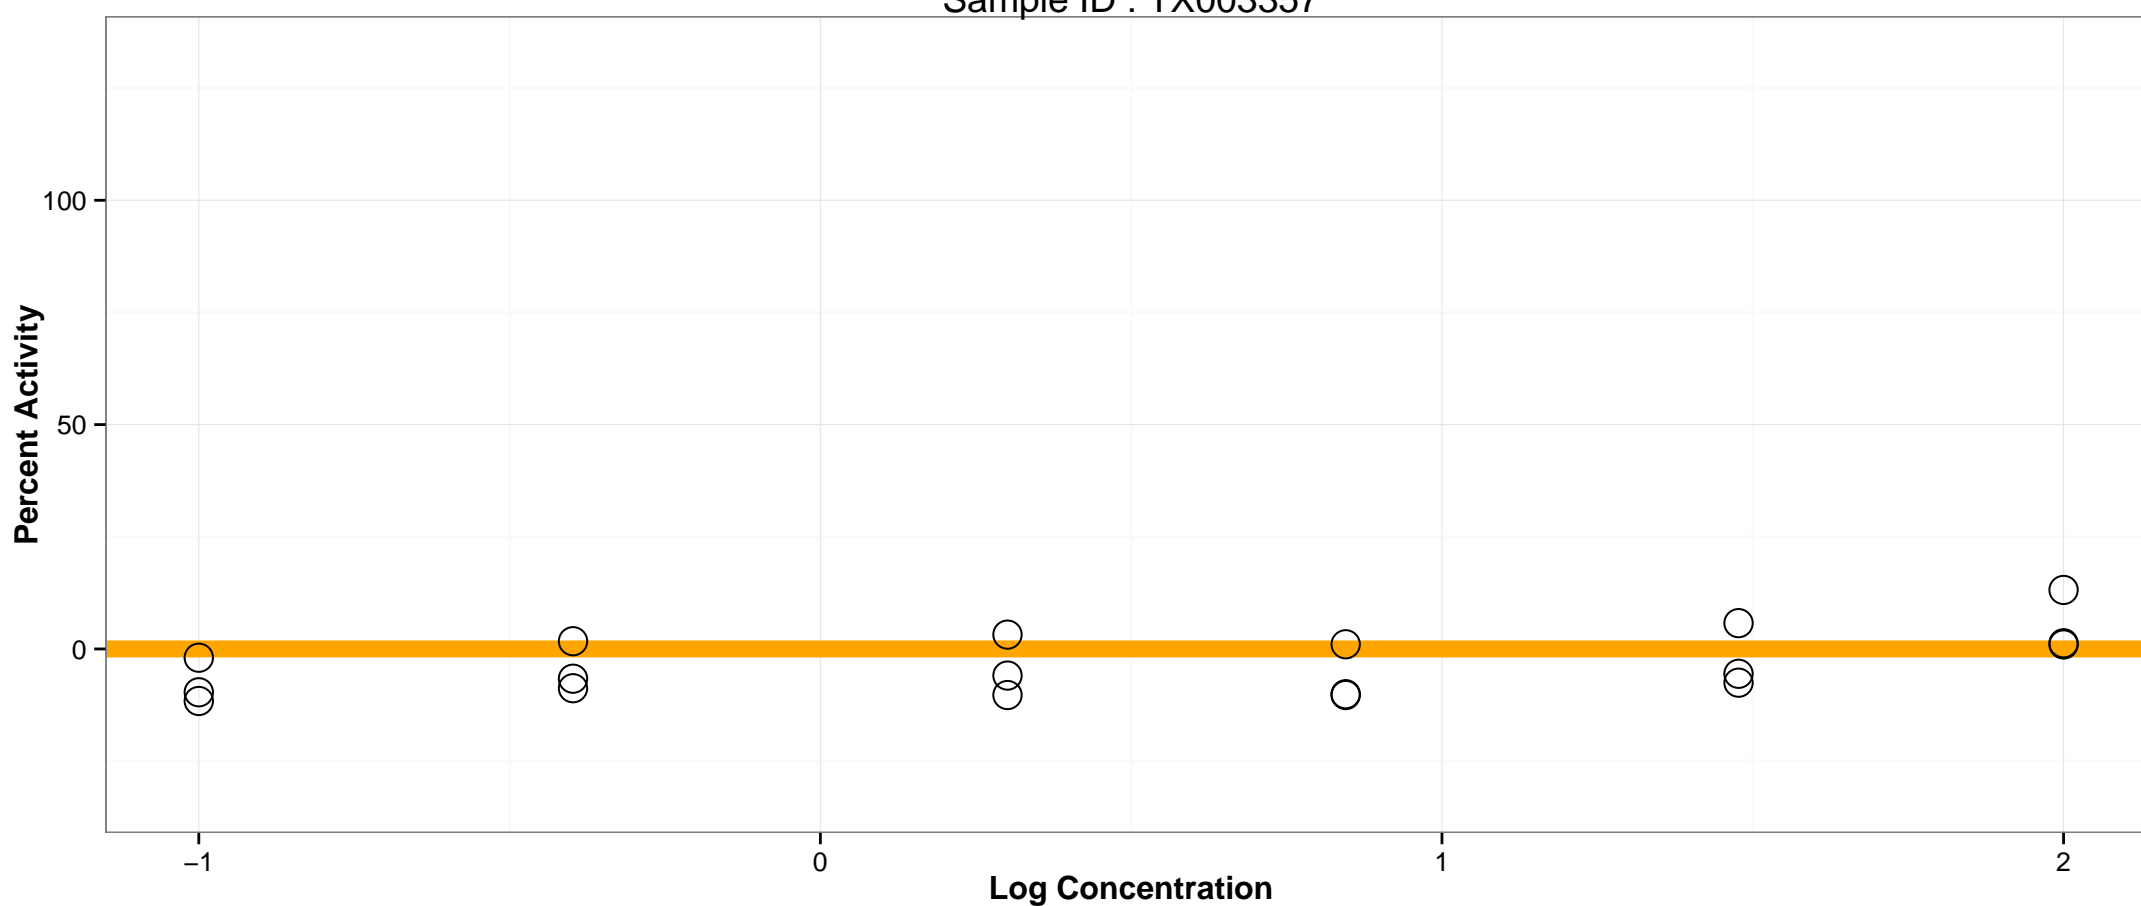

HILL MODEL

HILL MODEL: Not applicable

GAIN-LOSS MODEL

GNLS MODEL: Not applicable

|      | CNST   | HILL | GNLS |
|------|--------|------|------|
| AIC  | 128.22 | NA   | NA   |
| PROB | 1      | NA   | NA   |
| RMSE | 7.49   | NA   | NA   |

MAX\_MEAN : 5.15 MAX\_MED : 1.28 BMAD : 8.58  
COFF : 20 HIT-CALL : 0 FITC : 4 ACTP : 0  
FLAGS :

Assay ID 1824 (NHEERL\_TPO\_GUA\_dn)  
Sample ID : TP0001442F05

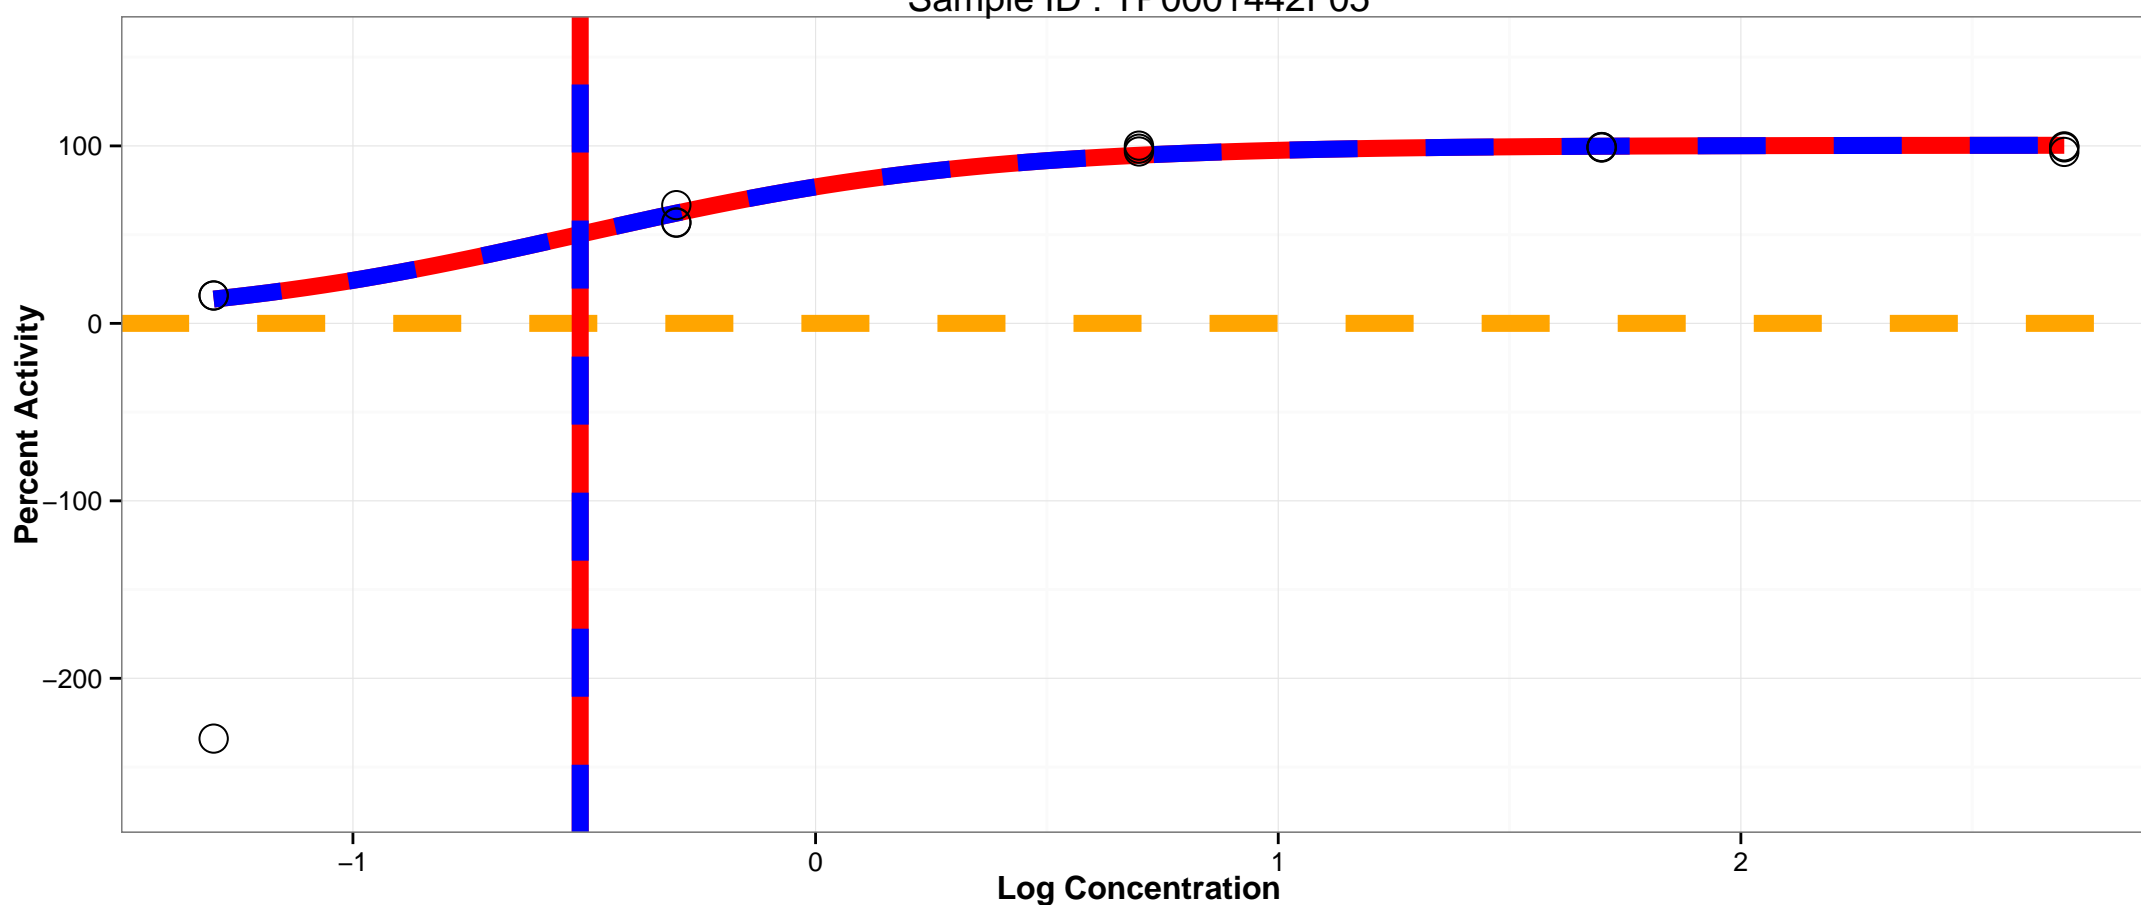

HILL MODEL

|     | tp  | ga     | gw     |
|-----|-----|--------|--------|
| val | 100 | -0.509 | 1.01   |
| sd  | 1.4 | 0.0586 | 0.0948 |

GAIN-LOSS MODEL

|     | tp  | ga     | gw   | la   | lw   |
|-----|-----|--------|------|------|------|
| val | 100 | -0.509 | 1.01 | 4.48 | 16.1 |
| sd  | NA  | NA     | NA   | NA   | NA   |

|      | CNST   | HILL   | GNLS   |
|------|--------|--------|--------|
| AIC  | 214.08 | 123.32 | 127.32 |
| PROB | 0      | 0.88   | 0.12   |
| RMSE | 101.31 | 64.01  | 64.01  |

MAX\_MEAN : 99.3 MAX\_MED : 99.4 BMAD : 3.71  
COFF : 20 HIT-CALL : 1 FITC : 41 ACTP : 1  
FLAGS : 10

Chemical : 5-Amino-2-methylphenol  
CAS : 2835-95-2

Assay ID 1508 (NHEERL\_TPO\_AUR\_dn)  
Sample ID : TX015601

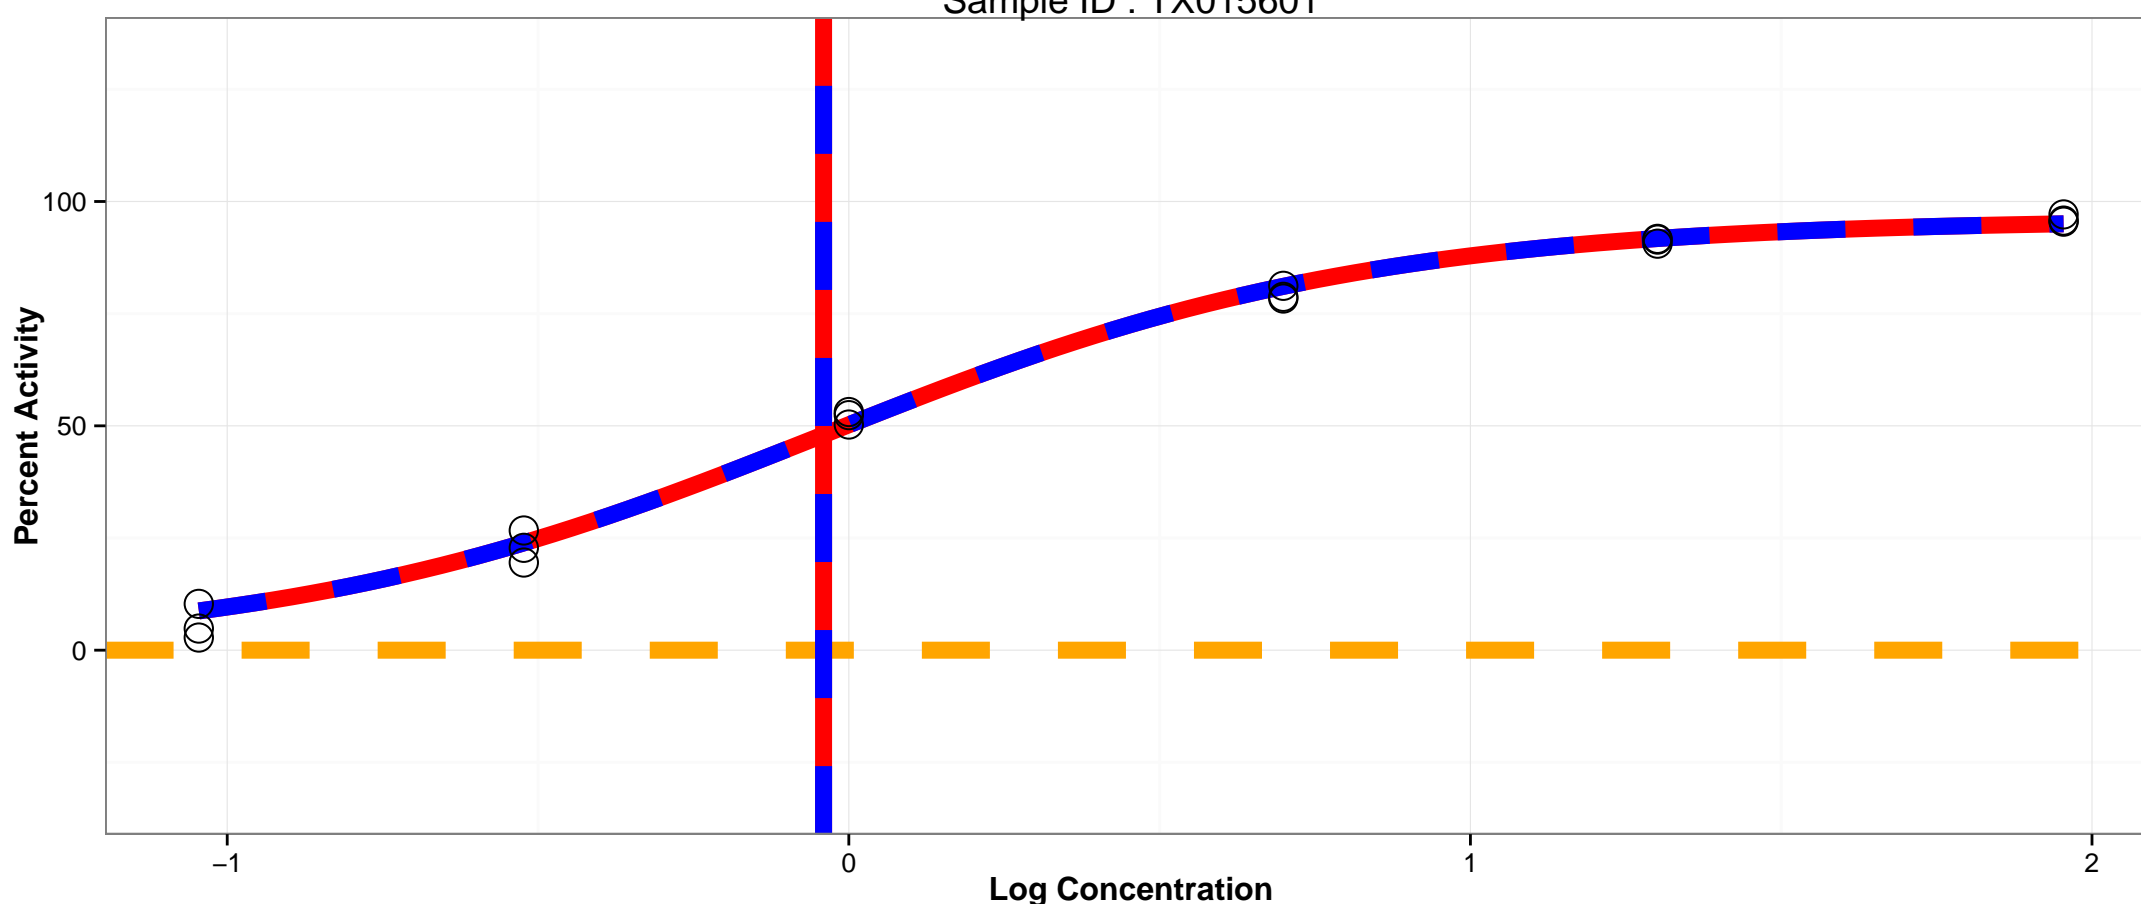

HILL MODEL

|     | tp   | ga      | gw    |
|-----|------|---------|-------|
| val | 96   | -0.0406 | 0.994 |
| sd  | 1.22 | 0.026   | 0.061 |

GAIN-LOSS MODEL

|     | tp   | ga      | gw    | la     | lw     |
|-----|------|---------|-------|--------|--------|
| val | 96   | -0.0406 | 0.994 | 3.42   | 10.9   |
| sd  | 1.22 | 0.026   | 0.061 | 345000 | 995000 |

|      | CNST   | HILL  | GNLS  |
|------|--------|-------|-------|
| AIC  | 207.59 | 92.94 | 96.94 |
| PROB | 0      | 0.88  | 0.12  |
| RMSE | 67.29  | 2.51  | 2.51  |

MAX\_MEAN : 96.1 MAX\_MED : 95.8 BMAD : 5.69  
COFF : 20 HIT-CALL : 1 FITC : 41 ACTP : 1  
FLAGS :

Assay ID 1509 (NHEERL\_HEK293T\_CellTiterGLO)  
Sample ID : TX015601

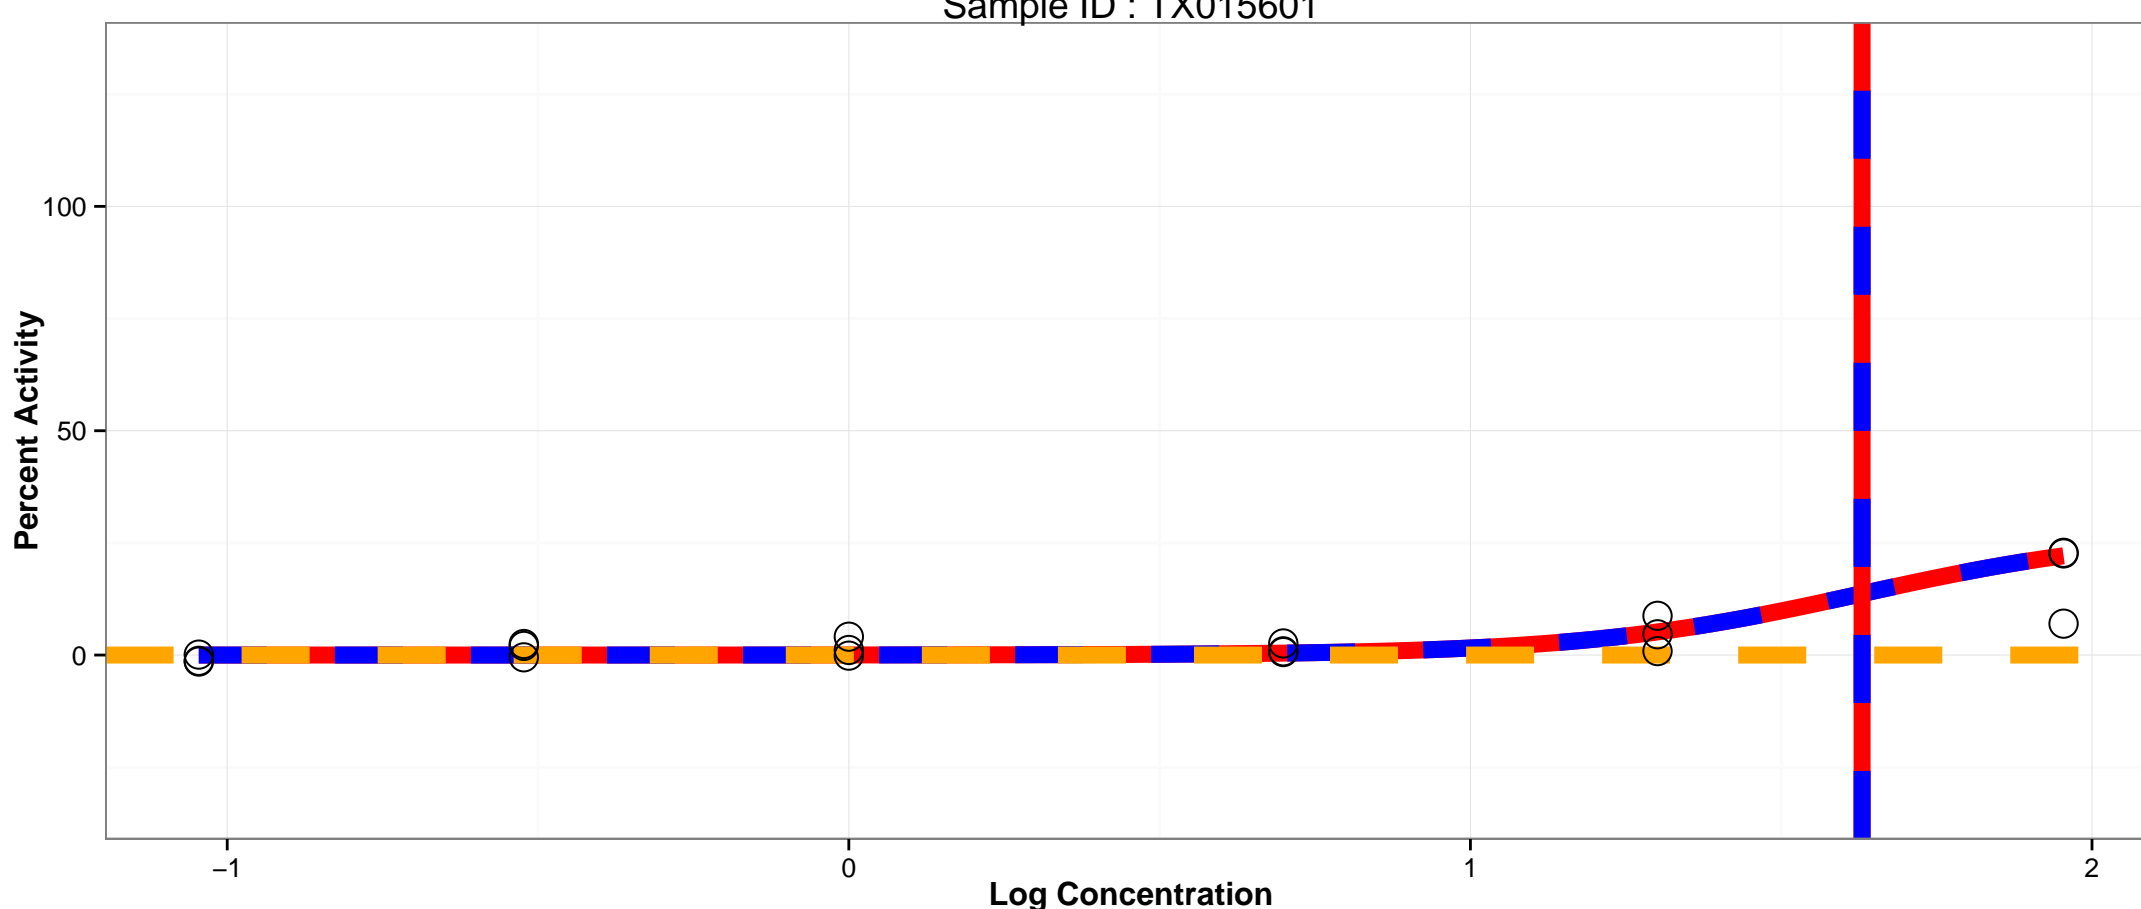

HILL MODEL

|     | tp   | ga    | gw   |
|-----|------|-------|------|
| val | 27.4 | 1.63  | 1.93 |
| sd  | 13   | 0.332 | 1.38 |

GAIN-LOSS MODEL

|     | tp   | ga    | gw   | la   | lw   |
|-----|------|-------|------|------|------|
| val | 27.4 | 1.63  | 1.93 | 3.57 | 4.55 |
| sd  | 13   | 0.333 | 1.38 | 1030 | 2880 |

|      | CNST   | HILL  | GNLS   |
|------|--------|-------|--------|
| AIC  | 120.52 | 98.26 | 102.26 |
| PROB | 0      | 0.88  | 0.12   |
| RMSE | 8.24   | 4.07  | 4.07   |

MAX\_MEAN : 17.5 MAX\_MED : 22.7 BMAD : 5.54  
COFF : 20 HIT-CALL : 1 FITC : 42 ACTP : 1  
FLAGS : 11; 6

Assay ID 1848 (NHEERL\_Quantilum\_inhib\_2\_dn)  
Sample ID : TX015601

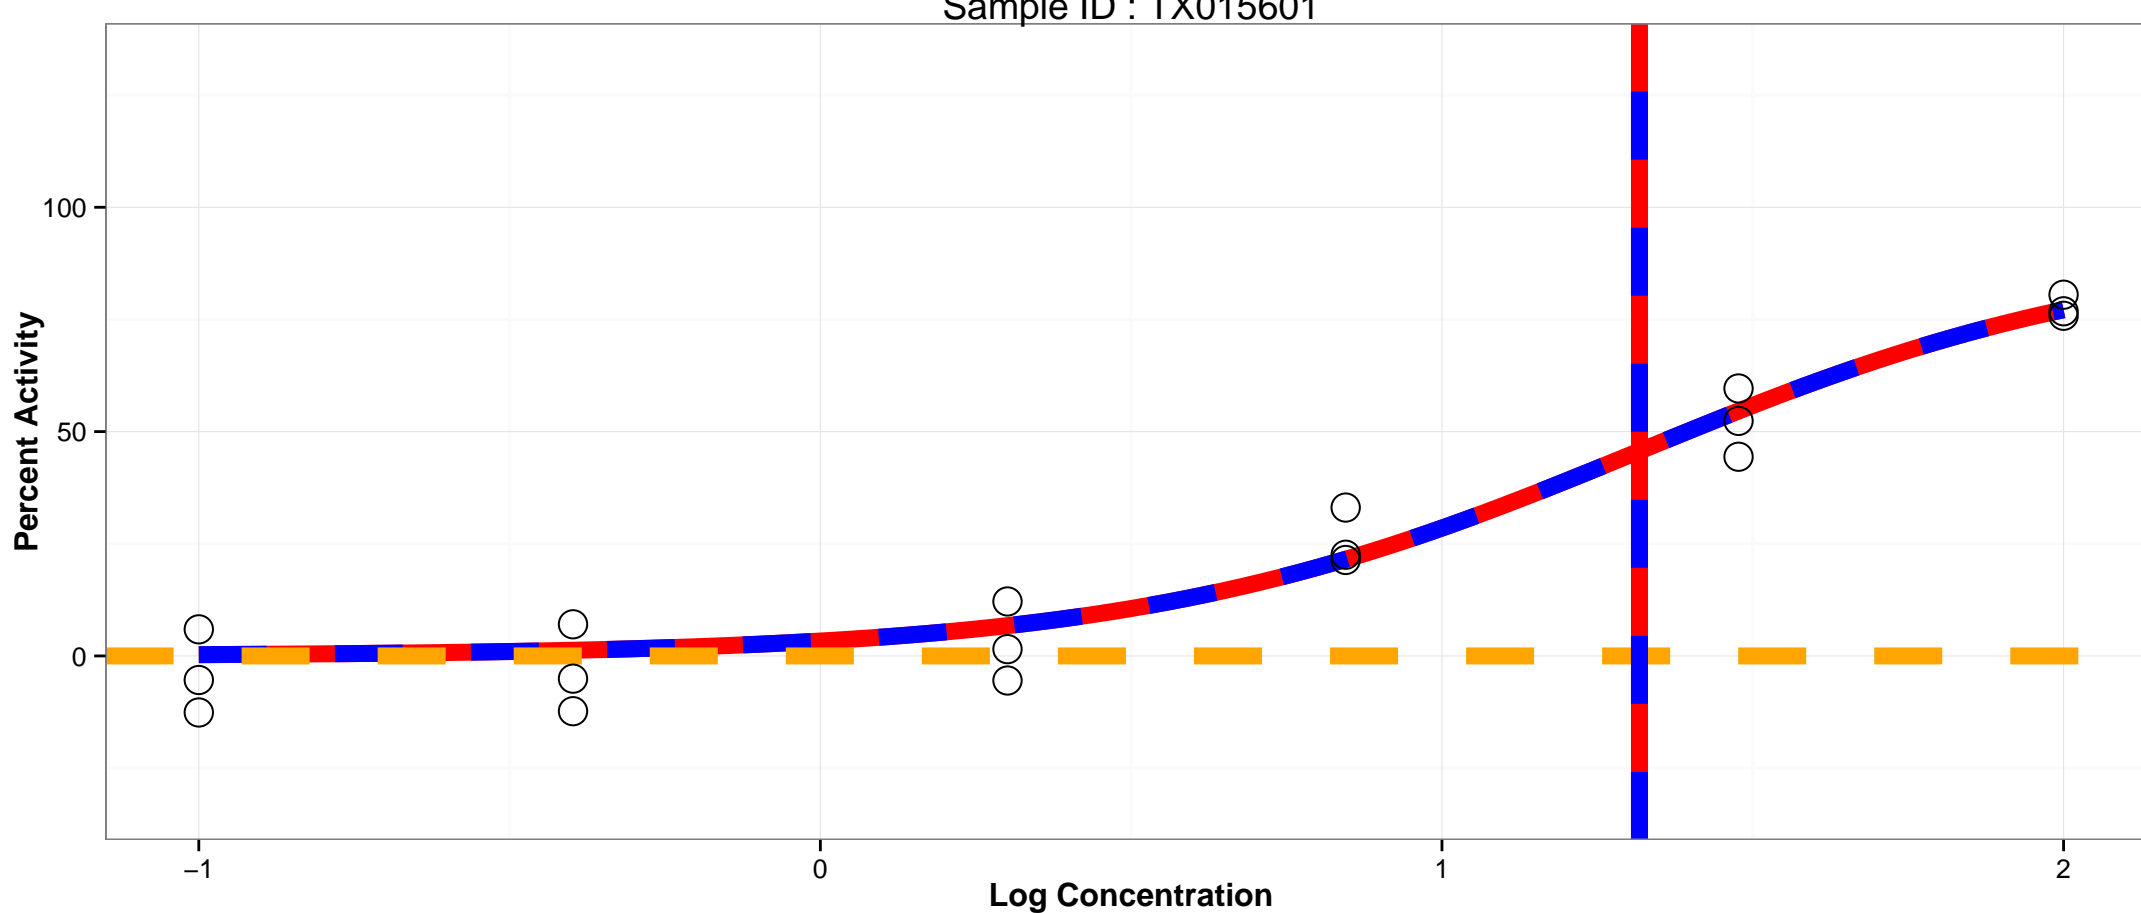

HILL MODEL

|     | tp   | ga    | gw    |
|-----|------|-------|-------|
| val | 91.3 | 1.32  | 1.08  |
| sd  | 12.8 | 0.171 | 0.235 |

GAIN-LOSS MODEL

|     | tp   | ga   | gw   | la   | lw |
|-----|------|------|------|------|----|
| val | 91.3 | 1.32 | 1.08 | 3.71 | 12 |
| sd  | NA   | NA   | NA   | NA   | NA |

|      | CNST   | HILL   | GNLS   |
|------|--------|--------|--------|
| AIC  | 186.38 | 132.74 | 136.74 |
| PROB | 0      | 0.88   | 0.12   |
| RMSE | 40.21  | 7.36   | 7.36   |

MAX\_MEAN : 77.7 MAX\_MED : 76.8 BMAD : 8.58  
COFF : 20 HIT-CALL : 1 FITC : 42 ACTP : 1  
FLAGS :

Assay ID 1824 (NHEERL\_TPO\_GUA\_dn)  
Sample ID : TP0001442F06

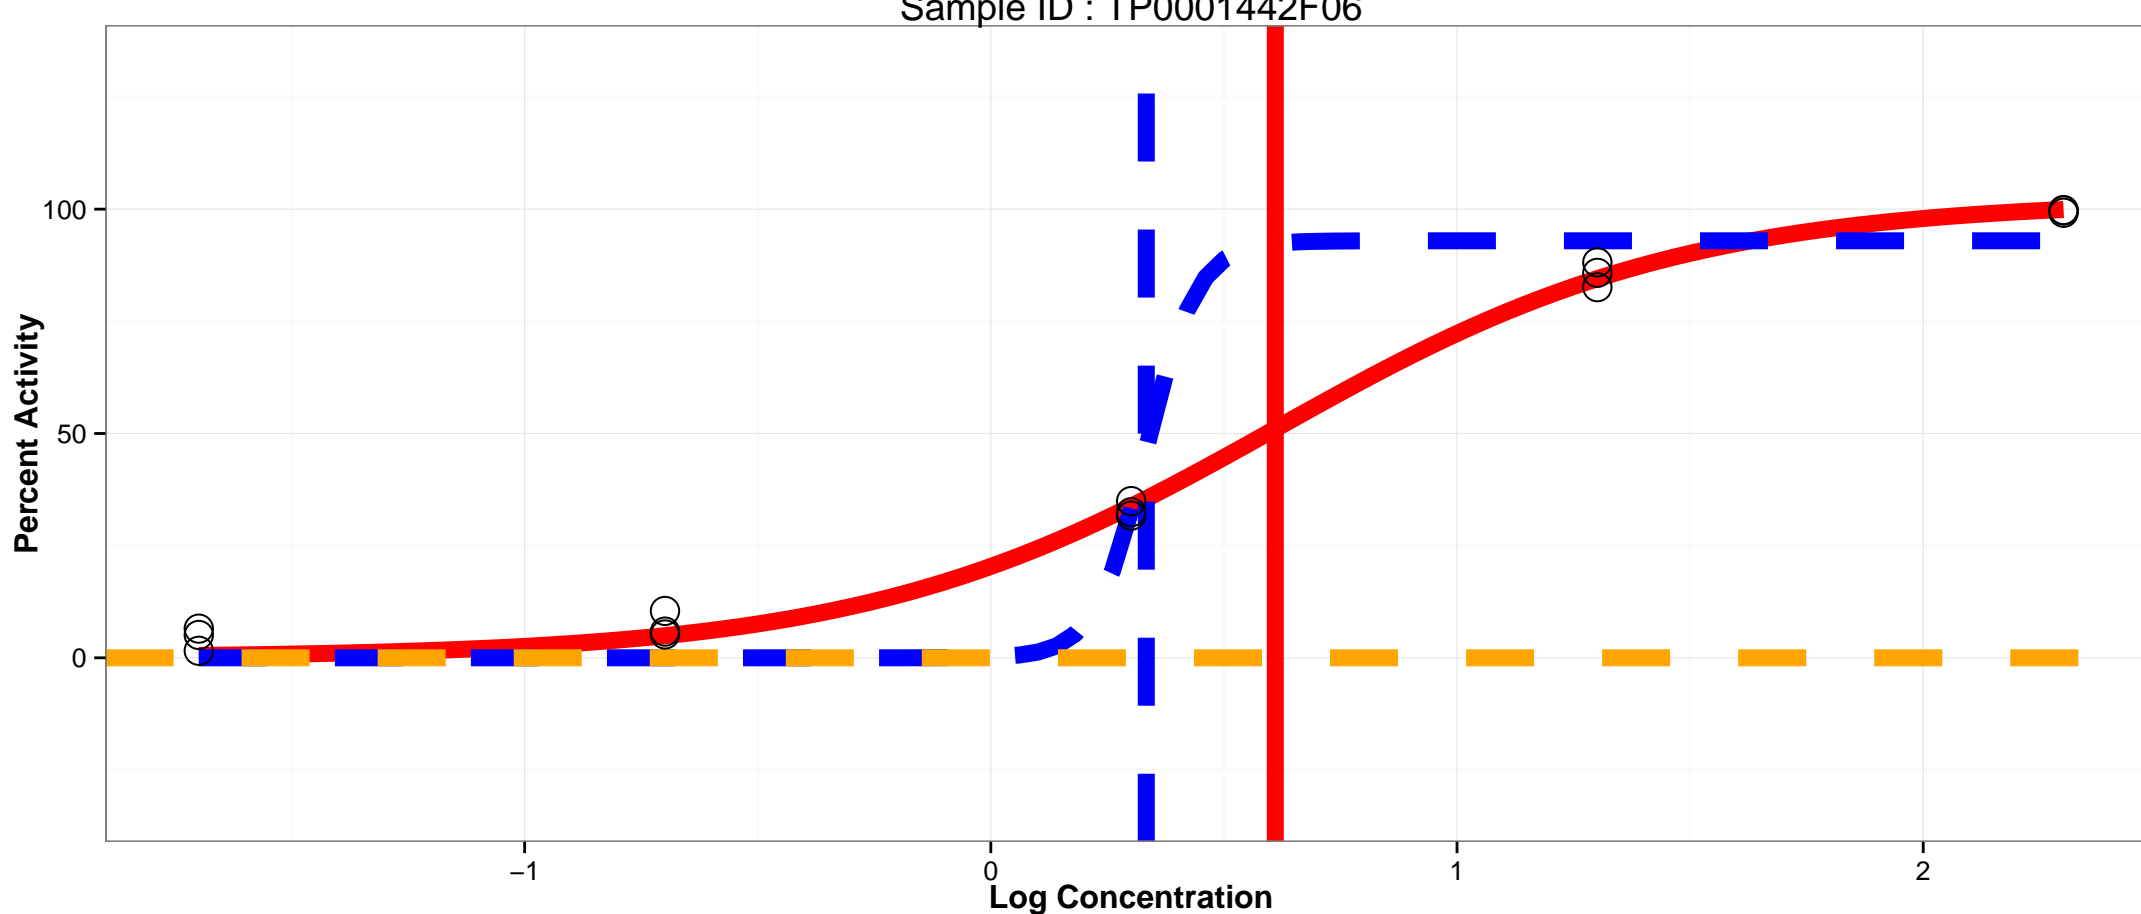

HILL MODEL

|     | tp   | ga     | gw     |
|-----|------|--------|--------|
| val | 102  | 0.61   | 0.989  |
| sd  | 1.49 | 0.0313 | 0.0639 |

GAIN-LOSS MODEL

|     | tp   | ga    | gw   | la  | lw   |
|-----|------|-------|------|-----|------|
| val | 92.9 | 0.333 | 7.98 | 4.3 | 13.8 |
| sd  | NA   | NA    | NA   | NA  | NA   |

|      | CNST   | HILL  | GNLS   |
|------|--------|-------|--------|
| AIC  | 169.02 | 81.02 | 111.29 |
| PROB | 0      | 1     | 0      |
| RMSE | 60.68  | 2.78  | 6.11   |

MAX\_MEAN : 99.6 MAX\_MED : 99.7 BMAD : 3.71  
COFF : 20 HIT-CALL : 1 FITC : 41 ACTP : 1  
FLAGS :

Chemical : Methyl parathion  
CAS : 298-00-0

Assay ID 1508 (NHEERL\_TPO\_AUR\_dn)  
Sample ID : TX001422

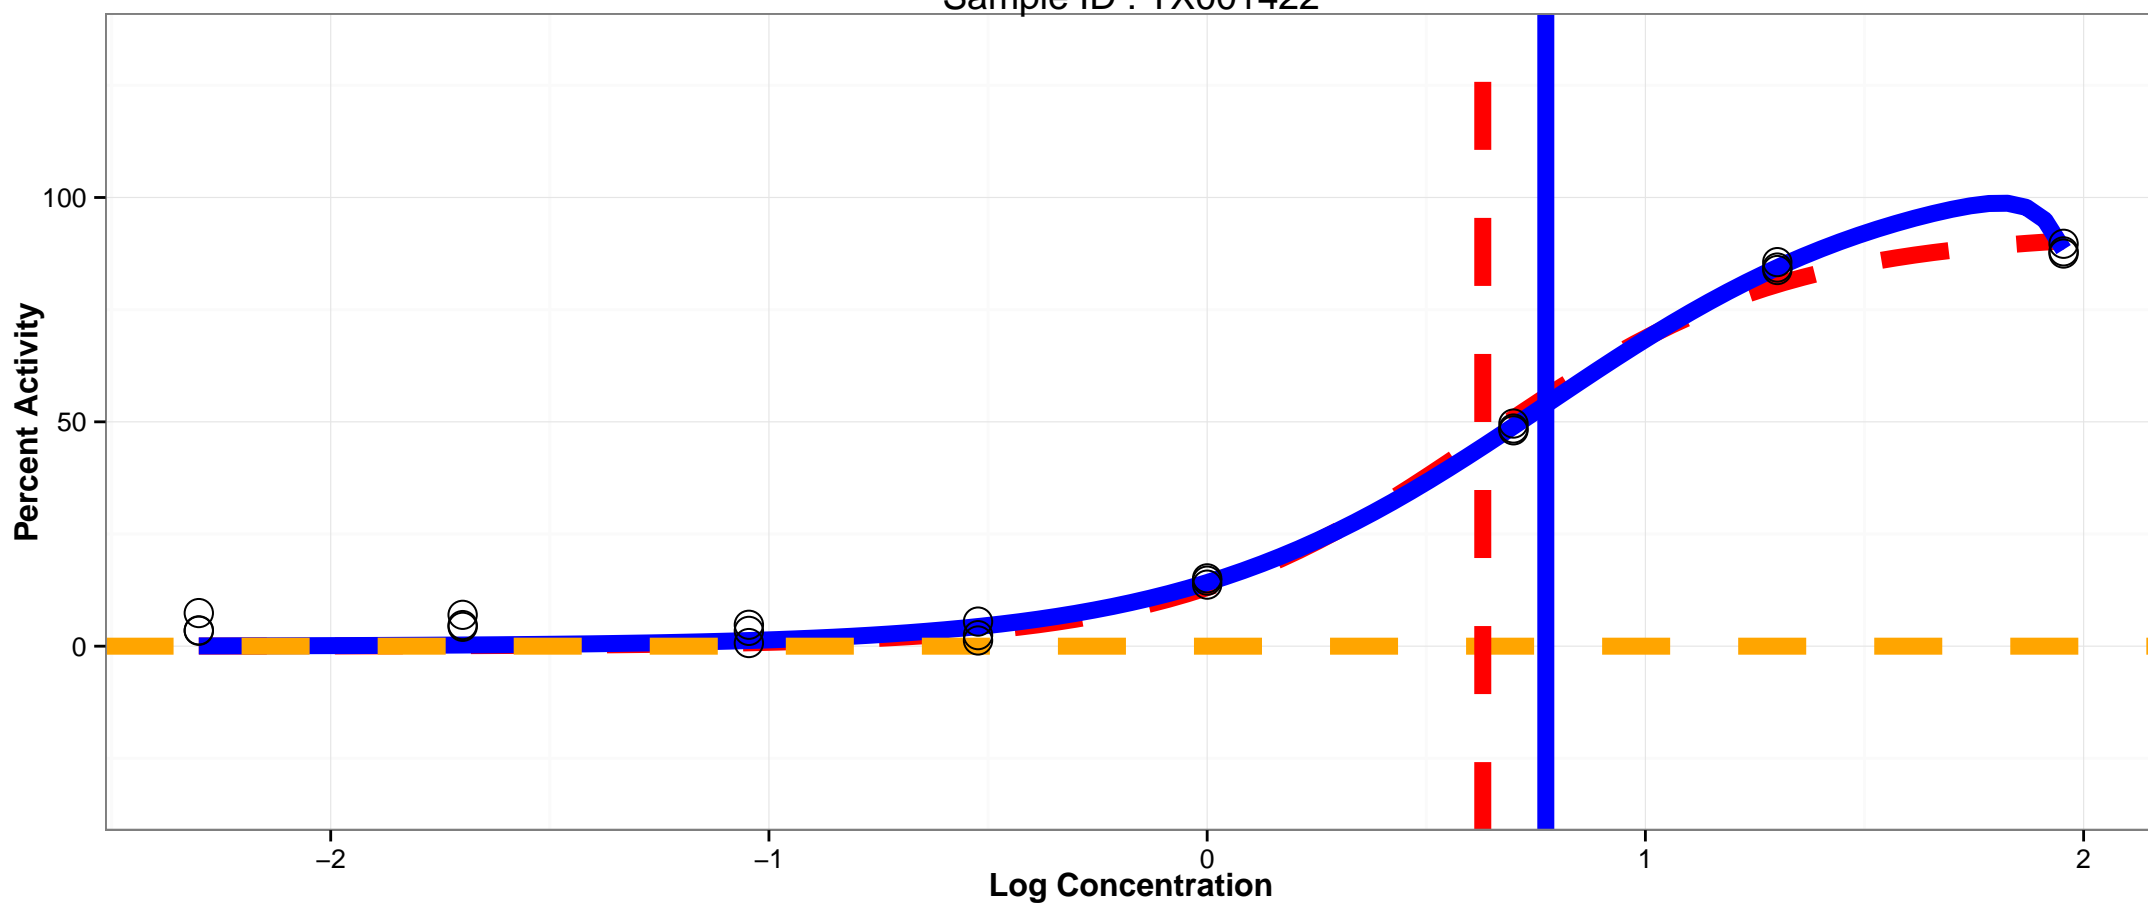

HILL MODEL

|     | tp   | ga     | gw     |
|-----|------|--------|--------|
| val | 92.3 | 0.629  | 1.25   |
| sd  | 2.07 | 0.0314 | 0.0944 |

GAIN-LOSS MODEL

|     | tp   | ga     | gw     | la      | lw   |
|-----|------|--------|--------|---------|------|
| val | 108  | 0.773  | 1.06   | 2.05    | 8.4  |
| sd  | 5.85 | 0.0577 | 0.0758 | 0.00765 | 1.48 |

|      | CNST   | HILL   | GNLS   |
|------|--------|--------|--------|
| AIC  | 254.36 | 137.87 | 129.57 |
| PROB | 0      | 0.02   | 0.98   |
| RMSE | 46.97  | 3.43   | 2.87   |

MAX\_MEAN : 88.4 MAX\_MED : 88 BMAD : 5.69  
COFF : 20 HIT-CALL : 1 FITC : 51 ACTP : 1  
FLAGS :

Assay ID 1509 (NHEERL\_HEK293T\_CellTiterGLO)  
Sample ID : TX001422

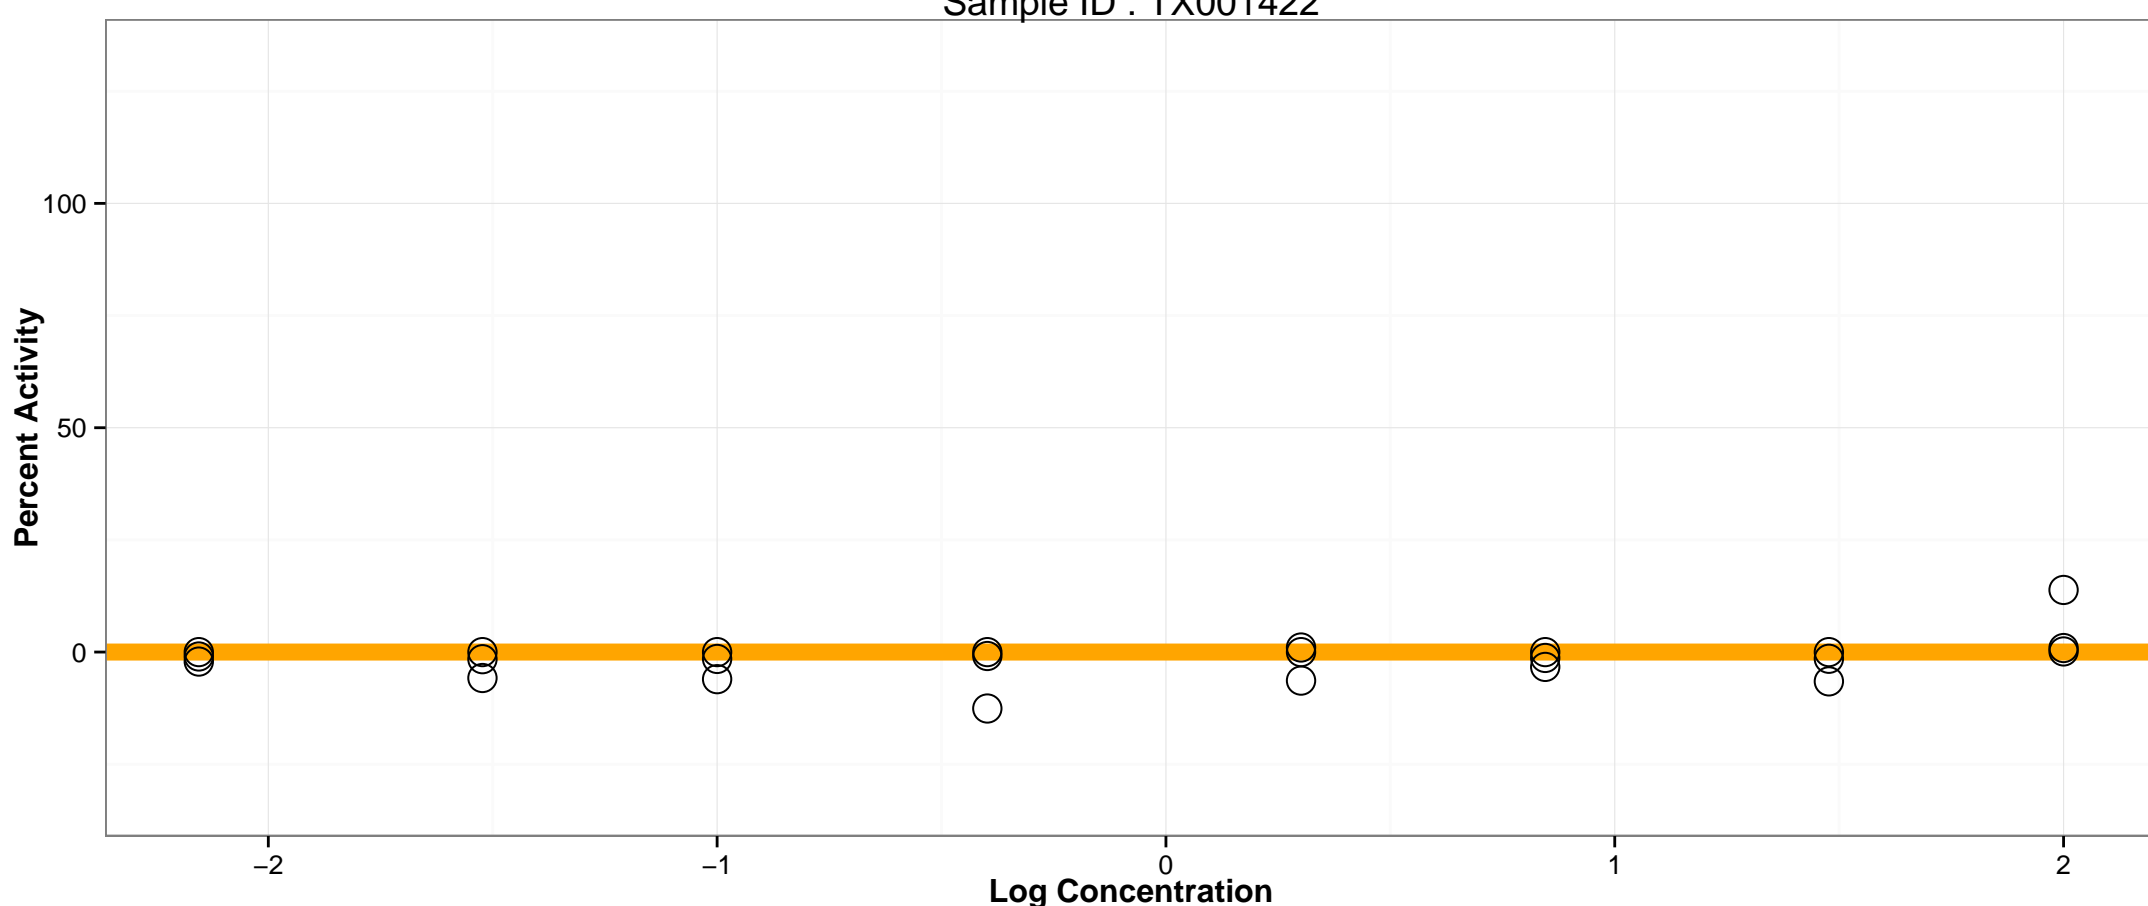

HILL MODEL

HILL MODEL: Not applicable

GAIN-LOSS MODEL

GNLS MODEL: Not applicable

|      | CNST   | HILL | GNLS |
|------|--------|------|------|
| AIC  | 137.23 | NA   | NA   |
| PROB | 1      | NA   | NA   |
| RMSE | 4.7    | NA   | NA   |

MAX\_MEAN : 4.97 MAX\_MED : 0.909 BMAD : 5.54  
COFF : 20 HIT-CALL : 0 FITC : 4 ACTP : 0  
FLAGS :

Assay ID 1848 (NHEERL\_Quantilum\_inhib\_2\_dn)  
Sample ID : TX001422

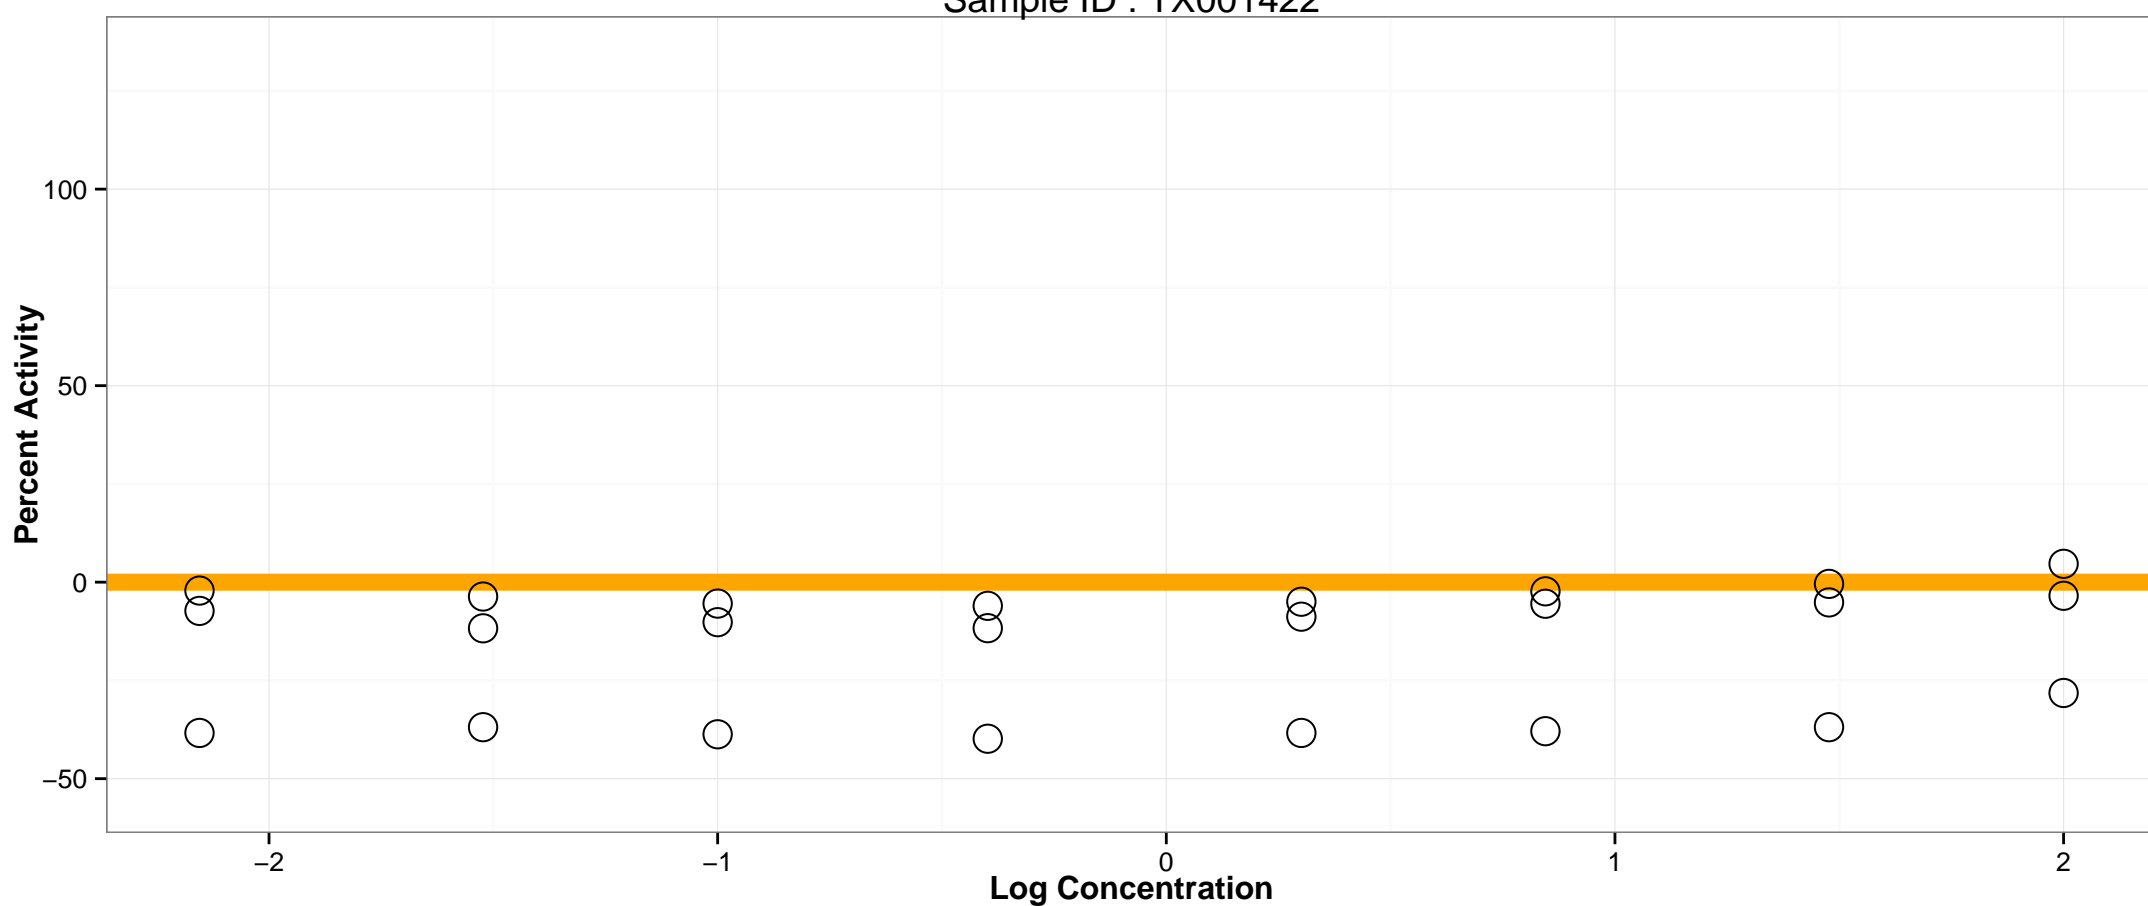

HILL MODEL

HILL MODEL: Not applicable

GAIN-LOSS MODEL

GNLS MODEL: Not applicable

|      | CNST   | HILL | GNLS |
|------|--------|------|------|
| AIC  | 219.15 | NA   | NA   |
| PROB | 1      | NA   | NA   |
| RMSE | 22.07  | NA   | NA   |

MAX\_MEAN : -8.98 MAX\_MED : -3.45 BMAD : 8.58  
COFF : 20 HIT-CALL : 0 FITC : 4 ACTP : 0  
FLAGS : 10

Assay ID 1824 (NHEERL\_TPO\_GUA\_dn)  
Sample ID : TP0001442G01

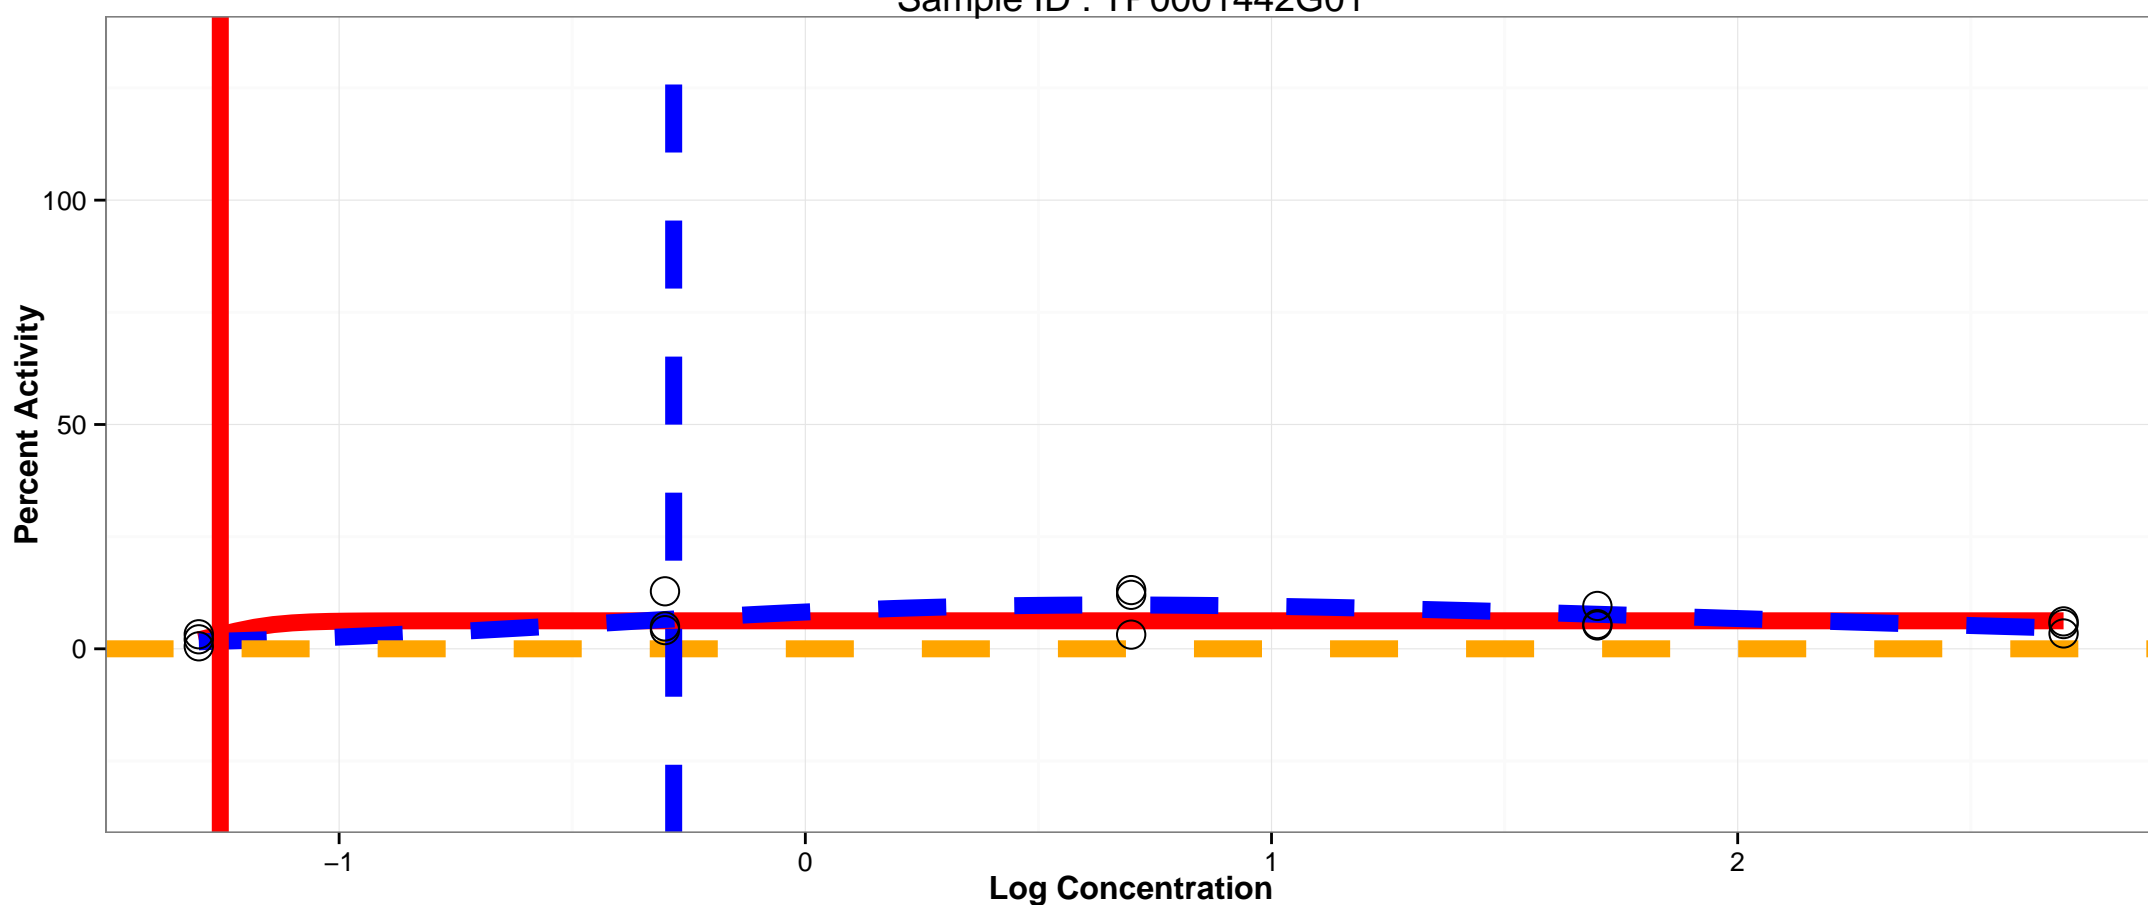

HILL MODEL

|     | tp    | ga    | gw   |
|-----|-------|-------|------|
| val | 6.24  | -1.25 | 7.09 |
| sd  | 0.992 | 2.42  | 372  |

GAIN-LOSS MODEL

|     | tp   | ga     | gw    | la   | lw    |
|-----|------|--------|-------|------|-------|
| val | 15.7 | -0.282 | 0.906 | 1.69 | 0.375 |
| sd  | 13.5 | 0.569  | 0.437 | 1.95 | 0.261 |

|      | CNST  | HILL  | GNLS  |
|------|-------|-------|-------|
| AIC  | 105.4 | 86.49 | 87.17 |
| PROB | 0     | 0.58  | 0.42  |
| RMSE | 7.21  | 3.31  | 2.95  |

MAX\_MEAN : 9.44 MAX\_MED : 12 BMAD : 3.71  
COFF : 20 HIT-CALL : 0 FITC : 13 ACTP : 1  
FLAGS :

Chemical : Bisphenol B  
CAS : 77-40-7

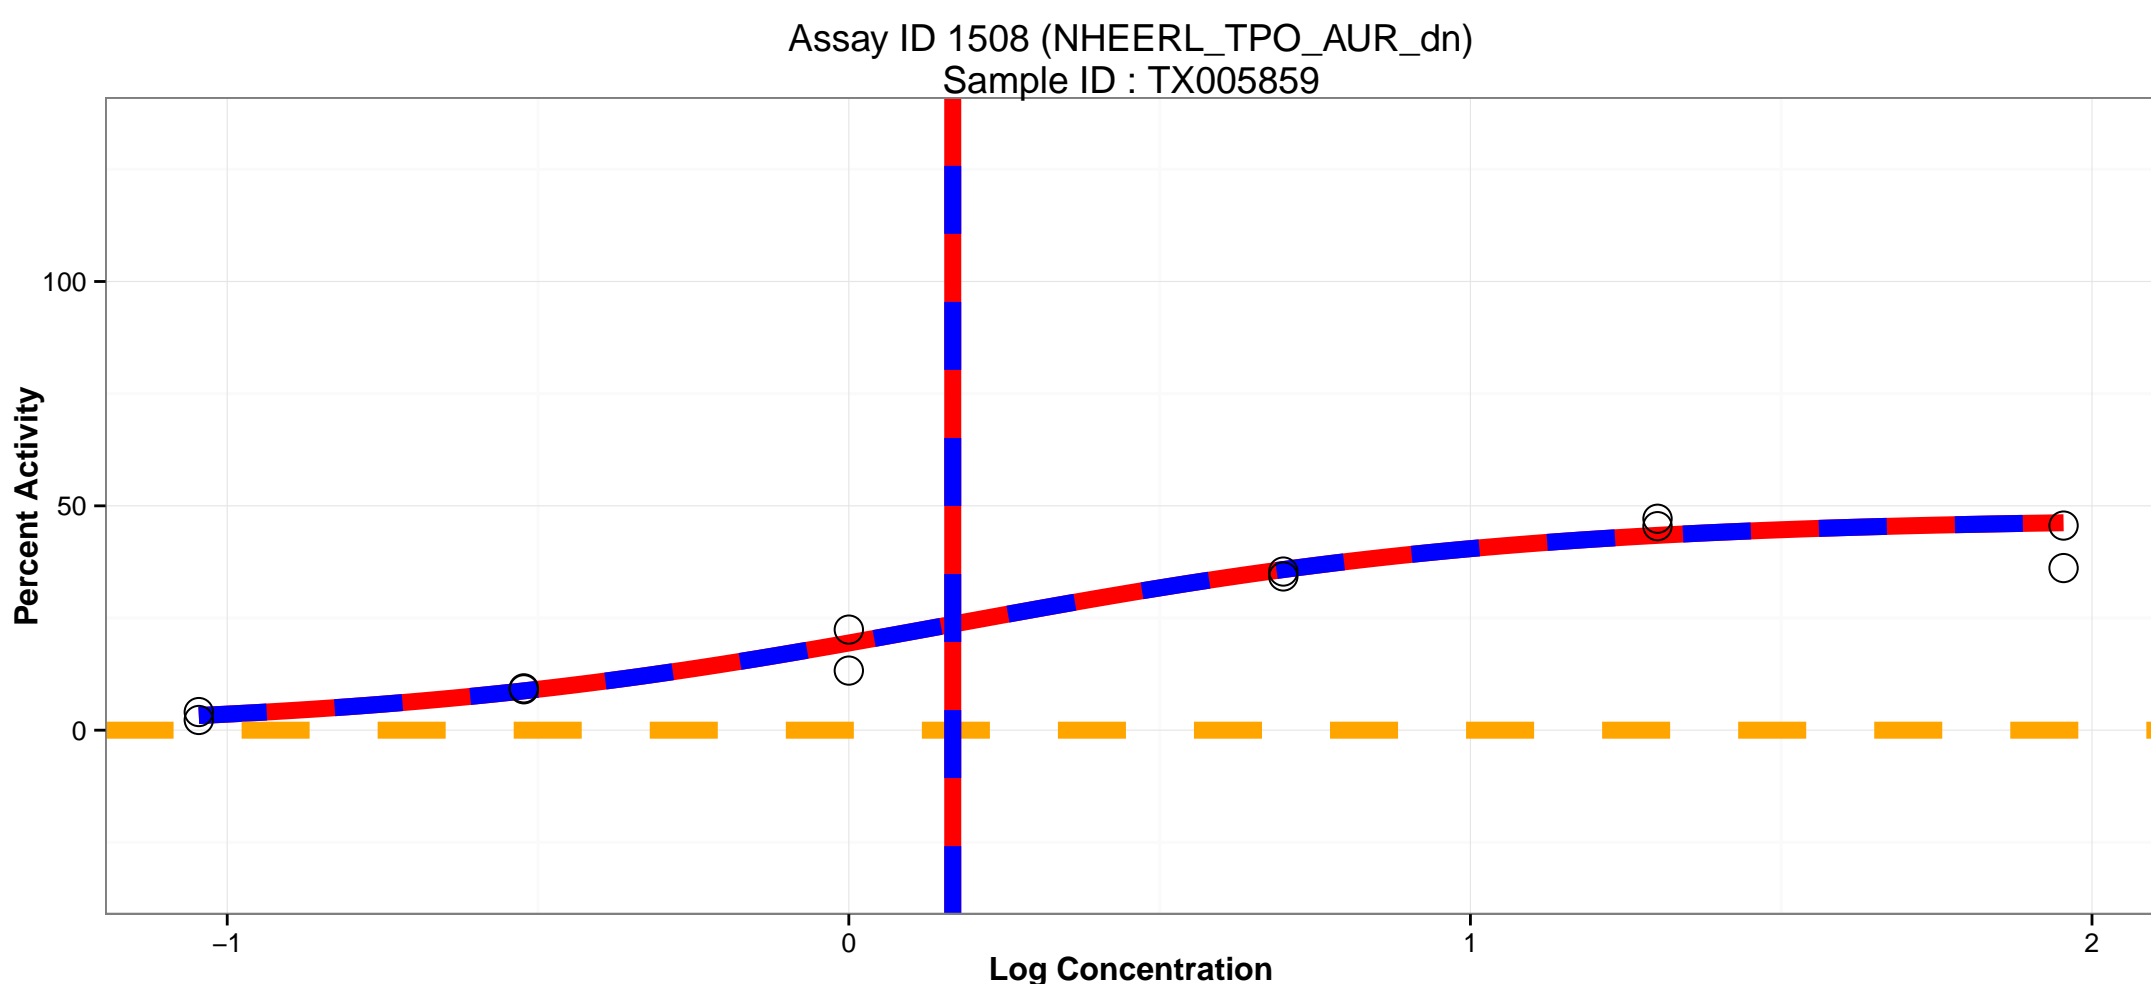

HILL MODEL

|     | tp   | ga     | gw    |
|-----|------|--------|-------|
| val | 47.2 | 0.167  | 0.931 |
| sd  | 2.48 | 0.0971 | 0.109 |

GAIN-LOSS MODEL

|     | tp   | ga    | gw    | la   | lw   |
|-----|------|-------|-------|------|------|
| val | 47.2 | 0.167 | 0.931 | 3.91 | 13.4 |
| sd  | NA   | NA    | NA    | NA   | NA   |

|      | CNST   | HILL  | GNLS  |
|------|--------|-------|-------|
| AIC  | 119.59 | 71.73 | 75.73 |
| PROB | 0      | 0.88  | 0.12  |
| RMSE | 30.24  | 3.78  | 3.78  |

MAX\_MEAN : 46.3 MAX\_MED : 46.3 BMAD : 5.69  
COFF : 20 HIT-CALL : 1 FITC : 41 ACTP : 1  
FLAGS :

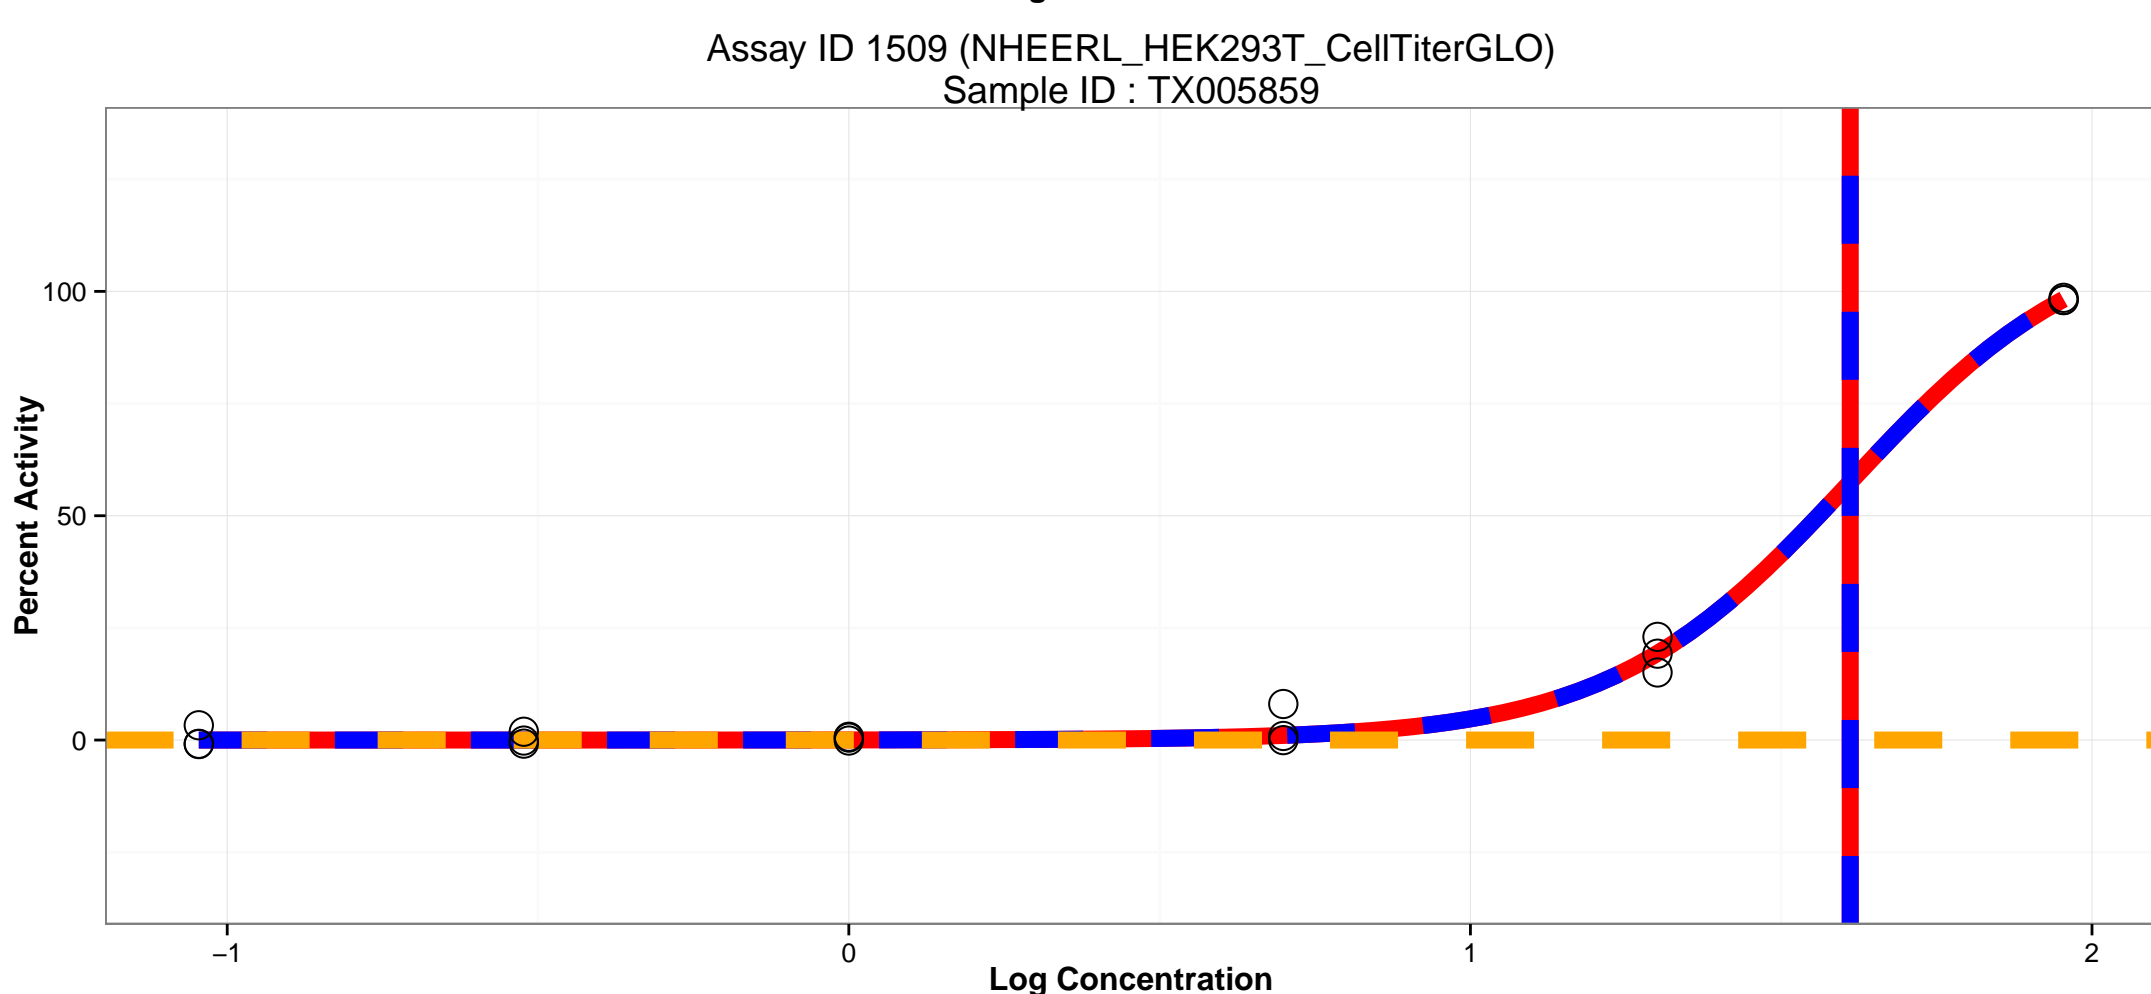

HILL MODEL

|     | tp   | ga     | gw   |
|-----|------|--------|------|
| val | 115  | 1.61   | 2.24 |
| sd  | 2.98 | 0.0238 | 0.1  |

GAIN-LOSS MODEL

|     | tp  | ga   | gw   | la   | lw |
|-----|-----|------|------|------|----|
| val | 115 | 1.61 | 2.24 | 3.35 | 14 |
| sd  | NA  | NA   | NA   | NA   | NA |

|      | CNST   | HILL  | GNLS  |
|------|--------|-------|-------|
| AIC  | 177.32 | 85.12 | 89.12 |
| PROB | 0      | 0.88  | 0.12  |
| RMSE | 40.94  | 2.35  | 2.35  |

MAX\_MEAN : 98.2 MAX\_MED : 98.1 BMAD : 5.54  
COFF : 20 HIT-CALL : 1 FITC : 42 ACTP : 1  
FLAGS :

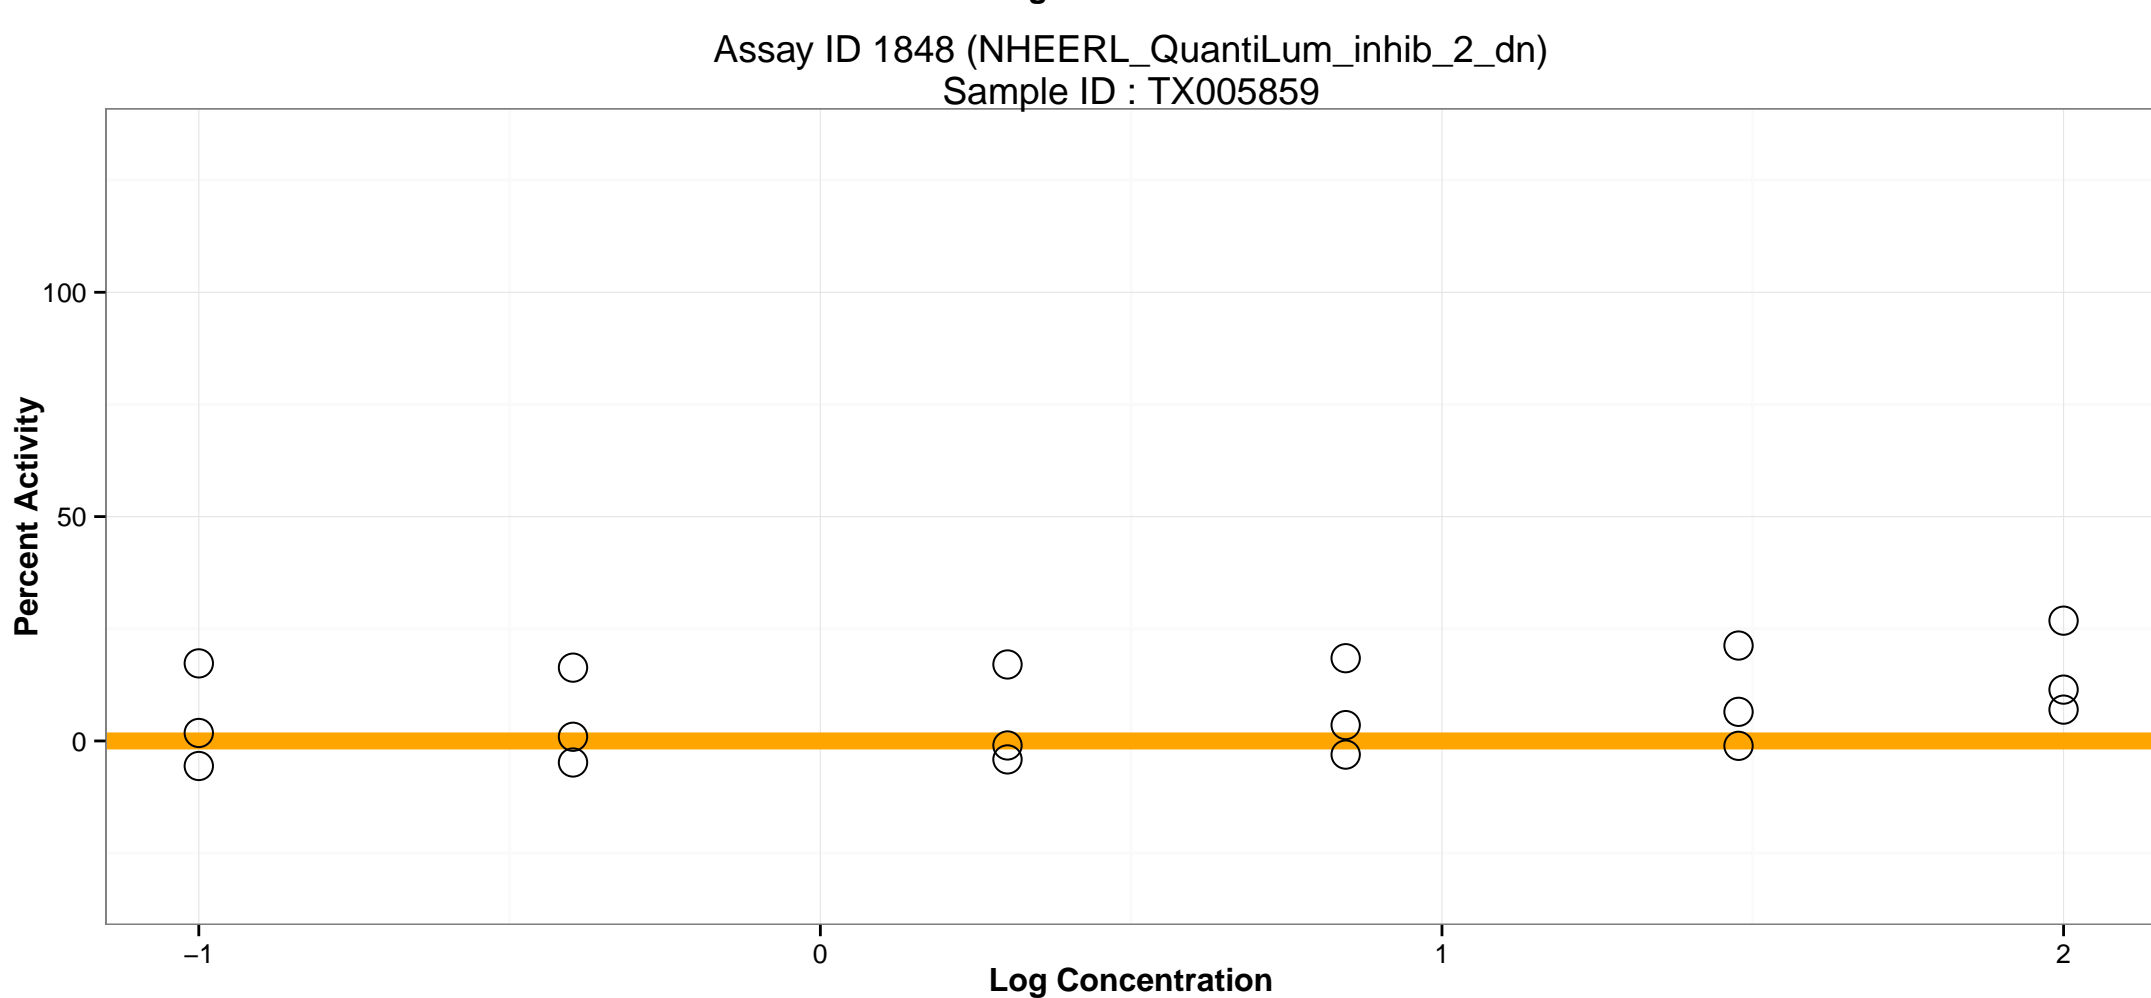

HILL MODEL

HILL MODEL: Not applicable

GAIN-LOSS MODEL

GNLS MODEL: Not applicable

|      | CNST  | HILL | GNLS |
|------|-------|------|------|
| AIC  | 144   | NA   | NA   |
| PROB | 1     | NA   | NA   |
| RMSE | 12.23 | NA   | NA   |

MAX\_MEAN : 15.1 MAX\_MED : 11.5 BMAD : 8.58  
COFF : 20 HIT-CALL : 0 FITC : 4 ACTP : 0  
FLAGS :

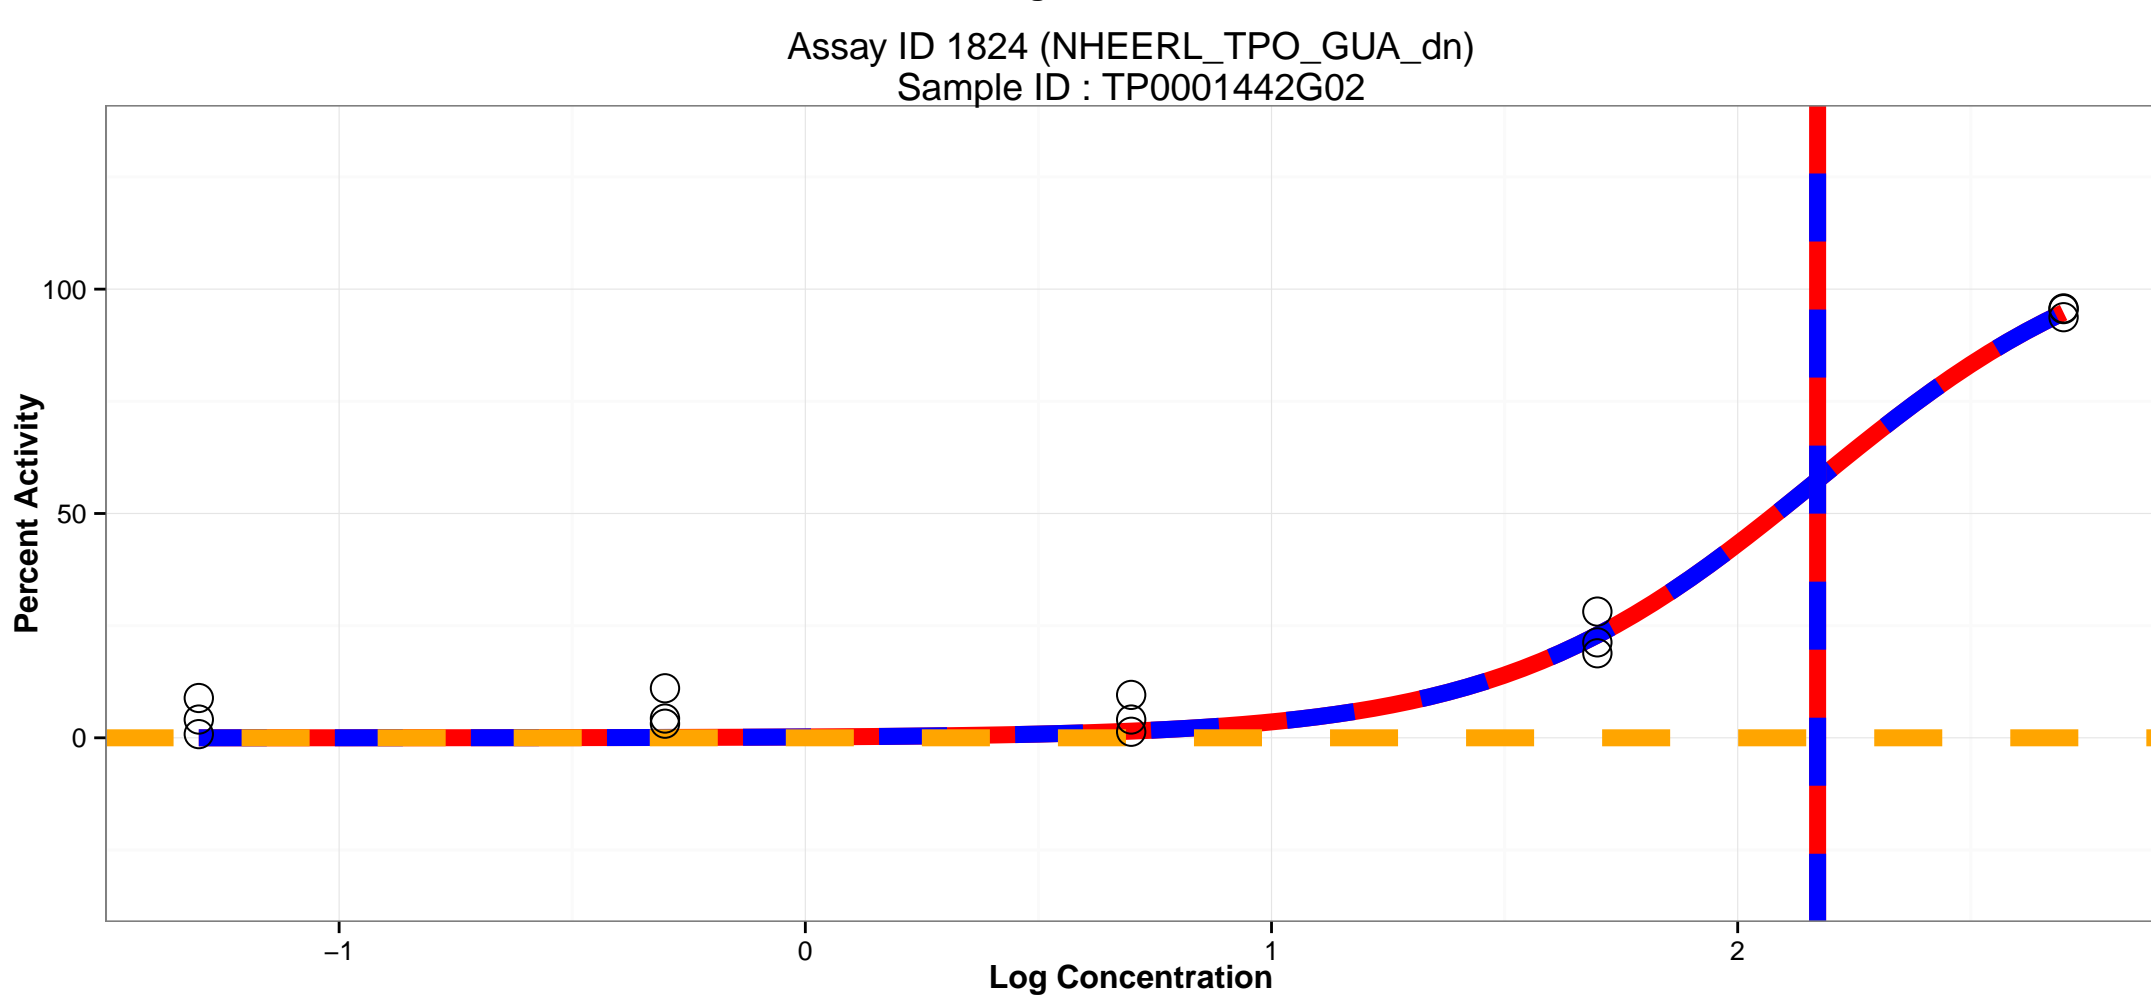

HILL MODEL

|     | tp   | ga    | gw    |
|-----|------|-------|-------|
| val | 115  | 2.17  | 1.28  |
| sd  | 31.9 | 0.313 | 0.556 |

GAIN-LOSS MODEL

|     | tp   | ga    | gw    | la   | lw   |
|-----|------|-------|-------|------|------|
| val | 115  | 2.17  | 1.28  | 3.37 | 10.7 |
| sd  | 31.9 | 0.313 | 0.556 | 174  | 2740 |

|      | CNST   | HILL | GNLS  |
|------|--------|------|-------|
| AIC  | 154.49 | 98.8 | 102.8 |
| PROB | 0      | 0.88 | 0.12  |
| RMSE | 44     | 4.94 | 4.94  |

MAX\_MEAN : 95 MAX\_MED : 95.6 BMAD : 3.71  
COFF : 20 HIT-CALL : 1 FITC : 42 ACTP : 1  
FLAGS :



Chemical : Phenolphthalin  
CAS : 81-90-3

Assay ID 1508 (NHEERL\_TPO\_AUR\_dn)  
Sample ID : TX006869

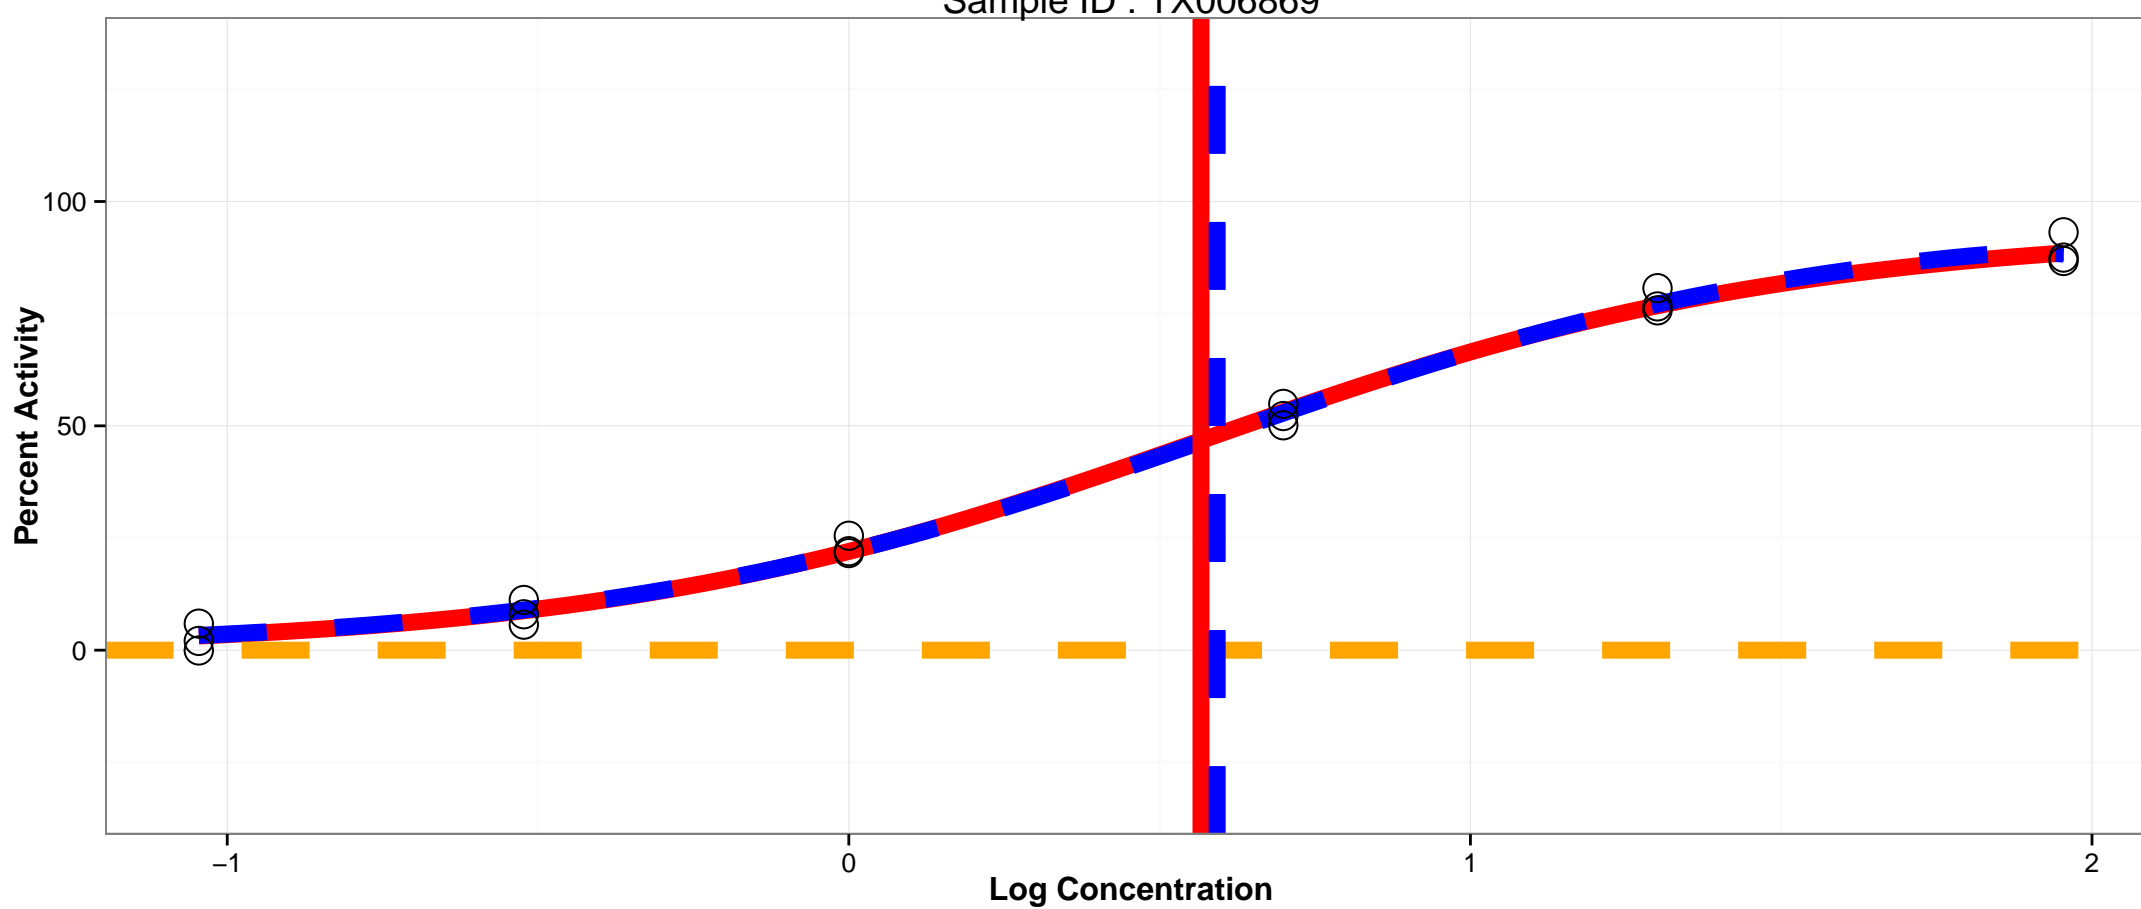

HILL MODEL

|     | tp   | ga     | gw     |
|-----|------|--------|--------|
| val | 93.5 | 0.567  | 0.903  |
| sd  | 2.39 | 0.0405 | 0.0498 |

GAIN-LOSS MODEL

|     | tp   | ga    | gw    | la   | lw   |
|-----|------|-------|-------|------|------|
| val | 95.4 | 0.593 | 0.883 | 2.15 | 9.15 |
| sd  | NA   | NA    | NA    | NA   | NA   |

|      | CNST   | HILL  | GNLS  |
|------|--------|-------|-------|
| AIC  | 198.44 | 92.54 | 96.39 |
| PROB | 0      | 0.87  | 0.13  |
| RMSE | 53.8   | 2.39  | 2.38  |

MAX\_MEAN : 89.1 MAX\_MED : 87.5 BMAD : 5.69  
COFF : 20 HIT-CALL : 1 FITC : 42 ACTP : 1  
FLAGS :

Assay ID 1509 (NHEERL\_HEK293T\_CellTiterGLO)  
Sample ID : TX006869

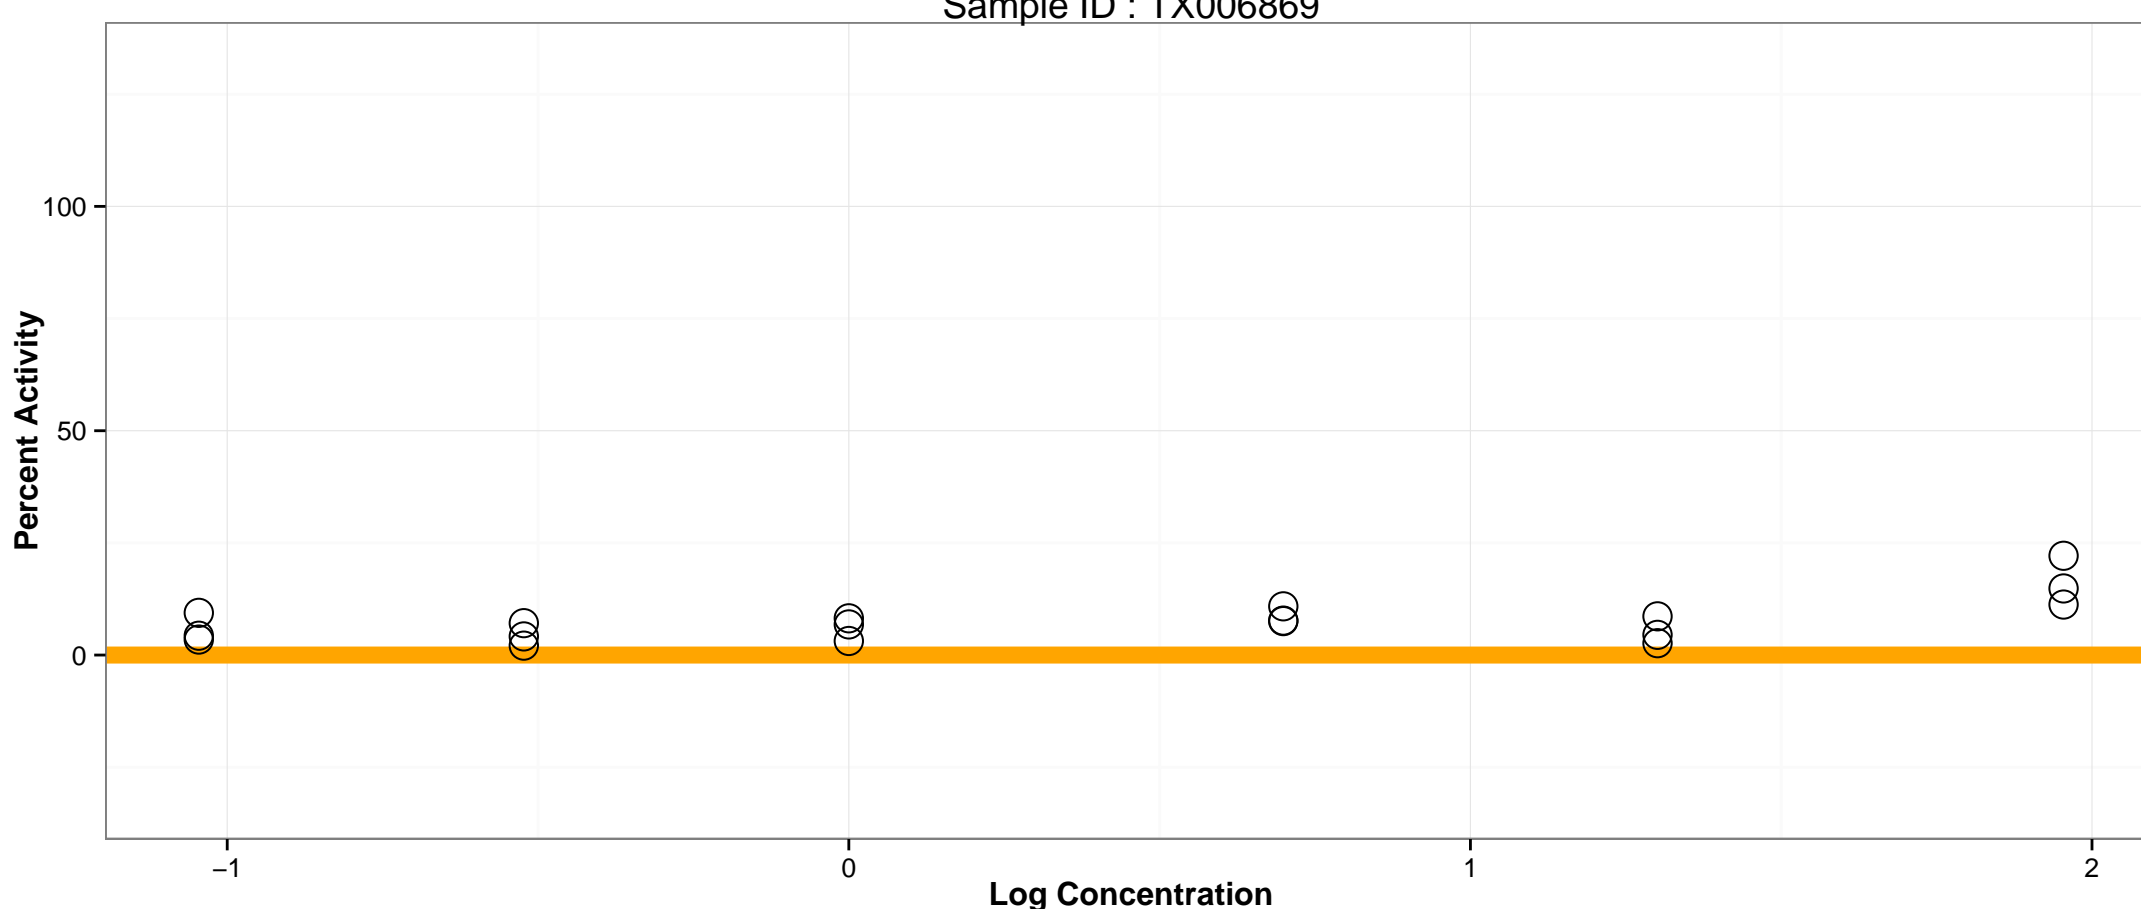

HILL MODEL

HILL MODEL: Not applicable

GAIN-LOSS MODEL

GNLS MODEL: Not applicable

|      | CNST   | HILL | GNLS |
|------|--------|------|------|
| AIC  | 133.96 | NA   | NA   |
| PROB | 1      | NA   | NA   |
| RMSE | 9.1    | NA   | NA   |

MAX\_MEAN : 16.1 MAX\_MED : 14.9 BMAD : 5.54  
COFF : 20 HIT-CALL : 0 FITC : 4 ACTP : 0  
FLAGS :

Assay ID 1848 (NHEERL\_Quantilum\_inhib\_2\_dn)  
Sample ID : TX006869

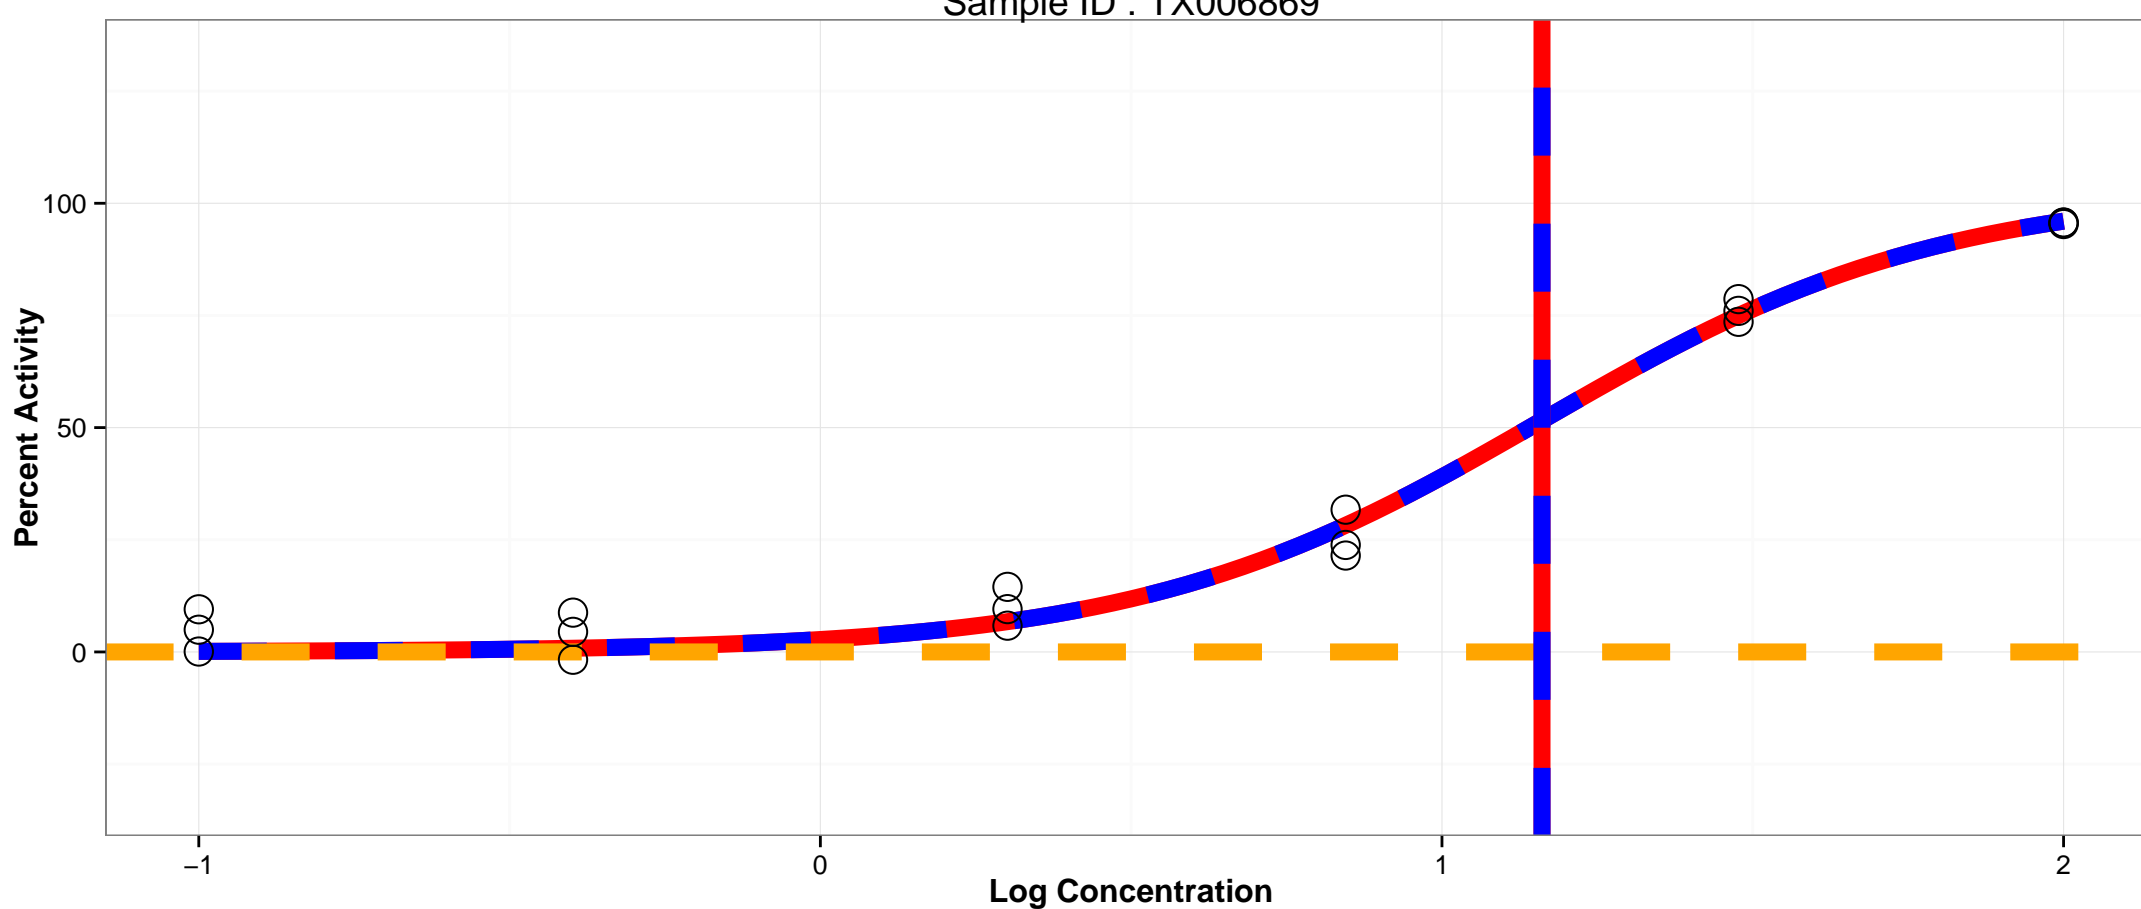

HILL MODEL

|     | tp   | ga     | gw    |
|-----|------|--------|-------|
| val | 103  | 1.16   | 1.34  |
| sd  | 4.08 | 0.0446 | 0.162 |

GAIN-LOSS MODEL

|     | tp  | ga   | gw   | la   | lw   |
|-----|-----|------|------|------|------|
| val | 103 | 1.16 | 1.34 | 3.04 | 8.57 |
| sd  | NA  | NA   | NA   | NA   | NA   |

|      | CNST   | HILL   | GNLS   |
|------|--------|--------|--------|
| AIC  | 195.01 | 113.87 | 117.87 |
| PROB | 0      | 0.88   | 0.12   |
| RMSE | 51.31  | 4.46   | 4.46   |

MAX\_MEAN : 95.6 MAX\_MED : 95.7 BMAD : 8.58  
COFF : 20 HIT-CALL : 1 FITC : 42 ACTP : 1  
FLAGS :

Assay ID 1824 (NHEERL\_TPO\_GUA\_dn)  
Sample ID : TP0001442G03

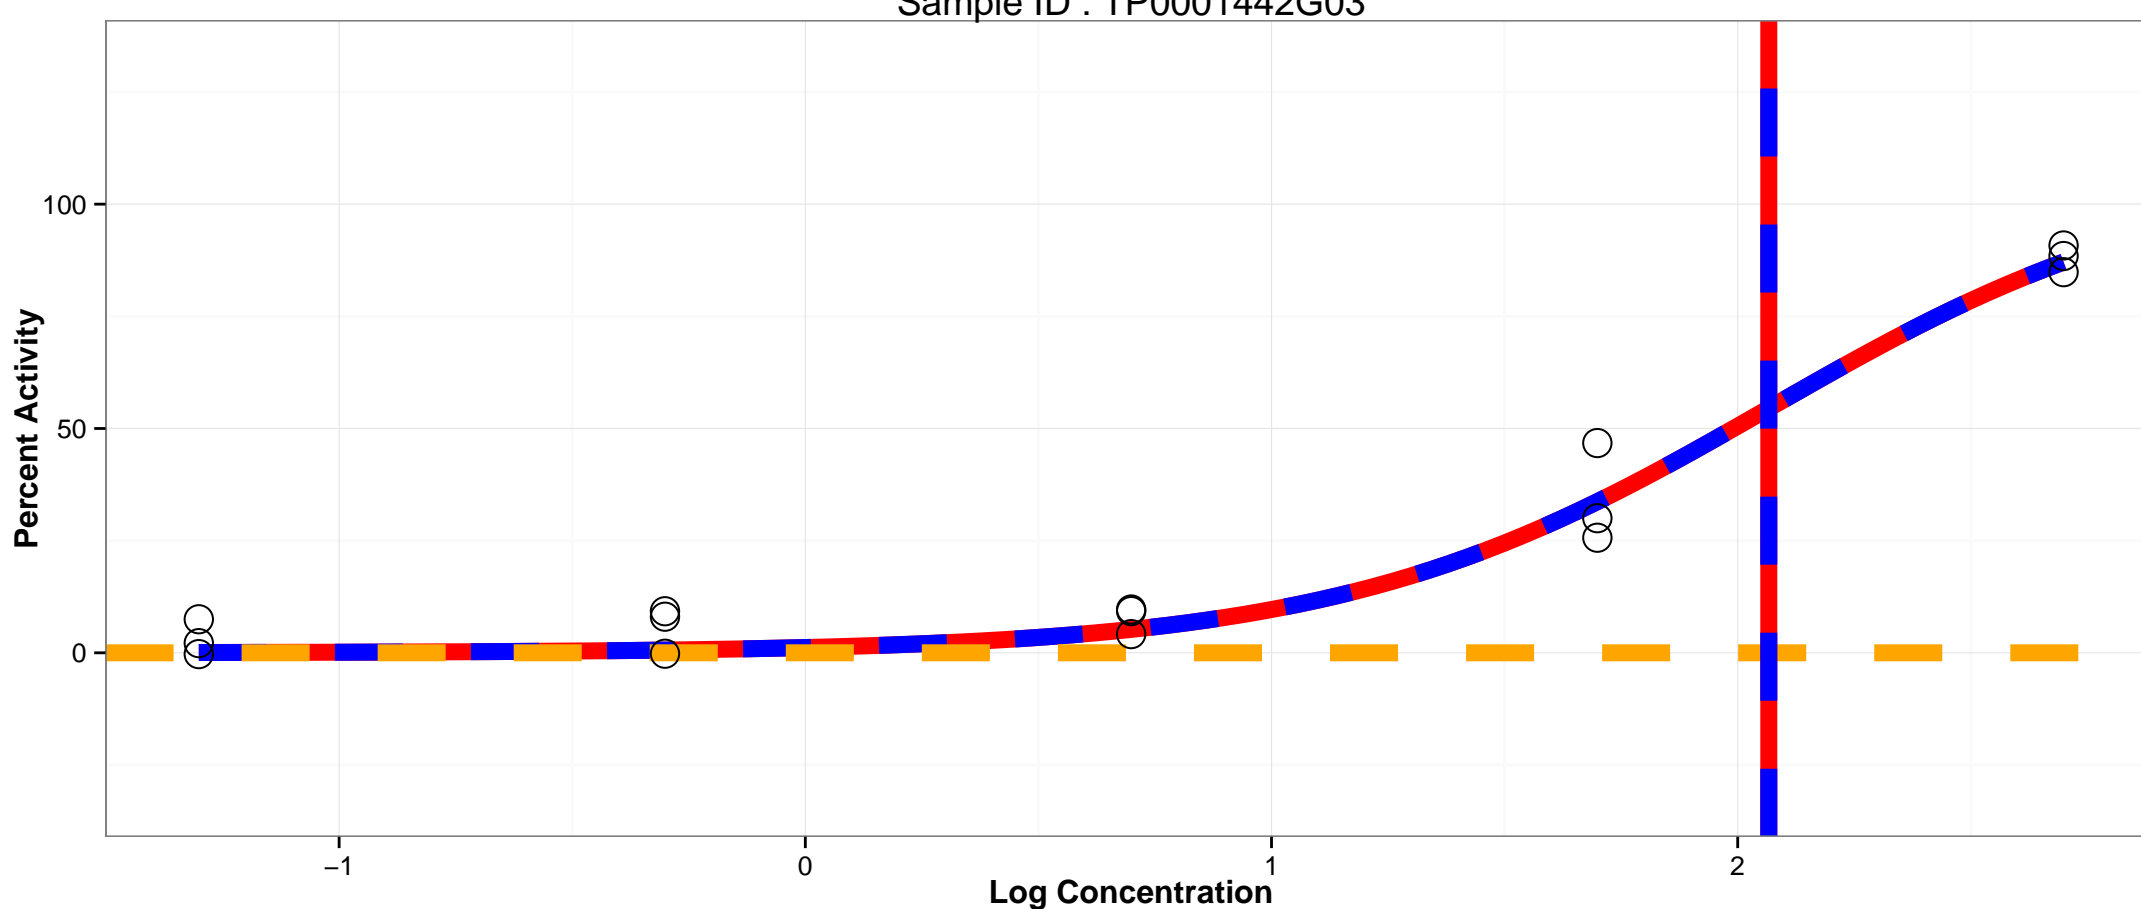

HILL MODEL

|     | tp   | ga    | gw    |
|-----|------|-------|-------|
| val | 109  | 2.07  | 0.949 |
| sd  | 17.5 | 0.219 | 0.241 |

GAIN-LOSS MODEL

|     | tp  | ga   | gw    | la   | lw   |
|-----|-----|------|-------|------|------|
| val | 109 | 2.07 | 0.949 | 4.64 | 7.38 |
| sd  | NA  | NA   | NA    | NA   | NA   |

|      | CNST   | HILL   | GNLS   |
|------|--------|--------|--------|
| AIC  | 155.55 | 103.94 | 107.94 |
| PROB | 0      | 0.88   | 0.12   |
| RMSE | 42.76  | 5.76   | 5.76   |

MAX\_MEAN : 88 MAX\_MED : 88.5 BMAD : 3.71  
COFF : 20 HIT-CALL : 1 FITC : 42 ACTP : 1  
FLAGS :

Chemical : N-Ethylaniline  
CAS : 103-69-5

Assay ID 1508 (NHEERL\_TPO\_AUR\_dn)  
Sample ID : TX010334

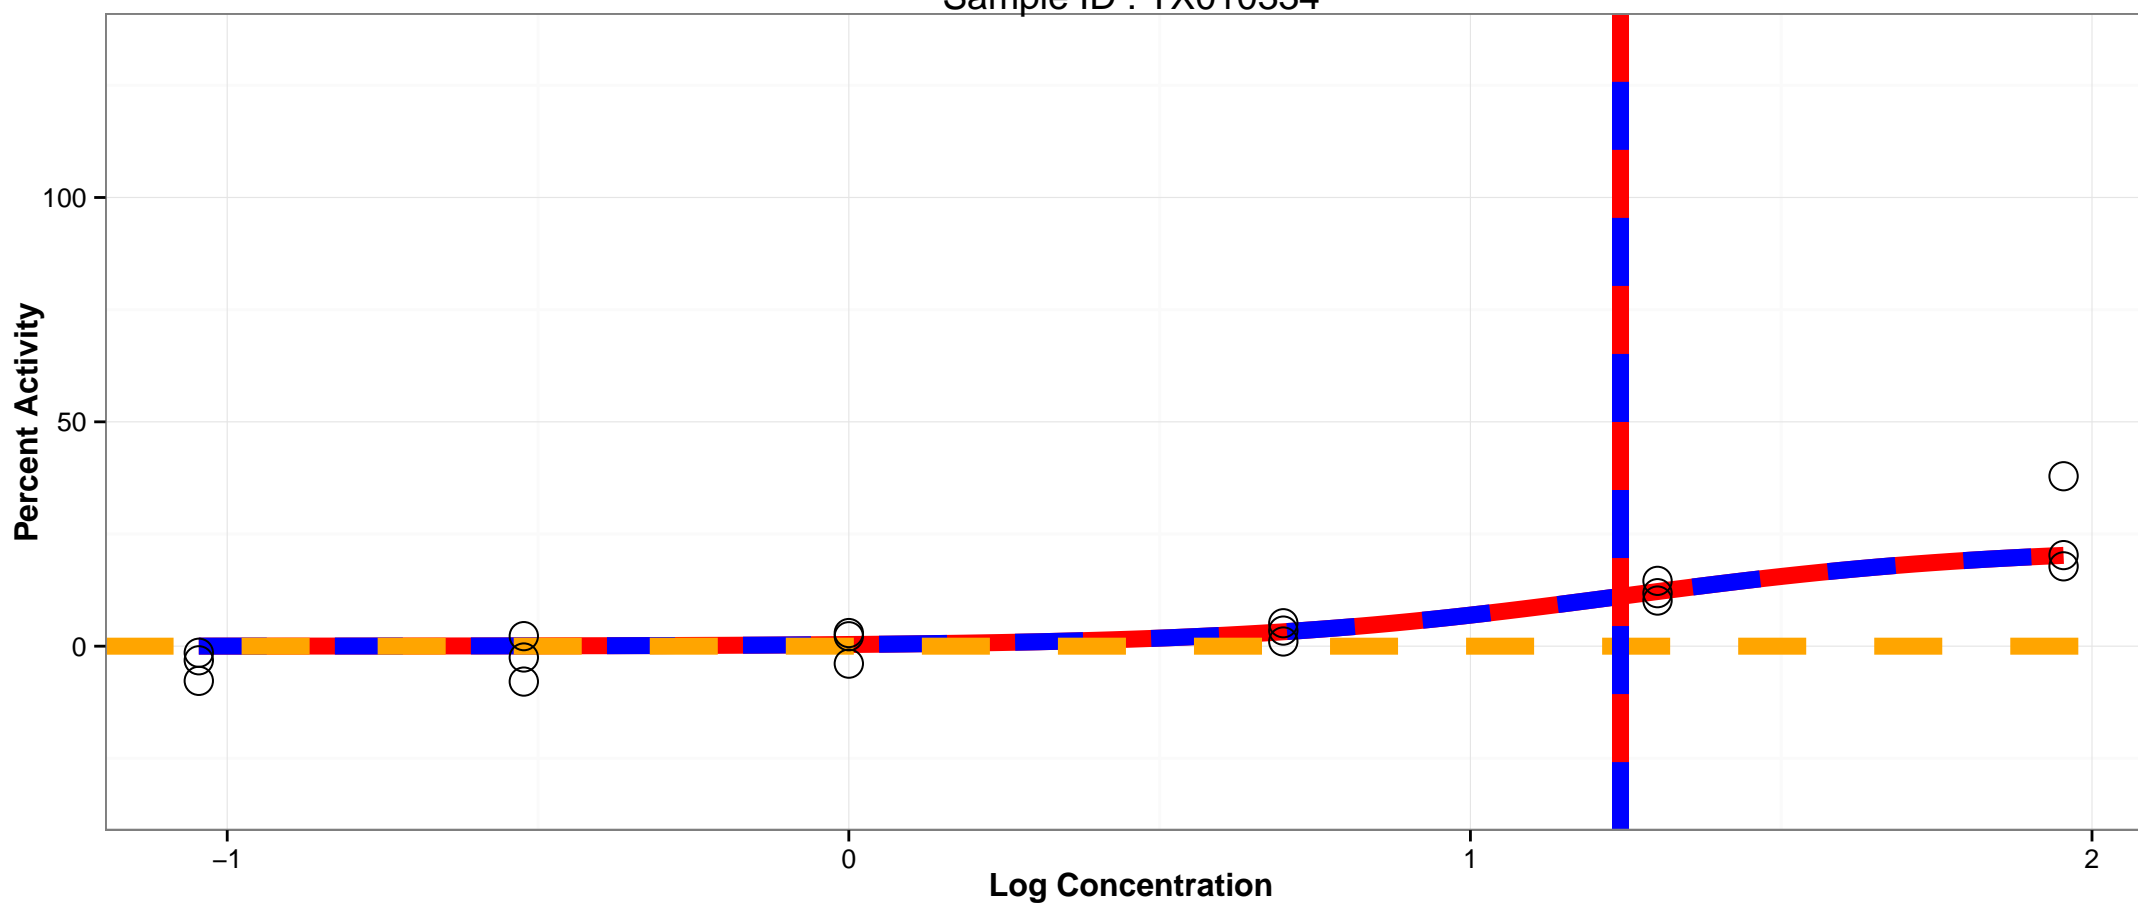

HILL MODEL

|     | tp   | ga    | gw    |
|-----|------|-------|-------|
| val | 22.2 | 1.24  | 1.42  |
| sd  | 4.39 | 0.181 | 0.582 |

GAIN-LOSS MODEL

|     | tp   | ga    | gw    | la   | lw   |
|-----|------|-------|-------|------|------|
| val | 22.2 | 1.24  | 1.42  | 2.69 | 7.24 |
| sd  | 4.4  | 0.181 | 0.582 | 297  | 2910 |

|      | CNST   | HILL   | GNLS   |
|------|--------|--------|--------|
| AIC  | 141.14 | 113.52 | 117.52 |
| PROB | 0      | 0.88   | 0.12   |
| RMSE | 12.55  | 5.32   | 5.32   |

MAX\_MEAN : 25.3 MAX\_MED : 20.3 BMAD : 5.69  
COFF : 20 HIT-CALL : 1 FITC : 38 ACTP : 1  
FLAGS : 11; 6

Assay ID 1509 (NHEERL\_HEK293T\_CellTiterGLO)  
Sample ID : TX010334

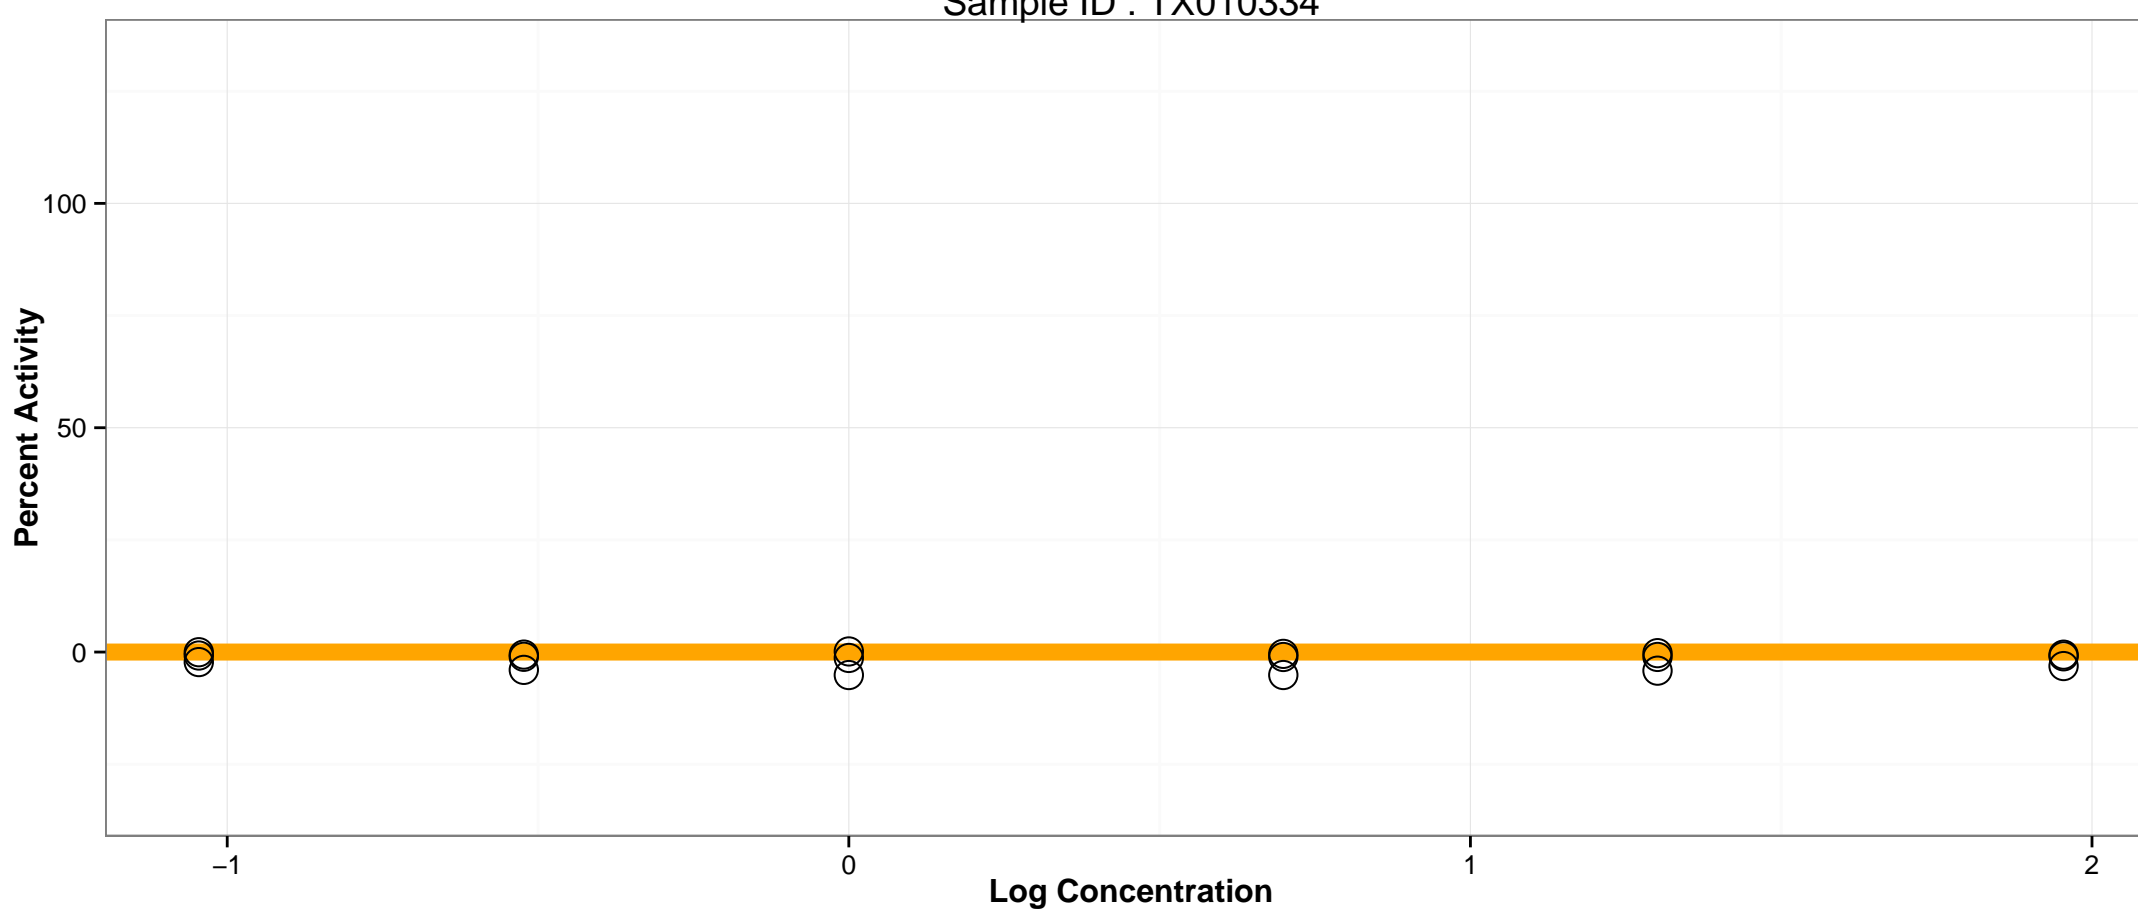

HILL MODEL

HILL MODEL: Not applicable

GAIN-LOSS MODEL

GNLS MODEL: Not applicable

|      | CNST  | HILL | GNLS |
|------|-------|------|------|
| AIC  | 84.81 | NA   | NA   |
| PROB | 1     | NA   | NA   |
| RMSE | 2.44  | NA   | NA   |

MAX\_MEAN : -1 MAX\_MED : -0.758 BMAD : 5.54  
COFF : 20 HIT-CALL : 0 FITC : 4 ACTP : 0  
FLAGS :

Assay ID 1848 (NHEERL\_Quantilum\_inhib\_2\_dn)  
Sample ID : TX010334

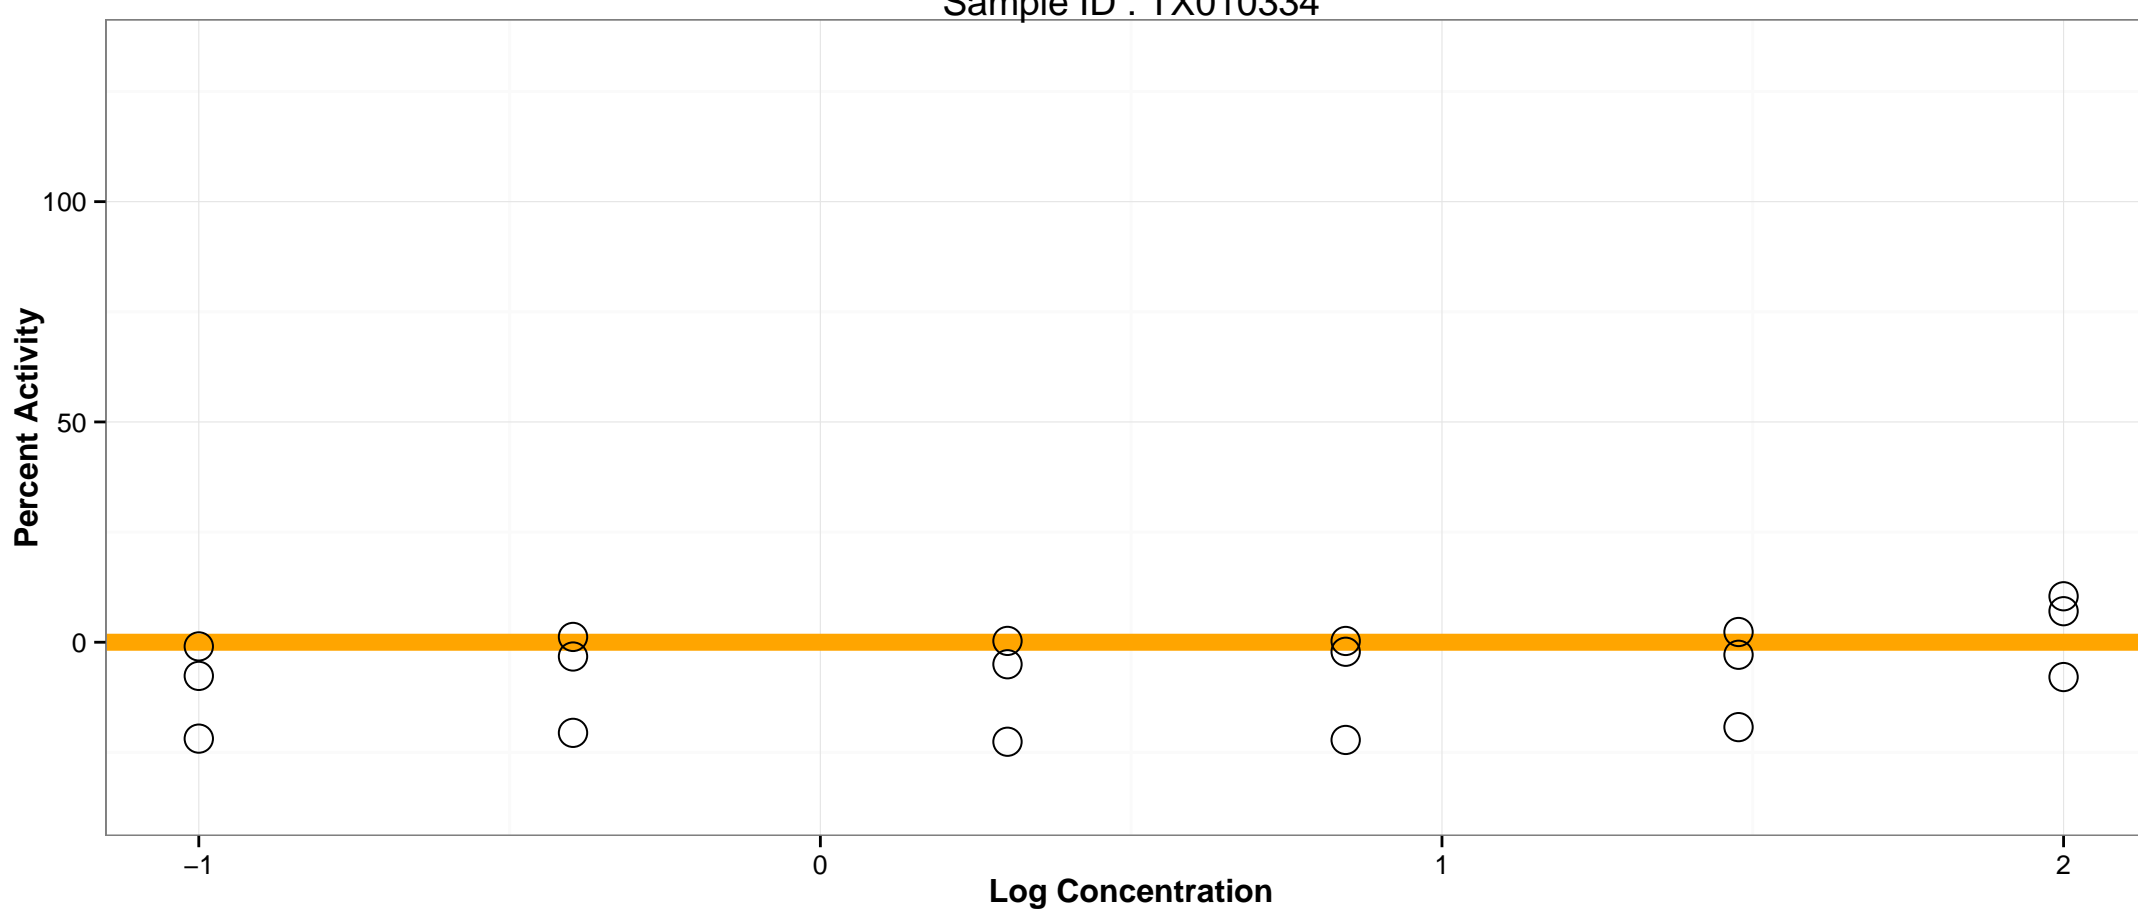

HILL MODEL

HILL MODEL: Not applicable

GAIN-LOSS MODEL

GNLS MODEL: Not applicable

|      | CNST   | HILL | GNLS |
|------|--------|------|------|
| AIC  | 142.94 | NA   | NA   |
| PROB | 1      | NA   | NA   |
| RMSE | 12.03  | NA   | NA   |

MAX\_MEAN : 3.21 MAX\_MED : 7.06 BMAD : 8.58  
COFF : 20 HIT-CALL : 0 FITC : 4 ACTP : 0  
FLAGS :

Assay ID 1824 (NHEERL\_TPO\_GUA\_dn)  
Sample ID : TP0001442G05

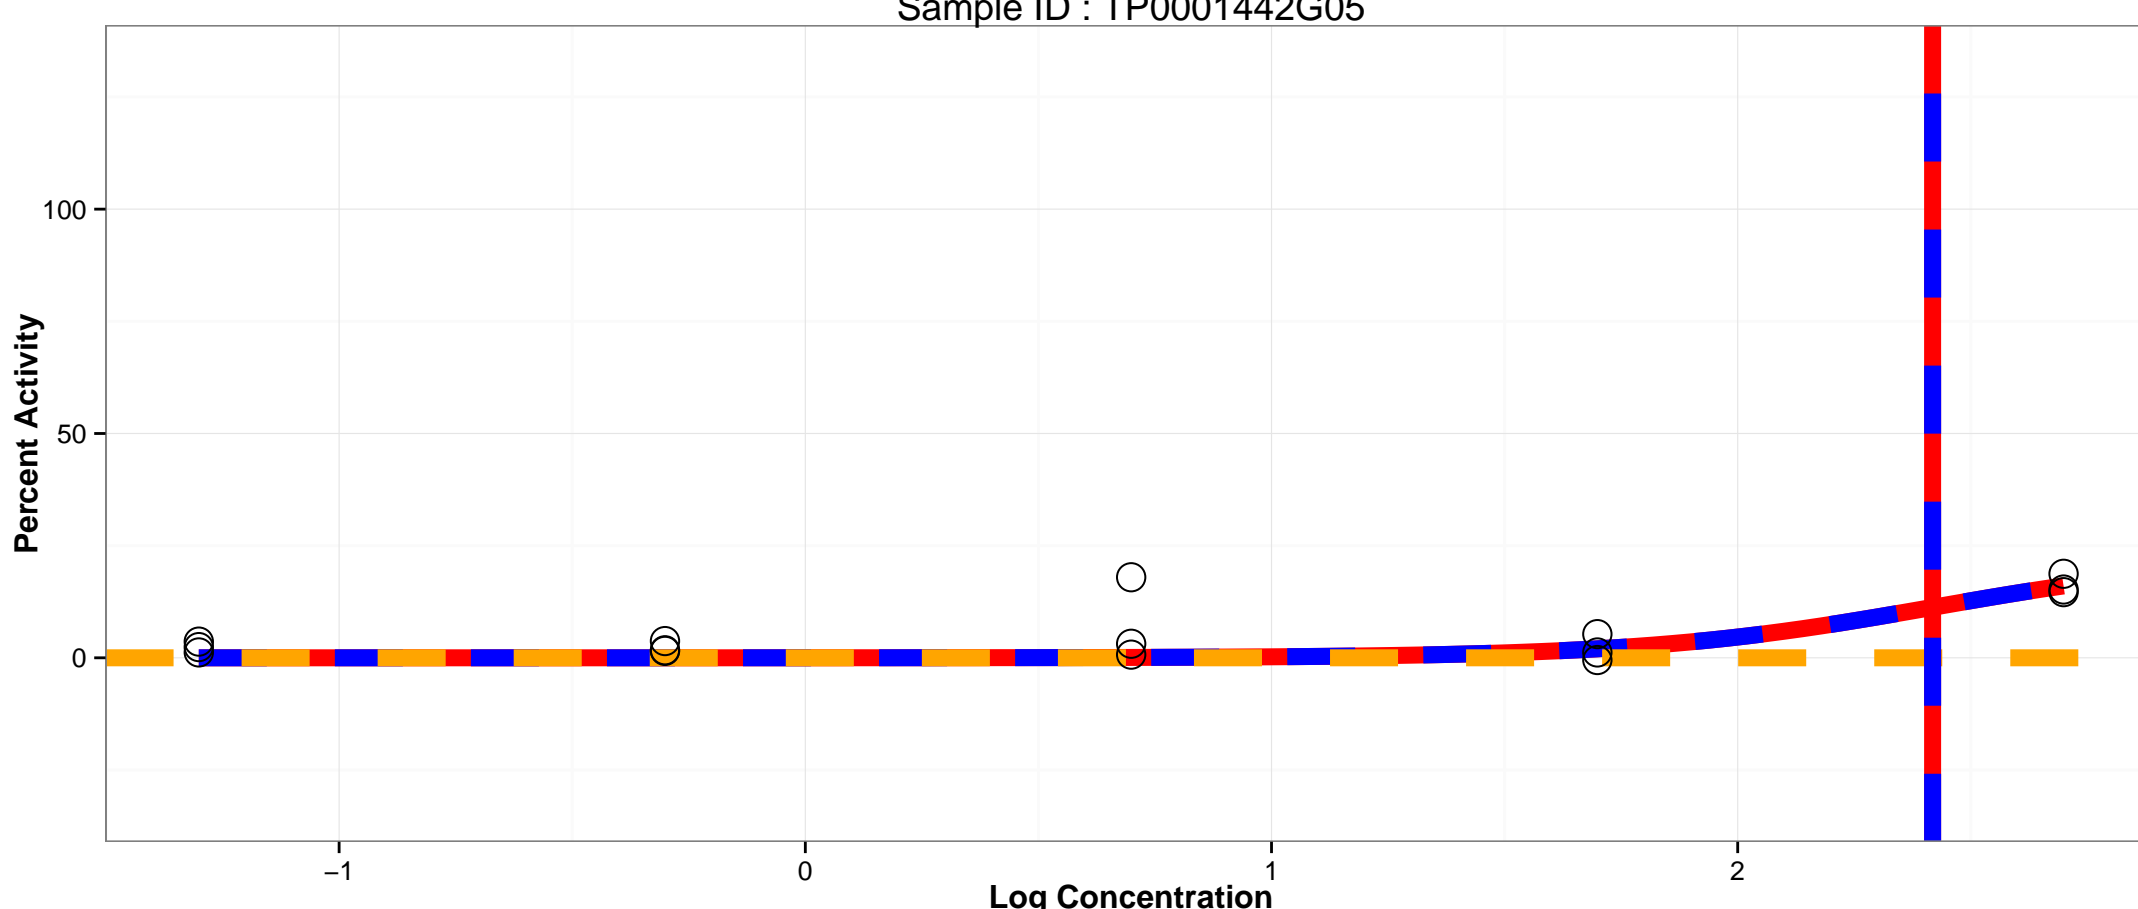

HILL MODEL

|     | tp   | ga   | gw   |
|-----|------|------|------|
| val | 22.5 | 2.42 | 1.4  |
| sd  | 45   | 1.68 | 2.45 |

GAIN-LOSS MODEL

|     | tp   | ga   | gw   | la  | lw   |
|-----|------|------|------|-----|------|
| val | 22.5 | 2.42 | 1.4  | 4.7 | 2.83 |
| sd  | 45.2 | 1.69 | 2.46 | 531 | 755  |

|      | CNST  | HILL  | GNLS  |
|------|-------|-------|-------|
| AIC  | 109.2 | 91.12 | 95.12 |
| PROB | 0     | 0.88  | 0.12  |
| RMSE | 8.95  | 5.14  | 5.14  |

MAX\_MEAN : 16.2 MAX\_MED : 15.2 BMAD : 3.71  
COFF : 20 HIT-CALL : 0 FITC : 21 ACTP : 1  
FLAGS : 12

Chemical : Aniline hydrochloride  
CAS : 142-04-1

Assay ID 1508 (NHEERL\_TPO\_AUR\_dn)  
Sample ID : TX009066

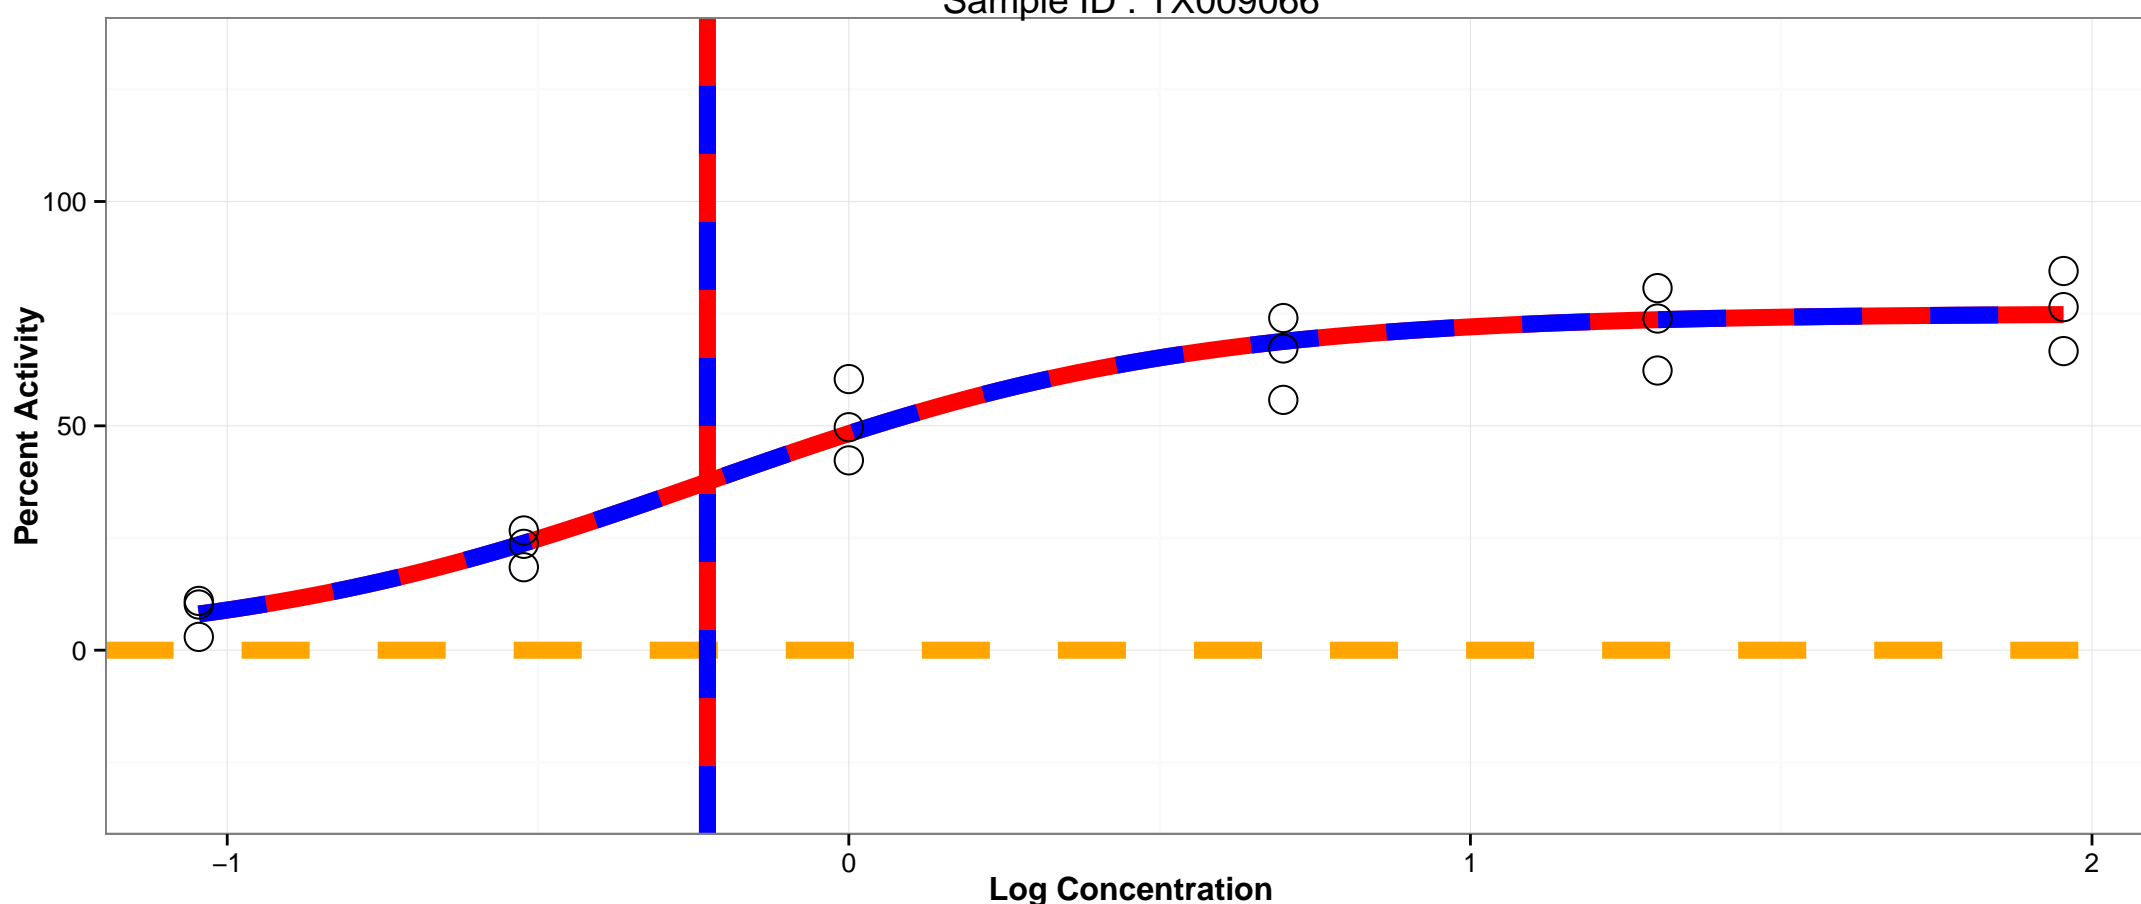

HILL MODEL

|     | tp   | ga     | gw    |
|-----|------|--------|-------|
| val | 75.1 | -0.227 | 1.12  |
| sd  | 3.45 | 0.0819 | 0.207 |

GAIN-LOSS MODEL

|     | tp   | ga     | gw    | la   | lw   |
|-----|------|--------|-------|------|------|
| val | 75.1 | -0.227 | 1.12  | 3.32 | 5.99 |
| sd  | 3.45 | 0.0819 | 0.207 | 1170 | 5140 |

|      | CNST   | HILL   | GNLS   |
|------|--------|--------|--------|
| AIC  | 201.06 | 128.91 | 132.91 |
| PROB | 0      | 0.88   | 0.12   |
| RMSE | 55.87  | 6.67   | 6.67   |

MAX\_MEAN : 75.9 MAX\_MED : 76.5 BMAD : 5.69  
COFF : 20 HIT-CALL : 1 FITC : 41 ACTP : 1  
FLAGS :

Assay ID 1509 (NHEERL\_HEK293T\_CellTiterGLO)  
Sample ID : TX009066

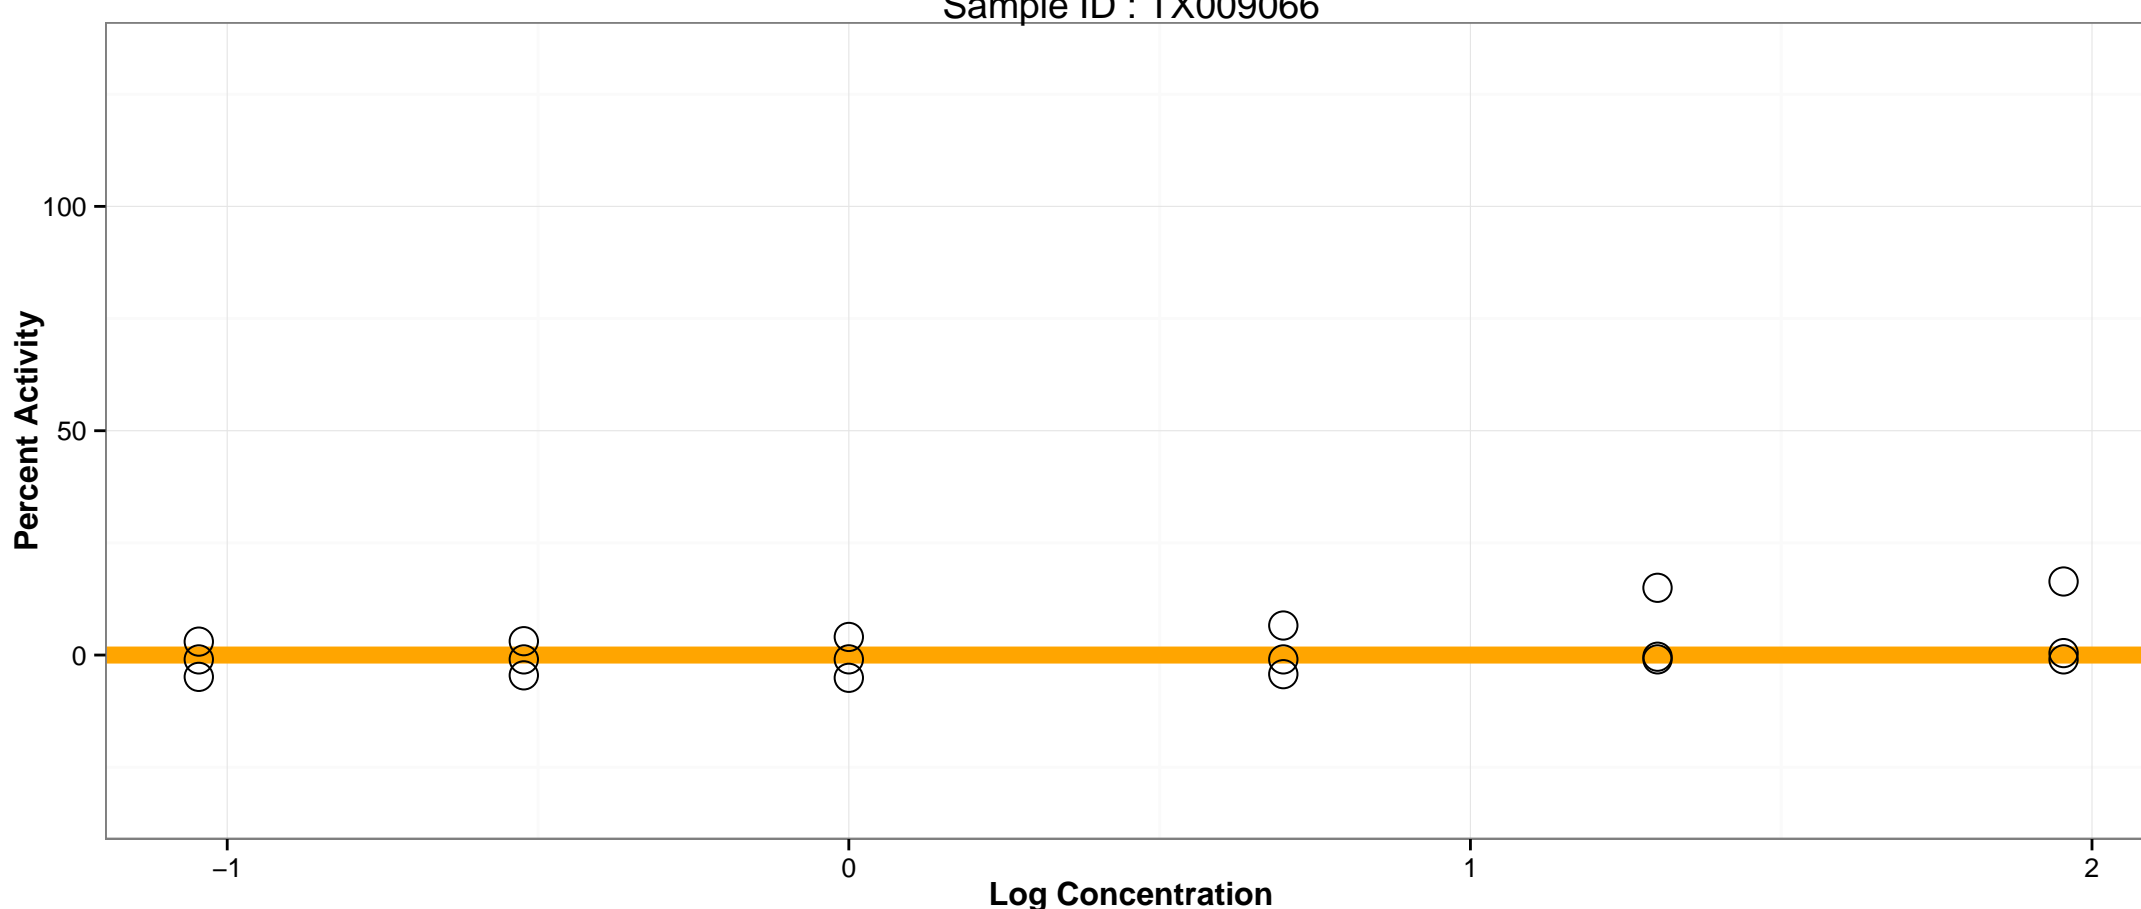

HILL MODEL

HILL MODEL: Not applicable

GAIN-LOSS MODEL

GNLS MODEL: Not applicable

|      | CNST   | HILL | GNLS |
|------|--------|------|------|
| AIC  | 114.42 | NA   | NA   |
| PROB | 1      | NA   | NA   |
| RMSE | 6.08   | NA   | NA   |

MAX\_MEAN : 5.3 MAX\_MED : 0.451 BMAD : 5.54  
COFF : 20 HIT-CALL : 0 FITC : 4 ACTP : 0  
FLAGS :

Assay ID 1848 (NHEERL\_Quantilum\_inhib\_2\_dn)  
Sample ID : TX009066

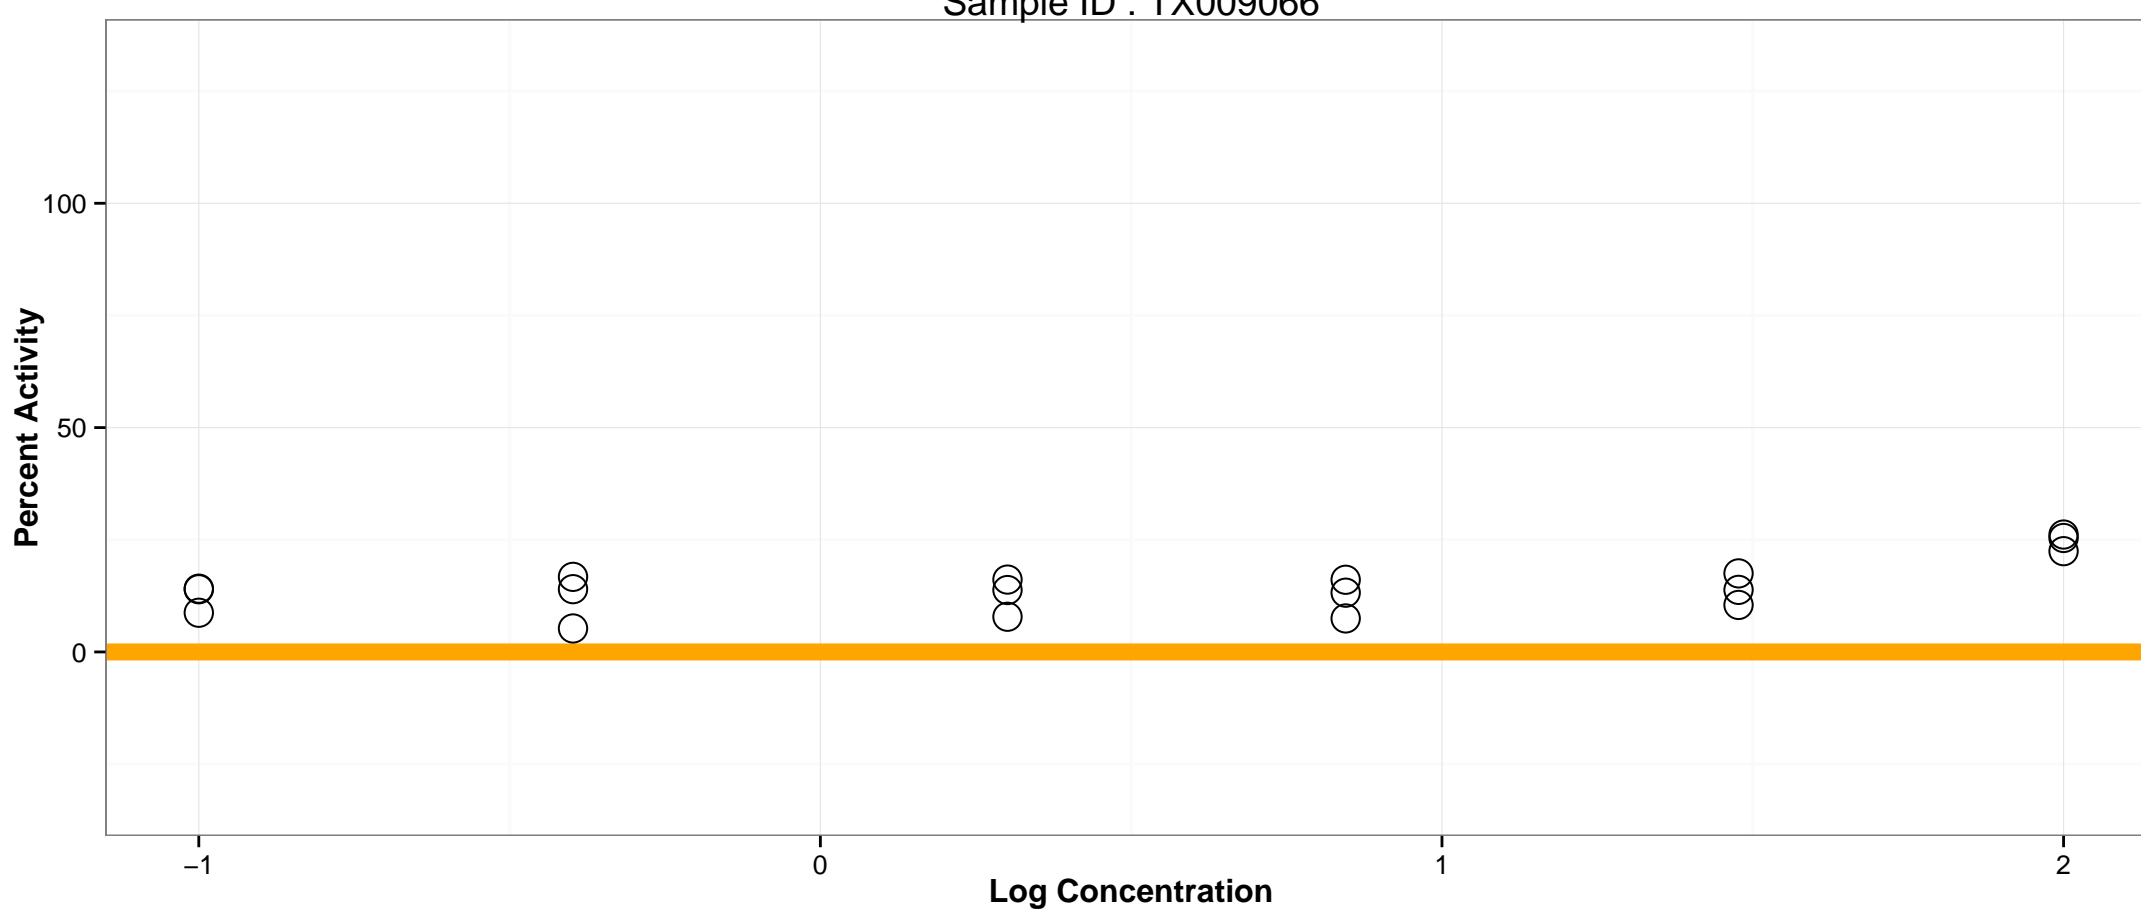

HILL MODEL

HILL MODEL: Not applicable

GAIN-LOSS MODEL

GNLS MODEL: Not applicable

|      | CNST   | HILL | GNLS |
|------|--------|------|------|
| AIC  | 155.47 | NA   | NA   |
| PROB | 1      | NA   | NA   |
| RMSE | 15.68  | NA   | NA   |

MAX\_MEAN : 24.7 MAX\_MED : 25.4 BMAD : 8.58  
COFF : 20 HIT-CALL : 0 FITC : 4 ACTP : 0  
FLAGS :

Assay ID 1824 (NHEERL\_TPO\_GUA\_dn)  
Sample ID : TP0001442G06

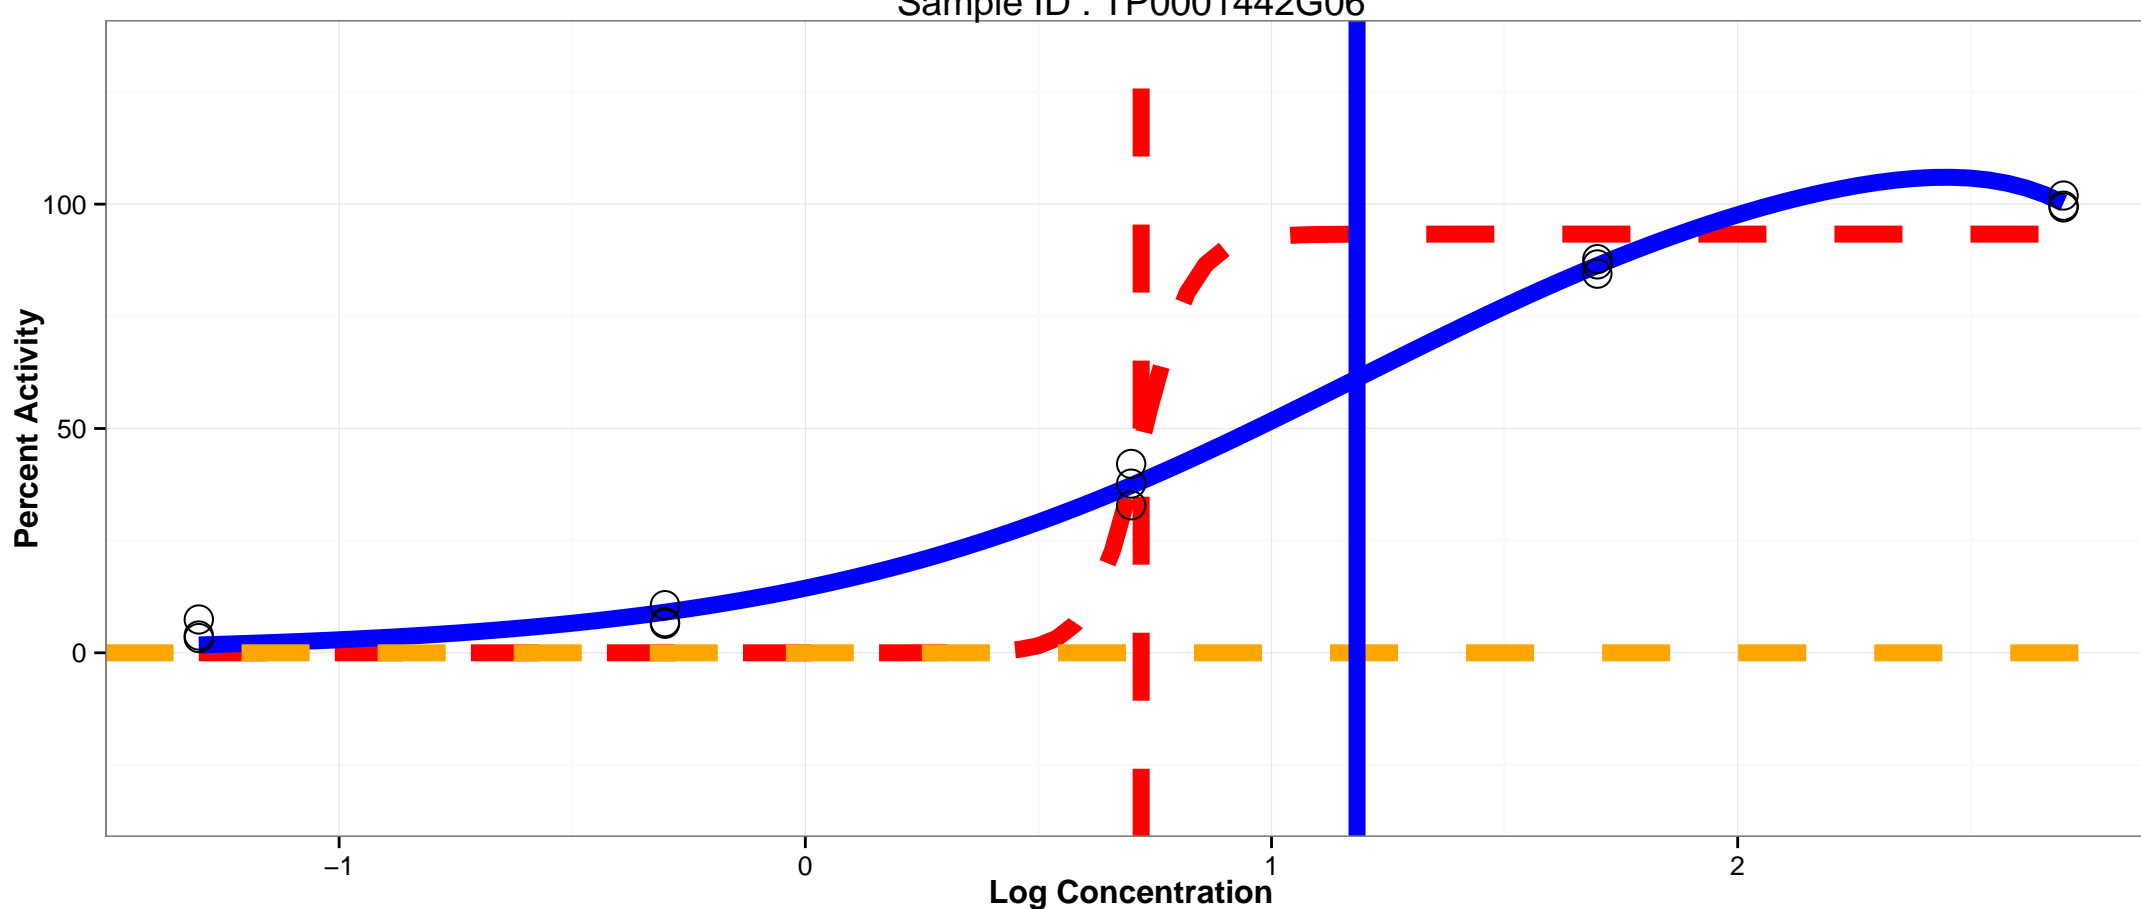

HILL MODEL

|     | tp   | ga    | gw   |
|-----|------|-------|------|
| val | 93.3 | 0.72  | 7.99 |
| sd  | 3.58 | 0.109 | 40.9 |

GAIN-LOSS MODEL

|     | tp  | ga   | gw    | la   | lw   |
|-----|-----|------|-------|------|------|
| val | 122 | 1.18 | 0.739 | 3.06 | 2.39 |
| sd  | NA  | NA   | NA    | NA   | NA   |

|      | CNST   | HILL   | GNLS |
|------|--------|--------|------|
| AIC  | 169.66 | 109.52 | 84.6 |
| PROB | 0      | 0      | 1    |
| RMSE | 61.69  | 6.48   | 2.65 |

MAX\_MEAN : 100 MAX\_MED : 99.7 BMAD : 3.71  
COFF : 20 HIT-CALL : 1 FITC : 51 ACTP : 1  
FLAGS :

Chemical : 4,4'-Methylenedianiline  
CAS : 101-77-9

Assay ID 1508 (NHEERL\_TPO\_AUR\_dn)  
Sample ID : TX003485

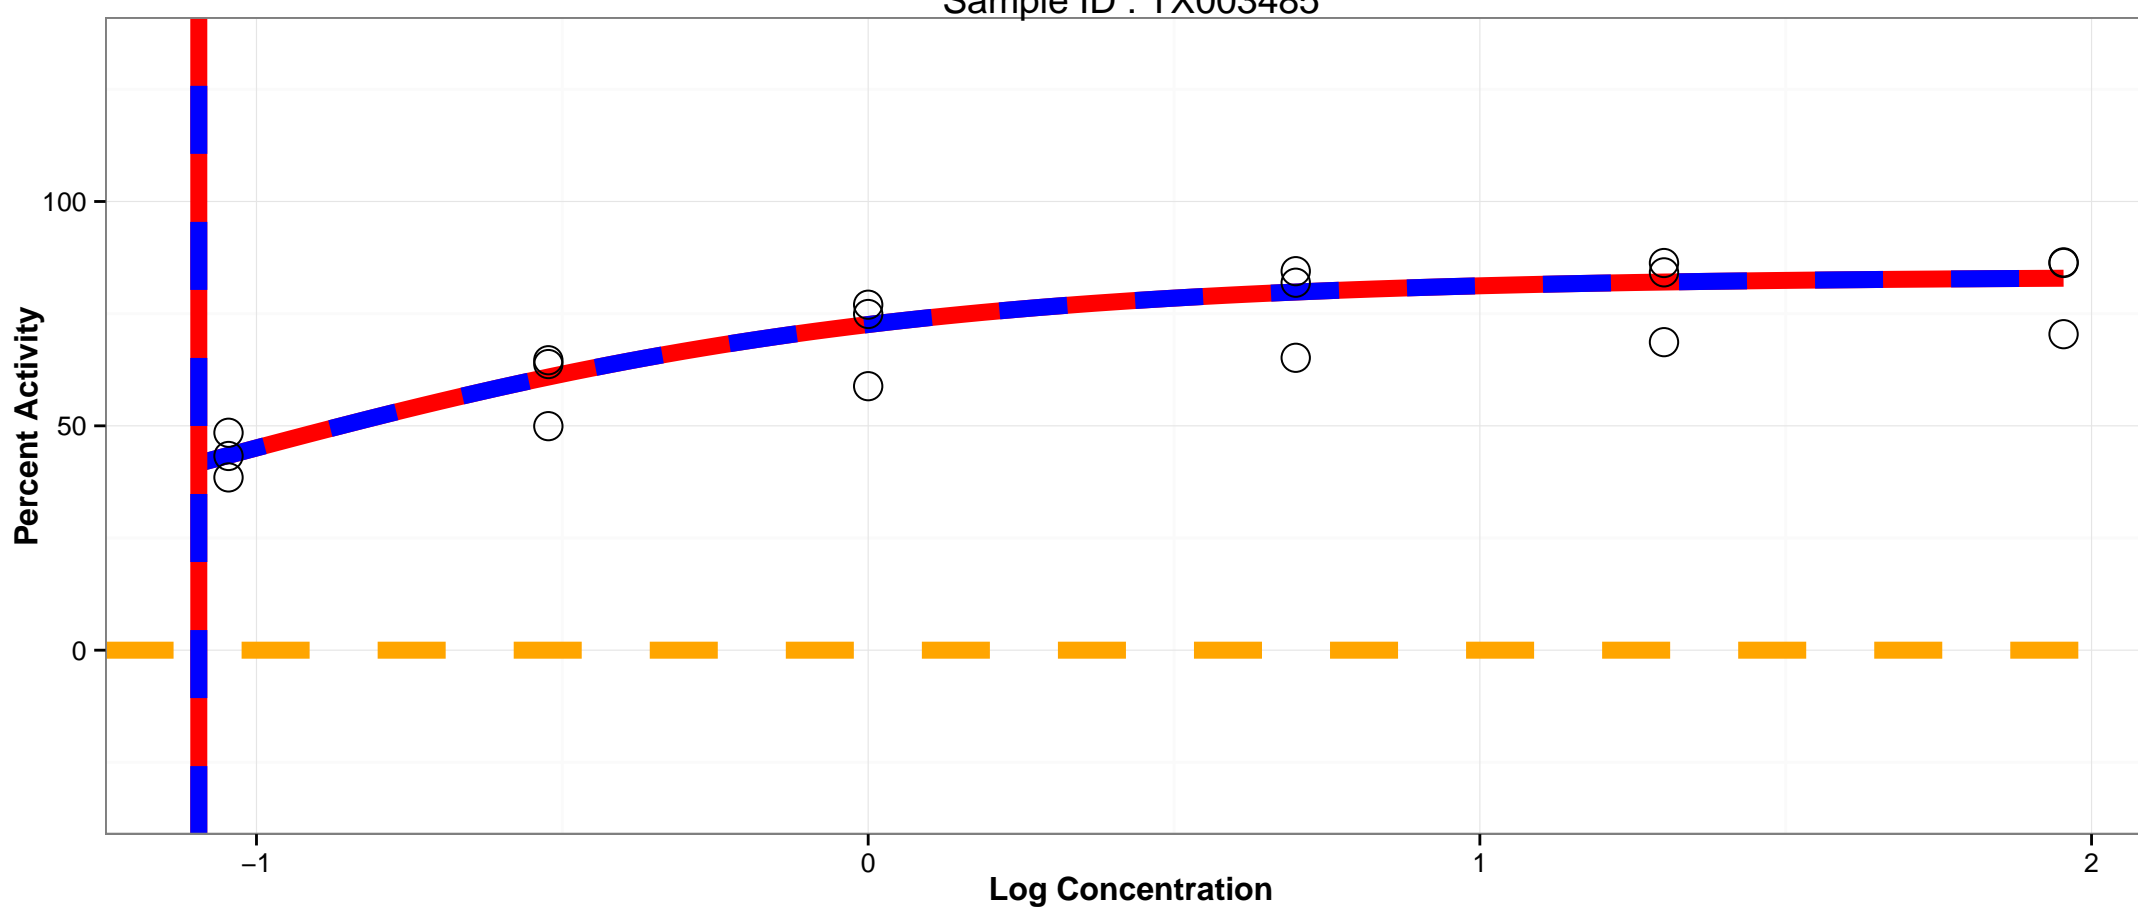

HILL MODEL

|     | tp   | ga    | gw    |
|-----|------|-------|-------|
| val | 83.3 | -1.09 | 0.759 |
| sd  | 3.6  | 0.106 | 0.216 |

GAIN-LOSS MODEL

|     | tp   | ga    | gw    | la   | lw    |
|-----|------|-------|-------|------|-------|
| val | 83.3 | -1.09 | 0.759 | 2.46 | 18    |
| sd  | 3.6  | 0.106 | 0.216 | 1580 | 54600 |

|      | CNST   | HILL   | GNLS   |
|------|--------|--------|--------|
| AIC  | 210.13 | 132.84 | 136.84 |
| PROB | 0      | 0.88   | 0.12   |
| RMSE | 70.19  | 7.56   | 7.56   |

MAX\_MEAN : 81.1 MAX\_MED : 86.3 BMAD : 5.69  
COFF : 20 HIT-CALL : 1 FITC : 40 ACTP : 1  
FLAGS :

Assay ID 1509 (NHEERL\_HEK293T\_CellTiterGLO)  
Sample ID : TX003485

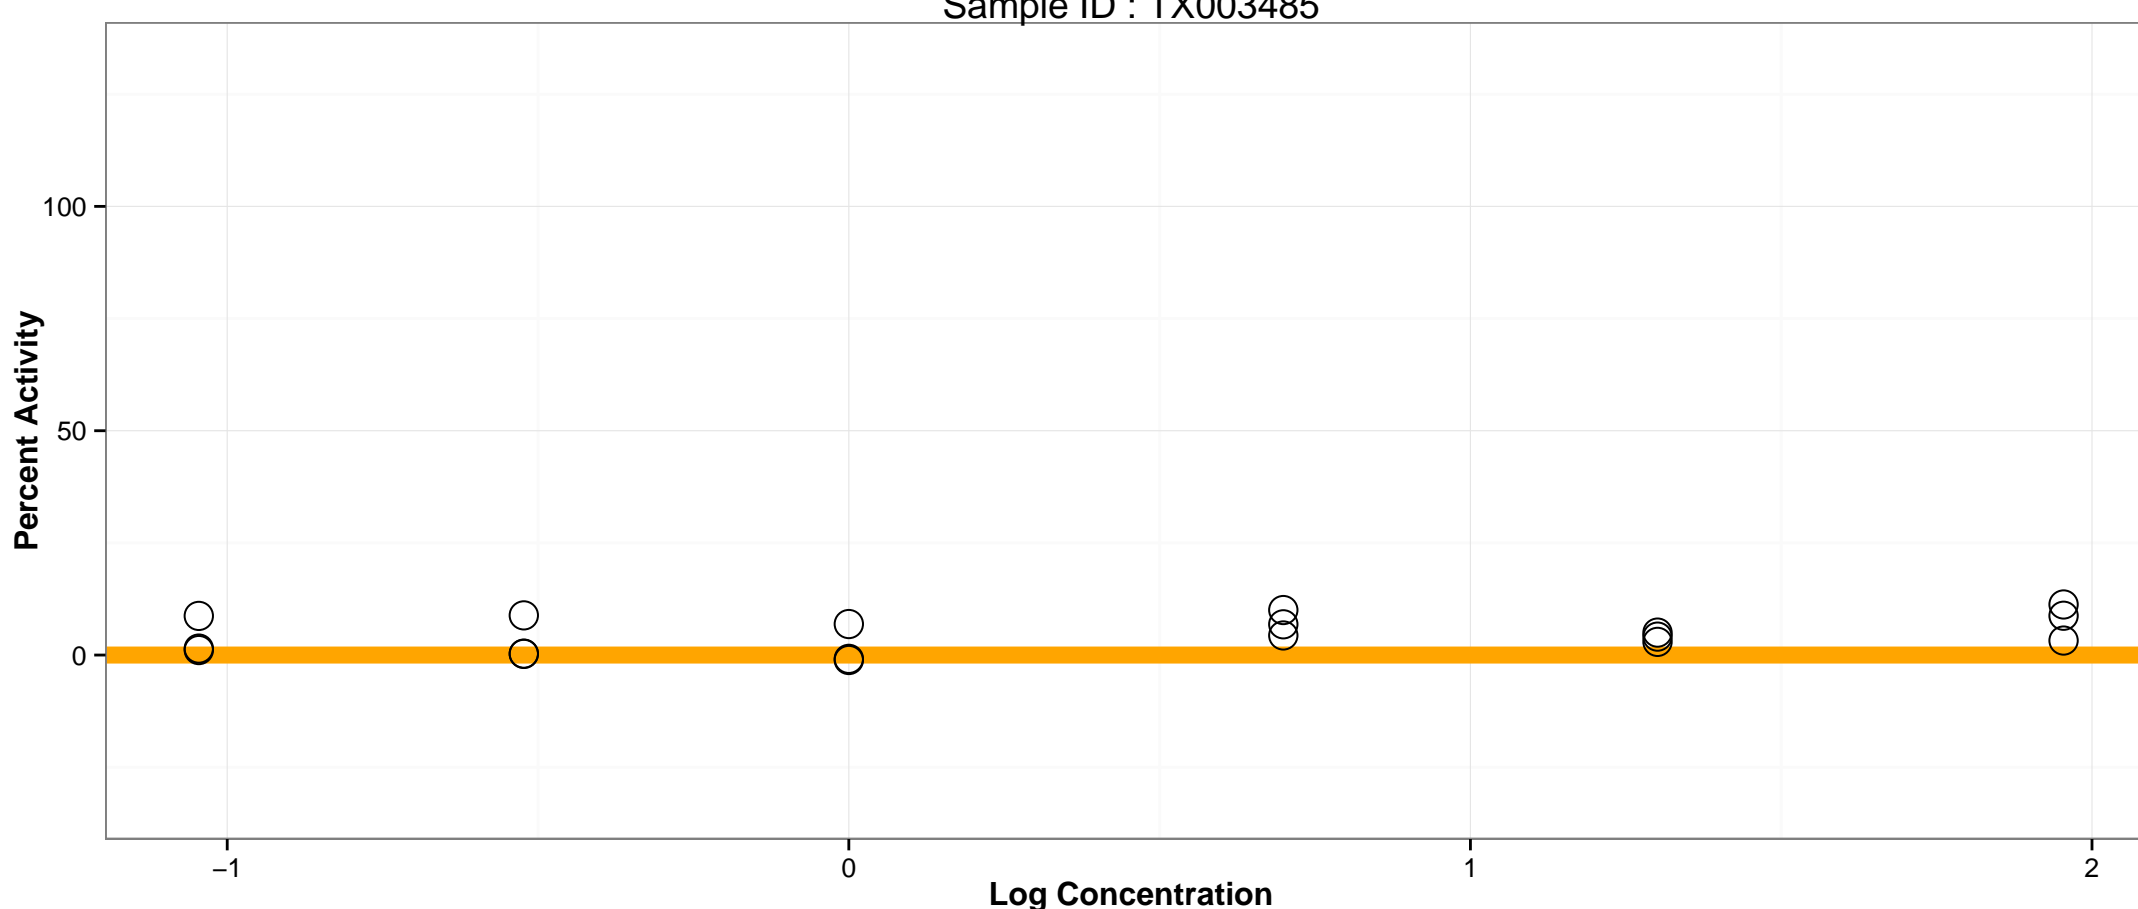

HILL MODEL

HILL MODEL: Not applicable

GAIN-LOSS MODEL

GNLS MODEL: Not applicable

|      | CNST   | HILL | GNLS |
|------|--------|------|------|
| AIC  | 119.27 | NA   | NA   |
| PROB | 1      | NA   | NA   |
| RMSE | 5.97   | NA   | NA   |

MAX\_MEAN : 7.77 MAX\_MED : 8.77 BMAD : 5.54  
COFF : 20 HIT-CALL : 0 FITC : 4 ACTP : 0  
FLAGS :

Assay ID 1848 (NHEERL\_Quantilum\_inhib\_2\_dn)  
Sample ID : TX003485

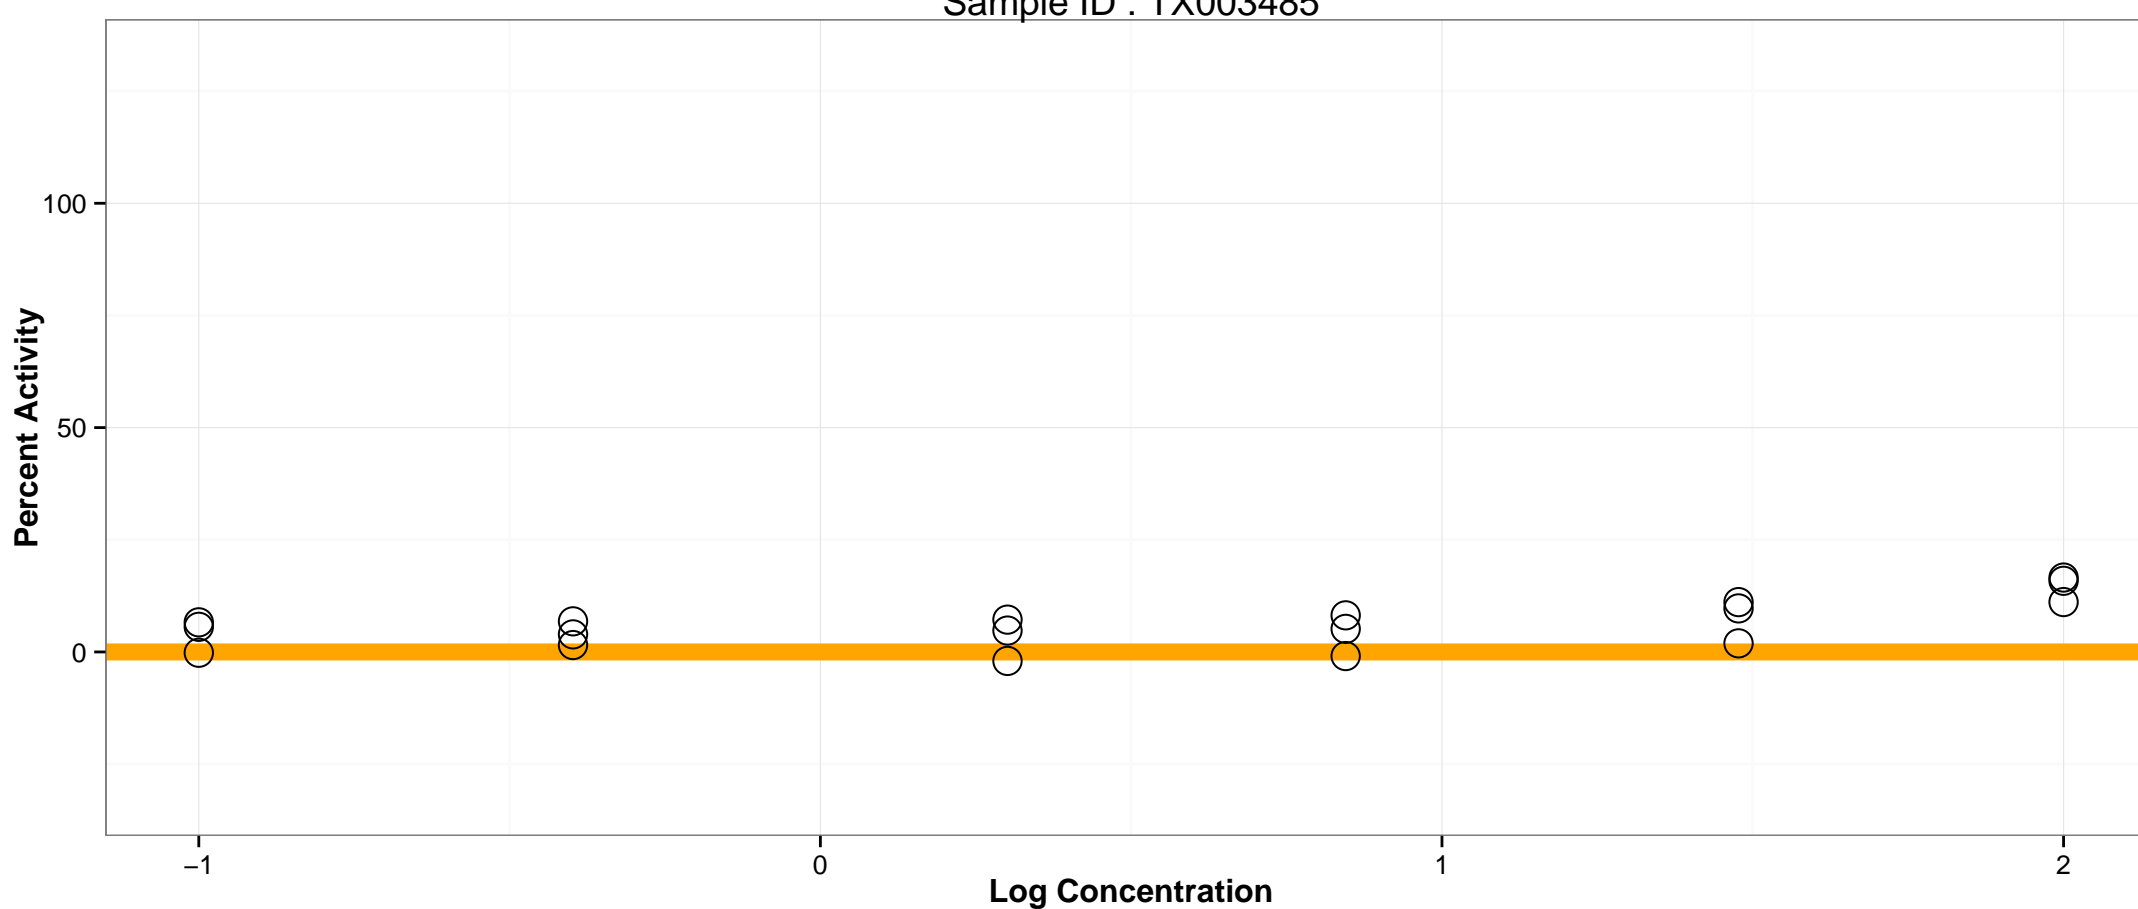

HILL MODEL

HILL MODEL: Not applicable

GAIN-LOSS MODEL

GNLS MODEL: Not applicable

|      | CNST   | HILL | GNLS |
|------|--------|------|------|
| AIC  | 130.04 | NA   | NA   |
| PROB | 1      | NA   | NA   |
| RMSE | 8.11   | NA   | NA   |

MAX\_MEAN : 14.5 MAX\_MED : 15.9 BMAD : 8.58  
COFF : 20 HIT-CALL : 0 FITC : 4 ACTP : 0  
FLAGS :

Assay ID 1824 (NHEERL\_TPO\_GUA\_dn)  
Sample ID : TP0001442H02

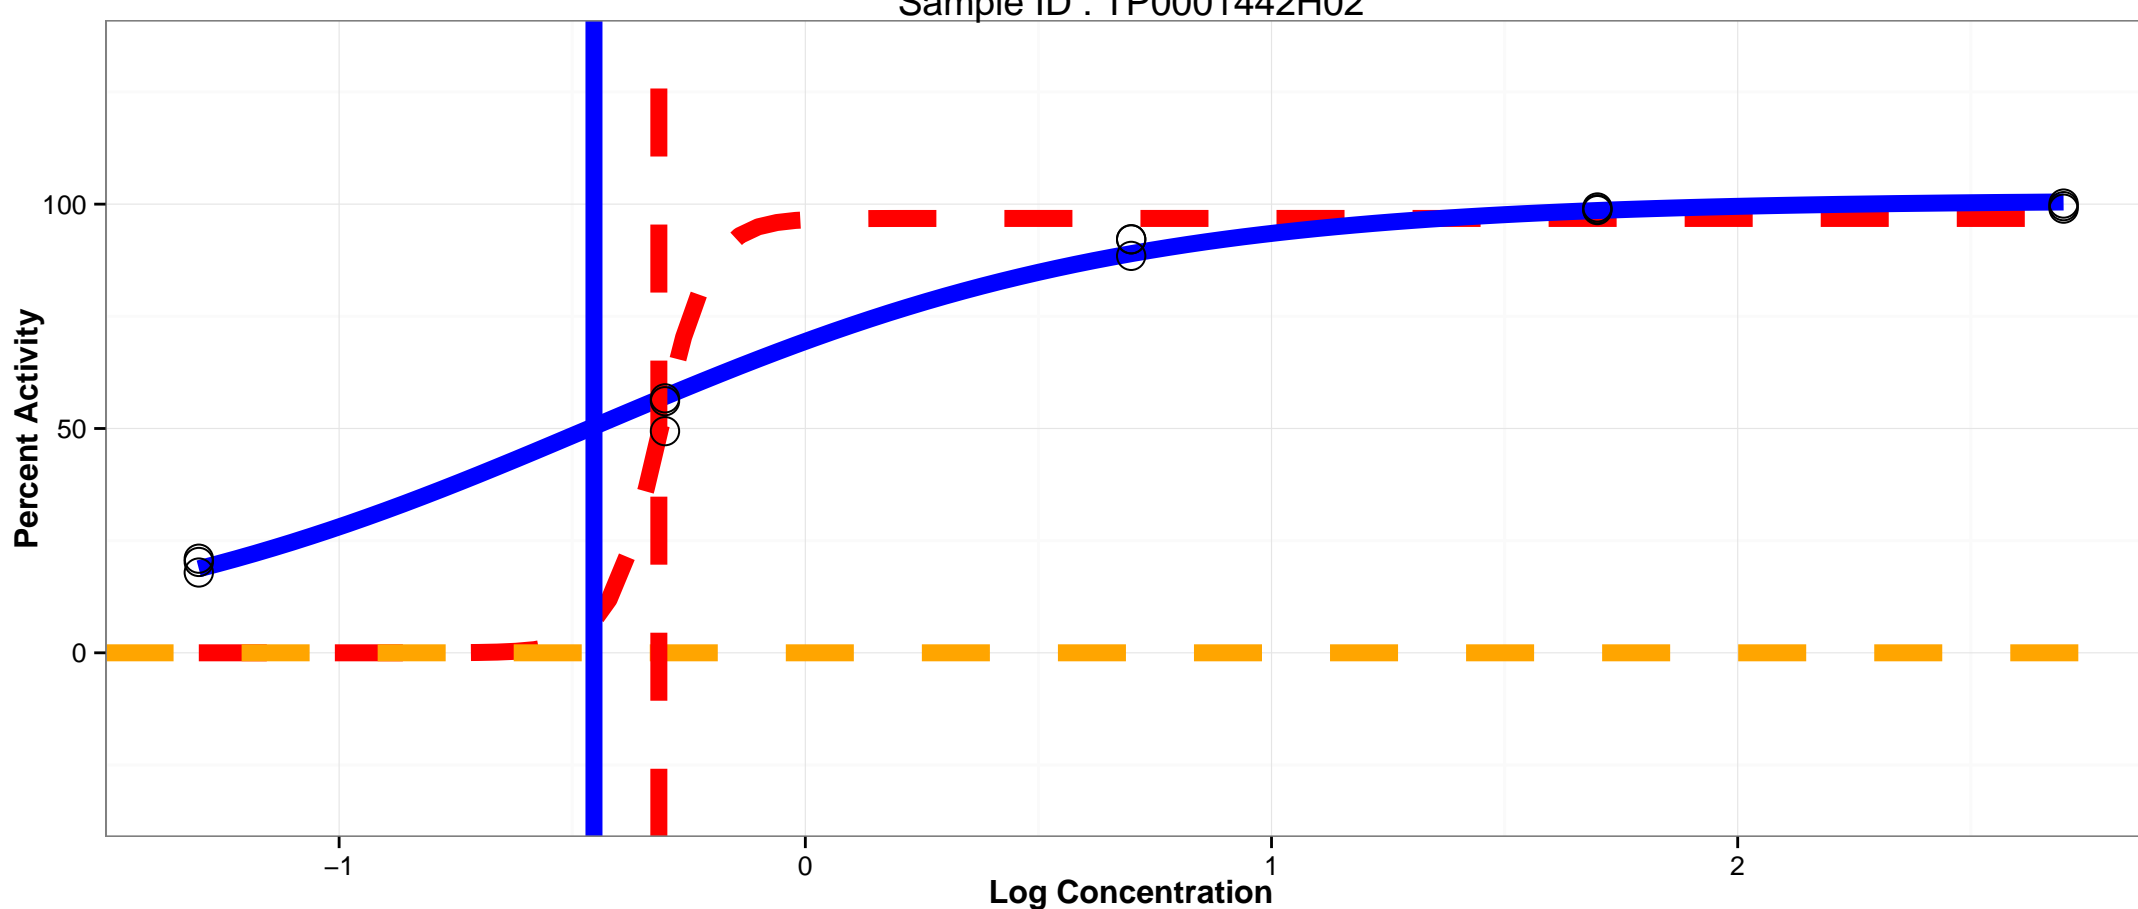

HILL MODEL

|     | tp   | ga     | gw |
|-----|------|--------|----|
| val | 96.8 | -0.314 | 8  |
| sd  | NA   | NA     | NA |

GAIN-LOSS MODEL

|     | tp  | ga     | gw    | la   | lw   |
|-----|-----|--------|-------|------|------|
| val | 101 | -0.453 | 0.757 | 4.68 | 8.22 |
| sd  | NA  | NA     | NA    | NA   | NA   |

|      | CNST   | HILL  | GNLS  |
|------|--------|-------|-------|
| AIC  | 178.64 | 116.4 | 77.74 |
| PROB | 0      | 0     | 1     |
| RMSE | 79.13  | 9.5   | 2.49  |

MAX\_MEAN : 99.6 MAX\_MED : 99.6 BMAD : 3.71  
COFF : 20 HIT-CALL : 1 FITC : 50 ACTP : 1  
FLAGS :

Chemical : 2,3,6-Trimethylphenol  
CAS : 2416-94-6

Assay ID 1508 (NHEERL\_TPO\_AUR\_dn)  
Sample ID : TX002257

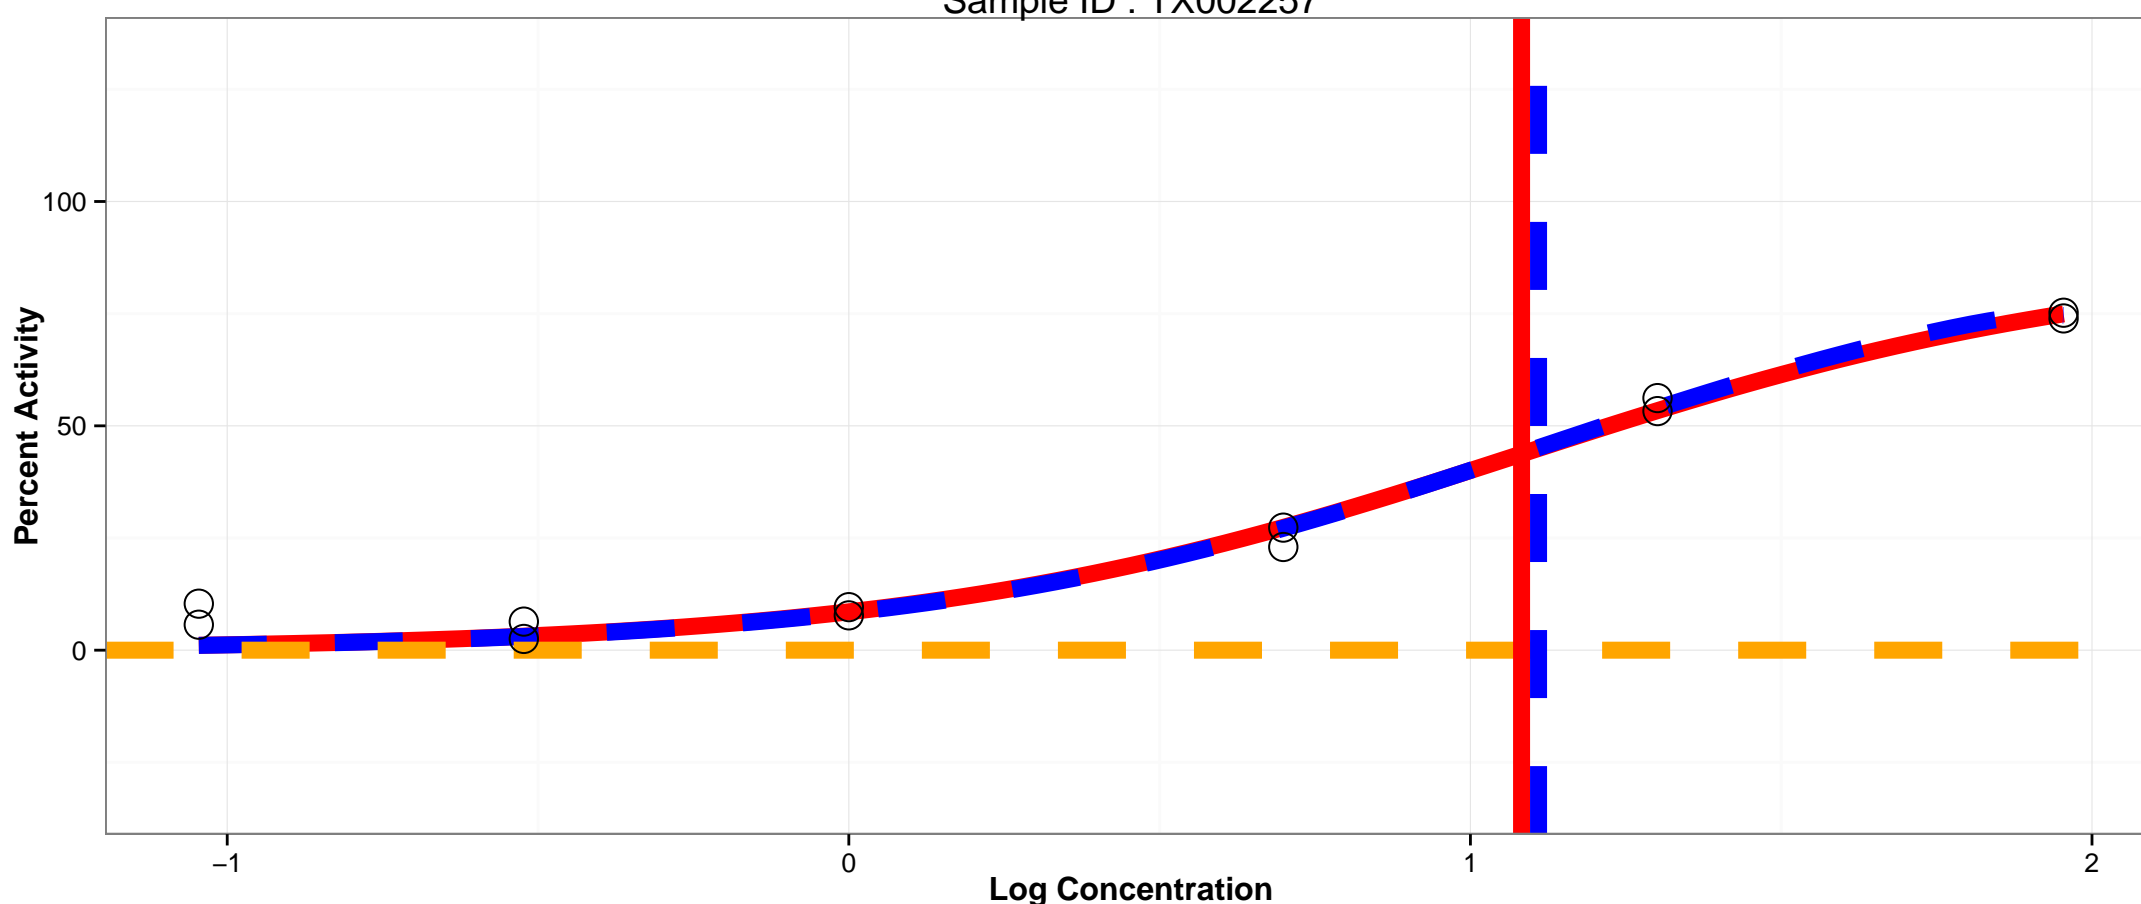

HILL MODEL

|     | tp   | ga    | gw     |
|-----|------|-------|--------|
| val | 87.5 | 1.08  | 0.892  |
| sd  | 5.3  | 0.085 | 0.0968 |

GAIN-LOSS MODEL

|     | tp   | ga   | gw    | la   | lw   |
|-----|------|------|-------|------|------|
| val | 90.3 | 1.11 | 0.892 | 2.15 | 8.04 |
| sd  | NA   | NA   | NA    | NA   | NA   |

|      | CNST   | HILL  | GNLS  |
|------|--------|-------|-------|
| AIC  | 124.64 | 70.63 | 74.14 |
| PROB | 0      | 0.85  | 0.15  |
| RMSE | 39.52  | 3.51  | 3.48  |

MAX\_MEAN : 74.6 MAX\_MED : 74.6 BMAD : 5.69  
COFF : 20 HIT-CALL : 1 FITC : 42 ACTP : 1  
FLAGS :

Assay ID 1509 (NHEERL\_HEK293T\_CellTiterGLO)  
Sample ID : TX002257

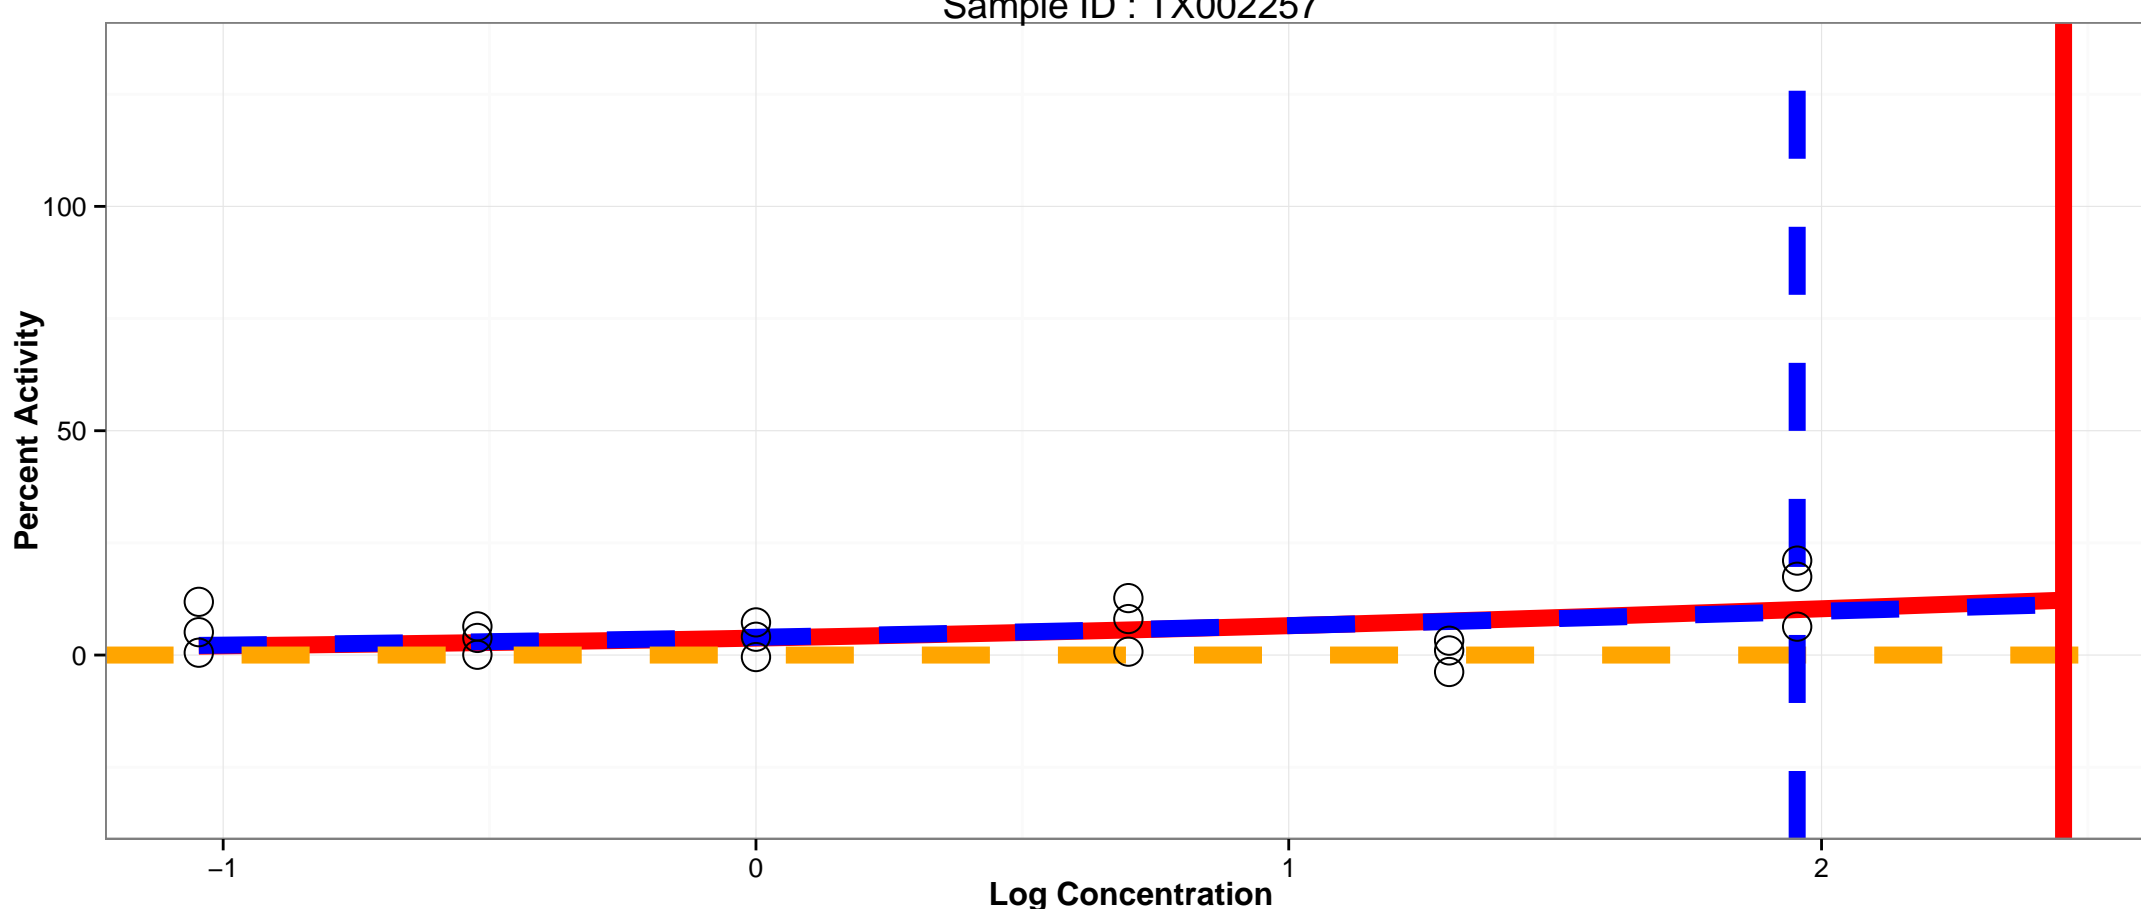

HILL MODEL

|     | tp   | ga   | gw    |
|-----|------|------|-------|
| val | 24.5 | 2.45 | 0.301 |
| sd  | 213  | 17.2 | 0.257 |

GAIN-LOSS MODEL

|     | tp   | ga   | gw  | la   | lw   |
|-----|------|------|-----|------|------|
| val | 19.2 | 1.95 | 0.3 | 2.91 | 10.6 |
| sd  | NA   | NA   | NA  | NA   | NA   |

|      | CNST   | HILL  | GNLS   |
|------|--------|-------|--------|
| AIC  | 130.18 | 124.6 | 128.65 |
| PROB | 0.05   | 0.84  | 0.11   |
| RMSE | 8.61   | 5.87  | 5.9    |

MAX\_MEAN : 15 MAX\_MED : 17.5 BMAD : 5.54  
COFF : 20 HIT-CALL : 0 FITC : 20 ACTP : 0.949  
FLAGS : 12

Assay ID 1848 (NHEERL\_Quantilum\_inhib\_2\_dn)  
Sample ID : TX002257

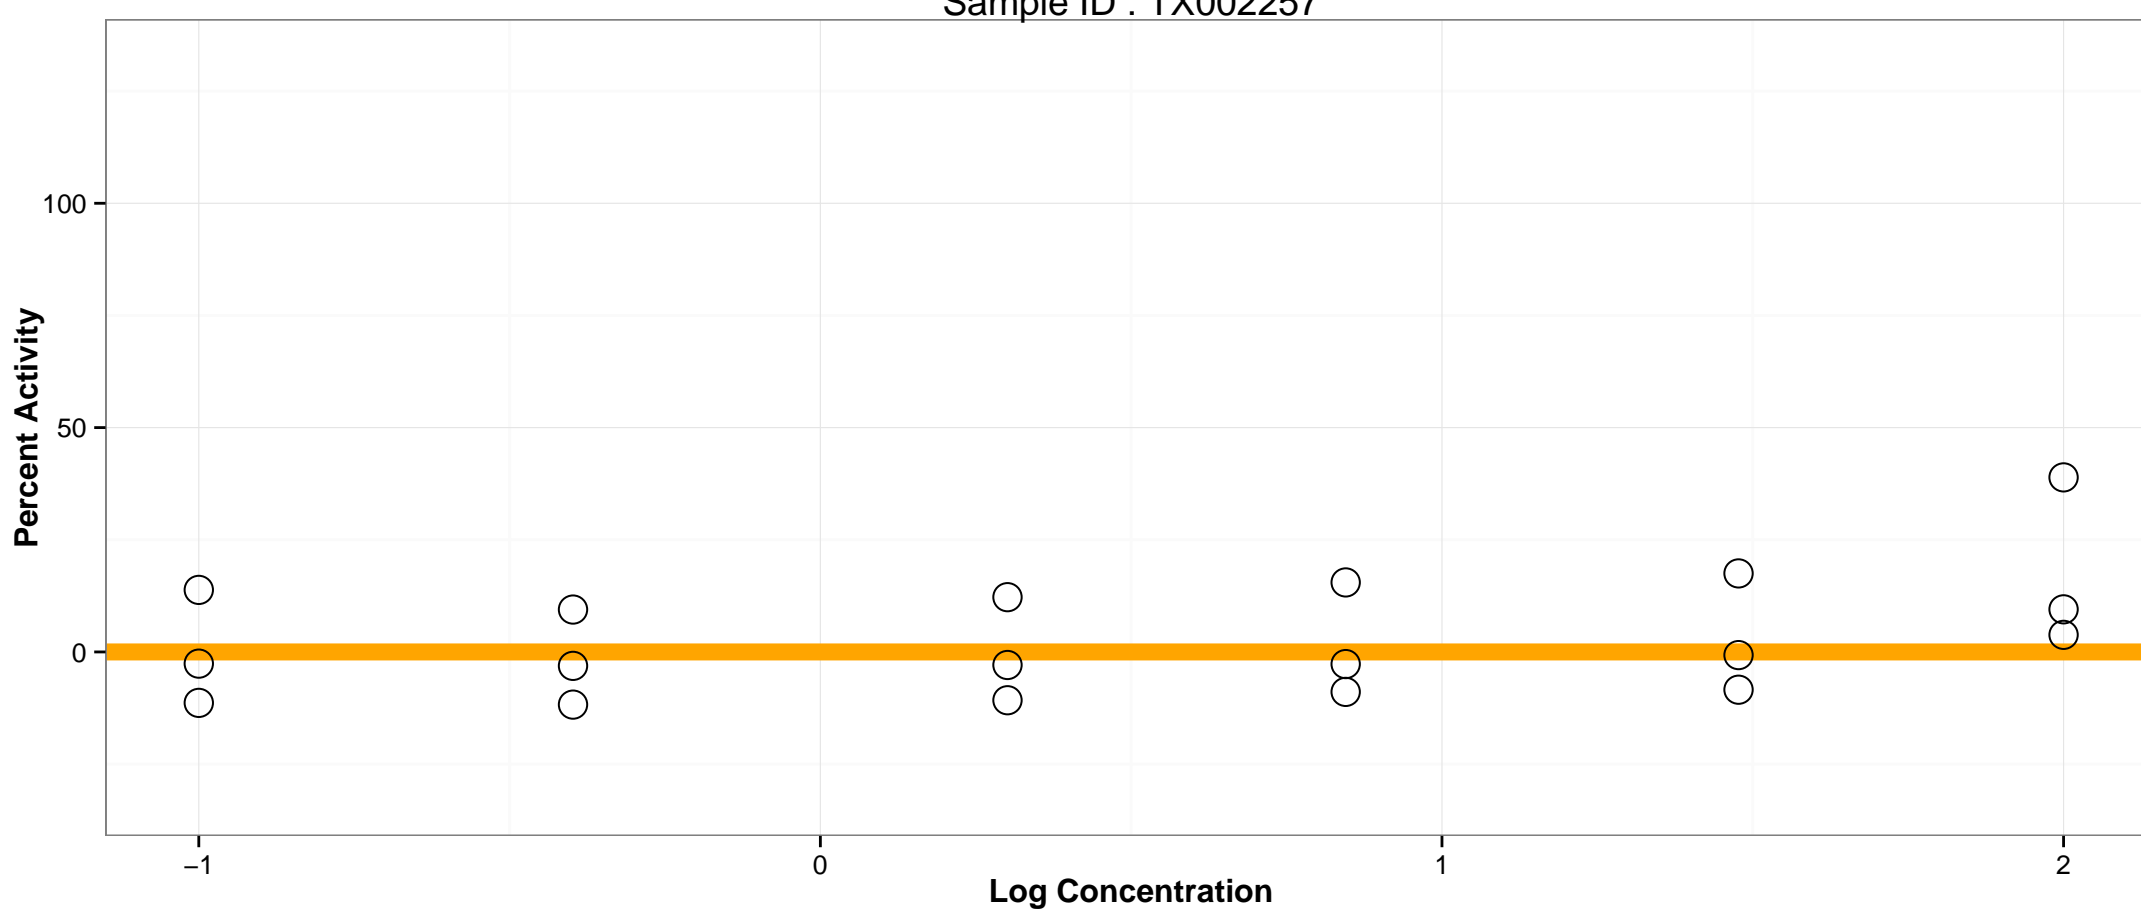

HILL MODEL

HILL MODEL: Not applicable

GAIN-LOSS MODEL

GNLS MODEL: Not applicable

|      | CNST   | HILL | GNLS |
|------|--------|------|------|
| AIC  | 145.22 | NA   | NA   |
| PROB | 1      | NA   | NA   |
| RMSE | 13.25  | NA   | NA   |

MAX\_MEAN : 17.4 MAX\_MED : 9.51 BMAD : 8.58  
COFF : 20 HIT-CALL : 0 FITC : 4 ACTP : 0  
FLAGS :

Assay ID 1824 (NHEERL\_TPO\_GUA\_dn)  
Sample ID : TP0001442H03

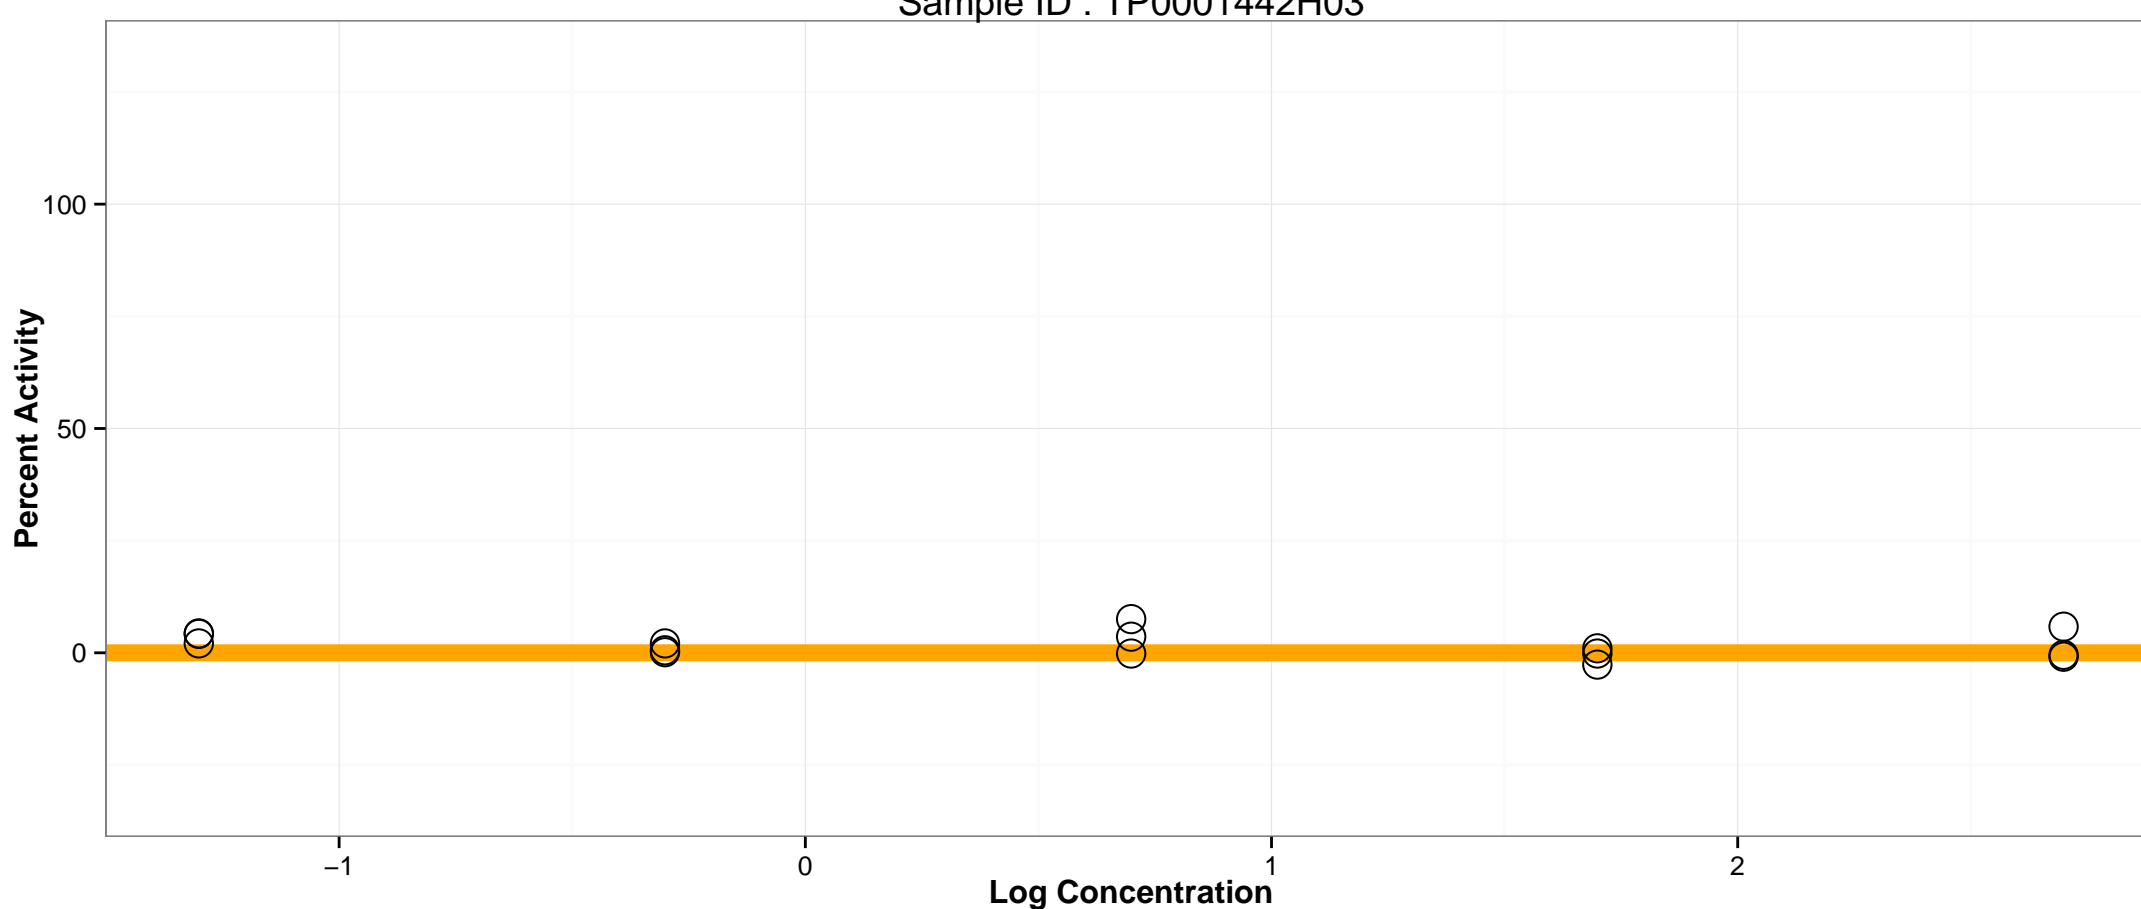

HILL MODEL

HILL MODEL: Not applicable

GAIN-LOSS MODEL

GNLS MODEL: Not applicable

|      | CNST  | HILL | GNLS |
|------|-------|------|------|
| AIC  | 80.05 | NA   | NA   |
| PROB | 1     | NA   | NA   |
| RMSE | 3.25  | NA   | NA   |

MAX\_MEAN : 3.66 MAX\_MED : 4.23 BMAD : 3.71  
COFF : 20 HIT-CALL : 0 FITC : 4 ACTP : 0  
FLAGS :

Chemical : Ethoxyquin  
CAS : 91-53-2

Assay ID 1508 (NHEERL\_TPO\_AUR\_dn)  
Sample ID : TX001384

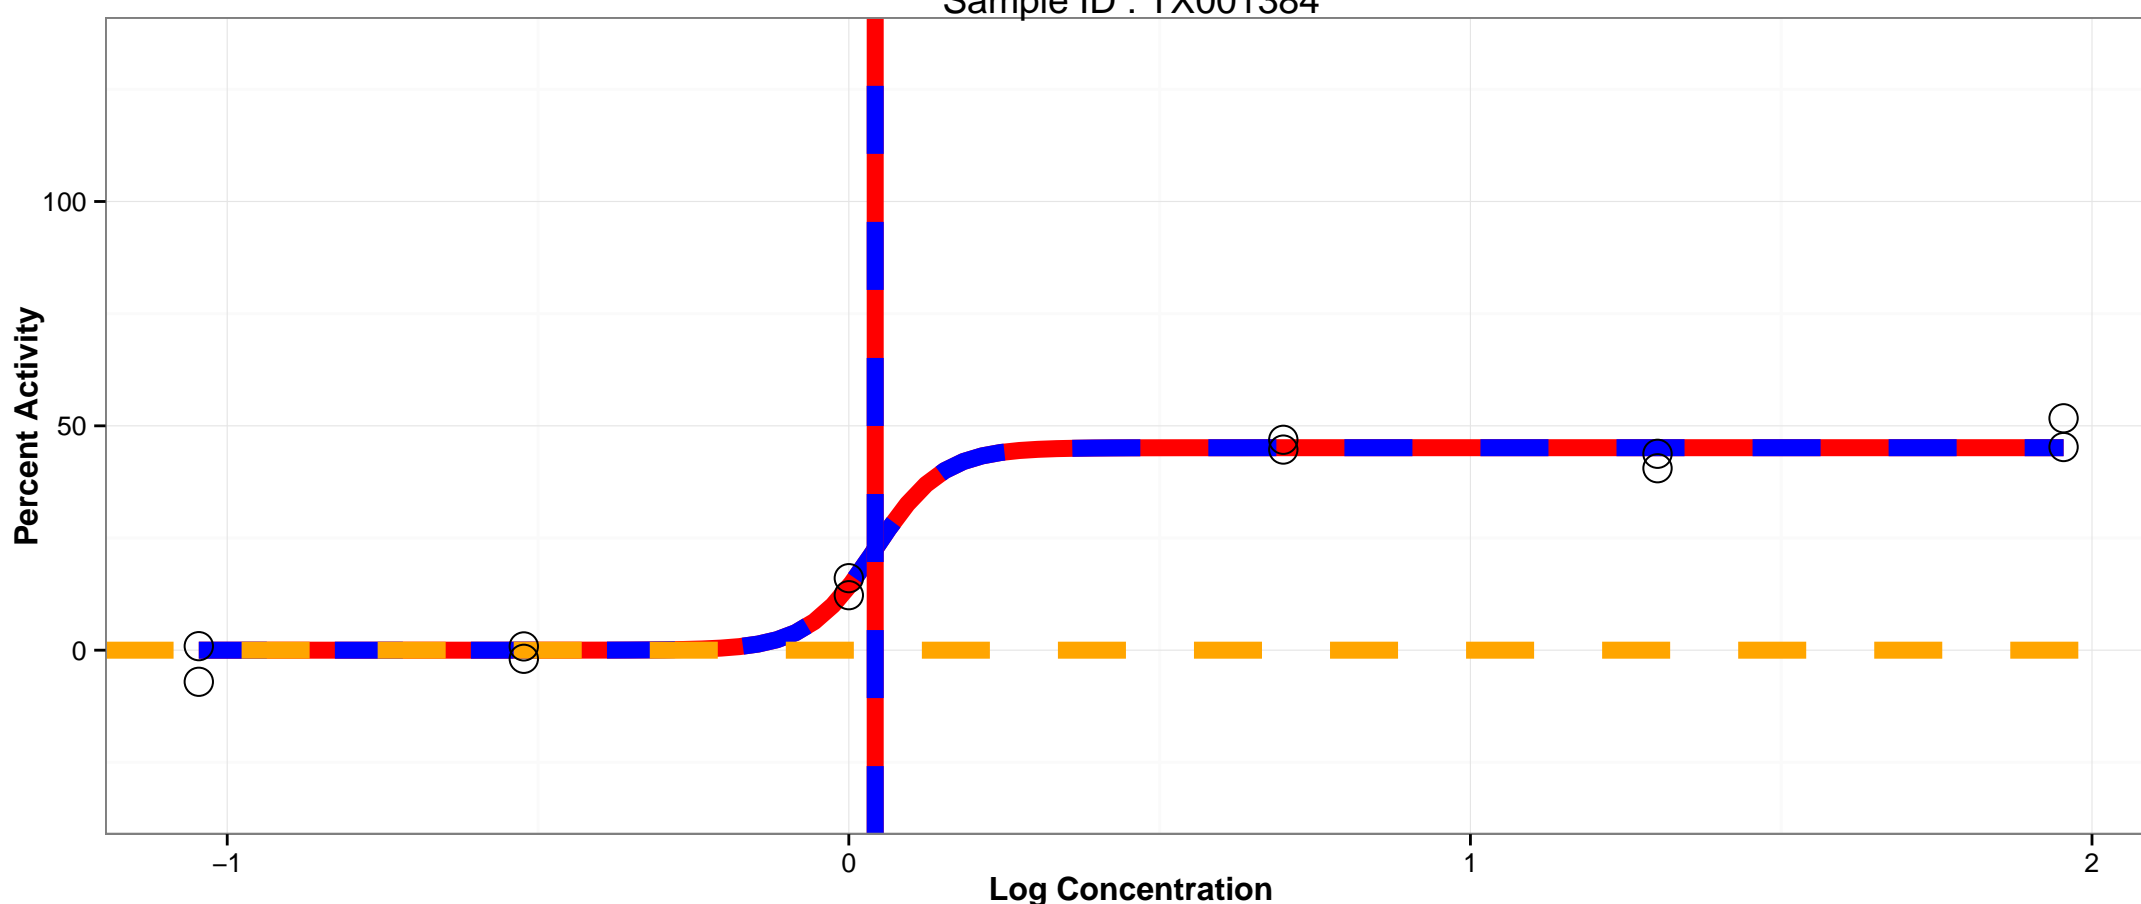

HILL MODEL

|     | tp   | ga     | gw   |
|-----|------|--------|------|
| val | 45.1 | 0.0424 | 8    |
| sd  | 1.2  | 0.237  | 44.7 |

GAIN-LOSS MODEL

|     | tp   | ga     | gw | la   | lw   |
|-----|------|--------|----|------|------|
| val | 45.1 | 0.0424 | 8  | 3.59 | 17.8 |
| sd  | NA   | NA     | NA | NA   | NA   |

|      | CNST   | HILL  | GNLS  |
|------|--------|-------|-------|
| AIC  | 121.42 | 70.35 | 74.35 |
| PROB | 0      | 0.88  | 0.12  |
| RMSE | 32.85  | 3.31  | 3.31  |

MAX\_MEAN : 48.5 MAX\_MED : 48.5 BMAD : 5.69  
COFF : 20 HIT-CALL : 1 FITC : 41 ACTP : 1  
FLAGS :

Assay ID 1509 (NHEERL\_HEK293T\_CellTiterGLO)  
Sample ID : TX001384

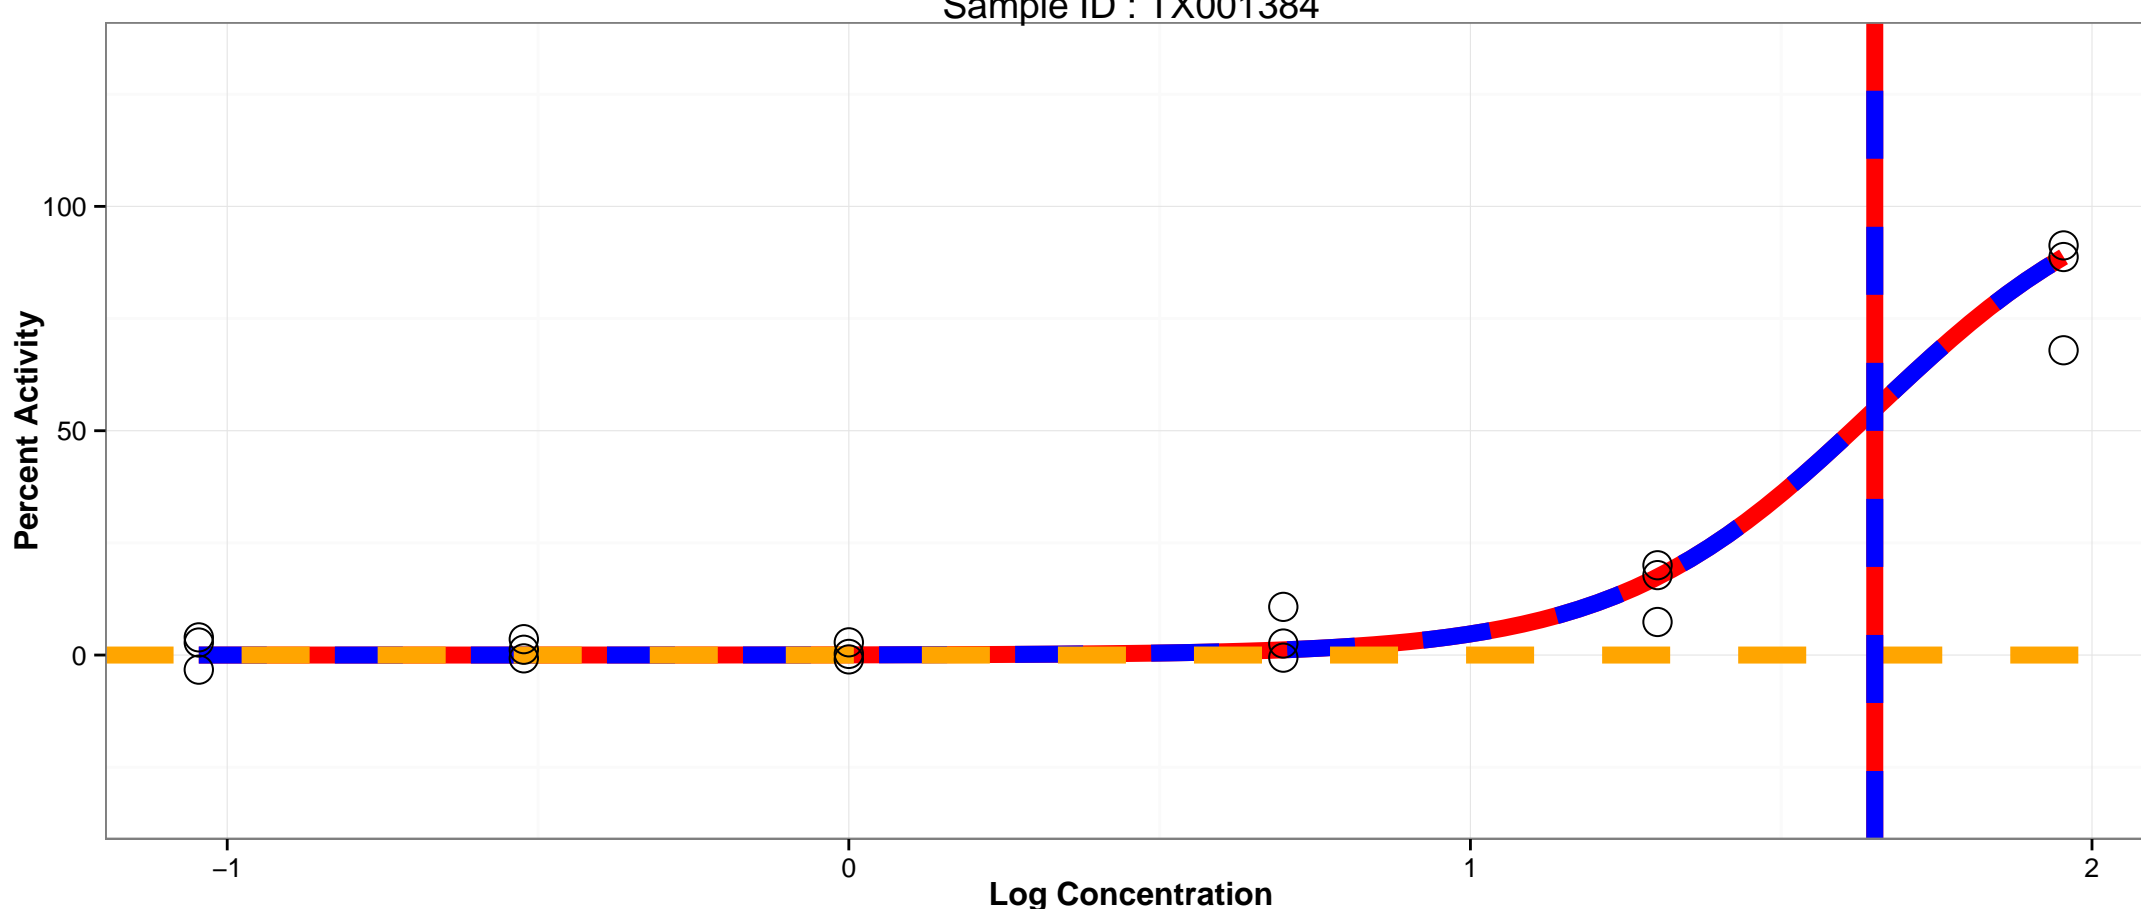

HILL MODEL

|     | tp   | ga    | gw   |
|-----|------|-------|------|
| val | 110  | 1.65  | 2.07 |
| sd  | 46.4 | 0.297 | 1.16 |

GAIN-LOSS MODEL

|     | tp  | ga   | gw   | la   | lw   |
|-----|-----|------|------|------|------|
| val | 110 | 1.65 | 2.07 | 3.36 | 13.5 |
| sd  | NA  | NA   | NA   | NA   | NA   |

|      | CNST   | HILL   | GNLS   |
|------|--------|--------|--------|
| AIC  | 171.44 | 117.79 | 121.79 |
| PROB | 0      | 0.88   | 0.12   |
| RMSE | 34.79  | 6.24   | 6.24   |

MAX\_MEAN : 82.7 MAX\_MED : 88.7 BMAD : 5.54  
COFF : 20 HIT-CALL : 1 FITC : 42 ACTP : 1  
FLAGS :

Assay ID 1848 (NHEERL\_Quantilum\_inhib\_2\_dn)  
Sample ID : TX001384

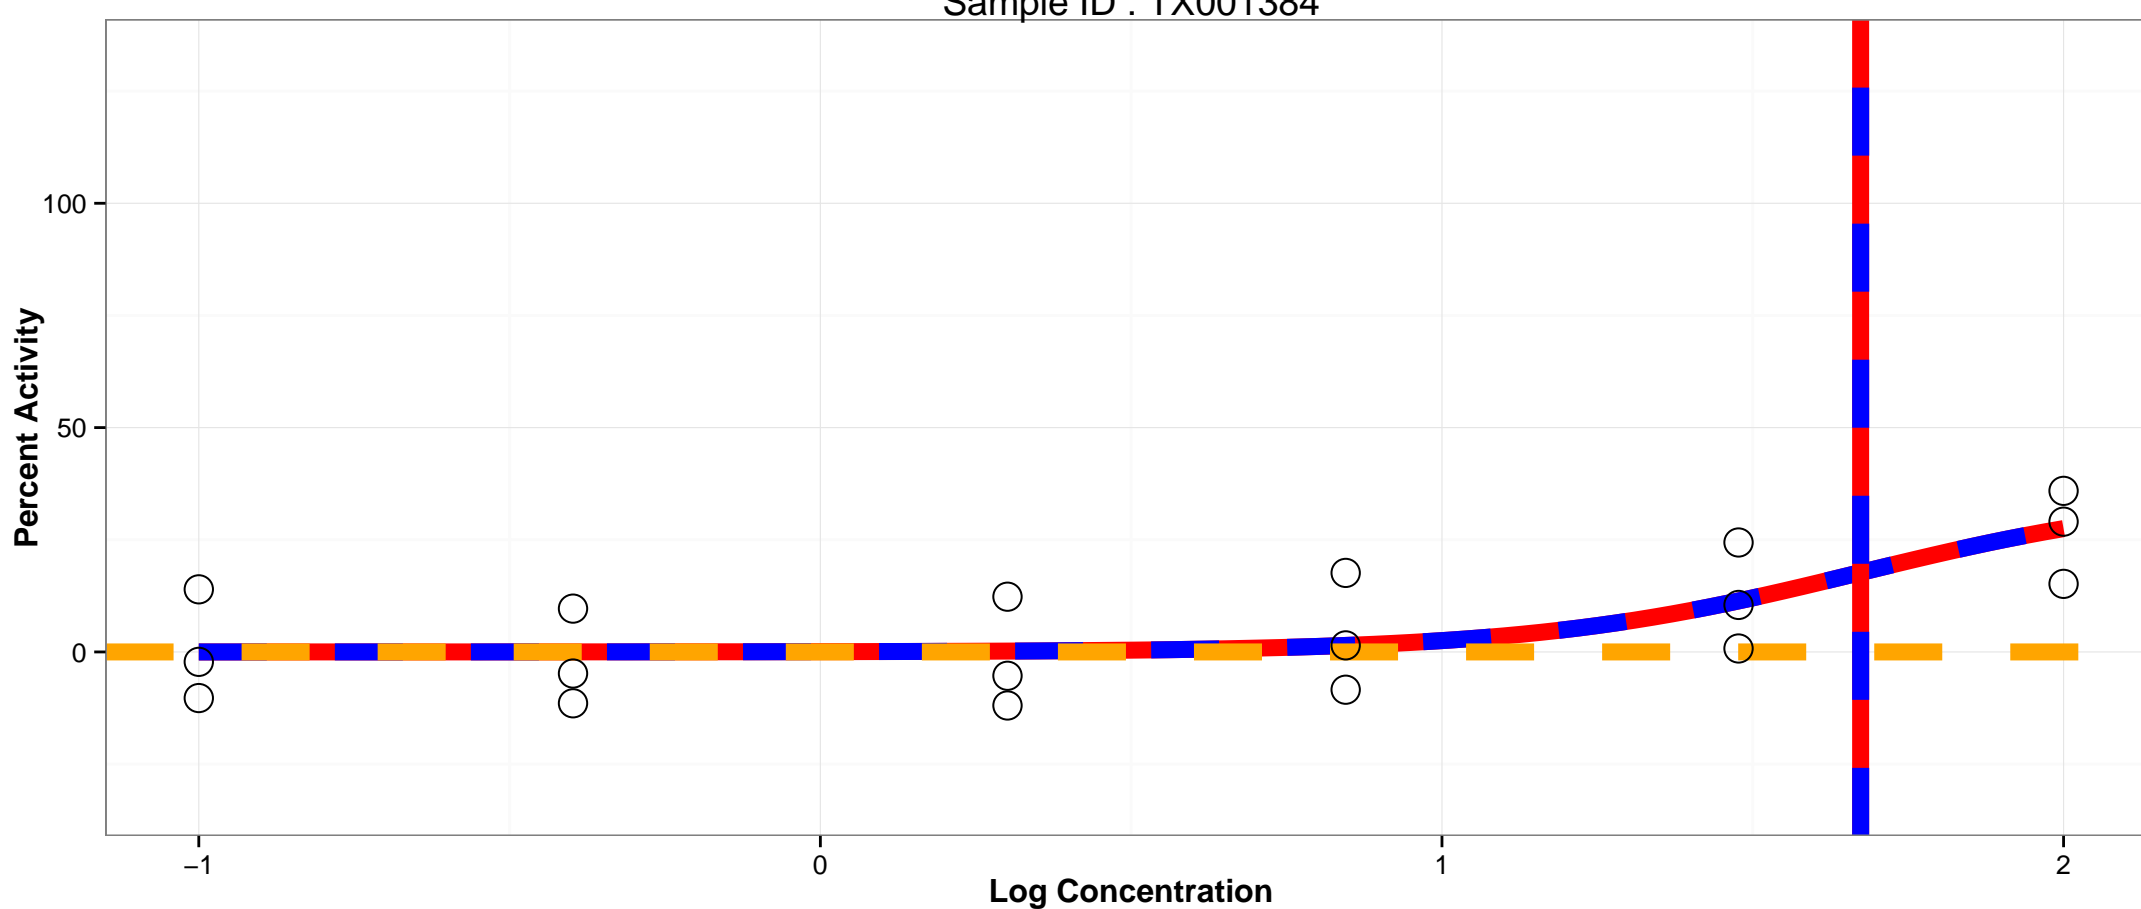

HILL MODEL

|     | tp   | ga   | gw   |
|-----|------|------|------|
| val | 35.4 | 1.67 | 1.66 |
| sd  | 43.7 | 0.88 | 2.75 |

GAIN-LOSS MODEL

|     | tp   | ga   | gw   | la   | lw   |
|-----|------|------|------|------|------|
| val | 35.4 | 1.67 | 1.66 | 3.89 | 16.1 |
| sd  | NA   | NA   | NA   | NA   | NA   |

|      | CNST   | HILL   | GNLS   |
|------|--------|--------|--------|
| AIC  | 152.72 | 144.55 | 148.55 |
| PROB | 0.01   | 0.87   | 0.12   |
| RMSE | 15.51  | 9.84   | 9.84   |

MAX\_MEAN : 26.7 MAX\_MED : 29.1 BMAD : 8.58  
COFF : 20 HIT-CALL : 1 FITC : 42 ACTP : 0.985  
FLAGS : 6

Assay ID 1824 (NHEERL\_TPO\_GUA\_dn)  
Sample ID : TP0001442H04

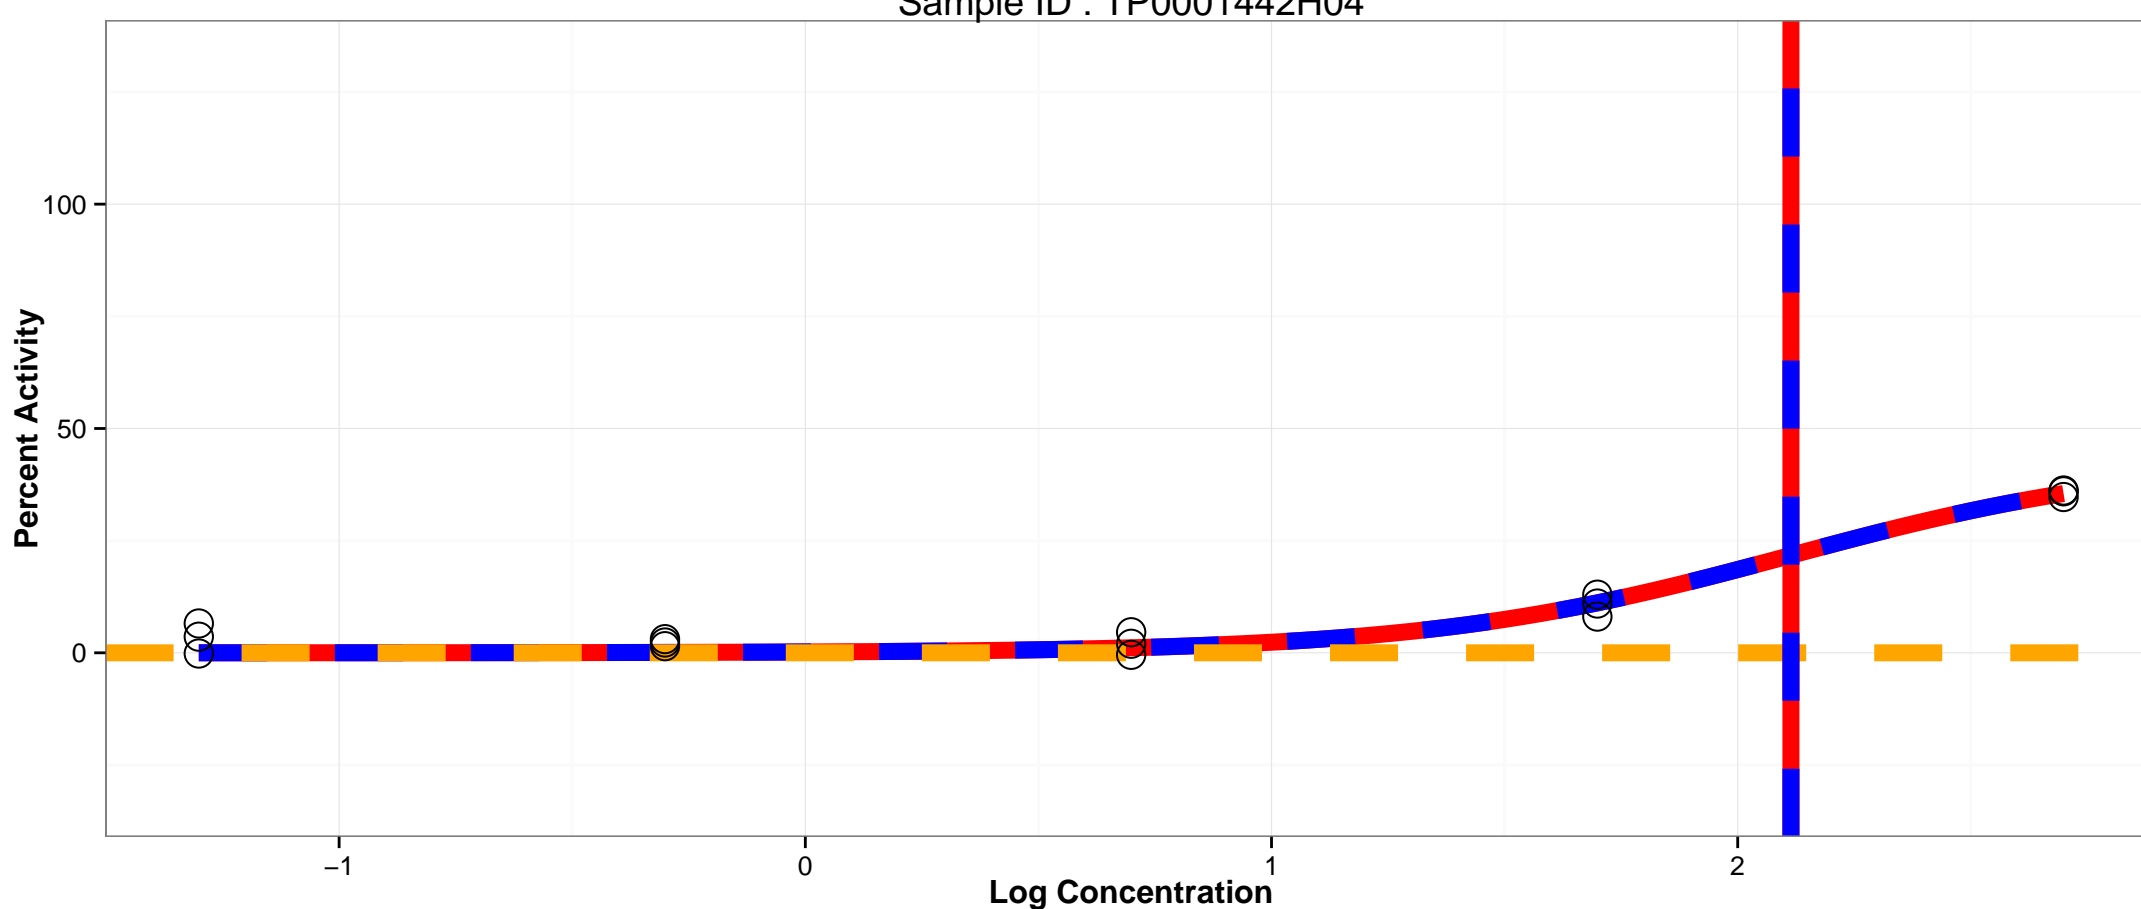

HILL MODEL

|     | tp   | ga   | gw    |
|-----|------|------|-------|
| val | 43.4 | 2.11 | 1.11  |
| sd  | 12.1 | 0.33 | 0.515 |

GAIN-LOSS MODEL

|     | tp   | ga   | gw    | la   | lw    |
|-----|------|------|-------|------|-------|
| val | 43.4 | 2.11 | 1.11  | 3.37 | 13.5  |
| sd  | 12.1 | 0.33 | 0.514 | 756  | 14700 |

|      | CNST  | HILL  | GNLS  |
|------|-------|-------|-------|
| AIC  | 126.9 | 79.26 | 83.26 |
| PROB | 0     | 0.88  | 0.12  |
| RMSE | 16.86 | 2.6   | 2.6   |

MAX\_MEAN : 35.6 MAX\_MED : 36 BMAD : 3.71  
COFF : 20 HIT-CALL : 1 FITC : 42 ACTP : 1  
FLAGS : 6

Chemical : 2-Anisidine  
CAS : 90-04-0

Assay ID 1508 (NHEERL\_TPO\_AUR\_dn)  
Sample ID : TX002185

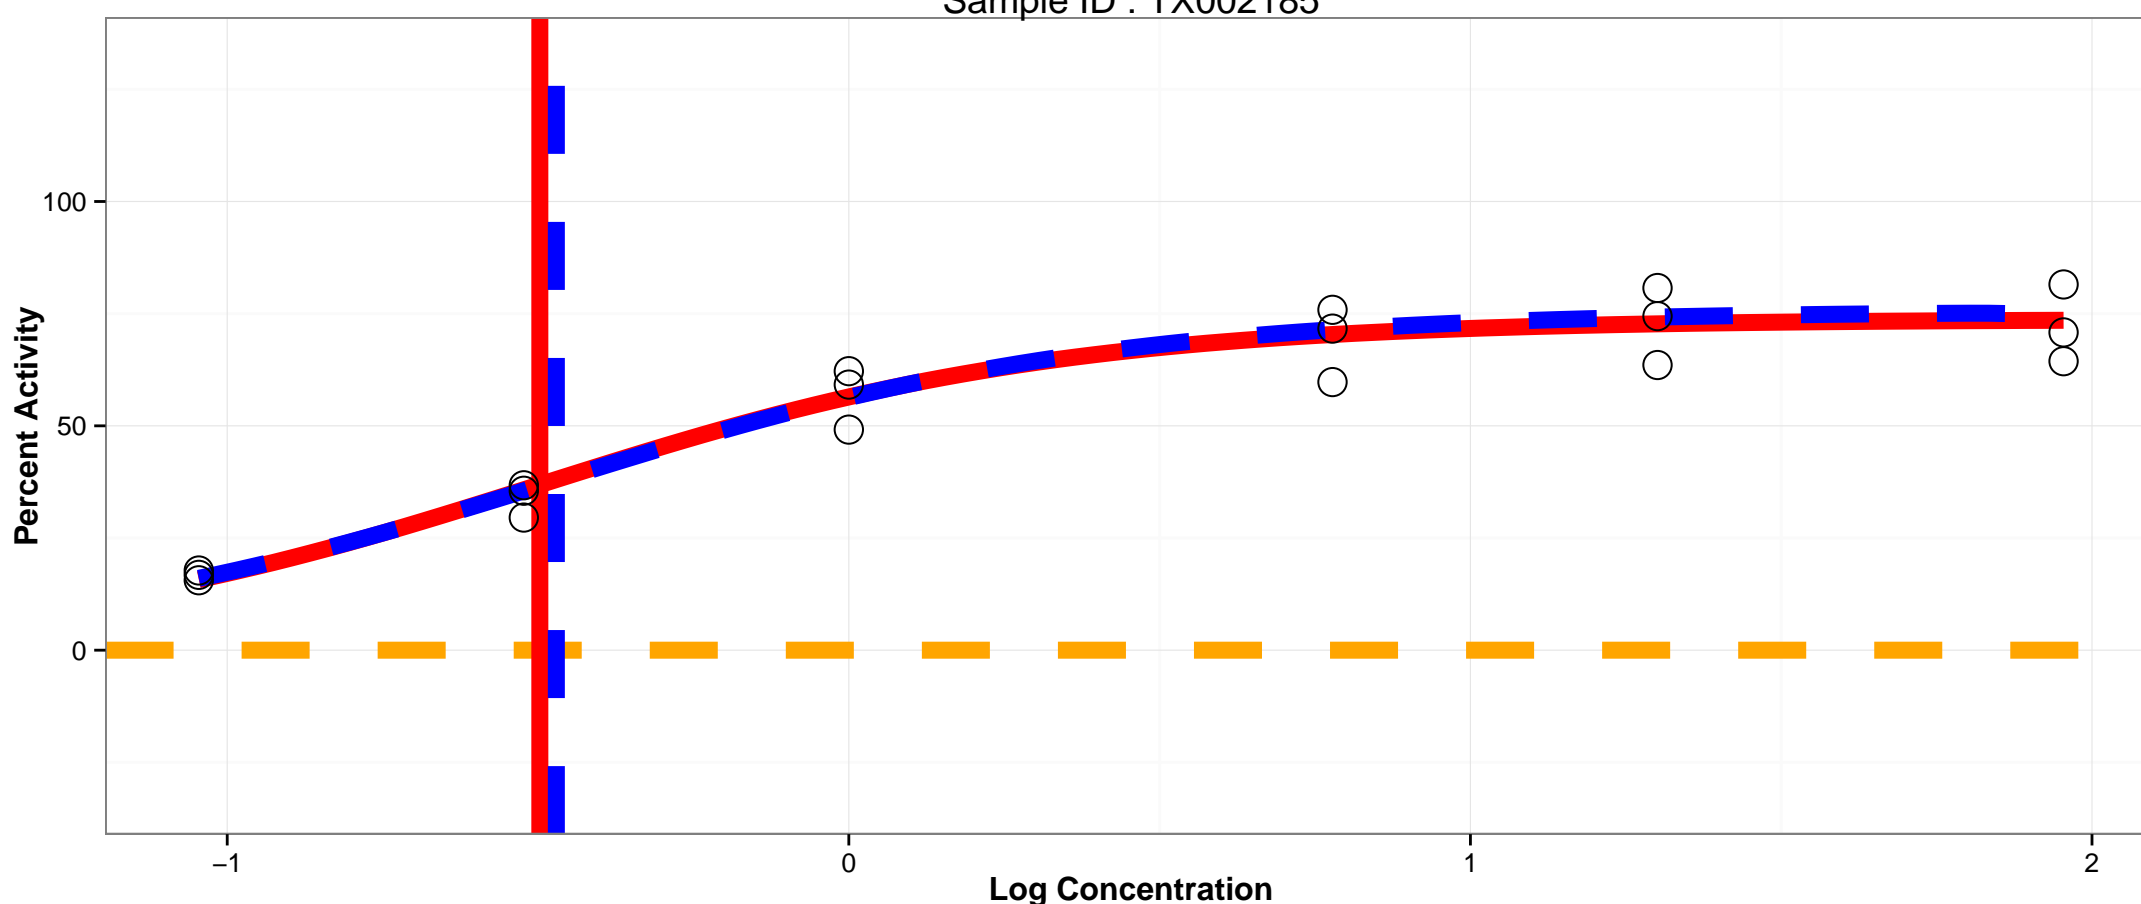

HILL MODEL

|     | tp   | ga     | gw    |
|-----|------|--------|-------|
| val | 73.7 | -0.497 | 1.03  |
| sd  | 2.89 | 0.0662 | 0.153 |

GAIN-LOSS MODEL

|     | tp   | ga     | gw    | la   | lw   |
|-----|------|--------|-------|------|------|
| val | 75.5 | -0.471 | 0.992 | 2.03 | 16.1 |
| sd  | NA   | NA     | NA    | NA   | NA   |

|      | CNST   | HILL   | GNLS   |
|------|--------|--------|--------|
| AIC  | 202.75 | 123.79 | 127.22 |
| PROB | 0      | 0.85   | 0.15   |
| RMSE | 57.98  | 5.71   | 5.77   |

MAX\_MEAN : 72.9 MAX\_MED : 74.5 BMAD : 5.69  
COFF : 20 HIT-CALL : 1 FITC : 41 ACTP : 1  
FLAGS :

Assay ID 1509 (NHEERL\_HEK293T\_CellTiterGLO)  
Sample ID : TX002185

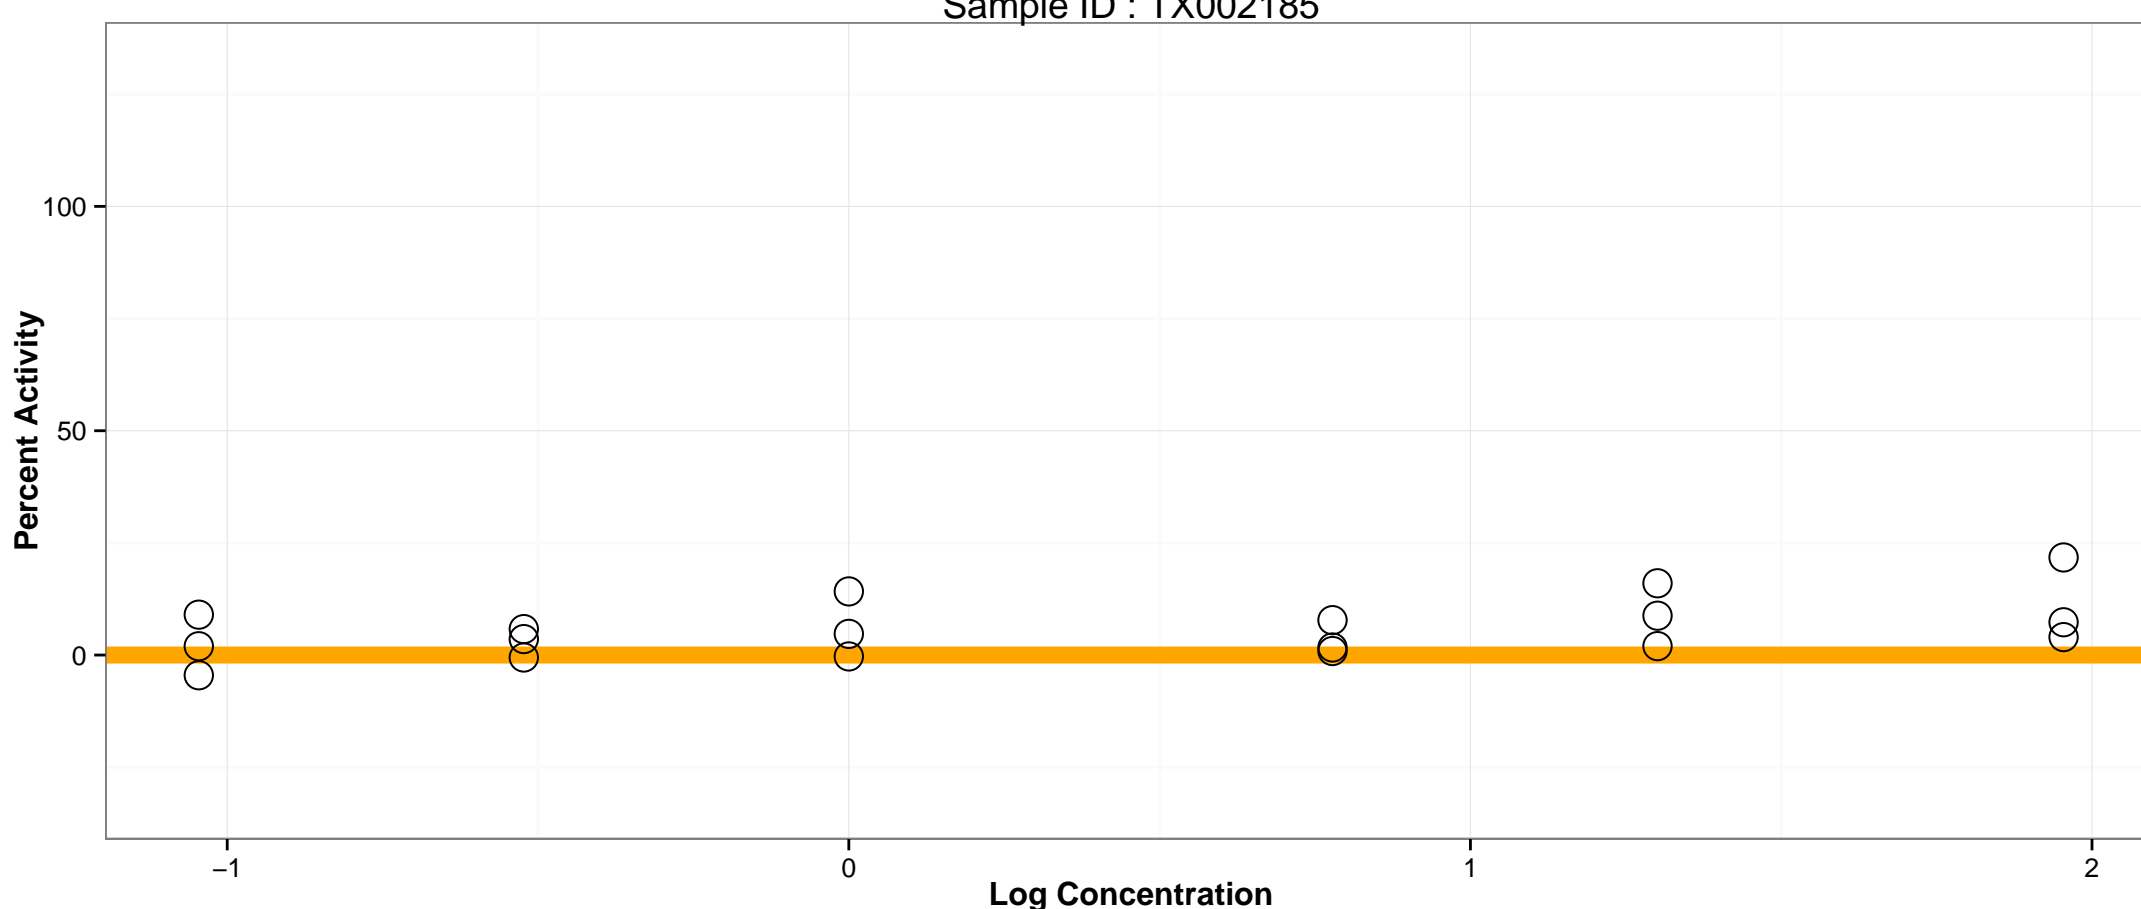

HILL MODEL

HILL MODEL: Not applicable

GAIN-LOSS MODEL

GNLS MODEL: Not applicable

|      | CNST   | HILL | GNLS |
|------|--------|------|------|
| AIC  | 129.94 | NA   | NA   |
| PROB | 1      | NA   | NA   |
| RMSE | 8.57   | NA   | NA   |

MAX\_MEAN : 11 MAX\_MED : 8.79 BMAD : 5.54  
COFF : 20 HIT-CALL : 0 FITC : 4 ACTP : 0  
FLAGS :

Assay ID 1848 (NHEERL\_Quantilum\_inhib\_2\_dn)  
Sample ID : TX002185

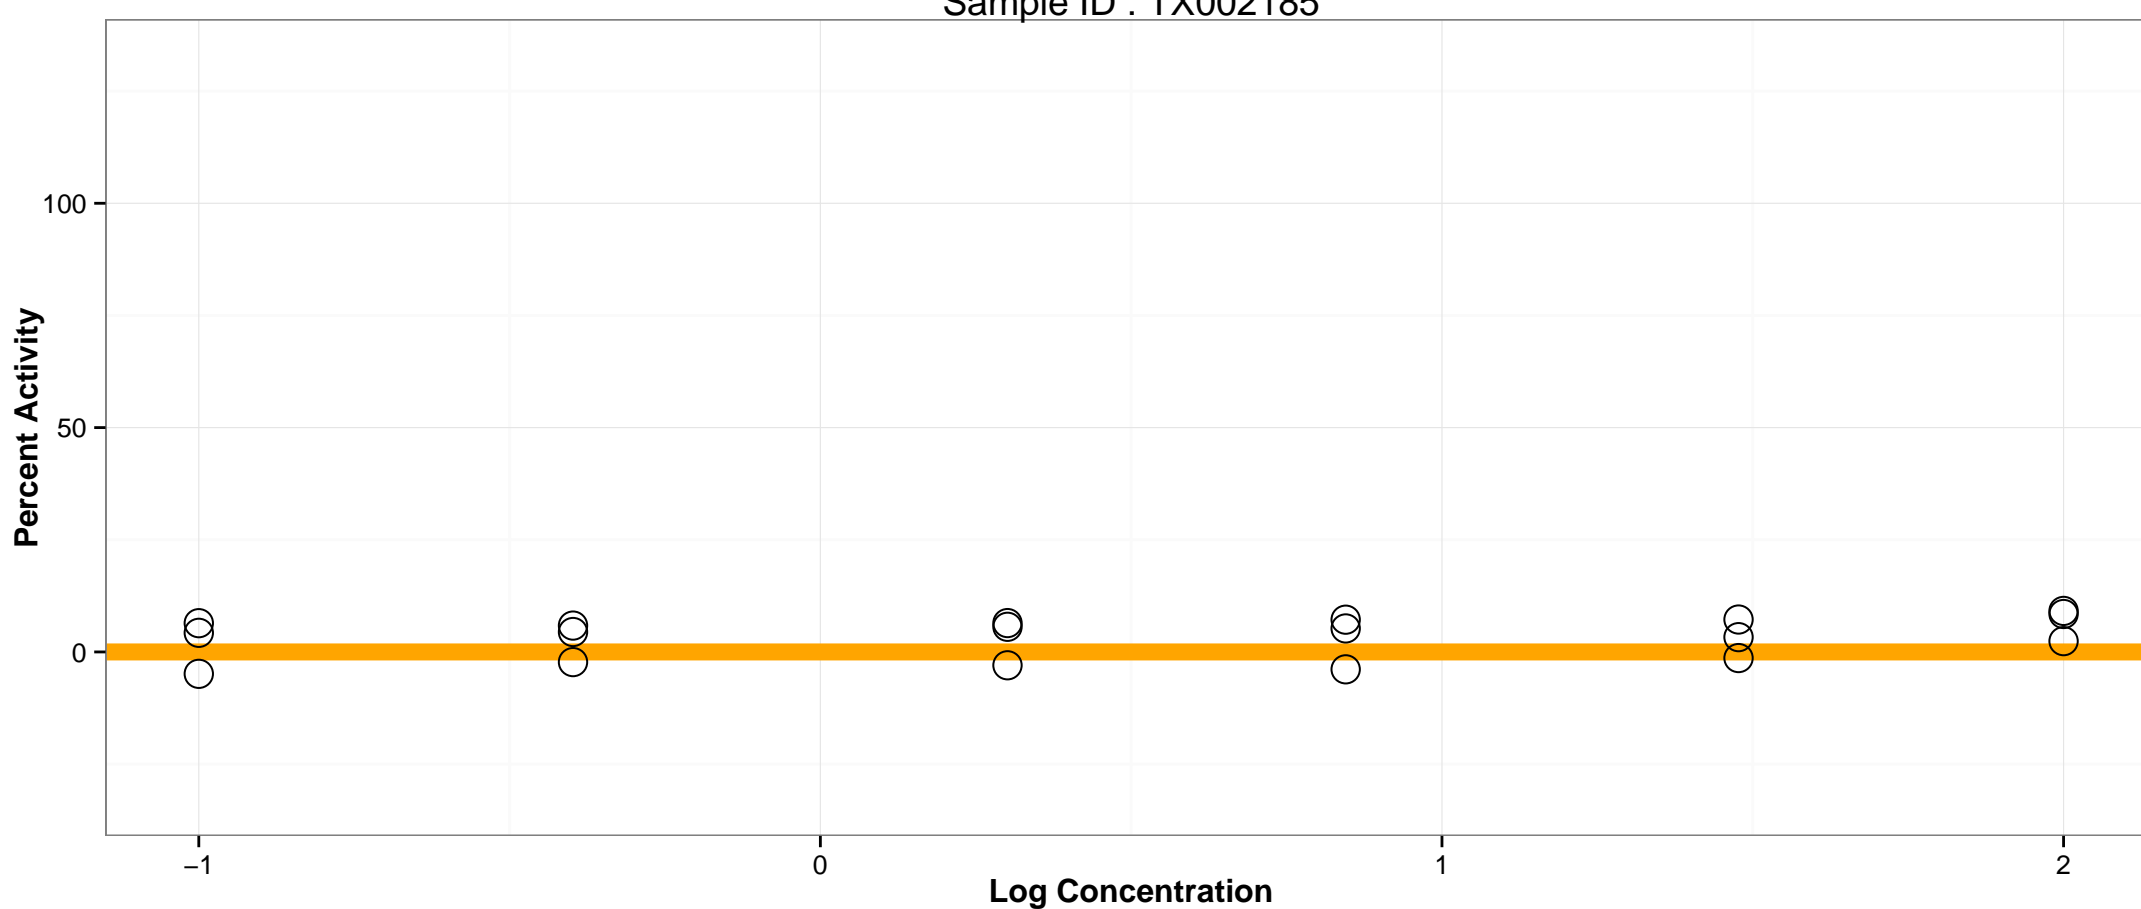

HILL MODEL

HILL MODEL: Not applicable

GAIN-LOSS MODEL

GNLS MODEL: Not applicable

|      | CNST   | HILL | GNLS |
|------|--------|------|------|
| AIC  | 117.76 | NA   | NA   |
| PROB | 1      | NA   | NA   |
| RMSE | 5.51   | NA   | NA   |

MAX\_MEAN : 6.68 MAX\_MED : 8.47 BMAD : 8.58  
COFF : 20 HIT-CALL : 0 FITC : 4 ACTP : 0  
FLAGS :

Assay ID 1824 (NHEERL\_TPO\_GUA\_dn)  
Sample ID : TP0001442H05

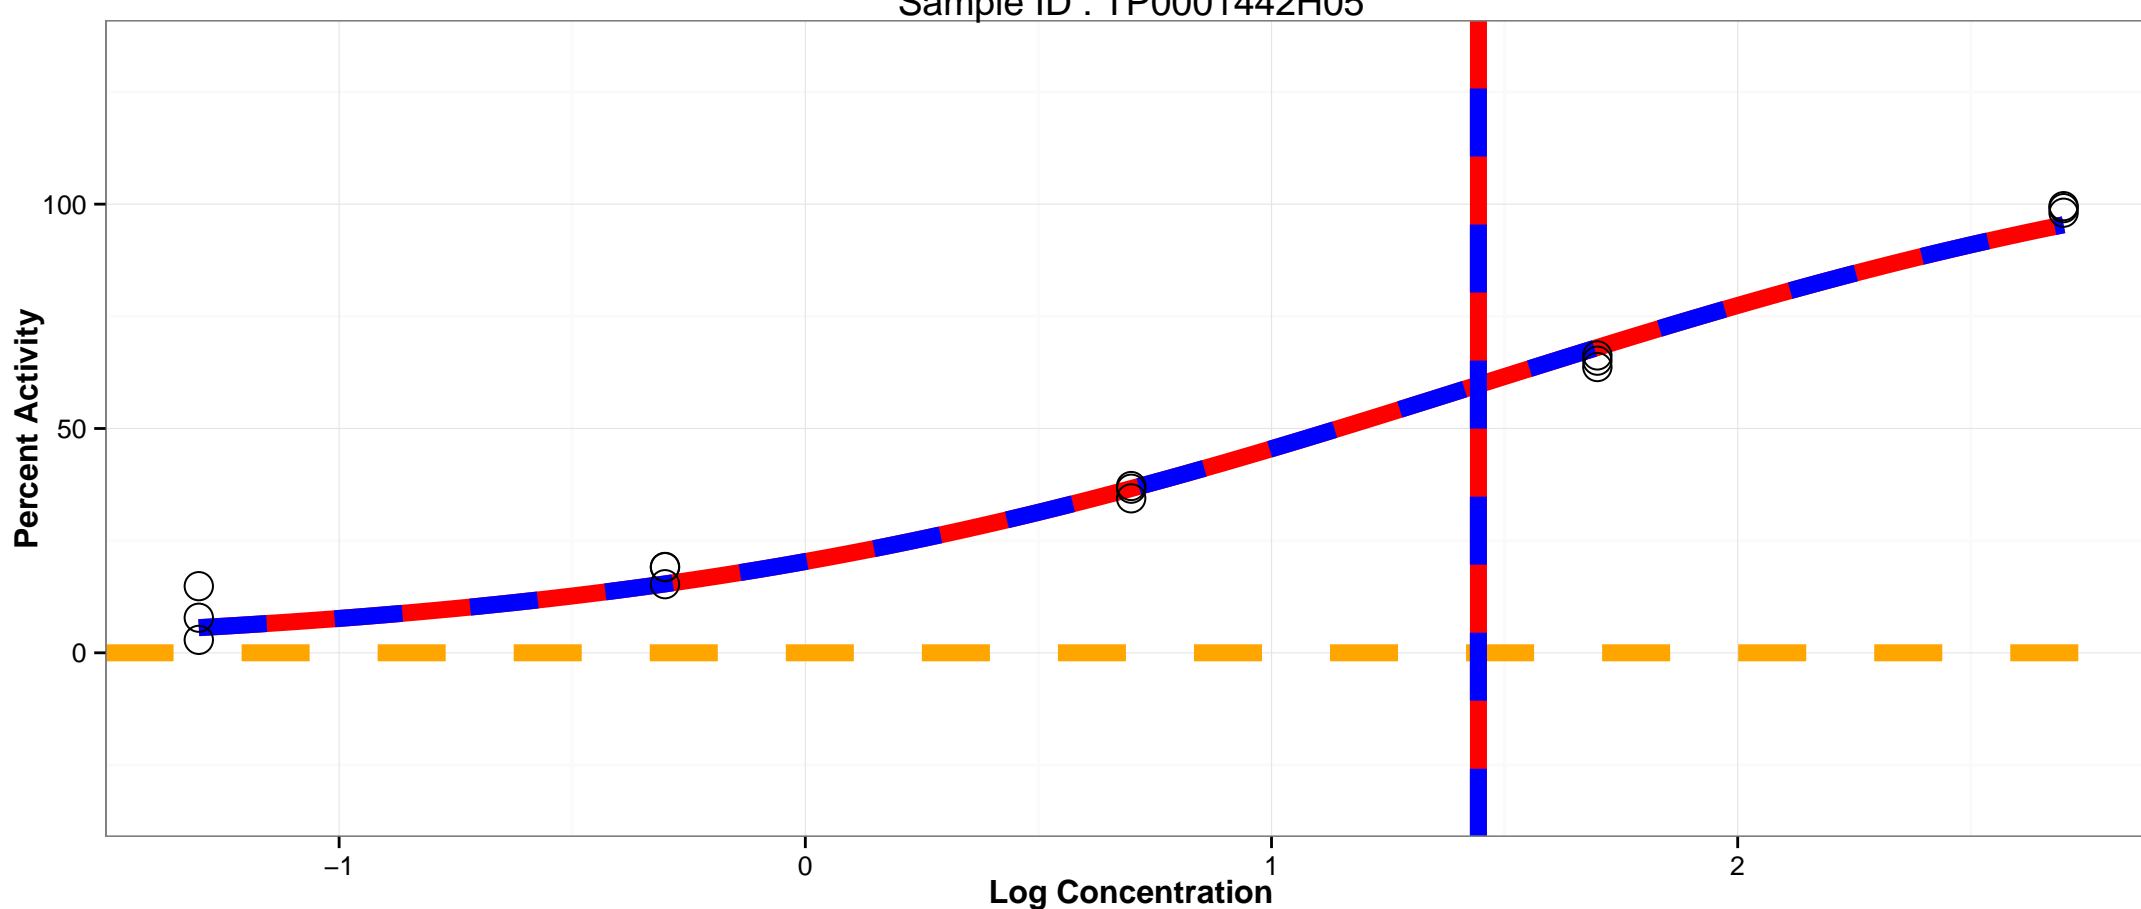

HILL MODEL

|     | tp  | ga    | gw    |
|-----|-----|-------|-------|
| val | 119 | 1.44  | 0.476 |
| sd  | 14  | 0.253 | 0.054 |

GAIN-LOSS MODEL

|     | tp  | ga    | gw     | la   | lw   |
|-----|-----|-------|--------|------|------|
| val | 119 | 1.44  | 0.476  | 3.52 | 11   |
| sd  | 14  | 0.254 | 0.0541 | 276  | 3680 |

|      | CNST   | HILL  | GNLS  |
|------|--------|-------|-------|
| AIC  | 166.74 | 90.14 | 94.14 |
| PROB | 0      | 0.88  | 0.12  |
| RMSE | 56.11  | 3.66  | 3.66  |

MAX\_MEAN : 98.9 MAX\_MED : 99.1 BMAD : 3.71  
COFF : 20 HIT-CALL : 1 FITC : 42 ACTP : 1  
FLAGS :

Chemical : Diphenylamine  
CAS : 122-39-4

Assay ID 1508 (NHEERL\_TPO\_AUR\_dn)  
Sample ID : TX003699

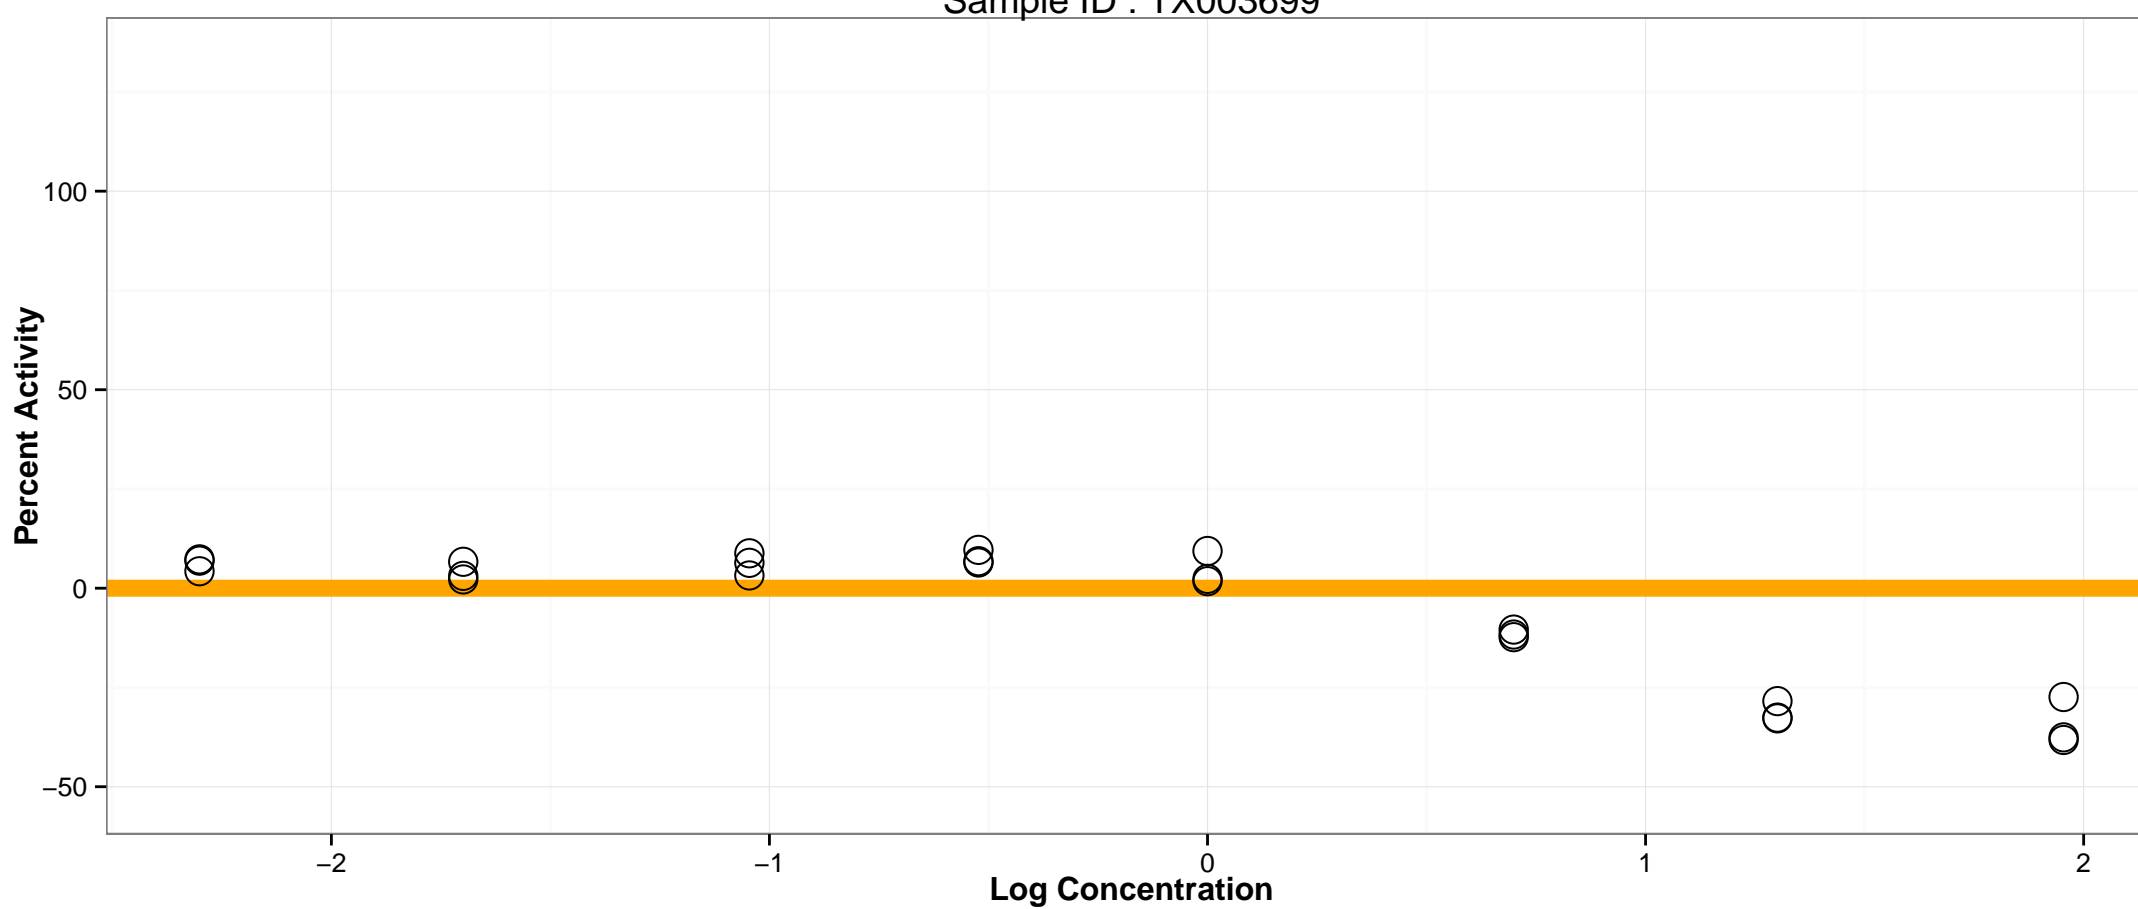

HILL MODEL

HILL MODEL: Not applicable

GAIN-LOSS MODEL

GNLS MODEL: Not applicable

|      | CNST   | HILL | GNLS |
|------|--------|------|------|
| AIC  | 207.53 | NA   | NA   |
| PROB | 1      | NA   | NA   |
| RMSE | 17.73  | NA   | NA   |

MAX\_MEAN : 7.66 MAX\_MED : 6.95 BMAD : 5.69  
COFF : 20 HIT-CALL : 0 FITC : 4 ACTP : 0  
FLAGS :

Assay ID 1509 (NHEERL\_HEK293T\_CellTiterGLO)  
Sample ID : TX003699

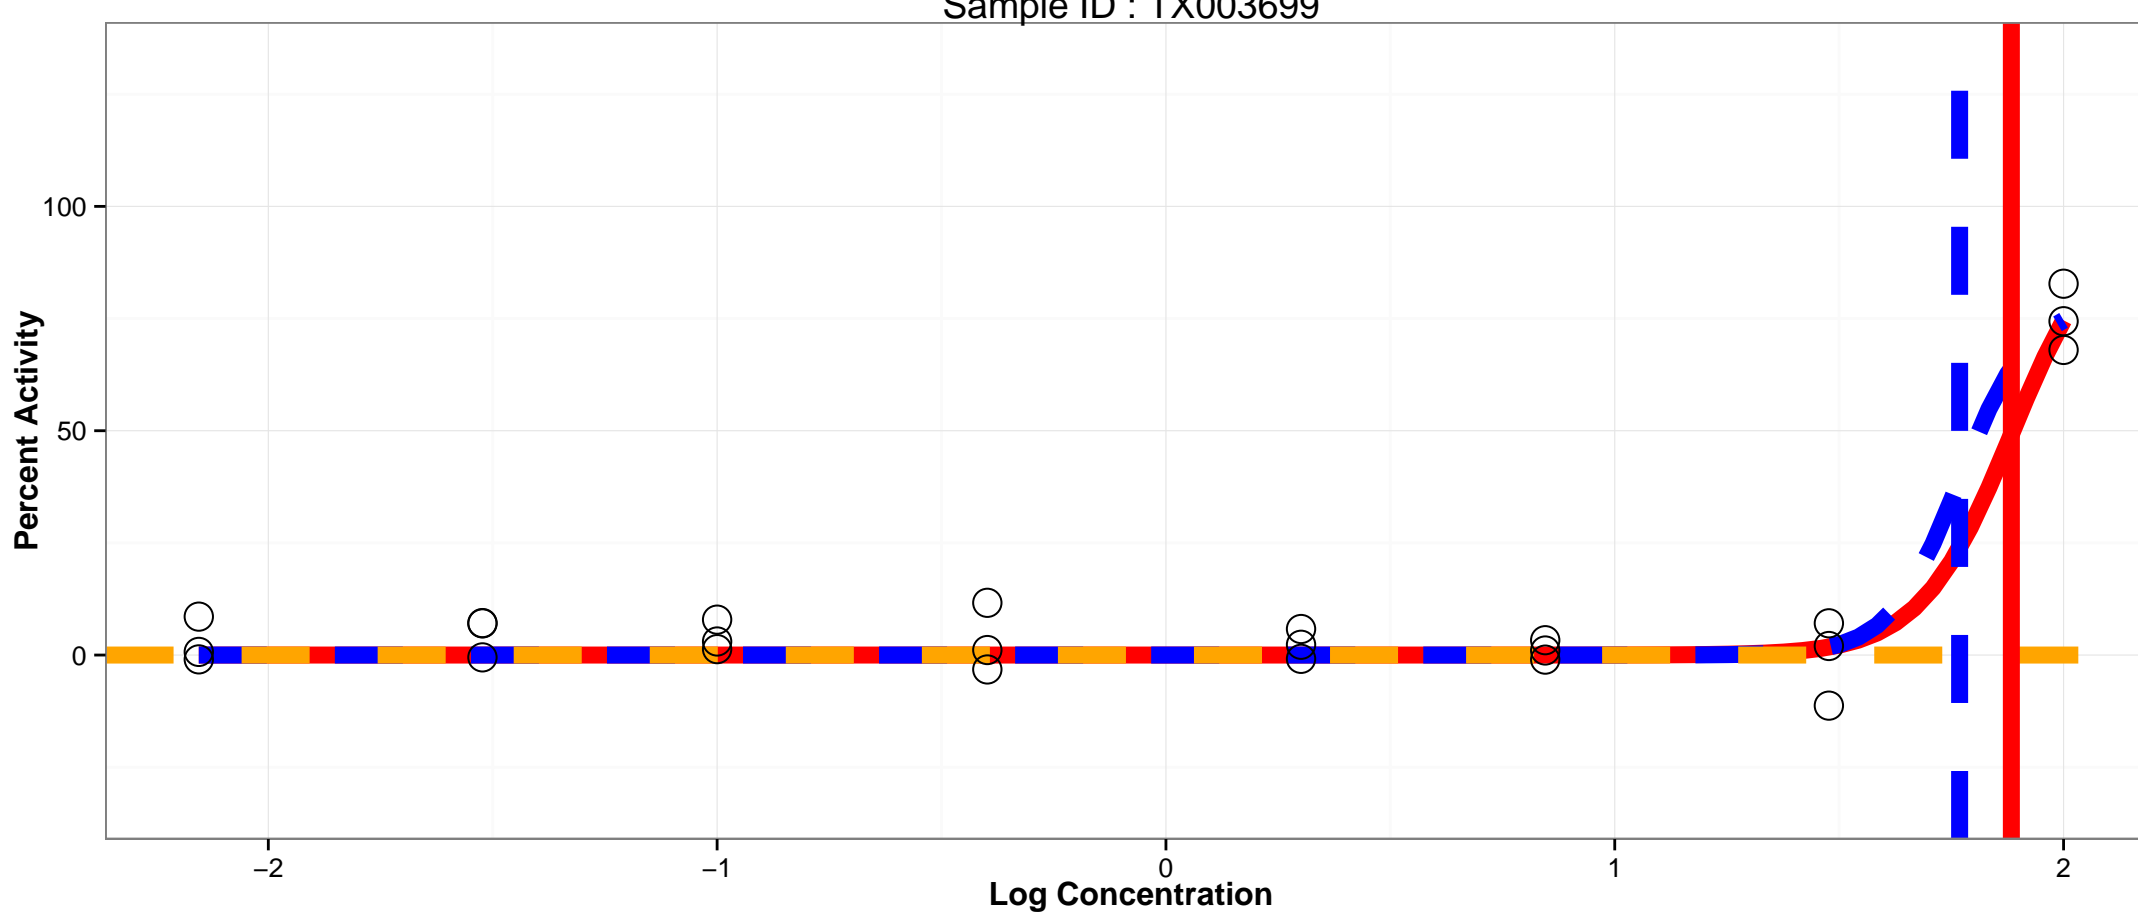

HILL MODEL

|     | tp   | ga    | gw   |
|-----|------|-------|------|
| val | 98.4 | 1.88  | 4.27 |
| sd  | 60.2 | 0.207 | 2.7  |

GAIN-LOSS MODEL

|     | tp   | ga   | gw   | la   | lw |
|-----|------|------|------|------|----|
| val | 78.3 | 1.77 | 5.63 | 3.66 | 11 |
| sd  | NA   | NA   | NA   | NA   | NA |

|      | CNST   | HILL   | GNLS   |
|------|--------|--------|--------|
| AIC  | 206.57 | 159.73 | 163.73 |
| PROB | 0      | 0.88   | 0.12   |
| RMSE | 27.12  | 5.62   | 5.62   |

MAX\_MEAN : 75.1 MAX\_MED : 74.4 BMAD : 5.54  
COFF : 20 HIT-CALL : 1 FITC : 42 ACTP : 1  
FLAGS : 6

Assay ID 1848 (NHEERL\_Quantilum\_inhib\_2\_dn)  
Sample ID : TX003699

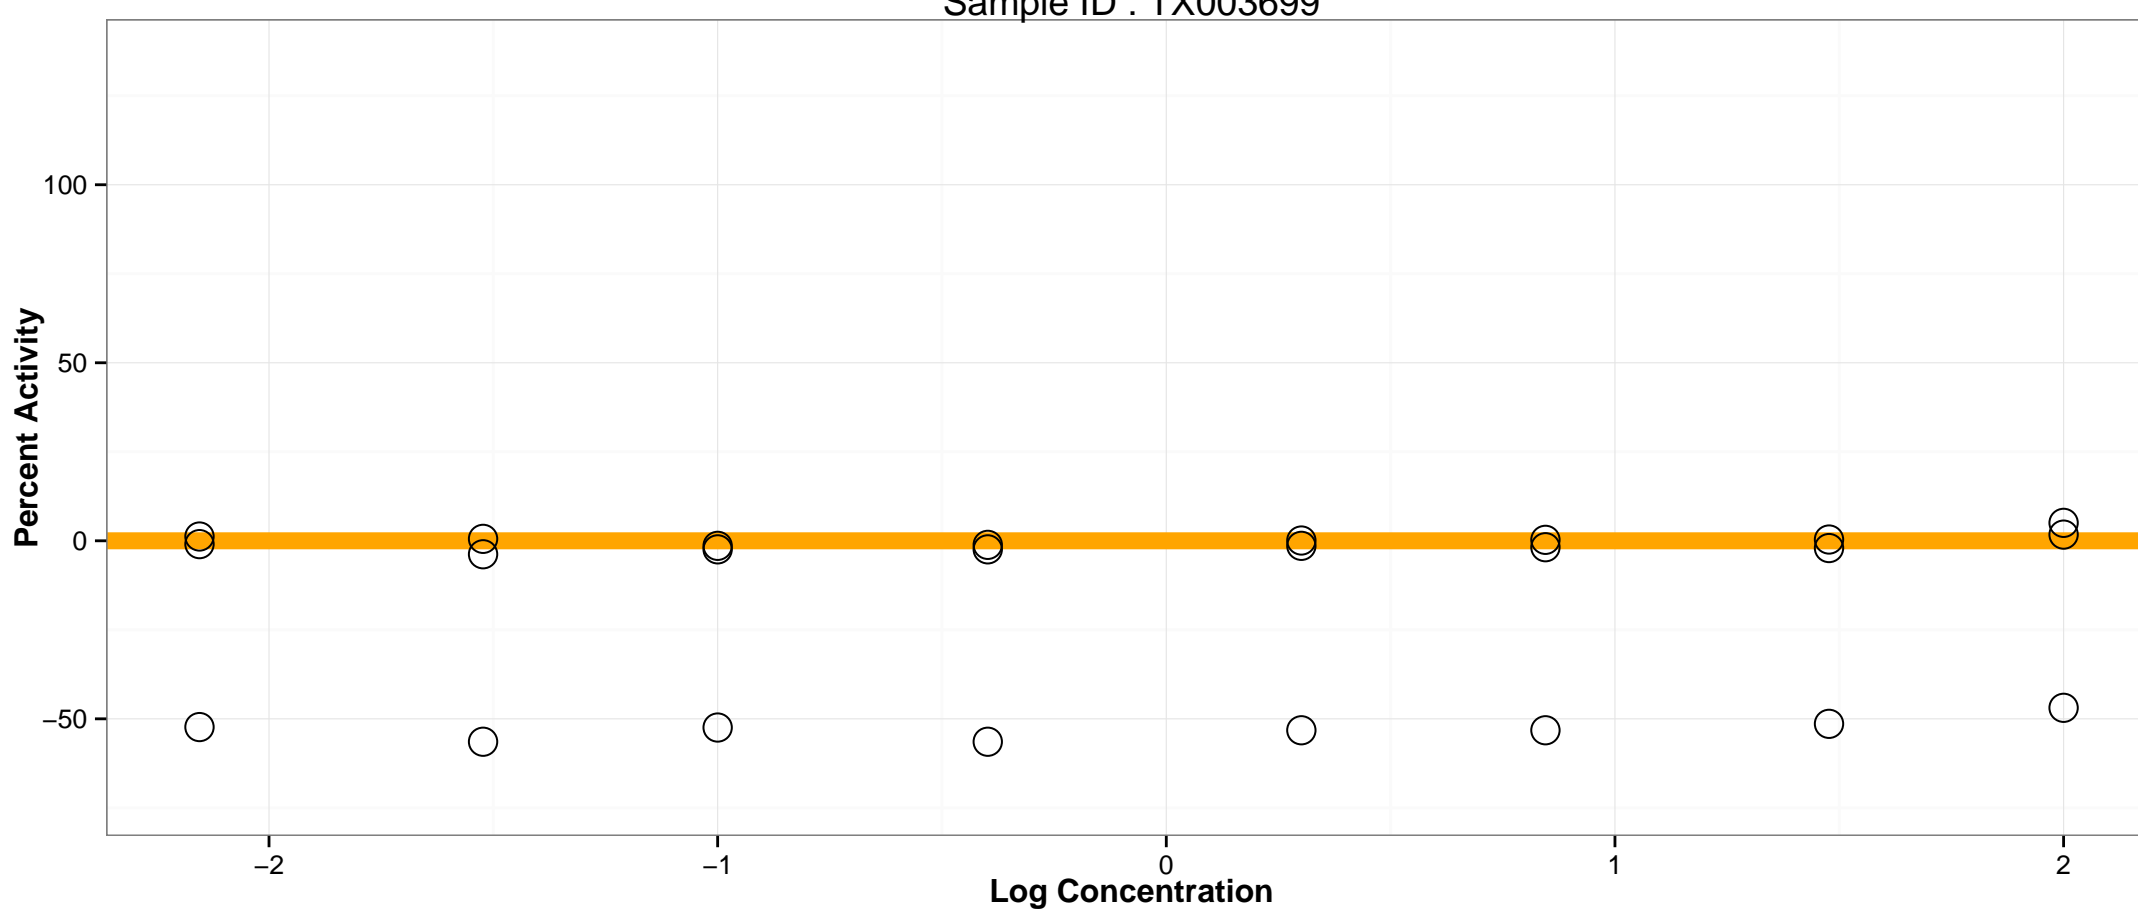

HILL MODEL

HILL MODEL: Not applicable

GAIN-LOSS MODEL

GNLS MODEL: Not applicable

|      | CNST   | HILL | GNLS |
|------|--------|------|------|
| AIC  | 233.28 | NA   | NA   |
| PROB | 1      | NA   | NA   |
| RMSE | 30.56  | NA   | NA   |

MAX\_MEAN : -13.4 MAX\_MED : 1.75 BMAD : 8.58  
COFF : 20 HIT-CALL : 0 FITC : 4 ACTP : 0  
FLAGS : 10

Assay ID 1824 (NHEERL\_TPO\_GUA\_dn)  
Sample ID : TP0001442H06

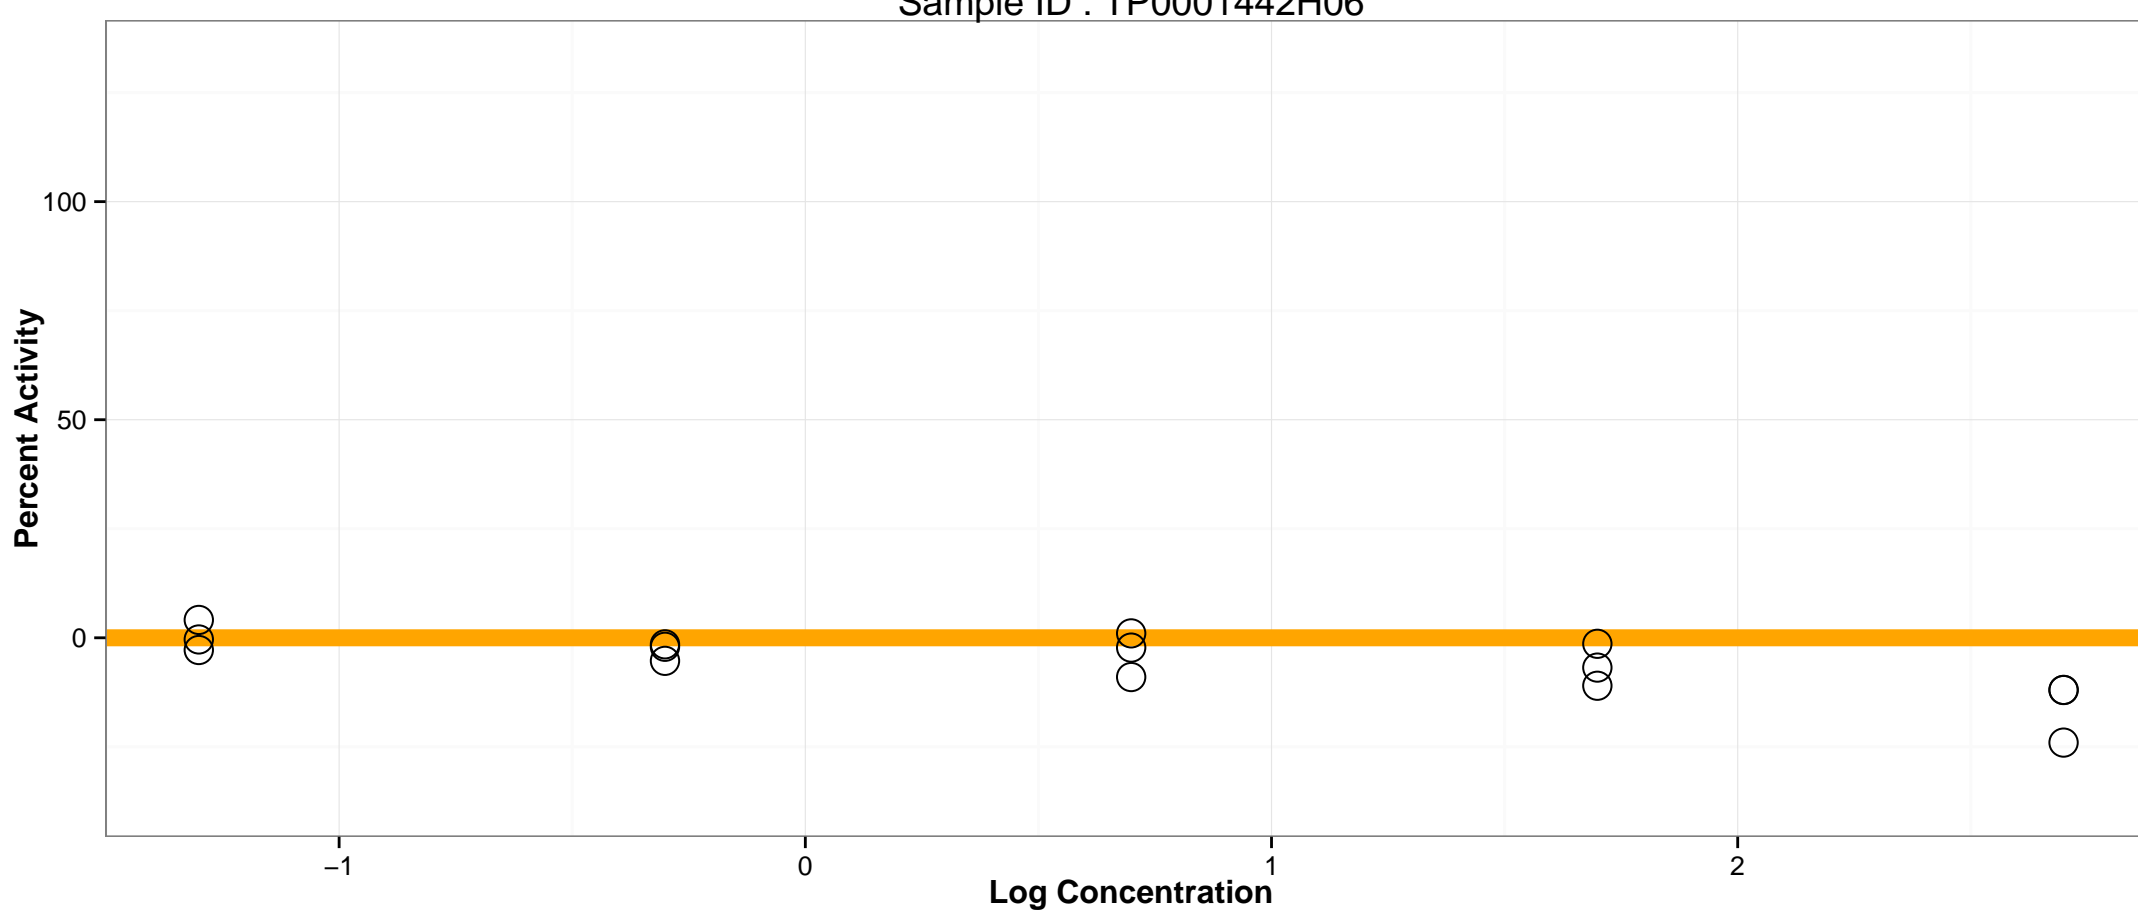

HILL MODEL

HILL MODEL: Not applicable

GAIN-LOSS MODEL

GNLS MODEL: Not applicable

|      | CNST   | HILL | GNLS |
|------|--------|------|------|
| AIC  | 108.88 | NA   | NA   |
| PROB | 1      | NA   | NA   |
| RMSE | 8.86   | NA   | NA   |

MAX\_MEAN : 0.313 MAX\_MED : -0.372 BMAD : 3.71  
COFF : 20 HIT-CALL : 0 FITC : 4 ACTP : 0  
FLAGS :



Chemical : Diazinon  
CAS : 333-41-5

Assay ID 1508 (NHEERL\_TPO\_AUR\_dn)  
Sample ID : TX000695

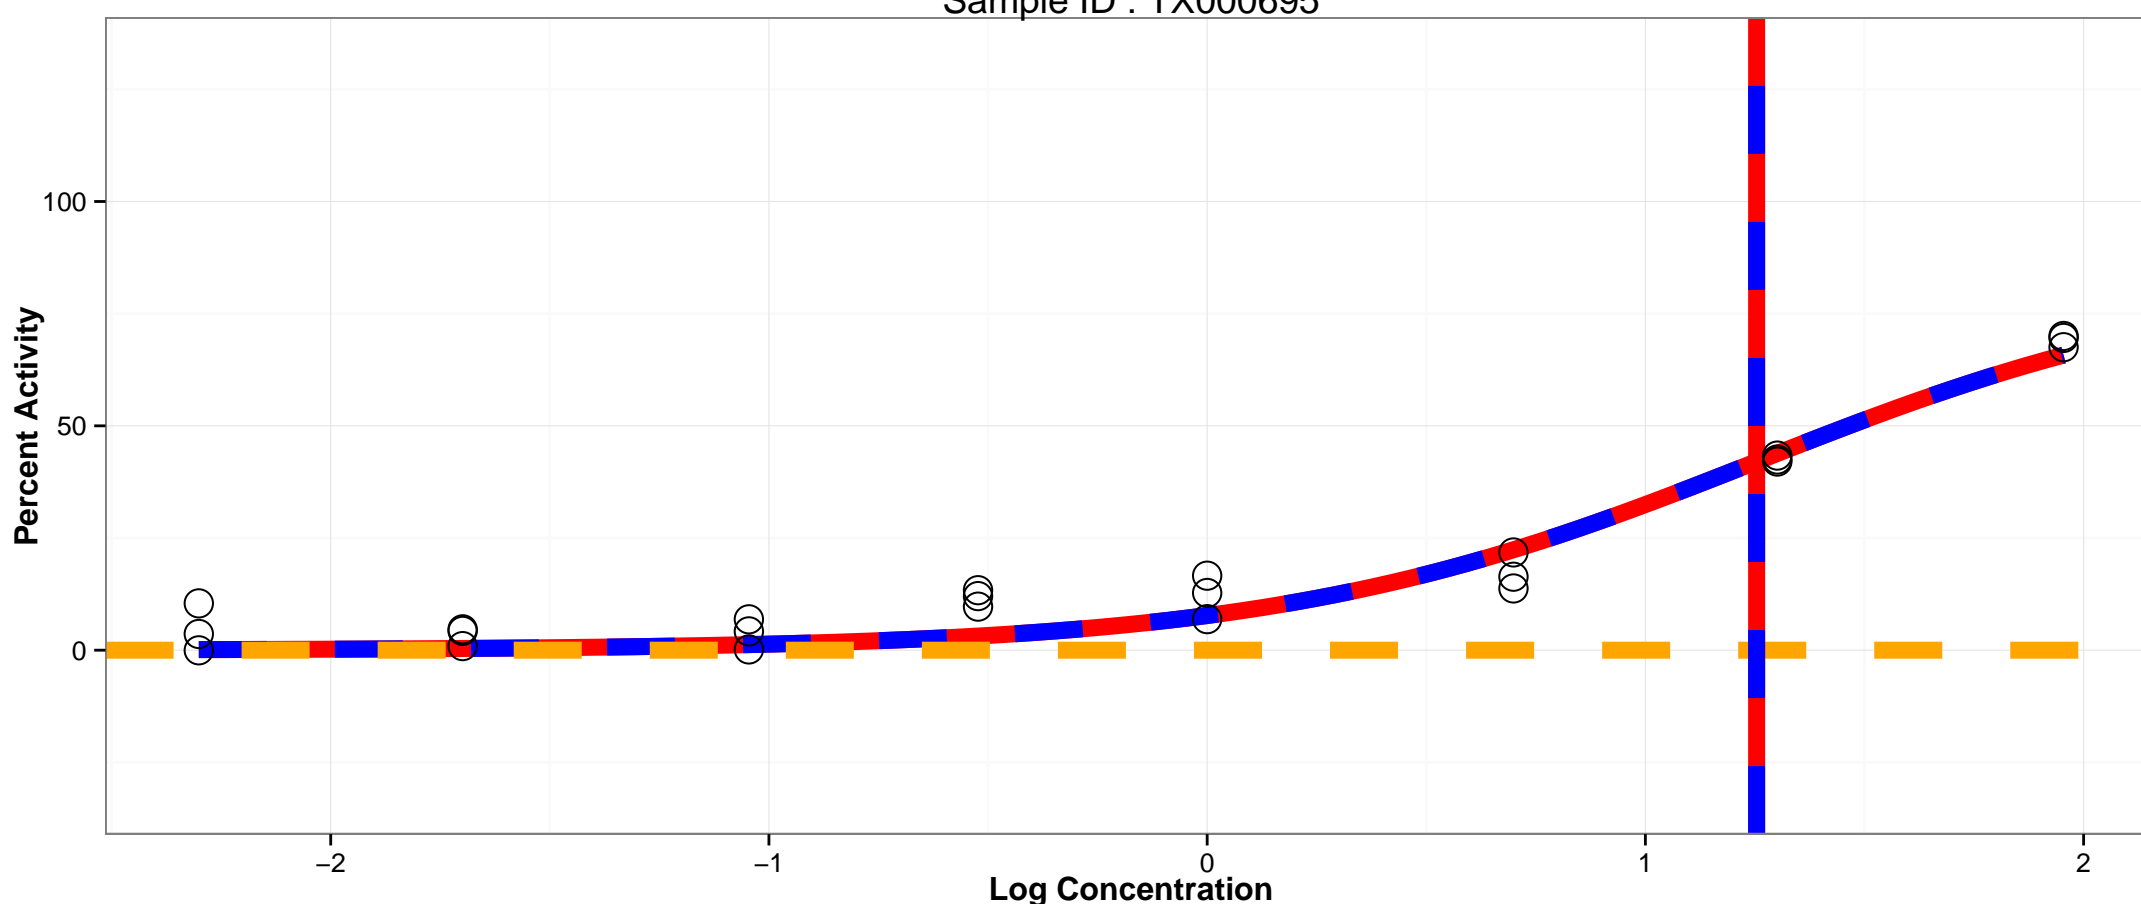

HILL MODEL

|     | tp   | ga    | gw    |
|-----|------|-------|-------|
| val | 84.1 | 1.25  | 0.794 |
| sd  | 10.7 | 0.156 | 0.179 |

GAIN-LOSS MODEL

|     | tp   | ga   | gw    | la   | lw |
|-----|------|------|-------|------|----|
| val | 84.1 | 1.25 | 0.794 | 3.28 | 18 |
| sd  | NA   | NA   | NA    | NA   | NA |

|      | CNST   | HILL   | GNLS   |
|------|--------|--------|--------|
| AIC  | 230.97 | 158.31 | 162.31 |
| PROB | 0      | 0.88   | 0.12   |
| RMSE | 30.16  | 5.32   | 5.32   |

MAX\_MEAN : 69.1 MAX\_MED : 69.6 BMAD : 5.69  
COFF : 20 HIT-CALL : 1 FITC : 42 ACTP : 1  
FLAGS :

Assay ID 1509 (NHEERL\_HEK293T\_CellTiterGLO)  
Sample ID : TX000695

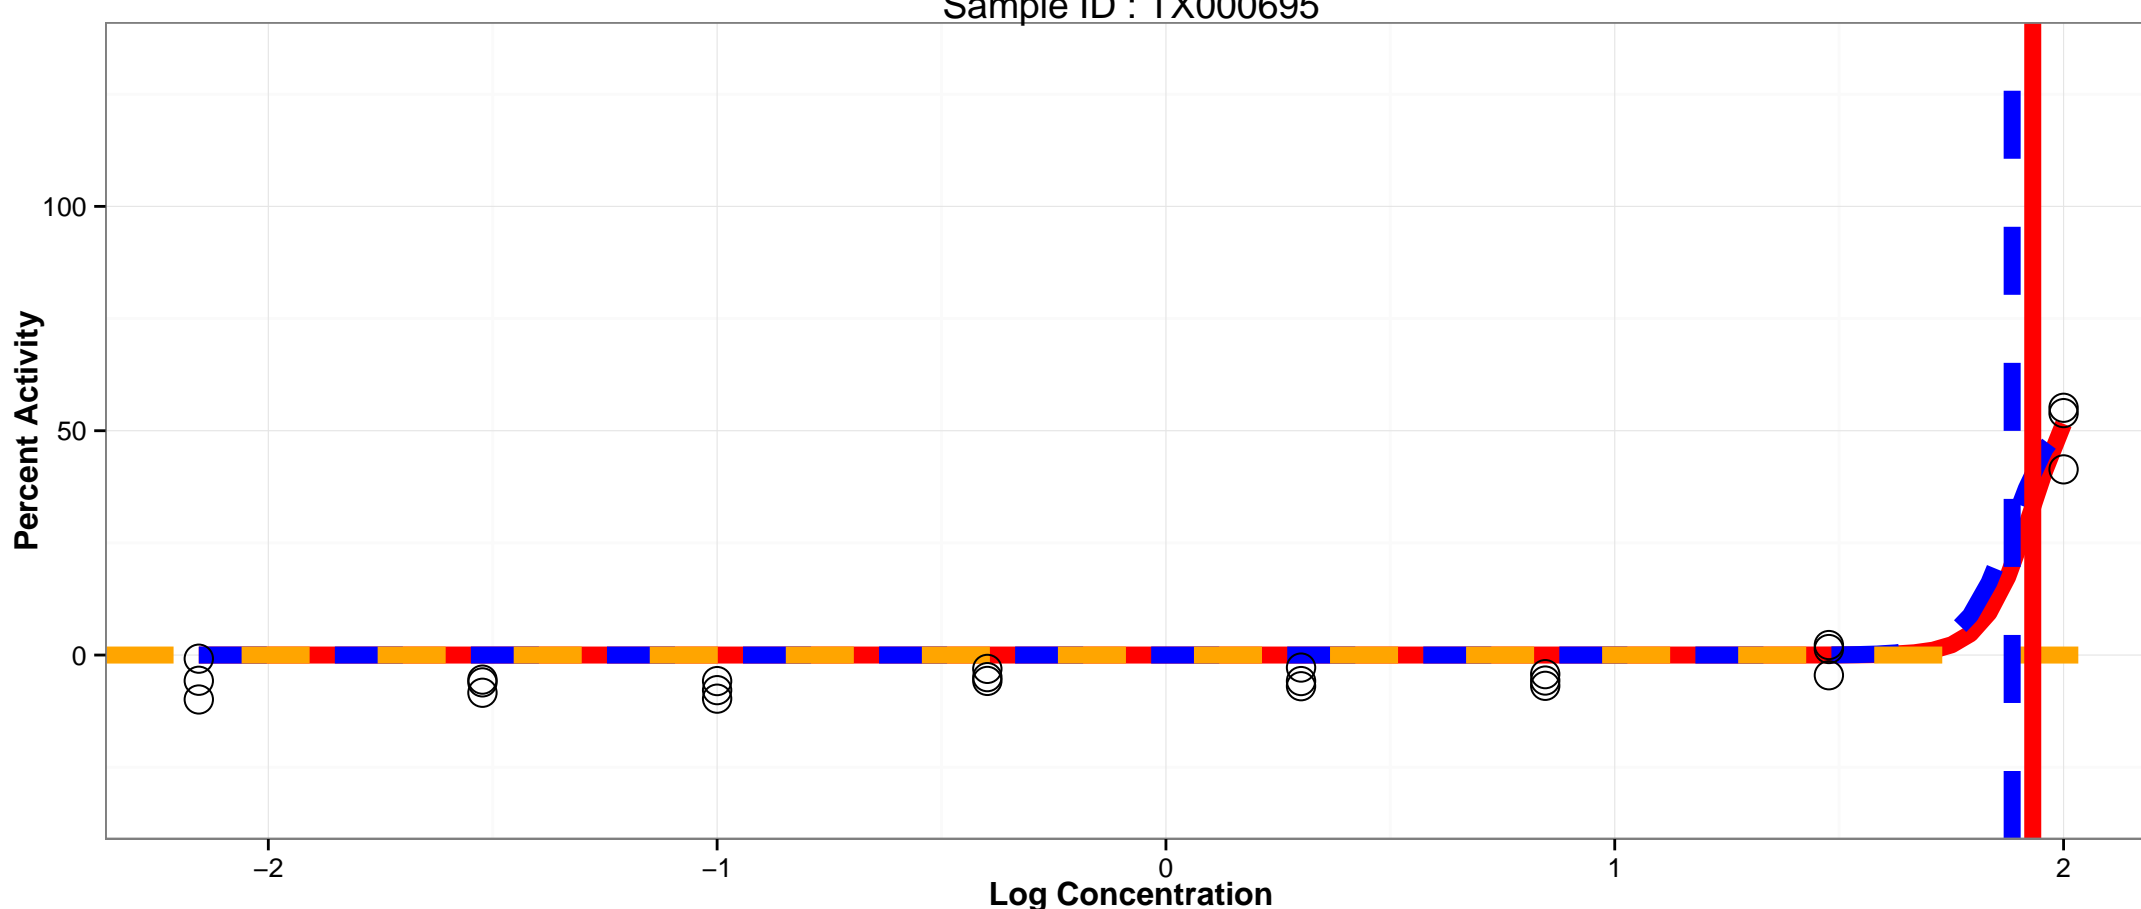

HILL MODEL

|     | tp   | ga    | gw   |
|-----|------|-------|------|
| val | 66.1 | 1.93  | 8    |
| sd  | 166  | 0.102 | 65.7 |

GAIN-LOSS MODEL

|     | tp  | ga    | gw   | la   | lw   |
|-----|-----|-------|------|------|------|
| val | 58  | 1.89  | 8    | 2.88 | 2.68 |
| sd  | 128 | 0.396 | 44.5 | 49.6 | 157  |

|      | CNST   | HILL   | GNLS   |
|------|--------|--------|--------|
| AIC  | 197.41 | 166.02 | 170.02 |
| PROB | 0      | 0.88   | 0.12   |
| RMSE | 18.71  | 5.98   | 5.98   |

MAX\_MEAN : 50.2 MAX\_MED : 53.9 BMAD : 5.54  
COFF : 20 HIT-CALL : 1 FITC : 42 ACTP : 1  
FLAGS : 6

Assay ID 1848 (NHEERL\_Quantilum\_inhib\_2\_dn)  
Sample ID : TX000695

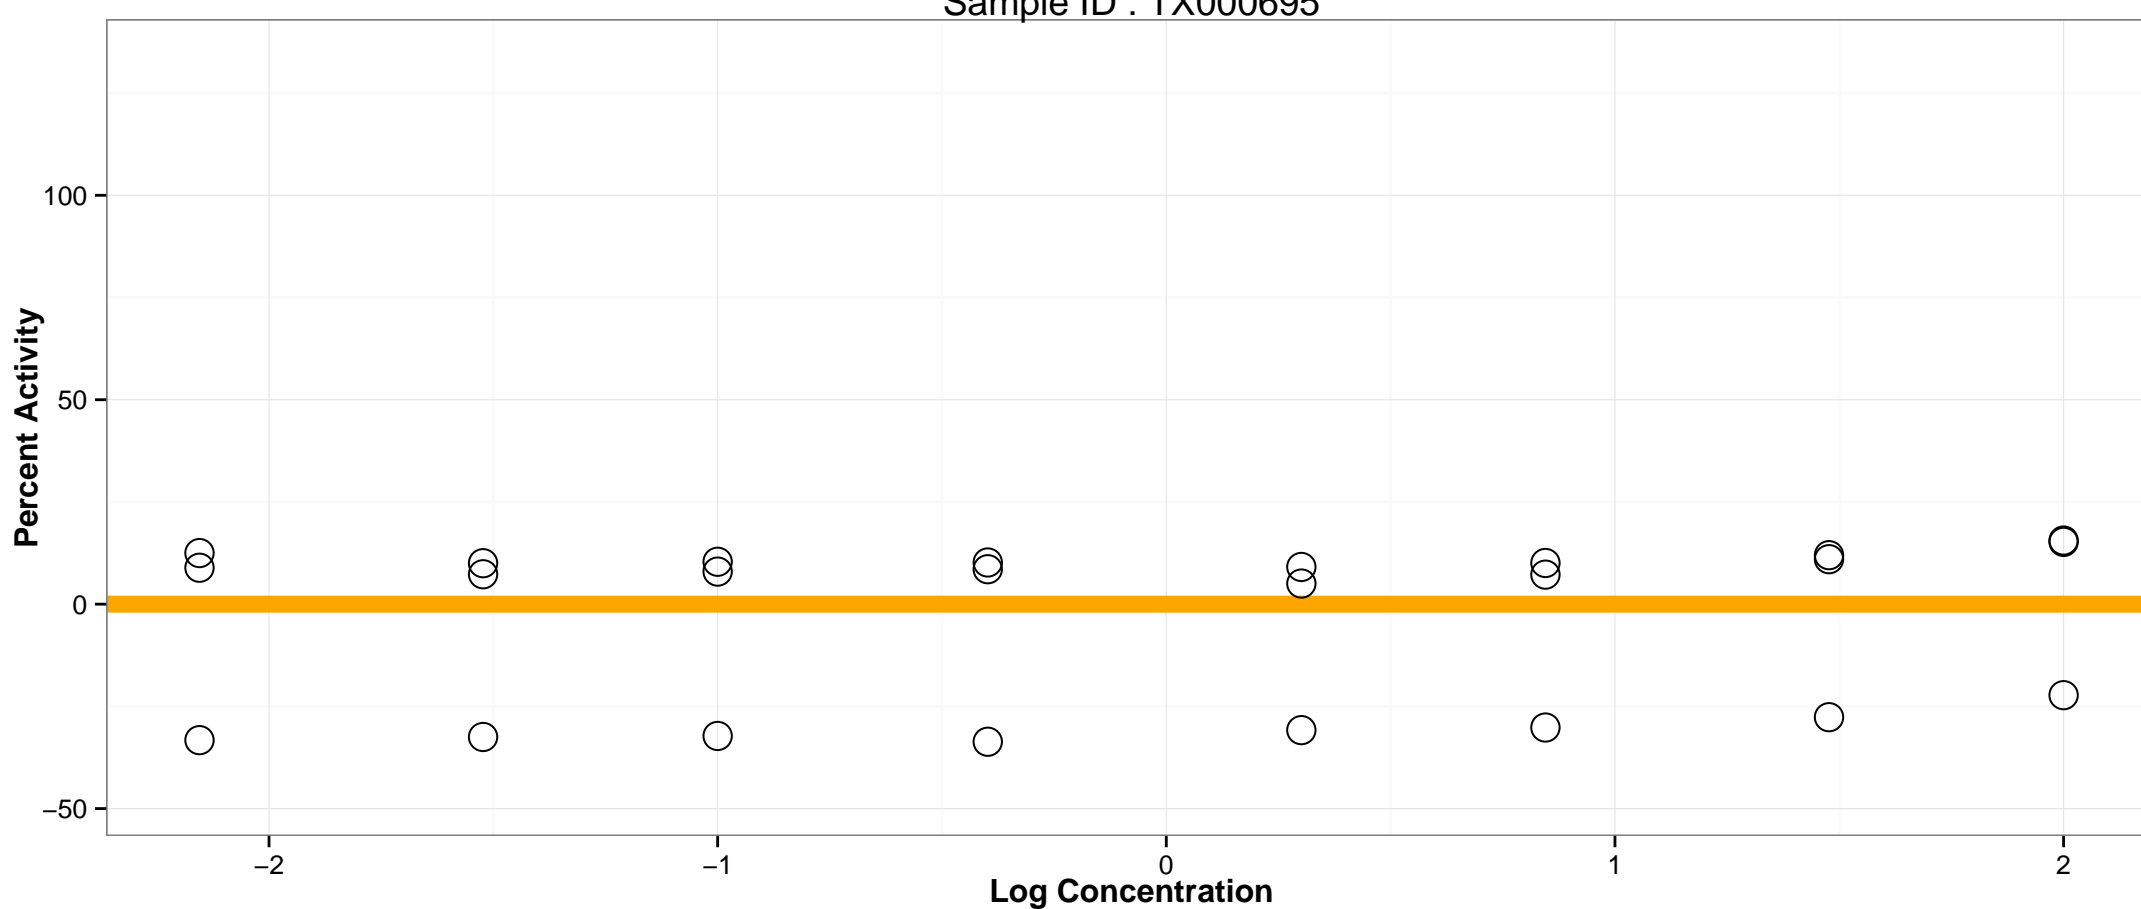

HILL MODEL

HILL MODEL: Not applicable

GAIN-LOSS MODEL

GNLS MODEL: Not applicable

|      | CNST   | HILL | GNLS |
|------|--------|------|------|
| AIC  | 215.61 | NA   | NA   |
| PROB | 1      | NA   | NA   |
| RMSE | 19.57  | NA   | NA   |

MAX\_MEAN : 2.86 MAX\_MED : 15.2 BMAD : 8.58  
COFF : 20 HIT-CALL : 0 FITC : 4 ACTP : 0  
FLAGS :

Chemical : Thidiazuron  
CAS : 51707-55-2

Assay ID 1508 (NHEERL\_TPO\_AUR\_dn)  
Sample ID : TX000704

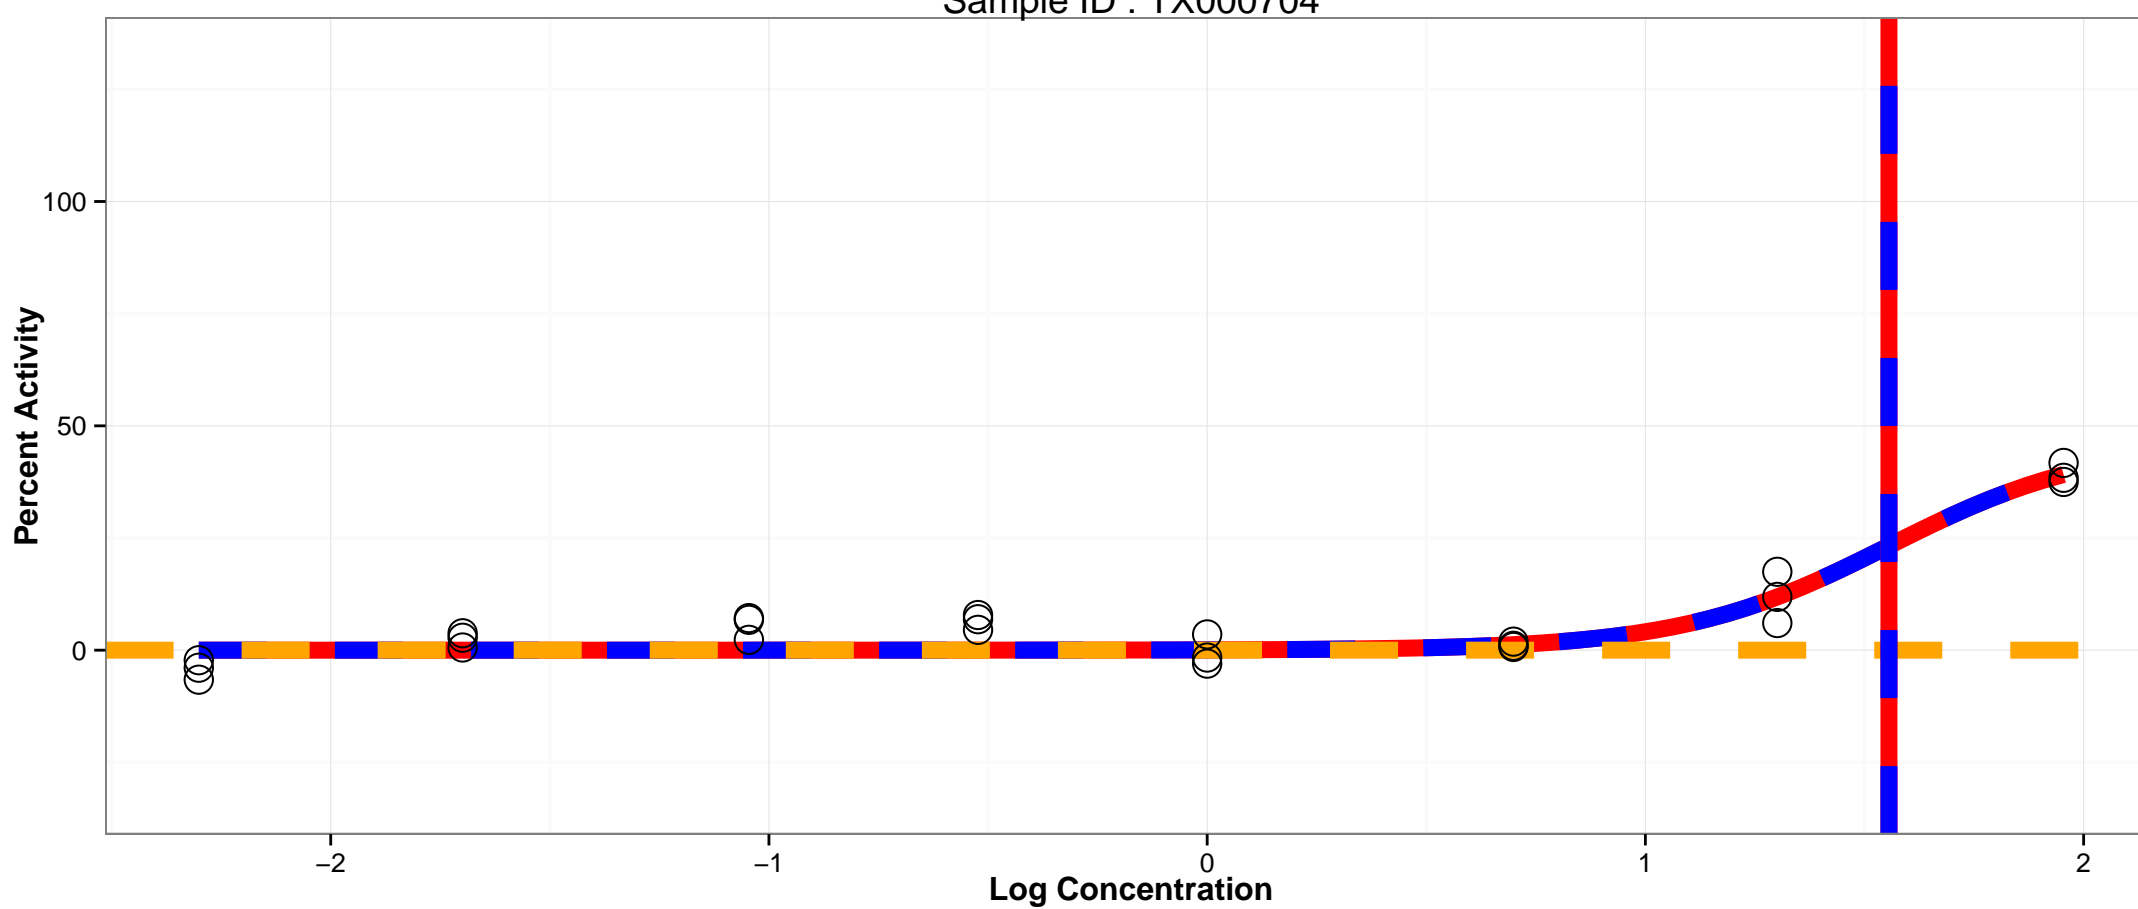

HILL MODEL

|     | tp   | ga    | gw   |
|-----|------|-------|------|
| val | 46.5 | 1.56  | 1.83 |
| sd  | 19.4 | 0.343 | 1.3  |

GAIN-LOSS MODEL

|     | tp   | ga   | gw   | la   | lw   |
|-----|------|------|------|------|------|
| val | 46.5 | 1.56 | 1.83 | 3.86 | 8.48 |
| sd  | NA   | NA   | NA   | NA   | NA   |

|      | CNST  | HILL   | GNLS   |
|------|-------|--------|--------|
| AIC  | 191.2 | 147.24 | 151.24 |
| PROB | 0     | 0.88   | 0.12   |
| RMSE | 15.08 | 4.17   | 4.17   |

MAX\_MEAN : 39.2 MAX\_MED : 38.4 BMAD : 5.69  
COFF : 20 HIT-CALL : 1 FITC : 42 ACTP : 1  
FLAGS : 6

Assay ID 1509 (NHEERL\_HEK293T\_CellTiterGLO)  
Sample ID : TX000704

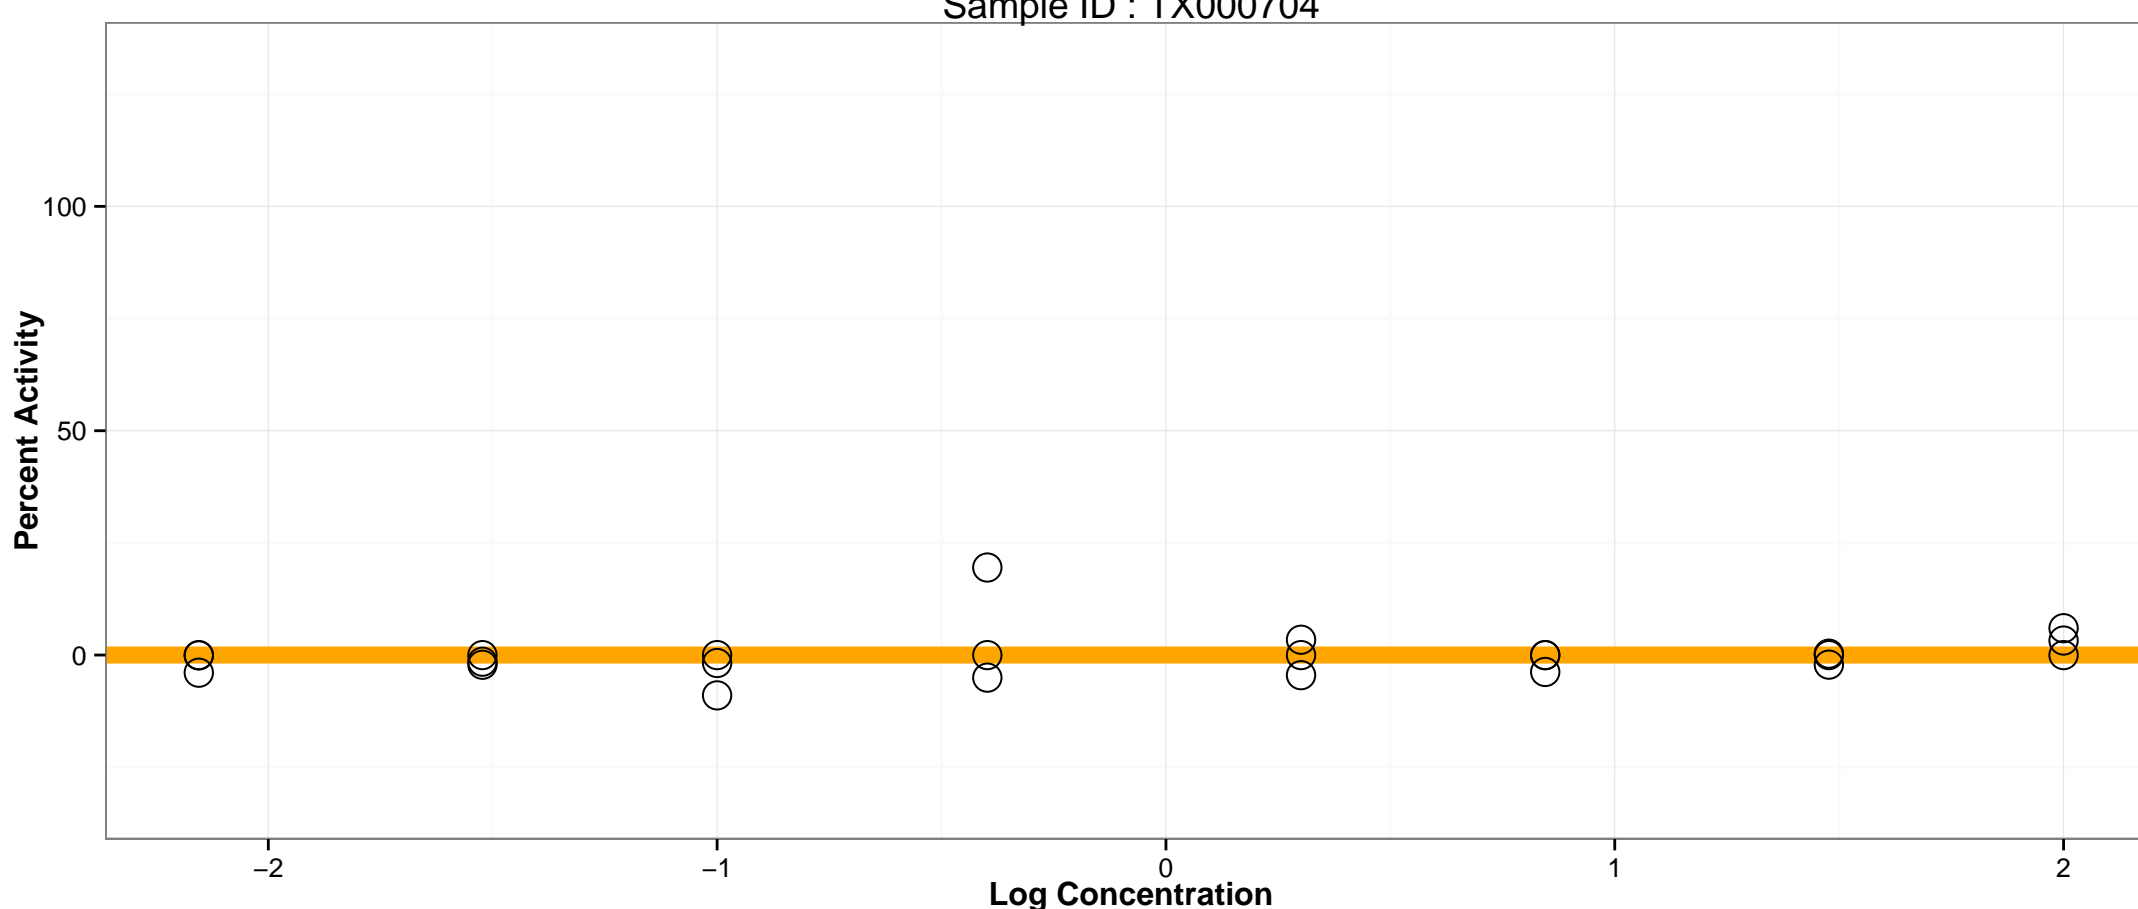

HILL MODEL

HILL MODEL: Not applicable

GAIN-LOSS MODEL

GNLS MODEL: Not applicable

|      | CNST   | HILL | GNLS |
|------|--------|------|------|
| AIC  | 136.01 | NA   | NA   |
| PROB | 1      | NA   | NA   |
| RMSE | 5.04   | NA   | NA   |

MAX\_MEAN : 4.84 MAX\_MED : 3.25 BMAD : 5.54  
COFF : 20 HIT-CALL : 0 FITC : 4 ACTP : 0  
FLAGS :

Assay ID 1848 (NHEERL\_Quantilum\_inhib\_2\_dn)  
Sample ID : TX000704

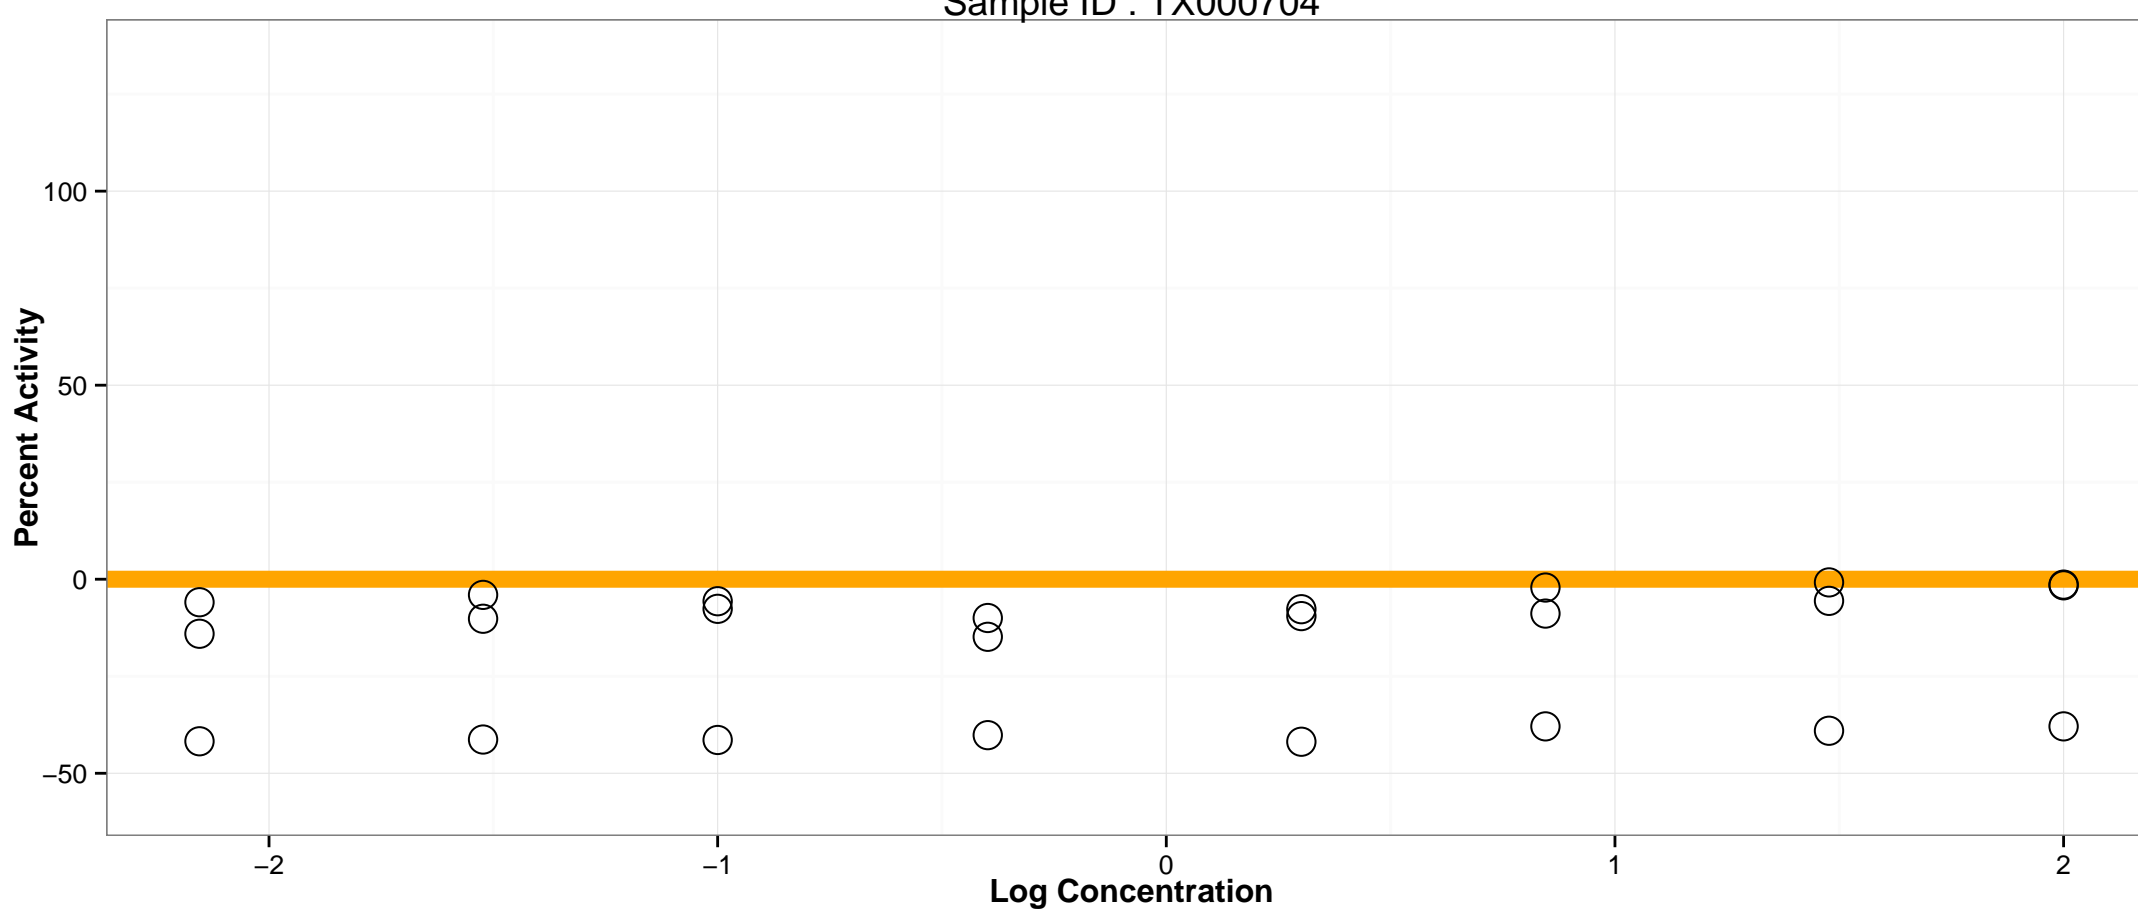

HILL MODEL

HILL MODEL: Not applicable

GAIN-LOSS MODEL

GNLS MODEL: Not applicable

|      | CNST   | HILL | GNLS |
|------|--------|------|------|
| AIC  | 223.82 | NA   | NA   |
| PROB | 1      | NA   | NA   |
| RMSE | 24.11  | NA   | NA   |

MAX\_MEAN : -13.6 MAX\_MED : -1.55 BMAD : 8.58  
COFF : 20 HIT-CALL : 0 FITC : 4 ACTP : 0  
FLAGS : 10

Chemical : Chlorpyrifos-methyl  
CAS : 5598-13-0

Assay ID 1508 (NHEERL\_TPO\_AUR\_dn)  
Sample ID : TX000719

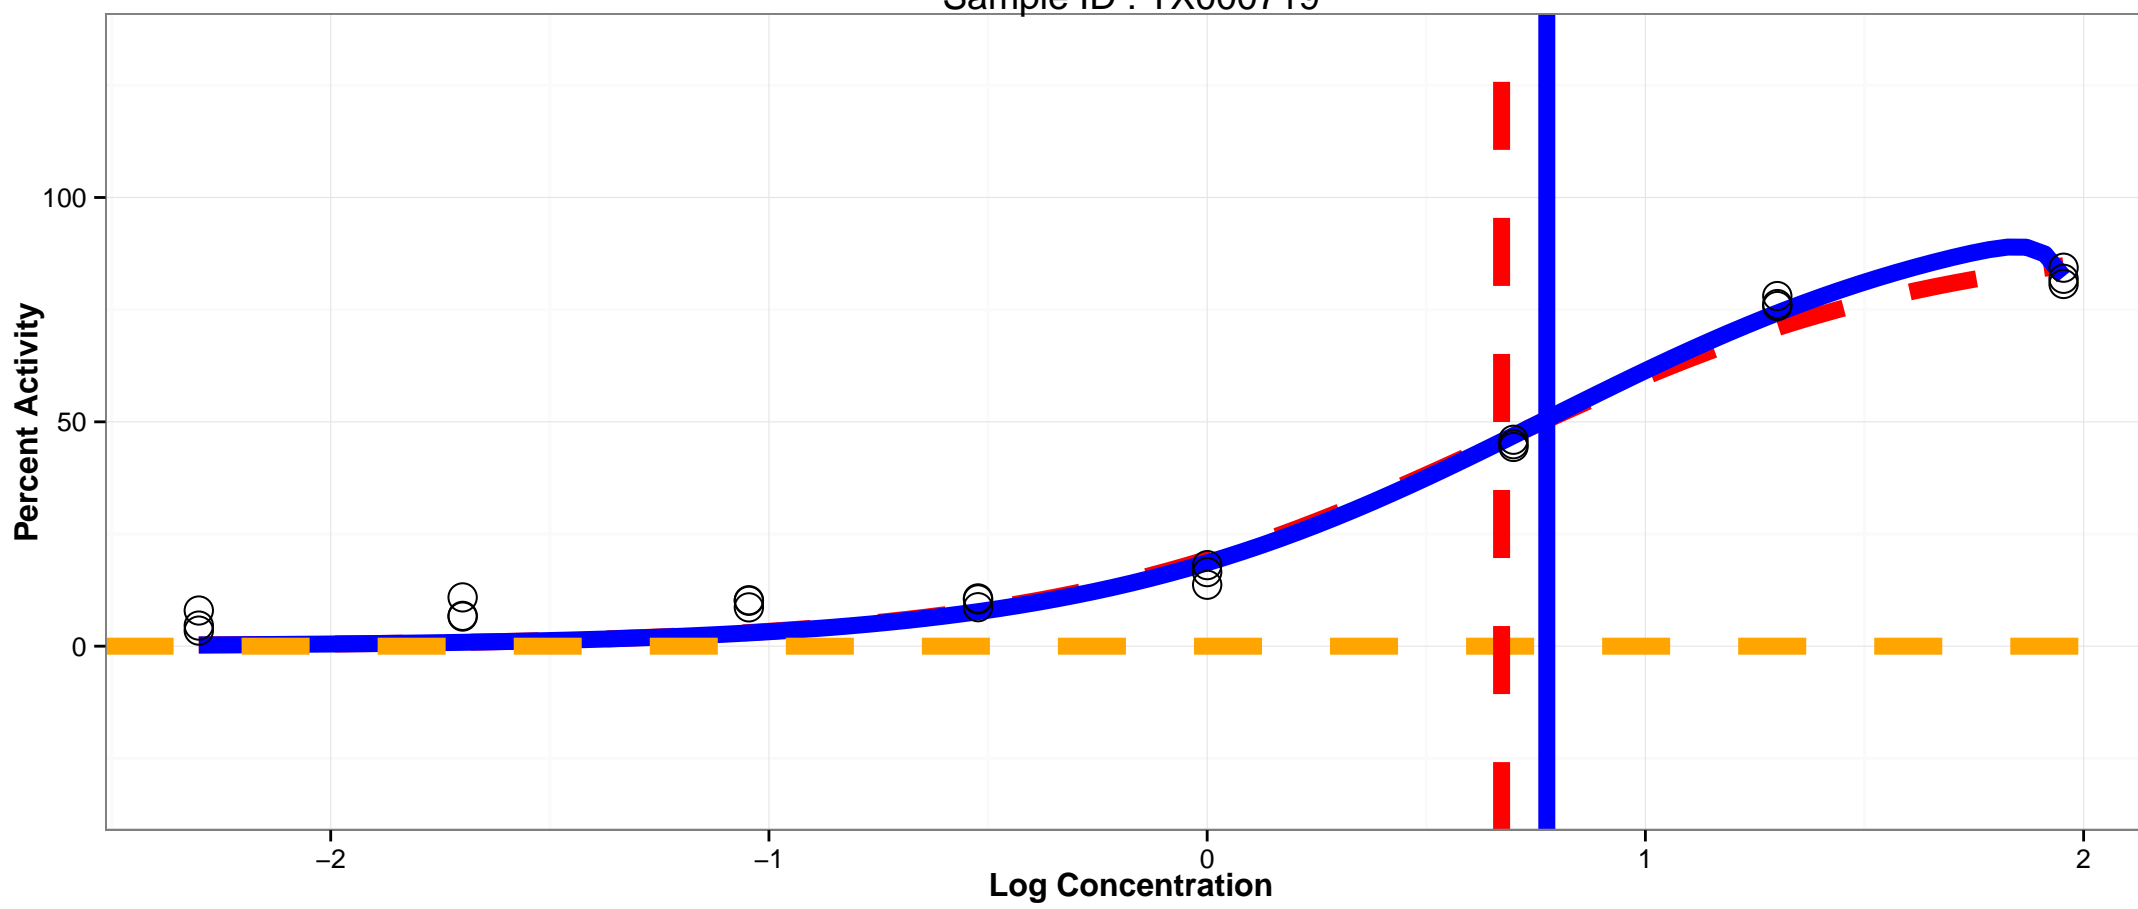

HILL MODEL

|     | tp   | ga     | gw    |
|-----|------|--------|-------|
| val | 91.6 | 0.672  | 0.853 |
| sd  | 5.07 | 0.0846 | 0.131 |

GAIN-LOSS MODEL

|     | tp   | ga    | gw    | la     | lw   |
|-----|------|-------|-------|--------|------|
| val | 101  | 0.775 | 0.836 | 2.04   | 10.4 |
| sd  | 16.1 | 0.192 | 0.138 | 0.0271 | 6.7  |

|      | CNST   | HILL   | GNLS   |
|------|--------|--------|--------|
| AIC  | 251.45 | 156.03 | 153.93 |
| PROB | 0      | 0.26   | 0.74   |
| RMSE | 43.68  | 4.93   | 4.47   |

MAX\_MEAN : 82.3 MAX\_MED : 81.9 BMAD : 5.69  
COFF : 20 HIT-CALL : 1 FITC : 51 ACTP : 1  
FLAGS :

Assay ID 1509 (NHEERL\_HEK293T\_CellTiterGLO)  
Sample ID : TX000719

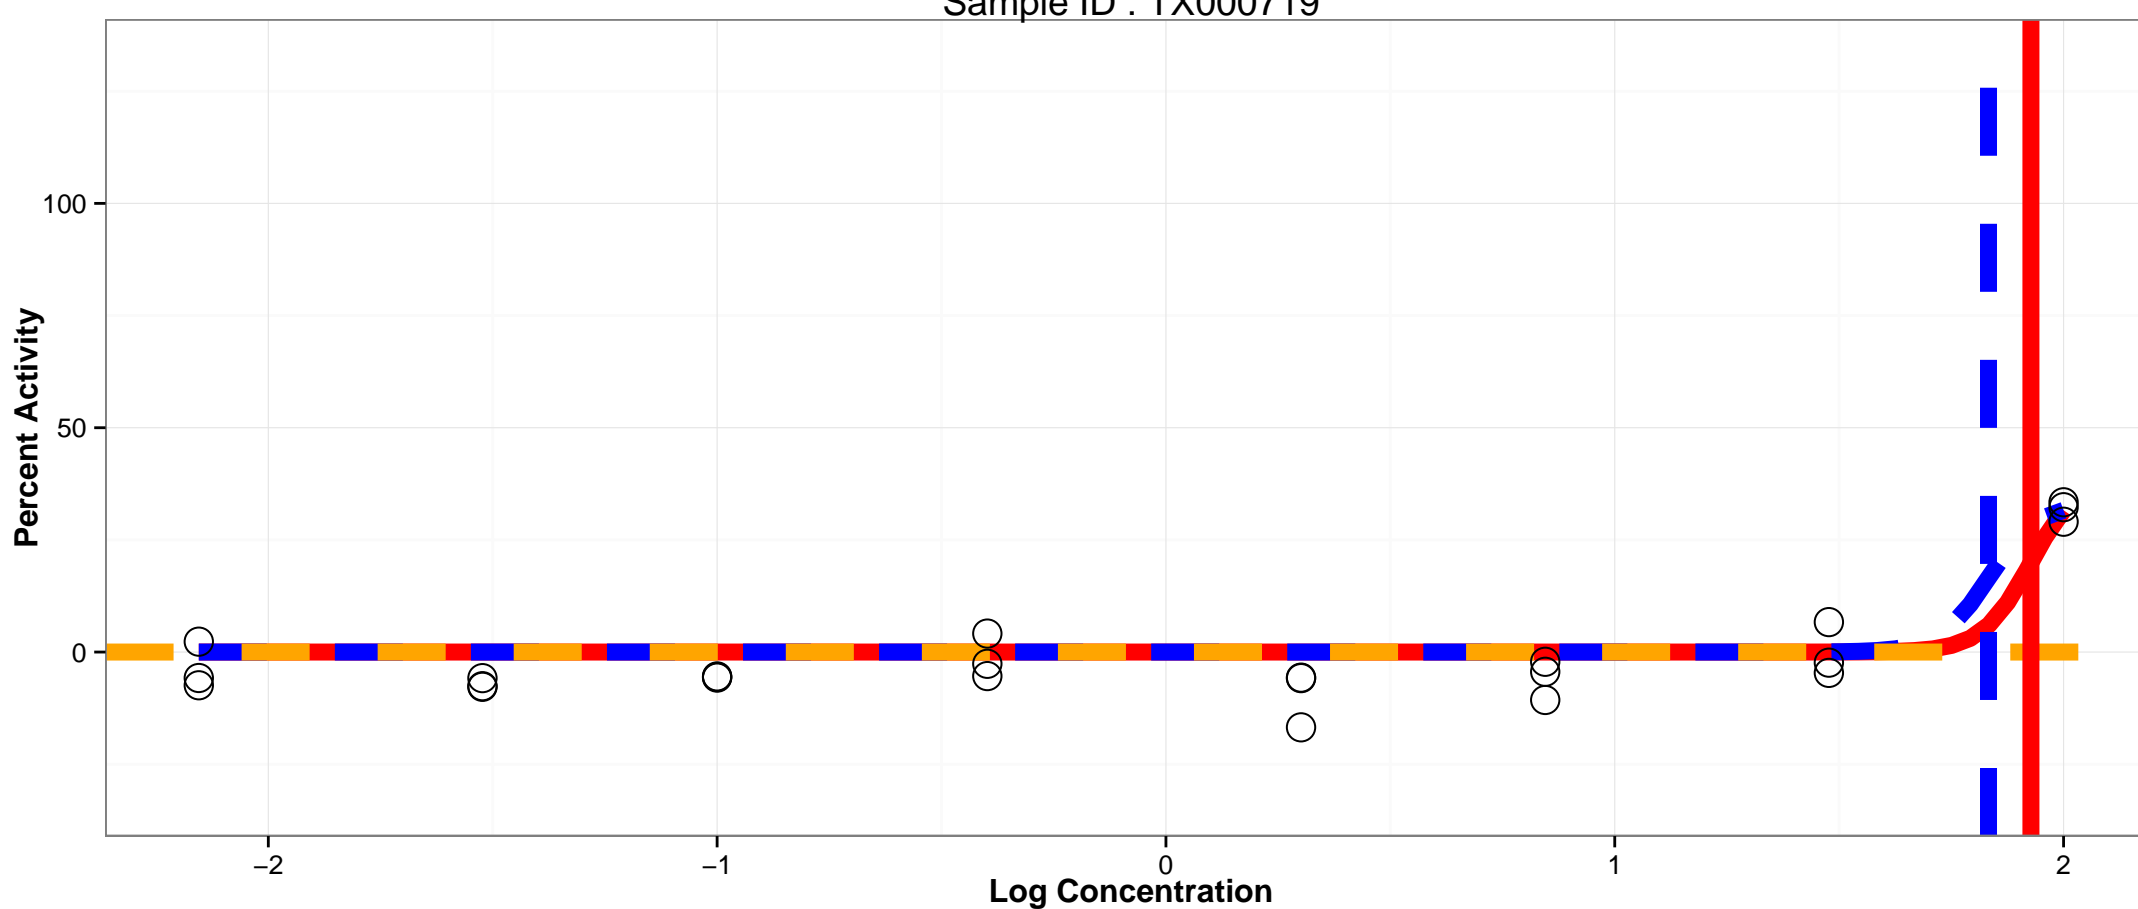

HILL MODEL

|     | tp   | ga   | gw |
|-----|------|------|----|
| val | 39.9 | 1.93 | 8  |
| sd  | NA   | NA   | NA |

GAIN-LOSS MODEL

|     | tp   | ga   | gw   | la   | lw |
|-----|------|------|------|------|----|
| val | 33.1 | 1.83 | 7.98 | 2.21 | 18 |
| sd  | NA   | NA   | NA   | NA   | NA |

|      | CNST   | HILL   | GNLS   |
|------|--------|--------|--------|
| AIC  | 188.19 | 166.46 | 170.47 |
| PROB | 0      | 0.88   | 0.12   |
| RMSE | 12.83  | 6.31   | 6.31   |

MAX\_MEAN : 31.6 MAX\_MED : 32.3 BMAD : 5.54  
COFF : 20 HIT-CALL : 1 FITC : 42 ACTP : 1  
FLAGS : 6

Assay ID 1848 (NHEERL\_Quantilum\_inhib\_2\_dn)  
Sample ID : TX000719

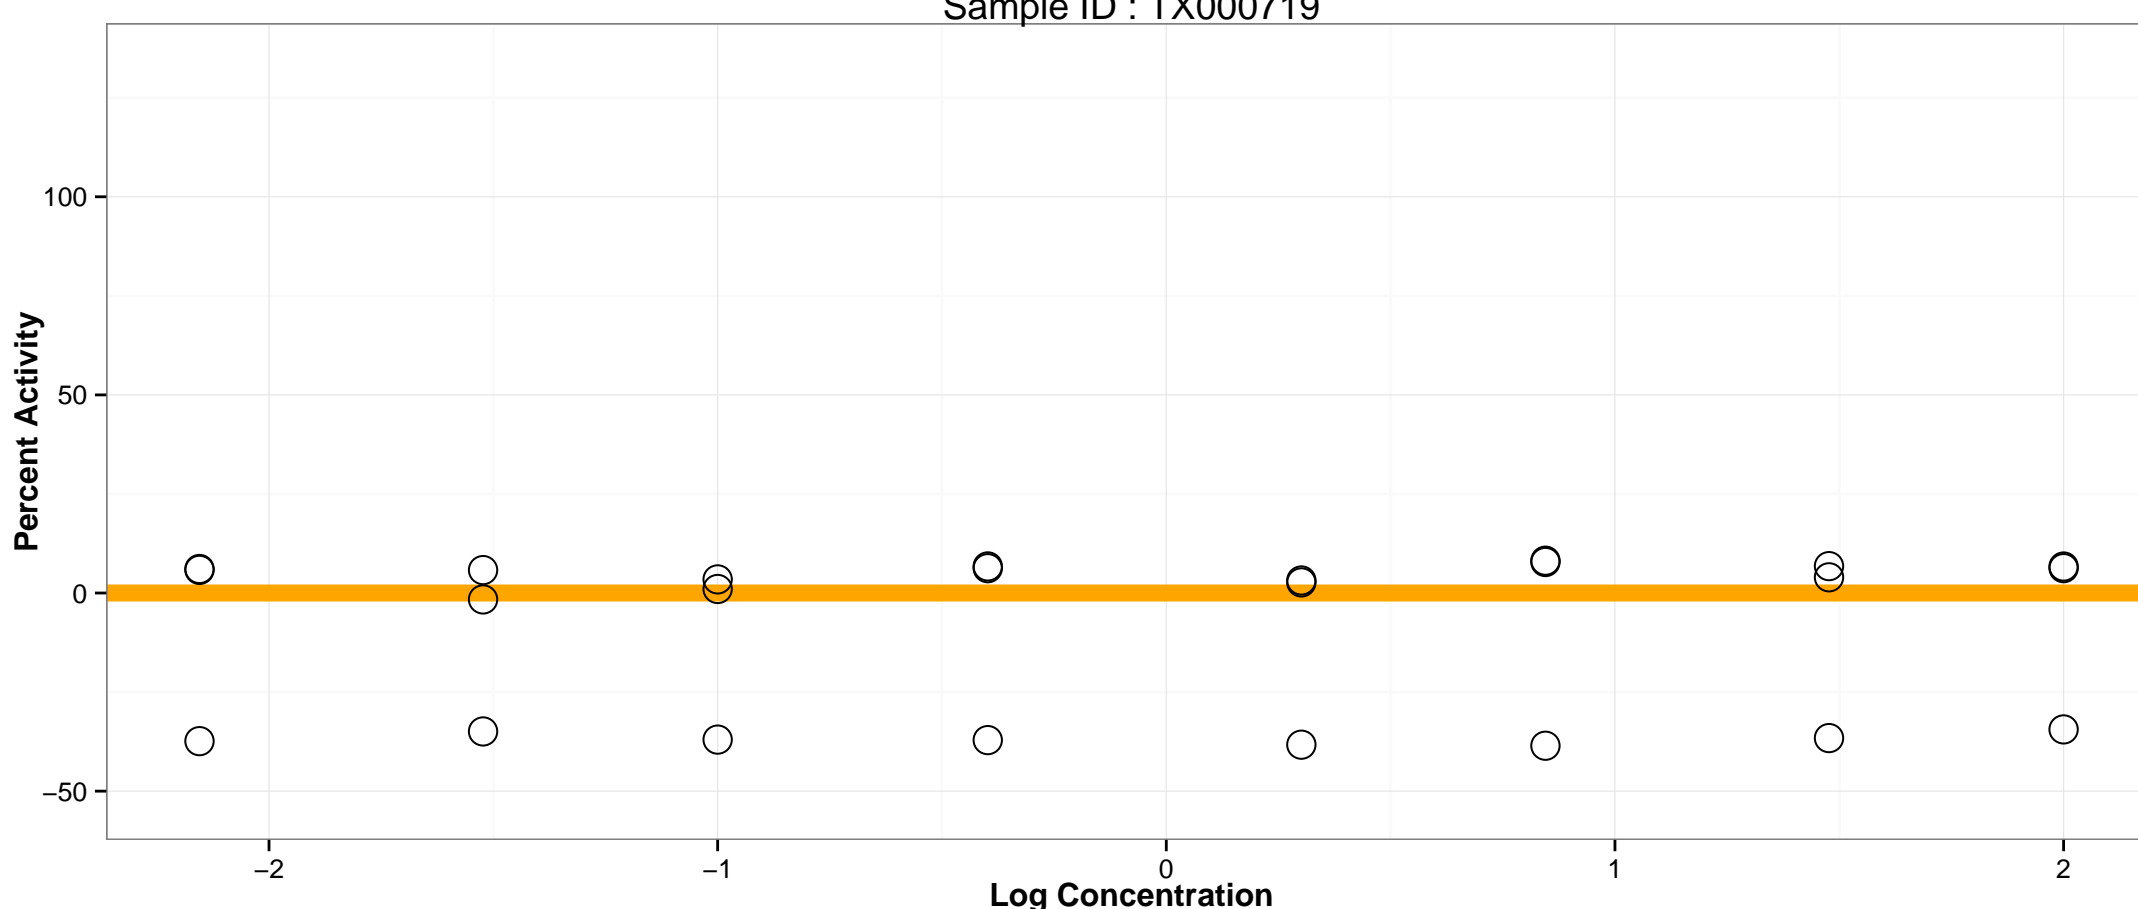

HILL MODEL  
HILL MODEL: Not applicable

GAIN-LOSS MODEL  
GNLS MODEL: Not applicable

|      | CNST   | HILL | GNLS |
|------|--------|------|------|
| AIC  | 218.16 | NA   | NA   |
| PROB | 1      | NA   | NA   |
| RMSE | 21.73  | NA   | NA   |

MAX\_MEAN : -7.14 MAX\_MED : 7.84 BMAD : 8.58  
COFF : 20 HIT-CALL : 0 FITC : 4 ACTP : 0  
FLAGS : 10

Assay ID 1508 (NHEERL\_TPO\_AUR\_dn)  
Sample ID : TX000740

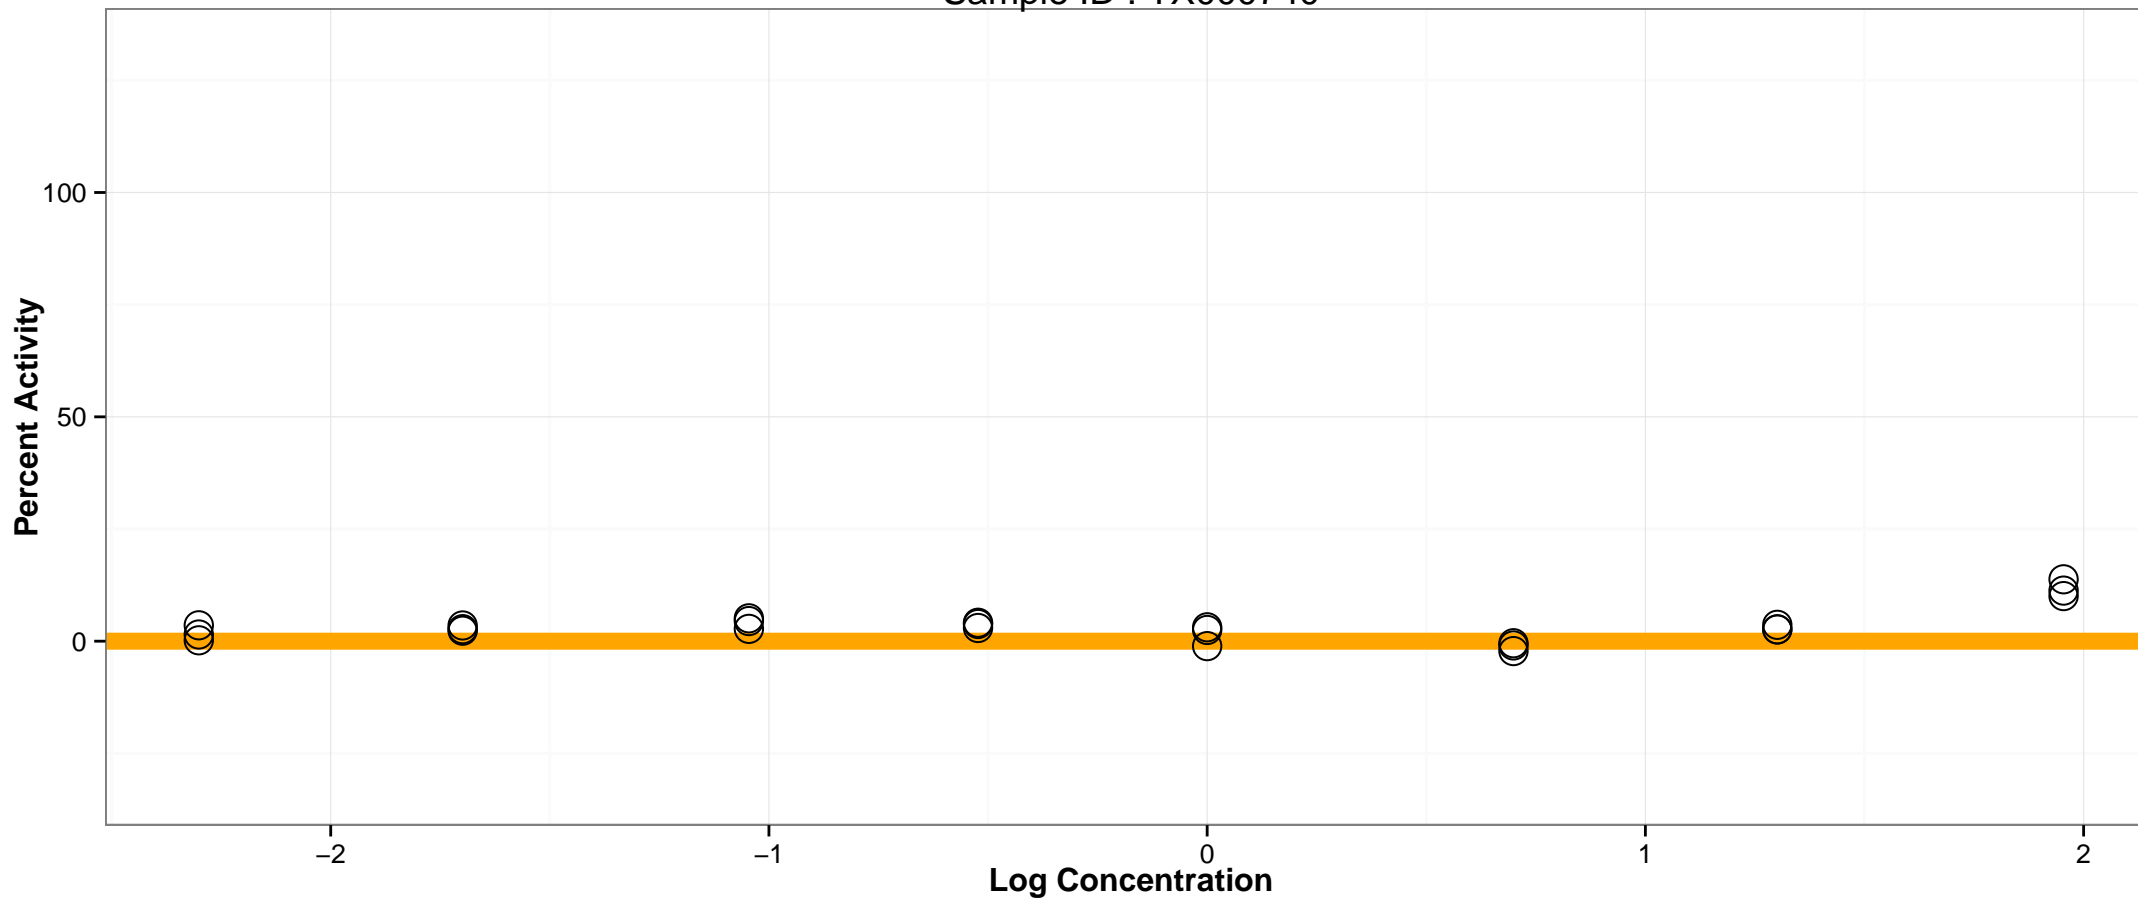

HILL MODEL

HILL MODEL: Not applicable

GAIN-LOSS MODEL

GNLS MODEL: Not applicable

|      | CNST   | HILL | GNLS |
|------|--------|------|------|
| AIC  | 145.69 | NA   | NA   |
| PROB | 1      | NA   | NA   |
| RMSE | 5.02   | NA   | NA   |

MAX\_MEAN : 11.7 MAX\_MED : 11.3 BMAD : 5.69  
COFF : 20 HIT-CALL : 0 FITC : 4 ACTP : 0  
FLAGS :

Assay ID 1509 (NHEERL\_HEK293T\_CellTiterGLO)  
Sample ID : TX000740

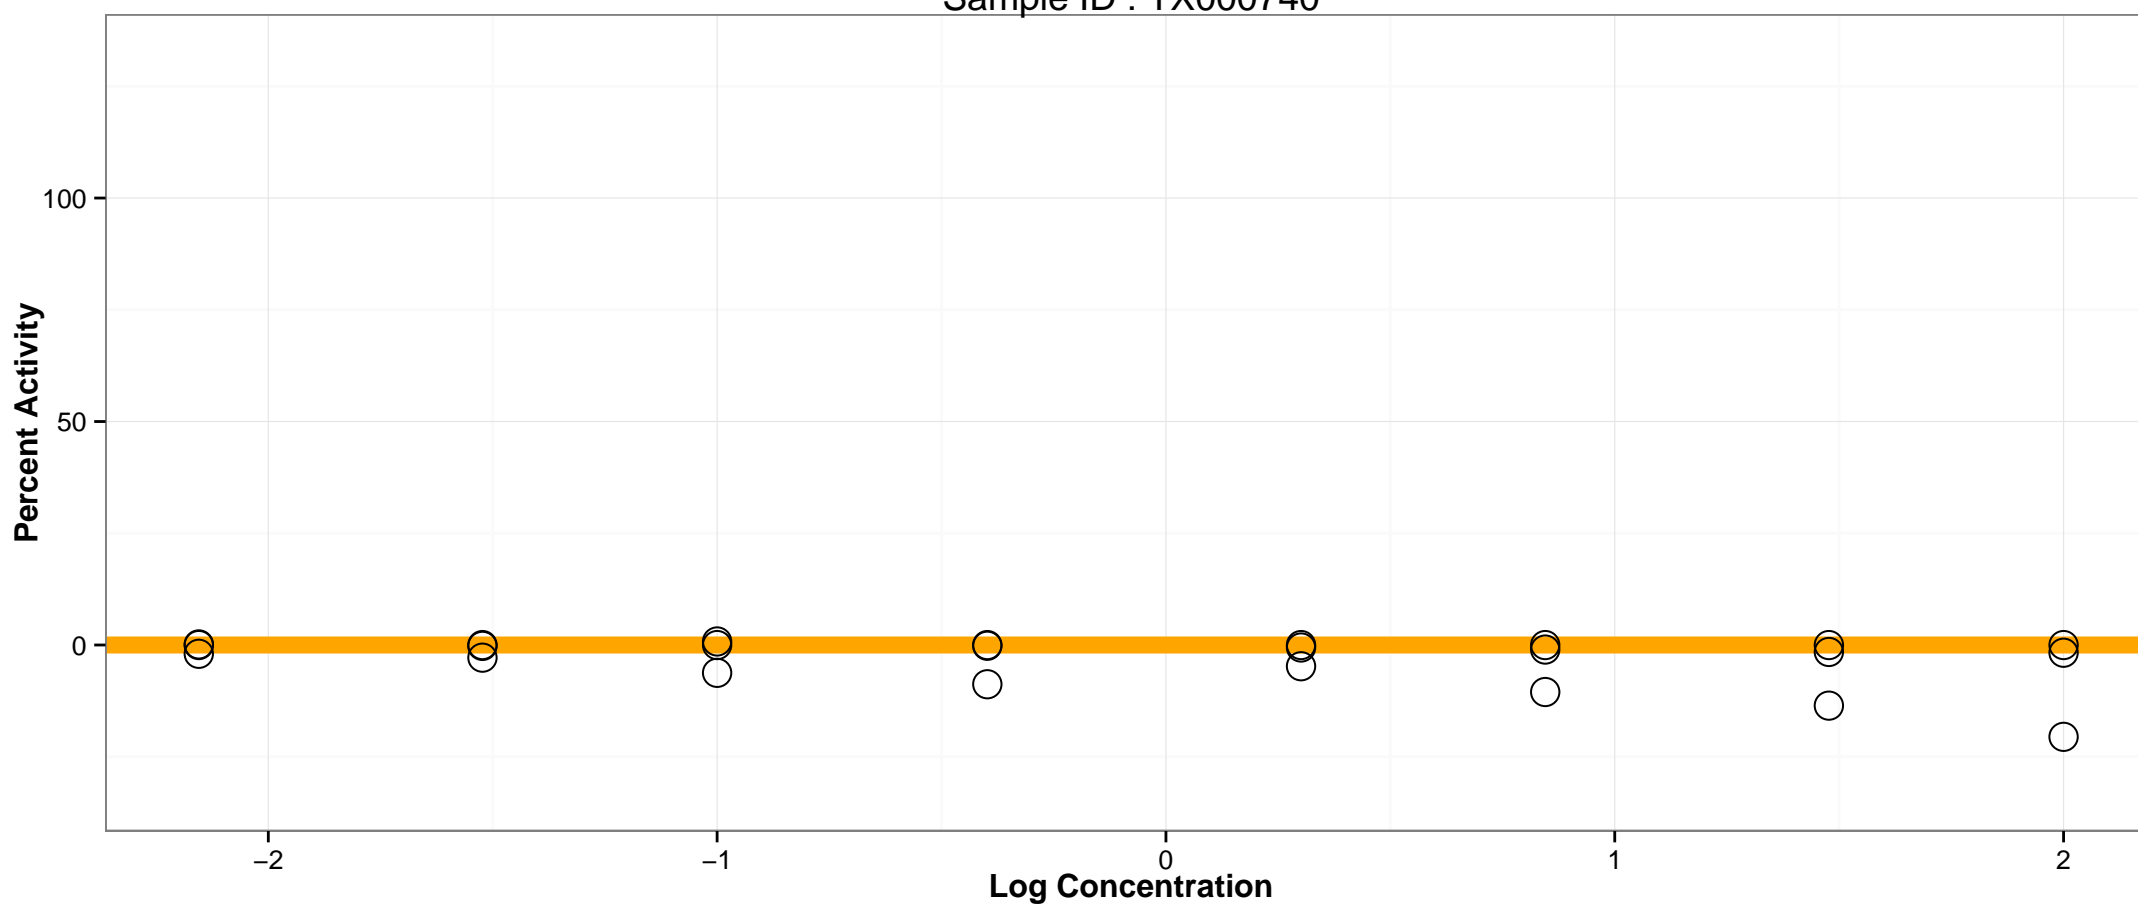

HILL MODEL

HILL MODEL: Not applicable

GAIN-LOSS MODEL

GNLS MODEL: Not applicable

|      | CNST   | HILL | GNLS |
|------|--------|------|------|
| AIC  | 144.77 | NA   | NA   |
| PROB | 1      | NA   | NA   |
| RMSE | 6.03   | NA   | NA   |

MAX\_MEAN : -0.604 MAX\_MED : -0.000729 BMAD : 5.54  
COFF : 20 HIT-CALL : 0 FITC : 4 ACTP : 0  
FLAGS :

Assay ID 1848 (NHEERL\_Quantilum\_inhib\_2\_dn)  
Sample ID : TX000740

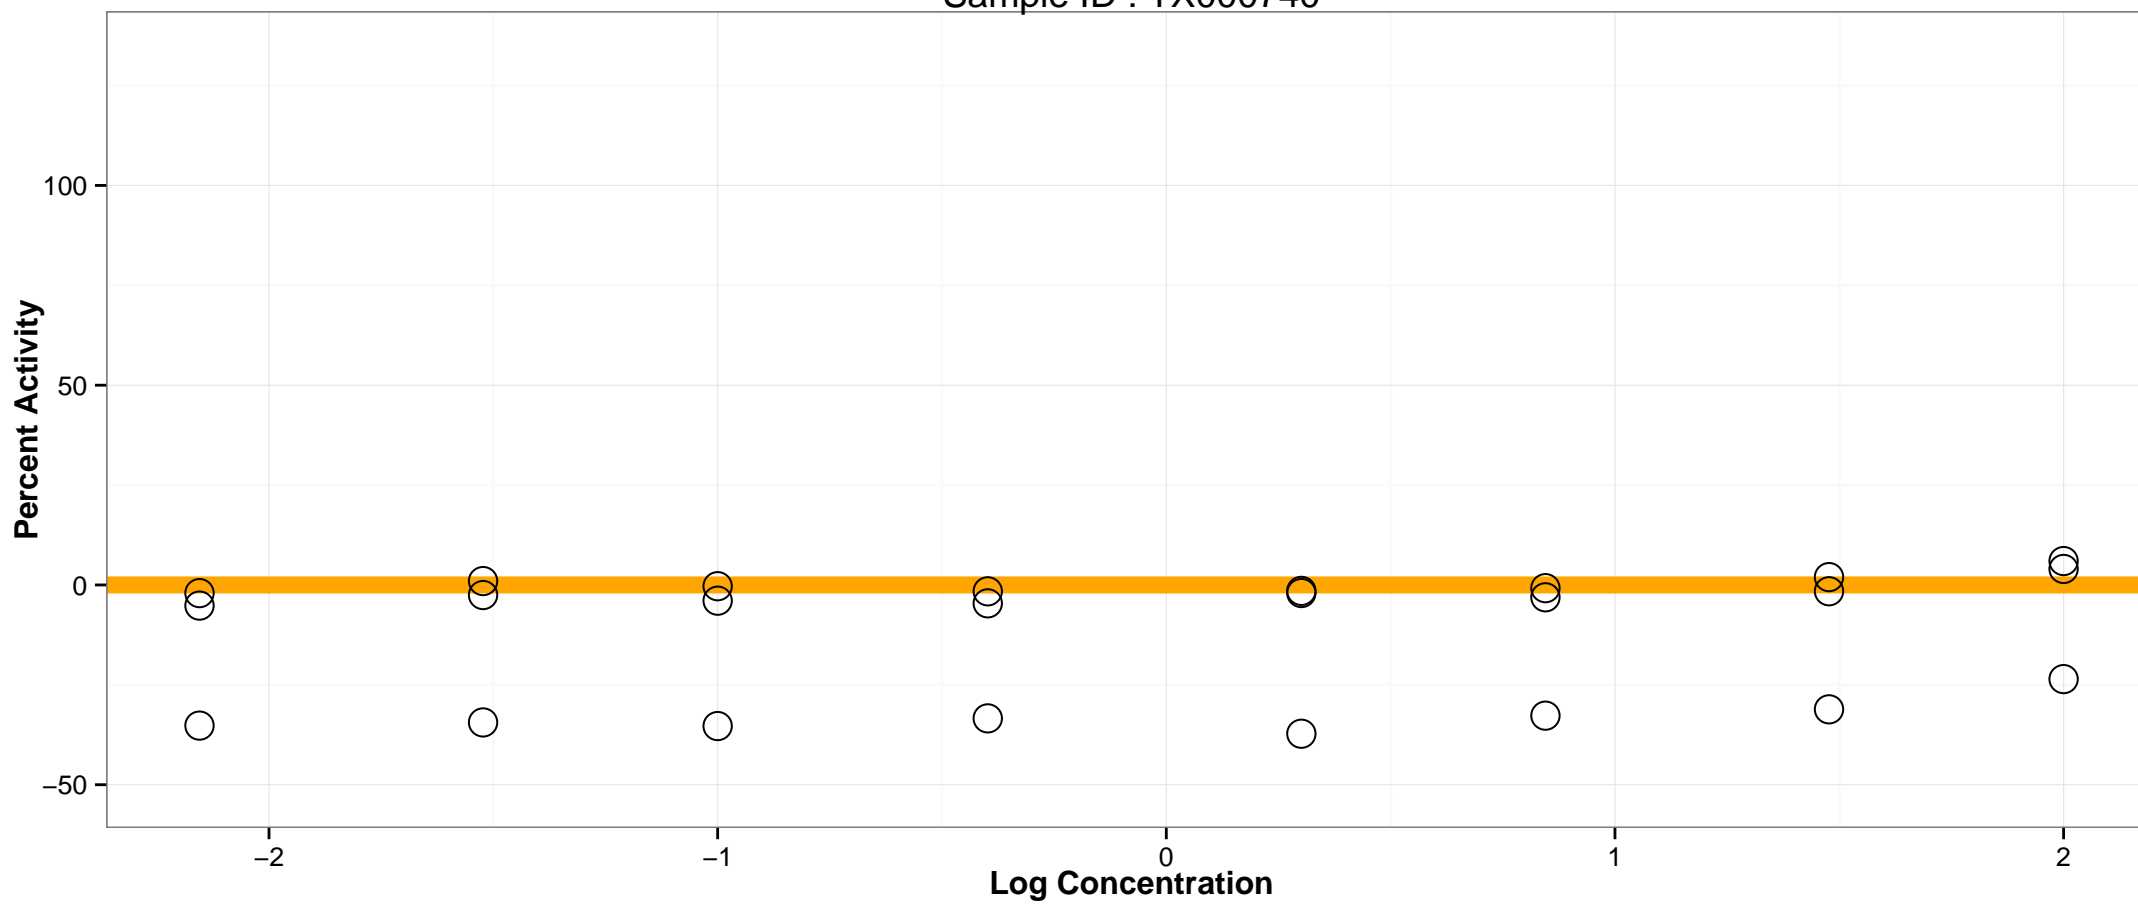

HILL MODEL

HILL MODEL: Not applicable

GAIN-LOSS MODEL

GNLS MODEL: Not applicable

|      | CNST   | HILL | GNLS |
|------|--------|------|------|
| AIC  | 211.31 | NA   | NA   |
| PROB | 1      | NA   | NA   |
| RMSE | 19.27  | NA   | NA   |

MAX\_MEAN : -4.51 MAX\_MED : 4.02 BMAD : 8.58  
COFF : 20 HIT-CALL : 0 FITC : 4 ACTP : 0  
FLAGS :

Chemical : Azamethiphos  
CAS : 35575-96-3

Assay ID 1508 (NHEERL\_TPO\_AUR\_dn)  
Sample ID : TX000750

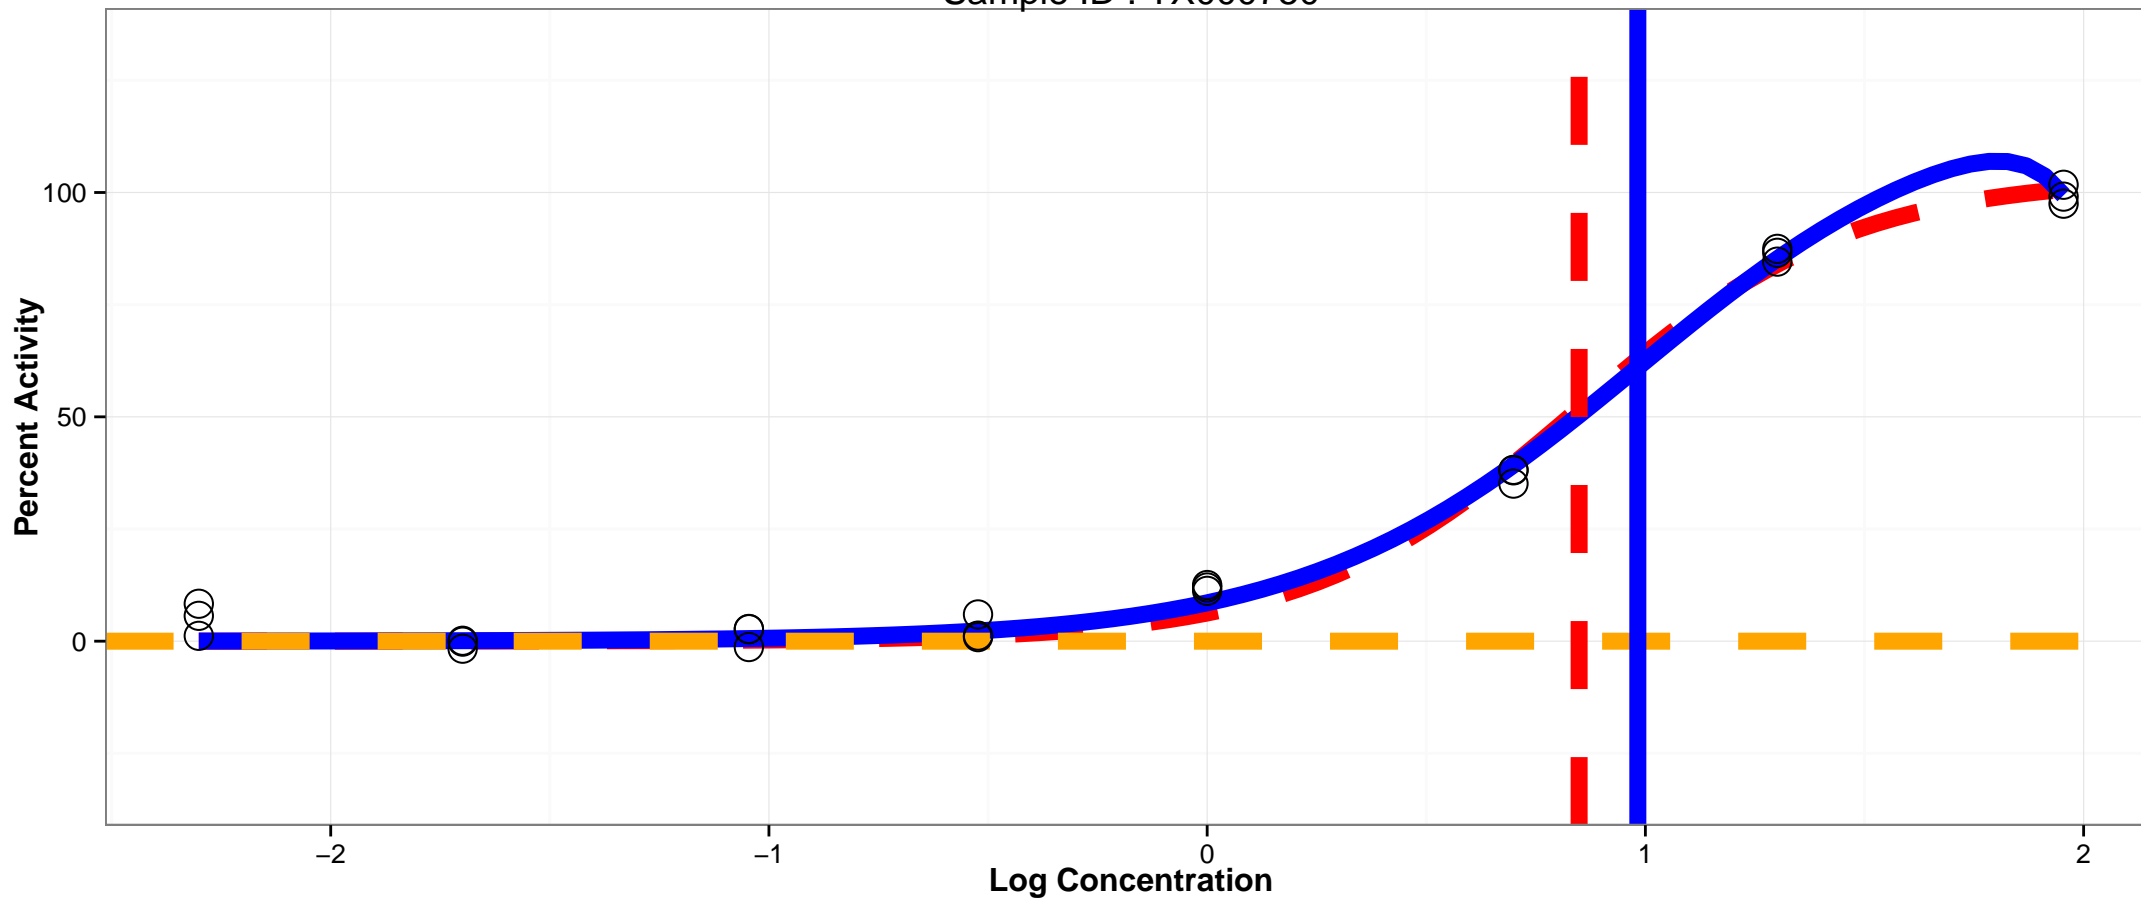

HILL MODEL

|     | tp   | ga     | gw    |
|-----|------|--------|-------|
| val | 104  | 0.849  | 1.4   |
| sd  | 2.76 | 0.0272 | 0.177 |

GAIN-LOSS MODEL

|     | tp  | ga    | gw   | la   | lw   |
|-----|-----|-------|------|------|------|
| val | 122 | 0.983 | 1.14 | 2.12 | 5.21 |
| sd  | NA  | NA    | NA   | NA   | NA   |

|      | CNST   | HILL  | GNLS   |
|------|--------|-------|--------|
| AIC  | 254.41 | 137.4 | 131.35 |
| PROB | 0      | 0.05  | 0.95   |
| RMSE | 48.61  | 3.51  | 2.93   |

MAX\_MEAN : 99.4 MAX\_MED : 99.1 BMAD : 5.69  
COFF : 20 HIT-CALL : 1 FITC : 51 ACTP : 1  
FLAGS :

Assay ID 1509 (NHEERL\_HEK293T\_CellTiterGLO)  
Sample ID : TX000750

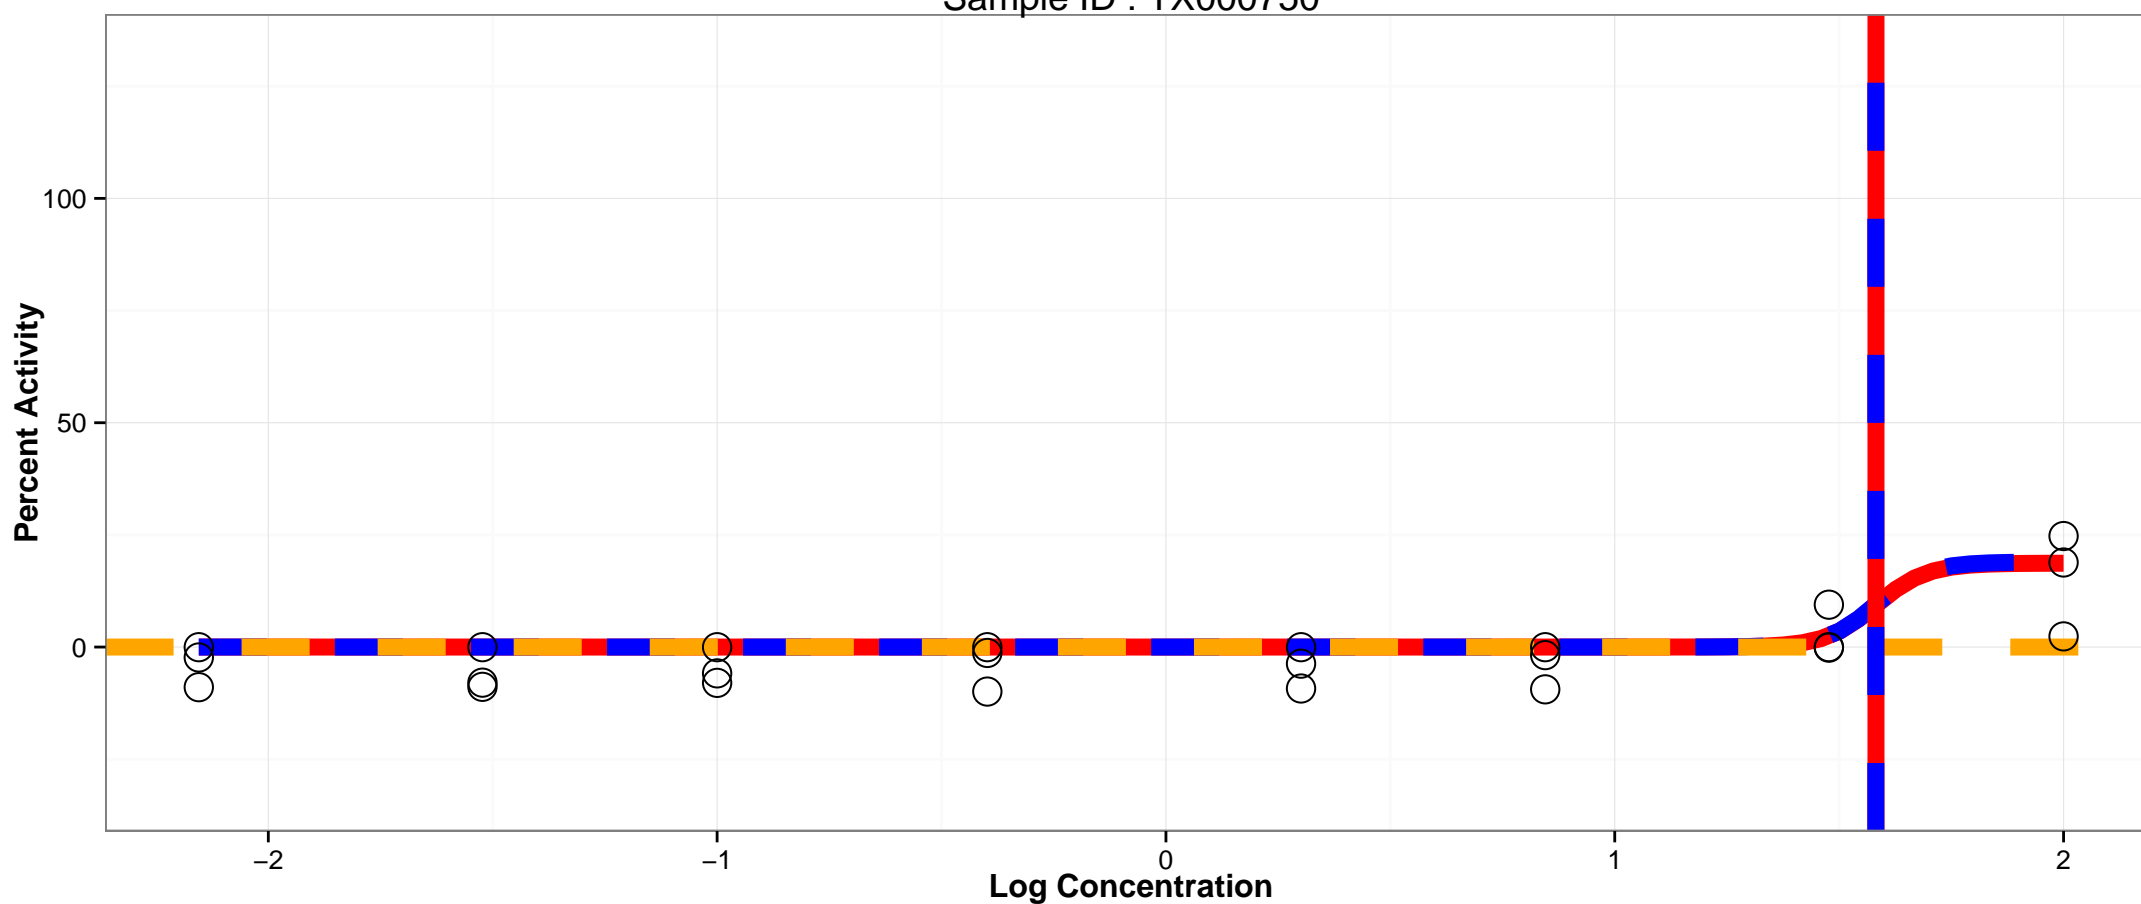

HILL MODEL

|     | tp   | ga   | gw   |
|-----|------|------|------|
| val | 18.7 | 1.58 | 7.76 |
| sd  | NA   | NA   | NA   |

GAIN-LOSS MODEL

|     | tp | ga   | gw   | la   | lw   |
|-----|----|------|------|------|------|
| val | 19 | 1.58 | 7.86 | 2.11 | 17.5 |
| sd  | NA | NA   | NA   | NA   | NA   |

|      | CNST   | HILL   | GNLS   |
|------|--------|--------|--------|
| AIC  | 169.41 | 165.96 | 169.96 |
| PROB | 0.14   | 0.76   | 0.1    |
| RMSE | 8.36   | 6.38   | 6.38   |

MAX\_MEAN : 15.3 MAX\_MED : 18.9 BMAD : 5.54  
COFF : 20 HIT-CALL : 0 FITC : 20 ACTP : 0.864  
FLAGS : 12

Assay ID 1848 (NHEERL\_Quantilum\_inhib\_2\_dn)  
Sample ID : TX000750

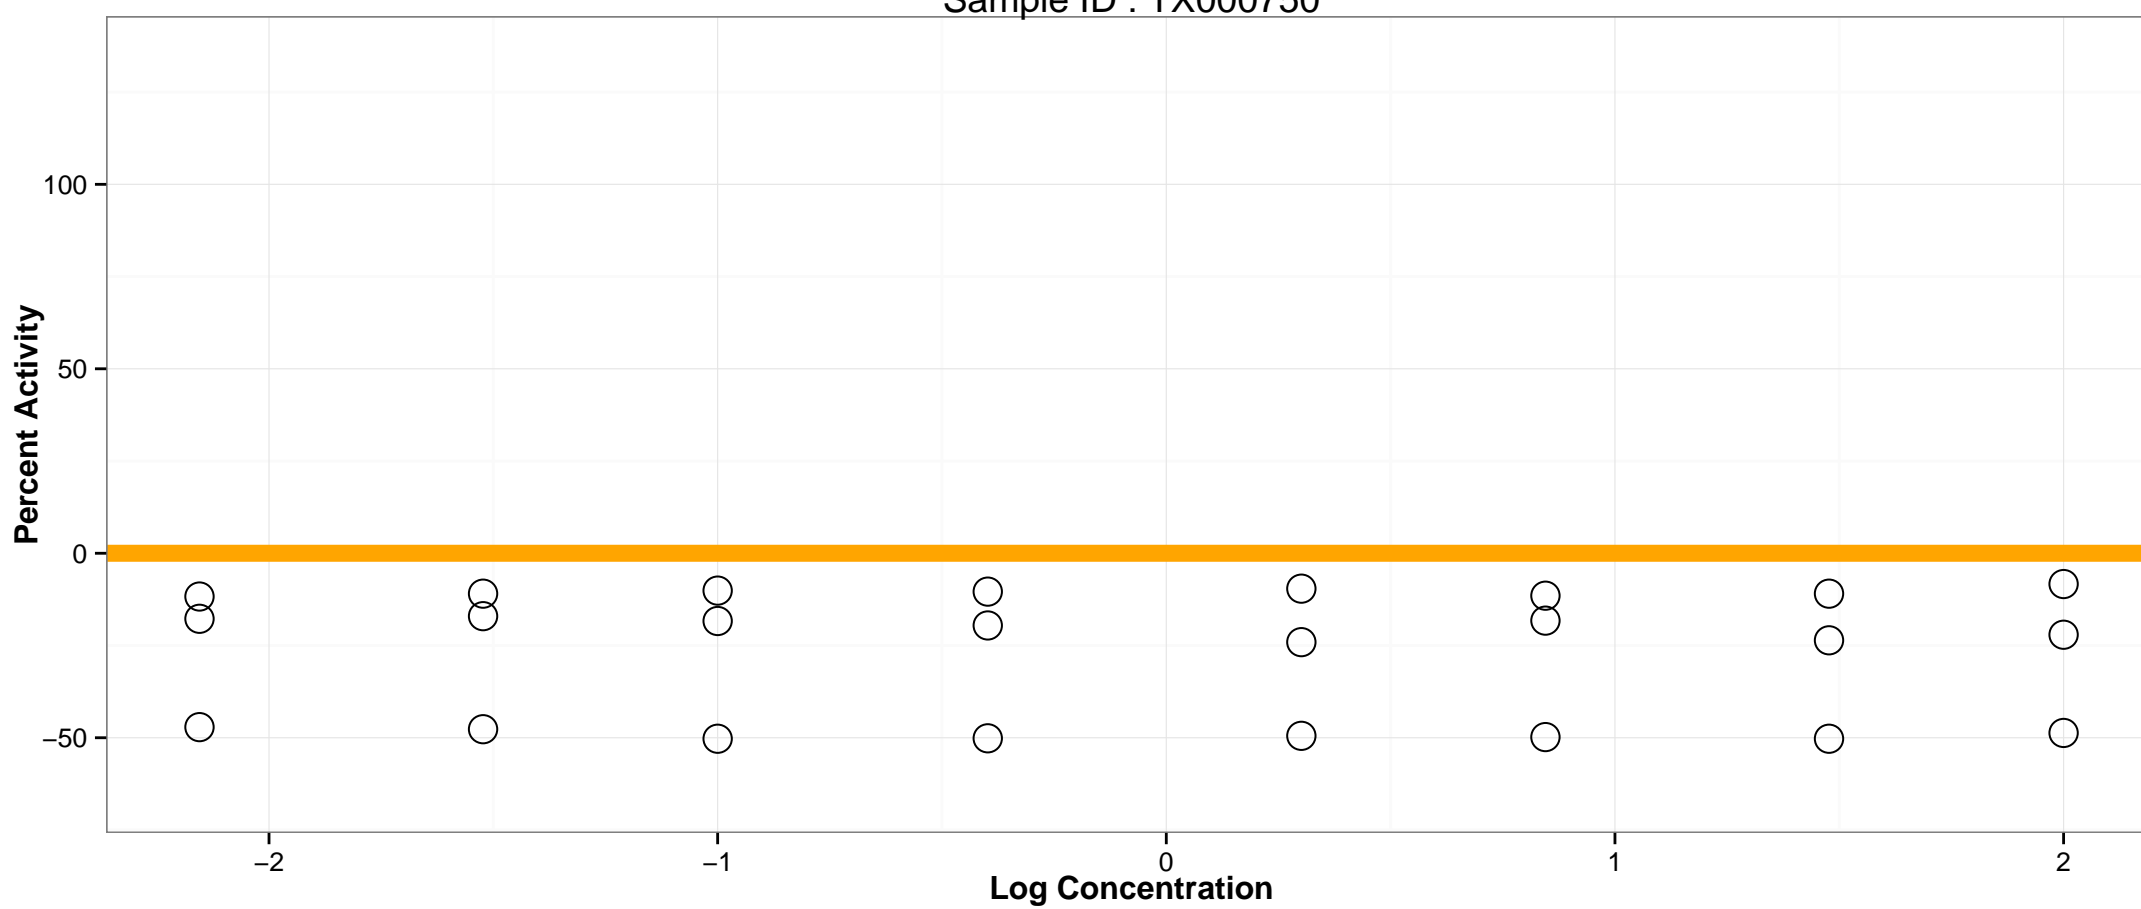

HILL MODEL  
HILL MODEL: Not applicable

GAIN-LOSS MODEL  
GNLS MODEL: Not applicable

|      | CNST   | HILL | GNLS |
|------|--------|------|------|
| AIC  | 238.15 | NA   | NA   |
| PROB | 1      | NA   | NA   |
| RMSE | 31.3   | NA   | NA   |

MAX\_MEAN : -25.2 MAX\_MED : -17 BMAD : 8.58  
COFF : 20 HIT-CALL : 0 FITC : 4 ACTP : 0  
FLAGS : 10

Assay ID 1508 (NHEERL\_TPO\_AUR\_dn)  
Sample ID : TX000761

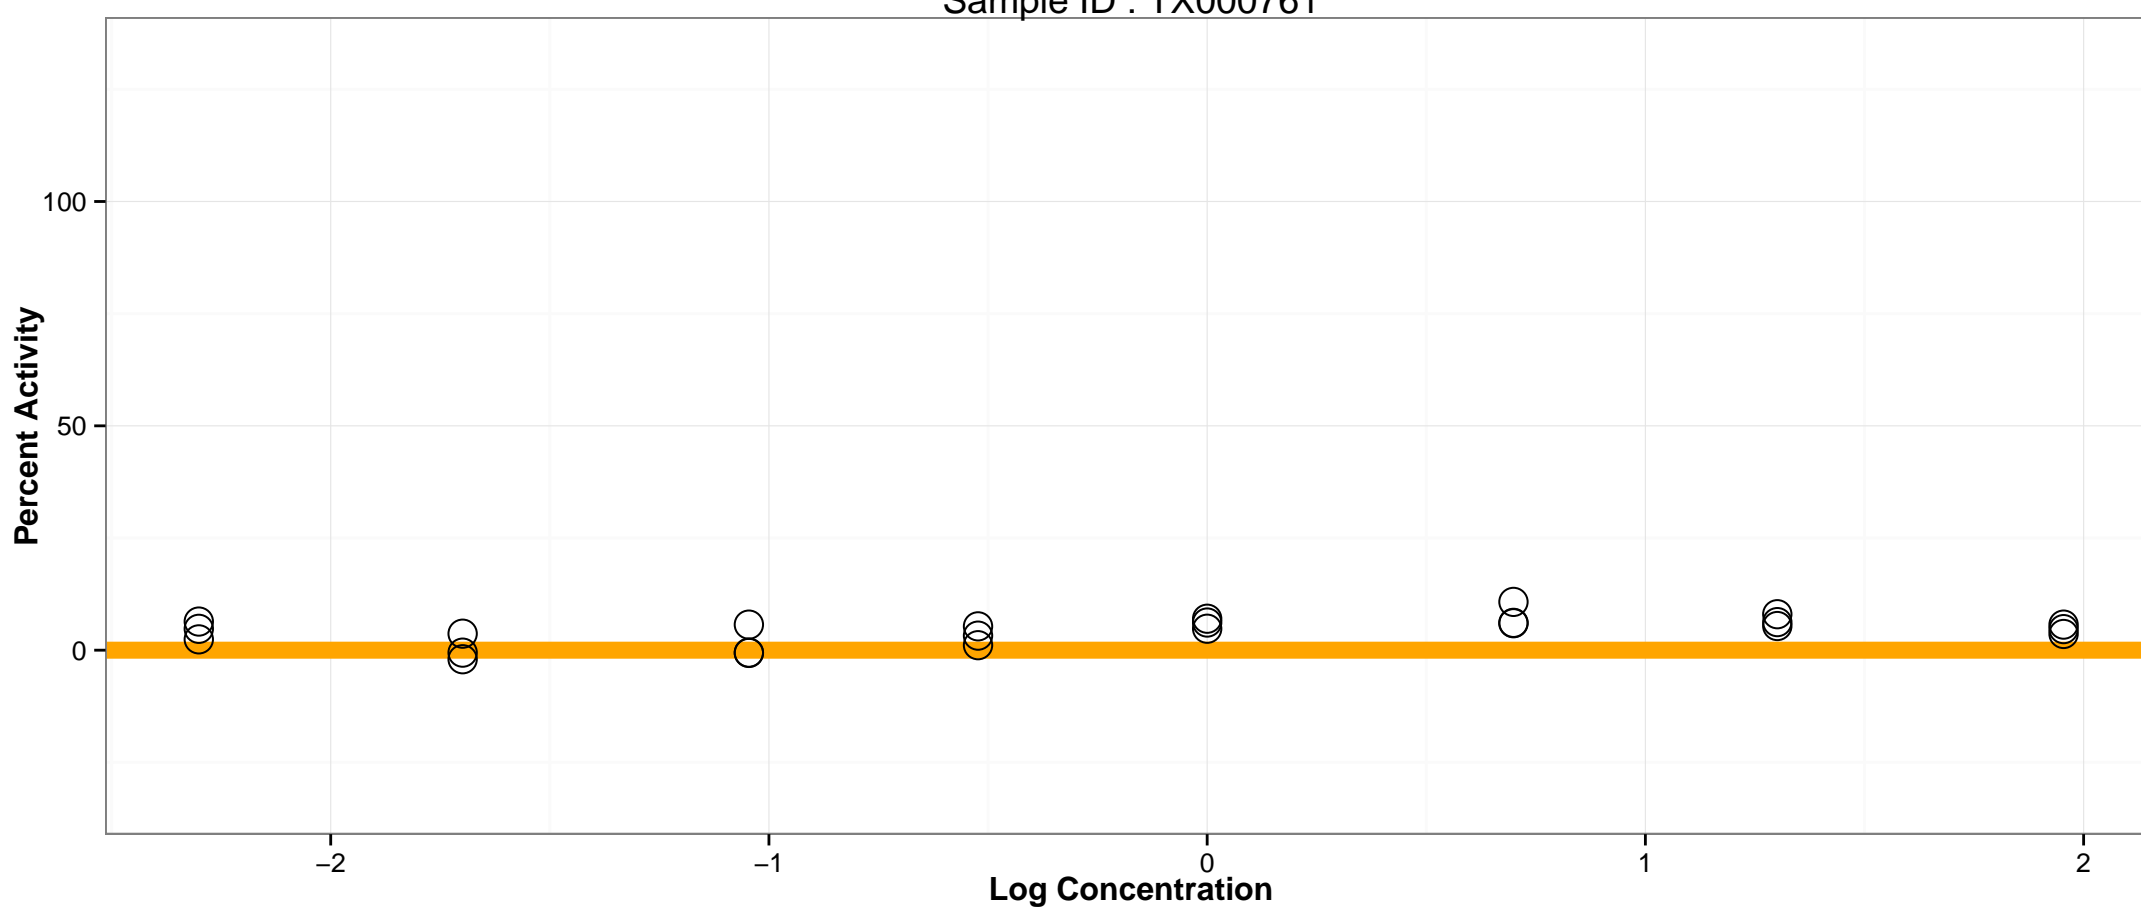

HILL MODEL

HILL MODEL: Not applicable

GAIN-LOSS MODEL

GNLS MODEL: Not applicable

|      | CNST  | HILL | GNLS |
|------|-------|------|------|
| AIC  | 153.5 | NA   | NA   |
| PROB | 1     | NA   | NA   |
| RMSE | 5.25  | NA   | NA   |

MAX\_MEAN : 7.63 MAX\_MED : 6.27 BMAD : 5.69  
COFF : 20 HIT-CALL : 0 FITC : 4 ACTP : 0  
FLAGS :

Assay ID 1509 (NHEERL\_HEK293T\_CellTiterGLO)  
Sample ID : TX000761

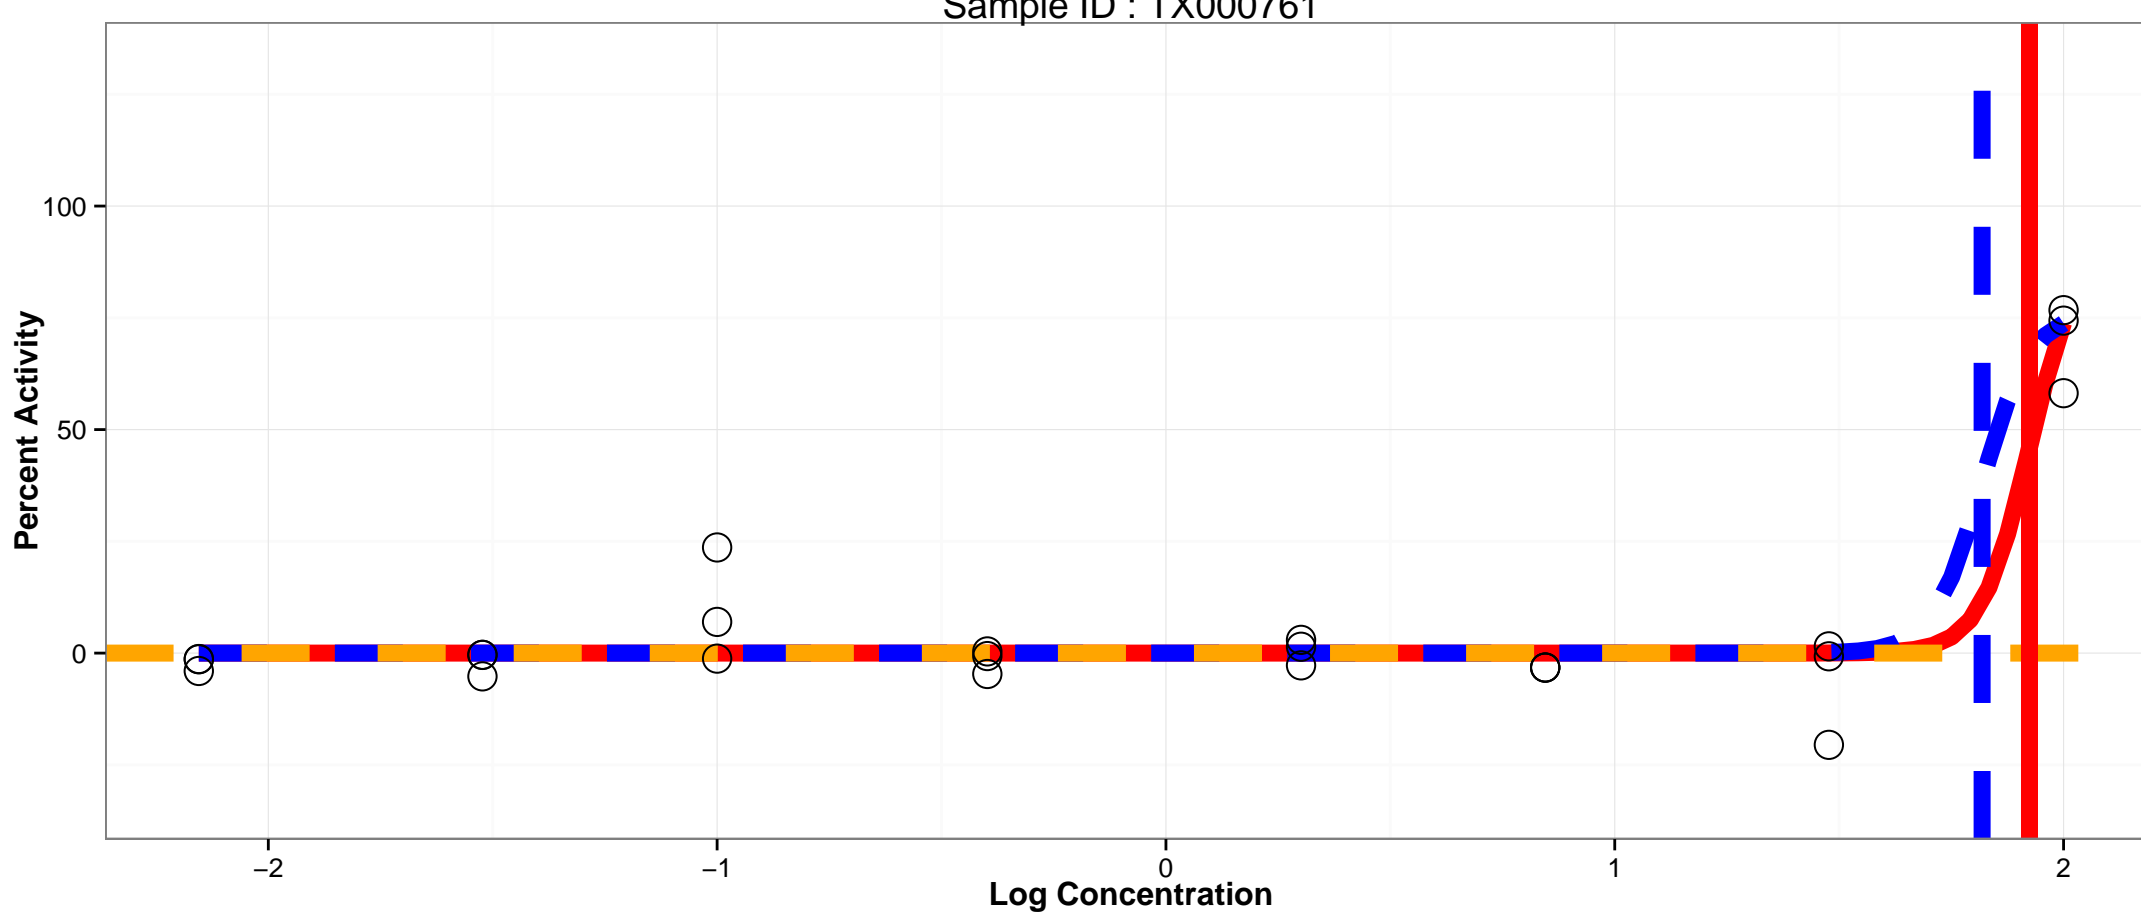

HILL MODEL

|     | tp   | ga   | gw |
|-----|------|------|----|
| val | 92.1 | 1.92 | 8  |
| sd  | NA   | NA   | NA |

GAIN-LOSS MODEL

|     | tp   | ga   | gw | la   | lw |
|-----|------|------|----|------|----|
| val | 76.4 | 1.82 | 8  | 2.77 | 18 |
| sd  | NA   | NA   | NA | NA   | NA |

|      | CNST  | HILL  | GNLS   |
|------|-------|-------|--------|
| AIC  | 207.5 | 163.1 | 167.14 |
| PROB | 0     | 0.88  | 0.12   |
| RMSE | 25.78 | 7.66  | 7.66   |

MAX\_MEAN : 69.8 MAX\_MED : 74.4 BMAD : 5.54  
COFF : 20 HIT-CALL : 1 FITC : 42 ACTP : 1  
FLAGS : 6

Assay ID 1848 (NHEERL\_Quantilum\_inhib\_2\_dn)  
Sample ID : TX000761

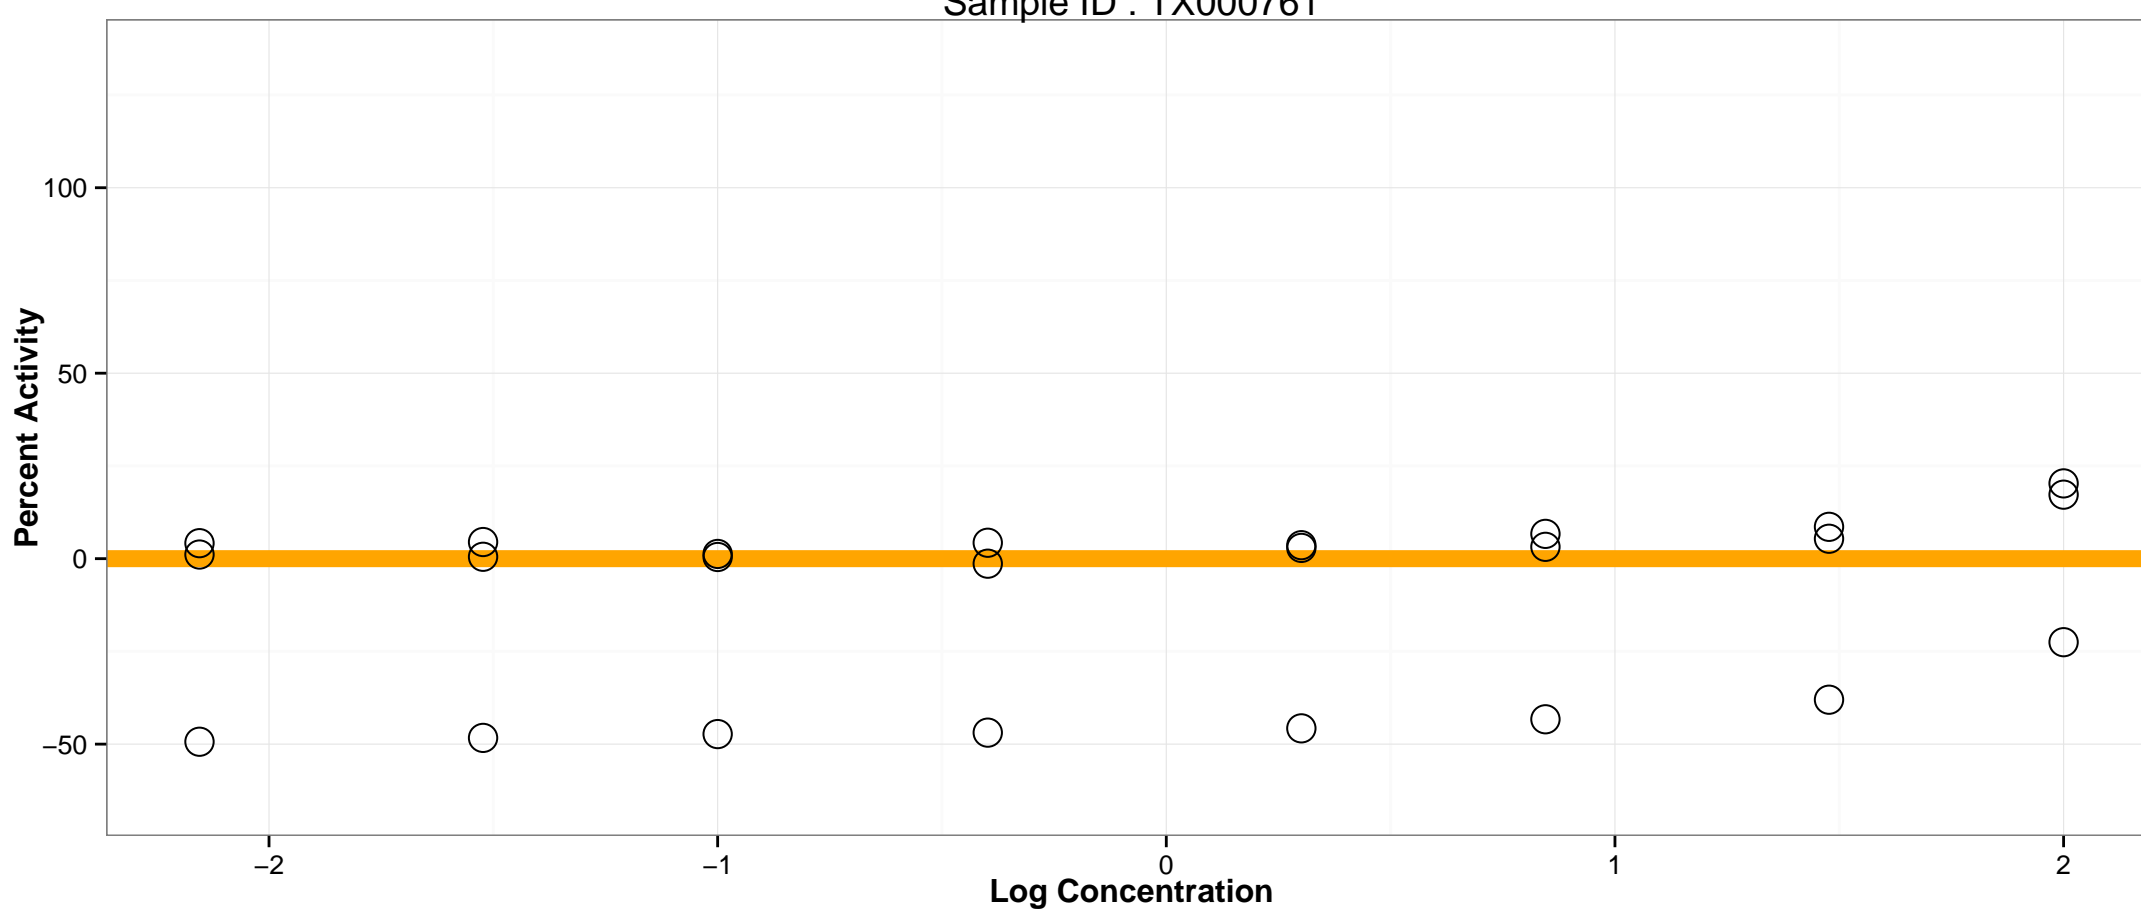

HILL MODEL

HILL MODEL: Not applicable

GAIN-LOSS MODEL

GNLS MODEL: Not applicable

|      | CNST   | HILL | GNLS |
|------|--------|------|------|
| AIC  | 226.07 | NA   | NA   |
| PROB | 1      | NA   | NA   |
| RMSE | 25.88  | NA   | NA   |

MAX\_MEAN : 5.02 MAX\_MED : 17.3 BMAD : 8.58  
COFF : 20 HIT-CALL : 0 FITC : 4 ACTP : 0  
FLAGS : 10

Assay ID 1508 (NHEERL\_TPO\_AUR\_dn)  
Sample ID : TX000767

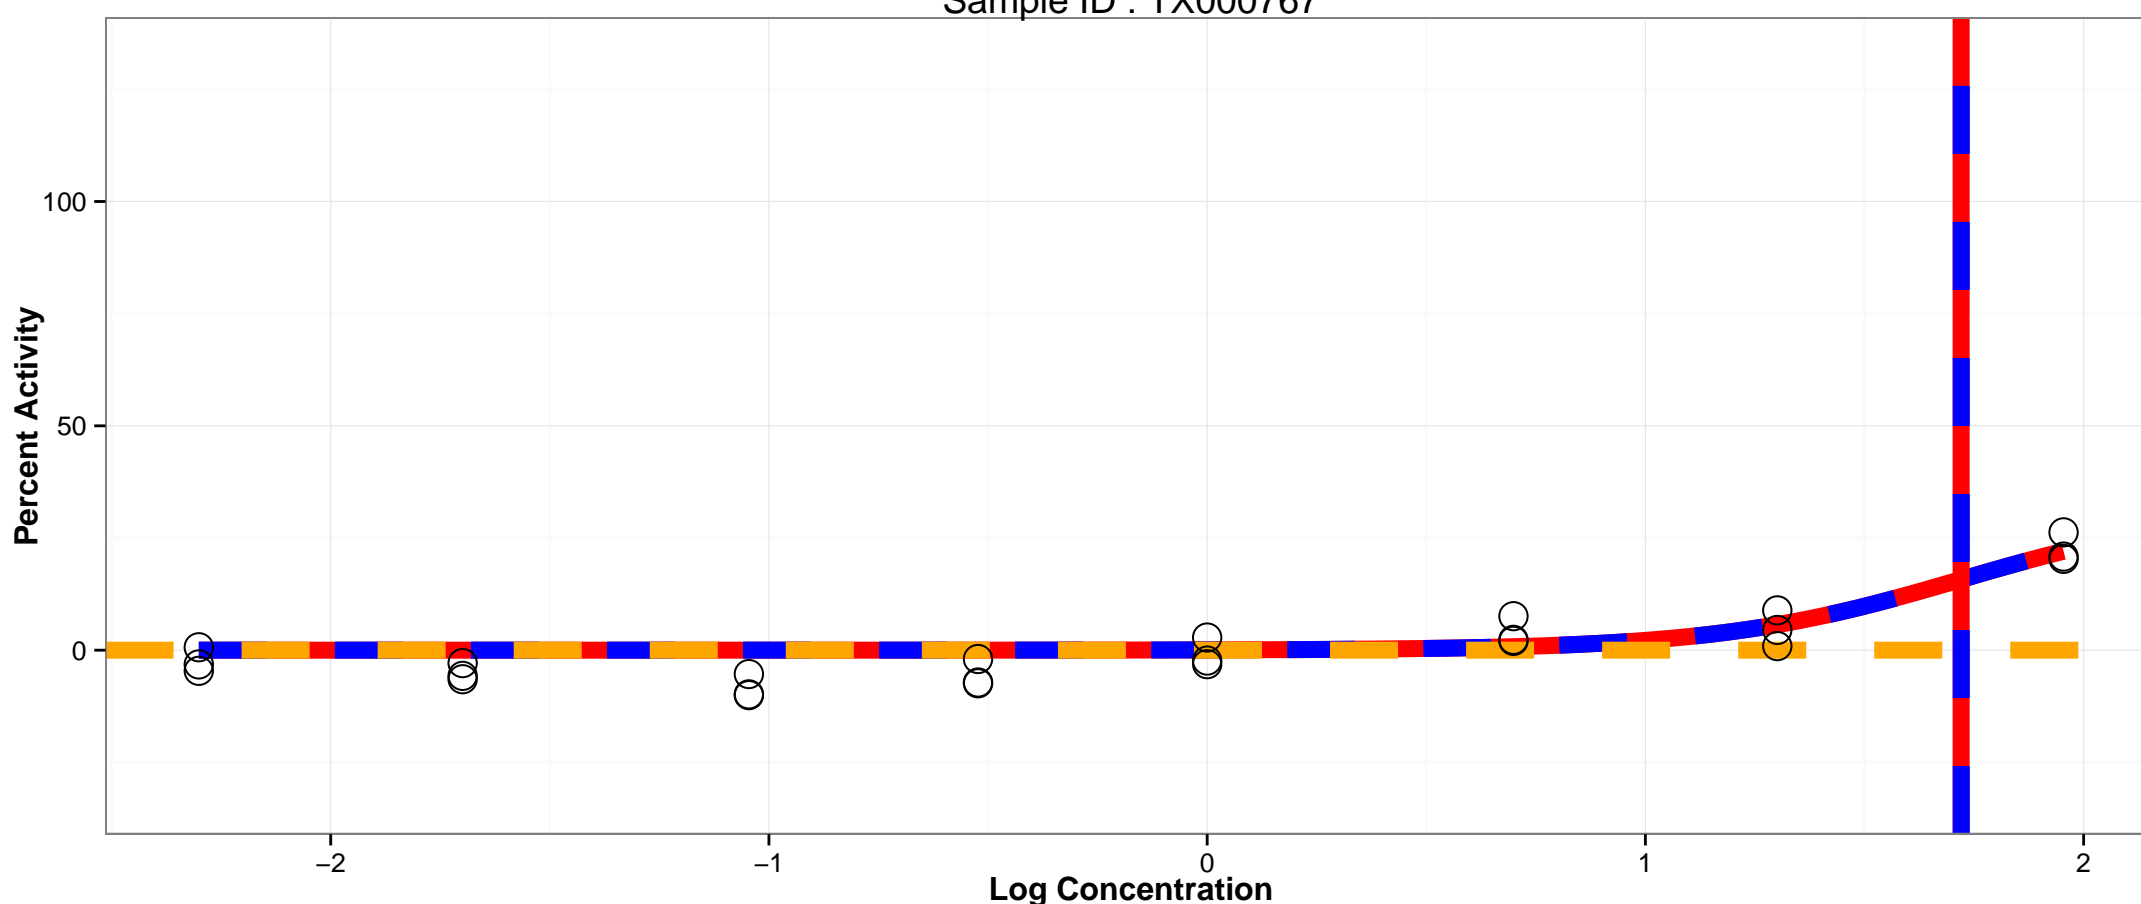

HILL MODEL

|     | tp   | ga    | gw   |
|-----|------|-------|------|
| val | 31.5 | 1.72  | 1.57 |
| sd  | 21.8 | 0.482 | 1.13 |

GAIN-LOSS MODEL

|     | tp   | ga    | gw   | la   | lw   |
|-----|------|-------|------|------|------|
| val | 31.5 | 1.72  | 1.57 | 3.34 | 5.5  |
| sd  | 21.8 | 0.482 | 1.13 | 1520 | 6060 |

|      | CNST   | HILL   | GNLS   |
|------|--------|--------|--------|
| AIC  | 175.81 | 155.01 | 159.01 |
| PROB | 0      | 0.88   | 0.12   |
| RMSE | 9.53   | 4.92   | 4.92   |

MAX\_MEAN : 22.5 MAX\_MED : 20.9 BMAD : 5.69  
COFF : 20 HIT-CALL : 1 FITC : 42 ACTP : 1  
FLAGS : 11; 6

Assay ID 1509 (NHEERL\_HEK293T\_CellTiterGLO)  
Sample ID : TX000767

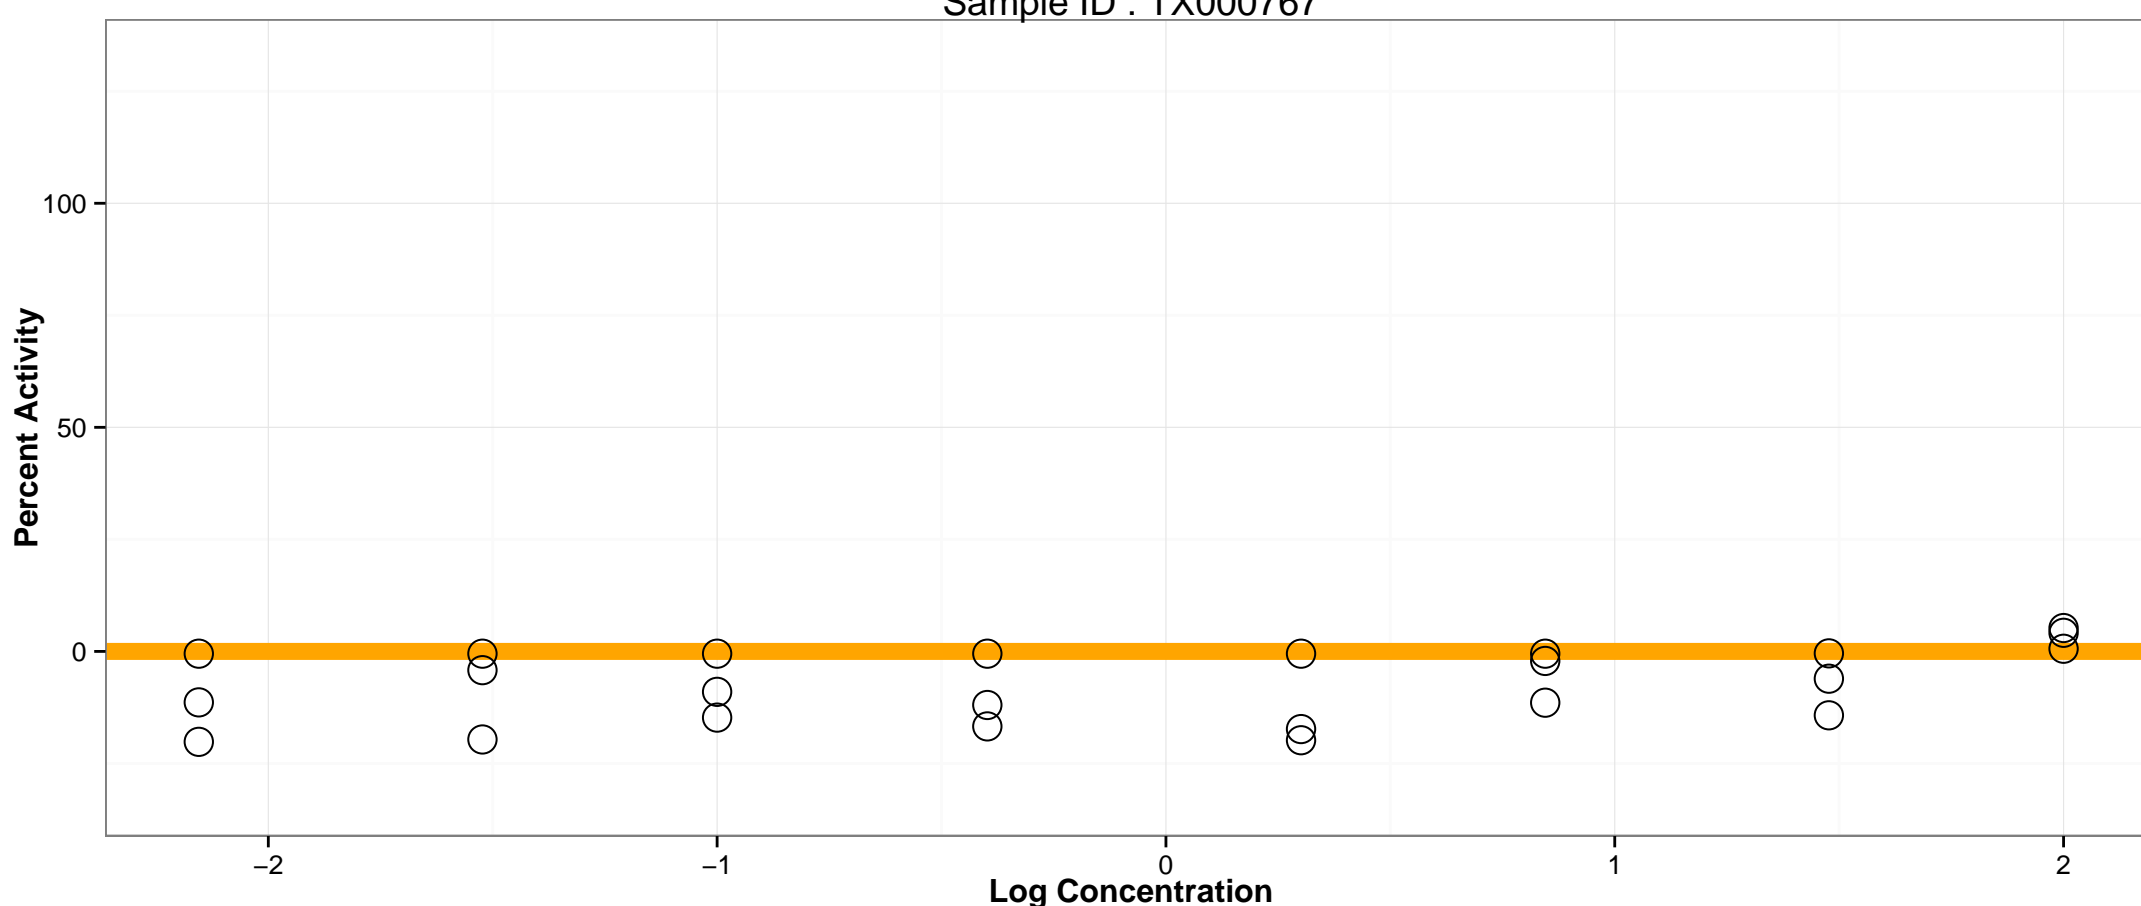

HILL MODEL

HILL MODEL: Not applicable

GAIN-LOSS MODEL

GNLS MODEL: Not applicable

|      | CNST   | HILL | GNLS |
|------|--------|------|------|
| AIC  | 185.77 | NA   | NA   |
| PROB | 1      | NA   | NA   |
| RMSE | 10.75  | NA   | NA   |

MAX\_MEAN : 3.33 MAX\_MED : 4.17 BMAD : 5.54  
COFF : 20 HIT-CALL : 0 FITC : 4 ACTP : 0  
FLAGS :

Assay ID 1848 (NHEERL\_Quantilum\_inhib\_2\_dn)  
Sample ID : TX000767

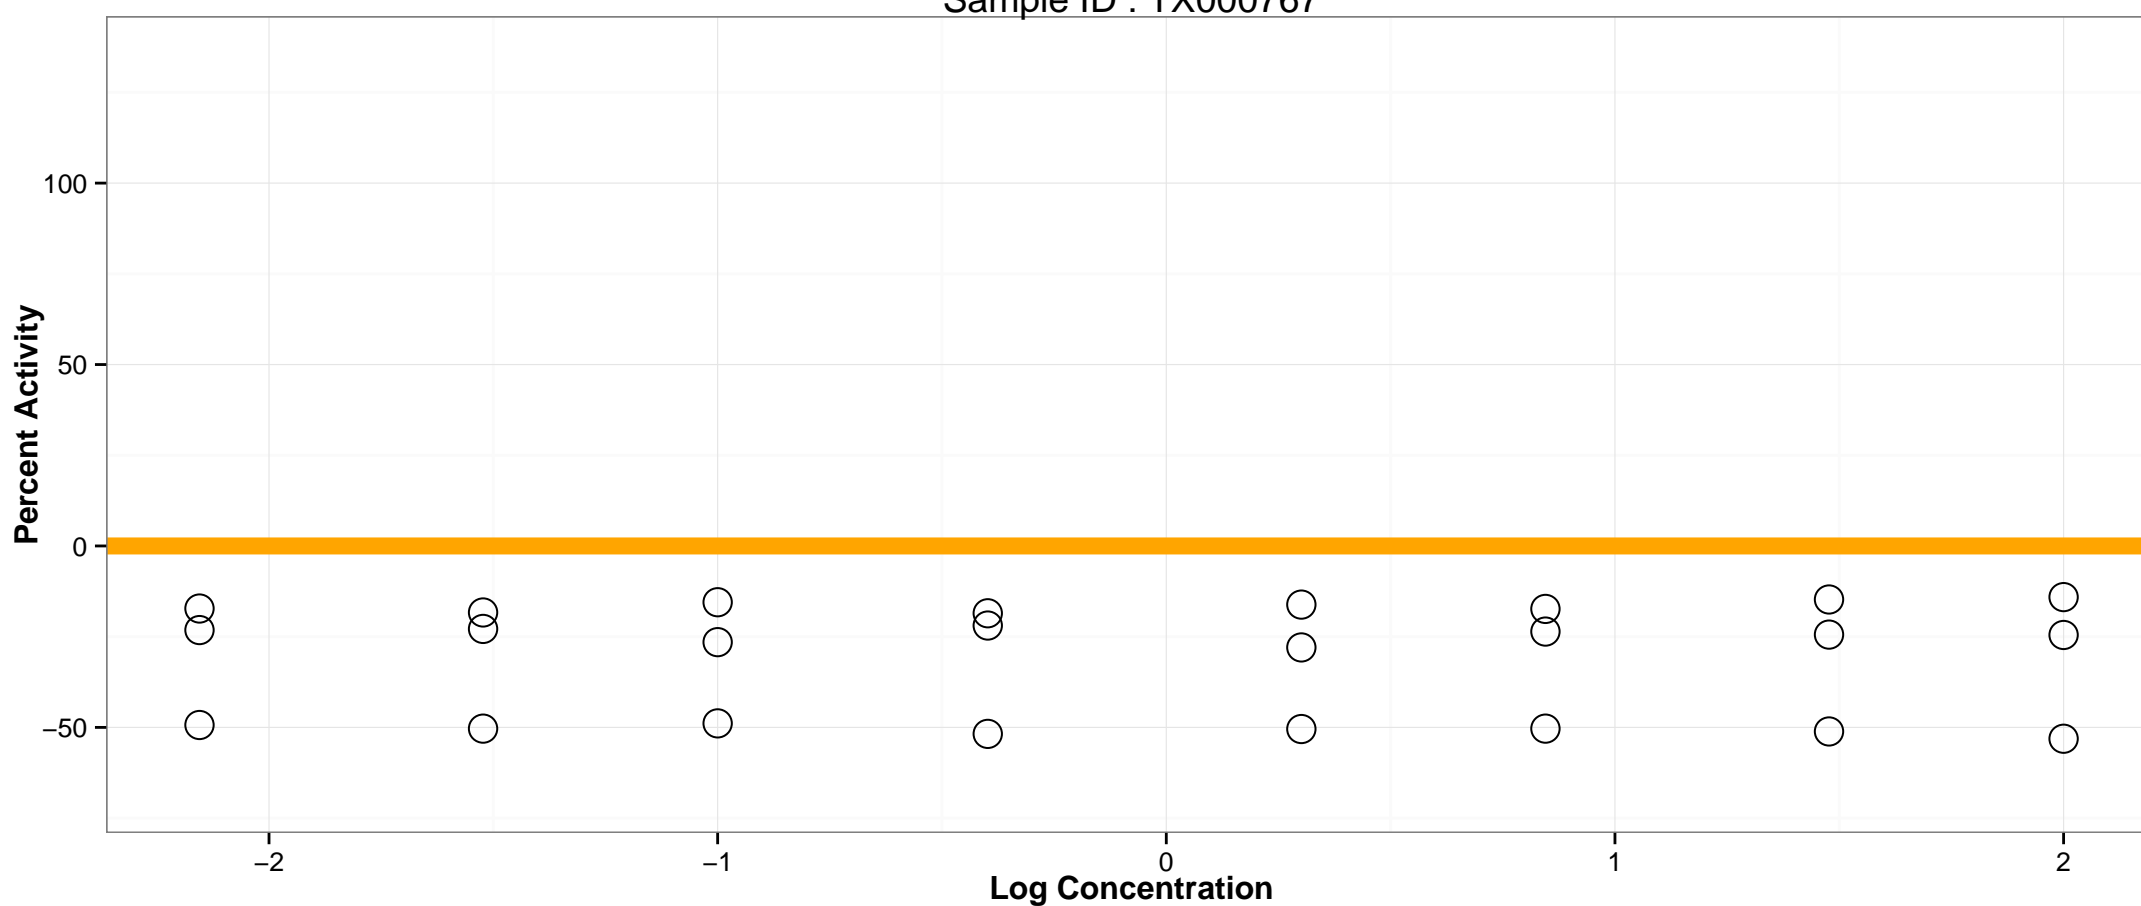

HILL MODEL

HILL MODEL: Not applicable

GAIN-LOSS MODEL

GNLS MODEL: Not applicable

|      | CNST   | HILL | GNLS |
|------|--------|------|------|
| AIC  | 242.88 | NA   | NA   |
| PROB | 1      | NA   | NA   |
| RMSE | 33.86  | NA   | NA   |

MAX\_MEAN : -29.9 MAX\_MED : -21.9 BMAD : 8.58  
COFF : 20 HIT-CALL : 0 FITC : 4 ACTP : 0  
FLAGS : 10

Chemical : Difenoconazole  
CAS : 119446-68-3

Assay ID 1508 (NHEERL\_TPO\_AUR\_dn)  
Sample ID : TX000785

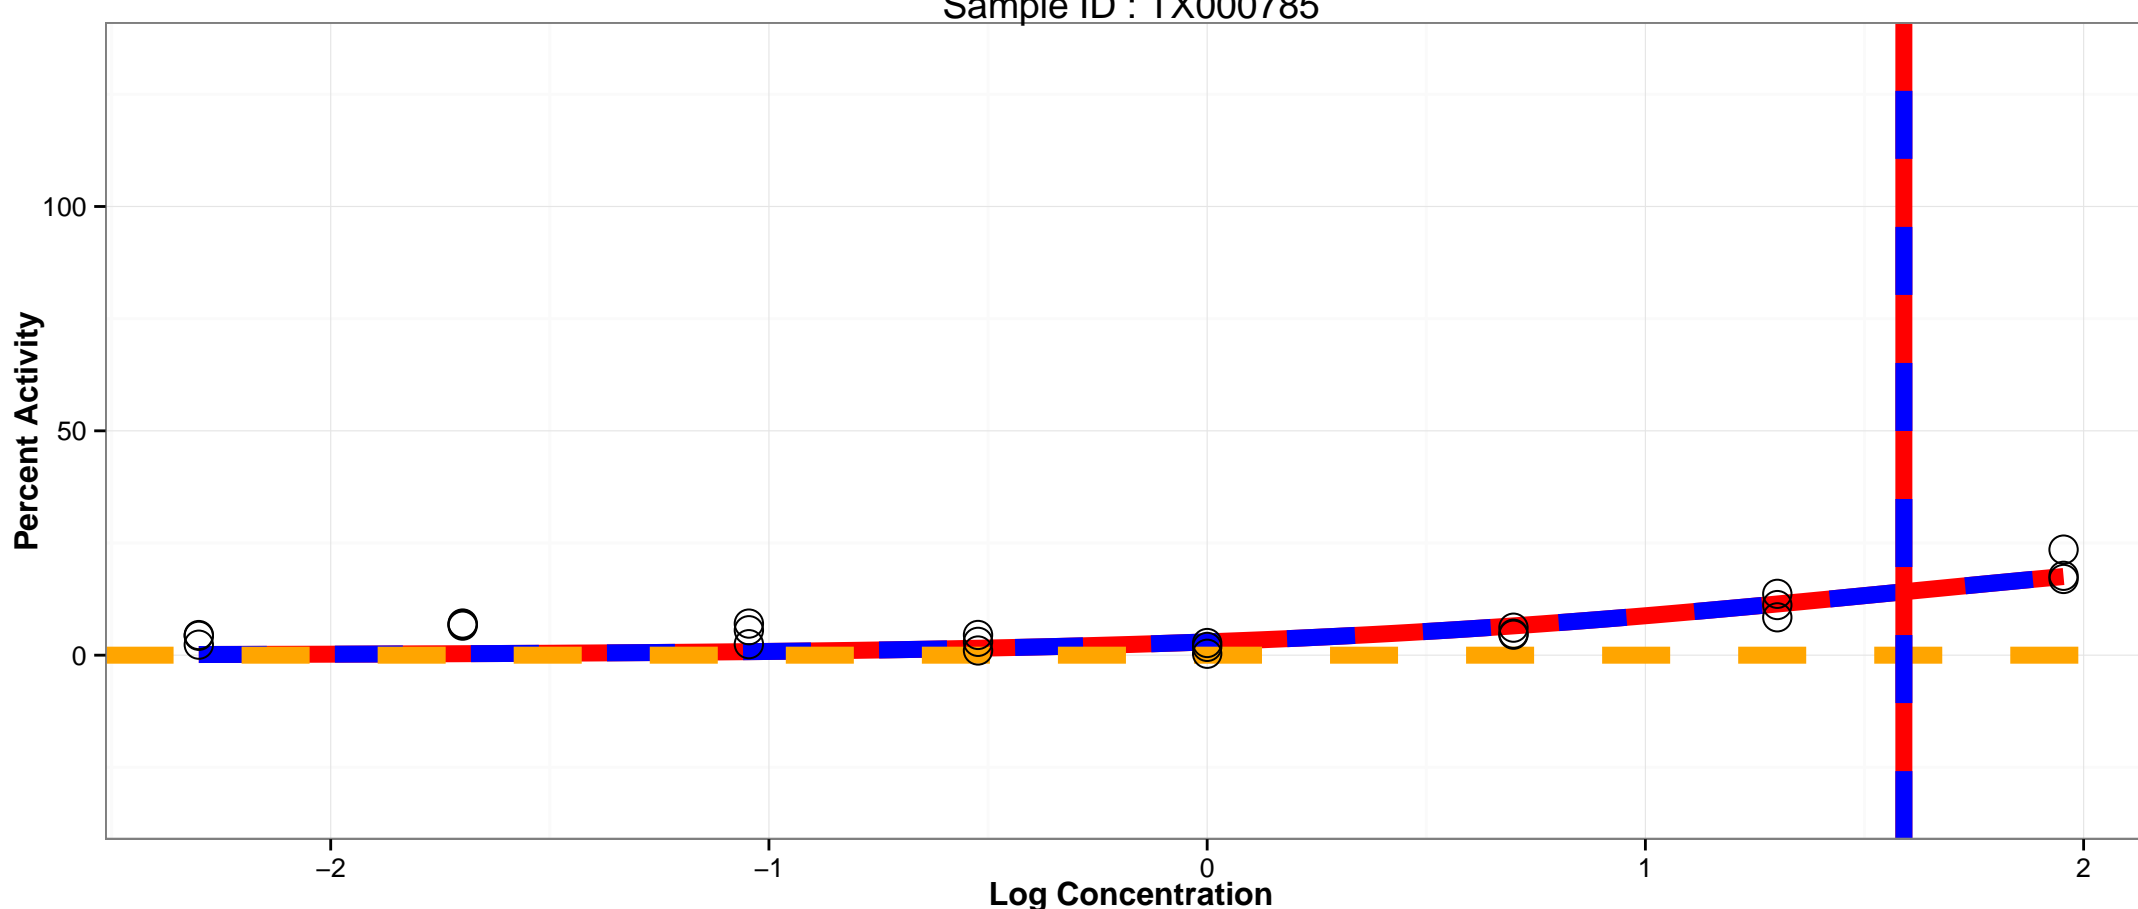

HILL MODEL

|     | tp   | ga    | gw    |
|-----|------|-------|-------|
| val | 28.3 | 1.59  | 0.586 |
| sd  | 10.9 | 0.622 | 0.275 |

GAIN-LOSS MODEL

|     | tp   | ga    | gw    | la   | lw    |
|-----|------|-------|-------|------|-------|
| val | 28.3 | 1.59  | 0.586 | 3.11 | 7.51  |
| sd  | 10.8 | 0.622 | 0.275 | 1580 | 10300 |

|      | CNST   | HILL   | GNLS   |
|------|--------|--------|--------|
| AIC  | 175.16 | 139.44 | 143.44 |
| PROB | 0      | 0.88   | 0.12   |
| RMSE | 8.98   | 3.6    | 3.6    |

MAX\_MEAN : 19.4 MAX\_MED : 17.7 BMAD : 5.69  
COFF : 20 HIT-CALL : 0 FITC : 21 ACTP : 1  
FLAGS : 12

Assay ID 1509 (NHEERL\_HEK293T\_CellTiterGLO)  
Sample ID : TX000785

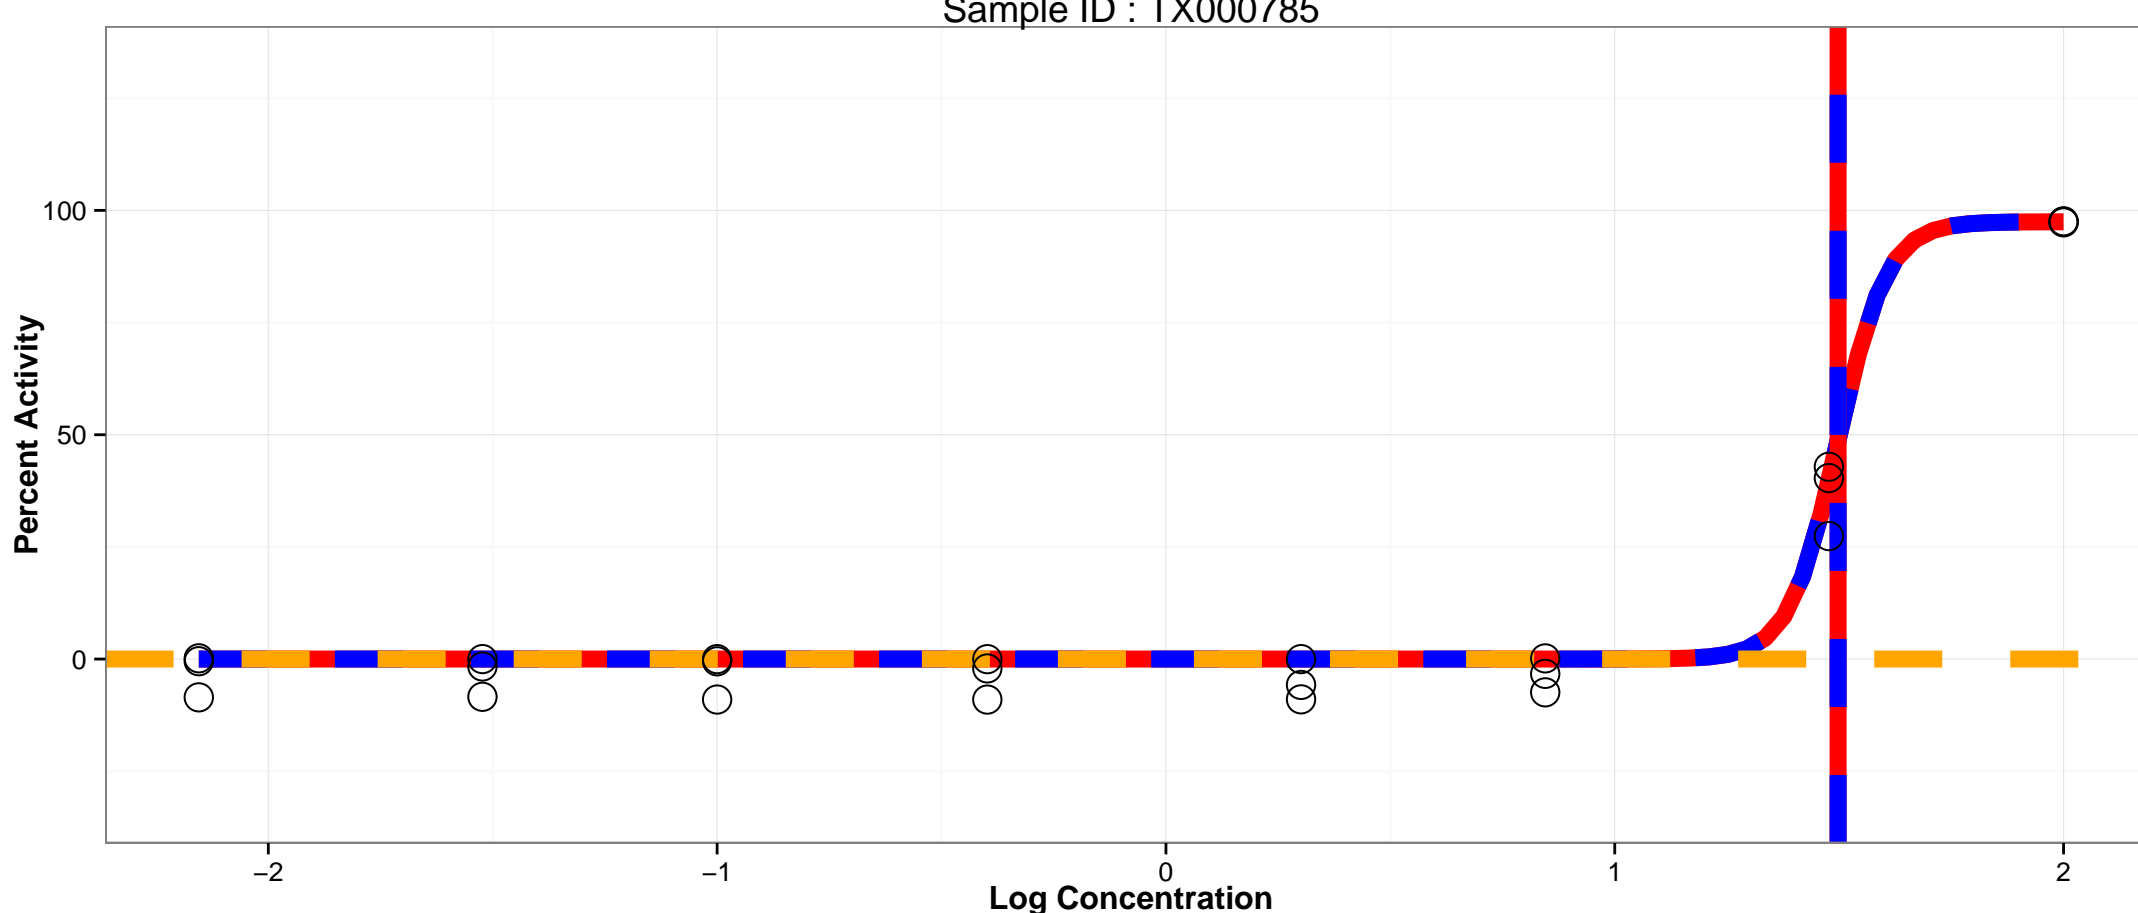

HILL MODEL

|     | tp   | ga      | gw   |
|-----|------|---------|------|
| val | 97.5 | 1.5     | 8    |
| sd  | 2.01 | 0.00789 | 2.95 |

GAIN-LOSS MODEL

|     | tp   | ga  | gw | la   | lw  |
|-----|------|-----|----|------|-----|
| val | 97.5 | 1.5 | 8  | 3.89 | 6.8 |
| sd  | NA   | NA  | NA | NA   | NA  |

|      | CNST   | HILL   | GNLS   |
|------|--------|--------|--------|
| AIC  | 232.08 | 154.72 | 158.72 |
| PROB | 0      | 0.88   | 0.12   |
| RMSE | 37.2   | 5.21   | 5.21   |

MAX\_MEAN : 97.5 MAX\_MED : 97.4 BMAD : 5.54  
COFF : 20 HIT-CALL : 1 FITC : 41 ACTP : 1  
FLAGS :

Assay ID 1848 (NHEERL\_Quantilum\_inhib\_2\_dn)  
Sample ID : TX000785

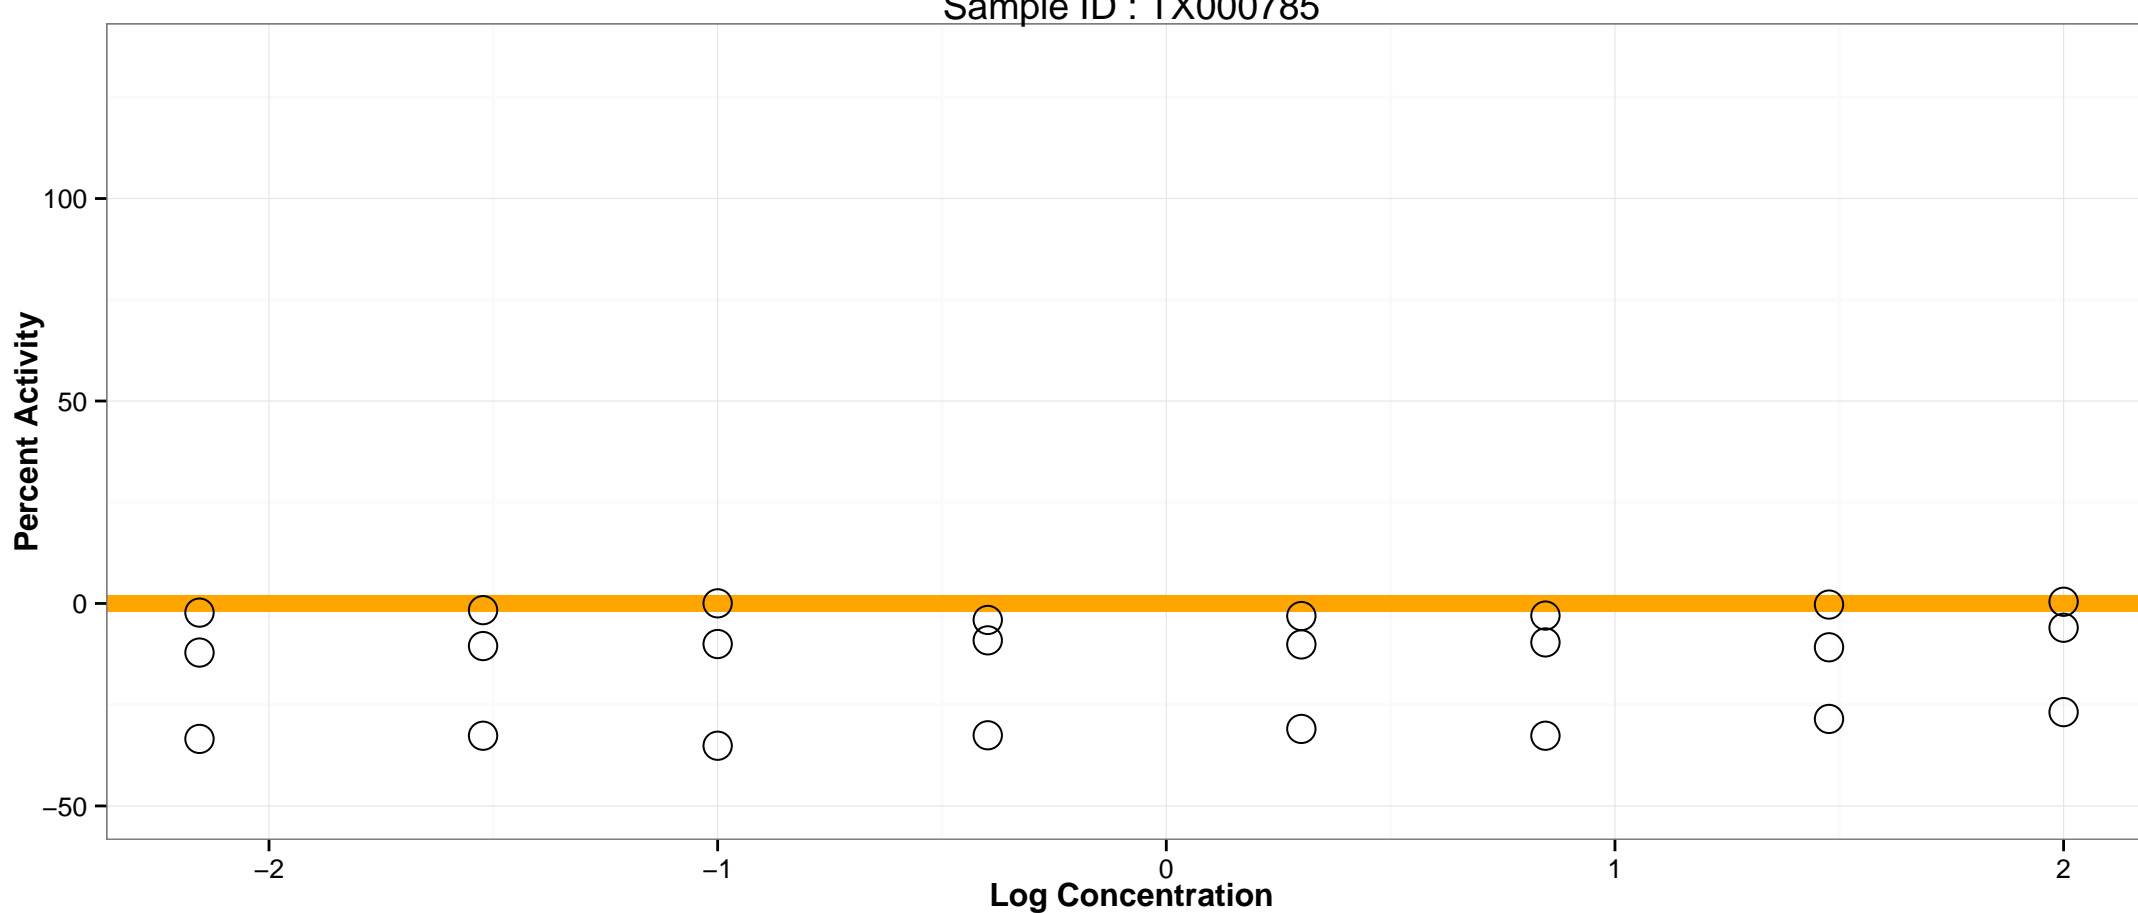

HILL MODEL

HILL MODEL: Not applicable

GAIN-LOSS MODEL

GNLS MODEL: Not applicable

|      | CNST   | HILL | GNLS |
|------|--------|------|------|
| AIC  | 213.22 | NA   | NA   |
| PROB | 1      | NA   | NA   |
| RMSE | 19.21  | NA   | NA   |

MAX\_MEAN : -10.8 MAX\_MED : -5.98 BMAD : 8.58  
COFF : 20 HIT-CALL : 0 FITC : 4 ACTP : 0  
FLAGS :



Chemical : Fenamidone  
CAS : 161326-34-7

Assay ID 1508 (NHEERL\_TPO\_AUR\_dn)  
Sample ID : TX000803

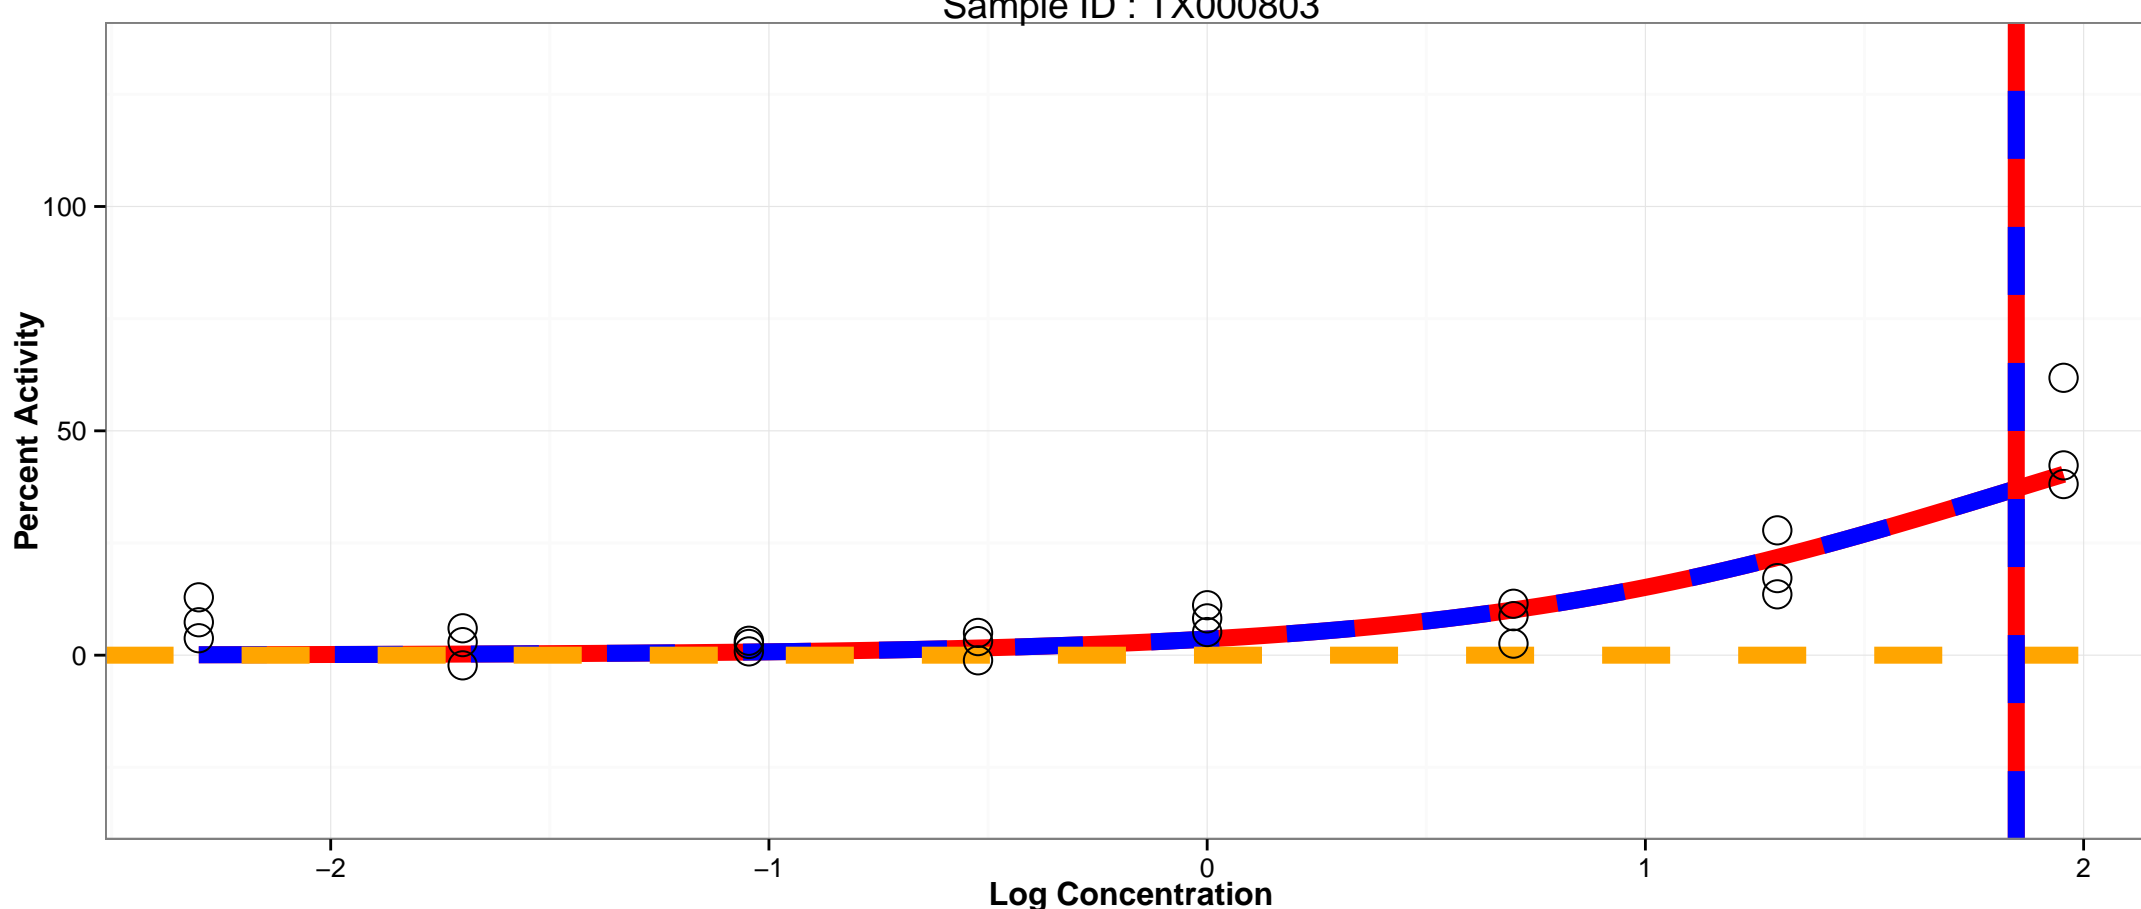

HILL MODEL

|     | tp   | ga    | gw    |
|-----|------|-------|-------|
| val | 74.2 | 1.85  | 0.7   |
| sd  | 27.8 | 0.478 | 0.198 |

GAIN-LOSS MODEL

|     | tp   | ga    | gw    | la    | lw     |
|-----|------|-------|-------|-------|--------|
| val | 74.2 | 1.85  | 0.7   | 2.86  | 14.1   |
| sd  | 27.8 | 0.478 | 0.198 | 37600 | 551000 |

|      | CNST   | HILL   | GNLS   |
|------|--------|--------|--------|
| AIC  | 205.76 | 163.34 | 167.34 |
| PROB | 0      | 0.88   | 0.12   |
| RMSE | 19.47  | 6.6    | 6.6    |

MAX\_MEAN : 47.4 MAX\_MED : 42.3 BMAD : 5.69  
COFF : 20 HIT-CALL : 1 FITC : 42 ACTP : 1  
FLAGS :

Assay ID 1509 (NHEERL\_HEK293T\_CellTiterGLO)  
Sample ID : TX000803

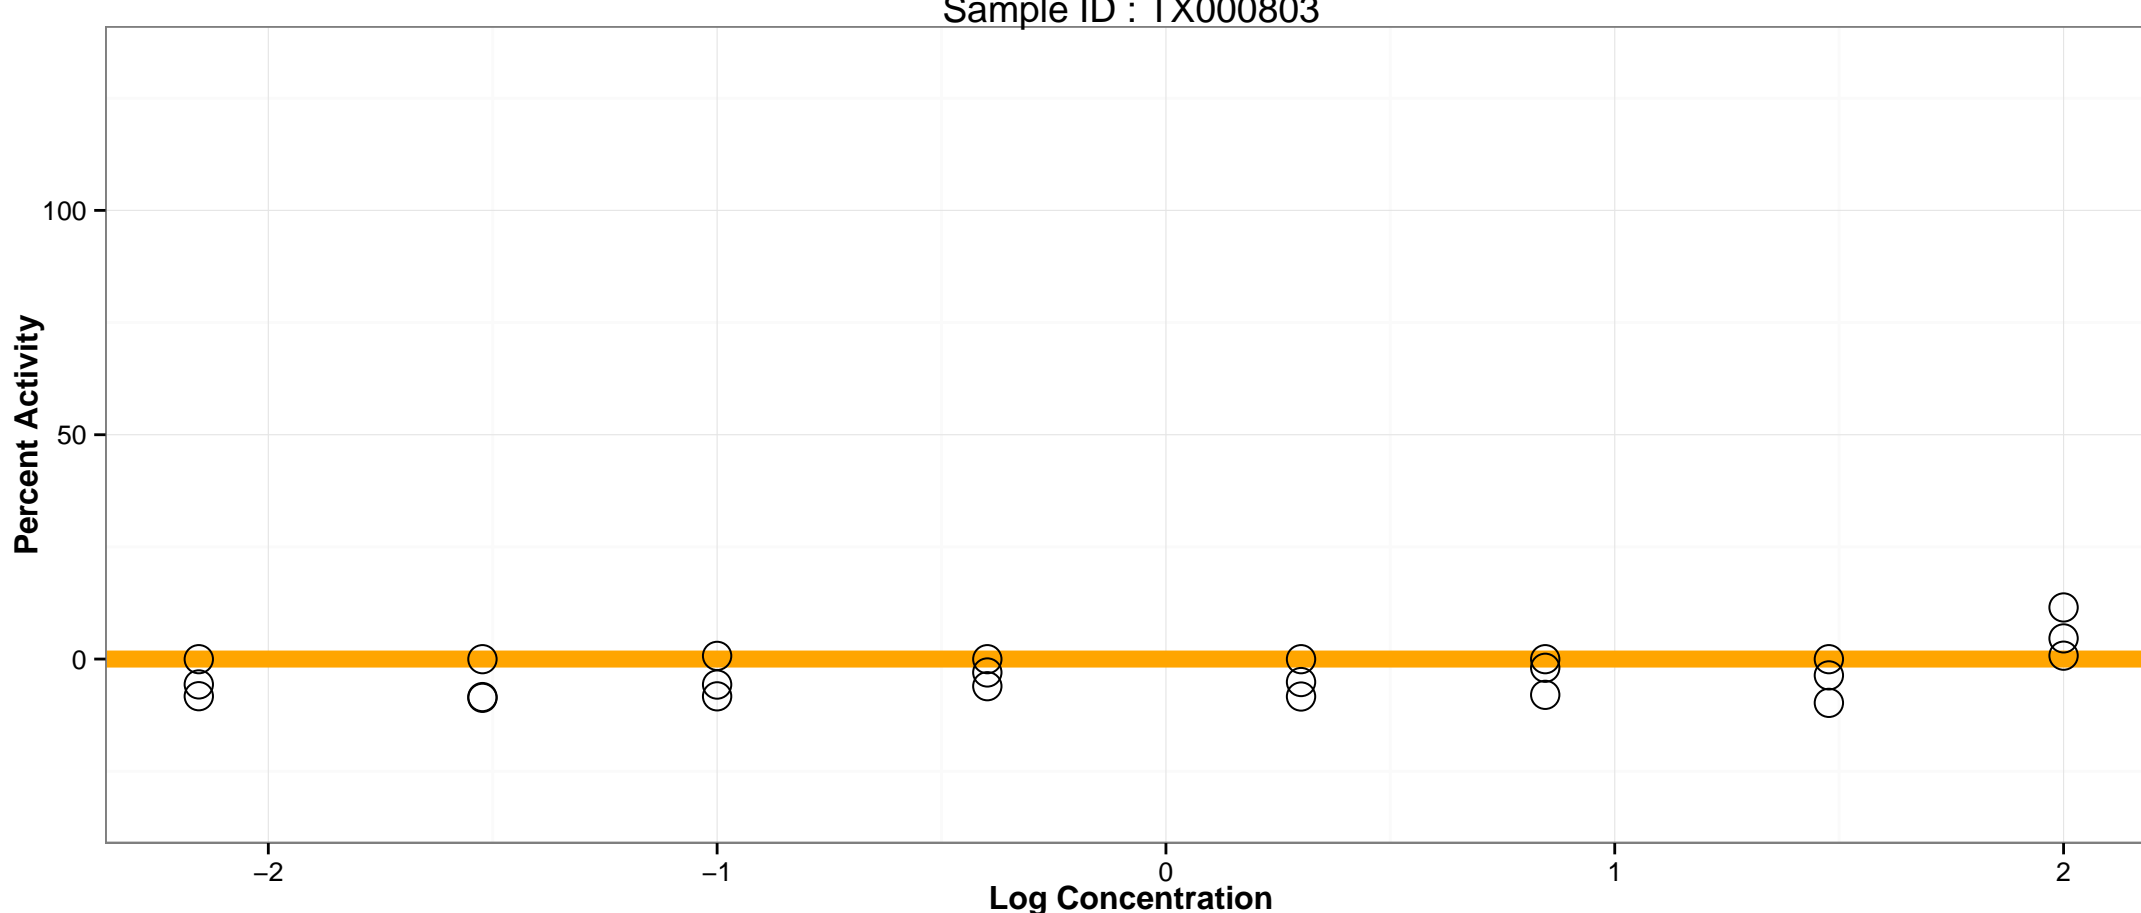

HILL MODEL

HILL MODEL: Not applicable

GAIN-LOSS MODEL

GNLS MODEL: Not applicable

|      | CNST   | HILL | GNLS |
|------|--------|------|------|
| AIC  | 157.42 | NA   | NA   |
| PROB | 1      | NA   | NA   |
| RMSE | 5.84   | NA   | NA   |

MAX\_MEAN : 5.63 MAX\_MED : 4.62 BMAD : 5.54  
COFF : 20 HIT-CALL : 0 FITC : 4 ACTP : 0  
FLAGS :

Assay ID 1848 (NHEERL\_Quantilum\_inhib\_2\_dn)  
Sample ID : TX000803

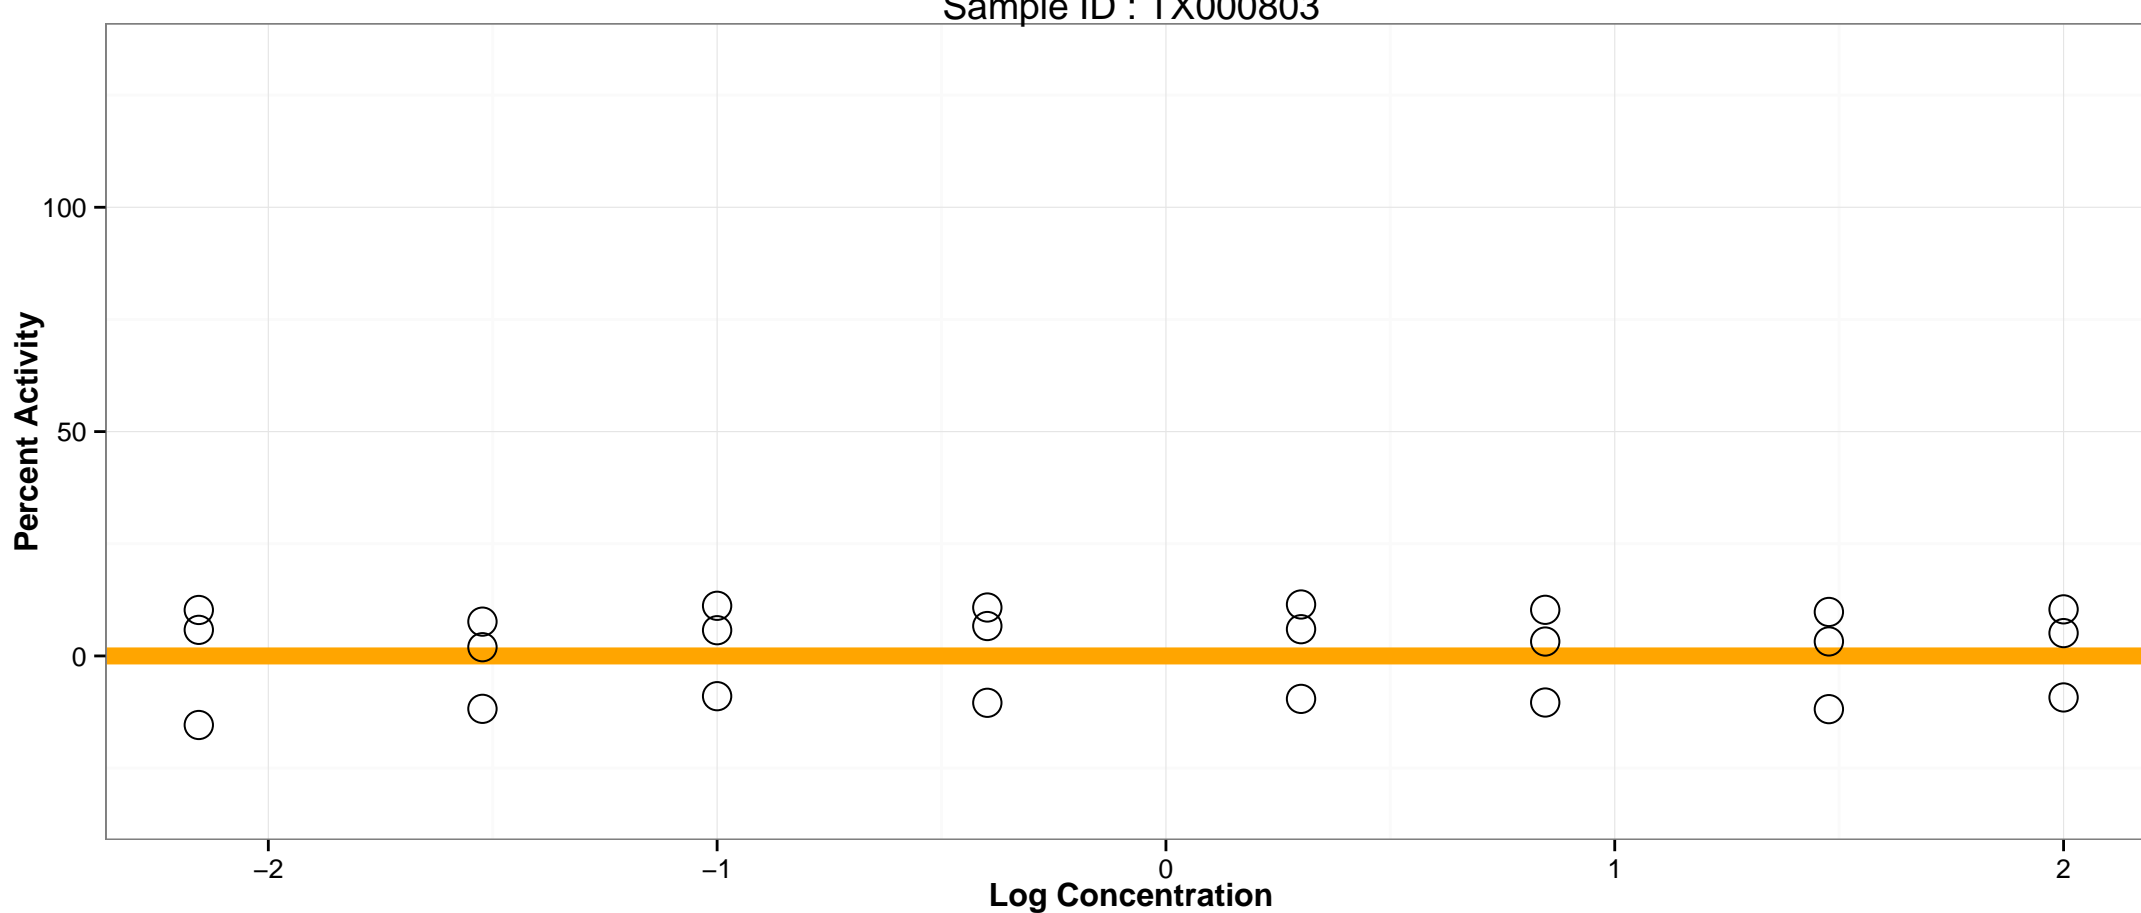

HILL MODEL

HILL MODEL: Not applicable

GAIN-LOSS MODEL

GNLS MODEL: Not applicable

|      | CNST   | HILL | GNLS |
|------|--------|------|------|
| AIC  | 181.44 | NA   | NA   |
| PROB | 1      | NA   | NA   |
| RMSE | 9.21   | NA   | NA   |

MAX\_MEAN : 2.66 MAX\_MED : 6.68 BMAD : 8.58  
COFF : 20 HIT-CALL : 0 FITC : 4 ACTP : 0  
FLAGS :

Assay ID 1508 (NHEERL\_TPO\_AUR\_dn)  
Sample ID : TX000824

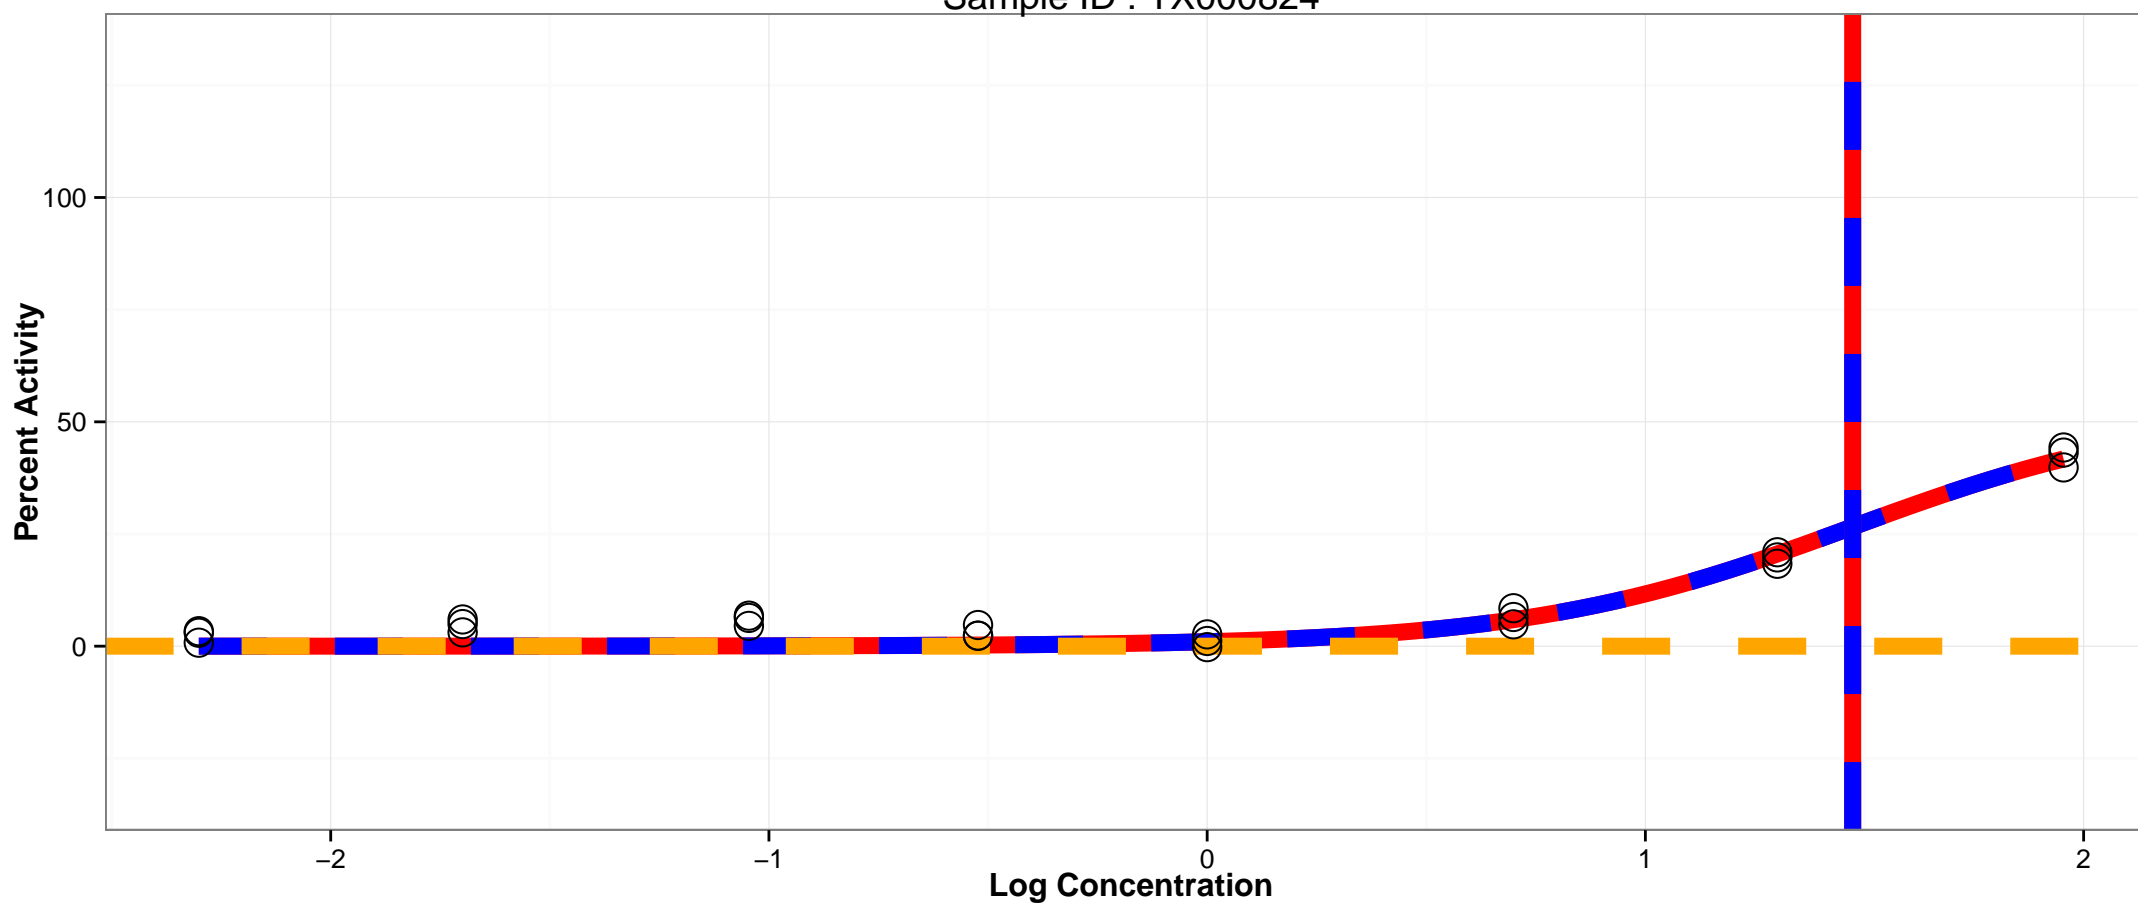

HILL MODEL

|     | tp   | ga    | gw    |
|-----|------|-------|-------|
| val | 53.2 | 1.47  | 1.17  |
| sd  | 7.43 | 0.135 | 0.233 |

GAIN-LOSS MODEL

|     | tp   | ga    | gw    | la   | lw   |
|-----|------|-------|-------|------|------|
| val | 53.2 | 1.47  | 1.17  | 3.67 | 4.83 |
| sd  | 7.43 | 0.135 | 0.233 | 1100 | 3090 |

|      | CNST   | HILL  | GNLS  |
|------|--------|-------|-------|
| AIC  | 199.85 | 134.6 | 138.6 |
| PROB | 0      | 0.88  | 0.12  |
| RMSE | 17.03  | 3.25  | 3.25  |

MAX\_MEAN : 42.4 MAX\_MED : 43.2 BMAD : 5.69  
COFF : 20 HIT-CALL : 1 FITC : 42 ACTP : 1  
FLAGS :

Assay ID 1509 (NHEERL\_HEK293T\_CellTiterGLO)  
Sample ID : TX000824

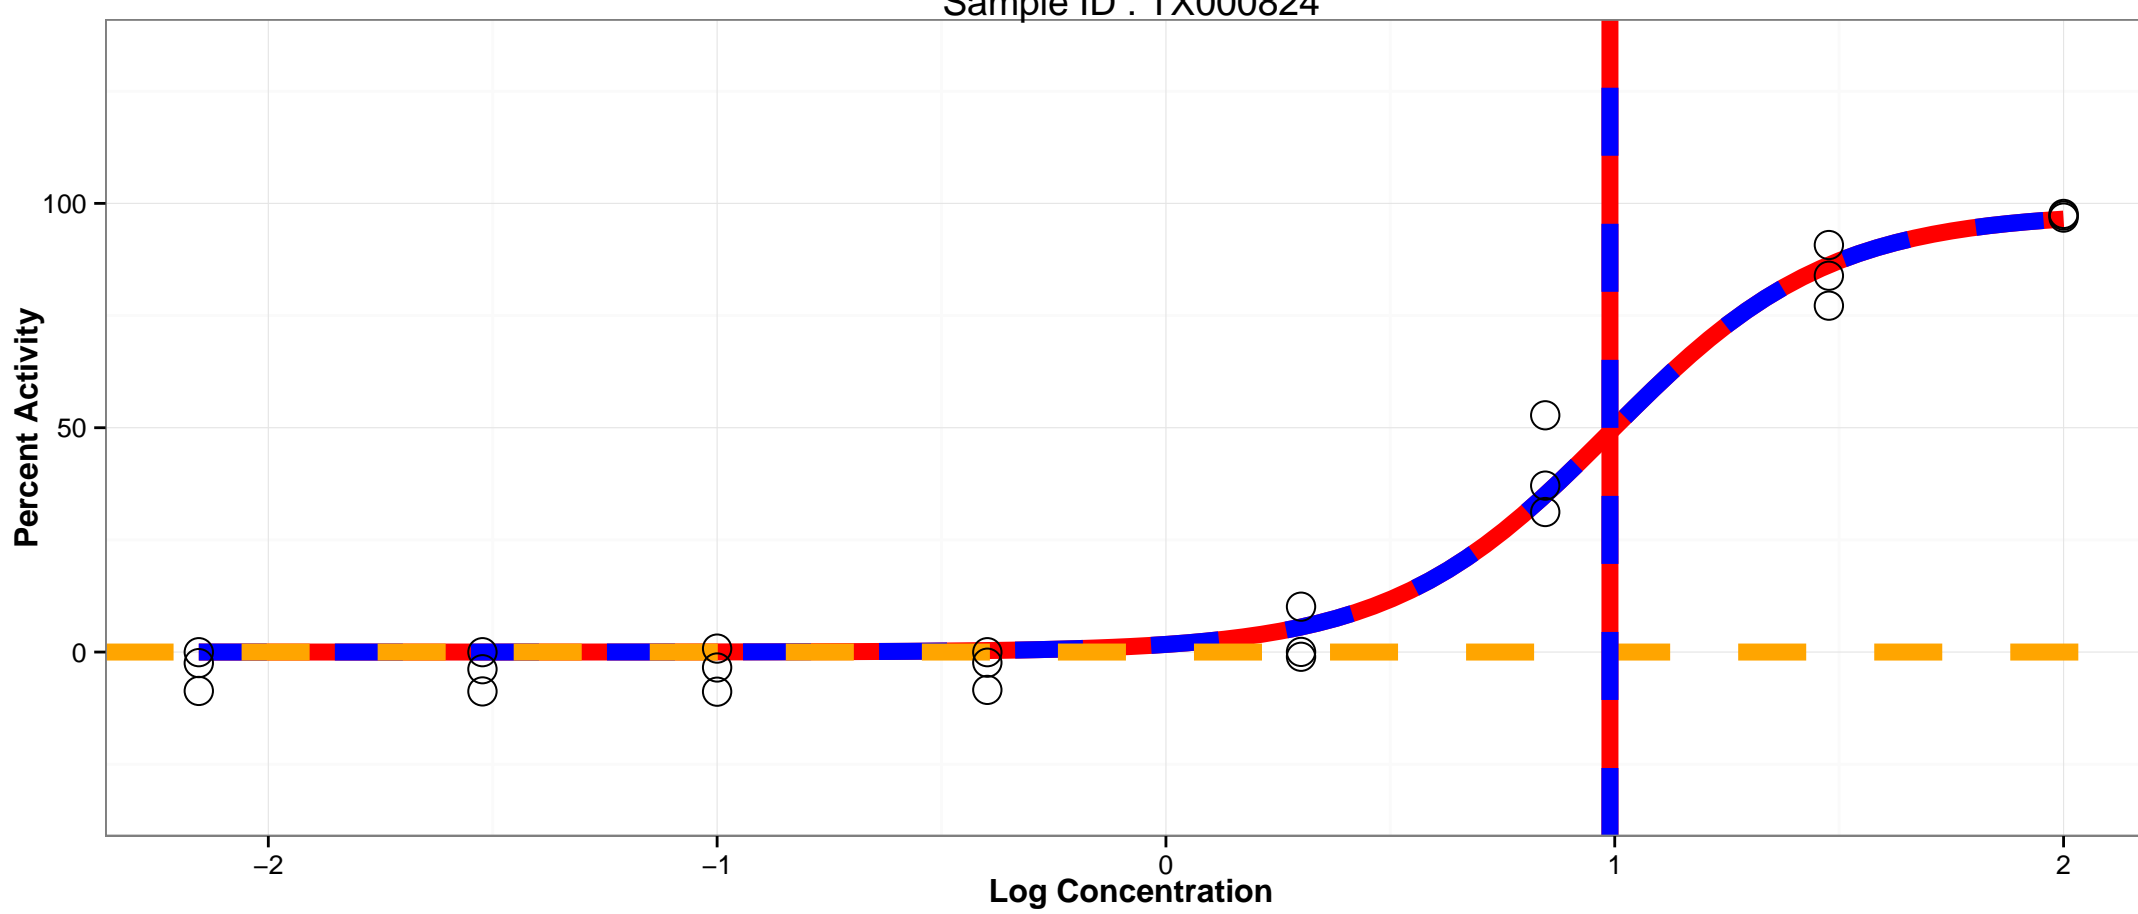

HILL MODEL

|     | tp   | ga     | gw    |
|-----|------|--------|-------|
| val | 98.1 | 0.989  | 1.77  |
| sd  | 3.28 | 0.0507 | 0.285 |

GAIN-LOSS MODEL

|     | tp   | ga    | gw   | la   | lw   |
|-----|------|-------|------|------|------|
| val | 98.1 | 0.989 | 1.77 | 3.28 | 12.2 |
| sd  | NA   | NA    | NA   | NA   | NA   |

|      | CNST   | HILL  | GNLS  |
|------|--------|-------|-------|
| AIC  | 254.01 | 161.9 | 165.9 |
| PROB | 0      | 0.88  | 0.12  |
| RMSE | 47.96  | 6.08  | 6.08  |

MAX\_MEAN : 97.3 MAX\_MED : 97.3 BMAD : 5.54  
COFF : 20 HIT-CALL : 1 FITC : 41 ACTP : 1  
FLAGS :

Assay ID 1848 (NHEERL\_Quantilum\_inhib\_2\_dn)  
Sample ID : TX000824

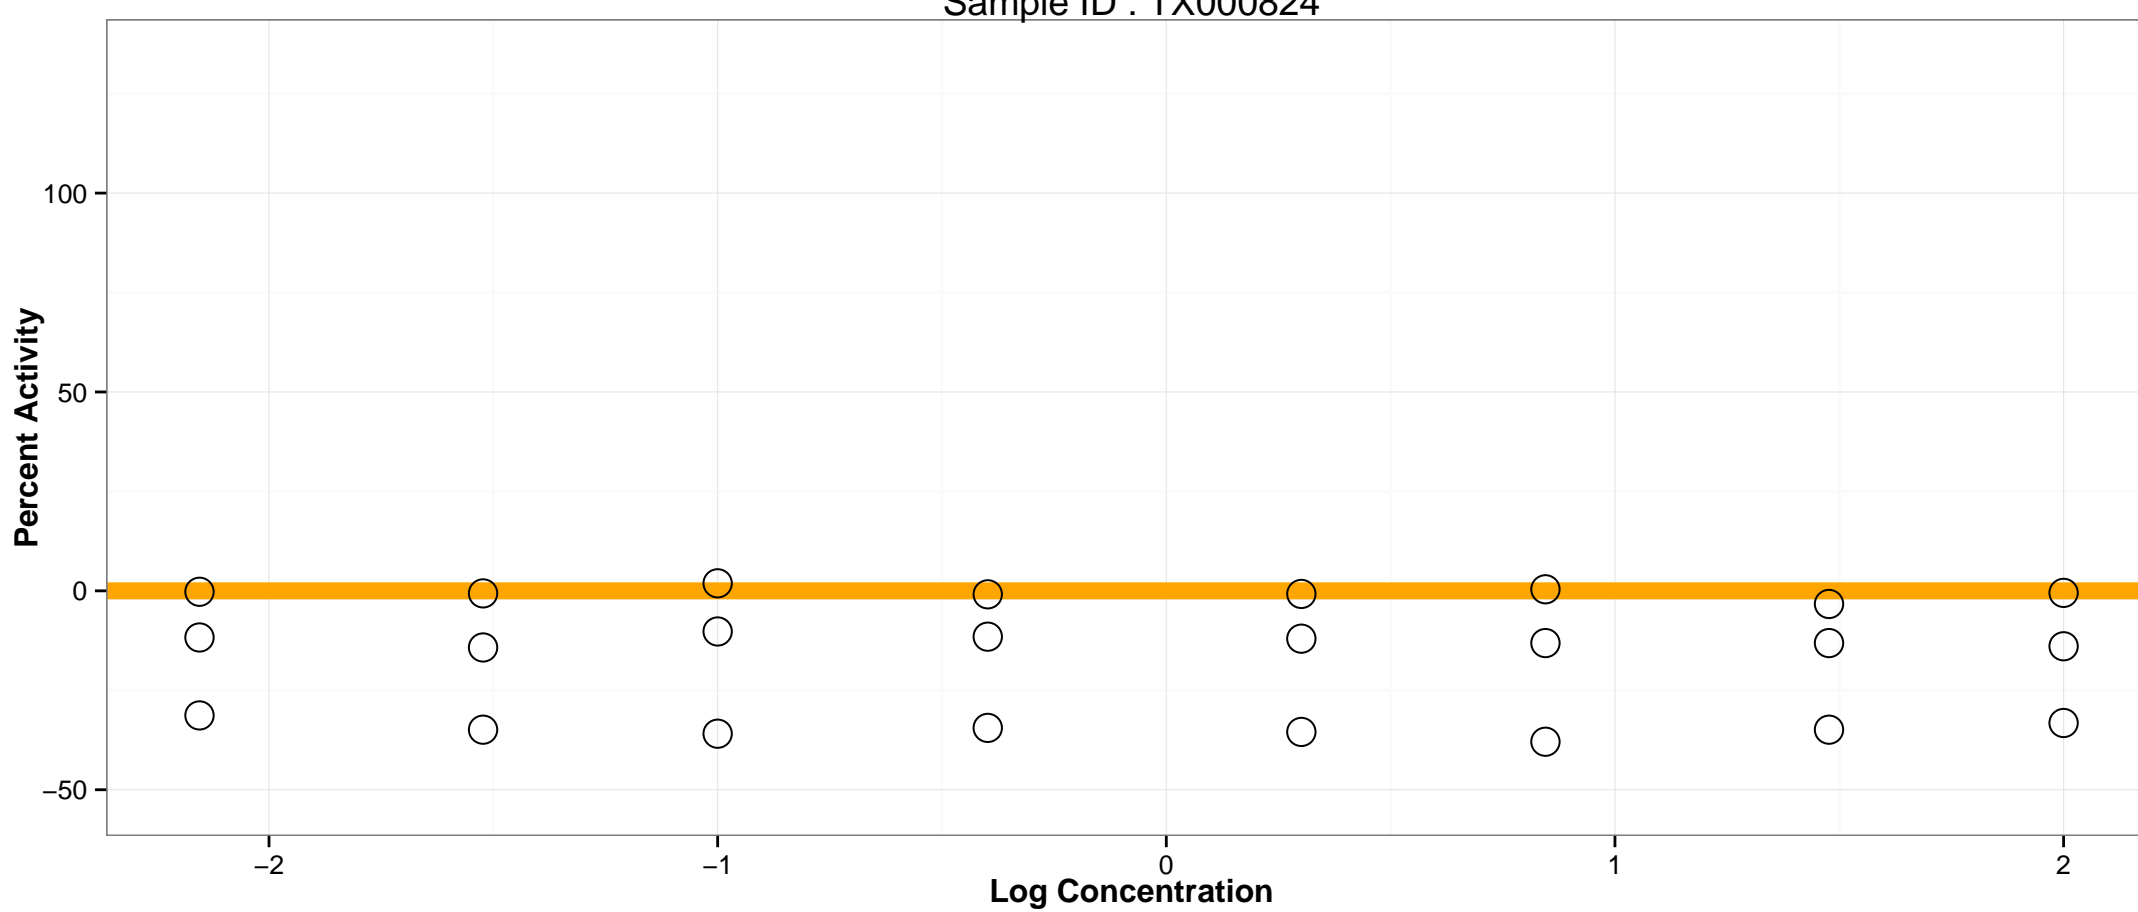

HILL MODEL

HILL MODEL: Not applicable

GAIN-LOSS MODEL

GNLS MODEL: Not applicable

|      | CNST   | HILL | GNLS |
|------|--------|------|------|
| AIC  | 218.79 | NA   | NA   |
| PROB | 1      | NA   | NA   |
| RMSE | 21.37  | NA   | NA   |

MAX\_MEAN : -14.4 MAX\_MED : -10.2 BMAD : 8.58  
COFF : 20 HIT-CALL : 0 FITC : 4 ACTP : 0  
FLAGS : 10

Chemical : Dazomet  
CAS : 533-74-4

Assay ID 1508 (NHEERL\_TPO\_AUR\_dn)  
Sample ID : TX000828

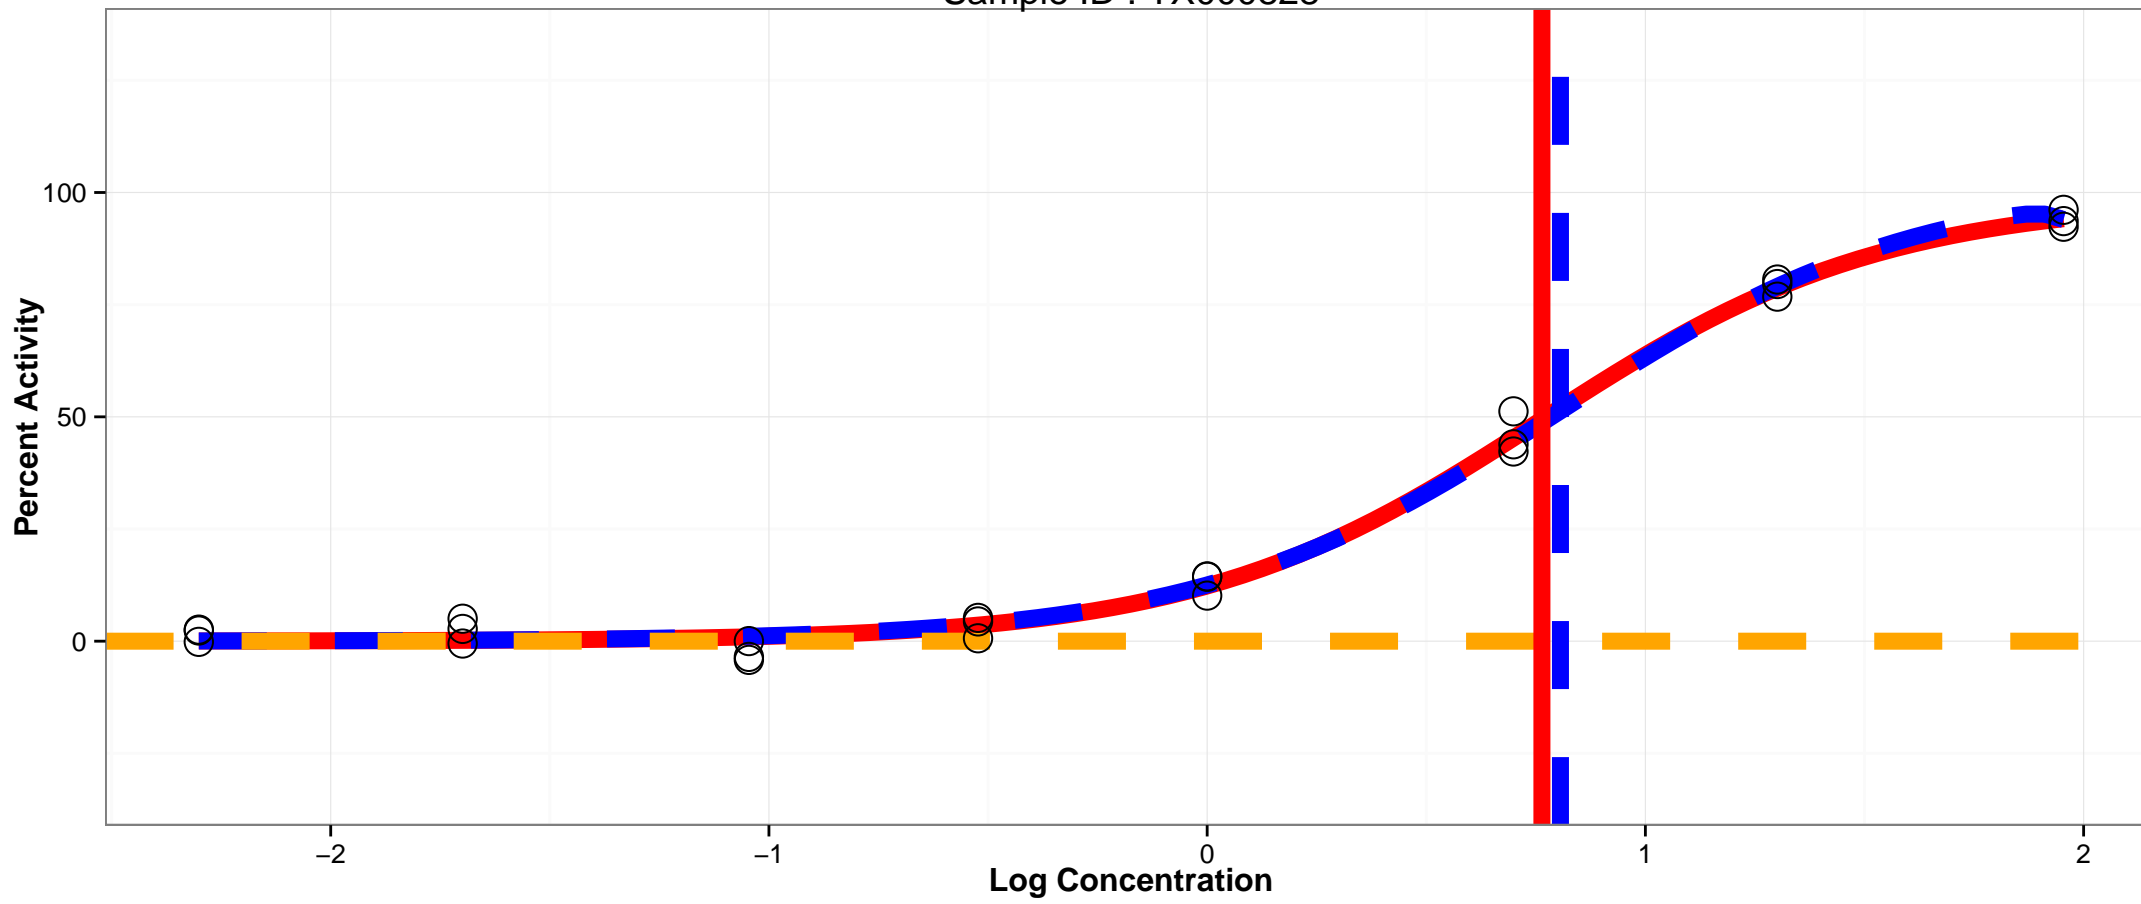

HILL MODEL

|     | tp   | ga     | gw     |
|-----|------|--------|--------|
| val | 98.7 | 0.764  | 1.11   |
| sd  | 2.19 | 0.0349 | 0.0675 |

GAIN-LOSS MODEL

|     | tp  | ga    | gw   | la  | lw   |
|-----|-----|-------|------|-----|------|
| val | 103 | 0.806 | 1.06 | 2.1 | 10.6 |
| sd  | NA  | NA    | NA   | NA  | NA   |

|      | CNST  | HILL   | GNLS  |
|------|-------|--------|-------|
| AIC  | 253.5 | 126.16 | 129.9 |
| PROB | 0     | 0.87   | 0.13  |
| RMSE | 46.66 | 2.71   | 2.75  |

MAX\_MEAN : 94.1 MAX\_MED : 93.6 BMAD : 5.69  
COFF : 20 HIT-CALL : 1 FITC : 41 ACTP : 1  
FLAGS :

Assay ID 1509 (NHEERL\_HEK293T\_CellTiterGLO)  
Sample ID : TX000828

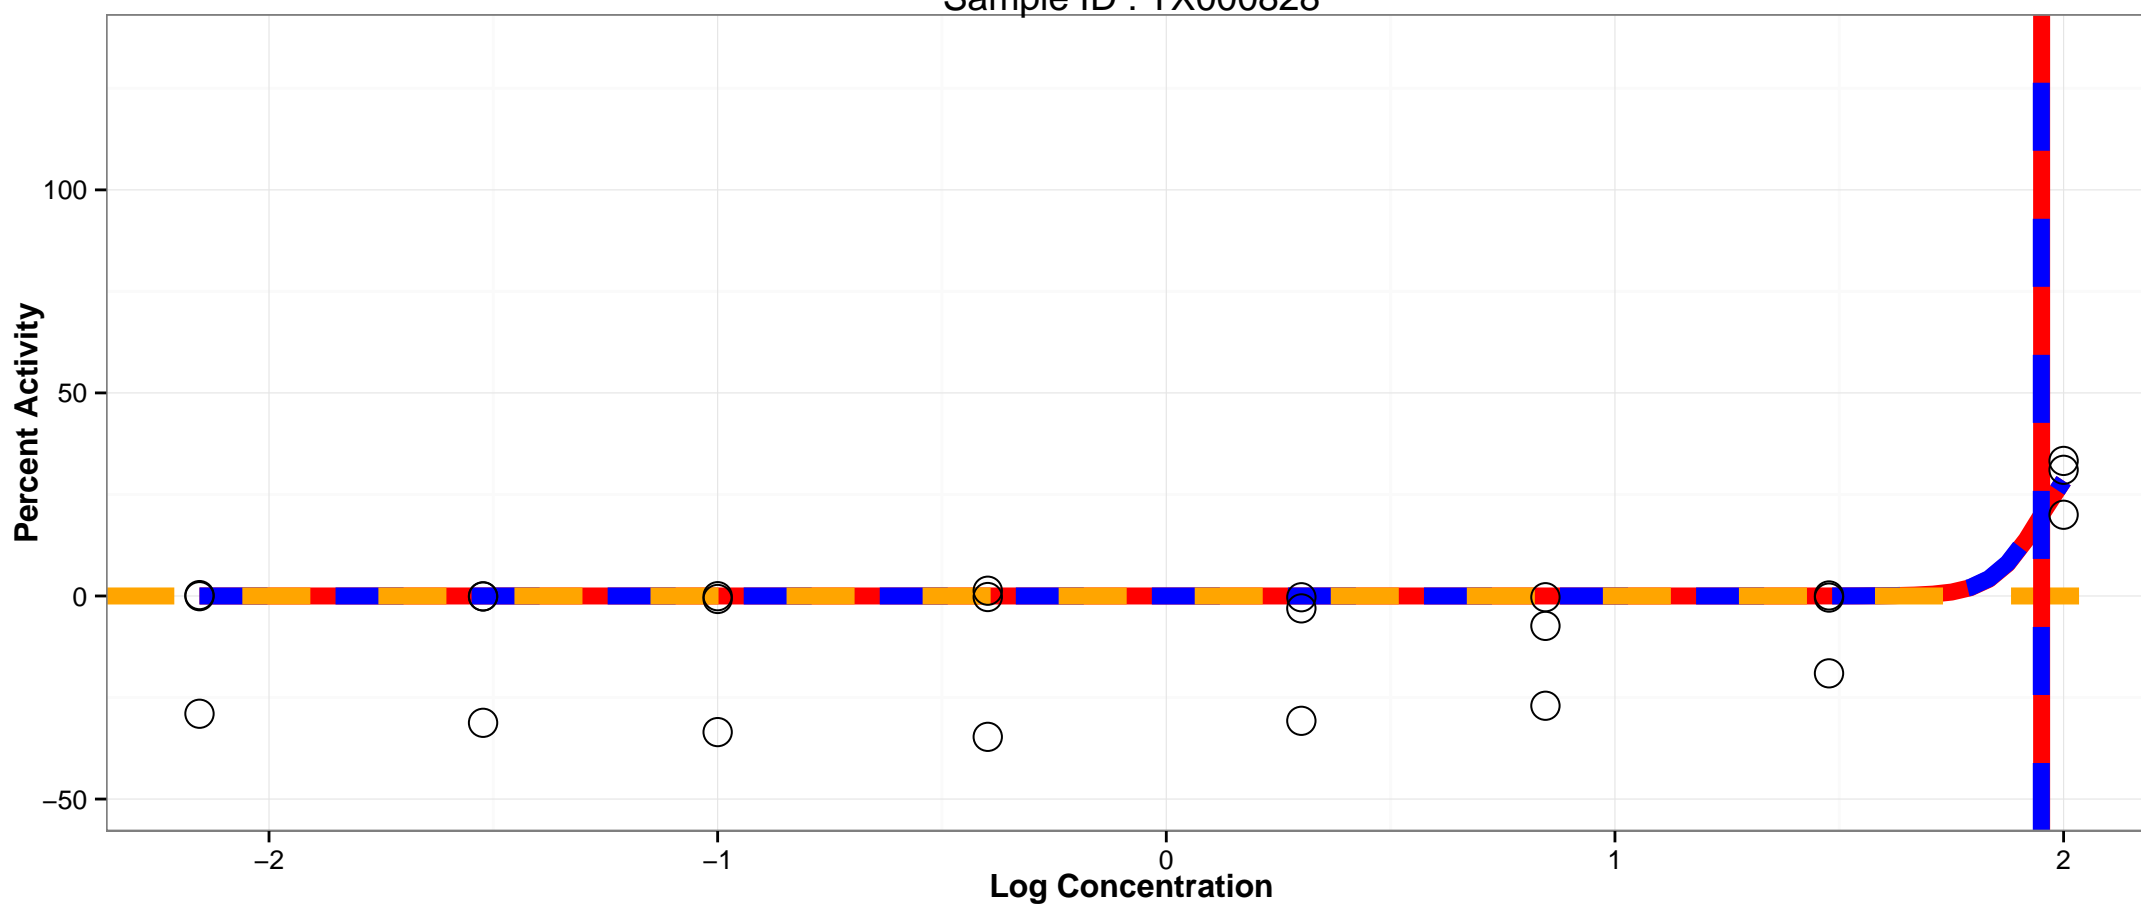

HILL MODEL

|     | tp   | ga    | gw   |
|-----|------|-------|------|
| val | 39.9 | 1.95  | 8    |
| sd  | 242  | 0.901 | 48.5 |

GAIN-LOSS MODEL

|     | tp   | ga    | gw   | la   | lw   |
|-----|------|-------|------|------|------|
| val | 39.9 | 1.95  | 7.91 | 3.83 | 1.75 |
| sd  | 255  | 0.972 | 45.5 | 691  | 688  |

|      | CNST   | HILL  | GNLS  |
|------|--------|-------|-------|
| AIC  | 212.42 | 207.4 | 211.4 |
| PROB | 0.07   | 0.82  | 0.11  |
| RMSE | 19.06  | 16.26 | 16.26 |

MAX\_MEAN : 28.1 MAX\_MED : 31.1 BMAD : 5.54  
COFF : 20 HIT-CALL : 1 FITC : 42 ACTP : 0.933  
FLAGS : 6

Assay ID 1848 (NHEERL\_Quantilum\_inhib\_2\_dn)  
Sample ID : TX000828

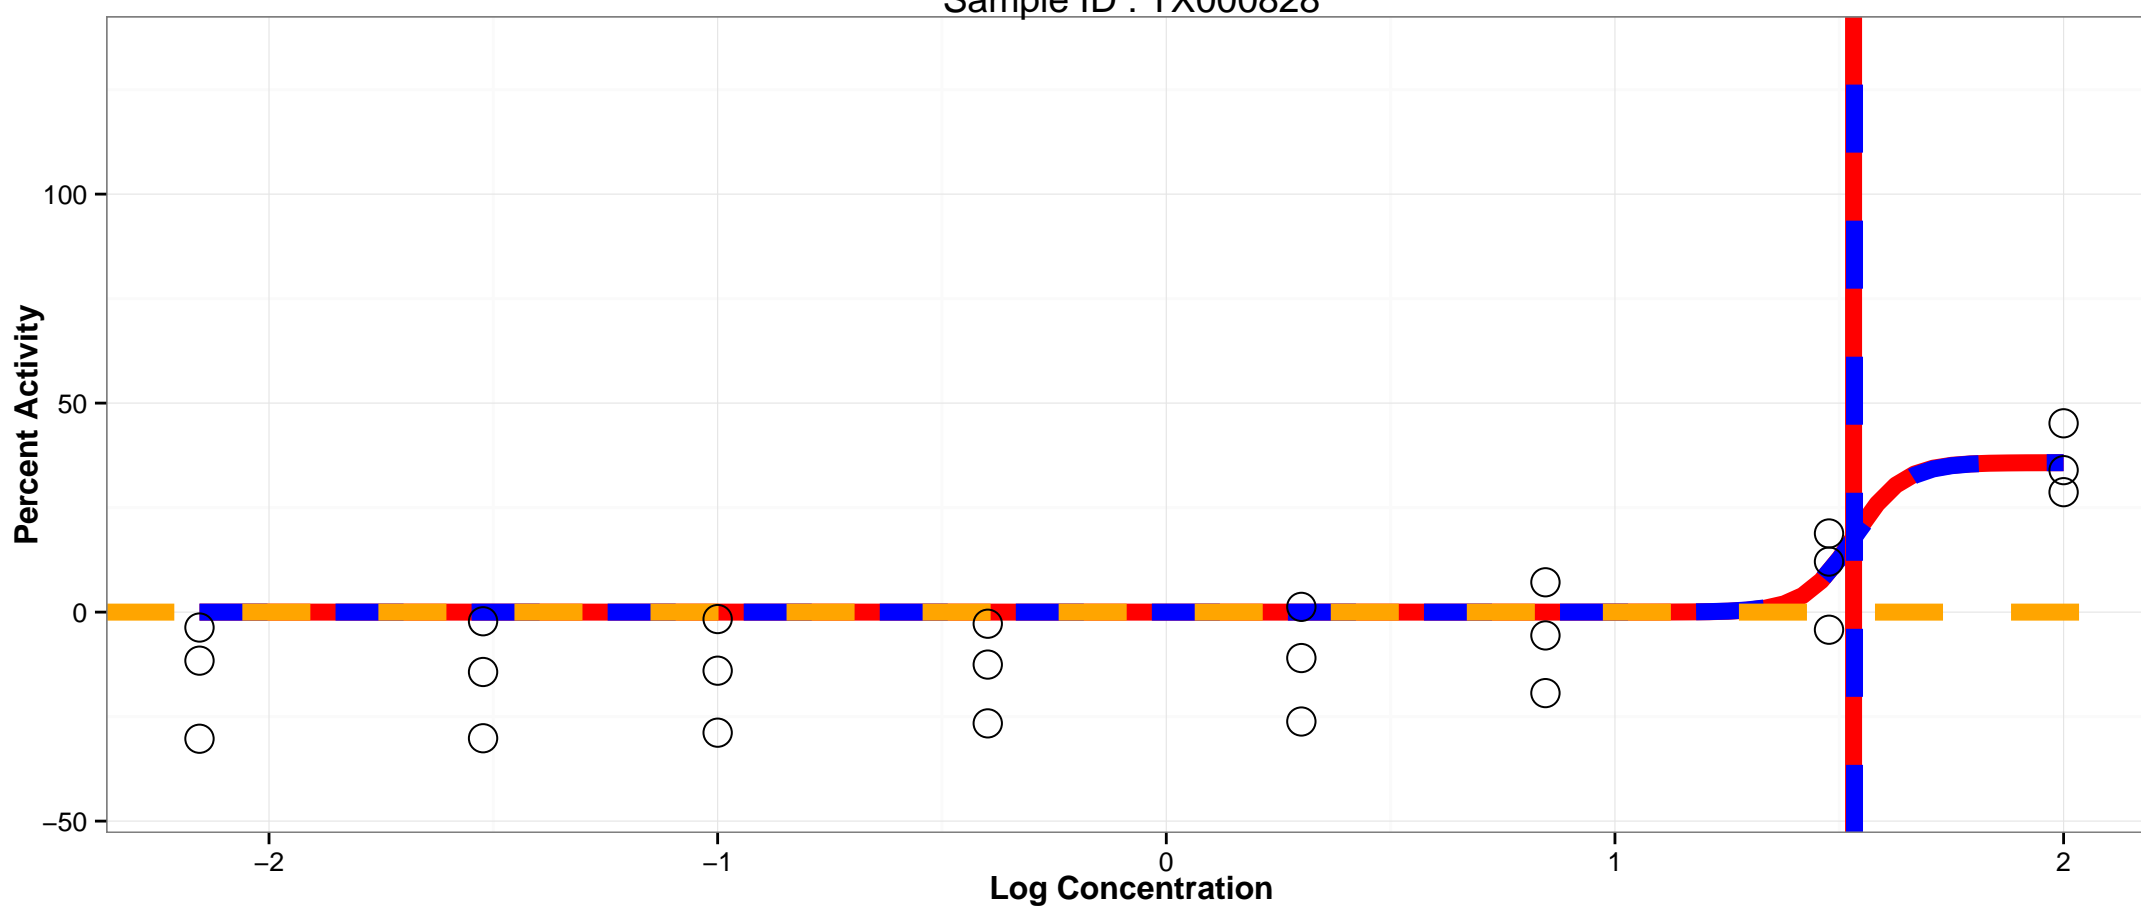

HILL MODEL

|     | tp   | ga   | gw   |
|-----|------|------|------|
| val | 35.8 | 1.53 | 7.98 |
| sd  | 7.5  | 1.4  | 203  |

GAIN-LOSS MODEL

|     | tp   | ga   | gw  | la   | lw   |
|-----|------|------|-----|------|------|
| val | 35.8 | 1.53 | 7.7 | 2.76 | 4.11 |
| sd  | NA   | NA   | NA  | NA   | NA   |

|      | CNST   | HILL  | GNLS  |
|------|--------|-------|-------|
| AIC  | 216.72 | 209.1 | 213.1 |
| PROB | 0.02   | 0.86  | 0.12  |
| RMSE | 20.3   | 15.51 | 15.51 |

MAX\_MEAN : 36 MAX\_MED : 34 BMAD : 8.58  
COFF : 20 HIT-CALL : 1 FITC : 41 ACTP : 0.981  
FLAGS : 6

Chemical : Anilazine  
CAS : 101-05-3

Assay ID 1508 (NHEERL\_TPO\_AUR\_dn)  
Sample ID : TX000832

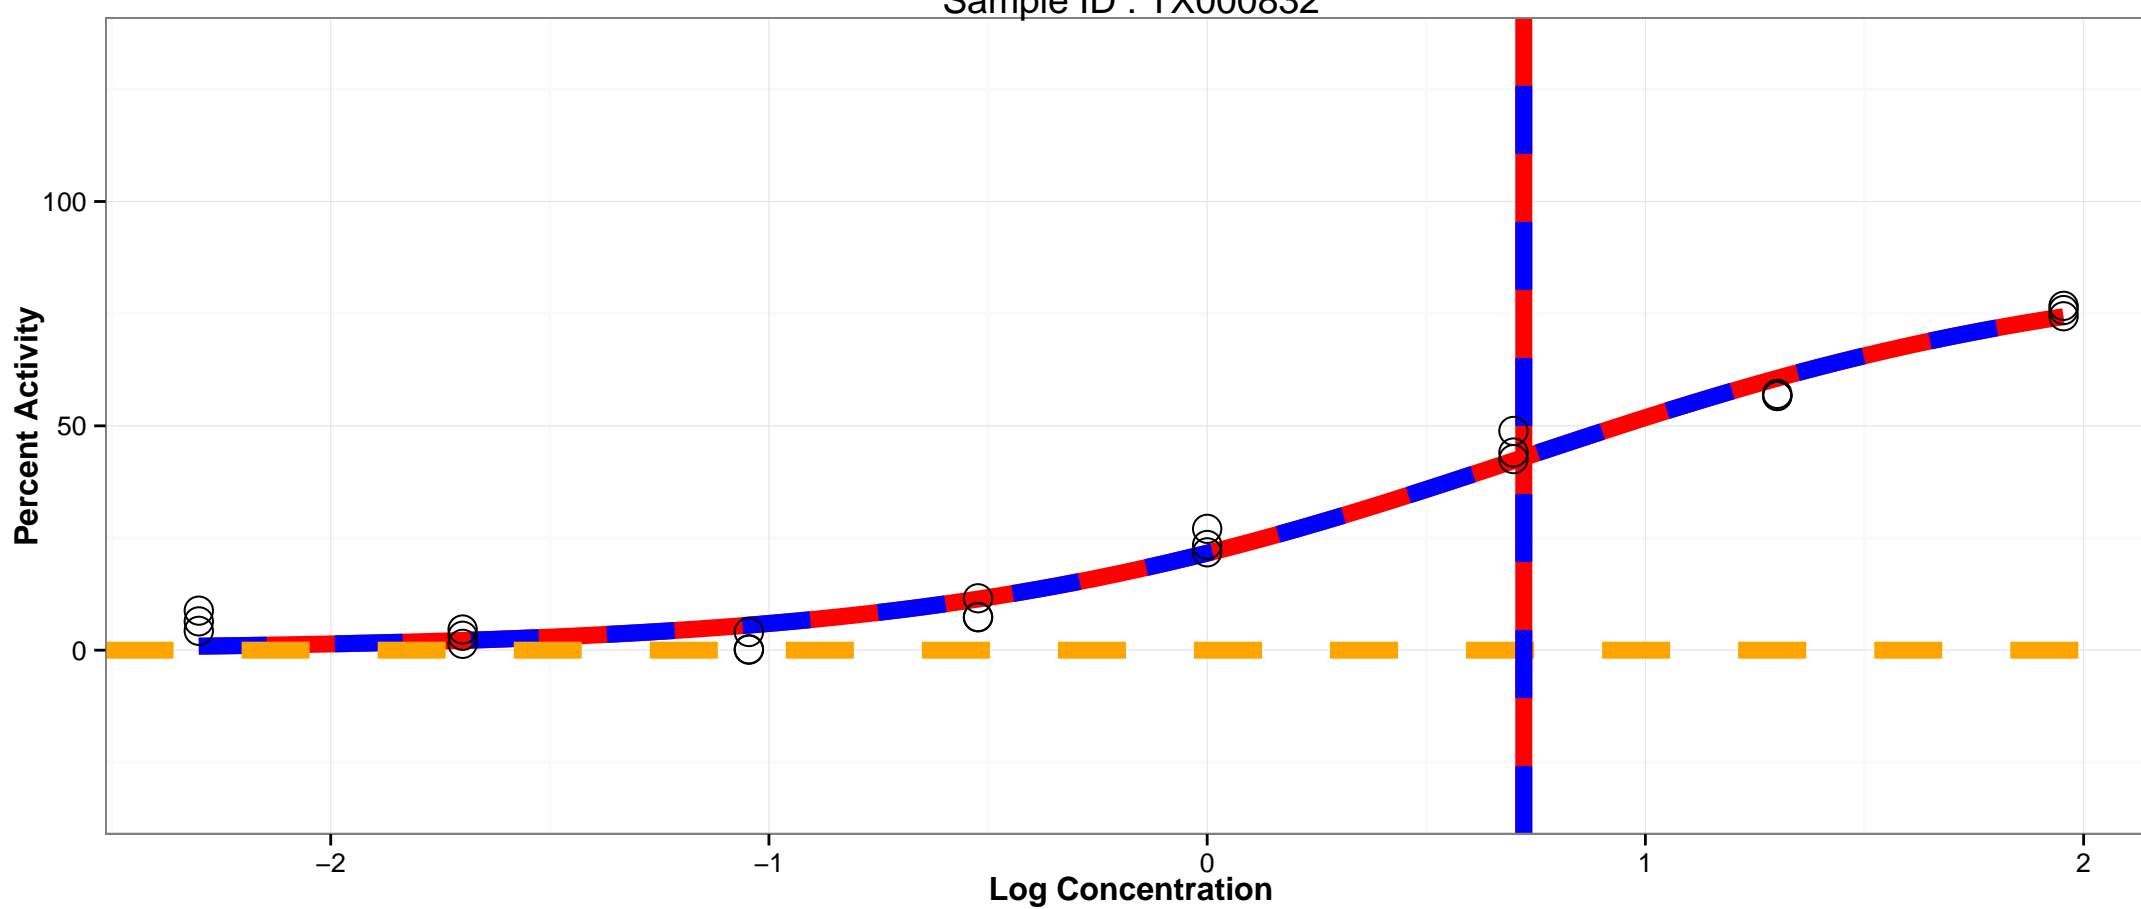

HILL MODEL

|     | tp   | ga    | gw     |
|-----|------|-------|--------|
| val | 85.9 | 0.723 | 0.655  |
| sd  | 6.18 | 0.142 | 0.0772 |

GAIN-LOSS MODEL

|     | tp   | ga    | gw    | la   | lw   |
|-----|------|-------|-------|------|------|
| val | 85.9 | 0.723 | 0.655 | 3.94 | 7.57 |
| sd  | NA   | NA    | NA    | NA   | NA   |

|      | CNST   | HILL   | GNLS   |
|------|--------|--------|--------|
| AIC  | 245.81 | 142.15 | 146.15 |
| PROB | 0      | 0.88   | 0.12   |
| RMSE | 38.3   | 3.76   | 3.76   |

MAX\_MEAN : 75.7 MAX\_MED : 75.8 BMAD : 5.69  
COFF : 20 HIT-CALL : 1 FITC : 42 ACTP : 1  
FLAGS :

Assay ID 1509 (NHEERL\_HEK293T\_CellTiterGLO)  
Sample ID : TX000832

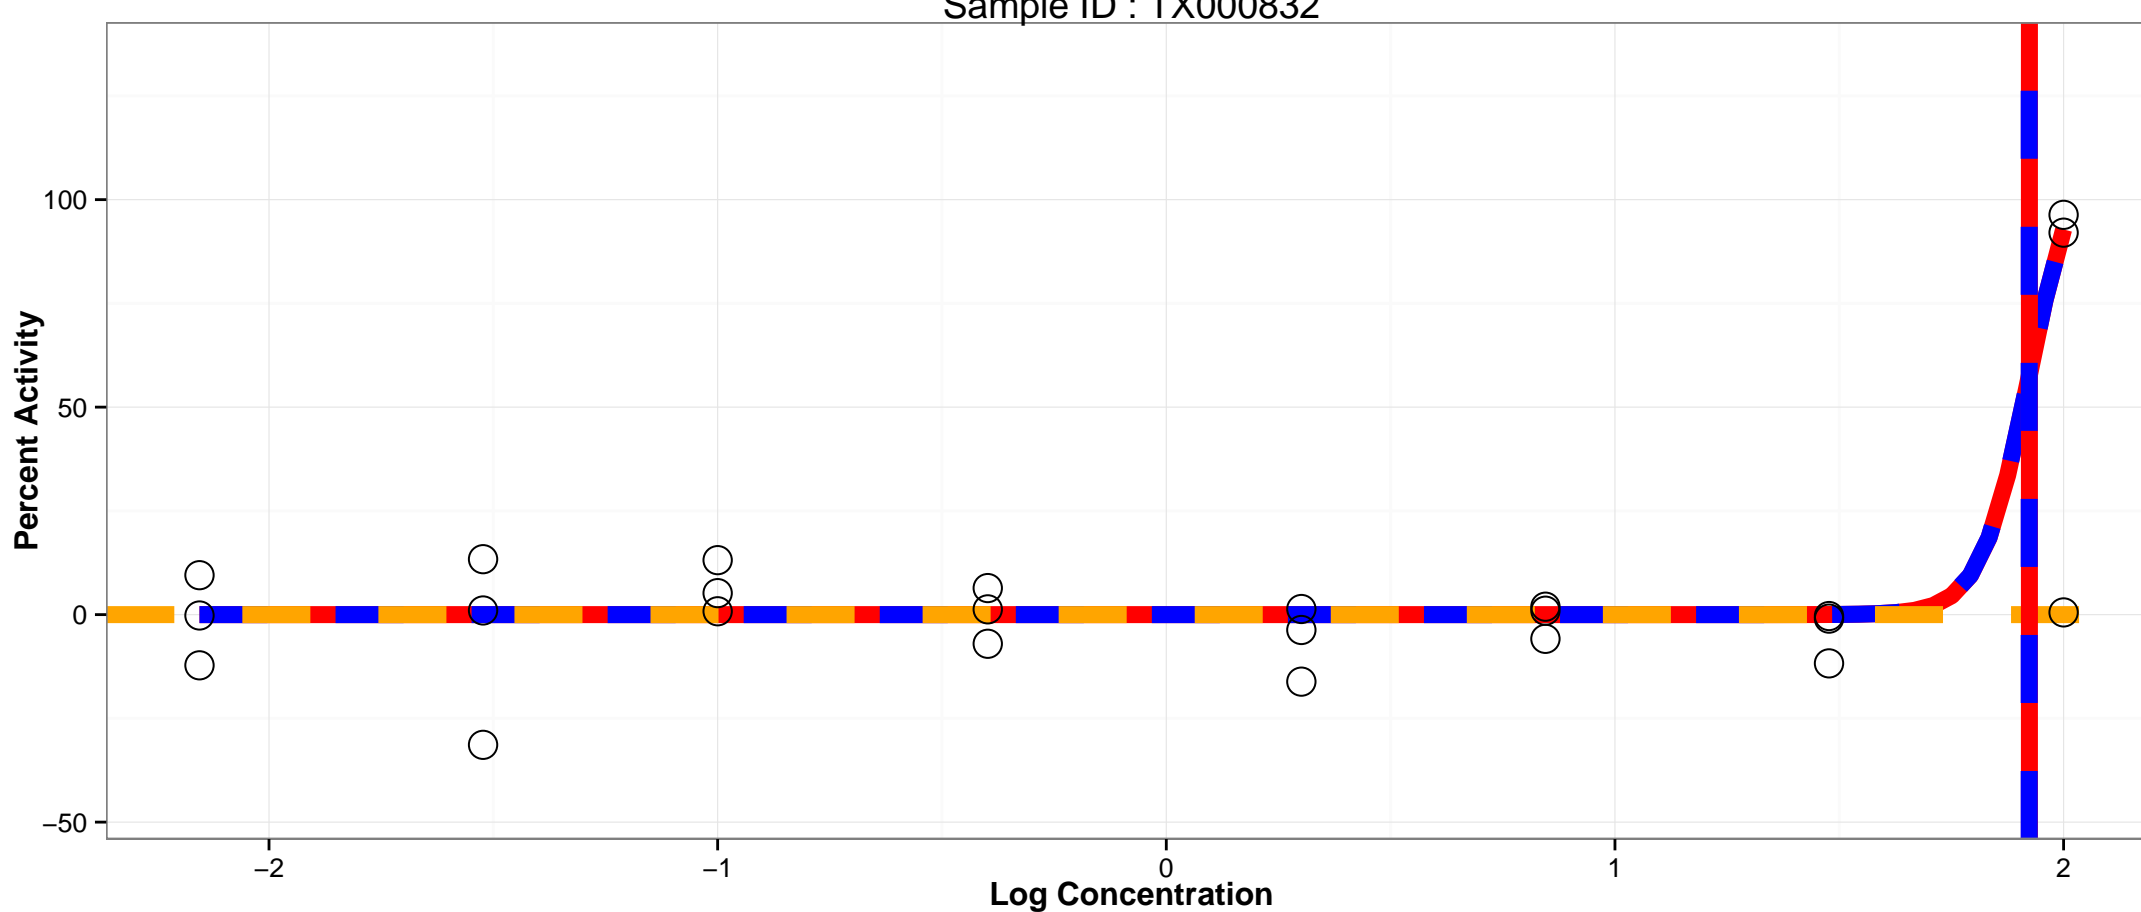

HILL MODEL

|     | tp  | ga     | gw   |
|-----|-----|--------|------|
| val | 116 | 1.92   | 8    |
| sd  | 119 | 0.0847 | 22.5 |

GAIN-LOSS MODEL

|     | tp  | ga     | gw   | la     | lw     |
|-----|-----|--------|------|--------|--------|
| val | 115 | 1.92   | 8    | 3.09   | 14.4   |
| sd  | 117 | 0.0844 | 22.1 | 133000 | 626000 |

|      | CNST   | HILL   | GNLS   |
|------|--------|--------|--------|
| AIC  | 209.58 | 198.62 | 202.62 |
| PROB | 0      | 0.88   | 0.12   |
| RMSE | 28.8   | 21.09  | 21.09  |

MAX\_MEAN : 63 MAX\_MED : 92.1 BMAD : 5.54  
COFF : 20 HIT-CALL : 1 FITC : 42 ACTP : 0.996  
FLAGS : 10; 6

Assay ID 1848 (NHEERL\_Quantilum\_inhib\_2\_dn)  
Sample ID : TX000832

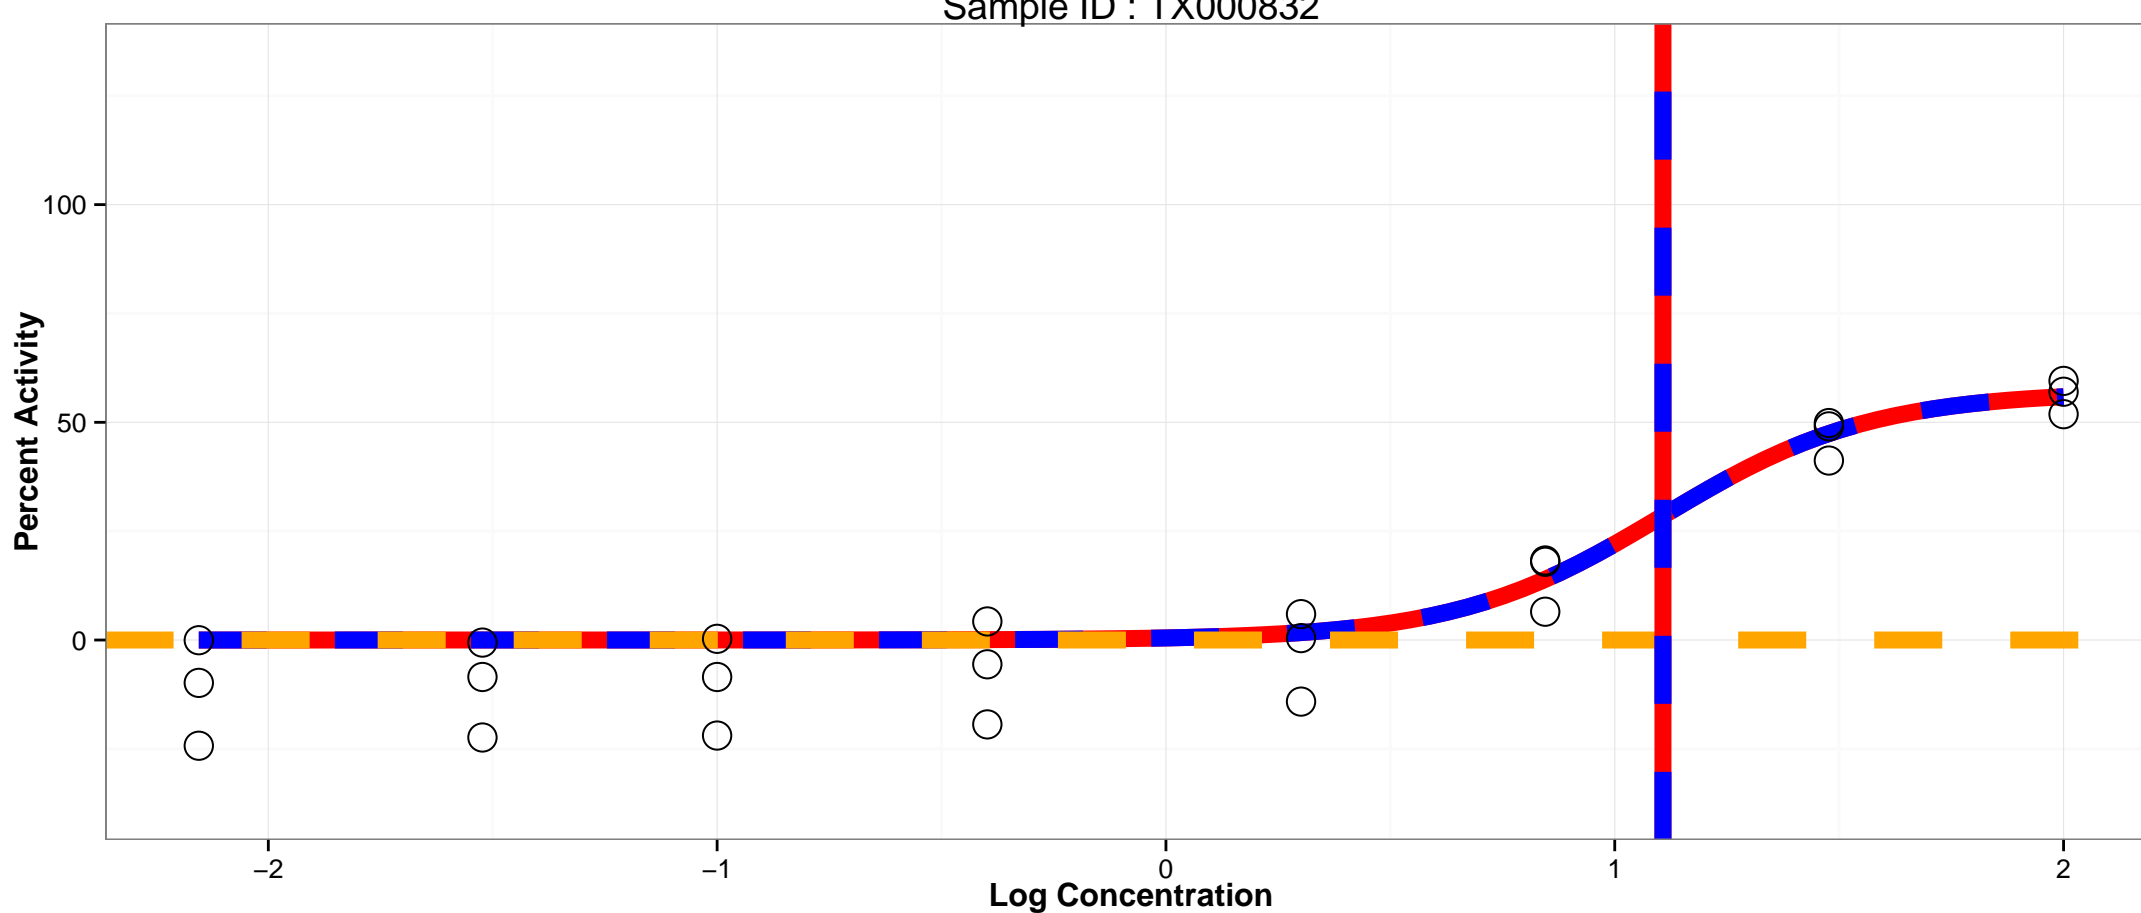

HILL MODEL

|     | tp   | ga    | gw    |
|-----|------|-------|-------|
| val | 57.1 | 1.11  | 1.87  |
| sd  | 5.62 | 0.119 | 0.575 |

GAIN-LOSS MODEL

|     | tp   | ga   | gw   | la   | lw   |
|-----|------|------|------|------|------|
| val | 57.1 | 1.11 | 1.87 | 3.76 | 17.4 |
| sd  | NA   | NA   | NA   | NA   | NA   |

|      | CNST   | HILL   | GNLS   |
|------|--------|--------|--------|
| AIC  | 230.73 | 187.97 | 191.97 |
| PROB | 0      | 0.88   | 0.12   |
| RMSE | 28.32  | 10.56  | 10.56  |

MAX\_MEAN : 56.1 MAX\_MED : 57 BMAD : 8.58  
COFF : 20 HIT-CALL : 1 FITC : 41 ACTP : 1  
FLAGS :

Chemical : Diuron  
CAS : 330-54-1

Assay ID 1508 (NHEERL\_TPO\_AUR\_dn)  
Sample ID : TX000848

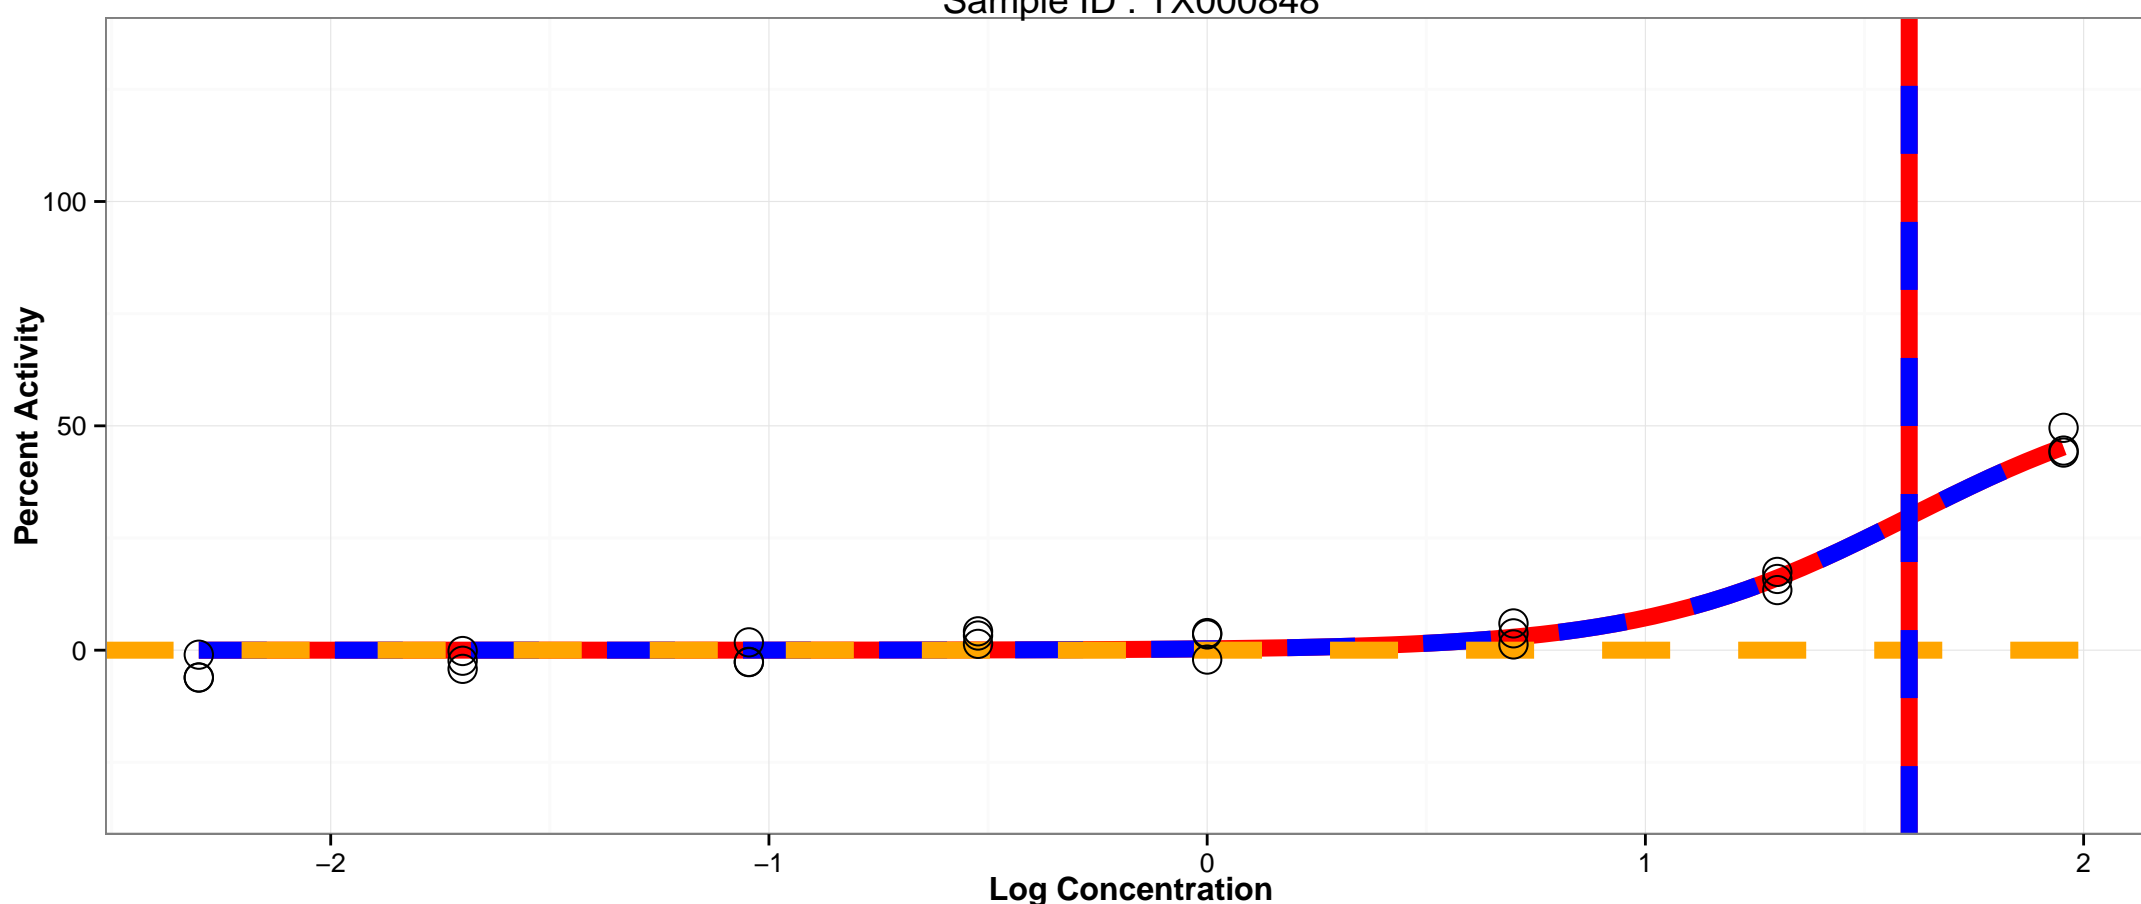

HILL MODEL

|     | tp   | ga    | gw    |
|-----|------|-------|-------|
| val | 59.5 | 1.6   | 1.43  |
| sd  | 13.2 | 0.181 | 0.404 |

GAIN-LOSS MODEL

|     | tp   | ga    | gw    | la   | lw   |
|-----|------|-------|-------|------|------|
| val | 59.5 | 1.6   | 1.43  | 3.25 | 5.78 |
| sd  | 13.2 | 0.181 | 0.404 | 569  | 2530 |

|      | CNST   | HILL   | GNLS   |
|------|--------|--------|--------|
| AIC  | 196.52 | 131.46 | 135.46 |
| PROB | 0      | 0.88   | 0.12   |
| RMSE | 17.49  | 2.99   | 2.99   |

MAX\_MEAN : 46 MAX\_MED : 44.5 BMAD : 5.69  
COFF : 20 HIT-CALL : 1 FITC : 42 ACTP : 1  
FLAGS : 6

Assay ID 1509 (NHEERL\_HEK293T\_CellTiterGLO)  
Sample ID : TX000848

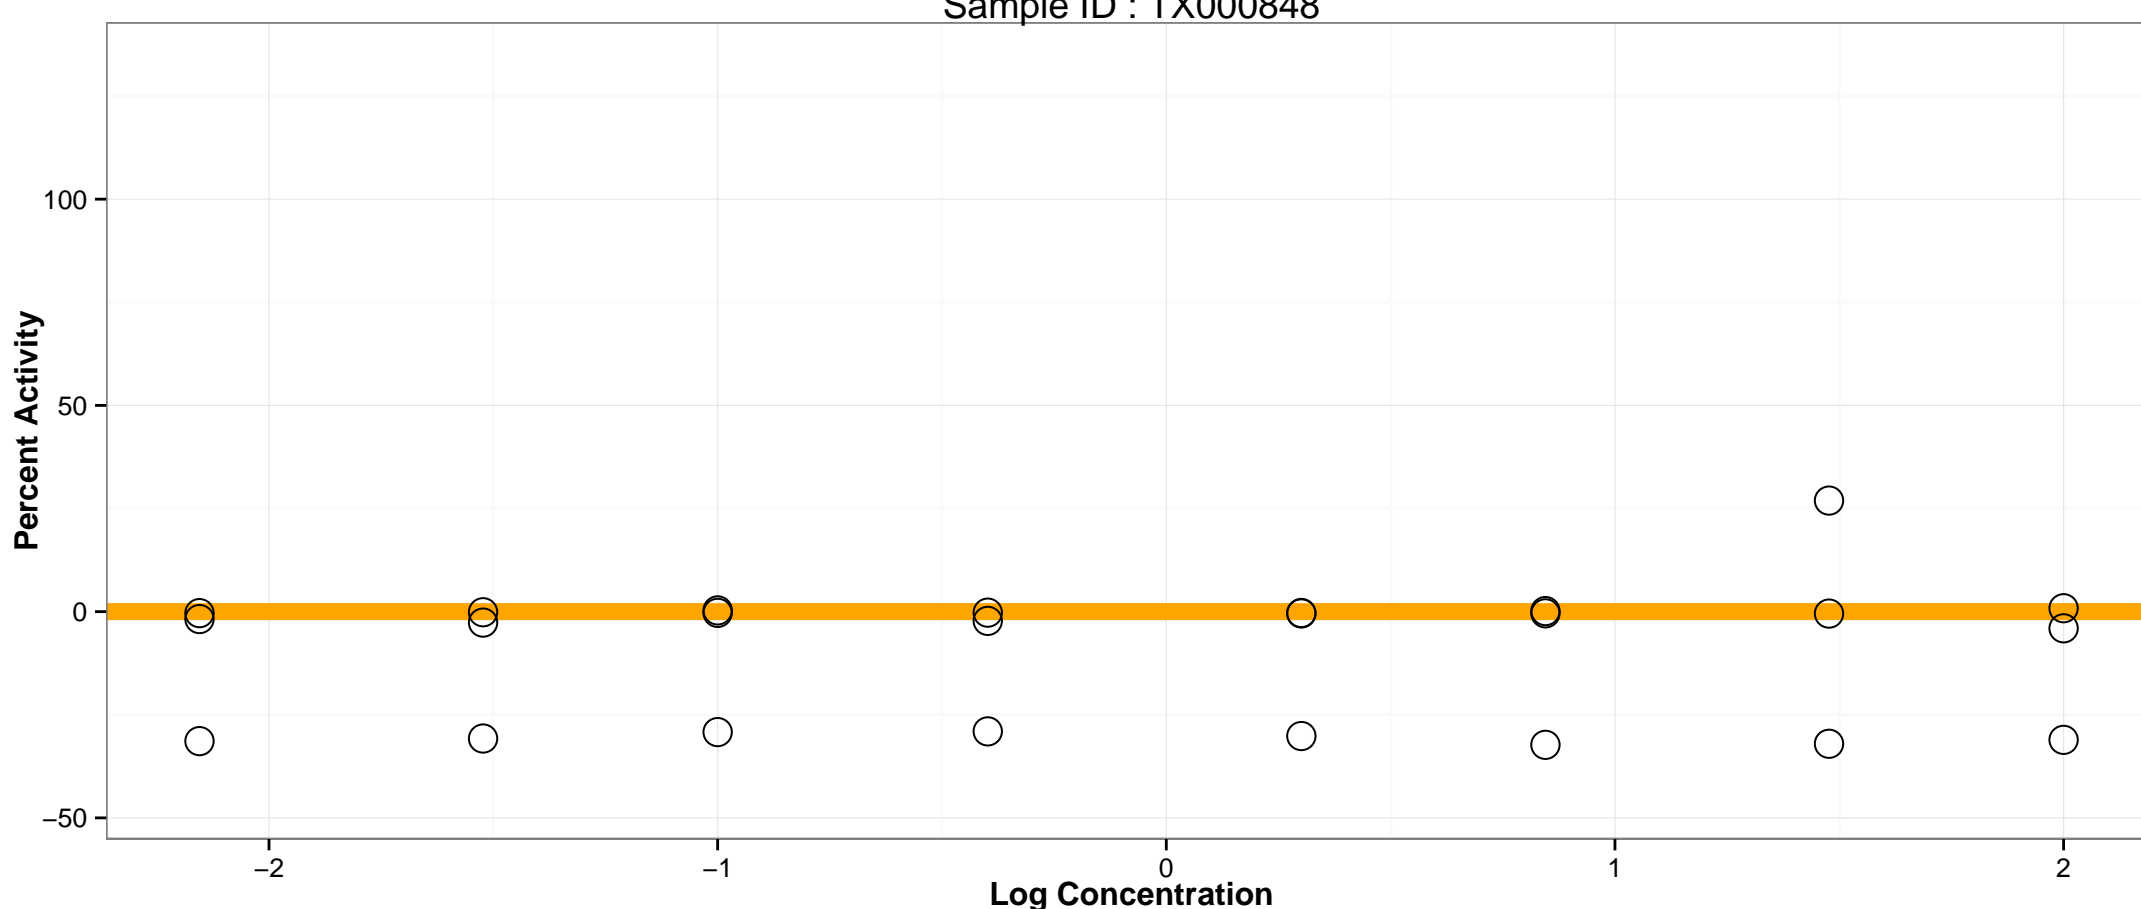

HILL MODEL

HILL MODEL: Not applicable

GAIN-LOSS MODEL

GNLS MODEL: Not applicable

|      | CNST   | HILL | GNLS |
|------|--------|------|------|
| AIC  | 210.85 | NA   | NA   |
| PROB | 1      | NA   | NA   |
| RMSE | 18.62  | NA   | NA   |

MAX\_MEAN : -1.85 MAX\_MED : -0.285 BMAD : 5.54  
COFF : 20 HIT-CALL : 0 FITC : 4 ACTP : 0  
FLAGS :

Assay ID 1848 (NHEERL\_Quantilum\_inhib\_2\_dn)  
Sample ID : TX000848

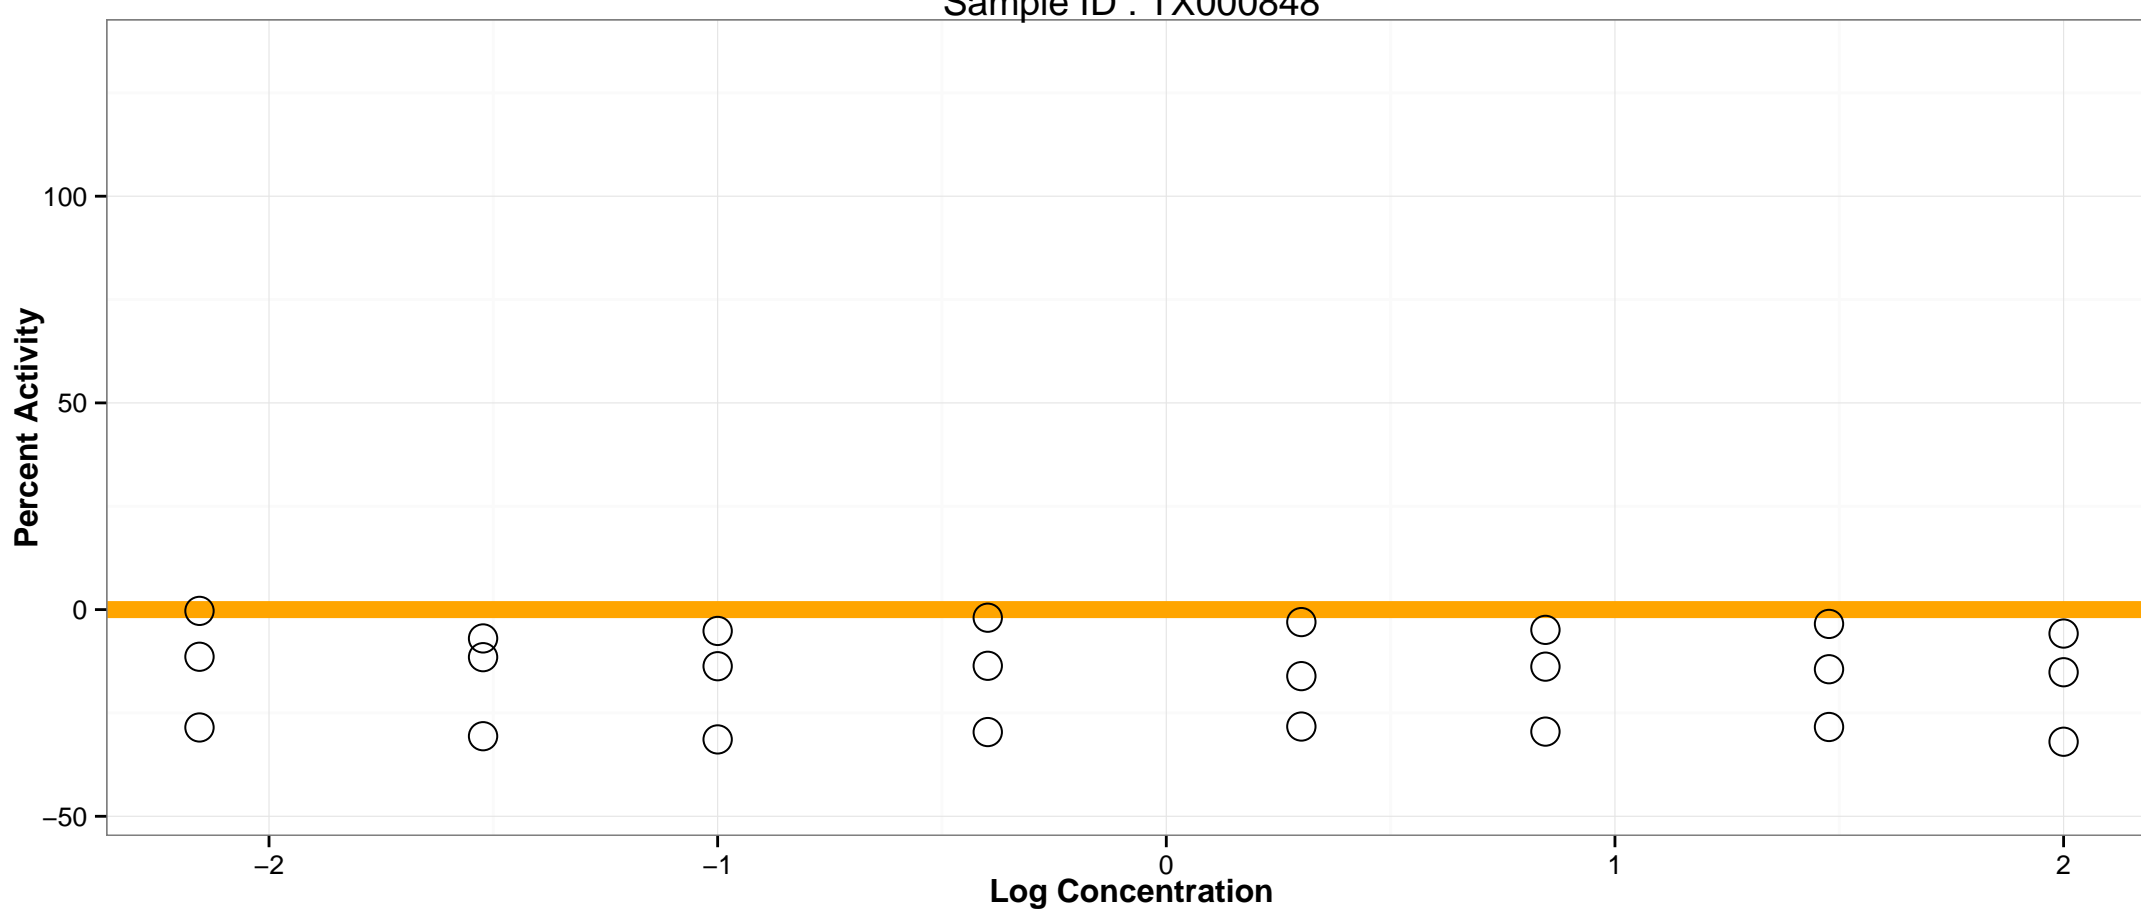

HILL MODEL

HILL MODEL: Not applicable

GAIN-LOSS MODEL

GNLS MODEL: Not applicable

|      | CNST   | HILL | GNLS |
|------|--------|------|------|
| AIC  | 214.59 | NA   | NA   |
| PROB | 1      | NA   | NA   |
| RMSE | 19.13  | NA   | NA   |

MAX\_MEAN : -13.4 MAX\_MED : -11.4 BMAD : 8.58  
COFF : 20 HIT-CALL : 0 FITC : 4 ACTP : 0  
FLAGS :

Chemical : Oxytetracycline dihydrate  
CAS : 6153-64-6

Assay ID 1508 (NHEERL\_TPO\_AUR\_dn)  
Sample ID : TX000854

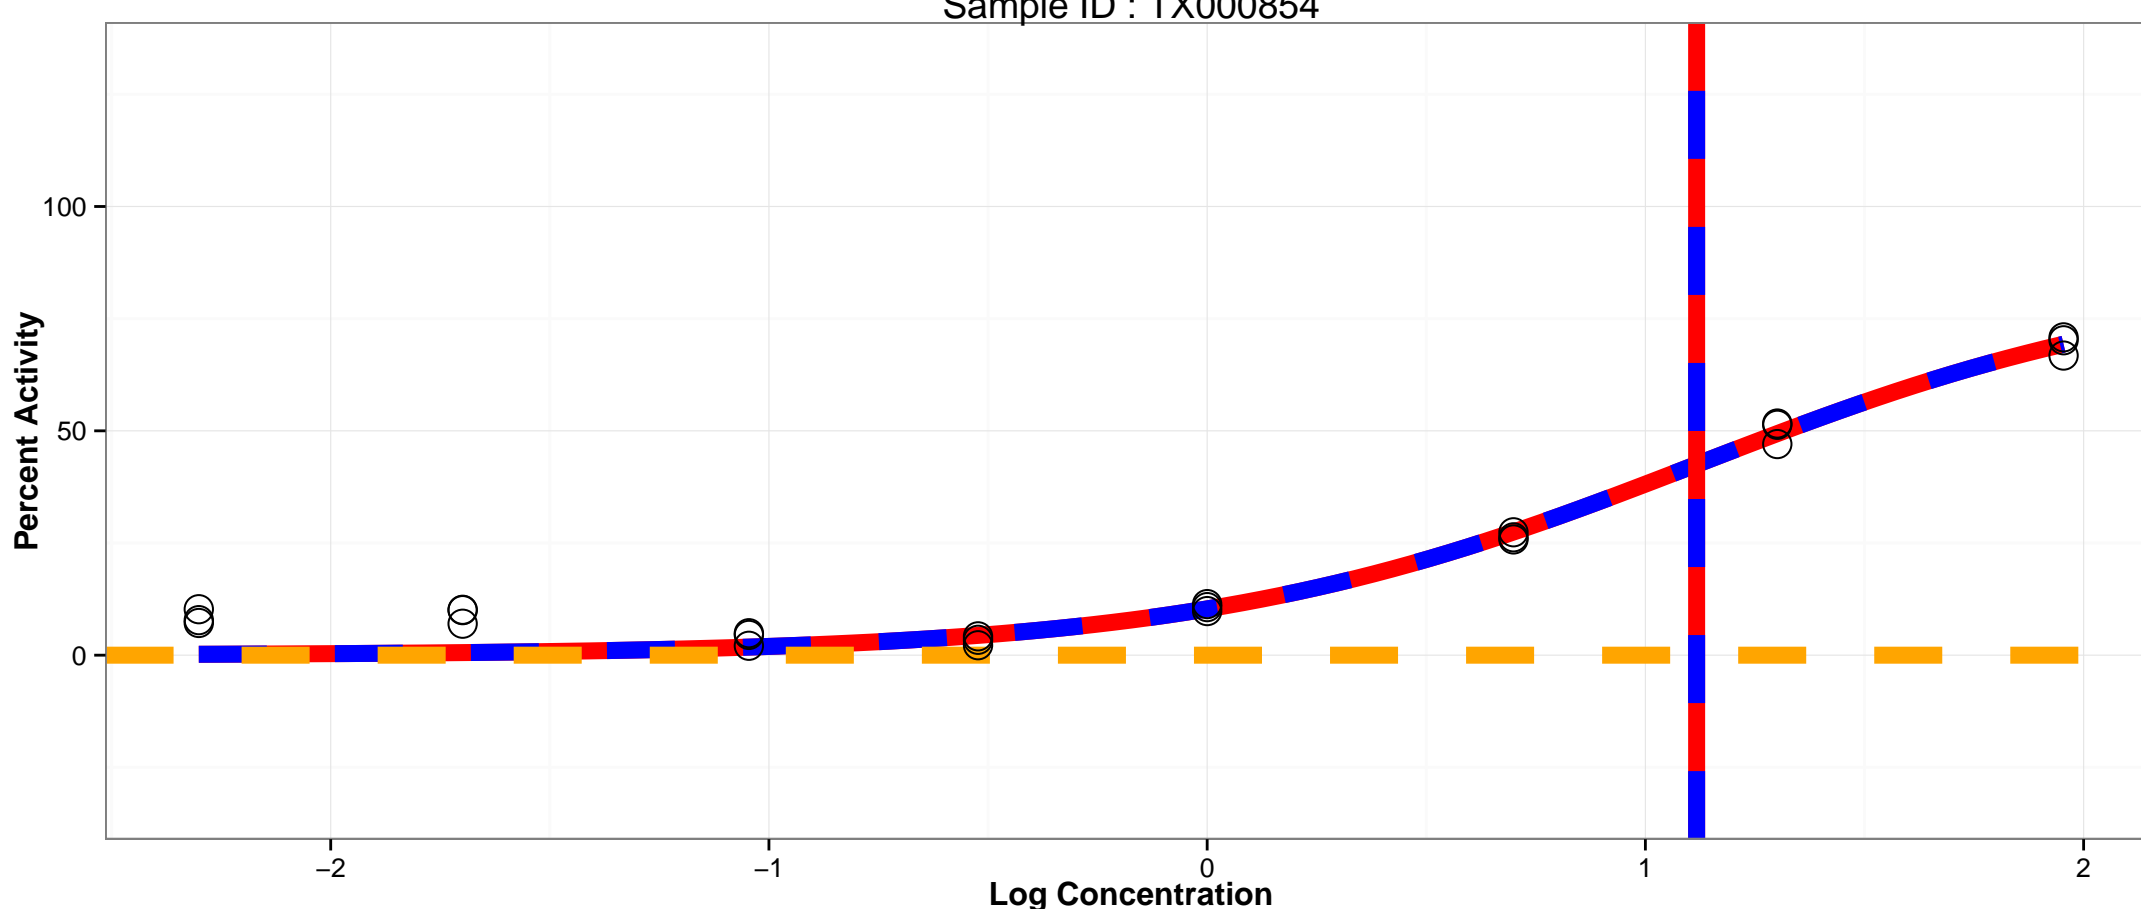

HILL MODEL

|     | tp   | ga    | gw     |
|-----|------|-------|--------|
| val | 85   | 1.12  | 0.77   |
| sd  | 7.02 | 0.123 | 0.0876 |

GAIN-LOSS MODEL

|     | tp   | ga    | gw     | la   | lw   |
|-----|------|-------|--------|------|------|
| val | 85   | 1.12  | 0.77   | 2.66 | 9.7  |
| sd  | 7.01 | 0.123 | 0.0874 | 297  | 4090 |

|      | CNST   | HILL   | GNLS   |
|------|--------|--------|--------|
| AIC  | 235.42 | 146.63 | 150.63 |
| PROB | 0      | 0.88   | 0.12   |
| RMSE | 32.23  | 4.49   | 4.49   |

MAX\_MEAN : 69.3 MAX\_MED : 70.2 BMAD : 5.69  
COFF : 20 HIT-CALL : 1 FITC : 42 ACTP : 1  
FLAGS :

Assay ID 1509 (NHEERL\_HEK293T\_CellTiterGLO)  
Sample ID : TX000854

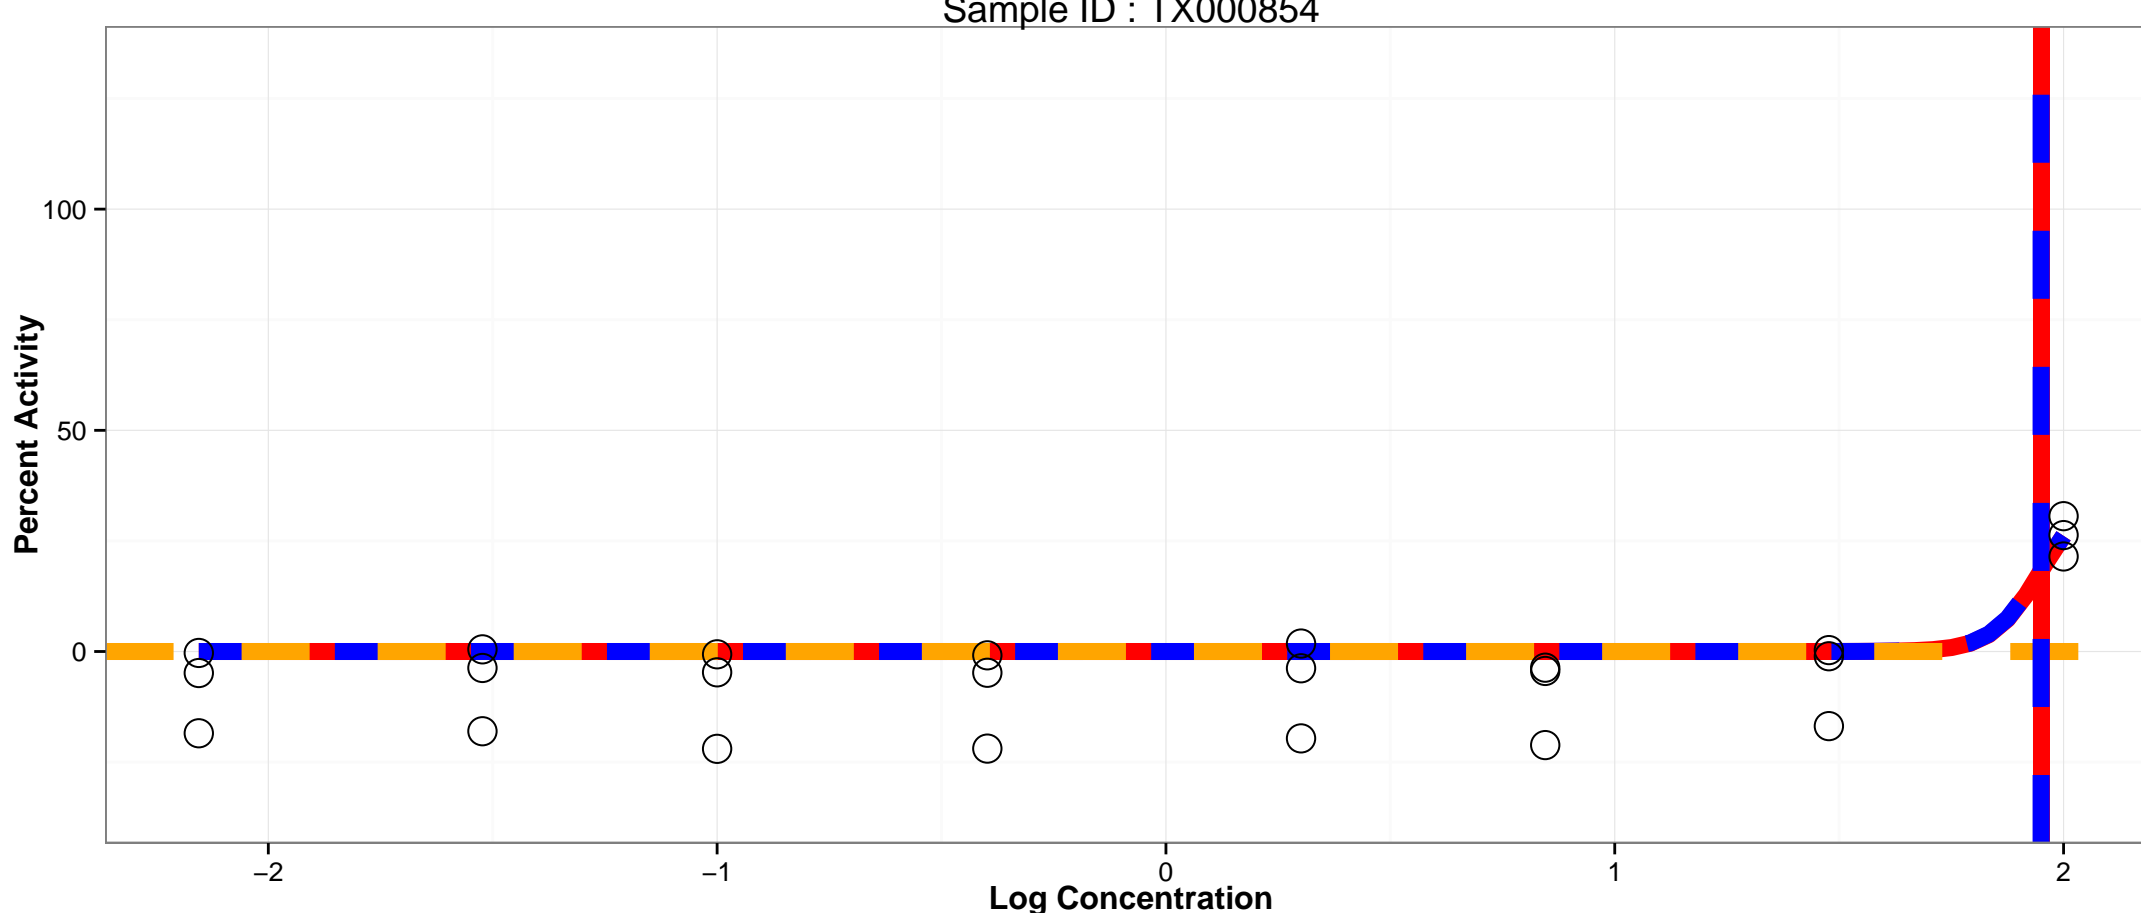

HILL MODEL

|     | tp   | ga   | gw  |
|-----|------|------|-----|
| val | 36.7 | 1.95 | 8   |
| sd  | 1310 | 4.78 | 320 |

GAIN-LOSS MODEL

|     | tp   | ga   | gw   | la   | lw    |
|-----|------|------|------|------|-------|
| val | 36.7 | 1.95 | 7.92 | 4    | 3.03  |
| sd  | 357  | 1.37 | 82.1 | 8270 | 12600 |

|      | CNST   | HILL   | GNLS   |
|------|--------|--------|--------|
| AIC  | 199.29 | 190.51 | 194.51 |
| PROB | 0.01   | 0.87   | 0.12   |
| RMSE | 14.39  | 11.04  | 11.04  |

MAX\_MEAN : 26.1 MAX\_MED : 26.3 BMAD : 5.54  
COFF : 20 HIT-CALL : 1 FITC : 42 ACTP : 0.989  
FLAGS : 6

Assay ID 1848 (NHEERL\_Quantilum\_inhib\_2\_dn)  
Sample ID : TX000854

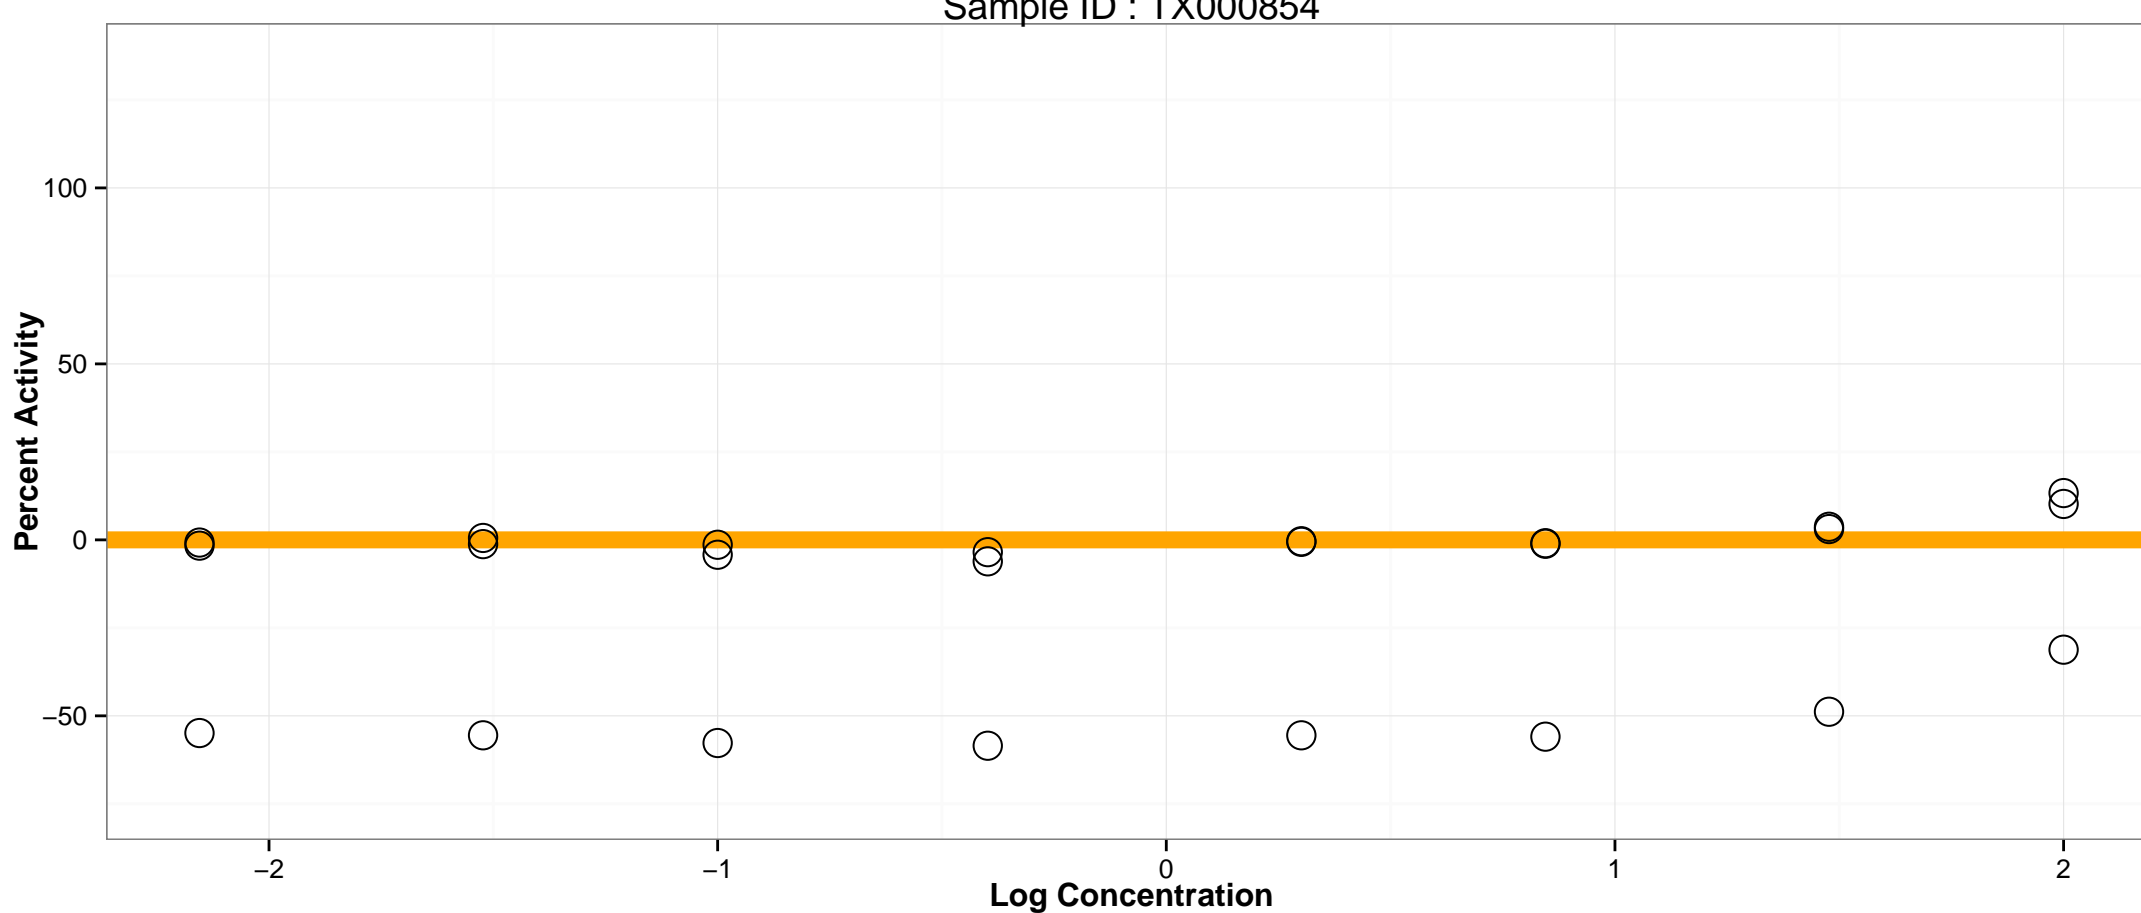

HILL MODEL

HILL MODEL: Not applicable

GAIN-LOSS MODEL

GNLS MODEL: Not applicable

|      | CNST   | HILL | GNLS |
|------|--------|------|------|
| AIC  | 233.57 | NA   | NA   |
| PROB | 1      | NA   | NA   |
| RMSE | 30.81  | NA   | NA   |

MAX\_MEAN : -2.55 MAX\_MED : 10.2 BMAD : 8.58  
COFF : 20 HIT-CALL : 0 FITC : 4 ACTP : 0  
FLAGS : 10

Chemical : Napropamide  
CAS : 15299-99-7

Assay ID 1508 (NHEERL\_TPO\_AUR\_dn)  
Sample ID : TX000870

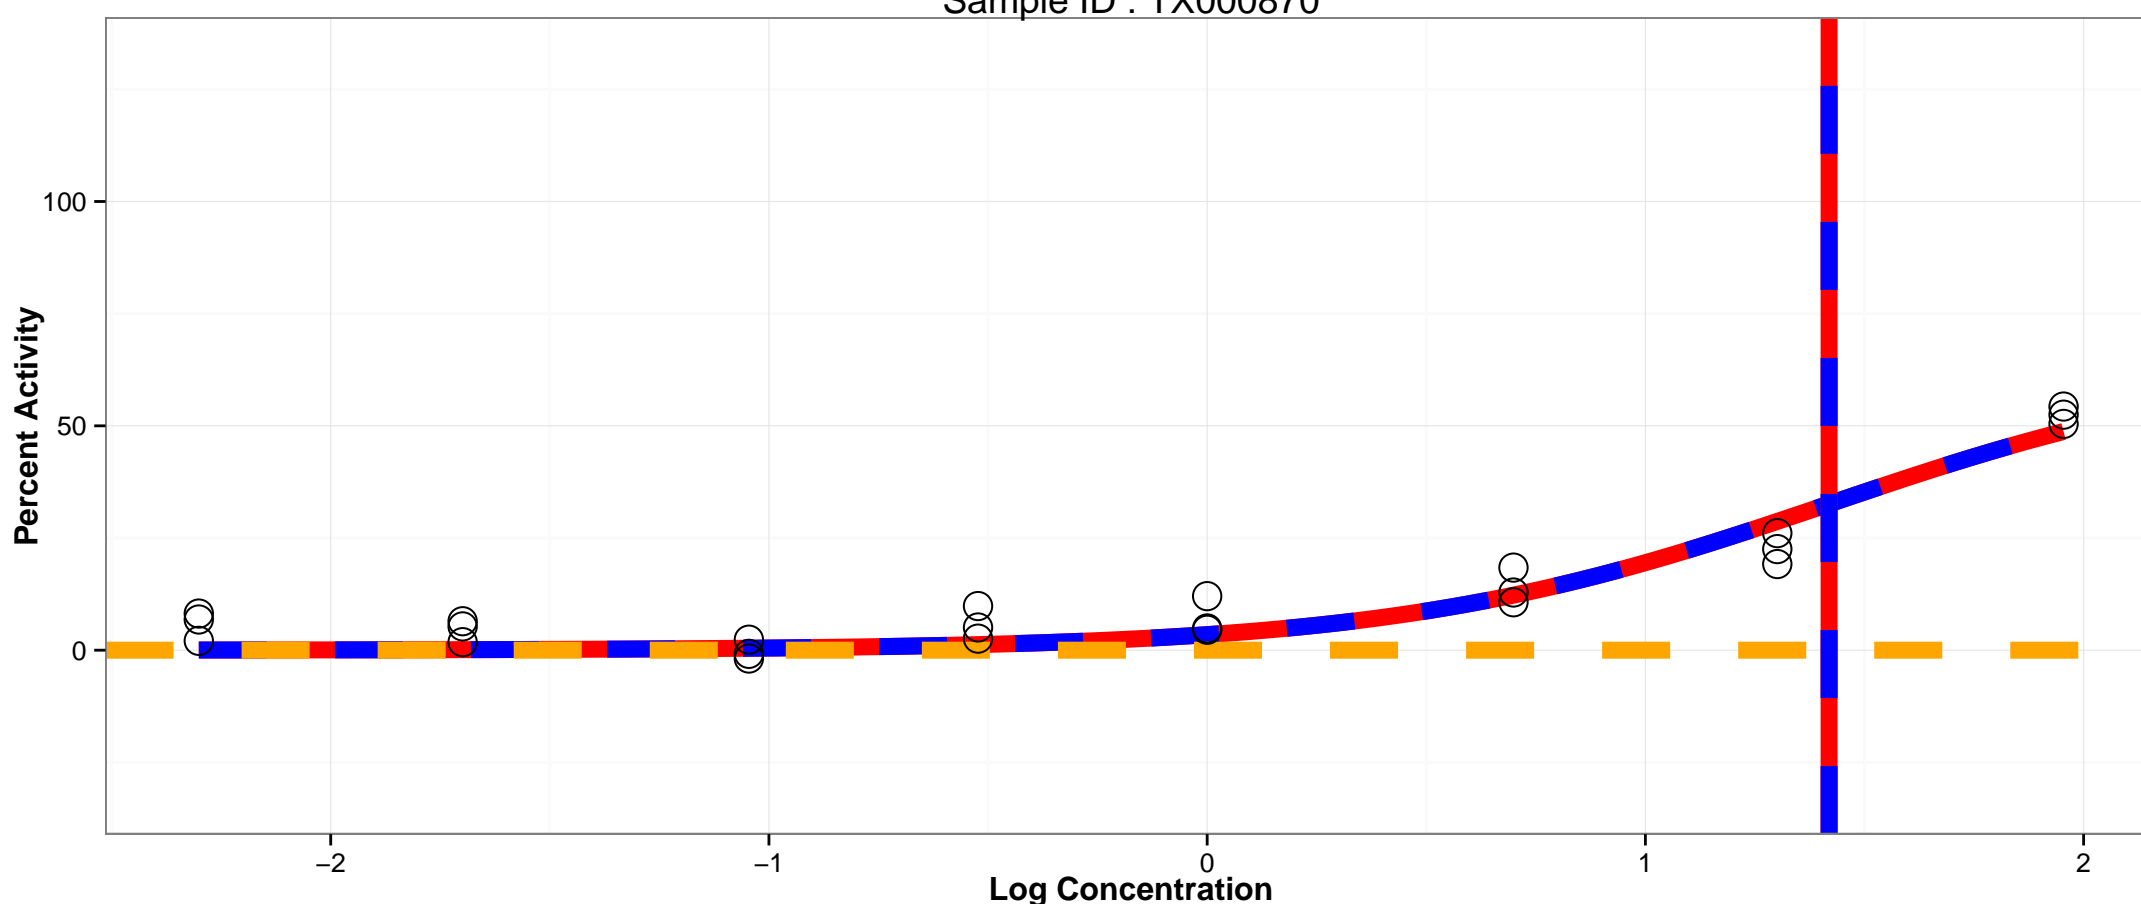

HILL MODEL

|     | tp   | ga    | gw    |
|-----|------|-------|-------|
| val | 65.2 | 1.42  | 0.882 |
| sd  | 9.92 | 0.182 | 0.168 |

GAIN-LOSS MODEL

|     | tp   | ga    | gw    | la    | lw     |
|-----|------|-------|-------|-------|--------|
| val | 65.2 | 1.42  | 0.882 | 3.95  | 5.98   |
| sd  | 9.92 | 0.182 | 0.168 | 44800 | 134000 |

|      | CNST   | HILL   | GNLS   |
|------|--------|--------|--------|
| AIC  | 212.46 | 155.36 | 159.36 |
| PROB | 0      | 0.88   | 0.12   |
| RMSE | 21.36  | 4.95   | 4.95   |

MAX\_MEAN : 52.4 MAX\_MED : 52.5 BMAD : 5.69  
COFF : 20 HIT-CALL : 1 FITC : 42 ACTP : 1  
FLAGS :

Assay ID 1509 (NHEERL\_HEK293T\_CellTiterGLO)  
Sample ID : TX000870

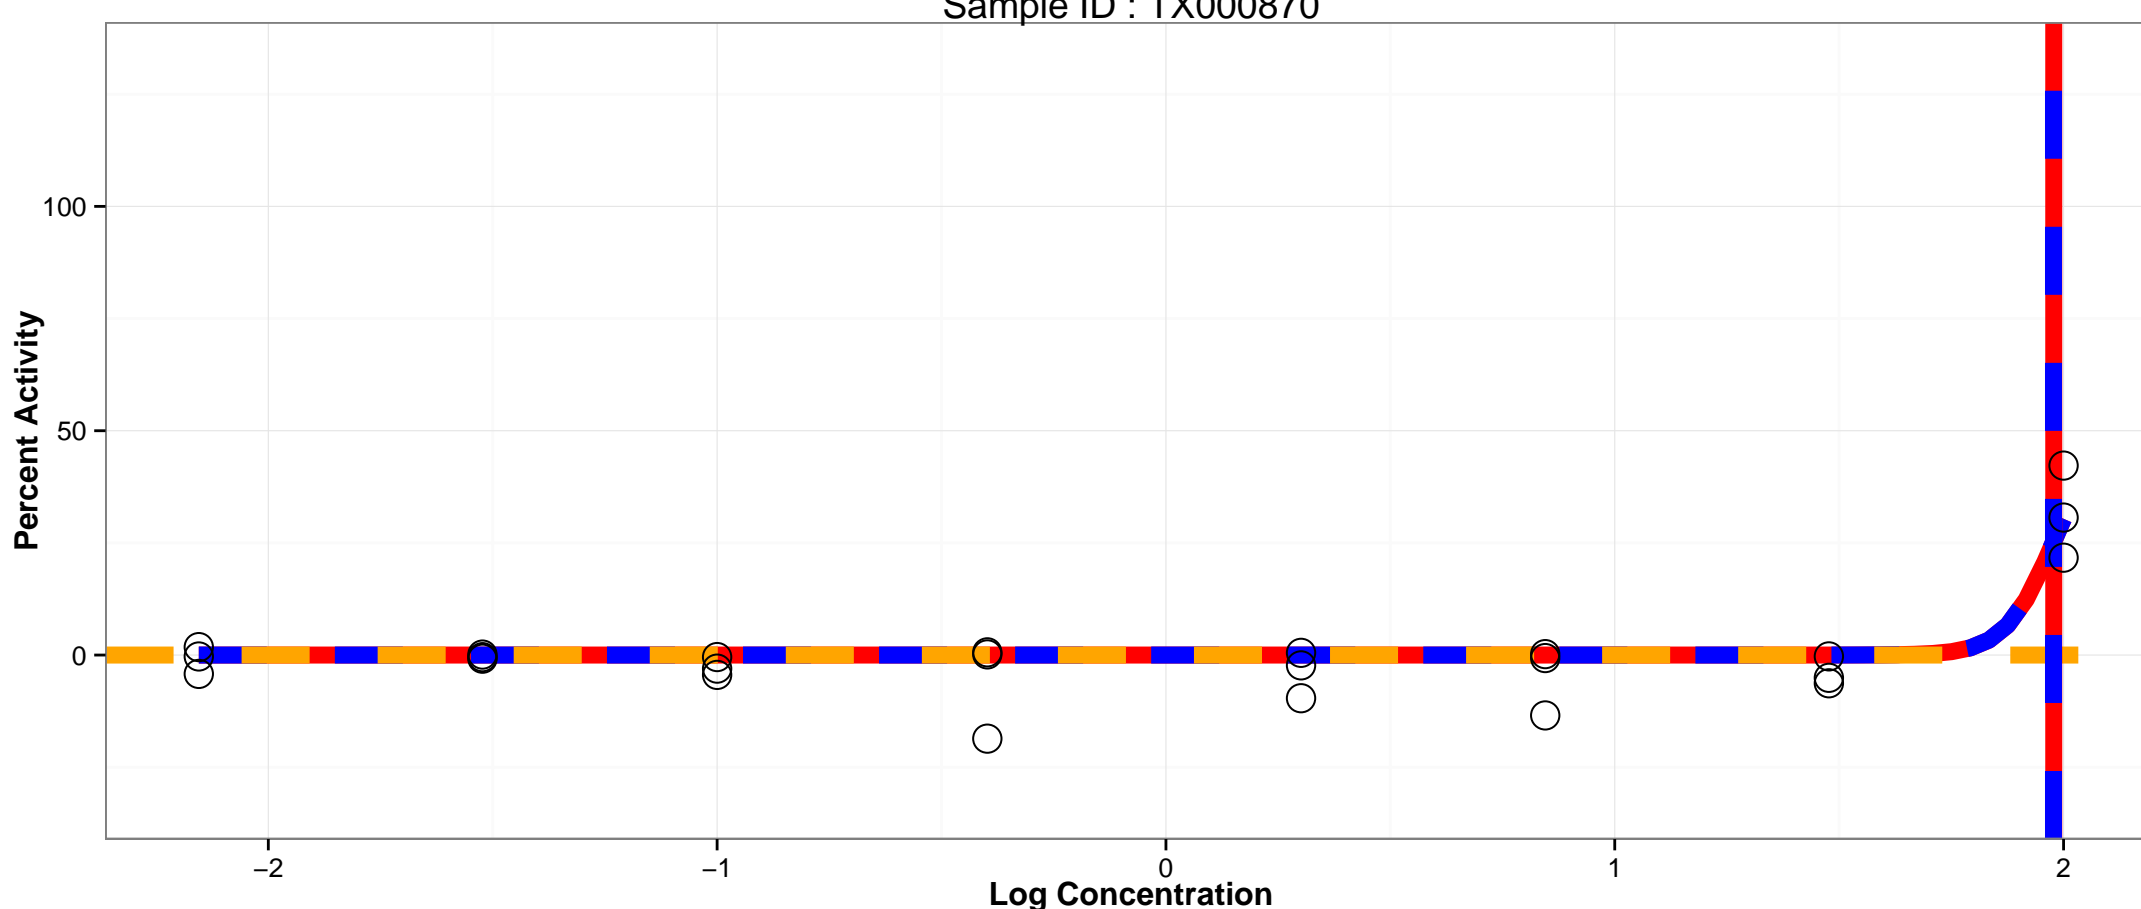

HILL MODEL

|     | tp   | ga     | gw   |
|-----|------|--------|------|
| val | 50.7 | 1.98   | 8    |
| sd  | 22.7 | 0.0386 | 15.7 |

GAIN-LOSS MODEL

|     | tp   | ga    | gw   | la    | lw    |
|-----|------|-------|------|-------|-------|
| val | 50.5 | 1.98  | 8    | 3.97  | 3.68  |
| sd  | 22.7 | 0.039 | 15.7 | 16400 | 30700 |

|      | CNST   | HILL  | GNLS  |
|------|--------|-------|-------|
| AIC  | 181.97 | 159.9 | 163.9 |
| PROB | 0      | 0.88  | 0.12  |
| RMSE | 12.81  | 6.32  | 6.32  |

MAX\_MEAN : 31.5 MAX\_MED : 30.7 BMAD : 5.54  
COFF : 20 HIT-CALL : 1 FITC : 42 ACTP : 1  
FLAGS : 6

Assay ID 1848 (NHEERL\_Quantilum\_inhib\_2\_dn)  
Sample ID : TX000870

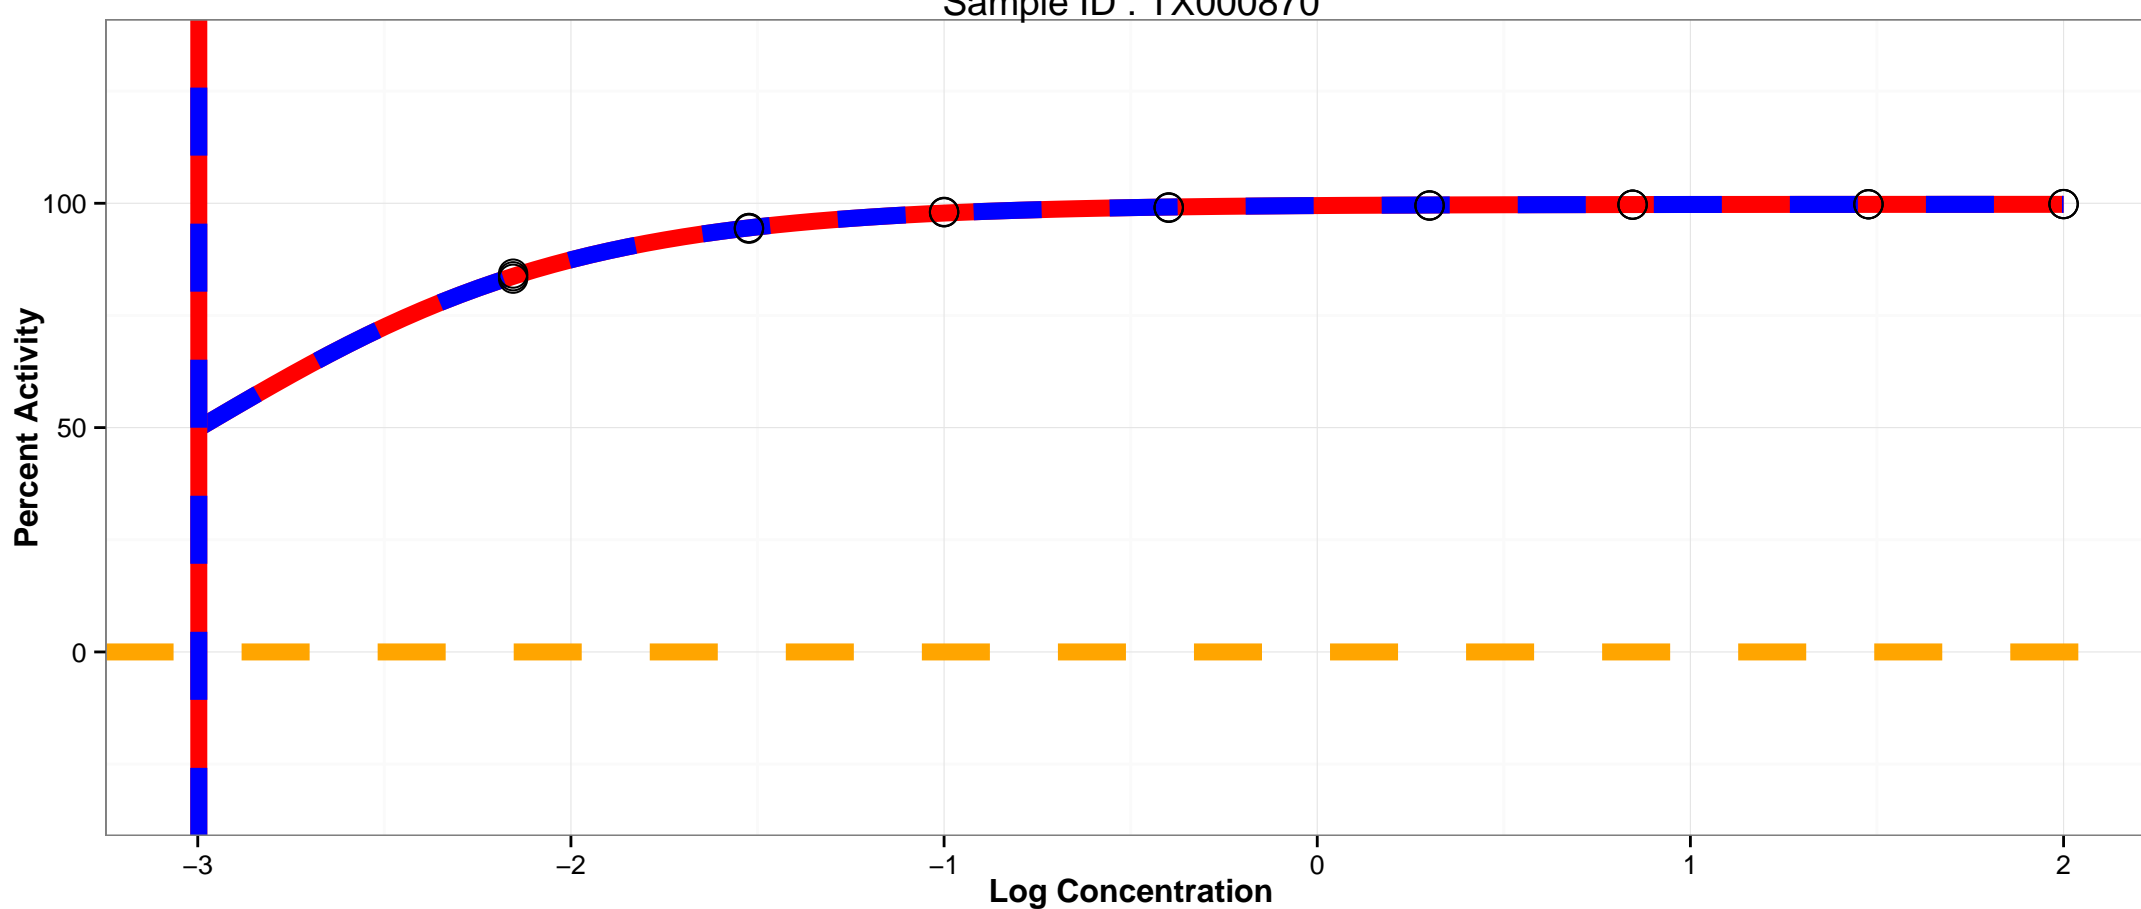

HILL MODEL

|     | tp     | ga     | gw     |
|-----|--------|--------|--------|
| val | 99.8   | -3     | 0.852  |
| sd  | 0.0715 | 0.0149 | 0.0088 |

GAIN-LOSS MODEL

|     | tp   | ga | gw    | la   | lw   |
|-----|------|----|-------|------|------|
| val | 99.8 | -3 | 0.852 | 3.97 | 17.8 |
| sd  | NA   | NA | NA    | NA   | NA   |

|      | CNST   | HILL  | GNLS  |
|------|--------|-------|-------|
| AIC  | 649.76 | -8.34 | -4.34 |
| PROB | 0      | 0.88  | 0.12  |
| RMSE | 96.91  | 0.2   | 0.2   |

MAX\_MEAN : 99.8 MAX\_MED : 99.8 BMAD : 8.58  
COFF : 20 HIT-CALL : 1 FITC : 40 ACTP : 1  
FLAGS :

Chemical : Dipropyl 2,5-pyridinedicarboxylate  
CAS : 136-45-8

Assay ID 1508 (NHEERL\_TPO\_AUR\_dn)  
Sample ID : TX000876

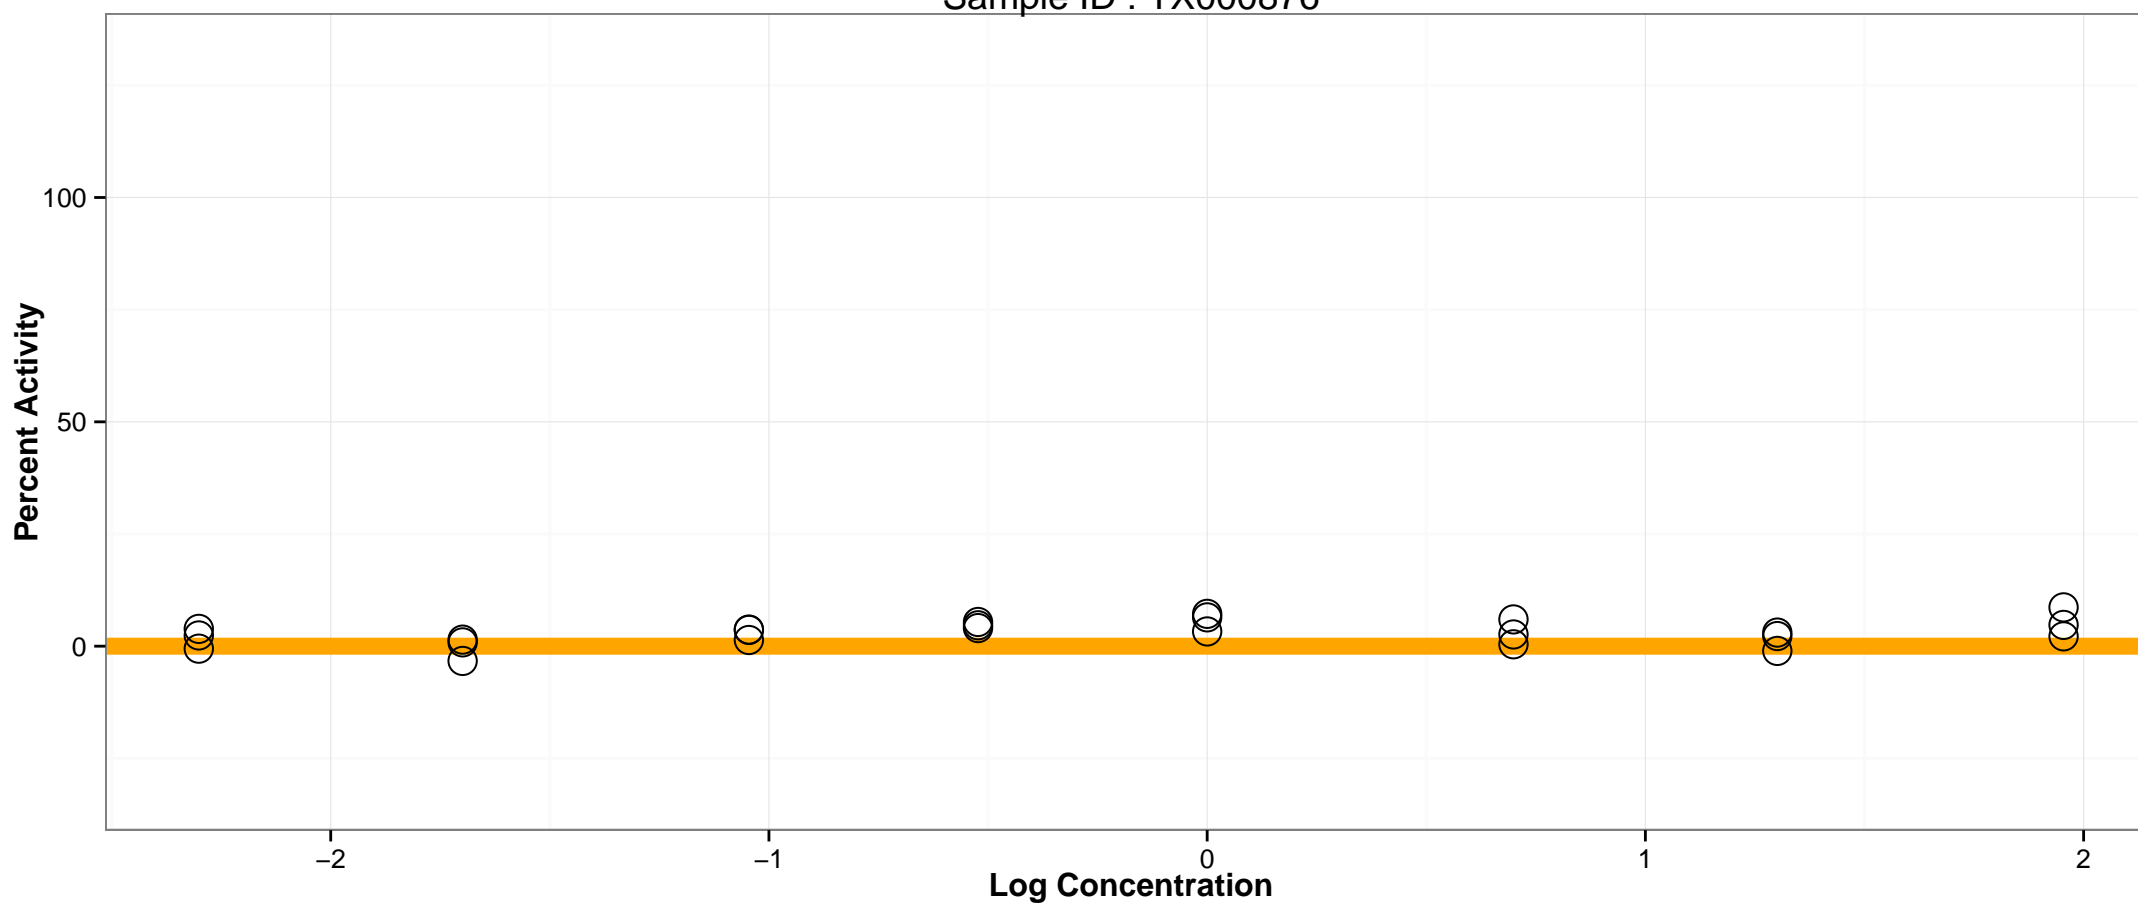

HILL MODEL

HILL MODEL: Not applicable

GAIN-LOSS MODEL

GNLS MODEL: Not applicable

|      | CNST   | HILL | GNLS |
|------|--------|------|------|
| AIC  | 140.22 | NA   | NA   |
| PROB | 1      | NA   | NA   |
| RMSE | 4.06   | NA   | NA   |

MAX\_MEAN : 5.65 MAX\_MED : 6.43 BMAD : 5.69  
COFF : 20 HIT-CALL : 0 FITC : 4 ACTP : 0  
FLAGS :

Assay ID 1509 (NHEERL\_HEK293T\_CellTiterGLO)  
Sample ID : TX000876

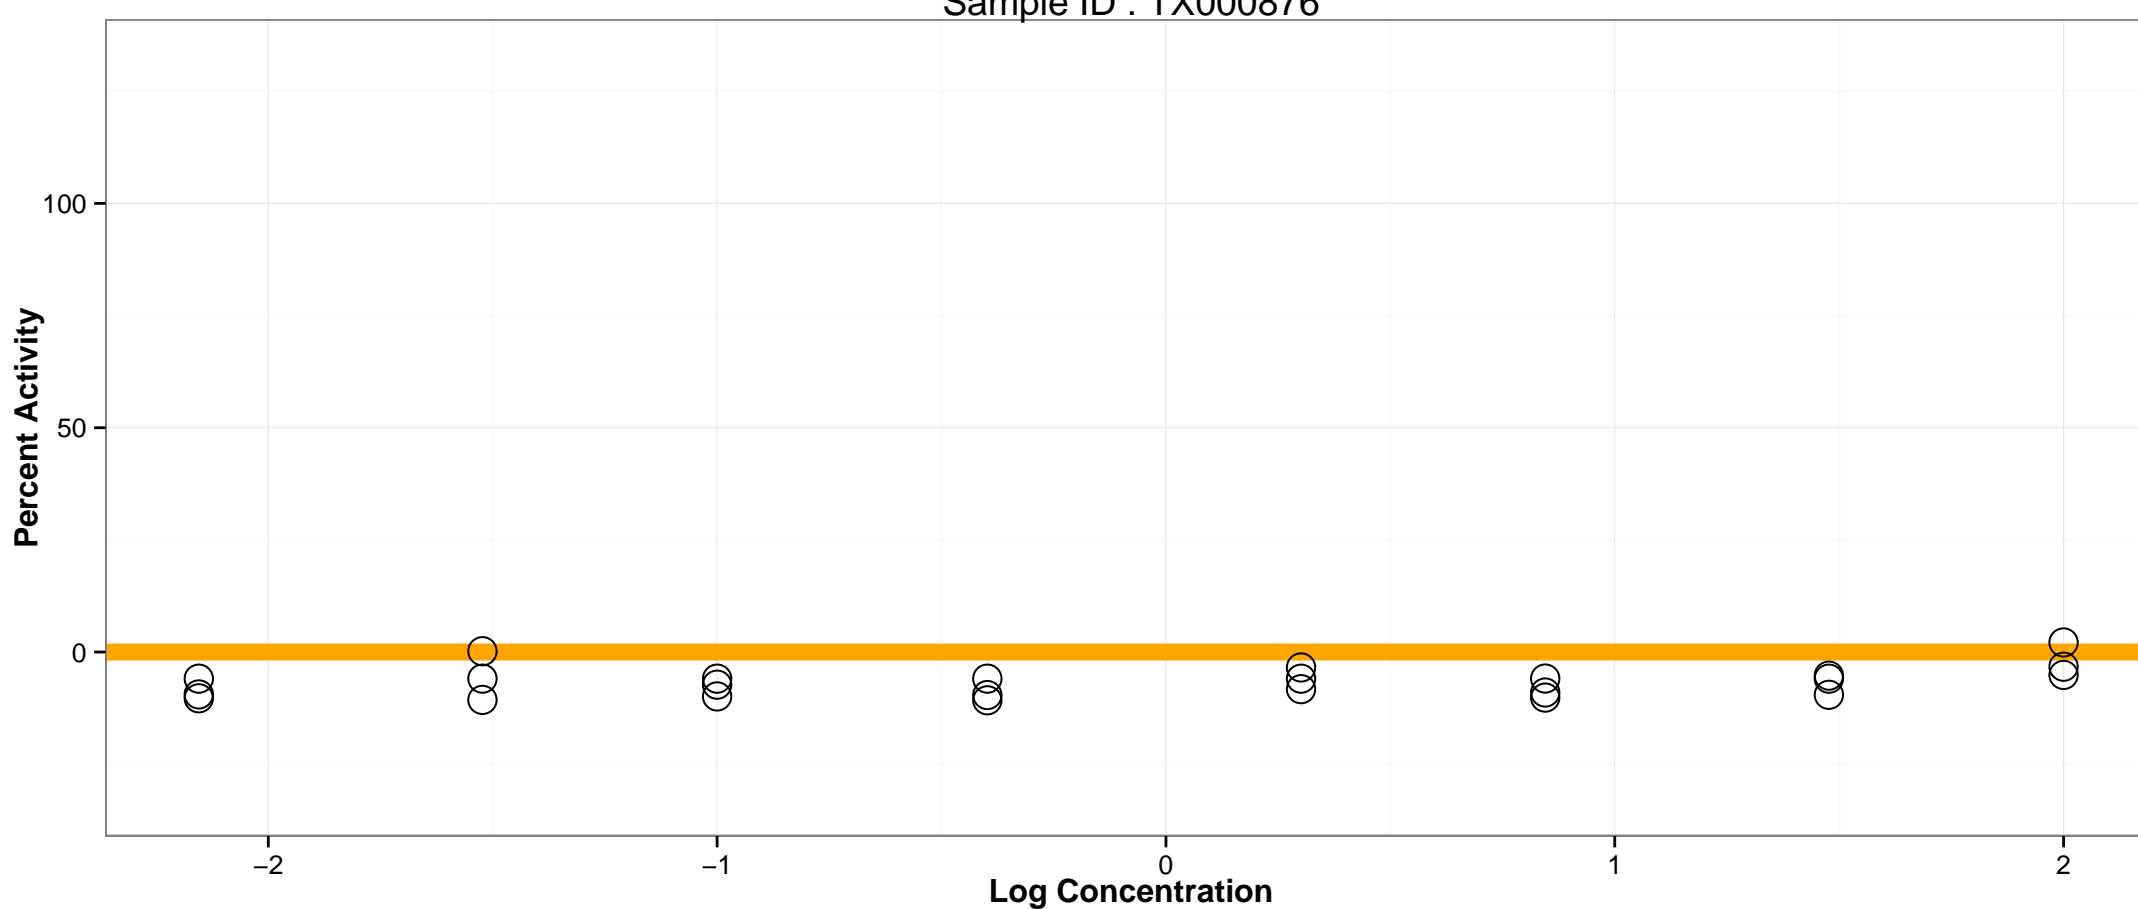

HILL MODEL

HILL MODEL: Not applicable

GAIN-LOSS MODEL

GNLS MODEL: Not applicable

|      | CNST   | HILL | GNLS |
|------|--------|------|------|
| AIC  | 171.15 | NA   | NA   |
| PROB | 1      | NA   | NA   |
| RMSE | 7.45   | NA   | NA   |

MAX\_MEAN : -2.06 MAX\_MED : -3.25 BMAD : 5.54  
COFF : 20 HIT-CALL : 0 FITC : 4 ACTP : 0  
FLAGS :

Assay ID 1848 (NHEERL\_Quantilum\_inhib\_2\_dn)  
Sample ID : TX000876

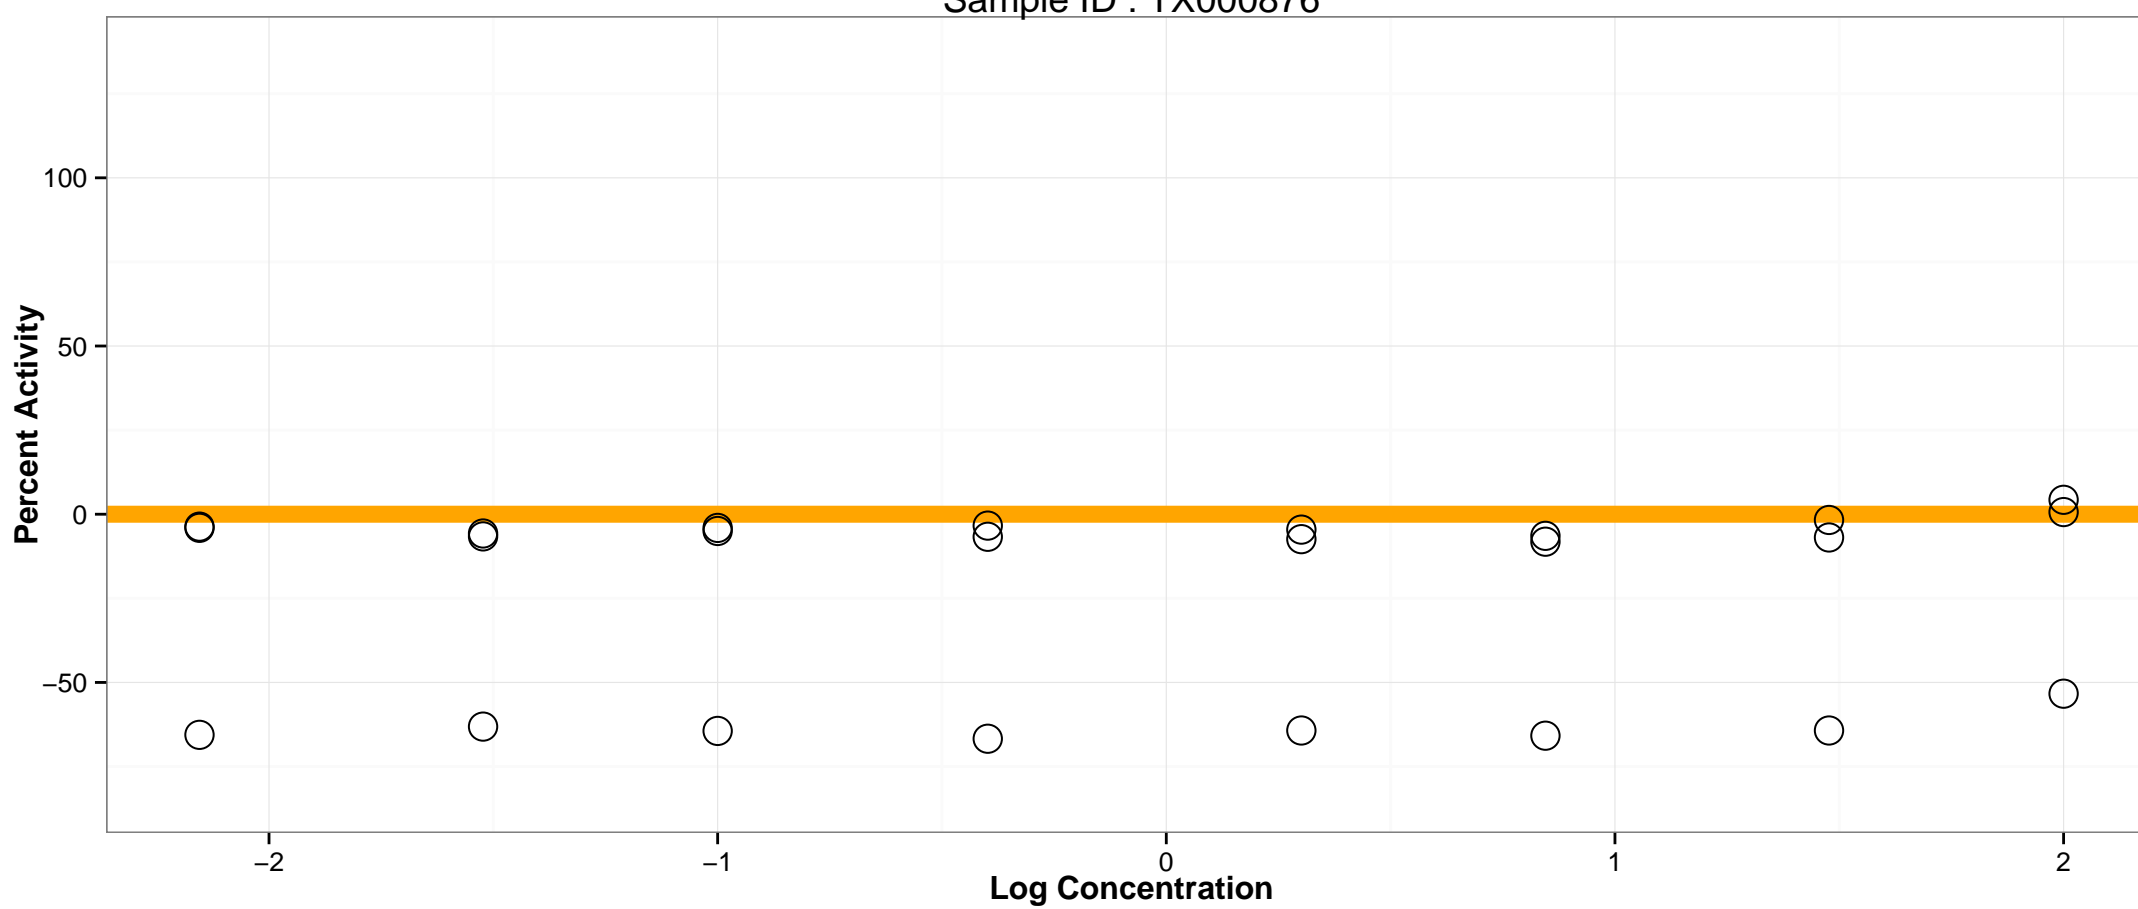

HILL MODEL

HILL MODEL: Not applicable

GAIN-LOSS MODEL

GNLS MODEL: Not applicable

|      | CNST   | HILL | GNLS |
|------|--------|------|------|
| AIC  | 242.73 | NA   | NA   |
| PROB | 1      | NA   | NA   |
| RMSE | 36.95  | NA   | NA   |

MAX\_MEAN : -16.1 MAX\_MED : 0.659 BMAD : 8.58  
COFF : 20 HIT-CALL : 0 FITC : 4 ACTP : 0  
FLAGS : 10



Chemical : Symclosene  
CAS : 87-90-1

Assay ID 1508 (NHEERL\_TPO\_AUR\_dn)  
Sample ID : TX000884

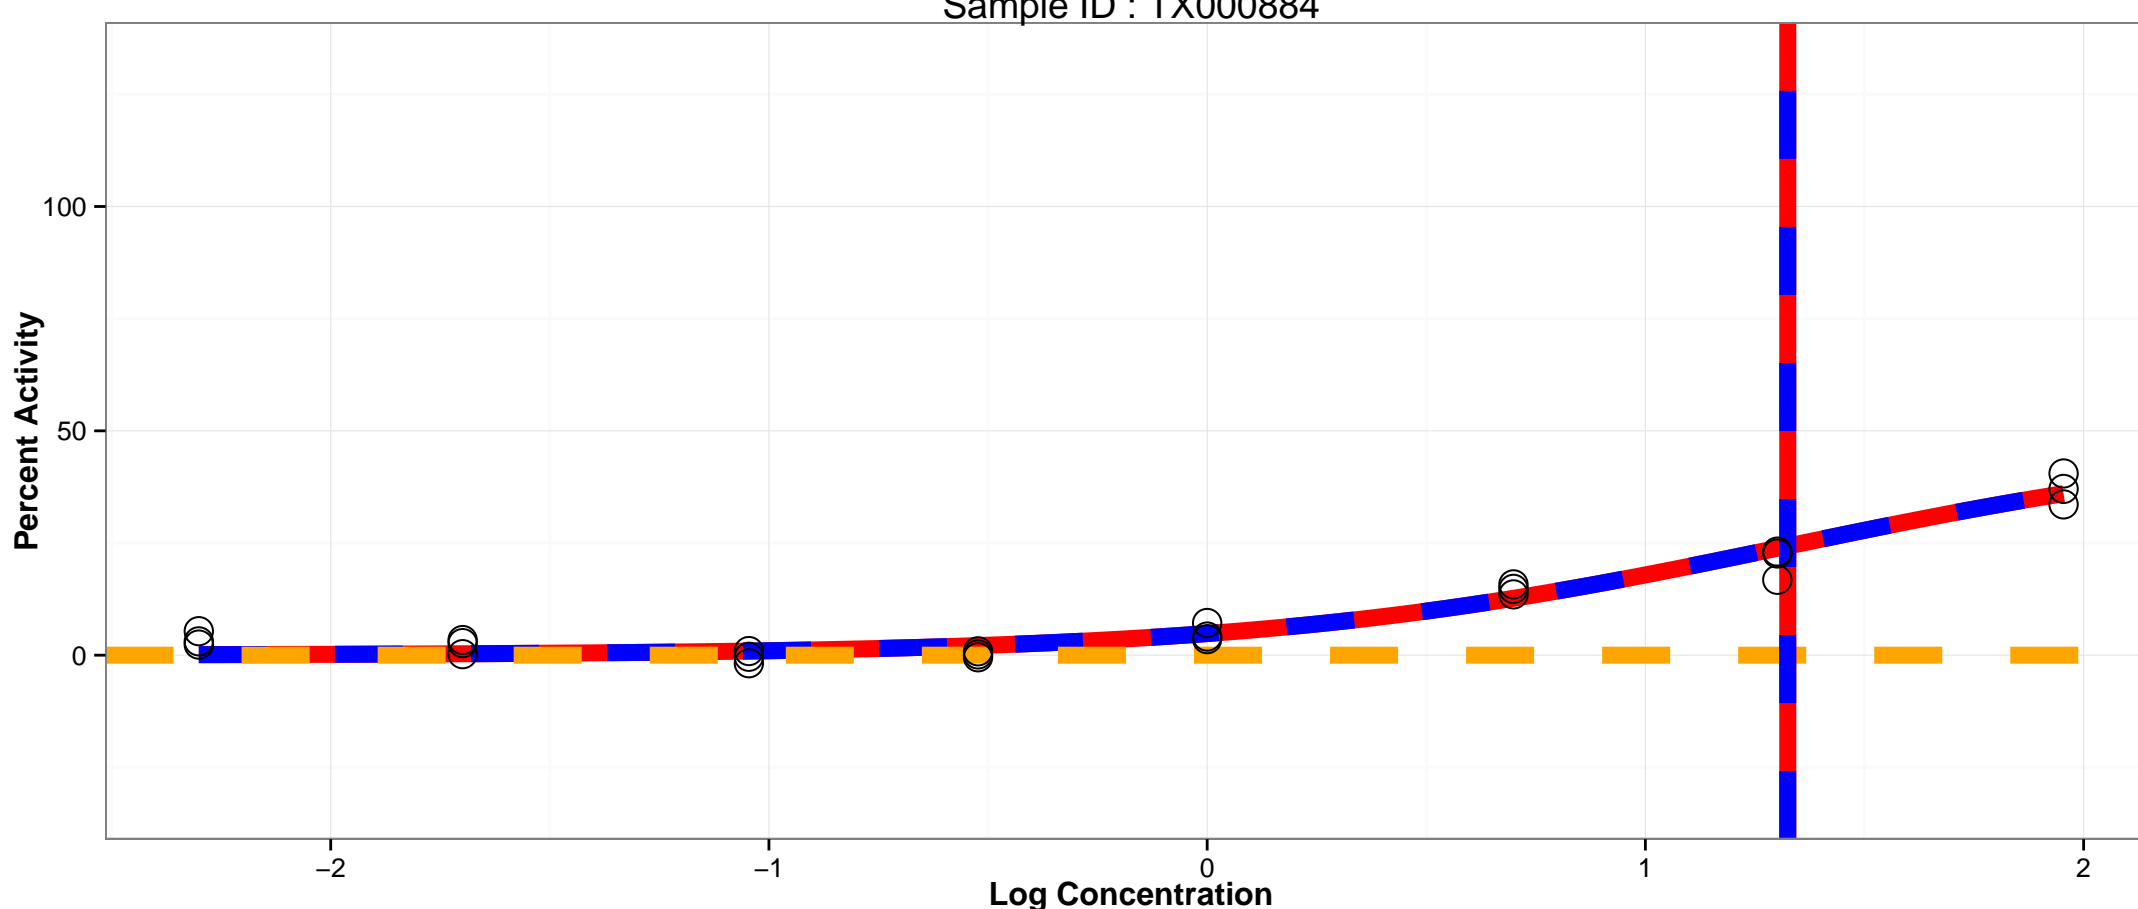

HILL MODEL

|     | tp   | ga    | gw    |
|-----|------|-------|-------|
| val | 48.6 | 1.32  | 0.724 |
| sd  | 8.78 | 0.261 | 0.116 |

GAIN-LOSS MODEL

|     | tp   | ga    | gw    | la   | lw   |
|-----|------|-------|-------|------|------|
| val | 48.6 | 1.32  | 0.724 | 3.18 | 6.95 |
| sd  | 8.78 | 0.261 | 0.116 | 1000 | 5700 |

|      | CNST   | HILL   | GNLS   |
|------|--------|--------|--------|
| AIC  | 201.01 | 125.47 | 129.47 |
| PROB | 0      | 0.88   | 0.12   |
| RMSE | 16.17  | 2.73   | 2.73   |

MAX\_MEAN : 37.1 MAX\_MED : 37.1 BMAD : 5.69  
COFF : 20 HIT-CALL : 1 FITC : 42 ACTP : 1  
FLAGS :

Assay ID 1509 (NHEERL\_HEK293T\_CellTiterGLO)  
Sample ID : TX000884

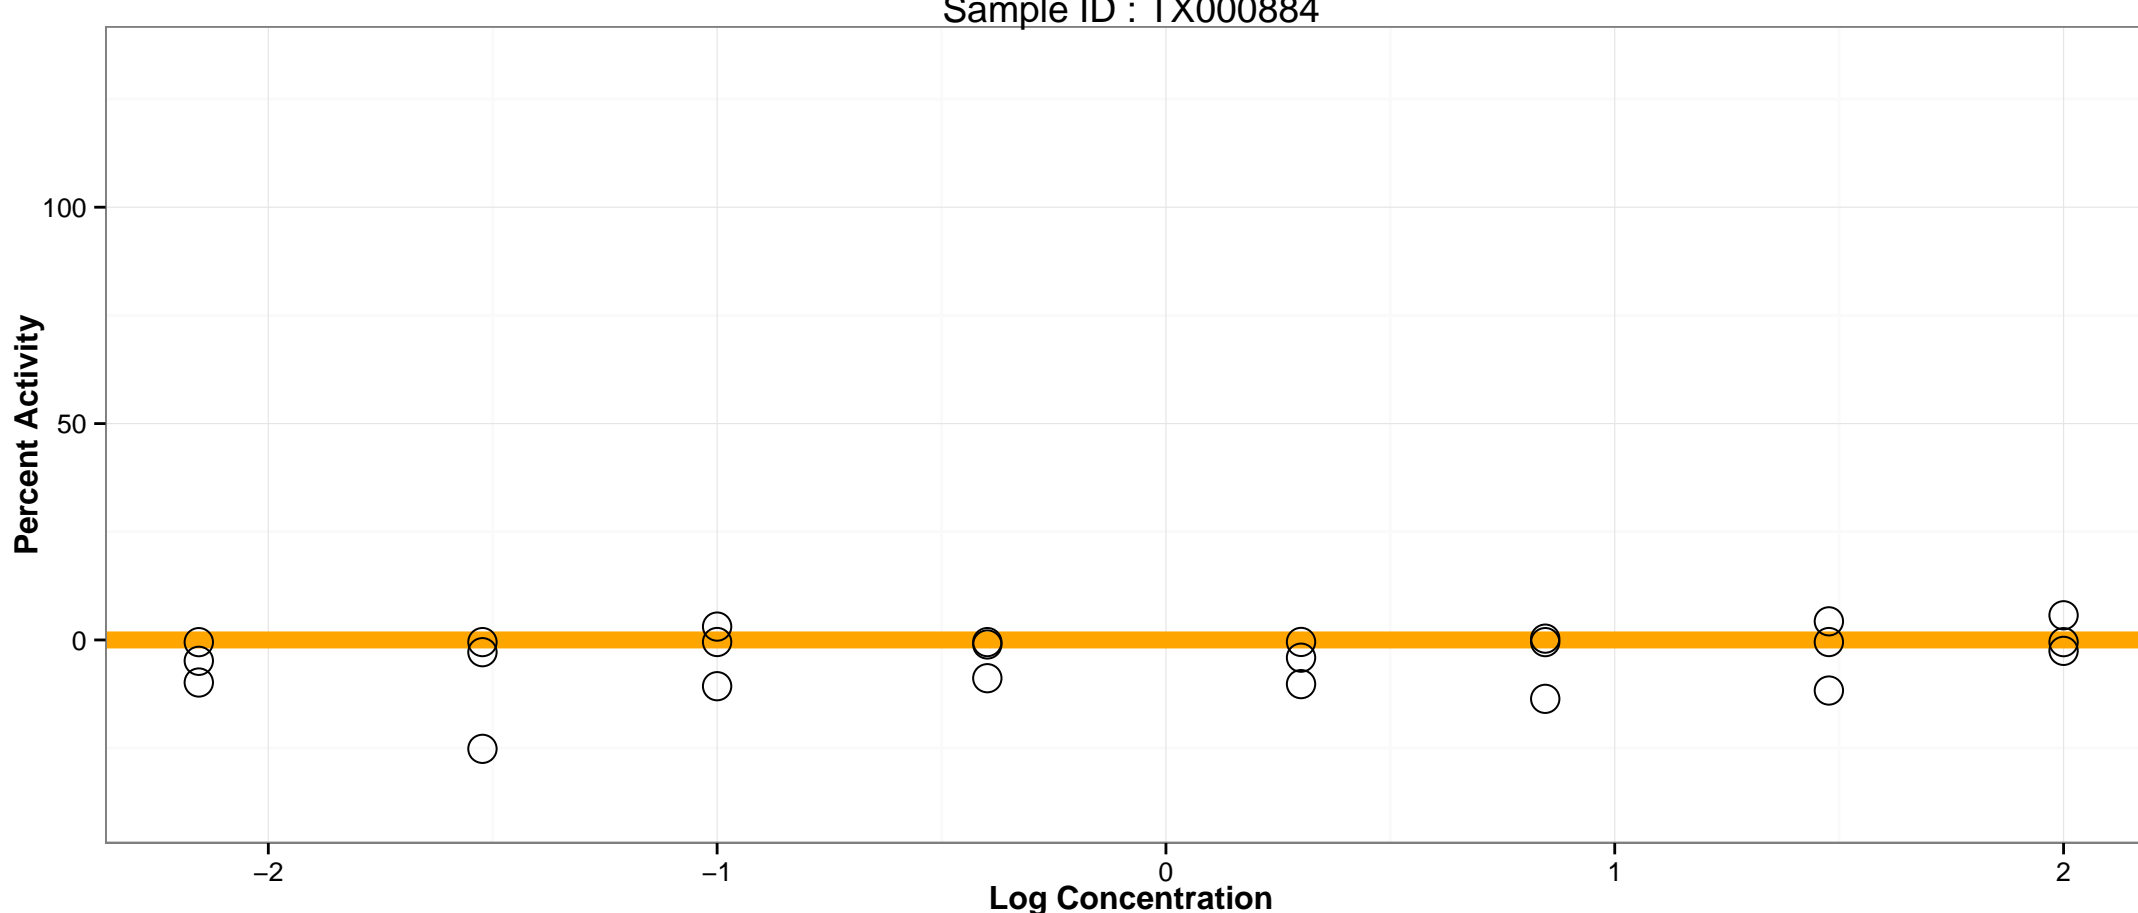

HILL MODEL

HILL MODEL: Not applicable

GAIN-LOSS MODEL

GNLS MODEL: Not applicable

|      | CNST   | HILL | GNLS |
|------|--------|------|------|
| AIC  | 164.75 | NA   | NA   |
| PROB | 1      | NA   | NA   |
| RMSE | 7.81   | NA   | NA   |

MAX\_MEAN : 0.907 MAX\_MED : -0.462 BMAD : 5.54  
COFF : 20 HIT-CALL : 0 FITC : 4 ACTP : 0  
FLAGS :

Assay ID 1848 (NHEERL\_Quantilum\_inhib\_2\_dn)  
Sample ID : TX000884

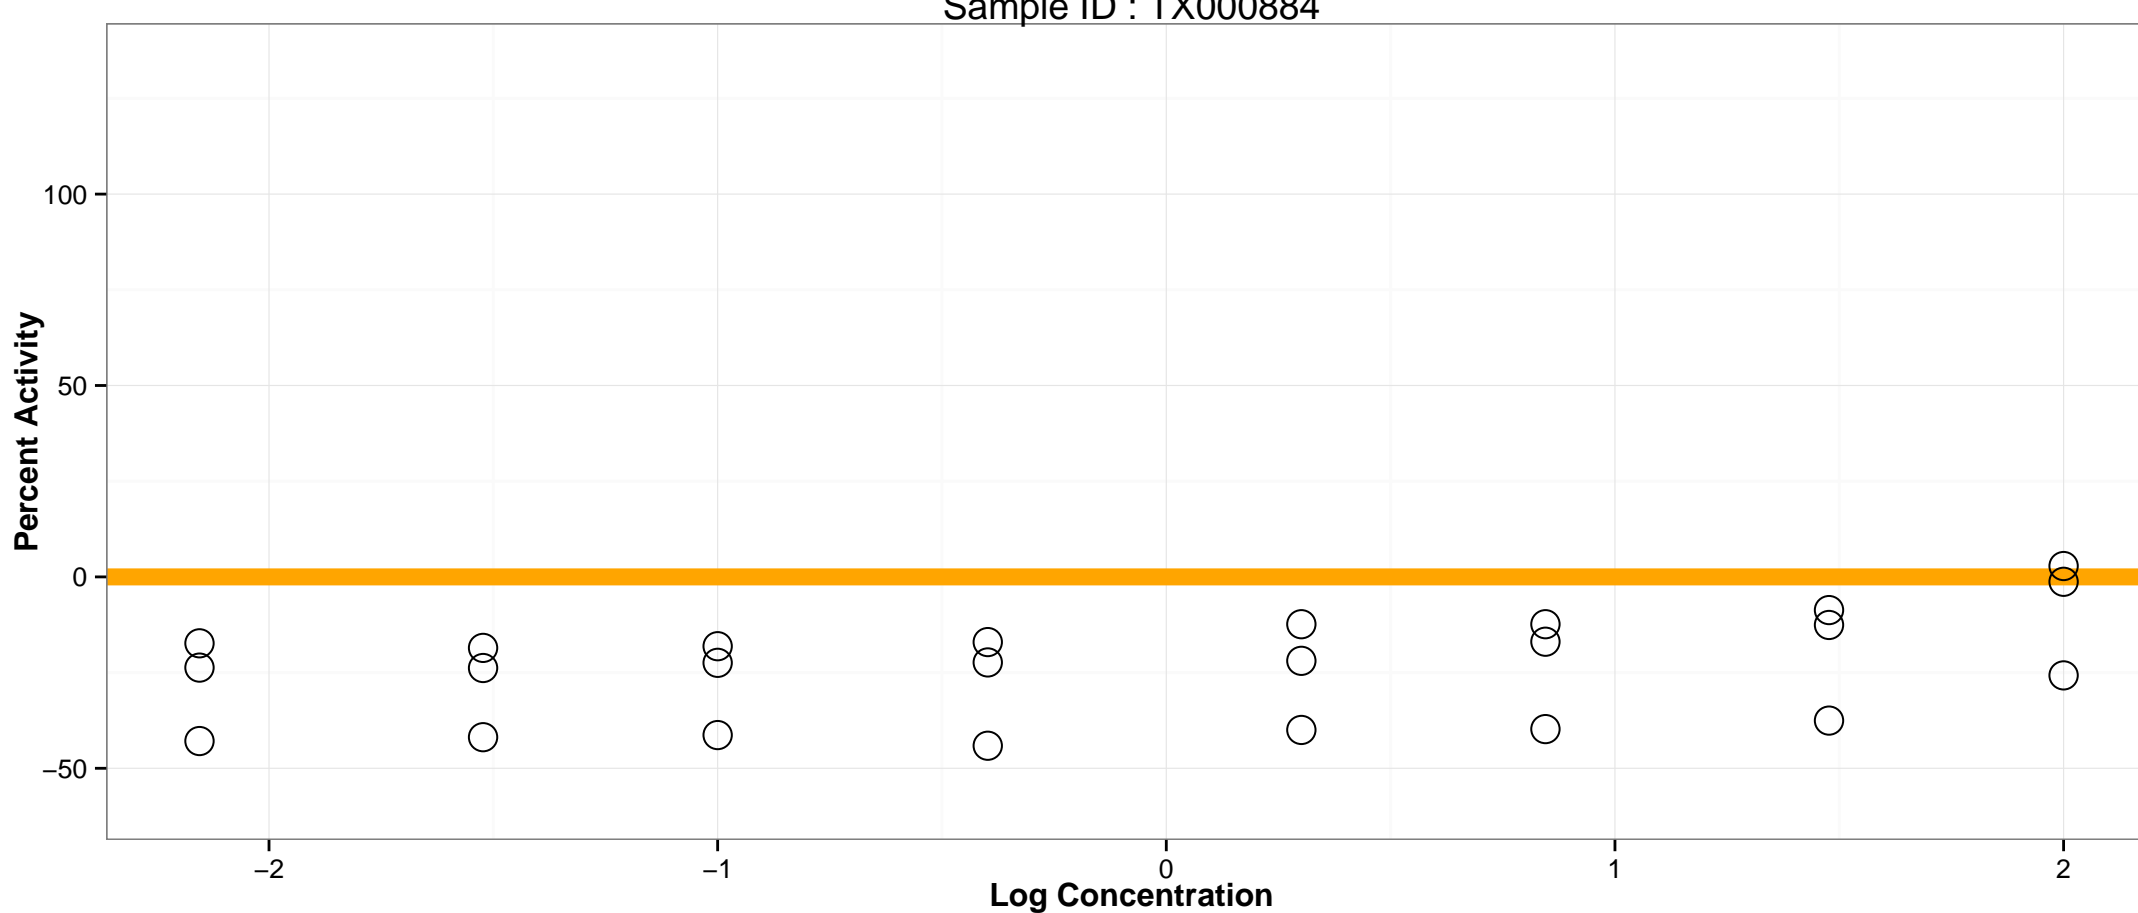

HILL MODEL

HILL MODEL: Not applicable

GAIN-LOSS MODEL

GNLS MODEL: Not applicable

|      | CNST  | HILL | GNLS |
|------|-------|------|------|
| AIC  | 231.5 | NA   | NA   |
| PROB | 1     | NA   | NA   |
| RMSE | 26.76 | NA   | NA   |

MAX\_MEAN : -8.04 MAX\_MED : -1.27 BMAD : 8.58  
COFF : 20 HIT-CALL : 0 FITC : 4 ACTP : 0  
FLAGS : 10

Assay ID 1508 (NHEERL\_TPO\_AUR\_dn)  
Sample ID : TX000892

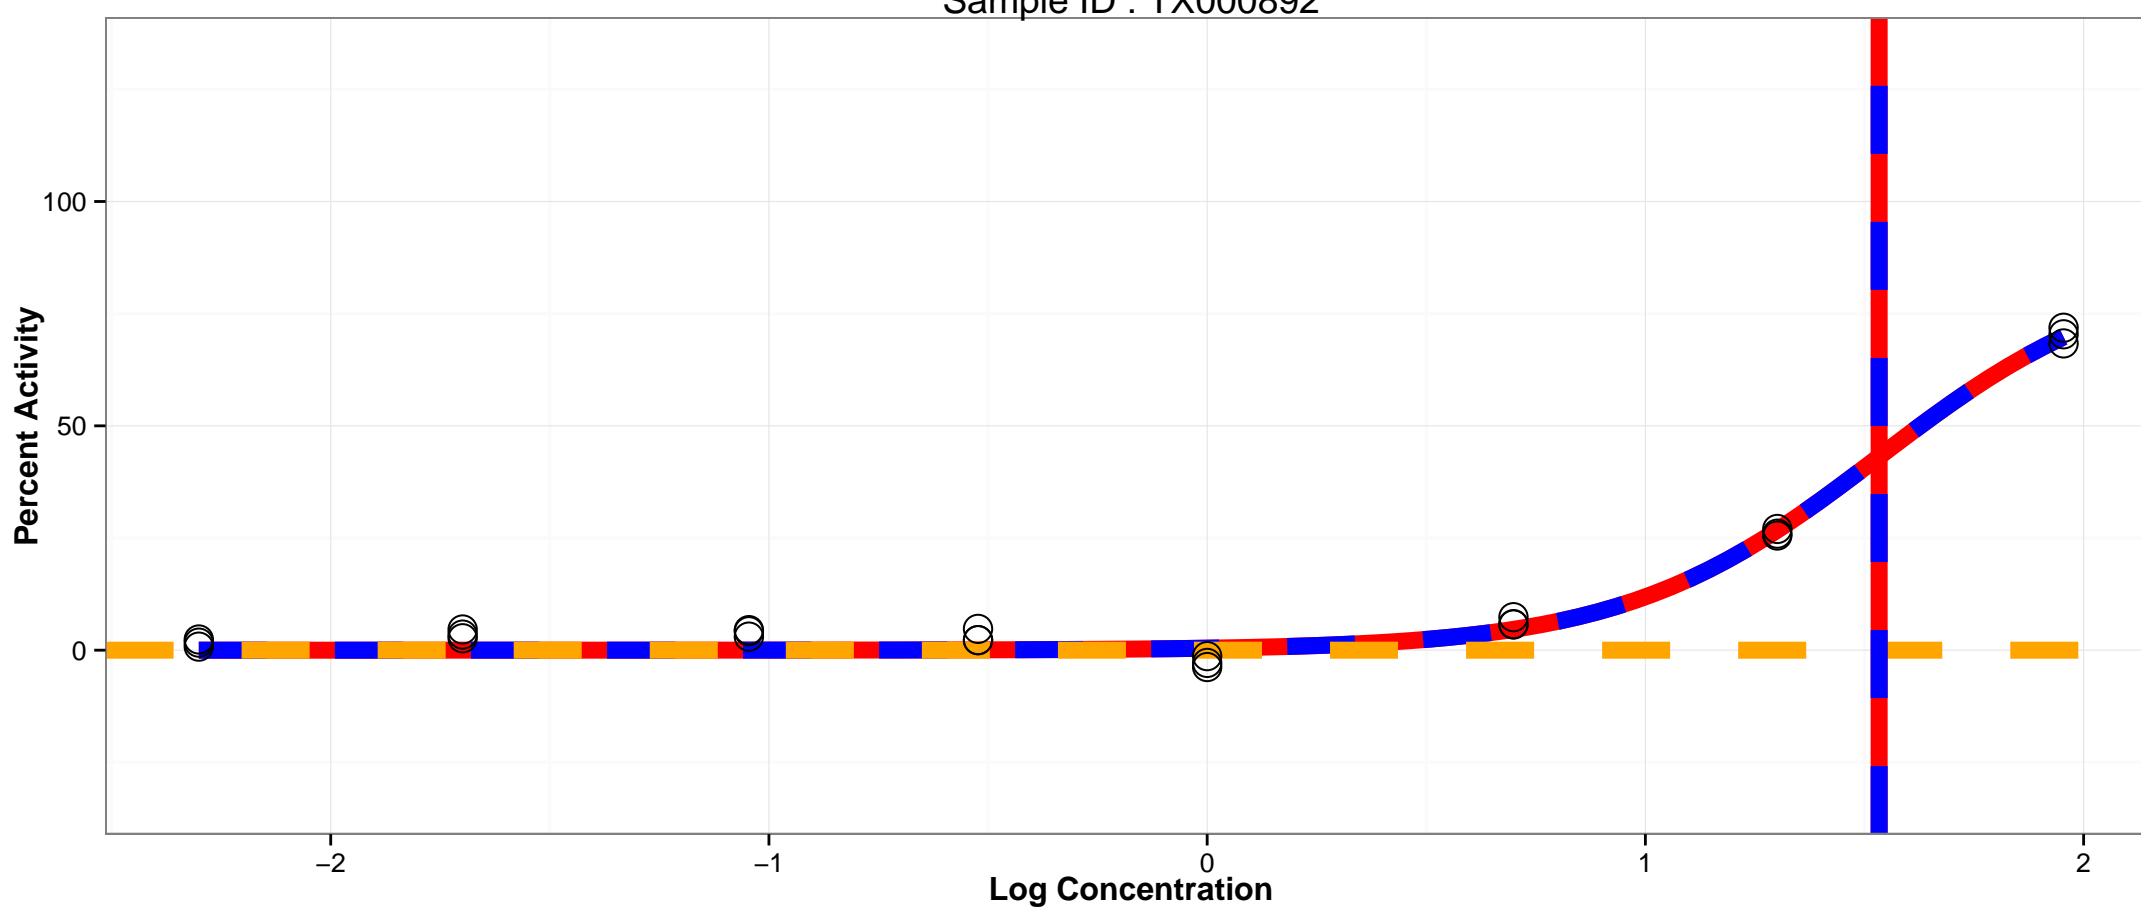

HILL MODEL

|     | tp   | ga     | gw    |
|-----|------|--------|-------|
| val | 86.2 | 1.53   | 1.49  |
| sd  | 8.2  | 0.0792 | 0.224 |

GAIN-LOSS MODEL

|     | tp   | ga     | gw    | la    | lw    |
|-----|------|--------|-------|-------|-------|
| val | 86.2 | 1.53   | 1.49  | 3.03  | 10.2  |
| sd  | 8.2  | 0.0792 | 0.224 | 10000 | 94700 |

|      | CNST   | HILL   | GNLS   |
|------|--------|--------|--------|
| AIC  | 216.31 | 127.65 | 131.65 |
| PROB | 0      | 0.88   | 0.12   |
| RMSE | 26.72  | 2.73   | 2.73   |

MAX\_MEAN : 70.2 MAX\_MED : 70.4 BMAD : 5.69  
COFF : 20 HIT-CALL : 1 FITC : 42 ACTP : 1  
FLAGS :

Assay ID 1509 (NHEERL\_HEK293T\_CellTiterGLO)  
Sample ID : TX000892

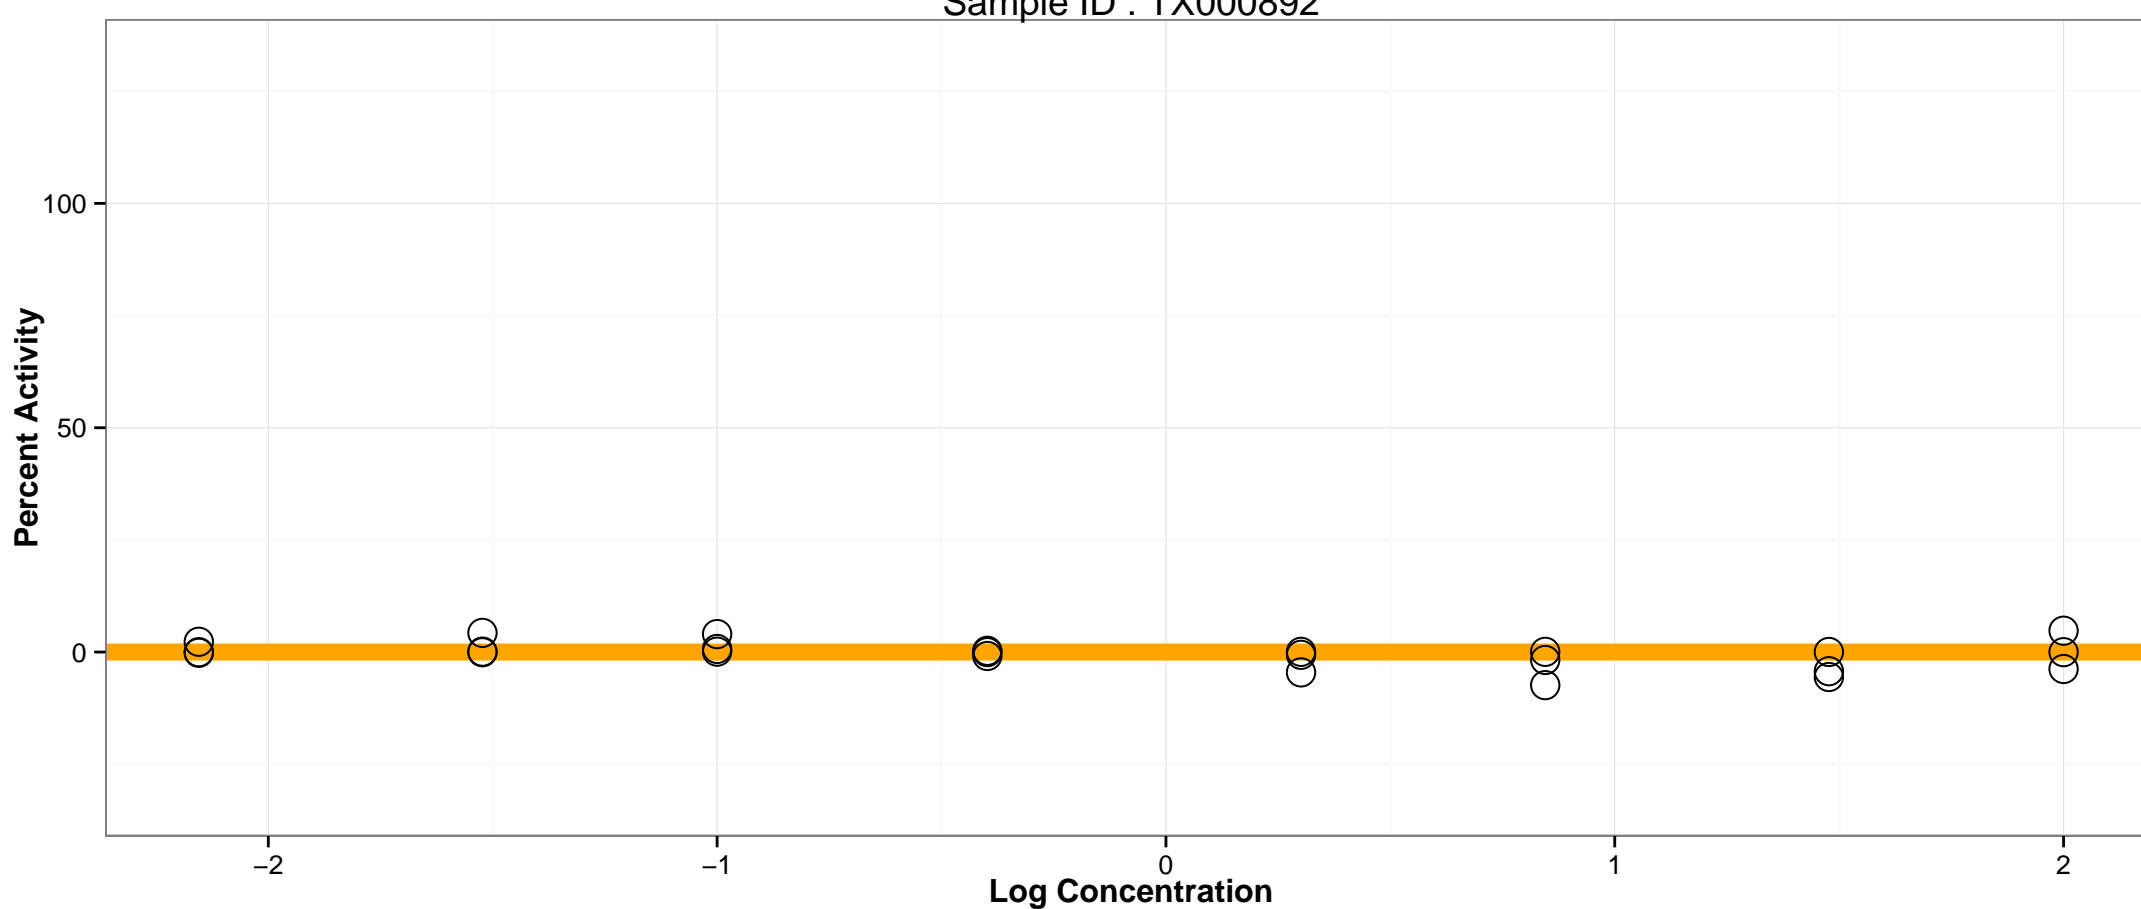

HILL MODEL

HILL MODEL: Not applicable

GAIN-LOSS MODEL

GNLS MODEL: Not applicable

|      | CNST   | HILL | GNLS |
|------|--------|------|------|
| AIC  | 120.65 | NA   | NA   |
| PROB | 1      | NA   | NA   |
| RMSE | 2.92   | NA   | NA   |

MAX\_MEAN : 1.61 MAX\_MED : 0.709 BMAD : 5.54  
COFF : 20 HIT-CALL : 0 FITC : 4 ACTP : 0  
FLAGS :

Assay ID 1848 (NHEERL\_Quantilum\_inhib\_2\_dn)  
Sample ID : TX000892

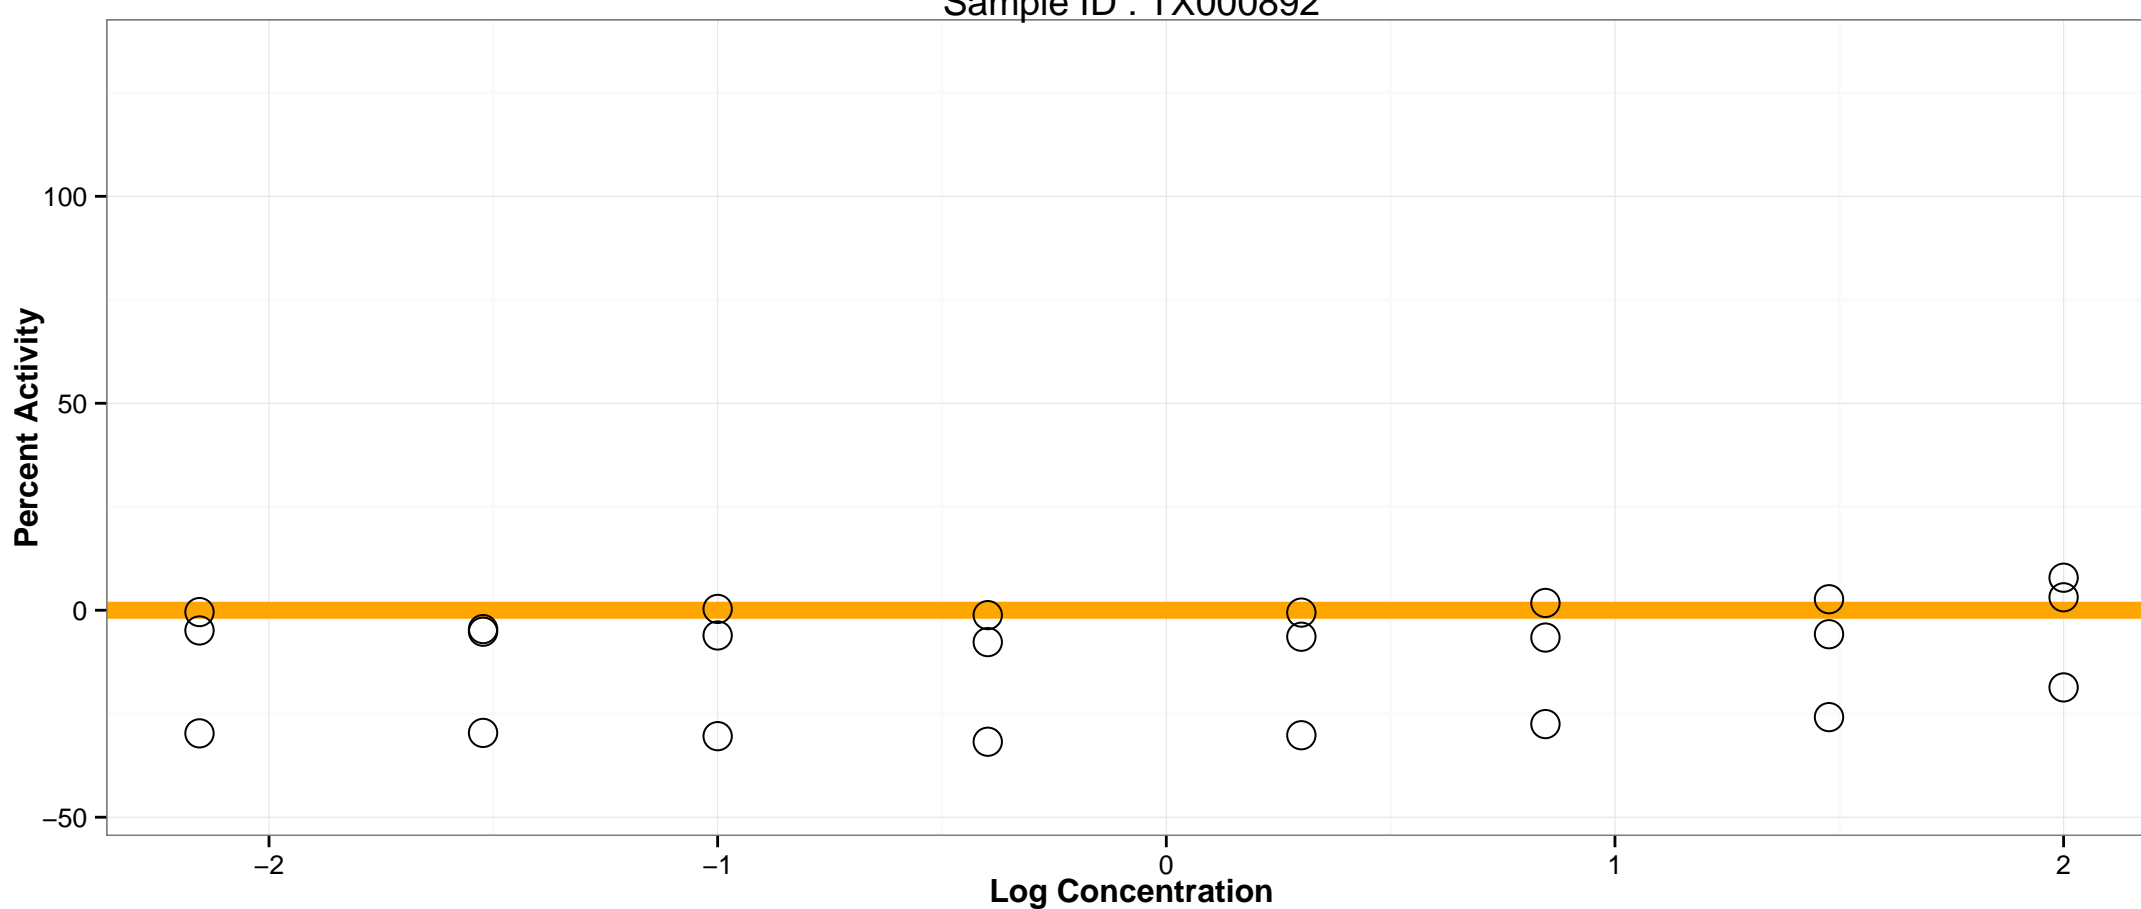

HILL MODEL

HILL MODEL: Not applicable

GAIN-LOSS MODEL

GNLS MODEL: Not applicable

|      | CNST   | HILL | GNLS |
|------|--------|------|------|
| AIC  | 205.58 | NA   | NA   |
| PROB | 1      | NA   | NA   |
| RMSE | 16.76  | NA   | NA   |

MAX\_MEAN : -2.54 MAX\_MED : 3.14 BMAD : 8.58  
COFF : 20 HIT-CALL : 0 FITC : 4 ACTP : 0  
FLAGS :

Chemical : Methamidophos  
CAS : 10265-92-6

Assay ID 1508 (NHEERL\_TPO\_AUR\_dn)  
Sample ID : TX000900

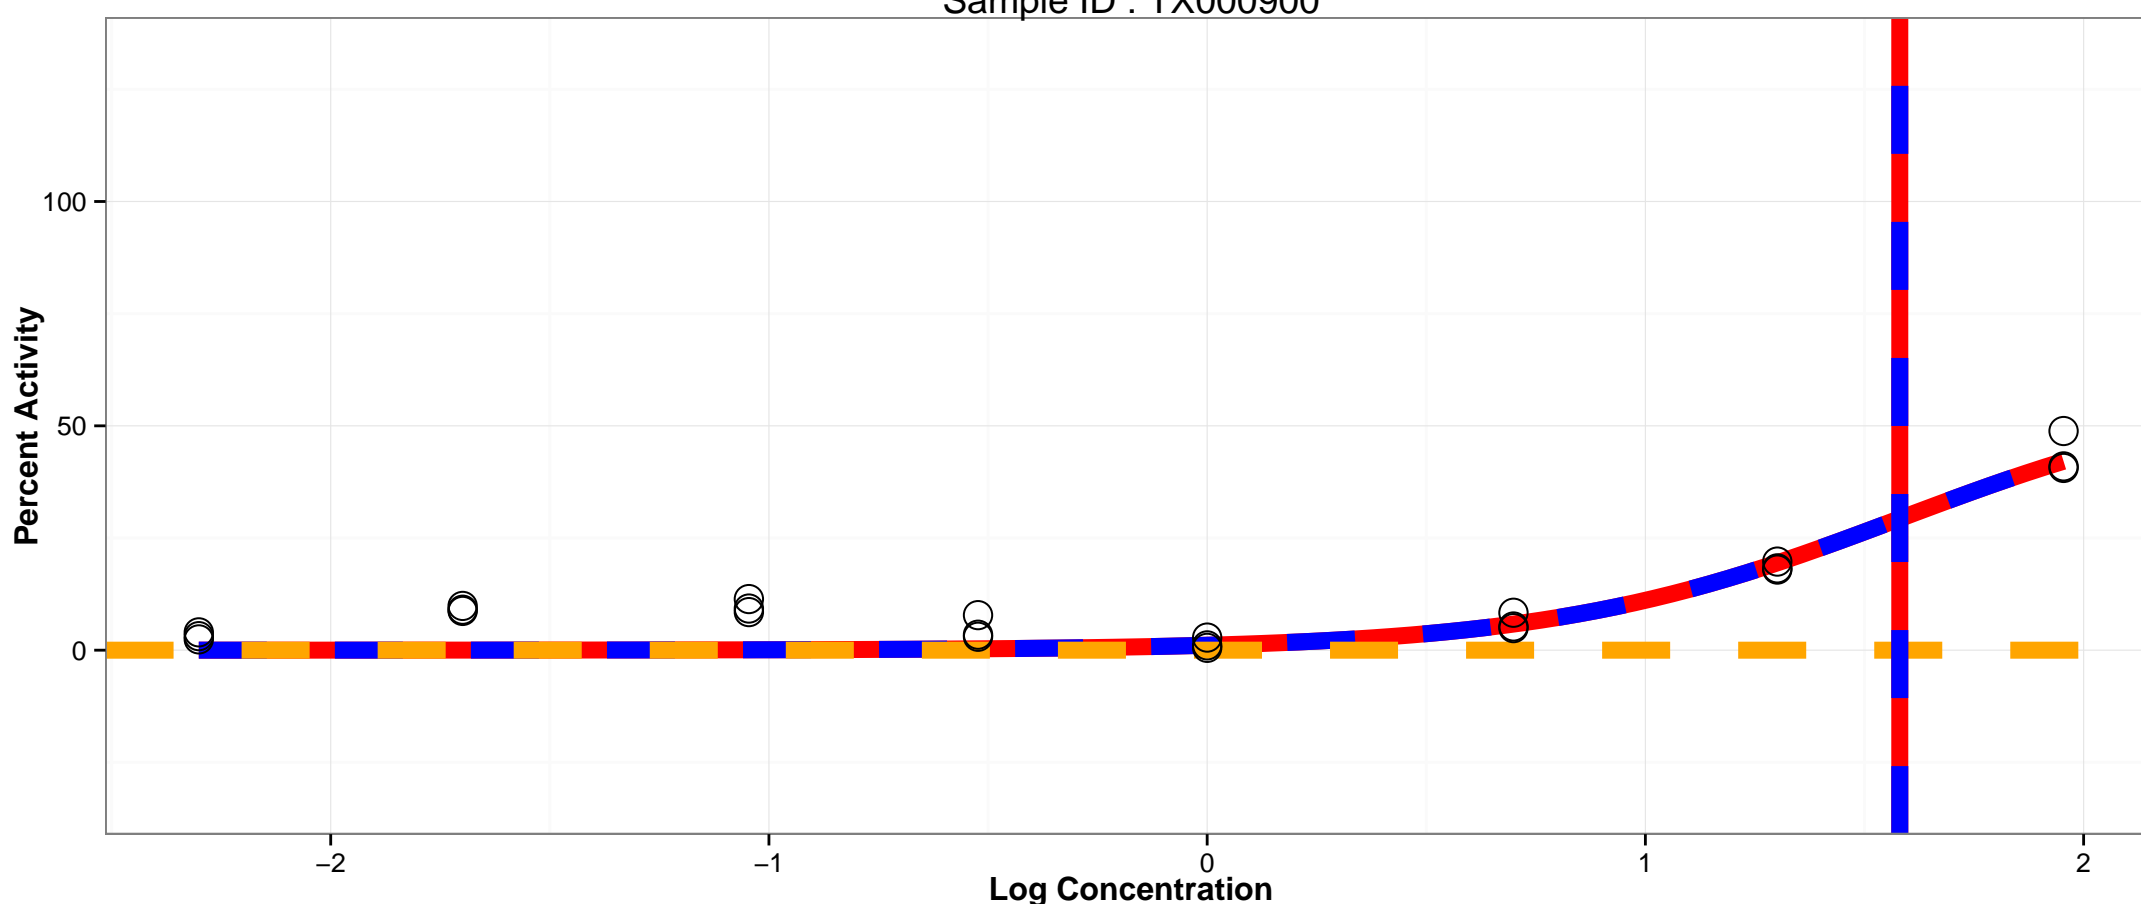

HILL MODEL

|     | tp   | ga    | gw    |
|-----|------|-------|-------|
| val | 58.6 | 1.58  | 1.09  |
| sd  | 16.8 | 0.278 | 0.354 |

GAIN-LOSS MODEL

|     | tp   | ga    | gw    | la   | lw   |
|-----|------|-------|-------|------|------|
| val | 58.6 | 1.58  | 1.09  | 3.64 | 5.02 |
| sd  | 16.8 | 0.278 | 0.354 | 2130 | 6350 |

|      | CNST   | HILL   | GNLS   |
|------|--------|--------|--------|
| AIC  | 203.62 | 158.25 | 162.25 |
| PROB | 0      | 0.88   | 0.12   |
| RMSE | 17.74  | 5.43   | 5.43   |

MAX\_MEAN : 43.5 MAX\_MED : 41 BMAD : 5.69  
COFF : 20 HIT-CALL : 1 FITC : 42 ACTP : 1  
FLAGS :

Assay ID 1509 (NHEERL\_HEK293T\_CellTiterGLO)  
Sample ID : TX000900

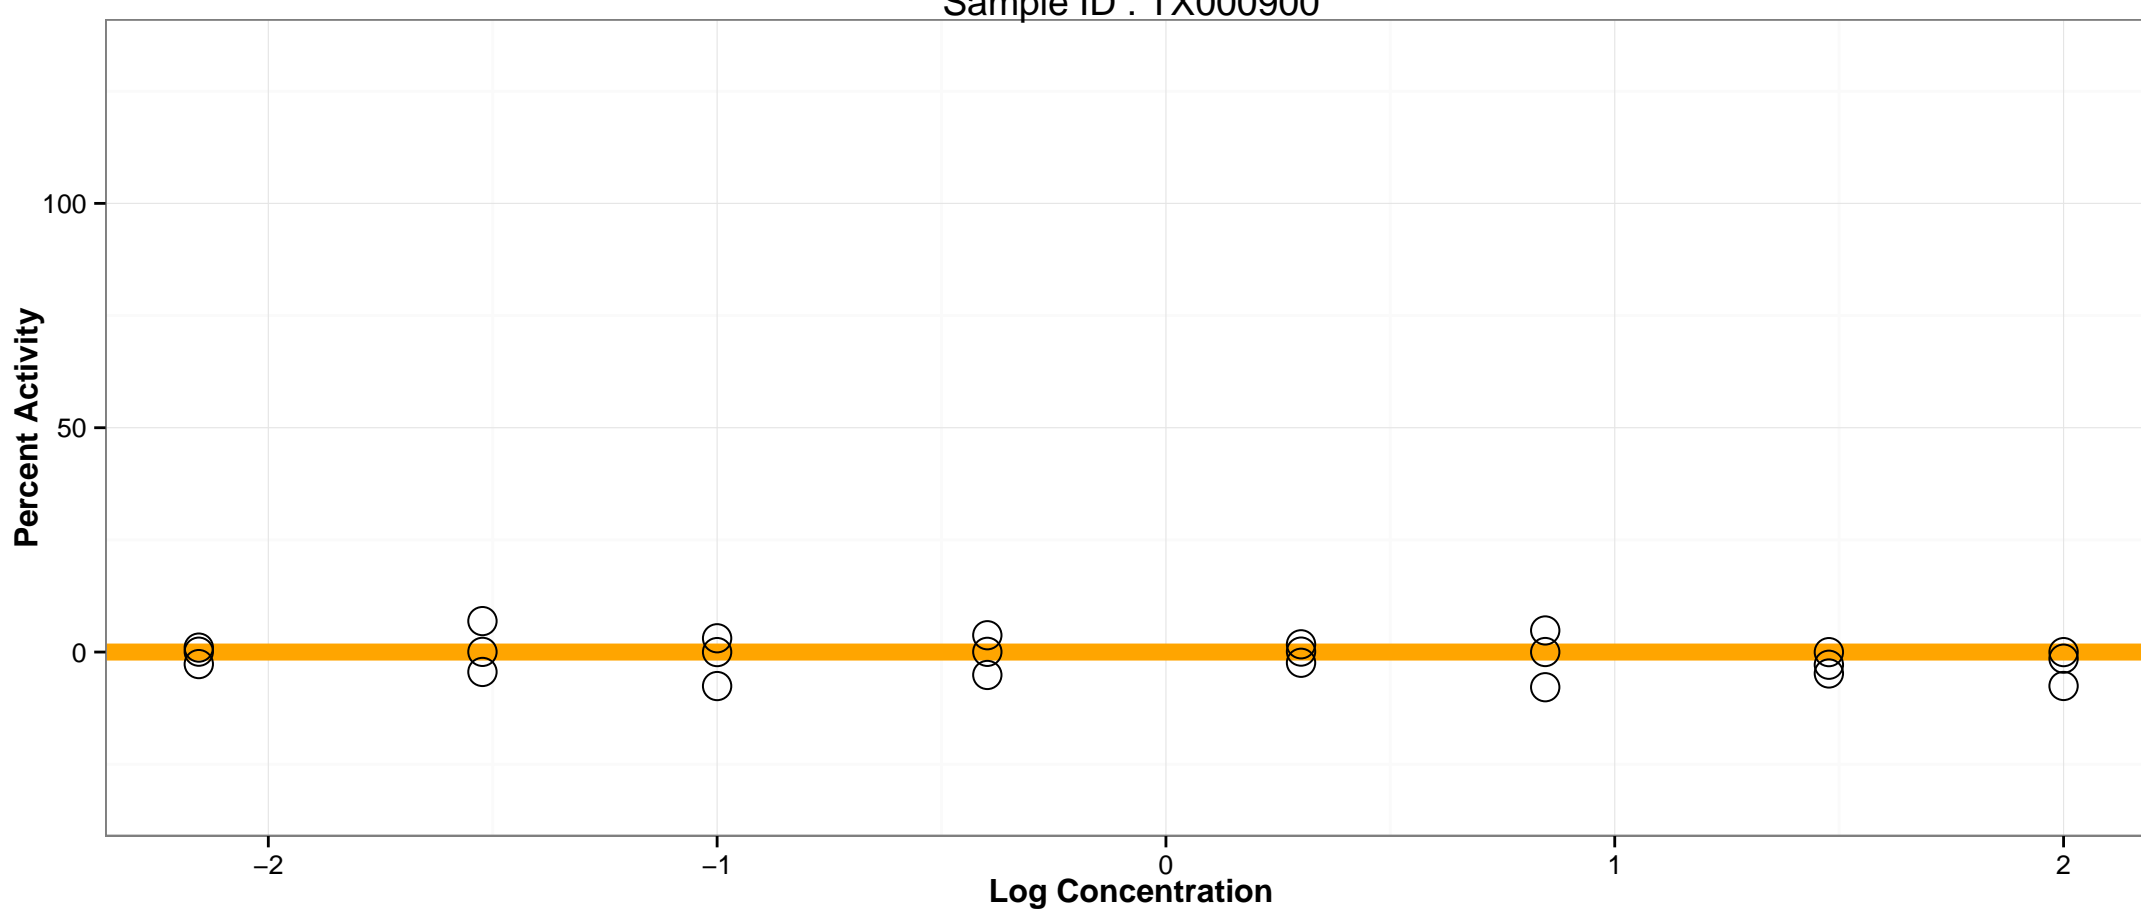

HILL MODEL

HILL MODEL: Not applicable

GAIN-LOSS MODEL

GNLS MODEL: Not applicable

|      | CNST   | HILL | GNLS |
|------|--------|------|------|
| AIC  | 136.54 | NA   | NA   |
| PROB | 1      | NA   | NA   |
| RMSE | 3.9    | NA   | NA   |

MAX\_MEAN : 0.849 MAX\_MED : 0.115 BMAD : 5.54  
COFF : 20 HIT-CALL : 0 FITC : 4 ACTP : 0  
FLAGS :

Assay ID 1848 (NHEERL\_Quantilum\_inhib\_2\_dn)  
Sample ID : TX000900

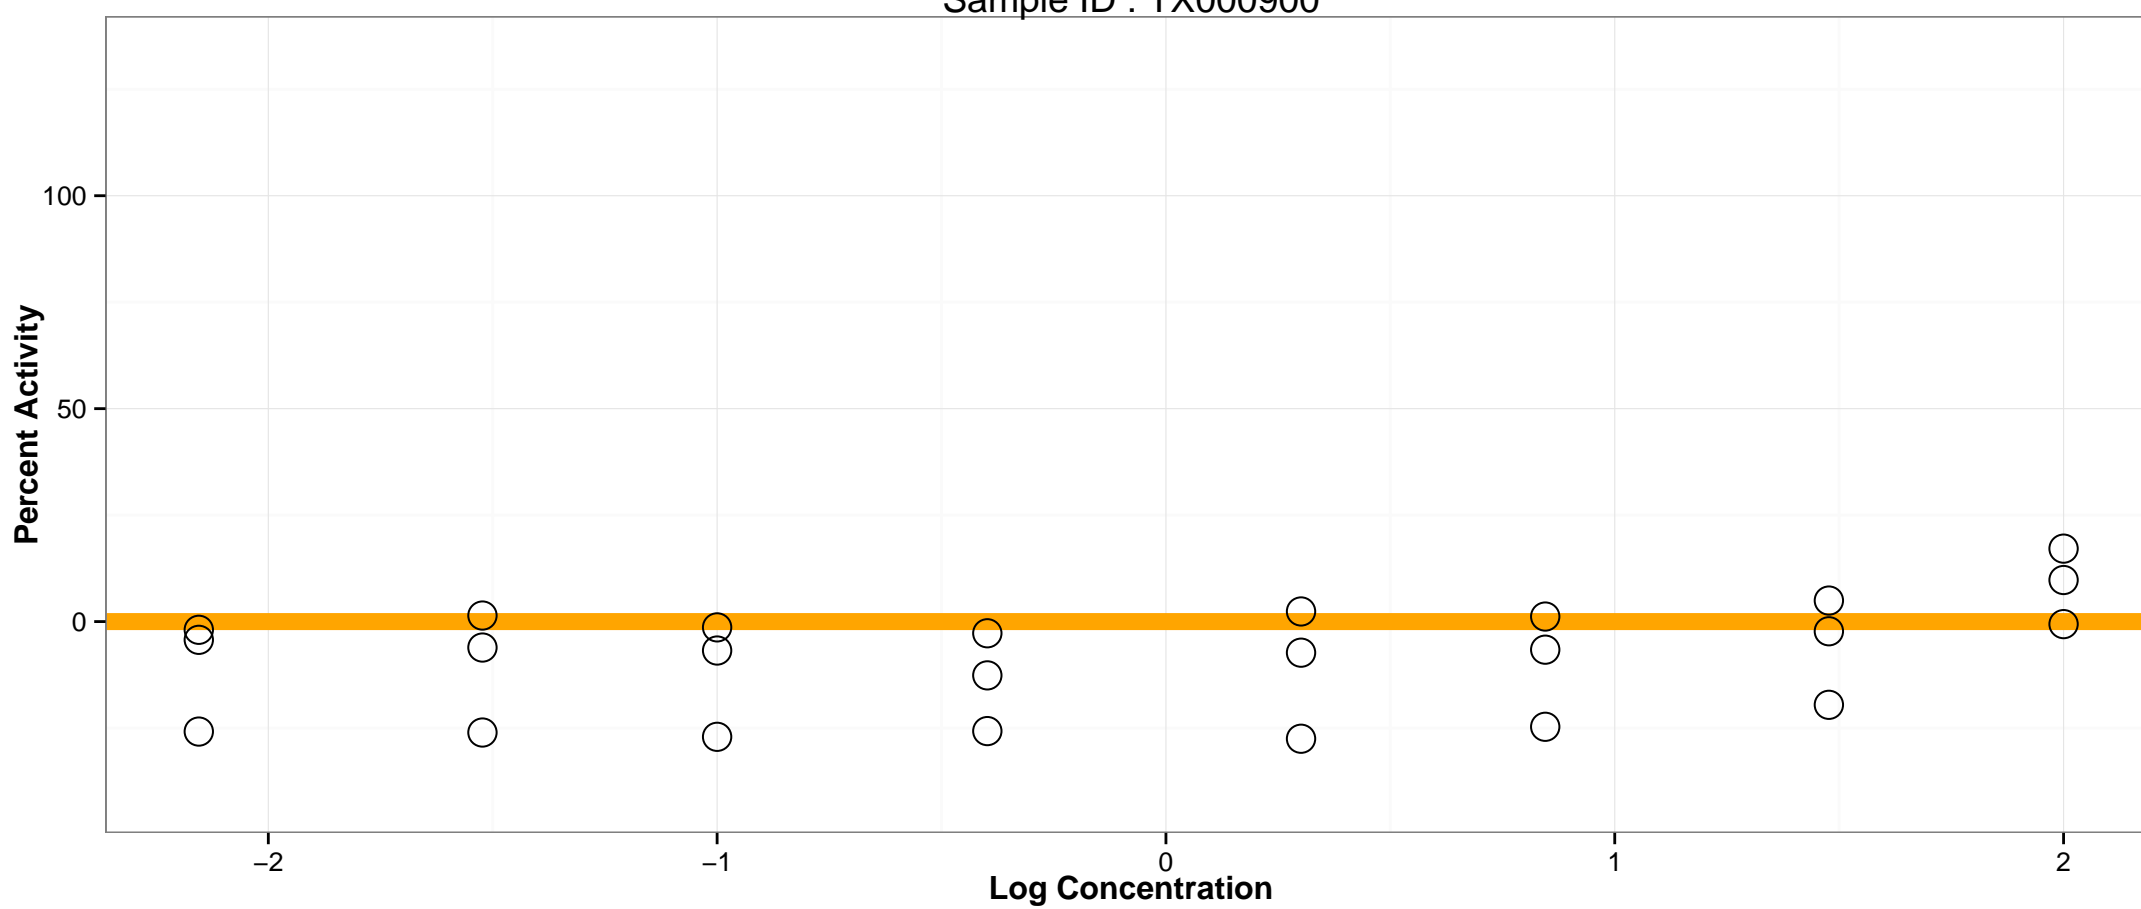

HILL MODEL

HILL MODEL: Not applicable

GAIN-LOSS MODEL

GNLS MODEL: Not applicable

|      | CNST   | HILL | GNLS |
|------|--------|------|------|
| AIC  | 200.49 | NA   | NA   |
| PROB | 1      | NA   | NA   |
| RMSE | 14.83  | NA   | NA   |

MAX\_MEAN : 8.78 MAX\_MED : 9.78 BMAD : 8.58  
COFF : 20 HIT-CALL : 0 FITC : 4 ACTP : 0  
FLAGS :

Assay ID 1508 (NHEERL\_TPO\_AUR\_dn)  
Sample ID : TX000918

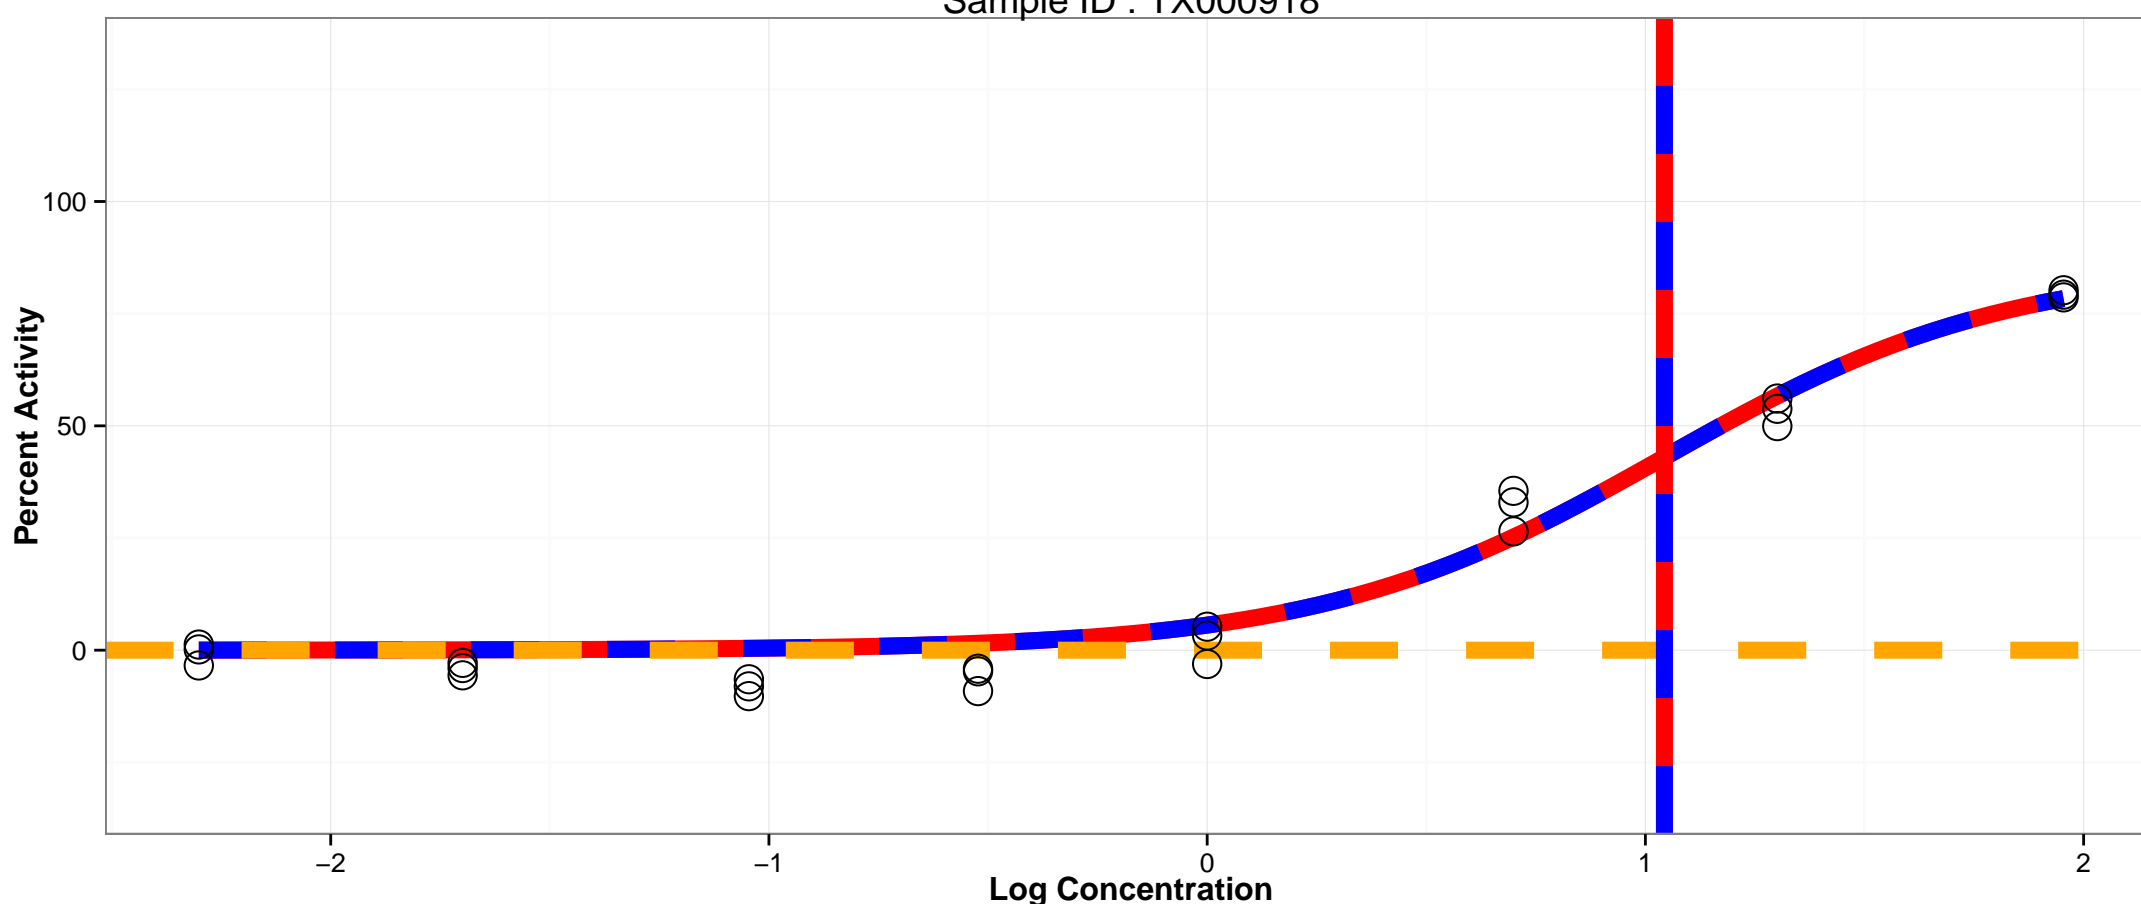

HILL MODEL

|     | tp   | ga     | gw    |
|-----|------|--------|-------|
| val | 86   | 1.04   | 1.11  |
| sd  | 5.76 | 0.0975 | 0.148 |

GAIN-LOSS MODEL

|     | tp   | ga     | gw    | la   | lw   |
|-----|------|--------|-------|------|------|
| val | 86   | 1.04   | 1.11  | 2.89 | 8.98 |
| sd  | 5.76 | 0.0975 | 0.148 | 721  | 6890 |

|      | CNST   | HILL   | GNLS   |
|------|--------|--------|--------|
| AIC  | 239.82 | 162.37 | 166.37 |
| PROB | 0      | 0.88   | 0.12   |
| RMSE | 35.9   | 5.75   | 5.75   |

MAX\_MEAN : 79.4 MAX\_MED : 79.2 BMAD : 5.69  
COFF : 20 HIT-CALL : 1 FITC : 42 ACTP : 1  
FLAGS :

Assay ID 1509 (NHEERL\_HEK293T\_CellTiterGLO)  
Sample ID : TX000918

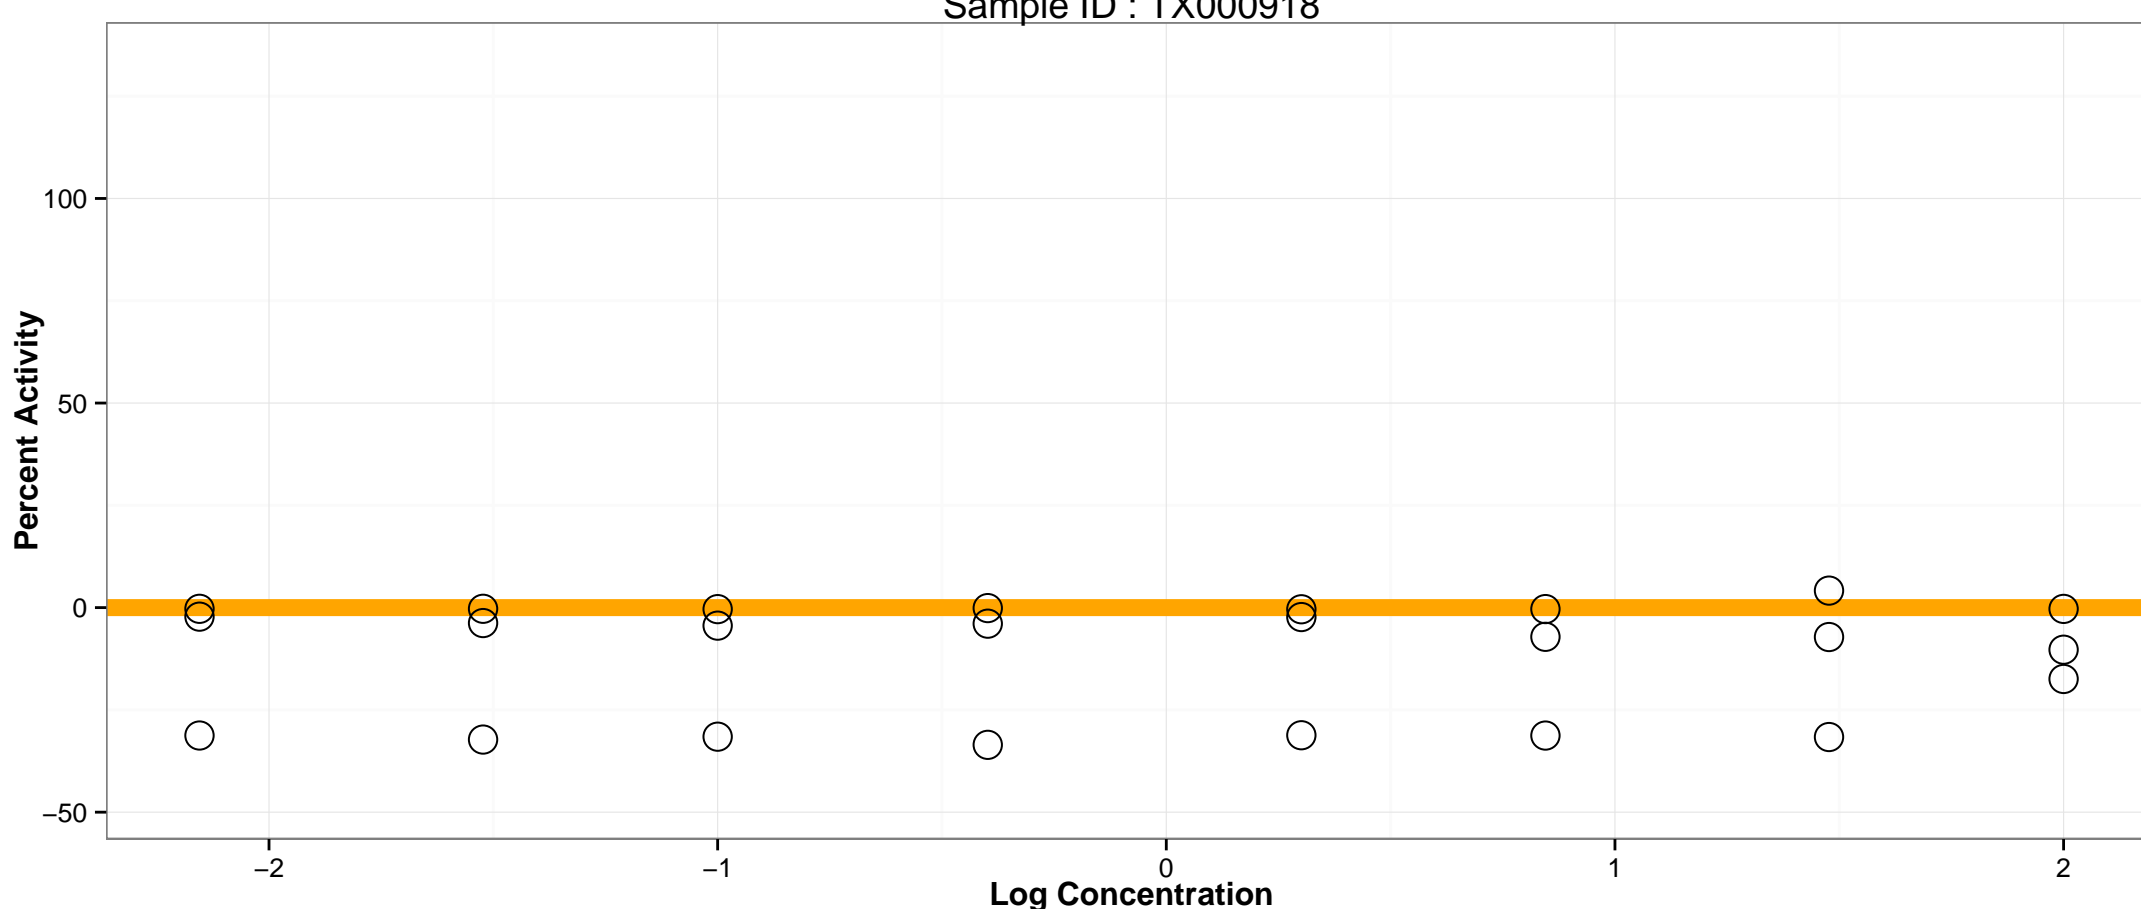

HILL MODEL

HILL MODEL: Not applicable

GAIN-LOSS MODEL

GNLS MODEL: Not applicable

|      | CNST   | HILL | GNLS |
|------|--------|------|------|
| AIC  | 208.07 | NA   | NA   |
| PROB | 1      | NA   | NA   |
| RMSE | 17.88  | NA   | NA   |

MAX\_MEAN : -9.34 MAX\_MED : -2.2 BMAD : 5.54  
COFF : 20 HIT-CALL : 0 FITC : 4 ACTP : 0  
FLAGS :

Assay ID 1848 (NHEERL\_Quantilum\_inhib\_2\_dn)  
Sample ID : TX000918

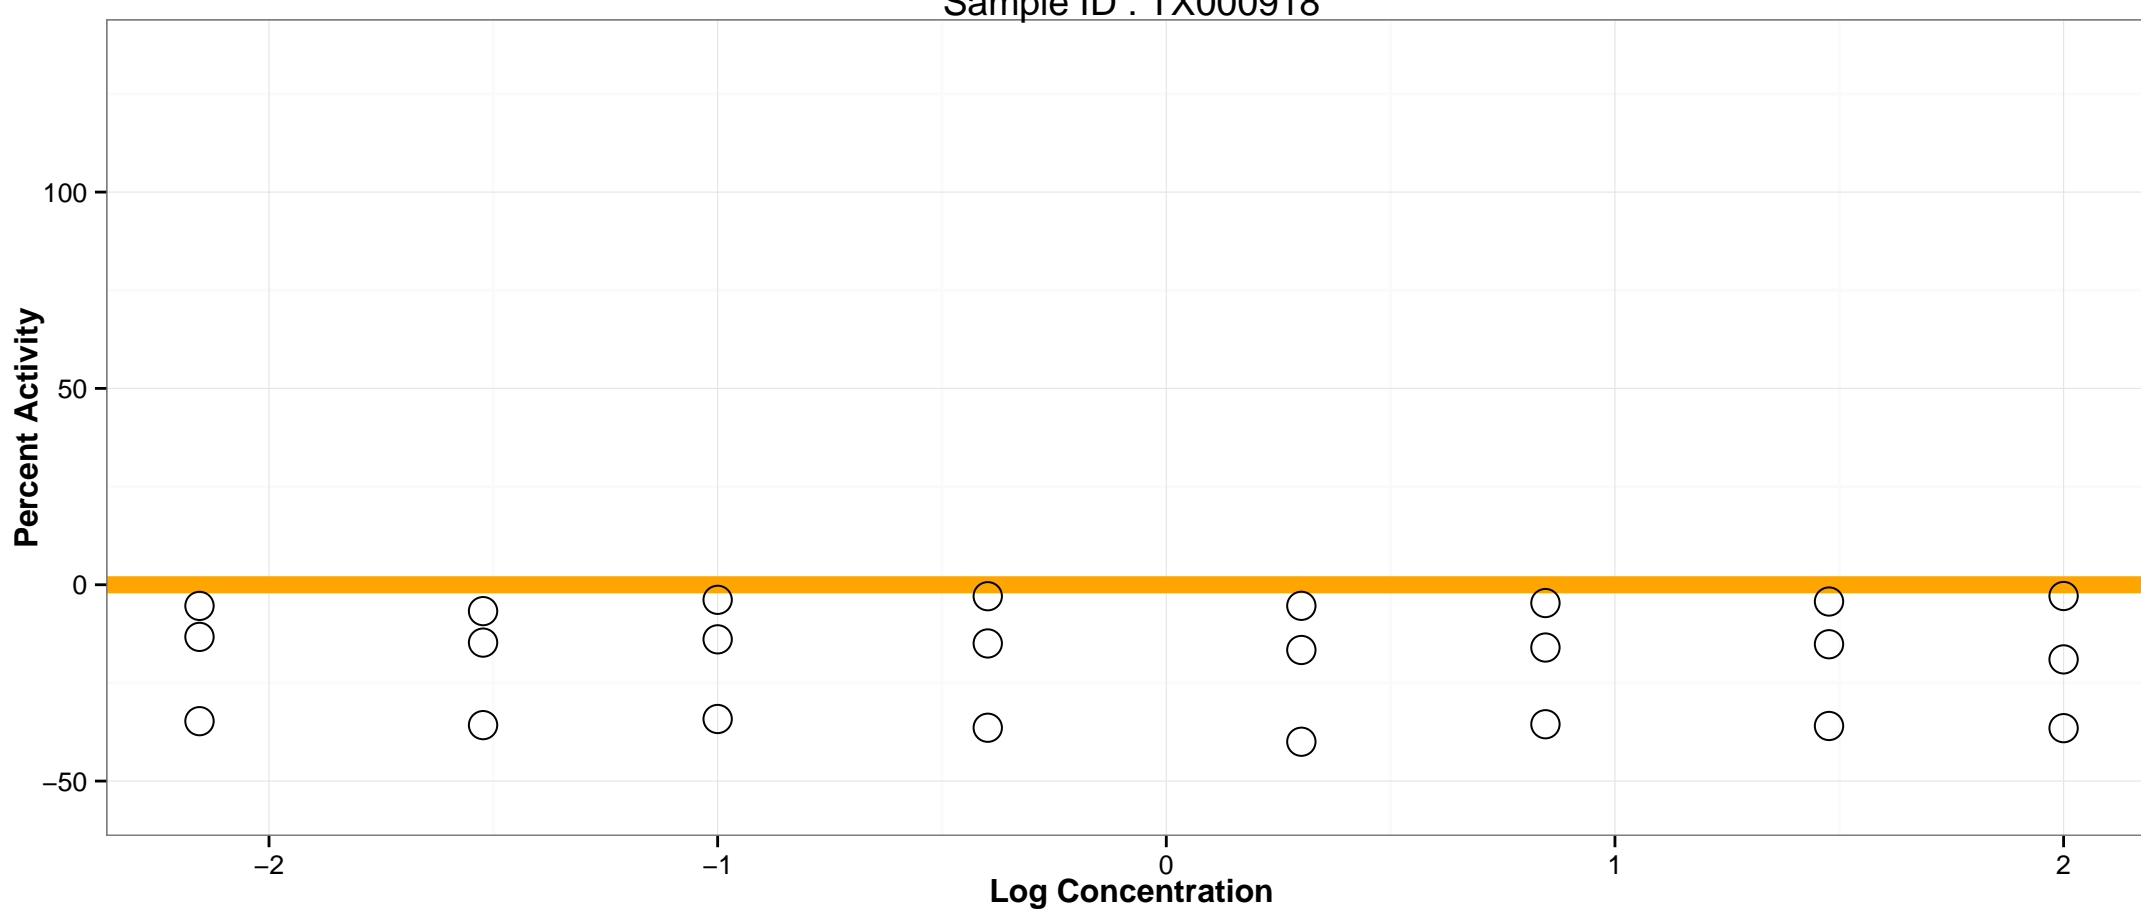

HILL MODEL

HILL MODEL: Not applicable

GAIN-LOSS MODEL

GNLS MODEL: Not applicable

|      | CNST   | HILL | GNLS |
|------|--------|------|------|
| AIC  | 222.87 | NA   | NA   |
| PROB | 1      | NA   | NA   |
| RMSE | 22.88  | NA   | NA   |

MAX\_MEAN : -17.3 MAX\_MED : -13.3 BMAD : 8.58  
COFF : 20 HIT-CALL : 0 FITC : 4 ACTP : 0  
FLAGS : 10

Chemical : Propiconazole  
CAS : 60207-90-1

Assay ID 1508 (NHEERL\_TPO\_AUR\_dn)  
Sample ID : TX000926

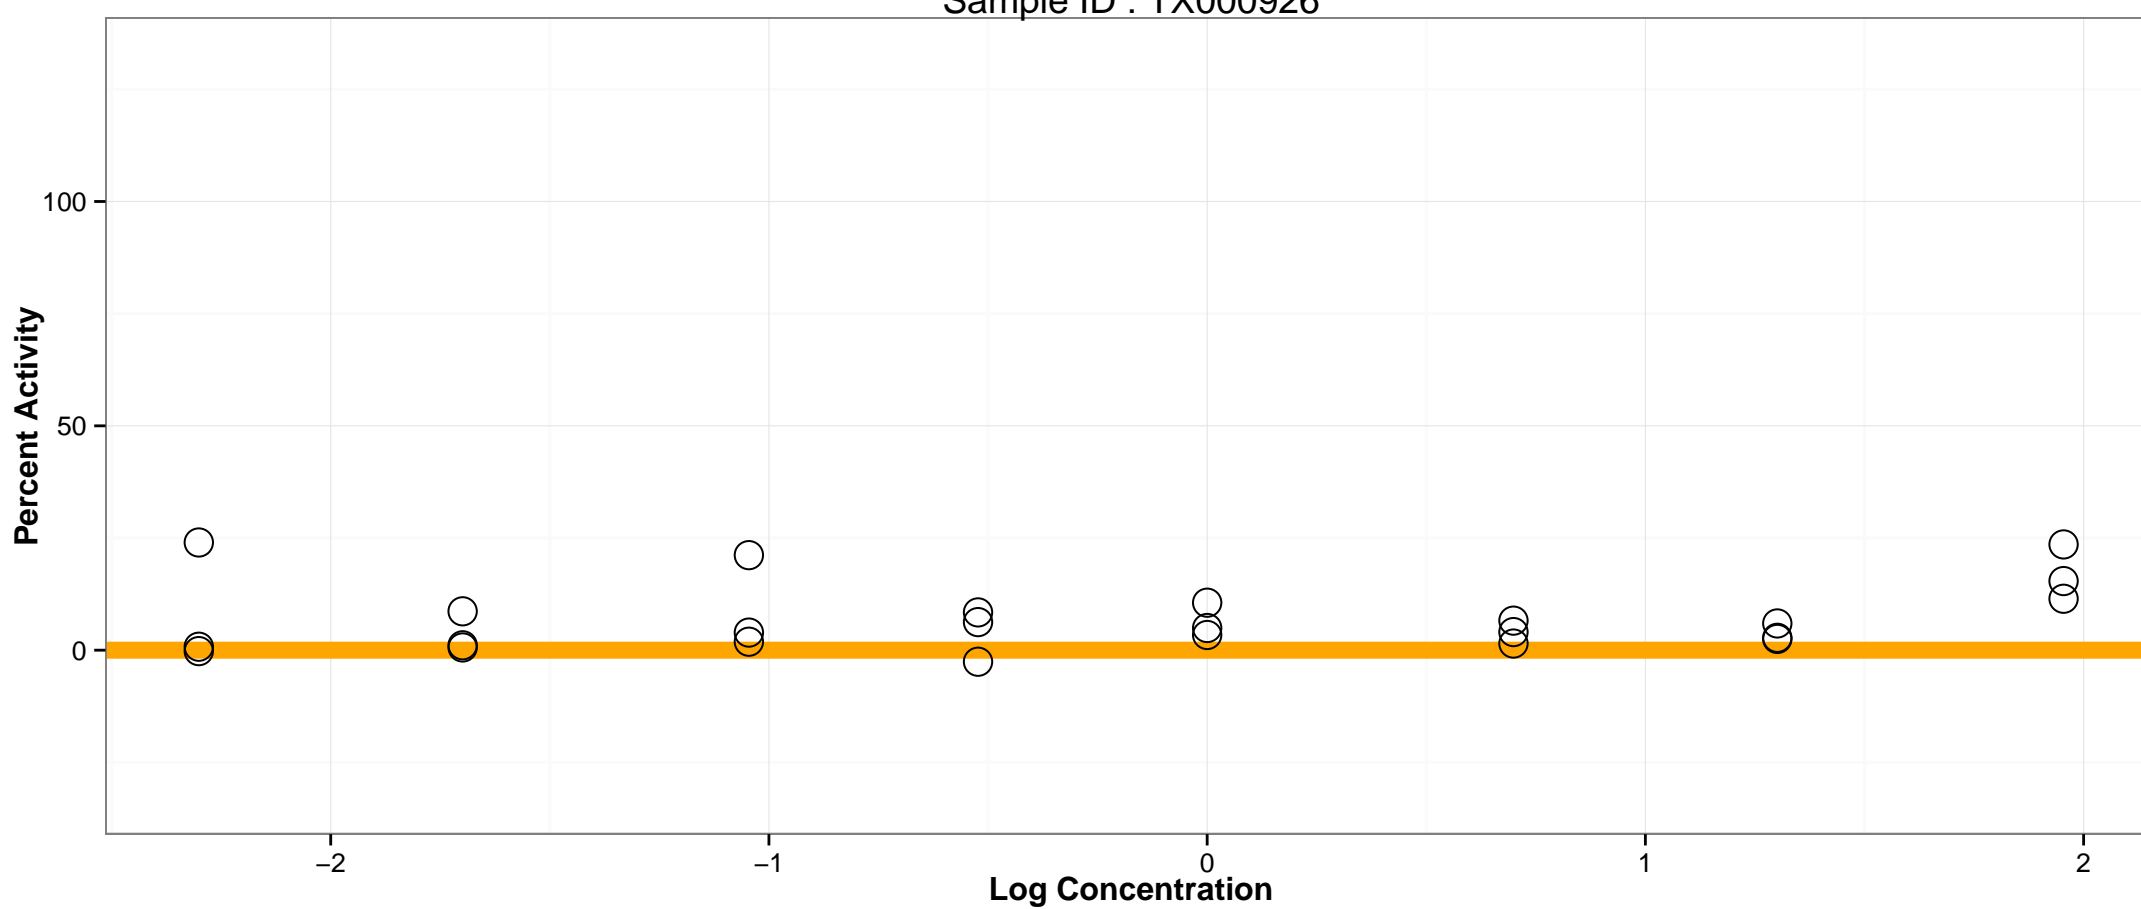

HILL MODEL

HILL MODEL: Not applicable

GAIN-LOSS MODEL

GNLS MODEL: Not applicable

|      | CNST   | HILL | GNLS |
|------|--------|------|------|
| AIC  | 179.09 | NA   | NA   |
| PROB | 1      | NA   | NA   |
| RMSE | 10.05  | NA   | NA   |

MAX\_MEAN : 16.8 MAX\_MED : 15.4 BMAD : 5.69  
COFF : 20 HIT-CALL : 0 FITC : 4 ACTP : 0  
FLAGS :

Assay ID 1509 (NHEERL\_HEK293T\_CellTiterGLO)  
Sample ID : TX000926

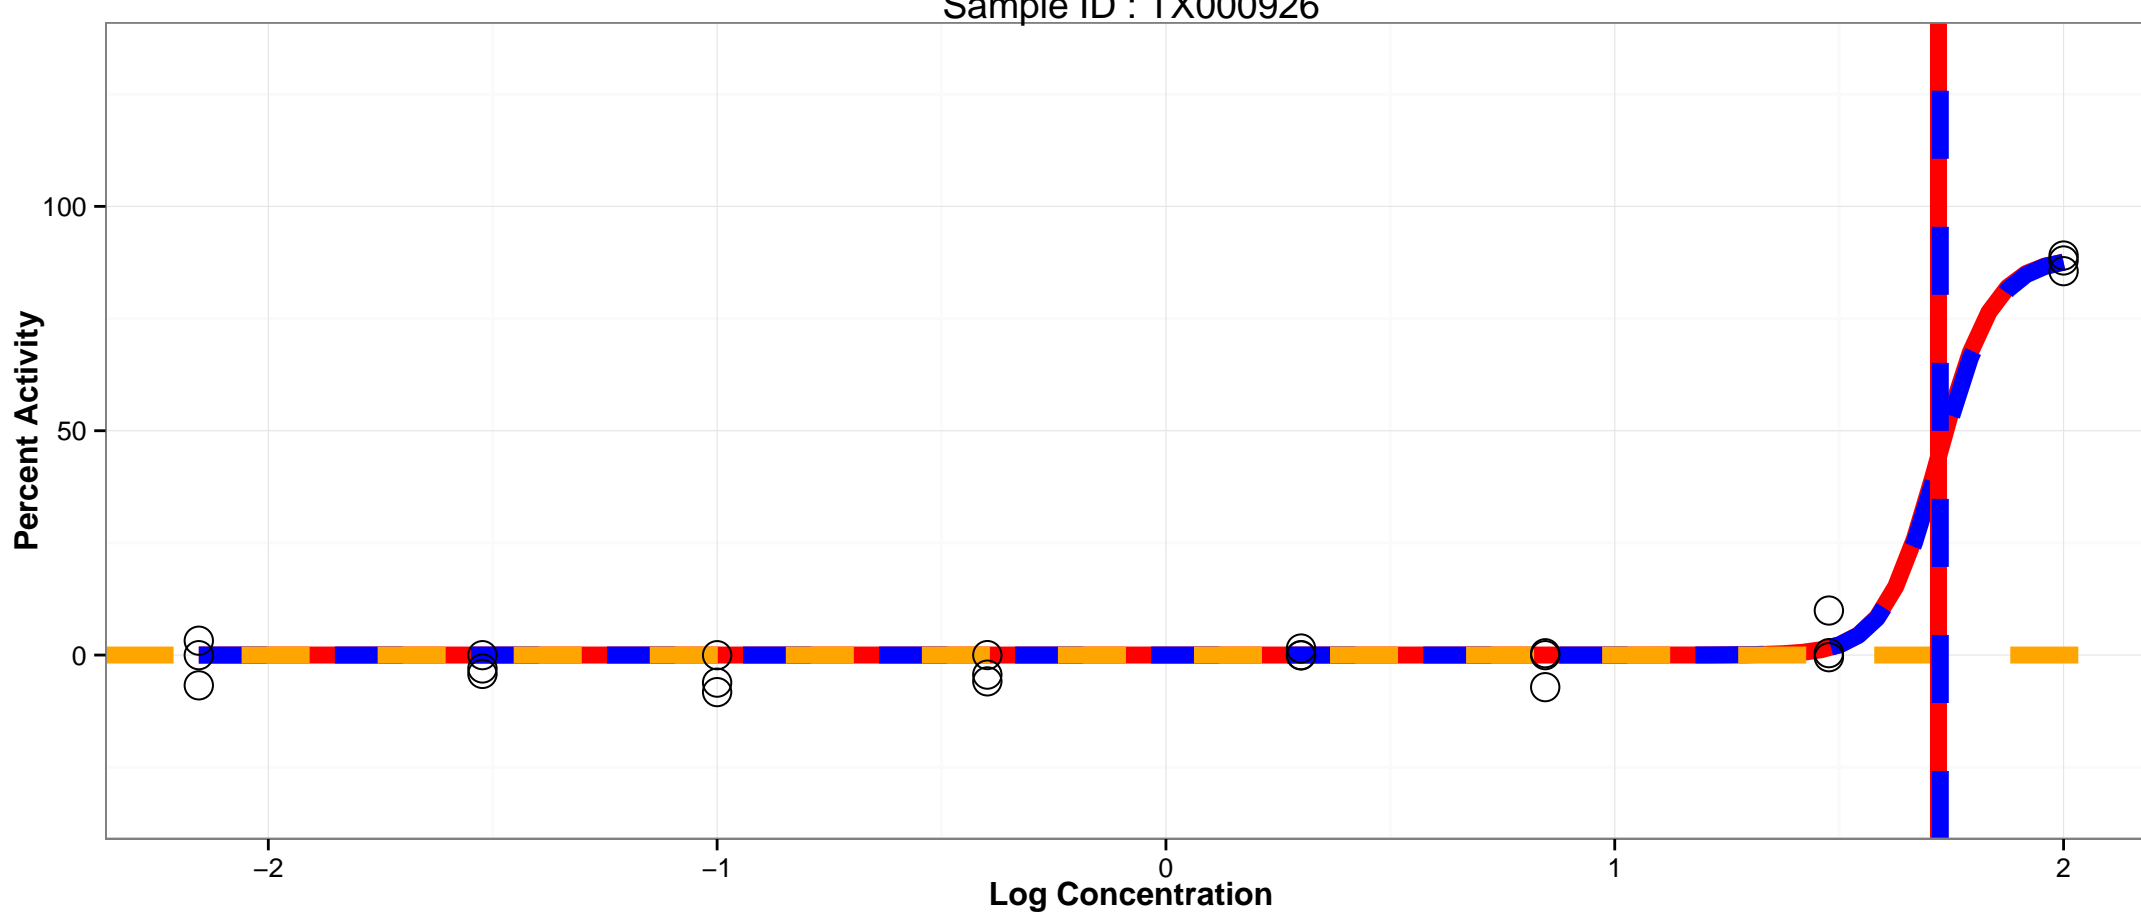

HILL MODEL

|     | tp   | ga   | gw   |
|-----|------|------|------|
| val | 88.5 | 1.72 | 7.14 |
| sd  | NA   | NA   | NA   |

GAIN-LOSS MODEL

|     | tp   | ga   | gw   | la   | lw   |
|-----|------|------|------|------|------|
| val | 88.6 | 1.73 | 7.03 | 2.39 | 10.1 |
| sd  | NA   | NA   | NA   | NA   | NA   |

|      | CNST   | HILL   | GNLS   |
|------|--------|--------|--------|
| AIC  | 206.54 | 142.29 | 146.29 |
| PROB | 0      | 0.88   | 0.12   |
| RMSE | 31.22  | 3.96   | 3.96   |

MAX\_MEAN : 87.5 MAX\_MED : 88 BMAD : 5.54  
COFF : 20 HIT-CALL : 1 FITC : 41 ACTP : 1  
FLAGS : 6

Assay ID 1848 (NHEERL\_Quantilum\_inhib\_2\_dn)  
Sample ID : TX000926

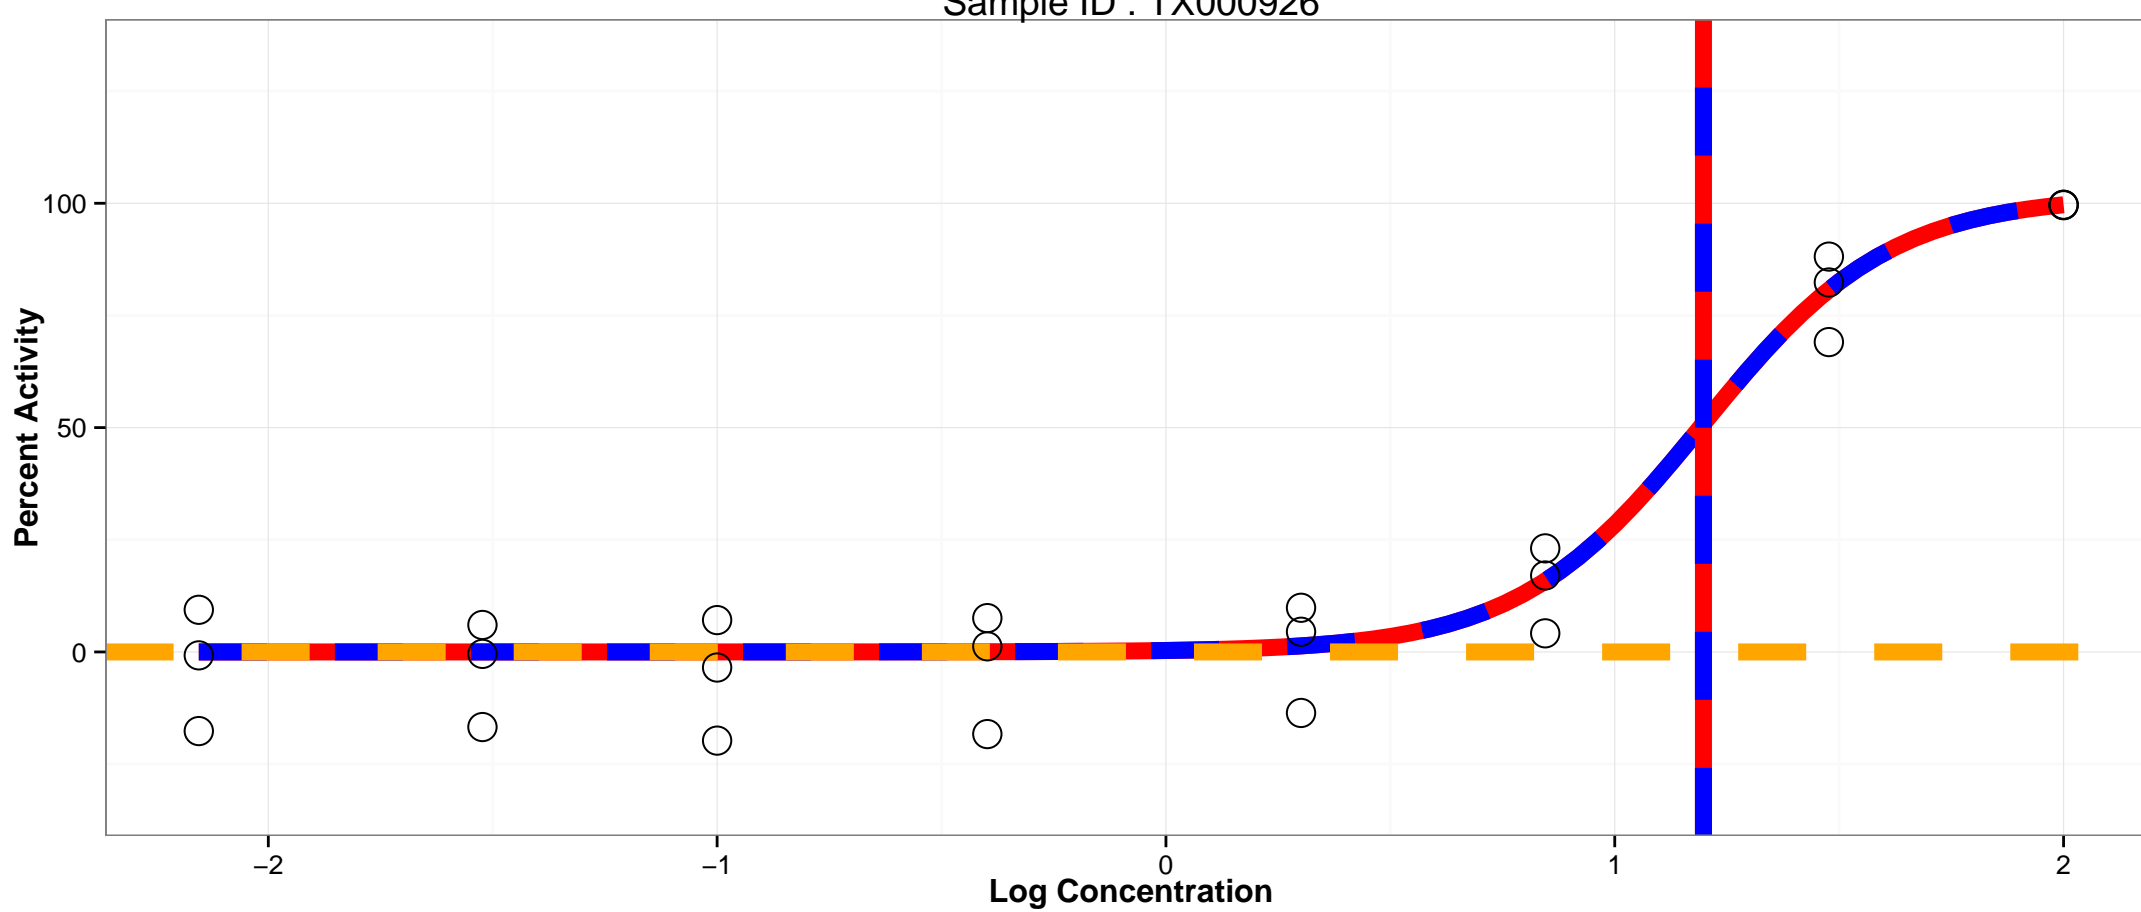

HILL MODEL

|     | tp   | ga     | gw    |
|-----|------|--------|-------|
| val | 102  | 1.2    | 2.09  |
| sd  | 5.32 | 0.0666 | 0.417 |

GAIN-LOSS MODEL

|     | tp  | ga  | gw   | la   | lw   |
|-----|-----|-----|------|------|------|
| val | 102 | 1.2 | 2.09 | 2.74 | 13.3 |
| sd  | NA  | NA  | NA   | NA   | NA   |

|      | CNST   | HILL   | GNLS   |
|------|--------|--------|--------|
| AIC  | 251.06 | 186.52 | 190.52 |
| PROB | 0      | 0.88   | 0.12   |
| RMSE | 46.46  | 9.69   | 9.69   |

MAX\_MEAN : 99.6 MAX\_MED : 99.7 BMAD : 8.58  
COFF : 20 HIT-CALL : 1 FITC : 41 ACTP : 1  
FLAGS :

Chemical : Rotenone  
CAS : 83-79-4

Assay ID 1508 (NHEERL\_TPO\_AUR\_dn)  
Sample ID : TX000939

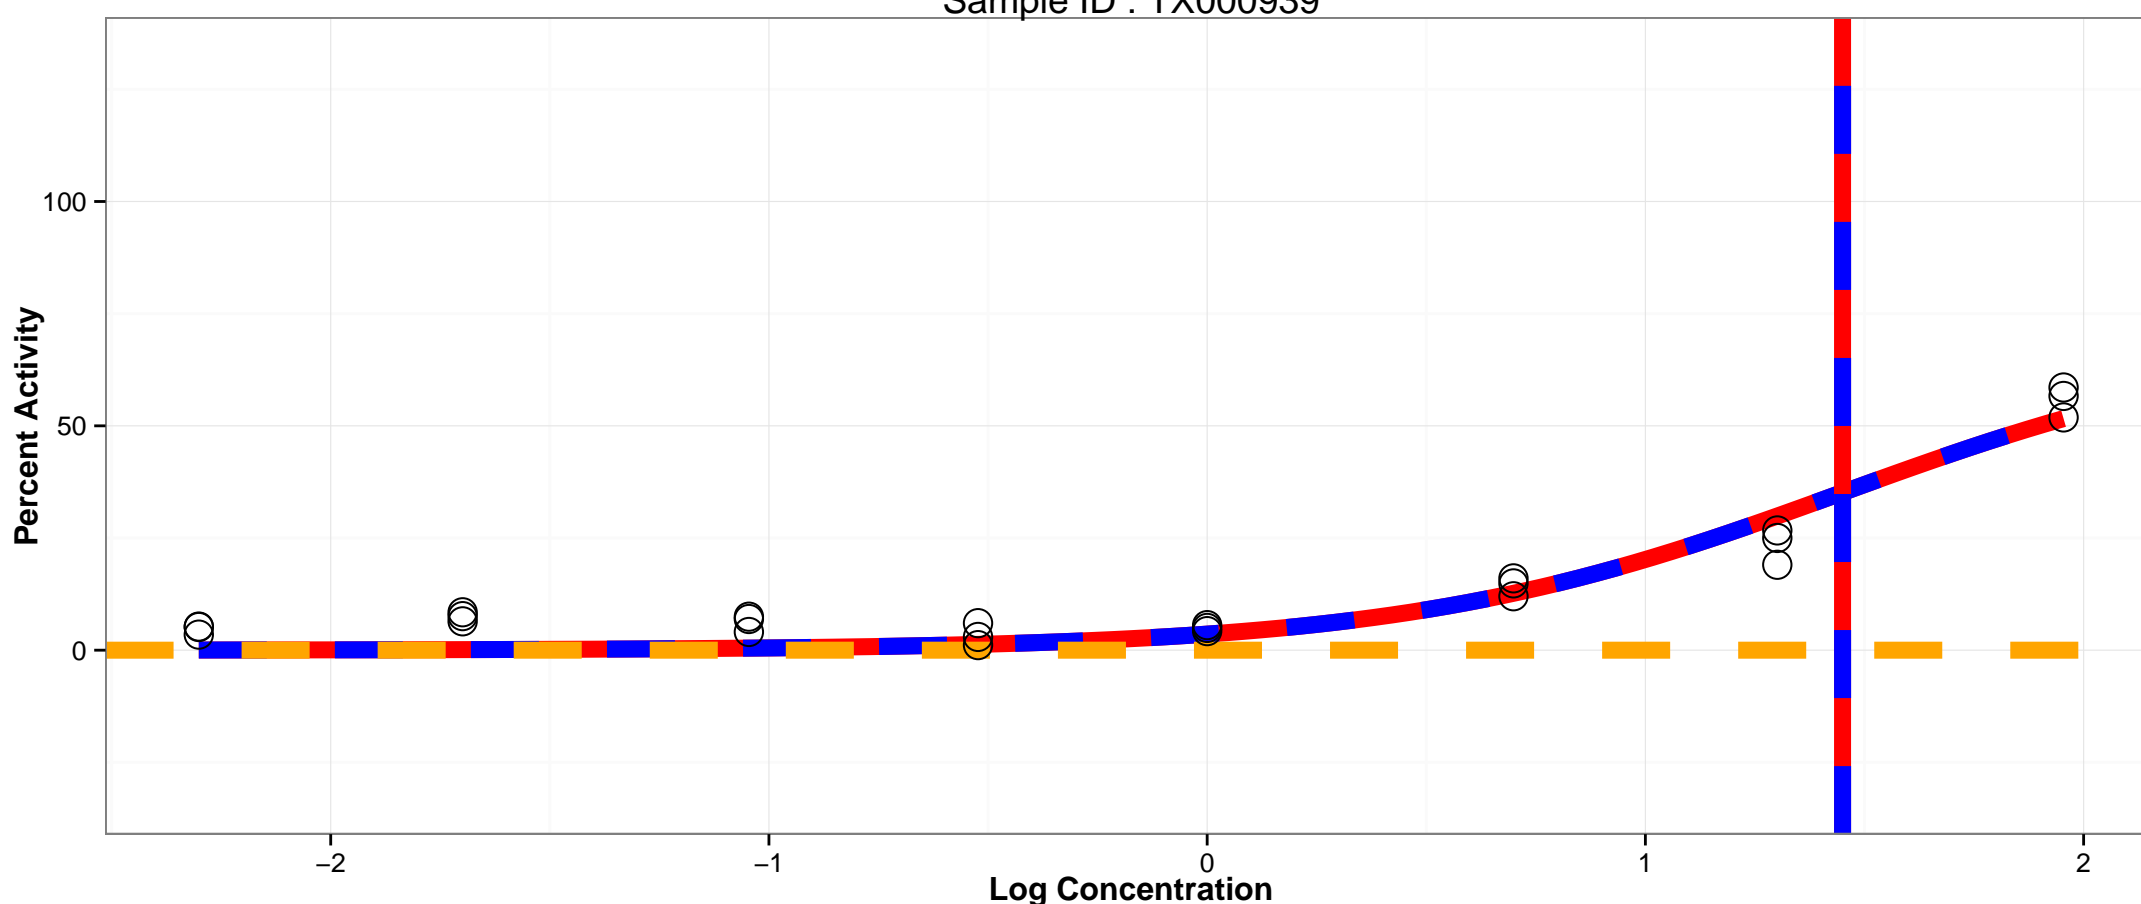

HILL MODEL

|     | tp   | ga    | gw    |
|-----|------|-------|-------|
| val | 70.3 | 1.45  | 0.876 |
| sd  | 11.2 | 0.187 | 0.161 |

GAIN-LOSS MODEL

|     | tp   | ga   | gw    | la   | lw   |
|-----|------|------|-------|------|------|
| val | 70.3 | 1.45 | 0.876 | 3.84 | 8.33 |
| sd  | NA   | NA   | NA    | NA   | NA   |

|      | CNST  | HILL   | GNLS   |
|------|-------|--------|--------|
| AIC  | 214.3 | 156.63 | 160.63 |
| PROB | 0     | 0.88   | 0.12   |
| RMSE | 22.49 | 5.04   | 5.04   |

MAX\_MEAN : 55.7 MAX\_MED : 56.7 BMAD : 5.69  
COFF : 20 HIT-CALL : 1 FITC : 42 ACTP : 1  
FLAGS :

Assay ID 1509 (NHEERL\_HEK293T\_CellTiterGLO)  
Sample ID : TX000939

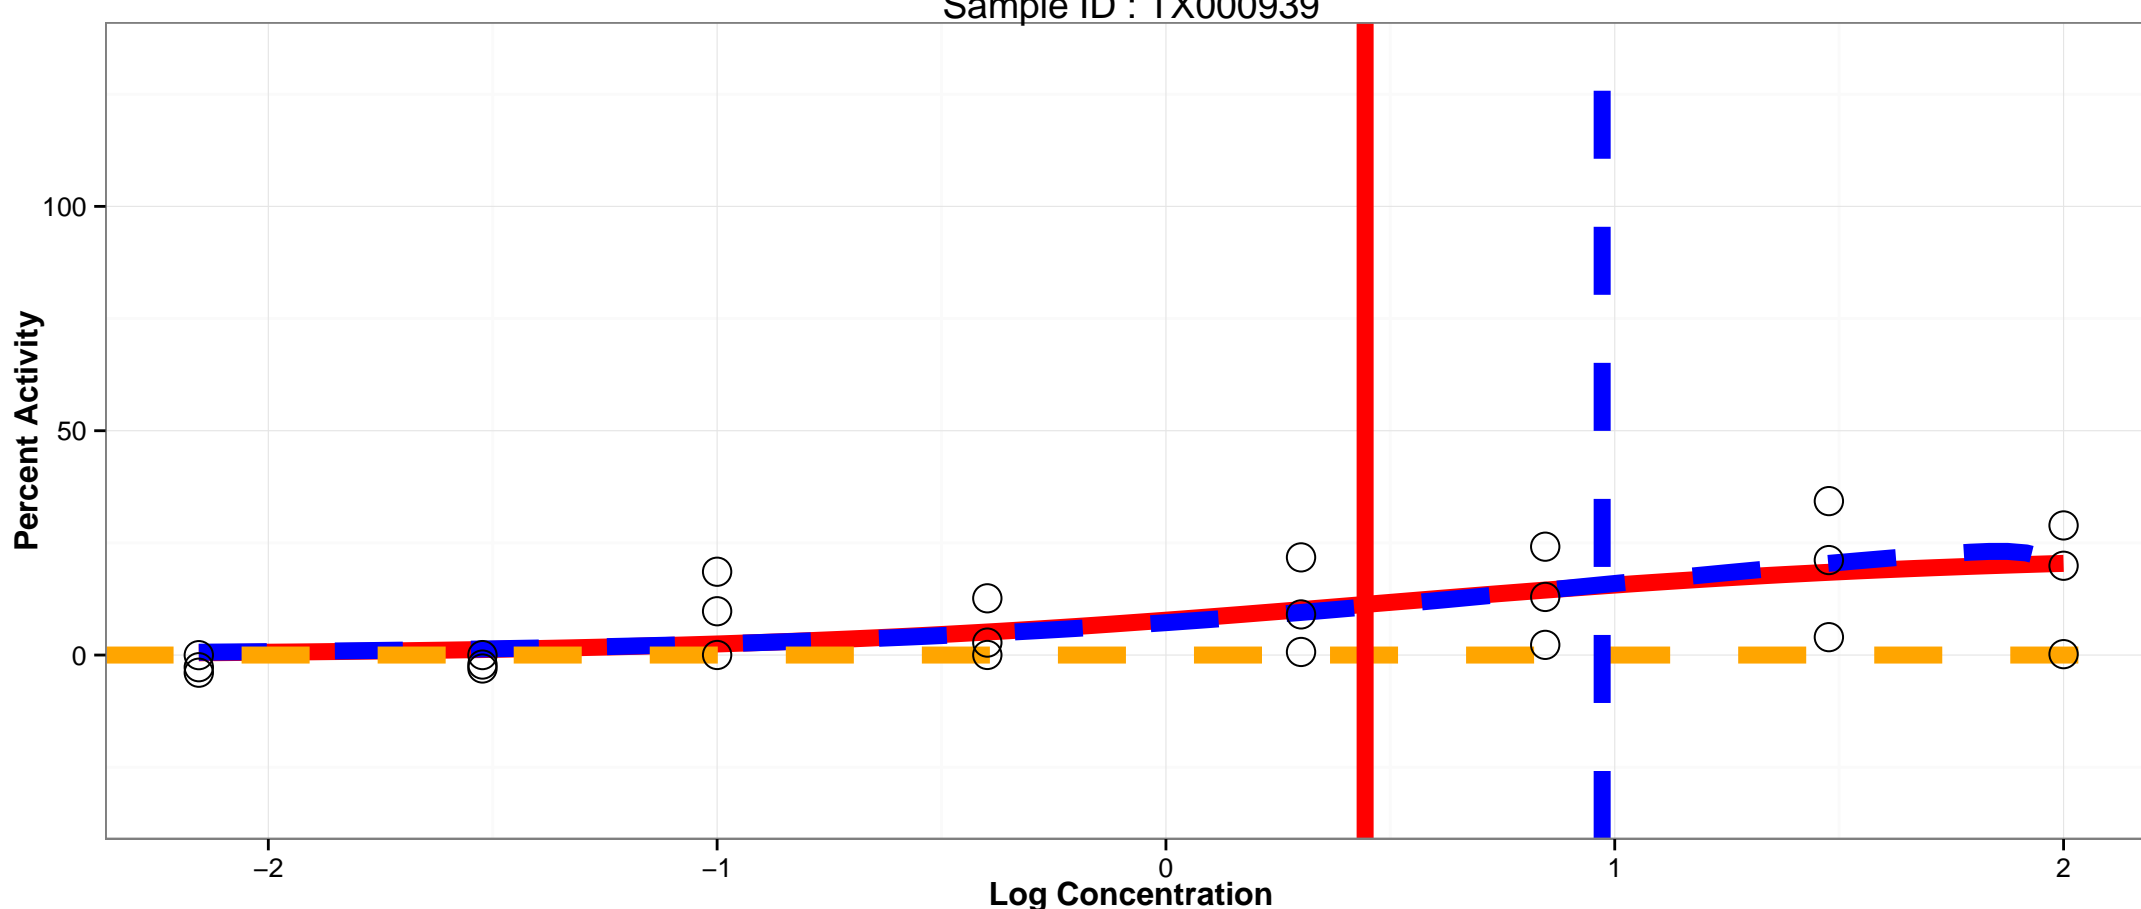

HILL MODEL

|     | tp   | ga    | gw    |
|-----|------|-------|-------|
| val | 22.6 | 0.444 | 0.63  |
| sd  | 9.66 | 0.893 | 0.395 |

GAIN-LOSS MODEL

|     | tp   | ga    | gw    | la    | lw   |
|-----|------|-------|-------|-------|------|
| val | 31.4 | 0.972 | 0.539 | 2.07  | 8.28 |
| sd  | 45.8 | 2.49  | 0.438 | 0.779 | 90.8 |

|      | CNST   | HILL   | GNLS   |
|------|--------|--------|--------|
| AIC  | 196.96 | 182.04 | 185.93 |
| PROB | 0      | 0.87   | 0.13   |
| RMSE | 14.19  | 8.87   | 8.83   |

MAX\_MEAN : 19.8 MAX\_MED : 21.2 BMAD : 5.54  
COFF : 20 HIT-CALL : 1 FITC : 38 ACTP : 0.999  
FLAGS : 11

Assay ID 1848 (NHEERL\_Quantilum\_inhib\_2\_dn)  
Sample ID : TX000939

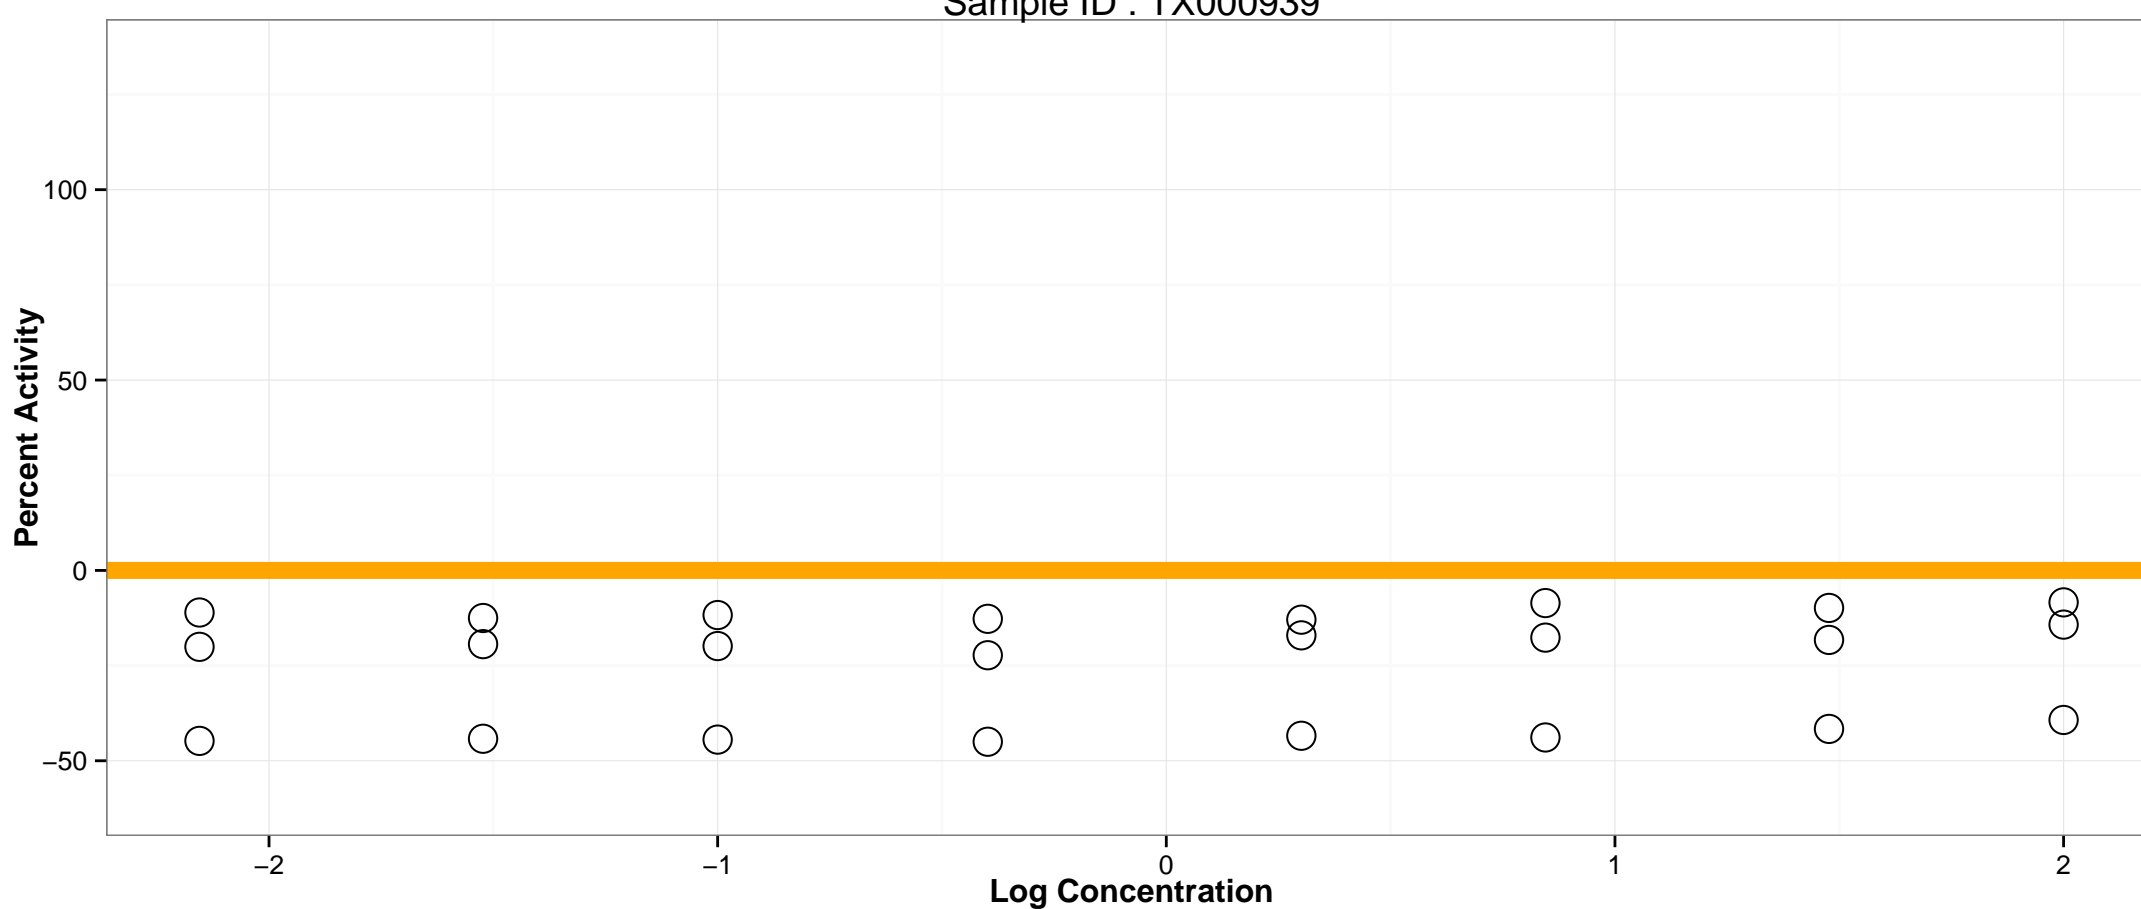

HILL MODEL

HILL MODEL: Not applicable

GAIN-LOSS MODEL

GNLS MODEL: Not applicable

|      | CNST   | HILL | GNLS |
|------|--------|------|------|
| AIC  | 233.13 | NA   | NA   |
| PROB | 1      | NA   | NA   |
| RMSE | 28     | NA   | NA   |

MAX\_MEAN : -20.6 MAX\_MED : -14.2 BMAD : 8.58  
COFF : 20 HIT-CALL : 0 FITC : 4 ACTP : 0  
FLAGS : 10

Chemical : Fenthion  
CAS : 55-38-9

Assay ID 1508 (NHEERL\_TPO\_AUR\_dn)  
Sample ID : TX000944

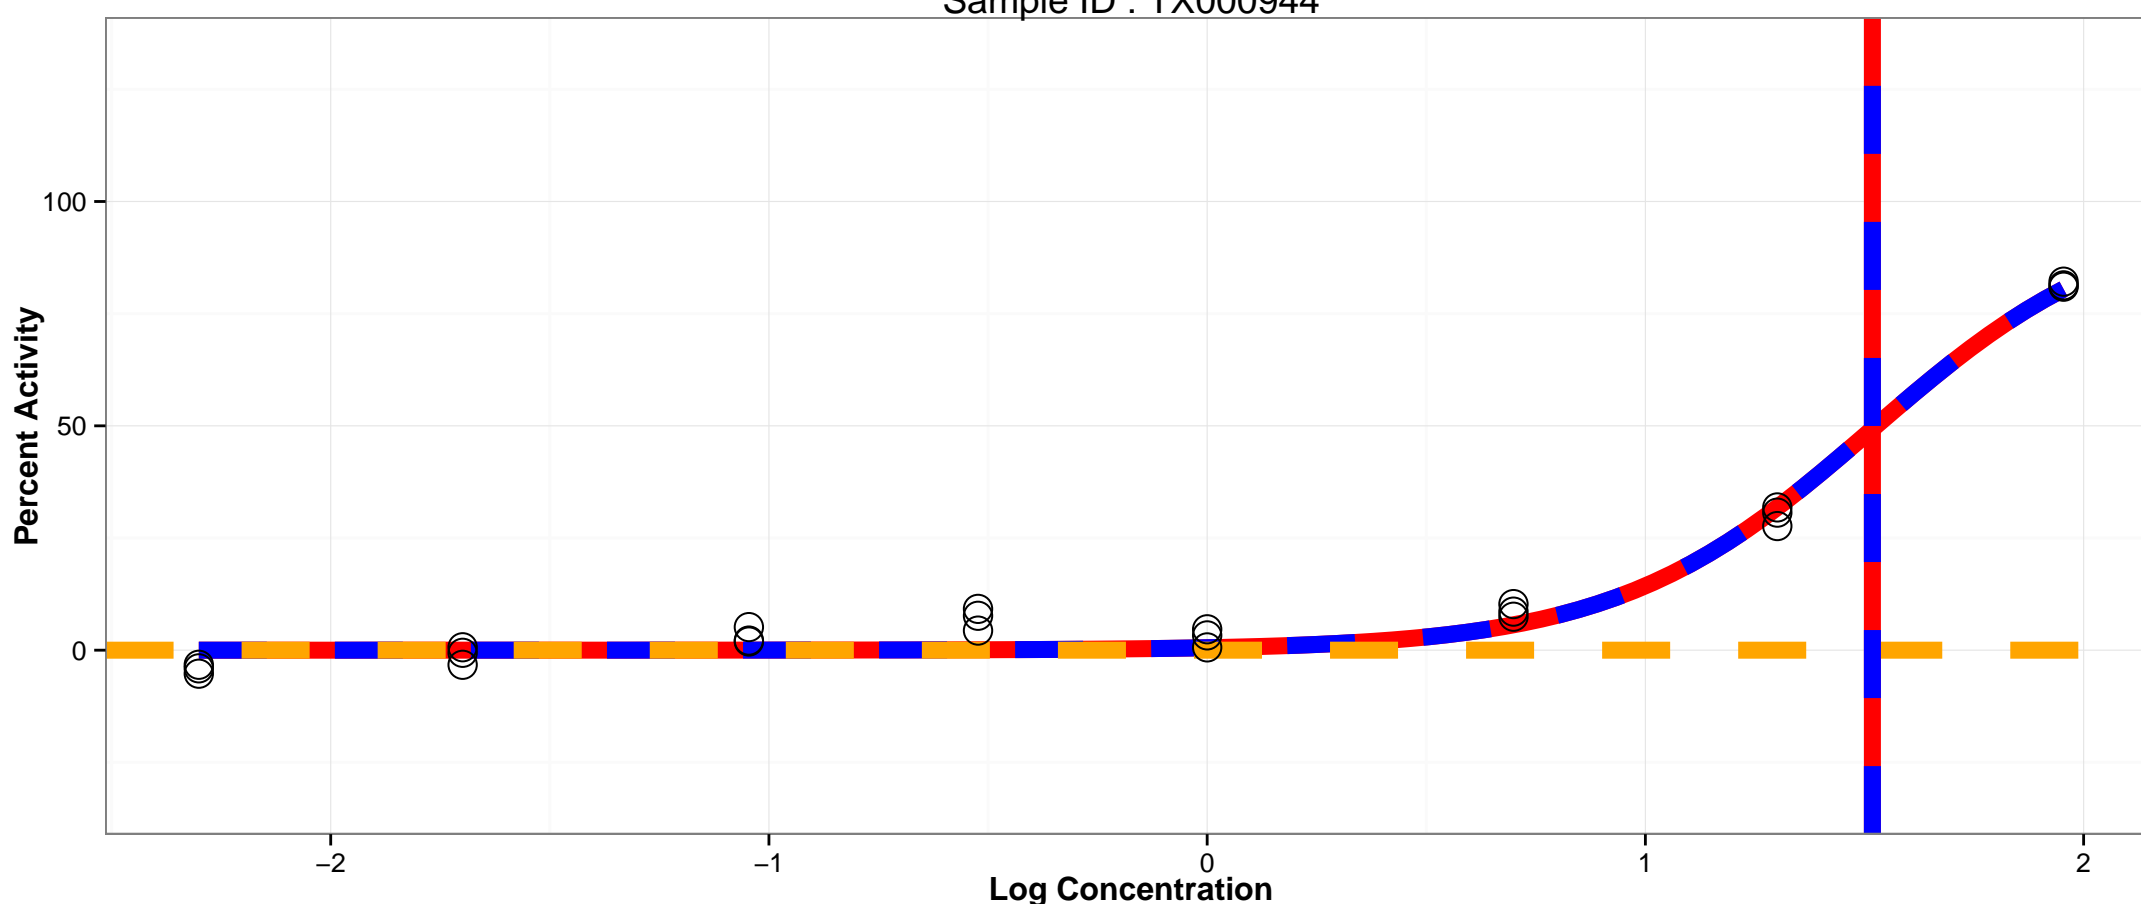

HILL MODEL

|     | tp   | ga     | gw    |
|-----|------|--------|-------|
| val | 98.6 | 1.52   | 1.49  |
| sd  | 10.3 | 0.0848 | 0.272 |

GAIN-LOSS MODEL

|     | tp   | ga     | gw    | la   | lw   |
|-----|------|--------|-------|------|------|
| val | 98.6 | 1.52   | 1.49  | 2.77 | 10.4 |
| sd  | 10.3 | 0.0848 | 0.272 | 405  | 5130 |

|      | CNST   | HILL   | GNLS   |
|------|--------|--------|--------|
| AIC  | 224.22 | 141.16 | 145.16 |
| PROB | 0      | 0.88   | 0.12   |
| RMSE | 31.08  | 3.76   | 3.76   |

MAX\_MEAN : 81.5 MAX\_MED : 81.3 BMAD : 5.69  
COFF : 20 HIT-CALL : 1 FITC : 42 ACTP : 1  
FLAGS :

Assay ID 1509 (NHEERL\_HEK293T\_CellTiterGLO)  
Sample ID : TX000944

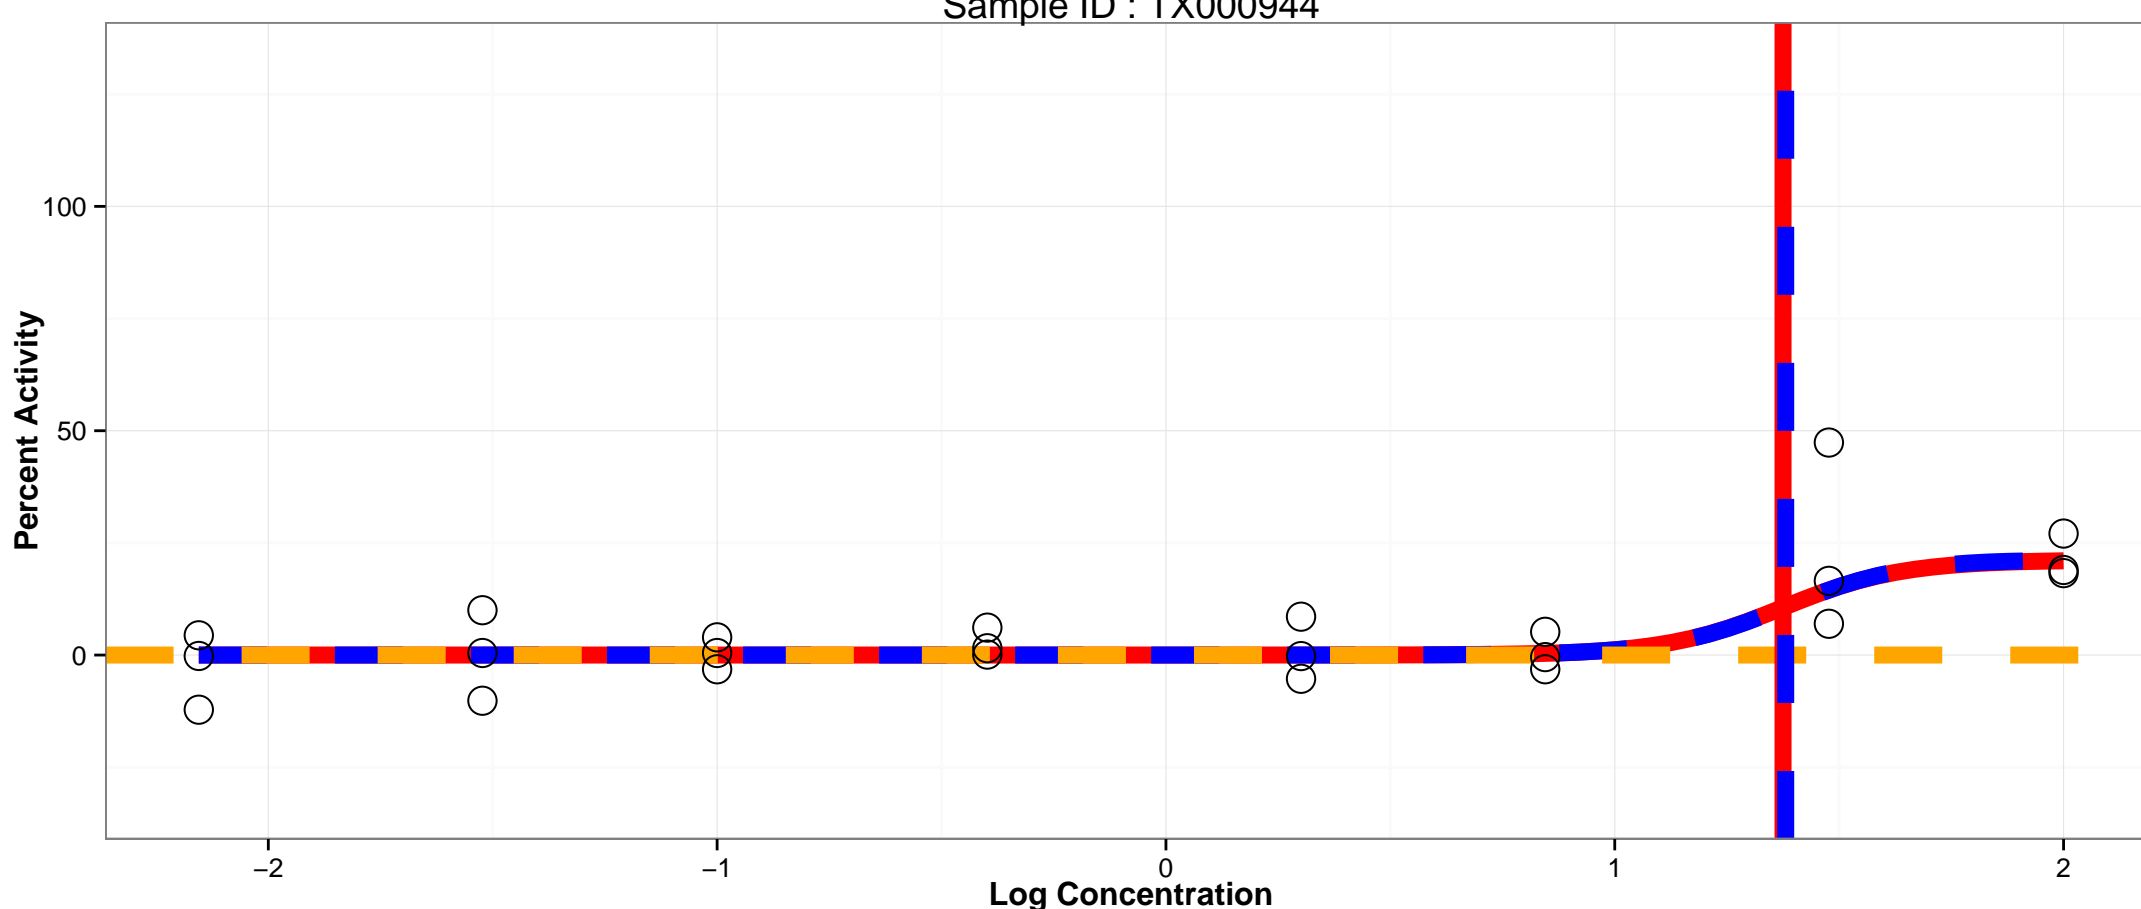

HILL MODEL

|     | tp   | ga    | gw   |
|-----|------|-------|------|
| val | 21.2 | 1.37  | 3.29 |
| sd  | 3.66 | 0.204 | 5.97 |

GAIN-LOSS MODEL

|     | tp   | ga   | gw   | la   | lw   |
|-----|------|------|------|------|------|
| val | 21.5 | 1.38 | 3.26 | 2.6  | 2.99 |
| sd  | 71.6 | 1.19 | 7.48 | 44.5 | 214  |

|      | CNST   | HILL   | GNLS   |
|------|--------|--------|--------|
| AIC  | 189.69 | 170.29 | 174.29 |
| PROB | 0      | 0.88   | 0.12   |
| RMSE | 13.8   | 8.58   | 8.58   |

MAX\_MEAN : 23.6 MAX\_MED : 19 BMAD : 5.54  
COFF : 20 HIT-CALL : 0 FITC : 21 ACTP : 1  
FLAGS : 12

Assay ID 1848 (NHEERL\_Quantilum\_inhib\_2\_dn)  
Sample ID : TX000944

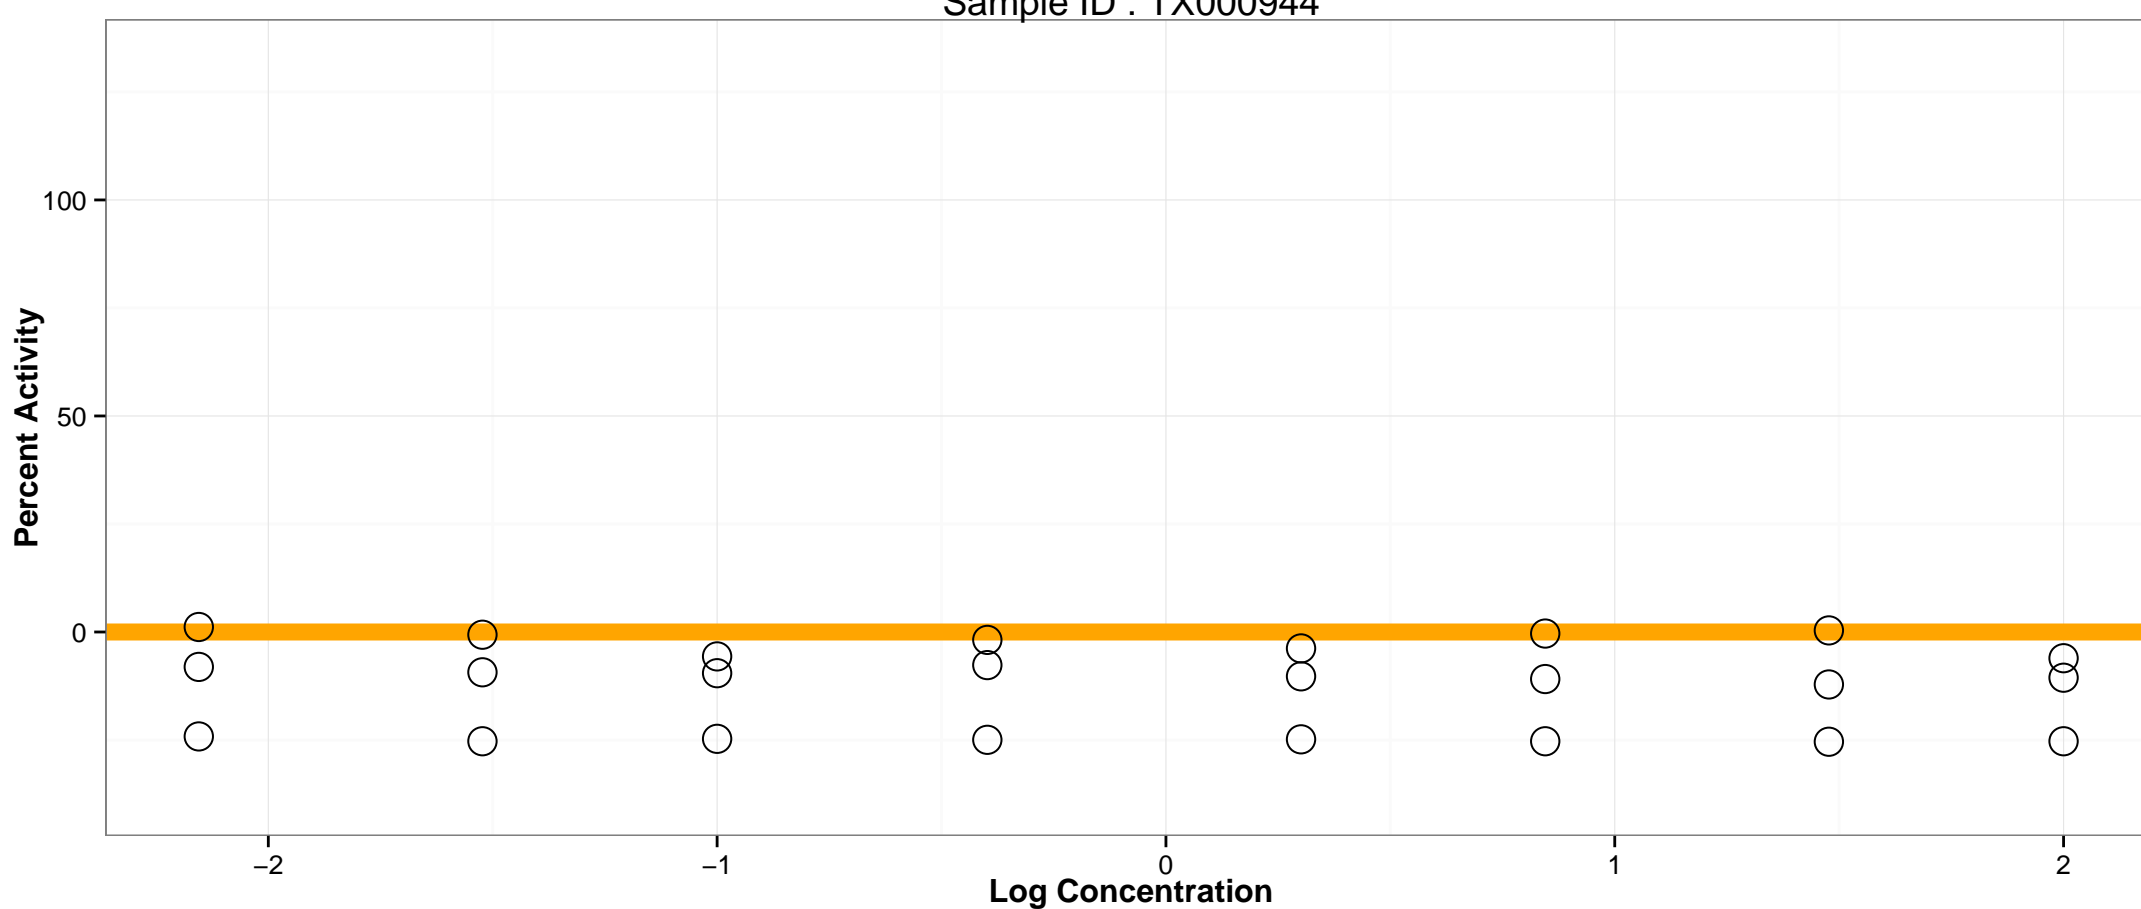

HILL MODEL

HILL MODEL: Not applicable

GAIN-LOSS MODEL

GNLS MODEL: Not applicable

|      | CNST   | HILL | GNLS |
|------|--------|------|------|
| AIC  | 204.35 | NA   | NA   |
| PROB | 1      | NA   | NA   |
| RMSE | 15.63  | NA   | NA   |

MAX\_MEAN : -10.3 MAX\_MED : -7.65 BMAD : 8.58  
COFF : 20 HIT-CALL : 0 FITC : 4 ACTP : 0  
FLAGS :

Assay ID 1508 (NHEERL\_TPO\_AUR\_dn)  
Sample ID : TX000945

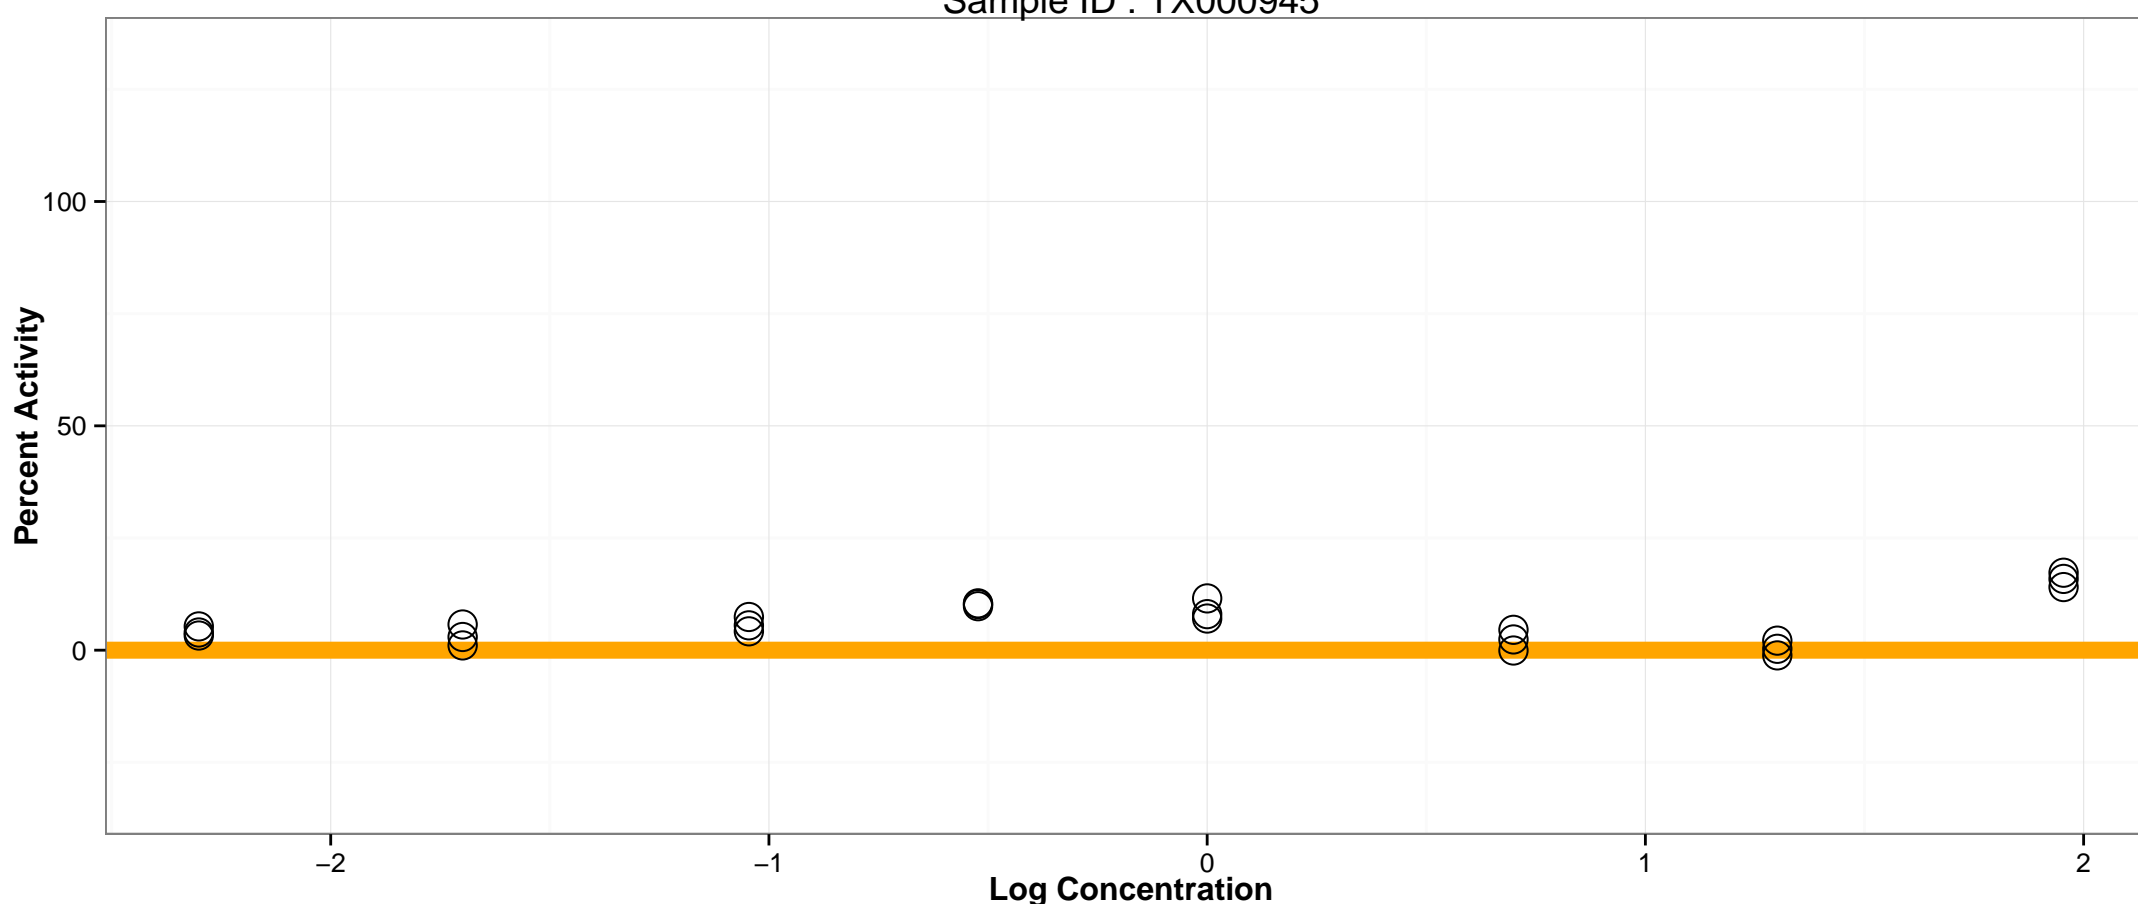

HILL MODEL

HILL MODEL: Not applicable

GAIN-LOSS MODEL

GNLS MODEL: Not applicable

|      | CNST   | HILL | GNLS |
|------|--------|------|------|
| AIC  | 171.77 | NA   | NA   |
| PROB | 1      | NA   | NA   |
| RMSE | 8.01   | NA   | NA   |

MAX\_MEAN : 15.7 MAX\_MED : 15.9 BMAD : 5.69  
COFF : 20 HIT-CALL : 0 FITC : 4 ACTP : 0  
FLAGS :

Assay ID 1509 (NHEERL\_HEK293T\_CellTiterGLO)  
Sample ID : TX000945

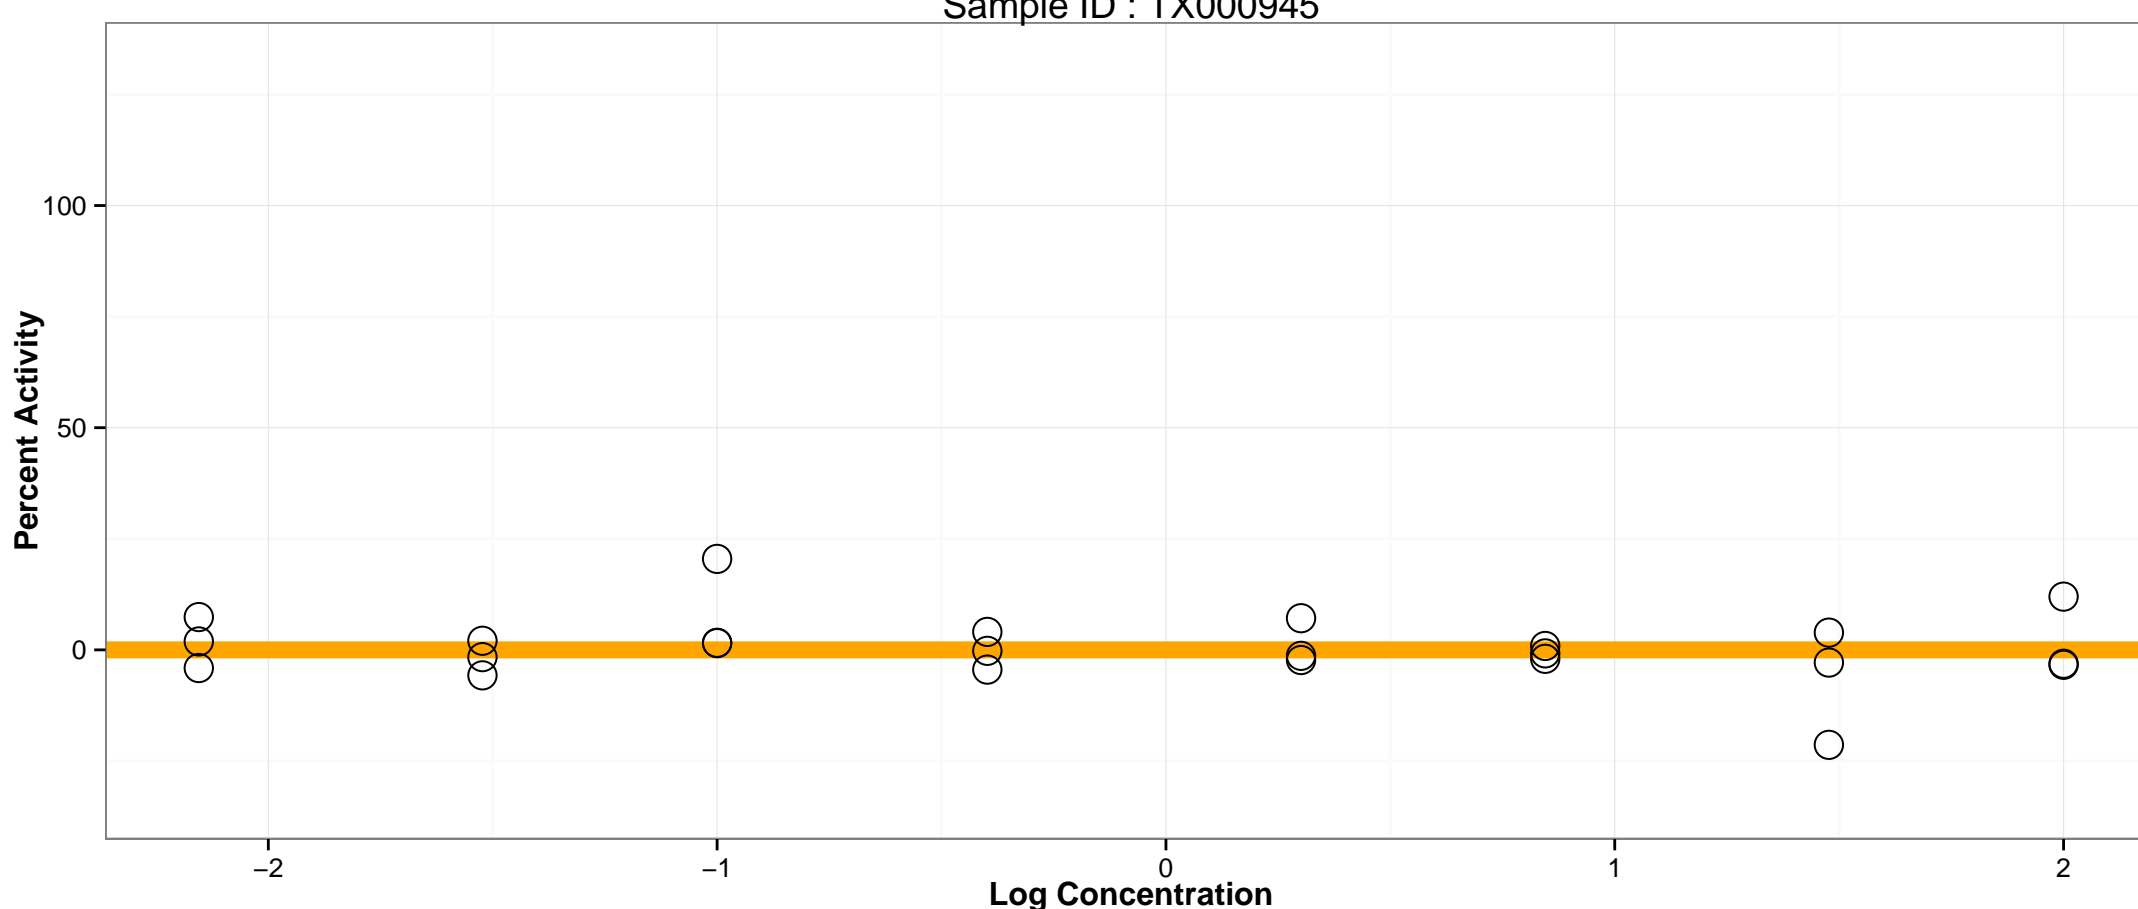

HILL MODEL

HILL MODEL: Not applicable

GAIN-LOSS MODEL

GNLS MODEL: Not applicable

|      | CNST   | HILL | GNLS |
|------|--------|------|------|
| AIC  | 158.84 | NA   | NA   |
| PROB | 1      | NA   | NA   |
| RMSE | 7.31   | NA   | NA   |

MAX\_MEAN : 7.87 MAX\_MED : 1.91 BMAD : 5.54  
COFF : 20 HIT-CALL : 0 FITC : 4 ACTP : 0  
FLAGS :

Assay ID 1848 (NHEERL\_Quantilum\_inhib\_2\_dn)  
Sample ID : TX000945

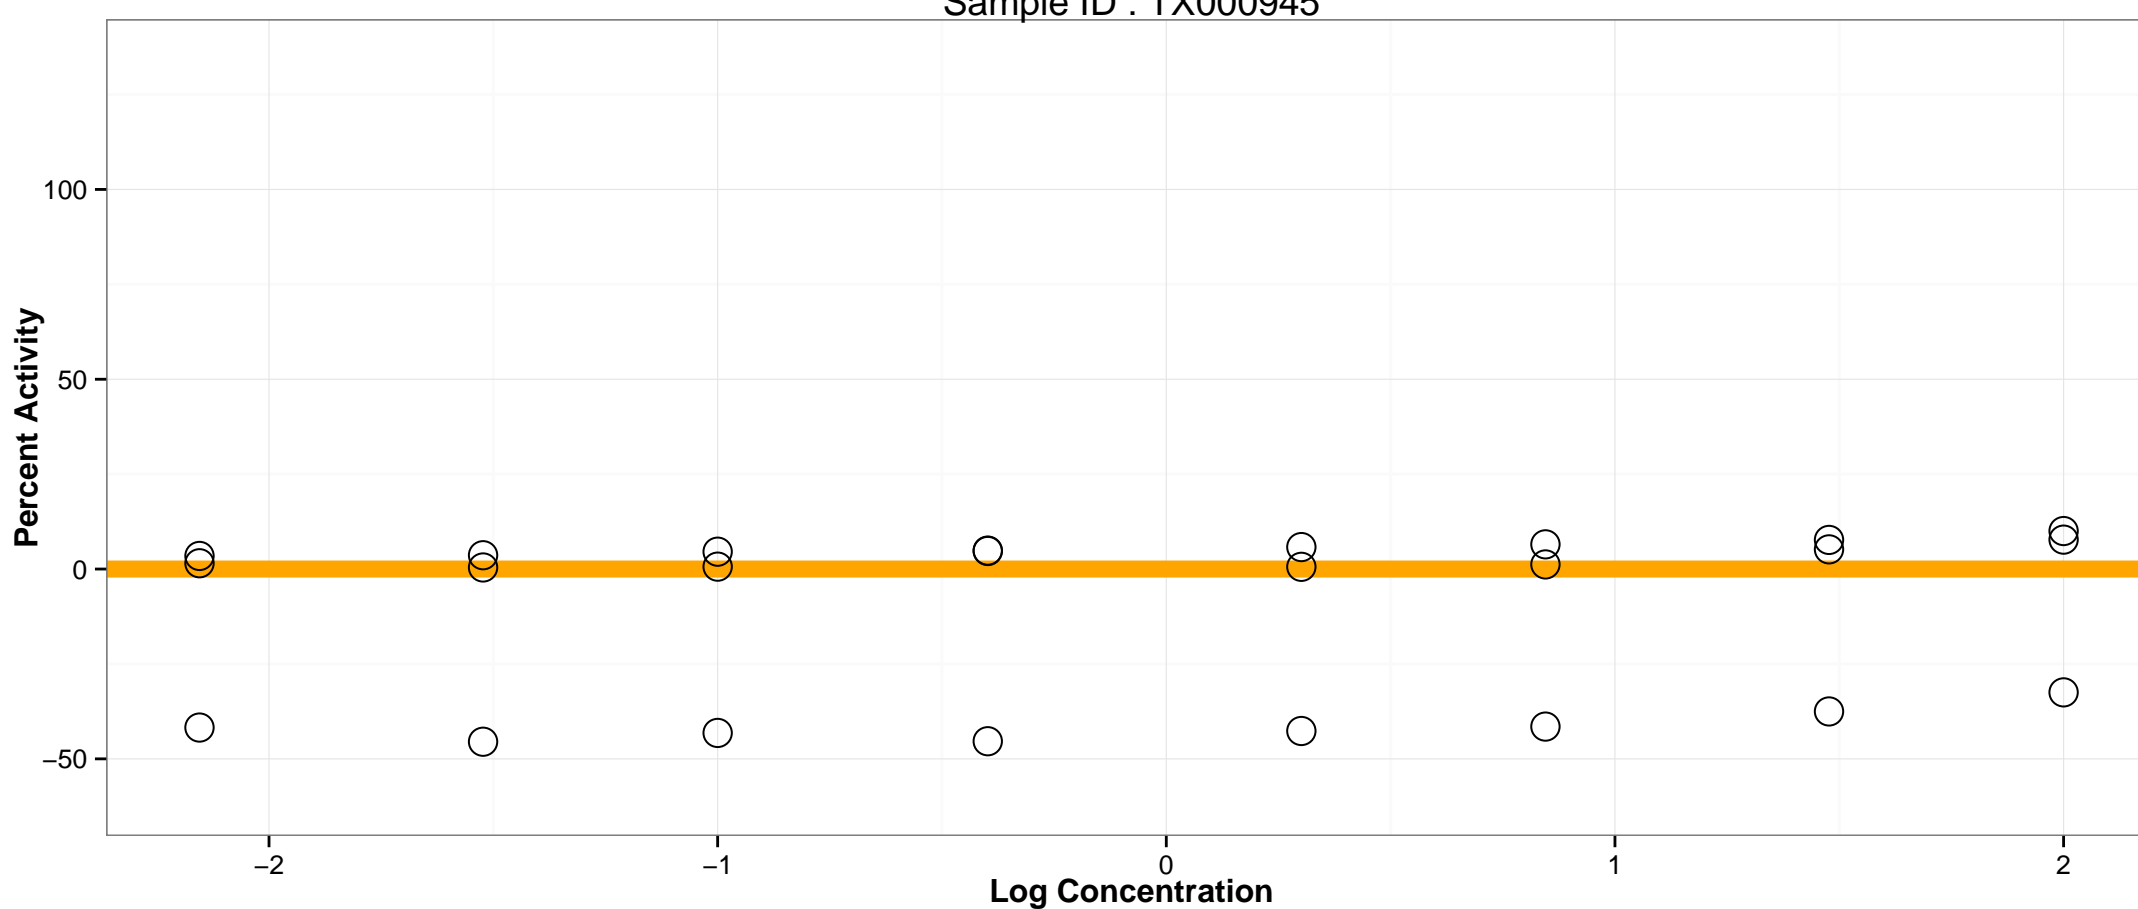

HILL MODEL

HILL MODEL: Not applicable

GAIN-LOSS MODEL

GNLS MODEL: Not applicable

|      | CNST  | HILL | GNLS |
|------|-------|------|------|
| AIC  | 222.9 | NA   | NA   |
| PROB | 1     | NA   | NA   |
| RMSE | 24.28 | NA   | NA   |

MAX\_MEAN : -4.89 MAX\_MED : 7.76 BMAD : 8.58  
COFF : 20 HIT-CALL : 0 FITC : 4 ACTP : 0  
FLAGS : 10



Chemical : Phosalone  
CAS : 2310-17-0

Assay ID 1508 (NHEERL\_TPO\_AUR\_dn)  
Sample ID : TX000955

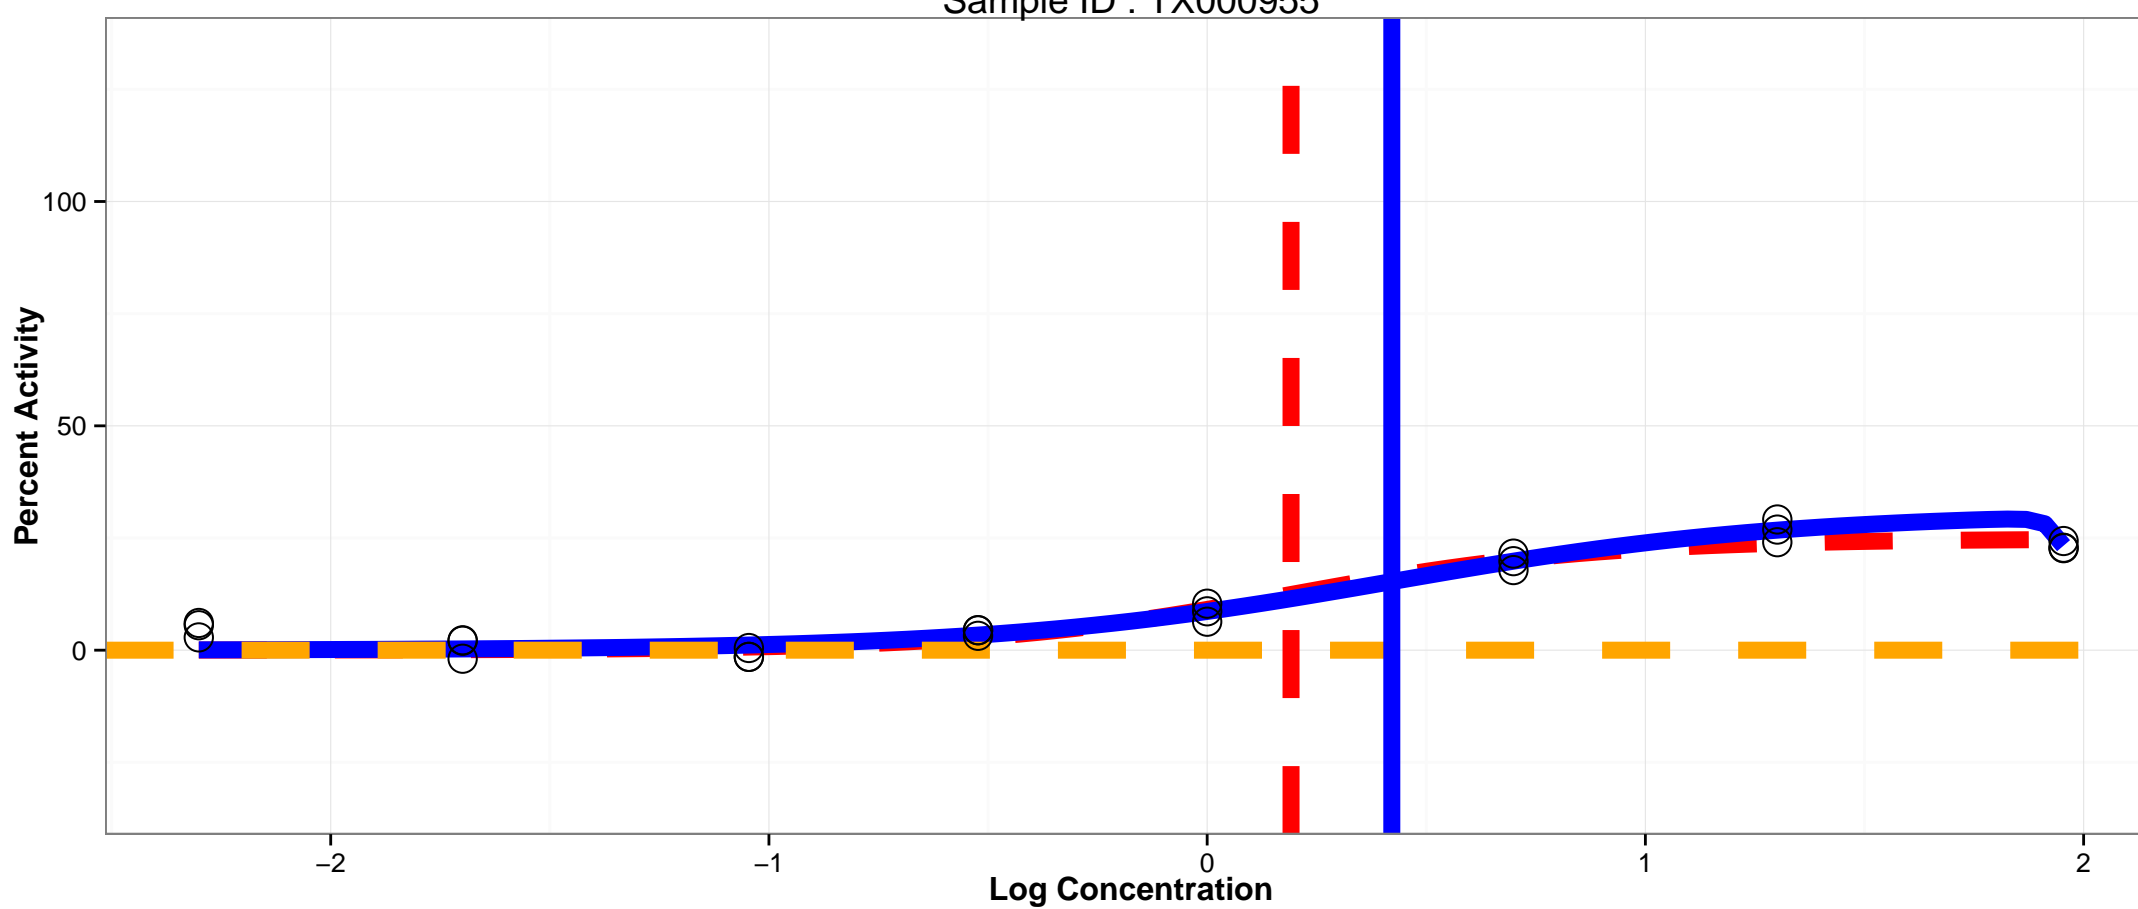

HILL MODEL

|     | tp   | ga     | gw    |
|-----|------|--------|-------|
| val | 24.8 | 0.191  | 1.25  |
| sd  | 1.19 | 0.0797 | 0.201 |

GAIN-LOSS MODEL

|     | tp   | ga    | gw    | la      | lw  |
|-----|------|-------|-------|---------|-----|
| val | 30.6 | 0.421 | 0.961 | 1.99    | 18  |
| sd  | 3.68 | 0.158 | 0.173 | 0.00661 | 6.5 |

|      | CNST   | HILL  | GNLS   |
|------|--------|-------|--------|
| AIC  | 201.19 | 123.1 | 121.24 |
| PROB | 0      | 0.28  | 0.72   |
| RMSE | 14.9   | 2.62  | 2.35   |

MAX\_MEAN : 26.7 MAX\_MED : 26.9 BMAD : 5.69  
COFF : 20 HIT-CALL : 1 FITC : 50 ACTP : 1  
FLAGS :

Assay ID 1509 (NHEERL\_HEK293T\_CellTiterGLO)  
Sample ID : TX000955

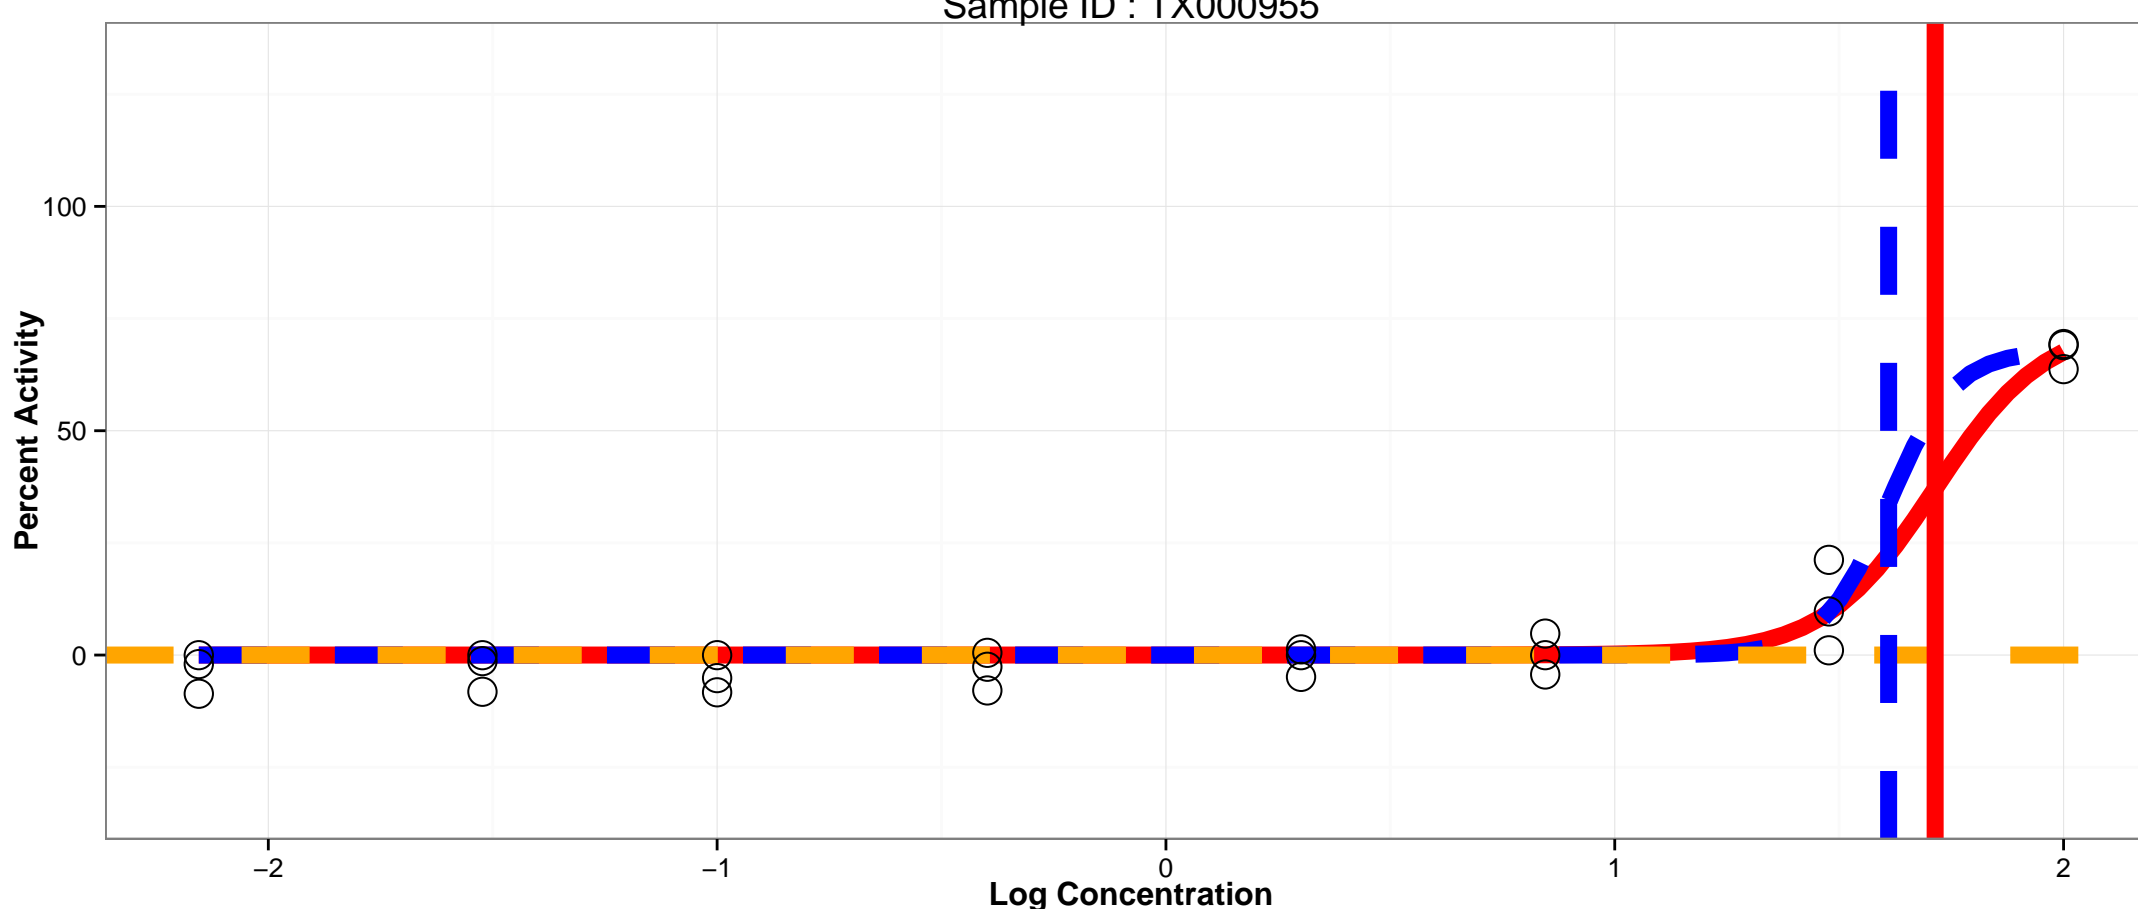

HILL MODEL

|     | tp   | ga   | gw   |
|-----|------|------|------|
| val | 74.2 | 1.71 | 3.53 |
| sd  | NA   | NA   | NA   |

GAIN-LOSS MODEL

|     | tp   | ga    | gw   | la   | lw   |
|-----|------|-------|------|------|------|
| val | 67.9 | 1.61  | 5.94 | 3.59 | 3.43 |
| sd  | 5.72 | 0.286 | 12.5 | 2050 | 4410 |

|      | CNST   | HILL   | GNLS   |
|------|--------|--------|--------|
| AIC  | 206.15 | 154.19 | 158.19 |
| PROB | 0      | 0.88   | 0.12   |
| RMSE | 24.64  | 5.03   | 5.03   |

MAX\_MEAN : 67.4 MAX\_MED : 69.1 BMAD : 5.54  
COFF : 20 HIT-CALL : 1 FITC : 42 ACTP : 1  
FLAGS : 6

Assay ID 1848 (NHEERL\_Quantilum\_inhib\_2\_dn)  
Sample ID : TX000955

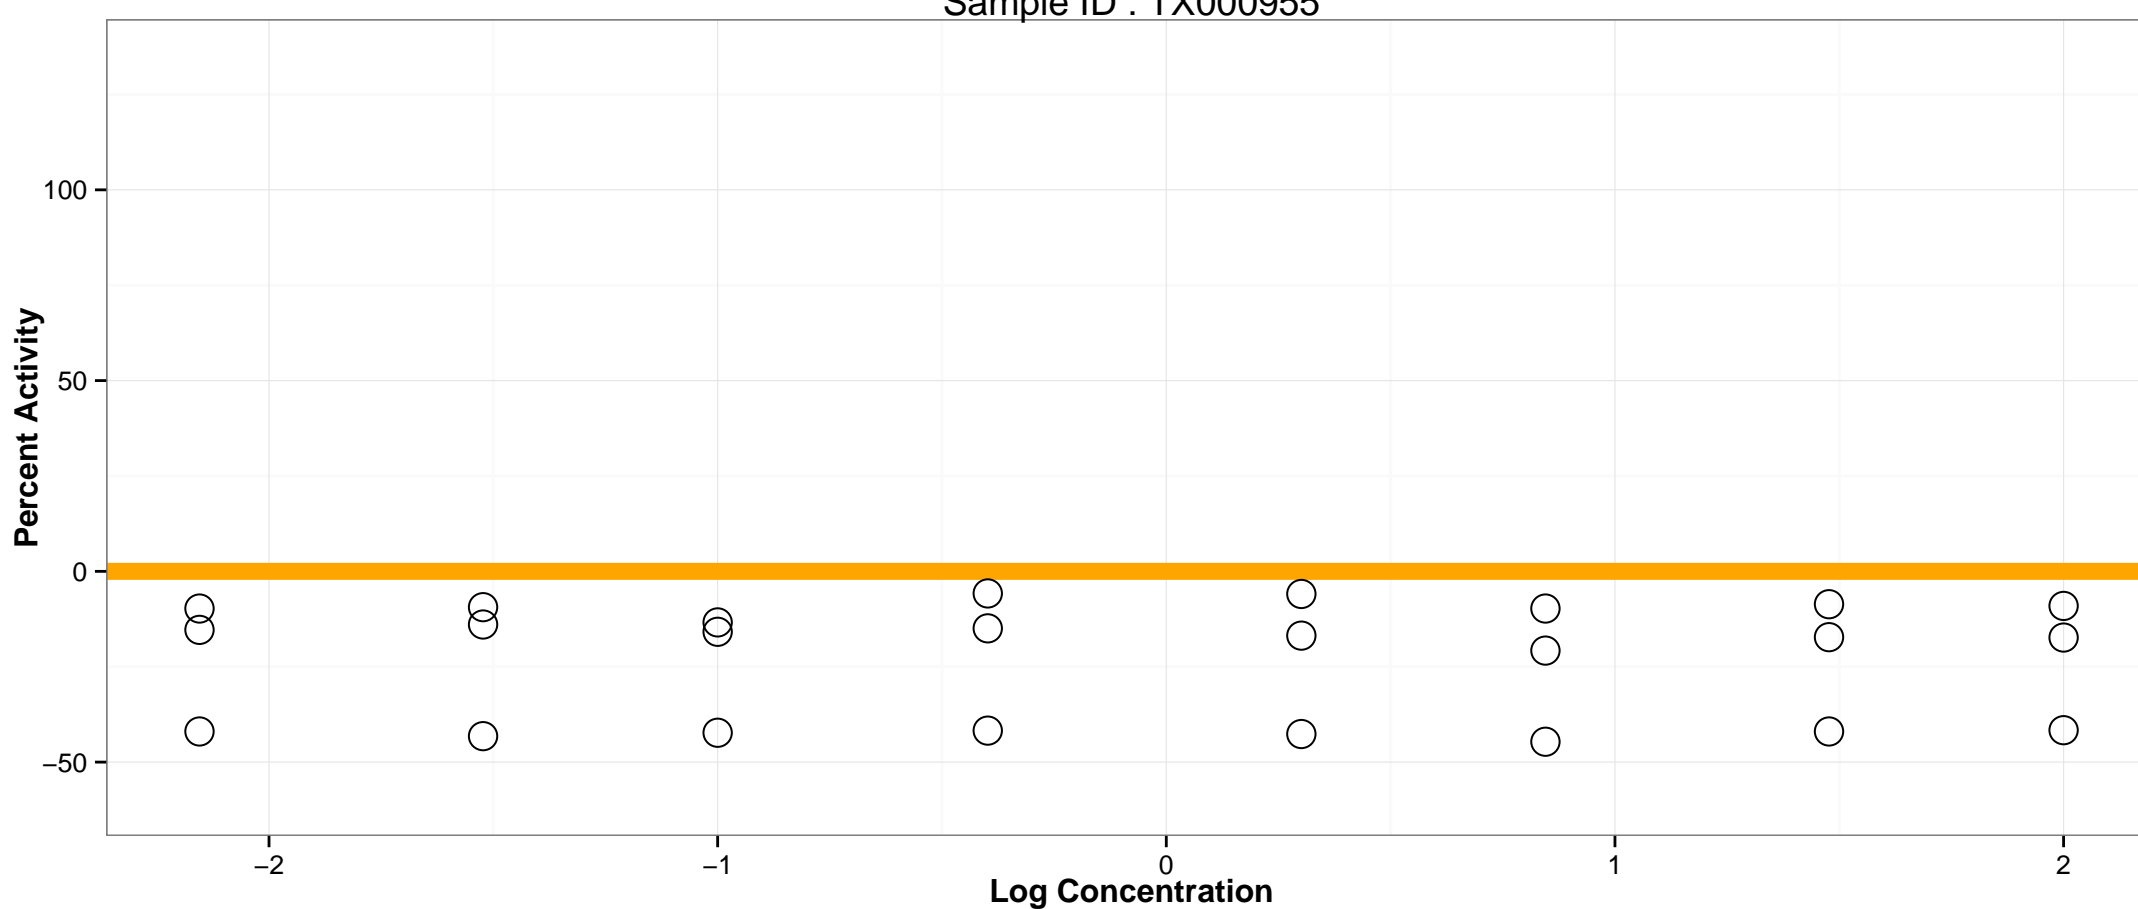

HILL MODEL

HILL MODEL: Not applicable

GAIN-LOSS MODEL

GNLS MODEL: Not applicable

|      | CNST   | HILL | GNLS |
|------|--------|------|------|
| AIC  | 230.73 | NA   | NA   |
| PROB | 1      | NA   | NA   |
| RMSE | 26.89  | NA   | NA   |

MAX\_MEAN : -20.8 MAX\_MED : -13.9 BMAD : 8.58  
COFF : 20 HIT-CALL : 0 FITC : 4 ACTP : 0  
FLAGS : 10

Chemical : Carboxin  
CAS : 5234-68-4

Assay ID 1508 (NHEERL\_TPO\_AUR\_dn)  
Sample ID : TX000965

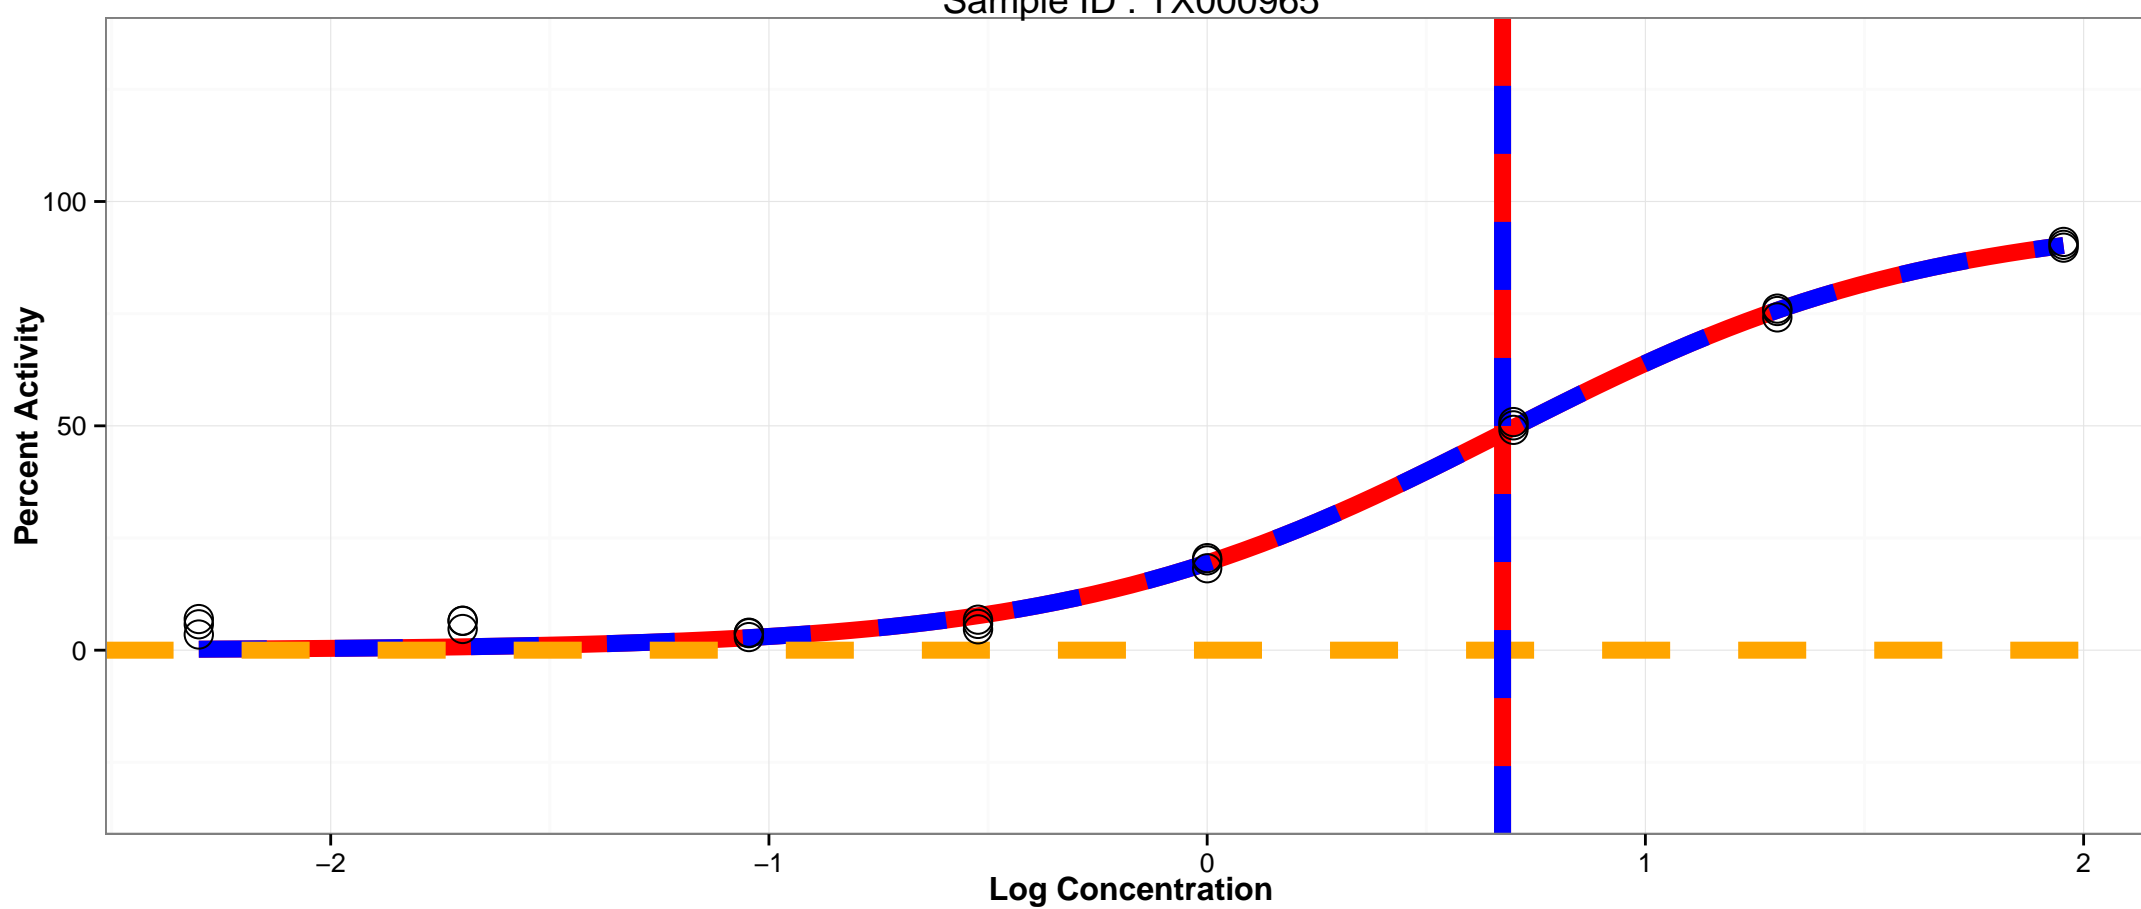

HILL MODEL

|     | tp   | ga     | gw     |
|-----|------|--------|--------|
| val | 96.8 | 0.674  | 0.889  |
| sd  | 1.94 | 0.0318 | 0.0416 |

GAIN-LOSS MODEL

|     | tp   | ga     | gw     | la   | lw    |
|-----|------|--------|--------|------|-------|
| val | 96.8 | 0.674  | 0.889  | 2.46 | 17.9  |
| sd  | 1.94 | 0.0318 | 0.0416 | 341  | 11800 |

|      | CNST   | HILL   | GNLS   |
|------|--------|--------|--------|
| AIC  | 253.65 | 124.52 | 128.52 |
| PROB | 0      | 0.88   | 0.12   |
| RMSE | 45.88  | 2.85   | 2.85   |

MAX\_MEAN : 90.4 MAX\_MED : 90.4 BMAD : 5.69  
COFF : 20 HIT-CALL : 1 FITC : 42 ACTP : 1  
FLAGS :

Assay ID 1509 (NHEERL\_HEK293T\_CellTiterGLO)  
Sample ID : TX000965

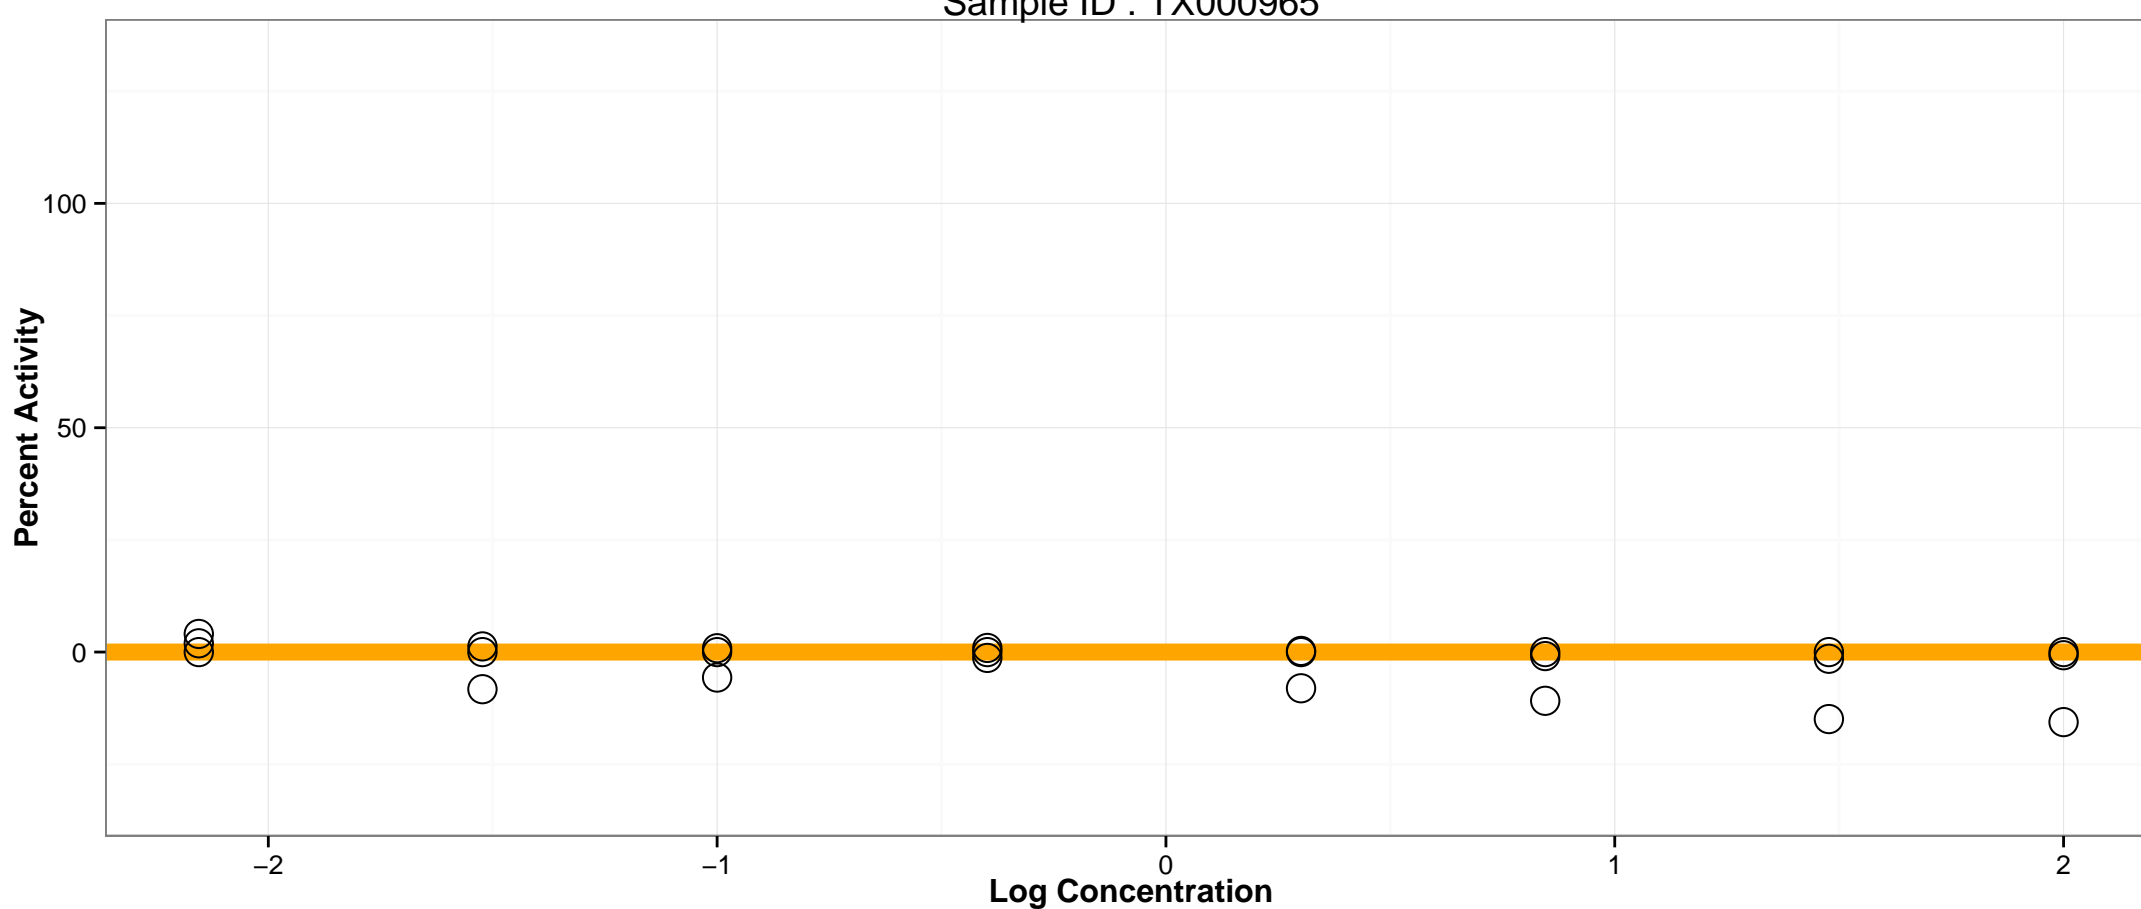

HILL MODEL

HILL MODEL: Not applicable

GAIN-LOSS MODEL

GNLS MODEL: Not applicable

|      | CNST   | HILL | GNLS |
|------|--------|------|------|
| AIC  | 146.36 | NA   | NA   |
| PROB | 1      | NA   | NA   |
| RMSE | 5.69   | NA   | NA   |

MAX\_MEAN : 2.01 MAX\_MED : 1.97 BMAD : 5.54  
COFF : 20 HIT-CALL : 0 FITC : 4 ACTP : 0  
FLAGS :

Assay ID 1848 (NHEERL\_Quantilum\_inhib\_2\_dn)  
Sample ID : TX000965

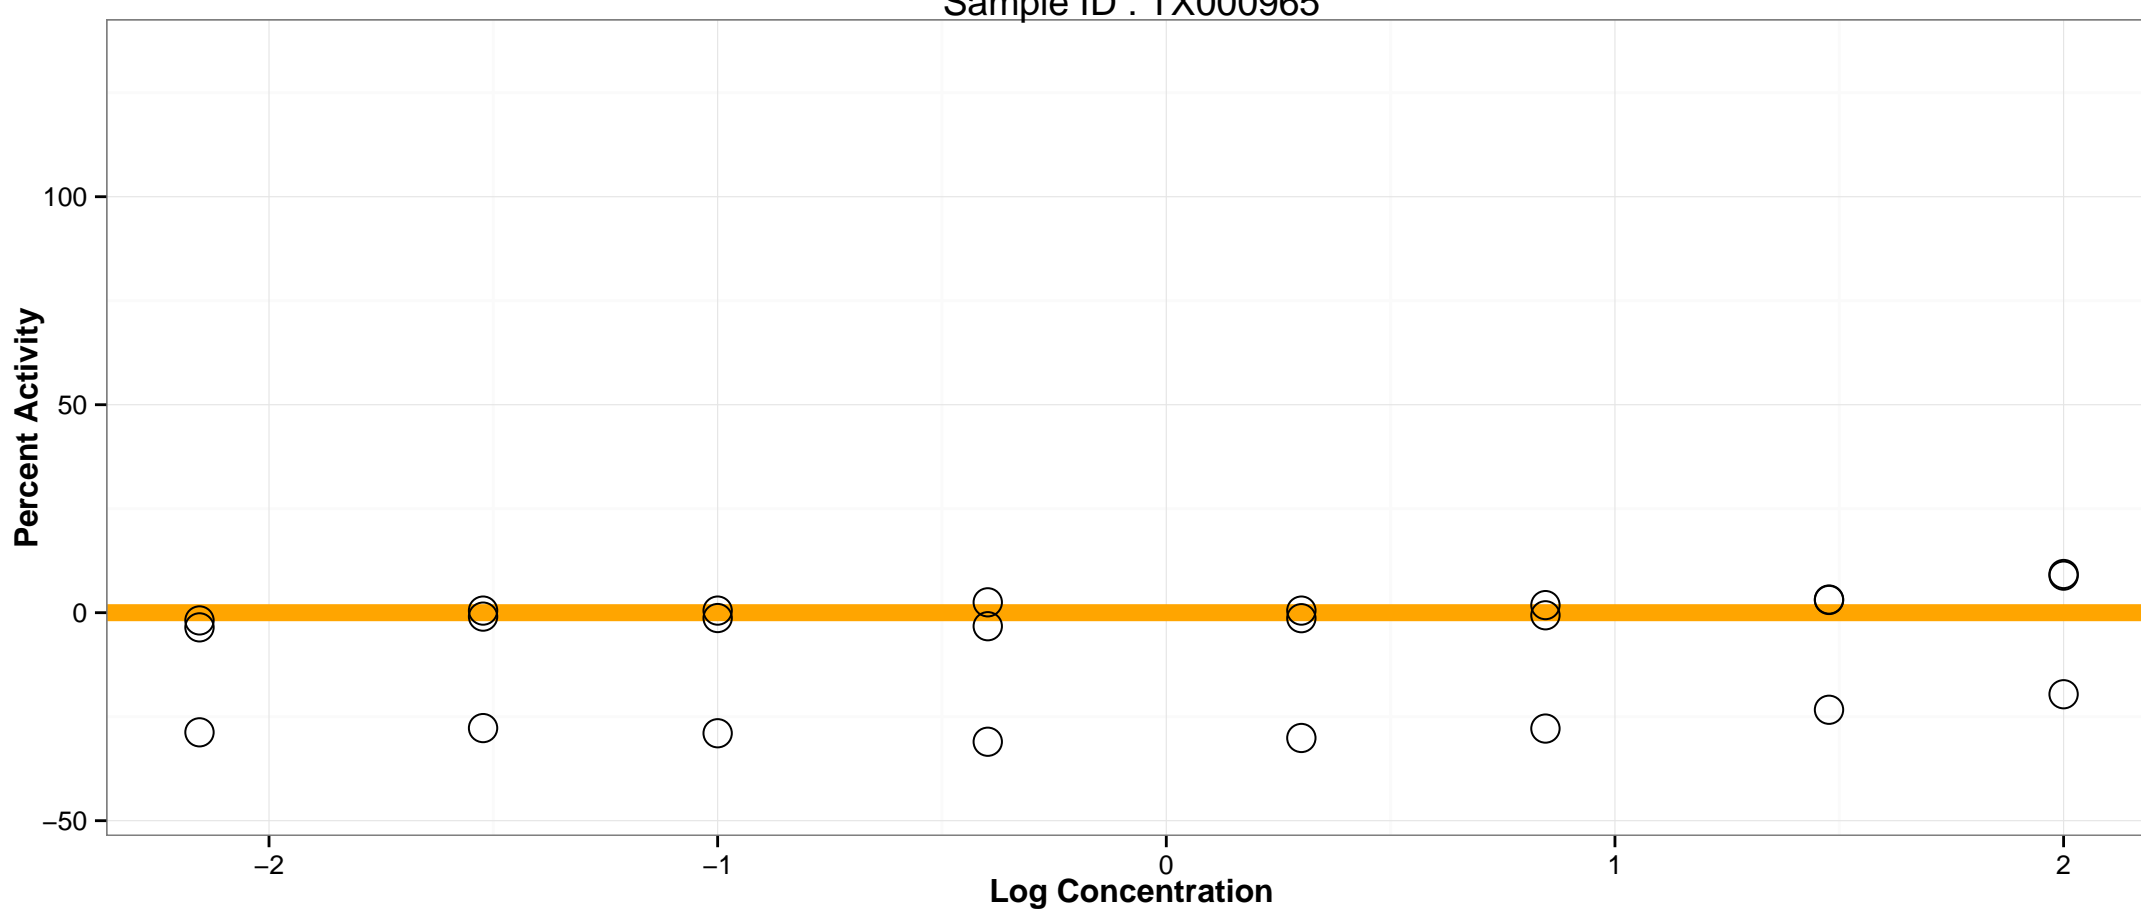

HILL MODEL

HILL MODEL: Not applicable

GAIN-LOSS MODEL

GNLS MODEL: Not applicable

|      | CNST   | HILL | GNLS |
|------|--------|------|------|
| AIC  | 203.18 | NA   | NA   |
| PROB | 1      | NA   | NA   |
| RMSE | 16.11  | NA   | NA   |

MAX\_MEAN : -0.449 MAX\_MED : 8.93 BMAD : 8.58  
COFF : 20 HIT-CALL : 0 FITC : 4 ACTP : 0  
FLAGS :

Chemical : Linuron  
CAS : 330-55-2

Assay ID 1508 (NHEERL\_TPO\_AUR\_dn)  
Sample ID : TX000967

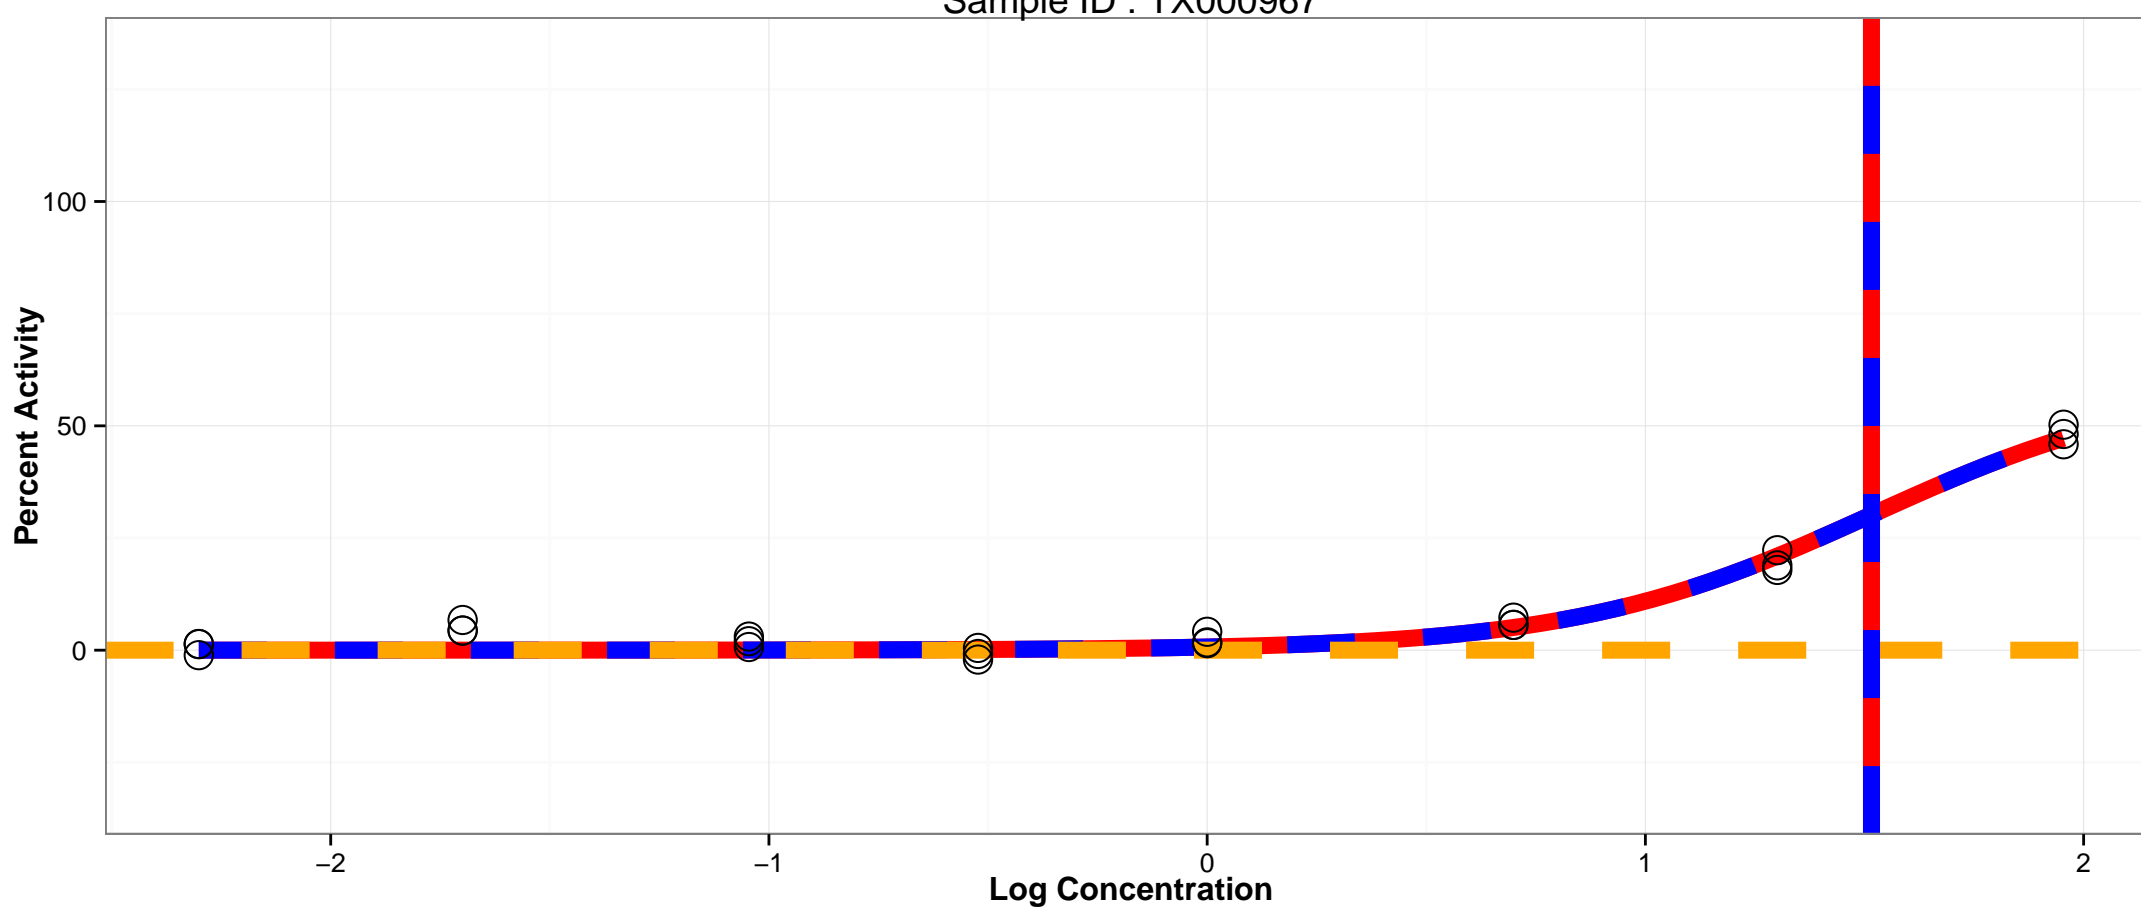

HILL MODEL

|     | tp   | ga     | gw    |
|-----|------|--------|-------|
| val | 60.3 | 1.52   | 1.27  |
| sd  | 6.37 | 0.0981 | 0.186 |

GAIN-LOSS MODEL

|     | tp   | ga     | gw    | la    | lw     |
|-----|------|--------|-------|-------|--------|
| val | 60.3 | 1.52   | 1.27  | 2.88  | 14.6   |
| sd  | 6.38 | 0.0983 | 0.187 | 42600 | 672000 |

|      | CNST  | HILL   | GNLS   |
|------|-------|--------|--------|
| AIC  | 201.4 | 121.51 | 125.51 |
| PROB | 0     | 0.88   | 0.12   |
| RMSE | 18.68 | 2.54   | 2.54   |

MAX\_MEAN : 48.1 MAX\_MED : 48.2 BMAD : 5.69  
COFF : 20 HIT-CALL : 1 FITC : 42 ACTP : 1  
FLAGS :

Assay ID 1509 (NHEERL\_HEK293T\_CellTiterGLO)  
Sample ID : TX000967

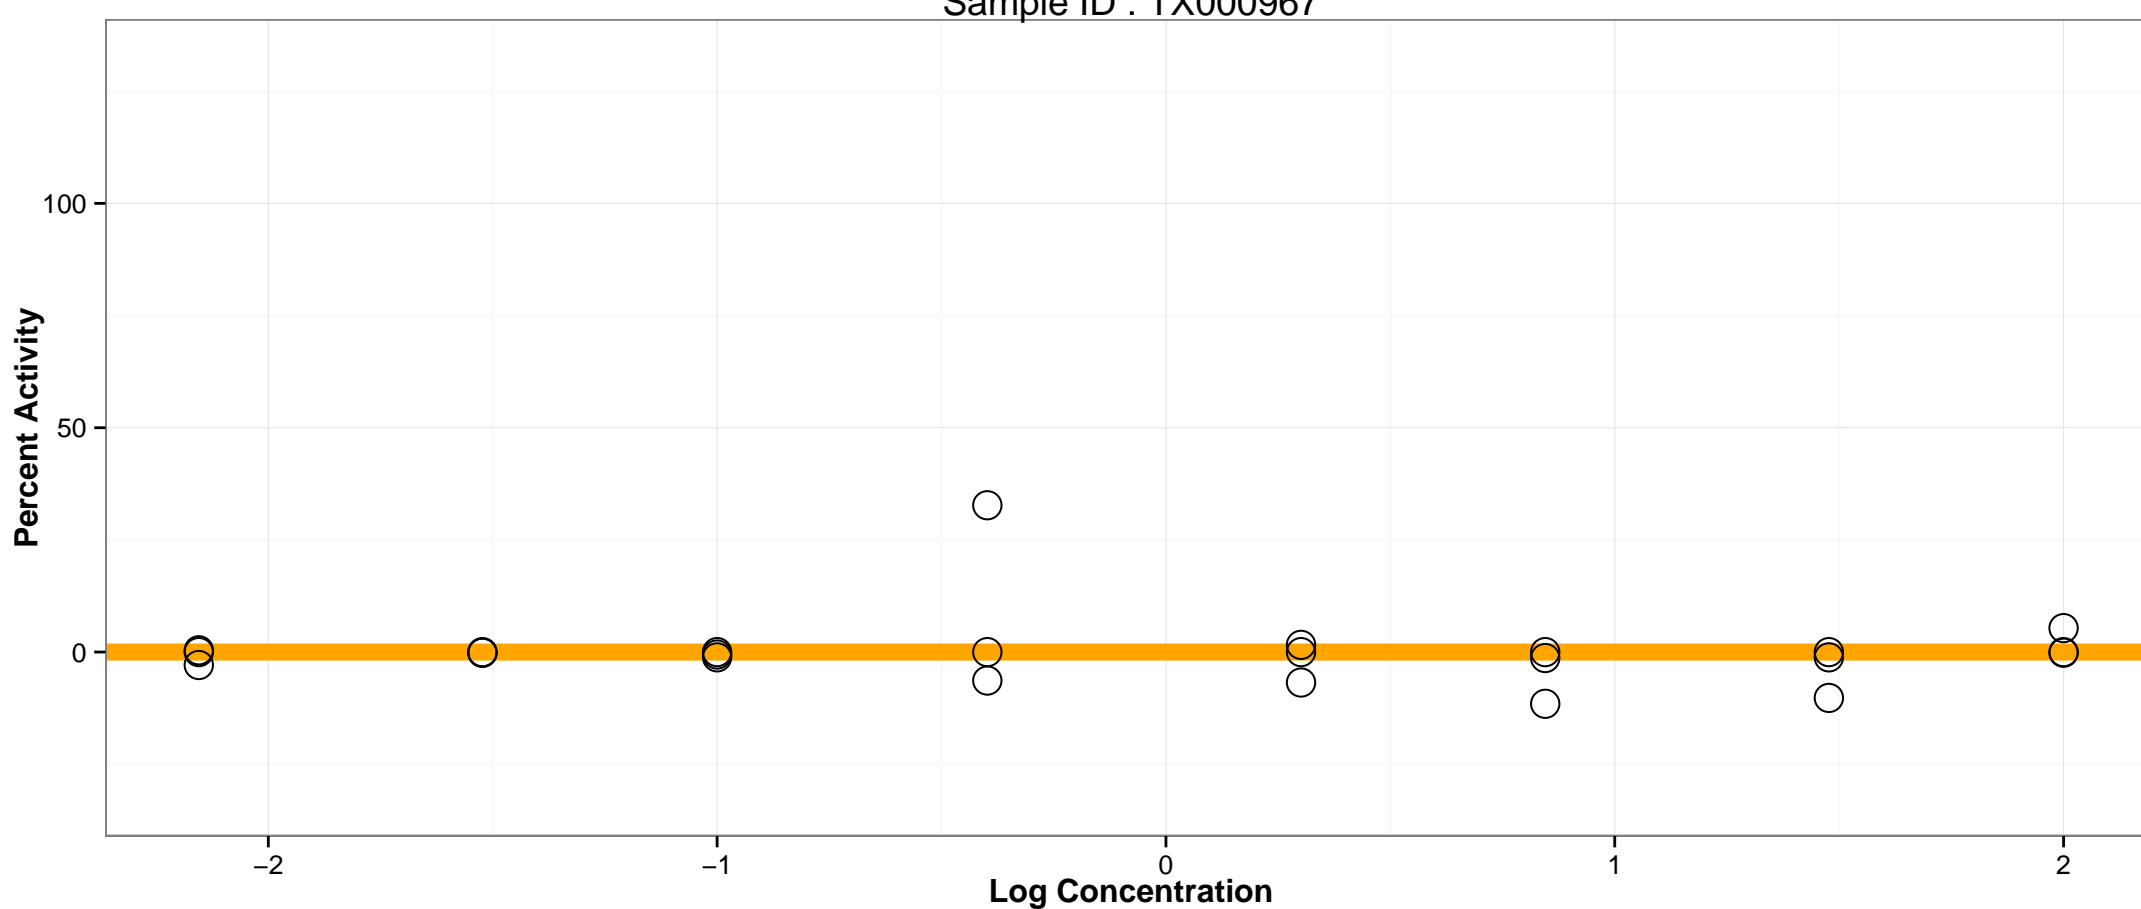

HILL MODEL

HILL MODEL: Not applicable

GAIN-LOSS MODEL

GNLS MODEL: Not applicable

|      | CNST   | HILL | GNLS |
|------|--------|------|------|
| AIC  | 146.07 | NA   | NA   |
| PROB | 1      | NA   | NA   |
| RMSE | 7.74   | NA   | NA   |

MAX\_MEAN : 8.8 MAX\_MED : 0.0026 BMAD : 5.54  
COFF : 20 HIT-CALL : 0 FITC : 4 ACTP : 0  
FLAGS :

Assay ID 1848 (NHEERL\_Quantilum\_inhib\_2\_dn)  
Sample ID : TX000967

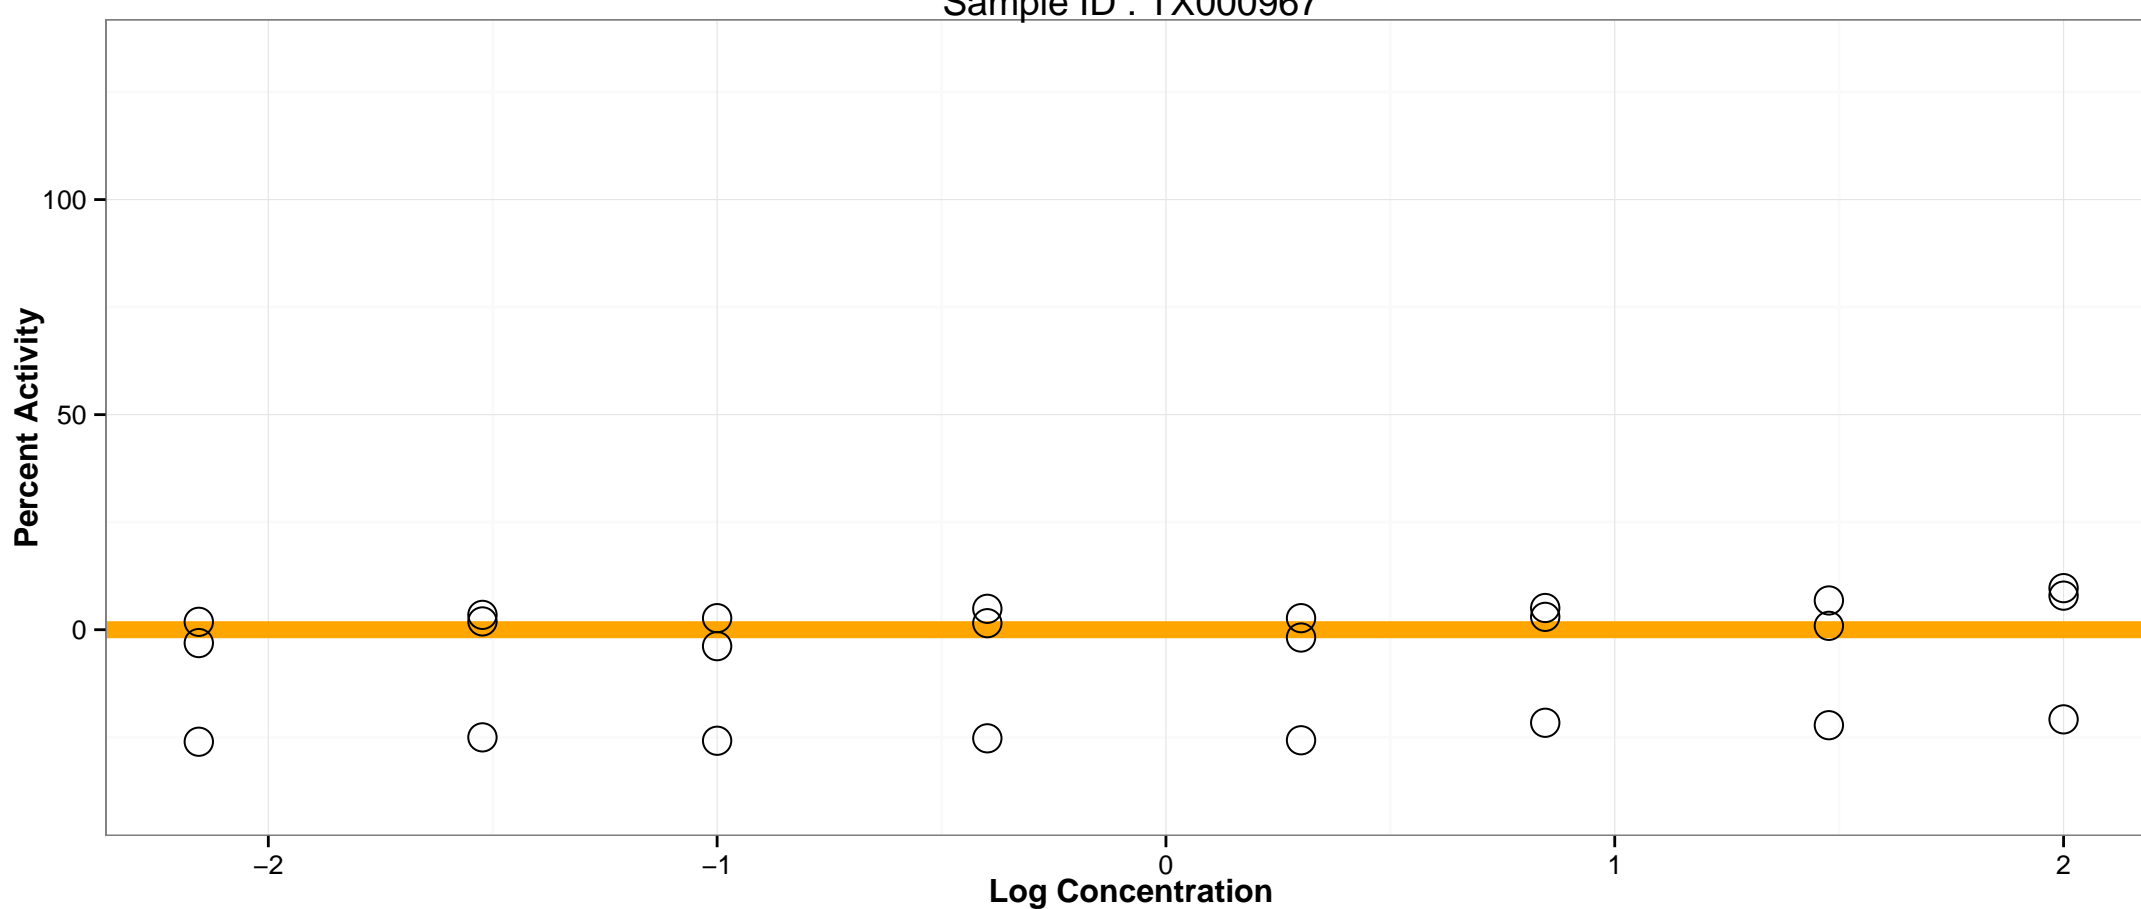

HILL MODEL

HILL MODEL: Not applicable

GAIN-LOSS MODEL

GNLS MODEL: Not applicable

|      | CNST  | HILL | GNLS |
|------|-------|------|------|
| AIC  | 198.8 | NA   | NA   |
| PROB | 1     | NA   | NA   |
| RMSE | 14.41 | NA   | NA   |

MAX\_MEAN : -1.07 MAX\_MED : 7.93 BMAD : 8.58  
COFF : 20 HIT-CALL : 0 FITC : 4 ACTP : 0  
FLAGS :

Chemical : Monocrotophos

CAS : 6923-22-4

Assay ID 1508 (NHEERL\_TPO\_AUR\_dn)  
Sample ID : TX000999

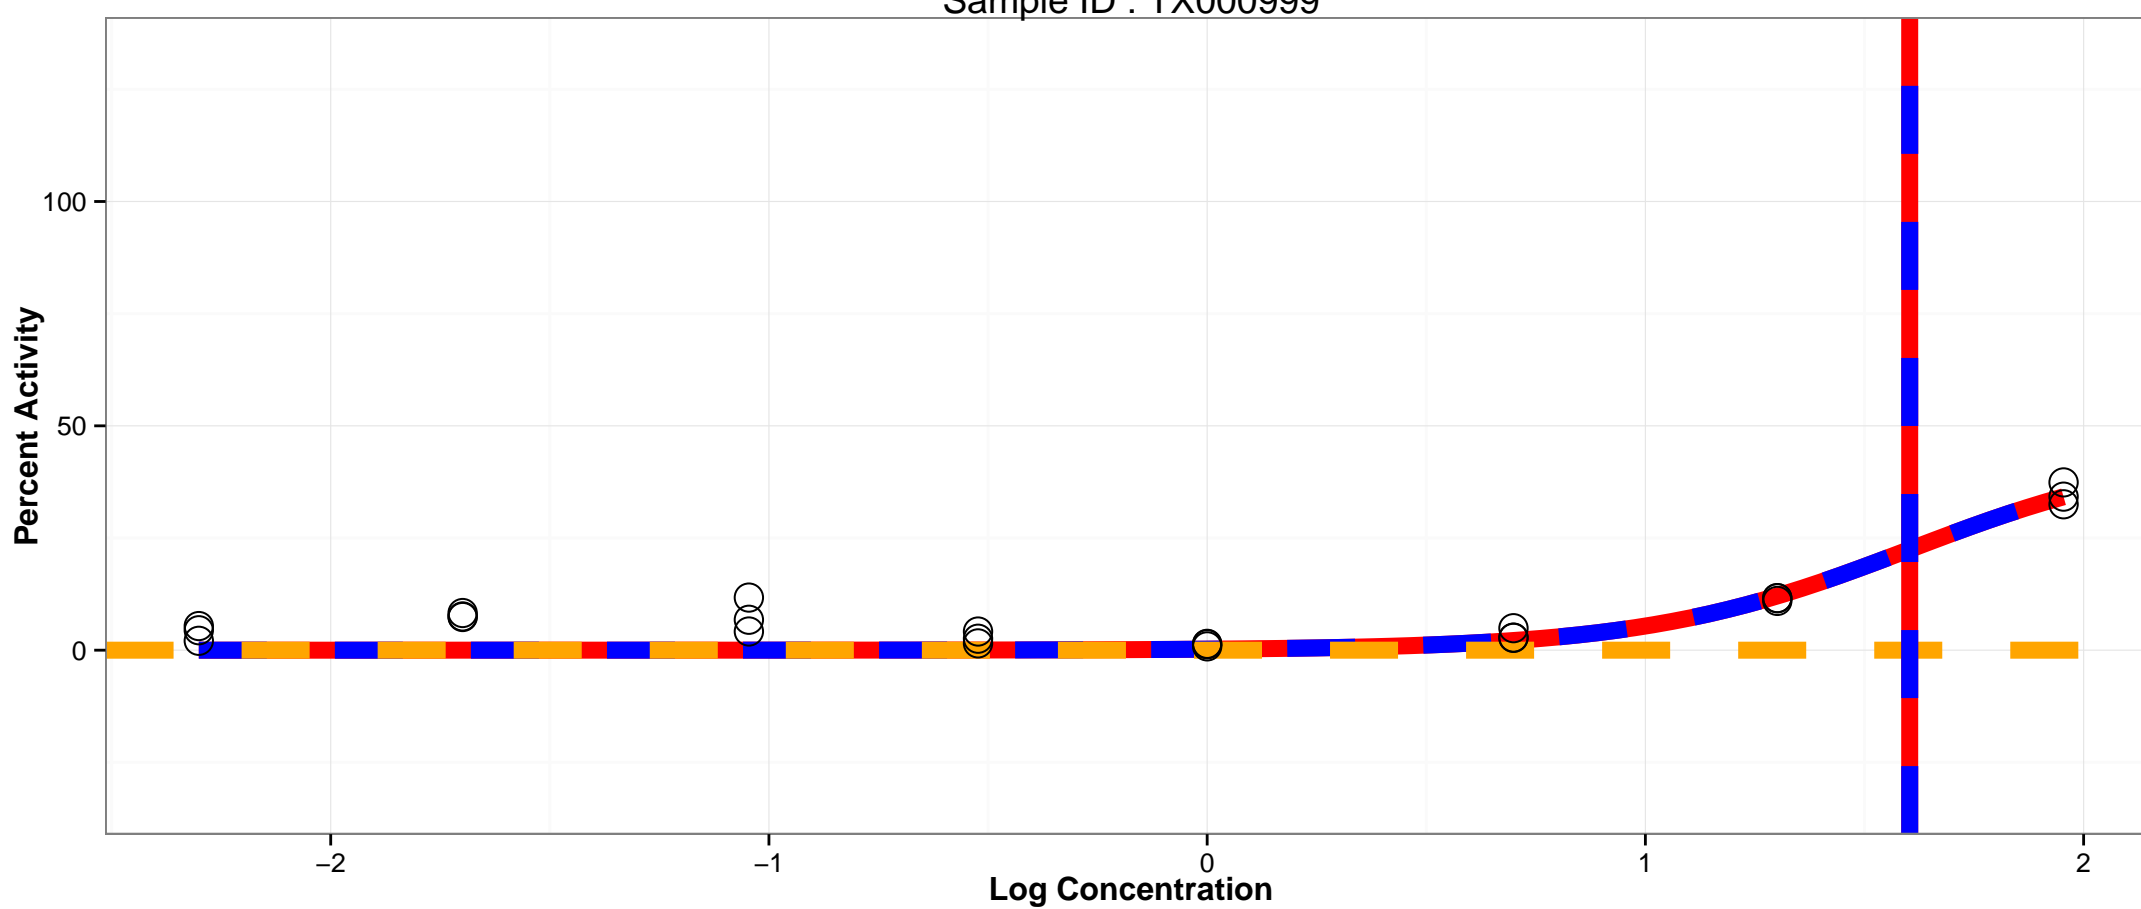

HILL MODEL

|     | tp   | ga    | gw    |
|-----|------|-------|-------|
| val | 44.9 | 1.6   | 1.44  |
| sd  | 13.3 | 0.239 | 0.564 |

GAIN-LOSS MODEL

|     | tp   | ga  | gw   | la   | lw   |
|-----|------|-----|------|------|------|
| val | 44.9 | 1.6 | 1.44 | 3.66 | 15.9 |
| sd  | NA   | NA  | NA   | NA   | NA   |

|      | CNST   | HILL | GMLS |
|------|--------|------|------|
| AIC  | 189.89 | 148  | 152  |
| PROB | 0      | 0.88 | 0.12 |
| RMSE | 13.73  | 4.5  | 4.5  |

MAX\_MEAN : 34.7 MAX\_MED : 34.2 BMAD : 5.69  
COFF : 20 HIT-CALL : 1 FITC : 42 ACTP : 1  
FLAGS : 6

Assay ID 1509 (NHEERL\_HEK293T\_CellTiterGLO)  
Sample ID : TX000999

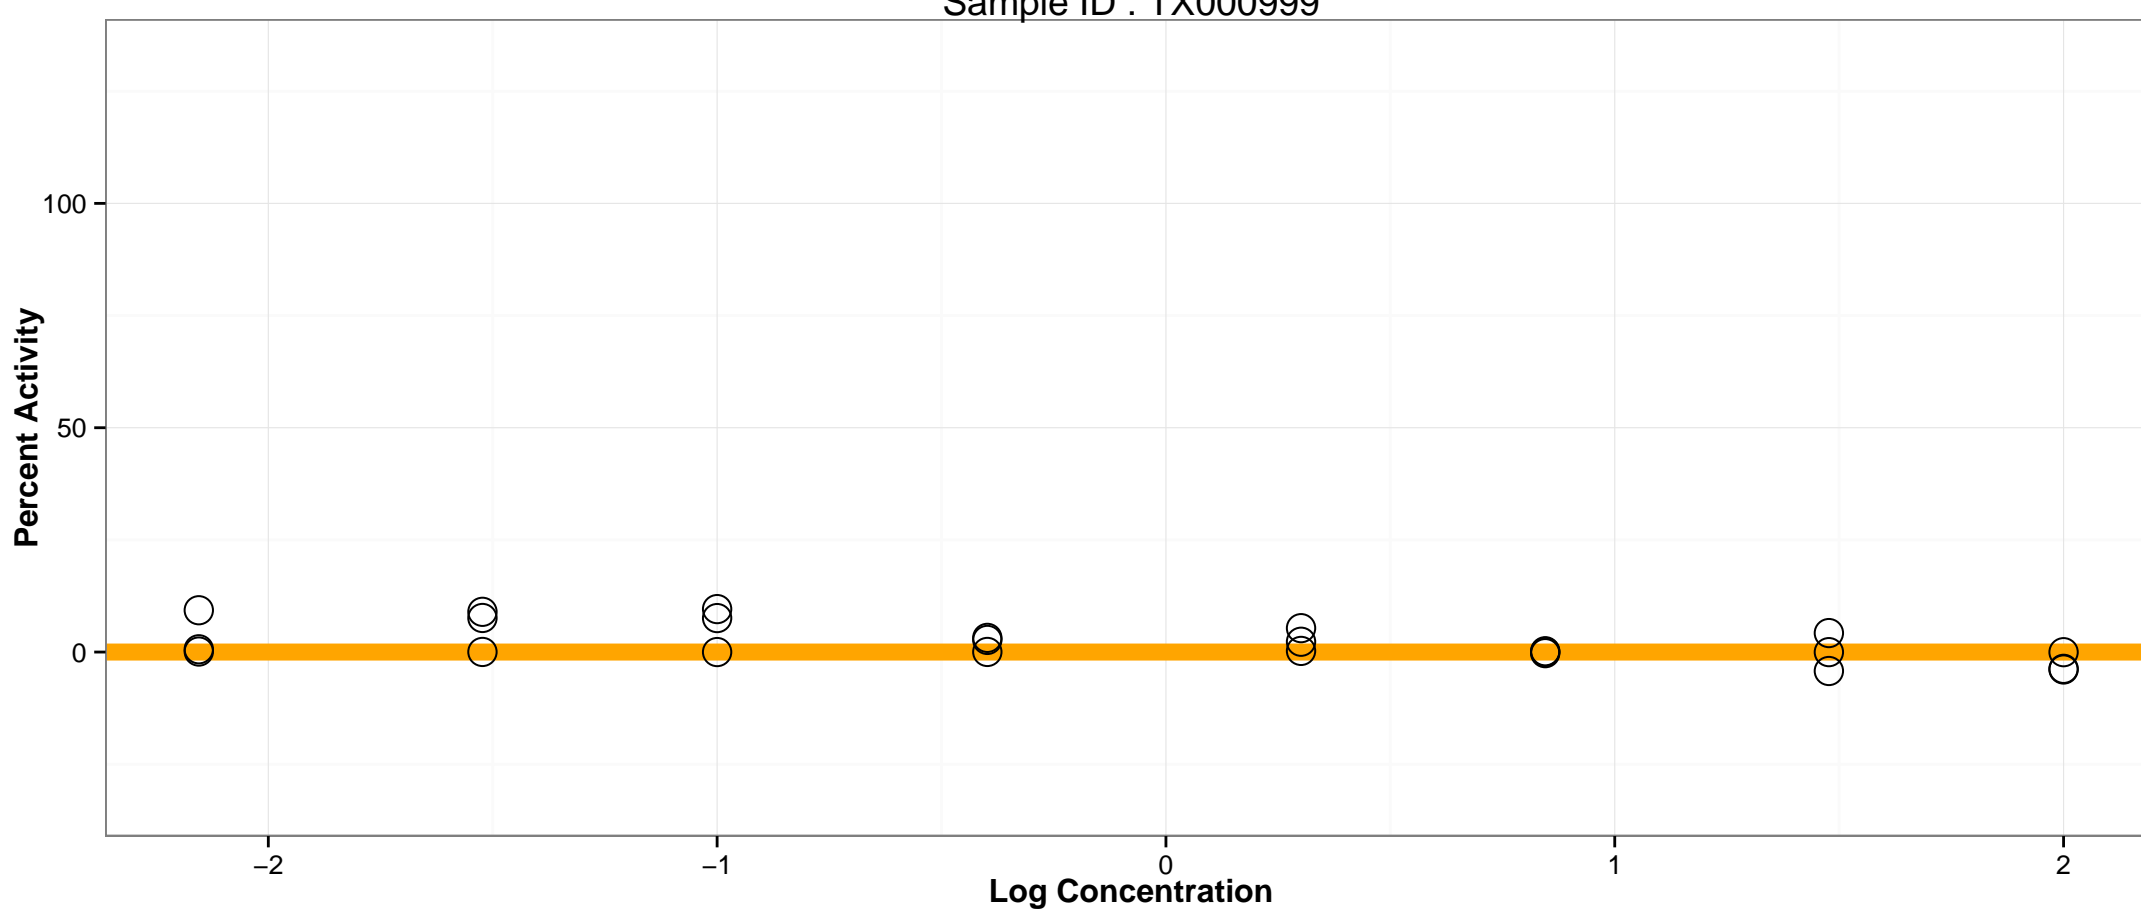

HILL MODEL

HILL MODEL: Not applicable

GAIN-LOSS MODEL

GMLS MODEL: Not applicable

|      | CNST   | HILL | GMLS |
|------|--------|------|------|
| AIC  | 142.44 | NA   | NA   |
| PROB | 1      | NA   | NA   |
| RMSE | 4.53   | NA   | NA   |

MAX\_MEAN : 5.73 MAX\_MED : 7.61 BMAD : 5.54  
COFF : 20 HIT-CALL : 0 FITC : 4 ACTP : 0  
FLAGS :

Assay ID 1848 (NHEERL\_Quantilum\_inhib\_2\_dn)  
Sample ID : TX000999

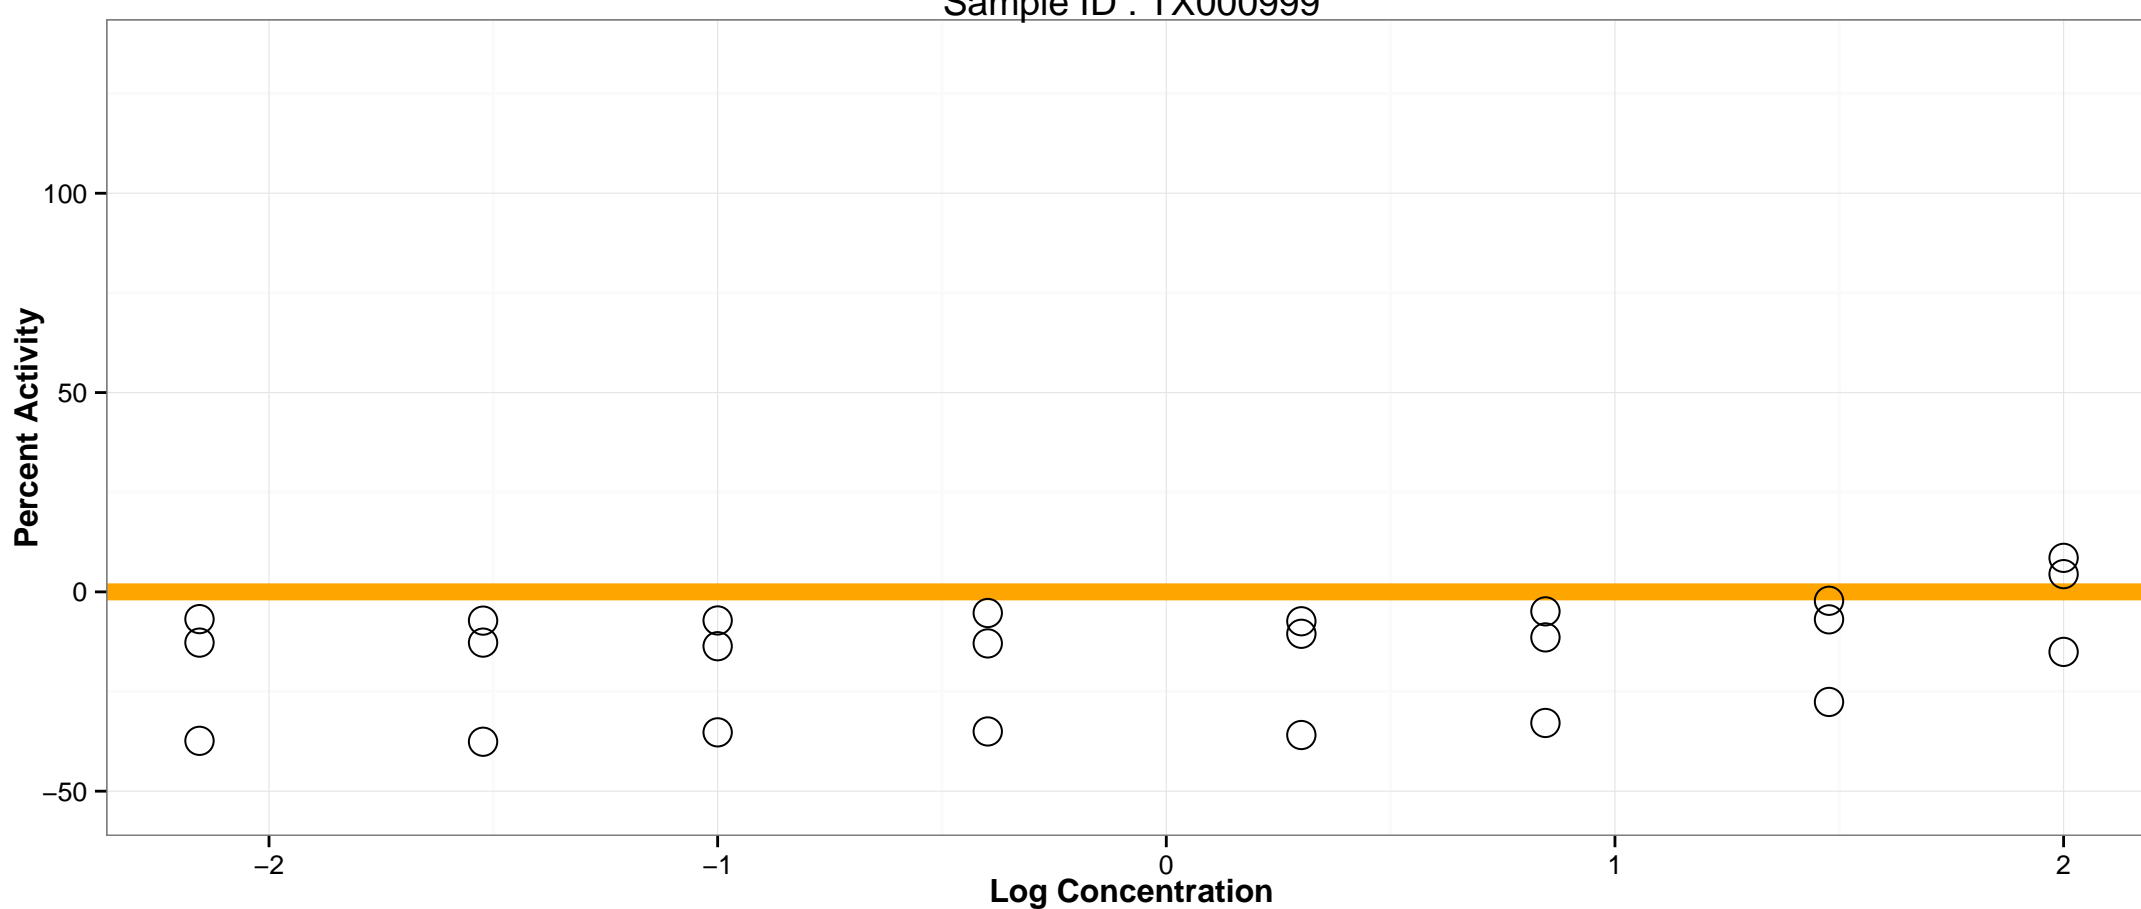

HILL MODEL

HILL MODEL: Not applicable

GAIN-LOSS MODEL

GMLS MODEL: Not applicable

|      | CNST   | HILL | GMLS |
|------|--------|------|------|
| AIC  | 216.16 | NA   | NA   |
| PROB | 1      | NA   | NA   |
| RMSE | 20.36  | NA   | NA   |

MAX\_MEAN : -0.676 MAX\_MED : 4.46 BMAD : 8.58  
COFF : 20 HIT-CALL : 0 FITC : 4 ACTP : 0  
FLAGS : 10

Chemical : Triphenyl phosphite  
CAS : 101-02-0

Assay ID 1508 (NHEERL\_TPO\_AUR\_dn)  
Sample ID : TX001031

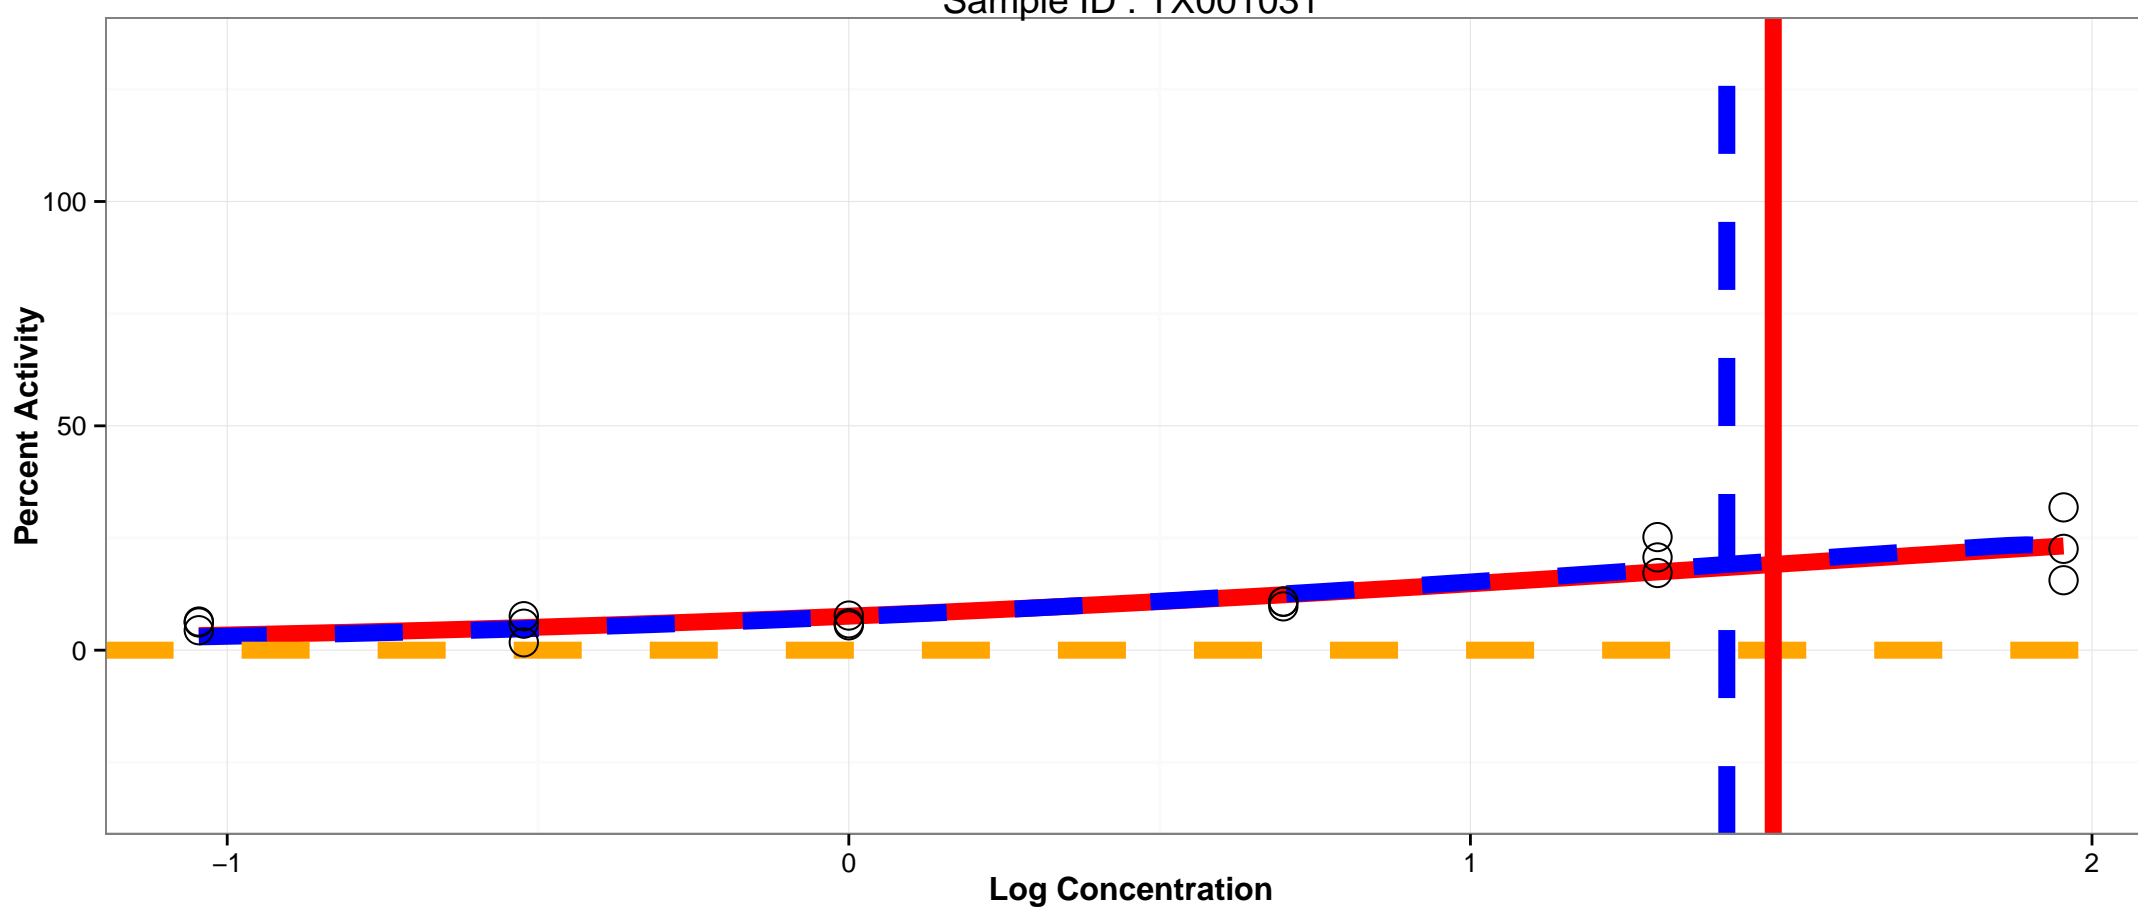

HILL MODEL

|     | tp   | ga    | gw    |
|-----|------|-------|-------|
| val | 38.2 | 1.49  | 0.408 |
| sd  | 16.7 | 0.948 | 0.123 |

GAIN-LOSS MODEL

|     | tp   | ga   | gw    | la   | lw |
|-----|------|------|-------|------|----|
| val | 38.2 | 1.41 | 0.437 | 2.01 | 18 |
| sd  | NA   | NA   | NA    | NA   | NA |

|      | CNST   | HILL  | GNLS  |
|------|--------|-------|-------|
| AIC  | 150.64 | 106.6 | 110.4 |
| PROB | 0      | 0.87  | 0.13  |
| RMSE | 14.49  | 3.8   | 3.78  |

MAX\_MEAN : 23.3 MAX\_MED : 22.6 BMAD : 5.69  
COFF : 20 HIT-CALL : 1 FITC : 42 ACTP : 1  
FLAGS : 11

Assay ID 1509 (NHEERL\_HEK293T\_CellTiterGLO)  
Sample ID : TX001031

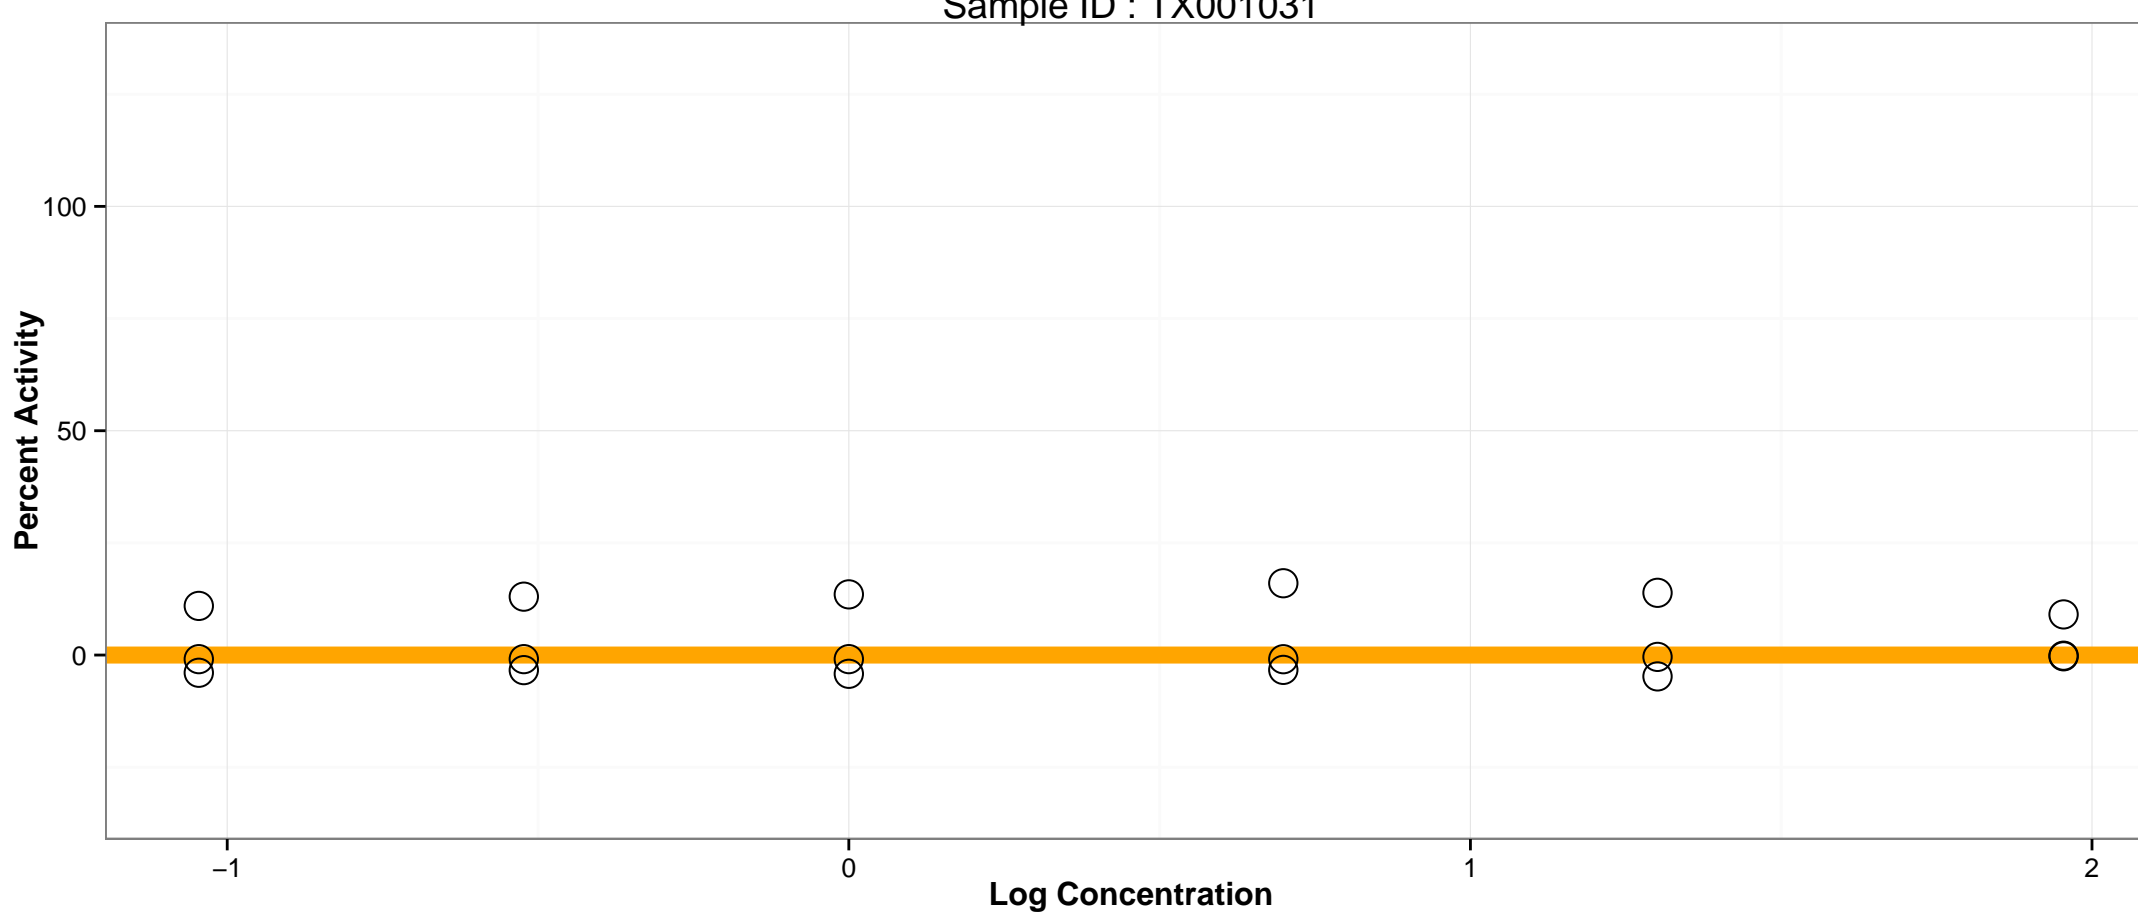

HILL MODEL

HILL MODEL: Not applicable

GAIN-LOSS MODEL

GNLS MODEL: Not applicable

|      | CNST   | HILL | GNLS |
|------|--------|------|------|
| AIC  | 127.13 | NA   | NA   |
| PROB | 1      | NA   | NA   |
| RMSE | 7.77   | NA   | NA   |

MAX\_MEAN : 3.94 MAX\_MED : -0.132 BMAD : 5.54  
COFF : 20 HIT-CALL : 0 FITC : 4 ACTP : 0  
FLAGS :

Assay ID 1848 (NHEERL\_Quantilum\_inhib\_2\_dn)  
Sample ID : TX001031

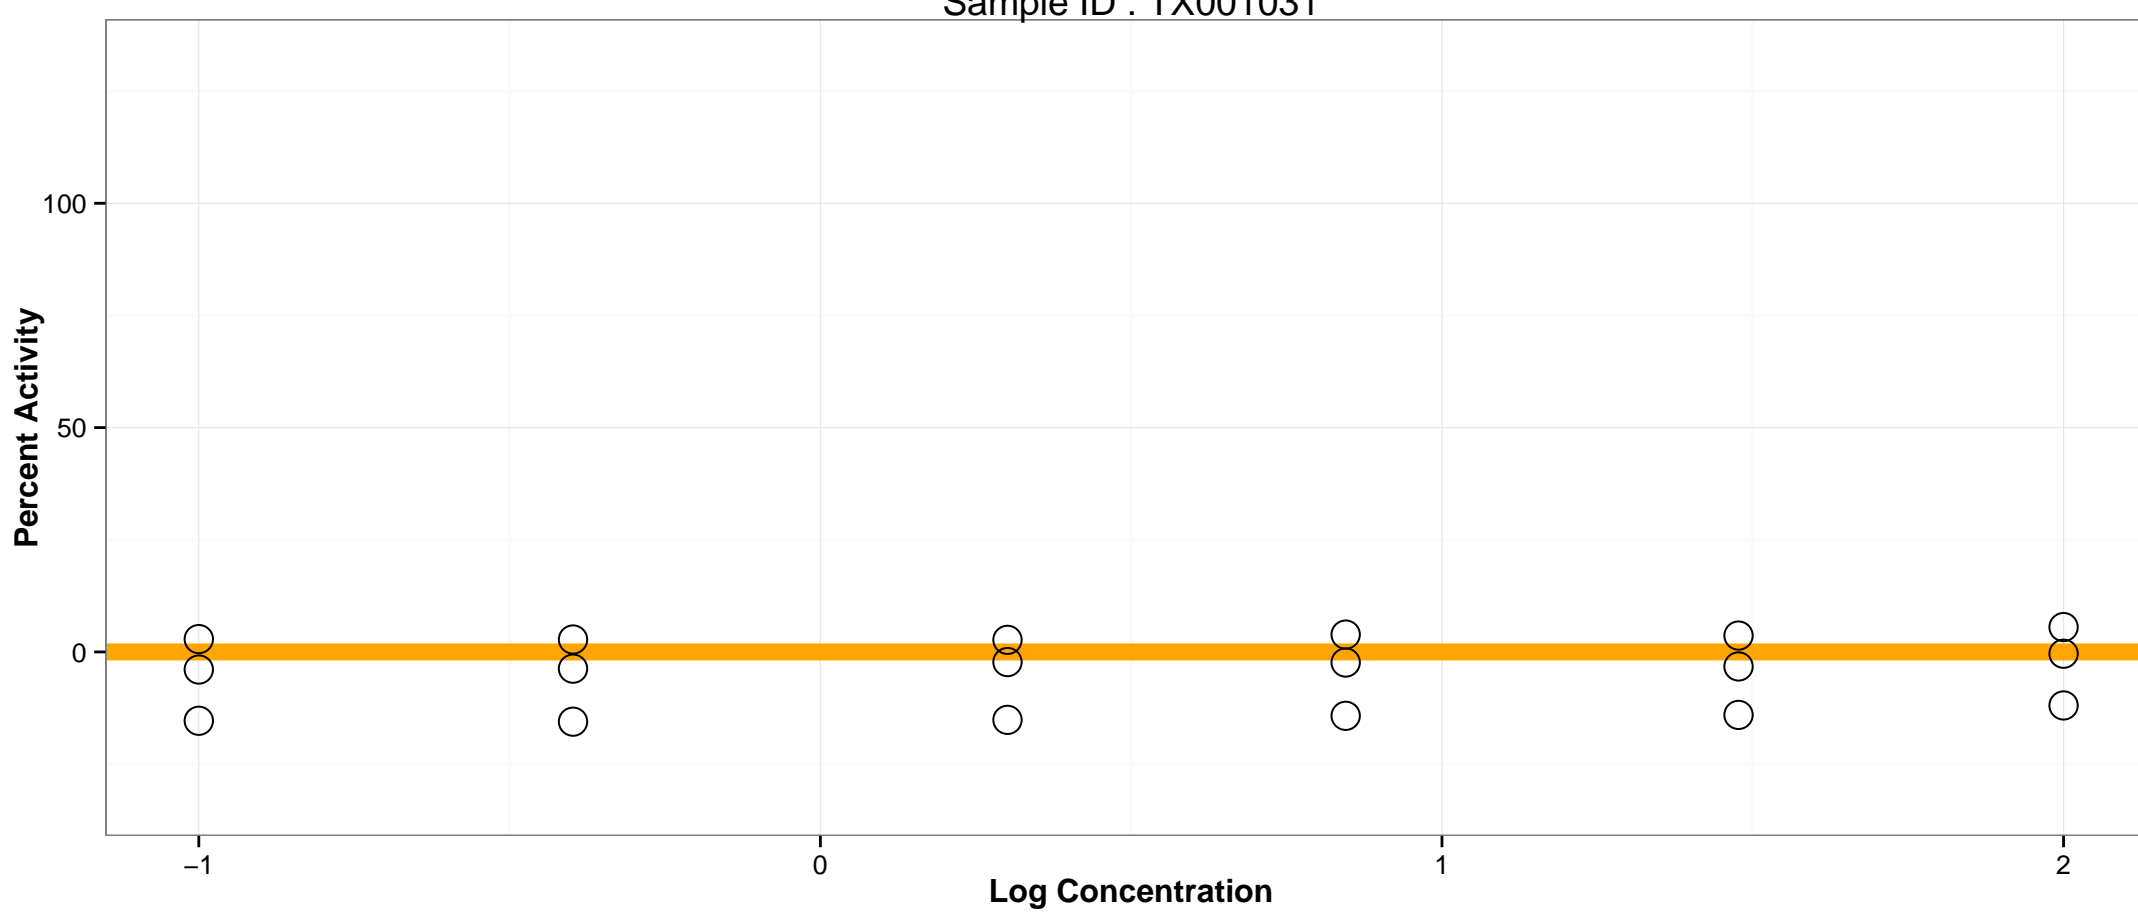

HILL MODEL

HILL MODEL: Not applicable

GAIN-LOSS MODEL

GNLS MODEL: Not applicable

|      | CNST   | HILL | GNLS |
|------|--------|------|------|
| AIC  | 132.17 | NA   | NA   |
| PROB | 1      | NA   | NA   |
| RMSE | 8.75   | NA   | NA   |

MAX\_MEAN : -2.25 MAX\_MED : -0.391 BMAD : 8.58  
COFF : 20 HIT-CALL : 0 FITC : 4 ACTP : 0  
FLAGS :

Chemical : Citronellol  
CAS : 106-22-9

Assay ID 1508 (NHEERL\_TPO\_AUR\_dn)  
Sample ID : TX001035

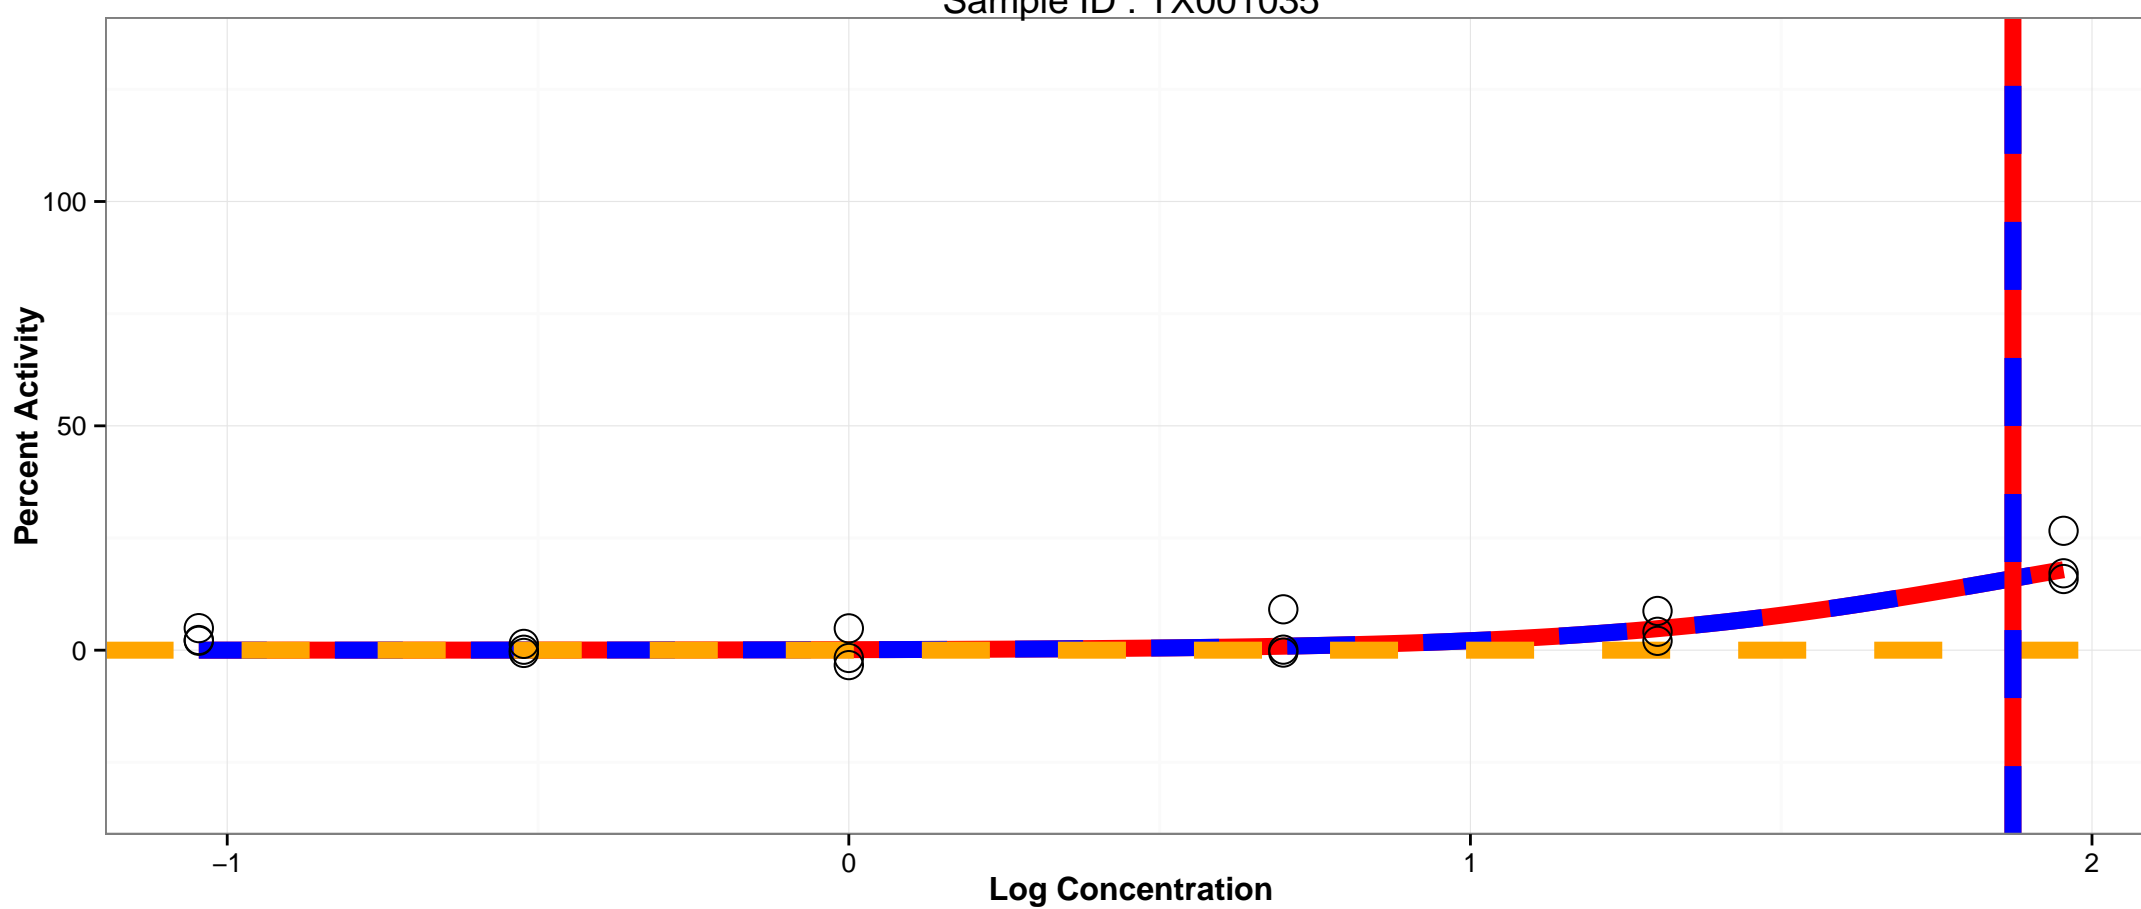

HILL MODEL

|     | tp   | ga   | gw   |
|-----|------|------|------|
| val | 31.9 | 1.87 | 1.32 |
| sd  | 62.7 | 1.38 | 1.41 |

GAIN-LOSS MODEL

|     | tp   | ga   | gw   | la   | lw    |
|-----|------|------|------|------|-------|
| val | 31.9 | 1.87 | 1.32 | 3.46 | 4.81  |
| sd  | 62.3 | 1.37 | 1.4  | 3150 | 10100 |

|      | CNST   | HILL   | GNLS   |
|------|--------|--------|--------|
| AIC  | 128.84 | 105.99 | 109.99 |
| PROB | 0      | 0.88   | 0.12   |
| RMSE | 9.16   | 3.71   | 3.71   |

MAX\_MEAN : 19.9 MAX\_MED : 17.1 BMAD : 5.69  
COFF : 20 HIT-CALL : 0 FITC : 21 ACTP : 1  
FLAGS : 12

Assay ID 1509 (NHEERL\_HEK293T\_CellTiterGLO)  
Sample ID : TX001035

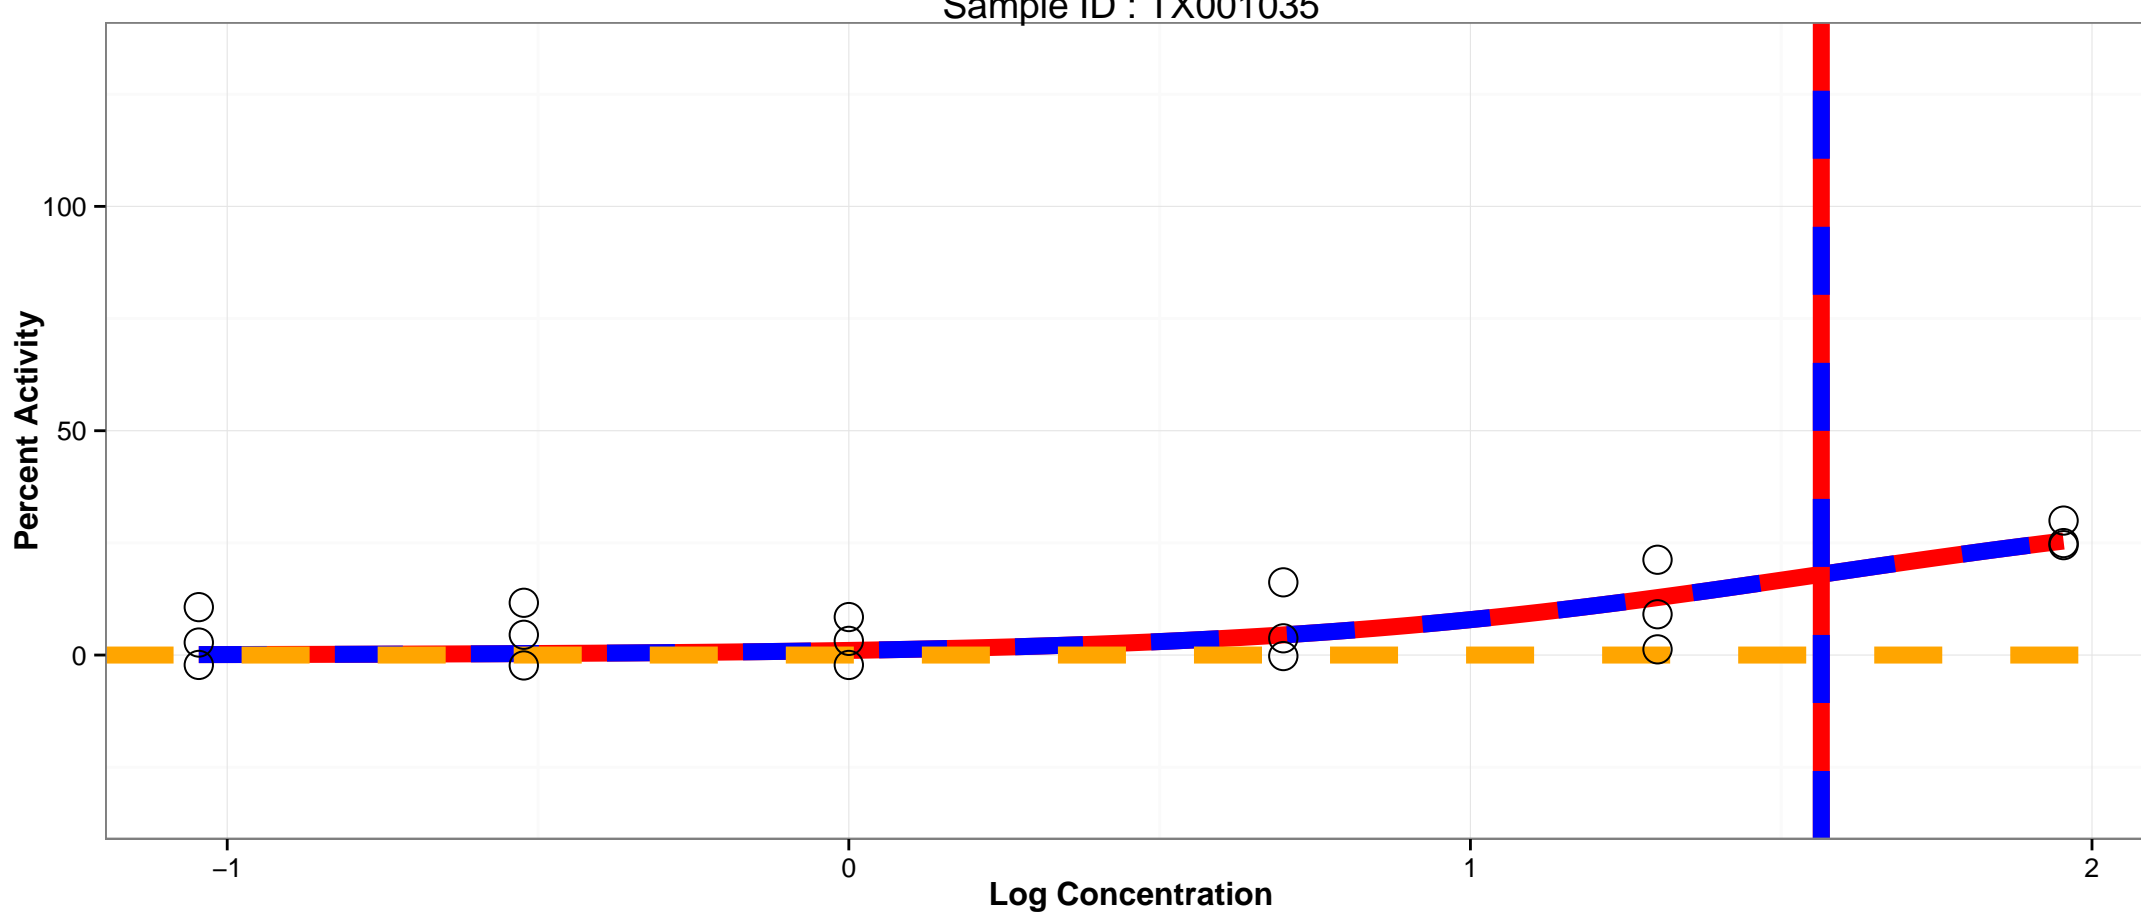

HILL MODEL

|     | tp   | ga    | gw    |
|-----|------|-------|-------|
| val | 36   | 1.56  | 0.977 |
| sd  | 16.7 | 0.489 | 0.693 |

GAIN-LOSS MODEL

|     | tp   | ga   | gw    | la   | lw   |
|-----|------|------|-------|------|------|
| val | 36   | 1.56 | 0.978 | 3.08 | 6.24 |
| sd  | 16.7 | 0.49 | 0.694 | 382  | 2130 |

|      | CNST   | HILL   | GNLS   |
|------|--------|--------|--------|
| AIC  | 146.97 | 127.58 | 131.58 |
| PROB | 0      | 0.88   | 0.12   |
| RMSE | 13.57  | 6.45   | 6.45   |

MAX\_MEAN : 26.5 MAX\_MED : 25 BMAD : 5.54  
COFF : 20 HIT-CALL : 1 FITC : 42 ACTP : 1  
FLAGS : 6

Assay ID 1848 (NHEERL\_Quantilum\_inhib\_2\_dn)  
Sample ID : TX001035

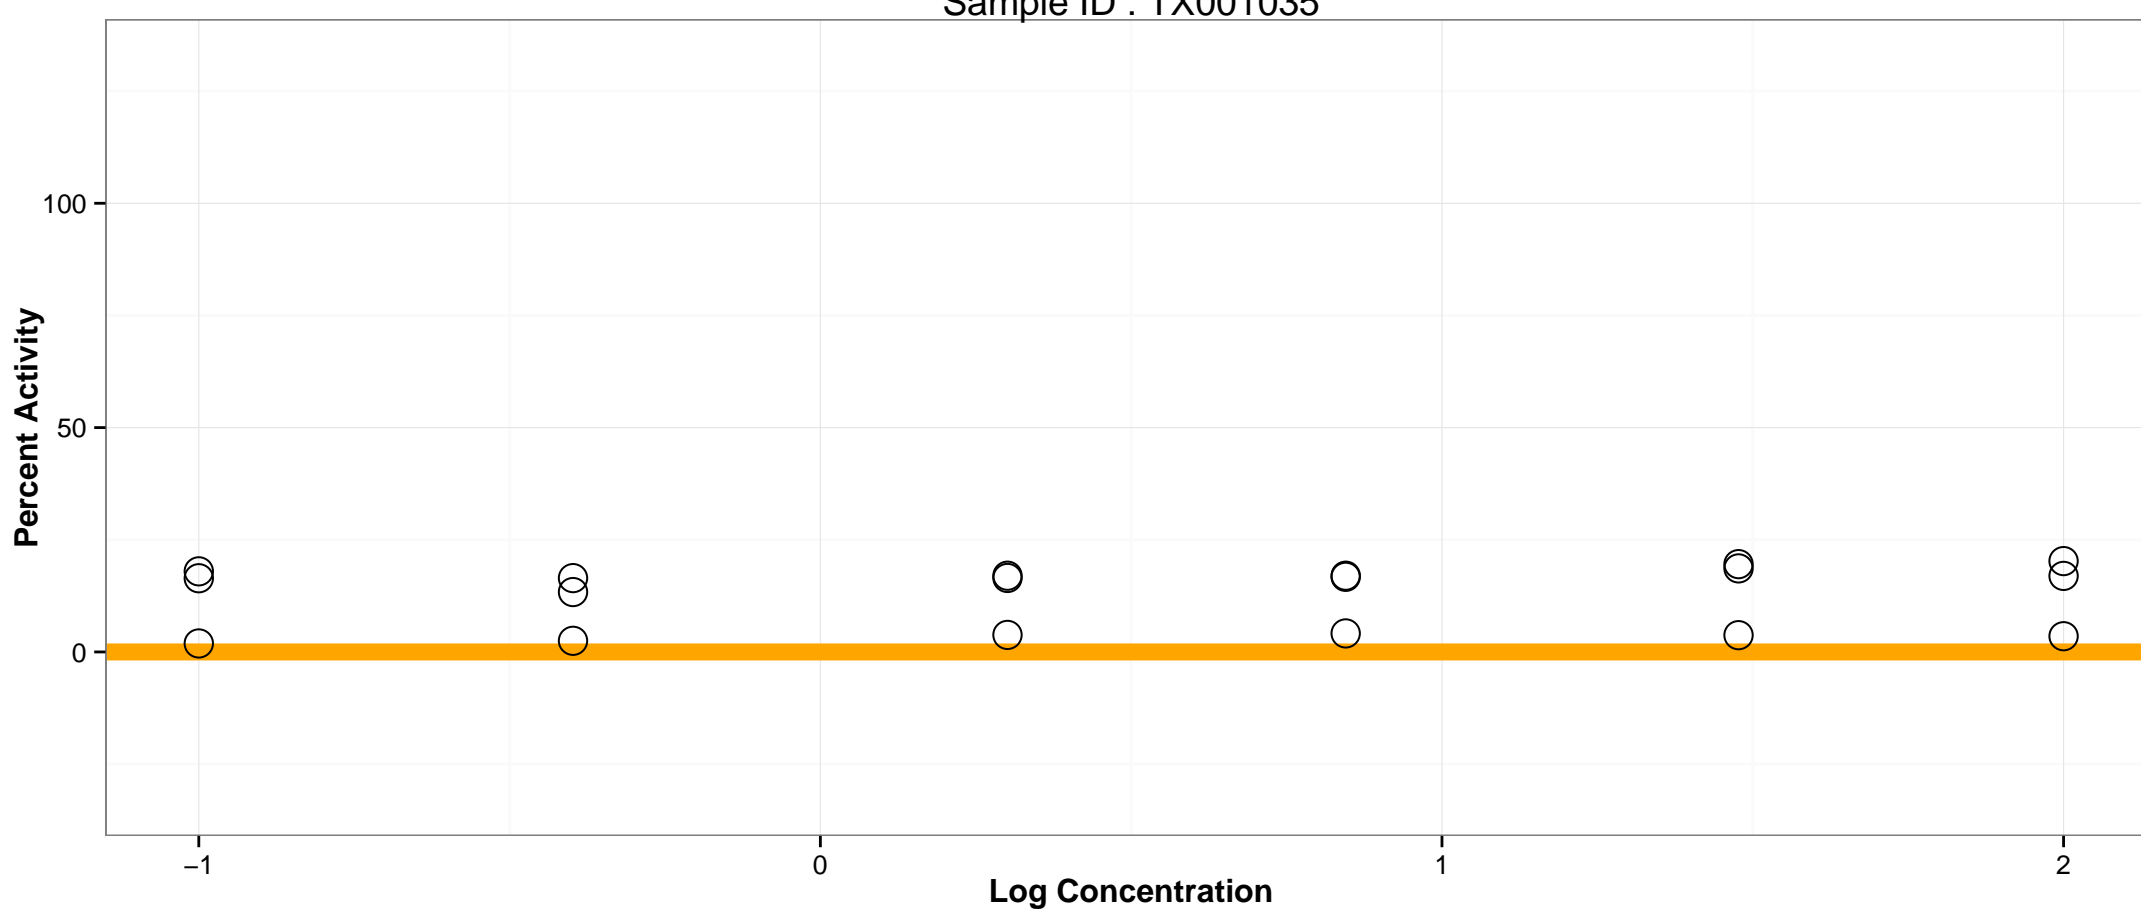

HILL MODEL

HILL MODEL: Not applicable

GAIN-LOSS MODEL

GNLS MODEL: Not applicable

|      | CNST   | HILL | GNLS |
|------|--------|------|------|
| AIC  | 152.07 | NA   | NA   |
| PROB | 1      | NA   | NA   |
| RMSE | 14.28  | NA   | NA   |

MAX\_MEAN : 14 MAX\_MED : 18.6 BMAD : 8.58  
COFF : 20 HIT-CALL : 0 FITC : 4 ACTP : 0  
FLAGS :

Chemical : Fenaminosulf  
CAS : 140-56-7

Assay ID 1508 (NHEERL\_TPO\_AUR\_dn)  
Sample ID : TX001038

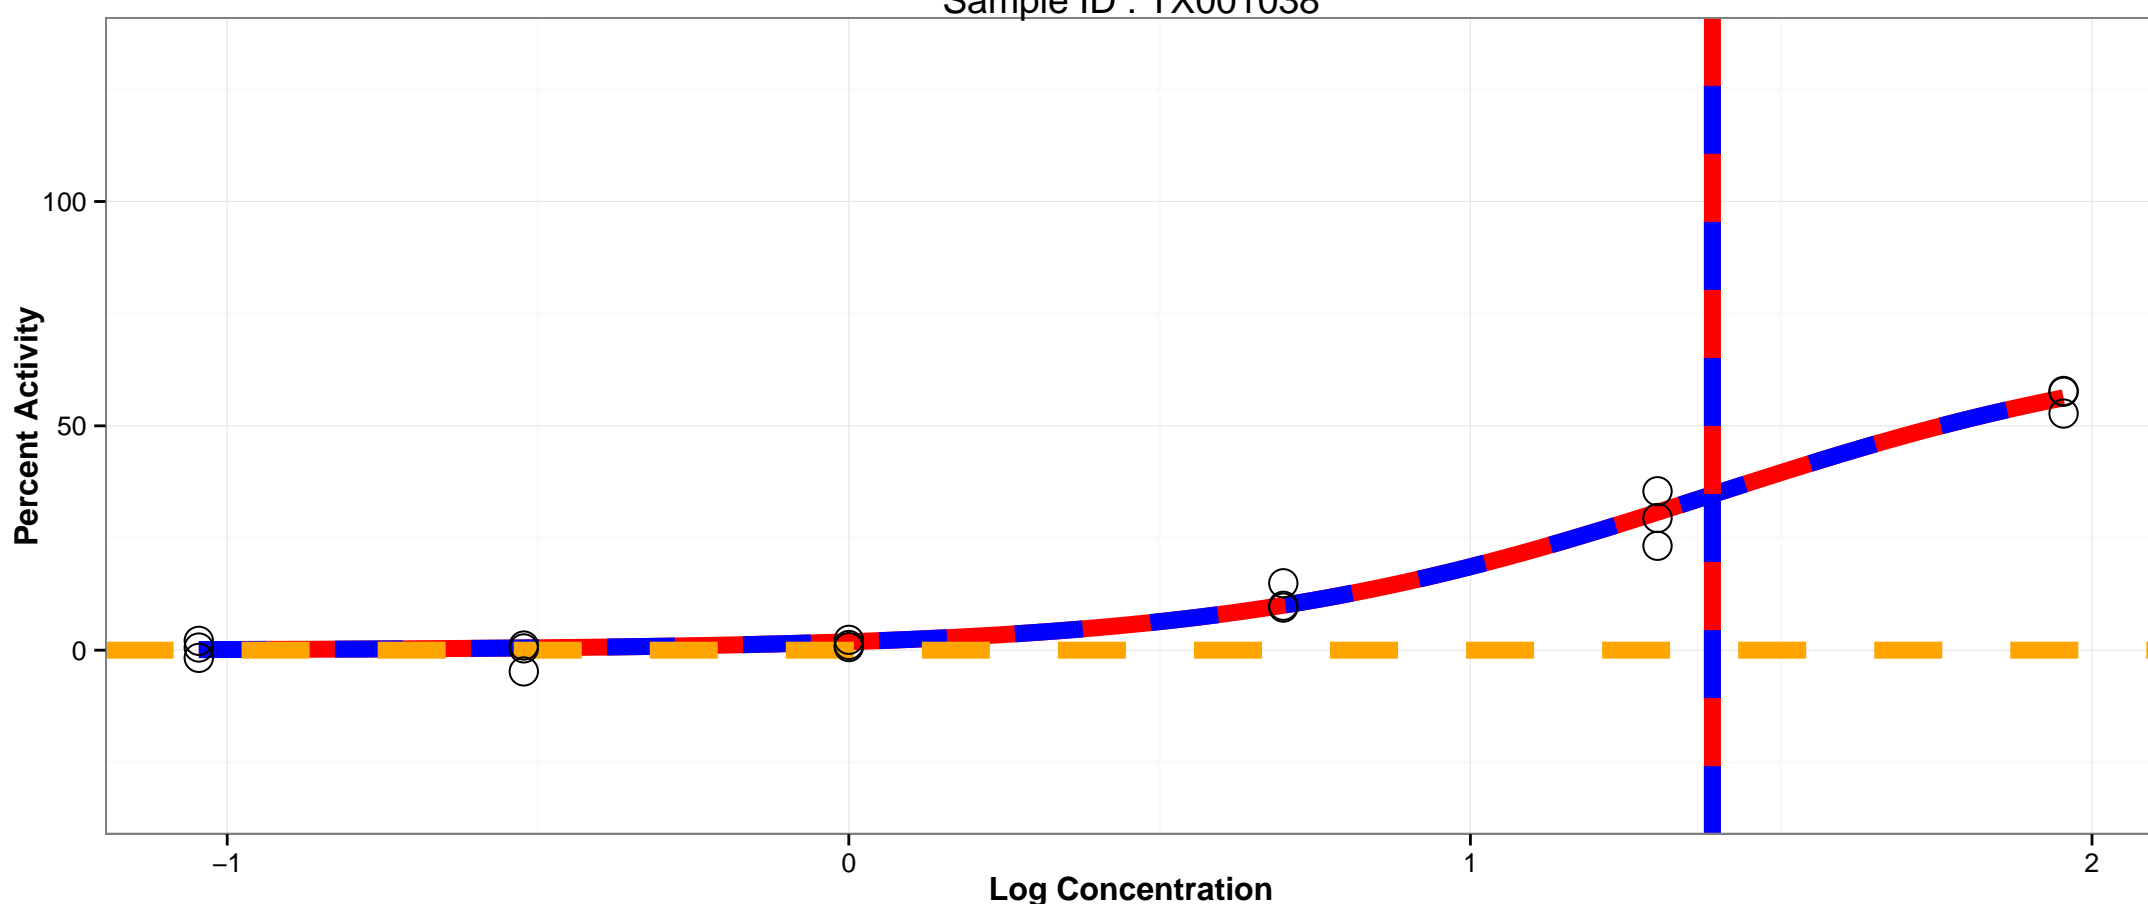

HILL MODEL

|     | tp   | ga    | gw   |
|-----|------|-------|------|
| val | 69.3 | 1.39  | 1.12 |
| sd  | 7.14 | 0.123 | 0.15 |

GAIN-LOSS MODEL

|     | tp   | ga    | gw   | la   | lw   |
|-----|------|-------|------|------|------|
| val | 69.3 | 1.39  | 1.12 | 3.9  | 4.44 |
| sd  | 7.14 | 0.123 | 0.15 | 2390 | 5470 |

|      | CNST   | HILL  | GNLS   |
|------|--------|-------|--------|
| AIC  | 169.16 | 97.07 | 101.07 |
| PROB | 0      | 0.88  | 0.12   |
| RMSE | 26.41  | 2.96  | 2.96   |

MAX\_MEAN : 56 MAX\_MED : 57.6 BMAD : 5.69  
COFF : 20 HIT-CALL : 1 FITC : 42 ACTP : 1  
FLAGS :

Assay ID 1509 (NHEERL\_HEK293T\_CellTiterGLO)  
Sample ID : TX001038

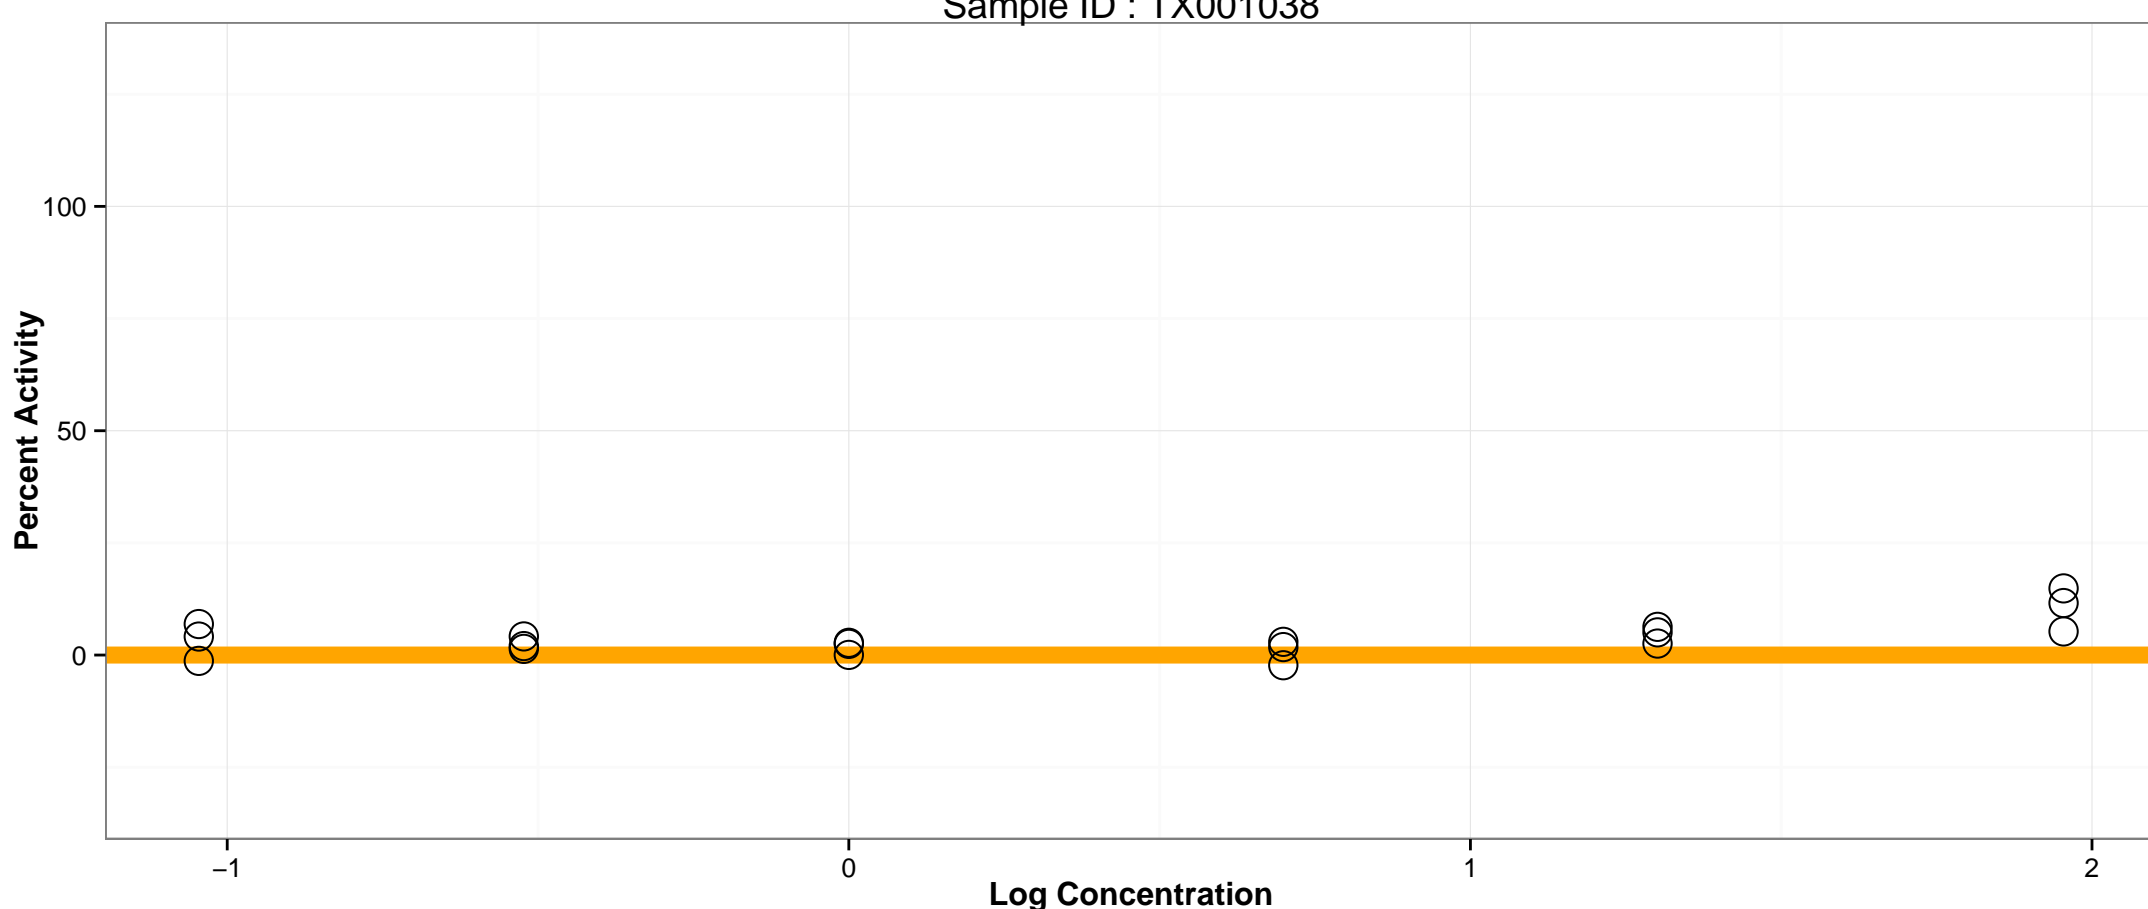

HILL MODEL

HILL MODEL: Not applicable

GAIN-LOSS MODEL

GNLS MODEL: Not applicable

|      | CNST   | HILL | GNLS |
|------|--------|------|------|
| AIC  | 114.69 | NA   | NA   |
| PROB | 1      | NA   | NA   |
| RMSE | 5.66   | NA   | NA   |

MAX\_MEAN : 10.6 MAX\_MED : 11.6 BMAD : 5.54  
COFF : 20 HIT-CALL : 0 FITC : 4 ACTP : 0  
FLAGS :

Assay ID 1848 (NHEERL\_Quantilum\_inhib\_2\_dn)  
Sample ID : TX001038

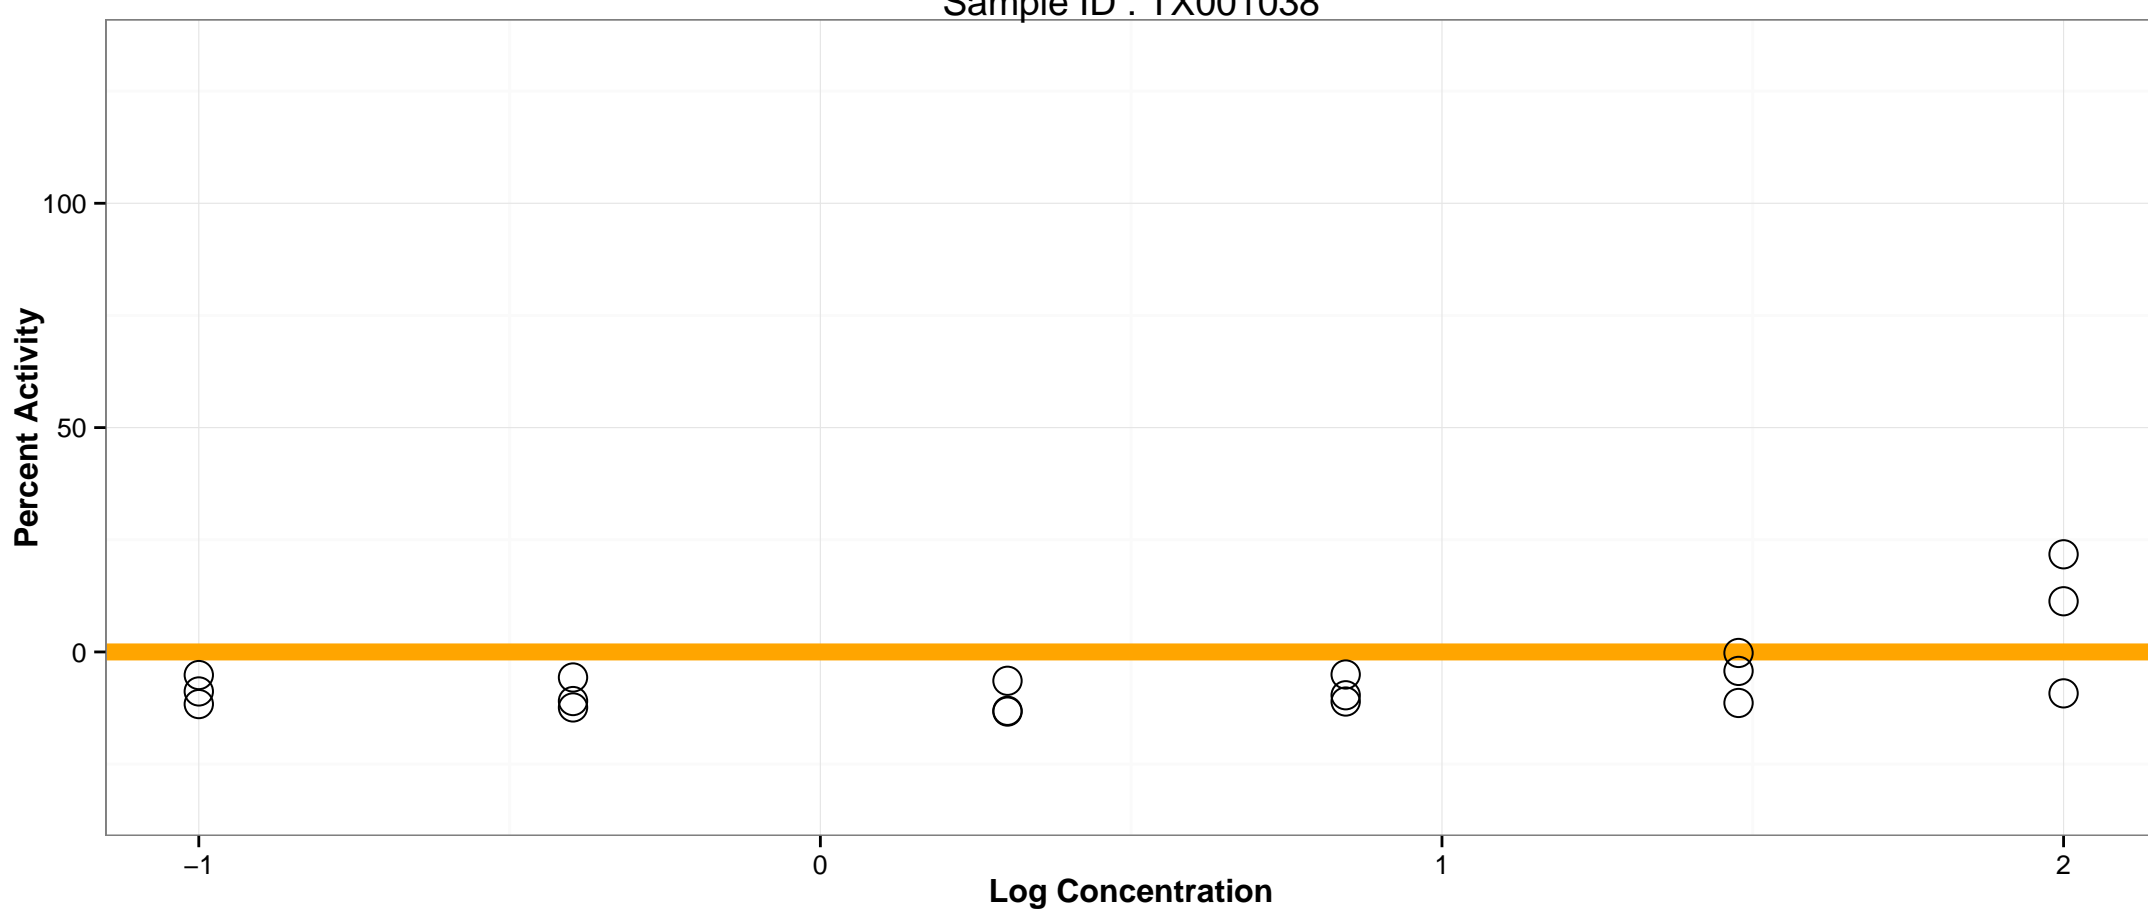

HILL MODEL

HILL MODEL: Not applicable

GAIN-LOSS MODEL

GNLS MODEL: Not applicable

|      | CNST   | HILL | GNLS |
|------|--------|------|------|
| AIC  | 140.81 | NA   | NA   |
| PROB | 1      | NA   | NA   |
| RMSE | 10.56  | NA   | NA   |

MAX\_MEAN : 7.95 MAX\_MED : 11.3 BMAD : 8.58  
COFF : 20 HIT-CALL : 0 FITC : 4 ACTP : 0  
FLAGS :

Chemical : 2-tert-Butylphenol  
CAS : 88-18-6

Assay ID 1508 (NHEERL\_TPO\_AUR\_dn)  
Sample ID : TX001346

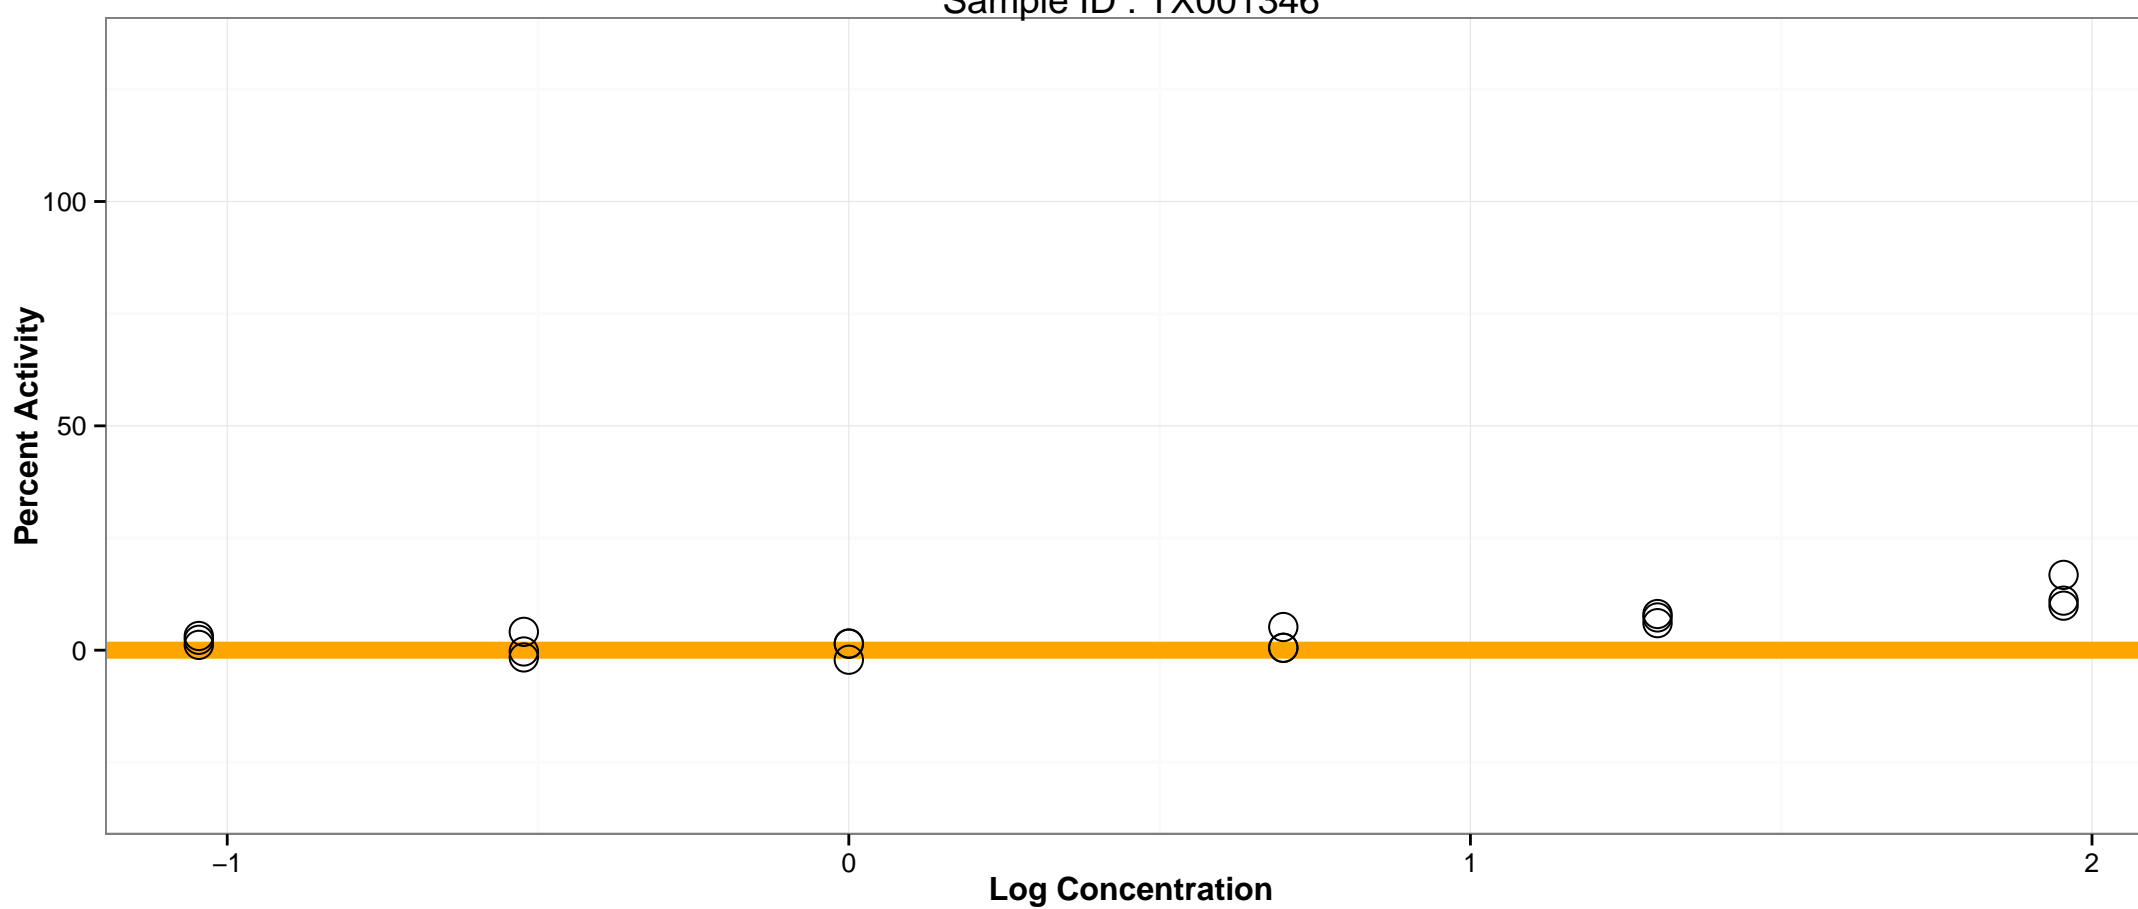

HILL MODEL

HILL MODEL: Not applicable

GAIN-LOSS MODEL

GNLS MODEL: Not applicable

|      | CNST  | HILL | GNLS |
|------|-------|------|------|
| AIC  | 118.9 | NA   | NA   |
| PROB | 1     | NA   | NA   |
| RMSE | 6.37  | NA   | NA   |

MAX\_MEAN : 12.6 MAX\_MED : 11.1 BMAD : 5.69  
COFF : 20 HIT-CALL : 0 FITC : 4 ACTP : 0  
FLAGS :

Assay ID 1509 (NHEERL\_HEK293T\_CellTiterGLO)  
Sample ID : TX001346

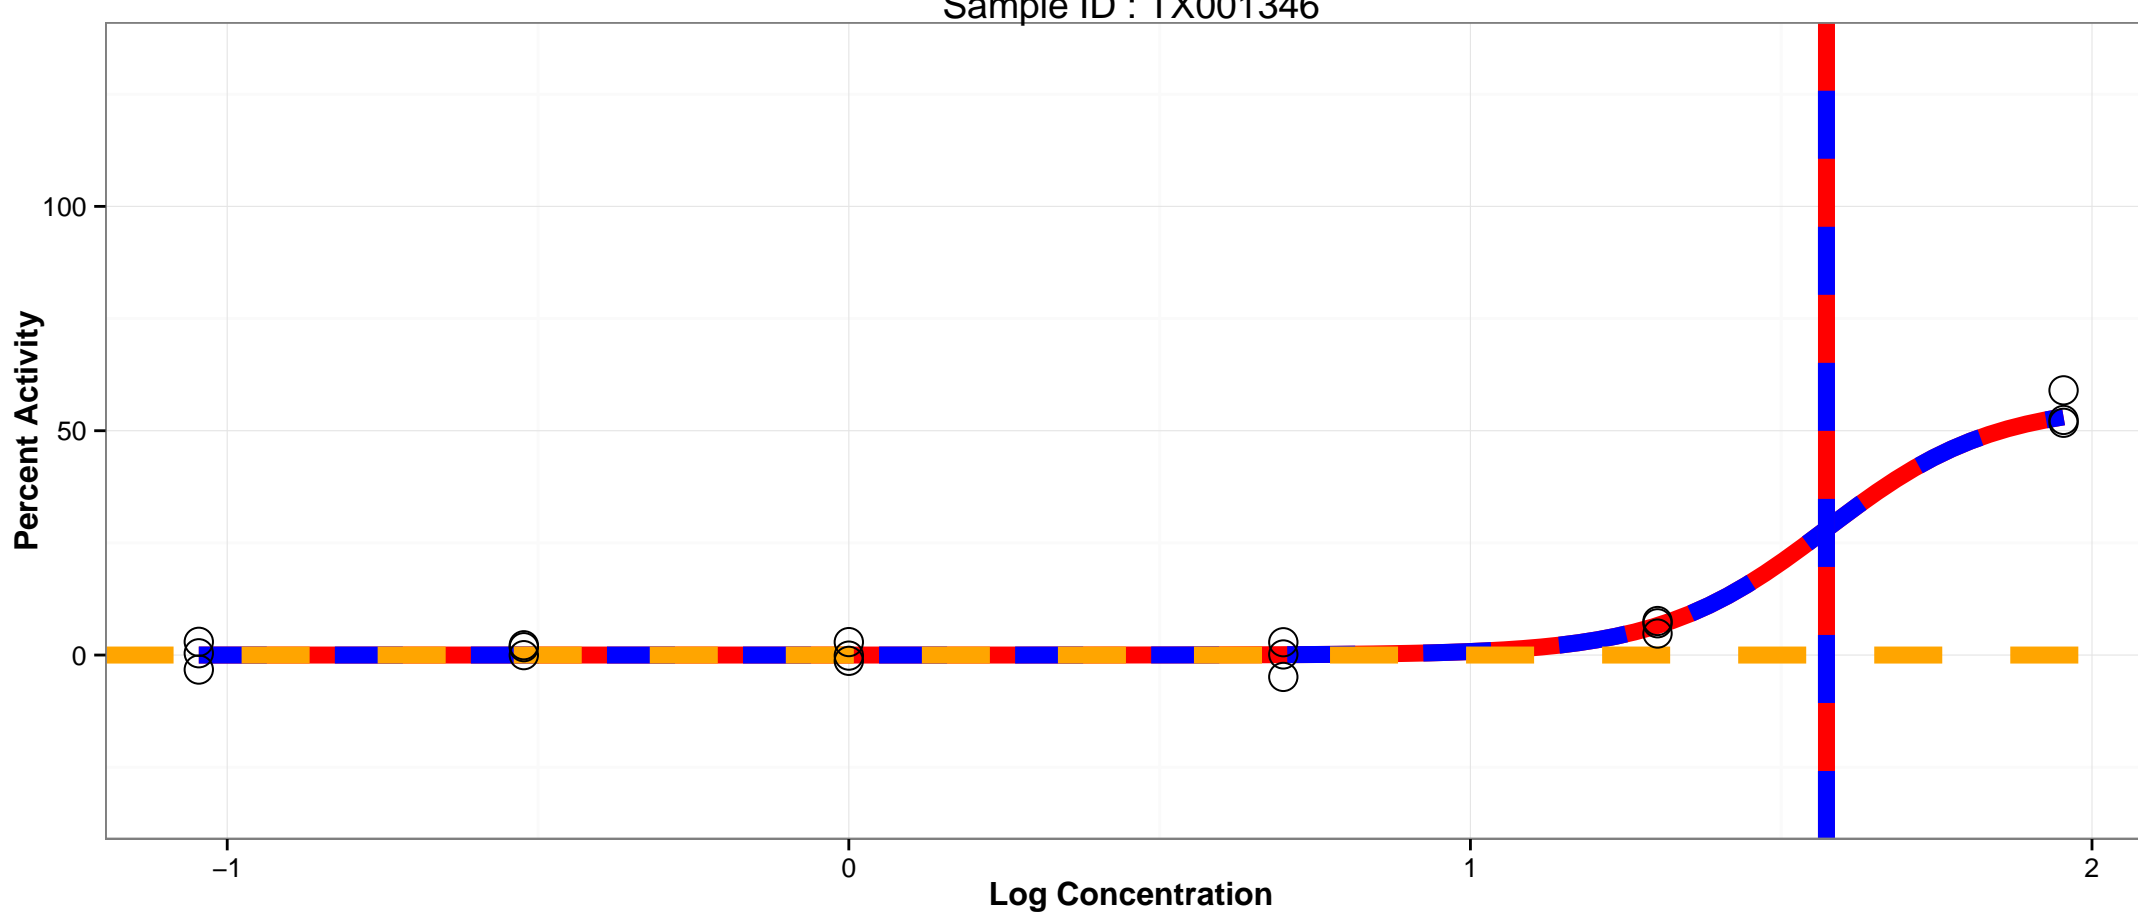

HILL MODEL

|     | tp   | ga   | gw   |
|-----|------|------|------|
| val | 56.2 | 1.57 | 3.23 |
| sd  | NA   | NA   | NA   |

GAIN-LOSS MODEL

|     | tp   | ga   | gw   | la   | lw  |
|-----|------|------|------|------|-----|
| val | 56.2 | 1.57 | 3.23 | 2.98 | 8.2 |
| sd  | NA   | NA   | NA   | NA   | NA  |

|      | CNST   | HILL | GNLS |
|------|--------|------|------|
| AIC  | 153.69 | 92.2 | 96.2 |
| PROB | 0      | 0.88 | 0.12 |
| RMSE | 22.5   | 2.49 | 2.49 |

MAX\_MEAN : 54.4 MAX\_MED : 52.4 BMAD : 5.54  
COFF : 20 HIT-CALL : 1 FITC : 42 ACTP : 1  
FLAGS : 6

Assay ID 1848 (NHEERL\_Quantilum\_inhib\_2\_dn)  
Sample ID : TX001346

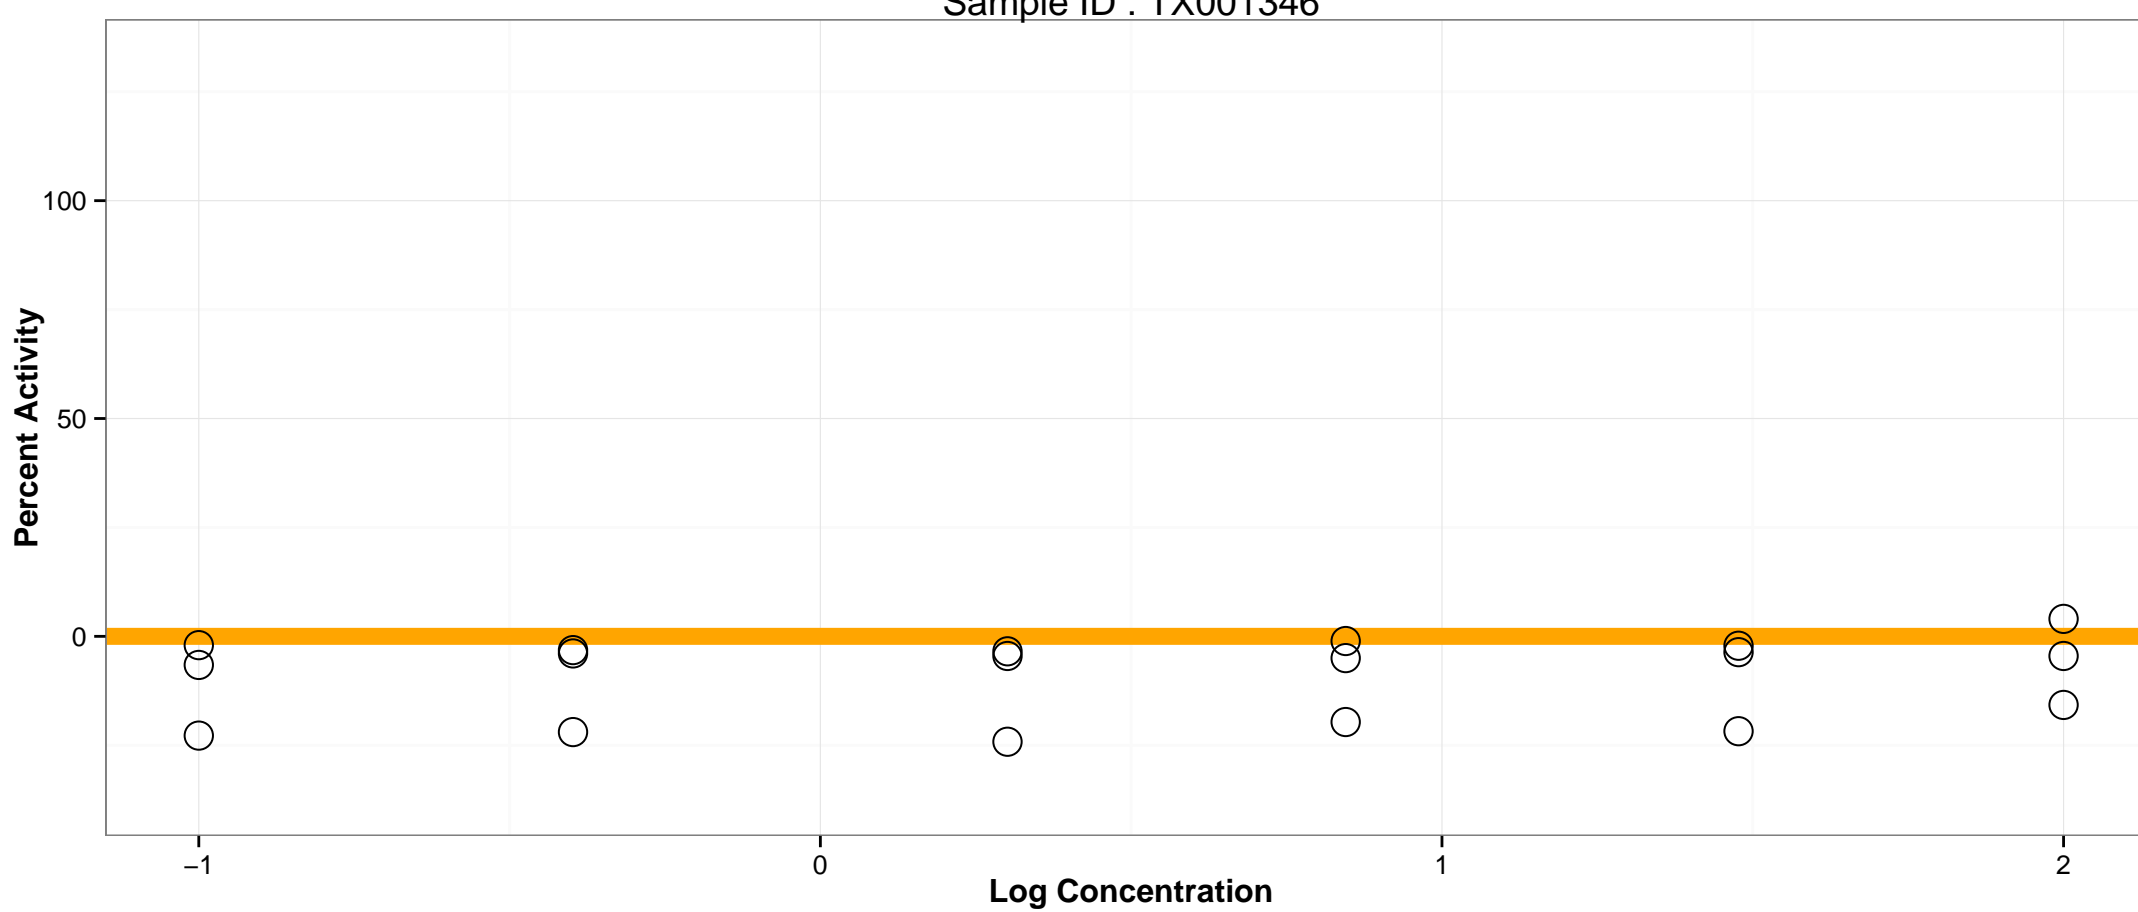

HILL MODEL

HILL MODEL: Not applicable

GAIN-LOSS MODEL

GNLS MODEL: Not applicable

|      | CNST   | HILL | GNLS |
|------|--------|------|------|
| AIC  | 144.75 | NA   | NA   |
| PROB | 1      | NA   | NA   |
| RMSE | 12.64  | NA   | NA   |

MAX\_MEAN : -5.4 MAX\_MED : -3.62 BMAD : 8.58  
COFF : 20 HIT-CALL : 0 FITC : 4 ACTP : 0  
FLAGS :



Chemical : 2-Methoxy-5-methylaniline  
CAS : 120-71-8

Assay ID 1508 (NHEERL\_TPO\_AUR\_dn)  
Sample ID : TX001355

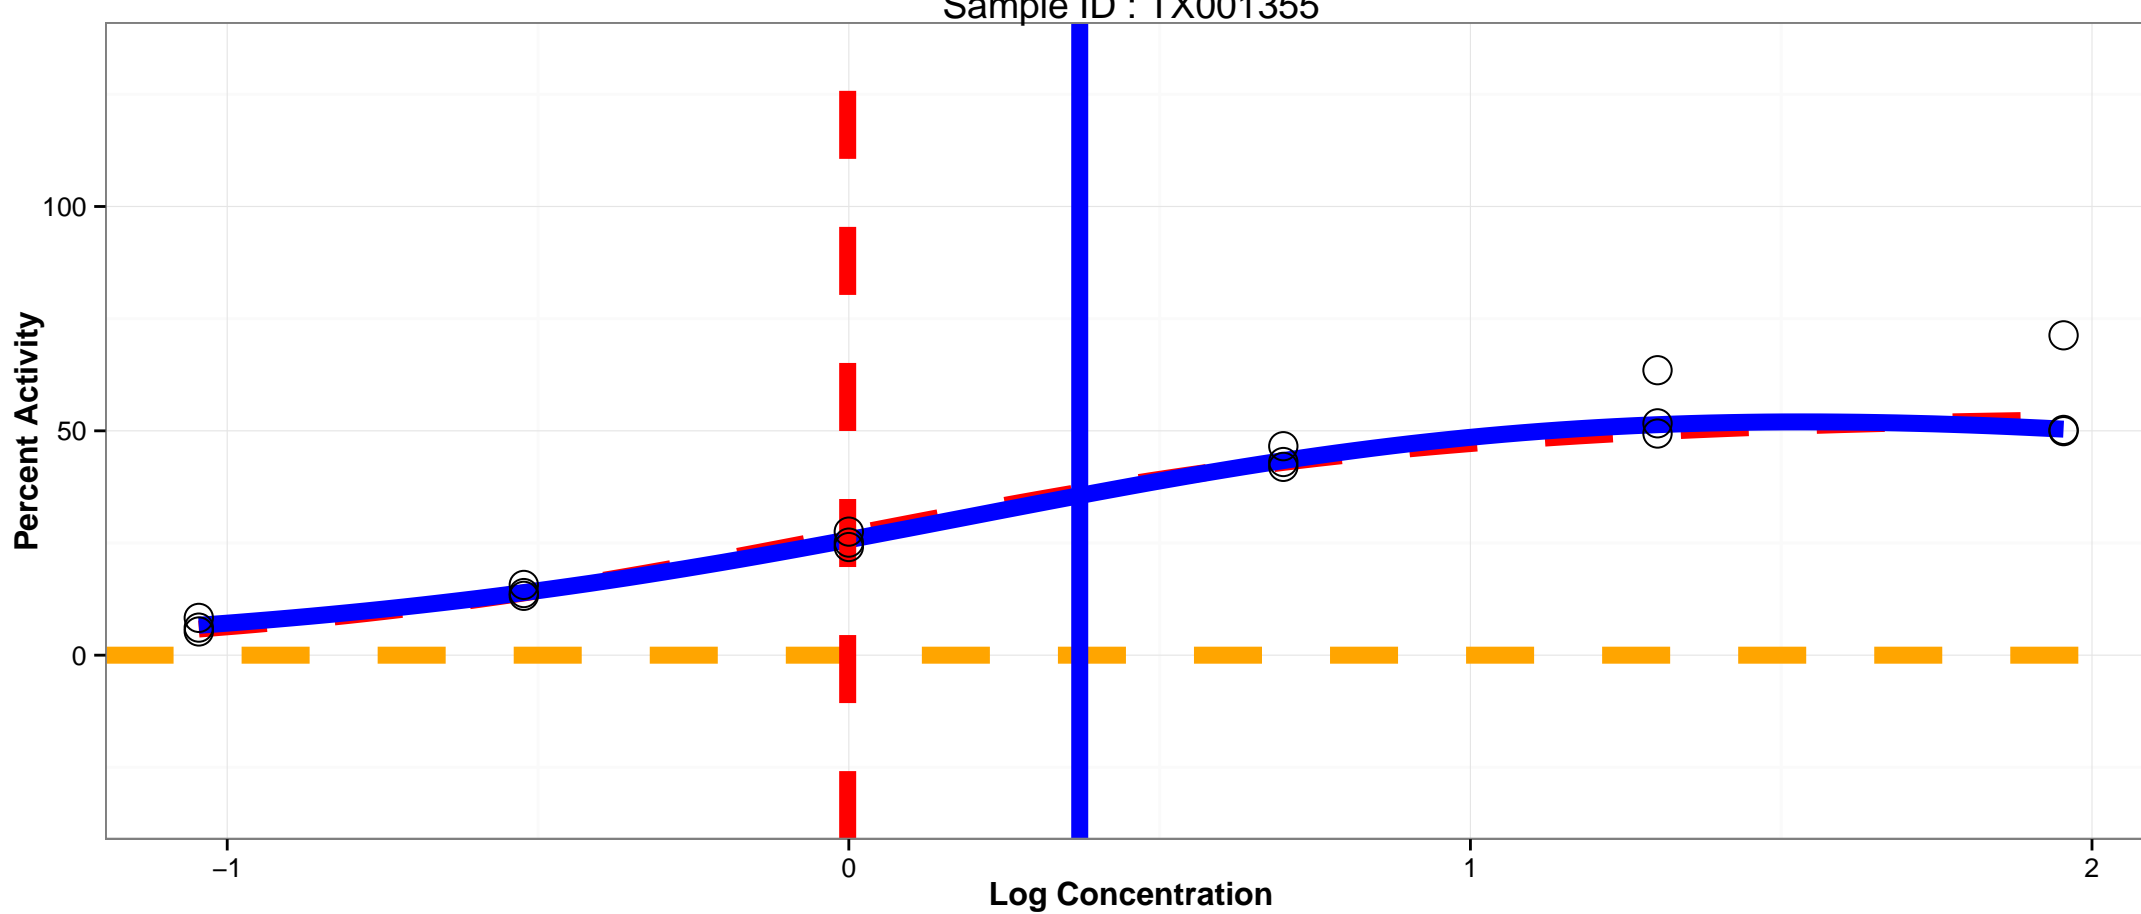

| HILL MODEL |      |          |       |
|------------|------|----------|-------|
|            | tp   | ga       | gw    |
| val        | 53.5 | -0.00184 | 0.874 |
| sd         | 1.95 | 0.0617   | 0.079 |

| GAIN-LOSS MODEL |      |       |        |       |       |
|-----------------|------|-------|--------|-------|-------|
|                 | tp   | ga    | gw     | la    | lw    |
| val             | 84.9 | 0.371 | 0.731  | 2.76  | 0.3   |
| sd              | 23.3 | 0.179 | 0.0886 | 0.724 | 0.256 |

|      | CNST  | HILL   | GNLS   |
|------|-------|--------|--------|
| AIC  | 187.8 | 109.29 | 109.05 |
| PROB | 0     | 0.47   | 0.53   |
| RMSE | 39.27 | 5.74   | 5.85   |

MAX\_MEAN : 57.2 MAX\_MED : 51.7 BMAD : 5.69  
COFF : 20 HIT-CALL : 1 FITC : 51 ACTP : 1  
FLAGS :

Assay ID 1509 (NHEERL\_HEK293T\_CellTiterGLO)  
Sample ID : TX001355

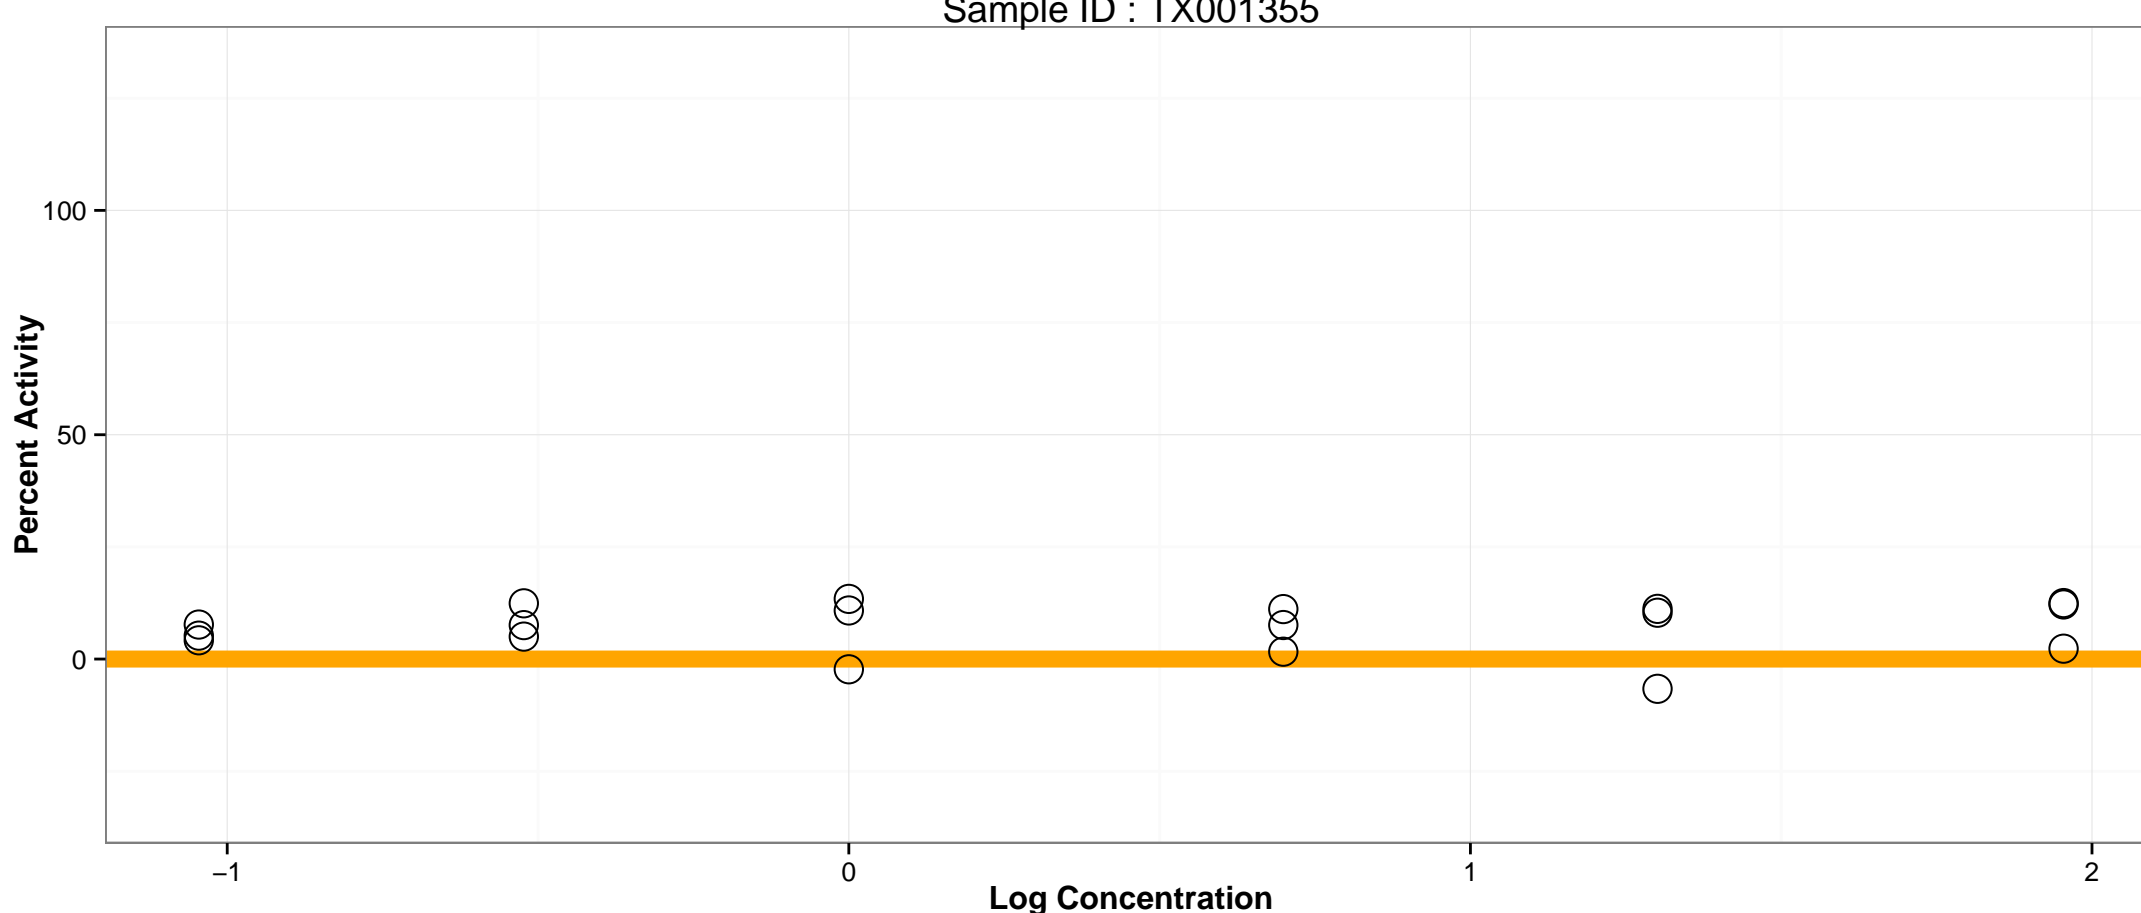

HILL MODEL

HILL MODEL: Not applicable

GAIN-LOSS MODEL

GNLS MODEL: Not applicable

|      | CNST   | HILL | GNLS |
|------|--------|------|------|
| AIC  | 134.86 | NA   | NA   |
| PROB | 1      | NA   | NA   |
| RMSE | 8.87   | NA   | NA   |

MAX\_MEAN : 9 MAX\_MED : 12.2 BMAD : 5.54  
COFF : 20 HIT-CALL : 0 FITC : 4 ACTP : 0  
FLAGS :

Assay ID 1848 (NHEERL\_Quantilum\_inhib\_2\_dn)  
Sample ID : TX001355

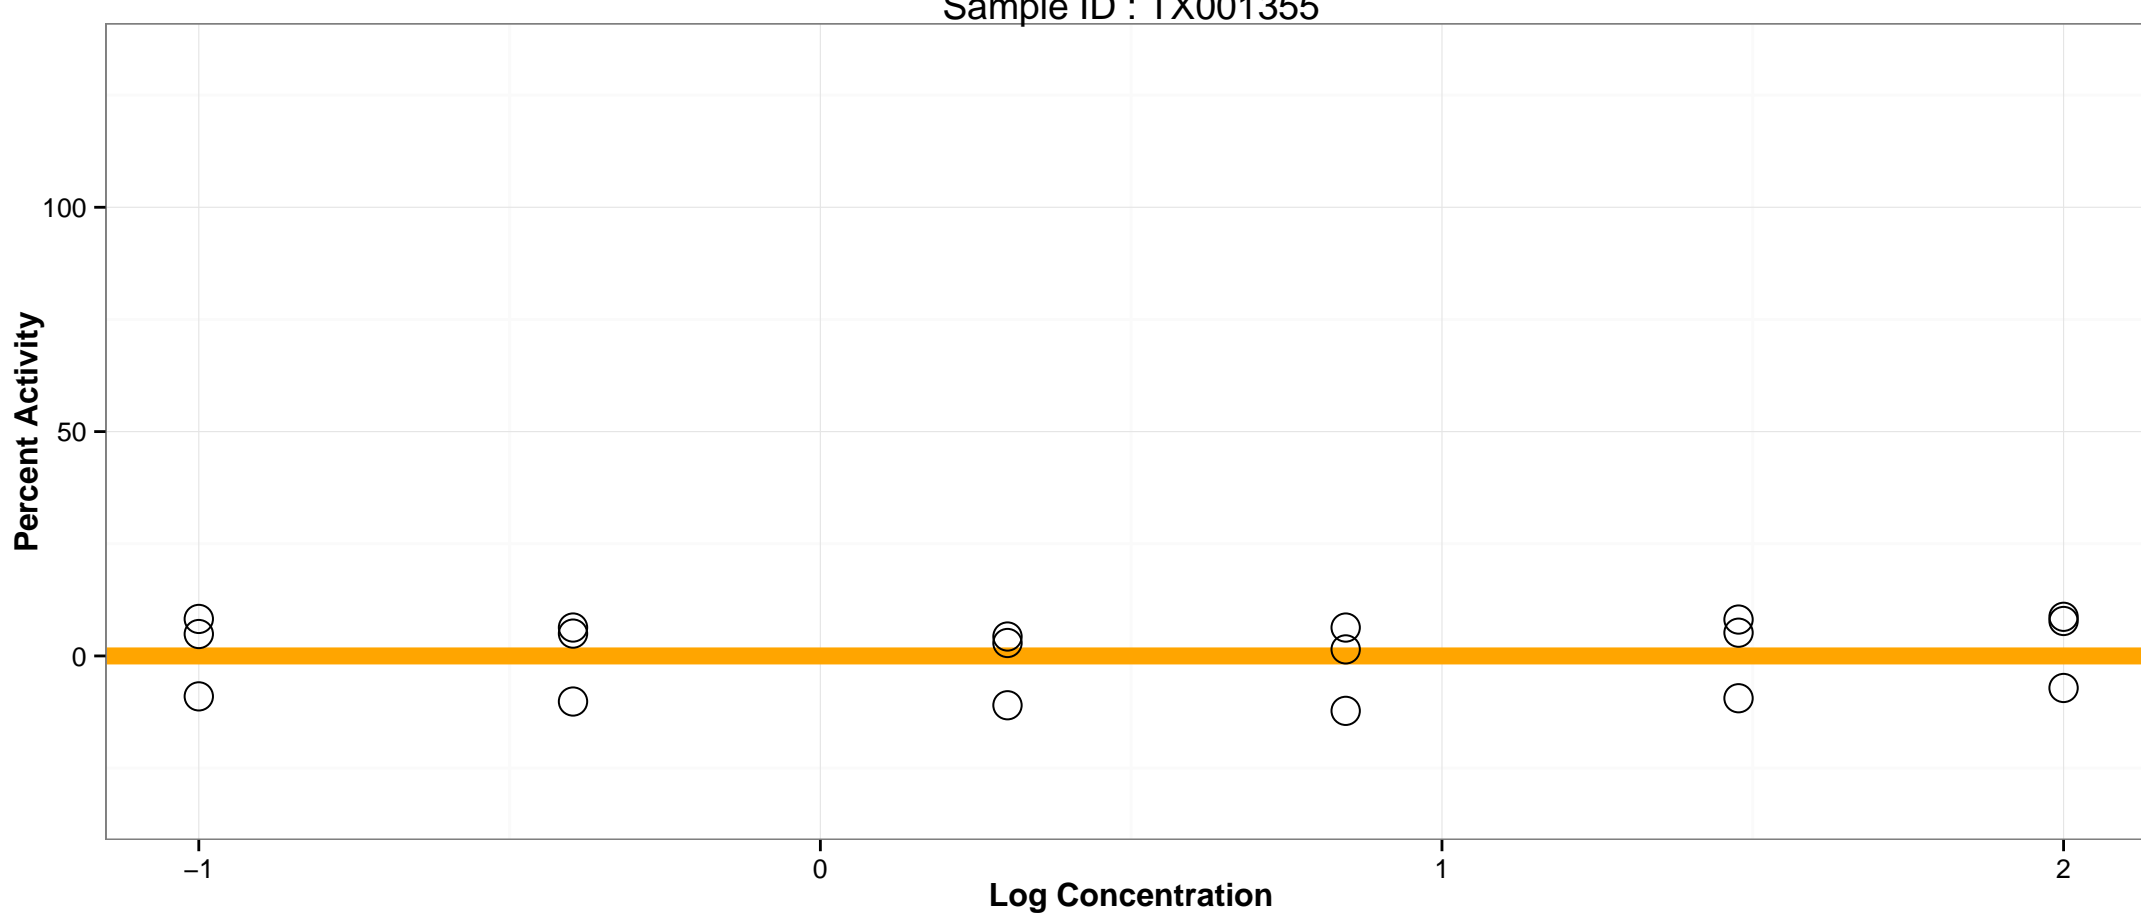

HILL MODEL

HILL MODEL: Not applicable

GAIN-LOSS MODEL

GNLS MODEL: Not applicable

|      | CNST   | HILL | GNLS |
|------|--------|------|------|
| AIC  | 129.76 | NA   | NA   |
| PROB | 1      | NA   | NA   |
| RMSE | 7.64   | NA   | NA   |

MAX\_MEAN : 3.14 MAX\_MED : 7.8 BMAD : 8.58  
COFF : 20 HIT-CALL : 0 FITC : 4 ACTP : 0  
FLAGS :

Chemical : Anthracene  
CAS : 120-12-7

Assay ID 1508 (NHEERL\_TPO\_AUR\_dn)  
Sample ID : TX001370

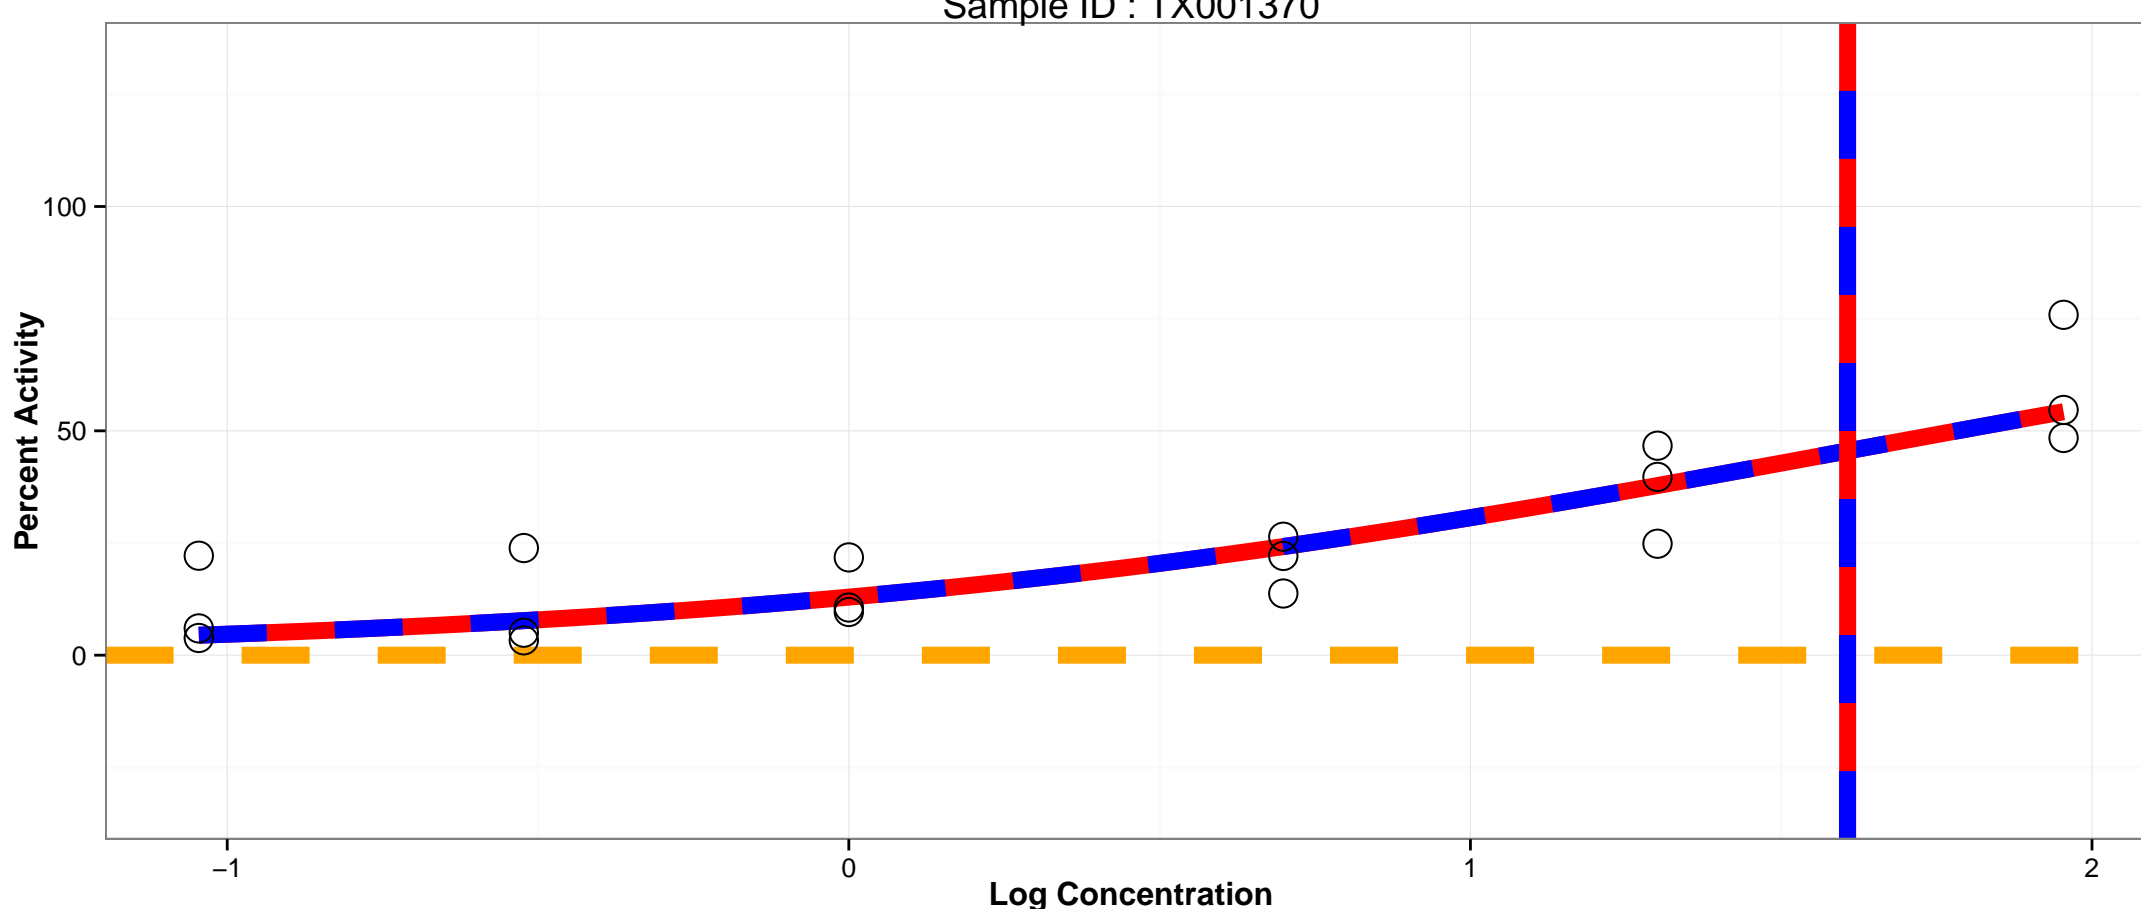

HILL MODEL

|     | tp   | ga    | gw    |
|-----|------|-------|-------|
| val | 91   | 1.61  | 0.486 |
| sd  | 39.5 | 0.803 | 0.142 |

GAIN-LOSS MODEL

|     | tp | ga   | gw    | la   | lw   |
|-----|----|------|-------|------|------|
| val | 91 | 1.61 | 0.486 | 2.94 | 16.2 |
| sd  | NA | NA   | NA    | NA   | NA   |

|      | CNST   | HILL  | GNLS  |
|------|--------|-------|-------|
| AIC  | 178.88 | 139.4 | 143.4 |
| PROB | 0      | 0.88  | 0.12  |
| RMSE | 32.21  | 9.34  | 9.34  |

MAX\_MEAN : 59.7 MAX\_MED : 54.7 BMAD : 5.69  
COFF : 20 HIT-CALL : 1 FITC : 42 ACTP : 1  
FLAGS :

Assay ID 1509 (NHEERL\_HEK293T\_CellTiterGLO)  
Sample ID : TX001370

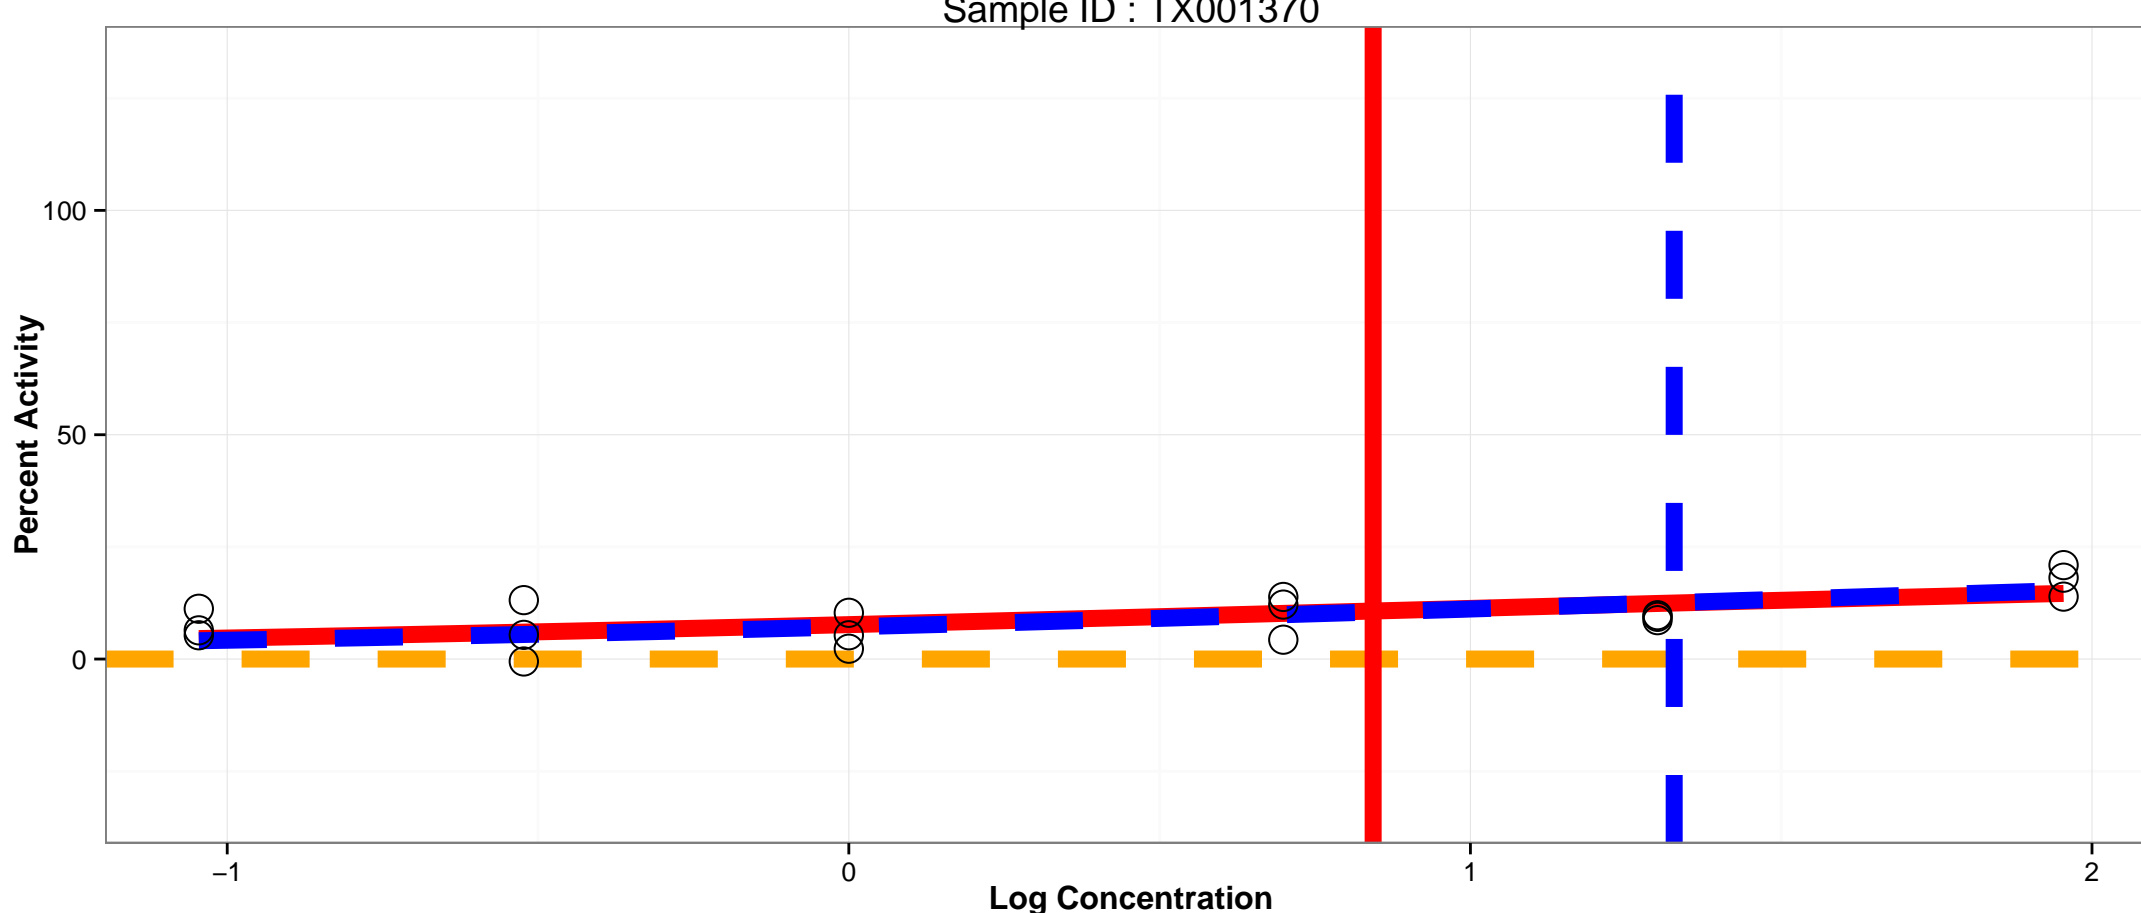

HILL MODEL

|     | tp   | ga    | gw    |
|-----|------|-------|-------|
| val | 21.4 | 0.844 | 0.3   |
| sd  | 15.8 | 2.3   | 0.171 |

GAIN-LOSS MODEL

|     | tp   | ga   | gw  | la   | lw   |
|-----|------|------|-----|------|------|
| val | 25.1 | 1.33 | 0.3 | 3.92 | 17.9 |
| sd  | NA   | NA   | NA  | NA   | NA   |

|      | CNST   | HILL   | GNLS  |
|------|--------|--------|-------|
| AIC  | 141.52 | 113.24 | 117.1 |
| PROB | 0      | 0.87   | 0.13  |
| RMSE | 10.85  | 4.2    | 4.18  |

MAX\_MEAN : 17.7 MAX\_MED : 18.2 BMAD : 5.54  
COFF : 20 HIT-CALL : 0 FITC : 21 ACTP : 1  
FLAGS : 12

Assay ID 1848 (NHEERL\_Quantilum\_inhib\_2\_dn)  
Sample ID : TX001370

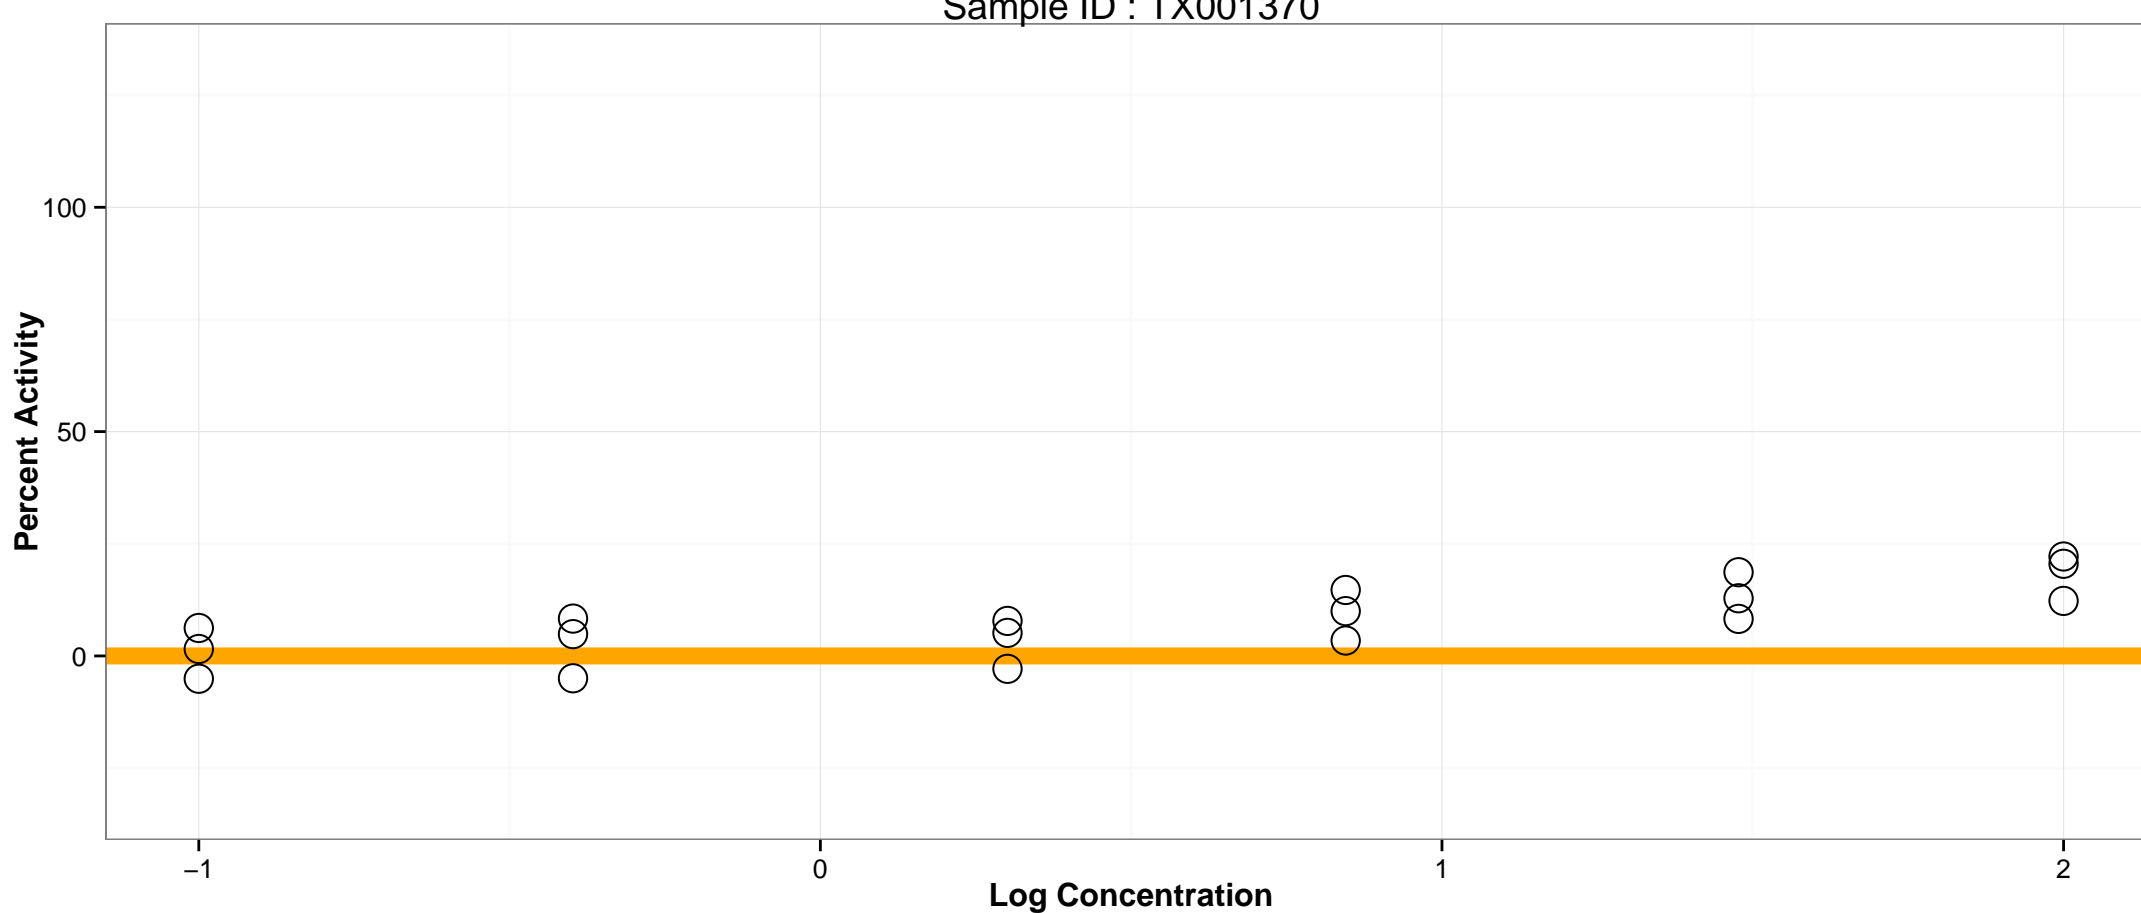

HILL MODEL

HILL MODEL: Not applicable

GAIN-LOSS MODEL

GNLS MODEL: Not applicable

|      | CNST  | HILL | GNLS |
|------|-------|------|------|
| AIC  | 141.8 | NA   | NA   |
| PROB | 1     | NA   | NA   |
| RMSE | 11.2  | NA   | NA   |

MAX\_MEAN : 18.3 MAX\_MED : 20.5 BMAD : 8.58  
COFF : 20 HIT-CALL : 0 FITC : 4 ACTP : 0  
FLAGS :

Chemical : Hydroquinone  
CAS : 123-31-9

Assay ID 1508 (NHEERL\_TPO\_AUR\_dn)  
Sample ID : TX001382

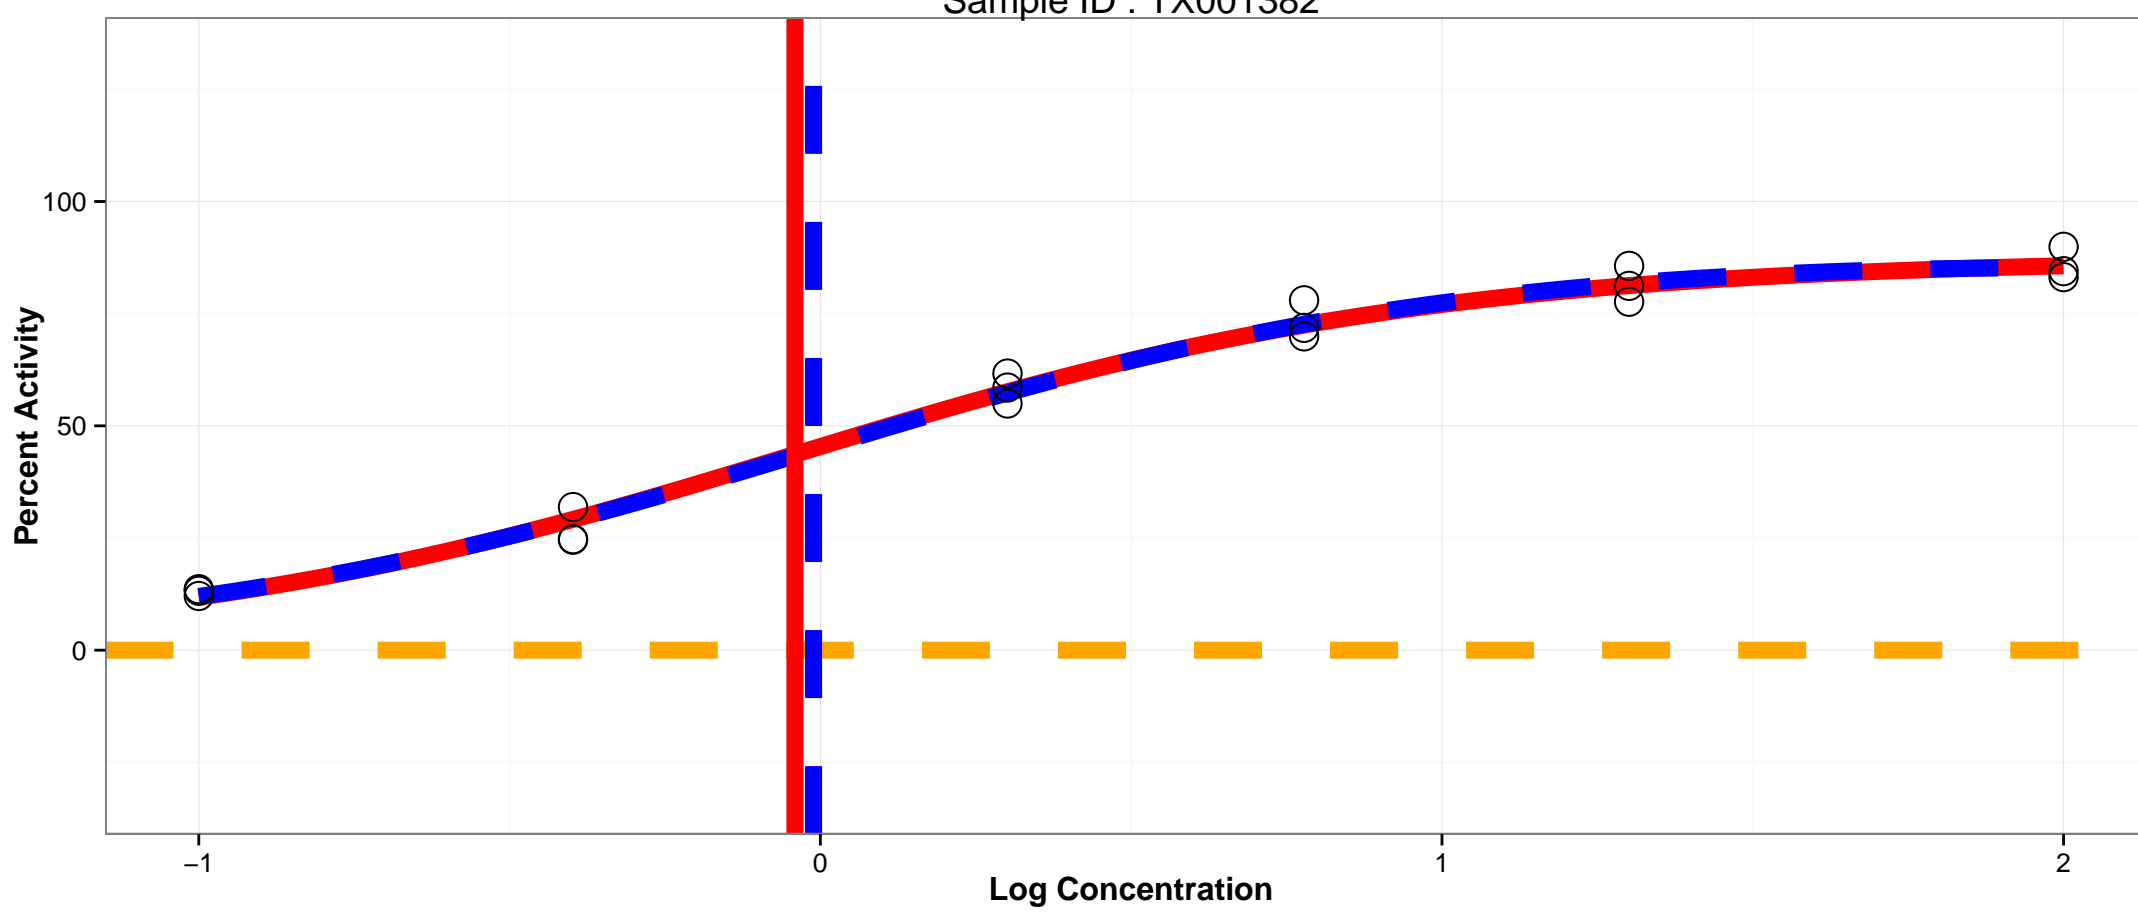

HILL MODEL

|     | tp   | ga      | gw     |
|-----|------|---------|--------|
| val | 87.3 | -0.0409 | 0.841  |
| sd  | 2.04 | 0.0493  | 0.0599 |

GAIN-LOSS MODEL

|     | tp   | ga     | gw    | la   | lw    |
|-----|------|--------|-------|------|-------|
| val | 89.3 | -0.011 | 0.819 | 4    | 0.808 |
| sd  | 21.8 | 0.274  | 0.152 | 16.7 | 8.81  |

|      | CNST   | HILL   | GNLS   |
|------|--------|--------|--------|
| AIC  | 205.48 | 102.39 | 106.26 |
| PROB | 0      | 0.87   | 0.13   |
| RMSE | 62.91  | 3.1    | 3.09   |

MAX\_MEAN : 85.9 MAX\_MED : 84.5 BMAD : 5.69  
COFF : 20 HIT-CALL : 1 FITC : 41 ACTP : 1  
FLAGS :

Assay ID 1509 (NHEERL\_HEK293T\_CellTiterGLO)  
Sample ID : TX001382

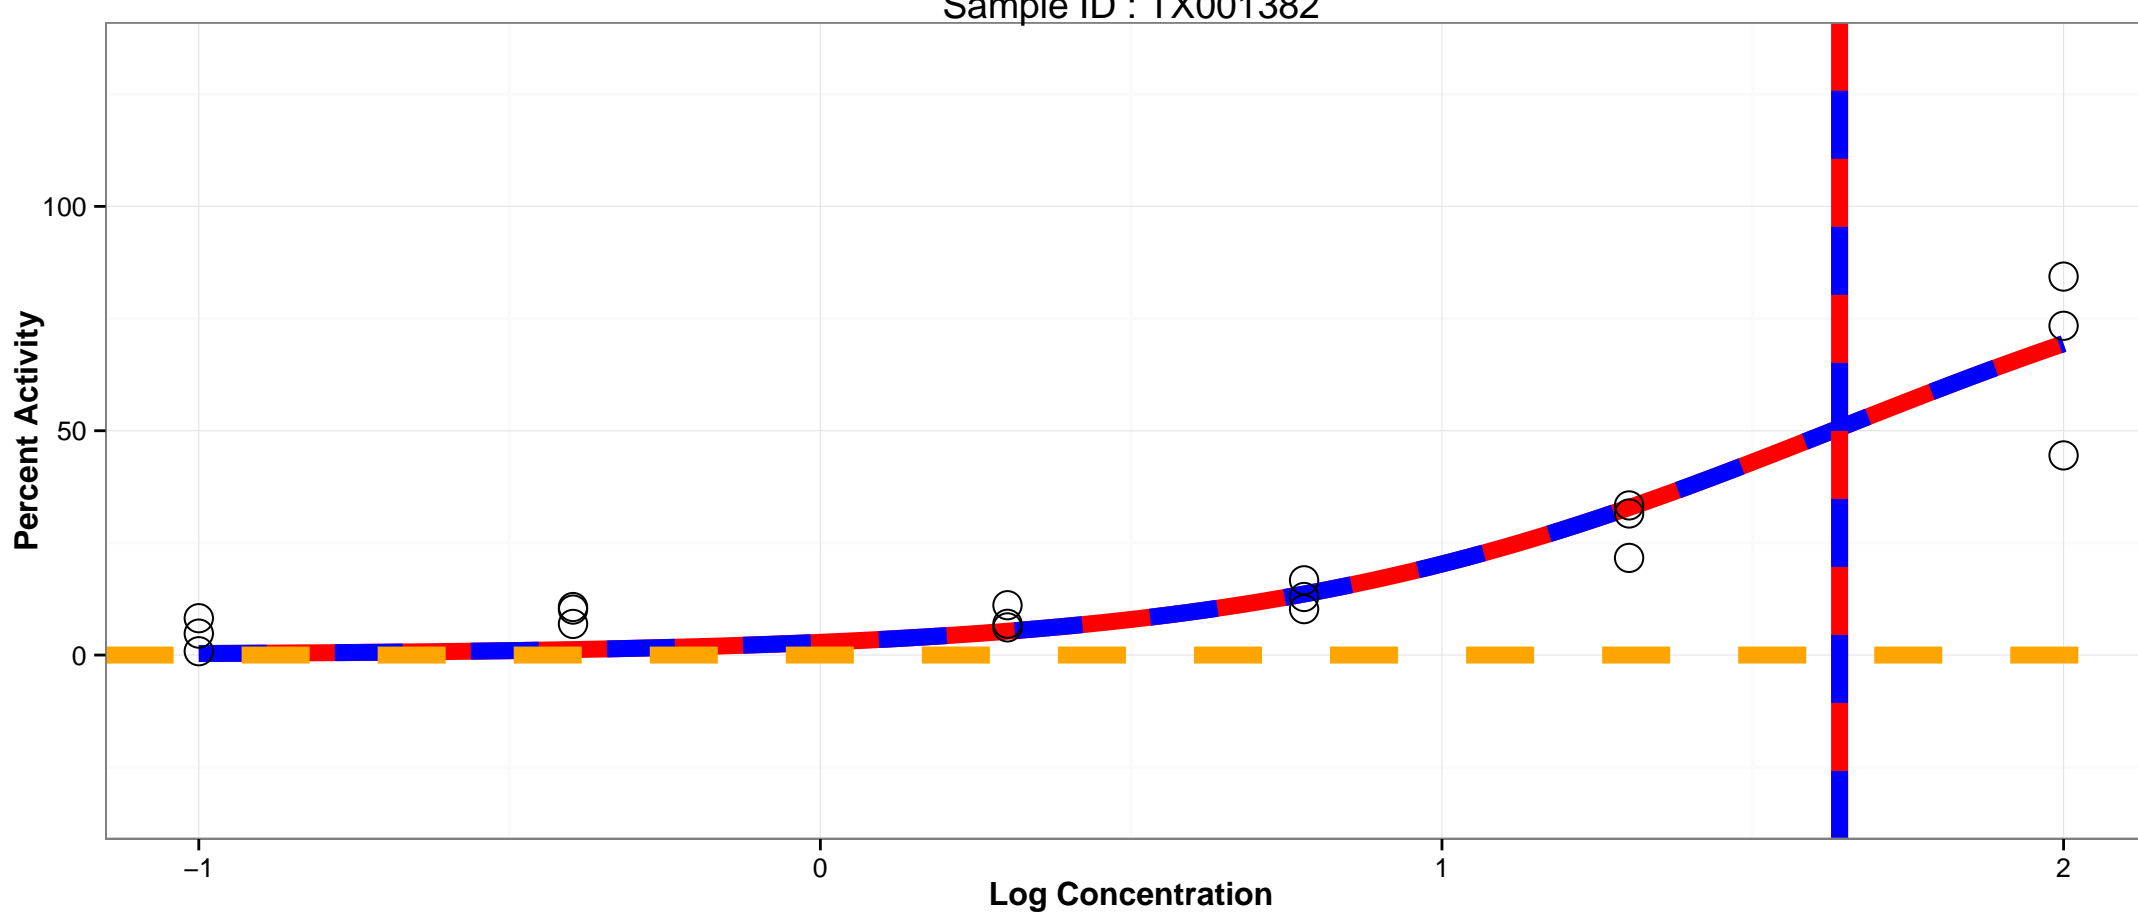

HILL MODEL

|     | tp   | ga    | gw    |
|-----|------|-------|-------|
| val | 101  | 1.64  | 0.939 |
| sd  | 26.7 | 0.253 | 0.212 |

GAIN-LOSS MODEL

|     | tp   | ga    | gw    | la   | lw    |
|-----|------|-------|-------|------|-------|
| val | 101  | 1.64  | 0.939 | 3.72 | 5.36  |
| sd  | 26.7 | 0.253 | 0.212 | 3220 | 10000 |

|      | CNST   | HILL   | GNLS   |
|------|--------|--------|--------|
| AIC  | 174.67 | 134.56 | 138.56 |
| PROB | 0      | 0.88   | 0.12   |
| RMSE | 31.79  | 8.6    | 8.6    |

MAX\_MEAN : 67.4 MAX\_MED : 73.4 BMAD : 5.54  
COFF : 20 HIT-CALL : 1 FITC : 42 ACTP : 1  
FLAGS :

Assay ID 1848 (NHEERL\_Quantilum\_inhib\_2\_dn)  
Sample ID : TX001382

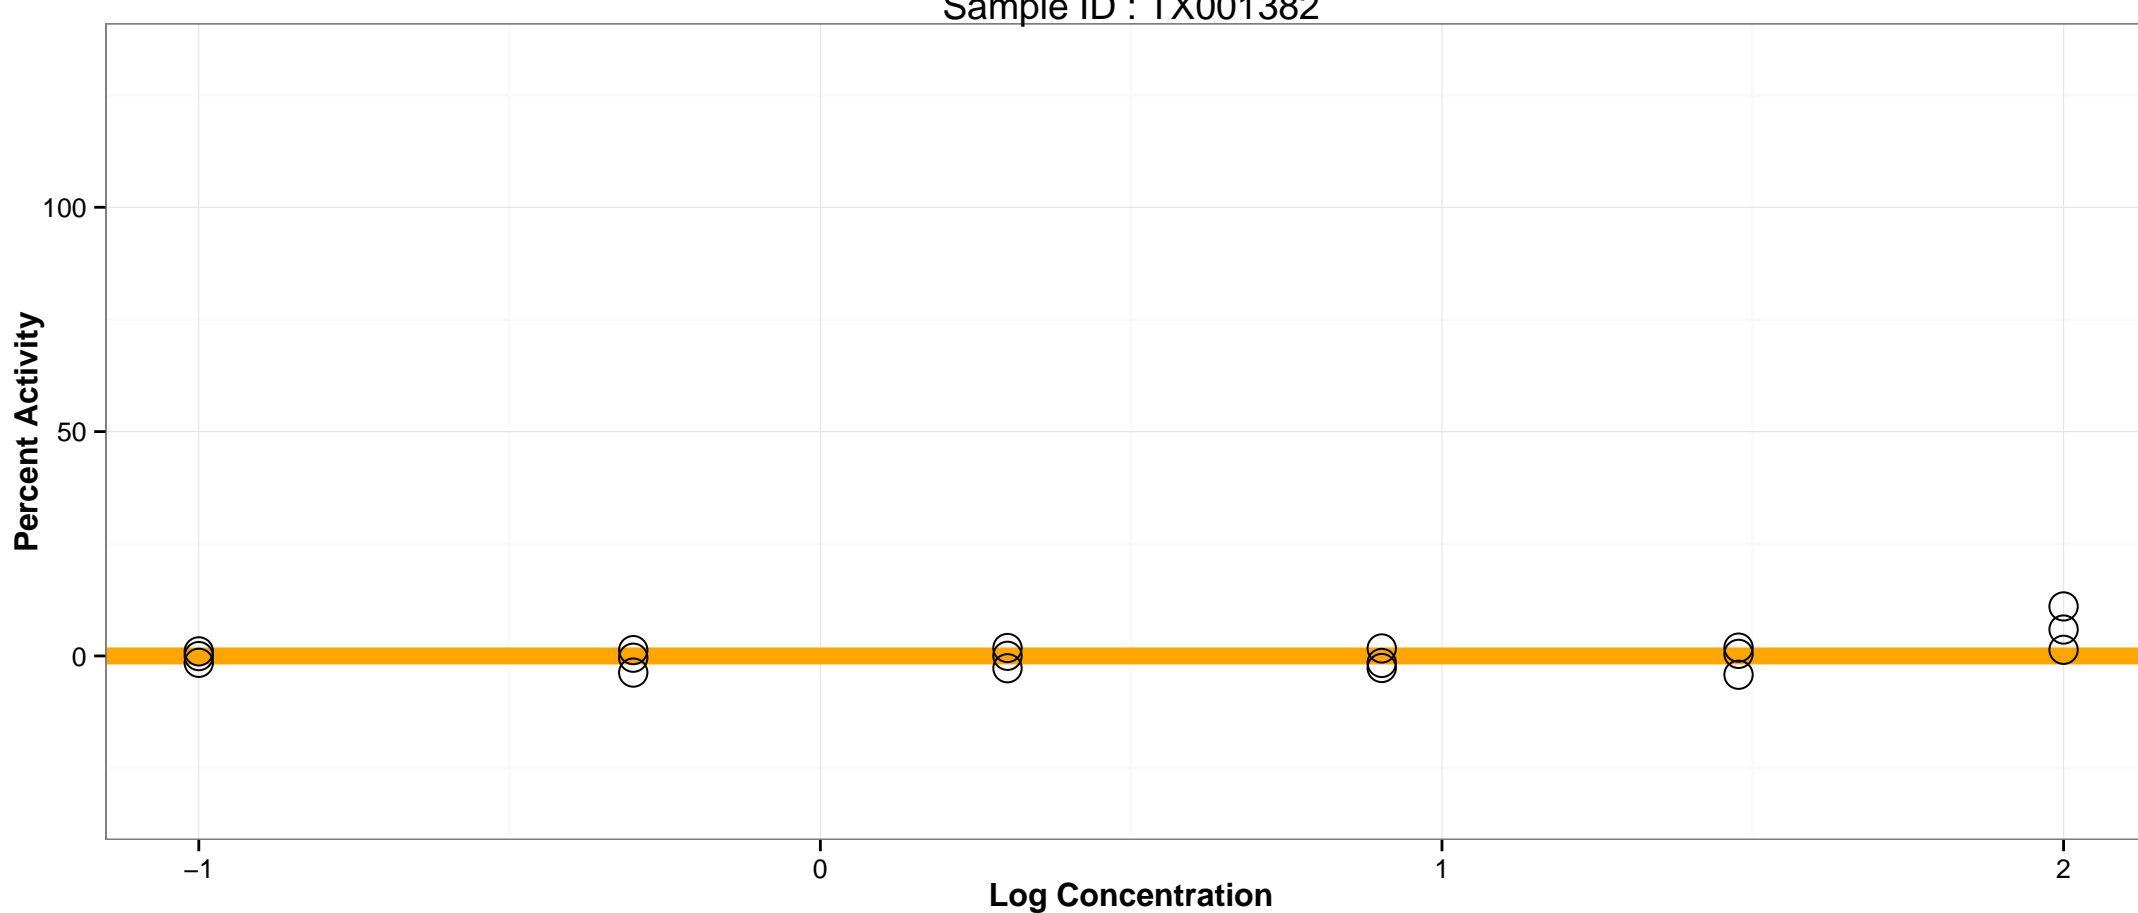

HILL MODEL

HILL MODEL: Not applicable

GAIN-LOSS MODEL

GNLS MODEL: Not applicable

|      | CNST  | HILL | GNLS |
|------|-------|------|------|
| AIC  | 94.48 | NA   | NA   |
| PROB | 1     | NA   | NA   |
| RMSE | 3.51  | NA   | NA   |

MAX\_MEAN : 6.11 MAX\_MED : 5.9 BMAD : 8.58  
COFF : 20 HIT-CALL : 0 FITC : 4 ACTP : 0  
FLAGS :

Assay ID 1508 (NHEERL\_TPO\_AUR\_dn)  
Sample ID : TX001402

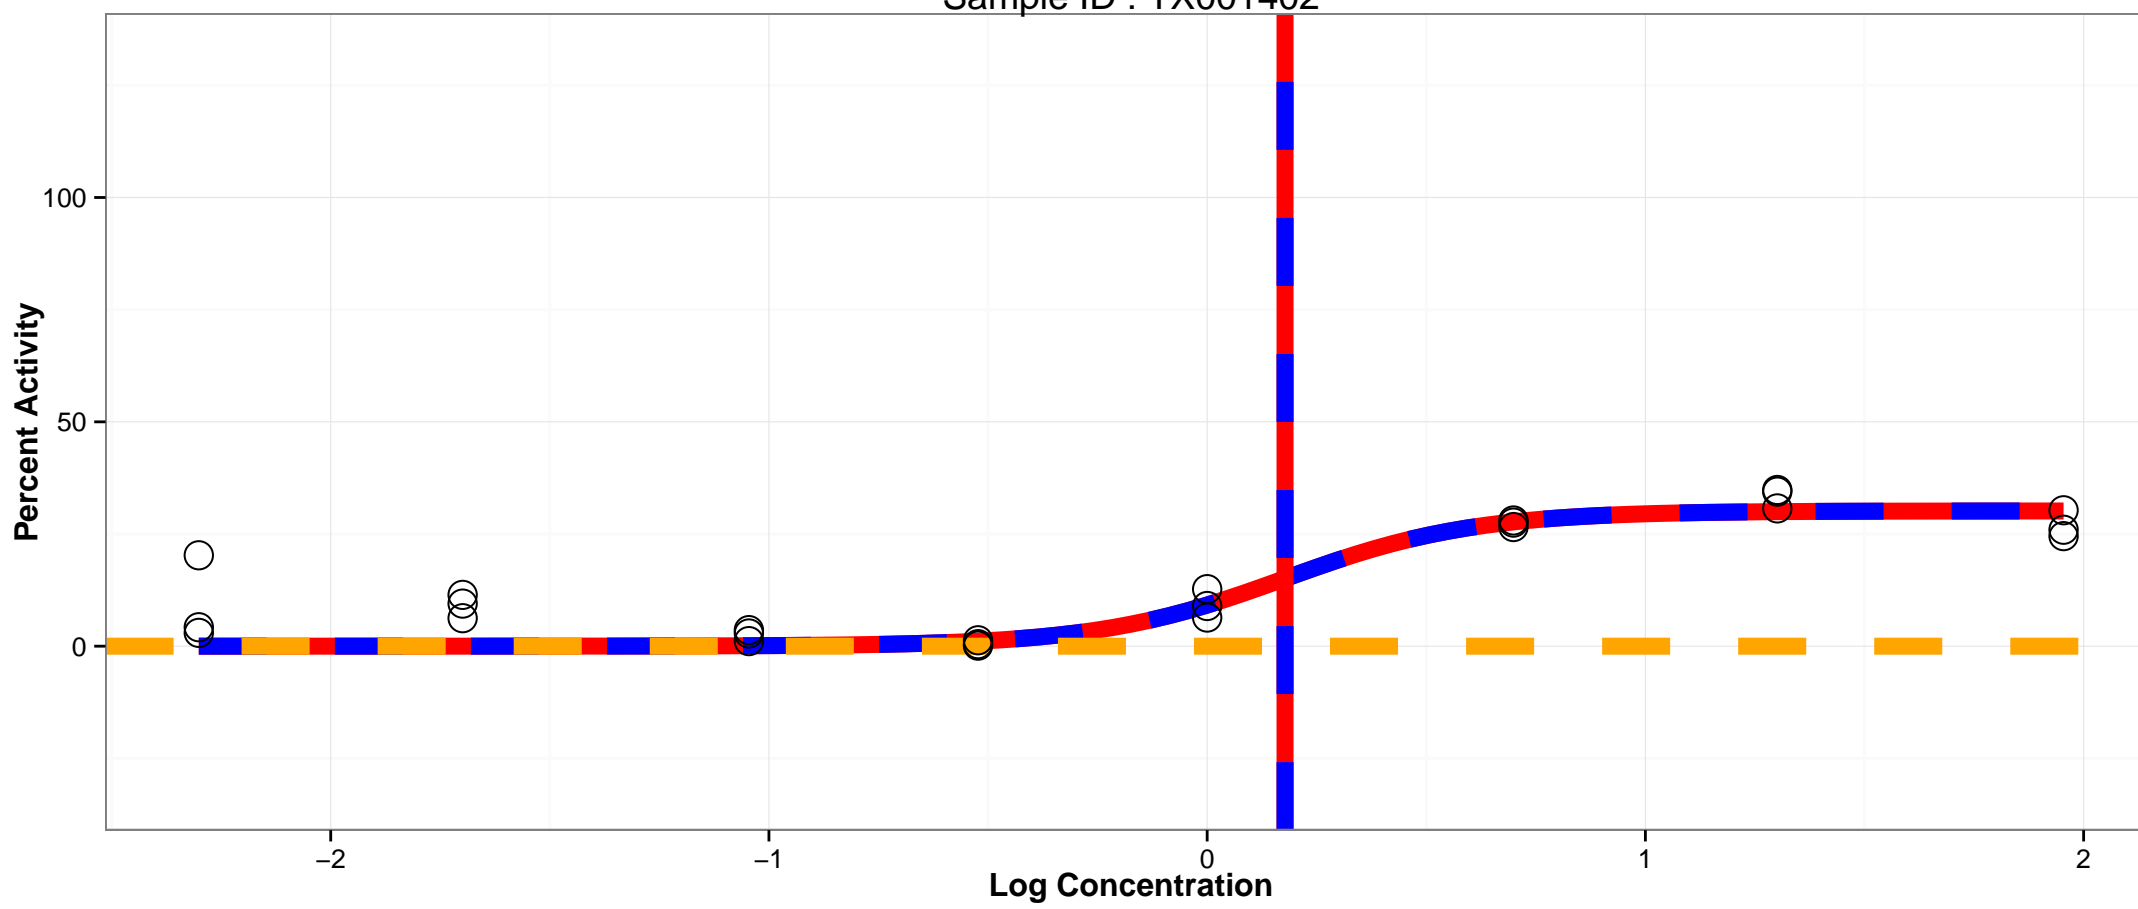

HILL MODEL

|     | tp   | ga     | gw    |
|-----|------|--------|-------|
| val | 30.1 | 0.178  | 2.02  |
| sd  | 1.9  | 0.0944 | 0.642 |

GAIN-LOSS MODEL

|     | tp   | ga    | gw   | la   | lw   |
|-----|------|-------|------|------|------|
| val | 30.1 | 0.178 | 2.02 | 2.84 | 10.4 |
| sd  | NA   | NA    | NA   | NA   | NA   |

|      | CNST   | HILL   | GNLS   |
|------|--------|--------|--------|
| AIC  | 213.92 | 155.14 | 159.14 |
| PROB | 0      | 0.88   | 0.12   |
| RMSE | 19.14  | 5.9    | 5.9    |

MAX\_MEAN : 33.3 MAX\_MED : 34.5 BMAD : 5.69  
COFF : 20 HIT-CALL : 1 FITC : 41 ACTP : 1  
FLAGS :

Assay ID 1509 (NHEERL\_HEK293T\_CellTiterGLO)  
Sample ID : TX001402

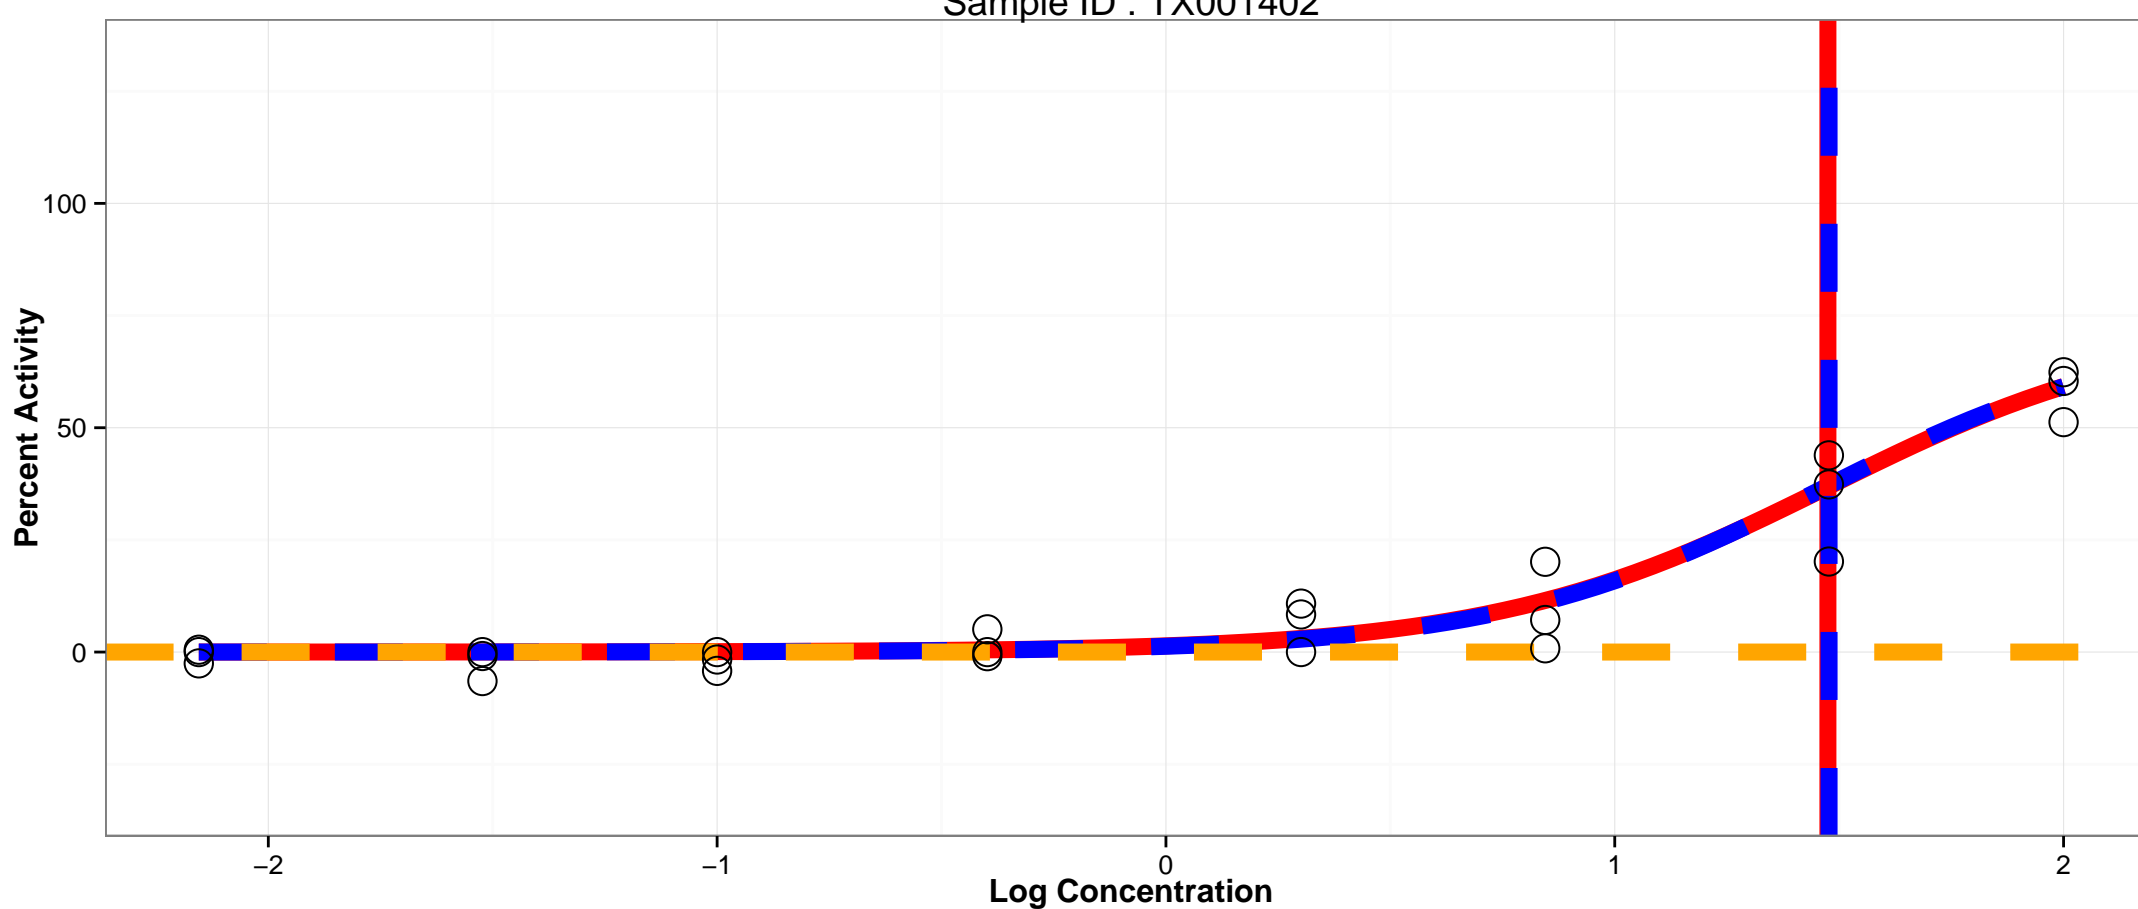

HILL MODEL

|     | tp   | ga    | gw    |
|-----|------|-------|-------|
| val | 73.7 | 1.47  | 1.16  |
| sd  | 20.1 | 0.258 | 0.556 |

GAIN-LOSS MODEL

|     | tp   | ga   | gw   | la | lw    |
|-----|------|------|------|----|-------|
| val | 74.9 | 1.48 | 1.19 | 4  | 0.833 |
| sd  | NA   | NA   | NA   | NA | NA    |

|      | CNST   | HILL   | GNLS   |
|------|--------|--------|--------|
| AIC  | 218.23 | 159.17 | 163.15 |
| PROB | 0      | 0.88   | 0.12   |
| RMSE | 24.7   | 5.78   | 5.79   |

MAX\_MEAN : 58 MAX\_MED : 60.4 BMAD : 5.54  
COFF : 20 HIT-CALL : 1 FITC : 42 ACTP : 1  
FLAGS :

Assay ID 1848 (NHEERL\_Quantilum\_inhib\_2\_dn)  
Sample ID : TX001402

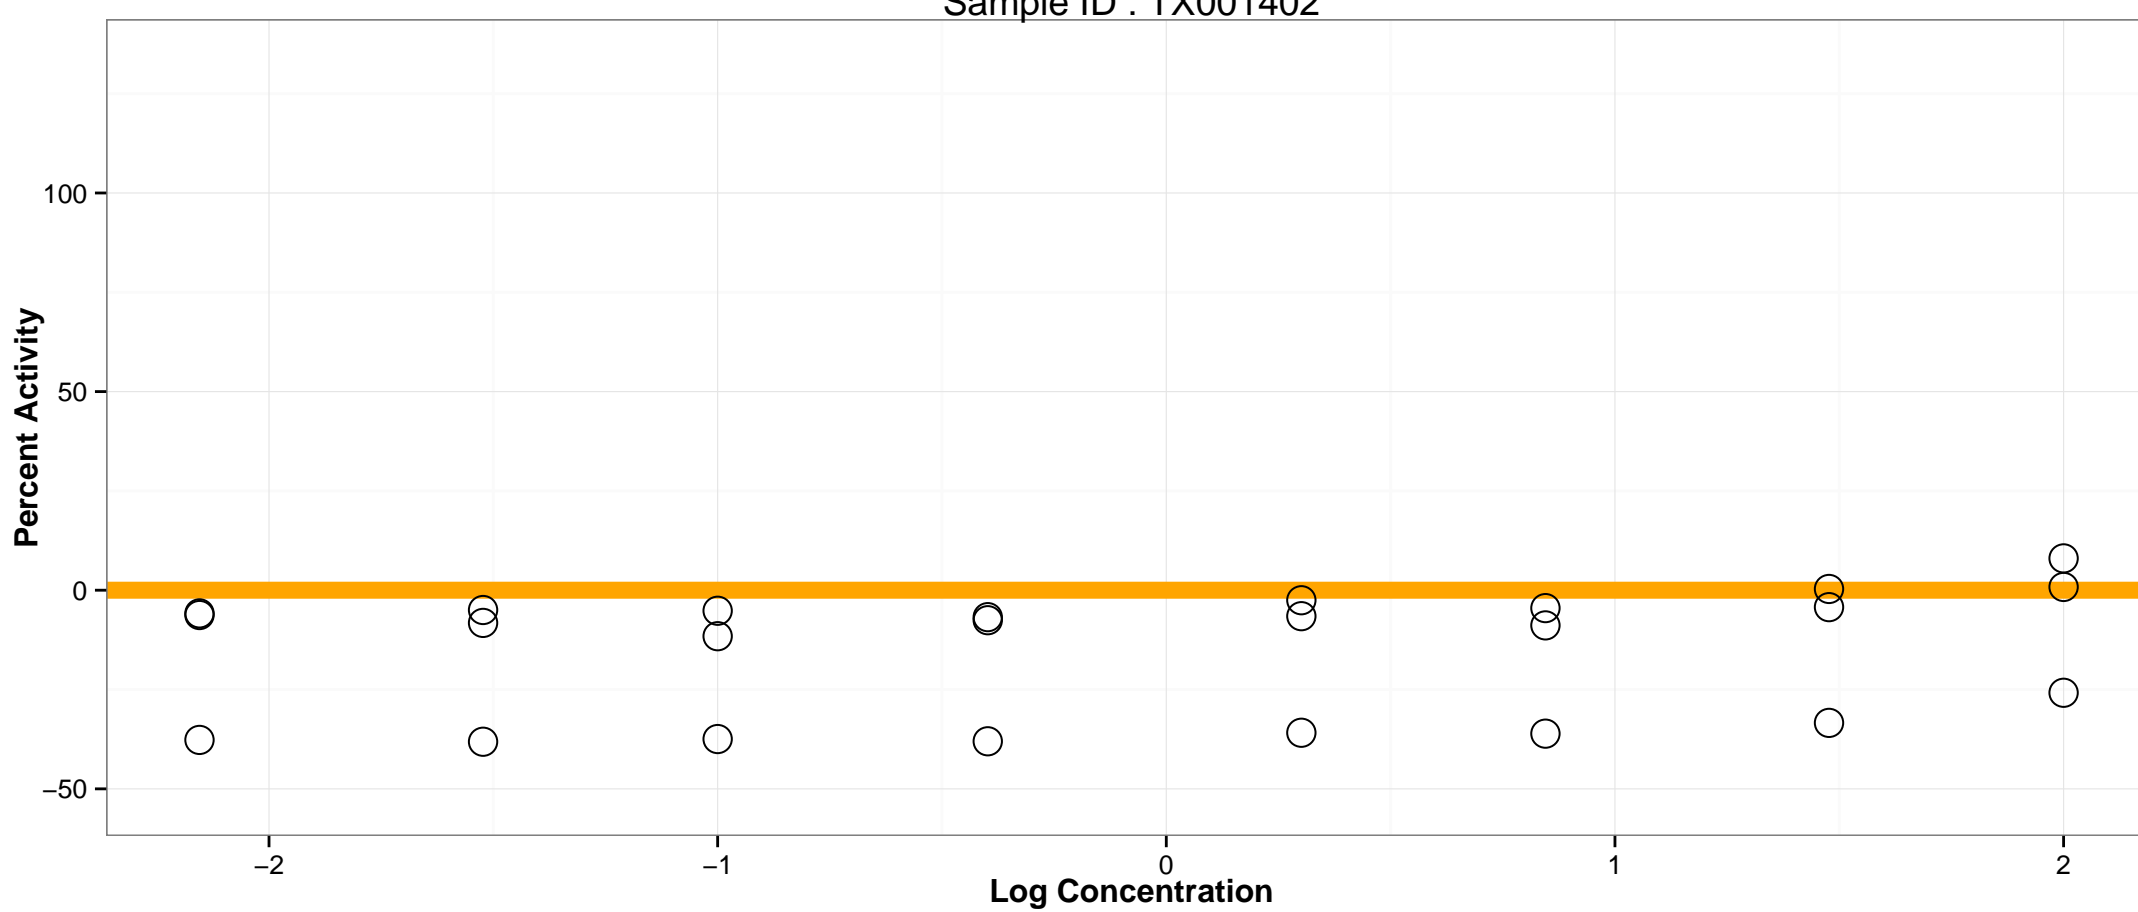

HILL MODEL

HILL MODEL: Not applicable

GAIN-LOSS MODEL

GNLS MODEL: Not applicable

|      | CNST   | HILL | GNLS |
|------|--------|------|------|
| AIC  | 217.09 | NA   | NA   |
| PROB | 1      | NA   | NA   |
| RMSE | 21.16  | NA   | NA   |

MAX\_MEAN : -5.65 MAX\_MED : 0.836 BMAD : 8.58  
COFF : 20 HIT-CALL : 0 FITC : 4 ACTP : 0  
FLAGS : 10

Chemical : Forchlorfenuron  
CAS : 68157-60-8

Assay ID 1508 (NHEERL\_TPO\_AUR\_dn)  
Sample ID : TX001411

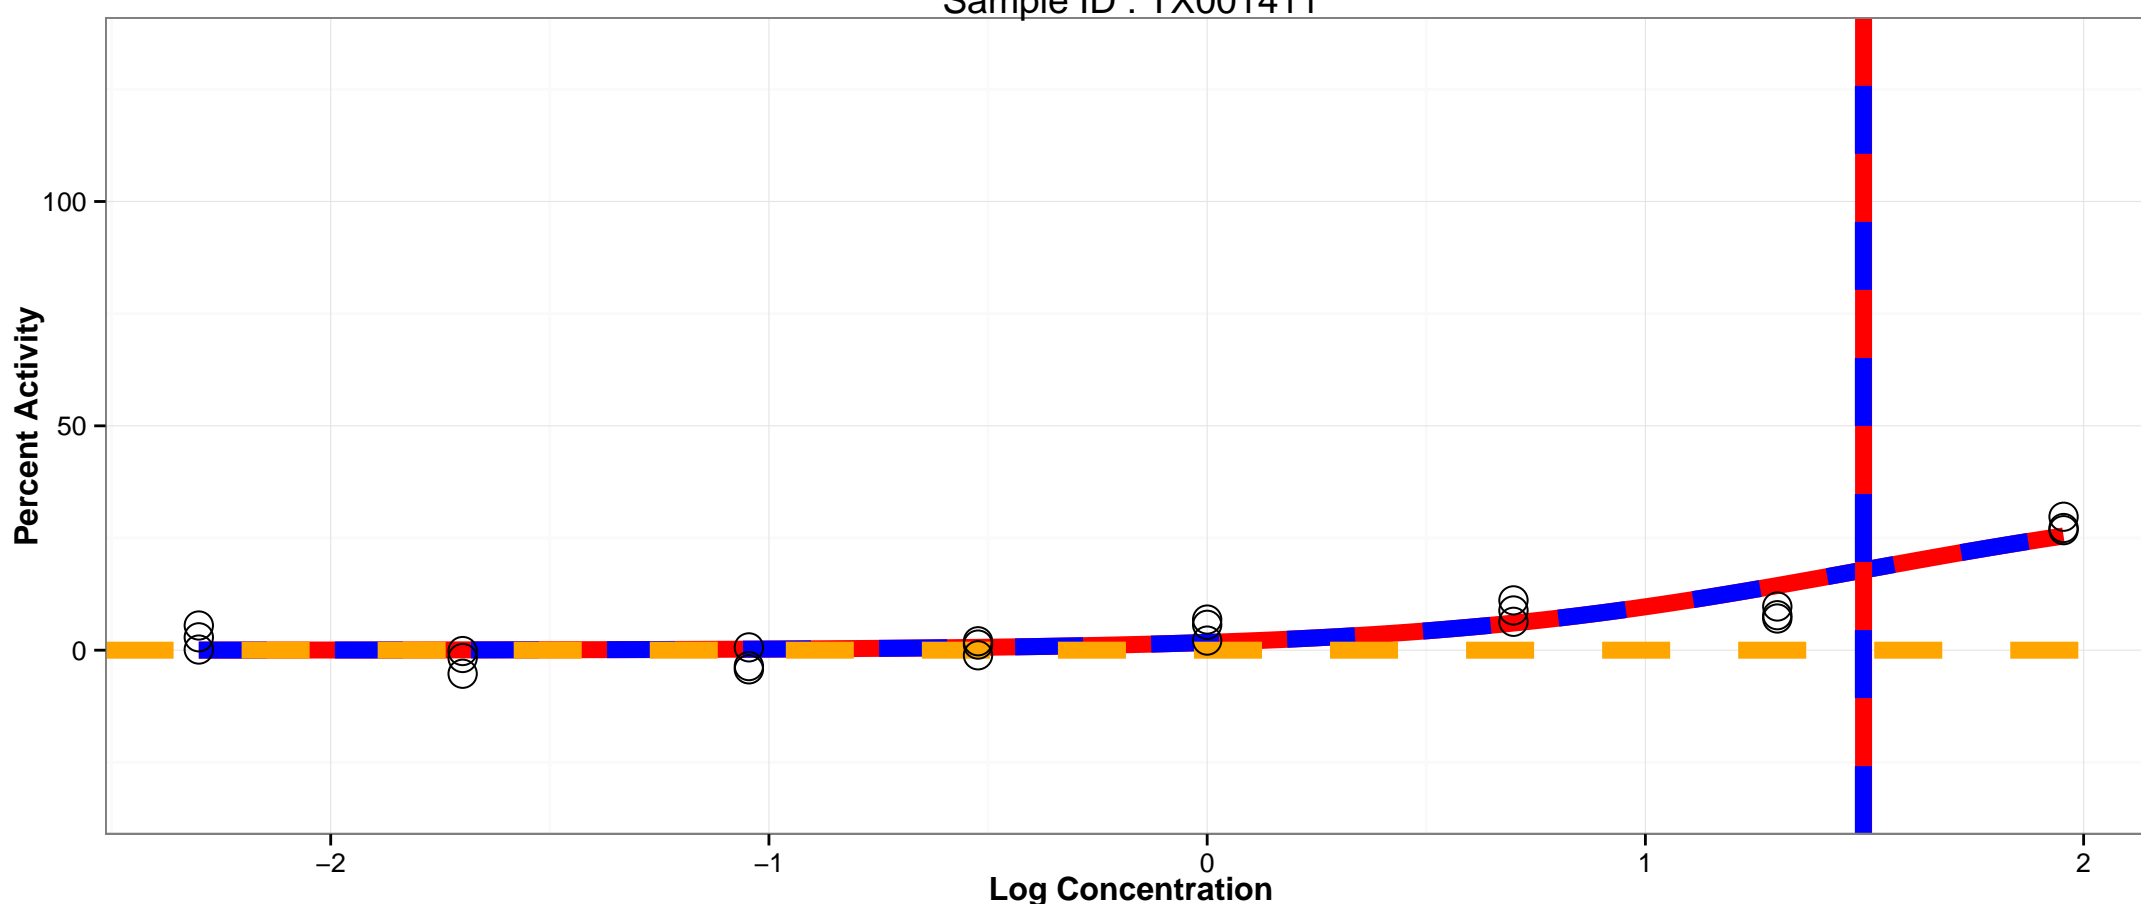

HILL MODEL

|     | tp   | ga    | gw    |
|-----|------|-------|-------|
| val | 35.7 | 1.5   | 0.865 |
| sd  | 7.37 | 0.275 | 0.222 |

GAIN-LOSS MODEL

|     | tp   | ga    | gw    | la   | lw    |
|-----|------|-------|-------|------|-------|
| val | 35.7 | 1.5   | 0.865 | 2.77 | 11    |
| sd  | 7.37 | 0.276 | 0.221 | 921  | 12400 |

|      | CNST   | HILL   | GNLS   |
|------|--------|--------|--------|
| AIC  | 180.61 | 141.54 | 145.54 |
| PROB | 0      | 0.88   | 0.12   |
| RMSE | 11.15  | 3.69   | 3.7    |

MAX\_MEAN : 27.9 MAX\_MED : 27.2 BMAD : 5.69  
COFF : 20 HIT-CALL : 1 FITC : 42 ACTP : 1  
FLAGS : 6

Assay ID 1509 (NHEERL\_HEK293T\_CellTiterGLO)  
Sample ID : TX001411

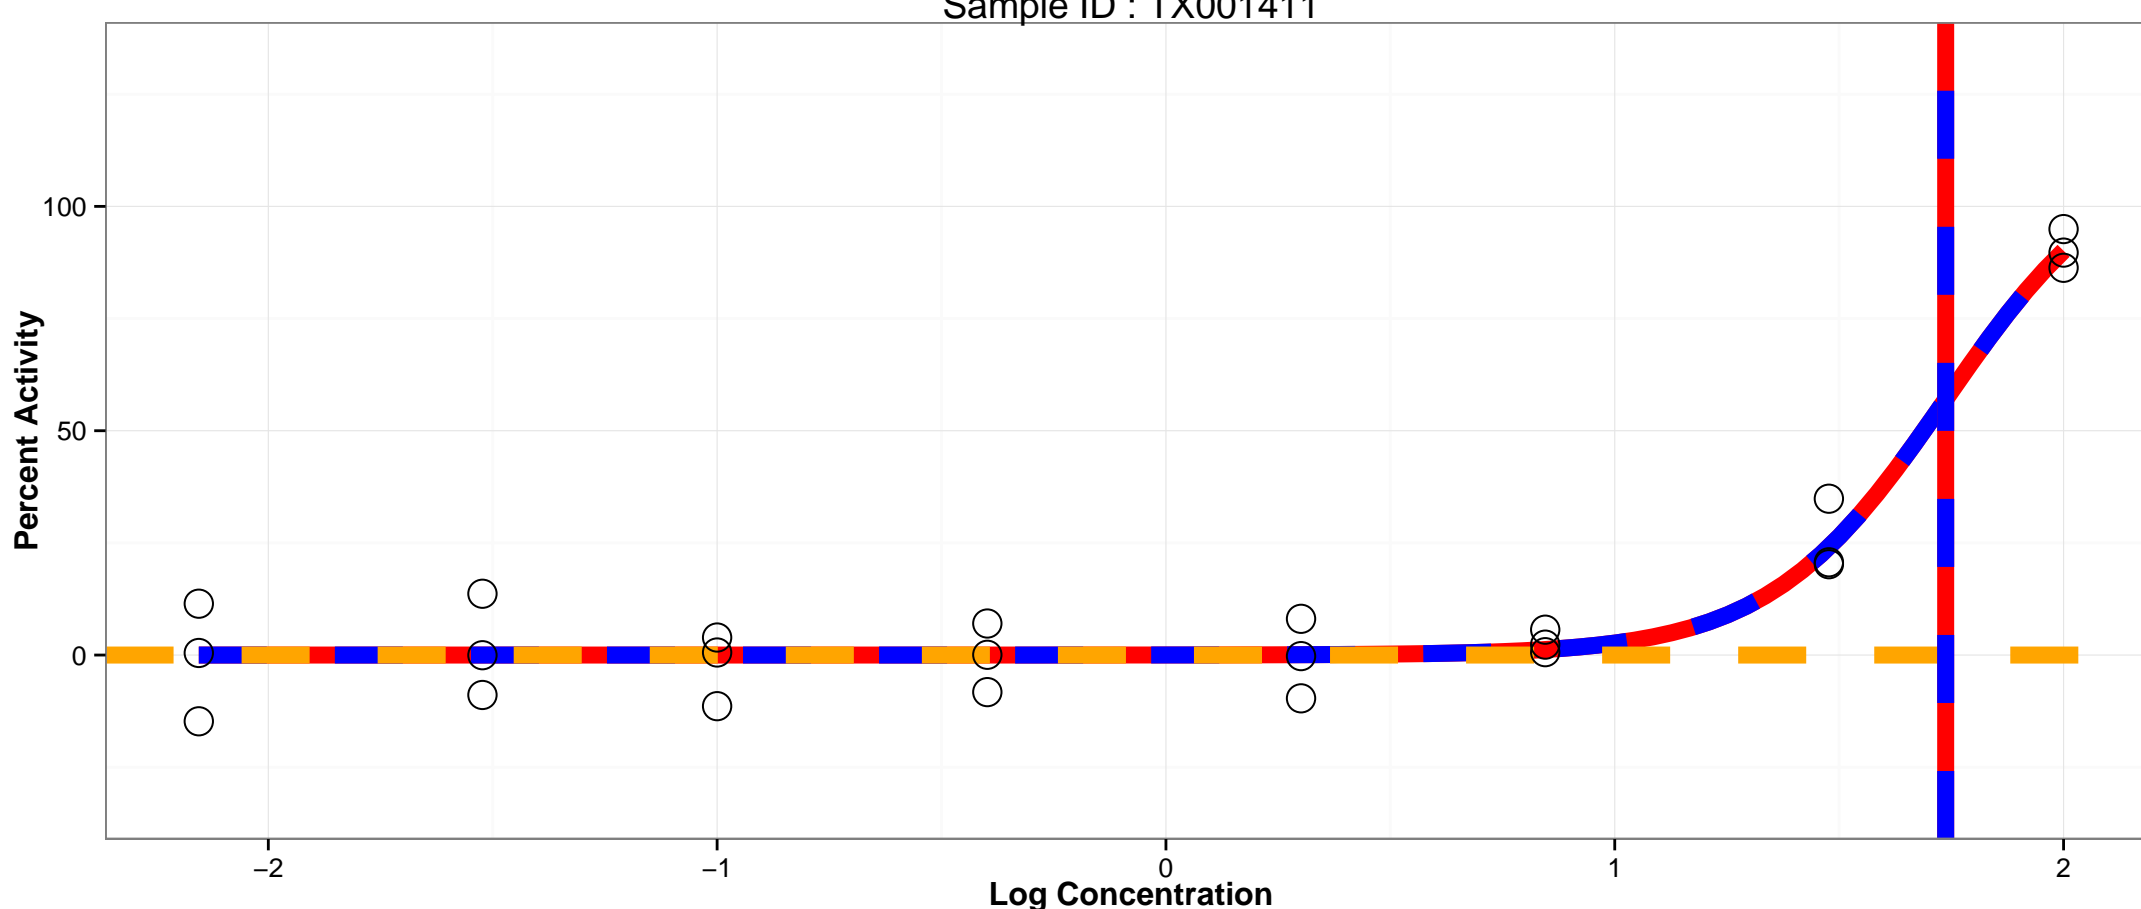

HILL MODEL

|     | tp   | ga    | gw   |
|-----|------|-------|------|
| val | 114  | 1.74  | 2.2  |
| sd  | 56.9 | 0.297 | 1.47 |

GAIN-LOSS MODEL

|     | tp  | ga   | gw  | la | lw   |
|-----|-----|------|-----|----|------|
| val | 114 | 1.74 | 2.2 | 4  | 7.56 |
| sd  | NA  | NA   | NA  | NA | NA   |

|      | CNST   | HILL   | GNLS   |
|------|--------|--------|--------|
| AIC  | 227.32 | 172.55 | 176.55 |
| PROB | 0      | 0.88   | 0.12   |
| RMSE | 33.94  | 7.18   | 7.18   |

MAX\_MEAN : 90.3 MAX\_MED : 89.7 BMAD : 5.54  
COFF : 20 HIT-CALL : 1 FITC : 42 ACTP : 1  
FLAGS :

Assay ID 1848 (NHEERL\_Quantilum\_inhib\_2\_dn)  
Sample ID : TX001411

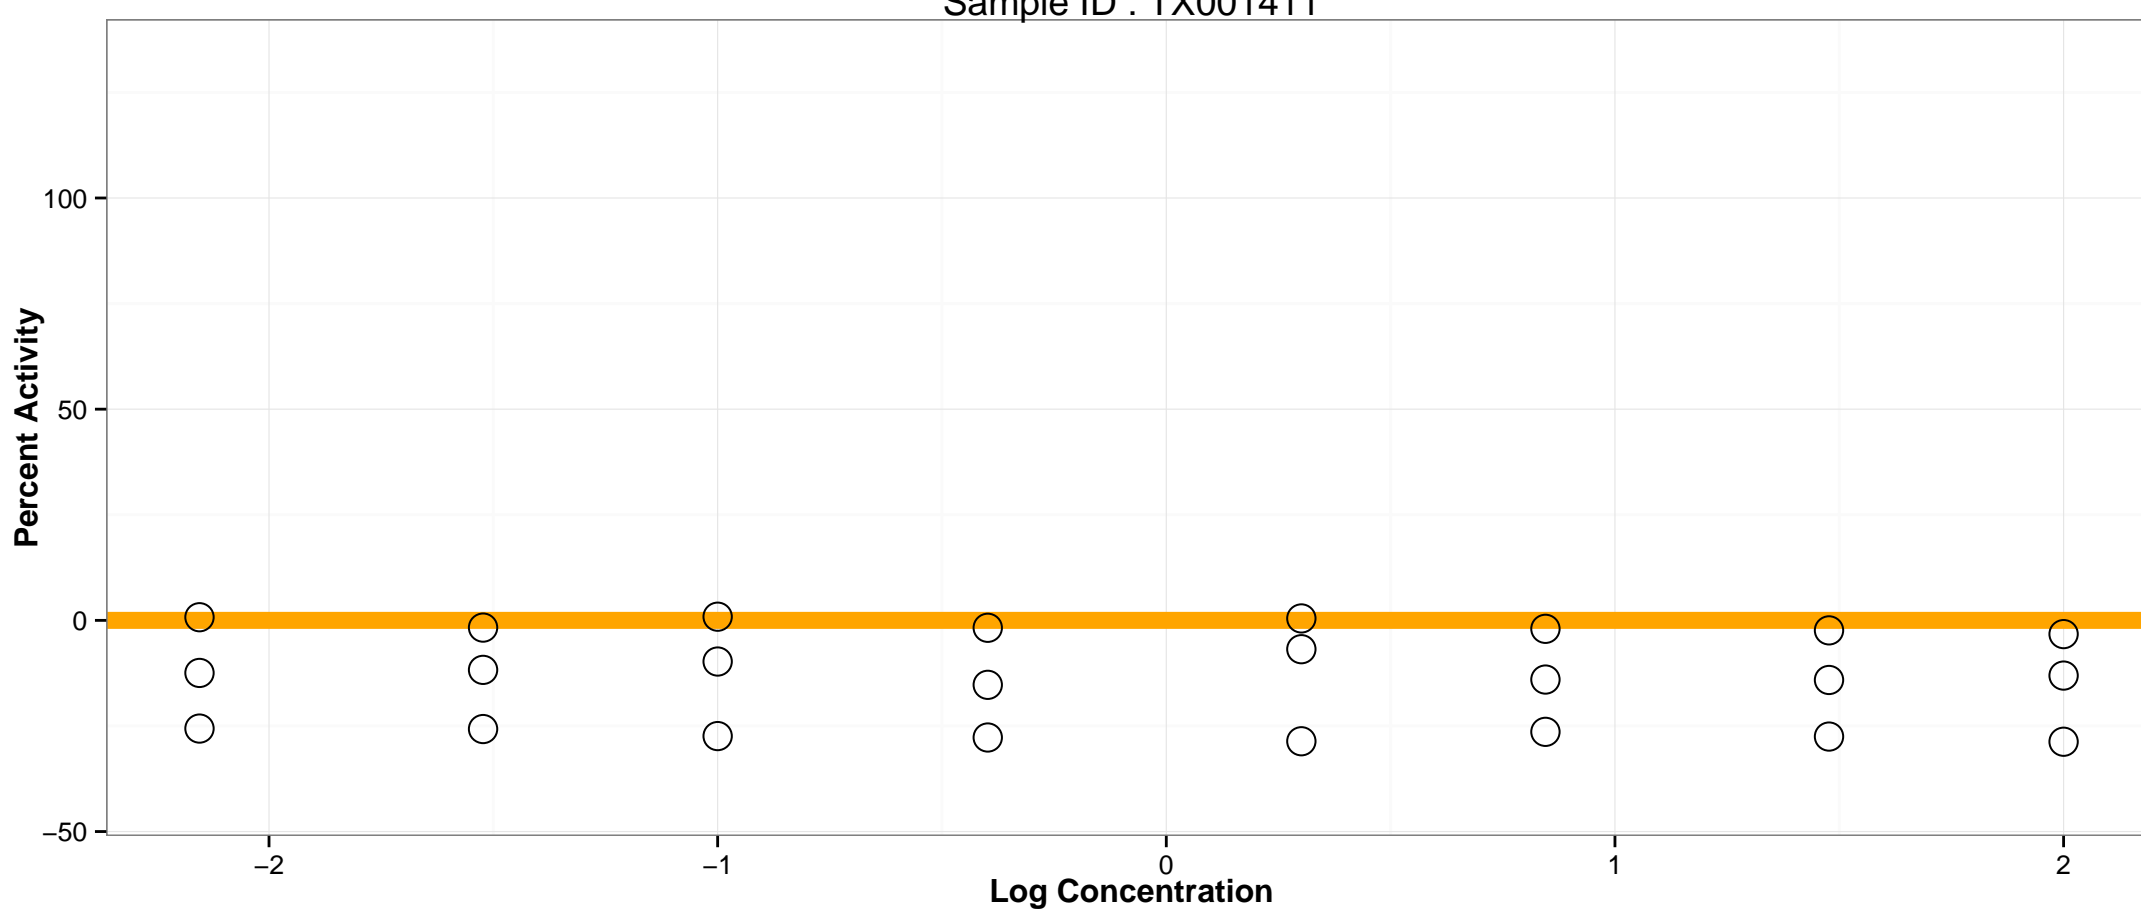

HILL MODEL

HILL MODEL: Not applicable

GAIN-LOSS MODEL

GNLS MODEL: Not applicable

|      | CNST   | HILL | GNLS |
|------|--------|------|------|
| AIC  | 209.48 | NA   | NA   |
| PROB | 1      | NA   | NA   |
| RMSE | 17.31  | NA   | NA   |

MAX\_MEAN : -11.7 MAX\_MED : -6.82 BMAD : 8.58  
COFF : 20 HIT-CALL : 0 FITC : 4 ACTP : 0  
FLAGS :

Chemical : Chlorpyrifos oxon  
CAS : 5598-15-2

Assay ID 1508 (NHEERL\_TPO\_AUR\_dn)  
Sample ID : TX001415

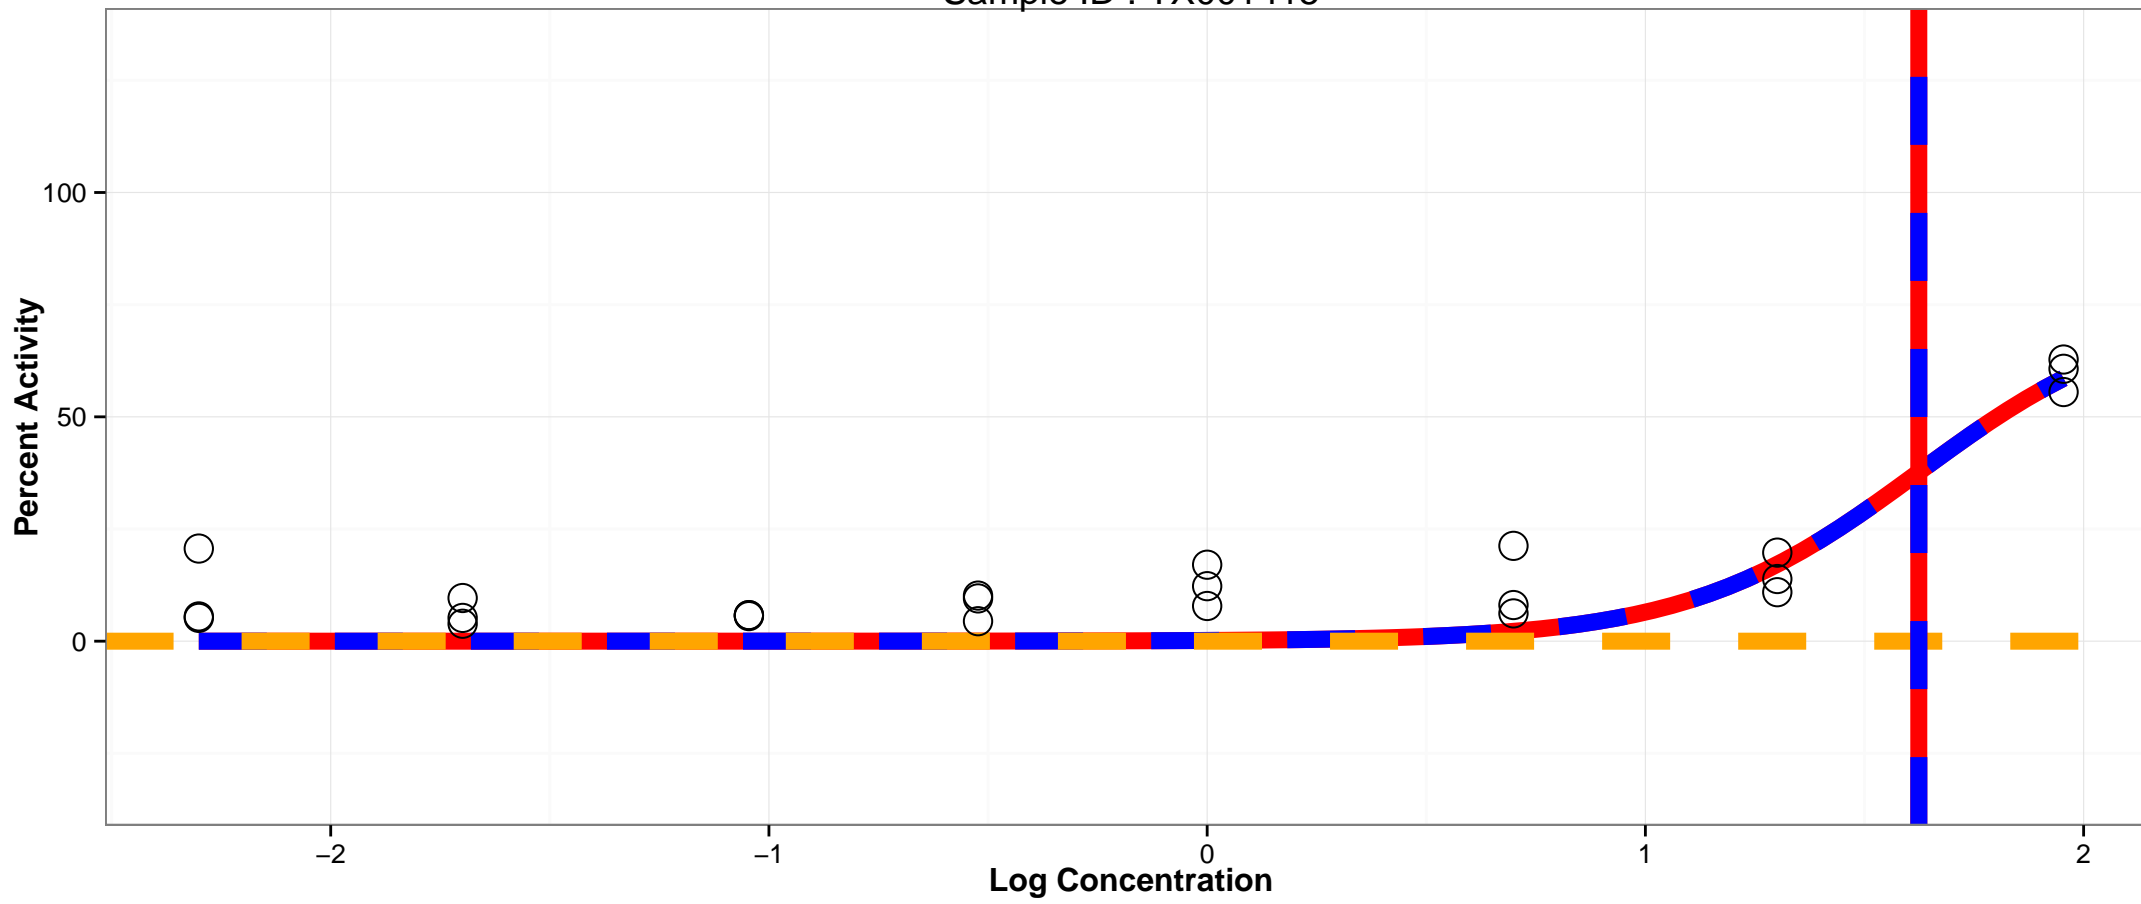

**HILL MODEL**

|     | tp   | ga    | gw   |
|-----|------|-------|------|
| val | 75.3 | 1.62  | 1.65 |
| sd  | 32.9 | 0.306 | 1.17 |

**GAIN-LOSS MODEL**

|     | tp   | ga    | gw   | la   | lw   |
|-----|------|-------|------|------|------|
| val | 75.3 | 1.62  | 1.65 | 3.25 | 5.82 |
| sd  | 32.7 | 0.304 | 1.16 | 666  | 2980 |

|      | CNST  | HILL   | GNLS   |
|------|-------|--------|--------|
| AIC  | 216.2 | 182.46 | 186.46 |
| PROB | 0     | 0.88   | 0.12   |
| RMSE | 23.63 | 8.95   | 8.95   |

MAX\_MEAN : 59.7 MAX\_MED : 60.7 BMAD : 5.69  
COFF : 20 HIT-CALL : 1 FITC : 42 ACTP : 1  
FLAGS : 6

Assay ID 1509 (NHEERL\_HEK293T\_CellTiterGLO)  
Sample ID : TX001415

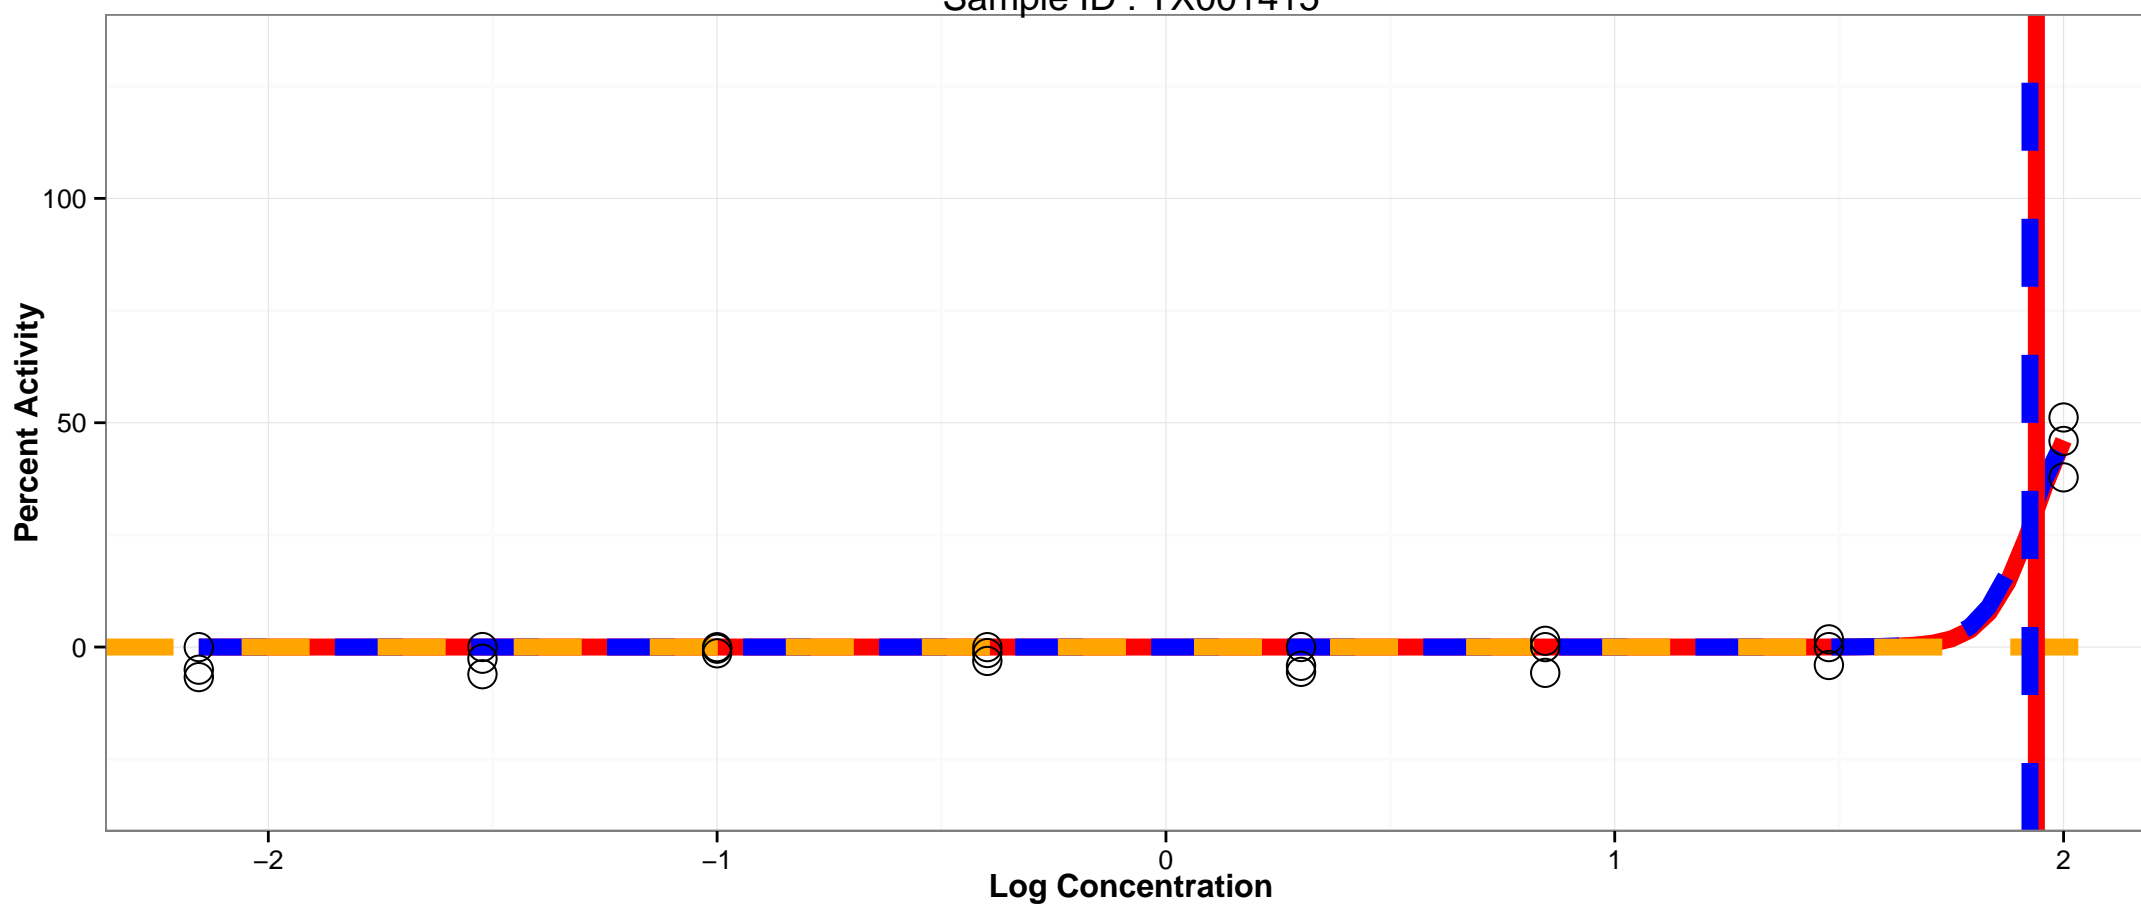

**HILL MODEL**

|     | tp   | ga    | gw   |
|-----|------|-------|------|
| val | 61.2 | 1.94  | 8    |
| sd  | 42.1 | 0.033 | 20.9 |

**GAIN-LOSS MODEL**

|     | tp   | ga     | gw | la   | lw  |
|-----|------|--------|----|------|-----|
| val | 57.7 | 1.93   | 8  | 2.74 | 4.4 |
| sd  | 38.8 | 0.0365 | 18 | 42.5 | 253 |

|      | CNST   | HILL   | GNLS   |
|------|--------|--------|--------|
| AIC  | 181.97 | 139.36 | 143.36 |
| PROB | 0      | 0.88   | 0.12   |
| RMSE | 16.32  | 3.66   | 3.66   |

MAX\_MEAN : 45 MAX\_MED : 45.9 BMAD : 5.54  
COFF : 20 HIT-CALL : 1 FITC : 42 ACTP : 1  
FLAGS : 6

Assay ID 1848 (NHEERL\_Quantilum\_inhib\_2\_dn)  
Sample ID : TX001415

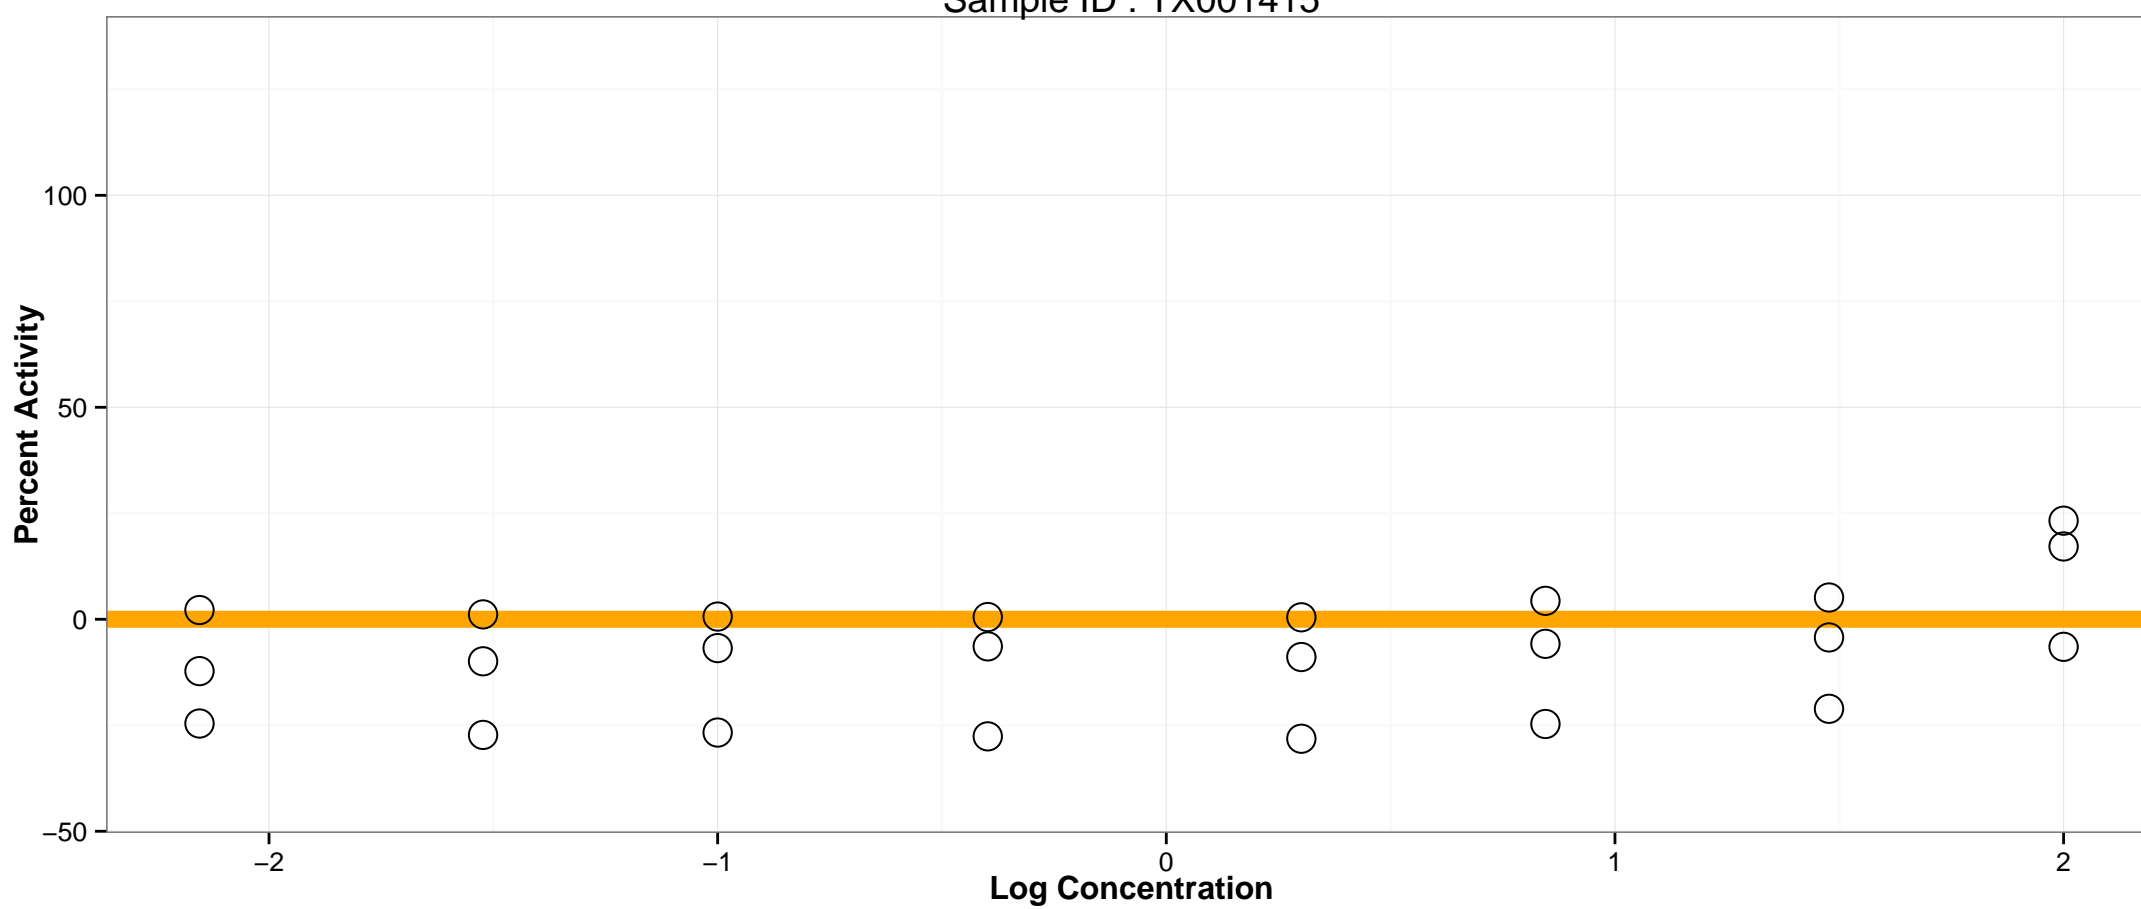

**HILL MODEL**

HILL MODEL: Not applicable

**GAIN-LOSS MODEL**

GNLS MODEL: Not applicable

|      | CNST   | HILL | GNLS |
|------|--------|------|------|
| AIC  | 204.74 | NA   | NA   |
| PROB | 1      | NA   | NA   |
| RMSE | 15.9   | NA   | NA   |

MAX\_MEAN : 11.3 MAX\_MED : 17.2 BMAD : 8.58  
COFF : 20 HIT-CALL : 0 FITC : 4 ACTP : 0  
FLAGS :

Assay ID 1508 (NHEERL\_TPO\_AUR\_dn)  
Sample ID : TX001420

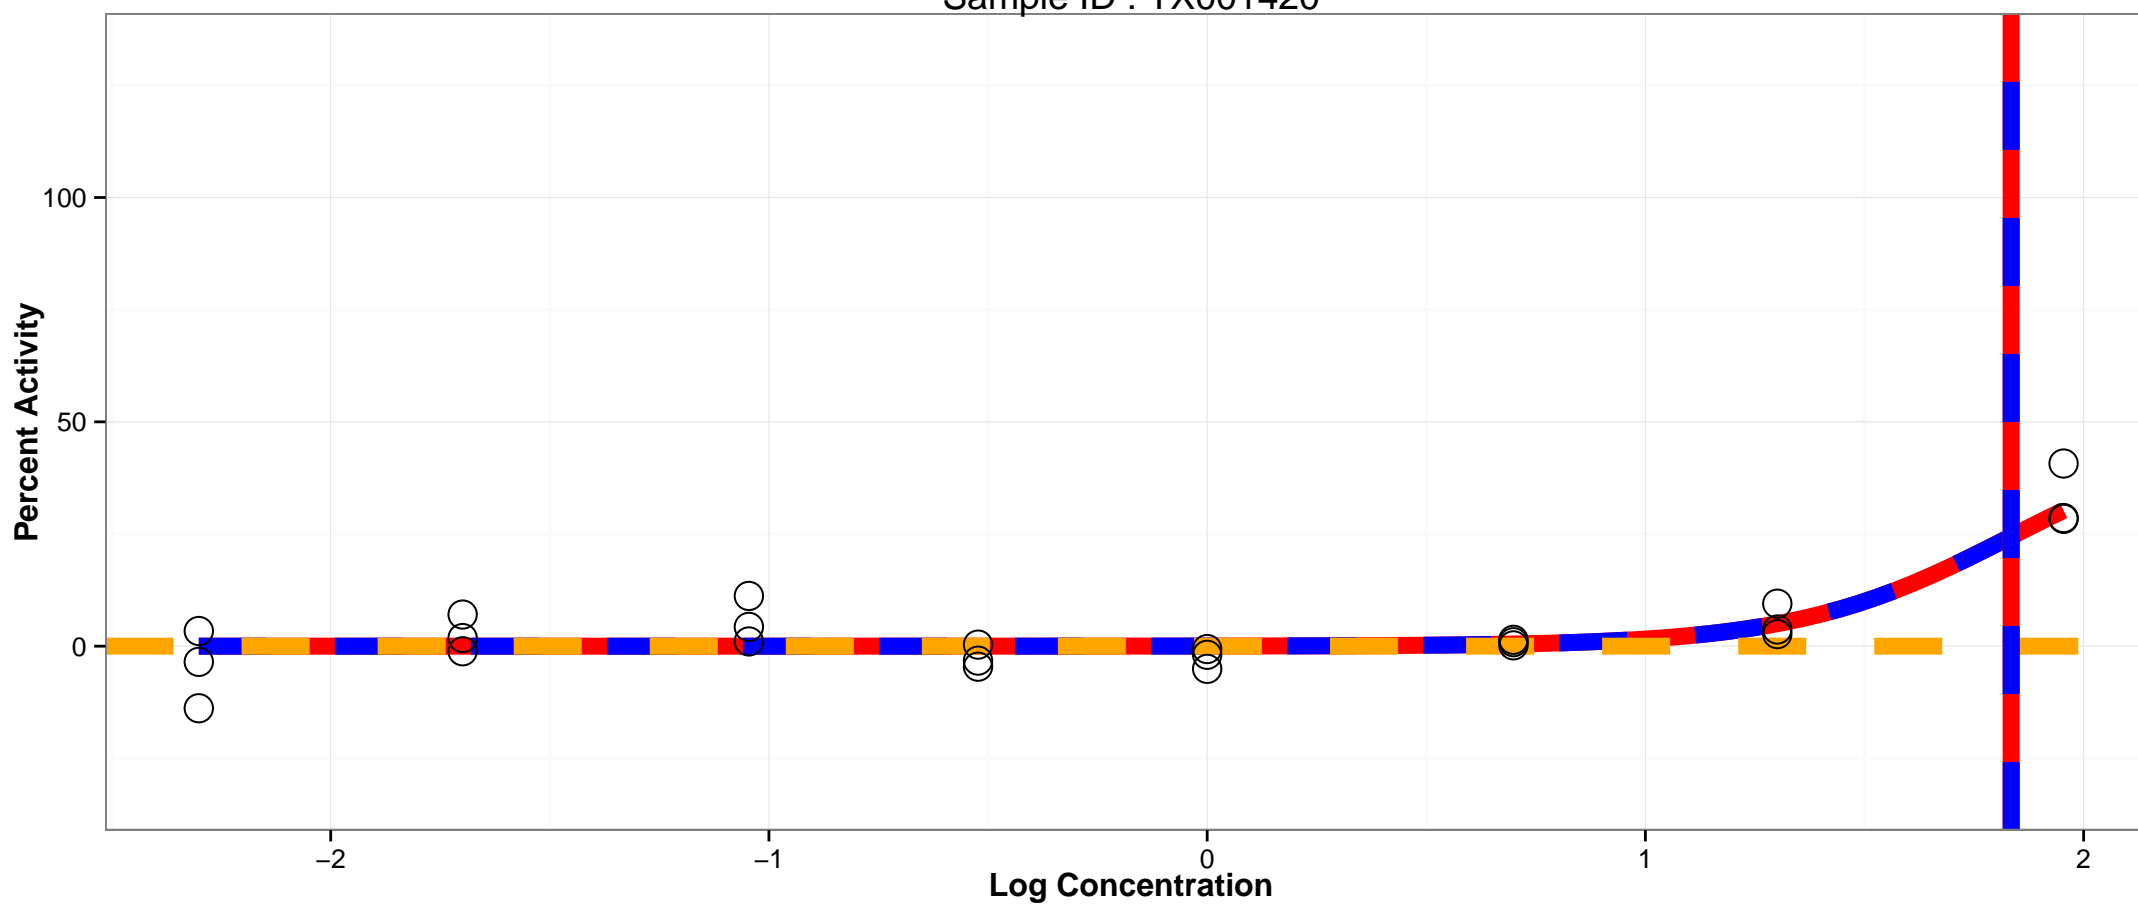

HILL MODEL

|     | tp   | ga   | gw   |
|-----|------|------|------|
| val | 48.9 | 1.83 | 1.77 |
| sd  | 110  | 1.31 | 2.22 |

GAIN-LOSS MODEL

|     | tp   | ga   | gw   | la   | lw   |
|-----|------|------|------|------|------|
| val | 48.9 | 1.83 | 1.77 | 3.67 | 14.4 |
| sd  | NA   | NA   | NA   | NA   | NA   |

|      | CNST   | HILL   | GNLS   |
|------|--------|--------|--------|
| AIC  | 182.15 | 151.61 | 155.61 |
| PROB | 0      | 0.88   | 0.12   |
| RMSE | 12.7   | 5.08   | 5.08   |

MAX\_MEAN : 32.6 MAX\_MED : 28.6 BMAD : 5.69  
COFF : 20 HIT-CALL : 1 FITC : 42 ACTP : 1  
FLAGS : 6

Assay ID 1509 (NHEERL\_HEK293T\_CellTiterGLO)  
Sample ID : TX001420

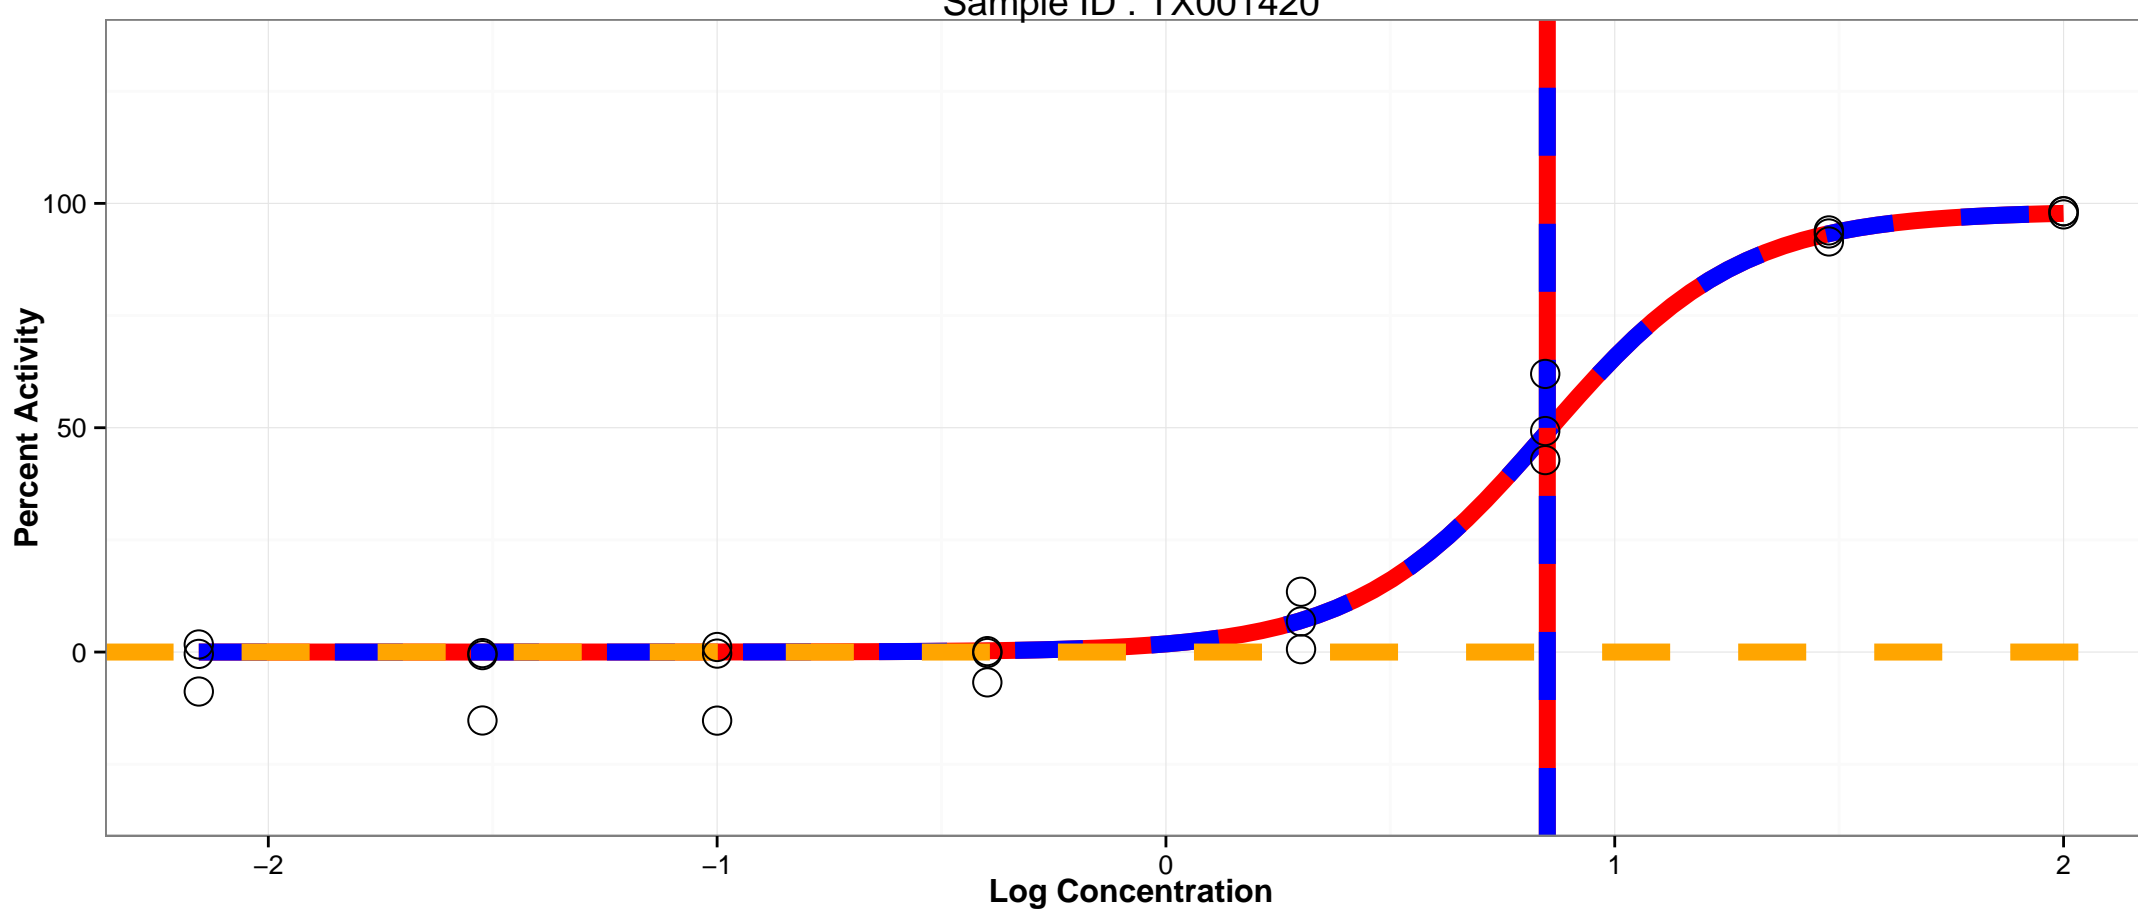

HILL MODEL

|     | tp   | ga    | gw    |
|-----|------|-------|-------|
| val | 98.2 | 0.85  | 2.03  |
| sd  | 1.98 | 0.031 | 0.289 |

GAIN-LOSS MODEL

|     | tp   | ga   | gw   | la   | lw   |
|-----|------|------|------|------|------|
| val | 98.2 | 0.85 | 2.03 | 3.56 | 11.4 |
| sd  | NA   | NA   | NA   | NA   | NA   |

|      | CNST   | HILL   | GNLS   |
|------|--------|--------|--------|
| AIC  | 258.47 | 158.21 | 162.21 |
| PROB | 0      | 0.88   | 0.12   |
| RMSE | 51.5   | 6.12   | 6.12   |

MAX\_MEAN : 98 MAX\_MED : 98.3 BMAD : 5.54  
COFF : 20 HIT-CALL : 1 FITC : 41 ACTP : 1  
FLAGS :

Assay ID 1848 (NHEERL\_Quantilum\_inhib\_2\_dn)  
Sample ID : TX001420

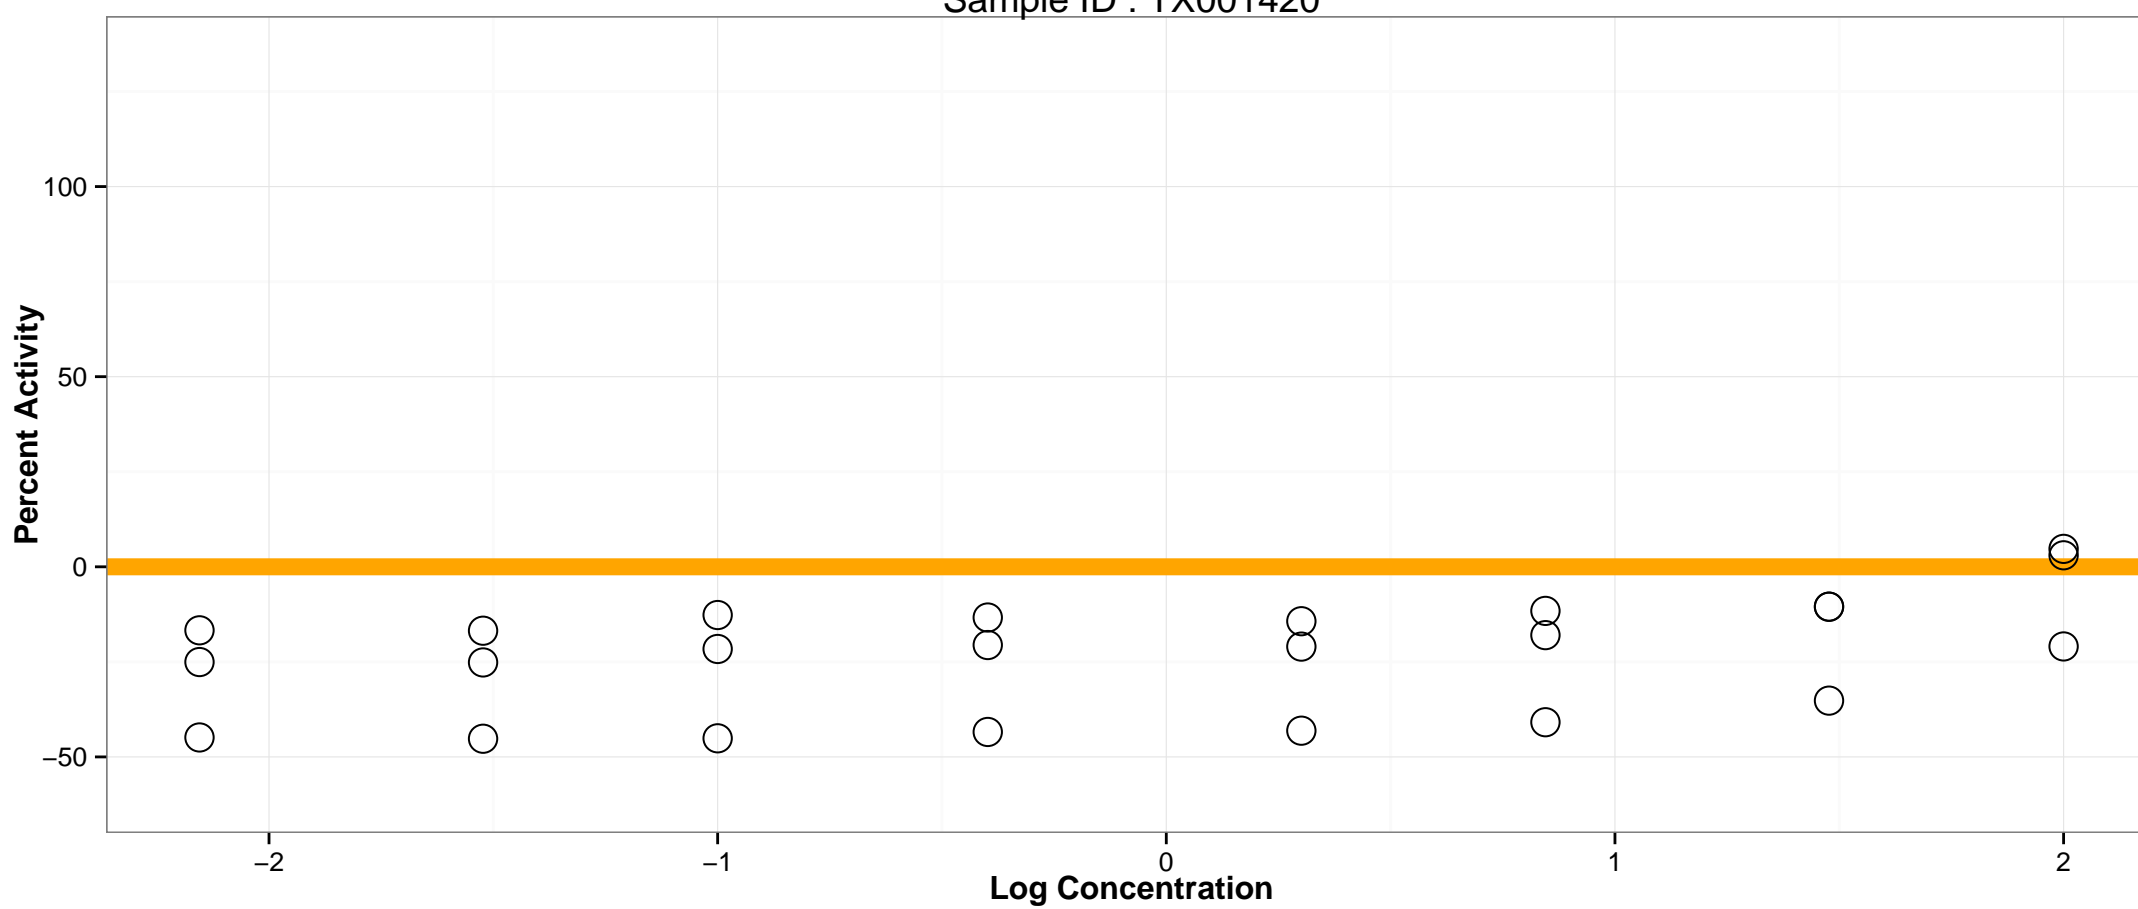

HILL MODEL

HILL MODEL: Not applicable

GAIN-LOSS MODEL

GNLS MODEL: Not applicable

|      | CNST   | HILL | GNLS |
|------|--------|------|------|
| AIC  | 231.59 | NA   | NA   |
| PROB | 1      | NA   | NA   |
| RMSE | 27.06  | NA   | NA   |

MAX\_MEAN : -4.38 MAX\_MED : 3.04 BMAD : 8.58  
COFF : 20 HIT-CALL : 0 FITC : 4 ACTP : 0  
FLAGS : 10

Chemical : Prallethrin  
CAS : 23031-36-9

Assay ID 1508 (NHEERL\_TPO\_AUR\_dn)  
Sample ID : TX001426

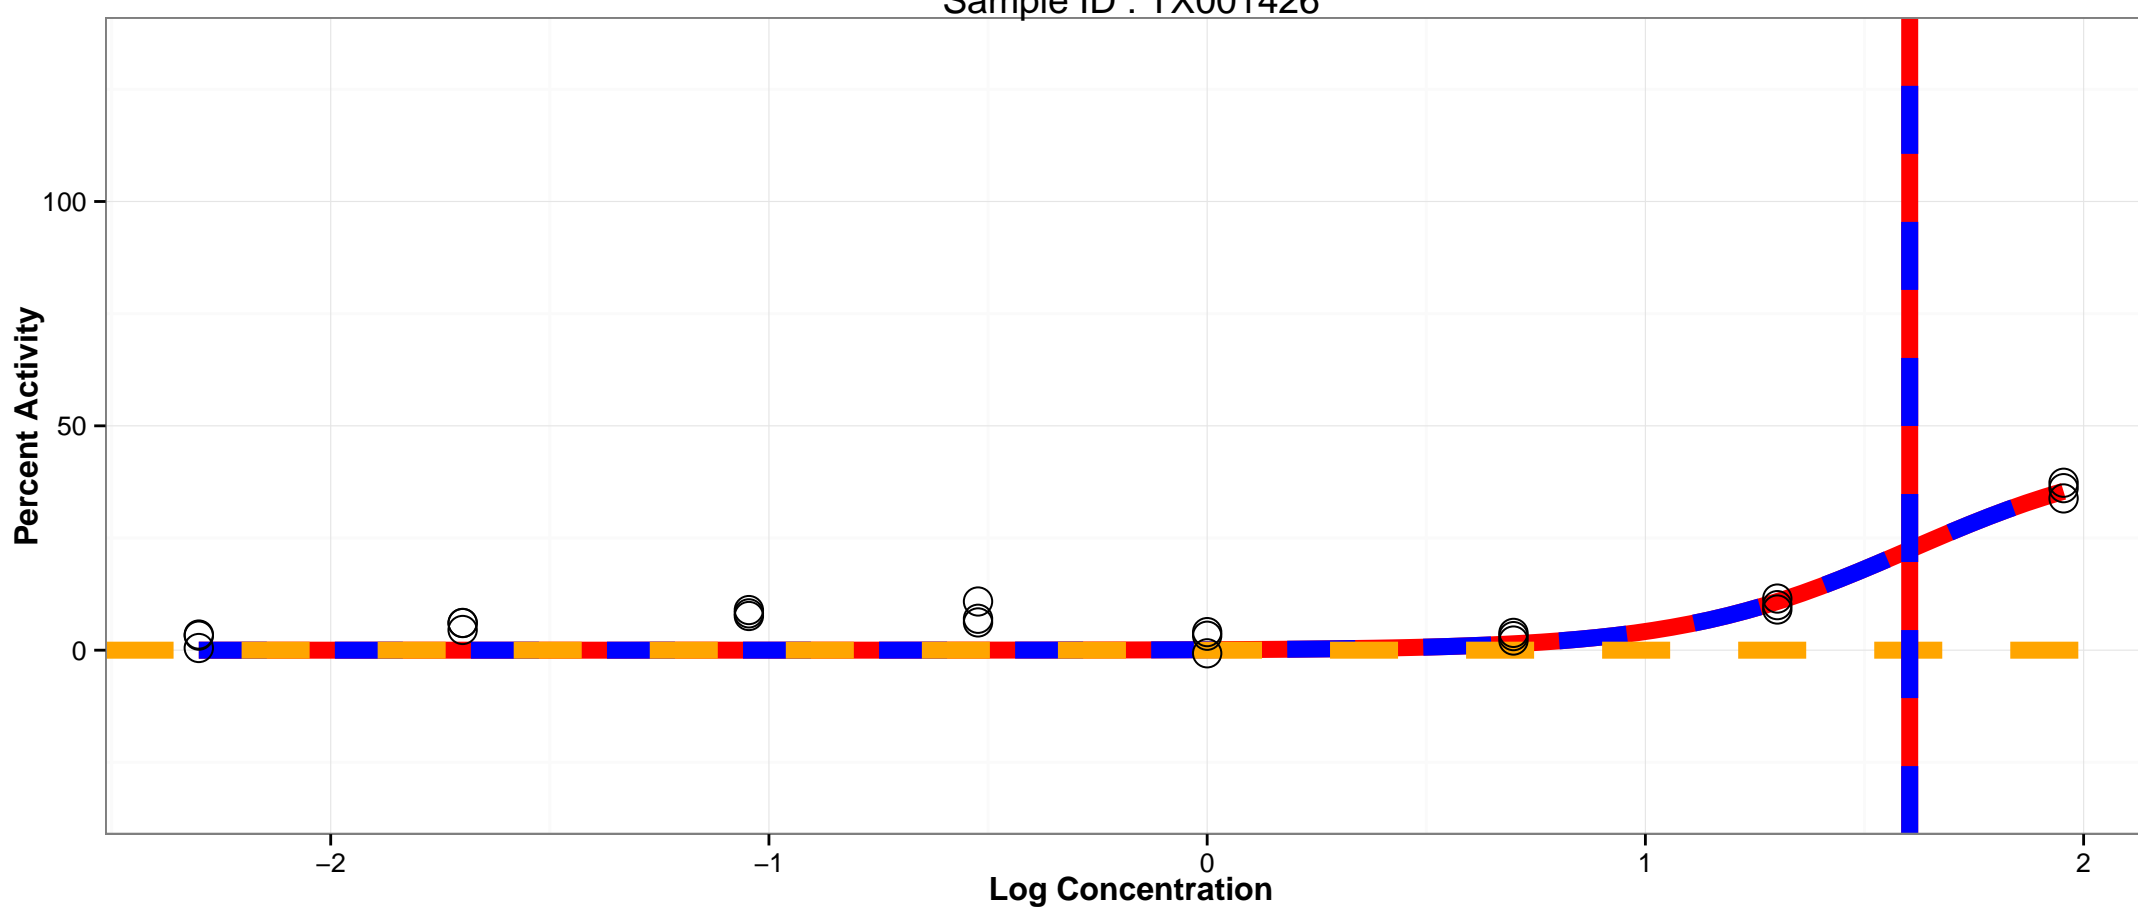

HILL MODEL

|     | tp   | ga    | gw    |
|-----|------|-------|-------|
| val | 44.8 | 1.6   | 1.64  |
| sd  | 16.8 | 0.285 | 0.906 |

GAIN-LOSS MODEL

|     | tp   | ga    | gw    | la   | lw    |
|-----|------|-------|-------|------|-------|
| val | 44.8 | 1.6   | 1.64  | 3.57 | 5.3   |
| sd  | 16.8 | 0.285 | 0.906 | 3120 | 10200 |

|      | CNST   | HILL   | GNLS   |
|------|--------|--------|--------|
| AIC  | 190.98 | 153.87 | 157.87 |
| PROB | 0      | 0.88   | 0.12   |
| RMSE | 14.06  | 4.89   | 4.89   |

MAX\_MEAN : 35.8 MAX\_MED : 36.1 BMAD : 5.69  
COFF : 20 HIT-CALL : 1 FITC : 42 ACTP : 1  
FLAGS : 6

Assay ID 1509 (NHEERL\_HEK293T\_CellTiterGLO)  
Sample ID : TX001426

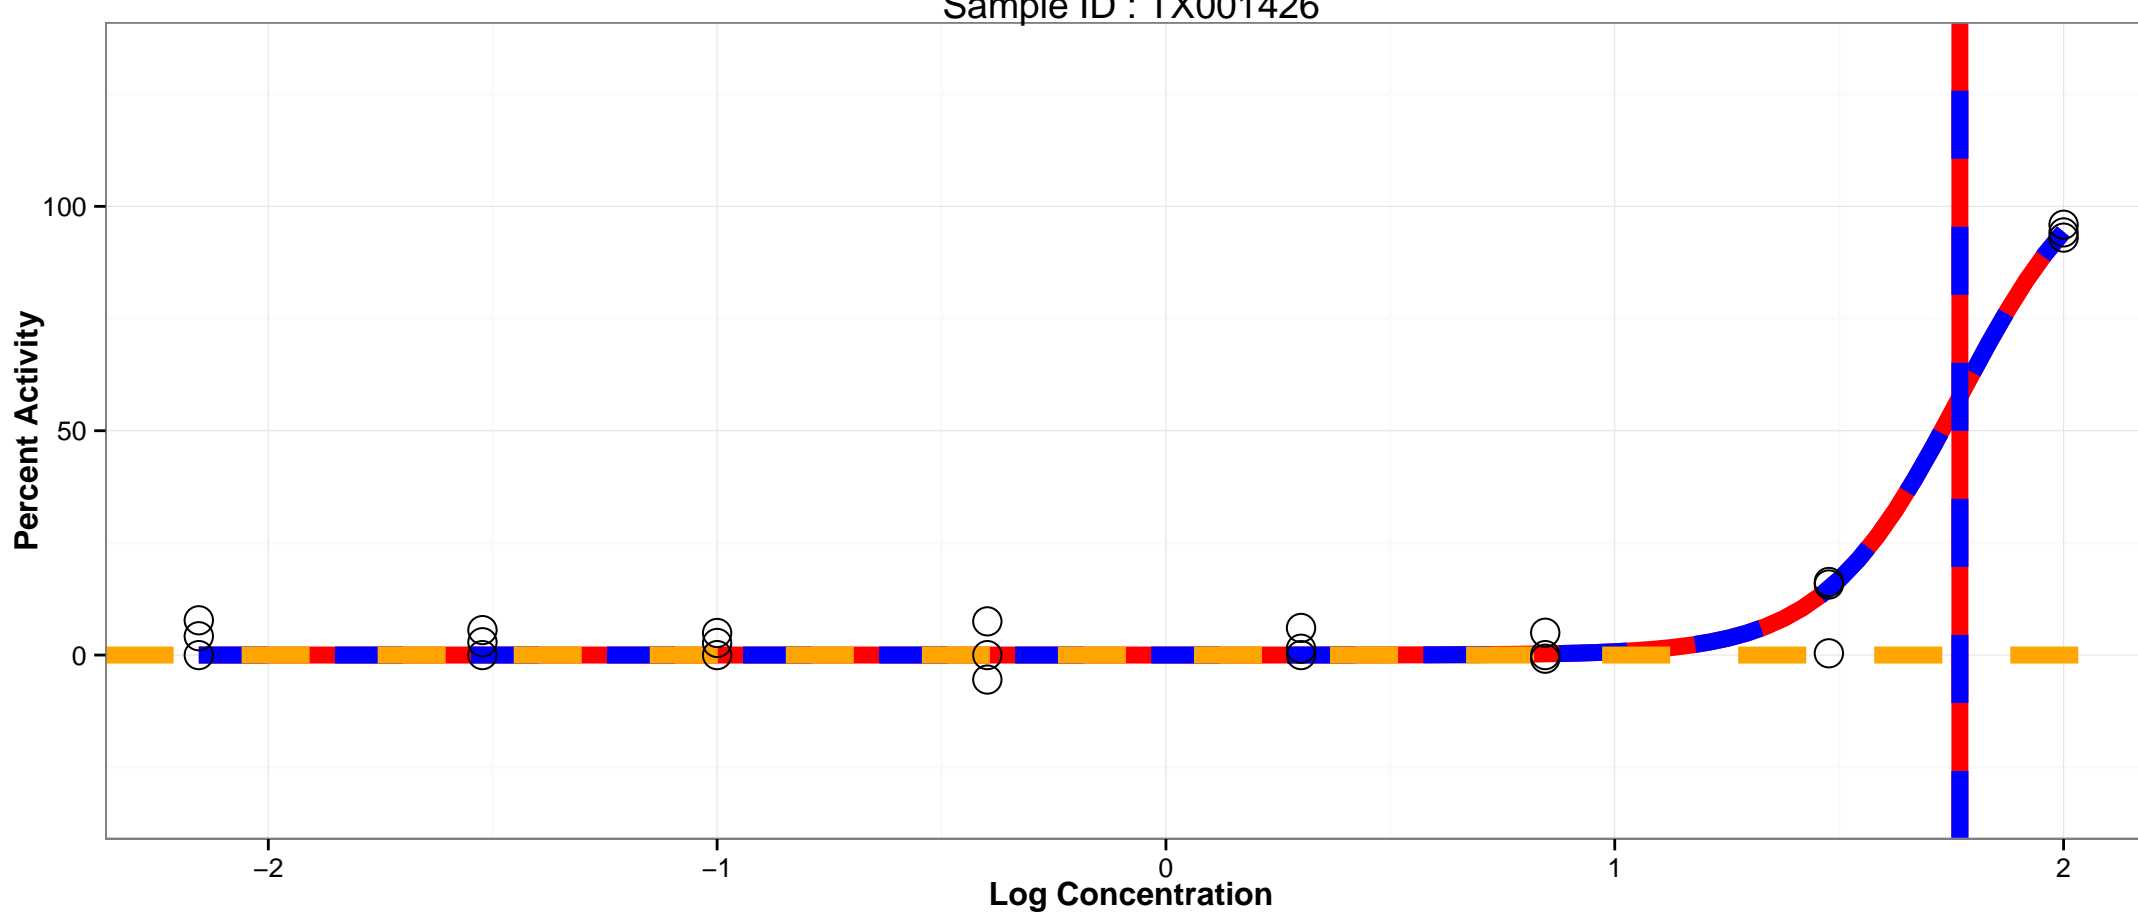

HILL MODEL

|     | tp  | ga   | gw   |
|-----|-----|------|------|
| val | 115 | 1.77 | 2.85 |
| sd  | NA  | NA   | NA   |

GAIN-LOSS MODEL

|     | tp  | ga   | gw   | la   | lw |
|-----|-----|------|------|------|----|
| val | 115 | 1.77 | 2.85 | 3.73 | 9  |
| sd  | NA  | NA   | NA   | NA   | NA |

|      | CNST   | HILL  | GNLS  |
|------|--------|-------|-------|
| AIC  | 214.93 | 146.8 | 150.8 |
| PROB | 0      | 0.88  | 0.12  |
| RMSE | 33.88  | 4.62  | 4.62  |

MAX\_MEAN : 94.4 MAX\_MED : 94.2 BMAD : 5.54  
COFF : 20 HIT-CALL : 1 FITC : 42 ACTP : 1  
FLAGS : 6

Assay ID 1848 (NHEERL\_Quantilum\_inhib\_2\_dn)  
Sample ID : TX001426

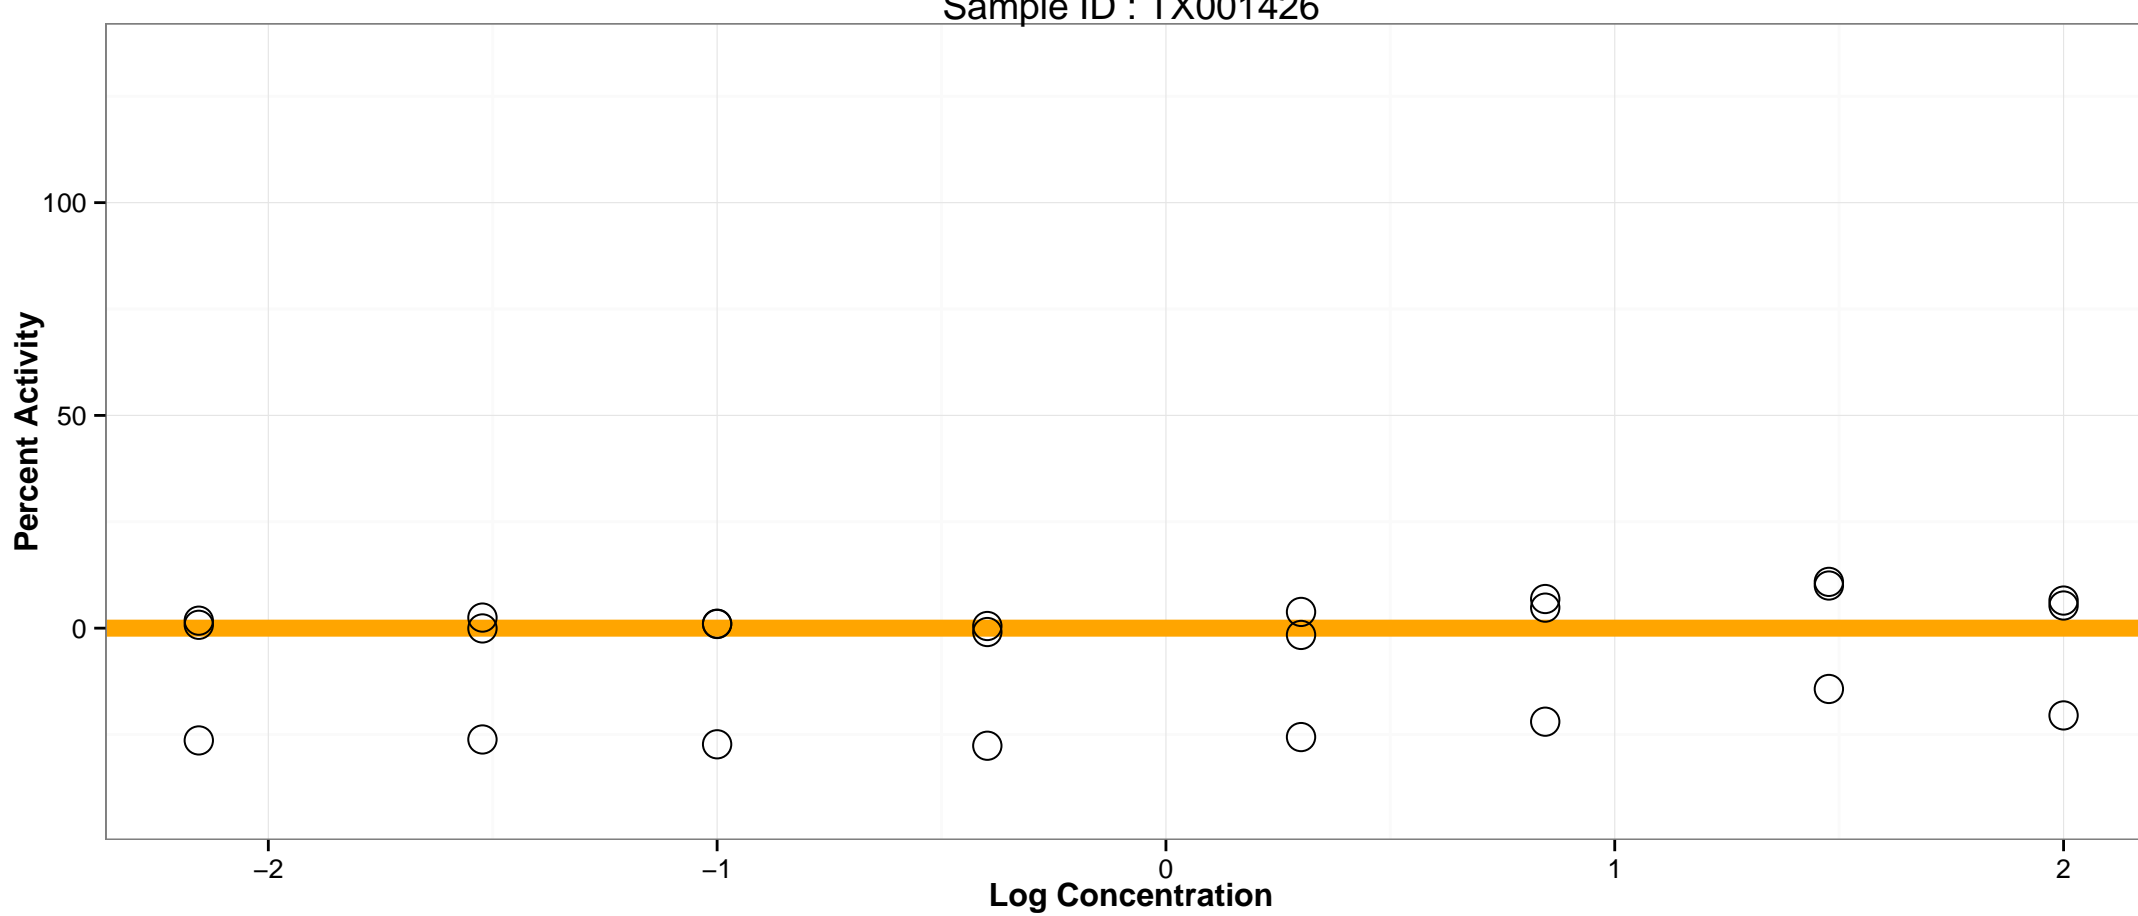

HILL MODEL

HILL MODEL: Not applicable

GAIN-LOSS MODEL

GNLS MODEL: Not applicable

|      | CNST   | HILL | GNLS |
|------|--------|------|------|
| AIC  | 198.77 | NA   | NA   |
| PROB | 1      | NA   | NA   |
| RMSE | 14.49  | NA   | NA   |

MAX\_MEAN : 2.22 MAX\_MED : 10 BMAD : 8.58  
COFF : 20 HIT-CALL : 0 FITC : 4 ACTP : 0  
FLAGS :



Assay ID 1508 (NHEERL\_TPO\_AUR\_dn)  
Sample ID : TX001446

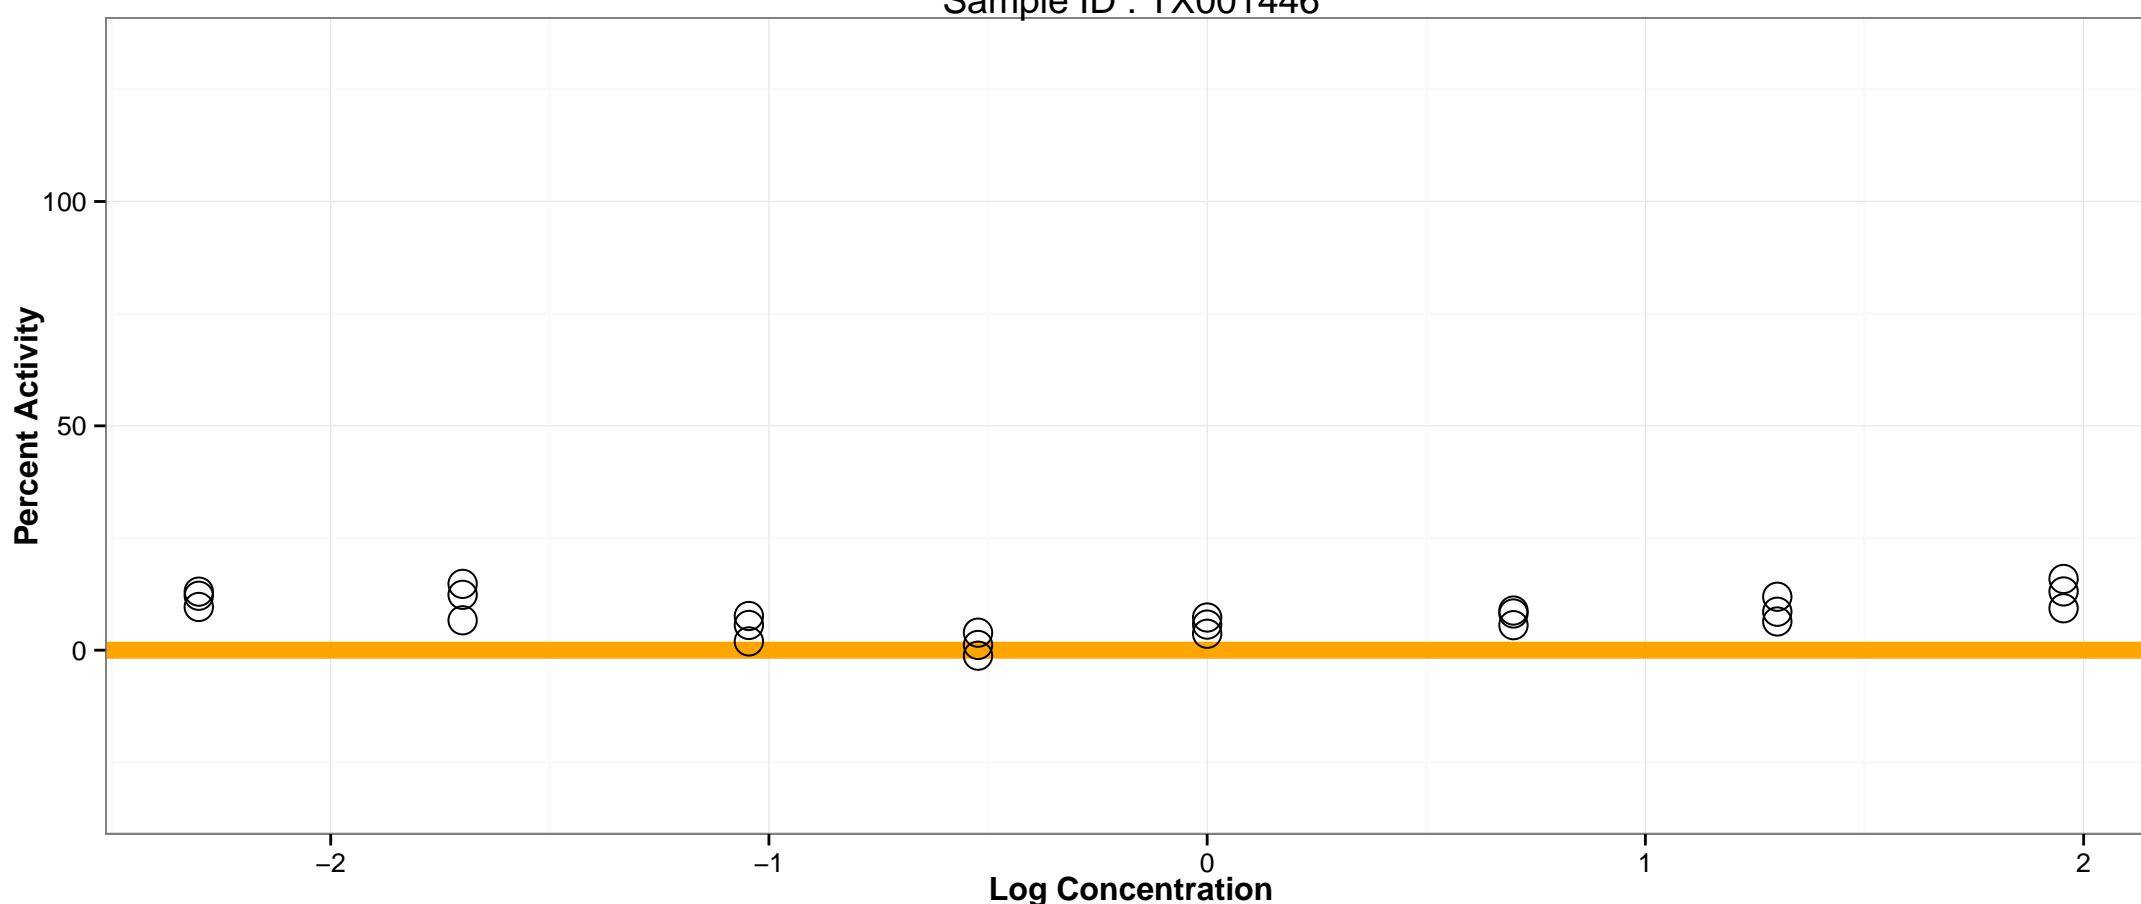

HILL MODEL

HILL MODEL: Not applicable

GAIN-LOSS MODEL

GNLS MODEL: Not applicable

|      | CNST   | HILL | GNLS |
|------|--------|------|------|
| AIC  | 179.99 | NA   | NA   |
| PROB | 1      | NA   | NA   |
| RMSE | 9.09   | NA   | NA   |

MAX\_MEAN : 12.8 MAX\_MED : 13.1 BMAD : 5.69  
COFF : 20 HIT-CALL : 0 FITC : 4 ACTP : 0  
FLAGS :

Assay ID 1509 (NHEERL\_HEK293T\_CellTiterGLO)  
Sample ID : TX001446

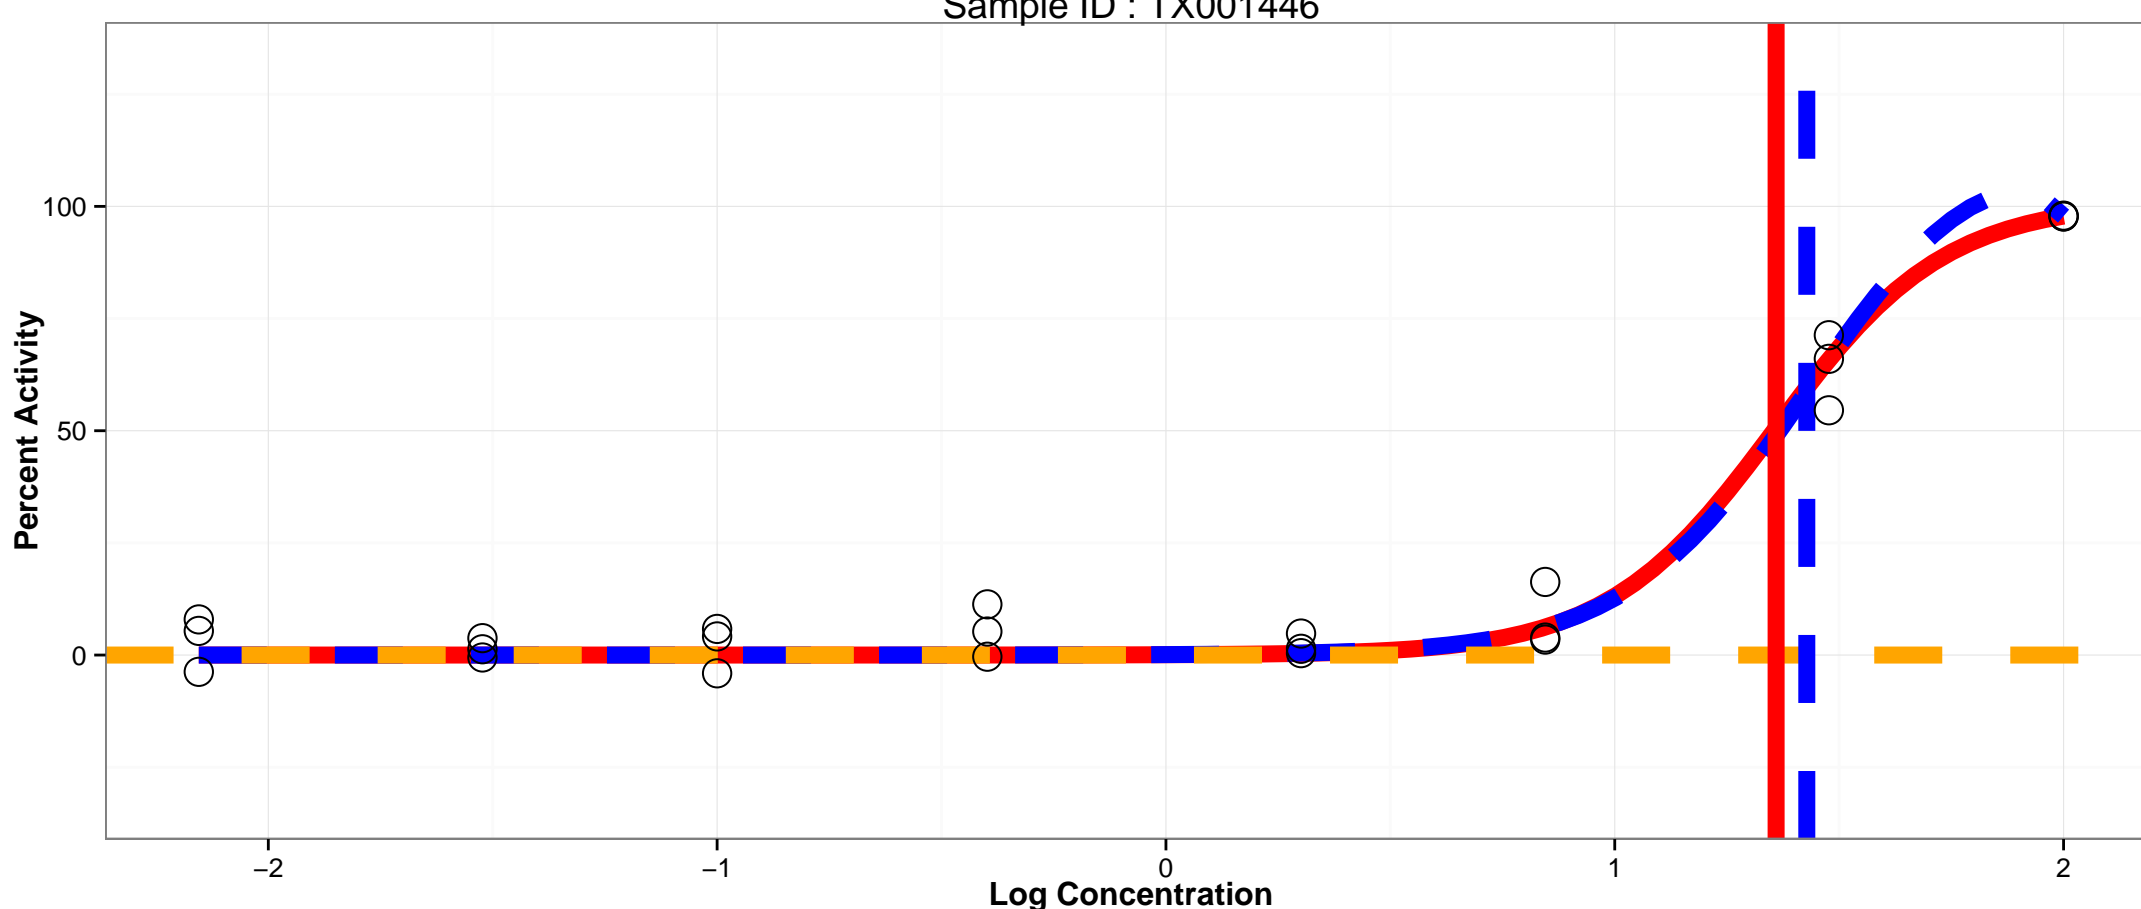

HILL MODEL

|     | tp   | ga     | gw    |
|-----|------|--------|-------|
| val | 101  | 1.36   | 2.3   |
| sd  | 3.31 | 0.0321 | 0.424 |

GAIN-LOSS MODEL

|     | tp  | ga   | gw   | la   | lw   |
|-----|-----|------|------|------|------|
| val | 118 | 1.43 | 2.14 | 2.16 | 5.38 |
| sd  | NA  | NA   | NA   | NA   | NA   |

|      | CNST   | HILL   | GNLS   |
|------|--------|--------|--------|
| AIC  | 242.83 | 155.36 | 159.31 |
| PROB | 0      | 0.88   | 0.12   |
| RMSE | 41.73  | 5.16   | 5.15   |

MAX\_MEAN : 97.8 MAX\_MED : 97.8 BMAD : 5.54  
COFF : 20 HIT-CALL : 1 FITC : 41 ACTP : 1  
FLAGS :

Assay ID 1848 (NHEERL\_Quantilum\_inhib\_2\_dn)  
Sample ID : TX001446

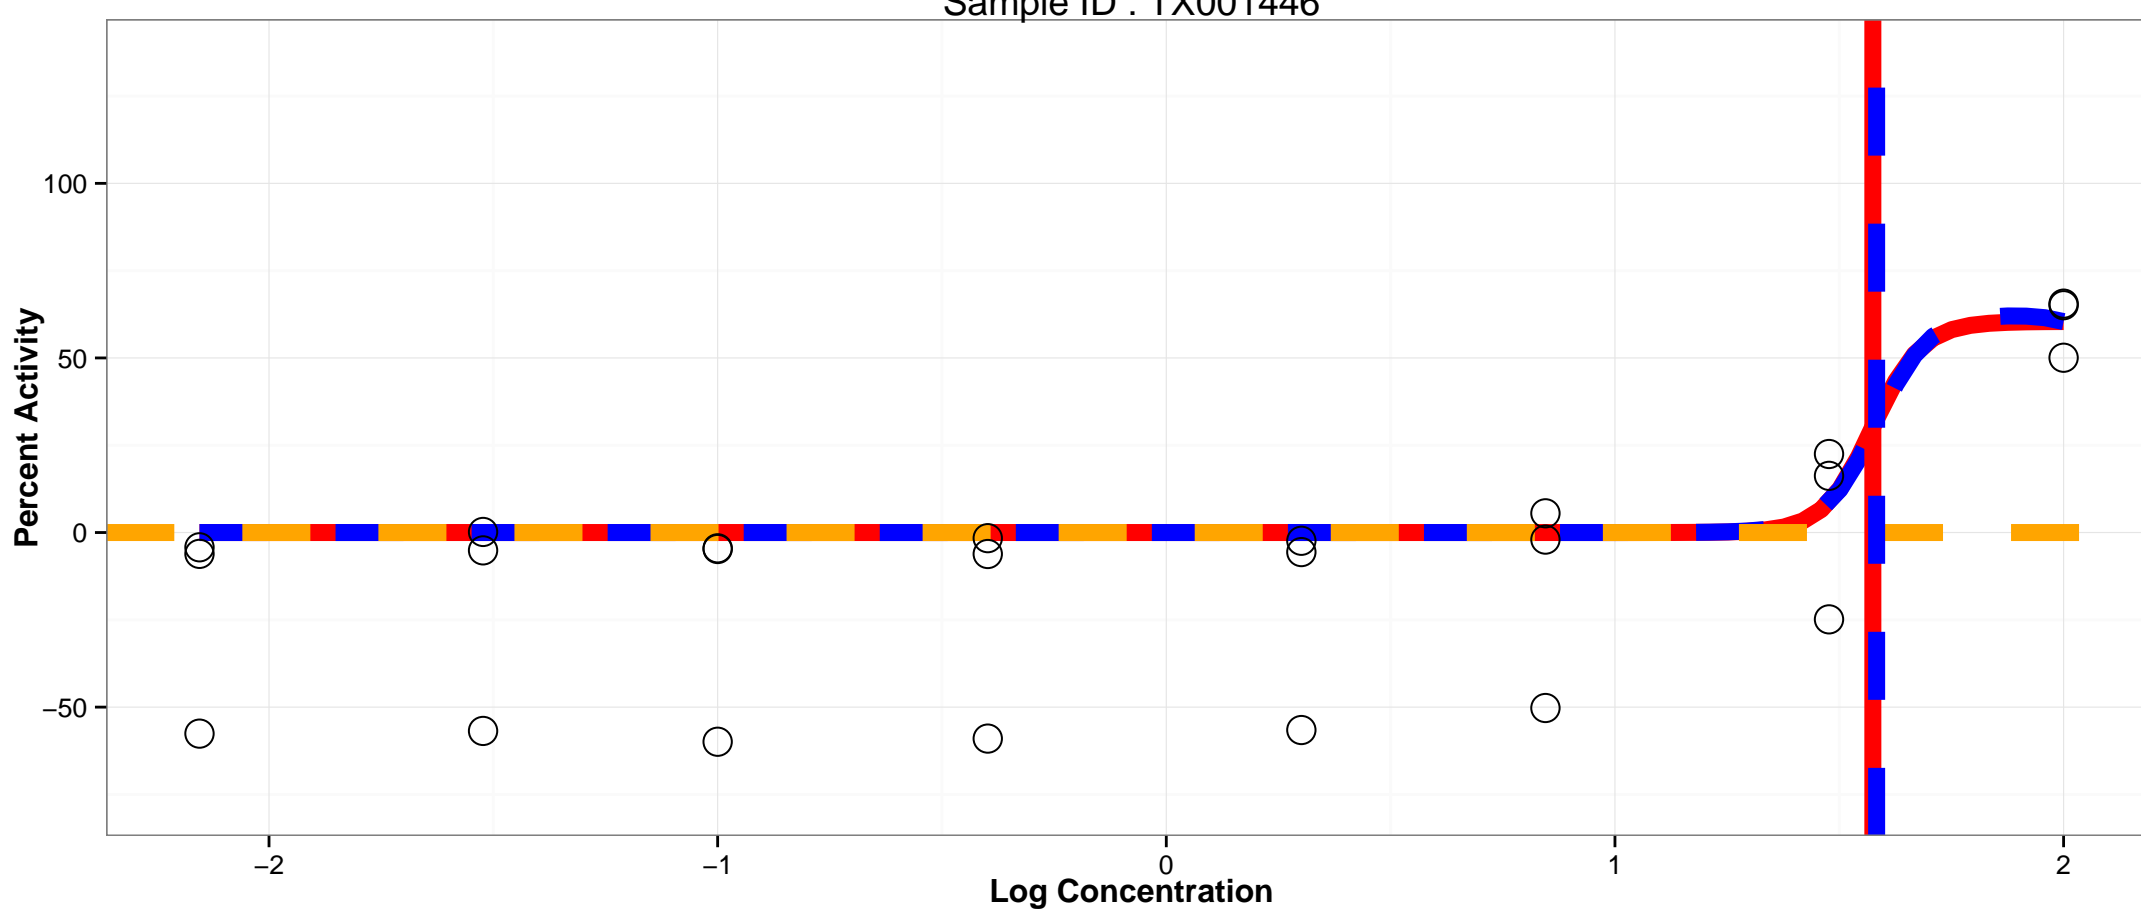

HILL MODEL

|     | tp   | ga   | gw   |
|-----|------|------|------|
| val | 60.4 | 1.57 | 7.94 |
| sd  | NA   | NA   | NA   |

GAIN-LOSS MODEL

|     | tp   | ga   | gw   | la   | lw   |
|-----|------|------|------|------|------|
| val | 62.7 | 1.58 | 7.47 | 2.18 | 8.03 |
| sd  | NA   | NA   | NA   | NA   | NA   |

|      | CNST   | HILL   | GNLS   |
|------|--------|--------|--------|
| AIC  | 244.06 | 236.49 | 240.49 |
| PROB | 0.02   | 0.86   | 0.12   |
| RMSE | 36.52  | 29.65  | 29.65  |

MAX\_MEAN : 60.3 MAX\_MED : 65.1 BMAD : 8.58  
COFF : 20 HIT-CALL : 1 FITC : 41 ACTP : 0.98  
FLAGS : 6; 10

Chemical : Thiram  
CAS : 137-26-8

Assay ID 1508 (NHEERL\_TPO\_AUR\_dn)  
Sample ID : TX001449

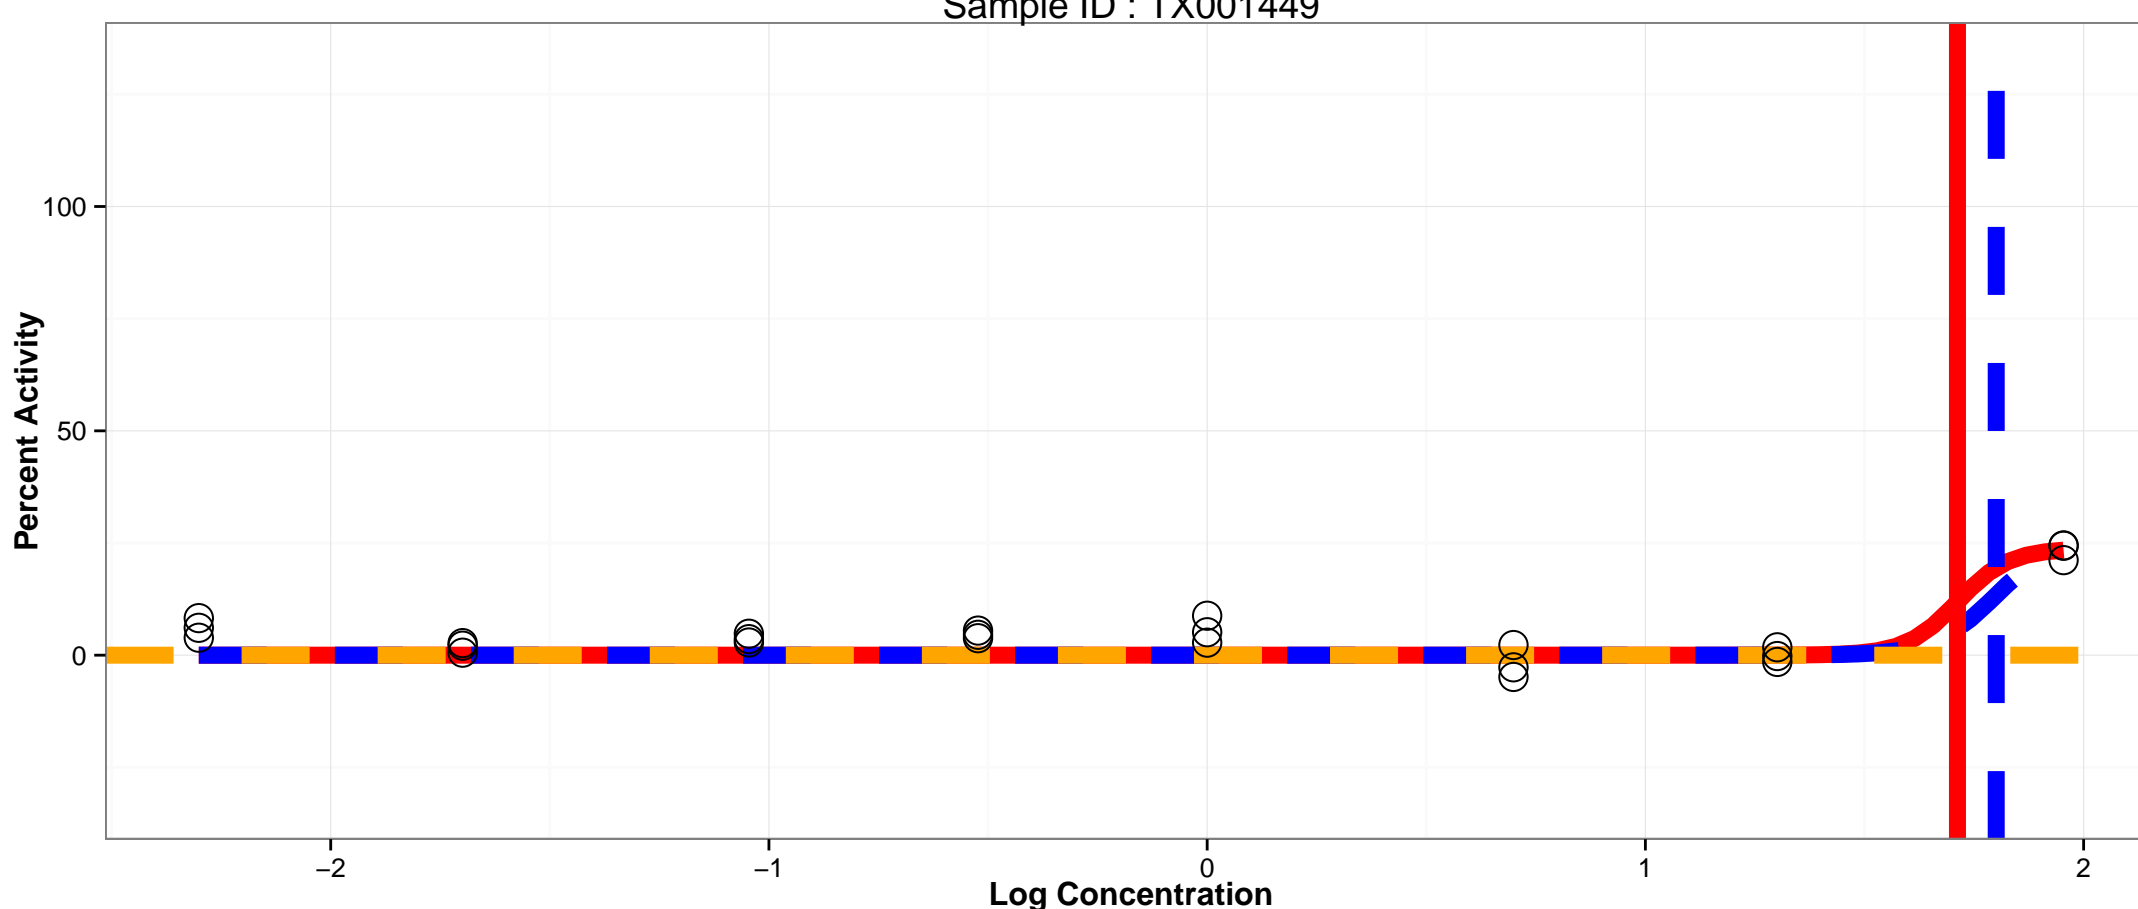

HILL MODEL

|     | tp   | ga   | gw   |
|-----|------|------|------|
| val | 23.8 | 1.71 | 7.47 |
| sd  | 104  | 10.7 | 199  |

GAIN-LOSS MODEL

|     | tp | ga  | gw   | la   | lw  |
|-----|----|-----|------|------|-----|
| val | 27 | 1.8 | 6.28 | 2.29 | 4.2 |
| sd  | NA | NA  | NA   | NA   | NA  |

|      | CNST   | HILL   | GNLS   |
|------|--------|--------|--------|
| AIC  | 170.65 | 146.24 | 150.24 |
| PROB | 0      | 0.88   | 0.12   |
| RMSE | 9.22   | 4.09   | 4.09   |

MAX\_MEAN : 23.4 MAX\_MED : 24.4 BMAD : 5.69  
COFF : 20 HIT-CALL : 1 FITC : 37 ACTP : 1  
FLAGS : 11; 6

Assay ID 1509 (NHEERL\_HEK293T\_CellTiterGLO)  
Sample ID : TX001449

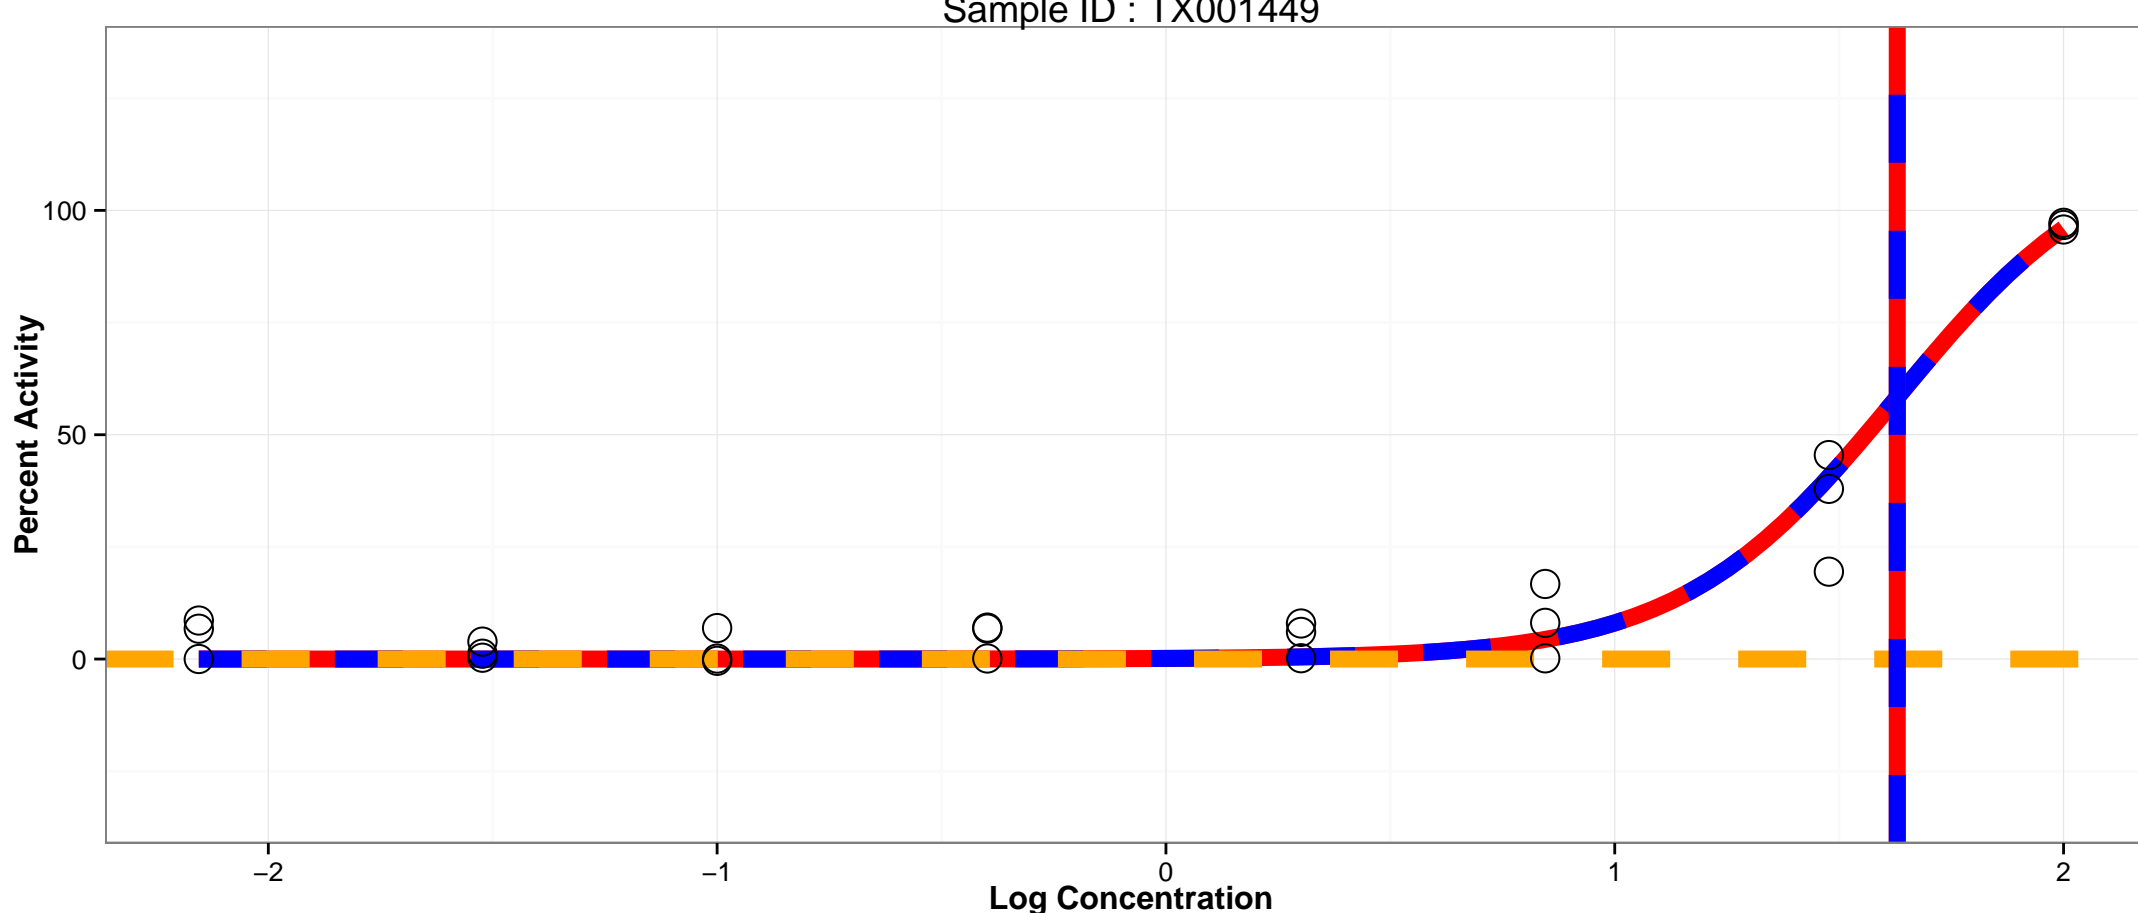

HILL MODEL

|     | tp   | ga    | gw    |
|-----|------|-------|-------|
| val | 117  | 1.63  | 1.8   |
| sd  | 20.7 | 0.116 | 0.629 |

GAIN-LOSS MODEL

|     | tp  | ga   | gw  | la | lw  |
|-----|-----|------|-----|----|-----|
| val | 117 | 1.63 | 1.8 | 4  | 7.7 |
| sd  | NA  | NA   | NA  | NA | NA  |

|      | CNST   | HILL   | GNLS   |
|------|--------|--------|--------|
| AIC  | 231.68 | 163.15 | 167.15 |
| PROB | 0      | 0.88   | 0.12   |
| RMSE | 36.86  | 6.54   | 6.54   |

MAX\_MEAN : 96.6 MAX\_MED : 96.8 BMAD : 5.54  
COFF : 20 HIT-CALL : 1 FITC : 42 ACTP : 1  
FLAGS :

Assay ID 1848 (NHEERL\_Quantilum\_inhib\_2\_dn)  
Sample ID : TX001449

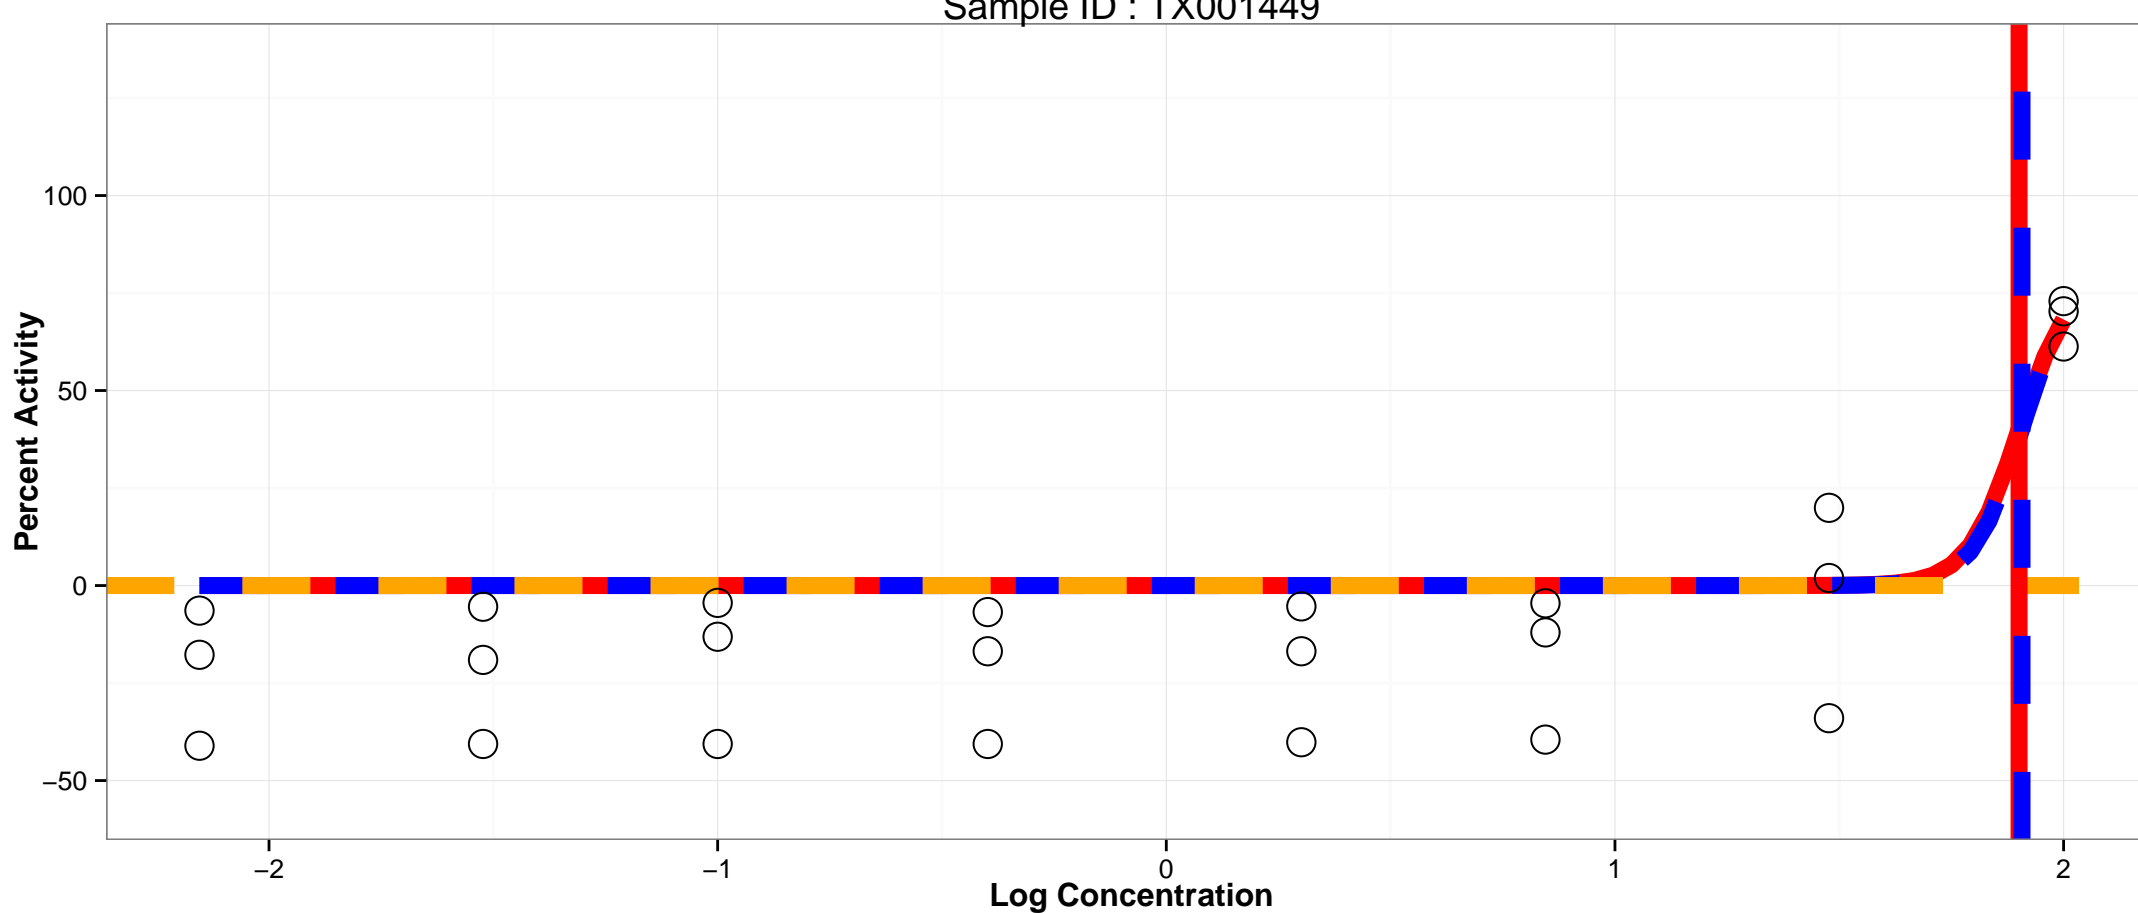

HILL MODEL

|     | tp   | ga  | gw   |
|-----|------|-----|------|
| val | 80.1 | 1.9 | 7.65 |
| sd  | NA   | NA  | NA   |

GAIN-LOSS MODEL

|     | tp   | ga   | gw | la   | lw   |
|-----|------|------|----|------|------|
| val | 80.6 | 1.91 | 8  | 2.51 | 7.72 |
| sd  | NA   | NA   | NA | NA   | NA   |

|      | CNST   | HILL  | GNLS  |
|------|--------|-------|-------|
| AIC  | 240.08 | 229.1 | 233.1 |
| PROB | 0      | 0.88  | 0.12  |
| RMSE | 33.62  | 23.44 | 23.44 |

MAX\_MEAN : 68.2 MAX\_MED : 70.3 BMAD : 8.58  
COFF : 20 HIT-CALL : 1 FITC : 42 ACTP : 0.996  
FLAGS : 6; 10

Chemical : Ethylene thiourea  
CAS : 96-45-7

Assay ID 1508 (NHEERL\_TPO\_AUR\_dn)  
Sample ID : TX001450

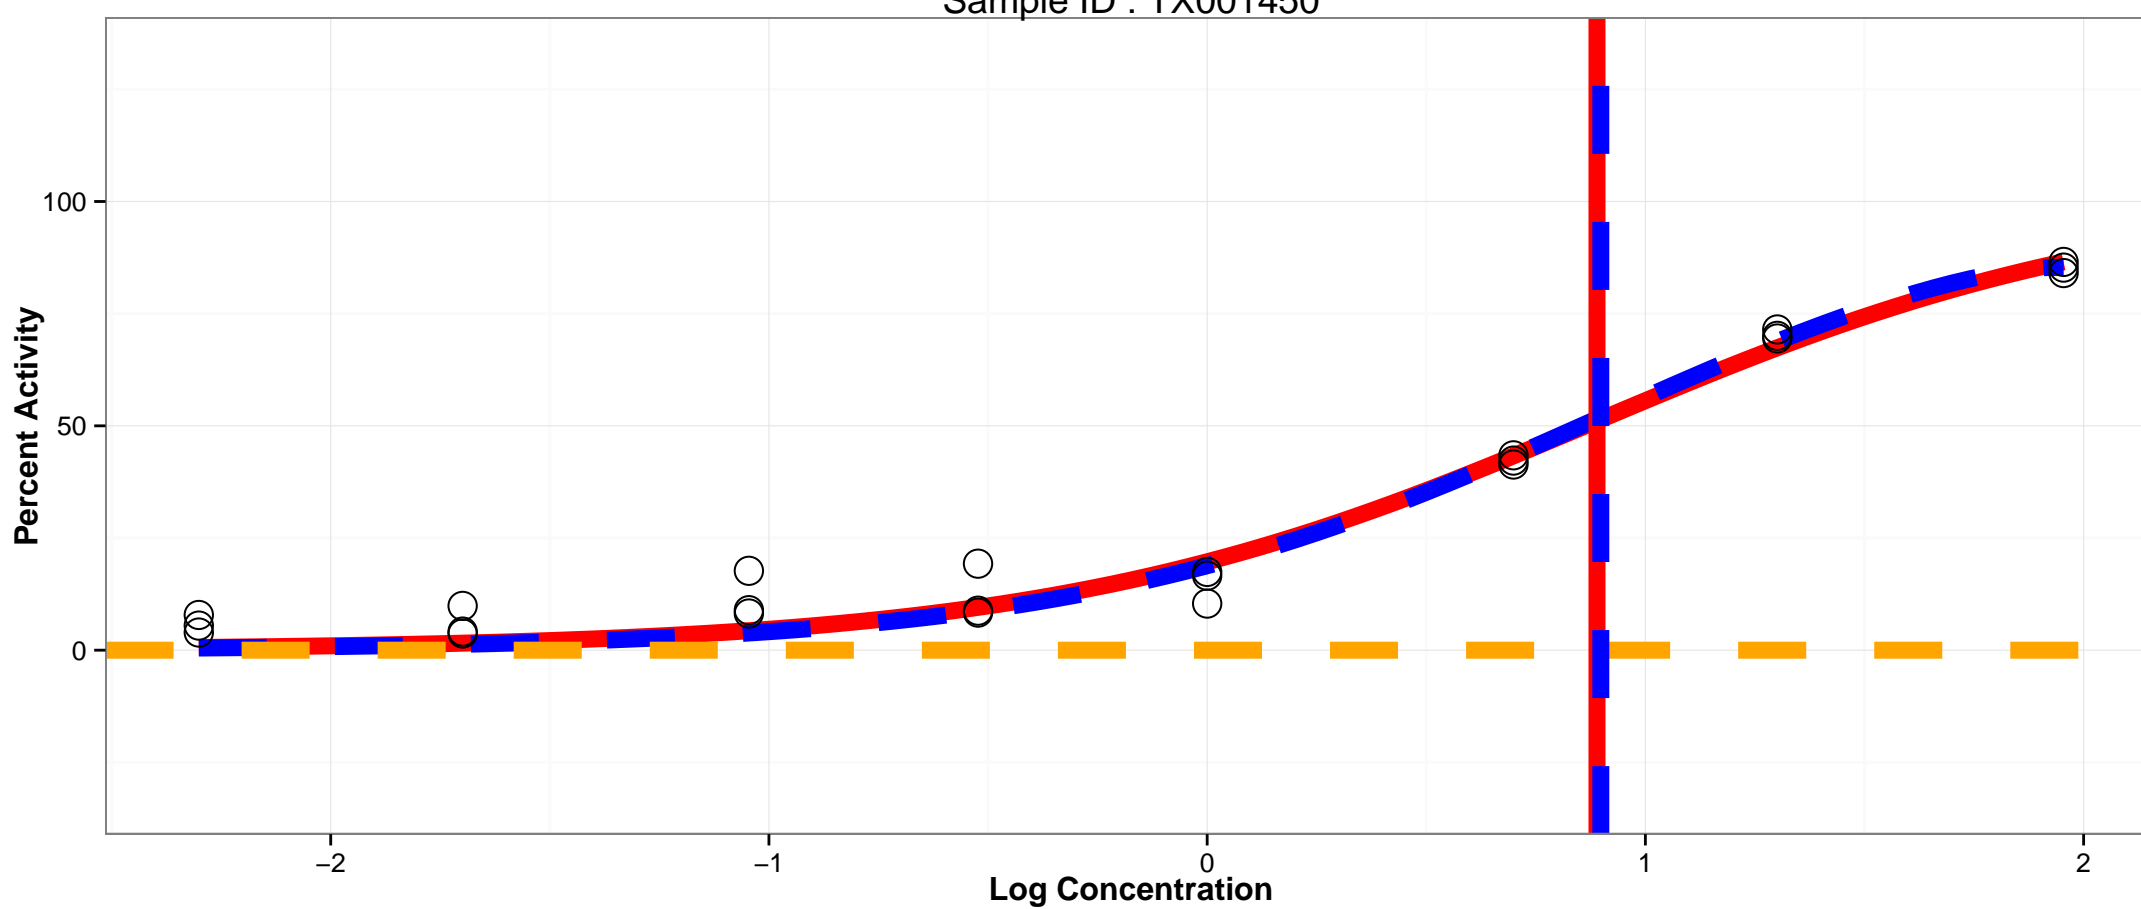

HILL MODEL

|     | tp   | ga    | gw    |
|-----|------|-------|-------|
| val | 102  | 0.89  | 0.699 |
| sd  | 8.57 | 0.134 | 0.11  |

GAIN-LOSS MODEL

|     | tp   | ga    | gw    | la   | lw   |
|-----|------|-------|-------|------|------|
| val | 104  | 0.898 | 0.729 | 2.42 | 2.97 |
| sd  | 27.5 | 0.349 | 0.16  | 4.4  | 25   |

|      | CNST   | HILL   | GNLS   |
|------|--------|--------|--------|
| AIC  | 250.33 | 153.68 | 156.46 |
| PROB | 0      | 0.8    | 0.2    |
| RMSE | 42.8   | 5.09   | 5.09   |

MAX\_MEAN : 85.3 MAX\_MED : 85.3 BMAD : 5.69  
COFF : 20 HIT-CALL : 1 FITC : 42 ACTP : 1  
FLAGS :

Assay ID 1509 (NHEERL\_HEK293T\_CellTiterGLO)  
Sample ID : TX001450

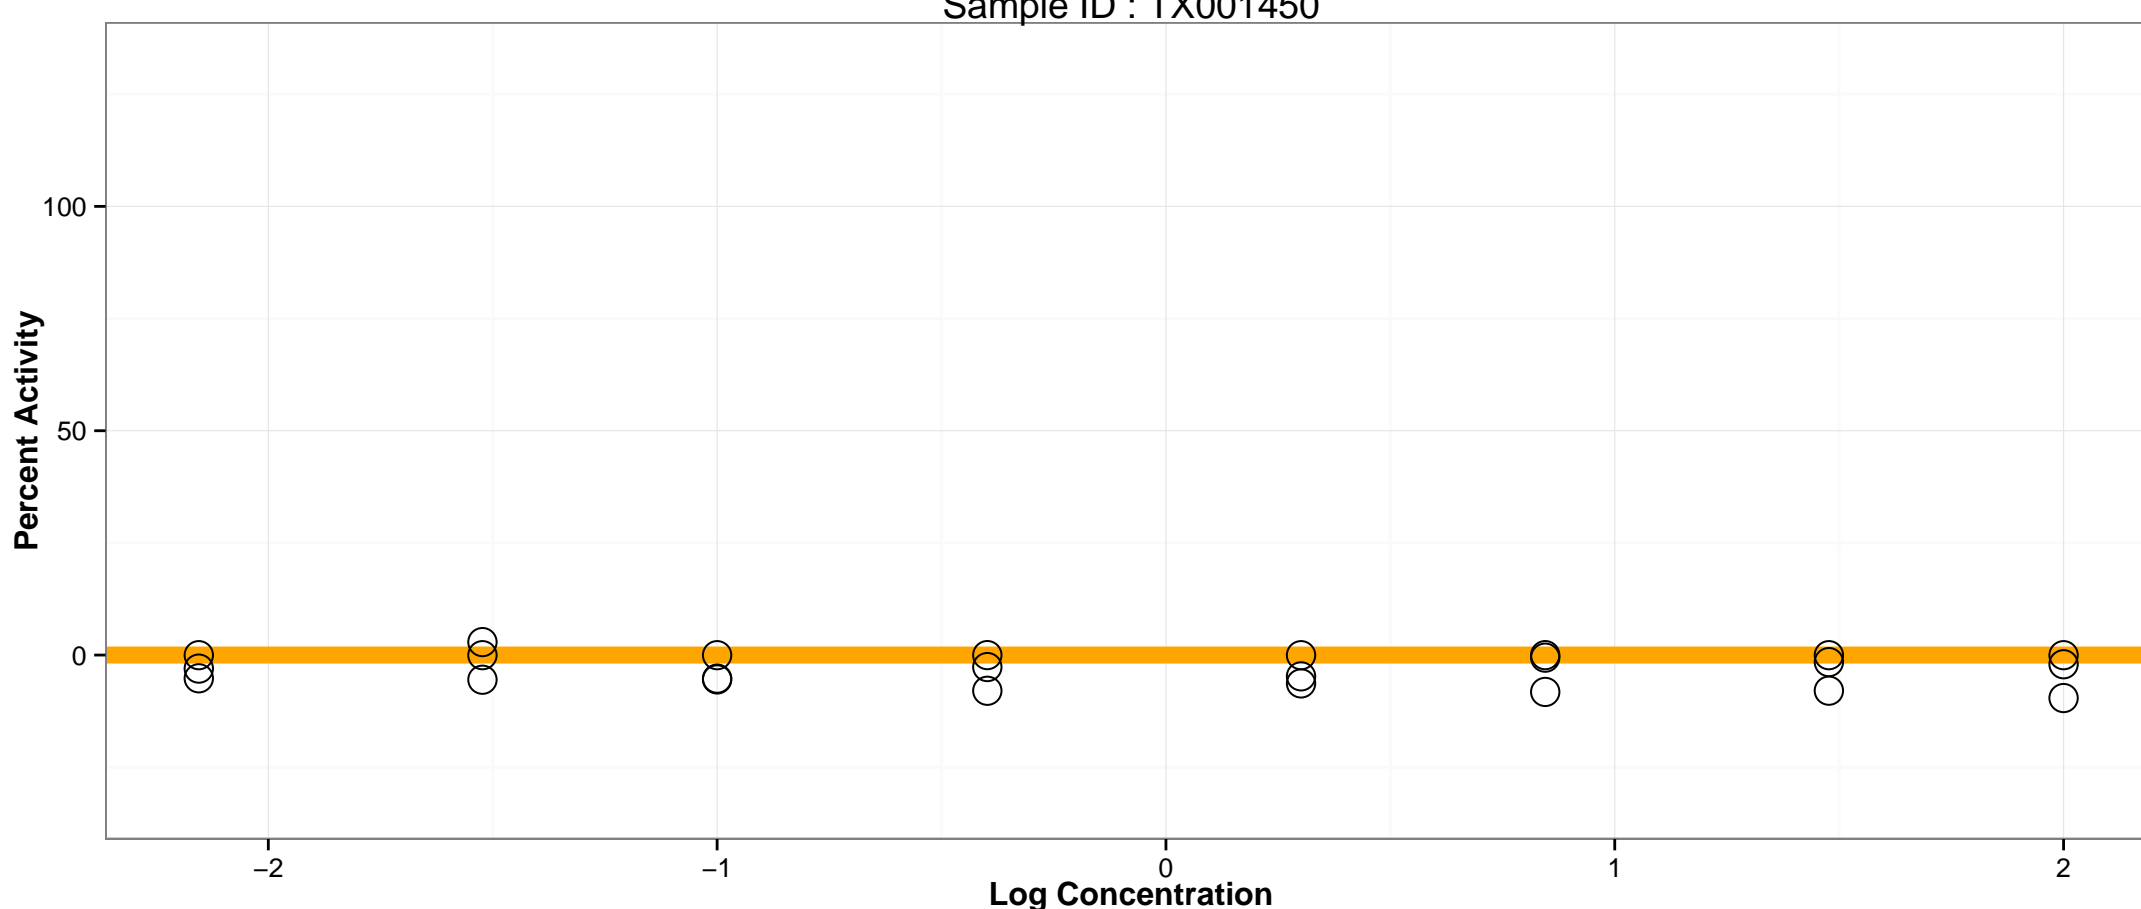

HILL MODEL

HILL MODEL: Not applicable

GAIN-LOSS MODEL

GNLS MODEL: Not applicable

|      | CNST   | HILL | GNLS |
|------|--------|------|------|
| AIC  | 143.96 | NA   | NA   |
| PROB | 1      | NA   | NA   |
| RMSE | 4.53   | NA   | NA   |

MAX\_MEAN : -0.867 MAX\_MED : -0.0175 BMAD : 5.54  
COFF : 20 HIT-CALL : 0 FITC : 4 ACTP : 0  
FLAGS :

Assay ID 1848 (NHEERL\_Quantilum\_inhib\_2\_dn)  
Sample ID : TX001450

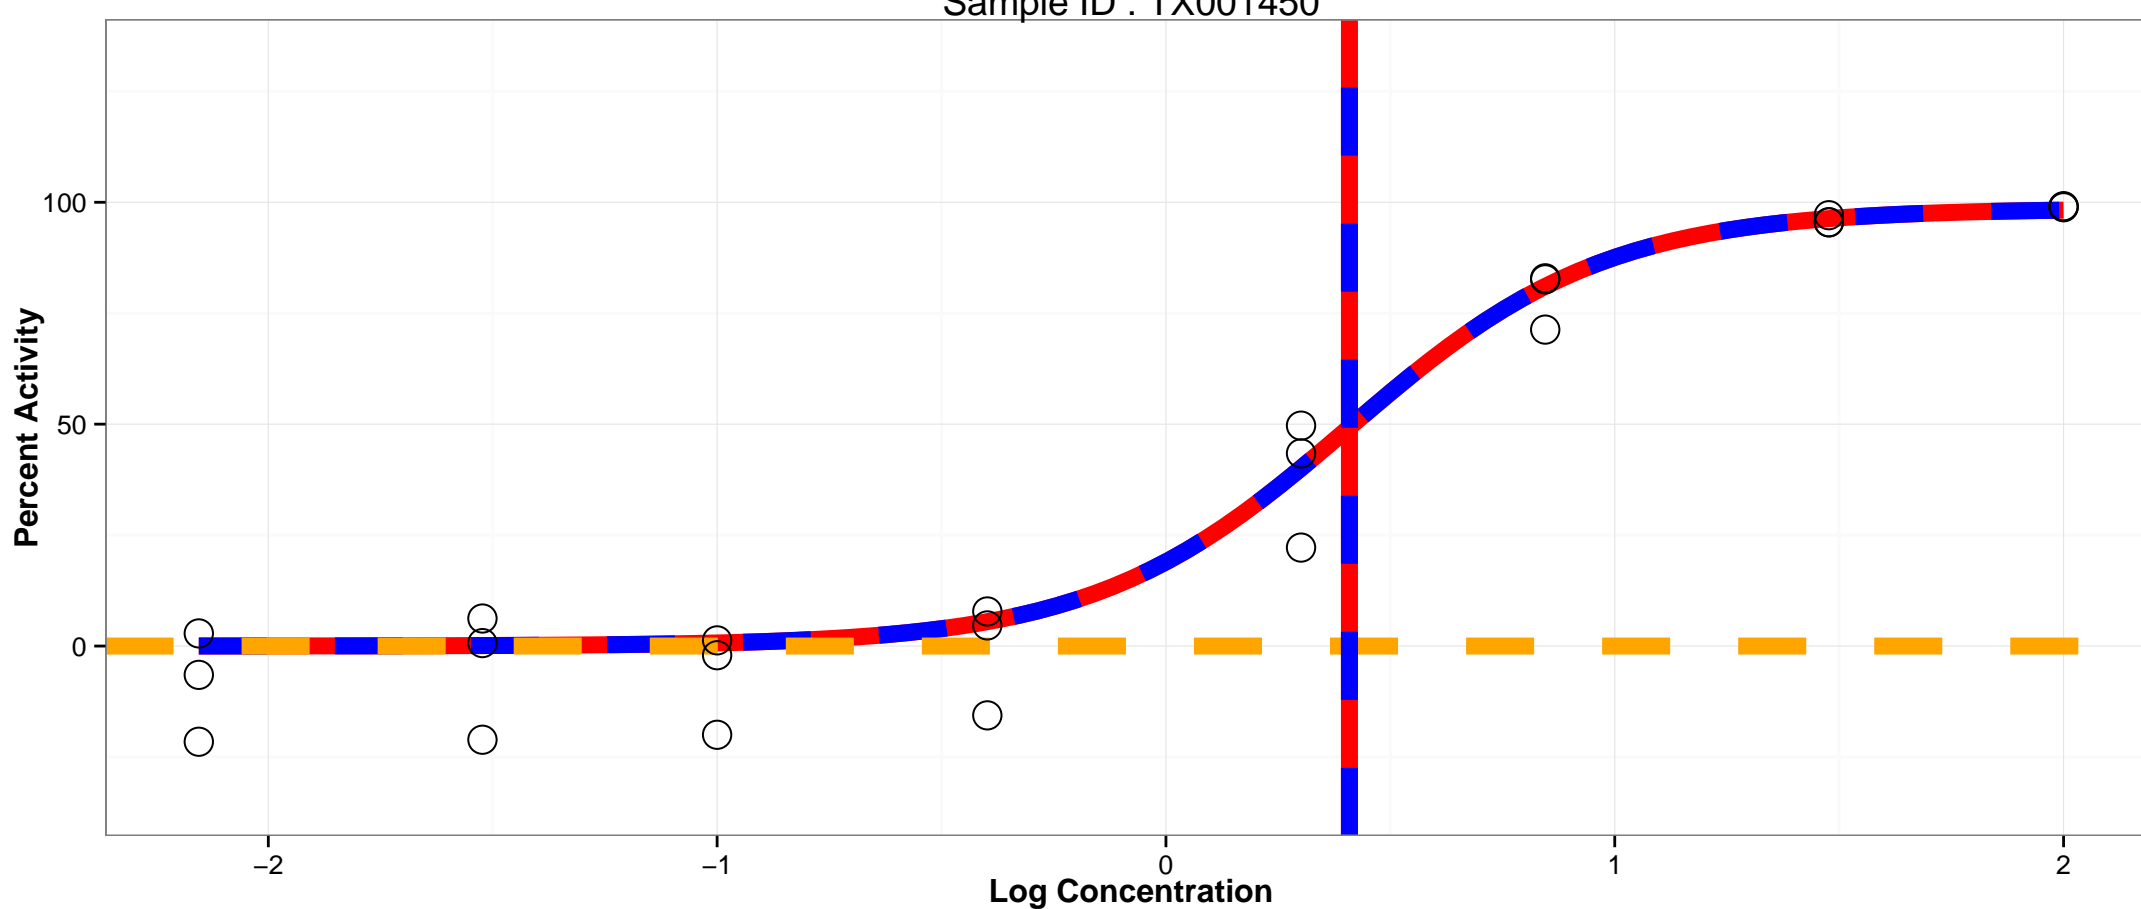

HILL MODEL

|     | tp   | ga     | gw    |
|-----|------|--------|-------|
| val | 98.6 | 0.409  | 1.52  |
| sd  | 2.92 | 0.0627 | 0.244 |

GAIN-LOSS MODEL

|     | tp   | ga     | gw    | la   | lw   |
|-----|------|--------|-------|------|------|
| val | 98.6 | 0.409  | 1.52  | 2.53 | 14.8 |
| sd  | 2.92 | 0.0627 | 0.244 | 218  | 6100 |

|      | CNST   | HILL   | GNLS   |
|------|--------|--------|--------|
| AIC  | 267.22 | 183.85 | 187.85 |
| PROB | 0      | 0.88   | 0.12   |
| RMSE | 58.61  | 10.03  | 10.03  |

MAX\_MEAN : 99 MAX\_MED : 99 BMAD : 8.58  
COFF : 20 HIT-CALL : 1 FITC : 41 ACTP : 1  
FLAGS :

Chemical : Ethephon  
CAS : 16672-87-0

Assay ID 1508 (NHEERL\_TPO\_AUR\_dn)  
Sample ID : TX001533

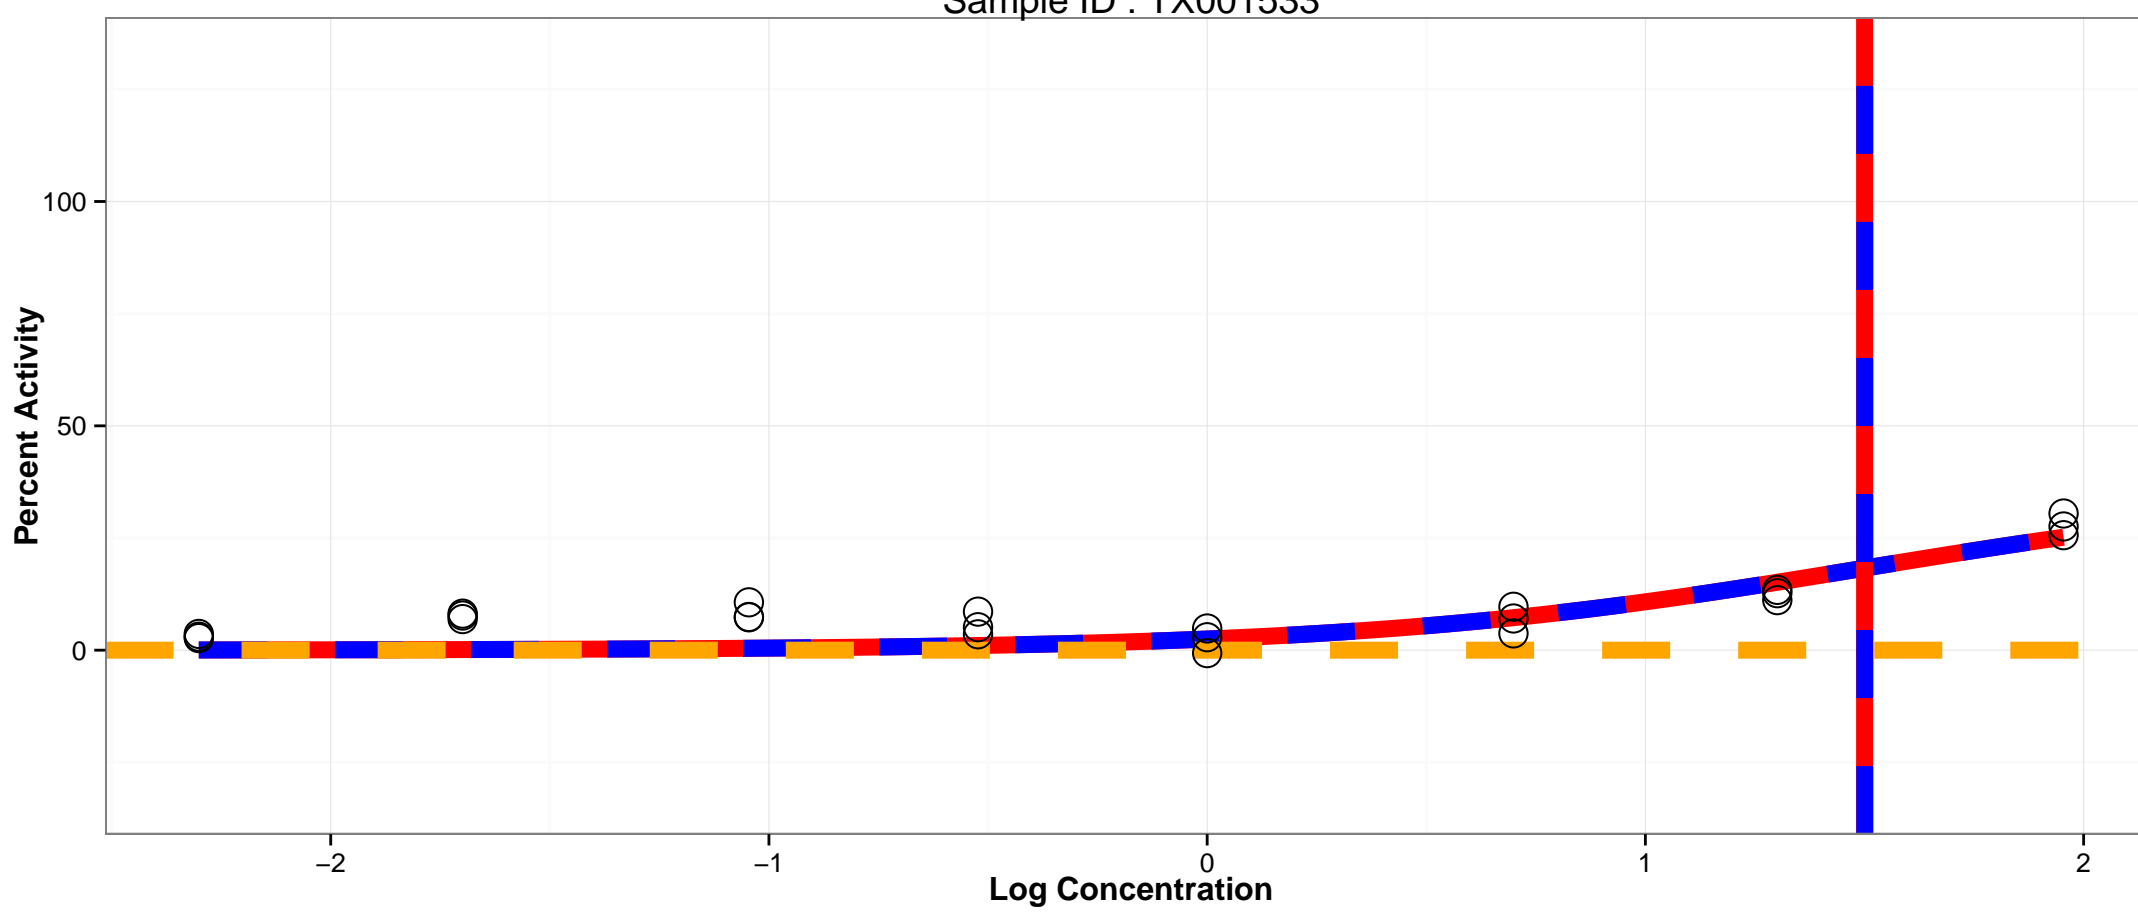

HILL MODEL

|     | tp   | ga   | gw    |
|-----|------|------|-------|
| val | 36.6 | 1.5  | 0.758 |
| sd  | 10.4 | 0.36 | 0.38  |

GAIN-LOSS MODEL

|     | tp   | ga   | gw    | la   | lw   |
|-----|------|------|-------|------|------|
| val | 36.6 | 1.5  | 0.758 | 3.69 | 4.7  |
| sd  | 10.4 | 0.36 | 0.381 | 1000 | 2720 |

|      | CNST   | HILL  | GNLS  |
|------|--------|-------|-------|
| AIC  | 189.02 | 154.8 | 158.8 |
| PROB | 0      | 0.88  | 0.12  |
| RMSE | 12.15  | 4.88  | 4.88  |

MAX\_MEAN : 27.9 MAX\_MED : 27.6 BMAD : 5.69  
COFF : 20 HIT-CALL : 1 FITC : 42 ACTP : 1  
FLAGS : 6

Assay ID 1509 (NHEERL\_HEK293T\_CellTiterGLO)  
Sample ID : TX001533

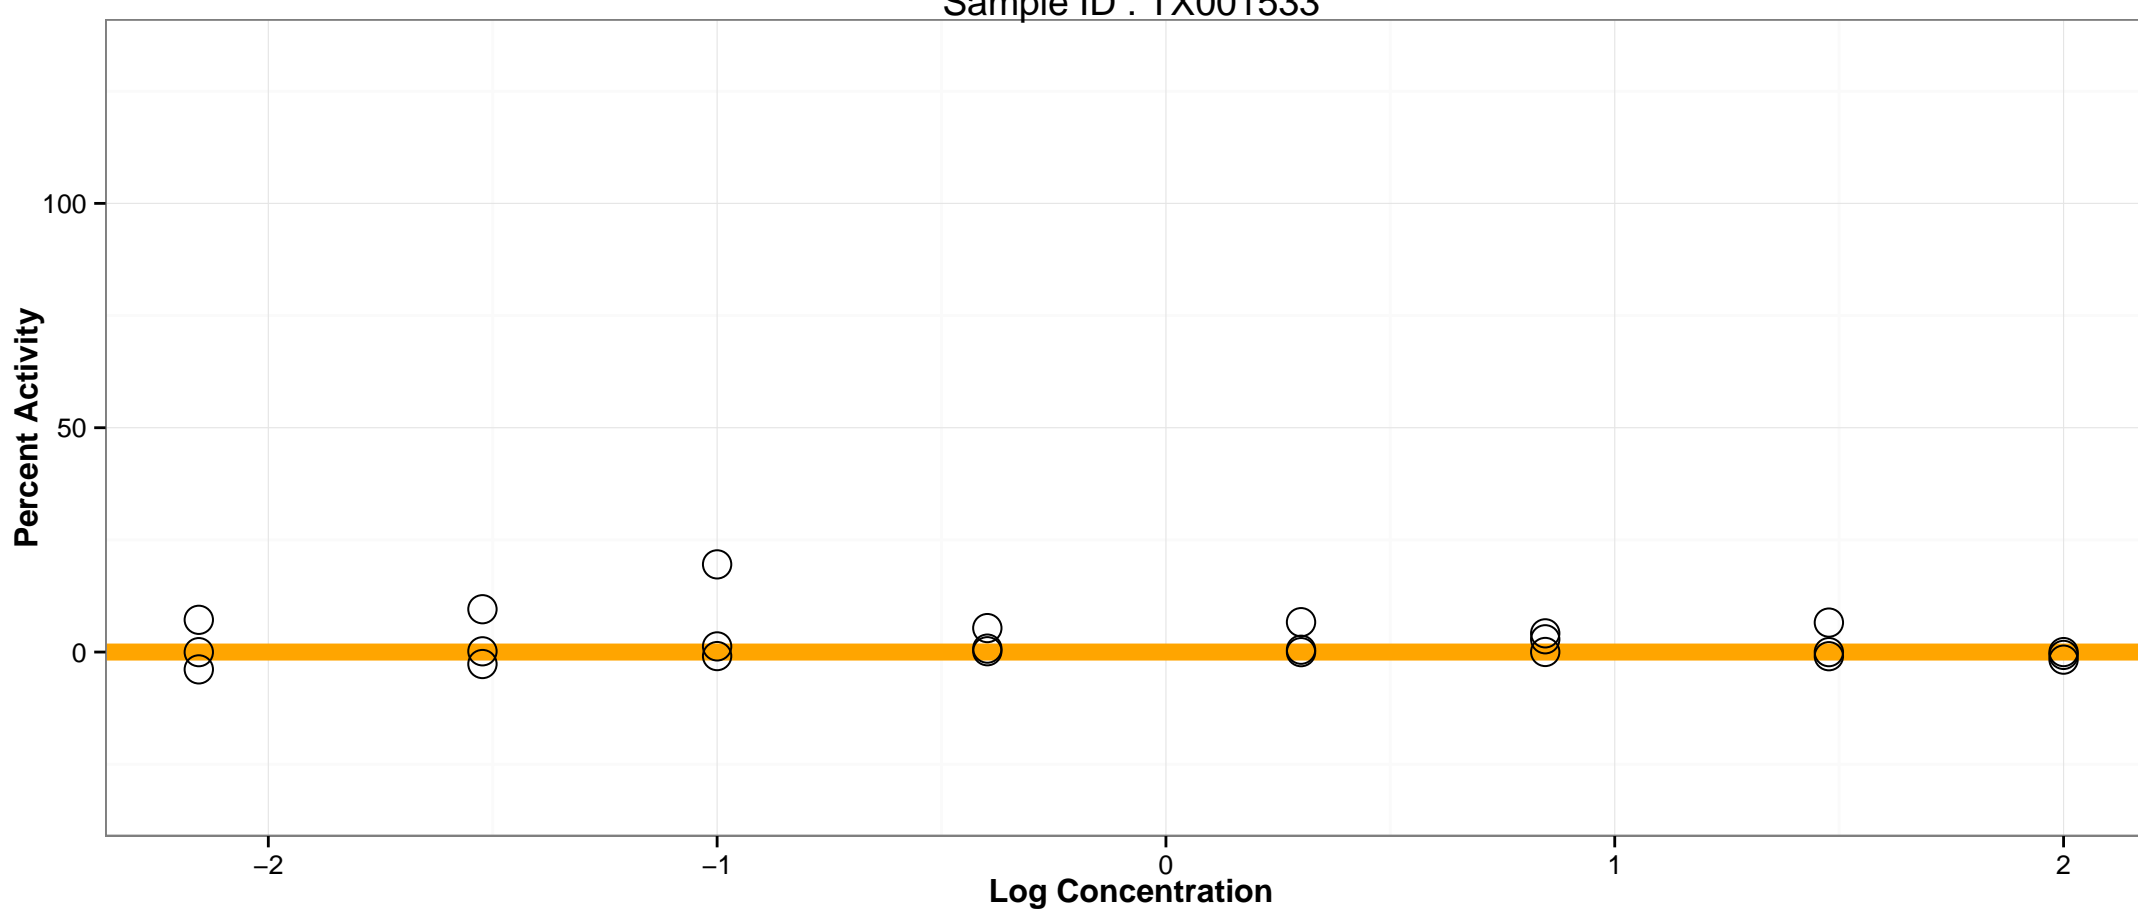

HILL MODEL

HILL MODEL: Not applicable

GAIN-LOSS MODEL

GNLS MODEL: Not applicable

|      | CNST   | HILL | GNLS |
|------|--------|------|------|
| AIC  | 142.38 | NA   | NA   |
| PROB | 1      | NA   | NA   |
| RMSE | 5.39   | NA   | NA   |

MAX\_MEAN : 6.65 MAX\_MED : 2.86 BMAD : 5.54  
COFF : 20 HIT-CALL : 0 FITC : 4 ACTP : 0  
FLAGS :

Assay ID 1848 (NHEERL\_Quantilum\_inhib\_2\_dn)  
Sample ID : TX001533

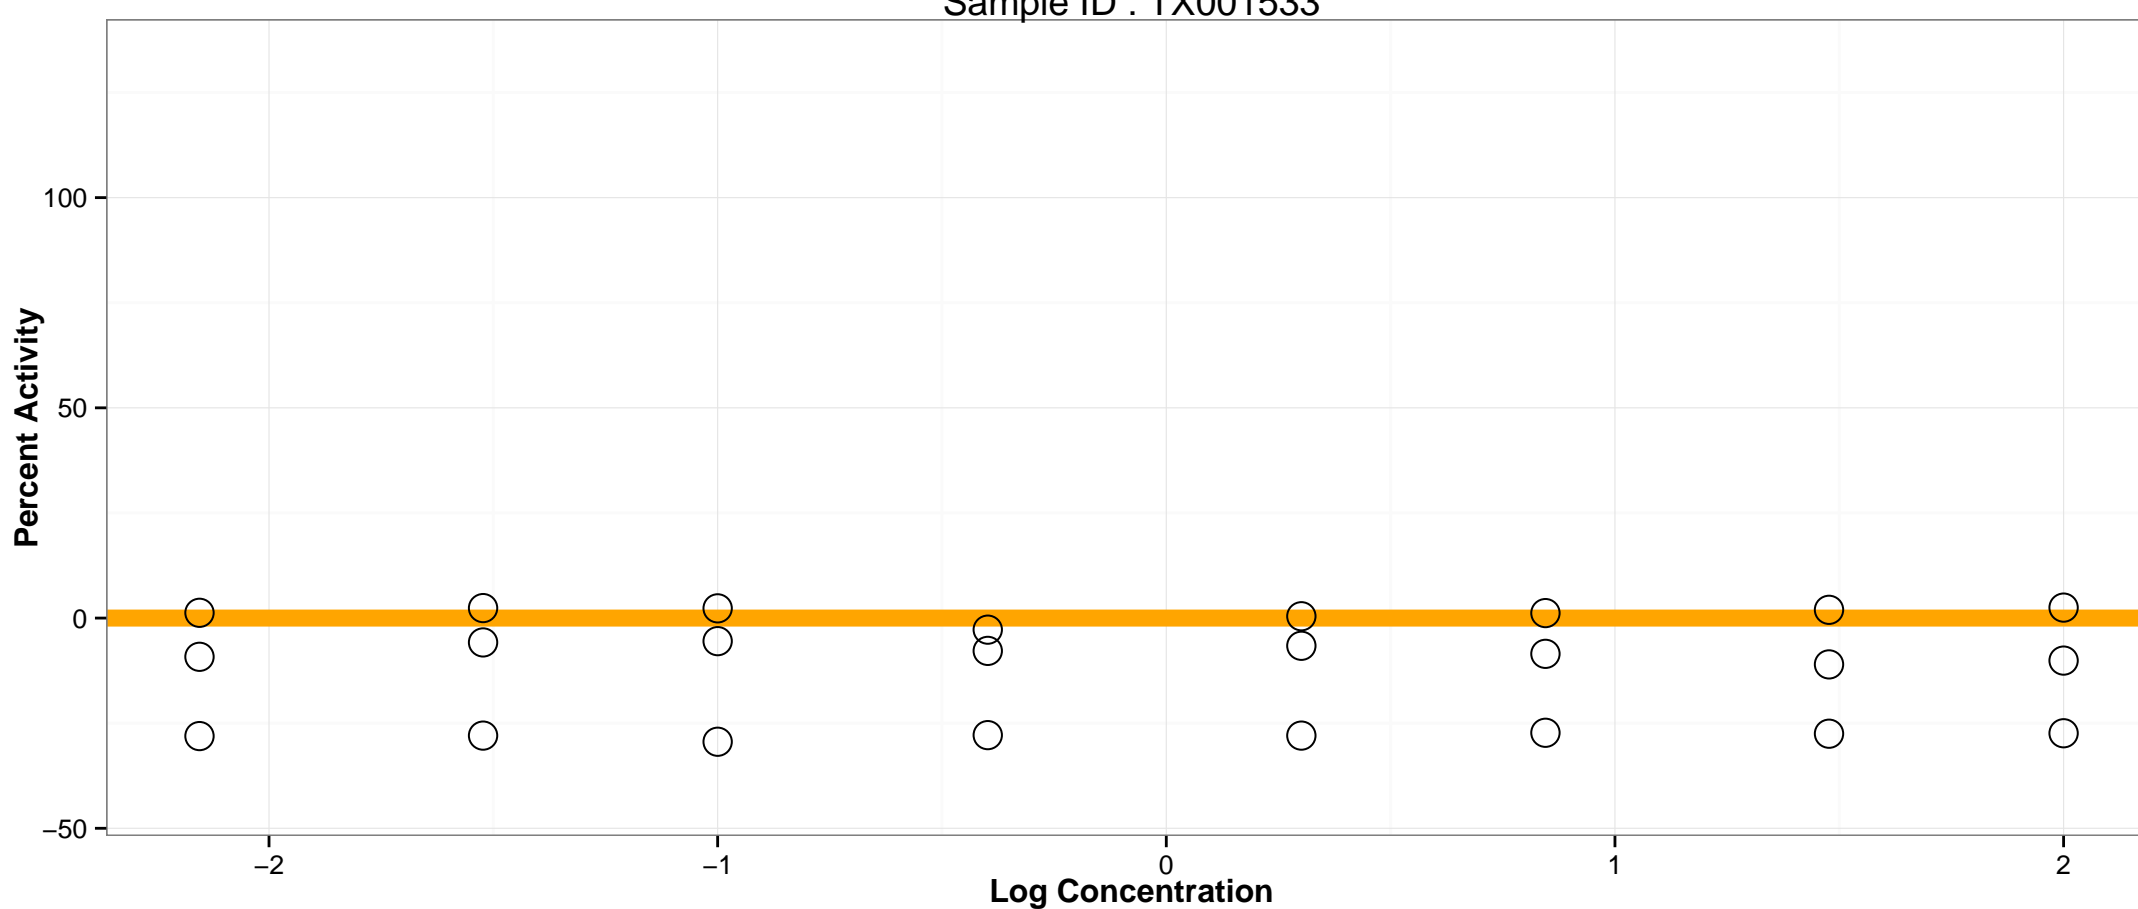

HILL MODEL

HILL MODEL: Not applicable

GAIN-LOSS MODEL

GNLS MODEL: Not applicable

|      | CNST   | HILL | GNLS |
|------|--------|------|------|
| AIC  | 206.86 | NA   | NA   |
| PROB | 1      | NA   | NA   |
| RMSE | 16.85  | NA   | NA   |

MAX\_MEAN : -10.4 MAX\_MED : -5.47 BMAD : 8.58  
COFF : 20 HIT-CALL : 0 FITC : 4 ACTP : 0  
FLAGS :

Chemical : Propanil  
CAS : 709-98-8

Assay ID 1508 (NHEERL\_TPO\_AUR\_dn)  
Sample ID : TX001536

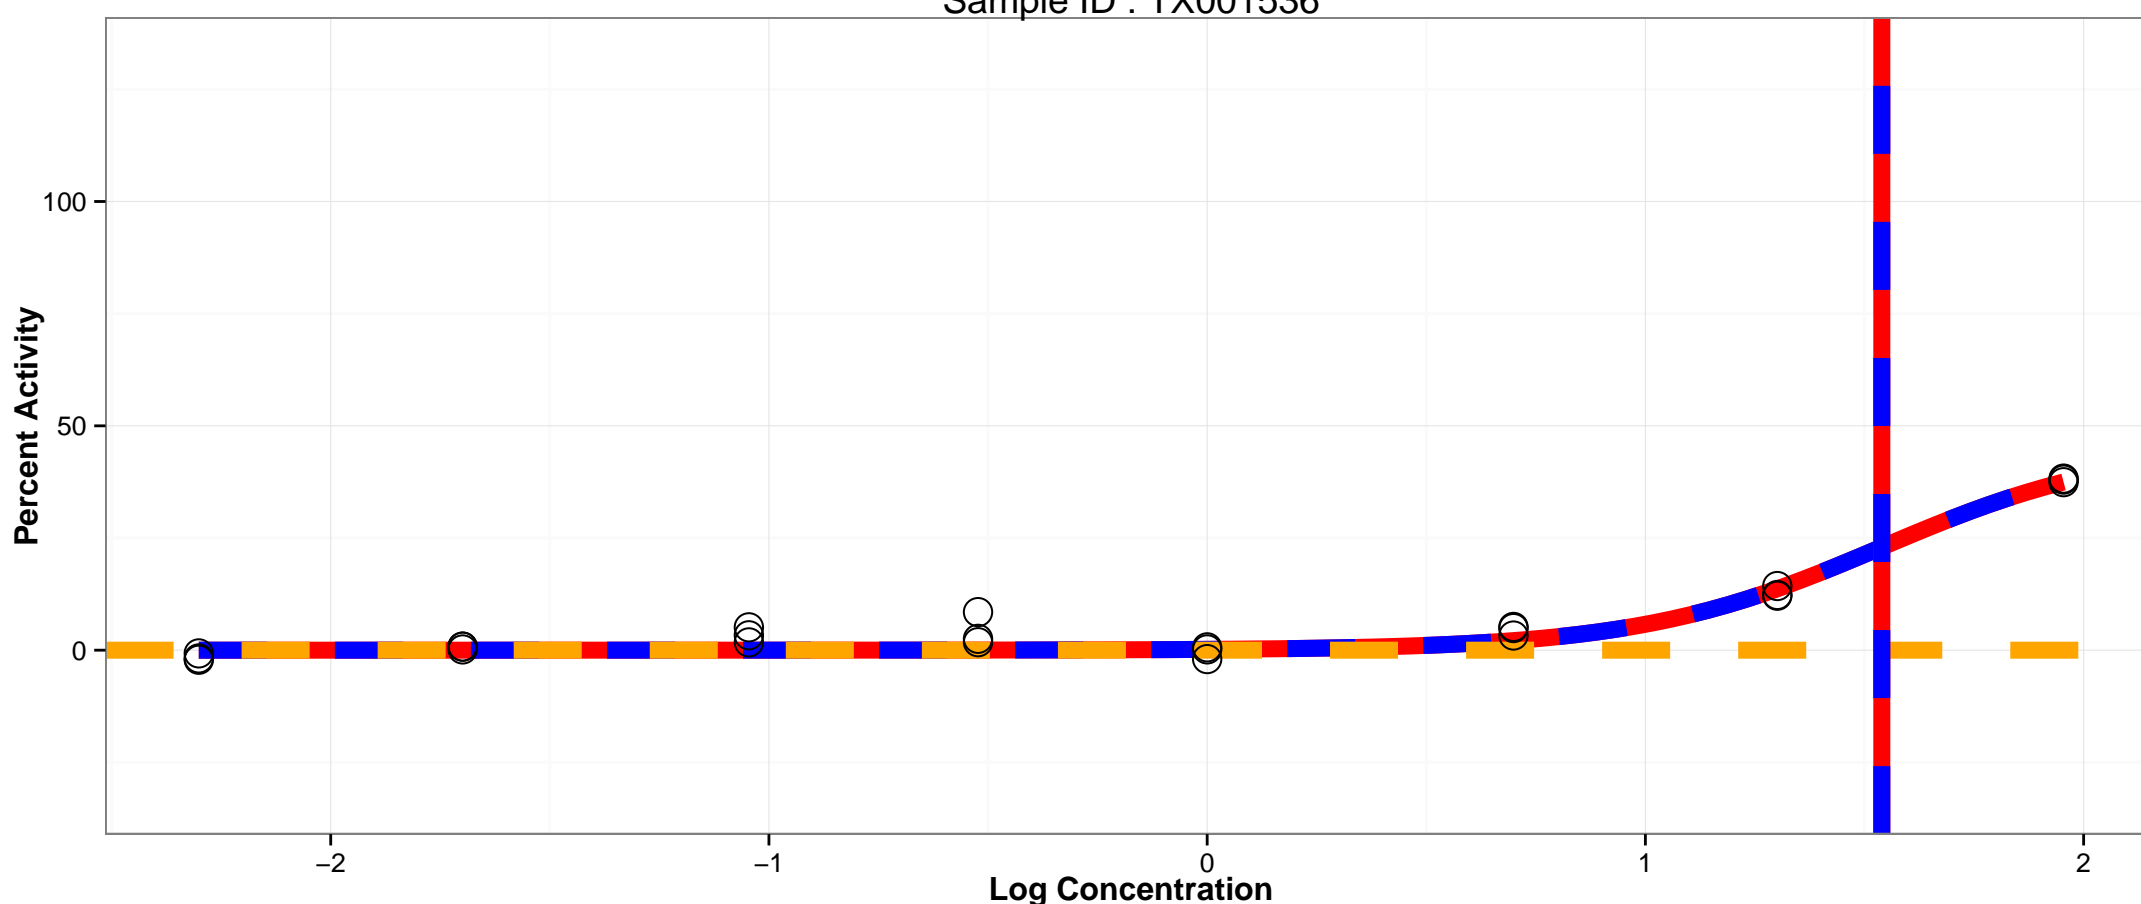

HILL MODEL

|     | tp   | ga    | gw    |
|-----|------|-------|-------|
| val | 45.9 | 1.54  | 1.56  |
| sd  | 6.22 | 0.107 | 0.374 |

GAIN-LOSS MODEL

|     | tp   | ga    | gw    | la    | lw    |
|-----|------|-------|-------|-------|-------|
| val | 45.9 | 1.54  | 1.56  | 3.95  | 5.23  |
| sd  | 6.22 | 0.107 | 0.374 | 11200 | 29400 |

|      | CNST   | HILL   | GNLS   |
|------|--------|--------|--------|
| AIC  | 188.17 | 117.89 | 121.89 |
| PROB | 0      | 0.88   | 0.12   |
| RMSE | 14.45  | 2.58   | 2.58   |

MAX\_MEAN : 37.9 MAX\_MED : 38 BMAD : 5.69  
COFF : 20 HIT-CALL : 1 FITC : 42 ACTP : 1  
FLAGS : 6

Assay ID 1509 (NHEERL\_HEK293T\_CellTiterGLO)  
Sample ID : TX001536

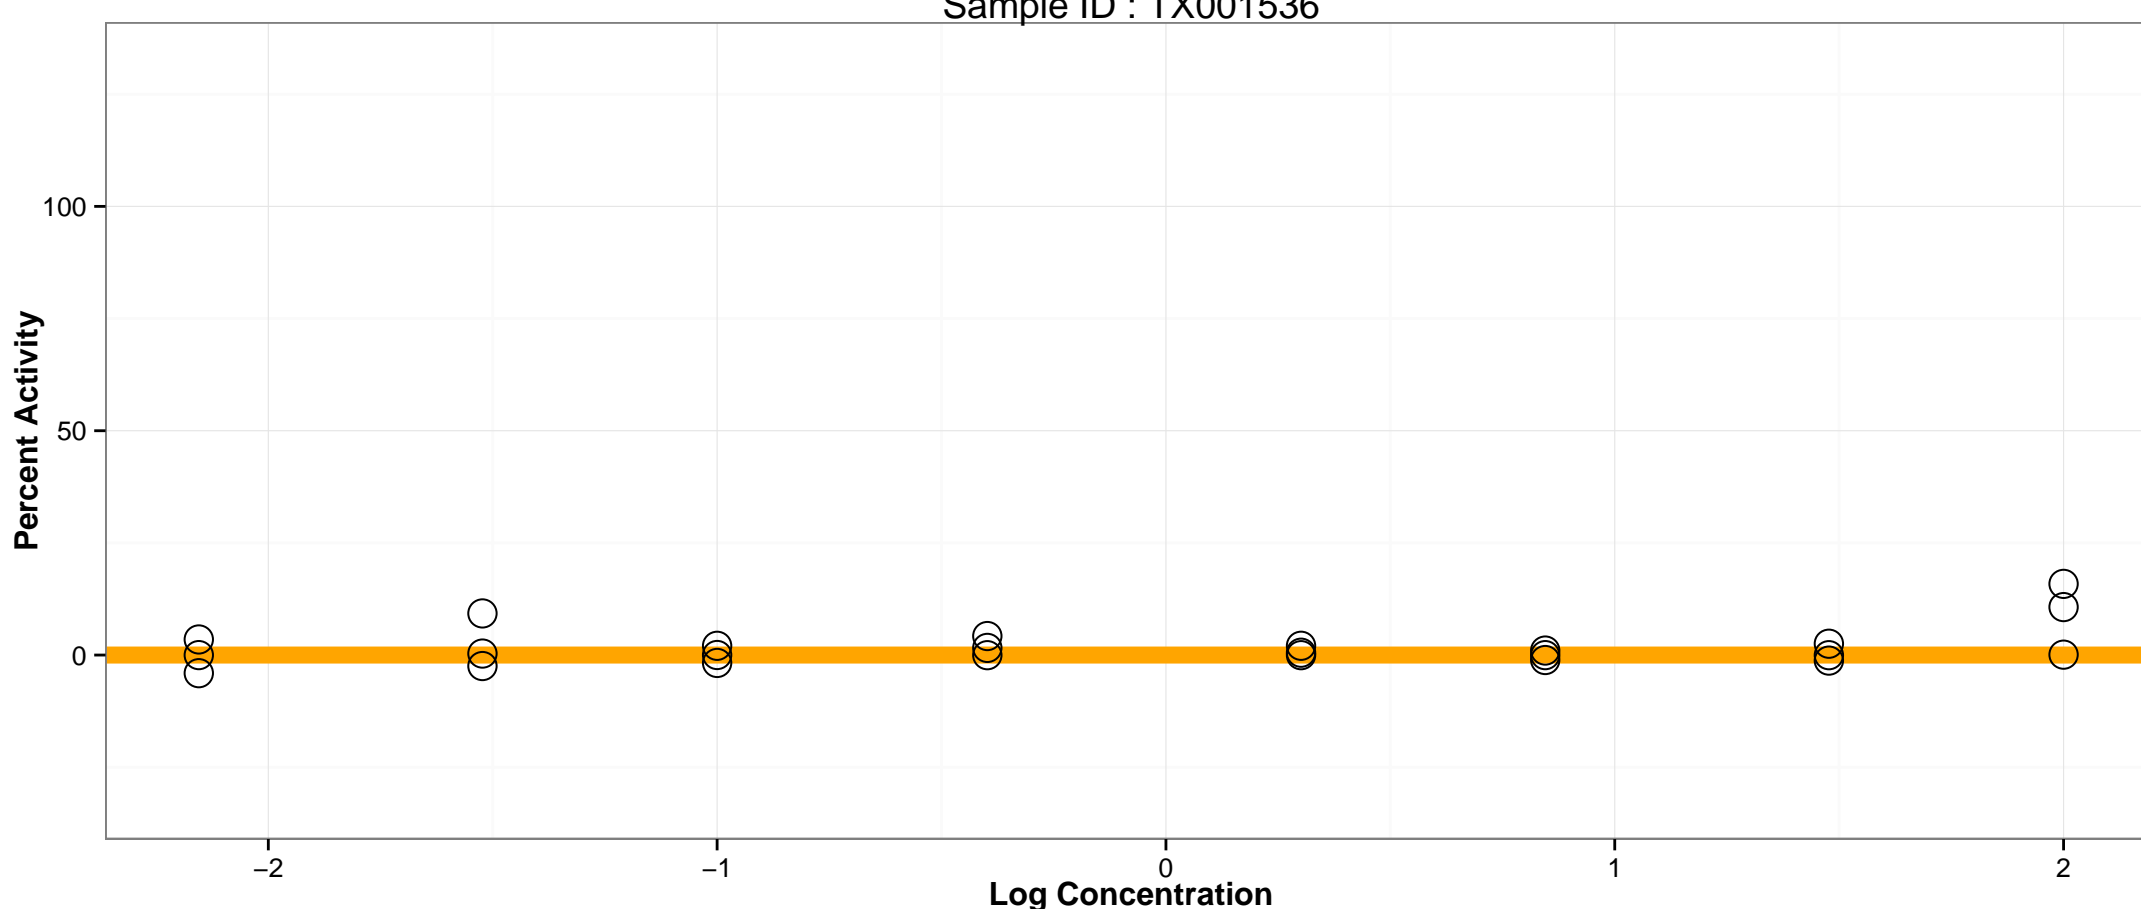

HILL MODEL

HILL MODEL: Not applicable

GAIN-LOSS MODEL

GNLS MODEL: Not applicable

|      | CNST   | HILL | GNLS |
|------|--------|------|------|
| AIC  | 134.03 | NA   | NA   |
| PROB | 1      | NA   | NA   |
| RMSE | 4.7    | NA   | NA   |

MAX\_MEAN : 8.89 MAX\_MED : 10.7 BMAD : 5.54  
COFF : 20 HIT-CALL : 0 FITC : 4 ACTP : 0  
FLAGS :

Assay ID 1848 (NHEERL\_Quantilum\_inhib\_2\_dn)  
Sample ID : TX001536

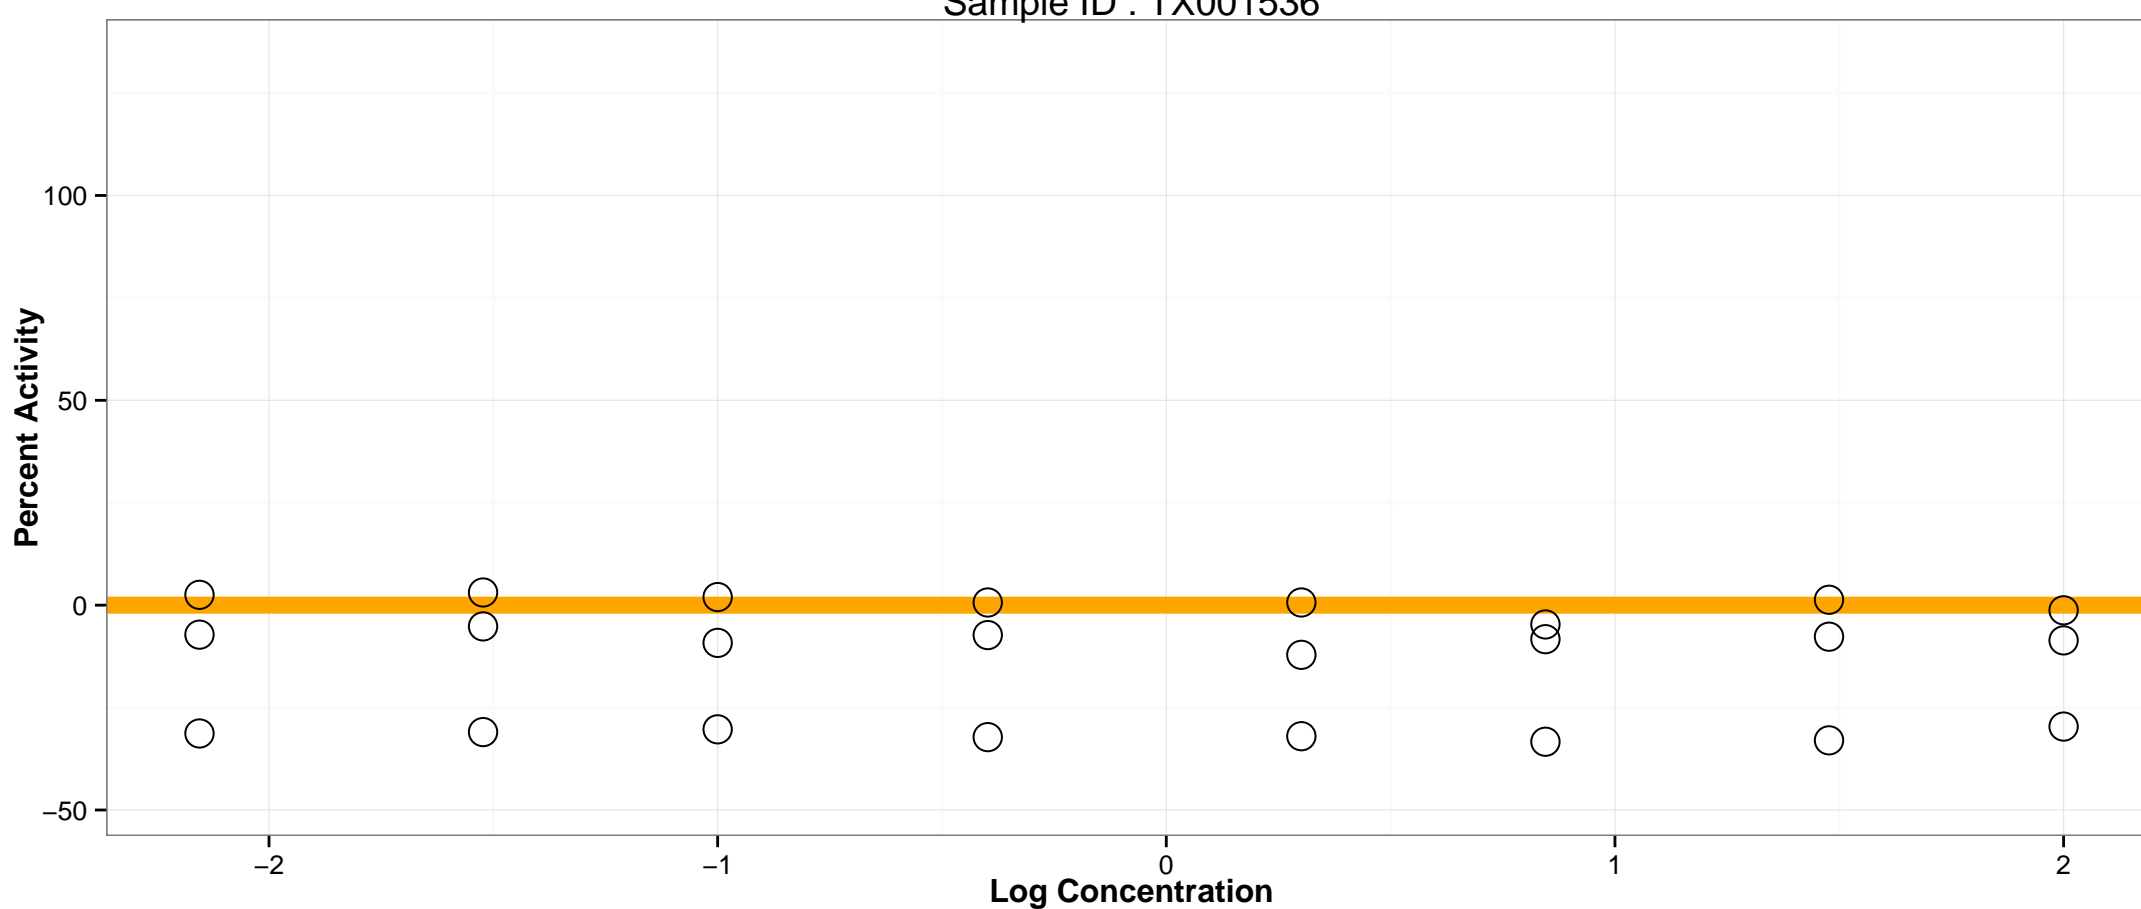

HILL MODEL

HILL MODEL: Not applicable

GAIN-LOSS MODEL

GNLS MODEL: Not applicable

|      | CNST   | HILL | GNLS |
|------|--------|------|------|
| AIC  | 212.15 | NA   | NA   |
| PROB | 1      | NA   | NA   |
| RMSE | 18.93  | NA   | NA   |

MAX\_MEAN : -11 MAX\_MED : -5.17 BMAD : 8.58  
COFF : 20 HIT-CALL : 0 FITC : 4 ACTP : 0  
FLAGS :

Chemical : Bifenazate  
CAS : 149877-41-8

Assay ID 1508 (NHEERL\_TPO\_AUR\_dn)  
Sample ID : TX001539

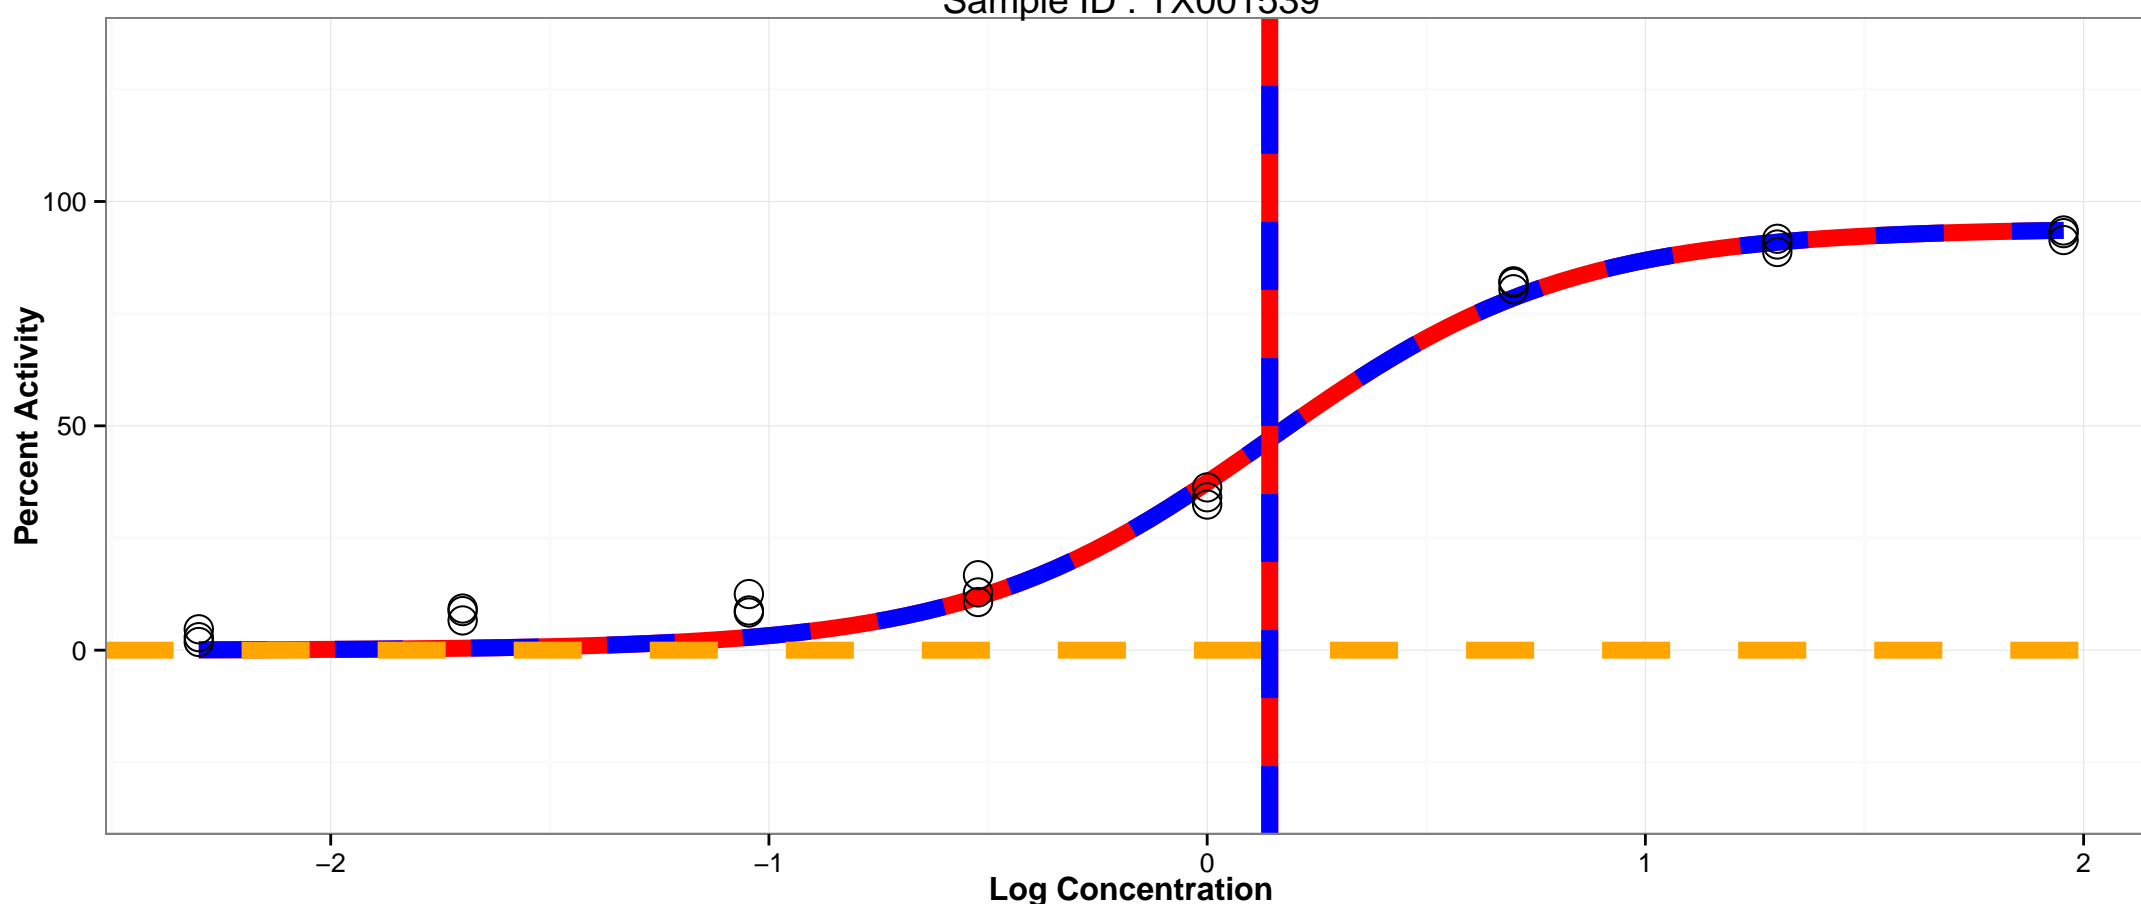

HILL MODEL

|     | tp   | ga     | gw    |
|-----|------|--------|-------|
| val | 94   | 0.143  | 1.27  |
| sd  | 1.77 | 0.0352 | 0.129 |

GAIN-LOSS MODEL

|     | tp | ga    | gw   | la   | lw   |
|-----|----|-------|------|------|------|
| val | 94 | 0.143 | 1.27 | 3.16 | 12.8 |
| sd  | NA | NA    | NA   | NA   | NA   |

|      | CNST   | HILL   | GNLS   |
|------|--------|--------|--------|
| AIC  | 264.77 | 149.57 | 153.57 |
| PROB | 0      | 0.88   | 0.12   |
| RMSE | 55.83  | 4.47   | 4.47   |

MAX\_MEAN : 92.6 MAX\_MED : 93 BMAD : 5.69  
COFF : 20 HIT-CALL : 1 FITC : 41 ACTP : 1  
FLAGS :

Assay ID 1509 (NHEERL\_HEK293T\_CellTiterGLO)  
Sample ID : TX001539

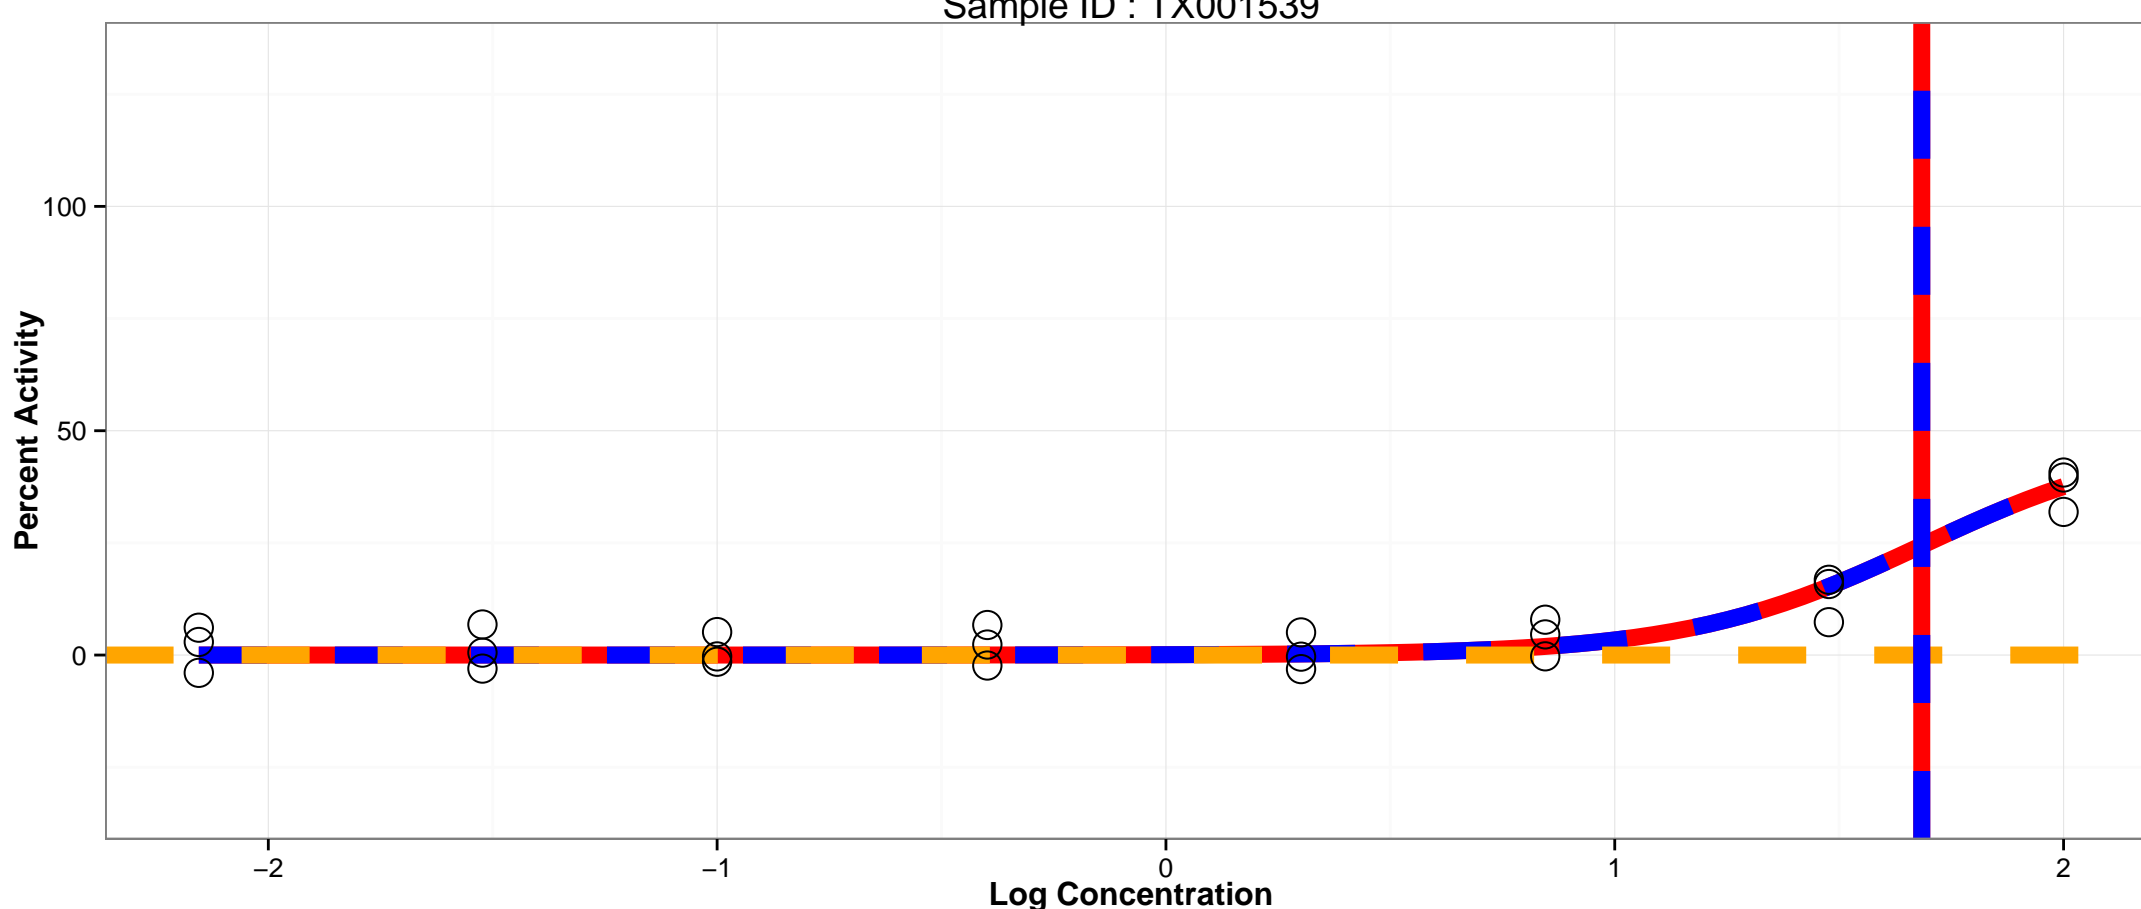

HILL MODEL

|     | tp   | ga    | gw    |
|-----|------|-------|-------|
| val | 48.8 | 1.68  | 1.65  |
| sd  | 14.6 | 0.201 | 0.736 |

GAIN-LOSS MODEL

|     | tp   | ga    | gw    | la   | lw   |
|-----|------|-------|-------|------|------|
| val | 48.8 | 1.68  | 1.65  | 3.42 | 5.93 |
| sd  | 14.6 | 0.201 | 0.736 | 1900 | 7930 |

|      | CNST   | HILL   | GNLS   |
|------|--------|--------|--------|
| AIC  | 190.74 | 146.24 | 150.24 |
| PROB | 0      | 0.88   | 0.12   |
| RMSE | 14.65  | 4.06   | 4.06   |

MAX\_MEAN : 37.4 MAX\_MED : 39.6 BMAD : 5.54  
COFF : 20 HIT-CALL : 1 FITC : 42 ACTP : 1  
FLAGS : 6

Assay ID 1848 (NHEERL\_QuantLum\_inhib\_2\_dn)  
Sample ID : TX001539

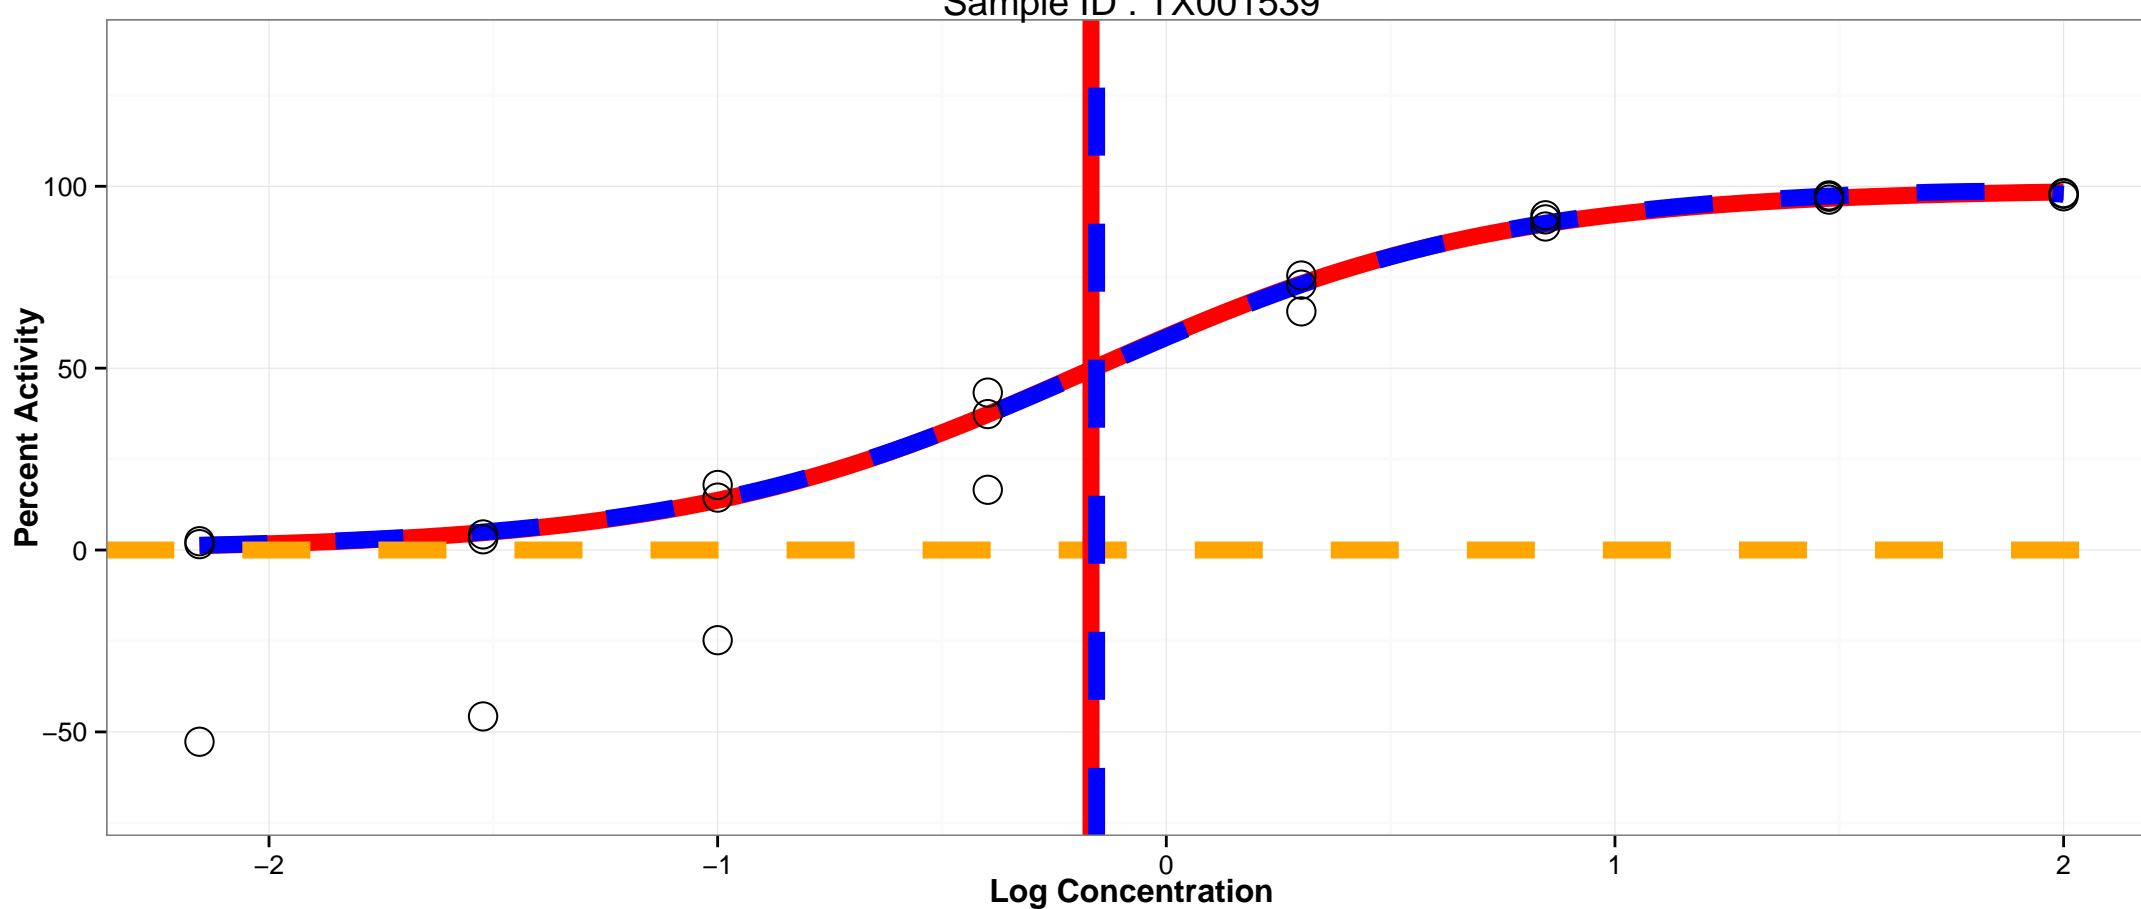

HILL MODEL

|     | tp   | ga     | gw     |
|-----|------|--------|--------|
| val | 99.3 | -0.168 | 0.957  |
| sd  | 2.04 | 0.0573 | 0.0861 |

GAIN-LOSS MODEL

|     | tp   | ga     | gw     | la   | lw   |
|-----|------|--------|--------|------|------|
| val | 100  | -0.155 | 0.94   | 2.38 | 4.87 |
| sd  | 3.07 | 0.066  | 0.0927 | 2.21 | 28.9 |

|      | CNST   | HILL   | GNLS   |
|------|--------|--------|--------|
| AIC  | 275.24 | 193.51 | 197.35 |
| PROB | 0      | 0.87   | 0.13   |
| RMSE | 66.61  | 17.67  | 17.72  |

MAX\_MEAN : 97.8 MAX\_MED : 97.9 BMAD : 8.58  
COFF : 20 HIT-CALL : 1 FITC : 41 ACTP : 1  
FLAGS :

Chemical : Triphenyltin hydroxide  
CAS : 76-87-9

Assay ID 1508 (NHEERL\_TPO\_AUR\_dn)  
Sample ID : TX001572

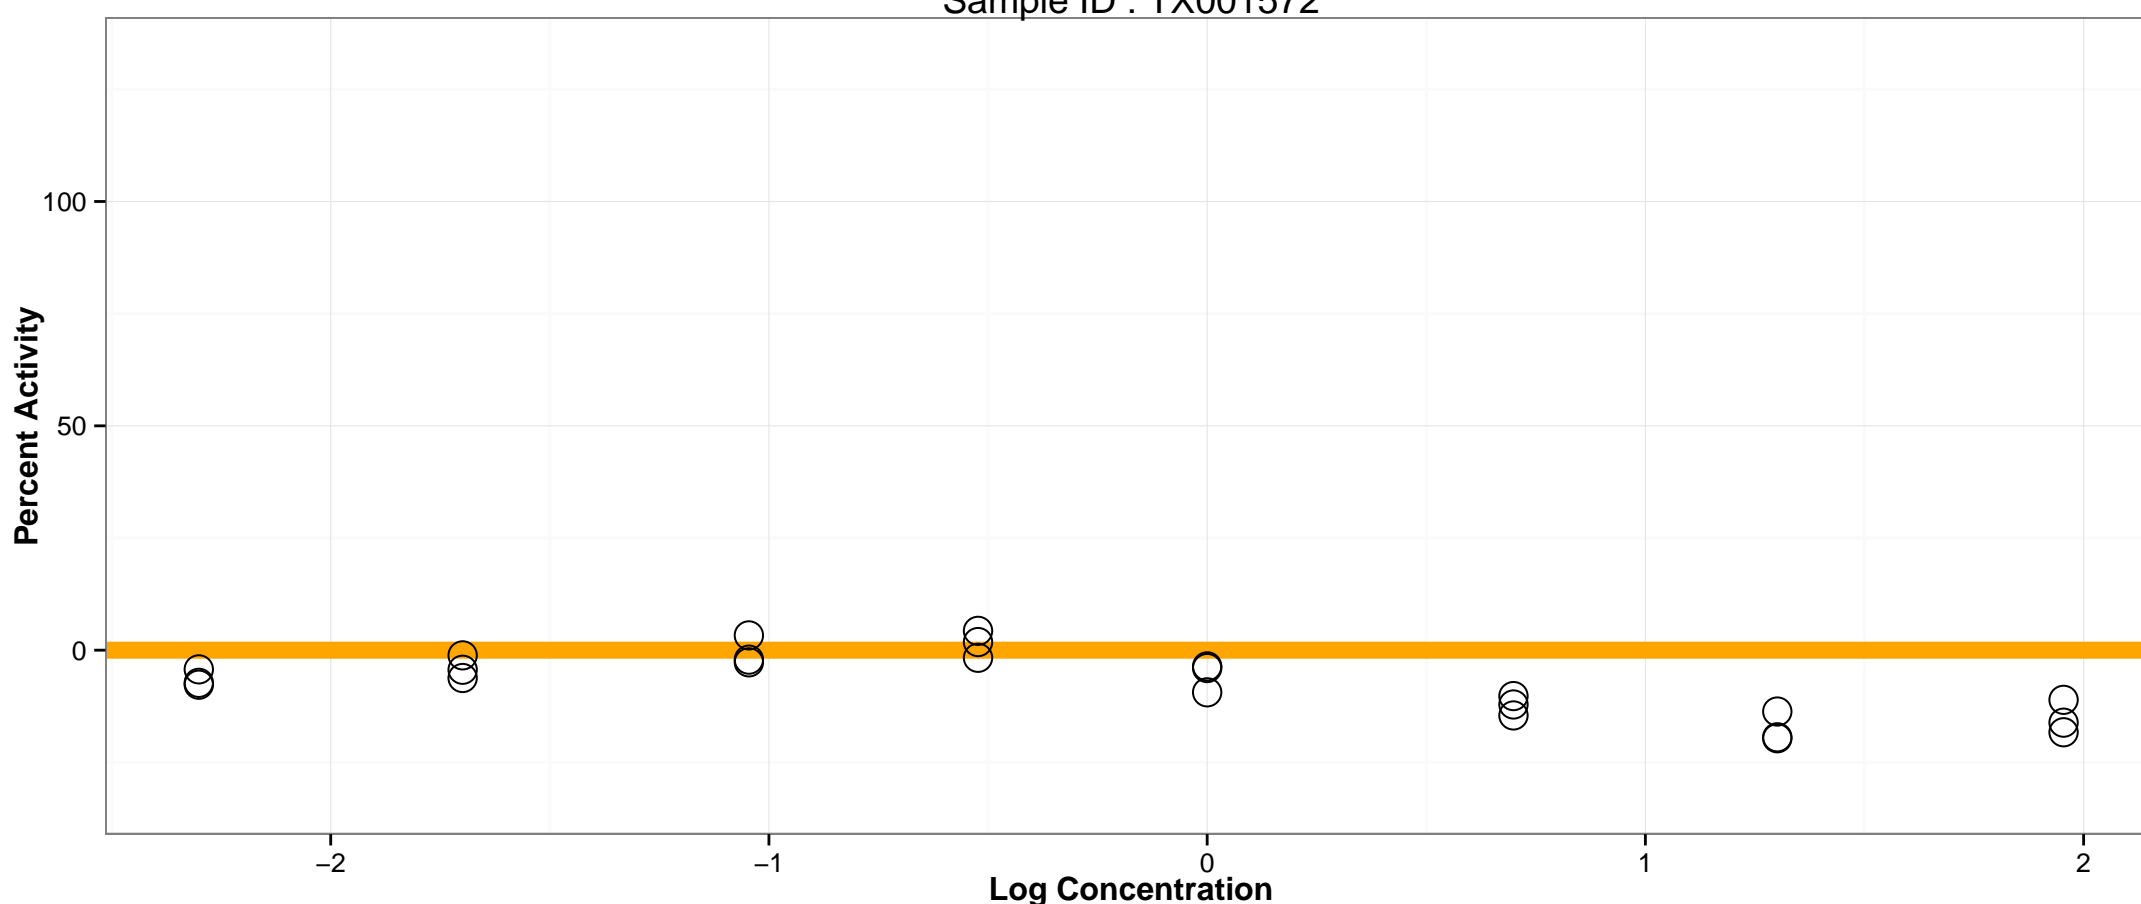

HILL MODEL

HILL MODEL: Not applicable

GAIN-LOSS MODEL

GNLS MODEL: Not applicable

|      | CNST  | HILL | GNLS |
|------|-------|------|------|
| AIC  | 183.5 | NA   | NA   |
| PROB | 1     | NA   | NA   |
| RMSE | 10.17 | NA   | NA   |

MAX\_MEAN : 1.49 MAX\_MED : 1.82 BMAD : 5.69  
COFF : 20 HIT-CALL : 0 FITC : 4 ACTP : 0  
FLAGS :

Assay ID 1509 (NHEERL\_HEK293T\_CellTiterGLO)  
Sample ID : TX001572

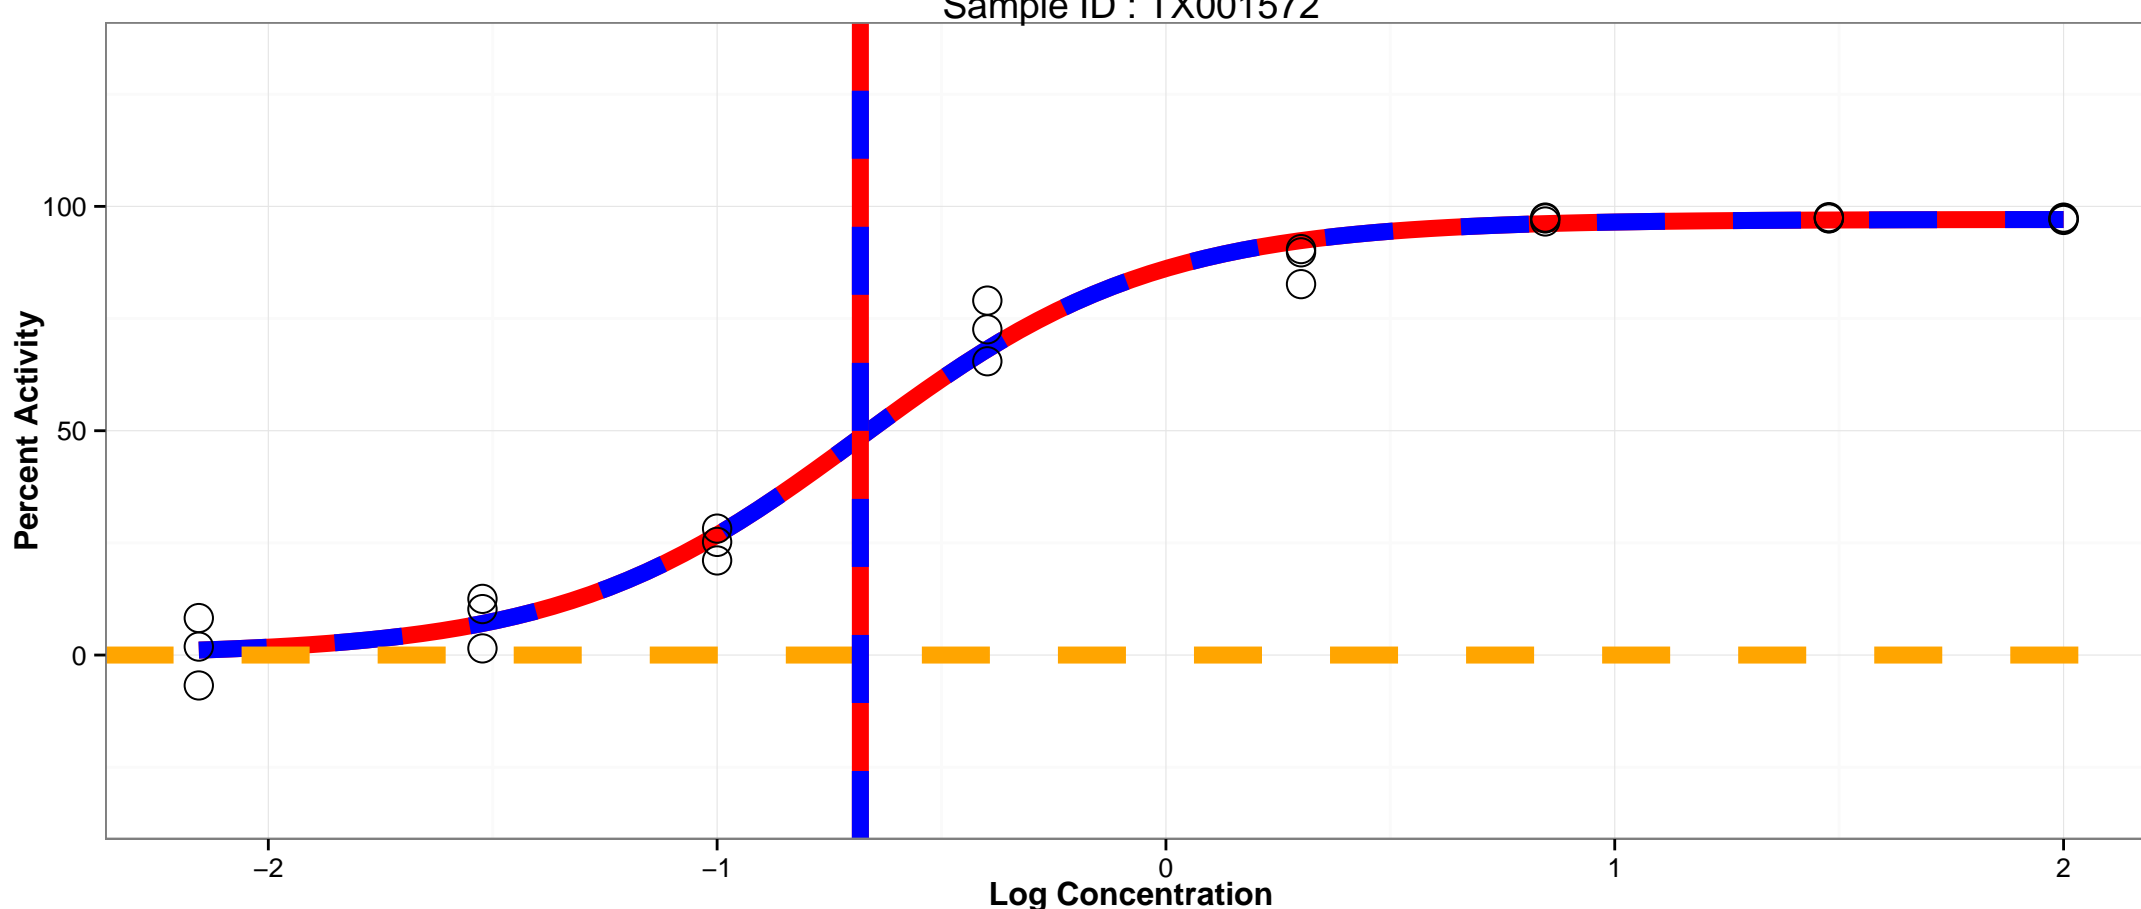

HILL MODEL

|     | tp   | ga     | gw    |
|-----|------|--------|-------|
| val | 97.1 | -0.681 | 1.32  |
| sd  | 1.09 | 0.0368 | 0.144 |

GAIN-LOSS MODEL

|     | tp   | ga     | gw    | la   | lw   |
|-----|------|--------|-------|------|------|
| val | 97.1 | -0.681 | 1.32  | 3.01 | 7.77 |
| sd  | 1.09 | 0.0368 | 0.144 | 637  | 4880 |

|      | CNST   | HILL   | GNLS   |
|------|--------|--------|--------|
| AIC  | 279.77 | 146.94 | 150.94 |
| PROB | 0      | 0.88   | 0.12   |
| RMSE | 72.55  | 4.45   | 4.45   |

MAX\_MEAN : 97.5 MAX\_MED : 97.4 BMAD : 5.54  
COFF : 20 HIT-CALL : 1 FITC : 41 ACTP : 1  
FLAGS :

Assay ID 1848 (NHEERL\_Quantilum\_inhib\_2\_dn)  
Sample ID : TX001572

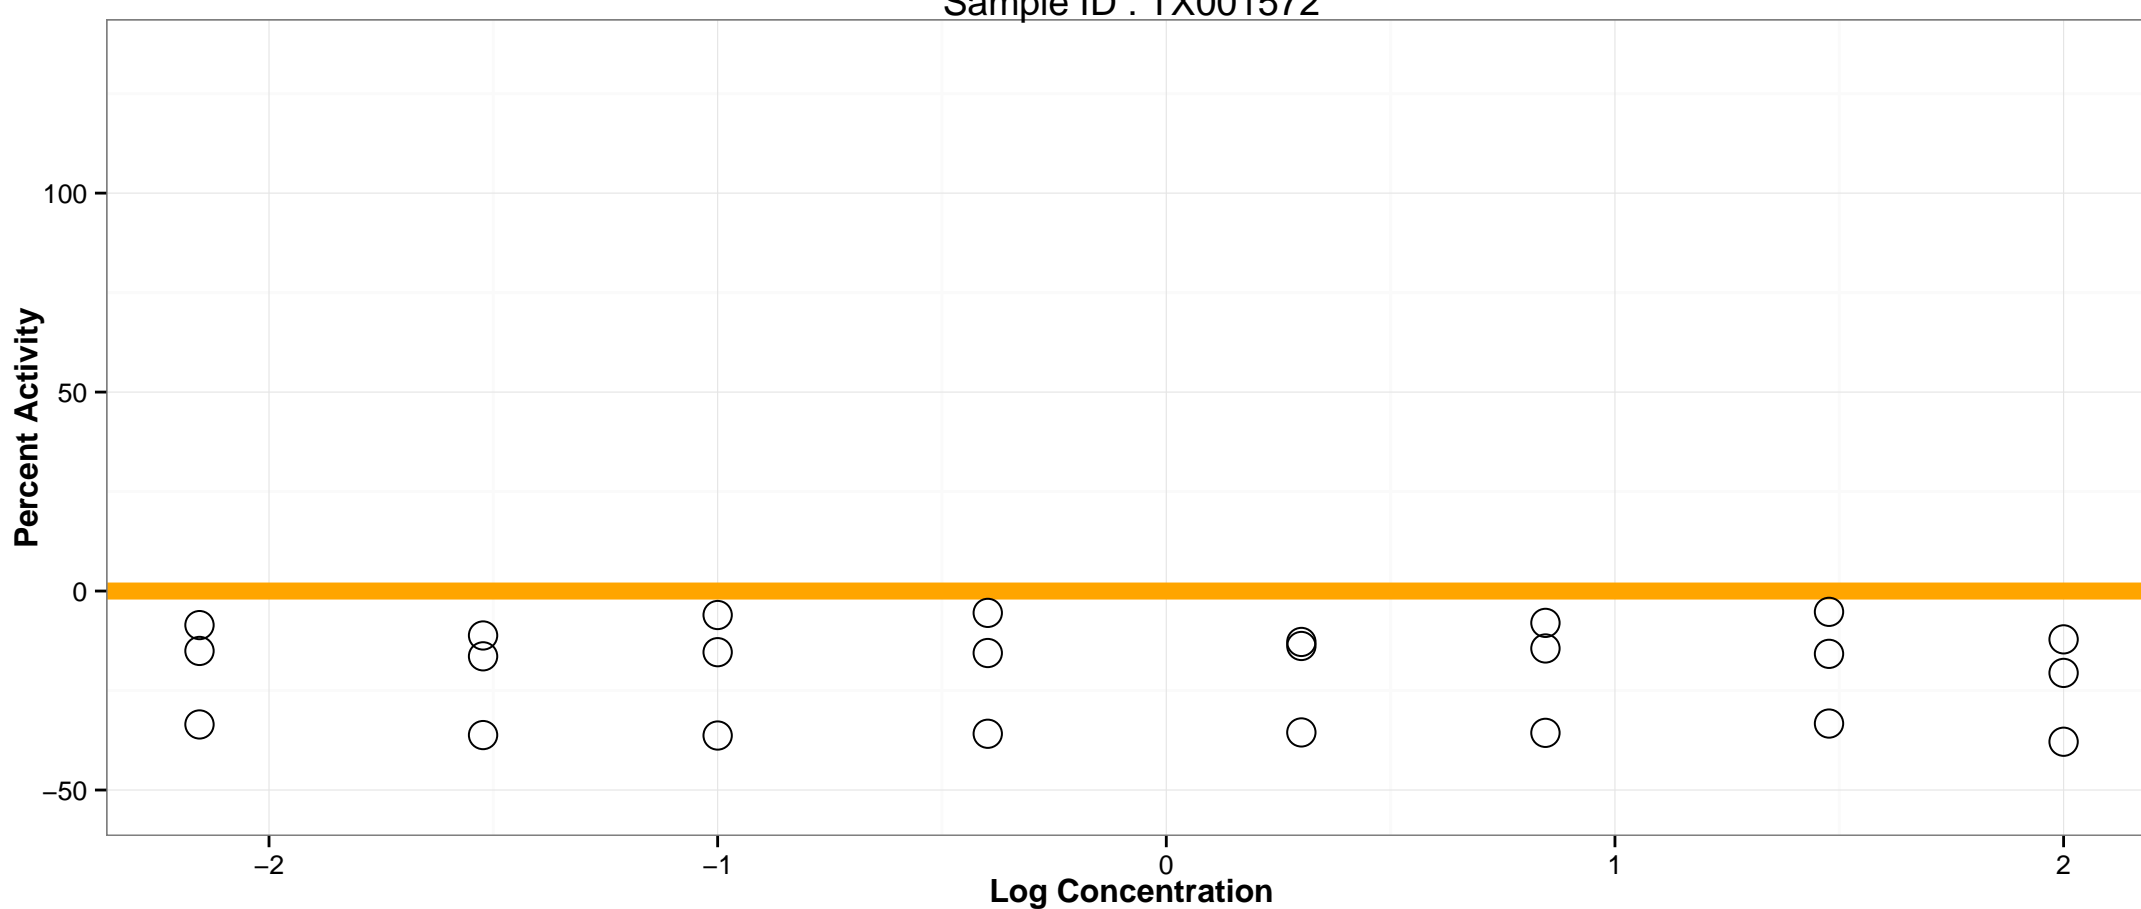

HILL MODEL

HILL MODEL: Not applicable

GAIN-LOSS MODEL

GNLS MODEL: Not applicable

|      | CNST  | HILL | GNLS |
|------|-------|------|------|
| AIC  | 224   | NA   | NA   |
| PROB | 1     | NA   | NA   |
| RMSE | 23.11 | NA   | NA   |

MAX\_MEAN : -18.1 MAX\_MED : -13.8 BMAD : 8.58  
COFF : 20 HIT-CALL : 0 FITC : 4 ACTP : 0  
FLAGS : 10

Chemical : Mevinphos  
CAS : 7786-34-7

Assay ID 1508 (NHEERL\_TPO\_AUR\_dn)  
Sample ID : TX001580

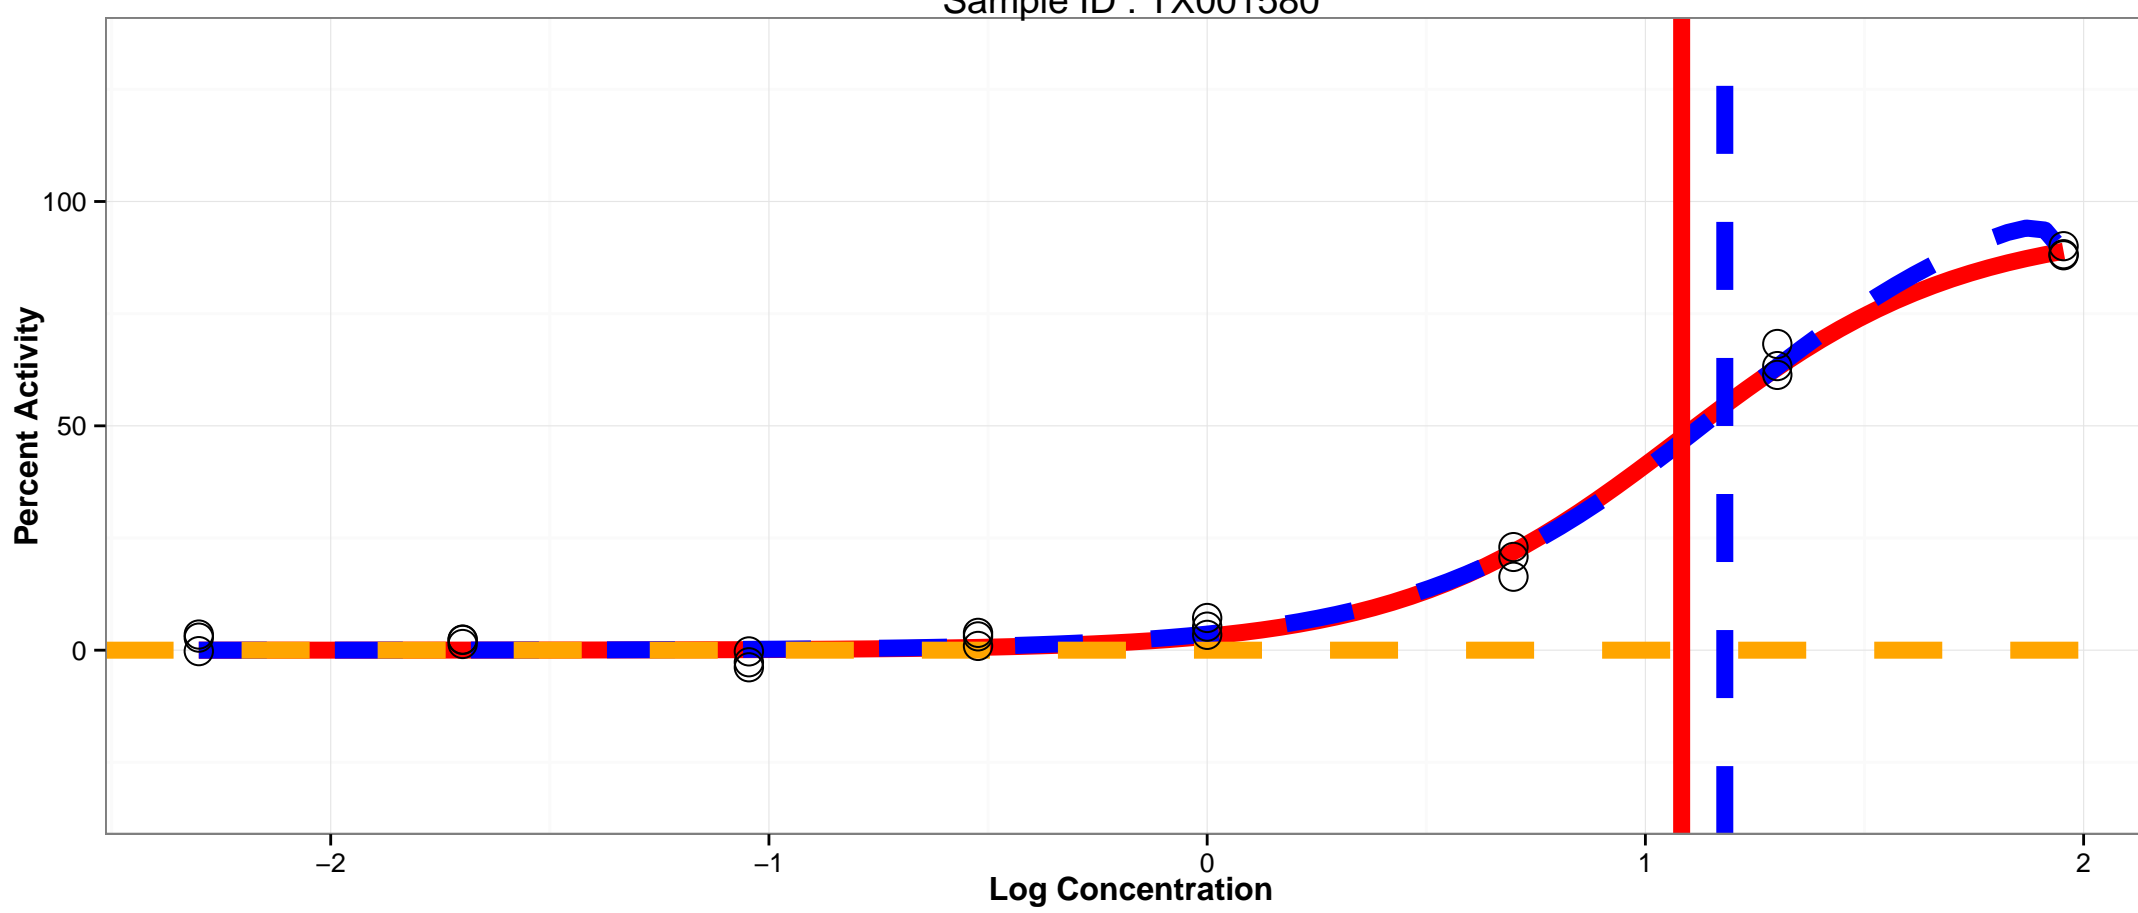

HILL MODEL

|     | tp   | ga     | gw    |
|-----|------|--------|-------|
| val | 94.7 | 1.08   | 1.36  |
| sd  | 2.36 | 0.0291 | 0.107 |

GAIN-LOSS MODEL

|     | tp  | ga   | gw   | la   | lw   |
|-----|-----|------|------|------|------|
| val | 108 | 1.18 | 1.24 | 2.03 | 13.3 |
| sd  | NA  | NA   | NA   | NA   | NA   |

|      | CNST   | HILL   | GNLS   |
|------|--------|--------|--------|
| AIC  | 242.15 | 123.61 | 125.97 |
| PROB | 0      | 0.77   | 0.23   |
| RMSE | 39.52  | 2.59   | 2.5    |

MAX\_MEAN : 88.8 MAX\_MED : 88.3 BMAD : 5.69  
COFF : 20 HIT-CALL : 1 FITC : 42 ACTP : 1  
FLAGS :

Assay ID 1509 (NHEERL\_HEK293T\_CellTiterGLO)  
Sample ID : TX001580

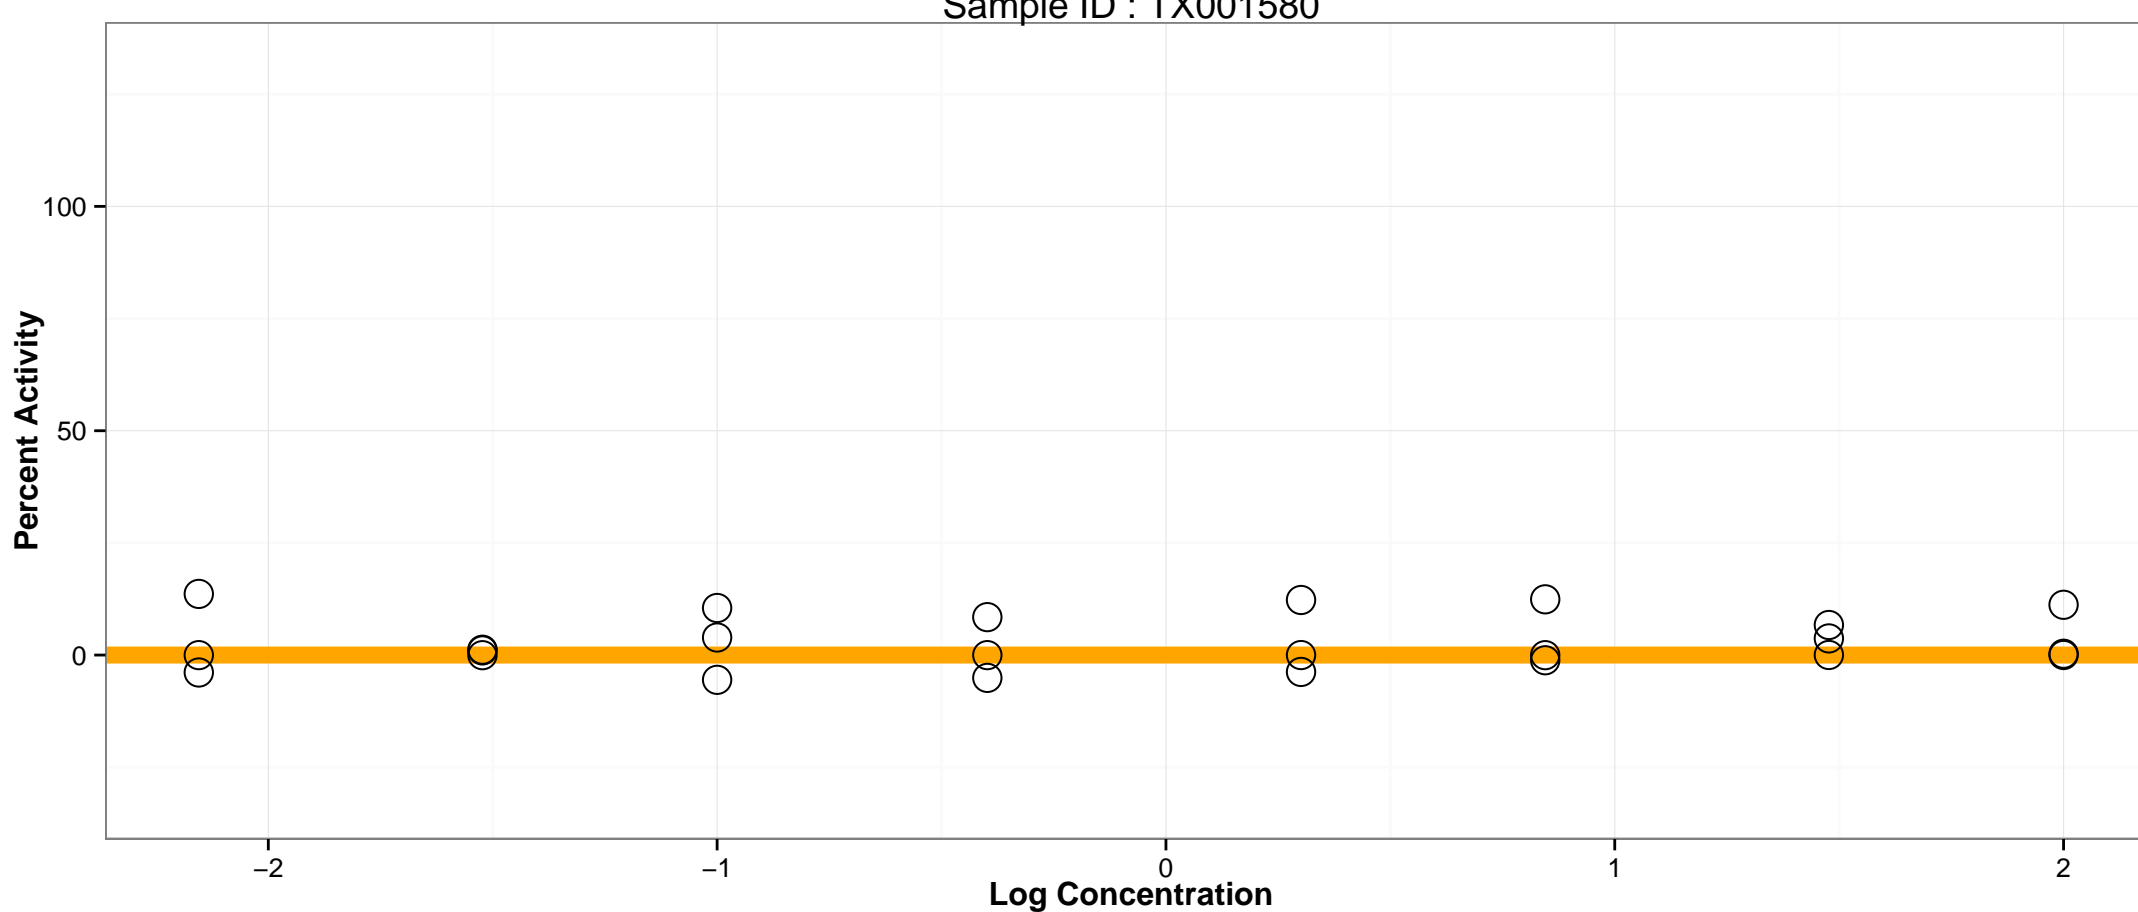

HILL MODEL

HILL MODEL: Not applicable

GAIN-LOSS MODEL

GNLS MODEL: Not applicable

|      | CNST   | HILL | GNLS |
|------|--------|------|------|
| AIC  | 158.58 | NA   | NA   |
| PROB | 1      | NA   | NA   |
| RMSE | 6.33   | NA   | NA   |

MAX\_MEAN : 3.85 MAX\_MED : 3.92 BMAD : 5.54  
COFF : 20 HIT-CALL : 0 FITC : 4 ACTP : 0  
FLAGS :

Assay ID 1848 (NHEERL\_Quantilum\_inhib\_2\_dn)  
Sample ID : TX001580

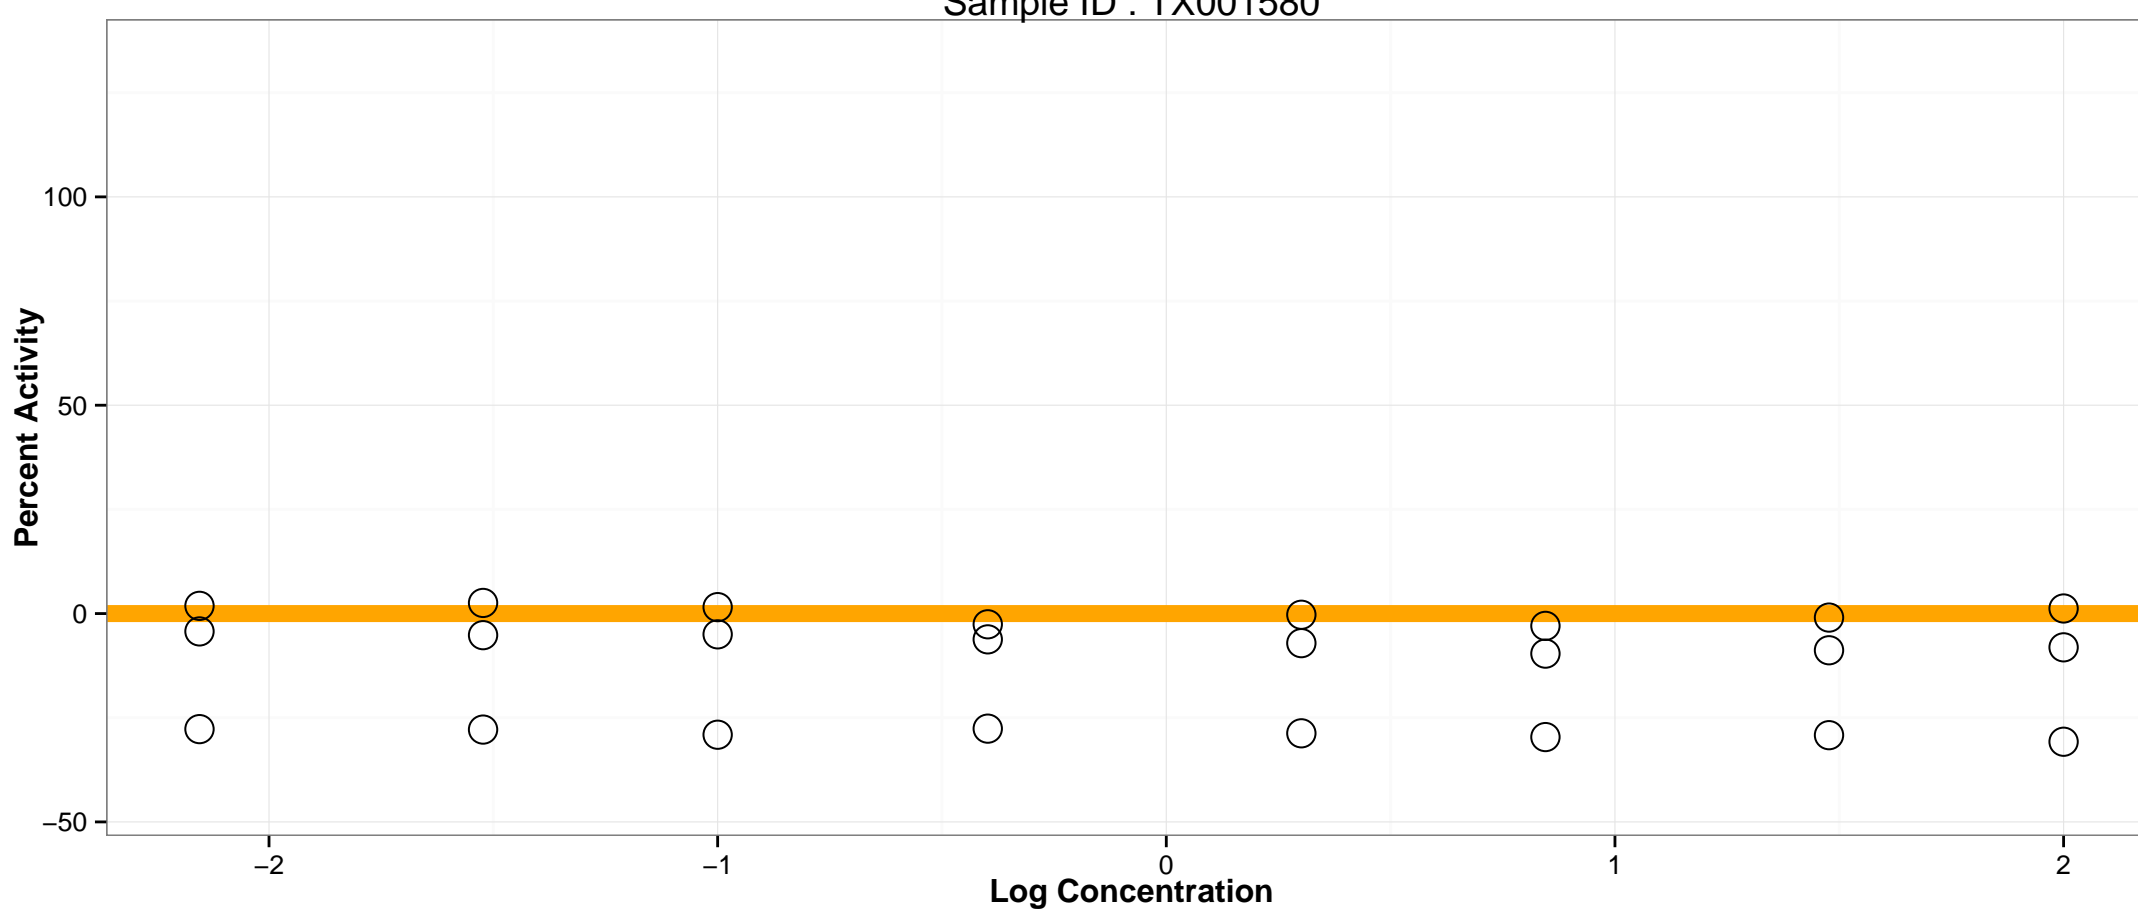

HILL MODEL

HILL MODEL: Not applicable

GAIN-LOSS MODEL

GNLS MODEL: Not applicable

|      | CNST  | HILL | GNLS |
|------|-------|------|------|
| AIC  | 207.2 | NA   | NA   |
| PROB | 1     | NA   | NA   |
| RMSE | 17.16 | NA   | NA   |

MAX\_MEAN : -10 MAX\_MED : -4.27 BMAD : 8.58  
COFF : 20 HIT-CALL : 0 FITC : 4 ACTP : 0  
FLAGS :



Chemical : Chlorethoxyfos  
CAS : 54593-83-8

Assay ID 1508 (NHEERL\_TPO\_AUR\_dn)  
Sample ID : TX001582

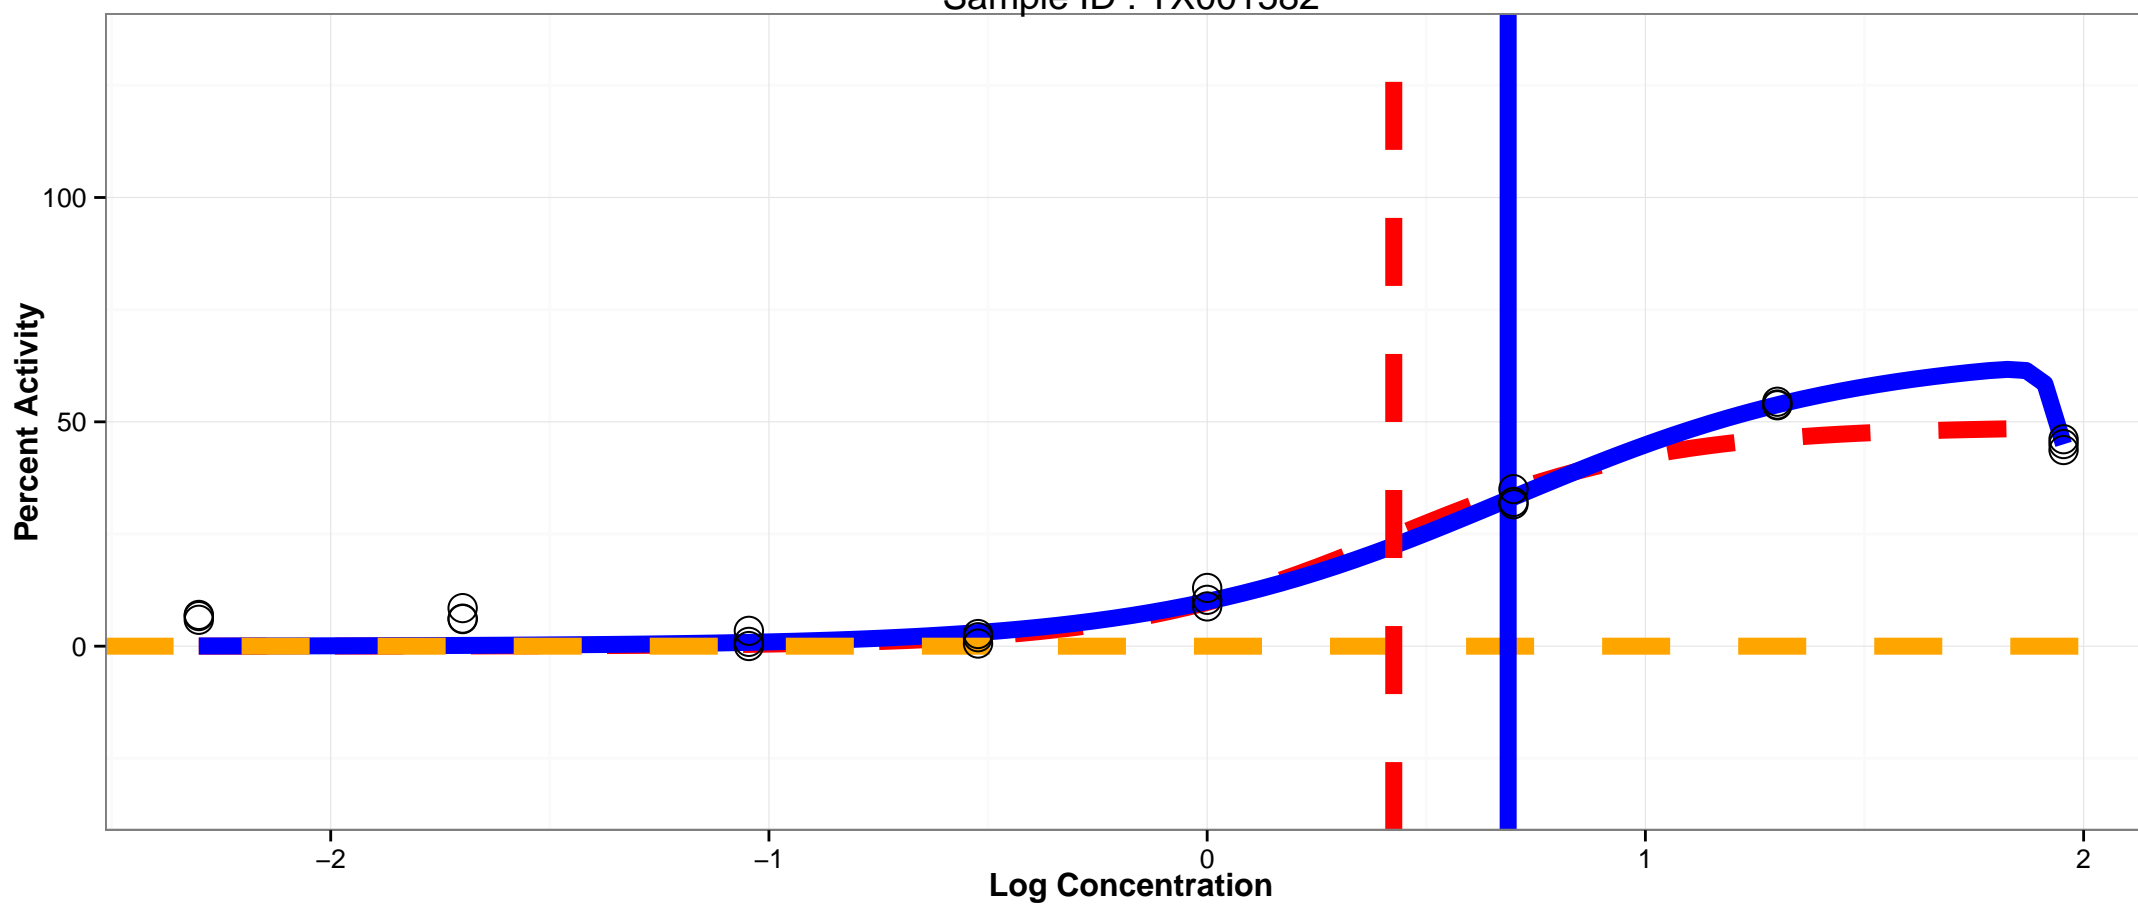

HILL MODEL

|     | tp   | ga     | gw    |
|-----|------|--------|-------|
| val | 48.9 | 0.426  | 1.42  |
| sd  | 2.87 | 0.0726 | 0.206 |

GAIN-LOSS MODEL

|     | tp   | ga     | gw    | la      | lw   |
|-----|------|--------|-------|---------|------|
| val | 65.4 | 0.687  | 1.09  | 1.98    | 17.9 |
| sd  | 5.37 | 0.0919 | 0.136 | 0.00427 | 4.59 |

|      | CNST   | HILL   | GNLS   |
|------|--------|--------|--------|
| AIC  | 230.29 | 153.31 | 139.67 |
| PROB | 0      | 0      | 1      |
| RMSE | 27.95  | 4.72   | 3.55   |

MAX\_MEAN : 54 MAX\_MED : 53.9 BMAD : 5.69  
COFF : 20 HIT-CALL : 1 FITC : 50 ACTP : 1  
FLAGS :

Assay ID 1509 (NHEERL\_HEK293T\_CellTiterGLO)  
Sample ID : TX001582

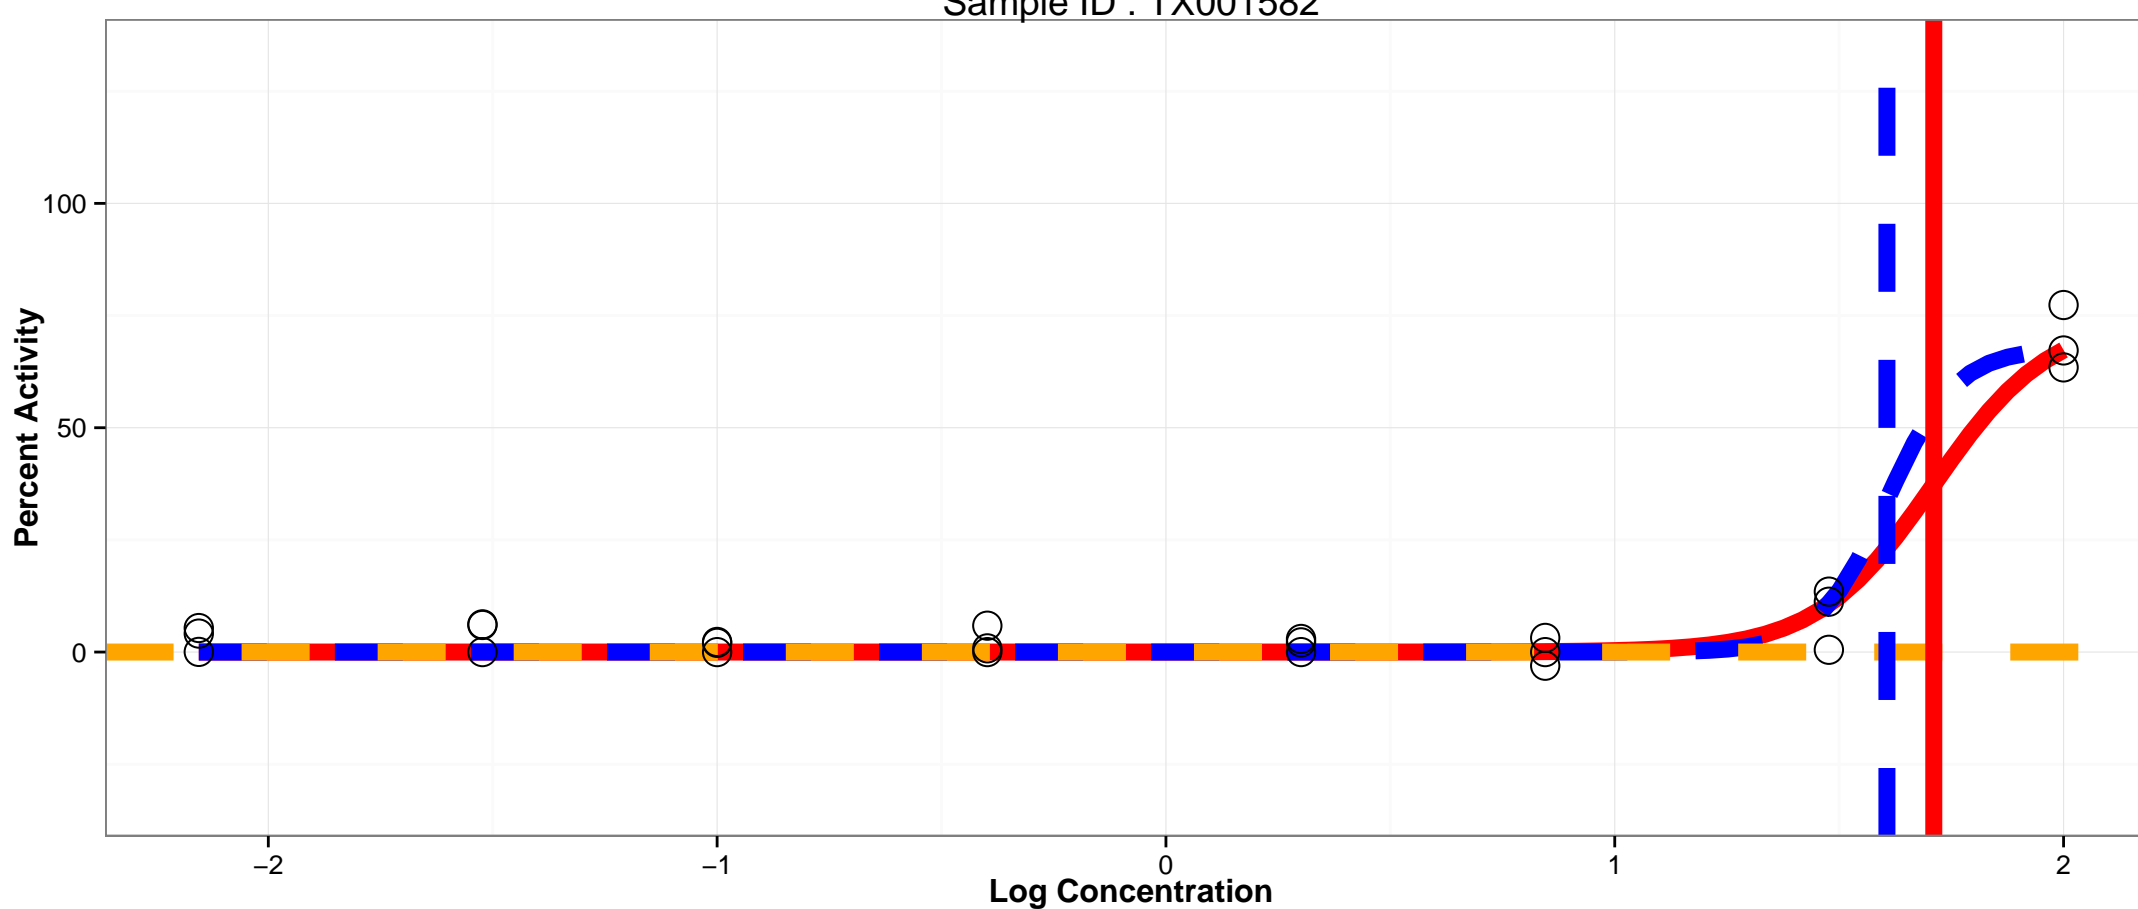

HILL MODEL

|     | tp   | ga   | gw   |
|-----|------|------|------|
| val | 74.7 | 1.71 | 3.33 |
| sd  | NA   | NA   | NA   |

GAIN-LOSS MODEL

|     | tp   | ga   | gw   | la   | lw   |
|-----|------|------|------|------|------|
| val | 67.7 | 1.61 | 5.63 | 3.94 | 3.33 |
| sd  | NA   | NA   | NA   | NA   | NA   |

|      | CNST   | HILL   | GNLS   |
|------|--------|--------|--------|
| AIC  | 201.46 | 144.64 | 148.64 |
| PROB | 0      | 0.88   | 0.12   |
| RMSE | 25.03  | 4.21   | 4.21   |

MAX\_MEAN : 69.3 MAX\_MED : 67.2 BMAD : 5.54  
COFF : 20 HIT-CALL : 1 FITC : 42 ACTP : 1  
FLAGS : 6

Assay ID 1848 (NHEERL\_Quantilum\_inhib\_2\_dn)  
Sample ID : TX001582

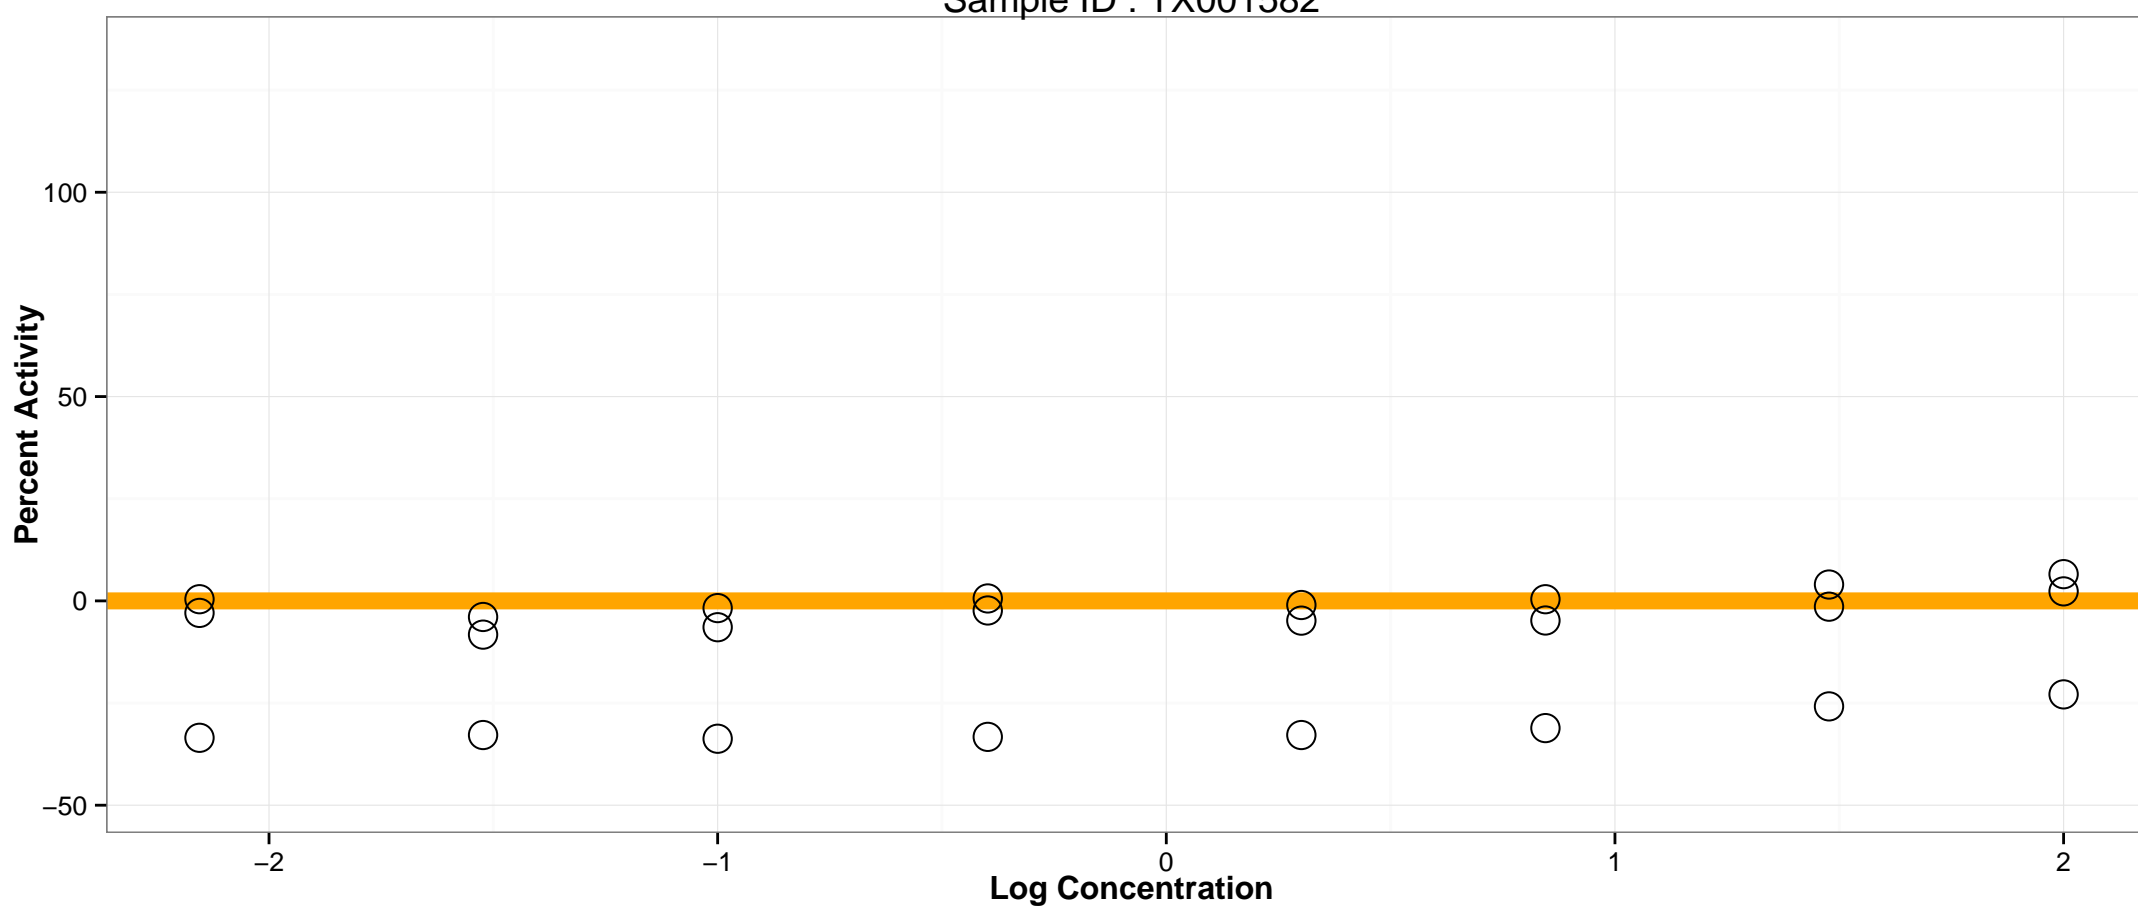

HILL MODEL

HILL MODEL: Not applicable

GAIN-LOSS MODEL

GNLS MODEL: Not applicable

|      | CNST   | HILL | GNLS |
|------|--------|------|------|
| AIC  | 208.94 | NA   | NA   |
| PROB | 1      | NA   | NA   |
| RMSE | 18.18  | NA   | NA   |

MAX\_MEAN : -4.65 MAX\_MED : 2.34 BMAD : 8.58  
COFF : 20 HIT-CALL : 0 FITC : 4 ACTP : 0  
FLAGS :

Assay ID 1508 (NHEERL\_TPO\_AUR\_dn)  
Sample ID : TX001588

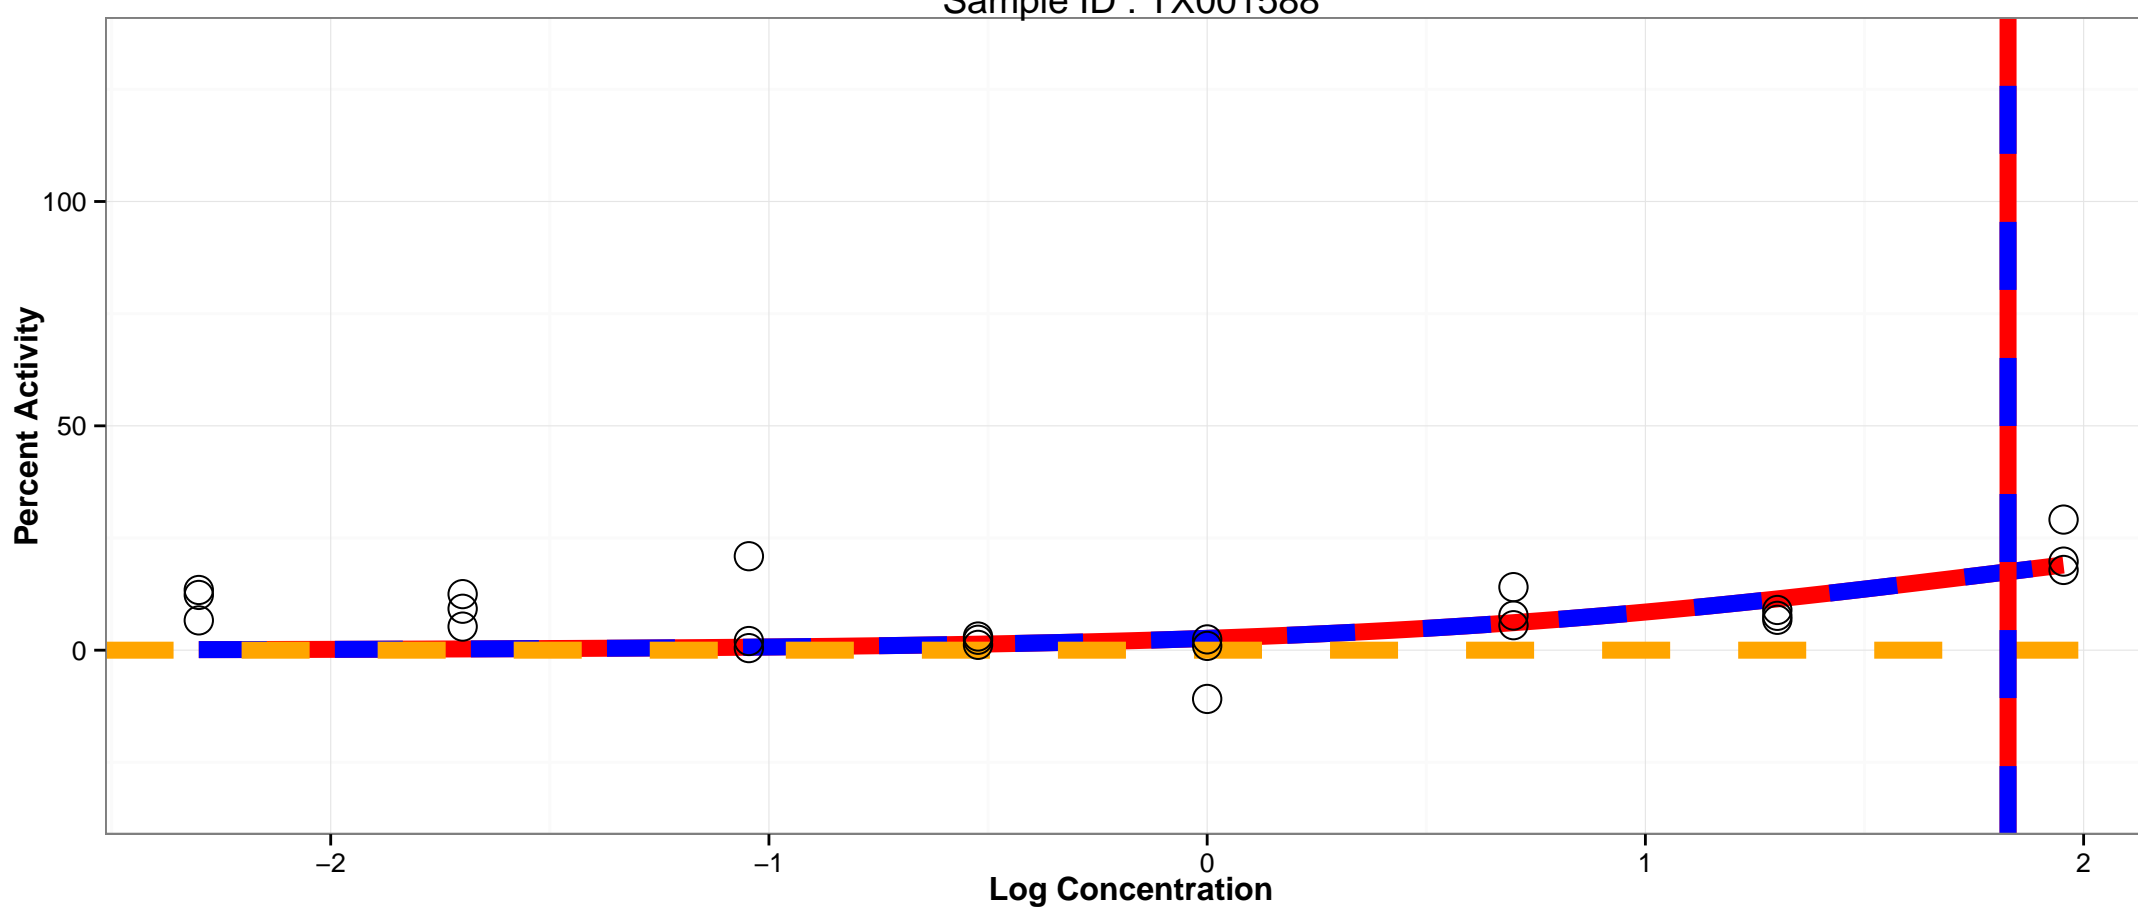

**HILL MODEL**

|     | tp   | ga    | gw    |
|-----|------|-------|-------|
| val | 34.9 | 1.83  | 0.596 |
| sd  | 22.9 | 0.988 | 0.451 |

**GAIN-LOSS MODEL**

|     | tp   | ga    | gw    | la   | lw   |
|-----|------|-------|-------|------|------|
| val | 34.9 | 1.83  | 0.596 | 3.74 | 4.61 |
| sd  | 22.9 | 0.987 | 0.451 | 2040 | 5250 |

|      | CNST  | HILL   | GNLS   |
|------|-------|--------|--------|
| AIC  | 189.1 | 173.68 | 177.68 |
| PROB | 0     | 0.88   | 0.12   |
| RMSE | 11.66 | 7.74   | 7.74   |

MAX\_MEAN : 22.3 MAX\_MED : 19.8 BMAD : 5.69  
COFF : 20 HIT-CALL : 0 FITC : 21 ACTP : 1  
FLAGS : 12

Assay ID 1509 (NHEERL\_HEK293T\_CellTiterGLO)  
Sample ID : TX001588

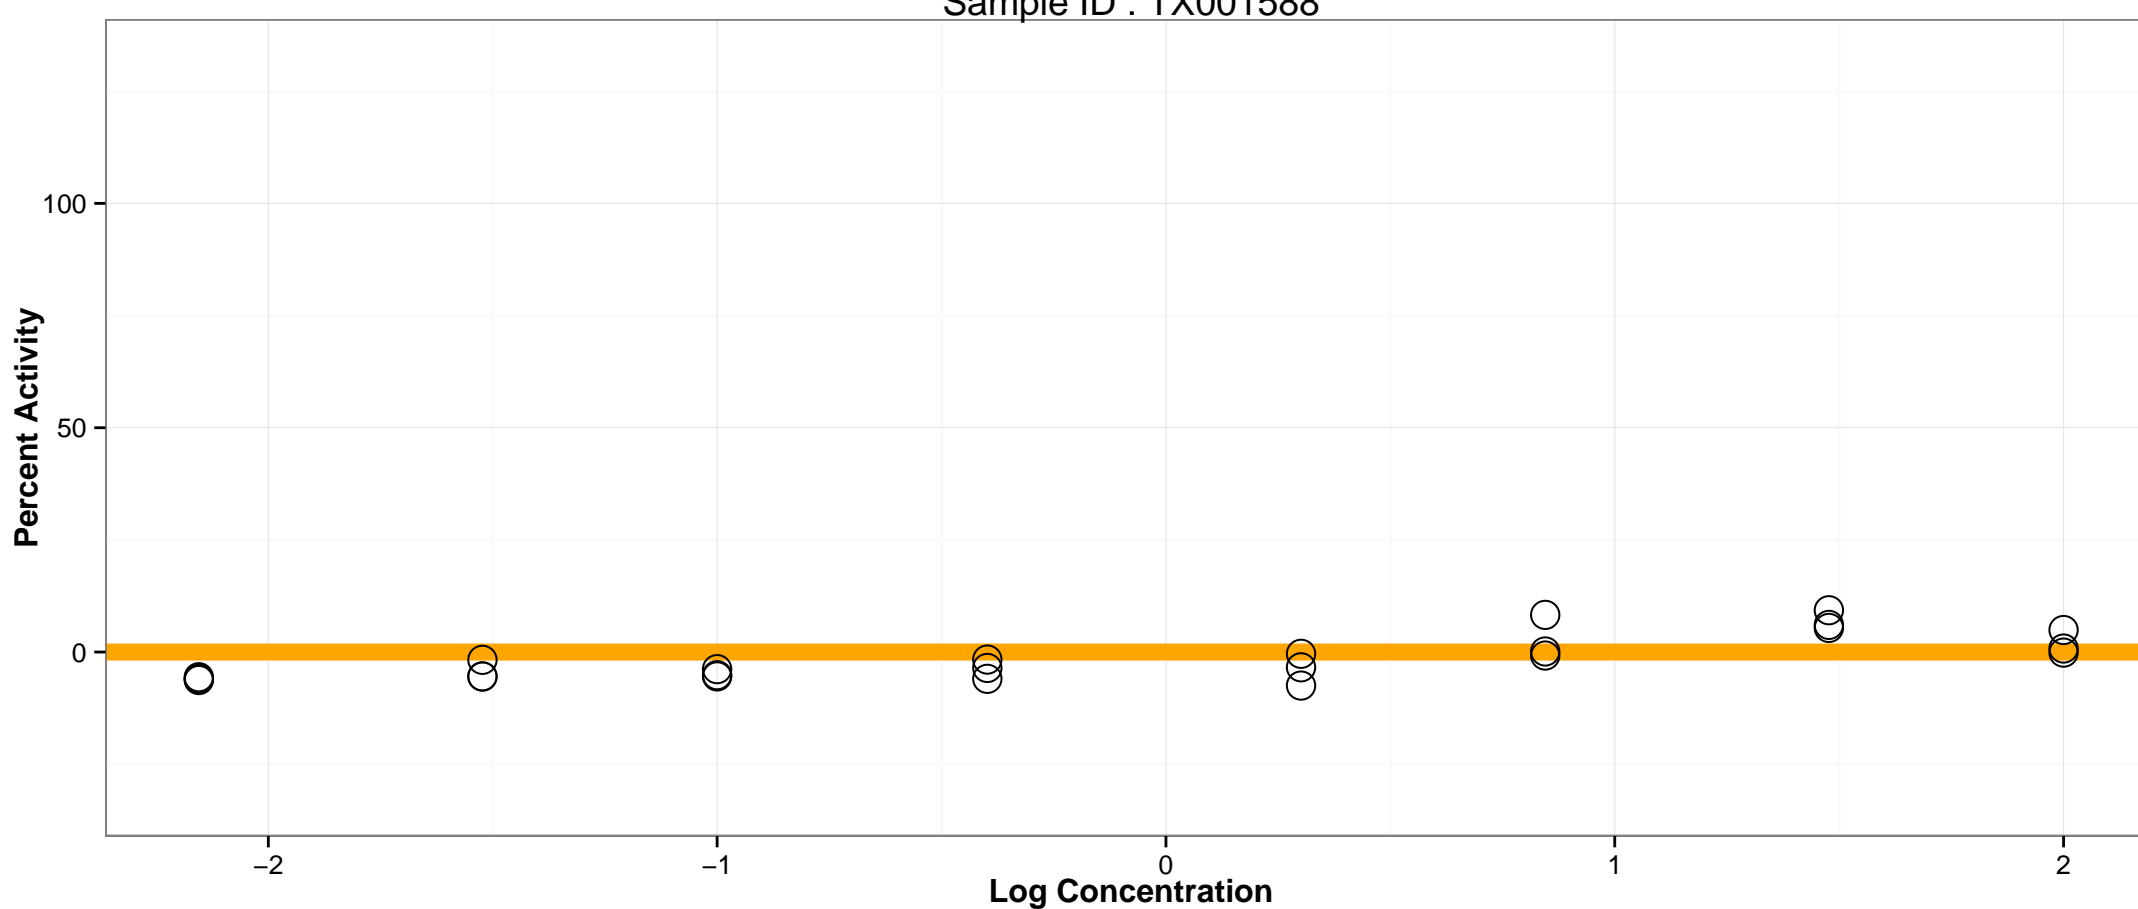

**HILL MODEL**

HILL MODEL: Not applicable

**GAIN-LOSS MODEL**

GNLS MODEL: Not applicable

|      | CNST   | HILL | GNLS |
|------|--------|------|------|
| AIC  | 151.23 | NA   | NA   |
| PROB | 1      | NA   | NA   |
| RMSE | 5.01   | NA   | NA   |

MAX\_MEAN : 6.93 MAX\_MED : 6.06 BMAD : 5.54  
COFF : 20 HIT-CALL : 0 FITC : 4 ACTP : 0  
FLAGS :

Assay ID 1848 (NHEERL\_Quantilum\_inhib\_2\_dn)  
Sample ID : TX001588

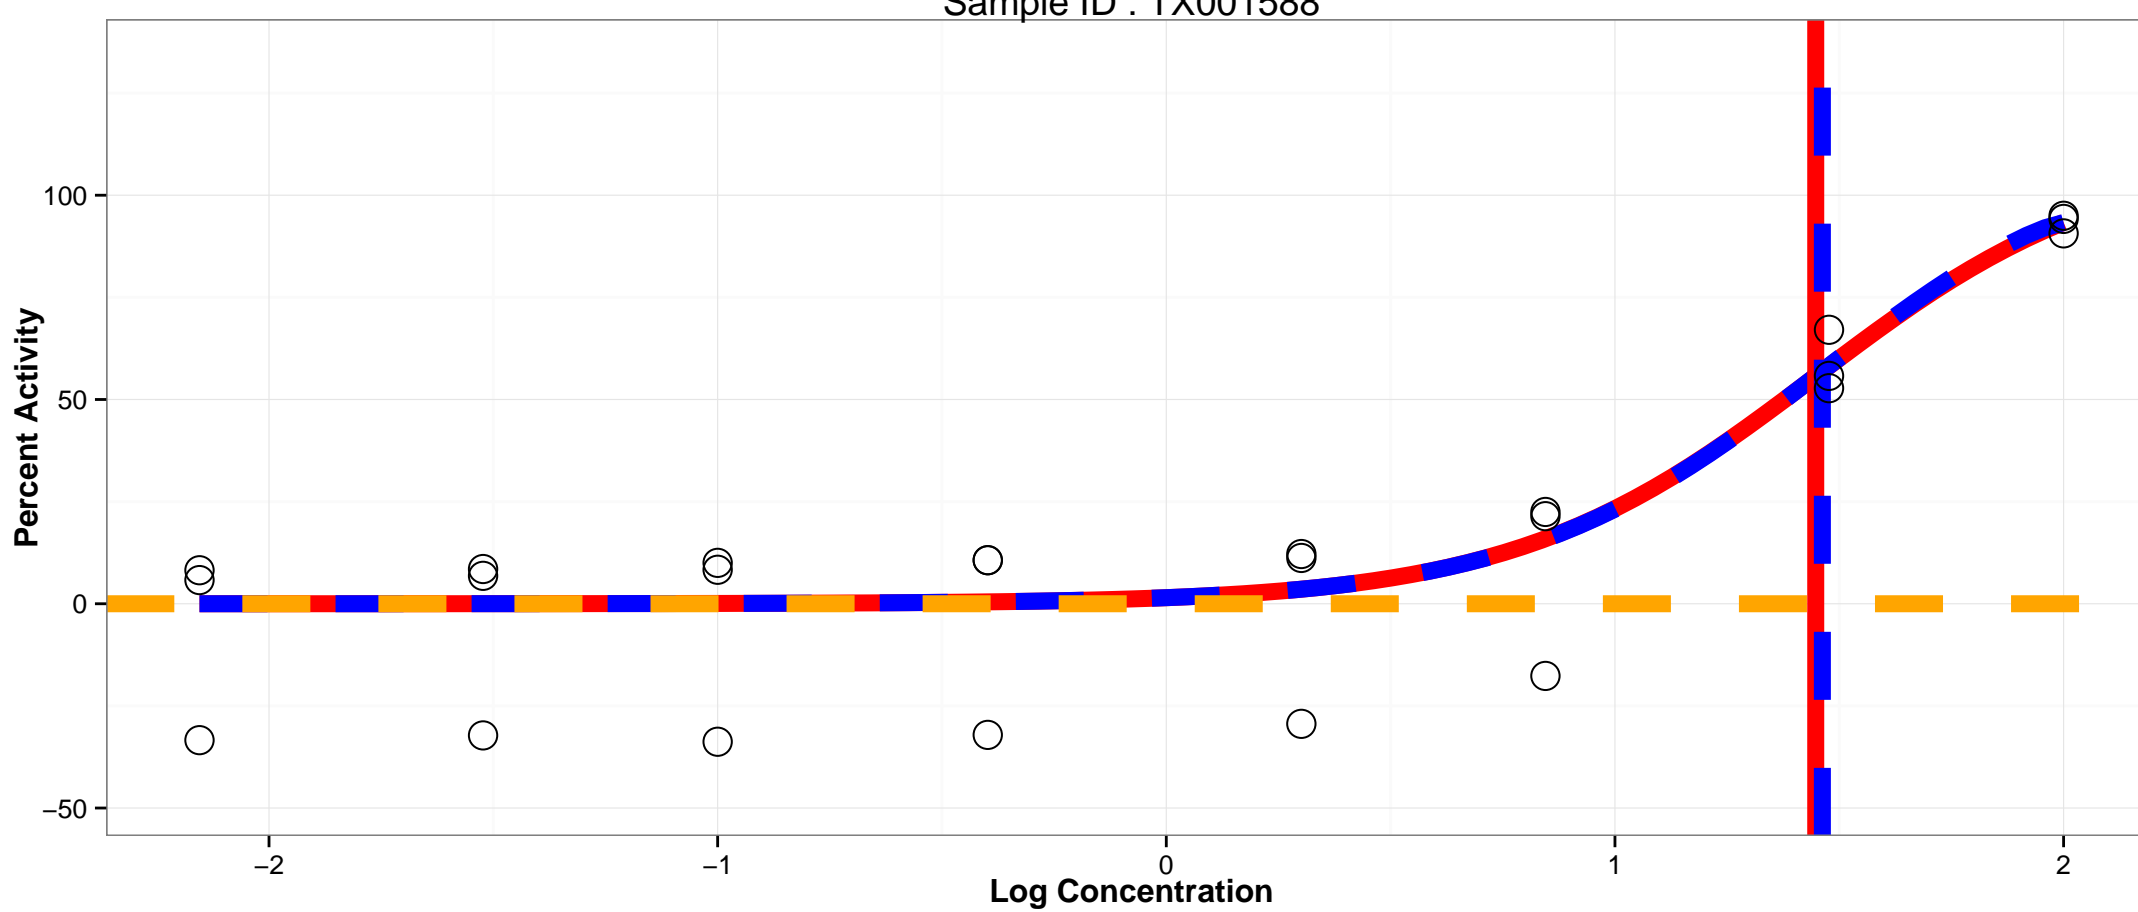

**HILL MODEL**

|     | tp   | ga    | gw    |
|-----|------|-------|-------|
| val | 111  | 1.45  | 1.29  |
| sd  | 29.6 | 0.237 | 0.649 |

**GAIN-LOSS MODEL**

|     | tp  | ga   | gw   | la  | lw   |
|-----|-----|------|------|-----|------|
| val | 114 | 1.46 | 1.28 | 2.2 | 9.31 |
| sd  | NA  | NA   | NA   | NA  | NA   |

|      | CNST   | HILL   | GNLS   |
|------|--------|--------|--------|
| AIC  | 249.84 | 213.57 | 217.57 |
| PROB | 0      | 0.88   | 0.12   |
| RMSE | 42.76  | 17.67  | 17.67  |

MAX\_MEAN : 93.3 MAX\_MED : 94.2 BMAD : 8.58  
COFF : 20 HIT-CALL : 1 FITC : 42 ACTP : 1  
FLAGS :

Chemical : Formetanate hydrochloride  
CAS : 23422-53-9

Assay ID 1508 (NHEERL\_TPO\_AUR\_dn)  
Sample ID : TX001589

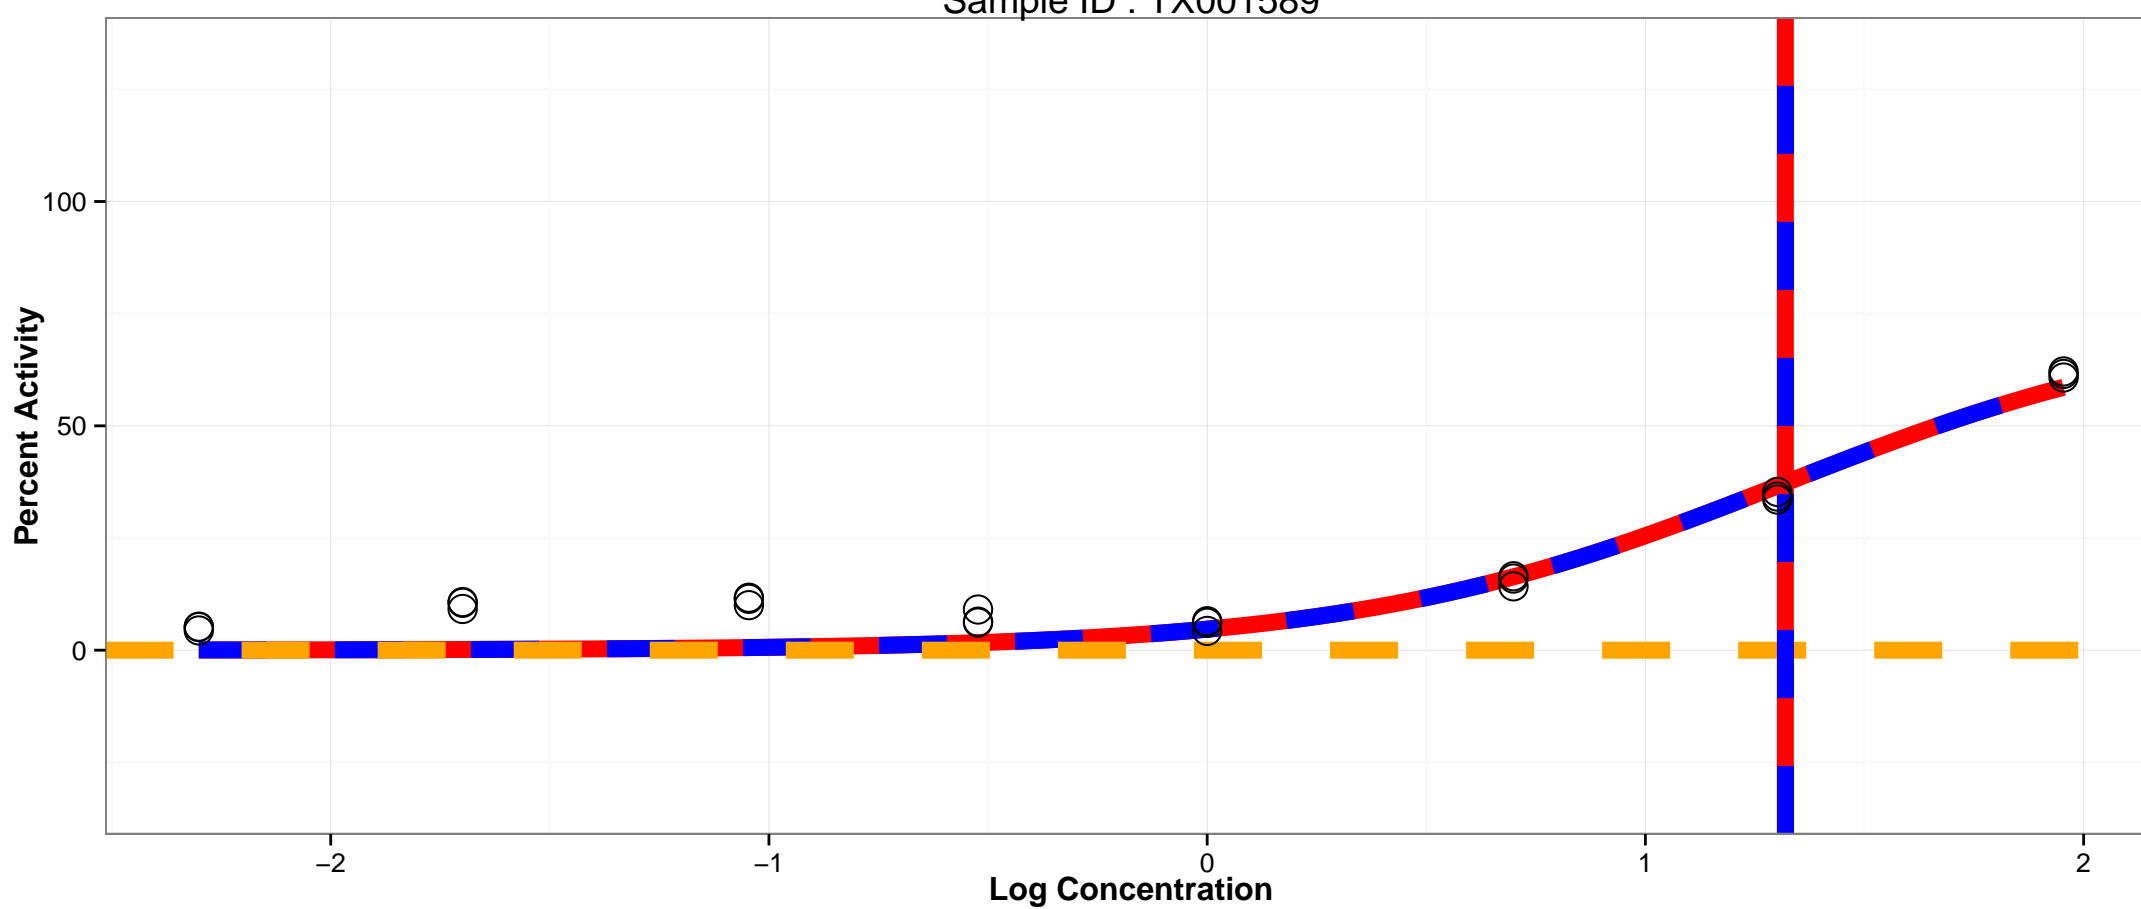

HILL MODEL

|     | tp   | ga   | gw    |
|-----|------|------|-------|
| val | 74.6 | 1.32 | 0.89  |
| sd  | 10.6 | 0.17 | 0.179 |

GAIN-LOSS MODEL

|     | tp   | ga   | gw   | la   | lw   |
|-----|------|------|------|------|------|
| val | 74.6 | 1.32 | 0.89 | 3.5  | 5.81 |
| sd  | 10.6 | 0.17 | 0.18 | 1590 | 5970 |

|      | CNST   | HILL   | GNLS   |
|------|--------|--------|--------|
| AIC  | 224.37 | 163.72 | 167.72 |
| PROB | 0      | 0.88   | 0.12   |
| RMSE | 26.33  | 5.97   | 5.97   |

MAX\_MEAN : 61.5 MAX\_MED : 61.6 BMAD : 5.69  
COFF : 20 HIT-CALL : 1 FITC : 42 ACTP : 1  
FLAGS :

Assay ID 1509 (NHEERL\_HEK293T\_CellTiterGLO)  
Sample ID : TX001589

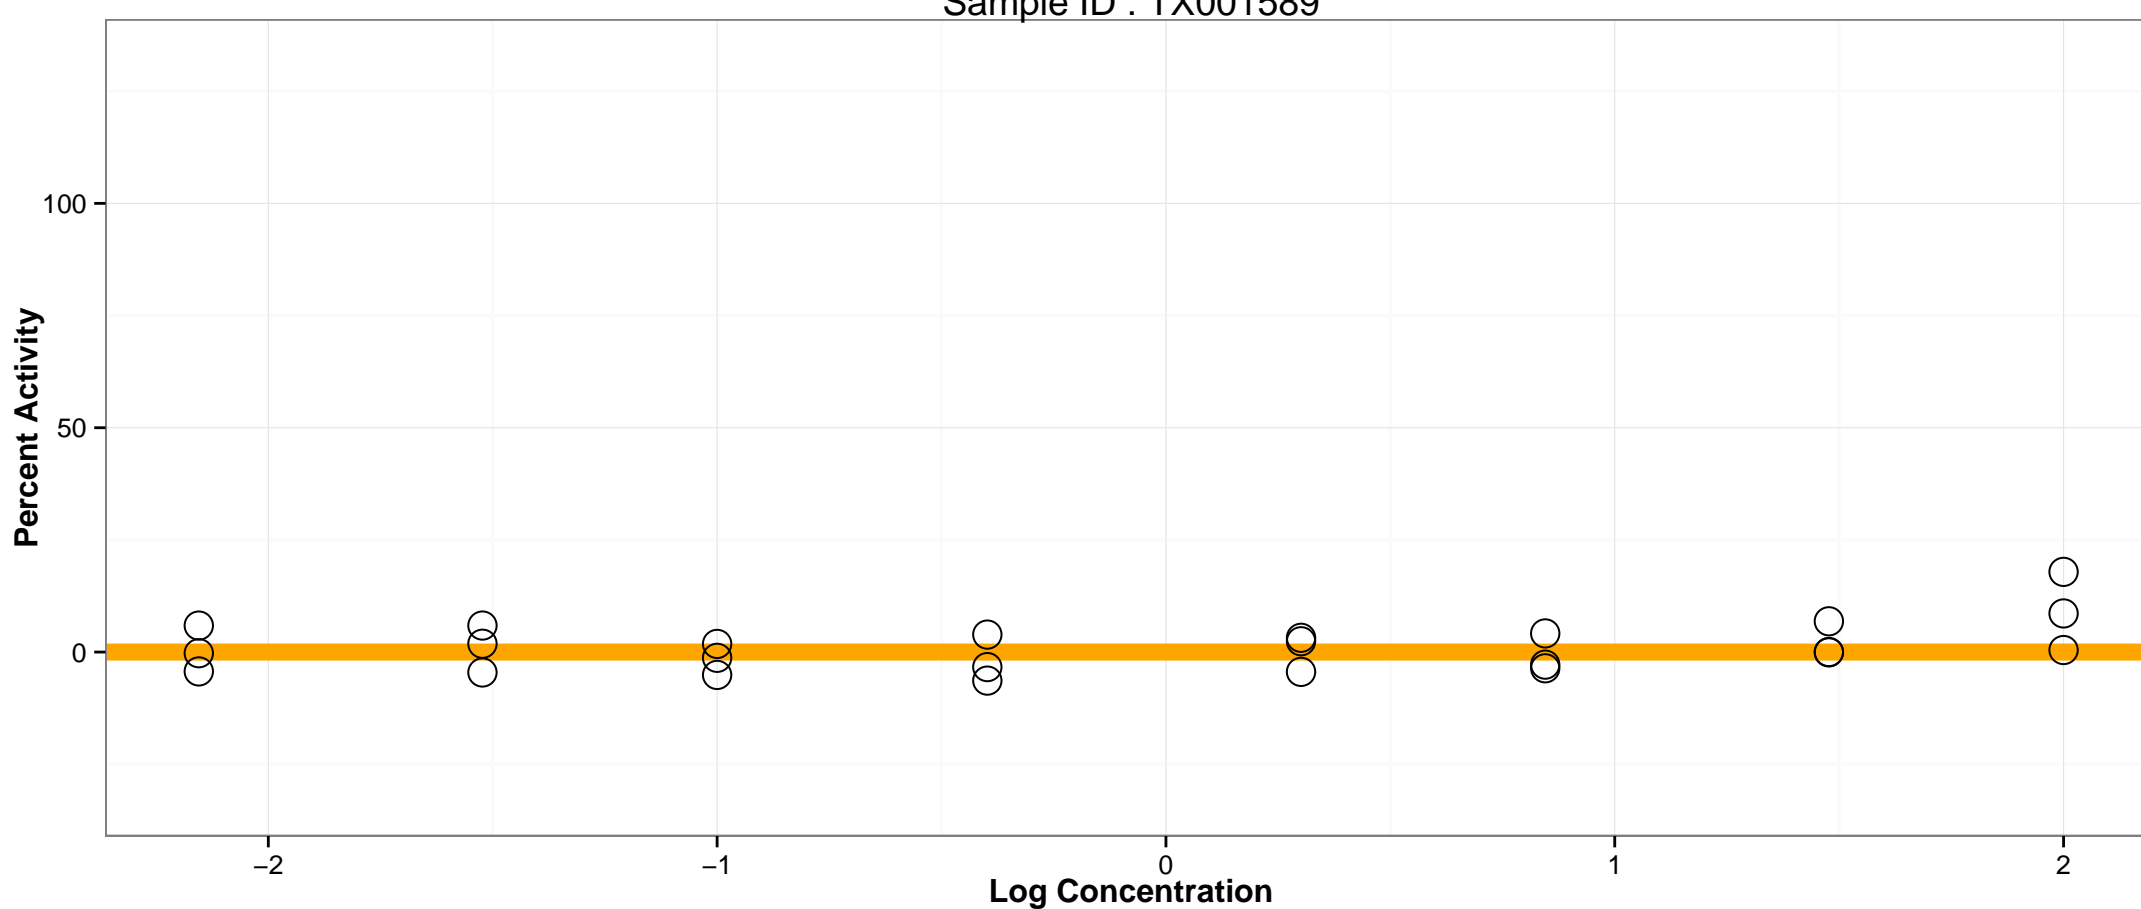

HILL MODEL

HILL MODEL: Not applicable

GAIN-LOSS MODEL

GNLS MODEL: Not applicable

|      | CNST   | HILL | GNLS |
|------|--------|------|------|
| AIC  | 150.05 | NA   | NA   |
| PROB | 1      | NA   | NA   |
| RMSE | 5.5    | NA   | NA   |

MAX\_MEAN : 8.99 MAX\_MED : 8.62 BMAD : 5.54  
COFF : 20 HIT-CALL : 0 FITC : 4 ACTP : 0  
FLAGS :

Assay ID 1848 (NHEERL\_Quantilum\_inhib\_2\_dn)  
Sample ID : TX001589

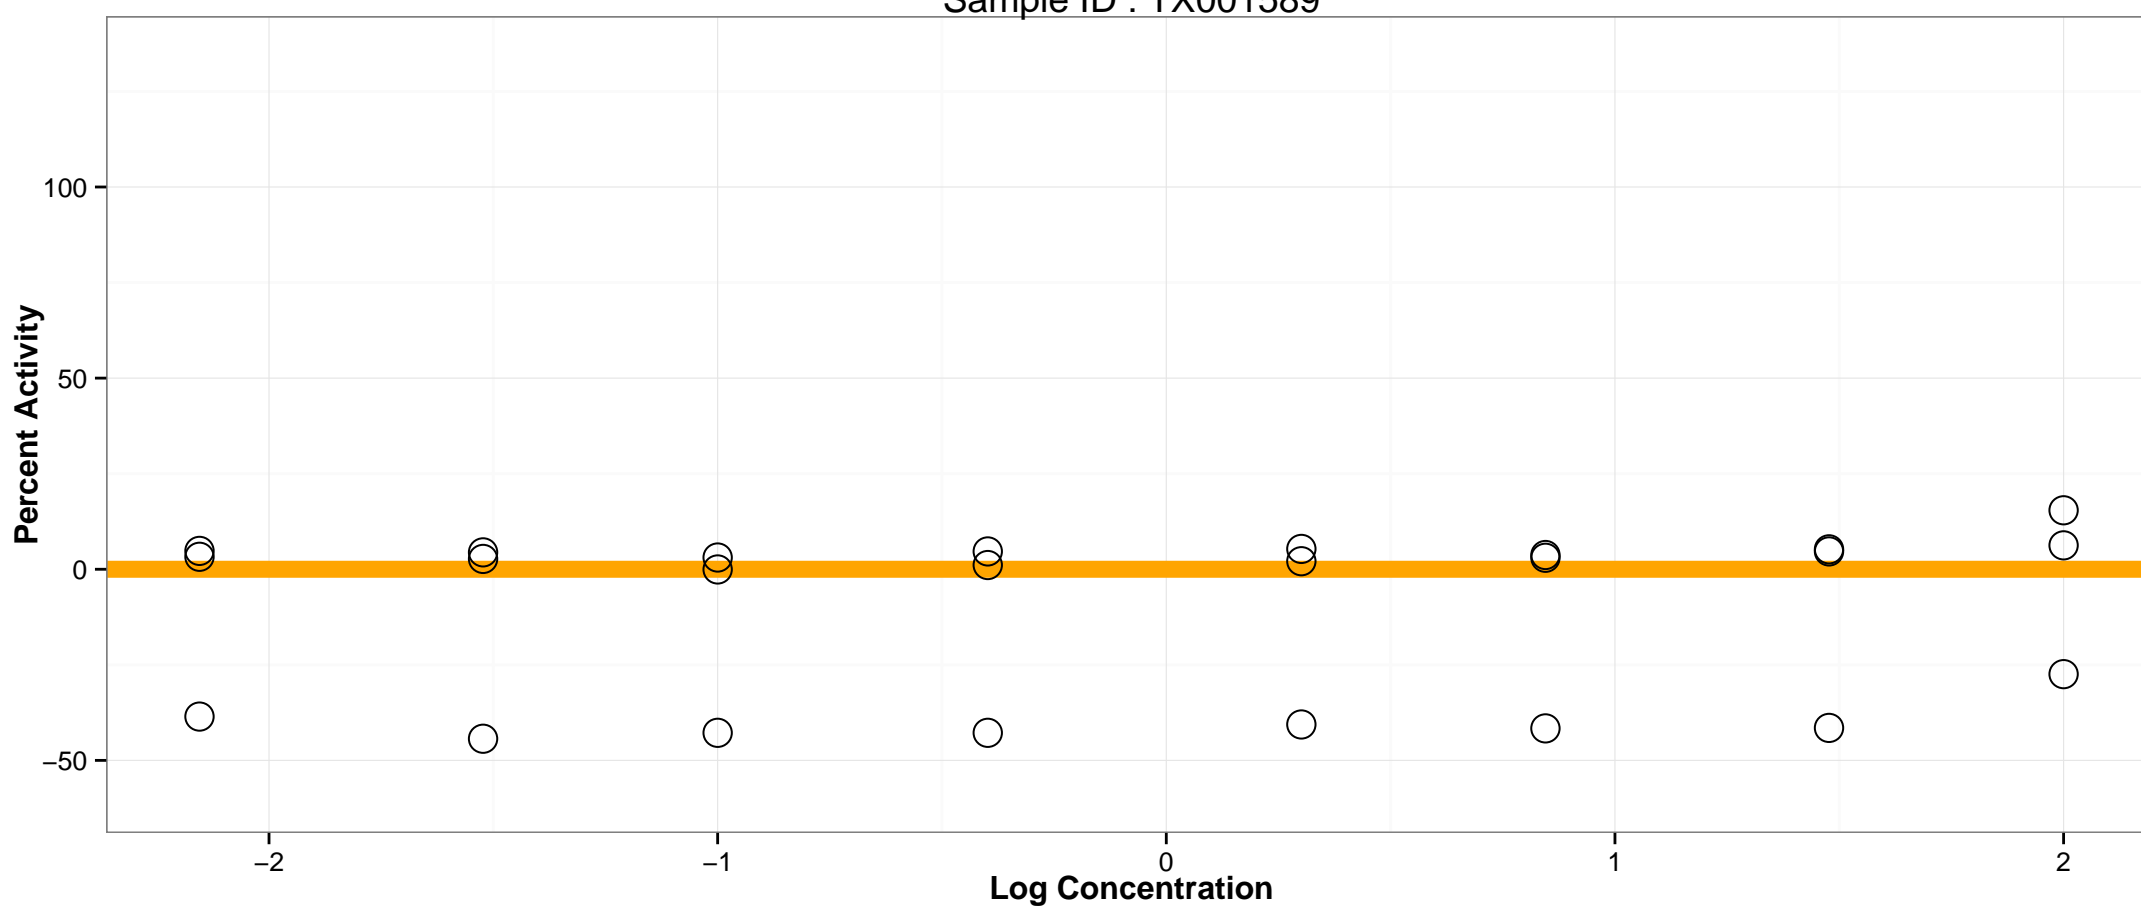

HILL MODEL

HILL MODEL: Not applicable

GAIN-LOSS MODEL

GNLS MODEL: Not applicable

|      | CNST   | HILL | GNLS |
|------|--------|------|------|
| AIC  | 221.65 | NA   | NA   |
| PROB | 1      | NA   | NA   |
| RMSE | 23.66  | NA   | NA   |

MAX\_MEAN : -1.9 MAX\_MED : 6.27 BMAD : 8.58  
COFF : 20 HIT-CALL : 0 FITC : 4 ACTP : 0  
FLAGS : 10

Chemical : Parathion  
CAS : 56-38-2

Assay ID 1508 (NHEERL\_TPO\_AUR\_dn)  
Sample ID : TX001592

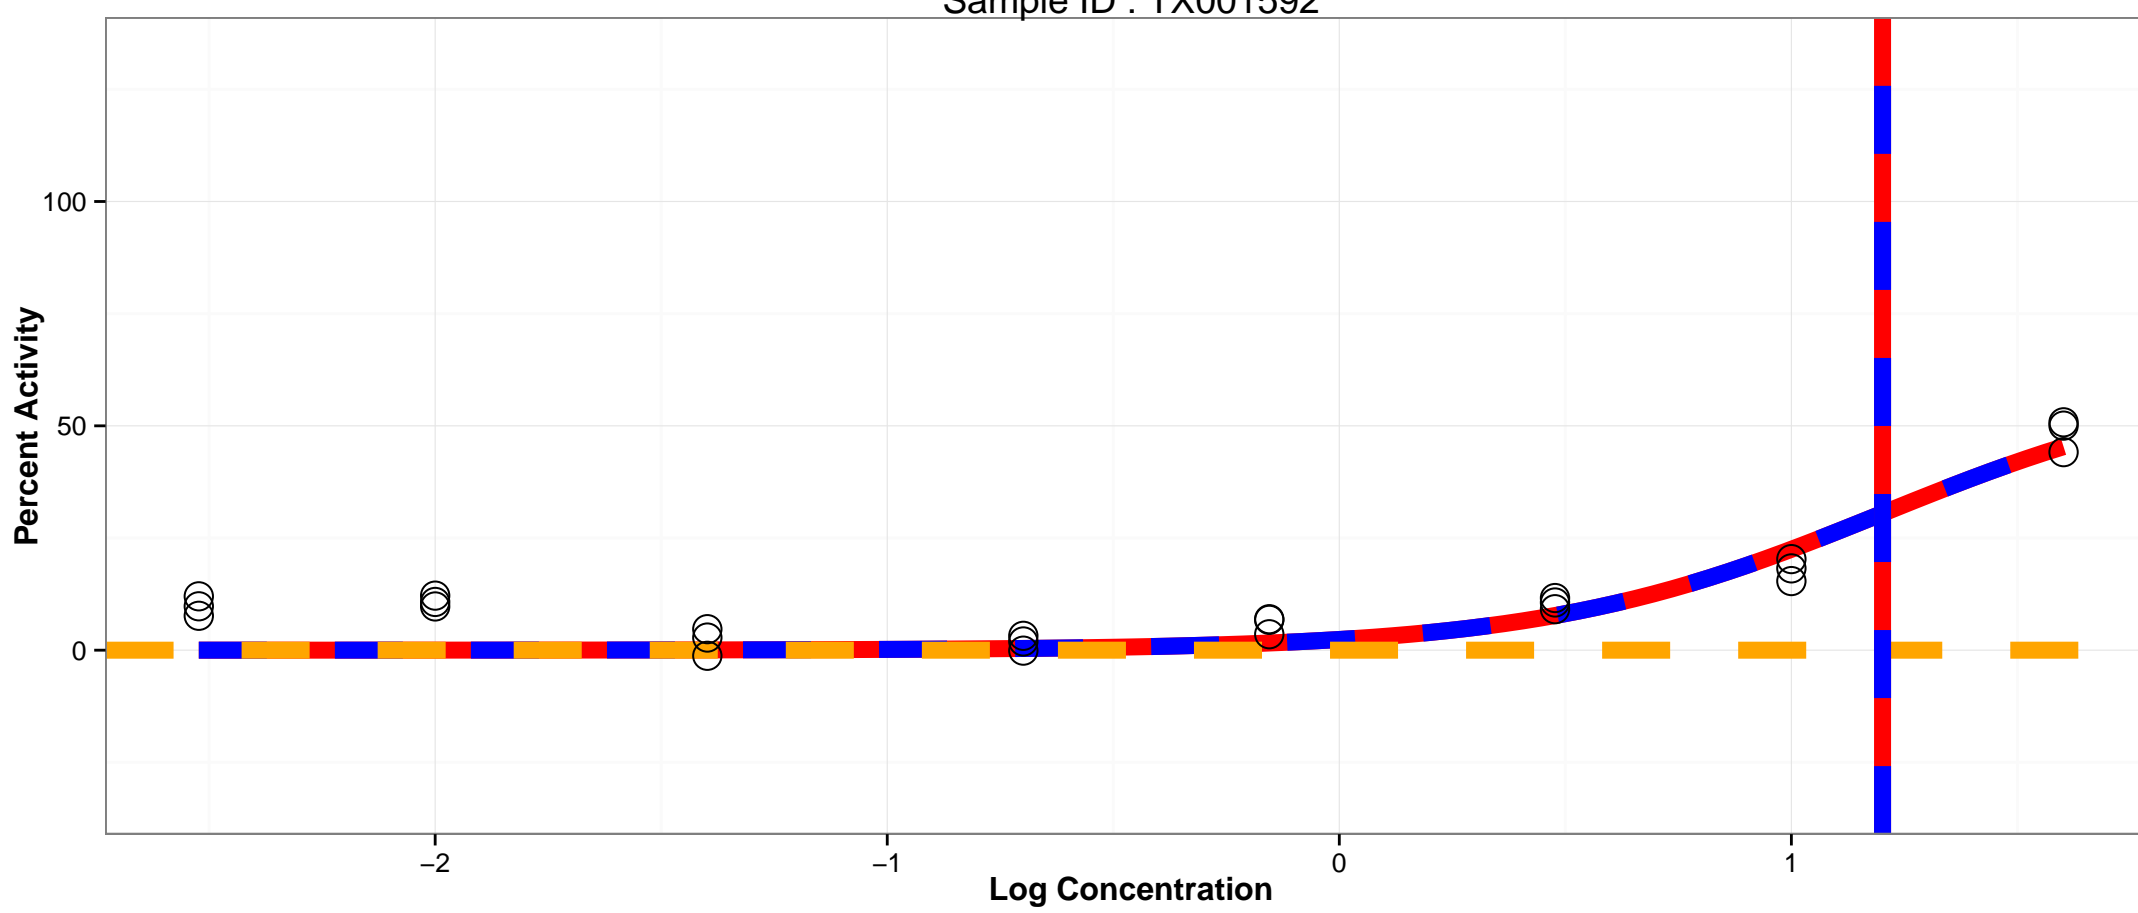

HILL MODEL

|     | tp   | ga    | gw    |
|-----|------|-------|-------|
| val | 61   | 1.2   | 1.16  |
| sd  | 11.7 | 0.175 | 0.317 |

GAIN-LOSS MODEL

|     | tp   | ga    | gw    | la   | lw    |
|-----|------|-------|-------|------|-------|
| val | 61   | 1.2   | 1.16  | 2.63 | 10.2  |
| sd  | 11.7 | 0.175 | 0.317 | 6930 | 68500 |

|      | CNST   | HILL   | GNLS   |
|------|--------|--------|--------|
| AIC  | 208.33 | 165.36 | 169.36 |
| PROB | 0      | 0.88   | 0.12   |
| RMSE | 19.54  | 6.16   | 6.16   |

MAX\_MEAN : 48.3 MAX\_MED : 50.1 BMAD : 5.69  
COFF : 20 HIT-CALL : 1 FITC : 42 ACTP : 1  
FLAGS :

Assay ID 1509 (NHEERL\_HEK293T\_CellTiterGLO)  
Sample ID : TX001592

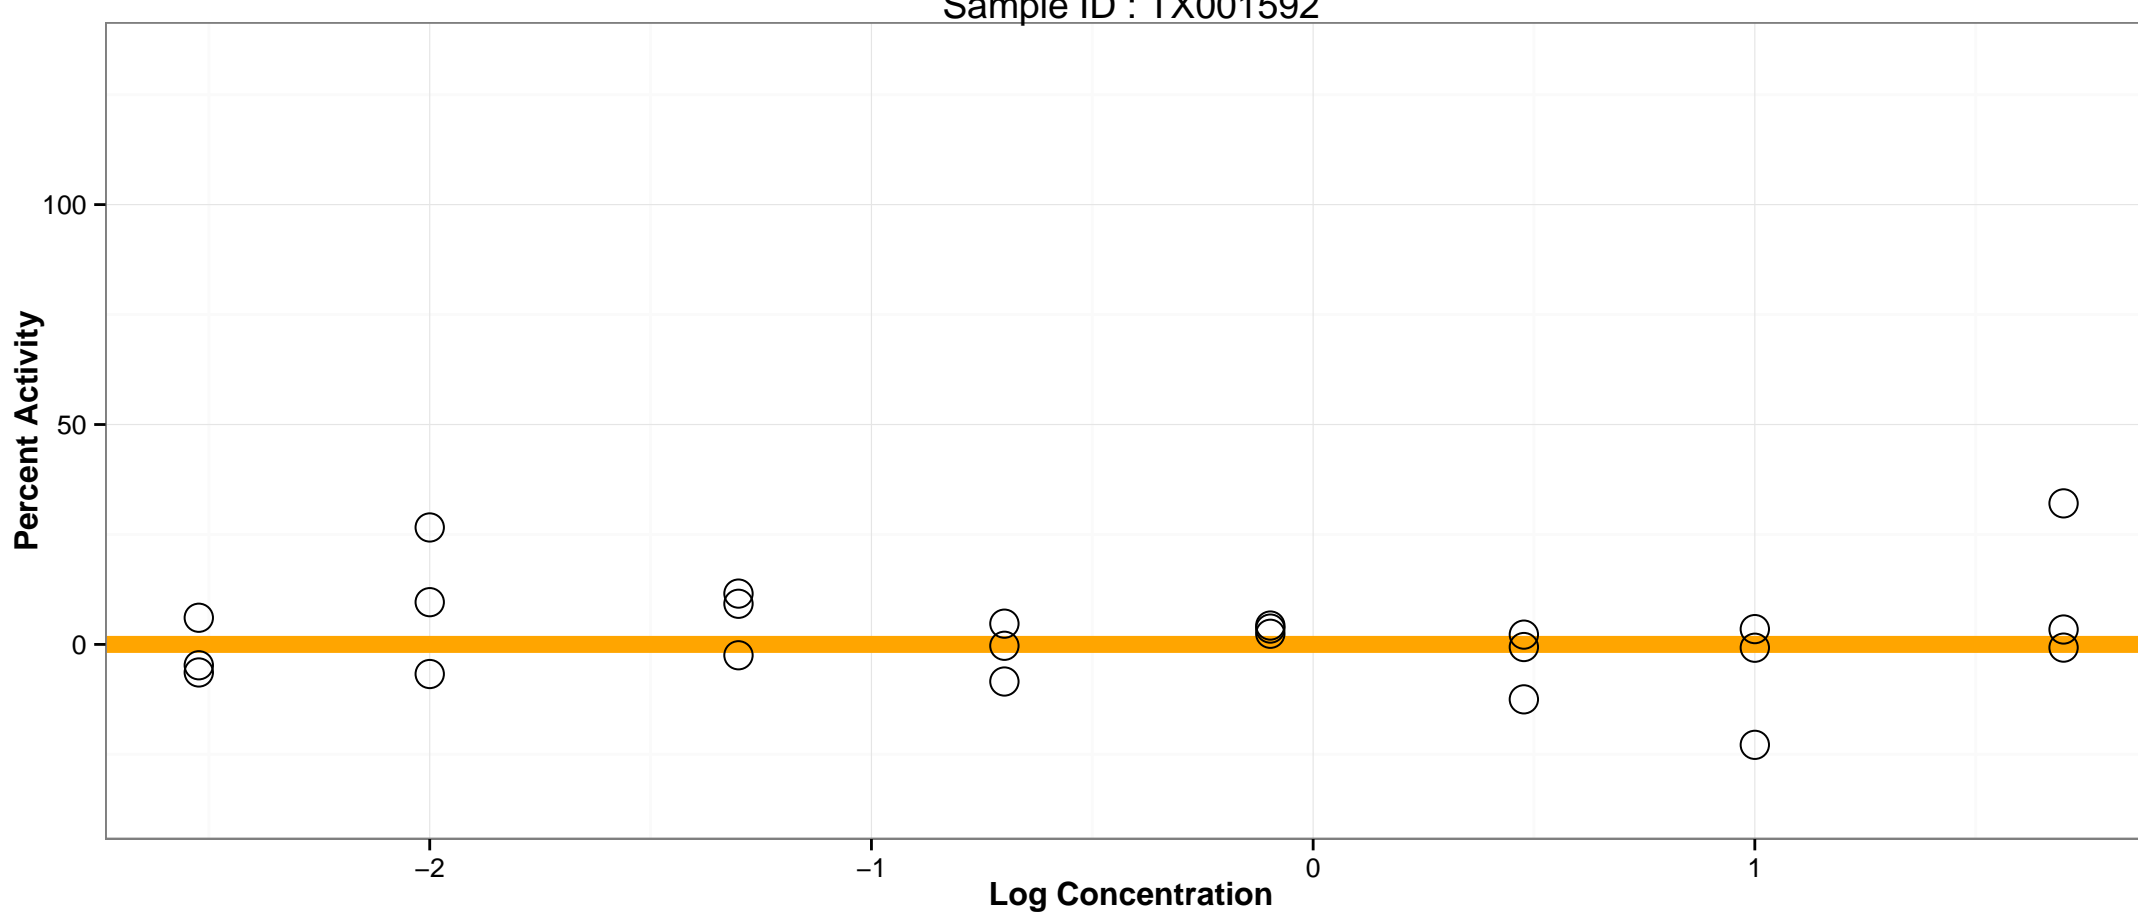

HILL MODEL

HILL MODEL: Not applicable

GAIN-LOSS MODEL

GNLS MODEL: Not applicable

|      | CNST   | HILL | GNLS |
|------|--------|------|------|
| AIC  | 182.21 | NA   | NA   |
| PROB | 1      | NA   | NA   |
| RMSE | 11.25  | NA   | NA   |

MAX\_MEAN : 11.6 MAX\_MED : 9.61 BMAD : 5.54  
COFF : 20 HIT-CALL : 0 FITC : 4 ACTP : 0  
FLAGS :

Assay ID 1848 (NHEERL\_Quantilum\_inhib\_2\_dn)  
Sample ID : TX001592

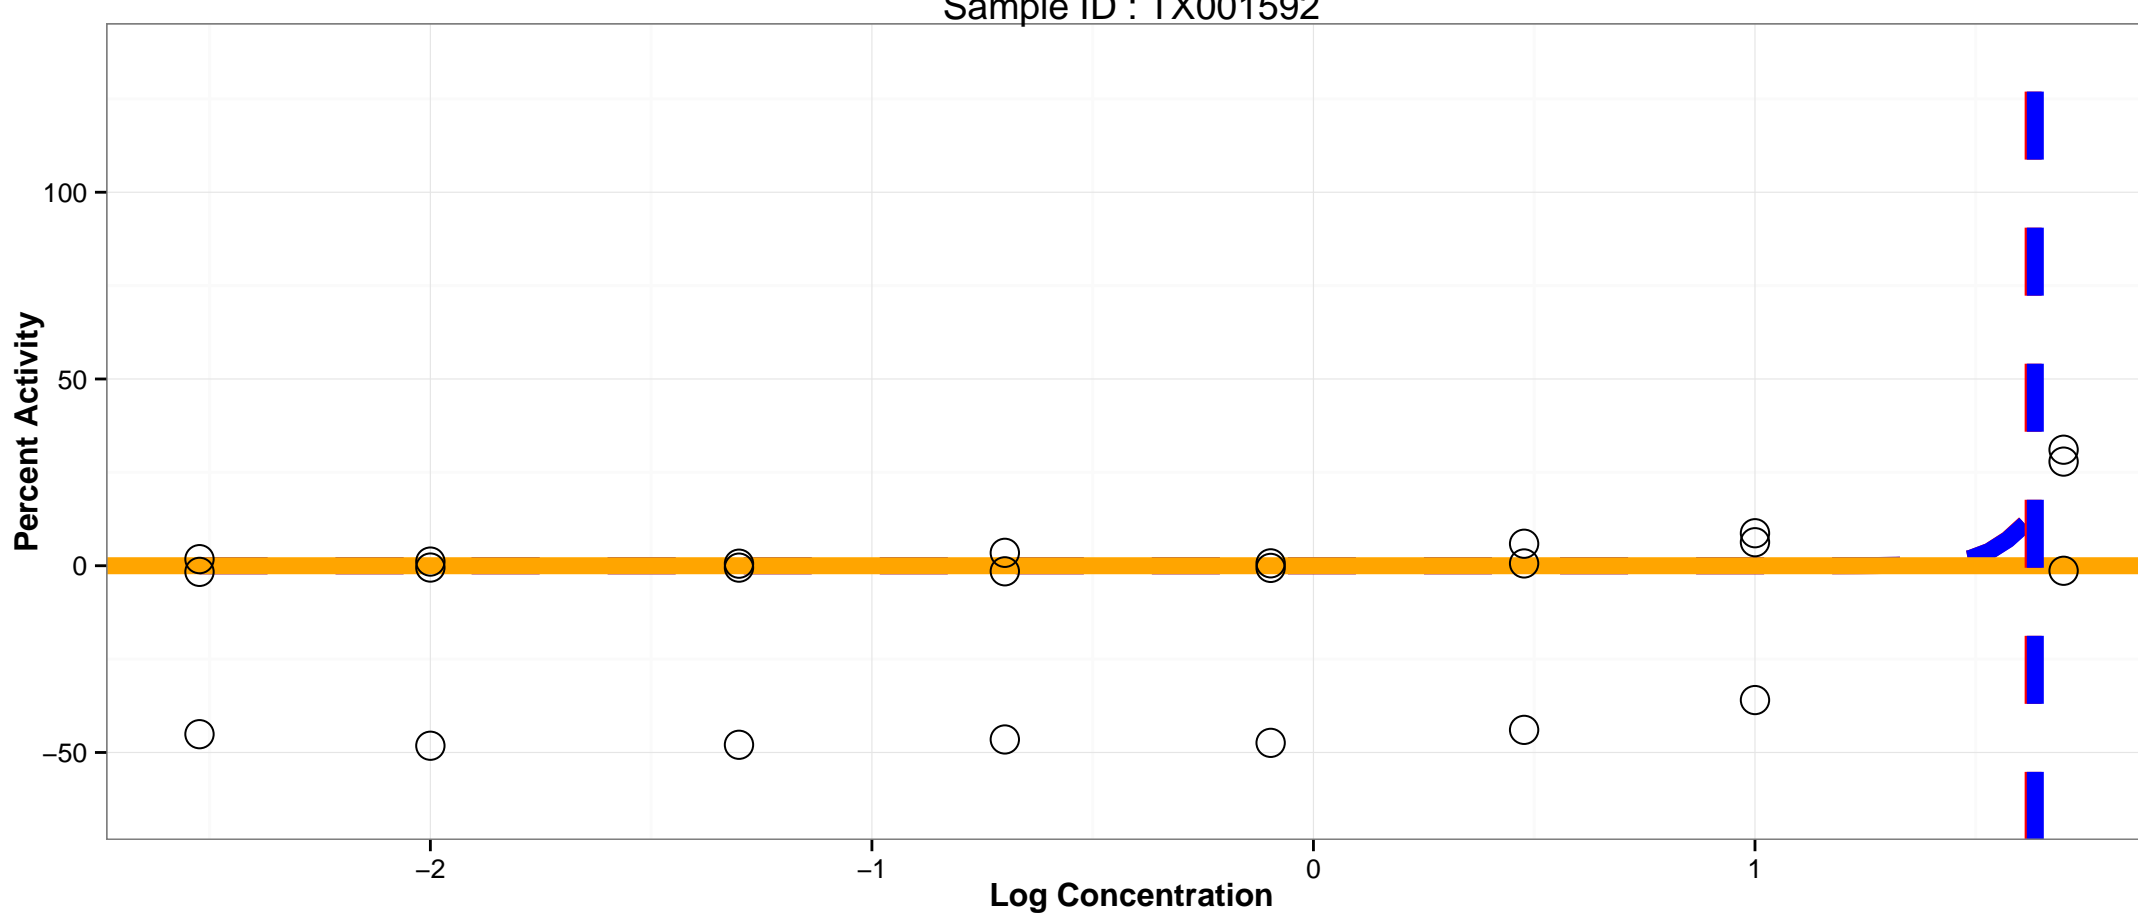

HILL MODEL

|     | tp  | ga   | gw   |
|-----|-----|------|------|
| val | 27  | 1.63 | 7.81 |
| sd  | 570 | 6.52 | 360  |

GAIN-LOSS MODEL

|     | tp   | ga   | gw   | la   | lw   |
|-----|------|------|------|------|------|
| val | 27.8 | 1.63 | 7.61 | 2.69 | 3.41 |
| sd  | 661  | 5.52 | 272  | 770  | 2650 |

|      | CNST   | HILL   | GNLS   |
|------|--------|--------|--------|
| AIC  | 226.36 | 229.56 | 233.56 |
| PROB | 0.81   | 0.16   | 0.02   |
| RMSE | 25.98  | 25.09  | 25.09  |

MAX\_MEAN : 19.2 MAX\_MED : 27.9 BMAD : 8.58  
COFF : 20 HIT-CALL : 0 FITC : 10 ACTP : 0.186  
FLAGS : 10

Assay ID 1508 (NHEERL\_TPO\_AUR\_dn)  
Sample ID : TX001594

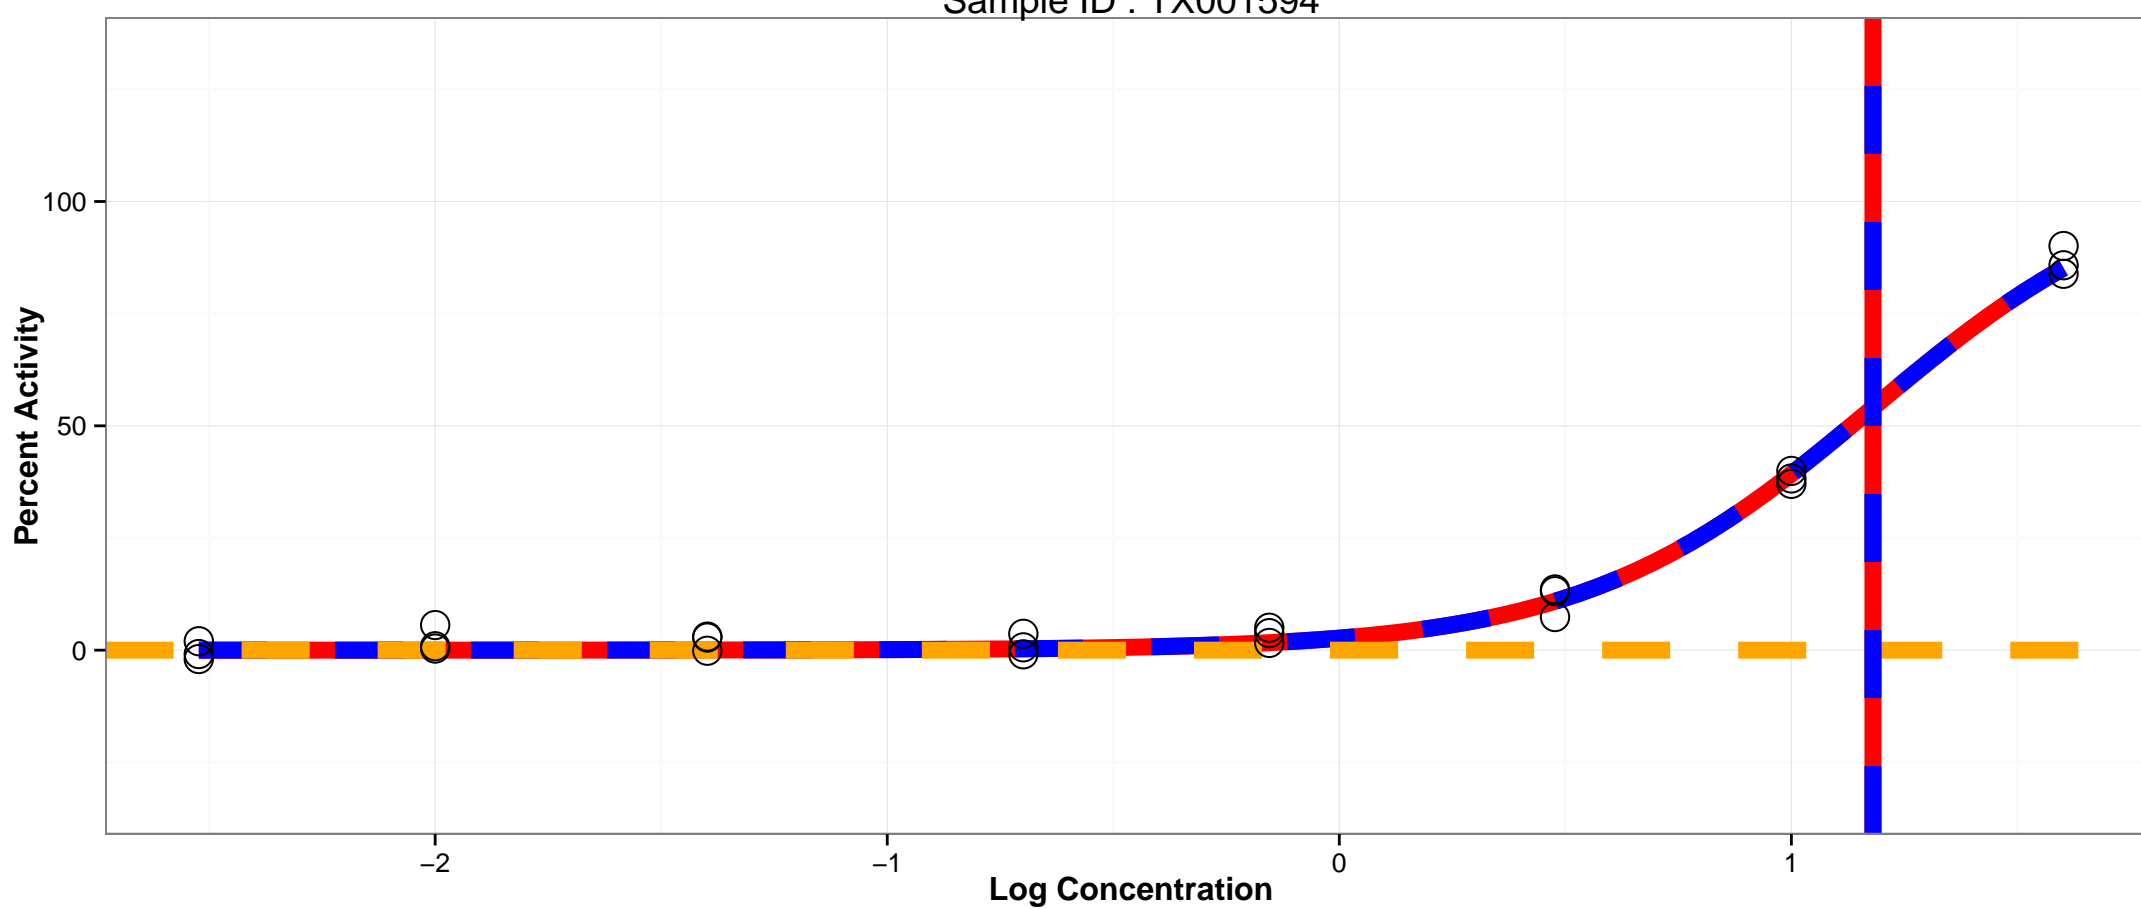

HILL MODEL

|     | tp   | ga     | gw    |
|-----|------|--------|-------|
| val | 108  | 1.18   | 1.35  |
| sd  | 8.52 | 0.0656 | 0.167 |

GAIN-LOSS MODEL

|     | tp   | ga     | gw    | la   | lw   |
|-----|------|--------|-------|------|------|
| val | 108  | 1.18   | 1.35  | 3.51 | 4.6  |
| sd  | 8.52 | 0.0656 | 0.167 | 1240 | 2990 |

|      | CNST   | HILL   | GNLS   |
|------|--------|--------|--------|
| AIC  | 229.76 | 120.76 | 124.76 |
| PROB | 0      | 0.88   | 0.12   |
| RMSE | 33.84  | 2.44   | 2.44   |

MAX\_MEAN : 86.6 MAX\_MED : 85.8 BMAD : 5.69  
COFF : 20 HIT-CALL : 1 FITC : 42 ACTP : 1  
FLAGS :

Assay ID 1509 (NHEERL\_HEK293T\_CellTiterGLO)  
Sample ID : TX001594

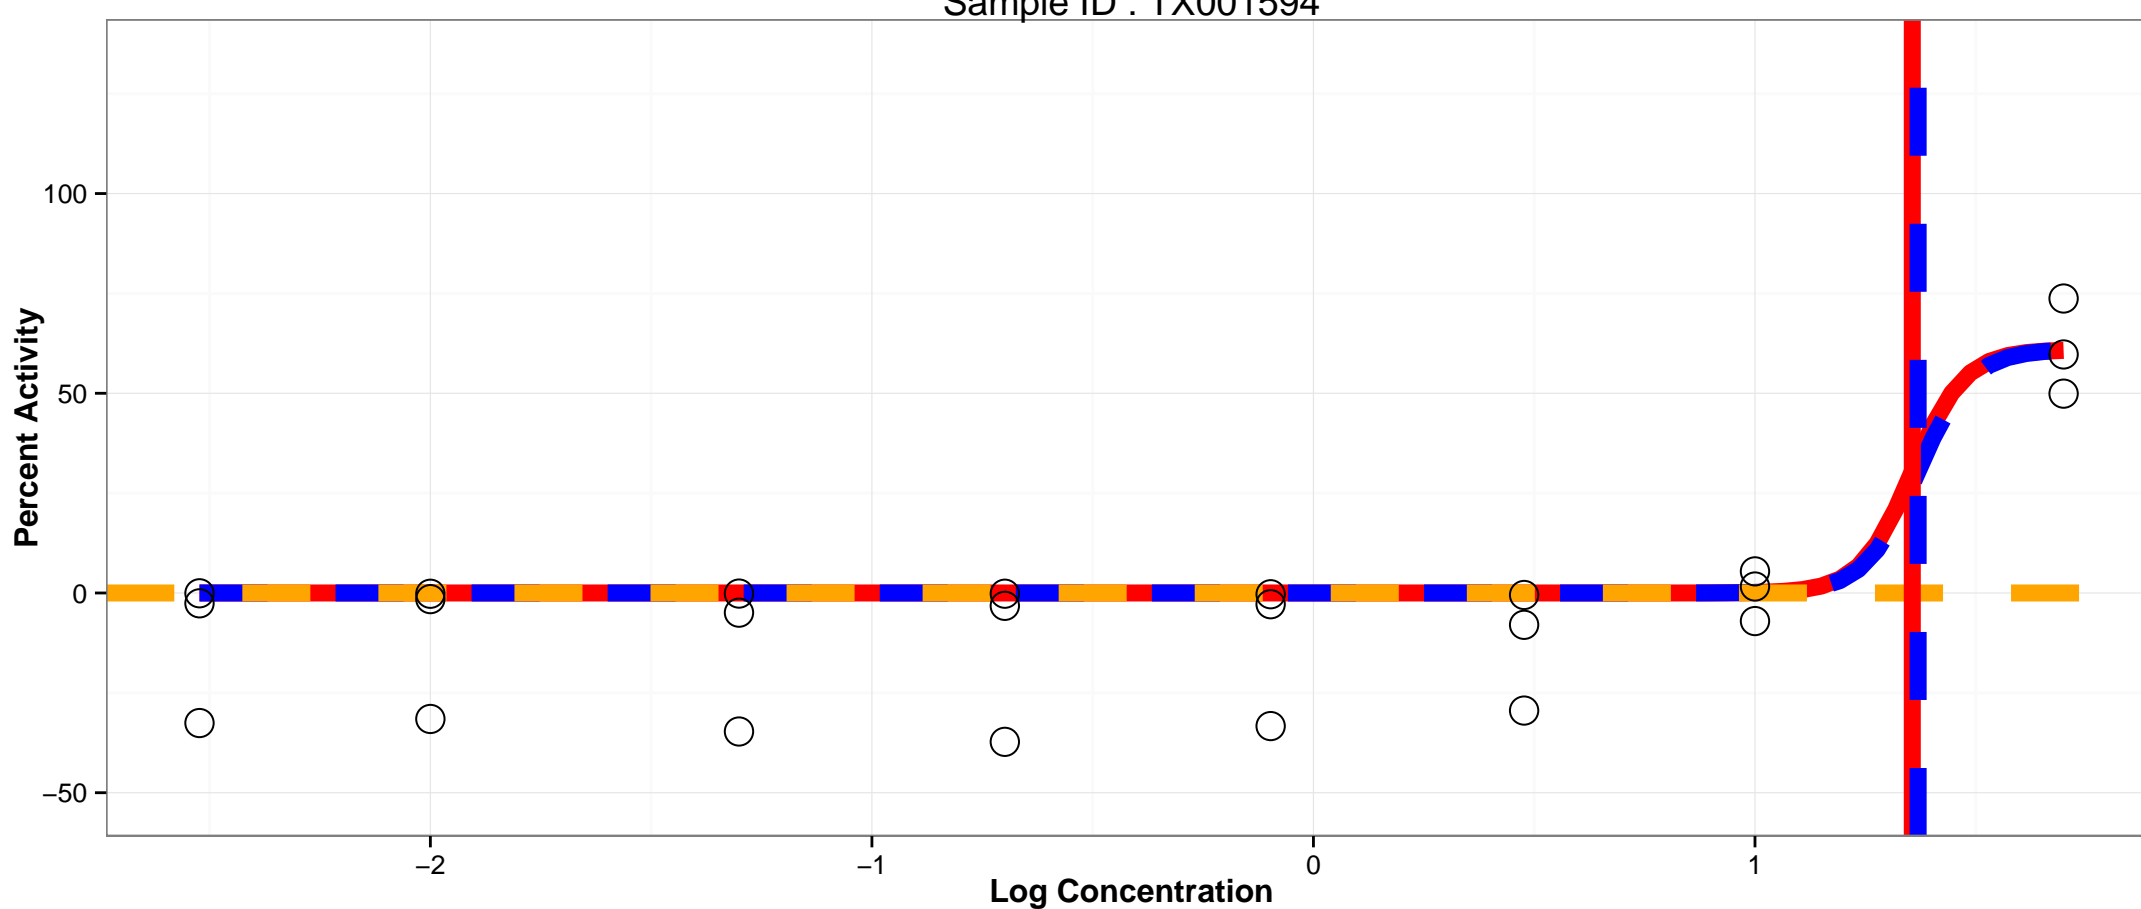

HILL MODEL

|     | tp   | ga   | gw   |
|-----|------|------|------|
| val | 60.9 | 1.36 | 7.44 |
| sd  | 73.5 | 13   | 265  |

GAIN-LOSS MODEL

|     | tp  | ga   | gw   | la   | lw   |
|-----|-----|------|------|------|------|
| val | 61  | 1.37 | 7.18 | 2.19 | 7.56 |
| sd  | 147 | 16.7 | 315  | 239  | 3330 |

|      | CNST   | HILL   | GNLS   |
|------|--------|--------|--------|
| AIC  | 227.08 | 210.14 | 214.14 |
| PROB | 0      | 0.88   | 0.12   |
| RMSE | 27.62  | 17.2   | 17.2   |

MAX\_MEAN : 61.1 MAX\_MED : 59.7 BMAD : 5.54  
COFF : 20 HIT-CALL : 1 FITC : 41 ACTP : 1  
FLAGS : 6

Assay ID 1848 (NHEERL\_Quantilum\_inhib\_2\_dn)  
Sample ID : TX001594

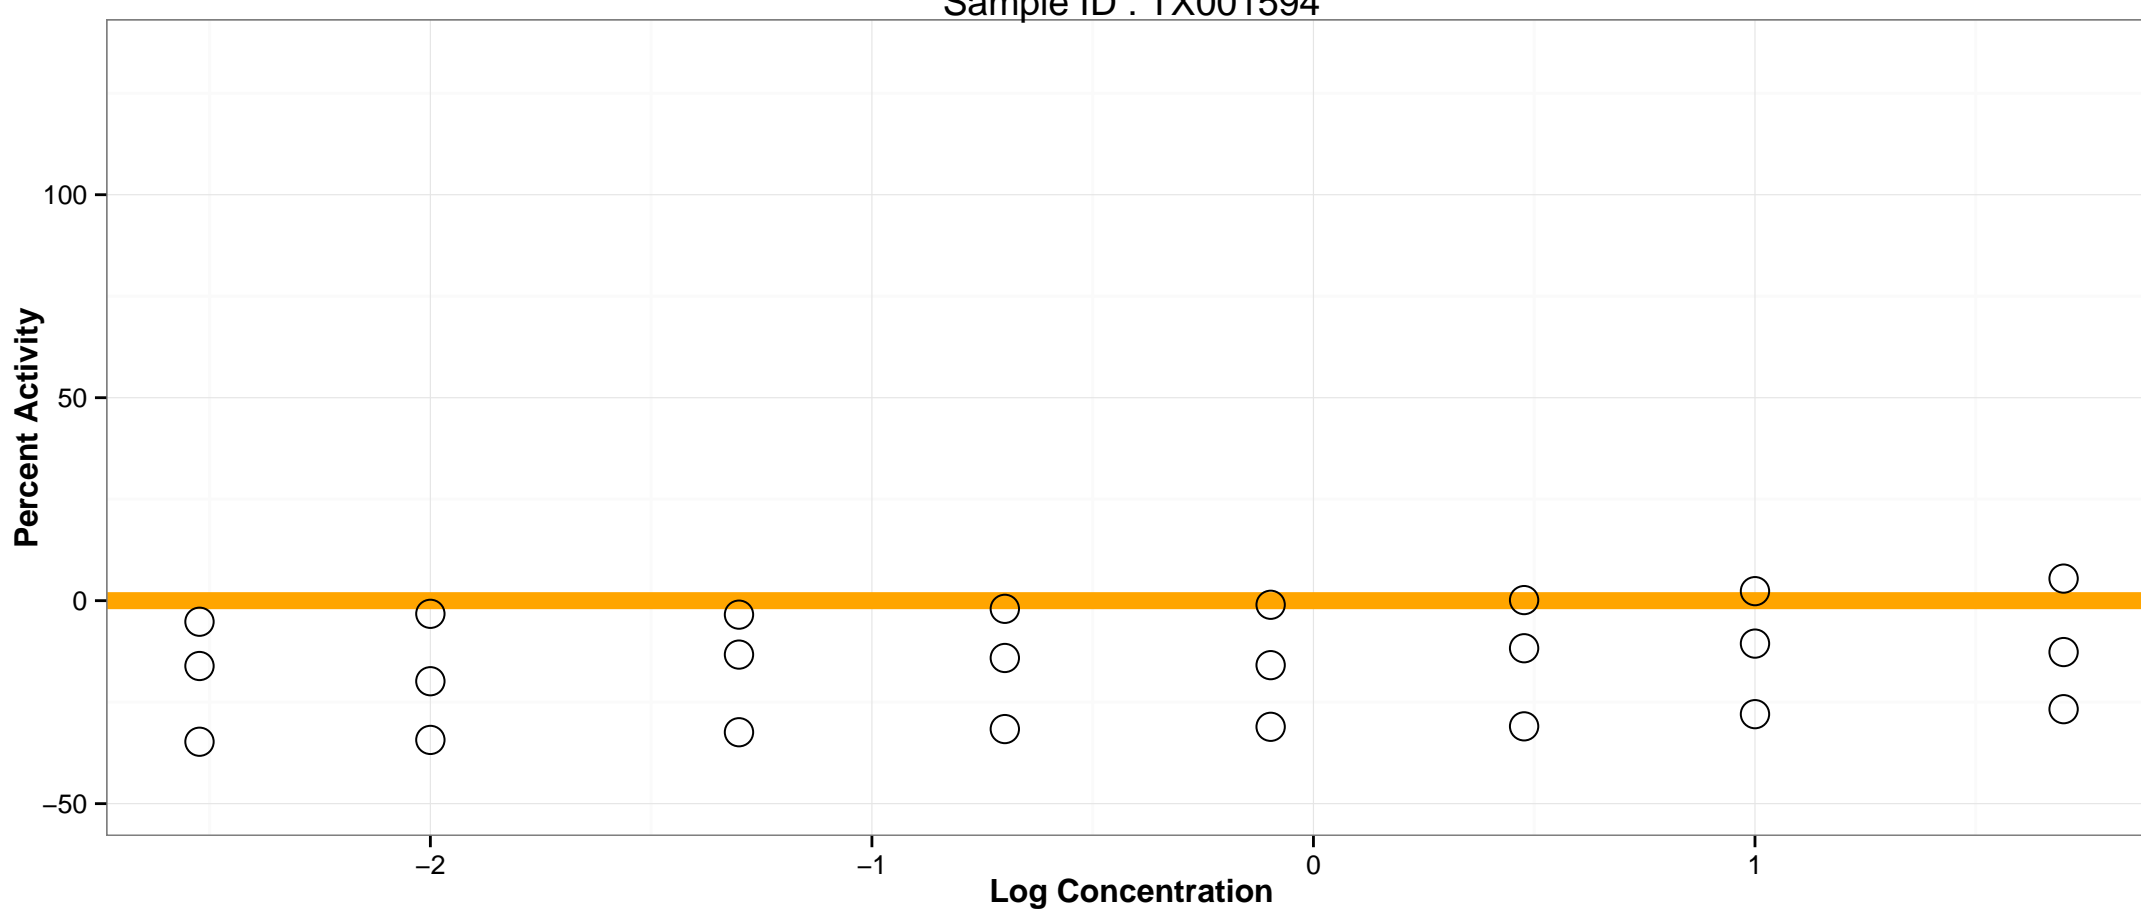

HILL MODEL

HILL MODEL: Not applicable

GAIN-LOSS MODEL

GNLS MODEL: Not applicable

|      | CNST   | HILL | GNLS |
|------|--------|------|------|
| AIC  | 216.54 | NA   | NA   |
| PROB | 1      | NA   | NA   |
| RMSE | 20.03  | NA   | NA   |

MAX\_MEAN : -11.3 MAX\_MED : -10.6 BMAD : 8.58  
COFF : 20 HIT-CALL : 0 FITC : 4 ACTP : 0  
FLAGS : 10

Chemical : Niclosamide  
CAS : 50-65-7

Assay ID 1508 (NHEERL\_TPO\_AUR\_dn)  
Sample ID : TX001601

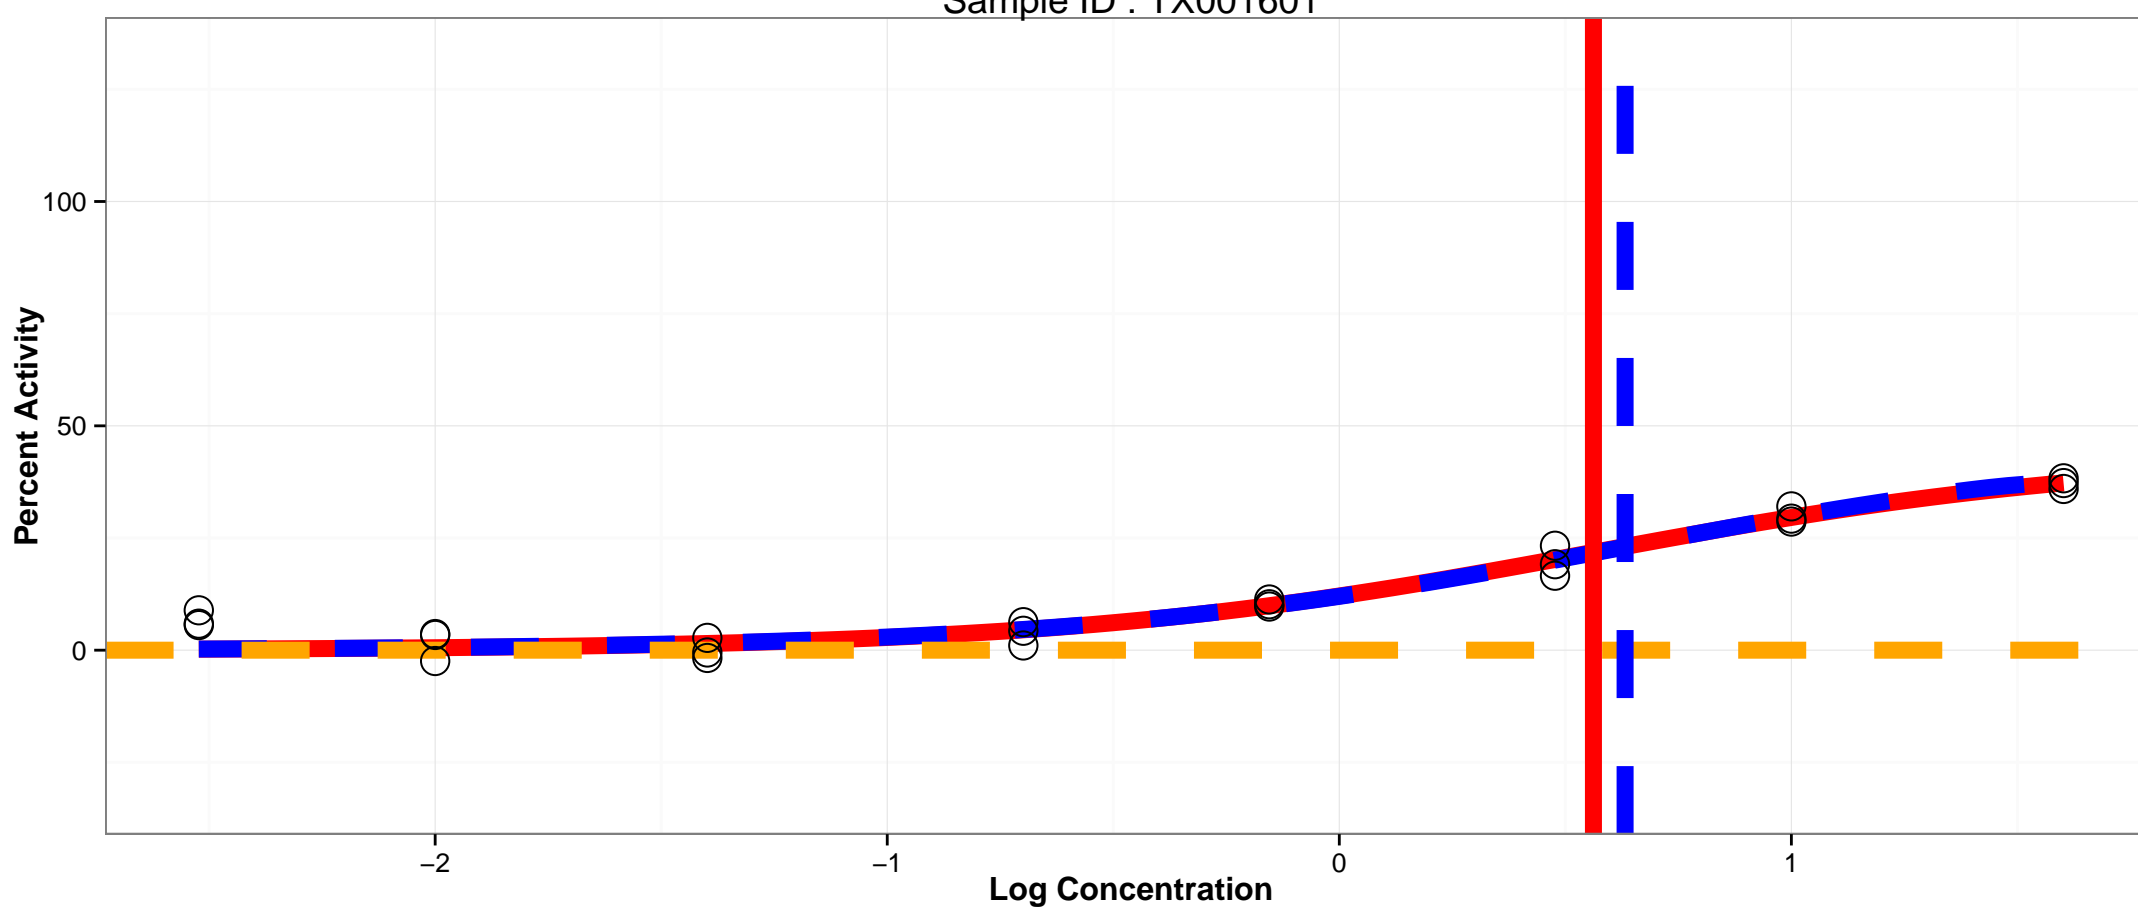

HILL MODEL

|     | tp   | ga    | gw    |
|-----|------|-------|-------|
| val | 43.6 | 0.562 | 0.741 |
| sd  | 4.34 | 0.165 | 0.116 |

GAIN-LOSS MODEL

|     | tp   | ga    | gw    | la   | lw   |
|-----|------|-------|-------|------|------|
| val | 46   | 0.632 | 0.716 | 1.85 | 6.33 |
| sd  | 17.6 | 0.525 | 0.21  | 1.2  | 30.2 |

|      | CNST   | HILL   | GNLS   |
|------|--------|--------|--------|
| AIC  | 211.88 | 129.95 | 133.85 |
| PROB | 0      | 0.88   | 0.12   |
| RMSE | 18.95  | 3.09   | 3.08   |

MAX\_MEAN : 37.2 MAX\_MED : 37.3 BMAD : 5.69  
COFF : 20 HIT-CALL : 1 FITC : 42 ACTP : 1  
FLAGS :

Assay ID 1509 (NHEERL\_HEK293T\_CellTiterGLO)  
Sample ID : TX001601

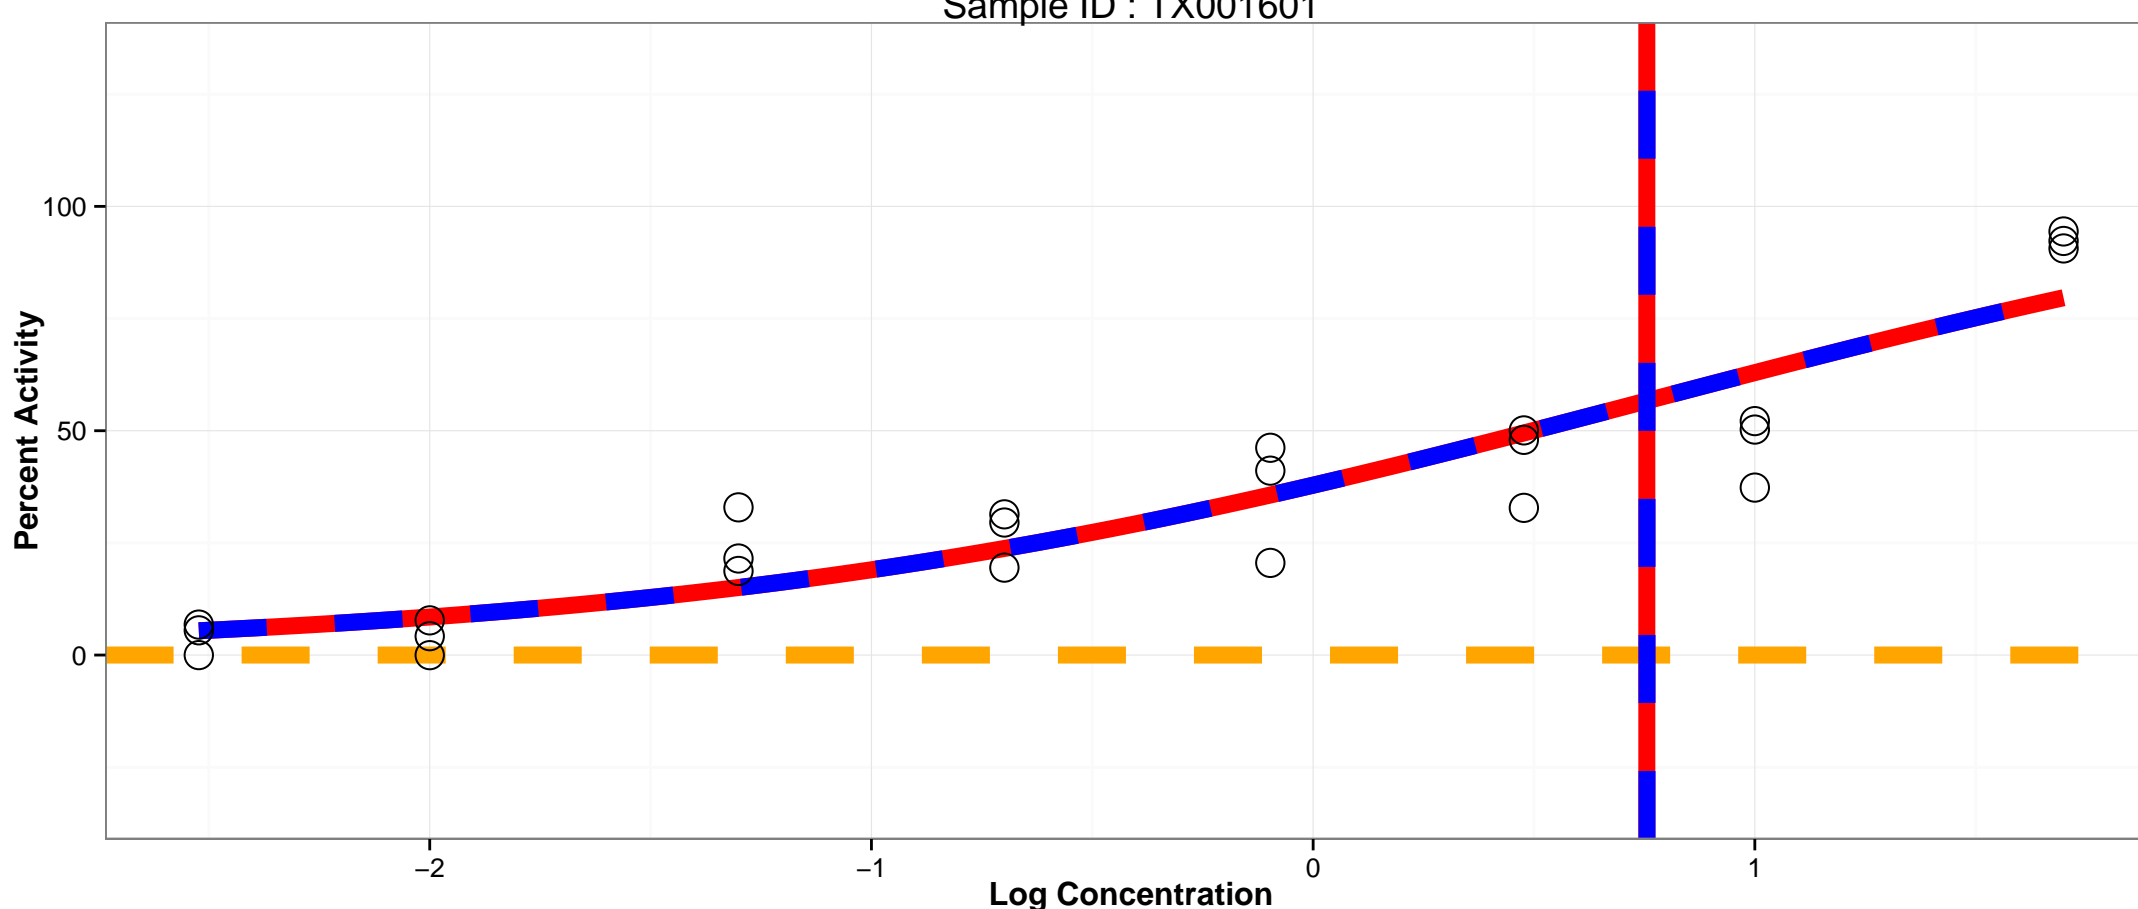

HILL MODEL

|     | tp   | ga    | gw     |
|-----|------|-------|--------|
| val | 113  | 0.756 | 0.396  |
| sd  | 29.6 | 0.561 | 0.0628 |

GAIN-LOSS MODEL

|     | tp  | ga    | gw    | la   | lw   |
|-----|-----|-------|-------|------|------|
| val | 113 | 0.756 | 0.396 | 3.22 | 13.7 |
| sd  | NA  | NA    | NA    | NA   | NA   |

|      | CNST   | HILL   | GNLS   |
|------|--------|--------|--------|
| AIC  | 253.12 | 191.12 | 195.12 |
| PROB | 0      | 0.88   | 0.12   |
| RMSE | 44.12  | 10.59  | 10.59  |

MAX\_MEAN : 92.5 MAX\_MED : 92.3 BMAD : 5.54  
COFF : 20 HIT-CALL : 1 FITC : 42 ACTP : 1  
FLAGS :

Assay ID 1848 (NHEERL\_QuantiLum\_inhib\_2\_dn)  
Sample ID : TX001601

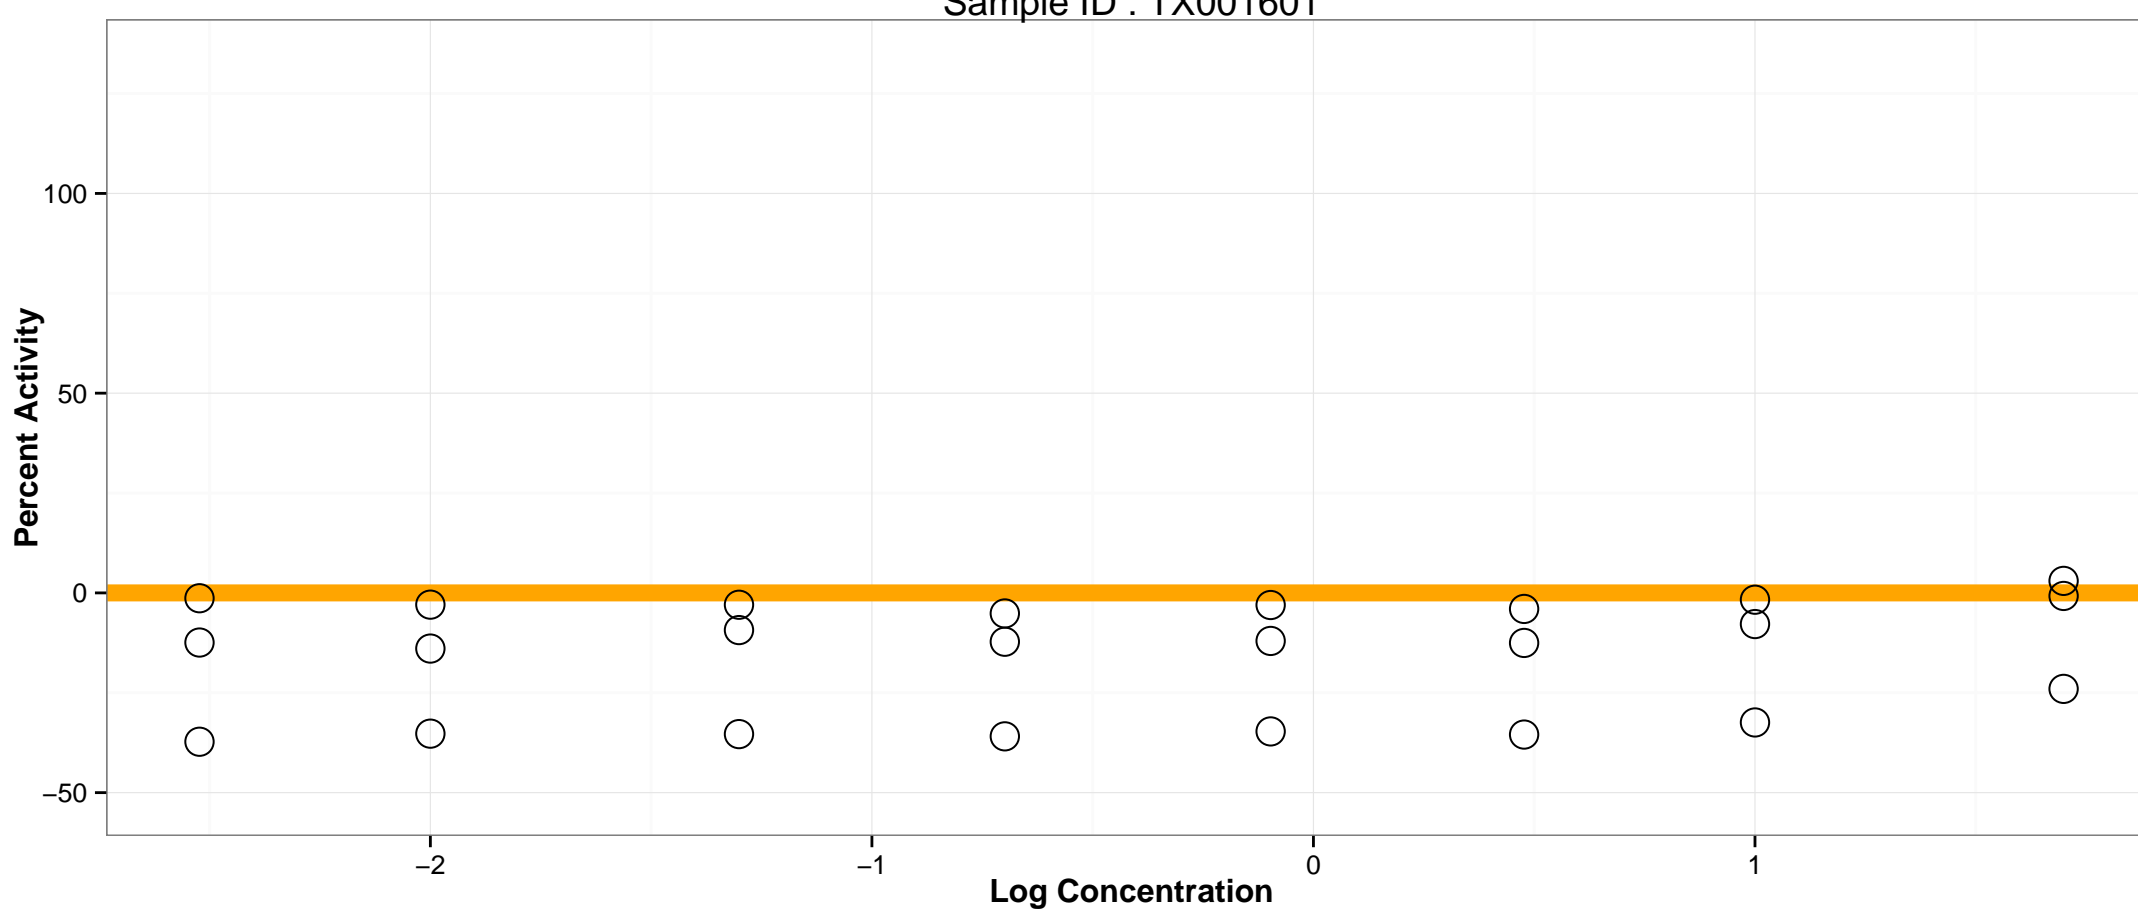

HILL MODEL

HILL MODEL: Not applicable

GAIN-LOSS MODEL

GNLS MODEL: Not applicable

|      | CNST   | HILL | GNLS |
|------|--------|------|------|
| AIC  | 216.77 | NA   | NA   |
| PROB | 1      | NA   | NA   |
| RMSE | 20.7   | NA   | NA   |

MAX\_MEAN : -7.25 MAX\_MED : -0.749 BMAD : 8.58  
COFF : 20 HIT-CALL : 0 FITC : 4 ACTP : 0  
FLAGS : 10

Chemical : S-Bioallethrin  
CAS : 28434-00-6

Assay ID 1508 (NHEERL\_TPO\_AUR\_dn)  
Sample ID : TX001603

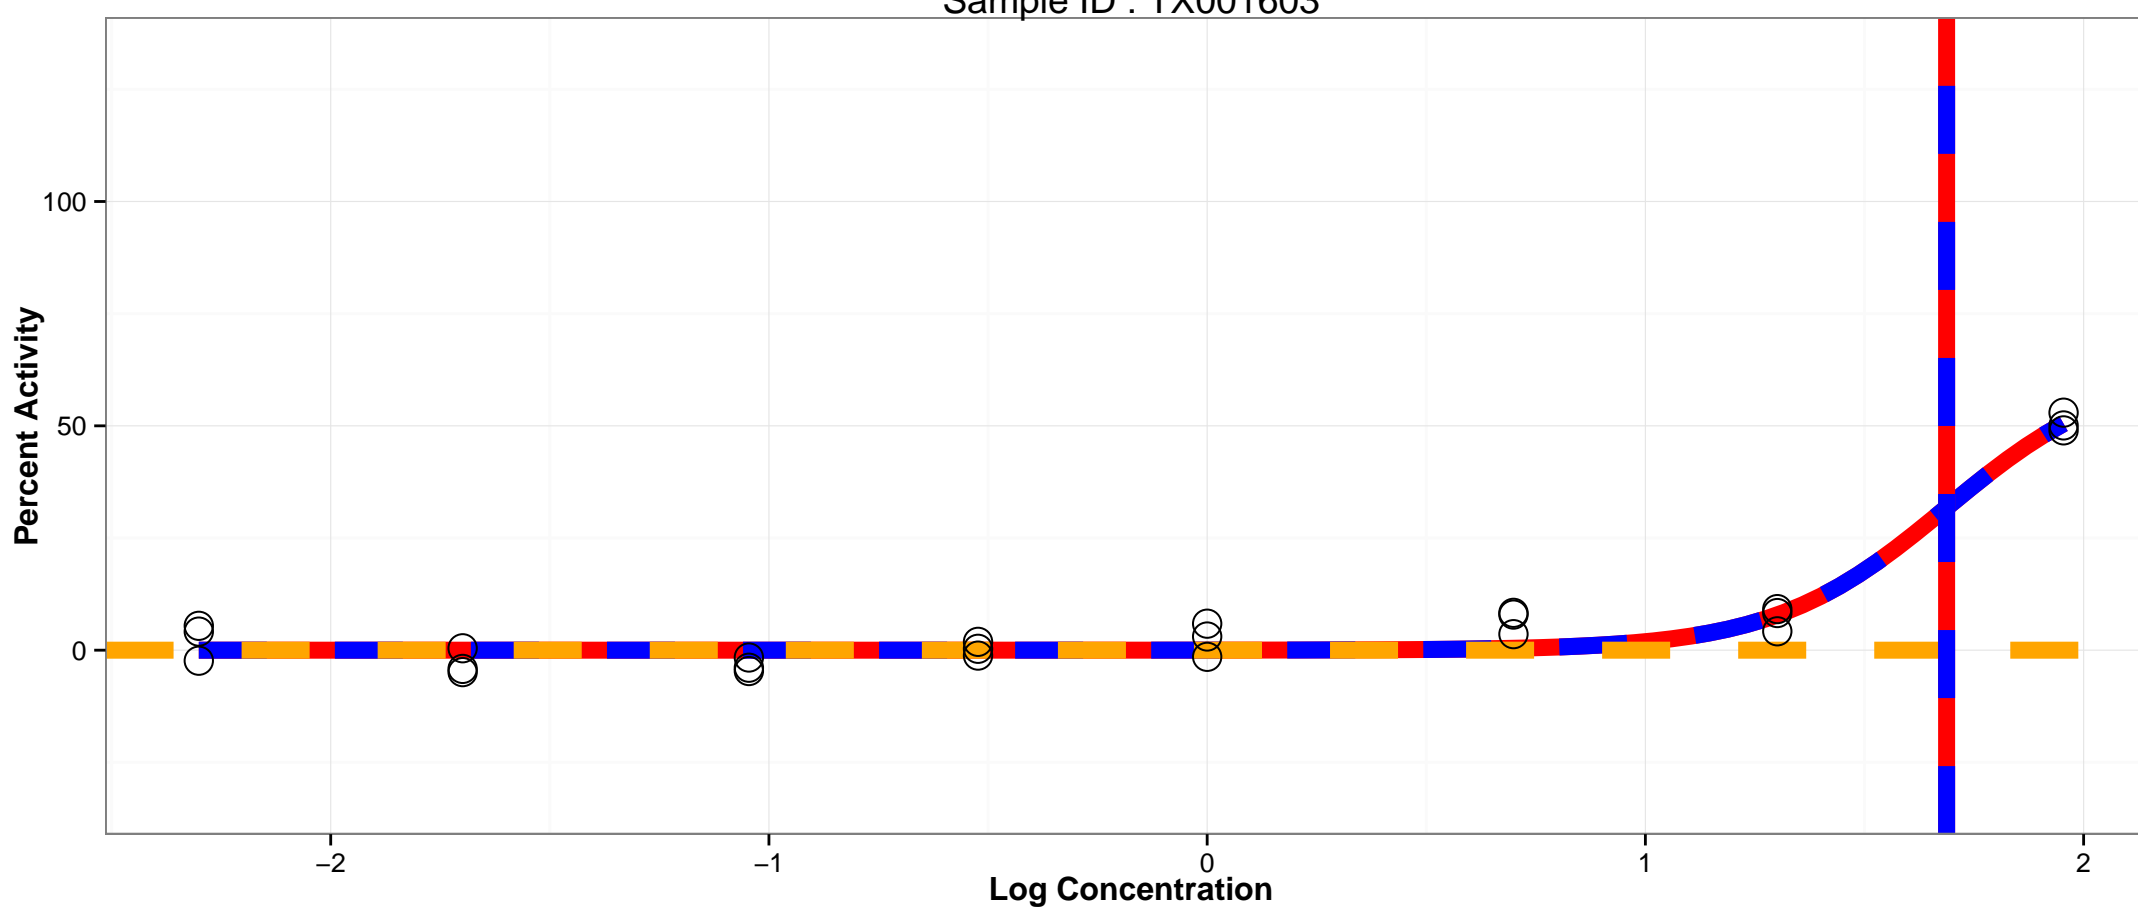

HILL MODEL

|     | tp   | ga    | gw   |
|-----|------|-------|------|
| val | 63.5 | 1.69  | 2.2  |
| sd  | 33.9 | 0.343 | 1.42 |

GAIN-LOSS MODEL

|     | tp   | ga   | gw  | la   | lw   |
|-----|------|------|-----|------|------|
| val | 63.5 | 1.69 | 2.2 | 2.93 | 17.7 |
| sd  | NA   | NA   | NA  | NA   | NA   |

|      | CNST   | HILL   | GNLS   |
|------|--------|--------|--------|
| AIC  | 193.58 | 141.72 | 145.72 |
| PROB | 0      | 0.88   | 0.12   |
| RMSE | 18.5   | 3.75   | 3.75   |

MAX\_MEAN : 50.7 MAX\_MED : 50.1 BMAD : 5.69  
COFF : 20 HIT-CALL : 1 FITC : 42 ACTP : 1  
FLAGS : 6

Assay ID 1509 (NHEERL\_HEK293T\_CellTiterGLO)  
Sample ID : TX001603

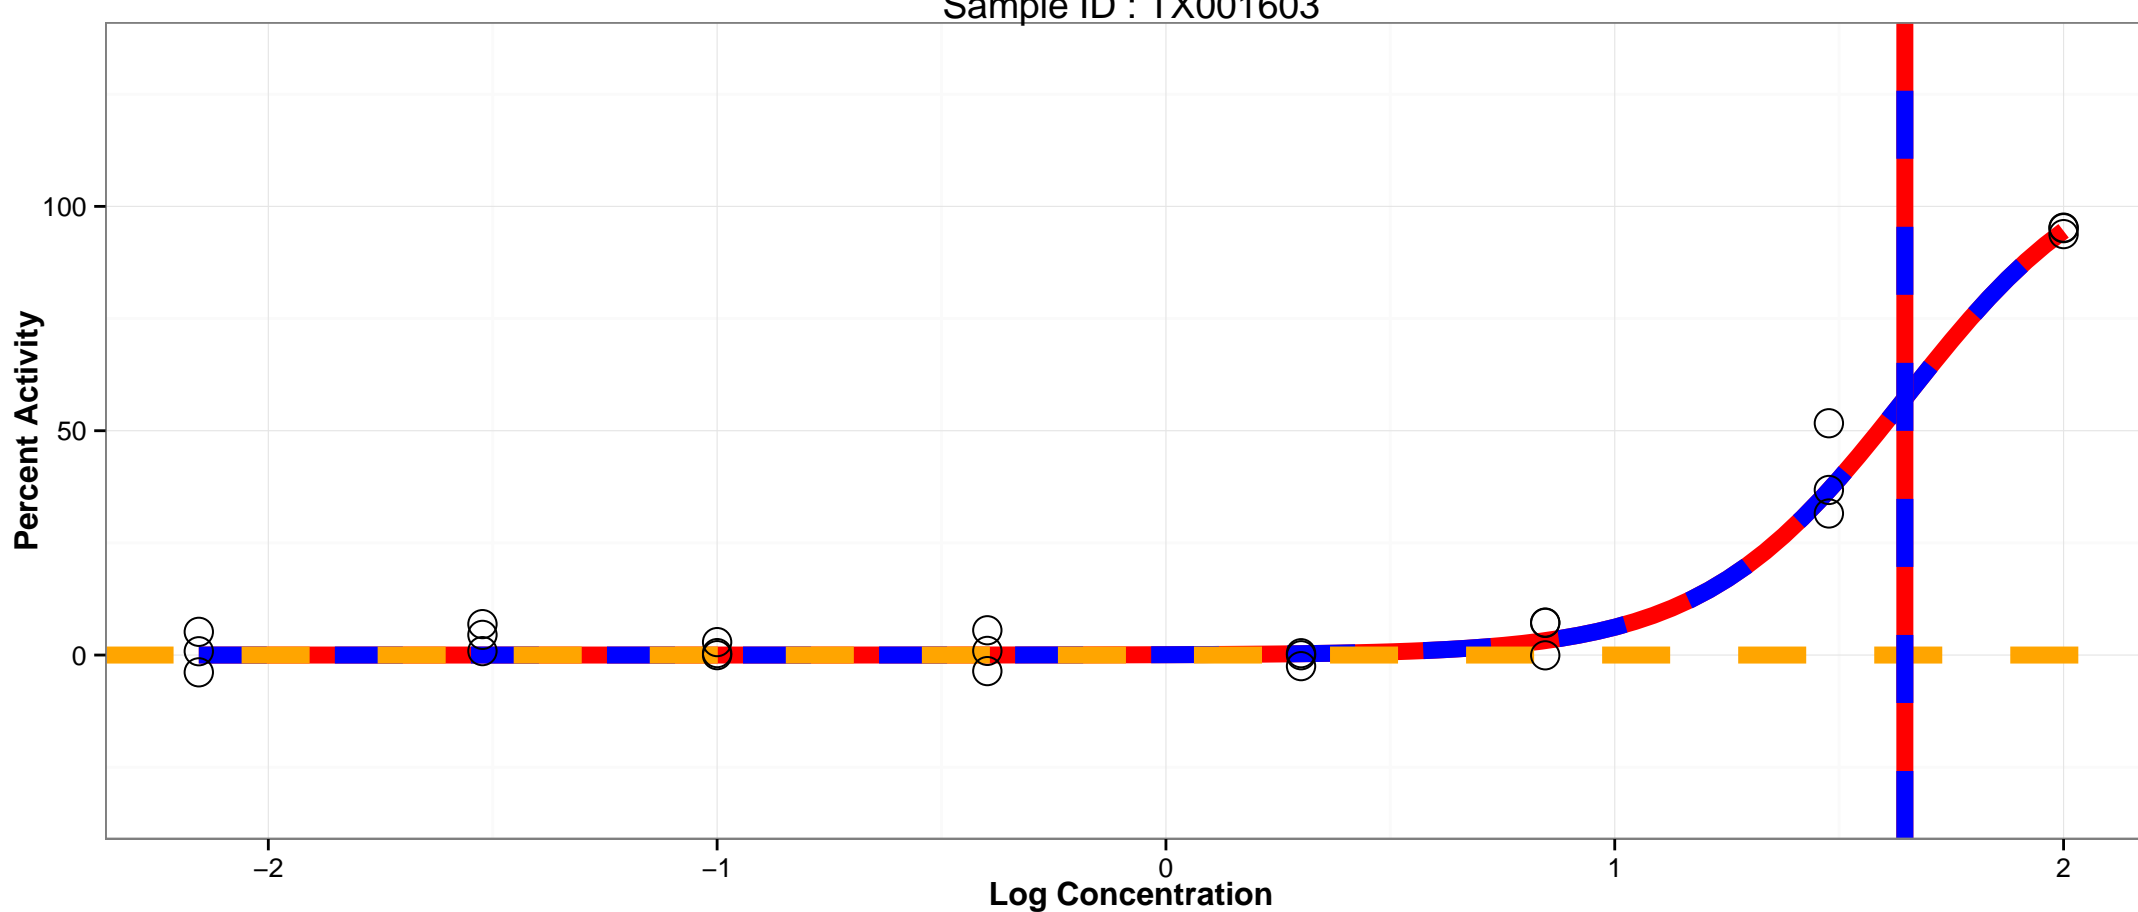

HILL MODEL

|     | tp   | ga     | gw    |
|-----|------|--------|-------|
| val | 114  | 1.65   | 1.92  |
| sd  | 13.1 | 0.0769 | 0.406 |

GAIN-LOSS MODEL

|     | tp   | ga    | gw    | la   | lw    |
|-----|------|-------|-------|------|-------|
| val | 114  | 1.65  | 1.92  | 3.28 | 7.14  |
| sd  | 13.1 | 0.077 | 0.406 | 2650 | 14700 |

|      | CNST   | HILL   | GNLS   |
|------|--------|--------|--------|
| AIC  | 231.69 | 143.55 | 147.55 |
| PROB | 0      | 0.88   | 0.12   |
| RMSE | 36.65  | 4.41   | 4.41   |

MAX\_MEAN : 94.8 MAX\_MED : 95.2 BMAD : 5.54  
COFF : 20 HIT-CALL : 1 FITC : 42 ACTP : 1  
FLAGS :

Assay ID 1848 (NHEERL\_Quantilum\_inhib\_2\_dn)  
Sample ID : TX001603

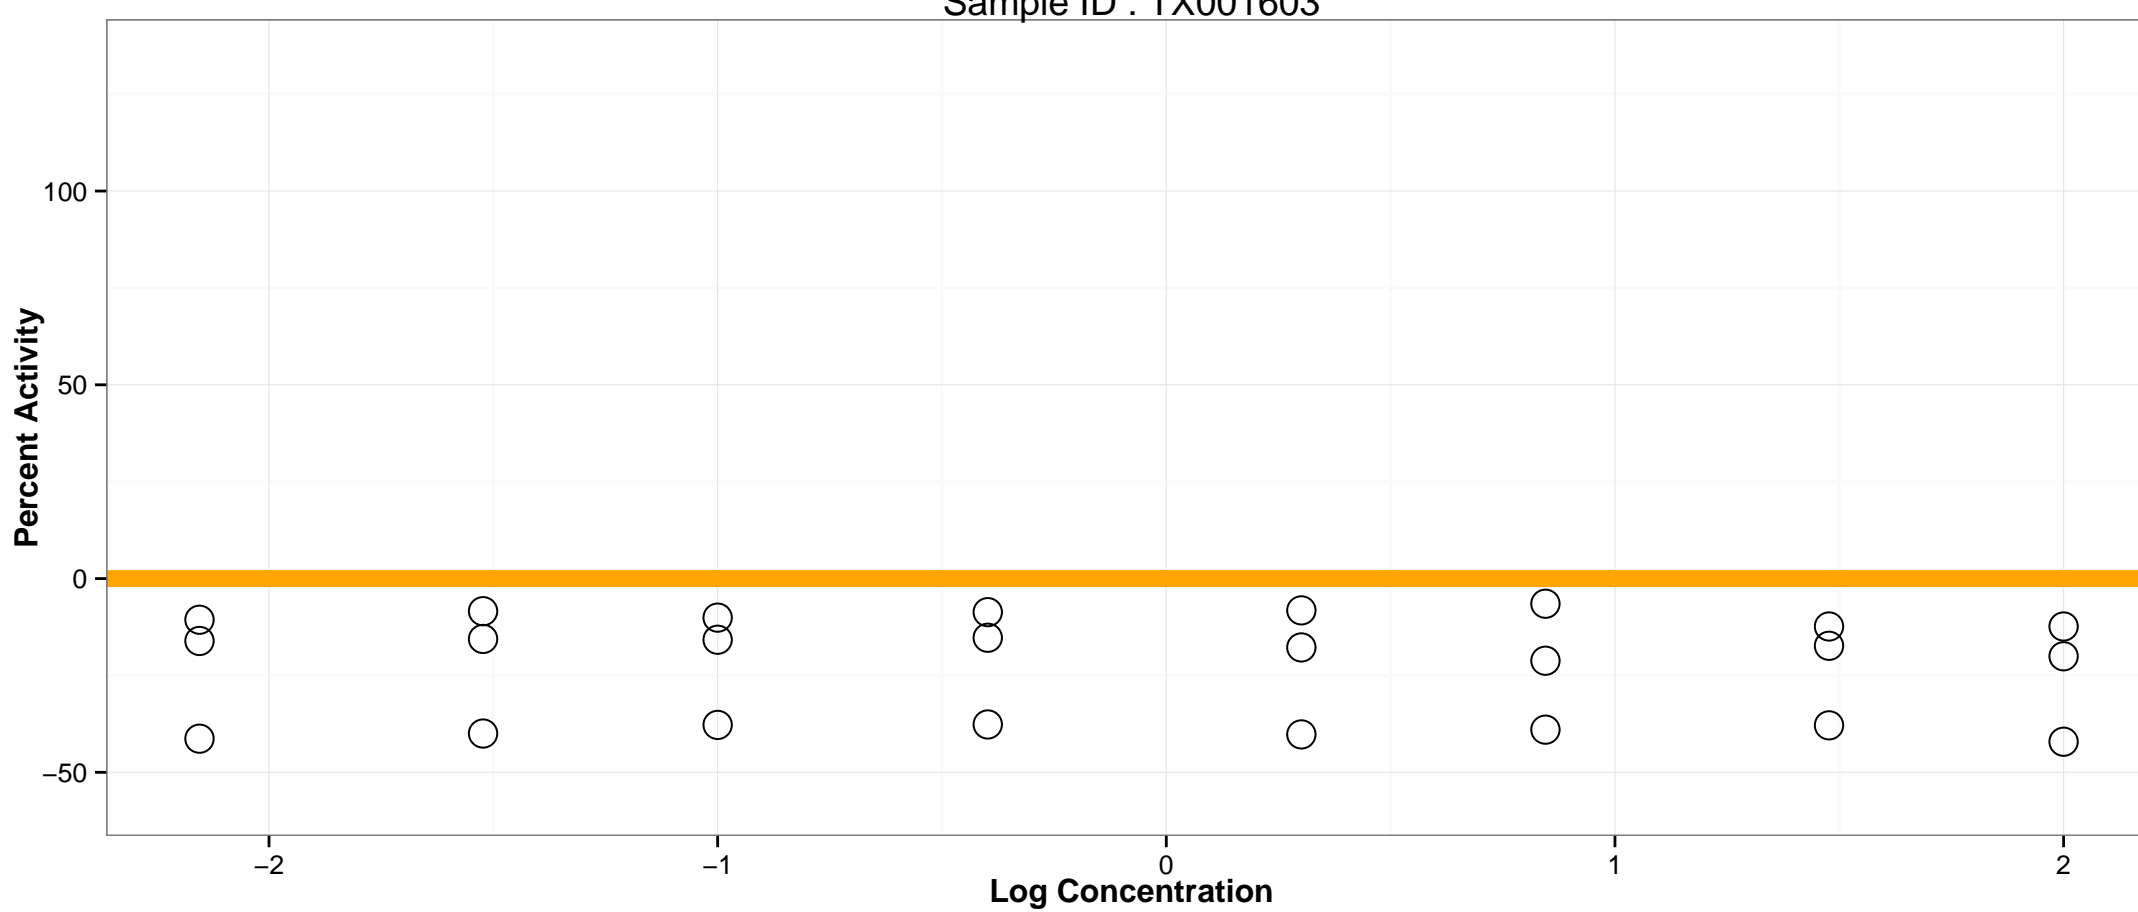

HILL MODEL

HILL MODEL: Not applicable

GAIN-LOSS MODEL

GNLS MODEL: Not applicable

|      | CNST   | HILL | GNLS |
|------|--------|------|------|
| AIC  | 228.81 | NA   | NA   |
| PROB | 1      | NA   | NA   |
| RMSE | 25.58  | NA   | NA   |

MAX\_MEAN : -20.5 MAX\_MED : -15.2 BMAD : 8.58  
COFF : 20 HIT-CALL : 0 FITC : 4 ACTP : 0  
FLAGS : 10

Chemical : Coumaphos  
CAS : 56-72-4

Assay ID 1508 (NHEERL\_TPO\_AUR\_dn)  
Sample ID : TX001606

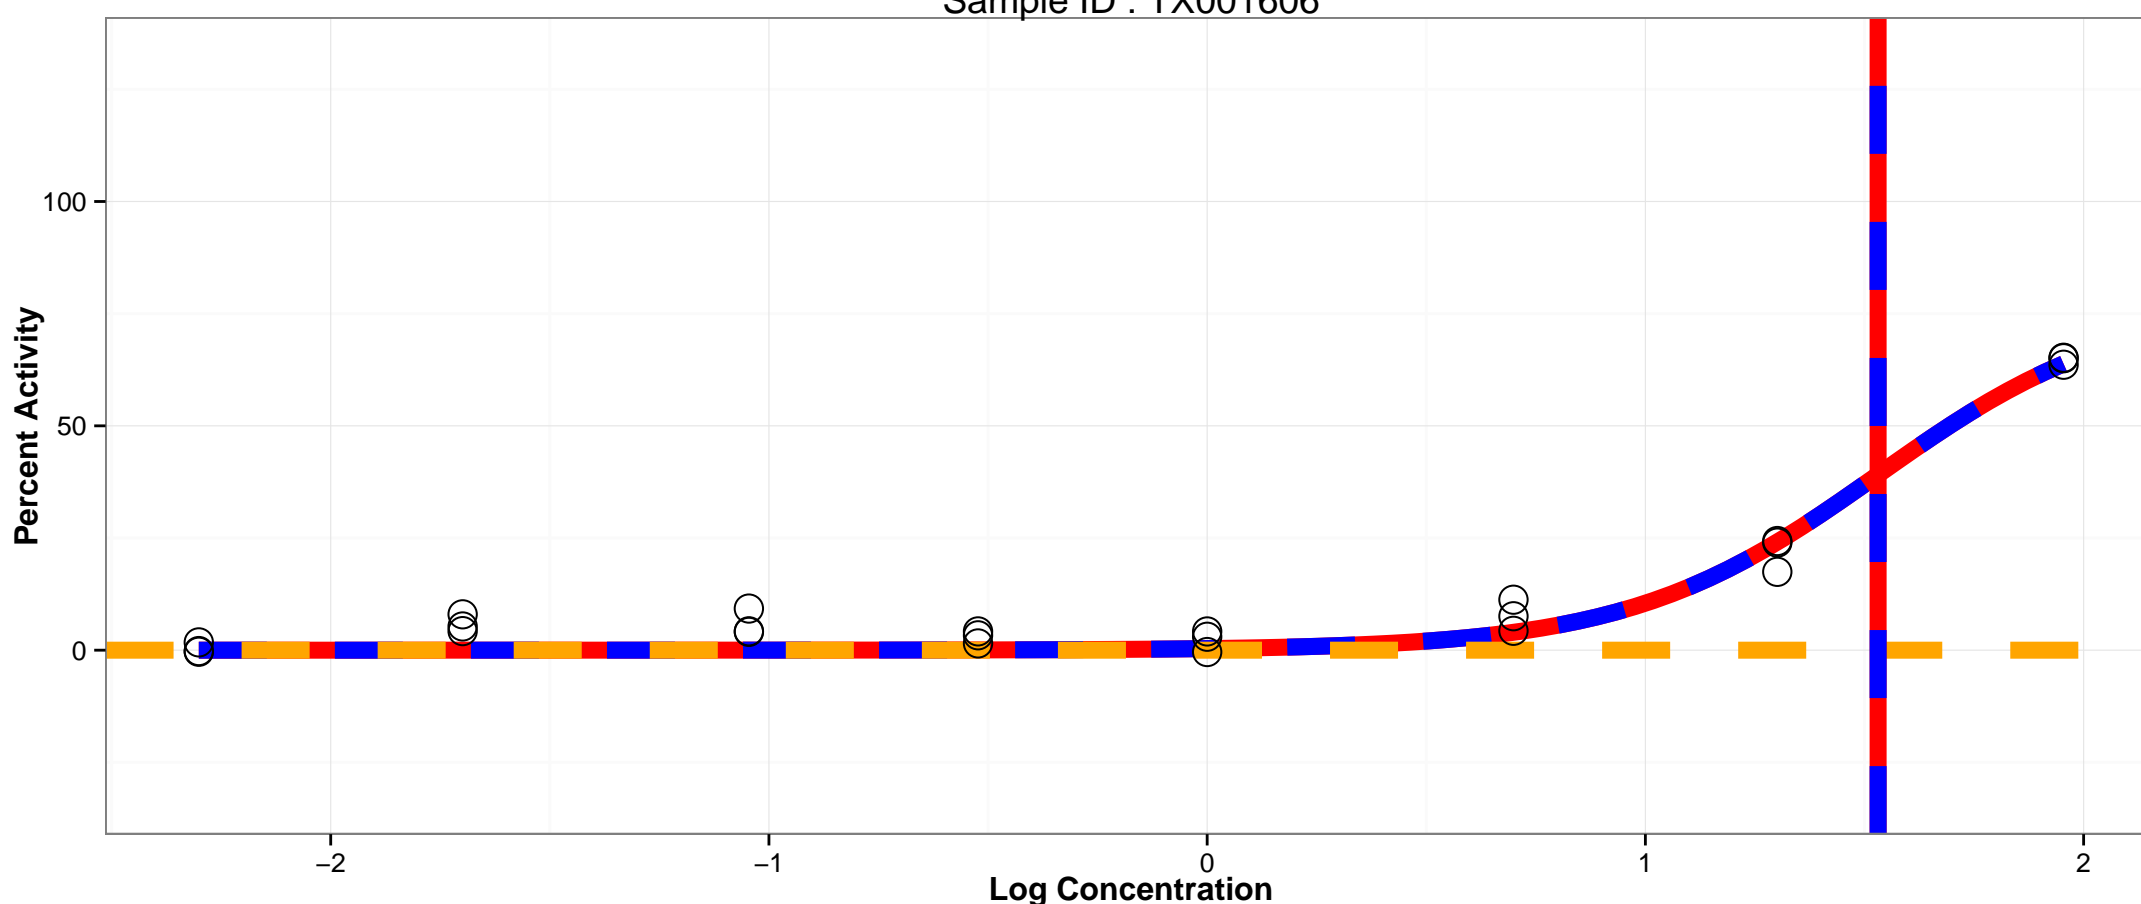

HILL MODEL

|     | tp   | ga   | gw   |
|-----|------|------|------|
| val | 78.2 | 1.53 | 1.53 |
| sd  | 10.8 | 0.11 | 0.38 |

GAIN-LOSS MODEL

|     | tp   | ga   | gw   | la   | lw    |
|-----|------|------|------|------|-------|
| val | 78.2 | 1.53 | 1.53 | 2.93 | 9.7   |
| sd  | 10.8 | 0.11 | 0.38 | 1980 | 19600 |

|      | CNST  | HILL   | GNLS   |
|------|-------|--------|--------|
| AIC  | 213.2 | 144.71 | 148.71 |
| PROB | 0     | 0.88   | 0.12   |
| RMSE | 24.58 | 4.08   | 4.08   |

MAX\_MEAN : 64.6 MAX\_MED : 65.1 BMAD : 5.69  
COFF : 20 HIT-CALL : 1 FITC : 42 ACTP : 1  
FLAGS :

Assay ID 1509 (NHEERL\_HEK293T\_CellTiterGLO)  
Sample ID : TX001606

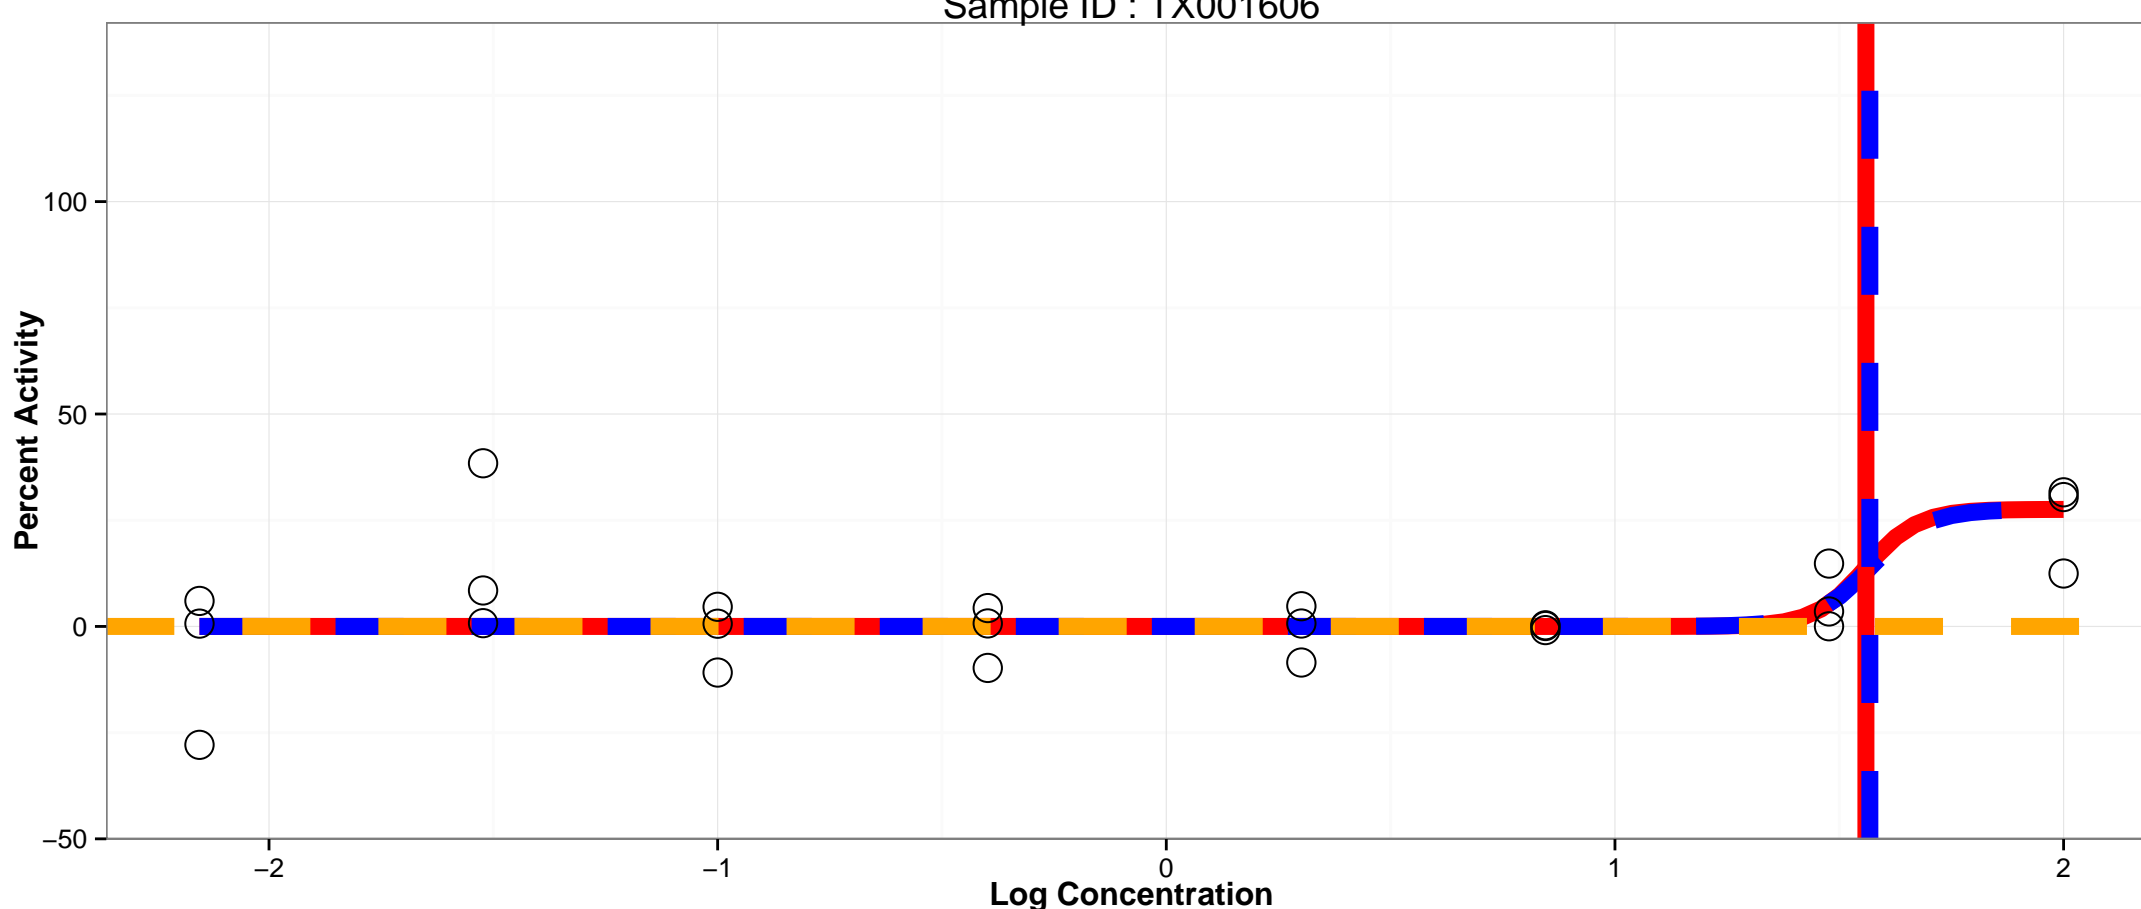

HILL MODEL

|     | tp   | ga   | gw   |
|-----|------|------|------|
| val | 27.6 | 1.56 | 7.59 |
| sd  | 5.31 | 1.68 | 154  |

GAIN-LOSS MODEL

|     | tp   | ga   | gw   | la   | lw    |
|-----|------|------|------|------|-------|
| val | 27.6 | 1.57 | 6.87 | 3.26 | 4.13  |
| sd  | 10.6 | 2.21 | 166  | 9310 | 30500 |

|      | CNST  | HILL   | GNLS   |
|------|-------|--------|--------|
| AIC  | 194.1 | 184.12 | 188.12 |
| PROB | 0.01  | 0.88   | 0.12   |
| RMSE | 14.47 | 11.34  | 11.34  |

MAX\_MEAN : 24.8 MAX\_MED : 30.5 BMAD : 5.54  
COFF : 20 HIT-CALL : 1 FITC : 41 ACTP : 0.994  
FLAGS : 6

Assay ID 1848 (NHEERL\_Quantilum\_inhib\_2\_dn)  
Sample ID : TX001606

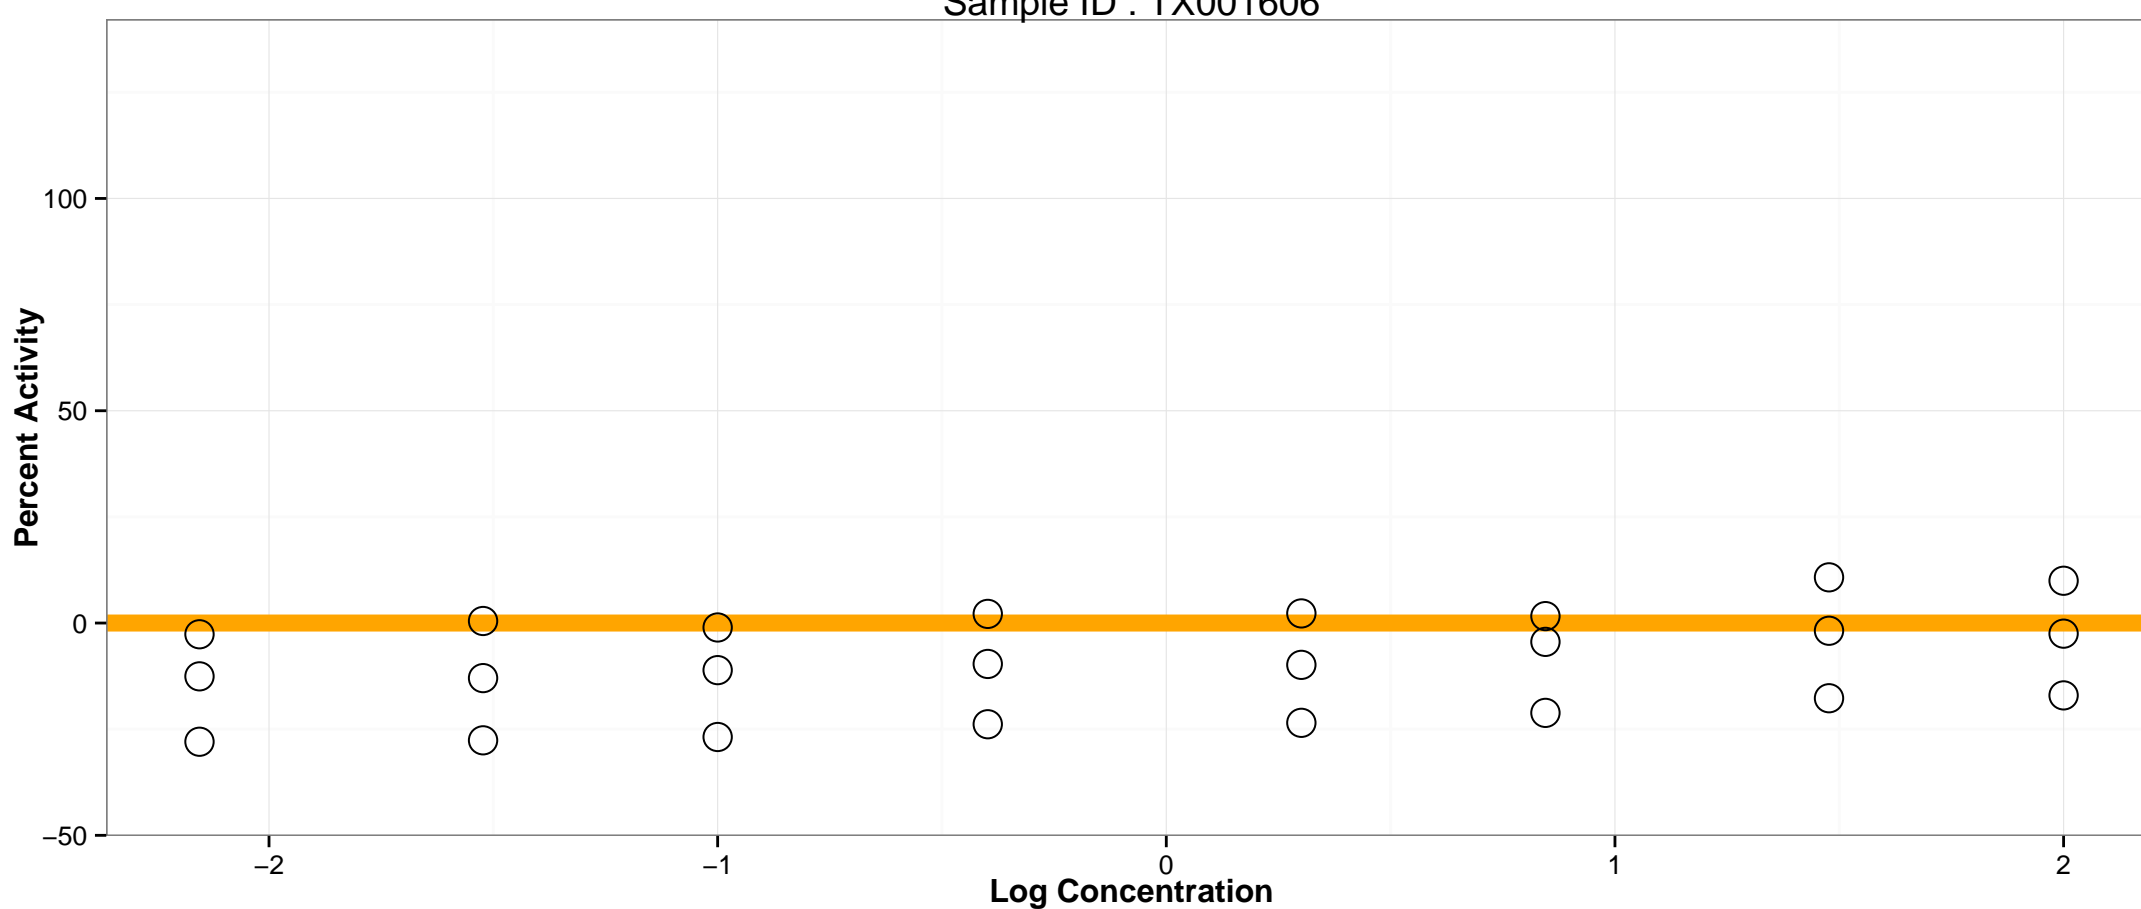

HILL MODEL

HILL MODEL: Not applicable

GAIN-LOSS MODEL

GNLS MODEL: Not applicable

|      | CNST   | HILL | GNLS |
|------|--------|------|------|
| AIC  | 201.82 | NA   | NA   |
| PROB | 1      | NA   | NA   |
| RMSE | 14.91  | NA   | NA   |

MAX\_MEAN : -2.91 MAX\_MED : -1.8 BMAD : 8.58  
COFF : 20 HIT-CALL : 0 FITC : 4 ACTP : 0  
FLAGS :



Chemical : Dichlorvos  
CAS : 62-73-7

Assay ID 1508 (NHEERL\_TPO\_AUR\_dn)  
Sample ID : TX001608

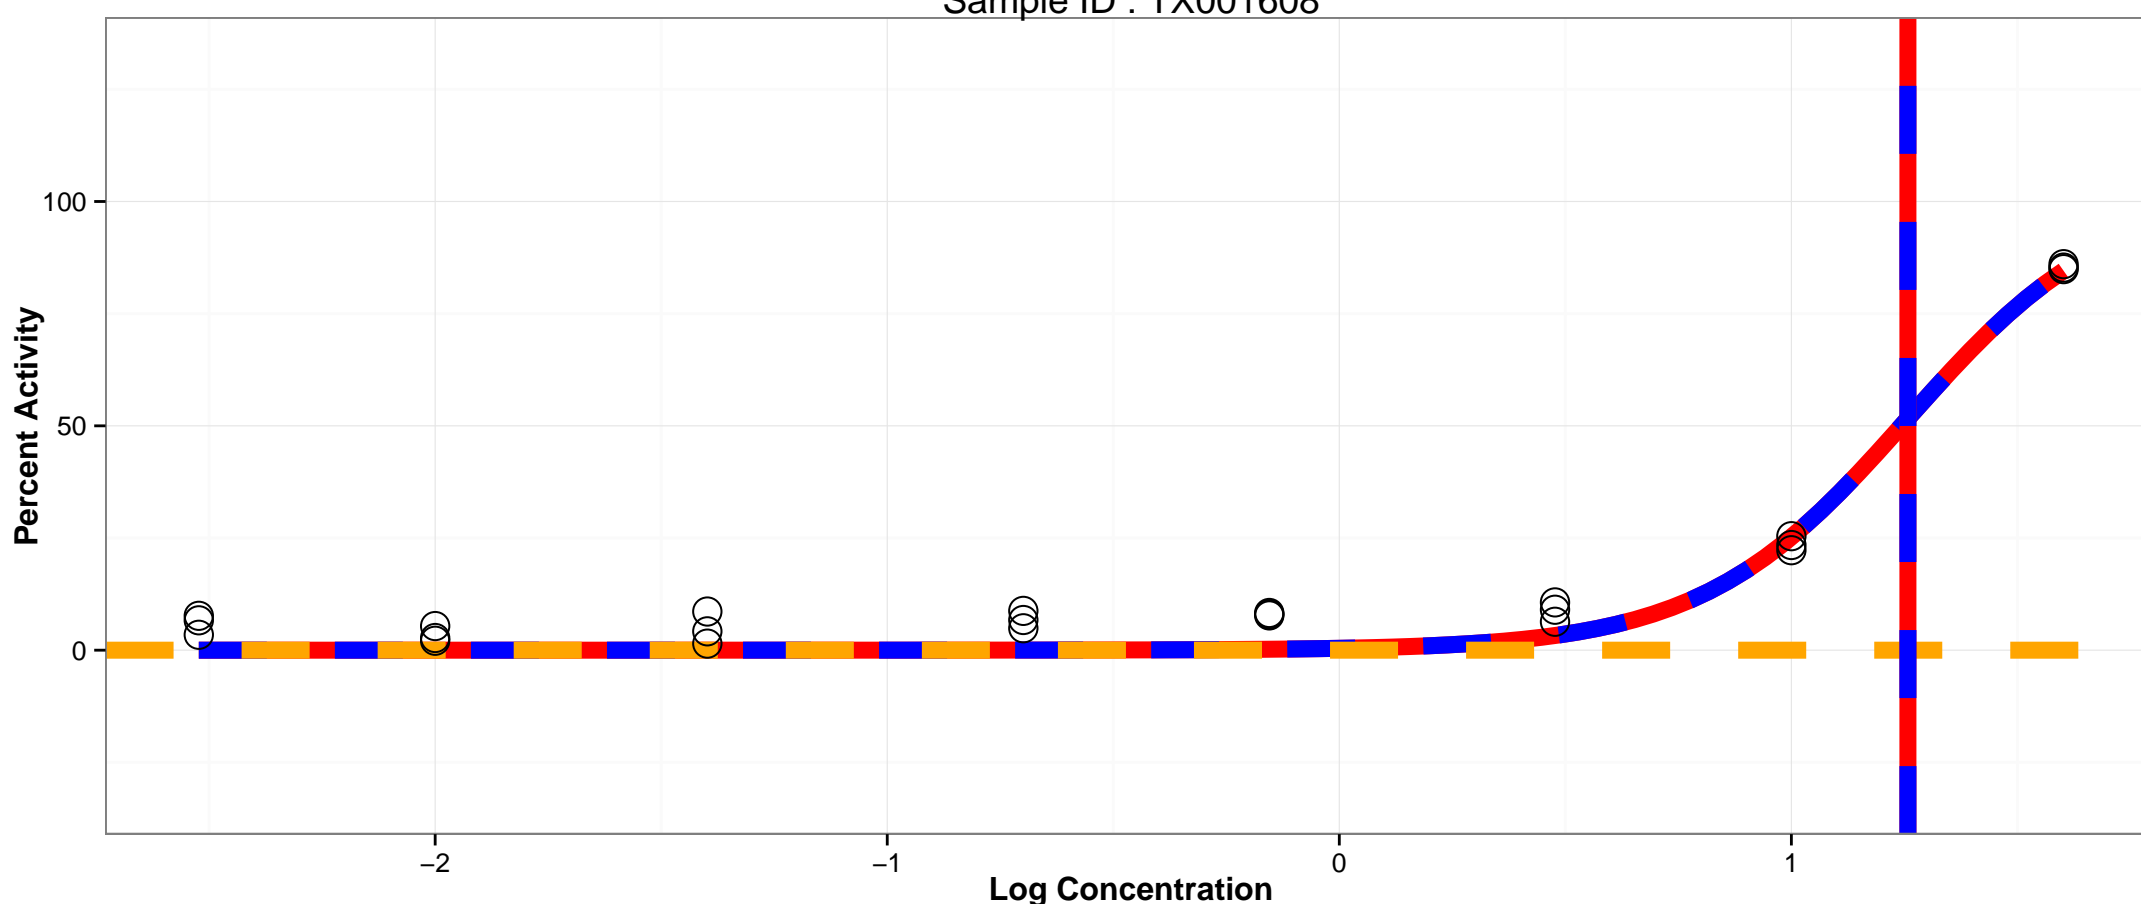

HILL MODEL

|     | tp   | ga    | gw    |
|-----|------|-------|-------|
| val | 103  | 1.26  | 1.9   |
| sd  | 20.1 | 0.134 | 0.628 |

GAIN-LOSS MODEL

|     | tp   | ga    | gw    | la    | lw      |
|-----|------|-------|-------|-------|---------|
| val | 103  | 1.26  | 1.9   | 2.53  | 14.4    |
| sd  | 20.1 | 0.134 | 0.629 | 75100 | 1150000 |

|      | CNST  | HILL   | GNLS   |
|------|-------|--------|--------|
| AIC  | 223.9 | 160.28 | 164.28 |
| PROB | 0     | 0.88   | 0.12   |
| RMSE | 31.89 | 5.37   | 5.37   |

MAX\_MEAN : 85.4 MAX\_MED : 85.3 BMAD : 5.69  
COFF : 20 HIT-CALL : 1 FITC : 42 ACTP : 1  
FLAGS :

Assay ID 1509 (NHEERL\_HEK293T\_CellTiterGLO)  
Sample ID : TX001608

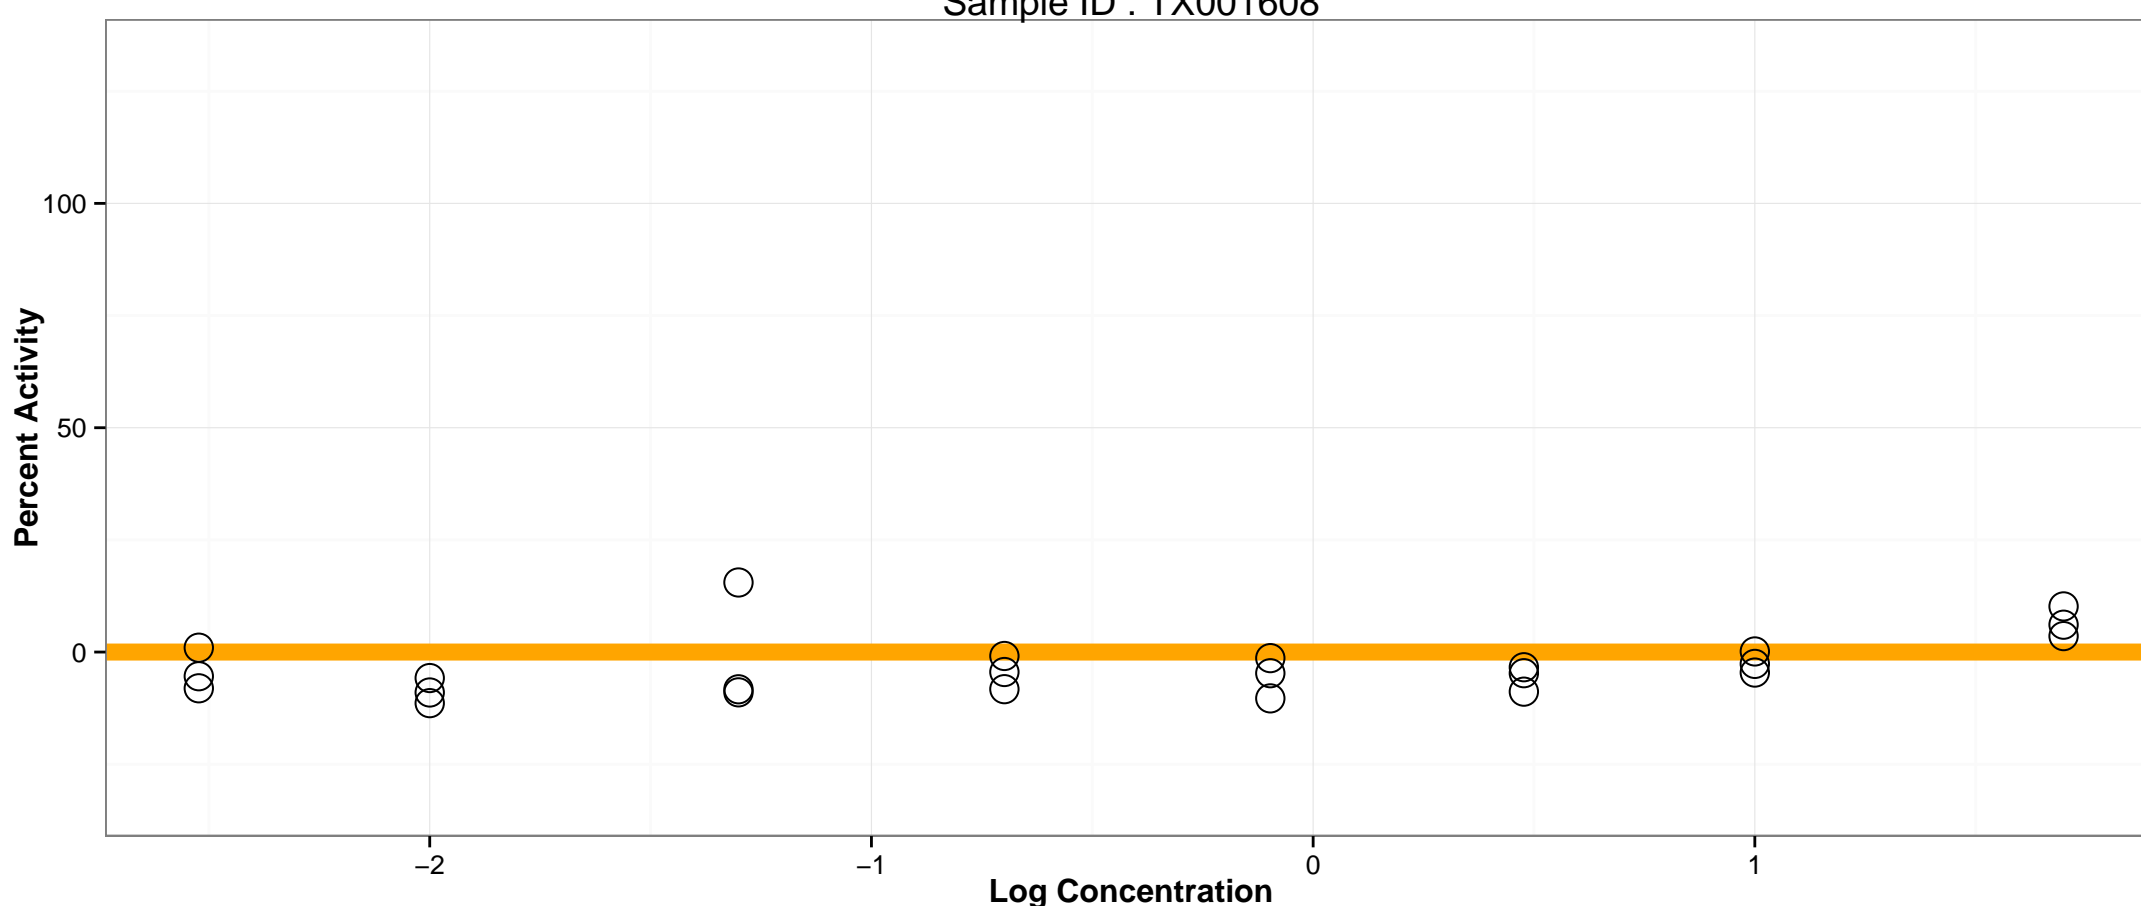

HILL MODEL

HILL MODEL: Not applicable

GAIN-LOSS MODEL

GNLS MODEL: Not applicable

|      | CNST  | HILL | GNLS |
|------|-------|------|------|
| AIC  | 167.9 | NA   | NA   |
| PROB | 1     | NA   | NA   |
| RMSE | 7.19  | NA   | NA   |

MAX\_MEAN : 6.62 MAX\_MED : 6.11 BMAD : 5.54  
COFF : 20 HIT-CALL : 0 FITC : 4 ACTP : 0  
FLAGS :

Assay ID 1848 (NHEERL\_Quantilum\_inhib\_2\_dn)  
Sample ID : TX001608

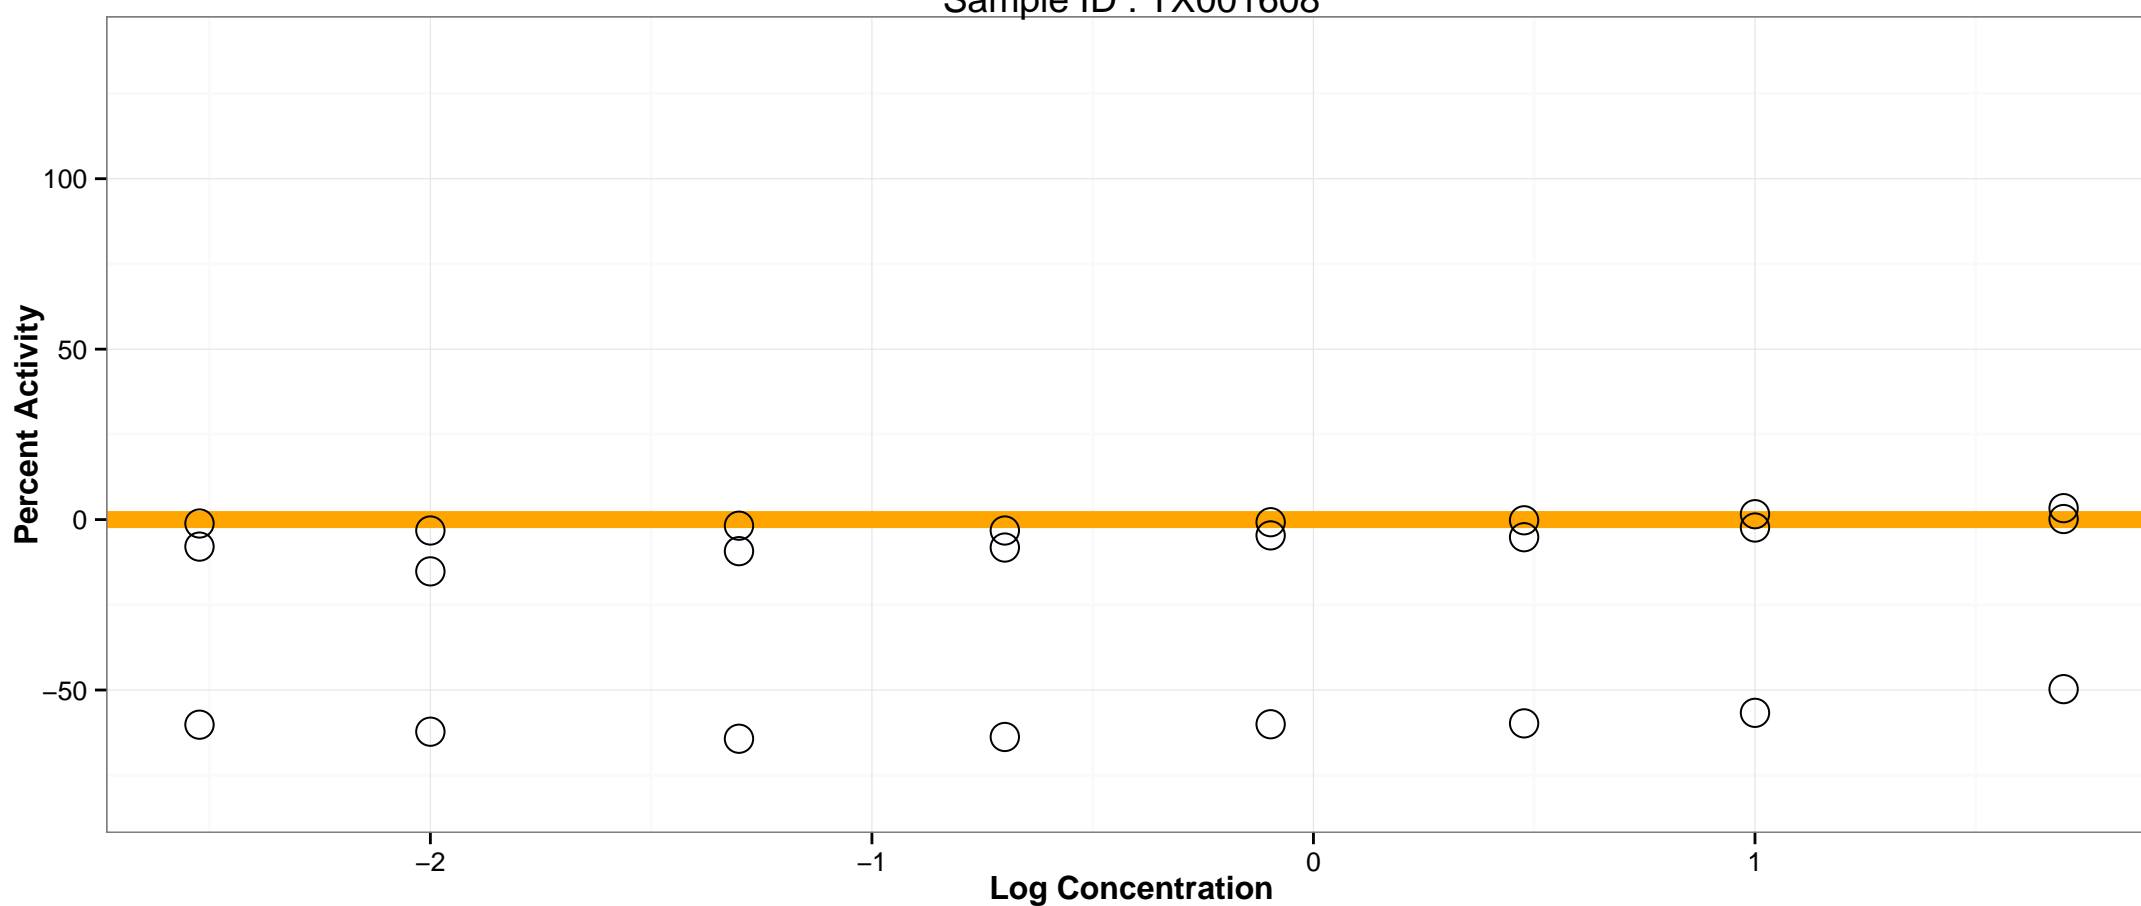

HILL MODEL

HILL MODEL: Not applicable

GAIN-LOSS MODEL

GNLS MODEL: Not applicable

|      | CNST   | HILL | GNLS |
|------|--------|------|------|
| AIC  | 239.95 | NA   | NA   |
| PROB | 1      | NA   | NA   |
| RMSE | 34.81  | NA   | NA   |

MAX\_MEAN : -15.4 MAX\_MED : 0.18 BMAD : 8.58  
COFF : 20 HIT-CALL : 0 FITC : 4 ACTP : 0  
FLAGS : 10

Chemical : Methylene bis(thiocyanate)  
CAS : 6317-18-6

Assay ID 1508 (NHEERL\_TPO\_AUR\_dn)  
Sample ID : TX001619

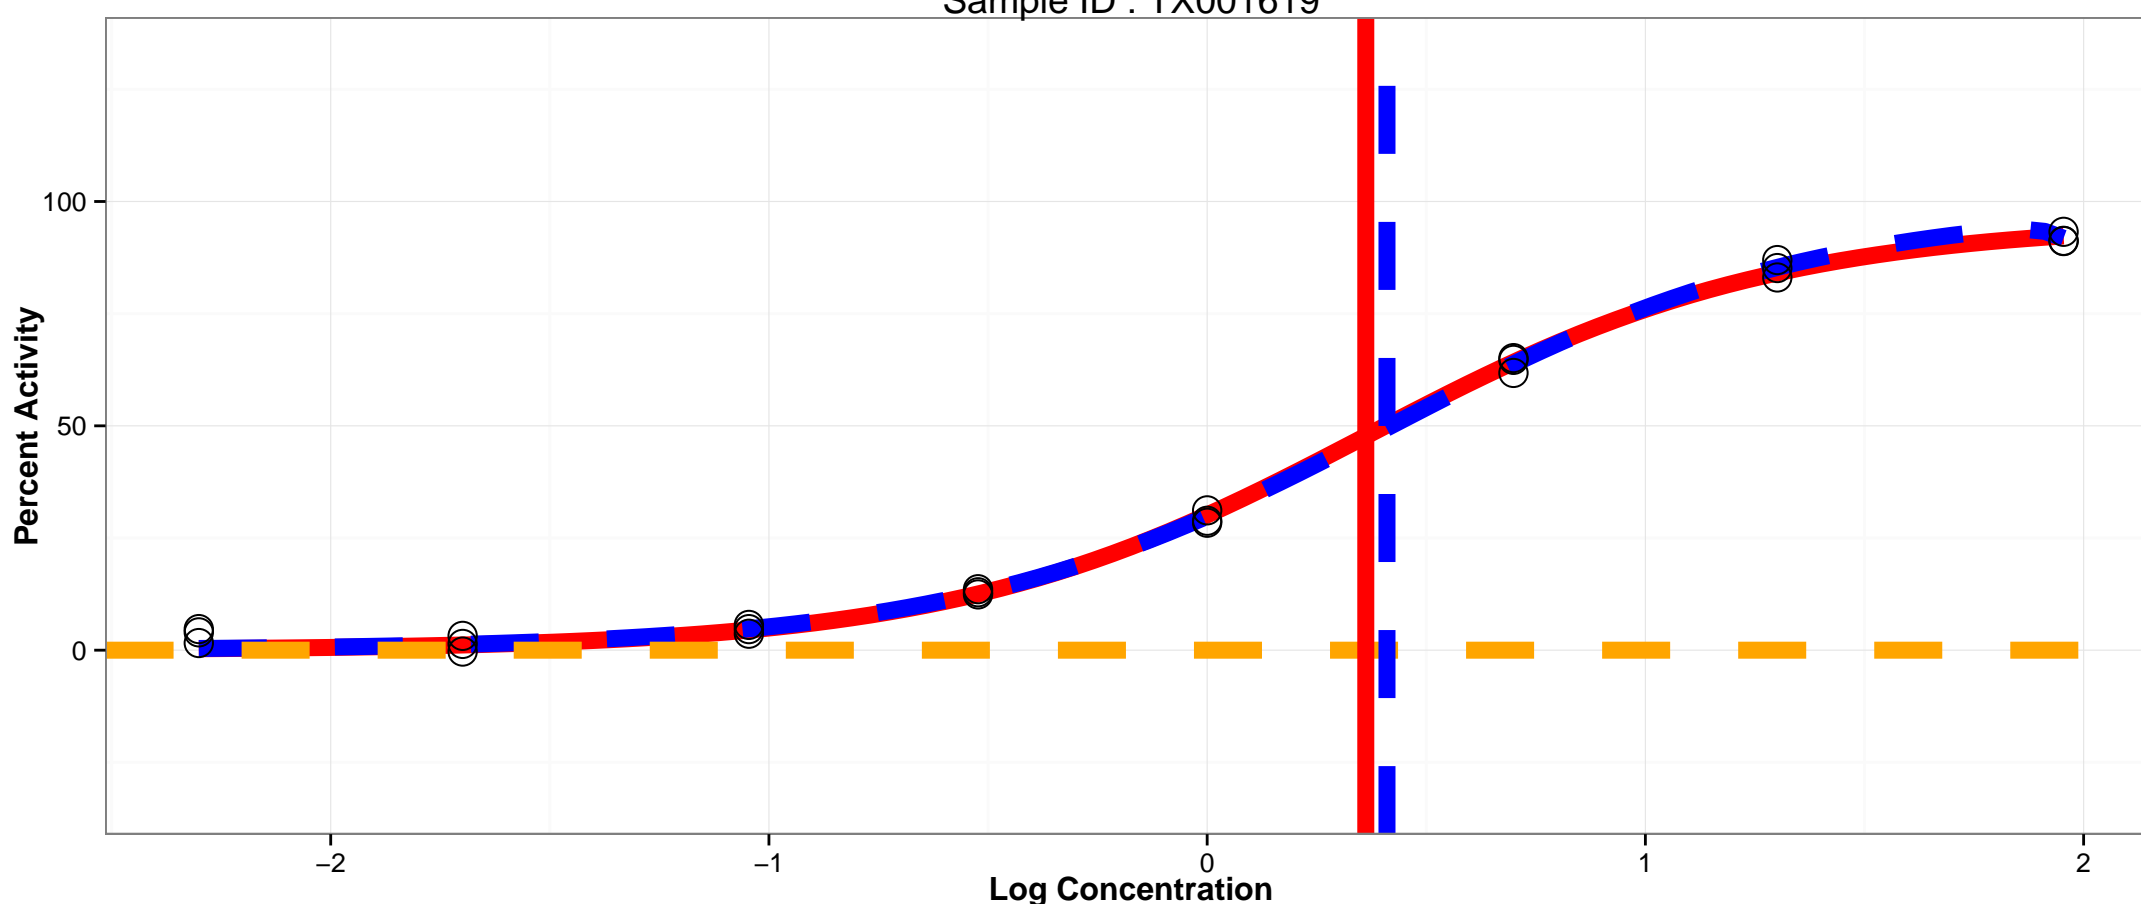

HILL MODEL

|     | tp   | ga     | gw     |
|-----|------|--------|--------|
| val | 95.4 | 0.362  | 0.928  |
| sd  | 1.12 | 0.0217 | 0.0289 |

GAIN-LOSS MODEL

|     | tp   | ga   | gw   | la   | lw   |
|-----|------|------|------|------|------|
| val | 99.1 | 0.41 | 0.89 | 2.12 | 9.03 |
| sd  | NA   | NA   | NA   | NA   | NA   |

|      | CNST  | HILL   | GNLS   |
|------|-------|--------|--------|
| AIC  | 259.9 | 102.22 | 103.91 |
| PROB | 0     | 0.7    | 0.3    |
| RMSE | 51.05 | 1.71   | 1.63   |

MAX\_MEAN : 91.9 MAX\_MED : 91.2 BMAD : 5.69  
COFF : 20 HIT-CALL : 1 FITC : 41 ACTP : 1  
FLAGS :

Assay ID 1509 (NHEERL\_HEK293T\_CellTiterGLO)  
Sample ID : TX001619

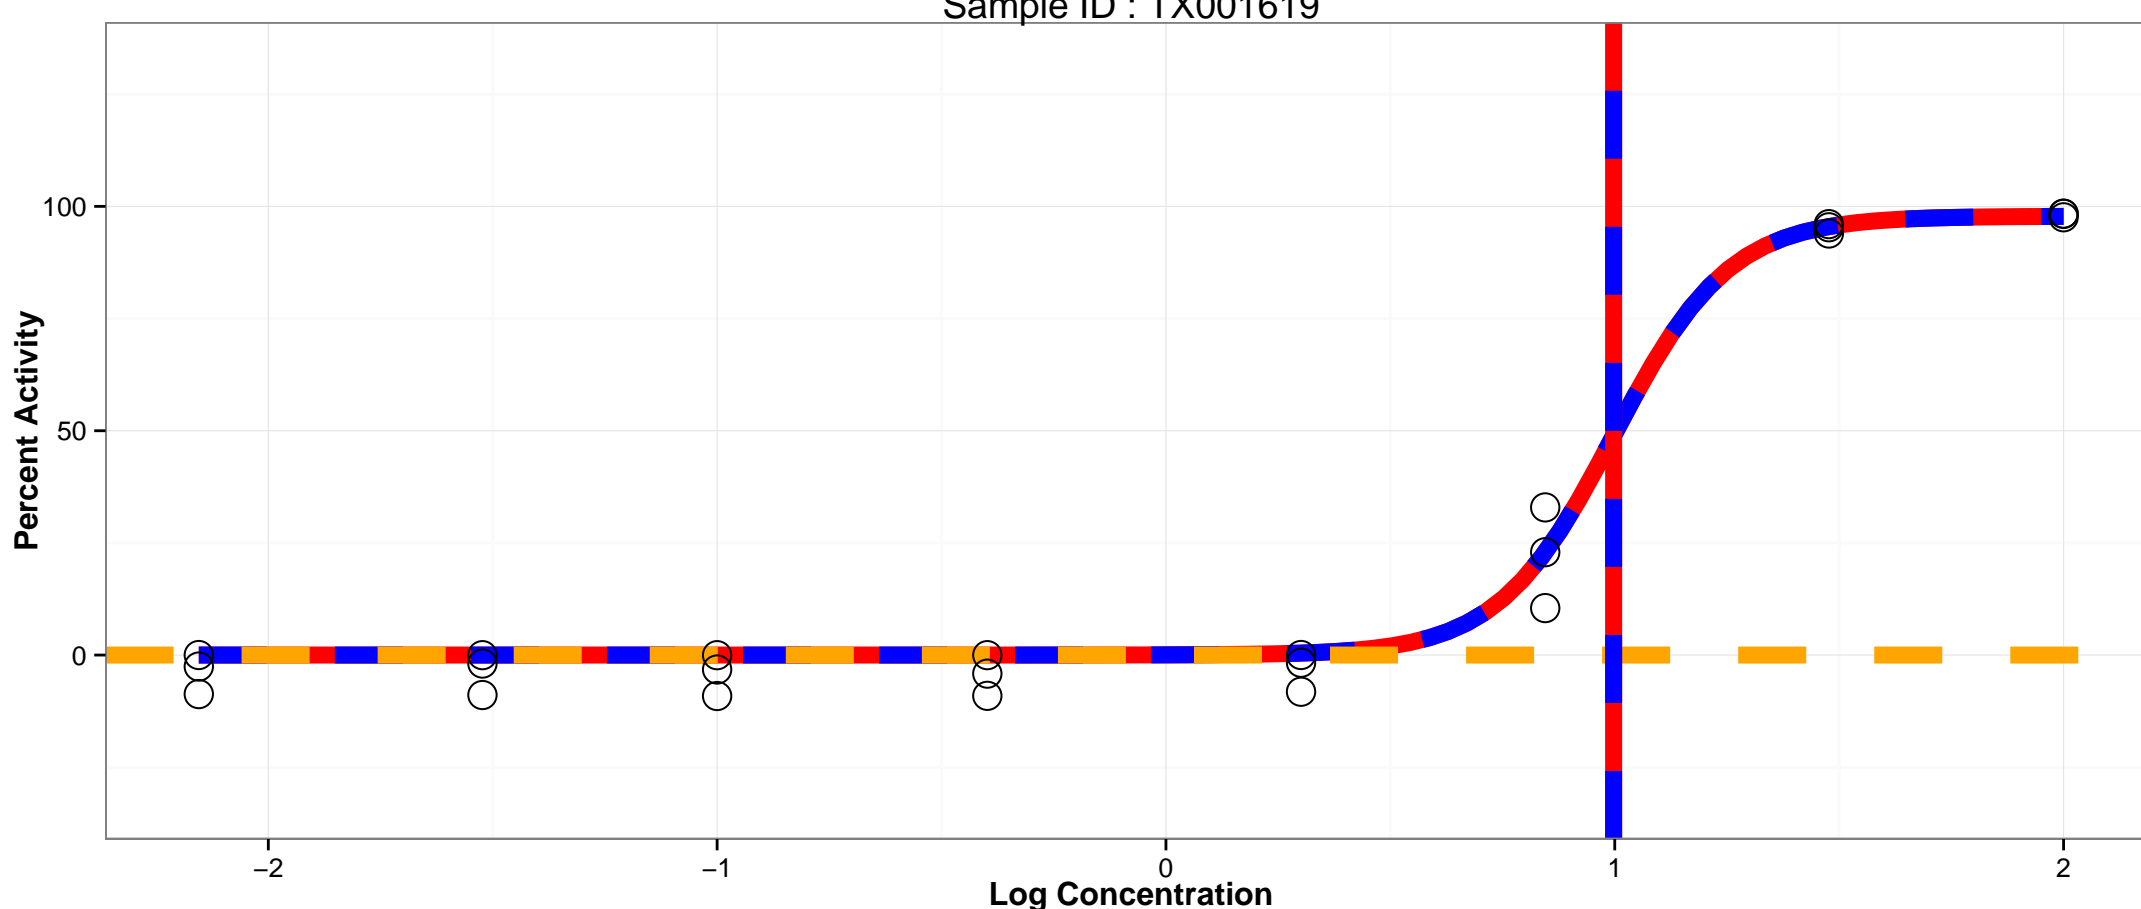

HILL MODEL

|     | tp   | ga    | gw    |
|-----|------|-------|-------|
| val | 97.8 | 0.998 | 3.38  |
| sd  | 2.1  | 0.05  | 0.885 |

GAIN-LOSS MODEL

|     | tp   | ga    | gw   | la   | lw   |
|-----|------|-------|------|------|------|
| val | 97.8 | 0.998 | 3.38 | 3.12 | 17.9 |
| sd  | NA   | NA    | NA   | NA   | NA   |

|      | CNST   | HILL   | GNLS   |
|------|--------|--------|--------|
| AIC  | 253.44 | 155.82 | 159.82 |
| PROB | 0      | 0.88   | 0.12   |
| RMSE | 49.23  | 5.38   | 5.38   |

MAX\_MEAN : 98.1 MAX\_MED : 98.3 BMAD : 5.54  
COFF : 20 HIT-CALL : 1 FITC : 41 ACTP : 1  
FLAGS :

Assay ID 1848 (NHEERL\_Quantilum\_inhib\_2\_dn)  
Sample ID : TX001619

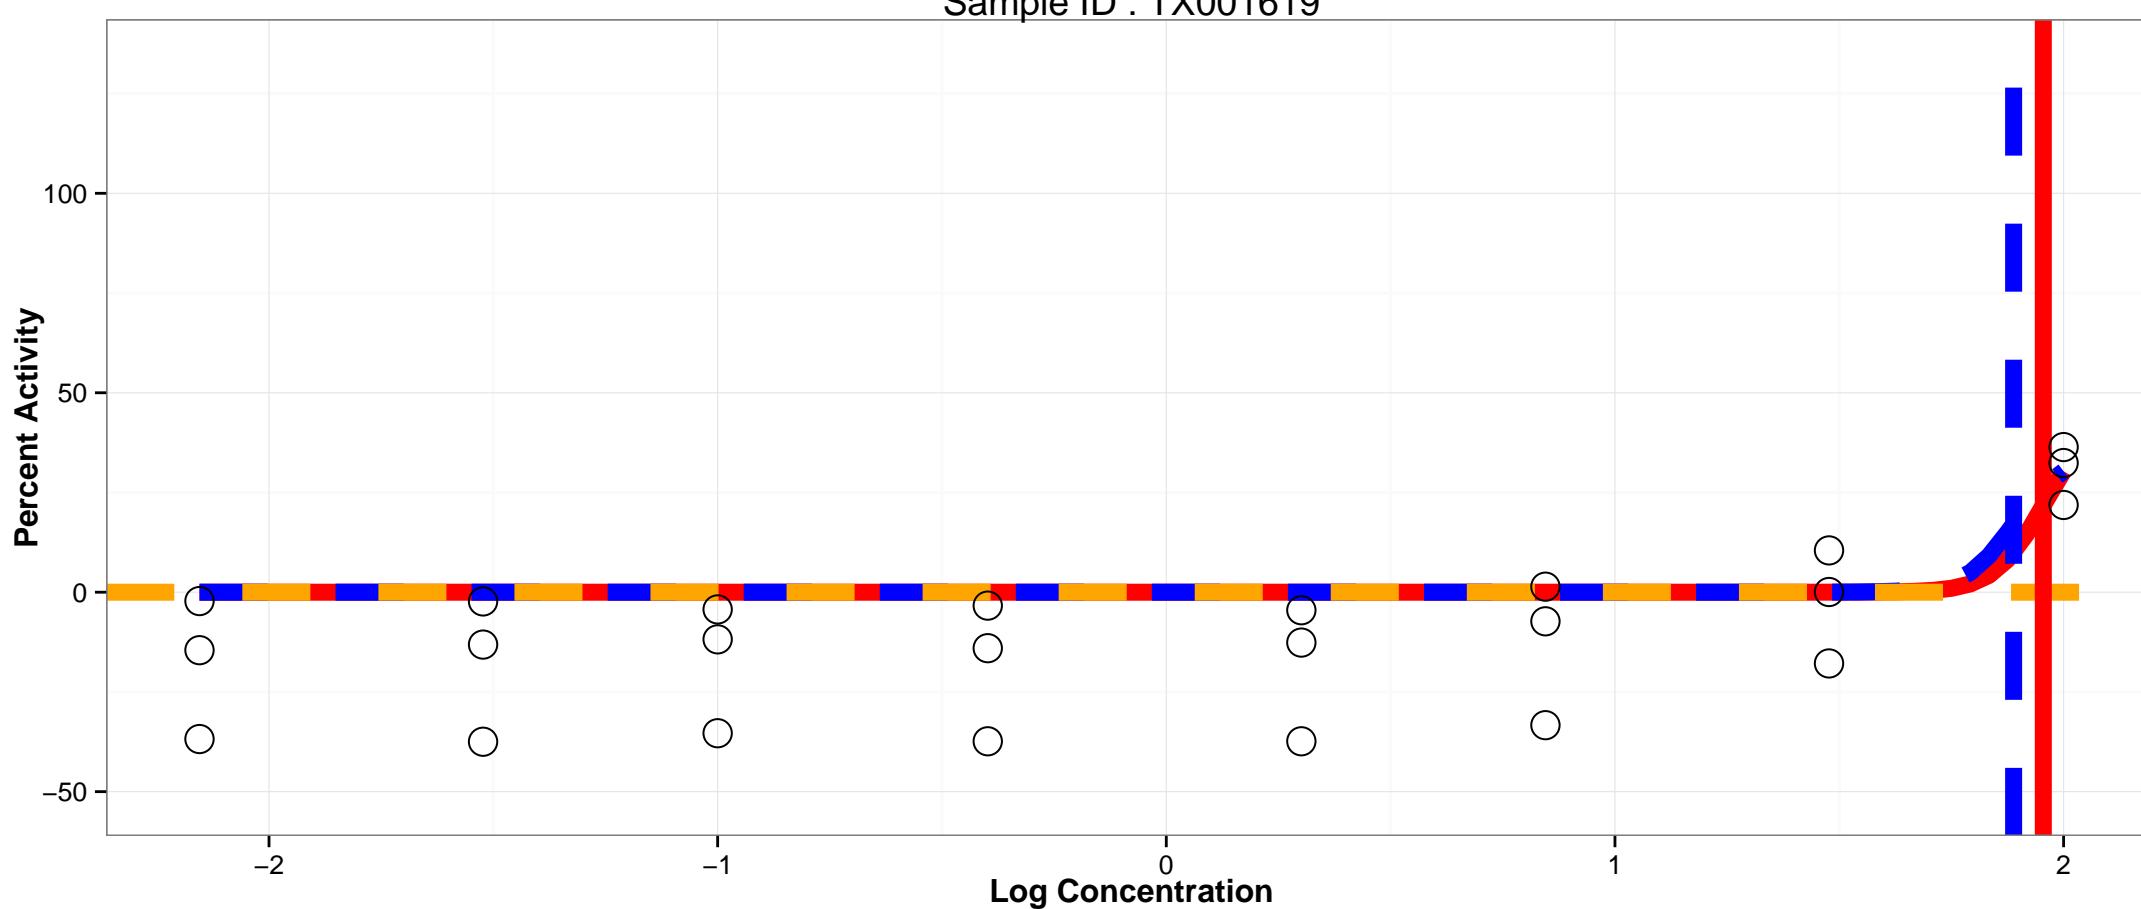

HILL MODEL

|     | tp   | ga   | gw |
|-----|------|------|----|
| val | 43.5 | 1.95 | 8  |
| sd  | NA   | NA   | NA |

GAIN-LOSS MODEL

|     | tp   | ga   | gw | la | lw   |
|-----|------|------|----|----|------|
| val | 34.2 | 1.89 | 8  | 4  | 12.7 |
| sd  | NA   | NA   | NA | NA | NA   |

|      | CNST   | HILL   | GNLS   |
|------|--------|--------|--------|
| AIC  | 221.89 | 219.83 | 223.83 |
| PROB | 0.24   | 0.67   | 0.09   |
| RMSE | 22.53  | 19.84  | 19.84  |

MAX\_MEAN : 30.2 MAX\_MED : 32.4 BMAD : 8.58  
COFF : 20 HIT-CALL : 1 FITC : 42 ACTP : 0.76  
FLAGS : 6; 11

Chemical : Tebupirimfos  
CAS : 96182-53-5

Assay ID 1508 (NHEERL\_TPO\_AUR\_dn)  
Sample ID : TX001623

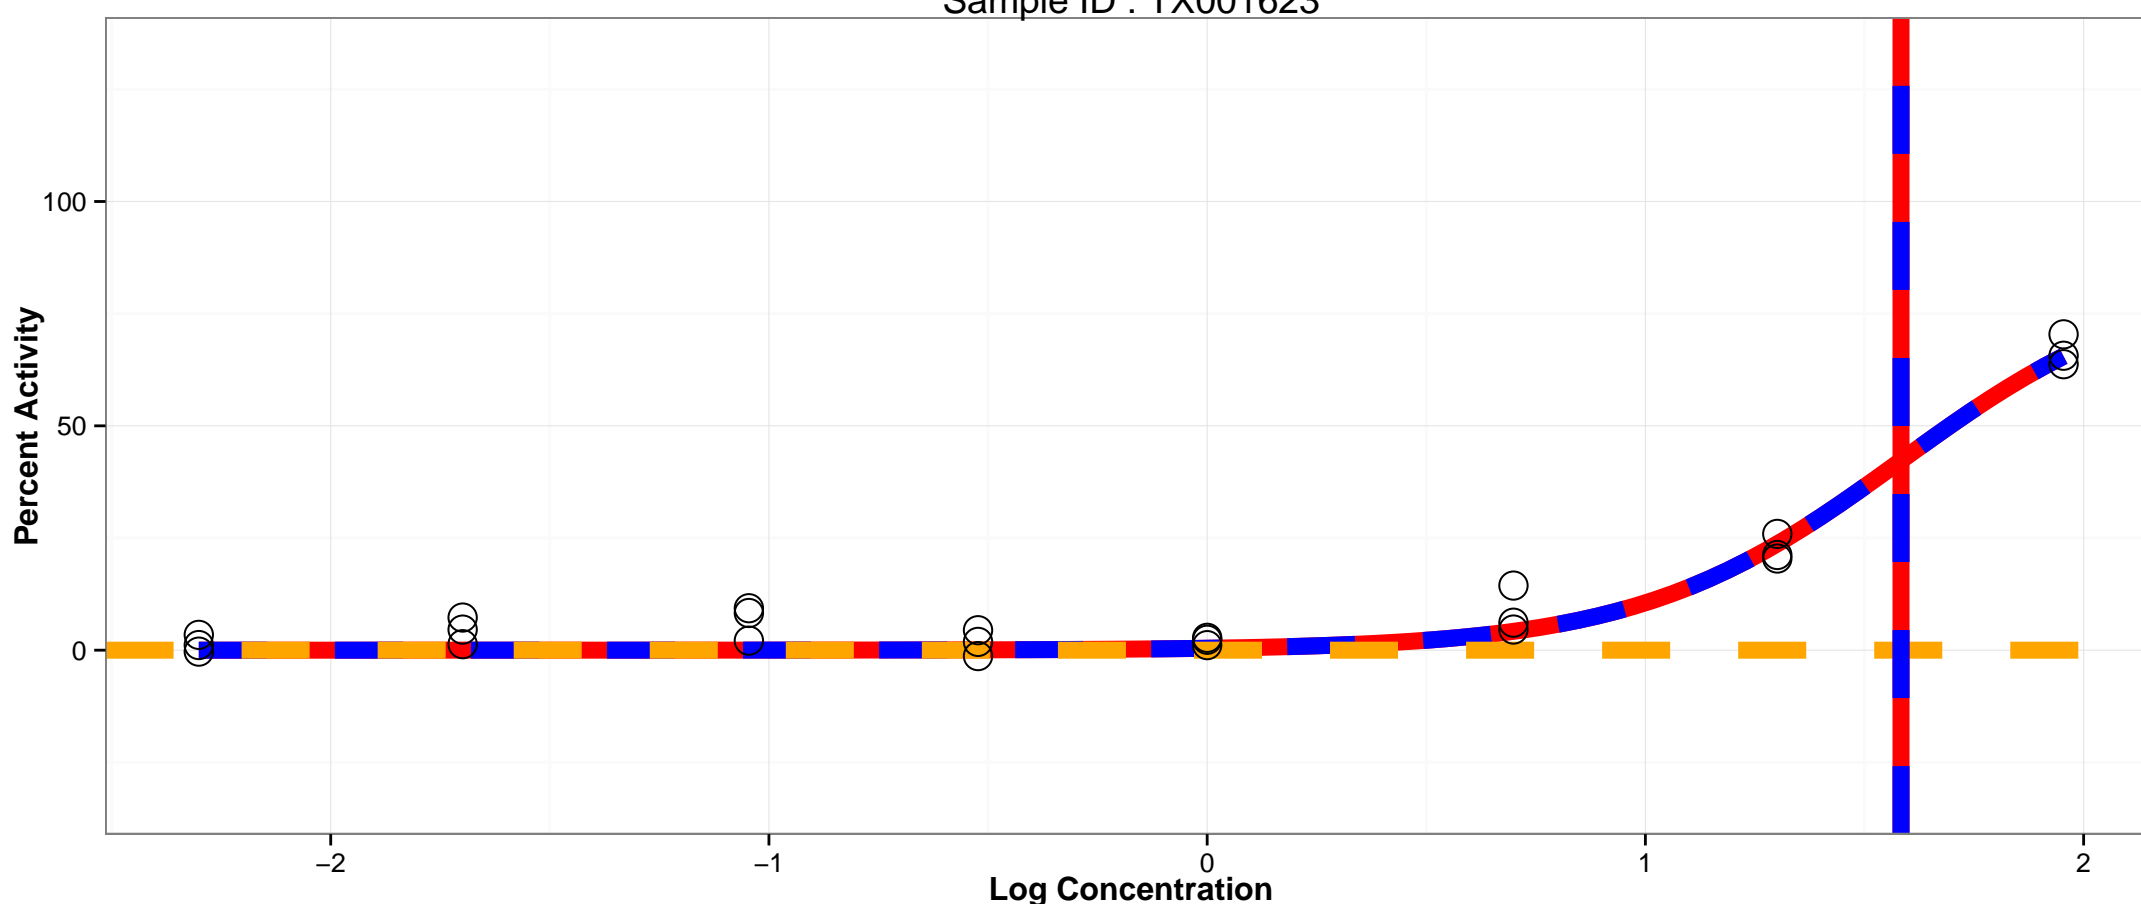

HILL MODEL

|     | tp   | ga    | gw    |
|-----|------|-------|-------|
| val | 84.5 | 1.58  | 1.45  |
| sd  | 13.7 | 0.133 | 0.335 |

GAIN-LOSS MODEL

|     | tp   | ga   | gw   | la   | lw |
|-----|------|------|------|------|----|
| val | 84.5 | 1.58 | 1.45 | 3.85 | 18 |
| sd  | NA   | NA   | NA   | NA   | NA |

|      | CNST  | HILL   | GNLS   |
|------|-------|--------|--------|
| AIC  | 214.7 | 145.46 | 149.46 |
| PROB | 0     | 0.88   | 0.12   |
| RMSE | 25.35 | 4.29   | 4.29   |

MAX\_MEAN : 66.6 MAX\_MED : 65.6 BMAD : 5.69  
COFF : 20 HIT-CALL : 1 FITC : 42 ACTP : 1  
FLAGS :

Assay ID 1509 (NHEERL\_HEK293T\_CellTiterGLO)  
Sample ID : TX001623

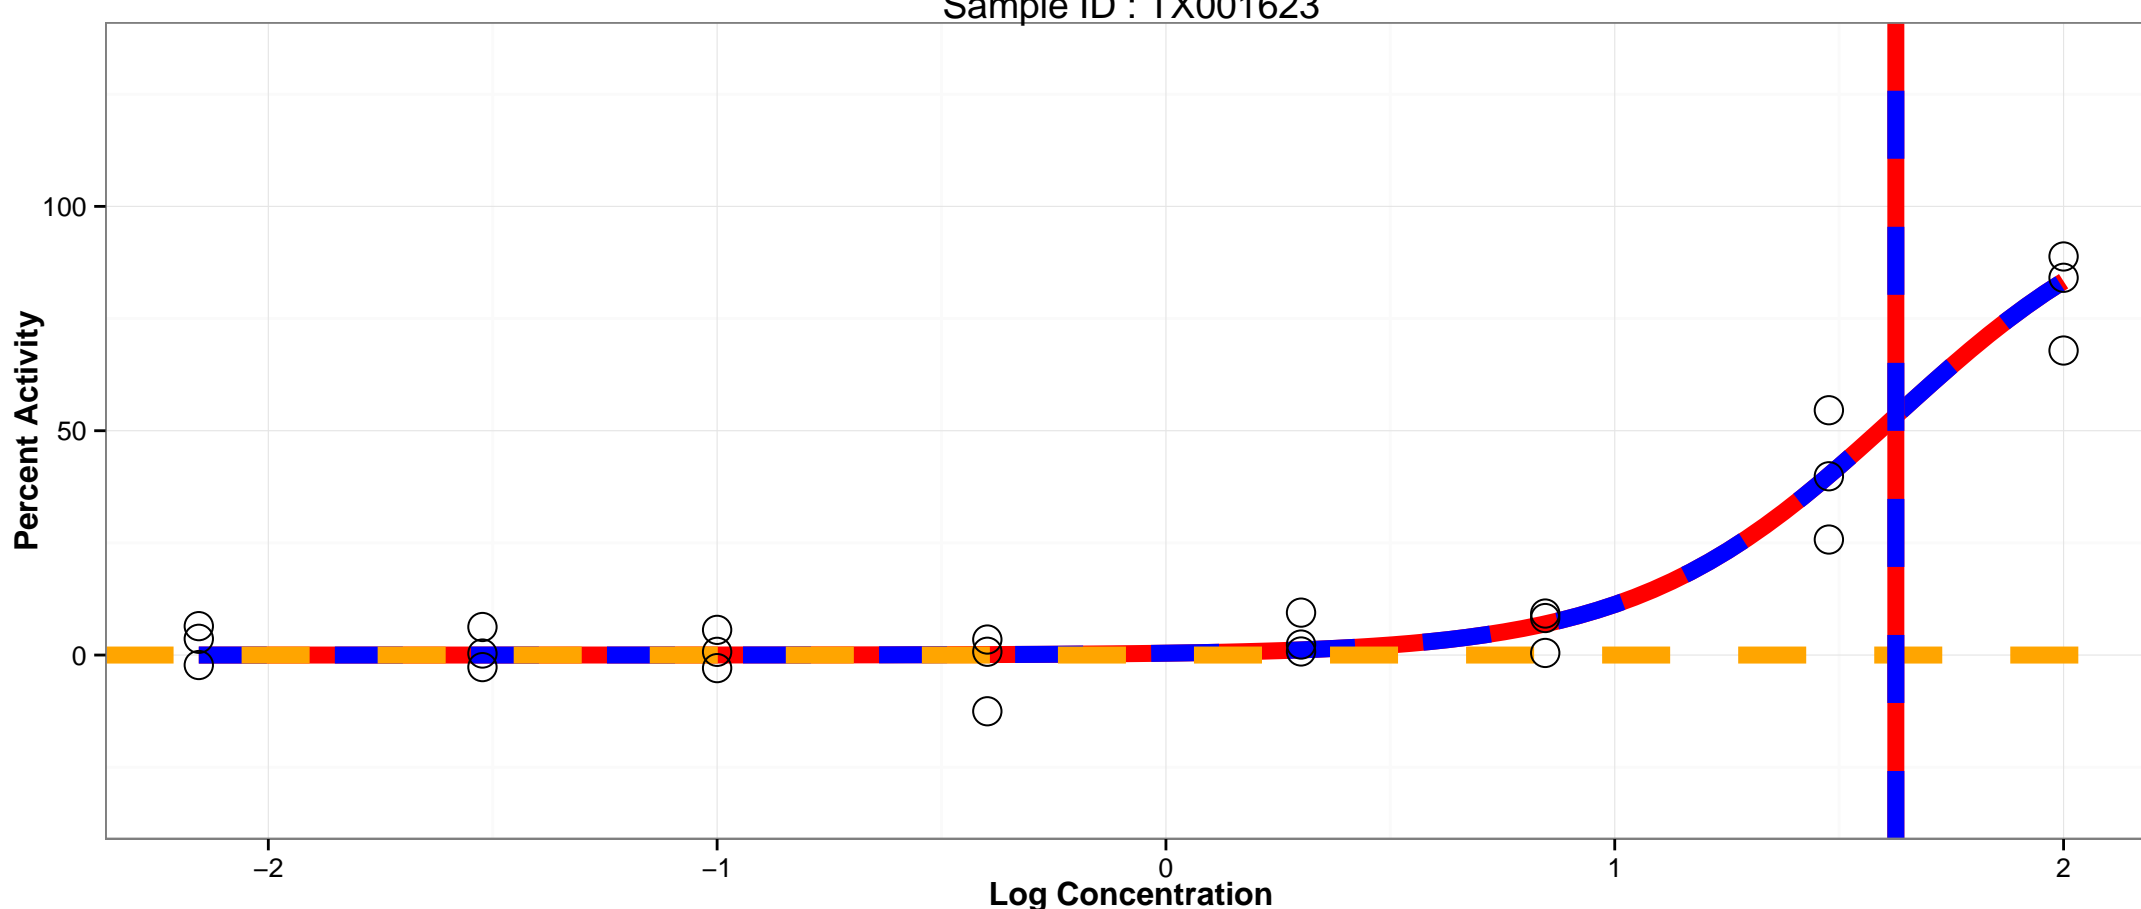

HILL MODEL

|     | tp   | ga    | gw    |
|-----|------|-------|-------|
| val | 107  | 1.63  | 1.48  |
| sd  | 23.5 | 0.181 | 0.417 |

GAIN-LOSS MODEL

|     | tp   | ga    | gw    | la    | lw     |
|-----|------|-------|-------|-------|--------|
| val | 107  | 1.63  | 1.48  | 3.4   | 8.16   |
| sd  | 23.5 | 0.181 | 0.417 | 94600 | 557000 |

|      | CNST  | HILL   | GNLS   |
|------|-------|--------|--------|
| AIC  | 228.5 | 167.54 | 171.54 |
| PROB | 0     | 0.88   | 0.12   |
| RMSE | 32.51 | 6.84   | 6.84   |

MAX\_MEAN : 80.3 MAX\_MED : 84.1 BMAD : 5.54  
COFF : 20 HIT-CALL : 1 FITC : 42 ACTP : 1  
FLAGS :

Assay ID 1848 (NHEERL\_Quantilum\_inhib\_2\_dn)  
Sample ID : TX001623

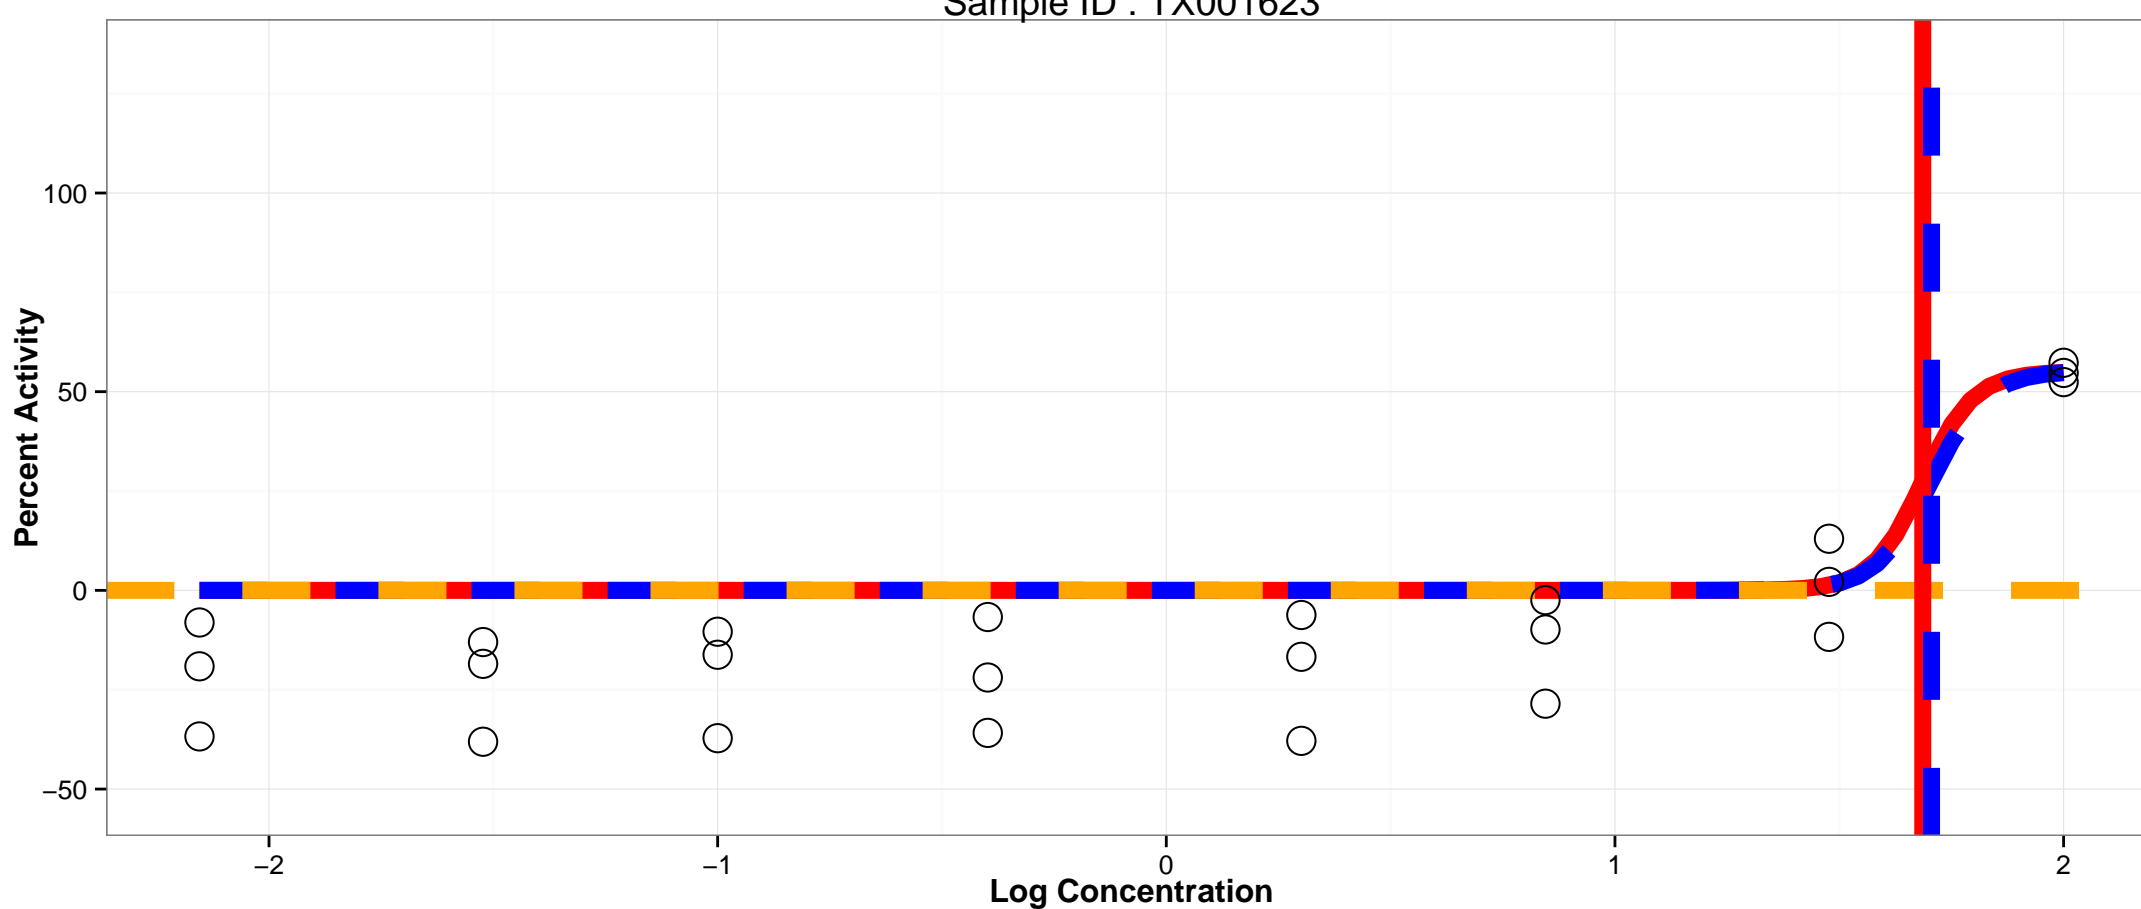

HILL MODEL

|     | tp   | ga   | gw   |
|-----|------|------|------|
| val | 55   | 1.69 | 7.75 |
| sd  | 89.7 | 9.93 | 365  |

GAIN-LOSS MODEL

|     | tp   | ga   | gw  | la   | lw   |
|-----|------|------|-----|------|------|
| val | 55.3 | 1.71 | 7.1 | 2.72 | 5.77 |
| sd  | 136  | 8.07 | 246 | 775  | 6110 |

|      | CNST   | HILL   | GNLS   |
|------|--------|--------|--------|
| AIC  | 232.64 | 223.33 | 227.33 |
| PROB | 0.01   | 0.87   | 0.12   |
| RMSE | 28.36  | 20.7   | 20.7   |

MAX\_MEAN : 54.8 MAX\_MED : 54.7 BMAD : 8.58  
COFF : 20 HIT-CALL : 1 FITC : 41 ACTP : 0.992  
FLAGS : 6; 10

Chemical : Pentachlorophenol  
CAS : 87-86-5

Assay ID 1508 (NHEERL\_TPO\_AUR\_dn)  
Sample ID : TX001735

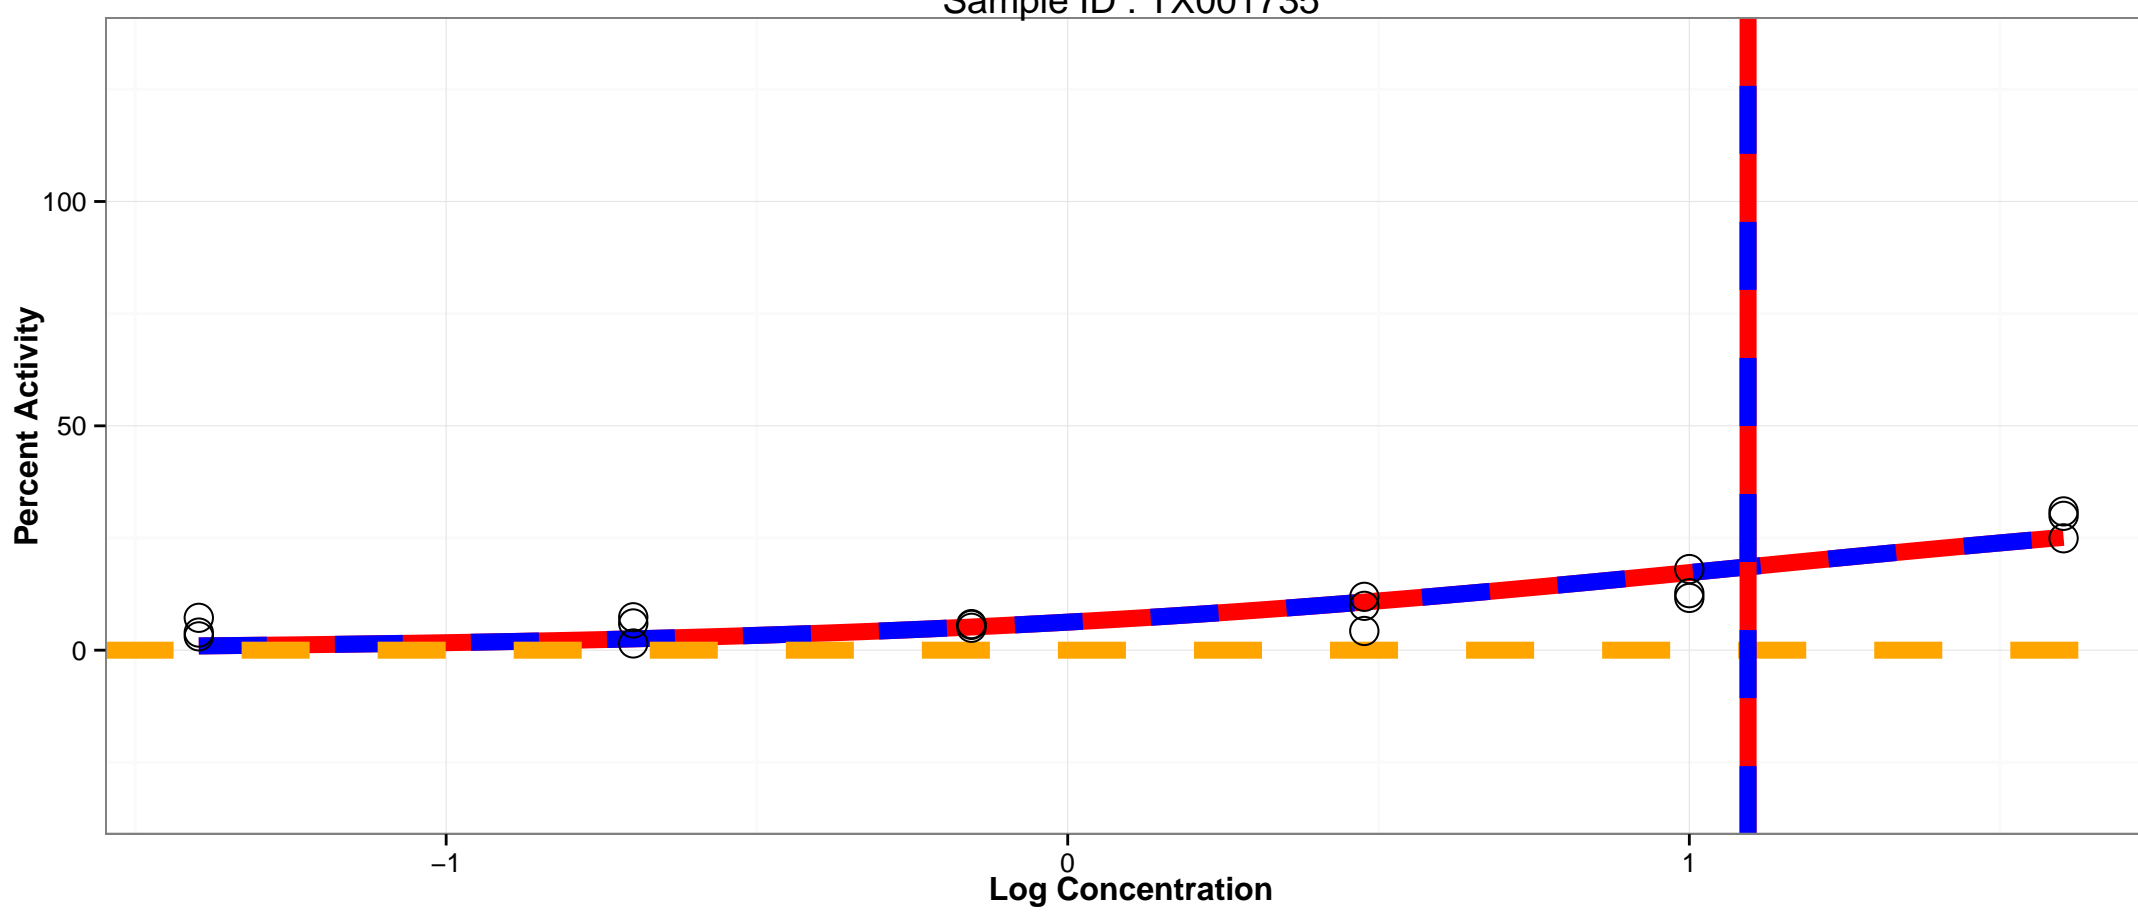

HILL MODEL

|     | tp   | ga    | gw    |
|-----|------|-------|-------|
| val | 37.1 | 1.09  | 0.634 |
| sd  | 8.61 | 0.332 | 0.144 |

GAIN-LOSS MODEL

|     | tp   | ga    | gw    | la   | lw   |
|-----|------|-------|-------|------|------|
| val | 37.1 | 1.09  | 0.634 | 3.38 | 4.58 |
| sd  | 8.62 | 0.332 | 0.144 | 815  | 2100 |

|      | CNST  | HILL   | GNLS   |
|------|-------|--------|--------|
| AIC  | 148.7 | 107.78 | 111.78 |
| PROB | 0     | 0.88   | 0.12   |
| RMSE | 14.18 | 3.68   | 3.68   |

MAX\_MEAN : 28.6 MAX\_MED : 30 BMAD : 5.69  
COFF : 20 HIT-CALL : 1 FITC : 42 ACTP : 1  
FLAGS : 6

Assay ID 1509 (NHEERL\_HEK293T\_CellTiterGLO)  
Sample ID : TX001735

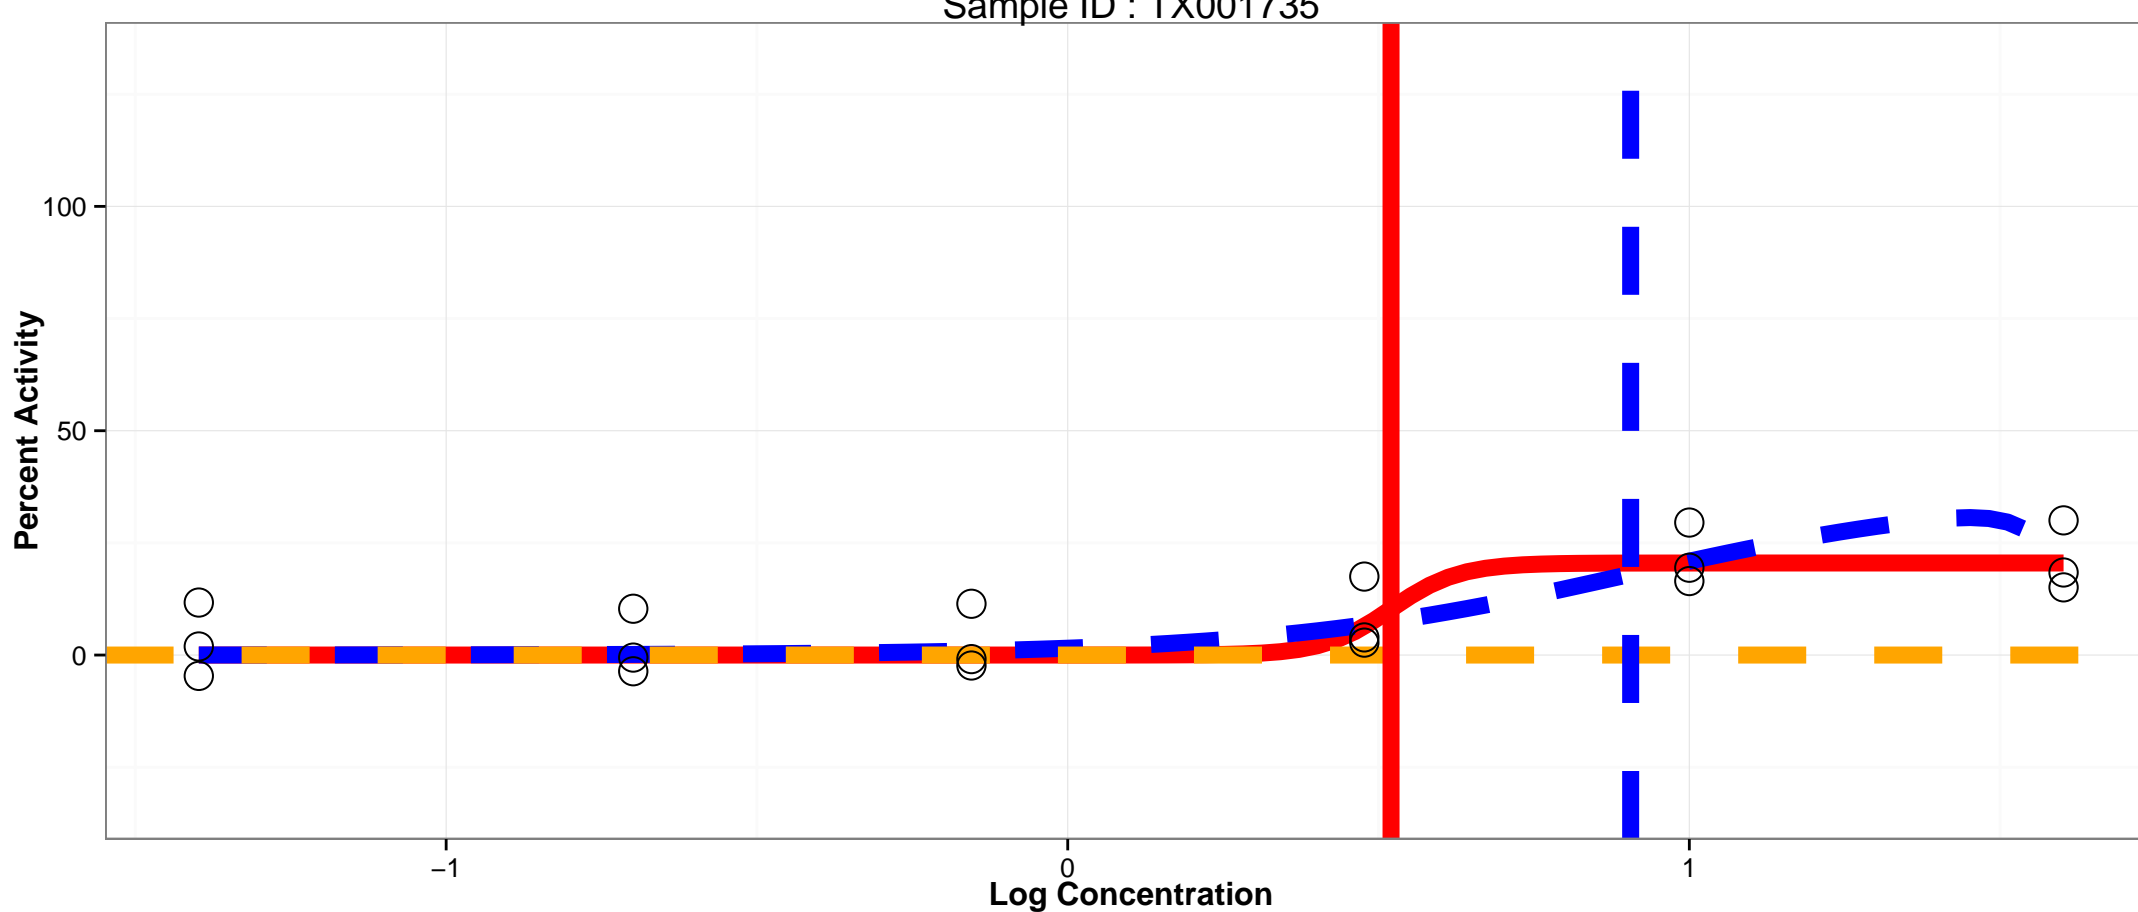

HILL MODEL

|     | tp   | ga    | gw   |
|-----|------|-------|------|
| val | 20.5 | 0.52  | 8    |
| sd  | 2.8  | 0.467 | 86.3 |

GAIN-LOSS MODEL

|     | tp | ga    | gw  | la   | lw |
|-----|----|-------|-----|------|----|
| val | 36 | 0.906 | 1.5 | 1.62 | 10 |
| sd  | NA | NA    | NA  | NA   | NA |

|      | CNST  | HILL   | GNLS   |
|------|-------|--------|--------|
| AIC  | 150.2 | 128.61 | 132.43 |
| PROB | 0     | 0.87   | 0.13   |
| RMSE | 14.42 | 6.6    | 6.53   |

MAX\_MEAN : 21.8 MAX\_MED : 19.5 BMAD : 5.54  
COFF : 20 HIT-CALL : 0 FITC : 21 ACTP : 1  
FLAGS : 8; 12

Assay ID 1848 (NHEERL\_Quantilum\_inhib\_2\_dn)  
Sample ID : TX001735

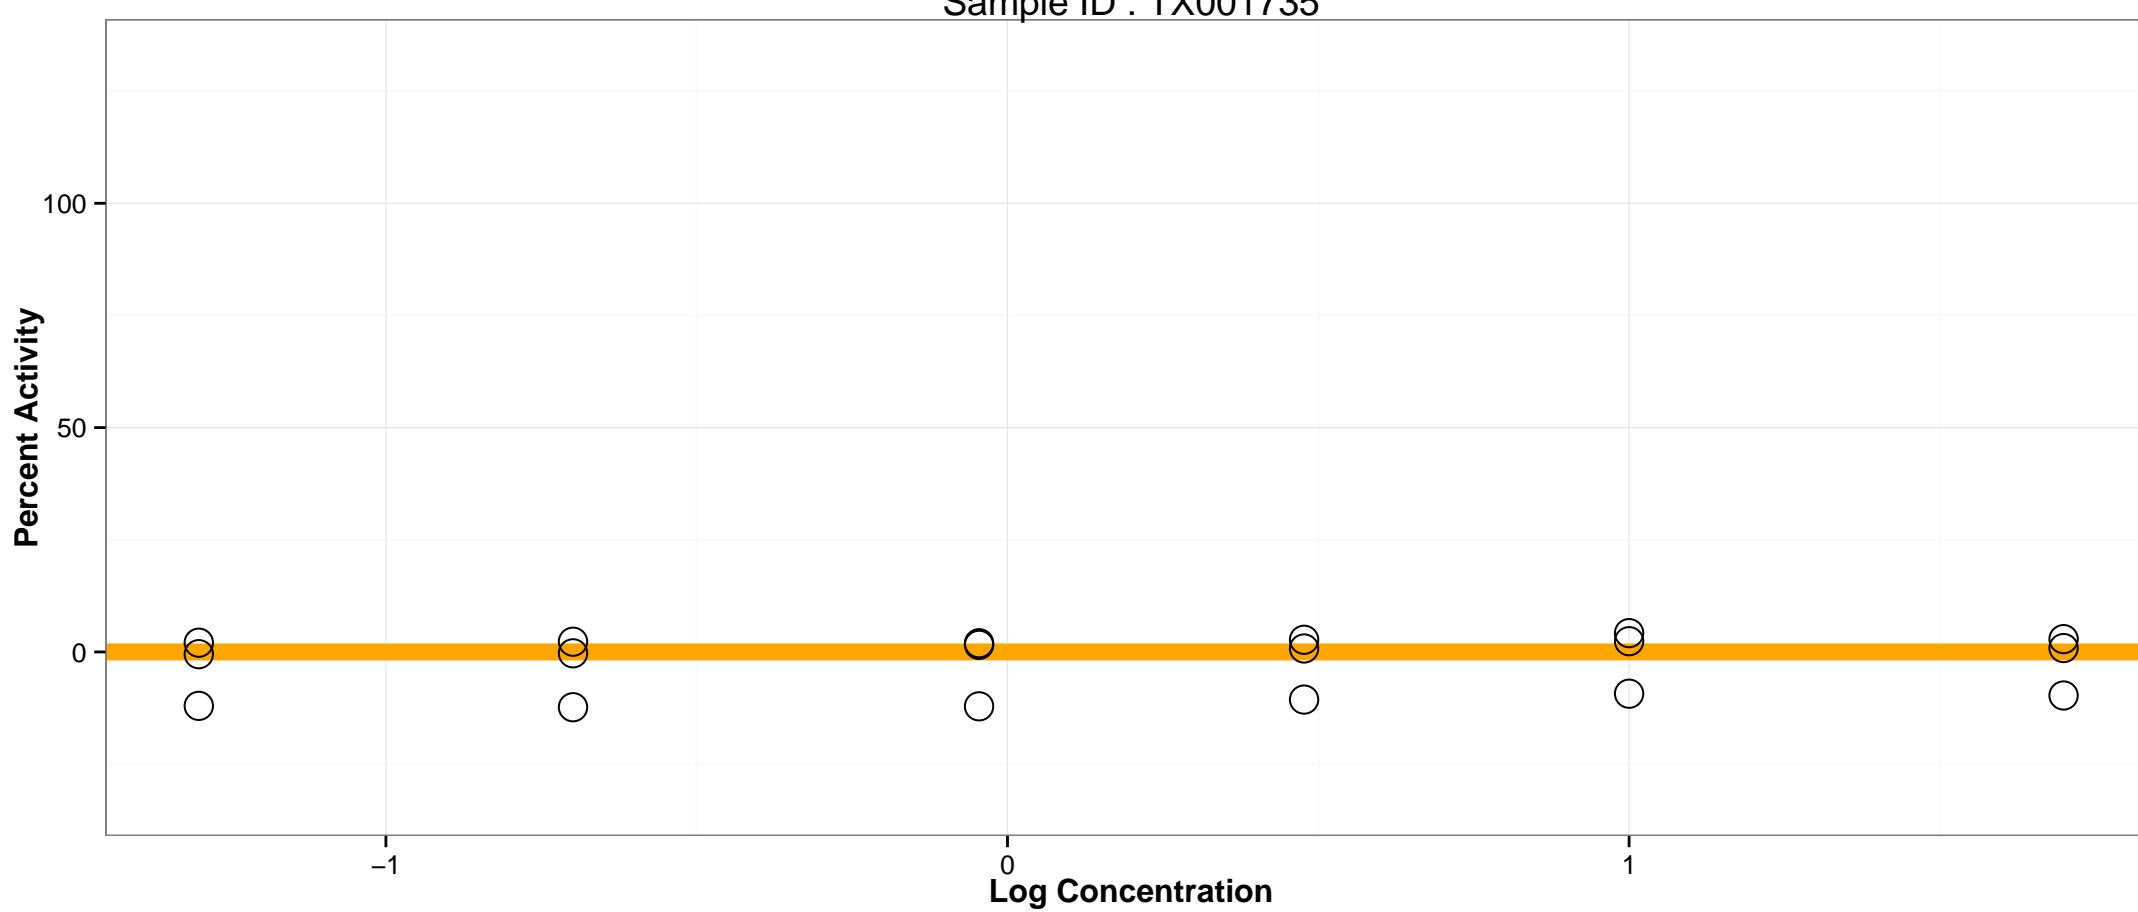

HILL MODEL

HILL MODEL: Not applicable

GAIN-LOSS MODEL

GNLS MODEL: Not applicable

|      | CNST   | HILL | GNLS |
|------|--------|------|------|
| AIC  | 121.71 | NA   | NA   |
| PROB | 1      | NA   | NA   |
| RMSE | 6.63   | NA   | NA   |

MAX\_MEAN : -0.894 MAX\_MED : 2.41 BMAD : 8.58  
COFF : 20 HIT-CALL : 0 FITC : 4 ACTP : 0  
FLAGS :

Chemical : N-Phenyl-1,4-benzenediamine  
CAS : 101-54-2

Assay ID 1508 (NHEERL\_TPO\_AUR\_dn)  
Sample ID : TX001760

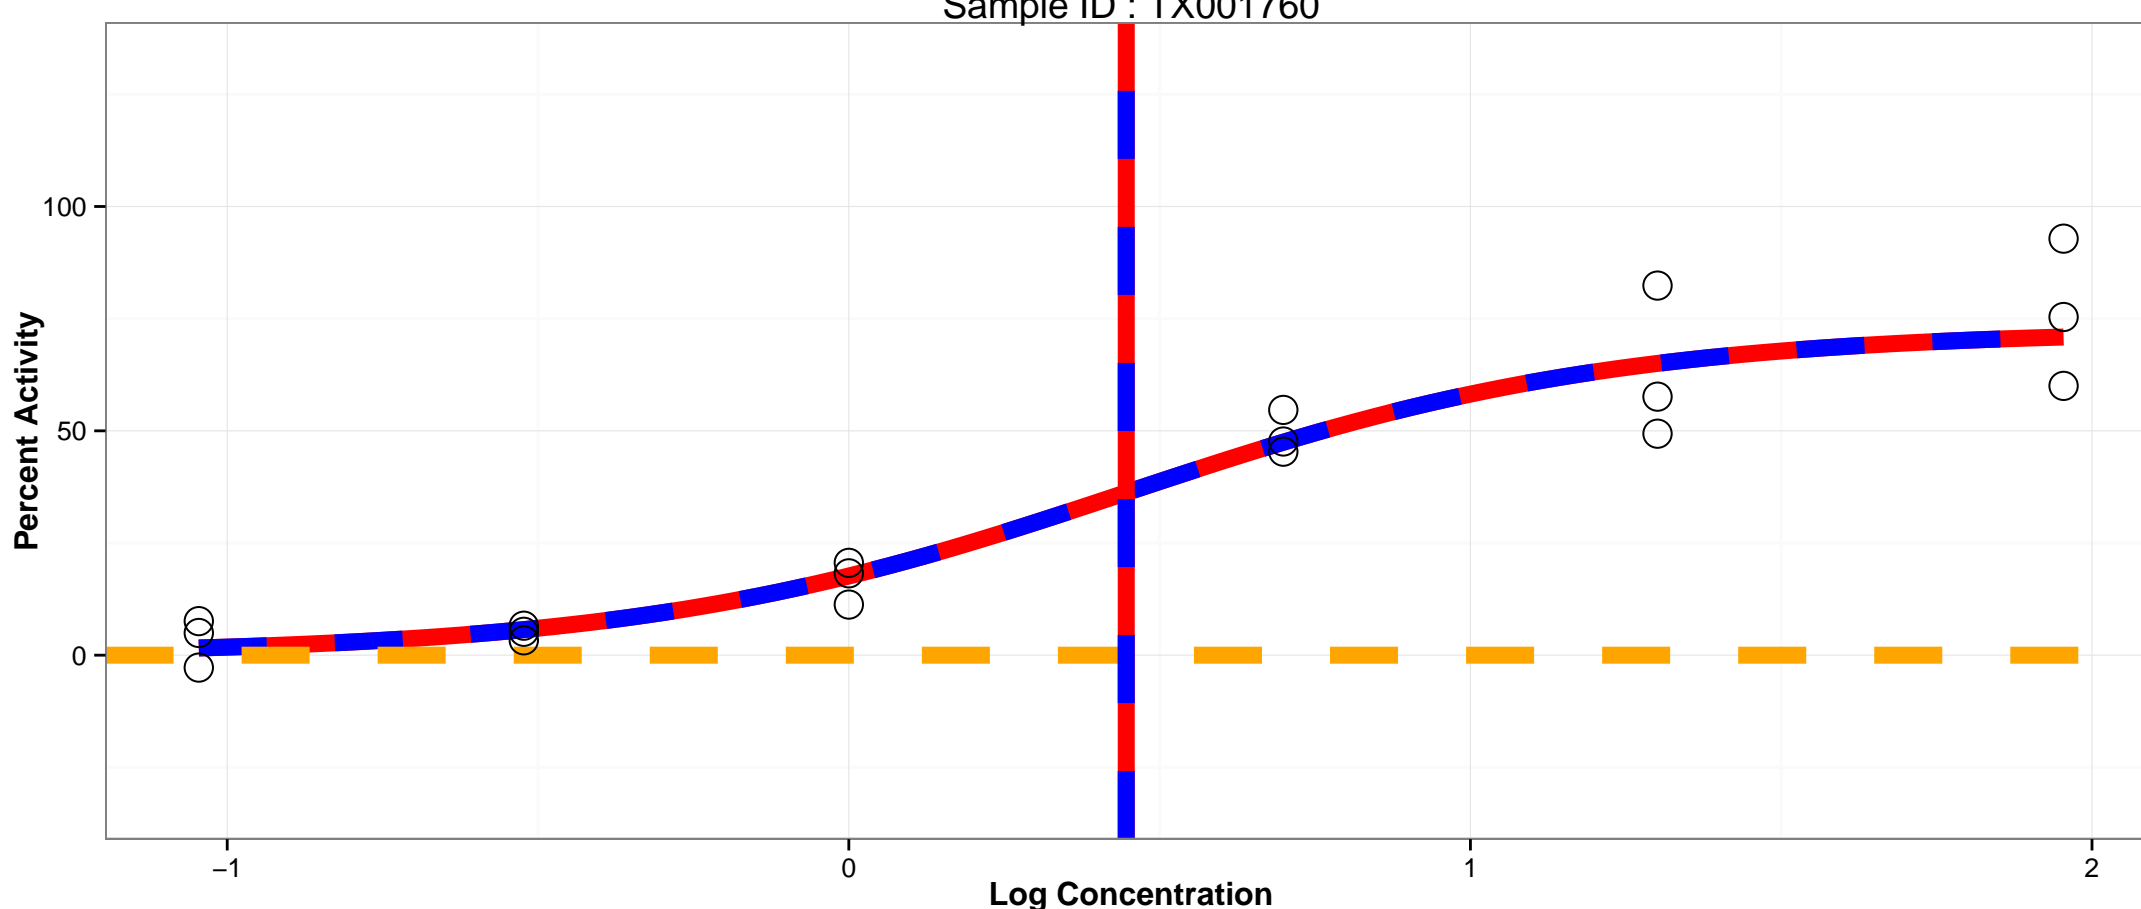

HILL MODEL

|     | tp   | ga    | gw    |
|-----|------|-------|-------|
| val | 72.5 | 0.446 | 1.1   |
| sd  | 8.26 | 0.136 | 0.236 |

GAIN-LOSS MODEL

|     | tp   | ga    | gw    | la    | lw     |
|-----|------|-------|-------|-------|--------|
| val | 72.5 | 0.446 | 1.1   | 2.8   | 13.8   |
| sd  | 8.26 | 0.136 | 0.236 | 14200 | 231000 |

|      | CNST   | HILL   | GNLS   |
|------|--------|--------|--------|
| AIC  | 192.73 | 136.46 | 140.46 |
| PROB | 0      | 0.88   | 0.12   |
| RMSE | 46.44  | 8.82   | 8.82   |

MAX\_MEAN : 76.1 MAX\_MED : 75.4 BMAD : 5.69  
COFF : 20 HIT-CALL : 1 FITC : 41 ACTP : 1  
FLAGS :

Assay ID 1509 (NHEERL\_HEK293T\_CellTiterGLO)  
Sample ID : TX001760

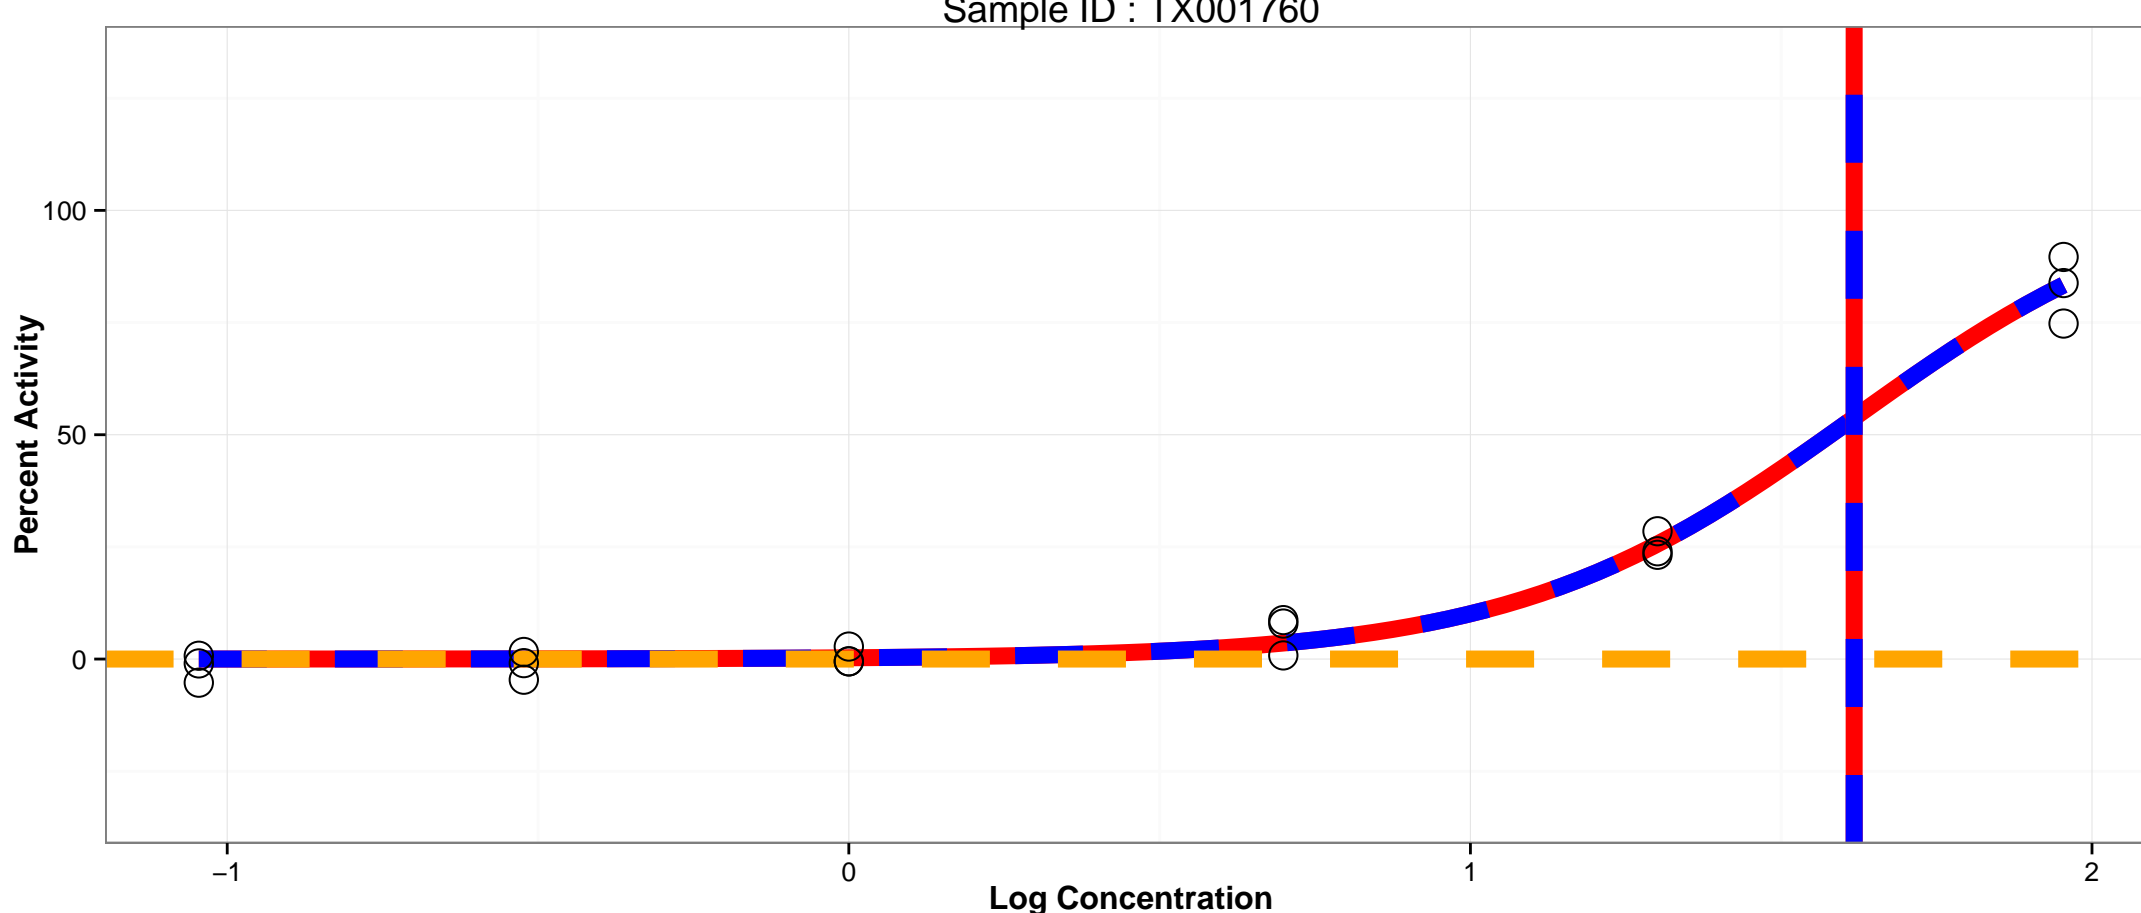

HILL MODEL

|     | tp   | ga    | gw    |
|-----|------|-------|-------|
| val | 108  | 1.62  | 1.6   |
| sd  | 22.9 | 0.163 | 0.442 |

GAIN-LOSS MODEL

|     | tp  | ga   | gw  | la   | lw   |
|-----|-----|------|-----|------|------|
| val | 108 | 1.62 | 1.6 | 3.95 | 6.88 |
| sd  | NA  | NA   | NA  | NA   | NA   |

|      | CNST   | HILL   | GNLS   |
|------|--------|--------|--------|
| AIC  | 175.65 | 106.88 | 110.88 |
| PROB | 0      | 0.88   | 0.12   |
| RMSE | 35.58  | 3.68   | 3.68   |

MAX\_MEAN : 82.7 MAX\_MED : 83.8 BMAD : 5.54  
COFF : 20 HIT-CALL : 1 FITC : 42 ACTP : 1  
FLAGS :

Assay ID 1848 (NHEERL\_Quantilum\_inhib\_2\_dn)  
Sample ID : TX001760

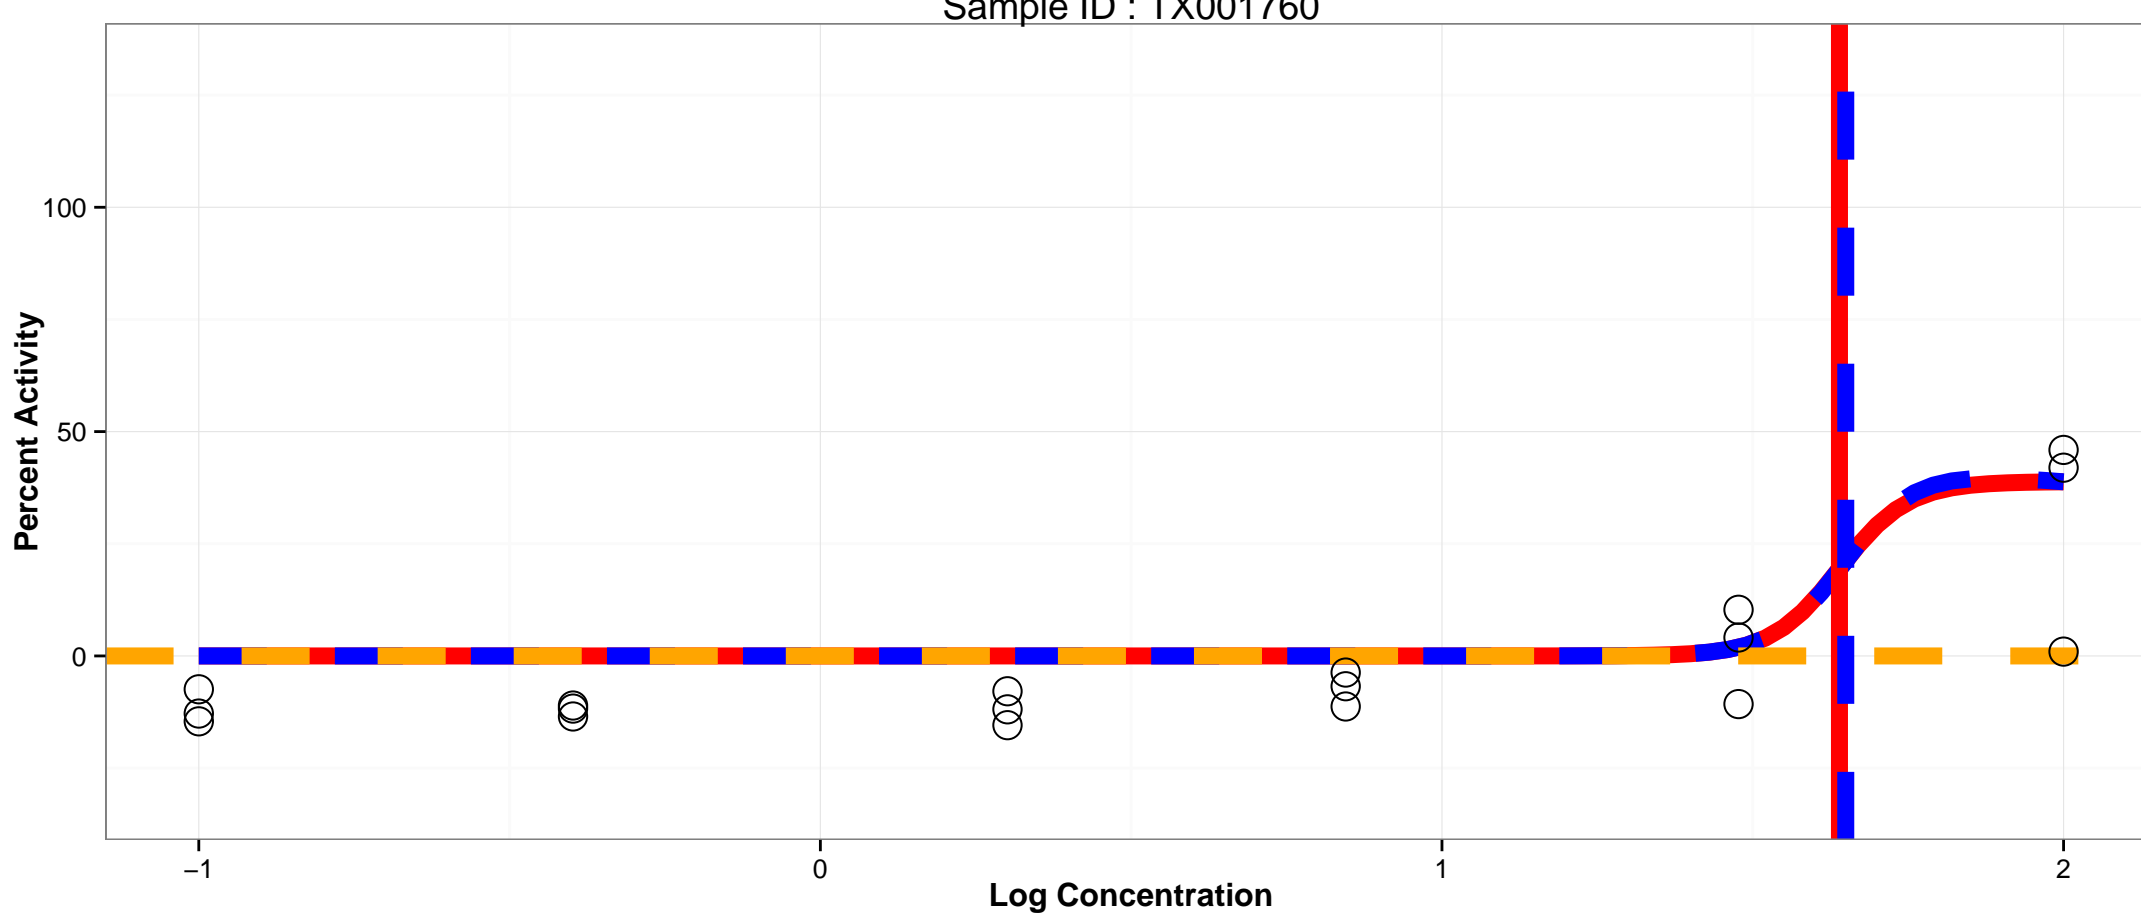

HILL MODEL

|     | tp   | ga   | gw   |
|-----|------|------|------|
| val | 38.9 | 1.64 | 7.91 |
| sd  | 13   | 3.17 | 153  |

GAIN-LOSS MODEL

|     | tp   | ga   | gw   | la   | lw    |
|-----|------|------|------|------|-------|
| val | 47.2 | 1.65 | 7.75 | 2.86 | 0.779 |
| sd  | NA   | NA   | NA   | NA   | NA    |

|      | CNST   | HILL   | GNLS   |
|------|--------|--------|--------|
| AIC  | 154.75 | 152.68 | 156.68 |
| PROB | 0.24   | 0.67   | 0.09   |
| RMSE | 17.65  | 13.39  | 13.39  |

MAX\_MEAN : 29.6 MAX\_MED : 42 BMAD : 8.58  
COFF : 20 HIT-CALL : 1 FITC : 41 ACTP : 0.762  
FLAGS : 6; 11; 16

Chemical : 2-Chlorophenol  
CAS : 95-57-8

Assay ID 1508 (NHEERL\_TPO\_AUR\_dn)  
Sample ID : TX001830

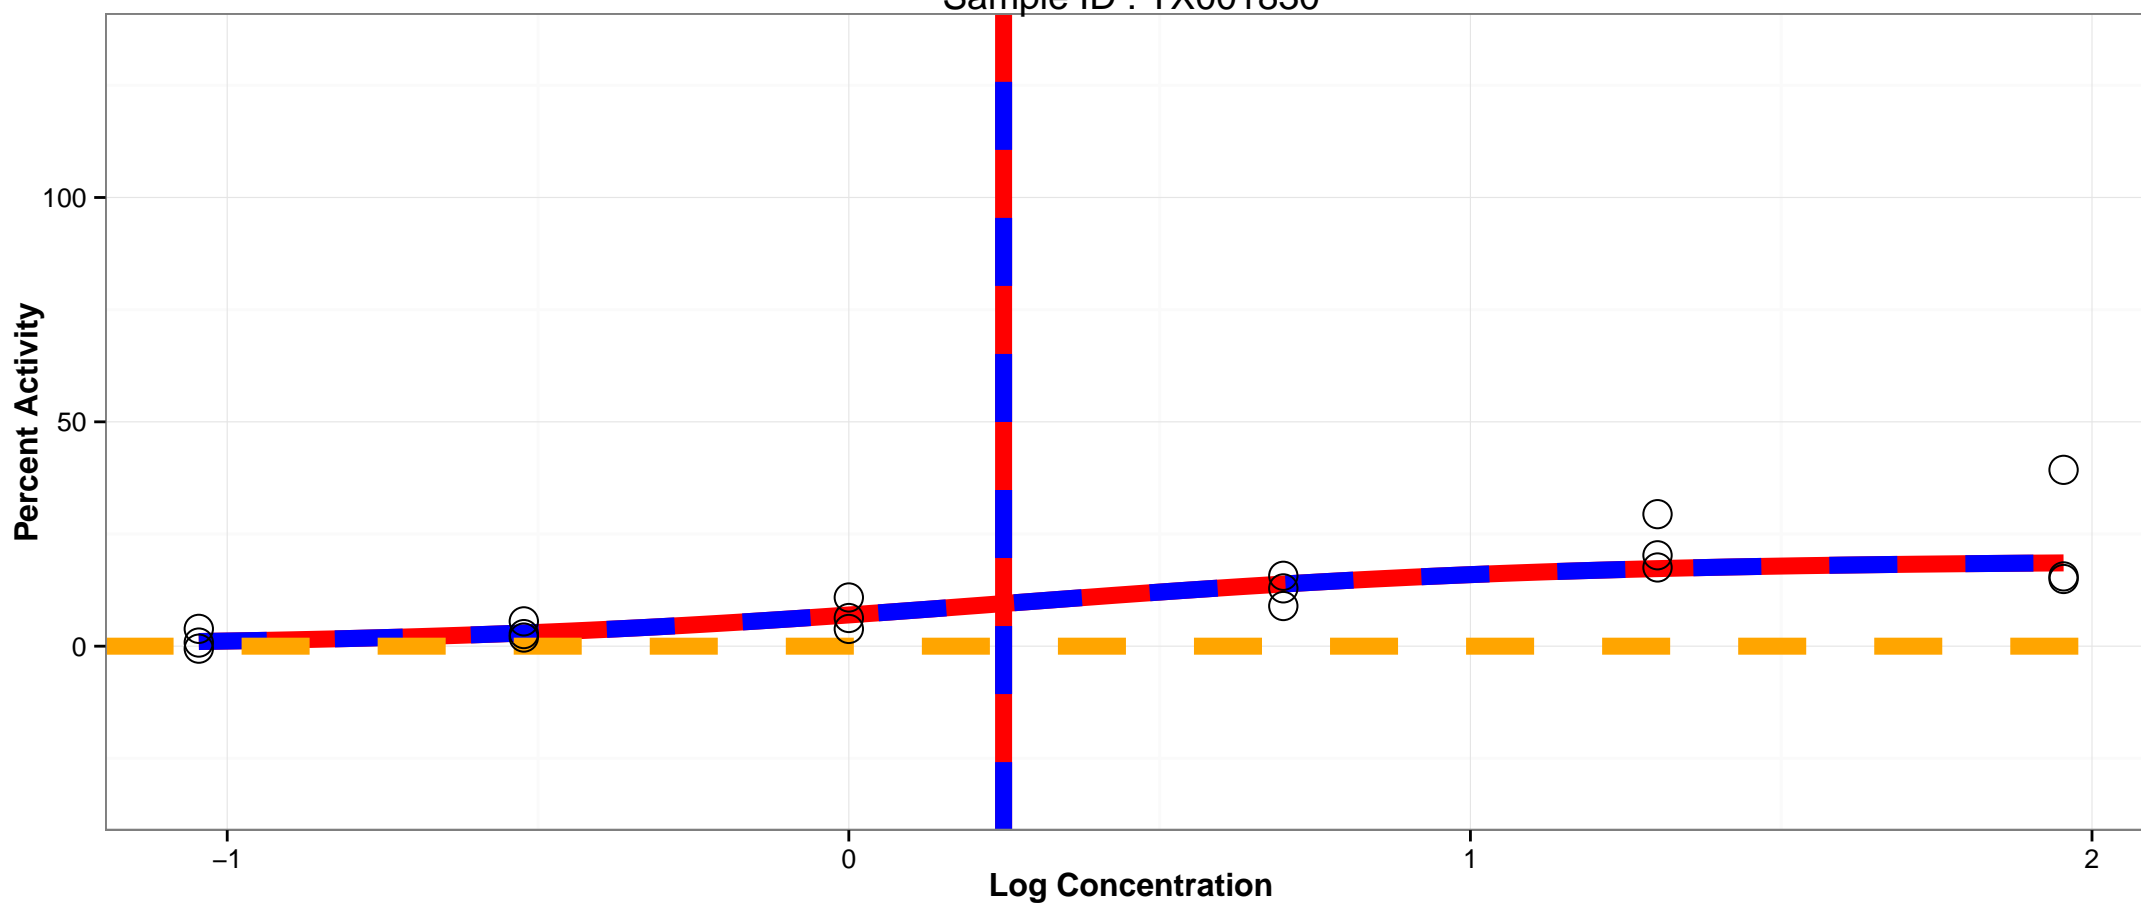

HILL MODEL

|     | tp  | ga    | gw    |
|-----|-----|-------|-------|
| val | 19  | 0.249 | 0.955 |
| sd  | 2.8 | 0.232 | 0.303 |

GAIN-LOSS MODEL

|     | tp | ga    | gw    | la   | lw   |
|-----|----|-------|-------|------|------|
| val | 19 | 0.249 | 0.955 | 3.41 | 7.03 |
| sd  | NA | NA    | NA    | NA   | NA   |

|      | CNST   | HILL   | GNLS   |
|------|--------|--------|--------|
| AIC  | 151.69 | 115.98 | 119.98 |
| PROB | 0      | 0.88   | 0.12   |
| RMSE | 15.49  | 6.15   | 6.15   |

MAX\_MEAN : 23.3 MAX\_MED : 20.3 BMAD : 5.69  
COFF : 20 HIT-CALL : 0 FITC : 20 ACTP : 1  
FLAGS : 12

Assay ID 1509 (NHEERL\_HEK293T\_CellTiterGLO)  
Sample ID : TX001830

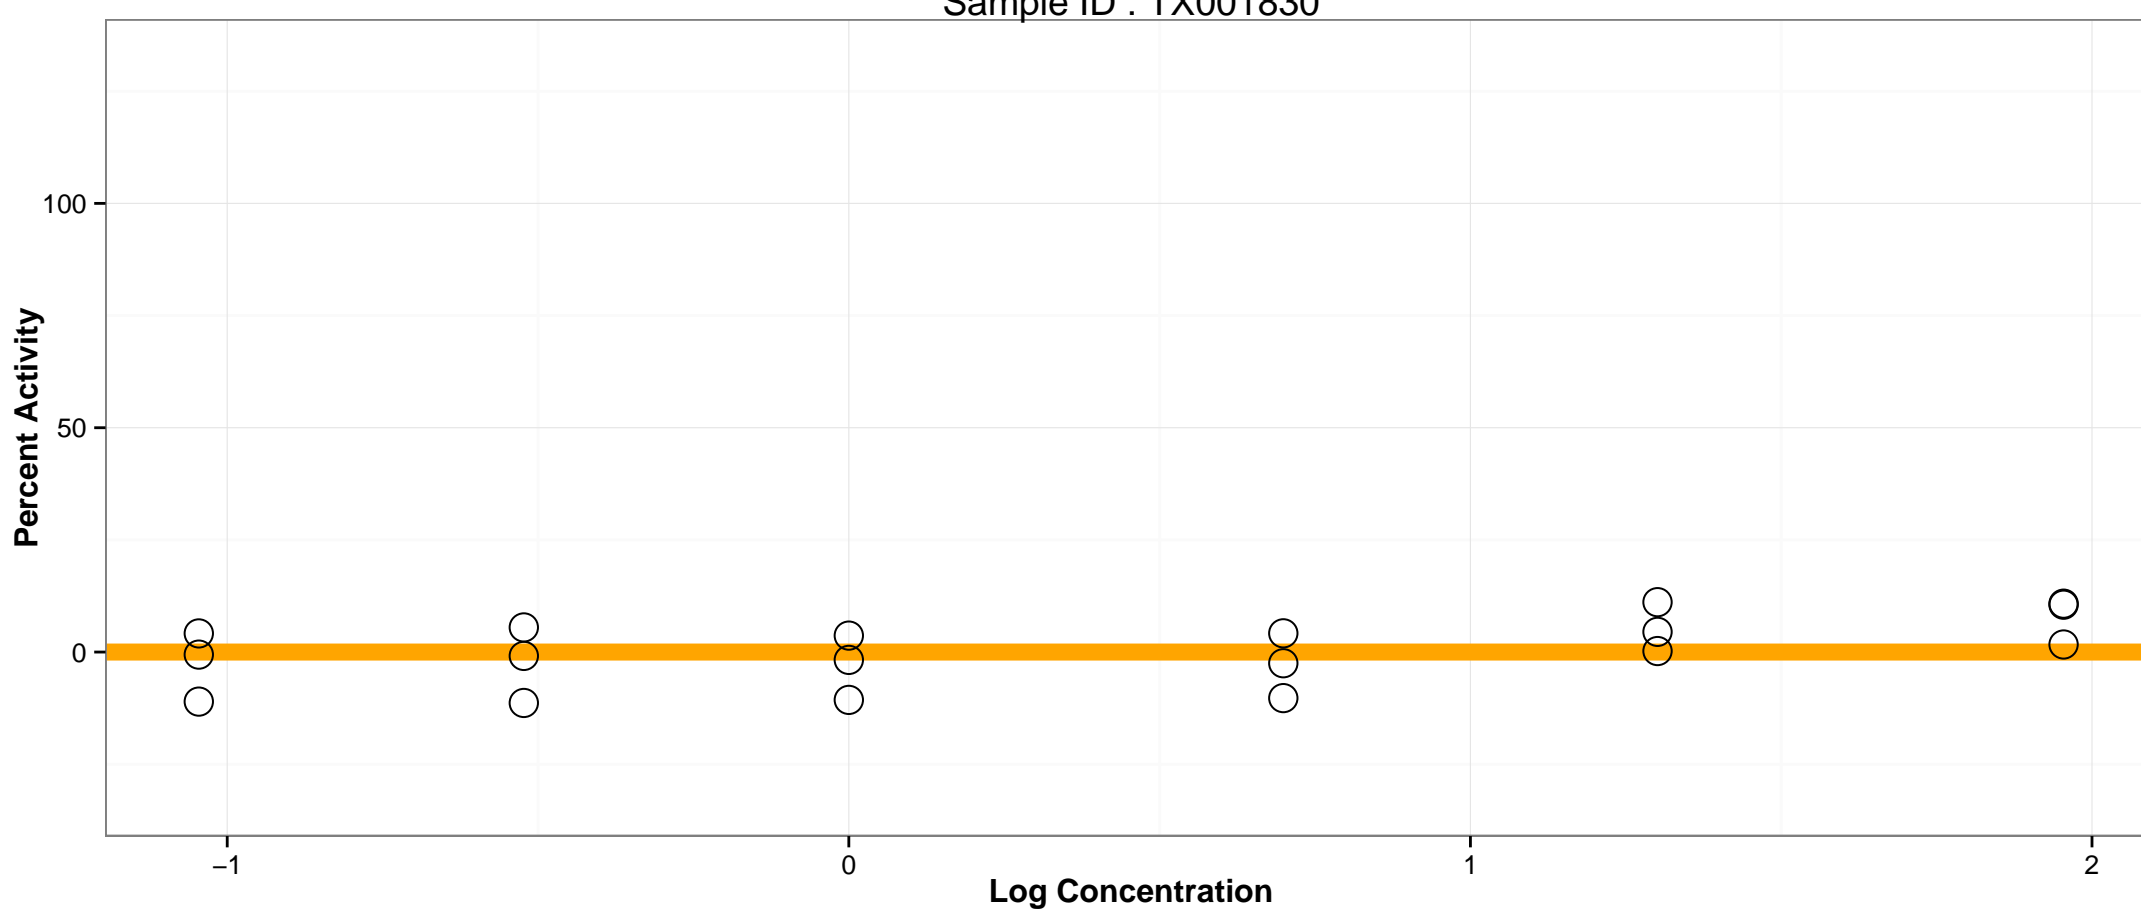

HILL MODEL

HILL MODEL: Not applicable

GAIN-LOSS MODEL

GNLS MODEL: Not applicable

|      | CNST   | HILL | GNLS |
|------|--------|------|------|
| AIC  | 126.25 | NA   | NA   |
| PROB | 1      | NA   | NA   |
| RMSE | 7.2    | NA   | NA   |

MAX\_MEAN : 7.69 MAX\_MED : 10.6 BMAD : 5.54  
COFF : 20 HIT-CALL : 0 FITC : 4 ACTP : 0  
FLAGS :

Assay ID 1848 (NHEERL\_Quantilum\_inhib\_2\_dn)  
Sample ID : TX001830

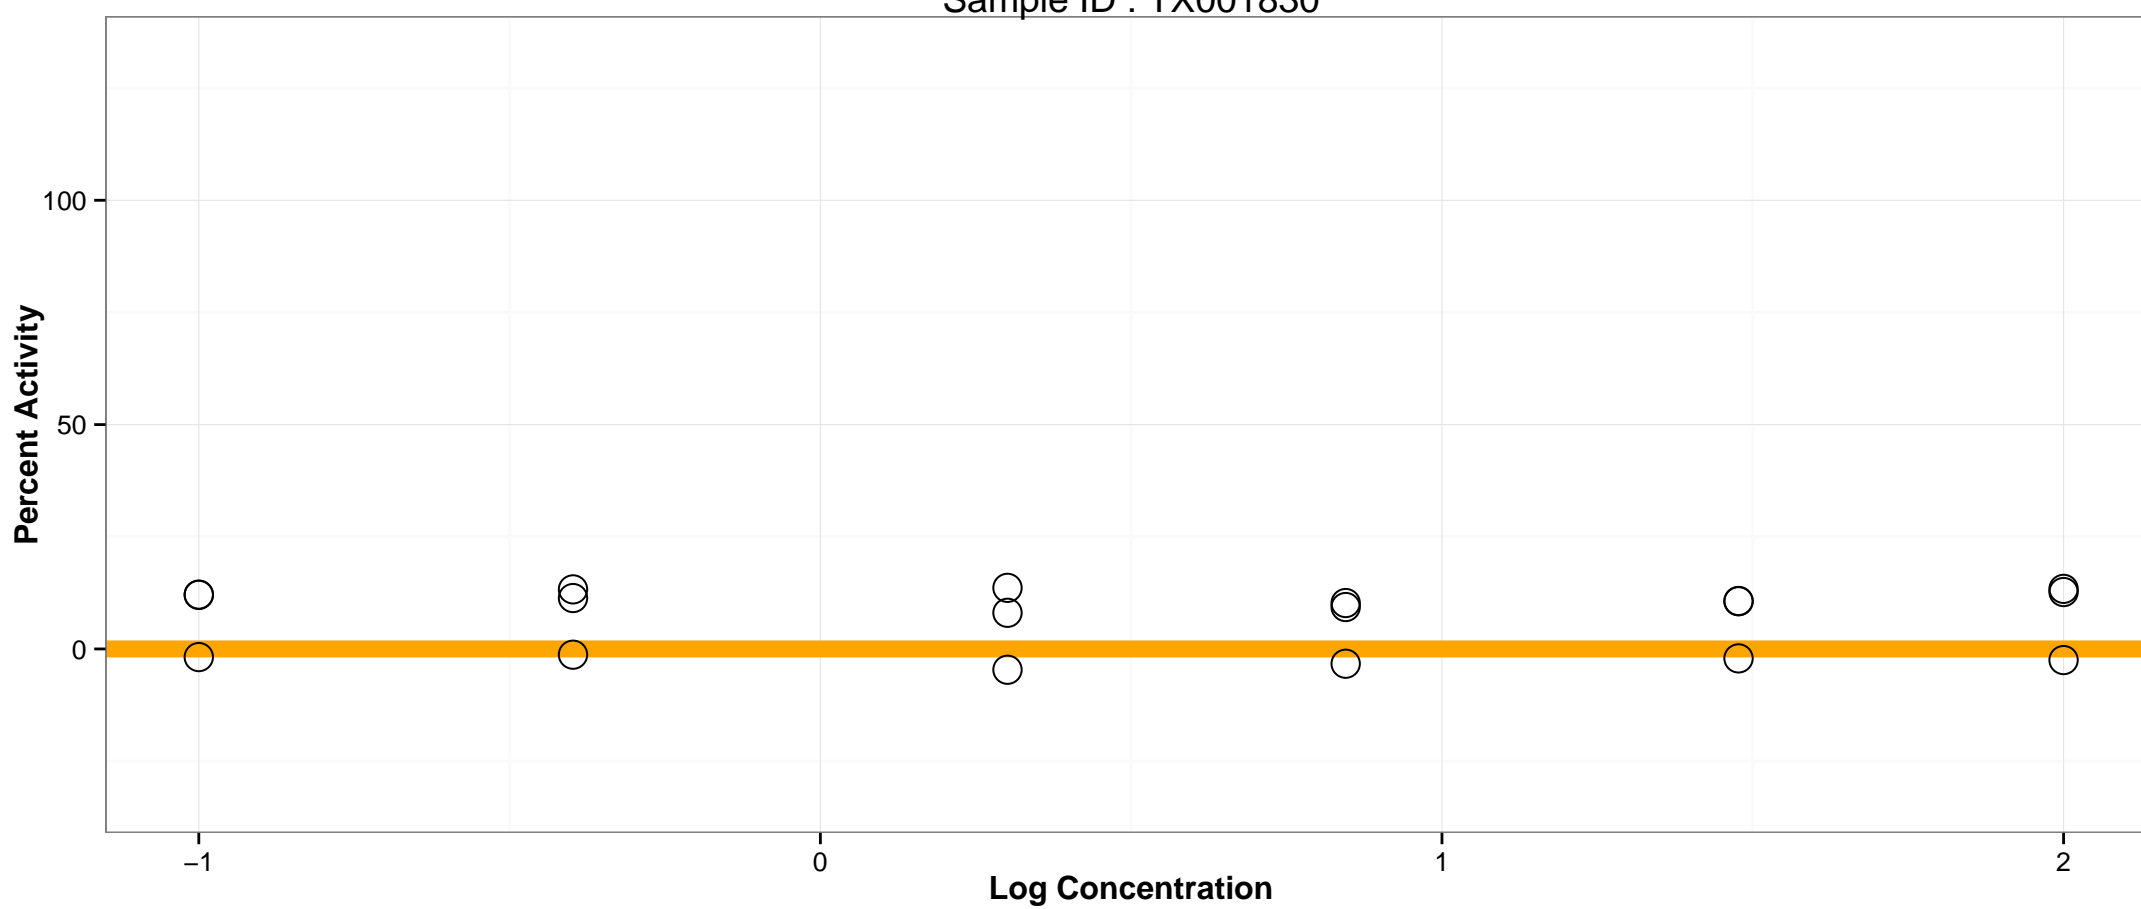

HILL MODEL

HILL MODEL: Not applicable

GAIN-LOSS MODEL

GNLS MODEL: Not applicable

|      | CNST   | HILL | GNLS |
|------|--------|------|------|
| AIC  | 137.72 | NA   | NA   |
| PROB | 1      | NA   | NA   |
| RMSE | 9.59   | NA   | NA   |

MAX\_MEAN : 7.87 MAX\_MED : 12.7 BMAD : 8.58  
COFF : 20 HIT-CALL : 0 FITC : 4 ACTP : 0  
FLAGS :

Chemical : 2-Chloroacetophenone  
CAS : 532-27-4

Assay ID 1508 (NHEERL\_TPO\_AUR\_dn)  
Sample ID : TX002089

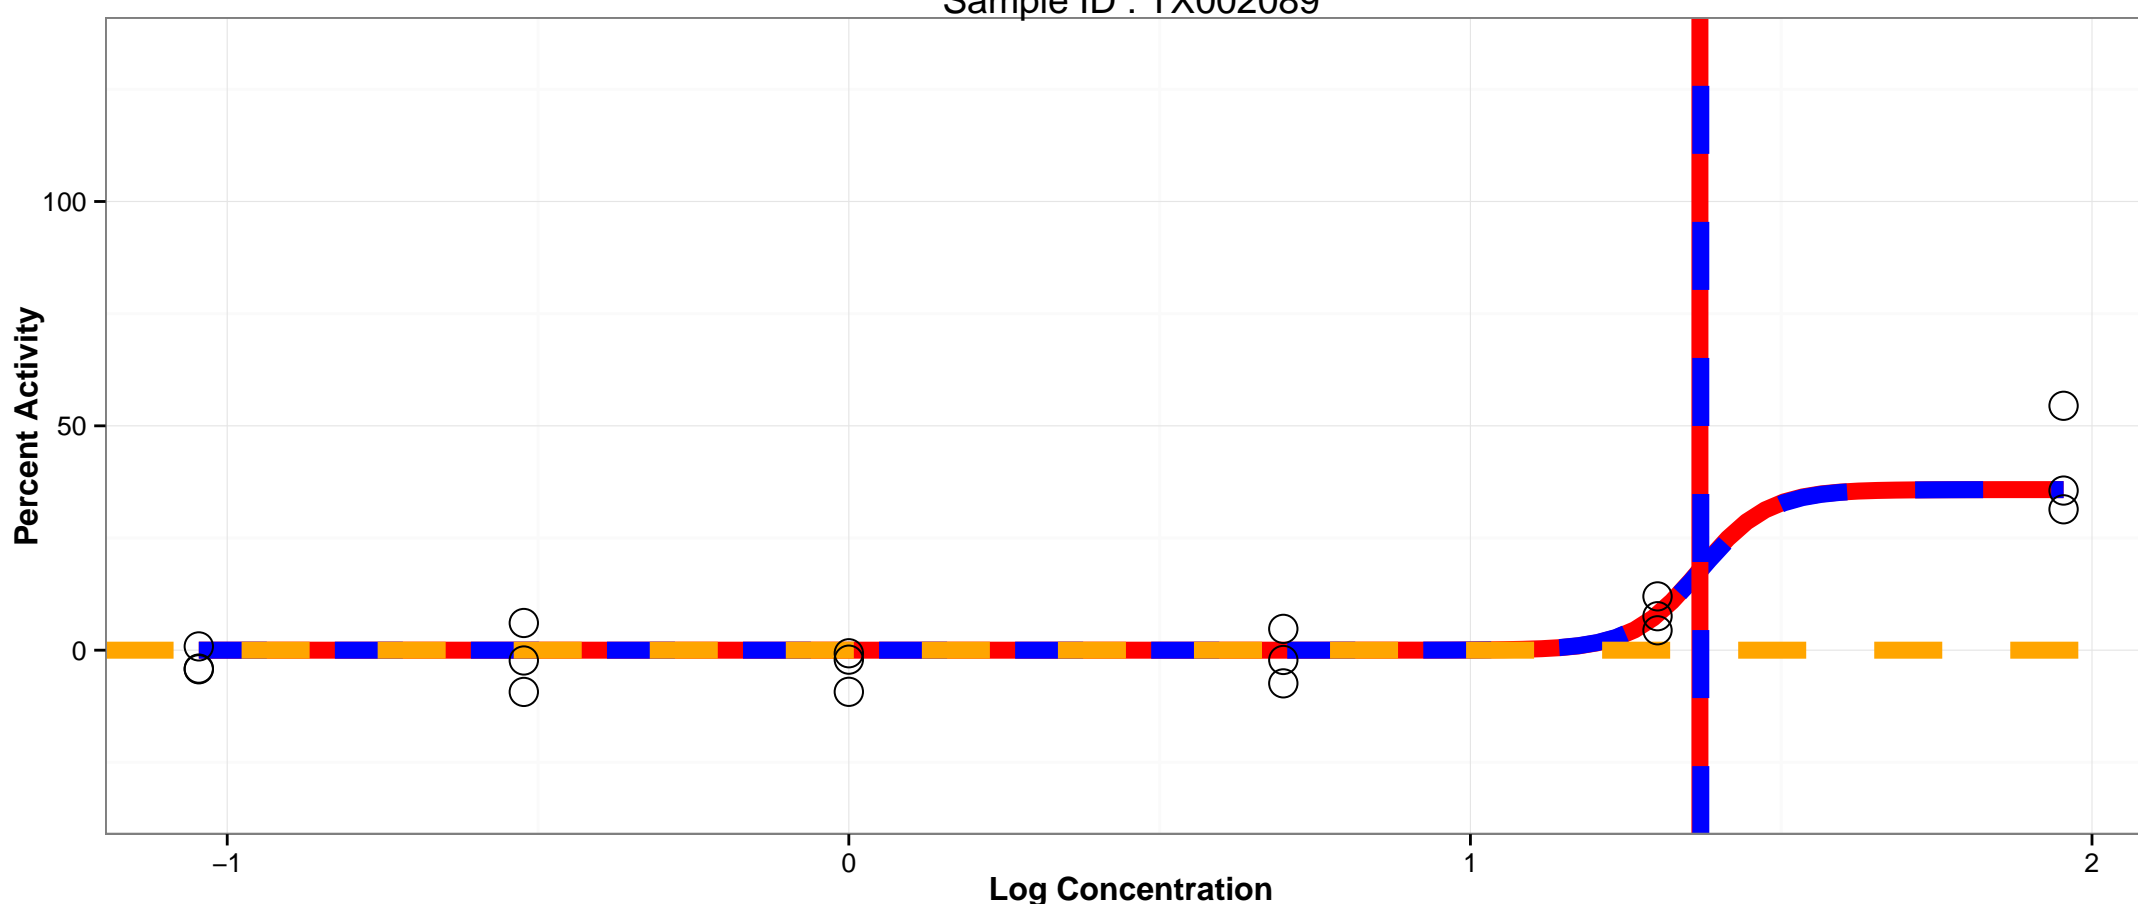

HILL MODEL

|     | tp   | ga    | gw   |
|-----|------|-------|------|
| val | 35.8 | 1.37  | 8    |
| sd  | 3.64 | 0.733 | 85.9 |

GAIN-LOSS MODEL

|     | tp   | ga   | gw   | la   | lw   |
|-----|------|------|------|------|------|
| val | 35.8 | 1.37 | 7.83 | 3.28 | 10.6 |
| sd  | NA   | NA   | NA   | NA   | NA   |

|      | CNST   | HILL   | GNLS   |
|------|--------|--------|--------|
| AIC  | 150.57 | 124.27 | 128.27 |
| PROB | 0      | 0.88   | 0.12   |
| RMSE | 17.92  | 6.39   | 6.39   |

MAX\_MEAN : 40.5 MAX\_MED : 35.6 BMAD : 5.69  
COFF : 20 HIT-CALL : 1 FITC : 41 ACTP : 1  
FLAGS : 6

Assay ID 1509 (NHEERL\_HEK293T\_CellTiterGLO)  
Sample ID : TX002089

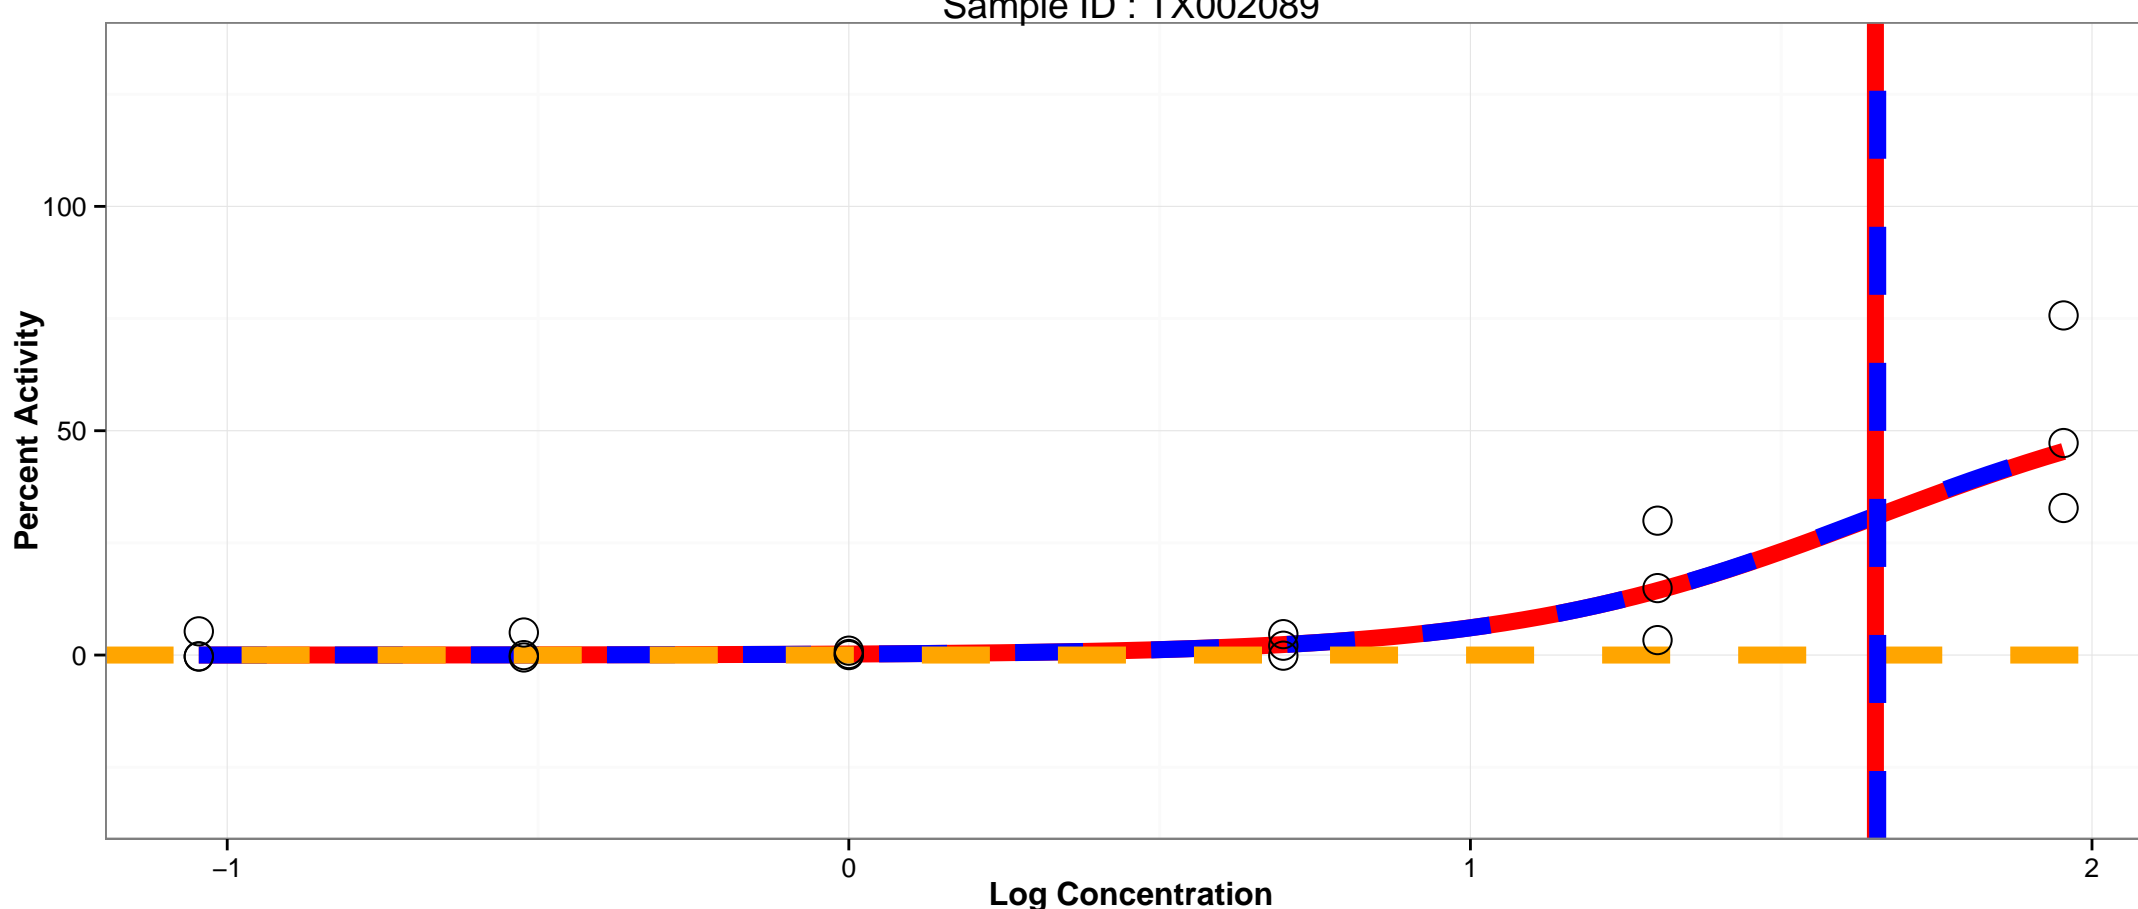

HILL MODEL

|     | tp   | ga    | gw   |
|-----|------|-------|------|
| val | 61.6 | 1.65  | 1.47 |
| sd  | 44.9 | 0.589 | 1.03 |

GAIN-LOSS MODEL

|     | tp   | ga   | gw   | la   | lw   |
|-----|------|------|------|------|------|
| val | 62.5 | 1.66 | 1.48 | 2.51 | 3.45 |
| sd  | 134  | 1.03 | 1.08 | 18.8 | 114  |

|      | CNST   | HILL   | GNLS   |
|------|--------|--------|--------|
| AIC  | 158.95 | 130.79 | 134.79 |
| PROB | 0      | 0.88   | 0.12   |
| RMSE | 23.87  | 9.17   | 9.17   |

MAX\_MEAN : 51.9 MAX\_MED : 47.3 BMAD : 5.54  
COFF : 20 HIT-CALL : 1 FITC : 42 ACTP : 1  
FLAGS : 6

Assay ID 1848 (NHEERL\_Quantilum\_inhib\_2\_dn)  
Sample ID : TX002089

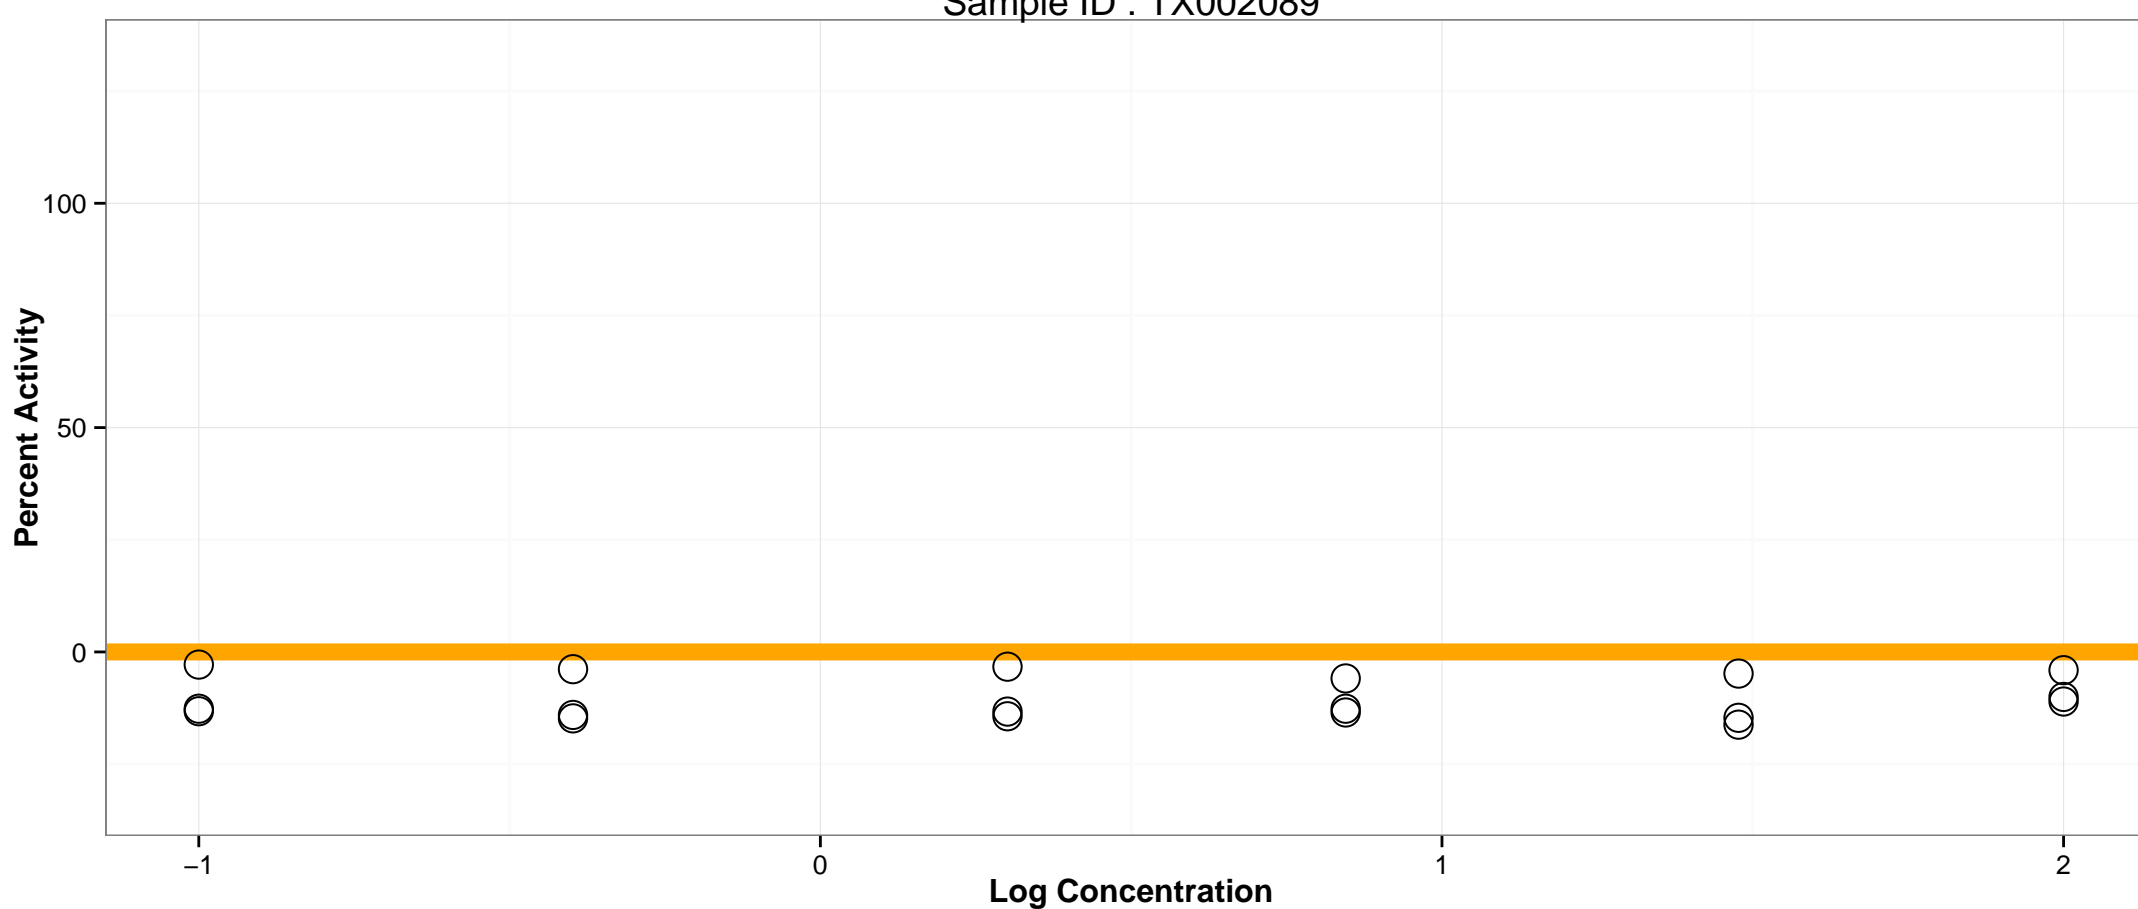

HILL MODEL

HILL MODEL: Not applicable

GAIN-LOSS MODEL

GNLS MODEL: Not applicable

|      | CNST   | HILL | GNLS |
|------|--------|------|------|
| AIC  | 143.64 | NA   | NA   |
| PROB | 1      | NA   | NA   |
| RMSE | 11.26  | NA   | NA   |

MAX\_MEAN : -8.37 MAX\_MED : -10 BMAD : 8.58  
COFF : 20 HIT-CALL : 0 FITC : 4 ACTP : 0  
FLAGS :

Chemical : 2-Naphthylamine  
CAS : 91-59-8

Assay ID 1508 (NHEERL\_TPO\_AUR\_dn)  
Sample ID : TX002103

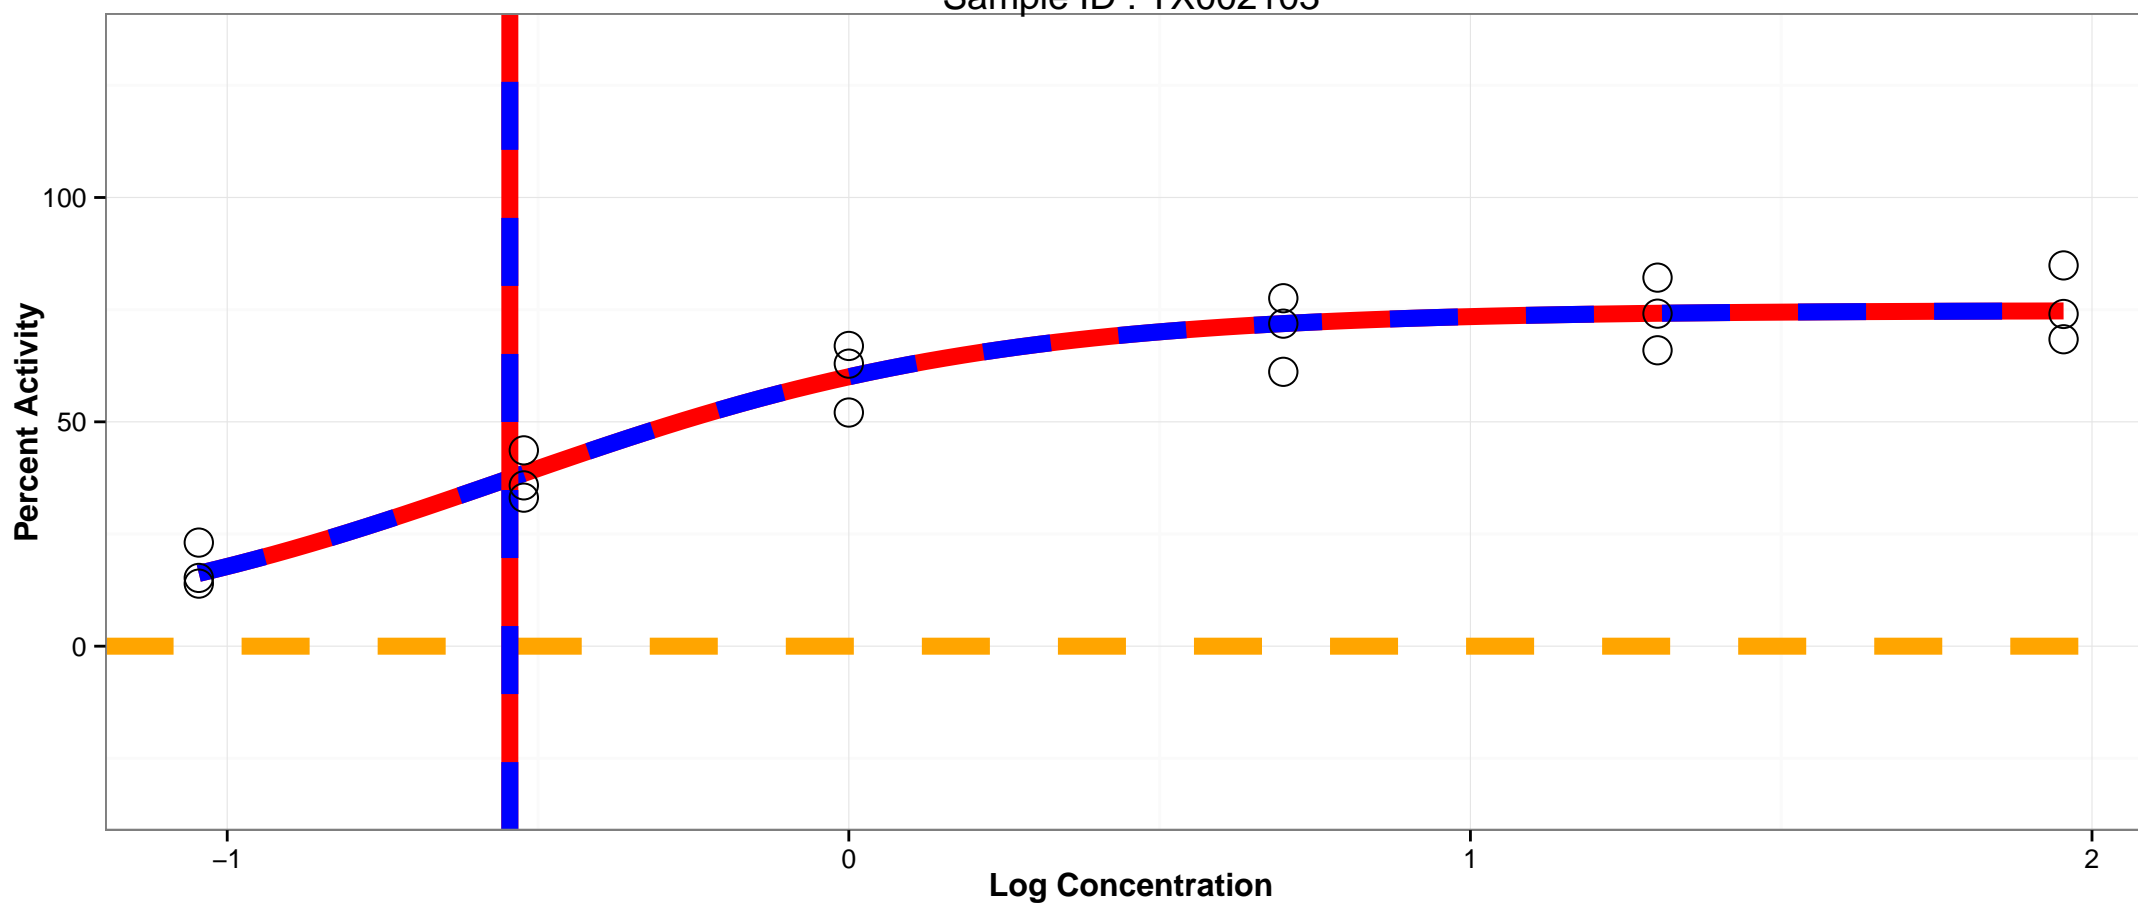

HILL MODEL

|     | tp   | ga     | gw    |
|-----|------|--------|-------|
| val | 74.8 | -0.545 | 1.12  |
| sd  | 2.74 | 0.0676 | 0.192 |

GAIN-LOSS MODEL

|     | tp   | ga     | gw   | la  | lw   |
|-----|------|--------|------|-----|------|
| val | 74.8 | -0.545 | 1.12 | 3.7 | 12.3 |
| sd  | NA   | NA     | NA   | NA  | NA   |

|      | CNST   | HILL  | GNLS  |
|------|--------|-------|-------|
| AIC  | 204.18 | 126.4 | 130.4 |
| PROB | 0      | 0.88  | 0.12  |
| RMSE | 60.23  | 6.04  | 6.04  |

MAX\_MEAN : 75.8 MAX\_MED : 74.1 BMAD : 5.69  
COFF : 20 HIT-CALL : 1 FITC : 41 ACTP : 1  
FLAGS :

Assay ID 1509 (NHEERL\_HEK293T\_CellTiterGLO)  
Sample ID : TX002103

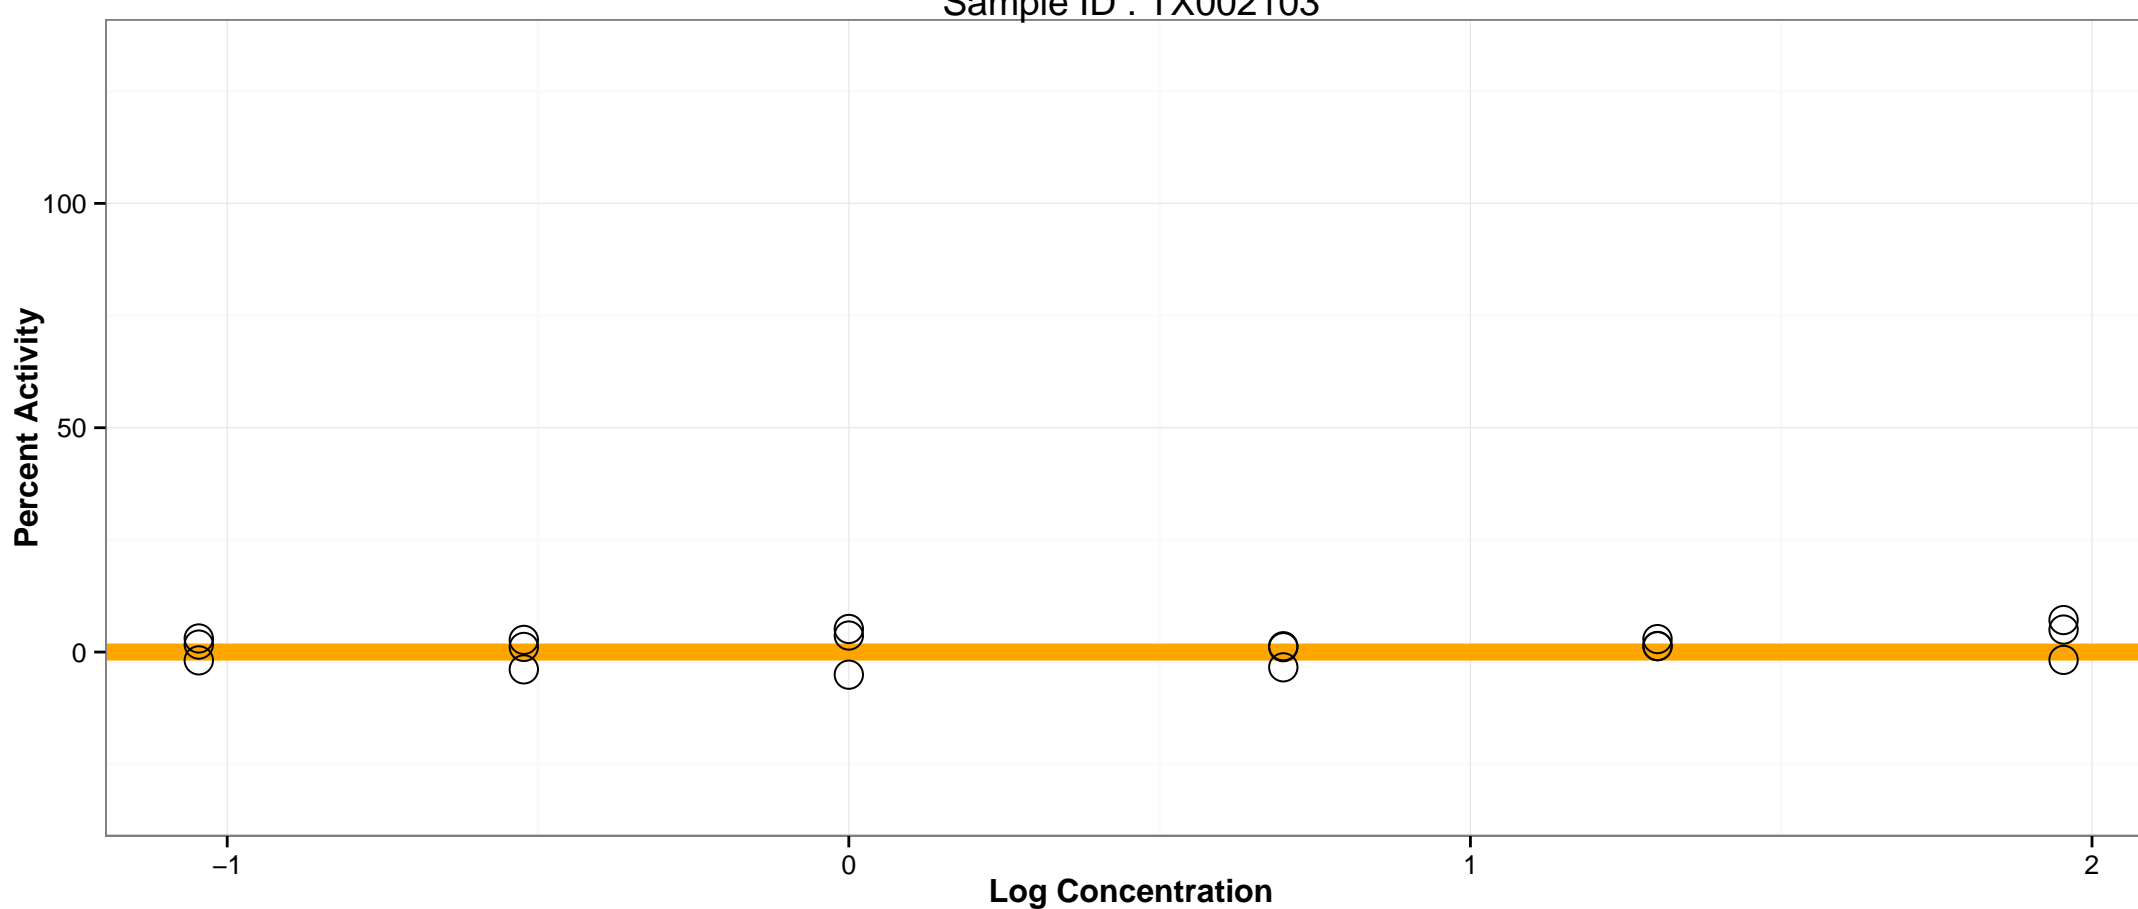

HILL MODEL

HILL MODEL: Not applicable

GAIN-LOSS MODEL

GNLS MODEL: Not applicable

|      | CNST  | HILL | GNLS |
|------|-------|------|------|
| AIC  | 99.52 | NA   | NA   |
| PROB | 1     | NA   | NA   |
| RMSE | 3.42  | NA   | NA   |

MAX\_MEAN : 3.48 MAX\_MED : 5.03 BMAD : 5.54  
COFF : 20 HIT-CALL : 0 FITC : 4 ACTP : 0  
FLAGS :

Assay ID 1848 (NHEERL\_Quantilum\_inhib\_2\_dn)  
Sample ID : TX002103

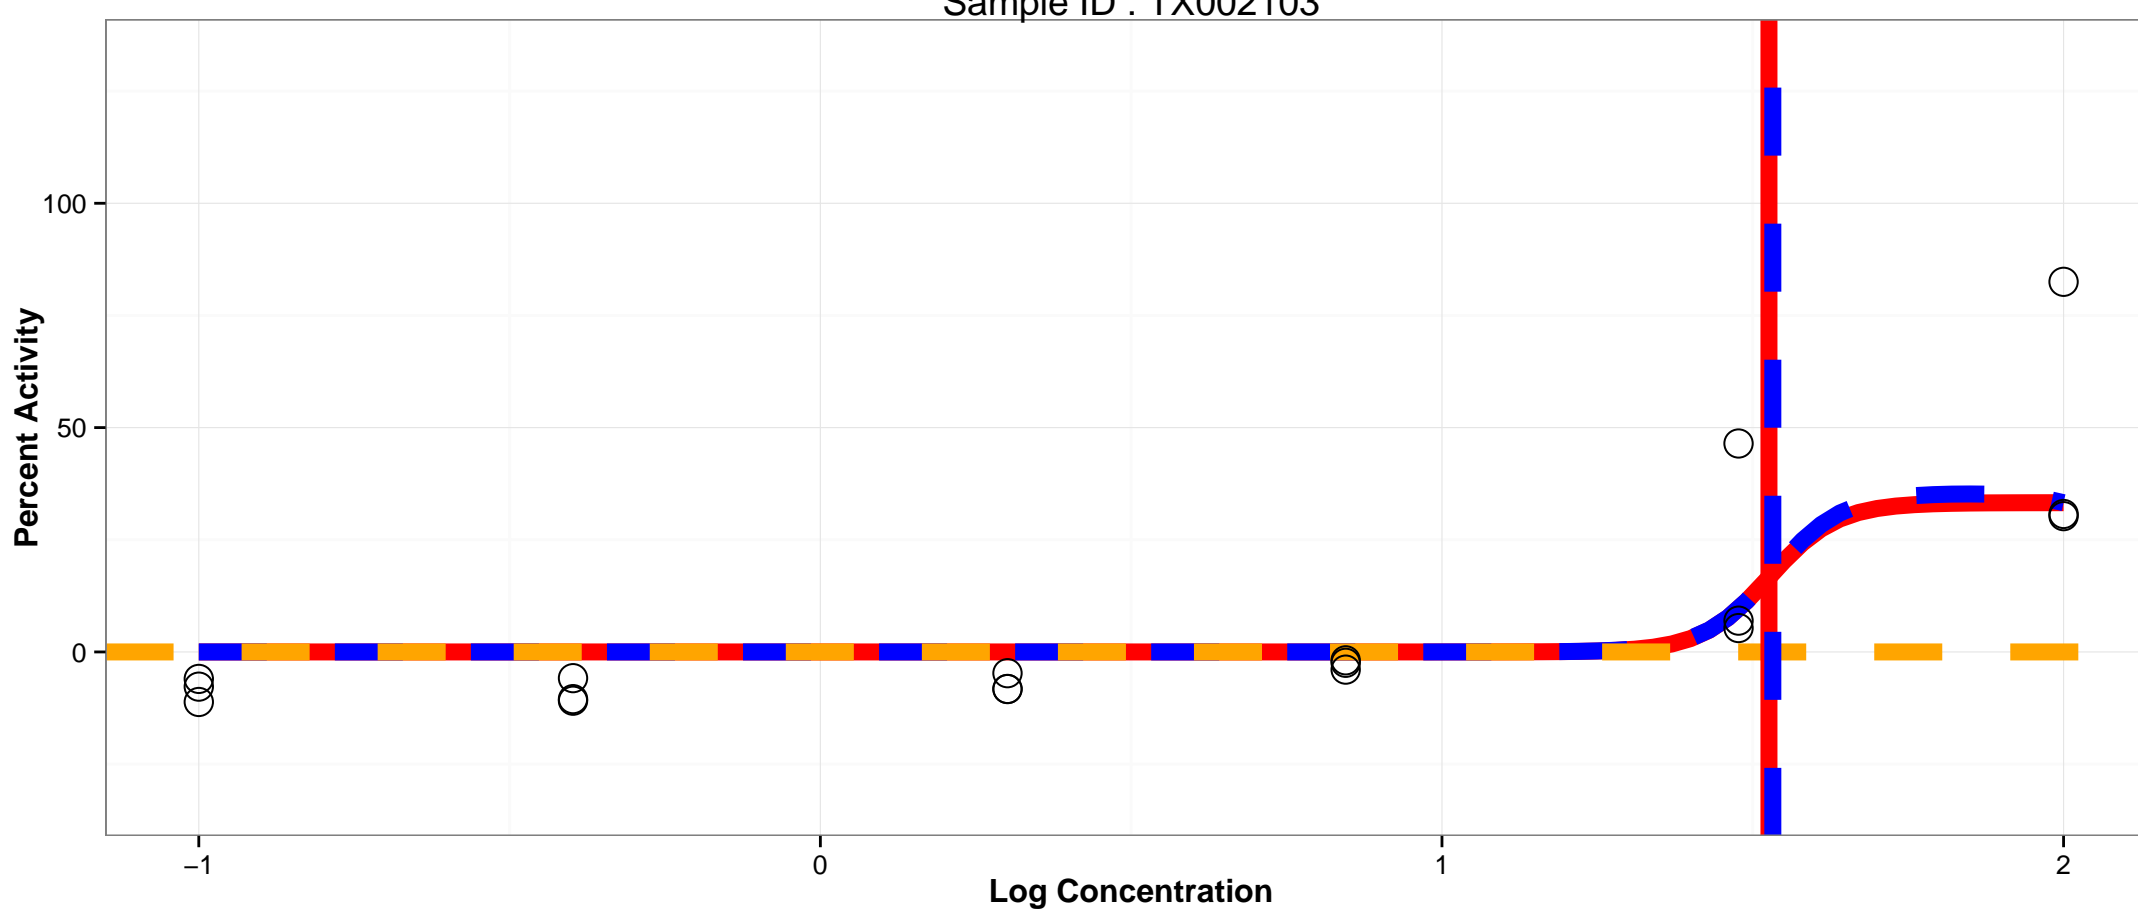

HILL MODEL

|     | tp   | ga    | gw   |
|-----|------|-------|------|
| val | 33.3 | 1.53  | 7.99 |
| sd  | 5.95 | 0.404 | 65.7 |

GAIN-LOSS MODEL

|     | tp   | ga   | gw   | la   | lw   |
|-----|------|------|------|------|------|
| val | 35.4 | 1.53 | 7.78 | 2.14 | 8.66 |
| sd  | NA   | NA   | NA   | NA   | NA   |

|      | CNST   | HILL   | GNLS   |
|------|--------|--------|--------|
| AIC  | 162.62 | 151.04 | 155.04 |
| PROB | 0      | 0.88   | 0.12   |
| RMSE | 25.35  | 15.79  | 15.79  |

MAX\_MEAN : 47.8 MAX\_MED : 30.8 BMAD : 8.58  
COFF : 20 HIT-CALL : 1 FITC : 41 ACTP : 0.997  
FLAGS : 6



Chemical : 2,4-Dimethylphenol  
CAS : 105-67-9

Assay ID 1508 (NHEERL\_TPO\_AUR\_dn)  
Sample ID : TX002120

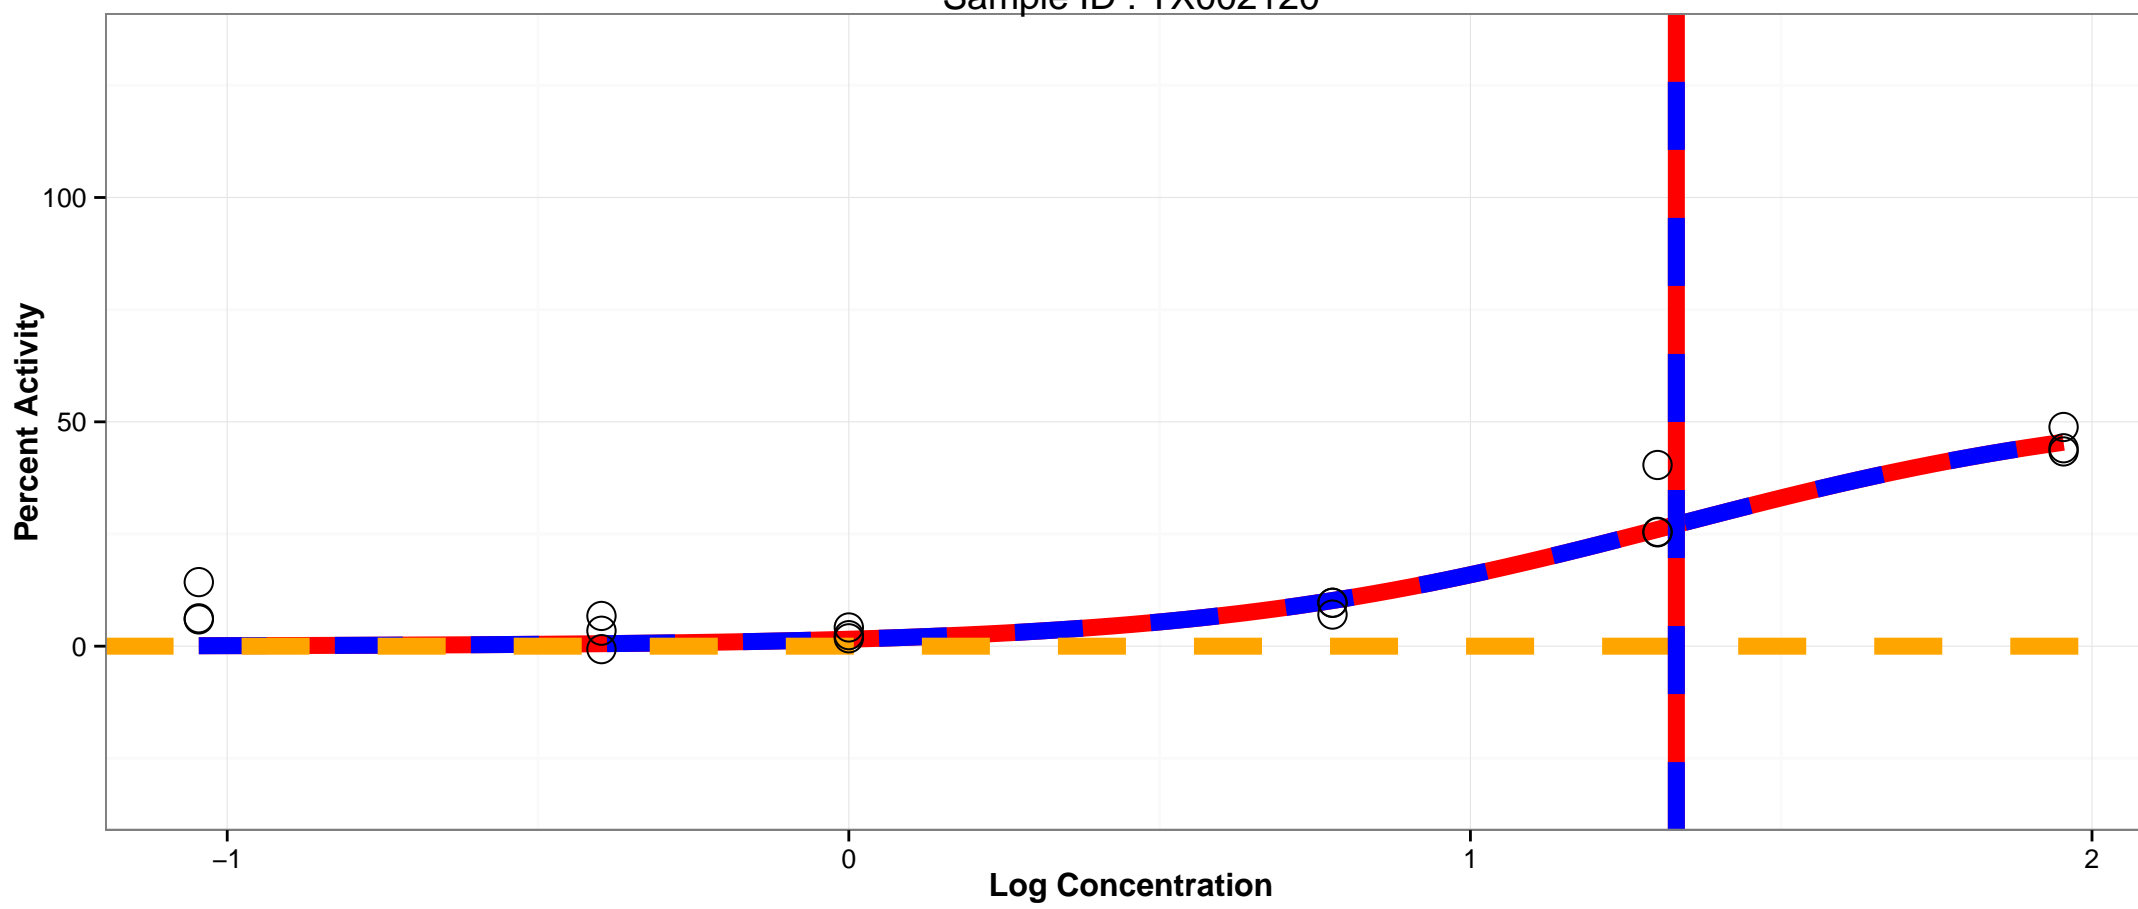

HILL MODEL

|     | tp   | ga   | gw    |
|-----|------|------|-------|
| val | 54.2 | 1.33 | 1.15  |
| sd  | 11.1 | 0.22 | 0.421 |

GAIN-LOSS MODEL

|     | tp   | ga   | gw   | la  | lw   |
|-----|------|------|------|-----|------|
| val | 54.2 | 1.33 | 1.15 | 3.9 | 8.61 |
| sd  | NA   | NA   | NA   | NA  | NA   |

|      | CNST   | HILL   | GNLS   |
|------|--------|--------|--------|
| AIC  | 165.99 | 117.58 | 121.58 |
| PROB | 0      | 0.88   | 0.12   |
| RMSE | 23.27  | 5.6    | 5.6    |

MAX\_MEAN : 45.5 MAX\_MED : 44.1 BMAD : 5.69  
COFF : 20 HIT-CALL : 1 FITC : 42 ACTP : 1  
FLAGS :

Assay ID 1509 (NHEERL\_HEK293T\_CellTiterGLO)  
Sample ID : TX002120

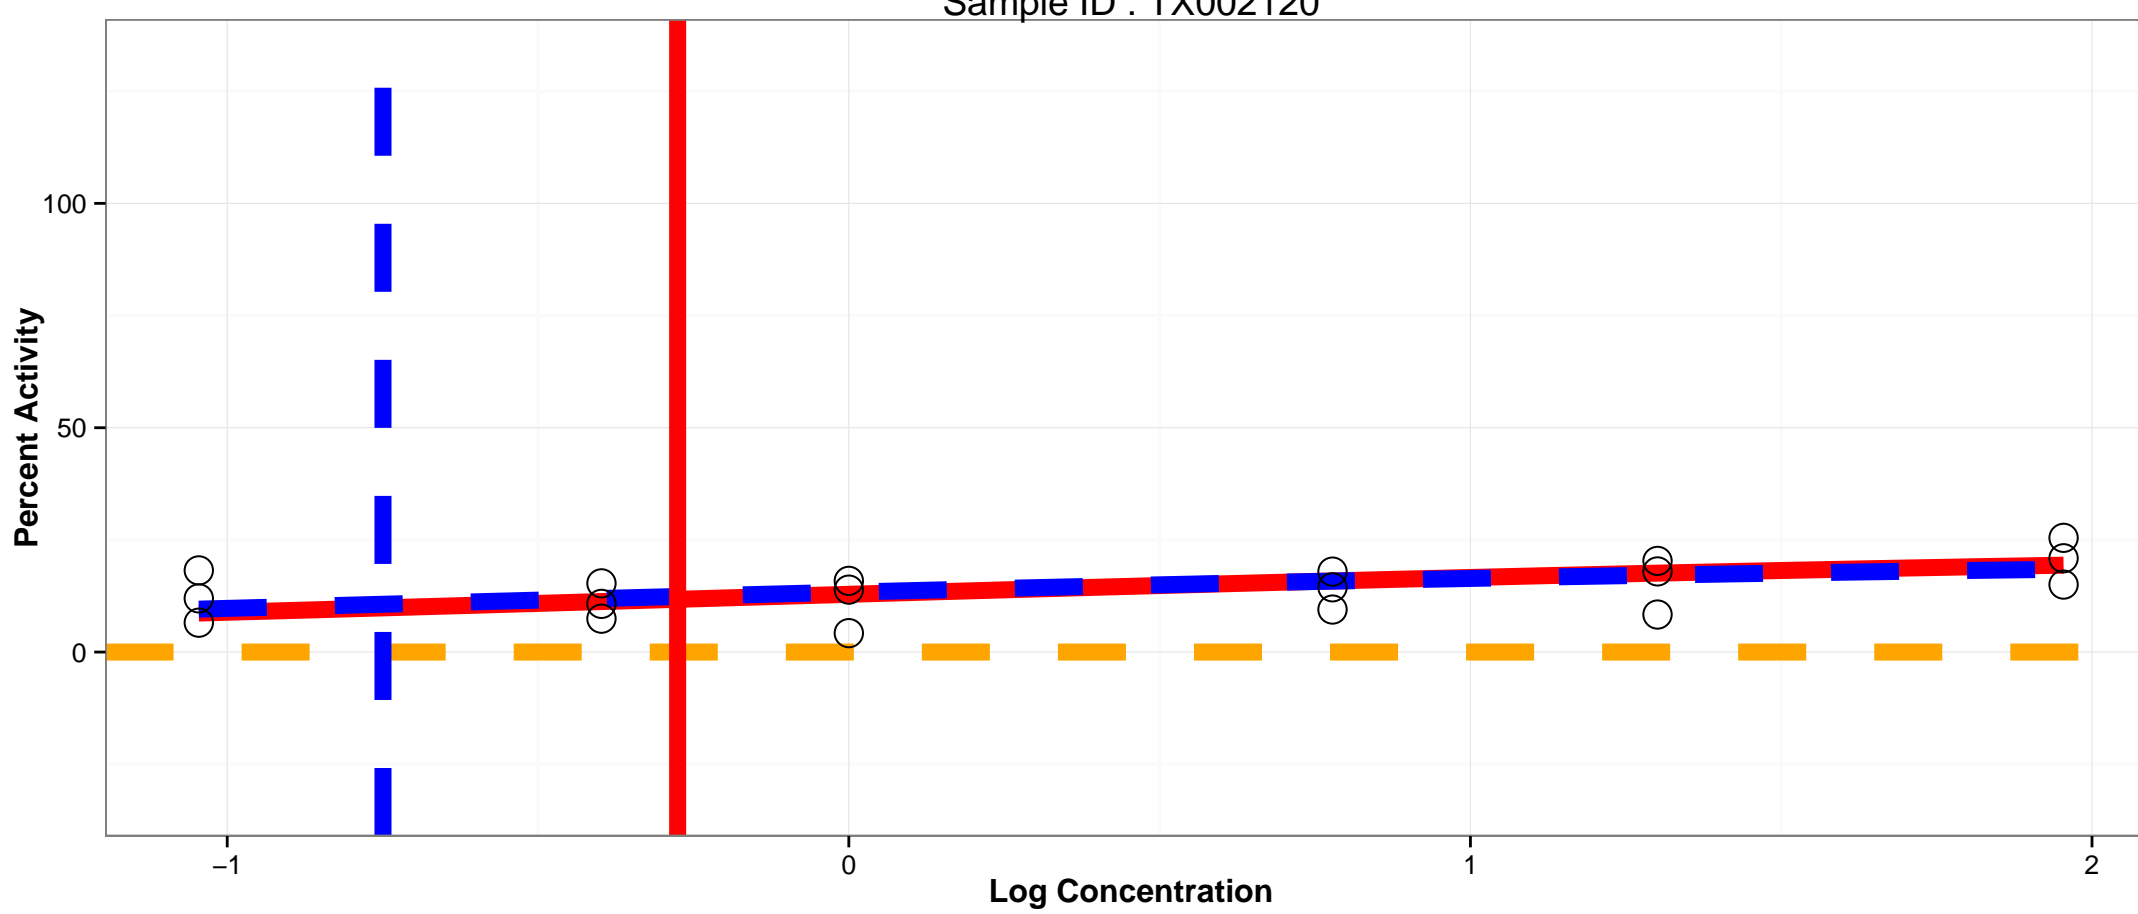

HILL MODEL

|     | tp   | ga     | gw  |
|-----|------|--------|-----|
| val | 23.5 | -0.275 | 0.3 |
| sd  | NA   | NA     | NA  |

GAIN-LOSS MODEL

|     | tp   | ga     | gw    | la   | lw   |
|-----|------|--------|-------|------|------|
| val | 21.3 | -0.749 | 0.3   | 3.47 | 5.73 |
| sd  | 10.8 | 1.59   | 0.315 | 2470 | 9330 |

|      | CNST   | HILL   | GNLS   |
|------|--------|--------|--------|
| AIC  | 154.33 | 117.04 | 120.94 |
| PROB | 0      | 0.88   | 0.12   |
| RMSE | 15.14  | 4.83   | 4.79   |

MAX\_MEAN : 20.5 MAX\_MED : 20.9 BMAD : 5.54  
COFF : 20 HIT-CALL : 1 FITC : 38 ACTP : 1  
FLAGS : 11

Assay ID 1848 (NHEERL\_Quantilum\_inhib\_2\_dn)  
Sample ID : TX002120

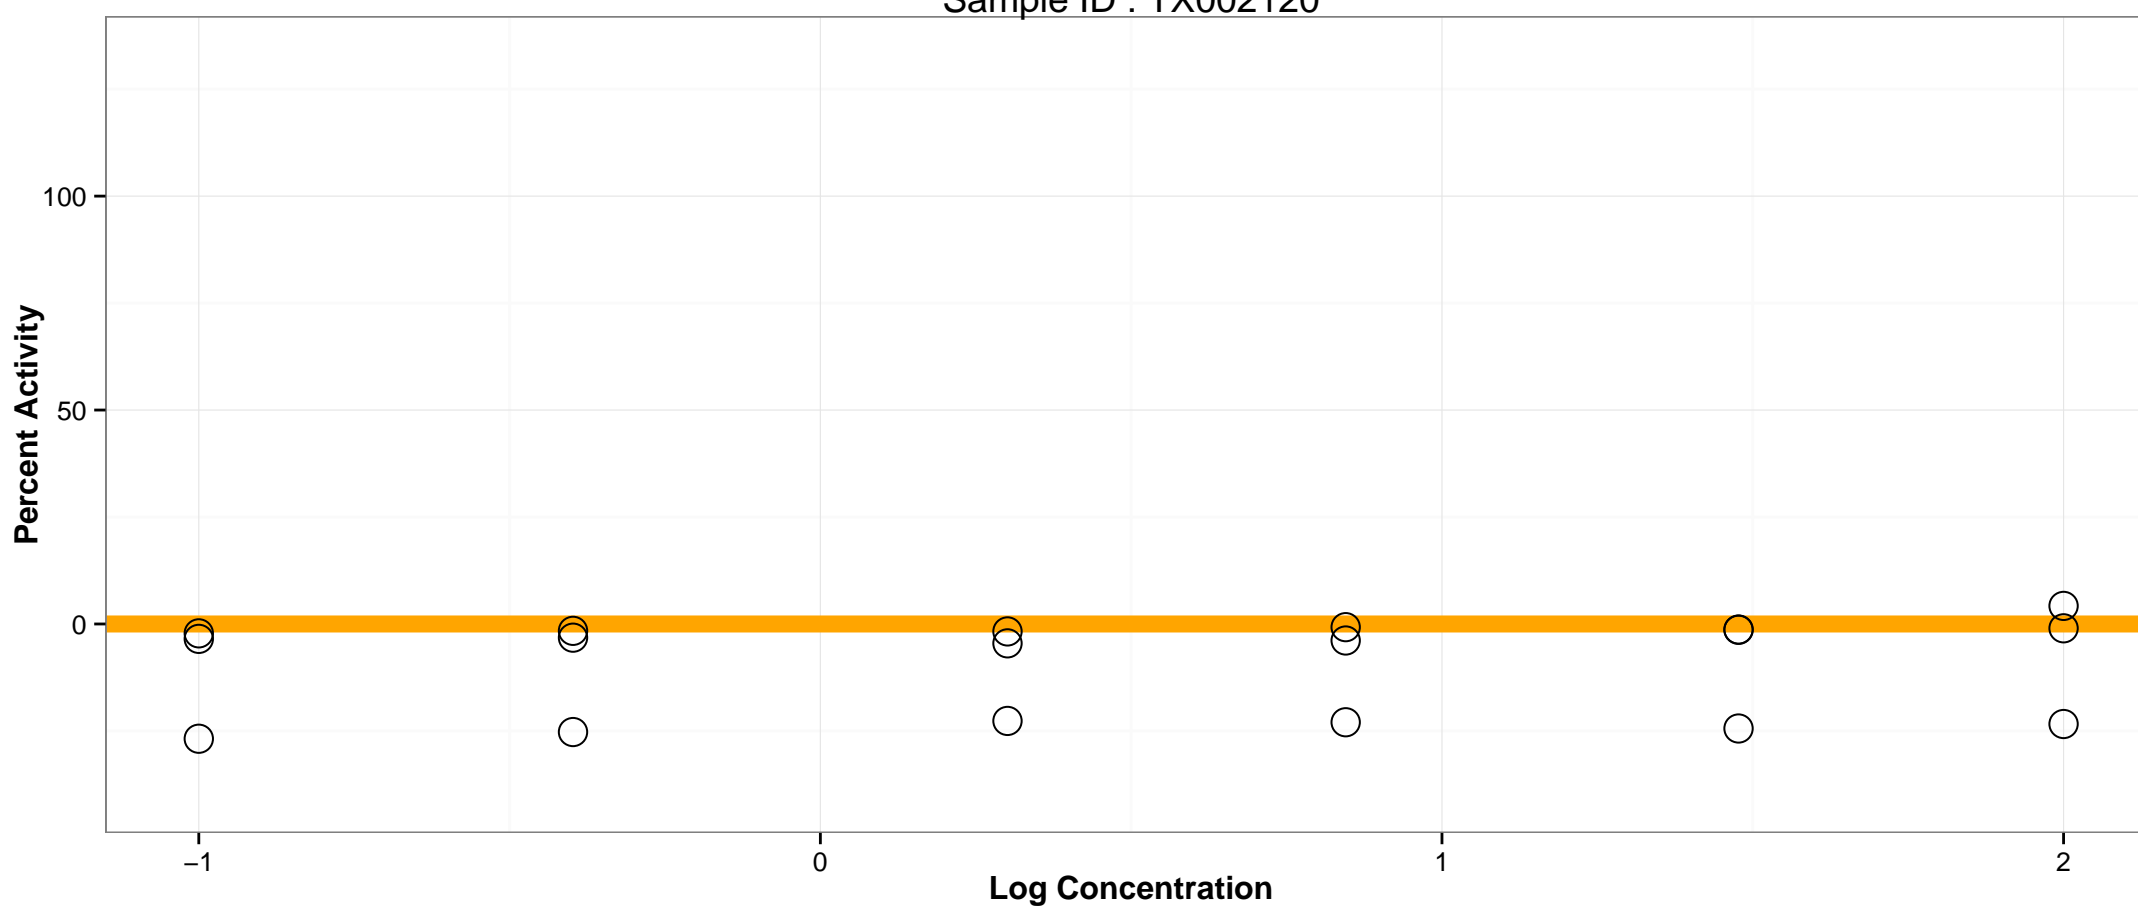

HILL MODEL

HILL MODEL: Not applicable

GAIN-LOSS MODEL

GNLS MODEL: Not applicable

|      | CNST   | HILL | GNLS |
|------|--------|------|------|
| AIC  | 148.36 | NA   | NA   |
| PROB | 1      | NA   | NA   |
| RMSE | 14.2   | NA   | NA   |

MAX\_MEAN : -6.71 MAX\_MED : -0.998 BMAD : 8.58  
COFF : 20 HIT-CALL : 0 FITC : 4 ACTP : 0  
FLAGS :

Chemical : Methyl 2-aminobenzoate  
CAS : 134-20-3

Assay ID 1508 (NHEERL\_TPO\_AUR\_dn)  
Sample ID : TX002195

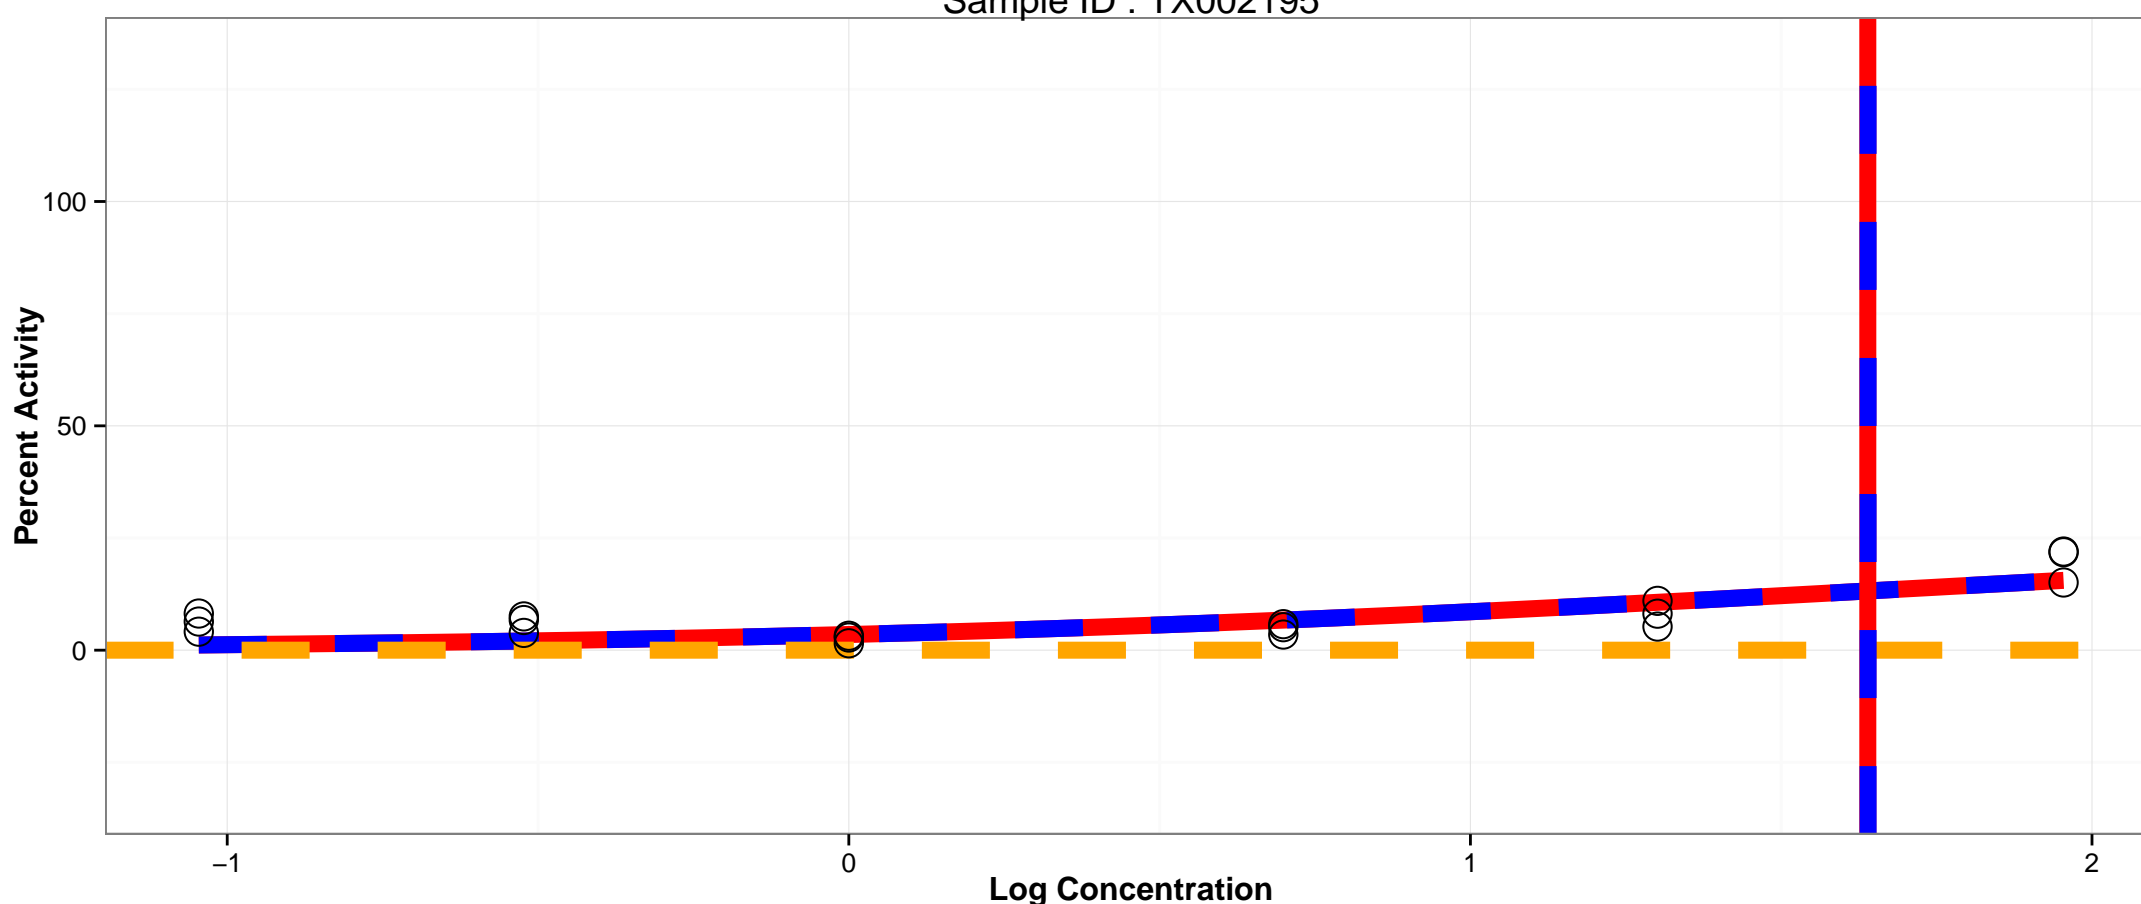

HILL MODEL

|     | tp   | ga    | gw    |
|-----|------|-------|-------|
| val | 26.4 | 1.64  | 0.498 |
| sd  | 10.4 | 0.601 | 0.277 |

GAIN-LOSS MODEL

|     | tp   | ga    | gw    | la   | lw    |
|-----|------|-------|-------|------|-------|
| val | 26.4 | 1.64  | 0.498 | 3.21 | 7.28  |
| sd  | 10.4 | 0.601 | 0.277 | 2220 | 12900 |

|      | CNST   | HILL  | GNLS  |
|------|--------|-------|-------|
| AIC  | 135.59 | 110.2 | 114.2 |
| PROB | 0      | 0.88  | 0.12  |
| RMSE | 9.83   | 3.91  | 3.91  |

MAX\_MEAN : 19.6 MAX\_MED : 21.8 BMAD : 5.69  
COFF : 20 HIT-CALL : 1 FITC : 42 ACTP : 1  
FLAGS : 11; 6

Assay ID 1509 (NHEERL\_HEK293T\_CellTiterGLO)  
Sample ID : TX002195

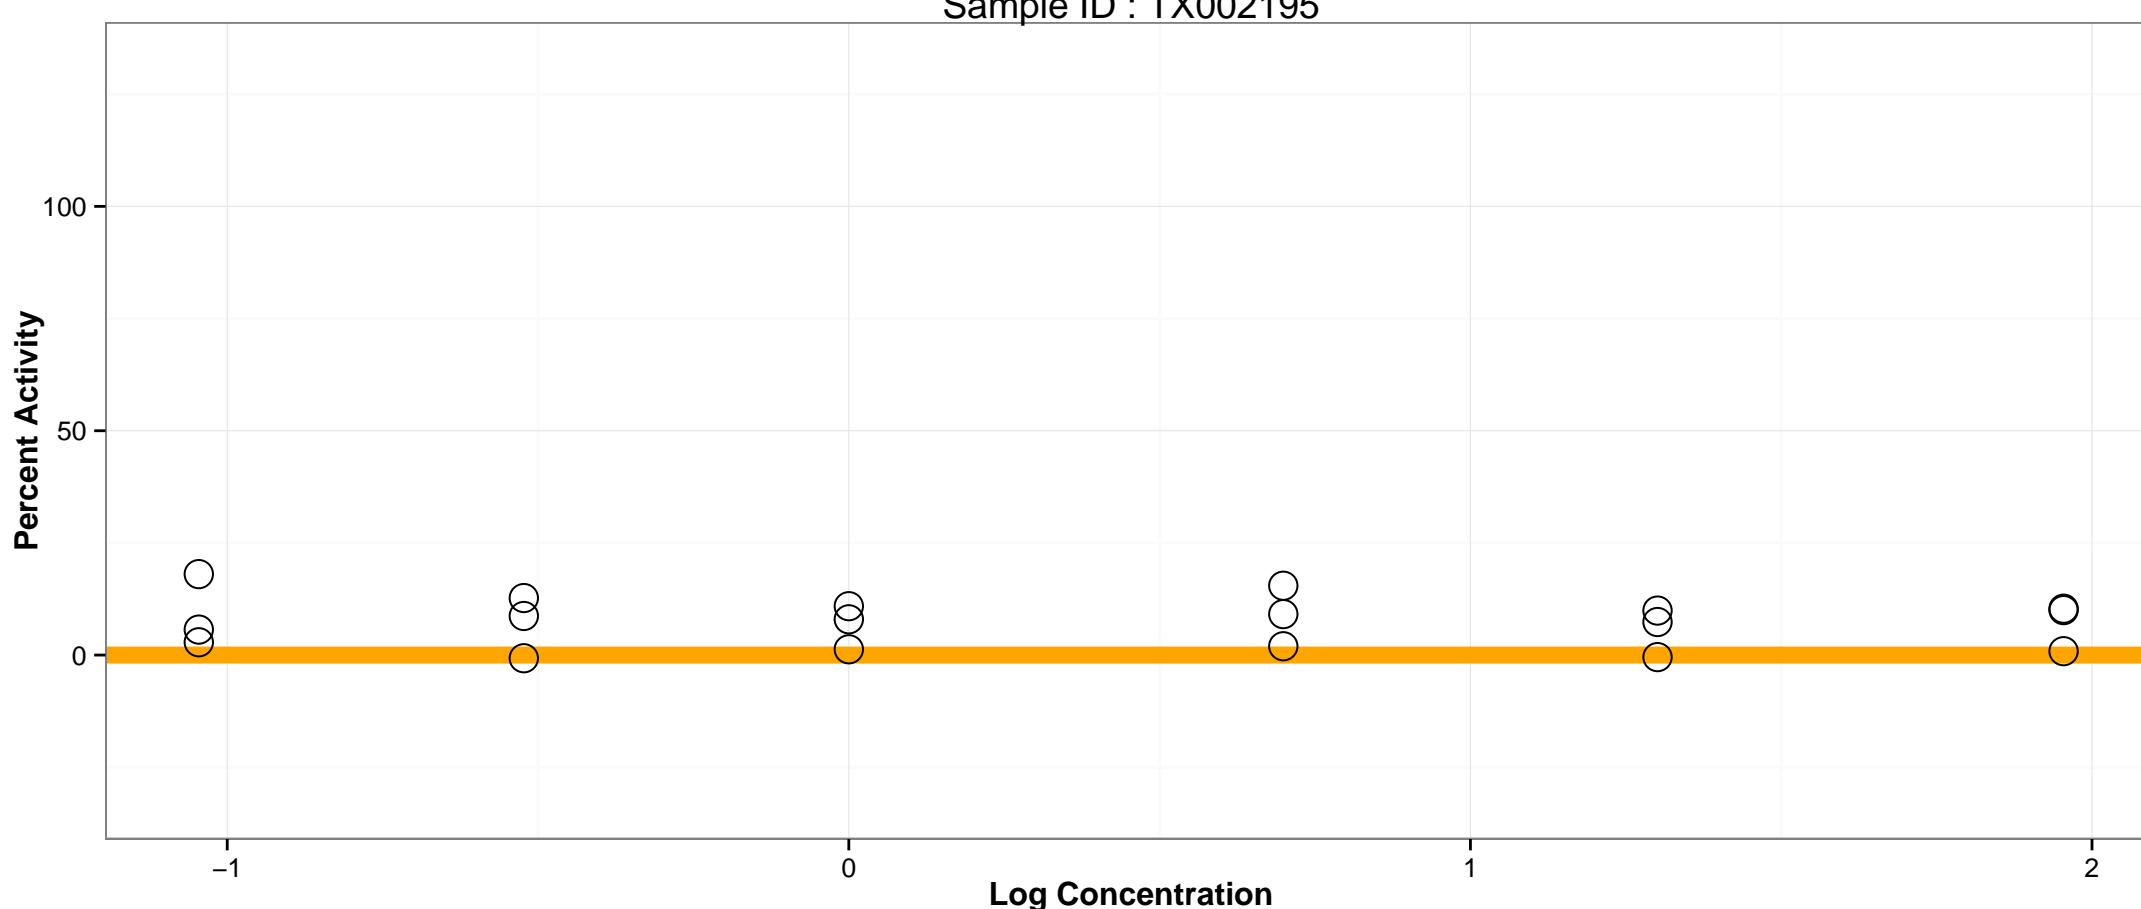

HILL MODEL

HILL MODEL: Not applicable

GAIN-LOSS MODEL

GNLS MODEL: Not applicable

|      | CNST   | HILL | GNLS |
|------|--------|------|------|
| AIC  | 134.63 | NA   | NA   |
| PROB | 1      | NA   | NA   |
| RMSE | 9.06   | NA   | NA   |

MAX\_MEAN : 8.87 MAX\_MED : 10 BMAD : 5.54  
COFF : 20 HIT-CALL : 0 FITC : 4 ACTP : 0  
FLAGS :

Assay ID 1848 (NHEERL\_Quantilum\_inhib\_2\_dn)  
Sample ID : TX002195

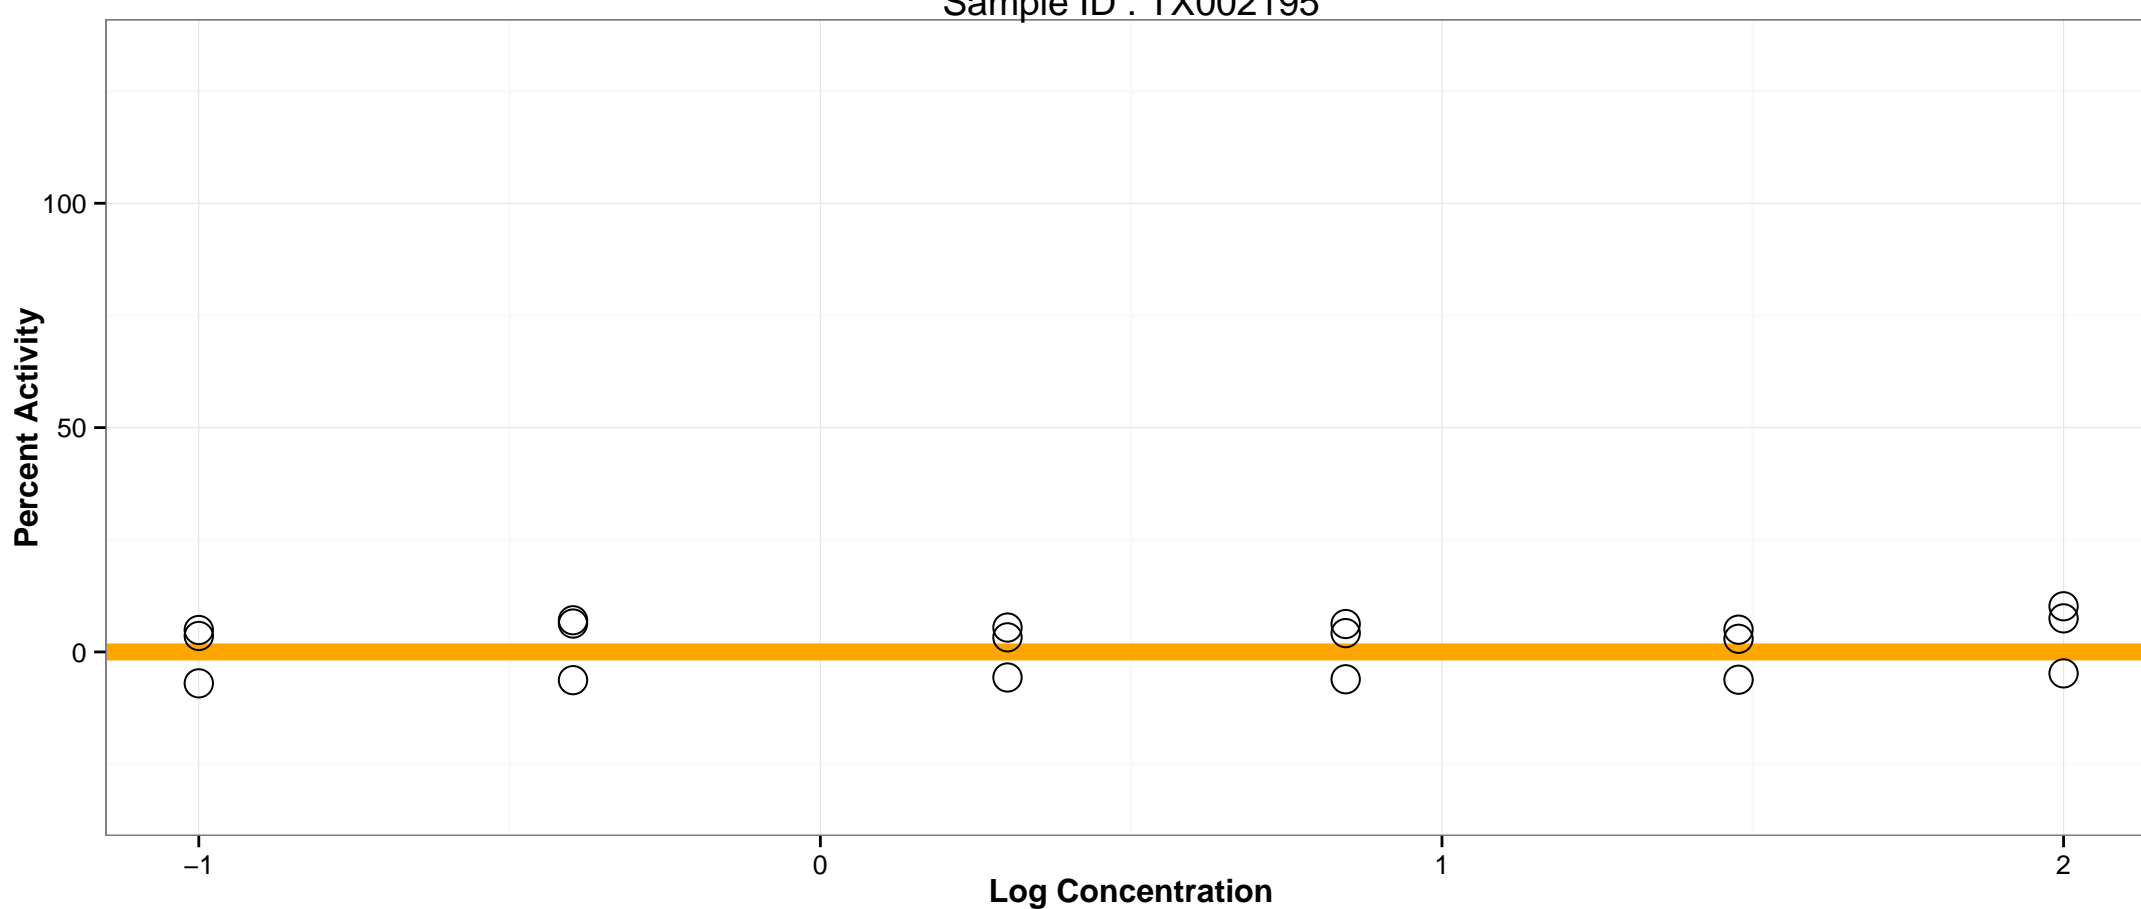

HILL MODEL

HILL MODEL: Not applicable

GAIN-LOSS MODEL

GNLS MODEL: Not applicable

|      | CNST   | HILL | GNLS |
|------|--------|------|------|
| AIC  | 120.93 | NA   | NA   |
| PROB | 1      | NA   | NA   |
| RMSE | 5.94   | NA   | NA   |

MAX\_MEAN : 4.31 MAX\_MED : 7.5 BMAD : 8.58  
COFF : 20 HIT-CALL : 0 FITC : 4 ACTP : 0  
FLAGS :

Chemical : 4-Cumylphenol  
CAS : 599-64-4

Assay ID 1508 (NHEERL\_TPO\_AUR\_dn)  
Sample ID : TX002221

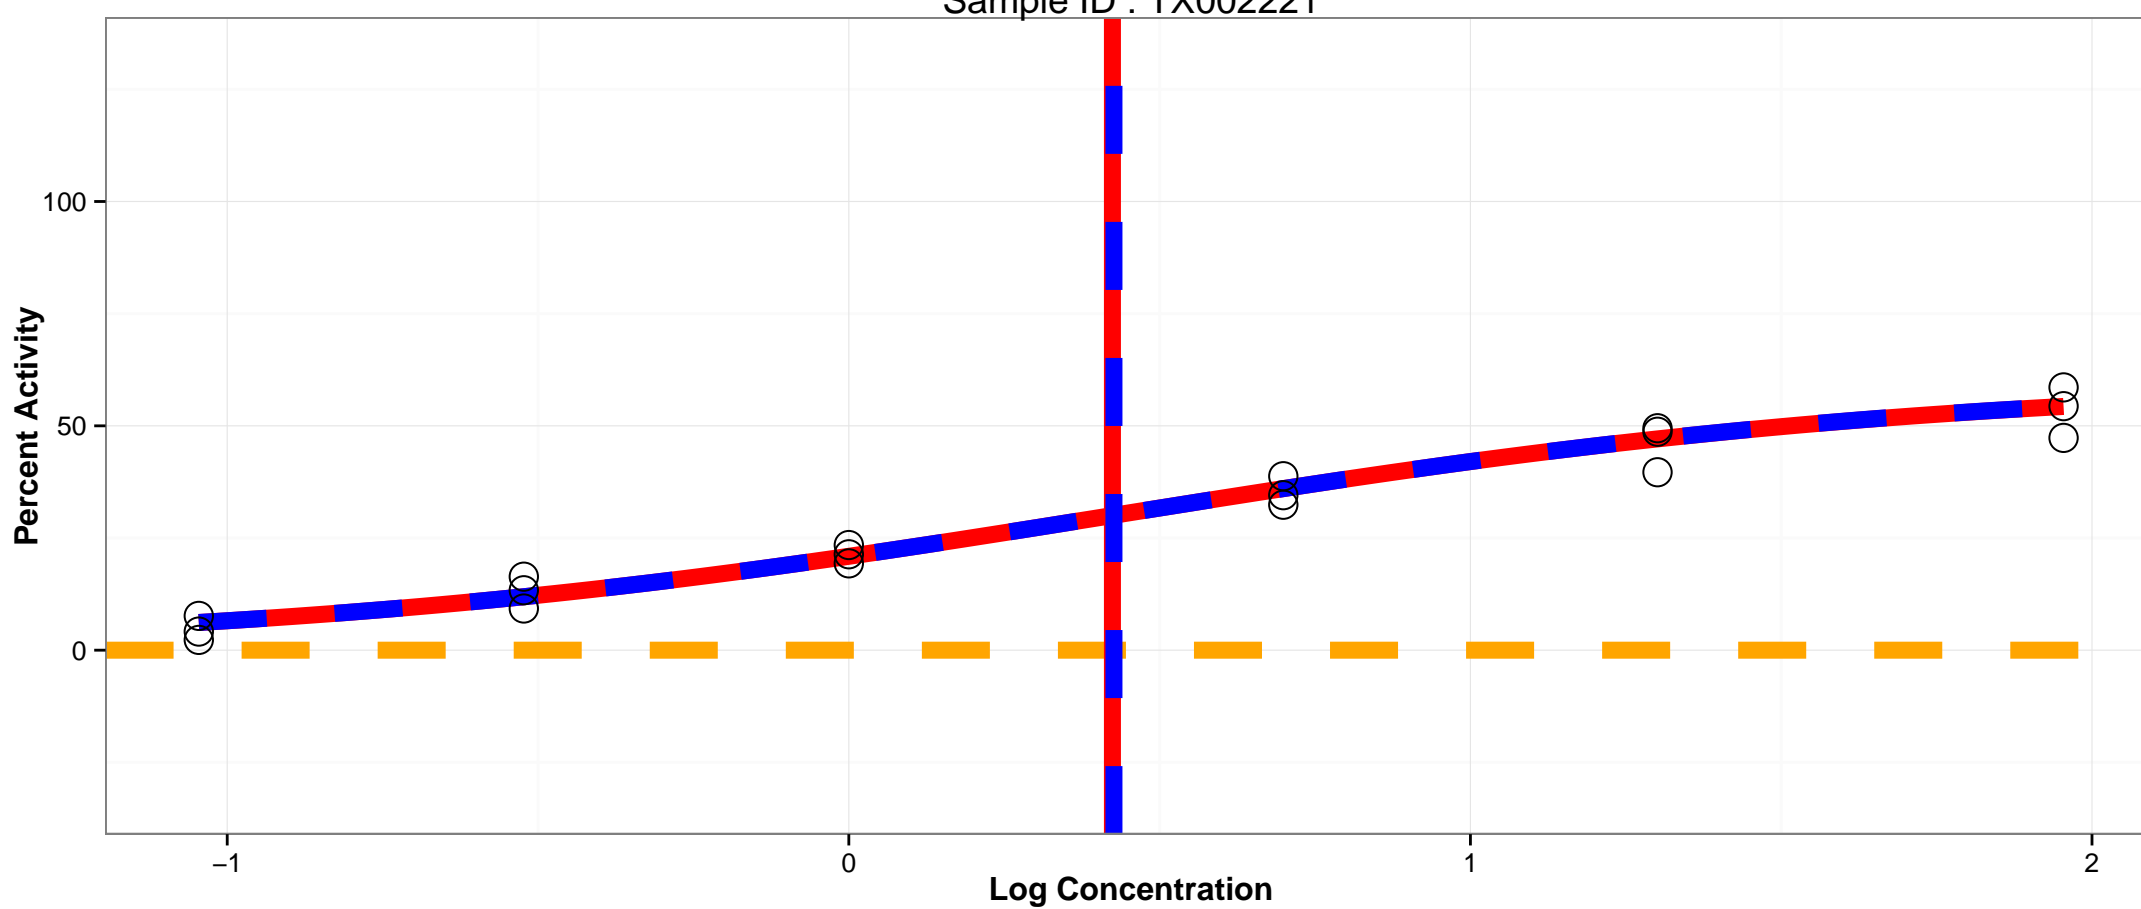

HILL MODEL

|     | tp   | ga    | gw     |
|-----|------|-------|--------|
| val | 60   | 0.424 | 0.64   |
| sd  | 4.84 | 0.153 | 0.0865 |

GAIN-LOSS MODEL

|     | tp   | ga    | gw    | la   | lw   |
|-----|------|-------|-------|------|------|
| val | 60.1 | 0.427 | 0.639 | 2.51 | 5.35 |
| sd  | 11.1 | 0.306 | 0.129 | 83.3 | 776  |

|      | CNST   | HILL   | GNLS   |
|------|--------|--------|--------|
| AIC  | 182.54 | 104.79 | 108.79 |
| PROB | 0      | 0.88   | 0.12   |
| RMSE | 33.97  | 3.44   | 3.44   |

MAX\_MEAN : 53.4 MAX\_MED : 54.4 BMAD : 5.69  
COFF : 20 HIT-CALL : 1 FITC : 42 ACTP : 1  
FLAGS :

Assay ID 1509 (NHEERL\_HEK293T\_CellTiterGLO)  
Sample ID : TX002221

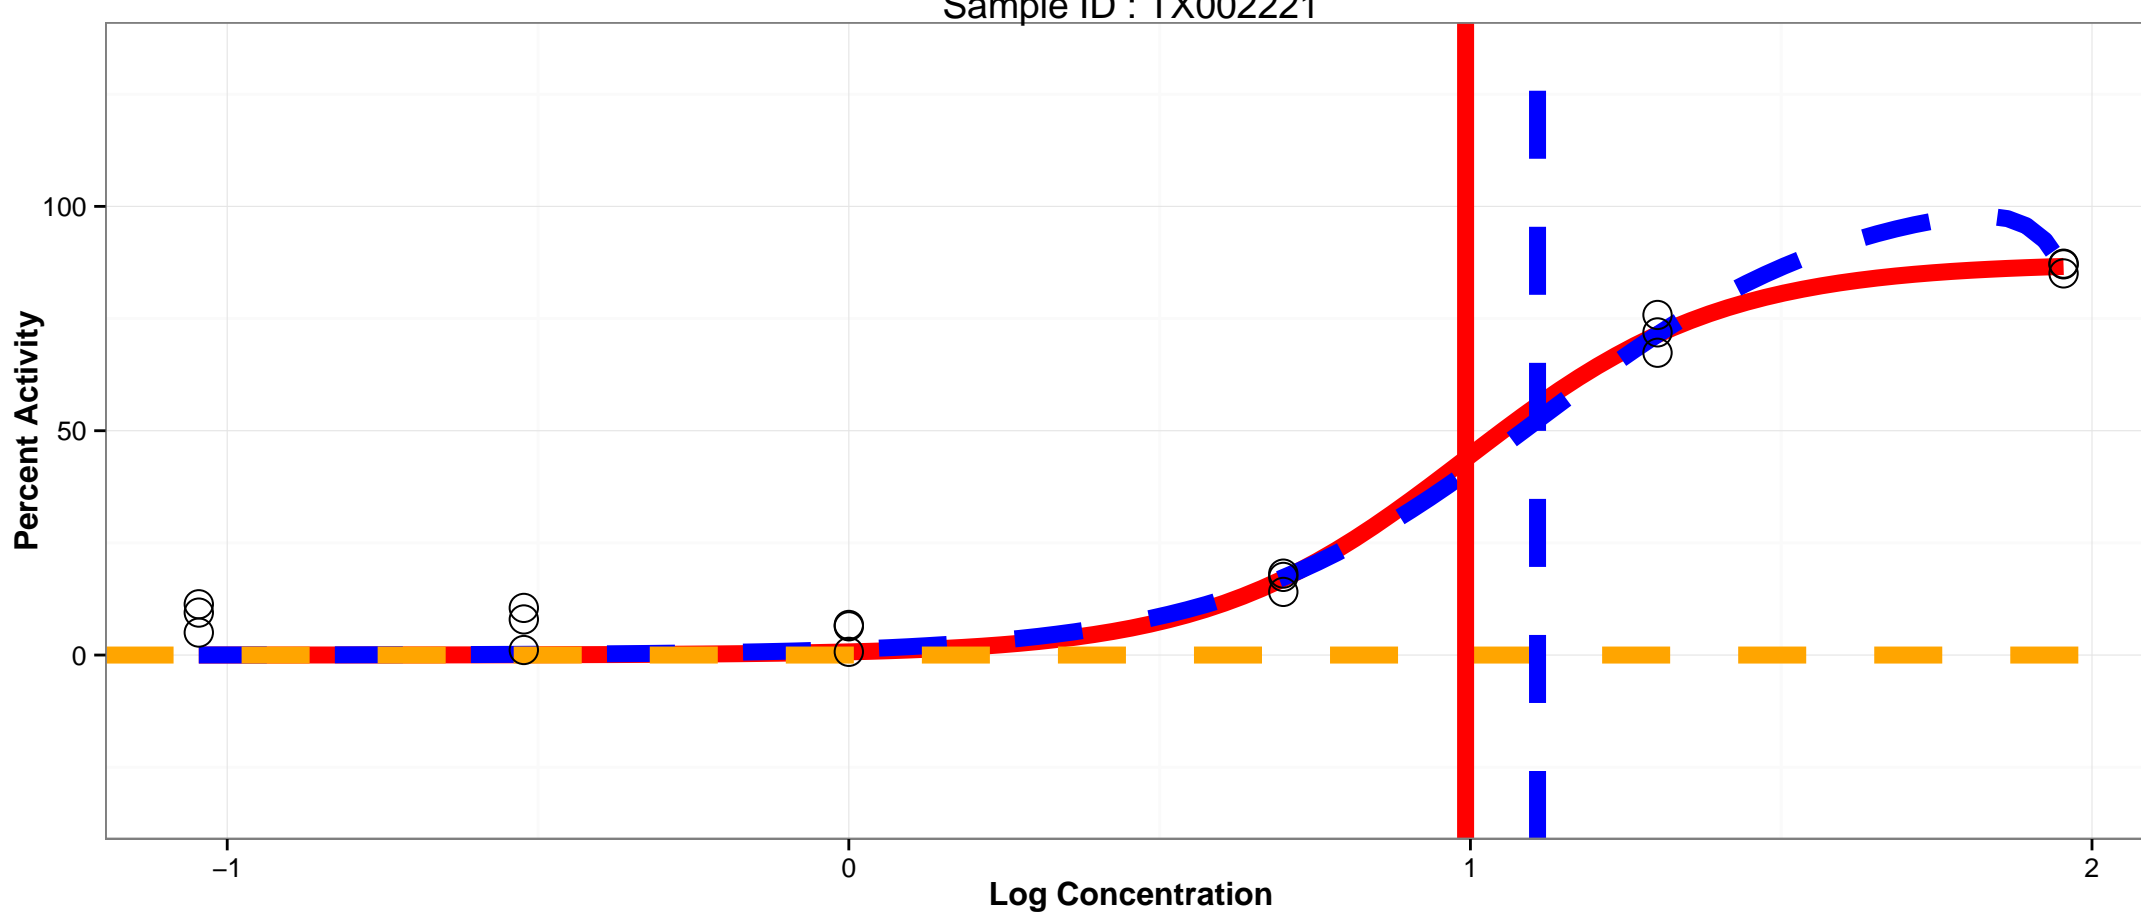

HILL MODEL

|     | tp   | ga     | gw   |
|-----|------|--------|------|
| val | 87.4 | 0.992  | 2.1  |
| sd  | 2.62 | 0.0357 | 0.24 |

GAIN-LOSS MODEL

|     | tp  | ga   | gw   | la   | lw  |
|-----|-----|------|------|------|-----|
| val | 105 | 1.11 | 1.72 | 2.04 | 9.2 |
| sd  | NA  | NA   | NA   | NA   | NA  |

|      | CNST  | HILL  | GNLS  |
|------|-------|-------|-------|
| AIC  | 191.3 | 120.8 | 124.1 |
| PROB | 0     | 0.84  | 0.16  |
| RMSE | 46.69 | 5.45  | 5.36  |

MAX\_MEAN : 86.5 MAX\_MED : 87.1 BMAD : 5.54  
COFF : 20 HIT-CALL : 1 FITC : 41 ACTP : 1  
FLAGS :

Assay ID 1848 (NHEERL\_Quantilum\_inhib\_2\_dn)  
Sample ID : TX002221

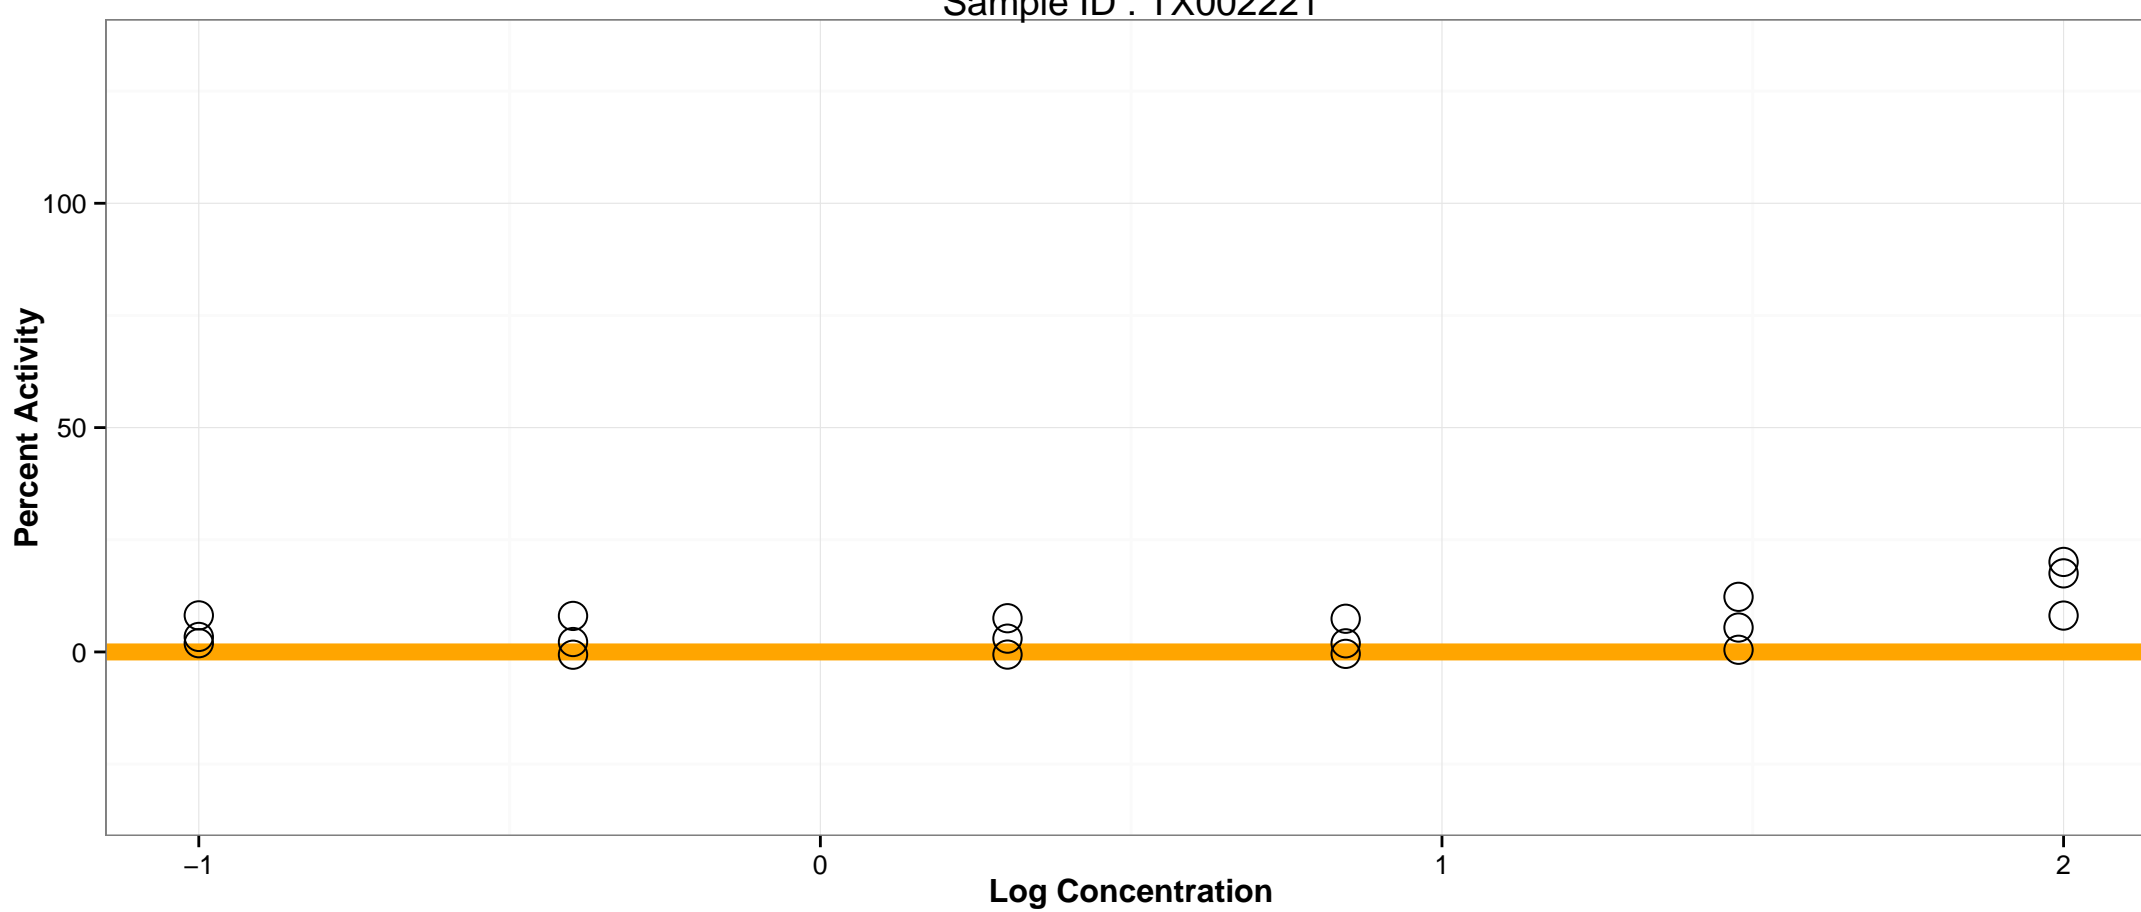

HILL MODEL

HILL MODEL: Not applicable

GAIN-LOSS MODEL

GNLS MODEL: Not applicable

|      | CNST   | HILL | GNLS |
|------|--------|------|------|
| AIC  | 128.72 | NA   | NA   |
| PROB | 1      | NA   | NA   |
| RMSE | 8.28   | NA   | NA   |

MAX\_MEAN : 15.2 MAX\_MED : 17.5 BMAD : 8.58  
COFF : 20 HIT-CALL : 0 FITC : 4 ACTP : 0  
FLAGS :

Chemical : 8-Hydroxyquinoline  
CAS : 148-24-3

Assay ID 1508 (NHEERL\_TPO\_AUR\_dn)  
Sample ID : TX002224

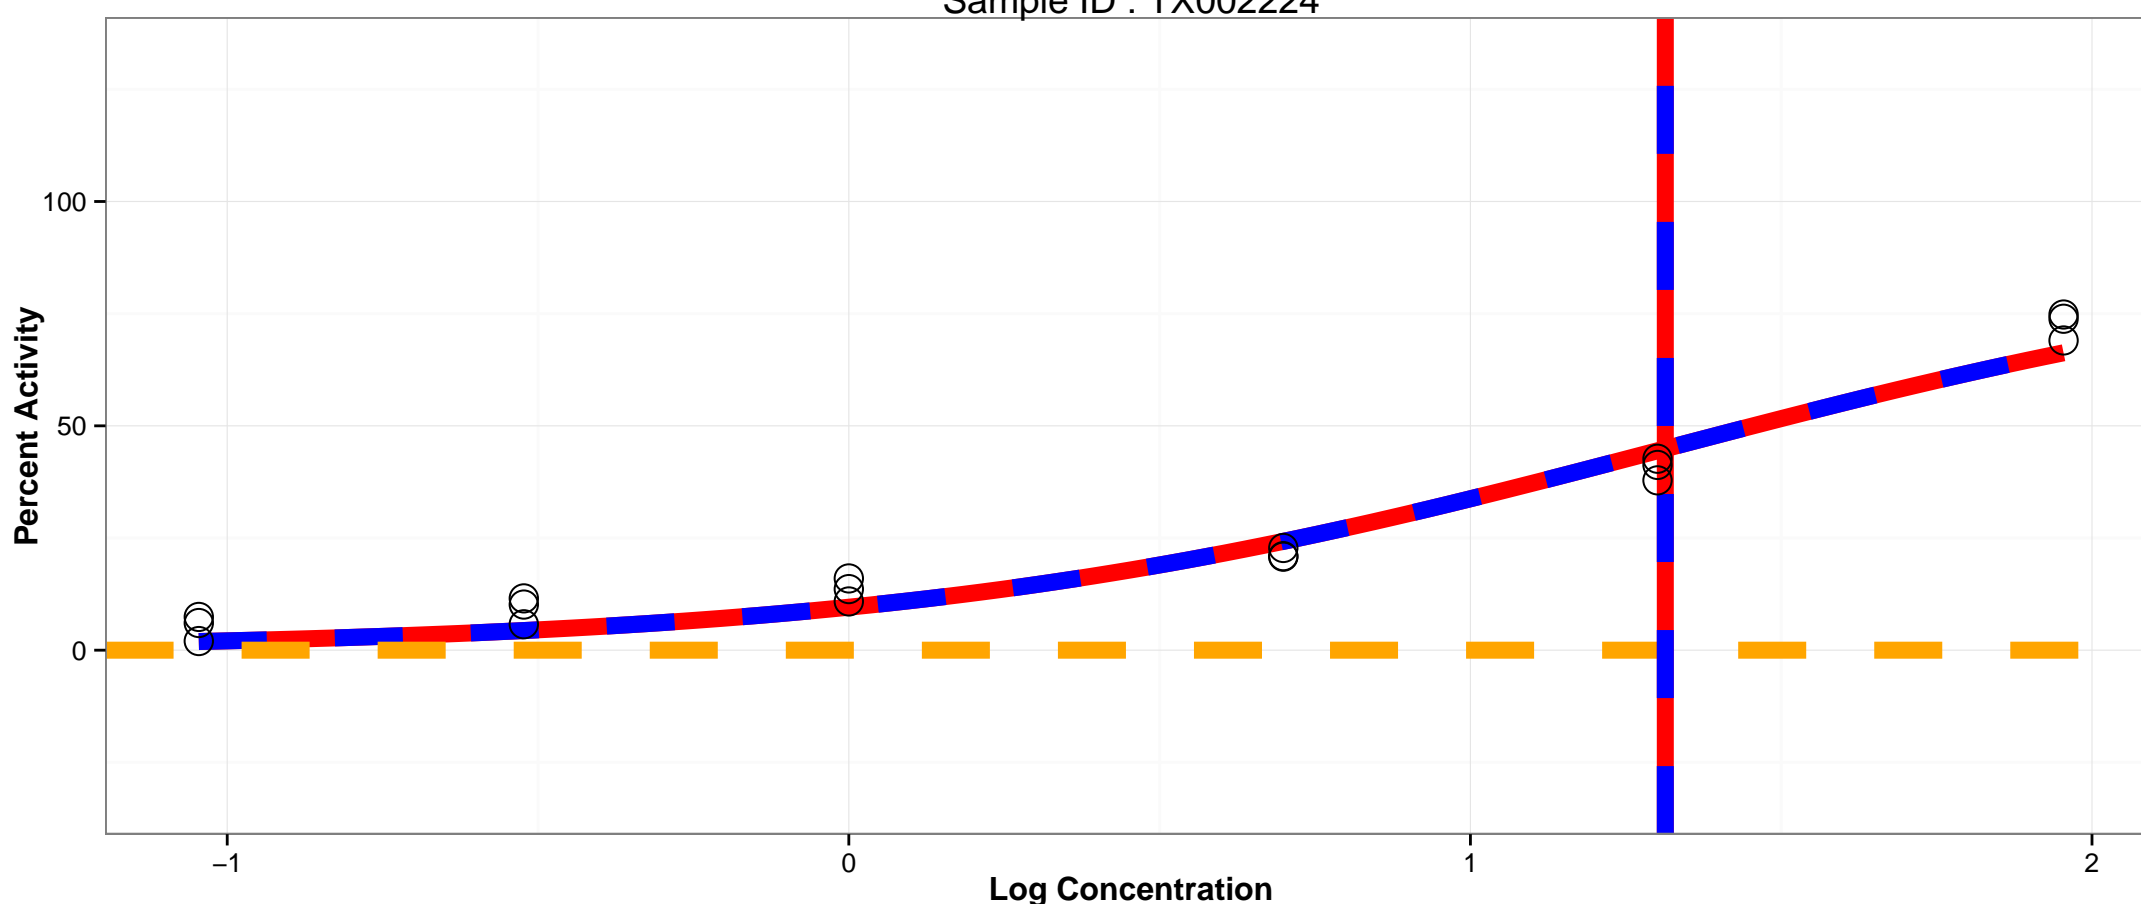

HILL MODEL

|     | tp   | ga    | gw    |
|-----|------|-------|-------|
| val | 89.8 | 1.31  | 0.703 |
| sd  | 13.8 | 0.205 | 0.102 |

GAIN-LOSS MODEL

|     | tp   | ga    | gw    | la   | lw     |
|-----|------|-------|-------|------|--------|
| val | 89.8 | 1.31  | 0.703 | 2.81 | 13.9   |
| sd  | 13.8 | 0.205 | 0.102 | 6660 | 108000 |

|      | CNST   | HILL   | GNLS   |
|------|--------|--------|--------|
| AIC  | 181.91 | 118.04 | 122.04 |
| PROB | 0      | 0.88   | 0.12   |
| RMSE | 35.83  | 4.79   | 4.79   |

MAX\_MEAN : 72.6 MAX\_MED : 73.9 BMAD : 5.69  
COFF : 20 HIT-CALL : 1 FITC : 42 ACTP : 1  
FLAGS :

Assay ID 1509 (NHEERL\_HEK293T\_CellTiterGLO)  
Sample ID : TX002224

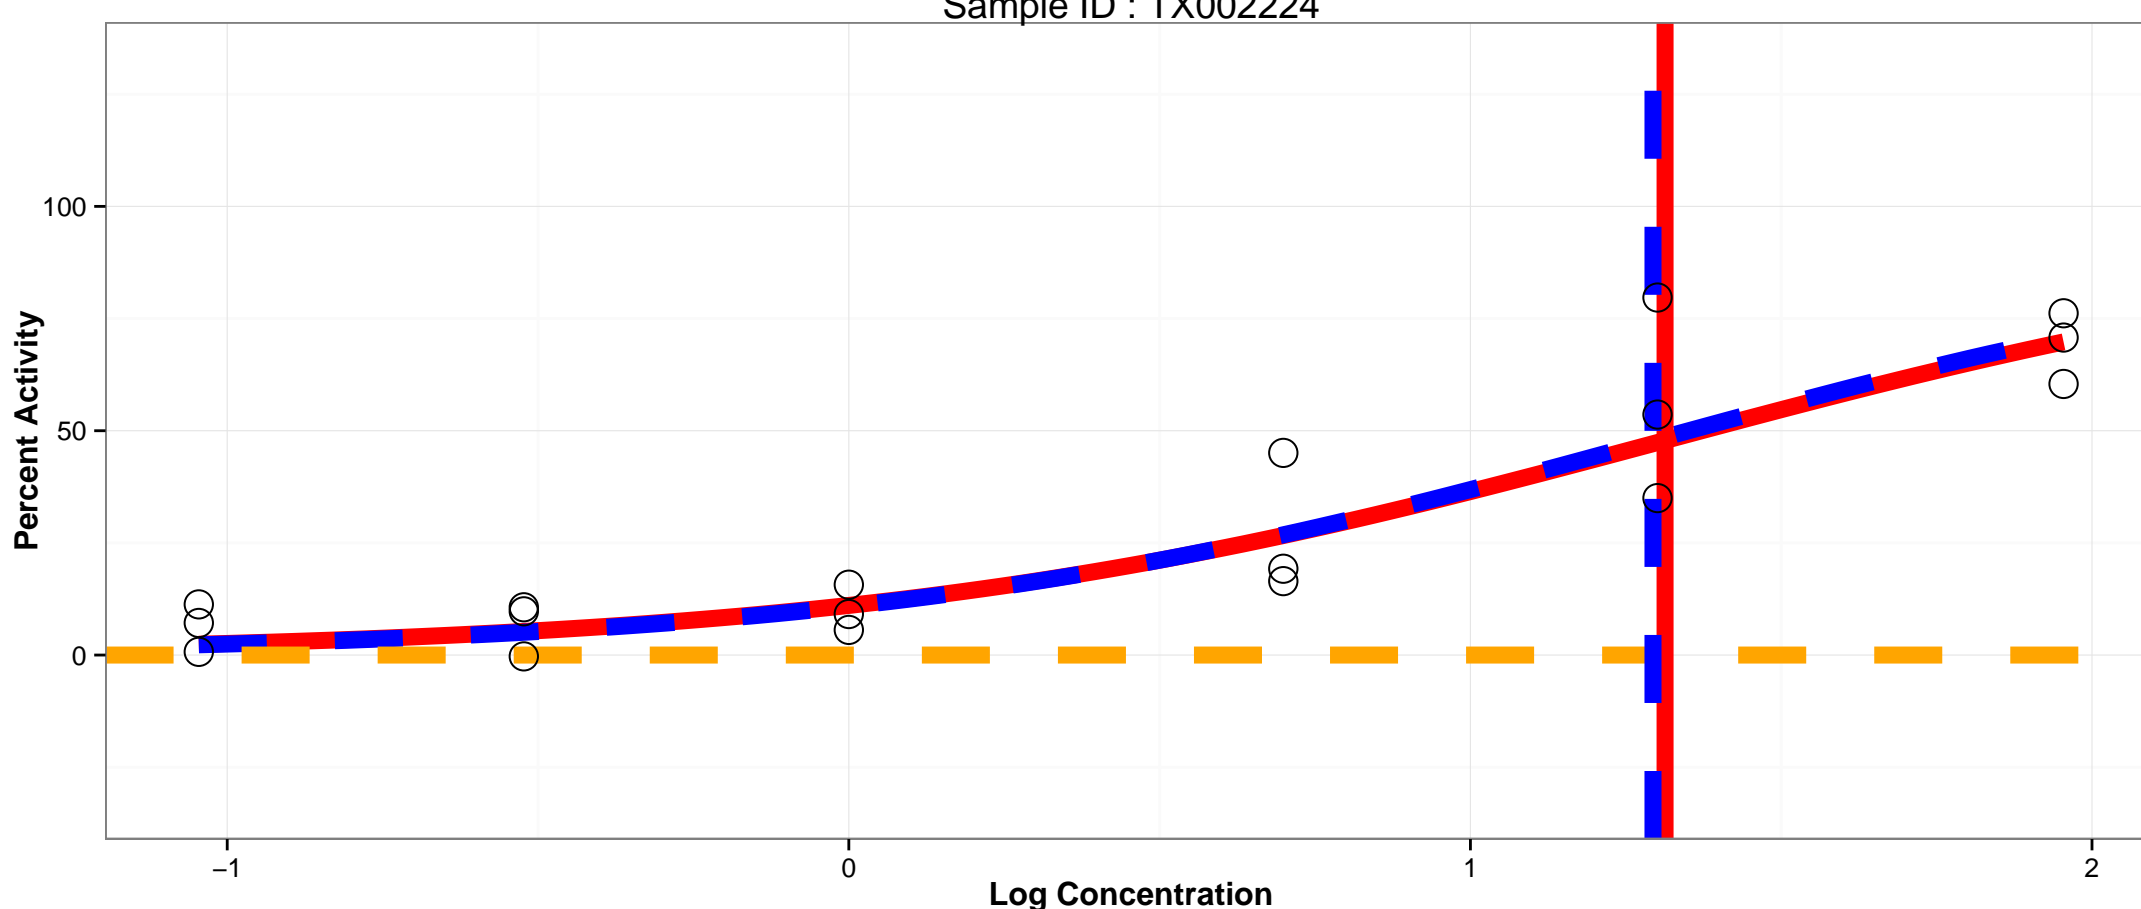

HILL MODEL

|     | tp   | ga    | gw    |
|-----|------|-------|-------|
| val | 95.6 | 1.31  | 0.673 |
| sd  | 34.4 | 0.601 | 0.239 |

GAIN-LOSS MODEL

|     | tp   | ga   | gw    | la   | lw   |
|-----|------|------|-------|------|------|
| val | 95.6 | 1.29 | 0.689 | 2.05 | 17.6 |
| sd  | NA   | NA   | NA    | NA   | NA   |

|      | CNST   | HILL  | GNLS   |
|------|--------|-------|--------|
| AIC  | 185.98 | 142.8 | 146.79 |
| PROB | 0      | 0.88  | 0.12   |
| RMSE | 39.68  | 10.81 | 10.72  |

MAX\_MEAN : 69.1 MAX\_MED : 70.8 BMAD : 5.54  
COFF : 20 HIT-CALL : 1 FITC : 42 ACTP : 1  
FLAGS :

Assay ID 1848 (NHEERL\_Quantilum\_inhib\_2\_dn)  
Sample ID : TX002224

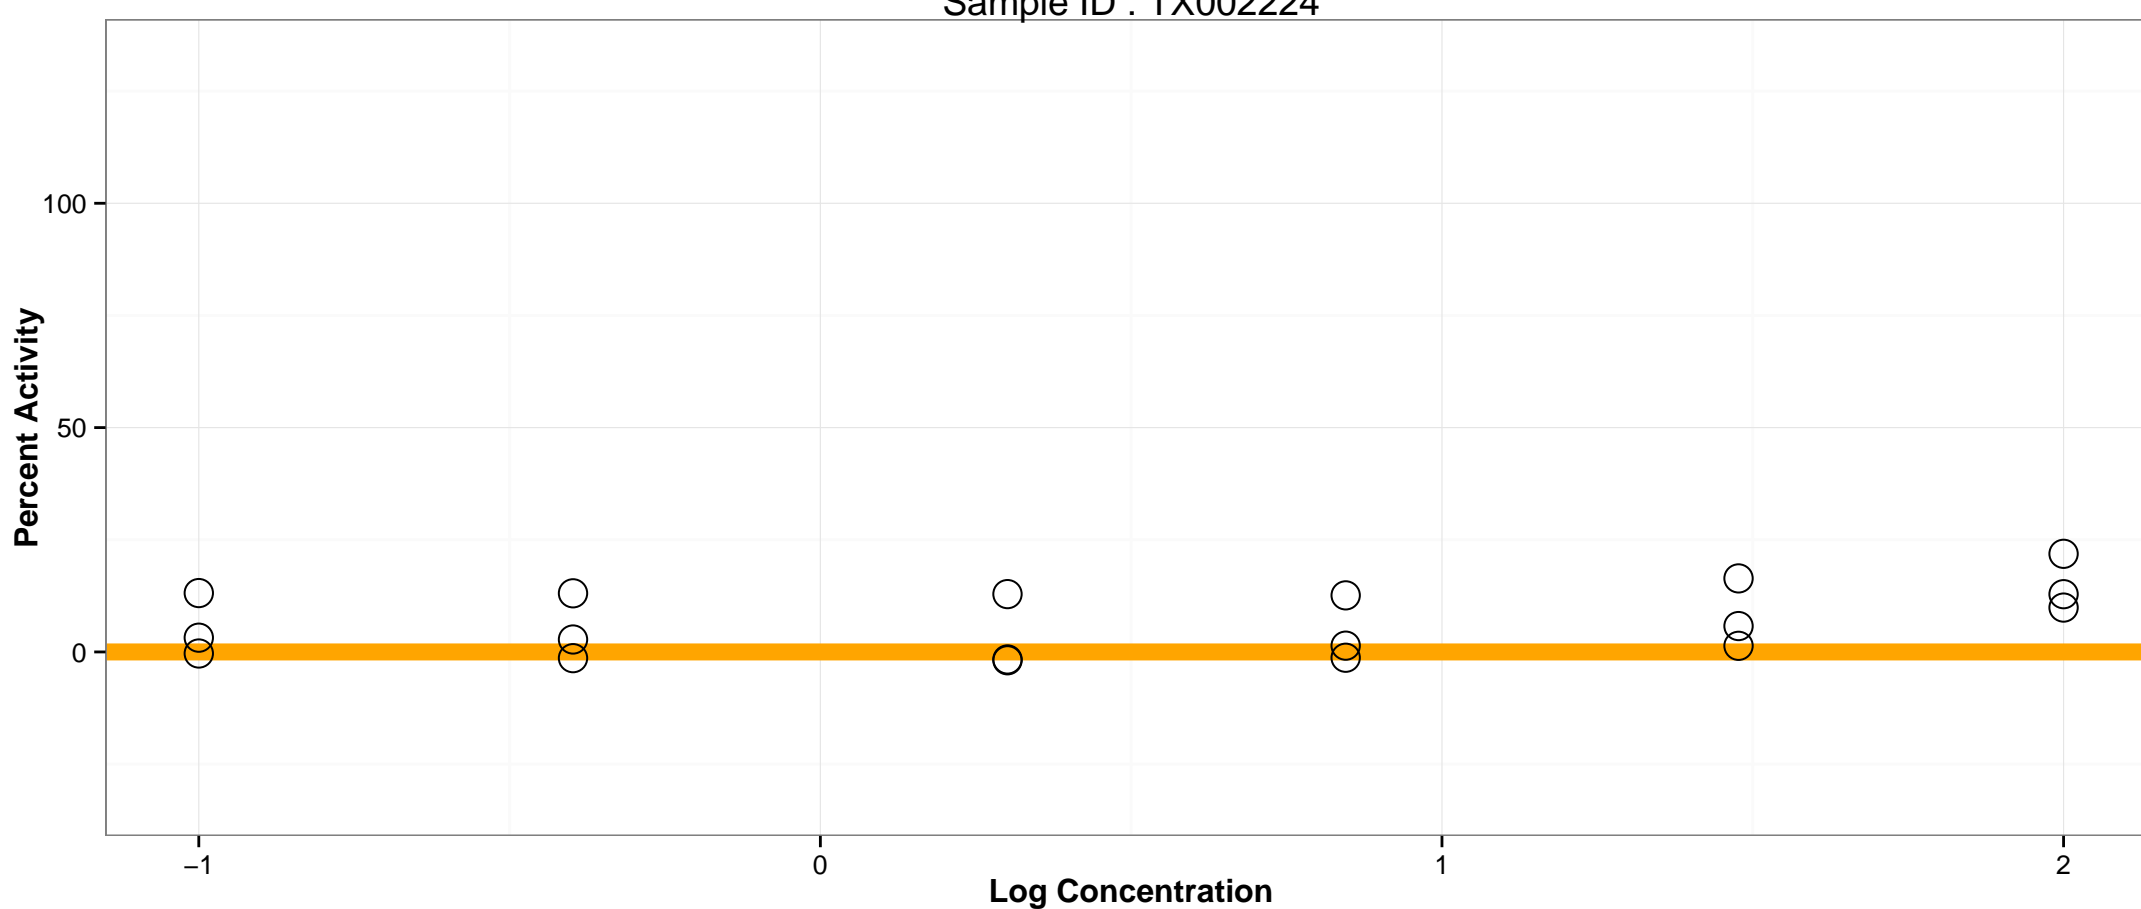

HILL MODEL

HILL MODEL: Not applicable

GAIN-LOSS MODEL

GNLS MODEL: Not applicable

|      | CNST   | HILL | GNLS |
|------|--------|------|------|
| AIC  | 136.43 | NA   | NA   |
| PROB | 1      | NA   | NA   |
| RMSE | 9.85   | NA   | NA   |

MAX\_MEAN : 14.9 MAX\_MED : 12.9 BMAD : 8.58  
COFF : 20 HIT-CALL : 0 FITC : 4 ACTP : 0  
FLAGS :

Chemical : Propyl gallate  
CAS : 121-79-9

Assay ID 1508 (NHEERL\_TPO\_AUR\_dn)  
Sample ID : TX002261

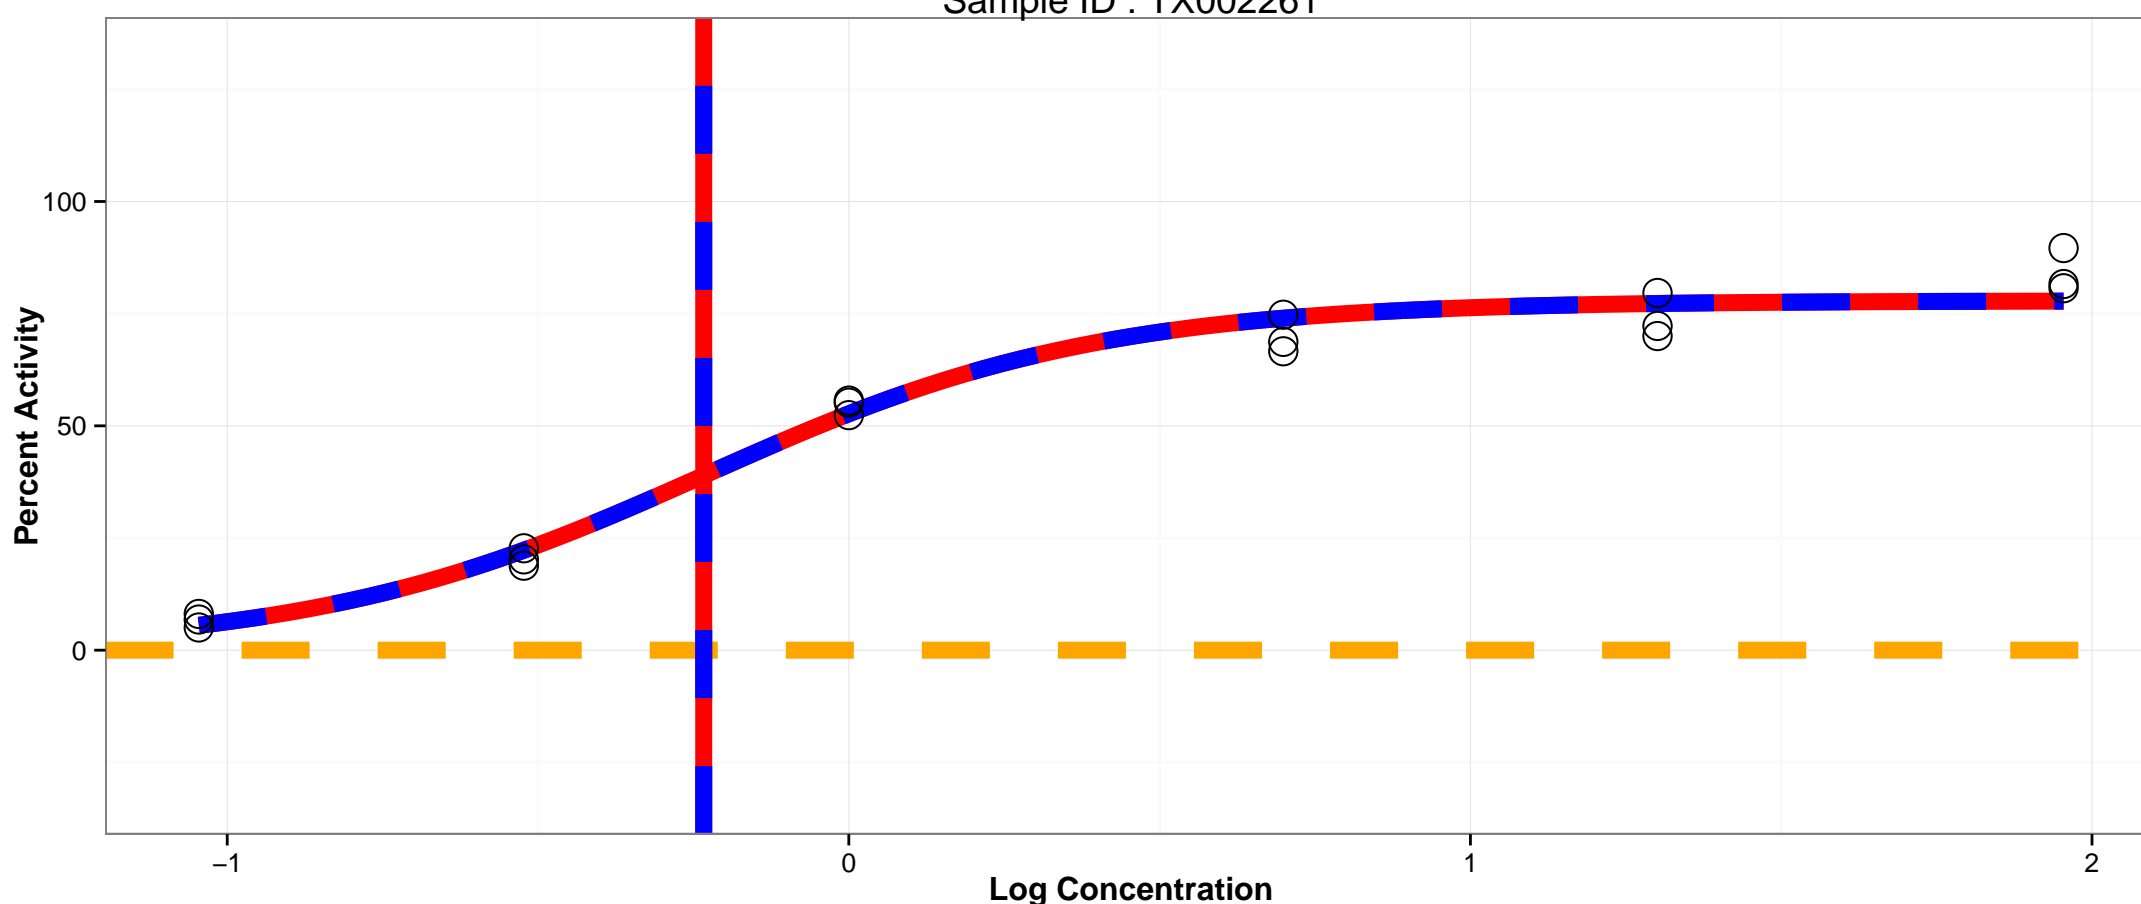

HILL MODEL

|     | tp   | ga     | gw    |
|-----|------|--------|-------|
| val | 77.9 | -0.233 | 1.37  |
| sd  | 2.23 | 0.0373 | 0.151 |

GAIN-LOSS MODEL

|     | tp   | ga     | gw   | la   | lw   |
|-----|------|--------|------|------|------|
| val | 77.9 | -0.233 | 1.37 | 3.94 | 8.64 |
| sd  | NA   | NA     | NA   | NA   | NA   |

|      | CNST   | HILL   | GNLS   |
|------|--------|--------|--------|
| AIC  | 203.04 | 113.25 | 117.25 |
| PROB | 0      | 0.88   | 0.12   |
| RMSE | 59.03  | 4.52   | 4.52   |

MAX\_MEAN : 84 MAX\_MED : 81.6 BMAD : 5.69  
COFF : 20 HIT-CALL : 1 FITC : 41 ACTP : 1  
FLAGS :

Assay ID 1509 (NHEERL\_HEK293T\_CellTiterGLO)  
Sample ID : TX002261

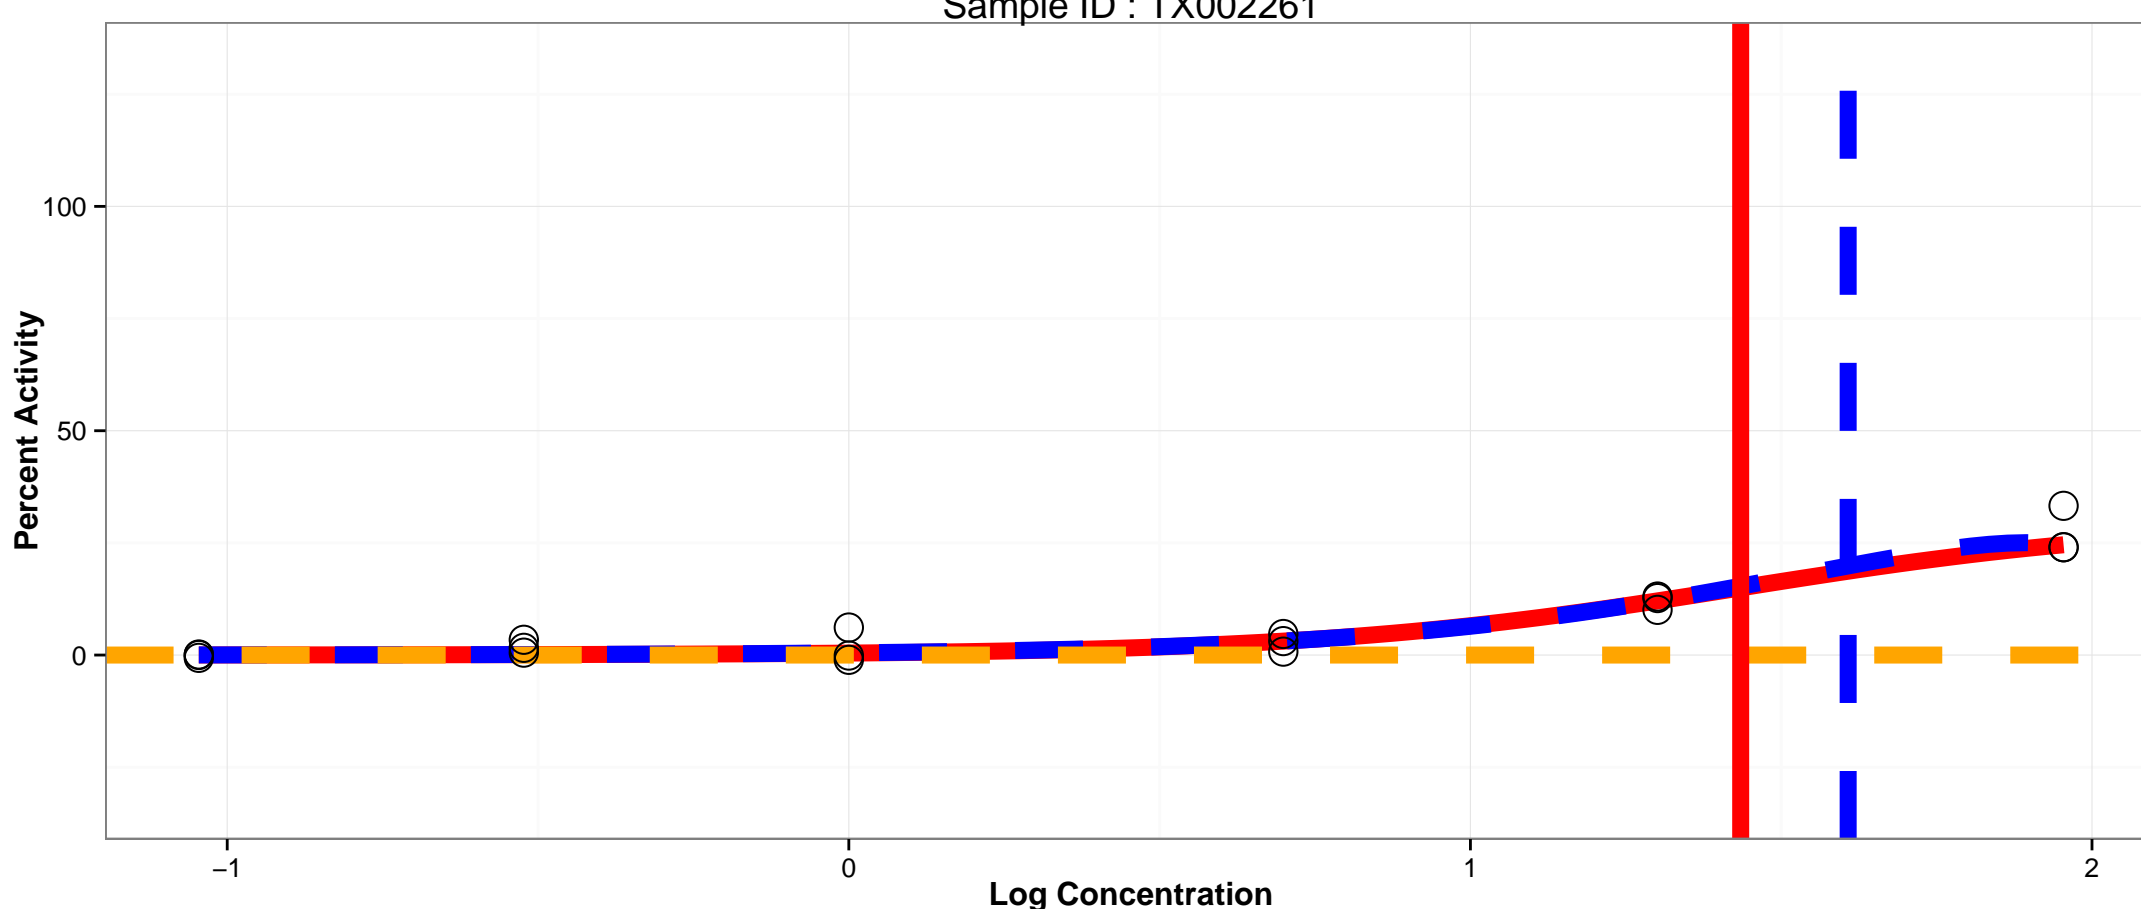

HILL MODEL

|     | tp   | ga    | gw    |
|-----|------|-------|-------|
| val | 29.9 | 1.43  | 1.27  |
| sd  | 5.49 | 0.173 | 0.382 |

GAIN-LOSS MODEL

|     | tp   | ga   | gw   | la   | lw   |
|-----|------|------|------|------|------|
| val | 39.9 | 1.61 | 1.18 | 2.13 | 4.37 |
| sd  | NA   | NA   | NA   | NA   | NA   |

|      | CNST   | HILL  | GNLS  |
|------|--------|-------|-------|
| AIC  | 140.62 | 89.93 | 93.88 |
| PROB | 0      | 0.88  | 0.12  |
| RMSE | 12.43  | 2.77  | 2.77  |

MAX\_MEAN : 27.1 MAX\_MED : 24 BMAD : 5.54  
COFF : 20 HIT-CALL : 1 FITC : 42 ACTP : 1  
FLAGS : 6

Assay ID 1848 (NHEERL\_Quantilum\_inhib\_2\_dn)  
Sample ID : TX002261

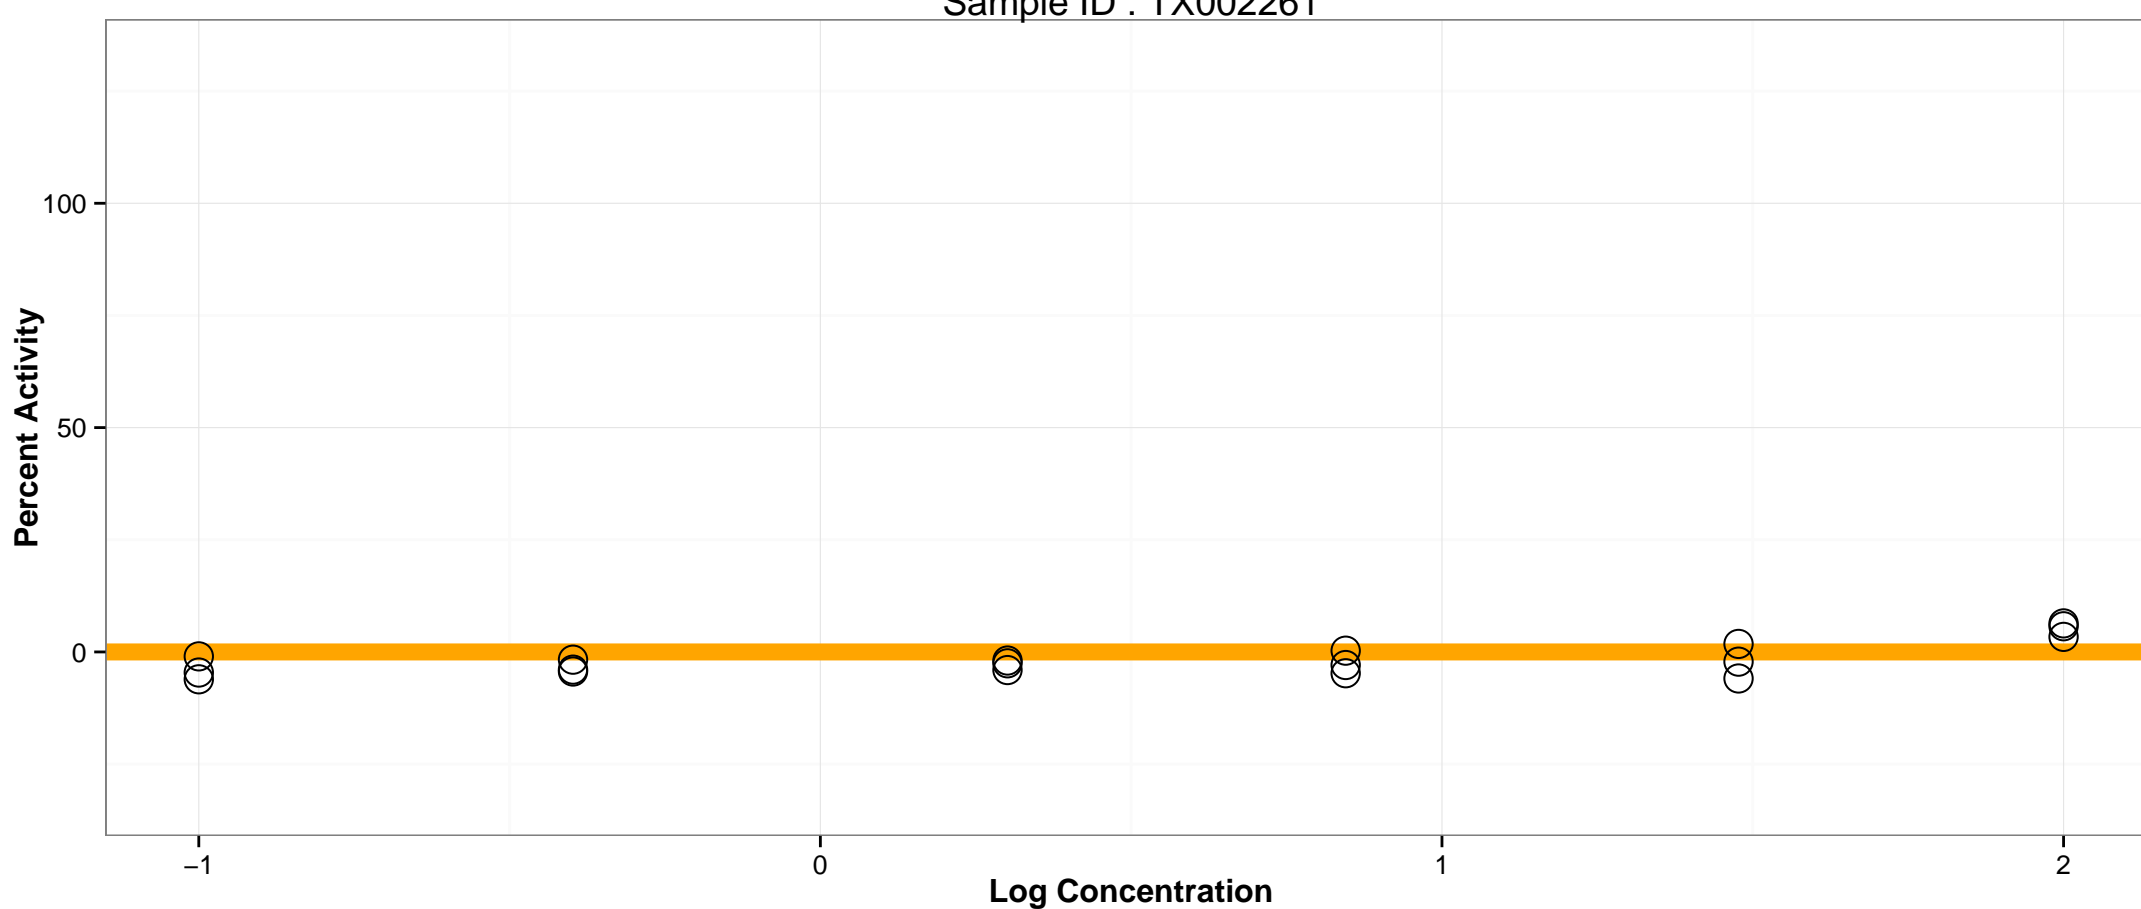

HILL MODEL

HILL MODEL: Not applicable

GAIN-LOSS MODEL

GNLS MODEL: Not applicable

|      | CNST   | HILL | GNLS |
|------|--------|------|------|
| AIC  | 105.52 | NA   | NA   |
| PROB | 1      | NA   | NA   |
| RMSE | 3.95   | NA   | NA   |

MAX\_MEAN : 5.16 MAX\_MED : 5.73 BMAD : 8.58  
COFF : 20 HIT-CALL : 0 FITC : 4 ACTP : 0  
FLAGS :

Chemical : 2,4,6-Trimethylphenol  
CAS : 527-60-6

Assay ID 1508 (NHEERL\_TPO\_AUR\_dn)  
Sample ID : TX002275

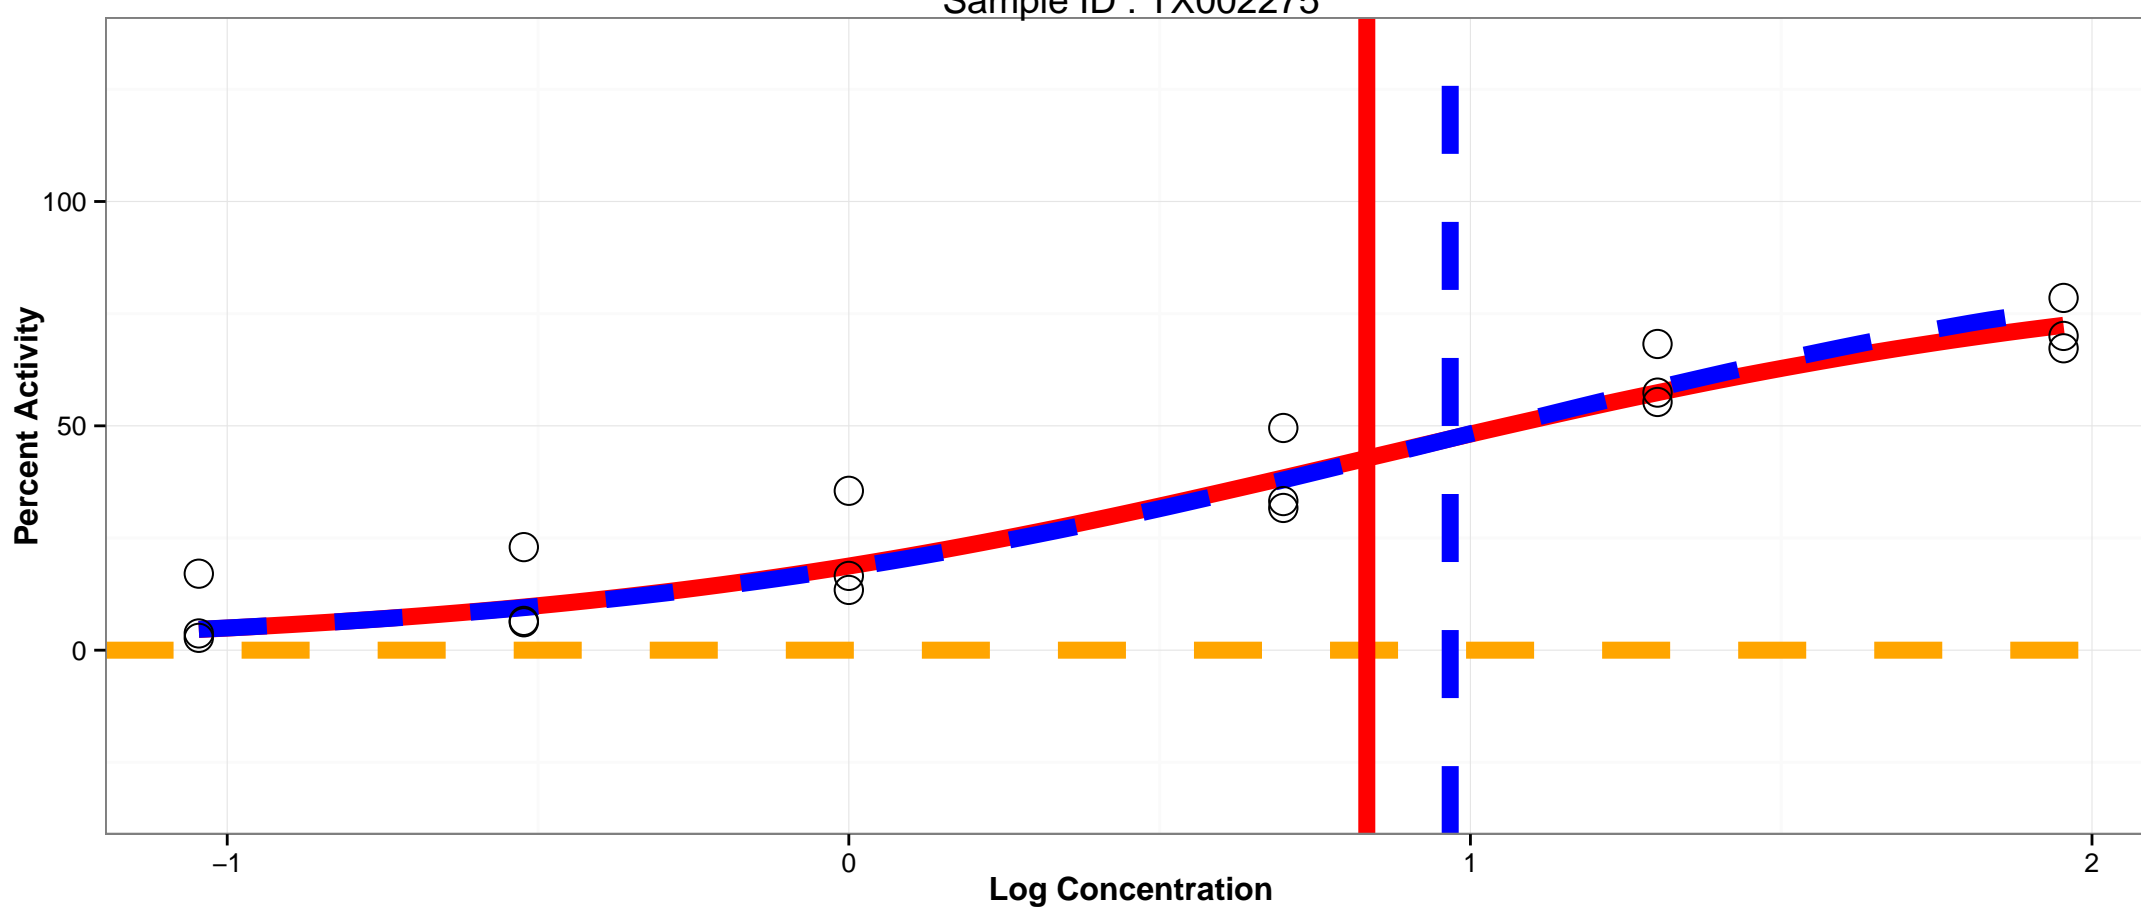

HILL MODEL

|     | tp   | ga    | gw    |
|-----|------|-------|-------|
| val | 85.5 | 0.833 | 0.662 |
| sd  | 12.7 | 0.269 | 0.151 |

GAIN-LOSS MODEL

|     | tp   | ga    | gw    | la   | lw   |
|-----|------|-------|-------|------|------|
| val | 94.2 | 0.968 | 0.638 | 2.02 | 17.9 |
| sd  | NA   | NA    | NA    | NA   | NA   |

|      | CNST  | HILL   | GNLS   |
|------|-------|--------|--------|
| AIC  | 190.8 | 133.38 | 137.02 |
| PROB | 0     | 0.86   | 0.14   |
| RMSE | 43.35 | 7.67   | 7.65   |

MAX\_MEAN : 72 MAX\_MED : 70.1 BMAD : 5.69  
COFF : 20 HIT-CALL : 1 FITC : 42 ACTP : 1  
FLAGS :

Assay ID 1509 (NHEERL\_HEK293T\_CellTiterGLO)  
Sample ID : TX002275

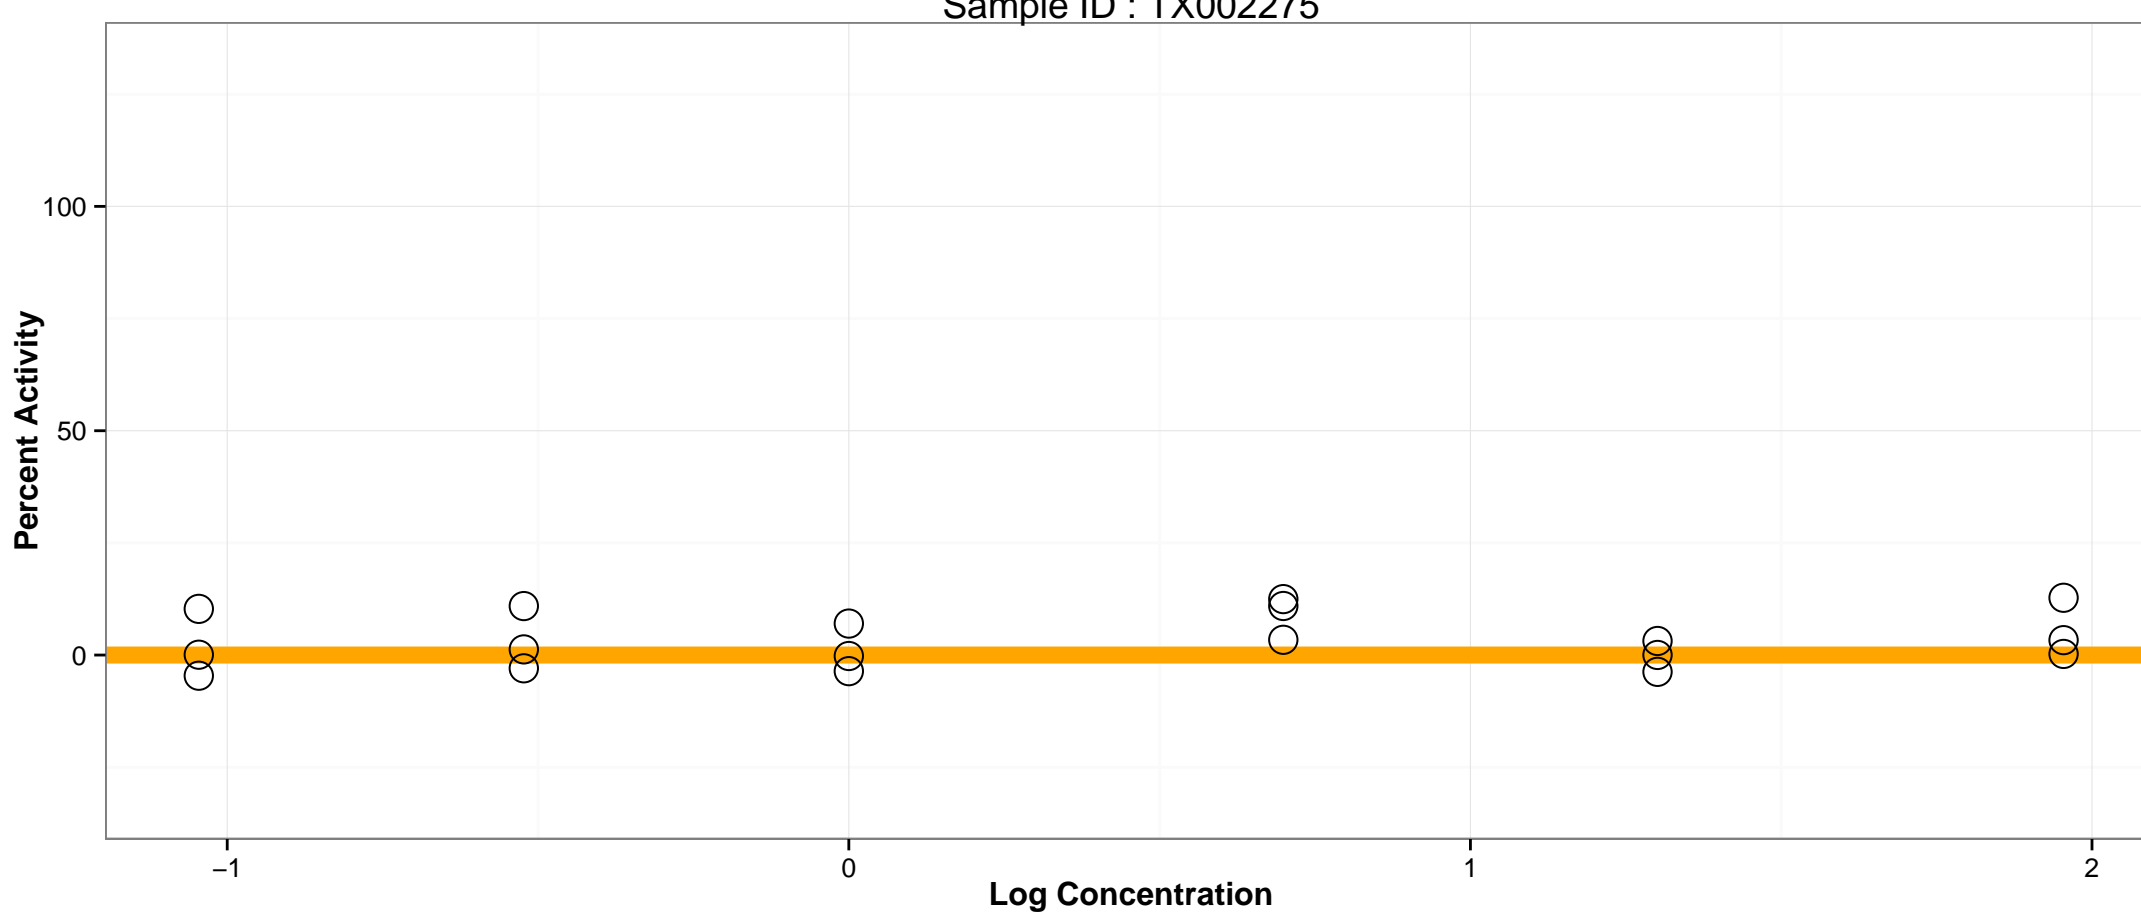

HILL MODEL

HILL MODEL: Not applicable

GAIN-LOSS MODEL

GNLS MODEL: Not applicable

|      | CNST   | HILL | GNLS |
|------|--------|------|------|
| AIC  | 122.39 | NA   | NA   |
| PROB | 1      | NA   | NA   |
| RMSE | 6.69   | NA   | NA   |

MAX\_MEAN : 8.95 MAX\_MED : 10.9 BMAD : 5.54  
COFF : 20 HIT-CALL : 0 FITC : 4 ACTP : 0  
FLAGS :

Assay ID 1848 (NHEERL\_Quantilum\_inhib\_2\_dn)  
Sample ID : TX002275

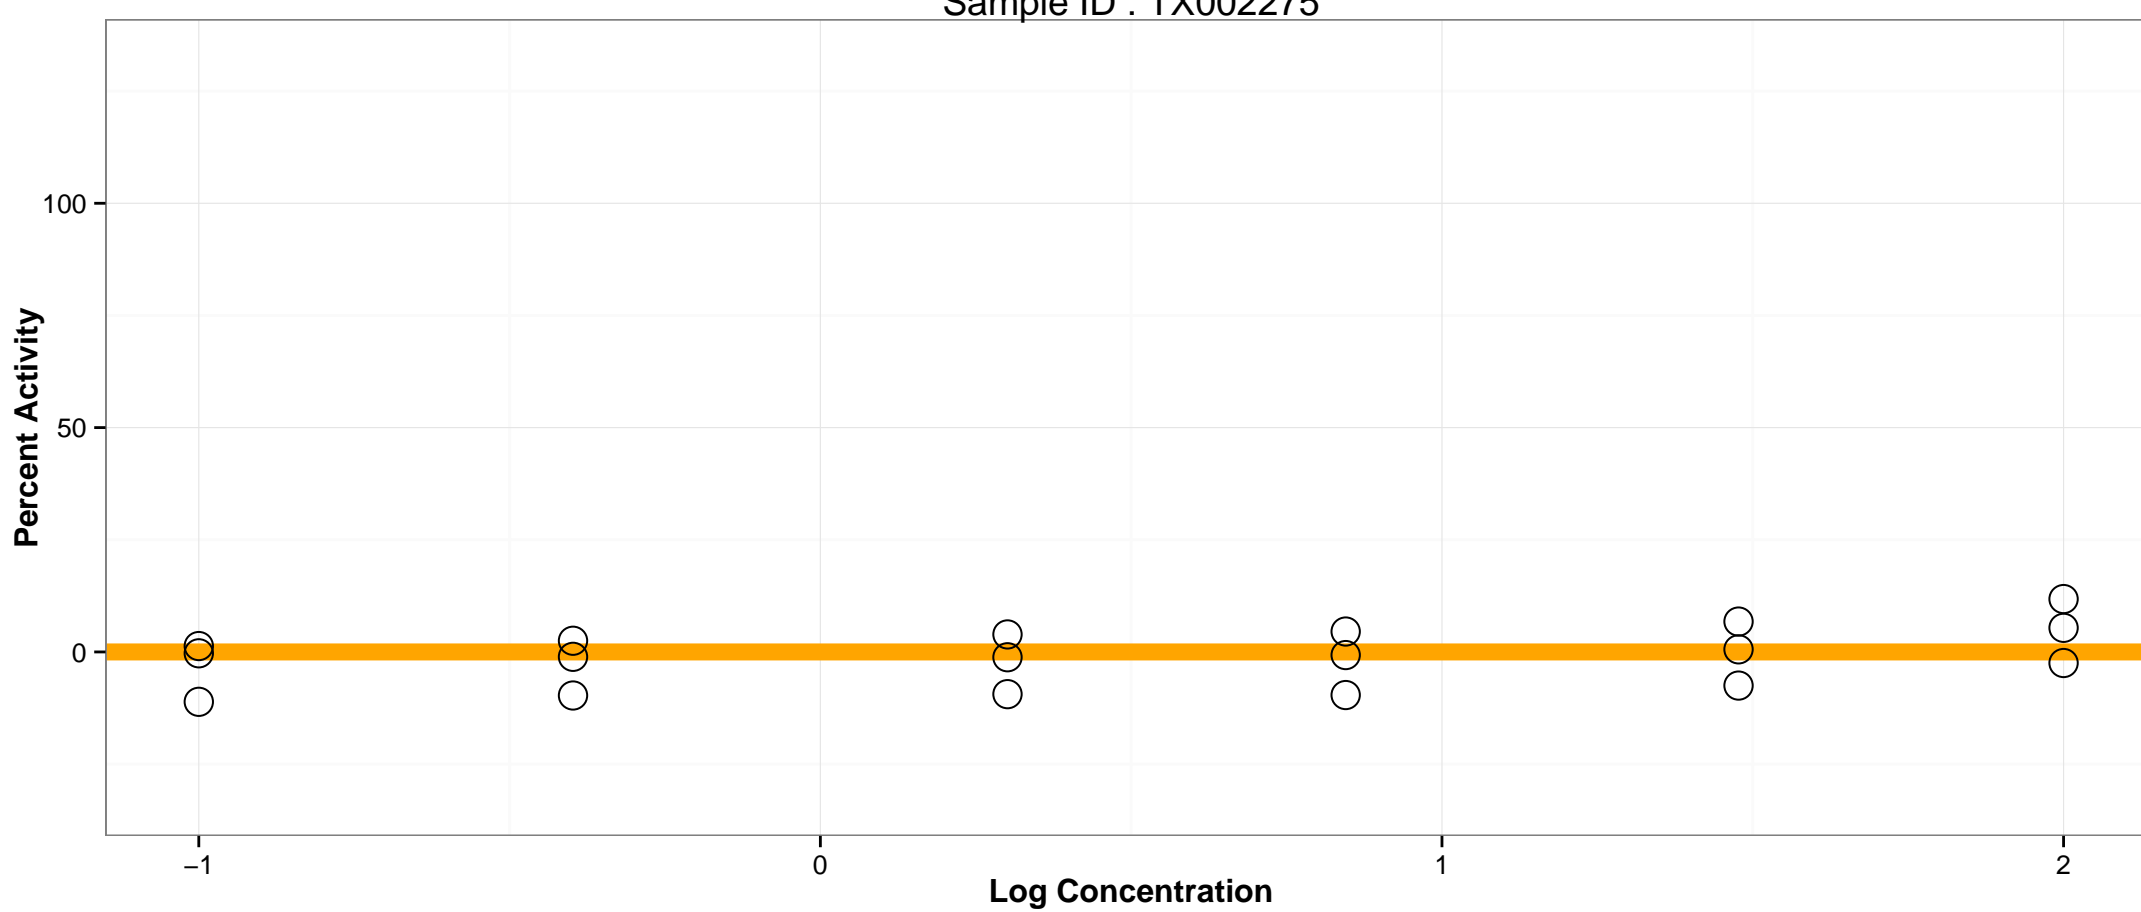

HILL MODEL

HILL MODEL: Not applicable

GAIN-LOSS MODEL

GNLS MODEL: Not applicable

|      | CNST   | HILL | GNLS |
|------|--------|------|------|
| AIC  | 121.15 | NA   | NA   |
| PROB | 1      | NA   | NA   |
| RMSE | 6.33   | NA   | NA   |

MAX\_MEAN : 4.91 MAX\_MED : 5.38 BMAD : 8.58  
COFF : 20 HIT-CALL : 0 FITC : 4 ACTP : 0  
FLAGS :

Chemical : Myrcene  
CAS : 123-35-3

Assay ID 1508 (NHEERL\_TPO\_AUR\_dn)  
Sample ID : TX002299

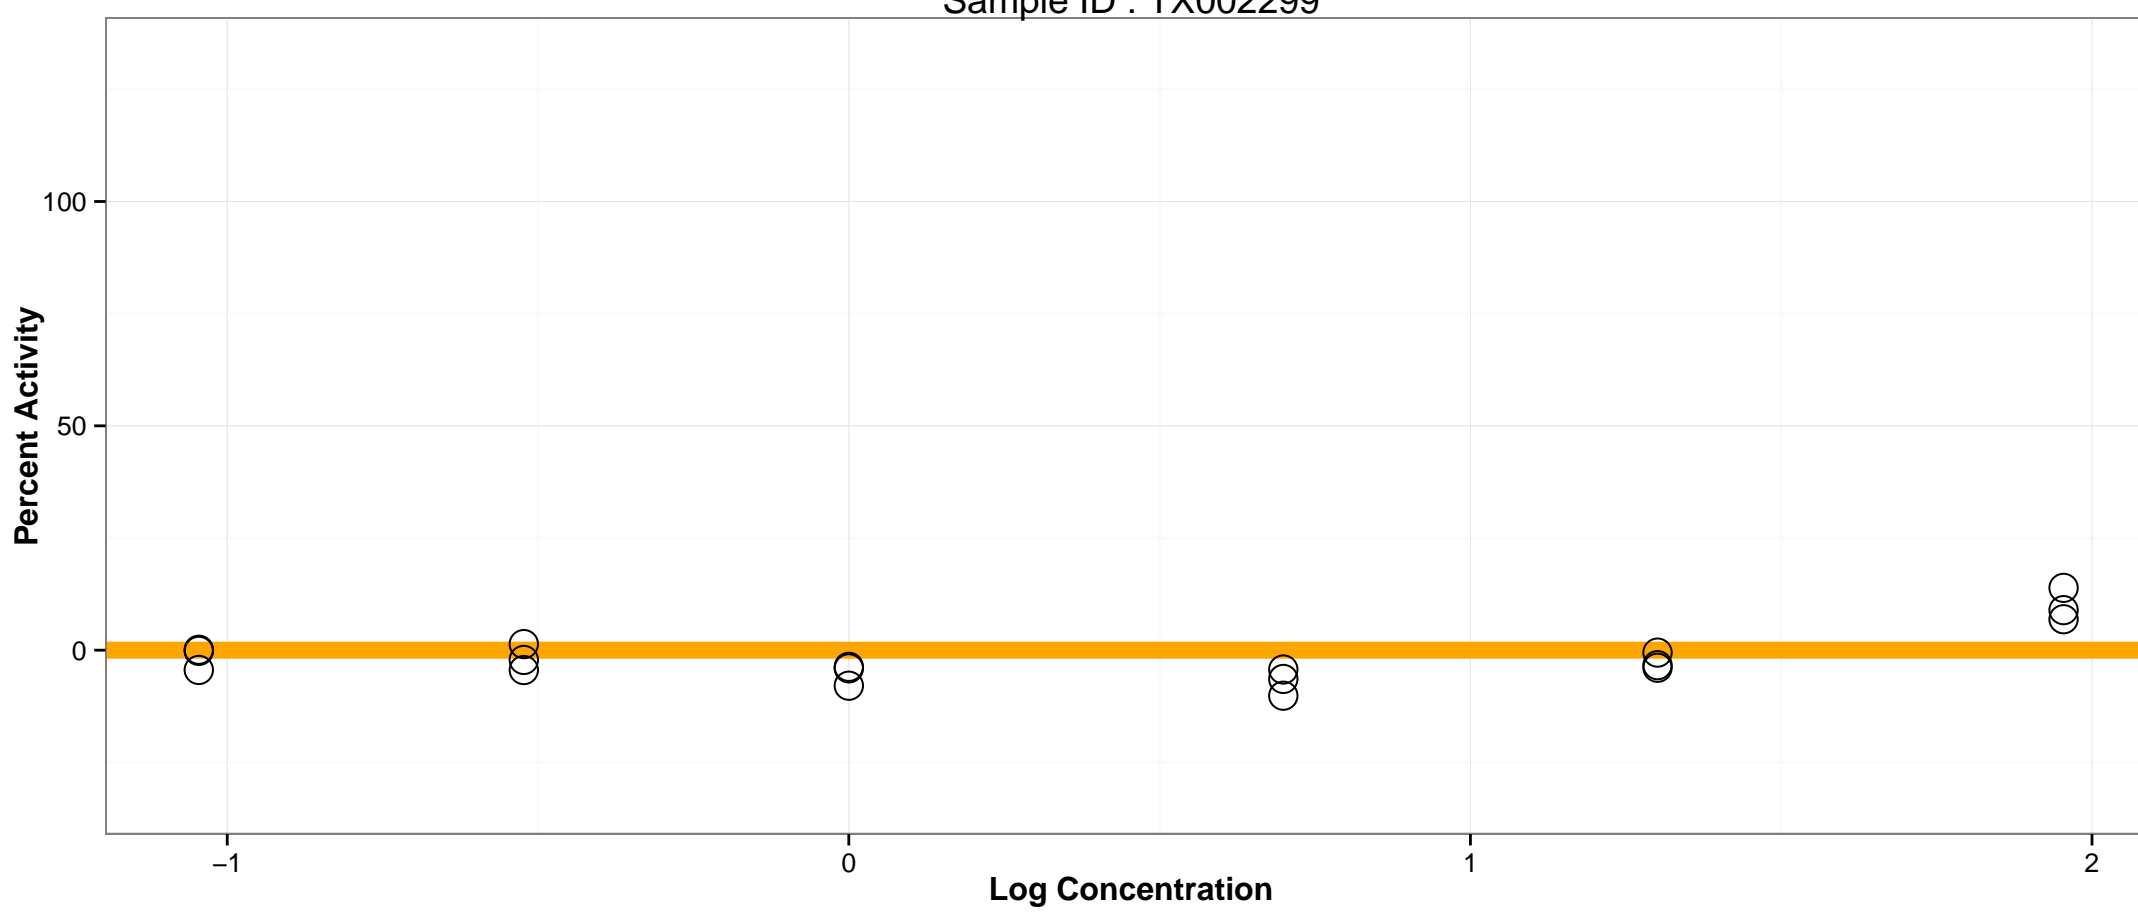

HILL MODEL

HILL MODEL: Not applicable

GAIN-LOSS MODEL

GNLS MODEL: Not applicable

|      | CNST   | HILL | GNLS |
|------|--------|------|------|
| AIC  | 118.79 | NA   | NA   |
| PROB | 1      | NA   | NA   |
| RMSE | 6      | NA   | NA   |

MAX\_MEAN : 9.91 MAX\_MED : 8.94 BMAD : 5.69  
COFF : 20 HIT-CALL : 0 FITC : 4 ACTP : 0  
FLAGS :

Assay ID 1509 (NHEERL\_HEK293T\_CellTiterGLO)  
Sample ID : TX002299

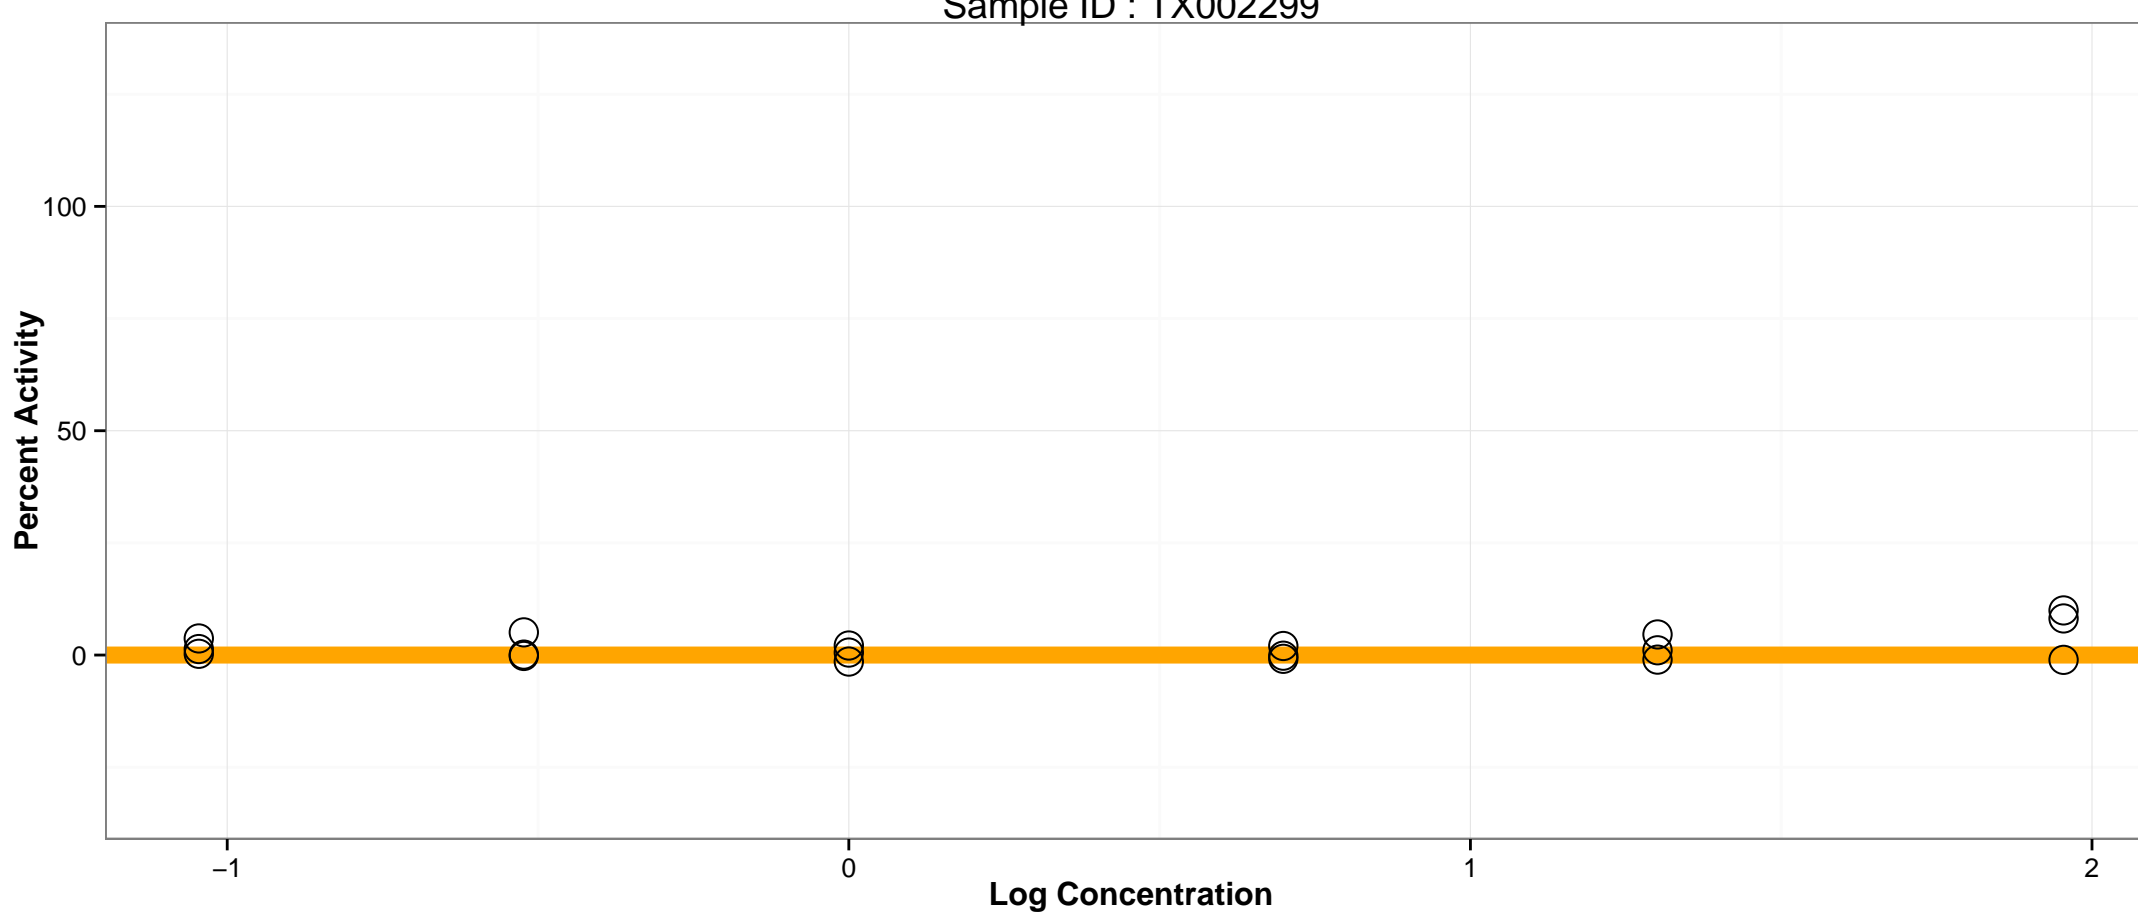

HILL MODEL

HILL MODEL: Not applicable

GAIN-LOSS MODEL

GNLS MODEL: Not applicable

|      | CNST  | HILL | GNLS |
|------|-------|------|------|
| AIC  | 96.82 | NA   | NA   |
| PROB | 1     | NA   | NA   |
| RMSE | 3.68  | NA   | NA   |

MAX\_MEAN : 5.69 MAX\_MED : 8.17 BMAD : 5.54  
COFF : 20 HIT-CALL : 0 FITC : 4 ACTP : 0  
FLAGS :

Assay ID 1848 (NHEERL\_Quantilum\_inhib\_2\_dn)  
Sample ID : TX002299

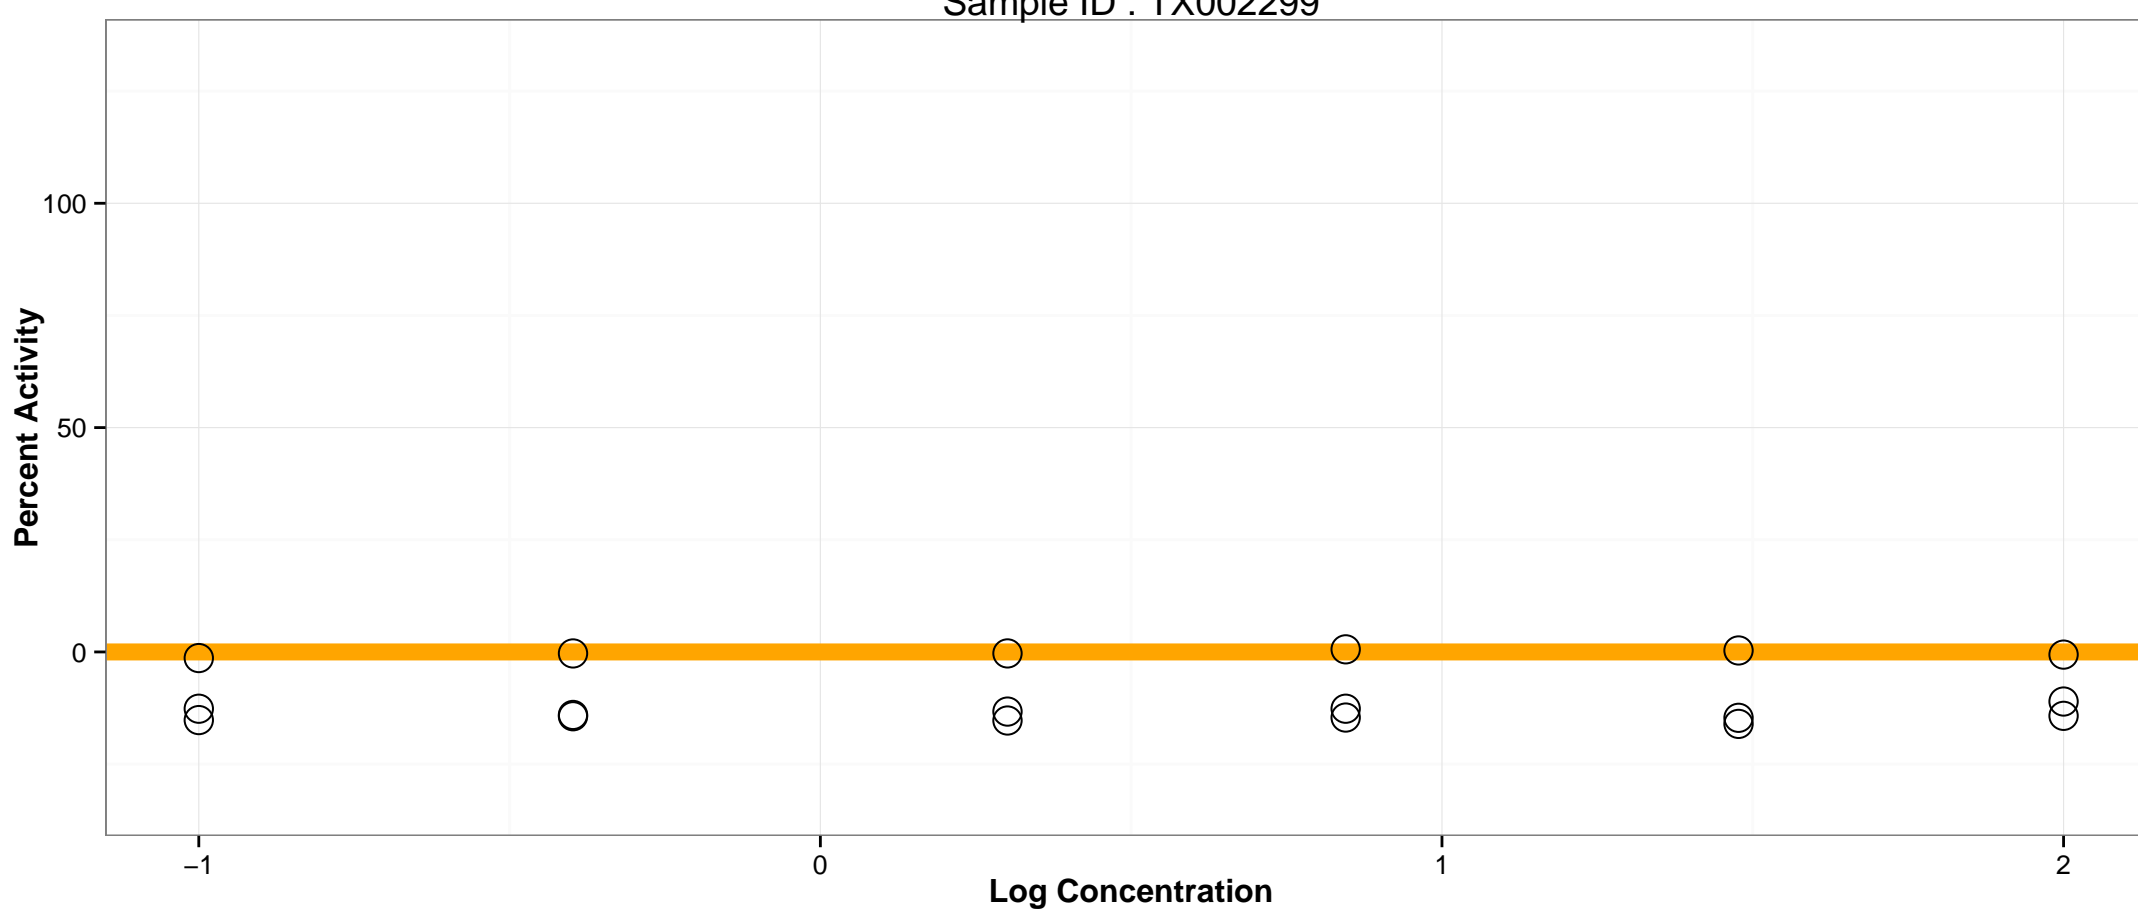

HILL MODEL

HILL MODEL: Not applicable

GAIN-LOSS MODEL

GNLS MODEL: Not applicable

|      | CNST  | HILL | GNLS |
|------|-------|------|------|
| AIC  | 144.1 | NA   | NA   |
| PROB | 1     | NA   | NA   |
| RMSE | 11.49 | NA   | NA   |

MAX\_MEAN : -8.62 MAX\_MED : -11 BMAD : 8.58  
COFF : 20 HIT-CALL : 0 FITC : 4 ACTP : 0  
FLAGS :

Chemical : 2,2',4,4'-Tetrahydroxybenzophenone  
CAS : 131-55-5

Assay ID 1508 (NHEERL\_TPO\_AUR\_dn)  
Sample ID : TX002393

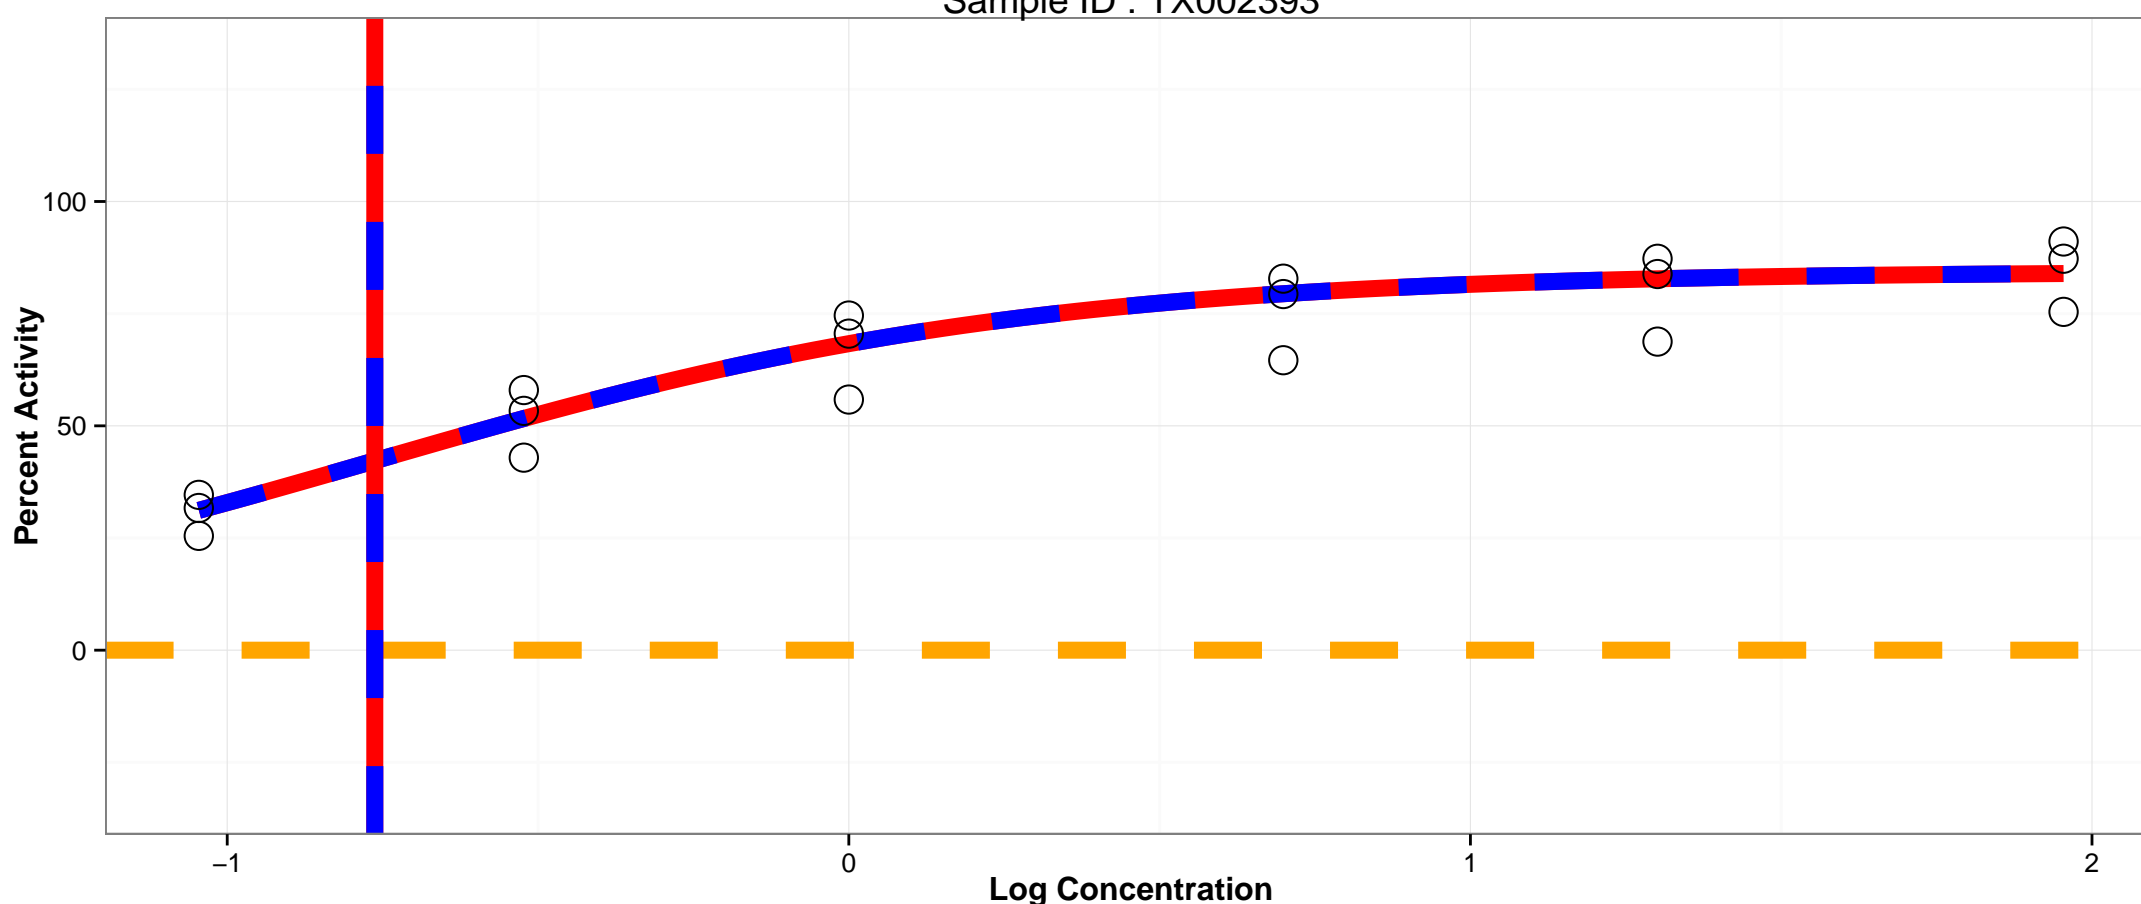

HILL MODEL

|     | tp   | ga     | gw    |
|-----|------|--------|-------|
| val | 84.4 | -0.763 | 0.823 |
| sd  | 3.67 | 0.0875 | 0.181 |

GAIN-LOSS MODEL

|     | tp   | ga     | gw    | la   | lw   |
|-----|------|--------|-------|------|------|
| val | 84.4 | -0.763 | 0.823 | 2.75 | 10.3 |
| sd  | 3.67 | 0.0875 | 0.181 | 545  | 7090 |

|      | CNST  | HILL   | GNLS   |
|------|-------|--------|--------|
| AIC  | 208.7 | 131.64 | 135.64 |
| PROB | 0     | 0.88   | 0.12   |
| RMSE | 67.86 | 7.25   | 7.25   |

MAX\_MEAN : 84.6 MAX\_MED : 87.3 BMAD : 5.69  
COFF : 20 HIT-CALL : 1 FITC : 41 ACTP : 1  
FLAGS :

Assay ID 1509 (NHEERL\_HEK293T\_CellTiterGLO)  
Sample ID : TX002393

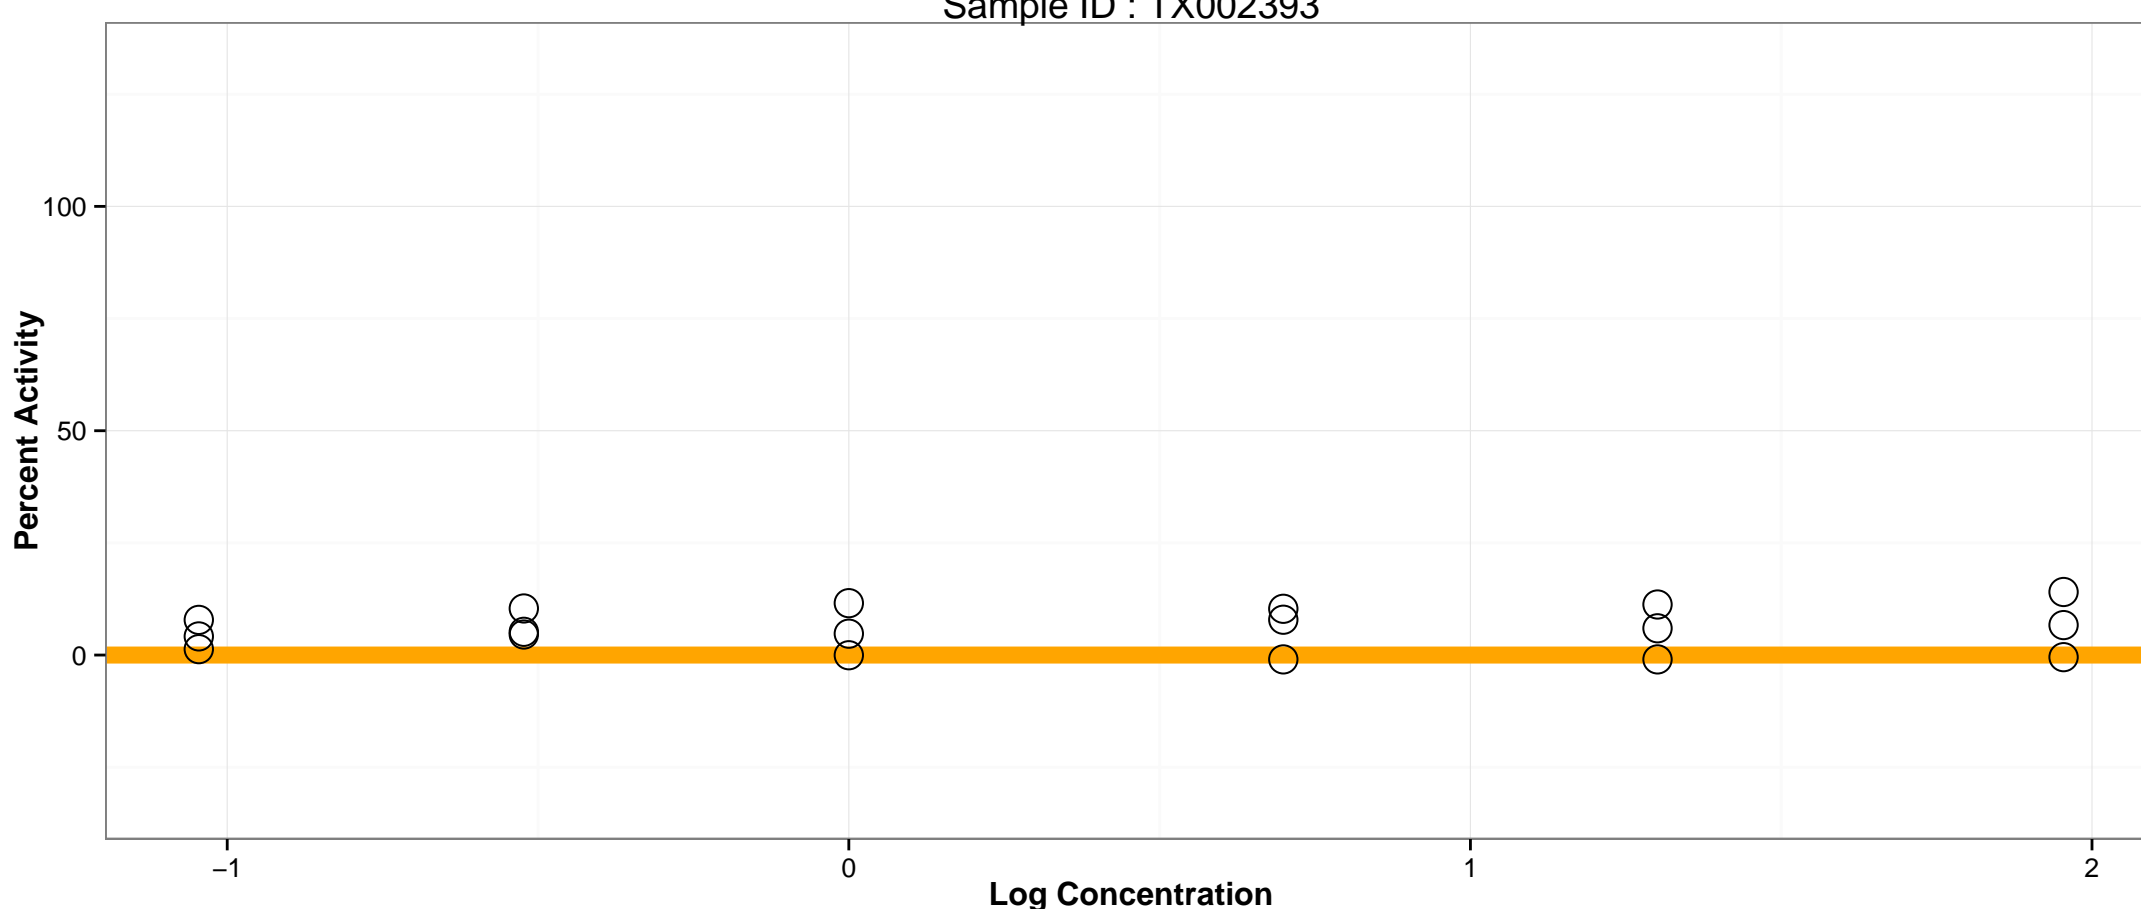

HILL MODEL

HILL MODEL: Not applicable

GAIN-LOSS MODEL

GNLS MODEL: Not applicable

|      | CNST   | HILL | GNLS |
|------|--------|------|------|
| AIC  | 127.03 | NA   | NA   |
| PROB | 1      | NA   | NA   |
| RMSE | 7.34   | NA   | NA   |

MAX\_MEAN : 6.77 MAX\_MED : 7.89 BMAD : 5.54  
COFF : 20 HIT-CALL : 0 FITC : 4 ACTP : 0  
FLAGS :

Assay ID 1848 (NHEERL\_Quantilum\_inhib\_2\_dn)  
Sample ID : TX002393

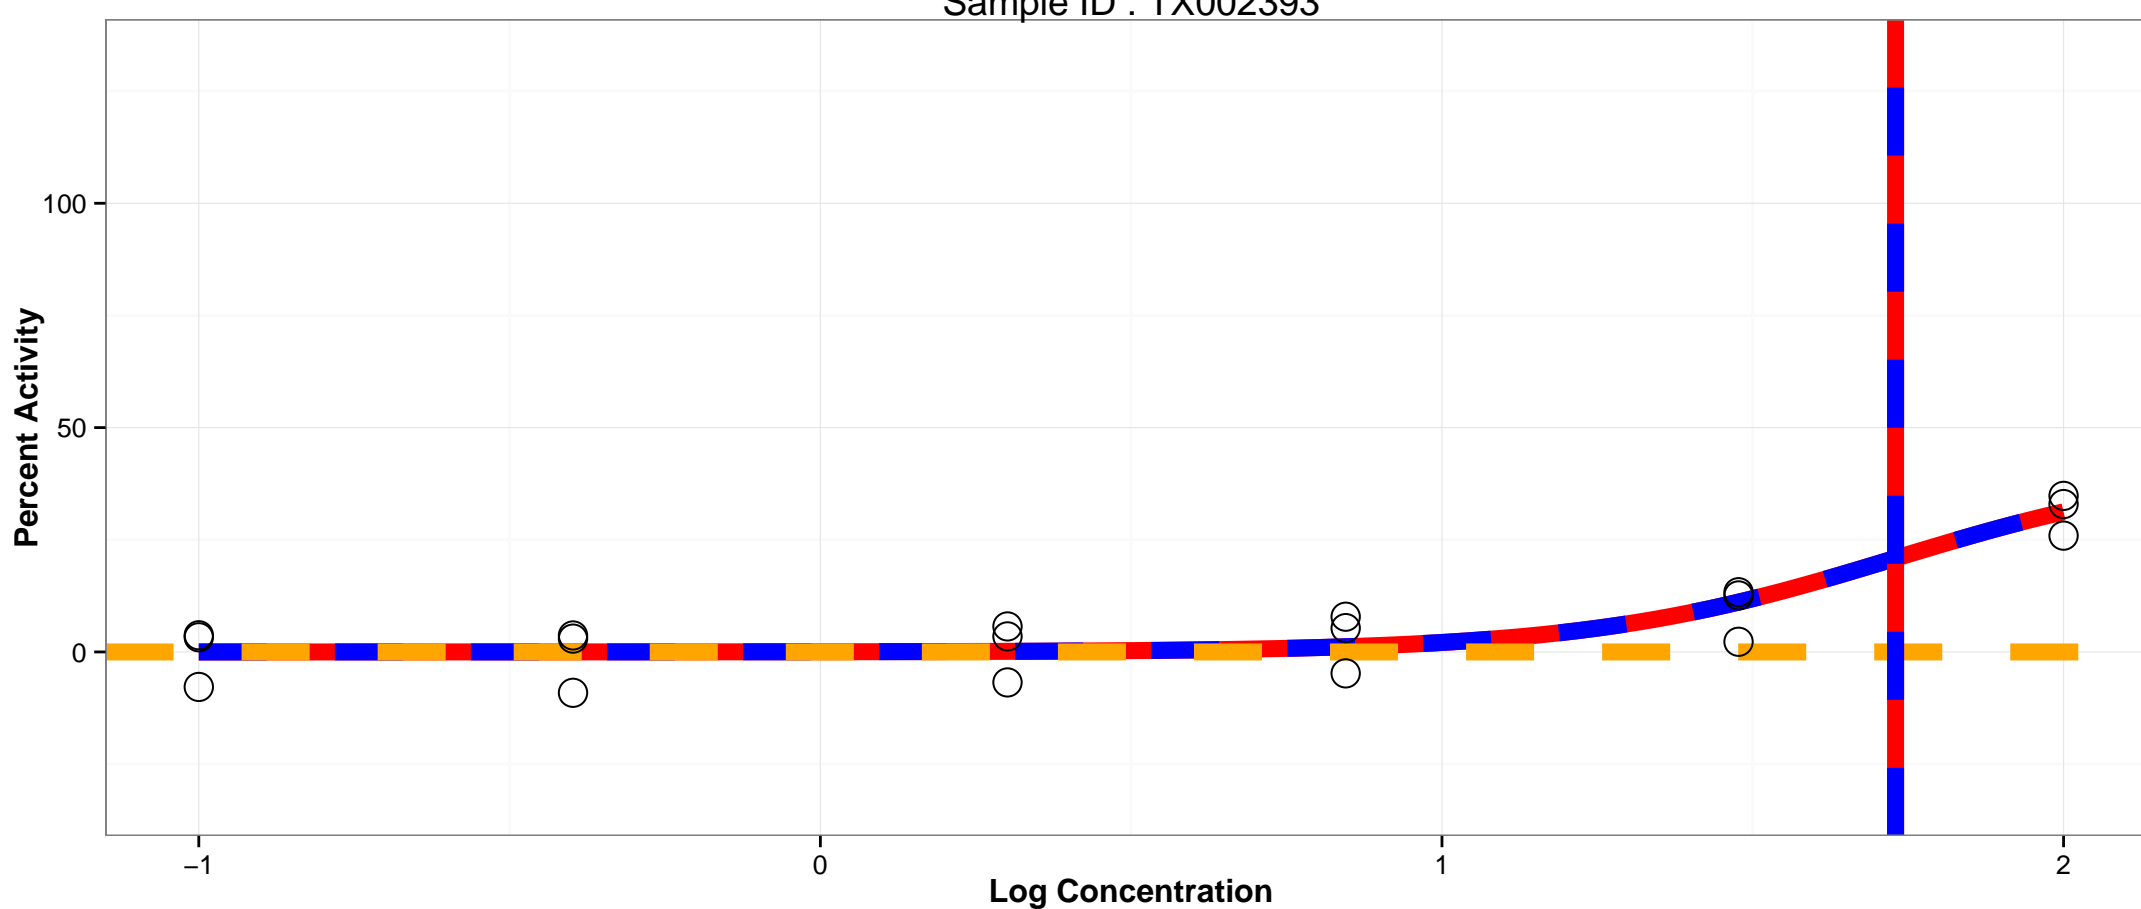

HILL MODEL

|     | tp   | ga    | gw   |
|-----|------|-------|------|
| val | 41.8 | 1.73  | 1.75 |
| sd  | 28.1 | 0.426 | 1.61 |

GAIN-LOSS MODEL

|     | tp   | ga    | gw   | la   | lw    |
|-----|------|-------|------|------|-------|
| val | 41.8 | 1.73  | 1.75 | 2.96 | 8.48  |
| sd  | 28   | 0.425 | 1.61 | 1640 | 14500 |

|      | CNST   | HILL   | GNLS   |
|------|--------|--------|--------|
| AIC  | 146.89 | 122.07 | 126.07 |
| PROB | 0      | 0.88   | 0.12   |
| RMSE | 14.35  | 5.31   | 5.31   |

MAX\_MEAN : 31.2 MAX\_MED : 33 BMAD : 8.58  
COFF : 20 HIT-CALL : 1 FITC : 42 ACTP : 1  
FLAGS : 6



Chemical : Geranyl acetate  
CAS : 105-87-3

Assay ID 1508 (NHEERL\_TPO\_AUR\_dn)  
Sample ID : TX002403

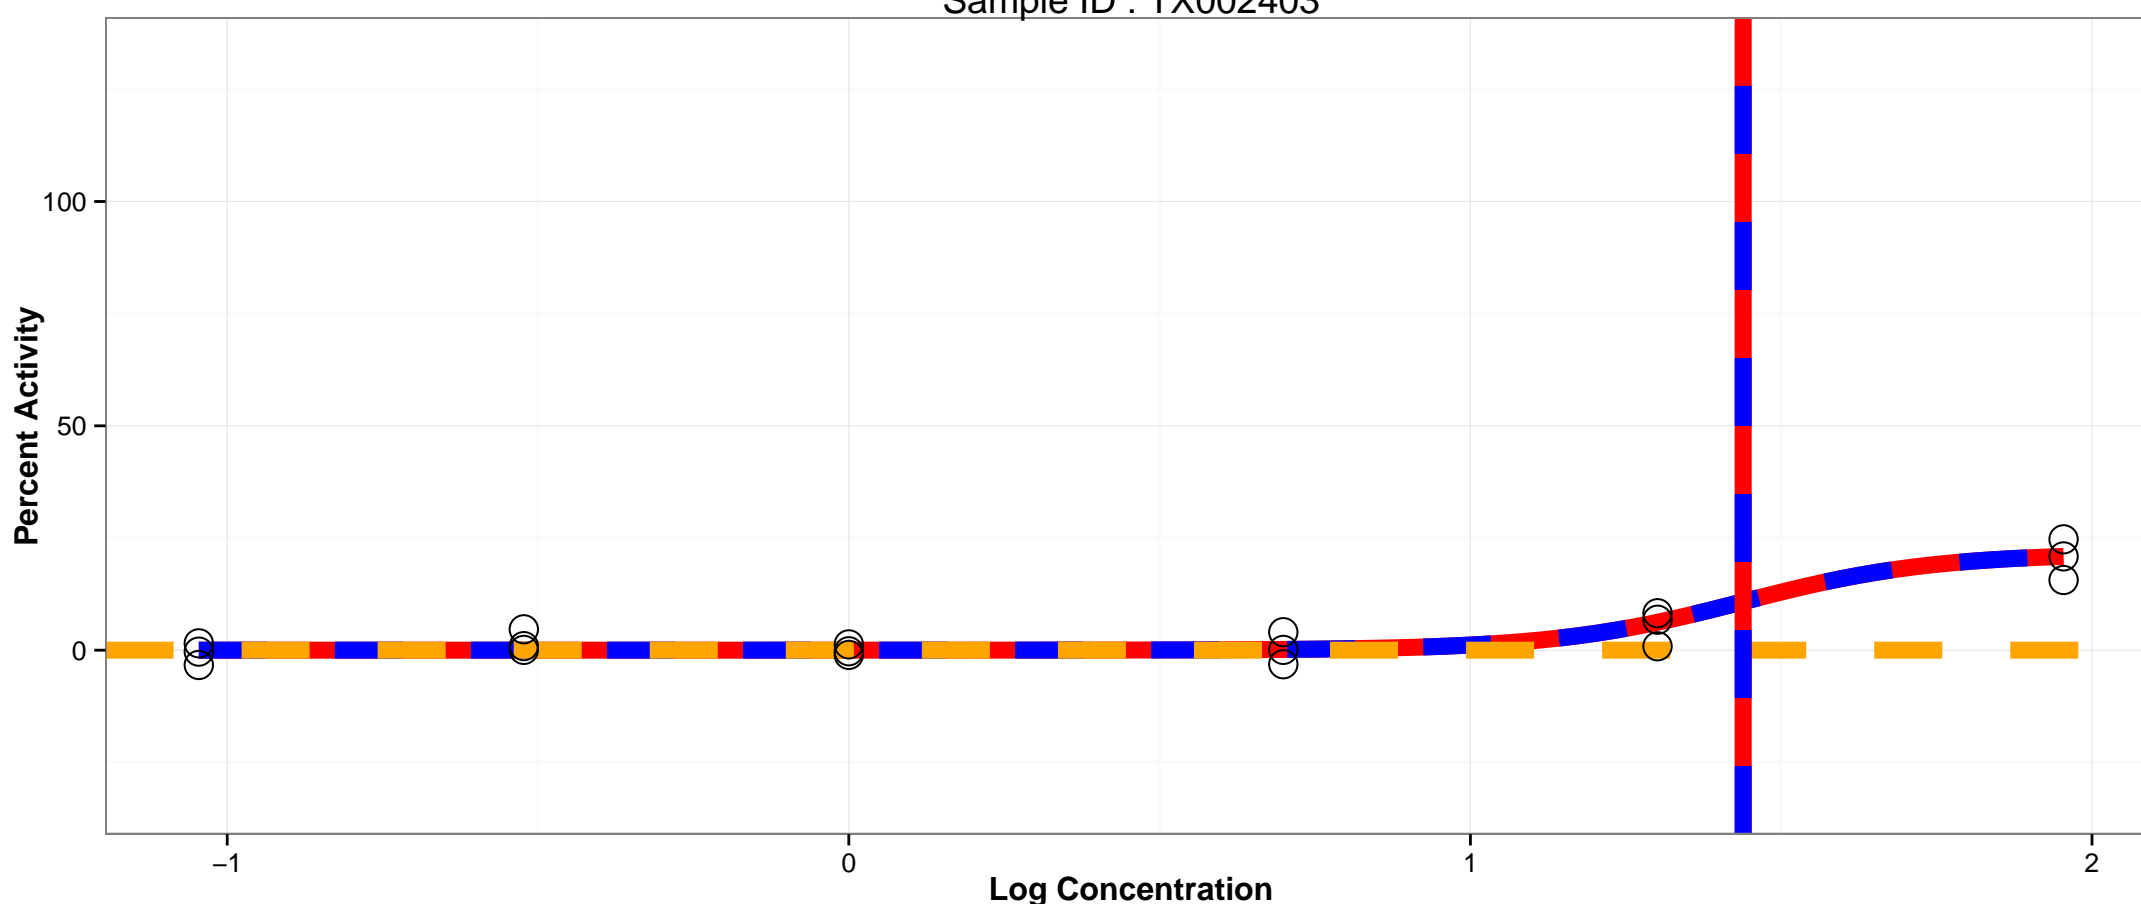

HILL MODEL

|     | tp   | ga   | gw   |
|-----|------|------|------|
| val | 21.6 | 1.44 | 2.86 |
| sd  | 9.34 | 0.49 | 8.15 |

GAIN-LOSS MODEL

|     | tp   | ga   | gw   | la   | lw  |
|-----|------|------|------|------|-----|
| val | 21.6 | 1.44 | 2.86 | 3.79 | 6.4 |
| sd  | NA   | NA   | NA   | NA   | NA  |

|      | CNST  | HILL  | GNLS   |
|------|-------|-------|--------|
| AIC  | 127.2 | 97.07 | 101.07 |
| PROB | 0     | 0.88  | 0.12   |
| RMSE | 9.05  | 2.79  | 2.79   |

MAX\_MEAN : 20.4 MAX\_MED : 20.9 BMAD : 5.69  
COFF : 20 HIT-CALL : 1 FITC : 37 ACTP : 1  
FLAGS : 11; 6

Assay ID 1509 (NHEERL\_HEK293T\_CellTiterGLO)  
Sample ID : TX002403

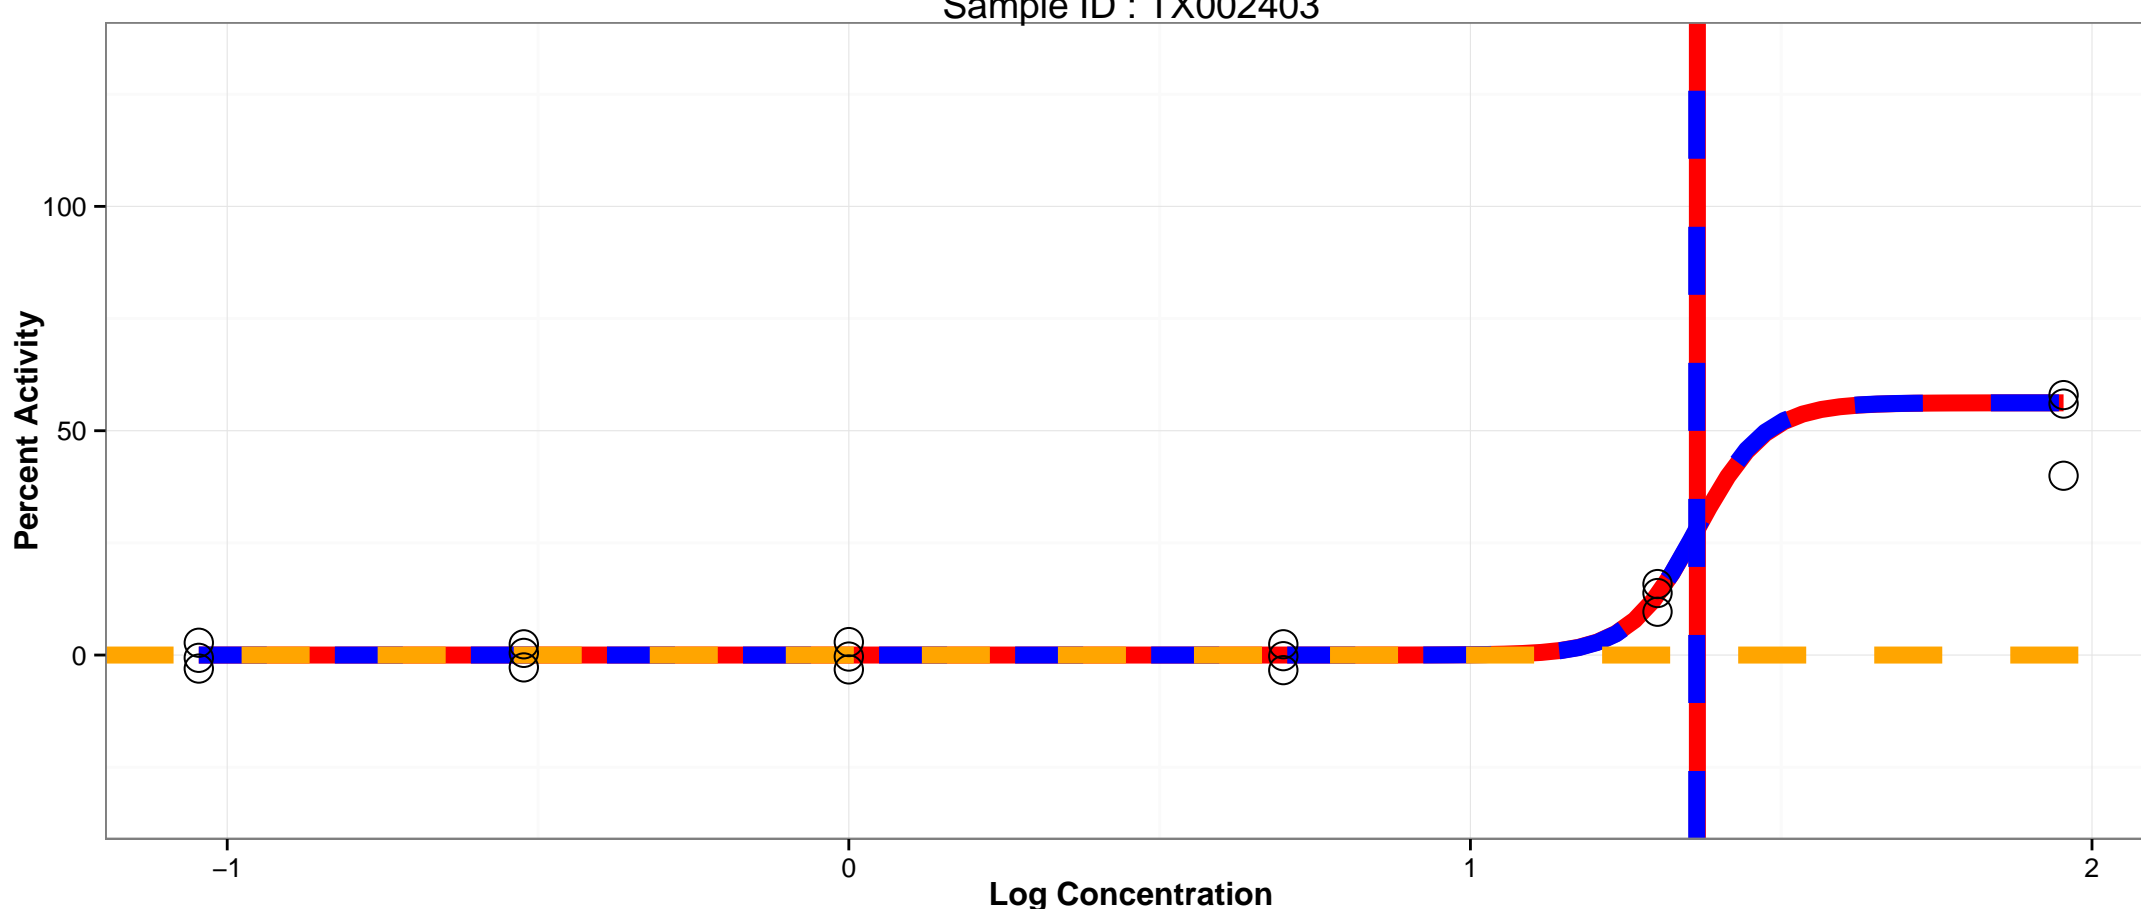

HILL MODEL

|     | tp   | ga     | gw   |
|-----|------|--------|------|
| val | 56.2 | 1.37   | 7.86 |
| sd  | 1.79 | 0.0428 | 5.29 |

GAIN-LOSS MODEL

|     | tp   | ga   | gw | la   | lw   |
|-----|------|------|----|------|------|
| val | 56.2 | 1.36 | 8  | 3.52 | 8.59 |
| sd  | NA   | NA   | NA | NA   | NA   |

|      | CNST   | HILL   | GNLS   |
|------|--------|--------|--------|
| AIC  | 156.61 | 103.88 | 107.88 |
| PROB | 0      | 0.88   | 0.12   |
| RMSE | 21.99  | 4.43   | 4.43   |

MAX\_MEAN : 51.3 MAX\_MED : 56.1 BMAD : 5.54  
COFF : 20 HIT-CALL : 1 FITC : 41 ACTP : 1  
FLAGS : 6

Assay ID 1848 (NHEERL\_Quantilum\_inhib\_2\_dn)  
Sample ID : TX002403

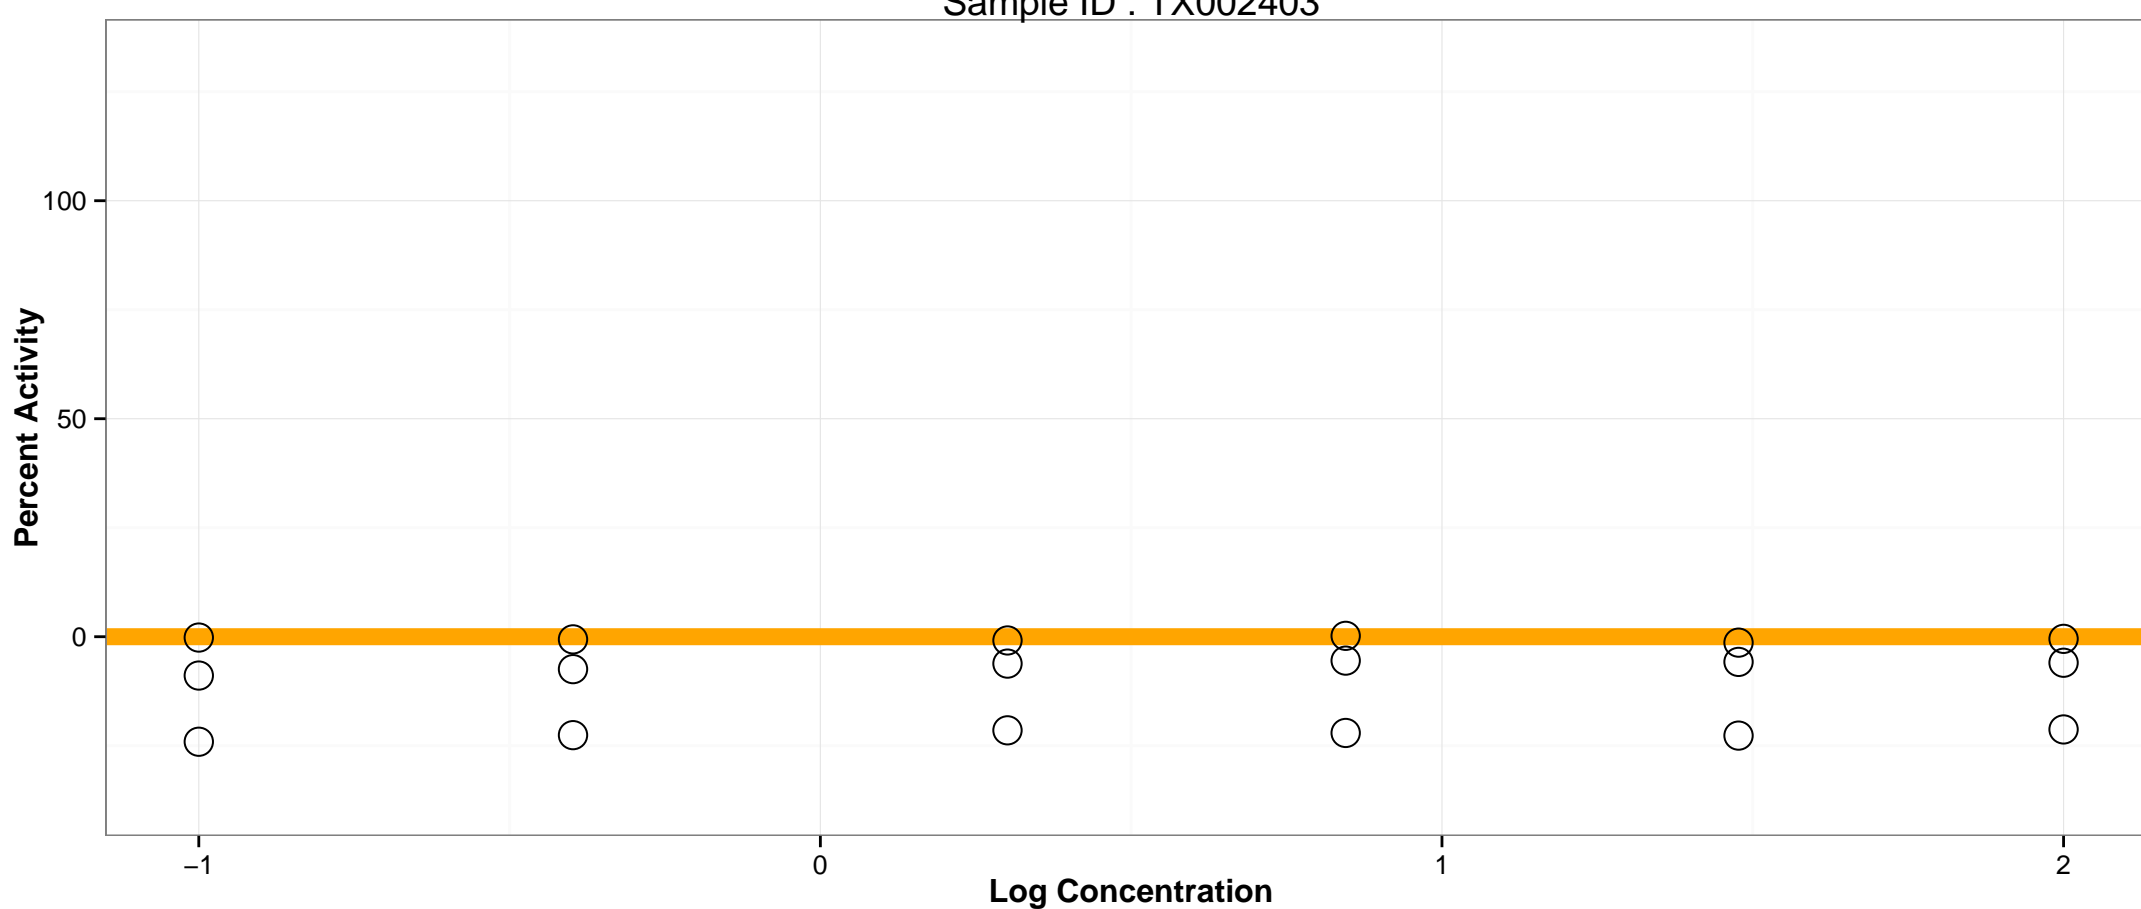

HILL MODEL

HILL MODEL: Not applicable

GAIN-LOSS MODEL

GNLS MODEL: Not applicable

|      | CNST  | HILL | GNLS |
|------|-------|------|------|
| AIC  | 147.6 | NA   | NA   |
| PROB | 1     | NA   | NA   |
| RMSE | 13.49 | NA   | NA   |

MAX\_MEAN : -9.11 MAX\_MED : -5.47 BMAD : 8.58  
COFF : 20 HIT-CALL : 0 FITC : 4 ACTP : 0  
FLAGS :

Chemical : 4-Hexylresorcinol  
CAS : 136-77-6

Assay ID 1508 (NHEERL\_TPO\_AUR\_dn)  
Sample ID : TX002429

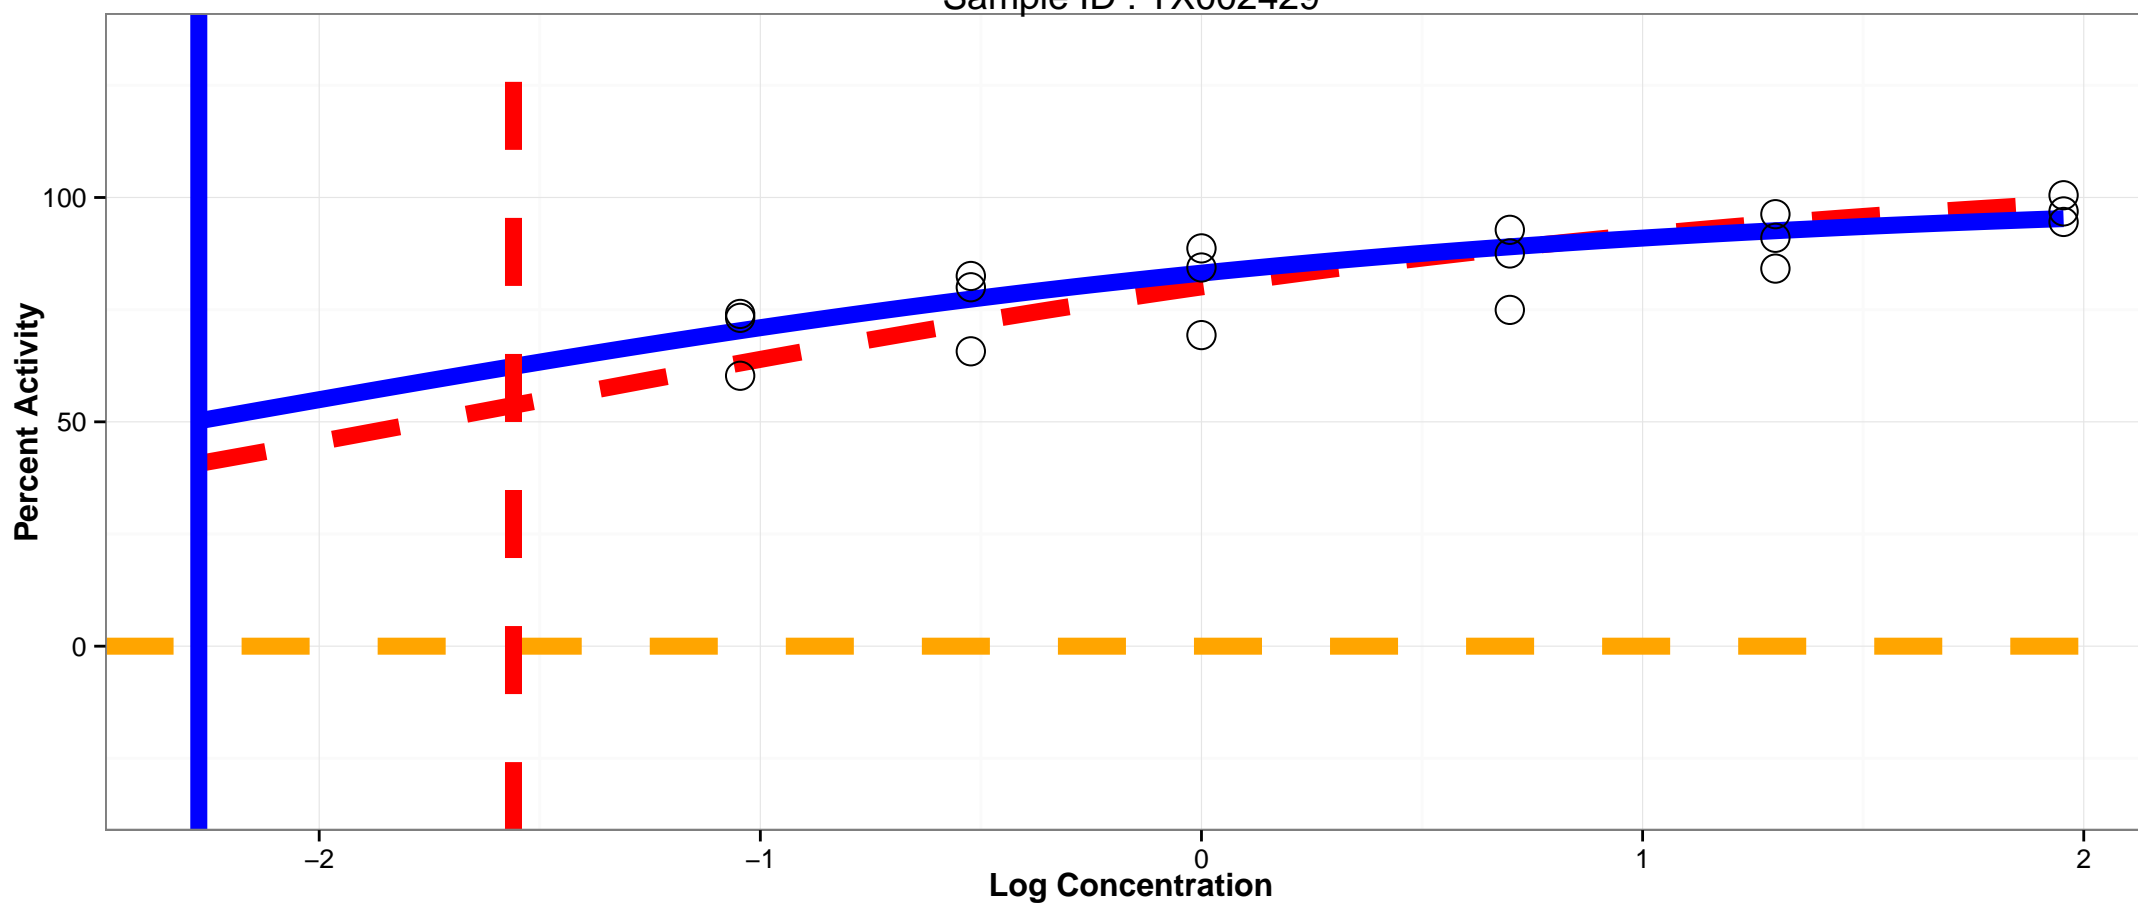

HILL MODEL

|     | tp  | ga    | gw  |
|-----|-----|-------|-----|
| val | 107 | -1.56 | 0.3 |
| sd  | NA  | NA    | NA  |

GAIN-LOSS MODEL

|     | tp   | ga    | gw   | la   | lw   |
|-----|------|-------|------|------|------|
| val | 100  | -2.27 | 0.3  | 3.16 | 7.49 |
| sd  | 13.3 | 0.646 | 0.25 | 1380 | 8580 |

|      | CNST   | HILL   | GNLS   |
|------|--------|--------|--------|
| AIC  | 216.75 | 133.86 | 133.11 |
| PROB | 0      | 0.41   | 0.59   |
| RMSE | 83.93  | 7.44   | 6.86   |

MAX\_MEAN : 97.3 MAX\_MED : 96.9 BMAD : 5.69  
COFF : 20 HIT-CALL : 1 FITC : 49 ACTP : 1  
FLAGS :

Assay ID 1509 (NHEERL\_HEK293T\_CellTiterGLO)  
Sample ID : TX002429

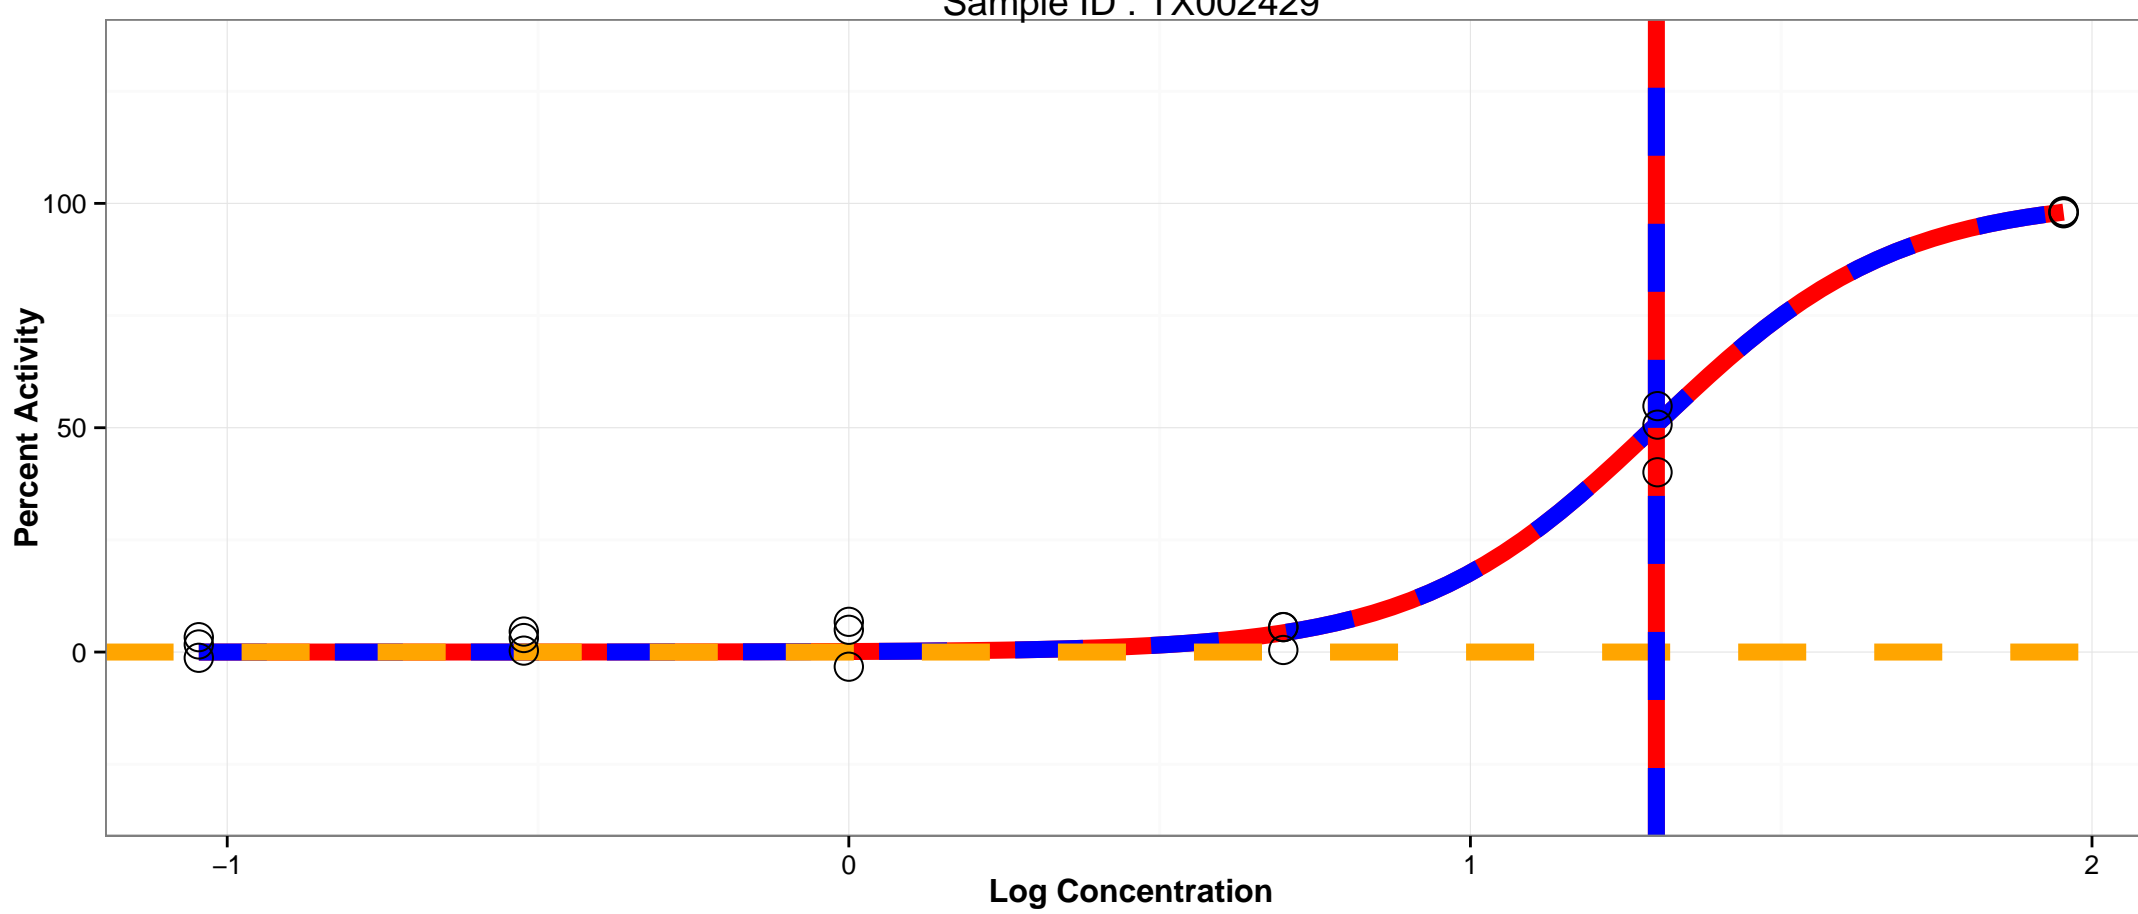

HILL MODEL

|     | tp   | ga    | gw    |
|-----|------|-------|-------|
| val | 101  | 1.3   | 2.26  |
| sd  | 2.64 | 0.024 | 0.355 |

GAIN-LOSS MODEL

|     | tp  | ga  | gw   | la   | lw   |
|-----|-----|-----|------|------|------|
| val | 101 | 1.3 | 2.26 | 3.01 | 8.62 |
| sd  | NA  | NA  | NA   | NA   | NA   |

|      | CNST   | HILL   | GNLS   |
|------|--------|--------|--------|
| AIC  | 187.03 | 107.38 | 111.38 |
| PROB | 0      | 0.88   | 0.12   |
| RMSE | 44.85  | 3.91   | 3.91   |

MAX\_MEAN : 98 MAX\_MED : 98.1 BMAD : 5.54  
COFF : 20 HIT-CALL : 1 FITC : 41 ACTP : 1  
FLAGS :

Assay ID 1848 (NHEERL\_Quantilum\_inhib\_2\_dn)  
Sample ID : TX002429

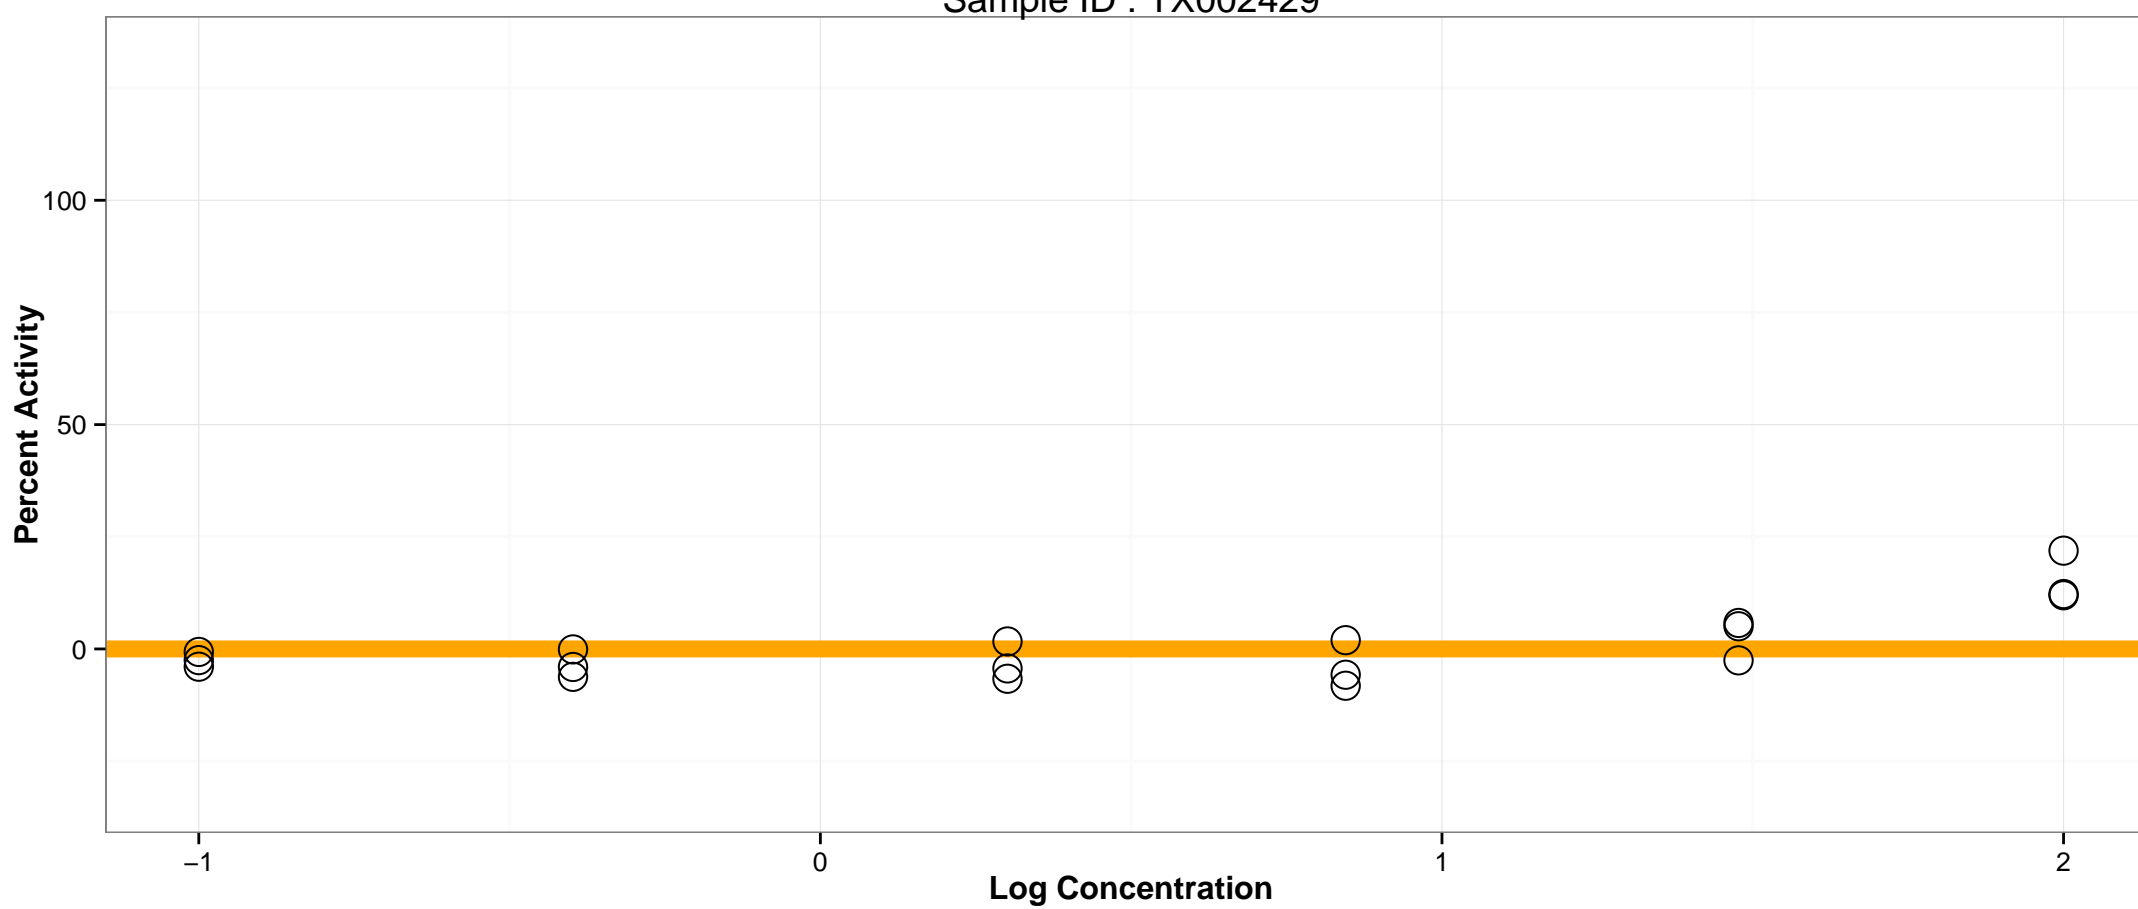

HILL MODEL

HILL MODEL: Not applicable

GAIN-LOSS MODEL

GNLS MODEL: Not applicable

|      | CNST   | HILL | GNLS |
|------|--------|------|------|
| AIC  | 125.82 | NA   | NA   |
| PROB | 1      | NA   | NA   |
| RMSE | 7.77   | NA   | NA   |

MAX\_MEAN : 15.4 MAX\_MED : 12.2 BMAD : 8.58  
COFF : 20 HIT-CALL : 0 FITC : 4 ACTP : 0  
FLAGS :

Chemical : Tannic acid  
CAS : 1401-55-4

Assay ID 1508 (NHEERL\_TPO\_AUR\_dn)  
Sample ID : TX002496

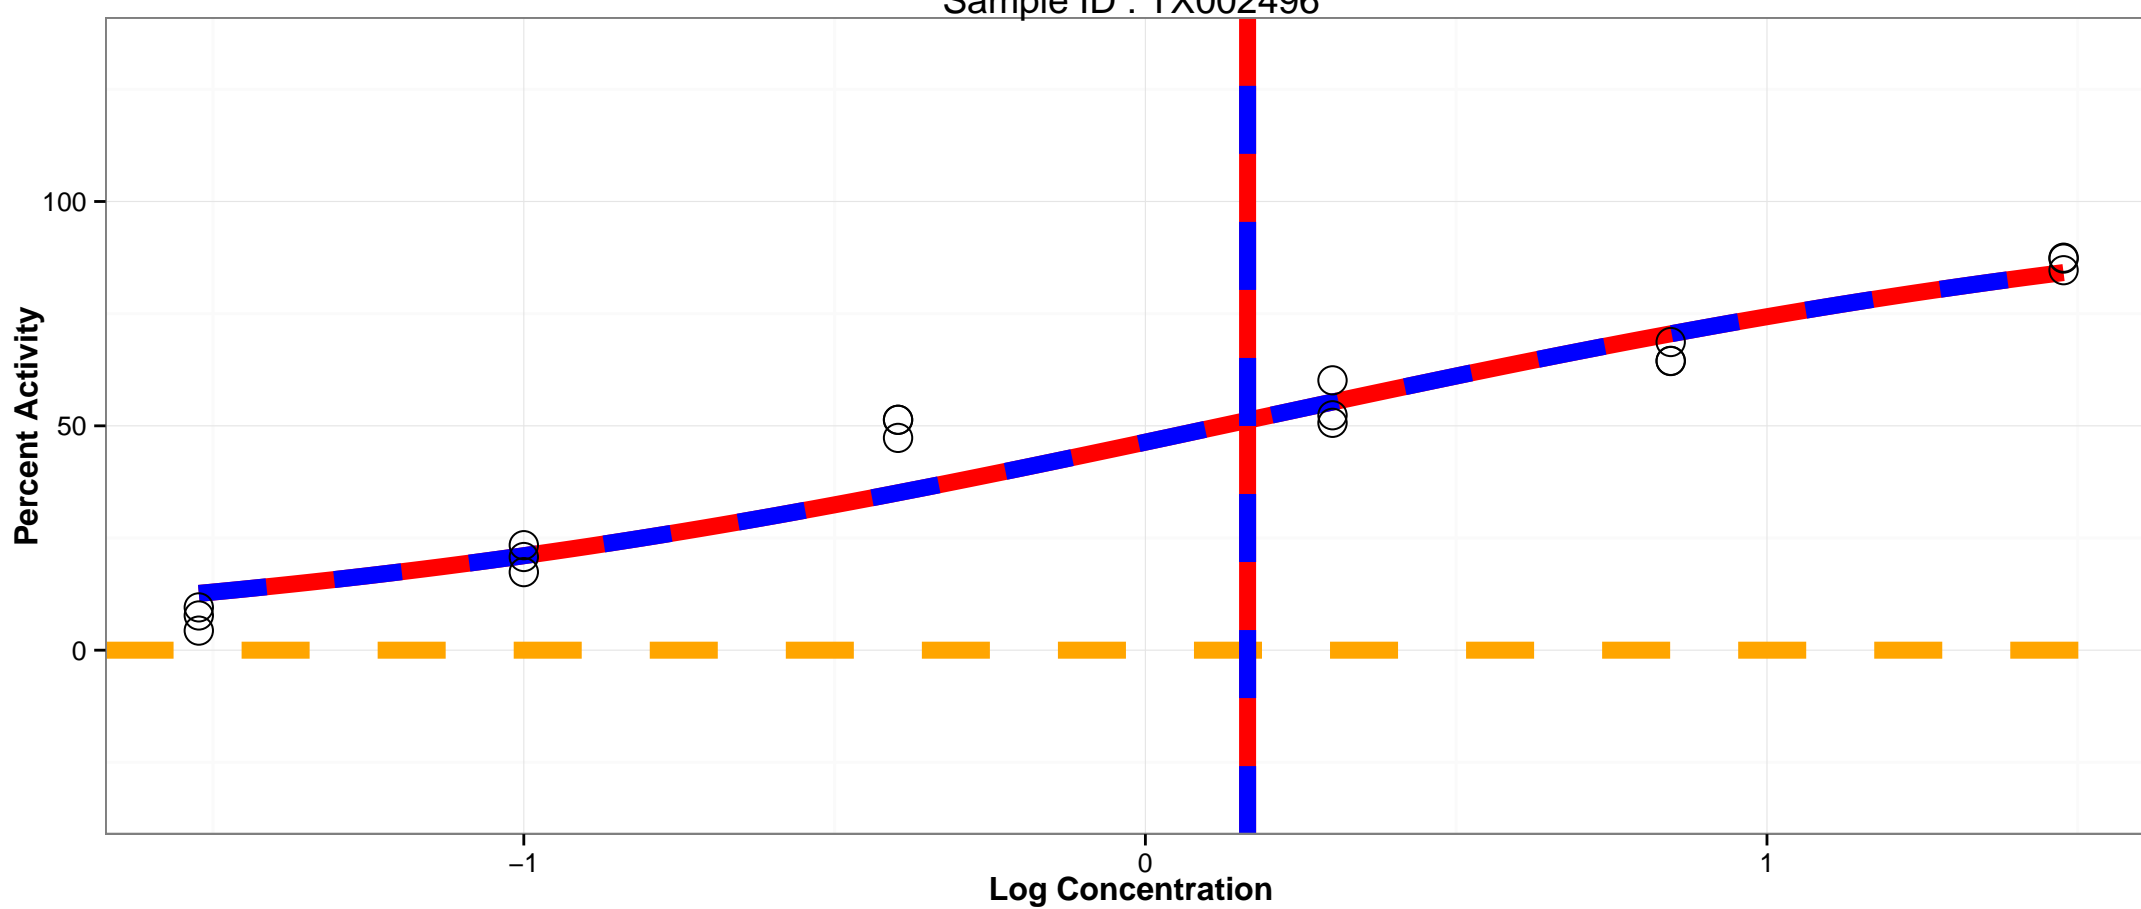

HILL MODEL

|     | tp   | ga    | gw     |
|-----|------|-------|--------|
| val | 102  | 0.164 | 0.505  |
| sd  | 15.2 | 0.354 | 0.0928 |

GAIN-LOSS MODEL

|     | tp   | ga    | gw     | la    | lw     |
|-----|------|-------|--------|-------|--------|
| val | 102  | 0.164 | 0.505  | 2.4   | 14.8   |
| sd  | 15.2 | 0.354 | 0.0928 | 63900 | 944000 |

|      | CNST   | HILL   | GNLS   |
|------|--------|--------|--------|
| AIC  | 199.89 | 130.24 | 134.24 |
| PROB | 0      | 0.88   | 0.12   |
| RMSE | 54.46  | 7.27   | 7.27   |

MAX\_MEAN : 86.5 MAX\_MED : 87.3 BMAD : 5.69  
COFF : 20 HIT-CALL : 1 FITC : 42 ACTP : 1  
FLAGS :

Assay ID 1509 (NHEERL\_HEK293T\_CellTiterGLO)  
Sample ID : TX002496

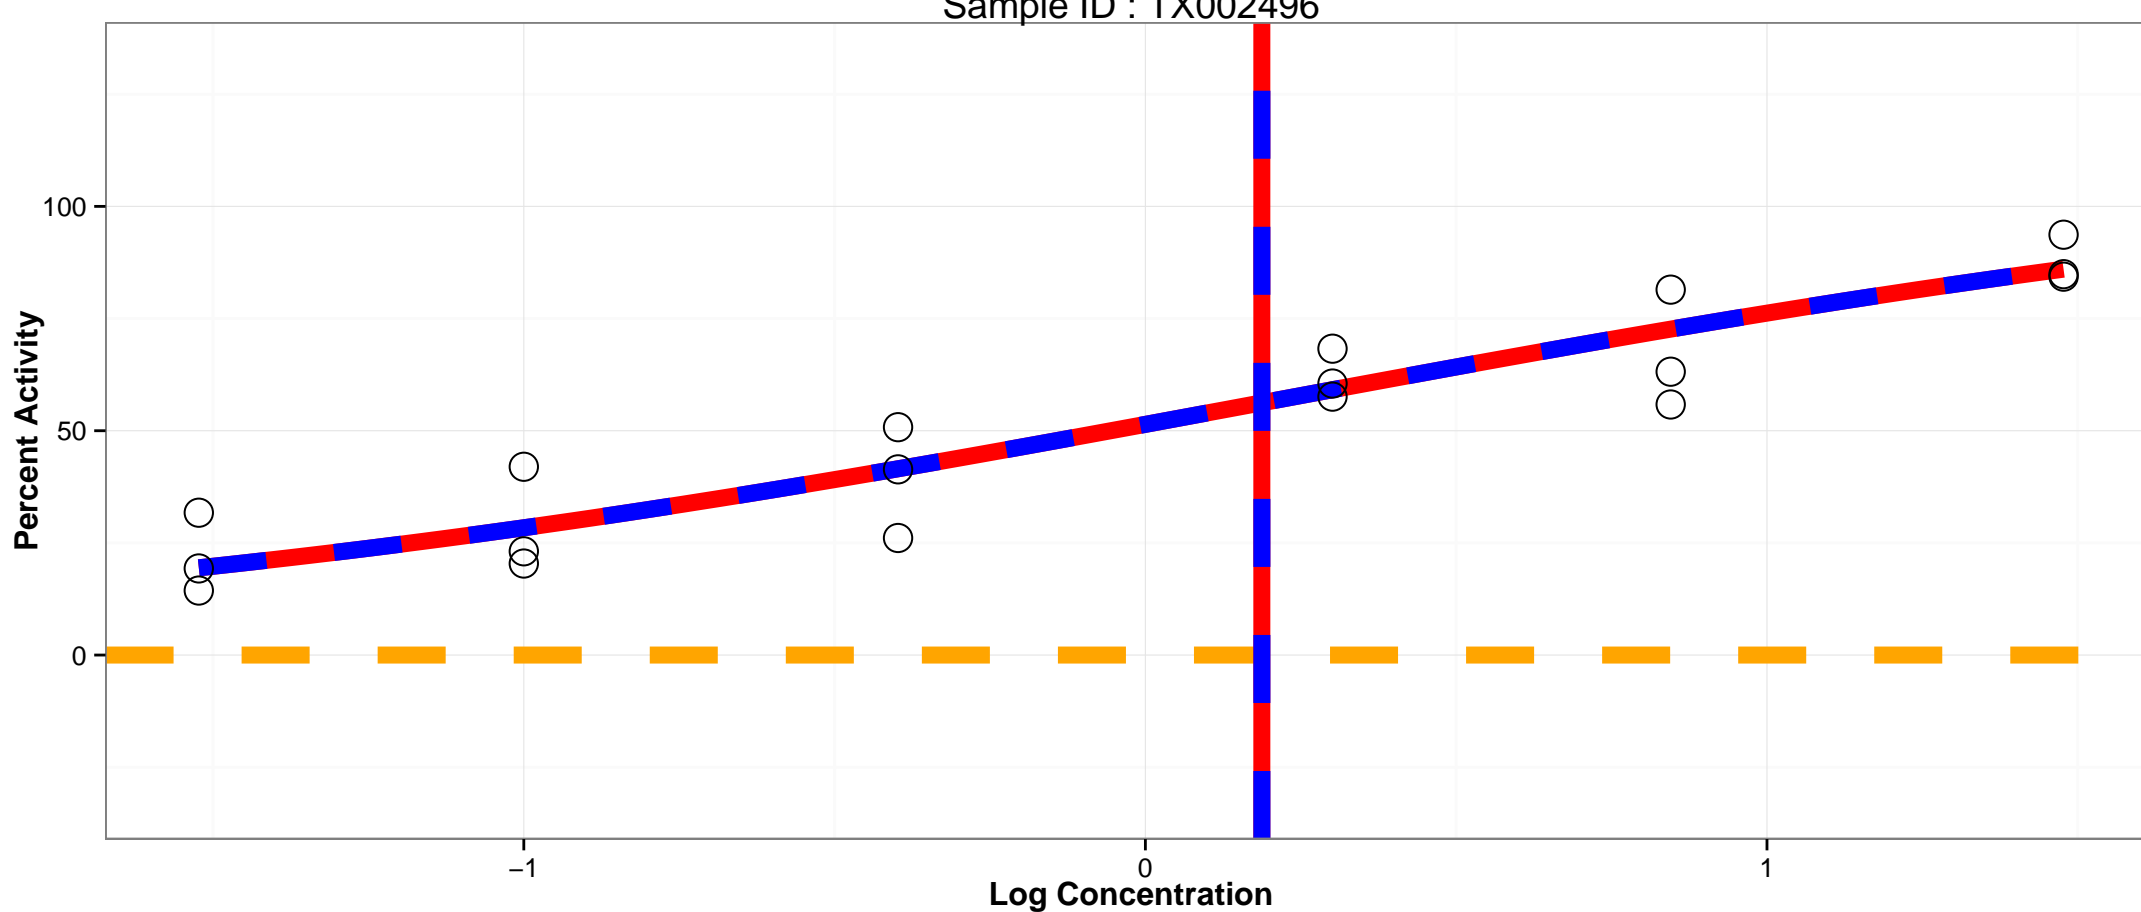

HILL MODEL

|     | tp   | ga    | gw    |
|-----|------|-------|-------|
| val | 112  | 0.187 | 0.397 |
| sd  | 26.1 | 0.609 | 0.114 |

GAIN-LOSS MODEL

|     | tp  | ga    | gw    | la   | lw   |
|-----|-----|-------|-------|------|------|
| val | 112 | 0.187 | 0.397 | 3.35 | 8.04 |
| sd  | NA  | NA    | NA    | NA   | NA   |

|      | CNST   | HILL   | GNLS   |
|------|--------|--------|--------|
| AIC  | 201.43 | 139.14 | 143.14 |
| PROB | 0      | 0.88   | 0.12   |
| RMSE | 56.65  | 8.75   | 8.75   |

MAX\_MEAN : 87.6 MAX\_MED : 84.9 BMAD : 5.54  
COFF : 20 HIT-CALL : 1 FITC : 42 ACTP : 1  
FLAGS :

Assay ID 1848 (NHEERL\_QuantLum\_inhib\_2\_dn)  
Sample ID : TX002496

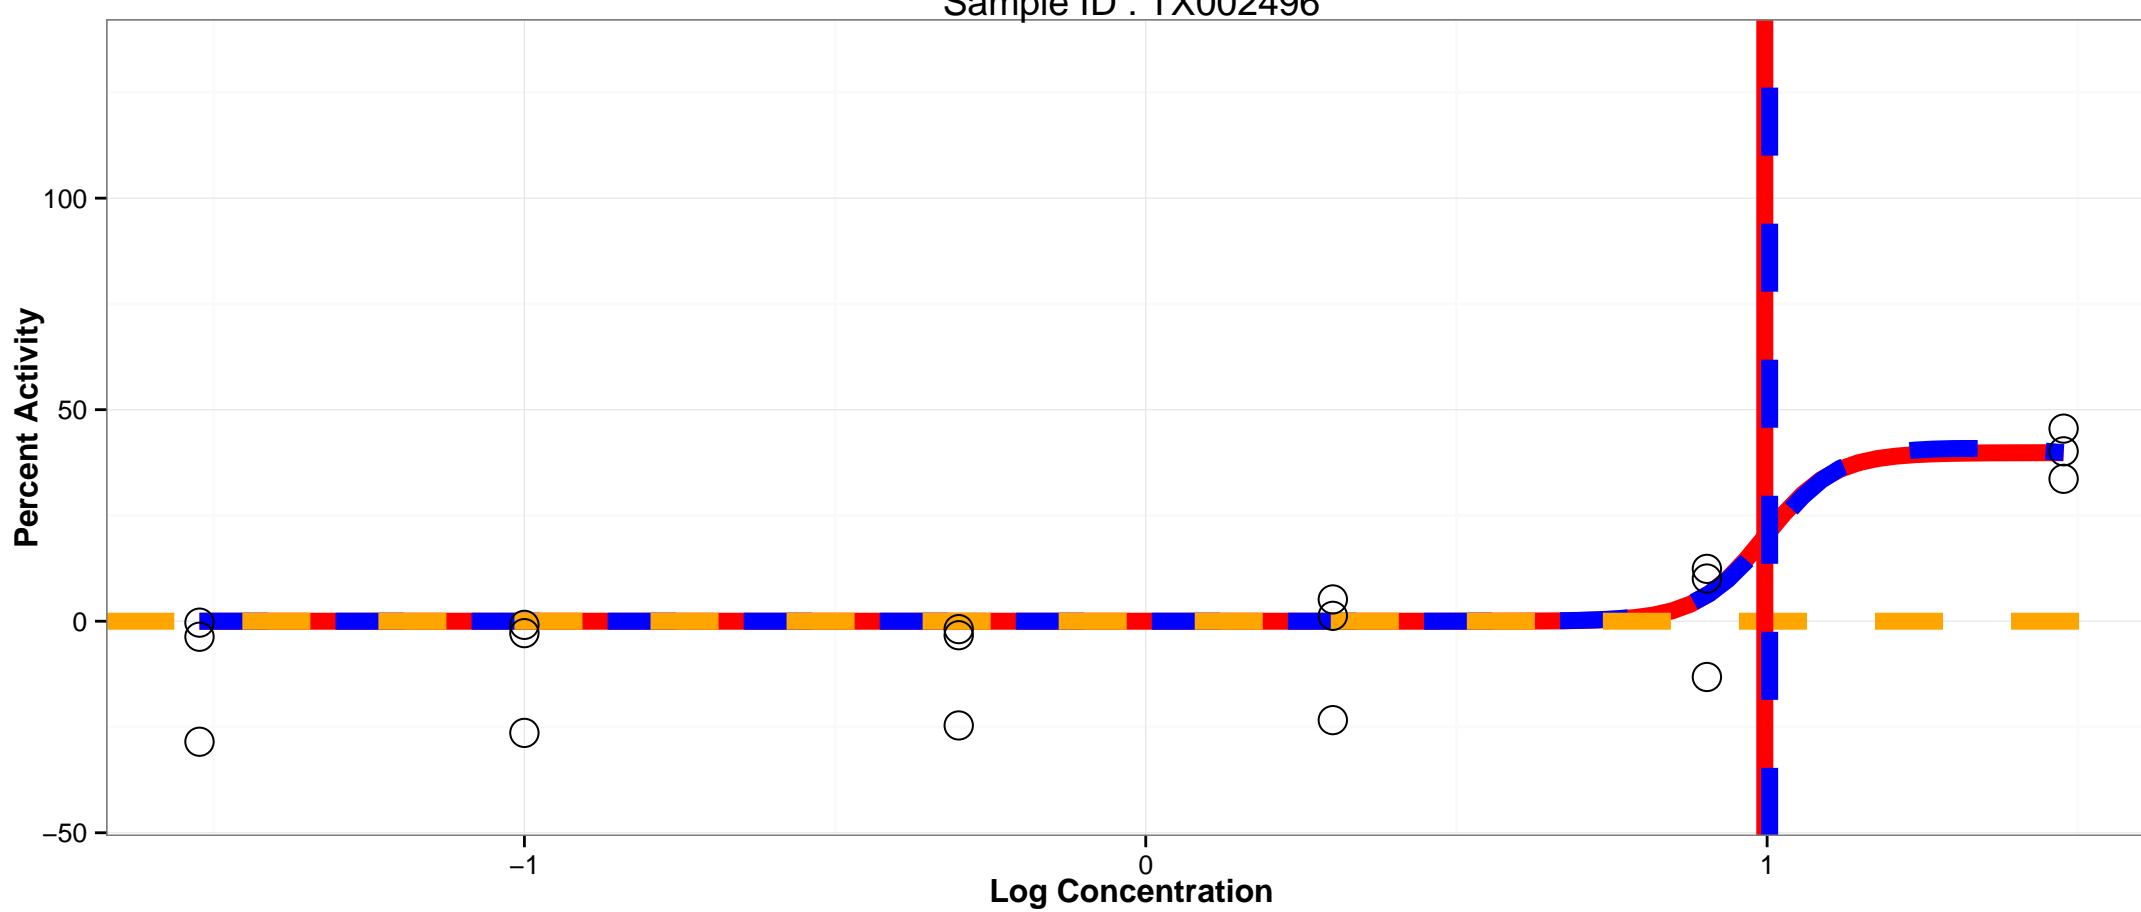

HILL MODEL

|     | tp   | ga    | gw   |
|-----|------|-------|------|
| val | 39.8 | 0.996 | 7.94 |
| sd  | 7.29 | 7.26  | 618  |

GAIN-LOSS MODEL

|     | tp   | ga   | gw  | la   | lw   |
|-----|------|------|-----|------|------|
| val | 41.3 | 1    | 7.5 | 1.78 | 4.75 |
| sd  | 921  | 3.95 | 273 | 39.3 | 722  |

|      | CNST   | HILL   | GNLS   |
|------|--------|--------|--------|
| AIC  | 163.31 | 151.23 | 155.23 |
| PROB | 0      | 0.88   | 0.12   |
| RMSE | 21.05  | 13.38  | 13.38  |

MAX\_MEAN : 39.8 MAX\_MED : 40.2 BMAD : 8.58  
COFF : 20 HIT-CALL : 1 FITC : 41 ACTP : 0.998  
FLAGS : 6

Chemical : tert-Butylhydroquinone  
CAS : 1948-33-0

Assay ID 1508 (NHEERL\_TPO\_AUR\_dn)  
Sample ID : TX002508

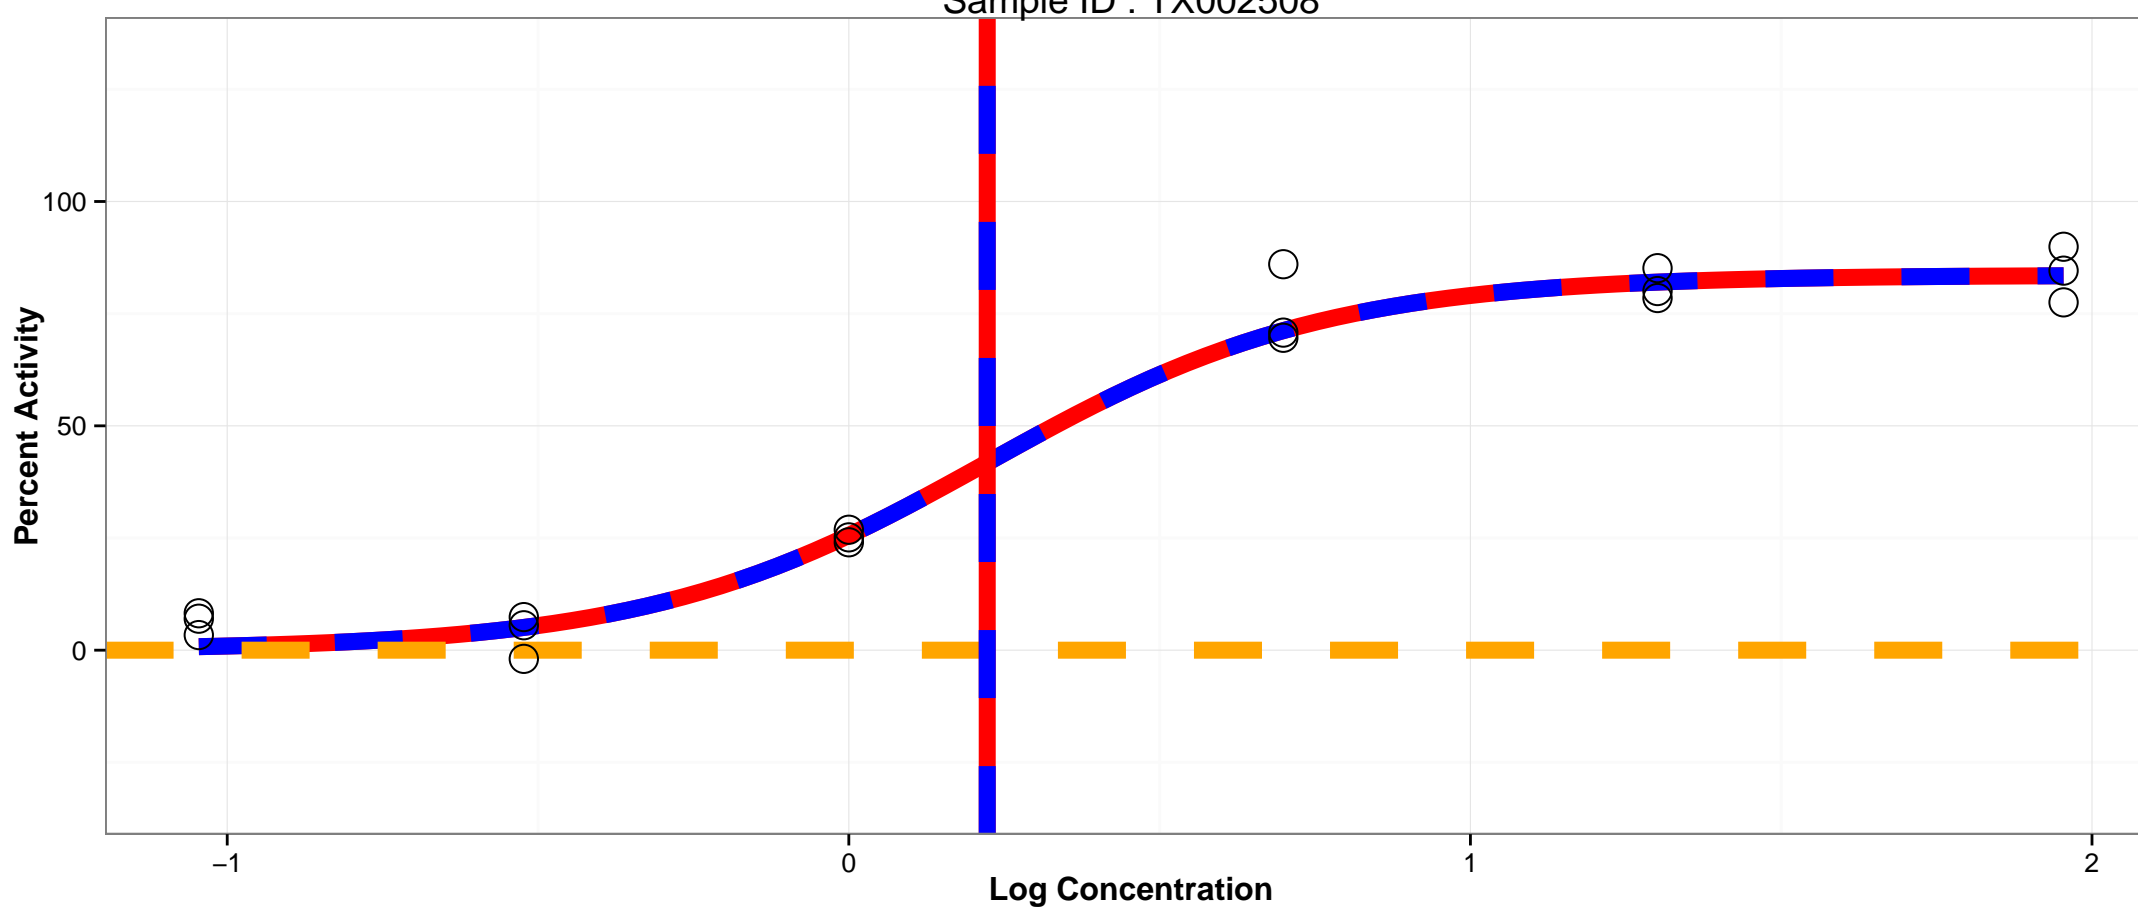

HILL MODEL

|     | tp   | ga     | gw    |
|-----|------|--------|-------|
| val | 83.6 | 0.223  | 1.6   |
| sd  | 2.28 | 0.0407 | 0.199 |

GAIN-LOSS MODEL

|     | tp   | ga     | gw    | la    | lw     |
|-----|------|--------|-------|-------|--------|
| val | 83.6 | 0.223  | 1.6   | 3.32  | 8.45   |
| sd  | 2.28 | 0.0407 | 0.199 | 35900 | 222000 |

|      | CNST   | HILL   | GNLS   |
|------|--------|--------|--------|
| AIC  | 201.57 | 117.13 | 121.13 |
| PROB | 0      | 0.88   | 0.12   |
| RMSE | 57.97  | 5.2    | 5.2    |

MAX\_MEAN : 84 MAX\_MED : 84.6 BMAD : 5.69  
COFF : 20 HIT-CALL : 1 FITC : 41 ACTP : 1  
FLAGS :

Assay ID 1509 (NHEERL\_HEK293T\_CellTiterGLO)  
Sample ID : TX002508

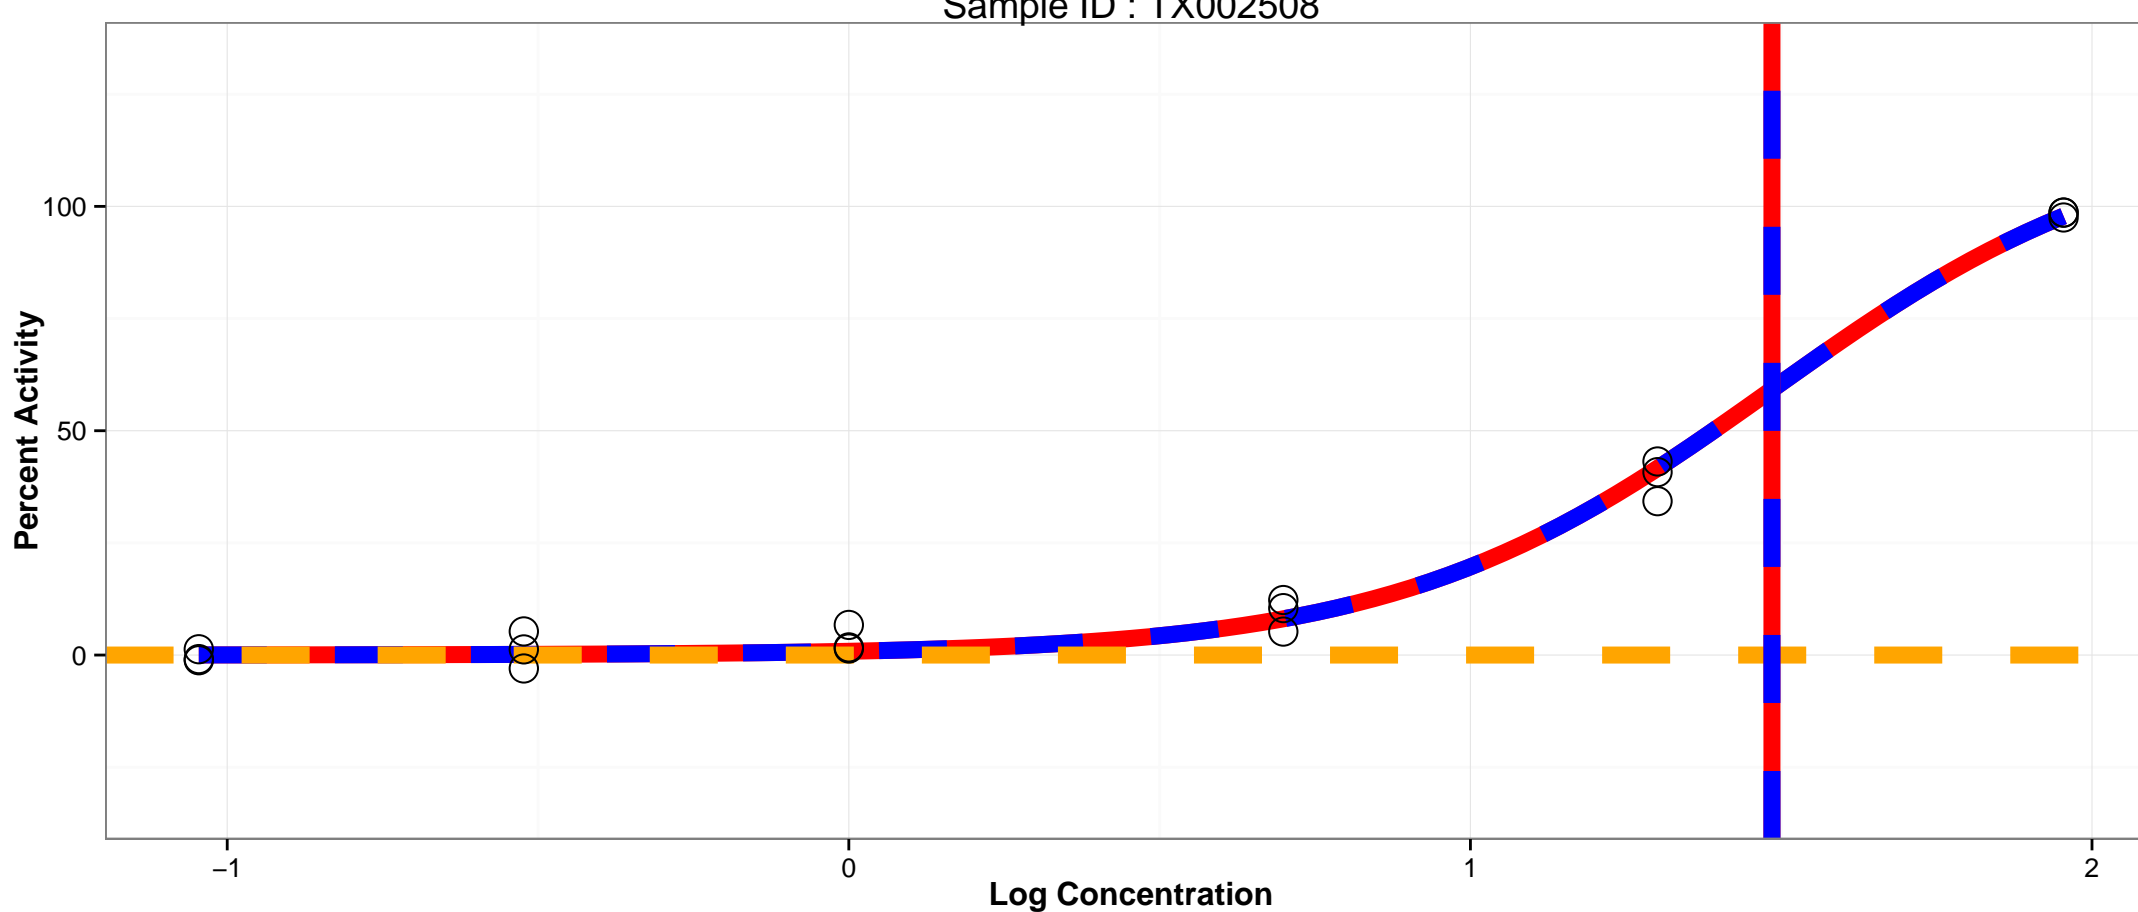

HILL MODEL

|     | tp   | ga     | gw    |
|-----|------|--------|-------|
| val | 118  | 1.49   | 1.44  |
| sd  | 7.91 | 0.0572 | 0.181 |

GAIN-LOSS MODEL

|     | tp  | ga   | gw   | la   | lw   |
|-----|-----|------|------|------|------|
| val | 118 | 1.49 | 1.44 | 2.91 | 17.5 |
| sd  | NA  | NA   | NA   | NA   | NA   |

|      | CNST   | HILL | GNLS  |
|------|--------|------|-------|
| AIC  | 184.91 | 98.7 | 102.7 |
| PROB | 0      | 0.88 | 0.12  |
| RMSE | 43.49  | 3.04 | 3.04  |

MAX\_MEAN : 98.3 MAX\_MED : 98.6 BMAD : 5.54  
COFF : 20 HIT-CALL : 1 FITC : 42 ACTP : 1  
FLAGS :

Assay ID 1848 (NHEERL\_Quantilum\_inhib\_2\_dn)  
Sample ID : TX002508

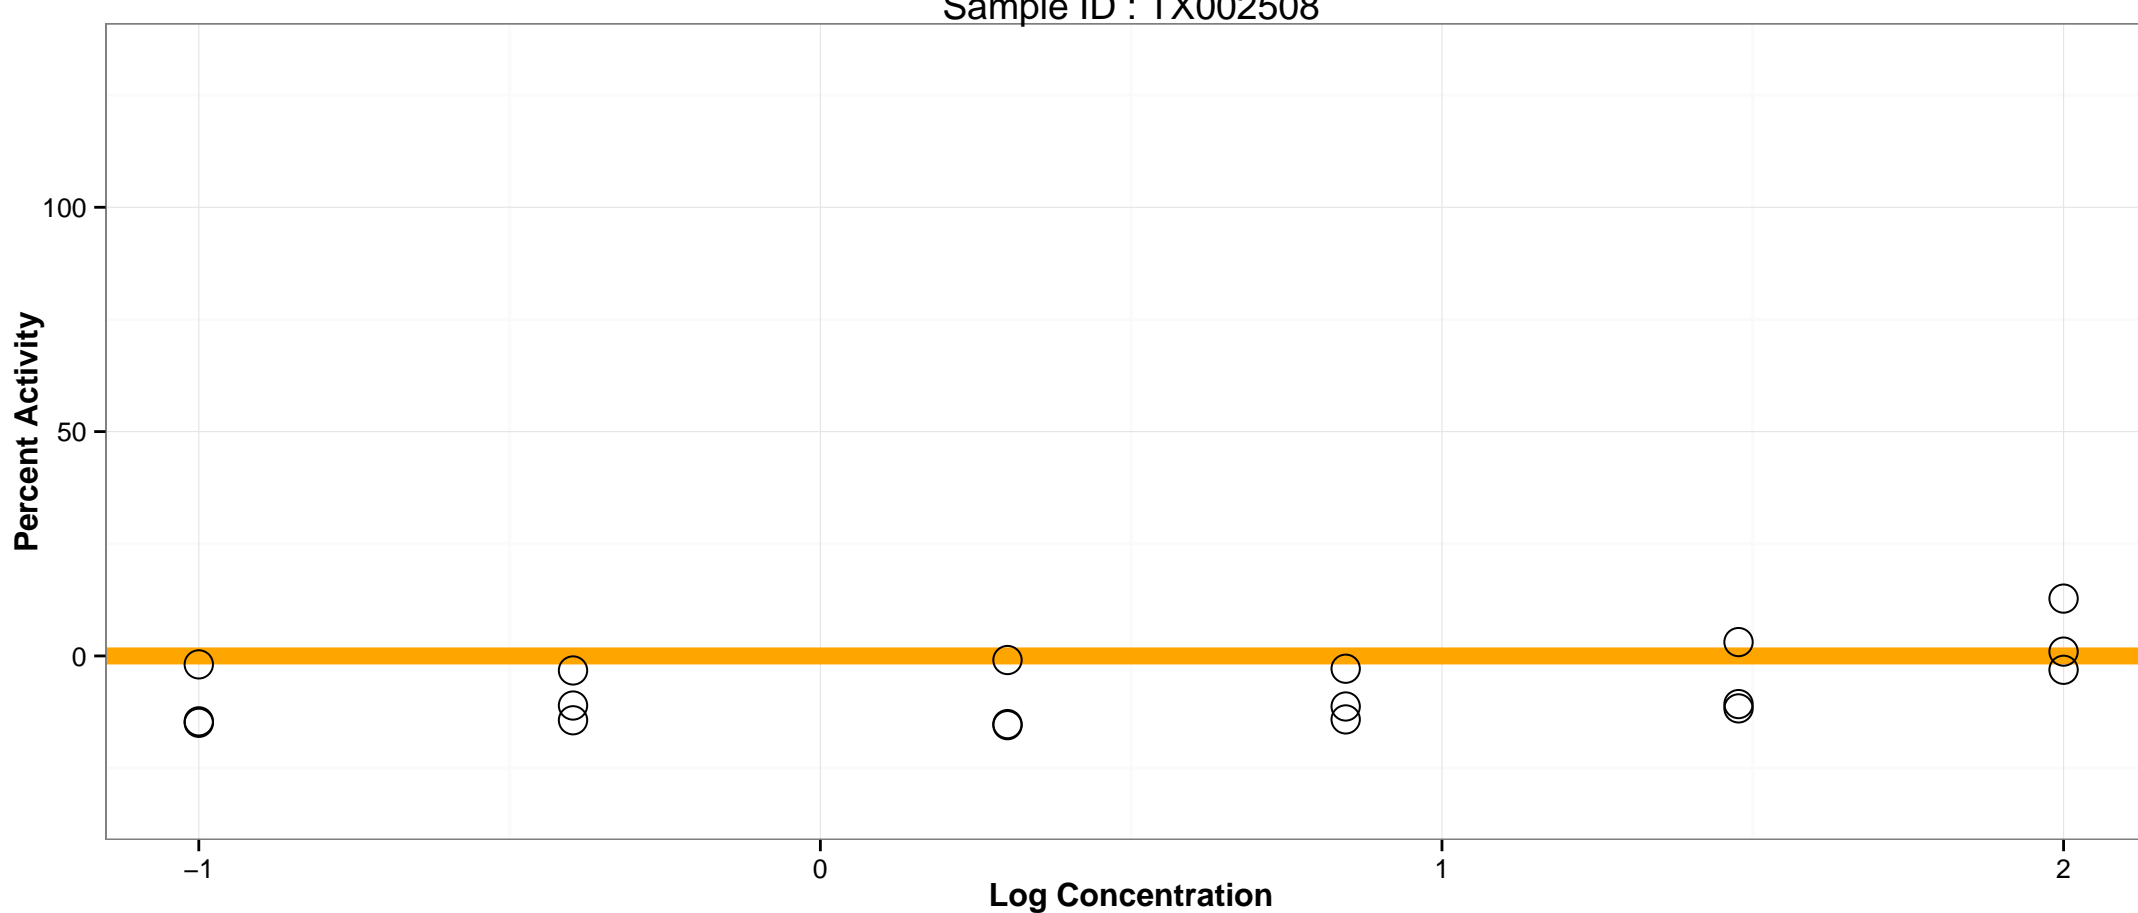

HILL MODEL

HILL MODEL: Not applicable

GAIN-LOSS MODEL

GNLS MODEL: Not applicable

|      | CNST  | HILL | GNLS |
|------|-------|------|------|
| AIC  | 140.9 | NA   | NA   |
| PROB | 1     | NA   | NA   |
| RMSE | 10.58 | NA   | NA   |

MAX\_MEAN : 3.57 MAX\_MED : 0.98 BMAD : 8.58  
COFF : 20 HIT-CALL : 0 FITC : 4 ACTP : 0  
FLAGS :

Chemical : tert-Butylhydroquinone  
CAS : 1948-33-0

Assay ID 1508 (NHEERL\_TPO\_AUR\_dn)  
Sample ID : TX102508

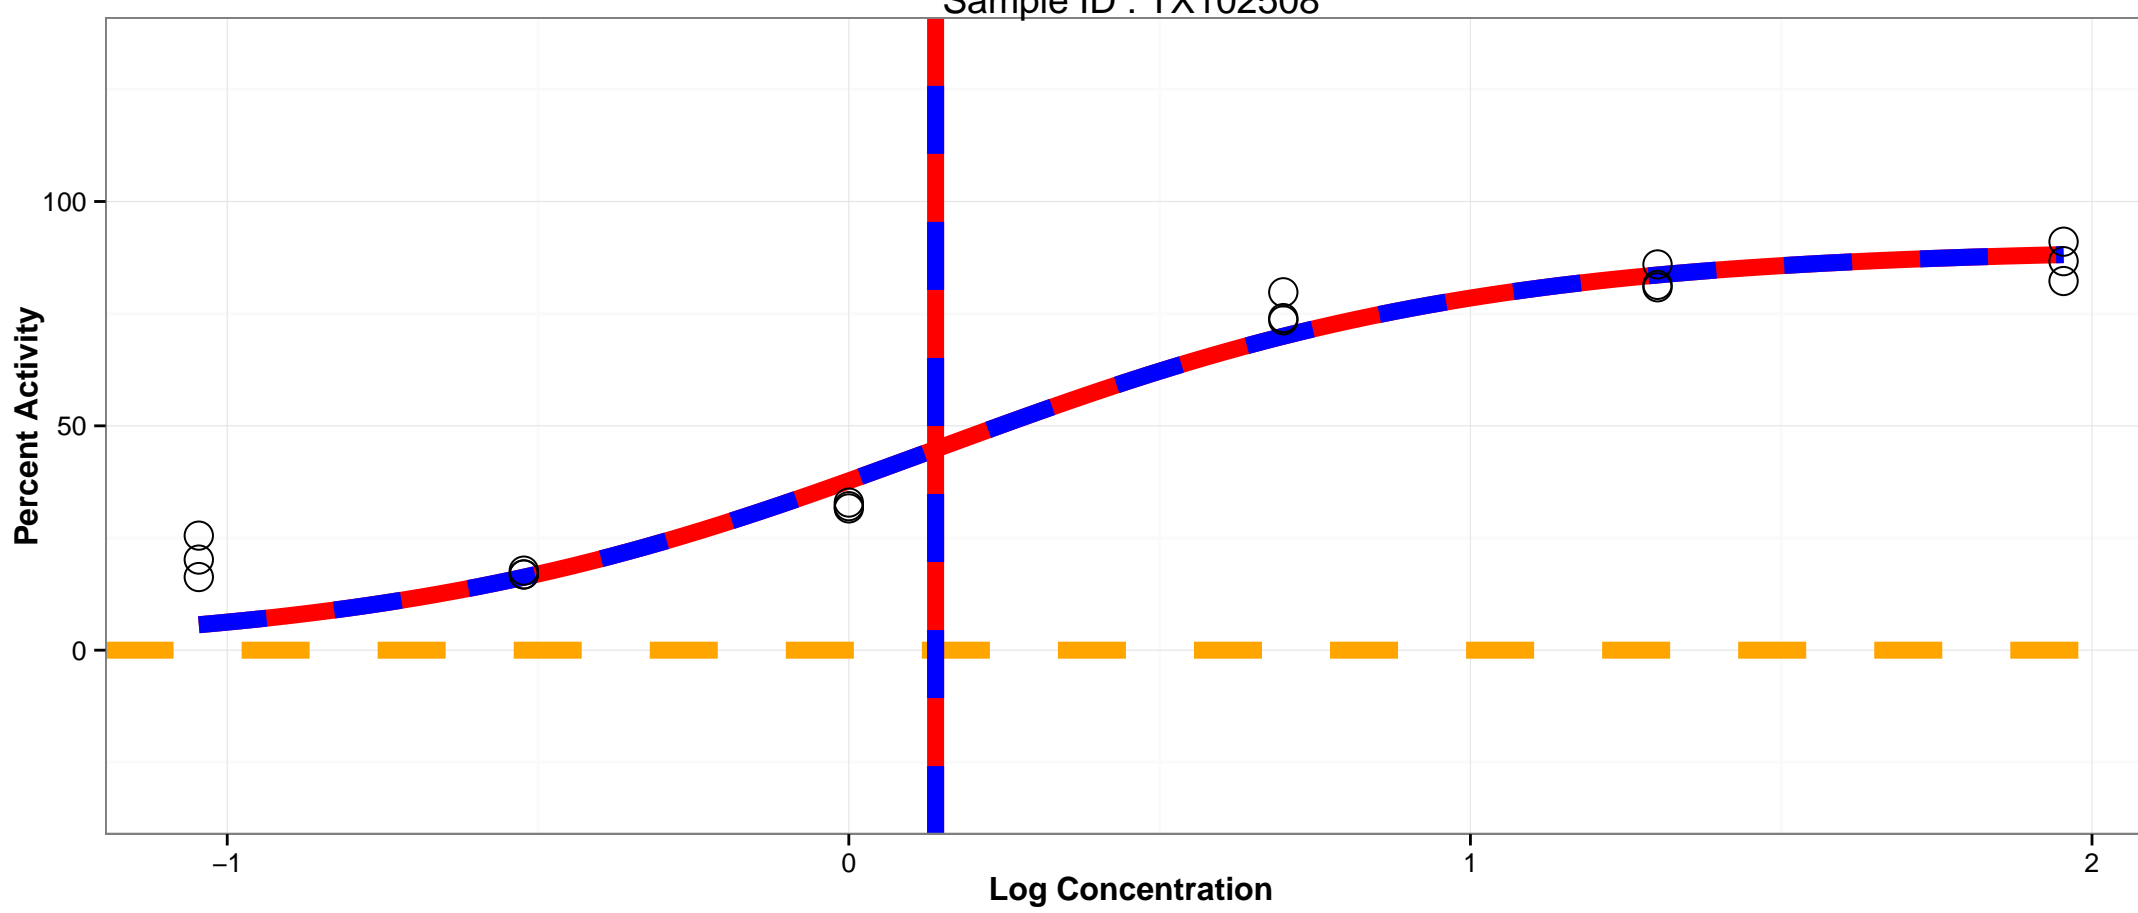

HILL MODEL

|     | tp   | ga     | gw    |
|-----|------|--------|-------|
| val | 89.6 | 0.14   | 0.987 |
| sd  | 3.39 | 0.0721 | 0.155 |

GAIN-LOSS MODEL

|     | tp   | ga   | gw    | la   | lw  |
|-----|------|------|-------|------|-----|
| val | 89.6 | 0.14 | 0.987 | 3.81 | 8.1 |
| sd  | NA   | NA   | NA    | NA   | NA  |

|      | CNST   | HILL   | GNLS   |
|------|--------|--------|--------|
| AIC  | 203.51 | 130.28 | 134.28 |
| PROB | 0      | 0.88   | 0.12   |
| RMSE | 60.43  | 7.47   | 7.47   |

MAX\_MEAN : 86.7 MAX\_MED : 86.7 BMAD : 5.69  
COFF : 20 HIT-CALL : 1 FITC : 41 ACTP : 1  
FLAGS :

Assay ID 1509 (NHEERL\_HEK293T\_CellTiterGLO)  
Sample ID : TX102508

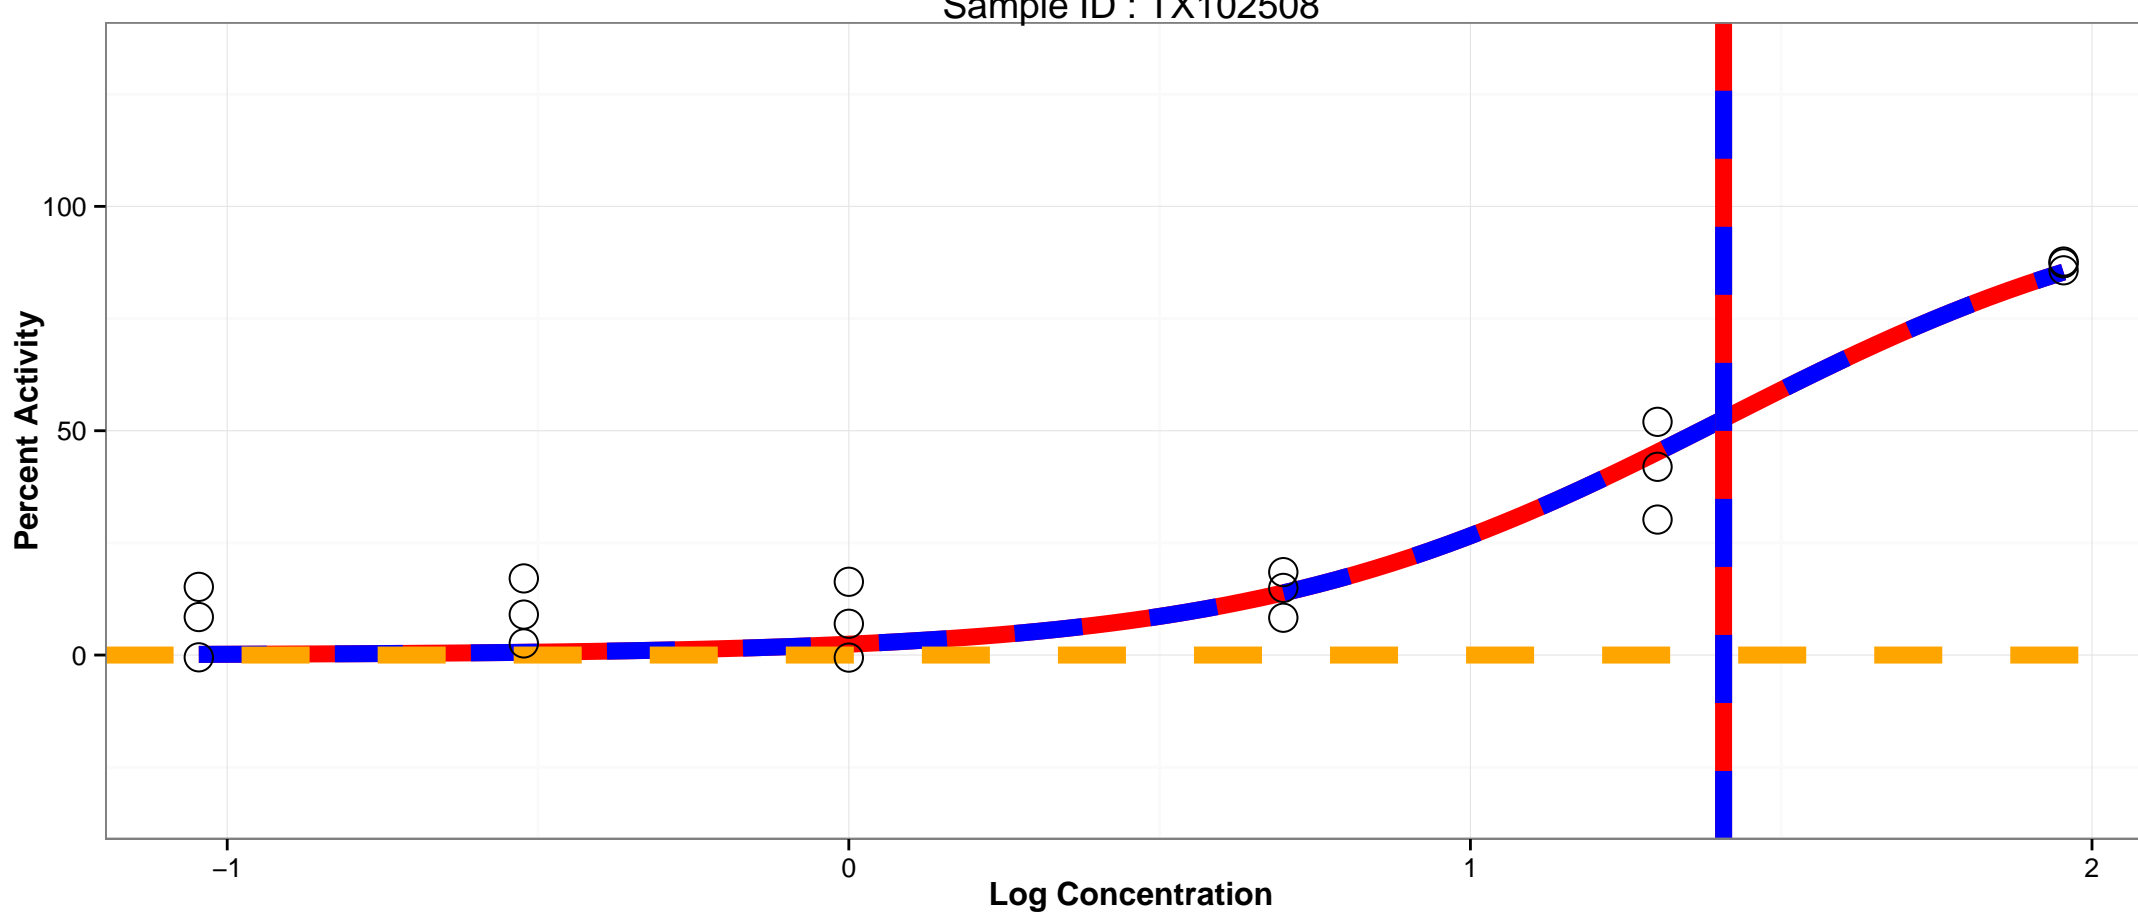

HILL MODEL

|     | tp   | ga    | gw    |
|-----|------|-------|-------|
| val | 105  | 1.41  | 1.16  |
| sd  | 15.4 | 0.156 | 0.278 |

GAIN-LOSS MODEL

|     | tp   | ga    | gw    | la   | lw    |
|-----|------|-------|-------|------|-------|
| val | 105  | 1.41  | 1.16  | 3.48 | 6.23  |
| sd  | 15.4 | 0.156 | 0.278 | 3960 | 16100 |

|      | CNST   | HILL   | GNLS   |
|------|--------|--------|--------|
| AIC  | 184.79 | 135.48 | 139.48 |
| PROB | 0      | 0.88   | 0.12   |
| RMSE | 40.61  | 8.2    | 8.2    |

MAX\_MEAN : 86.9 MAX\_MED : 87.3 BMAD : 5.54  
COFF : 20 HIT-CALL : 1 FITC : 42 ACTP : 1  
FLAGS :

Assay ID 1848 (NHEERL\_Quantilum\_inhib\_2\_dn)  
Sample ID : TX102508

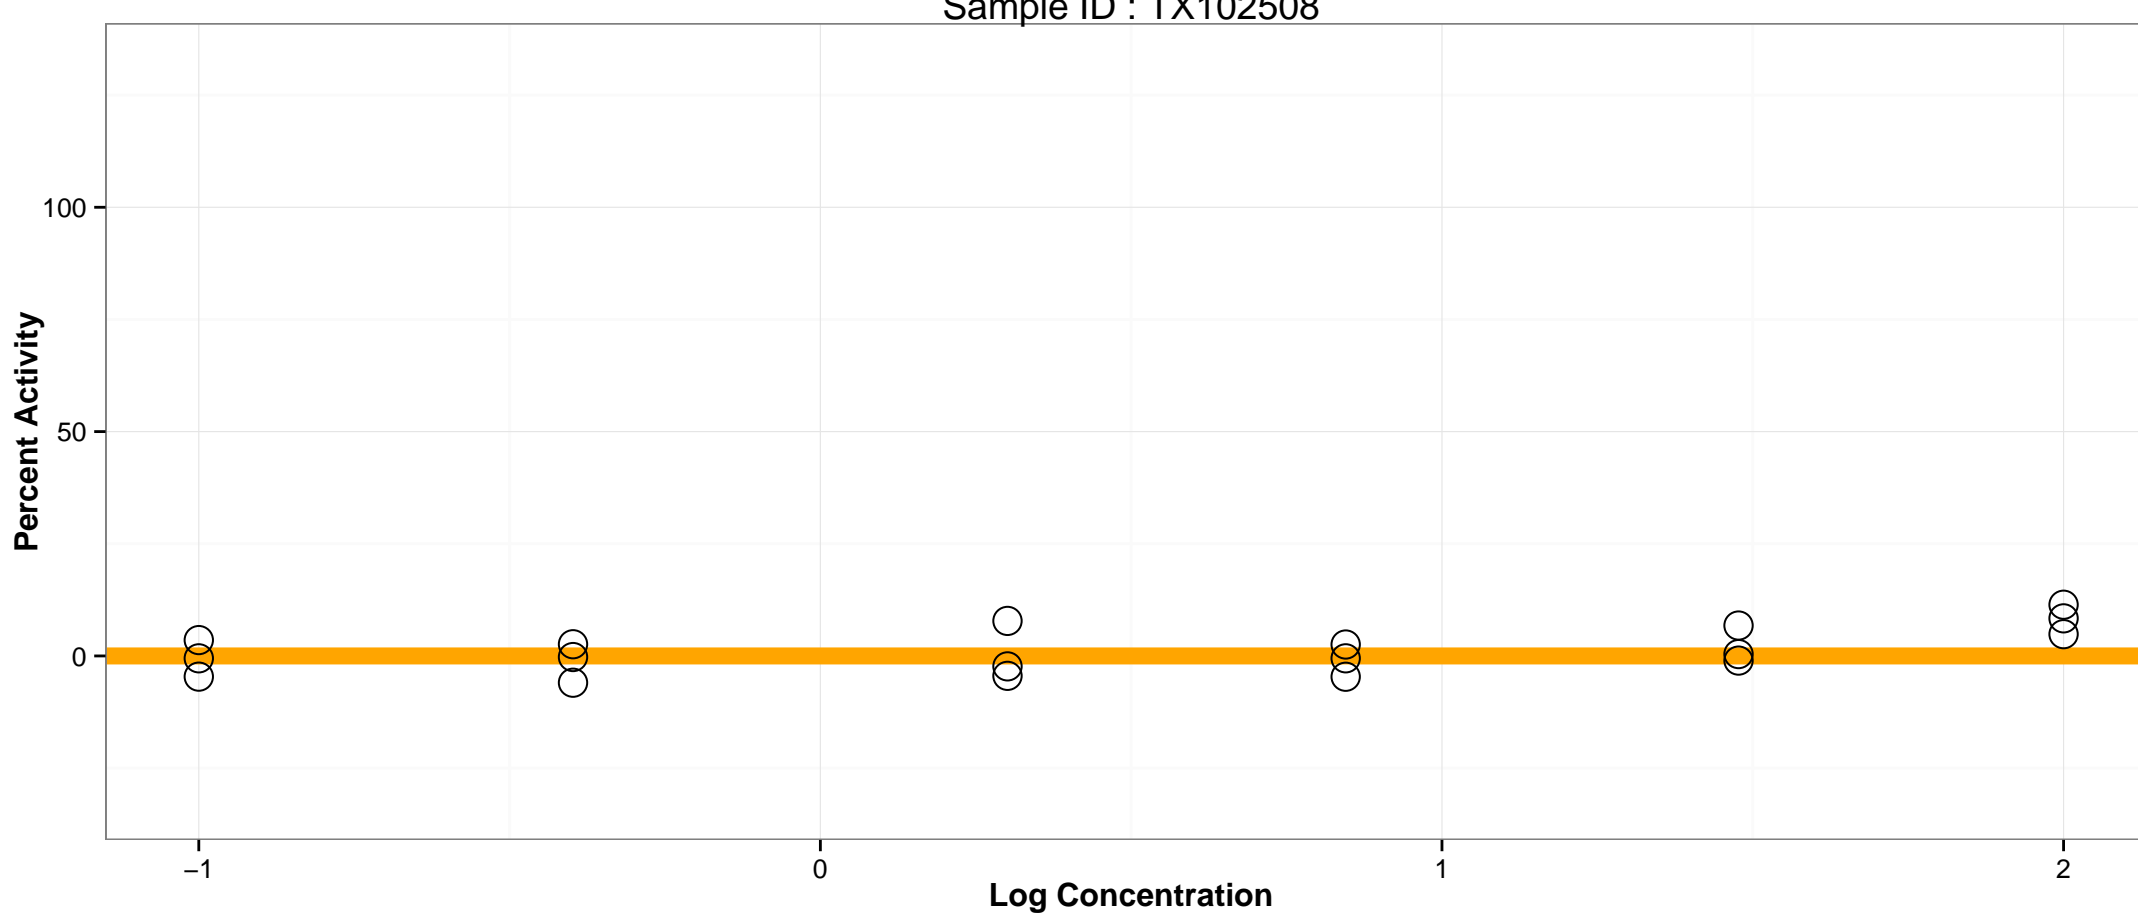

HILL MODEL  
HILL MODEL: Not applicable

GAIN-LOSS MODEL  
GNLS MODEL: Not applicable

|      | CNST   | HILL | GNLS |
|------|--------|------|------|
| AIC  | 112.86 | NA   | NA   |
| PROB | 1      | NA   | NA   |
| RMSE | 5.07   | NA   | NA   |

MAX\_MEAN : 8.23 MAX\_MED : 8.39 BMAD : 8.58  
COFF : 20 HIT-CALL : 0 FITC : 4 ACTP : 0  
FLAGS :

Chemical : 2-tert-Butyl-4-methoxyphenol  
CAS : 121-00-6

Assay ID 1508 (NHEERL\_TPO\_AUR\_dn)  
Sample ID : TX002530

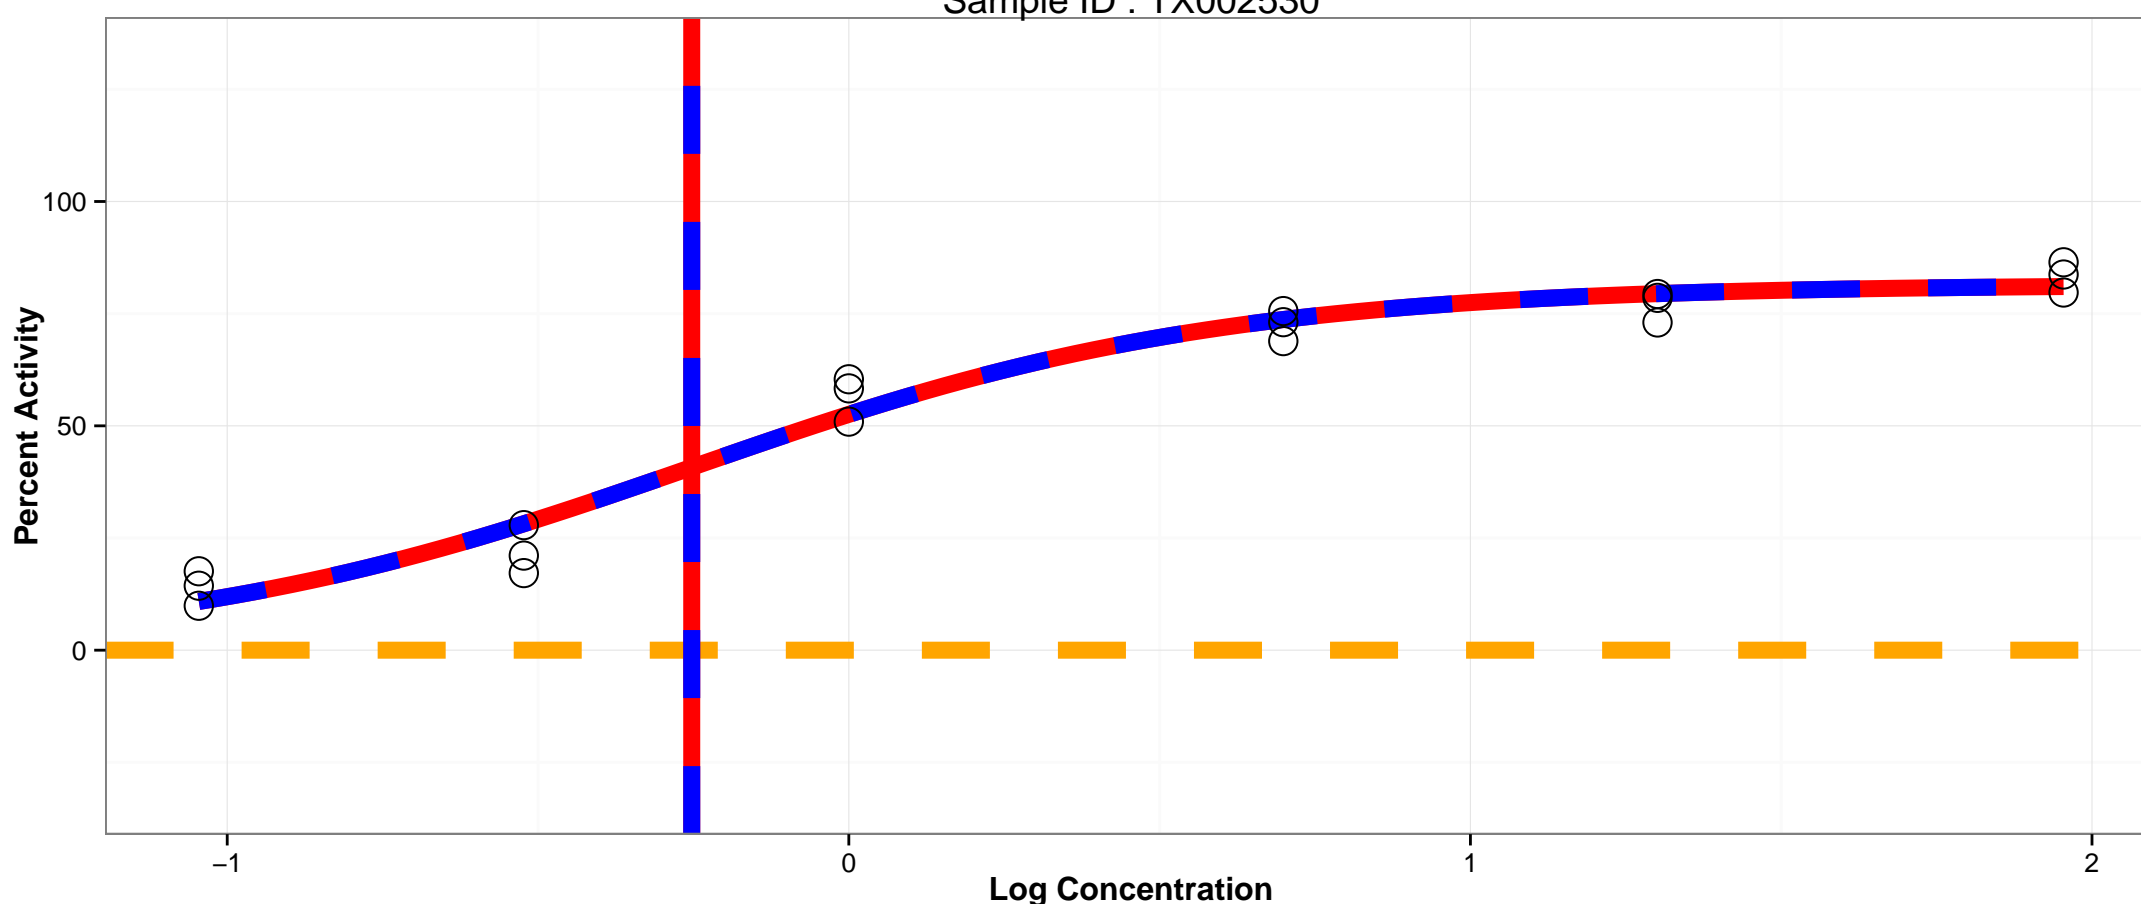

HILL MODEL

|     | tp   | ga     | gw    |
|-----|------|--------|-------|
| val | 81.5 | -0.253 | 1.03  |
| sd  | 2.26 | 0.0613 | 0.145 |

GAIN-LOSS MODEL

|     | tp   | ga     | gw    | la   | lw   |
|-----|------|--------|-------|------|------|
| val | 81.5 | -0.253 | 1.03  | 3.37 | 6.26 |
| sd  | 2.26 | 0.0613 | 0.145 | 1130 | 4990 |

|      | CNST   | HILL   | GNLS   |
|------|--------|--------|--------|
| AIC  | 204.14 | 117.66 | 121.66 |
| PROB | 0      | 0.88   | 0.12   |
| RMSE | 60.66  | 4.91   | 4.91   |

MAX\_MEAN : 83.3 MAX\_MED : 83.7 BMAD : 5.69  
COFF : 20 HIT-CALL : 1 FITC : 41 ACTP : 1  
FLAGS :

Assay ID 1509 (NHEERL\_HEK293T\_CellTiterGLO)  
Sample ID : TX002530

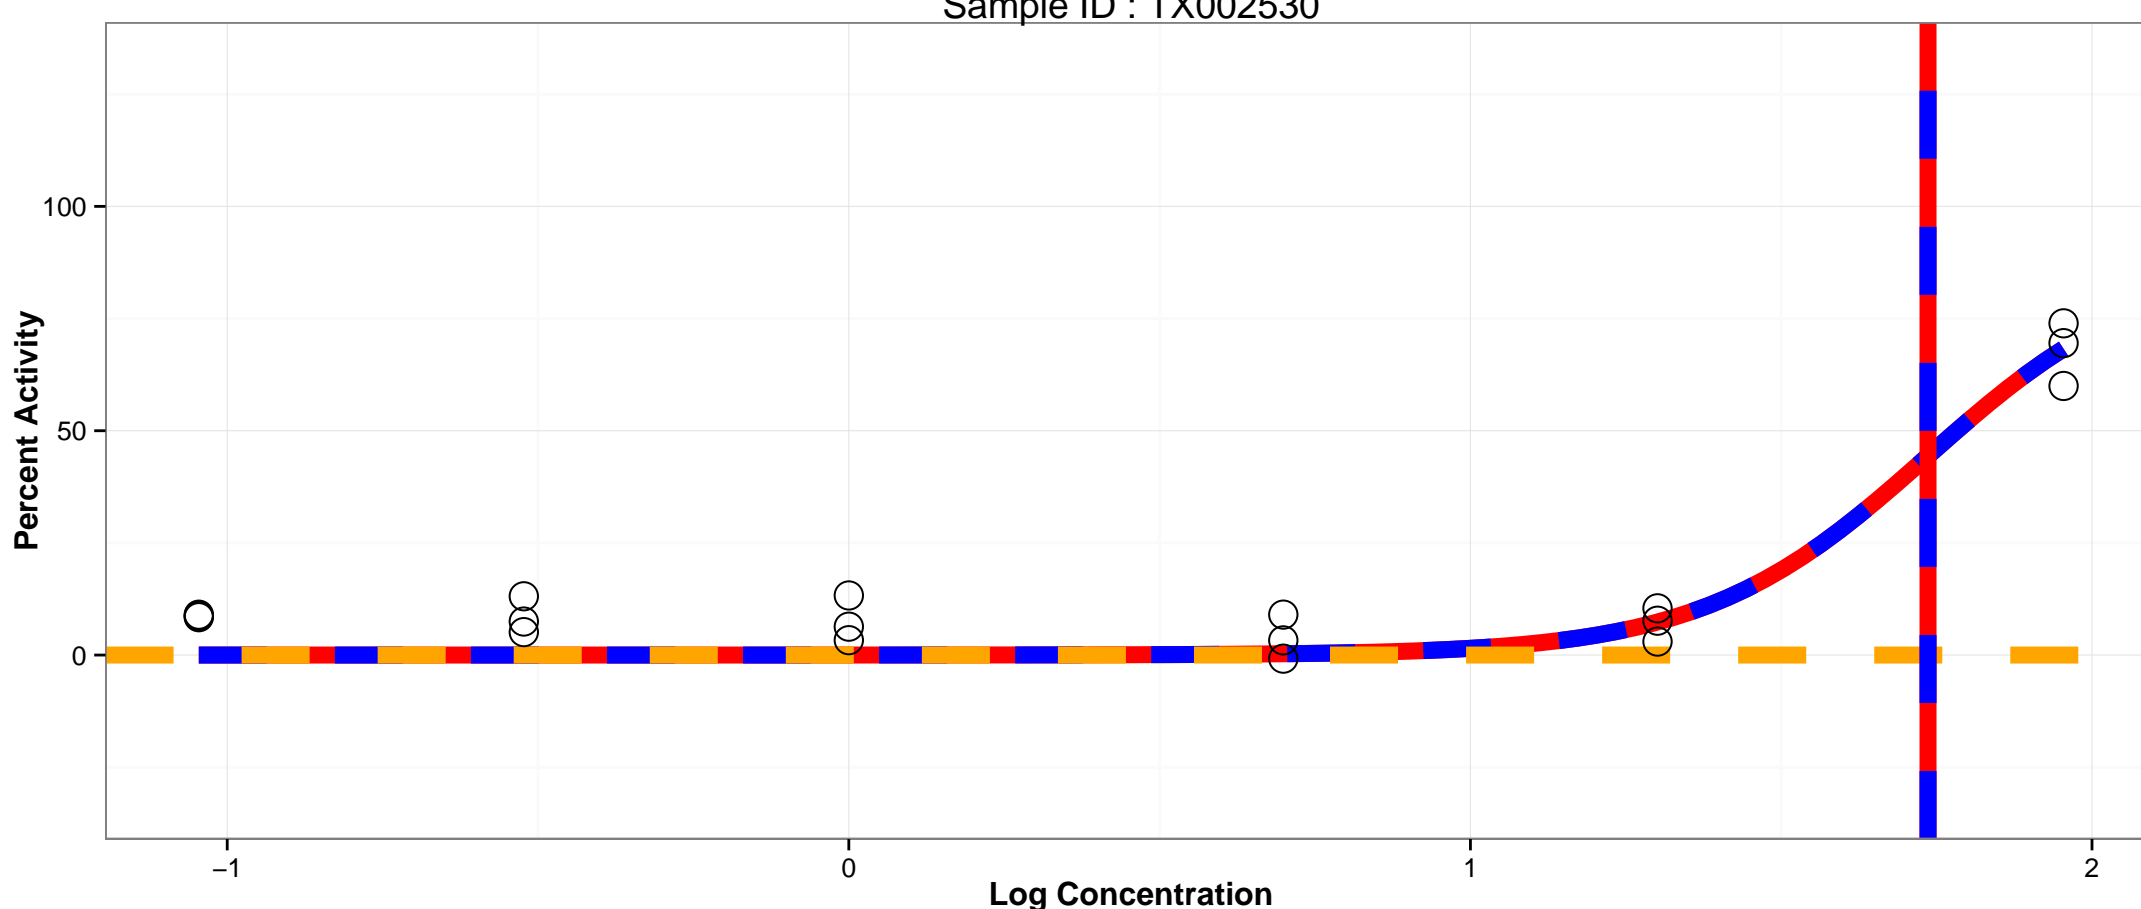

HILL MODEL

|     | tp   | ga    | gw  |
|-----|------|-------|-----|
| val | 88.7 | 1.74  | 2.4 |
| sd  | 126  | 0.826 | 3.2 |

GAIN-LOSS MODEL

|     | tp   | ga   | gw  | la   | lw |
|-----|------|------|-----|------|----|
| val | 88.7 | 1.74 | 2.4 | 3.93 | 17 |
| sd  | NA   | NA   | NA  | NA   | NA |

|      | CNST   | HILL   | GNLS   |
|------|--------|--------|--------|
| AIC  | 167.01 | 132.48 | 136.48 |
| PROB | 0      | 0.88   | 0.12   |
| RMSE | 28.75  | 7.18   | 7.18   |

MAX\_MEAN : 67.8 MAX\_MED : 69.5 BMAD : 5.54  
COFF : 20 HIT-CALL : 1 FITC : 42 ACTP : 1  
FLAGS : 6

Assay ID 1848 (NHEERL\_Quantilum\_inhib\_2\_dn)  
Sample ID : TX002530

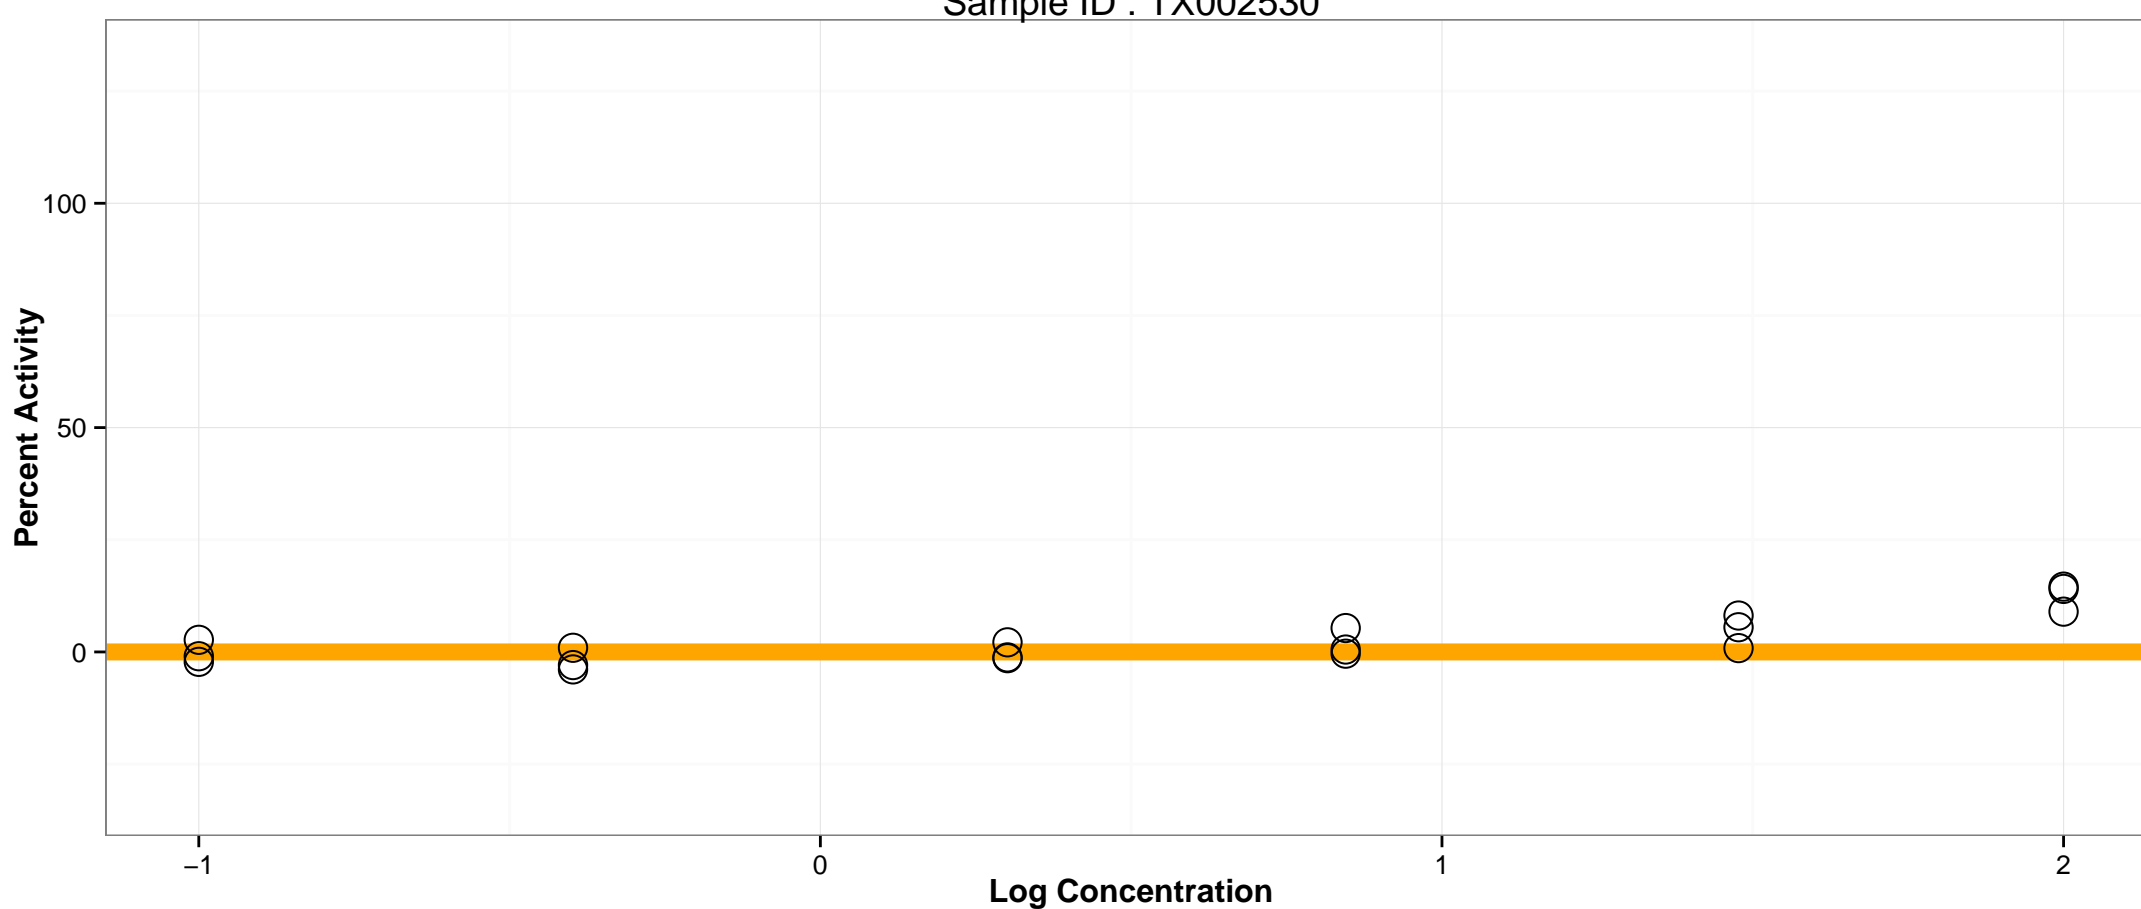

HILL MODEL

HILL MODEL: Not applicable

GAIN-LOSS MODEL

GNLS MODEL: Not applicable

|      | CNST   | HILL | GNLS |
|------|--------|------|------|
| AIC  | 116.32 | NA   | NA   |
| PROB | 1      | NA   | NA   |
| RMSE | 6.07   | NA   | NA   |

MAX\_MEAN : 12.5 MAX\_MED : 14.1 BMAD : 8.58  
COFF : 20 HIT-CALL : 0 FITC : 4 ACTP : 0  
FLAGS :

Chemical : 4-(1,1,3,3-Tetramethylbutyl)phenol  
CAS : 140-66-9

Assay ID 1508 (NHEERL\_TPO\_AUR\_dn)  
Sample ID : TX002580

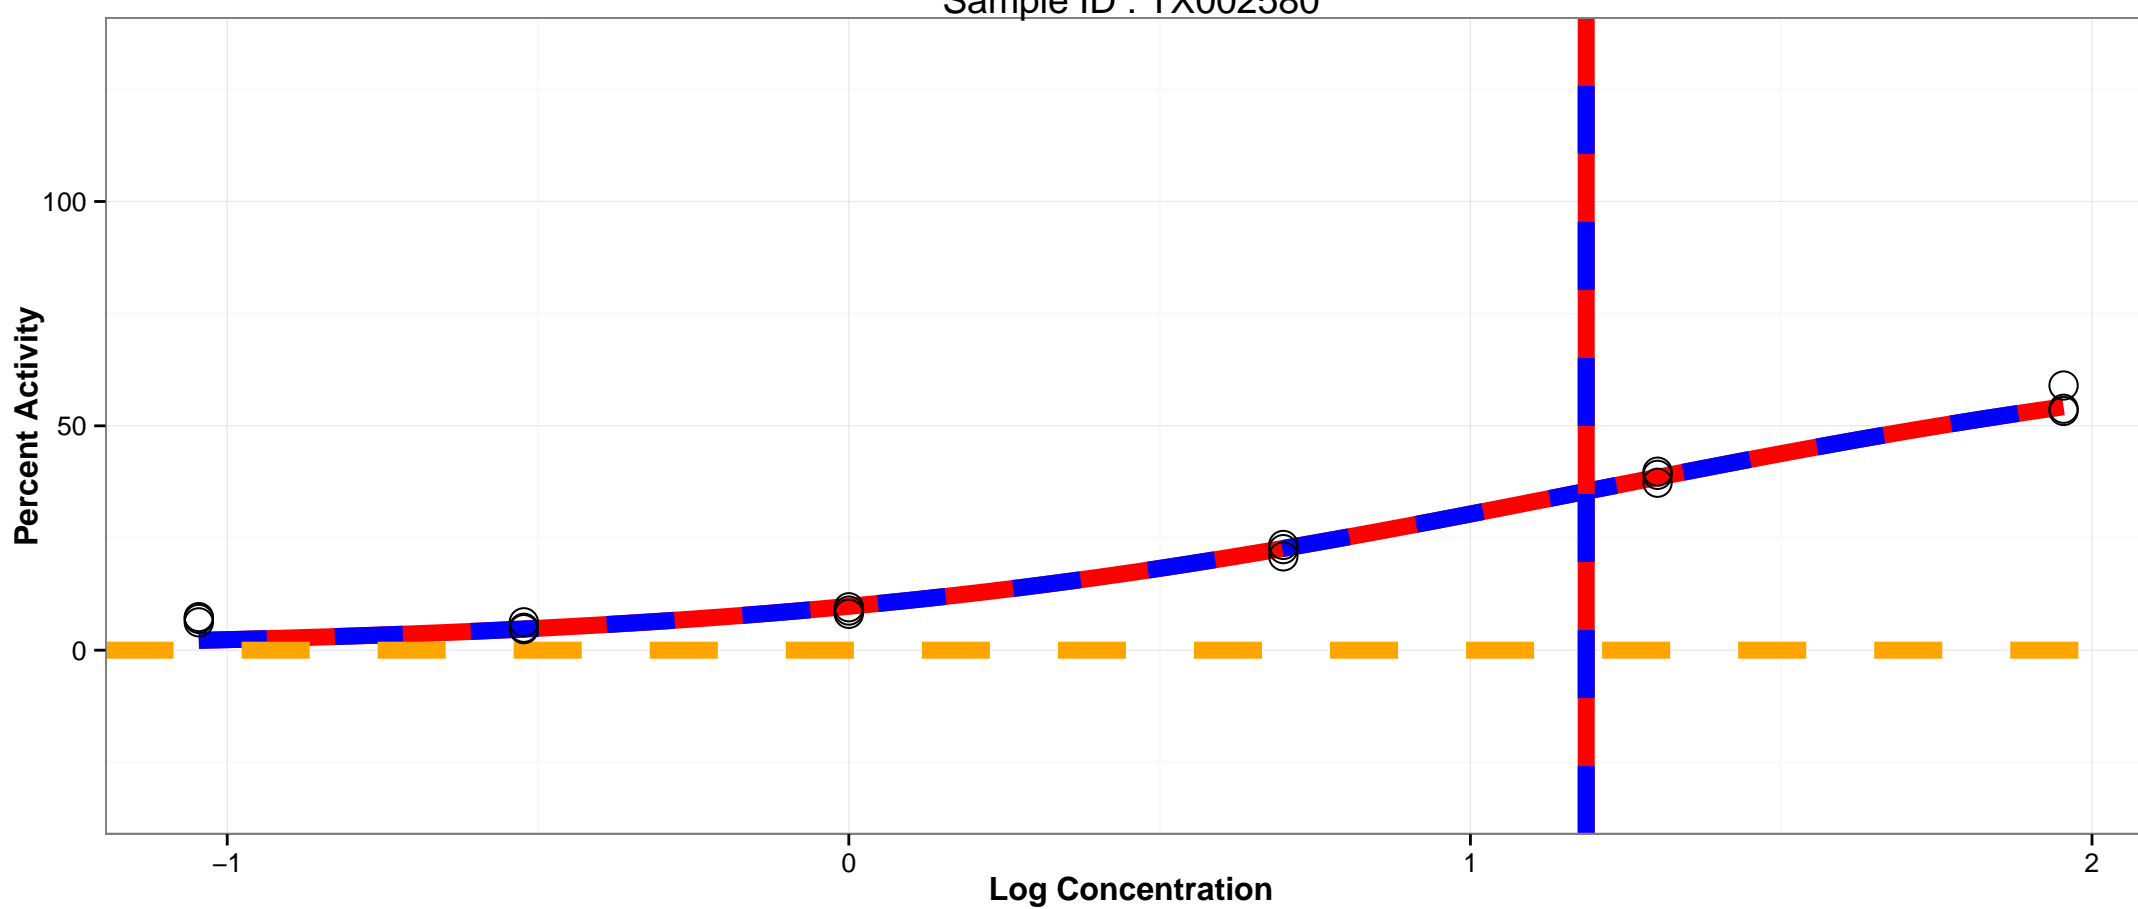

HILL MODEL

|     | tp   | ga    | gw     |
|-----|------|-------|--------|
| val | 70.8 | 1.19  | 0.671  |
| sd  | 5.31 | 0.117 | 0.0554 |

GAIN-LOSS MODEL

|     | tp   | ga    | gw     | la   | lw    |
|-----|------|-------|--------|------|-------|
| val | 70.8 | 1.19  | 0.671  | 2.56 | 16.9  |
| sd  | 5.31 | 0.117 | 0.0554 | 1670 | 45800 |

|      | CNST   | HILL  | GNLS  |
|------|--------|-------|-------|
| AIC  | 175.87 | 89.39 | 93.39 |
| PROB | 0      | 0.88  | 0.12  |
| RMSE | 29.52  | 2.39  | 2.39  |

MAX\_MEAN : 55.4 MAX\_MED : 53.8 BMAD : 5.69  
COFF : 20 HIT-CALL : 1 FITC : 42 ACTP : 1  
FLAGS :

Assay ID 1509 (NHEERL\_HEK293T\_CellTiterGLO)  
Sample ID : TX002580

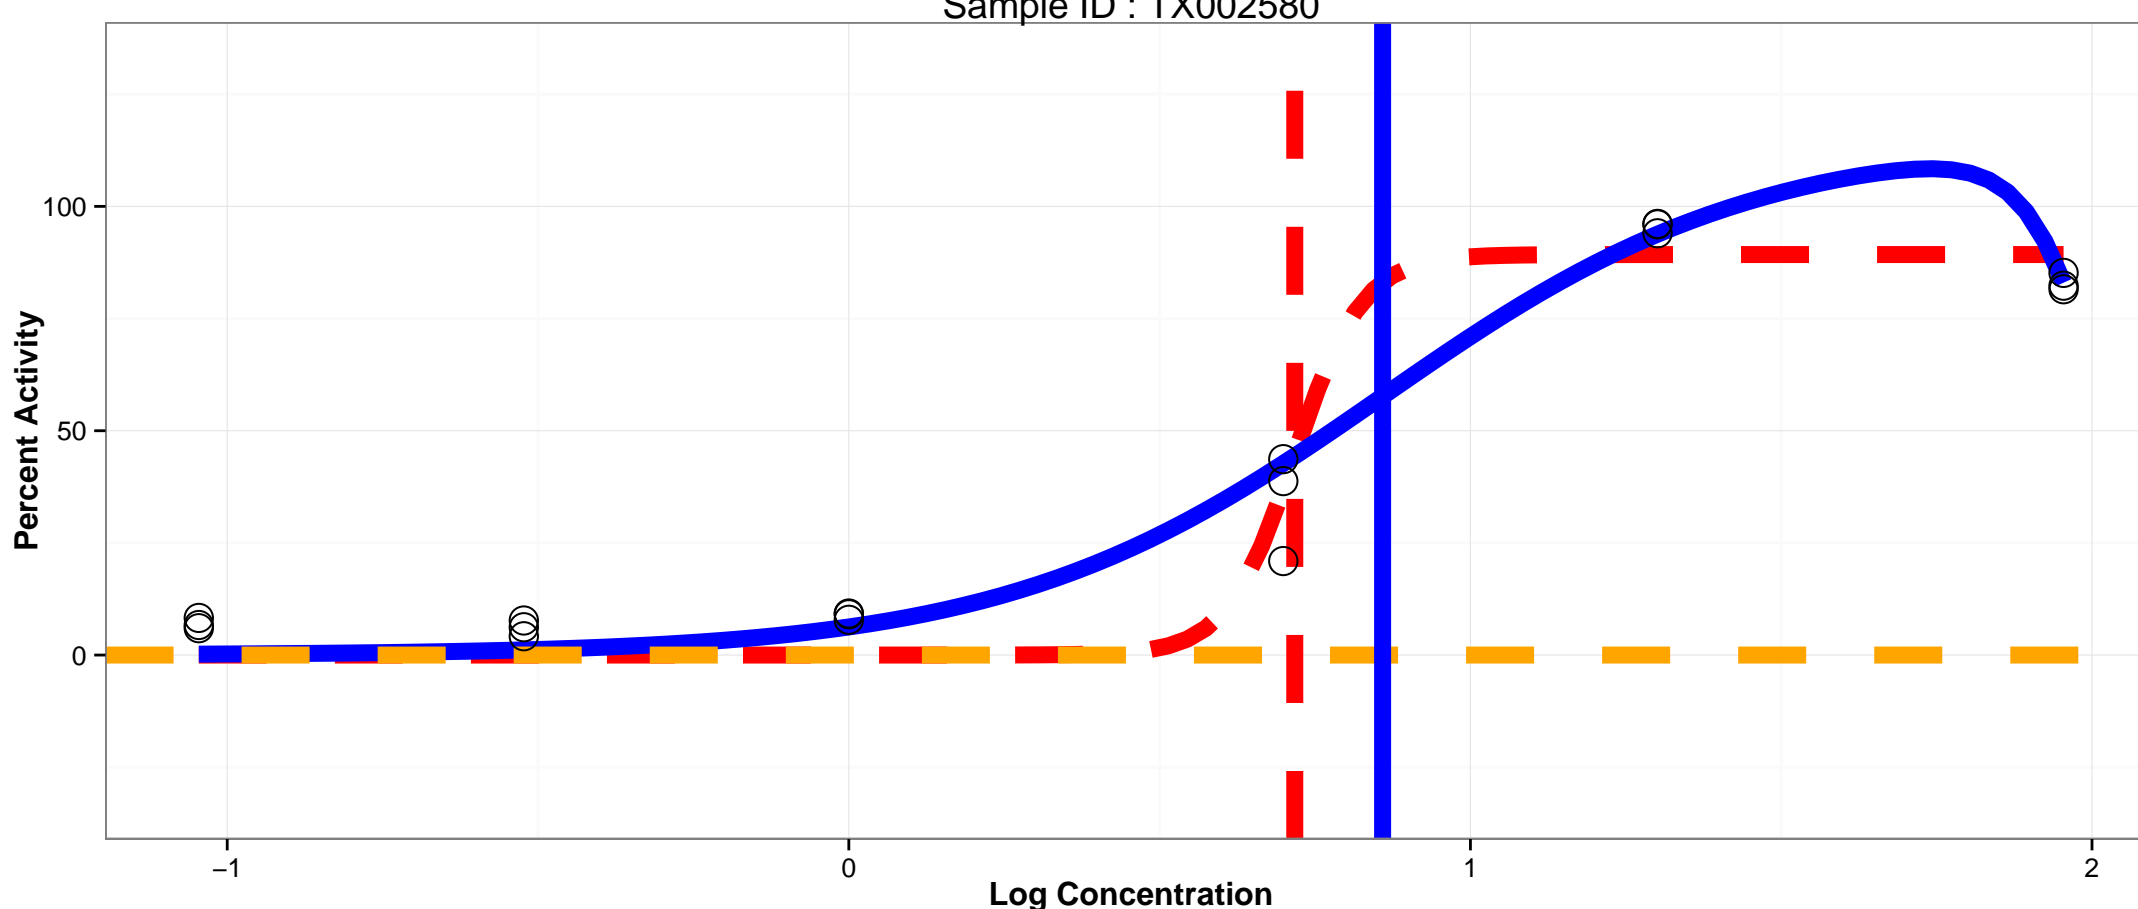

HILL MODEL

|     | tp   | ga     | gw   |
|-----|------|--------|------|
| val | 89.3 | 0.717  | 8    |
| sd  | 3.43 | 0.0556 | 23.6 |

GAIN-LOSS MODEL

|     | tp   | ga     | gw    | la      | lw   |
|-----|------|--------|-------|---------|------|
| val | 115  | 0.859  | 1.45  | 2.02    | 7.19 |
| sd  | 13.6 | 0.0902 | 0.316 | 0.00891 | 2.7  |

|      | CNST   | HILL   | GNLS   |
|------|--------|--------|--------|
| AIC  | 197.32 | 135.13 | 124.86 |
| PROB | 0      | 0.01   | 0.99   |
| RMSE | 53.92  | 7.61   | 6.43   |

MAX\_MEAN : 95.4 MAX\_MED : 96 BMAD : 5.54  
COFF : 20 HIT-CALL : 1 FITC : 50 ACTP : 1  
FLAGS :

Assay ID 1848 (NHEERL\_Quantilum\_inhib\_2\_dn)  
Sample ID : TX002580

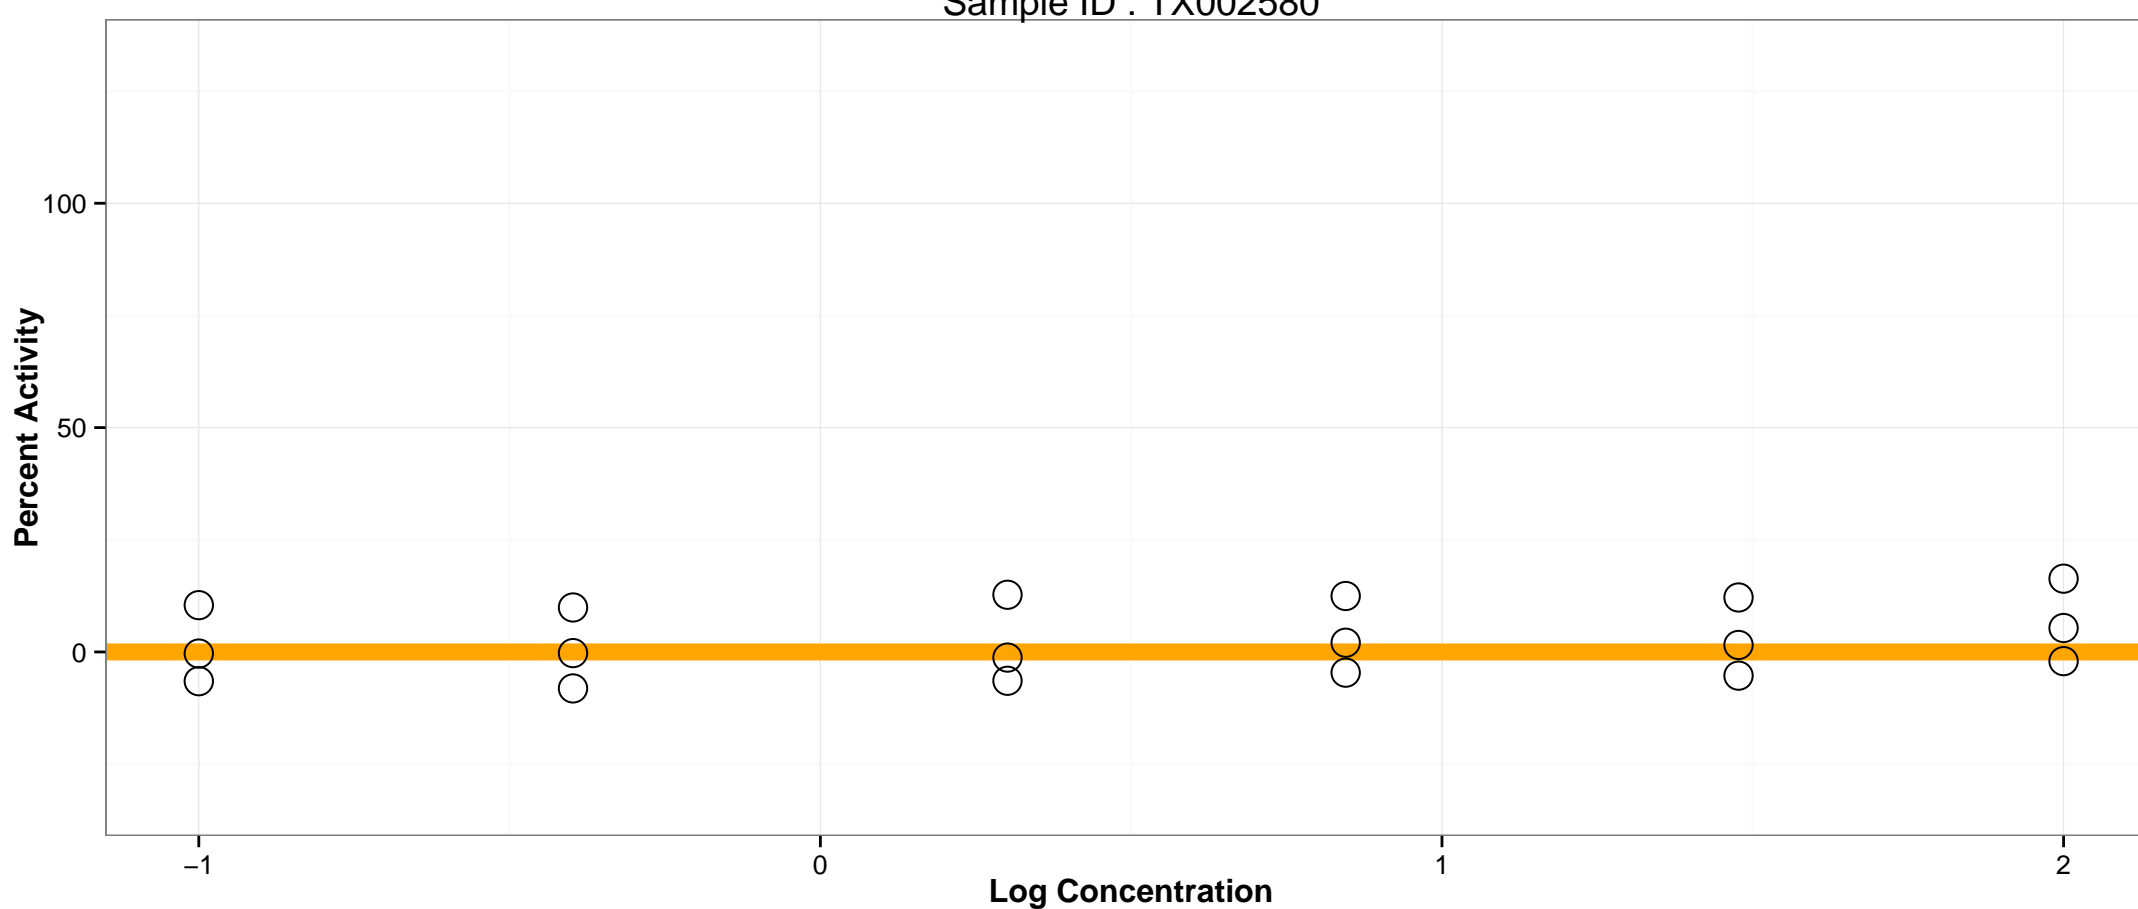

HILL MODEL

HILL MODEL: Not applicable

GAIN-LOSS MODEL

GNLS MODEL: Not applicable

|      | CNST   | HILL | GNLS |
|------|--------|------|------|
| AIC  | 130.22 | NA   | NA   |
| PROB | 1      | NA   | NA   |
| RMSE | 8.1    | NA   | NA   |

MAX\_MEAN : 6.55 MAX\_MED : 5.35 BMAD : 8.58  
COFF : 20 HIT-CALL : 0 FITC : 4 ACTP : 0  
FLAGS :

Chemical : 4-Aminobenzoic acid  
CAS : 150-13-0

Assay ID 1508 (NHEERL\_TPO\_AUR\_dn)  
Sample ID : TX002591

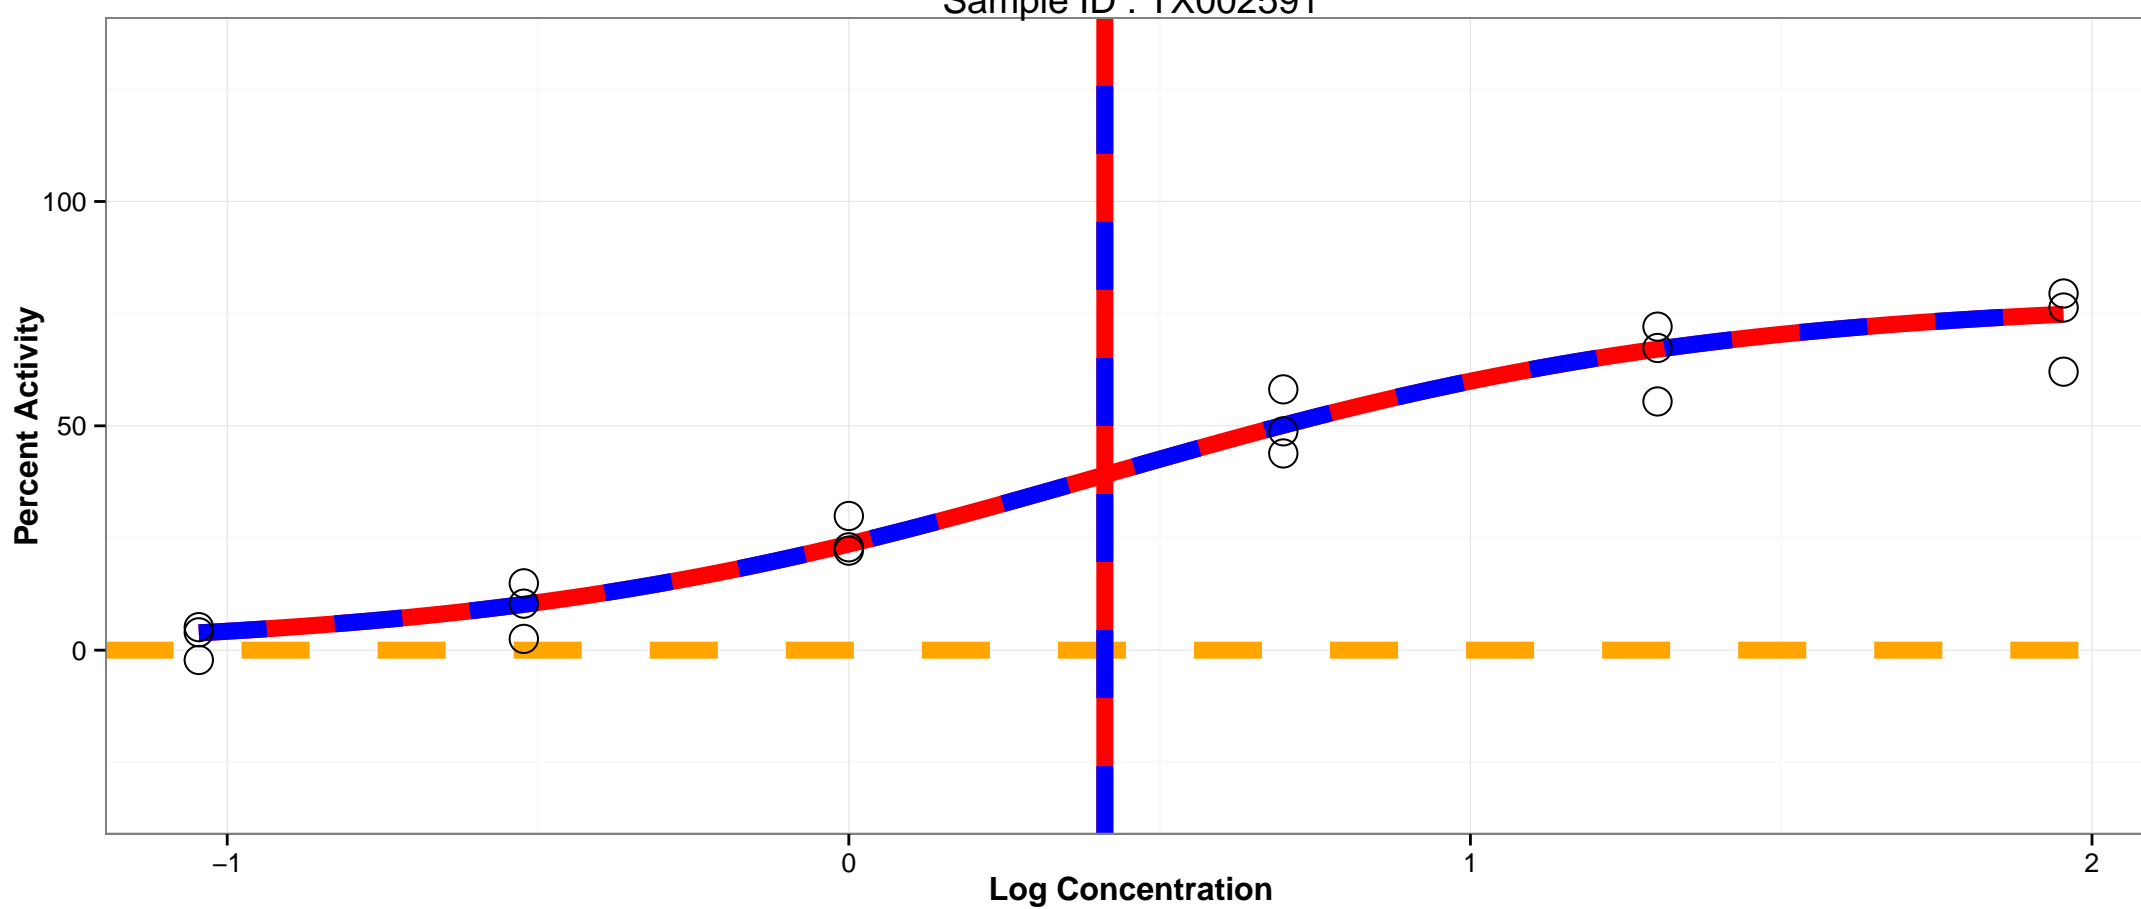

HILL MODEL

|     | tp   | ga    | gw    |
|-----|------|-------|-------|
| val | 78.1 | 0.412 | 0.881 |
| sd  | 5.26 | 0.117 | 0.132 |

GAIN-LOSS MODEL

|     | tp   | ga    | gw    | la     | lw      |
|-----|------|-------|-------|--------|---------|
| val | 78.1 | 0.412 | 0.881 | 2.9    | 15.3    |
| sd  | 5.26 | 0.117 | 0.132 | 270000 | 2050000 |

|      | CNST   | HILL   | GNLS   |
|------|--------|--------|--------|
| AIC  | 193.48 | 123.55 | 127.55 |
| PROB | 0      | 0.88   | 0.12   |
| RMSE | 46.43  | 5.84   | 5.84   |

MAX\_MEAN : 72.7 MAX\_MED : 76.4 BMAD : 5.69  
COFF : 20 HIT-CALL : 1 FITC : 41 ACTP : 1  
FLAGS :

Assay ID 1509 (NHEERL\_HEK293T\_CellTiterGLO)  
Sample ID : TX002591

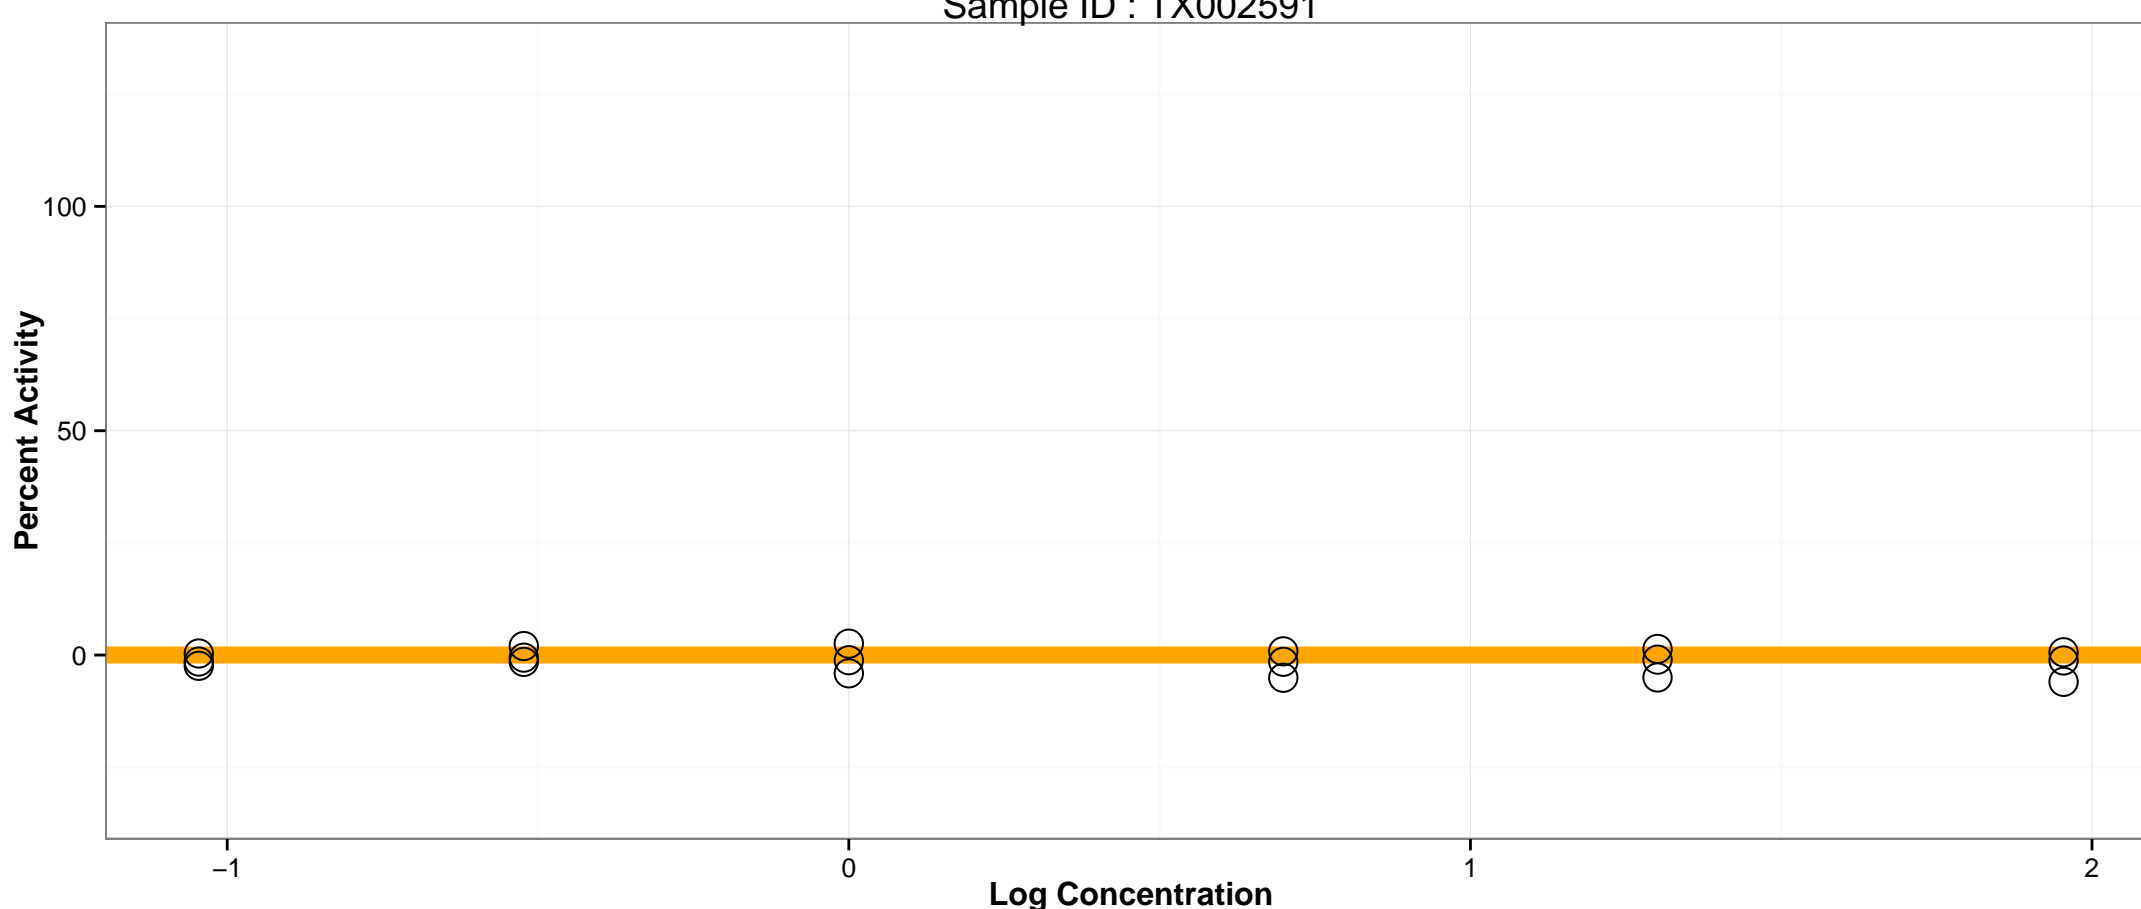

HILL MODEL

HILL MODEL: Not applicable

GAIN-LOSS MODEL

GNLS MODEL: Not applicable

|      | CNST | HILL | GNLS |
|------|------|------|------|
| AIC  | 89.4 | NA   | NA   |
| PROB | 1    | NA   | NA   |
| RMSE | 2.71 | NA   | NA   |

MAX\_MEAN : -0.0151 MAX\_MED : -0.561 BMAD : 5.54  
COFF : 20 HIT-CALL : 0 FITC : 4 ACTP : 0  
FLAGS :

Assay ID 1848 (NHEERL\_Quantilum\_inhib\_2\_dn)  
Sample ID : TX002591

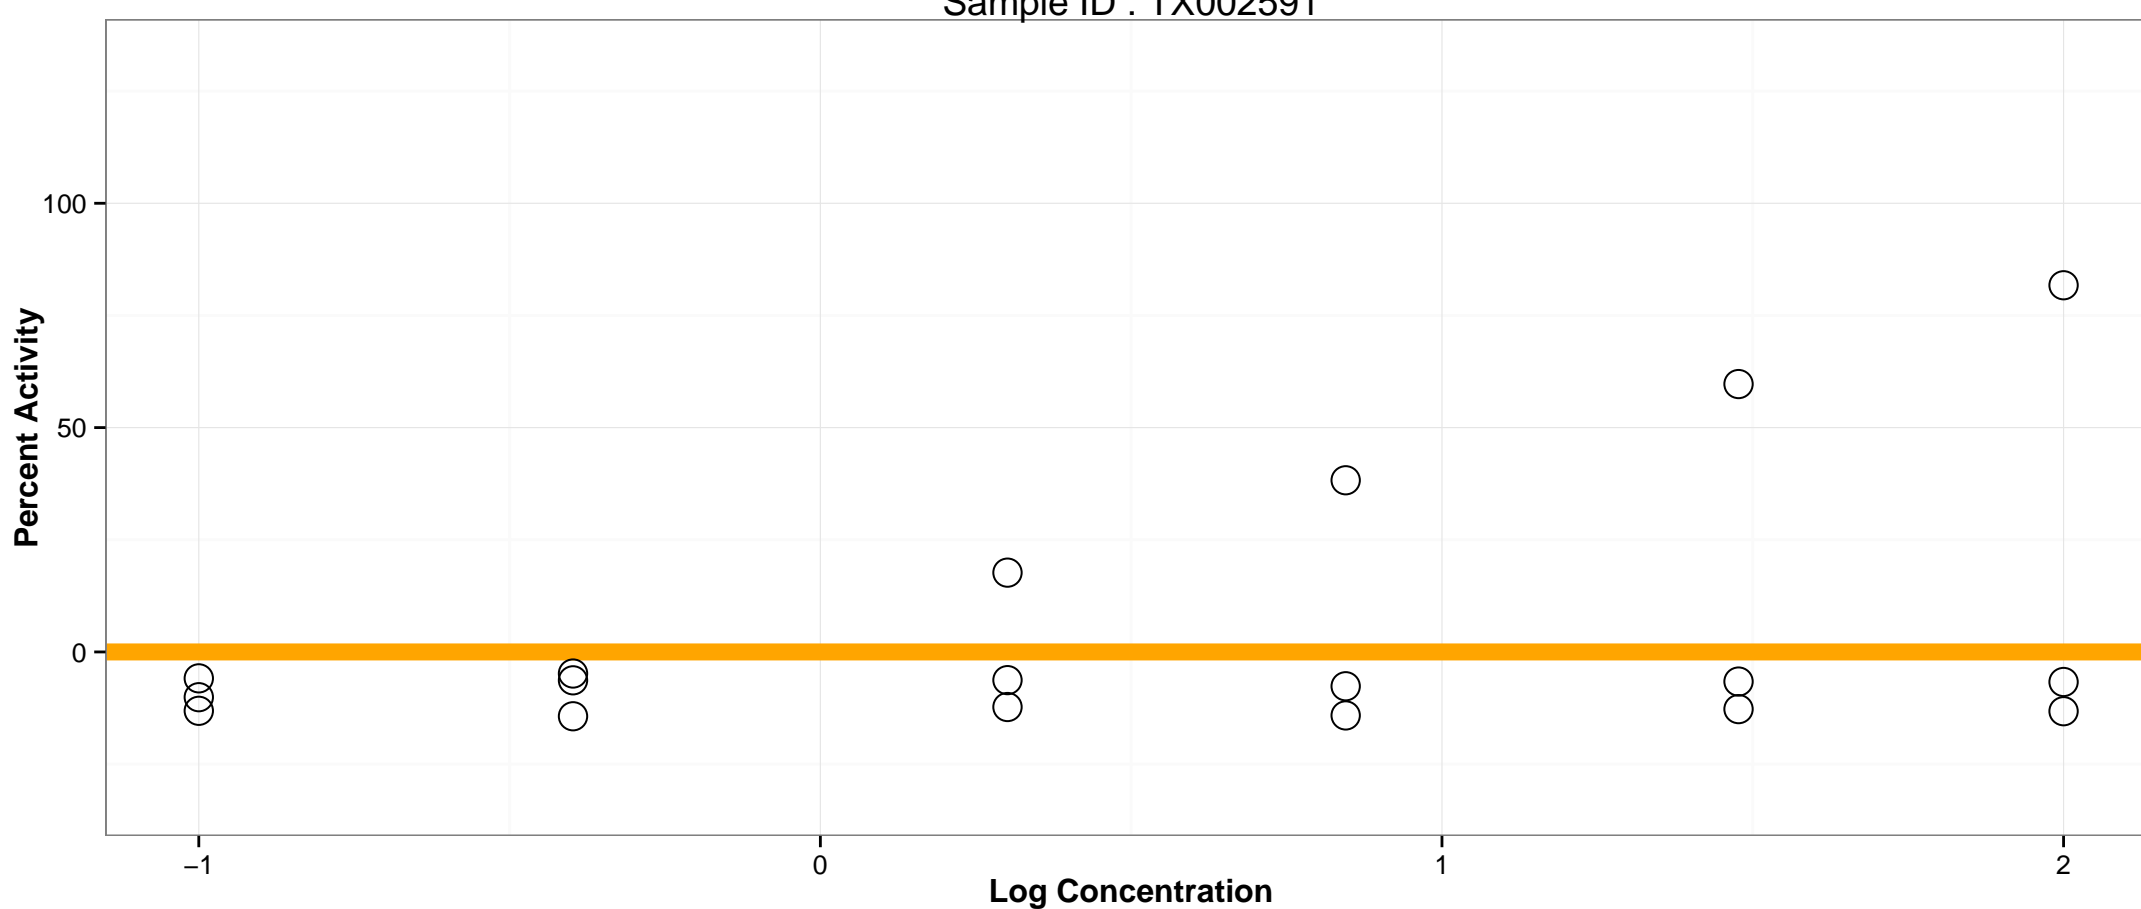

HILL MODEL

HILL MODEL: Not applicable

GAIN-LOSS MODEL

GNLS MODEL: Not applicable

|      | CNST   | HILL | GNLS |
|------|--------|------|------|
| AIC  | 167.09 | NA   | NA   |
| PROB | 1      | NA   | NA   |
| RMSE | 27.36  | NA   | NA   |

MAX\_MEAN : 20.6 MAX\_MED : -6.27 BMAD : 8.58  
COFF : 20 HIT-CALL : 0 FITC : 4 ACTP : 0  
FLAGS : 10



Chemical : 4-(2-Methylbutan-2-yl)phenol  
CAS : 80-46-6

Assay ID 1508 (NHEERL\_TPO\_AUR\_dn)  
Sample ID : TX002599

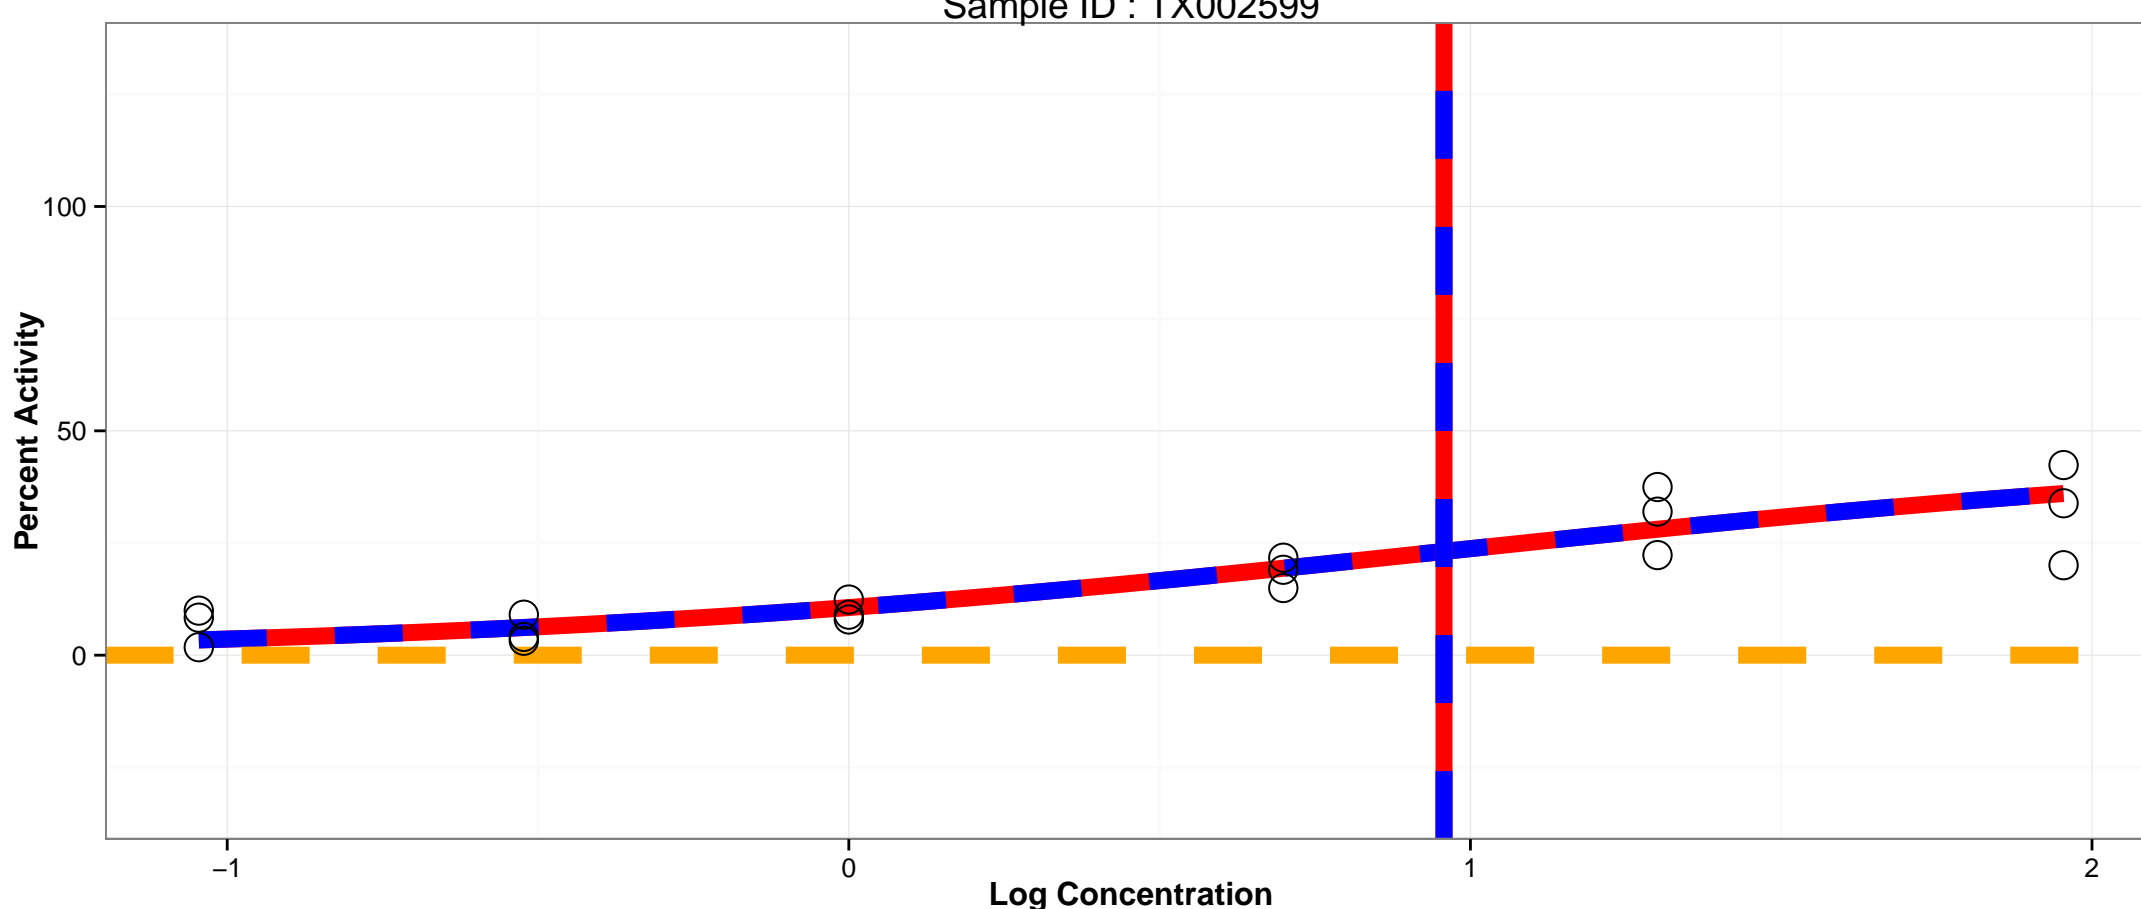

HILL MODEL

|     | tp   | ga    | gw    |
|-----|------|-------|-------|
| val | 46.2 | 0.958 | 0.549 |
| sd  | 15   | 0.616 | 0.196 |

GAIN-LOSS MODEL

|     | tp   | ga    | gw    | la   | lw   |
|-----|------|-------|-------|------|------|
| val | 46.2 | 0.958 | 0.549 | 3.07 | 9.64 |
| sd  | NA   | NA    | NA    | NA   | NA   |

|      | CNST   | HILL   | GNLS   |
|------|--------|--------|--------|
| AIC  | 164.19 | 120.13 | 124.13 |
| PROB | 0      | 0.88   | 0.12   |
| RMSE | 20.97  | 5.61   | 5.61   |

MAX\_MEAN : 32.1 MAX\_MED : 33.9 BMAD : 5.69  
COFF : 20 HIT-CALL : 1 FITC : 42 ACTP : 1  
FLAGS :

Assay ID 1509 (NHEERL\_HEK293T\_CellTiterGLO)  
Sample ID : TX002599

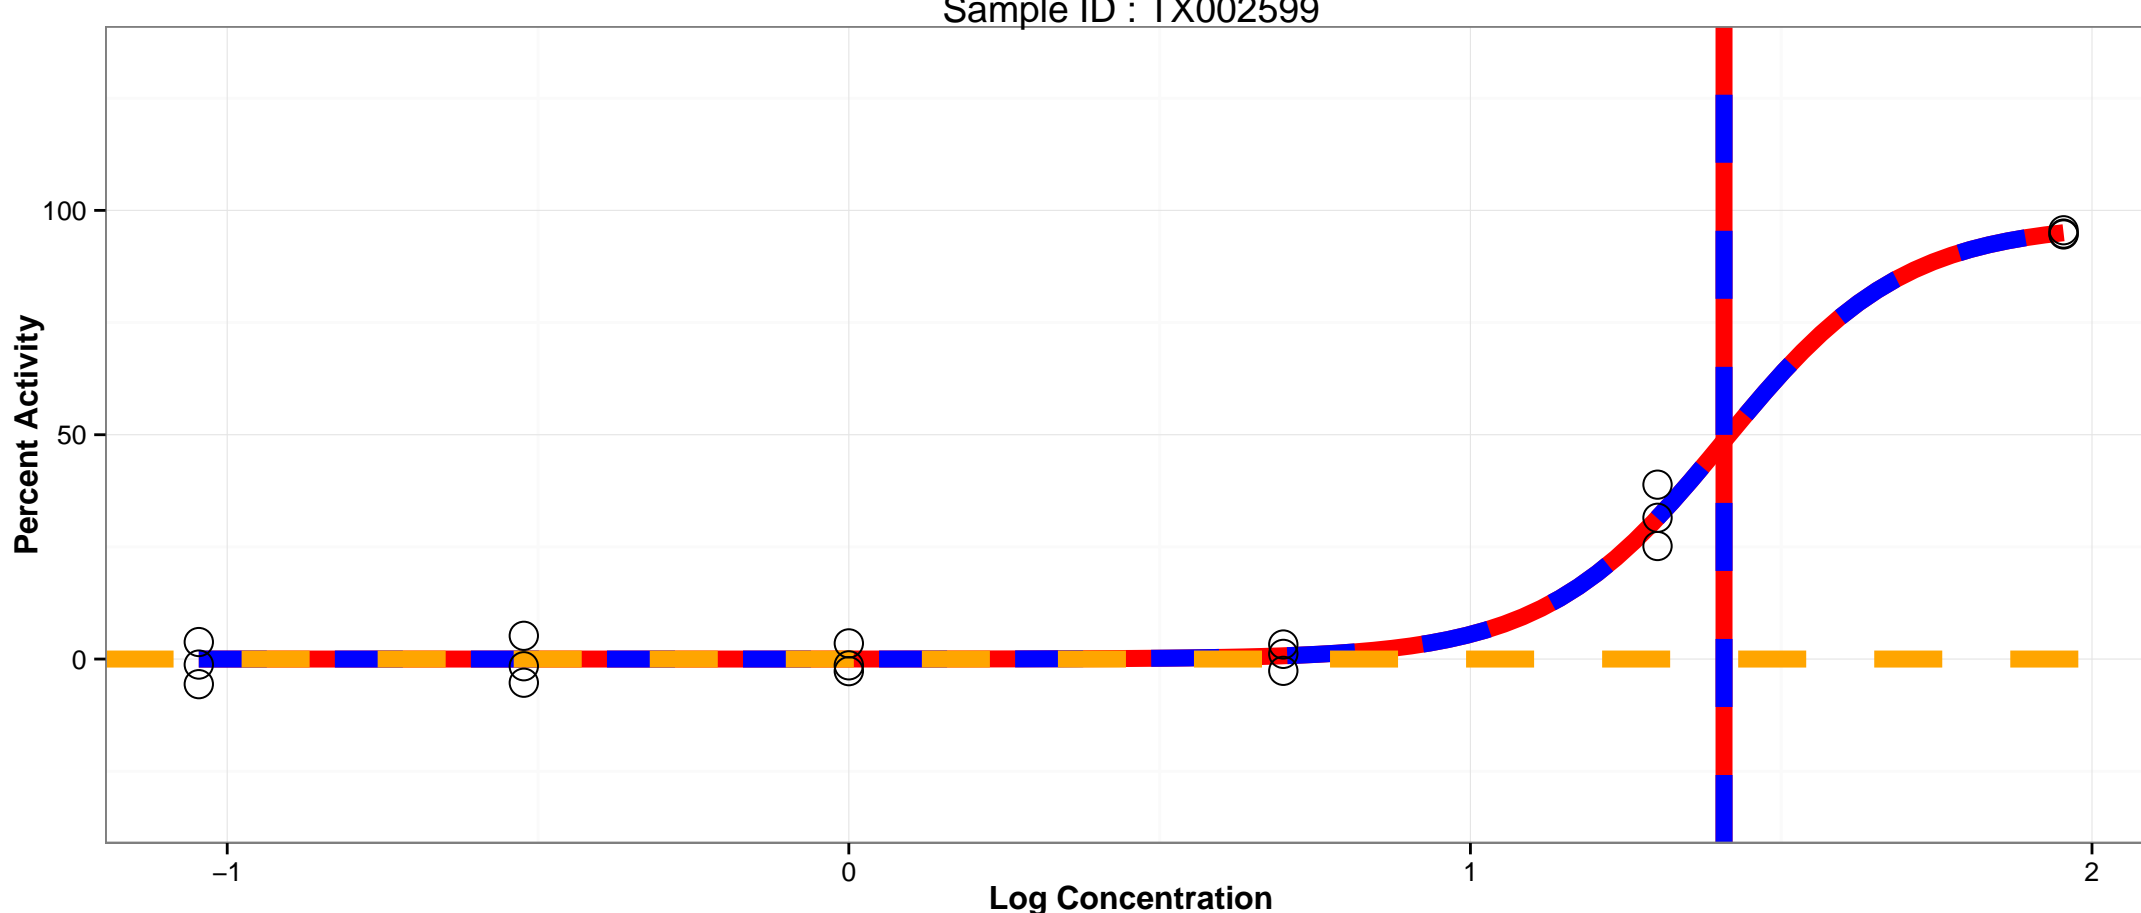

HILL MODEL

|     | tp   | ga     | gw   |
|-----|------|--------|------|
| val | 97.2 | 1.41   | 3    |
| sd  | 4.12 | 0.0511 | 1.12 |

GAIN-LOSS MODEL

|     | tp   | ga   | gw | la  | lw   |
|-----|------|------|----|-----|------|
| val | 97.2 | 1.41 | 3  | 3.5 | 10.7 |
| sd  | NA   | NA   | NA | NA  | NA   |

|      | CNST   | HILL   | GNLS   |
|------|--------|--------|--------|
| AIC  | 181.34 | 107.08 | 111.08 |
| PROB | 0      | 0.88   | 0.12   |
| RMSE | 41.08  | 3.64   | 3.64   |

MAX\_MEAN : 95 MAX\_MED : 94.8 BMAD : 5.54  
COFF : 20 HIT-CALL : 1 FITC : 41 ACTP : 1  
FLAGS :

Assay ID 1848 (NHEERL\_Quantilum\_inhib\_2\_dn)  
Sample ID : TX002599

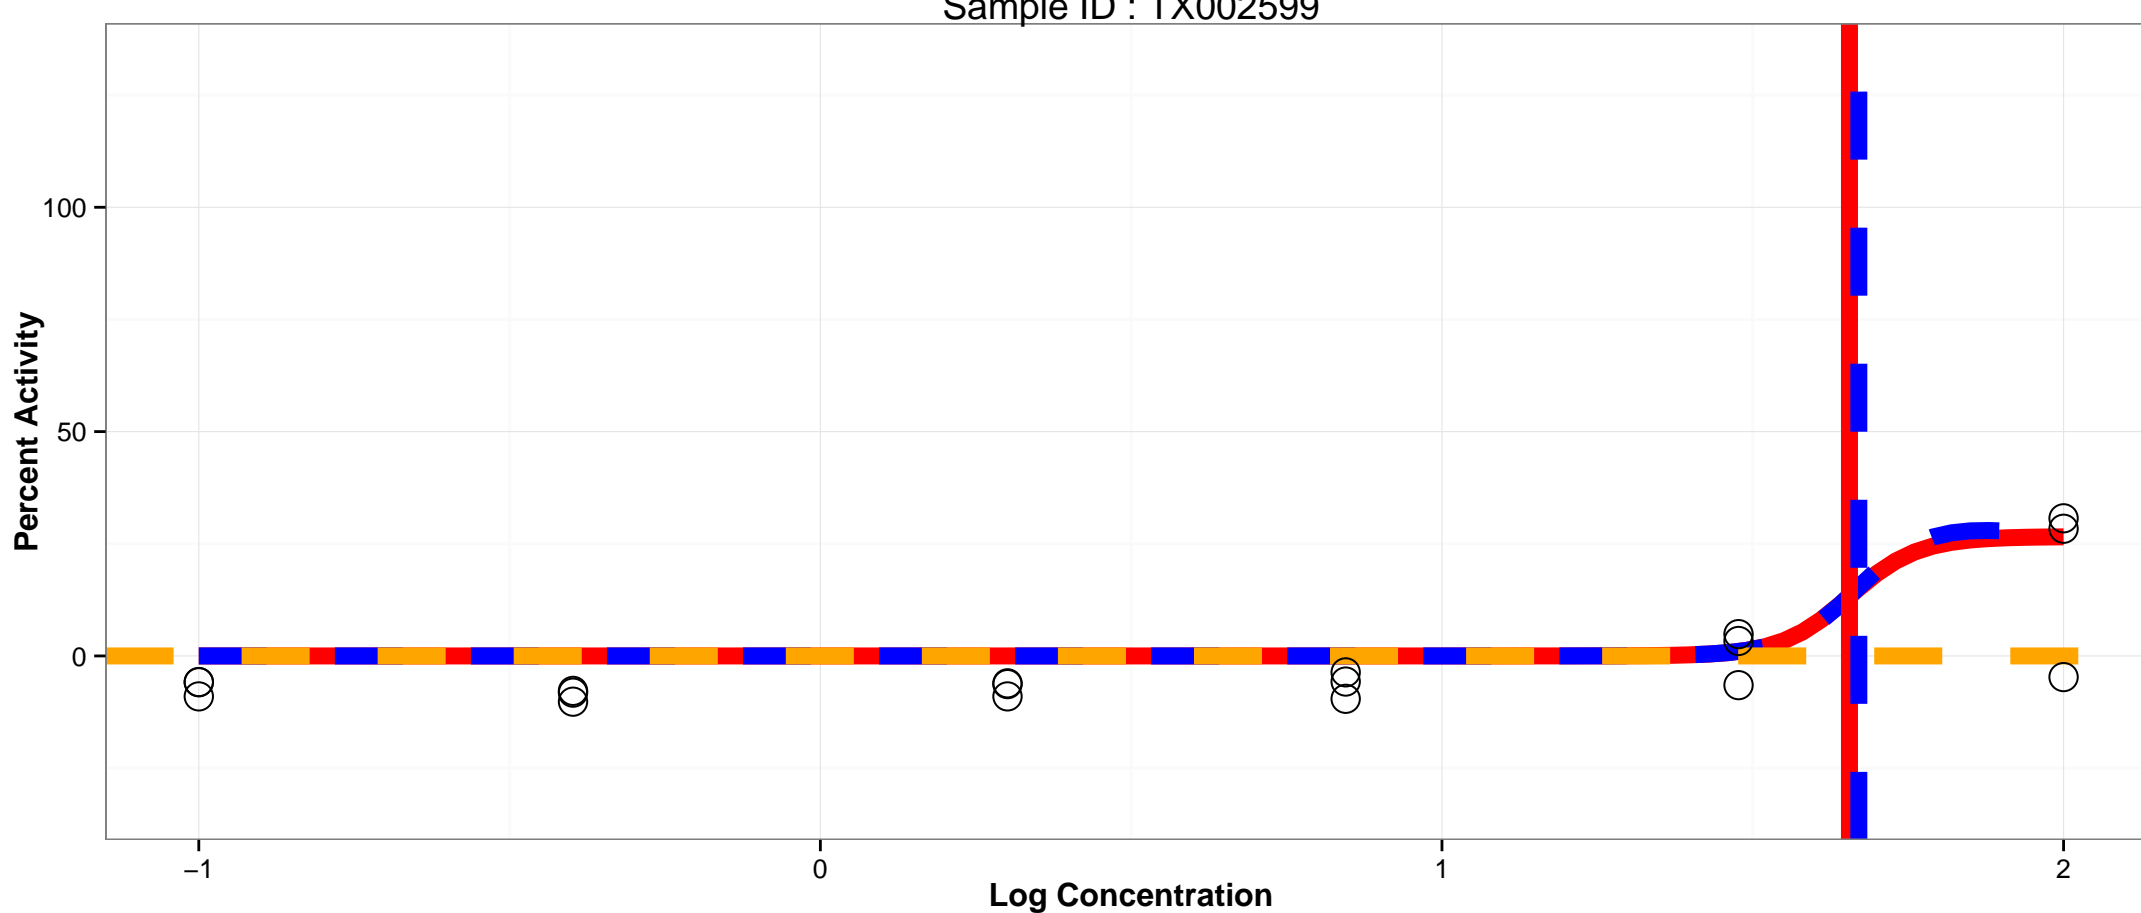

HILL MODEL

|     | tp   | ga   | gw   |
|-----|------|------|------|
| val | 26.6 | 1.66 | 7.93 |
| sd  | 11.8 | 4.01 | 177  |

GAIN-LOSS MODEL

|     | tp   | ga   | gw   | la   | lw   |
|-----|------|------|------|------|------|
| val | 32.2 | 1.67 | 7.71 | 2.36 | 1.88 |
| sd  | 2400 | 6.11 | 181  | 95.9 | 432  |

|      | CNST   | HILL  | GNLS  |
|------|--------|-------|-------|
| AIC  | 140.35 | 139.3 | 143.3 |
| PROB | 0.34   | 0.58  | 0.08  |
| RMSE | 11.83  | 9.85  | 9.85  |

MAX\_MEAN : 18.1 MAX\_MED : 28.4 BMAD : 8.58  
COFF : 20 HIT-CALL : 1 FITC : 41 ACTP : 0.657  
FLAGS : 6; 11; 16

Assay ID 1508 (NHEERL\_TPO\_AUR\_dn)  
Sample ID : TX002605

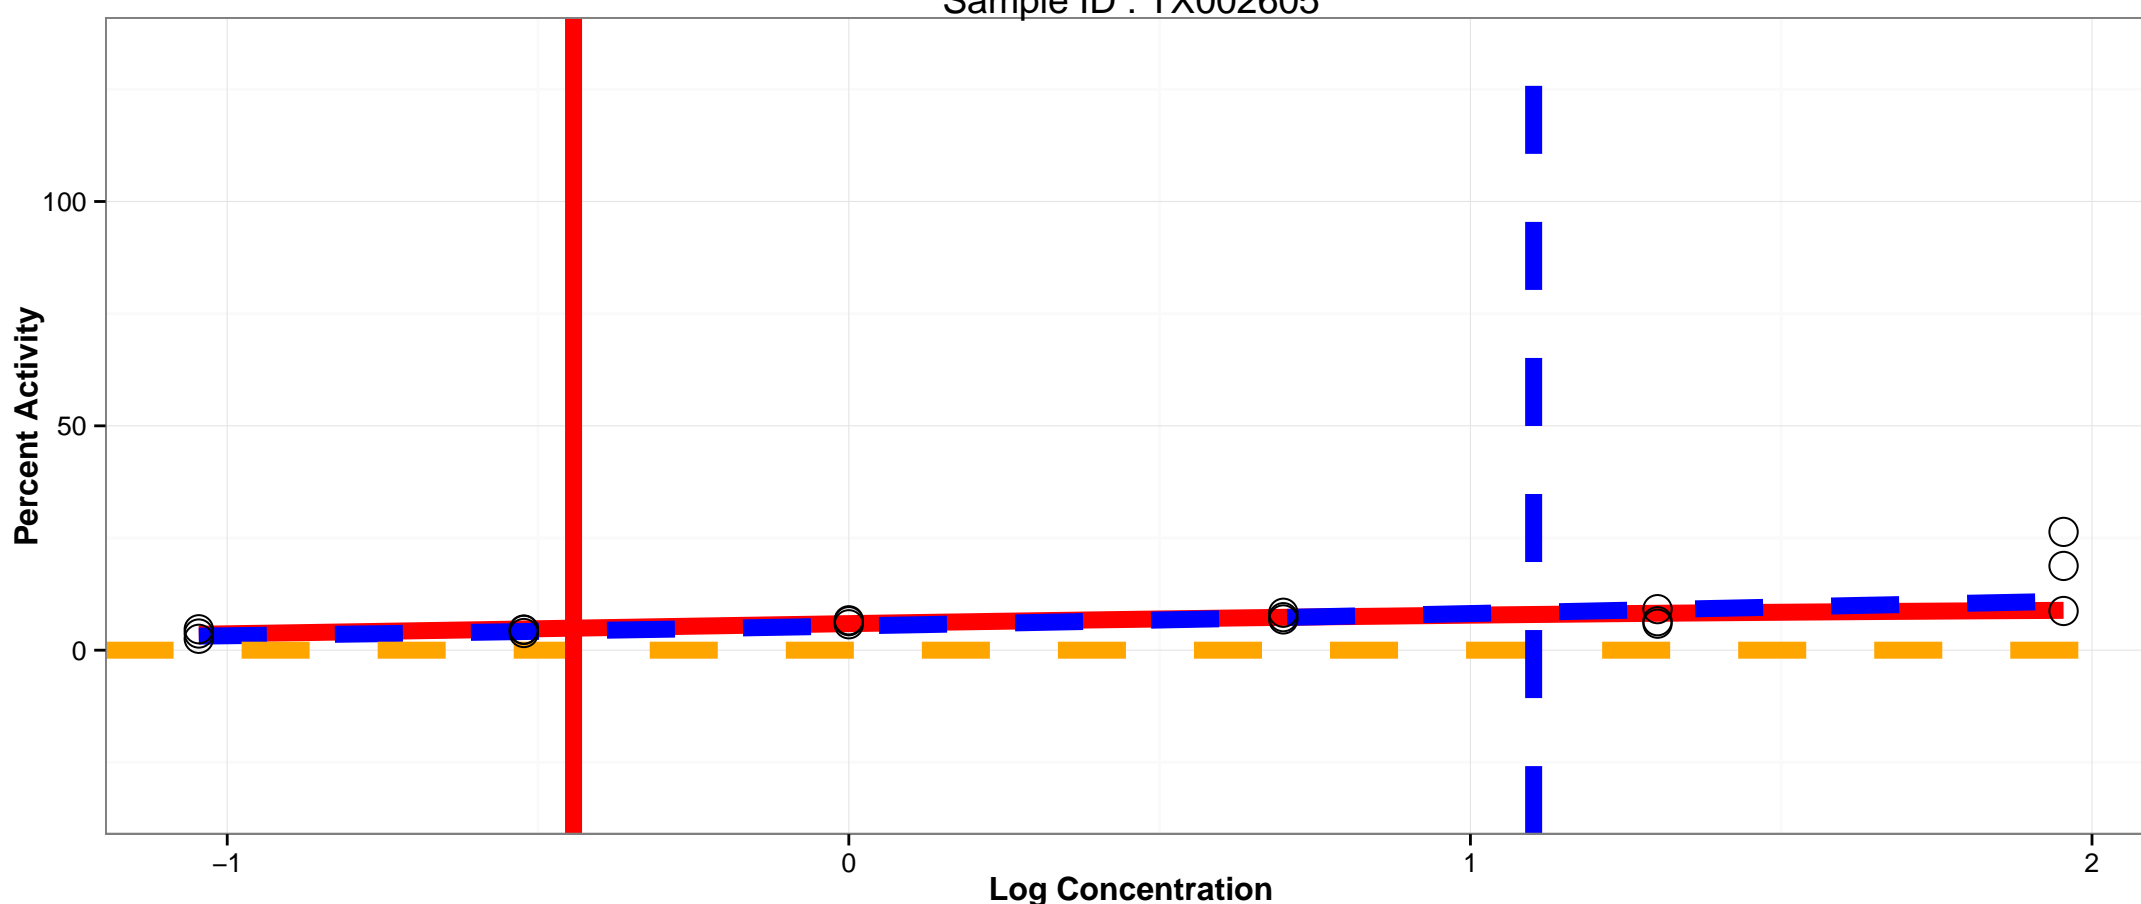

HILL MODEL

|     | tp   | ga     | gw    |
|-----|------|--------|-------|
| val | 9.81 | -0.443 | 0.409 |
| sd  | 3.04 | 0.724  | 0.272 |

GAIN-LOSS MODEL

|     | tp   | ga  | gw  | la   | lw   |
|-----|------|-----|-----|------|------|
| val | 16.9 | 1.1 | 0.3 | 3.95 | 10.8 |
| sd  | NA   | NA  | NA  | NA   | NA   |

|      | CNST   | HILL  | GNLS   |
|------|--------|-------|--------|
| AIC  | 134.17 | 94.71 | 101.29 |
| PROB | 0      | 0.96  | 0.04   |
| RMSE | 9.65   | 4.82  | 4.29   |

MAX\_MEAN : 18 MAX\_MED : 18.8 BMAD : 5.69  
COFF : 20 HIT-CALL : 0 FITC : 15 ACTP : 1  
FLAGS : 12

Assay ID 1509 (NHEERL\_HEK293T\_CellTiterGLO)  
Sample ID : TX002605

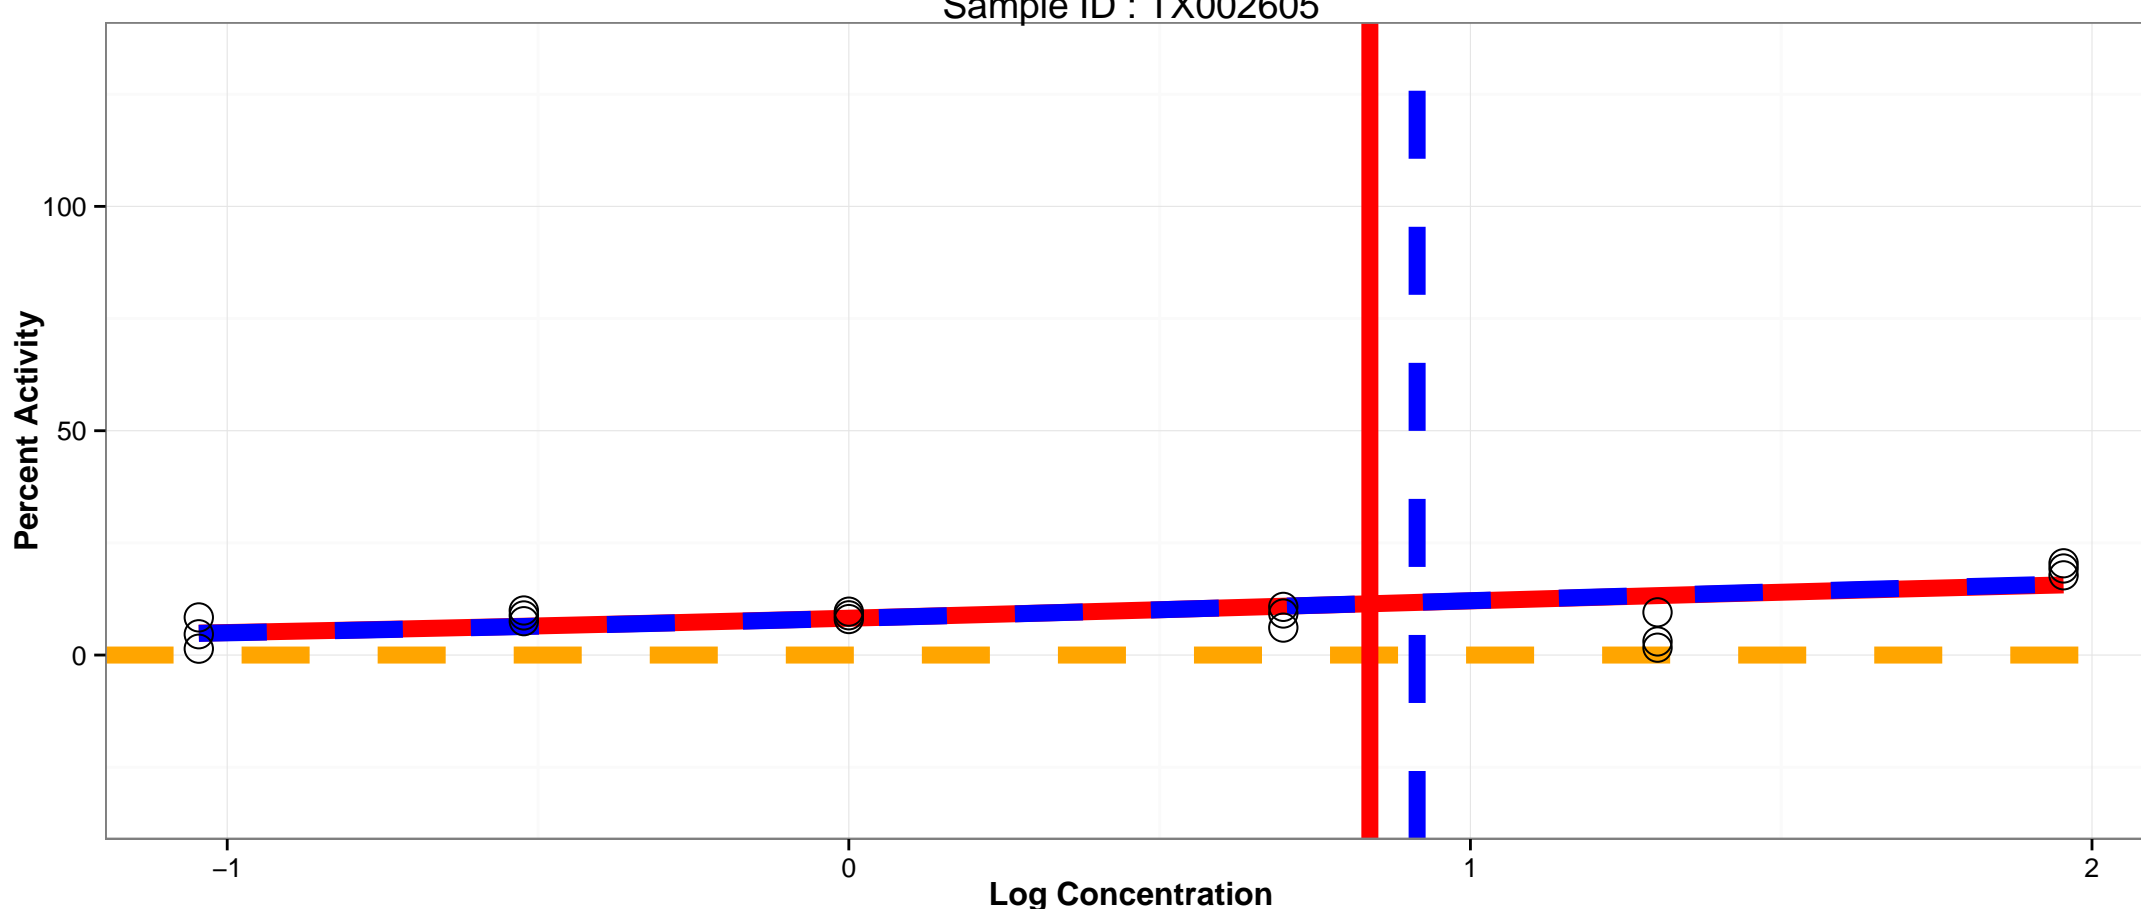

HILL MODEL

|     | tp   | ga    | gw    |
|-----|------|-------|-------|
| val | 22.9 | 0.838 | 0.3   |
| sd  | 15.9 | 2.07  | 0.154 |

GAIN-LOSS MODEL

|     | tp   | ga    | gw    | la   | lw    |
|-----|------|-------|-------|------|-------|
| val | 23.5 | 0.914 | 0.3   | 2.59 | 14.3  |
| sd  | 17.9 | 2.27  | 0.164 | 634  | 14300 |

|      | CNST   | HILL   | GNLS   |
|------|--------|--------|--------|
| AIC  | 140.25 | 111.98 | 115.93 |
| PROB | 0      | 0.88   | 0.12   |
| RMSE | 10.58  | 4.51   | 4.52   |

MAX\_MEAN : 19.2 MAX\_MED : 19.3 BMAD : 5.54  
COFF : 20 HIT-CALL : 0 FITC : 21 ACTP : 1  
FLAGS : 12

Assay ID 1848 (NHEERL\_Quantilum\_inhib\_2\_dn)  
Sample ID : TX002605

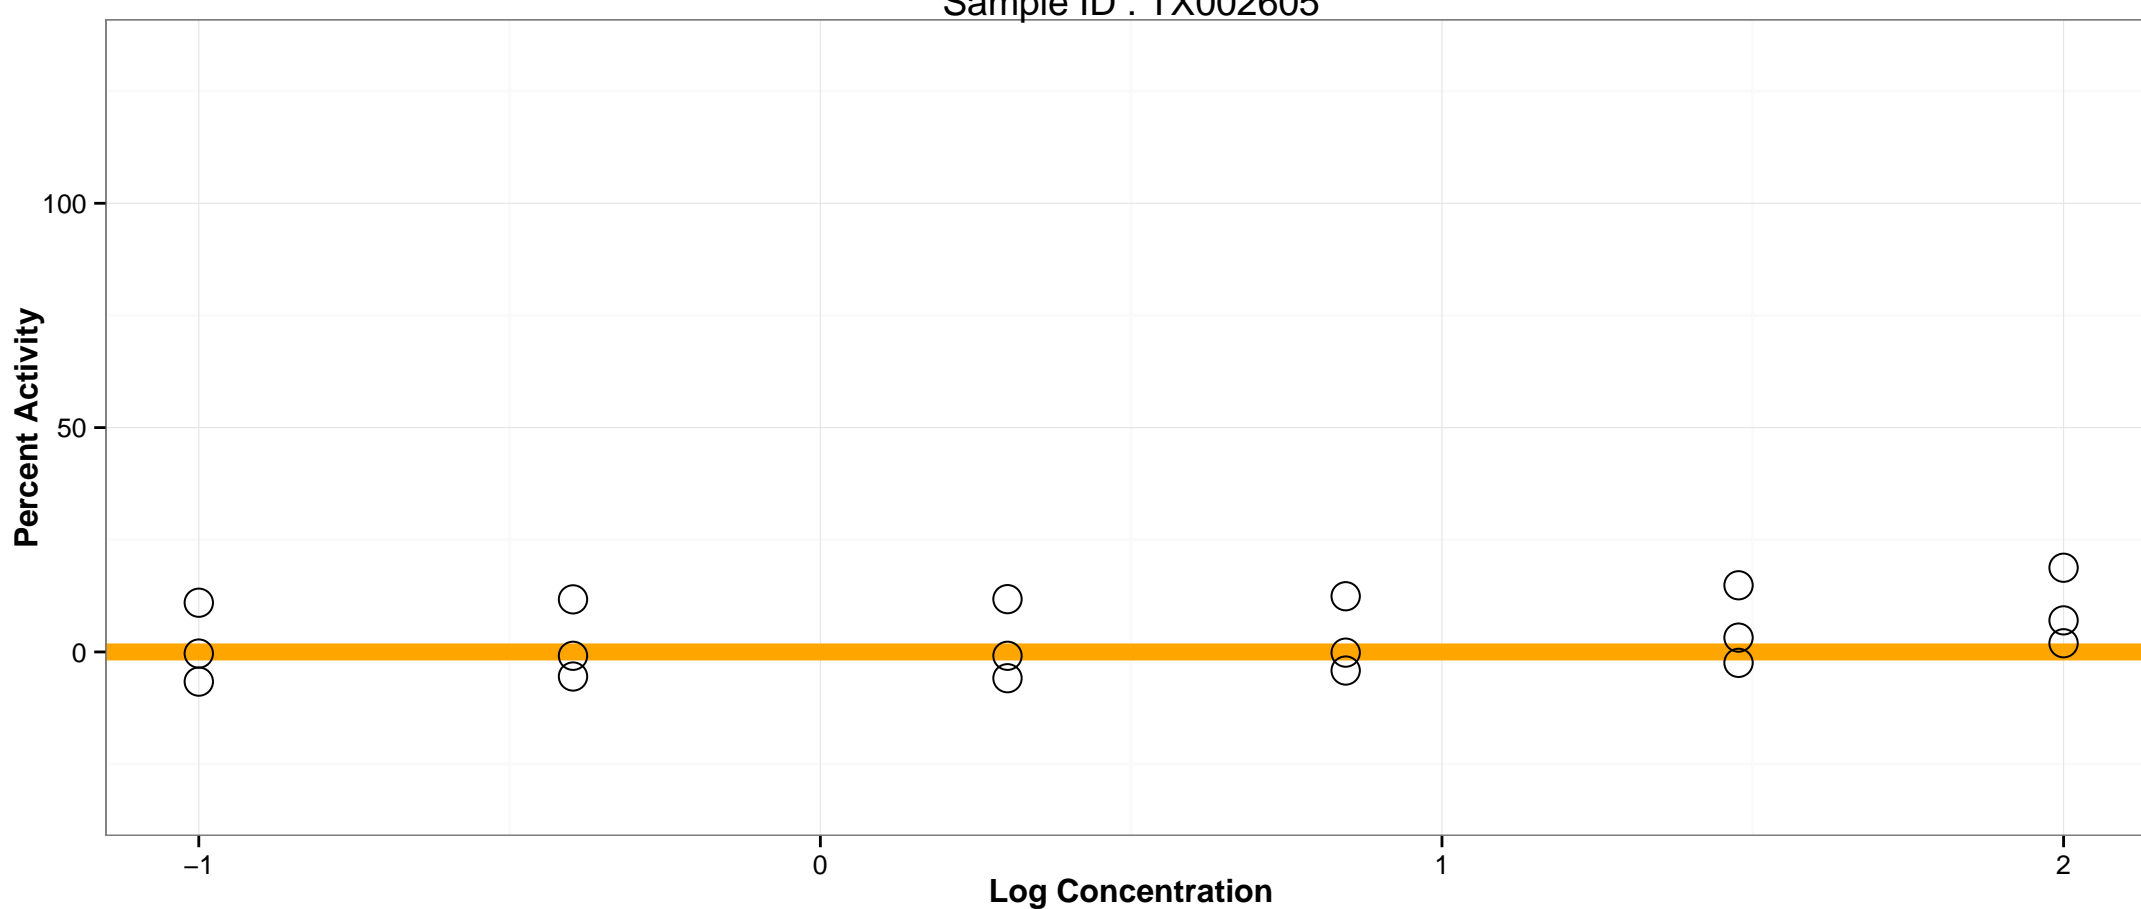

HILL MODEL

HILL MODEL: Not applicable

GAIN-LOSS MODEL

GNLS MODEL: Not applicable

|      | CNST   | HILL | GNLS |
|------|--------|------|------|
| AIC  | 131.52 | NA   | NA   |
| PROB | 1      | NA   | NA   |
| RMSE | 8.57   | NA   | NA   |

MAX\_MEAN : 9.26 MAX\_MED : 7.05 BMAD : 8.58  
COFF : 20 HIT-CALL : 0 FITC : 4 ACTP : 0  
FLAGS :

Chemical : 2,4-Bis(2-methylbutan-2-yl)phenol  
CAS : 120-95-6

Assay ID 1508 (NHEERL\_TPO\_AUR\_dn)  
Sample ID : TX002641

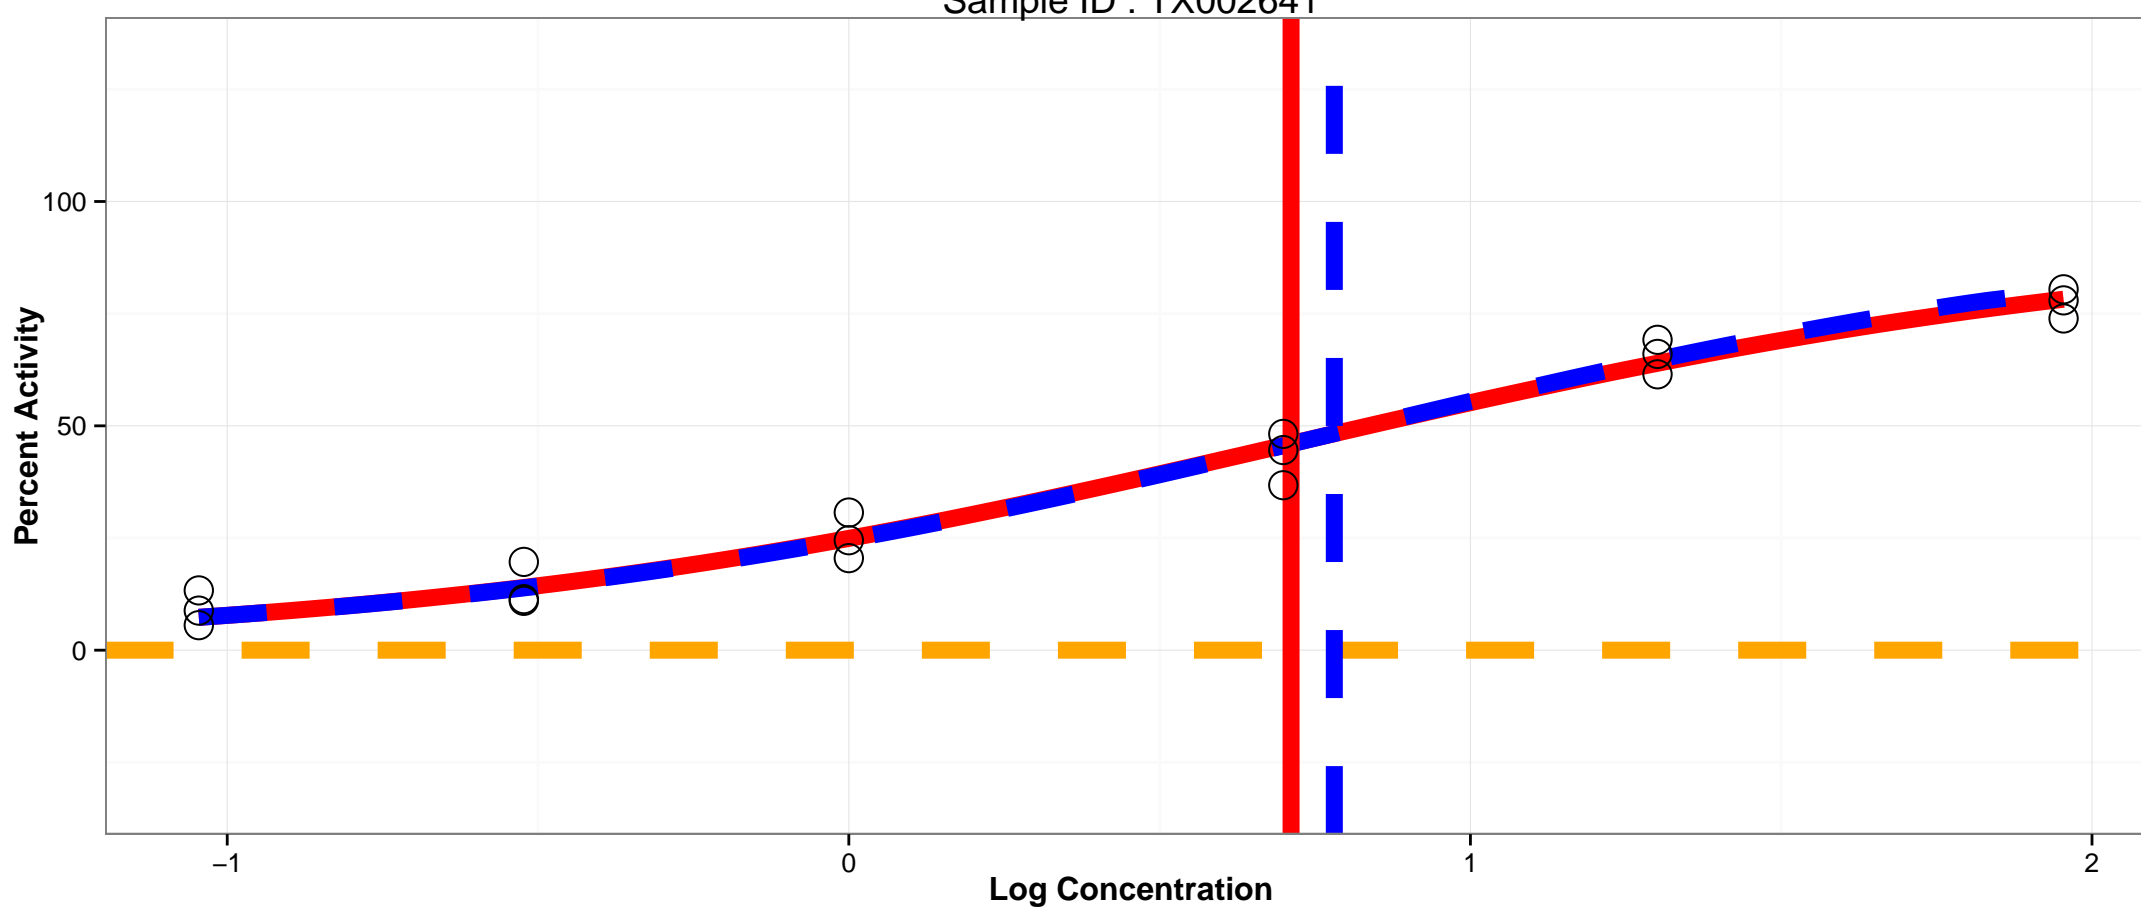

HILL MODEL

|     | tp   | ga    | gw     |
|-----|------|-------|--------|
| val | 92.1 | 0.711 | 0.605  |
| sd  | 6.94 | 0.149 | 0.0718 |

GAIN-LOSS MODEL

|     | tp   | ga    | gw    | la   | lw   |
|-----|------|-------|-------|------|------|
| val | 96.5 | 0.781 | 0.594 | 2.06 | 13.1 |
| sd  | NA   | NA    | NA    | NA   | NA   |

|      | CNST   | HILL   | GNLS   |
|------|--------|--------|--------|
| AIC  | 193.74 | 110.83 | 114.27 |
| PROB | 0      | 0.85   | 0.15   |
| RMSE | 46.85  | 4.01   | 3.96   |

MAX\_MEAN : 77.5 MAX\_MED : 78 BMAD : 5.69  
COFF : 20 HIT-CALL : 1 FITC : 42 ACTP : 1  
FLAGS :

Assay ID 1509 (NHEERL\_HEK293T\_CellTiterGLO)  
Sample ID : TX002641

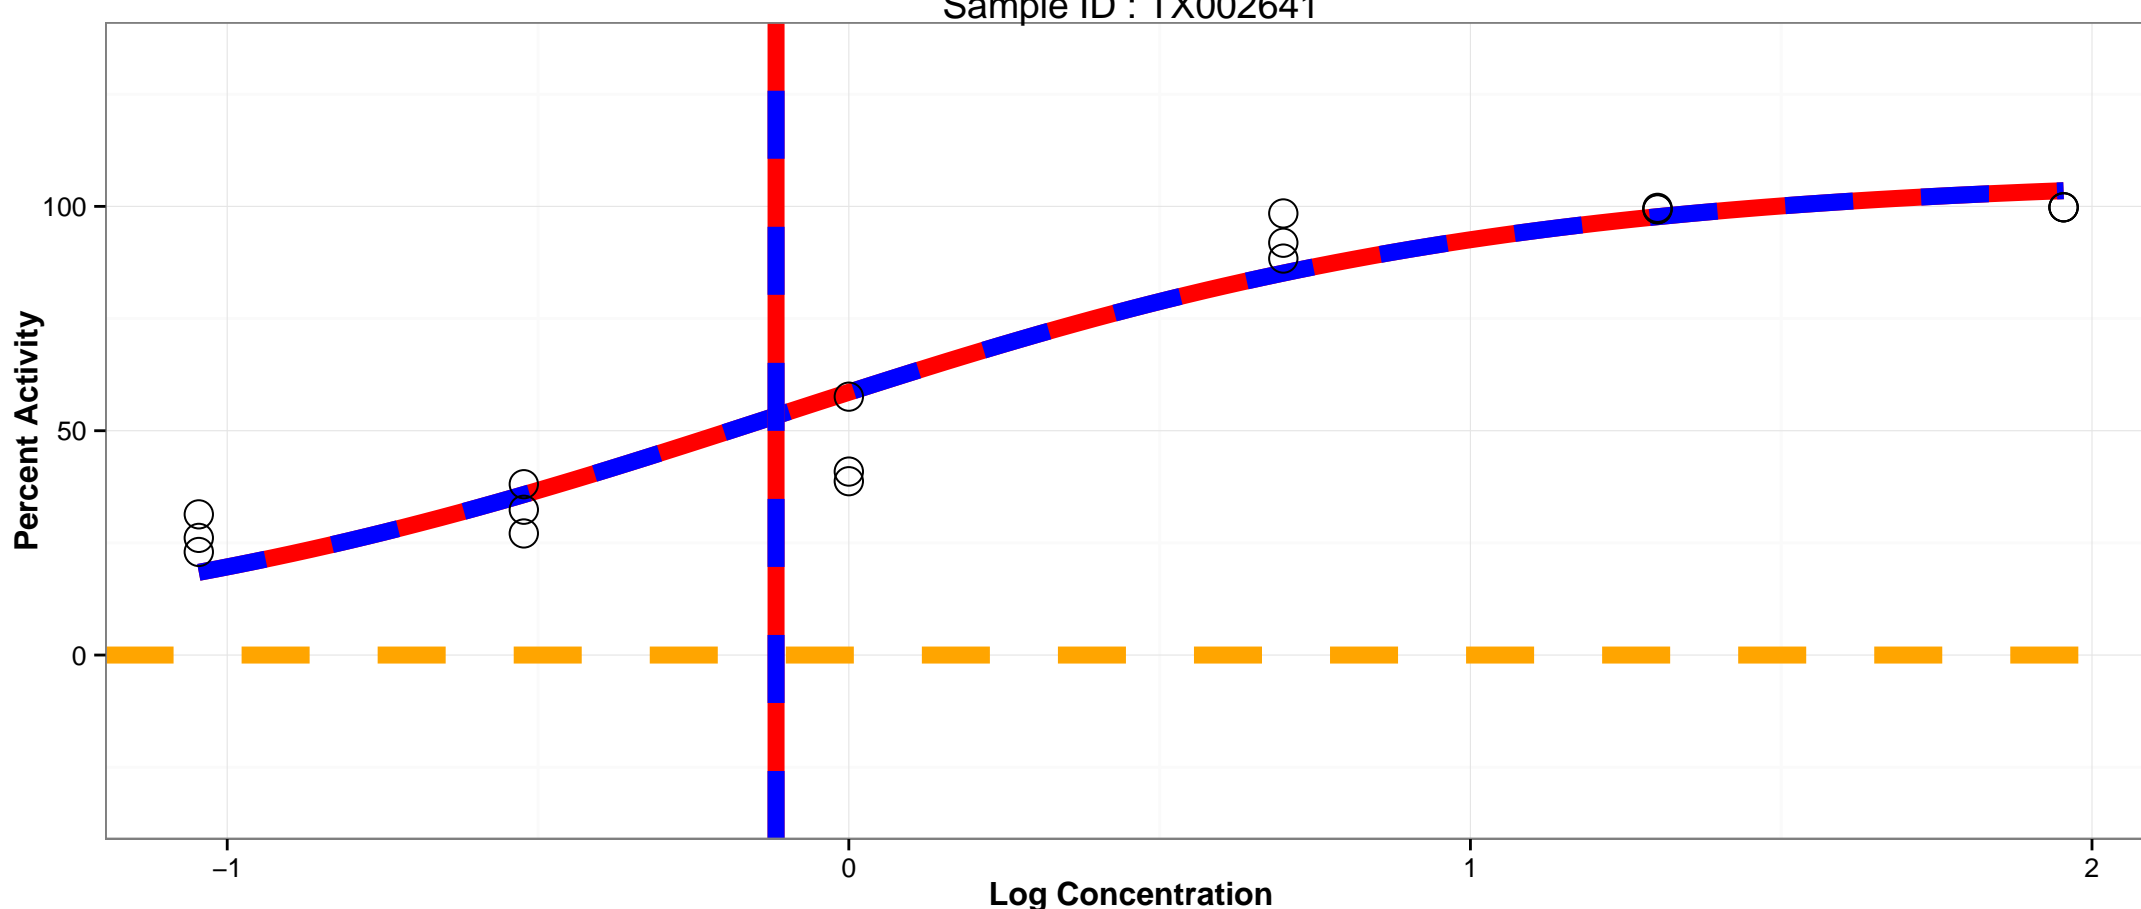

HILL MODEL

|     | tp   | ga     | gw    |
|-----|------|--------|-------|
| val | 107  | -0.117 | 0.732 |
| sd  | 4.52 | 0.101  | 0.116 |

GAIN-LOSS MODEL

|     | tp  | ga     | gw    | la   | lw   |
|-----|-----|--------|-------|------|------|
| val | 107 | -0.117 | 0.732 | 3.25 | 12.9 |
| sd  | NA  | NA     | NA    | NA   | NA   |

|      | CNST   | HILL   | GNLS   |
|------|--------|--------|--------|
| AIC  | 210.93 | 136.31 | 140.31 |
| PROB | 0      | 0.88   | 0.12   |
| RMSE | 73.58  | 8.59   | 8.59   |

MAX\_MEAN : 99.8 MAX\_MED : 99.8 BMAD : 5.54  
COFF : 20 HIT-CALL : 1 FITC : 41 ACTP : 1  
FLAGS :

Assay ID 1848 (NHEERL\_Quantilum\_inhib\_2\_dn)  
Sample ID : TX002641

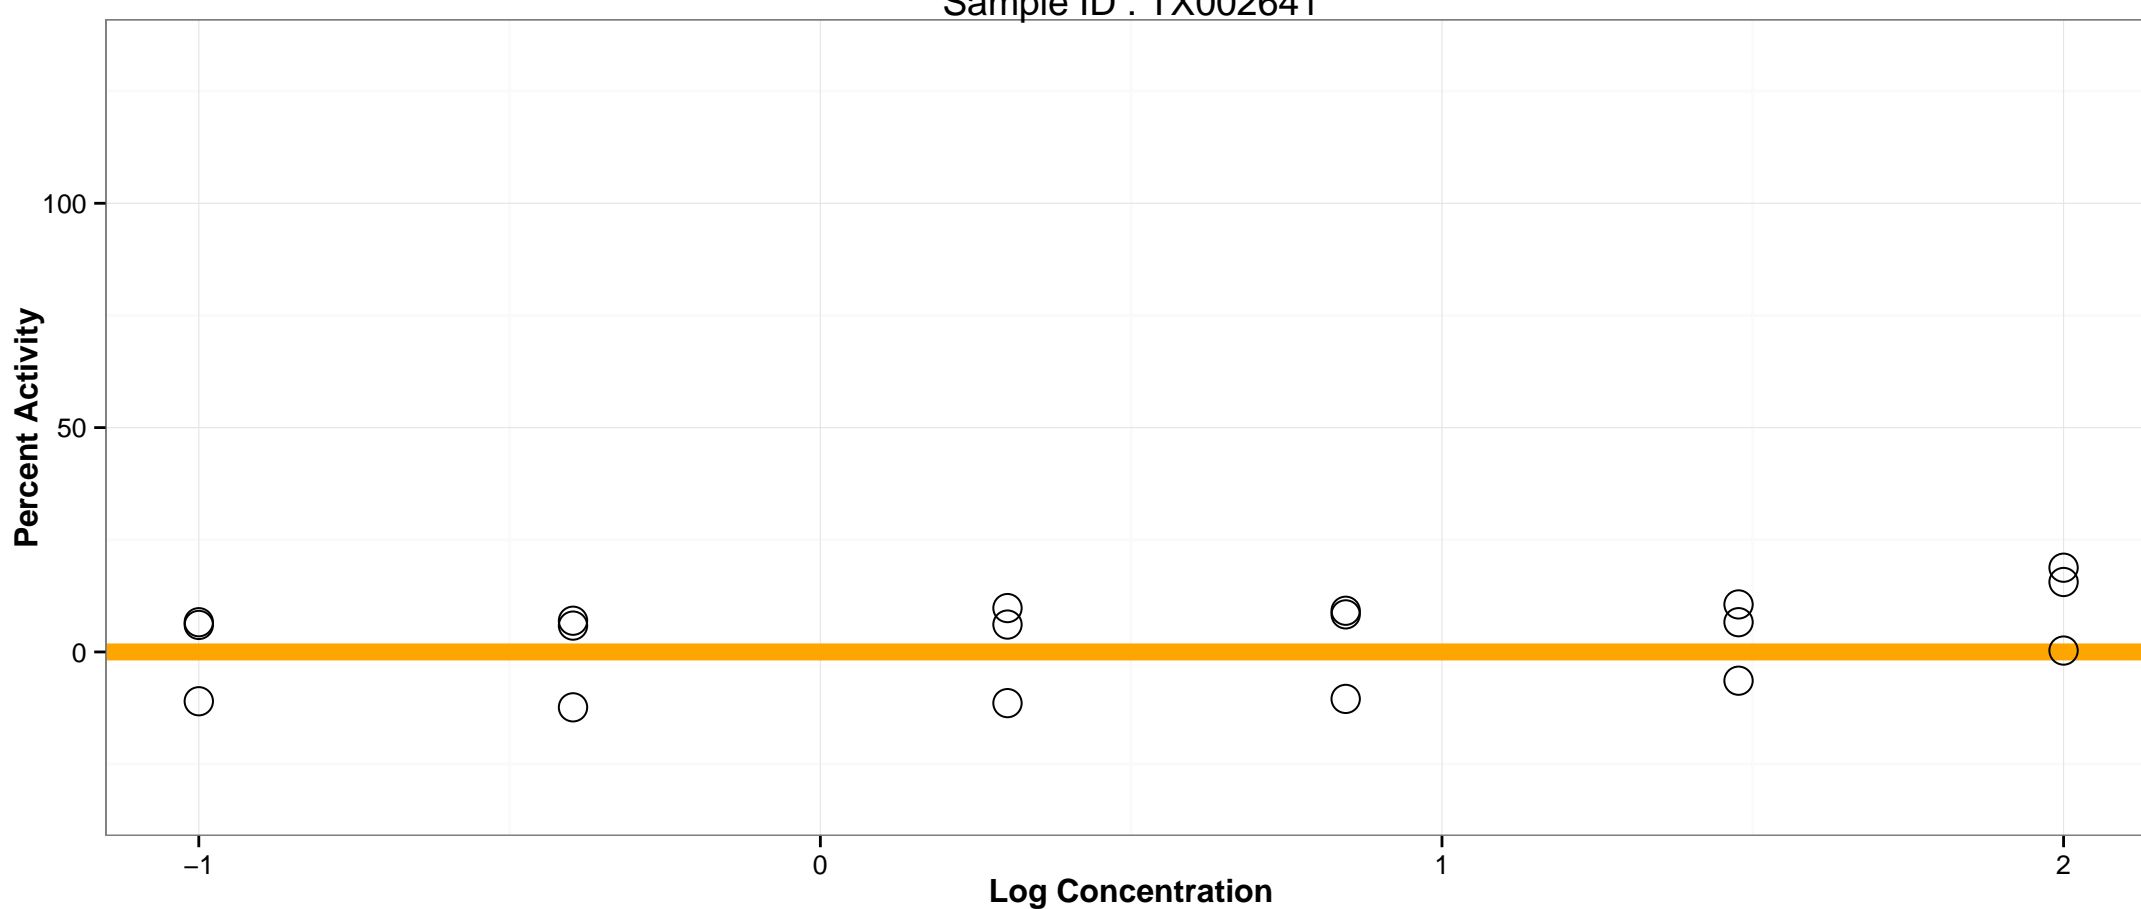

HILL MODEL

HILL MODEL: Not applicable

GAIN-LOSS MODEL

GNLS MODEL: Not applicable

|      | CNST  | HILL | GNLS |
|------|-------|------|------|
| AIC  | 138.6 | NA   | NA   |
| PROB | 1     | NA   | NA   |
| RMSE | 9.88  | NA   | NA   |

MAX\_MEAN : 11.6 MAX\_MED : 15.6 BMAD : 8.58  
COFF : 20 HIT-CALL : 0 FITC : 4 ACTP : 0  
FLAGS :

Chemical : 2,6-Di-tert-butylphenol  
CAS : 128-39-2

Assay ID 1508 (NHEERL\_TPO\_AUR\_dn)  
Sample ID : TX002669

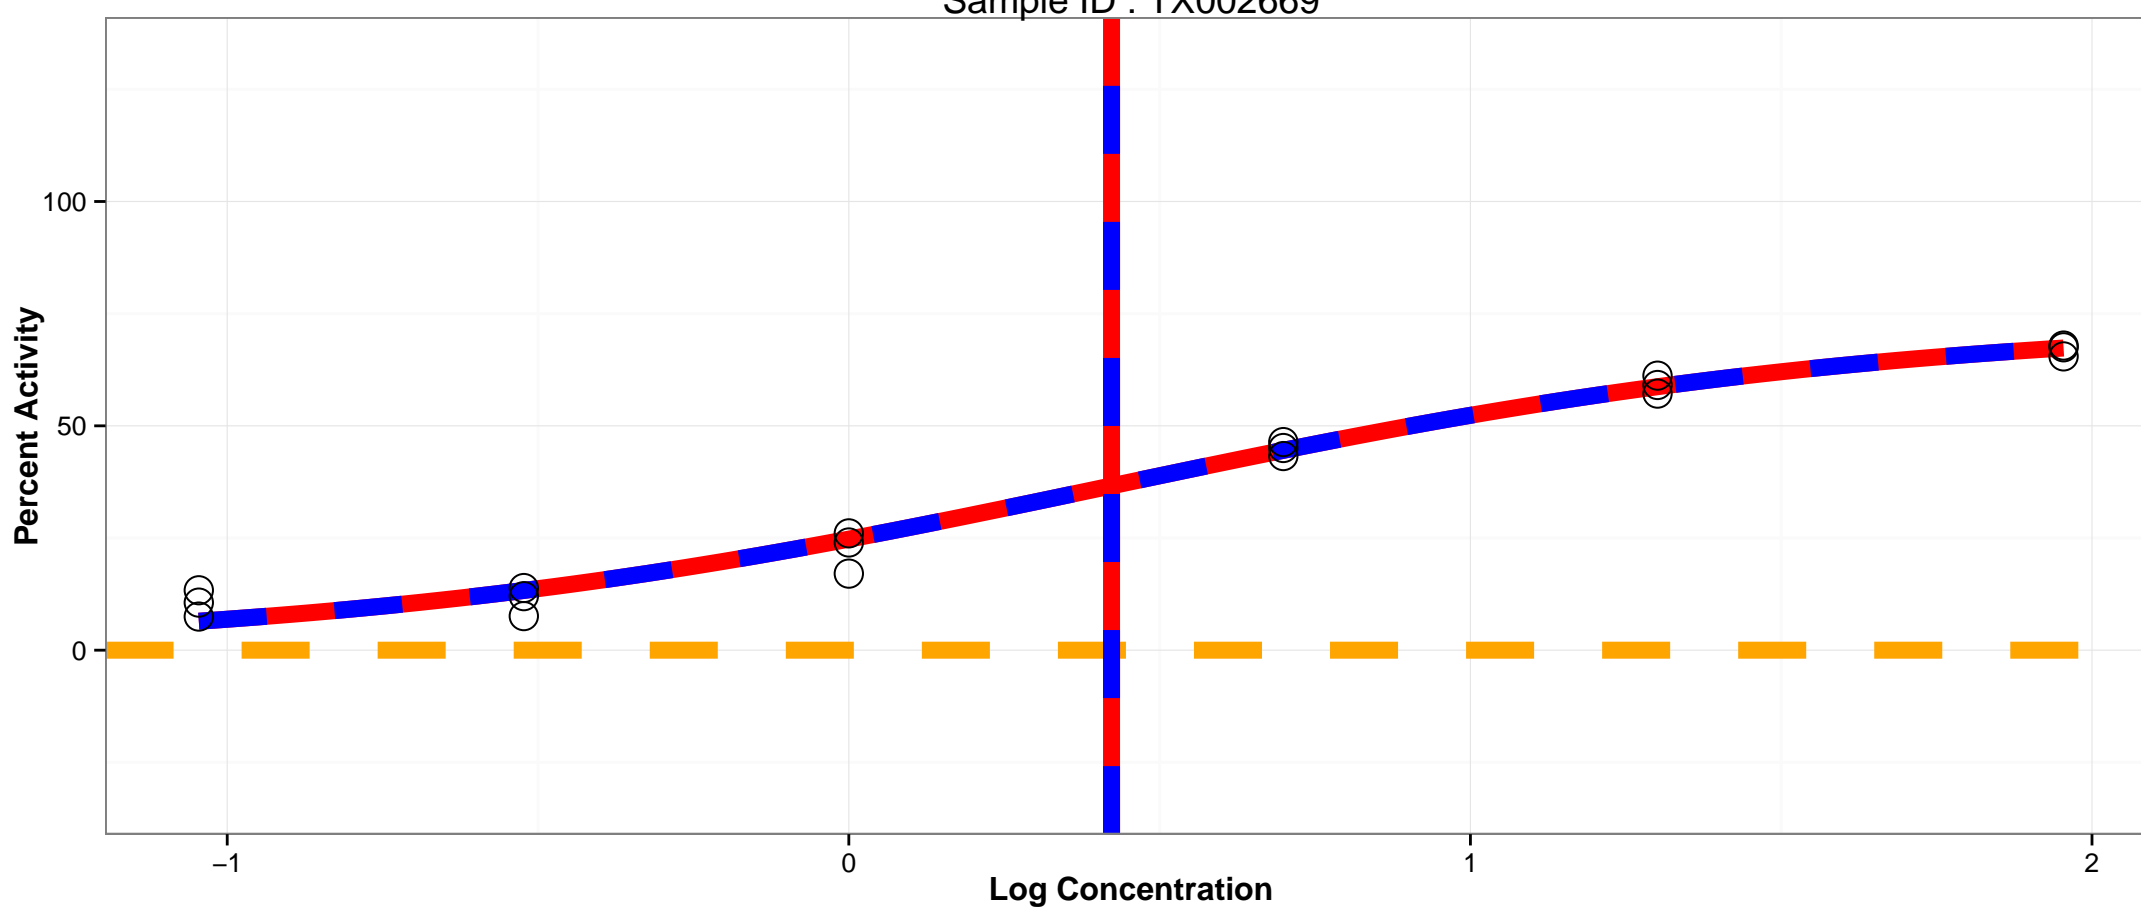

HILL MODEL

|     | tp   | ga     | gw     |
|-----|------|--------|--------|
| val | 73.2 | 0.423  | 0.691  |
| sd  | 2.54 | 0.0651 | 0.0561 |

GAIN-LOSS MODEL

|     | tp   | ga    | gw    | la   | lw   |
|-----|------|-------|-------|------|------|
| val | 73.2 | 0.423 | 0.691 | 3.37 | 7.37 |
| sd  | NA   | NA    | NA    | NA   | NA   |

|      | CNST  | HILL  | GNLS   |
|------|-------|-------|--------|
| AIC  | 190.4 | 98.49 | 102.49 |
| PROB | 0     | 0.88  | 0.12   |
| RMSE | 42.37 | 3.16  | 3.16   |

MAX\_MEAN : 67 MAX\_MED : 67.5 BMAD : 5.69  
COFF : 20 HIT-CALL : 1 FITC : 42 ACTP : 1  
FLAGS :

Assay ID 1509 (NHEERL\_HEK293T\_CellTiterGLO)  
Sample ID : TX002669

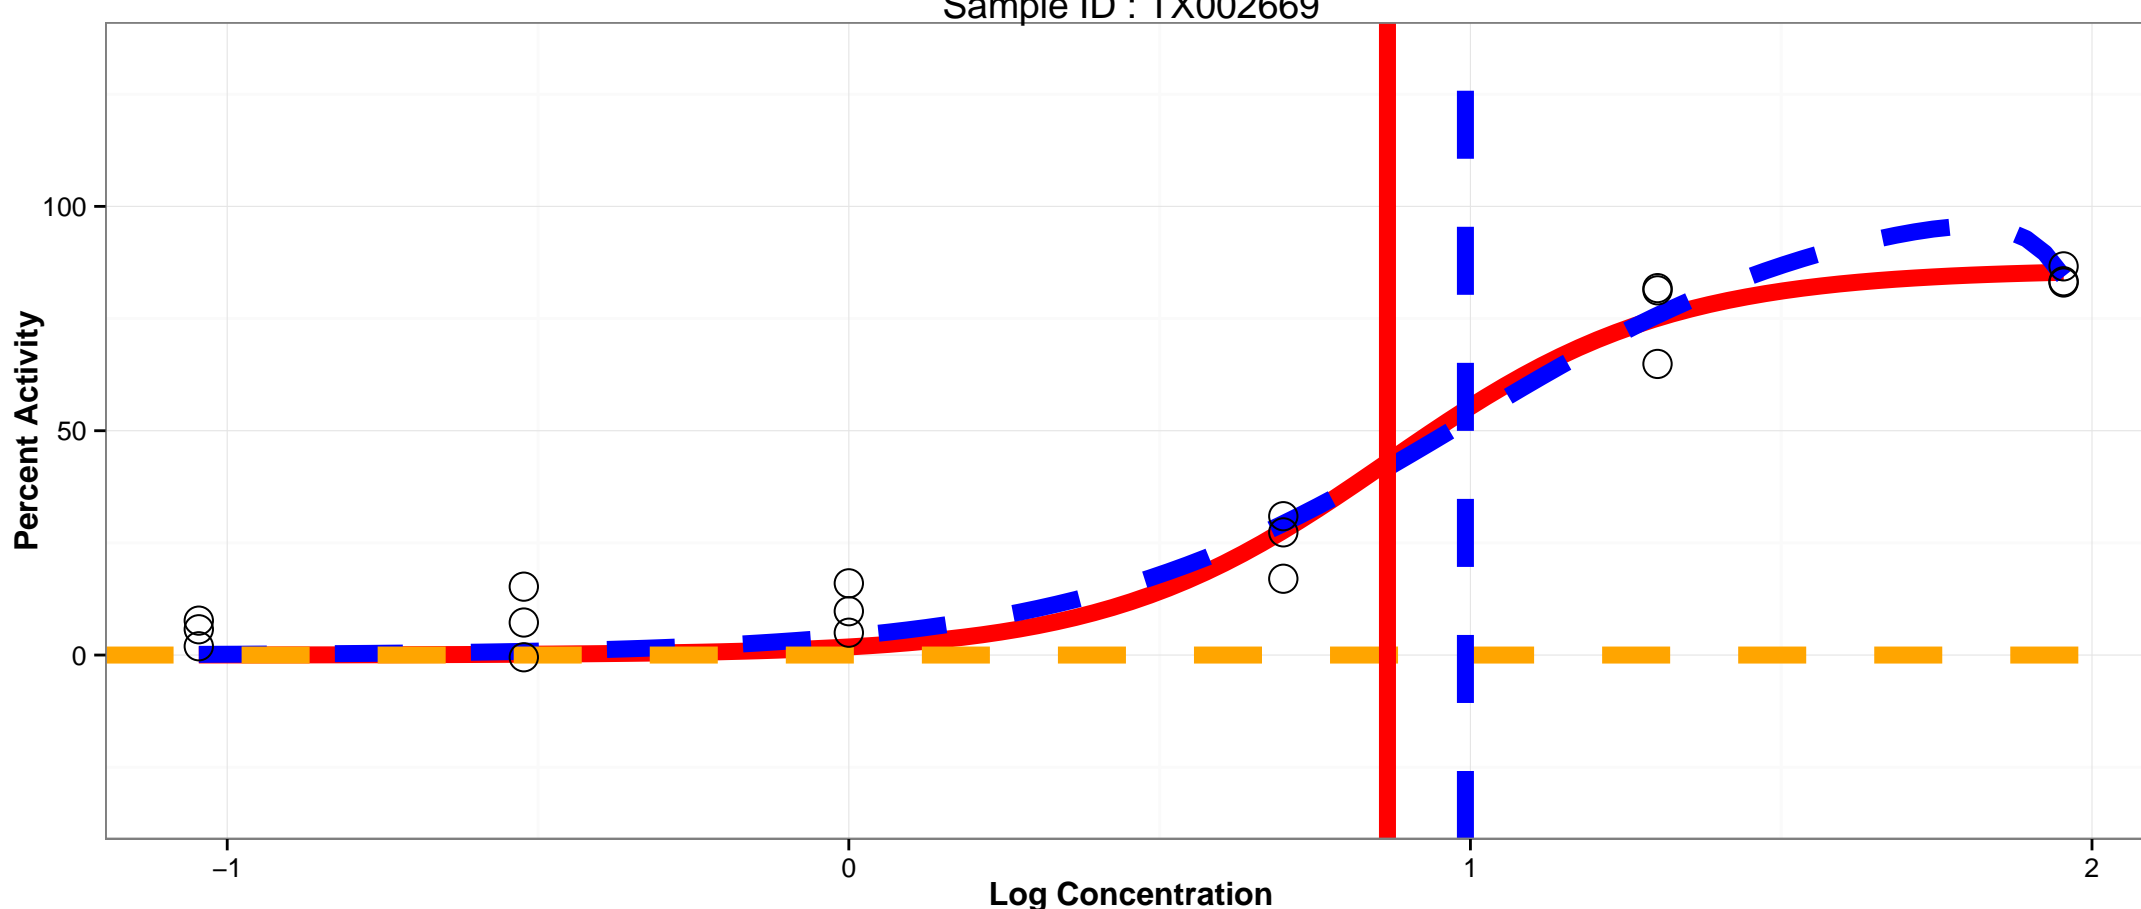

HILL MODEL

|     | tp   | ga     | gw    |
|-----|------|--------|-------|
| val | 86   | 0.867  | 1.93  |
| sd  | 4.15 | 0.0618 | 0.735 |

GAIN-LOSS MODEL

|     | tp   | ga    | gw    | la     | lw   |
|-----|------|-------|-------|--------|------|
| val | 104  | 0.992 | 1.39  | 2.05   | 7.78 |
| sd  | 30.7 | 0.218 | 0.566 | 0.0385 | 8.3  |

|      | CNST   | HILL   | GNLS  |
|------|--------|--------|-------|
| AIC  | 192.97 | 132.36 | 133.9 |
| PROB | 0      | 0.68   | 0.32  |
| RMSE | 48.08  | 7.35   | 6.93  |

MAX\_MEAN : 84.3 MAX\_MED : 83.3 BMAD : 5.54  
COFF : 20 HIT-CALL : 1 FITC : 41 ACTP : 1  
FLAGS :

Assay ID 1848 (NHEERL\_Quantilum\_inhib\_2\_dn)  
Sample ID : TX002669

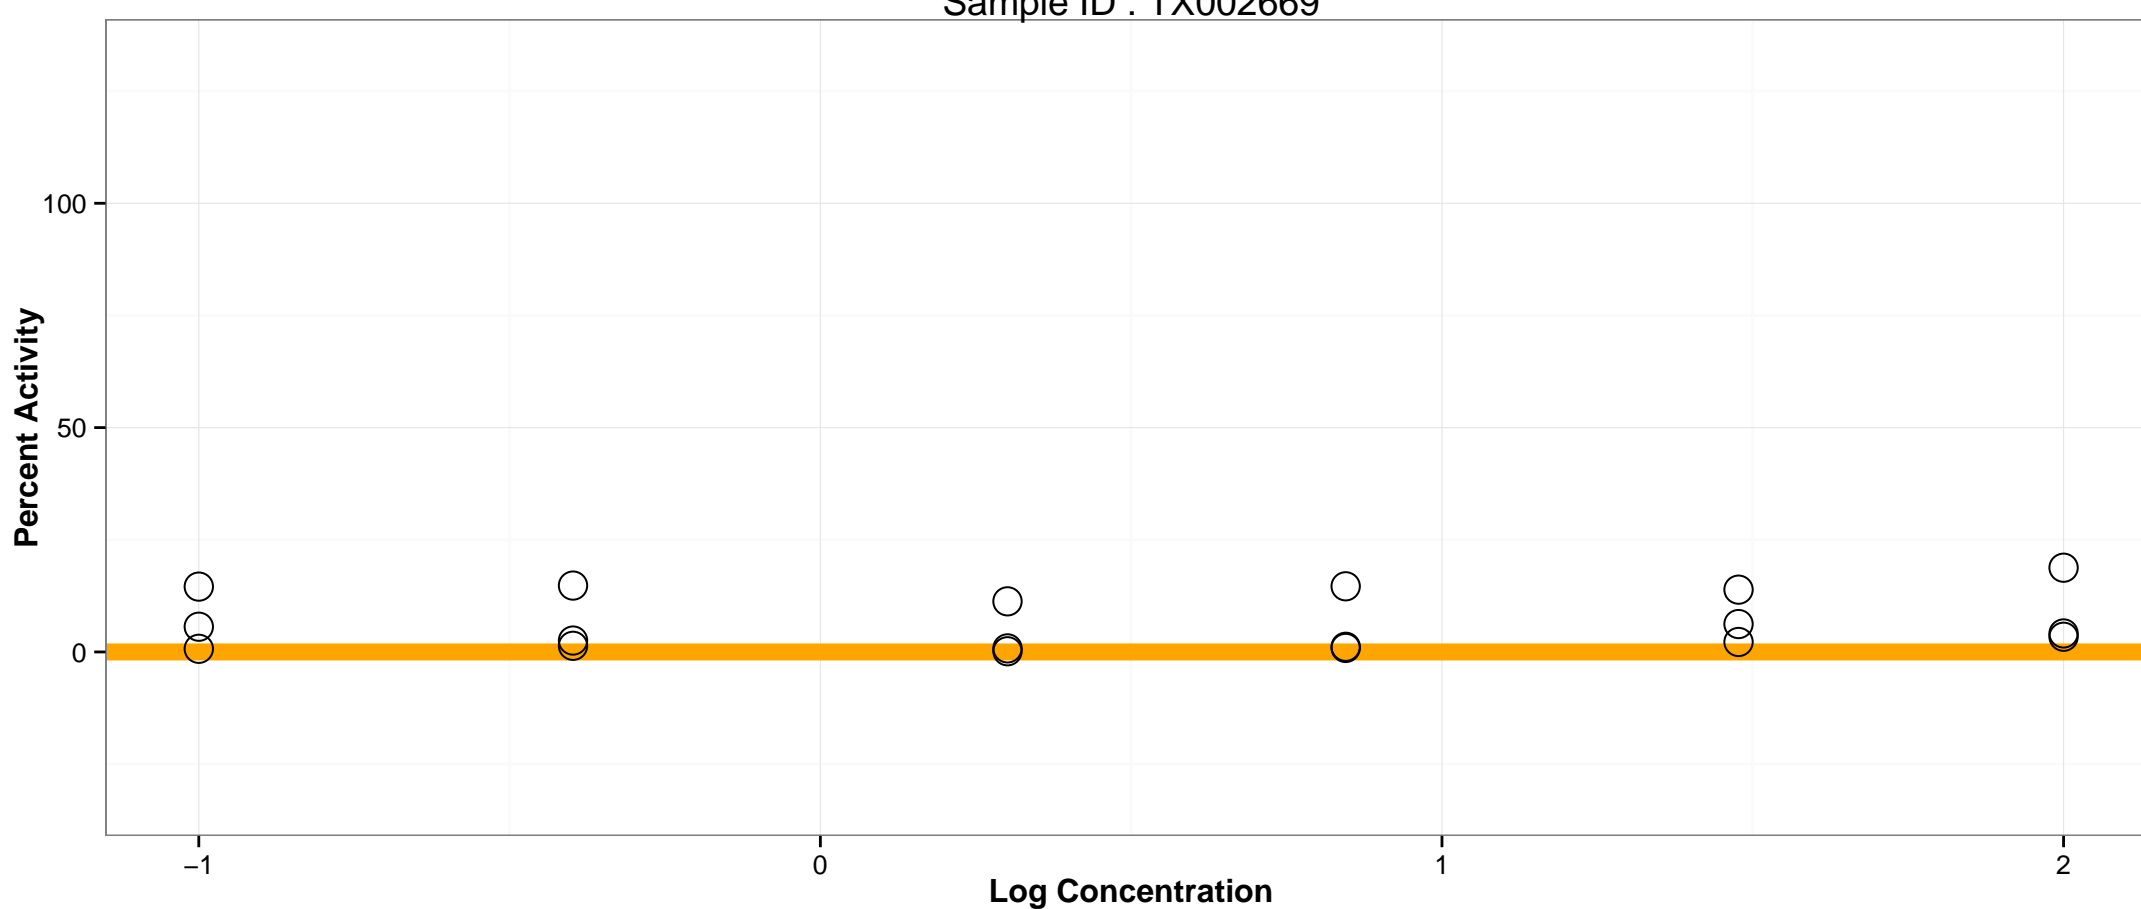

HILL MODEL

HILL MODEL: Not applicable

GAIN-LOSS MODEL

GNLS MODEL: Not applicable

|      | CNST   | HILL | GNLS |
|------|--------|------|------|
| AIC  | 132.34 | NA   | NA   |
| PROB | 1      | NA   | NA   |
| RMSE | 8.93   | NA   | NA   |

MAX\_MEAN : 8.77 MAX\_MED : 6.23 BMAD : 8.58  
COFF : 20 HIT-CALL : 0 FITC : 4 ACTP : 0  
FLAGS :

Assay ID 1508 (NHEERL\_TPO\_AUR\_dn)  
Sample ID : TX002687

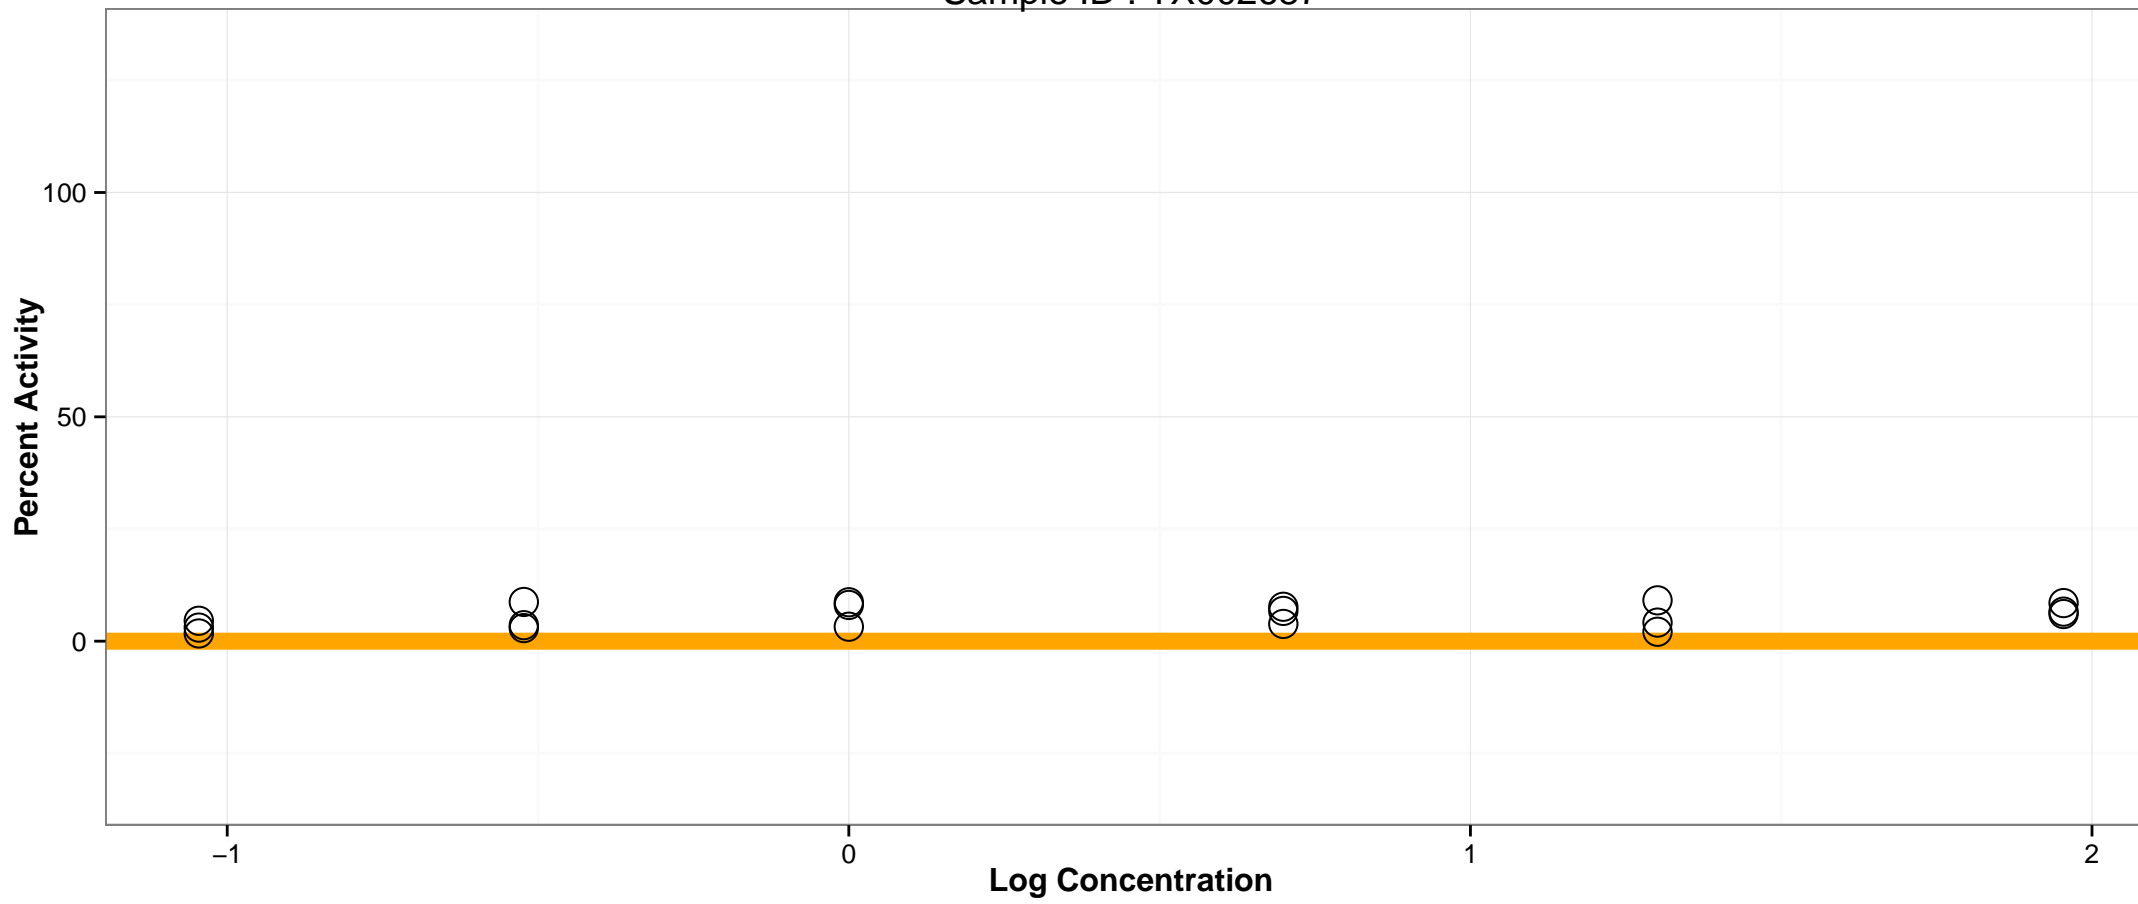

HILL MODEL

HILL MODEL: Not applicable

GAIN-LOSS MODEL

GNLS MODEL: Not applicable

|      | CNST   | HILL | GNLS |
|------|--------|------|------|
| AIC  | 121.07 | NA   | NA   |
| PROB | 1      | NA   | NA   |
| RMSE | 6.05   | NA   | NA   |

MAX\_MEAN : 7.05 MAX\_MED : 8.09 BMAD : 5.69  
COFF : 20 HIT-CALL : 0 FITC : 4 ACTP : 0  
FLAGS :

Assay ID 1509 (NHEERL\_HEK293T\_CellTiterGLO)  
Sample ID : TX002687

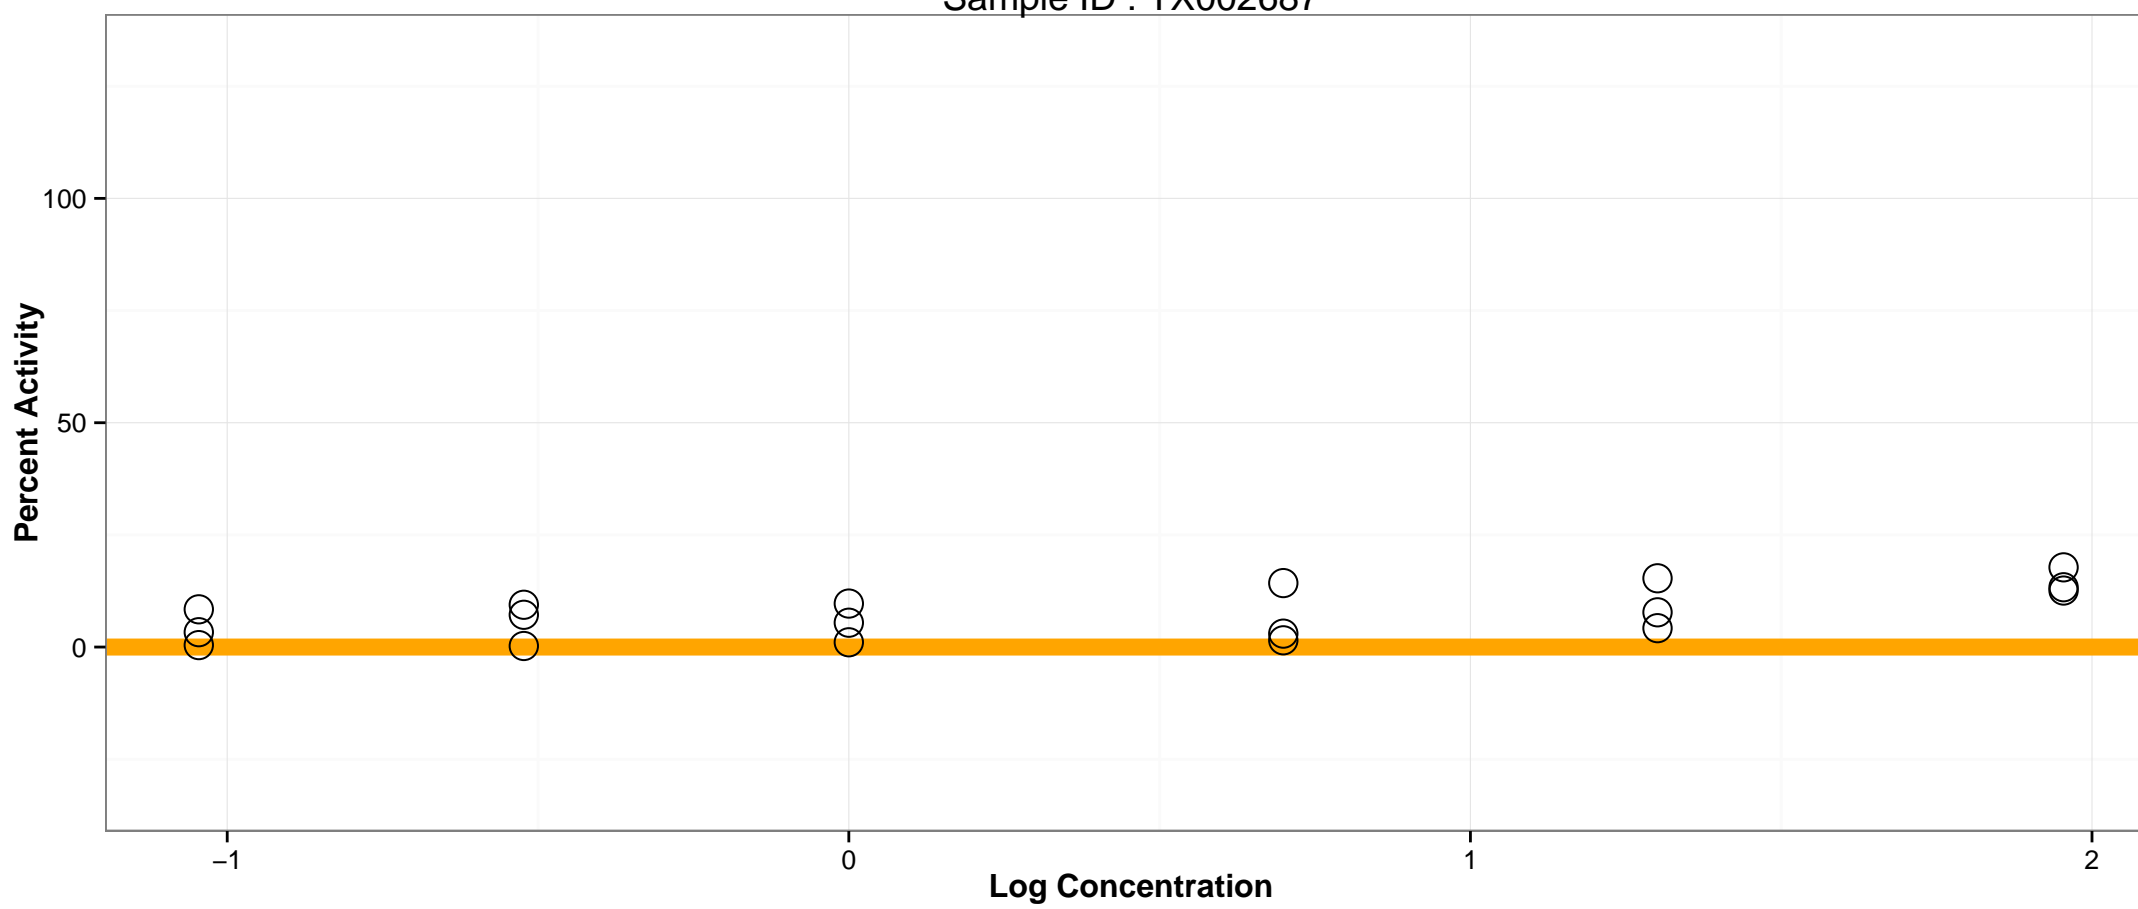

HILL MODEL

HILL MODEL: Not applicable

GAIN-LOSS MODEL

GNLS MODEL: Not applicable

|      | CNST   | HILL | GNLS |
|------|--------|------|------|
| AIC  | 135.03 | NA   | NA   |
| PROB | 1      | NA   | NA   |
| RMSE | 9.22   | NA   | NA   |

MAX\_MEAN : 14.6 MAX\_MED : 13.3 BMAD : 5.54  
COFF : 20 HIT-CALL : 0 FITC : 4 ACTP : 0  
FLAGS :

Assay ID 1848 (NHEERL\_Quantilum\_inhib\_2\_dn)  
Sample ID : TX002687

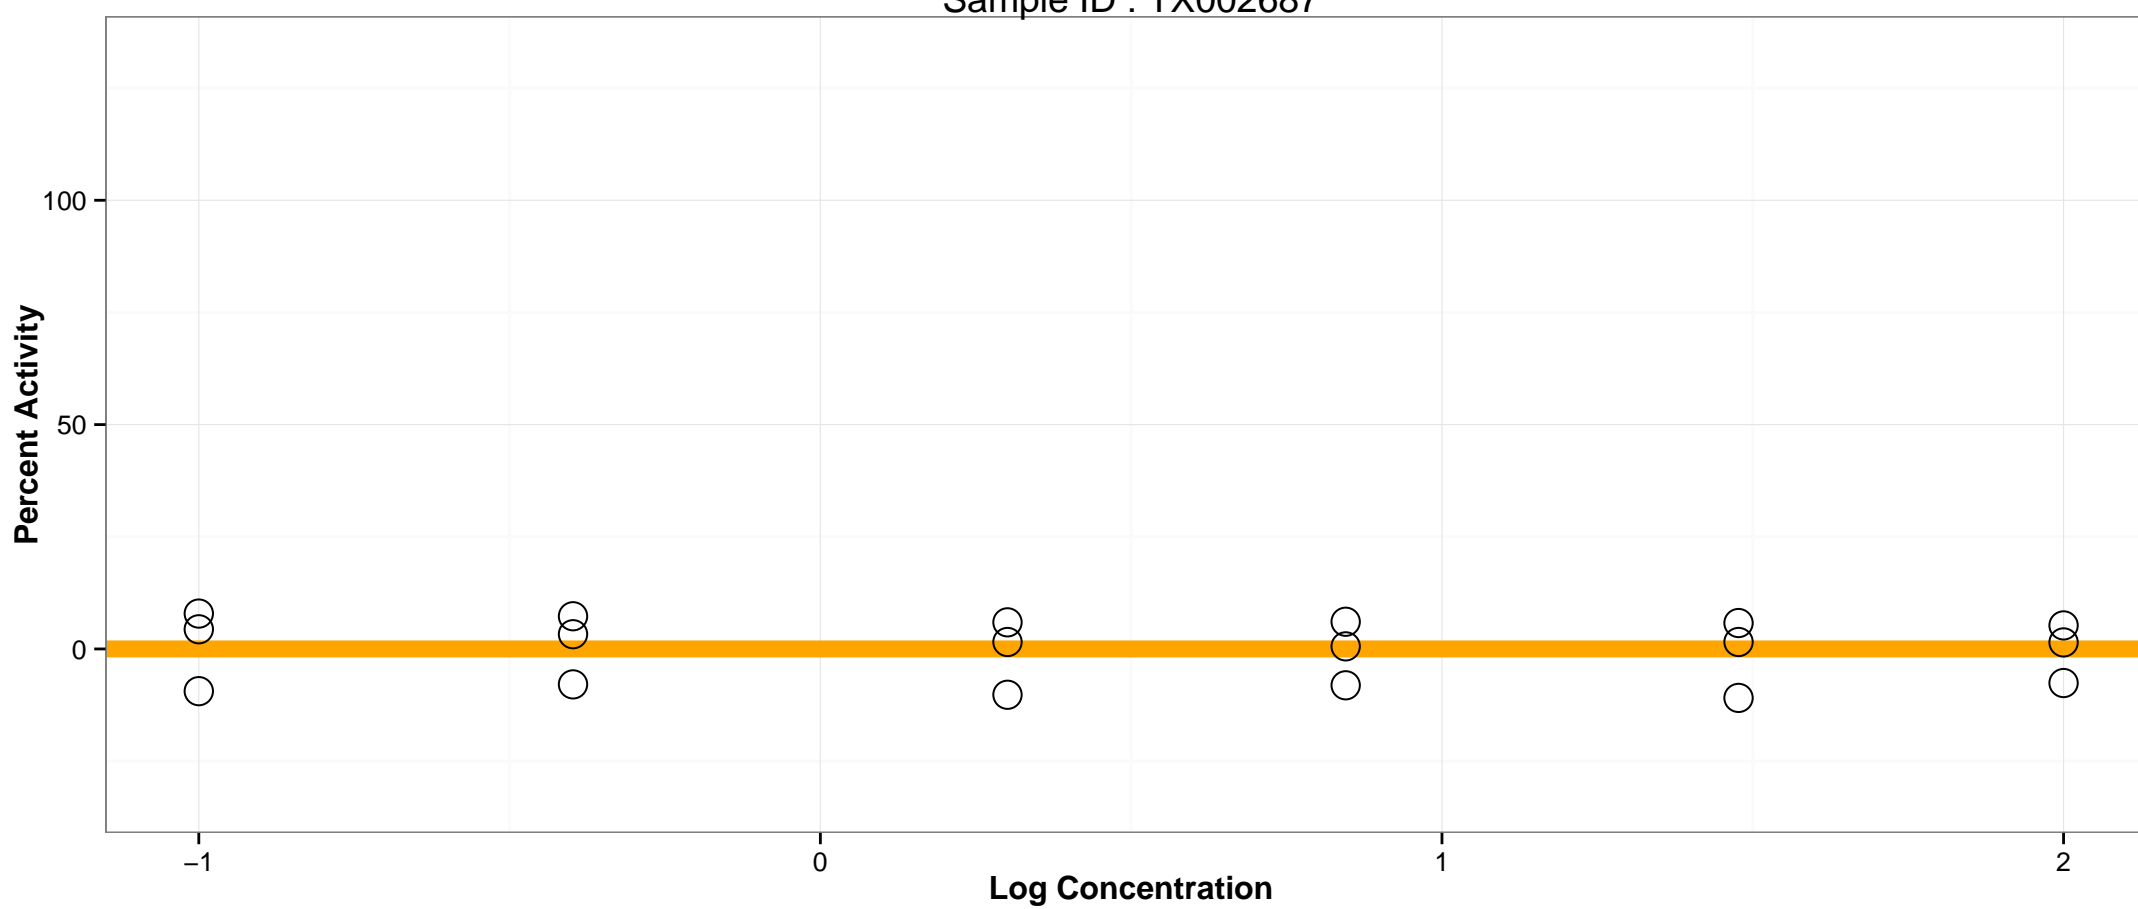

HILL MODEL

HILL MODEL: Not applicable

GAIN-LOSS MODEL

GNLS MODEL: Not applicable

|      | CNST   | HILL | GNLS |
|------|--------|------|------|
| AIC  | 124.05 | NA   | NA   |
| PROB | 1      | NA   | NA   |
| RMSE | 6.59   | NA   | NA   |

MAX\_MEAN : 0.965 MAX\_MED : 4.39 BMAD : 8.58  
COFF : 20 HIT-CALL : 0 FITC : 4 ACTP : 0  
FLAGS :

Chemical : 2,3-Diaminotoluene  
CAS : 2687-25-4

Assay ID 1508 (NHEERL\_TPO\_AUR\_dn)  
Sample ID : TX002691

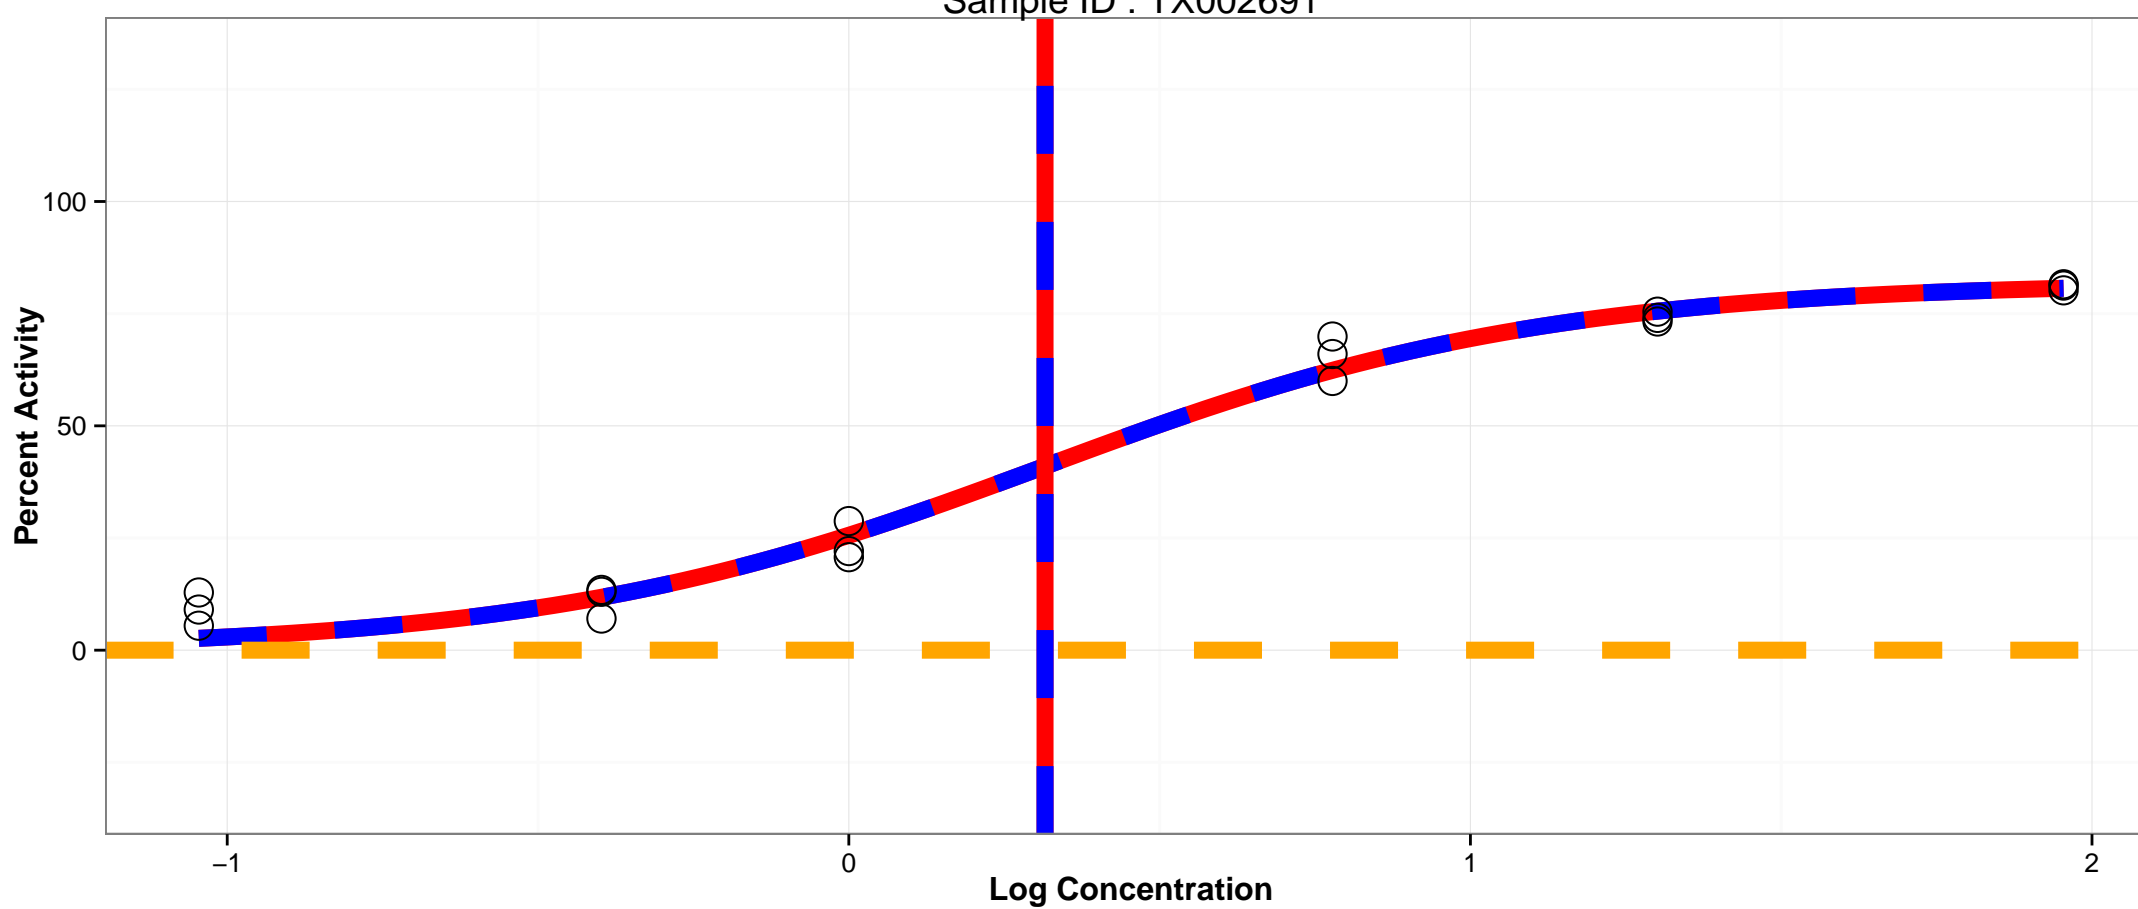

HILL MODEL

|     | tp   | ga     | gw    |
|-----|------|--------|-------|
| val | 82   | 0.316  | 1.09  |
| sd  | 2.12 | 0.0561 | 0.119 |

GAIN-LOSS MODEL

|     | tp   | ga     | gw    | la   | lw    |
|-----|------|--------|-------|------|-------|
| val | 82   | 0.316  | 1.09  | 2.46 | 17.9  |
| sd  | 2.12 | 0.0561 | 0.119 | 371  | 13000 |

|      | CNST   | HILL   | GNLS   |
|------|--------|--------|--------|
| AIC  | 198.77 | 110.72 | 114.72 |
| PROB | 0      | 0.88   | 0.12   |
| RMSE | 53.5   | 4.16   | 4.16   |

MAX\_MEAN : 81 MAX\_MED : 81.3 BMAD : 5.69  
COFF : 20 HIT-CALL : 1 FITC : 41 ACTP : 1  
FLAGS :

Assay ID 1509 (NHEERL\_HEK293T\_CellTiterGLO)  
Sample ID : TX002691

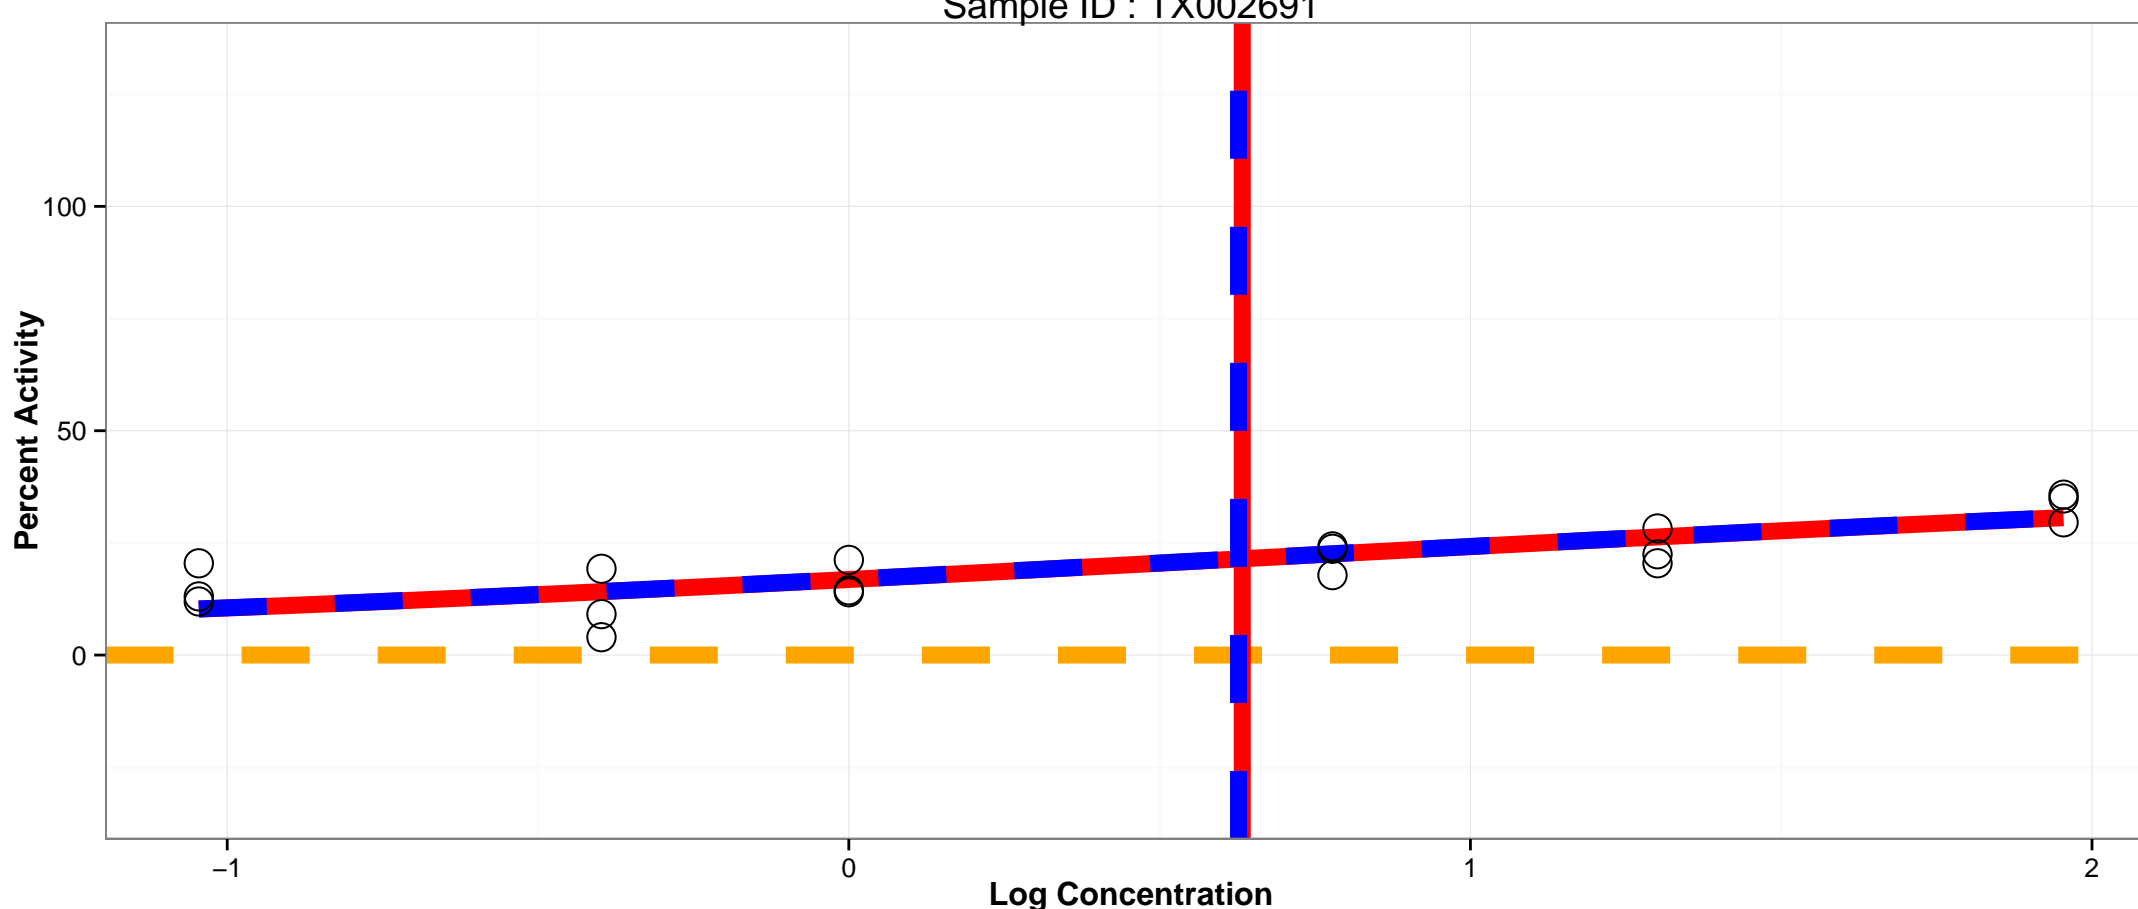

HILL MODEL

|     | tp   | ga    | gw    |
|-----|------|-------|-------|
| val | 42.9 | 0.633 | 0.3   |
| sd  | 14.6 | 1.08  | 0.113 |

GAIN-LOSS MODEL

|     | tp   | ga    | gw    | la     | lw     |
|-----|------|-------|-------|--------|--------|
| val | 42.9 | 0.627 | 0.3   | 3.52   | 8.4    |
| sd  | 14.8 | 1.09  | 0.113 | 175000 | 959000 |

|      | CNST   | HILL   | GNLS   |
|------|--------|--------|--------|
| AIC  | 167.48 | 117.65 | 121.65 |
| PROB | 0      | 0.88   | 0.12   |
| RMSE | 21.88  | 4.87   | 4.87   |

MAX\_MEAN : 33.4 MAX\_MED : 34.9 BMAD : 5.54  
COFF : 20 HIT-CALL : 1 FITC : 42 ACTP : 1  
FLAGS :

Assay ID 1848 (NHEERL\_QuantLum\_inhib\_2\_dn)  
Sample ID : TX002691

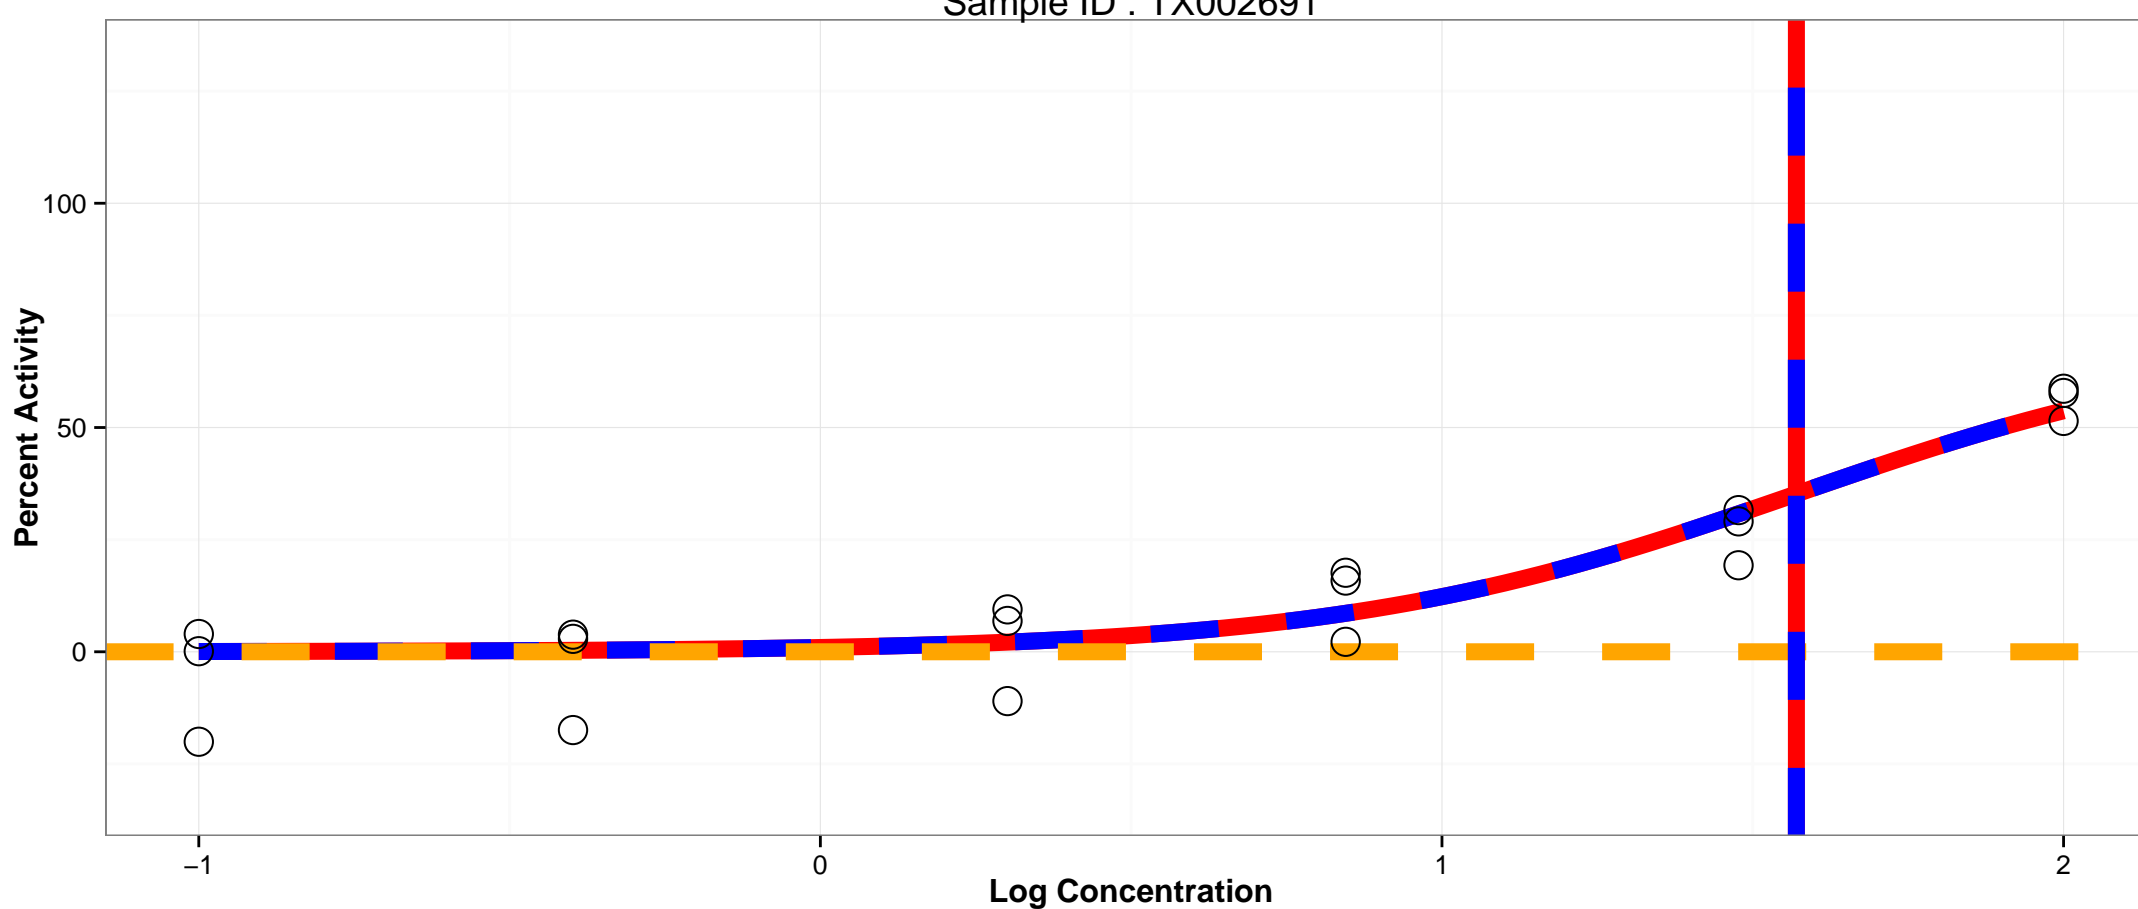

HILL MODEL

|     | tp   | ga    | gw    |
|-----|------|-------|-------|
| val | 70.4 | 1.57  | 1.18  |
| sd  | 15.5 | 0.198 | 0.398 |

GAIN-LOSS MODEL

|     | tp   | ga   | gw   | la   | lw   |
|-----|------|------|------|------|------|
| val | 70.4 | 1.57 | 1.18 | 2.91 | 16.4 |
| sd  | NA   | NA   | NA   | NA   | NA   |

|      | CNST  | HILL   | GNLS   |
|------|-------|--------|--------|
| AIC  | 171.5 | 137.14 | 141.14 |
| PROB | 0     | 0.88   | 0.12   |
| RMSE | 27.09 | 8.69   | 8.69   |

MAX\_MEAN : 56 MAX\_MED : 57.7 BMAD : 8.58  
COFF : 20 HIT-CALL : 1 FITC : 42 ACTP : 1  
FLAGS :

Chemical : 3,7-Dimethyl-2,6-octadienal  
CAS : 5392-40-5

Assay ID 1508 (NHEERL\_TPO\_AUR\_dn)  
Sample ID : TX002747

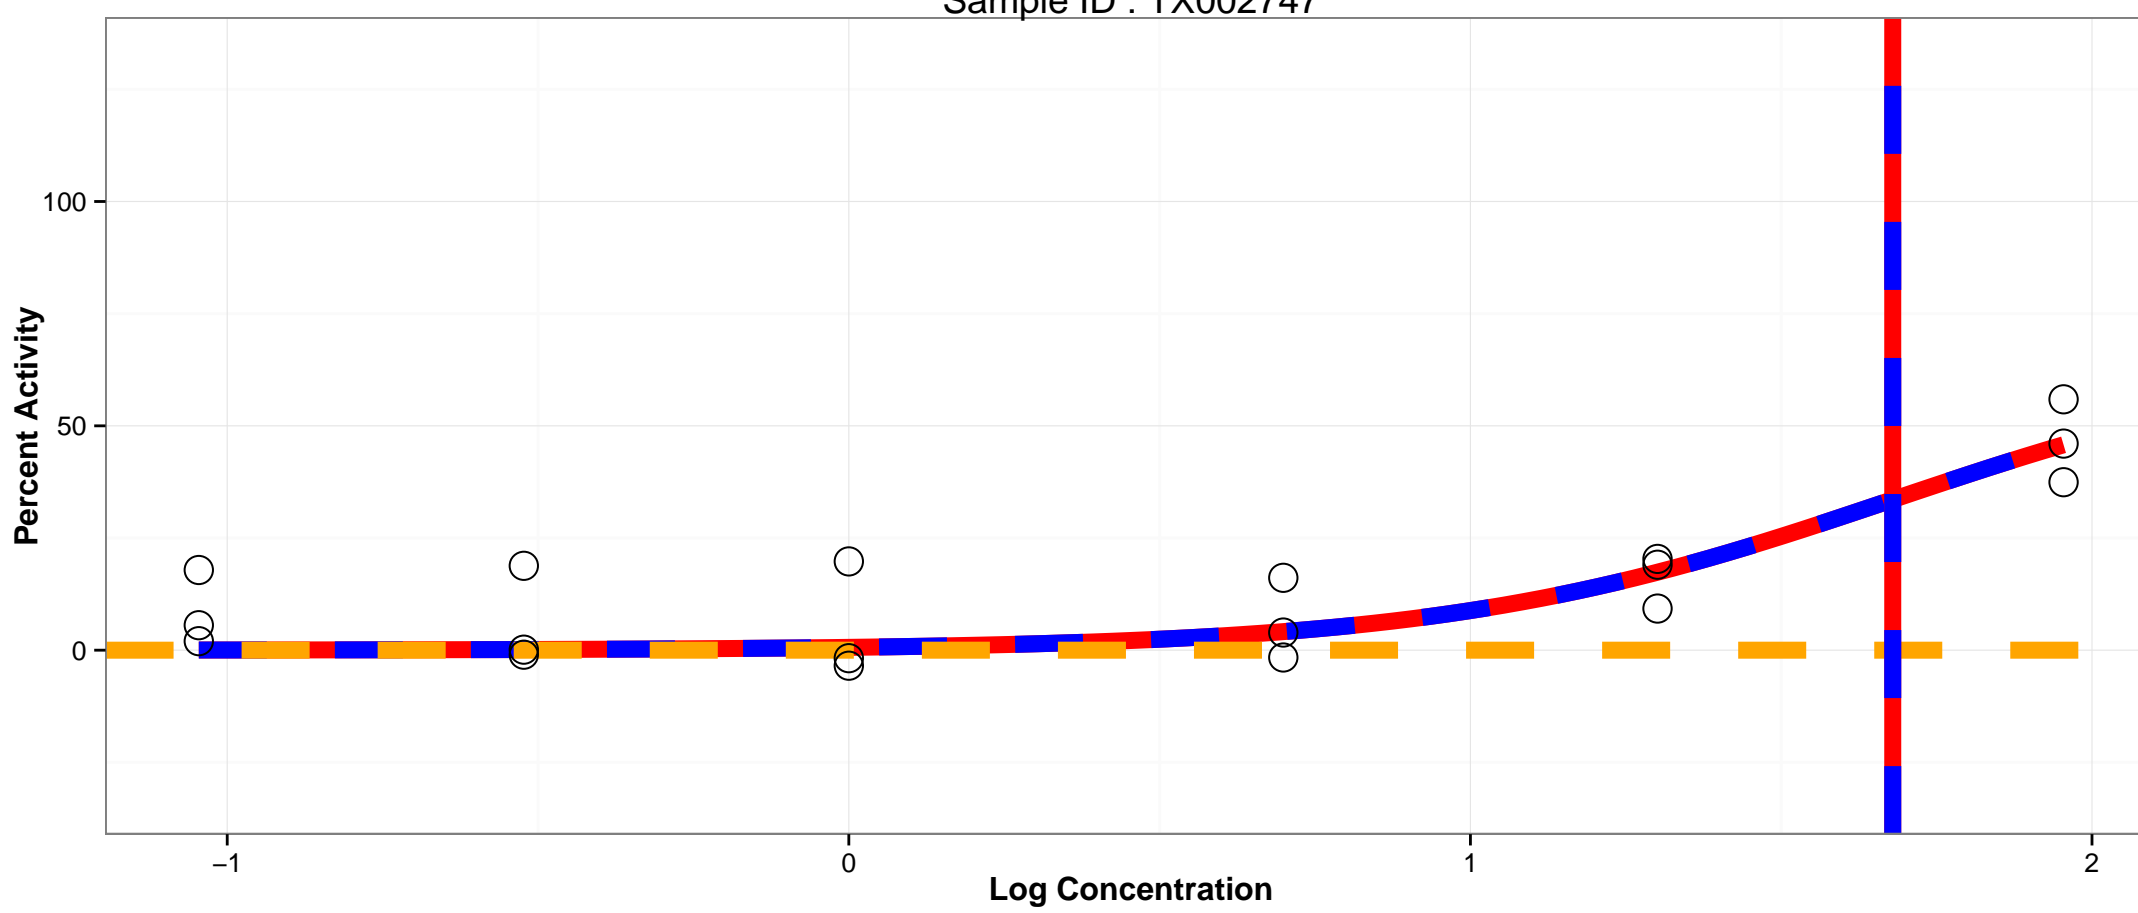

HILL MODEL

|     | tp   | ga    | gw    |
|-----|------|-------|-------|
| val | 67.1 | 1.68  | 1.21  |
| sd  | 46.3 | 0.596 | 0.811 |

GAIN-LOSS MODEL

|     | tp   | ga    | gw    | la    | lw     |
|-----|------|-------|-------|-------|--------|
| val | 67.1 | 1.68  | 1.21  | 3.95  | 5.31   |
| sd  | 46.3 | 0.596 | 0.812 | 60200 | 160000 |

|      | CNST   | HILL   | GNLS   |
|------|--------|--------|--------|
| AIC  | 163.59 | 138.89 | 142.89 |
| PROB | 0      | 0.88   | 0.12   |
| RMSE | 22.25  | 9.19   | 9.19   |

MAX\_MEAN : 46.5 MAX\_MED : 46.1 BMAD : 5.69  
COFF : 20 HIT-CALL : 1 FITC : 42 ACTP : 1  
FLAGS :

Assay ID 1509 (NHEERL\_HEK293T\_CellTiterGLO)  
Sample ID : TX002747

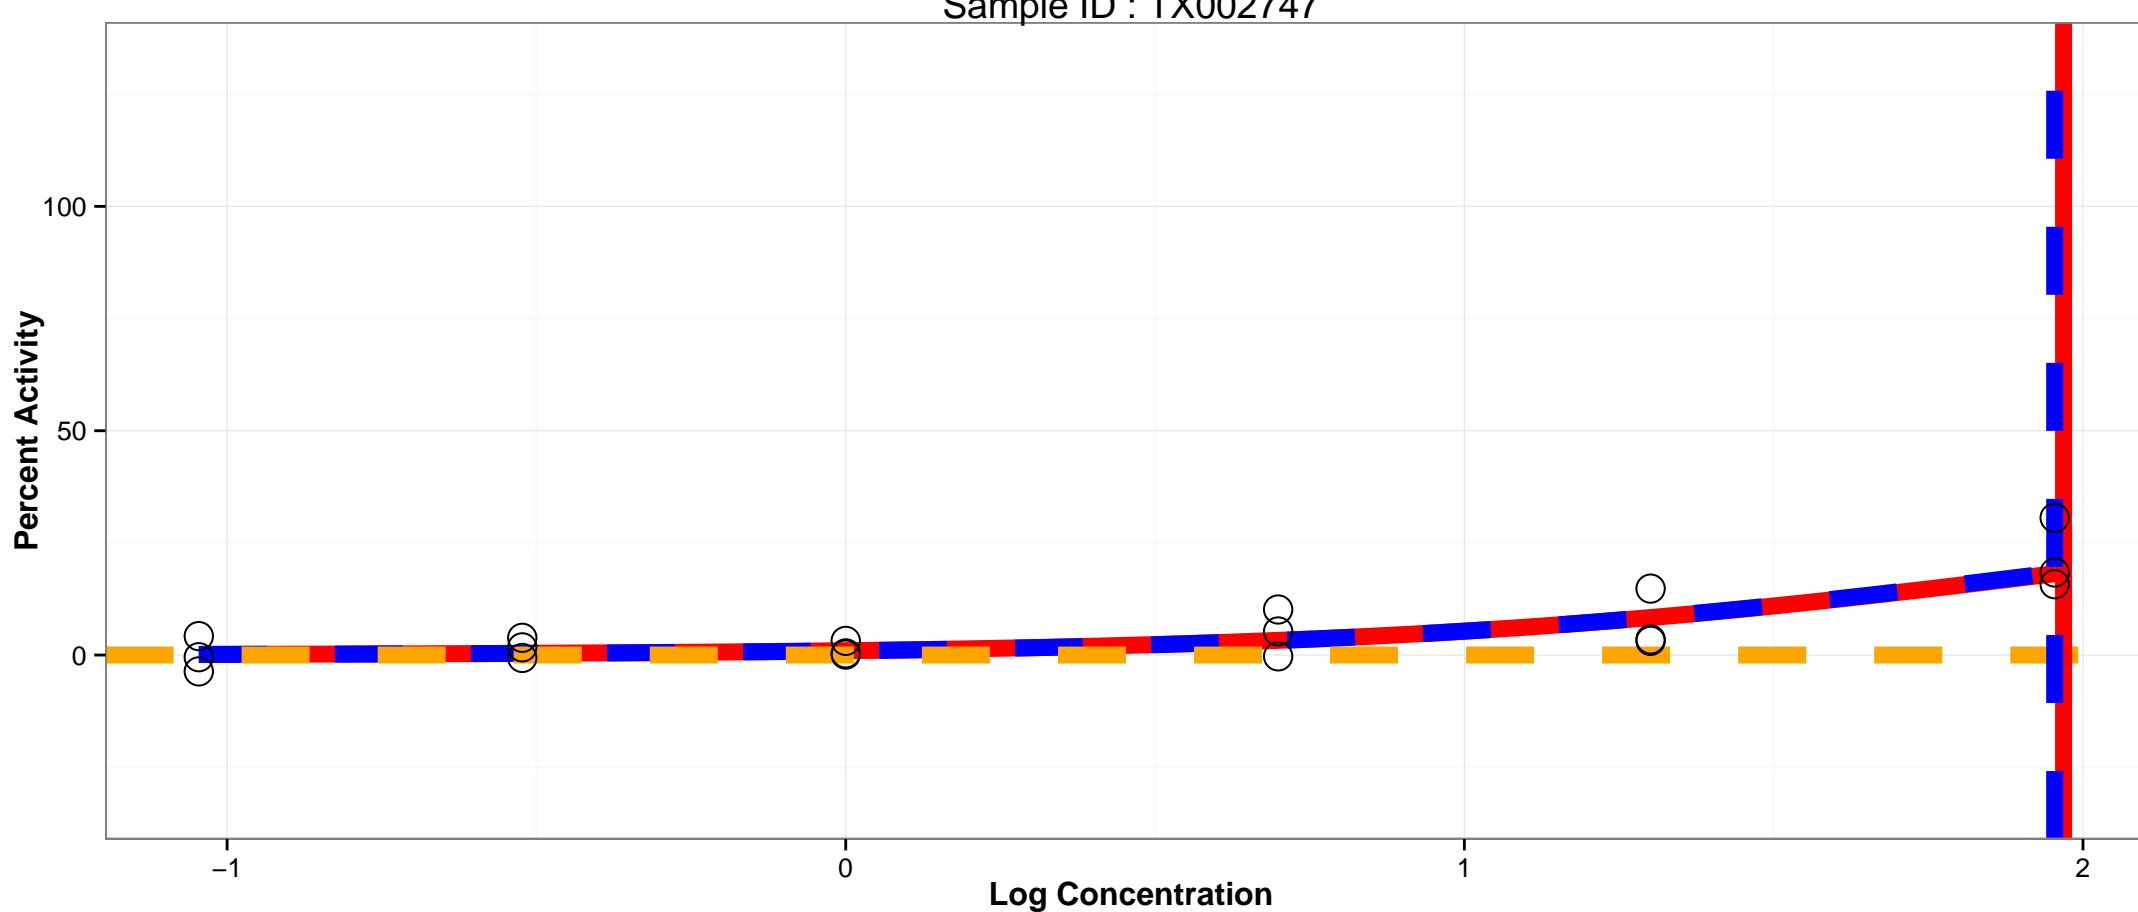

HILL MODEL

|     | tp   | ga    | gw    |
|-----|------|-------|-------|
| val | 36.7 | 1.97  | 0.795 |
| sd  | 27.5 | 0.796 | 0.375 |

GAIN-LOSS MODEL

|     | tp   | ga    | gw    | la   | lw    |
|-----|------|-------|-------|------|-------|
| val | 36.7 | 1.95  | 0.807 | 3.46 | 5.79  |
| sd  | 34.6 | 0.982 | 0.385 | 4320 | 16600 |

|      | CNST   | HILL   | GNLS   |
|------|--------|--------|--------|
| AIC  | 133.78 | 113.01 | 117.02 |
| PROB | 0      | 0.88   | 0.12   |
| RMSE | 10.43  | 4.53   | 4.51   |

MAX\_MEAN : 21.6 MAX\_MED : 18.4 BMAD : 5.54  
COFF : 20 HIT-CALL : 0 FITC : 21 ACTP : 1  
FLAGS : 12

Assay ID 1848 (NHEERL\_Quantilum\_inhib\_2\_dn)  
Sample ID : TX002747

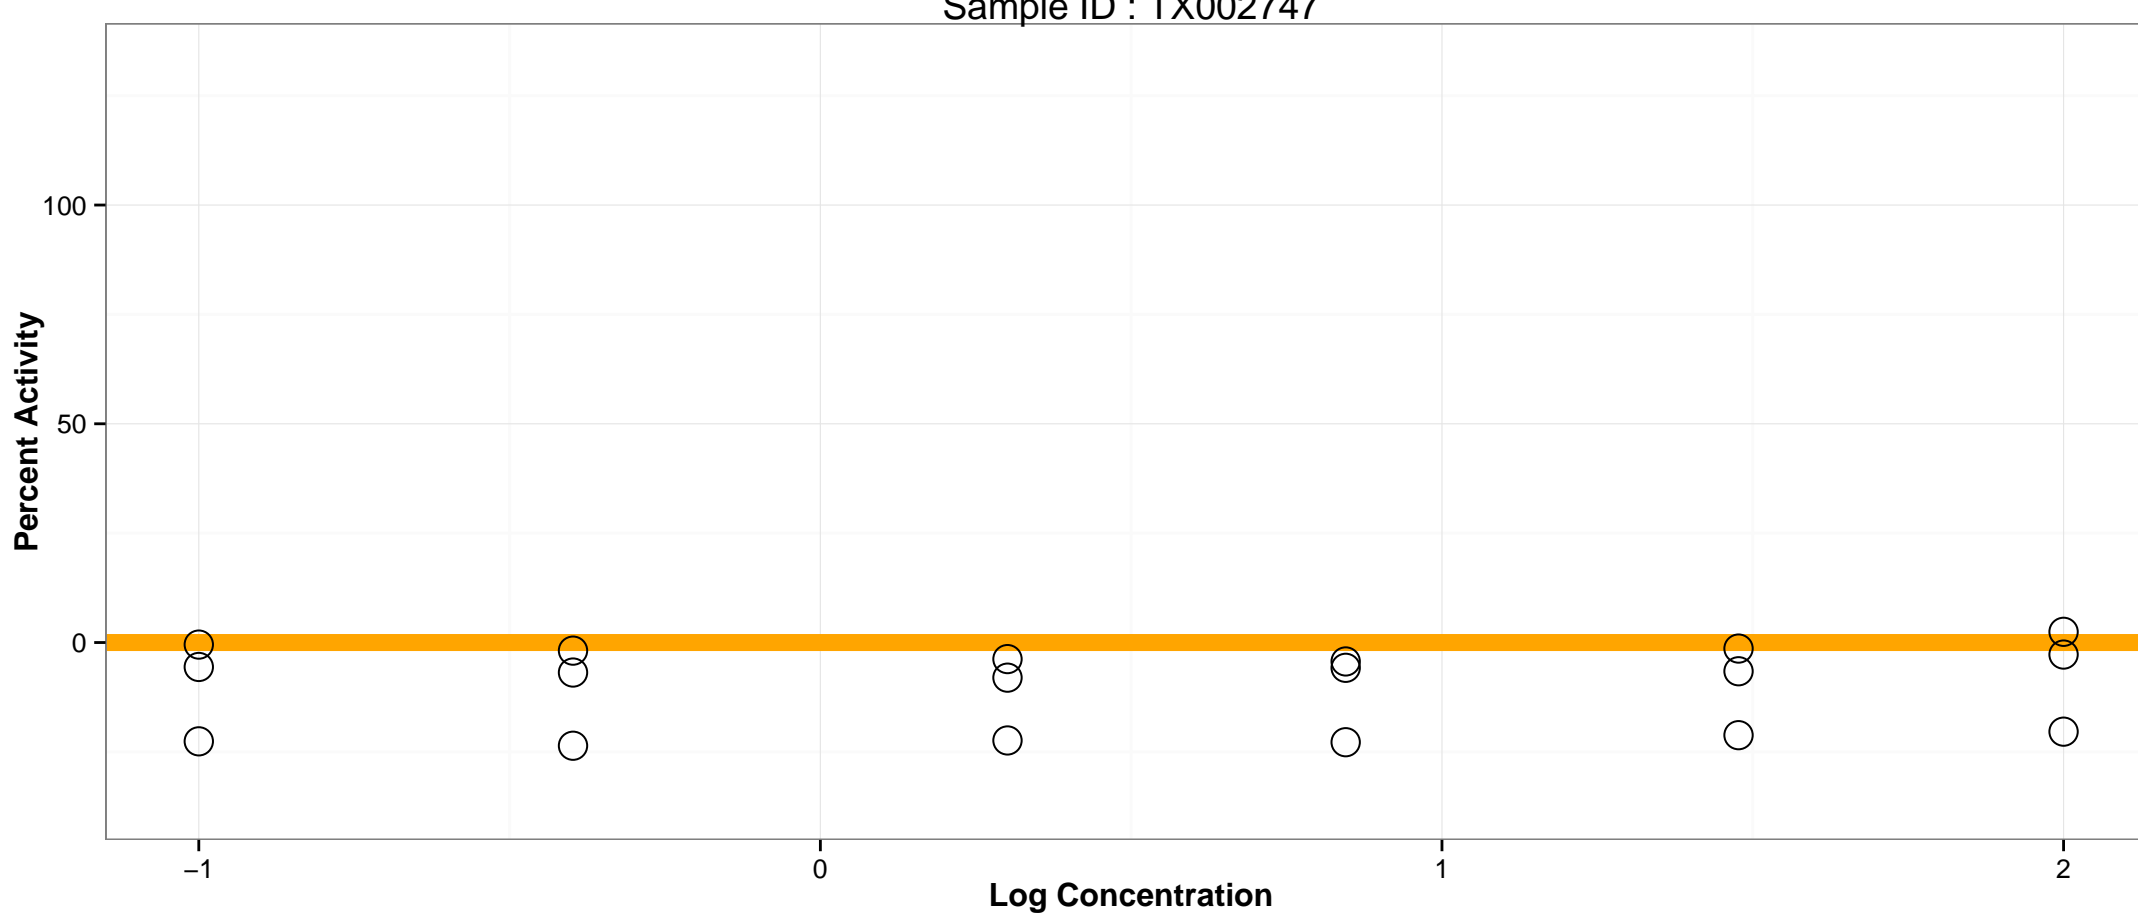

HILL MODEL

HILL MODEL: Not applicable

GAIN-LOSS MODEL

GNLS MODEL: Not applicable

|      | CNST   | HILL | GNLS |
|------|--------|------|------|
| AIC  | 147.28 | NA   | NA   |
| PROB | 1      | NA   | NA   |
| RMSE | 13.37  | NA   | NA   |

MAX\_MEAN : -6.88 MAX\_MED : -2.74 BMAD : 8.58  
COFF : 20 HIT-CALL : 0 FITC : 4 ACTP : 0  
FLAGS :

Assay ID 1508 (NHEERL\_TPO\_AUR\_dn)  
Sample ID : TX002765

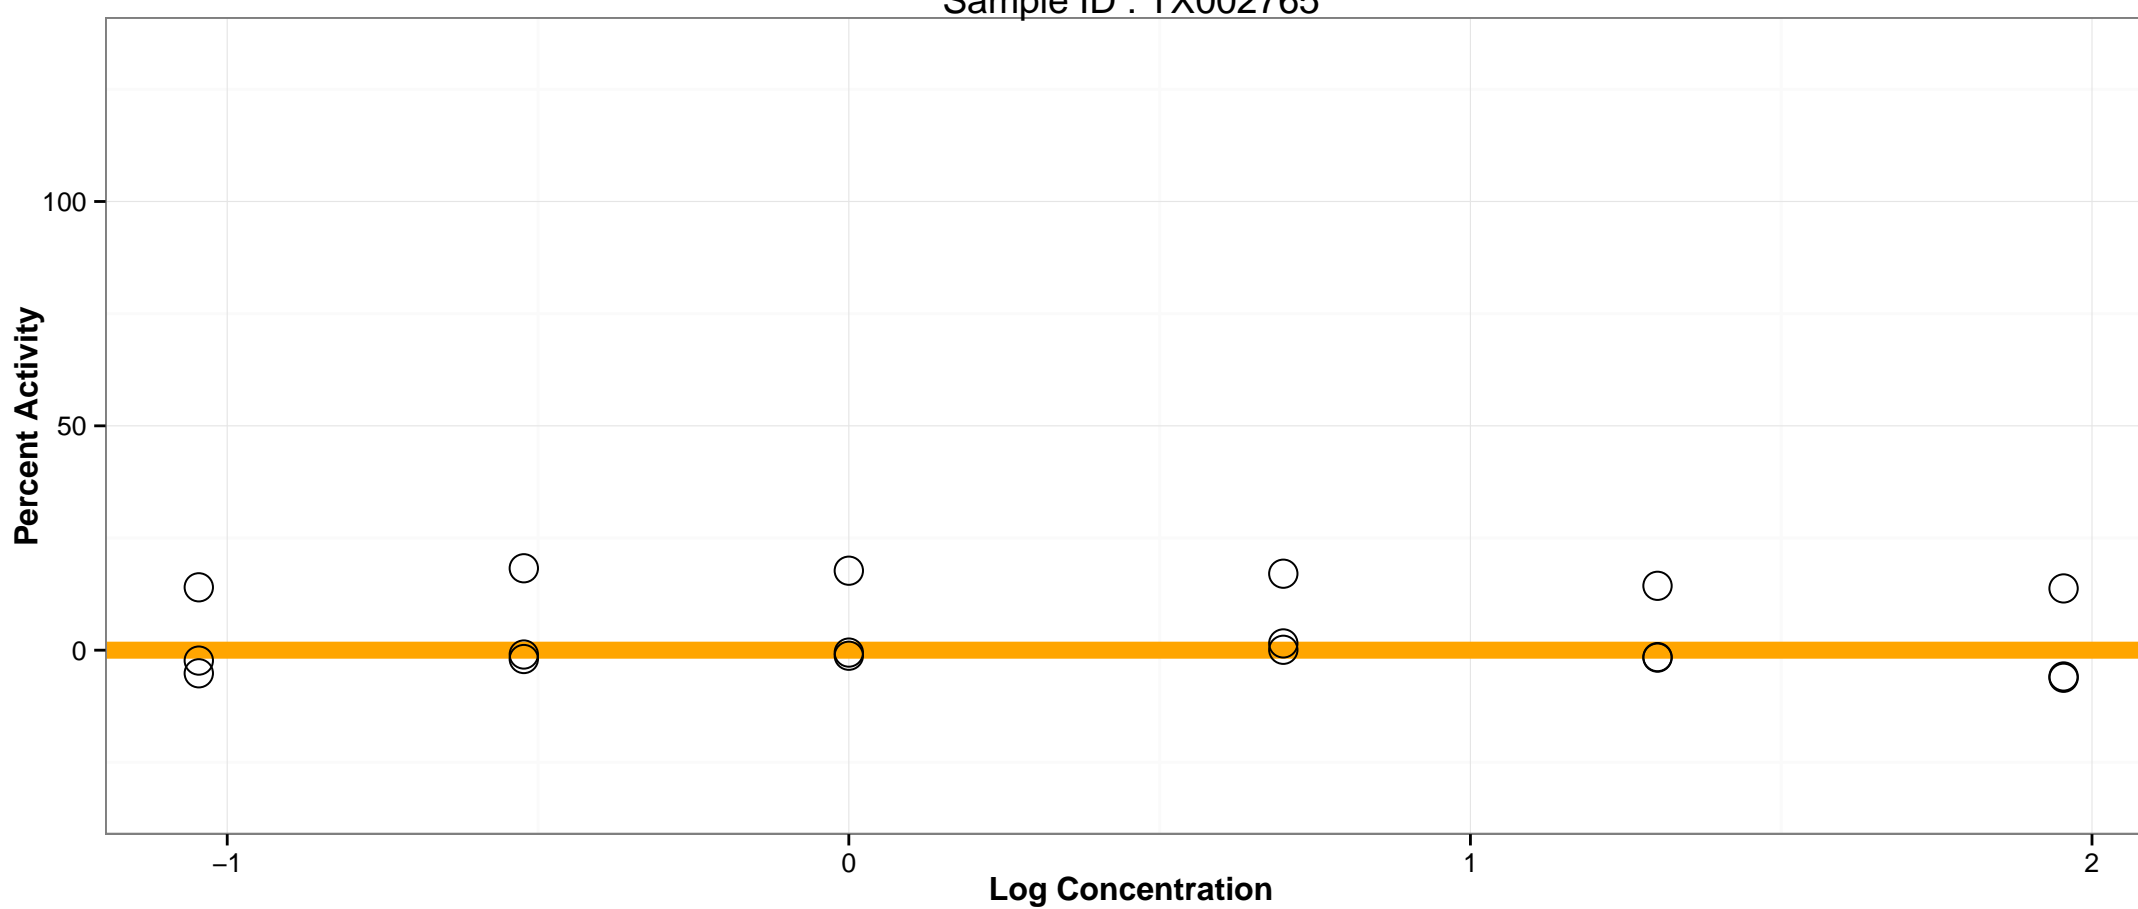

### HILL MODEL

HILL MODEL: Not applicable

### GAIN-LOSS MODEL

GNLS MODEL: Not applicable

|      | CNST   | HILL | GNLS |
|------|--------|------|------|
| AIC  | 134.83 | NA   | NA   |
| PROB | 1      | NA   | NA   |
| RMSE | 9.57   | NA   | NA   |

MAX\_MEAN : 6.22 MAX\_MED : 1.52 BMAD : 5.69  
COFF : 20 HIT-CALL : 0 FITC : 4 ACTP : 0  
FLAGS :

Assay ID 1509 (NHEERL\_HEK293T\_CellTiterGLO)  
Sample ID : TX002765

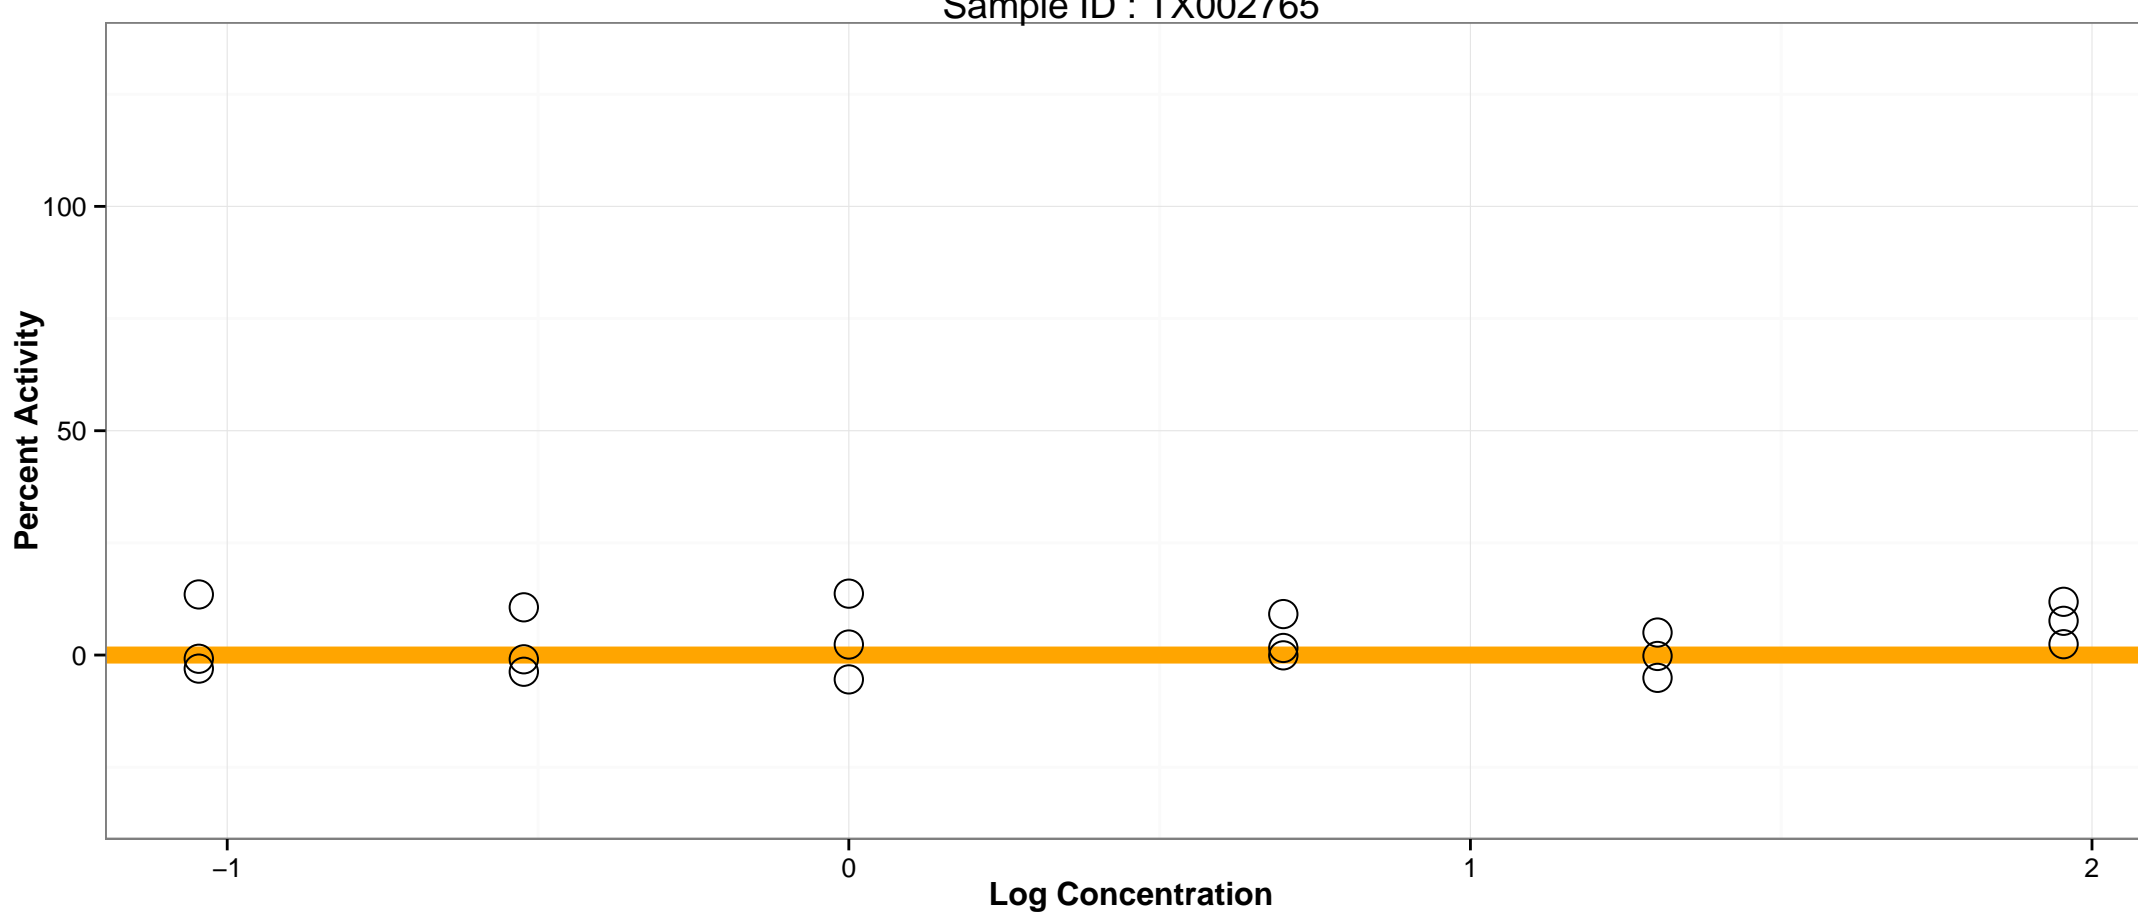

### HILL MODEL

HILL MODEL: Not applicable

### GAIN-LOSS MODEL

GNLS MODEL: Not applicable

|      | CNST   | HILL | GNLS |
|------|--------|------|------|
| AIC  | 124.21 | NA   | NA   |
| PROB | 1      | NA   | NA   |
| RMSE | 7.02   | NA   | NA   |

MAX\_MEAN : 7.32 MAX\_MED : 7.64 BMAD : 5.54  
COFF : 20 HIT-CALL : 0 FITC : 4 ACTP : 0  
FLAGS :

Assay ID 1848 (NHEERL\_Quantilum\_inhib\_2\_dn)  
Sample ID : TX002765

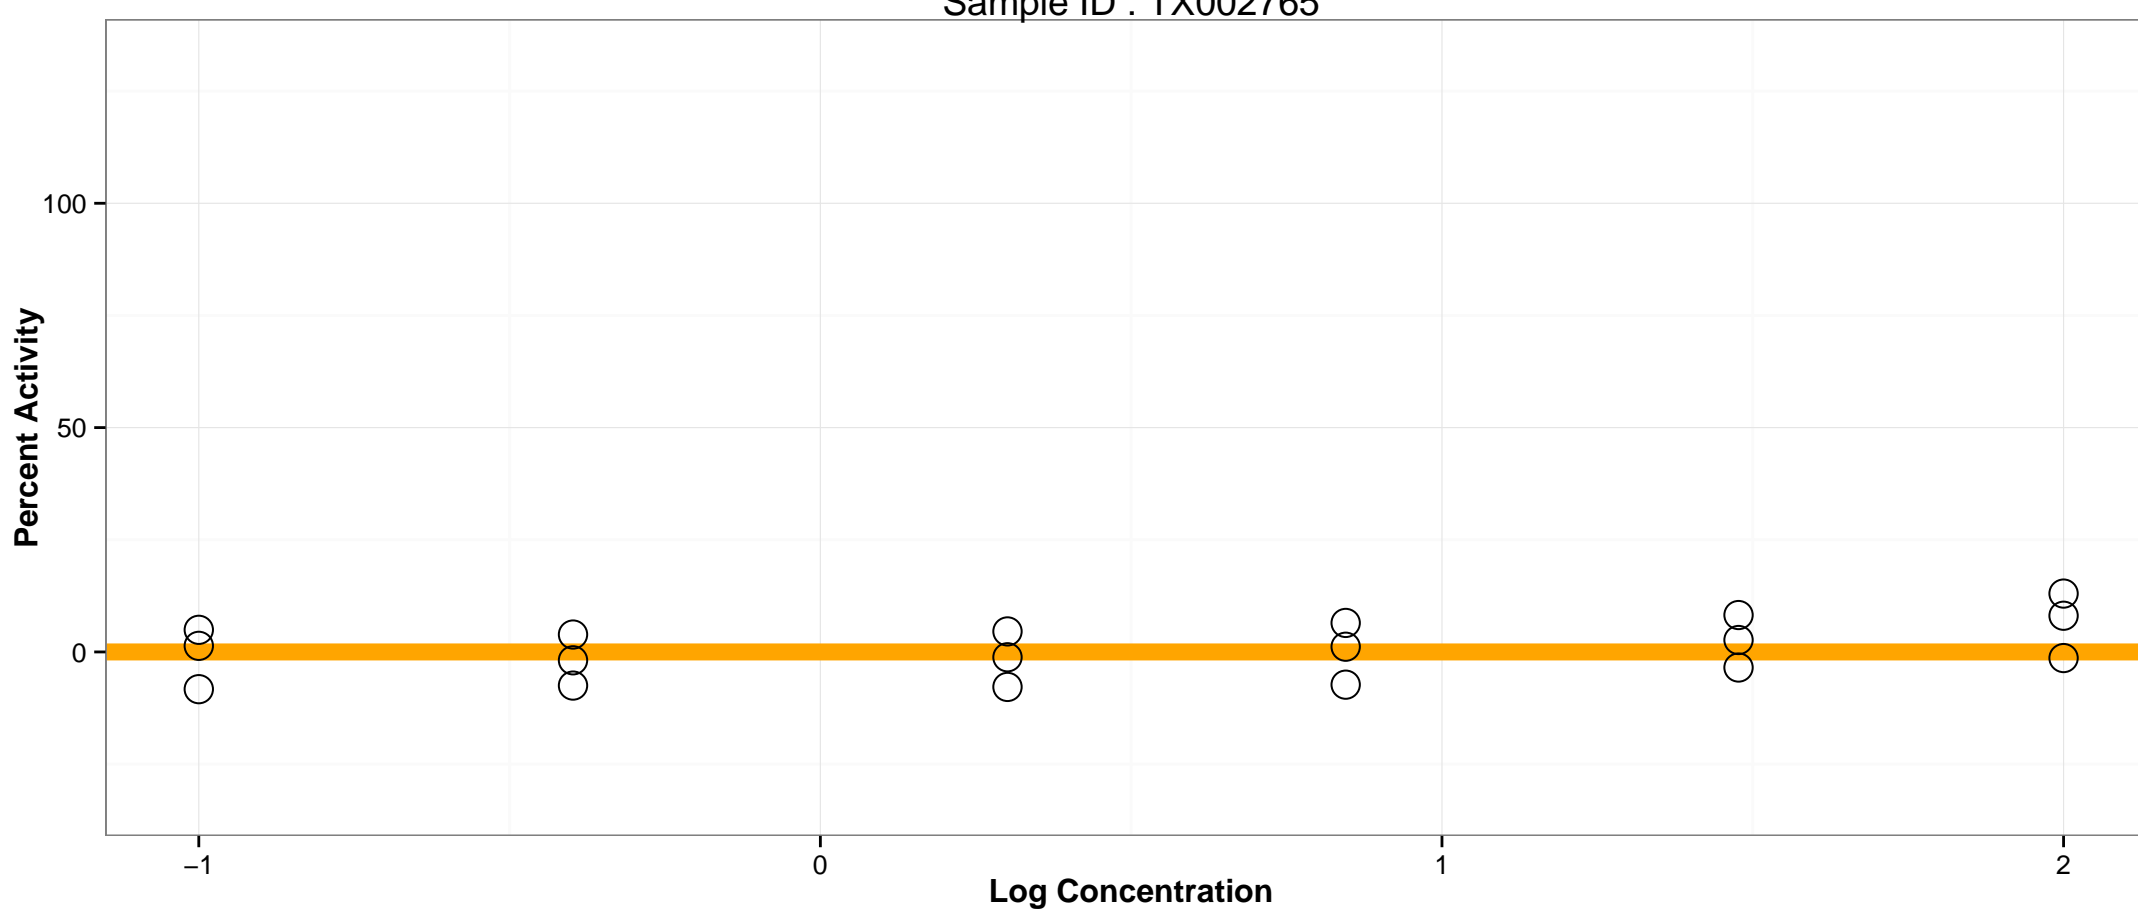

### HILL MODEL

HILL MODEL: Not applicable

### GAIN-LOSS MODEL

GNLS MODEL: Not applicable

|      | CNST  | HILL | GNLS |
|------|-------|------|------|
| AIC  | 120.4 | NA   | NA   |
| PROB | 1     | NA   | NA   |
| RMSE | 6.11  | NA   | NA   |

MAX\_MEAN : 6.58 MAX\_MED : 8.08 BMAD : 8.58  
COFF : 20 HIT-CALL : 0 FITC : 4 ACTP : 0  
FLAGS :



Chemical : Bisphenol A  
CAS : 80-05-7

Assay ID 1508 (NHEERL\_TPO\_AUR\_dn)  
Sample ID : TX002800

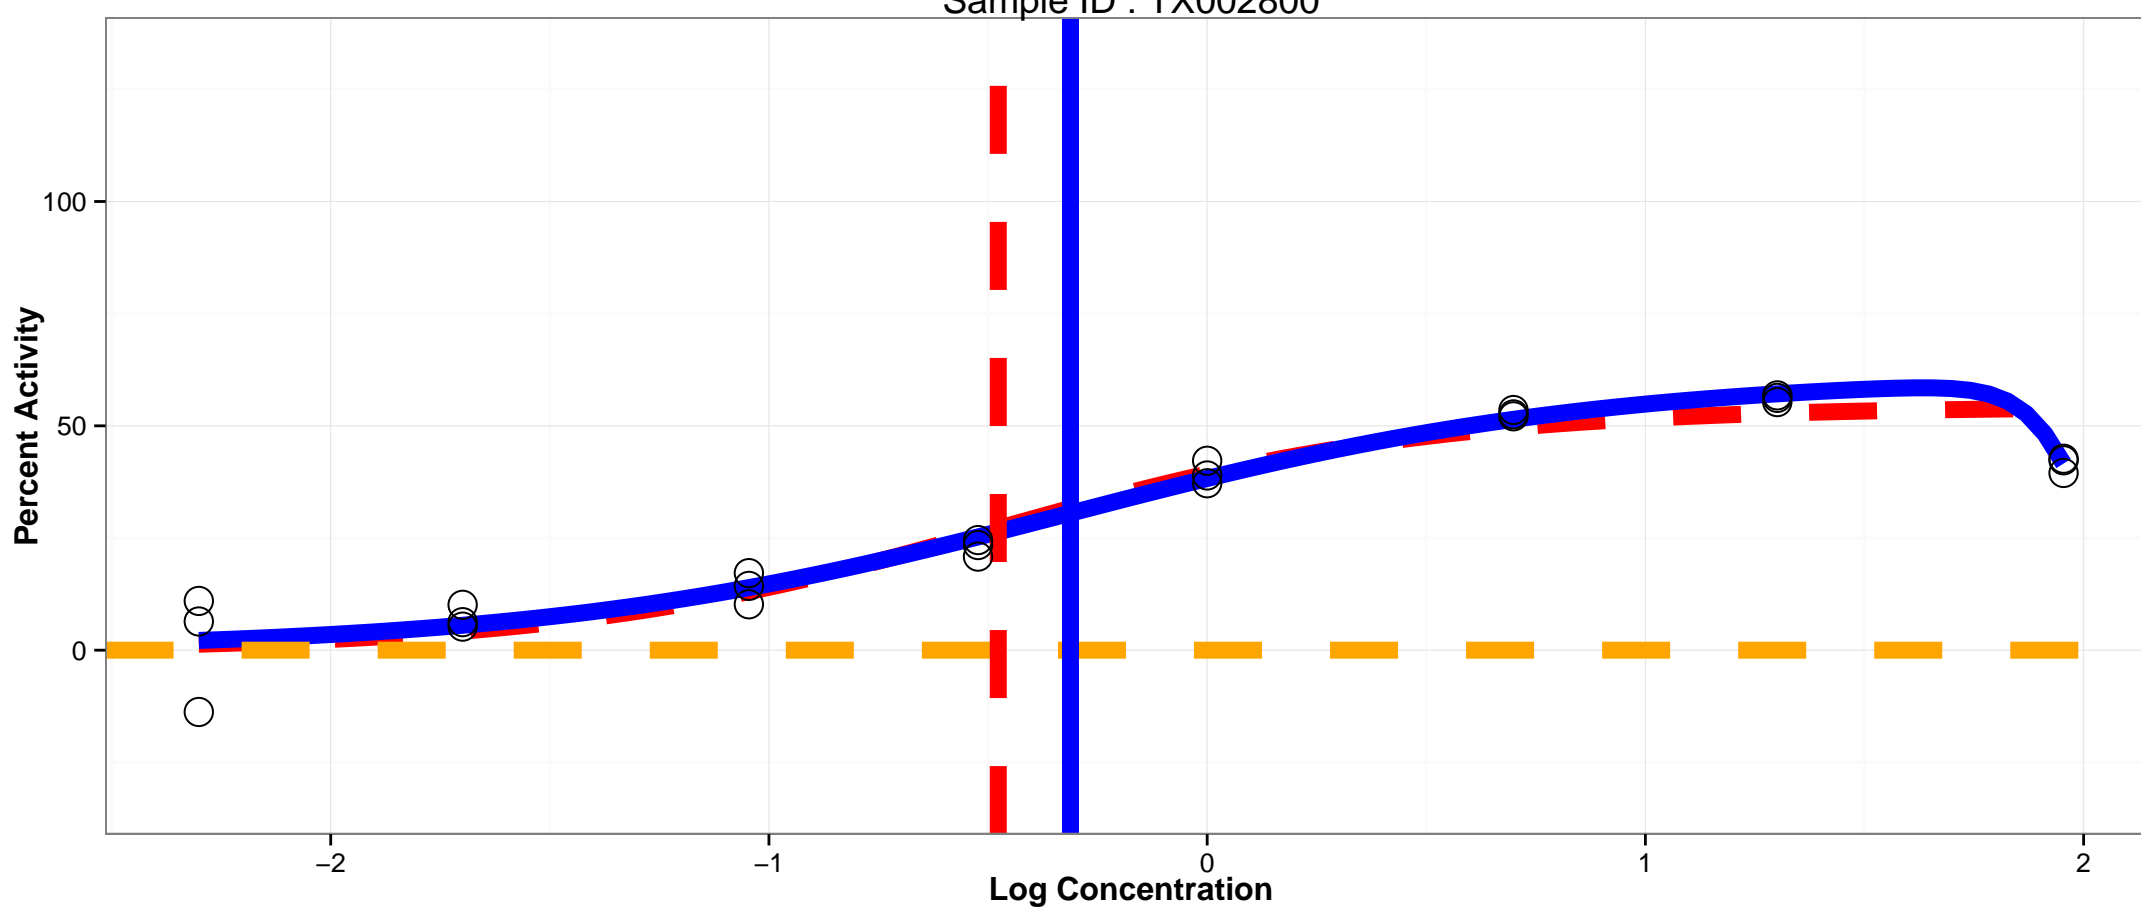

HILL MODEL

|     | tp   | ga     | gw    |
|-----|------|--------|-------|
| val | 54.3 | -0.477 | 0.876 |
| sd  | 3.37 | 0.102  | 0.15  |

GAIN-LOSS MODEL

|     | tp   | ga     | gw     | la     | lw   |
|-----|------|--------|--------|--------|------|
| val | 61.1 | -0.312 | 0.721  | 2.01   | 6.24 |
| sd  | 2.44 | 0.0747 | 0.0774 | 0.0132 | 1.57 |

|      | CNST   | HILL   | GNLS  |
|------|--------|--------|-------|
| AIC  | 245.04 | 164.71 | 141.4 |
| PROB | 0      | 0      | 1     |
| RMSE | 35.57  | 6.41   | 4.34  |

MAX\_MEAN : 56.1 MAX\_MED : 56.2 BMAD : 5.69  
COFF : 20 HIT-CALL : 1 FITC : 50 ACTP : 1  
FLAGS :

Assay ID 1509 (NHEERL\_HEK293T\_CellTiterGLO)  
Sample ID : TX002800

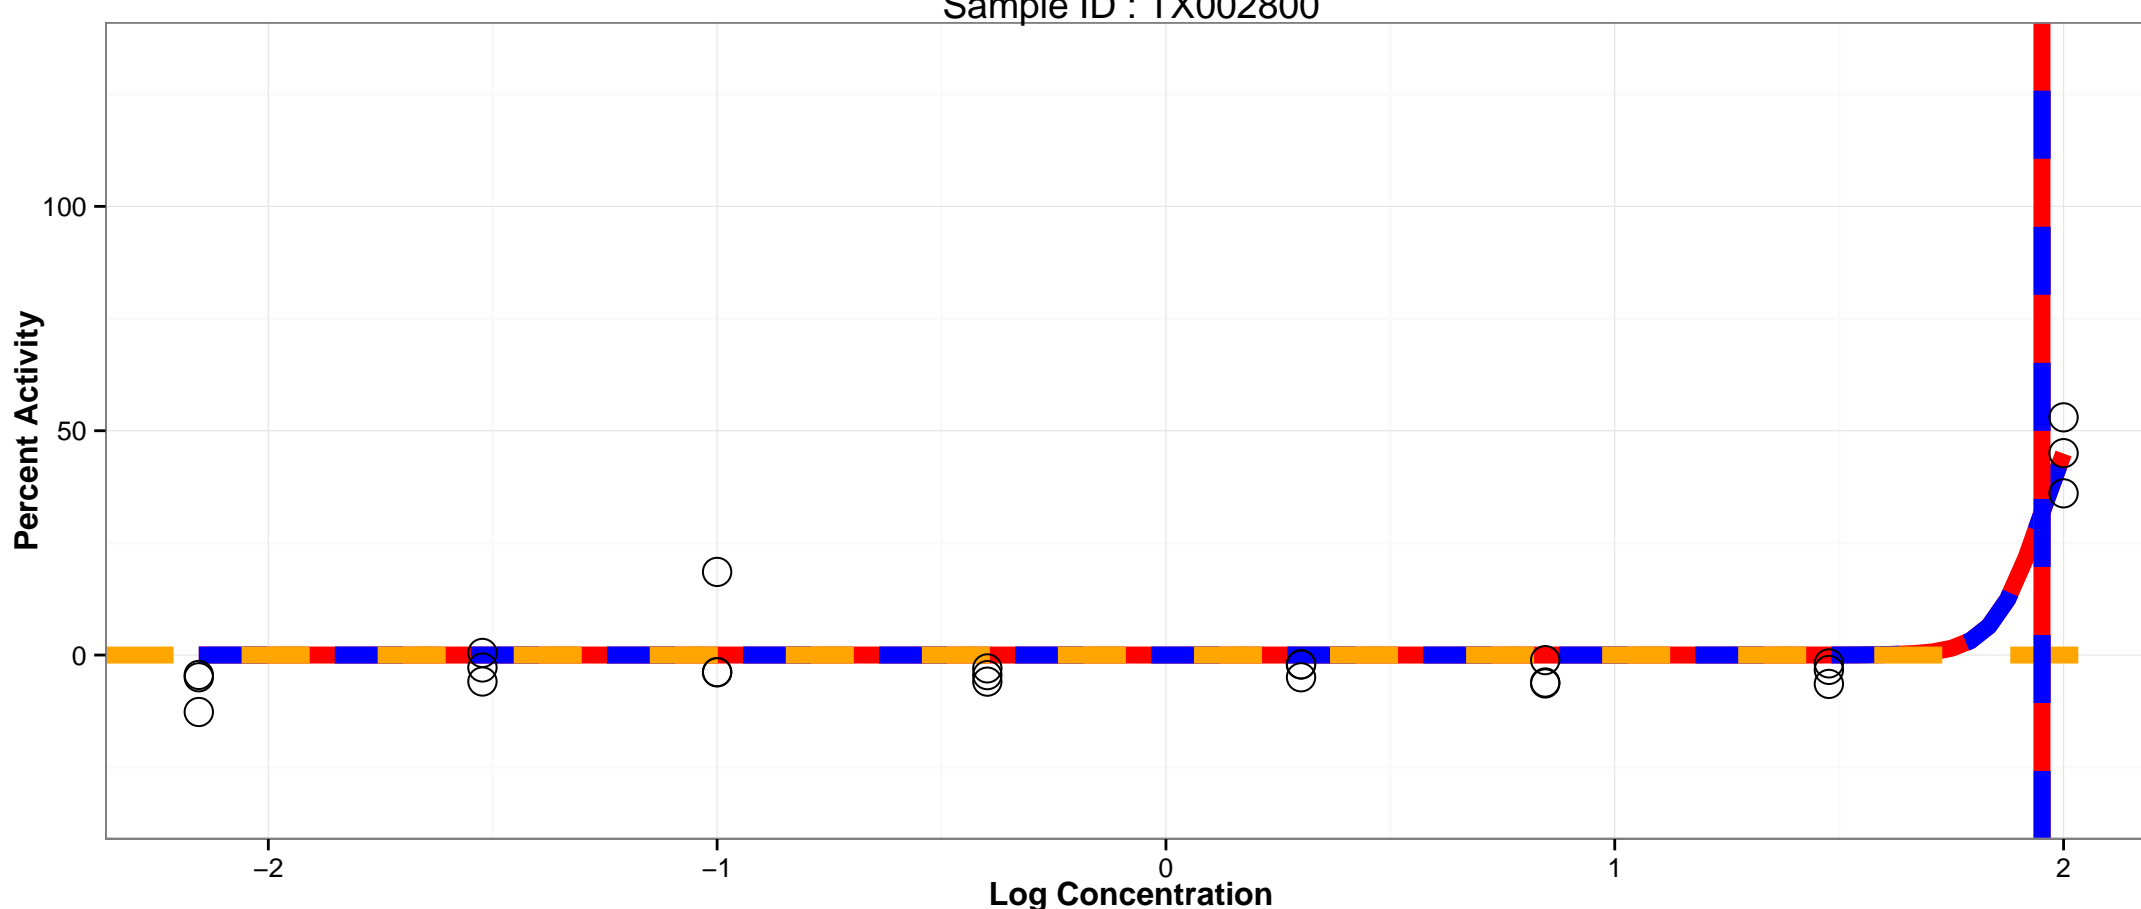

HILL MODEL

|     | tp   | ga   | gw |
|-----|------|------|----|
| val | 63.4 | 1.95 | 8  |
| sd  | 57.2 | 0.12 | 14 |

GAIN-LOSS MODEL

|     | tp   | ga    | gw   | la   | lw   |
|-----|------|-------|------|------|------|
| val | 63.6 | 1.95  | 8    | 2.72 | 7.84 |
| sd  | 58.5 | 0.121 | 14.2 | 706  | 7700 |

|      | CNST   | HILL   | GNLS   |
|------|--------|--------|--------|
| AIC  | 194.38 | 165.26 | 169.26 |
| PROB | 0      | 0.88   | 0.12   |
| RMSE | 17.06  | 6.44   | 6.44   |

MAX\_MEAN : 44.7 MAX\_MED : 45 BMAD : 5.54  
COFF : 20 HIT-CALL : 1 FITC : 42 ACTP : 1  
FLAGS : 6

Assay ID 1848 (NHEERL\_Quantilum\_inhib\_2\_dn)  
Sample ID : TX002800

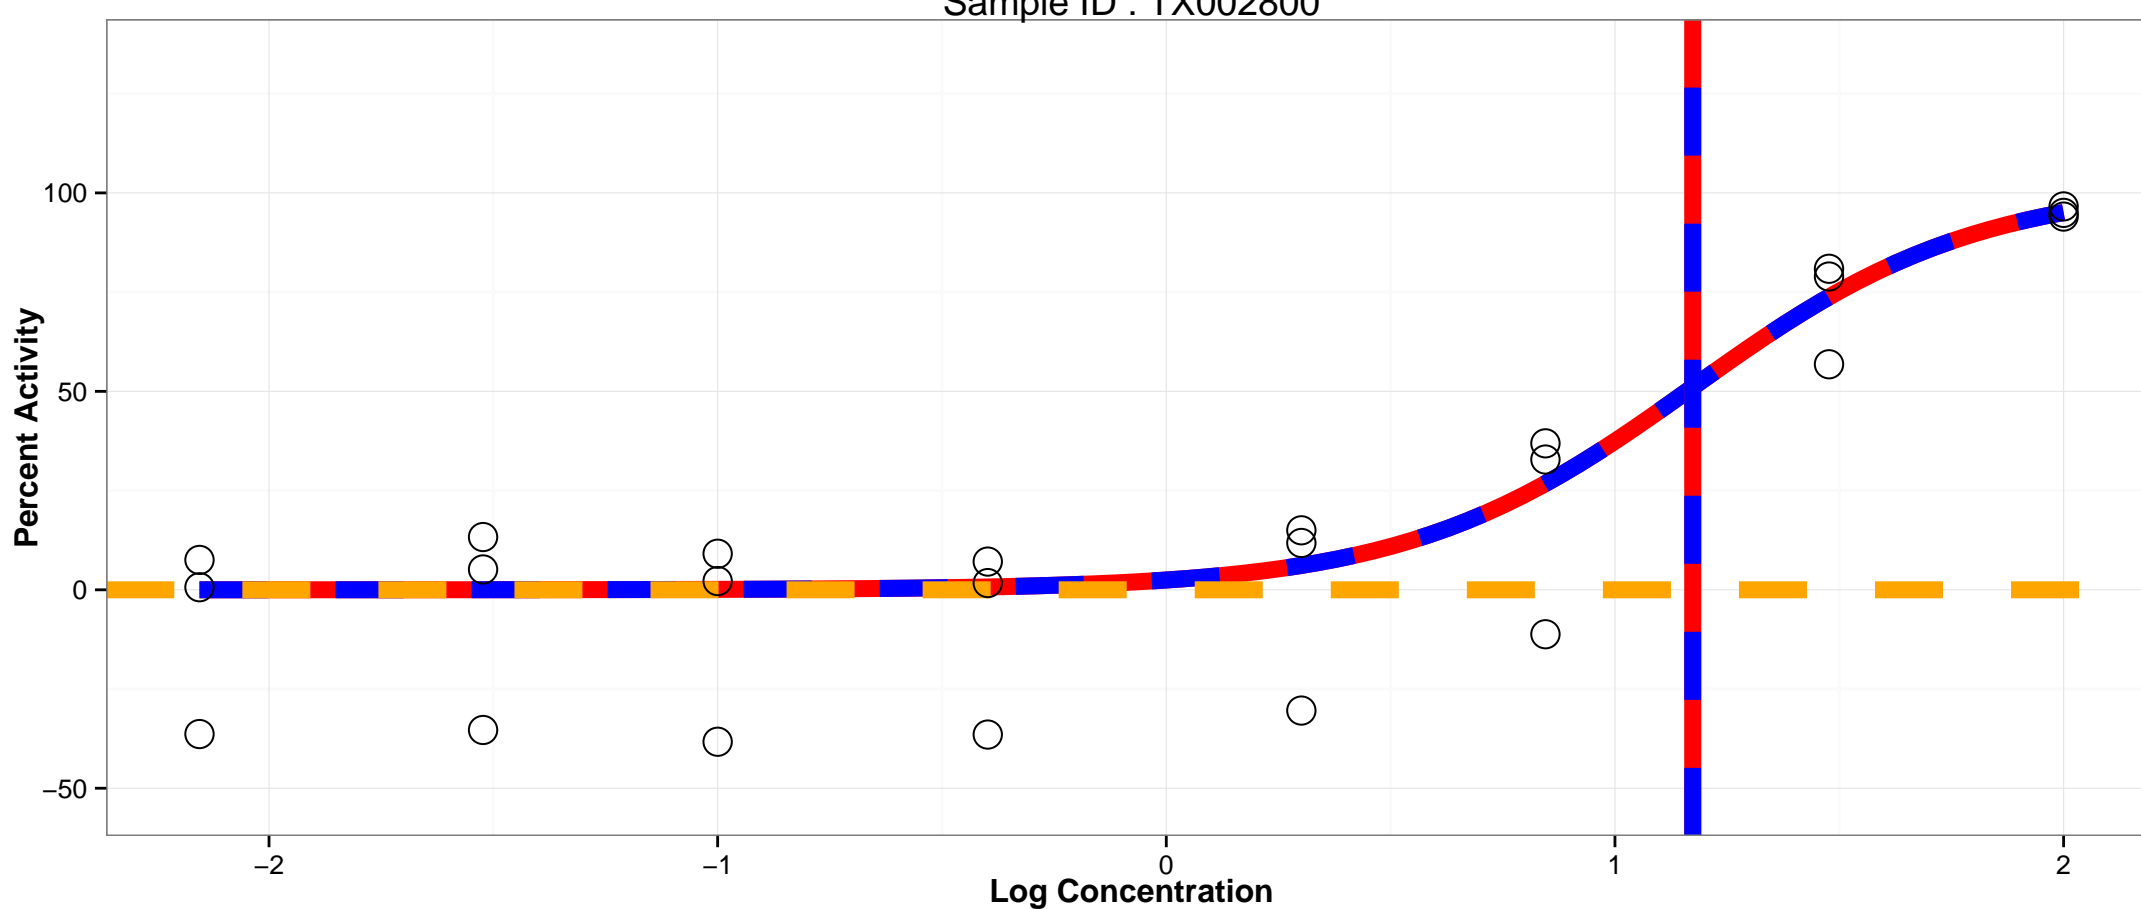

HILL MODEL

|     | tp  | ga    | gw    |
|-----|-----|-------|-------|
| val | 102 | 1.17  | 1.37  |
| sd  | 15  | 0.178 | 0.529 |

GAIN-LOSS MODEL

|     | tp  | ga   | gw   | la   | lw   |
|-----|-----|------|------|------|------|
| val | 102 | 1.17 | 1.37 | 3.98 | 5.88 |
| sd  | NA  | NA   | NA   | NA   | NA   |

|      | CNST   | HILL  | GNLS  |
|------|--------|-------|-------|
| AIC  | 255.07 | 217.9 | 221.9 |
| PROB | 0      | 0.88  | 0.12  |
| RMSE | 46.92  | 19.58 | 19.58 |

MAX\_MEAN : 95.2 MAX\_MED : 95 BMAD : 8.58  
COFF : 20 HIT-CALL : 1 FITC : 42 ACTP : 1  
FLAGS :

Chemical : Bisphenol A  
CAS : 80-05-7

Assay ID 1508 (NHEERL\_TPO\_AUR\_dn)  
Sample ID : TX012317

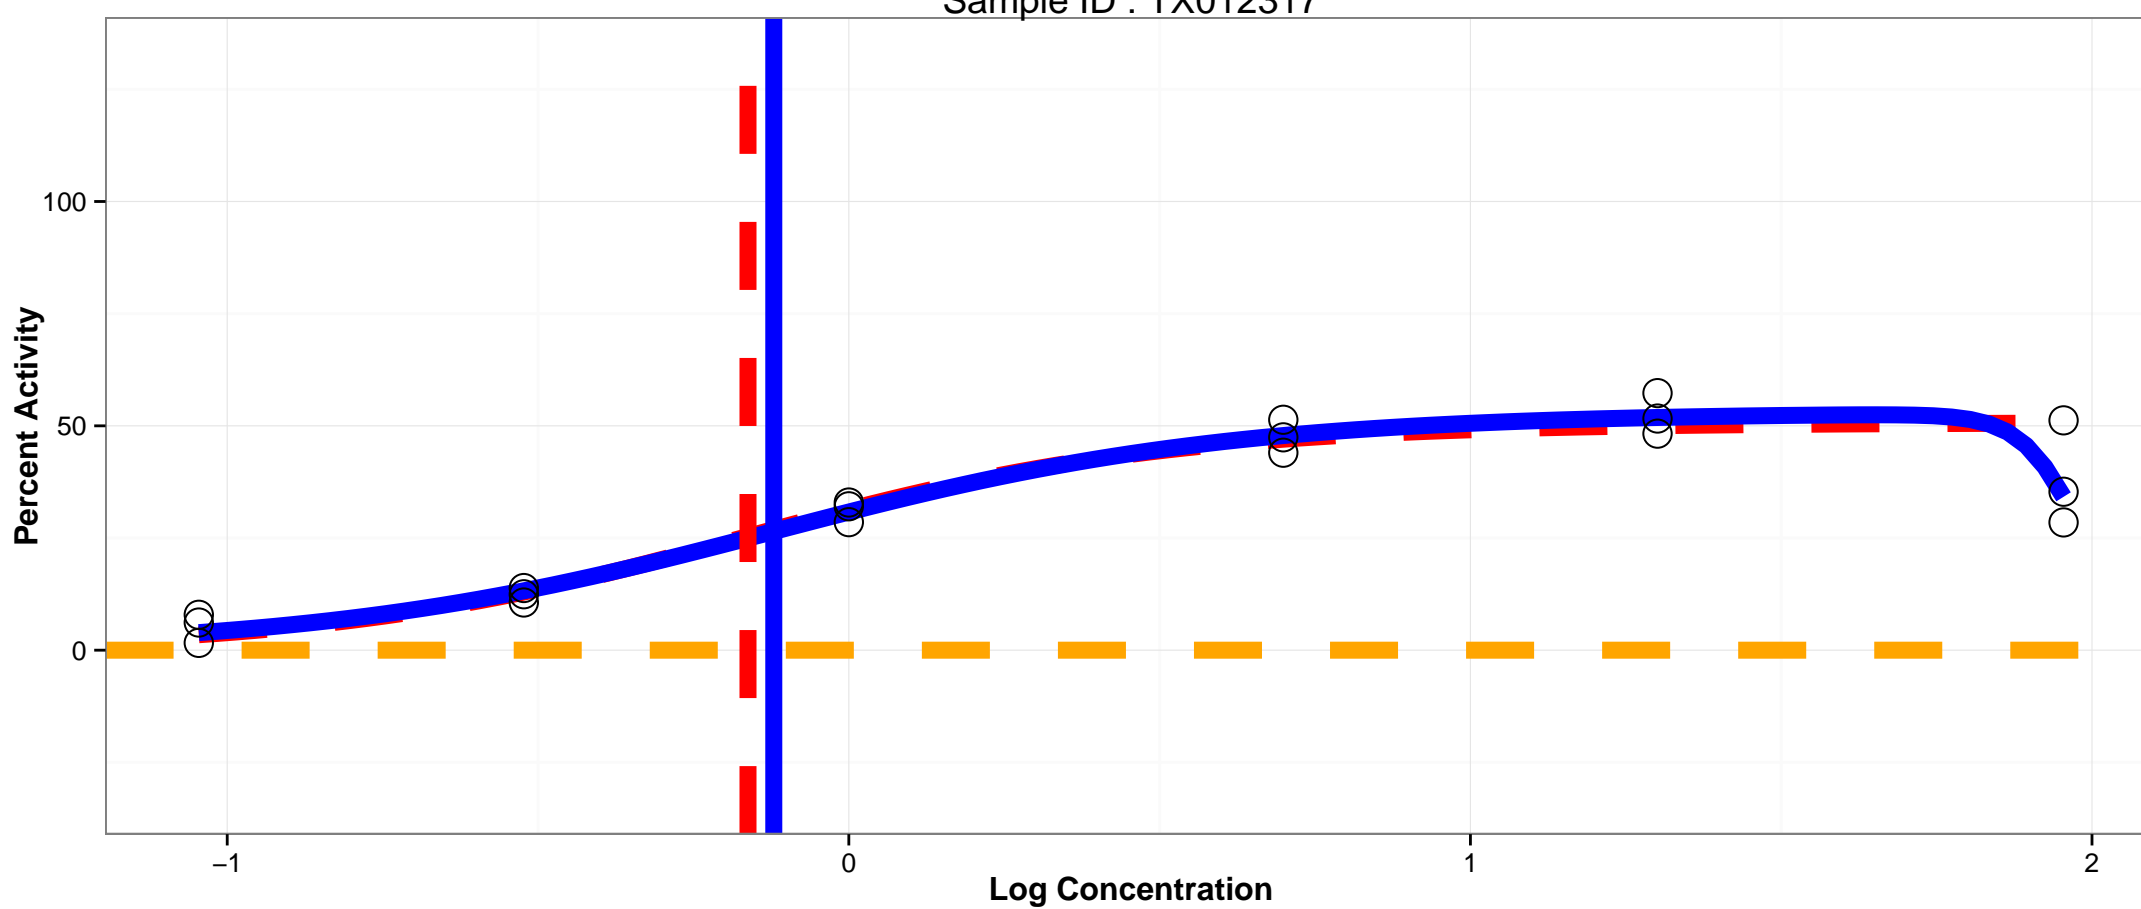

HILL MODEL

|     | tp   | ga     | gw    |
|-----|------|--------|-------|
| val | 50.7 | -0.162 | 1.29  |
| sd  | 1.97 | 0.0549 | 0.188 |

GAIN-LOSS MODEL

|     | tp   | ga     | gw    | la     | lw   |
|-----|------|--------|-------|--------|------|
| val | 52.9 | -0.121 | 1.19  | 1.98   | 9.02 |
| sd  | 2.5  | 0.0624 | 0.176 | 0.0194 | 5.88 |

|      | CNST   | HILL  | GNLS   |
|------|--------|-------|--------|
| AIC  | 184.95 | 120.3 | 114.65 |
| PROB | 0      | 0.06  | 0.94   |
| RMSE | 35.97  | 6.9   | 4.94   |

MAX\_MEAN : 52.4 MAX\_MED : 51.6 BMAD : 5.69  
COFF : 20 HIT-CALL : 1 FITC : 50 ACTP : 1  
FLAGS :

Assay ID 1509 (NHEERL\_HEK293T\_CellTiterGLO)  
Sample ID : TX012317

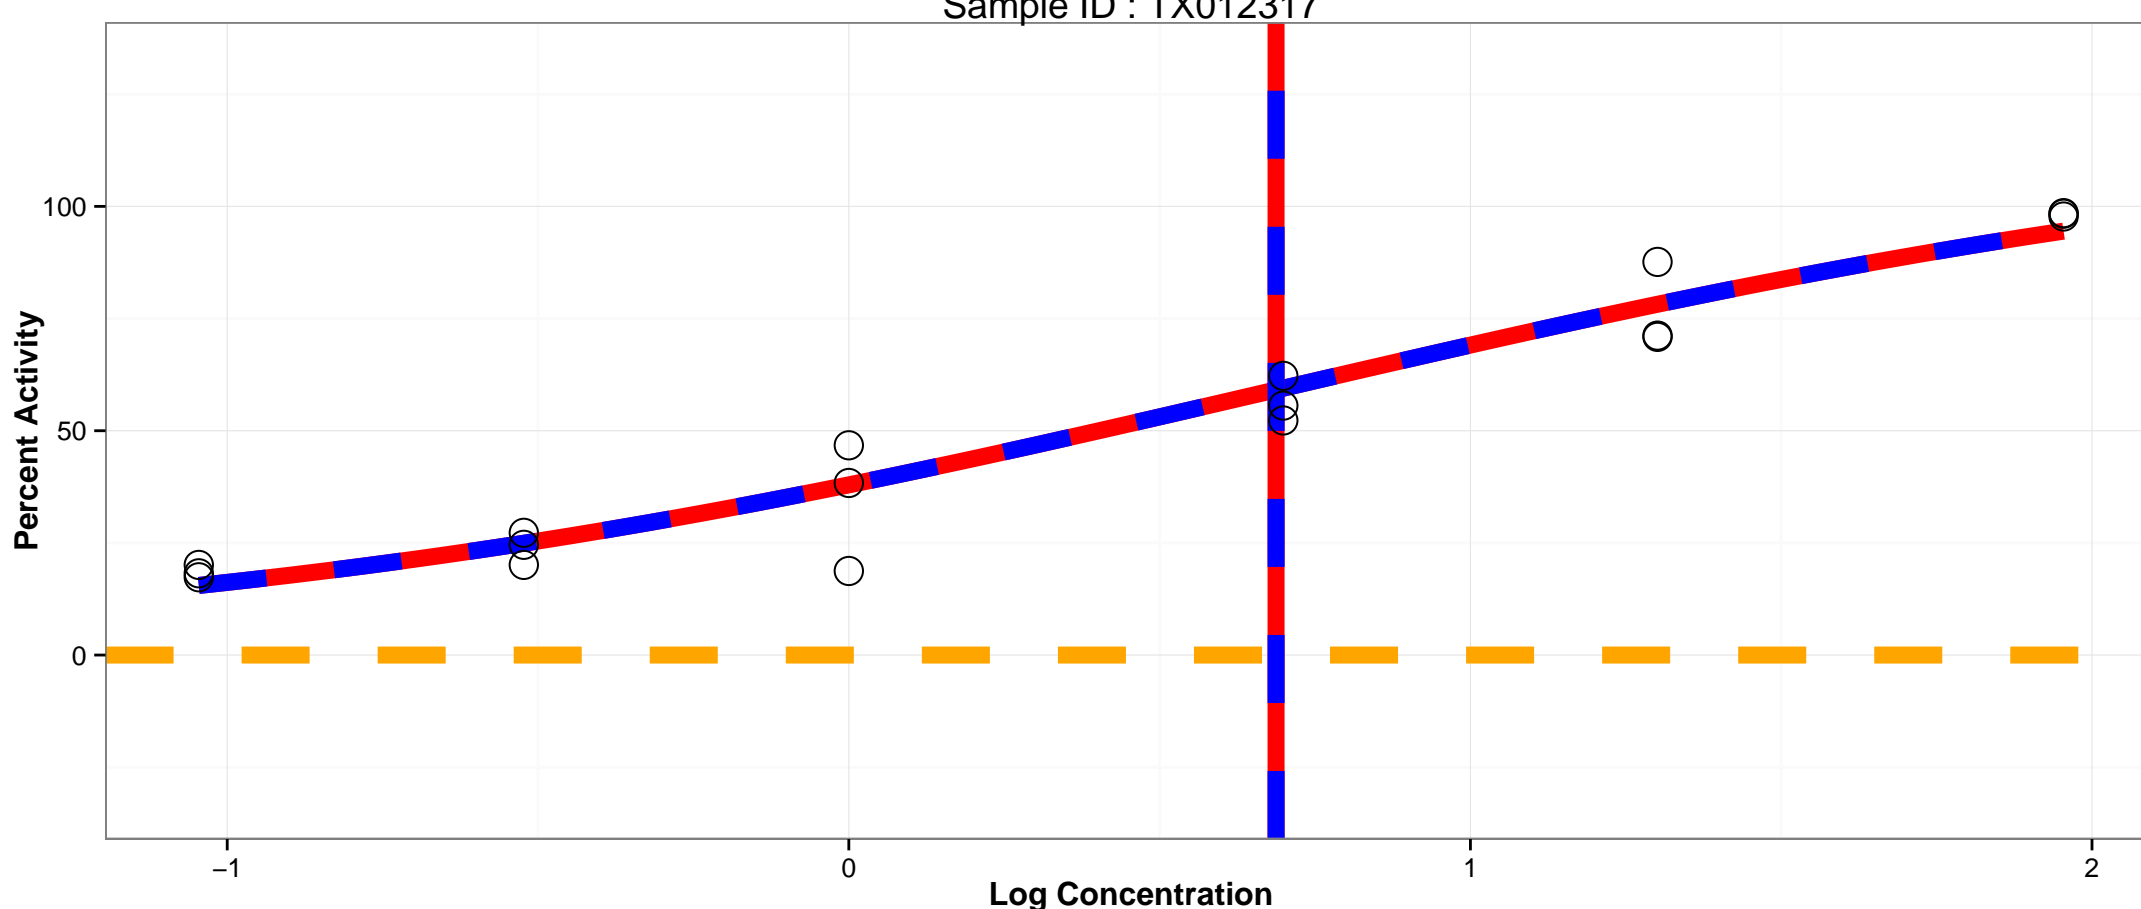

HILL MODEL

|     | tp   | ga    | gw     |
|-----|------|-------|--------|
| val | 118  | 0.687 | 0.474  |
| sd  | 12.4 | 0.242 | 0.0598 |

GAIN-LOSS MODEL

|     | tp  | ga    | gw    | la   | lw   |
|-----|-----|-------|-------|------|------|
| val | 118 | 0.687 | 0.474 | 2.75 | 17.9 |
| sd  | NA  | NA    | NA    | NA   | NA   |

|      | CNST   | HILL   | GNLS   |
|------|--------|--------|--------|
| AIC  | 202.51 | 127.01 | 131.01 |
| PROB | 0      | 0.88   | 0.12   |
| RMSE | 59.26  | 6.72   | 6.72   |

MAX\_MEAN : 98.2 MAX\_MED : 98.4 BMAD : 5.54  
COFF : 20 HIT-CALL : 1 FITC : 42 ACTP : 1  
FLAGS :

Assay ID 1848 (NHEERL\_Quantilum\_inhib\_2\_dn)  
Sample ID : TX012317

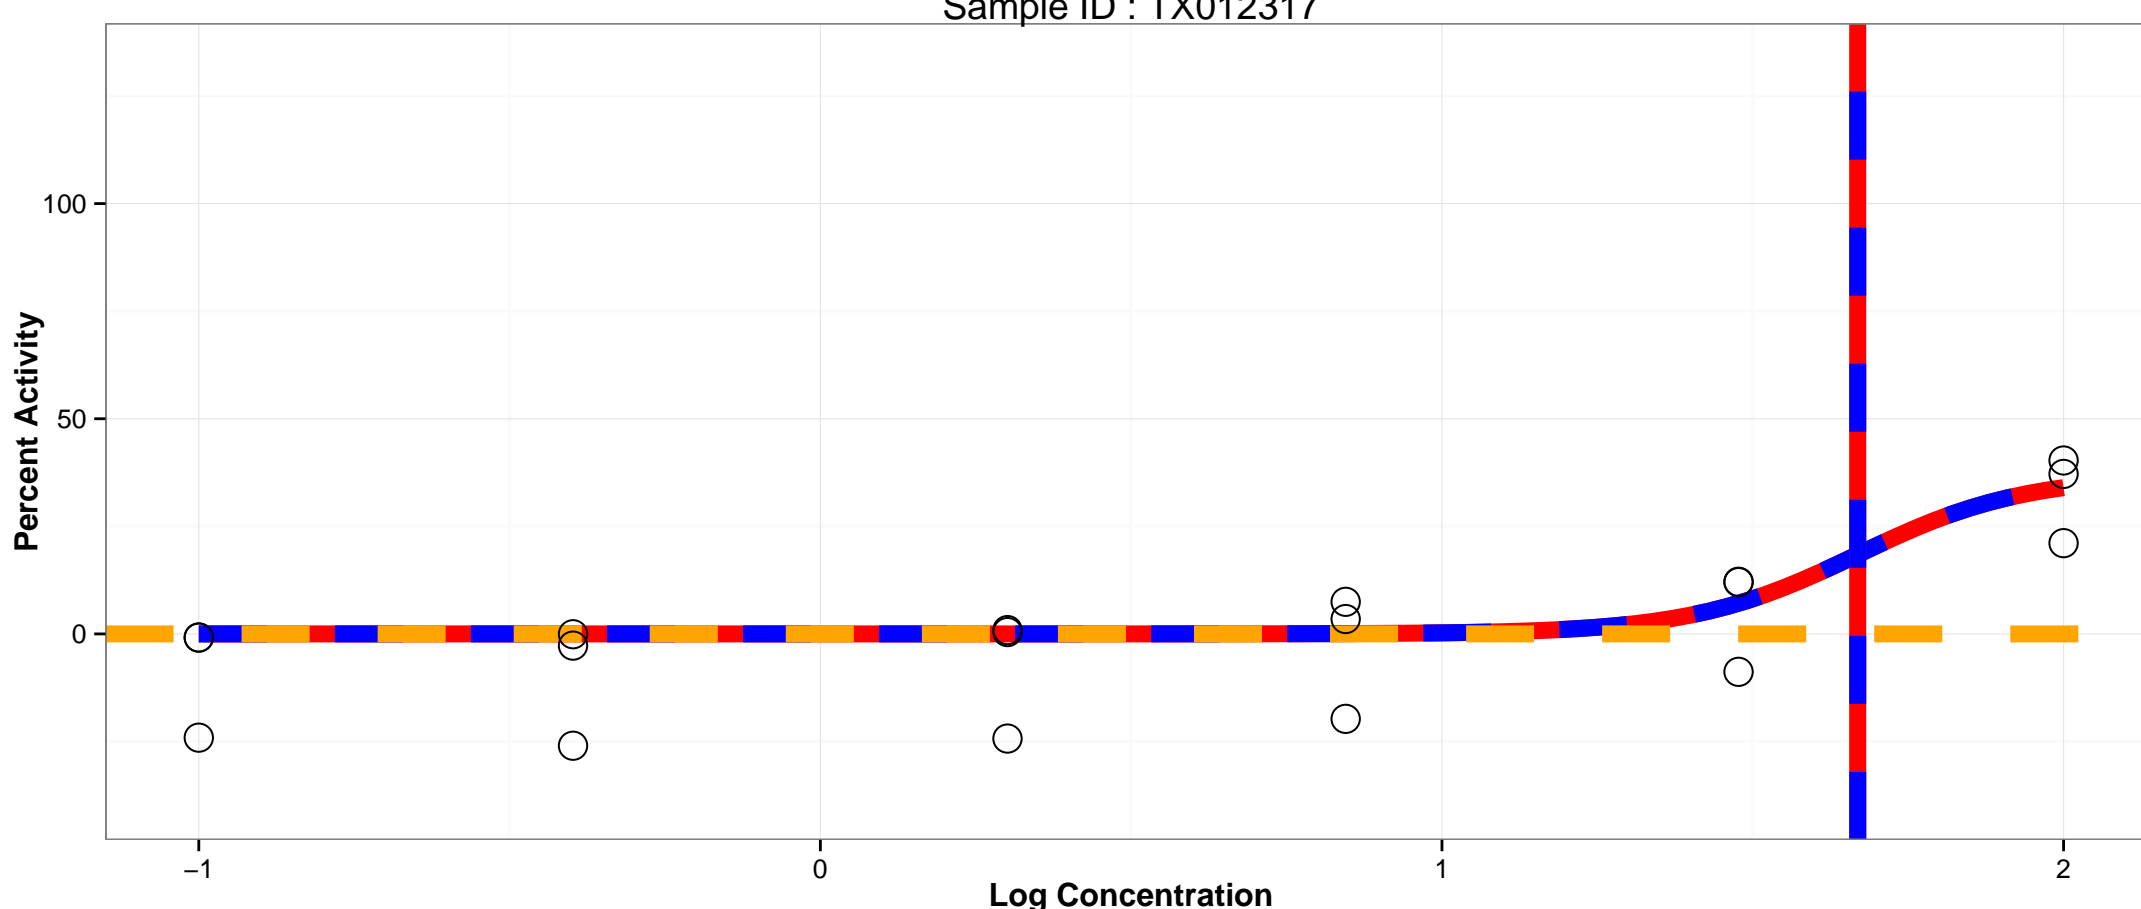

HILL MODEL

|     | tp   | ga   | gw   |
|-----|------|------|------|
| val | 36.9 | 1.67 | 3.24 |
| sd  | 142  | 2.83 | 37   |

GAIN-LOSS MODEL

|     | tp   | ga   | gw   | la   | lw   |
|-----|------|------|------|------|------|
| val | 36.9 | 1.67 | 3.24 | 3.84 | 11.8 |
| sd  | NA   | NA   | NA   | NA   | NA   |

|      | CNST   | HILL   | GNLS   |
|------|--------|--------|--------|
| AIC  | 158.56 | 149.82 | 153.82 |
| PROB | 0.01   | 0.87   | 0.12   |
| RMSE | 18.46  | 12.55  | 12.55  |

MAX\_MEAN : 32.9 MAX\_MED : 37.2 BMAD : 8.58  
COFF : 20 HIT-CALL : 1 FITC : 42 ACTP : 0.989  
FLAGS : 6

Chemical : Bisphenol A  
CAS : 80-05-7

Assay ID 1508 (NHEERL\_TPO\_AUR\_dn)  
Sample ID : TX102800

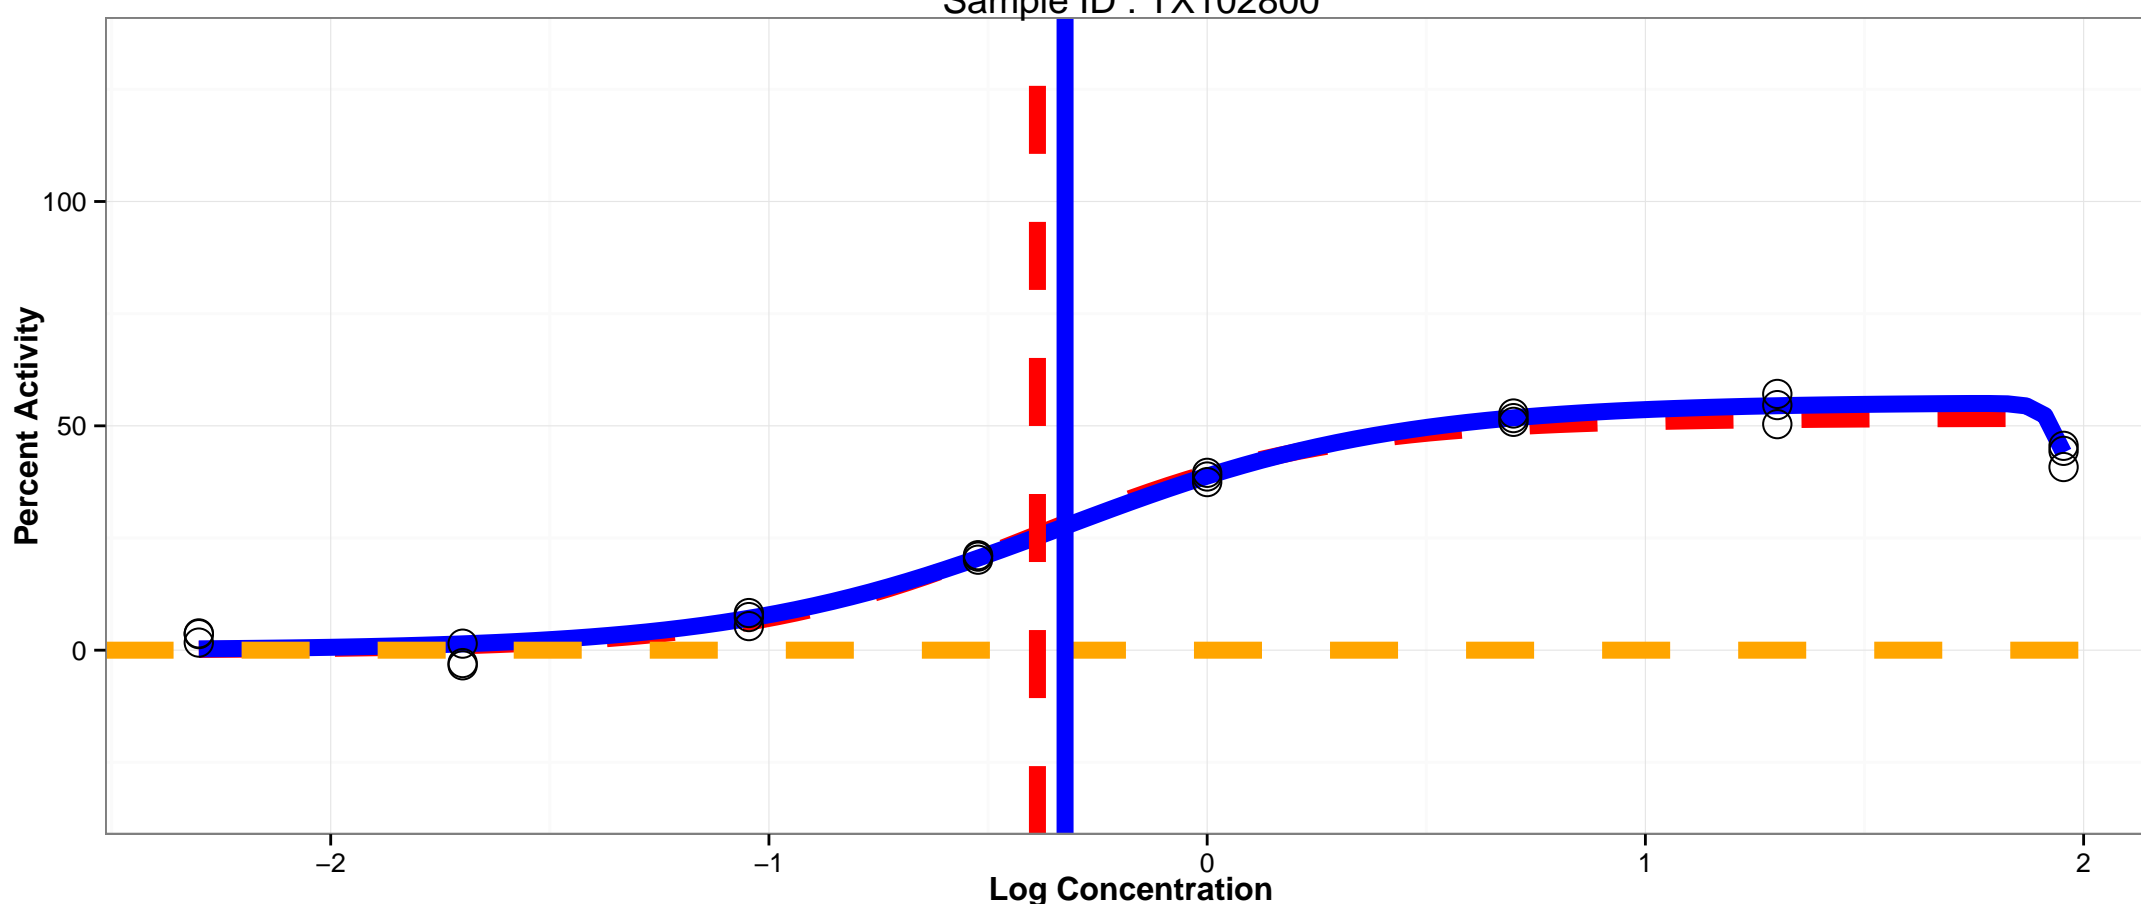

HILL MODEL

|     | tp   | ga     | gw    |
|-----|------|--------|-------|
| val | 51.7 | -0.387 | 1.31  |
| sd  | 1.82 | 0.0435 | 0.133 |

GAIN-LOSS MODEL

|     | tp   | ga     | gw     | la      | lw   |
|-----|------|--------|--------|---------|------|
| val | 55.2 | -0.324 | 1.15   | 1.99    | 15.9 |
| sd  | 1.21 | 0.0297 | 0.0773 | 0.00491 | 2.06 |

|      | CNST   | HILL   | GNLS   |
|------|--------|--------|--------|
| AIC  | 243.13 | 137.93 | 117.14 |
| PROB | 0      | 0      | 1      |
| RMSE | 34.47  | 3.74   | 2.16   |

MAX\_MEAN : 54 MAX\_MED : 54.6 BMAD : 5.69  
COFF : 20 HIT-CALL : 1 FITC : 50 ACTP : 1  
FLAGS :

Assay ID 1509 (NHEERL\_HEK293T\_CellTiterGLO)  
Sample ID : TX102800

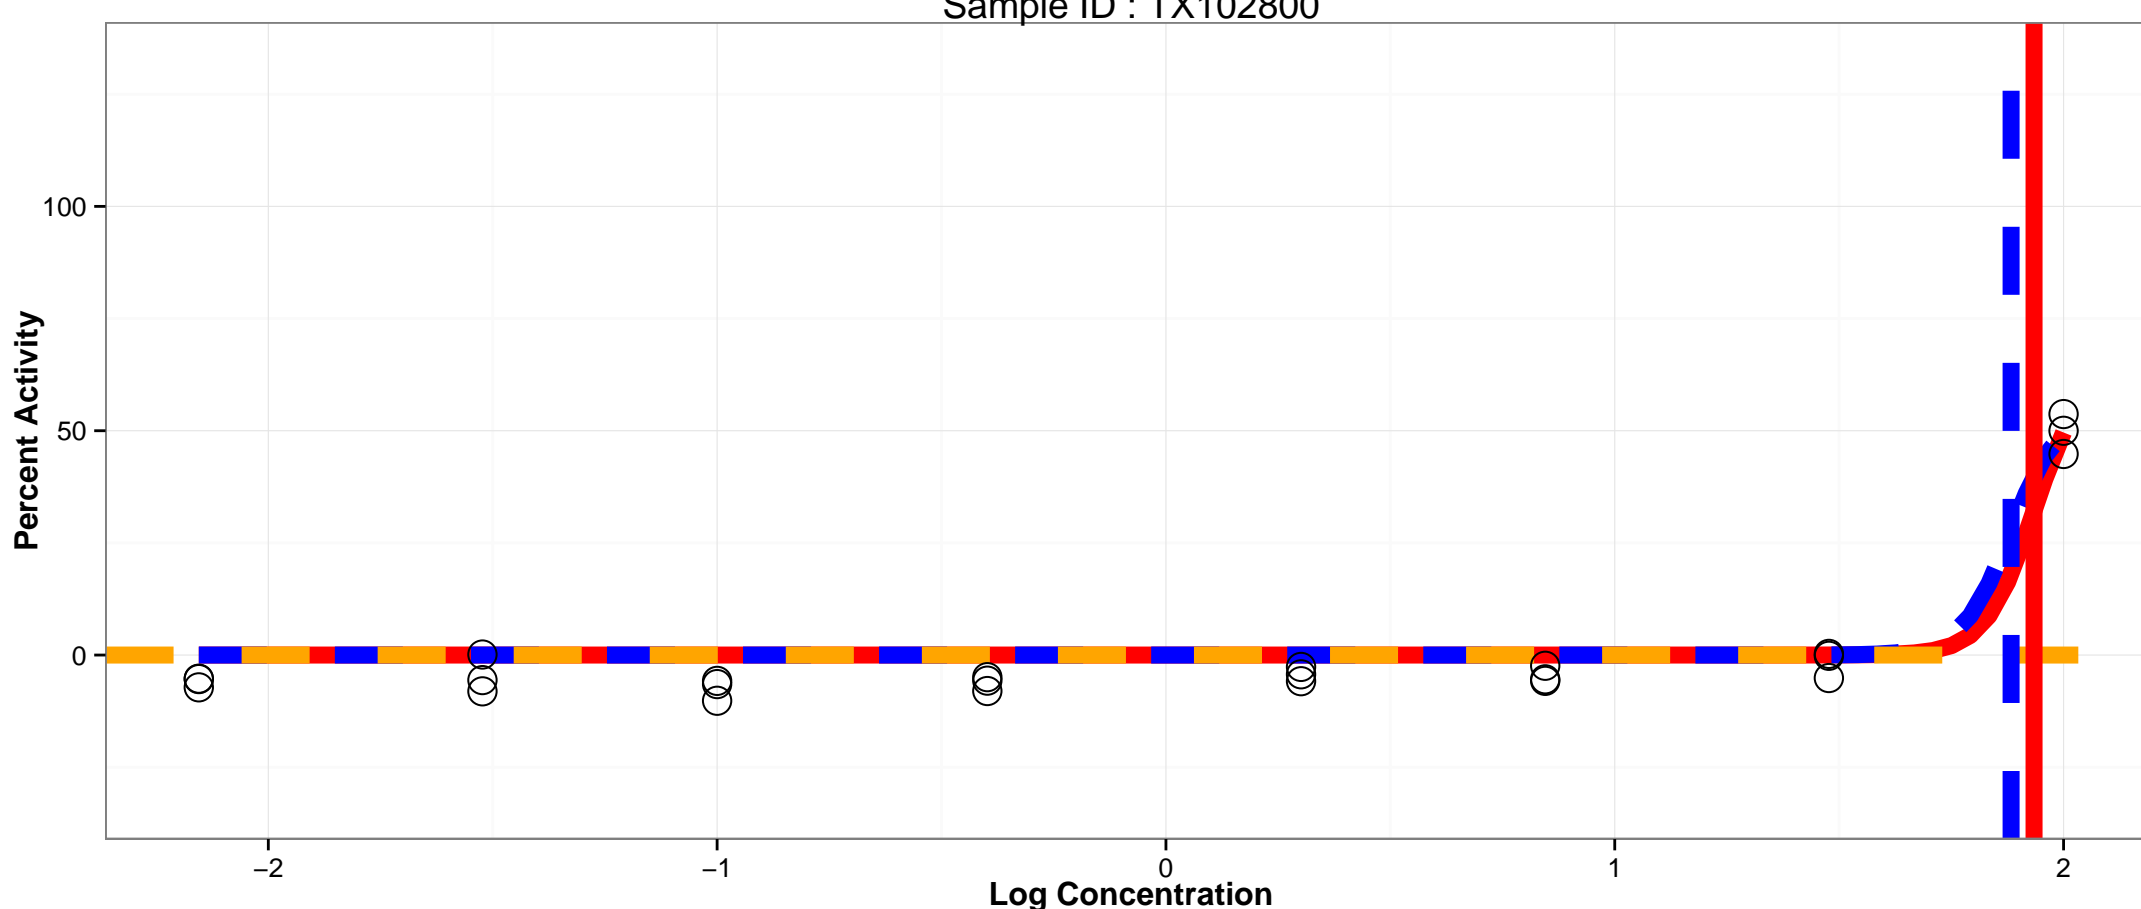

HILL MODEL

|     | tp   | ga   | gw |
|-----|------|------|----|
| val | 64.4 | 1.93 | 8  |
| sd  | NA   | NA   | NA |

GAIN-LOSS MODEL

|     | tp   | ga   | gw | la | lw   |
|-----|------|------|----|----|------|
| val | 55.5 | 1.88 | 8  | 4  | 1.24 |
| sd  | NA   | NA   | NA | NA | NA   |

|      | CNST   | HILL   | GNLS   |
|------|--------|--------|--------|
| AIC  | 195.94 | 161.03 | 165.04 |
| PROB | 0      | 0.88   | 0.12   |
| RMSE | 18.32  | 5.39   | 5.39   |

MAX\_MEAN : 49.5 MAX\_MED : 50 BMAD : 5.54  
COFF : 20 HIT-CALL : 1 FITC : 42 ACTP : 1  
FLAGS : 6

Assay ID 1848 (NHEERL\_Quantilum\_inhib\_2\_dn)  
Sample ID : TX102800

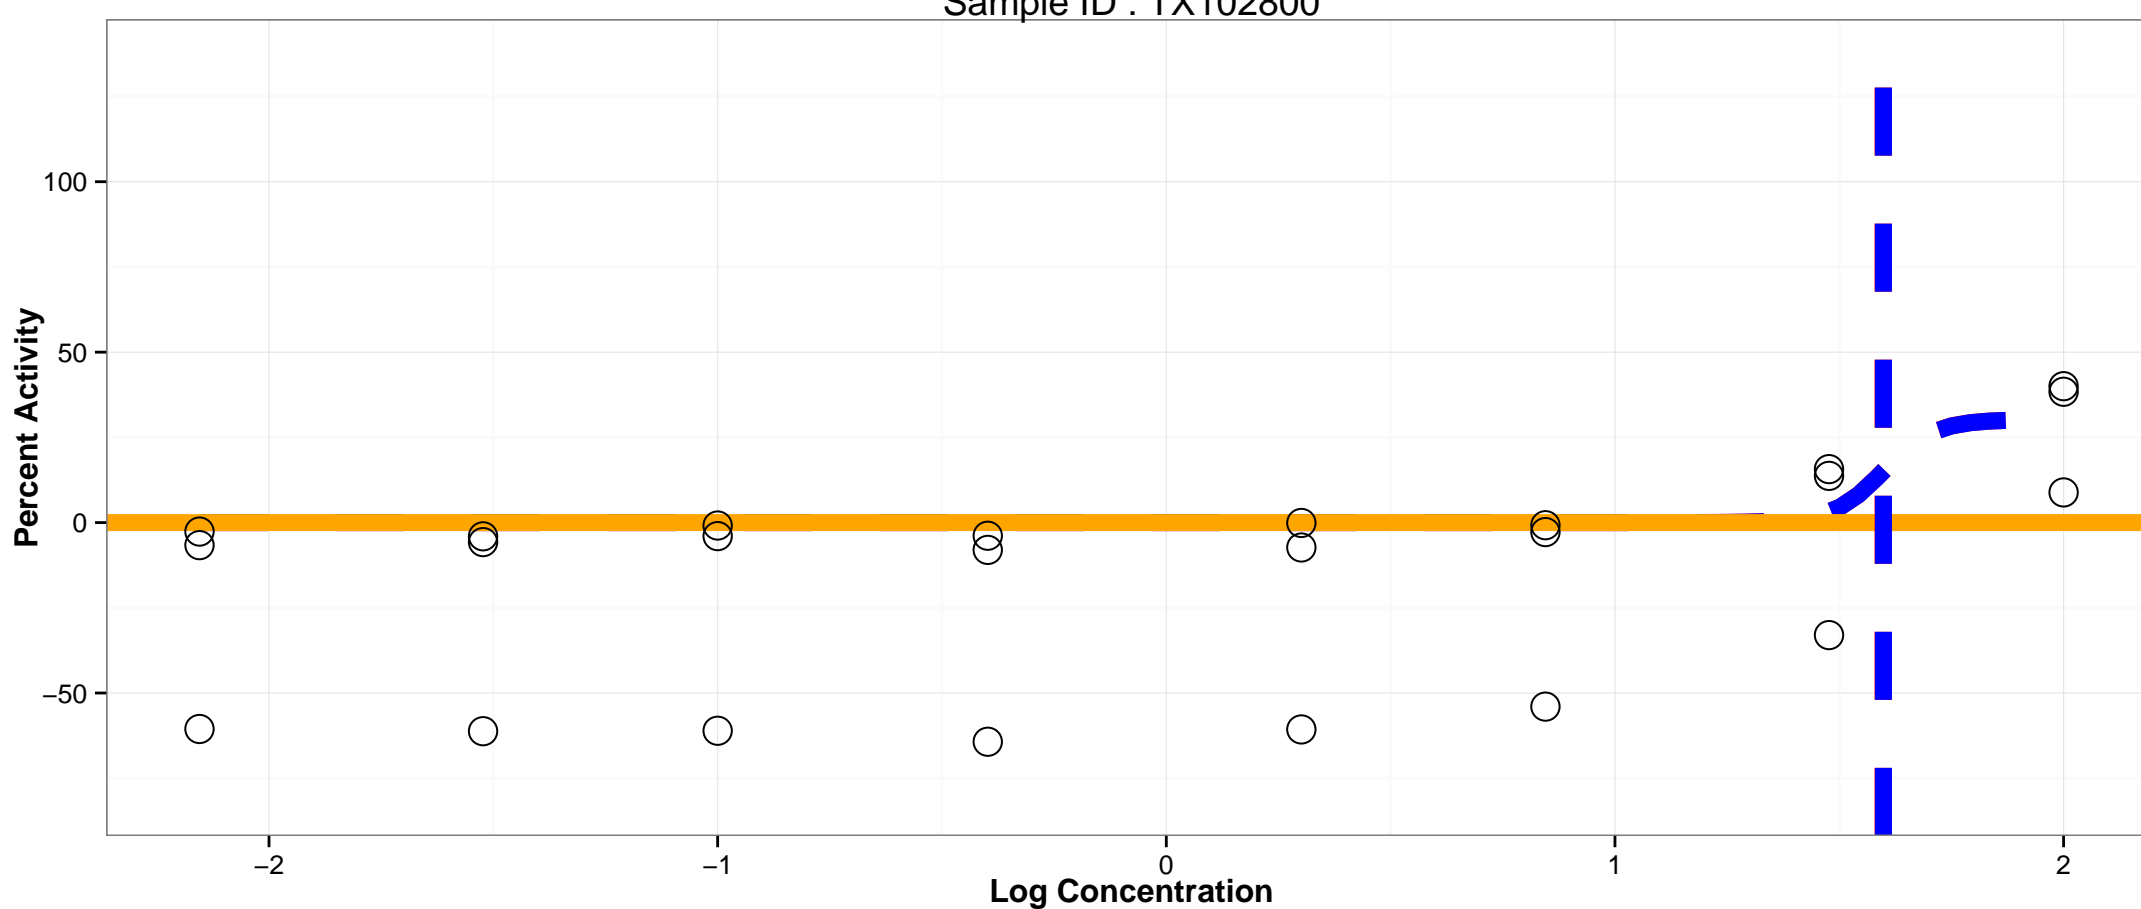

HILL MODEL

|     | tp   | ga   | gw   |
|-----|------|------|------|
| val | 30.2 | 1.6  | 7.85 |
| sd  | 18.6 | 8.02 | 520  |

GAIN-LOSS MODEL

|     | tp   | ga  | gw   | la   | lw   |
|-----|------|-----|------|------|------|
| val | 30.2 | 1.6 | 7.79 | 3.04 | 9.17 |
| sd  | NA   | NA  | NA   | NA   | NA   |

|      | CNST   | HILL   | GNLS   |
|------|--------|--------|--------|
| AIC  | 238.59 | 240.51 | 244.51 |
| PROB | 0.7    | 0.27   | 0.04   |
| RMSE | 33.41  | 31.82  | 31.82  |

MAX\_MEAN : 29.1 MAX\_MED : 38.4 BMAD : 8.58  
COFF : 20 HIT-CALL : 0 FITC : 10 ACTP : 0.303  
FLAGS : 10

Chemical : Bisphenol A  
CAS : 80-05-7

Assay ID 1508 (NHEERL\_TPO\_AUR\_dn)  
Sample ID : TX112317

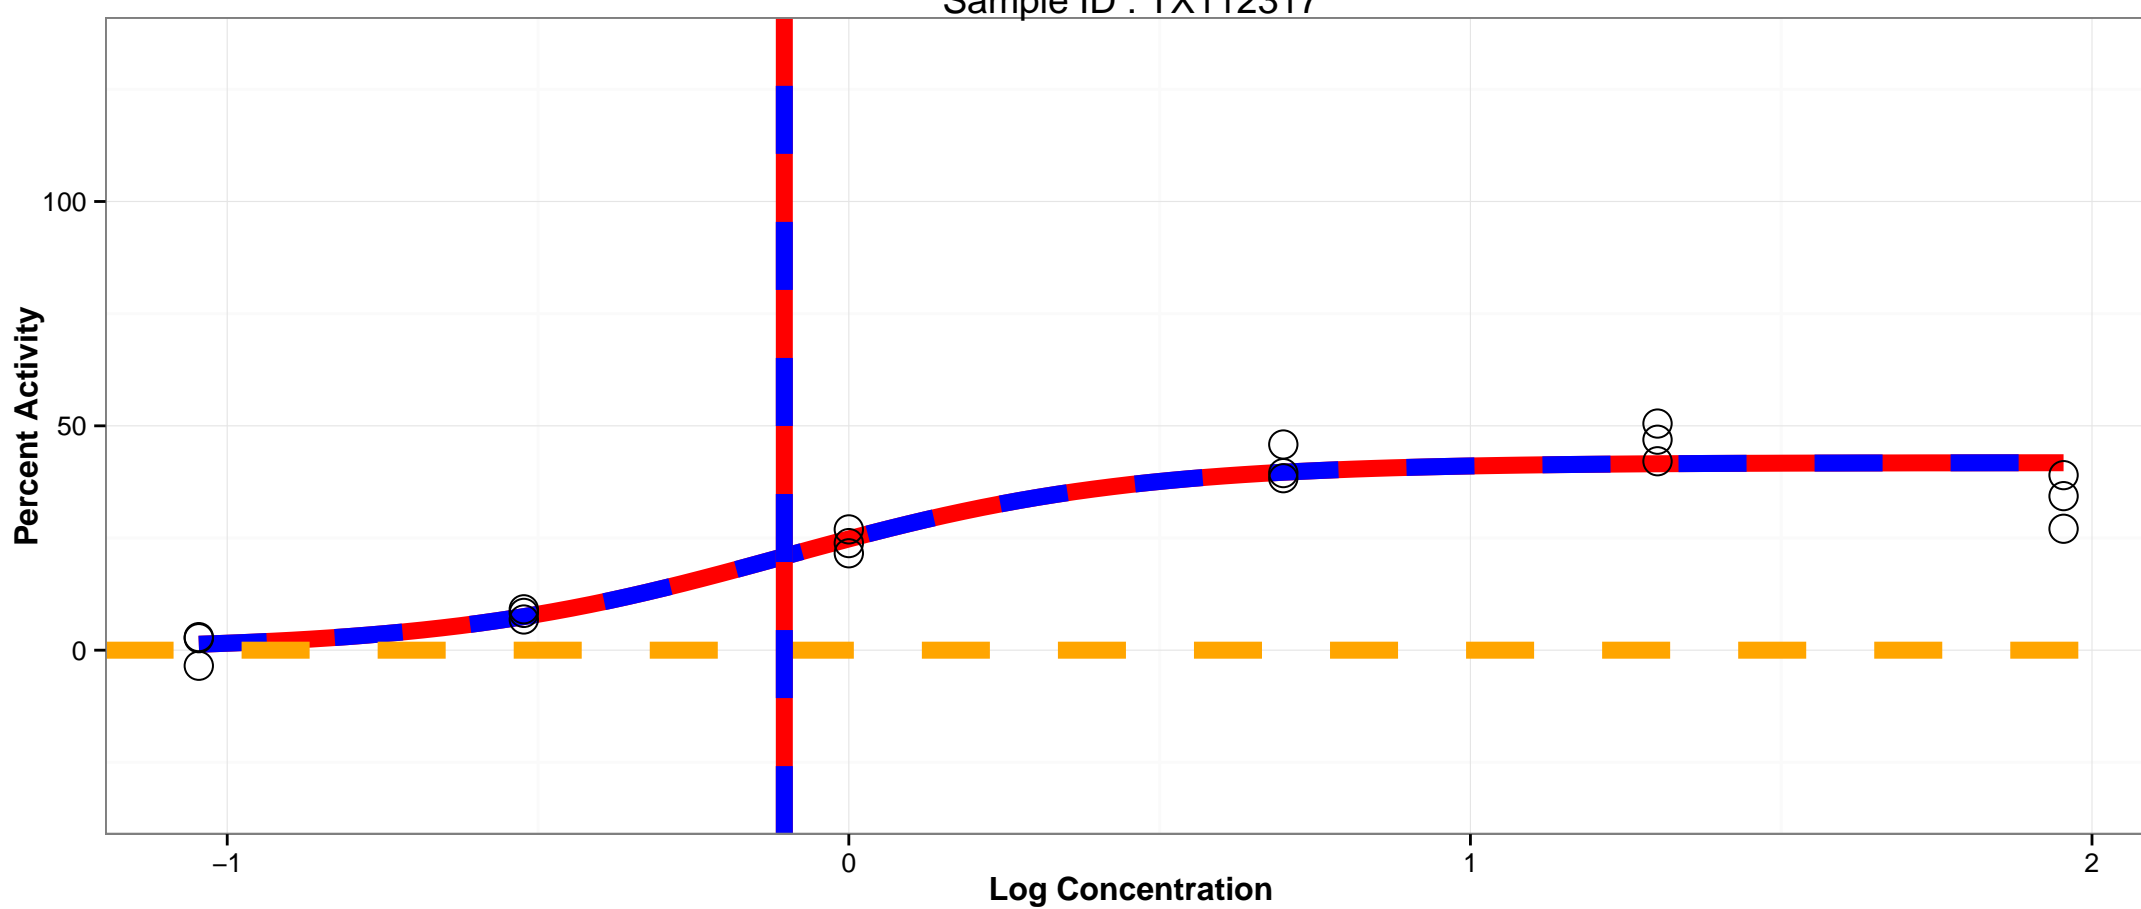

HILL MODEL

|     | tp   | ga     | gw    |
|-----|------|--------|-------|
| val | 41.8 | -0.104 | 1.58  |
| sd  | 2.04 | 0.0597 | 0.265 |

GAIN-LOSS MODEL

|     | tp   | ga     | gw   | la   | lw   |
|-----|------|--------|------|------|------|
| val | 41.8 | -0.104 | 1.58 | 3.29 | 11.5 |
| sd  | NA   | NA     | NA   | NA   | NA   |

|      | CNST   | HILL   | GNLS   |
|------|--------|--------|--------|
| AIC  | 179.21 | 115.81 | 119.81 |
| PROB | 0      | 0.88   | 0.12   |
| RMSE | 30.81  | 5.14   | 5.14   |

MAX\_MEAN : 46.5 MAX\_MED : 46.9 BMAD : 5.69  
COFF : 20 HIT-CALL : 1 FITC : 41 ACTP : 1  
FLAGS :

Assay ID 1509 (NHEERL\_HEK293T\_CellTiterGLO)  
Sample ID : TX112317

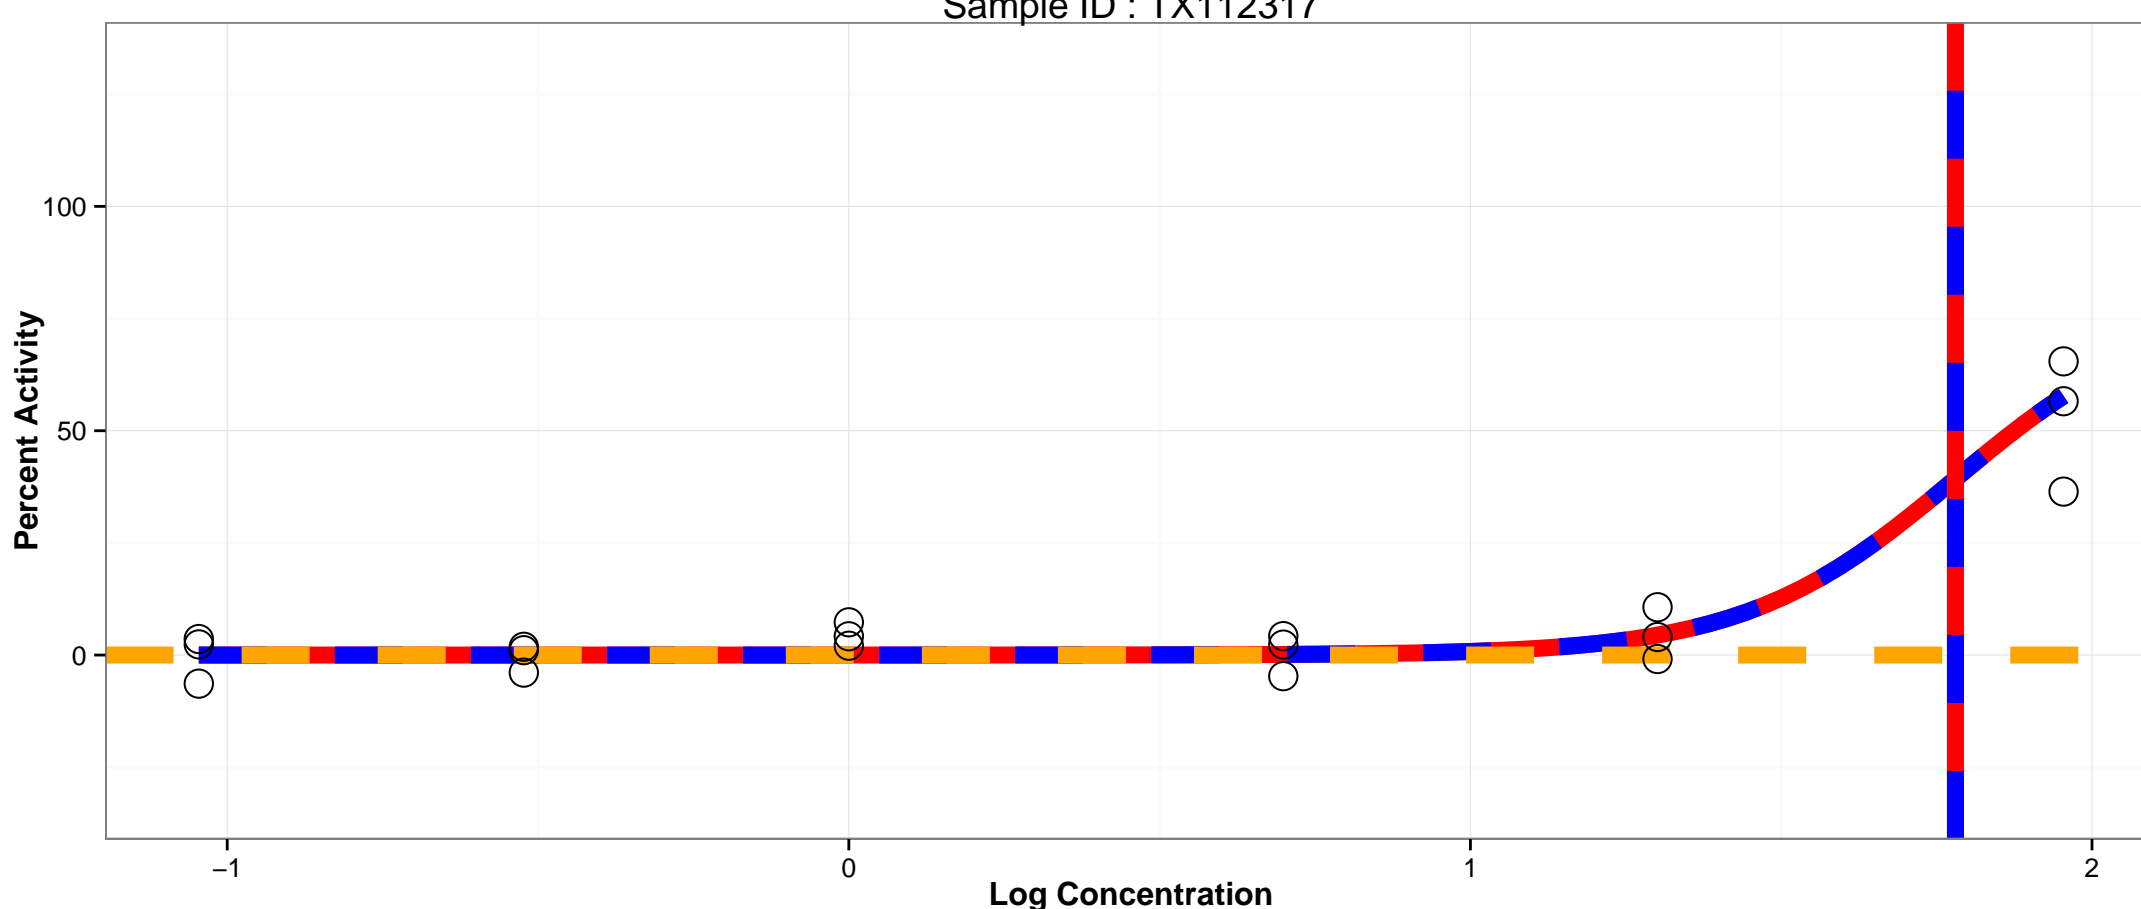

HILL MODEL

|     | tp   | ga   | gw   |
|-----|------|------|------|
| val | 78.6 | 1.78 | 2.55 |
| sd  | 670  | 4.42 | 15.7 |

GAIN-LOSS MODEL

|     | tp   | ga   | gw   | la   | lw   |
|-----|------|------|------|------|------|
| val | 78.6 | 1.78 | 2.55 | 3.25 | 14.8 |
| sd  | NA   | NA   | NA   | NA   | NA   |

|      | CNST   | HILL   | GNLS   |
|------|--------|--------|--------|
| AIC  | 154.46 | 123.72 | 127.72 |
| PROB | 0      | 0.88   | 0.12   |
| RMSE | 22.54  | 6.59   | 6.59   |

MAX\_MEAN : 52.8 MAX\_MED : 56.6 BMAD : 5.54  
COFF : 20 HIT-CALL : 1 FITC : 42 ACTP : 1  
FLAGS : 6

Assay ID 1848 (NHEERL\_Quantilum\_inhib\_2\_dn)  
Sample ID : TX112317

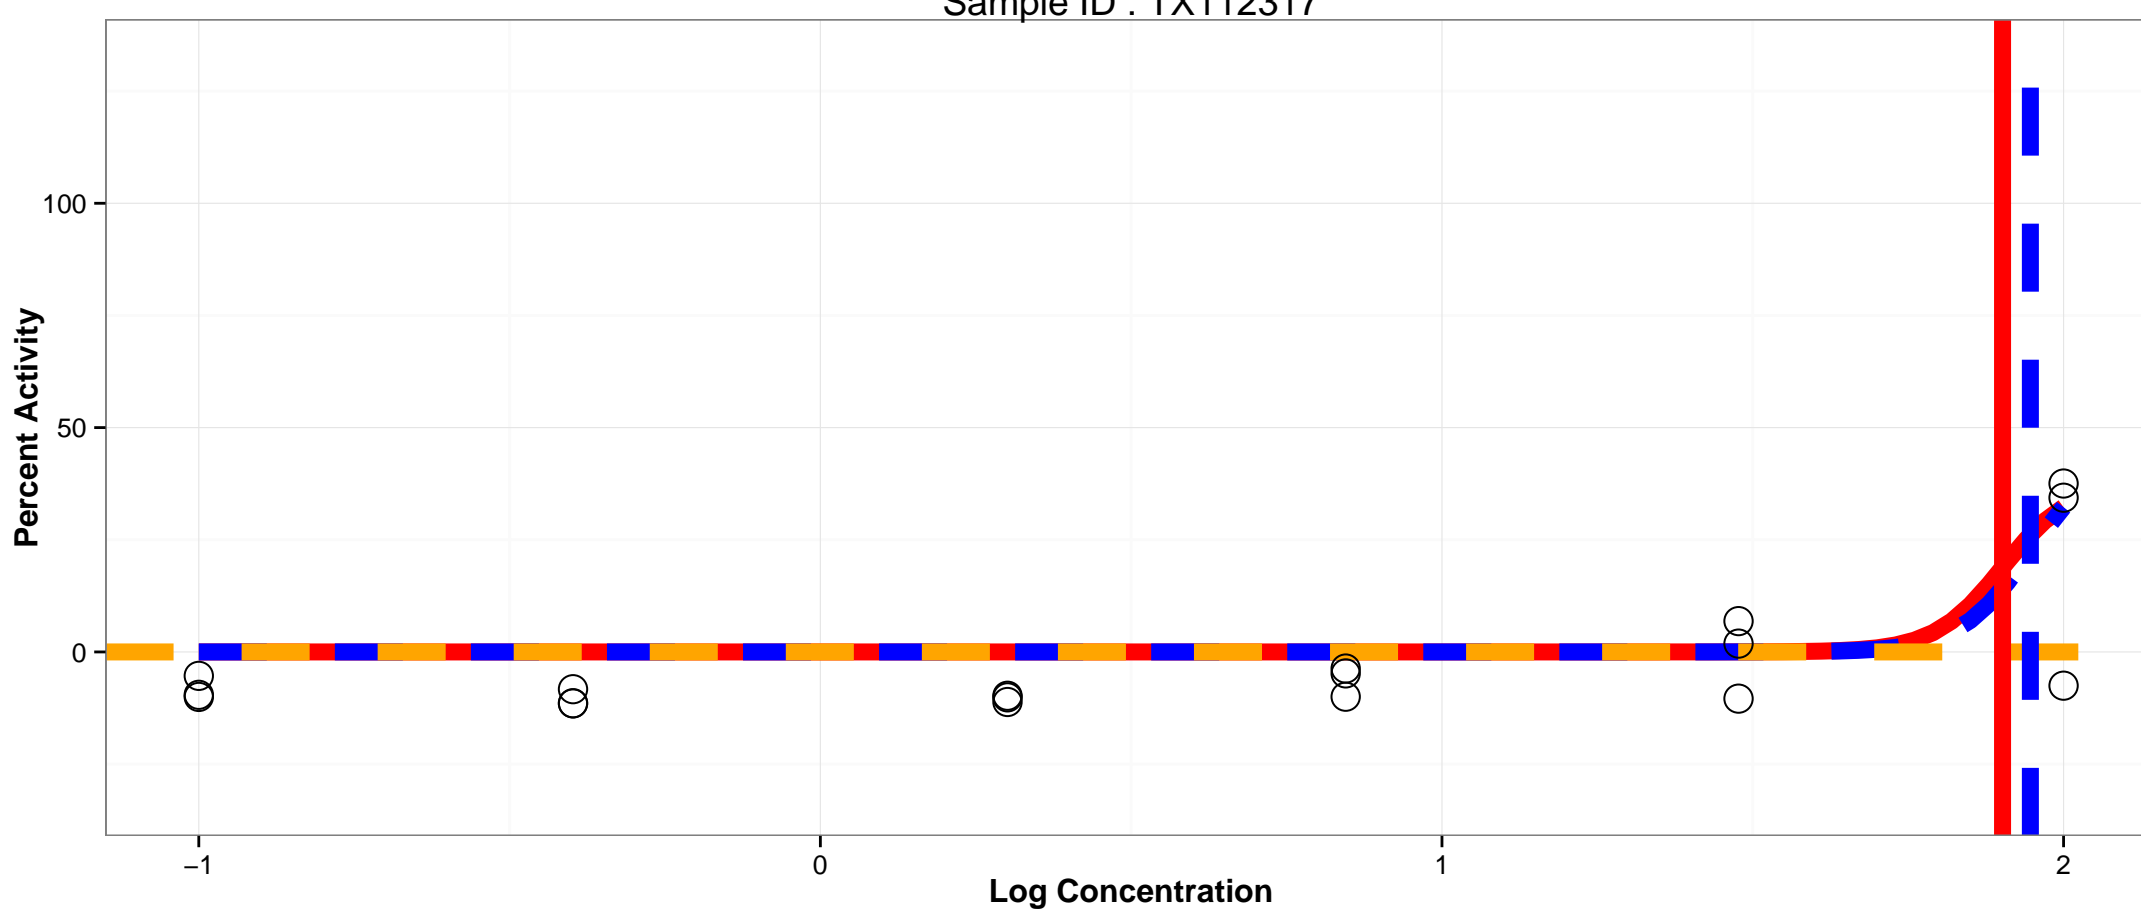

HILL MODEL

|     | tp   | ga  | gw   |
|-----|------|-----|------|
| val | 37.6 | 1.9 | 7.95 |
| sd  | NA   | NA  | NA   |

GAIN-LOSS MODEL

|     | tp | ga   | gw   | la   | lw   |
|-----|----|------|------|------|------|
| val | 45 | 1.95 | 7.59 | 2.41 | 14.2 |
| sd  | NA | NA   | NA   | NA   | NA   |

|      | CNST   | HILL   | GNLS   |
|------|--------|--------|--------|
| AIC  | 148.14 | 147.45 | 151.45 |
| PROB | 0.38   | 0.54   | 0.07   |
| RMSE | 14.56  | 12.43  | 12.43  |

MAX\_MEAN : 21.5 MAX\_MED : 34.4 BMAD : 8.58  
COFF : 20 HIT-CALL : 1 FITC : 42 ACTP : 0.617  
FLAGS : 6; 11; 16

Chemical : Bisphenol A  
CAS : 80-05-7

Assay ID 1508 (NHEERL\_TPO\_AUR\_dn)  
Sample ID : TX202800

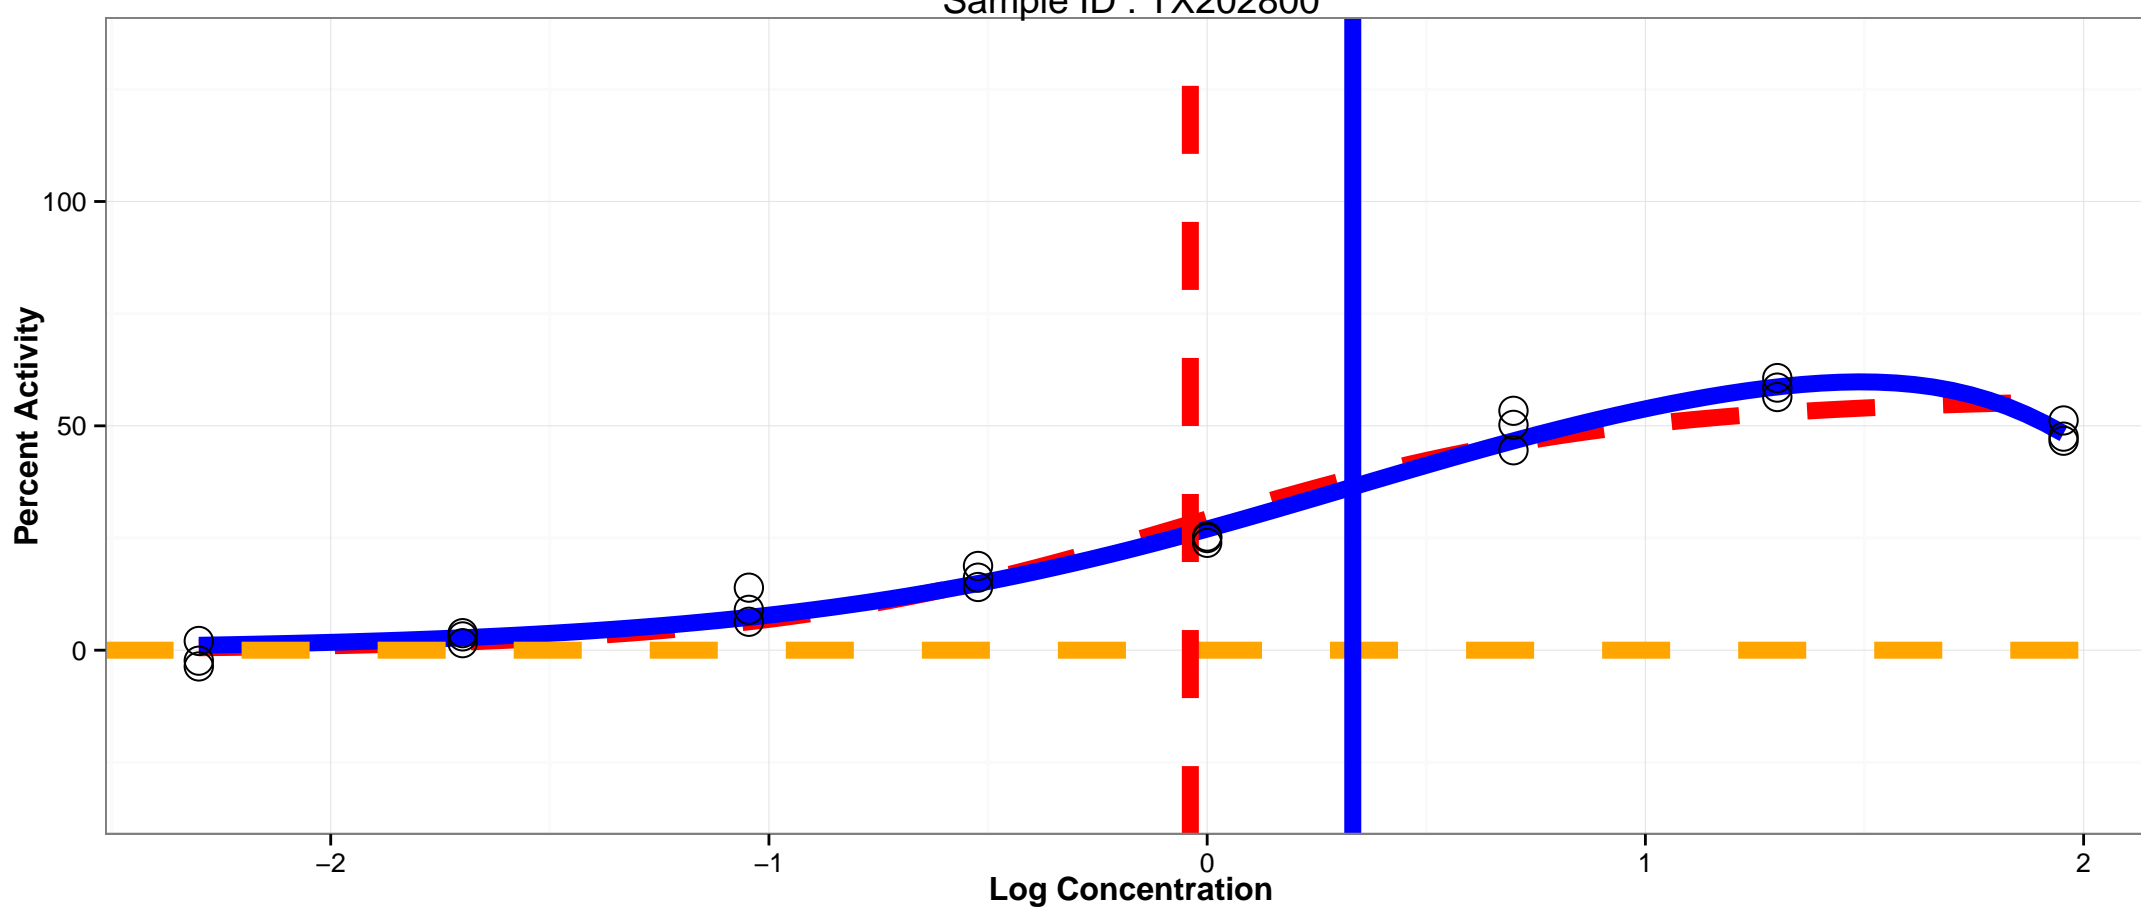

HILL MODEL

|     | tp   | ga      | gw    |
|-----|------|---------|-------|
| val | 56.3 | -0.0384 | 0.892 |
| sd  | 3.52 | 0.101   | 0.122 |

GAIN-LOSS MODEL

|     | tp   | ga    | gw     | la    | lw   |
|-----|------|-------|--------|-------|------|
| val | 72.8 | 0.332 | 0.691  | 2.16  | 1.93 |
| sd  | 9.81 | 0.187 | 0.0768 | 0.143 | 1.93 |

|      | CNST   | HILL   | GNLS |
|------|--------|--------|------|
| AIC  | 241.59 | 151.98 | 132  |
| PROB | 0      | 0      | 1    |
| RMSE | 33.99  | 4.58   | 2.9  |

MAX\_MEAN : 58.5 MAX\_MED : 58.5 BMAD : 5.69  
COFF : 20 HIT-CALL : 1 FITC : 51 ACTP : 1  
FLAGS :

Assay ID 1509 (NHEERL\_HEK293T\_CellTiterGLO)  
Sample ID : TX202800

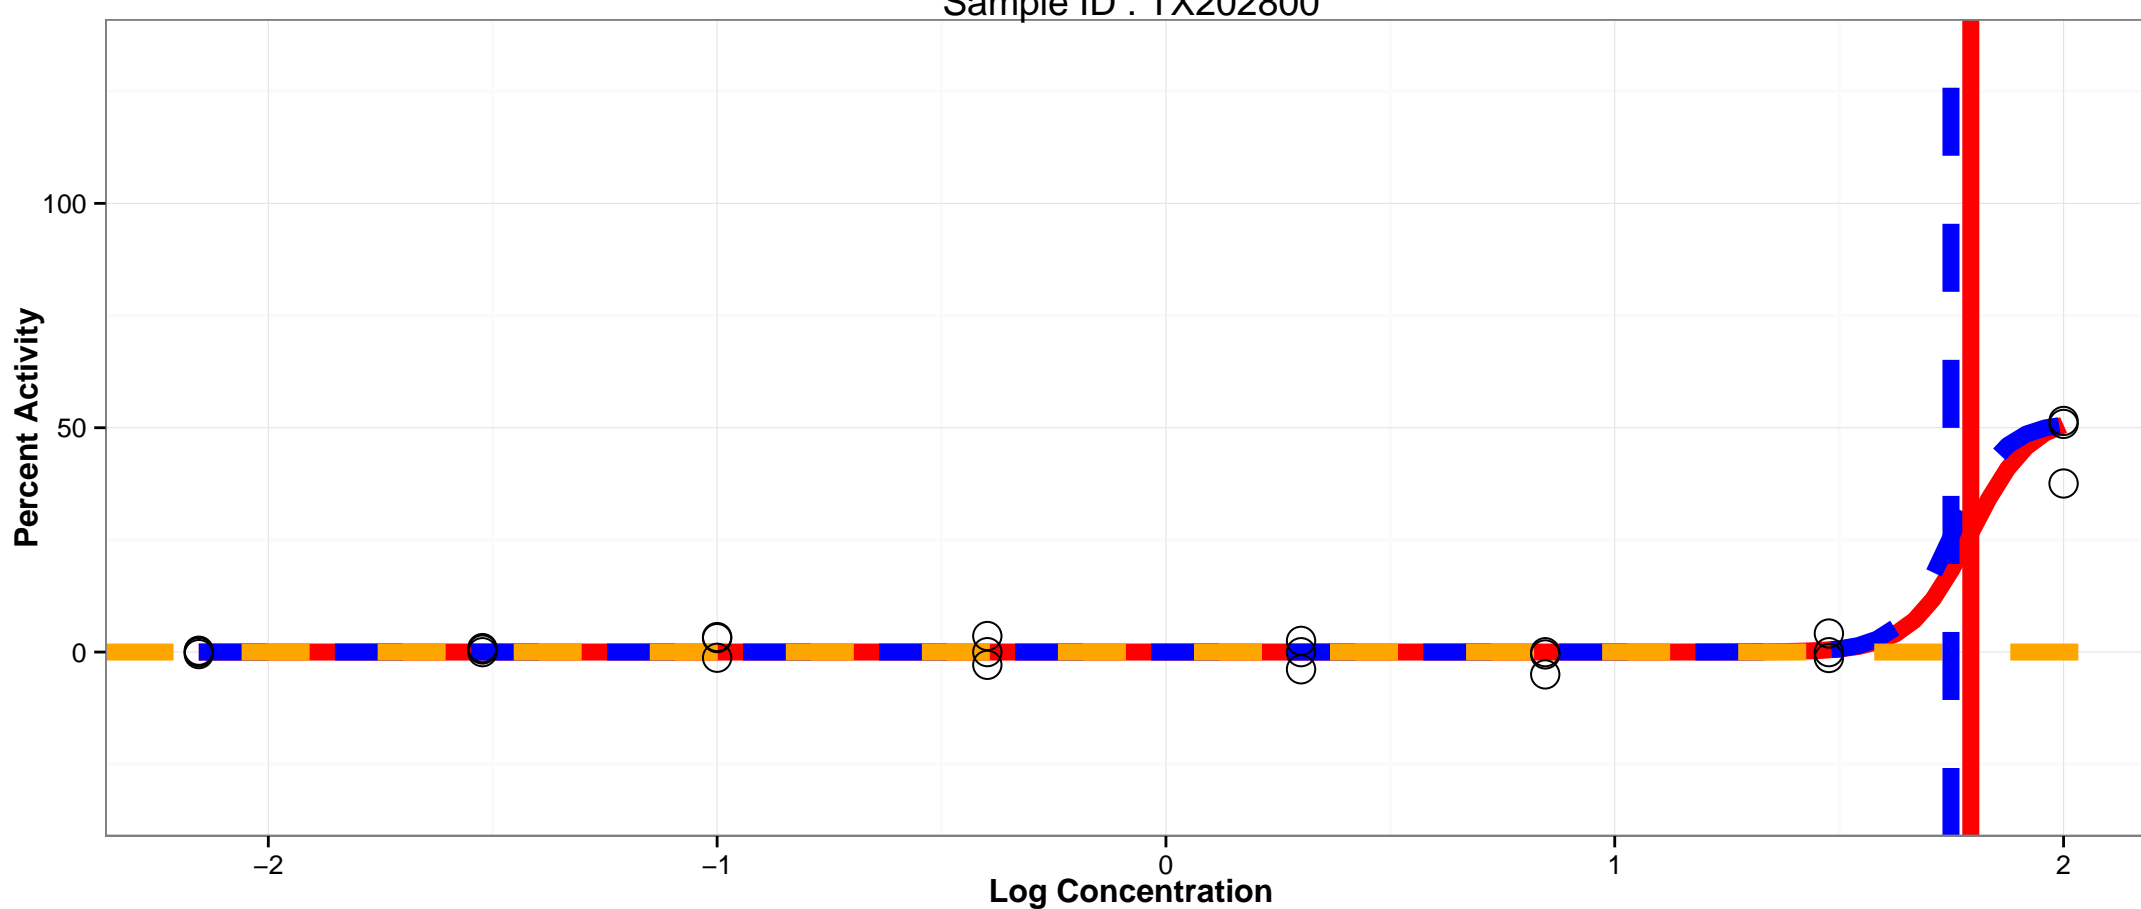

HILL MODEL

|     | tp   | ga    | gw   |
|-----|------|-------|------|
| val | 53   | 1.79  | 6.46 |
| sd  | 39.5 | 0.725 | 13.2 |

GAIN-LOSS MODEL

|     | tp   | ga   | gw   | la   | lw   |
|-----|------|------|------|------|------|
| val | 51.3 | 1.75 | 7.46 | 2.62 | 5.82 |
| sd  | NA   | NA   | NA   | NA   | NA   |

|      | CNST  | HILL   | GNLS   |
|------|-------|--------|--------|
| AIC  | 176   | 125.59 | 129.59 |
| PROB | 0     | 0.88   | 0.12   |
| RMSE | 16.79 | 3.41   | 3.41   |

MAX\_MEAN : 46.7 MAX\_MED : 50.9 BMAD : 5.54  
COFF : 20 HIT-CALL : 1 FITC : 41 ACTP : 1  
FLAGS : 6

Assay ID 1848 (NHEERL\_Quantilum\_inhib\_2\_dn)  
Sample ID : TX202800

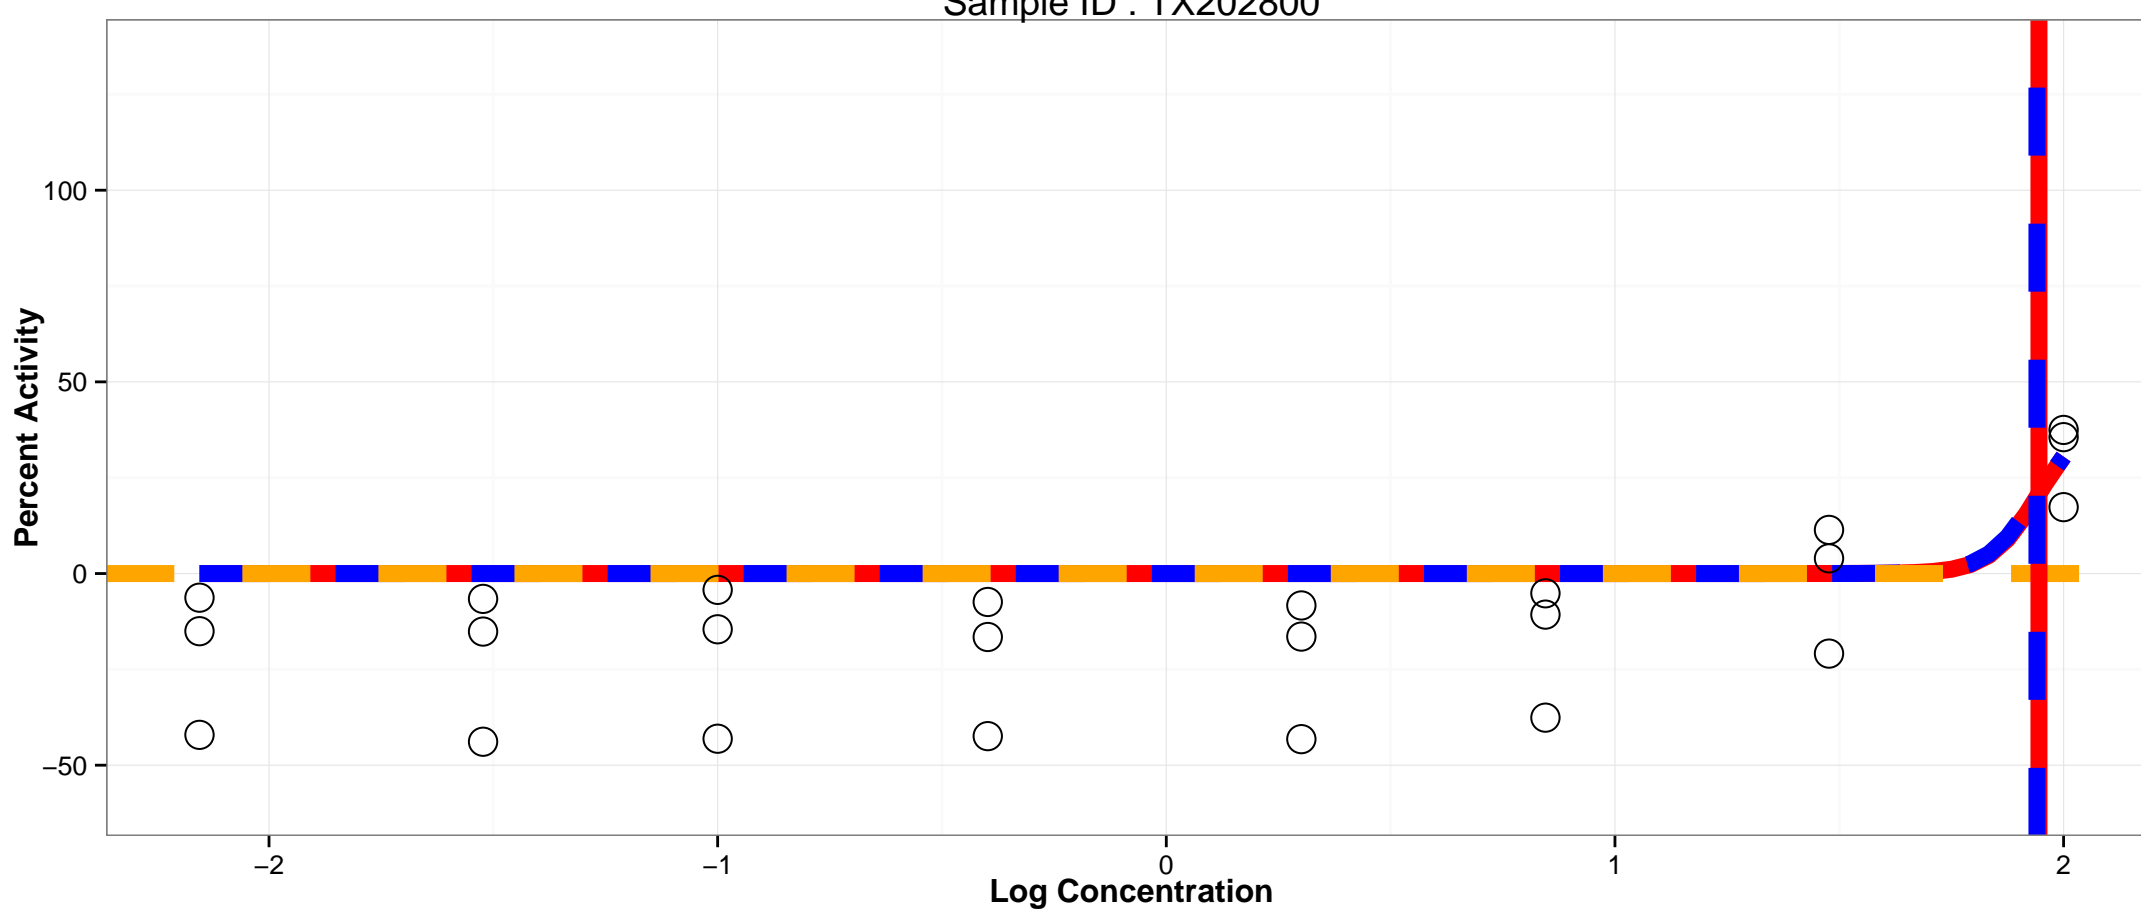

HILL MODEL

|     | tp   | ga   | gw  |
|-----|------|------|-----|
| val | 41.6 | 1.95 | 8   |
| sd  | 737  | 2.49 | 197 |

GAIN-LOSS MODEL

|     | tp   | ga   | gw  | la   | lw   |
|-----|------|------|-----|------|------|
| val | 40.9 | 1.94 | 7.9 | 3.3  | 2.76 |
| sd  | 553  | 2.41 | 132 | 3100 | 6680 |

|      | CNST   | HILL   | GNLS   |
|------|--------|--------|--------|
| AIC  | 228.12 | 228.11 | 232.11 |
| PROB | 0.47   | 0.47   | 0.06   |
| RMSE | 25.62  | 23.3   | 23.3   |

MAX\_MEAN : 30.1 MAX\_MED : 35.6 BMAD : 8.58  
COFF : 20 HIT-CALL : 1 FITC : 42 ACTP : 0.533  
FLAGS : 6; 10; 11; 16

Chemical : Bisphenol A  
CAS : 80-05-7

Assay ID 1508 (NHEERL\_TPO\_AUR\_dn)  
Sample ID : TX212317

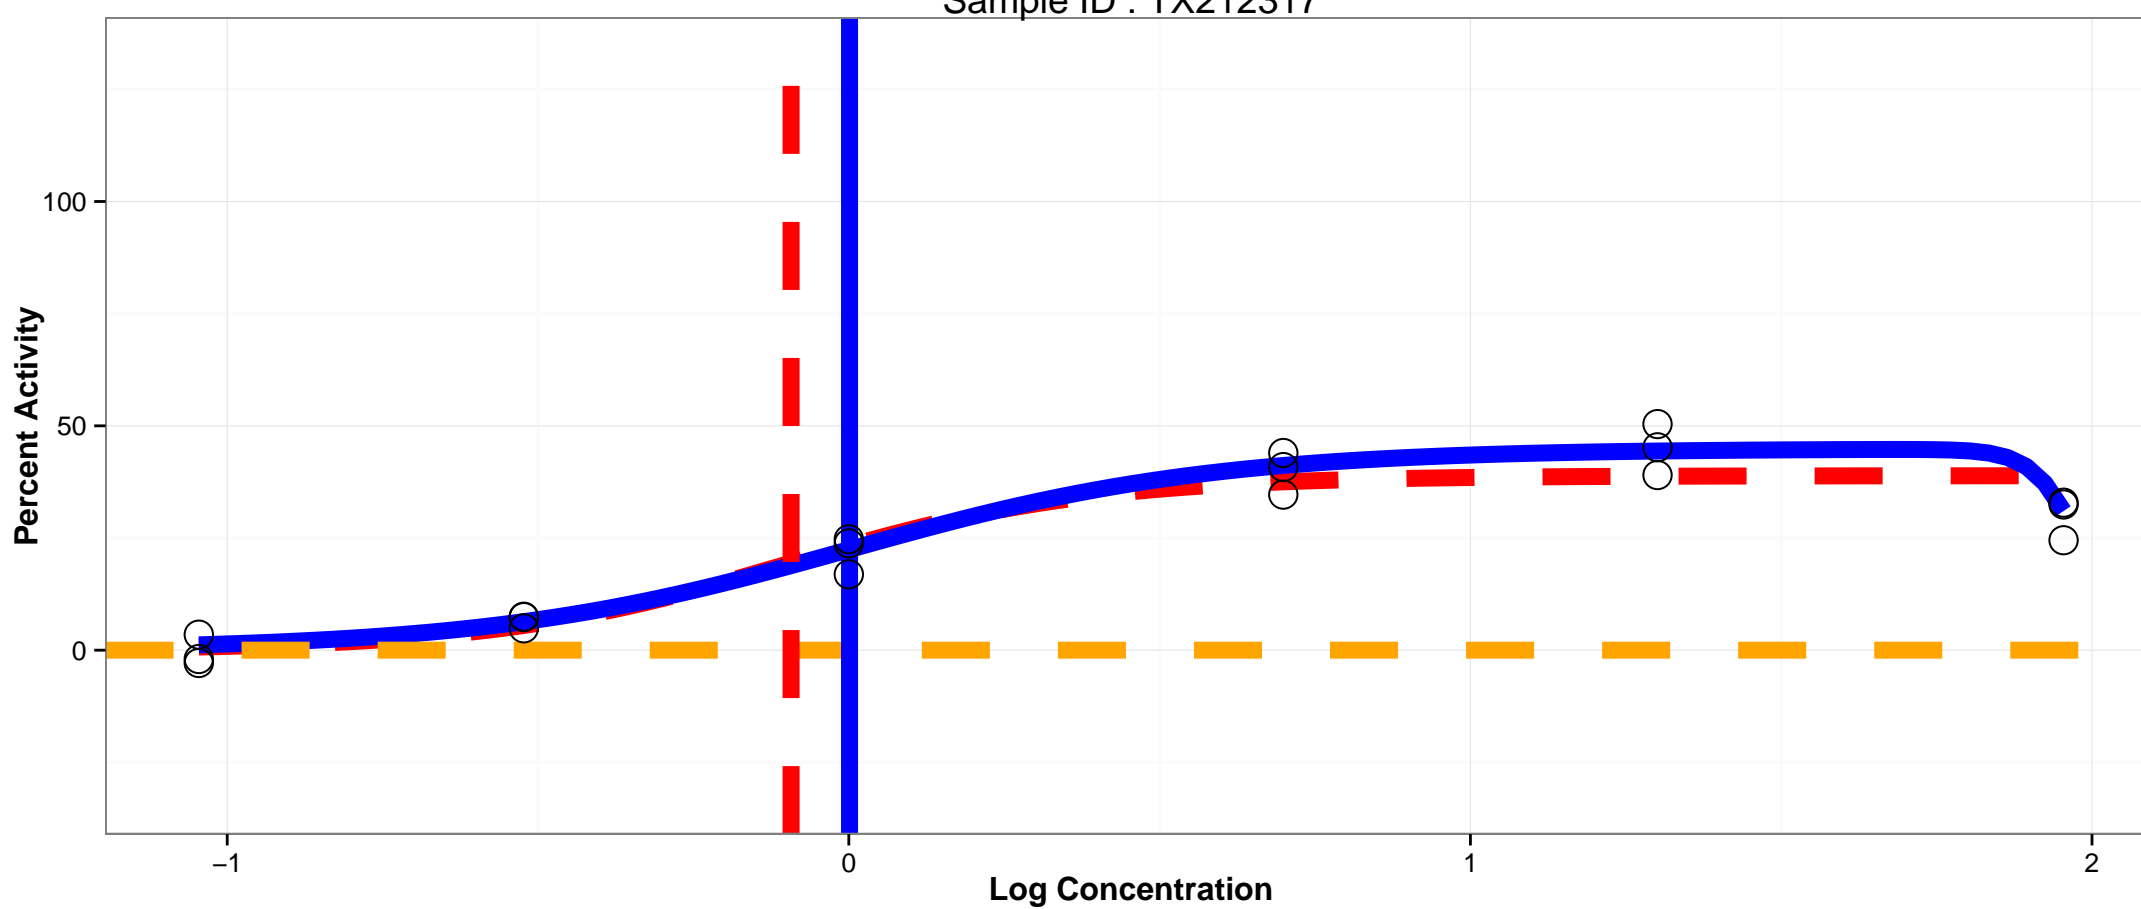

HILL MODEL

|     | tp   | ga      | gw    |
|-----|------|---------|-------|
| val | 38.9 | -0.0929 | 1.82  |
| sd  | 2.52 | 0.073   | 0.404 |

GAIN-LOSS MODEL

|     | tp   | ga      | gw    | la     | lw   |
|-----|------|---------|-------|--------|------|
| val | 44.9 | 0.00116 | 1.49  | 1.99   | 11.2 |
| sd  | 2.64 | 0.0754  | 0.279 | 0.0194 | 6.97 |

|      | CNST  | HILL   | GNLS   |
|------|-------|--------|--------|
| AIC  | 177   | 122.05 | 111.22 |
| PROB | 0     | 0      | 1      |
| RMSE | 29.13 | 5.76   | 3.63   |

MAX\_MEAN : 44.9 MAX\_MED : 45.2 BMAD : 5.69  
COFF : 20 HIT-CALL : 1 FITC : 50 ACTP : 1  
FLAGS :

Assay ID 1509 (NHEERL\_HEK293T\_CellTiterGLO)  
Sample ID : TX212317

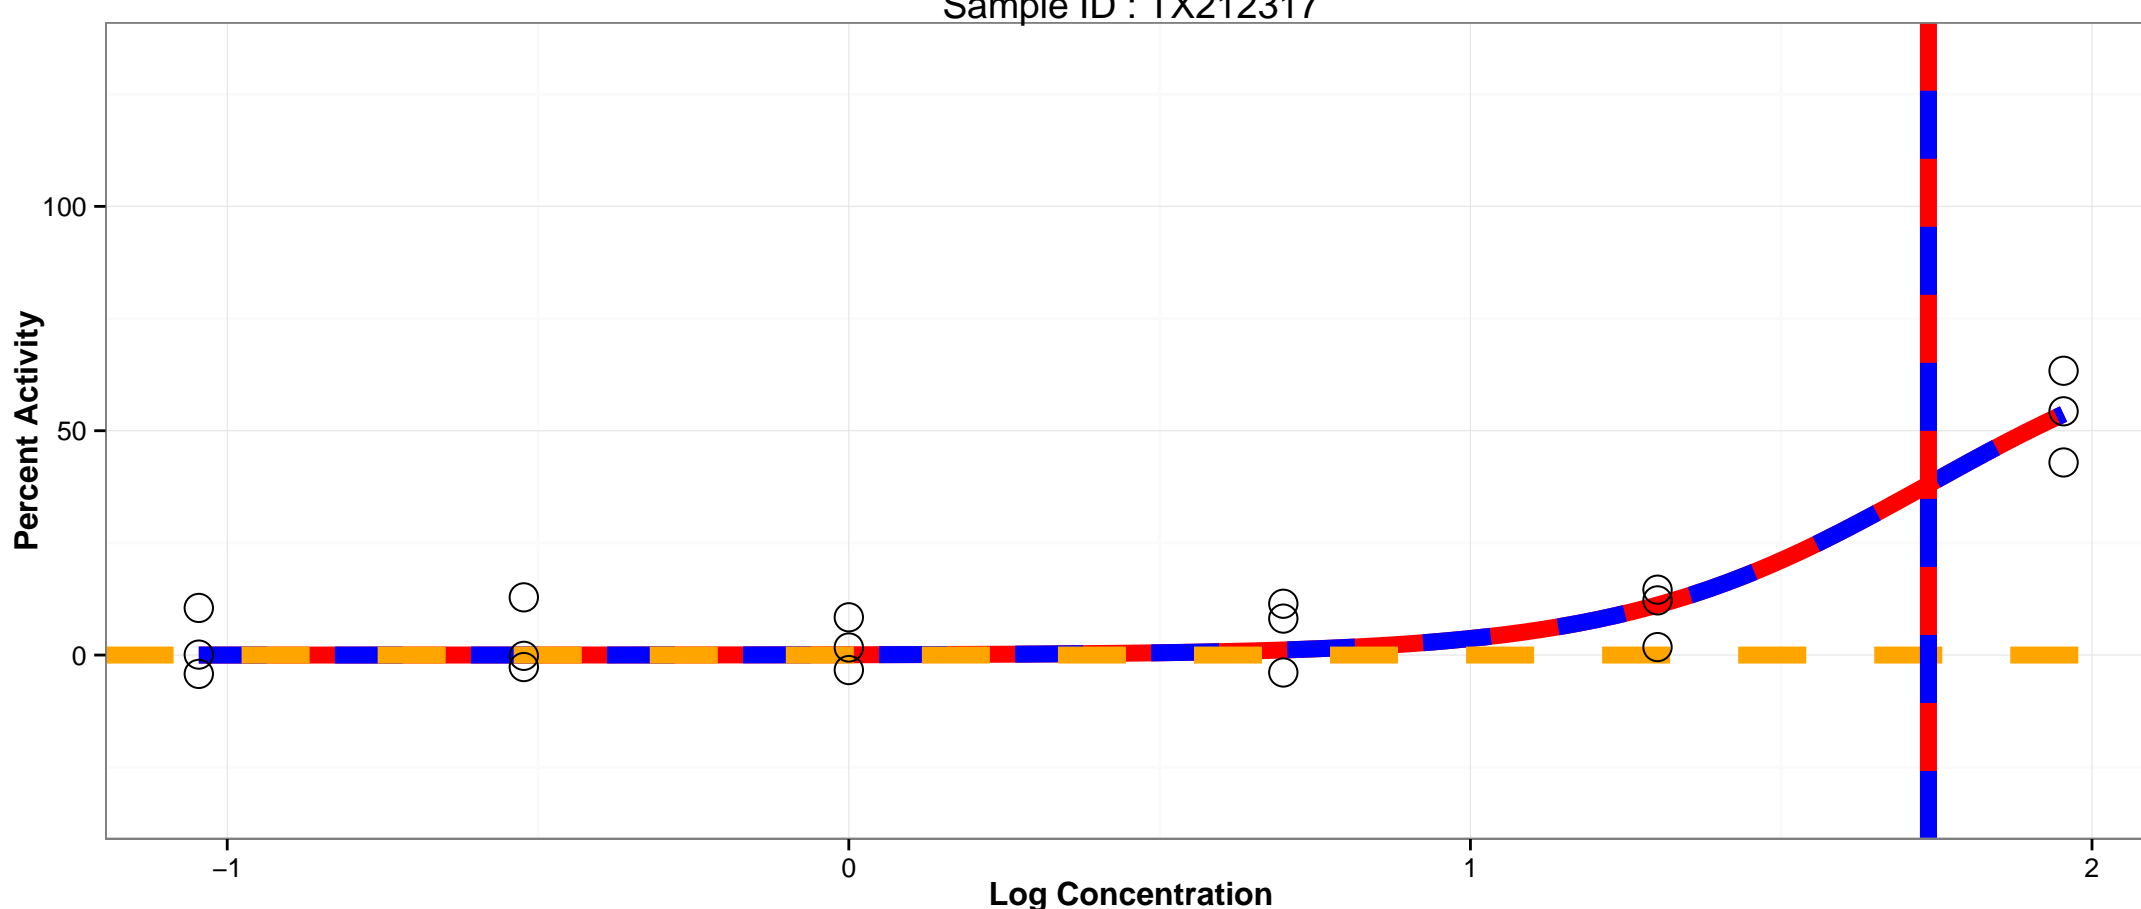

HILL MODEL

|     | tp   | ga    | gw   |
|-----|------|-------|------|
| val | 76.1 | 1.74  | 1.76 |
| sd  | 63.1 | 0.538 | 1.36 |

GAIN-LOSS MODEL

|     | tp   | ga    | gw   | la    | lw    |
|-----|------|-------|------|-------|-------|
| val | 76.1 | 1.74  | 1.75 | 3.94  | 4.84  |
| sd  | 62.7 | 0.535 | 1.36 | 20000 | 48800 |

|      | CNST  | HILL   | GNLS   |
|------|-------|--------|--------|
| AIC  | 160.8 | 131.07 | 135.07 |
| PROB | 0     | 0.88   | 0.12   |
| RMSE | 23.3  | 6.98   | 6.98   |

MAX\_MEAN : 53.6 MAX\_MED : 54.3 BMAD : 5.54  
COFF : 20 HIT-CALL : 1 FITC : 42 ACTP : 1  
FLAGS : 6

Assay ID 1848 (NHEERL\_Quantilum\_inhib\_2\_dn)  
Sample ID : TX212317

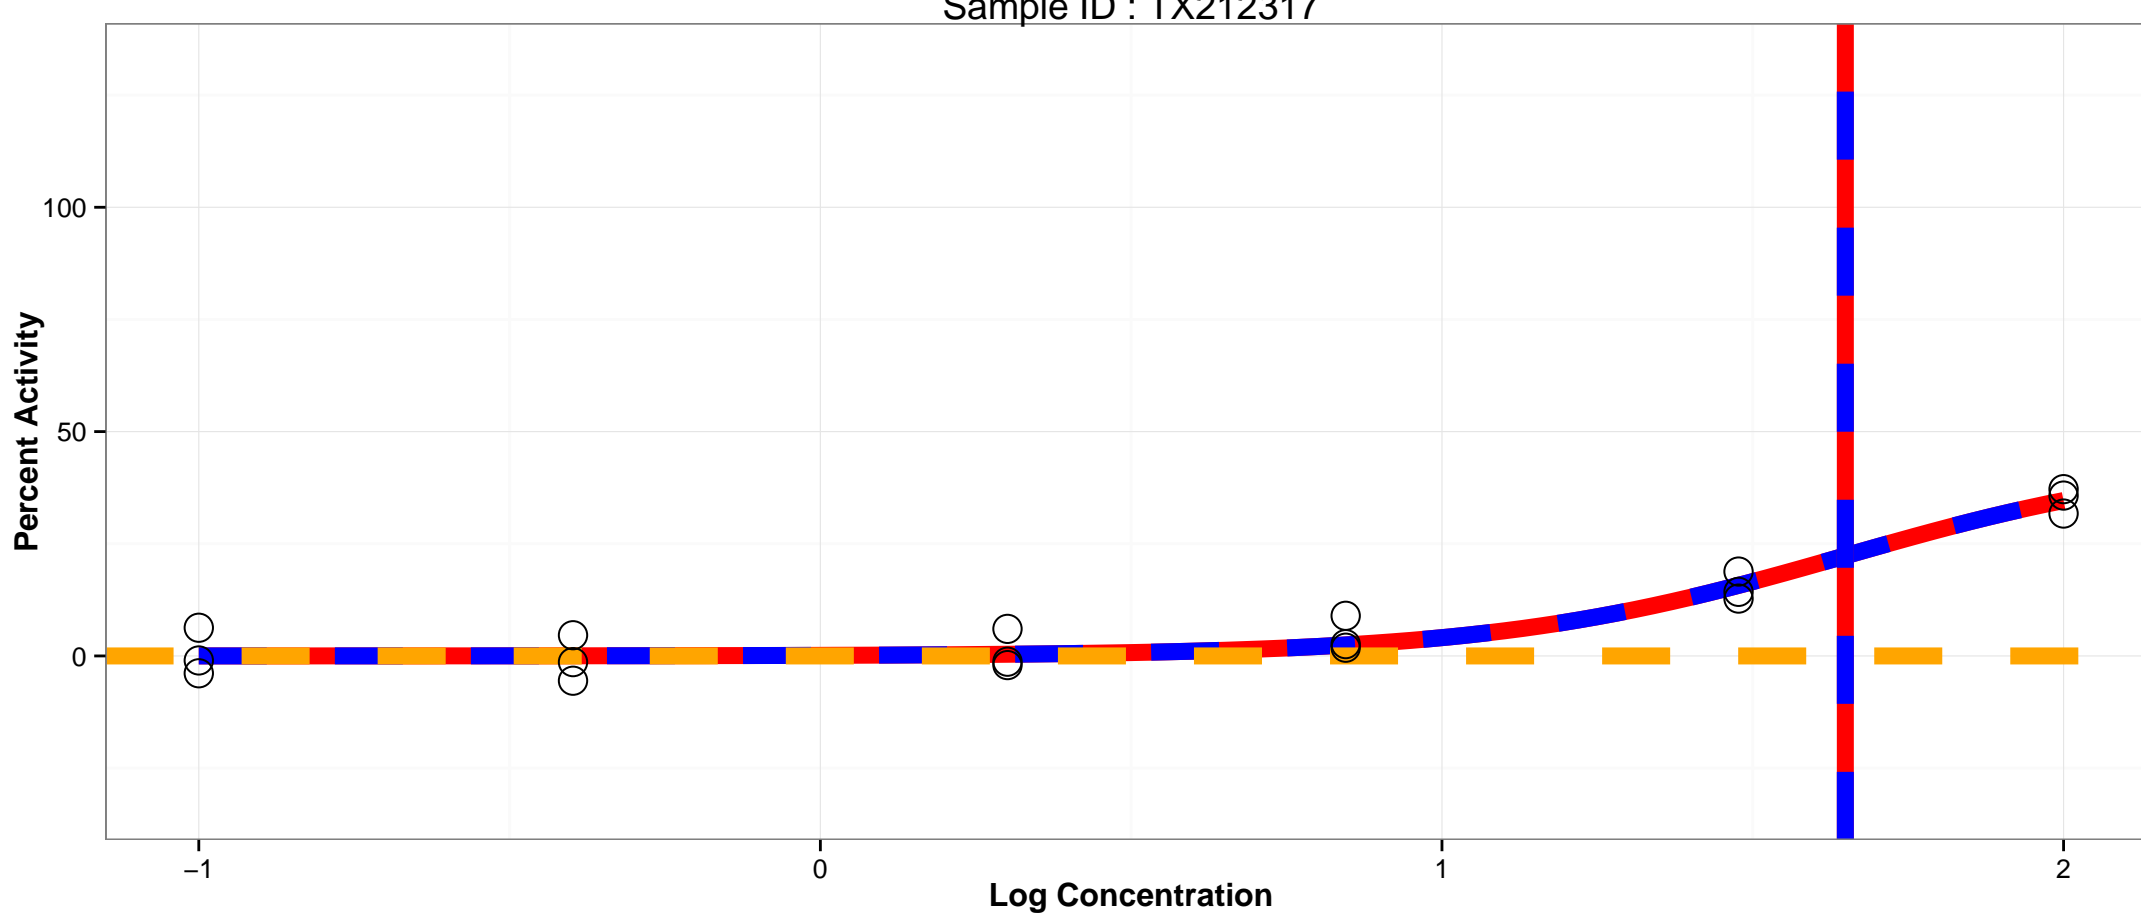

HILL MODEL

|     | tp   | ga    | gw    |
|-----|------|-------|-------|
| val | 44.6 | 1.65  | 1.54  |
| sd  | 10.2 | 0.168 | 0.512 |

GAIN-LOSS MODEL

|     | tp   | ga    | gw    | la   | lw    |
|-----|------|-------|-------|------|-------|
| val | 44.6 | 1.65  | 1.54  | 2.7  | 12.6  |
| sd  | 10.2 | 0.168 | 0.512 | 1240 | 22200 |

|      | CNST   | HILL   | GNLS   |
|------|--------|--------|--------|
| AIC  | 150.83 | 106.87 | 110.87 |
| PROB | 0      | 0.88   | 0.12   |
| RMSE | 16.04  | 3.57   | 3.57   |

MAX\_MEAN : 34.9 MAX\_MED : 35.8 BMAD : 8.58  
COFF : 20 HIT-CALL : 1 FITC : 42 ACTP : 1  
FLAGS : 6

Chemical : Pirimiphos-methyl  
CAS : 29232-93-7

Assay ID 1508 (NHEERL\_TPO\_AUR\_dn)  
Sample ID : TX002825

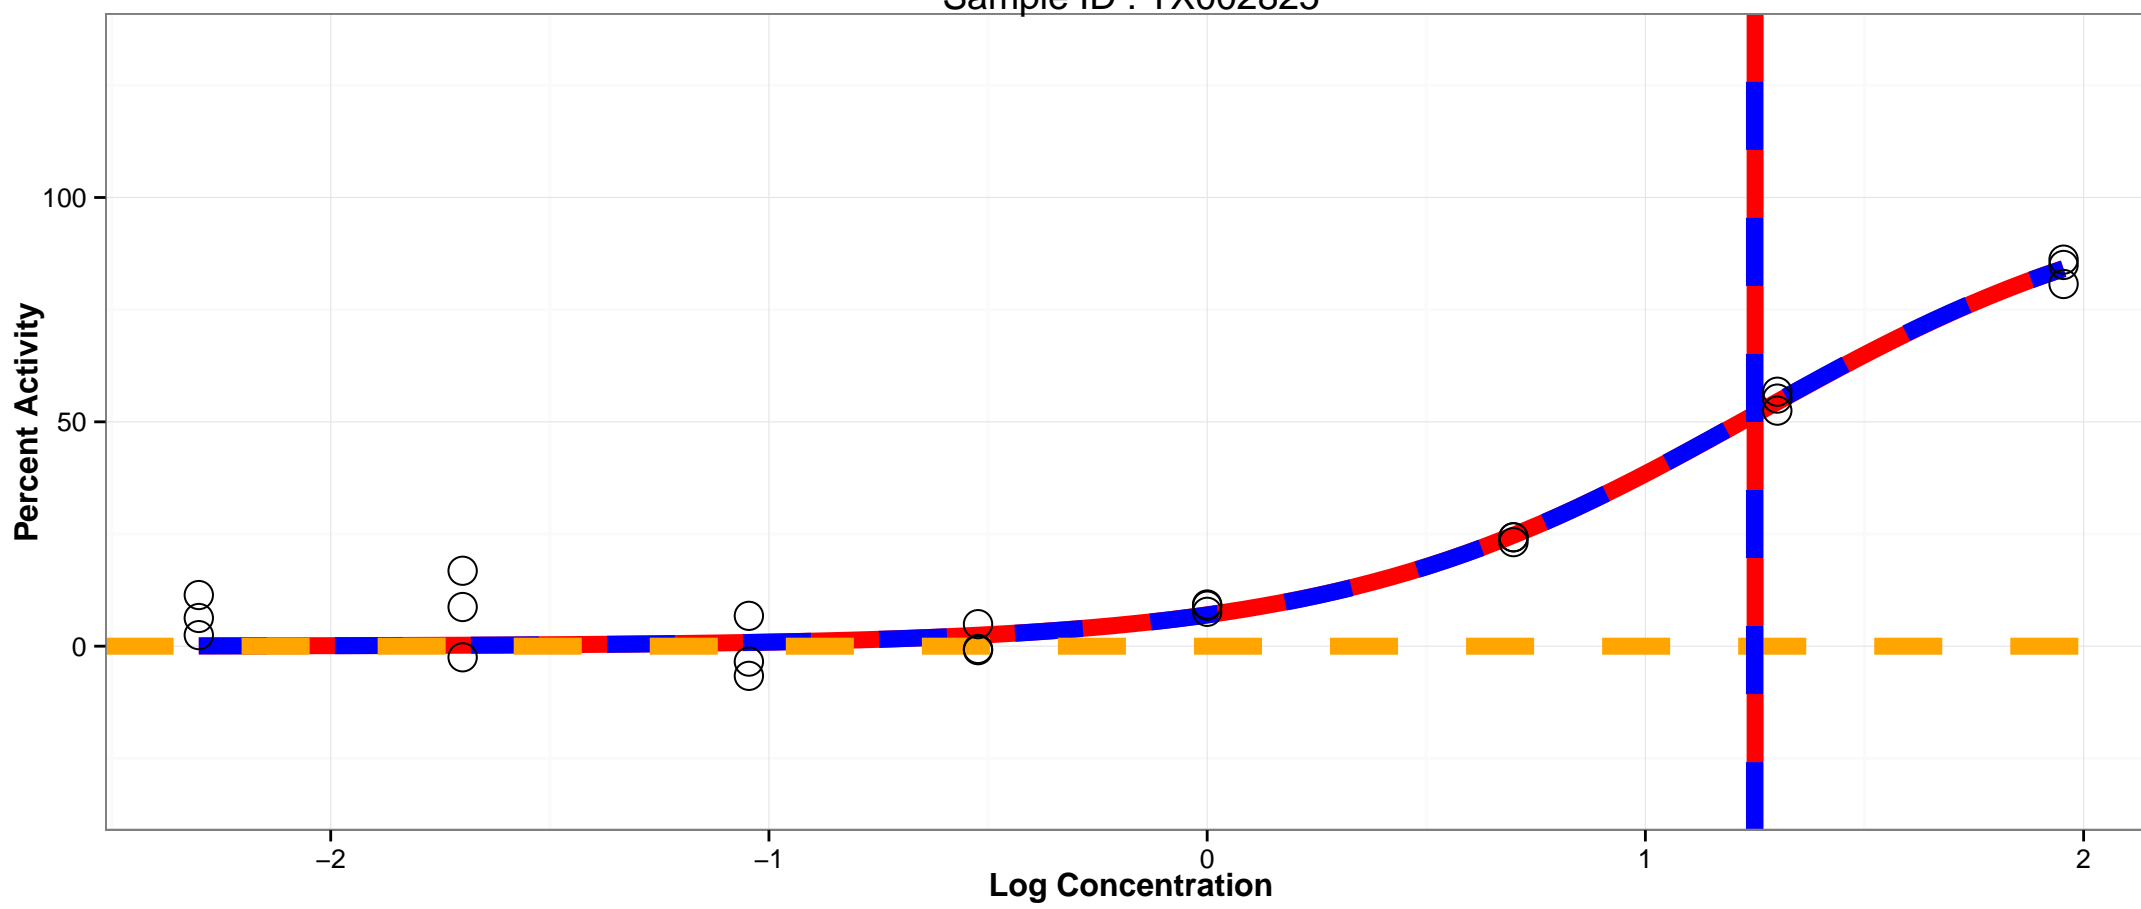

**HILL MODEL**

|     | tp   | ga    | gw    |
|-----|------|-------|-------|
| val | 103  | 1.25  | 0.912 |
| sd  | 8.74 | 0.106 | 0.108 |

**GAIN-LOSS MODEL**

|     | tp  | ga   | gw    | la   | lw   |
|-----|-----|------|-------|------|------|
| val | 103 | 1.25 | 0.915 | 2.91 | 2.69 |
| sd  | NA  | NA   | NA    | NA   | NA   |

|      | CNST   | HILL   | GNLS   |
|------|--------|--------|--------|
| AIC  | 240.35 | 153.92 | 157.91 |
| PROB | 0      | 0.88   | 0.12   |
| RMSE | 36.97  | 5.41   | 5.41   |

MAX\_MEAN : 84 MAX\_MED : 85 BMAD : 5.69  
COFF : 20 HIT-CALL : 1 FITC : 42 ACTP : 1  
FLAGS :

Assay ID 1509 (NHEERL\_HEK293T\_CellTiterGLO)  
Sample ID : TX002825

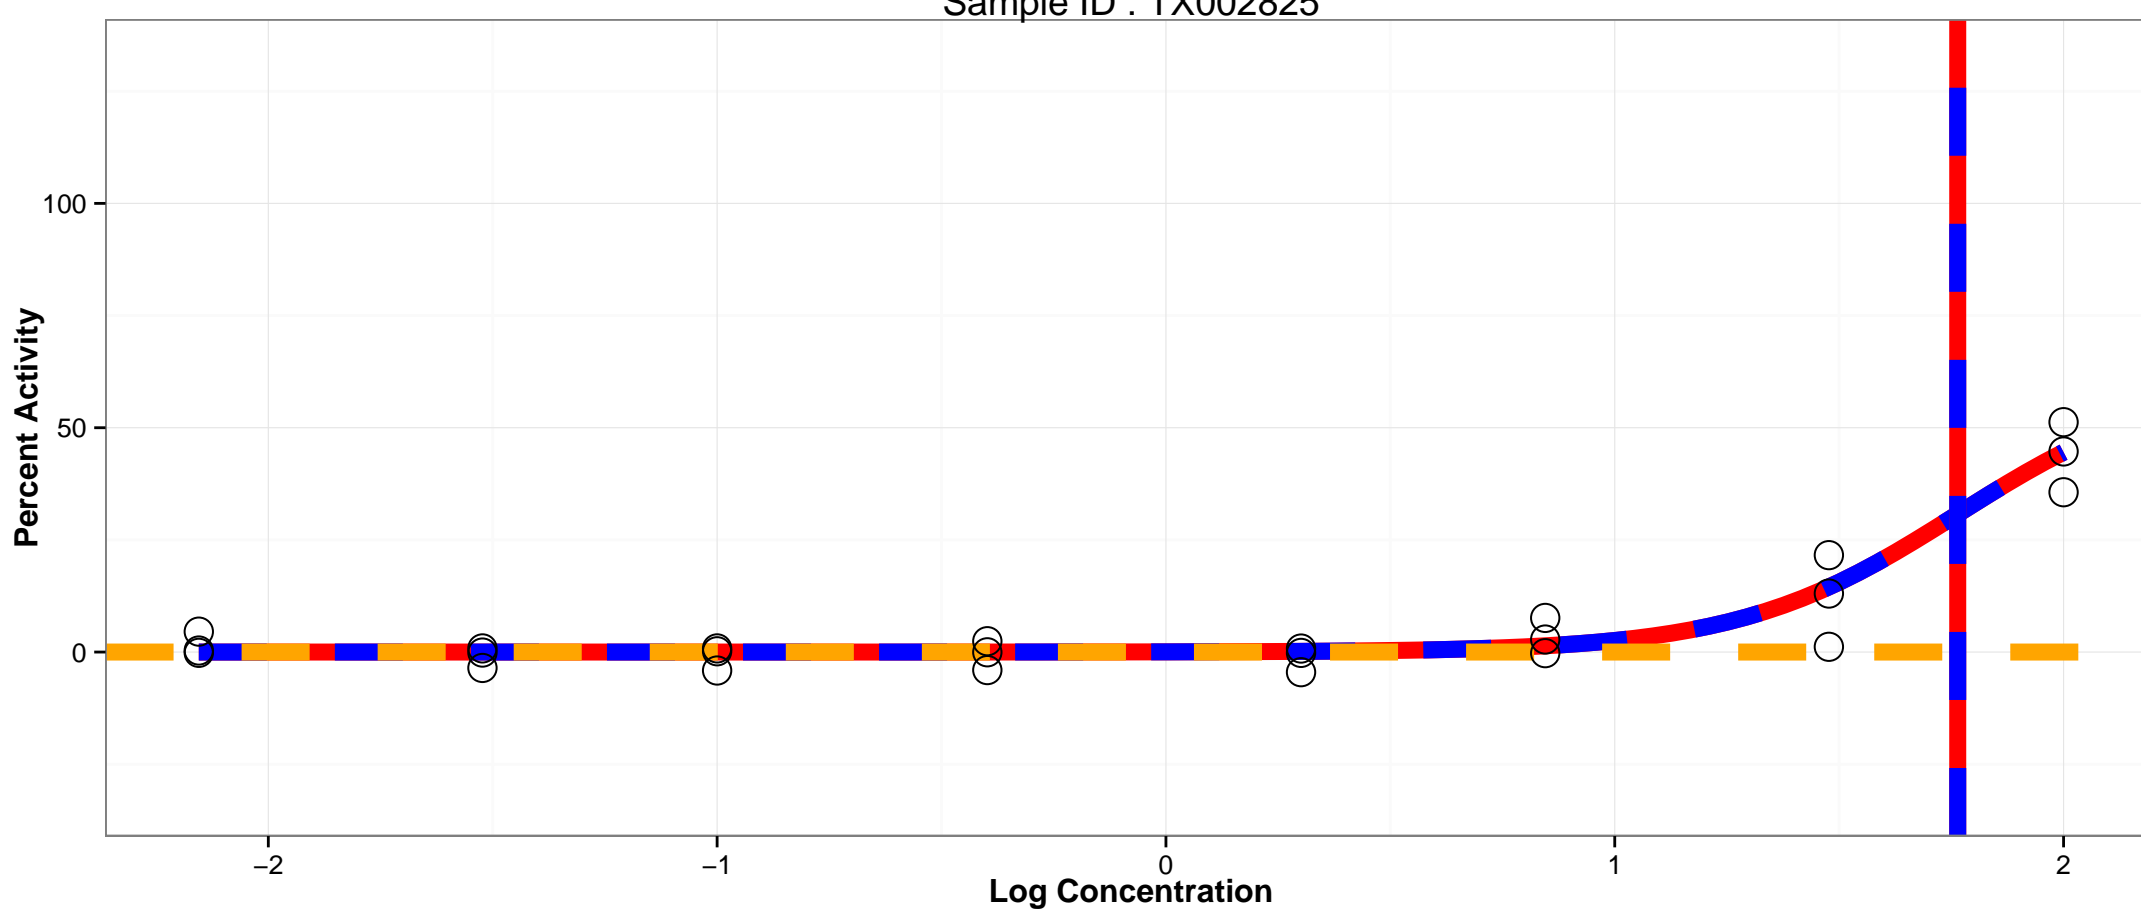

**HILL MODEL**

|     | tp   | ga    | gw    |
|-----|------|-------|-------|
| val | 61.5 | 1.76  | 1.78  |
| sd  | 25.6 | 0.263 | 0.812 |

**GAIN-LOSS MODEL**

|     | tp   | ga    | gw    | la   | lw    |
|-----|------|-------|-------|------|-------|
| val | 61.5 | 1.76  | 1.78  | 2.91 | 9.83  |
| sd  | 25.6 | 0.263 | 0.812 | 3230 | 34600 |

|      | CNST   | HILL   | GNLS   |
|------|--------|--------|--------|
| AIC  | 190.94 | 146.31 | 150.31 |
| PROB | 0      | 0.88   | 0.12   |
| RMSE | 16.7   | 4.53   | 4.53   |

MAX\_MEAN : 43.9 MAX\_MED : 44.7 BMAD : 5.54  
COFF : 20 HIT-CALL : 1 FITC : 42 ACTP : 1  
FLAGS : 6

Assay ID 1848 (NHEERL\_Quantilum\_inhib\_2\_dn)  
Sample ID : TX002825

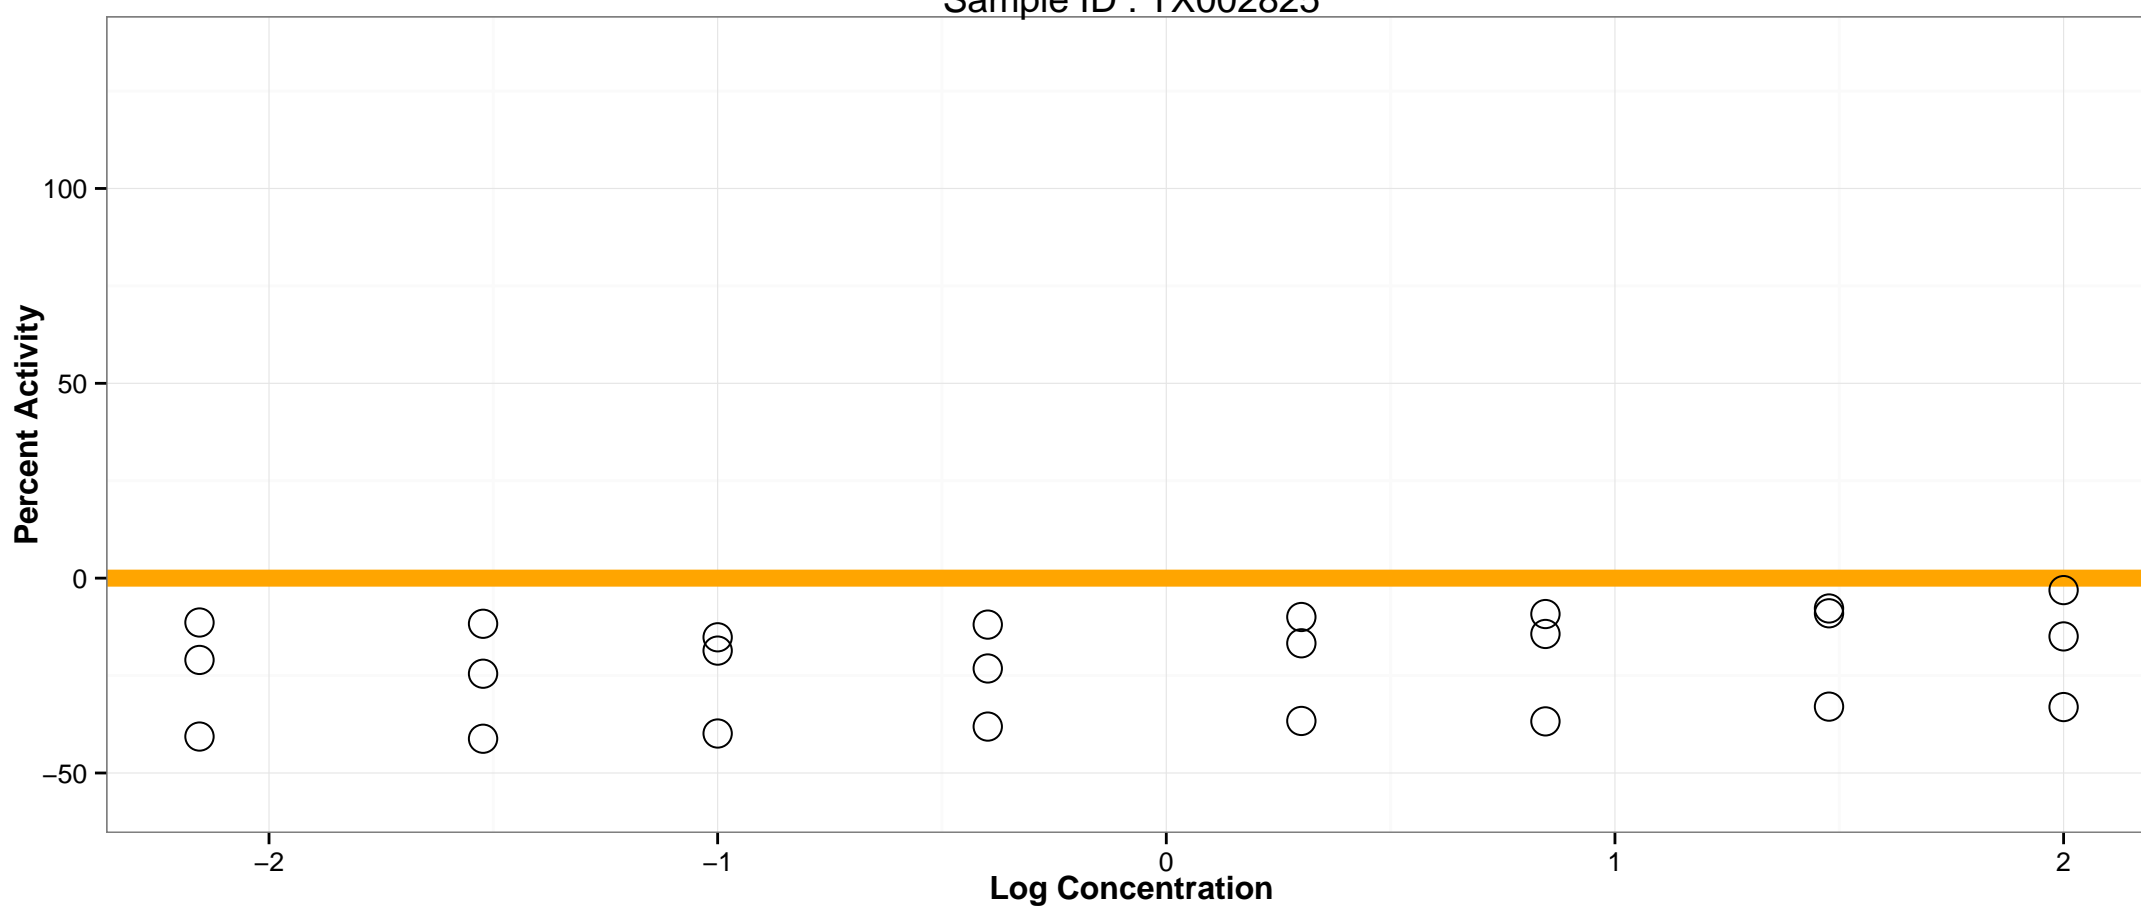

**HILL MODEL**

HILL MODEL: Not applicable

**GAIN-LOSS MODEL**

GNLS MODEL: Not applicable

|      | CNST   | HILL | GNLS |
|------|--------|------|------|
| AIC  | 227.76 | NA   | NA   |
| PROB | 1      | NA   | NA   |
| RMSE | 24.88  | NA   | NA   |

MAX\_MEAN : -16.6 MAX\_MED : -9 BMAD : 8.58  
COFF : 20 HIT-CALL : 0 FITC : 4 ACTP : 0  
FLAGS : 10

Chemical : Metam-sodium hydrate  
CAS : 6734-80-1

Assay ID 1508 (NHEERL\_TPO\_AUR\_dn)  
Sample ID : TX002838

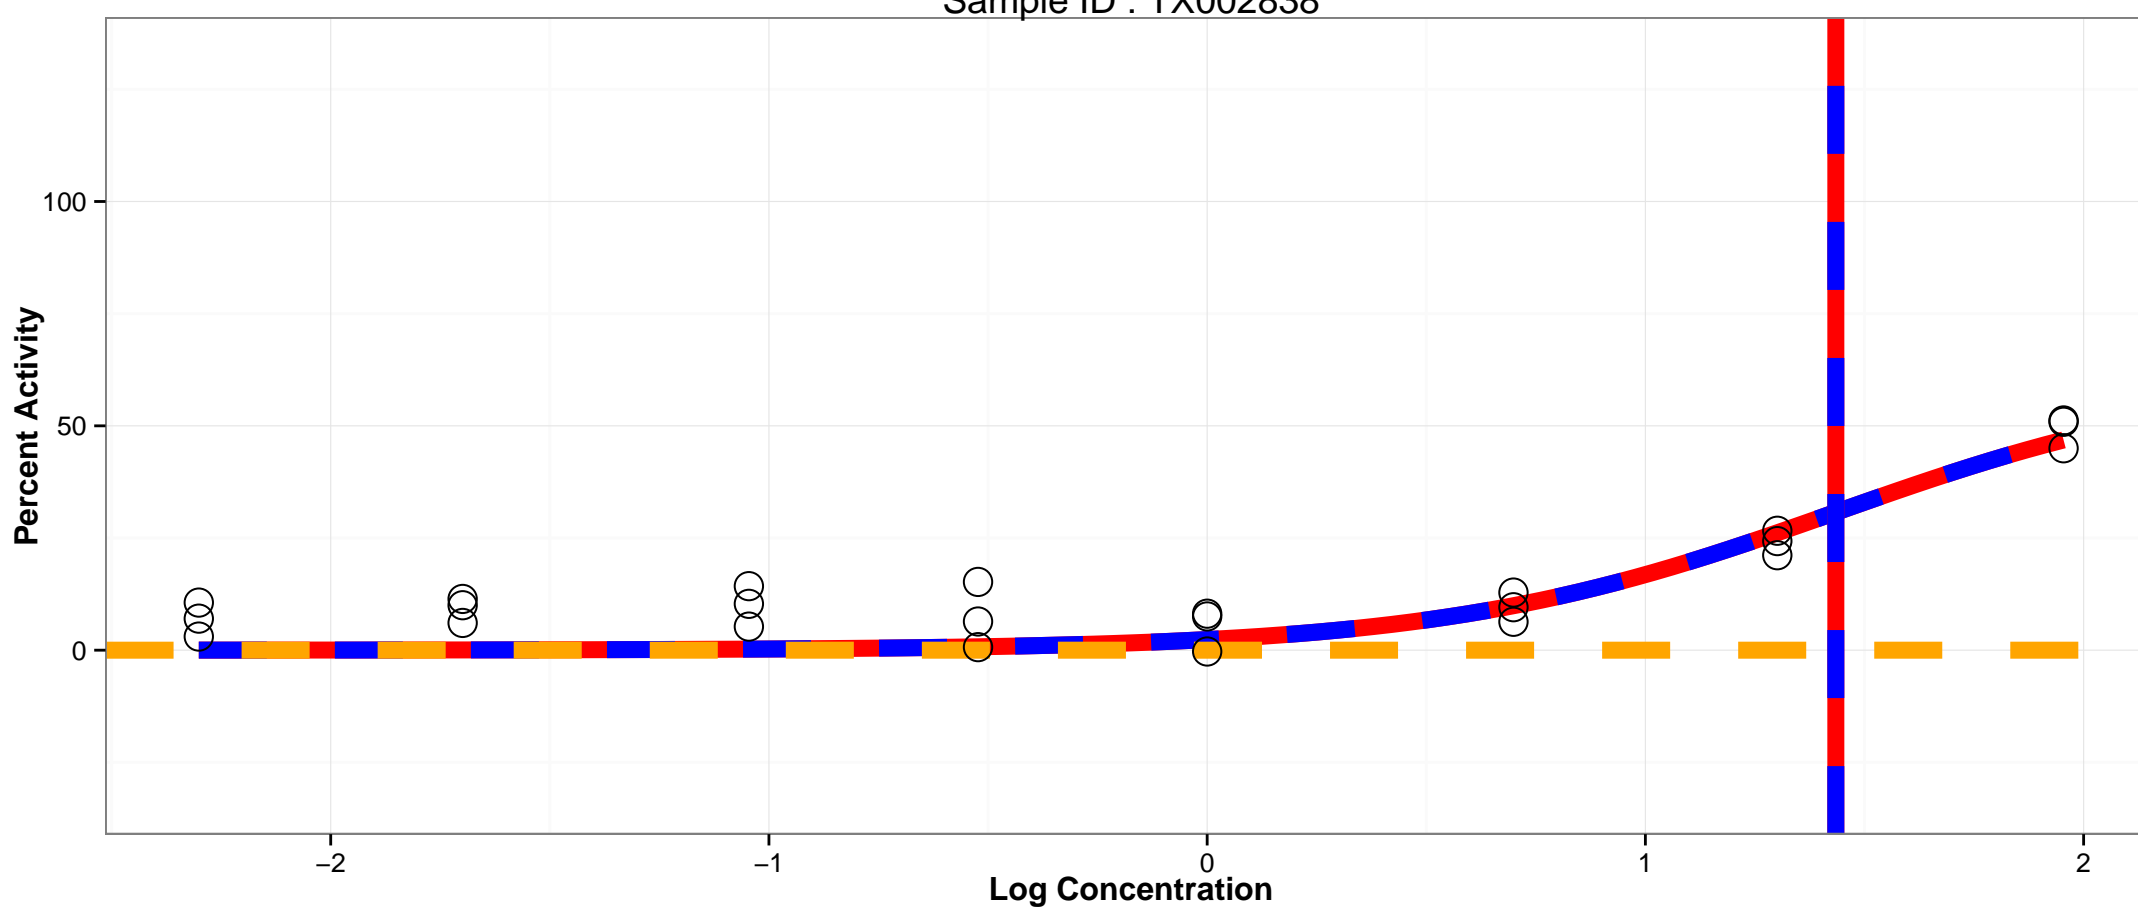

HILL MODEL

|     | tp   | ga    | gw    |
|-----|------|-------|-------|
| val | 61.5 | 1.43  | 0.974 |
| sd  | 13.8 | 0.242 | 0.335 |

GAIN-LOSS MODEL

|     | tp   | ga   | gw    | la   | lw   |
|-----|------|------|-------|------|------|
| val | 61.5 | 1.43 | 0.974 | 3.95 | 8.66 |
| sd  | NA   | NA   | NA    | NA   | NA   |

|      | CNST   | HILL   | GNLS   |
|------|--------|--------|--------|
| AIC  | 213.65 | 171.05 | 175.05 |
| PROB | 0      | 0.88   | 0.12   |
| RMSE | 20.88  | 6.95   | 6.95   |

MAX\_MEAN : 49 MAX\_MED : 50.9 BMAD : 5.69  
COFF : 20 HIT-CALL : 1 FITC : 42 ACTP : 1  
FLAGS :

Assay ID 1509 (NHEERL\_HEK293T\_CellTiterGLO)  
Sample ID : TX002838

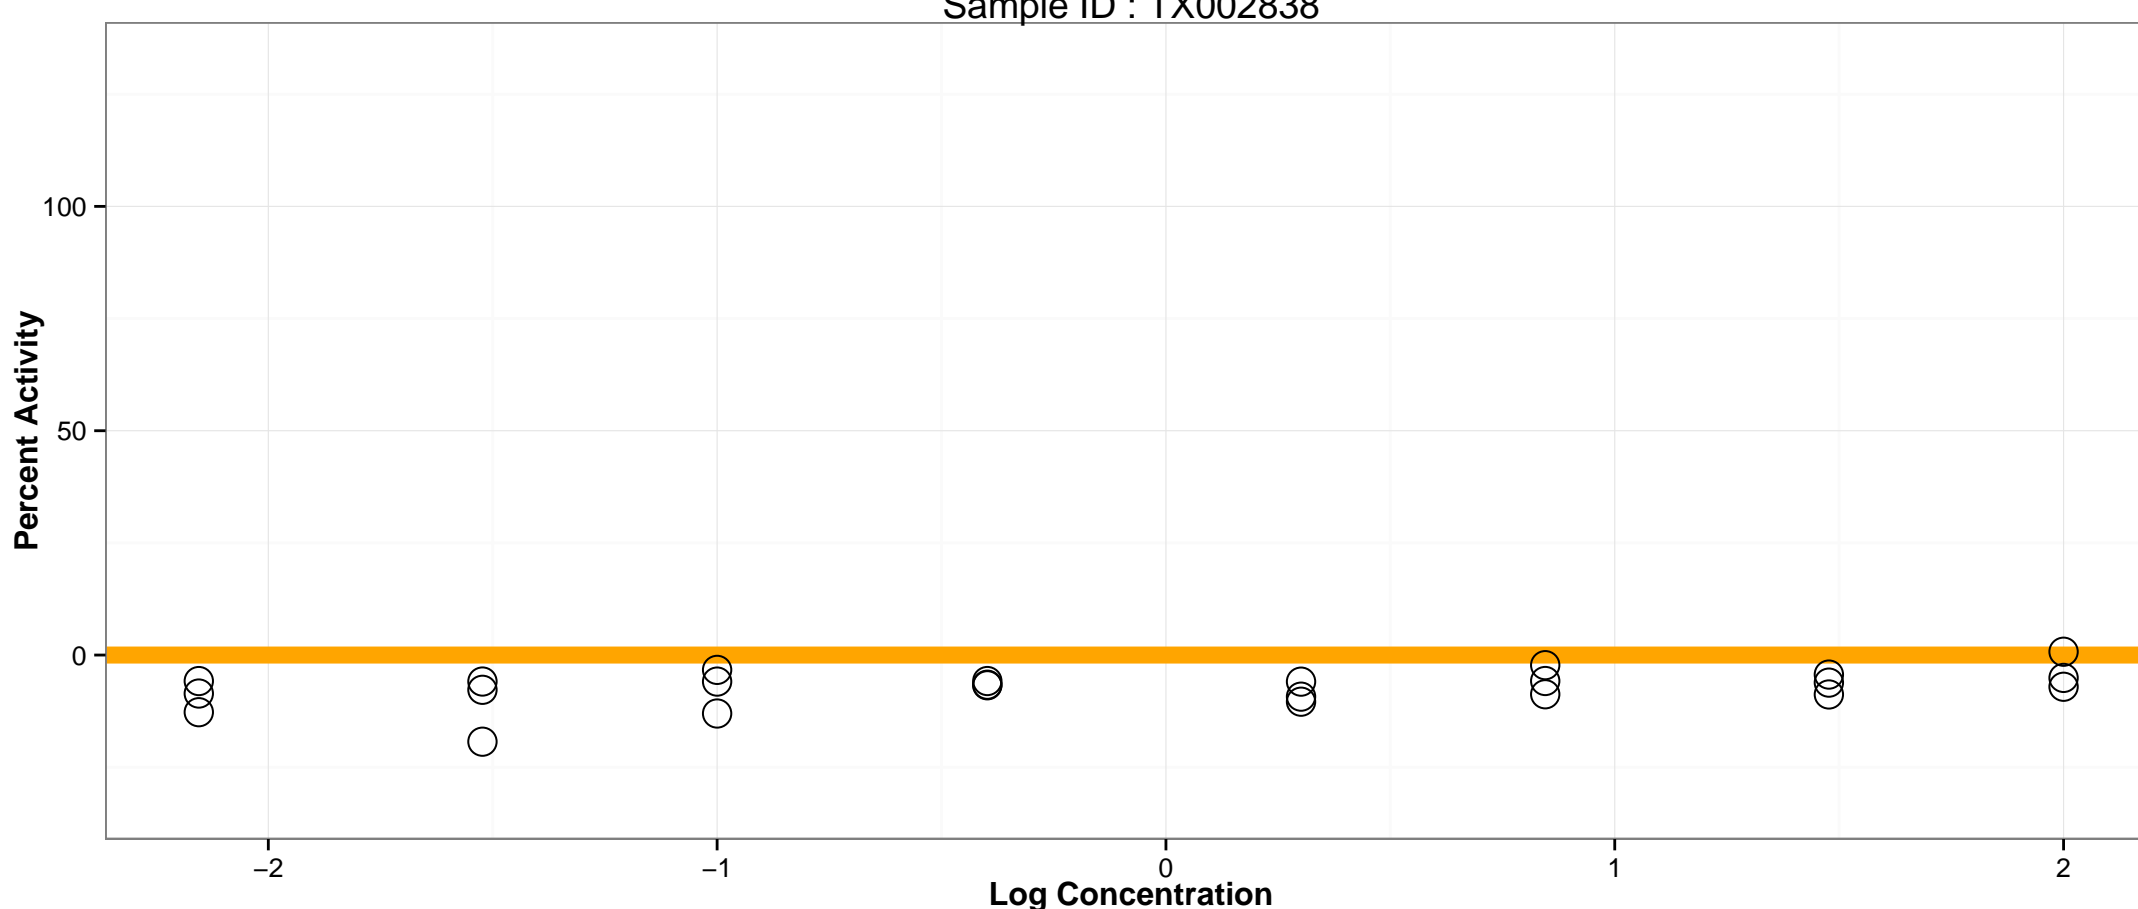

HILL MODEL

HILL MODEL: Not applicable

GAIN-LOSS MODEL

GNLS MODEL: Not applicable

|      | CNST   | HILL | GNLS |
|------|--------|------|------|
| AIC  | 174.39 | NA   | NA   |
| PROB | 1      | NA   | NA   |
| RMSE | 8.23   | NA   | NA   |

MAX\_MEAN : -3.79 MAX\_MED : -5.08 BMAD : 5.54  
COFF : 20 HIT-CALL : 0 FITC : 4 ACTP : 0  
FLAGS :

Assay ID 1848 (NHEERL\_Quantilum\_inhib\_2\_dn)  
Sample ID : TX002838

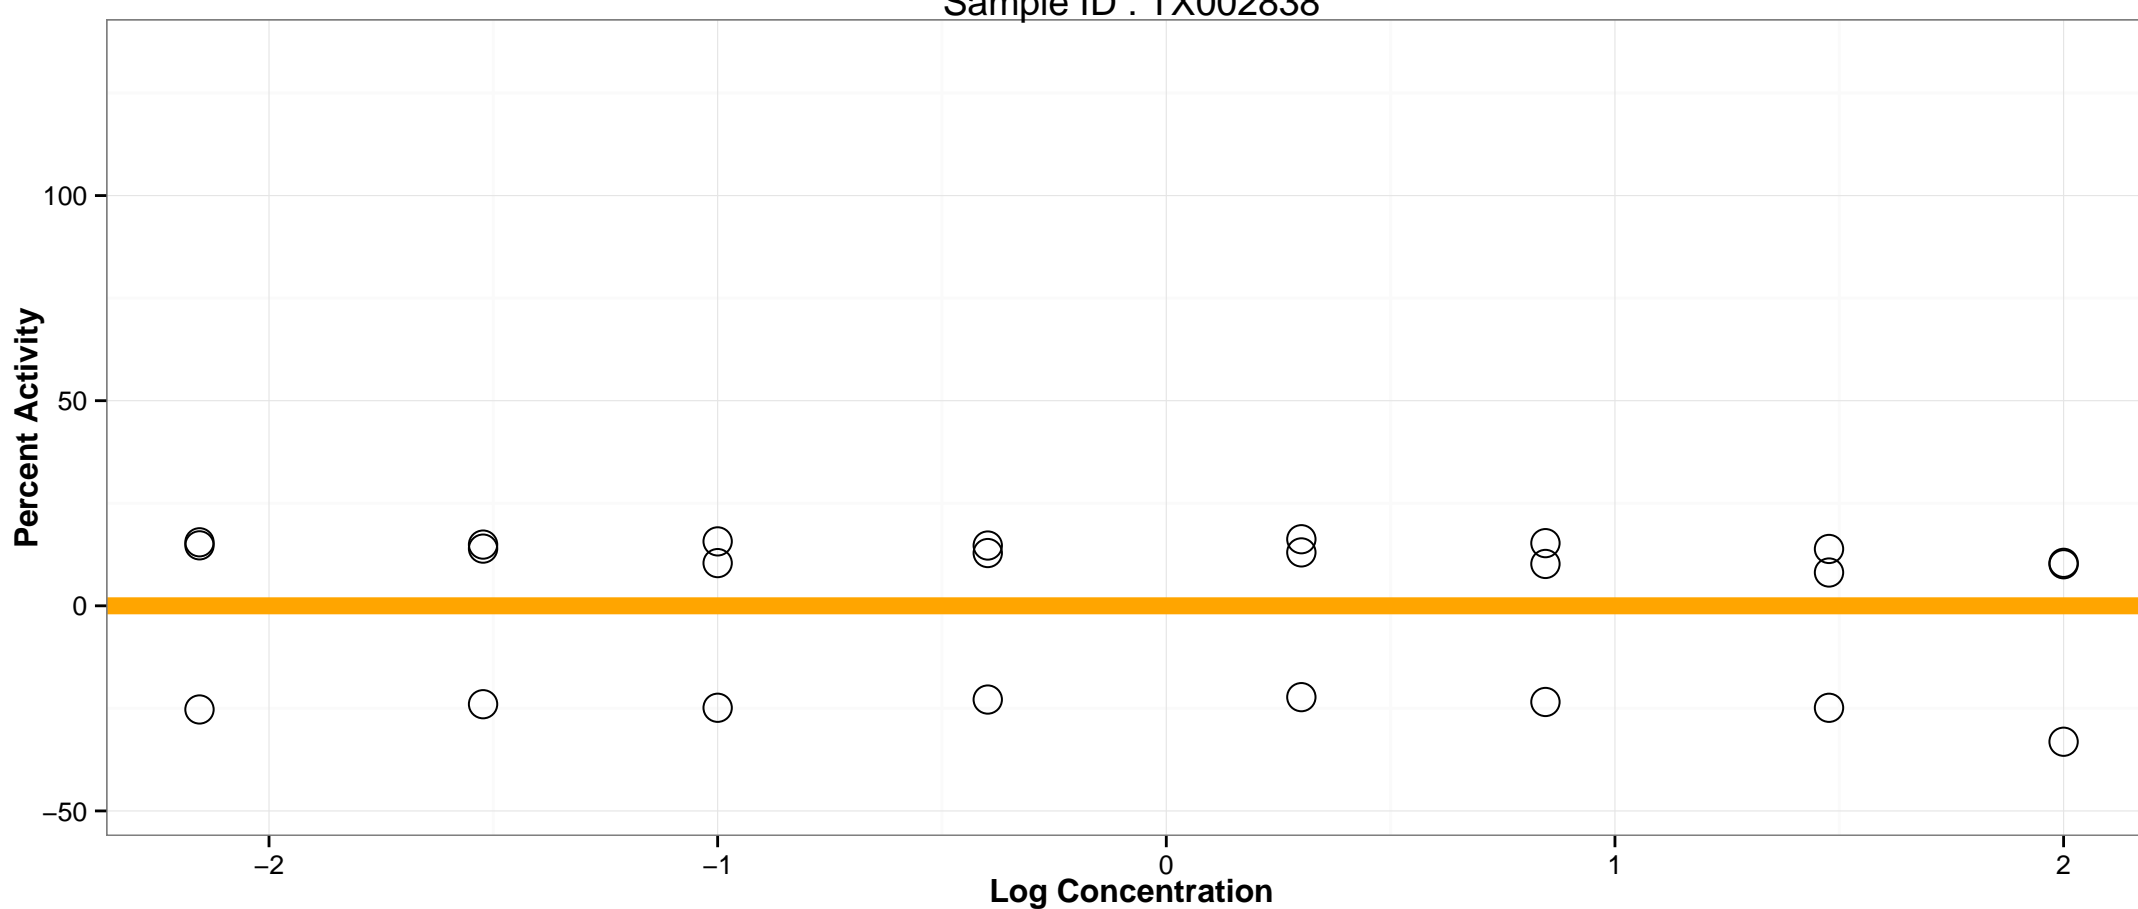

HILL MODEL

HILL MODEL: Not applicable

GAIN-LOSS MODEL

GNLS MODEL: Not applicable

|      | CNST   | HILL | GNLS |
|------|--------|------|------|
| AIC  | 213.89 | NA   | NA   |
| PROB | 1      | NA   | NA   |
| RMSE | 18.22  | NA   | NA   |

MAX\_MEAN : 2.34 MAX\_MED : 14.8 BMAD : 8.58  
COFF : 20 HIT-CALL : 0 FITC : 4 ACTP : 0  
FLAGS :



Assay ID 1508 (NHEERL\_TPO\_AUR\_dn)  
Sample ID : TX002846

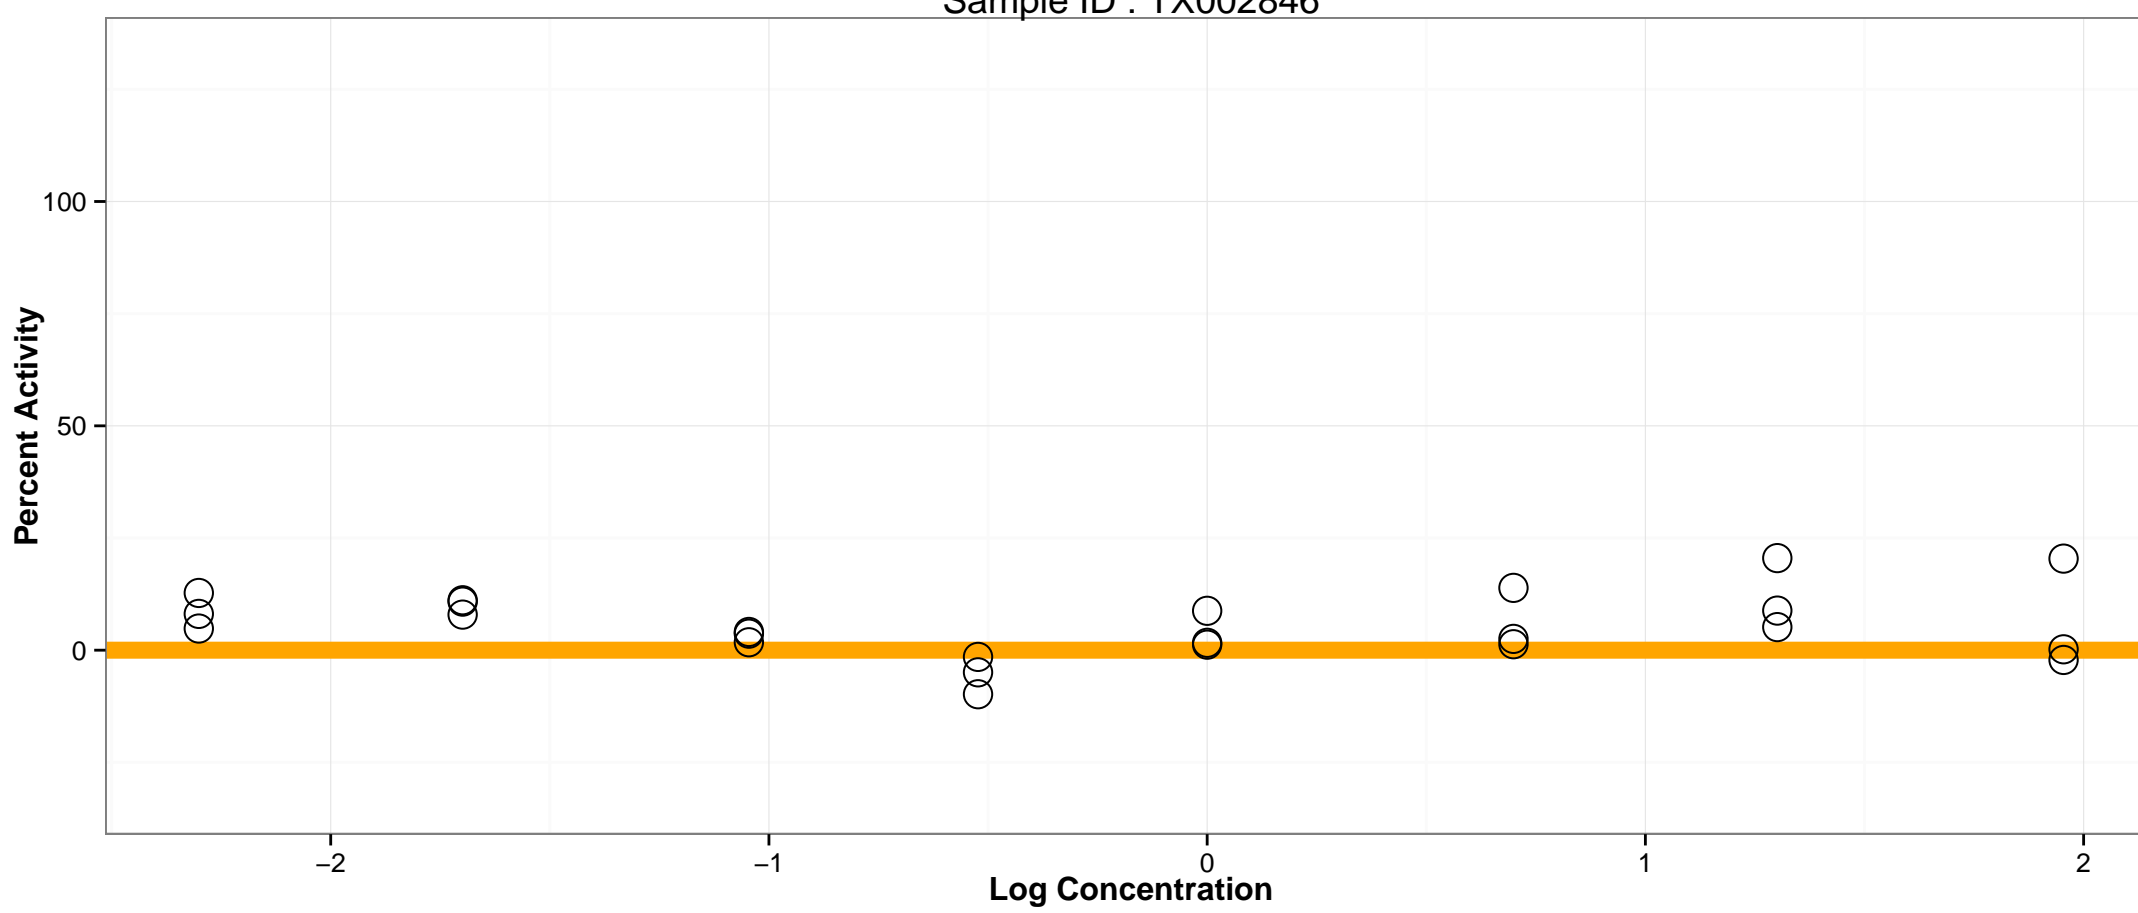

### HILL MODEL

HILL MODEL: Not applicable

### GAIN-LOSS MODEL

GNLS MODEL: Not applicable

|      | CNST   | HILL | GNLS |
|------|--------|------|------|
| AIC  | 176.38 | NA   | NA   |
| PROB | 1      | NA   | NA   |
| RMSE | 9      | NA   | NA   |

MAX\_MEAN : 11.5 MAX\_MED : 10.8 BMAD : 5.69  
COFF : 20 HIT-CALL : 0 FITC : 4 ACTP : 0  
FLAGS :

Assay ID 1509 (NHEERL\_HEK293T\_CellTiterGLO)  
Sample ID : TX002846

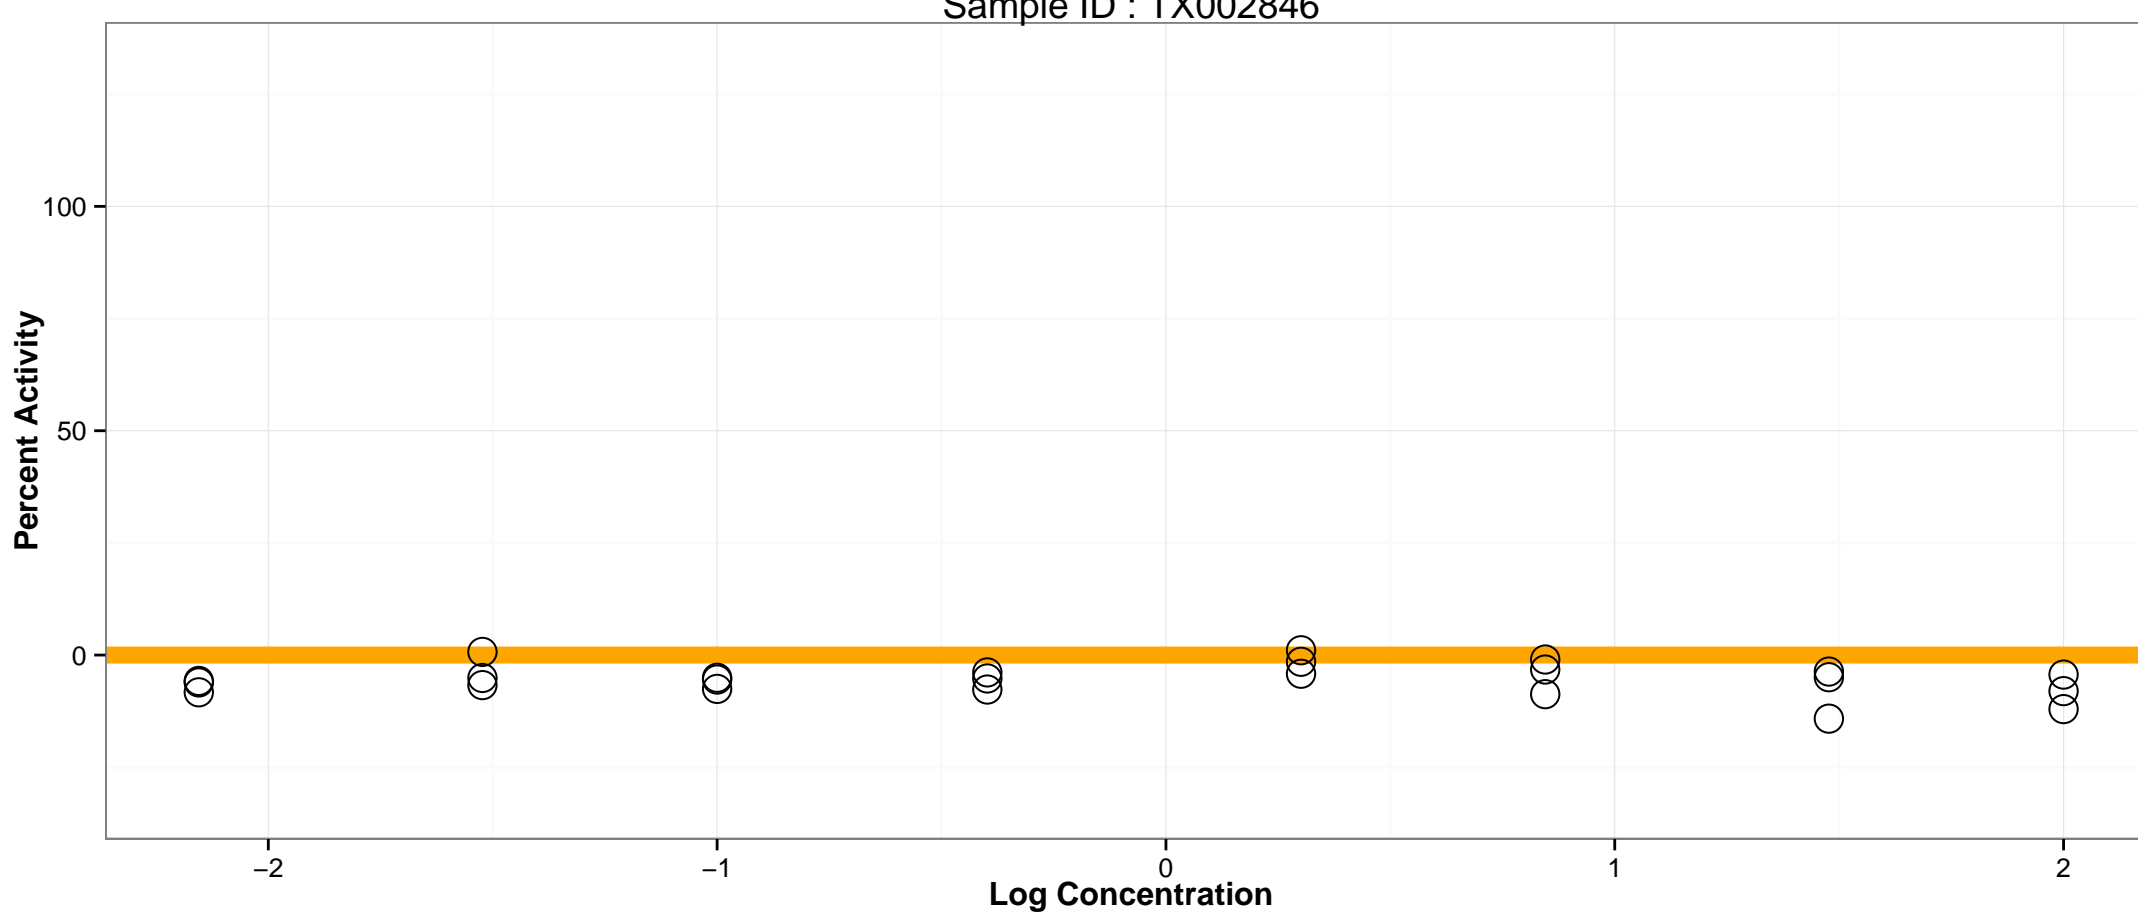

### HILL MODEL

HILL MODEL: Not applicable

### GAIN-LOSS MODEL

GNLS MODEL: Not applicable

|      | CNST   | HILL | GNLS |
|------|--------|------|------|
| AIC  | 162.55 | NA   | NA   |
| PROB | 1      | NA   | NA   |
| RMSE | 6.45   | NA   | NA   |

MAX\_MEAN : -1.52 MAX\_MED : -1.49 BMAD : 5.54  
COFF : 20 HIT-CALL : 0 FITC : 4 ACTP : 0  
FLAGS :

Assay ID 1848 (NHEERL\_Quantilum\_inhib\_2\_dn)  
Sample ID : TX002846

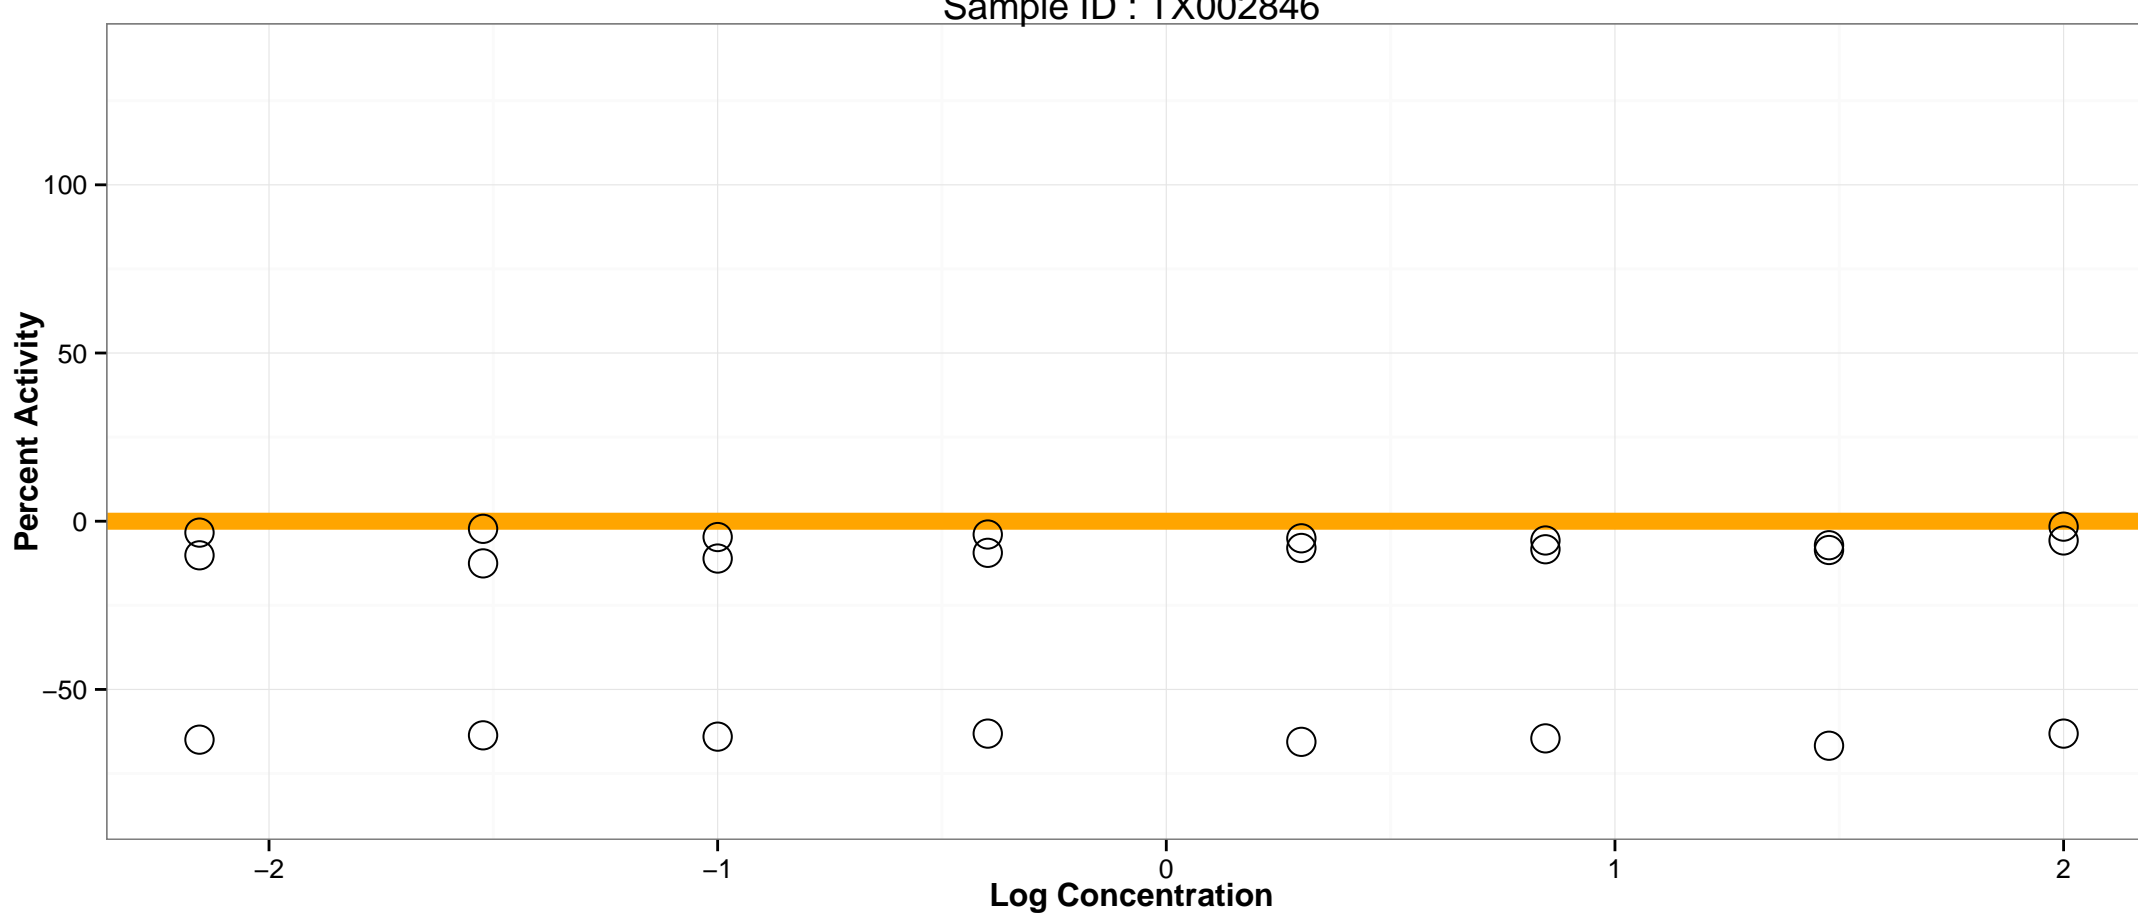

### HILL MODEL

HILL MODEL: Not applicable

### GAIN-LOSS MODEL

GNLS MODEL: Not applicable

|      | CNST   | HILL | GNLS |
|------|--------|------|------|
| AIC  | 244.14 | NA   | NA   |
| PROB | 1      | NA   | NA   |
| RMSE | 37.7   | NA   | NA   |

MAX\_MEAN : -23.5 MAX\_MED : -5.7 BMAD : 8.58  
COFF : 20 HIT-CALL : 0 FITC : 4 ACTP : 0  
FLAGS : 10

Chemical : 4-tert-Butylphenol  
CAS : 98-54-4

Assay ID 1508 (NHEERL\_TPO\_AUR\_dn)  
Sample ID : TX002917

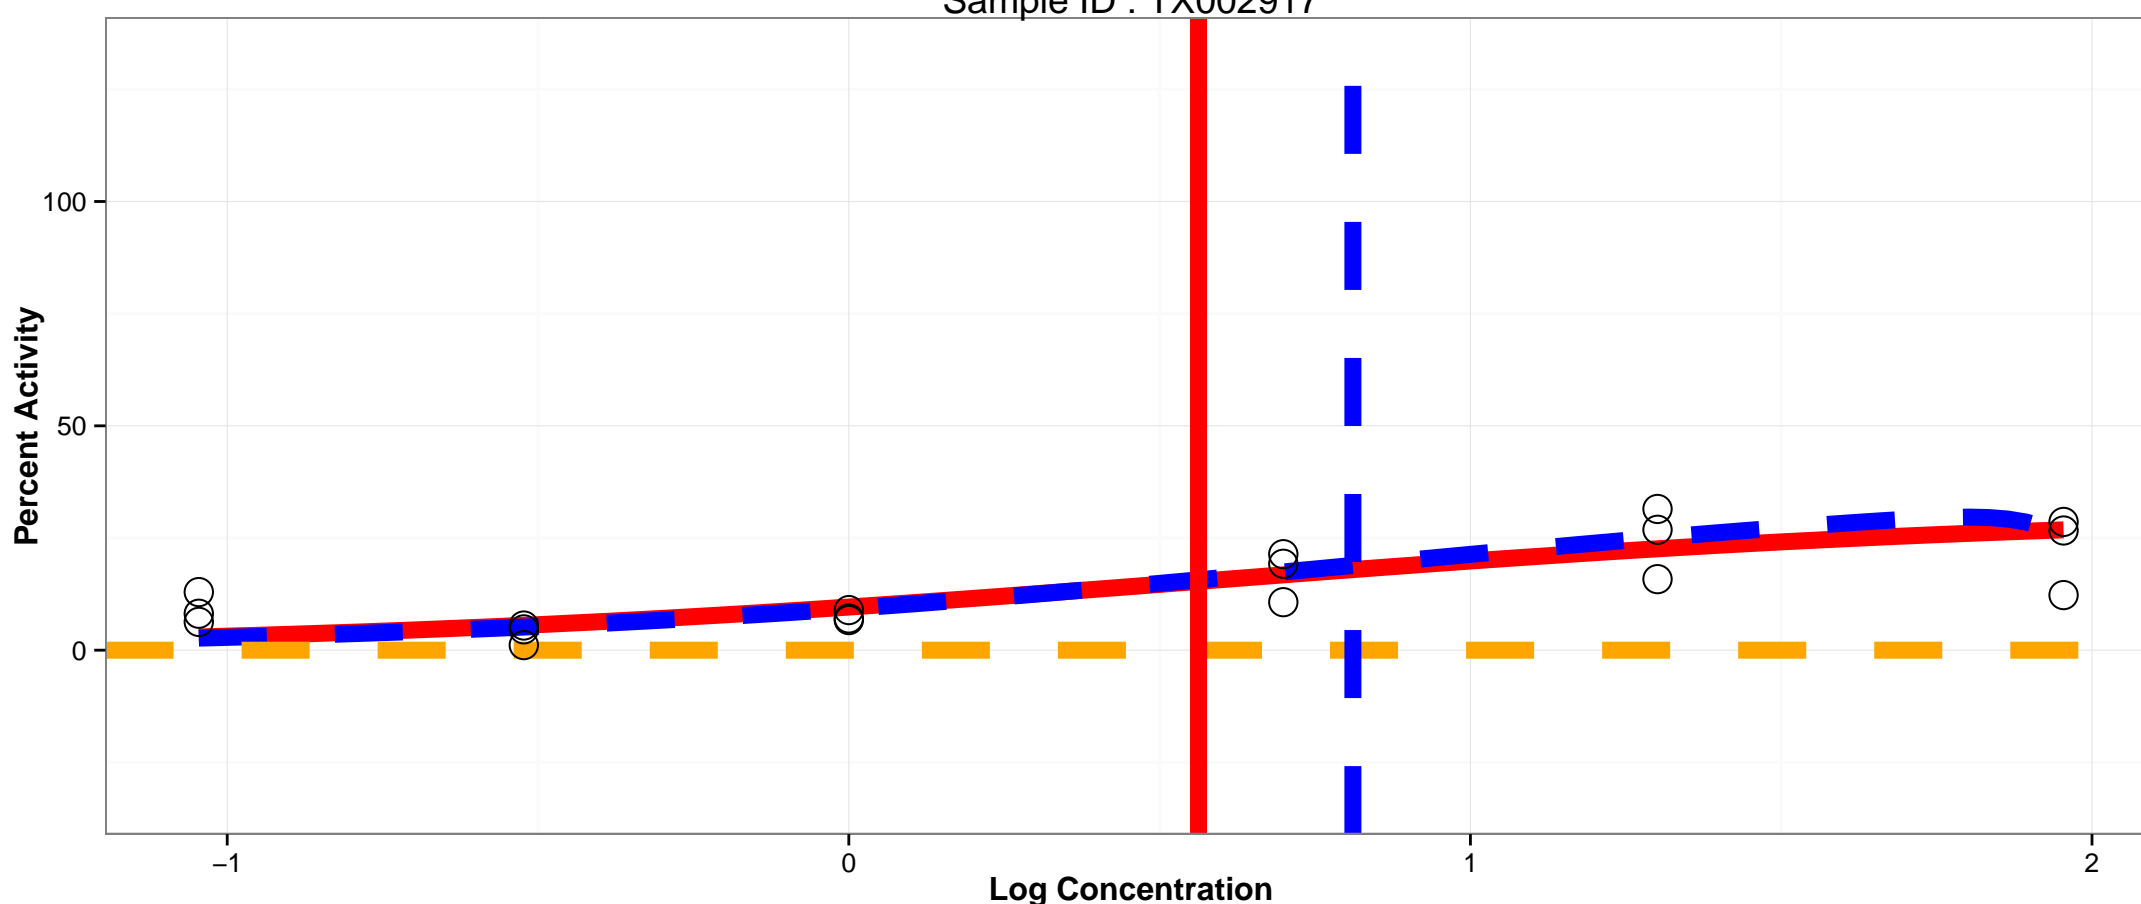

HILL MODEL

|     | tp   | ga    | gw    |
|-----|------|-------|-------|
| val | 30.7 | 0.563 | 0.605 |
| sd  | 8.42 | 0.546 | 0.342 |

GAIN-LOSS MODEL

|     | tp   | ga    | gw    | la   | lw   |
|-----|------|-------|-------|------|------|
| val | 37.8 | 0.811 | 0.601 | 2.04 | 7.6  |
| sd  | 16.8 | 0.686 | 0.24  | 0.17 | 16.4 |

|      | CNST   | HILL   | GNLS   |
|------|--------|--------|--------|
| AIC  | 156.64 | 122.25 | 125.09 |
| PROB | 0      | 0.81   | 0.19   |
| RMSE | 16.82  | 5.75   | 5.55   |

MAX\_MEAN : 24.7 MAX\_MED : 26.9 BMAD : 5.69  
COFF : 20 HIT-CALL : 1 FITC : 42 ACTP : 1  
FLAGS :

Assay ID 1509 (NHEERL\_HEK293T\_CellTiterGLO)  
Sample ID : TX002917

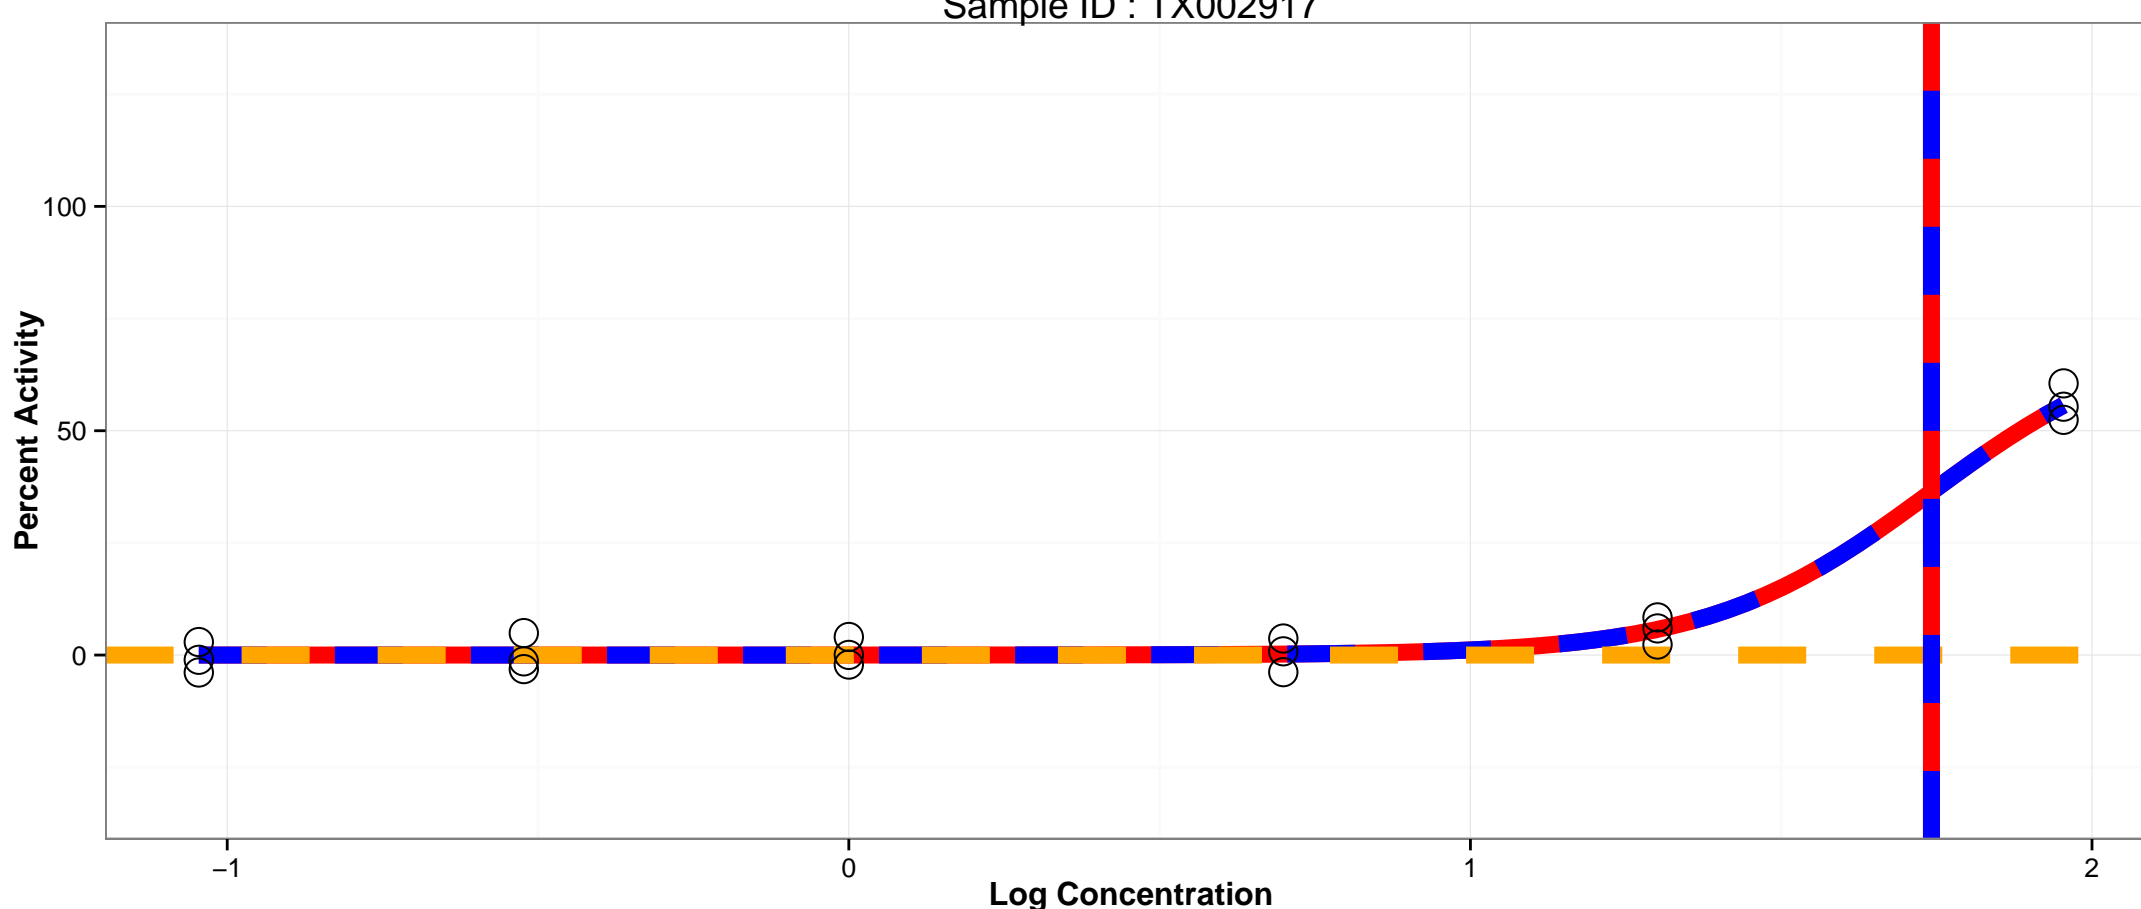

HILL MODEL

|     | tp   | ga   | gw   |
|-----|------|------|------|
| val | 72.7 | 1.74 | 2.43 |
| sd  | 129  | 1.03 | 3.77 |

GAIN-LOSS MODEL

|     | tp   | ga   | gw   | la   | lw   |
|-----|------|------|------|------|------|
| val | 72.7 | 1.74 | 2.43 | 3.59 | 14.2 |
| sd  | NA   | NA   | NA   | NA   | NA   |

|      | CNST  | HILL   | GNLS   |
|------|-------|--------|--------|
| AIC  | 155   | 101.62 | 105.62 |
| PROB | 0     | 0.88   | 0.12   |
| RMSE | 23.22 | 3.01   | 3.01   |

MAX\_MEAN : 56.1 MAX\_MED : 55.4 BMAD : 5.54  
COFF : 20 HIT-CALL : 1 FITC : 42 ACTP : 1  
FLAGS : 6

Assay ID 1848 (NHEERL\_Quantilum\_inhib\_2\_dn)  
Sample ID : TX002917

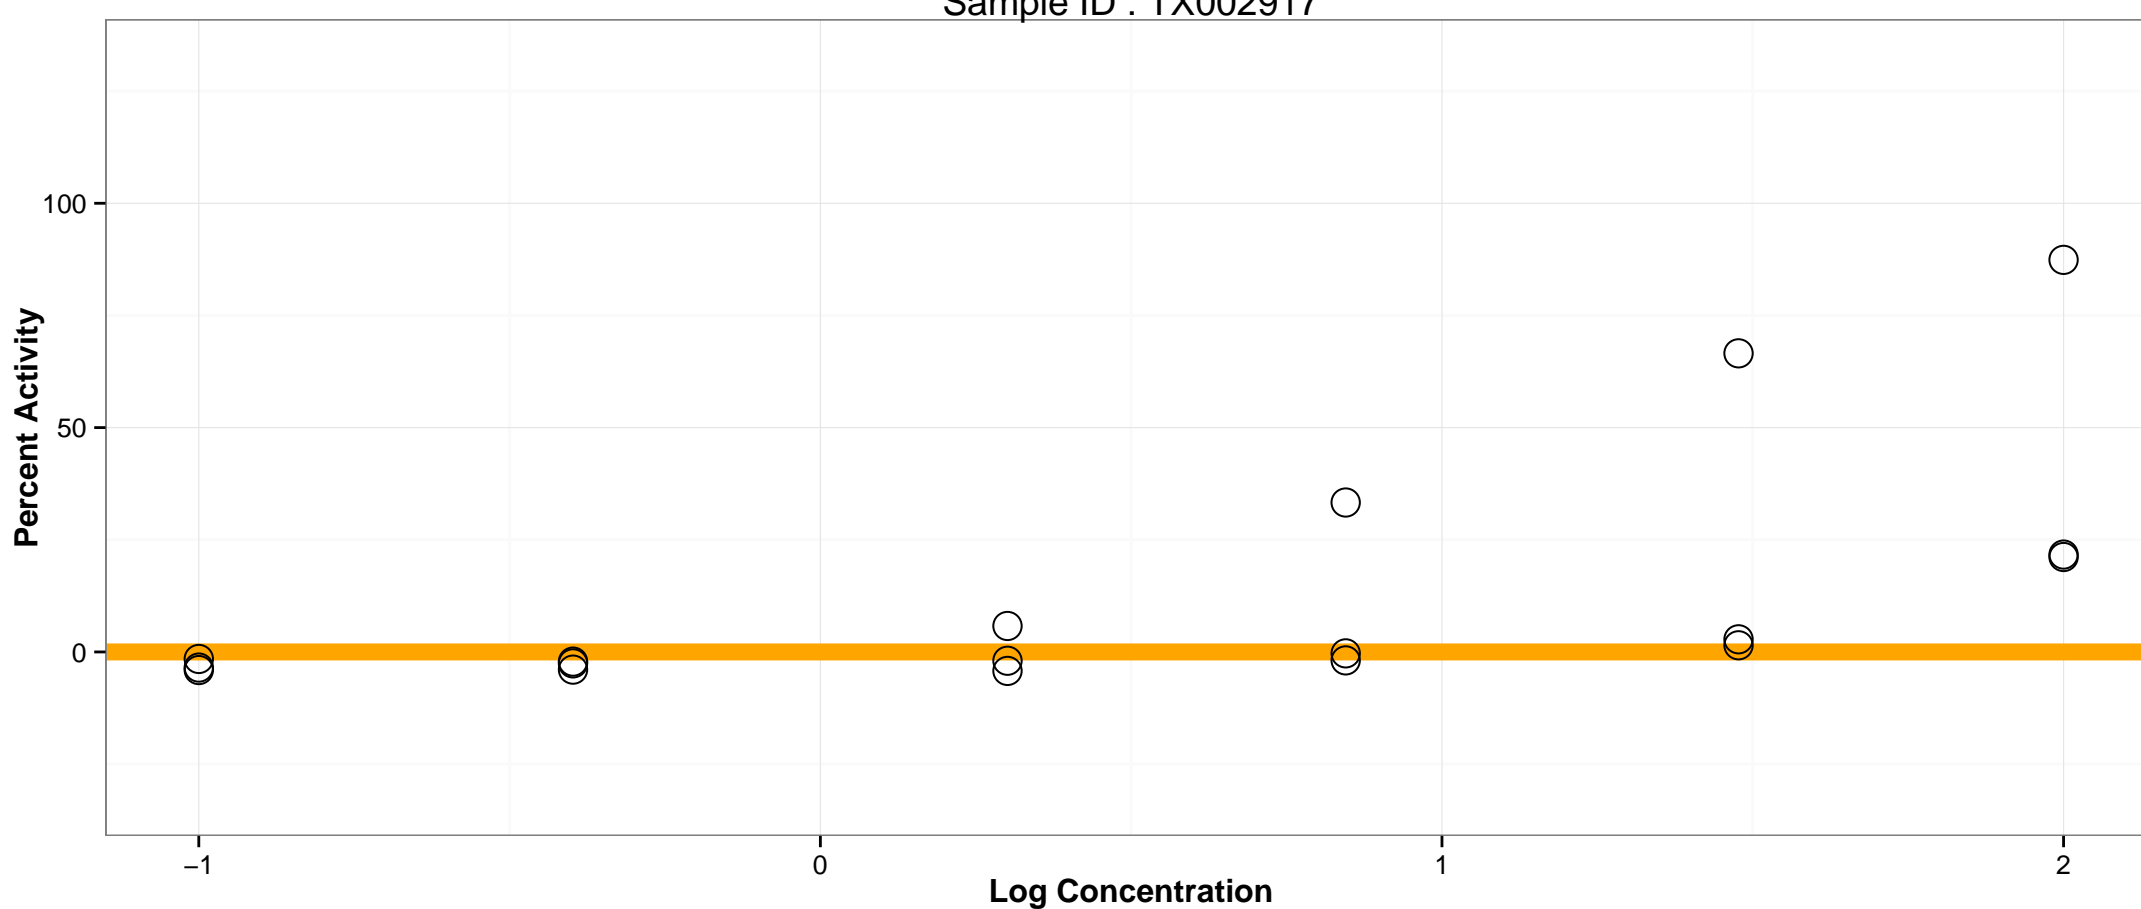

HILL MODEL

HILL MODEL: Not applicable

GAIN-LOSS MODEL

GNLS MODEL: Not applicable

|      | CNST   | HILL | GNLS |
|------|--------|------|------|
| AIC  | 163.18 | NA   | NA   |
| PROB | 1      | NA   | NA   |
| RMSE | 28.11  | NA   | NA   |

MAX\_MEAN : 43.4 MAX\_MED : 21.7 BMAD : 8.58  
COFF : 20 HIT-CALL : 0 FITC : 4 ACTP : 0  
FLAGS : 10

Chemical : Eugenol  
CAS : 97-53-0

Assay ID 1508 (NHEERL\_TPO\_AUR\_dn)  
Sample ID : TX002953

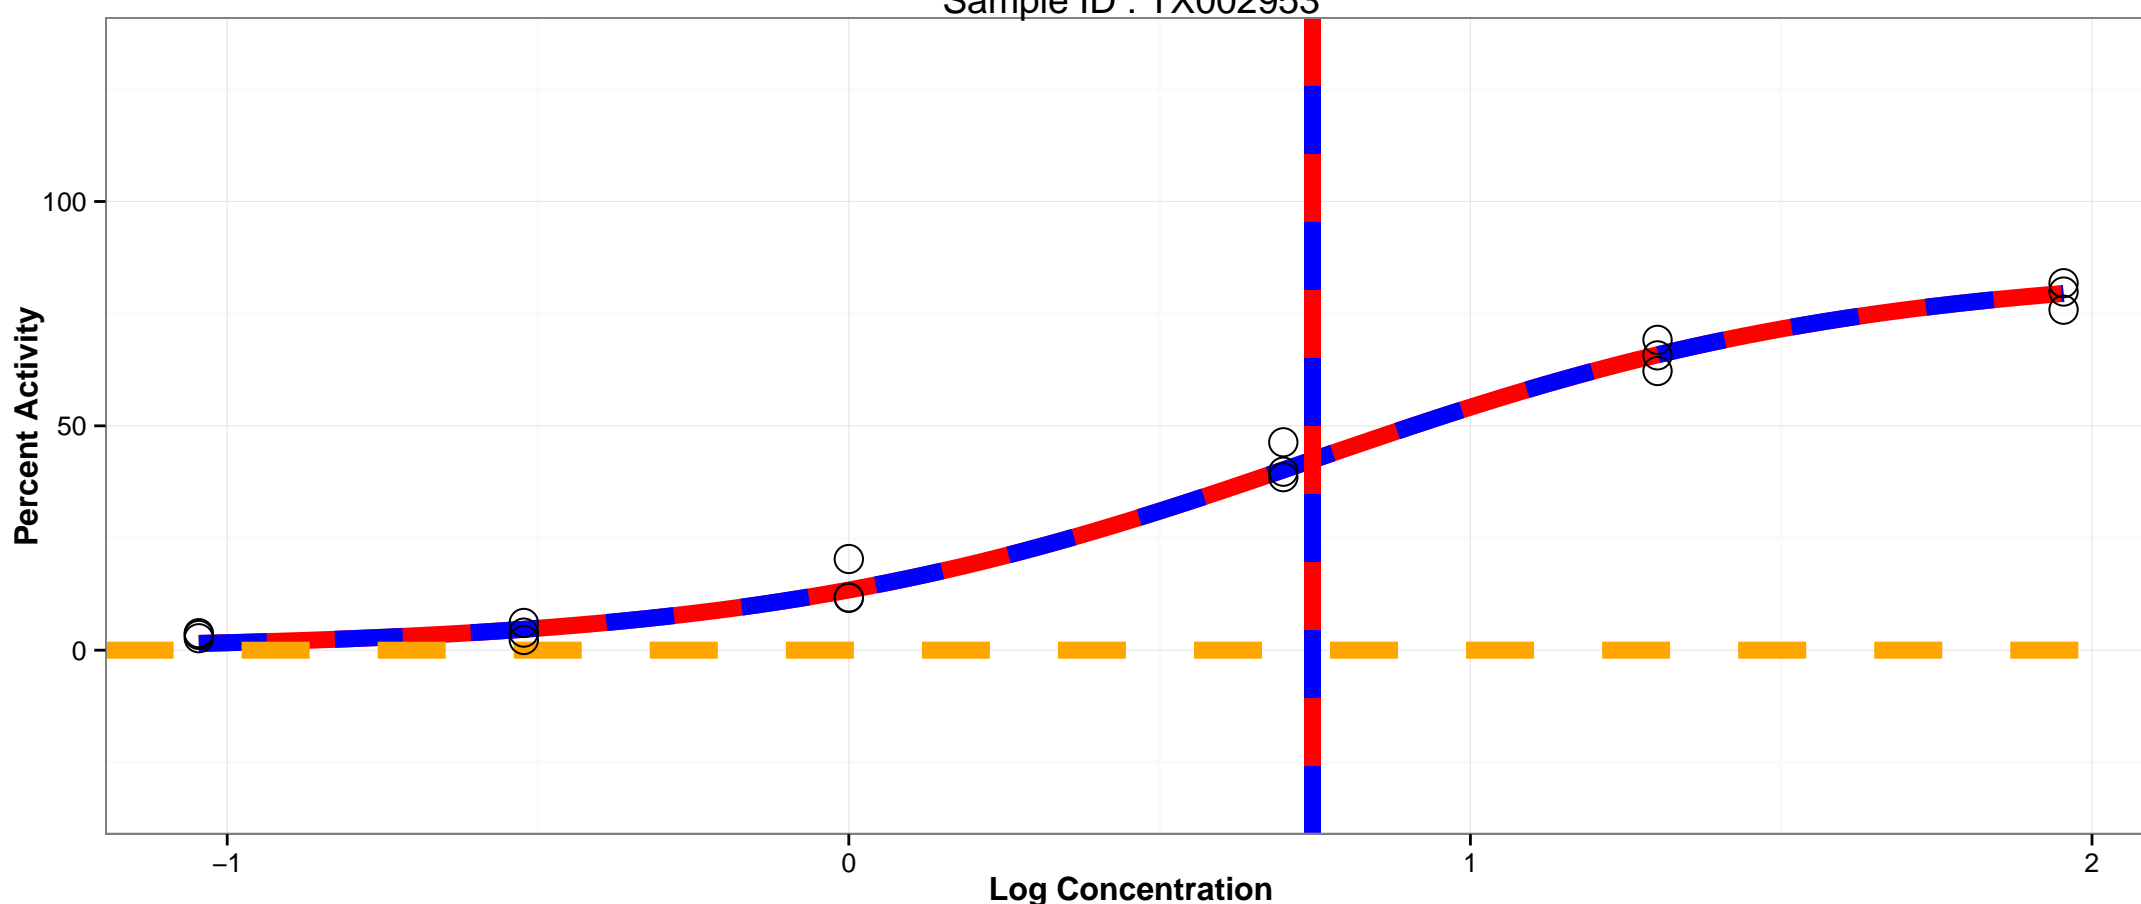

HILL MODEL

|     | tp   | ga     | gw     |
|-----|------|--------|--------|
| val | 84.8 | 0.746  | 0.974  |
| sd  | 2.82 | 0.0504 | 0.0777 |

GAIN-LOSS MODEL

|     | tp   | ga     | gw     | la    | lw     |
|-----|------|--------|--------|-------|--------|
| val | 84.8 | 0.746  | 0.974  | 2.86  | 10.5   |
| sd  | 2.82 | 0.0504 | 0.0777 | 13700 | 159000 |

|      | CNST   | HILL  | GNLS   |
|------|--------|-------|--------|
| AIC  | 192.26 | 98.28 | 102.28 |
| PROB | 0      | 0.88  | 0.12   |
| RMSE | 45.84  | 2.94  | 2.94   |

MAX\_MEAN : 79.2 MAX\_MED : 79.9 BMAD : 5.69  
COFF : 20 HIT-CALL : 1 FITC : 42 ACTP : 1  
FLAGS :

Assay ID 1509 (NHEERL\_HEK293T\_CellTiterGLO)  
Sample ID : TX002953

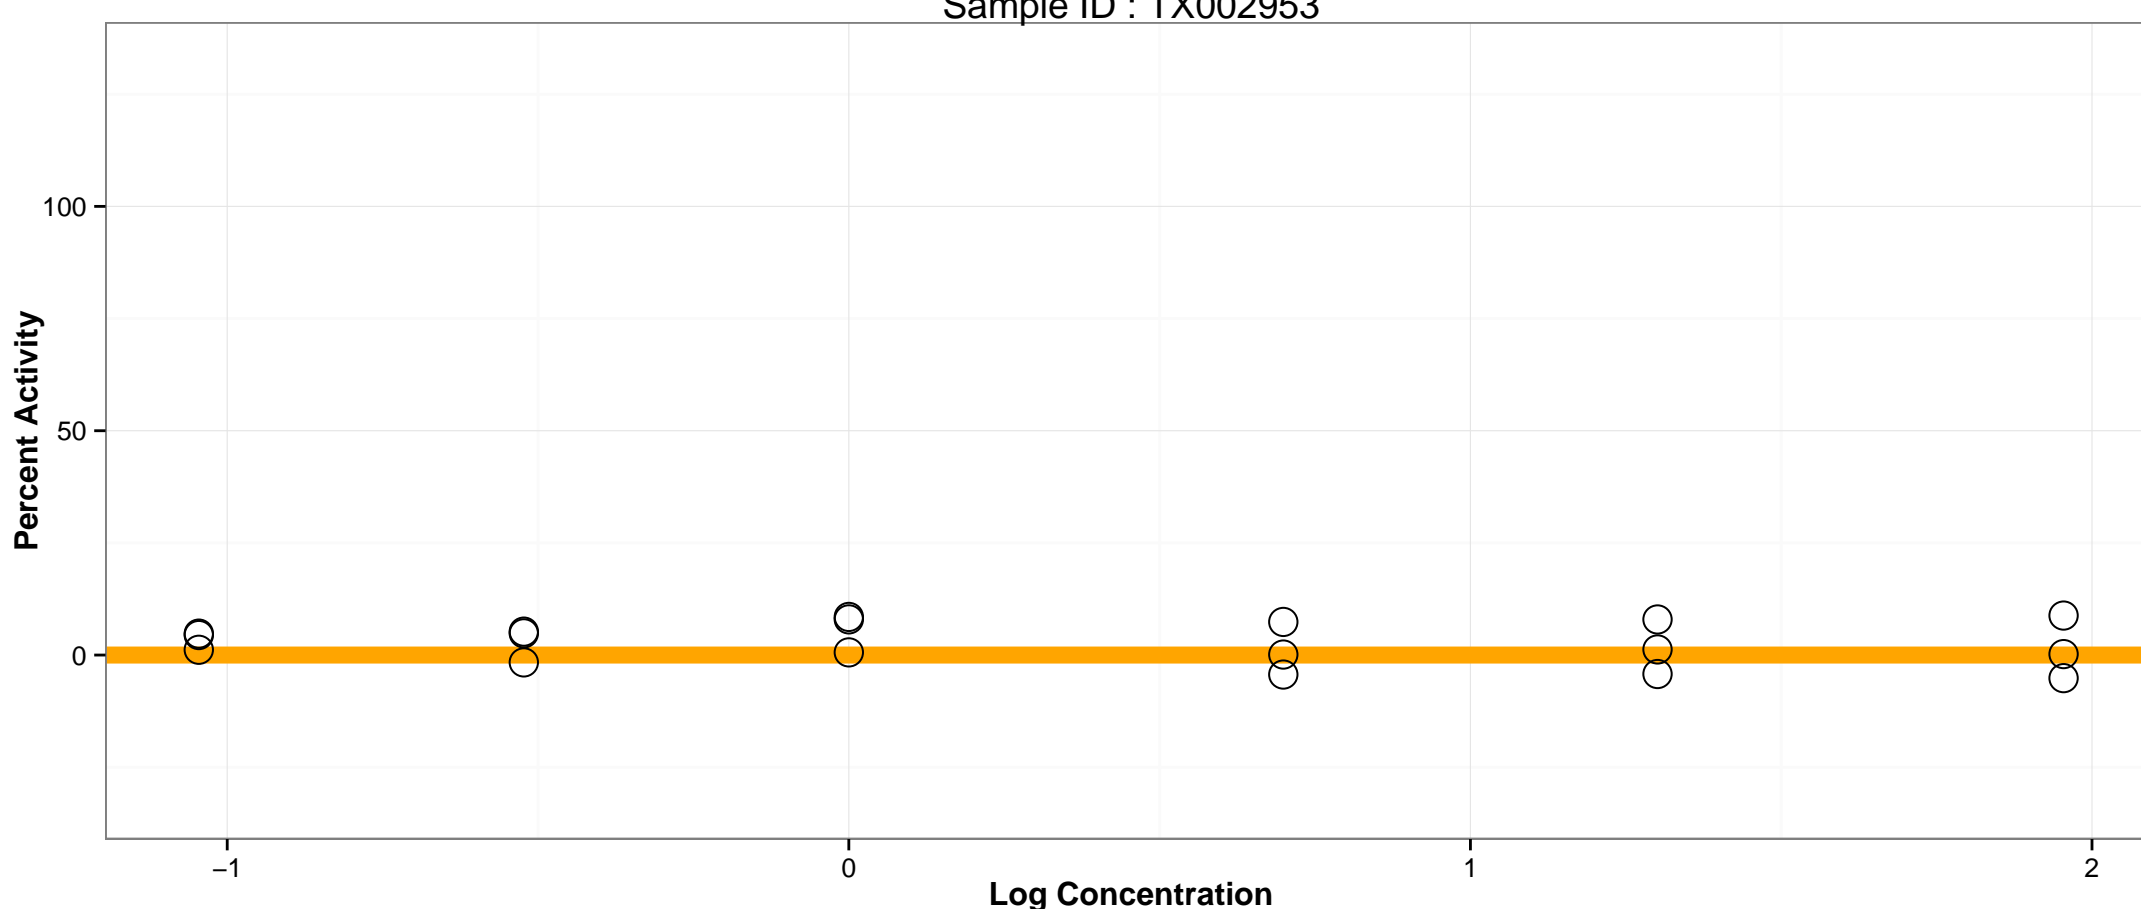

HILL MODEL

HILL MODEL: Not applicable

GAIN-LOSS MODEL

GNLS MODEL: Not applicable

|      | CNST   | HILL | GNLS |
|------|--------|------|------|
| AIC  | 115.21 | NA   | NA   |
| PROB | 1      | NA   | NA   |
| RMSE | 5.24   | NA   | NA   |

MAX\_MEAN : 5.69 MAX\_MED : 7.97 BMAD : 5.54  
COFF : 20 HIT-CALL : 0 FITC : 4 ACTP : 0  
FLAGS :

Assay ID 1848 (NHEERL\_Quantilum\_inhib\_2\_dn)  
Sample ID : TX002953

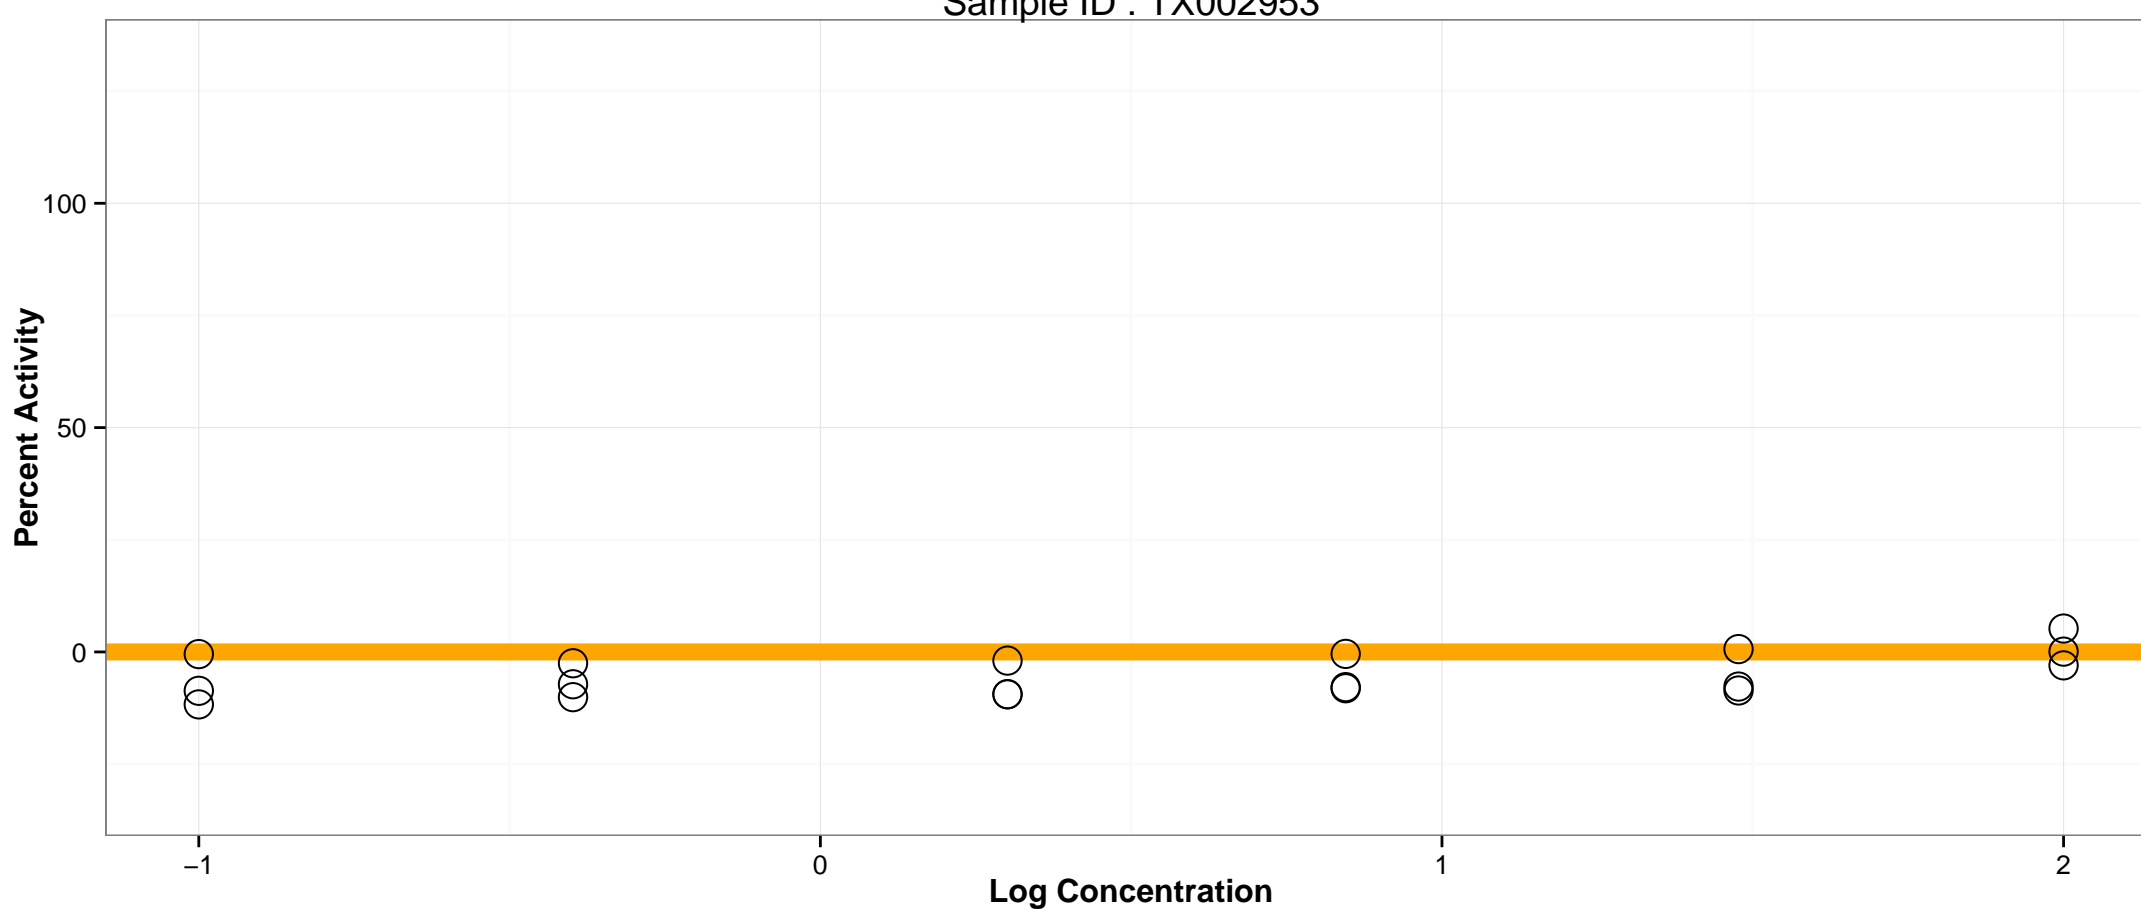

HILL MODEL

HILL MODEL: Not applicable

GAIN-LOSS MODEL

GNLS MODEL: Not applicable

|      | CNST   | HILL | GNLS |
|------|--------|------|------|
| AIC  | 125.17 | NA   | NA   |
| PROB | 1      | NA   | NA   |
| RMSE | 6.87   | NA   | NA   |

MAX\_MEAN : 0.777 MAX\_MED : 0.0826 BMAD : 8.58  
COFF : 20 HIT-CALL : 0 FITC : 4 ACTP : 0  
FLAGS :

Chemical : 2,4-Di-tert-butylphenol  
CAS : 96-76-4

Assay ID 1508 (NHEERL\_TPO\_AUR\_dn)  
Sample ID : TX003117

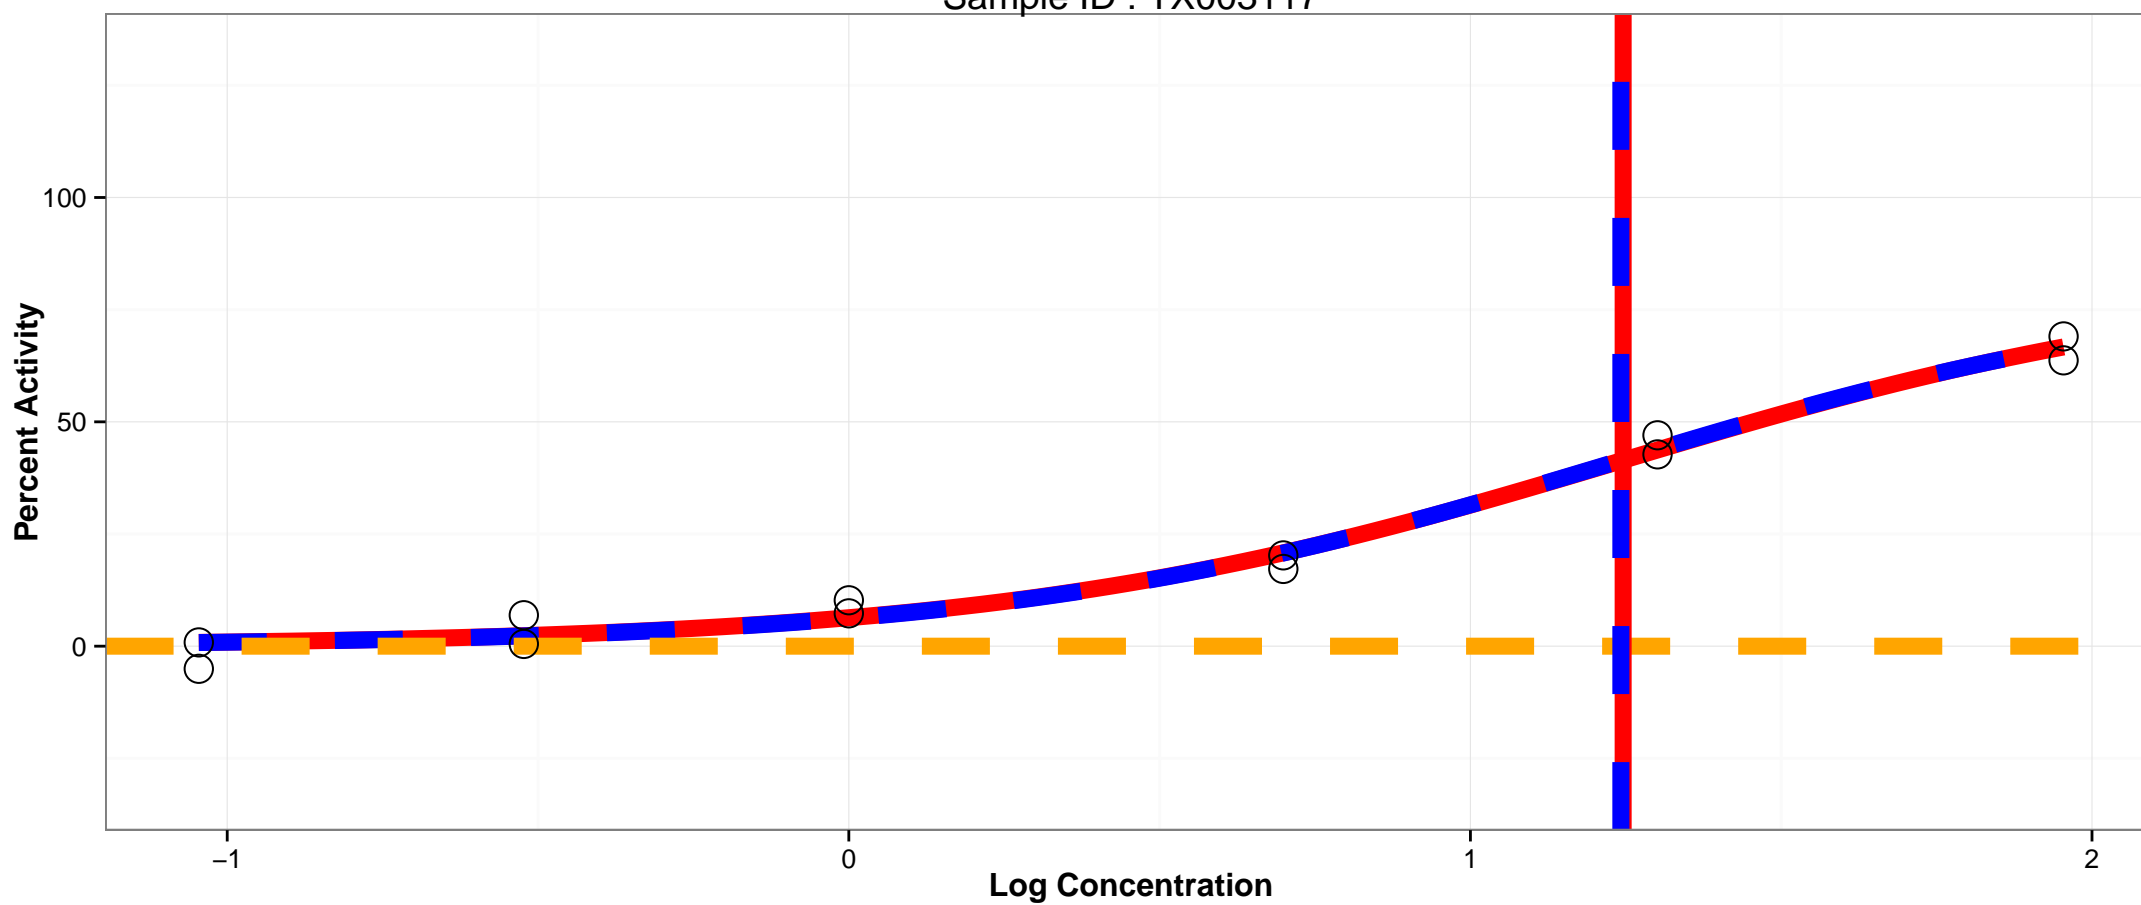

HILL MODEL

|     | tp   | ga   | gw    |
|-----|------|------|-------|
| val | 82.9 | 1.25 | 0.868 |
| sd  | 9.69 | 0.15 | 0.139 |

GAIN-LOSS MODEL

|     | tp   | ga   | gw    | la   | lw   |
|-----|------|------|-------|------|------|
| val | 82.9 | 1.24 | 0.876 | 3.88 | 1.15 |
| sd  | NA   | NA   | NA    | NA   | NA   |

|      | CNST   | HILL | GNLS  |
|------|--------|------|-------|
| AIC  | 120.62 | 70.6 | 74.59 |
| PROB | 0      | 0.88 | 0.12  |
| RMSE | 33.92  | 3.09 | 3.08  |

MAX\_MEAN : 66.4 MAX\_MED : 66.4 BMAD : 5.69  
COFF : 20 HIT-CALL : 1 FITC : 42 ACTP : 1  
FLAGS :

Assay ID 1509 (NHEERL\_HEK293T\_CellTiterGLO)  
Sample ID : TX003117

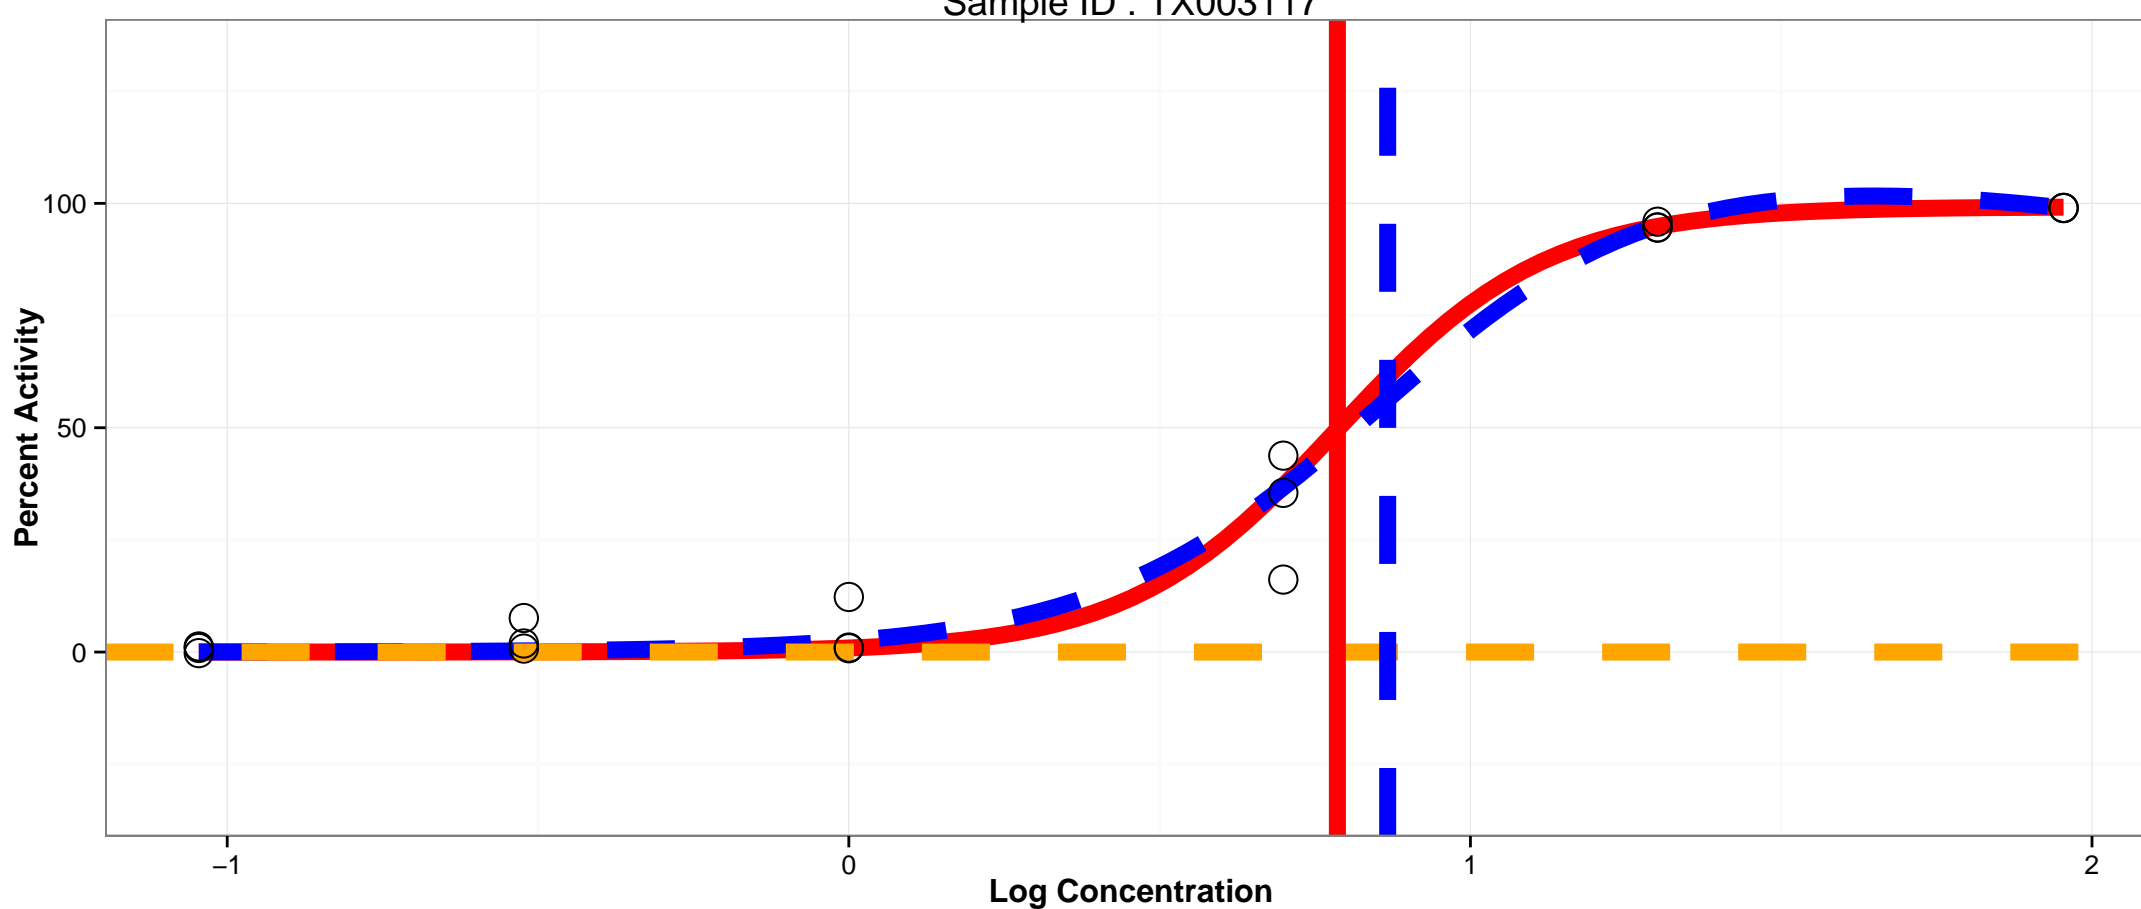

HILL MODEL

|     | tp   | ga     | gw   |
|-----|------|--------|------|
| val | 99.2 | 0.786  | 2.59 |
| sd  | 1.27 | 0.0212 | 0.31 |

GAIN-LOSS MODEL

|     | tp  | ga    | gw   | la   | lw    |
|-----|-----|-------|------|------|-------|
| val | 118 | 0.867 | 1.91 | 3.33 | 0.539 |
| sd  | NA  | NA    | NA   | NA   | NA    |

|      | CNST   | HILL   | GNLS   |
|------|--------|--------|--------|
| AIC  | 199.56 | 113.06 | 116.33 |
| PROB | 0      | 0.84   | 0.16   |
| RMSE | 57.81  | 6.14   | 5.94   |

MAX\_MEAN : 99 MAX\_MED : 99 BMAD : 5.54  
COFF : 20 HIT-CALL : 1 FITC : 41 ACTP : 1  
FLAGS :

Assay ID 1848 (NHEERL\_Quantilum\_inhib\_2\_dn)  
Sample ID : TX003117

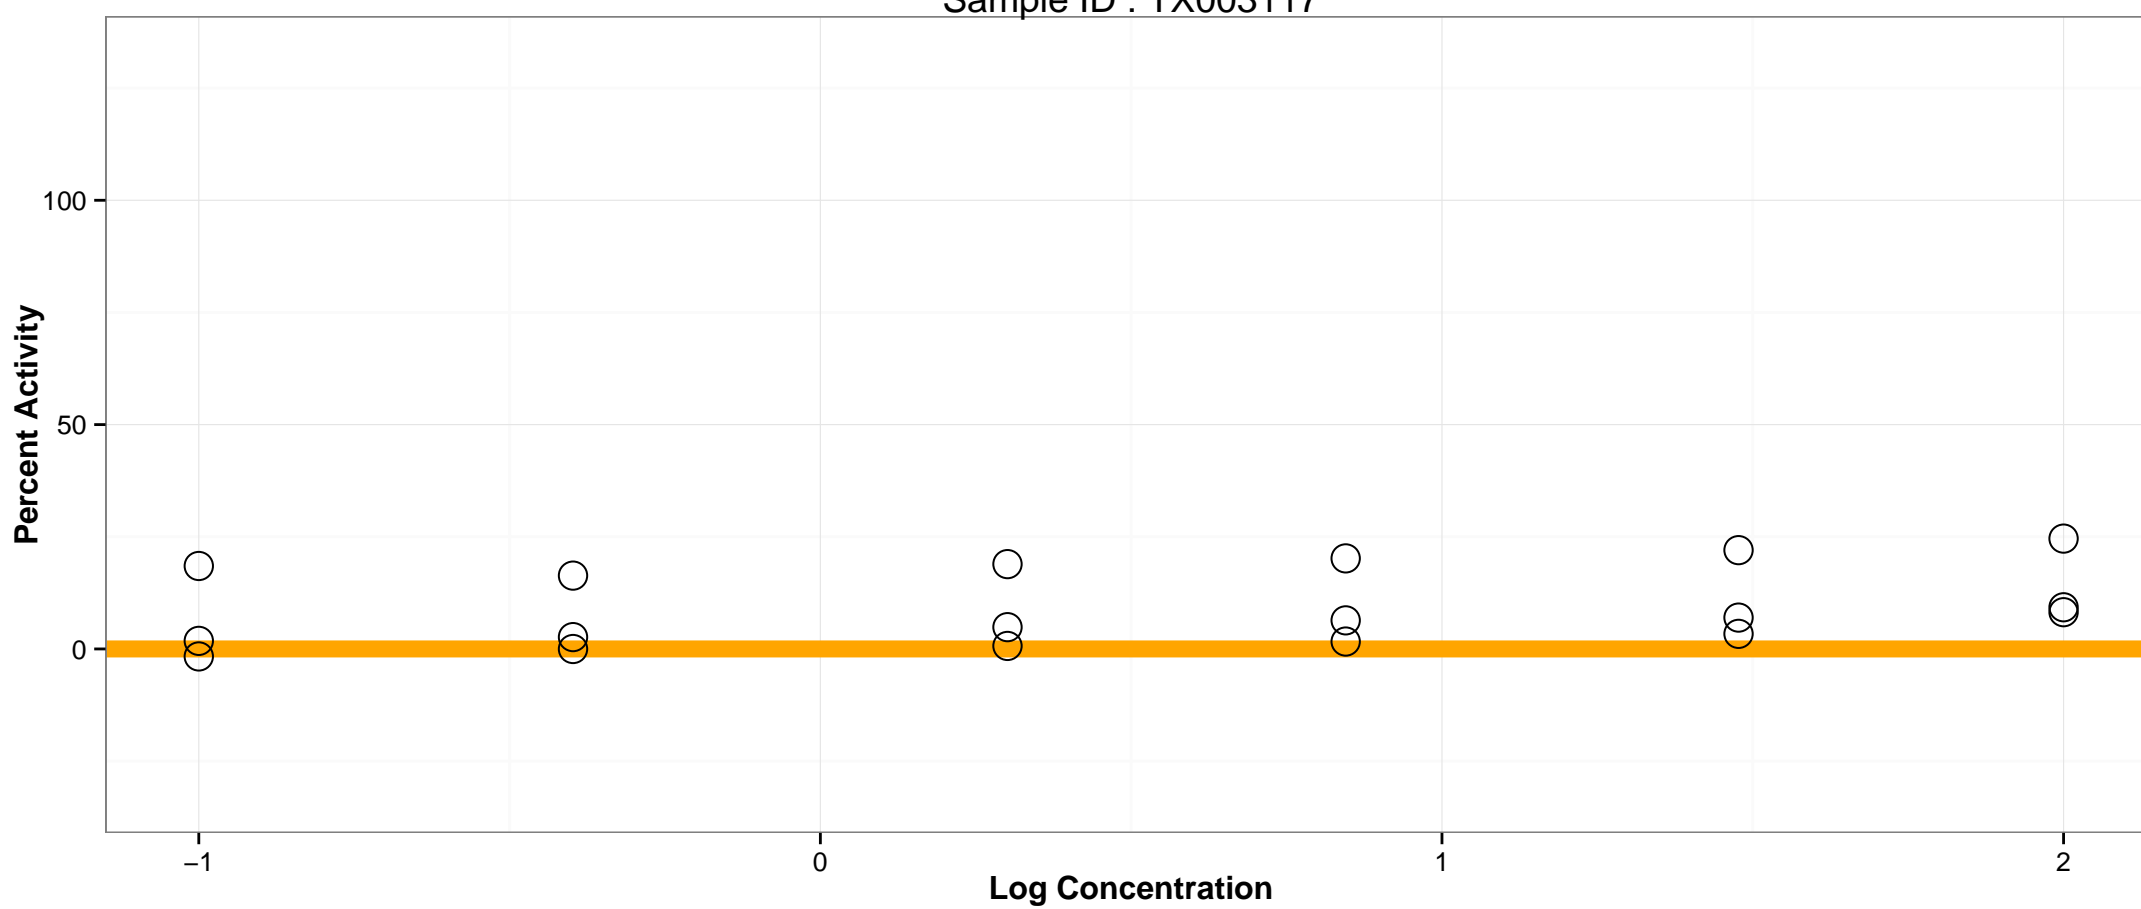

HILL MODEL

HILL MODEL: Not applicable

GAIN-LOSS MODEL

GNLS MODEL: Not applicable

|      | CNST   | HILL | GNLS |
|------|--------|------|------|
| AIC  | 144.59 | NA   | NA   |
| PROB | 1      | NA   | NA   |
| RMSE | 12.38  | NA   | NA   |

MAX\_MEAN : 14 MAX\_MED : 9.3 BMAD : 8.58  
COFF : 20 HIT-CALL : 0 FITC : 4 ACTP : 0  
FLAGS :

Assay ID 1508 (NHEERL\_TPO\_AUR\_dn)  
Sample ID : TX003197

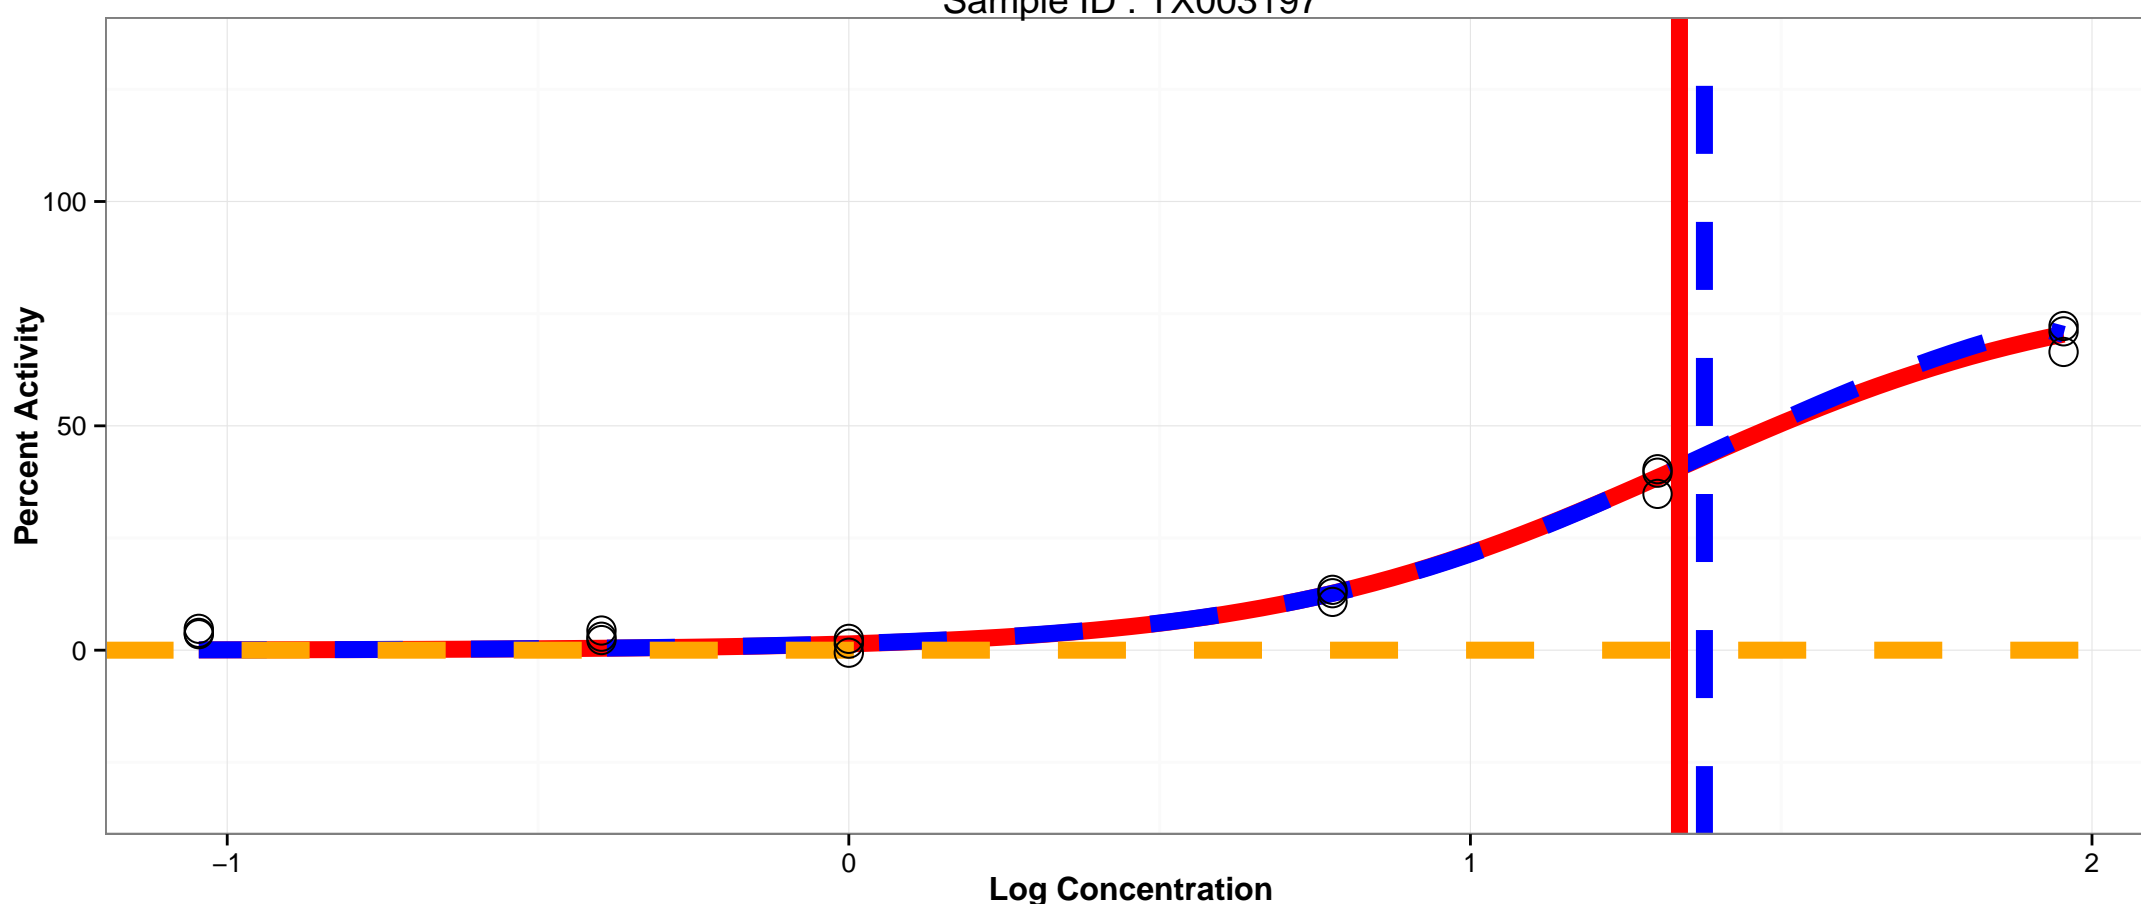

HILL MODEL

|     | tp   | ga     | gw    |
|-----|------|--------|-------|
| val | 81.3 | 1.34   | 1.31  |
| sd  | 5.07 | 0.0633 | 0.152 |

GAIN-LOSS MODEL

|     | tp   | ga   | gw   | la   | lw |
|-----|------|------|------|------|----|
| val | 86.7 | 1.38 | 1.28 | 2.03 | 18 |
| sd  | NA   | NA   | NA   | NA   | NA |

|      | CNST  | HILL | GNLS  |
|------|-------|------|-------|
| AIC  | 177.3 | 95.8 | 99.69 |
| PROB | 0     | 0.87 | 0.13  |
| RMSE | 33.04 | 2.6  | 2.59  |

MAX\_MEAN : 69.9 MAX\_MED : 71.1 BMAD : 5.69  
COFF : 20 HIT-CALL : 1 FITC : 42 ACTP : 1  
FLAGS :

Assay ID 1509 (NHEERL\_HEK293T\_CellTiterGLO)  
Sample ID : TX003197

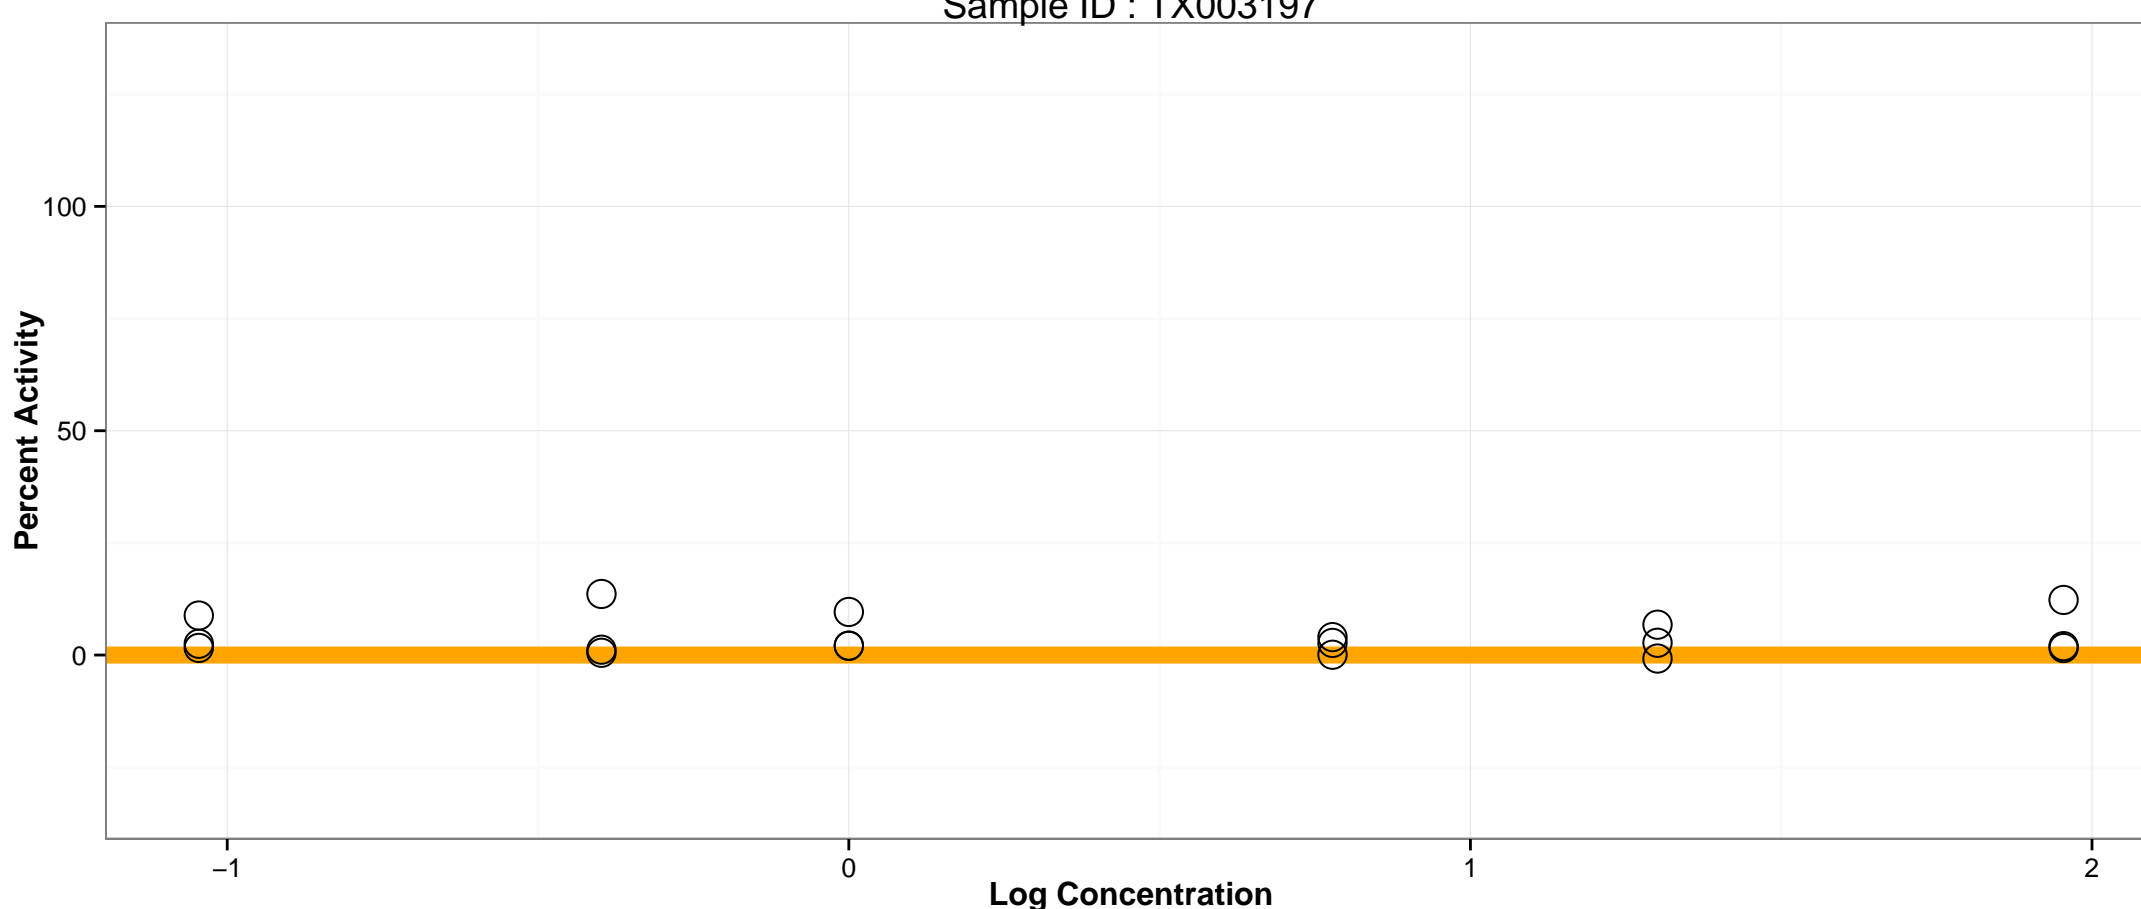

HILL MODEL

HILL MODEL: Not applicable

GAIN-LOSS MODEL

GNLS MODEL: Not applicable

|      | CNST   | HILL | GNLS |
|------|--------|------|------|
| AIC  | 115.43 | NA   | NA   |
| PROB | 1      | NA   | NA   |
| RMSE | 5.83   | NA   | NA   |

MAX\_MEAN : 5.29 MAX\_MED : 2.75 BMAD : 5.54  
COFF : 20 HIT-CALL : 0 FITC : 4 ACTP : 0  
FLAGS :

Assay ID 1848 (NHEERL\_Quantilum\_inhib\_2\_dn)  
Sample ID : TX003197

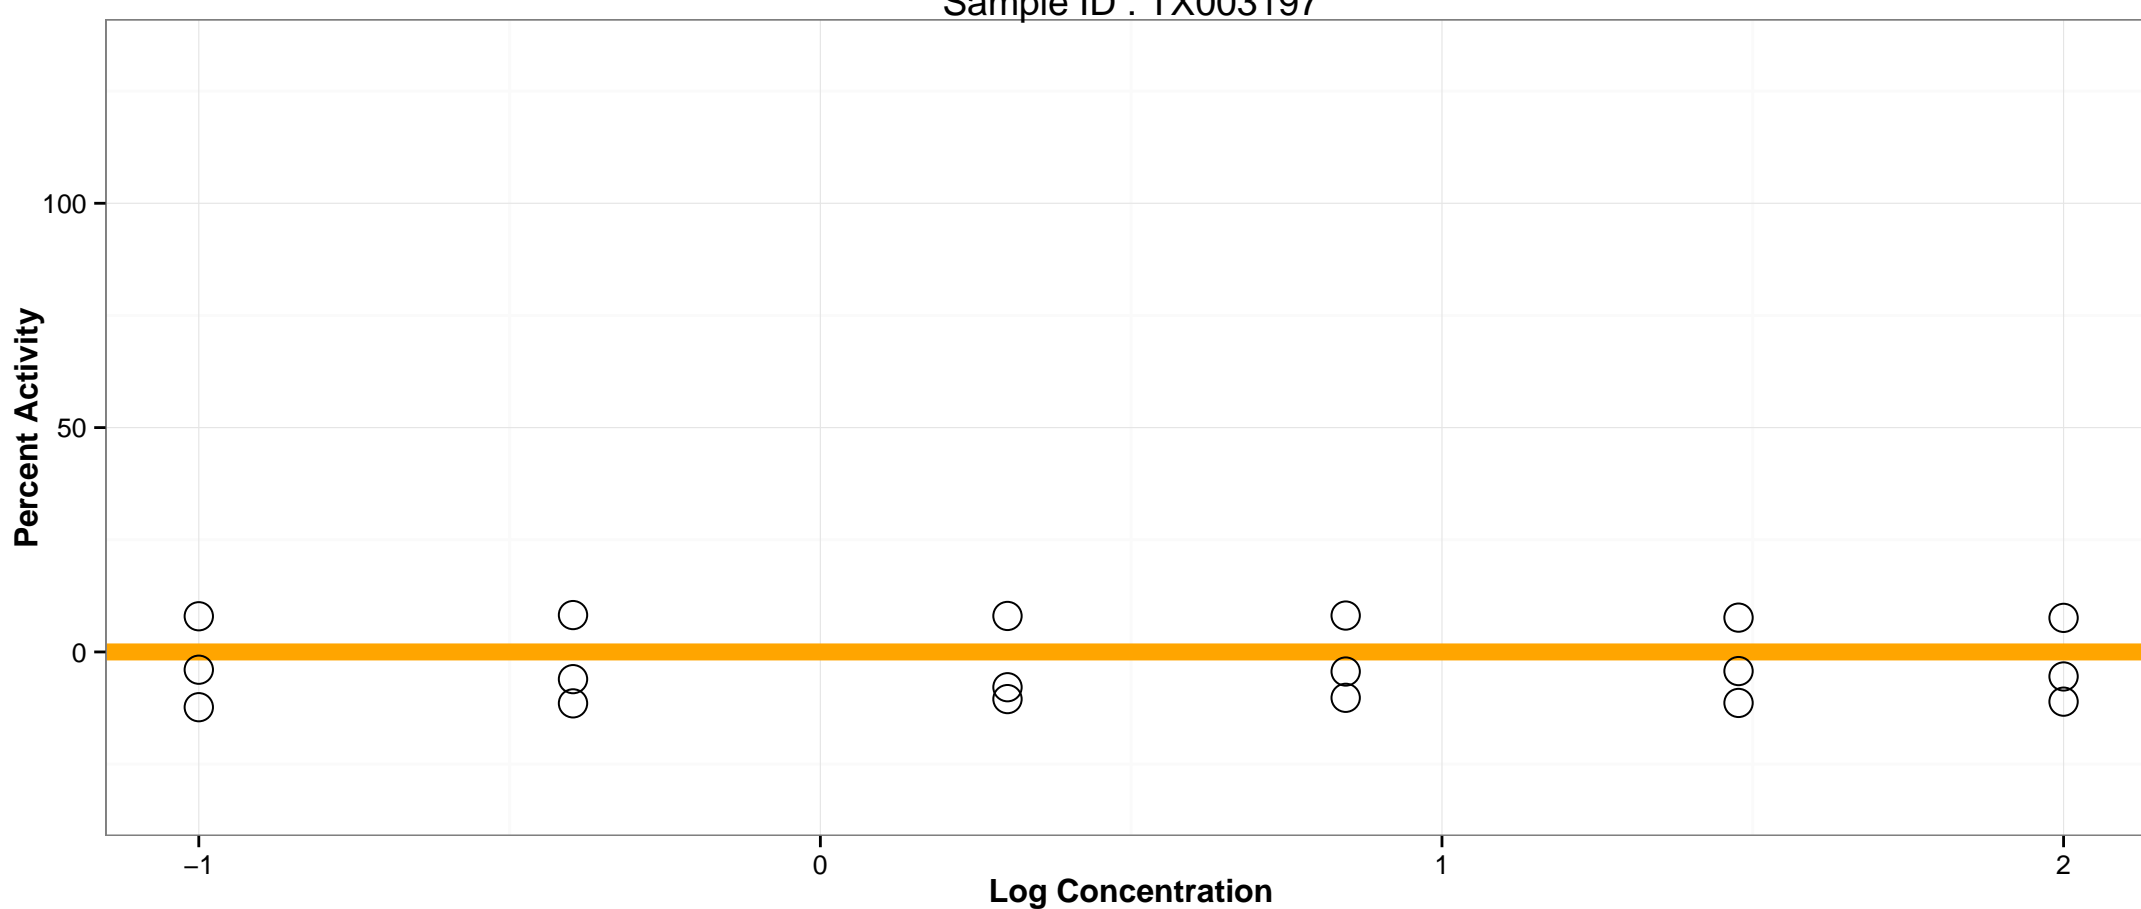

HILL MODEL

HILL MODEL: Not applicable

GAIN-LOSS MODEL

GNLS MODEL: Not applicable

|      | CNST   | HILL | GNLS |
|------|--------|------|------|
| AIC  | 133.93 | NA   | NA   |
| PROB | 1      | NA   | NA   |
| RMSE | 8.52   | NA   | NA   |

MAX\_MEAN : -2.15 MAX\_MED : -3.95 BMAD : 8.58  
COFF : 20 HIT-CALL : 0 FITC : 4 ACTP : 0  
FLAGS :

Assay ID 1508 (NHEERL\_TPO\_AUR\_dn)  
Sample ID : TX003211

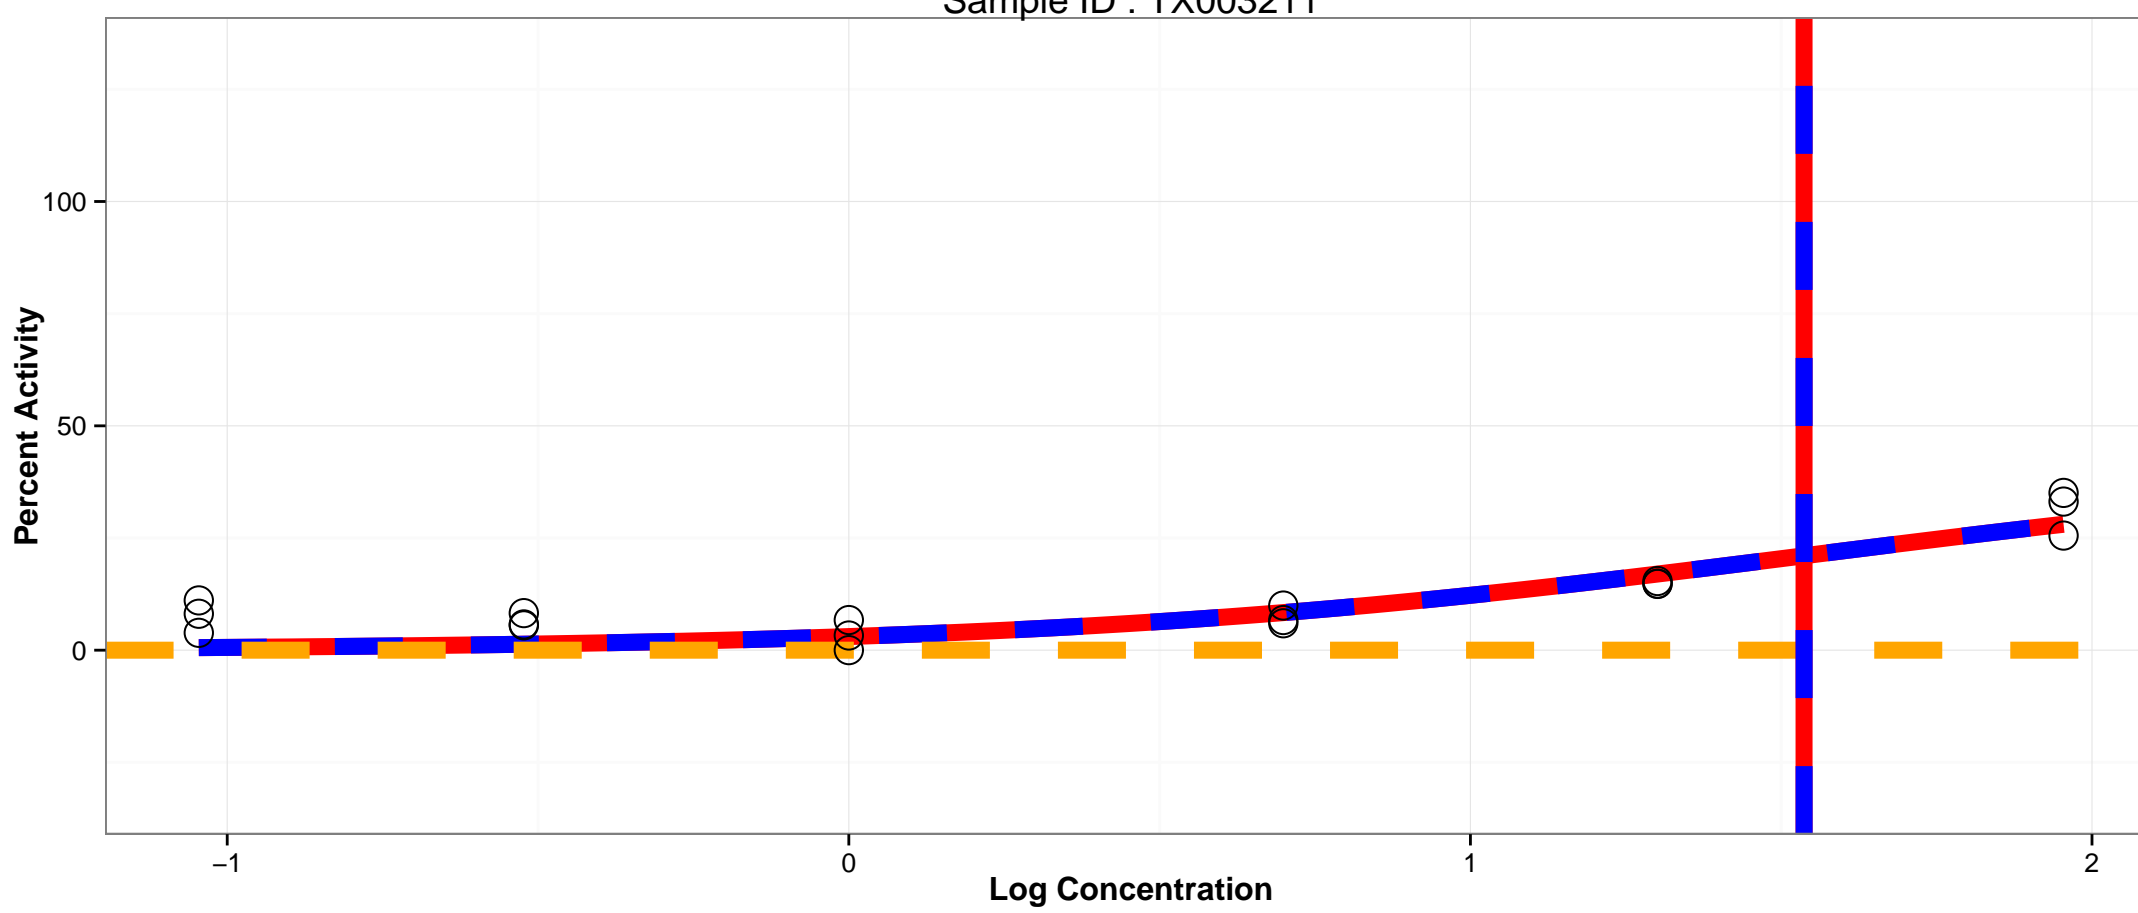

HILL MODEL

|     | tp   | ga    | gw    |
|-----|------|-------|-------|
| val | 42.1 | 1.54  | 0.722 |
| sd  | 11.6 | 0.351 | 0.251 |

GAIN-LOSS MODEL

|     | tp   | ga    | gw    | la    | lw     |
|-----|------|-------|-------|-------|--------|
| val | 42.1 | 1.54  | 0.722 | 3.34  | 8.7    |
| sd  | 11.6 | 0.351 | 0.251 | 48300 | 304000 |

|      | CNST   | HILL   | GNLS   |
|------|--------|--------|--------|
| AIC  | 151.24 | 115.94 | 119.94 |
| PROB | 0      | 0.88   | 0.12   |
| RMSE | 15.33  | 4.66   | 4.66   |

MAX\_MEAN : 31.2 MAX\_MED : 33.1 BMAD : 5.69  
COFF : 20 HIT-CALL : 1 FITC : 42 ACTP : 1  
FLAGS : 6

Assay ID 1509 (NHEERL\_HEK293T\_CellTiterGLO)  
Sample ID : TX003211

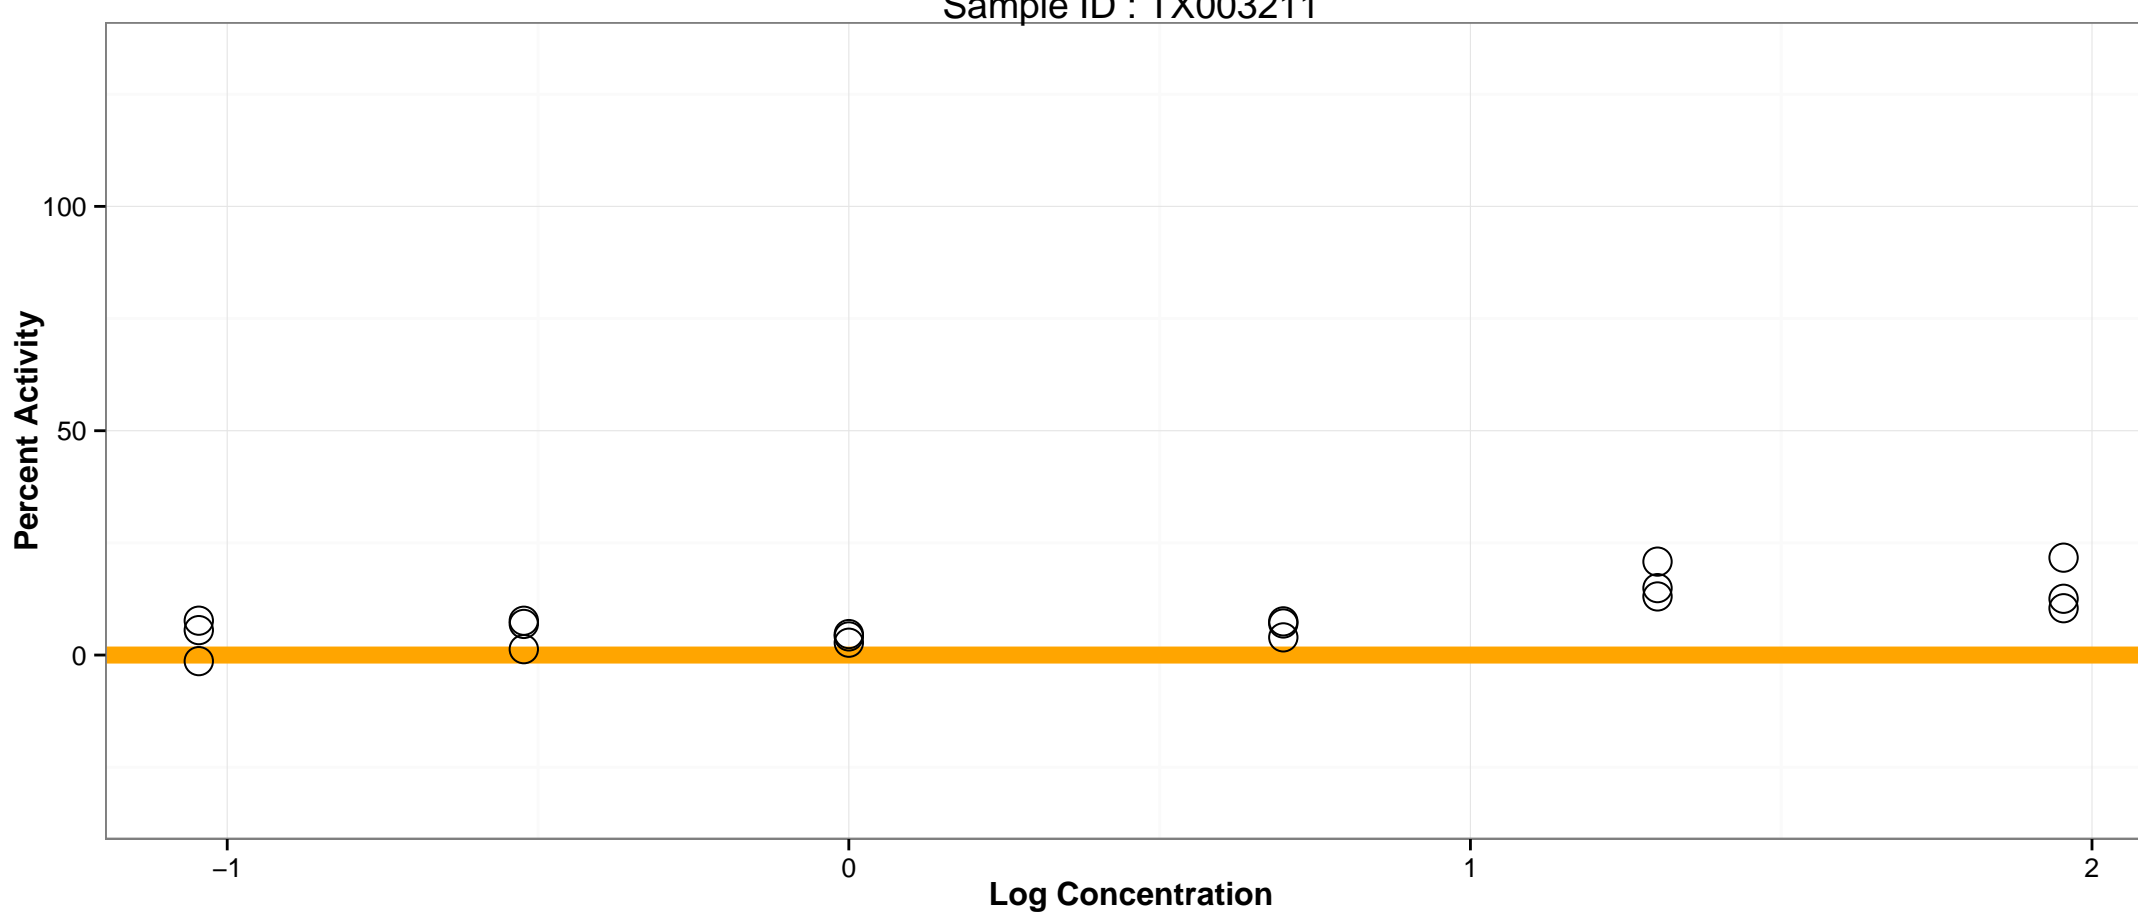

HILL MODEL

HILL MODEL: Not applicable

GAIN-LOSS MODEL

GNLS MODEL: Not applicable

|      | CNST   | HILL | GNLS |
|------|--------|------|------|
| AIC  | 138.65 | NA   | NA   |
| PROB | 1      | NA   | NA   |
| RMSE | 10.37  | NA   | NA   |

MAX\_MEAN : 16.3 MAX\_MED : 14.9 BMAD : 5.54  
COFF : 20 HIT-CALL : 0 FITC : 4 ACTP : 0  
FLAGS :

Assay ID 1848 (NHEERL\_Quantilum\_inhib\_2\_dn)  
Sample ID : TX003211

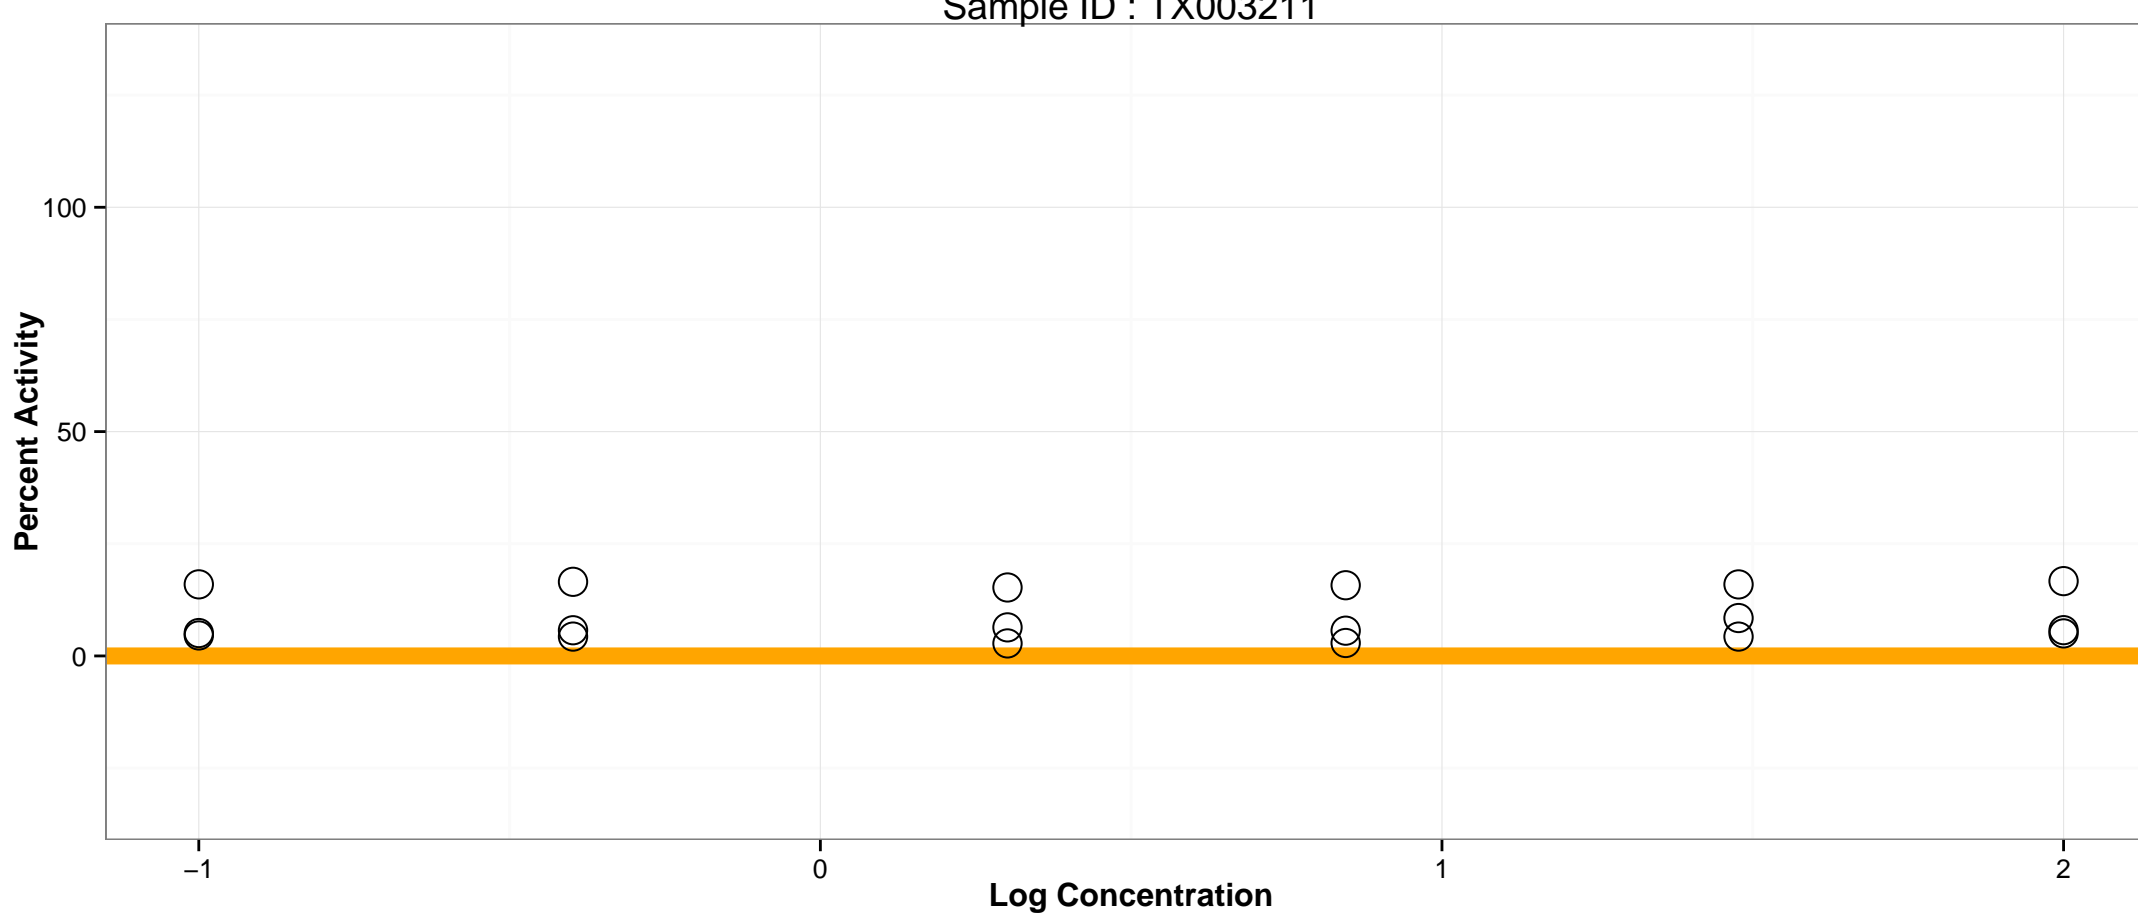

HILL MODEL

HILL MODEL: Not applicable

GAIN-LOSS MODEL

GNLS MODEL: Not applicable

|      | CNST   | HILL | GNLS |
|------|--------|------|------|
| AIC  | 138.85 | NA   | NA   |
| PROB | 1      | NA   | NA   |
| RMSE | 10.22  | NA   | NA   |

MAX\_MEAN : 9.58 MAX\_MED : 8.46 BMAD : 8.58  
COFF : 20 HIT-CALL : 0 FITC : 4 ACTP : 0  
FLAGS :

Chemical : Monuron  
CAS : 150-68-5

Assay ID 1508 (NHEERL\_TPO\_AUR\_dn)  
Sample ID : TX003222

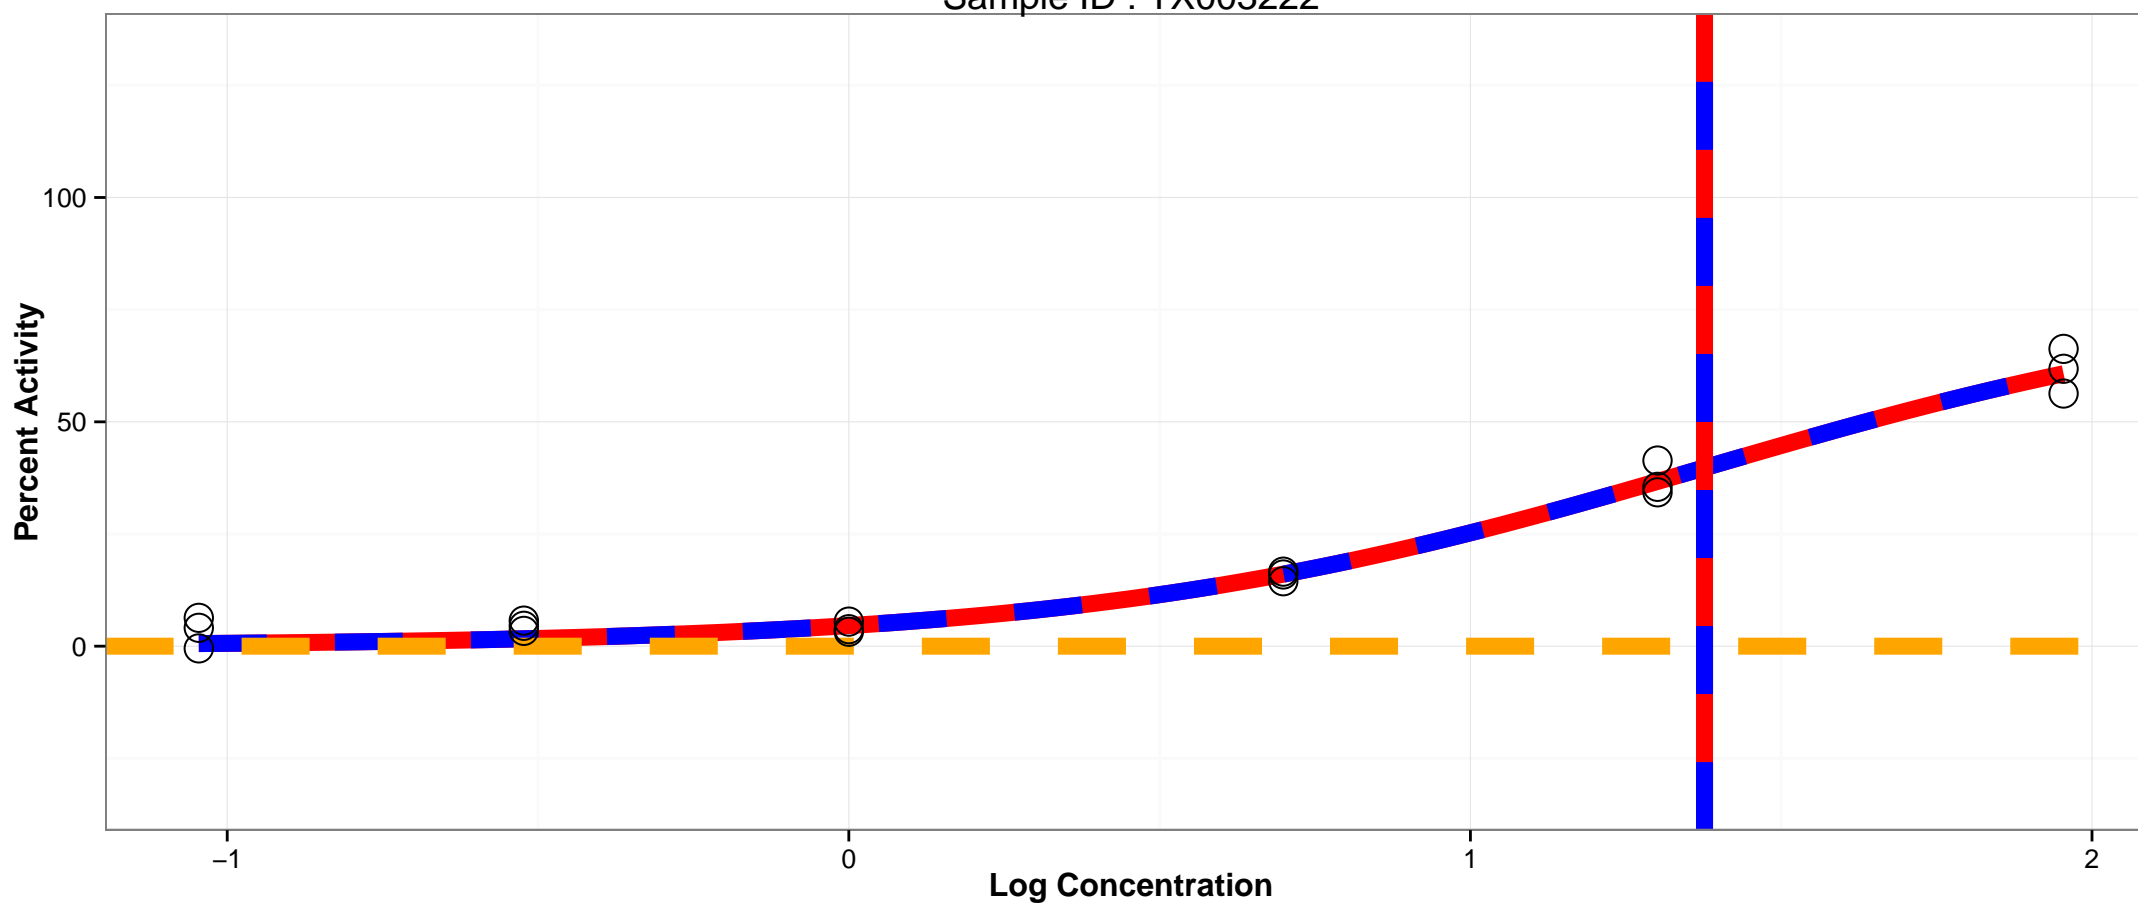

HILL MODEL

|     | tp   | ga    | gw    |
|-----|------|-------|-------|
| val | 79.5 | 1.38  | 0.882 |
| sd  | 9.67 | 0.148 | 0.112 |

GAIN-LOSS MODEL

|     | tp   | ga    | gw    | la   | lw    |
|-----|------|-------|-------|------|-------|
| val | 79.5 | 1.38  | 0.882 | 3.17 | 7.84  |
| sd  | 9.67 | 0.148 | 0.112 | 3030 | 19500 |

|      | CNST   | HILL   | GNLS   |
|------|--------|--------|--------|
| AIC  | 175.12 | 100.08 | 104.08 |
| PROB | 0      | 0.88   | 0.12   |
| RMSE | 30.24  | 2.99   | 2.99   |

MAX\_MEAN : 61.5 MAX\_MED : 61.8 BMAD : 5.69  
COFF : 20 HIT-CALL : 1 FITC : 42 ACTP : 1  
FLAGS :

Assay ID 1509 (NHEERL\_HEK293T\_CellTiterGLO)  
Sample ID : TX003222

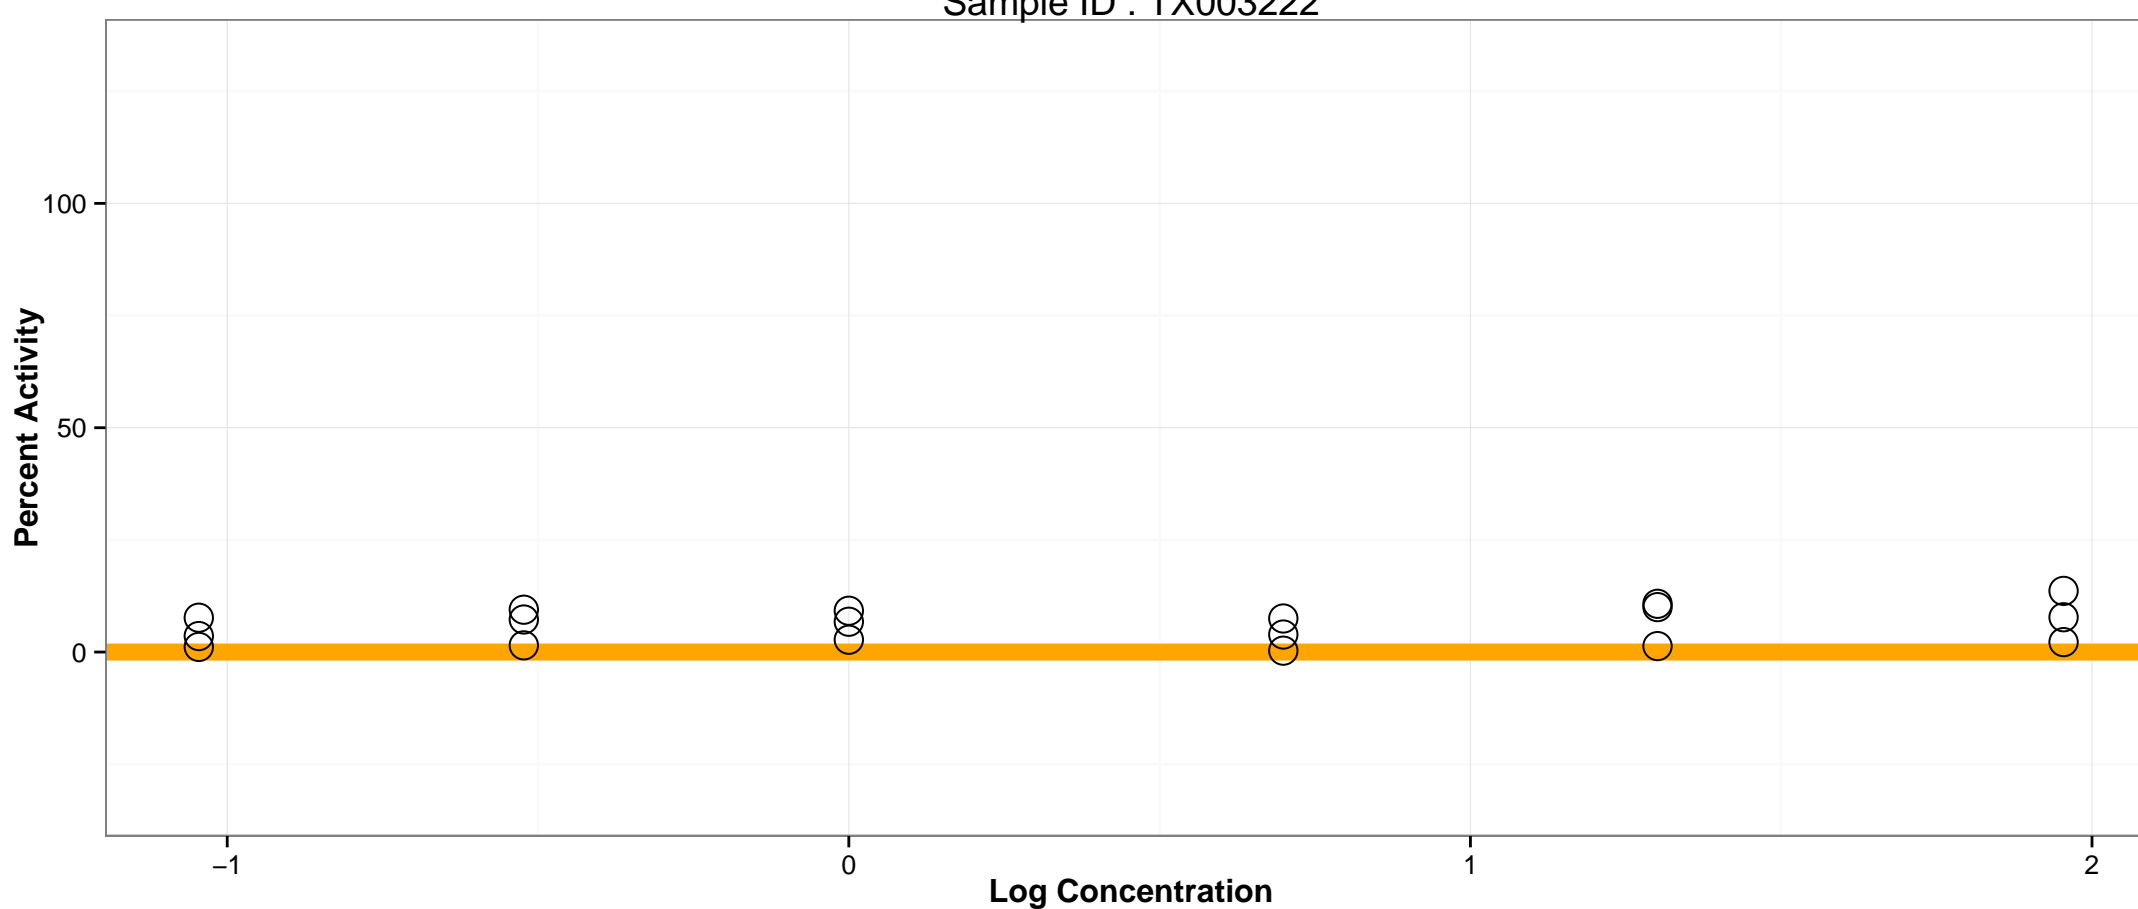

HILL MODEL

HILL MODEL: Not applicable

GAIN-LOSS MODEL

GNLS MODEL: Not applicable

|      | CNST   | HILL | GNLS |
|------|--------|------|------|
| AIC  | 125.84 | NA   | NA   |
| PROB | 1      | NA   | NA   |
| RMSE | 7.06   | NA   | NA   |

MAX\_MEAN : 7.88 MAX\_MED : 10 BMAD : 5.54  
COFF : 20 HIT-CALL : 0 FITC : 4 ACTP : 0  
FLAGS :

Assay ID 1848 (NHEERL\_Quantilum\_inhib\_2\_dn)  
Sample ID : TX003222

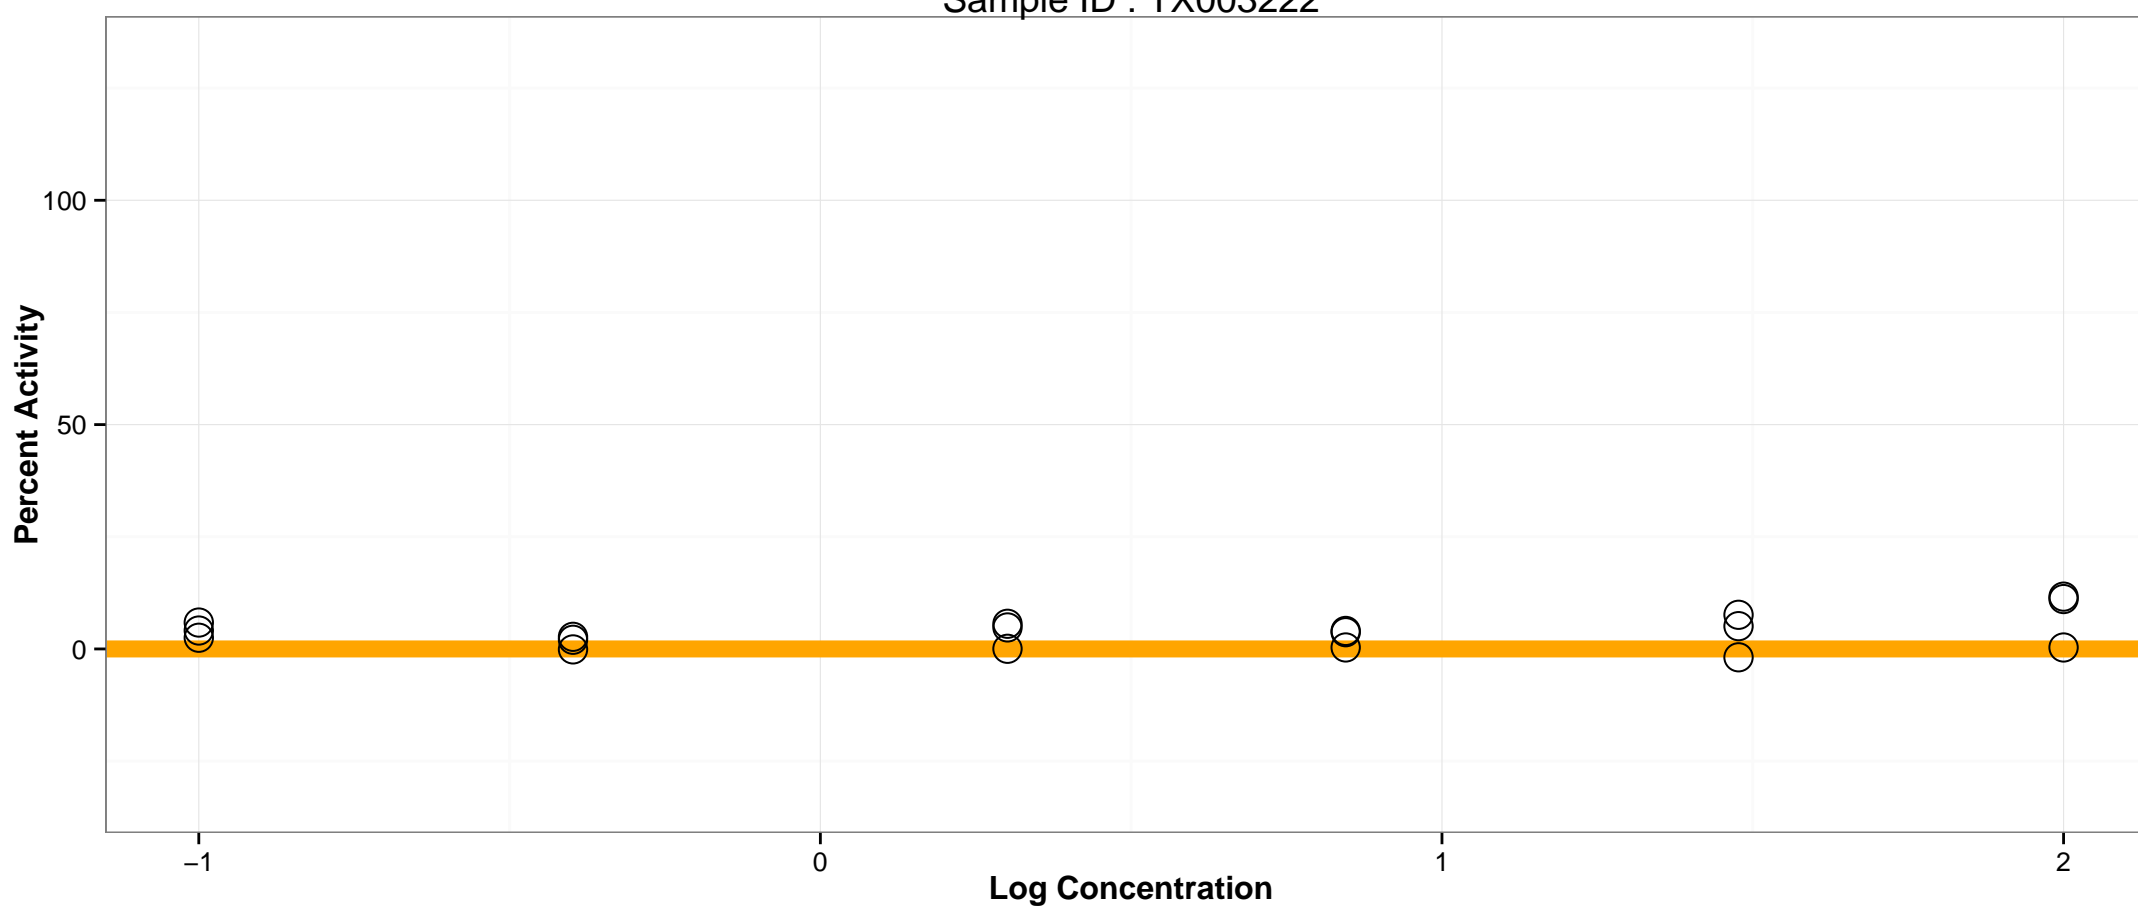

HILL MODEL

HILL MODEL: Not applicable

GAIN-LOSS MODEL

GNLS MODEL: Not applicable

|      | CNST   | HILL | GNLS |
|------|--------|------|------|
| AIC  | 113.72 | NA   | NA   |
| PROB | 1      | NA   | NA   |
| RMSE | 5.28   | NA   | NA   |

MAX\_MEAN : 7.71 MAX\_MED : 11.1 BMAD : 8.58  
COFF : 20 HIT-CALL : 0 FITC : 4 ACTP : 0  
FLAGS :

Chemical : 2,4,6-Tris(tert-butyl)phenol  
CAS : 732-26-3

Assay ID 1508 (NHEERL\_TPO\_AUR\_dn)  
Sample ID : TX003249

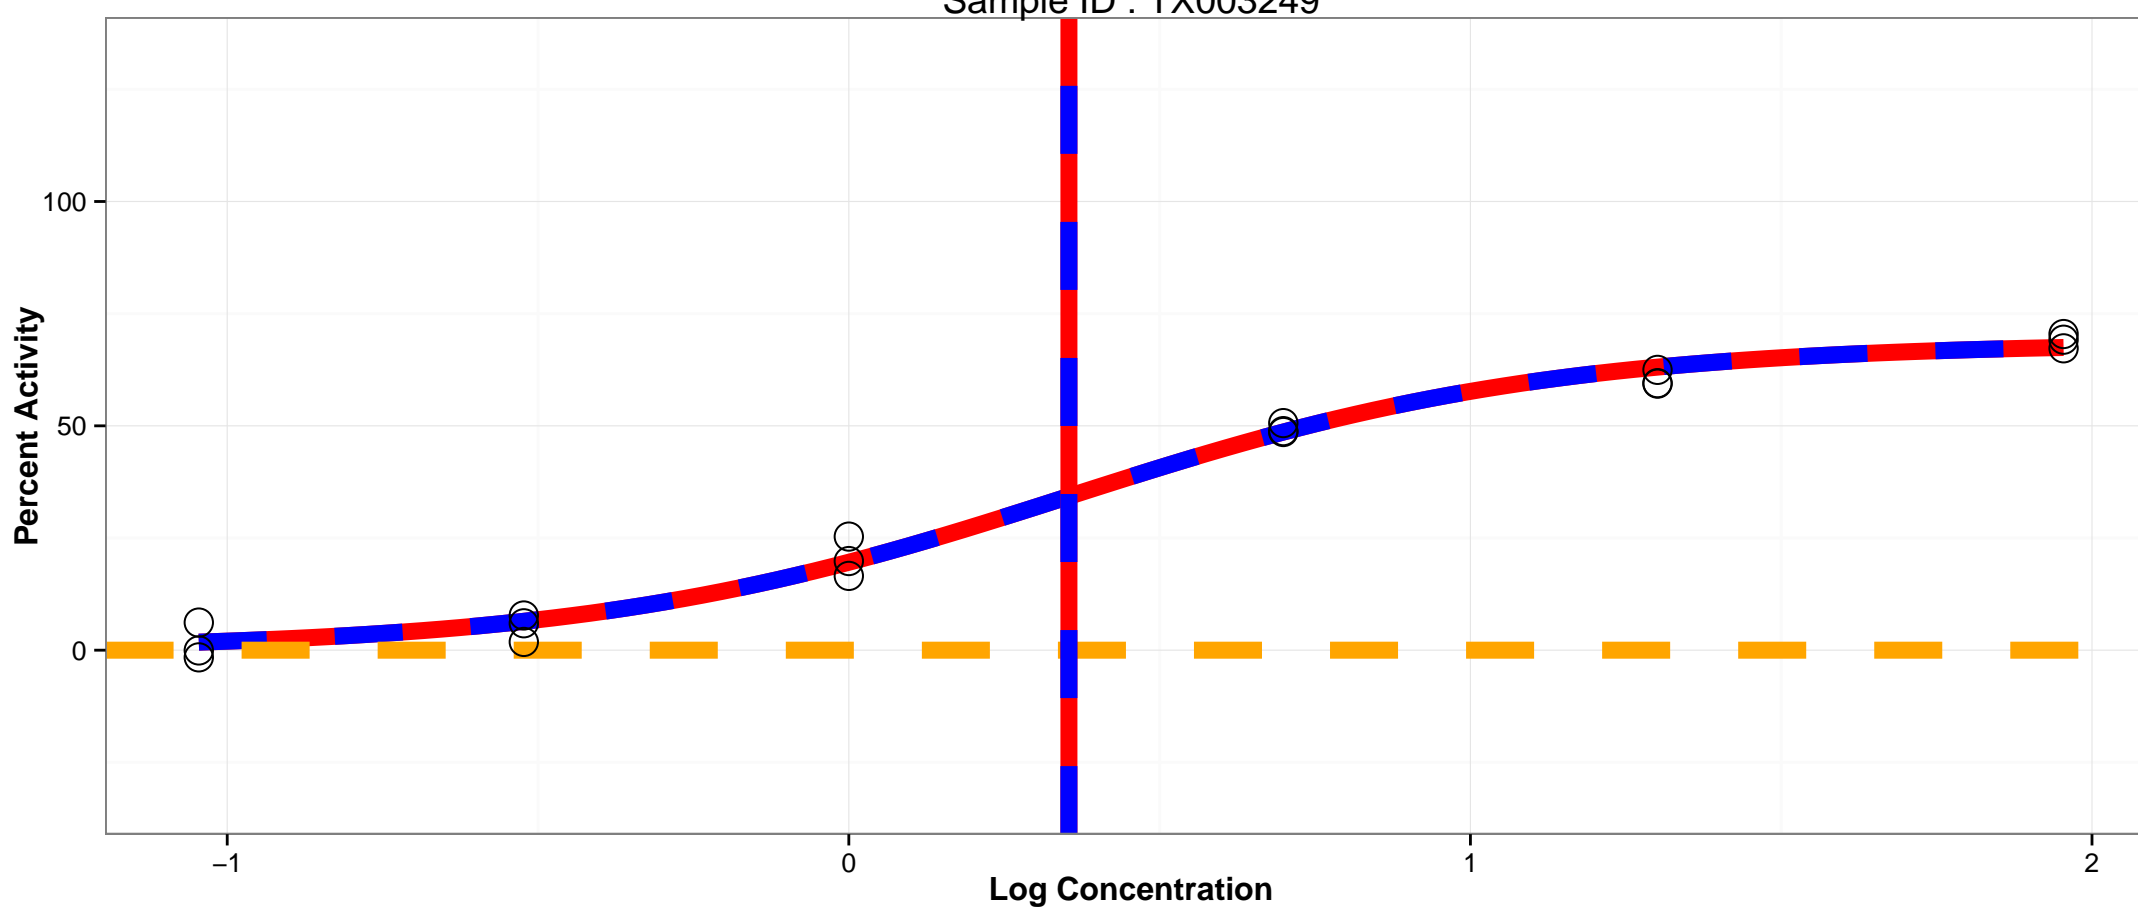

HILL MODEL

|     | tp   | ga     | gw     |
|-----|------|--------|--------|
| val | 68.5 | 0.354  | 1.12   |
| sd  | 1.69 | 0.0399 | 0.0884 |

GAIN-LOSS MODEL

|     | tp   | ga     | gw     | la   | lw   |
|-----|------|--------|--------|------|------|
| val | 68.5 | 0.354  | 1.12   | 3.16 | 7.64 |
| sd  | 1.69 | 0.0399 | 0.0884 | 996  | 6340 |

|      | CNST   | HILL  | GNLS   |
|------|--------|-------|--------|
| AIC  | 191.13 | 97.99 | 101.99 |
| PROB | 0      | 0.88  | 0.12   |
| RMSE | 43.48  | 2.81  | 2.81   |

MAX\_MEAN : 69 MAX\_MED : 69.2 BMAD : 5.69  
COFF : 20 HIT-CALL : 1 FITC : 41 ACTP : 1  
FLAGS :

Assay ID 1509 (NHEERL\_HEK293T\_CellTiterGLO)  
Sample ID : TX003249

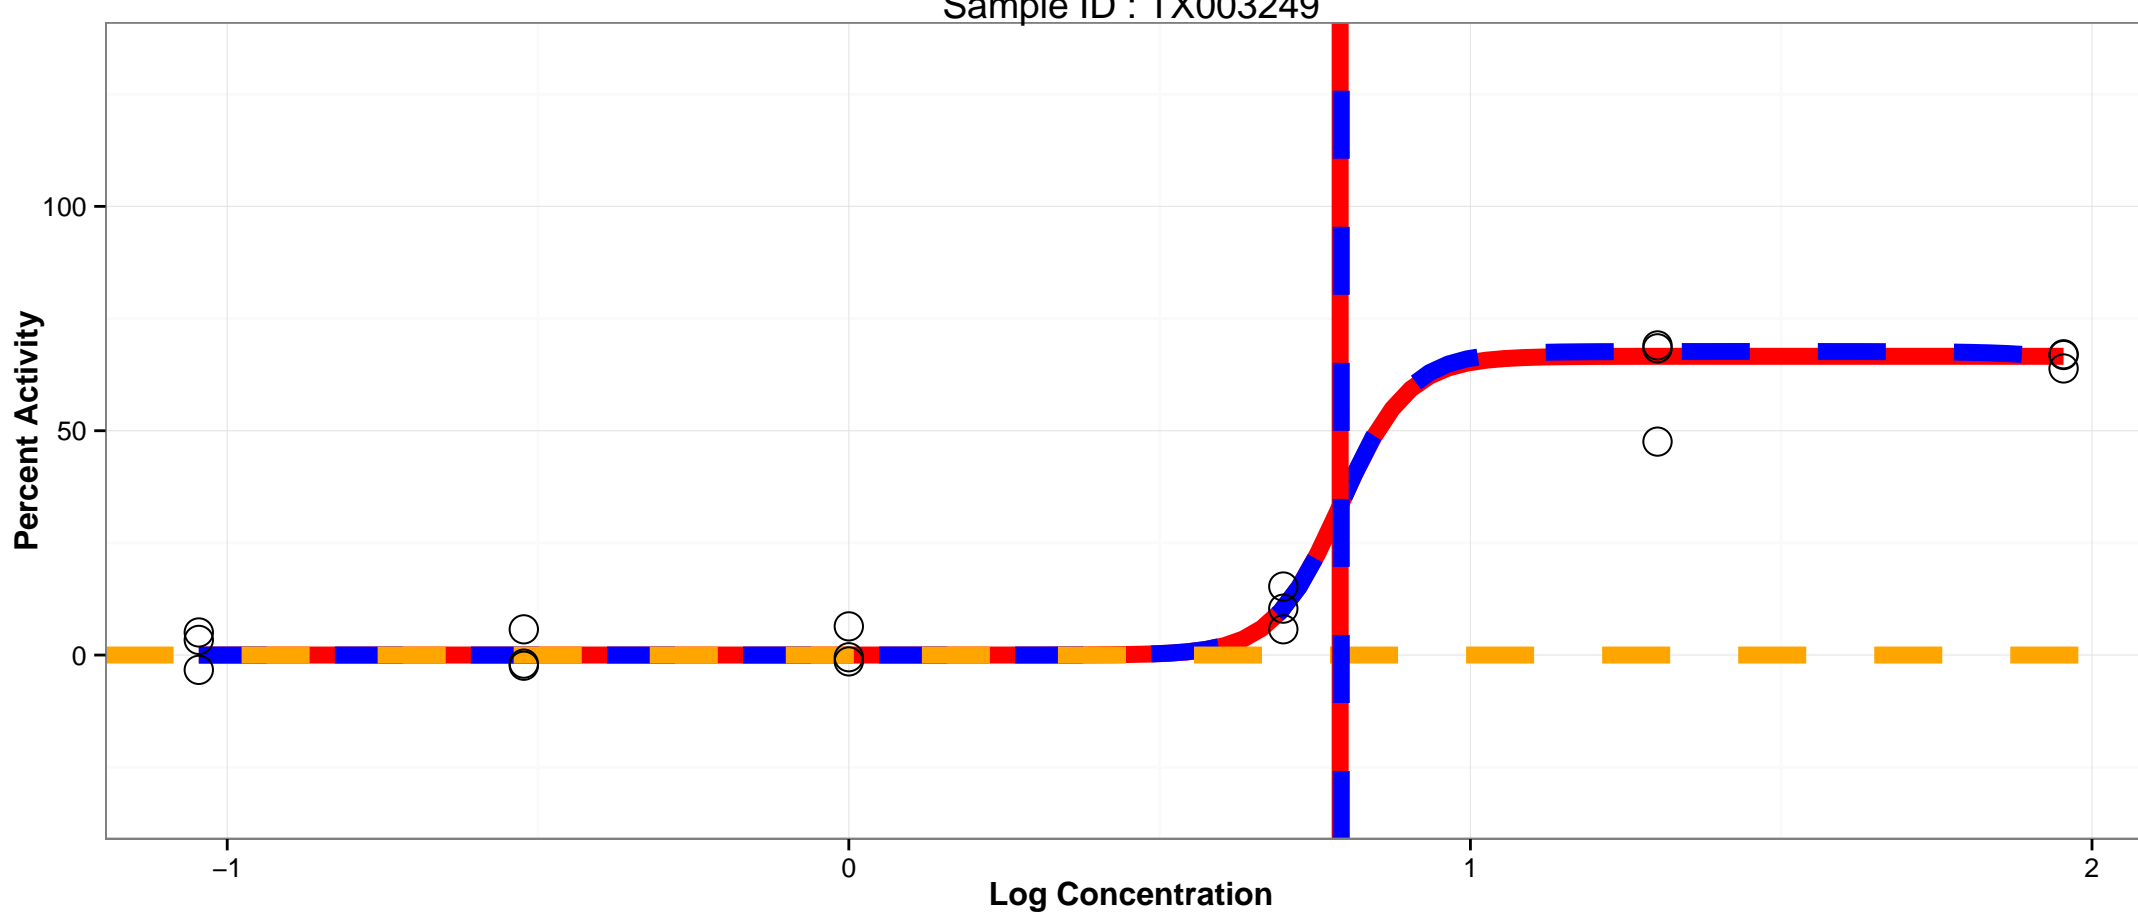

HILL MODEL

|     | tp   | ga    | gw   |
|-----|------|-------|------|
| val | 66.6 | 0.79  | 8    |
| sd  | 1.57 | 0.177 | 15.4 |

GAIN-LOSS MODEL

|     | tp   | ga    | gw   | la    | lw  |
|-----|------|-------|------|-------|-----|
| val | 67.6 | 0.792 | 7.94 | 2.2   | 6.4 |
| sd  | 2.35 | 0.195 | 16.6 | 0.709 | 18  |

|      | CNST  | HILL   | GNLS   |
|------|-------|--------|--------|
| AIC  | 183   | 115.34 | 119.06 |
| PROB | 0     | 0.87   | 0.13   |
| RMSE | 37.46 | 5.56   | 5.73   |

MAX\_MEAN : 65.9 MAX\_MED : 68.4 BMAD : 5.54  
COFF : 20 HIT-CALL : 1 FITC : 41 ACTP : 1  
FLAGS :

Assay ID 1848 (NHEERL\_Quantilum\_inhib\_2\_dn)  
Sample ID : TX003249

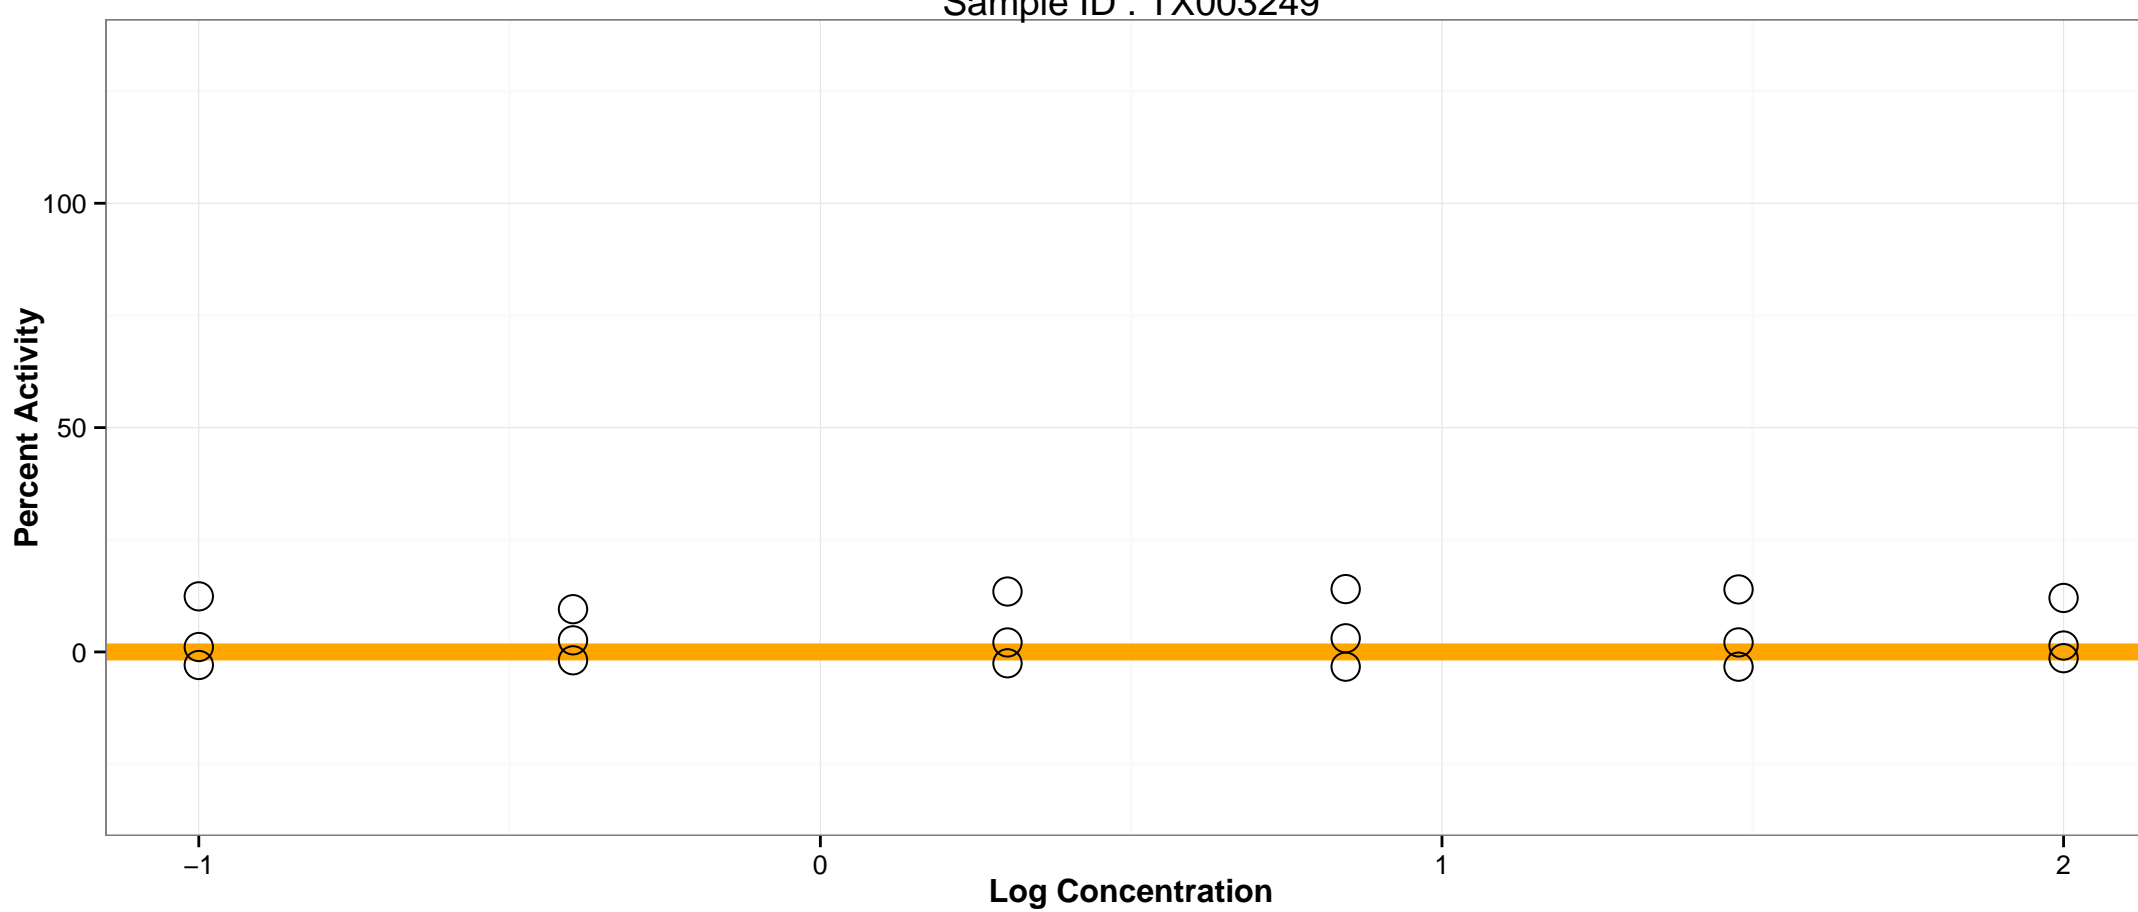

HILL MODEL

HILL MODEL: Not applicable

GAIN-LOSS MODEL

GNLS MODEL: Not applicable

|      | CNST   | HILL | GNLS |
|------|--------|------|------|
| AIC  | 126.41 | NA   | NA   |
| PROB | 1      | NA   | NA   |
| RMSE | 7.58   | NA   | NA   |

MAX\_MEAN : 4.6 MAX\_MED : 3.06 BMAD : 8.58  
COFF : 20 HIT-CALL : 0 FITC : 4 ACTP : 0  
FLAGS :



Chemical : 2-Methoxy-5-nitroaniline  
CAS : 99-59-2

Assay ID 1508 (NHEERL\_TPO\_AUR\_dn)  
Sample ID : TX003251

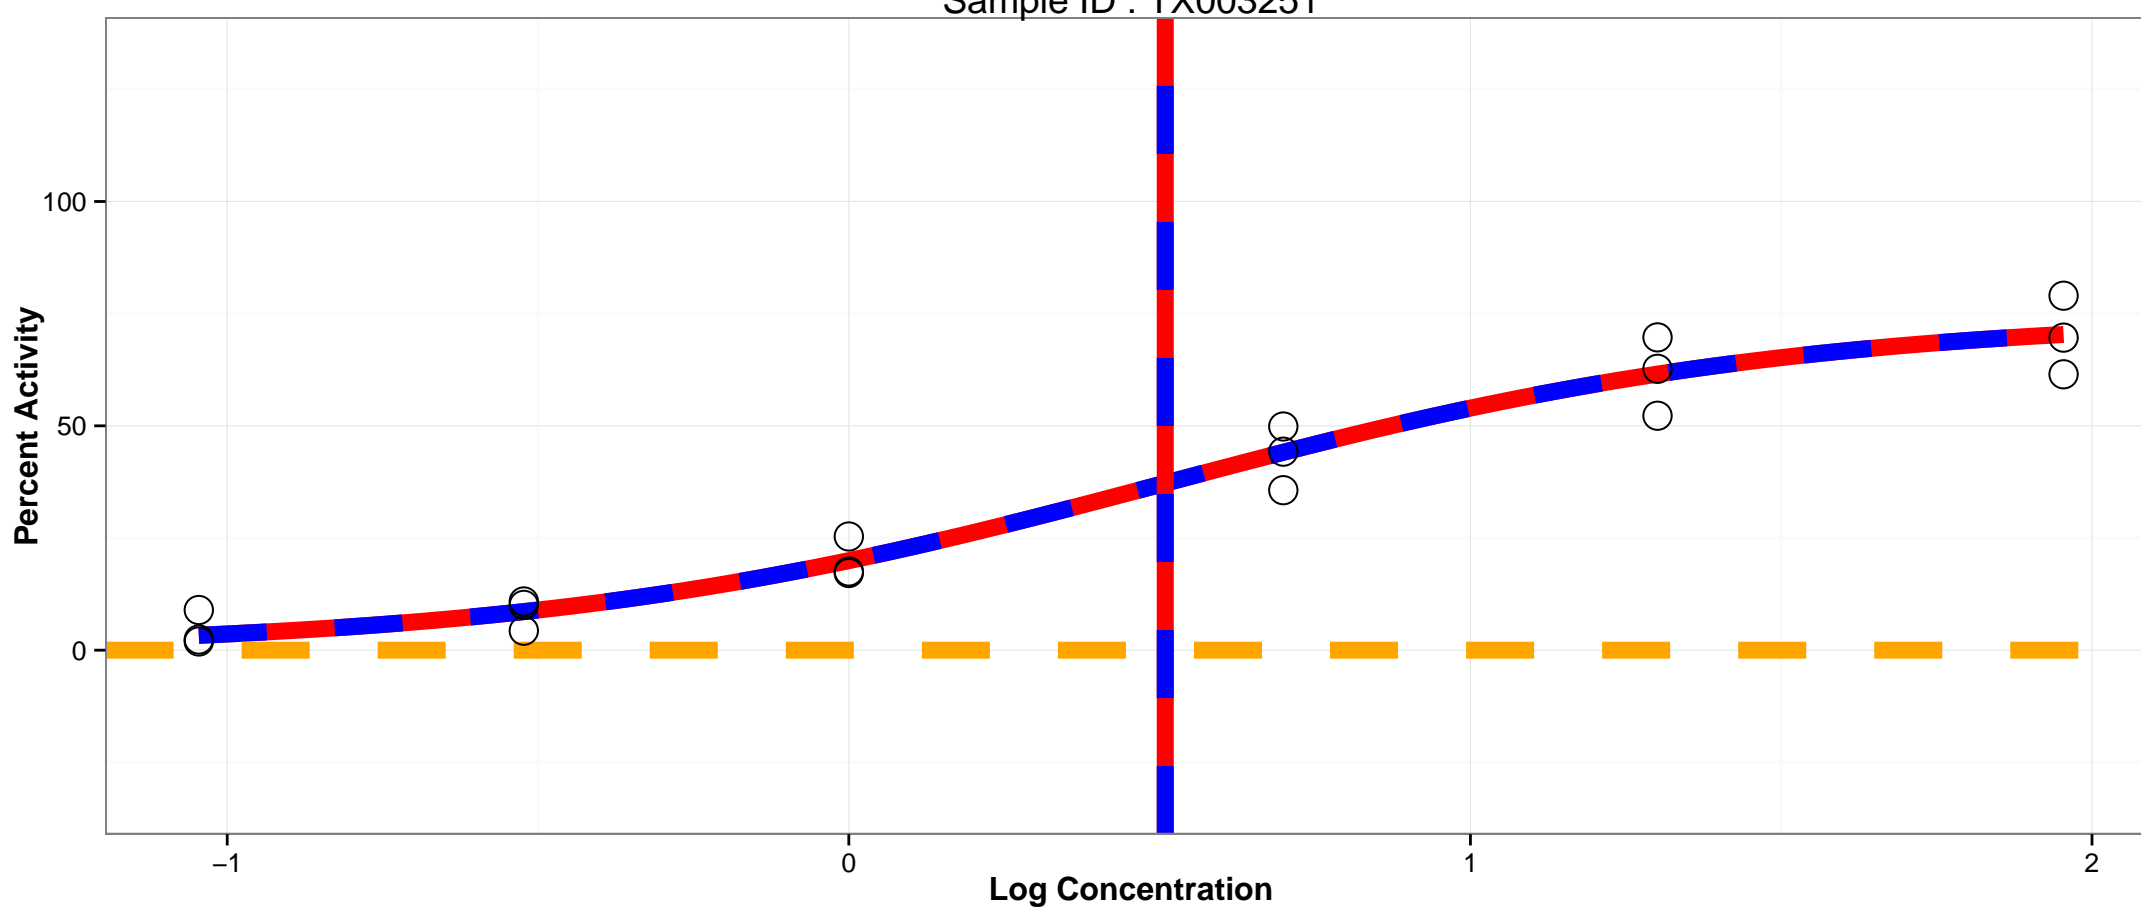

HILL MODEL

|     | tp   | ga    | gw    |
|-----|------|-------|-------|
| val | 74.4 | 0.509 | 0.857 |
| sd  | 5.78 | 0.129 | 0.133 |

GAIN-LOSS MODEL

|     | tp   | ga    | gw    | la   | lw   |
|-----|------|-------|-------|------|------|
| val | 74.4 | 0.509 | 0.857 | 3.23 | 8.02 |
| sd  | NA   | NA    | NA    | NA   | NA   |

|      | CNST   | HILL   | GNLS   |
|------|--------|--------|--------|
| AIC  | 190.65 | 121.34 | 125.34 |
| PROB | 0      | 0.88   | 0.12   |
| RMSE | 43.27  | 5.35   | 5.35   |

MAX\_MEAN : 70.1 MAX\_MED : 69.7 BMAD : 5.69  
COFF : 20 HIT-CALL : 1 FITC : 42 ACTP : 1  
FLAGS :

Assay ID 1509 (NHEERL\_HEK293T\_CellTiterGLO)  
Sample ID : TX003251

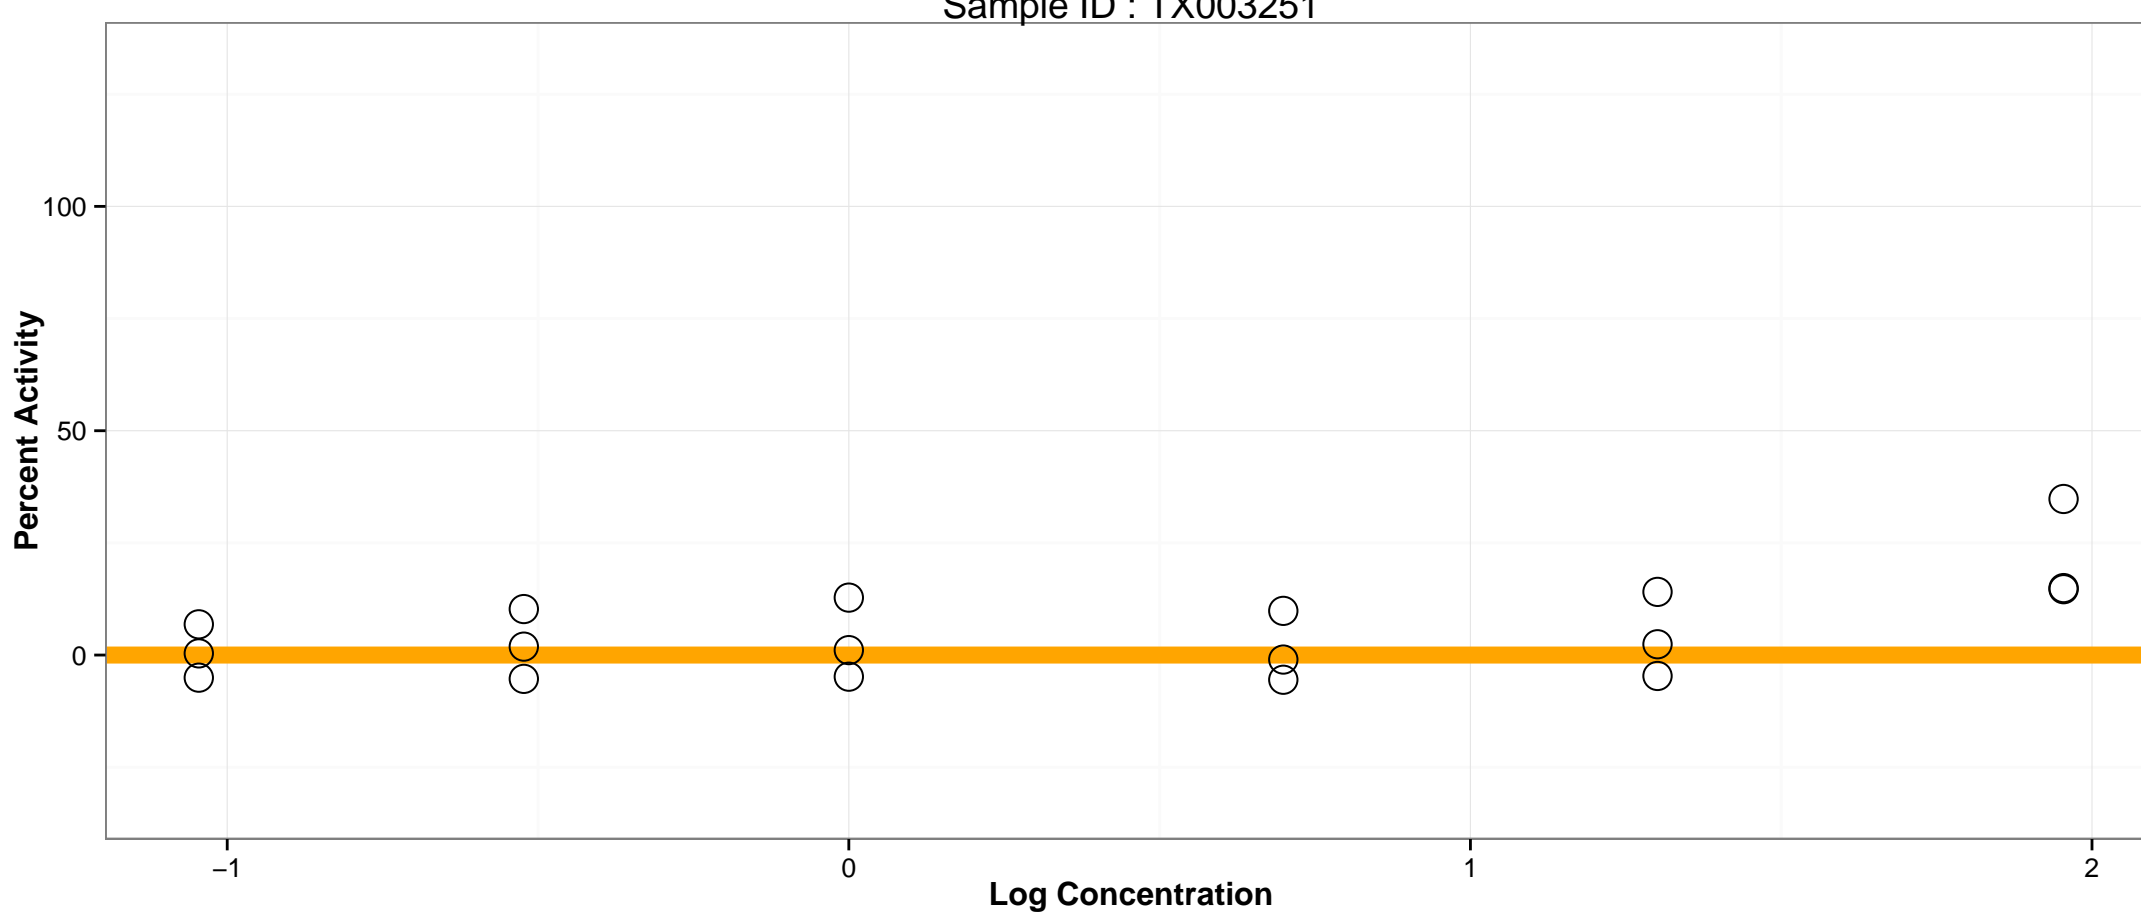

HILL MODEL

HILL MODEL: Not applicable

GAIN-LOSS MODEL

GNLS MODEL: Not applicable

|      | CNST   | HILL | GNLS |
|------|--------|------|------|
| AIC  | 139.19 | NA   | NA   |
| PROB | 1      | NA   | NA   |
| RMSE | 11.55  | NA   | NA   |

MAX\_MEAN : 21.5 MAX\_MED : 14.9 BMAD : 5.54  
COFF : 20 HIT-CALL : 0 FITC : 4 ACTP : 0  
FLAGS :

Assay ID 1848 (NHEERL\_Quantilum\_inhib\_2\_dn)  
Sample ID : TX003251

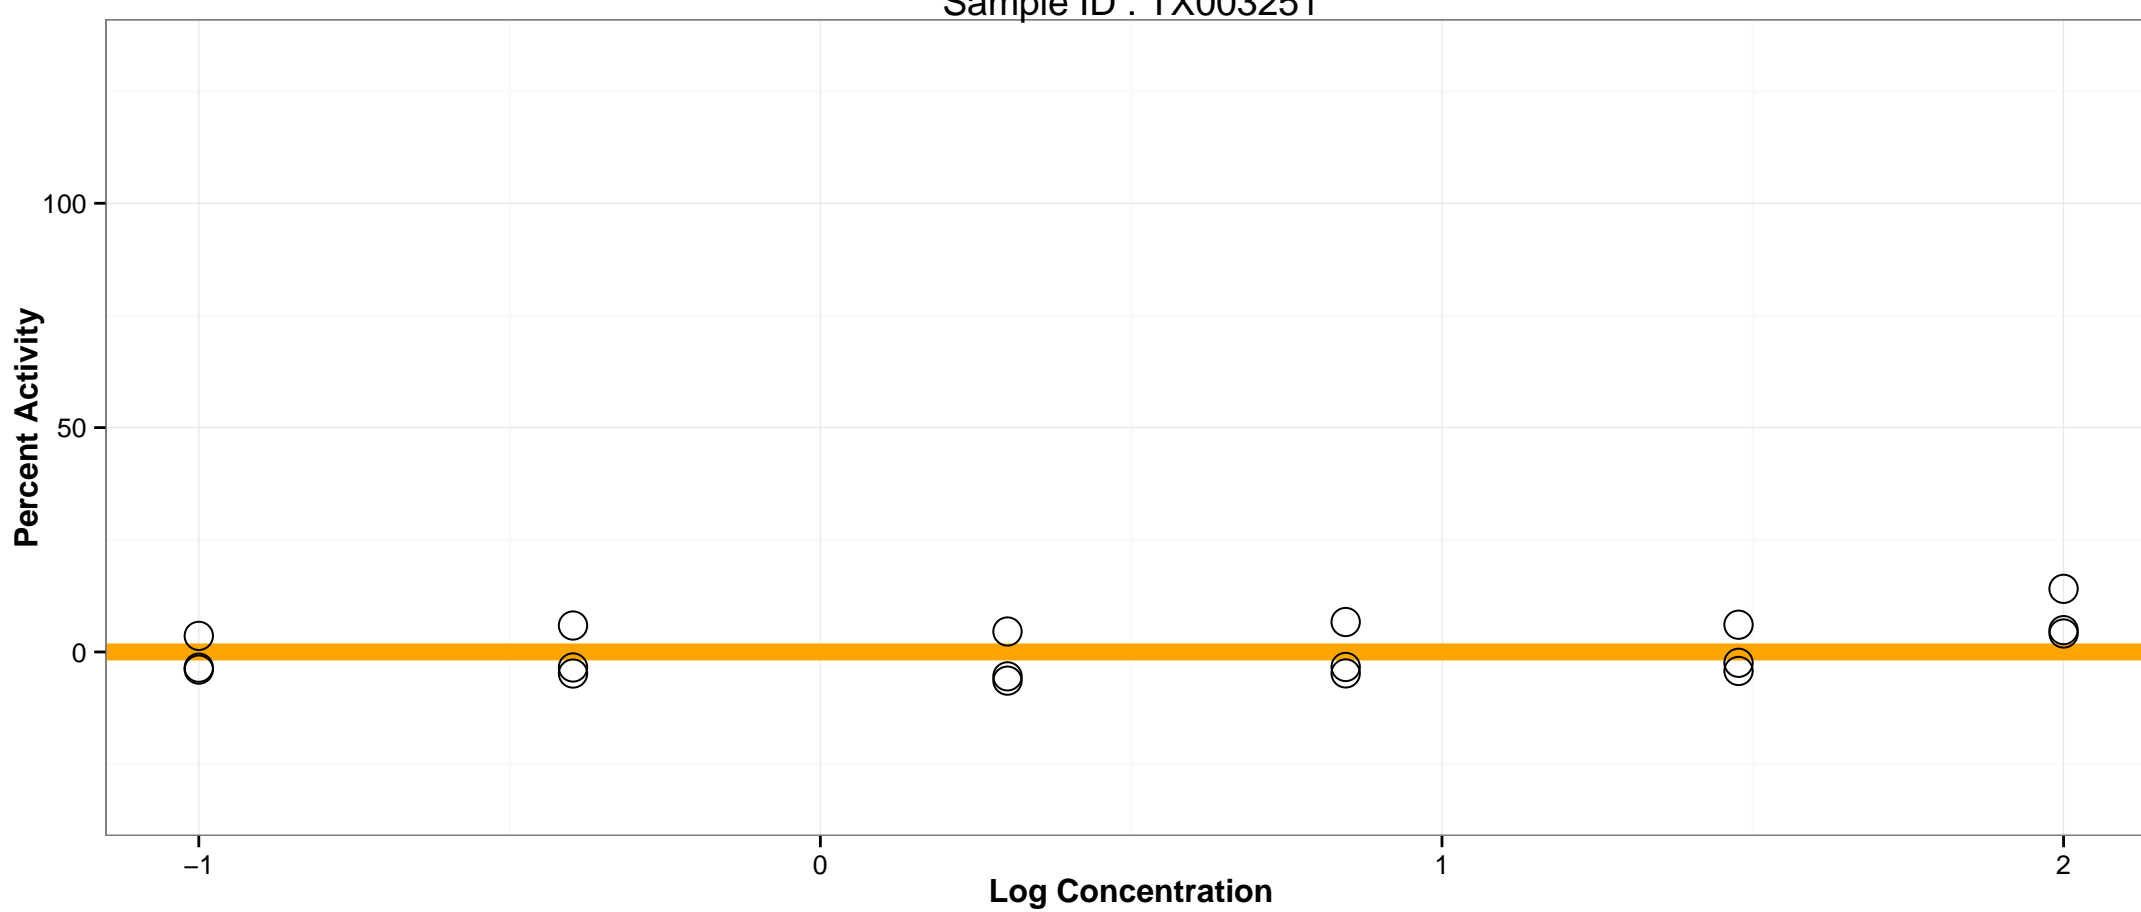

HILL MODEL

HILL MODEL: Not applicable

GAIN-LOSS MODEL

GNLS MODEL: Not applicable

|      | CNST   | HILL | GNLS |
|------|--------|------|------|
| AIC  | 117.58 | NA   | NA   |
| PROB | 1      | NA   | NA   |
| RMSE | 5.67   | NA   | NA   |

MAX\_MEAN : 7.69 MAX\_MED : 4.87 BMAD : 8.58  
COFF : 20 HIT-CALL : 0 FITC : 4 ACTP : 0  
FLAGS :

Chemical : 4,4'-Methylenebis(N,N-dimethylaniline)

CAS : 101-61-1

Assay ID 1508 (NHEERL\_TPO\_AUR\_dn)  
Sample ID : TX003345

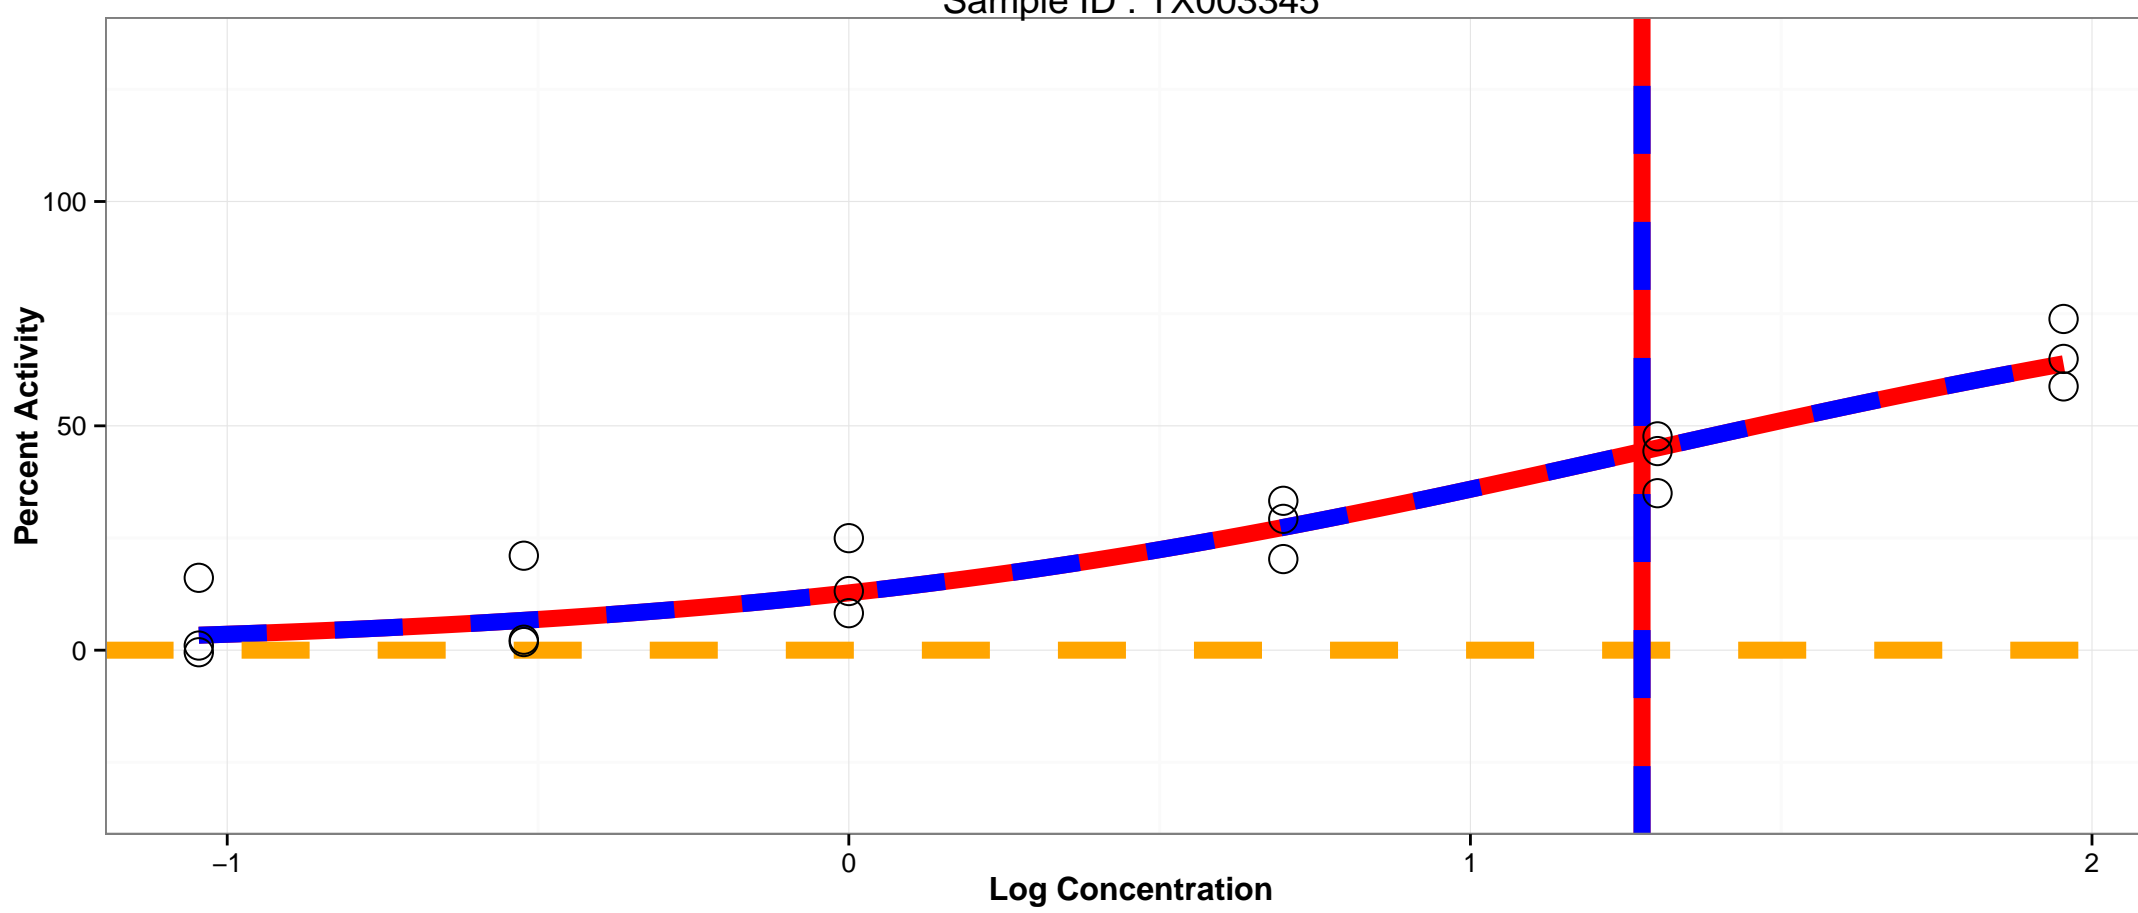

HILL MODEL

|     | tp   | ga    | gw    |
|-----|------|-------|-------|
| val | 88.6 | 1.28  | 0.606 |
| sd  | 21.9 | 0.411 | 0.142 |

GAIN-LOSS MODEL

|     | tp   | ga    | gw    | la     | lw     |
|-----|------|-------|-------|--------|--------|
| val | 88.6 | 1.28  | 0.606 | 3.95   | 6.08   |
| sd  | 21.9 | 0.411 | 0.142 | 126000 | 385000 |

|      | CNST   | HILL   | GNLS   |
|------|--------|--------|--------|
| AIC  | 182.72 | 131.41 | 135.41 |
| PROB | 0      | 0.88   | 0.12   |
| RMSE | 35.4   | 7.17   | 7.17   |

MAX\_MEAN : 65.9 MAX\_MED : 64.9 BMAD : 5.69  
COFF : 20 HIT-CALL : 1 FITC : 42 ACTP : 1  
FLAGS :

Assay ID 1509 (NHEERL\_HEK293T\_CellTiterGLO)  
Sample ID : TX003345

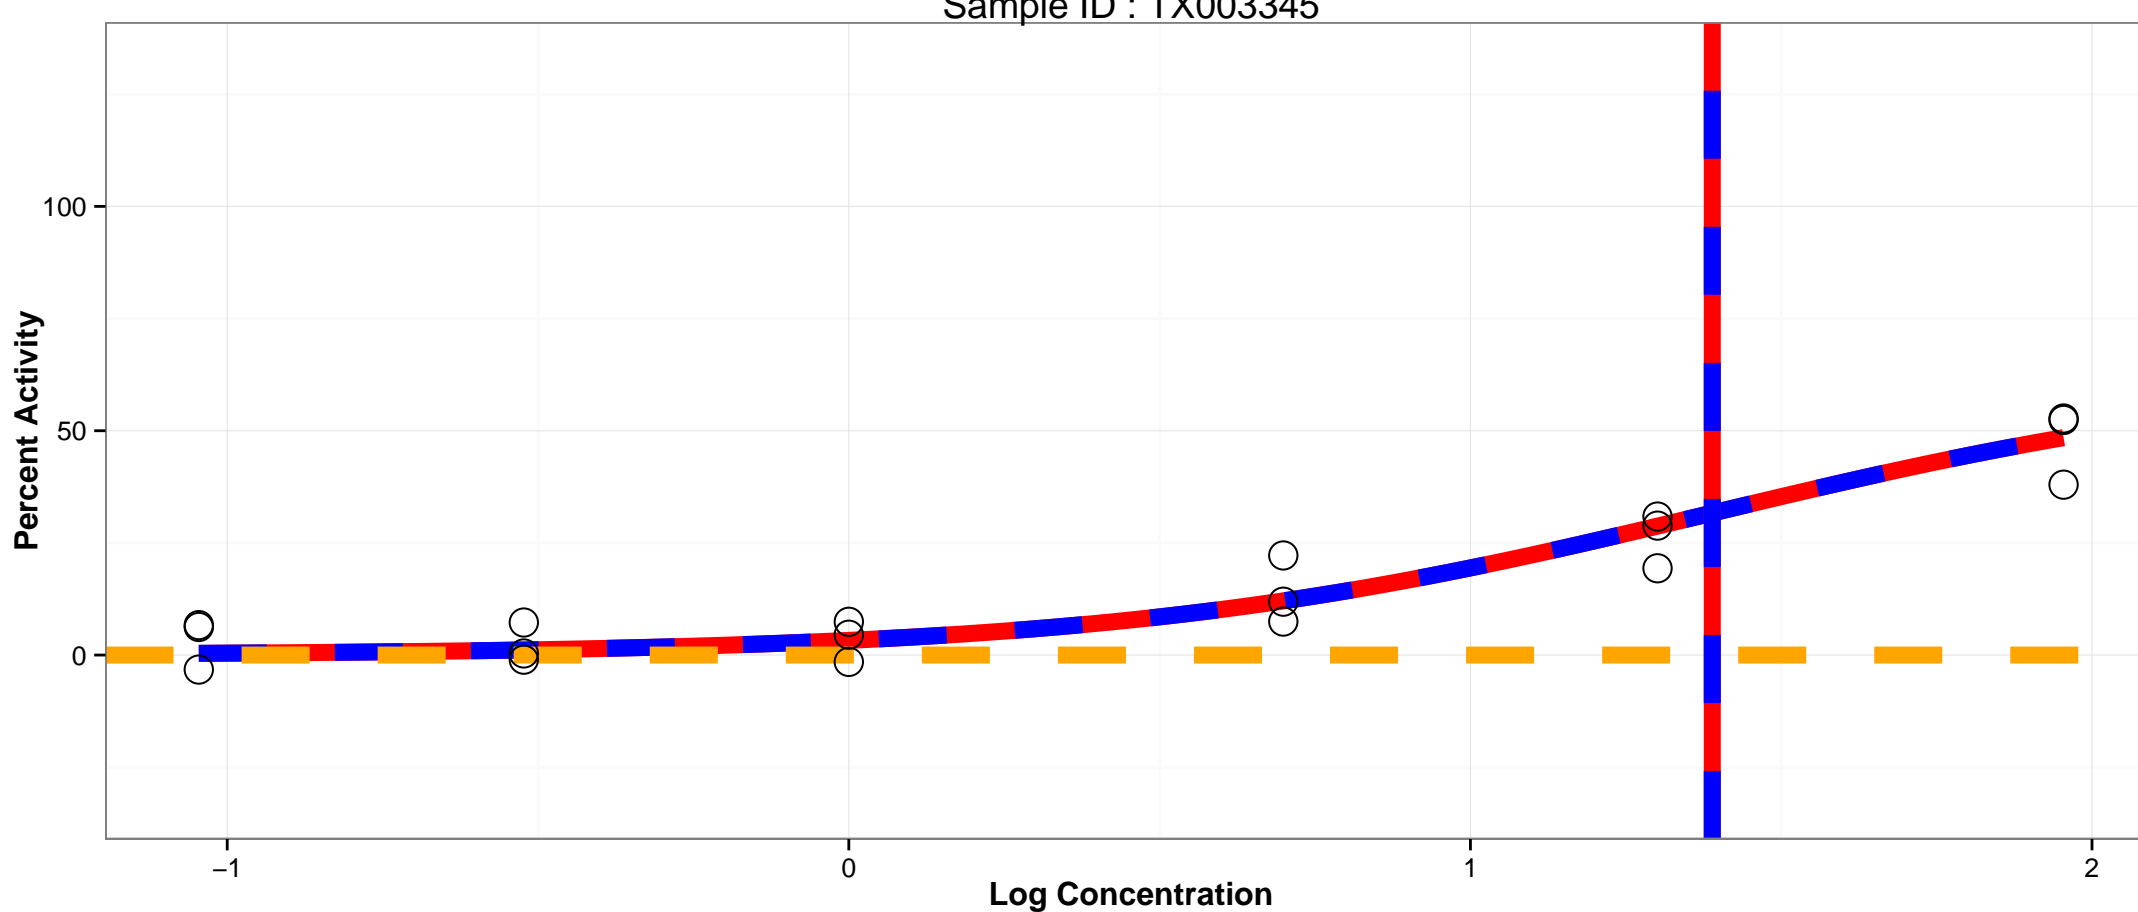

HILL MODEL

|     | tp   | ga    | gw   |
|-----|------|-------|------|
| val | 63.3 | 1.39  | 0.91 |
| sd  | 14.4 | 0.258 | 0.24 |

GAIN-LOSS MODEL

|     | tp   | ga    | gw    | la     | lw     |
|-----|------|-------|-------|--------|--------|
| val | 63.3 | 1.39  | 0.909 | 3.94   | 7.1    |
| sd  | 14.4 | 0.258 | 0.24  | 288000 | 741000 |

|      | CNST   | HILL   | GNLS   |
|------|--------|--------|--------|
| AIC  | 166.22 | 121.85 | 125.85 |
| PROB | 0      | 0.88   | 0.12   |
| RMSE | 23.63  | 5.44   | 5.44   |

MAX\_MEAN : 47.7 MAX\_MED : 52.4 BMAD : 5.54  
COFF : 20 HIT-CALL : 1 FITC : 42 ACTP : 1  
FLAGS :

Assay ID 1848 (NHEERL\_Quantilum\_inhib\_2\_dn)  
Sample ID : TX003345

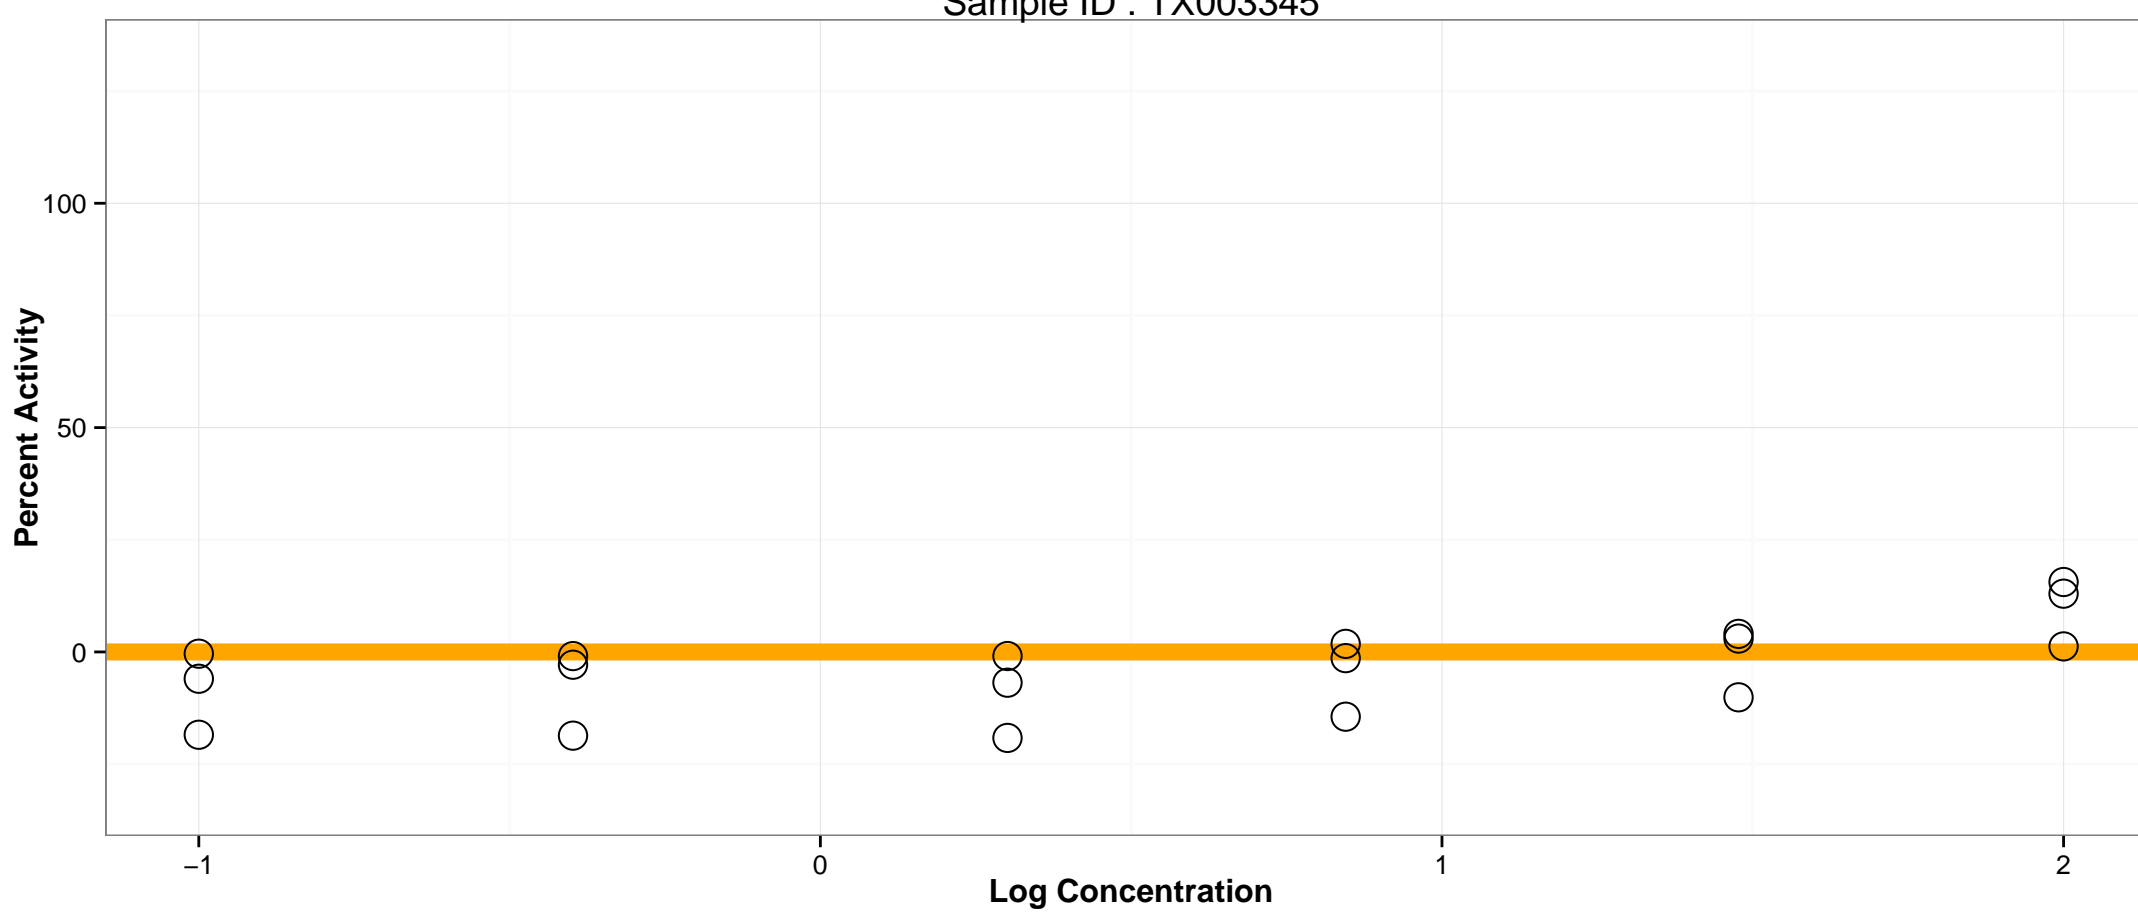

HILL MODEL

HILL MODEL: Not applicable

GAIN-LOSS MODEL

GNLS MODEL: Not applicable

|      | CNST  | HILL | GNLS |
|------|-------|------|------|
| AIC  | 137.9 | NA   | NA   |
| PROB | 1     | NA   | NA   |
| RMSE | 10.28 | NA   | NA   |

MAX\_MEAN : 9.95 MAX\_MED : 13 BMAD : 8.58  
COFF : 20 HIT-CALL : 0 FITC : 4 ACTP : 0  
FLAGS :

Chemical : (E)-Anethole  
CAS : 4180-23-8

Assay ID 1508 (NHEERL\_TPO\_AUR\_dn)  
Sample ID : TX003353

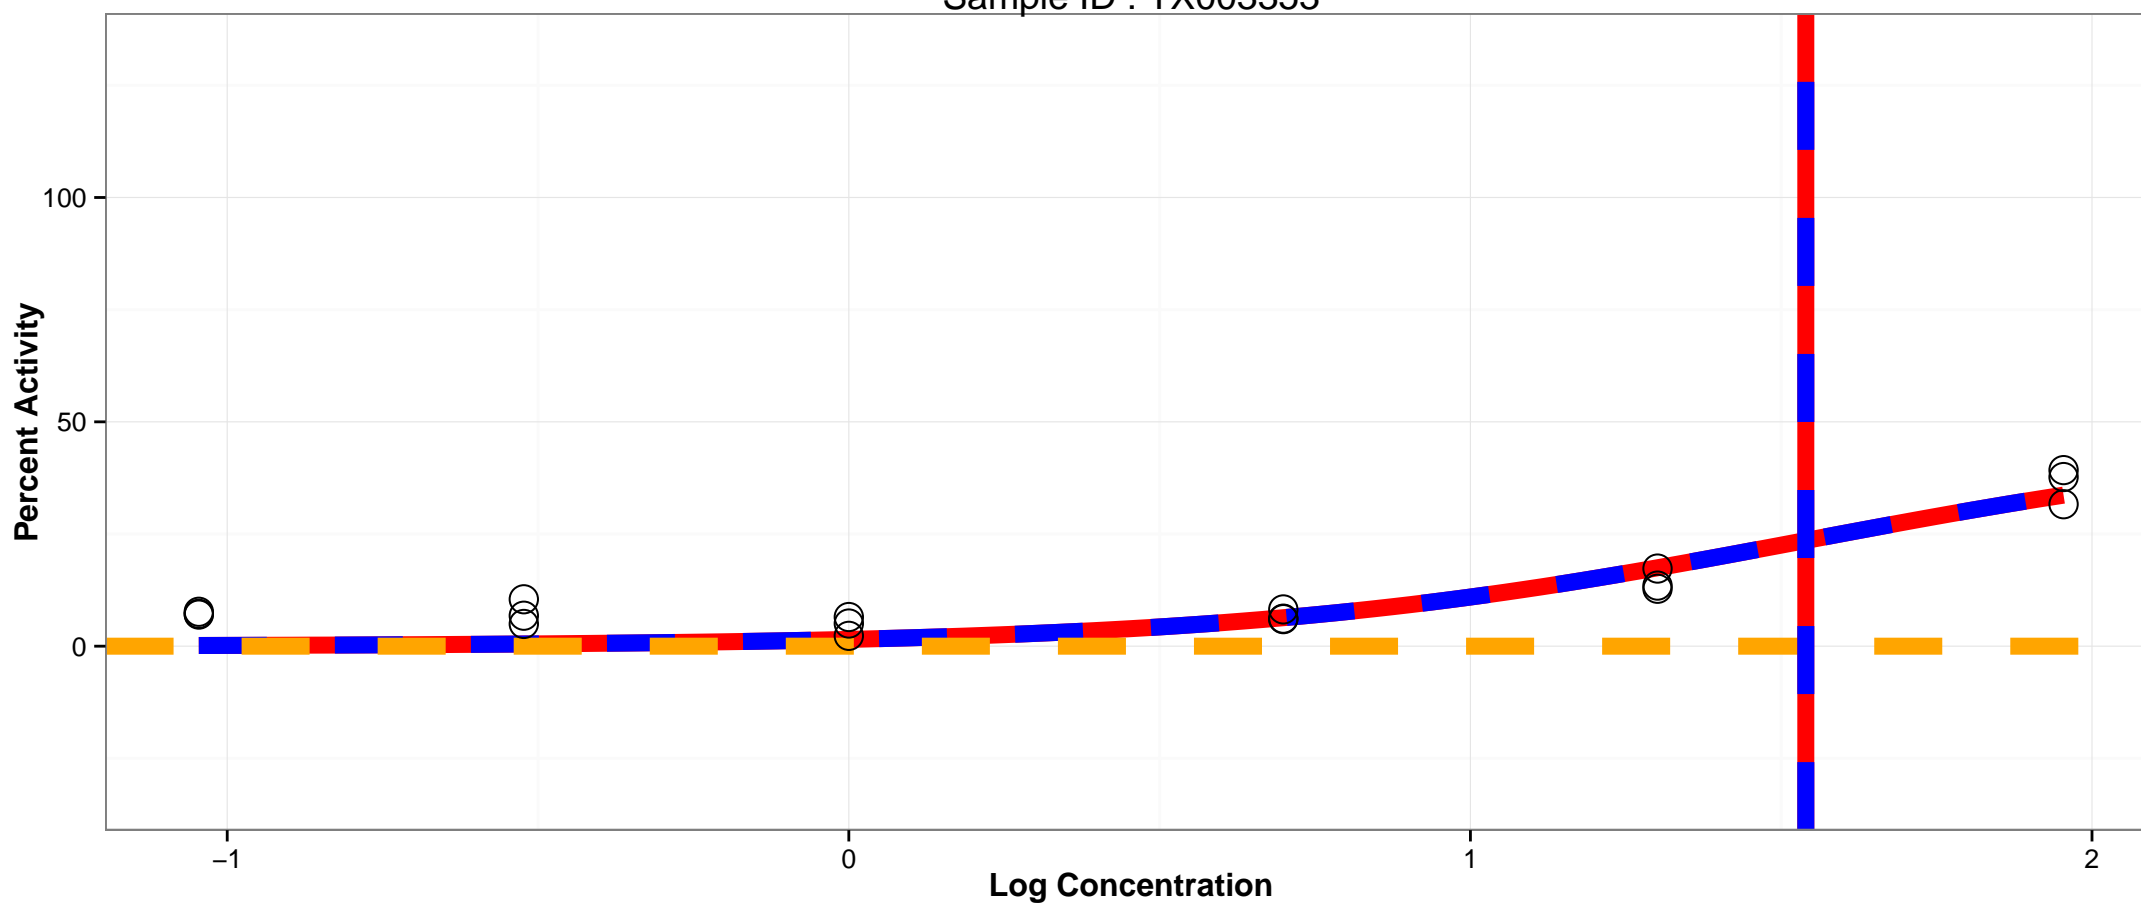

HILL MODEL

|     | tp   | ga    | gw    |
|-----|------|-------|-------|
| val | 47.1 | 1.54  | 0.961 |
| sd  | 11.5 | 0.253 | 0.334 |

GAIN-LOSS MODEL

|     | tp   | ga    | gw    | la   | lw      |
|-----|------|-------|-------|------|---------|
| val | 47.1 | 1.54  | 0.961 | 2.87 | 18      |
| sd  | 11.5 | 0.253 | 0.334 | 5170 | 3460000 |

|      | CNST   | HILL   | GNLS   |
|------|--------|--------|--------|
| AIC  | 153.82 | 119.14 | 123.14 |
| PROB | 0      | 0.88   | 0.12   |
| RMSE | 16.94  | 4.97   | 4.97   |

MAX\_MEAN : 36.2 MAX\_MED : 37.7 BMAD : 5.69  
COFF : 20 HIT-CALL : 1 FITC : 42 ACTP : 1  
FLAGS : 6

Assay ID 1509 (NHEERL\_HEK293T\_CellTiterGLO)  
Sample ID : TX003353

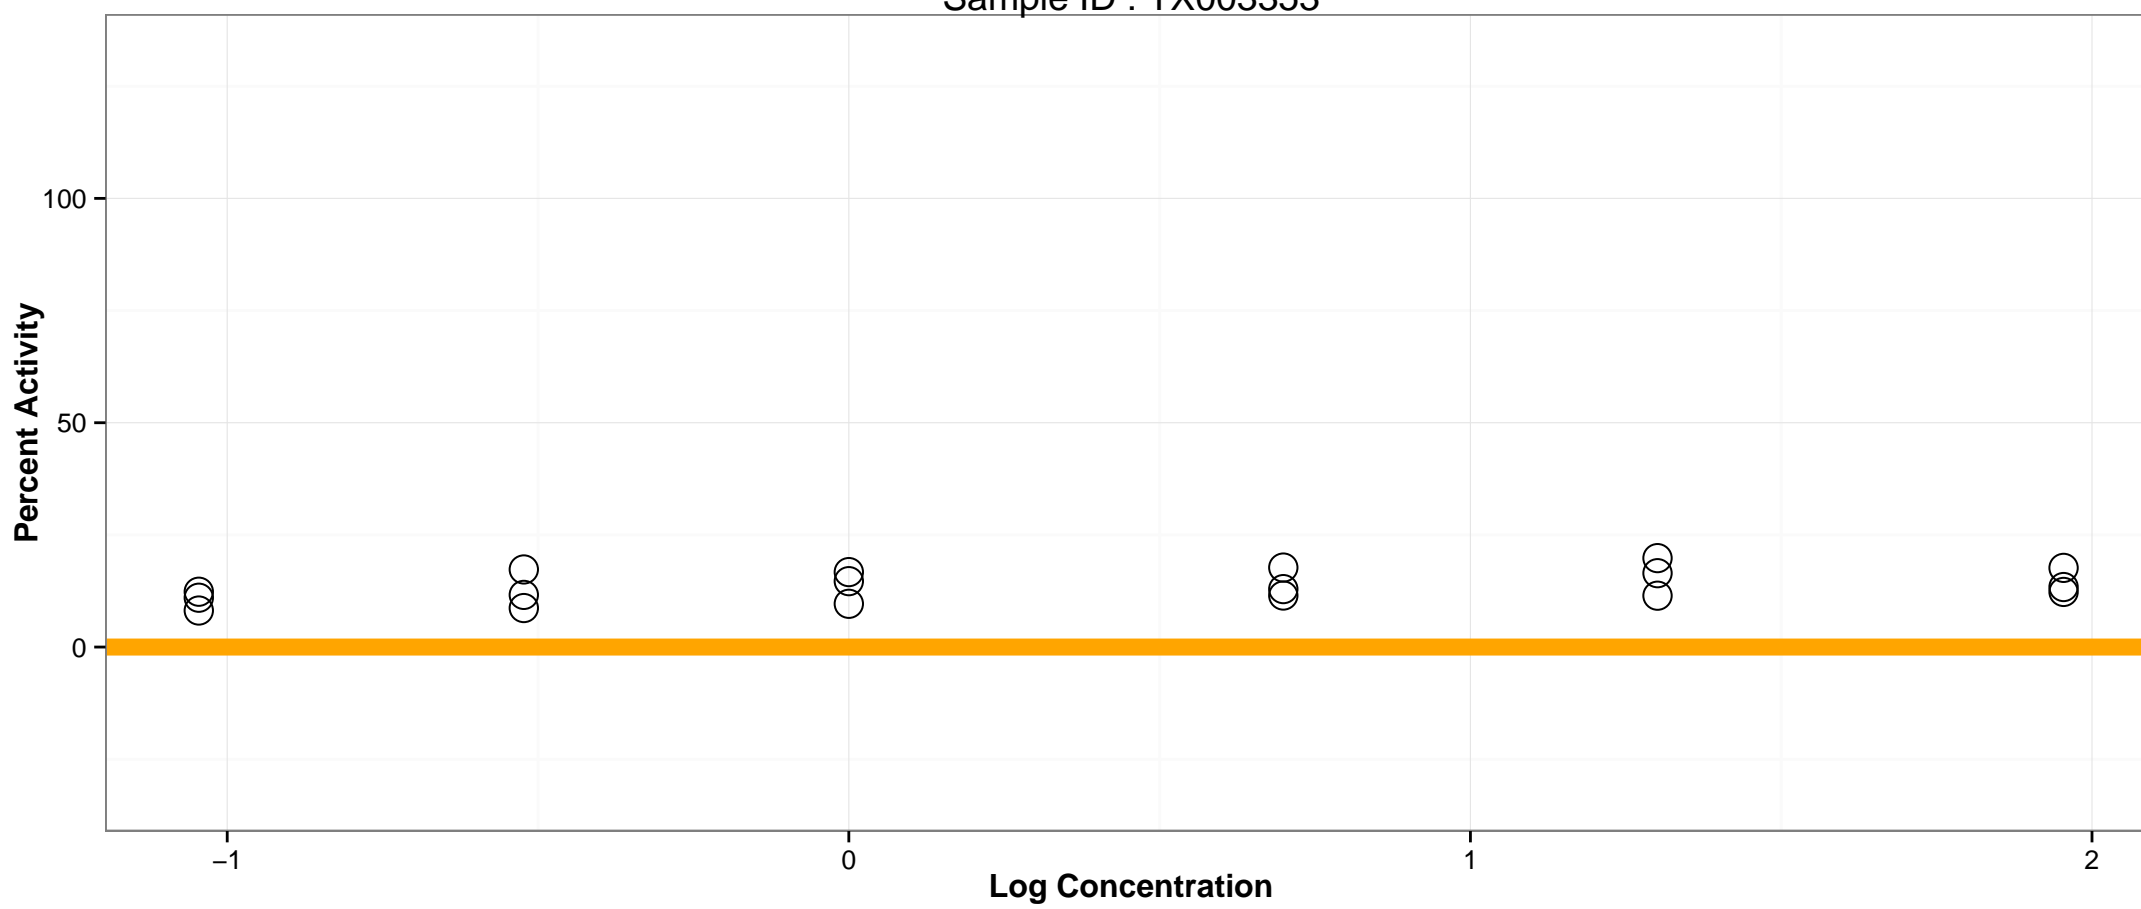

HILL MODEL

HILL MODEL: Not applicable

GAIN-LOSS MODEL

GNLS MODEL: Not applicable

|      | CNST  | HILL | GNLS |
|------|-------|------|------|
| AIC  | 151.8 | NA   | NA   |
| PROB | 1     | NA   | NA   |
| RMSE | 13.93 | NA   | NA   |

MAX\_MEAN : 15.9 MAX\_MED : 16.5 BMAD : 5.54  
COFF : 20 HIT-CALL : 0 FITC : 4 ACTP : 0  
FLAGS :

Assay ID 1848 (NHEERL\_Quantilum\_inhib\_2\_dn)  
Sample ID : TX003353

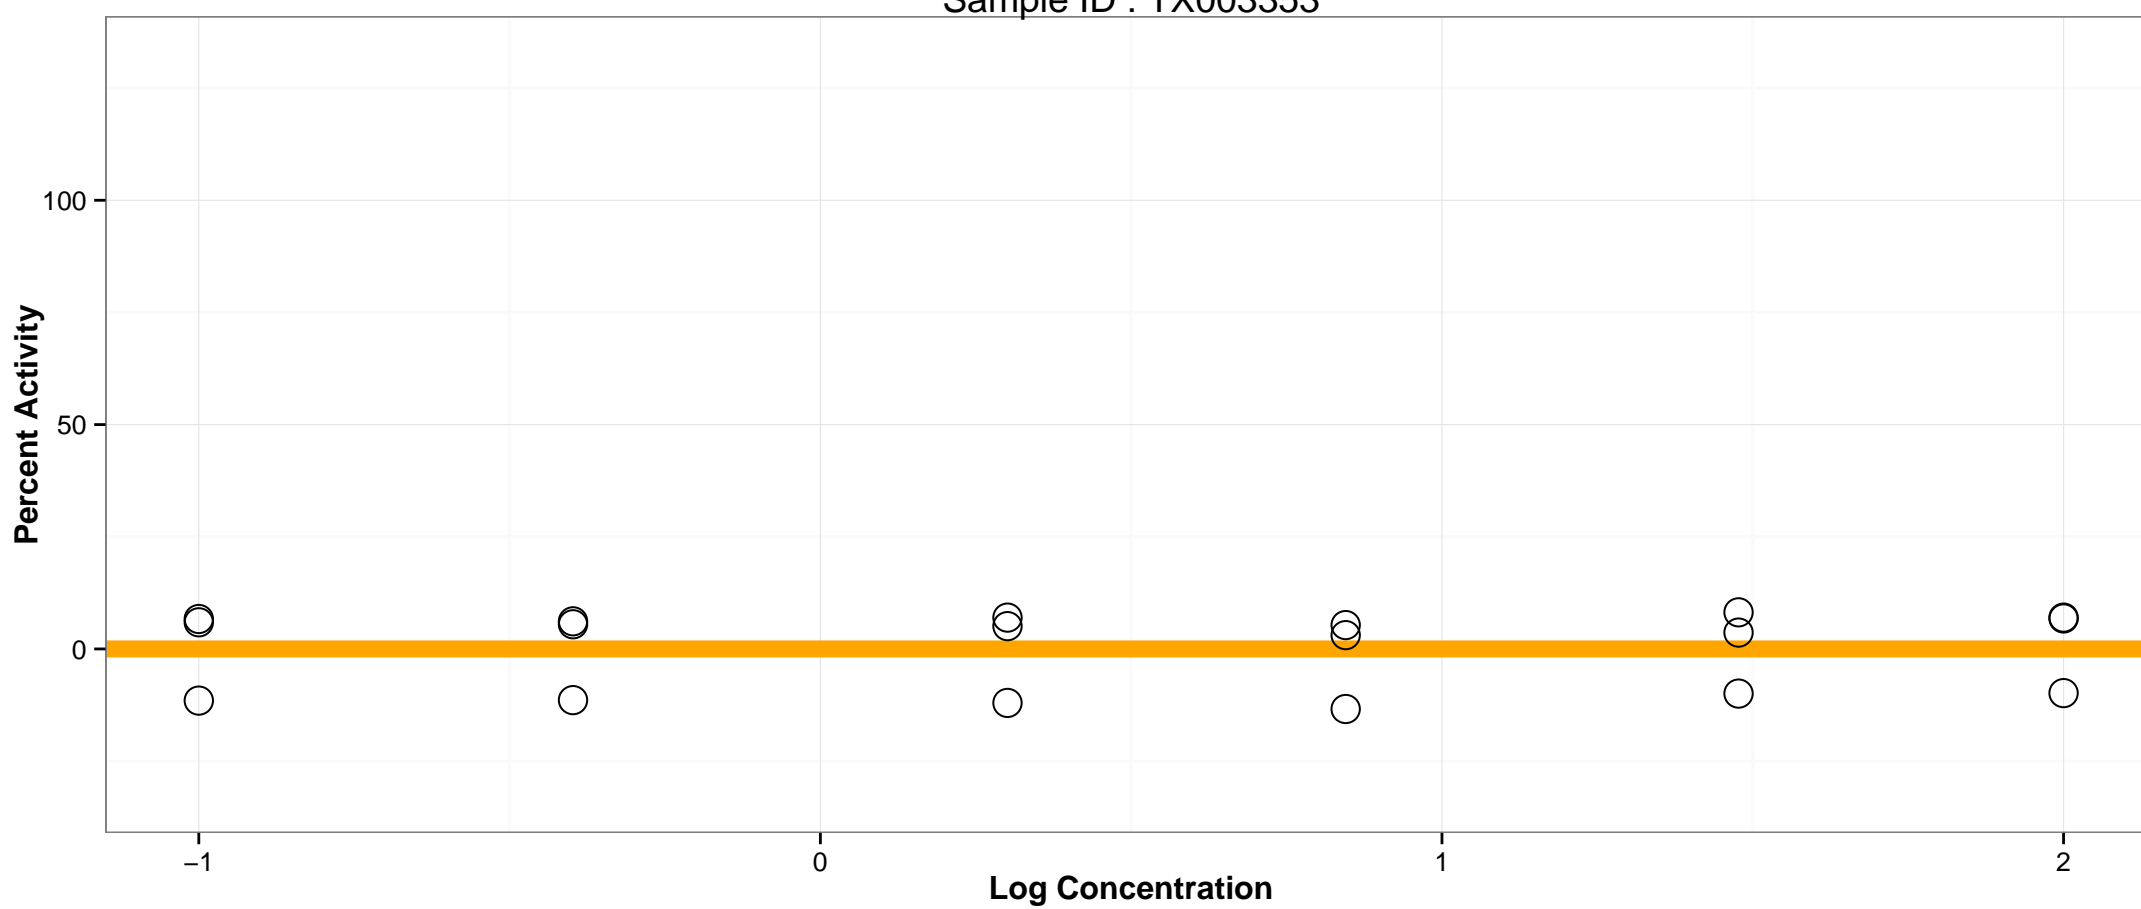

HILL MODEL

HILL MODEL: Not applicable

GAIN-LOSS MODEL

GNLS MODEL: Not applicable

|      | CNST  | HILL | GNLS |
|------|-------|------|------|
| AIC  | 132.3 | NA   | NA   |
| PROB | 1     | NA   | NA   |
| RMSE | 8.22  | NA   | NA   |

MAX\_MEAN : 1.32 MAX\_MED : 6.8 BMAD : 8.58  
COFF : 20 HIT-CALL : 0 FITC : 4 ACTP : 0  
FLAGS :

Chemical : 1-Dodecyl-2-pyrrolidinone  
CAS : 2687-96-9

Assay ID 1508 (NHEERL\_TPO\_AUR\_dn)  
Sample ID : TX003405

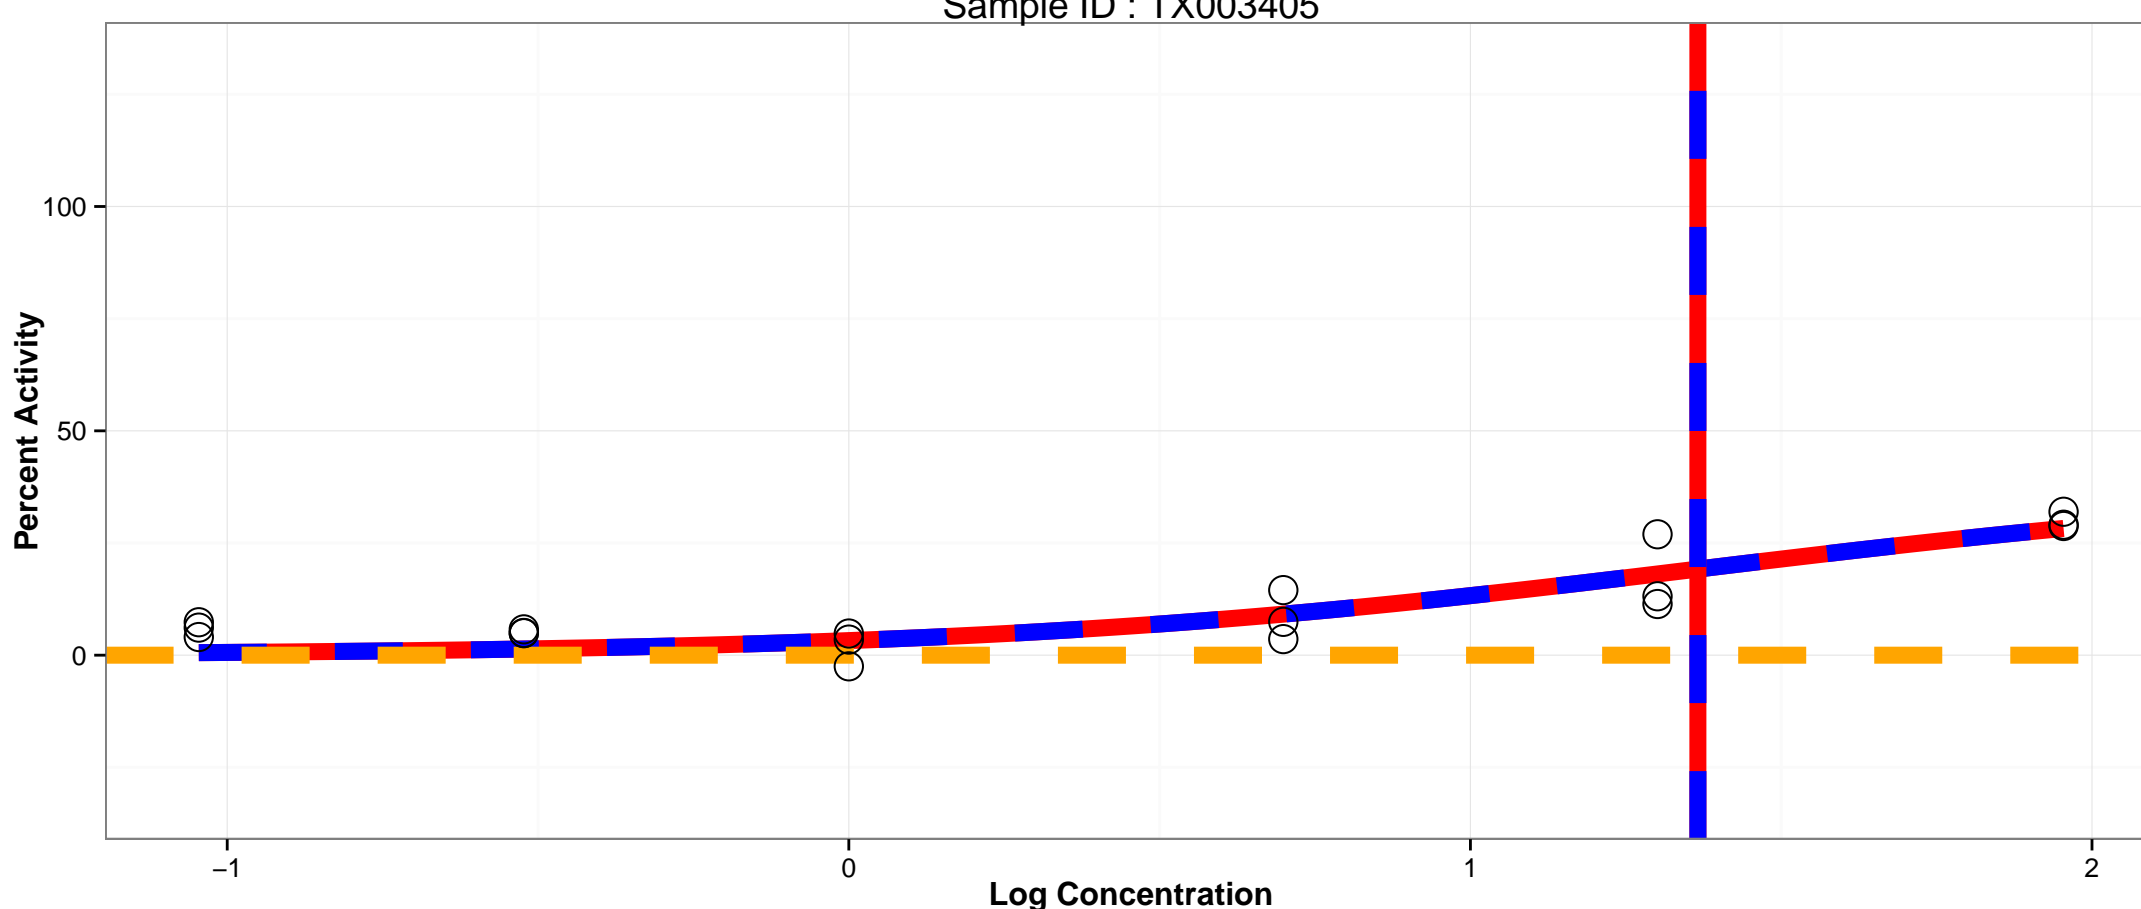

HILL MODEL

|     | tp   | ga    | gw    |
|-----|------|-------|-------|
| val | 38.4 | 1.37  | 0.757 |
| sd  | 10.2 | 0.377 | 0.297 |

GAIN-LOSS MODEL

|     | tp   | ga    | gw    | la   | lw   |
|-----|------|-------|-------|------|------|
| val | 38.4 | 1.37  | 0.757 | 3.95 | 4.41 |
| sd  | 10.2 | 0.377 | 0.297 | 2760 | 6100 |

|      | CNST   | HILL   | GNLS   |
|------|--------|--------|--------|
| AIC  | 151.35 | 117.45 | 121.45 |
| PROB | 0      | 0.88   | 0.12   |
| RMSE | 15.35  | 4.68   | 4.68   |

MAX\_MEAN : 30 MAX\_MED : 29.1 BMAD : 5.69  
COFF : 20 HIT-CALL : 1 FITC : 42 ACTP : 1  
FLAGS : 6

Assay ID 1509 (NHEERL\_HEK293T\_CellTiterGLO)  
Sample ID : TX003405

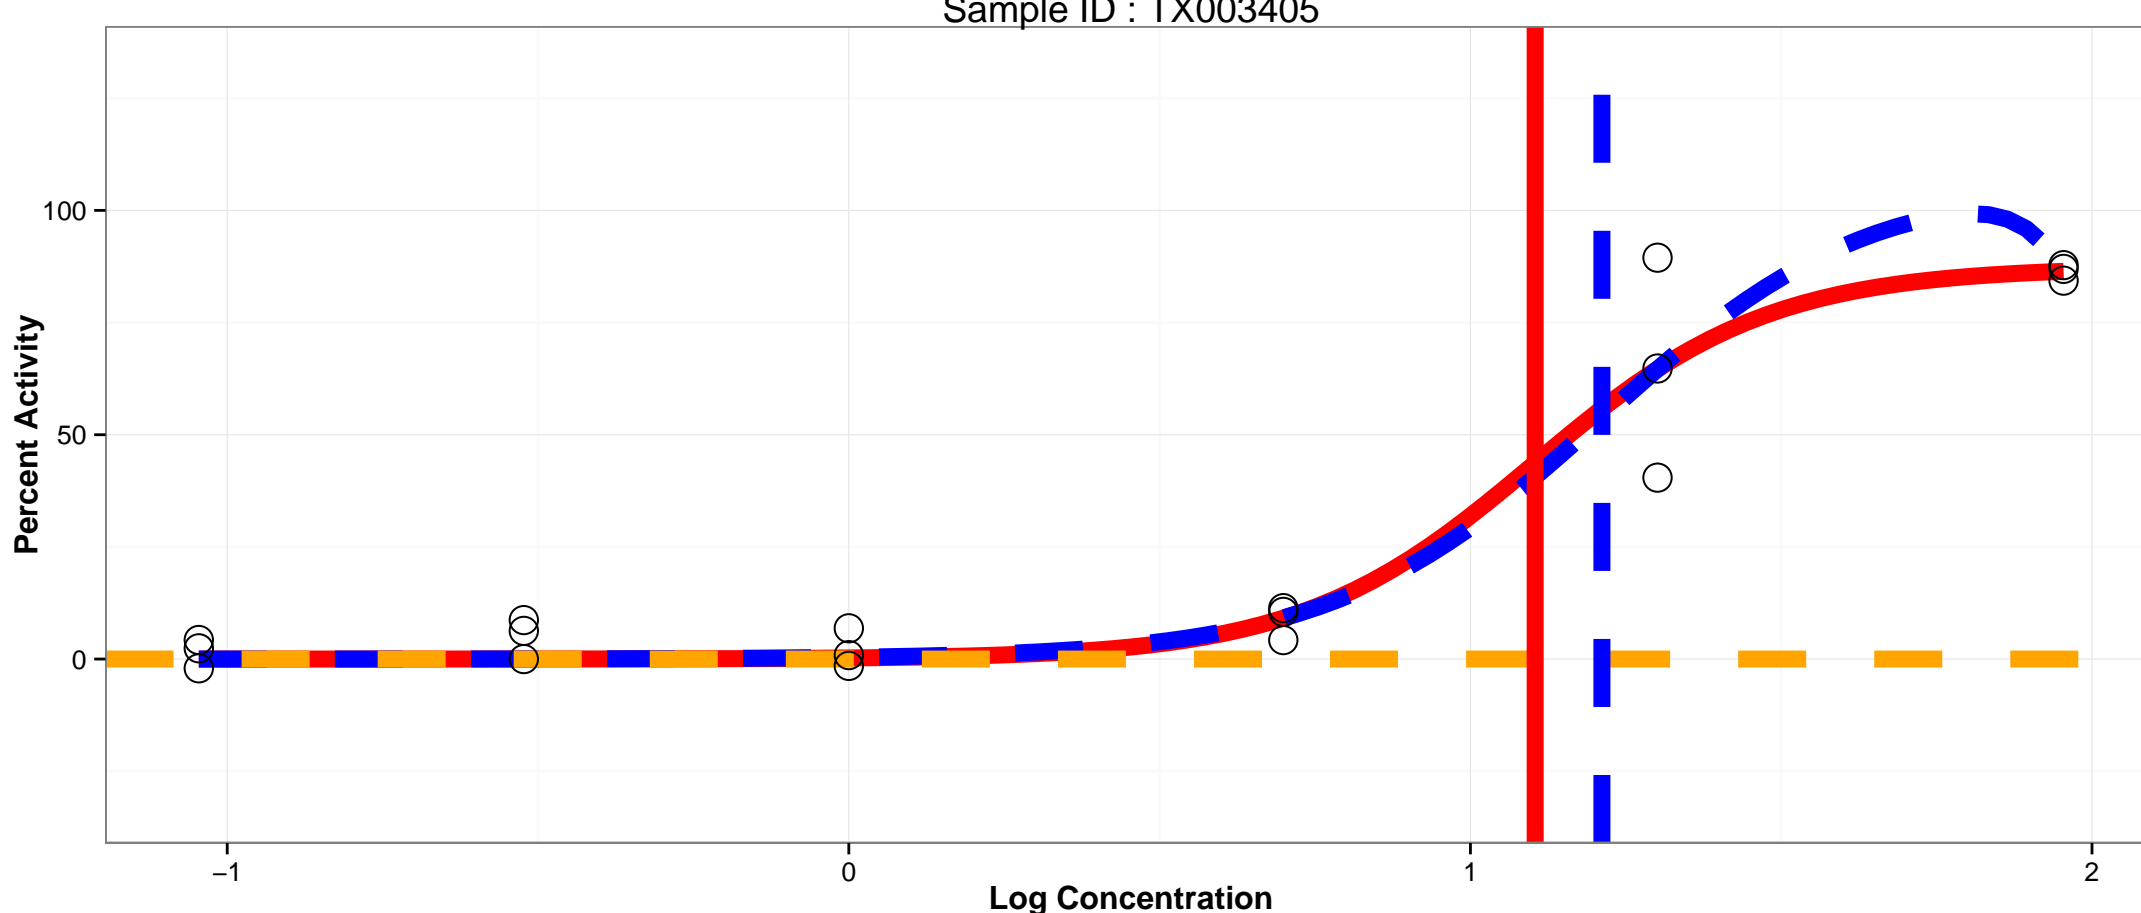

HILL MODEL

|     | tp   | ga     | gw    |
|-----|------|--------|-------|
| val | 87.4 | 1.1    | 2.31  |
| sd  | 2.77 | 0.0453 | 0.338 |

GAIN-LOSS MODEL

|     | tp  | ga   | gw   | la   | lw   |
|-----|-----|------|------|------|------|
| val | 107 | 1.21 | 2.01 | 2.05 | 7.39 |
| sd  | NA  | NA   | NA   | NA   | NA   |

|      | CNST   | HILL   | GNLS   |
|------|--------|--------|--------|
| AIC  | 188.78 | 130.12 | 134.05 |
| PROB | 0      | 0.88   | 0.12   |
| RMSE | 45.14  | 8.91   | 8.91   |

MAX\_MEAN : 86.4 MAX\_MED : 87 BMAD : 5.54  
COFF : 20 HIT-CALL : 1 FITC : 41 ACTP : 1  
FLAGS :

Assay ID 1848 (NHEERL\_Quantilum\_inhib\_2\_dn)  
Sample ID : TX003405

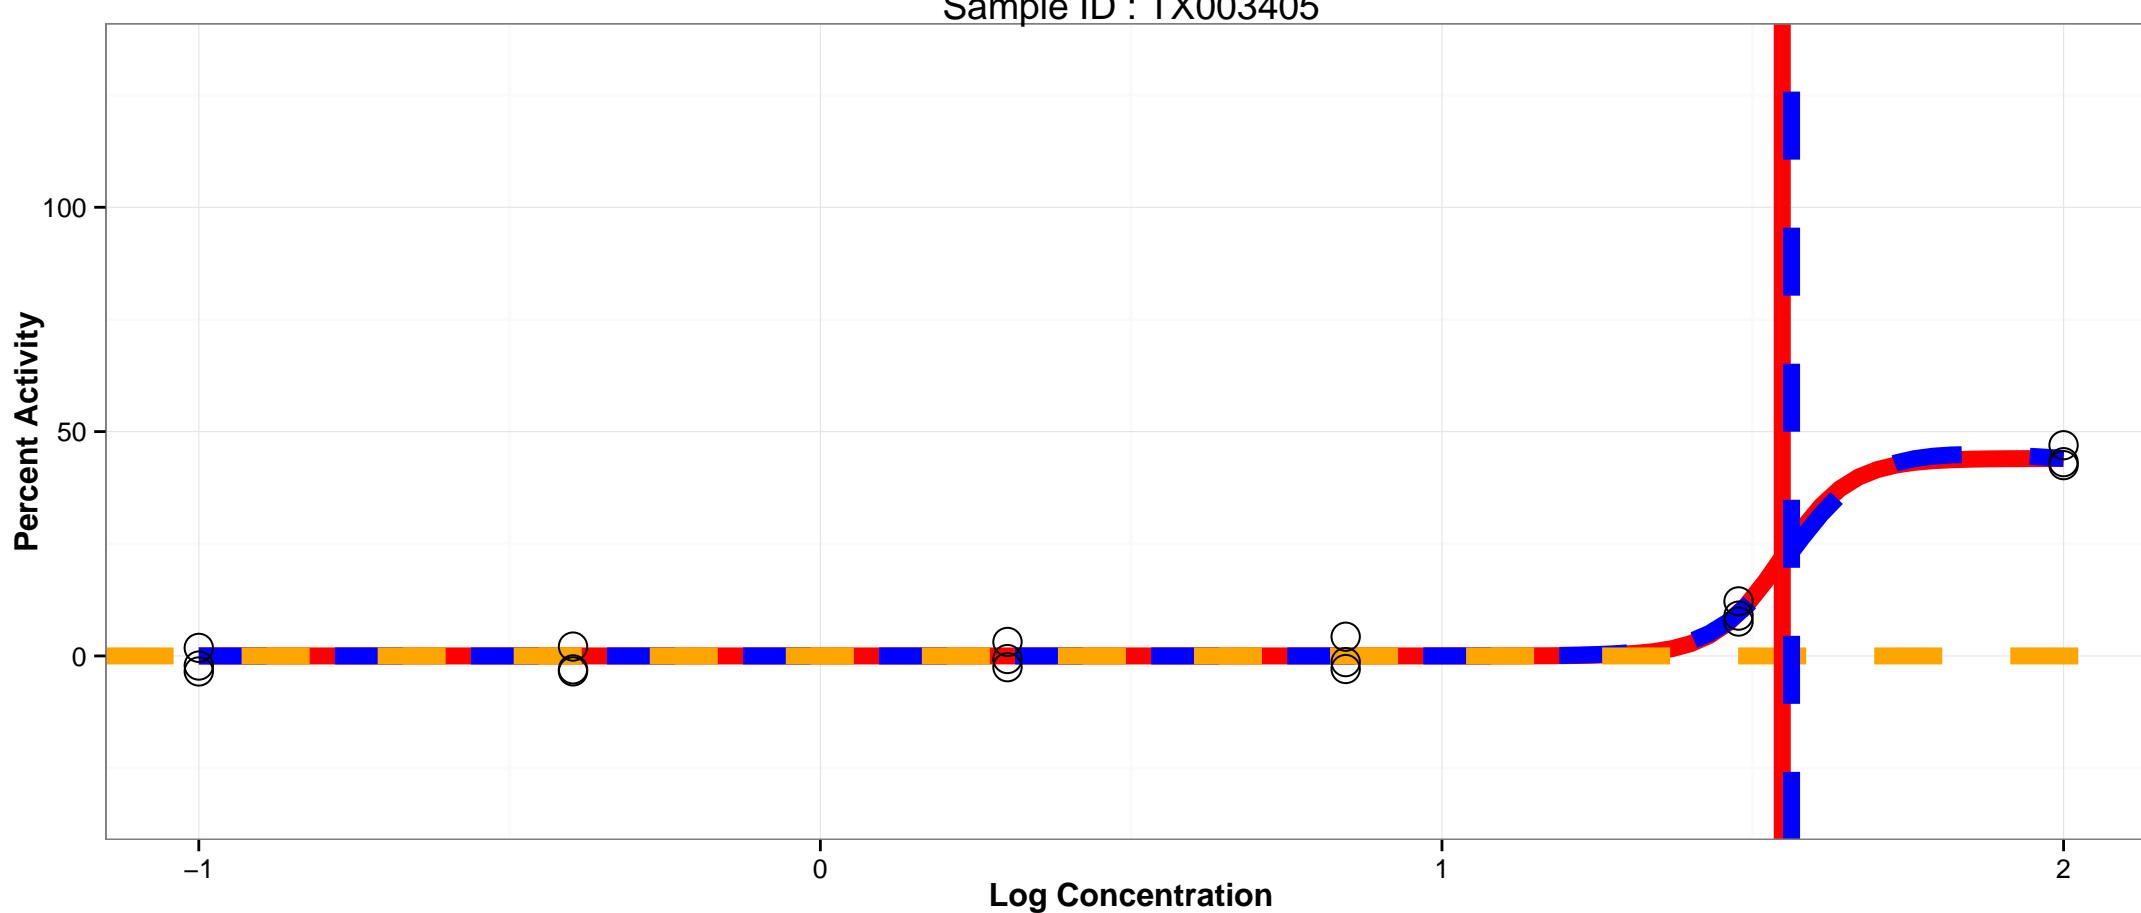

HILL MODEL

|     | tp  | ga     | gw   |
|-----|-----|--------|------|
| val | 44  | 1.55   | 8    |
| sd  | 1.5 | 0.0489 | 5.54 |

GAIN-LOSS MODEL

|     | tp   | ga   | gw   | la   | lw   |
|-----|------|------|------|------|------|
| val | 46.9 | 1.56 | 6.96 | 2.65 | 1.82 |
| sd  | NA   | NA   | NA   | NA   | NA   |

|      | CNST   | HILL | GNLS |
|------|--------|------|------|
| AIC  | 150.85 | 95.3 | 99.3 |
| PROB | 0      | 0.88 | 0.12 |
| RMSE | 18.65  | 2.5  | 2.5  |

MAX\_MEAN : 44.2 MAX\_MED : 43.2 BMAD : 8.58  
COFF : 20 HIT-CALL : 1 FITC : 41 ACTP : 1  
FLAGS : 6

Chemical : Resorcinol  
CAS : 108-46-3

Assay ID 1508 (NHEERL\_TPO\_AUR\_dn)  
Sample ID : TX003433

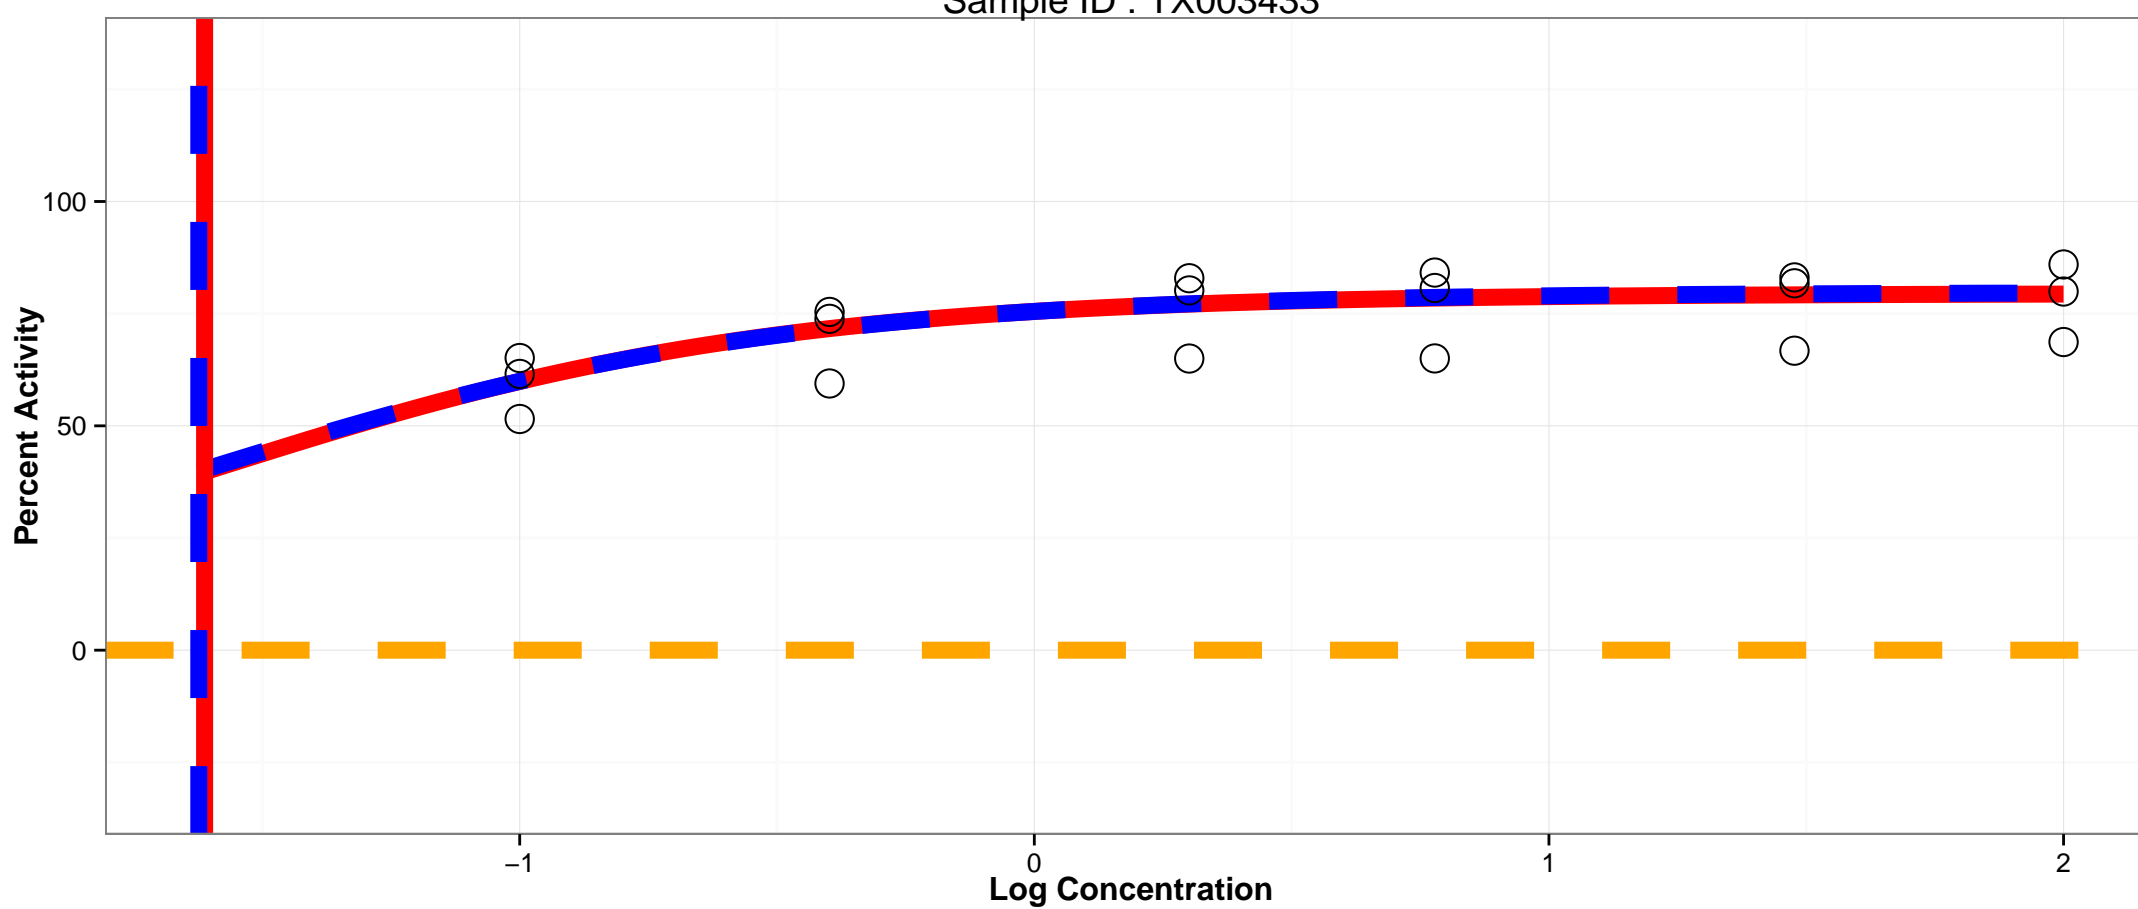

HILL MODEL

|     | tp   | ga    | gw    |
|-----|------|-------|-------|
| val | 79.5 | -1.61 | 0.793 |
| sd  | 3.22 | 0.425 | 0.502 |

GAIN-LOSS MODEL

|     | tp   | ga    | gw    | la    | lw   |
|-----|------|-------|-------|-------|------|
| val | 79.7 | -1.62 | 0.771 | 2.12  | 17.9 |
| sd  | 7.33 | 0.523 | 0.75  | 0.335 | 52.7 |

|      | CNST   | HILL   | GNLS   |
|------|--------|--------|--------|
| AIC  | 211.98 | 133.54 | 137.53 |
| PROB | 0      | 0.88   | 0.12   |
| RMSE | 73.52  | 7.49   | 7.5    |

MAX\_MEAN : 78.2 MAX\_MED : 81.8 BMAD : 5.69  
COFF : 20 HIT-CALL : 1 FITC : 40 ACTP : 1  
FLAGS :

Assay ID 1509 (NHEERL\_HEK293T\_CellTiterGLO)  
Sample ID : TX003433

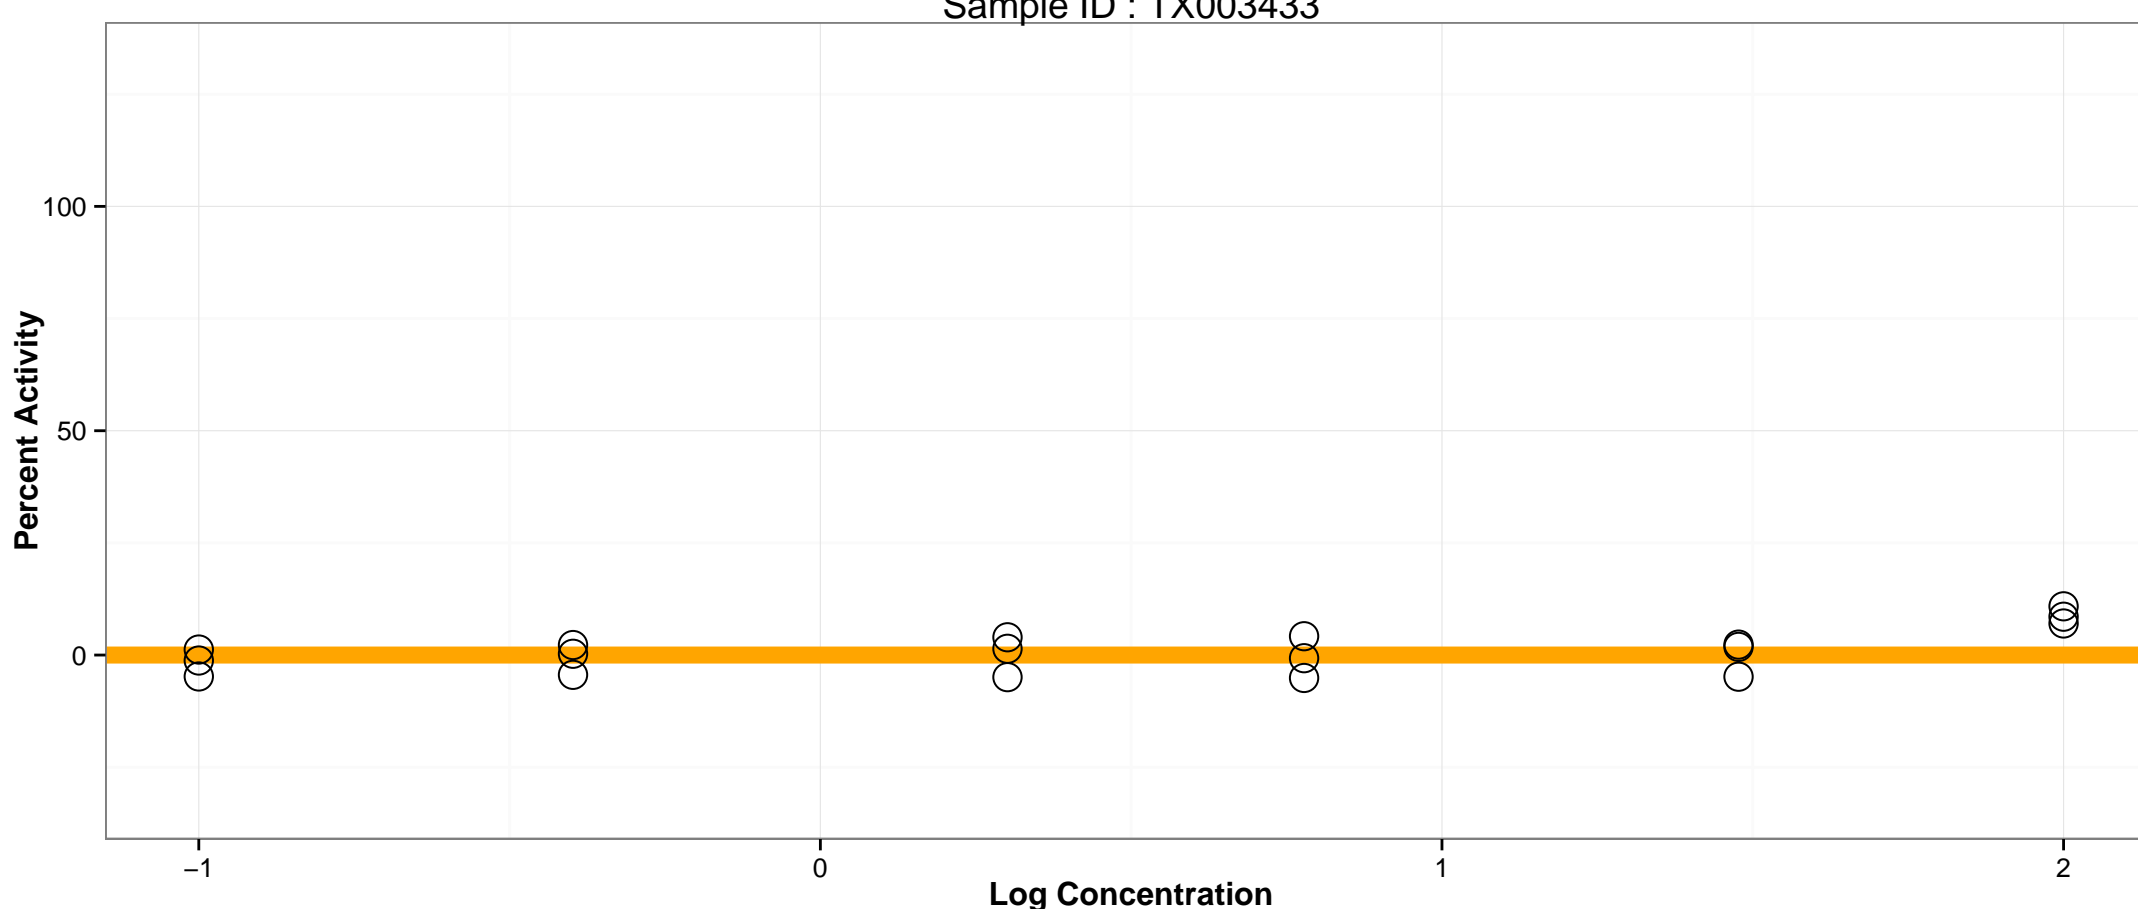

HILL MODEL

HILL MODEL: Not applicable

GAIN-LOSS MODEL

GNLS MODEL: Not applicable

|      | CNST   | HILL | GNLS |
|------|--------|------|------|
| AIC  | 110.62 | NA   | NA   |
| PROB | 1      | NA   | NA   |
| RMSE | 4.77   | NA   | NA   |

MAX\_MEAN : 8.83 MAX\_MED : 8.56 BMAD : 5.54  
COFF : 20 HIT-CALL : 0 FITC : 4 ACTP : 0  
FLAGS :

Assay ID 1848 (NHEERL\_Quantilum\_inhib\_2\_dn)  
Sample ID : TX003433

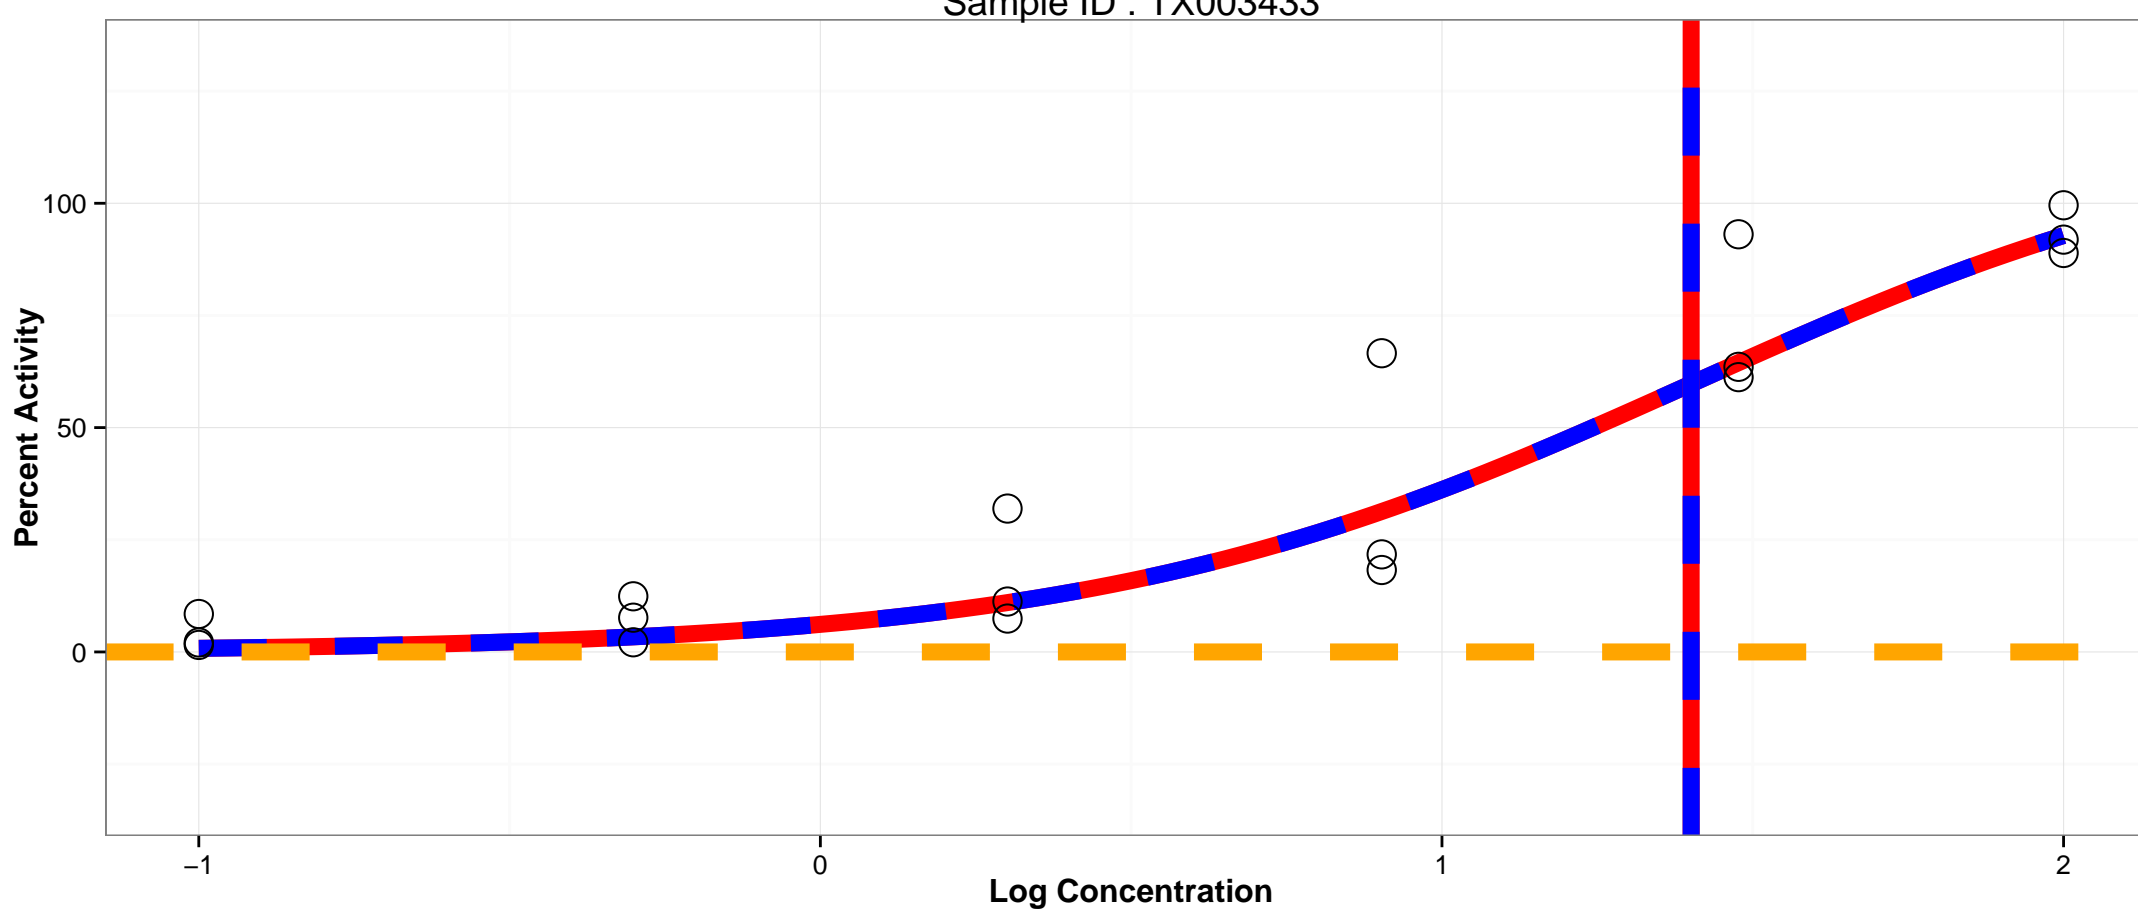

HILL MODEL

|     | tp   | ga    | gw    |
|-----|------|-------|-------|
| val | 119  | 1.4   | 0.904 |
| sd  | 23.6 | 0.244 | 0.262 |

GAIN-LOSS MODEL

|     | tp   | ga    | gw    | la   | lw    |
|-----|------|-------|-------|------|-------|
| val | 119  | 1.4   | 0.904 | 3.45 | 5.94  |
| sd  | 23.6 | 0.244 | 0.262 | 3170 | 13000 |

|      | CNST   | HILL   | GNLS   |
|------|--------|--------|--------|
| AIC  | 196.36 | 147.66 | 151.66 |
| PROB | 0      | 0.88   | 0.12   |
| RMSE | 52.42  | 12.94  | 12.94  |

MAX\_MEAN : 93.5 MAX\_MED : 91.9 BMAD : 8.58  
COFF : 20 HIT-CALL : 1 FITC : 42 ACTP : 1  
FLAGS :

Chemical : 1,2-Phenylenediamine  
CAS : 95-54-5

Assay ID 1508 (NHEERL\_TPO\_AUR\_dn)  
Sample ID : TX003437

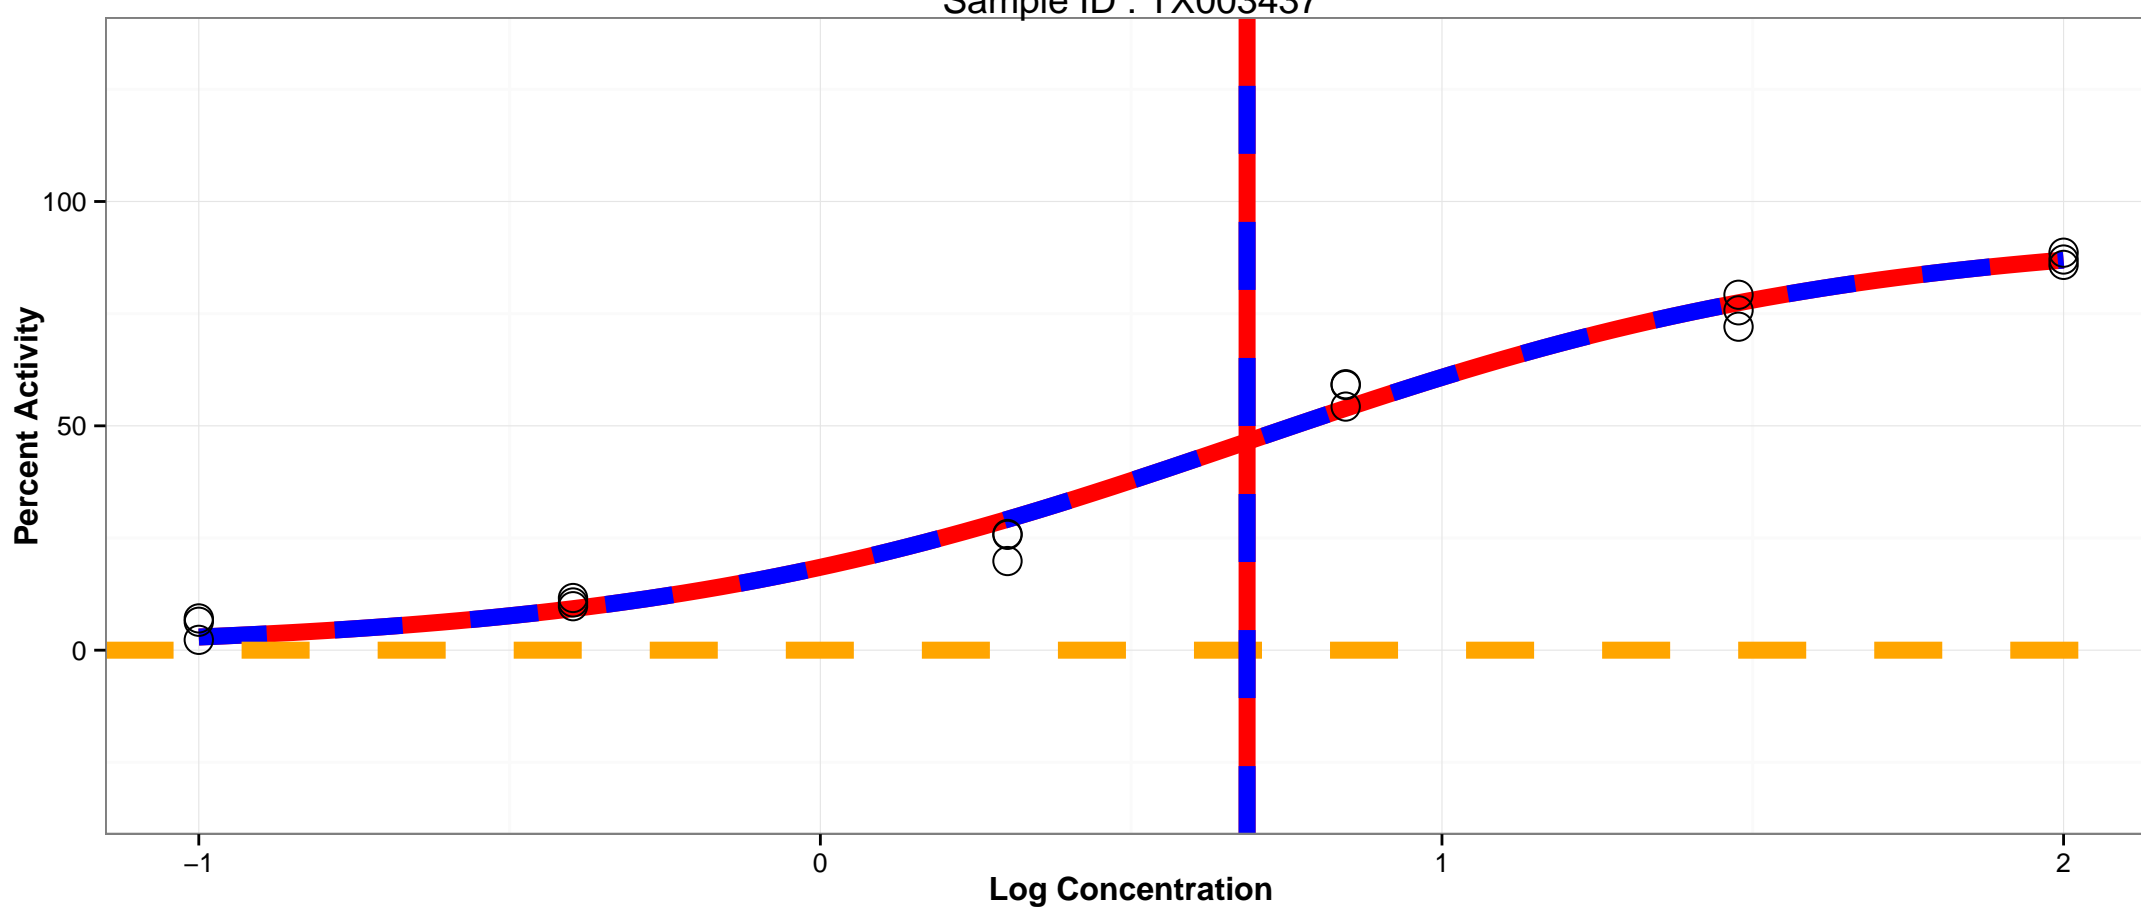

HILL MODEL

|     | tp   | ga     | gw     |
|-----|------|--------|--------|
| val | 93   | 0.686  | 0.882  |
| sd  | 3.22 | 0.0632 | 0.0856 |

GAIN-LOSS MODEL

|     | tp   | ga     | gw     | la  | lw   |
|-----|------|--------|--------|-----|------|
| val | 93   | 0.686  | 0.882  | 2.9 | 9.46 |
| sd  | 3.22 | 0.0632 | 0.0856 | 852 | 8990 |

|      | CNST  | HILL   | GNLS   |
|------|-------|--------|--------|
| AIC  | 198.7 | 106.16 | 110.16 |
| PROB | 0     | 0.88   | 0.12   |
| RMSE | 53.83 | 3.66   | 3.66   |

MAX\_MEAN : 87.2 MAX\_MED : 87.1 BMAD : 5.69  
COFF : 20 HIT-CALL : 1 FITC : 42 ACTP : 1  
FLAGS :

Assay ID 1509 (NHEERL\_HEK293T\_CellTiterGLO)  
Sample ID : TX003437

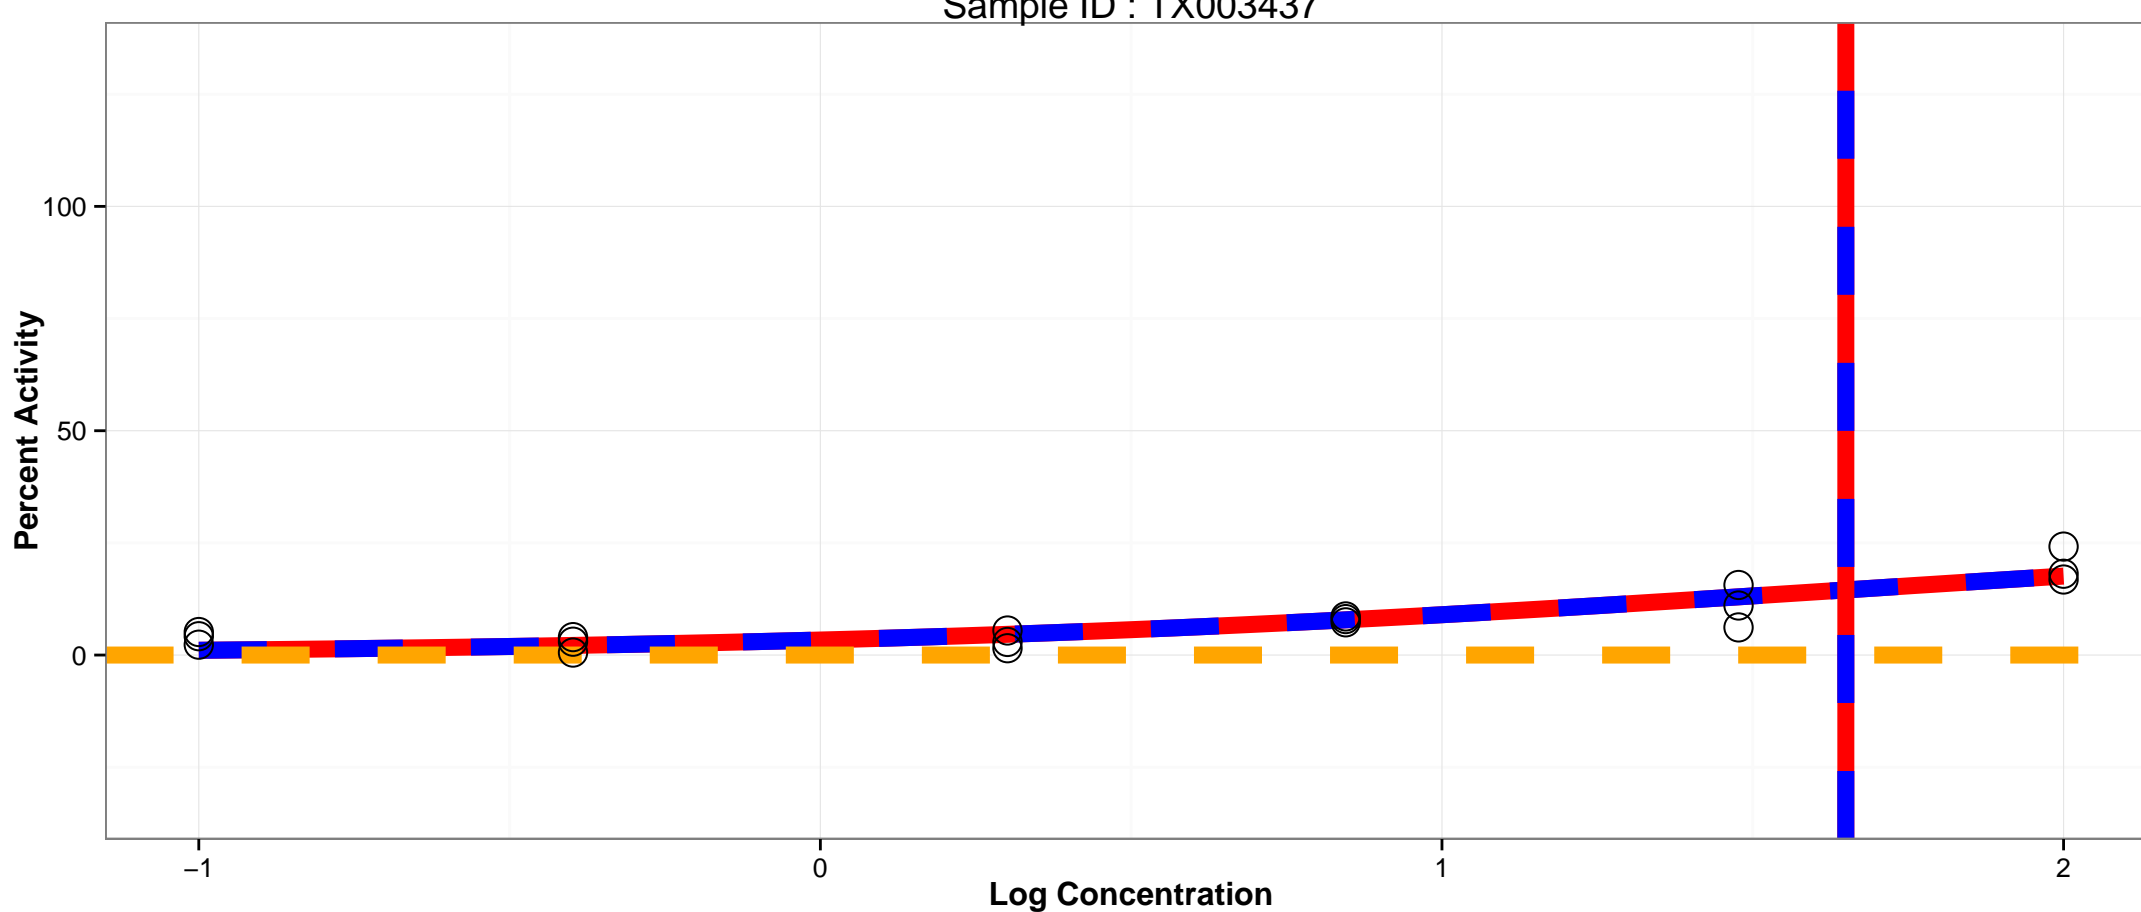

HILL MODEL

|     | tp   | ga    | gw    |
|-----|------|-------|-------|
| val | 29   | 1.65  | 0.536 |
| sd  | 9.95 | 0.588 | 0.145 |

GAIN-LOSS MODEL

|     | tp   | ga    | gw    | la   | lw   |
|-----|------|-------|-------|------|------|
| val | 29   | 1.65  | 0.536 | 4    | 4.05 |
| sd  | 9.95 | 0.588 | 0.145 | 1280 | 2600 |

|      | CNST   | HILL  | GNLS   |
|------|--------|-------|--------|
| AIC  | 137.48 | 96.61 | 100.61 |
| PROB | 0      | 0.88  | 0.12   |
| RMSE | 10.3   | 2.89  | 2.89   |

MAX\_MEAN : 19.7 MAX\_MED : 18.1 BMAD : 5.54  
COFF : 20 HIT-CALL : 0 FITC : 21 ACTP : 1  
FLAGS : 12

Assay ID 1848 (NHEERL\_Quantilum\_inhib\_2\_dn)  
Sample ID : TX003437

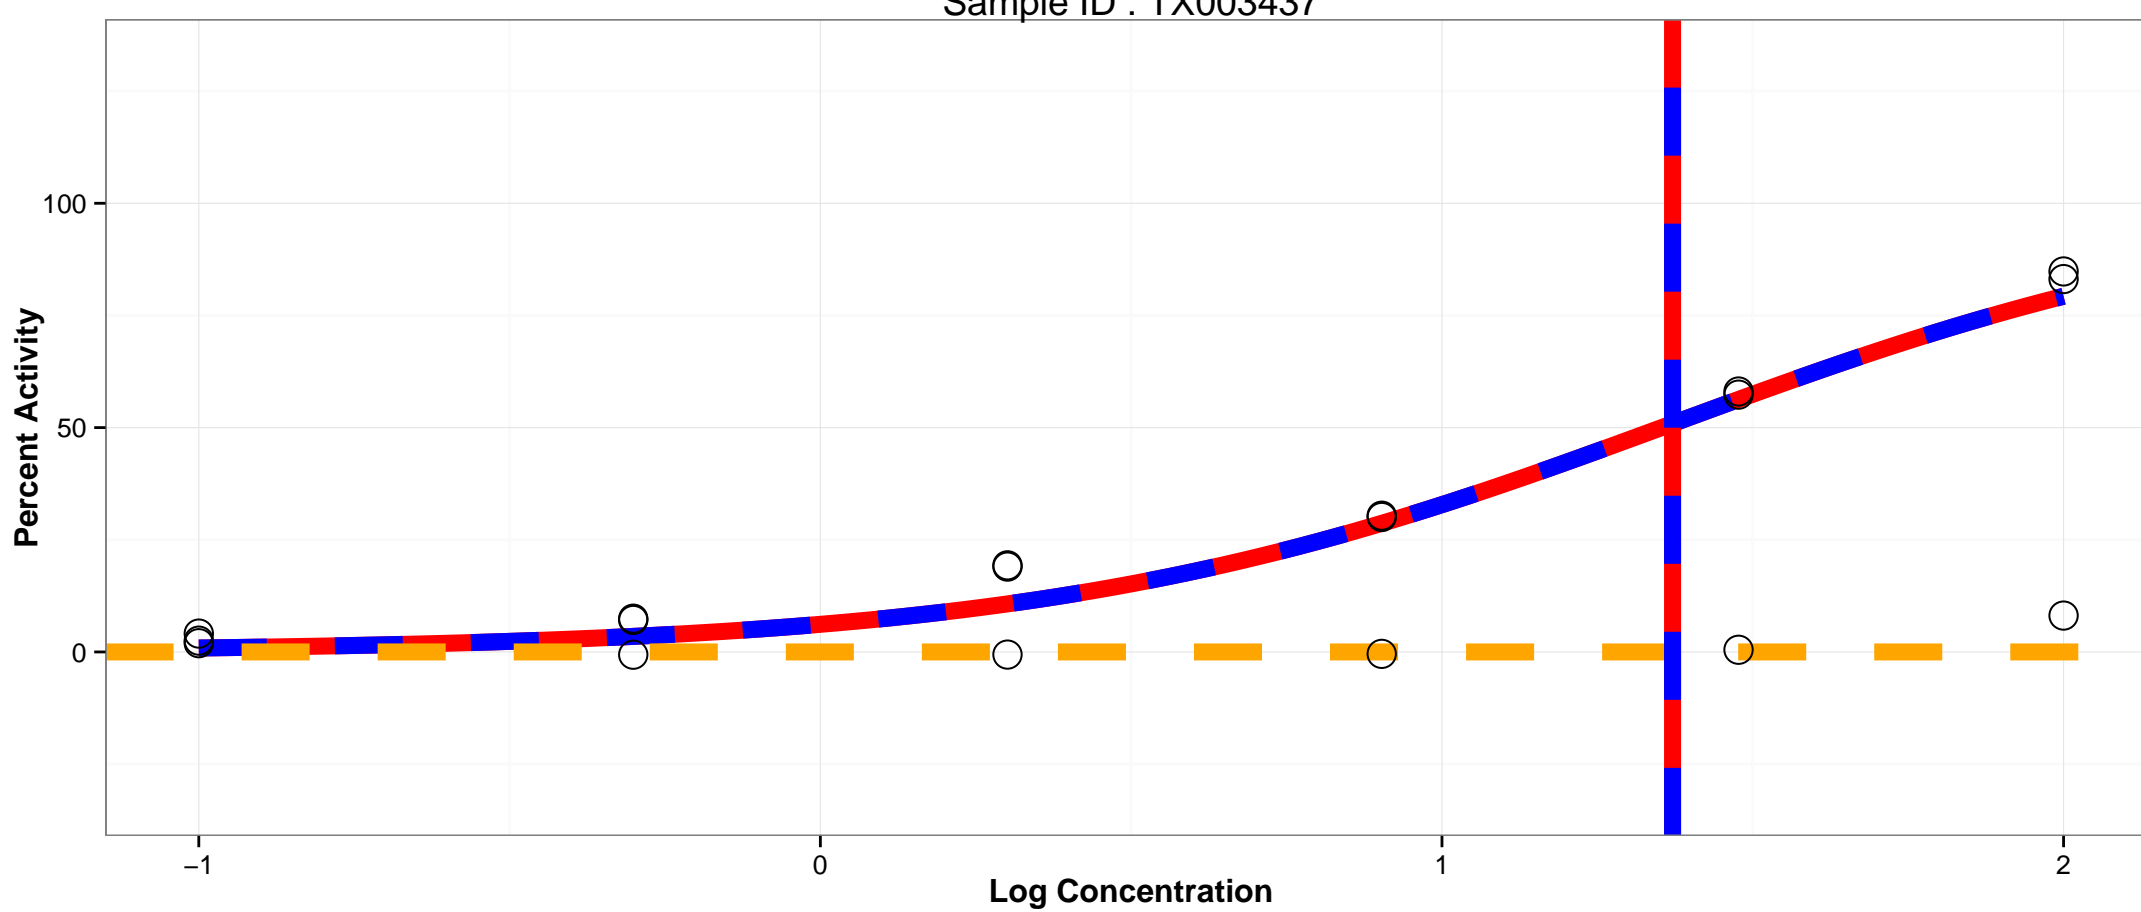

HILL MODEL

|     | tp   | ga    | gw    |
|-----|------|-------|-------|
| val | 102  | 1.37  | 0.869 |
| sd  | 24.1 | 0.274 | 0.25  |

GAIN-LOSS MODEL

|     | tp   | ga    | gw    | la   | lw   |
|-----|------|-------|-------|------|------|
| val | 102  | 1.37  | 0.869 | 2.82 | 9.95 |
| sd  | 24.1 | 0.274 | 0.25  | 627  | 7640 |

|      | CNST   | HILL   | GNLS   |
|------|--------|--------|--------|
| AIC  | 179.92 | 160.07 | 164.07 |
| PROB | 0      | 0.88   | 0.12   |
| RMSE | 36.15  | 22.86  | 22.86  |

MAX\_MEAN : 58.7 MAX\_MED : 83.1 BMAD : 8.58  
COFF : 20 HIT-CALL : 1 FITC : 42 ACTP : 1  
FLAGS : 10

Chemical : 2,4-Diaminotoluene  
CAS : 95-80-7

Assay ID 1508 (NHEERL\_TPO\_AUR\_dn)  
Sample ID : TX003499

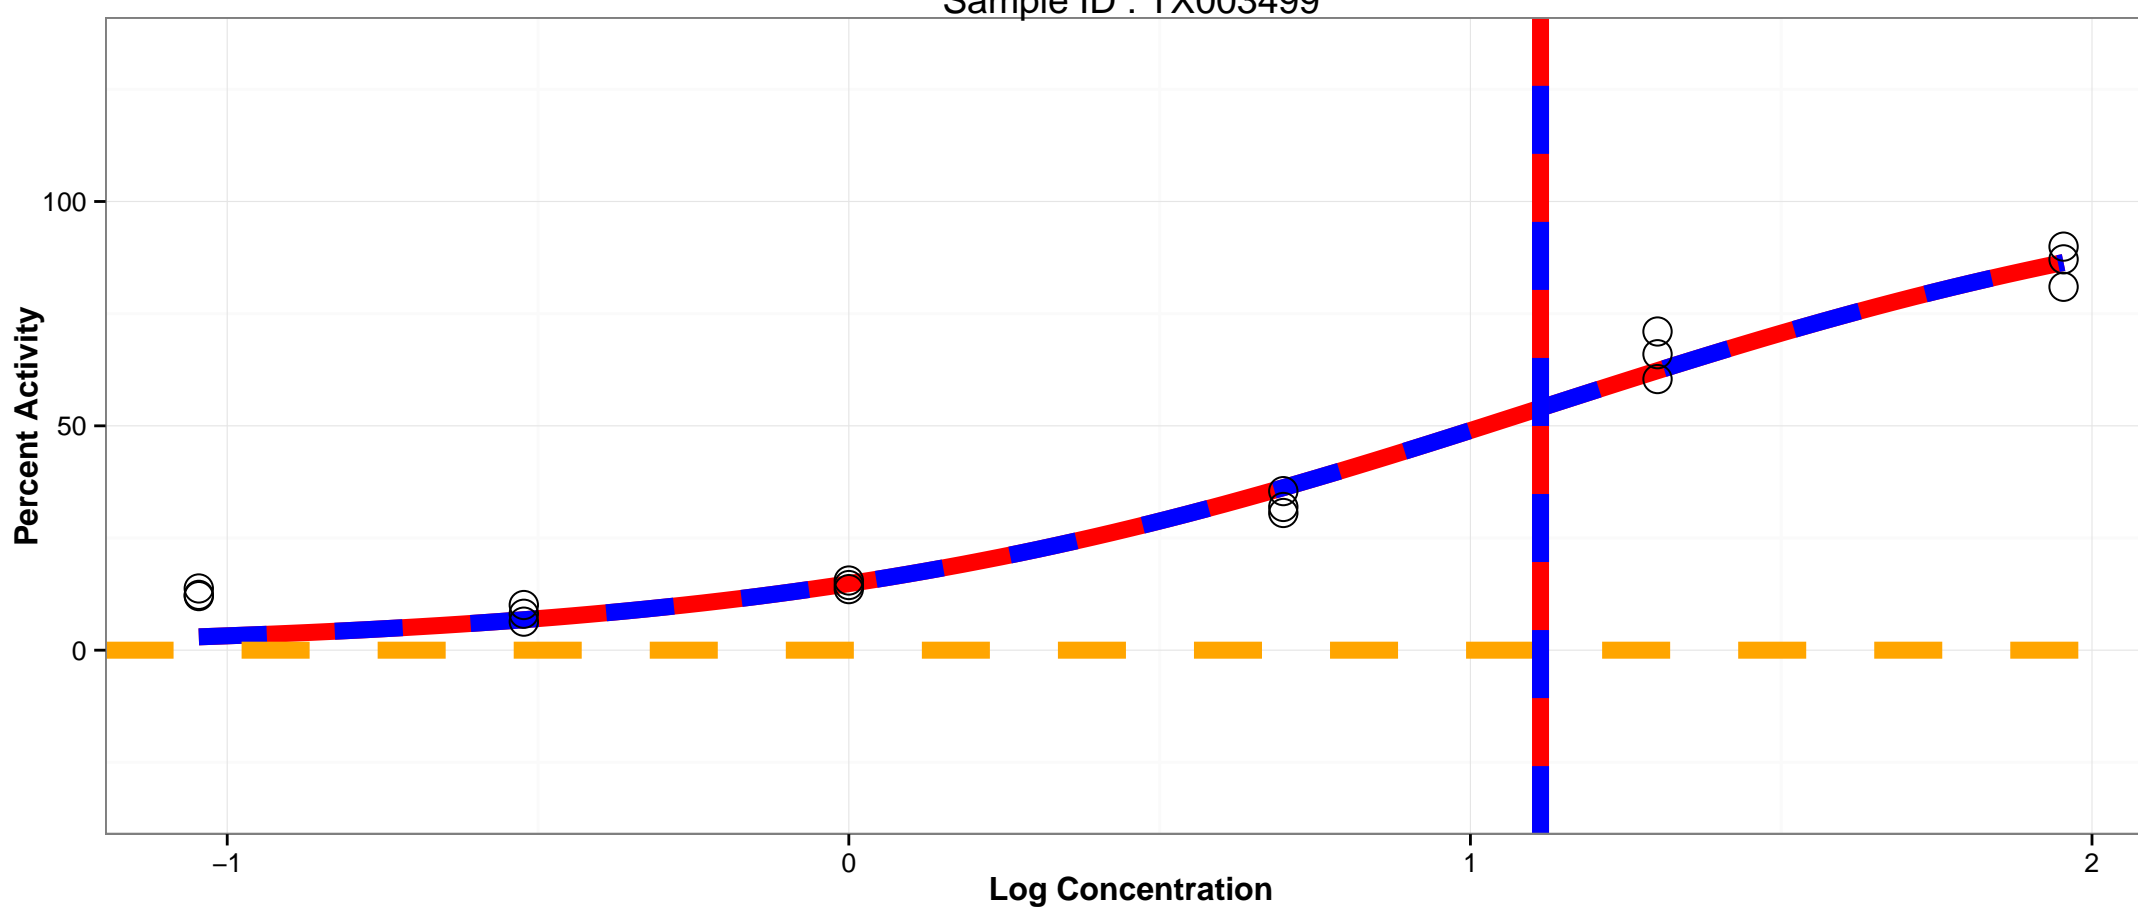

HILL MODEL

|     | tp   | ga    | gw     |
|-----|------|-------|--------|
| val | 108  | 1.11  | 0.717  |
| sd  | 10.5 | 0.156 | 0.0905 |

GAIN-LOSS MODEL

|     | tp  | ga   | gw    | la   | lw   |
|-----|-----|------|-------|------|------|
| val | 108 | 1.11 | 0.717 | 3.73 | 17.3 |
| sd  | NA  | NA   | NA    | NA   | NA   |

|      | CNST   | HILL   | GNLS   |
|------|--------|--------|--------|
| AIC  | 192.71 | 119.19 | 123.19 |
| PROB | 0      | 0.88   | 0.12   |
| RMSE | 47.05  | 5.21   | 5.21   |

MAX\_MEAN : 86 MAX\_MED : 87.1 BMAD : 5.69  
COFF : 20 HIT-CALL : 1 FITC : 42 ACTP : 1  
FLAGS :

Assay ID 1509 (NHEERL\_HEK293T\_CellTiterGLO)  
Sample ID : TX003499

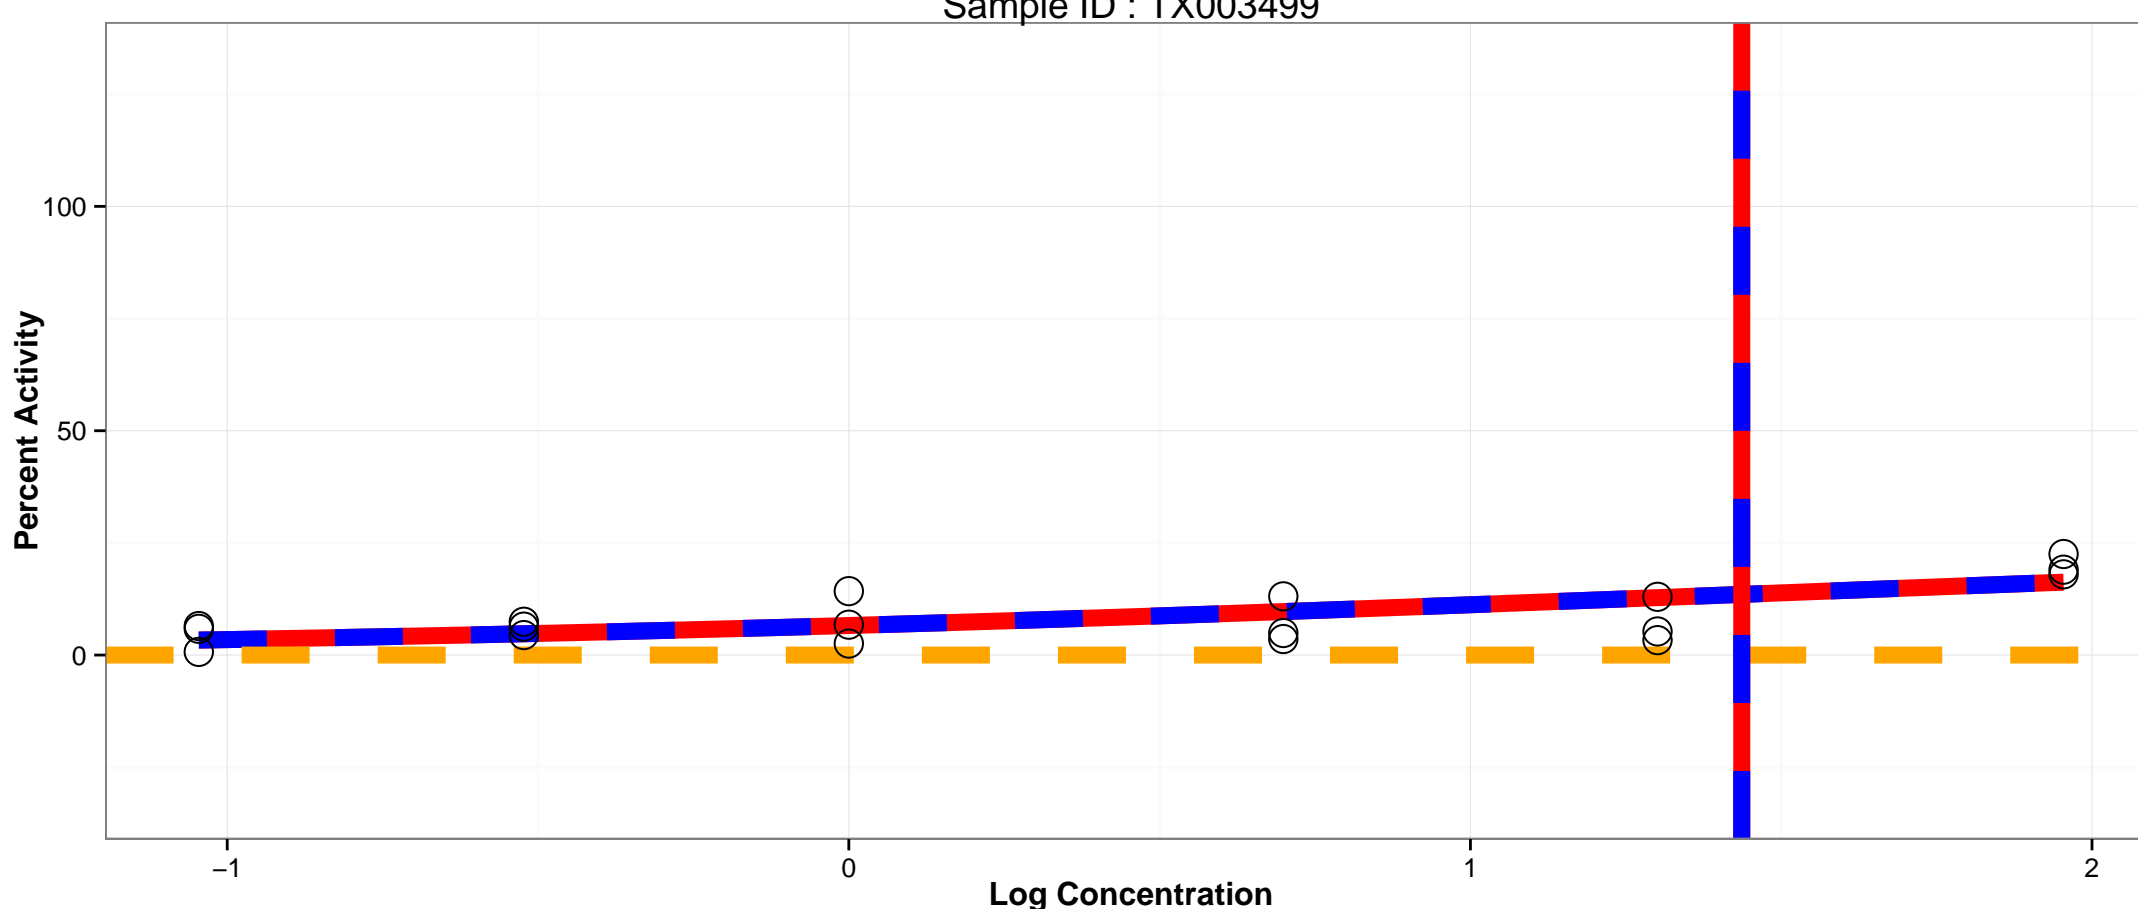

HILL MODEL

|     | tp   | ga   | gw    |
|-----|------|------|-------|
| val | 27   | 1.44 | 0.343 |
| sd  | 12.5 | 1.14 | 0.112 |

GAIN-LOSS MODEL

|     | tp   | ga   | gw    | la   | lw   |
|-----|------|------|-------|------|------|
| val | 27   | 1.44 | 0.343 | 3.95 | 4.32 |
| sd  | 12.5 | 1.14 | 0.112 | 2080 | 4500 |

|      | CNST   | HILL   | GNLS   |
|------|--------|--------|--------|
| AIC  | 139.69 | 115.44 | 119.44 |
| PROB | 0      | 0.88   | 0.12   |
| RMSE | 10.69  | 4.57   | 4.57   |

MAX\_MEAN : 19.9 MAX\_MED : 19 BMAD : 5.54  
COFF : 20 HIT-CALL : 0 FITC : 21 ACTP : 1  
FLAGS : 12

Assay ID 1848 (NHEERL\_Quantilum\_inhib\_2\_dn)  
Sample ID : TX003499

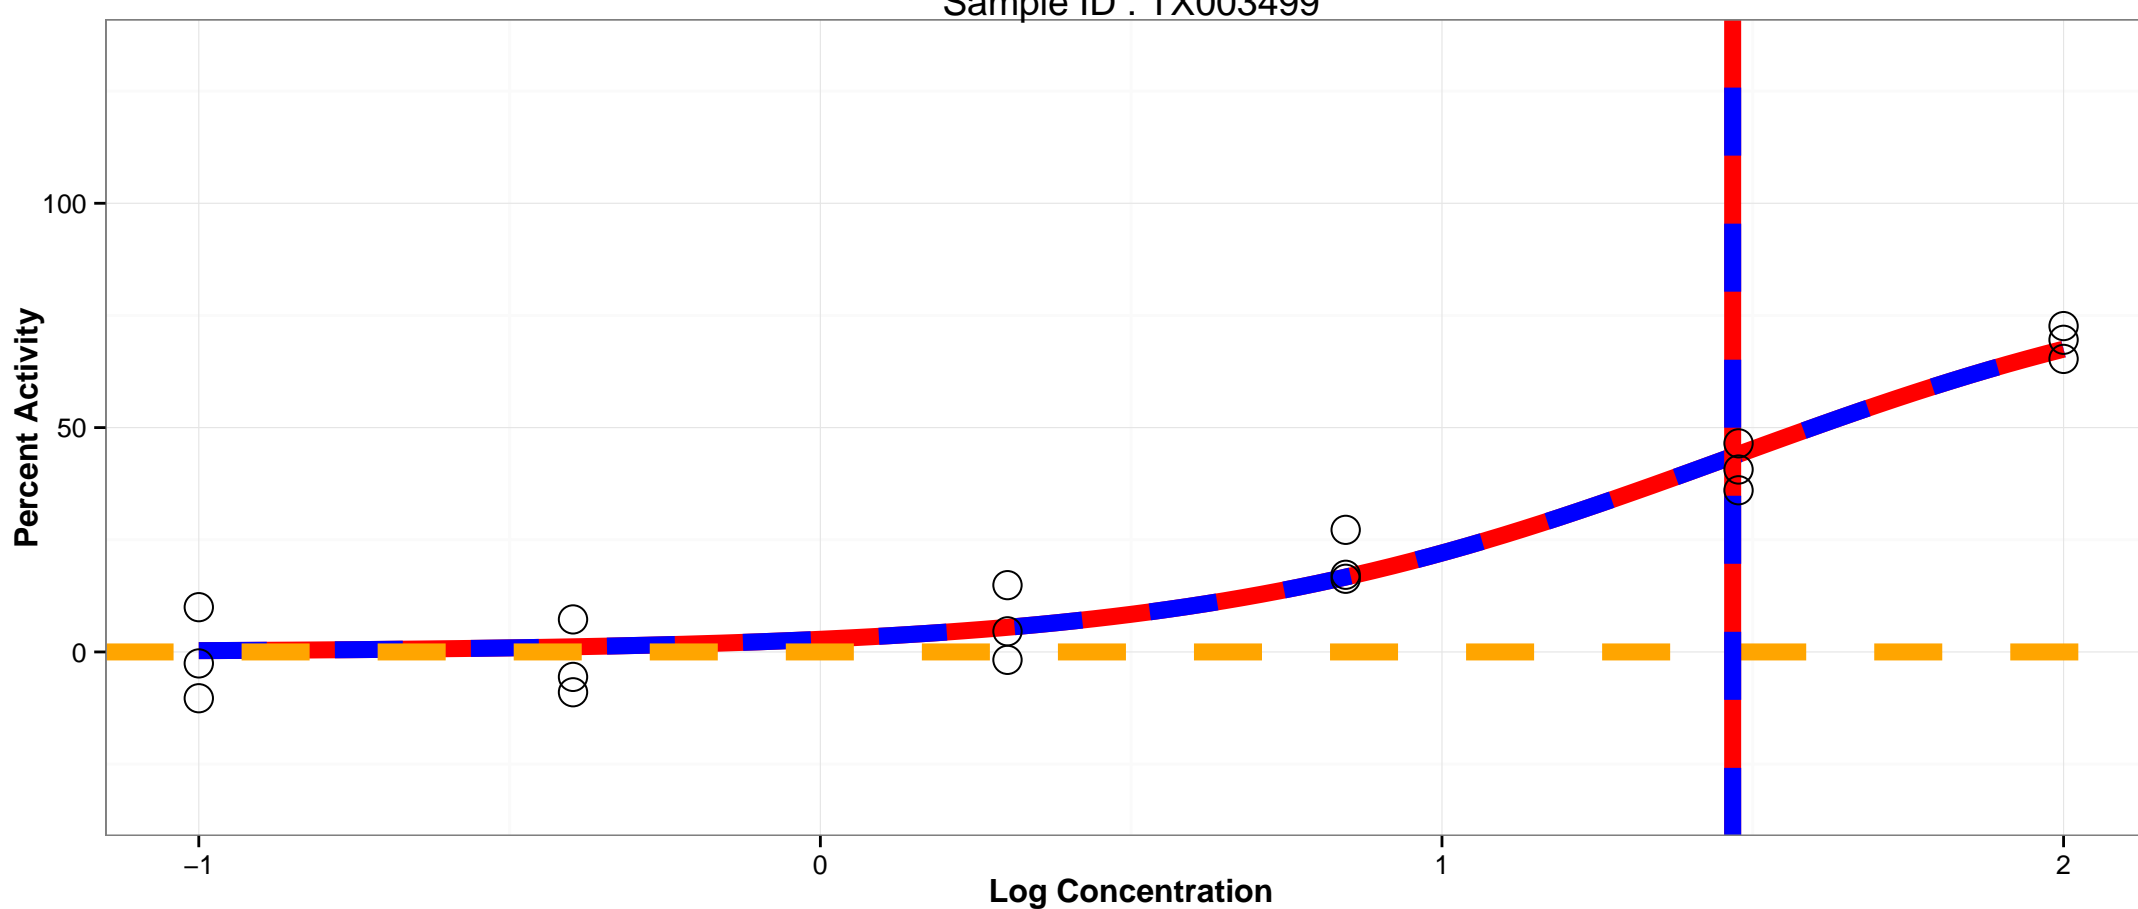

HILL MODEL

|     | tp   | ga    | gw    |
|-----|------|-------|-------|
| val | 87.2 | 1.47  | 1.01  |
| sd  | 14.4 | 0.186 | 0.197 |

GAIN-LOSS MODEL

|     | tp   | ga   | gw   | la   | lw   |
|-----|------|------|------|------|------|
| val | 87.2 | 1.47 | 1.01 | 3.72 | 17.7 |
| sd  | NA   | NA   | NA   | NA   | NA   |

|      | CNST   | HILL   | GNLS   |
|------|--------|--------|--------|
| AIC  | 180.48 | 129.11 | 133.11 |
| PROB | 0      | 0.88   | 0.12   |
| RMSE | 34.5   | 6.54   | 6.54   |

MAX\_MEAN : 69.2 MAX\_MED : 69.6 BMAD : 8.58  
COFF : 20 HIT-CALL : 1 FITC : 42 ACTP : 1  
FLAGS :

Chemical : Maleic hydrazide

CAS : 123-33-1

Assay ID 1508 (NHEERL\_TPO\_AUR\_dn)  
Sample ID : TX003708

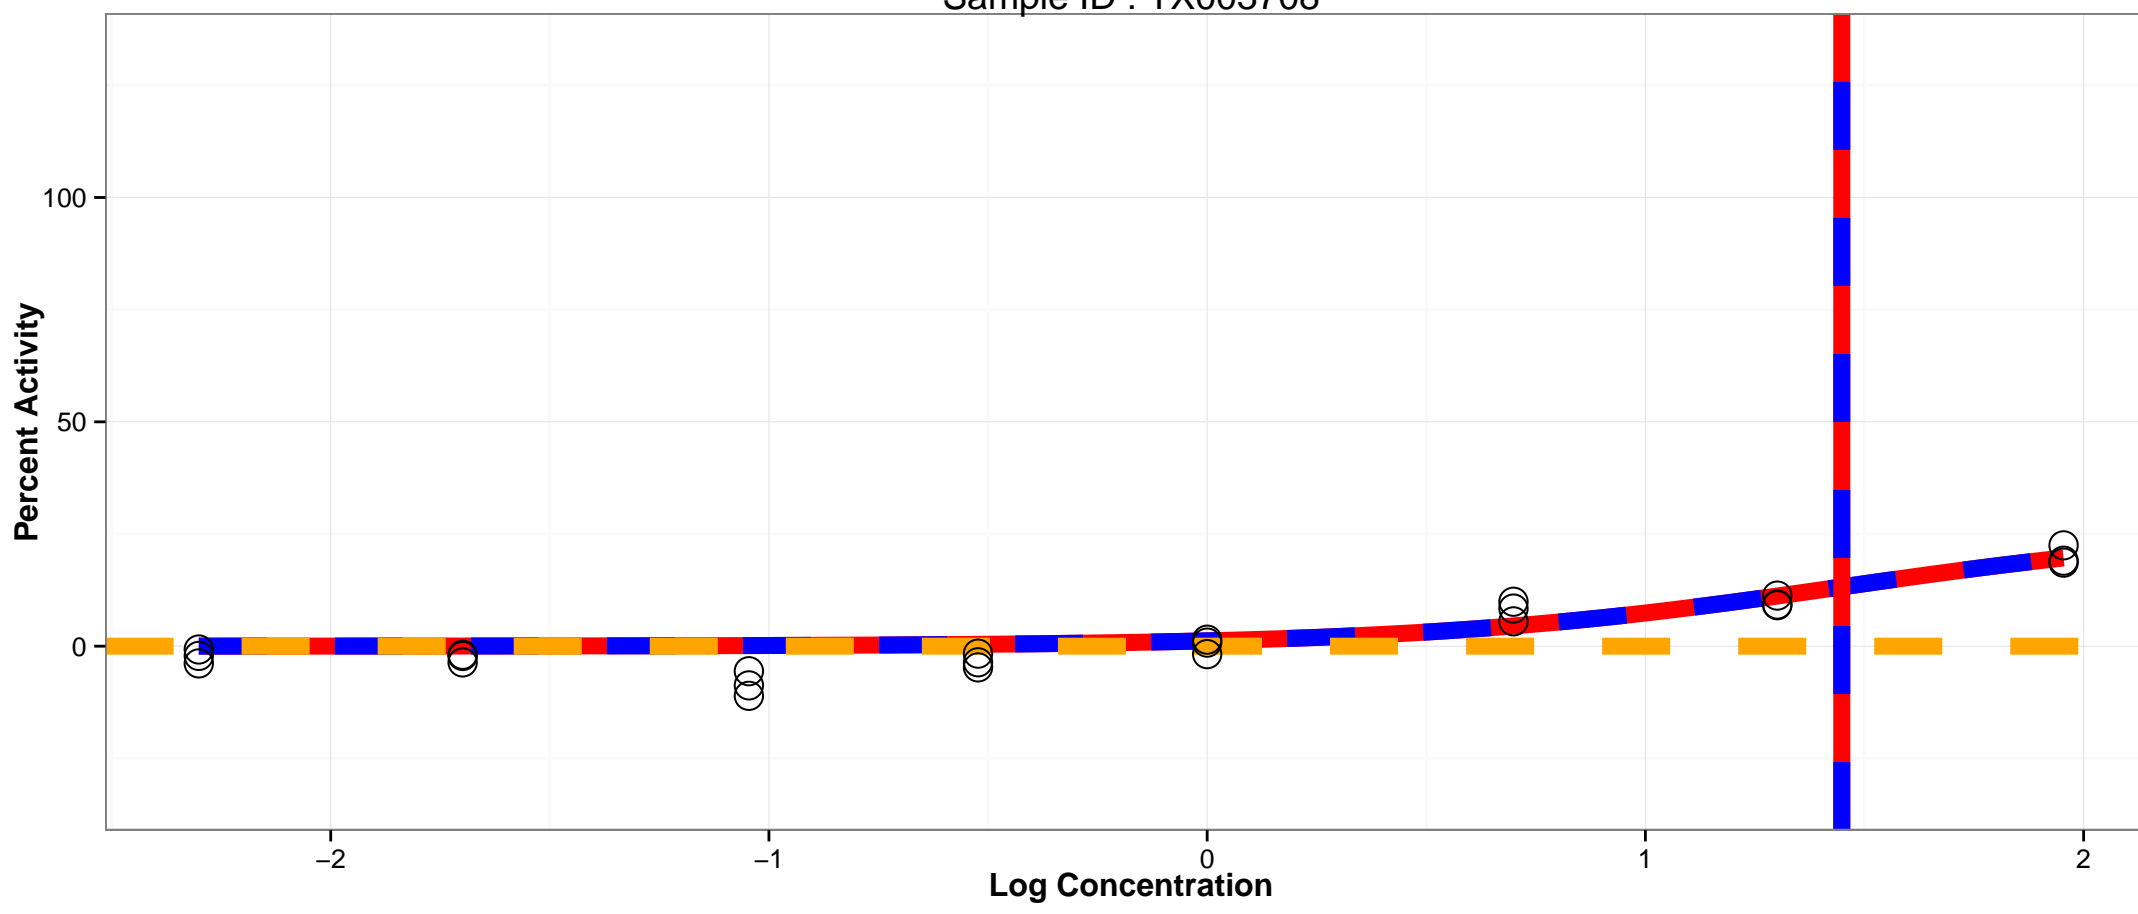

HILL MODEL

|     | tp   | ga    | gw    |
|-----|------|-------|-------|
| val | 26.4 | 1.45  | 0.916 |
| sd  | 8.91 | 0.408 | 0.276 |

GAIN-LOSS MODEL

|     | tp   | ga    | gw    | la   | lw   |
|-----|------|-------|-------|------|------|
| val | 26.4 | 1.45  | 0.916 | 3.28 | 5.68 |
| sd  | 8.91 | 0.408 | 0.276 | 966  | 4140 |

|      | CNST   | HILL   | GNLS   |
|------|--------|--------|--------|
| AIC  | 176.47 | 142.68 | 146.68 |
| PROB | 0      | 0.88   | 0.12   |
| RMSE | 9.19   | 4.06   | 4.06   |

MAX\_MEAN : 20.1 MAX\_MED : 19.1 BMAD : 5.69  
COFF : 20 HIT-CALL : 0 FITC : 21 ACTP : 1  
FLAGS : 12

Assay ID 1509 (NHEERL\_HEK293T\_CellTiterGLO)  
Sample ID : TX003708

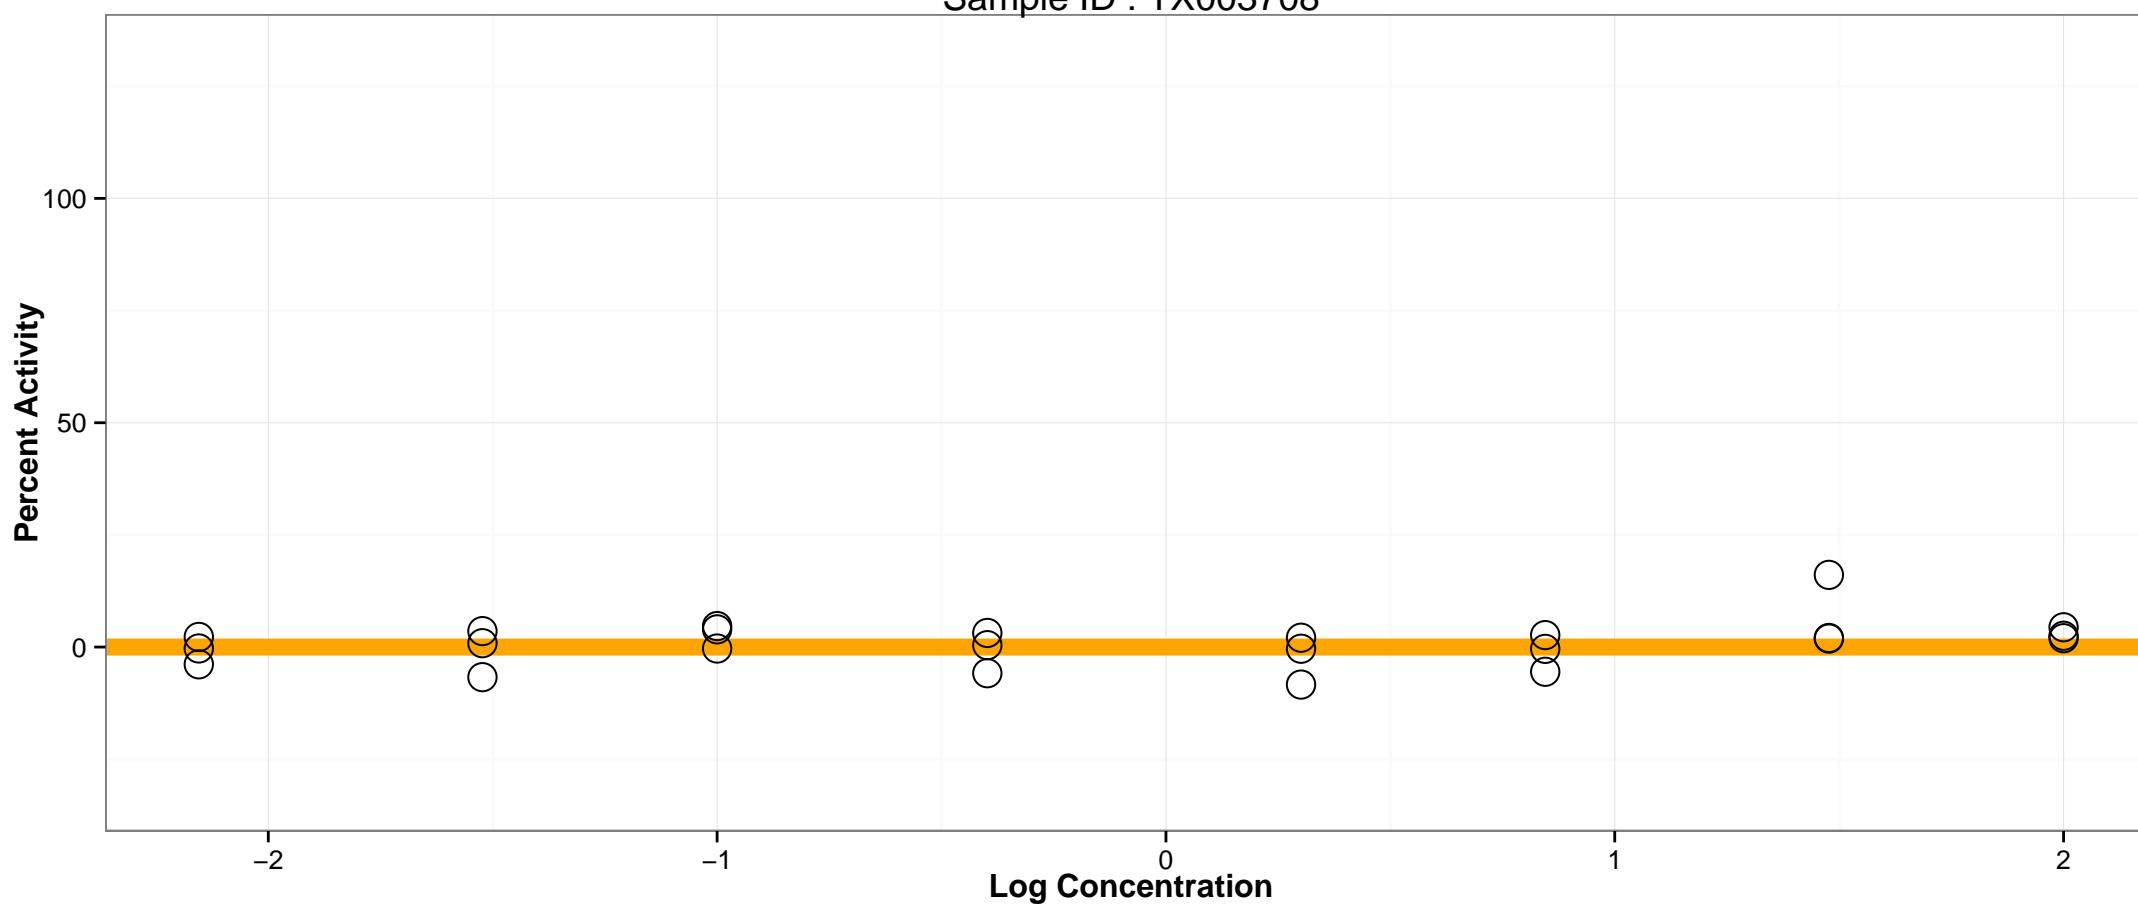

HILL MODEL

HILL MODEL: Not applicable

GAIN-LOSS MODEL

GNLS MODEL: Not applicable

|      | CNST   | HILL | GNLS |
|------|--------|------|------|
| AIC  | 142.95 | NA   | NA   |
| PROB | 1      | NA   | NA   |
| RMSE | 4.87   | NA   | NA   |

MAX\_MEAN : 6.68 MAX\_MED : 3.96 BMAD : 5.54  
COFF : 20 HIT-CALL : 0 FITC : 4 ACTP : 0  
FLAGS :

Assay ID 1848 (NHEERL\_Quantilum\_inhib\_2\_dn)  
Sample ID : TX003708

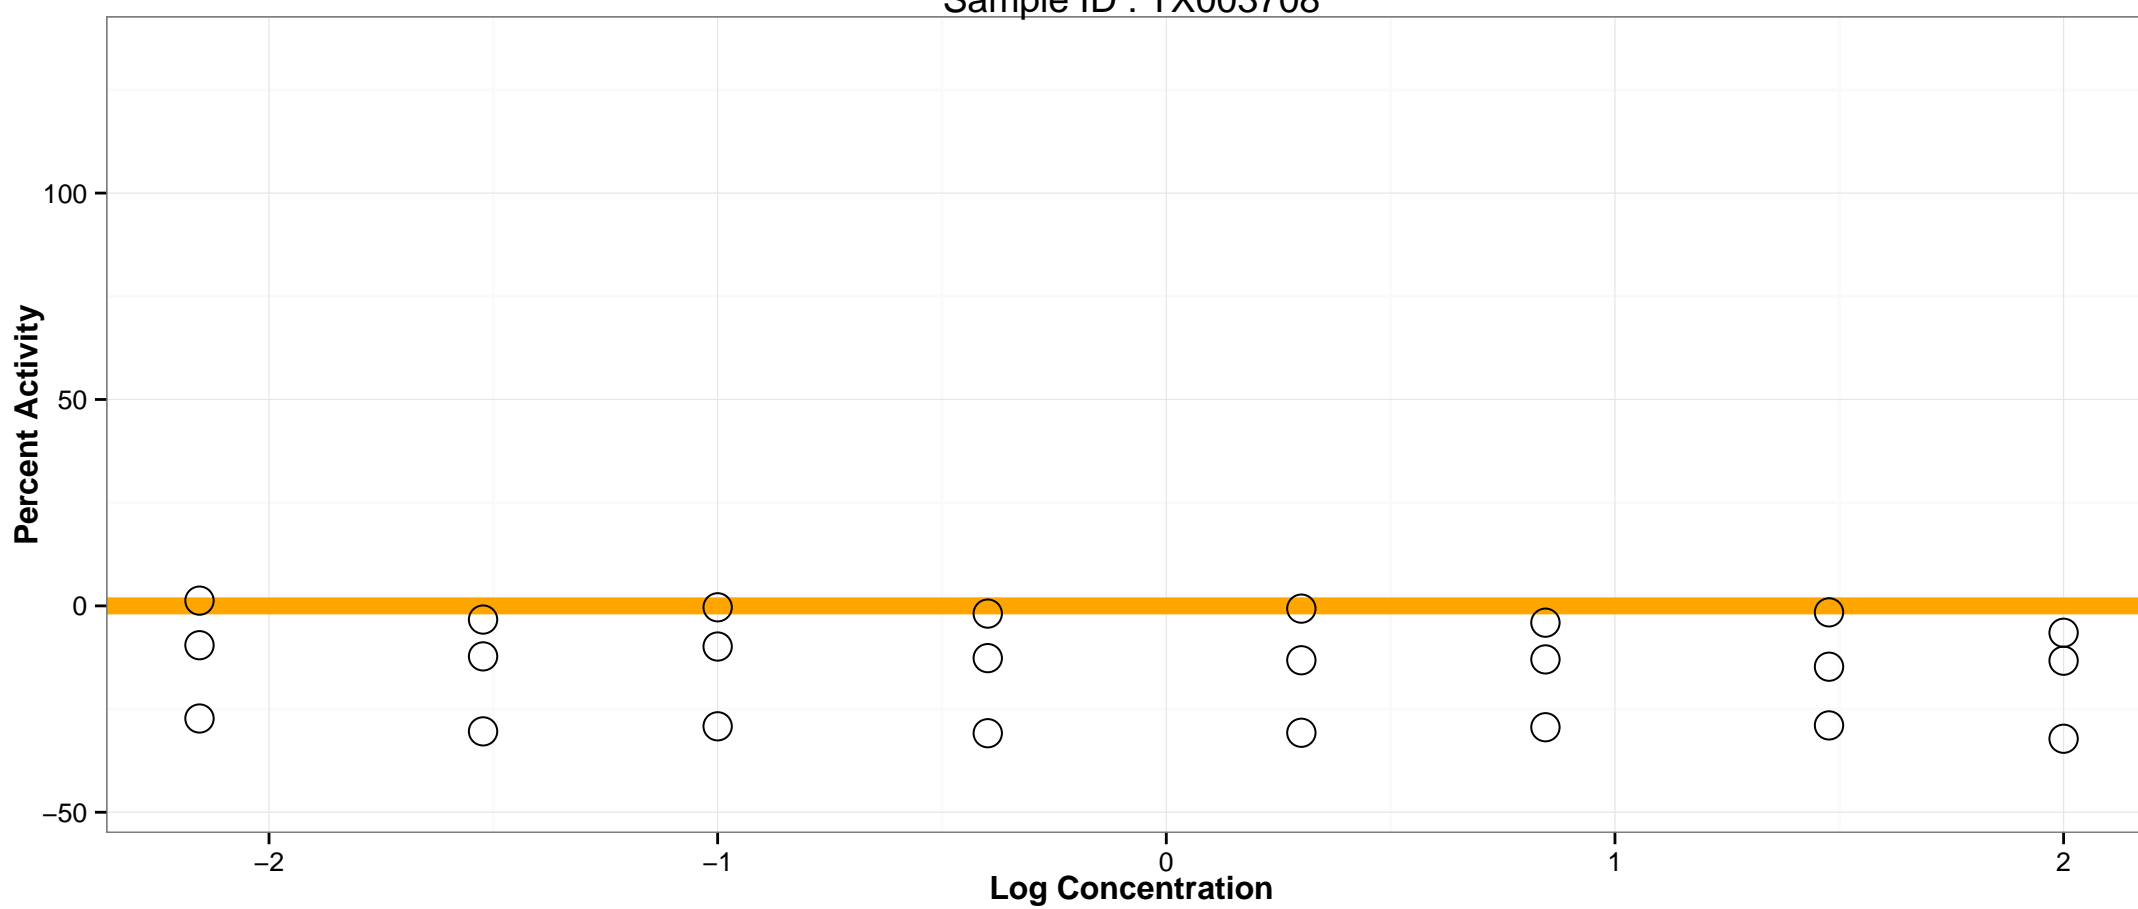

HILL MODEL

HILL MODEL: Not applicable

GAIN-LOSS MODEL

GNLS MODEL: Not applicable

|      | CNST   | HILL | GNLS |
|------|--------|------|------|
| AIC  | 213.18 | NA   | NA   |
| PROB | 1      | NA   | NA   |
| RMSE | 18.77  | NA   | NA   |

MAX\_MEAN : -11.8 MAX\_MED : -9.52 BMAD : 8.58  
COFF : 20 HIT-CALL : 0 FITC : 4 ACTP : 0  
FLAGS :



Chemical : Cyanamide  
CAS : 420-04-2

Assay ID 1508 (NHEERL\_TPO\_AUR\_dn)  
Sample ID : TX003715

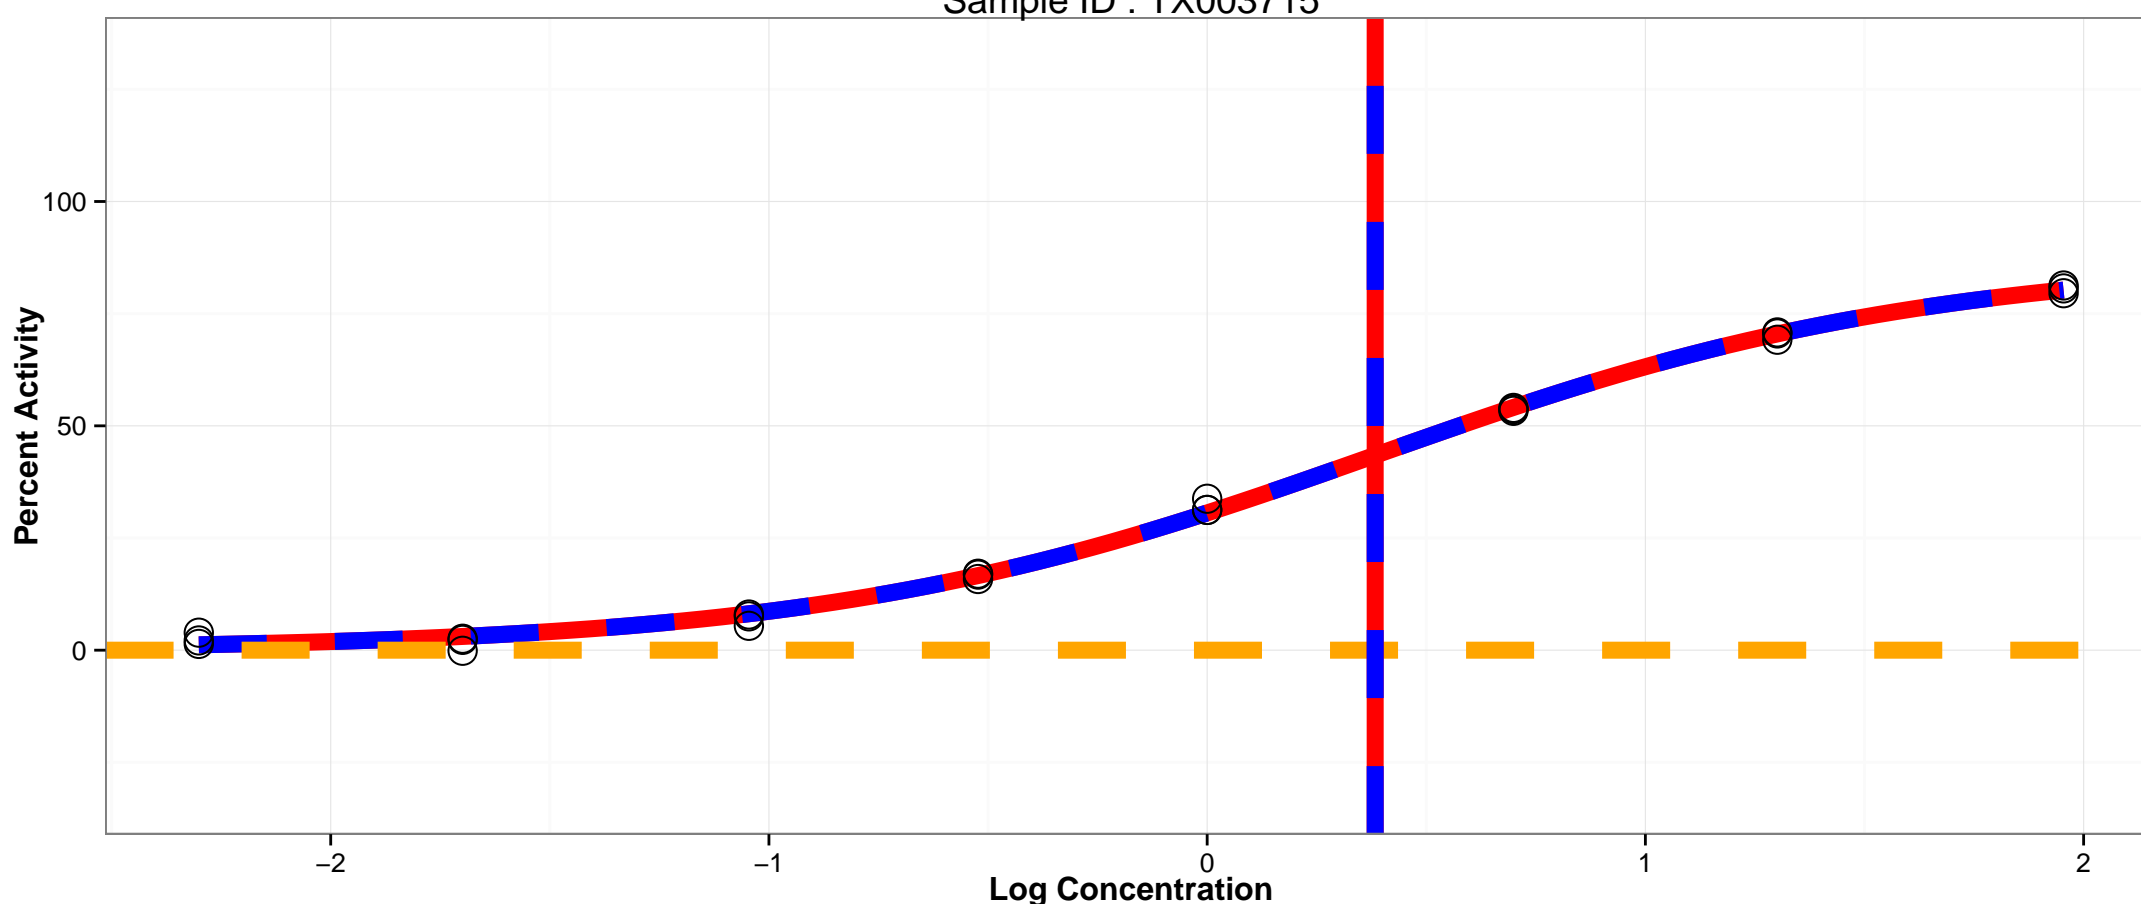

HILL MODEL

|     | tp    | ga     | gw     |
|-----|-------|--------|--------|
| val | 86.9  | 0.383  | 0.691  |
| sd  | 0.997 | 0.0227 | 0.0154 |

GAIN-LOSS MODEL

|     | tp    | ga     | gw     | la   | lw   |
|-----|-------|--------|--------|------|------|
| val | 86.9  | 0.383  | 0.691  | 3.04 | 8.44 |
| sd  | 0.997 | 0.0227 | 0.0154 | 812  | 6300 |

|      | CNST   | HILL  | GNLS  |
|------|--------|-------|-------|
| AIC  | 253.58 | 87.11 | 91.11 |
| PROB | 0      | 0.88  | 0.12  |
| RMSE | 44.25  | 1.34  | 1.34  |

MAX\_MEAN : 80.5 MAX\_MED : 80.6 BMAD : 5.69  
COFF : 20 HIT-CALL : 1 FITC : 42 ACTP : 1  
FLAGS :

Assay ID 1509 (NHEERL\_HEK293T\_CellTiterGLO)  
Sample ID : TX003715

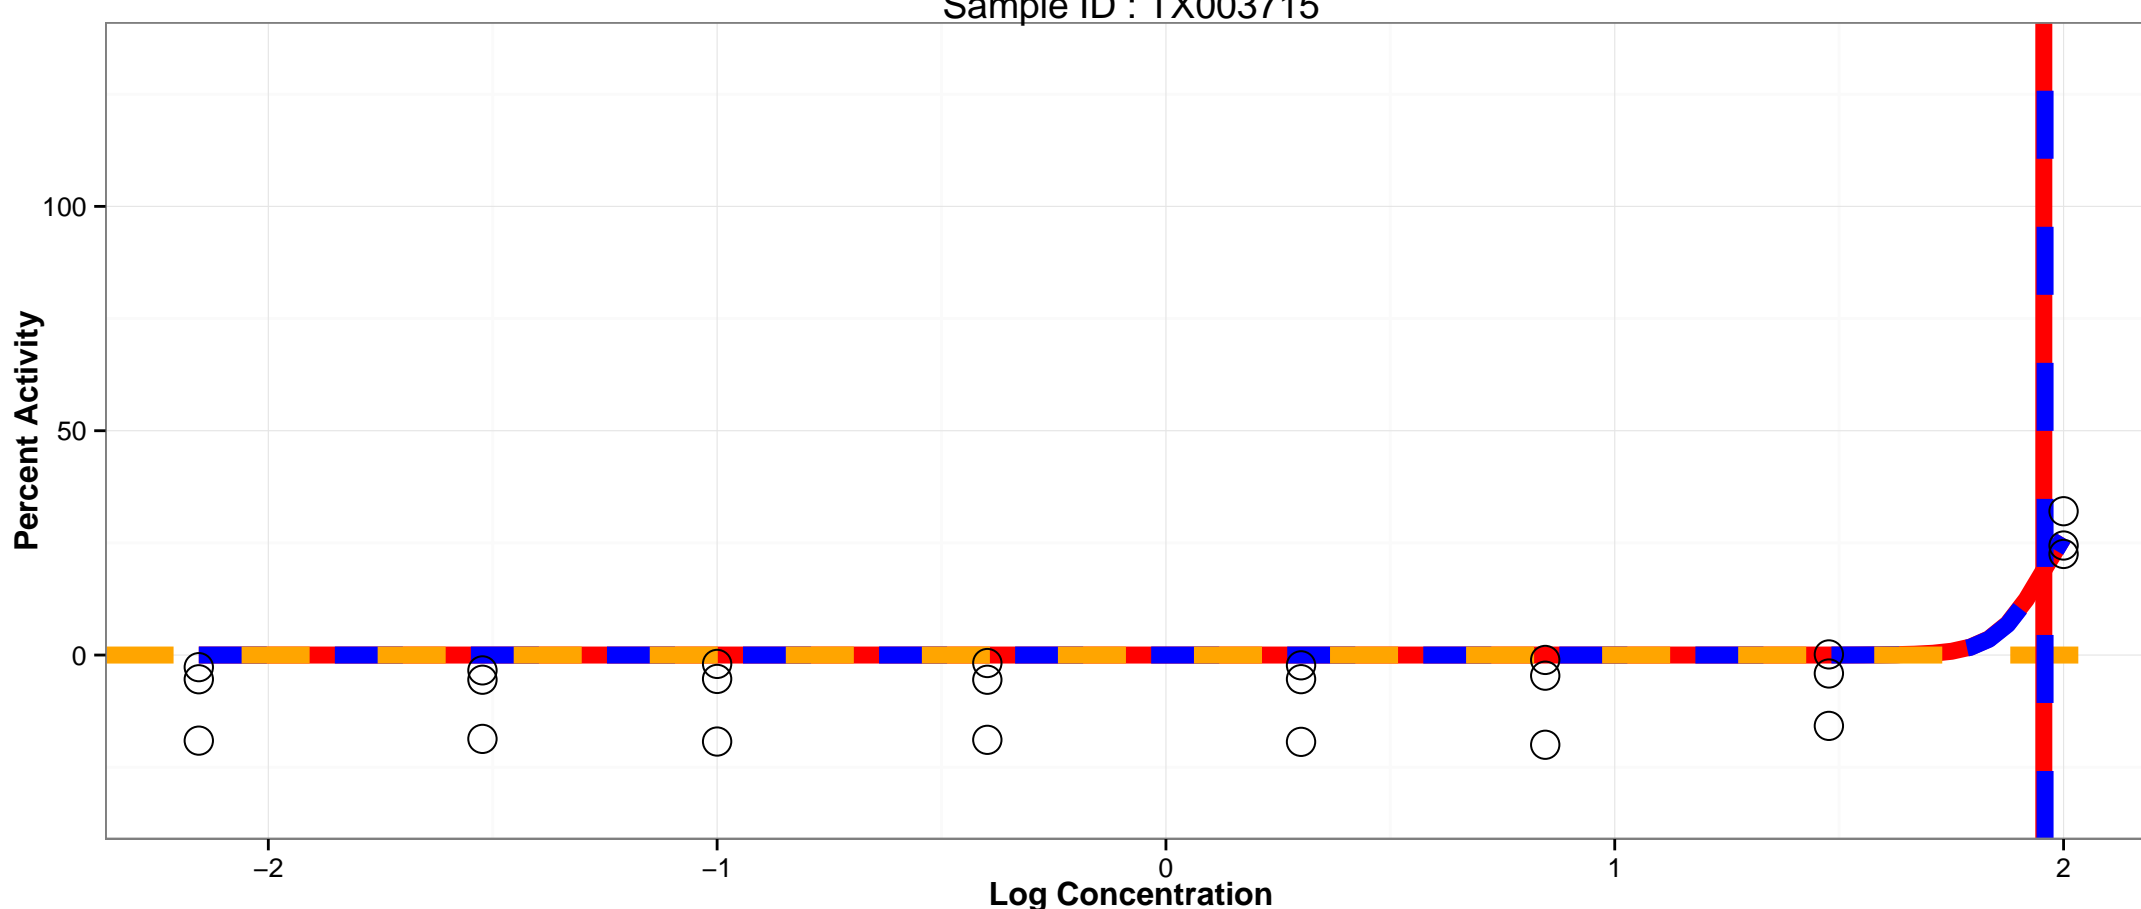

HILL MODEL

|     | tp   | ga   | gw |
|-----|------|------|----|
| val | 37.8 | 1.96 | 8  |
| sd  | NA   | NA   | NA |

GAIN-LOSS MODEL

|     | tp   | ga   | gw   | la   | lw   |
|-----|------|------|------|------|------|
| val | 38.5 | 1.96 | 7.99 | 3.08 | 3.44 |
| sd  | NA   | NA   | NA   | NA   | NA   |

|      | CNST   | HILL   | GNLS   |
|------|--------|--------|--------|
| AIC  | 198.64 | 189.99 | 193.99 |
| PROB | 0.01   | 0.87   | 0.12   |
| RMSE | 14.16  | 10.66  | 10.66  |

MAX\_MEAN : 26.3 MAX\_MED : 24.4 BMAD : 5.54  
COFF : 20 HIT-CALL : 1 FITC : 42 ACTP : 0.988  
FLAGS : 6

Assay ID 1848 (NHEERL\_Quantilum\_inhib\_2\_dn)  
Sample ID : TX003715

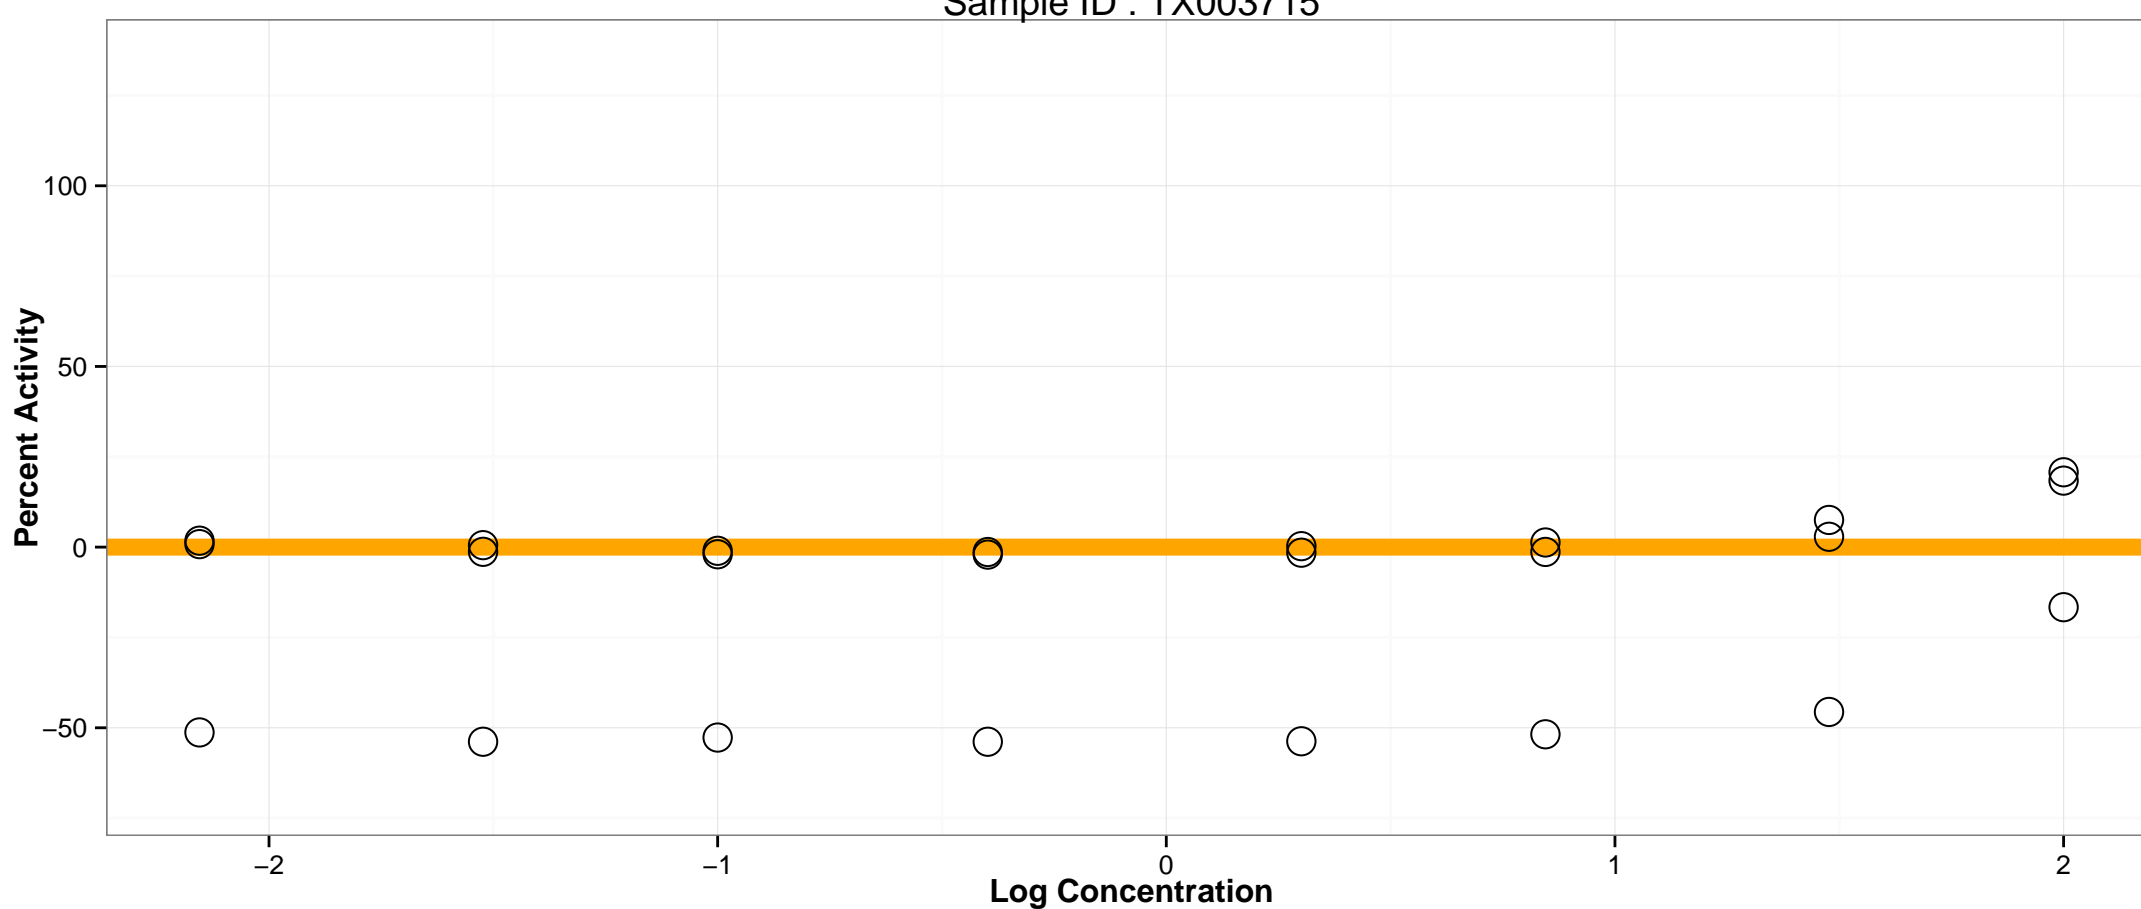

HILL MODEL

HILL MODEL: Not applicable

GAIN-LOSS MODEL

GNLS MODEL: Not applicable

|      | CNST   | HILL | GNLS |
|------|--------|------|------|
| AIC  | 230.53 | NA   | NA   |
| PROB | 1      | NA   | NA   |
| RMSE | 28.85  | NA   | NA   |

MAX\_MEAN : 7.51 MAX\_MED : 18.4 BMAD : 8.58  
COFF : 20 HIT-CALL : 0 FITC : 4 ACTP : 0  
FLAGS : 10

Assay ID 1508 (NHEERL\_TPO\_AUR\_dn)  
Sample ID : TX003818

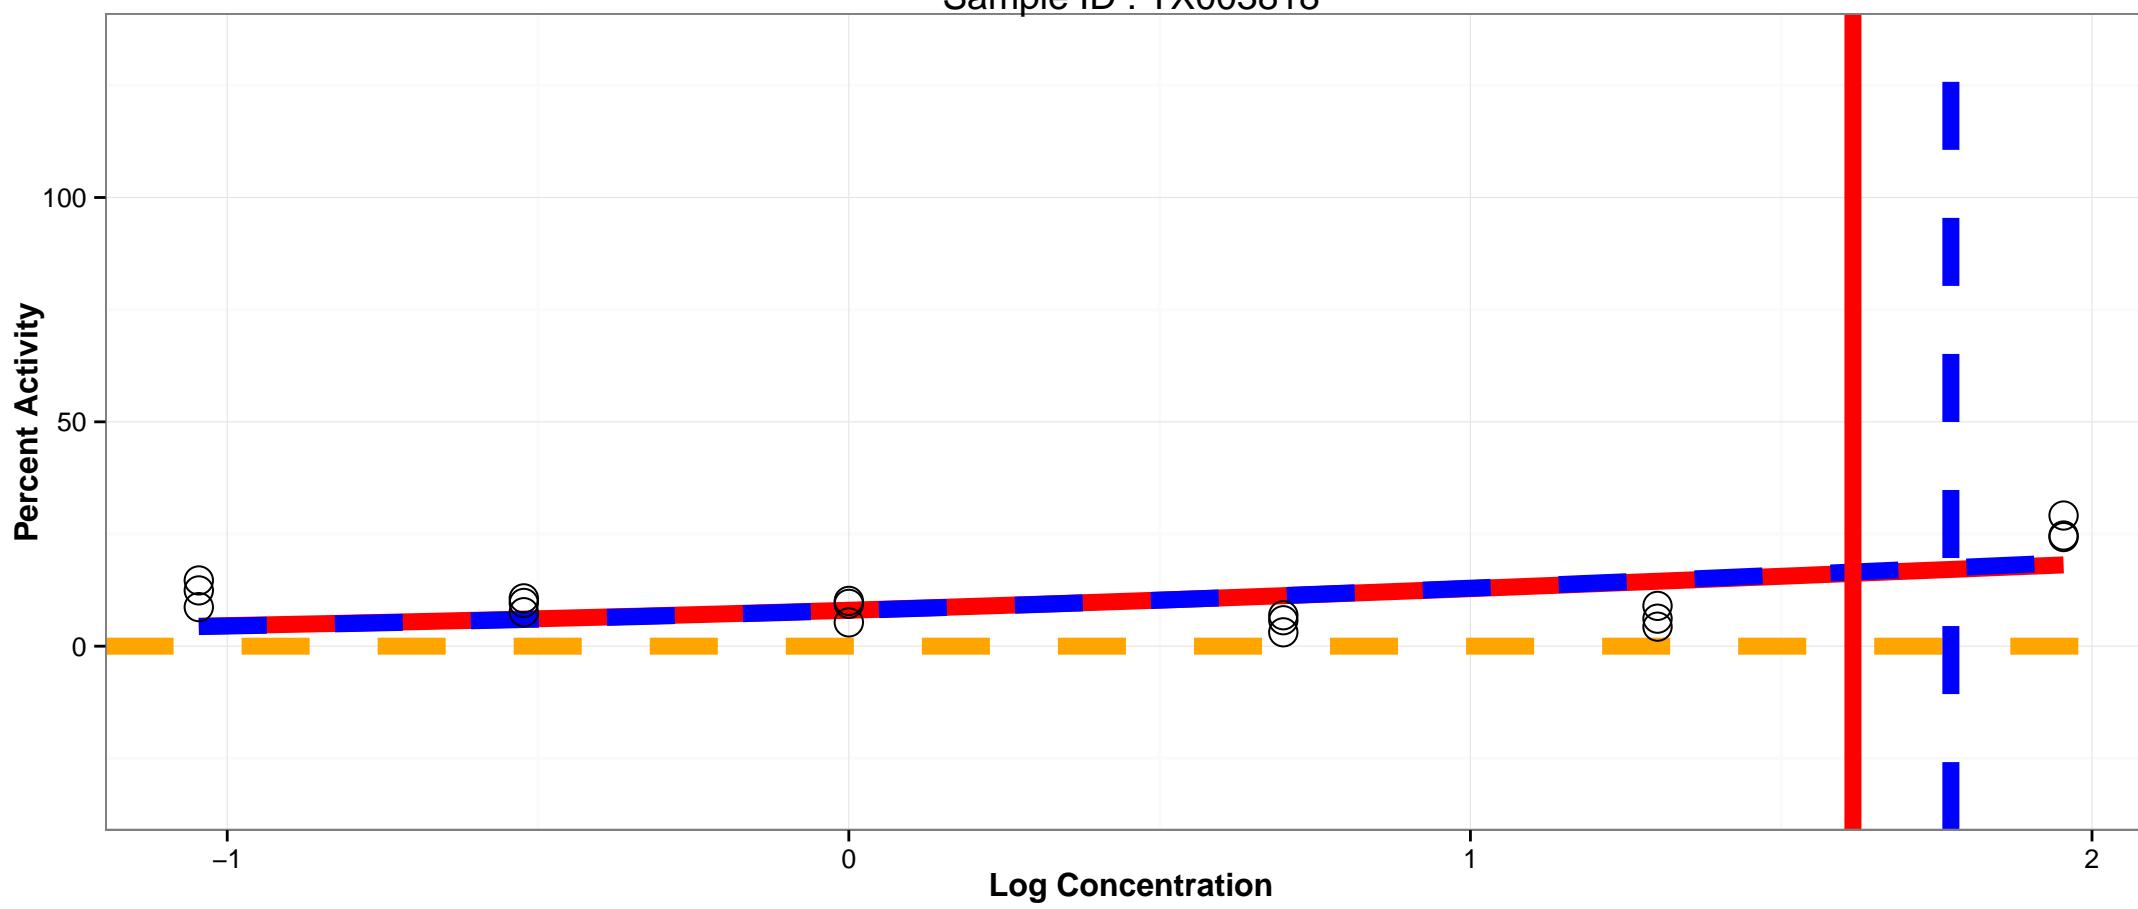

HILL MODEL

|     | tp   | ga   | gw    |
|-----|------|------|-------|
| val | 32.4 | 1.62 | 0.3   |
| sd  | 36.2 | 2.51 | 0.248 |

GAIN-LOSS MODEL

|     | tp | ga   | gw  | la   | lw |
|-----|----|------|-----|------|----|
| val | 35 | 1.77 | 0.3 | 3.95 | 18 |
| sd  | NA | NA   | NA  | NA   | NA |

|      | CNST   | HILL   | GNLS   |
|------|--------|--------|--------|
| AIC  | 147.54 | 129.25 | 133.14 |
| PROB | 0      | 0.87   | 0.13   |
| RMSE | 13.35  | 6.48   | 6.46   |

MAX\_MEAN : 26 MAX\_MED : 24.7 BMAD : 5.69  
COFF : 20 HIT-CALL : 1 FITC : 42 ACTP : 1  
FLAGS : 6

Assay ID 1509 (NHEERL\_HEK293T\_CellTiterGLO)  
Sample ID : TX003818

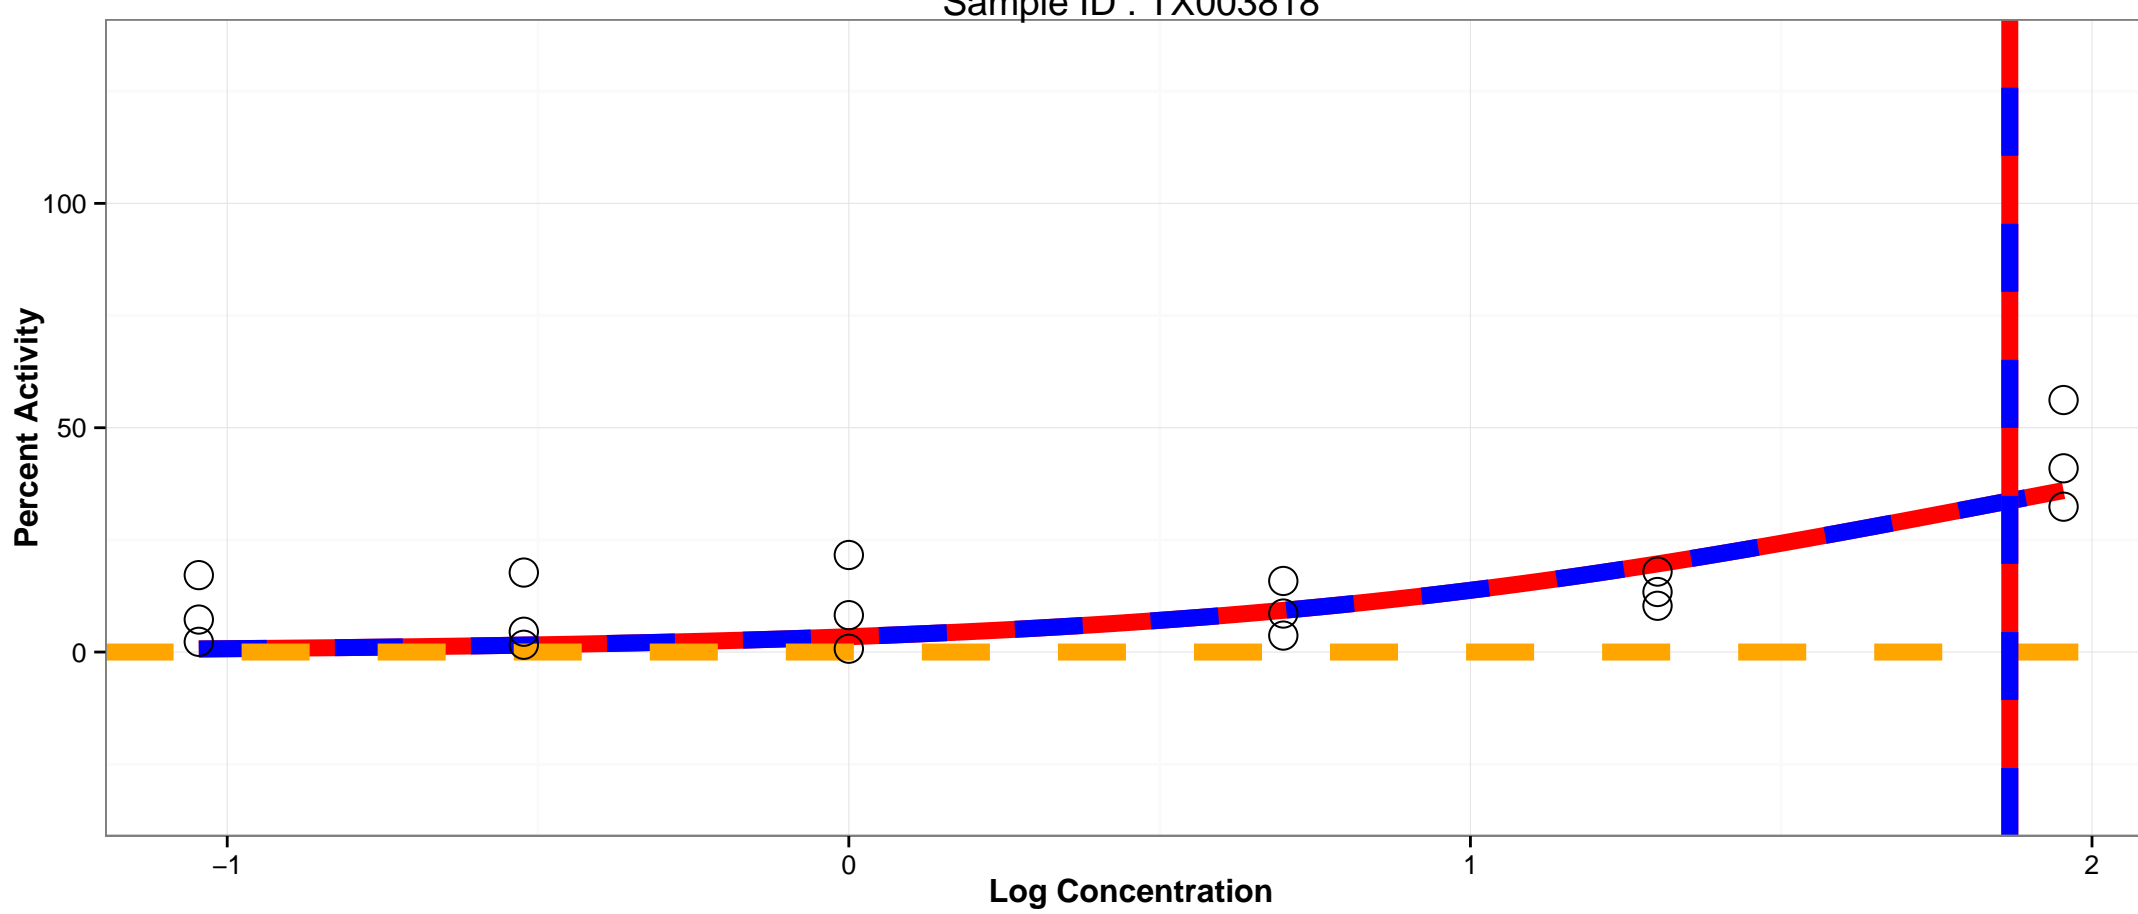

HILL MODEL

|     | tp   | ga    | gw    |
|-----|------|-------|-------|
| val | 67.4 | 1.87  | 0.681 |
| sd  | 30.1 | 0.573 | 0.375 |

GAIN-LOSS MODEL

|     | tp   | ga   | gw    | la  | lw   |
|-----|------|------|-------|-----|------|
| val | 67.4 | 1.87 | 0.681 | 3.1 | 14.8 |
| sd  | NA   | NA   | NA    | NA  | NA   |

|      | CNST   | HILL   | GNLS   |
|------|--------|--------|--------|
| AIC  | 161.92 | 139.97 | 143.97 |
| PROB | 0      | 0.88   | 0.12   |
| RMSE | 21.16  | 9.43   | 9.43   |

MAX\_MEAN : 43.2 MAX\_MED : 41 BMAD : 5.54  
COFF : 20 HIT-CALL : 1 FITC : 42 ACTP : 1  
FLAGS : 6

Assay ID 1848 (NHEERL\_Quantilum\_inhib\_2\_dn)  
Sample ID : TX003818

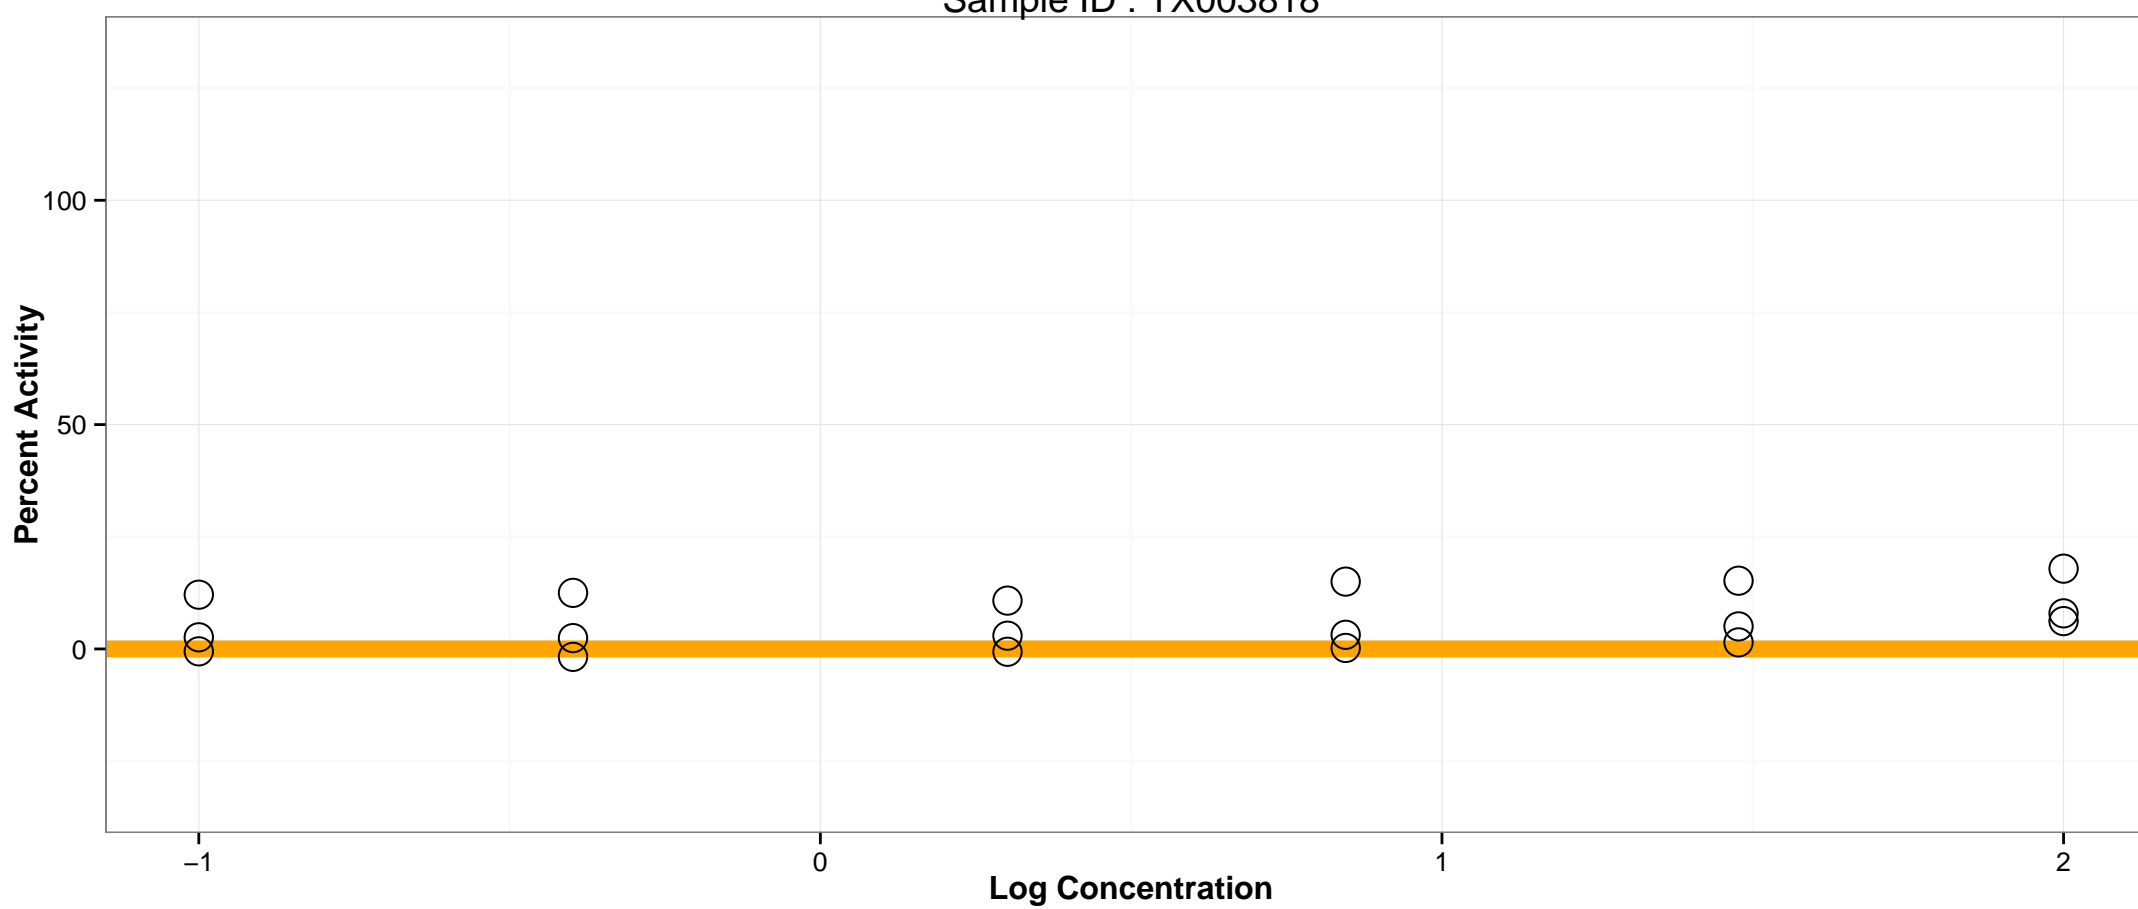

HILL MODEL

HILL MODEL: Not applicable

GAIN-LOSS MODEL

GNLS MODEL: Not applicable

|      | CNST   | HILL | GNLS |
|------|--------|------|------|
| AIC  | 131.83 | NA   | NA   |
| PROB | 1      | NA   | NA   |
| RMSE | 8.7    | NA   | NA   |

MAX\_MEAN : 10.7 MAX\_MED : 7.94 BMAD : 8.58  
COFF : 20 HIT-CALL : 0 FITC : 4 ACTP : 0  
FLAGS :

Chemical : Sodium hexyldecyl sulfate  
CAS : 1120-01-0

Assay ID 1508 (NHEERL\_TPO\_AUR\_dn)  
Sample ID : TX003824

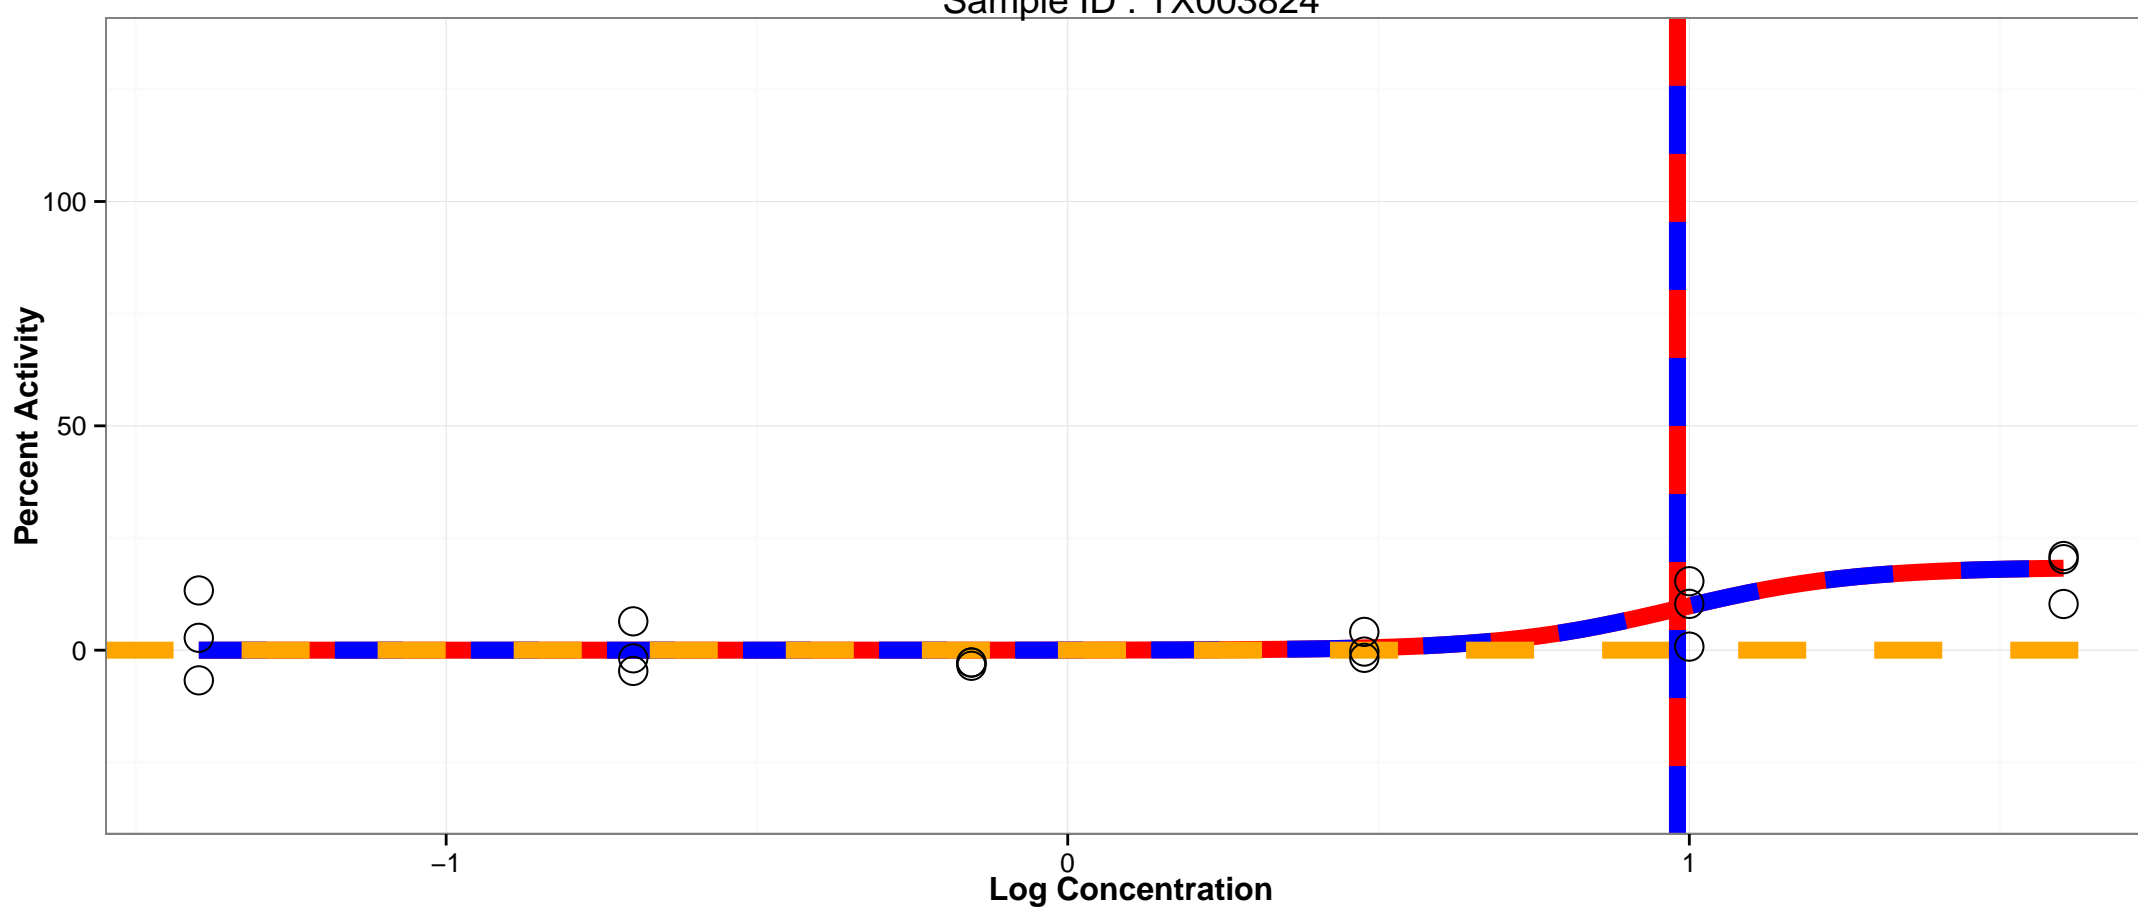

HILL MODEL

|     | tp   | ga    | gw   |
|-----|------|-------|------|
| val | 18.5 | 0.981 | 3.08 |
| sd  | 3.52 | 0.121 | 4.02 |

GAIN-LOSS MODEL

|     | tp   | ga    | gw   | la   | lw   |
|-----|------|-------|------|------|------|
| val | 18.5 | 0.981 | 3.08 | 2.29 | 7.39 |
| sd  | 3.63 | 0.122 | 4.02 | 765  | 8220 |

|      | CNST   | HILL   | GNLS   |
|------|--------|--------|--------|
| AIC  | 134.32 | 120.69 | 124.69 |
| PROB | 0      | 0.88   | 0.12   |
| RMSE | 9.56   | 5.42   | 5.42   |

MAX\_MEAN : 17.2 MAX\_MED : 20.3 BMAD : 5.69  
COFF : 20 HIT-CALL : 0 FITC : 20 ACTP : 0.999  
FLAGS : 12

Assay ID 1509 (NHEERL\_HEK293T\_CellTiterGLO)  
Sample ID : TX003824

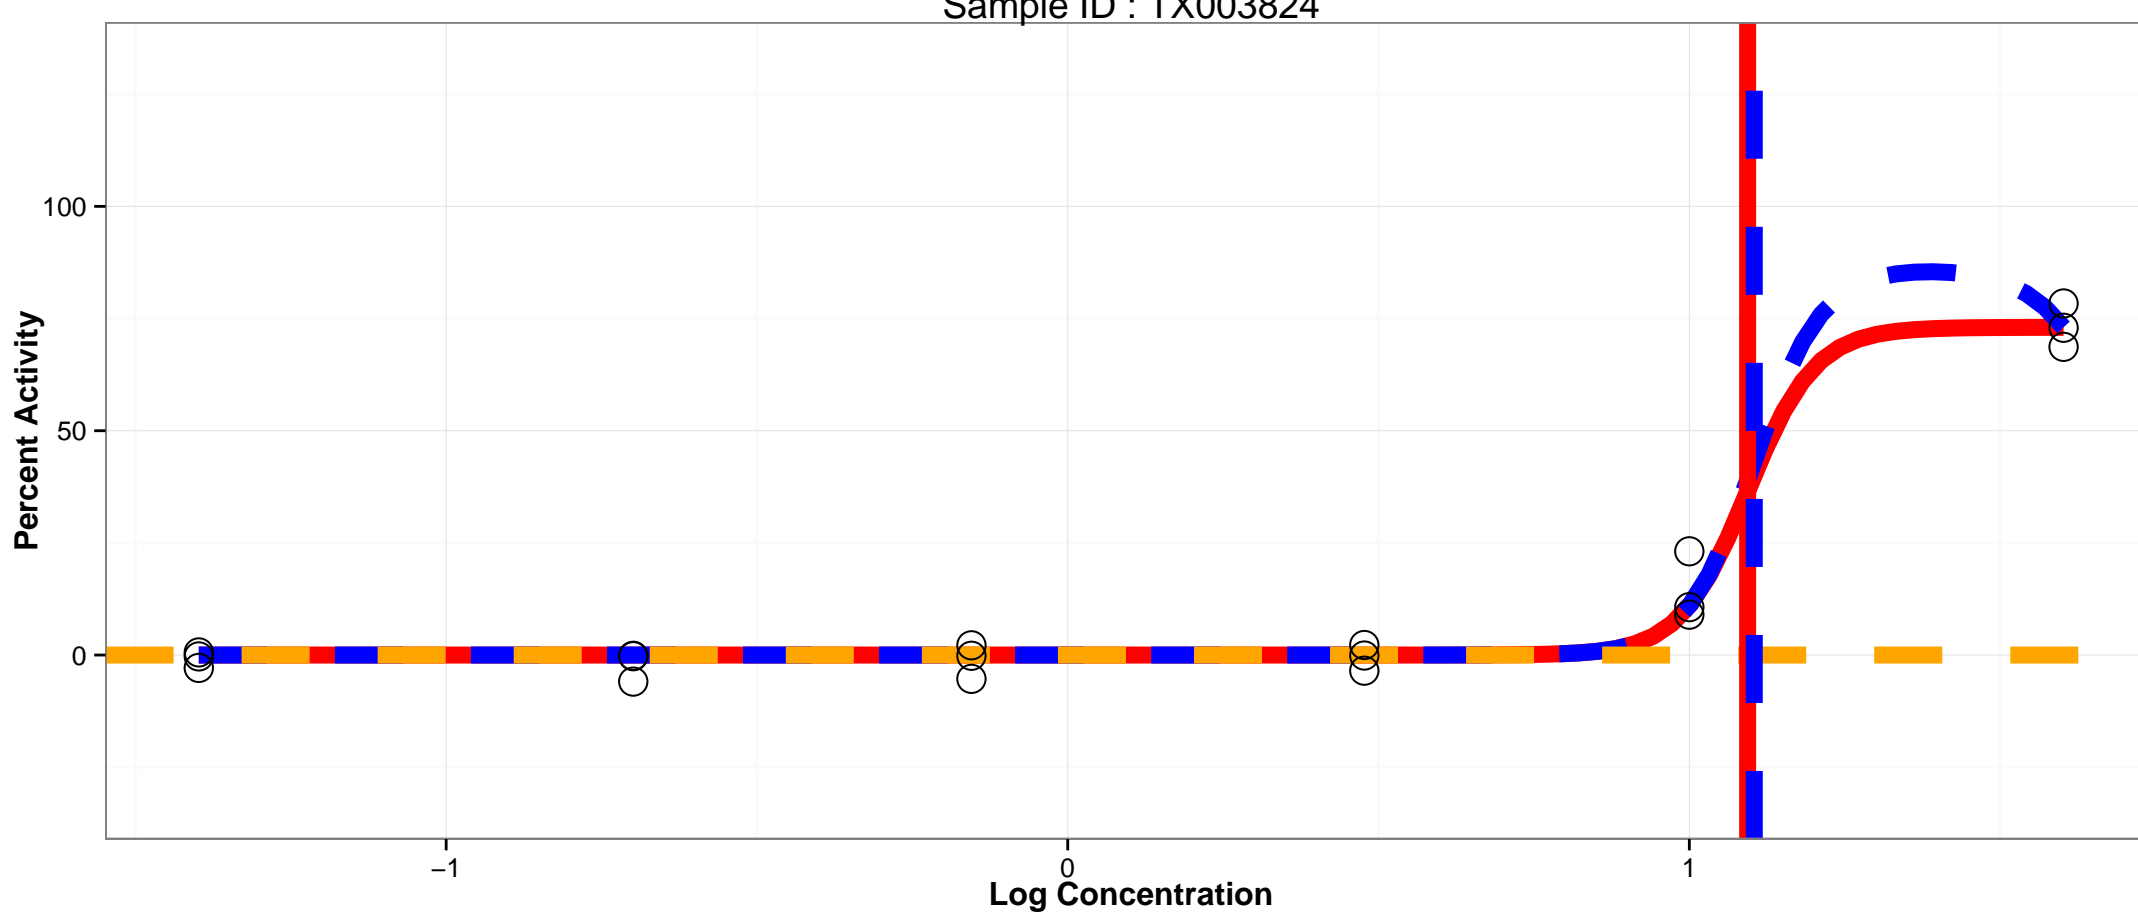

HILL MODEL

|     | tp  | ga     | gw   |
|-----|-----|--------|------|
| val | 73  | 1.09   | 8    |
| sd  | 2.3 | 0.0391 | 3.31 |

GAIN-LOSS MODEL

|     | tp   | ga  | gw | la   | lw   |
|-----|------|-----|----|------|------|
| val | 86.5 | 1.1 | 8  | 1.71 | 6.71 |
| sd  | NA   | NA  | NA | NA   | NA   |

|      | CNST   | HILL   | GNLS   |
|------|--------|--------|--------|
| AIC  | 167.42 | 106.52 | 110.52 |
| PROB | 0      | 0.88   | 0.12   |
| RMSE | 30.74  | 4.03   | 4.03   |

MAX\_MEAN : 73.3 MAX\_MED : 73 BMAD : 5.54  
COFF : 20 HIT-CALL : 1 FITC : 41 ACTP : 1  
FLAGS : 6

Assay ID 1848 (NHEERL\_QuantiLum\_inhib\_2\_dn)  
Sample ID : TX003824

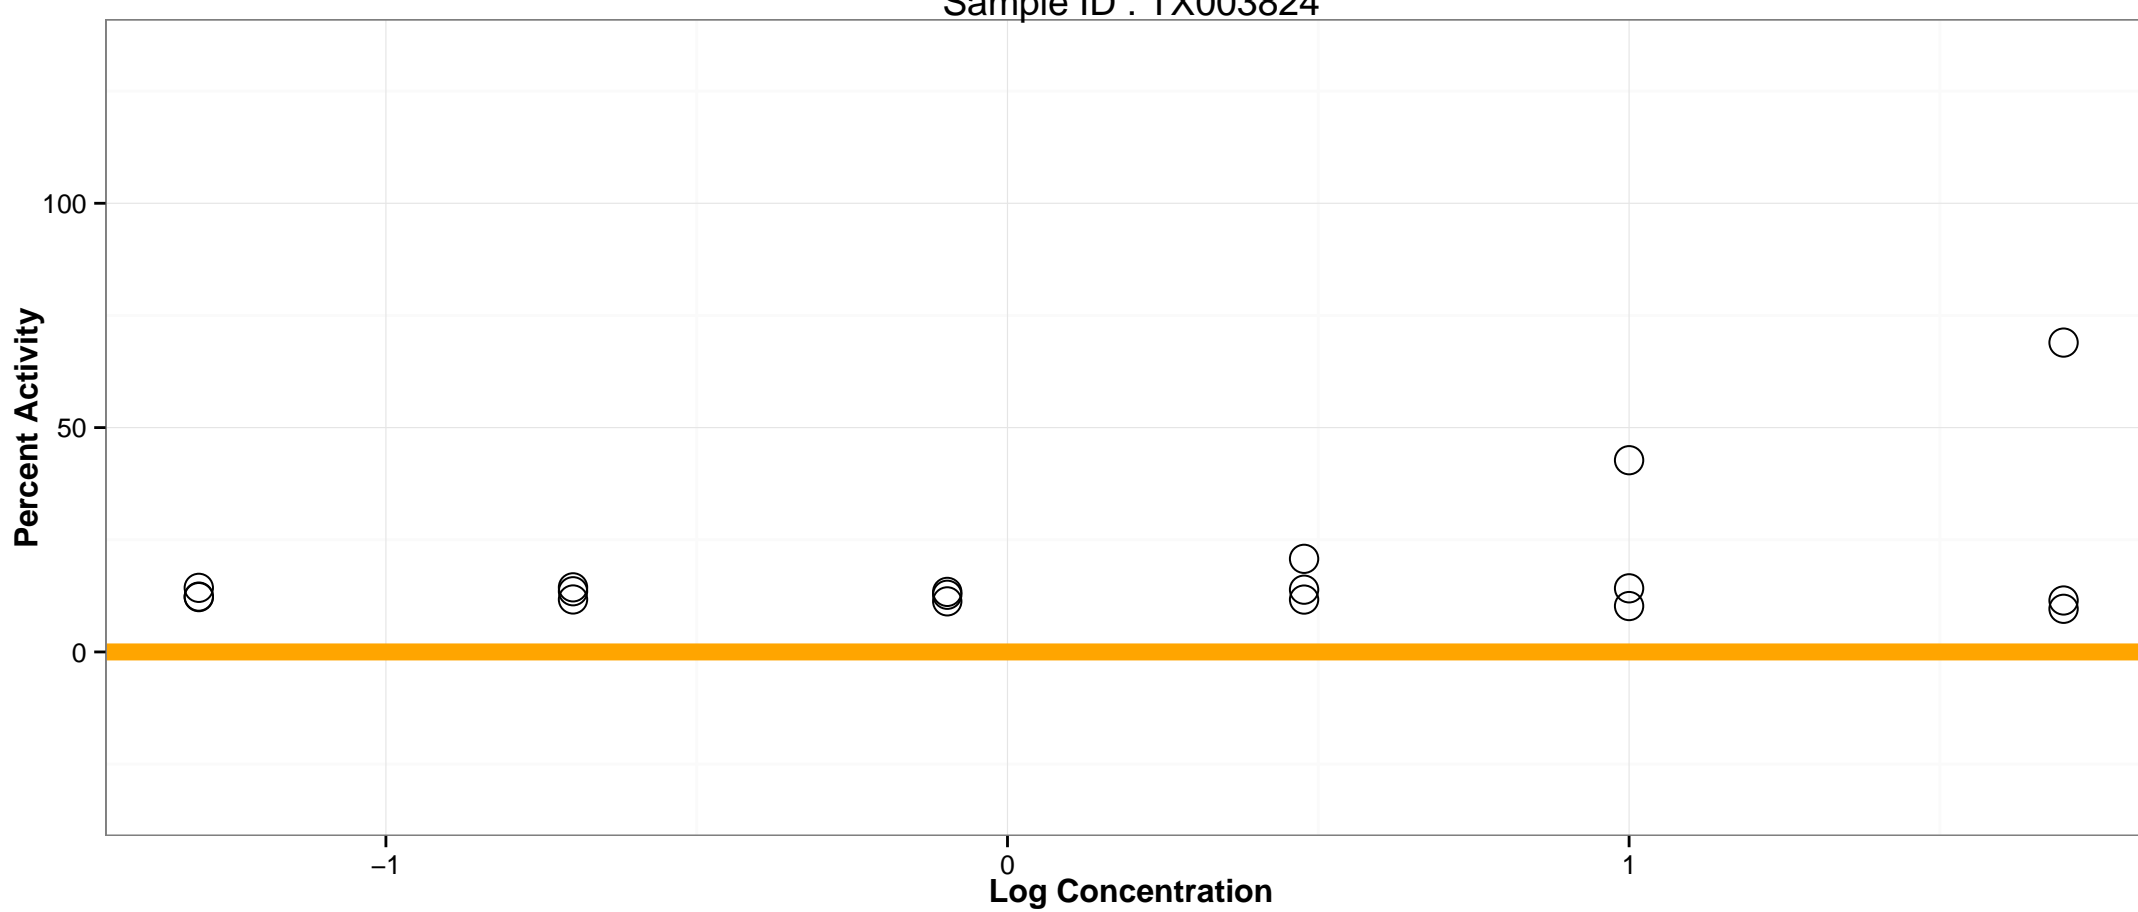

HILL MODEL

HILL MODEL: Not applicable

GAIN-LOSS MODEL

GNLS MODEL: Not applicable

|      | CNST  | HILL | GNLS |
|------|-------|------|------|
| AIC  | 163.6 | NA   | NA   |
| PROB | 1     | NA   | NA   |
| RMSE | 22.83 | NA   | NA   |

MAX\_MEAN : 30 MAX\_MED : 14.2 BMAD : 8.58  
COFF : 20 HIT-CALL : 0 FITC : 4 ACTP : 0  
FLAGS : 10

Chemical : Catechol  
CAS : 120-80-9

Assay ID 1508 (NHEERL\_TPO\_AUR\_dn)  
Sample ID : TX003836

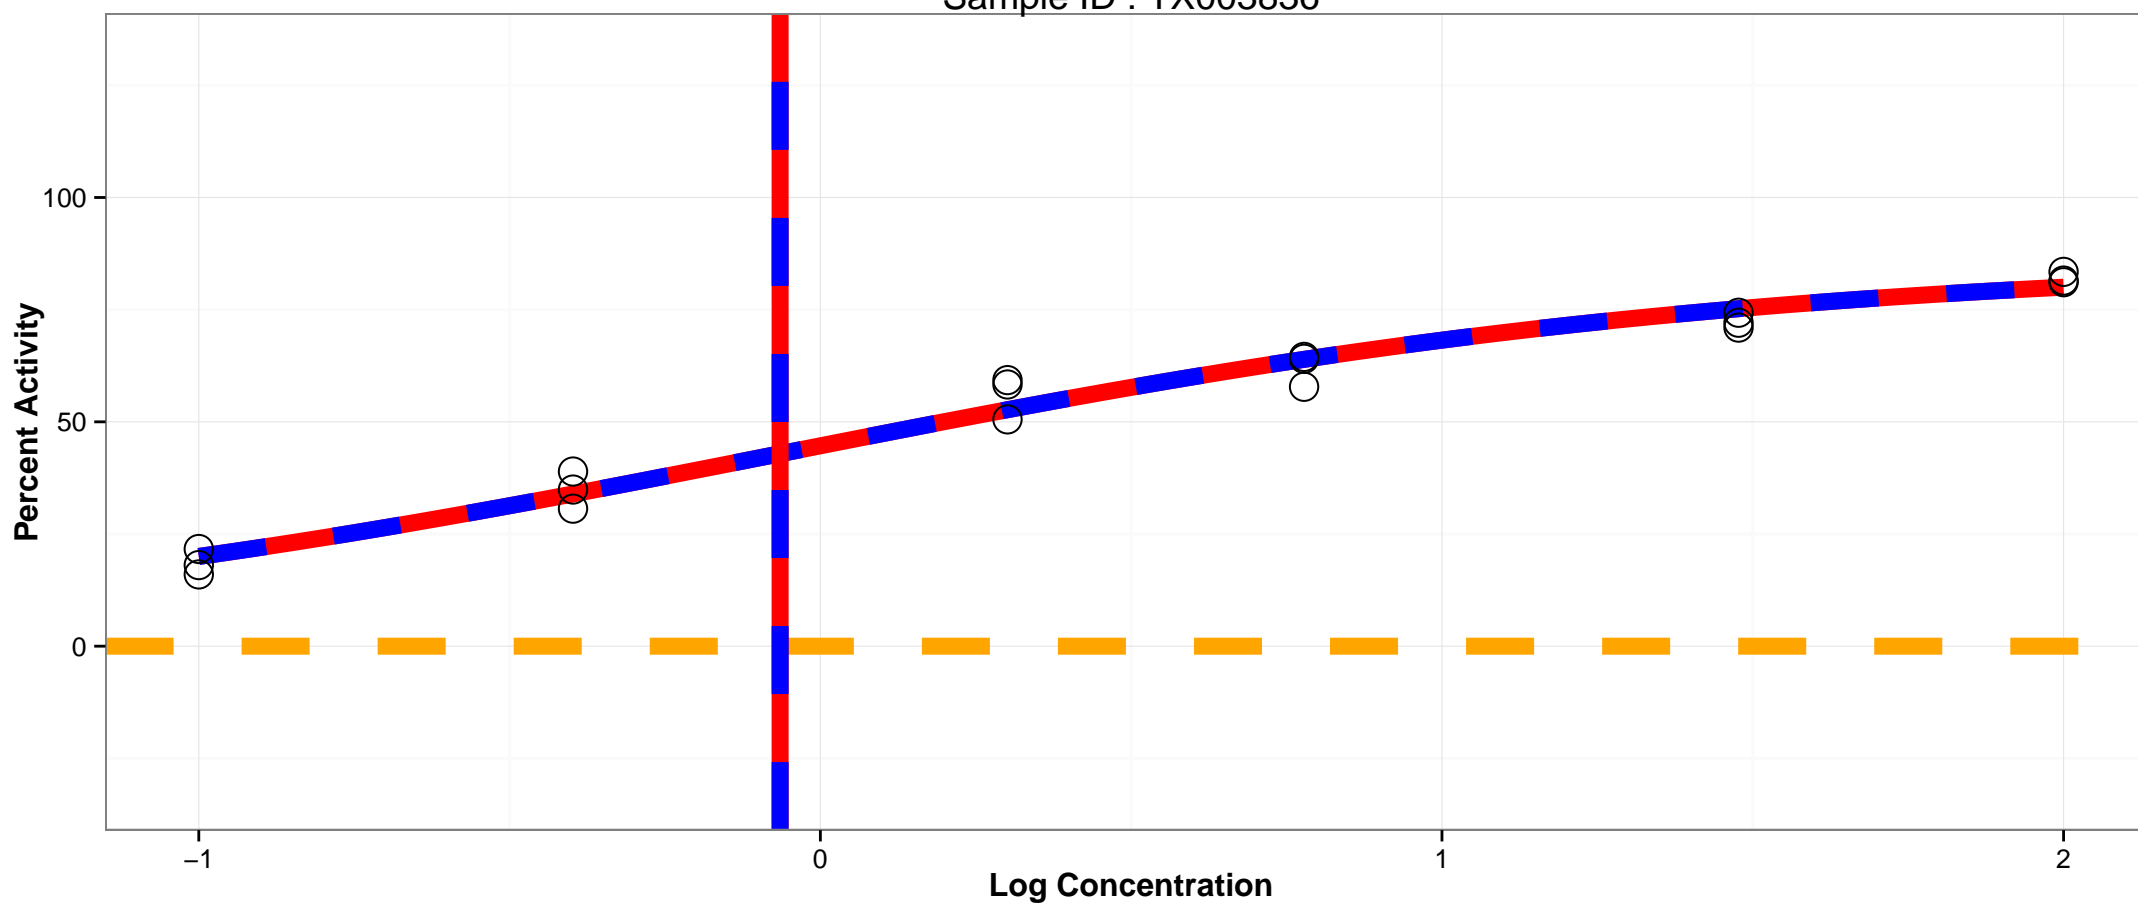

HILL MODEL

|     | tp   | ga      | gw     |
|-----|------|---------|--------|
| val | 85.8 | -0.0648 | 0.553  |
| sd  | 3.87 | 0.111   | 0.0637 |

GAIN-LOSS MODEL

|     | tp   | ga      | gw    | la | lw |
|-----|------|---------|-------|----|----|
| val | 85.8 | -0.0648 | 0.553 | 4  | 18 |
| sd  | NA   | NA      | NA    | NA | NA |

|      | CNST   | HILL   | GNLS   |
|------|--------|--------|--------|
| AIC  | 203.11 | 106.15 | 110.15 |
| PROB | 0      | 0.88   | 0.12   |
| RMSE | 58.58  | 3.5    | 3.5    |

MAX\_MEAN : 82 MAX\_MED : 81.5 BMAD : 5.69  
COFF : 20 HIT-CALL : 1 FITC : 42 ACTP : 1  
FLAGS :

Assay ID 1509 (NHEERL\_HEK293T\_CellTiterGLO)  
Sample ID : TX003836

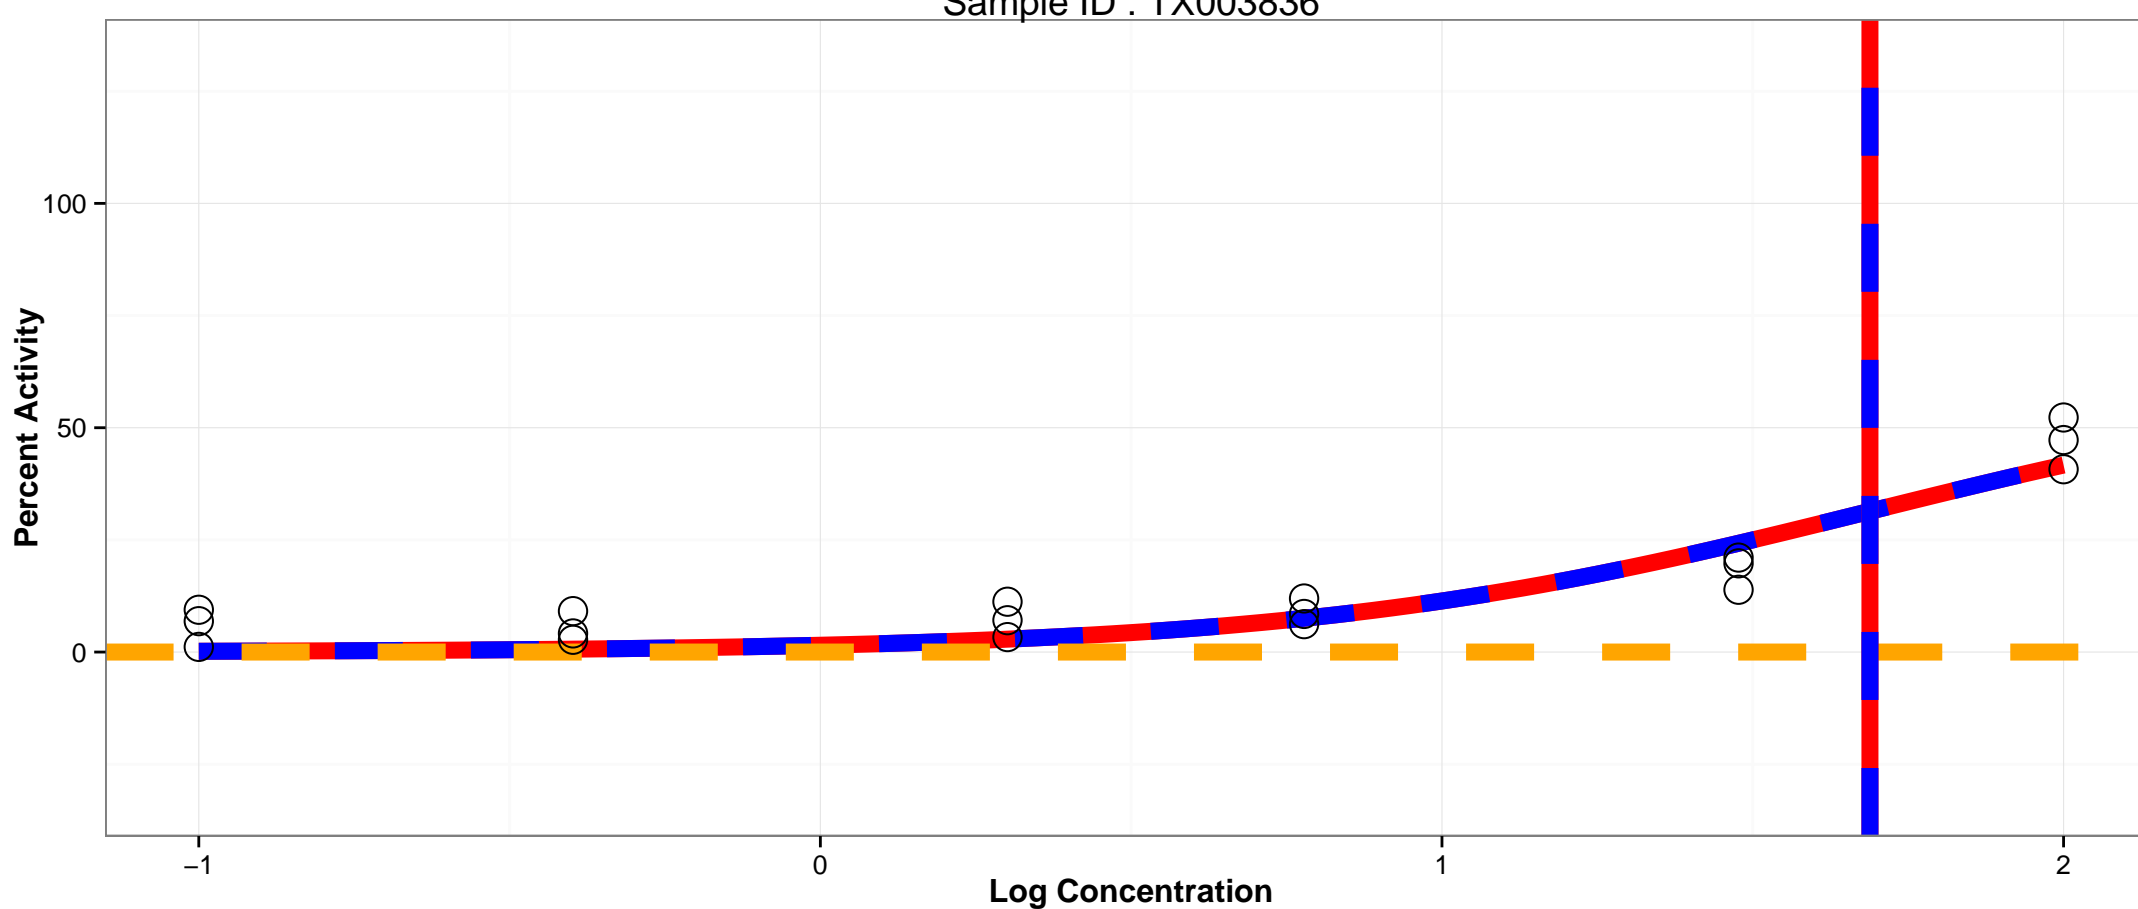

HILL MODEL

|     | tp   | ga    | gw    |
|-----|------|-------|-------|
| val | 62.7 | 1.69  | 0.951 |
| sd  | 14.7 | 0.232 | 0.278 |

GAIN-LOSS MODEL

|     | tp   | ga    | gw    | la    | lw     |
|-----|------|-------|-------|-------|--------|
| val | 62.7 | 1.69  | 0.951 | 3.97  | 6.3    |
| sd  | 14.7 | 0.232 | 0.277 | 91900 | 293000 |

|      | CNST   | HILL   | GNLS   |
|------|--------|--------|--------|
| AIC  | 161.67 | 124.48 | 128.48 |
| PROB | 0      | 0.88   | 0.12   |
| RMSE | 21.53  | 5.84   | 5.84   |

MAX\_MEAN : 46.8 MAX\_MED : 47.3 BMAD : 5.54  
COFF : 20 HIT-CALL : 1 FITC : 42 ACTP : 1  
FLAGS :

Assay ID 1848 (NHEERL\_Quantilum\_inhib\_2\_dn)  
Sample ID : TX003836

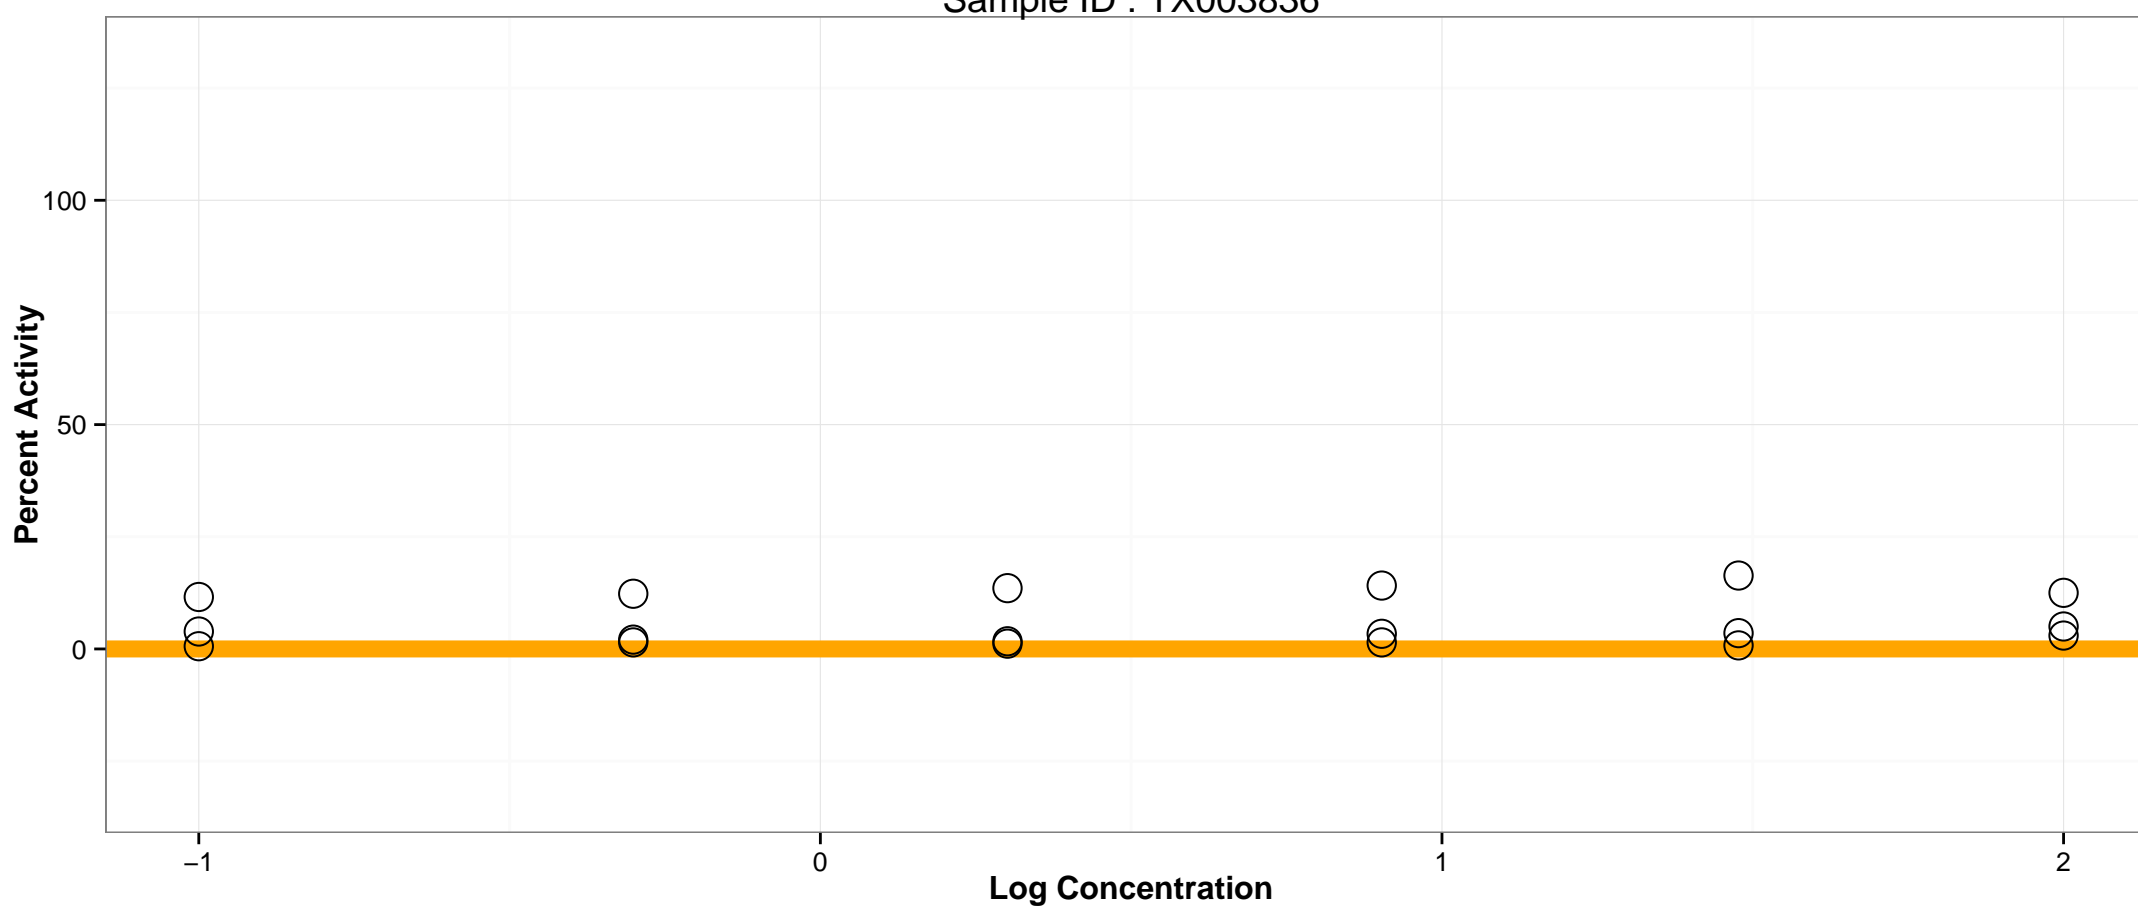

HILL MODEL

HILL MODEL: Not applicable

GAIN-LOSS MODEL

GNLS MODEL: Not applicable

|      | CNST   | HILL | GNLS |
|------|--------|------|------|
| AIC  | 128.91 | NA   | NA   |
| PROB | 1      | NA   | NA   |
| RMSE | 8.1    | NA   | NA   |

MAX\_MEAN : 6.91 MAX\_MED : 5.02 BMAD : 8.58  
COFF : 20 HIT-CALL : 0 FITC : 4 ACTP : 0  
FLAGS :

Chemical : 2-Mercaptobenzothiazole  
CAS : 149-30-4

Assay ID 1508 (NHEERL\_TPO\_AUR\_dn)  
Sample ID : TX003844

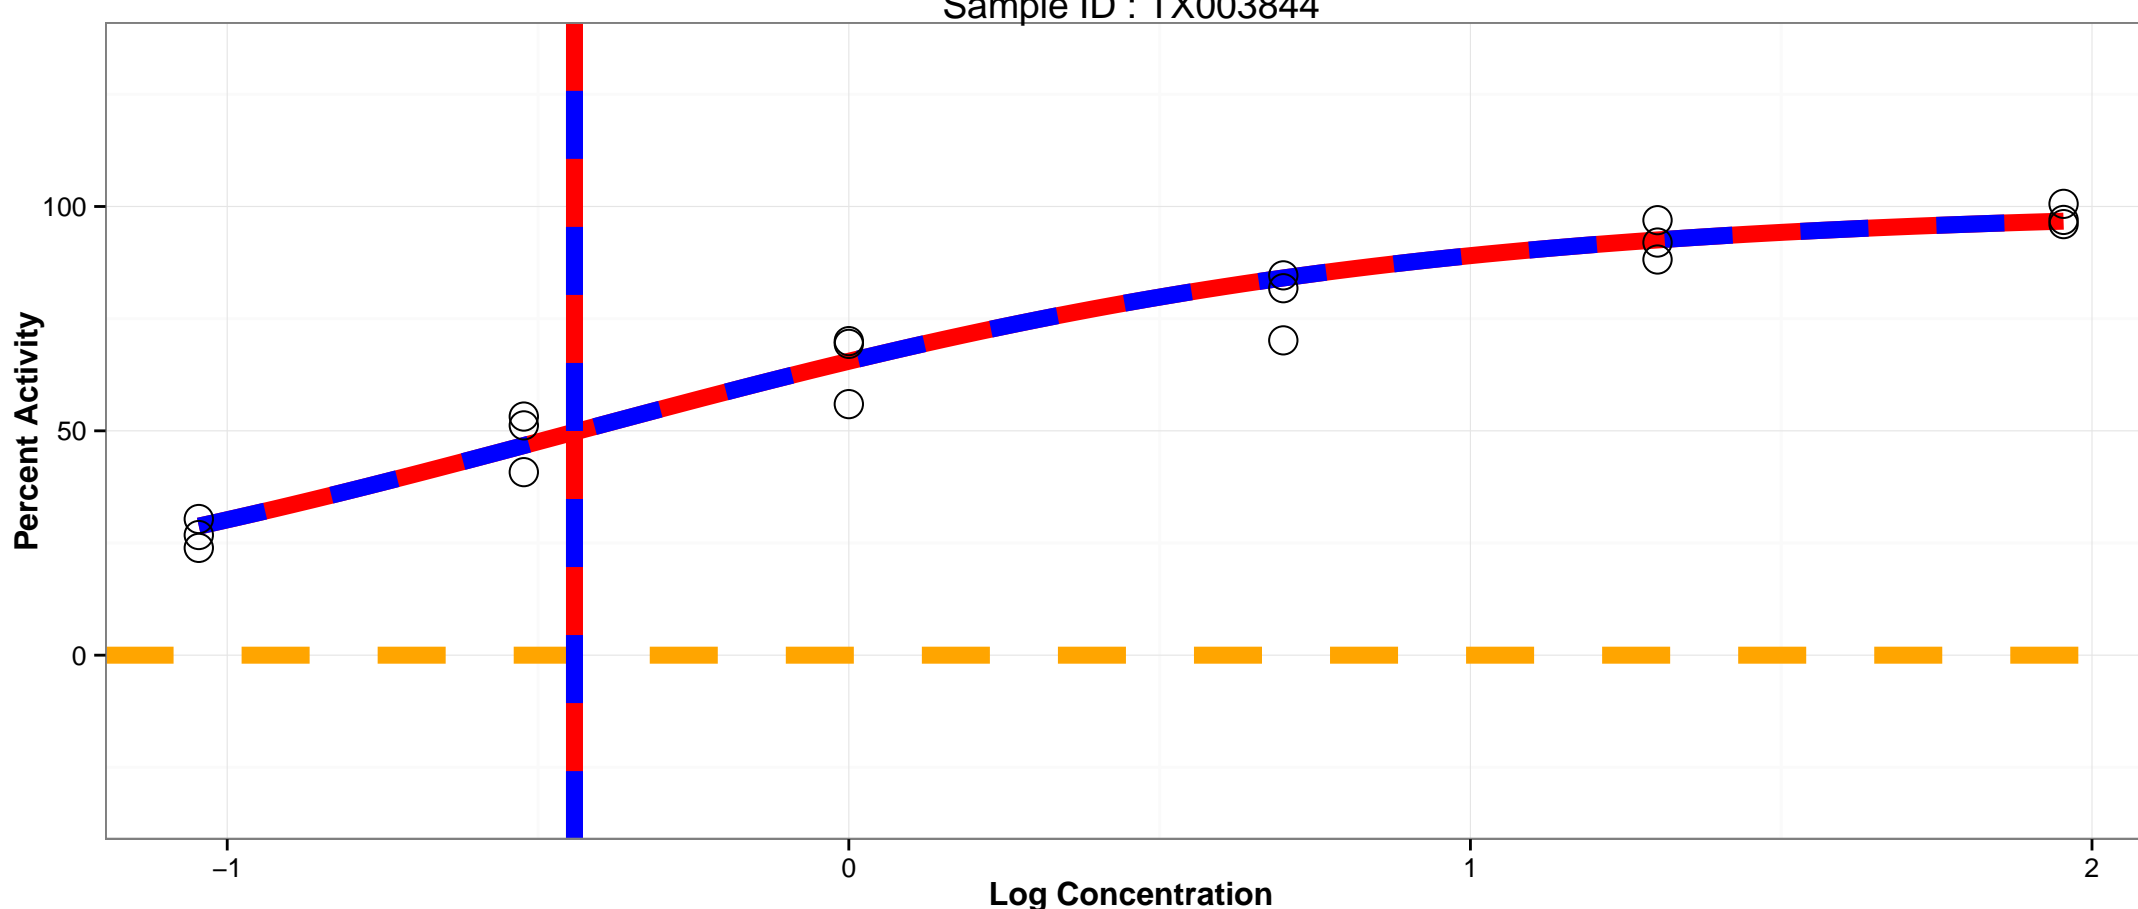

HILL MODEL

|     | tp   | ga     | gw     |
|-----|------|--------|--------|
| val | 99.5 | -0.441 | 0.646  |
| sd  | 3.4  | 0.089  | 0.0854 |

GAIN-LOSS MODEL

|     | tp   | ga     | gw    | la   | lw   |
|-----|------|--------|-------|------|------|
| val | 99.5 | -0.441 | 0.646 | 2.83 | 17.9 |
| sd  | NA   | NA     | NA    | NA   | NA   |

|      | CNST   | HILL   | GNLS   |
|------|--------|--------|--------|
| AIC  | 211.02 | 119.22 | 123.22 |
| PROB | 0      | 0.88   | 0.12   |
| RMSE | 72.79  | 5.3    | 5.3    |

MAX\_MEAN : 97.9 MAX\_MED : 97 BMAD : 5.69  
COFF : 20 HIT-CALL : 1 FITC : 41 ACTP : 1  
FLAGS :

Assay ID 1509 (NHEERL\_HEK293T\_CellTiterGLO)  
Sample ID : TX003844

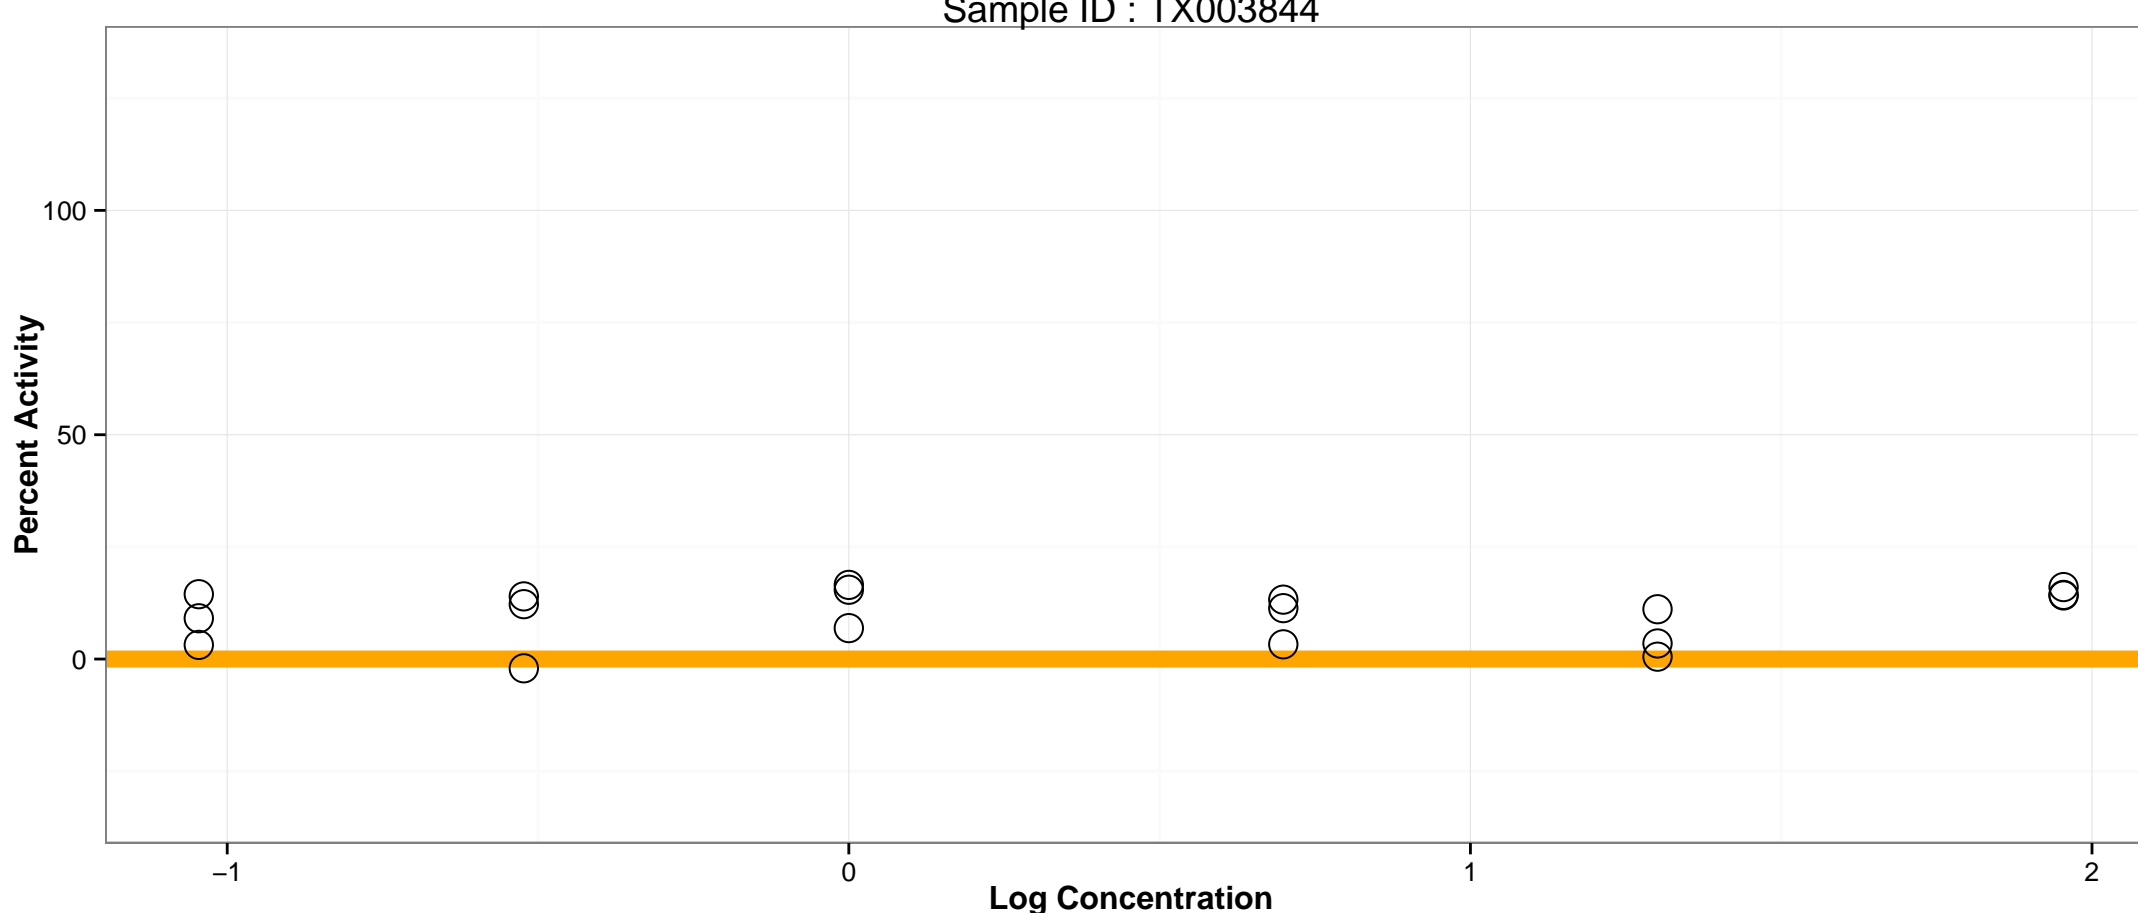

HILL MODEL

HILL MODEL: Not applicable

GAIN-LOSS MODEL

GNLS MODEL: Not applicable

|      | CNST   | HILL | GNLS |
|------|--------|------|------|
| AIC  | 143.85 | NA   | NA   |
| PROB | 1      | NA   | NA   |
| RMSE | 11.37  | NA   | NA   |

MAX\_MEAN : 14.8 MAX\_MED : 15.5 BMAD : 5.54  
COFF : 20 HIT-CALL : 0 FITC : 4 ACTP : 0  
FLAGS :

Assay ID 1848 (NHEERL\_Quantilum\_inhib\_2\_dn)  
Sample ID : TX003844

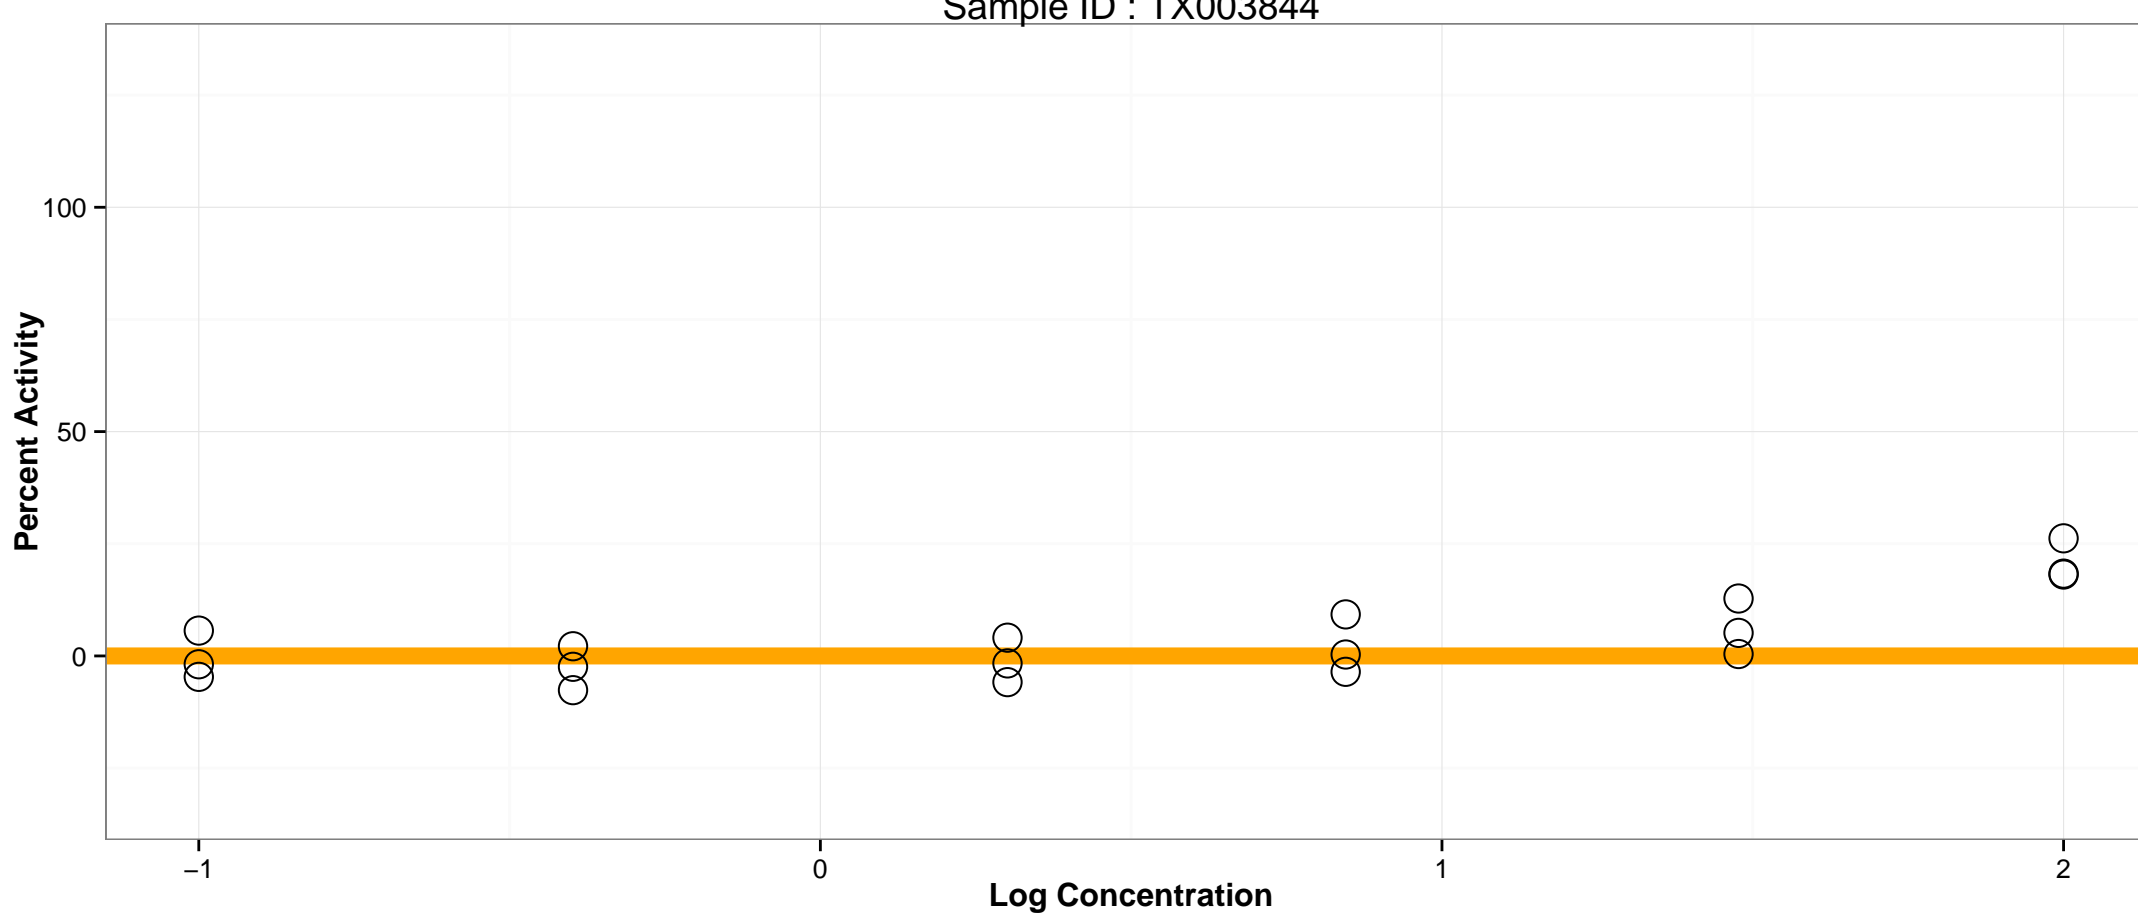

HILL MODEL

HILL MODEL: Not applicable

GAIN-LOSS MODEL

GNLS MODEL: Not applicable

|      | CNST   | HILL | GNLS |
|------|--------|------|------|
| AIC  | 134.81 | NA   | NA   |
| PROB | 1      | NA   | NA   |
| RMSE | 10.06  | NA   | NA   |

MAX\_MEAN : 20.9 MAX\_MED : 18.4 BMAD : 8.58  
COFF : 20 HIT-CALL : 0 FITC : 4 ACTP : 0  
FLAGS :

Chemical : 2,5-Di-tert-butylbenzene-1,4-diol  
CAS : 88-58-4

Assay ID 1508 (NHEERL\_TPO\_AUR\_dn)  
Sample ID : TX003958

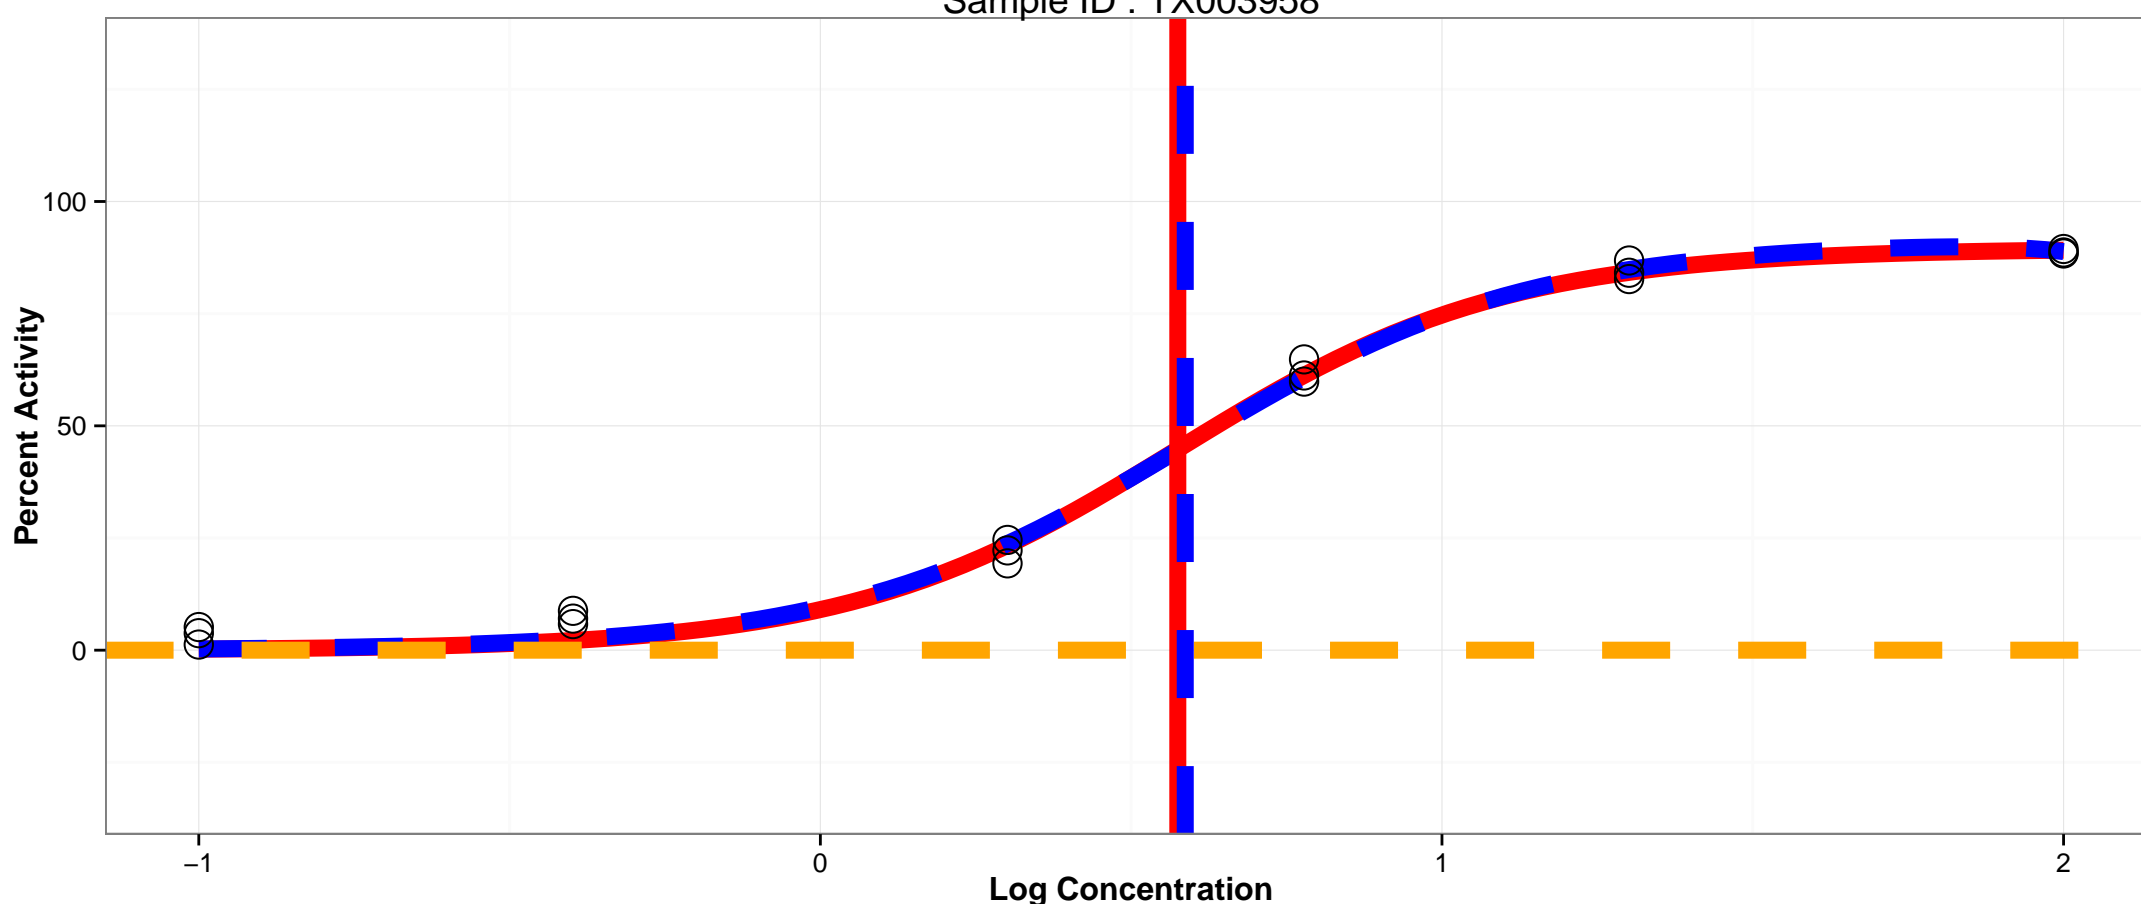

HILL MODEL

|     | tp   | ga     | gw    |
|-----|------|--------|-------|
| val | 89.5 | 0.575  | 1.65  |
| sd  | 1.27 | 0.0187 | 0.124 |

GAIN-LOSS MODEL

|     | tp   | ga    | gw   | la   | lw   |
|-----|------|-------|------|------|------|
| val | 91.1 | 0.587 | 1.58 | 2.34 | 5.06 |
| sd  | NA   | NA    | NA   | NA   | NA   |

|      | CNST   | HILL | GNLS   |
|------|--------|------|--------|
| AIC  | 200.66 | 99.8 | 103.49 |
| PROB | 0      | 0.86 | 0.14   |
| RMSE | 56.94  | 3.01 | 2.97   |

MAX\_MEAN : 88.8 MAX\_MED : 88.7 BMAD : 5.69  
COFF : 20 HIT-CALL : 1 FITC : 41 ACTP : 1  
FLAGS :

Assay ID 1509 (NHEERL\_HEK293T\_CellTiterGLO)  
Sample ID : TX003958

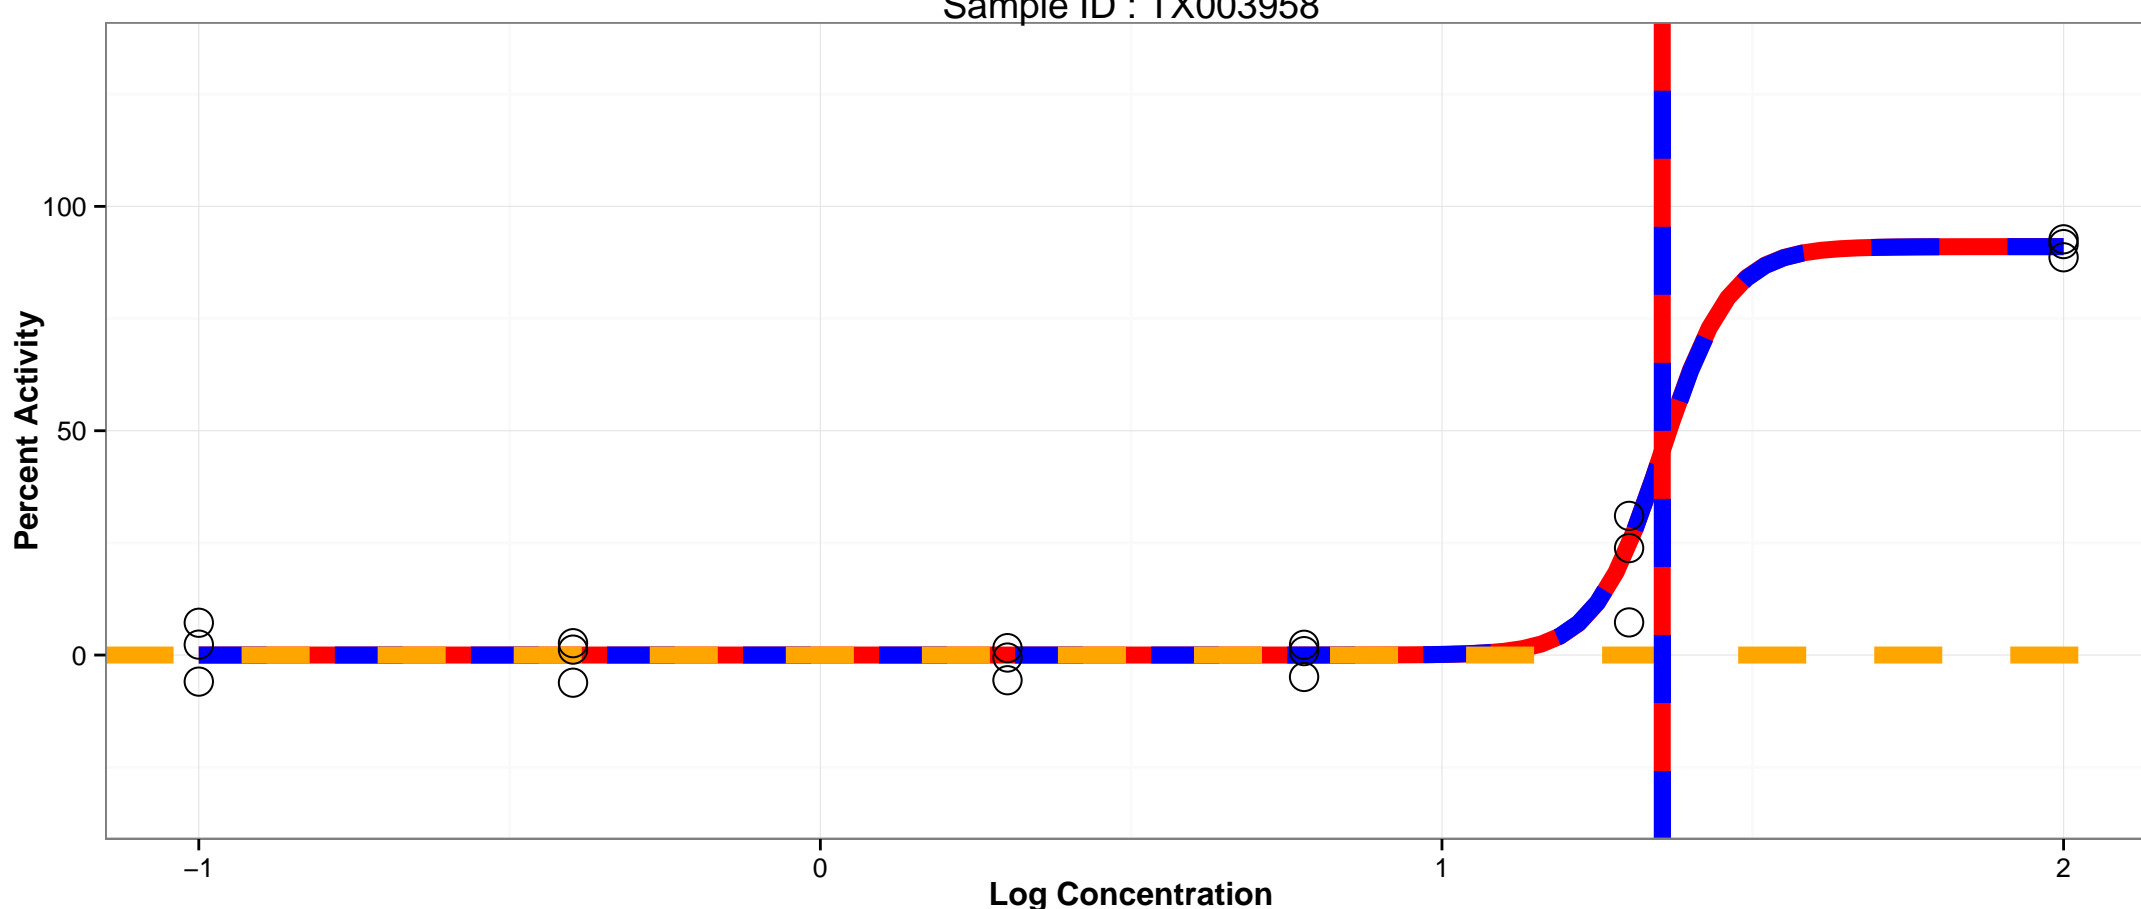

HILL MODEL

|     | tp   | ga     | gw   |
|-----|------|--------|------|
| val | 91   | 1.35   | 8    |
| sd  | 2.13 | 0.0326 | 4.79 |

GAIN-LOSS MODEL

|     | tp | ga   | gw   | la   | lw   |
|-----|----|------|------|------|------|
| val | 91 | 1.35 | 7.94 | 2.97 | 10.6 |
| sd  | NA | NA   | NA   | NA   | NA   |

|      | CNST   | HILL   | GNLS   |
|------|--------|--------|--------|
| AIC  | 176.91 | 117.83 | 121.83 |
| PROB | 0      | 0.88   | 0.12   |
| RMSE | 38.46  | 5.57   | 5.57   |

MAX\_MEAN : 91 MAX\_MED : 91.6 BMAD : 5.54  
COFF : 20 HIT-CALL : 1 FITC : 41 ACTP : 1  
FLAGS :

Assay ID 1848 (NHEERL\_Quantilum\_inhib\_2\_dn)  
Sample ID : TX003958

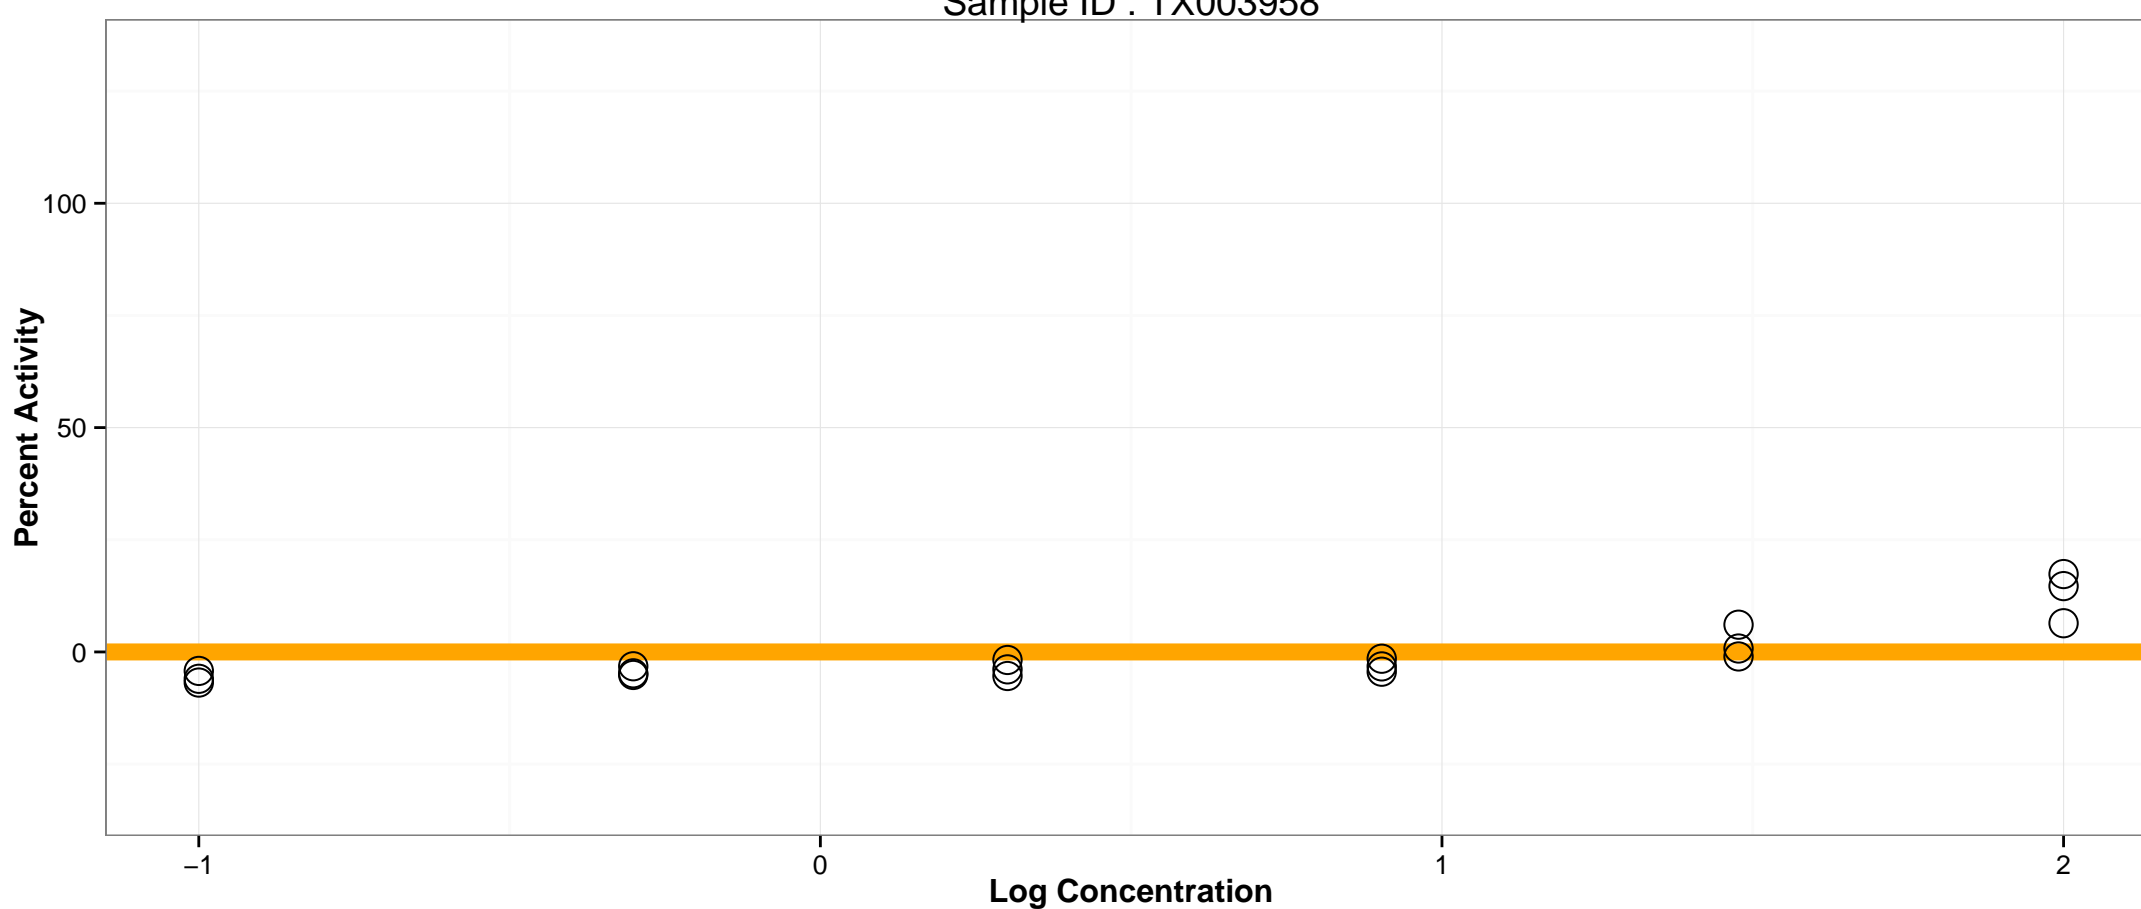

HILL MODEL

HILL MODEL: Not applicable

GAIN-LOSS MODEL

GNLS MODEL: Not applicable

|      | CNST   | HILL | GNLS |
|------|--------|------|------|
| AIC  | 121.75 | NA   | NA   |
| PROB | 1      | NA   | NA   |
| RMSE | 6.81   | NA   | NA   |

MAX\_MEAN : 12.8 MAX\_MED : 14.7 BMAD : 8.58  
COFF : 20 HIT-CALL : 0 FITC : 4 ACTP : 0  
FLAGS :

Chemical : meso-Hexestrol  
CAS : 84-16-2

Assay ID 1508 (NHEERL\_TPO\_AUR\_dn)  
Sample ID : TX003990

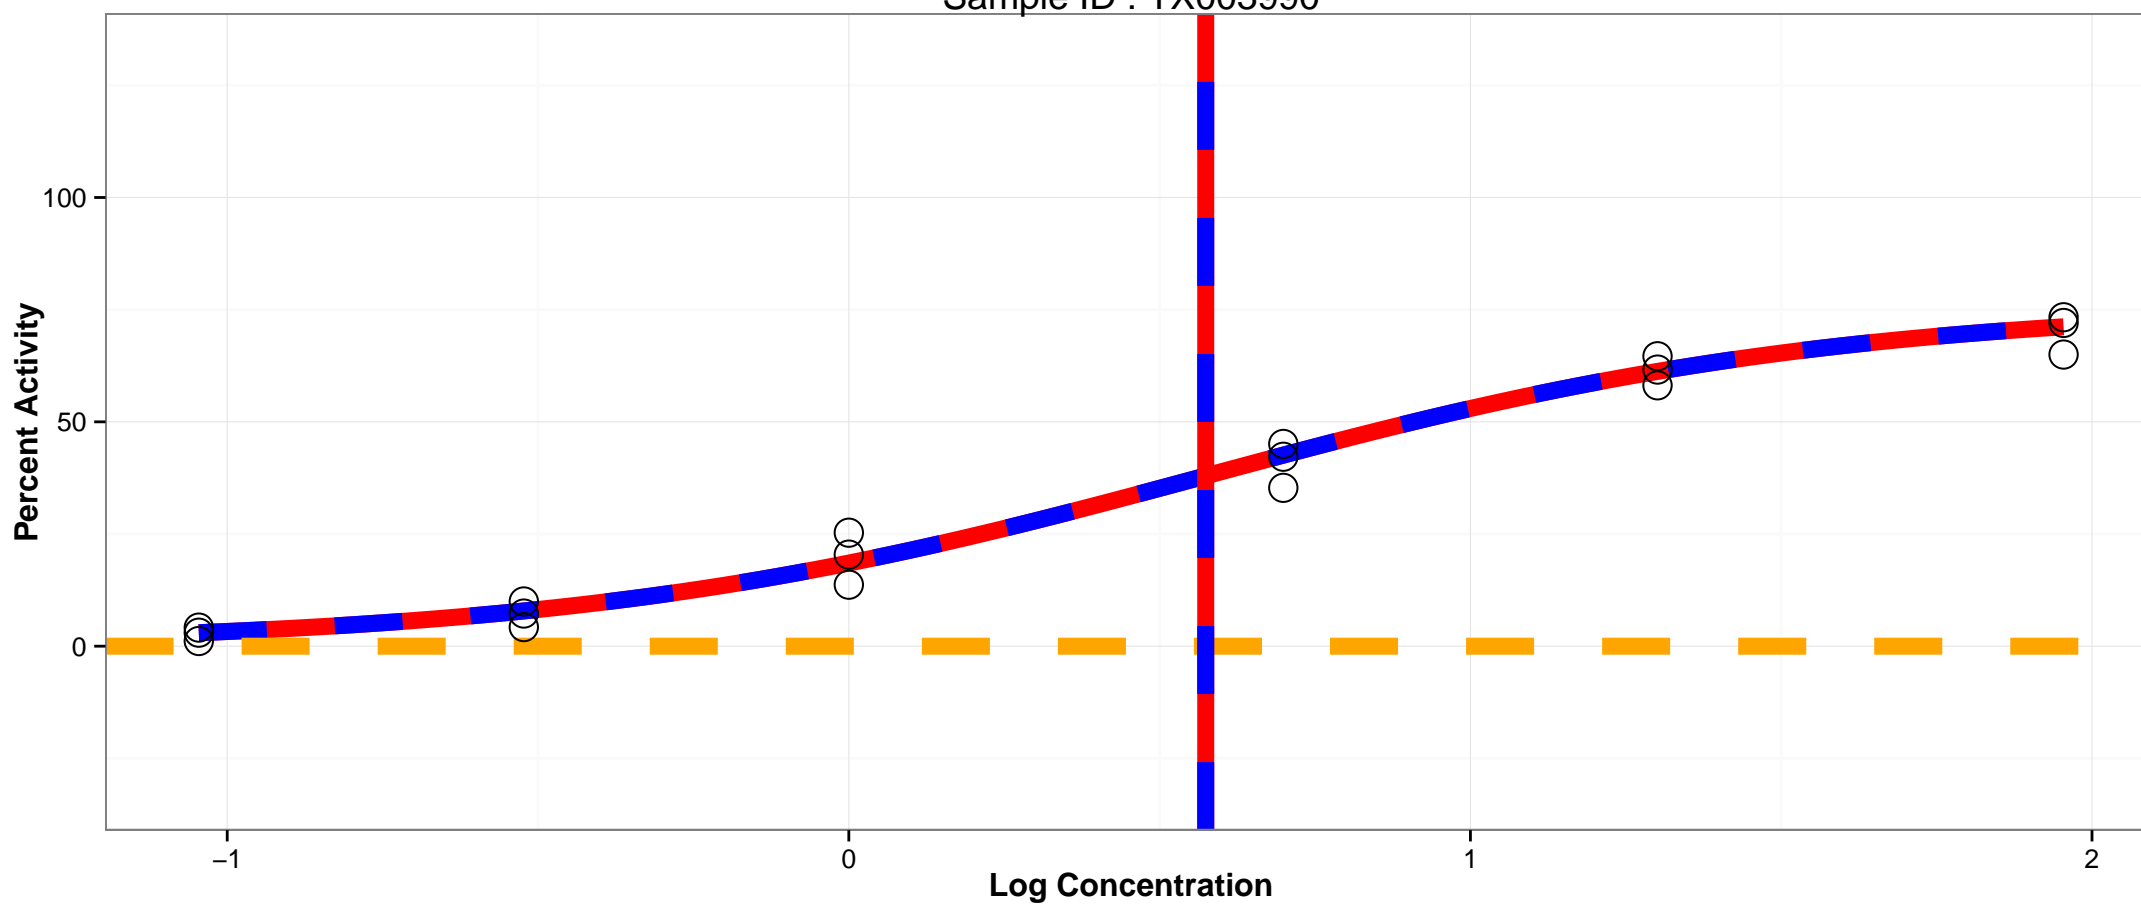

HILL MODEL

|     | tp   | ga     | gw     |
|-----|------|--------|--------|
| val | 75.9 | 0.574  | 0.855  |
| sd  | 3.31 | 0.0761 | 0.0792 |

GAIN-LOSS MODEL

|     | tp   | ga    | gw    | la   | lw   |
|-----|------|-------|-------|------|------|
| val | 75.9 | 0.574 | 0.855 | 3.92 | 9.73 |
| sd  | NA   | NA    | NA    | NA   | NA   |

|      | CNST   | HILL   | GNLS   |
|------|--------|--------|--------|
| AIC  | 190.07 | 104.94 | 108.94 |
| PROB | 0      | 0.88   | 0.12   |
| RMSE | 42.6   | 3.49   | 3.49   |

MAX\_MEAN : 70.1 MAX\_MED : 72.1 BMAD : 5.69  
COFF : 20 HIT-CALL : 1 FITC : 42 ACTP : 1  
FLAGS :

Assay ID 1509 (NHEERL\_HEK293T\_CellTiterGLO)  
Sample ID : TX003990

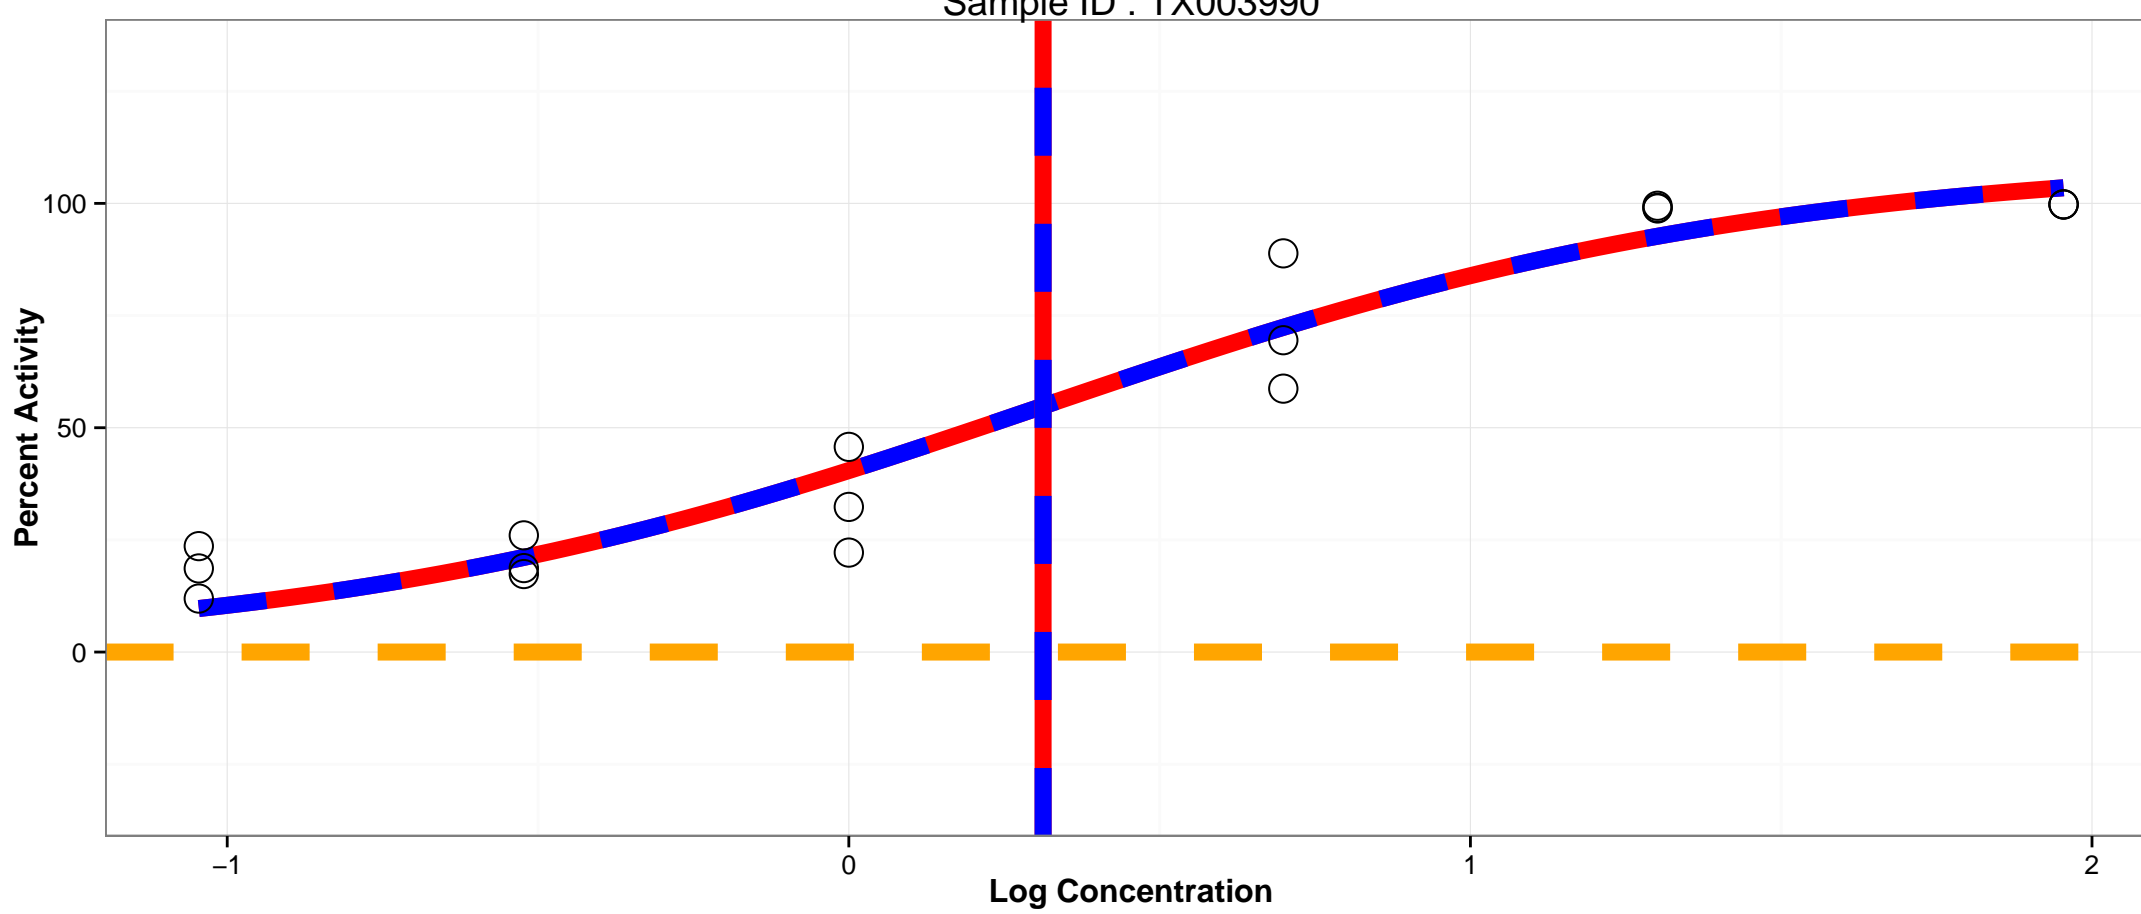

HILL MODEL

|     | tp   | ga    | gw    |
|-----|------|-------|-------|
| val | 110  | 0.313 | 0.746 |
| sd  | 6.68 | 0.133 | 0.124 |

GAIN-LOSS MODEL

|     | tp  | ga    | gw    | la   | lw   |
|-----|-----|-------|-------|------|------|
| val | 110 | 0.313 | 0.746 | 3.42 | 8.19 |
| sd  | NA  | NA    | NA    | NA   | NA   |

|      | CNST   | HILL   | GNLS   |
|------|--------|--------|--------|
| AIC  | 207.11 | 138.52 | 142.52 |
| PROB | 0      | 0.88   | 0.12   |
| RMSE | 67.31  | 8.76   | 8.76   |

MAX\_MEAN : 99.8 MAX\_MED : 99.8 BMAD : 5.54  
COFF : 20 HIT-CALL : 1 FITC : 42 ACTP : 1  
FLAGS :

Assay ID 1848 (NHEERL\_Quantilum\_inhib\_2\_dn)  
Sample ID : TX003990

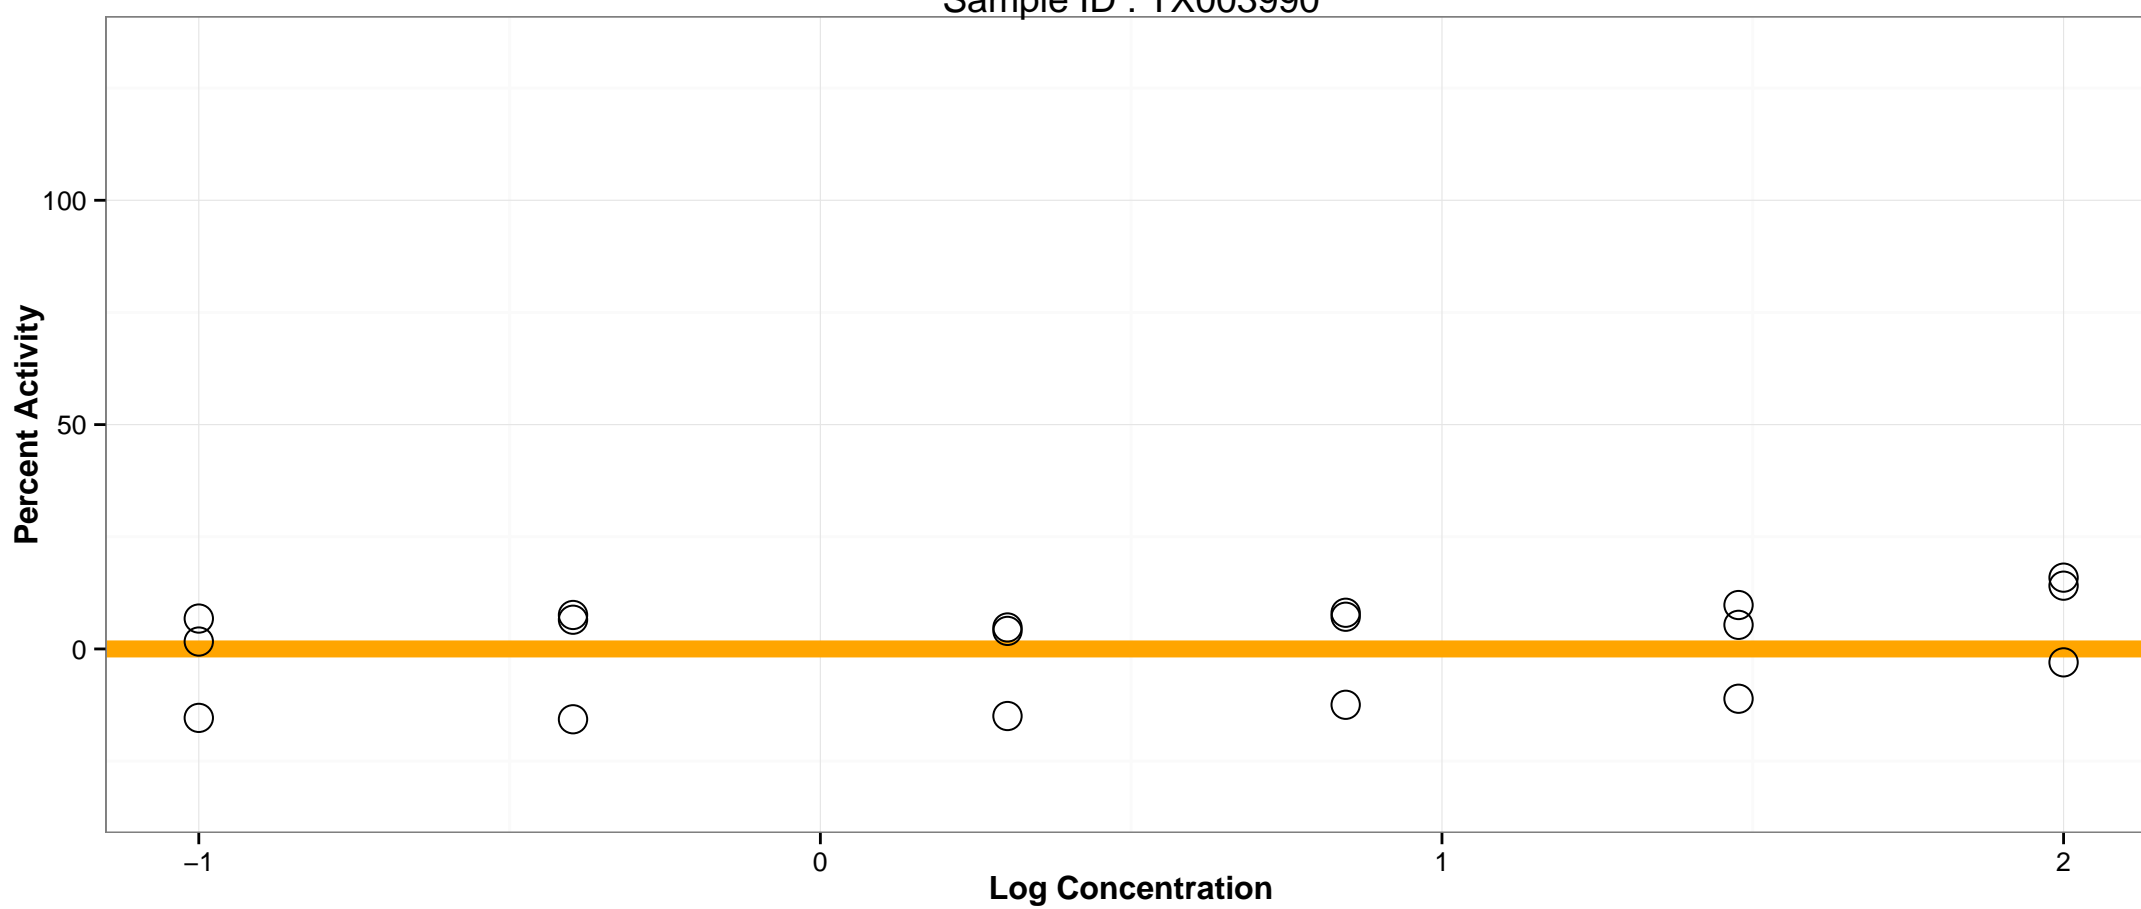

HILL MODEL

HILL MODEL: Not applicable

GAIN-LOSS MODEL

GNLS MODEL: Not applicable

|      | CNST   | HILL | GNLS |
|------|--------|------|------|
| AIC  | 139.61 | NA   | NA   |
| PROB | 1      | NA   | NA   |
| RMSE | 10.2   | NA   | NA   |

MAX\_MEAN : 9.01 MAX\_MED : 14.1 BMAD : 8.58  
COFF : 20 HIT-CALL : 0 FITC : 4 ACTP : 0  
FLAGS :

Chemical : Sodium erythorbate (1:1)  
CAS : 6381-77-7

Assay ID 1508 (NHEERL\_TPO\_AUR\_dn)  
Sample ID : TX004030

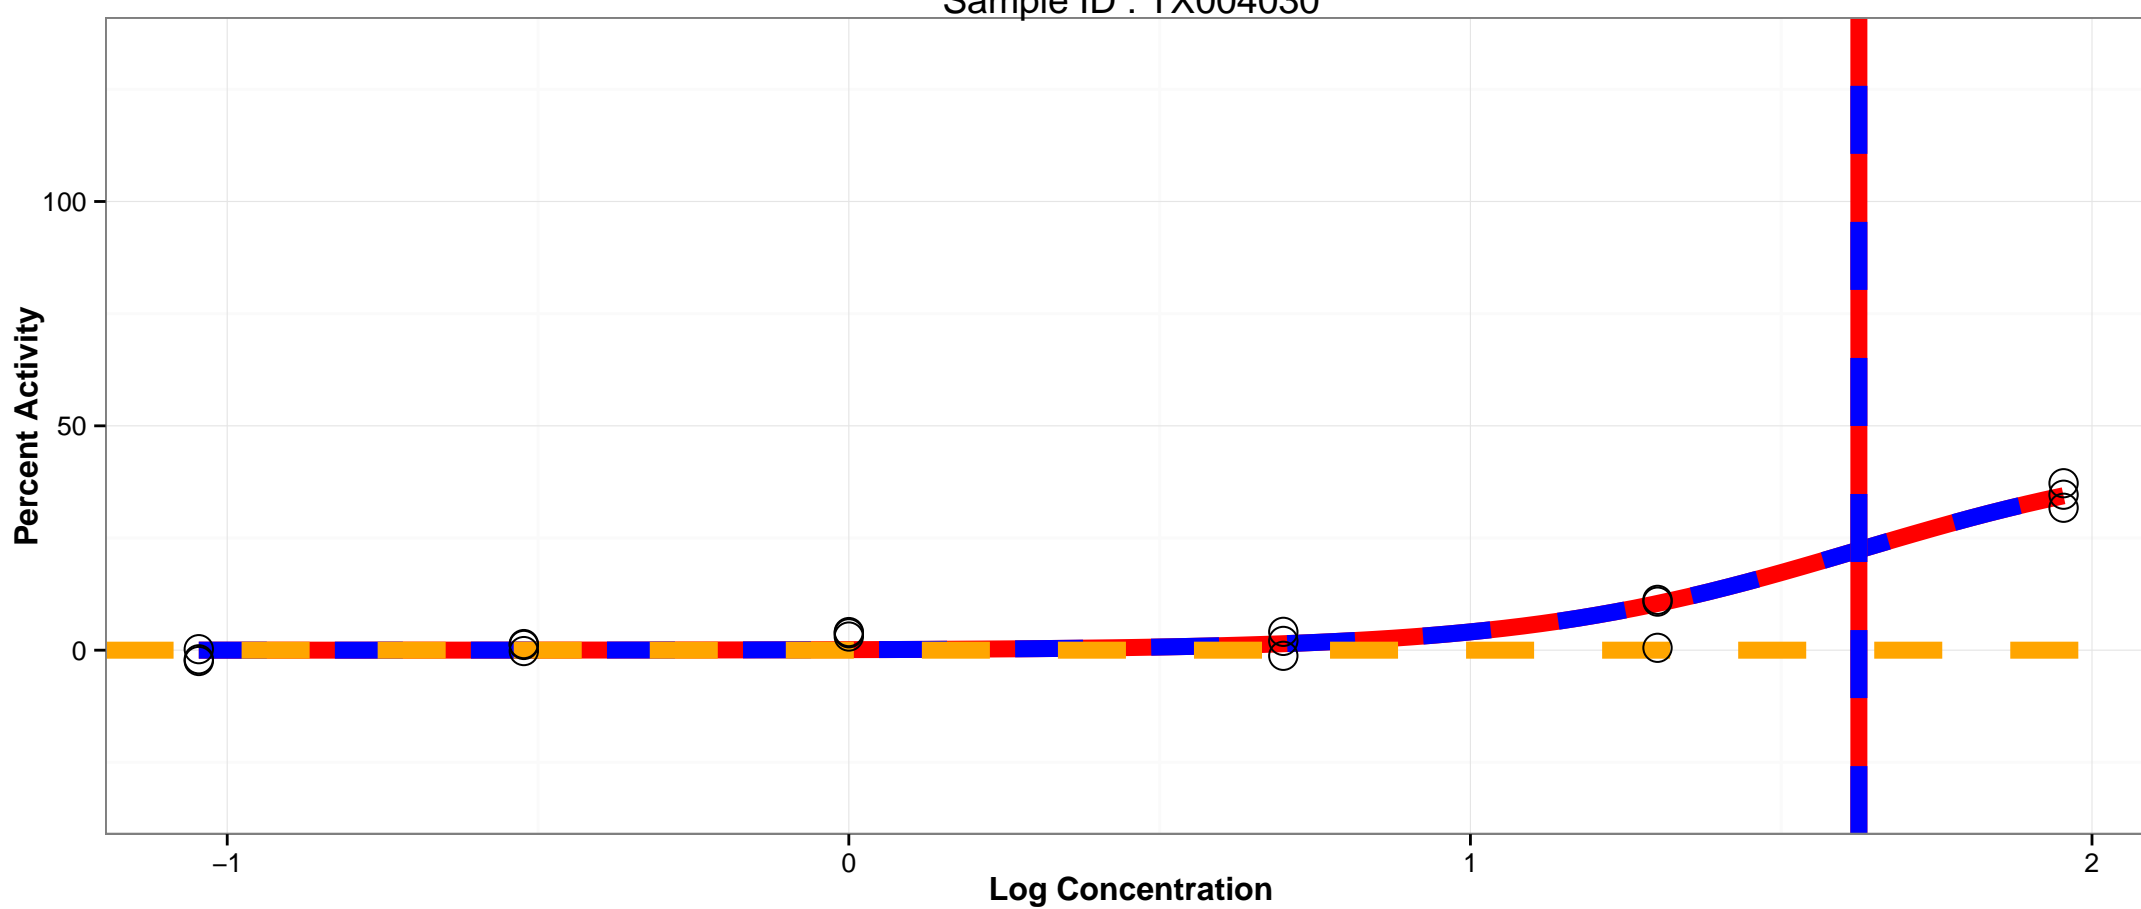

HILL MODEL

|     | tp   | ga    | gw  |
|-----|------|-------|-----|
| val | 44.7 | 1.62  | 1.6 |
| sd  | 17.2 | 0.294 | 0.8 |

GAIN-LOSS MODEL

|     | tp   | ga   | gw  | la   | lw   |
|-----|------|------|-----|------|------|
| val | 44.7 | 1.62 | 1.6 | 3.95 | 16.9 |
| sd  | NA   | NA   | NA  | NA   | NA   |

|      | CNST   | HILL | GNLS  |
|------|--------|------|-------|
| AIC  | 143.39 | 97.9 | 101.9 |
| PROB | 0      | 0.88 | 0.12  |
| RMSE | 14.75  | 3.15 | 3.15  |

MAX\_MEAN : 34.5 MAX\_MED : 34.7 BMAD : 5.69  
COFF : 20 HIT-CALL : 1 FITC : 42 ACTP : 1  
FLAGS : 6

Assay ID 1509 (NHEERL\_HEK293T\_CellTiterGLO)  
Sample ID : TX004030

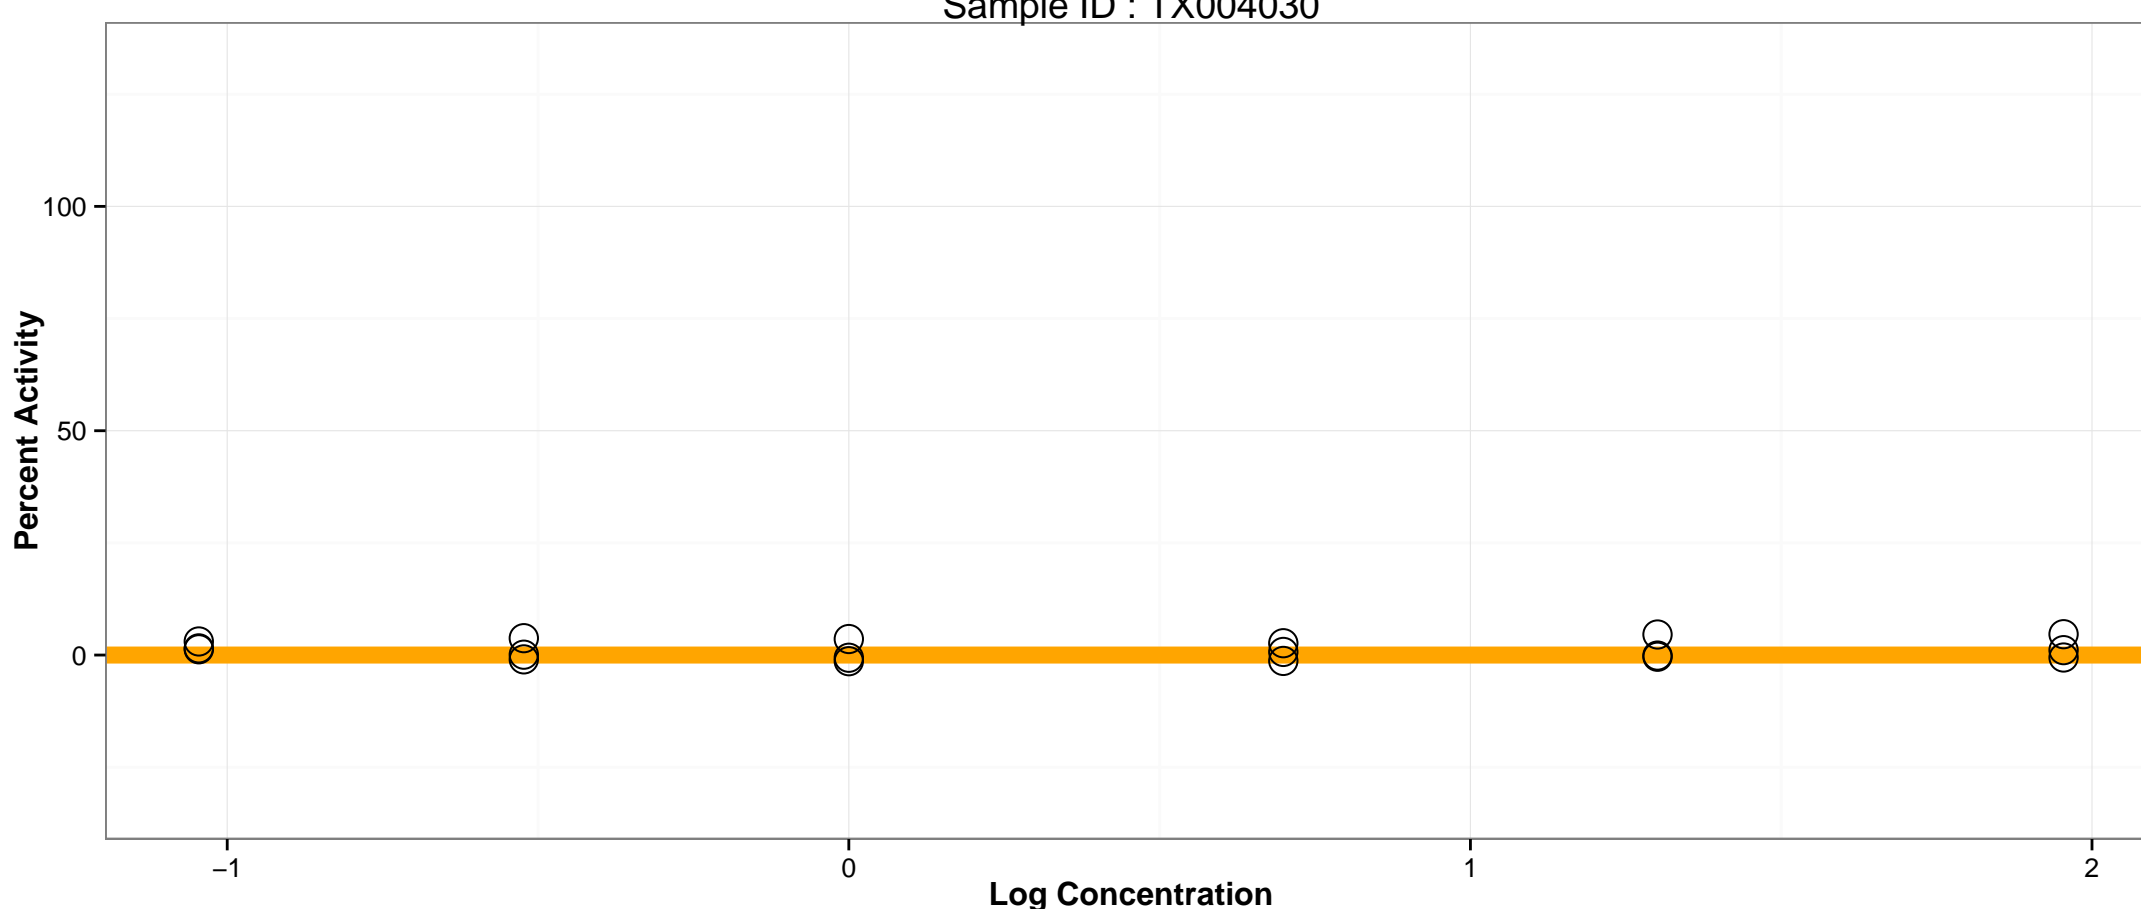

HILL MODEL

HILL MODEL: Not applicable

GAIN-LOSS MODEL

GNLS MODEL: Not applicable

|      | CNST  | HILL | GNLS |
|------|-------|------|------|
| AIC  | 84.17 | NA   | NA   |
| PROB | 1     | NA   | NA   |
| RMSE | 2.32  | NA   | NA   |

MAX\_MEAN : 1.95 MAX\_MED : 1.51 BMAD : 5.54  
COFF : 20 HIT-CALL : 0 FITC : 4 ACTP : 0  
FLAGS :

Assay ID 1848 (NHEERL\_Quantilum\_inhib\_2\_dn)  
Sample ID : TX004030

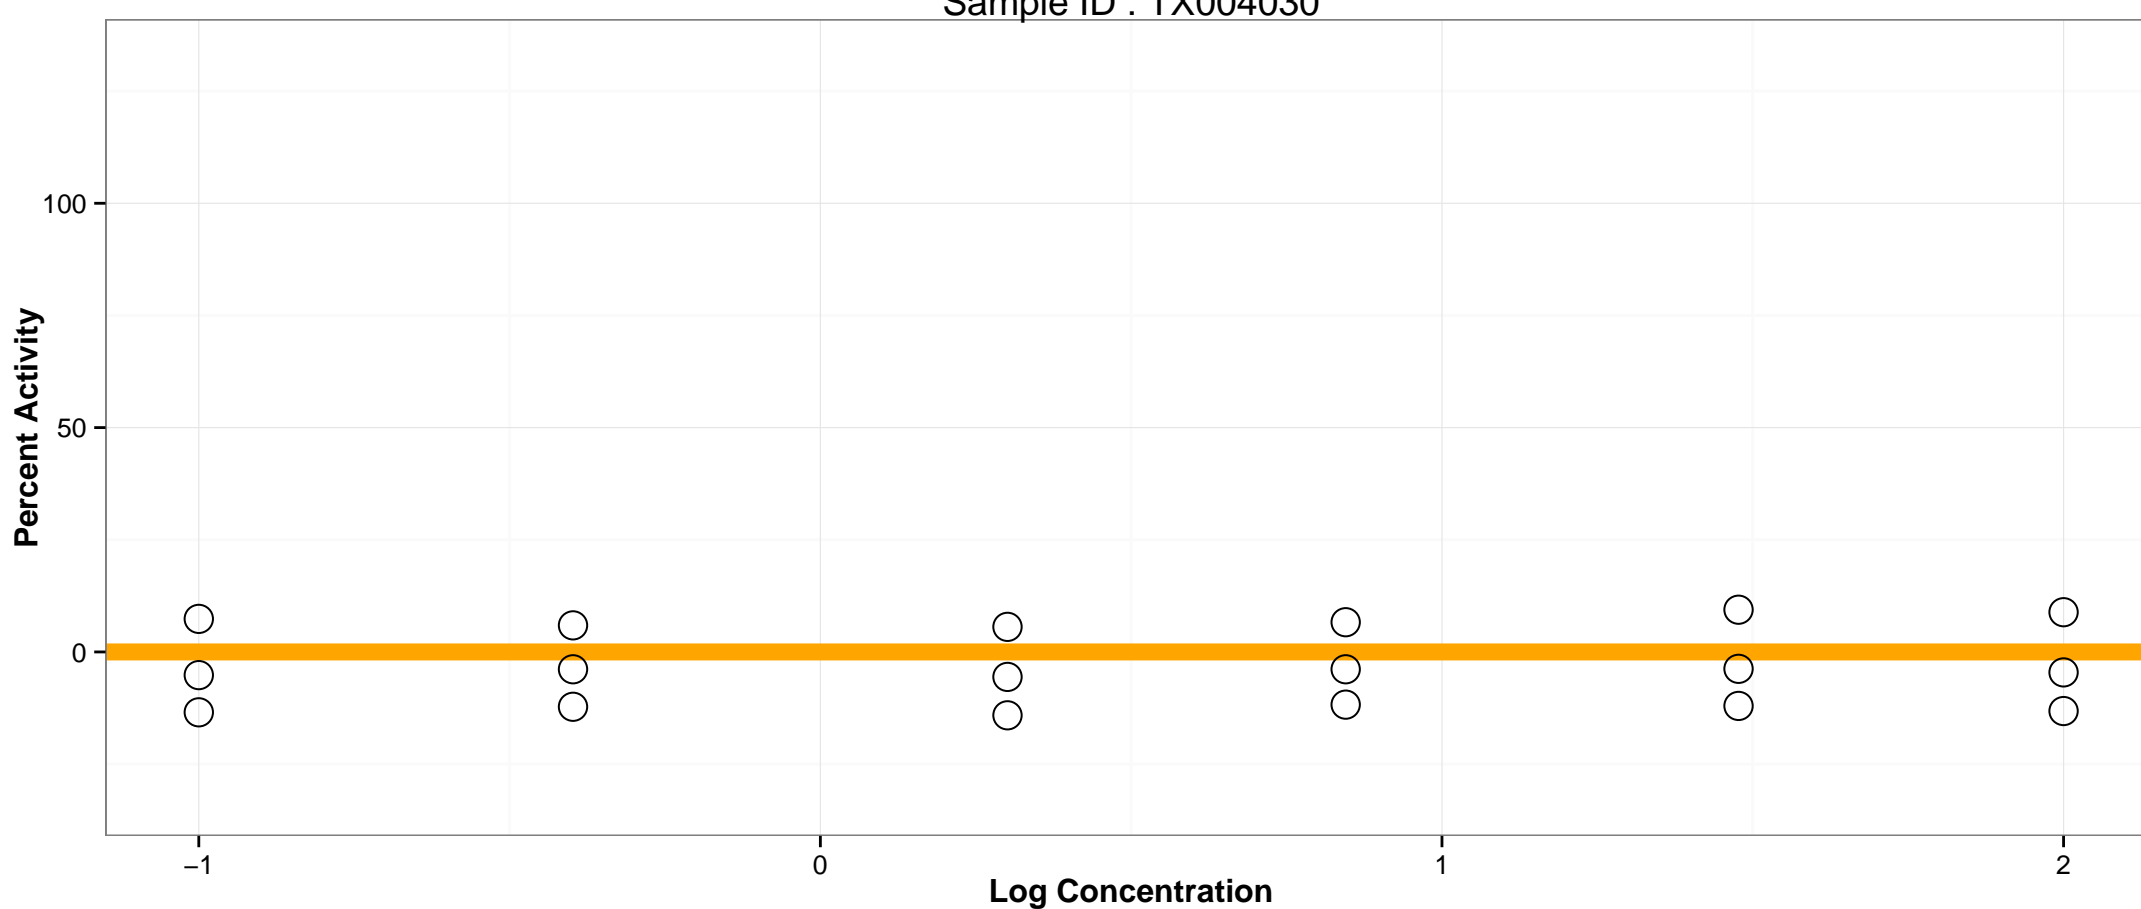

HILL MODEL

HILL MODEL: Not applicable

GAIN-LOSS MODEL

GNLS MODEL: Not applicable

|      | CNST   | HILL | GNLS |
|------|--------|------|------|
| AIC  | 135.03 | NA   | NA   |
| PROB | 1      | NA   | NA   |
| RMSE | 8.94   | NA   | NA   |

MAX\_MEAN : -2.12 MAX\_MED : -3.75 BMAD : 8.58  
COFF : 20 HIT-CALL : 0 FITC : 4 ACTP : 0  
FLAGS :



Chemical : Bisphenol AF  
CAS : 1478-61-1

Assay ID 1508 (NHEERL\_TPO\_AUR\_dn)  
Sample ID : TX004108

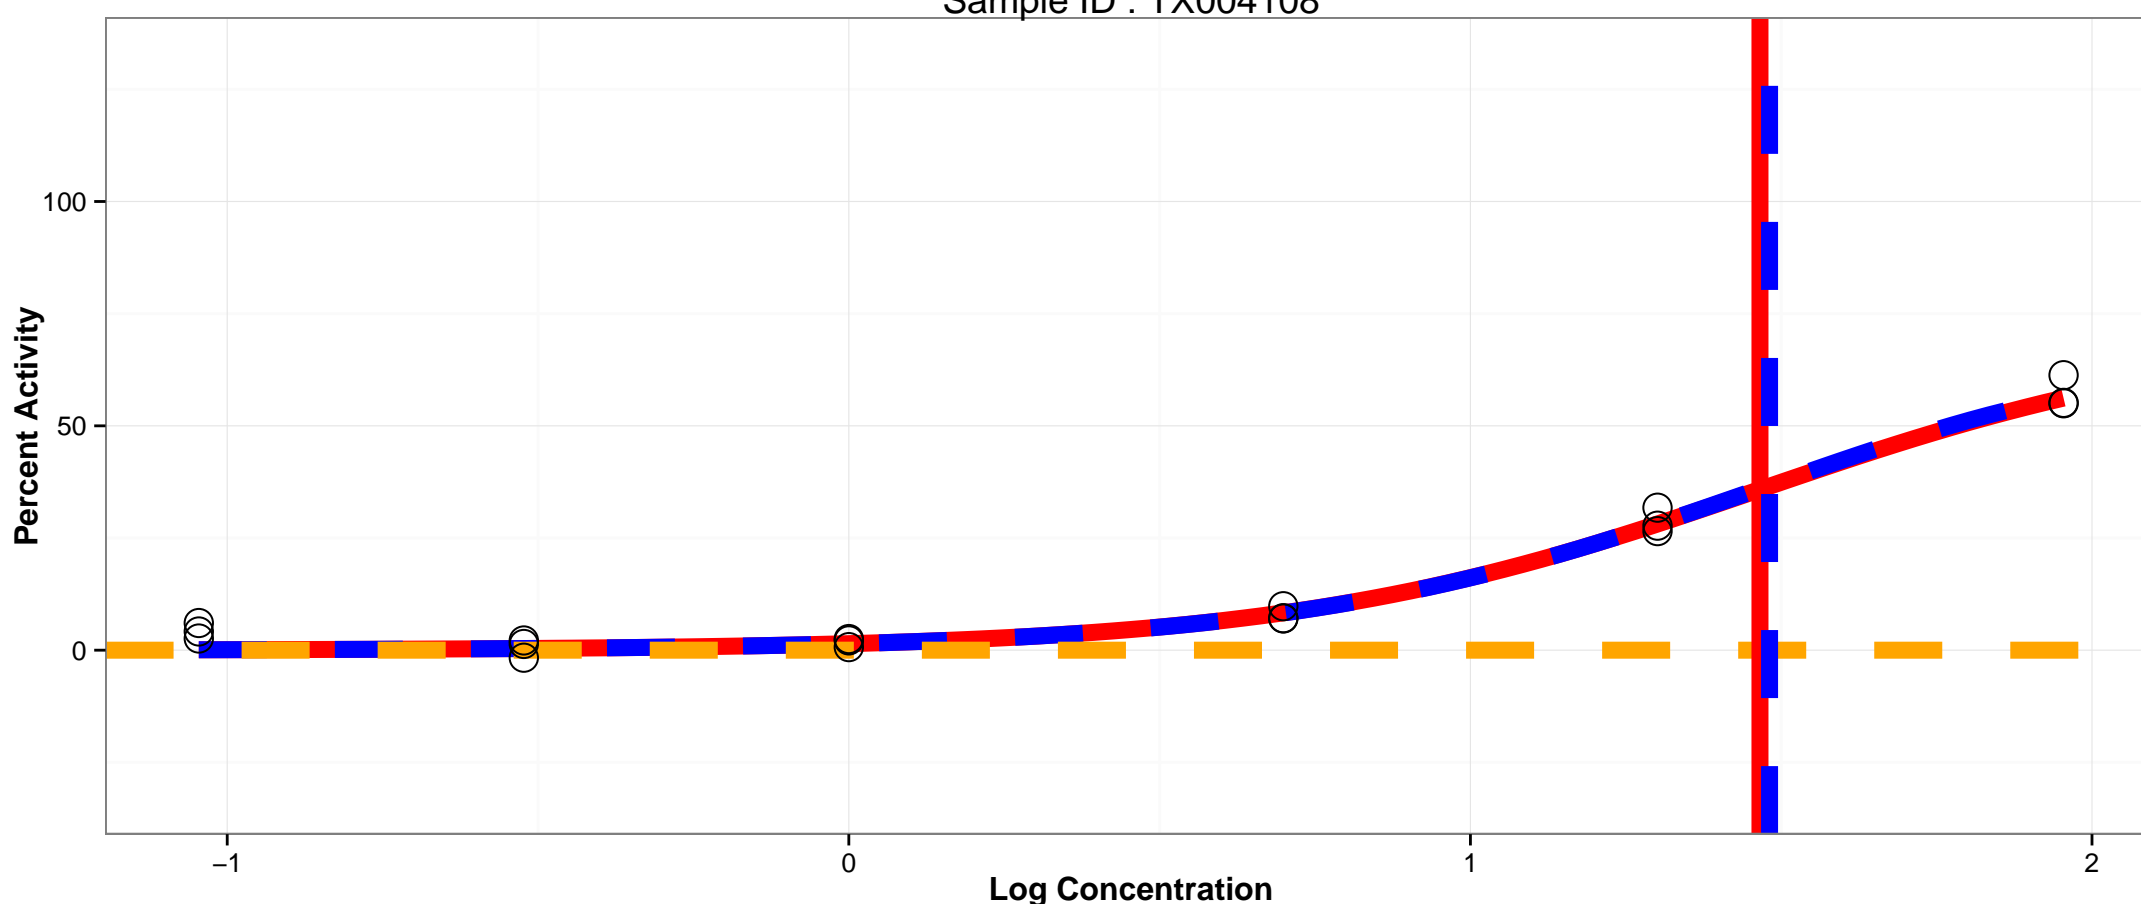

HILL MODEL

|     | tp   | ga    | gw    |
|-----|------|-------|-------|
| val | 71.6 | 1.47  | 1.15  |
| sd  | 7.95 | 0.113 | 0.164 |

GAIN-LOSS MODEL

|     | tp   | ga   | gw   | la  | lw   |
|-----|------|------|------|-----|------|
| val | 73.5 | 1.48 | 1.15 | 2.4 | 3.96 |
| sd  | NA   | NA   | NA   | NA  | NA   |

|      | CNST   | HILL  | GNLS |
|------|--------|-------|------|
| AIC  | 168.66 | 93.33 | 97.3 |
| PROB | 0      | 0.88  | 0.12 |
| RMSE | 26.45  | 2.57  | 2.57 |

MAX\_MEAN : 57.2 MAX\_MED : 55.1 BMAD : 5.69  
COFF : 20 HIT-CALL : 1 FITC : 42 ACTP : 1  
FLAGS :

Assay ID 1509 (NHEERL\_HEK293T\_CellTiterGLO)  
Sample ID : TX004108

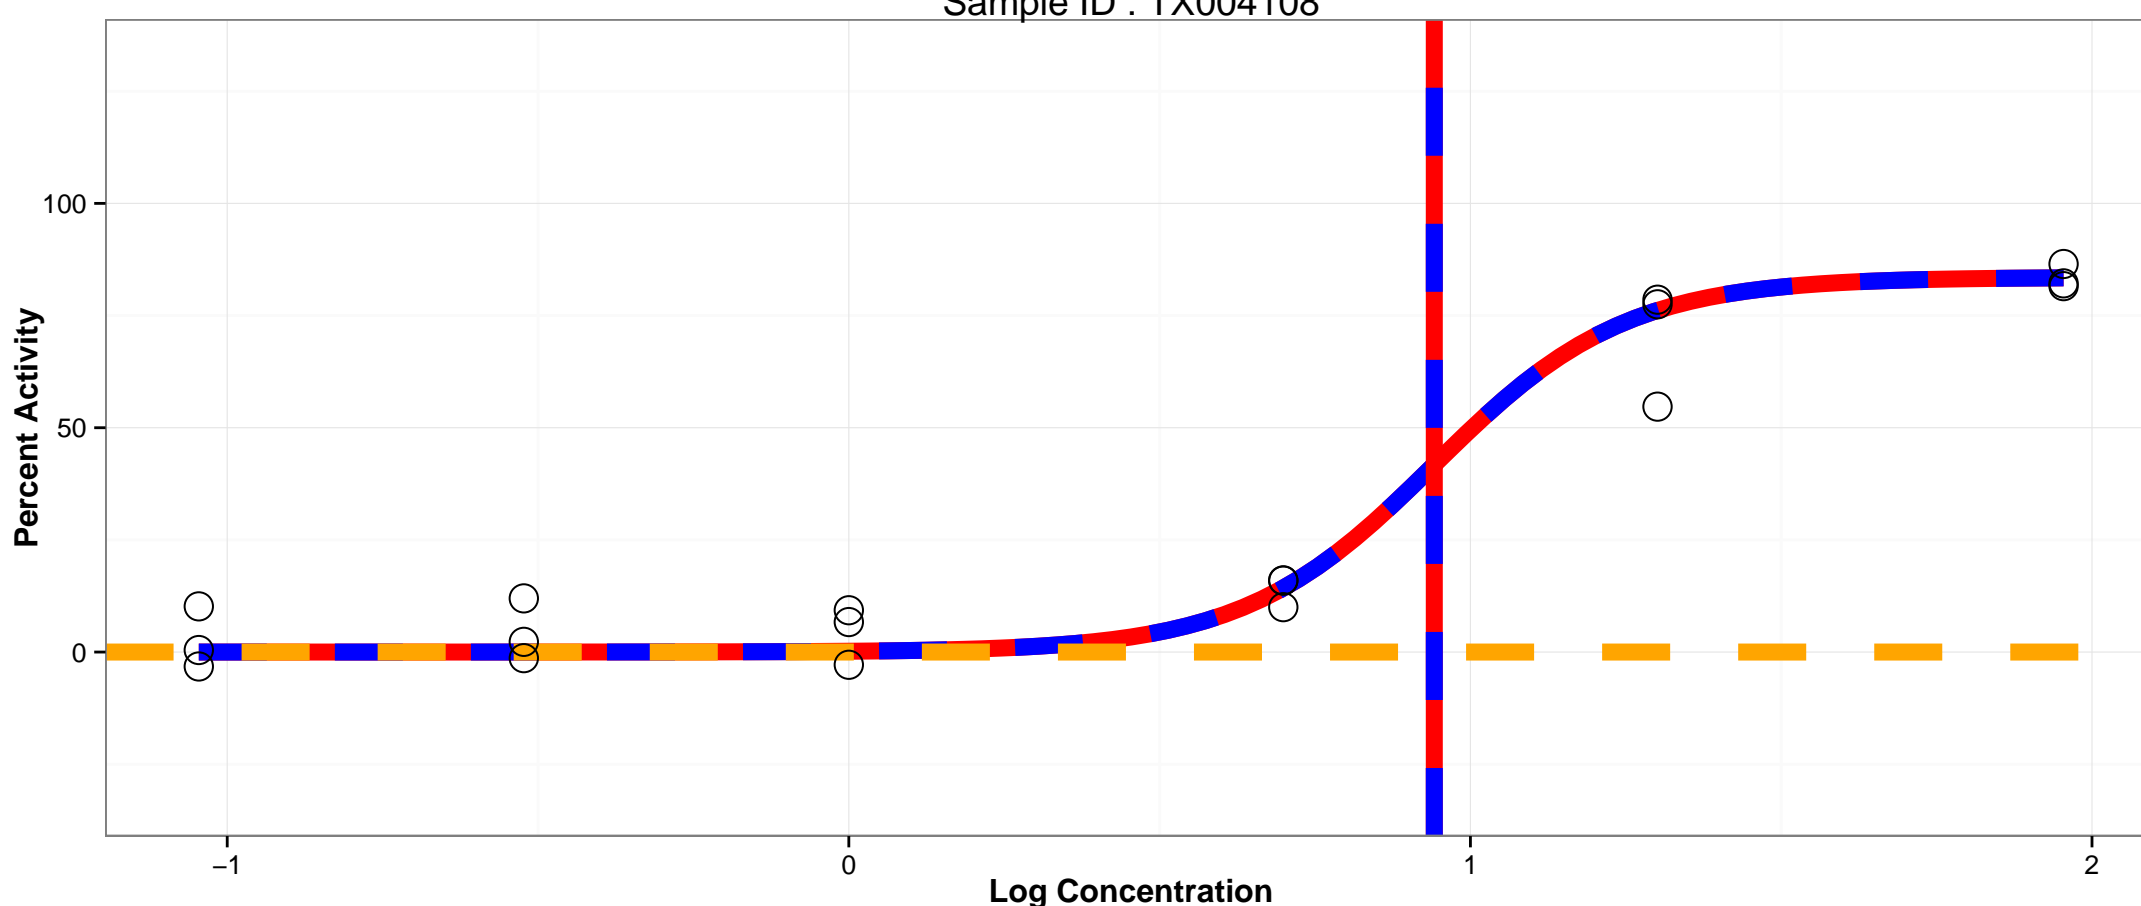

HILL MODEL

|     | tp   | ga     | gw    |
|-----|------|--------|-------|
| val | 83.5 | 0.942  | 2.82  |
| sd  | 2.68 | 0.0461 | 0.474 |

GAIN-LOSS MODEL

|     | tp   | ga    | gw   | la   | lw   |
|-----|------|-------|------|------|------|
| val | 83.5 | 0.942 | 2.82 | 3.38 | 8.79 |
| sd  | NA   | NA    | NA   | NA   | NA   |

|      | CNST  | HILL   | GNLS   |
|------|-------|--------|--------|
| AIC  | 190   | 126.04 | 130.04 |
| PROB | 0     | 0.88   | 0.12   |
| RMSE | 45.39 | 7.09   | 7.09   |

MAX\_MEAN : 83.4 MAX\_MED : 82.2 BMAD : 5.54  
COFF : 20 HIT-CALL : 1 FITC : 41 ACTP : 1  
FLAGS :

Assay ID 1848 (NHEERL\_Quantilum\_inhib\_2\_dn)  
Sample ID : TX004108

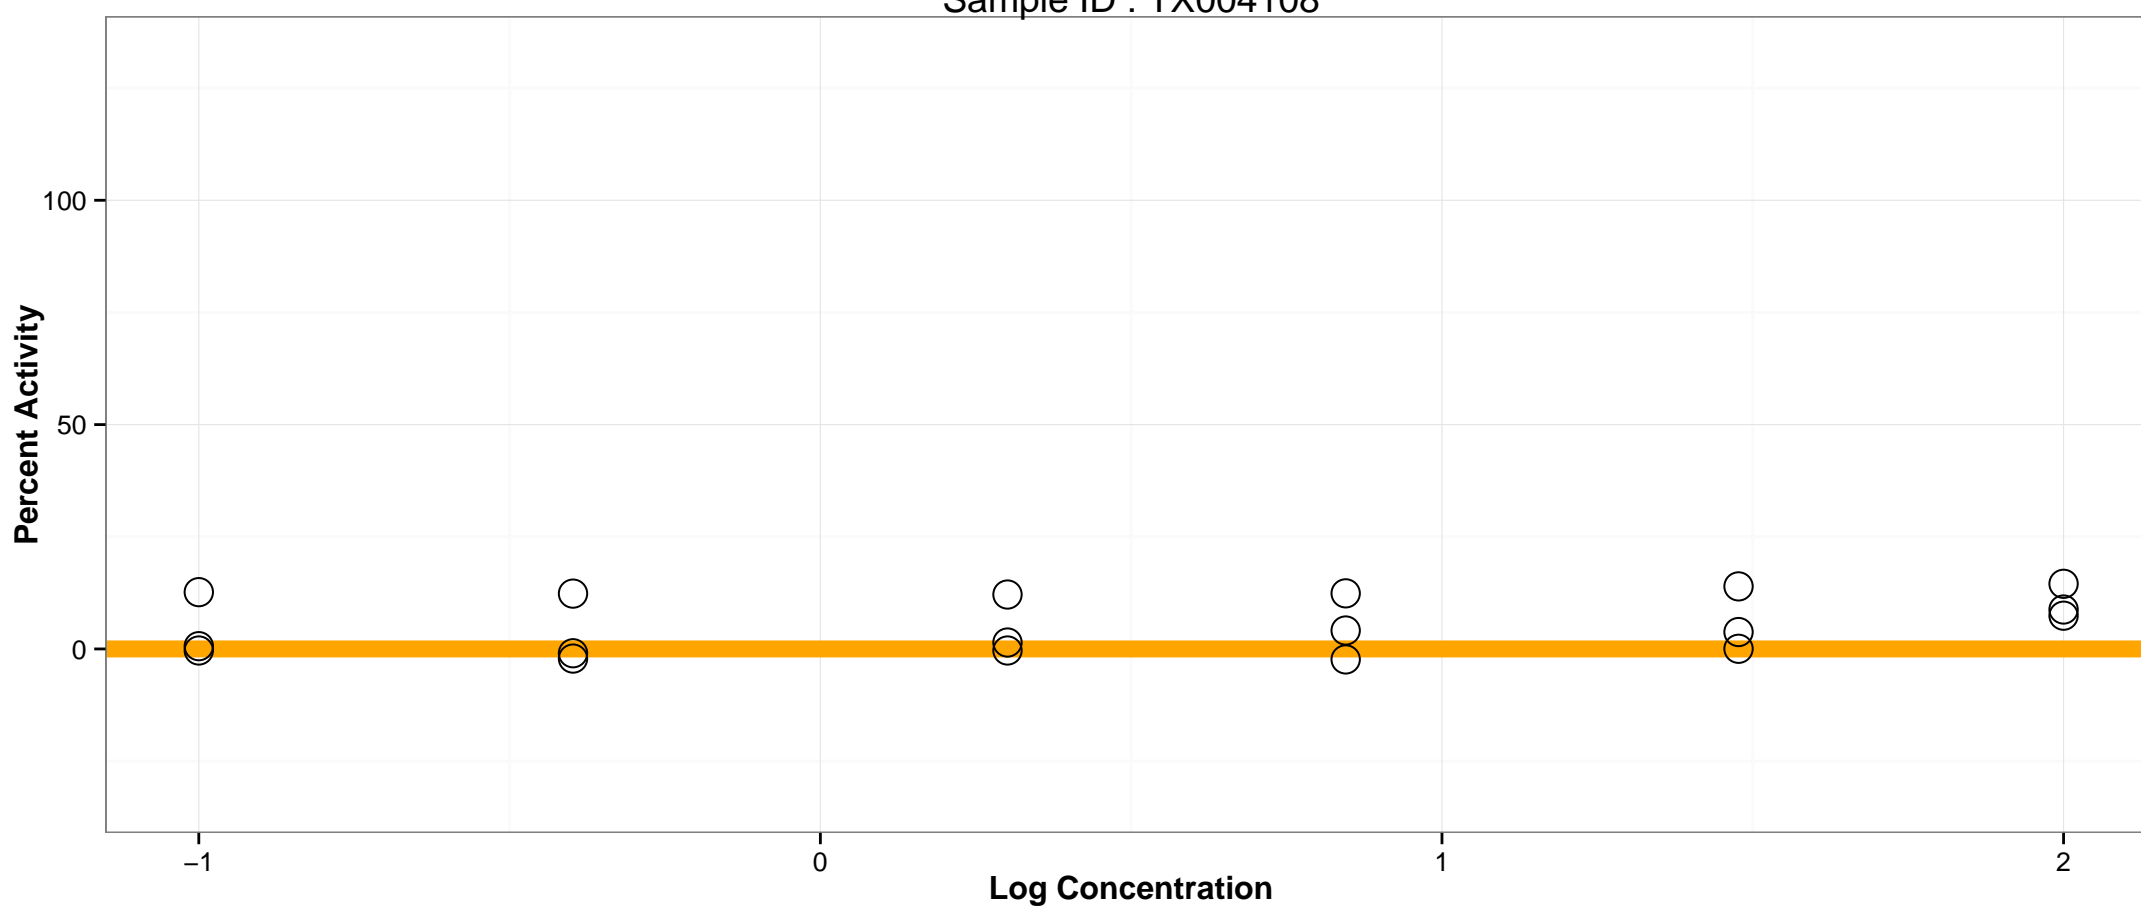

HILL MODEL

HILL MODEL: Not applicable

GAIN-LOSS MODEL

GNLS MODEL: Not applicable

|      | CNST   | HILL | GNLS |
|------|--------|------|------|
| AIC  | 130.03 | NA   | NA   |
| PROB | 1      | NA   | NA   |
| RMSE | 8.16   | NA   | NA   |

MAX\_MEAN : 10.3 MAX\_MED : 8.8 BMAD : 8.58  
COFF : 20 HIT-CALL : 0 FITC : 4 ACTP : 0  
FLAGS :

Chemical : 2-tert-Butyl-4-ethylphenol  
CAS : 96-70-8

Assay ID 1508 (NHEERL\_TPO\_AUR\_dn)  
Sample ID : TX004188

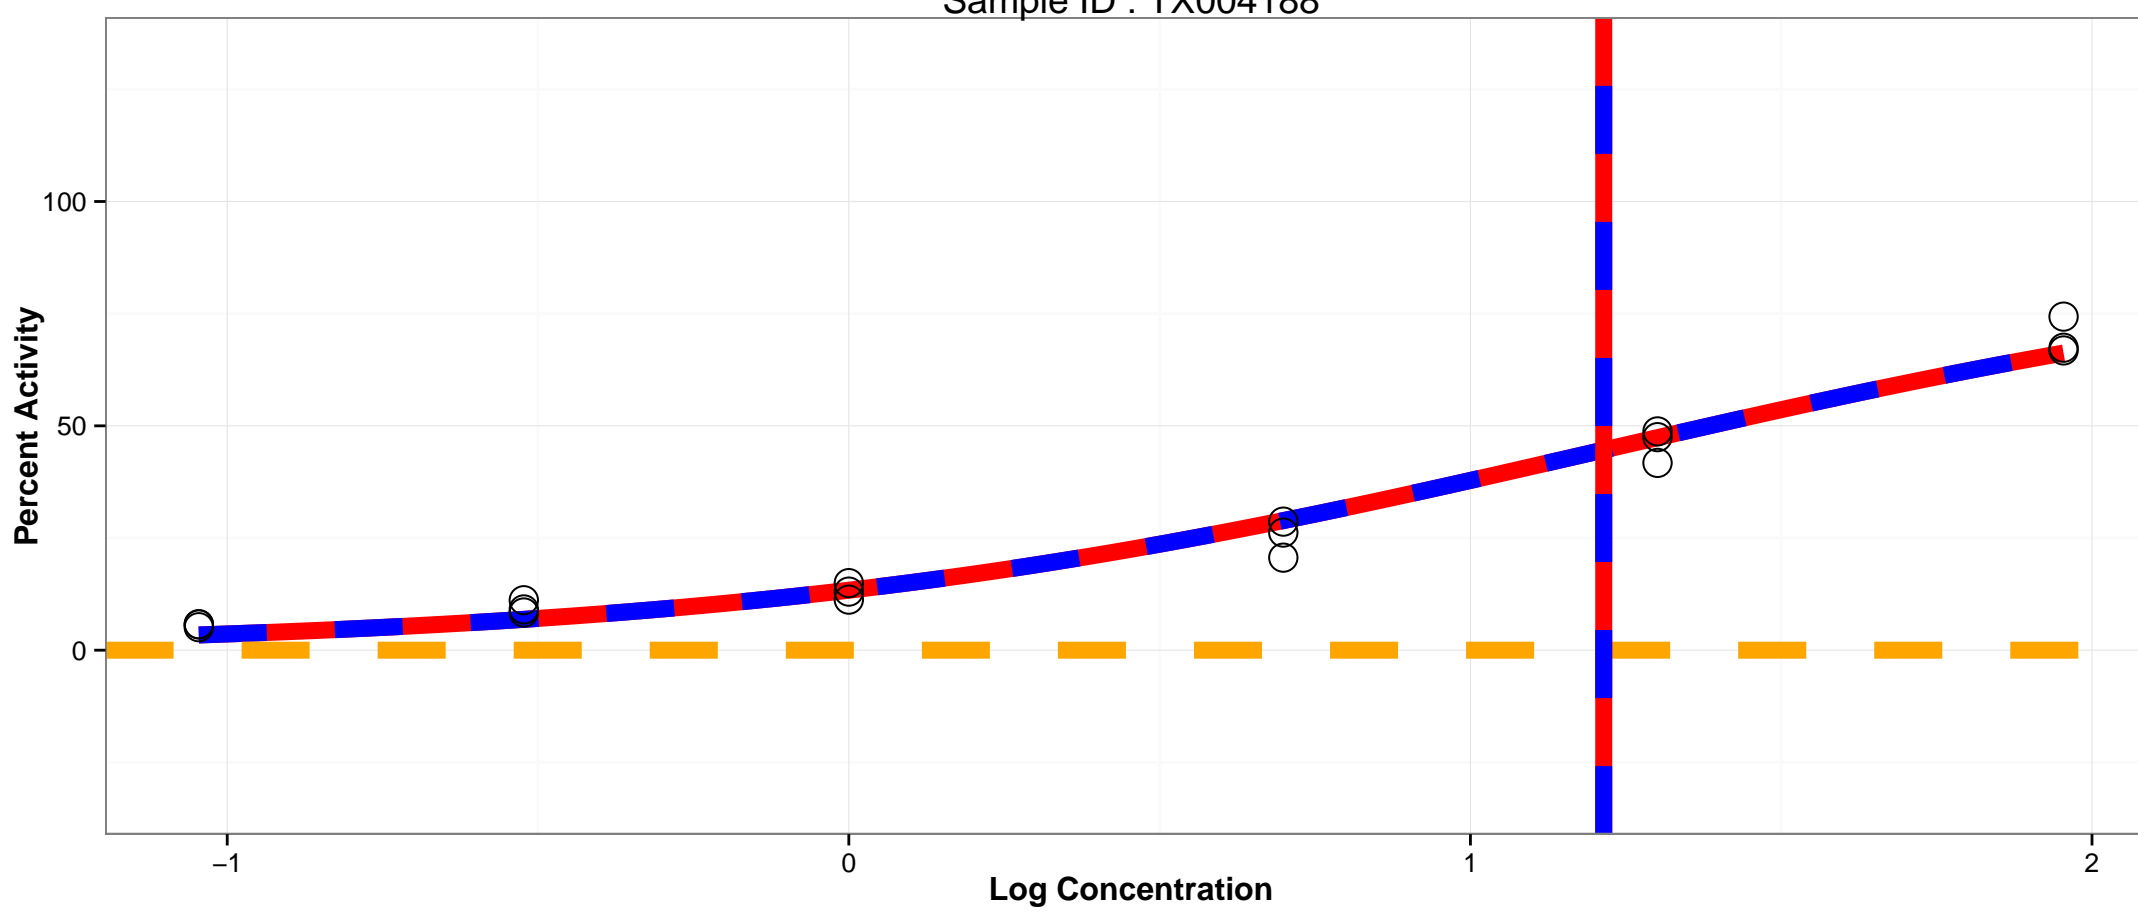

HILL MODEL

|     | tp   | ga    | gw     |
|-----|------|-------|--------|
| val | 89.2 | 1.21  | 0.621  |
| sd  | 8.39 | 0.153 | 0.0598 |

GAIN-LOSS MODEL

|     | tp   | ga   | gw    | la   | lw |
|-----|------|------|-------|------|----|
| val | 89.2 | 1.21 | 0.621 | 2.75 | 18 |
| sd  | NA   | NA   | NA    | NA   | NA |

|      | CNST   | HILL   | GNLS   |
|------|--------|--------|--------|
| AIC  | 183.13 | 103.38 | 107.38 |
| PROB | 0      | 0.88   | 0.12   |
| RMSE | 36.32  | 3.52   | 3.52   |

MAX\_MEAN : 69.5 MAX\_MED : 67.4 BMAD : 5.69  
COFF : 20 HIT-CALL : 1 FITC : 42 ACTP : 1  
FLAGS :

Assay ID 1509 (NHEERL\_HEK293T\_CellTiterGLO)  
Sample ID : TX004188

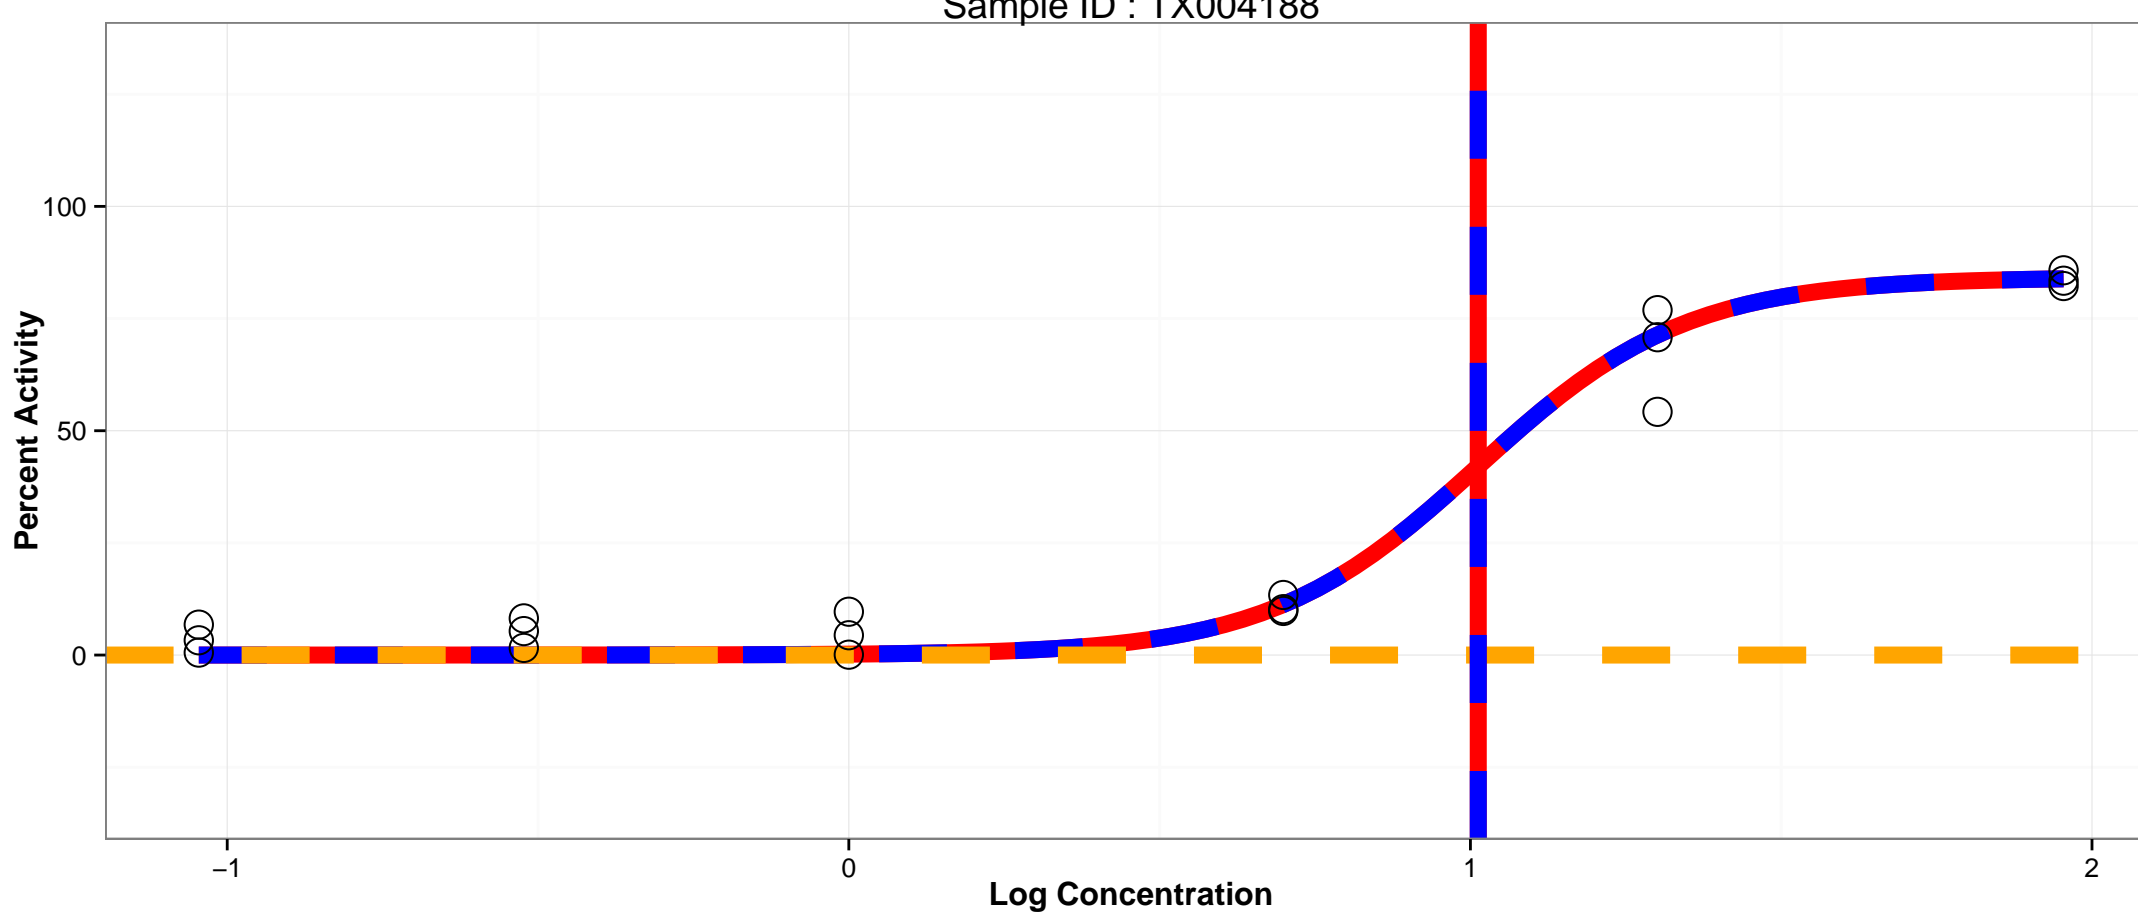

HILL MODEL

|     | tp   | ga     | gw    |
|-----|------|--------|-------|
| val | 84.2 | 1.01   | 2.59  |
| sd  | 2.28 | 0.0384 | 0.314 |

GAIN-LOSS MODEL

|     | tp   | ga   | gw   | la   | lw   |
|-----|------|------|------|------|------|
| val | 84.2 | 1.01 | 2.59 | 2.75 | 10.9 |
| sd  | NA   | NA   | NA   | NA   | NA   |

|      | CNST   | HILL   | GNLS   |
|------|--------|--------|--------|
| AIC  | 189.02 | 119.62 | 123.62 |
| PROB | 0      | 0.88   | 0.12   |
| RMSE | 44.48  | 5.78   | 5.78   |

MAX\_MEAN : 83.8 MAX\_MED : 83.4 BMAD : 5.54  
COFF : 20 HIT-CALL : 1 FITC : 41 ACTP : 1  
FLAGS :

Assay ID 1848 (NHEERL\_Quantilum\_inhib\_2\_dn)  
Sample ID : TX004188

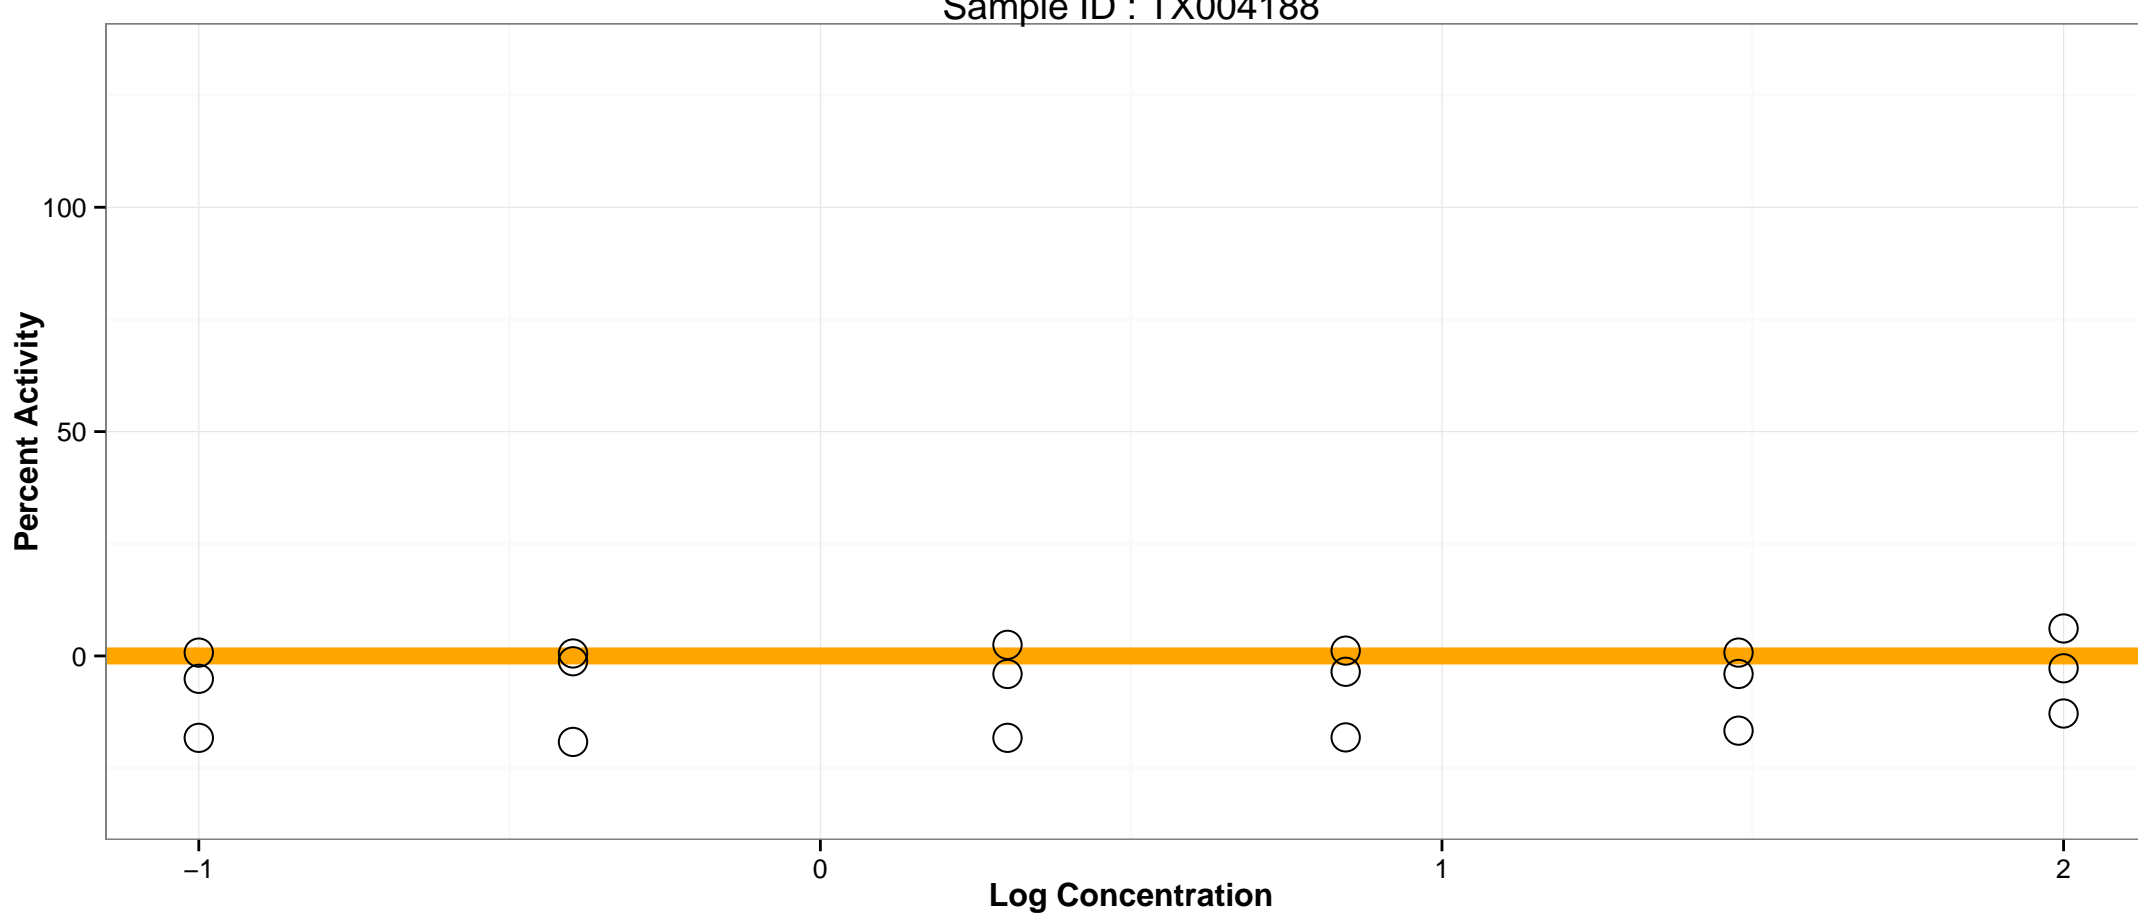

HILL MODEL

HILL MODEL: Not applicable

GAIN-LOSS MODEL

GNLS MODEL: Not applicable

|      | CNST   | HILL | GNLS |
|------|--------|------|------|
| AIC  | 137.58 | NA   | NA   |
| PROB | 1      | NA   | NA   |
| RMSE | 10.35  | NA   | NA   |

MAX\_MEAN : -3.14 MAX\_MED : -1.17 BMAD : 8.58  
COFF : 20 HIT-CALL : 0 FITC : 4 ACTP : 0  
FLAGS :

Assay ID 1508 (NHEERL\_TPO\_AUR\_dn)  
Sample ID : TX004359

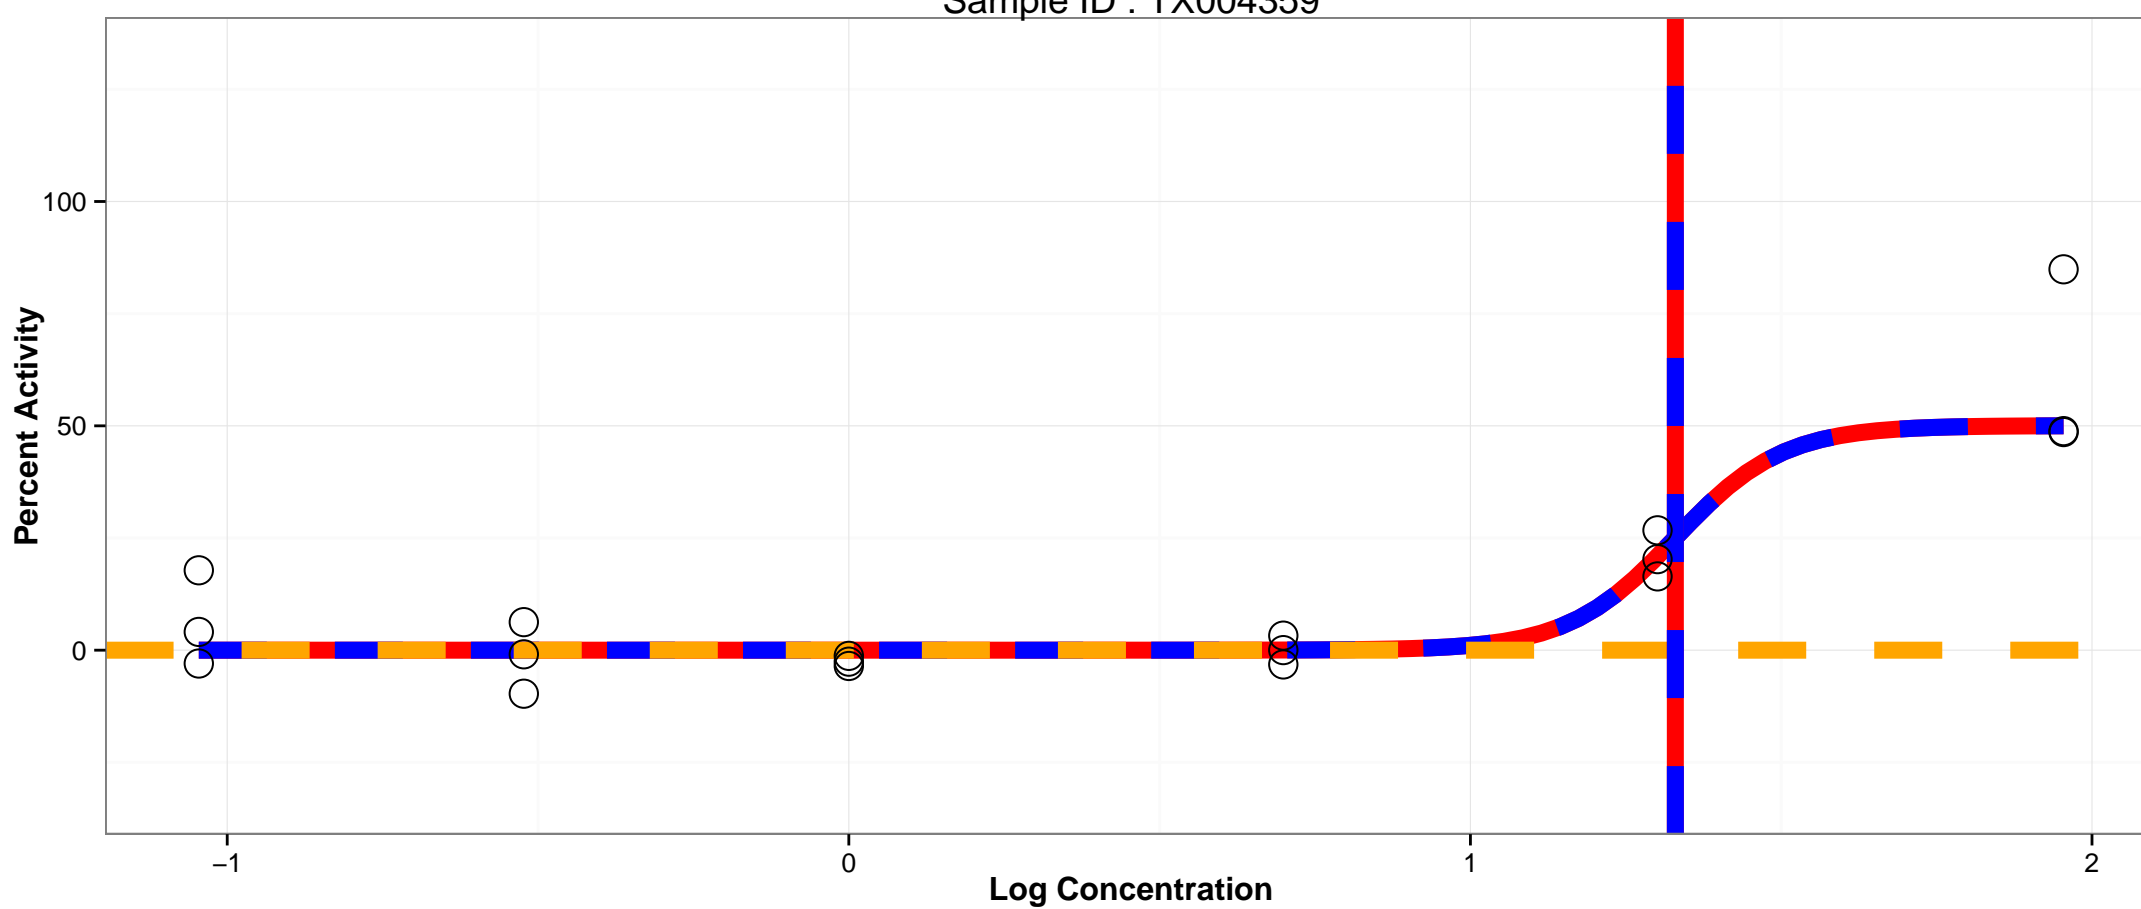

HILL MODEL

|     | tp | ga   | gw   |
|-----|----|------|------|
| val | 50 | 1.33 | 5.03 |
| sd  | NA | NA   | NA   |

GAIN-LOSS MODEL

|     | tp | ga   | gw   | la   | lw   |
|-----|----|------|------|------|------|
| val | 50 | 1.33 | 5.03 | 2.74 | 11.7 |
| sd  | NA | NA   | NA   | NA   | NA   |

|      | CNST   | HILL   | GNLS   |
|------|--------|--------|--------|
| AIC  | 167.35 | 131.98 | 135.98 |
| PROB | 0      | 0.88   | 0.12   |
| RMSE | 27.76  | 9.98   | 9.98   |

MAX\_MEAN : 60.8 MAX\_MED : 48.8 BMAD : 5.69  
COFF : 20 HIT-CALL : 1 FITC : 41 ACTP : 1  
FLAGS :

Assay ID 1509 (NHEERL\_HEK293T\_CellTiterGLO)  
Sample ID : TX004359

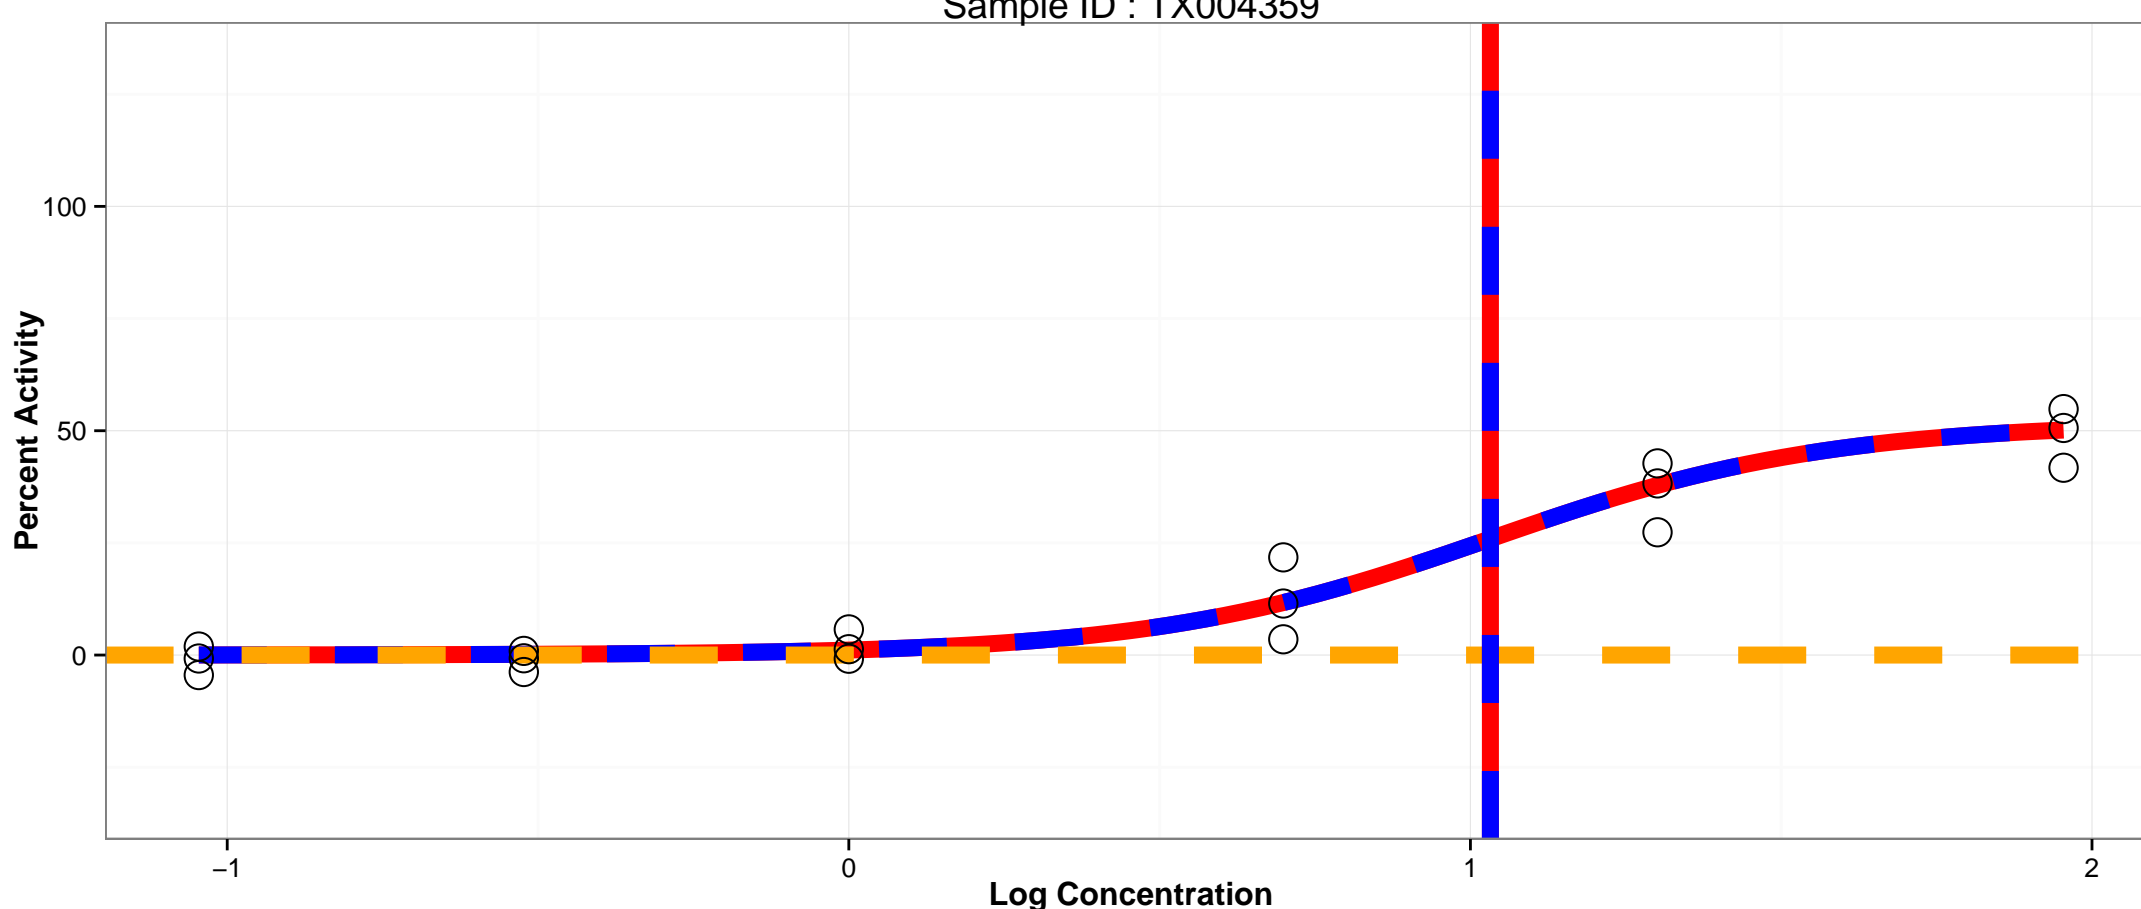

HILL MODEL

|     | tp   | ga     | gw    |
|-----|------|--------|-------|
| val | 51.8 | 1.03   | 1.61  |
| sd  | 4.25 | 0.0937 | 0.417 |

GAIN-LOSS MODEL

|     | tp   | ga   | gw   | la   | lw   |
|-----|------|------|------|------|------|
| val | 51.8 | 1.03 | 1.61 | 3.06 | 9.58 |
| sd  | NA   | NA   | NA   | NA   | NA   |

|      | CNST   | HILL   | GNLS   |
|------|--------|--------|--------|
| AIC  | 169.83 | 117.93 | 121.93 |
| PROB | 0      | 0.88   | 0.12   |
| RMSE | 25.87  | 5.06   | 5.06   |

MAX\_MEAN : 49.1 MAX\_MED : 50.6 BMAD : 5.54  
COFF : 20 HIT-CALL : 1 FITC : 41 ACTP : 1  
FLAGS :

Assay ID 1848 (NHEERL\_Quantilum\_inhib\_2\_dn)  
Sample ID : TX004359

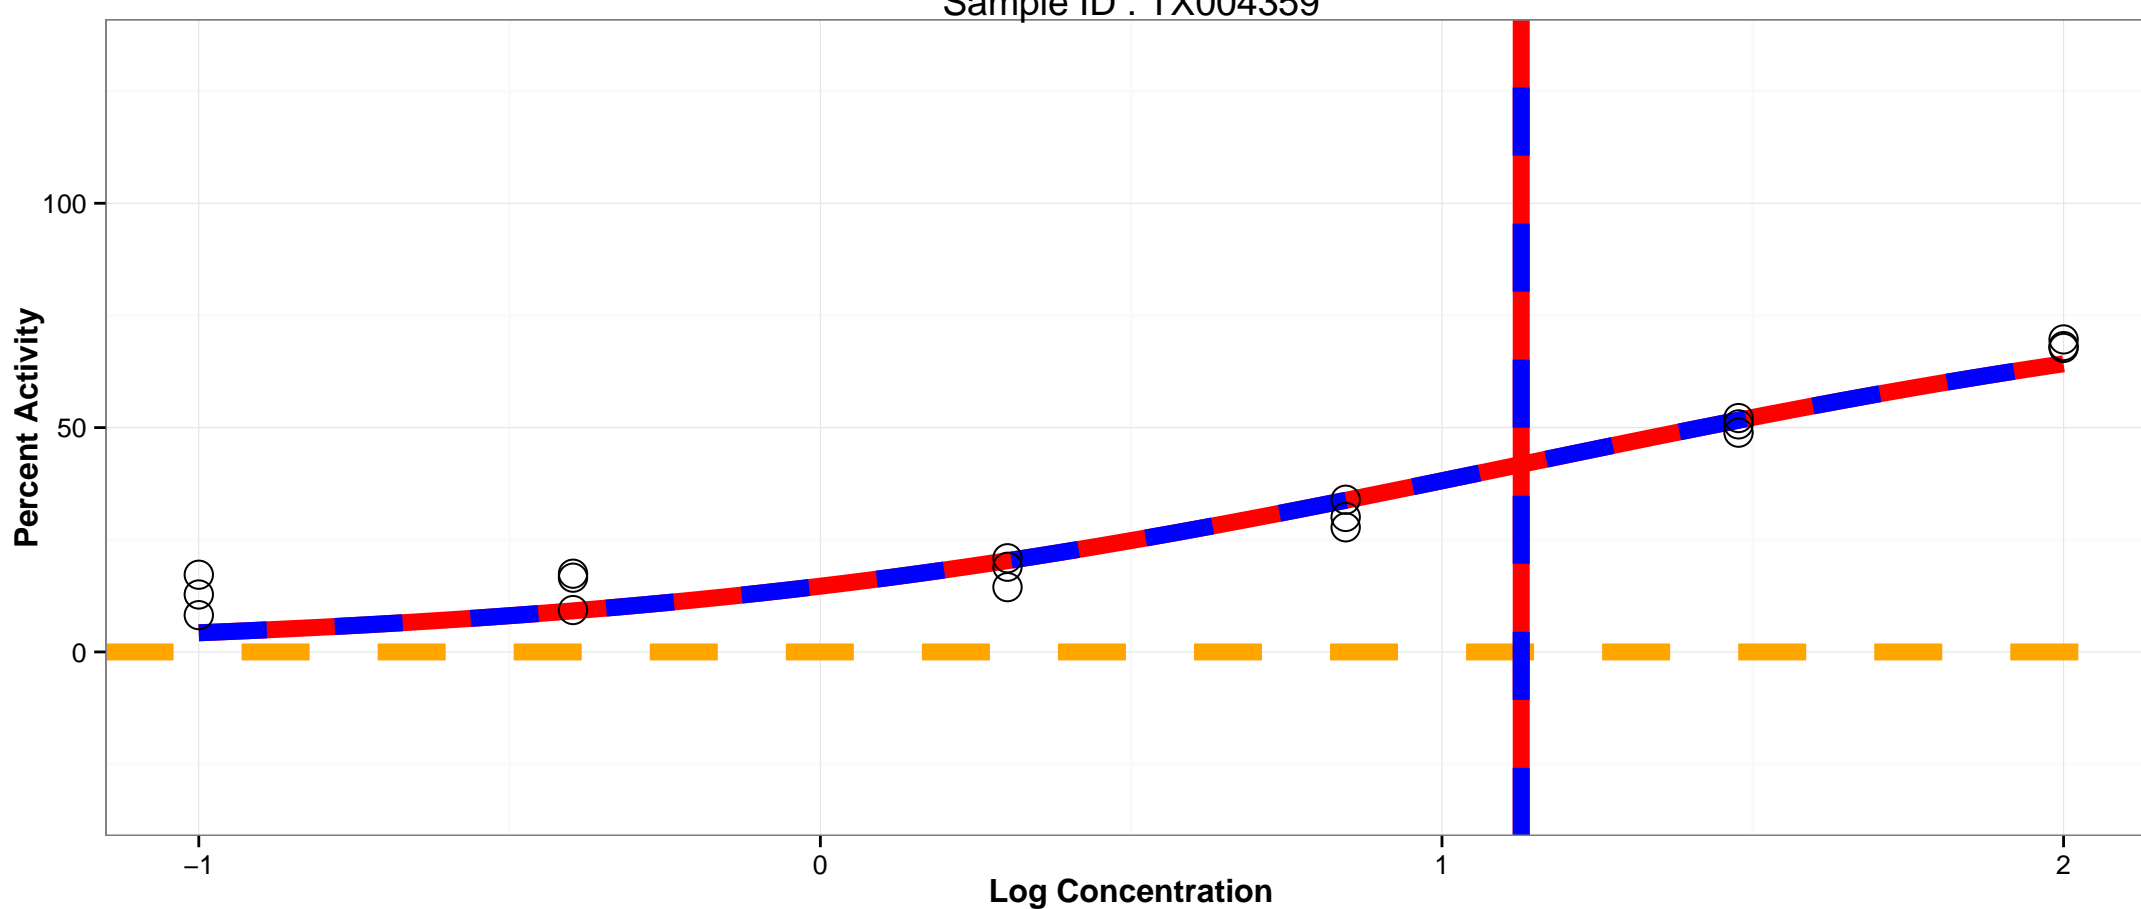

HILL MODEL

|     | tp   | ga   | gw    |
|-----|------|------|-------|
| val | 83.6 | 1.13 | 0.597 |
| sd  | 11.5 | 0.23 | 0.091 |

GAIN-LOSS MODEL

|     | tp   | ga   | gw    | la | lw |
|-----|------|------|-------|----|----|
| val | 83.6 | 1.13 | 0.596 | 4  | 18 |
| sd  | NA   | NA   | NA    | NA | NA |

|      | CNST   | HILL   | GNLS   |
|------|--------|--------|--------|
| AIC  | 186.46 | 121.03 | 125.03 |
| PROB | 0      | 0.88   | 0.12   |
| RMSE | 38.59  | 5.44   | 5.44   |

MAX\_MEAN : 68.5 MAX\_MED : 68.2 BMAD : 8.58  
COFF : 20 HIT-CALL : 1 FITC : 42 ACTP : 1  
FLAGS :

Chemical : 4-Heptylphenol

CAS : 1987-50-4

Assay ID 1508 (NHEERL\_TPO\_AUR\_dn)  
Sample ID : TX004423

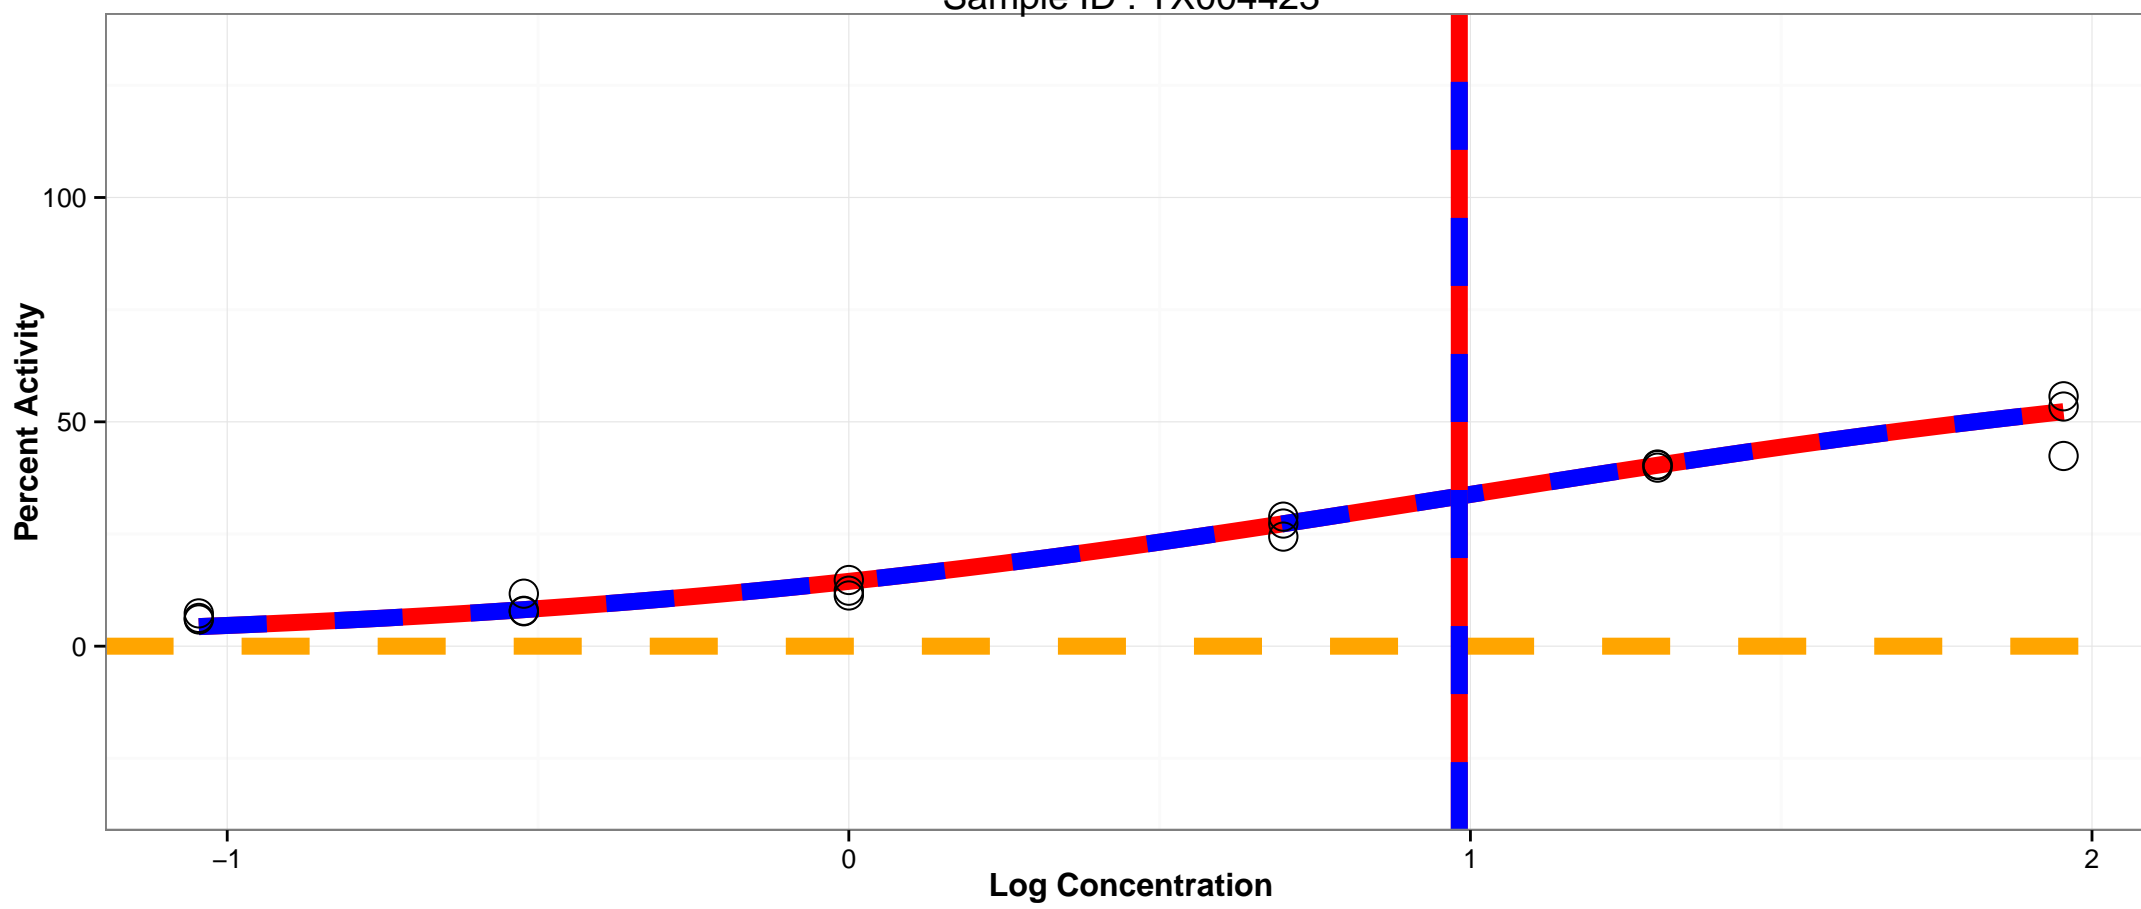

HILL MODEL

|     | tp   | ga    | gw     |
|-----|------|-------|--------|
| val | 66.9 | 0.982 | 0.57   |
| sd  | 7.32 | 0.188 | 0.0568 |

GAIN-LOSS MODEL

|     | tp   | ga    | gw     | la   | lw   |
|-----|------|-------|--------|------|------|
| val | 66.9 | 0.982 | 0.57   | 2.97 | 8.5  |
| sd  | 7.32 | 0.188 | 0.0568 | 656  | 5470 |

|      | CNST   | HILL  | GNLS  |
|------|--------|-------|-------|
| AIC  | 176.77 | 94.69 | 98.69 |
| PROB | 0      | 0.88  | 0.12  |
| RMSE | 29.51  | 3.02  | 3.02  |

MAX\_MEAN : 50.5 MAX\_MED : 53.4 BMAD : 5.69  
COFF : 20 HIT-CALL : 1 FITC : 42 ACTP : 1  
FLAGS :

Assay ID 1509 (NHEERL\_HEK293T\_CellTiterGLO)  
Sample ID : TX004423

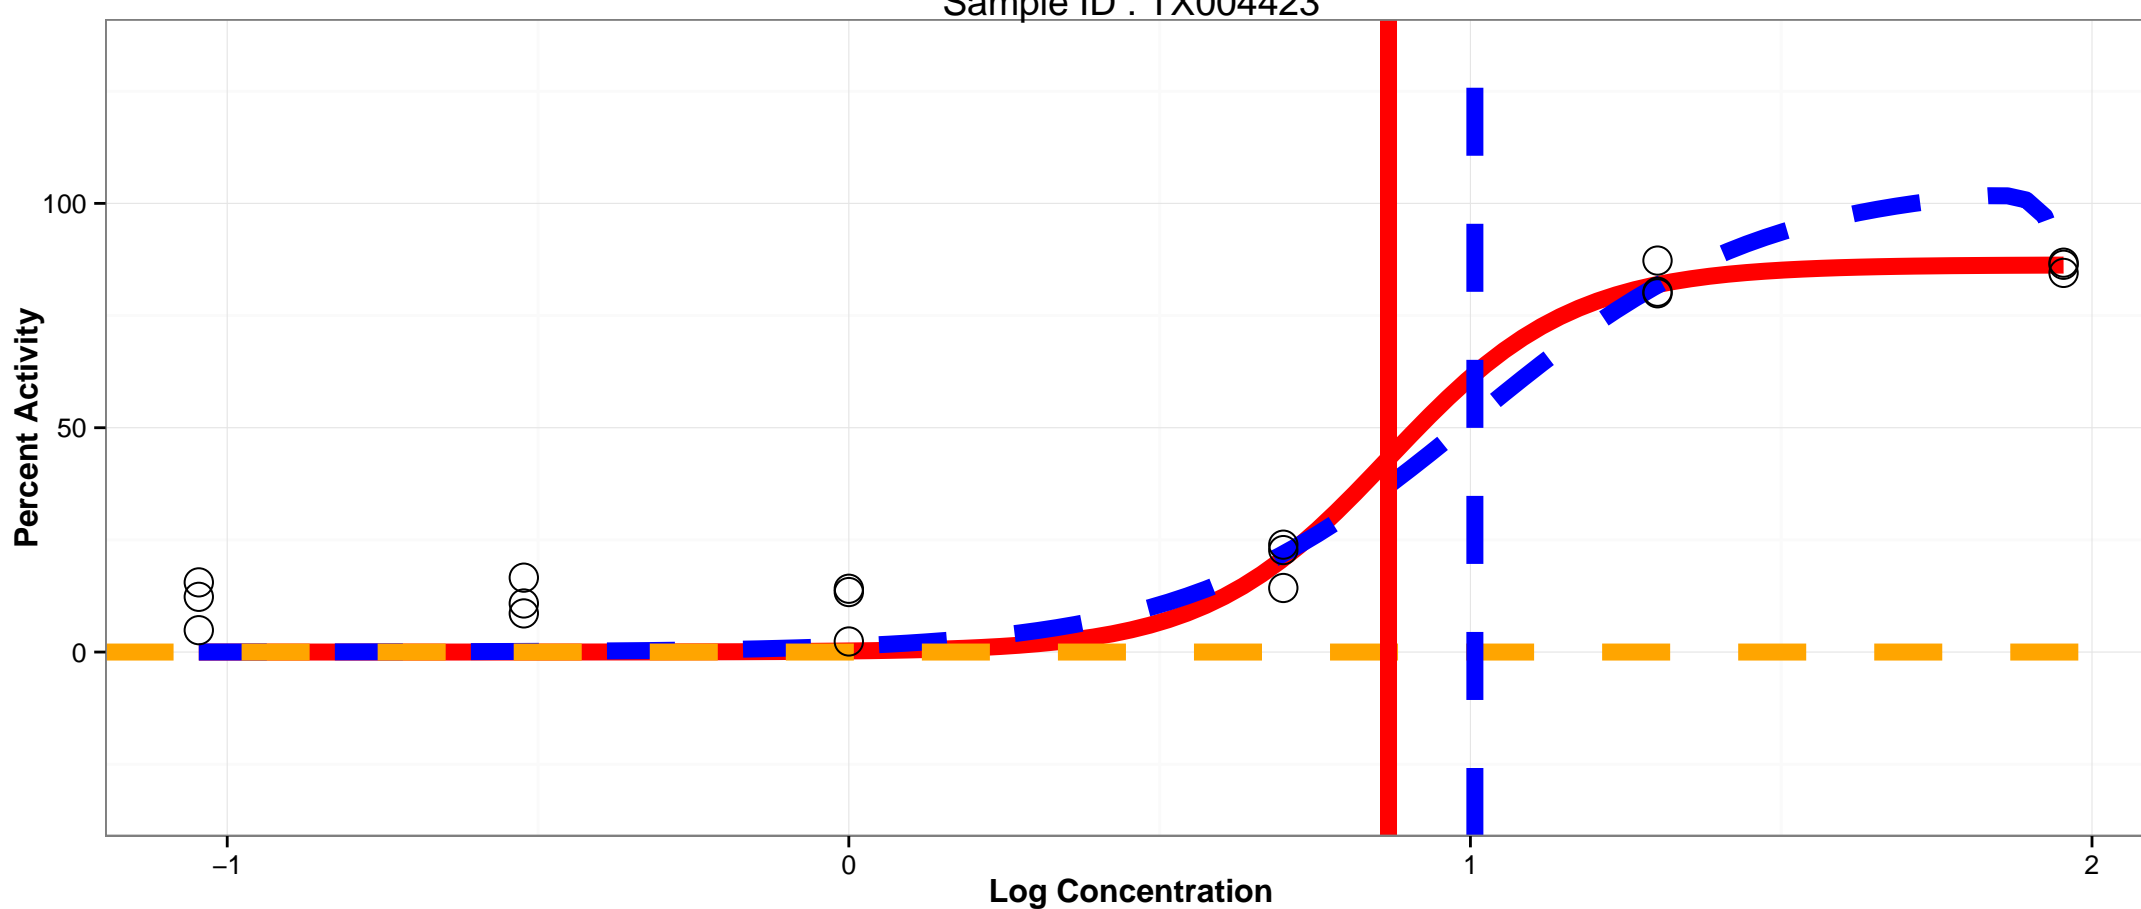

HILL MODEL

|     | tp   | ga     | gw    |
|-----|------|--------|-------|
| val | 86.3 | 0.868  | 2.94  |
| sd  | 3.88 | 0.0651 | 0.991 |

GAIN-LOSS MODEL

|     | tp  | ga   | gw   | la   | lw   |
|-----|-----|------|------|------|------|
| val | 105 | 1.01 | 1.87 | 1.99 | 17.7 |
| sd  | NA  | NA   | NA   | NA   | NA   |

|      | CNST   | HILL   | GNLS   |
|------|--------|--------|--------|
| AIC  | 194.42 | 138.08 | 141.19 |
| PROB | 0      | 0.83   | 0.17   |
| RMSE | 50.09  | 8.66   | 8.45   |

MAX\_MEAN : 85.9 MAX\_MED : 86.3 BMAD : 5.54  
COFF : 20 HIT-CALL : 1 FITC : 41 ACTP : 1  
FLAGS :

Assay ID 1848 (NHEERL\_Quantilum\_inhib\_2\_dn)  
Sample ID : TX004423

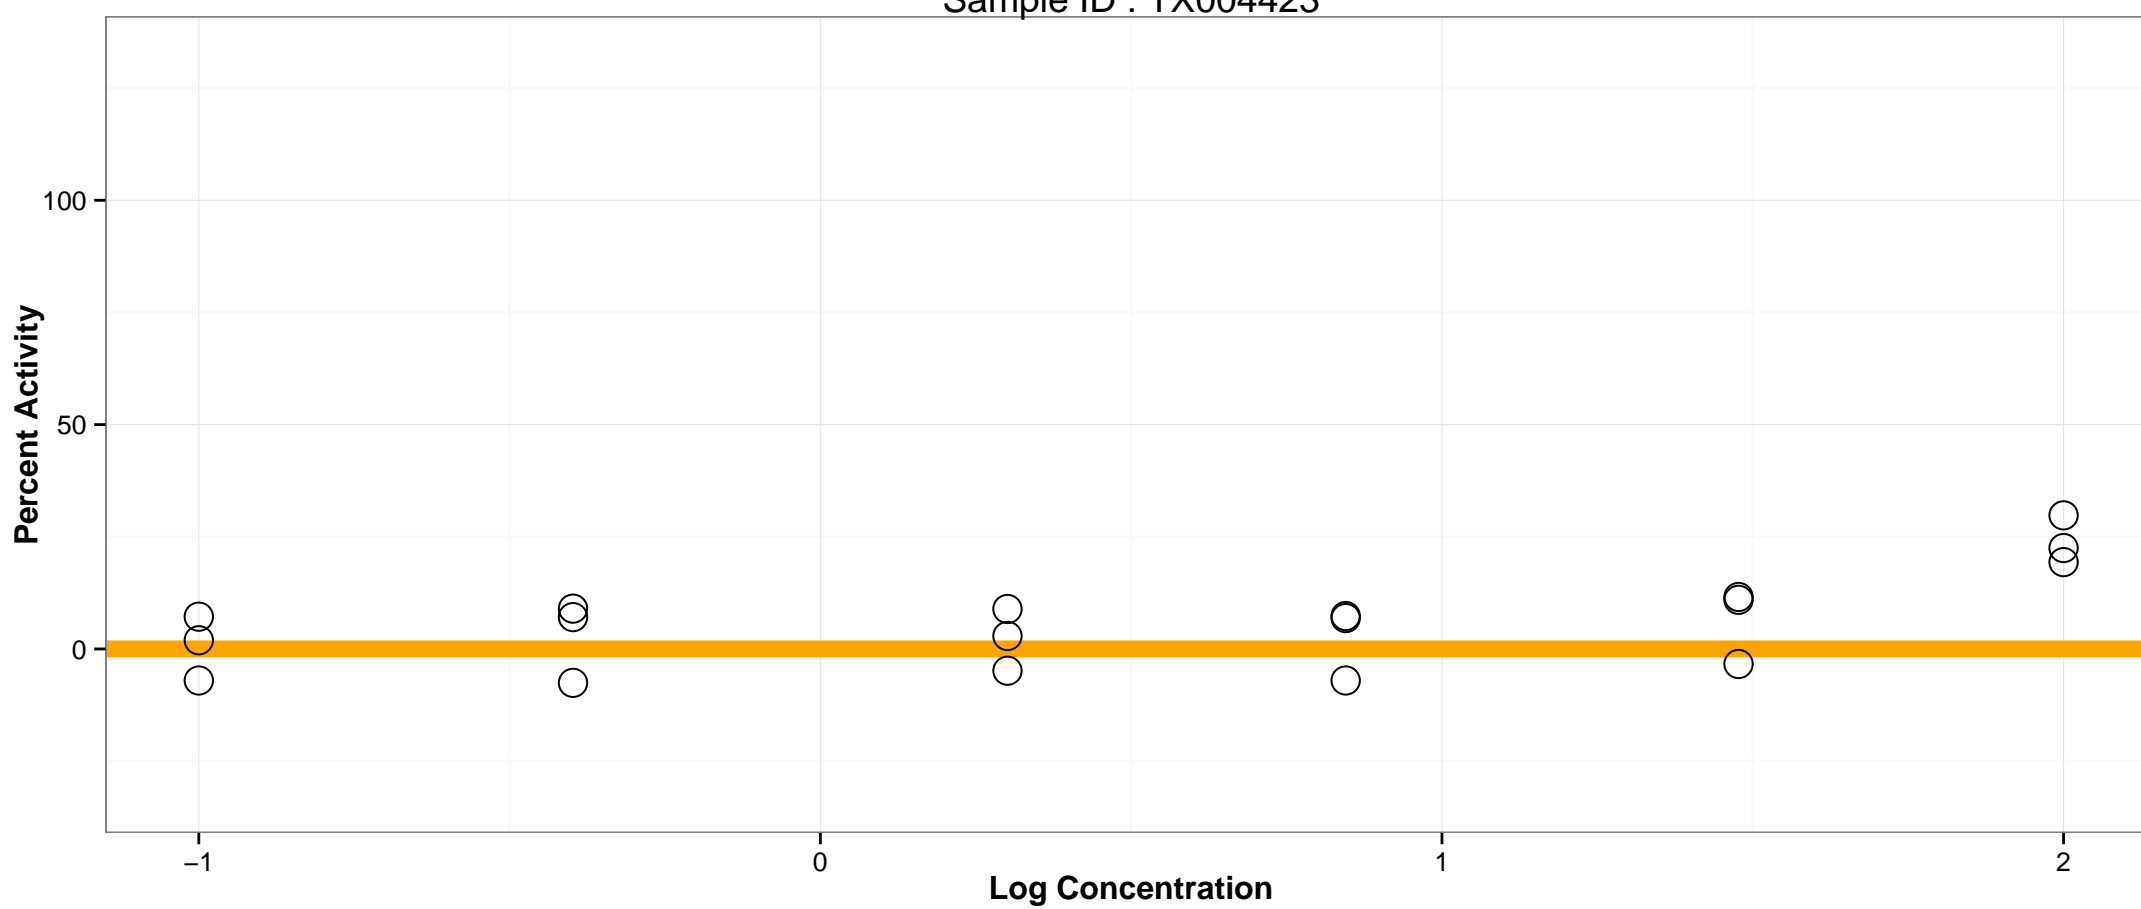

HILL MODEL

HILL MODEL: Not applicable

GAIN-LOSS MODEL

GNLS MODEL: Not applicable

|      | CNST   | HILL | GNLS |
|------|--------|------|------|
| AIC  | 142.81 | NA   | NA   |
| PROB | 1      | NA   | NA   |
| RMSE | 11.99  | NA   | NA   |

MAX\_MEAN : 23.9 MAX\_MED : 22.5 BMAD : 8.58  
COFF : 20 HIT-CALL : 0 FITC : 4 ACTP : 0  
FLAGS :

Chemical : Phorate  
CAS : 298-02-2

Assay ID 1508 (NHEERL\_TPO\_AUR\_dn)  
Sample ID : TX004824

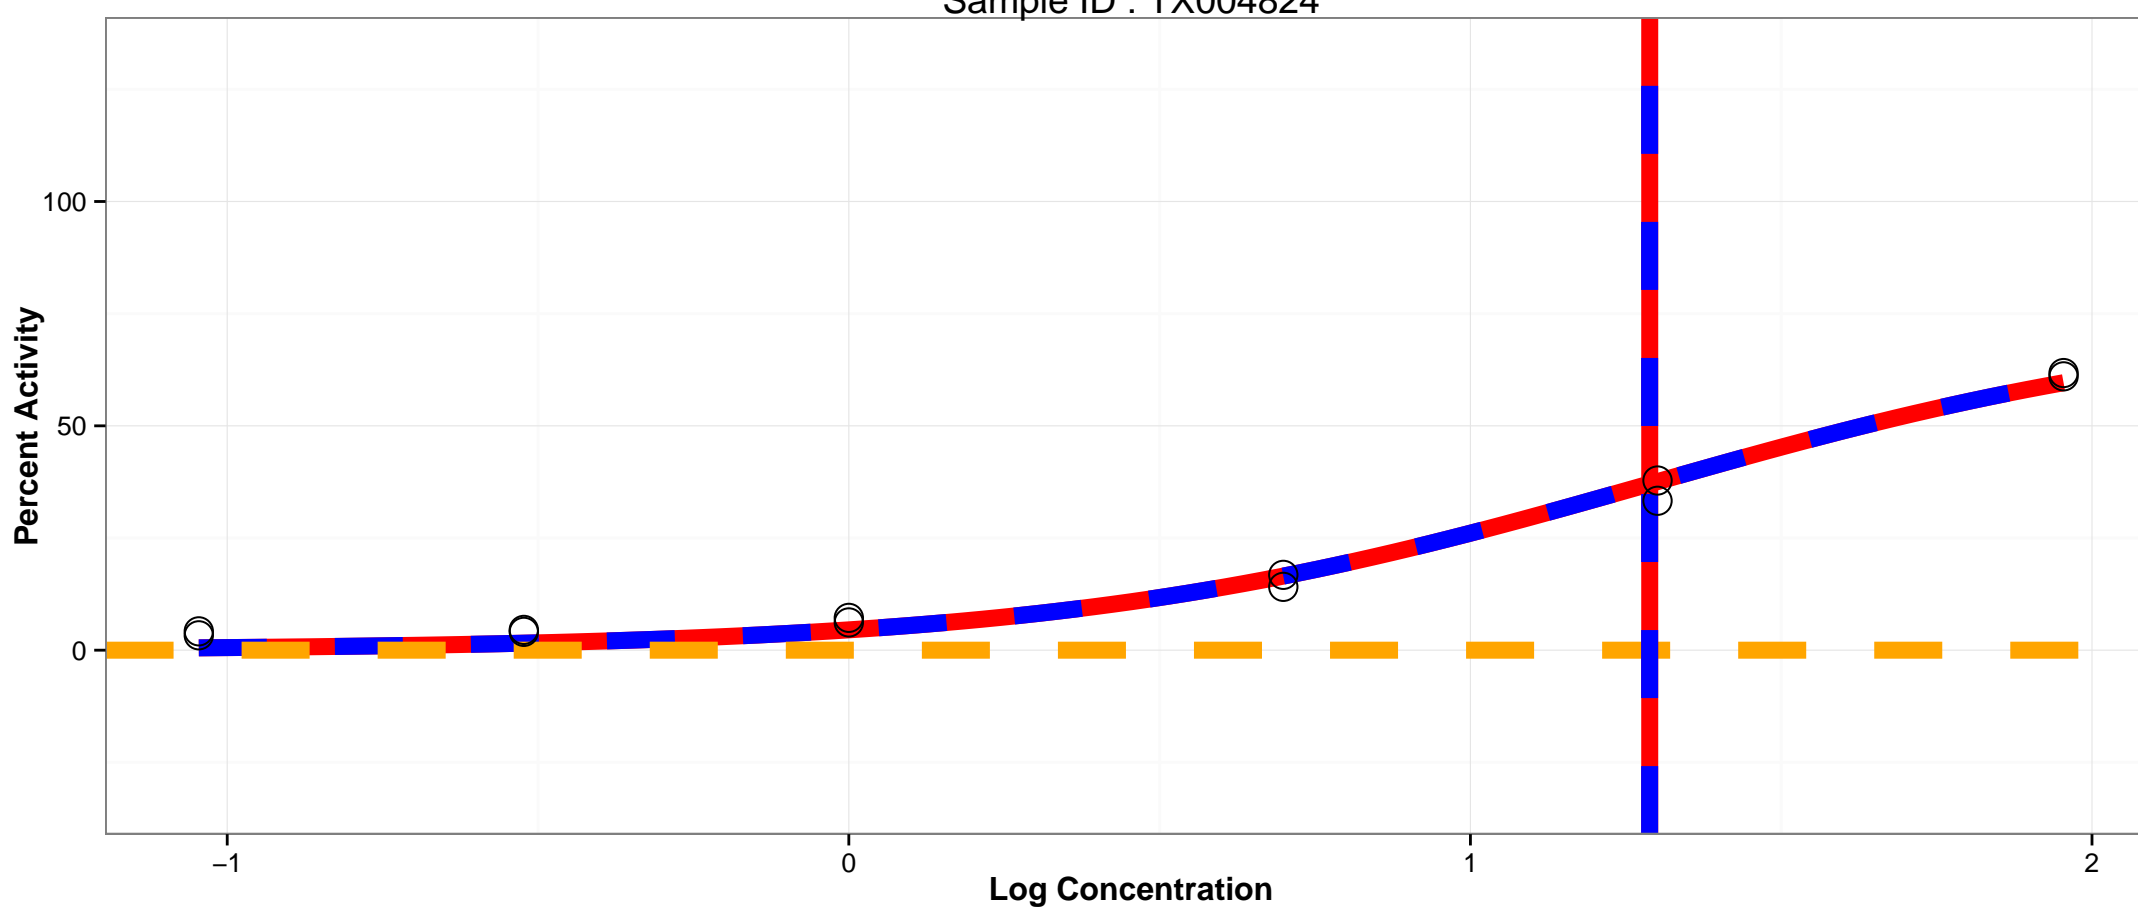

HILL MODEL

|     | tp   | ga    | gw    |
|-----|------|-------|-------|
| val | 74.1 | 1.29  | 0.921 |
| sd  | 8.38 | 0.131 | 0.144 |

GAIN-LOSS MODEL

|     | tp   | ga   | gw    | la   | lw   |
|-----|------|------|-------|------|------|
| val | 74.1 | 1.29 | 0.921 | 3.34 | 14.9 |
| sd  | NA   | NA   | NA    | NA   | NA   |

|      | CNST   | HILL  | GNLS  |
|------|--------|-------|-------|
| AIC  | 117.14 | 66.51 | 70.51 |
| PROB | 0      | 0.88  | 0.12  |
| RMSE | 29.89  | 2.54  | 2.54  |

MAX\_MEAN : 61.4 MAX\_MED : 61.4 BMAD : 5.69  
COFF : 20 HIT-CALL : 1 FITC : 42 ACTP : 1  
FLAGS :

Assay ID 1509 (NHEERL\_HEK293T\_CellTiterGLO)  
Sample ID : TX004824

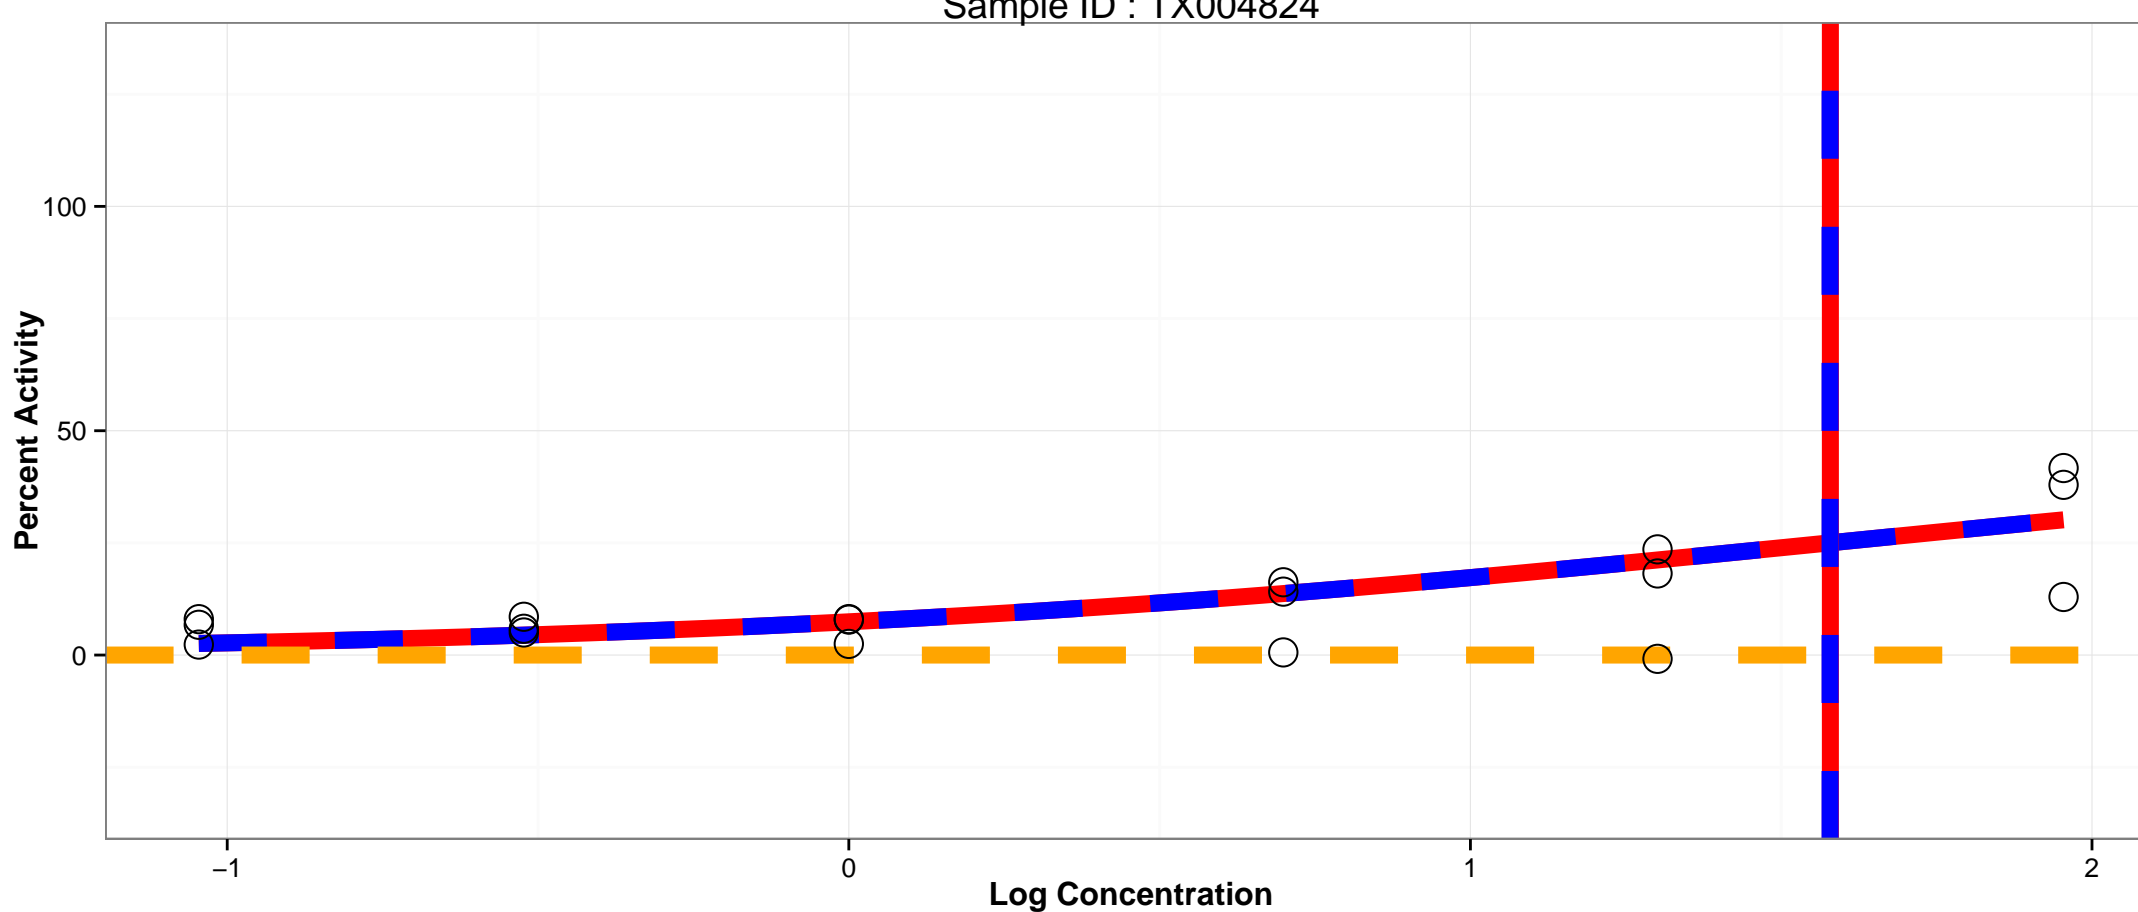

HILL MODEL

|     | tp   | ga    | gw    |
|-----|------|-------|-------|
| val | 50   | 1.58  | 0.481 |
| sd  | 31.8 | 0.886 | 0.155 |

GAIN-LOSS MODEL

|     | tp   | ga    | gw    | la    | lw     |
|-----|------|-------|-------|-------|--------|
| val | 50   | 1.58  | 0.481 | 3.37  | 7.78   |
| sd  | 31.7 | 0.885 | 0.155 | 23500 | 129000 |

|      | CNST   | HILL   | GNLS   |
|------|--------|--------|--------|
| AIC  | 153.44 | 133.36 | 137.36 |
| PROB | 0      | 0.88   | 0.12   |
| RMSE | 16.8   | 8.36   | 8.36   |

MAX\_MEAN : 30.9 MAX\_MED : 38 BMAD : 5.54  
COFF : 20 HIT-CALL : 1 FITC : 42 ACTP : 1  
FLAGS :

Assay ID 1848 (NHEERL\_Quantilum\_inhib\_2\_dn)  
Sample ID : TX004824

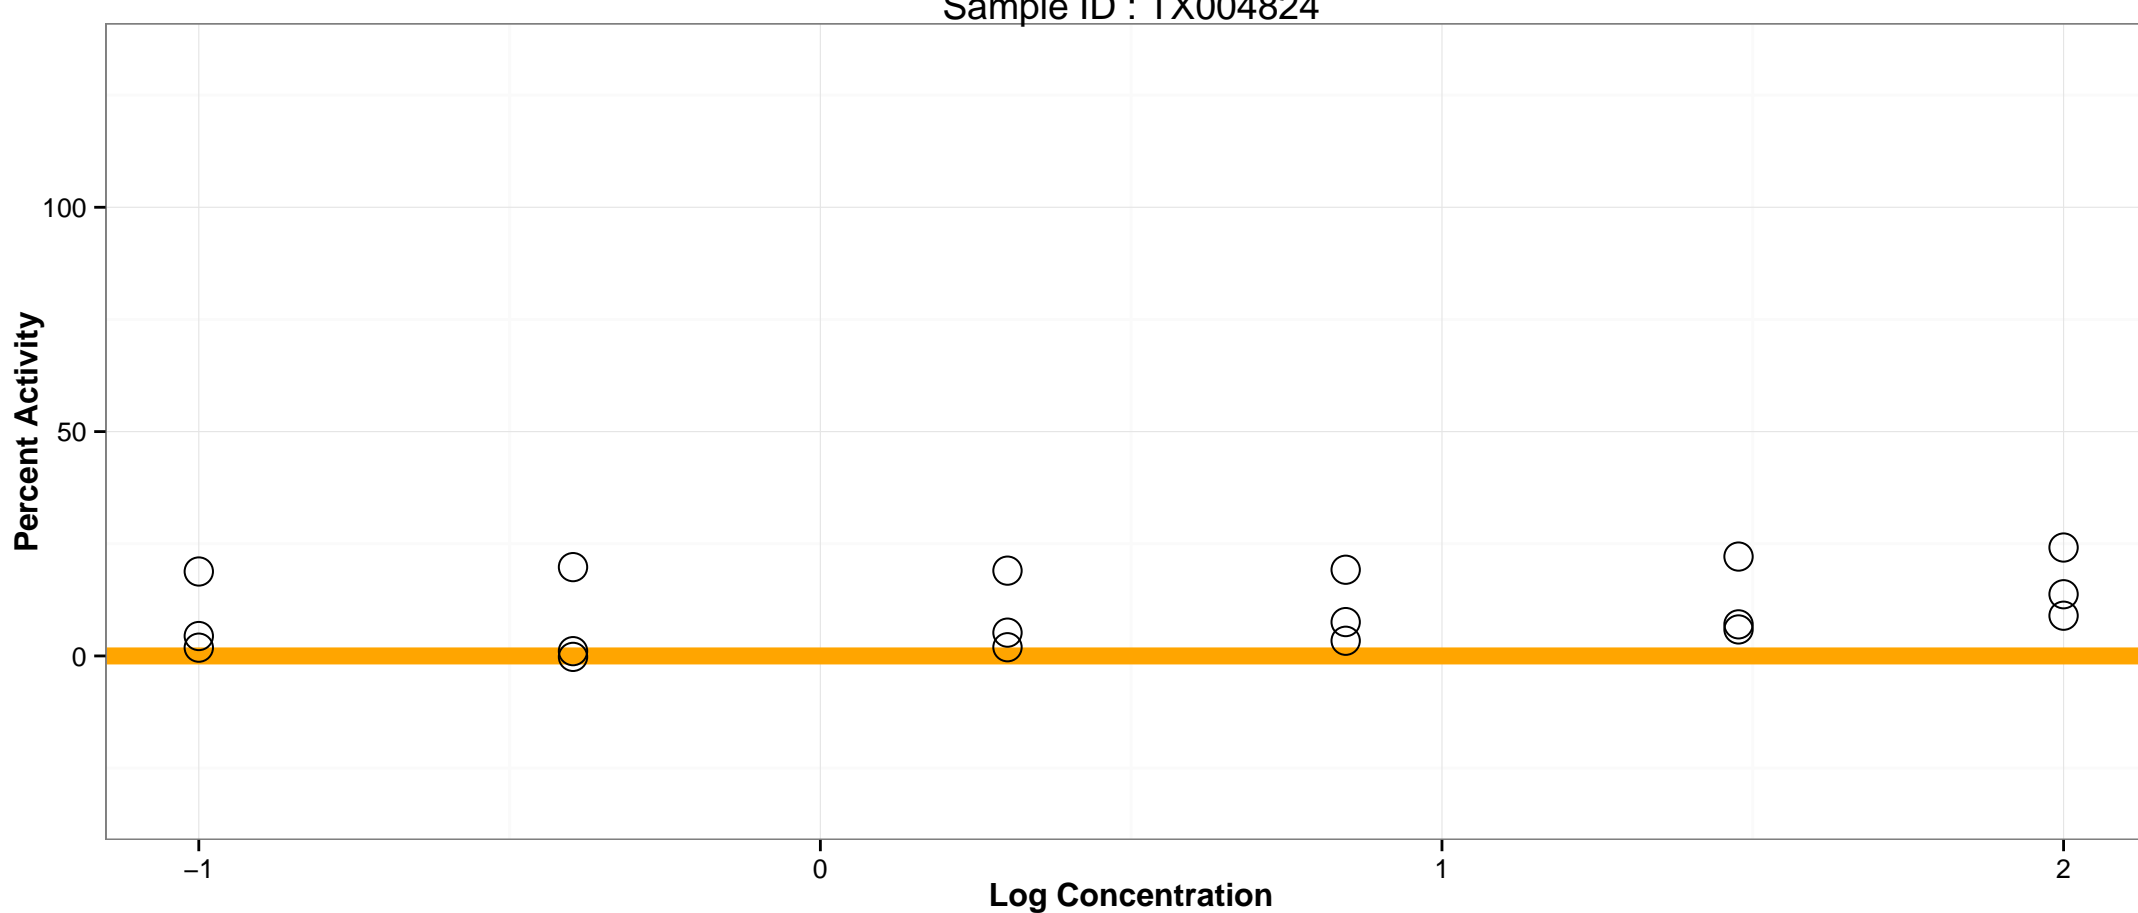

HILL MODEL

HILL MODEL: Not applicable

GAIN-LOSS MODEL

GNLS MODEL: Not applicable

|      | CNST   | HILL | GNLS |
|------|--------|------|------|
| AIC  | 146.94 | NA   | NA   |
| PROB | 1      | NA   | NA   |
| RMSE | 12.98  | NA   | NA   |

MAX\_MEAN : 15.6 MAX\_MED : 13.8 BMAD : 8.58  
COFF : 20 HIT-CALL : 0 FITC : 4 ACTP : 0  
FLAGS :

Chemical : Simvastatin  
CAS : 79902-63-9

Assay ID 1508 (NHEERL\_TPO\_AUR\_dn)  
Sample ID : TX005060

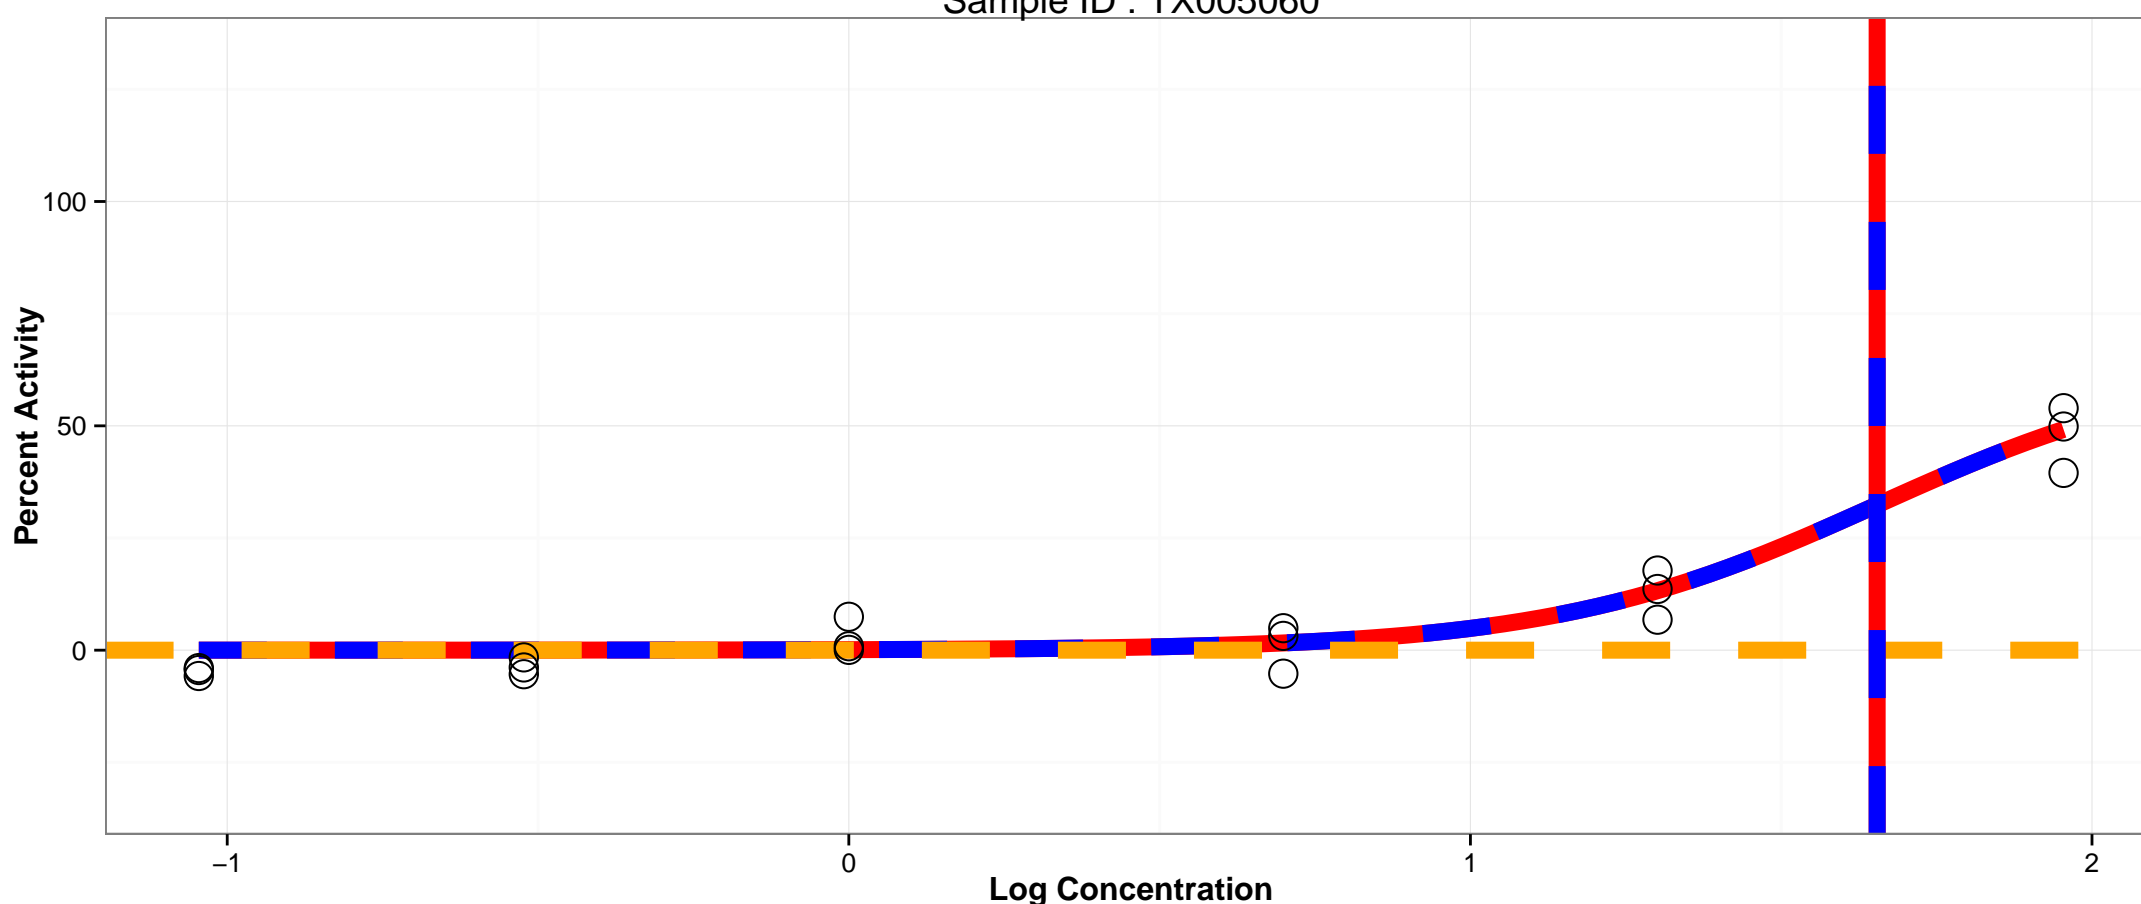

HILL MODEL

|     | tp   | ga    | gw   |
|-----|------|-------|------|
| val | 64.7 | 1.65  | 1.67 |
| sd  | 45.5 | 0.521 | 1.33 |

GAIN-LOSS MODEL

|     | tp   | ga   | gw   | la   | lw   |
|-----|------|------|------|------|------|
| val | 64.7 | 1.65 | 1.67 | 3.69 | 6.82 |
| sd  | NA   | NA   | NA   | NA   | NA   |

|      | CNST   | HILL   | GNLS   |
|------|--------|--------|--------|
| AIC  | 156.56 | 117.52 | 121.52 |
| PROB | 0      | 0.88   | 0.12   |
| RMSE | 20.74  | 4.76   | 4.76   |

MAX\_MEAN : 47.8 MAX\_MED : 49.9 BMAD : 5.69  
COFF : 20 HIT-CALL : 1 FITC : 42 ACTP : 1  
FLAGS : 6

Assay ID 1509 (NHEERL\_HEK293T\_CellTiterGLO)  
Sample ID : TX005060

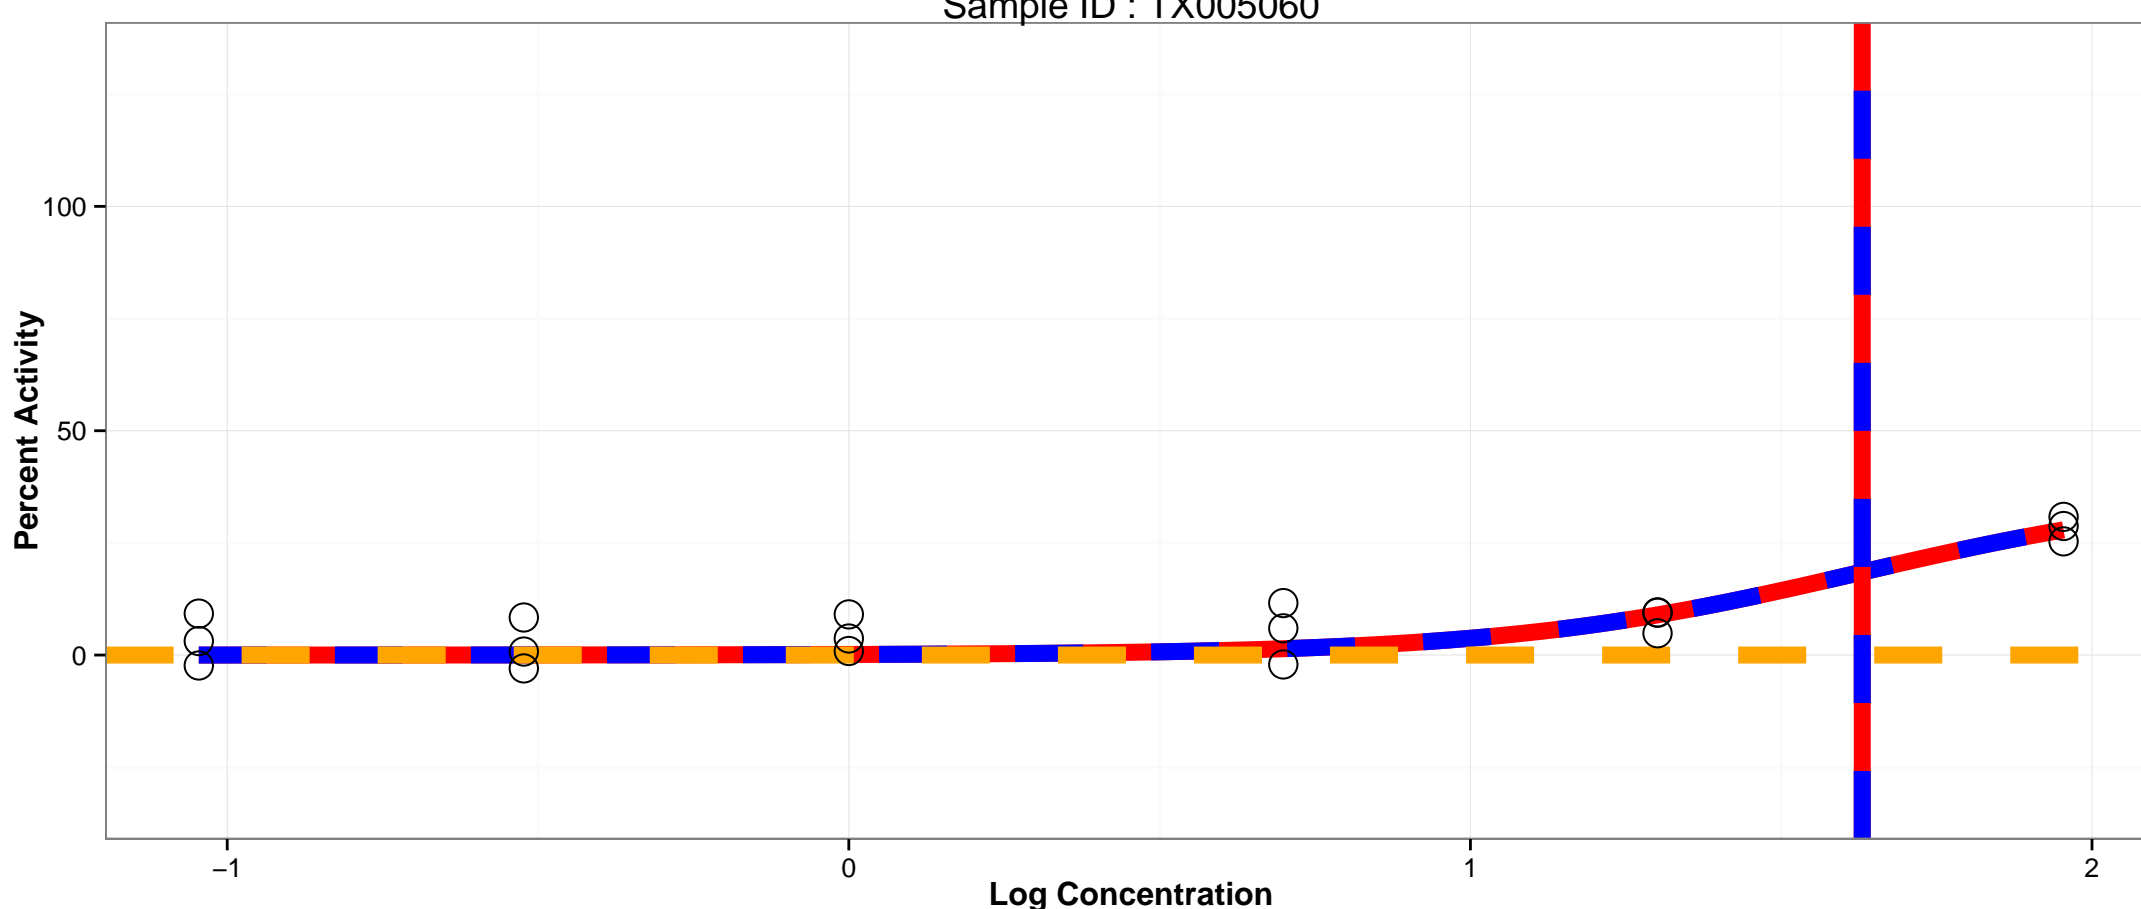

HILL MODEL

|     | tp   | ga    | gw   |
|-----|------|-------|------|
| val | 37   | 1.63  | 1.51 |
| sd  | 19.1 | 0.386 | 1.11 |

GAIN-LOSS MODEL

|     | tp   | ga    | gw   | la   | lw   |
|-----|------|-------|------|------|------|
| val | 37   | 1.63  | 1.51 | 3.13 | 6.47 |
| sd  | 19.1 | 0.386 | 1.11 | 823  | 4530 |

|      | CNST   | HILL   | GNLS   |
|------|--------|--------|--------|
| AIC  | 144.04 | 117.44 | 121.44 |
| PROB | 0      | 0.88   | 0.12   |
| RMSE | 13.07  | 4.96   | 4.96   |

MAX\_MEAN : 28.3 MAX\_MED : 28.8 BMAD : 5.54  
COFF : 20 HIT-CALL : 1 FITC : 42 ACTP : 1  
FLAGS : 6

Assay ID 1848 (NHEERL\_Quantilum\_inhib\_2\_dn)  
Sample ID : TX005060

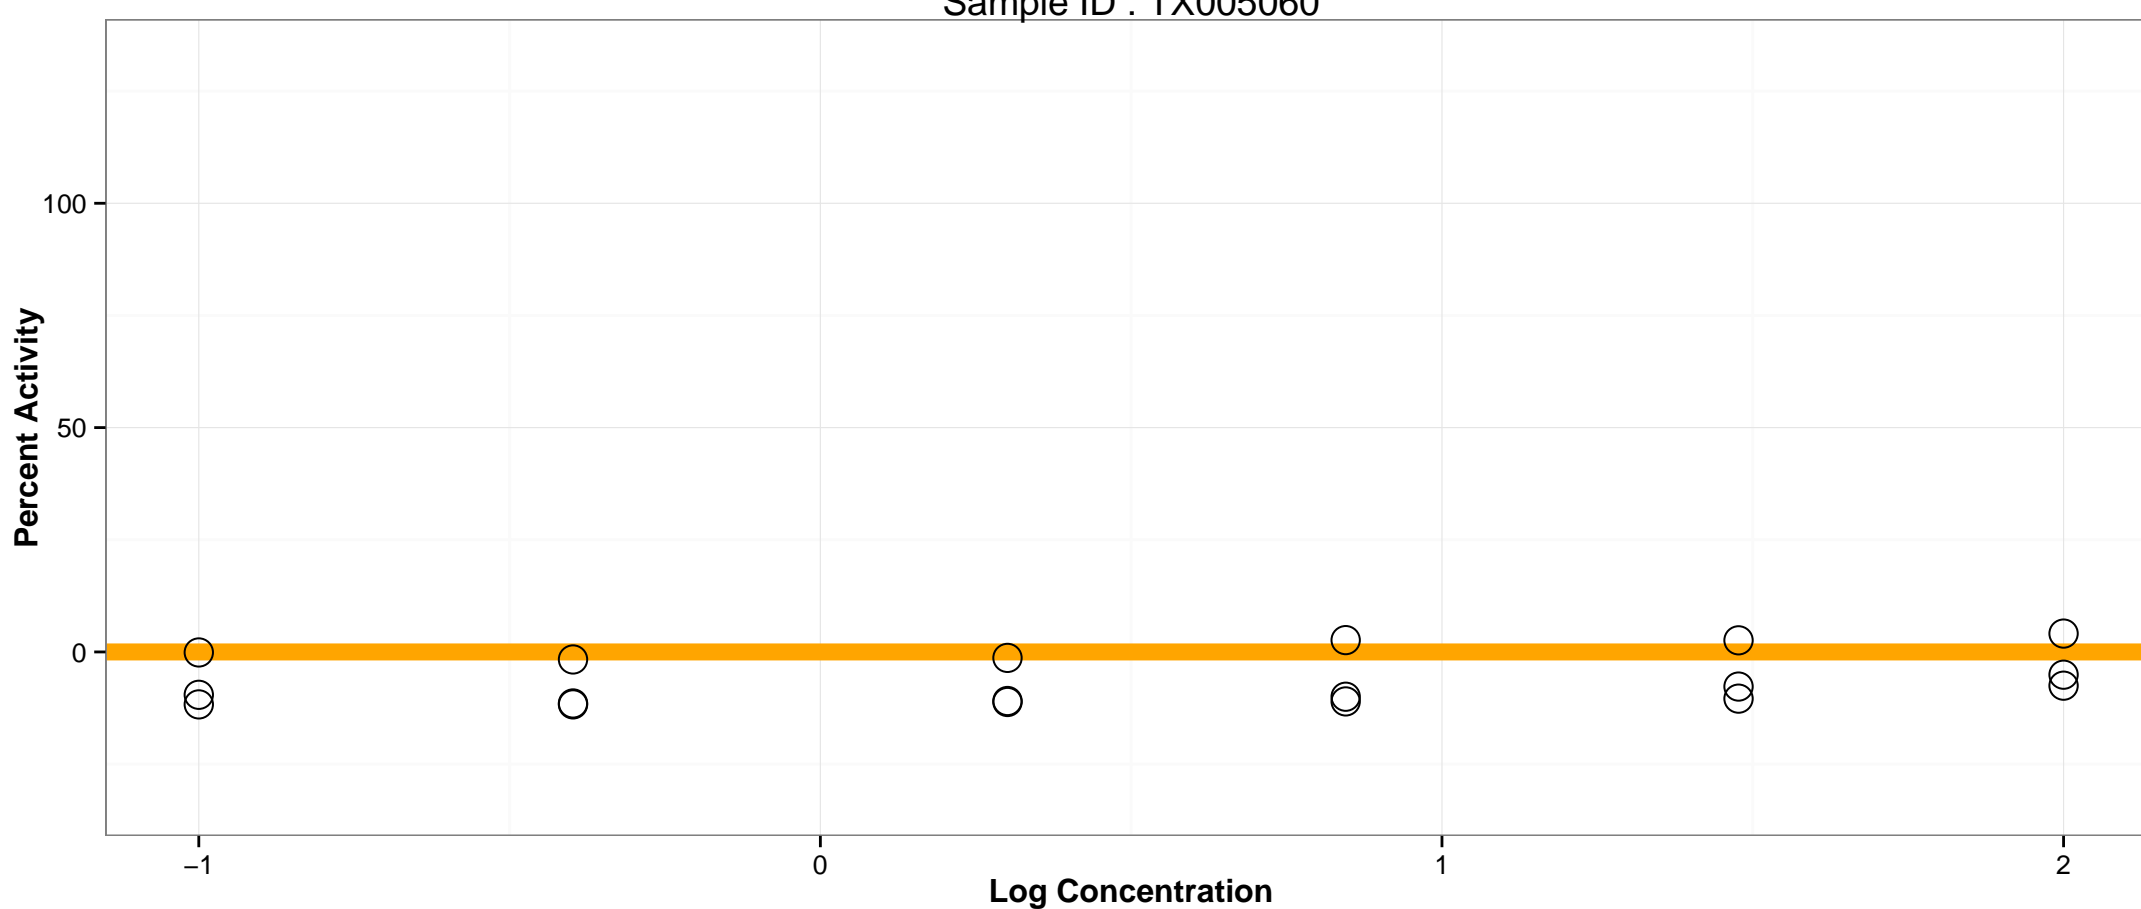

HILL MODEL

HILL MODEL: Not applicable

GAIN-LOSS MODEL

GNLS MODEL: Not applicable

|      | CNST   | HILL | GNLS |
|------|--------|------|------|
| AIC  | 132.42 | NA   | NA   |
| PROB | 1      | NA   | NA   |
| RMSE | 8.31   | NA   | NA   |

MAX\_MEAN : -2.82 MAX\_MED : -5.06 BMAD : 8.58  
COFF : 20 HIT-CALL : 0 FITC : 4 ACTP : 0  
FLAGS :

Chemical : 4,4',4"-Ethane-1,1,1-triyltriphenol  
CAS : 27955-94-8

Assay ID 1508 (NHEERL\_TPO\_AUR\_dn)  
Sample ID : TX005080

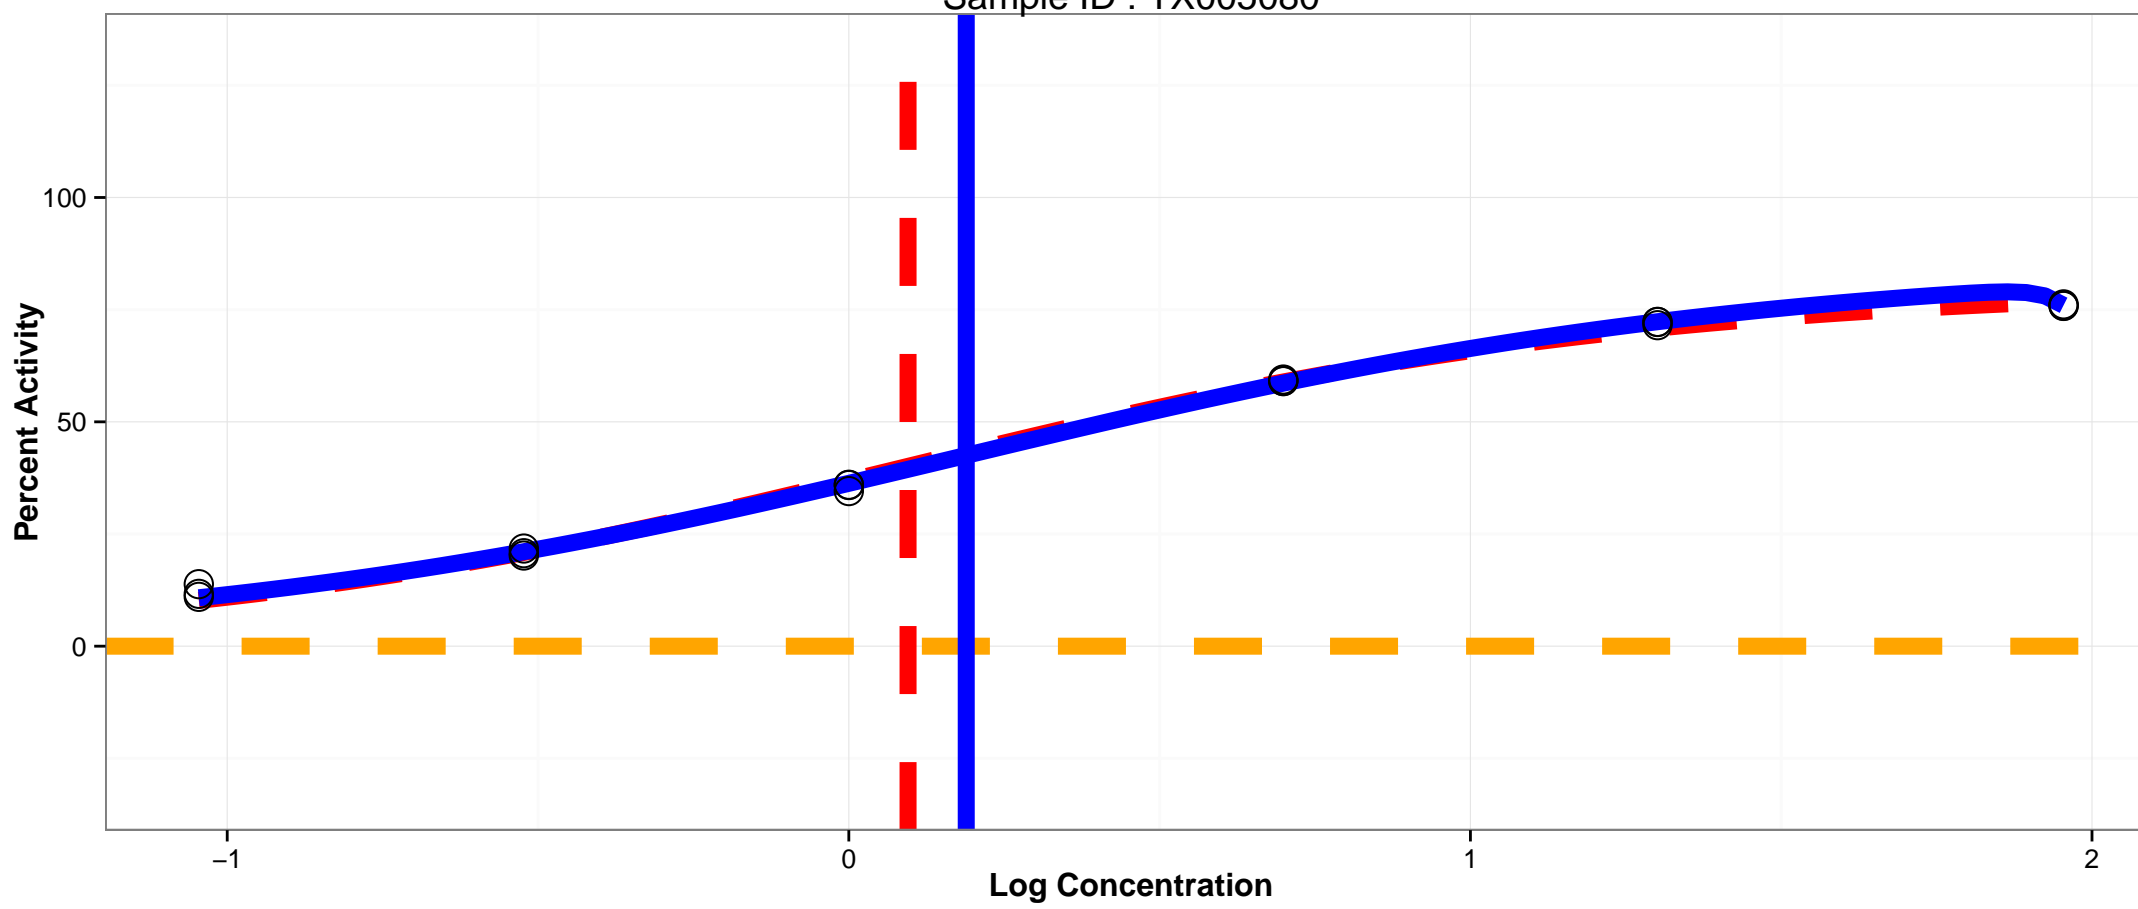

HILL MODEL

|     | tp    | ga     | gw     |
|-----|-------|--------|--------|
| val | 80.2  | 0.0953 | 0.733  |
| sd  | 0.967 | 0.0233 | 0.0234 |

GAIN-LOSS MODEL

|     | tp    | ga     | gw     | la      | lw    |
|-----|-------|--------|--------|---------|-------|
| val | 85    | 0.189  | 0.678  | 2.05    | 13.1  |
| sd  | 0.519 | 0.0131 | 0.0101 | 0.00449 | 0.485 |

|      | CNST   | HILL  | GNLS  |
|------|--------|-------|-------|
| AIC  | 198.36 | 68.48 | 56.87 |
| PROB | 0      | 0     | 1     |
| RMSE | 52.15  | 1.31  | 0.95  |

MAX\_MEAN : 76 MAX\_MED : 75.9 BMAD : 5.69  
COFF : 20 HIT-CALL : 1 FITC : 51 ACTP : 1  
FLAGS :

Assay ID 1509 (NHEERL\_HEK293T\_CellTiterGLO)  
Sample ID : TX005080

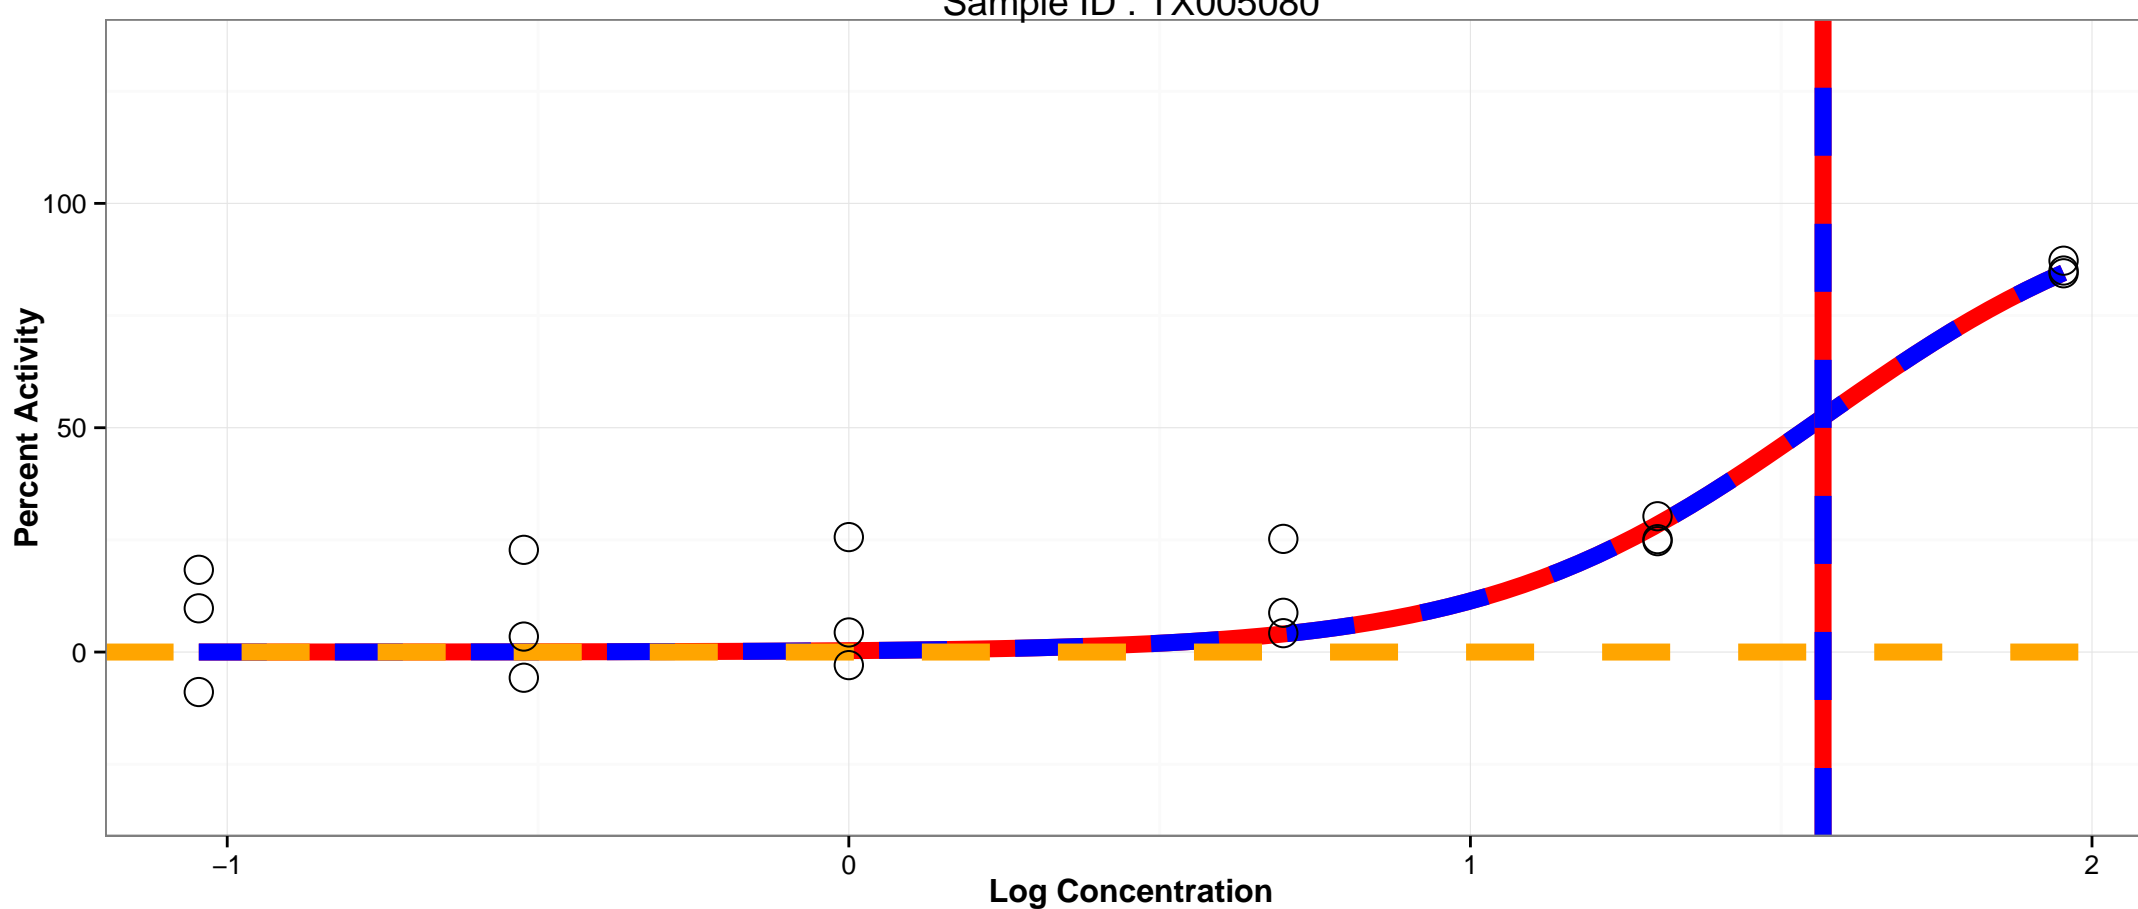

HILL MODEL

|     | tp   | ga    | gw    |
|-----|------|-------|-------|
| val | 105  | 1.57  | 1.61  |
| sd  | 26.8 | 0.199 | 0.683 |

GAIN-LOSS MODEL

|     | tp   | ga    | gw    | la   | lw    |
|-----|------|-------|-------|------|-------|
| val | 105  | 1.57  | 1.61  | 2.51 | 16.8  |
| sd  | 26.8 | 0.199 | 0.685 | 829  | 24800 |

|      | CNST   | HILL  | GNLS  |
|------|--------|-------|-------|
| AIC  | 182.02 | 144.6 | 148.6 |
| PROB | 0      | 0.88  | 0.12  |
| RMSE | 38.46  | 11.18 | 11.18 |

MAX\_MEAN : 85.6 MAX\_MED : 85 BMAD : 5.54  
COFF : 20 HIT-CALL : 1 FITC : 42 ACTP : 1  
FLAGS :

Assay ID 1848 (NHEERL\_Quantilum\_inhib\_2\_dn)  
Sample ID : TX005080

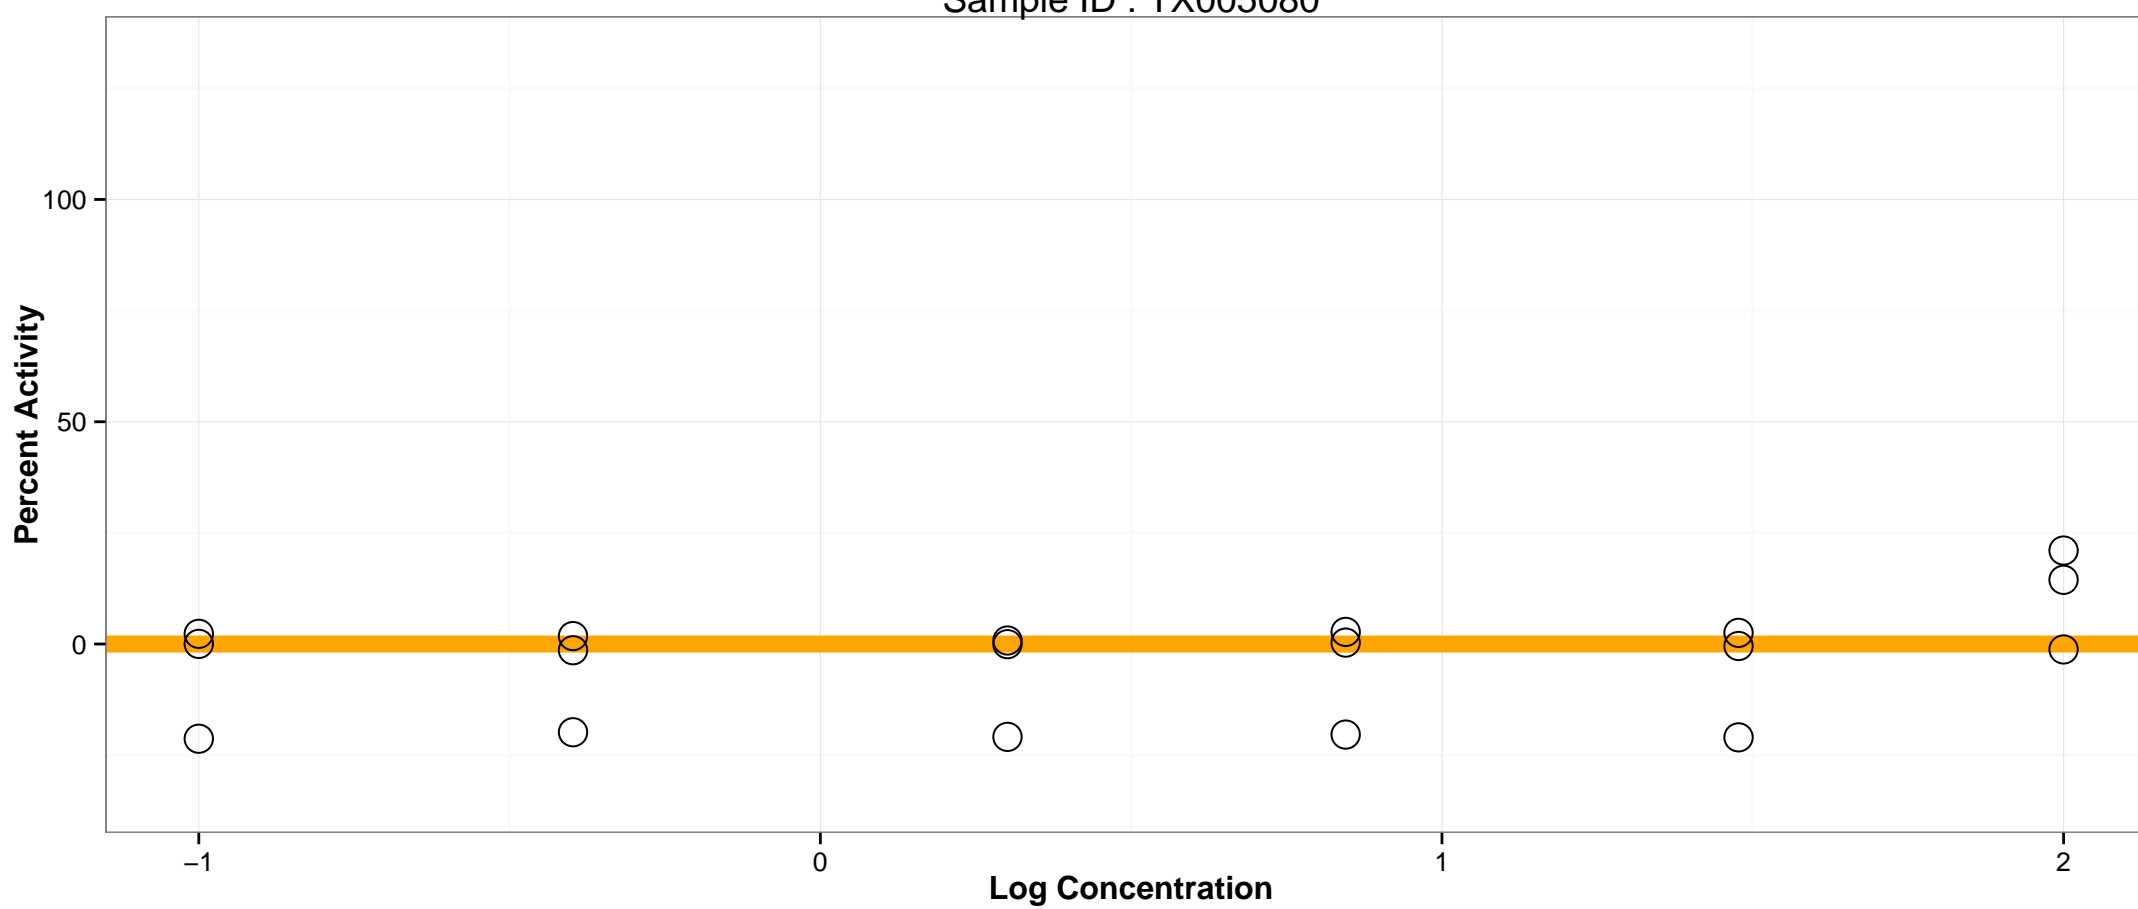

HILL MODEL

HILL MODEL: Not applicable

GAIN-LOSS MODEL

GNLS MODEL: Not applicable

|      | CNST   | HILL | GNLS |
|------|--------|------|------|
| AIC  | 144.51 | NA   | NA   |
| PROB | 1      | NA   | NA   |
| RMSE | 12.5   | NA   | NA   |

MAX\_MEAN : 11.4 MAX\_MED : 14.5 BMAD : 8.58  
COFF : 20 HIT-CALL : 0 FITC : 4 ACTP : 0  
FLAGS :

Chemical : 4-Pentylaniline  
CAS : 33228-44-3

Assay ID 1508 (NHEERL\_TPO\_AUR\_dn)  
Sample ID : TX005098

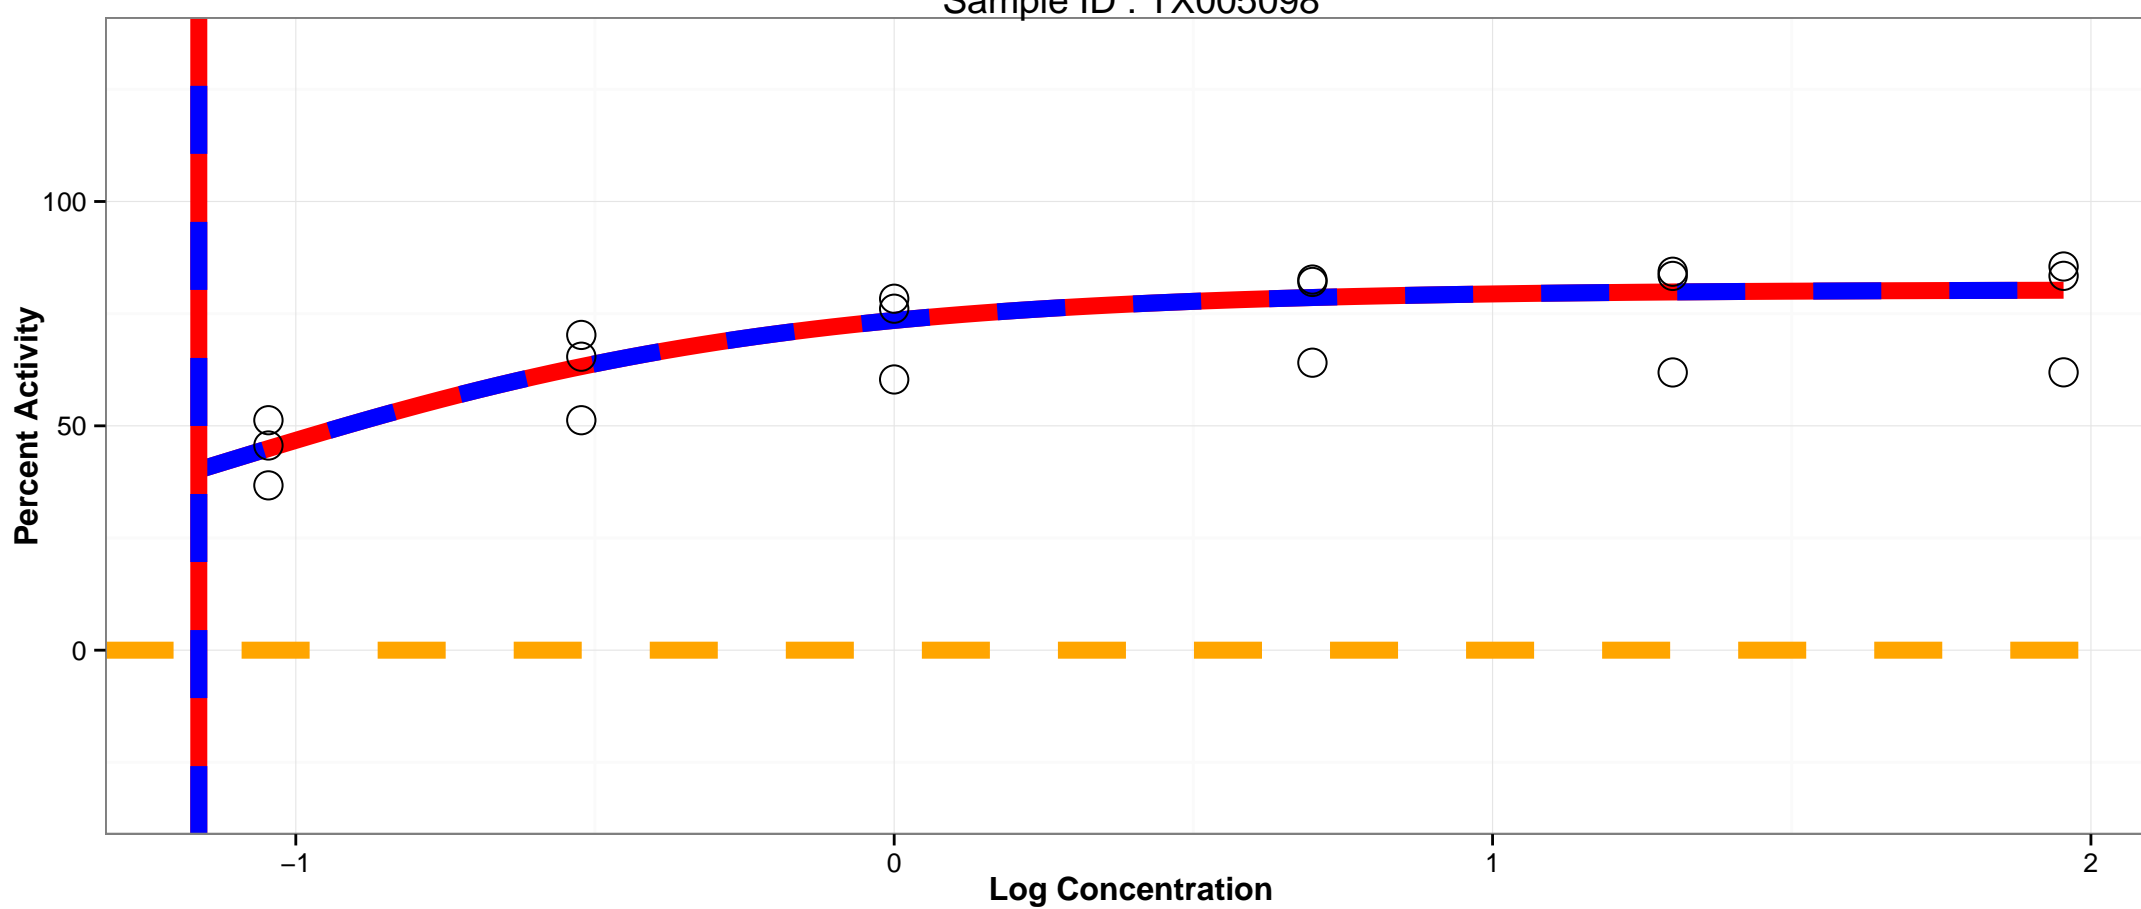

HILL MODEL

|     | tp   | ga    | gw    |
|-----|------|-------|-------|
| val | 80.4 | -1.16 | 0.886 |
| sd  | 3.96 | 0.136 | 0.342 |

GAIN-LOSS MODEL

|     | tp   | ga    | gw    | la   | lw   |
|-----|------|-------|-------|------|------|
| val | 80.4 | -1.16 | 0.886 | 3.95 | 3.67 |
| sd  | 3.96 | 0.136 | 0.342 | 1890 | 3470 |

|      | CNST   | HILL   | GNLS   |
|------|--------|--------|--------|
| AIC  | 209.84 | 139.48 | 143.48 |
| PROB | 0      | 0.88   | 0.12   |
| RMSE | 69.59  | 9.05   | 9.05   |

MAX\_MEAN : 77 MAX\_MED : 83.4 BMAD : 5.69  
COFF : 20 HIT-CALL : 1 FITC : 40 ACTP : 1  
FLAGS :

Assay ID 1509 (NHEERL\_HEK293T\_CellTiterGLO)  
Sample ID : TX005098

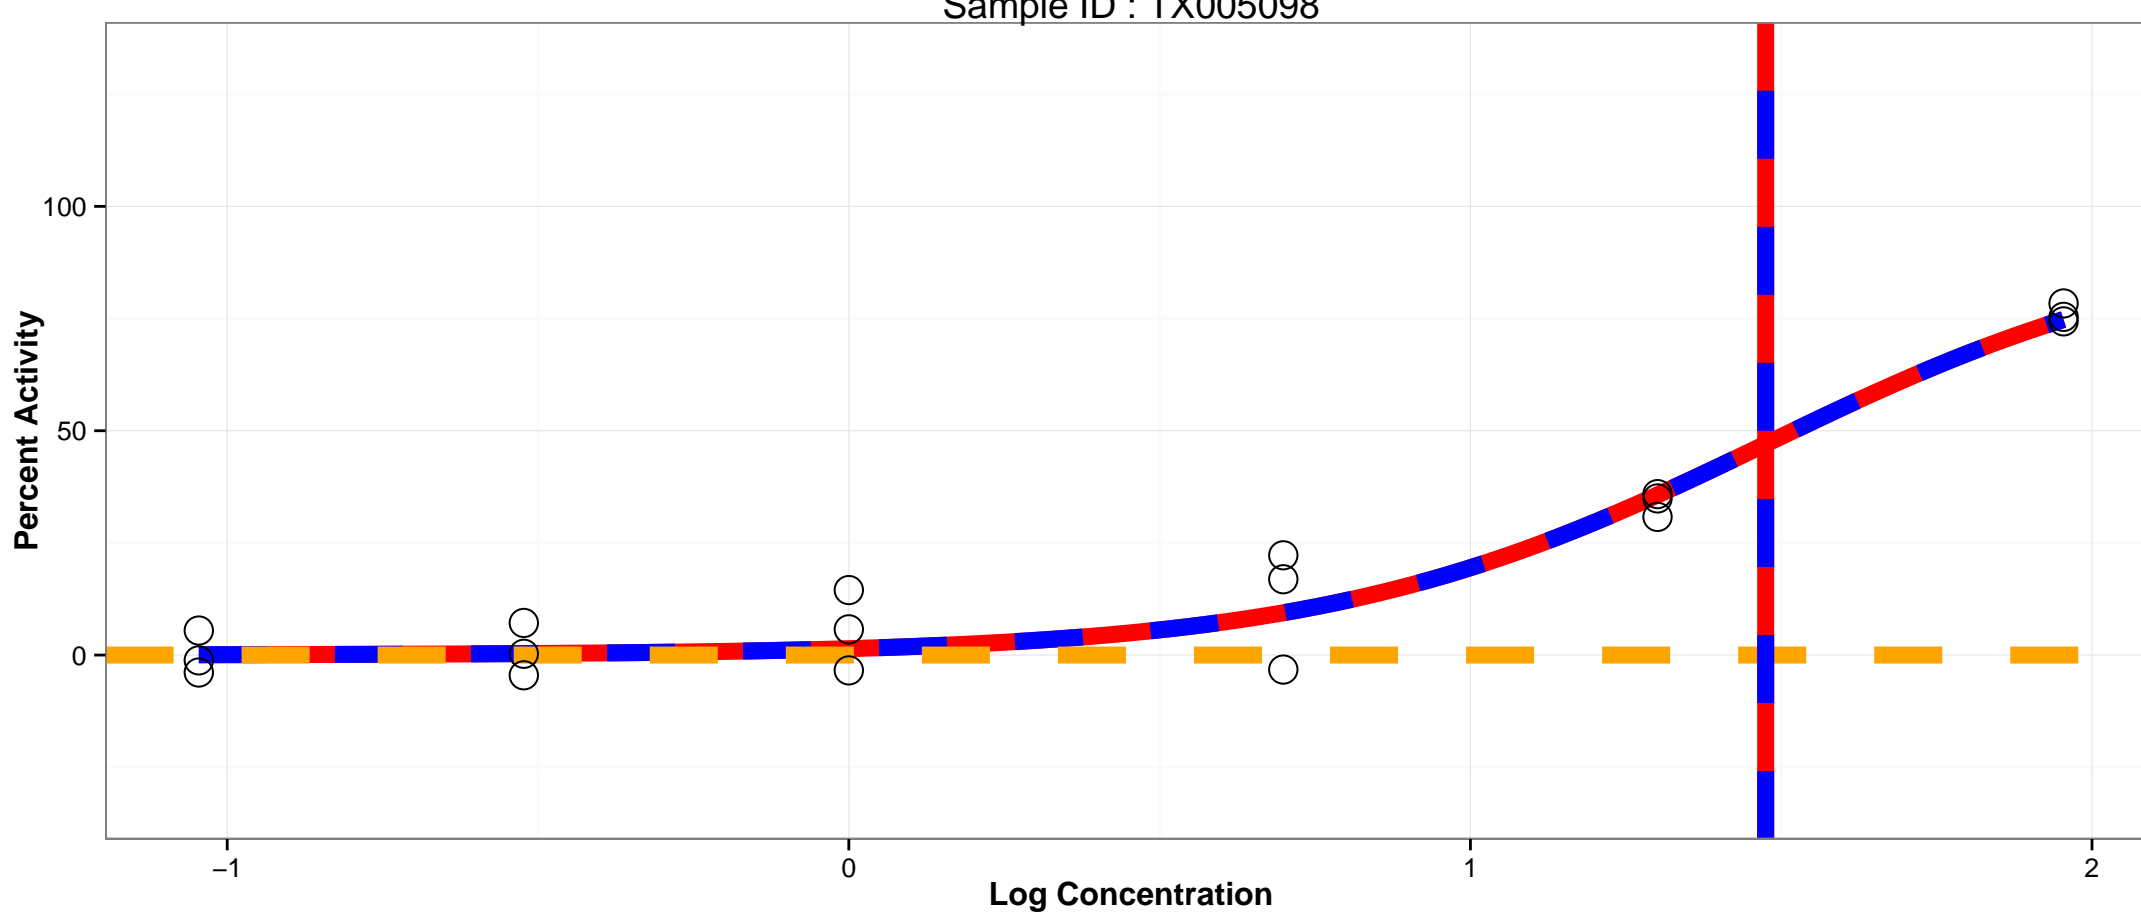

HILL MODEL

|     | tp   | ga    | gw    |
|-----|------|-------|-------|
| val | 94.1 | 1.47  | 1.23  |
| sd  | 18.1 | 0.165 | 0.448 |

GAIN-LOSS MODEL

|     | tp   | ga    | gw    | la     | lw     |
|-----|------|-------|-------|--------|--------|
| val | 94.1 | 1.48  | 1.23  | 3.63   | 7.68   |
| sd  | 18.1 | 0.165 | 0.448 | 157000 | 723000 |

|      | CNST   | HILL   | GNLS   |
|------|--------|--------|--------|
| AIC  | 178.99 | 126.75 | 130.75 |
| PROB | 0      | 0.88   | 0.12   |
| RMSE | 34.94  | 6.45   | 6.45   |

MAX\_MEAN : 76.1 MAX\_MED : 75.4 BMAD : 5.54  
COFF : 20 HIT-CALL : 1 FITC : 42 ACTP : 1  
FLAGS :

Assay ID 1848 (NHEERL\_Quantilum\_inhib\_2\_dn)  
Sample ID : TX005098

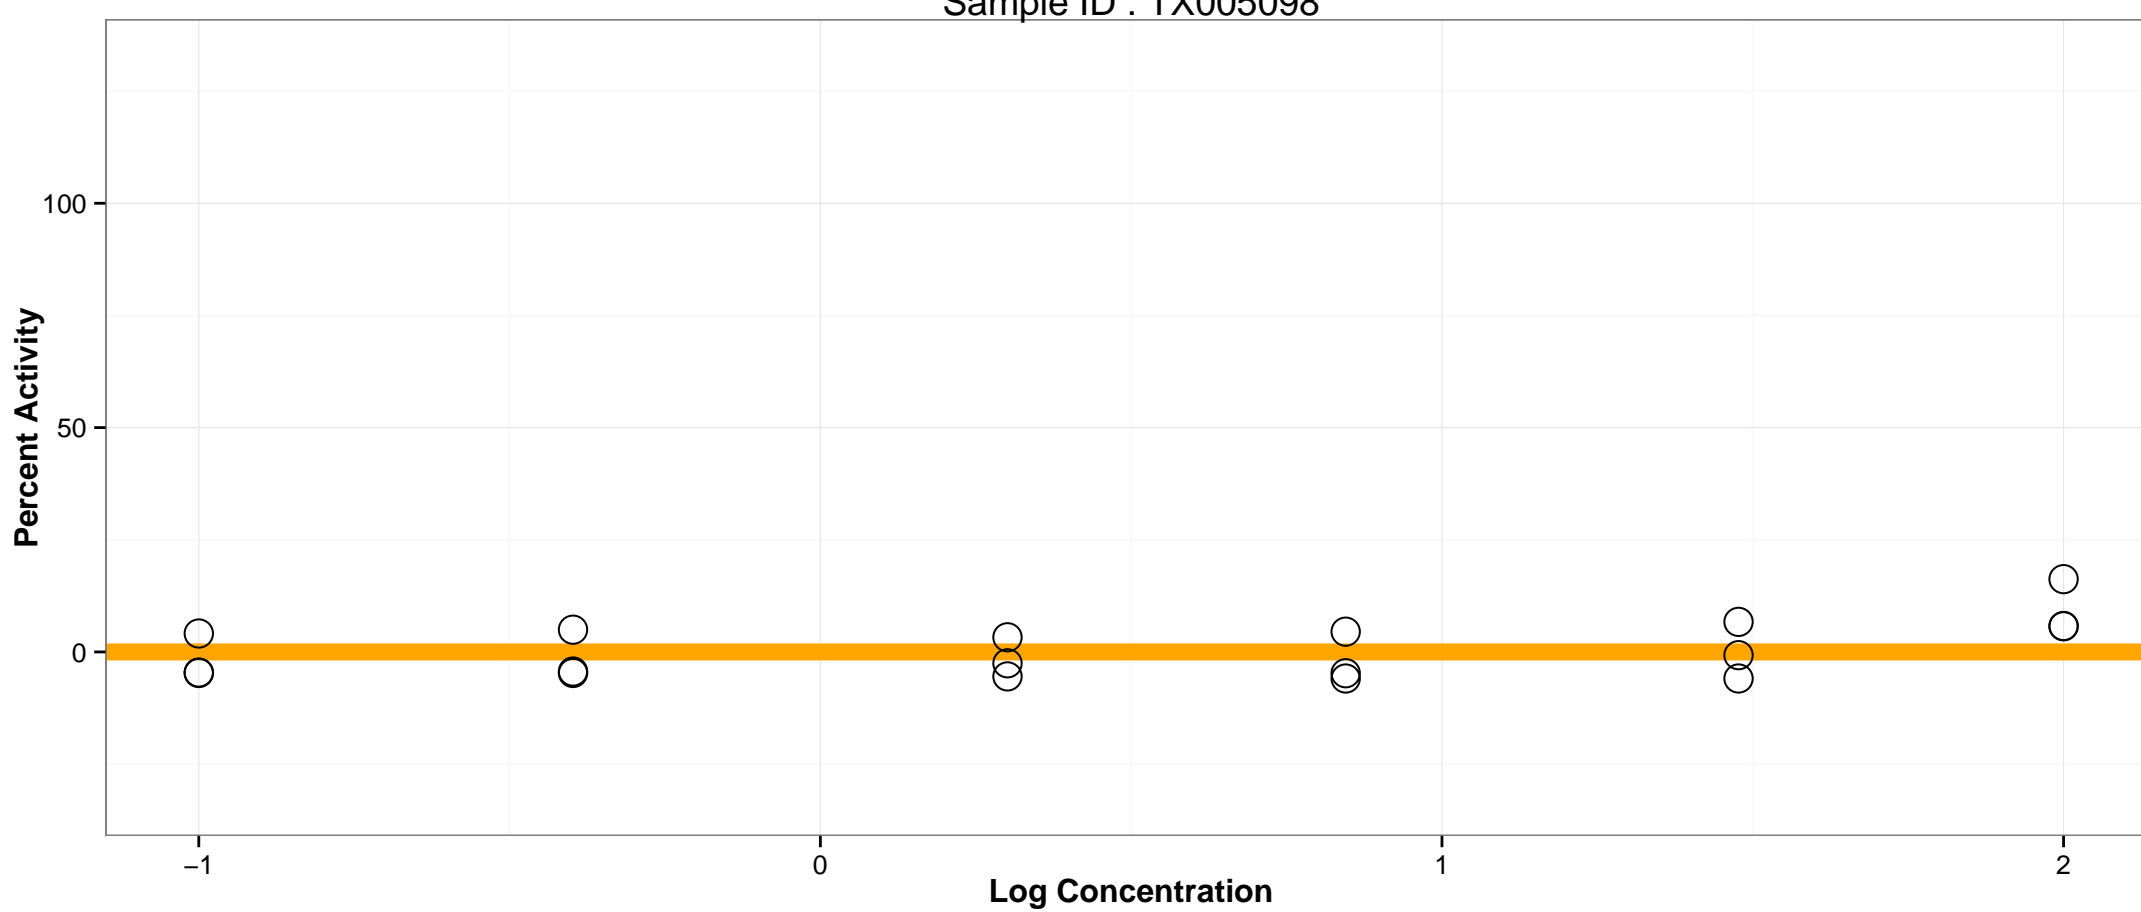

HILL MODEL

HILL MODEL: Not applicable

GAIN-LOSS MODEL

GNLS MODEL: Not applicable

|      | CNST   | HILL | GNLS |
|------|--------|------|------|
| AIC  | 119.15 | NA   | NA   |
| PROB | 1      | NA   | NA   |
| RMSE | 6.06   | NA   | NA   |

MAX\_MEAN : 9.26 MAX\_MED : 5.79 BMAD : 8.58  
COFF : 20 HIT-CALL : 0 FITC : 4 ACTP : 0  
FLAGS :



Chemical : 2-Methylaniline  
CAS : 95-53-4

Assay ID 1508 (NHEERL\_TPO\_AUR\_dn)  
Sample ID : TX005116

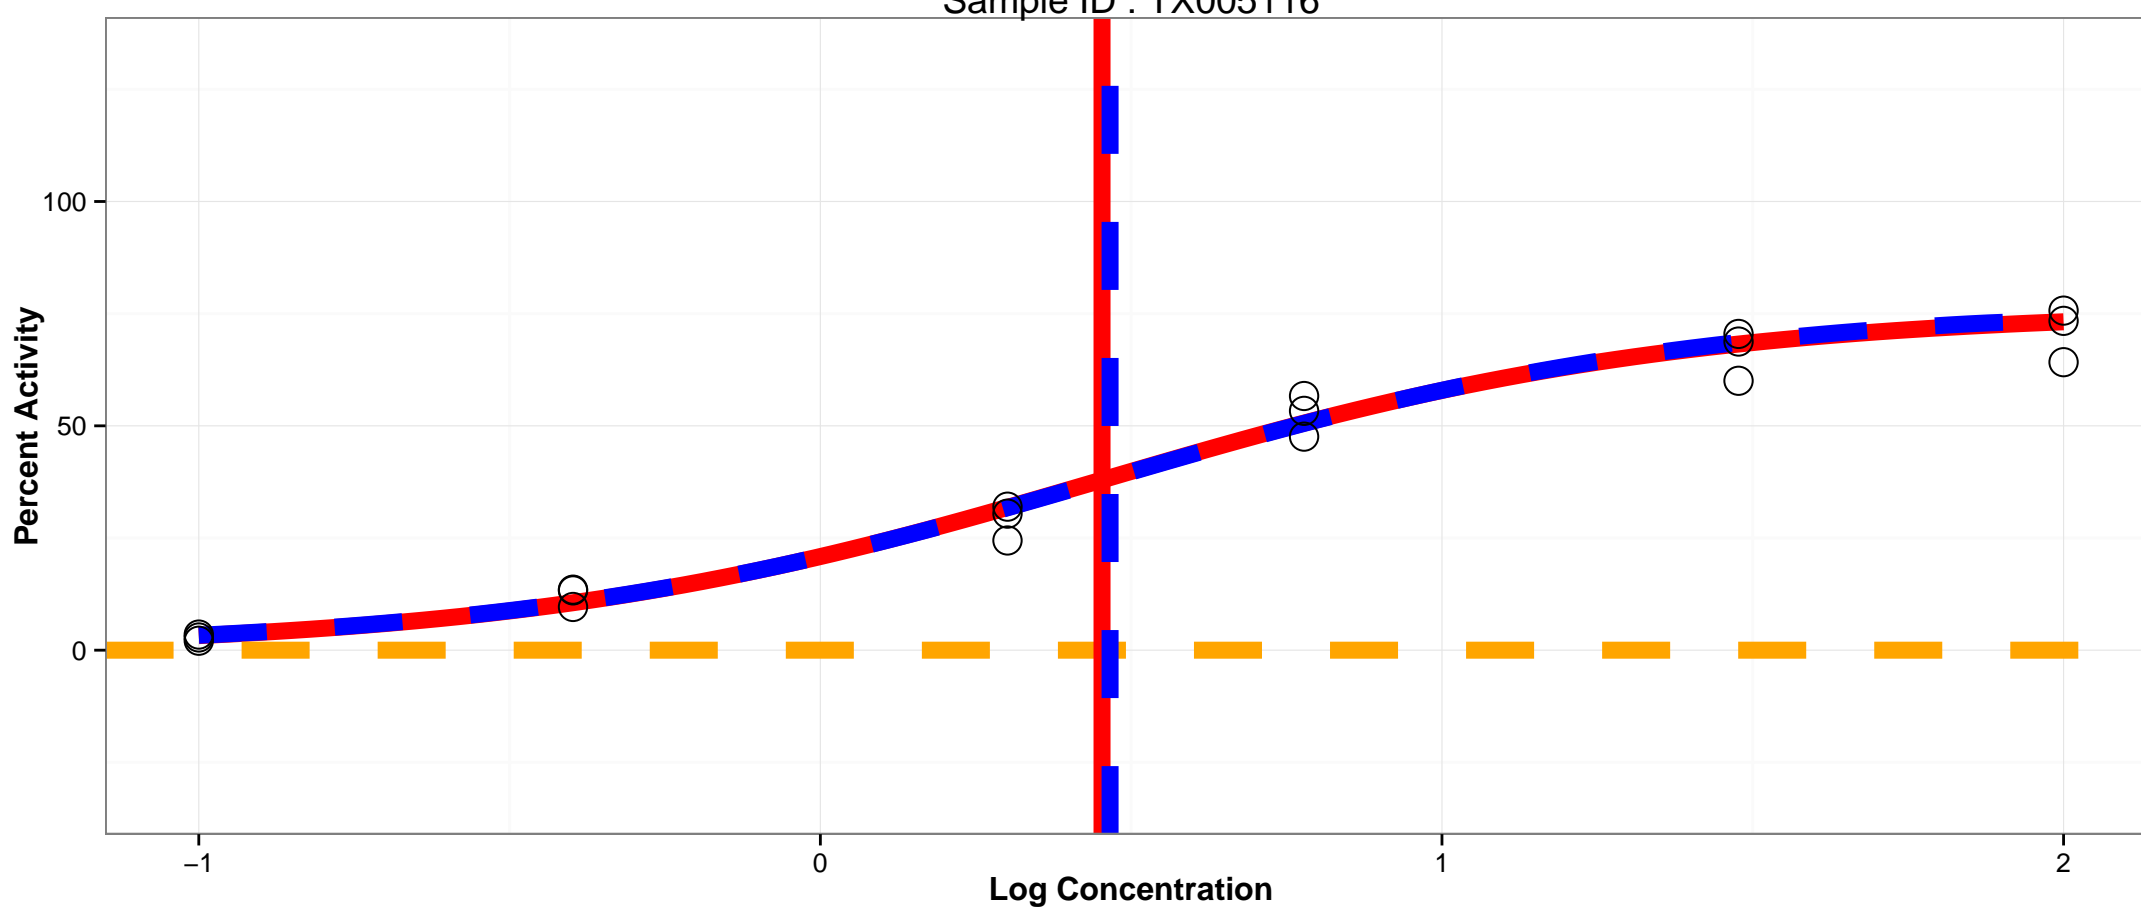

HILL MODEL

|     | tp   | ga     | gw     |
|-----|------|--------|--------|
| val | 75.9 | 0.453  | 0.929  |
| sd  | 2.71 | 0.0606 | 0.0923 |

GAIN-LOSS MODEL

|     | tp   | ga    | gw    | la   | lw   |
|-----|------|-------|-------|------|------|
| val | 76.7 | 0.466 | 0.917 | 2.18 | 10.5 |
| sd  | NA   | NA    | NA    | NA   | NA   |

|      | CNST   | HILL   | GNLS   |
|------|--------|--------|--------|
| AIC  | 194.27 | 108.29 | 112.24 |
| PROB | 0      | 0.88   | 0.12   |
| RMSE | 47.08  | 4      | 3.99   |

MAX\_MEAN : 71.1 MAX\_MED : 73.4 BMAD : 5.69  
COFF : 20 HIT-CALL : 1 FITC : 41 ACTP : 1  
FLAGS :

Assay ID 1509 (NHEERL\_HEK293T\_CellTiterGLO)  
Sample ID : TX005116

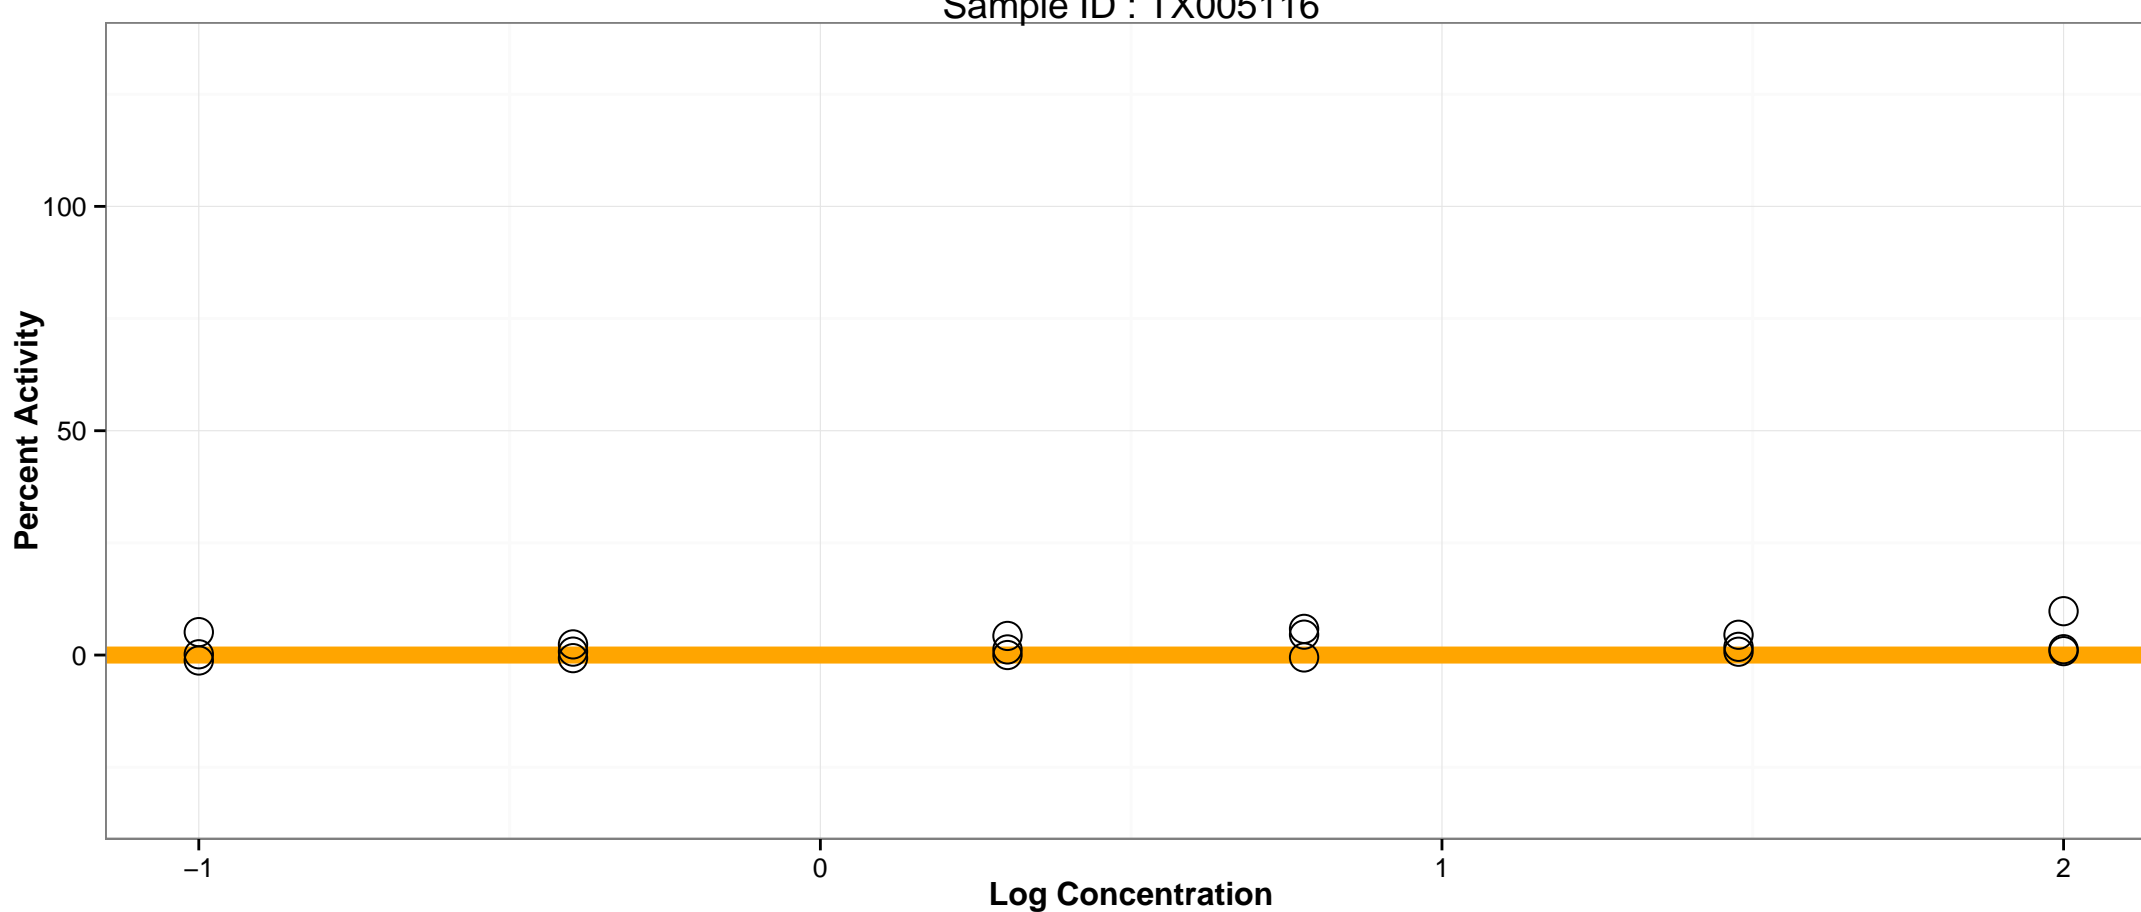

HILL MODEL

HILL MODEL: Not applicable

GAIN-LOSS MODEL

GNLS MODEL: Not applicable

|      | CNST  | HILL | GNLS |
|------|-------|------|------|
| AIC  | 97.92 | NA   | NA   |
| PROB | 1     | NA   | NA   |
| RMSE | 3.59  | NA   | NA   |

MAX\_MEAN : 4 MAX\_MED : 4.56 BMAD : 5.54  
COFF : 20 HIT-CALL : 0 FITC : 4 ACTP : 0  
FLAGS :

Assay ID 1848 (NHEERL\_Quantilum\_inhib\_2\_dn)  
Sample ID : TX005116

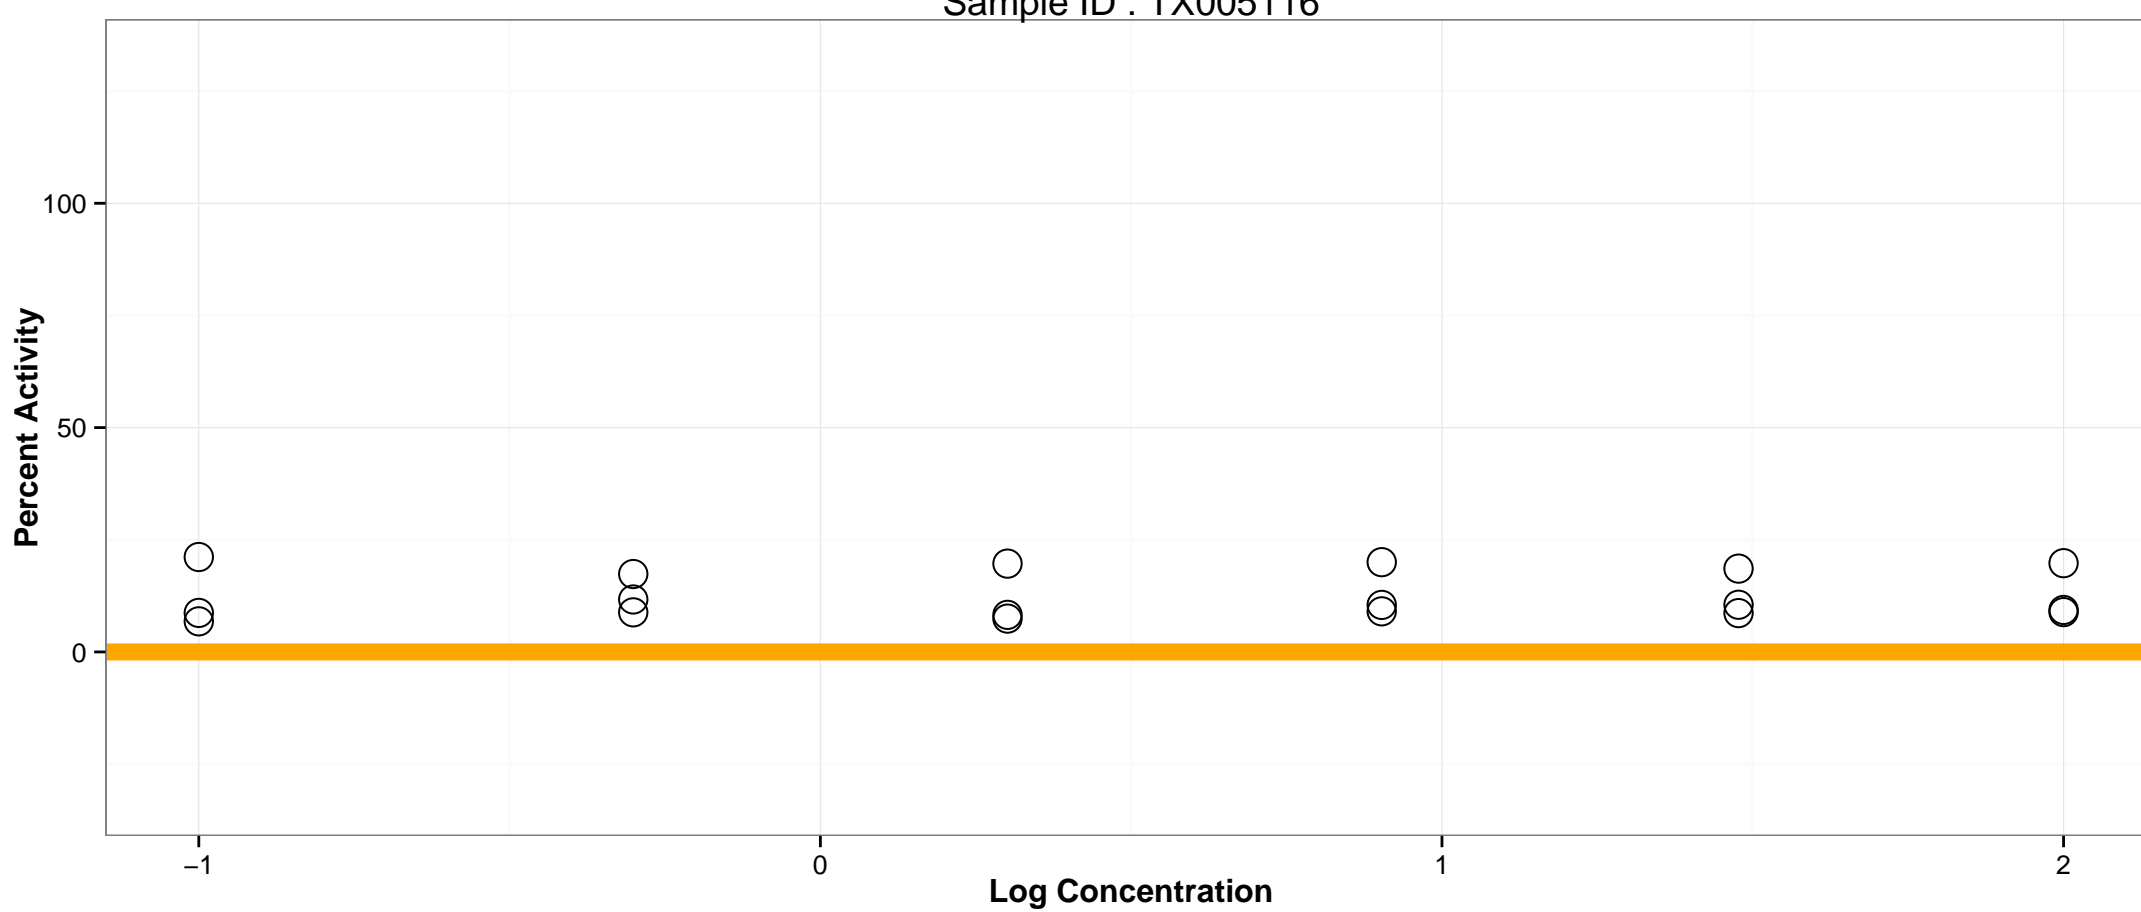

HILL MODEL

HILL MODEL: Not applicable

GAIN-LOSS MODEL

GNLS MODEL: Not applicable

|      | CNST   | HILL | GNLS |
|------|--------|------|------|
| AIC  | 149.95 | NA   | NA   |
| PROB | 1      | NA   | NA   |
| RMSE | 13.51  | NA   | NA   |

MAX\_MEAN : 13.2 MAX\_MED : 11.7 BMAD : 8.58  
COFF : 20 HIT-CALL : 0 FITC : 4 ACTP : 0  
FLAGS :

Chemical : Sorbic acid  
CAS : 110-44-1

Assay ID 1508 (NHEERL\_TPO\_AUR\_dn)  
Sample ID : TX005141

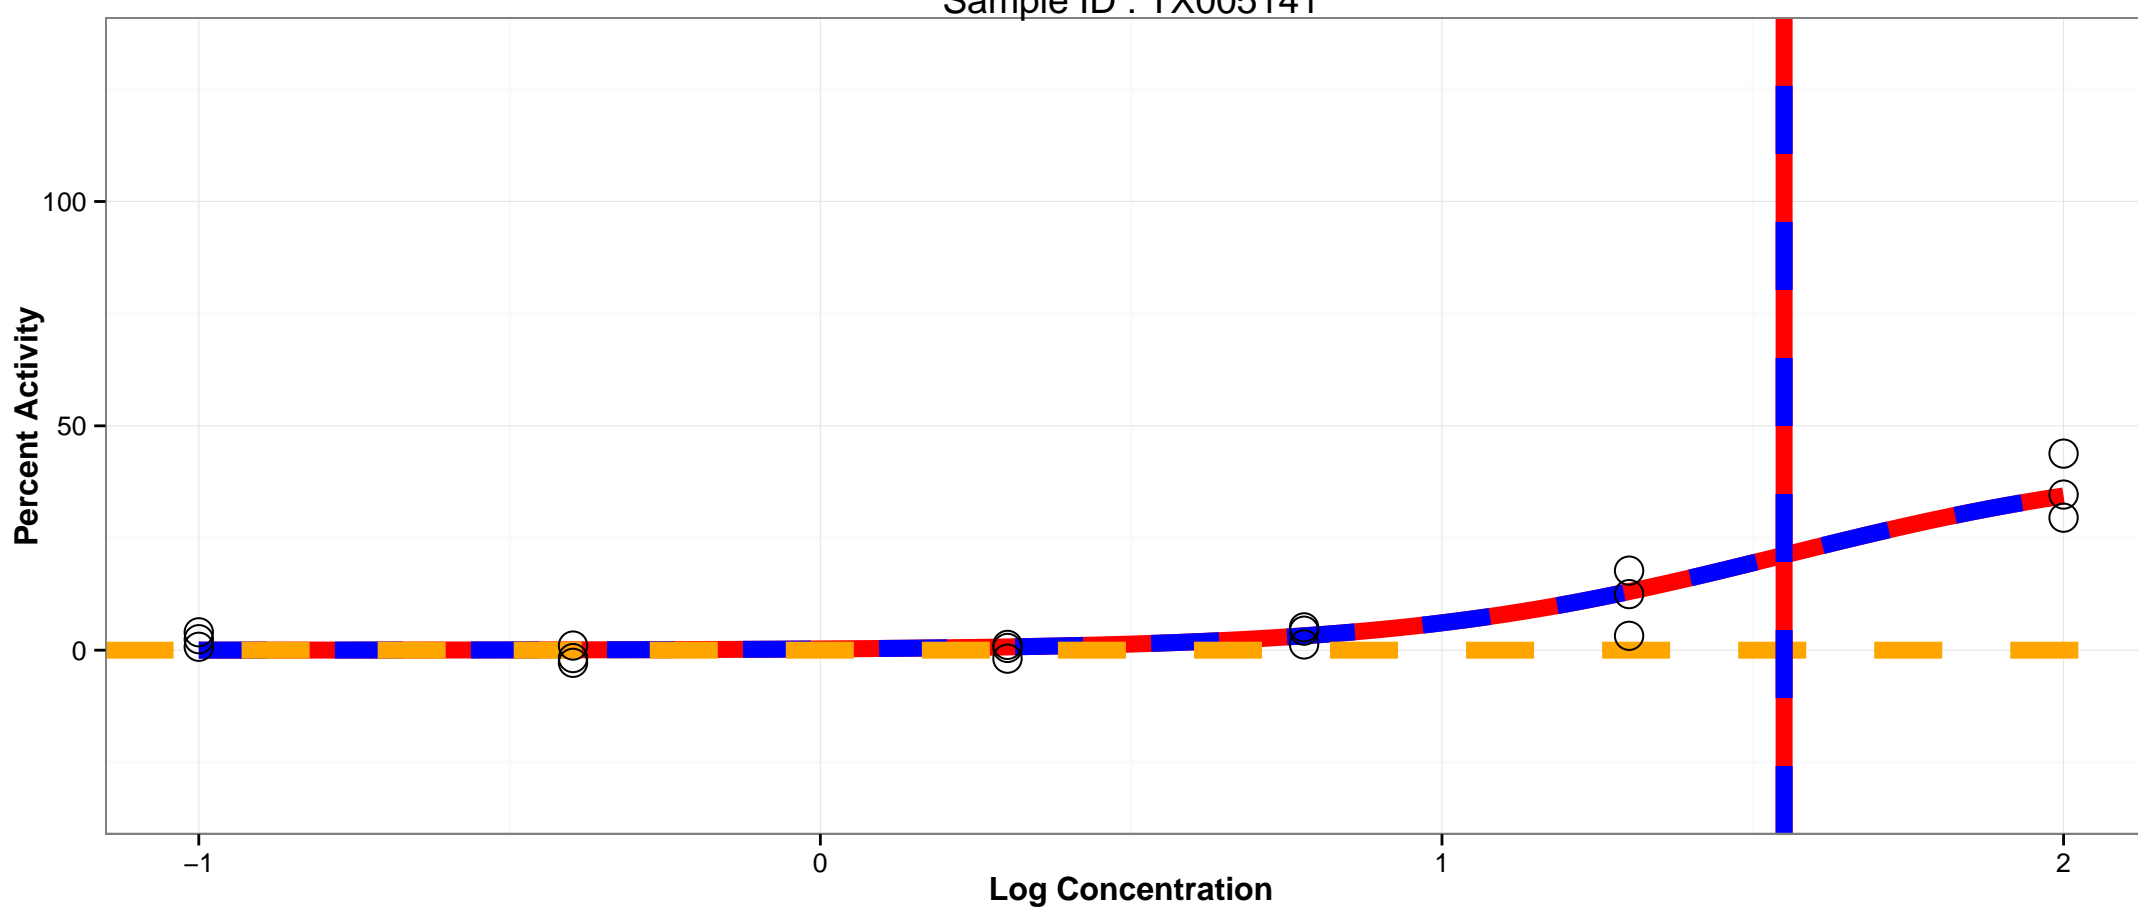

HILL MODEL

|     | tp   | ga    | gw    |
|-----|------|-------|-------|
| val | 42.4 | 1.55  | 1.41  |
| sd  | 11.7 | 0.266 | 0.498 |

GAIN-LOSS MODEL

|     | tp   | ga    | gw    | la  | lw   |
|-----|------|-------|-------|-----|------|
| val | 42.4 | 1.55  | 1.41  | 2.8 | 6.99 |
| sd  | 11.7 | 0.266 | 0.498 | 292 | 2550 |

|      | CNST   | HILL   | GNLS   |
|------|--------|--------|--------|
| AIC  | 147.16 | 106.83 | 110.83 |
| PROB | 0      | 0.88   | 0.12   |
| RMSE | 15.92  | 3.96   | 3.96   |

MAX\_MEAN : 36 MAX\_MED : 34.7 BMAD : 5.69  
COFF : 20 HIT-CALL : 1 FITC : 42 ACTP : 1  
FLAGS : 6

Assay ID 1509 (NHEERL\_HEK293T\_CellTiterGLO)  
Sample ID : TX005141

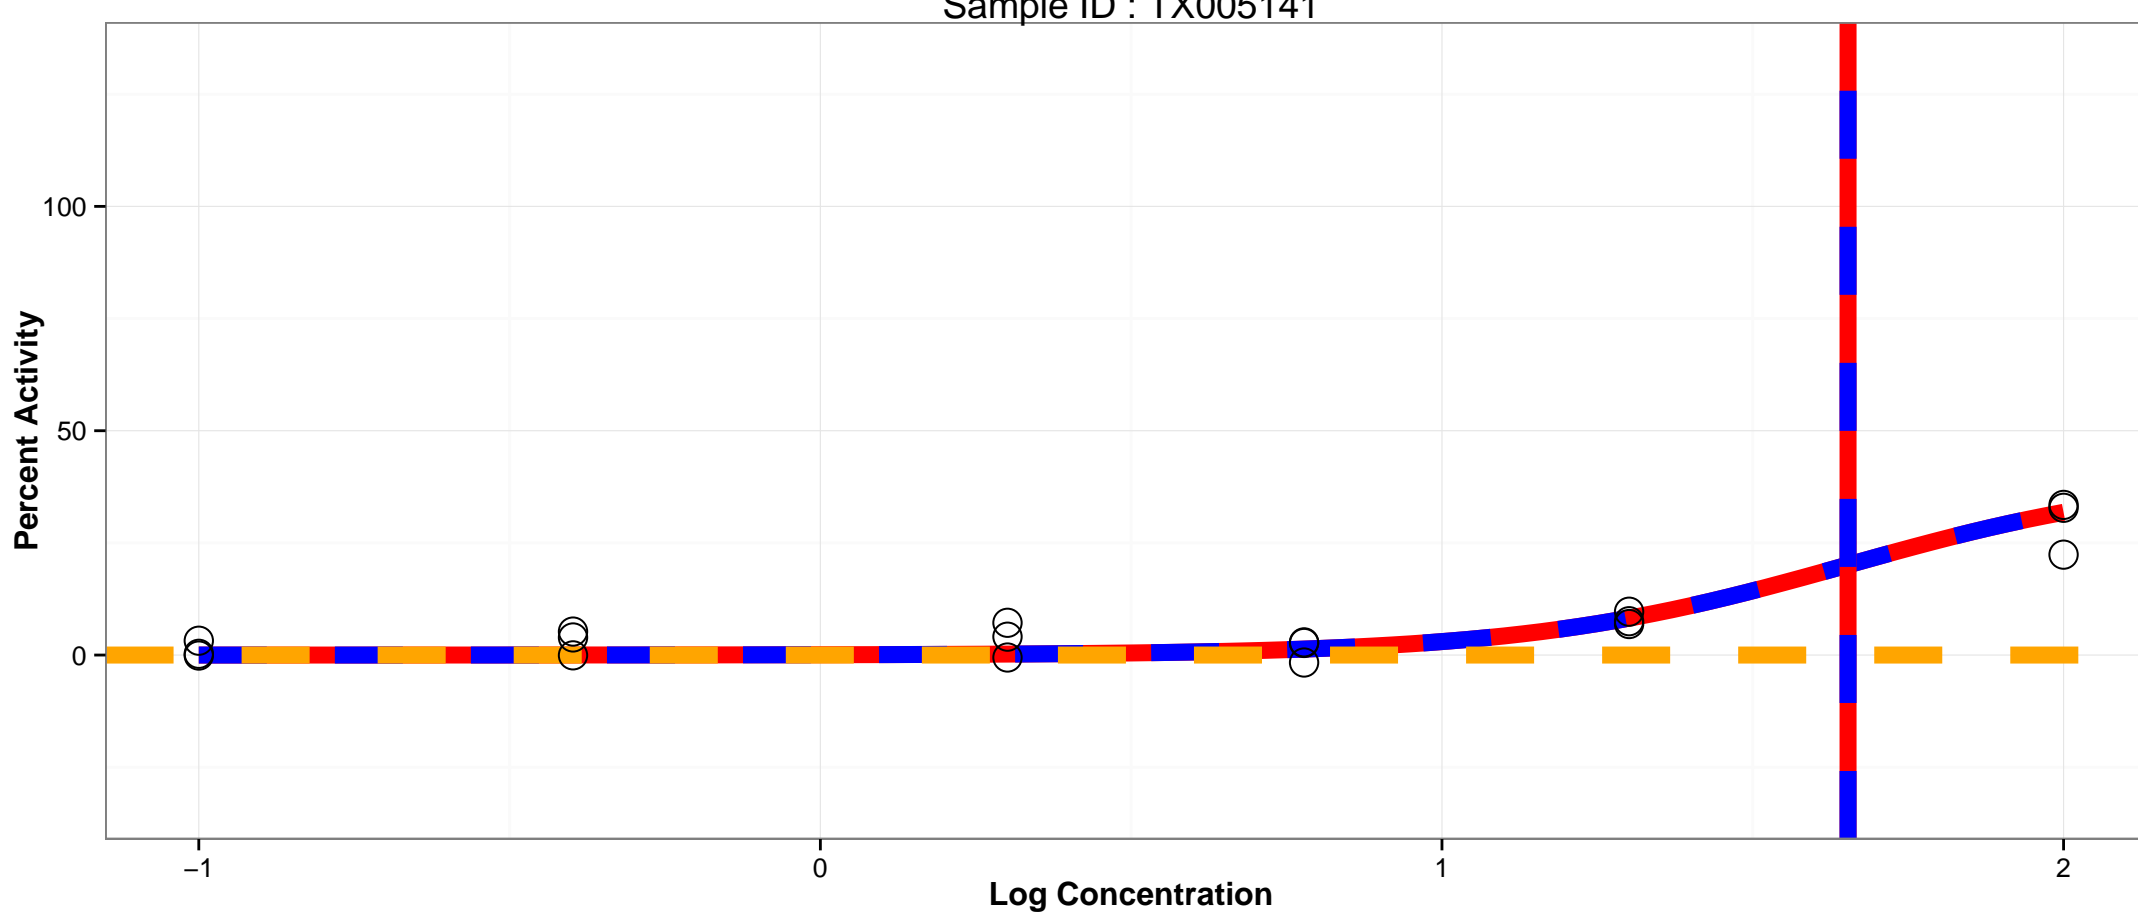

HILL MODEL

|     | tp   | ga    | gw    |
|-----|------|-------|-------|
| val | 40.2 | 1.65  | 1.67  |
| sd  | 17.3 | 0.338 | 0.948 |

GAIN-LOSS MODEL

|     | tp   | ga    | gw    | la   | lw   |
|-----|------|-------|-------|------|------|
| val | 40.2 | 1.65  | 1.67  | 3.03 | 7.77 |
| sd  | 17.2 | 0.337 | 0.944 | 1280 | 9680 |

|      | CNST  | HILL   | GNLS   |
|------|-------|--------|--------|
| AIC  | 140.2 | 103.44 | 107.44 |
| PROB | 0     | 0.88   | 0.12   |
| RMSE | 12.99 | 3.56   | 3.56   |

MAX\_MEAN : 29.6 MAX\_MED : 32.8 BMAD : 5.54  
COFF : 20 HIT-CALL : 1 FITC : 42 ACTP : 1  
FLAGS : 6

Assay ID 1848 (NHEERL\_Quantilum\_inhib\_2\_dn)  
Sample ID : TX005141

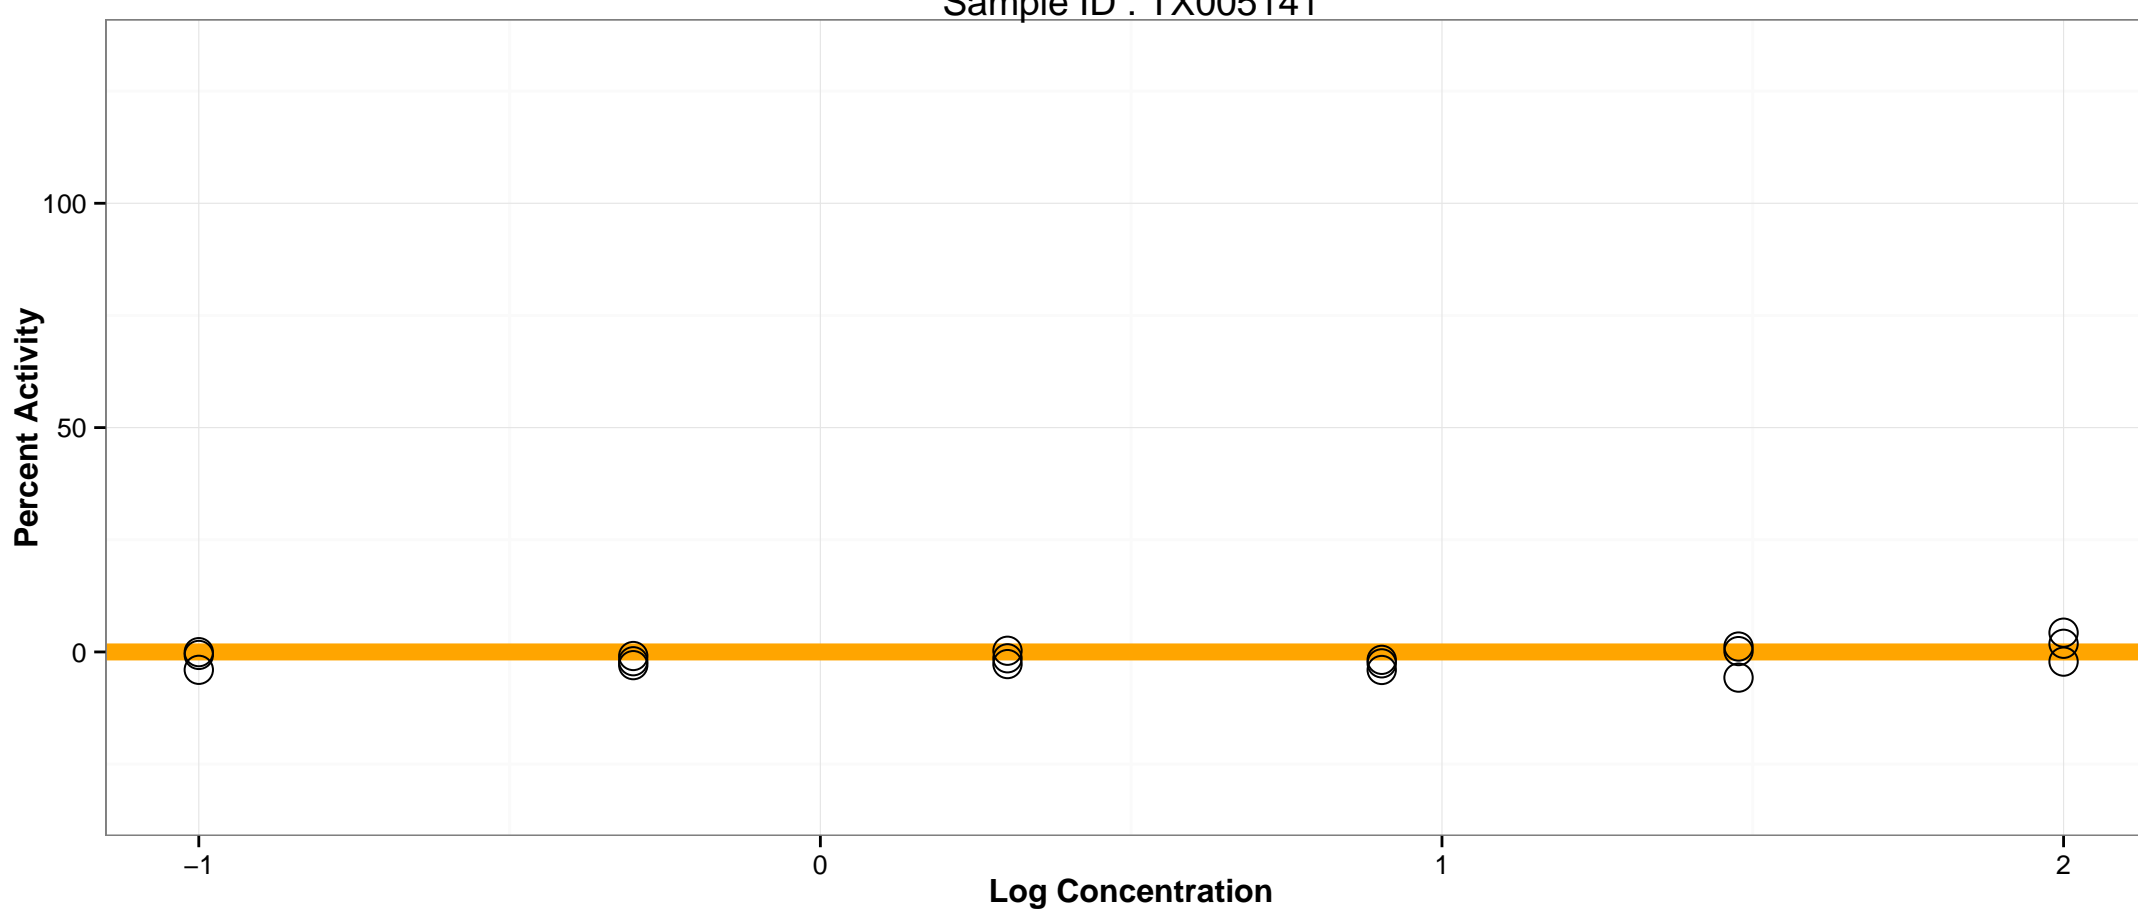

HILL MODEL

HILL MODEL: Not applicable

GAIN-LOSS MODEL

GNLS MODEL: Not applicable

|      | CNST  | HILL | GNLS |
|------|-------|------|------|
| AIC  | 89.62 | NA   | NA   |
| PROB | 1     | NA   | NA   |
| RMSE | 2.64  | NA   | NA   |

MAX\_MEAN : 1.33 MAX\_MED : 1.83 BMAD : 8.58  
COFF : 20 HIT-CALL : 0 FITC : 4 ACTP : 0  
FLAGS :

Chemical : 1,2-Benzenedicarboxaldehyde  
CAS : 643-79-8

Assay ID 1508 (NHEERL\_TPO\_AUR\_dn)  
Sample ID : TX005185

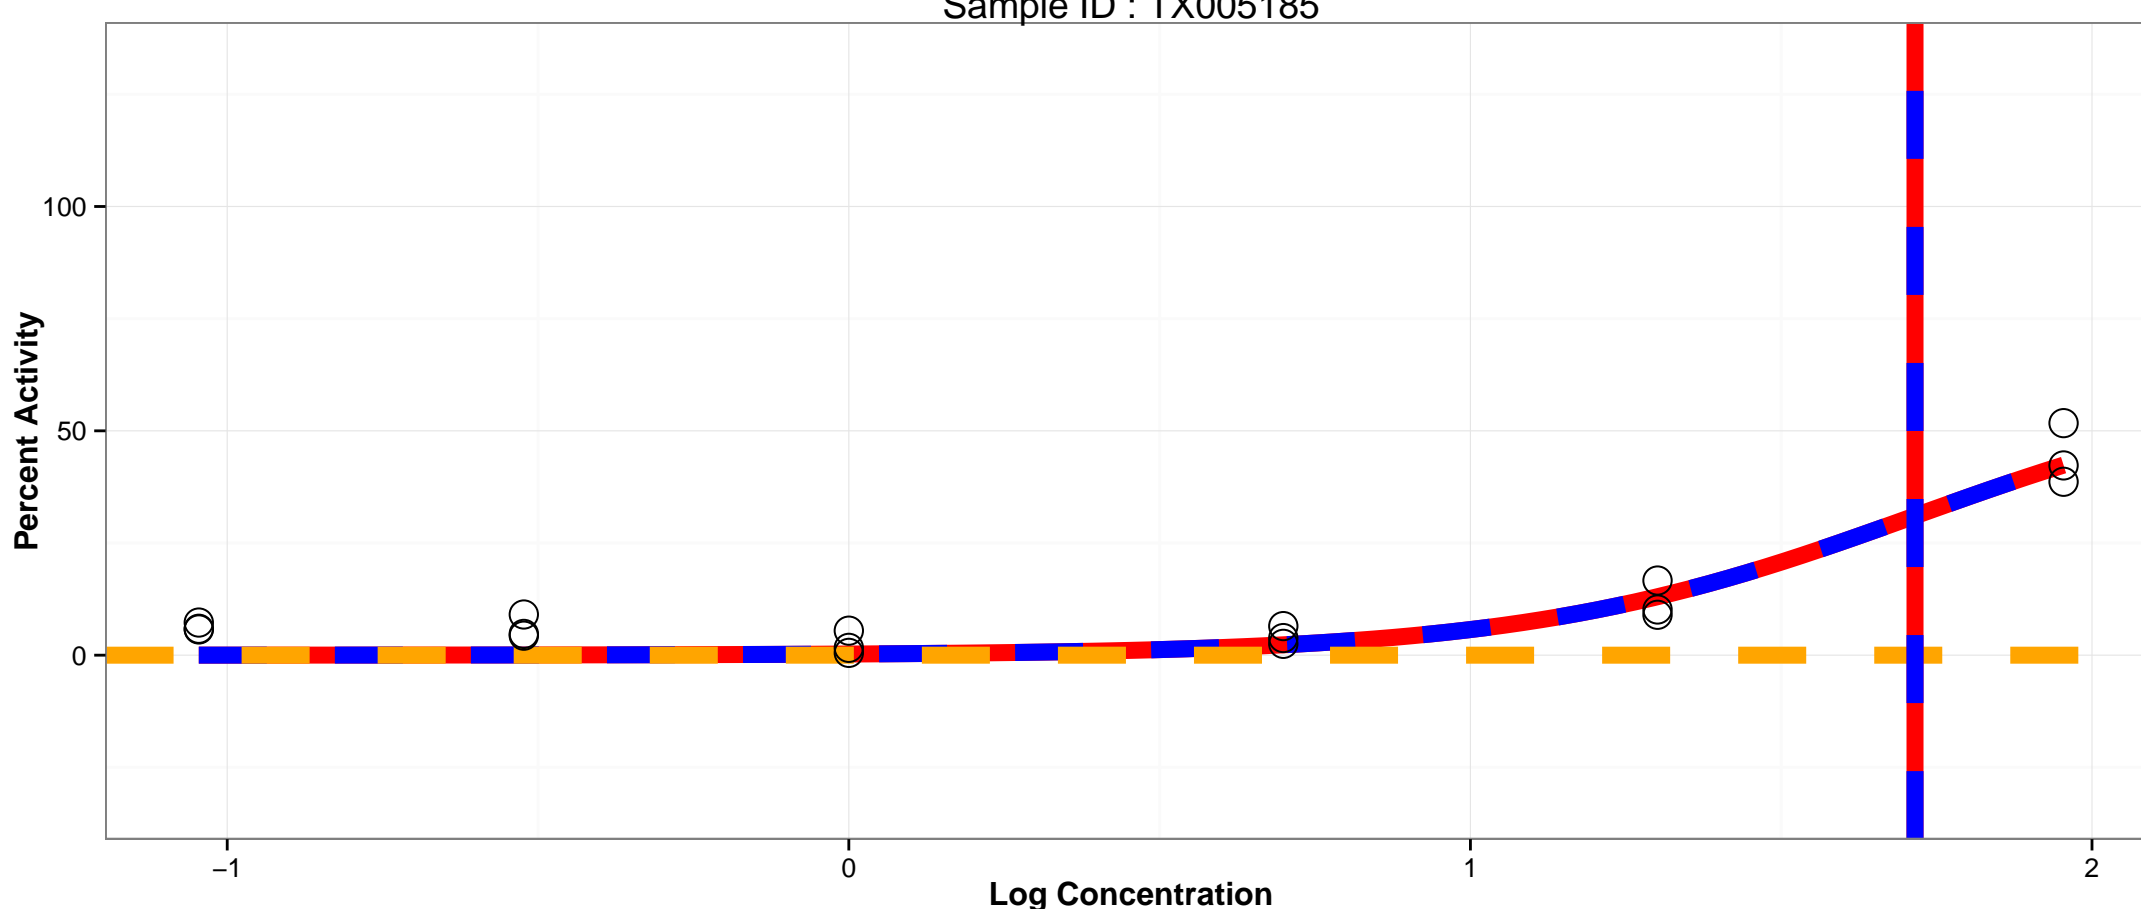

HILL MODEL

|     | tp   | ga    | gw    |
|-----|------|-------|-------|
| val | 62.1 | 1.72  | 1.39  |
| sd  | 26.7 | 0.329 | 0.605 |

GAIN-LOSS MODEL

|     | tp   | ga    | gw    | la   | lw   |
|-----|------|-------|-------|------|------|
| val | 62.1 | 1.72  | 1.39  | 3.48 | 5.51 |
| sd  | 26.8 | 0.329 | 0.605 | 2250 | 8120 |

|      | CNST   | HILL   | GNLS   |
|------|--------|--------|--------|
| AIC  | 155.15 | 118.42 | 122.42 |
| PROB | 0      | 0.88   | 0.12   |
| RMSE | 19.38  | 4.89   | 4.89   |

MAX\_MEAN : 44.2 MAX\_MED : 42.3 BMAD : 5.69  
COFF : 20 HIT-CALL : 1 FITC : 42 ACTP : 1  
FLAGS : 6

Assay ID 1509 (NHEERL\_HEK293T\_CellTiterGLO)  
Sample ID : TX005185

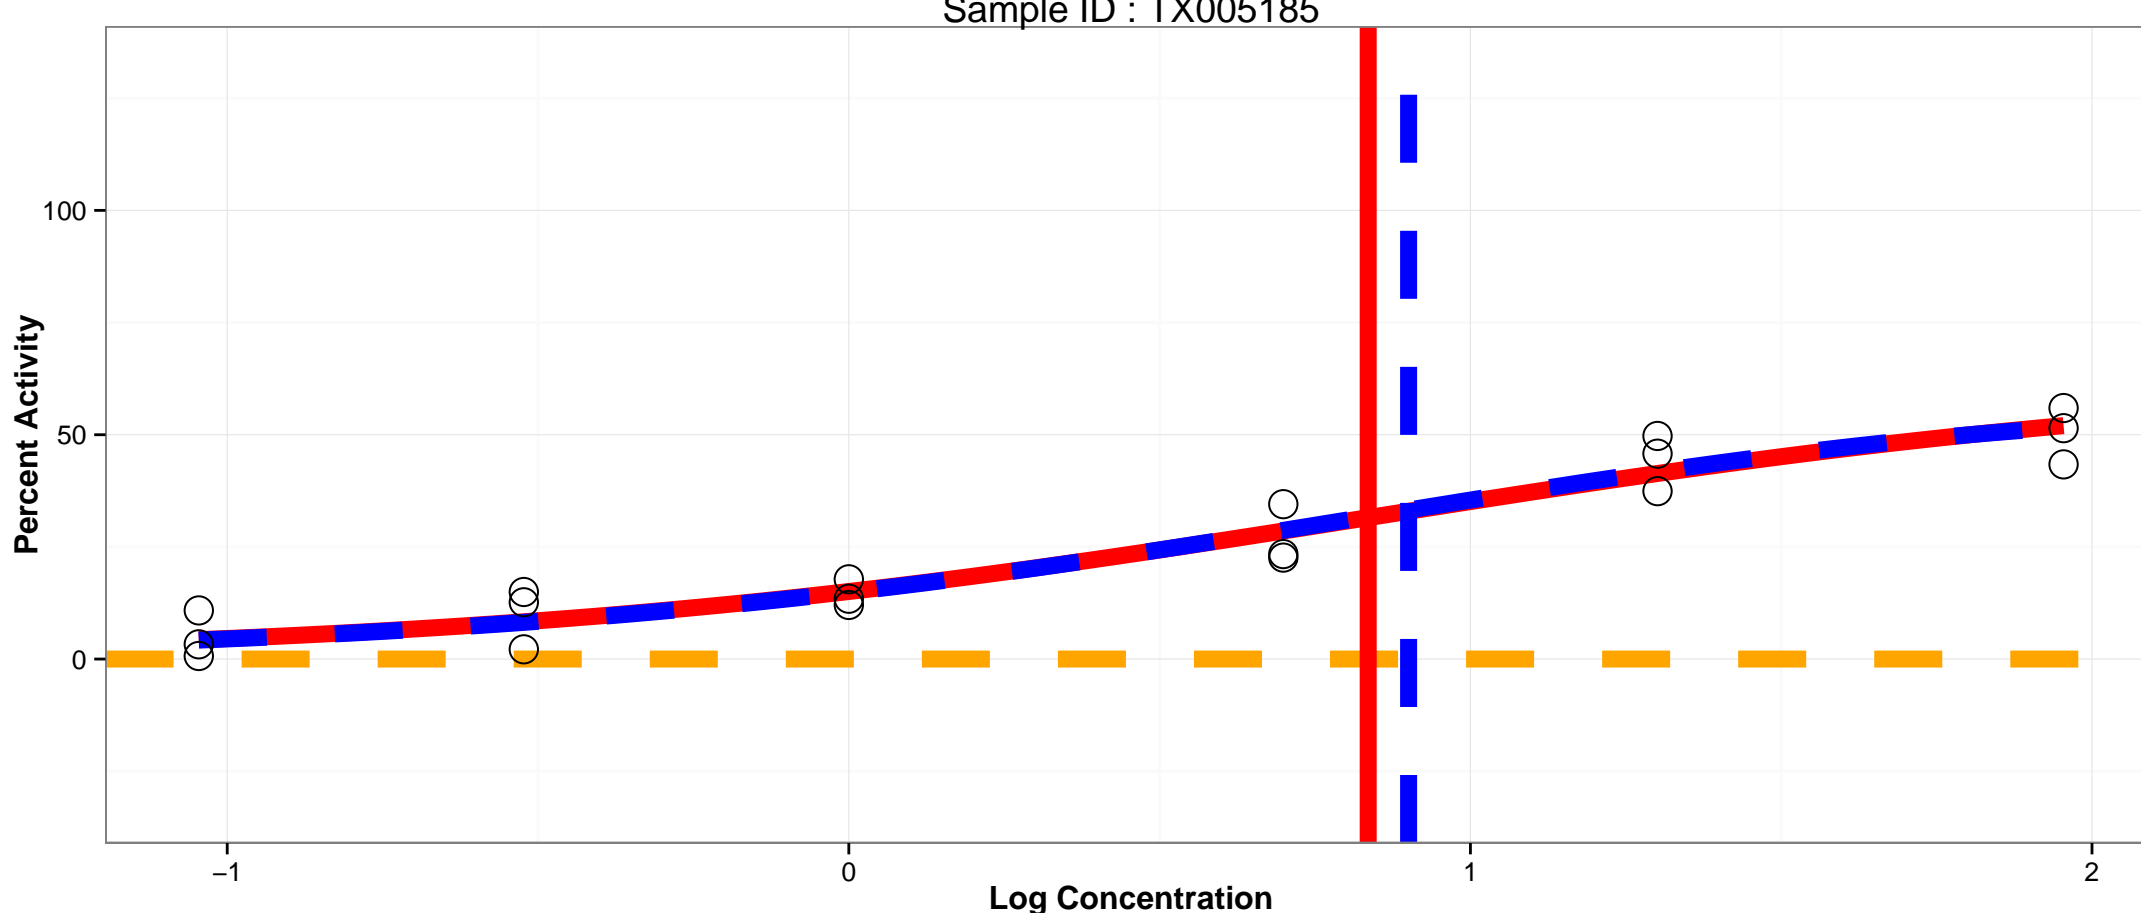

HILL MODEL

|     | tp   | ga    | gw    |
|-----|------|-------|-------|
| val | 63   | 0.836 | 0.603 |
| sd  | 11.6 | 0.358 | 0.153 |

GAIN-LOSS MODEL

|     | tp   | ga    | gw    | la   | lw    |
|-----|------|-------|-------|------|-------|
| val | 67.1 | 0.901 | 0.602 | 3.81 | 0.676 |
| sd  | NA   | NA    | NA    | NA   | NA    |

|      | CNST   | HILL   | GNLS   |
|------|--------|--------|--------|
| AIC  | 178.38 | 120.82 | 124.61 |
| PROB | 0      | 0.87   | 0.13   |
| RMSE | 30.78  | 5.1    | 5.06   |

MAX\_MEAN : 50.3 MAX\_MED : 51.5 BMAD : 5.54  
COFF : 20 HIT-CALL : 1 FITC : 42 ACTP : 1  
FLAGS :

Assay ID 1848 (NHEERL\_Quantilum\_inhib\_2\_dn)  
Sample ID : TX005185

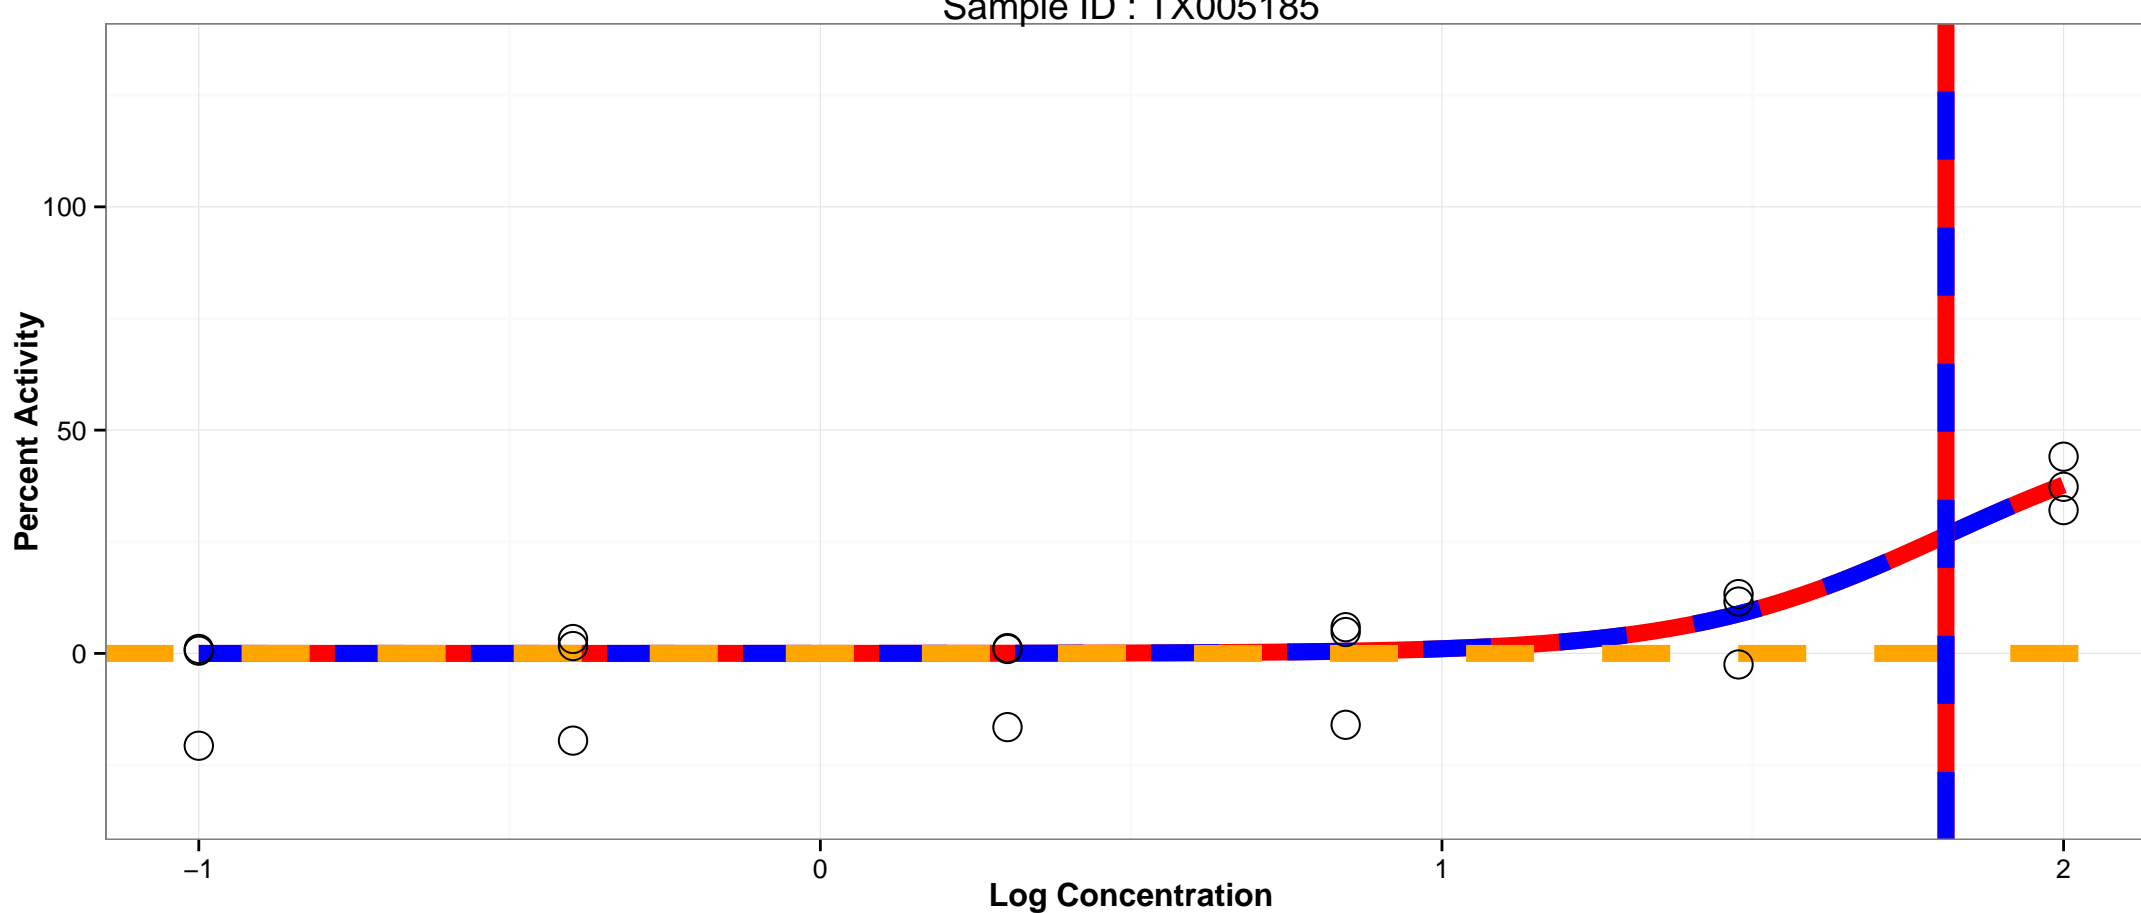

HILL MODEL

|     | tp   | ga   | gw   |
|-----|------|------|------|
| val | 52.9 | 1.81 | 2.09 |
| sd  | 132  | 1.38 | 4.77 |

GAIN-LOSS MODEL

|     | tp   | ga   | gw   | la    | lw    |
|-----|------|------|------|-------|-------|
| val | 52.9 | 1.81 | 2.09 | 3.93  | 4.18  |
| sd  | 126  | 1.31 | 4.54 | 15900 | 34400 |

|      | CNST   | HILL   | GNLS   |
|------|--------|--------|--------|
| AIC  | 157.21 | 139.69 | 143.69 |
| PROB | 0      | 0.88   | 0.12   |
| RMSE | 18.4   | 9.56   | 9.56   |

MAX\_MEAN : 37.8 MAX\_MED : 37.3 BMAD : 8.58  
COFF : 20 HIT-CALL : 1 FITC : 42 ACTP : 1  
FLAGS : 6

Chemical : Trichloroacetic acid  
CAS : 76-03-9

Assay ID 1508 (NHEERL\_TPO\_AUR\_dn)  
Sample ID : TX005199

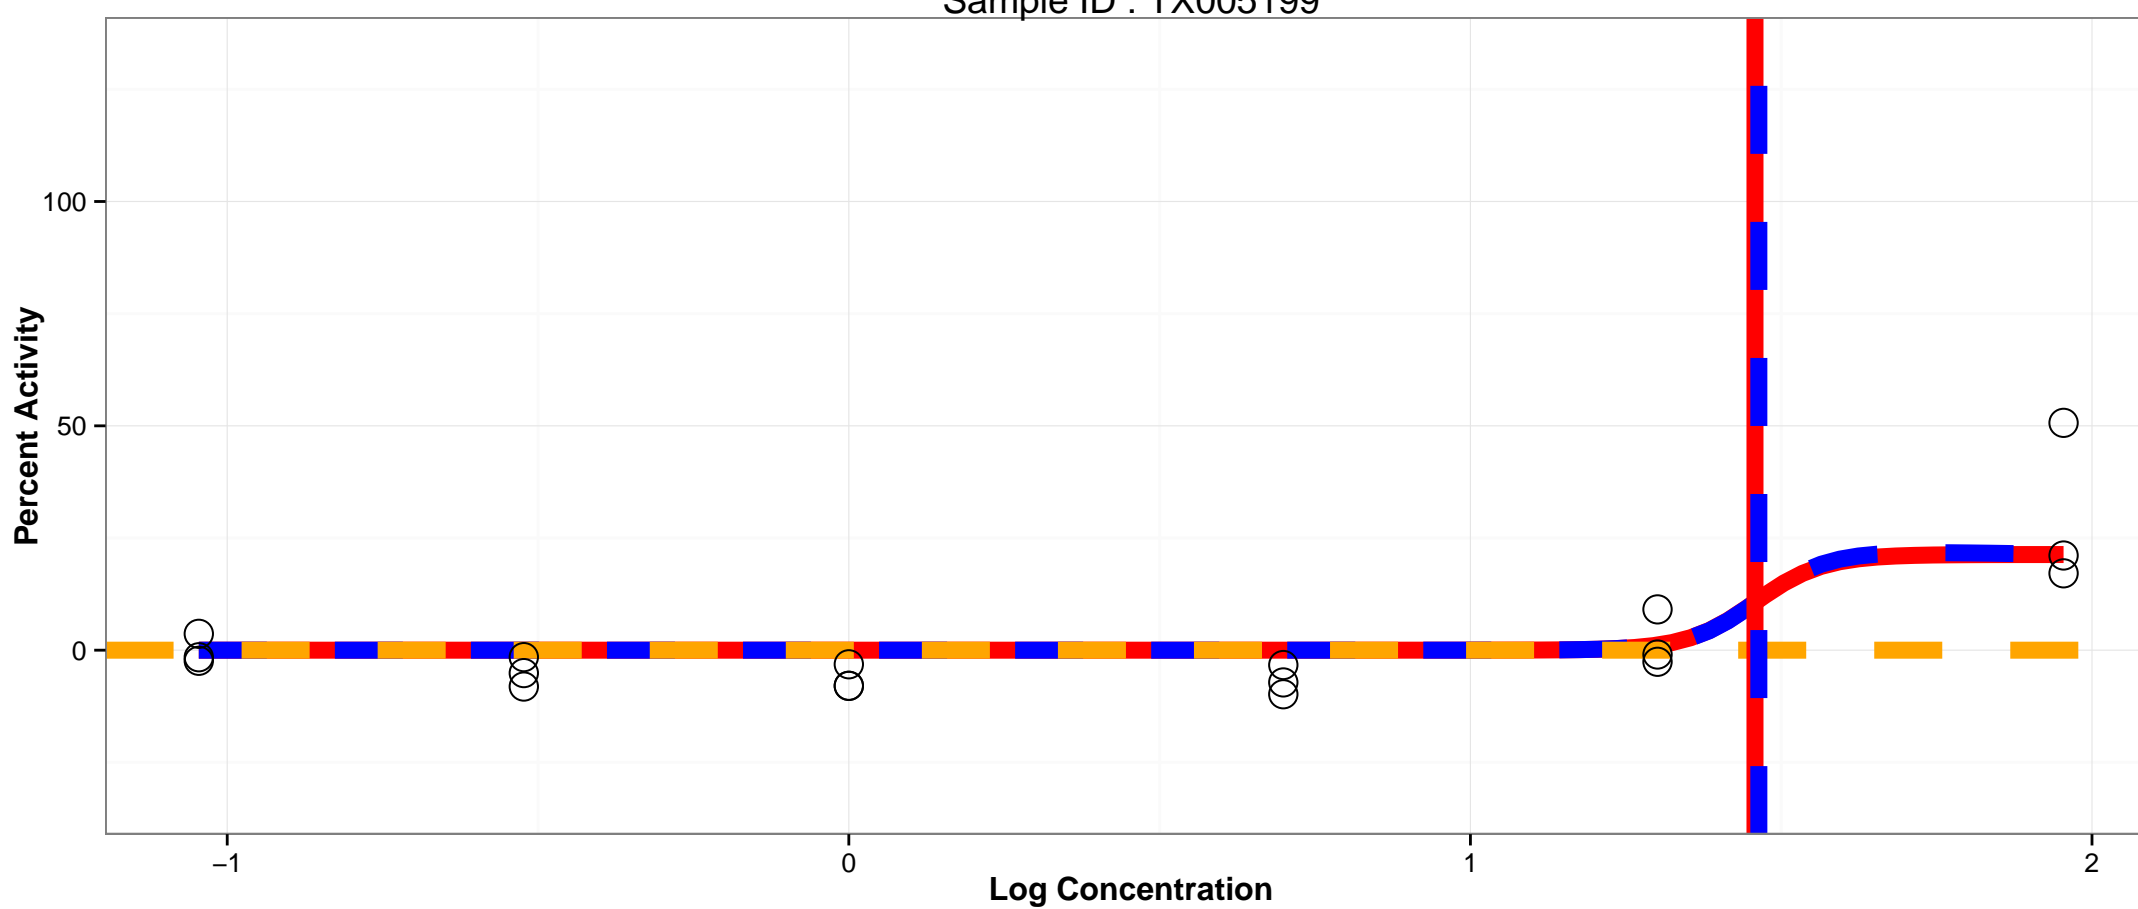

HILL MODEL

|     | tp   | ga   | gw   |
|-----|------|------|------|
| val | 21.3 | 1.46 | 7.98 |
| sd  | 4.22 | 3.66 | 186  |

GAIN-LOSS MODEL

|     | tp | ga   | gw   | la   | lw    |
|-----|----|------|------|------|-------|
| val | 25 | 1.46 | 7.86 | 3.94 | 0.382 |
| sd  | NA | NA   | NA   | NA   | NA    |

|      | CNST   | HILL   | GNLS   |
|------|--------|--------|--------|
| AIC  | 141.77 | 132.41 | 136.41 |
| PROB | 0.01   | 0.87   | 0.12   |
| RMSE | 14.54  | 8.73   | 8.73   |

MAX\_MEAN : 29.6 MAX\_MED : 21.1 BMAD : 5.69  
COFF : 20 HIT-CALL : 1 FITC : 37 ACTP : 0.992  
FLAGS : 11; 6

Assay ID 1509 (NHEERL\_HEK293T\_CellTiterGLO)  
Sample ID : TX005199

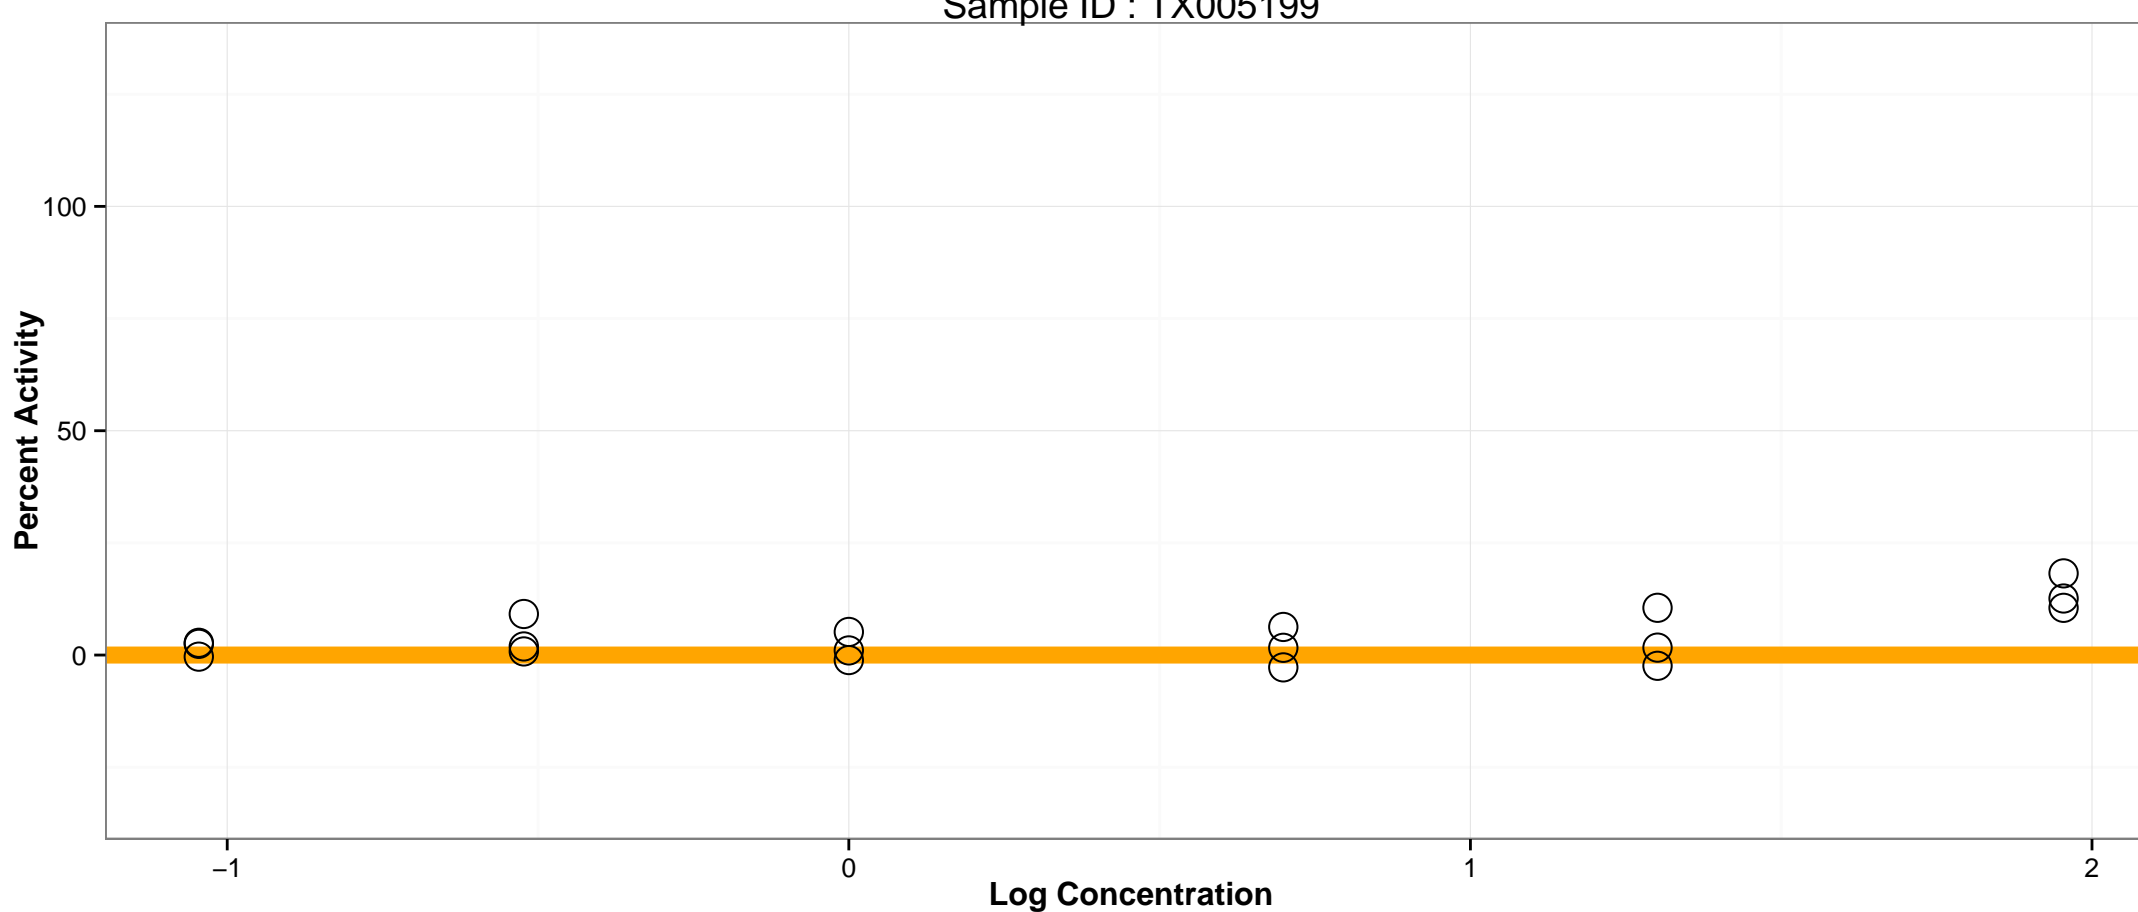

HILL MODEL

HILL MODEL: Not applicable

GAIN-LOSS MODEL

GNLS MODEL: Not applicable

|      | CNST   | HILL | GNLS |
|------|--------|------|------|
| AIC  | 122.57 | NA   | NA   |
| PROB | 1      | NA   | NA   |
| RMSE | 7.08   | NA   | NA   |

MAX\_MEAN : 13.8 MAX\_MED : 12.6 BMAD : 5.54  
COFF : 20 HIT-CALL : 0 FITC : 4 ACTP : 0  
FLAGS :

Assay ID 1848 (NHEERL\_Quantilum\_inhib\_2\_dn)  
Sample ID : TX005199

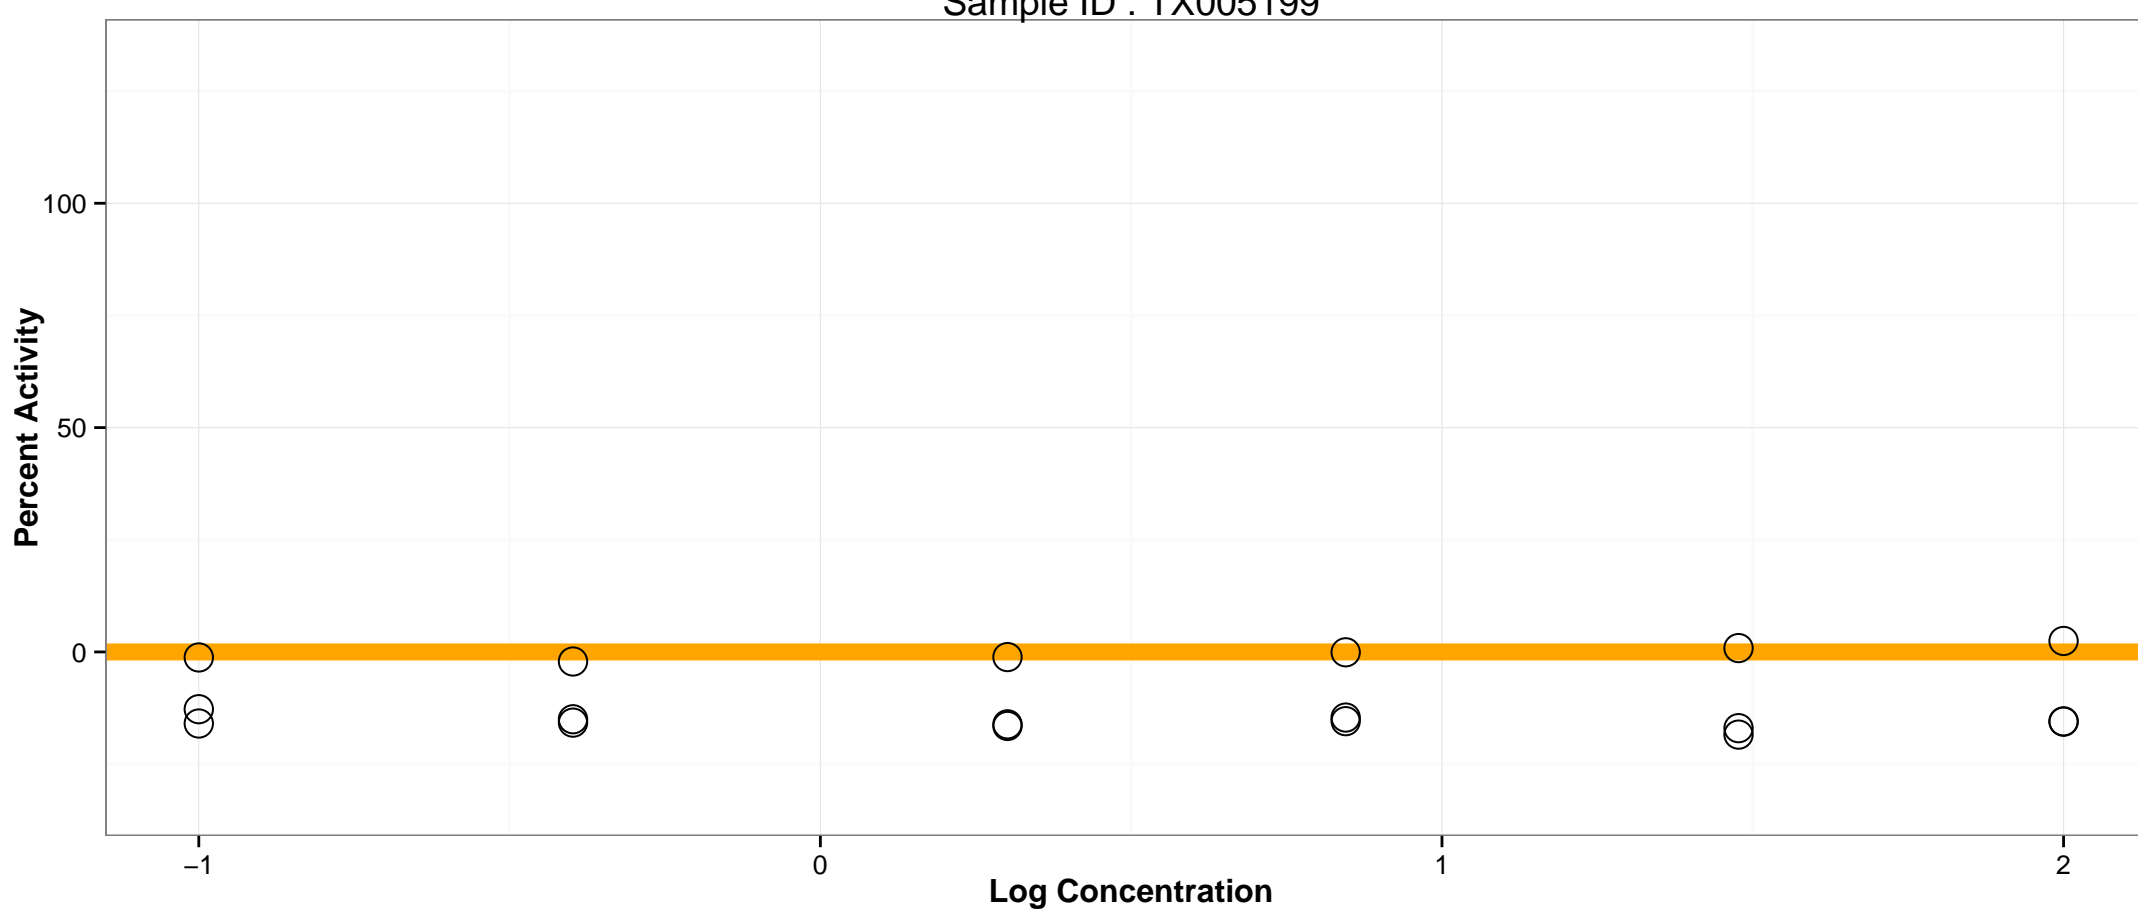

HILL MODEL

HILL MODEL: Not applicable

GAIN-LOSS MODEL

GNLS MODEL: Not applicable

|      | CNST   | HILL | GNLS |
|------|--------|------|------|
| AIC  | 148.32 | NA   | NA   |
| PROB | 1      | NA   | NA   |
| RMSE | 12.9   | NA   | NA   |

MAX\_MEAN : -9.51 MAX\_MED : -12.7 BMAD : 8.58  
COFF : 20 HIT-CALL : 0 FITC : 4 ACTP : 0  
FLAGS :

Assay ID 1508 (NHEERL\_TPO\_AUR\_dn)  
Sample ID : TX005404

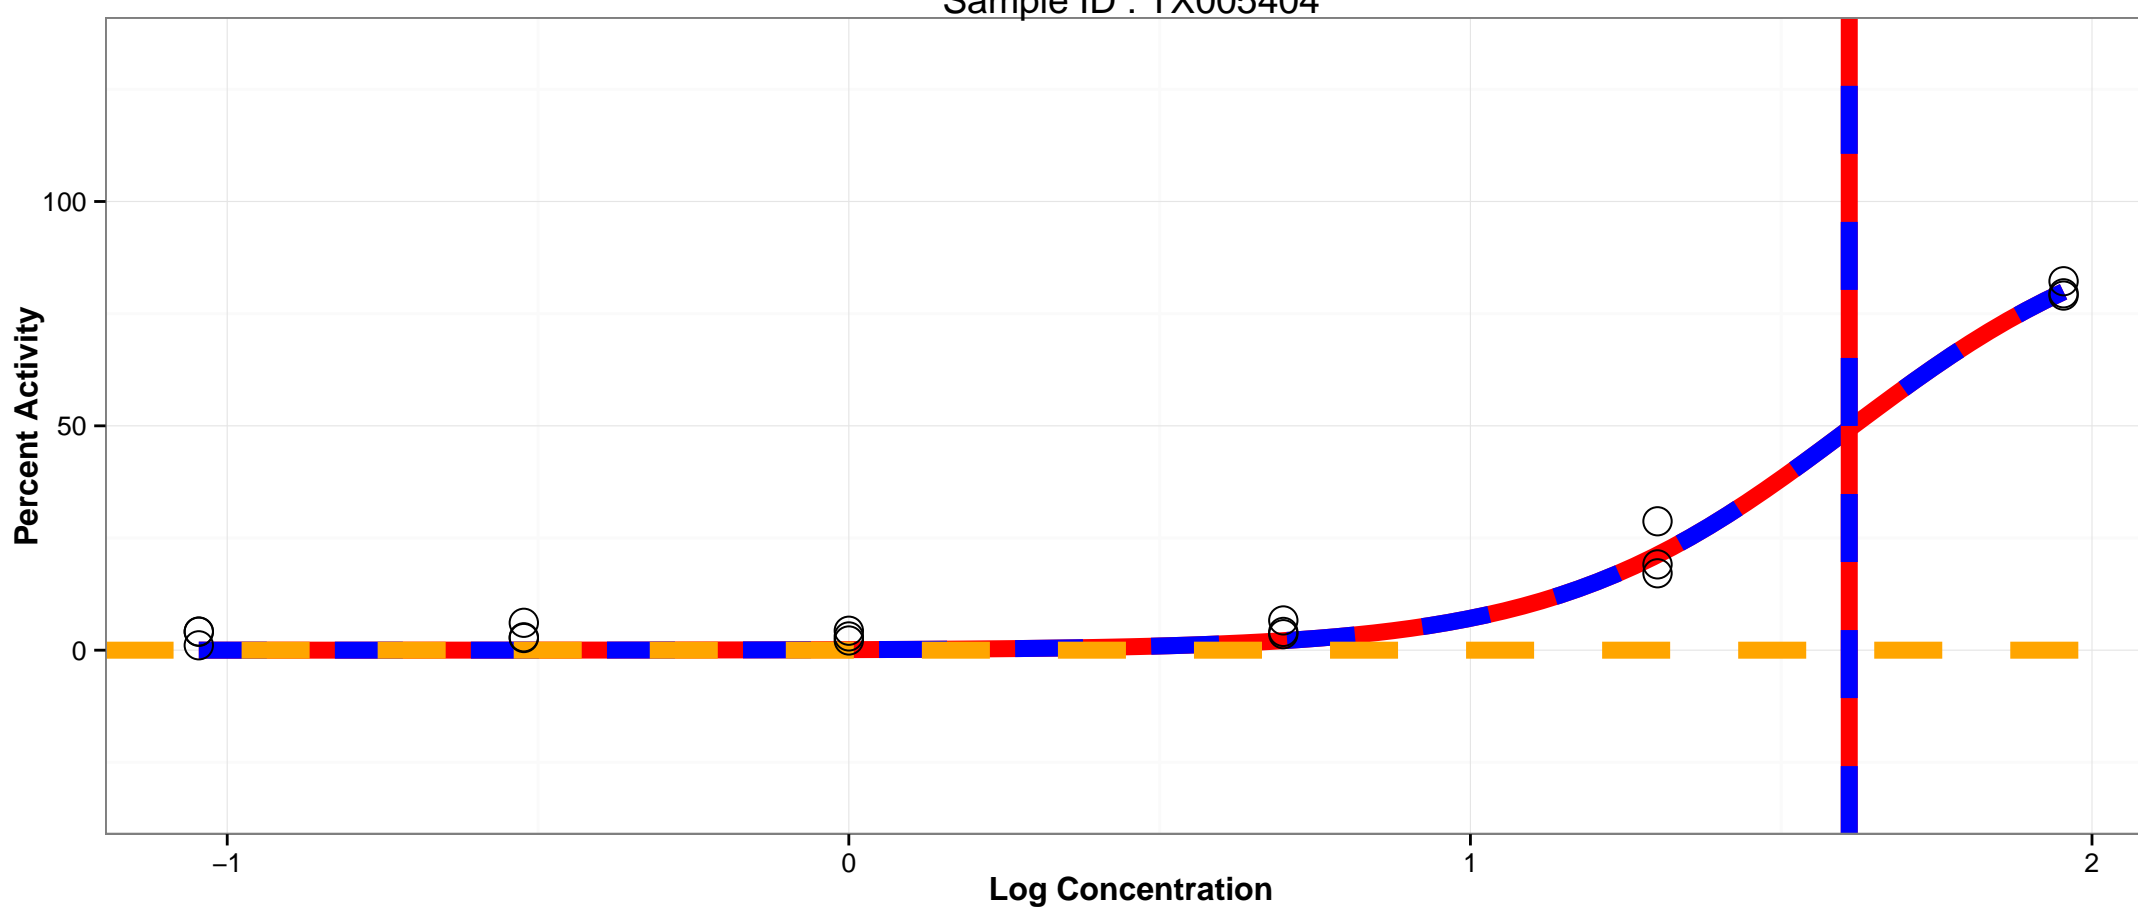

**HILL MODEL**

|     | tp   | ga    | gw    |
|-----|------|-------|-------|
| val | 98.7 | 1.61  | 1.82  |
| sd  | 20.1 | 0.151 | 0.566 |

**GAIN-LOSS MODEL**

|     | tp   | ga    | gw    | la   | lw    |
|-----|------|-------|-------|------|-------|
| val | 98.7 | 1.61  | 1.82  | 3.13 | 8.35  |
| sd  | 20.1 | 0.151 | 0.567 | 4690 | 33300 |

|      | CNST   | HILL   | GNLS   |
|------|--------|--------|--------|
| AIC  | 173.59 | 107.08 | 111.08 |
| PROB | 0      | 0.88   | 0.12   |
| RMSE | 34.17  | 3.57   | 3.57   |

MAX\_MEAN : 80.3 MAX\_MED : 79.5 BMAD : 5.69  
COFF : 20 HIT-CALL : 1 FITC : 42 ACTP : 1  
FLAGS :

Assay ID 1509 (NHEERL\_HEK293T\_CellTiterGLO)  
Sample ID : TX005404

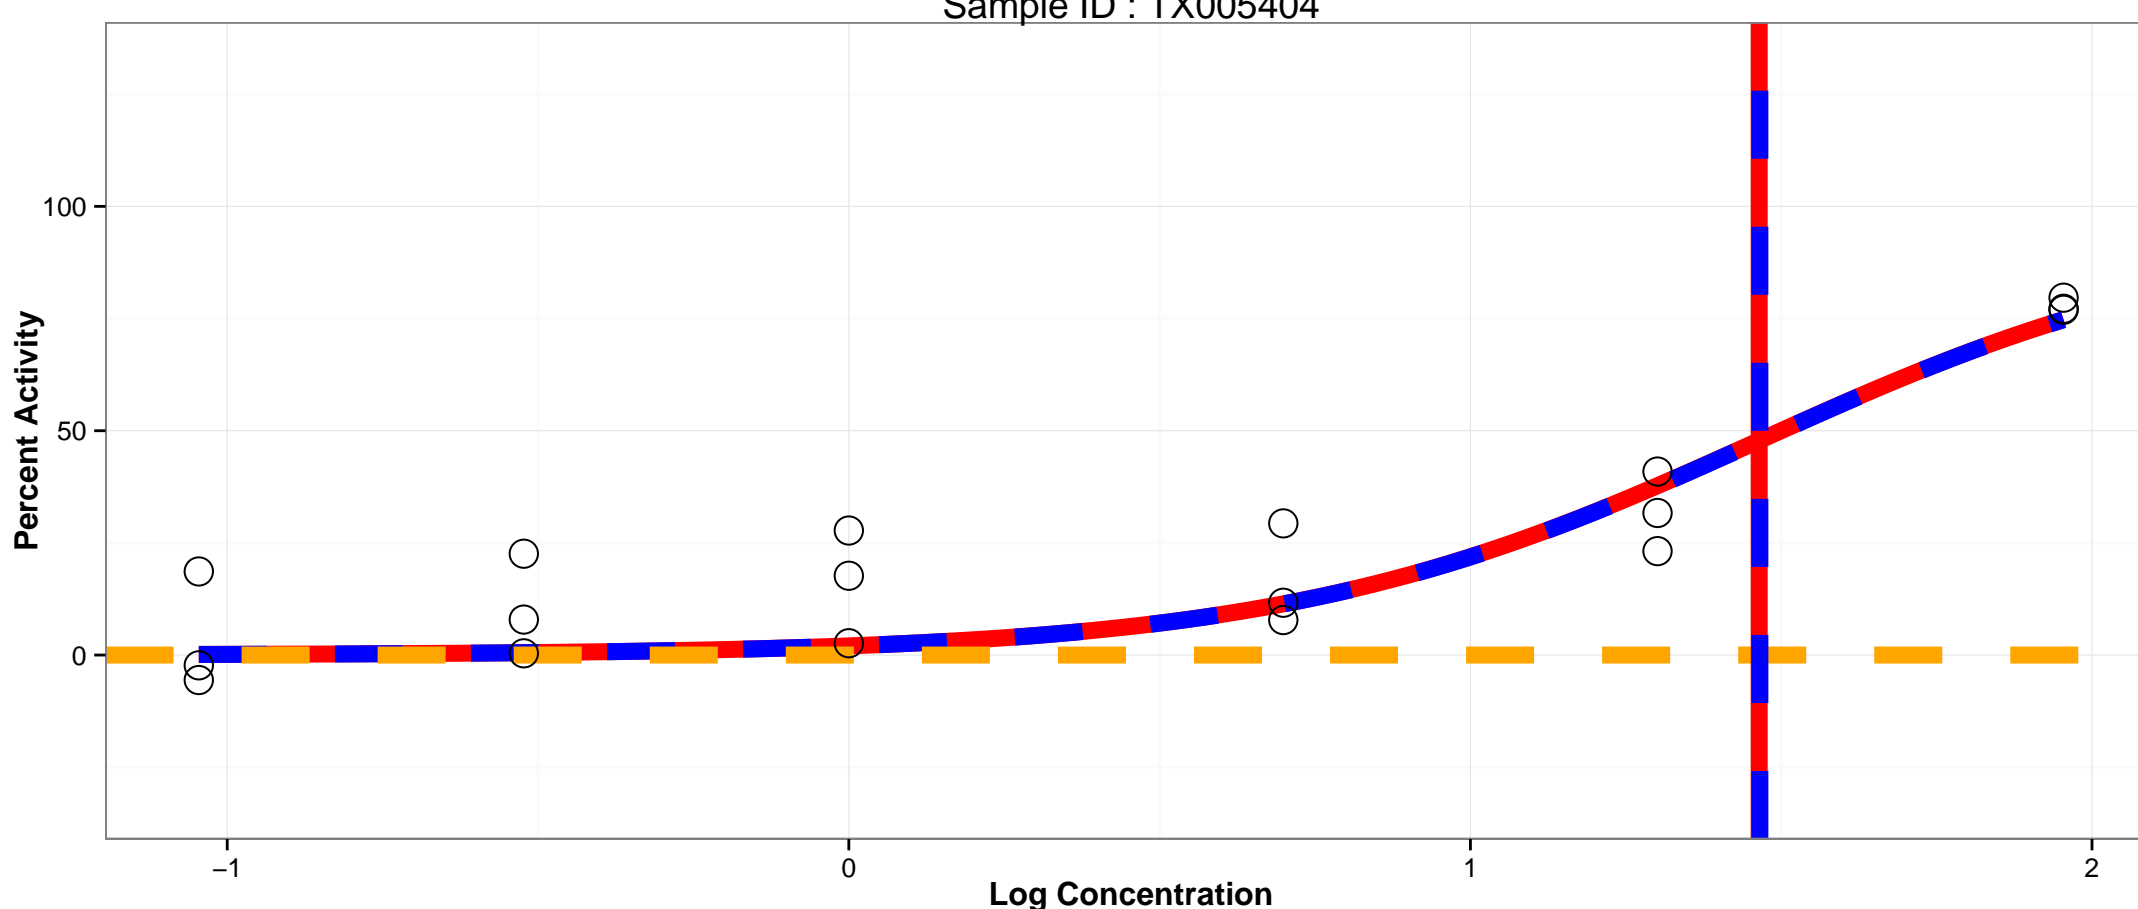

**HILL MODEL**

|     | tp   | ga    | gw    |
|-----|------|-------|-------|
| val | 95.6 | 1.46  | 1.13  |
| sd  | 19.1 | 0.194 | 0.404 |

**GAIN-LOSS MODEL**

|     | tp   | ga   | gw   | la   | lw   |
|-----|------|------|------|------|------|
| val | 95.6 | 1.47 | 1.13 | 2.72 | 17.9 |
| sd  | NA   | NA   | NA   | NA   | NA   |

|      | CNST   | HILL   | GNLS   |
|------|--------|--------|--------|
| AIC  | 182.29 | 147.71 | 151.71 |
| PROB | 0      | 0.88   | 0.12   |
| RMSE | 36.93  | 11.69  | 11.69  |

MAX\_MEAN : 77.9 MAX\_MED : 77.2 BMAD : 5.54  
COFF : 20 HIT-CALL : 1 FITC : 42 ACTP : 1  
FLAGS :

Assay ID 1848 (NHEERL\_Quantilum\_inhib\_2\_dn)  
Sample ID : TX005404

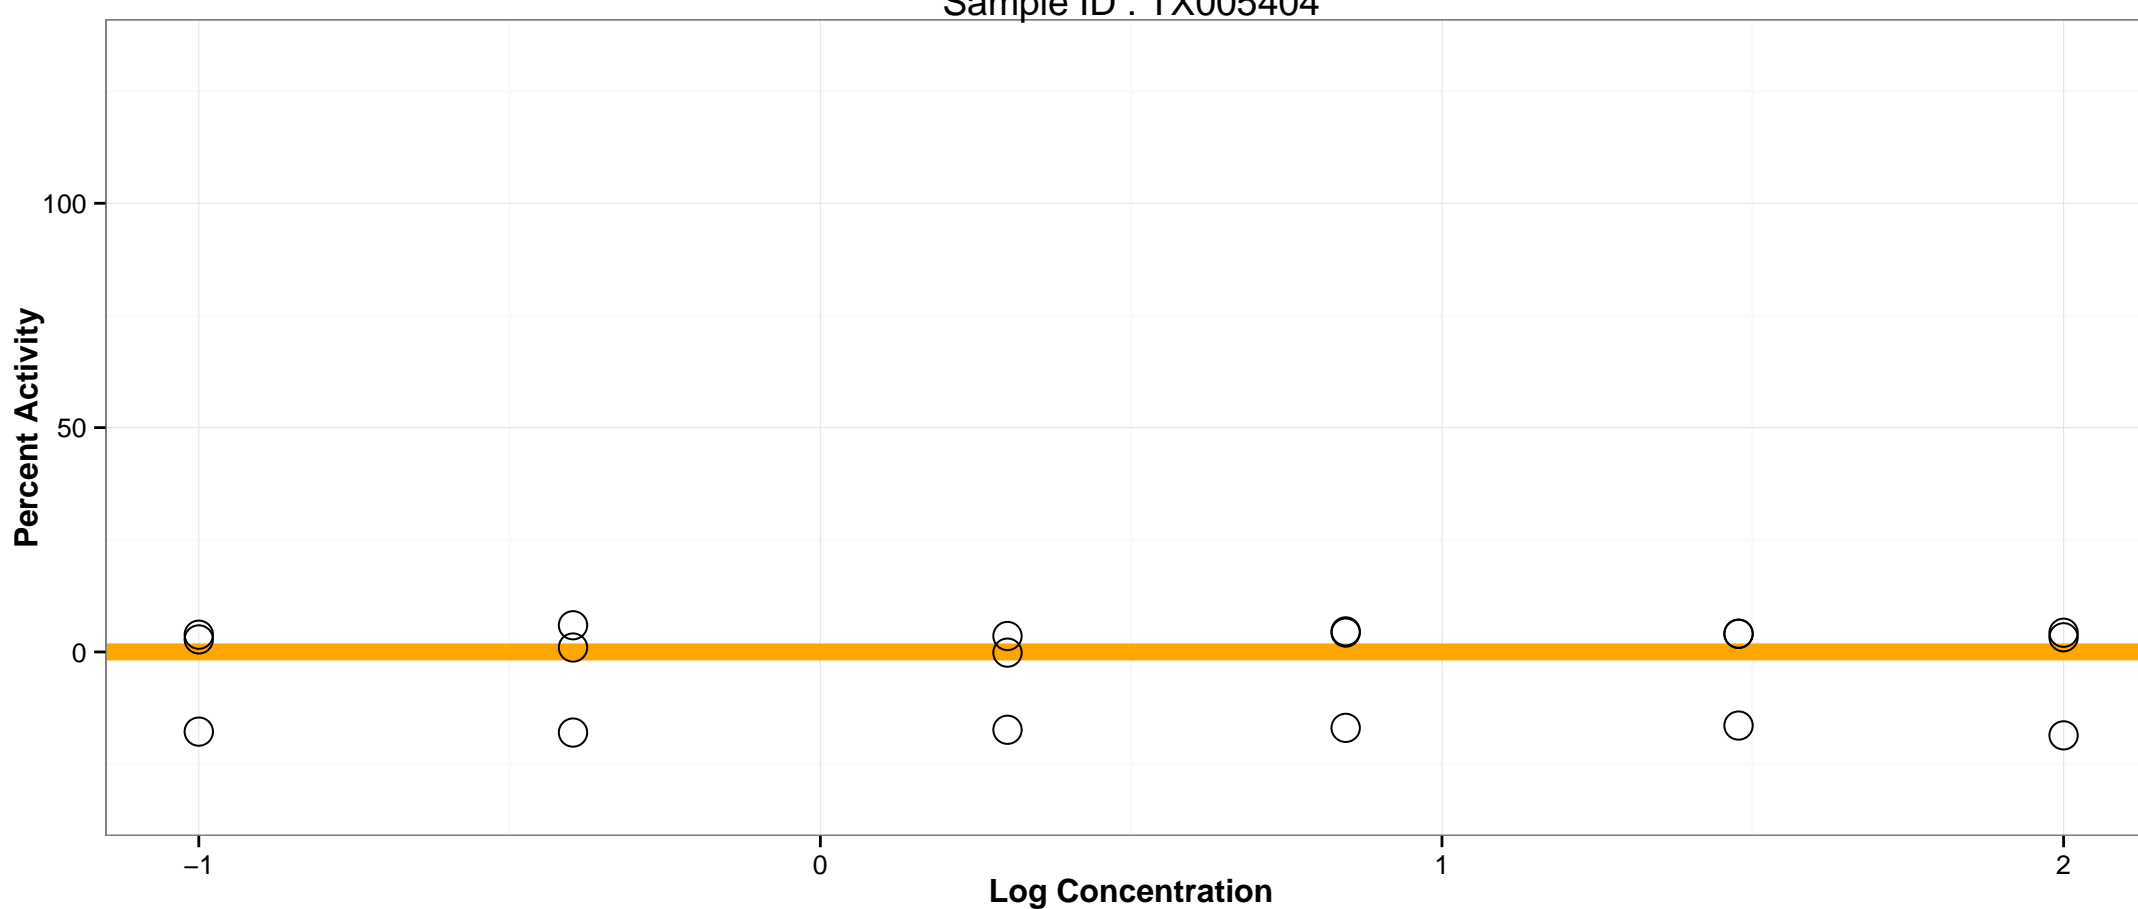

**HILL MODEL**

HILL MODEL: Not applicable

**GAIN-LOSS MODEL**

GNLS MODEL: Not applicable

|      | CNST   | HILL | GNLS |
|------|--------|------|------|
| AIC  | 138.91 | NA   | NA   |
| PROB | 1      | NA   | NA   |
| RMSE | 10.57  | NA   | NA   |

MAX\_MEAN : -2.66 MAX\_MED : 4.32 BMAD : 8.58  
COFF : 20 HIT-CALL : 0 FITC : 4 ACTP : 0  
FLAGS :

Chemical : Resmethrin  
CAS : 10453-86-8

Assay ID 1508 (NHEERL\_TPO\_AUR\_dn)  
Sample ID : TX005545

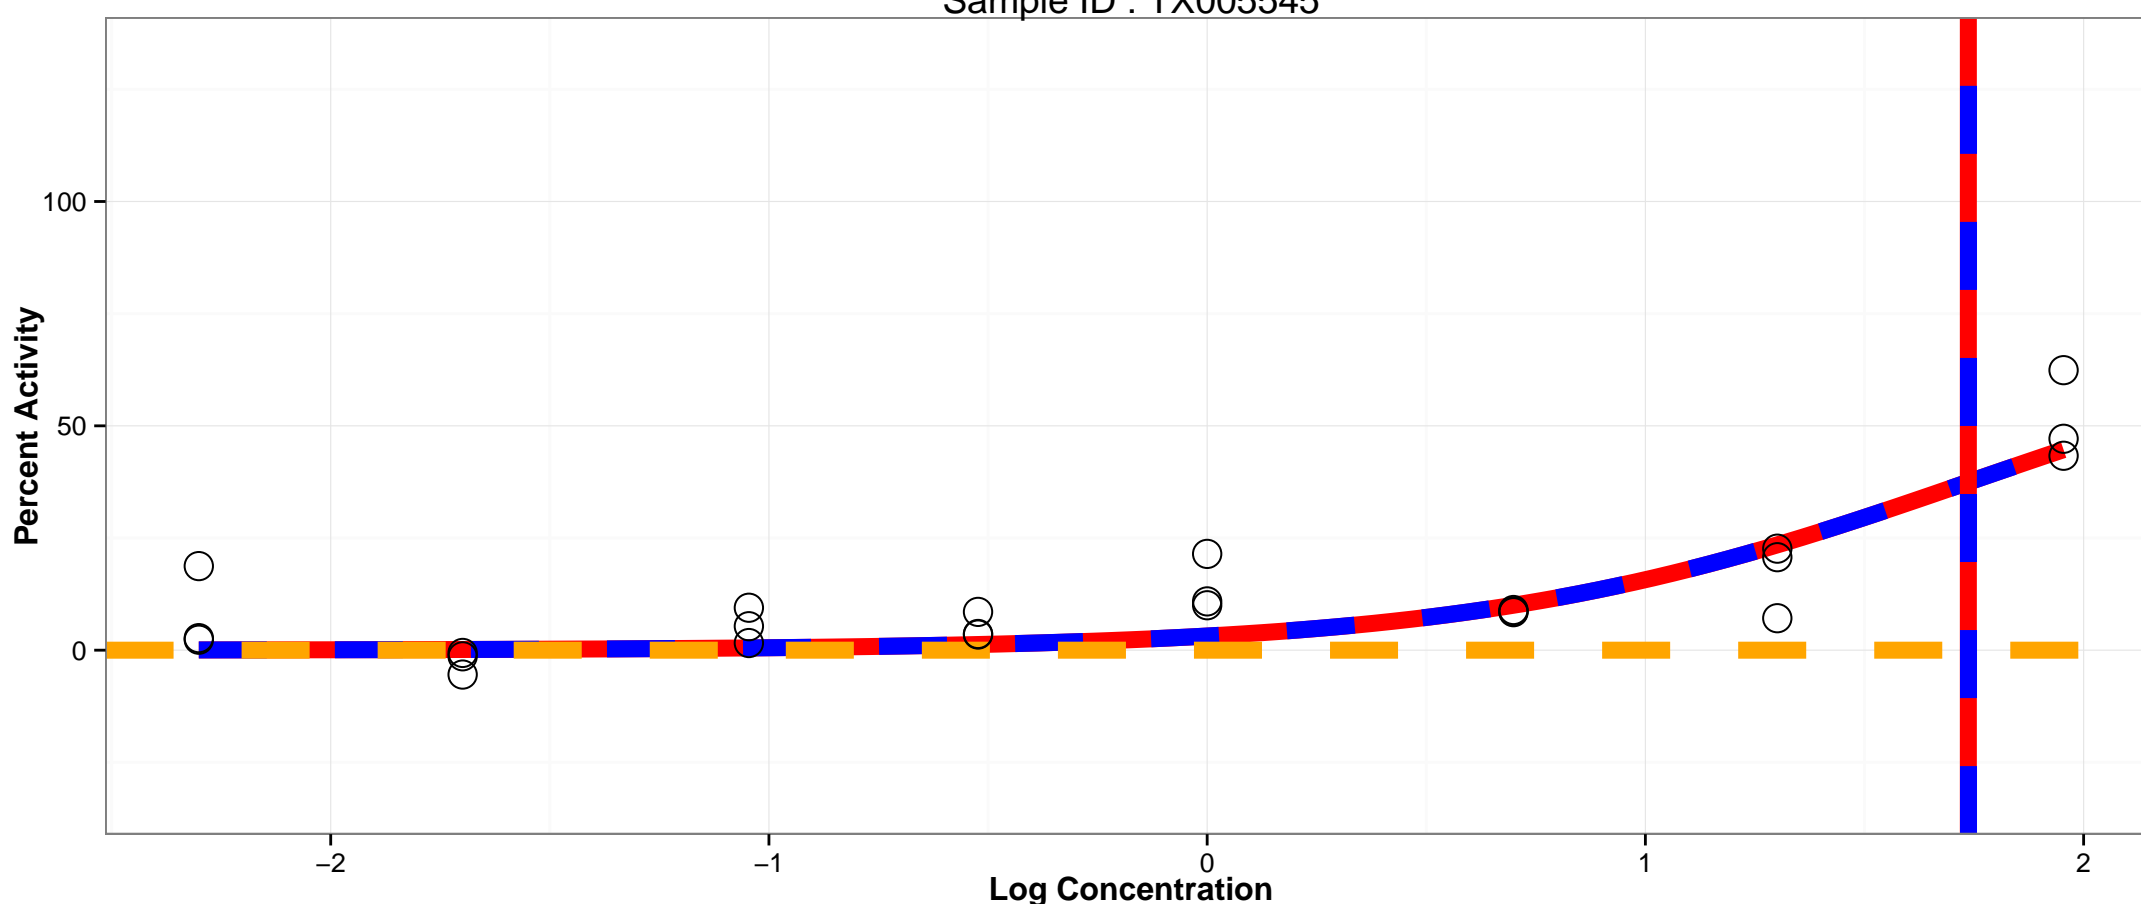

HILL MODEL

|     | tp   | ga    | gw    |
|-----|------|-------|-------|
| val | 74.9 | 1.74  | 0.782 |
| sd  | 22.7 | 0.359 | 0.25  |

GAIN-LOSS MODEL

|     | tp   | ga    | gw    | la    | lw     |
|-----|------|-------|-------|-------|--------|
| val | 74.9 | 1.74  | 0.781 | 3.14  | 9.49   |
| sd  | 22.7 | 0.359 | 0.249 | 19000 | 152000 |

|      | CNST   | HILL   | GNLS   |
|------|--------|--------|--------|
| AIC  | 210.96 | 174.55 | 178.55 |
| PROB | 0      | 0.88   | 0.12   |
| RMSE | 20.93  | 8.19   | 8.19   |

MAX\_MEAN : 51 MAX\_MED : 47.1 BMAD : 5.69  
COFF : 20 HIT-CALL : 1 FITC : 42 ACTP : 1  
FLAGS :

Assay ID 1509 (NHEERL\_HEK293T\_CellTiterGLO)  
Sample ID : TX005545

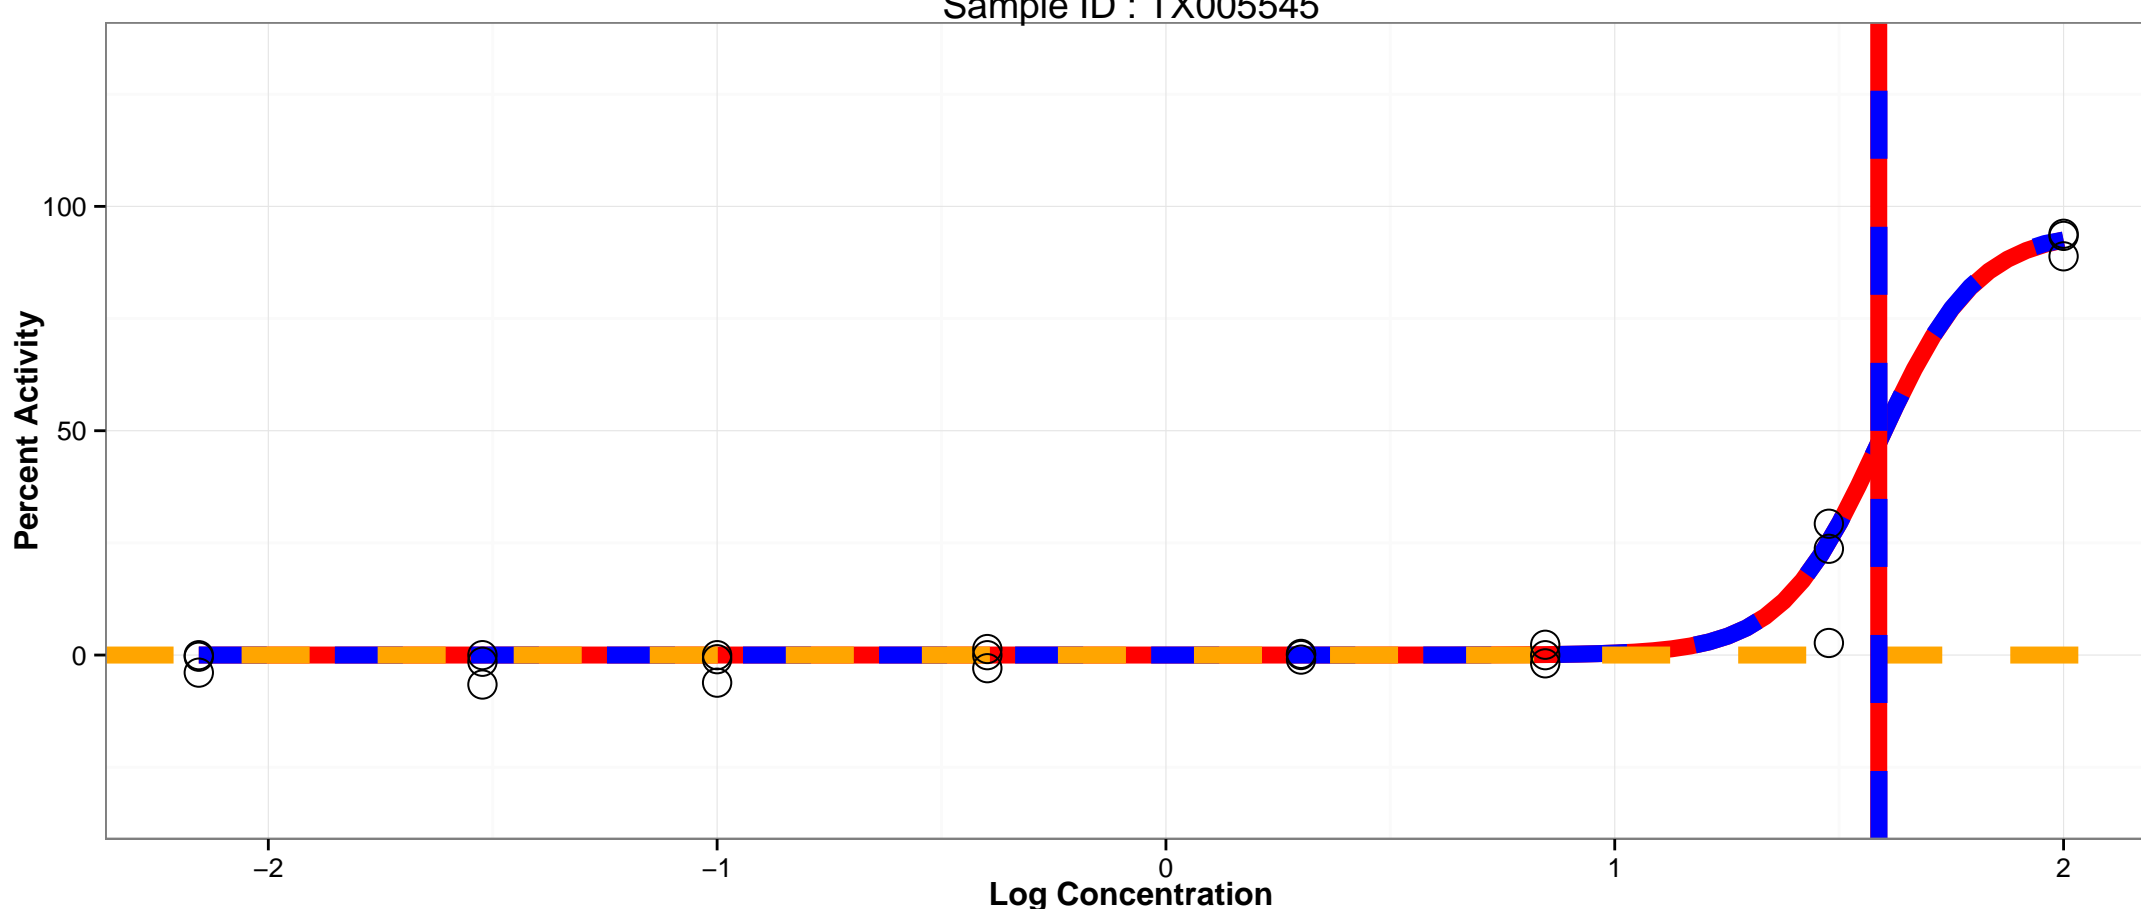

HILL MODEL

|     | tp   | ga   | gw   |
|-----|------|------|------|
| val | 94.7 | 1.59 | 3.96 |
| sd  | NA   | NA   | NA   |

GAIN-LOSS MODEL

|     | tp   | ga   | gw   | la   | lw   |
|-----|------|------|------|------|------|
| val | 94.9 | 1.59 | 3.96 | 2.17 | 15.1 |
| sd  | NA   | NA   | NA   | NA   | NA   |

|      | CNST   | HILL  | GNLS  |
|------|--------|-------|-------|
| AIC  | 217.33 | 135.9 | 139.9 |
| PROB | 0      | 0.88  | 0.12  |
| RMSE | 33.54  | 5.25  | 5.25  |

MAX\_MEAN : 92.1 MAX\_MED : 93.4 BMAD : 5.54  
COFF : 20 HIT-CALL : 1 FITC : 41 ACTP : 1  
FLAGS :

Assay ID 1848 (NHEERL\_Quantilum\_inhib\_2\_dn)  
Sample ID : TX005545

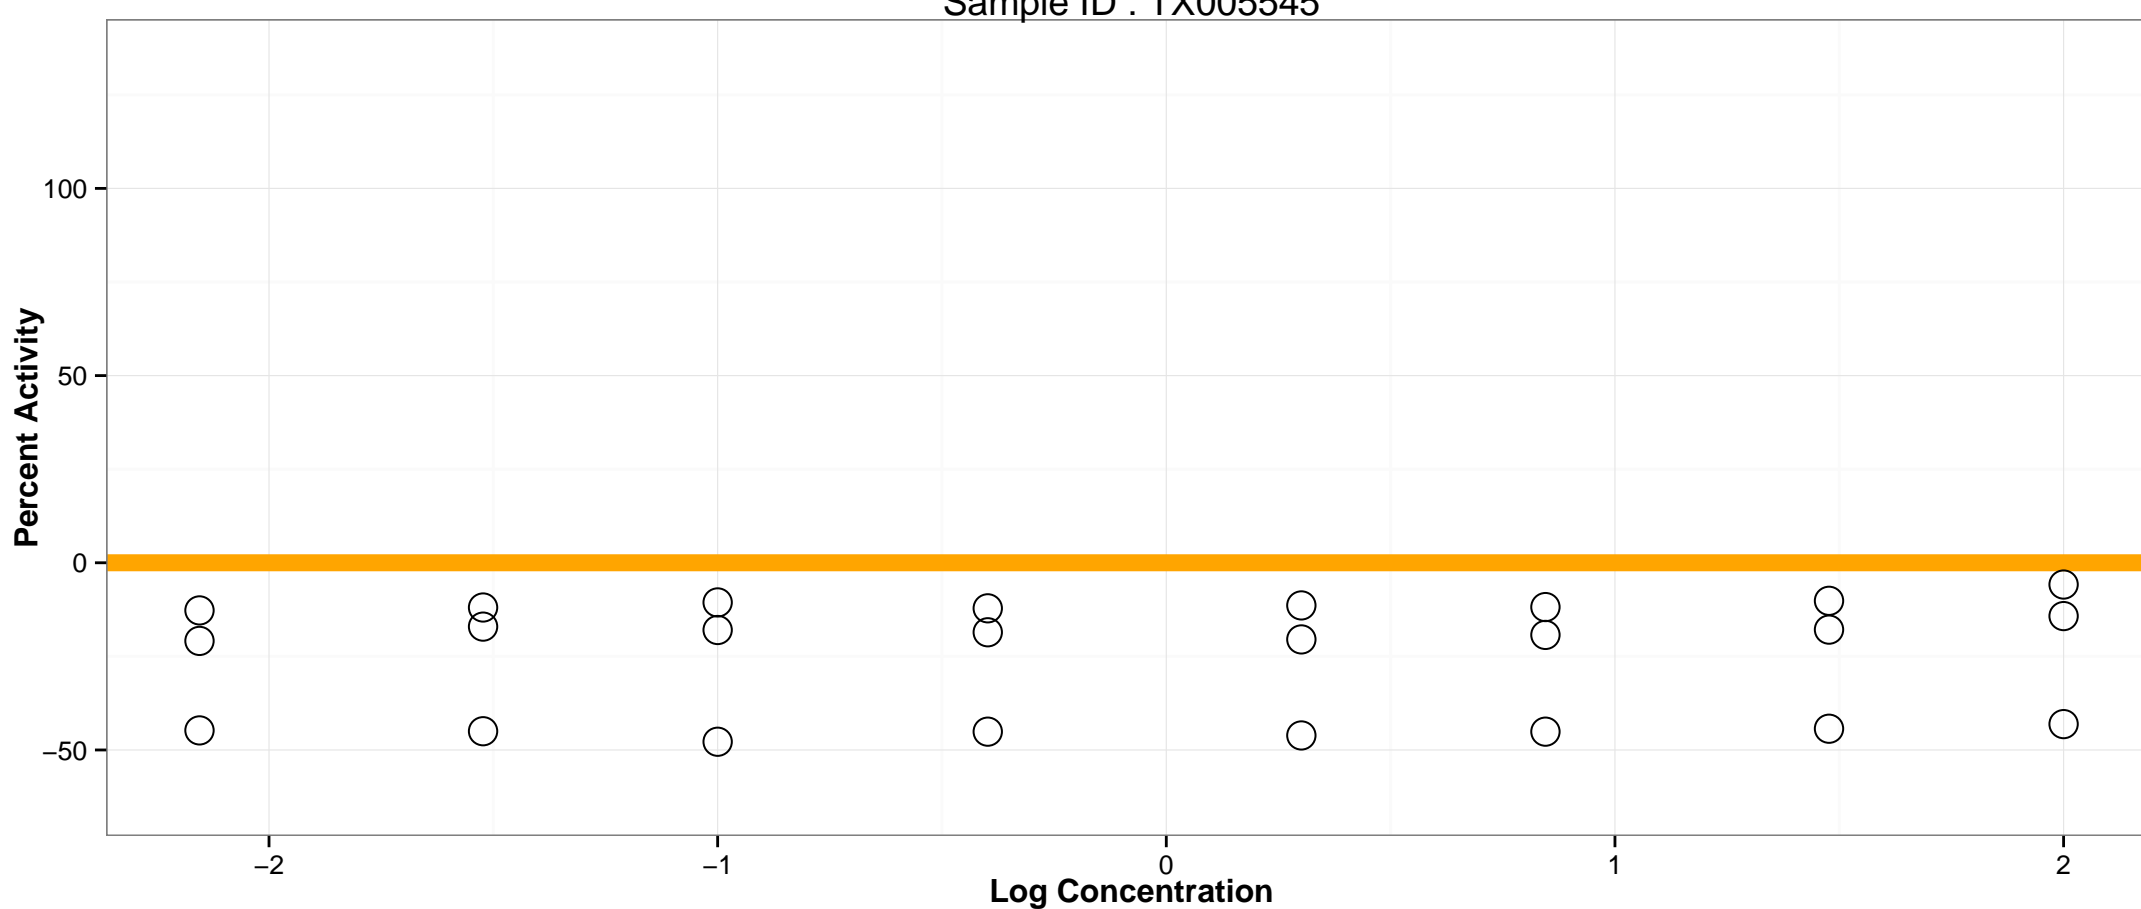

HILL MODEL

HILL MODEL: Not applicable

GAIN-LOSS MODEL

GNLS MODEL: Not applicable

|      | CNST   | HILL | GNLS |
|------|--------|------|------|
| AIC  | 234.37 | NA   | NA   |
| PROB | 1      | NA   | NA   |
| RMSE | 28.86  | NA   | NA   |

MAX\_MEAN : -21 MAX\_MED : -14.2 BMAD : 8.58  
COFF : 20 HIT-CALL : 0 FITC : 4 ACTP : 0  
FLAGS : 10

Assay ID 1508 (NHEERL\_TPO\_AUR\_dn)  
Sample ID : TX005619

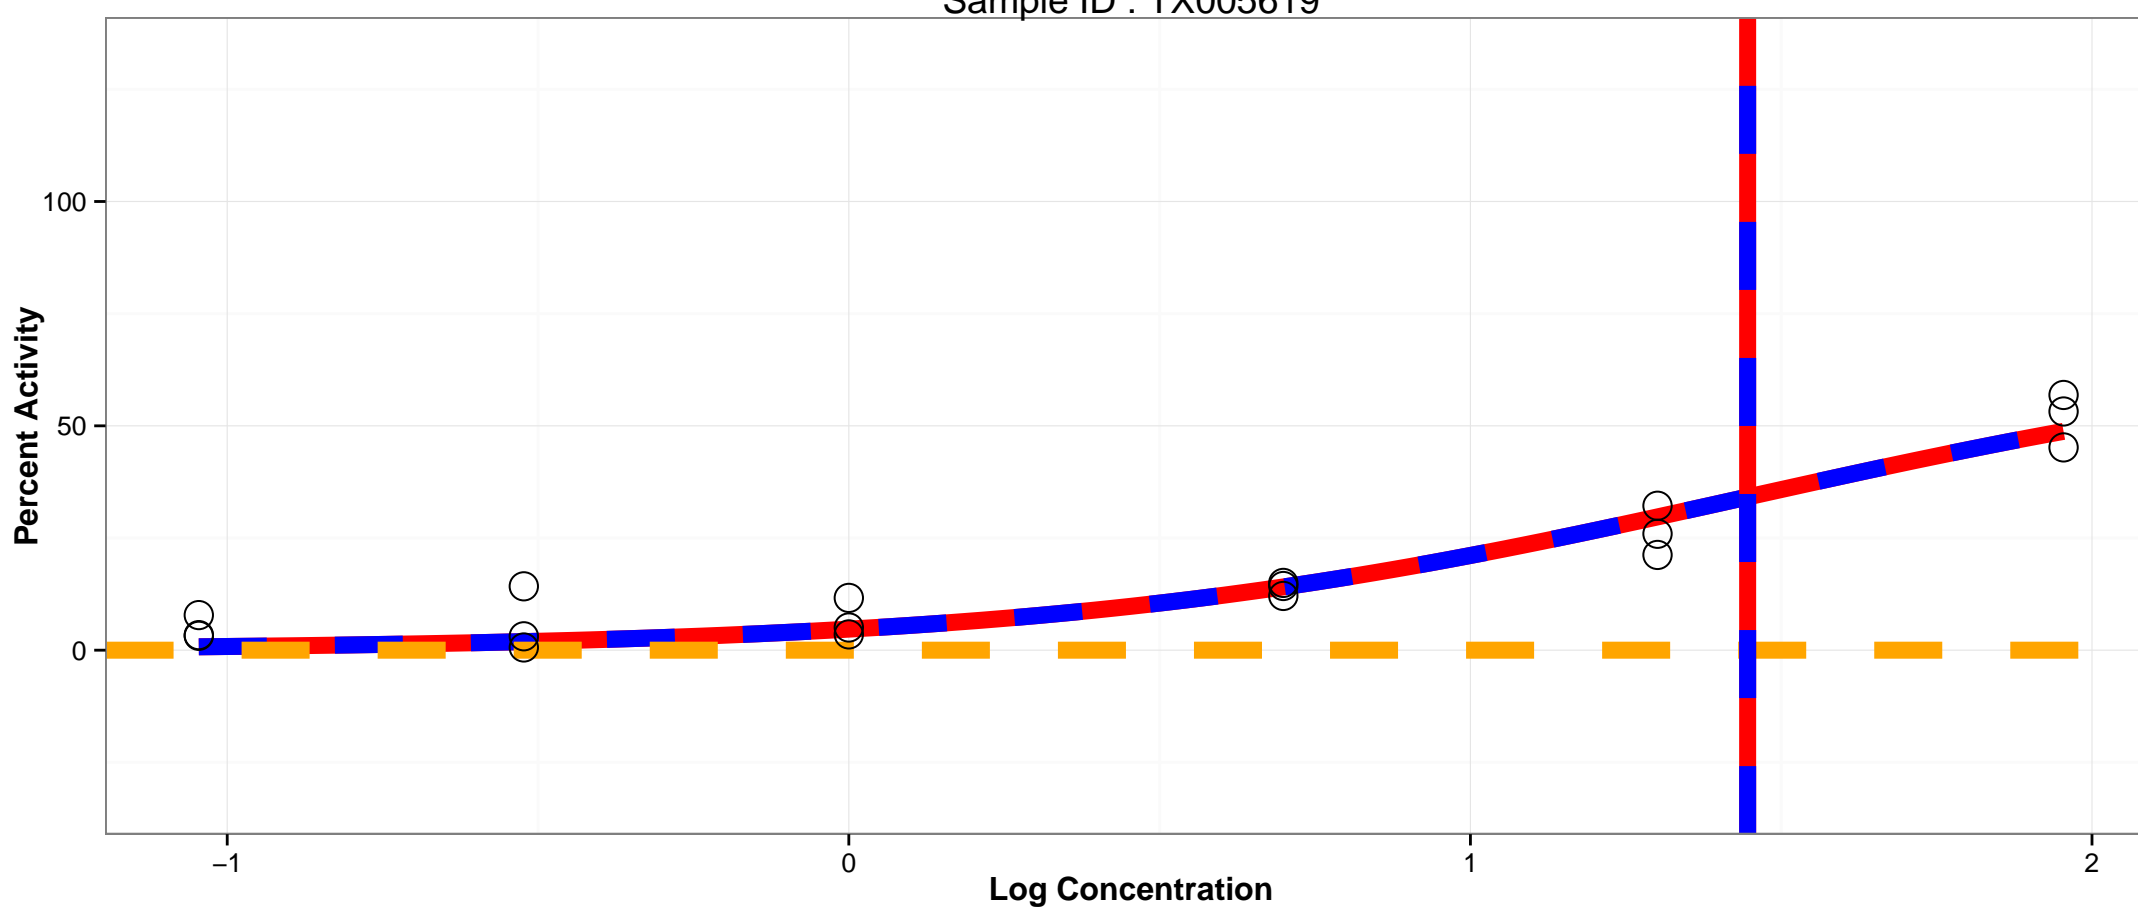

HILL MODEL

|     | tp   | ga    | gw    |
|-----|------|-------|-------|
| val | 68.3 | 1.45  | 0.783 |
| sd  | 12.9 | 0.238 | 0.144 |

GAIN-LOSS MODEL

|     | tp   | ga    | gw    | la   | lw   |
|-----|------|-------|-------|------|------|
| val | 68.3 | 1.45  | 0.783 | 3.69 | 5.36 |
| sd  | 12.9 | 0.238 | 0.144 | 2960 | 9110 |

|      | CNST   | HILL   | GNLS   |
|------|--------|--------|--------|
| AIC  | 168.43 | 117.71 | 121.71 |
| PROB | 0      | 0.88   | 0.12   |
| RMSE | 25.08  | 5.08   | 5.08   |

MAX\_MEAN : 51.8 MAX\_MED : 53.2 BMAD : 5.69  
COFF : 20 HIT-CALL : 1 FITC : 42 ACTP : 1  
FLAGS :

Assay ID 1509 (NHEERL\_HEK293T\_CellTiterGLO)  
Sample ID : TX005619

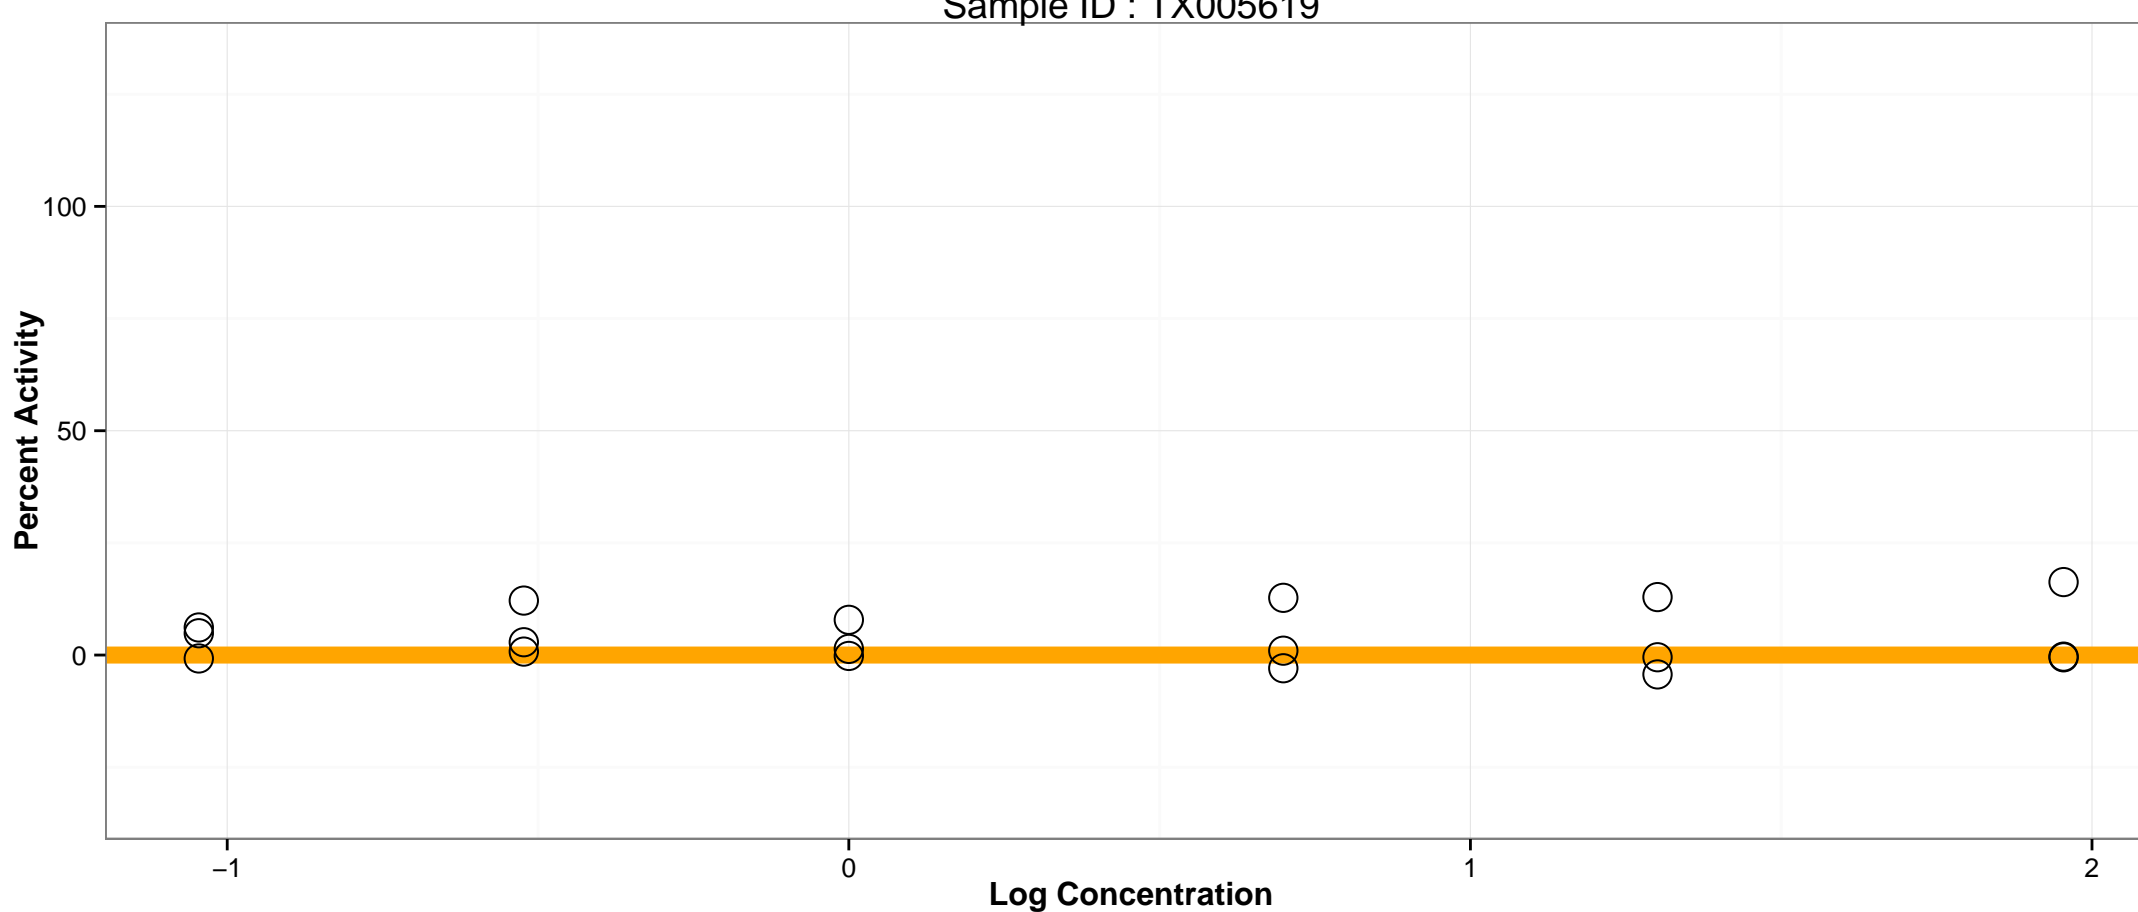

HILL MODEL

HILL MODEL: Not applicable

GAIN-LOSS MODEL

GNLS MODEL: Not applicable

|      | CNST   | HILL | GNLS |
|------|--------|------|------|
| AIC  | 122.94 | NA   | NA   |
| PROB | 1      | NA   | NA   |
| RMSE | 7.1    | NA   | NA   |

MAX\_MEAN : 5.27 MAX\_MED : 4.88 BMAD : 5.54  
COFF : 20 HIT-CALL : 0 FITC : 4 ACTP : 0  
FLAGS :

Assay ID 1848 (NHEERL\_Quantilum\_inhib\_2\_dn)  
Sample ID : TX005619

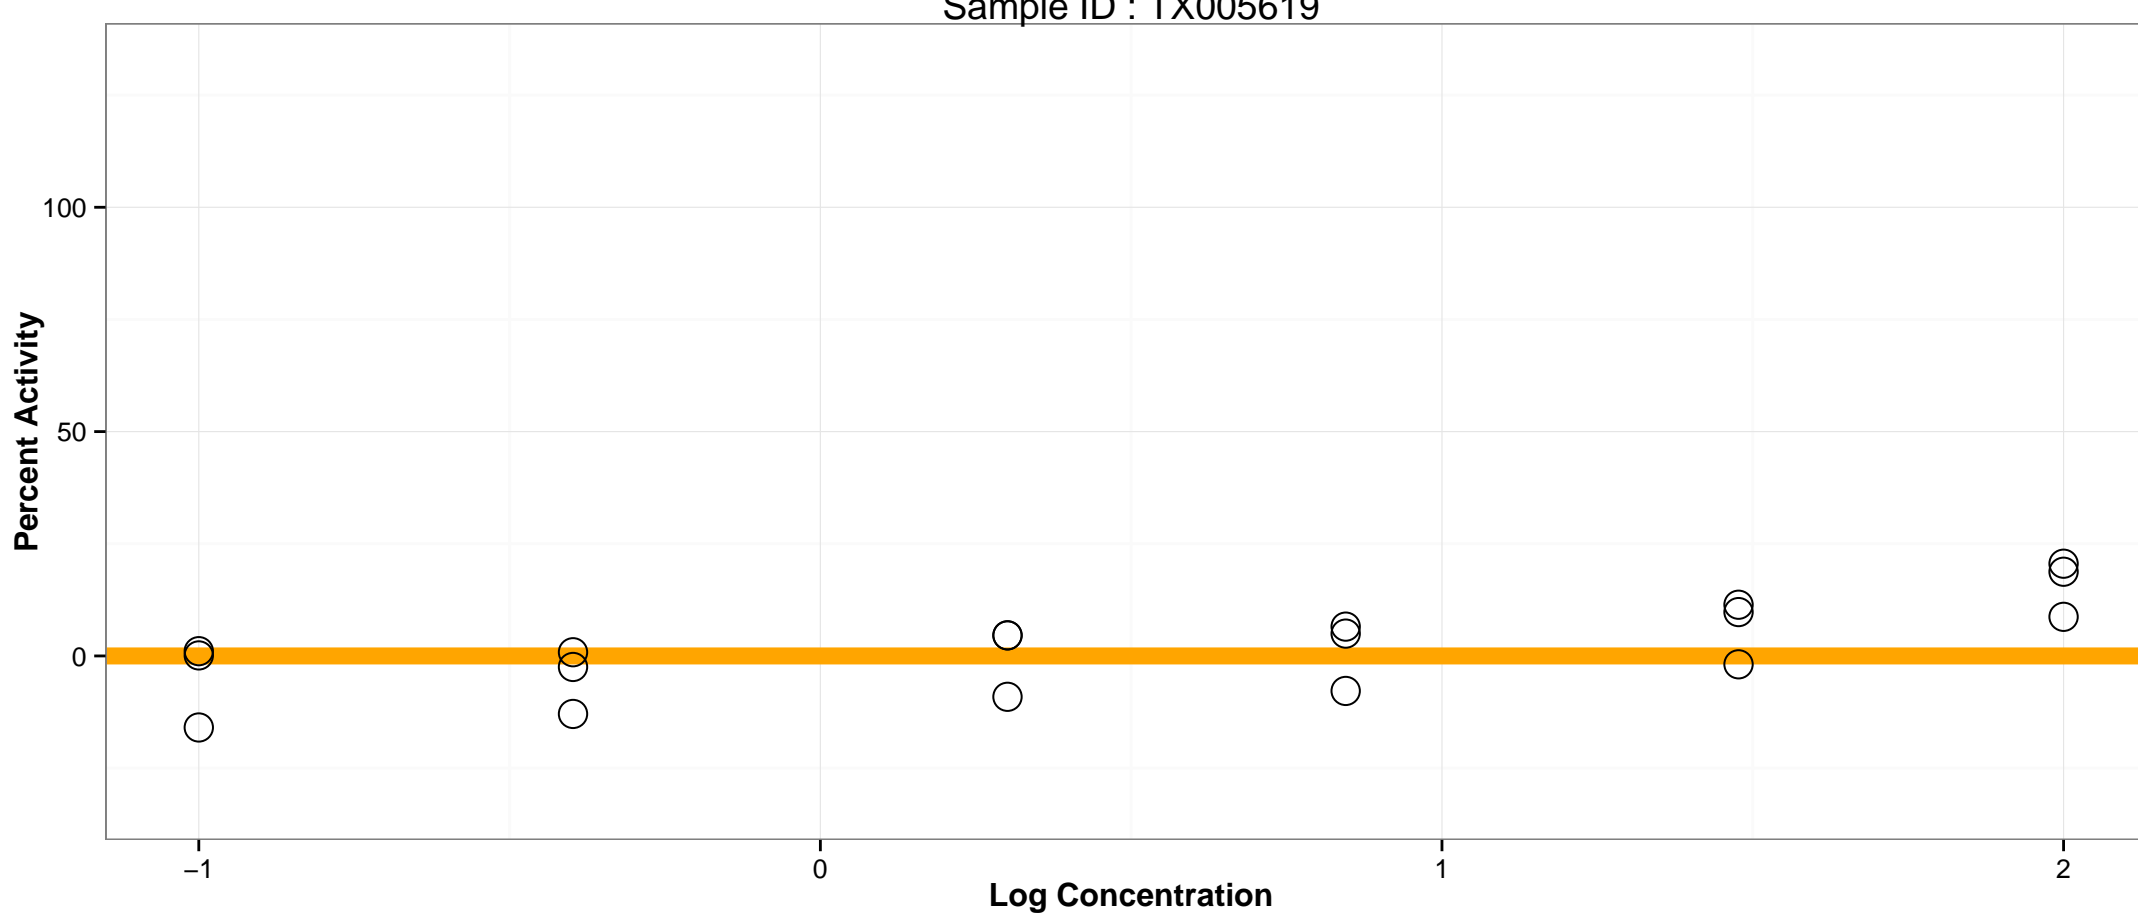

HILL MODEL

HILL MODEL: Not applicable

GAIN-LOSS MODEL

GNLS MODEL: Not applicable

|      | CNST   | HILL | GNLS |
|------|--------|------|------|
| AIC  | 136.95 | NA   | NA   |
| PROB | 1      | NA   | NA   |
| RMSE | 9.9    | NA   | NA   |

MAX\_MEAN : 16 MAX\_MED : 18.8 BMAD : 8.58  
COFF : 20 HIT-CALL : 0 FITC : 4 ACTP : 0  
FLAGS :

Chemical : Azathioprine  
CAS : 446-86-6

Assay ID 1508 (NHEERL\_TPO\_AUR\_dn)  
Sample ID : TX005739

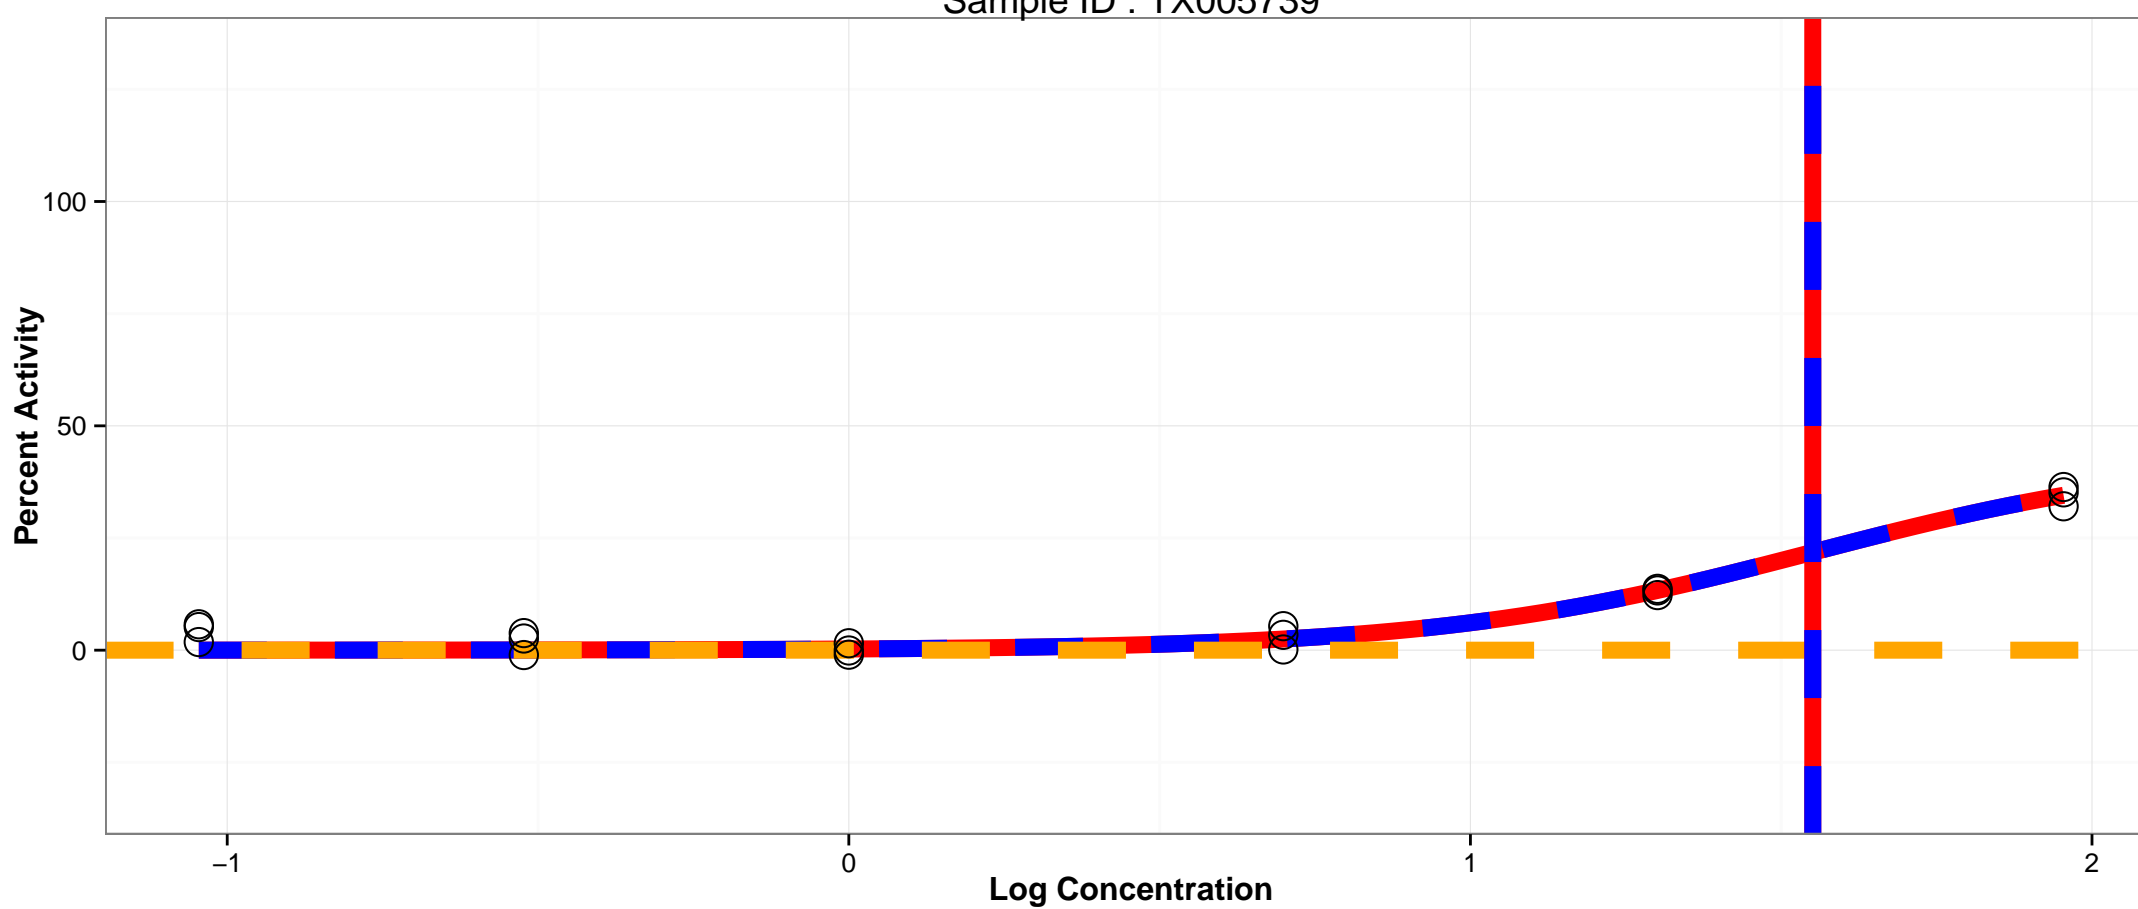

HILL MODEL

|     | tp   | ga    | gw    |
|-----|------|-------|-------|
| val | 43.6 | 1.55  | 1.43  |
| sd  | 8.98 | 0.171 | 0.436 |

GAIN-LOSS MODEL

|     | tp   | ga    | gw    | la    | lw     |
|-----|------|-------|-------|-------|--------|
| val | 43.6 | 1.55  | 1.43  | 3.22  | 8.54   |
| sd  | 8.98 | 0.171 | 0.436 | 20600 | 140000 |

|      | CNST   | HILL  | GNLS  |
|------|--------|-------|-------|
| AIC  | 147.82 | 92.87 | 96.87 |
| PROB | 0      | 0.88  | 0.12  |
| RMSE | 15.34  | 2.52  | 2.52  |

MAX\_MEAN : 34.5 MAX\_MED : 35.2 BMAD : 5.69  
COFF : 20 HIT-CALL : 1 FITC : 42 ACTP : 1  
FLAGS : 6

Assay ID 1509 (NHEERL\_HEK293T\_CellTiterGLO)  
Sample ID : TX005739

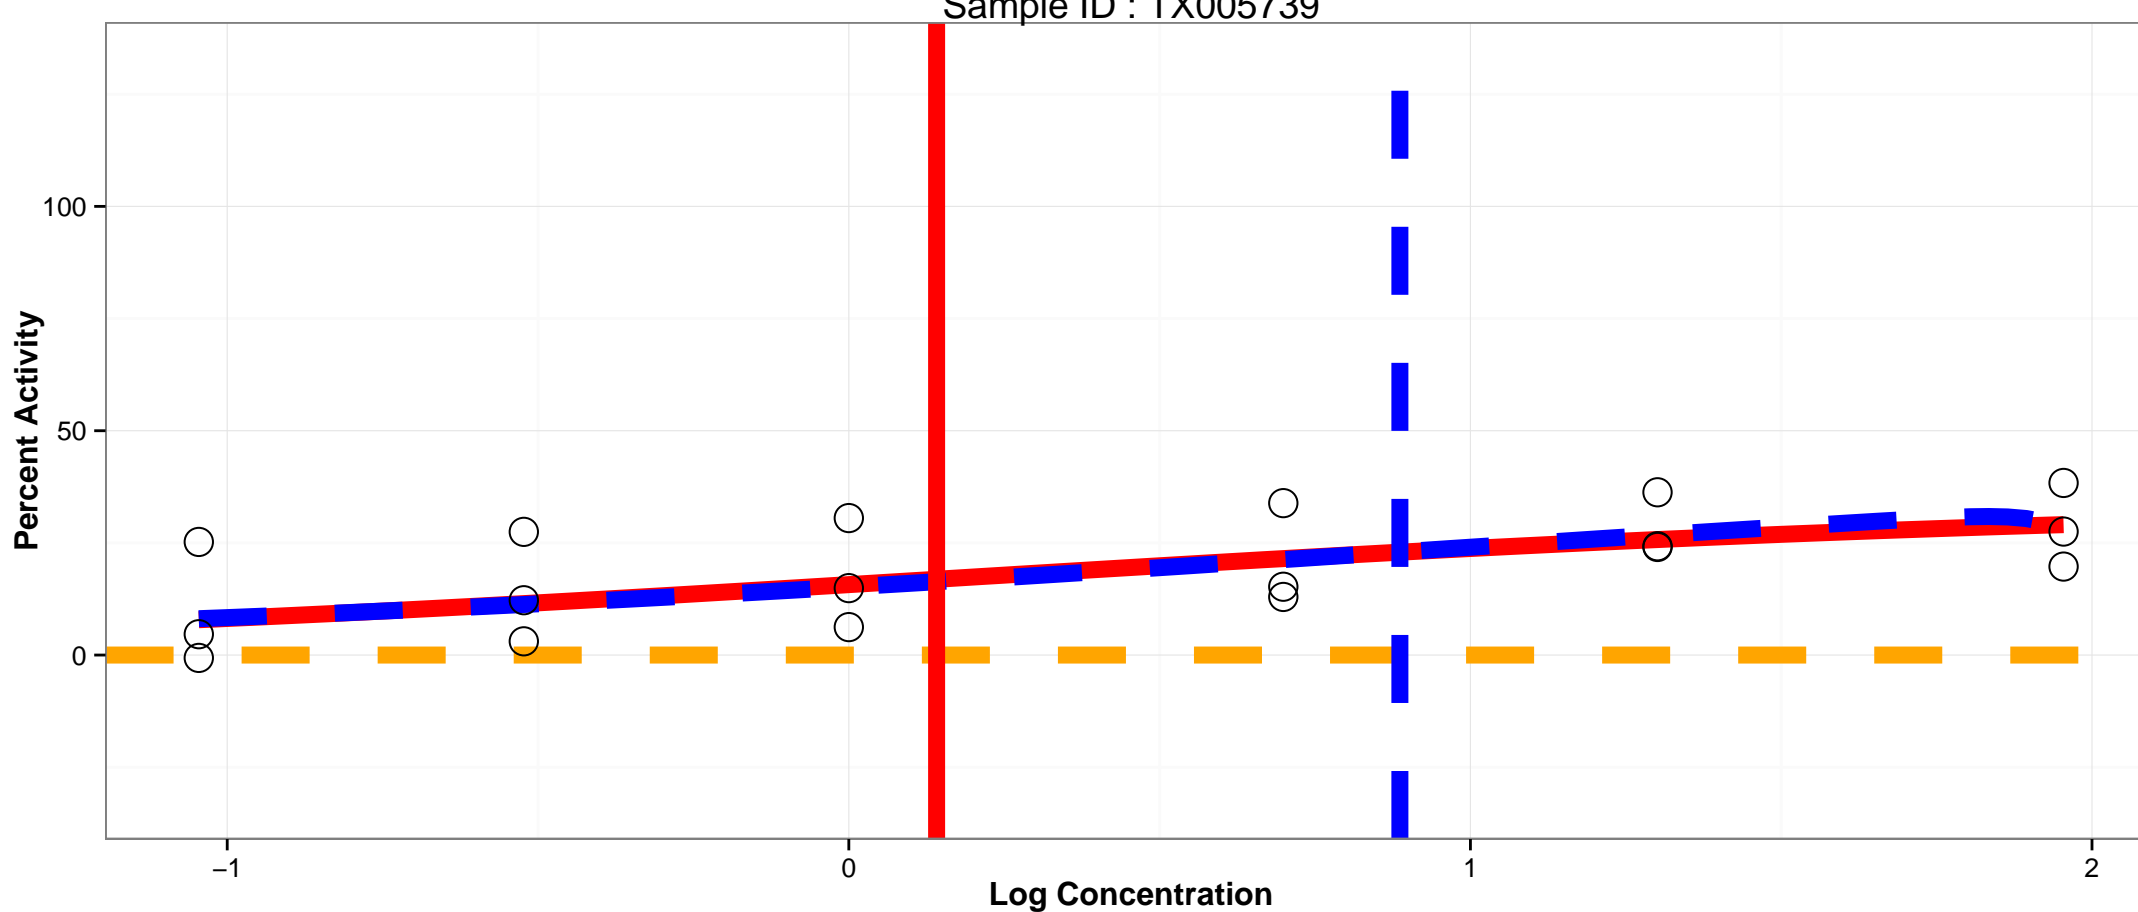

HILL MODEL

|     | tp   | ga    | gw    |
|-----|------|-------|-------|
| val | 33.8 | 0.141 | 0.436 |
| sd  | 18.2 | 1.38  | 0.414 |

GAIN-LOSS MODEL

|     | tp | ga    | gw    | la   | lw   |
|-----|----|-------|-------|------|------|
| val | 46 | 0.887 | 0.347 | 2.05 | 8.49 |
| sd  | NA | NA    | NA    | NA   | NA   |

|      | CNST   | HILL   | GNLS  |
|------|--------|--------|-------|
| AIC  | 168.61 | 141.94 | 145.8 |
| PROB | 0      | 0.87   | 0.13  |
| RMSE | 22.88  | 9.36   | 9.34  |

MAX\_MEAN : 28.5 MAX\_MED : 27.5 BMAD : 5.54  
COFF : 20 HIT-CALL : 1 FITC : 42 ACTP : 1  
FLAGS :

Assay ID 1848 (NHEERL\_Quantilum\_inhib\_2\_dn)  
Sample ID : TX005739

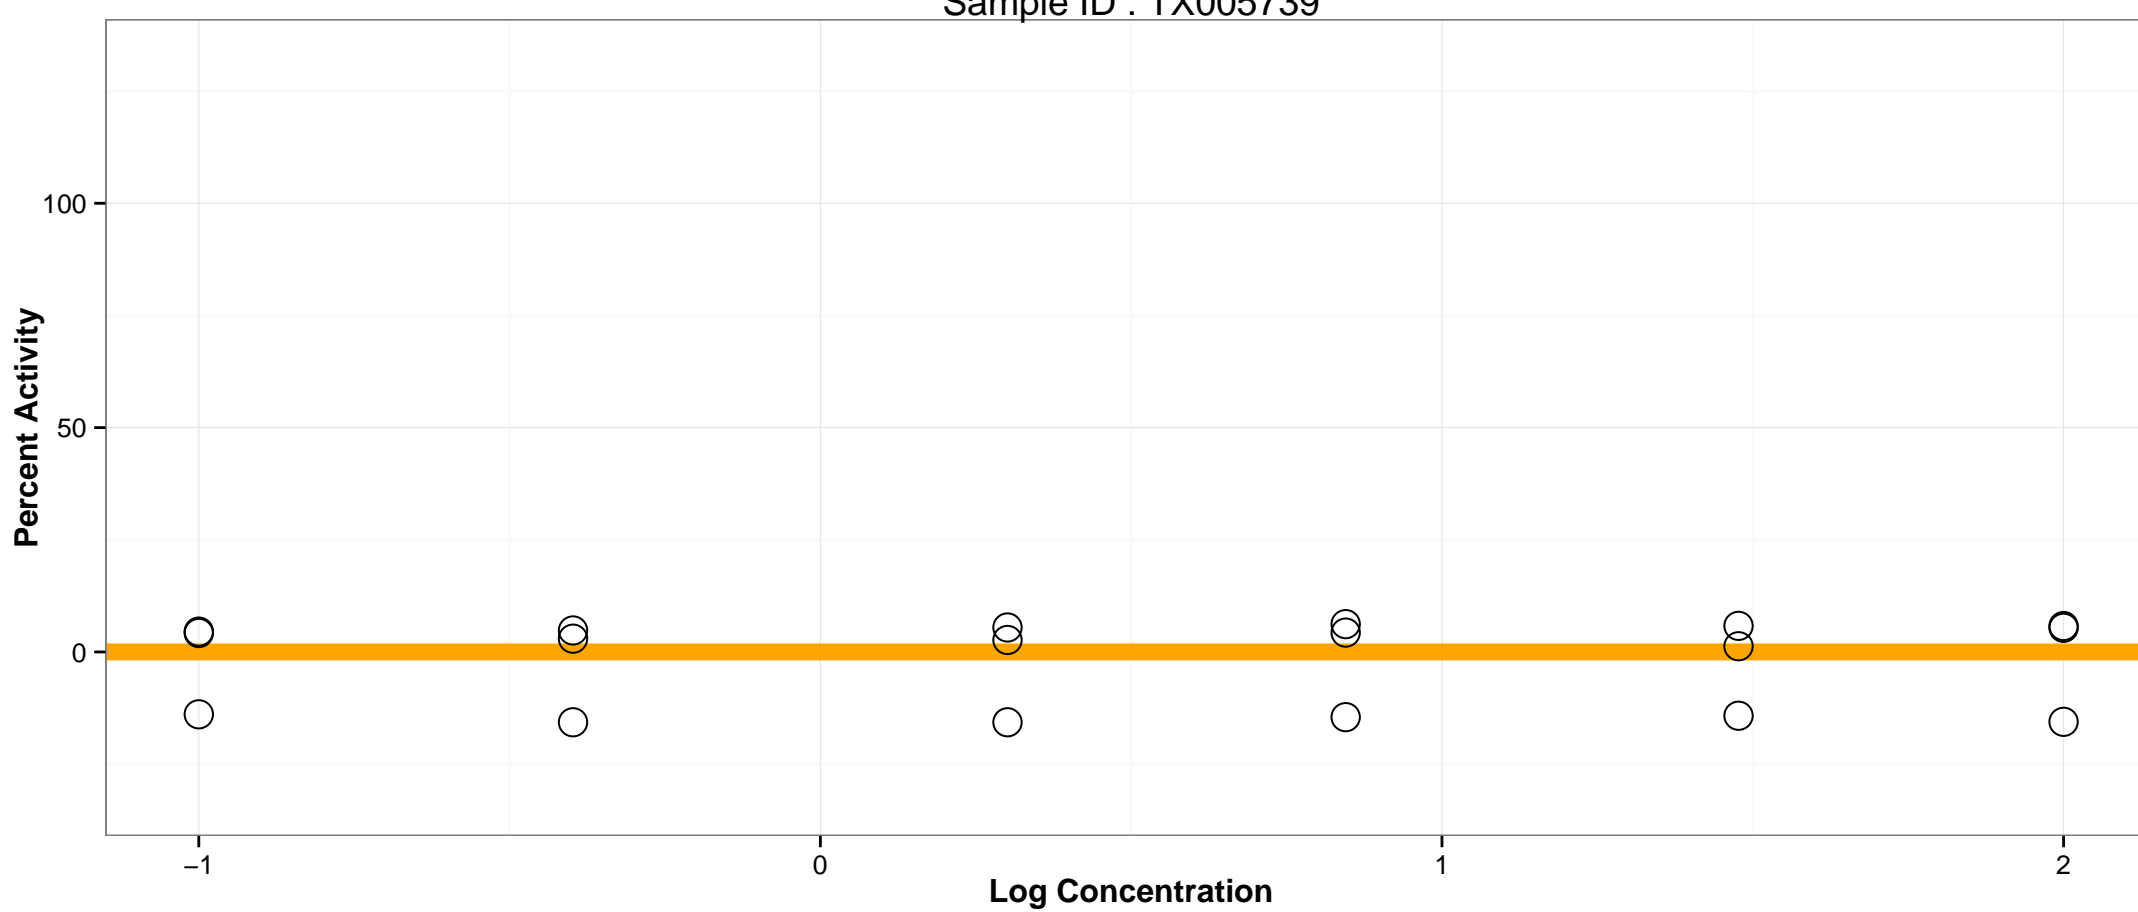

HILL MODEL

HILL MODEL: Not applicable

GAIN-LOSS MODEL

GNLS MODEL: Not applicable

|      | CNST  | HILL | GNLS |
|------|-------|------|------|
| AIC  | 135.8 | NA   | NA   |
| PROB | 1     | NA   | NA   |
| RMSE | 9.43  | NA   | NA   |

MAX\_MEAN : -1.33 MAX\_MED : 5.39 BMAD : 8.58  
COFF : 20 HIT-CALL : 0 FITC : 4 ACTP : 0  
FLAGS :



Chemical : 17alpha-Ethinylestradiol  
CAS : 57-63-6

Assay ID 1508 (NHEERL\_TPO\_AUR\_dn)  
Sample ID : TX005798

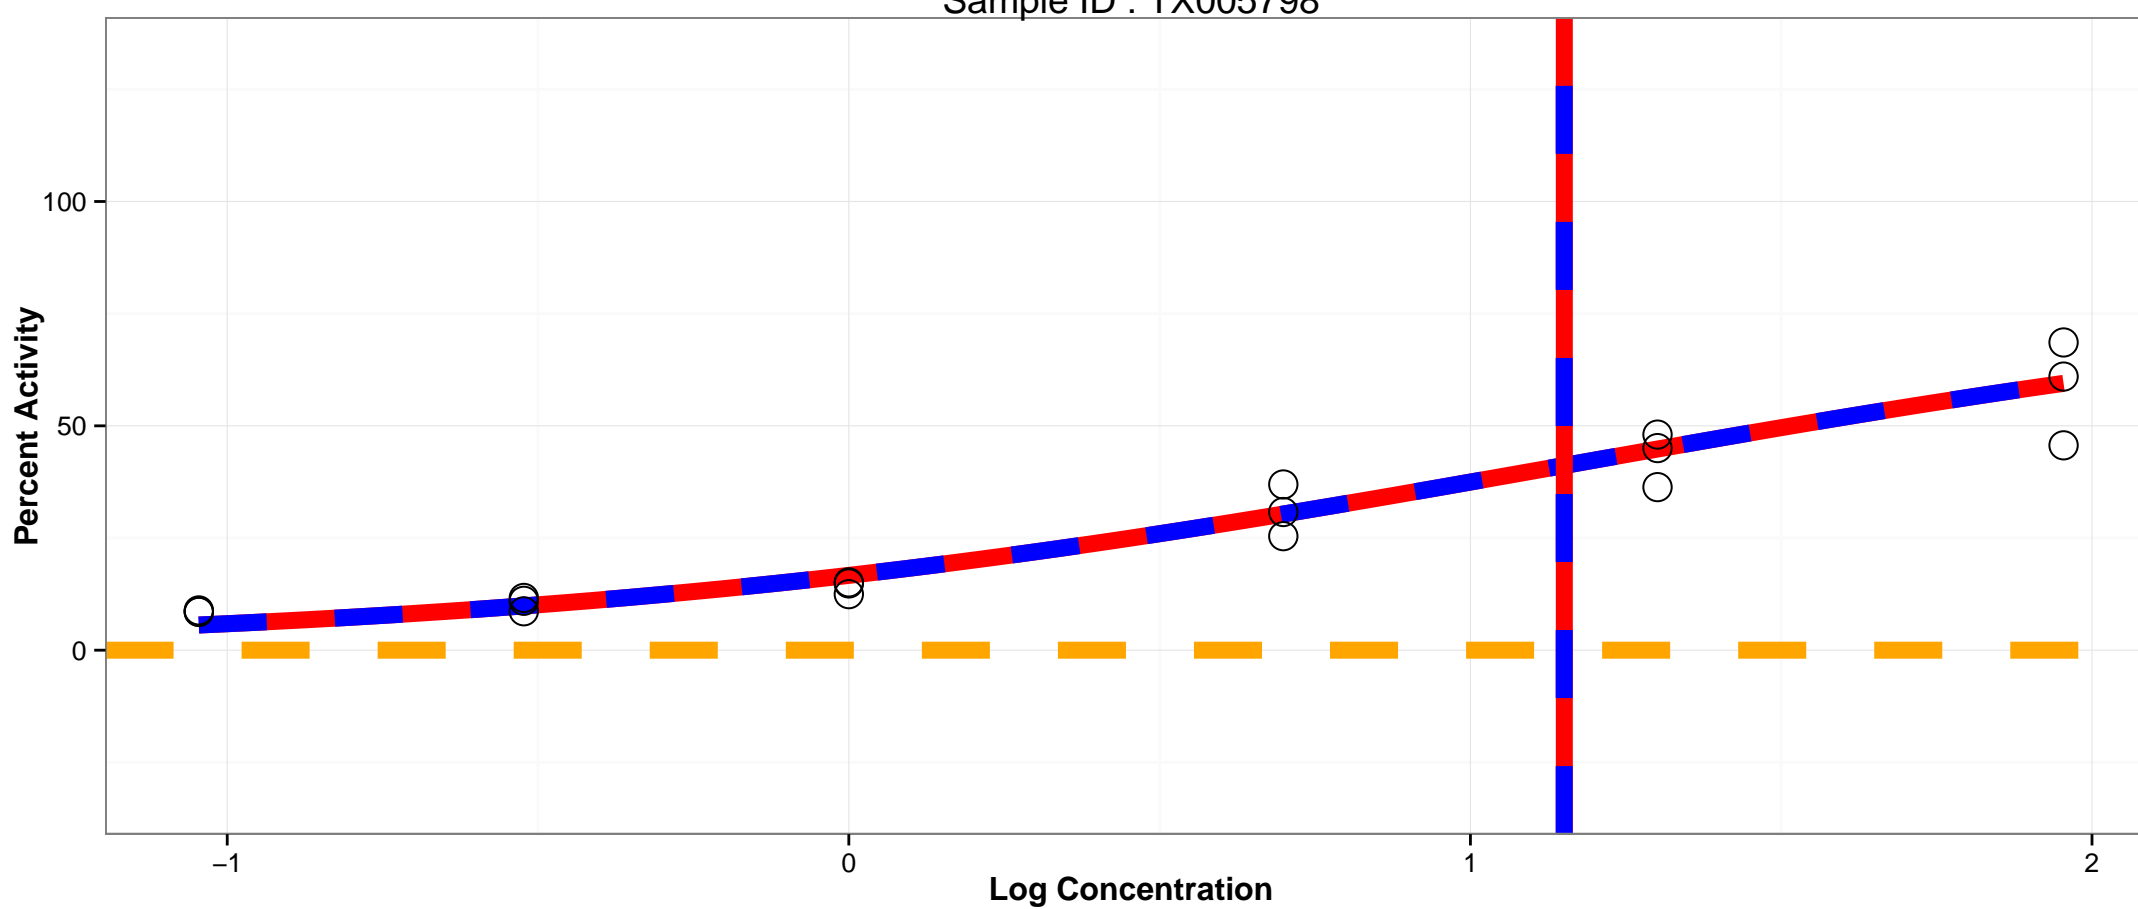

HILL MODEL

|     | tp   | ga    | gw     |
|-----|------|-------|--------|
| val | 82.3 | 1.15  | 0.517  |
| sd  | 16.5 | 0.367 | 0.0796 |

GAIN-LOSS MODEL

|     | tp   | ga   | gw    | la   | lw   |
|-----|------|------|-------|------|------|
| val | 82.3 | 1.15 | 0.517 | 3.56 | 17.7 |
| sd  | NA   | NA   | NA    | NA   | NA   |

|      | CNST   | HILL   | GNLS   |
|------|--------|--------|--------|
| AIC  | 181.19 | 117.33 | 121.33 |
| PROB | 0      | 0.88   | 0.12   |
| RMSE | 33.58  | 5.18   | 5.18   |

MAX\_MEAN : 58.4 MAX\_MED : 61 BMAD : 5.69  
COFF : 20 HIT-CALL : 1 FITC : 42 ACTP : 1  
FLAGS :

Assay ID 1509 (NHEERL\_HEK293T\_CellTiterGLO)  
Sample ID : TX005798

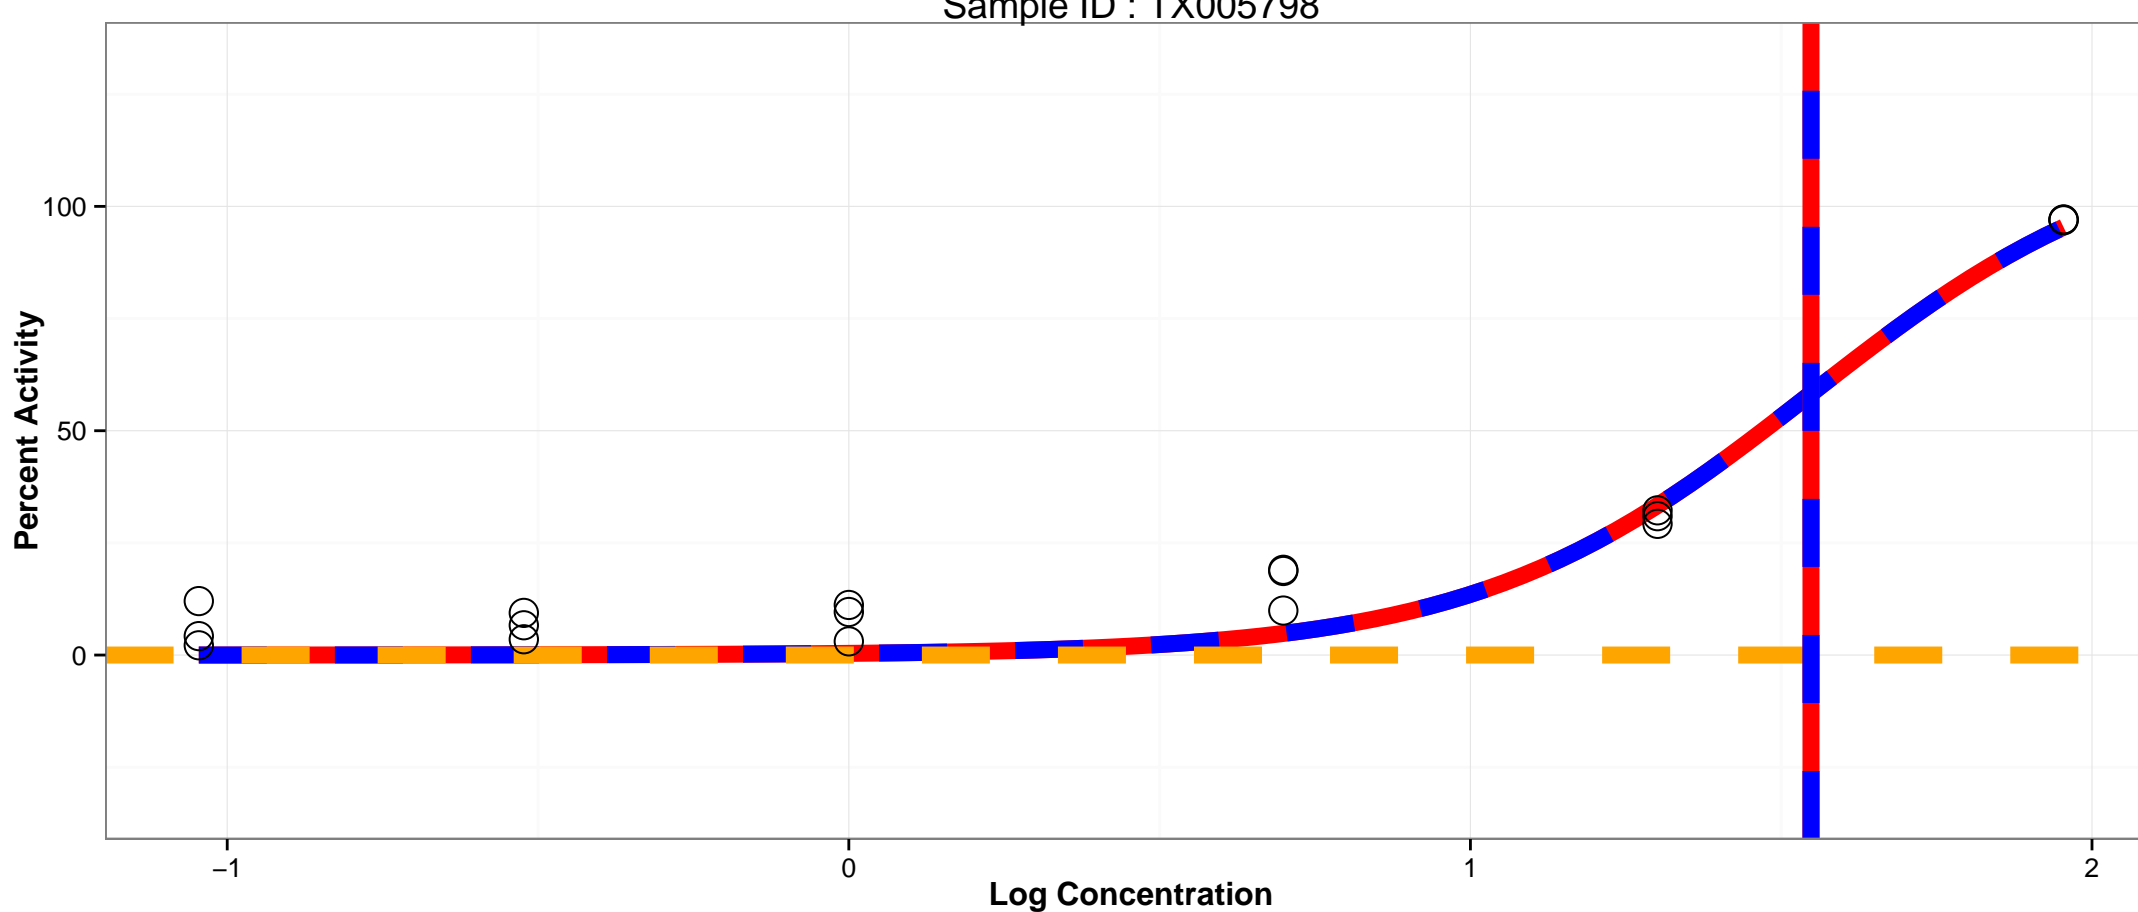

HILL MODEL

|     | tp   | ga    | gw    |
|-----|------|-------|-------|
| val | 117  | 1.55  | 1.61  |
| sd  | 22.5 | 0.145 | 0.588 |

GAIN-LOSS MODEL

|     | tp  | ga   | gw   | la   | lw   |
|-----|-----|------|------|------|------|
| val | 117 | 1.55 | 1.61 | 3.26 | 12.4 |
| sd  | NA  | NA   | NA   | NA   | NA   |

|      | CNST   | HILL   | GNLS   |
|------|--------|--------|--------|
| AIC  | 184.02 | 132.21 | 136.21 |
| PROB | 0      | 0.88   | 0.12   |
| RMSE | 42.46  | 7.36   | 7.36   |

MAX\_MEAN : 97 MAX\_MED : 97 BMAD : 5.54  
COFF : 20 HIT-CALL : 1 FITC : 42 ACTP : 1  
FLAGS :

Assay ID 1848 (NHEERL\_Quantilum\_inhib\_2\_dn)  
Sample ID : TX005798

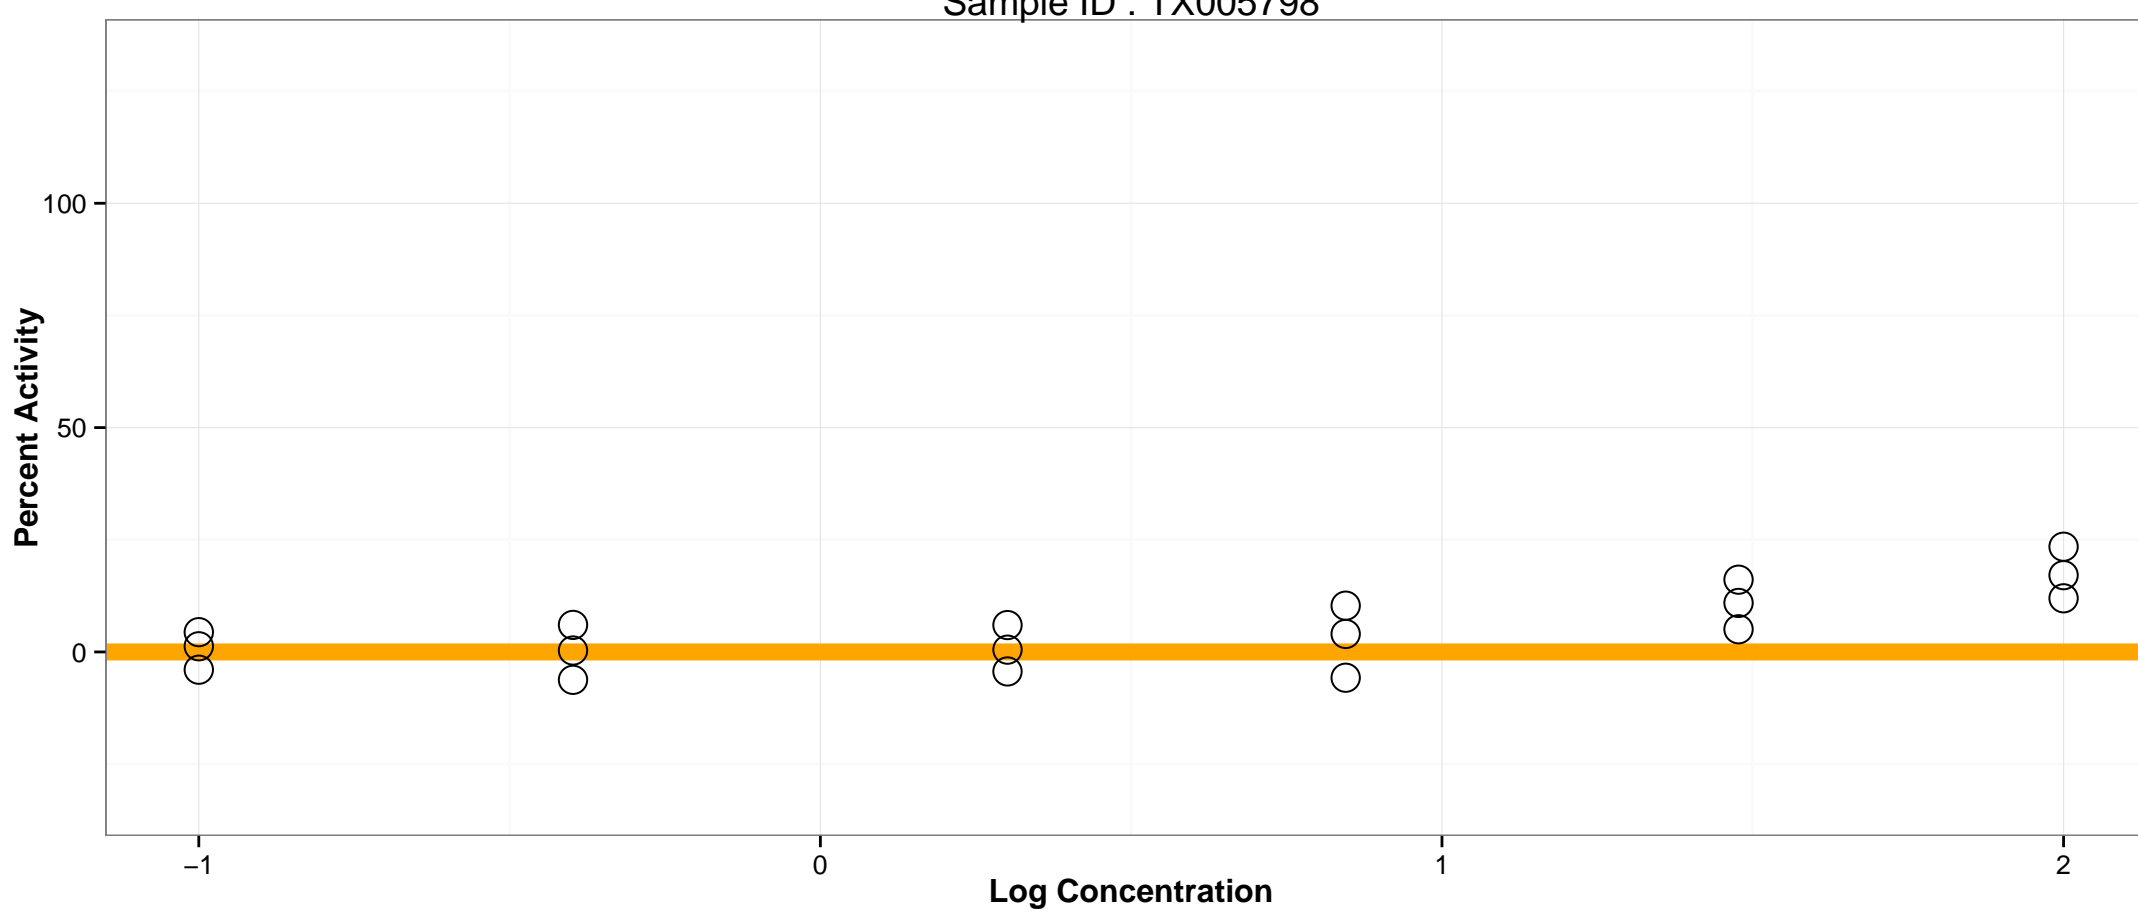

HILL MODEL

HILL MODEL: Not applicable

GAIN-LOSS MODEL

GNLS MODEL: Not applicable

|      | CNST   | HILL | GNLS |
|------|--------|------|------|
| AIC  | 135.57 | NA   | NA   |
| PROB | 1      | NA   | NA   |
| RMSE | 9.76   | NA   | NA   |

MAX\_MEAN : 17.5 MAX\_MED : 17.1 BMAD : 8.58  
COFF : 20 HIT-CALL : 0 FITC : 4 ACTP : 0  
FLAGS :

Chemical : Mifepristone  
CAS : 84371-65-3

Assay ID 1508 (NHEERL\_TPO\_AUR\_dn)  
Sample ID : TX005847

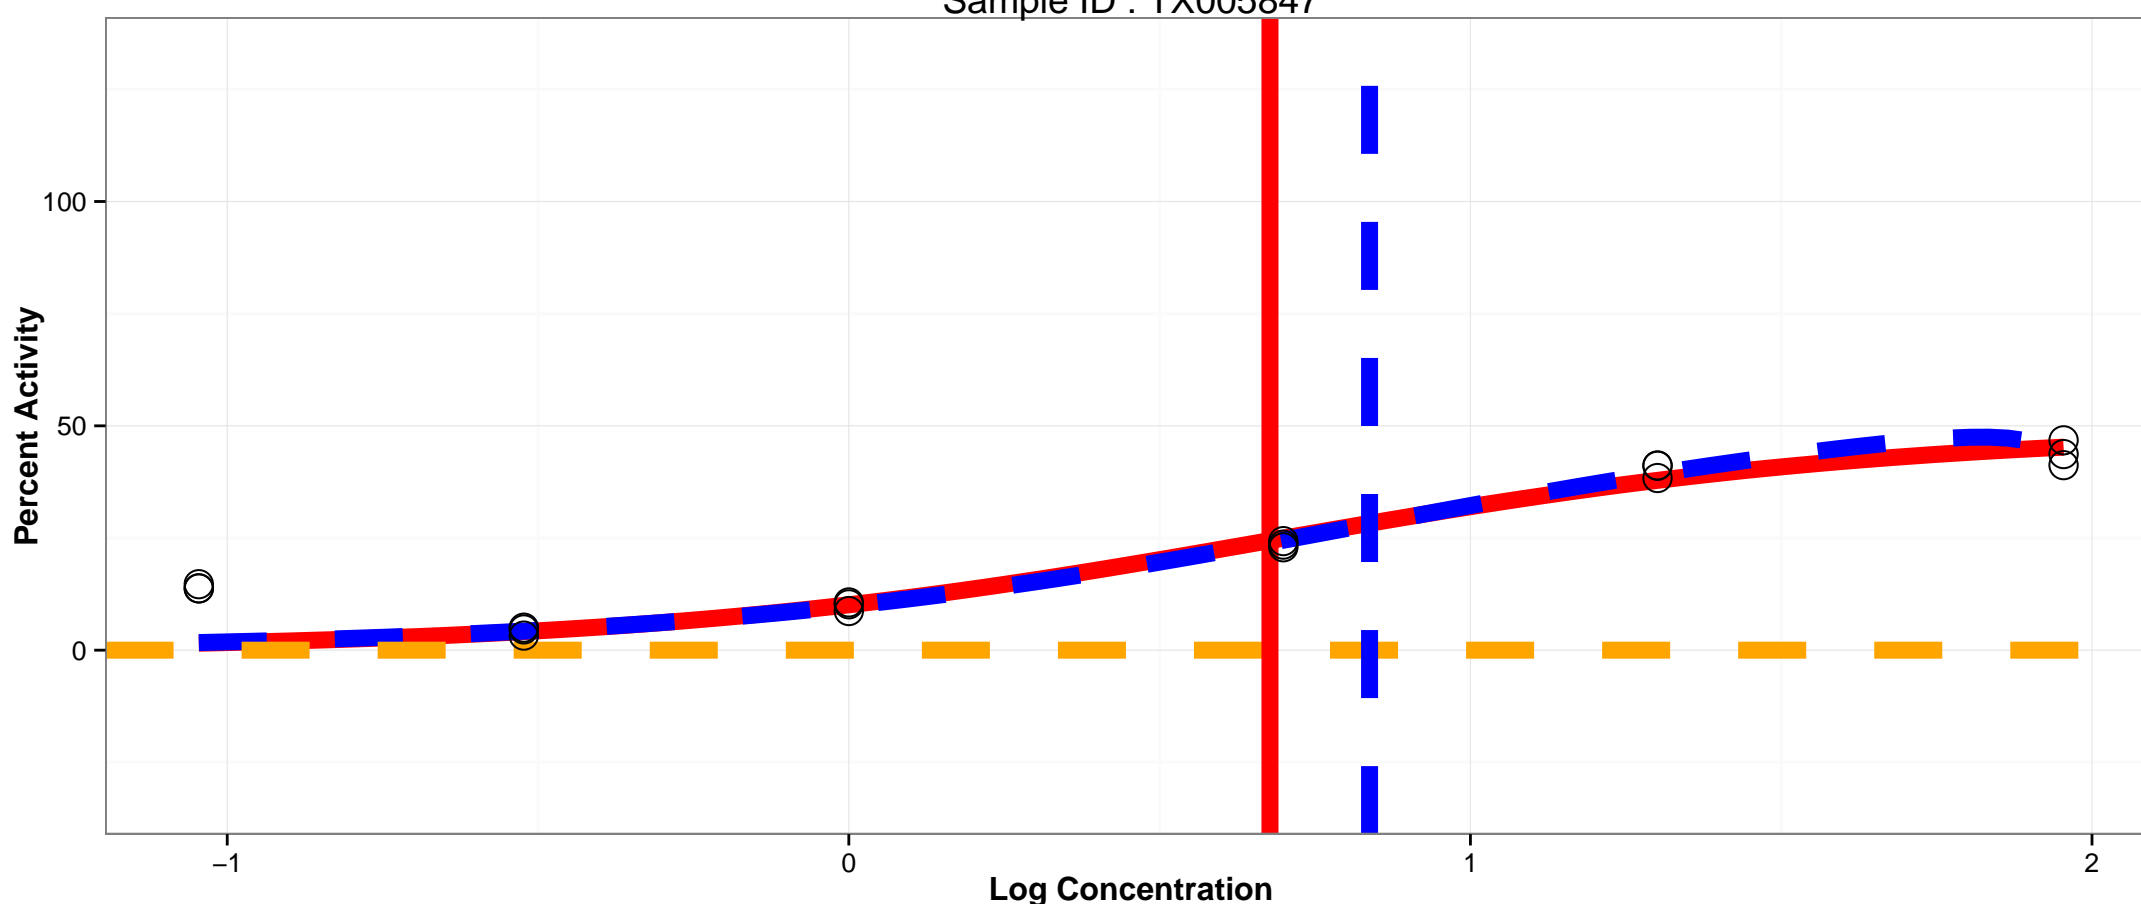

HILL MODEL

|     | tp   | ga    | gw    |
|-----|------|-------|-------|
| val | 48.8 | 0.678 | 0.861 |
| sd  | 3.3  | 0.103 | 0.128 |

GAIN-LOSS MODEL

|     | tp   | ga    | gw    | la   | lw   |
|-----|------|-------|-------|------|------|
| val | 56.1 | 0.838 | 0.799 | 2.08 | 6.98 |
| sd  | NA   | NA    | NA    | NA   | NA   |

|      | CNST   | HILL   | GNLS   |
|------|--------|--------|--------|
| AIC  | 174.06 | 114.61 | 115.26 |
| PROB | 0      | 0.58   | 0.42   |
| RMSE | 27.16  | 5.4    | 5.23   |

MAX\_MEAN : 43.9 MAX\_MED : 43.7 BMAD : 5.69  
COFF : 20 HIT-CALL : 1 FITC : 42 ACTP : 1  
FLAGS :

Assay ID 1509 (NHEERL\_HEK293T\_CellTiterGLO)  
Sample ID : TX005847

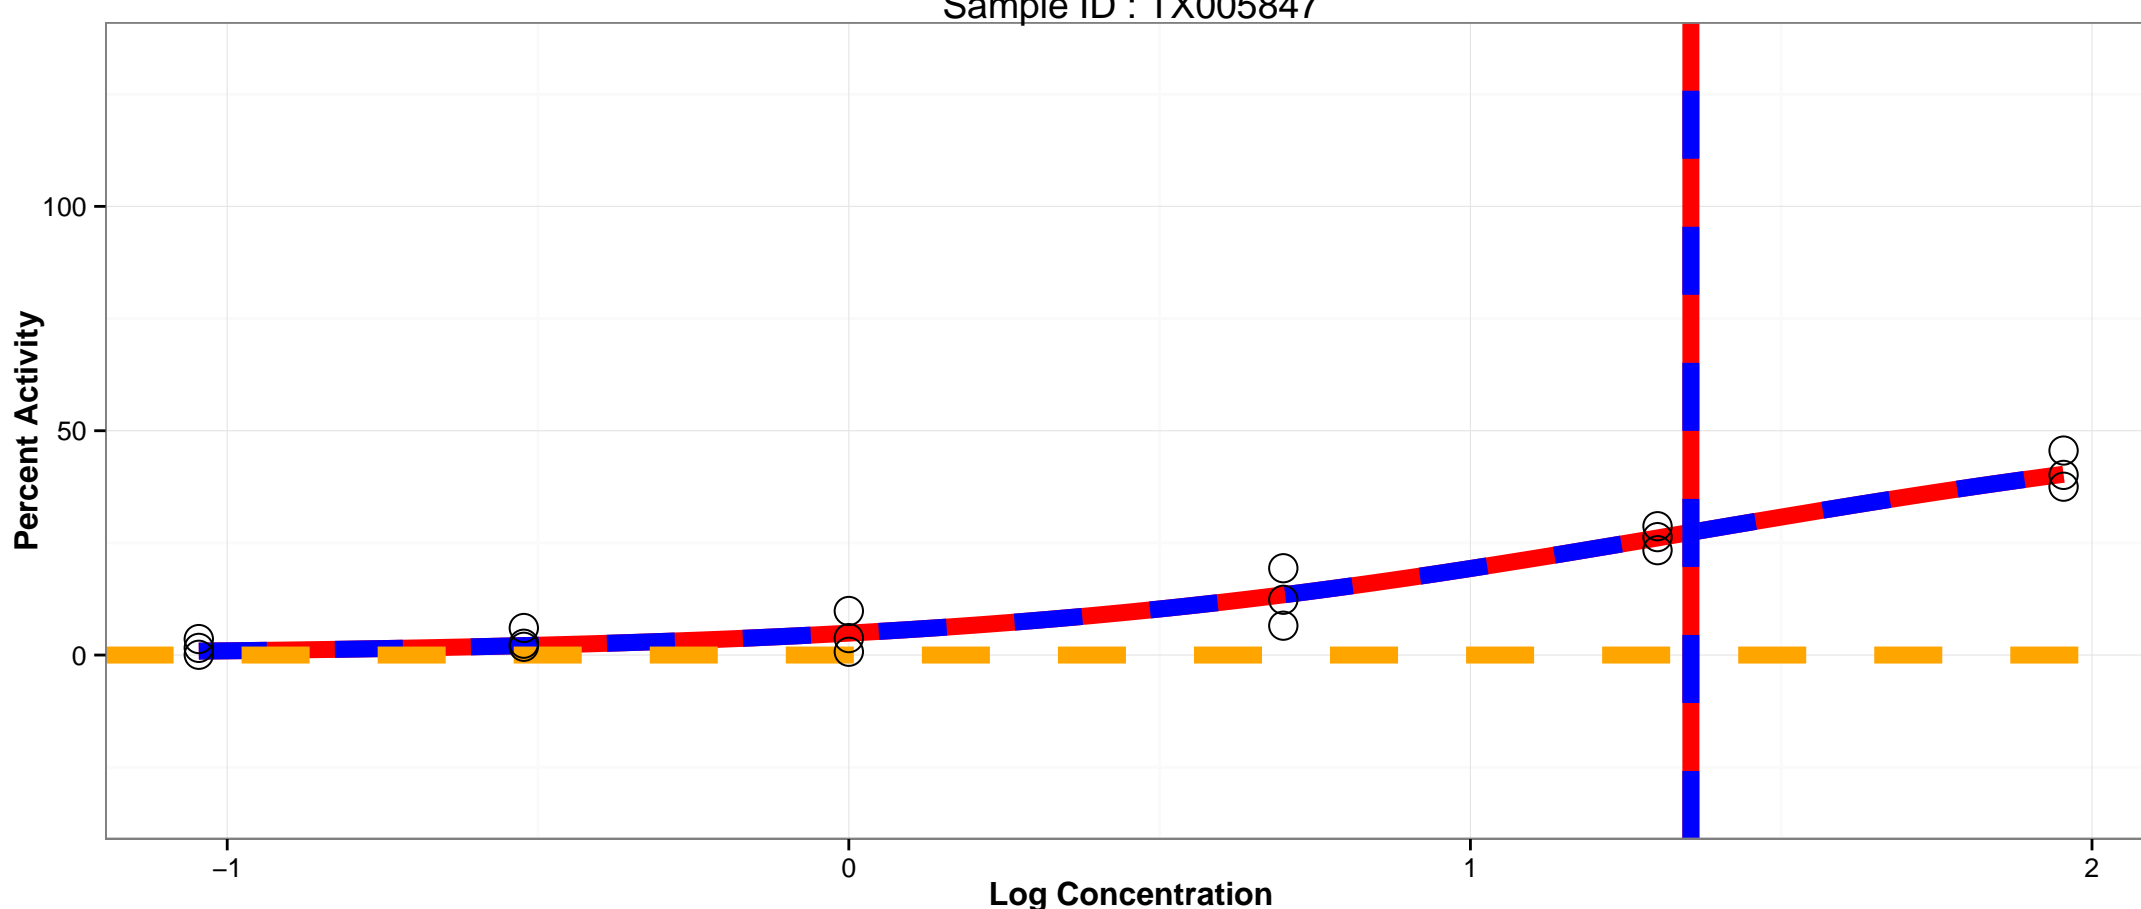

HILL MODEL

|     | tp   | ga    | gw    |
|-----|------|-------|-------|
| val | 54.7 | 1.35  | 0.744 |
| sd  | 10.5 | 0.266 | 0.159 |

GAIN-LOSS MODEL

|     | tp   | ga    | gw    | la   | lw   |
|-----|------|-------|-------|------|------|
| val | 54.7 | 1.35  | 0.745 | 3.05 | 6.93 |
| sd  | 10.5 | 0.266 | 0.159 | 678  | 4290 |

|      | CNST   | HILL  | GNLS  |
|------|--------|-------|-------|
| AIC  | 162.68 | 103.8 | 107.8 |
| PROB | 0      | 0.88  | 0.12  |
| RMSE | 20.96  | 3.34  | 3.34  |

MAX\_MEAN : 41.1 MAX\_MED : 40.2 BMAD : 5.54  
COFF : 20 HIT-CALL : 1 FITC : 42 ACTP : 1  
FLAGS :

Assay ID 1848 (NHEERL\_Quantilum\_inhib\_2\_dn)  
Sample ID : TX005847

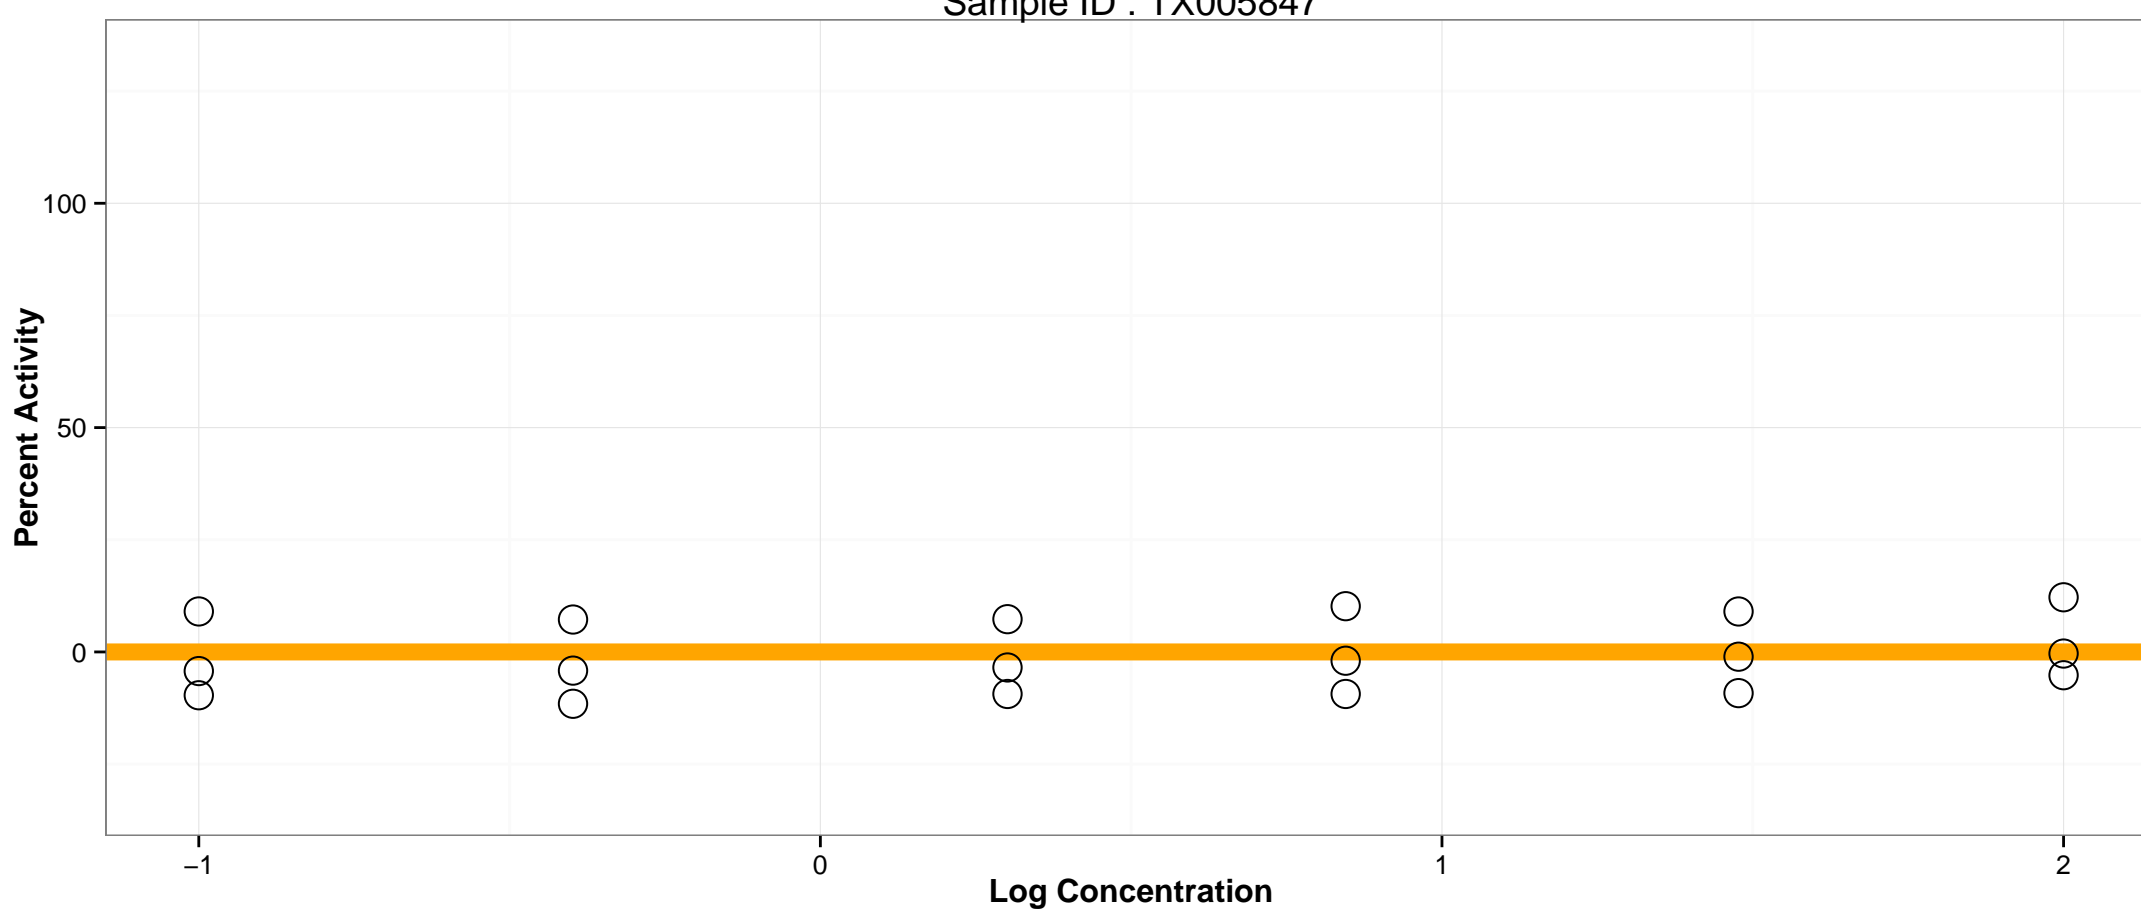

HILL MODEL

HILL MODEL: Not applicable

GAIN-LOSS MODEL

GNLS MODEL: Not applicable

|      | CNST   | HILL | GNLS |
|------|--------|------|------|
| AIC  | 130.09 | NA   | NA   |
| PROB | 1      | NA   | NA   |
| RMSE | 7.77   | NA   | NA   |

MAX\_MEAN : 2.22 MAX\_MED : -0.345 BMAD : 8.58  
COFF : 20 HIT-CALL : 0 FITC : 4 ACTP : 0  
FLAGS :

Chemical : Tolazamide  
CAS : 1156-19-0

Assay ID 1508 (NHEERL\_TPO\_AUR\_dn)  
Sample ID : TX005875

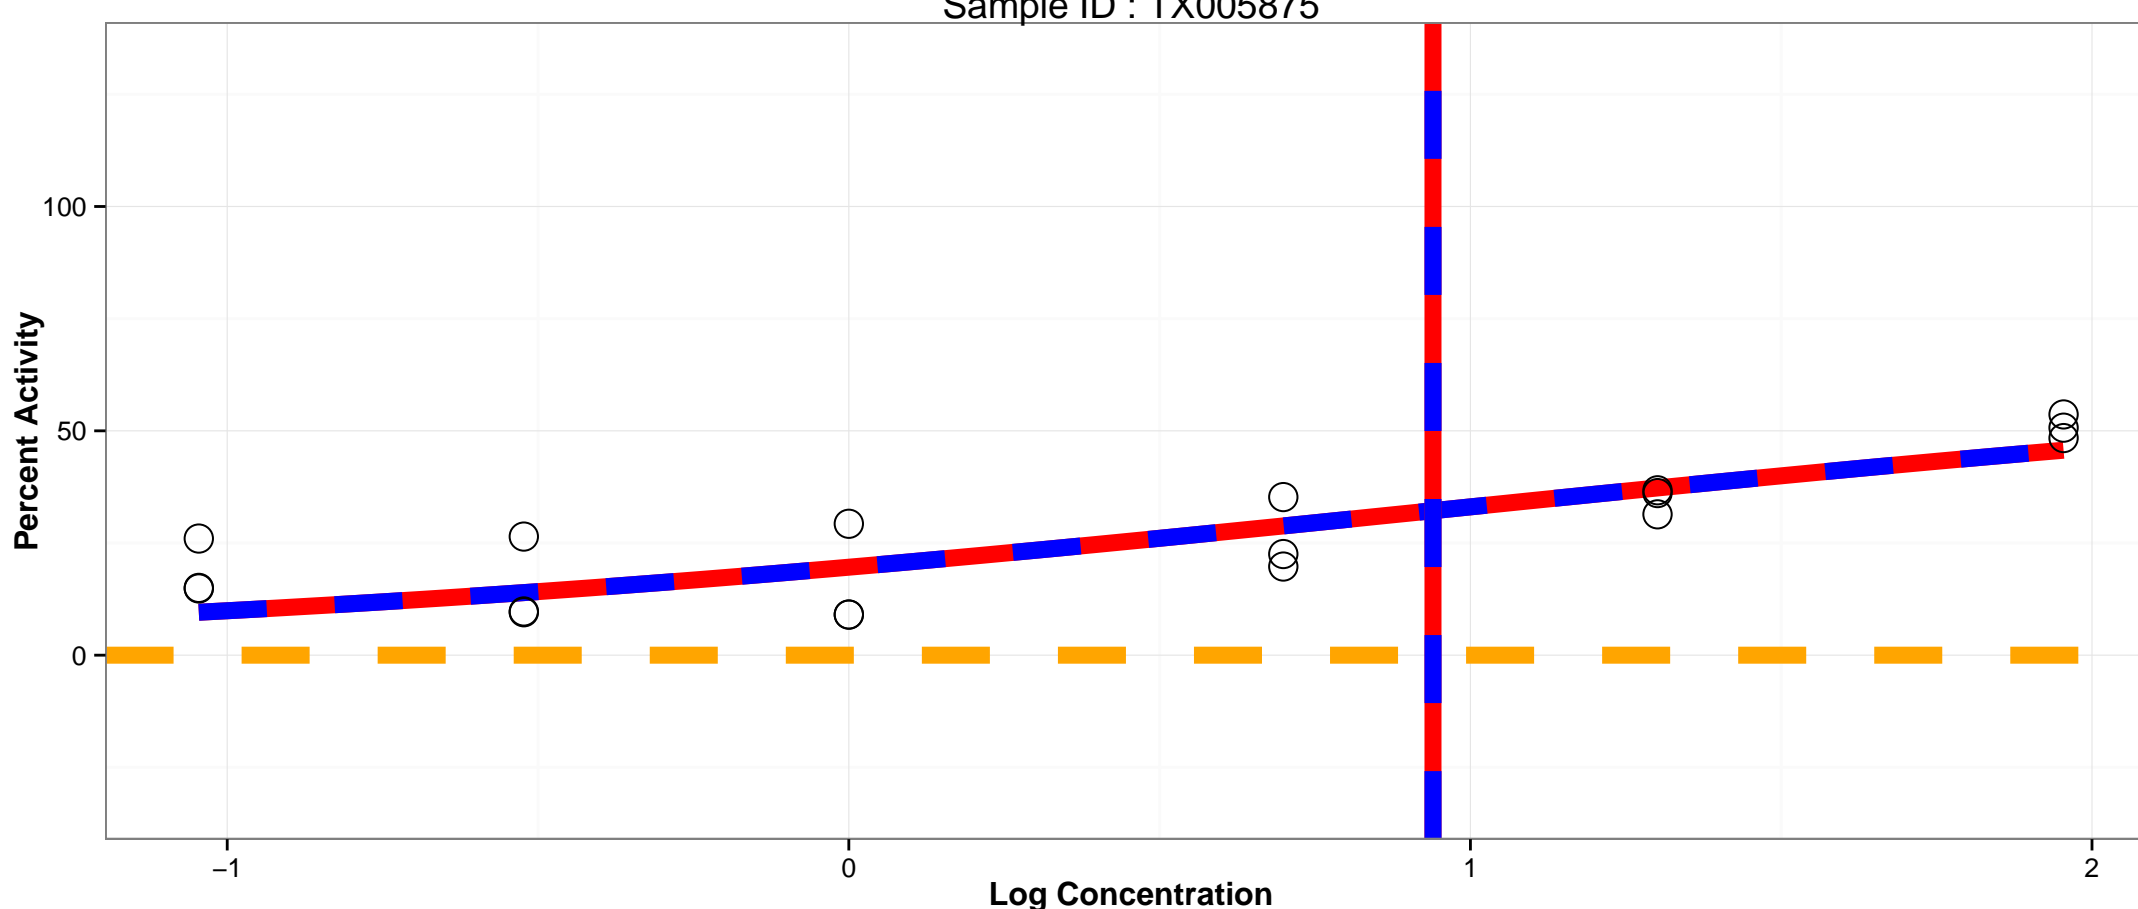

HILL MODEL

|     | tp   | ga    | gw    |
|-----|------|-------|-------|
| val | 64.4 | 0.94  | 0.382 |
| sd  | 16.5 | 0.658 | 0.103 |

GAIN-LOSS MODEL

|     | tp   | ga    | gw    | la   | lw    |
|-----|------|-------|-------|------|-------|
| val | 64.4 | 0.94  | 0.382 | 2.47 | 17.4  |
| sd  | 16.5 | 0.658 | 0.103 | 345  | 11400 |

|      | CNST   | HILL | GNLS |
|------|--------|------|------|
| AIC  | 178.65 | 136  | 140  |
| PROB | 0      | 0.88 | 0.12 |
| RMSE | 30.38  | 7.93 | 7.93 |

MAX\_MEAN : 50.9 MAX\_MED : 50.7 BMAD : 5.69  
COFF : 20 HIT-CALL : 1 FITC : 42 ACTP : 1  
FLAGS :

Assay ID 1509 (NHEERL\_HEK293T\_CellTiterGLO)  
Sample ID : TX005875

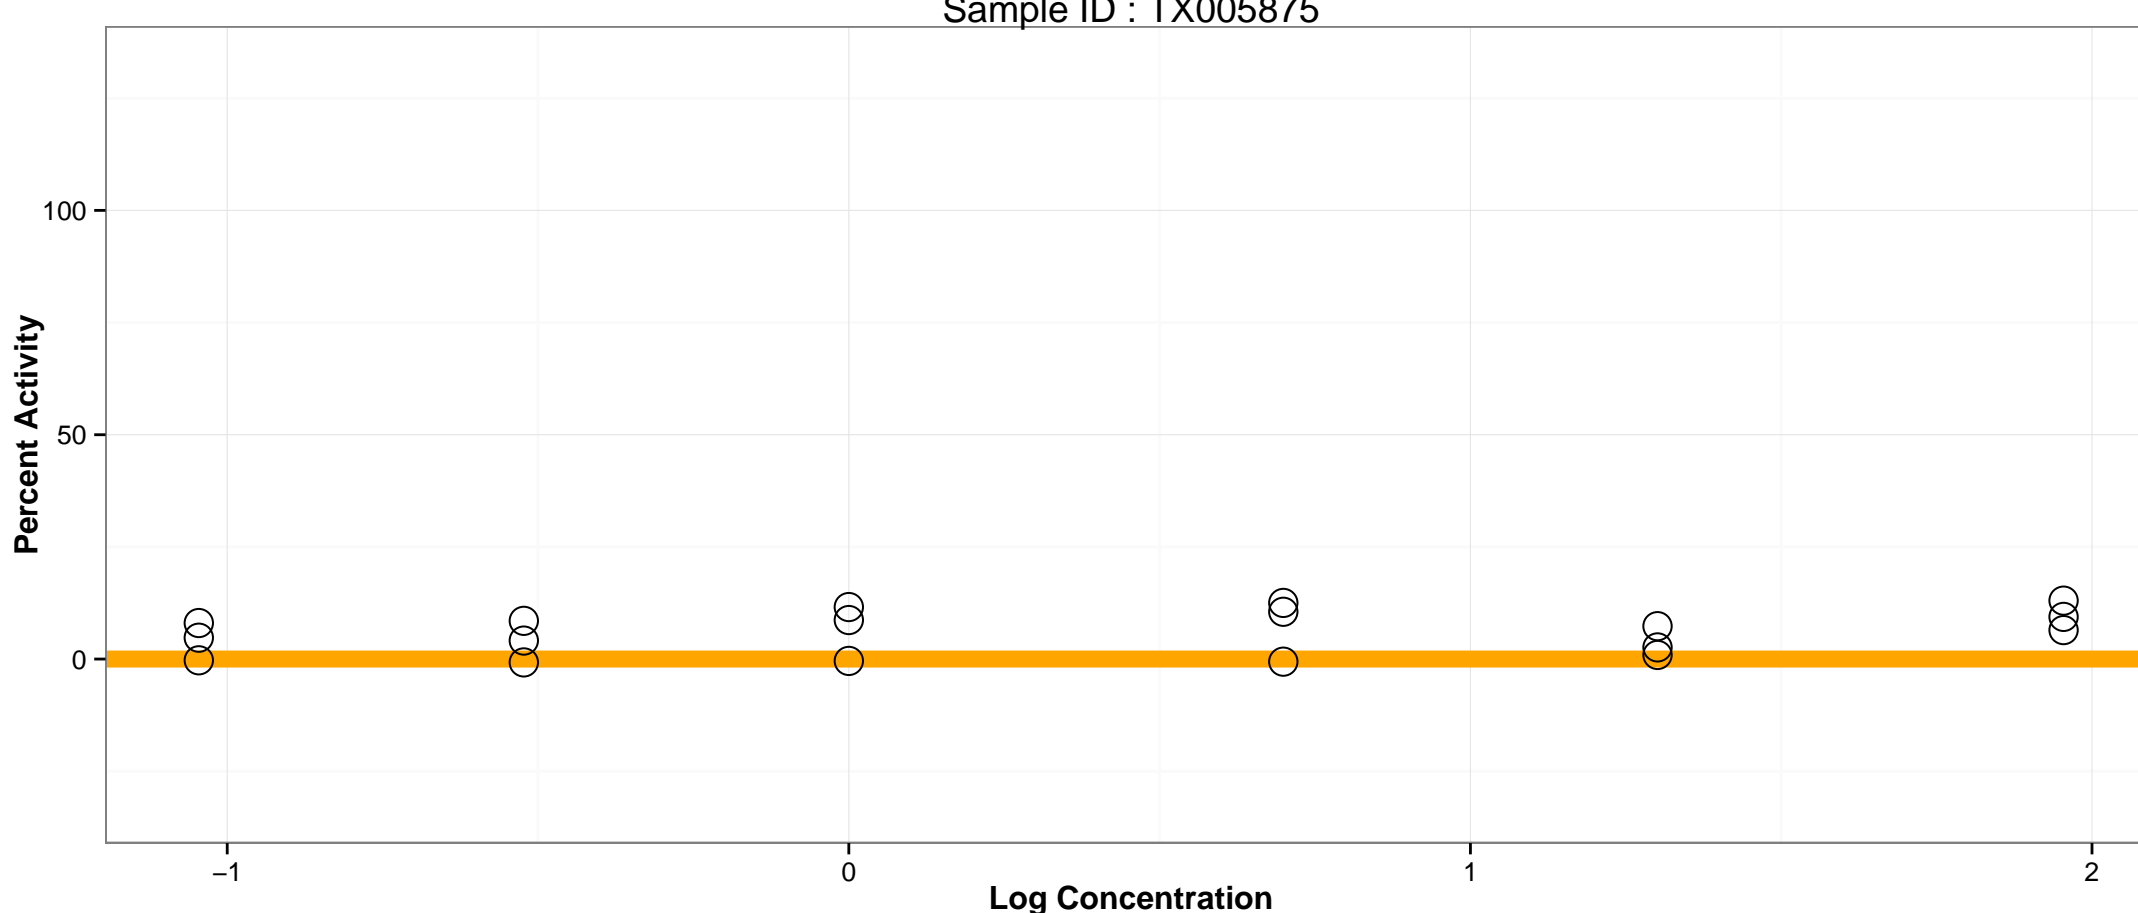

HILL MODEL

HILL MODEL: Not applicable

GAIN-LOSS MODEL

GNLS MODEL: Not applicable

|      | CNST   | HILL | GNLS |
|------|--------|------|------|
| AIC  | 128.12 | NA   | NA   |
| PROB | 1      | NA   | NA   |
| RMSE | 7.52   | NA   | NA   |

MAX\_MEAN : 9.64 MAX\_MED : 10.6 BMAD : 5.54  
COFF : 20 HIT-CALL : 0 FITC : 4 ACTP : 0  
FLAGS :

Assay ID 1848 (NHEERL\_Quantilum\_inhib\_2\_dn)  
Sample ID : TX005875

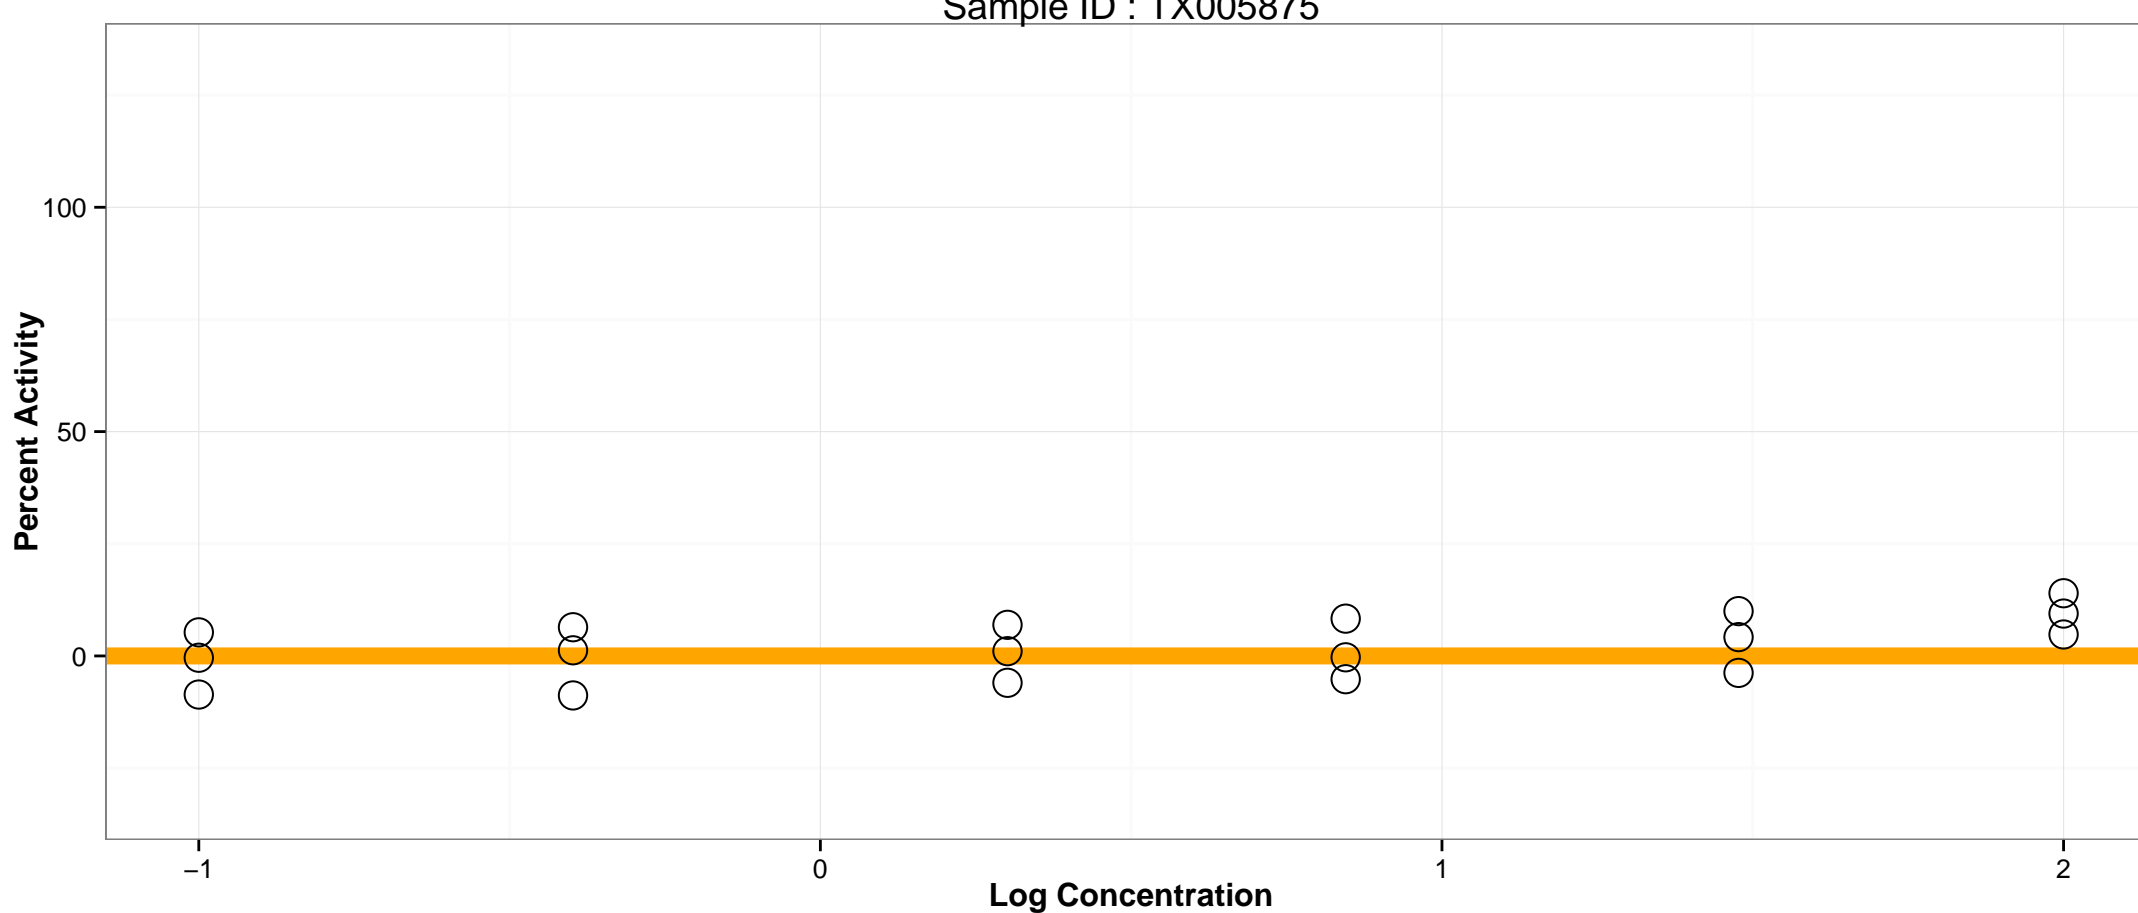

HILL MODEL

HILL MODEL: Not applicable

GAIN-LOSS MODEL

GNLS MODEL: Not applicable

|      | CNST   | HILL | GNLS |
|------|--------|------|------|
| AIC  | 124.76 | NA   | NA   |
| PROB | 1      | NA   | NA   |
| RMSE | 6.84   | NA   | NA   |

MAX\_MEAN : 9.41 MAX\_MED : 9.46 BMAD : 8.58  
COFF : 20 HIT-CALL : 0 FITC : 4 ACTP : 0  
FLAGS :

Chemical : 4,4'-Methylenebis(2-methylaniline)  
CAS : 838-88-0

Assay ID 1508 (NHEERL\_TPO\_AUR\_dn)  
Sample ID : TX005897

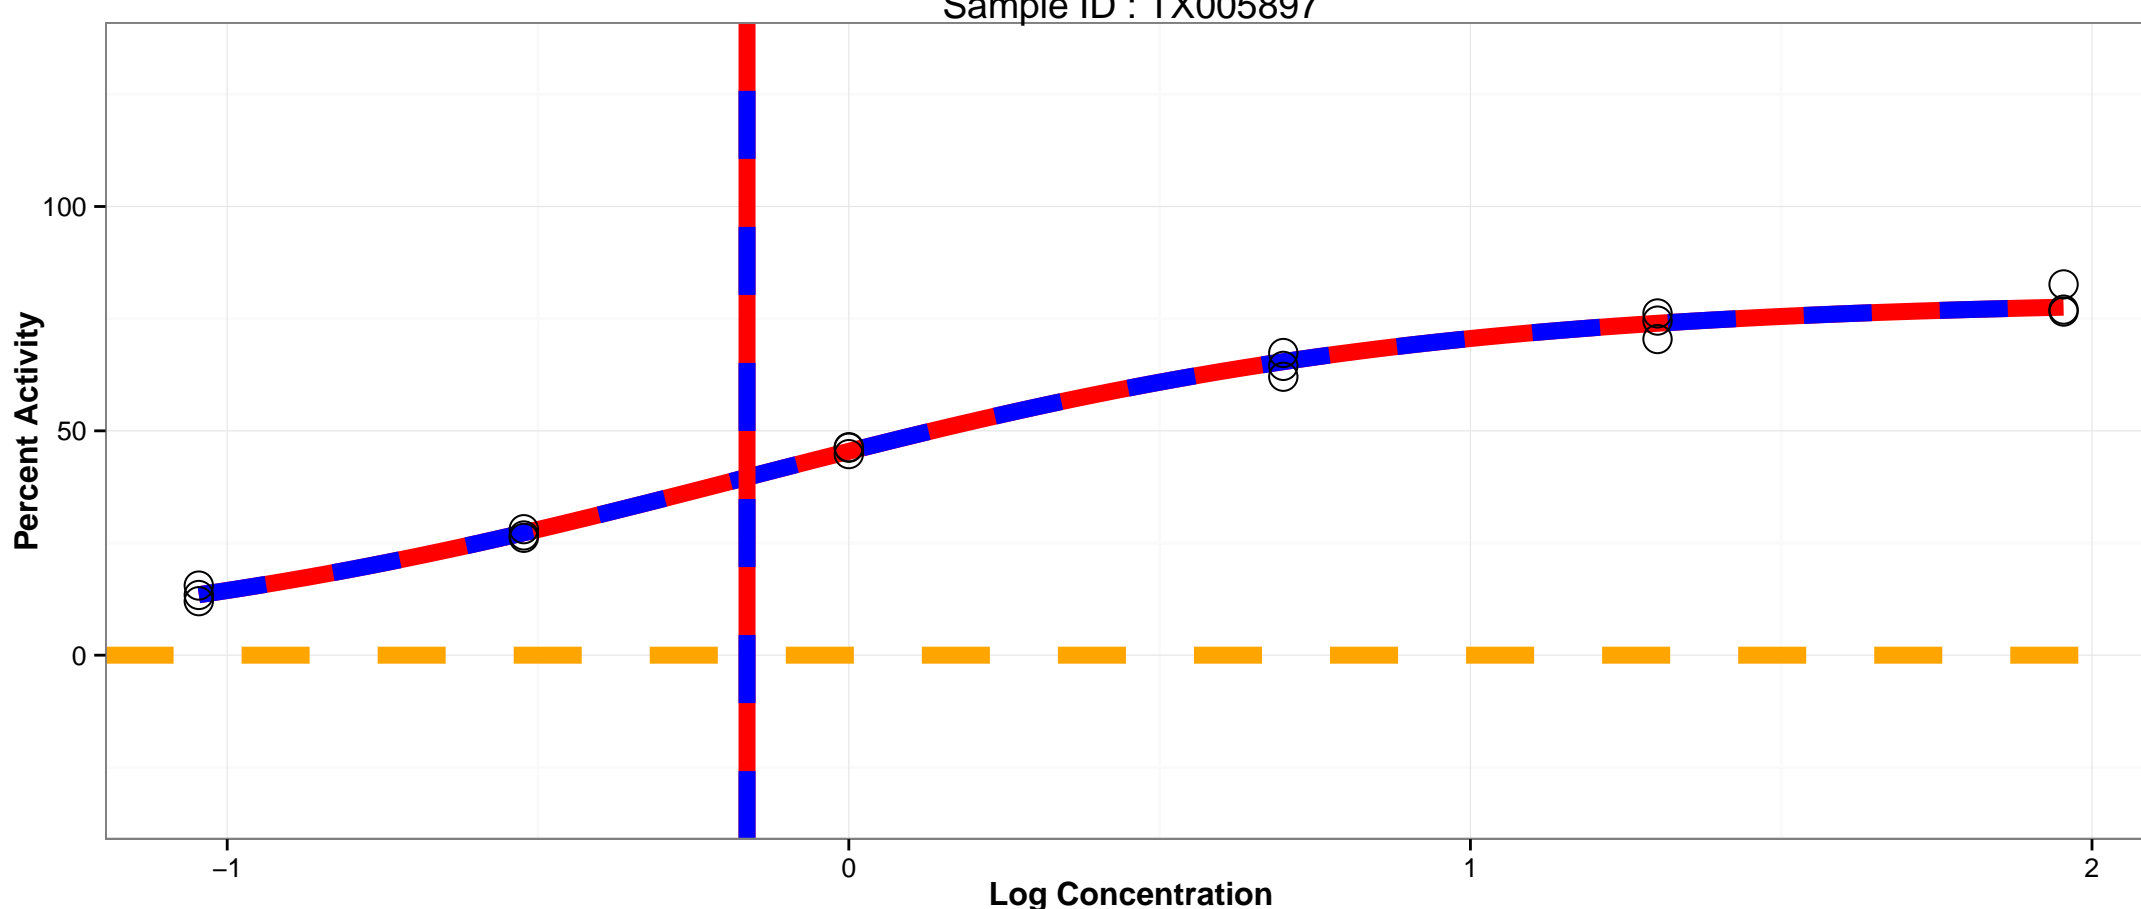

HILL MODEL

|     | tp   | ga     | gw     |
|-----|------|--------|--------|
| val | 79.3 | -0.164 | 0.781  |
| sd  | 1.22 | 0.0286 | 0.0379 |

GAIN-LOSS MODEL

|     | tp   | ga     | gw    | la   | lw   |
|-----|------|--------|-------|------|------|
| val | 79.3 | -0.164 | 0.781 | 3.82 | 16.7 |
| sd  | NA   | NA     | NA    | NA   | NA   |

|      | CNST   | HILL | GNLS |
|------|--------|------|------|
| AIC  | 201.26 | 83.4 | 87.4 |
| PROB | 0      | 0.88 | 0.12 |
| RMSE | 56.06  | 1.98 | 1.98 |

MAX\_MEAN : 78.8 MAX\_MED : 77 BMAD : 5.69  
COFF : 20 HIT-CALL : 1 FITC : 41 ACTP : 1  
FLAGS :

Assay ID 1509 (NHEERL\_HEK293T\_CellTiterGLO)  
Sample ID : TX005897

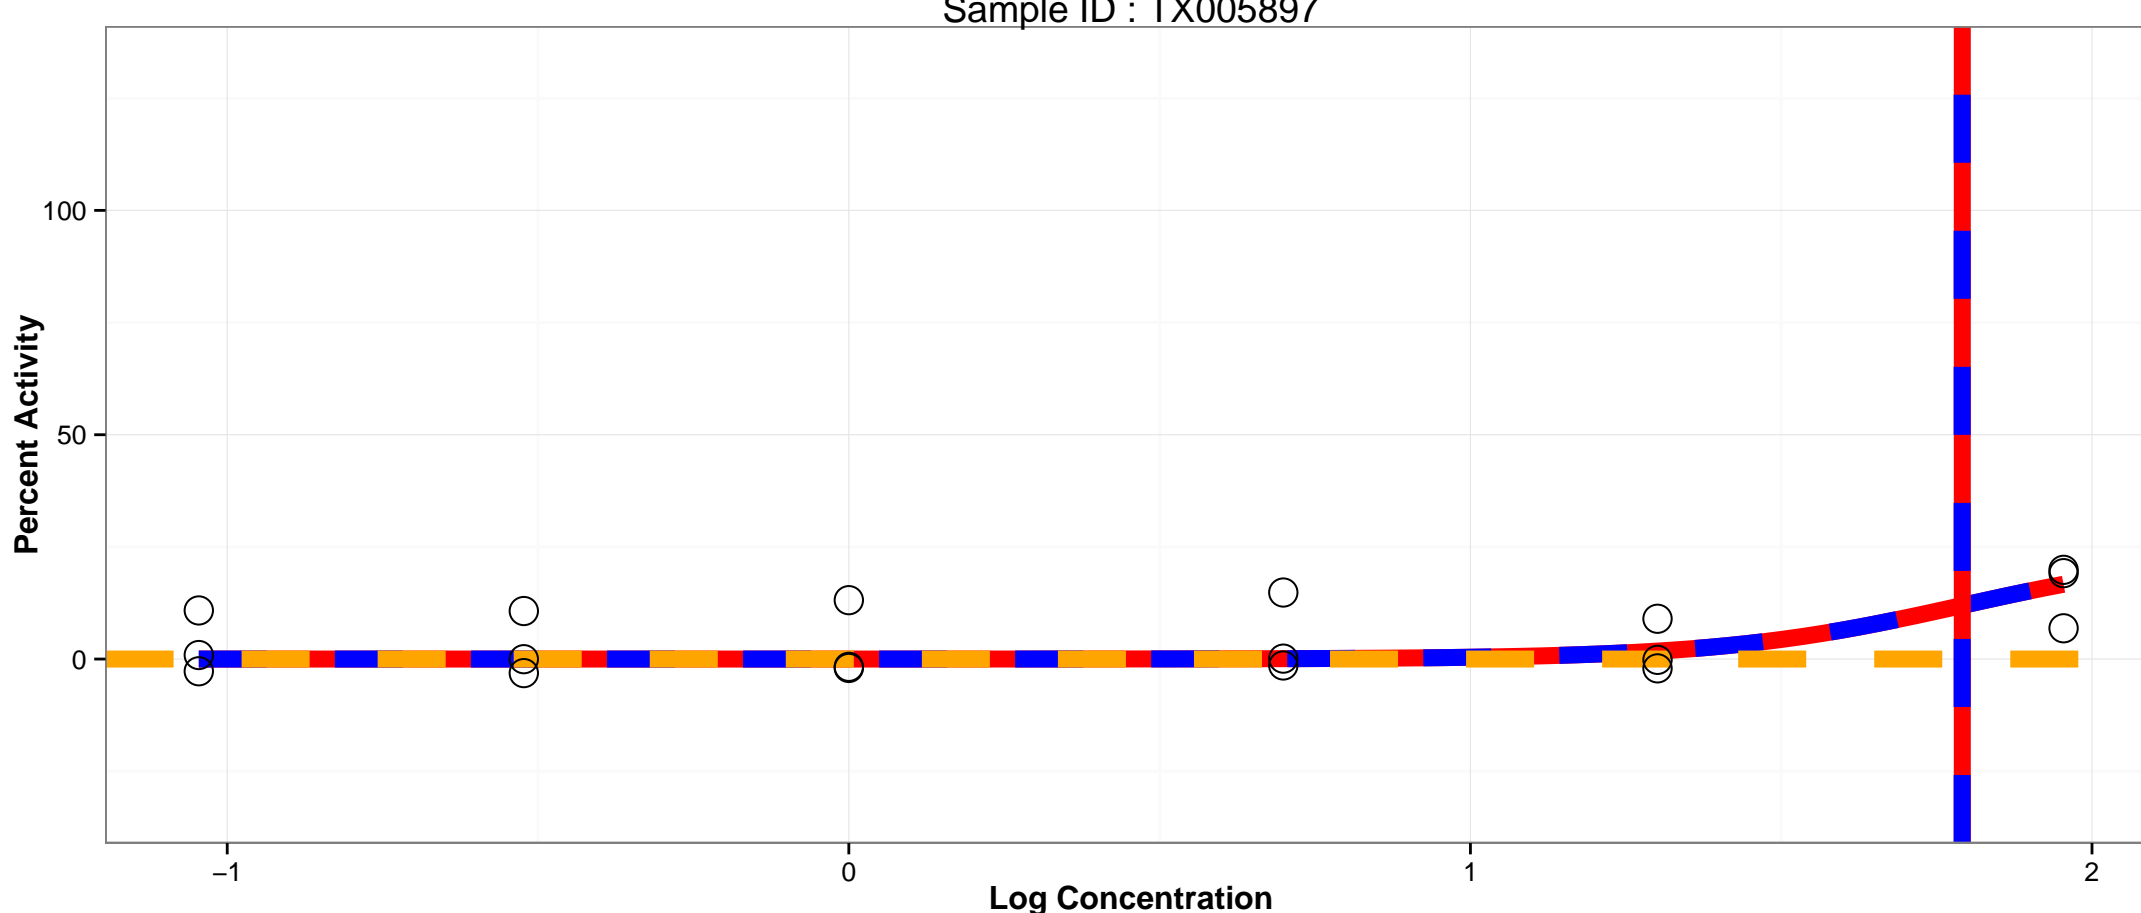

HILL MODEL

|     | tp   | ga   | gw   |
|-----|------|------|------|
| val | 23.9 | 1.79 | 2.23 |
| sd  | 94.1 | 2.07 | 6.75 |

GAIN-LOSS MODEL

|     | tp   | ga   | gw   | la   | lw   |
|-----|------|------|------|------|------|
| val | 23.9 | 1.79 | 2.23 | 3.49 | 3.98 |
| sd  | 101  | 2.23 | 7.23 | 1670 | 4300 |

|      | CNST   | HILL   | GNLS   |
|------|--------|--------|--------|
| AIC  | 133.32 | 128.14 | 132.14 |
| PROB | 0.06   | 0.83   | 0.11   |
| RMSE | 9.27   | 6.8    | 6.8    |

MAX\_MEAN : 15.3 MAX\_MED : 19.2 BMAD : 5.54  
COFF : 20 HIT-CALL : 0 FITC : 21 ACTP : 0.938  
FLAGS : 12

Assay ID 1848 (NHEERL\_Quantilum\_inhib\_2\_dn)  
Sample ID : TX005897

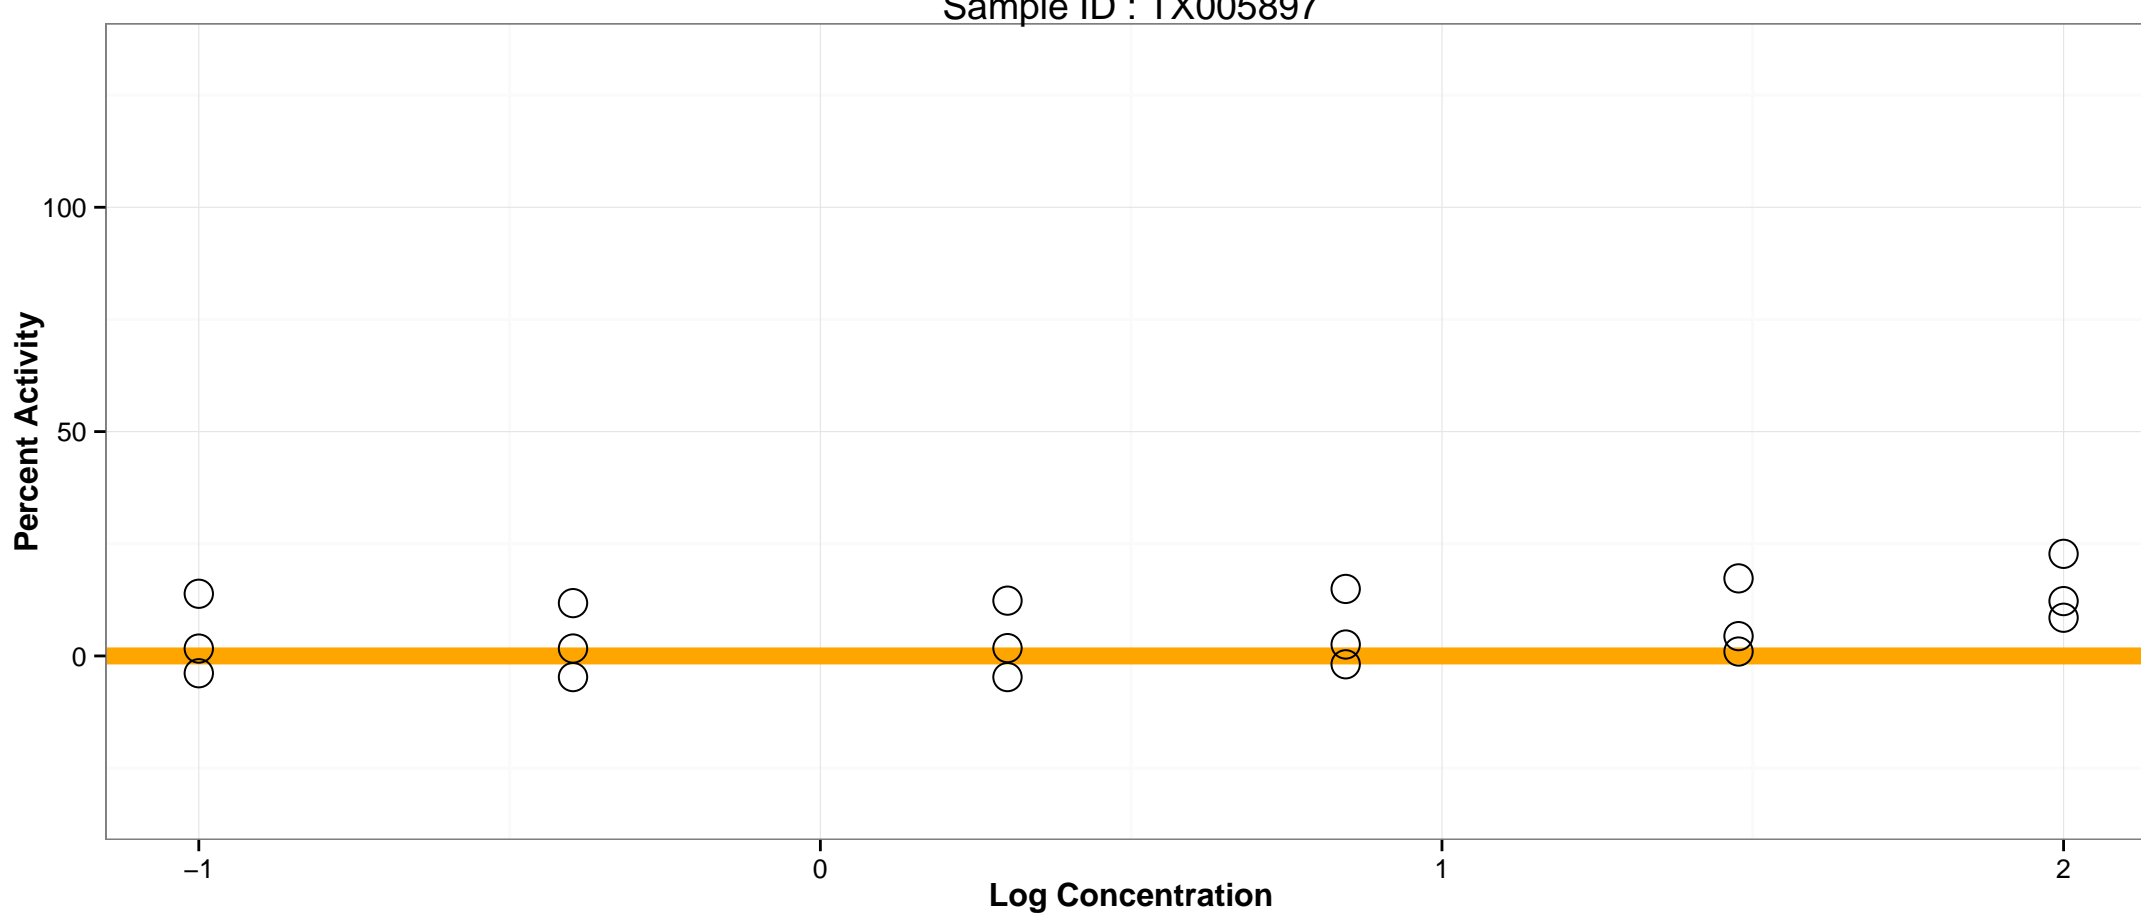

HILL MODEL

HILL MODEL: Not applicable

GAIN-LOSS MODEL

GNLS MODEL: Not applicable

|      | CNST   | HILL | GNLS |
|------|--------|------|------|
| AIC  | 137.39 | NA   | NA   |
| PROB | 1      | NA   | NA   |
| RMSE | 10.12  | NA   | NA   |

MAX\_MEAN : 14.5 MAX\_MED : 12.2 BMAD : 8.58  
COFF : 20 HIT-CALL : 0 FITC : 4 ACTP : 0  
FLAGS :

Chemical : 4-Cyclohexylcyclohexanone  
CAS : 92-68-2

Assay ID 1508 (NHEERL\_TPO\_AUR\_dn)  
Sample ID : TX006030

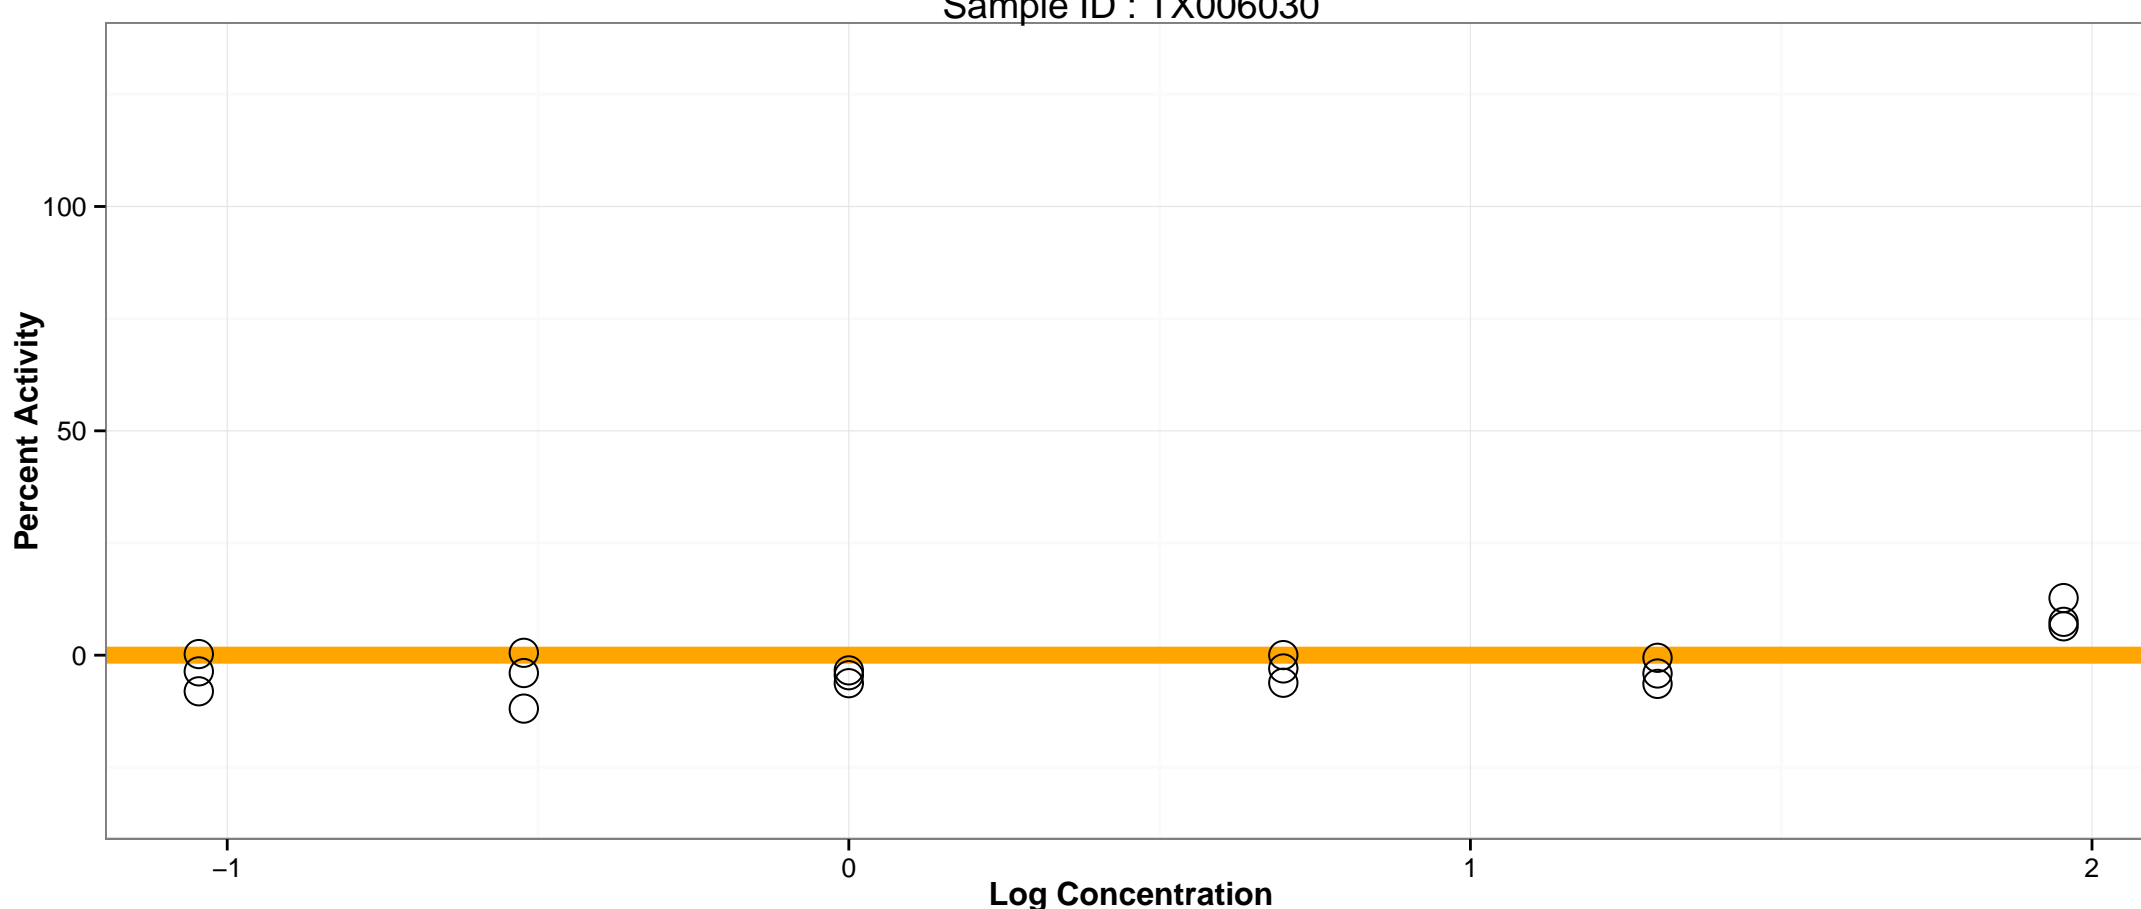

HILL MODEL

HILL MODEL: Not applicable

GAIN-LOSS MODEL

GNLS MODEL: Not applicable

|      | CNST  | HILL | GNLS |
|------|-------|------|------|
| AIC  | 119.8 | NA   | NA   |
| PROB | 1     | NA   | NA   |
| RMSE | 6.09  | NA   | NA   |

MAX\_MEAN : 8.88 MAX\_MED : 7.44 BMAD : 5.69  
COFF : 20 HIT-CALL : 0 FITC : 4 ACTP : 0  
FLAGS :

Assay ID 1509 (NHEERL\_HEK293T\_CellTiterGLO)  
Sample ID : TX006030

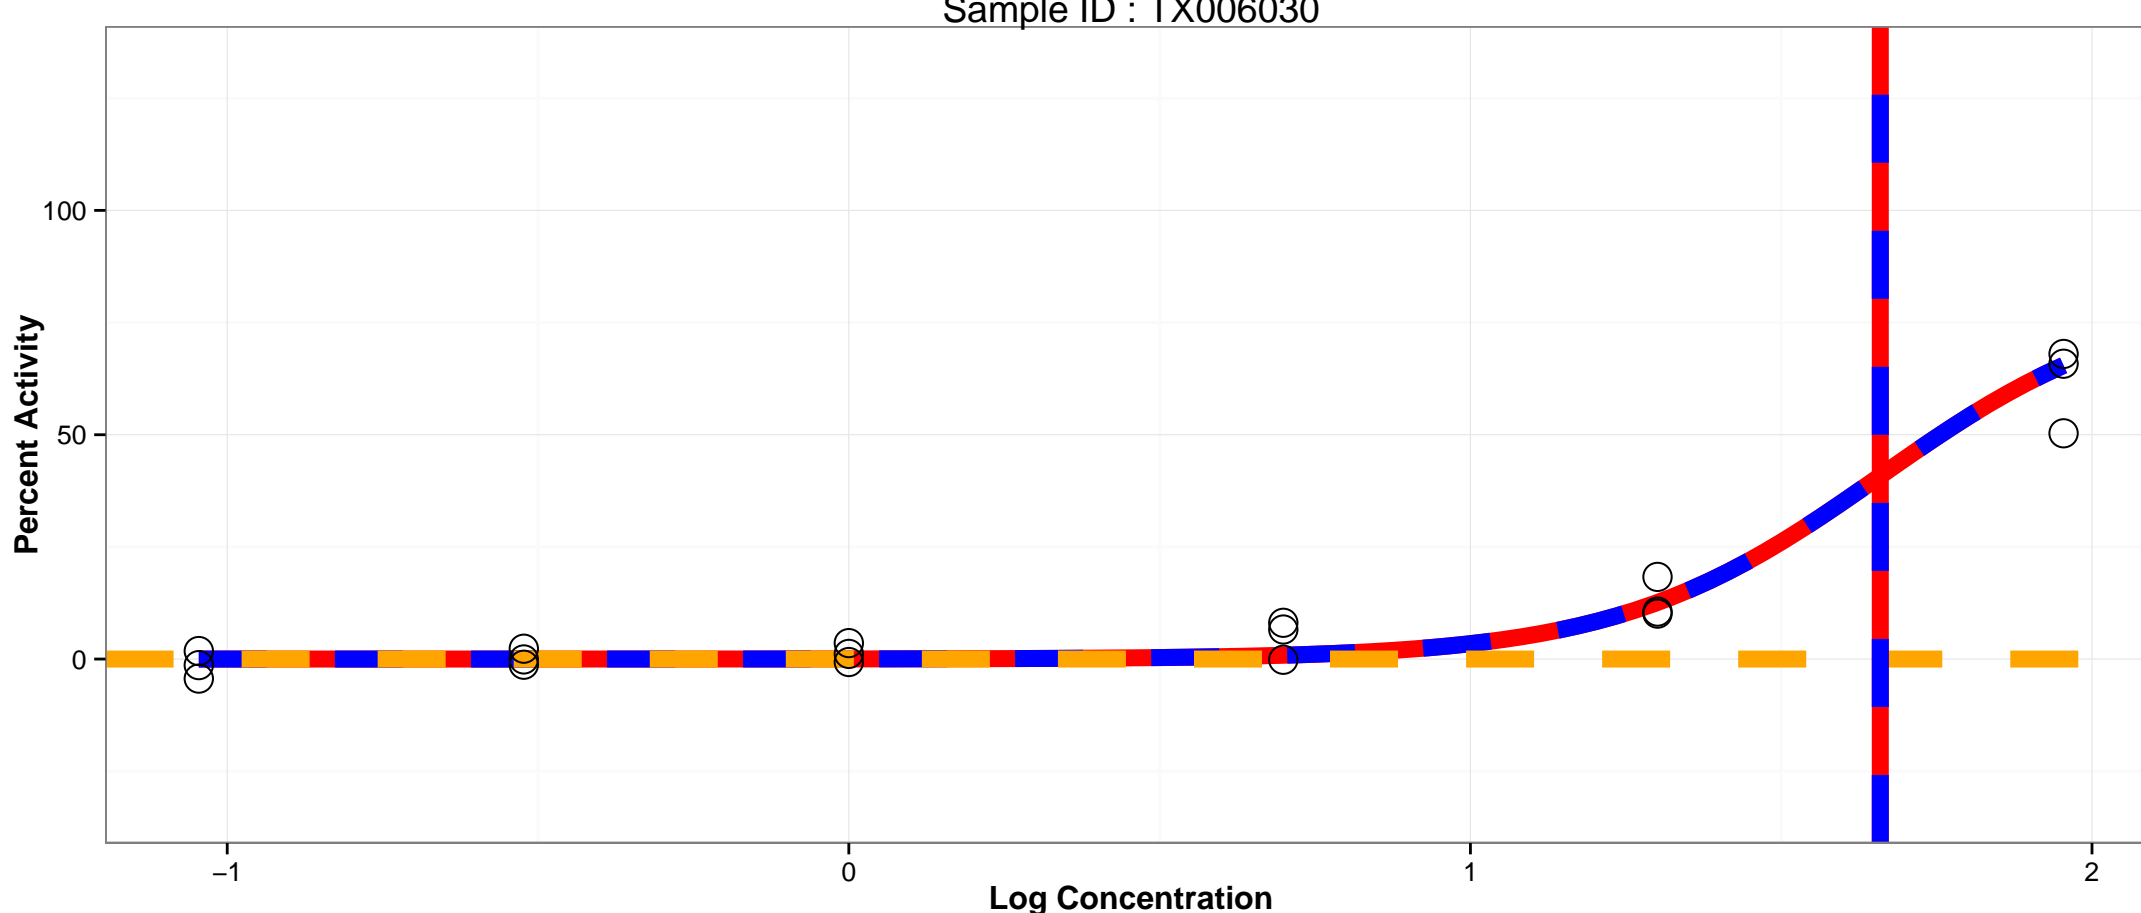

HILL MODEL

|     | tp   | ga    | gw   |
|-----|------|-------|------|
| val | 81.6 | 1.66  | 2.06 |
| sd  | 32.7 | 0.274 | 1.08 |

GAIN-LOSS MODEL

|     | tp   | ga    | gw   | la    | lw    |
|-----|------|-------|------|-------|-------|
| val | 81.6 | 1.66  | 2.06 | 3.91  | 5.13  |
| sd  | 32.7 | 0.274 | 1.08 | 18400 | 48100 |

|      | CNST  | HILL  | GNLS  |
|------|-------|-------|-------|
| AIC  | 162.2 | 111.5 | 115.5 |
| PROB | 0     | 0.88  | 0.12  |
| RMSE | 26.03 | 4.77  | 4.77  |

MAX\_MEAN : 61.4 MAX\_MED : 65.8 BMAD : 5.54  
COFF : 20 HIT-CALL : 1 FITC : 42 ACTP : 1  
FLAGS : 6

Assay ID 1848 (NHEERL\_Quantilum\_inhib\_2\_dn)  
Sample ID : TX006030

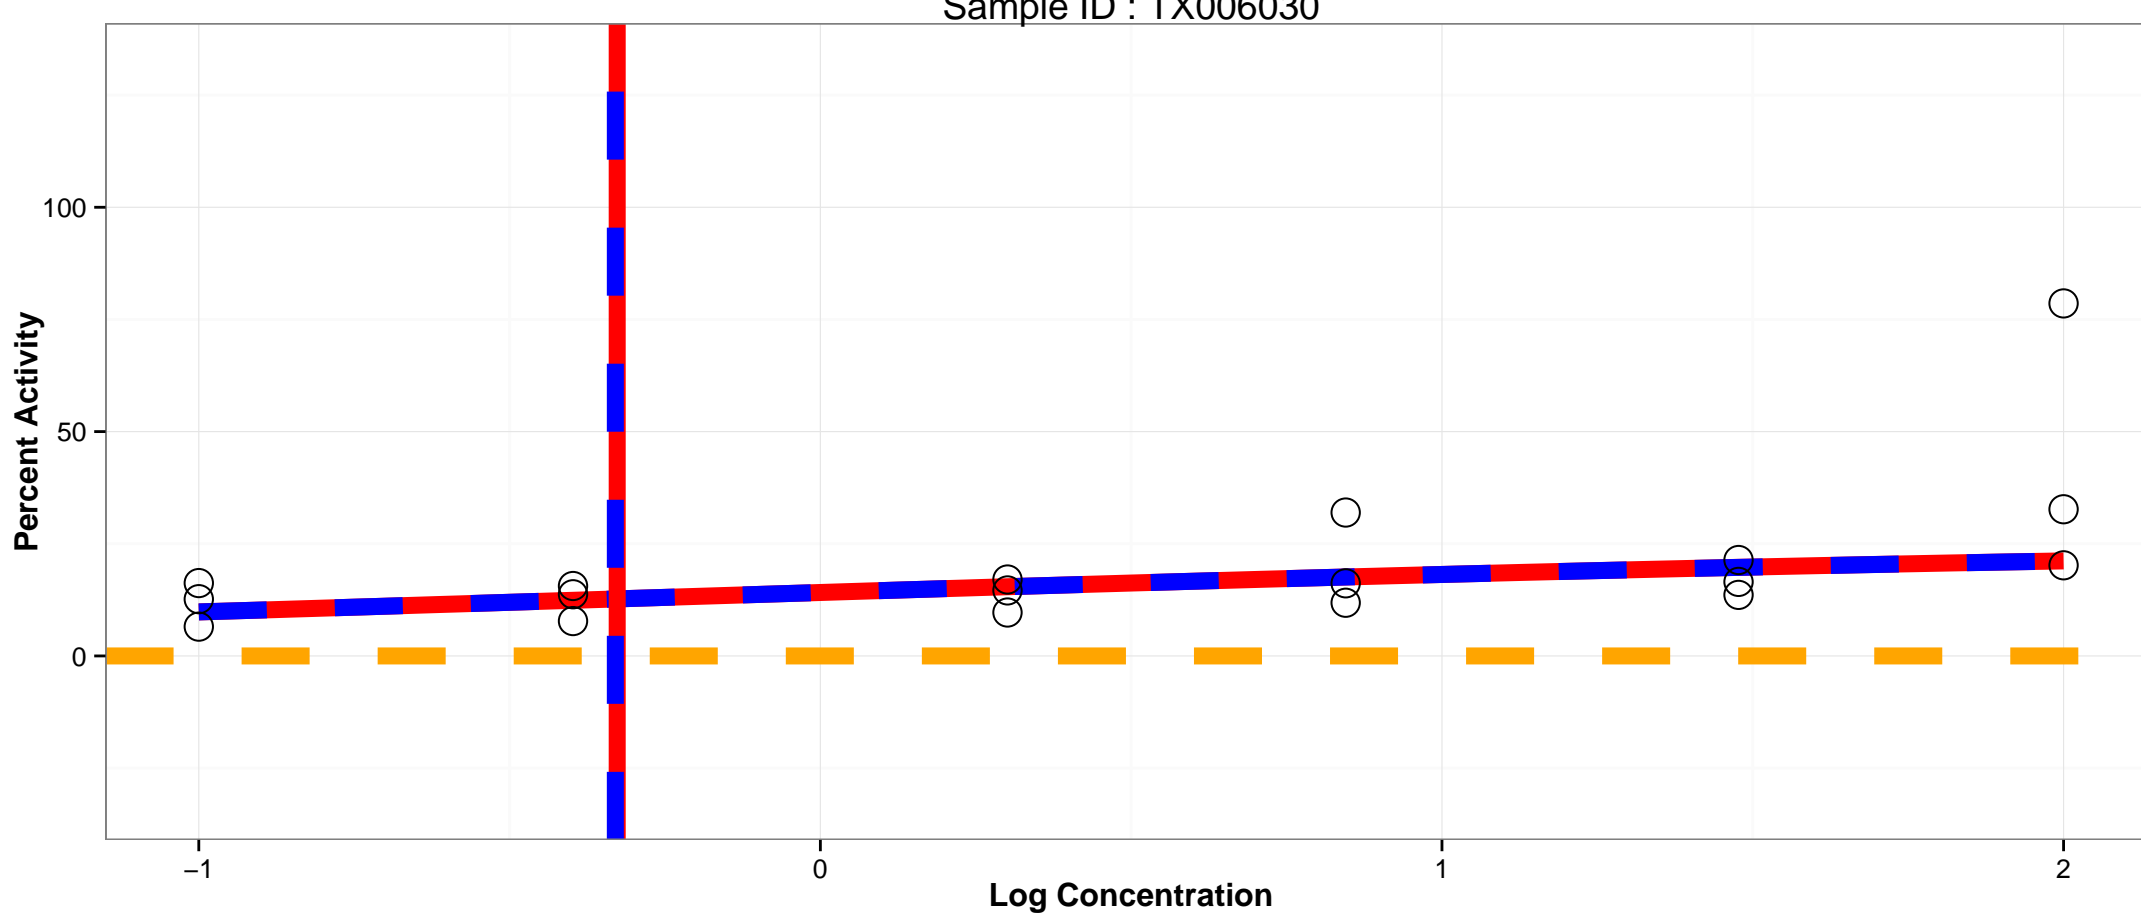

HILL MODEL

|     | tp   | ga     | gw  |
|-----|------|--------|-----|
| val | 25.4 | -0.327 | 0.3 |
| sd  | NA   | NA     | NA  |

GAIN-LOSS MODEL

|     | tp   | ga    | gw  | la   | lw   |
|-----|------|-------|-----|------|------|
| val | 25.4 | -0.33 | 0.3 | 3.99 | 6.77 |
| sd  | NA   | NA    | NA  | NA   | NA   |

|      | CNST  | HILL   | GNLS   |
|------|-------|--------|--------|
| AIC  | 167.5 | 138.12 | 142.12 |
| PROB | 0     | 0.88   | 0.12   |
| RMSE | 25.34 | 14.63  | 14.63  |

MAX\_MEAN : 43.8 MAX\_MED : 32.7 BMAD : 8.58  
COFF : 20 HIT-CALL : 1 FITC : 42 ACTP : 1  
FLAGS : 6

Chemical : 17alpha-Estradiol  
CAS : 57-91-0

Assay ID 1508 (NHEERL\_TPO\_AUR\_dn)  
Sample ID : TX006088

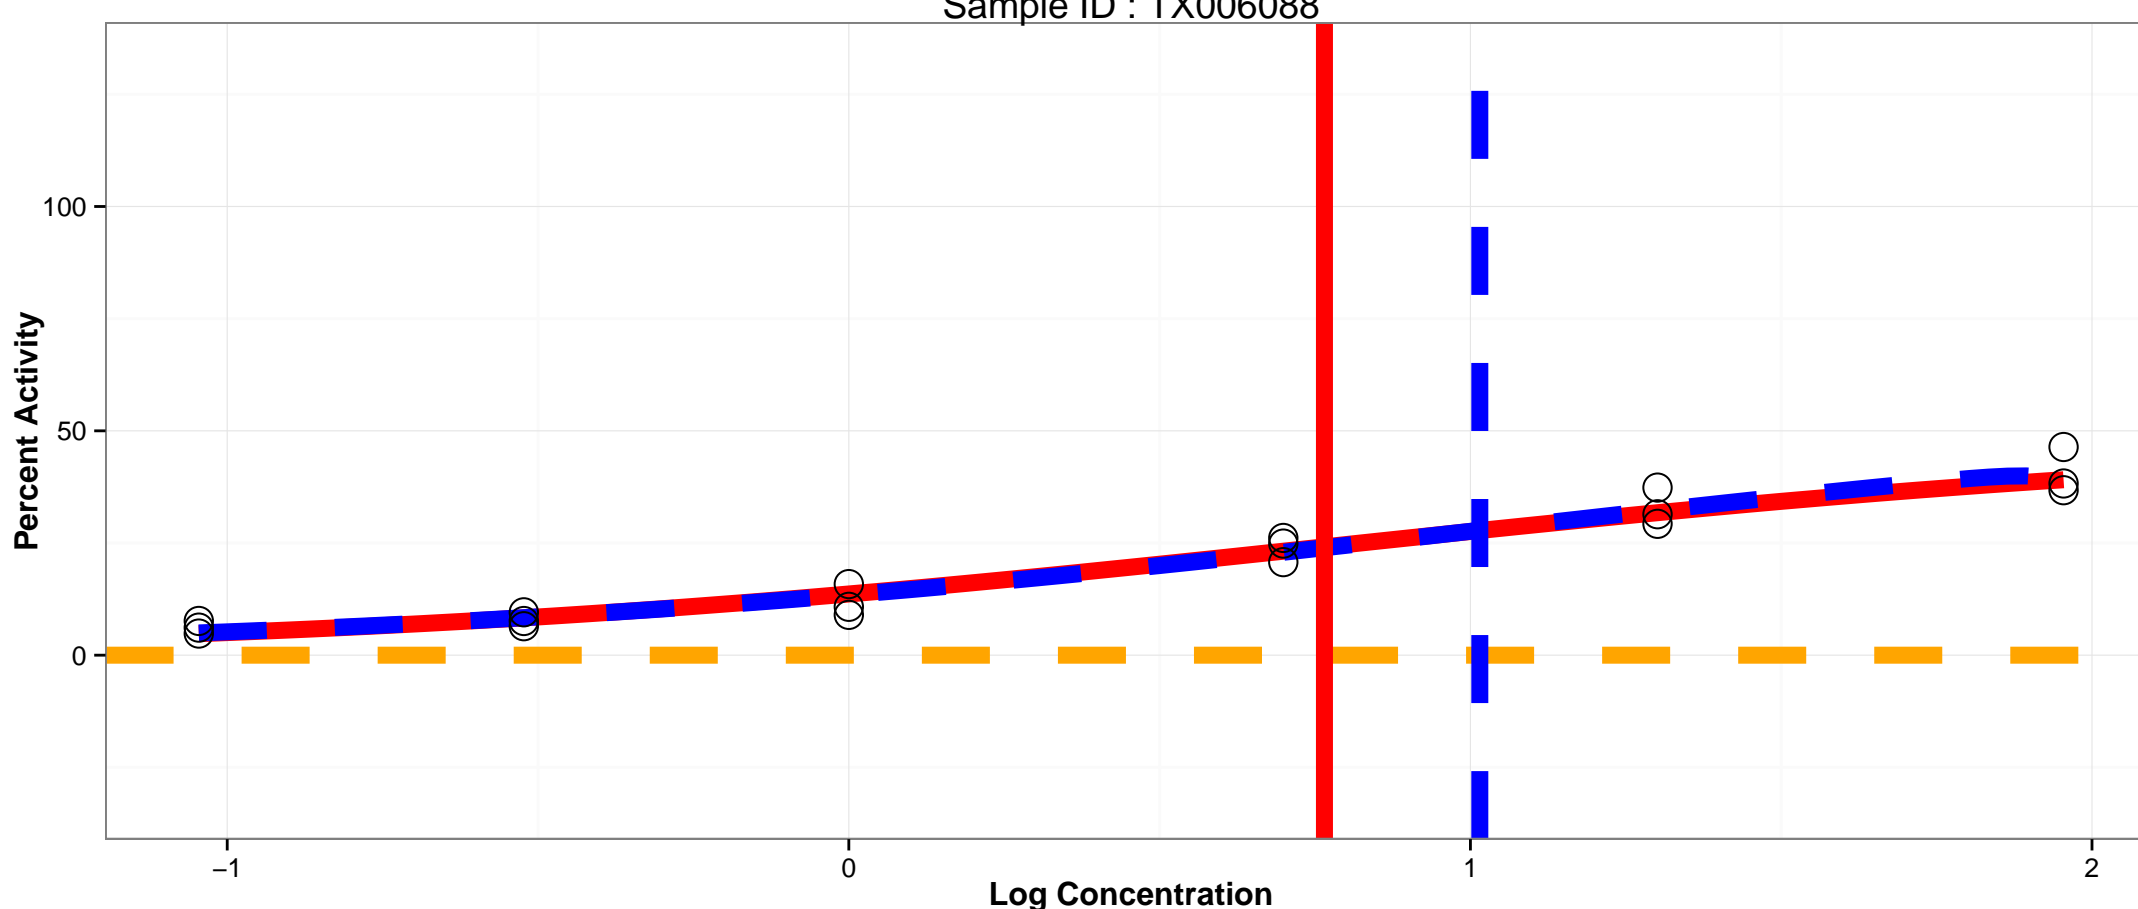

HILL MODEL

|     | tp   | ga    | gw     |
|-----|------|-------|--------|
| val | 48.3 | 0.765 | 0.529  |
| sd  | 7.11 | 0.308 | 0.0924 |

GAIN-LOSS MODEL

|     | tp   | ga   | gw   | la   | lw   |
|-----|------|------|------|------|------|
| val | 55.7 | 1.02 | 0.49 | 2.07 | 9.92 |
| sd  | NA   | NA   | NA   | NA   | NA   |

|      | CNST   | HILL  | GNLS   |
|------|--------|-------|--------|
| AIC  | 170.19 | 99.65 | 103.44 |
| PROB | 0      | 0.87  | 0.13   |
| RMSE | 24.39  | 3.03  | 3.01   |

MAX\_MEAN : 40.5 MAX\_MED : 38.3 BMAD : 5.69  
COFF : 20 HIT-CALL : 1 FITC : 42 ACTP : 1  
FLAGS :

Assay ID 1509 (NHEERL\_HEK293T\_CellTiterGLO)  
Sample ID : TX006088

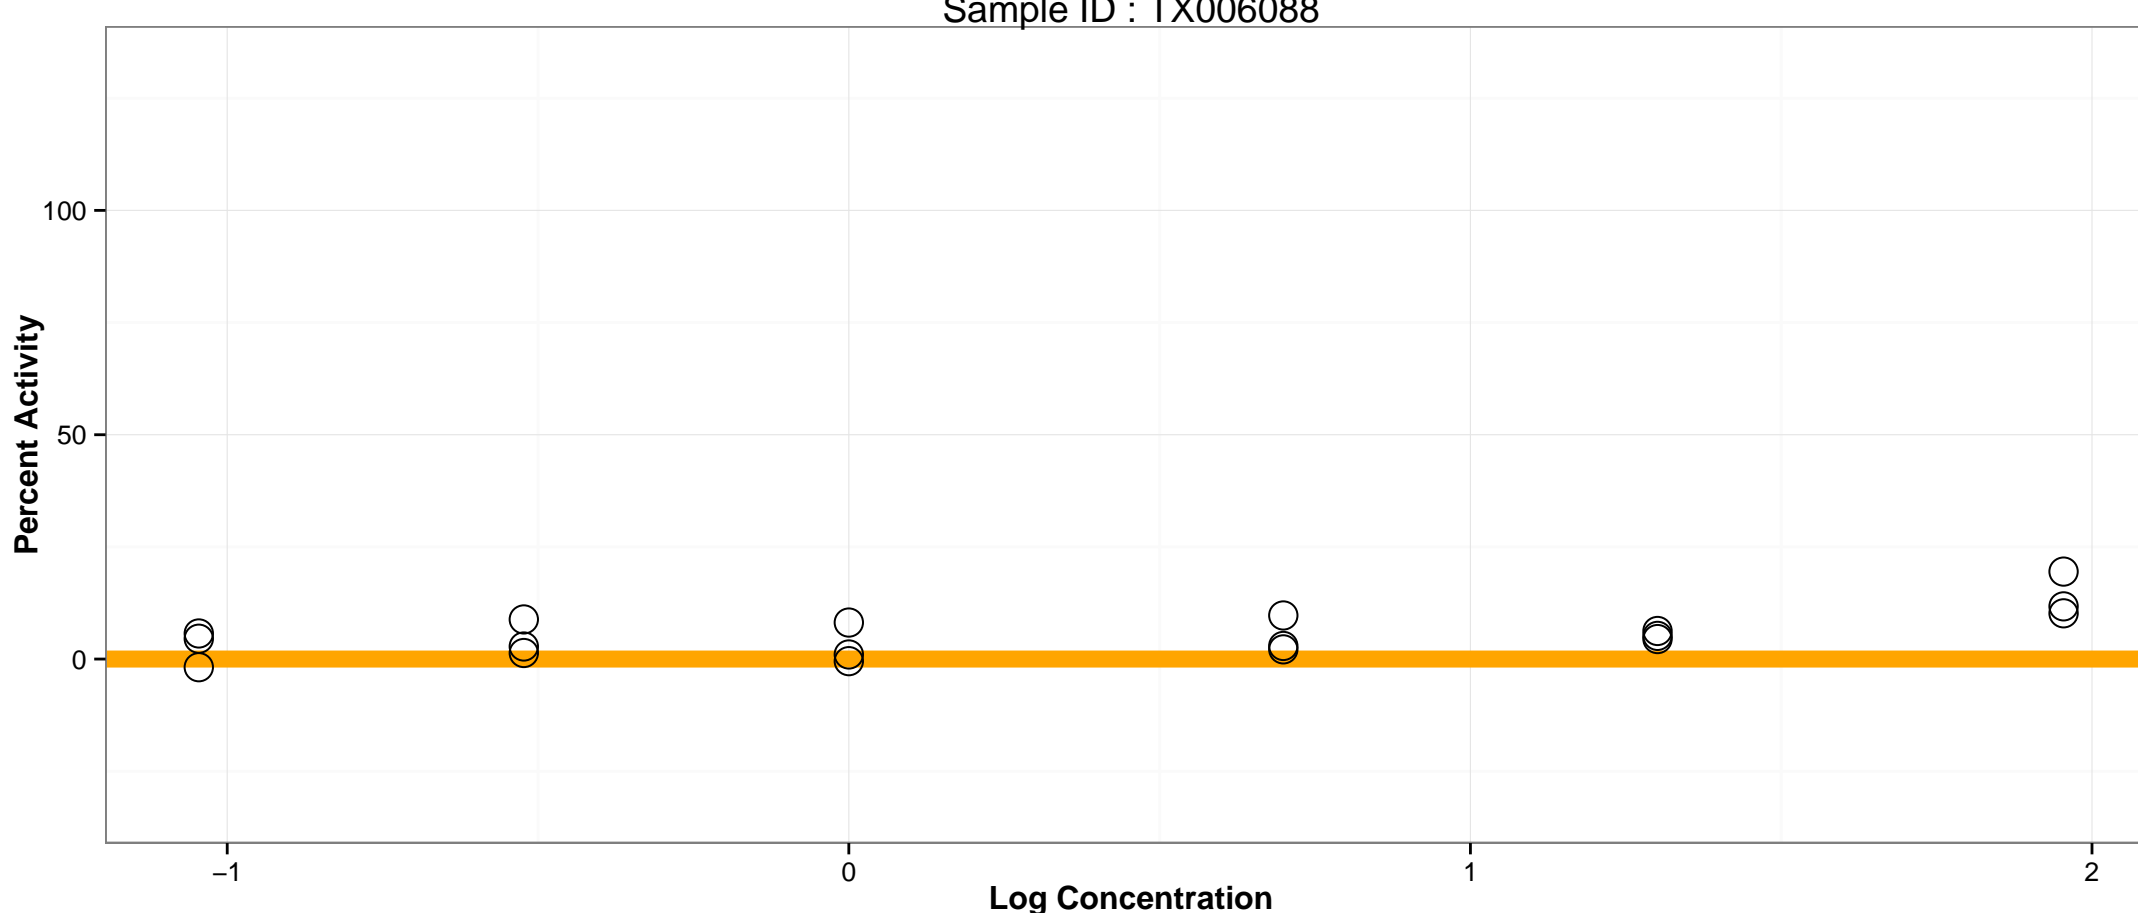

HILL MODEL

HILL MODEL: Not applicable

GAIN-LOSS MODEL

GNLS MODEL: Not applicable

|      | CNST   | HILL | GNLS |
|------|--------|------|------|
| AIC  | 126.29 | NA   | NA   |
| PROB | 1      | NA   | NA   |
| RMSE | 7.56   | NA   | NA   |

MAX\_MEAN : 13.8 MAX\_MED : 11.8 BMAD : 5.54  
COFF : 20 HIT-CALL : 0 FITC : 4 ACTP : 0  
FLAGS :

Assay ID 1848 (NHEERL\_Quantilum\_inhib\_2\_dn)  
Sample ID : TX006088

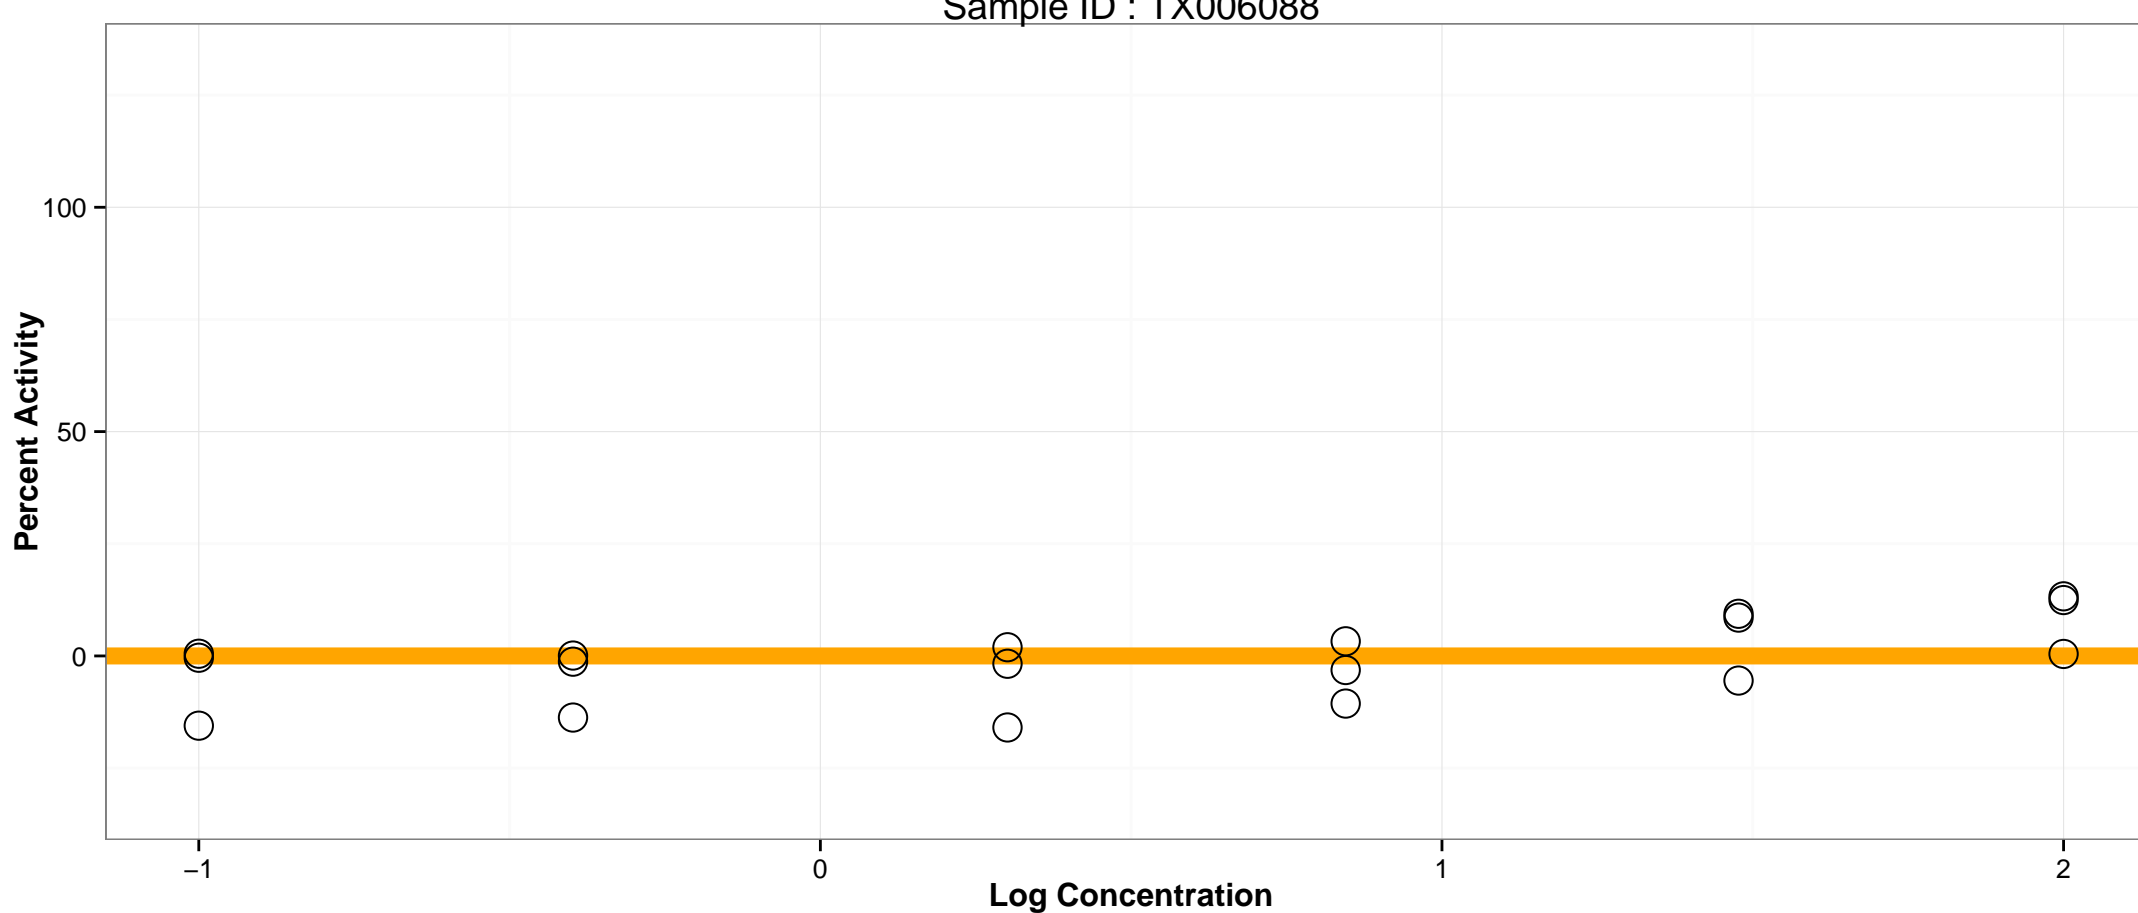

HILL MODEL

HILL MODEL: Not applicable

GAIN-LOSS MODEL

GNLS MODEL: Not applicable

|      | CNST   | HILL | GNLS |
|------|--------|------|------|
| AIC  | 132.17 | NA   | NA   |
| PROB | 1      | NA   | NA   |
| RMSE | 8.66   | NA   | NA   |

MAX\_MEAN : 8.74 MAX\_MED : 12.5 BMAD : 8.58  
COFF : 20 HIT-CALL : 0 FITC : 4 ACTP : 0  
FLAGS :

Chemical : Darbufelone mesylate  
CAS : 139340-56-0

Assay ID 1508 (NHEERL\_TPO\_AUR\_dn)  
Sample ID : TX006143

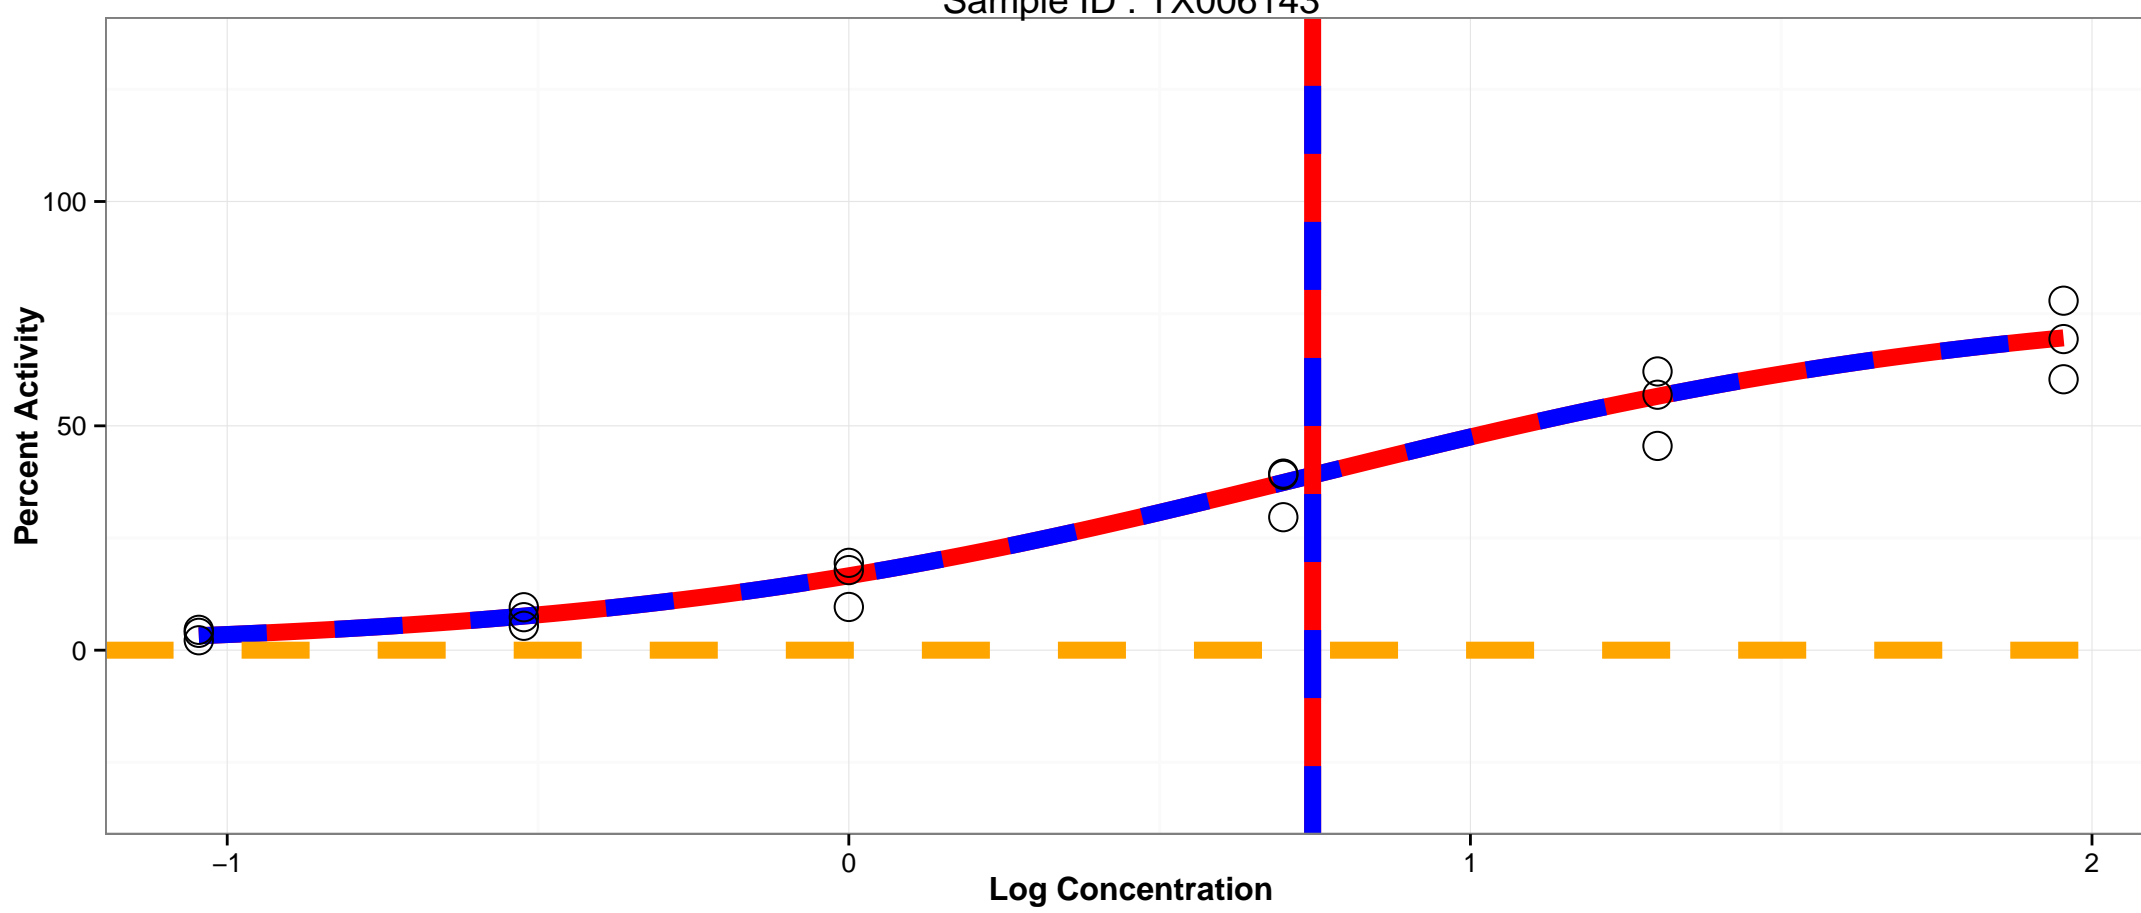

HILL MODEL

|     | tp   | ga    | gw    |
|-----|------|-------|-------|
| val | 78   | 0.746 | 0.762 |
| sd  | 7.11 | 0.148 | 0.101 |

GAIN-LOSS MODEL

|     | tp | ga    | gw    | la   | lw   |
|-----|----|-------|-------|------|------|
| val | 78 | 0.746 | 0.762 | 3.55 | 8.35 |
| sd  | NA | NA    | NA    | NA   | NA   |

|      | CNST   | HILL   | GNLS   |
|------|--------|--------|--------|
| AIC  | 187.27 | 116.61 | 120.61 |
| PROB | 0      | 0.88   | 0.12   |
| RMSE | 39.91  | 4.96   | 4.96   |

MAX\_MEAN : 69.2 MAX\_MED : 69.3 BMAD : 5.69  
COFF : 20 HIT-CALL : 1 FITC : 42 ACTP : 1  
FLAGS :

Assay ID 1509 (NHEERL\_HEK293T\_CellTiterGLO)  
Sample ID : TX006143

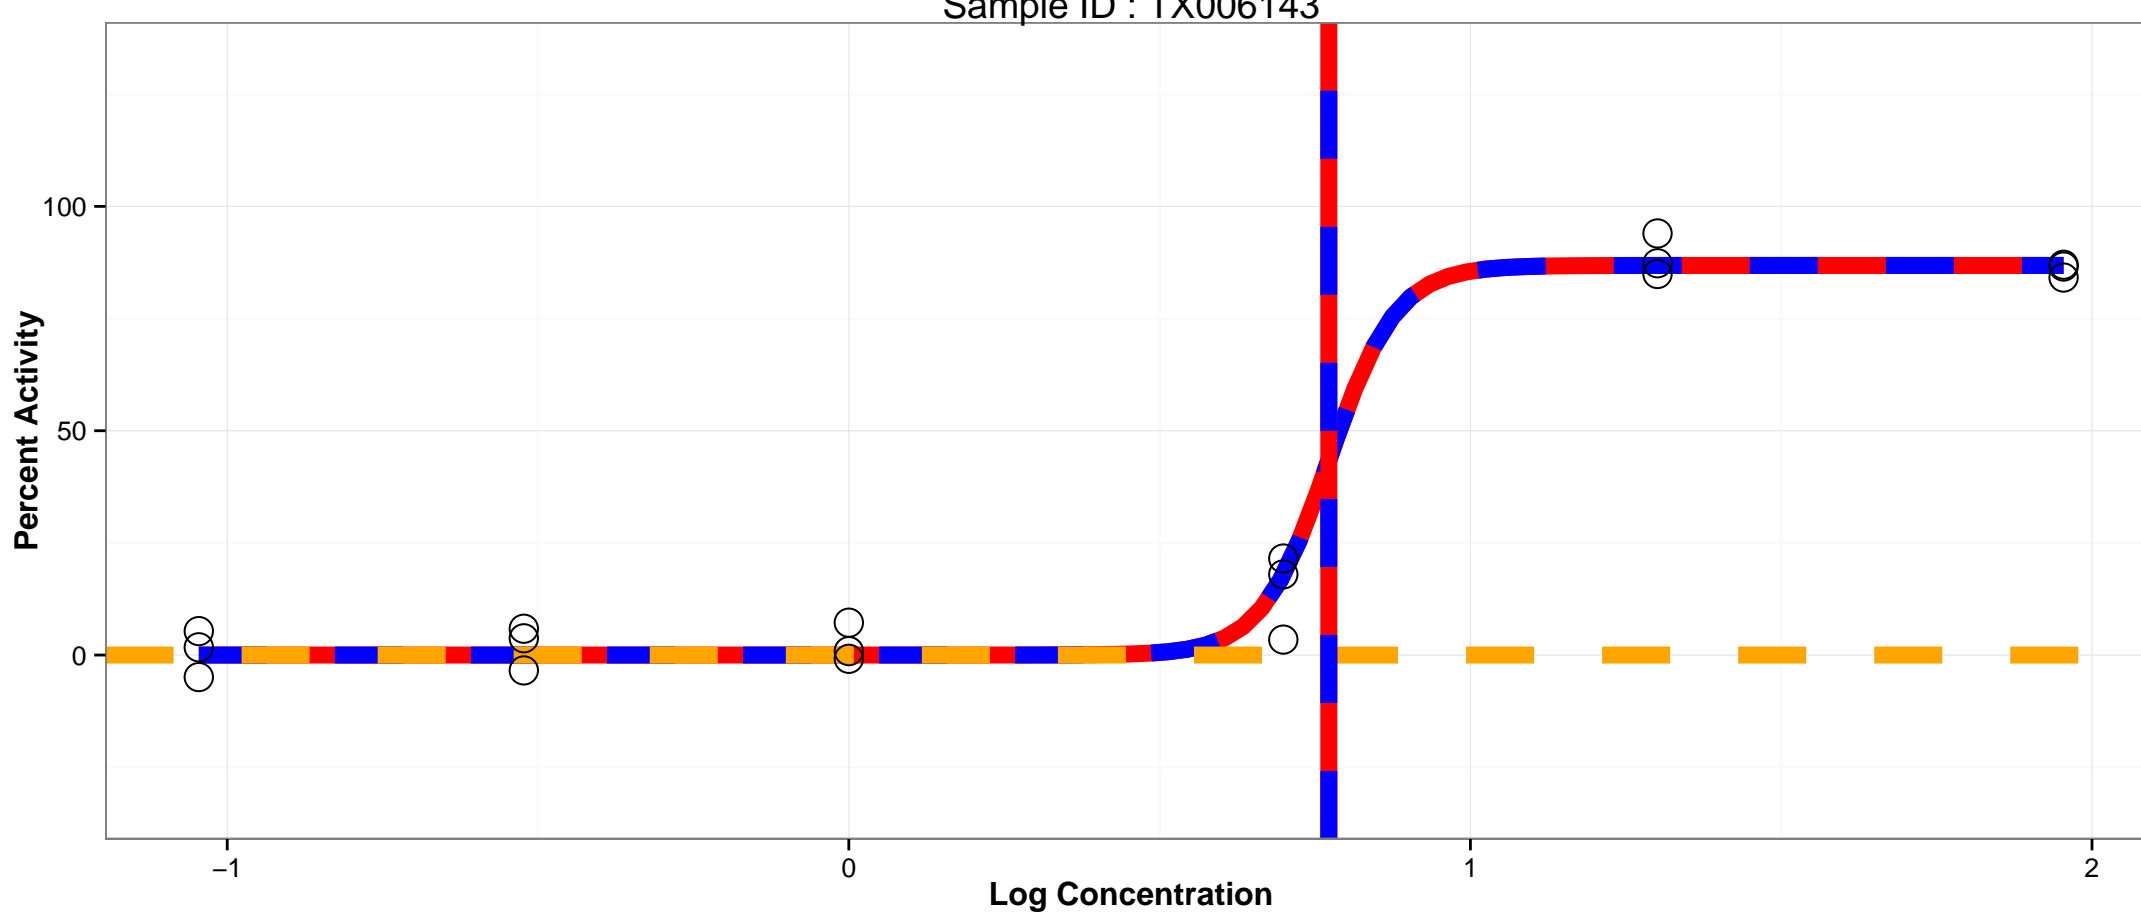

HILL MODEL

|     | tp   | ga    | gw   |
|-----|------|-------|------|
| val | 86.8 | 0.772 | 8    |
| sd  | 1.58 | 0.186 | 20.3 |

GAIN-LOSS MODEL

|     | tp   | ga    | gw | la   | lw   |
|-----|------|-------|----|------|------|
| val | 86.8 | 0.772 | 8  | 3.46 | 9.16 |
| sd  | NA   | NA    | NA | NA   | NA   |

|      | CNST   | HILL   | GNLS   |
|------|--------|--------|--------|
| AIC  | 194.33 | 115.83 | 119.83 |
| PROB | 0      | 0.88   | 0.12   |
| RMSE | 50.99  | 5.02   | 5.02   |

MAX\_MEAN : 88.8 MAX\_MED : 87.3 BMAD : 5.54  
COFF : 20 HIT-CALL : 1 FITC : 41 ACTP : 1  
FLAGS :

Assay ID 1848 (NHEERL\_Quantilum\_inhib\_2\_dn)  
Sample ID : TX006143

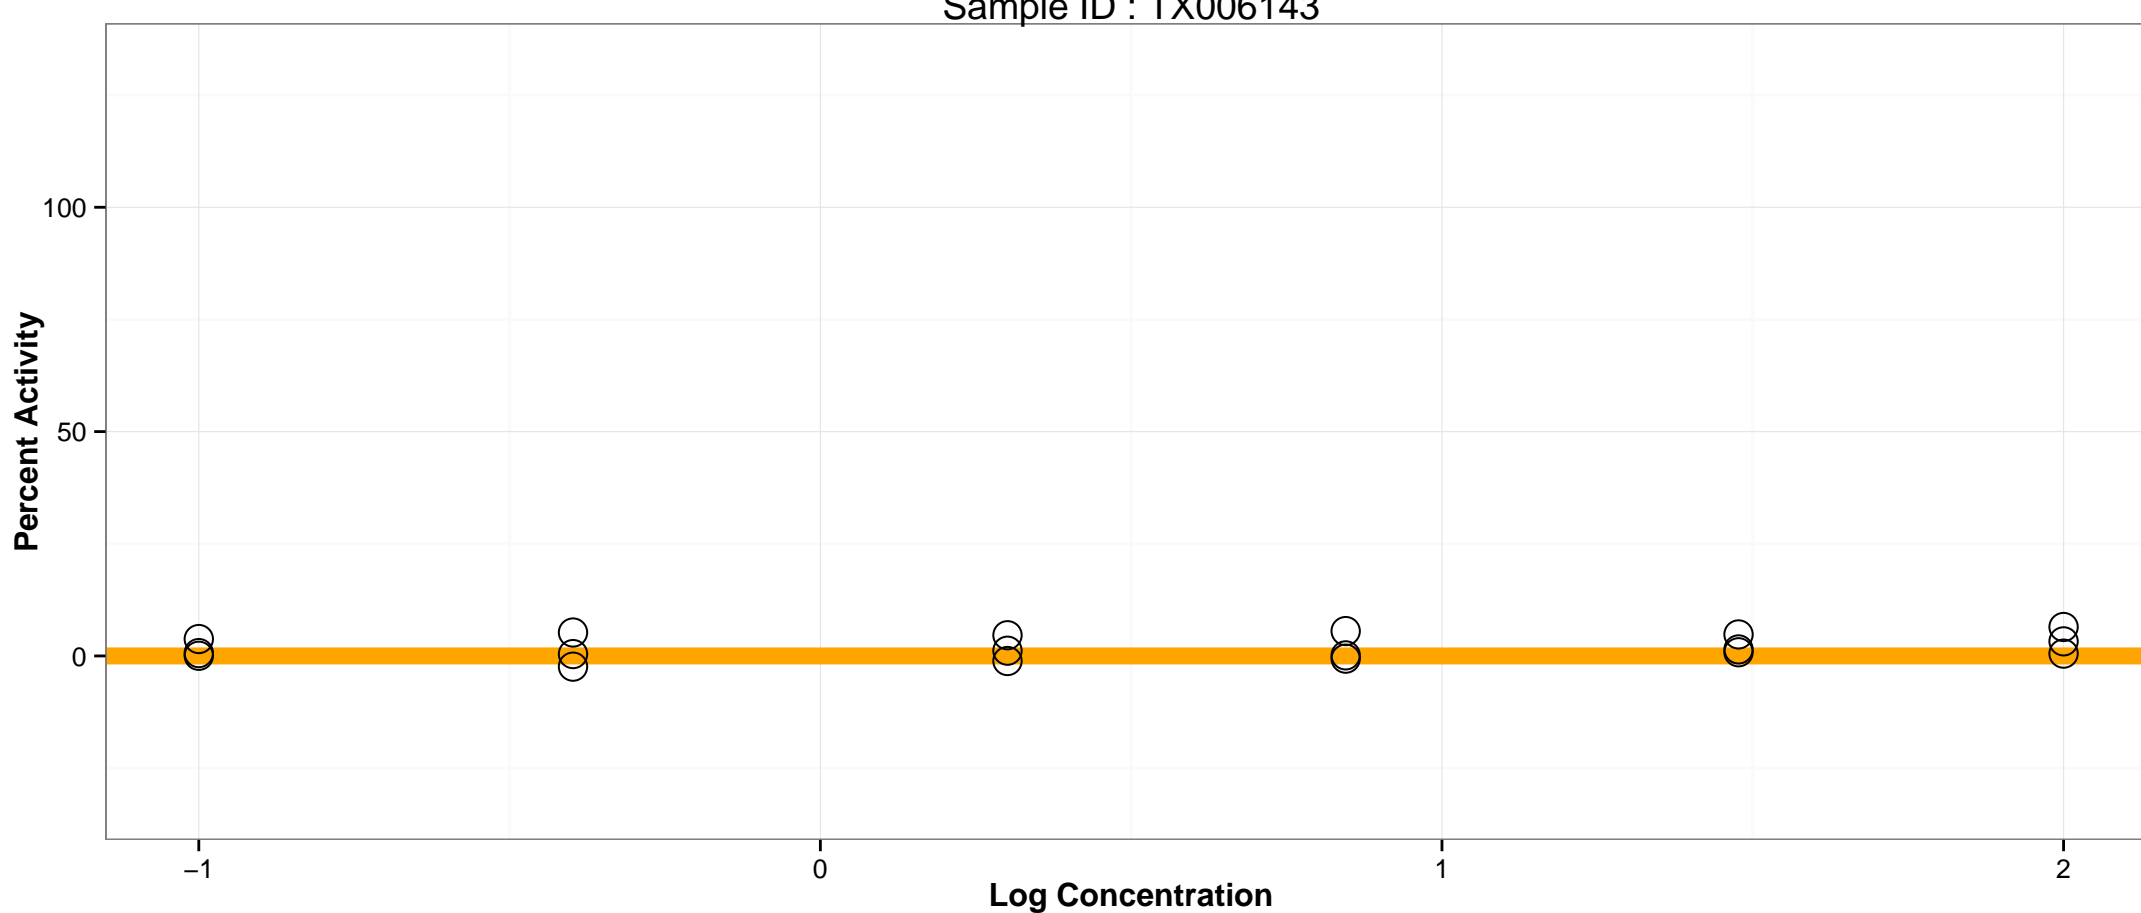

HILL MODEL

HILL MODEL: Not applicable

GAIN-LOSS MODEL

GNLS MODEL: Not applicable

|      | CNST  | HILL | GNLS |
|------|-------|------|------|
| AIC  | 95.65 | NA   | NA   |
| PROB | 1     | NA   | NA   |
| RMSE | 3.18  | NA   | NA   |

MAX\_MEAN : 3.42 MAX\_MED : 3.26 BMAD : 8.58  
COFF : 20 HIT-CALL : 0 FITC : 4 ACTP : 0  
FLAGS :

Assay ID 1508 (NHEERL\_TPO\_AUR\_dn)  
Sample ID : TX006155

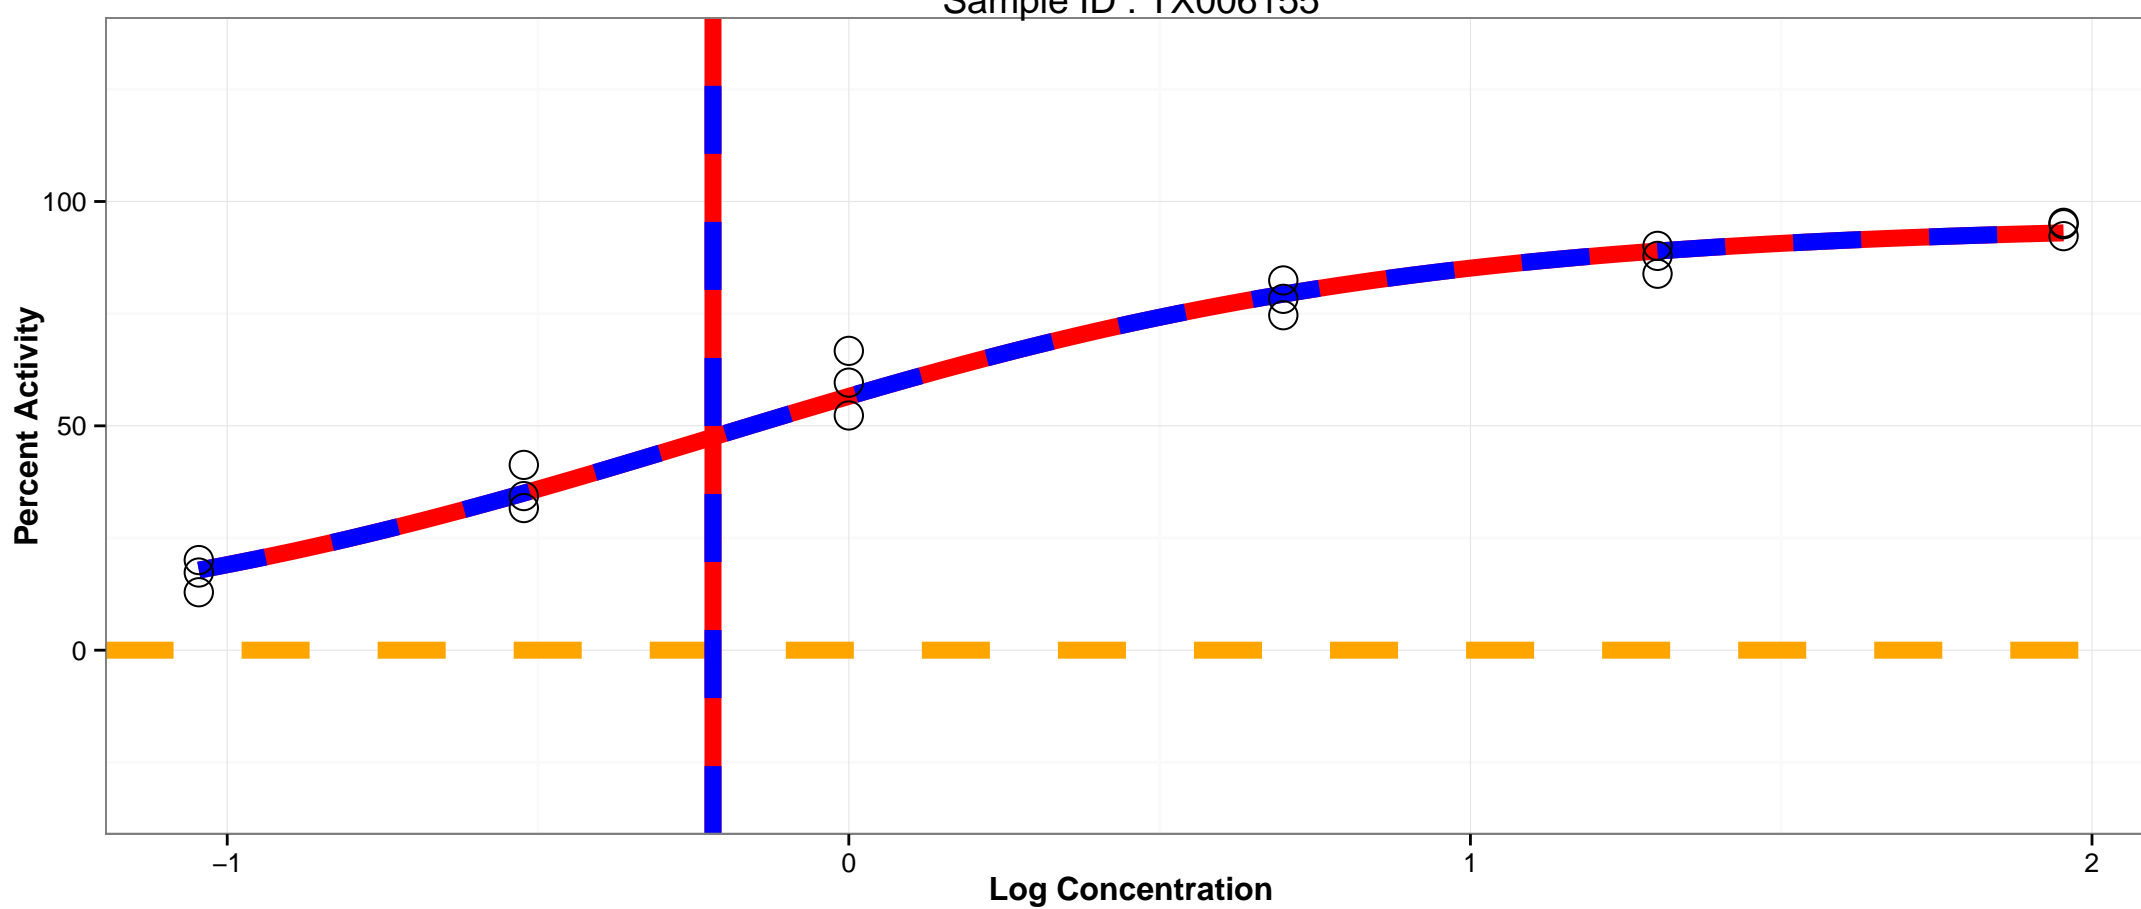

HILL MODEL

|     | tp   | ga     | gw     |
|-----|------|--------|--------|
| val | 95   | -0.219 | 0.769  |
| sd  | 2.29 | 0.0614 | 0.0701 |

GAIN-LOSS MODEL

|     | tp | ga     | gw    | la   | lw   |
|-----|----|--------|-------|------|------|
| val | 95 | -0.219 | 0.769 | 3.92 | 17.9 |
| sd  | NA | NA     | NA    | NA   | NA   |

|      | CNST  | HILL   | GNLS   |
|------|-------|--------|--------|
| AIC  | 208.4 | 109.01 | 113.01 |
| PROB | 0     | 0.88   | 0.12   |
| RMSE | 68.11 | 3.95   | 3.95   |

MAX\_MEAN : 94.2 MAX\_MED : 95 BMAD : 5.69  
COFF : 20 HIT-CALL : 1 FITC : 41 ACTP : 1  
FLAGS :

Assay ID 1509 (NHEERL\_HEK293T\_CellTiterGLO)  
Sample ID : TX006155

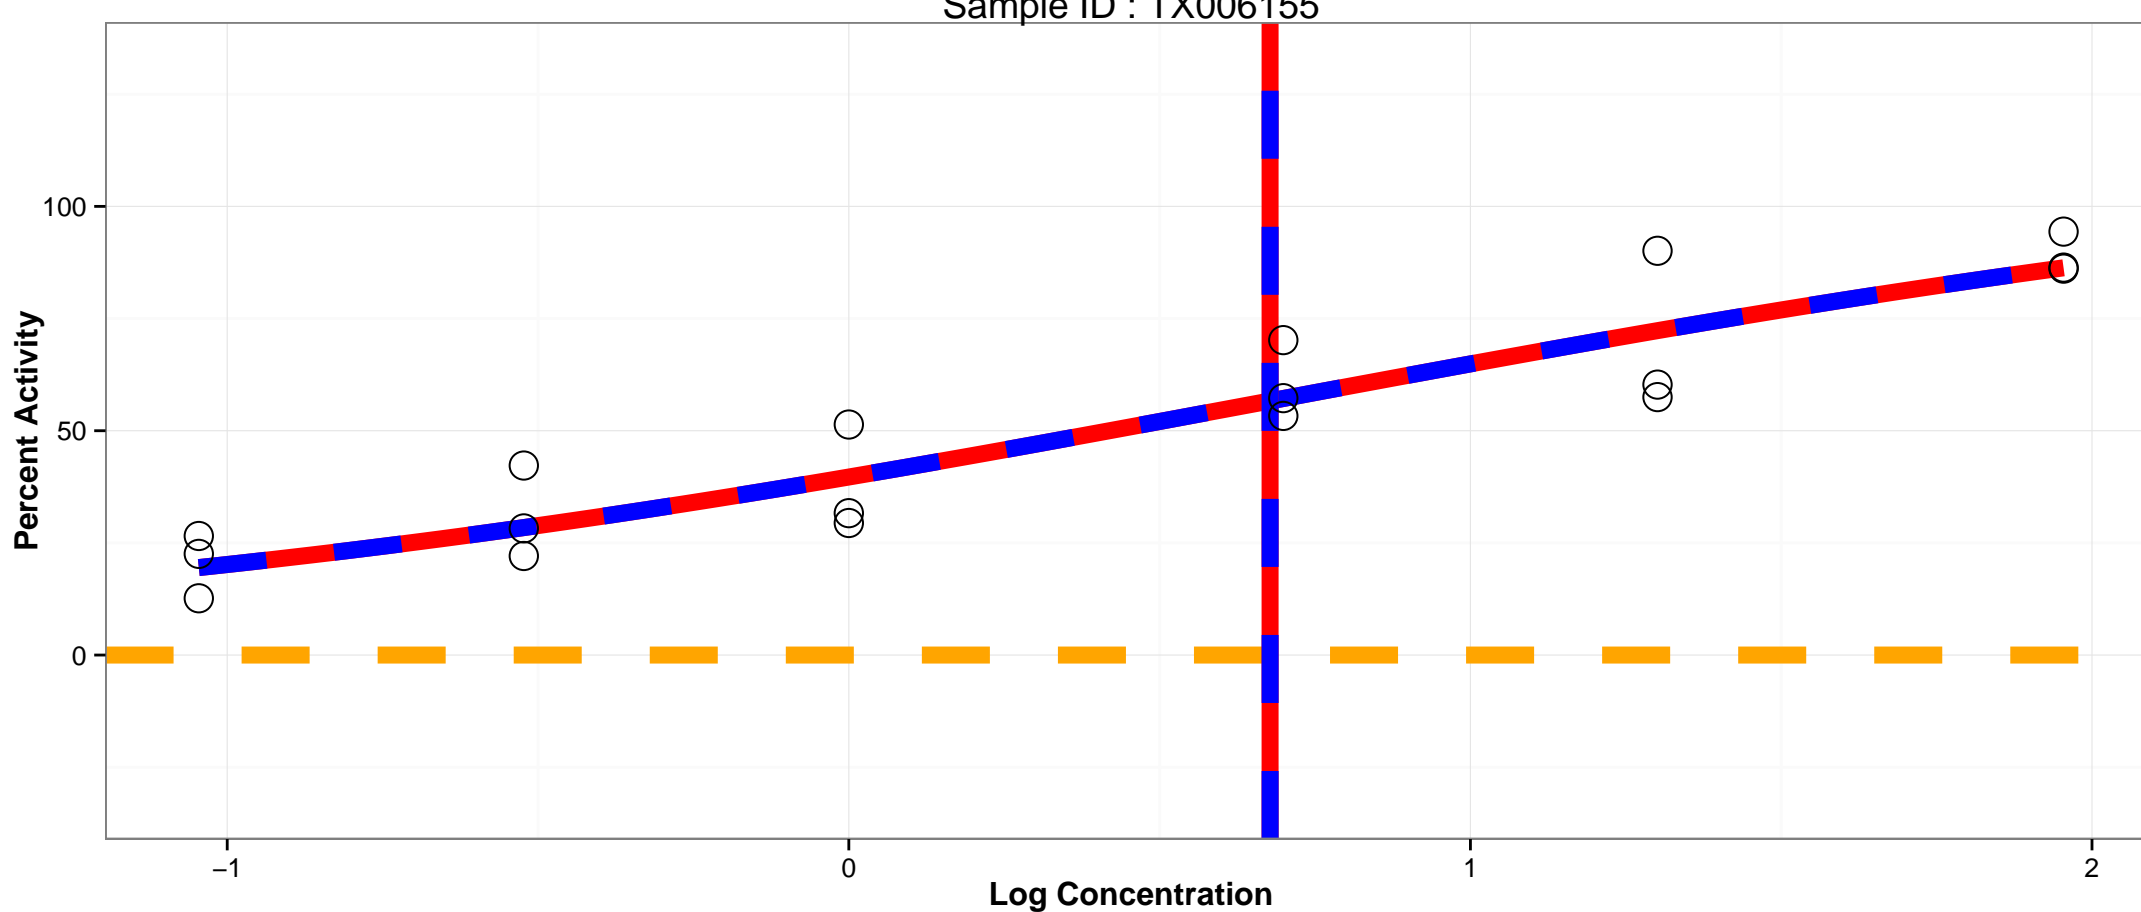

HILL MODEL

|     | tp   | ga    | gw    |
|-----|------|-------|-------|
| val | 113  | 0.678 | 0.396 |
| sd  | 24.2 | 0.578 | 0.102 |

GAIN-LOSS MODEL

|     | tp   | ga    | gw    | la   | lw   |
|-----|------|-------|-------|------|------|
| val | 113  | 0.678 | 0.396 | 3.67 | 4.57 |
| sd  | 24.2 | 0.577 | 0.102 | 743  | 1980 |

|      | CNST   | HILL   | GNLS   |
|------|--------|--------|--------|
| AIC  | 201.62 | 141.86 | 145.86 |
| PROB | 0      | 0.88   | 0.12   |
| RMSE | 57.18  | 9.35   | 9.35   |

MAX\_MEAN : 89 MAX\_MED : 86.4 BMAD : 5.54  
COFF : 20 HIT-CALL : 1 FITC : 42 ACTP : 1  
FLAGS :

Assay ID 1848 (NHEERL\_Quantilum\_inhib\_2\_dn)  
Sample ID : TX006155

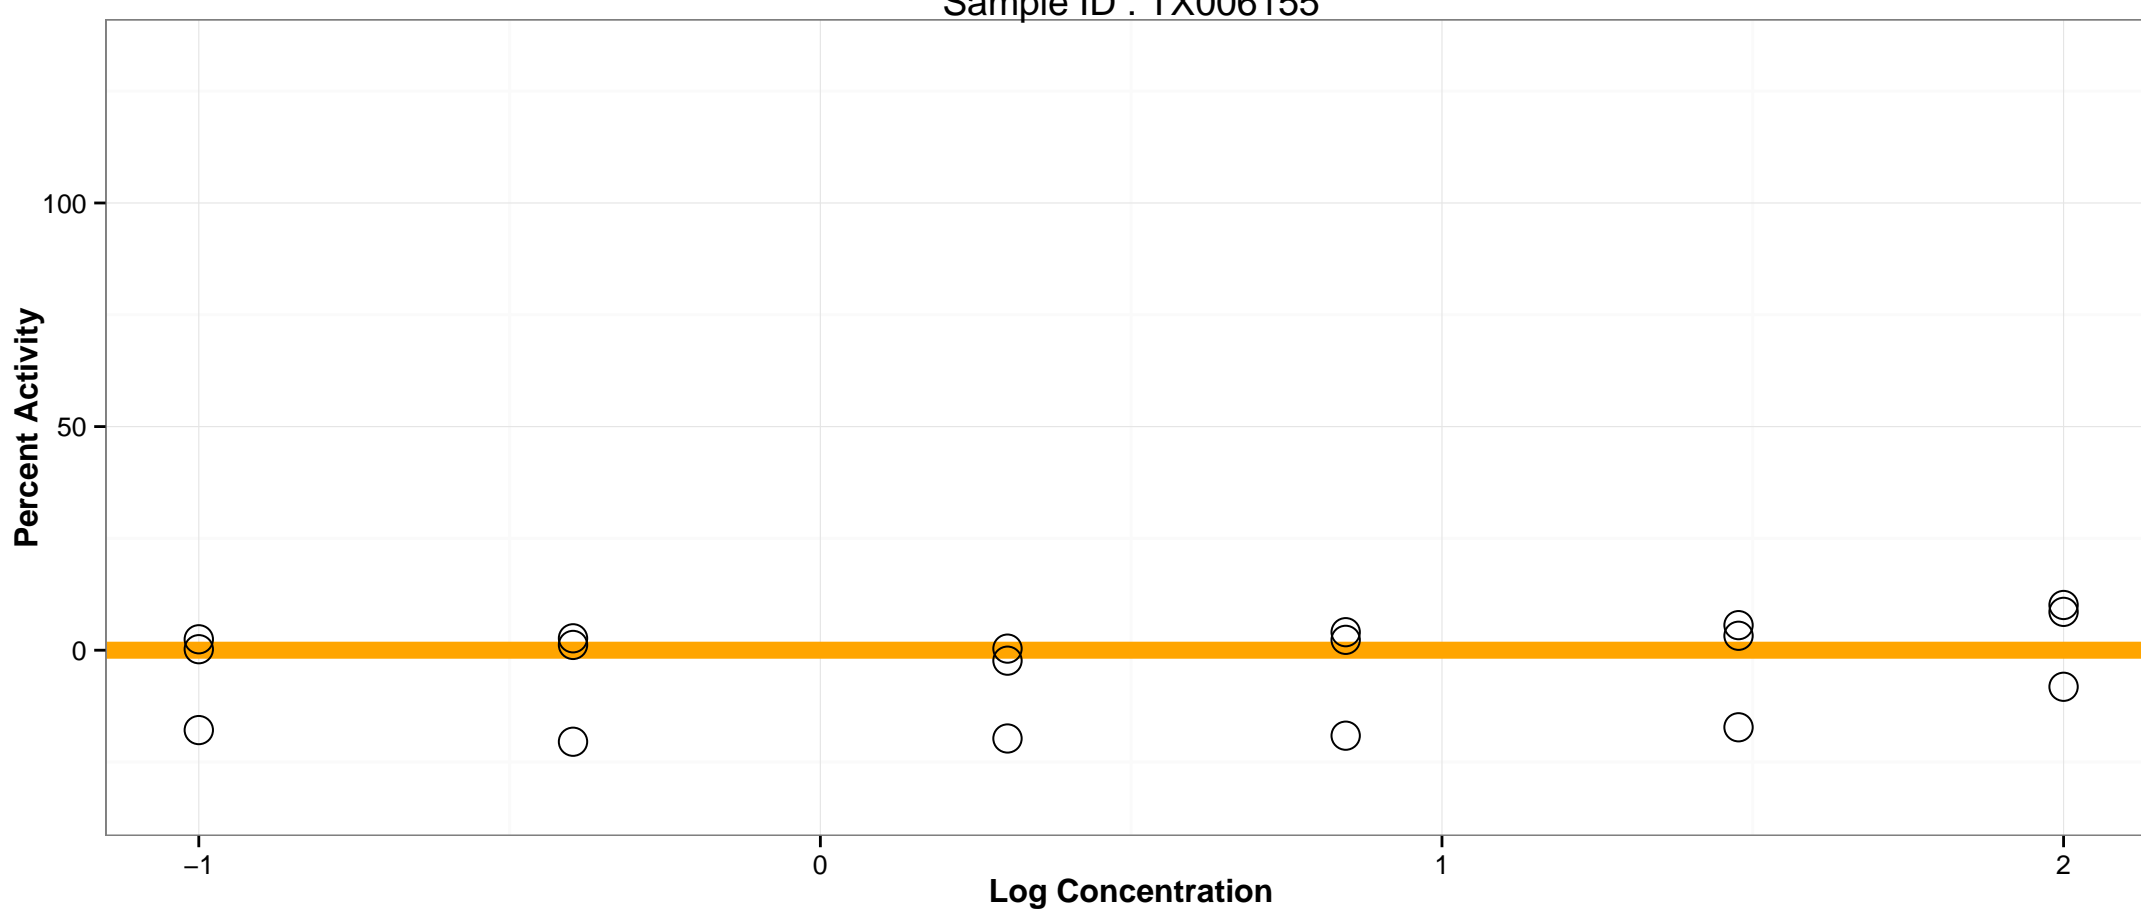

HILL MODEL

HILL MODEL: Not applicable

GAIN-LOSS MODEL

GNLS MODEL: Not applicable

|      | CNST   | HILL | GNLS |
|------|--------|------|------|
| AIC  | 139.51 | NA   | NA   |
| PROB | 1      | NA   | NA   |
| RMSE | 10.84  | NA   | NA   |

MAX\_MEAN : 3.51 MAX\_MED : 8.58 BMAD : 8.58  
COFF : 20 HIT-CALL : 0 FITC : 4 ACTP : 0  
FLAGS :



Assay ID 1508 (NHEERL\_TPO\_AUR\_dn)  
Sample ID : TX006156

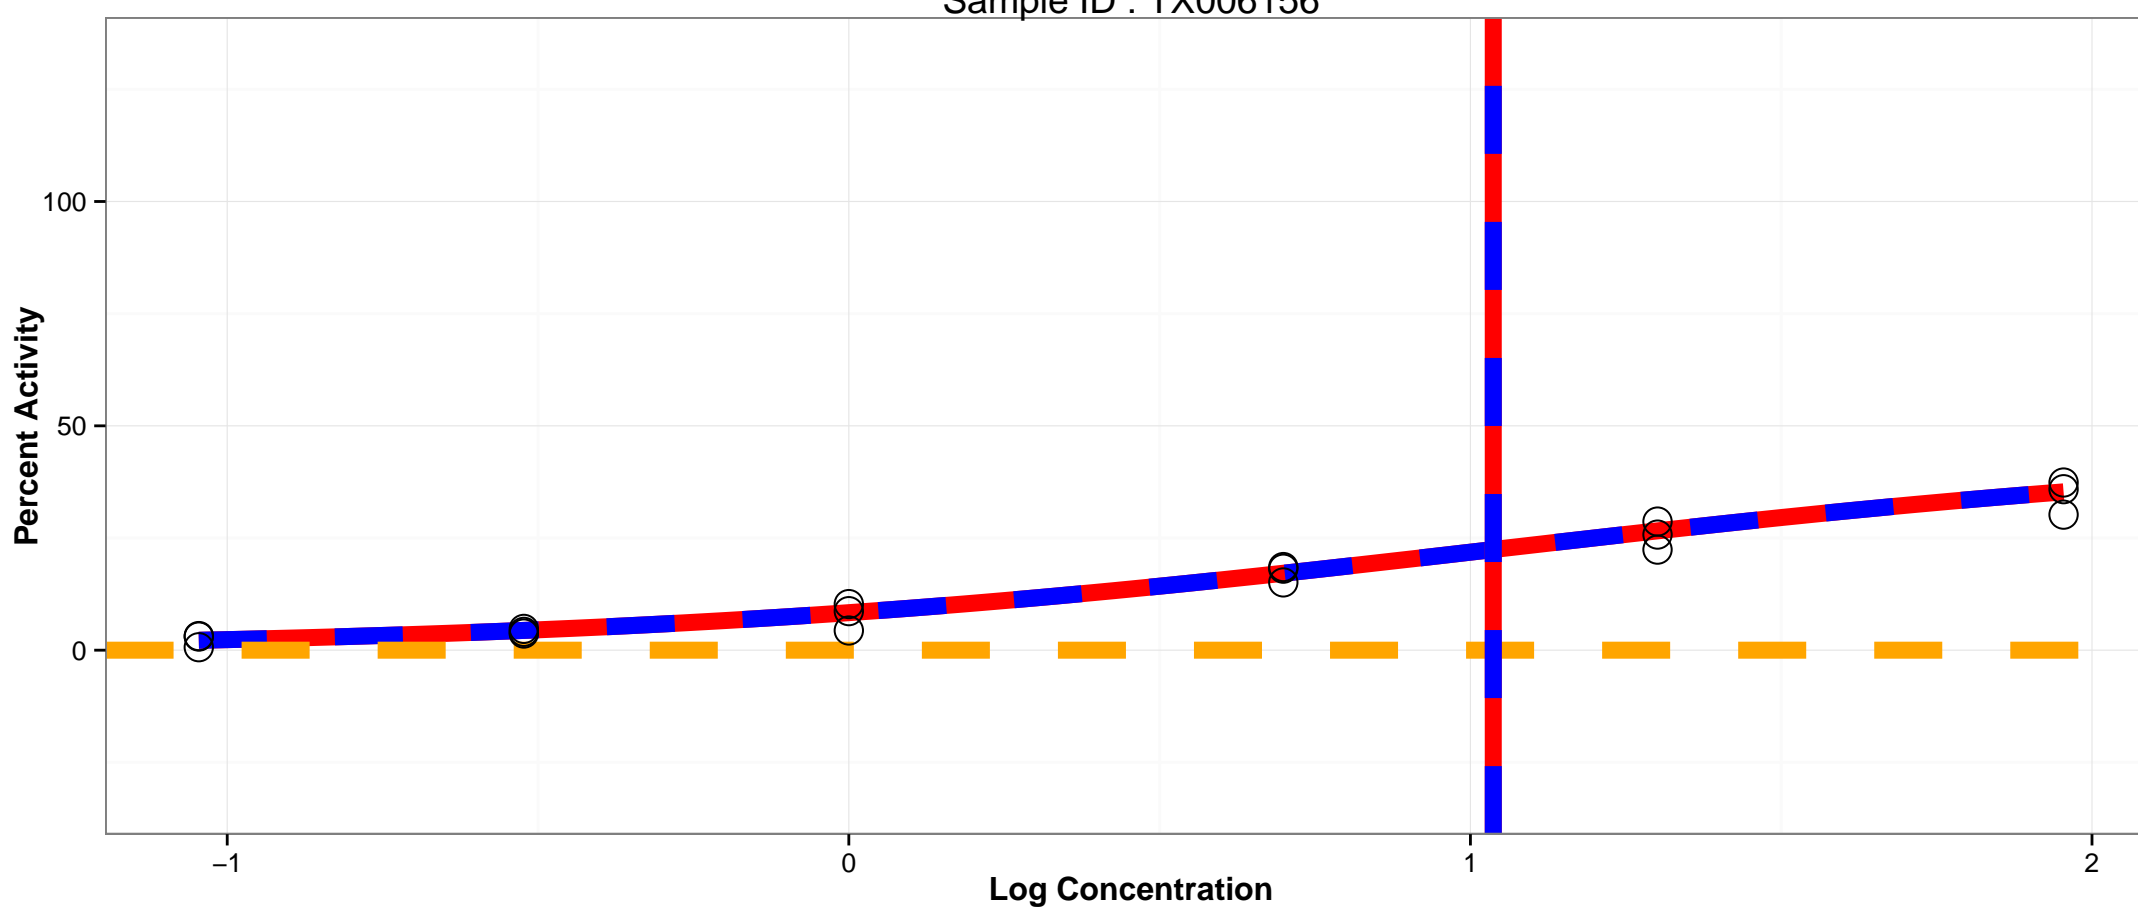

HILL MODEL

|     | tp   | ga    | gw     |
|-----|------|-------|--------|
| val | 44.9 | 1.04  | 0.617  |
| sd  | 5.49 | 0.213 | 0.0771 |

GAIN-LOSS MODEL

|     | tp   | ga    | gw     | la   | lw    |
|-----|------|-------|--------|------|-------|
| val | 44.9 | 1.04  | 0.617  | 2.52 | 16.2  |
| sd  | 5.49 | 0.213 | 0.0771 | 665  | 19000 |

|      | CNST   | HILL  | GNLS  |
|------|--------|-------|-------|
| AIC  | 161.27 | 86.88 | 90.88 |
| PROB | 0      | 0.88  | 0.12  |
| RMSE | 19.38  | 2.16  | 2.16  |

MAX\_MEAN : 34.5 MAX\_MED : 35.9 BMAD : 5.69  
COFF : 20 HIT-CALL : 1 FITC : 42 ACTP : 1  
FLAGS :

Assay ID 1509 (NHEERL\_HEK293T\_CellTiterGLO)  
Sample ID : TX006156

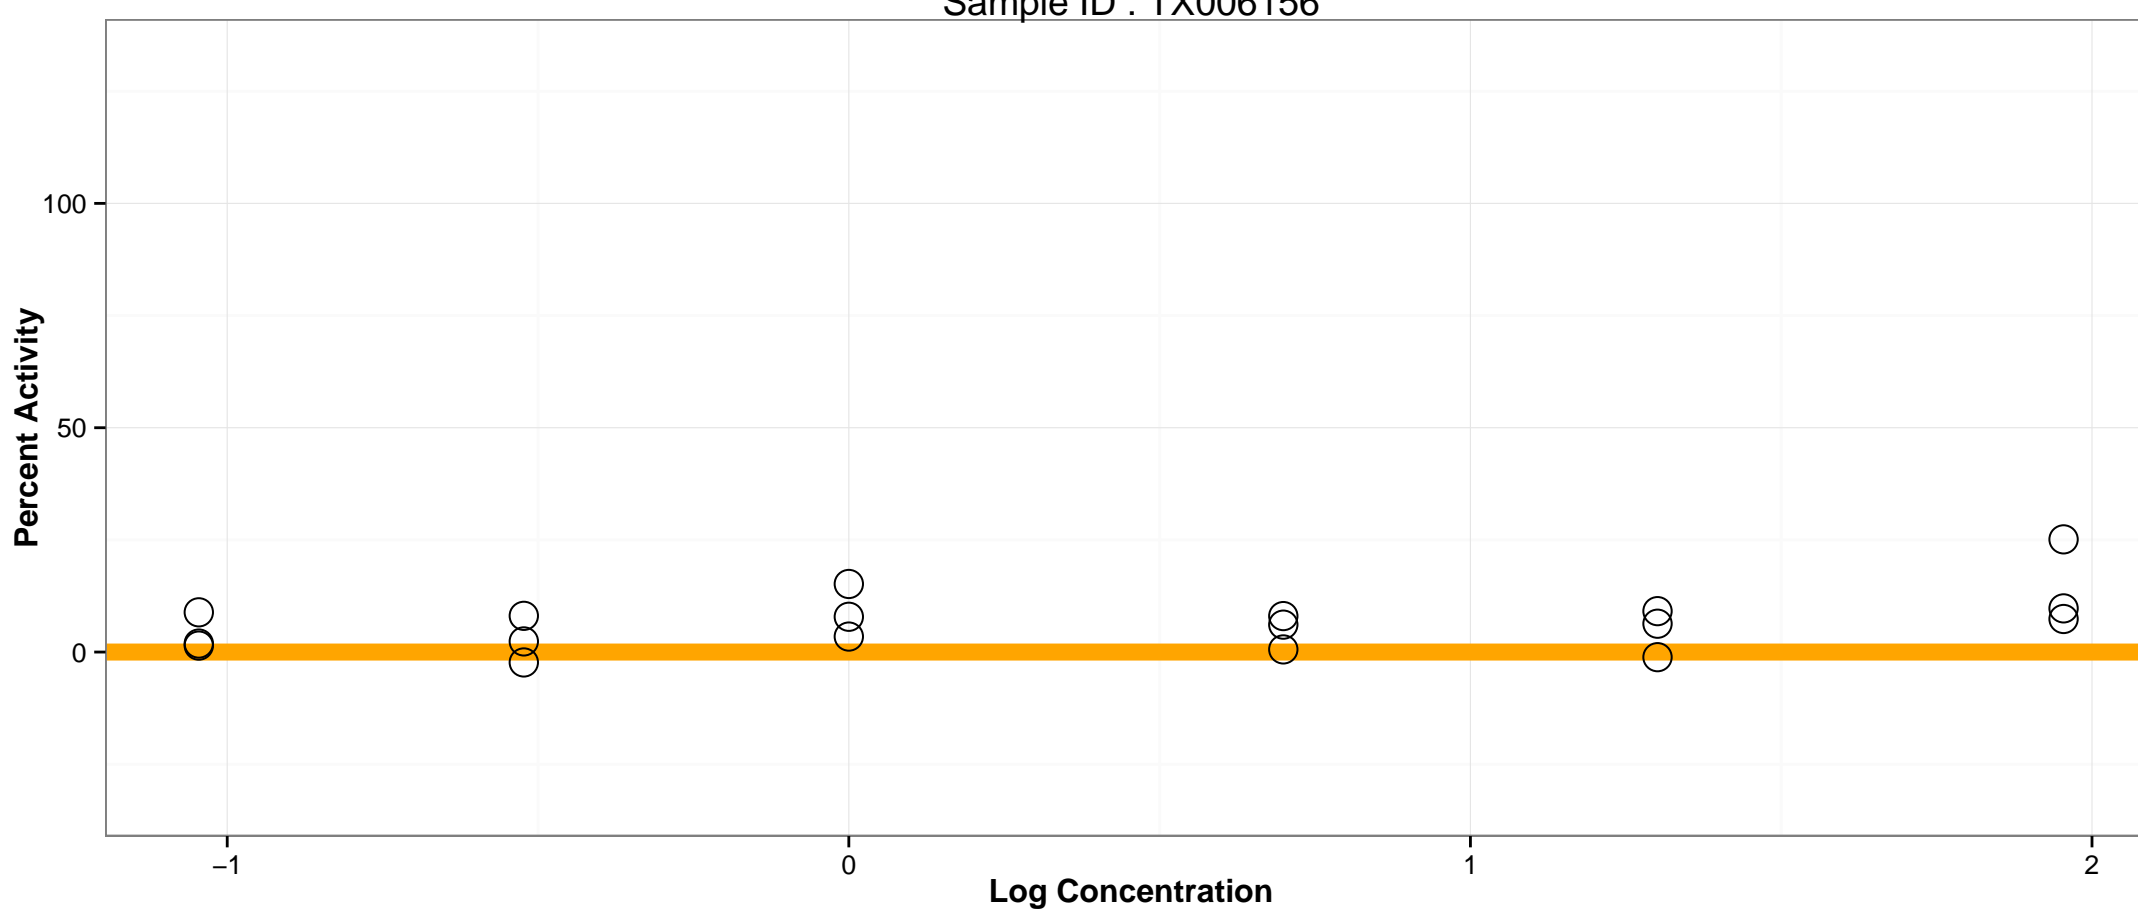

HILL MODEL

HILL MODEL: Not applicable

GAIN-LOSS MODEL

GNLS MODEL: Not applicable

|      | CNST   | HILL | GNLS |
|------|--------|------|------|
| AIC  | 131.91 | NA   | NA   |
| PROB | 1      | NA   | NA   |
| RMSE | 9.05   | NA   | NA   |

MAX\_MEAN : 14.1 MAX\_MED : 9.75 BMAD : 5.54  
COFF : 20 HIT-CALL : 0 FITC : 4 ACTP : 0  
FLAGS :

Assay ID 1848 (NHEERL\_QuantLum\_inhib\_2\_dn)  
Sample ID : TX006156

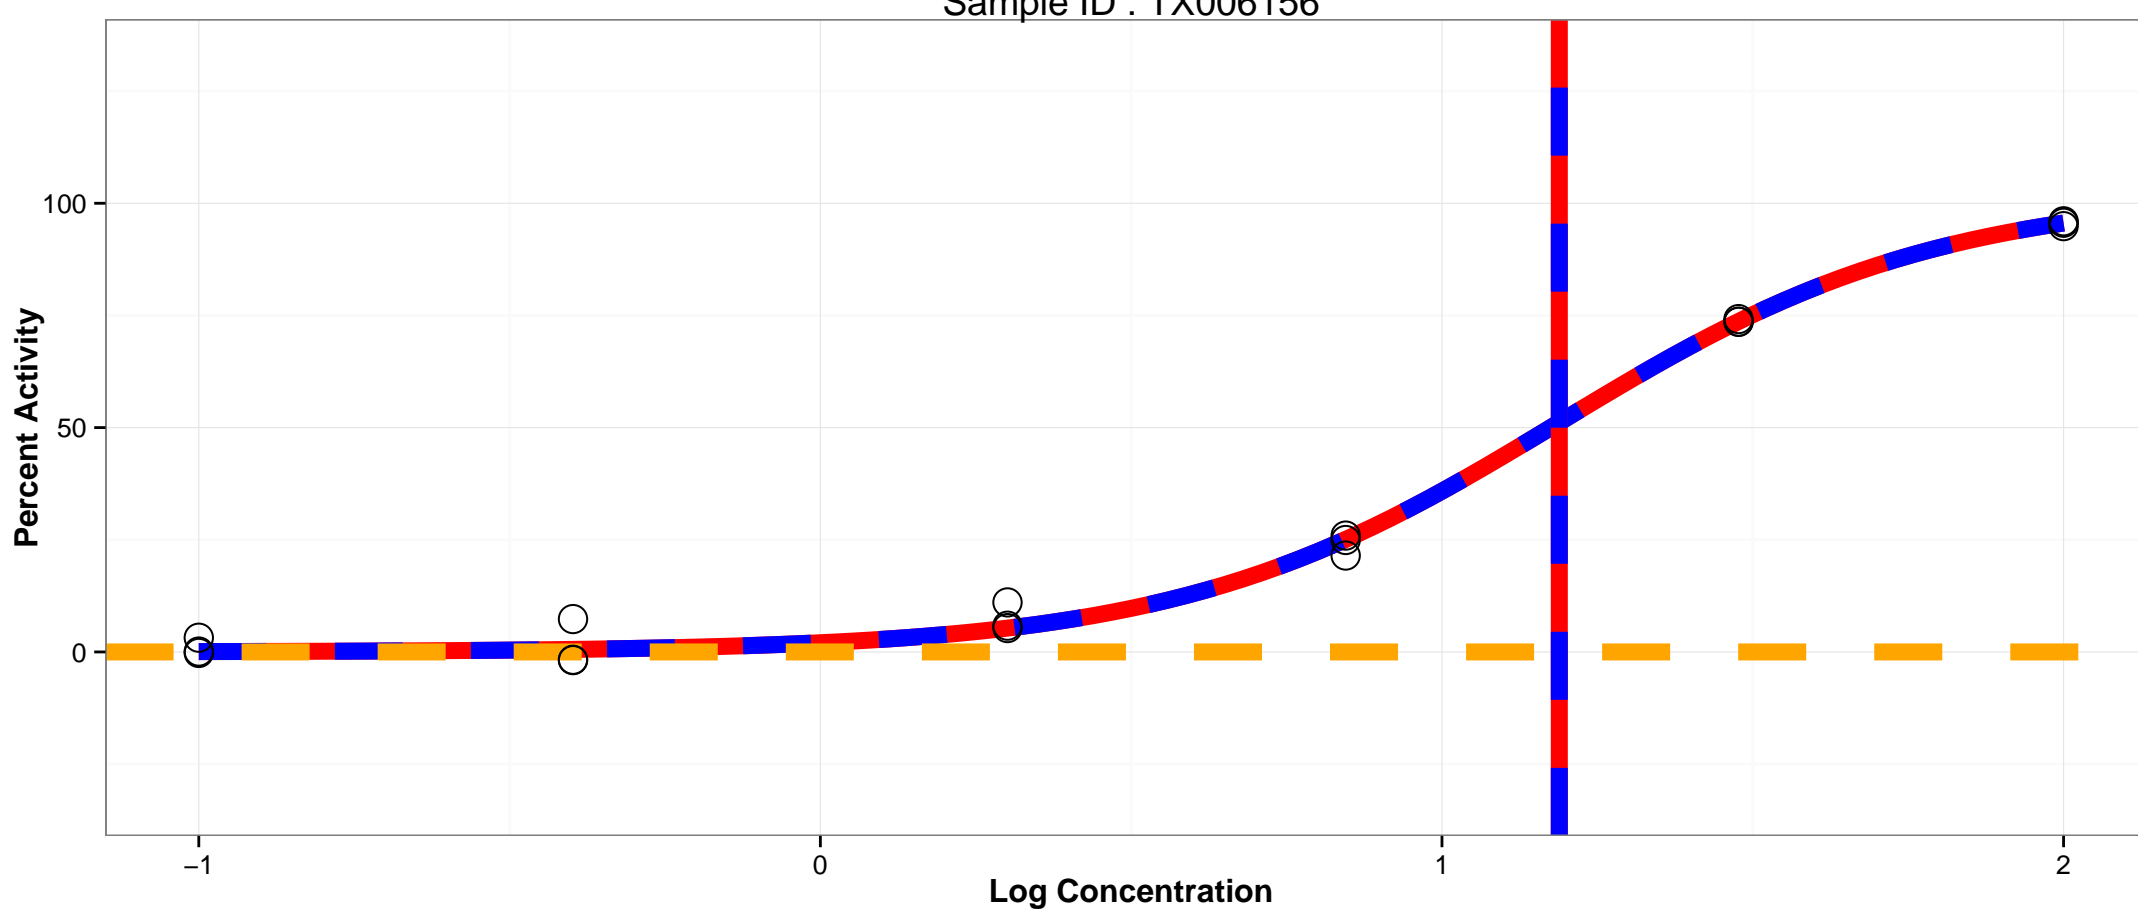

HILL MODEL

|     | tp  | ga     | gw     |
|-----|-----|--------|--------|
| val | 102 | 1.19   | 1.42   |
| sd  | 1.5 | 0.0162 | 0.0534 |

GAIN-LOSS MODEL

|     | tp  | ga   | gw   | la | lw   |
|-----|-----|------|------|----|------|
| val | 102 | 1.19 | 1.42 | 4  | 12.1 |
| sd  | NA  | NA   | NA   | NA | NA   |

|      | CNST   | HILL | GNLS |
|------|--------|------|------|
| AIC  | 194.11 | 88.6 | 92.6 |
| PROB | 0      | 0.88 | 0.12 |
| RMSE | 50.4   | 2.52 | 2.52 |

MAX\_MEAN : 95.5 MAX\_MED : 95.7 BMAD : 8.58  
COFF : 20 HIT-CALL : 1 FITC : 42 ACTP : 1  
FLAGS :

Assay ID 1508 (NHEERL\_TPO\_AUR\_dn)  
Sample ID : TX006159

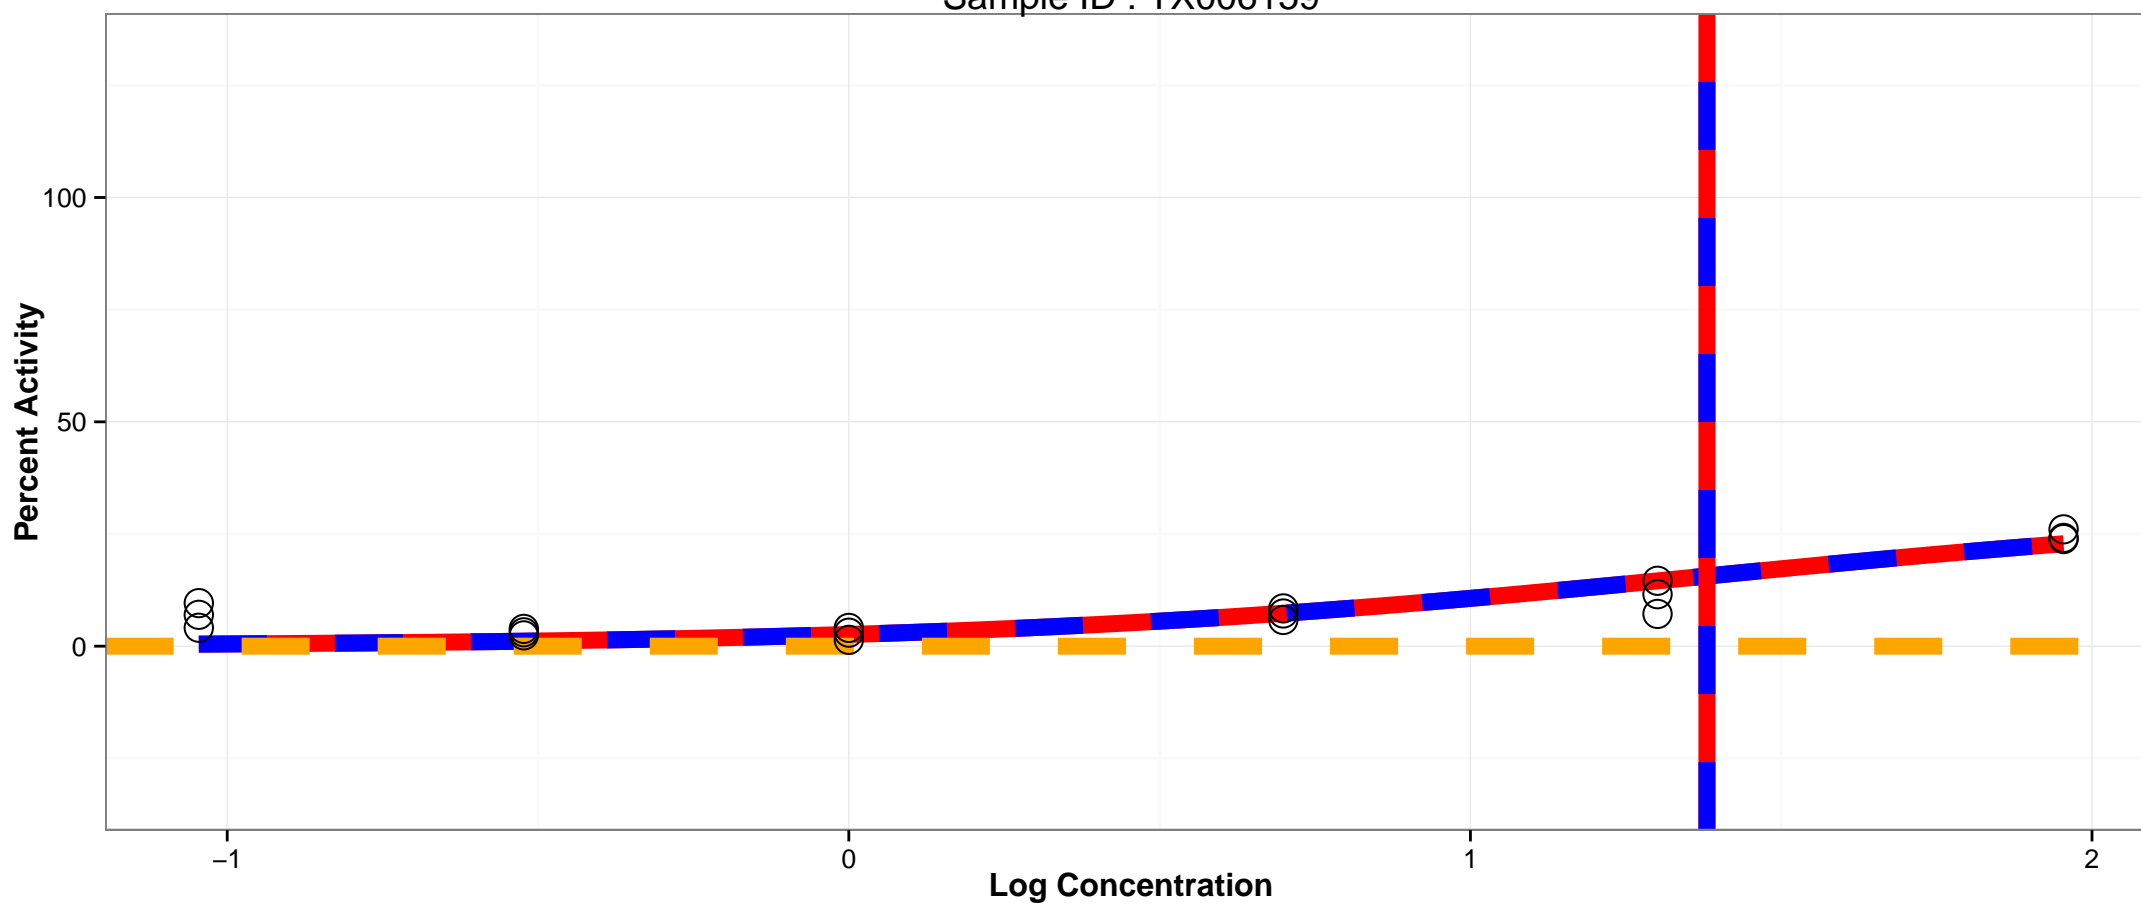

HILL MODEL

|     | tp   | ga    | gw    |
|-----|------|-------|-------|
| val | 31.3 | 1.38  | 0.753 |
| sd  | 6.17 | 0.261 | 0.17  |

GAIN-LOSS MODEL

|     | tp   | ga    | gw    | la     | lw     |
|-----|------|-------|-------|--------|--------|
| val | 31.3 | 1.38  | 0.753 | 3.71   | 7.85   |
| sd  | 6.17 | 0.261 | 0.17  | 184000 | 824000 |

|      | CNST  | HILL   | GNLS   |
|------|-------|--------|--------|
| AIC  | 142.6 | 104.07 | 108.07 |
| PROB | 0     | 0.88   | 0.12   |
| RMSE | 12.03 | 3.62   | 3.62   |

MAX\_MEAN : 24.7 MAX\_MED : 24.1 BMAD : 5.69  
COFF : 20 HIT-CALL : 1 FITC : 42 ACTP : 1  
FLAGS : 6

Assay ID 1509 (NHEERL\_HEK293T\_CellTiterGLO)  
Sample ID : TX006159

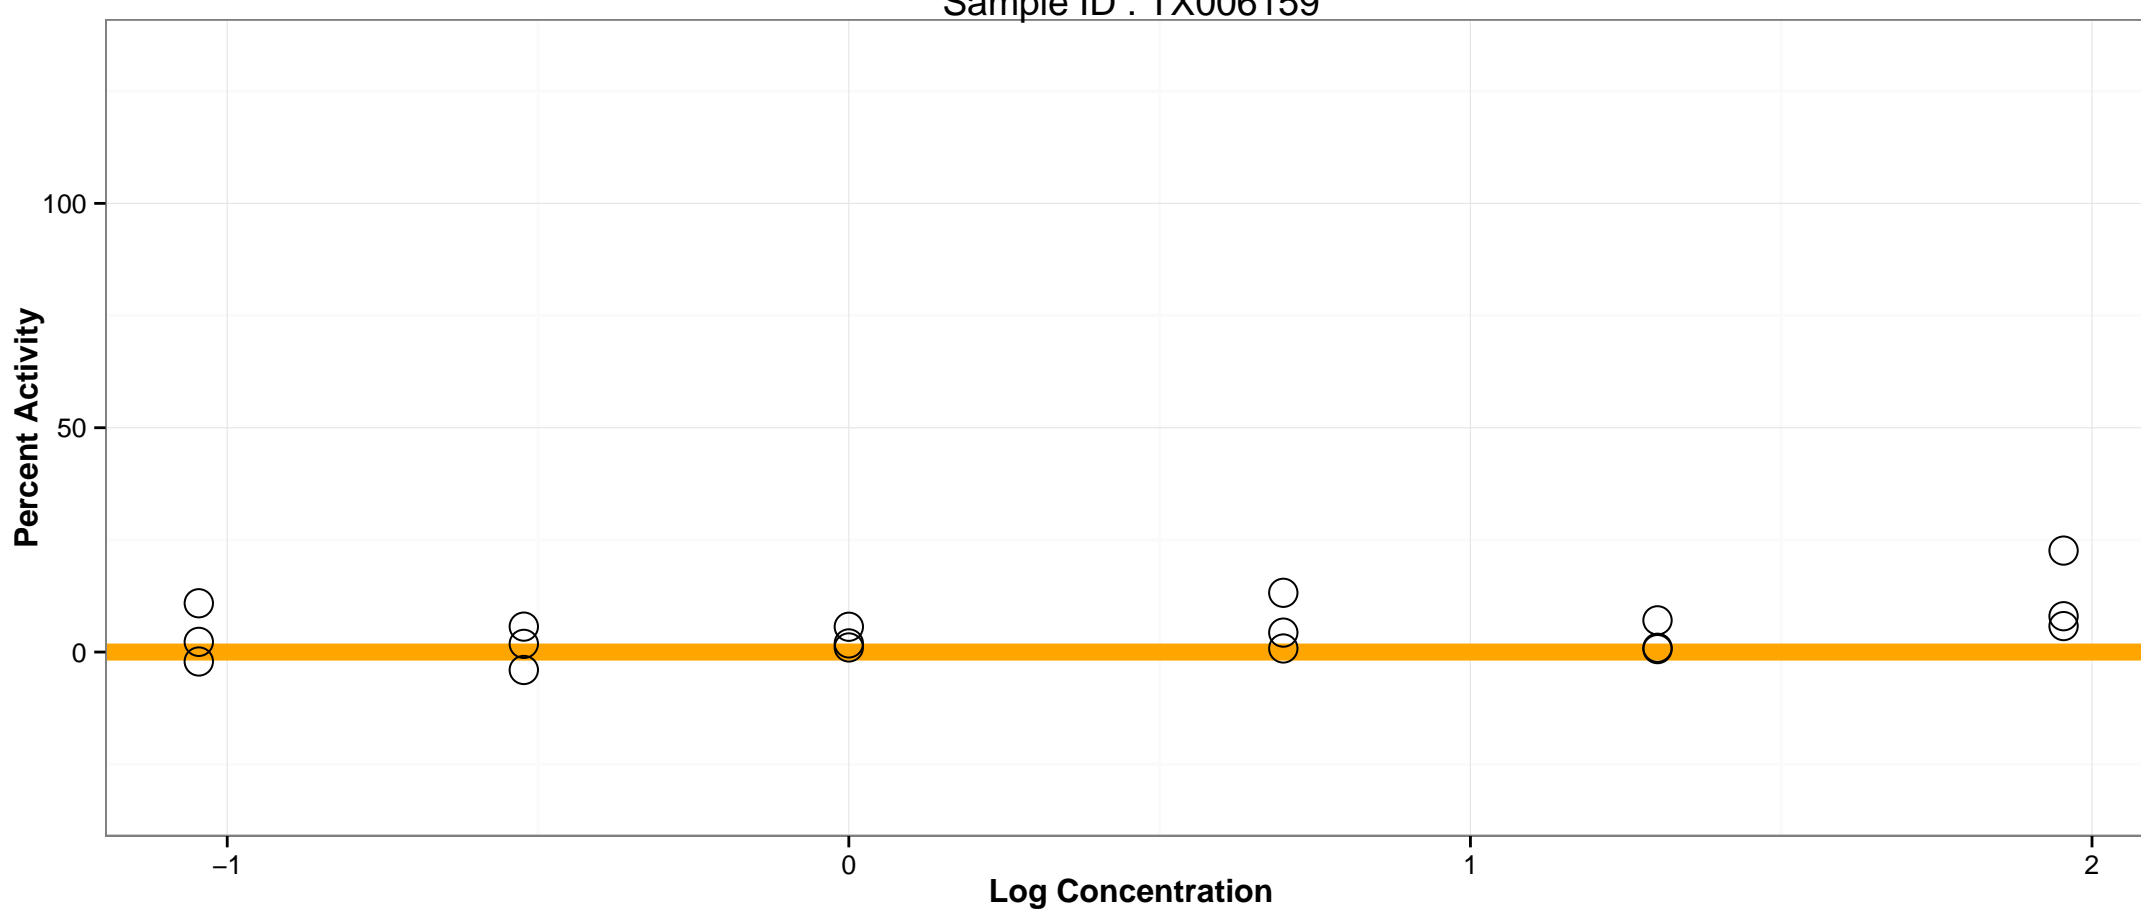

HILL MODEL

HILL MODEL: Not applicable

GAIN-LOSS MODEL

GNLS MODEL: Not applicable

|      | CNST   | HILL | GNLS |
|------|--------|------|------|
| AIC  | 124.43 | NA   | NA   |
| PROB | 1      | NA   | NA   |
| RMSE | 7.72   | NA   | NA   |

MAX\_MEAN : 12.1 MAX\_MED : 8 BMAD : 5.54  
COFF : 20 HIT-CALL : 0 FITC : 4 ACTP : 0  
FLAGS :

Assay ID 1848 (NHEERL\_Quantilum\_inhib\_2\_dn)  
Sample ID : TX006159

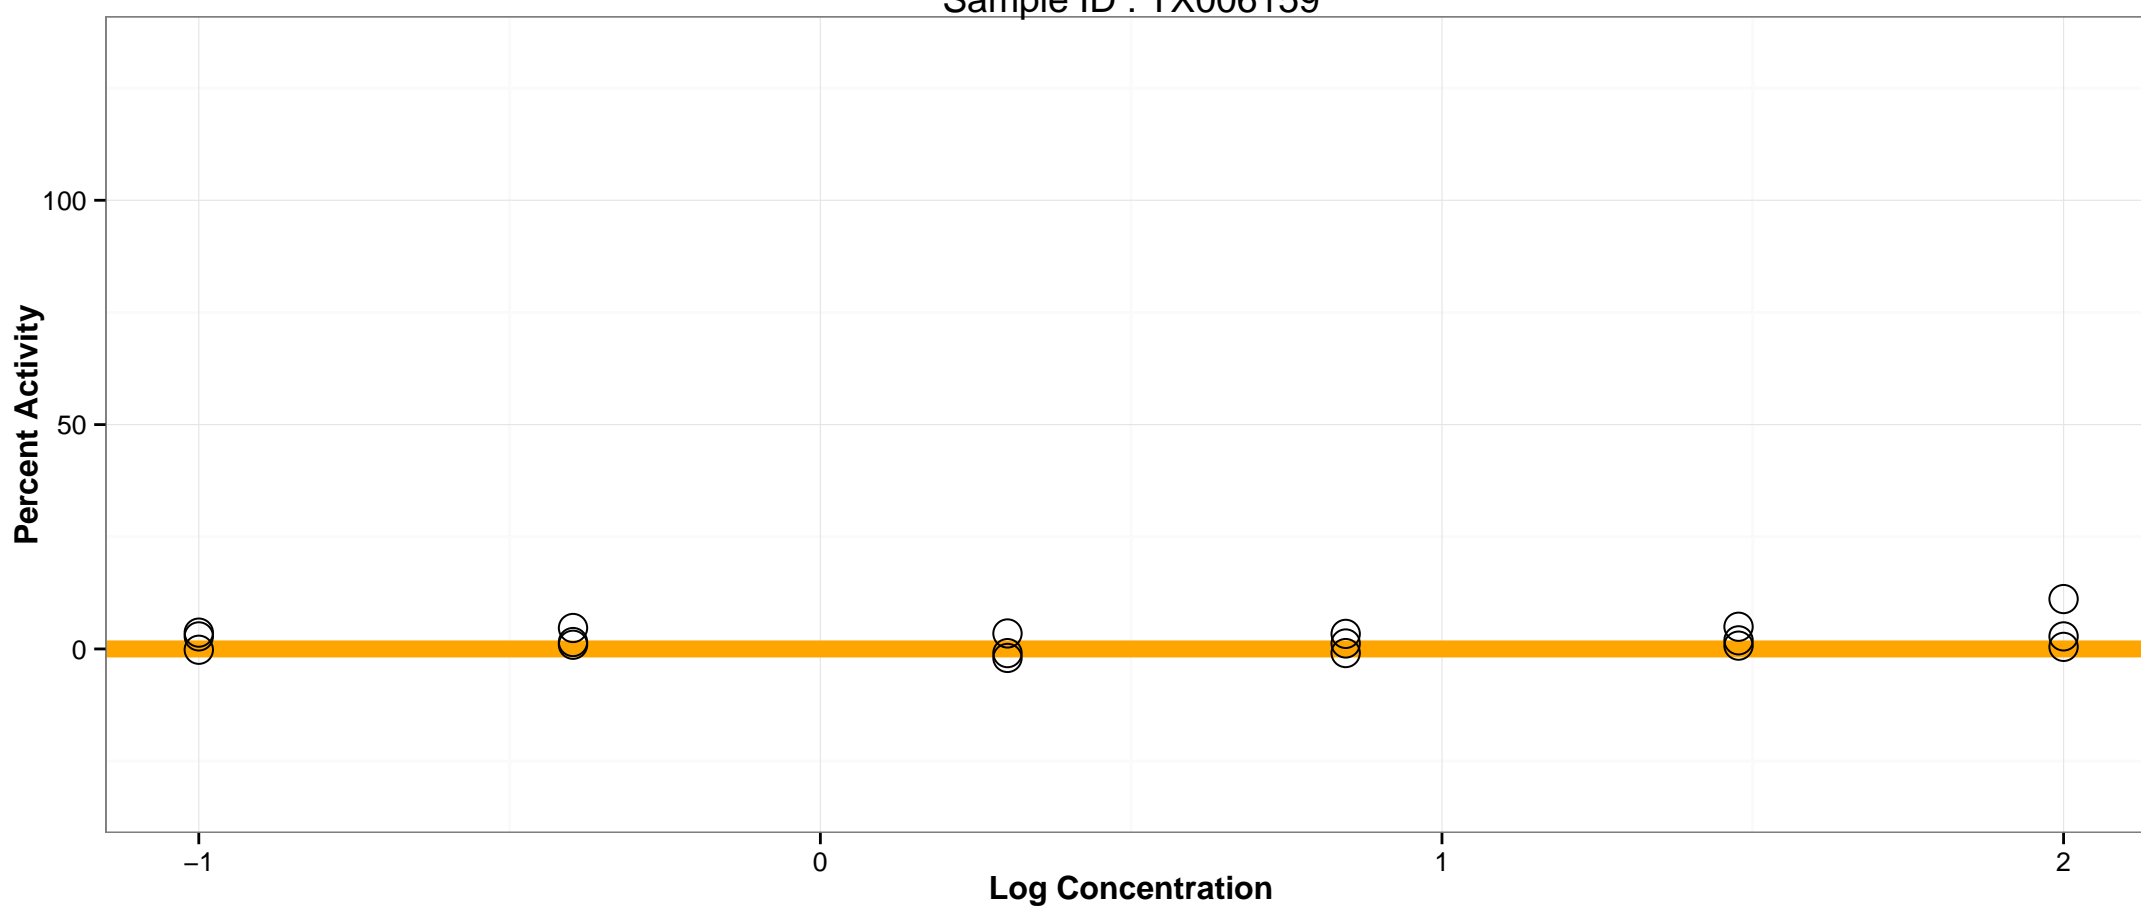

HILL MODEL

HILL MODEL: Not applicable

GAIN-LOSS MODEL

GNLS MODEL: Not applicable

|      | CNST | HILL | GNLS |
|------|------|------|------|
| AIC  | 97.3 | NA   | NA   |
| PROB | 1    | NA   | NA   |
| RMSE | 3.63 | NA   | NA   |

MAX\_MEAN : 4.8 MAX\_MED : 2.81 BMAD : 8.58  
COFF : 20 HIT-CALL : 0 FITC : 4 ACTP : 0  
FLAGS :

Assay ID 1508 (NHEERL\_TPO\_AUR\_dn)  
Sample ID : TX006168

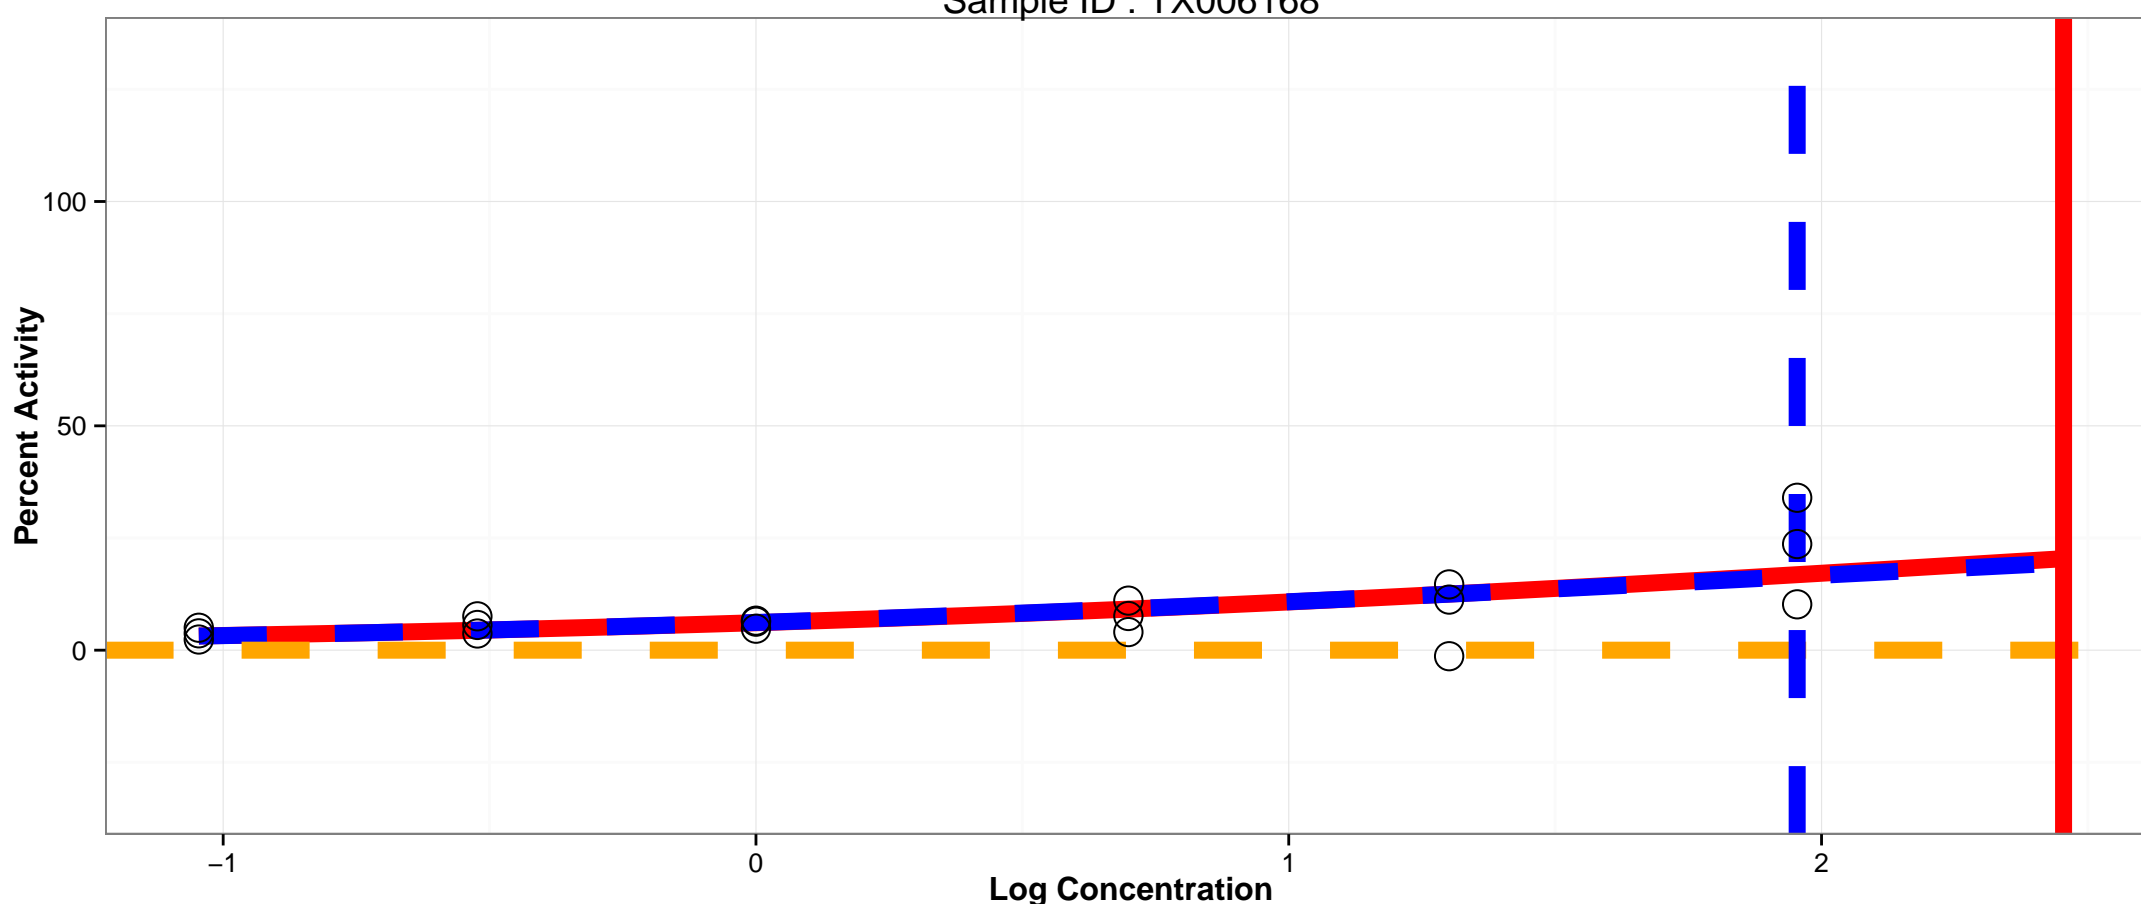

HILL MODEL

|     | tp   | ga   | gw    |
|-----|------|------|-------|
| val | 40.8 | 2.45 | 0.307 |
| sd  | 50.2 | 2.46 | 0.11  |

GAIN-LOSS MODEL

|     | tp   | ga   | gw    | la   | lw   |
|-----|------|------|-------|------|------|
| val | 32.8 | 1.95 | 0.325 | 2.95 | 7.54 |
| sd  | 62   | 3.69 | 0.118 | 470  | 3570 |

|      | CNST   | HILL   | GNLS   |
|------|--------|--------|--------|
| AIC  | 141.04 | 117.69 | 121.94 |
| PROB | 0      | 0.89   | 0.11   |
| RMSE | 12.05  | 5.93   | 6      |

MAX\_MEAN : 22.6 MAX\_MED : 23.7 BMAD : 5.69  
COFF : 20 HIT-CALL : 1 FITC : 42 ACTP : 1  
FLAGS : 11; 6

Assay ID 1509 (NHEERL\_HEK293T\_CellTiterGLO)  
Sample ID : TX006168

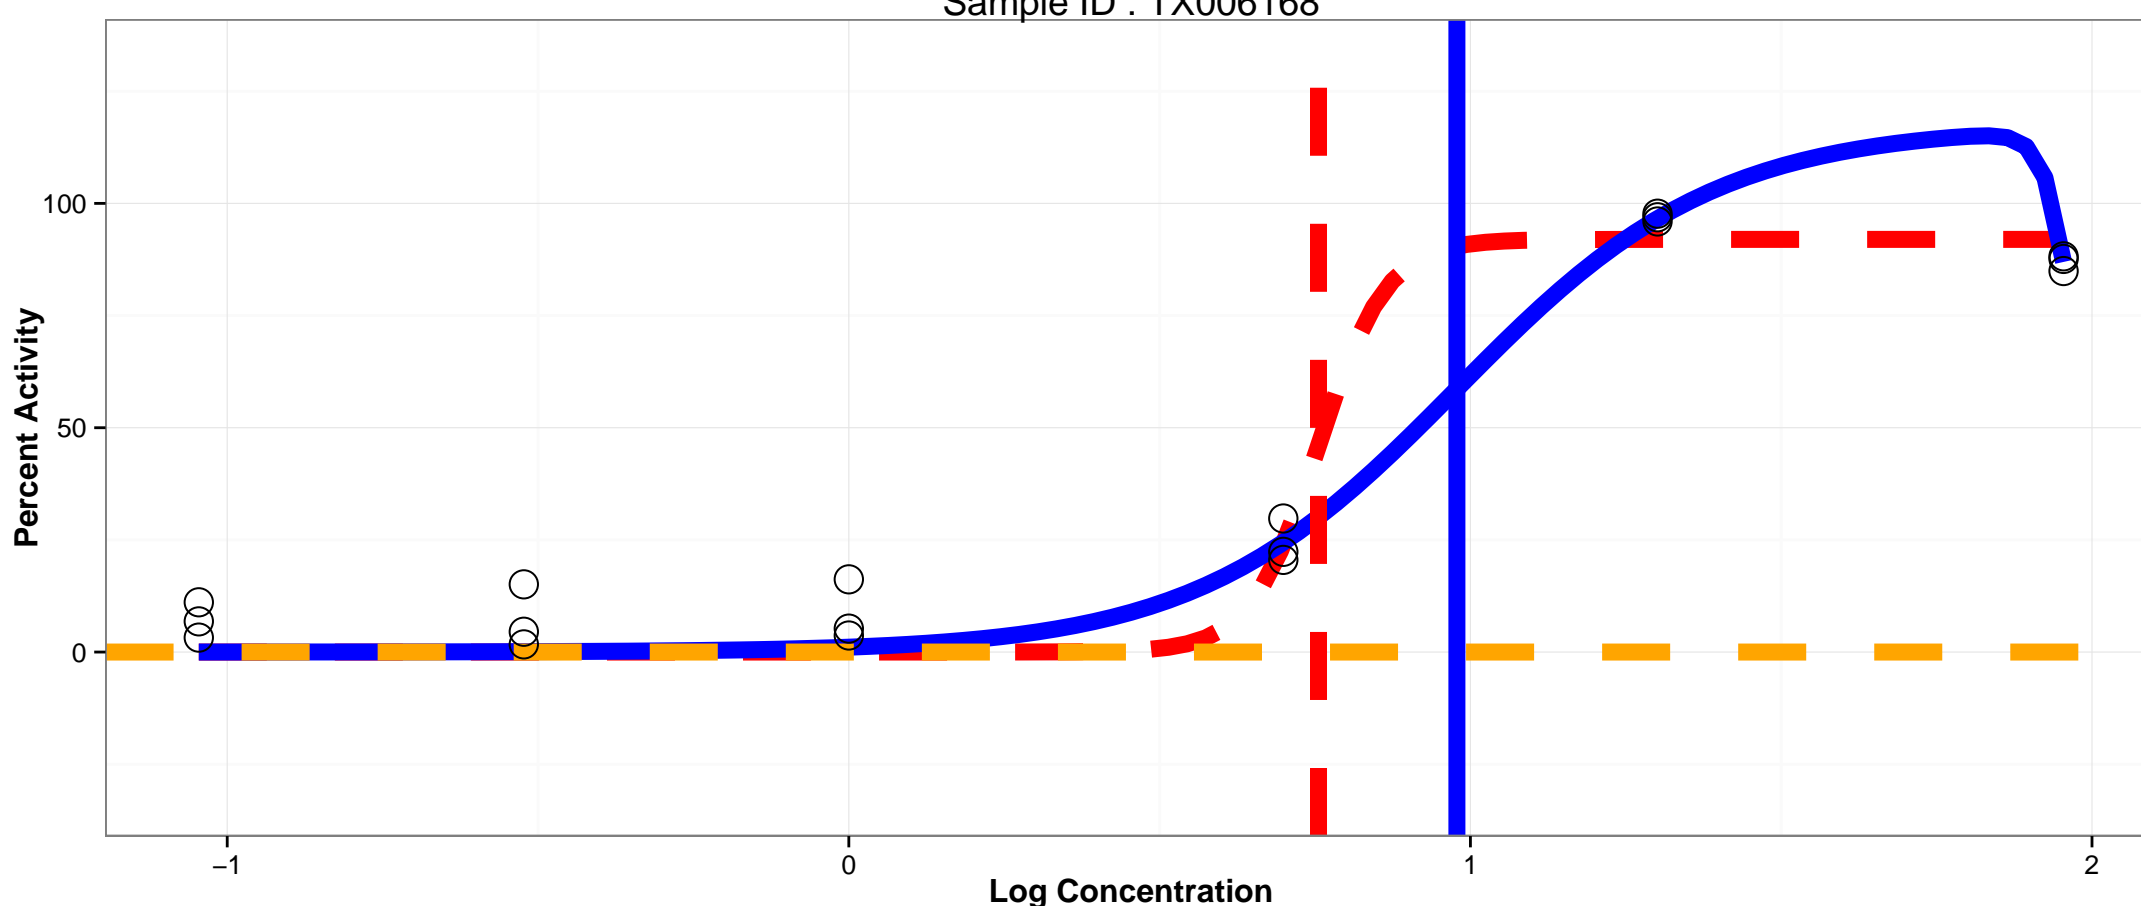

HILL MODEL

|     | tp   | ga    | gw   |
|-----|------|-------|------|
| val | 92   | 0.756 | 8    |
| sd  | 2.82 | 0.116 | 16.3 |

GAIN-LOSS MODEL

|     | tp   | ga    | gw   | la      | lw   |
|-----|------|-------|------|---------|------|
| val | 117  | 0.978 | 2.07 | 1.98    | 18   |
| sd  | 71.1 | 0.41  | 2.01 | 0.00676 | 35.4 |

|      | CNST   | HILL   | GNLS   |
|------|--------|--------|--------|
| AIC  | 197.21 | 131.16 | 128.06 |
| PROB | 0      | 0.18   | 0.82   |
| RMSE | 54.45  | 7.23   | 6.4    |

MAX\_MEAN : 96.9 MAX\_MED : 96.9 BMAD : 5.54  
COFF : 20 HIT-CALL : 1 FITC : 50 ACTP : 1  
FLAGS :

Assay ID 1848 (NHEERL\_QuantLum\_inhib\_2\_dn)  
Sample ID : TX006168

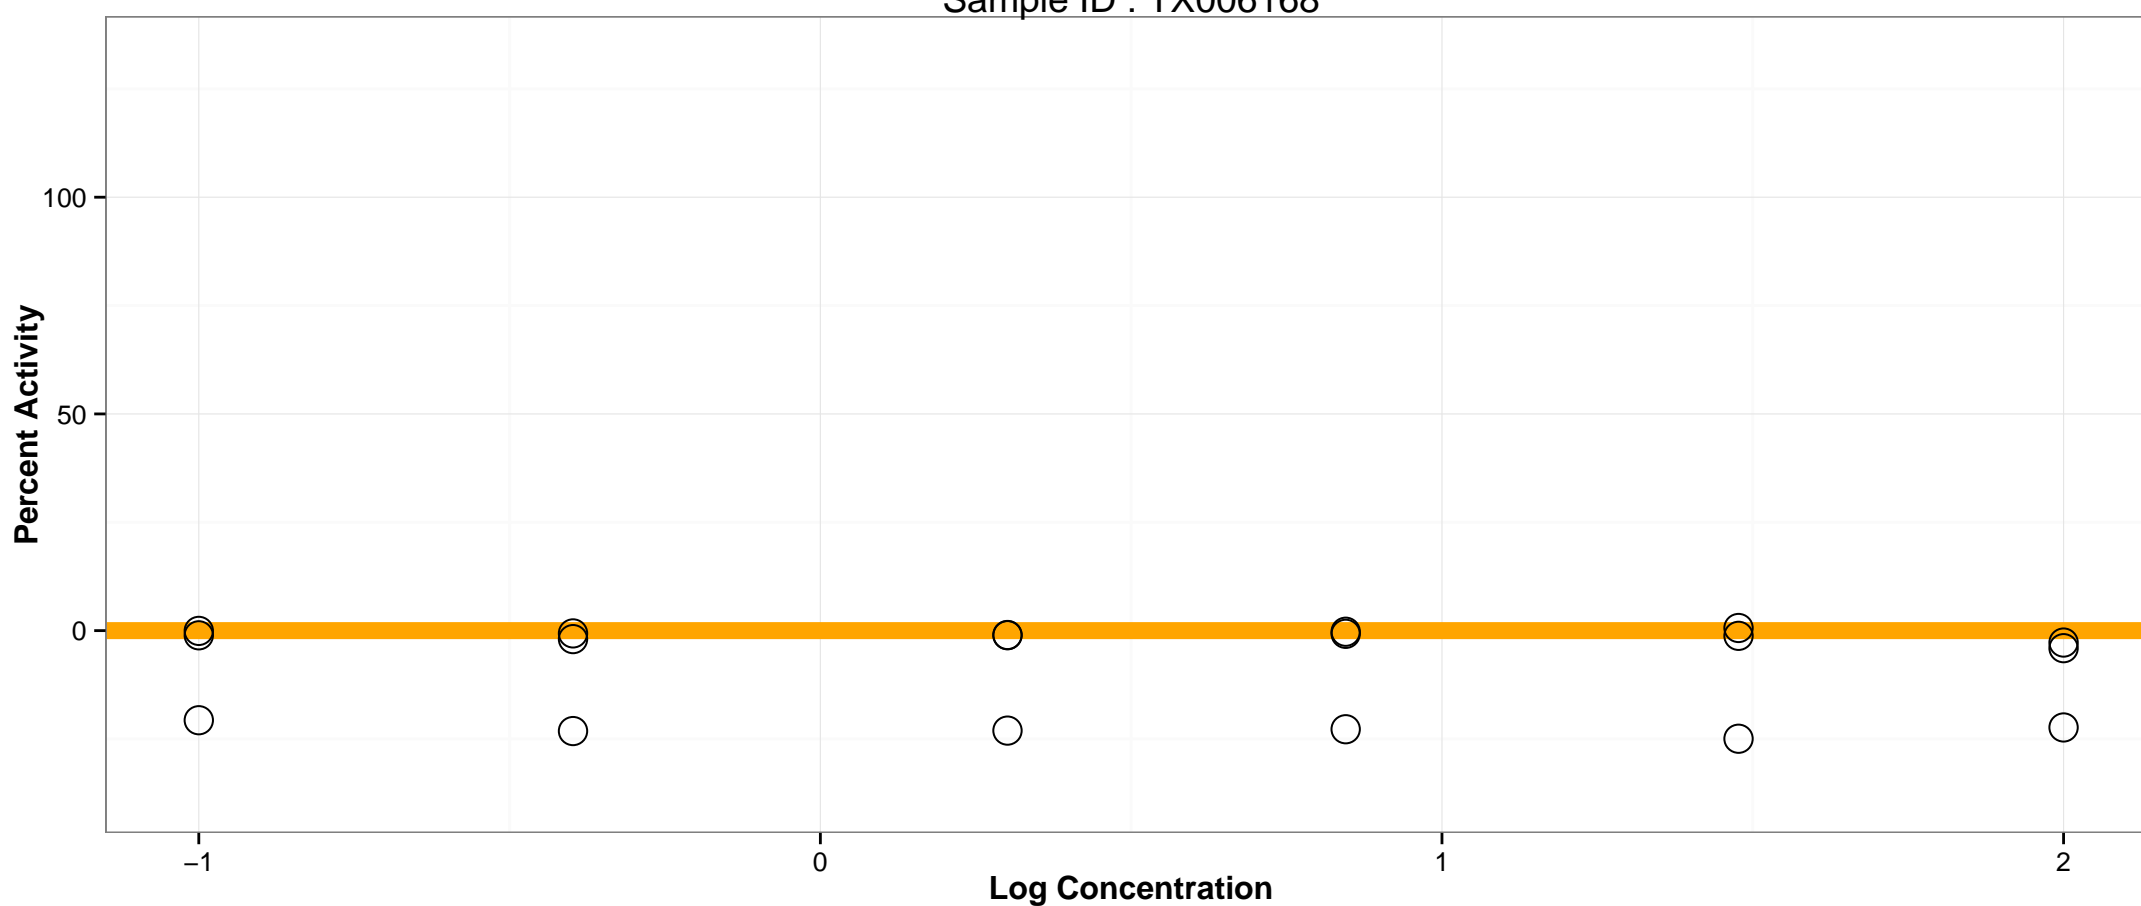

HILL MODEL

HILL MODEL: Not applicable

GAIN-LOSS MODEL

GNLS MODEL: Not applicable

|      | CNST   | HILL | GNLS |
|------|--------|------|------|
| AIC  | 145.58 | NA   | NA   |
| PROB | 1      | NA   | NA   |
| RMSE | 13.26  | NA   | NA   |

MAX\_MEAN : -7.26 MAX\_MED : -0.726 BMAD : 8.58  
COFF : 20 HIT-CALL : 0 FITC : 4 ACTP : 0  
FLAGS :

Assay ID 1508 (NHEERL\_TPO\_AUR\_dn)  
Sample ID : TX006179

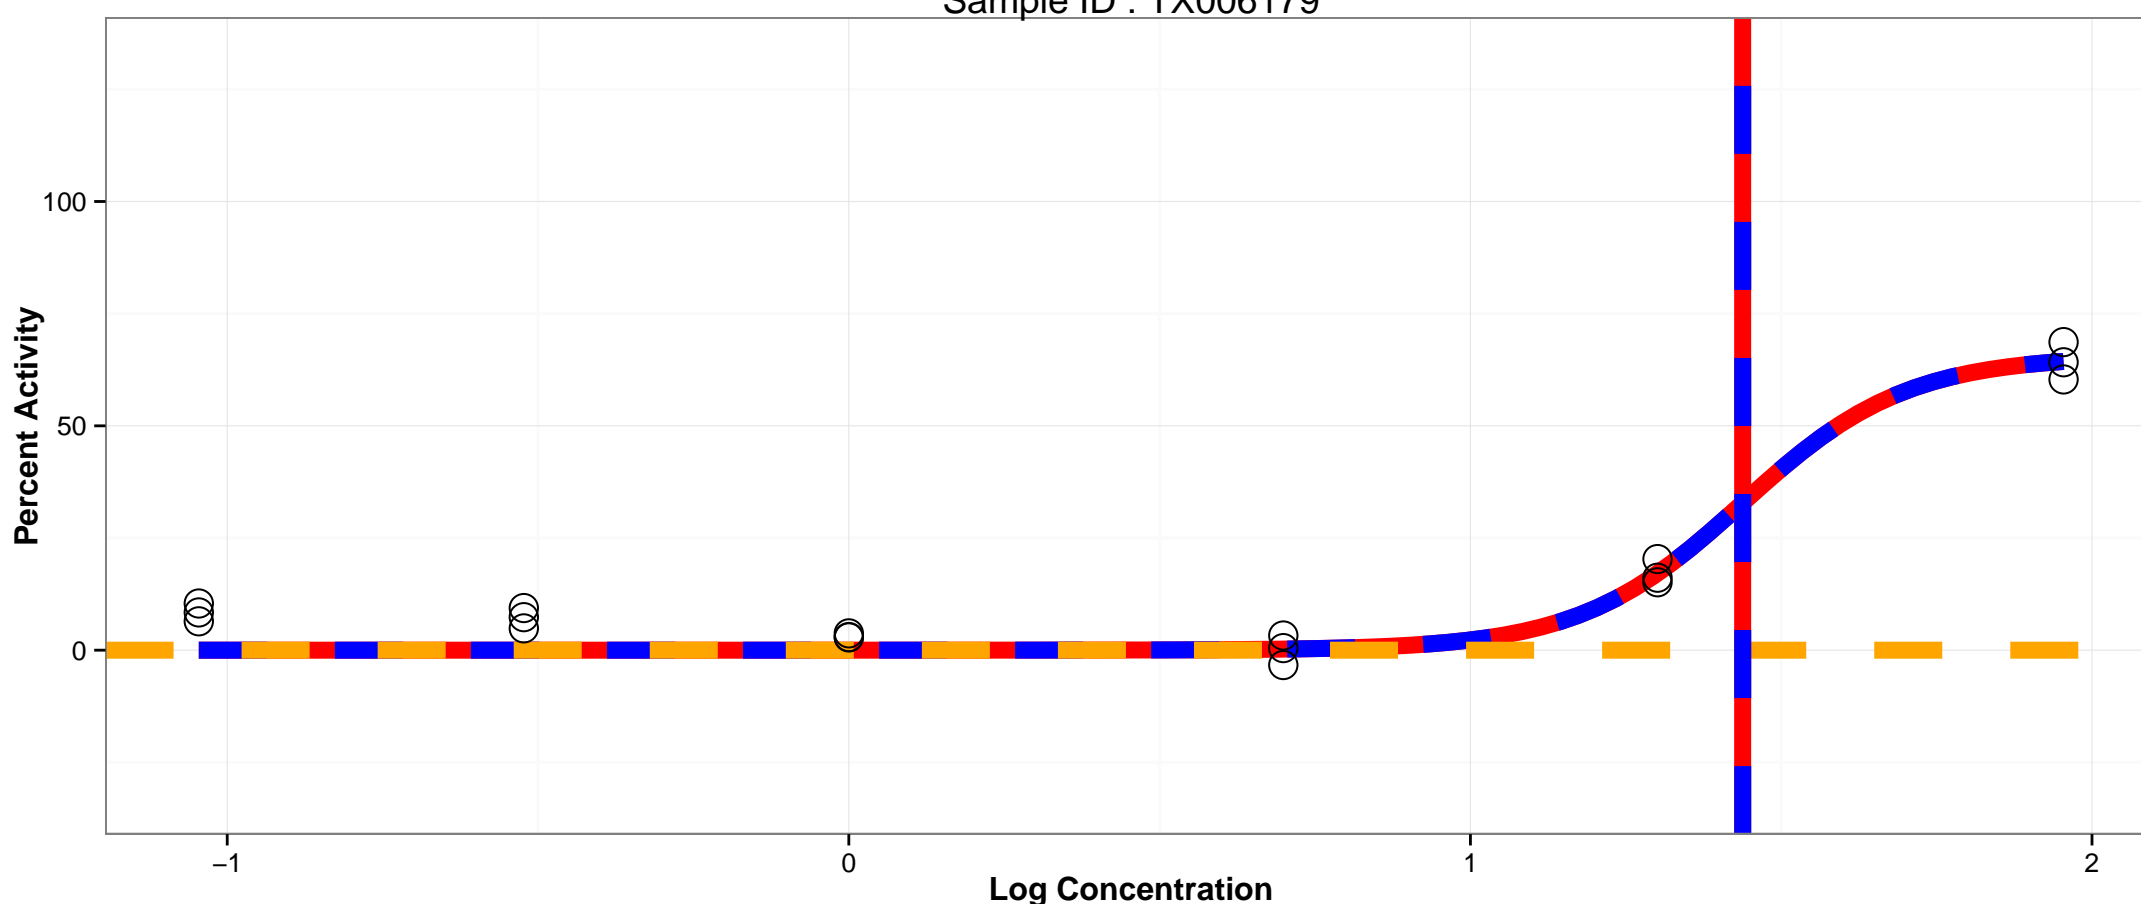

HILL MODEL

|     | tp   | ga    | gw   |
|-----|------|-------|------|
| val | 65.6 | 1.44  | 3.3  |
| sd  | 16.3 | 0.384 | 8.18 |

GAIN-LOSS MODEL

|     | tp   | ga   | gw  | la   | lw   |
|-----|------|------|-----|------|------|
| val | 65.7 | 1.44 | 3.3 | 2.62 | 5.18 |
| sd  | NA   | NA   | NA  | NA   | NA   |

|      | CNST   | HILL   | GNLS   |
|------|--------|--------|--------|
| AIC  | 167.29 | 120.34 | 124.34 |
| PROB | 0      | 0.88   | 0.12   |
| RMSE | 27.71  | 5.22   | 5.22   |

MAX\_MEAN : 64.4 MAX\_MED : 64.2 BMAD : 5.69  
COFF : 20 HIT-CALL : 1 FITC : 41 ACTP : 1  
FLAGS : 6

Assay ID 1509 (NHEERL\_HEK293T\_CellTiterGLO)  
Sample ID : TX006179

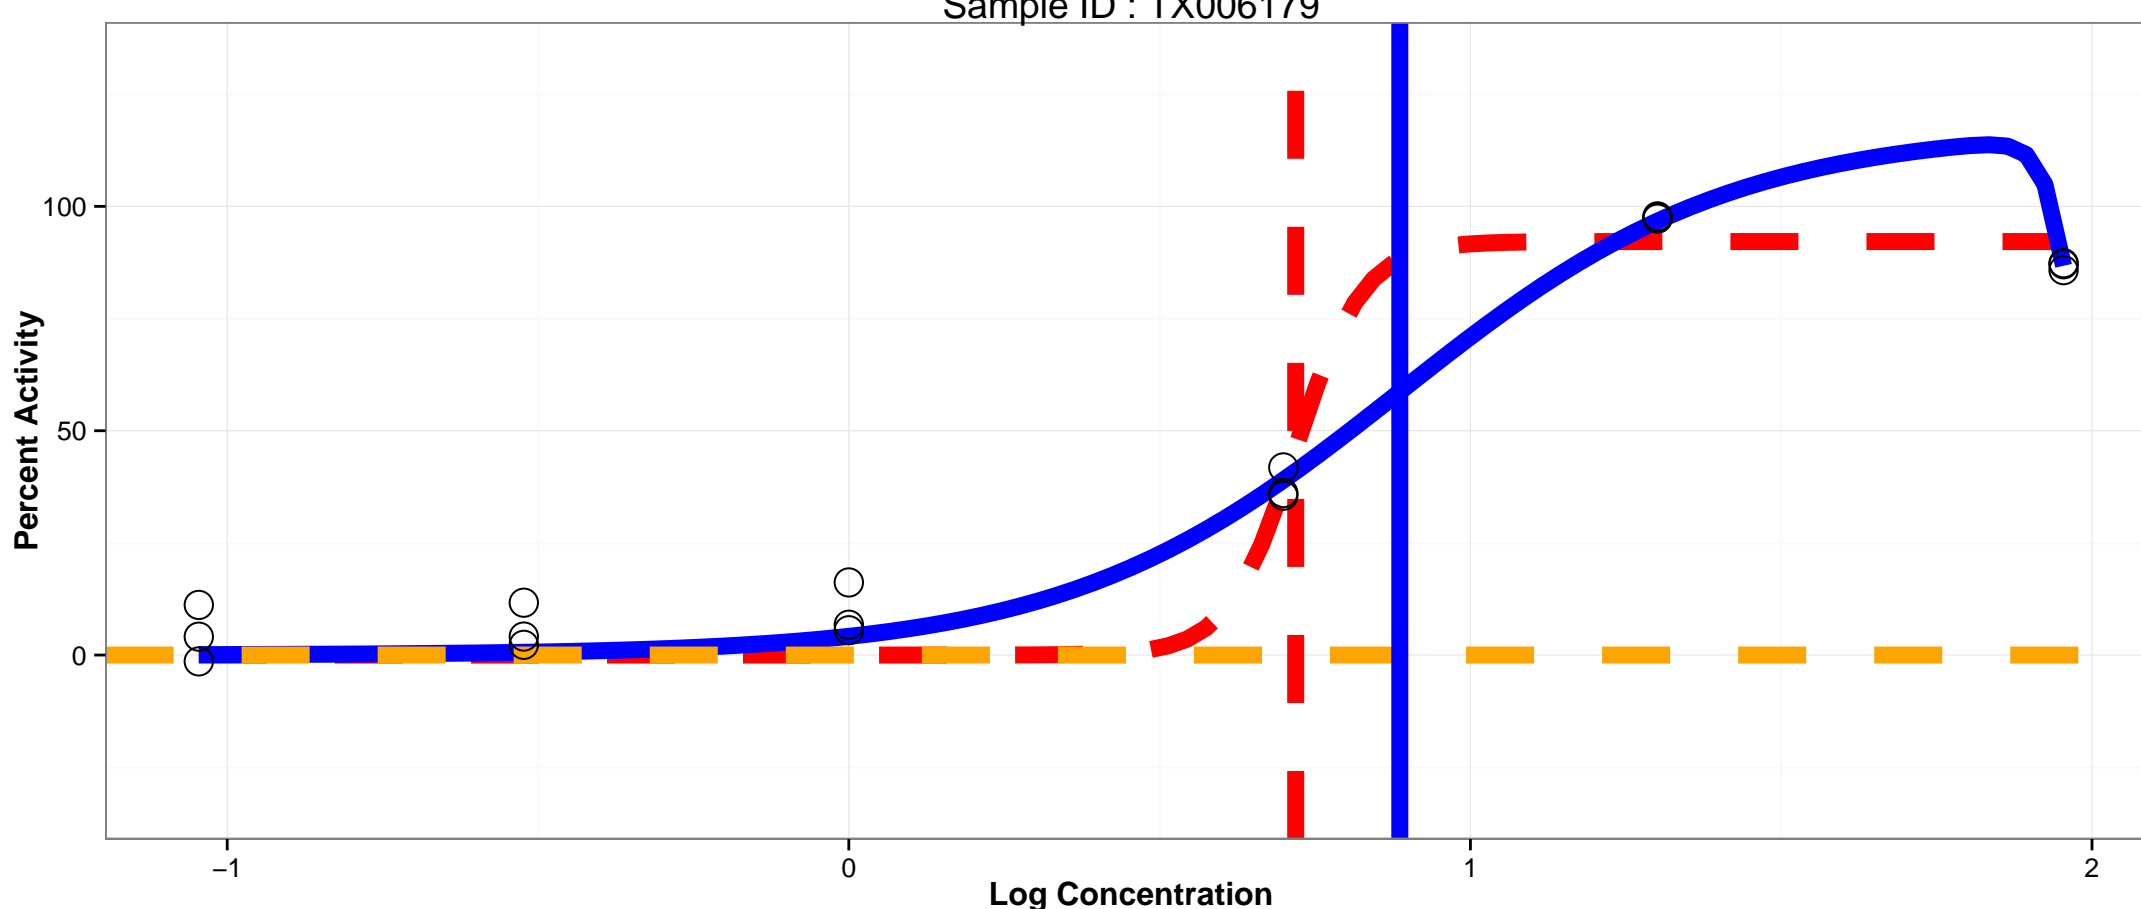

HILL MODEL

|     | tp   | ga    | gw   |
|-----|------|-------|------|
| val | 92.2 | 0.719 | 8    |
| sd  | 2.9  | 0.054 | 21.4 |

GAIN-LOSS MODEL

|     | tp   | ga     | gw    | la      | lw   |
|-----|------|--------|-------|---------|------|
| val | 117  | 0.886  | 1.62  | 1.98    | 17.8 |
| sd  | 13.9 | 0.0885 | 0.363 | 0.00373 | 6.4  |

|      | CNST  | HILL   | GNLS   |
|------|-------|--------|--------|
| AIC  | 198.7 | 129.48 | 118.67 |
| PROB | 0     | 0      | 1      |
| RMSE | 55.81 | 6.84   | 5.08   |

MAX\_MEAN : 97.5 MAX\_MED : 97.5 BMAD : 5.54  
COFF : 20 HIT-CALL : 1 FITC : 50 ACTP : 1  
FLAGS :

Assay ID 1848 (NHEERL\_Quantilum\_inhib\_2\_dn)  
Sample ID : TX006179

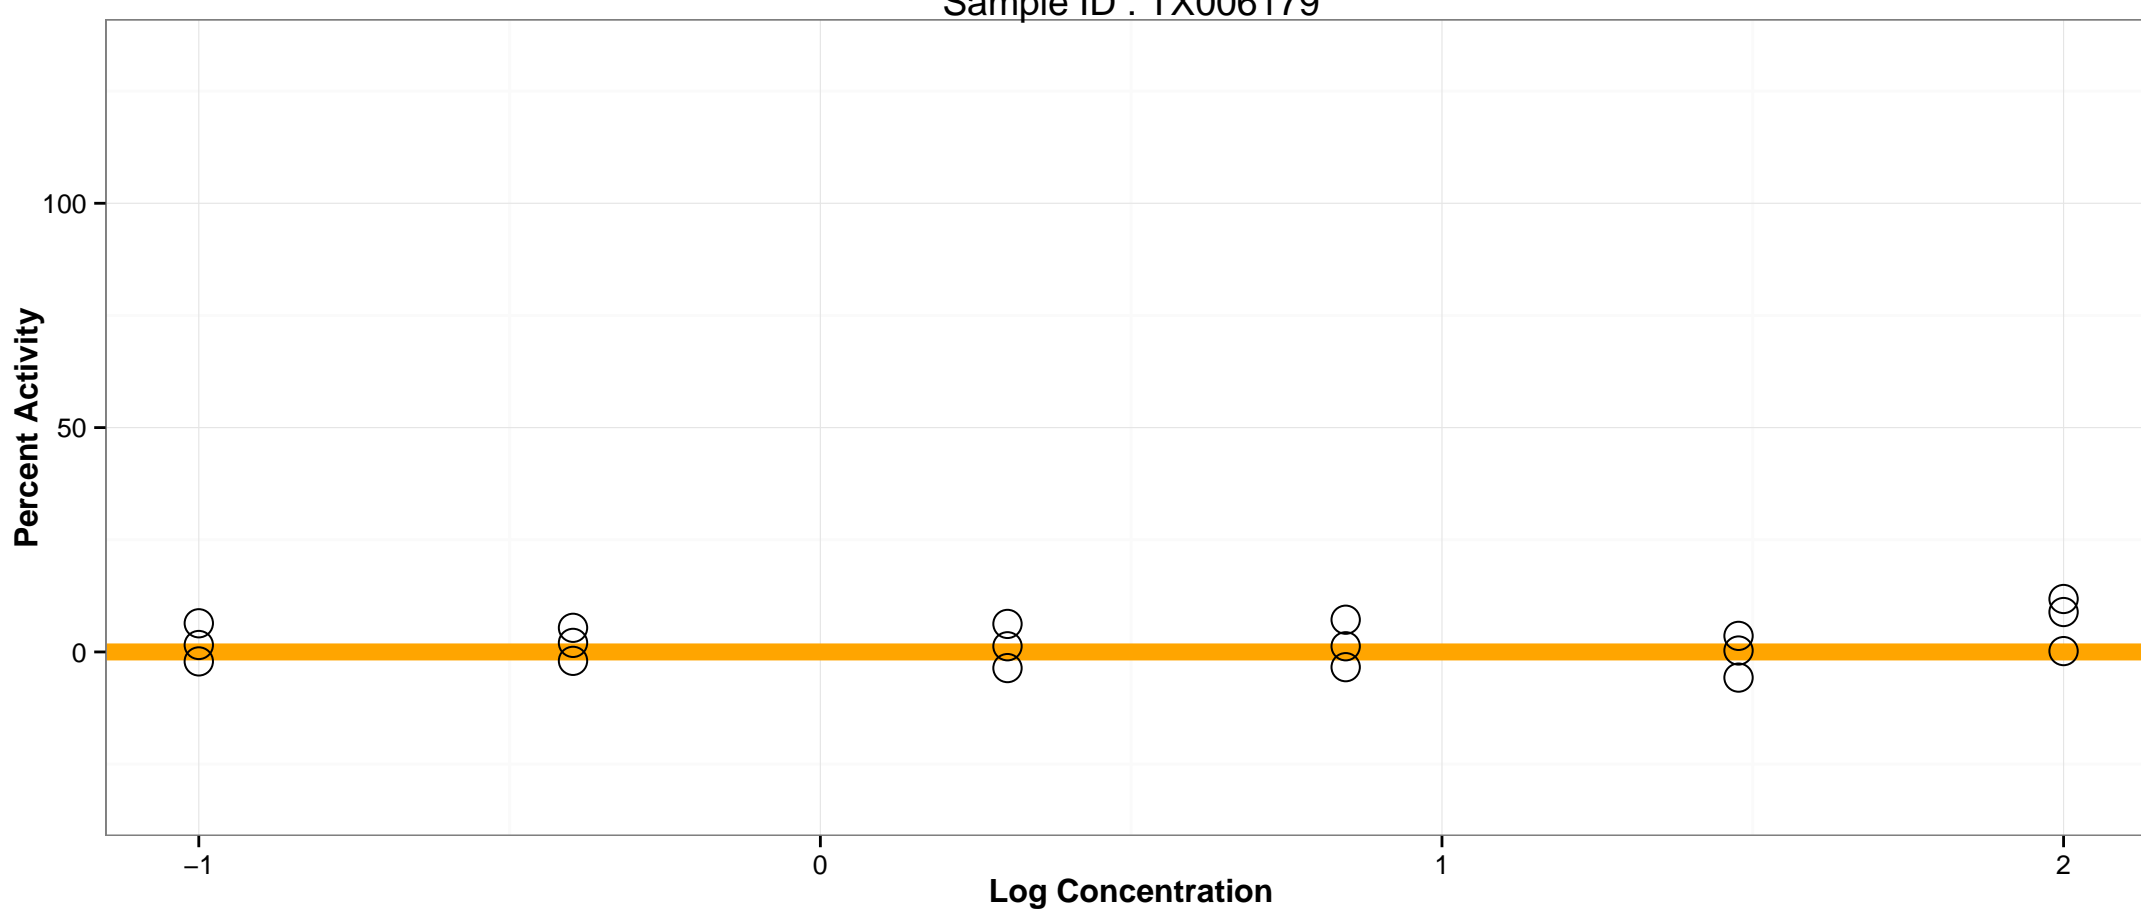

HILL MODEL

HILL MODEL: Not applicable

GAIN-LOSS MODEL

GNLS MODEL: Not applicable

|      | CNST   | HILL | GNLS |
|------|--------|------|------|
| AIC  | 112.75 | NA   | NA   |
| PROB | 1      | NA   | NA   |
| RMSE | 5.1    | NA   | NA   |

MAX\_MEAN : 6.97 MAX\_MED : 8.91 BMAD : 8.58  
COFF : 20 HIT-CALL : 0 FITC : 4 ACTP : 0  
FLAGS :

Assay ID 1508 (NHEERL\_TPO\_AUR\_dn)  
Sample ID : TX006185

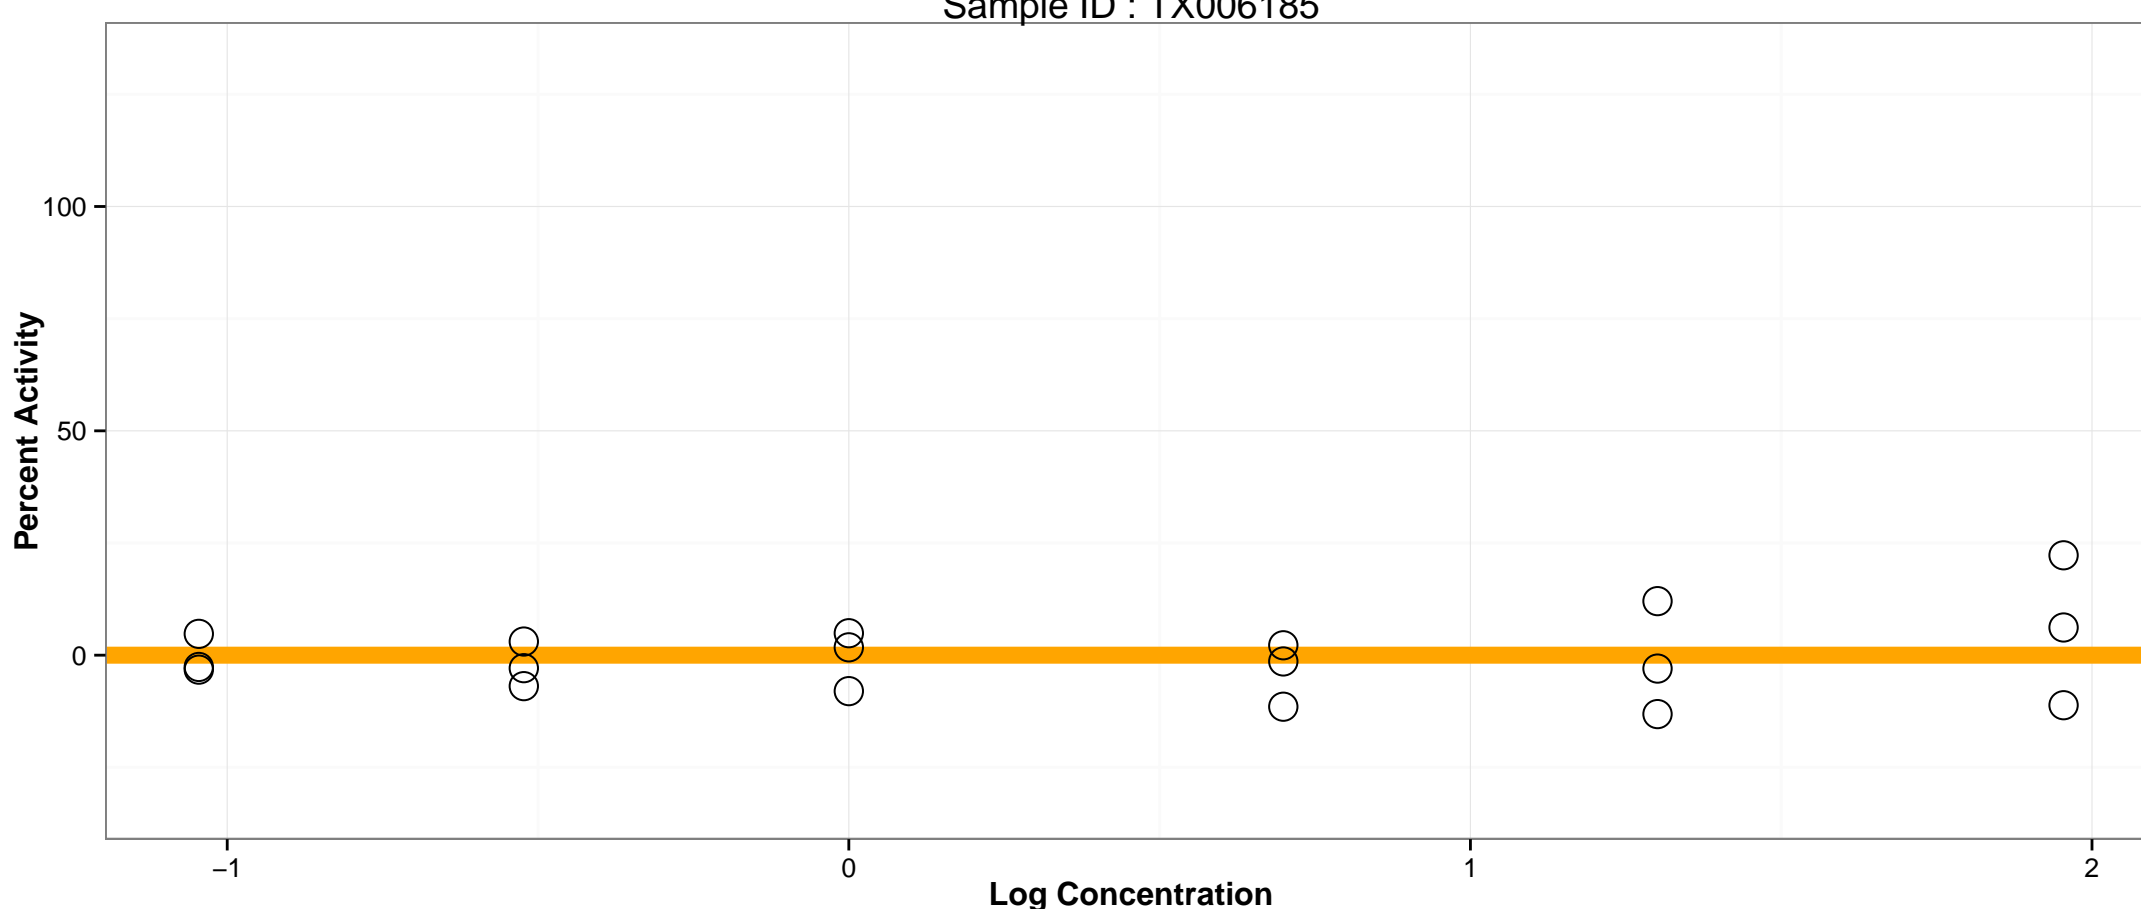

HILL MODEL

HILL MODEL: Not applicable

GAIN-LOSS MODEL

GNLS MODEL: Not applicable

|      | CNST   | HILL | GNLS |
|------|--------|------|------|
| AIC  | 130.46 | NA   | NA   |
| PROB | 1      | NA   | NA   |
| RMSE | 8.56   | NA   | NA   |

MAX\_MEAN : 5.77 MAX\_MED : 6.18 BMAD : 5.69  
COFF : 20 HIT-CALL : 0 FITC : 4 ACTP : 0  
FLAGS :

Assay ID 1509 (NHEERL\_HEK293T\_CellTiterGLO)  
Sample ID : TX006185

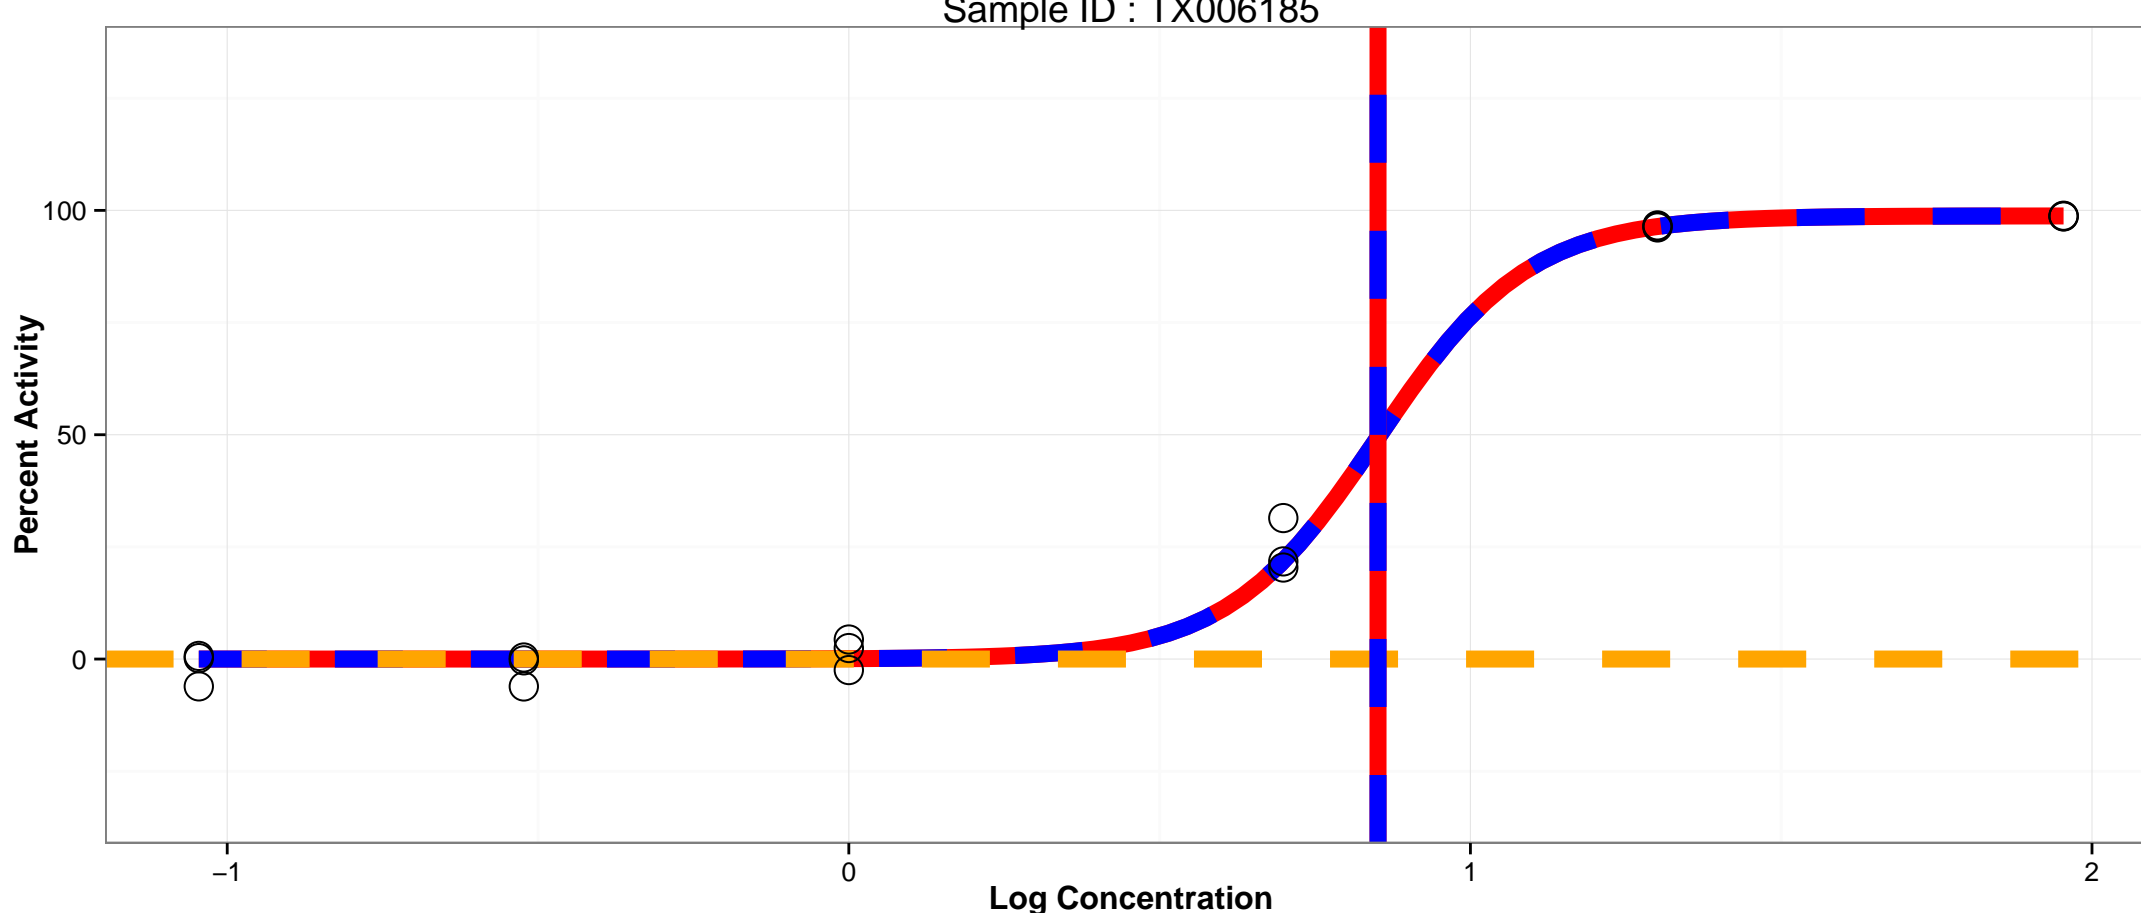

HILL MODEL

|     | tp    | ga     | gw    |
|-----|-------|--------|-------|
| val | 98.8  | 0.851  | 3.58  |
| sd  | 0.961 | 0.0194 | 0.406 |

GAIN-LOSS MODEL

|     | tp   | ga    | gw   | la   | lw   |
|-----|------|-------|------|------|------|
| val | 98.8 | 0.851 | 3.58 | 3.12 | 12.7 |
| sd  | NA   | NA    | NA   | NA   | NA   |

|      | CNST   | HILL  | GNLS   |
|------|--------|-------|--------|
| AIC  | 198.82 | 97.67 | 101.67 |
| PROB | 0      | 0.88  | 0.12   |
| RMSE | 57.32  | 3.33  | 3.33   |

MAX\_MEAN : 98.7 MAX\_MED : 98.7 BMAD : 5.54  
COFF : 20 HIT-CALL : 1 FITC : 41 ACTP : 1  
FLAGS :

Assay ID 1848 (NHEERL\_QuantLum\_inhib\_2\_dn)  
Sample ID : TX006185

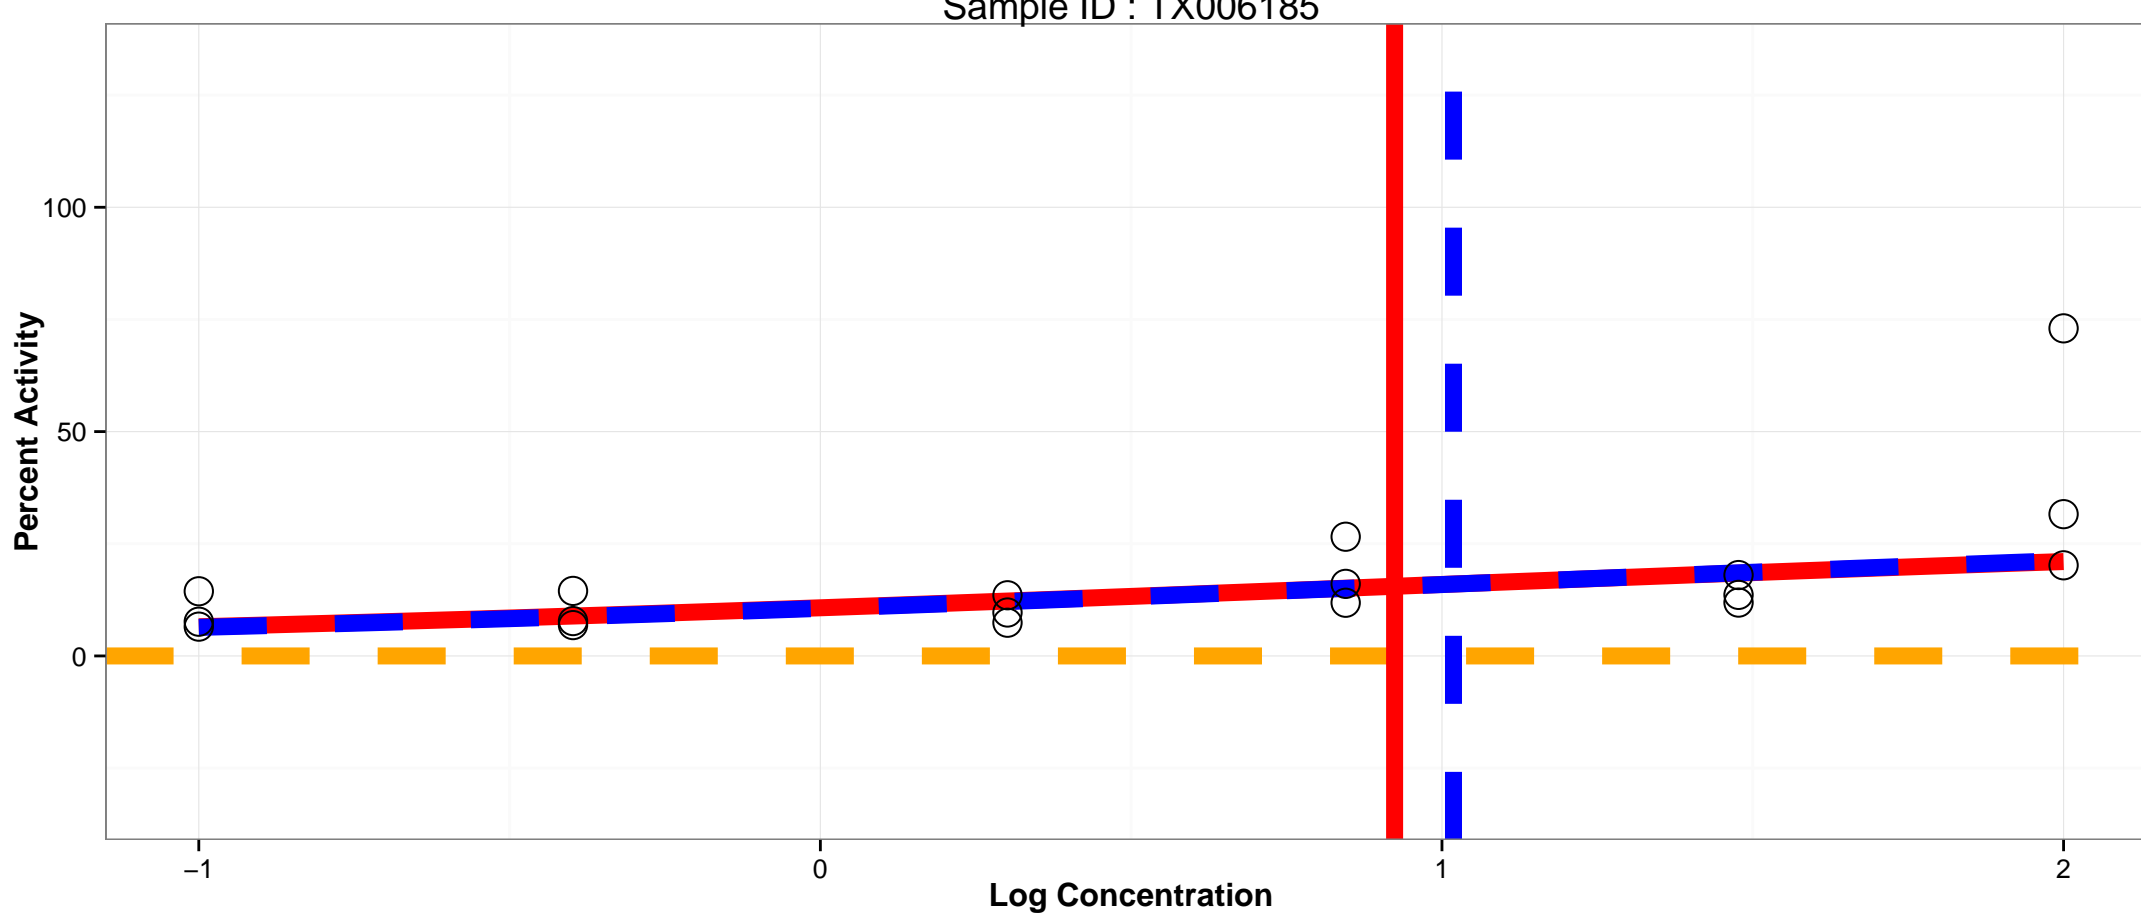

HILL MODEL

|     | tp | ga    | gw  |
|-----|----|-------|-----|
| val | 31 | 0.924 | 0.3 |
| sd  | NA | NA    | NA  |

GAIN-LOSS MODEL

|     | tp | ga   | gw  | la | lw  |
|-----|----|------|-----|----|-----|
| val | 32 | 1.02 | 0.3 | 4  | 5.4 |
| sd  | NA | NA   | NA  | NA | NA  |

|      | CNST   | HILL   | GNLS   |
|------|--------|--------|--------|
| AIC  | 162.96 | 134.86 | 138.88 |
| PROB | 0      | 0.88   | 0.12   |
| RMSE | 22.92  | 13.24  | 13.2   |

MAX\_MEAN : 41.6 MAX\_MED : 31.6 BMAD : 8.58  
COFF : 20 HIT-CALL : 1 FITC : 42 ACTP : 1  
FLAGS : 6

Assay ID 1508 (NHEERL\_TPO\_AUR\_dn)  
Sample ID : TX006190

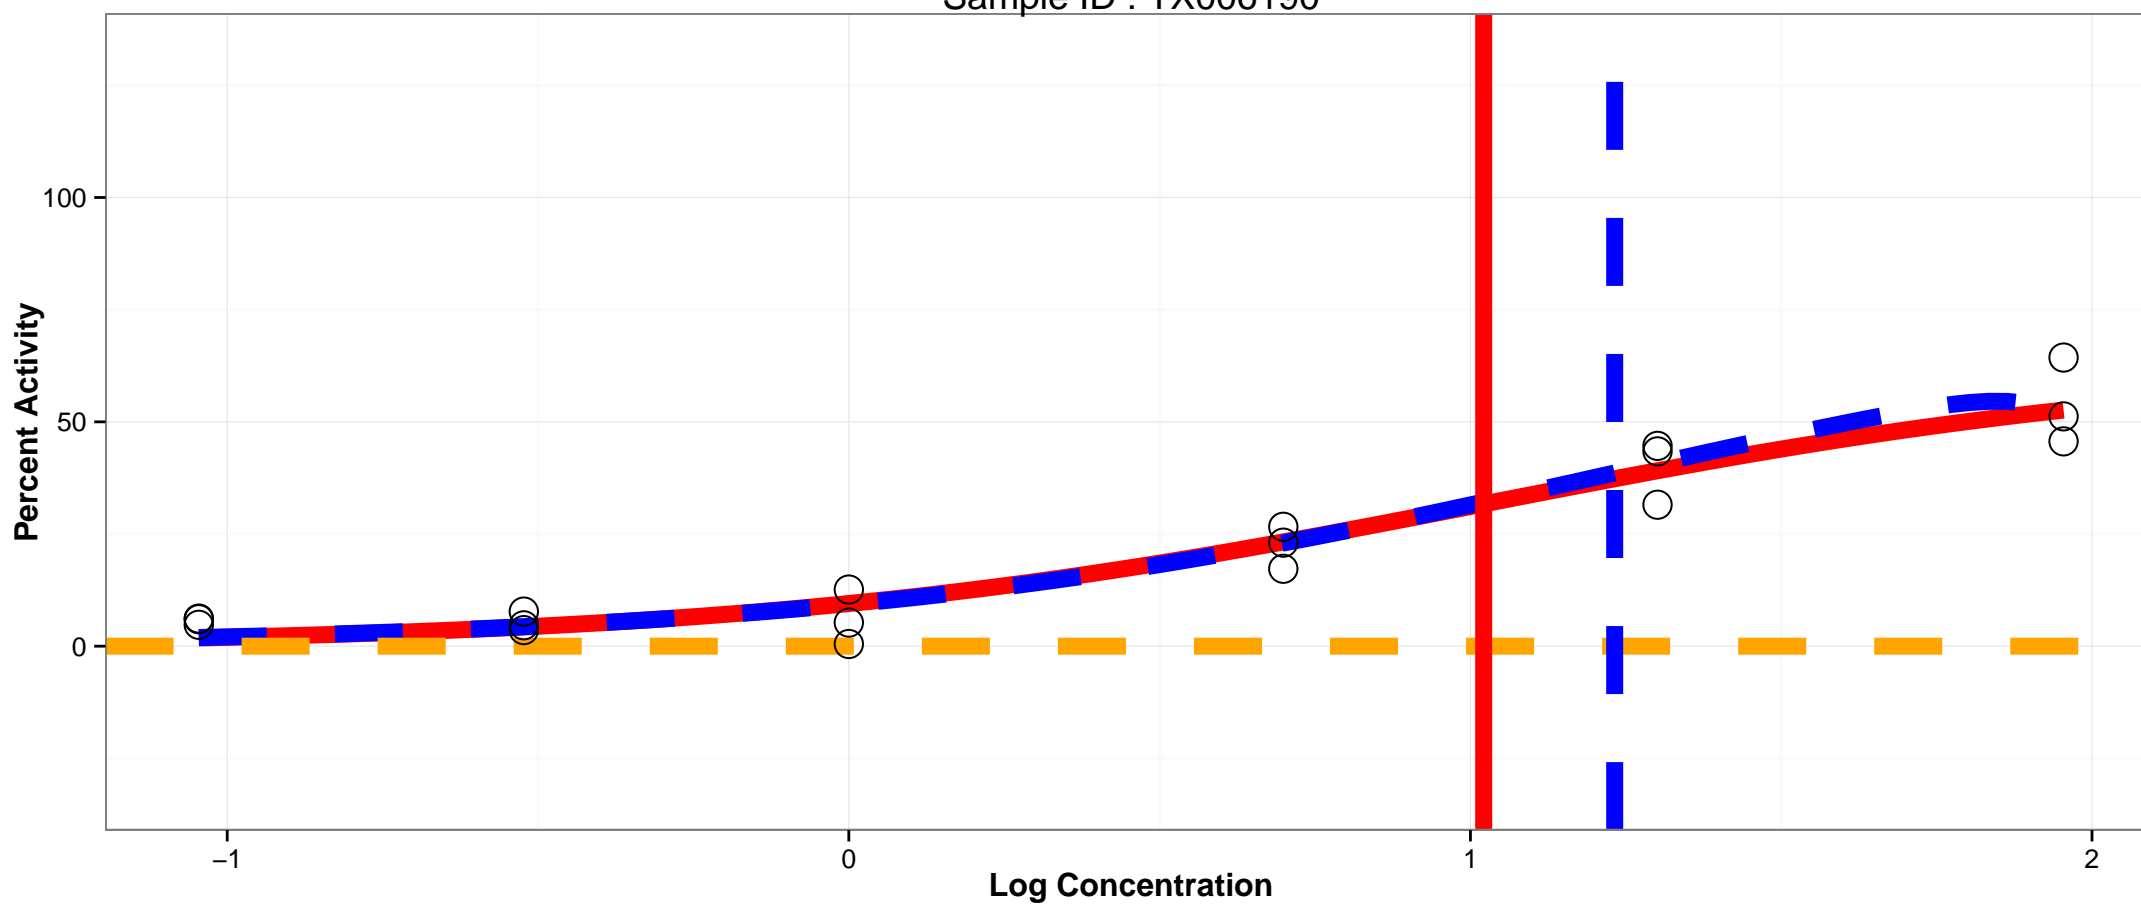

HILL MODEL

|     | tp   | ga   | gw    |
|-----|------|------|-------|
| val | 63.4 | 1.02 | 0.738 |
| sd  | 13.2 | 0.32 | 0.221 |

GAIN-LOSS MODEL

|     | tp   | ga   | gw    | la   | lw   |
|-----|------|------|-------|------|------|
| val | 77.2 | 1.23 | 0.698 | 2.09 | 6.35 |
| sd  | NA   | NA   | NA    | NA   | NA   |

|      | CNST   | HILL   | GNLS   |
|------|--------|--------|--------|
| AIC  | 175.58 | 120.96 | 124.15 |
| PROB | 0      | 0.83   | 0.17   |
| RMSE | 29.48  | 5.31   | 5.35   |

MAX\_MEAN : 53.7 MAX\_MED : 51.2 BMAD : 5.69  
COFF : 20 HIT-CALL : 1 FITC : 42 ACTP : 1  
FLAGS :

Assay ID 1509 (NHEERL\_HEK293T\_CellTiterGLO)  
Sample ID : TX006190

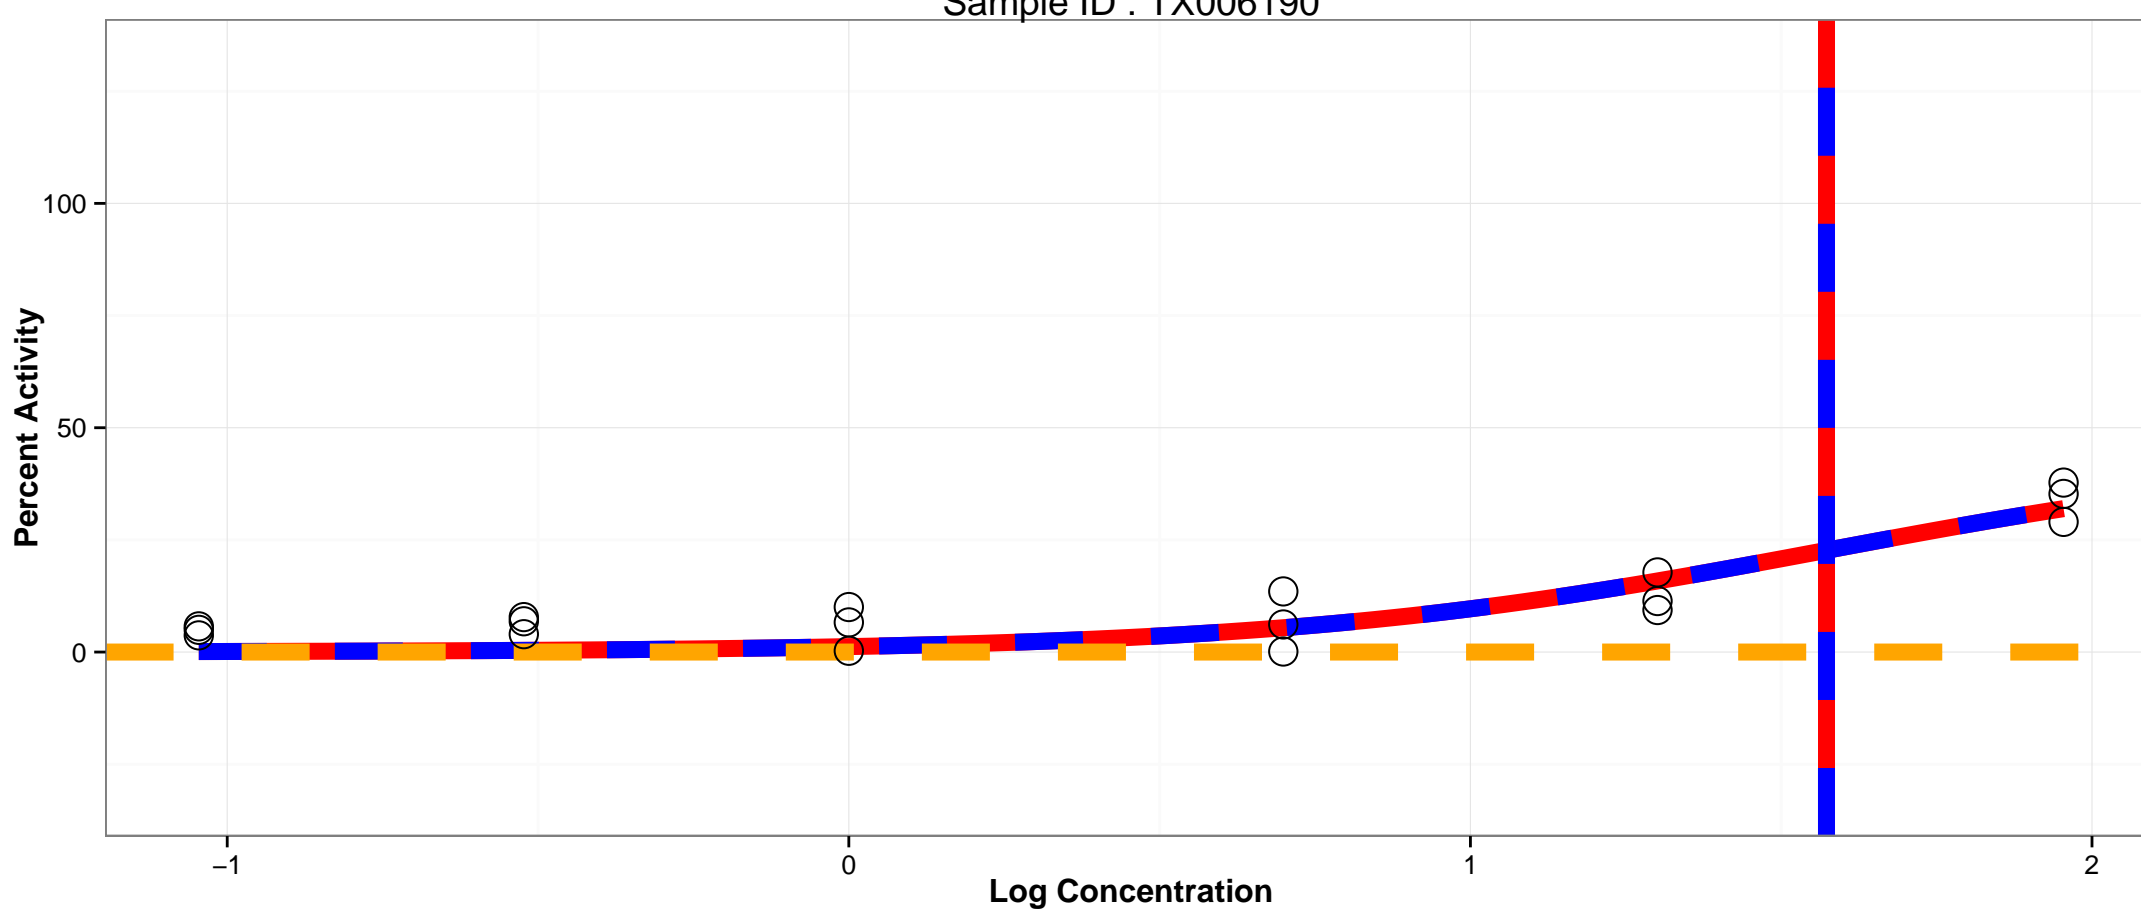

HILL MODEL

|     | tp   | ga    | gw    |
|-----|------|-------|-------|
| val | 45.3 | 1.57  | 0.992 |
| sd  | 16.4 | 0.344 | 0.758 |

GAIN-LOSS MODEL

|     | tp   | ga   | gw    | la   | lw   |
|-----|------|------|-------|------|------|
| val | 45.3 | 1.57 | 0.993 | 3.49 | 17.8 |
| sd  | NA   | NA   | NA    | NA   | NA   |

|      | CNST   | HILL   | GNLS   |
|------|--------|--------|--------|
| AIC  | 151.67 | 122.09 | 126.09 |
| PROB | 0      | 0.88   | 0.12   |
| RMSE | 16     | 5.27   | 5.27   |

MAX\_MEAN : 34 MAX\_MED : 35.3 BMAD : 5.54  
COFF : 20 HIT-CALL : 1 FITC : 42 ACTP : 1  
FLAGS : 6

Assay ID 1848 (NHEERL\_Quantilum\_inhib\_2\_dn)  
Sample ID : TX006190

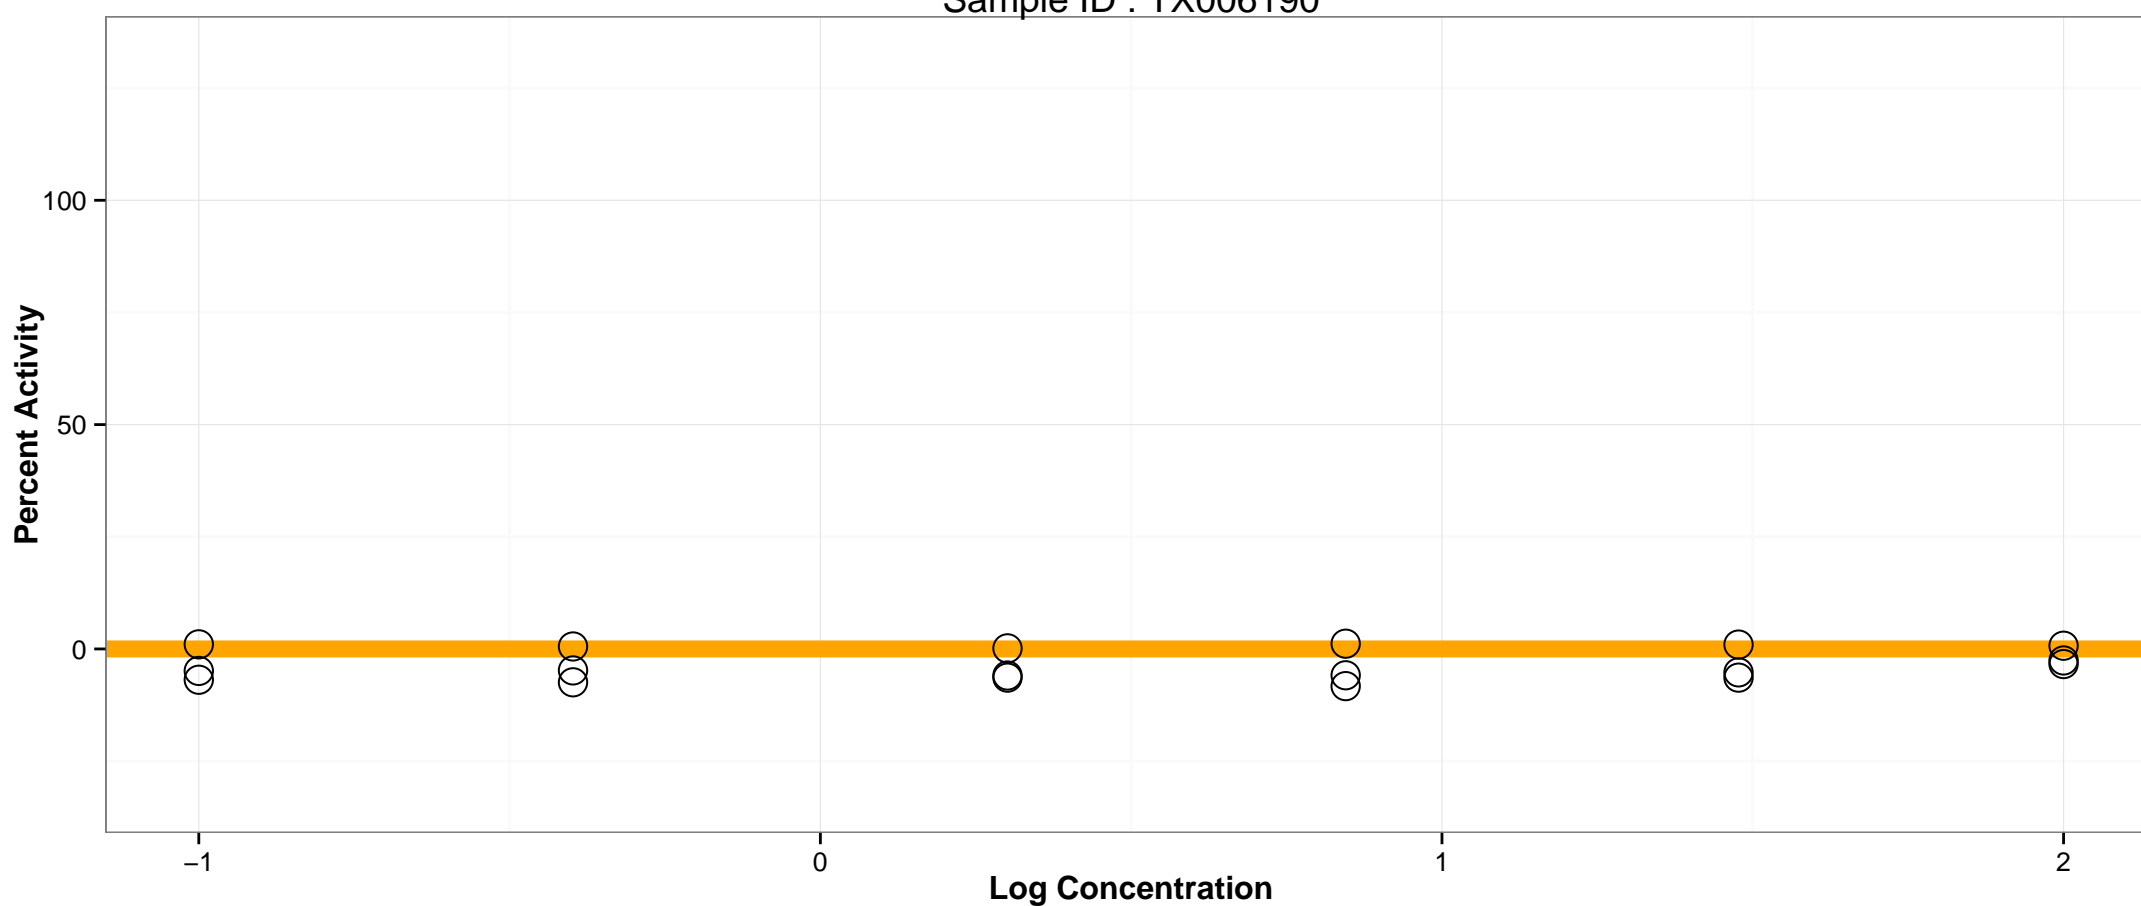

HILL MODEL

HILL MODEL: Not applicable

GAIN-LOSS MODEL

GNLS MODEL: Not applicable

|      | CNST   | HILL | GNLS |
|------|--------|------|------|
| AIC  | 112.29 | NA   | NA   |
| PROB | 1      | NA   | NA   |
| RMSE | 4.81   | NA   | NA   |

MAX\_MEAN : -1.73 MAX\_MED : -2.56 BMAD : 8.58  
COFF : 20 HIT-CALL : 0 FITC : 4 ACTP : 0  
FLAGS :

Chemical : CJ-013790

CAS : 179465-71-5

Assay ID 1508 (NHEERL\_TPO\_AUR\_dn)  
Sample ID : TX006192

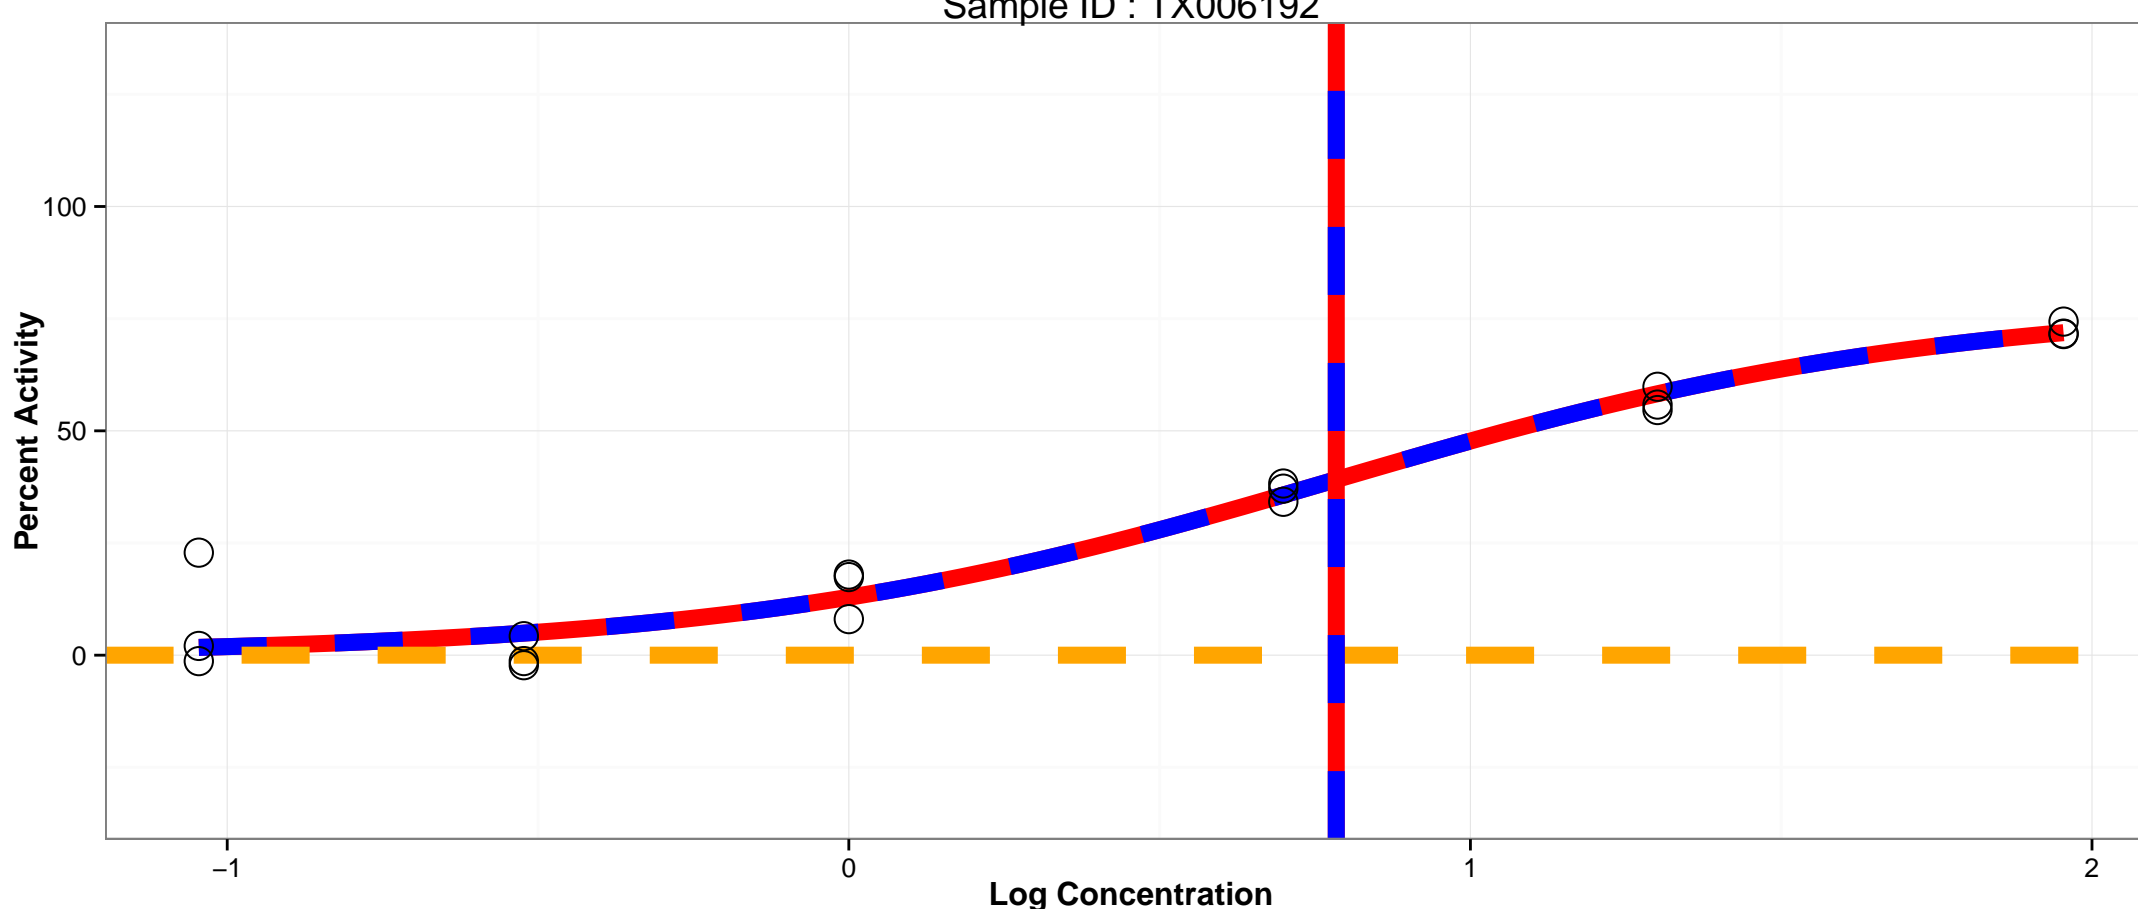

| HILL MODEL |      |        |       |
|------------|------|--------|-------|
|            | tp   | ga     | gw    |
| val        | 78.3 | 0.784  | 0.899 |
| sd         | 4.22 | 0.0802 | 0.117 |

| GAIN-LOSS MODEL |      |        |       |      |      |
|-----------------|------|--------|-------|------|------|
|                 | tp   | ga     | gw    | la   | lw   |
| val             | 78.3 | 0.784  | 0.899 | 3.03 | 8.21 |
| sd              | 4.22 | 0.0802 | 0.117 | 1280 | 9790 |

|      | CNST   | HILL   | GNLS   |
|------|--------|--------|--------|
| AIC  | 188.67 | 116.84 | 120.84 |
| PROB | 0      | 0.88   | 0.12   |
| RMSE | 41.32  | 6.03   | 6.03   |

MAX\_MEAN : 72.5 MAX\_MED : 71.7 BMAD : 5.69  
COFF : 20 HIT-CALL : 1 FITC : 42 ACTP : 1  
FLAGS :

Assay ID 1509 (NHEERL\_HEK293T\_CellTiterGLO)  
Sample ID : TX006192

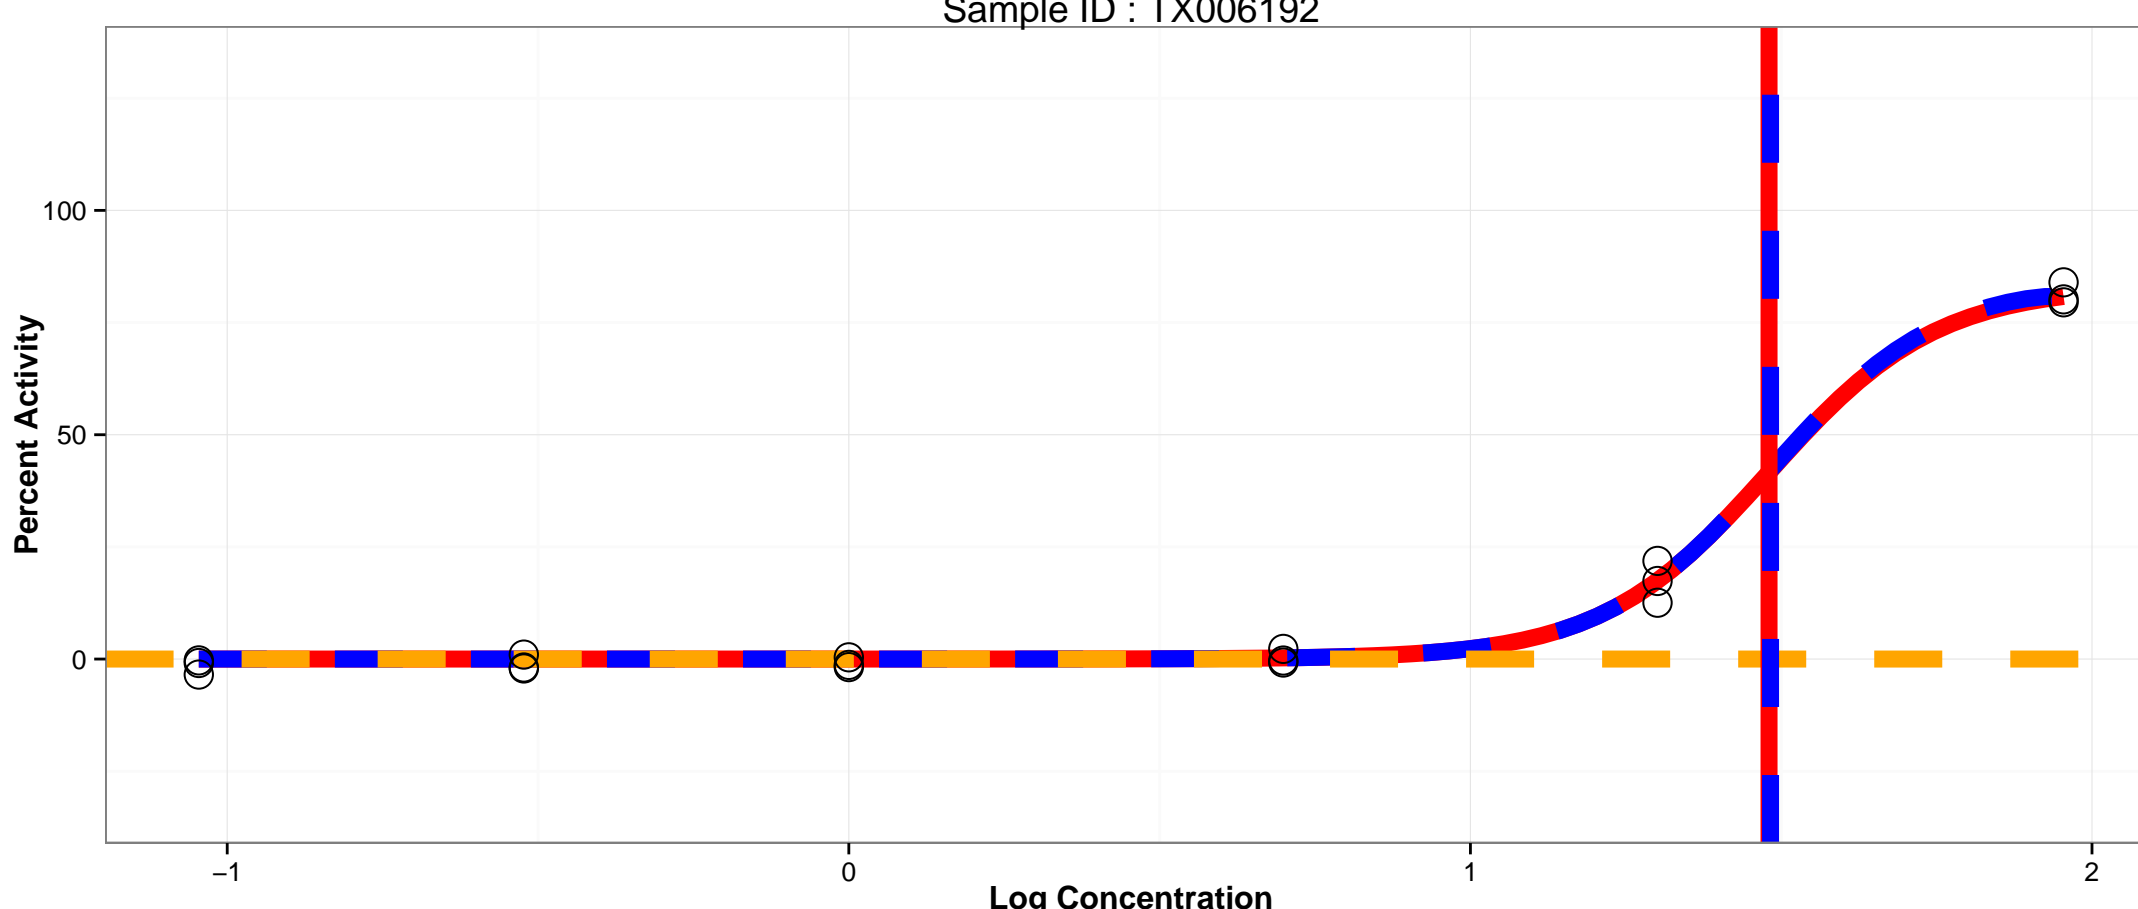

| HILL MODEL |      |        |       |
|------------|------|--------|-------|
|            | tp   | ga     | gw    |
| val        | 83.3 | 1.48   | 3.21  |
| sd         | 2.26 | 0.0339 | 0.516 |

| GAIN-LOSS MODEL |      |        |       |        |      |
|-----------------|------|--------|-------|--------|------|
|                 | tp   | ga     | gw    | la     | lw   |
| val             | 84.4 | 1.48   | 3.21  | 2.11   | 11.9 |
| sd              | 4.63 | 0.0331 | 0.554 | 0.0143 | 19.6 |

|      | CNST   | HILL  | GNLS  |
|------|--------|-------|-------|
| AIC  | 171.08 | 88.15 | 92.15 |
| PROB | 0      | 0.88  | 0.12  |
| RMSE | 33.97  | 2.21  | 2.21  |

MAX\_MEAN : 81.2 MAX\_MED : 80.2 BMAD : 5.54  
COFF : 20 HIT-CALL : 1 FITC : 41 ACTP : 1  
FLAGS :

Assay ID 1848 (NHEERL\_Quantilum\_inhib\_2\_dn)  
Sample ID : TX006192

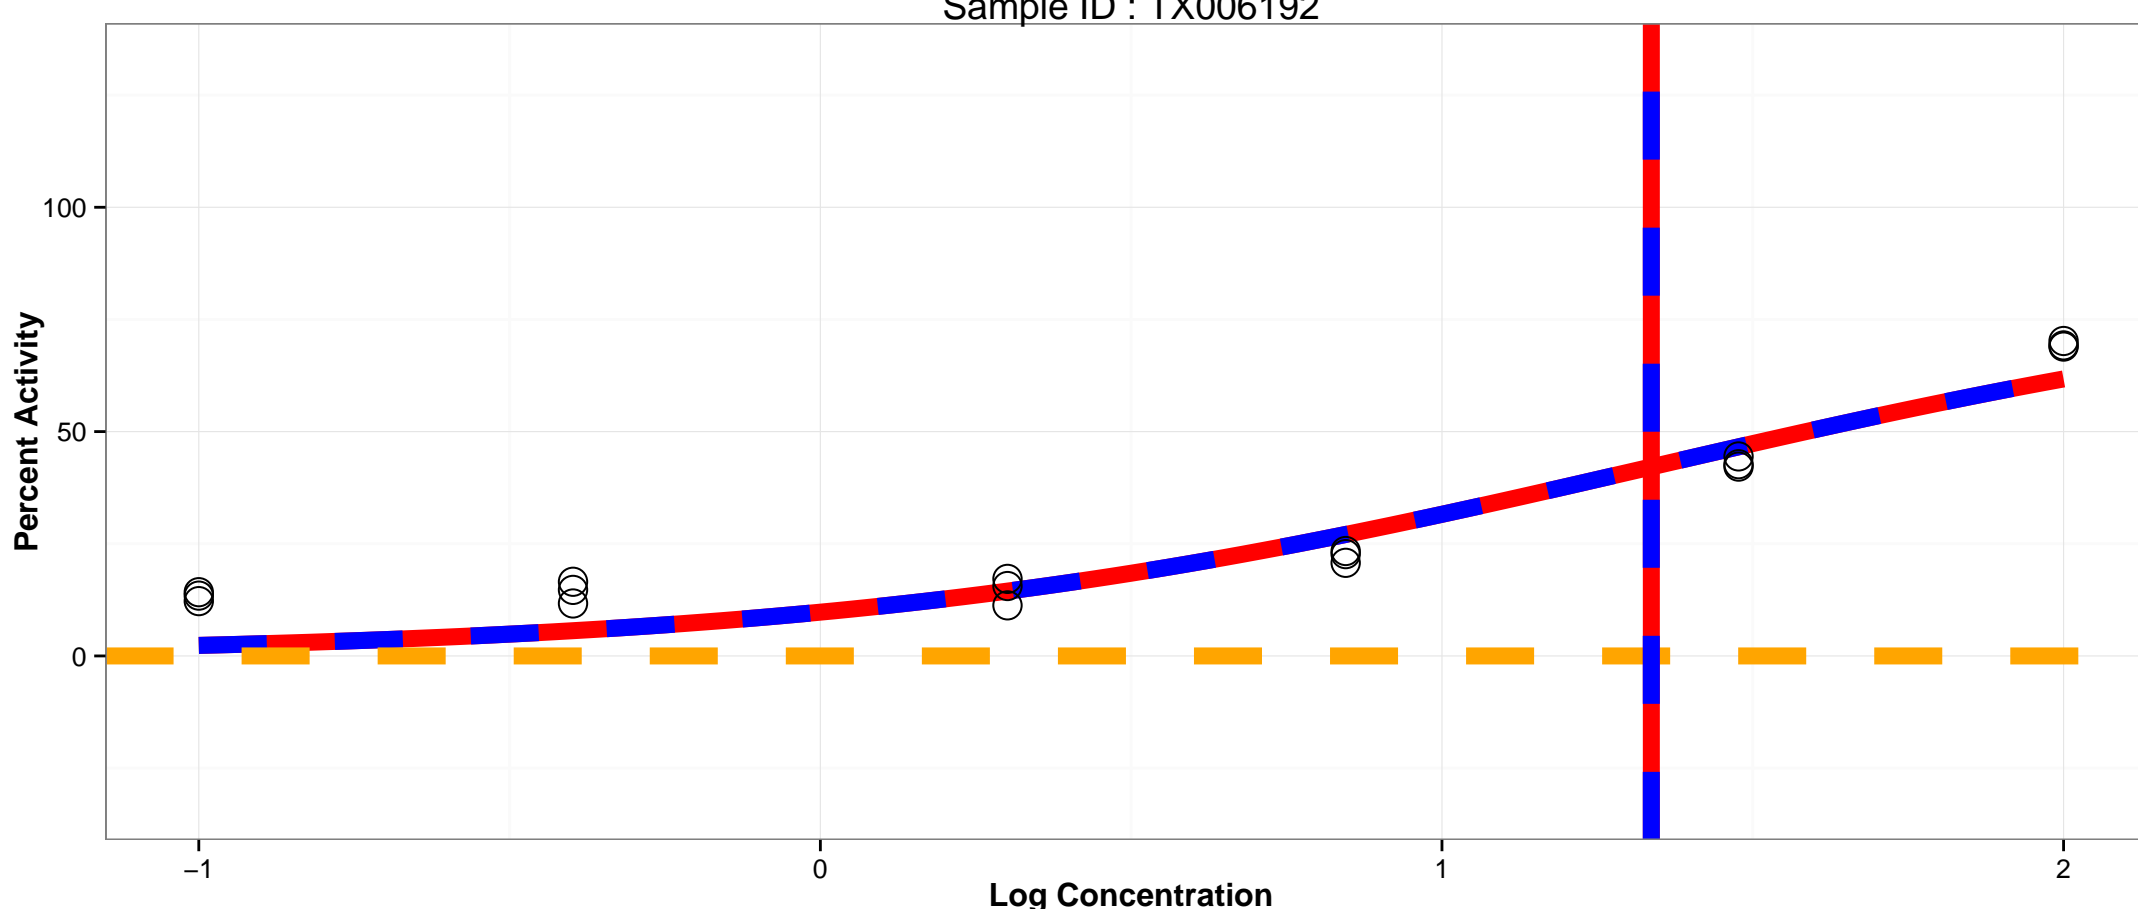

| HILL MODEL |      |       |       |
|------------|------|-------|-------|
|            | tp   | ga    | gw    |
| val        | 84.2 | 1.34  | 0.66  |
| sd         | 16.2 | 0.273 | 0.141 |

| GAIN-LOSS MODEL |      |       |       |       |        |
|-----------------|------|-------|-------|-------|--------|
|                 | tp   | ga    | gw    | la    | lw     |
| val             | 84.2 | 1.34  | 0.661 | 3.09  | 10.5   |
| sd              | 16.2 | 0.273 | 0.141 | 11200 | 108000 |

|      | CNST   | HILL   | GNLS   |
|------|--------|--------|--------|
| AIC  | 183.17 | 132.58 | 136.58 |
| PROB | 0      | 0.88   | 0.12   |
| RMSE | 36.04  | 7.12   | 7.12   |

MAX\_MEAN : 69.5 MAX\_MED : 69.2 BMAD : 8.58  
COFF : 20 HIT-CALL : 1 FITC : 42 ACTP : 1  
FLAGS :

Assay ID 1508 (NHEERL\_TPO\_AUR\_dn)  
Sample ID : TX006195

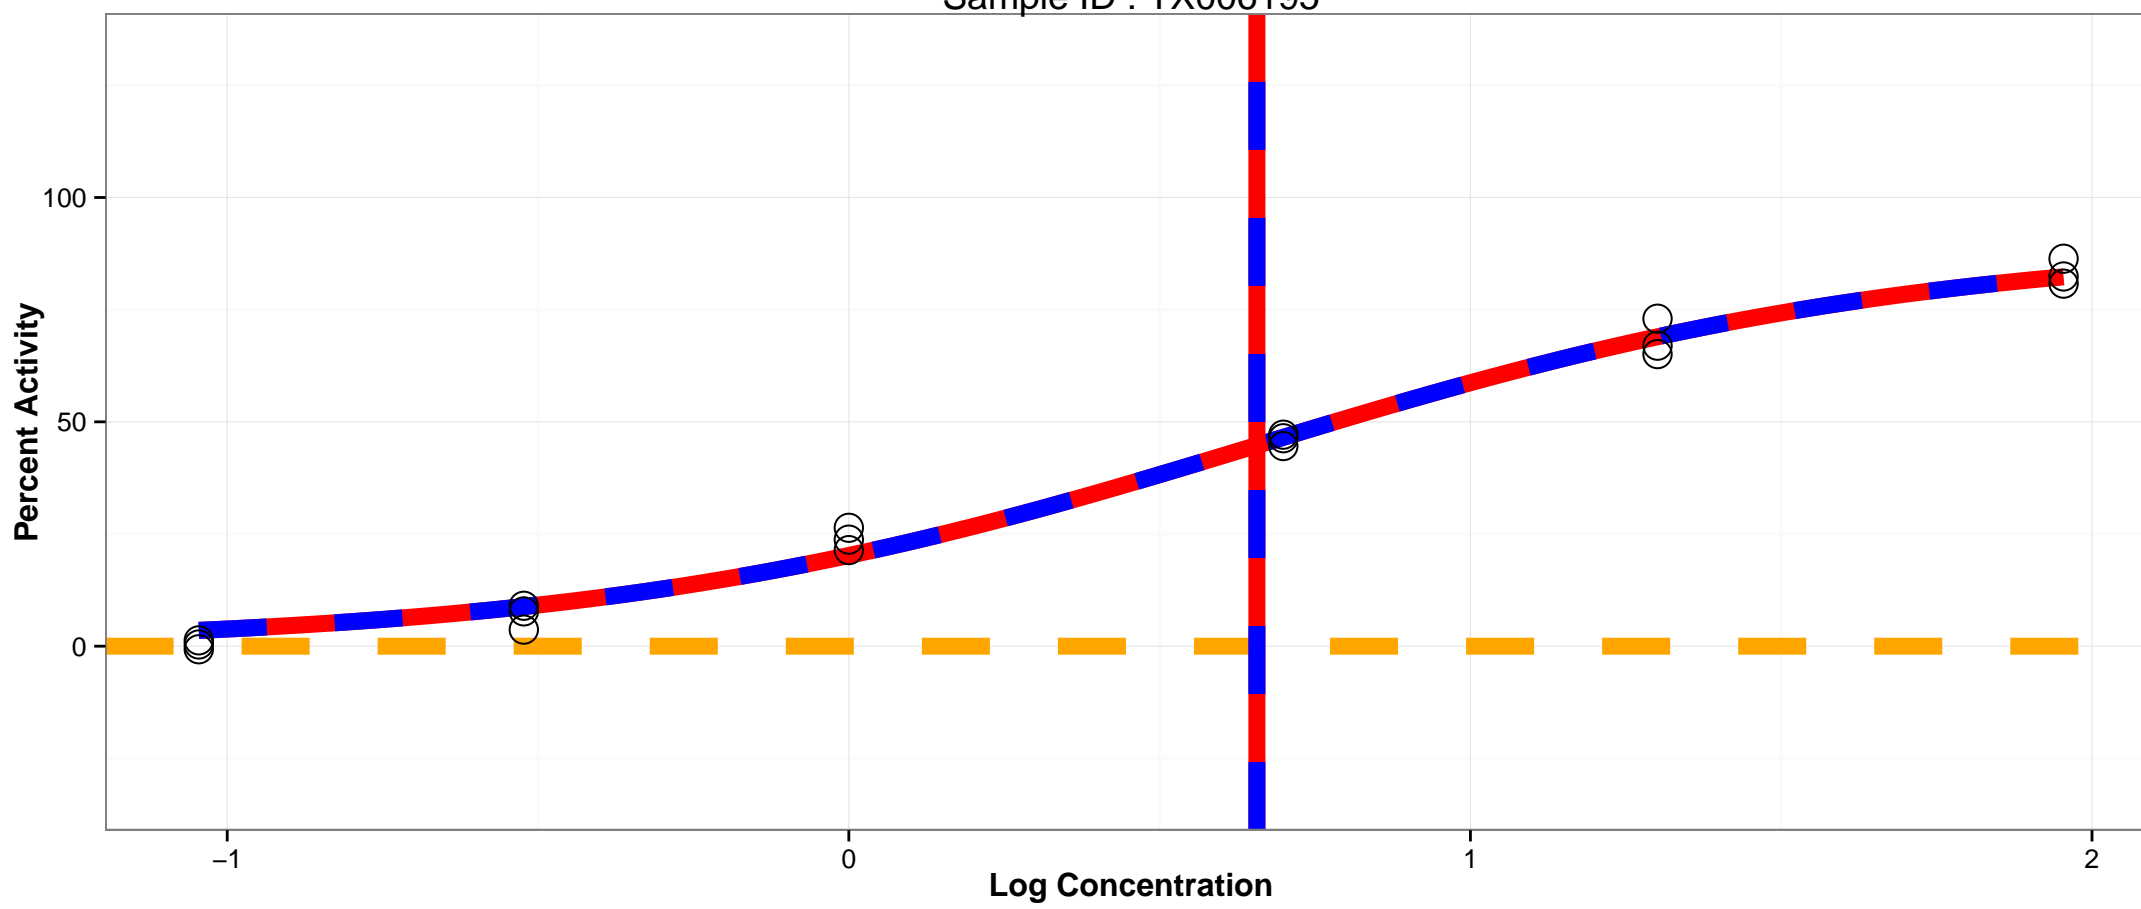

HILL MODEL

|     | tp   | ga     | gw     |
|-----|------|--------|--------|
| val | 89.5 | 0.657  | 0.815  |
| sd  | 3.21 | 0.0589 | 0.0614 |

GAIN-LOSS MODEL

|     | tp   | ga     | gw     | la  | lw   |
|-----|------|--------|--------|-----|------|
| val | 89.5 | 0.657  | 0.815  | 3.2 | 6.88 |
| sd  | 3.21 | 0.0589 | 0.0614 | 870 | 4820 |

|      | CNST   | HILL   | GNLS   |
|------|--------|--------|--------|
| AIC  | 194.97 | 101.48 | 105.48 |
| PROB | 0      | 0.88   | 0.12   |
| RMSE | 48.92  | 3.07   | 3.07   |

MAX\_MEAN : 83.2 MAX\_MED : 82.4 BMAD : 5.69  
COFF : 20 HIT-CALL : 1 FITC : 42 ACTP : 1  
FLAGS :

Assay ID 1509 (NHEERL\_HEK293T\_CellTiterGLO)  
Sample ID : TX006195

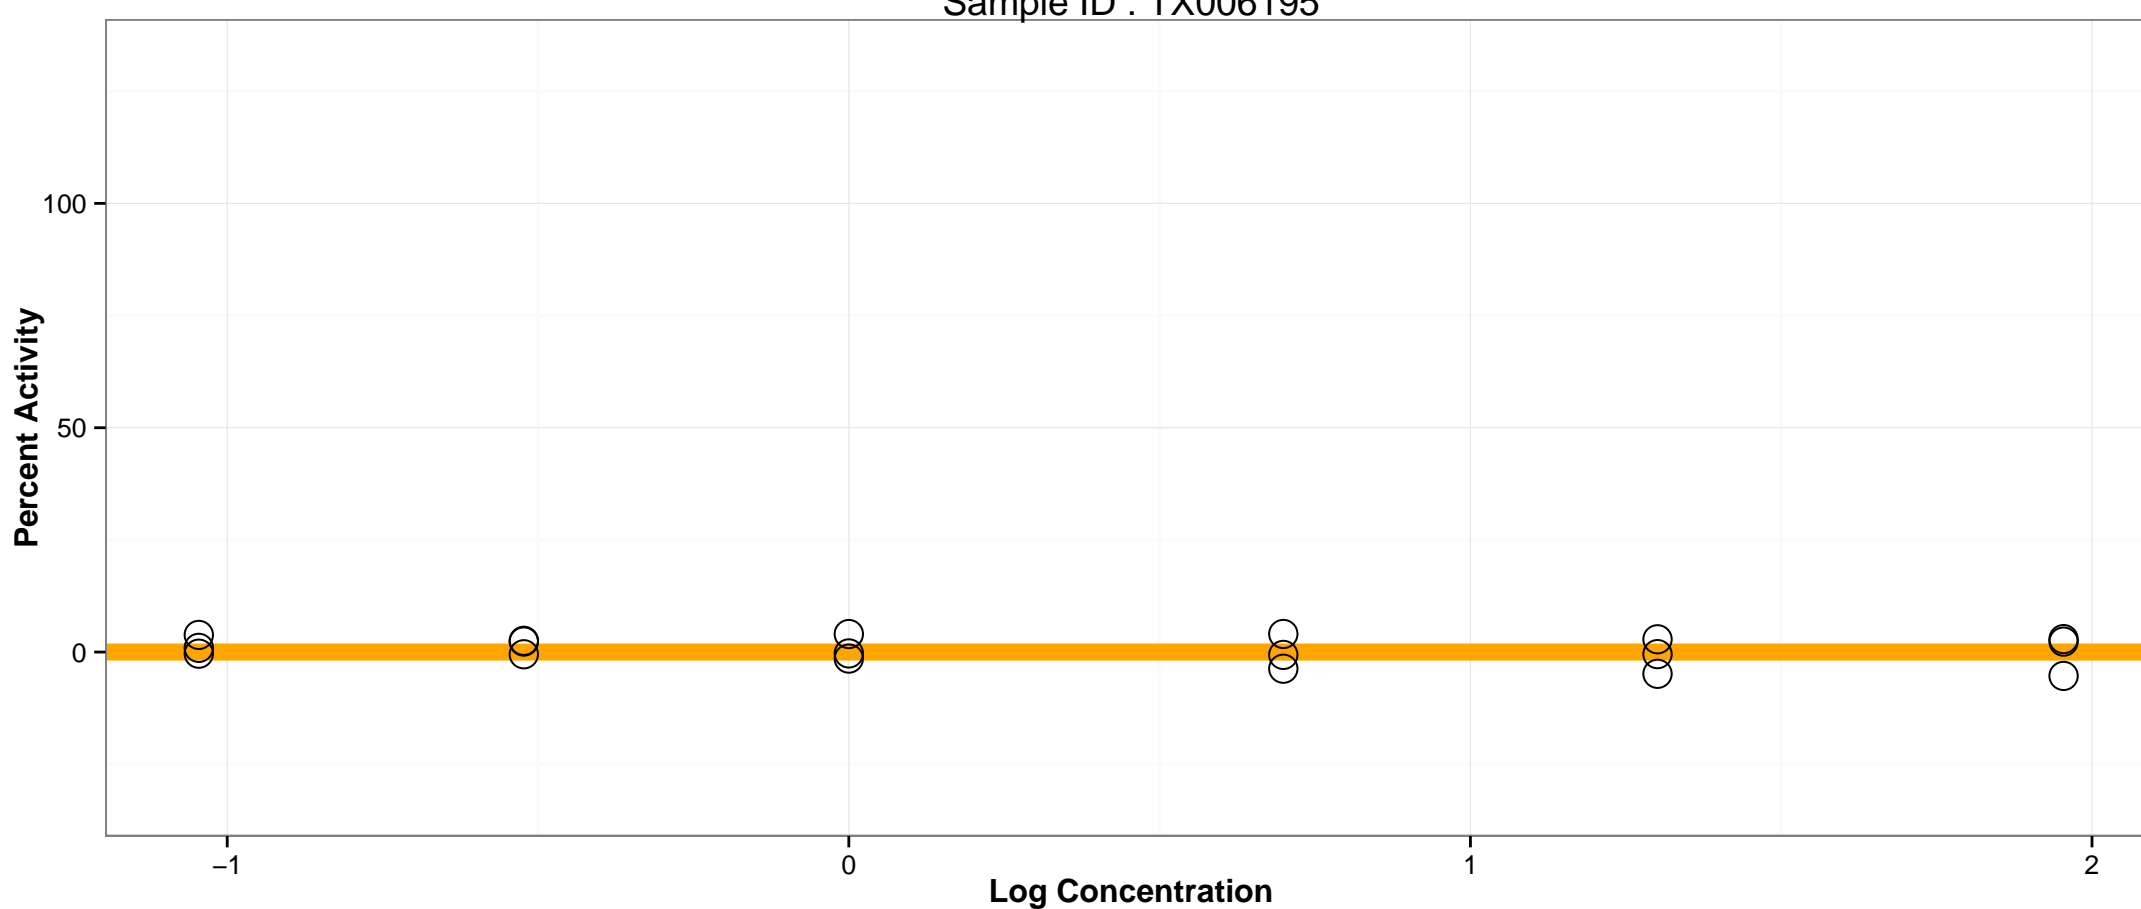

HILL MODEL  
HILL MODEL: Not applicable

GAIN-LOSS MODEL  
GNLS MODEL: Not applicable

|      | CNST  | HILL | GNLS |
|------|-------|------|------|
| AIC  | 93.62 | NA   | NA   |
| PROB | 1     | NA   | NA   |
| RMSE | 2.89  | NA   | NA   |

MAX\_MEAN : 1.48 MAX\_MED : 2.35 BMAD : 5.54  
COFF : 20 HIT-CALL : 0 FITC : 4 ACTP : 0  
FLAGS :

Assay ID 1848 (NHEERL\_Quantilum\_inhib\_2\_dn)  
Sample ID : TX006195

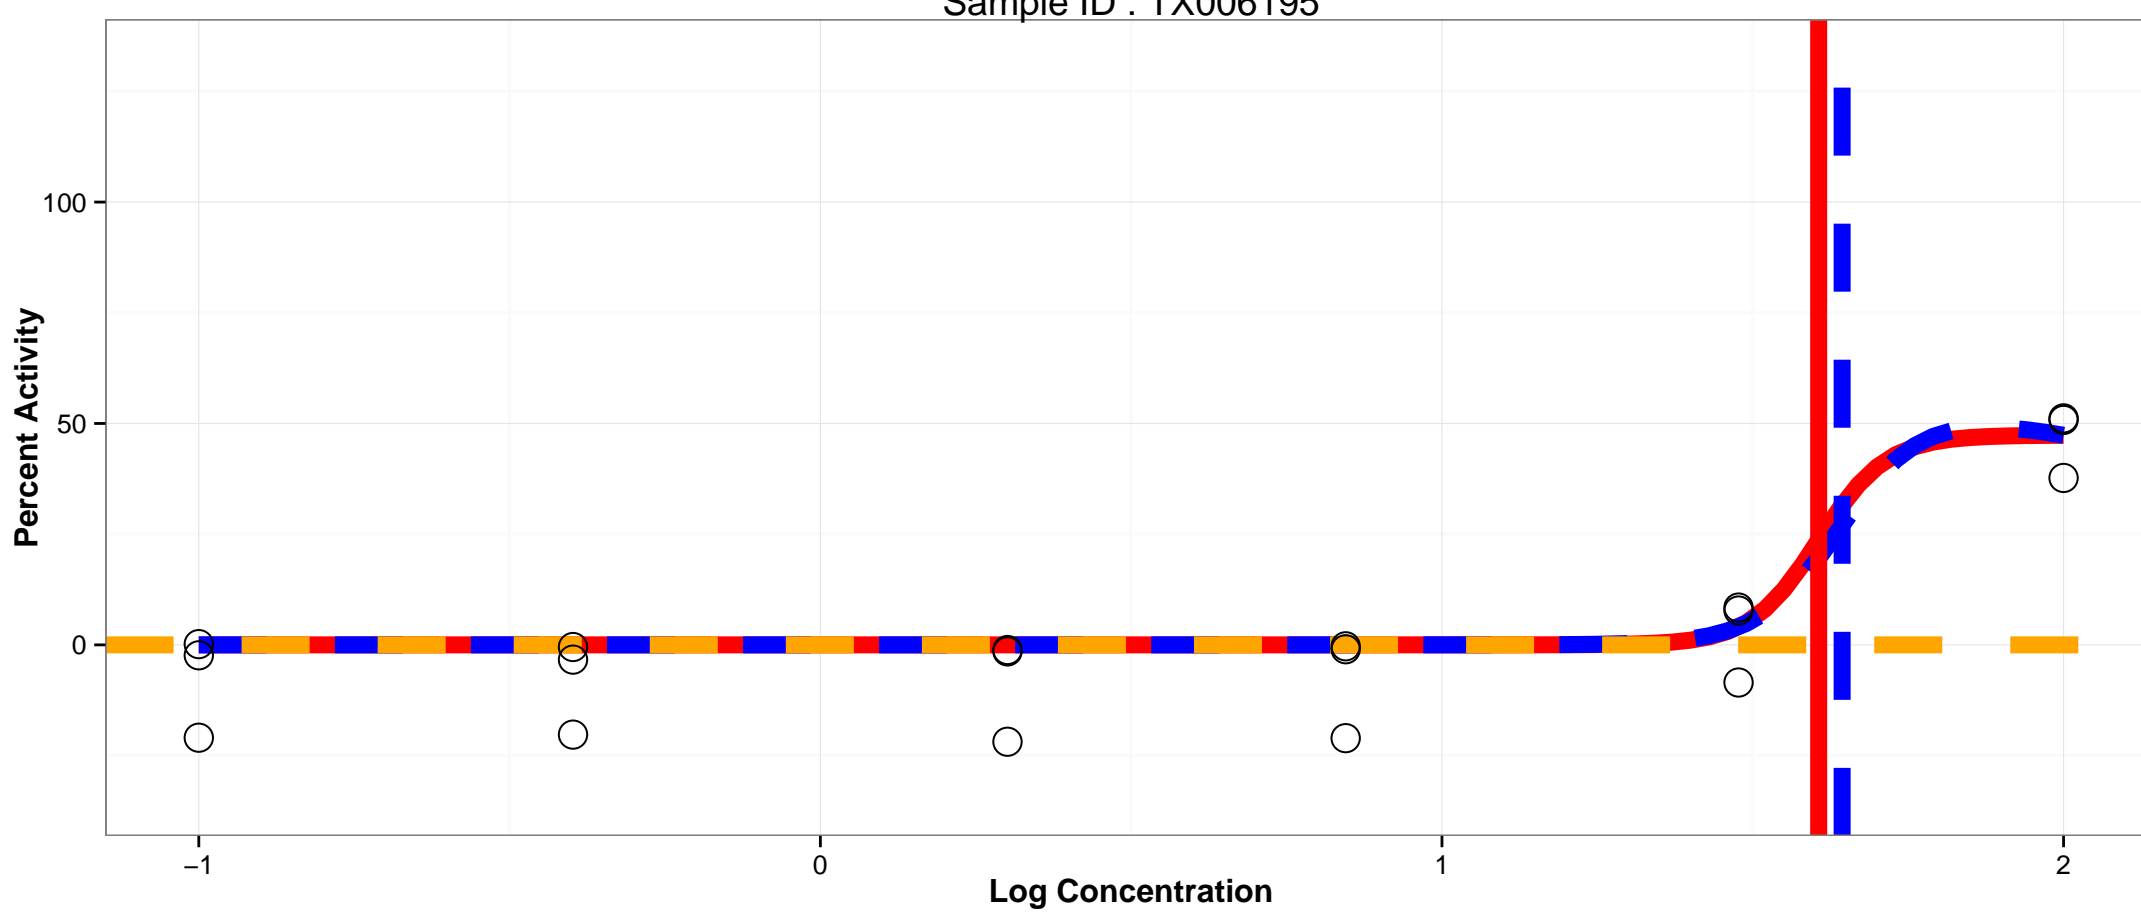

HILL MODEL

|     | tp   | ga   | gw   |
|-----|------|------|------|
| val | 47.4 | 1.61 | 7.97 |
| sd  | 7.05 | 2.02 | 124  |

GAIN-LOSS MODEL

|     | tp  | ga   | gw   | la   | lw   |
|-----|-----|------|------|------|------|
| val | 57  | 1.64 | 6.61 | 2.45 | 1.57 |
| sd  | 979 | 1.42 | 60.3 | 24.7 | 101  |

|      | CNST   | HILL   | GNLS   |
|------|--------|--------|--------|
| AIC  | 162.32 | 143.71 | 147.71 |
| PROB | 0      | 0.88   | 0.12   |
| RMSE | 21.88  | 10.81  | 10.81  |

MAX\_MEAN : 46.6 MAX\_MED : 50.8 BMAD : 8.58  
COFF : 20 HIT-CALL : 1 FITC : 41 ACTP : 1  
FLAGS : 6



Assay ID 1508 (NHEERL\_TPO\_AUR\_dn)  
Sample ID : TX006196

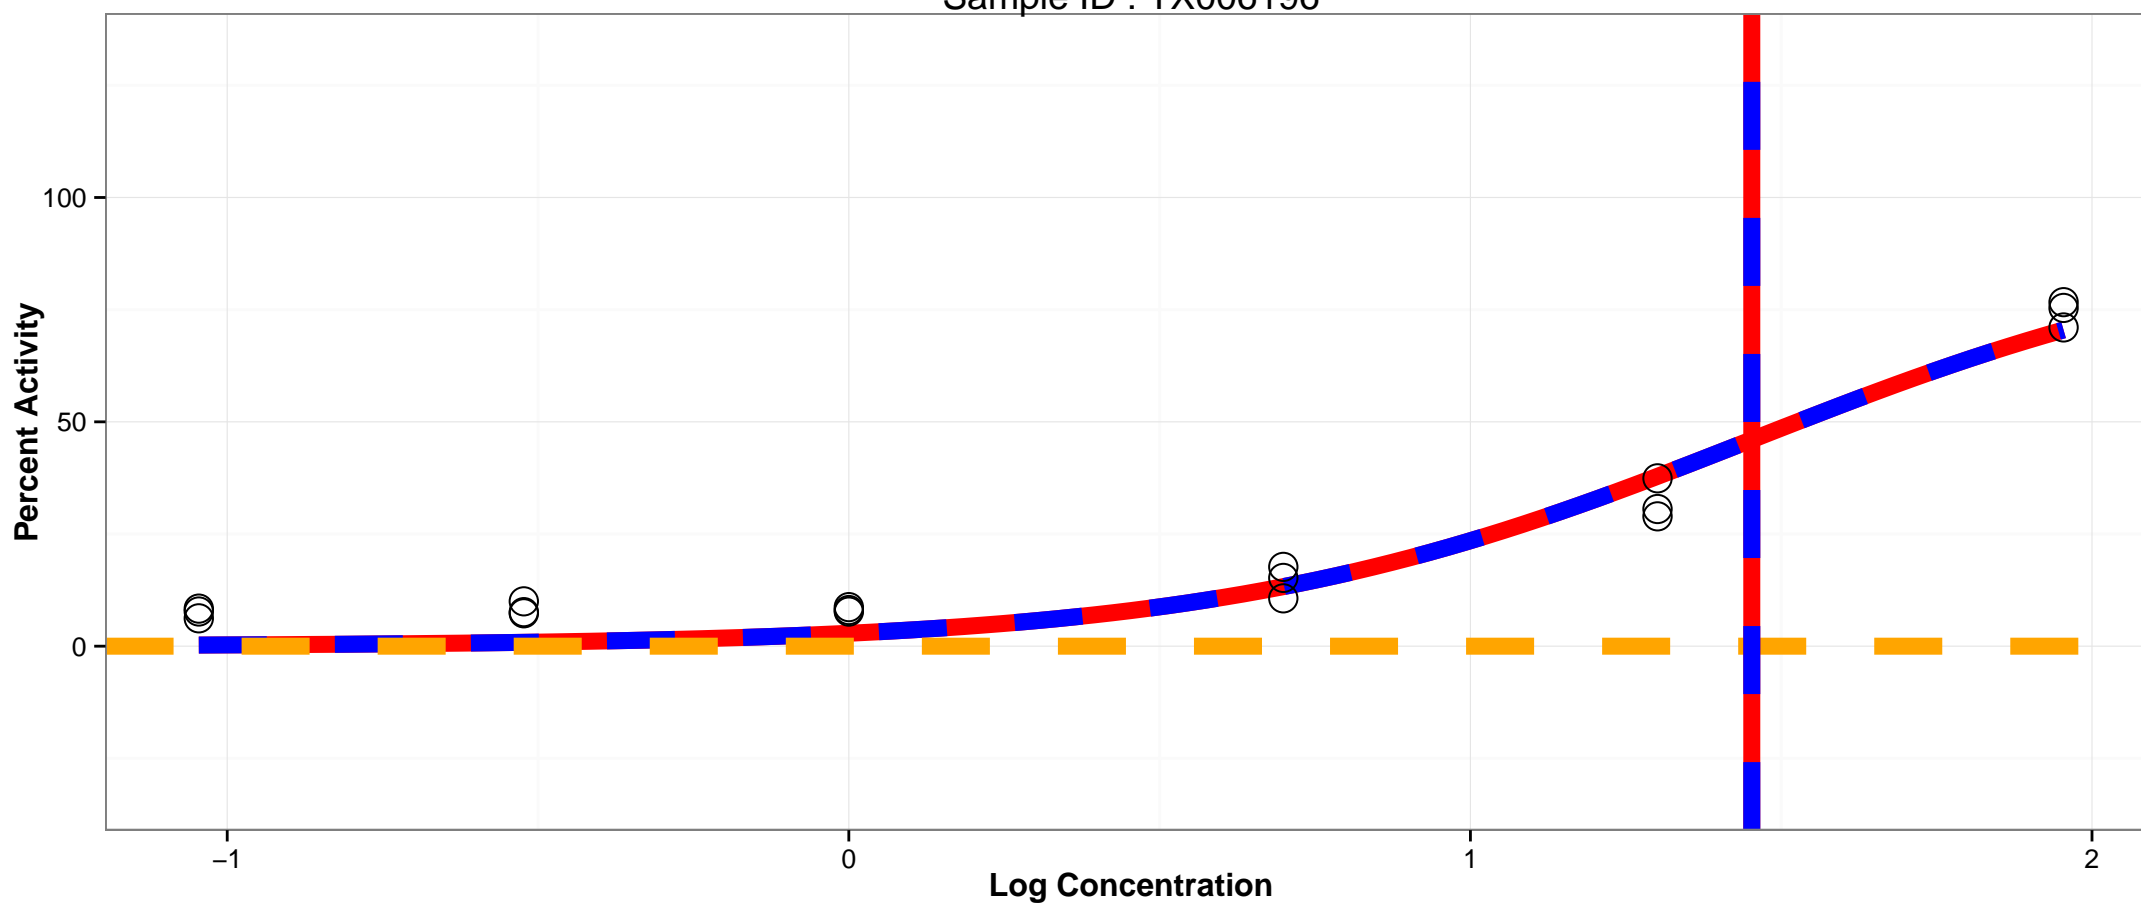

HILL MODEL

|     | tp   | ga    | gw    |
|-----|------|-------|-------|
| val | 92   | 1.45  | 1.03  |
| sd  | 13.8 | 0.155 | 0.227 |

GAIN-LOSS MODEL

|     | tp   | ga    | gw    | la     | lw      |
|-----|------|-------|-------|--------|---------|
| val | 92   | 1.45  | 1.03  | 3.7    | 8.38    |
| sd  | 13.8 | 0.155 | 0.227 | 371000 | 1420000 |

|      | CNST  | HILL   | GNLS   |
|------|-------|--------|--------|
| AIC  | 178.3 | 126.71 | 130.71 |
| PROB | 0     | 0.88   | 0.12   |
| RMSE | 34.18 | 5.96   | 5.96   |

MAX\_MEAN : 74.4 MAX\_MED : 75.4 BMAD : 5.69  
COFF : 20 HIT-CALL : 1 FITC : 42 ACTP : 1  
FLAGS :

Assay ID 1509 (NHEERL\_HEK293T\_CellTiterGLO)  
Sample ID : TX006196

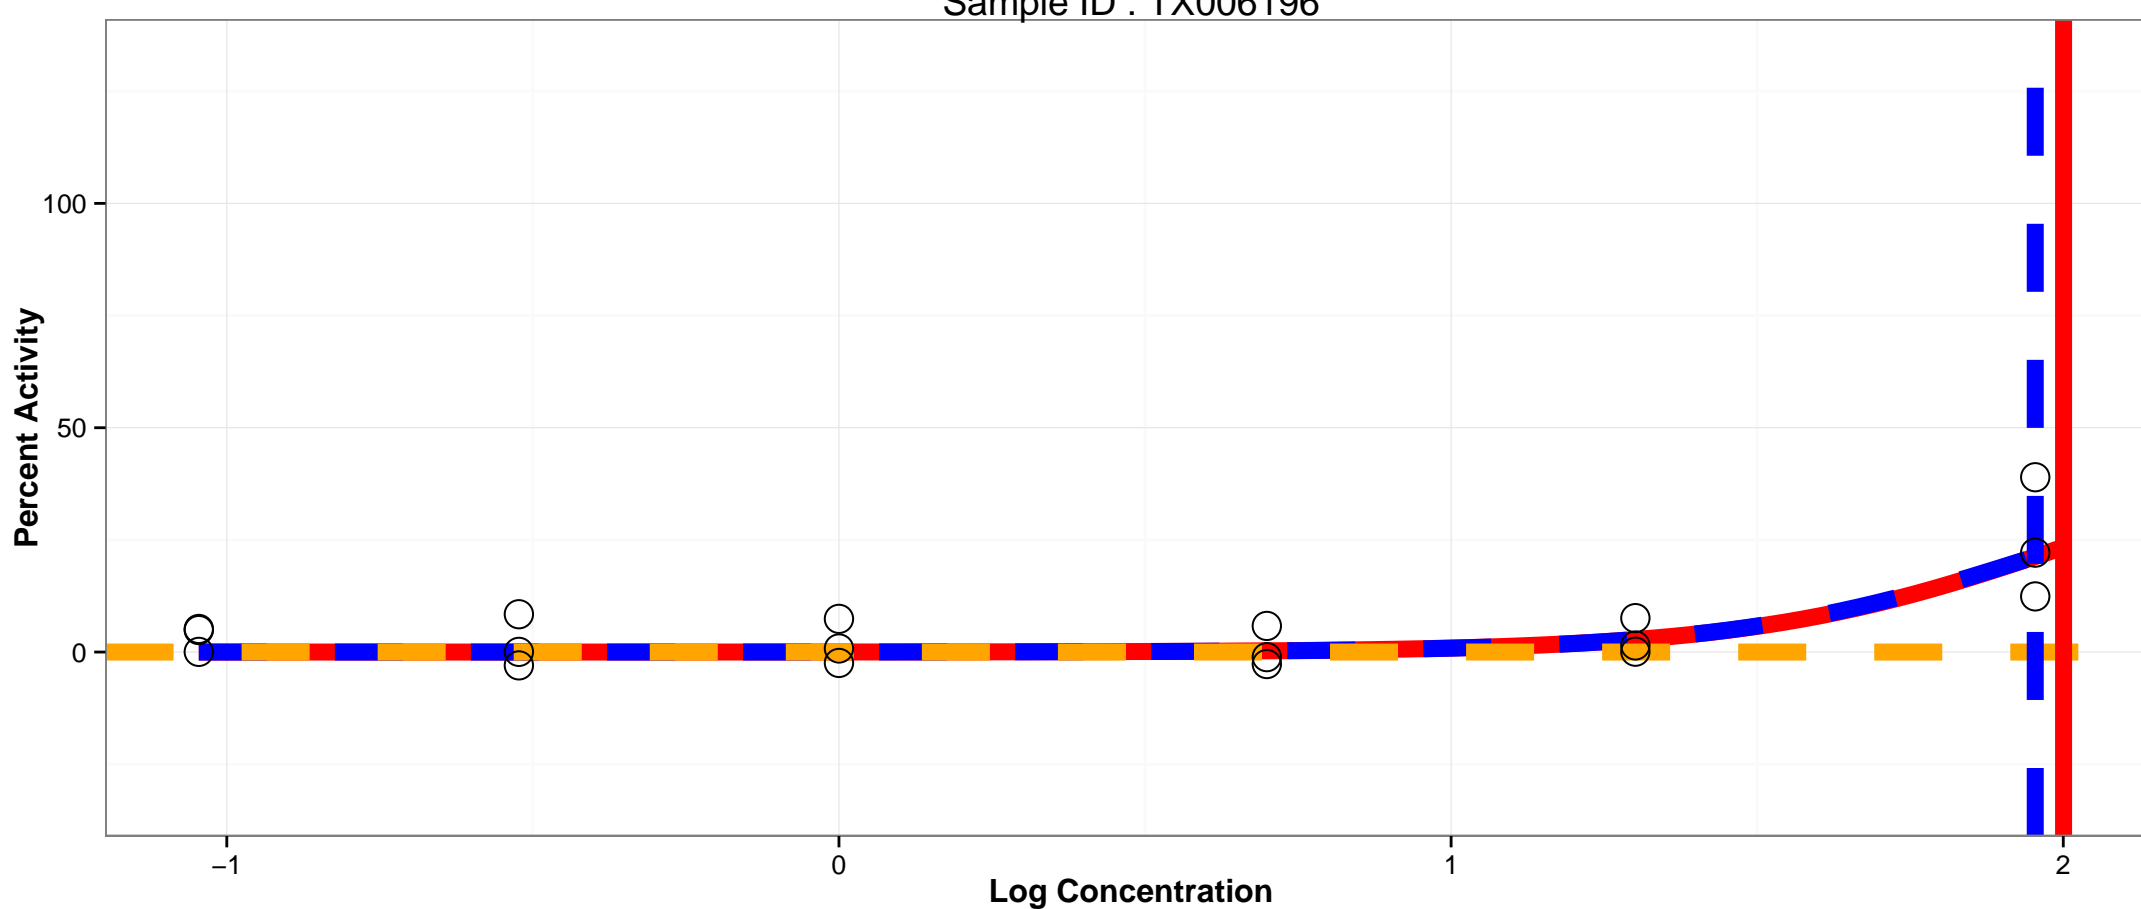

HILL MODEL

|     | tp   | ga   | gw   |
|-----|------|------|------|
| val | 46.8 | 2    | 1.71 |
| sd  | 413  | 4.24 | 4.61 |

GAIN-LOSS MODEL

|     | tp   | ga   | gw   | la   | lw    |
|-----|------|------|------|------|-------|
| val | 42.5 | 1.95 | 1.76 | 2.36 | 16.7  |
| sd  | 541  | 6.27 | 7.93 | 805  | 31300 |

|      | CNST   | HILL   | GNLS   |
|------|--------|--------|--------|
| AIC  | 133.94 | 122.19 | 126.19 |
| PROB | 0      | 0.88   | 0.12   |
| RMSE | 11.69  | 6.05   | 6.05   |

MAX\_MEAN : 24.5 MAX\_MED : 22.2 BMAD : 5.54  
COFF : 20 HIT-CALL : 1 FITC : 42 ACTP : 0.998  
FLAGS : 11; 6

Assay ID 1848 (NHEERL\_Quantilum\_inhib\_2\_dn)  
Sample ID : TX006196

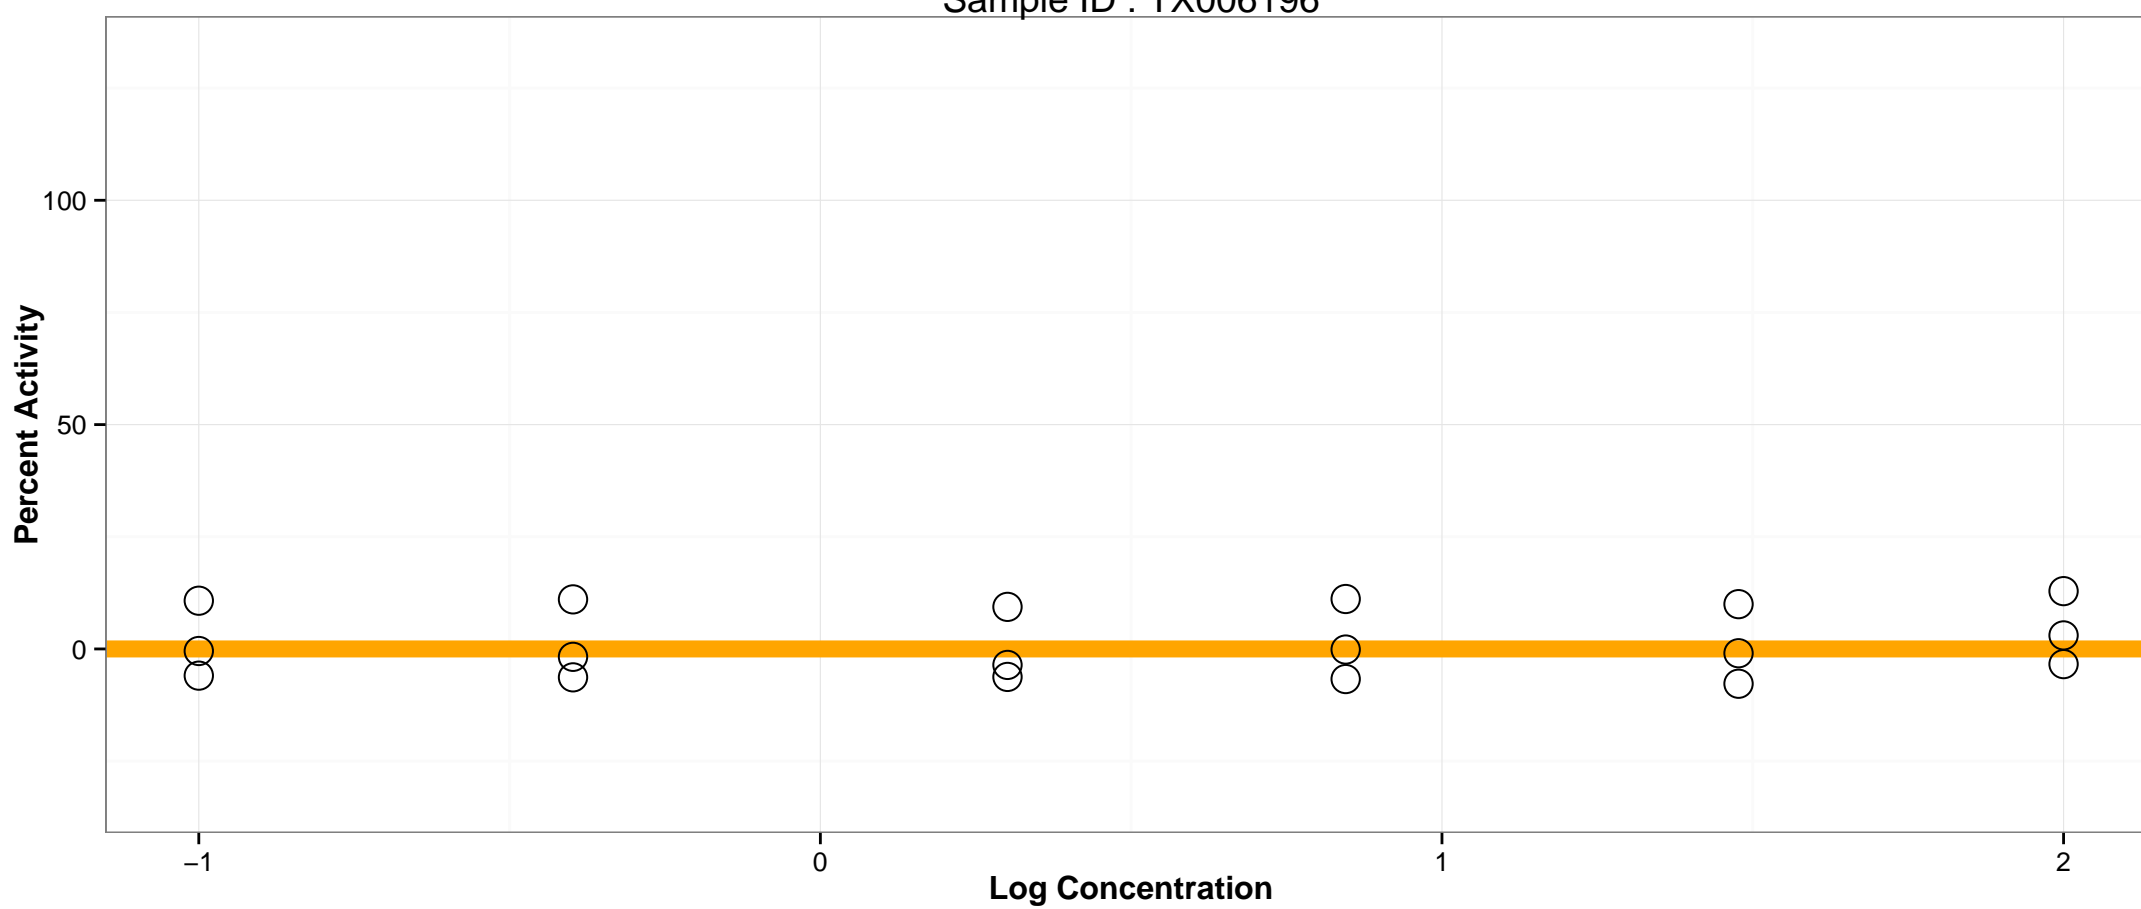

HILL MODEL

HILL MODEL: Not applicable

GAIN-LOSS MODEL

GNLS MODEL: Not applicable

|      | CNST   | HILL | GNLS |
|------|--------|------|------|
| AIC  | 127.43 | NA   | NA   |
| PROB | 1      | NA   | NA   |
| RMSE | 7.35   | NA   | NA   |

MAX\_MEAN : 4.18 MAX\_MED : 3.03 BMAD : 8.58  
COFF : 20 HIT-CALL : 0 FITC : 4 ACTP : 0  
FLAGS :

Assay ID 1508 (NHEERL\_TPO\_AUR\_dn)  
Sample ID : TX006197

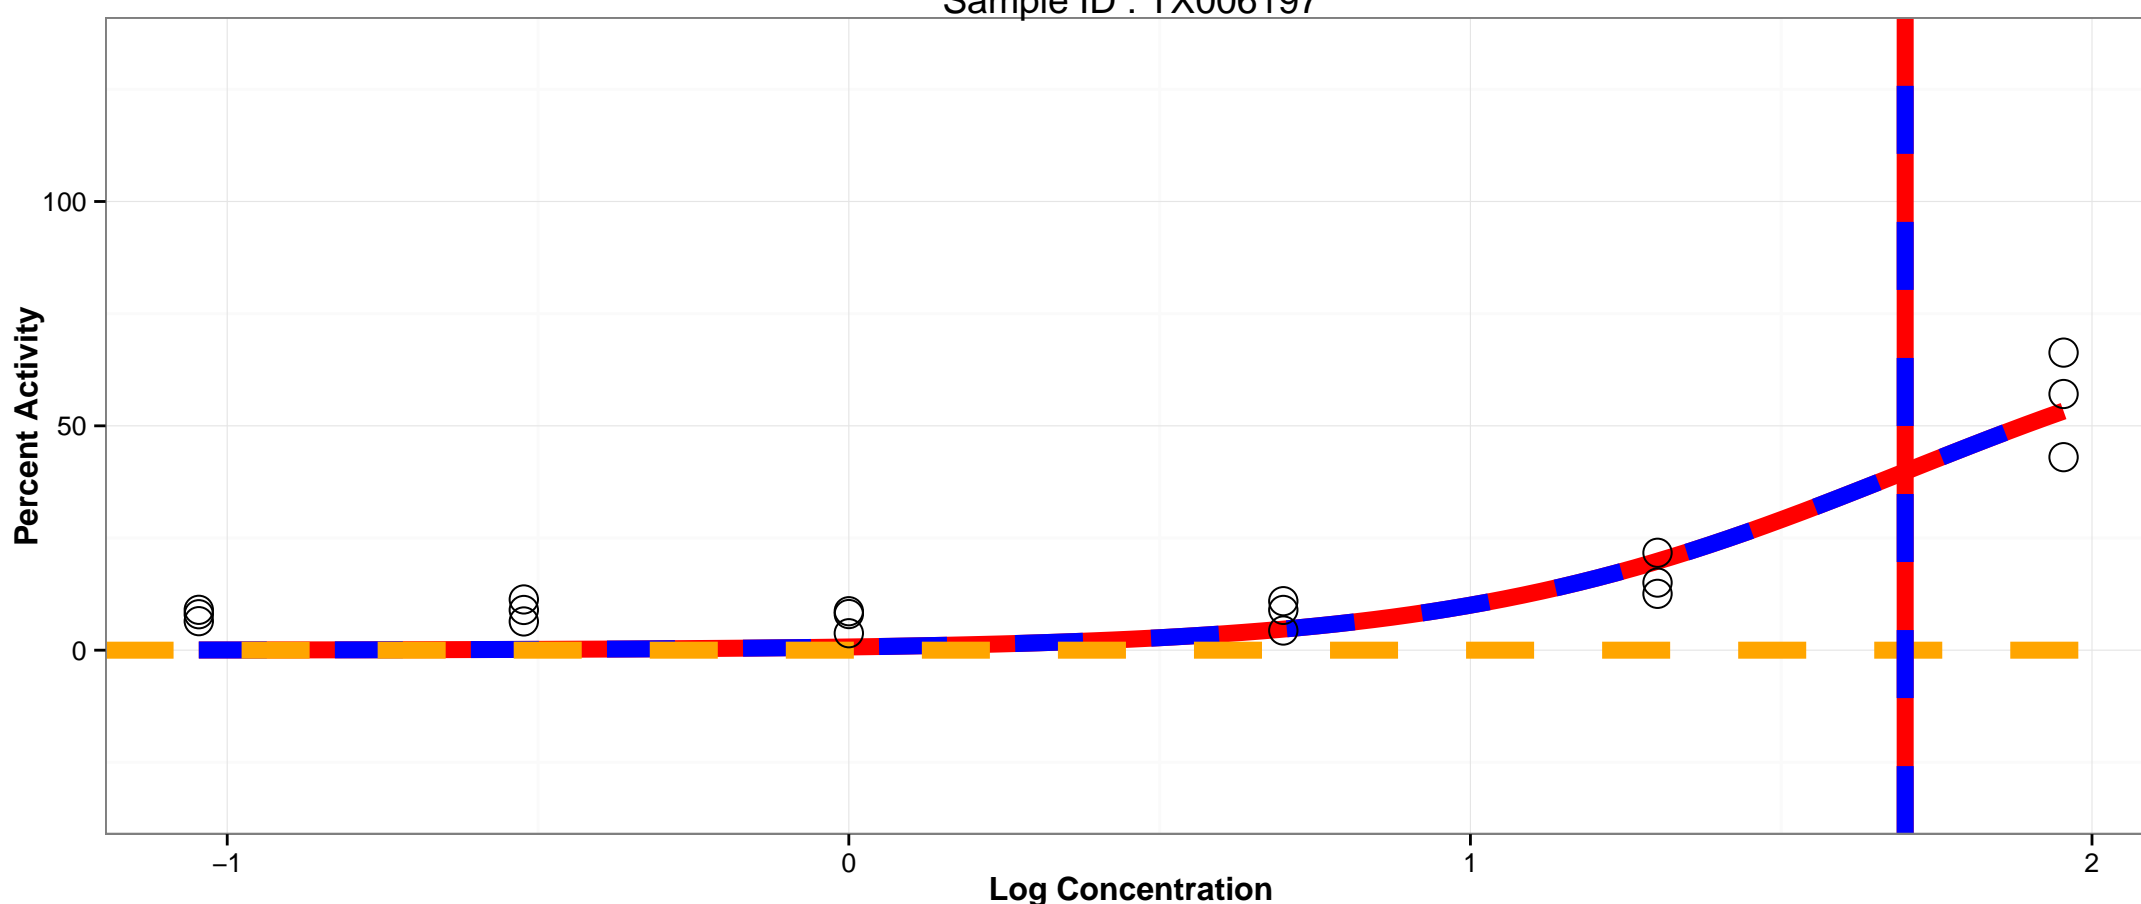

**HILL MODEL**

|     | tp   | ga    | gw    |
|-----|------|-------|-------|
| val | 79.6 | 1.7   | 1.2   |
| sd  | 30.7 | 0.324 | 0.594 |

**GAIN-LOSS MODEL**

|     | tp   | ga    | gw    | la   | lw    |
|-----|------|-------|-------|------|-------|
| val | 79.6 | 1.7   | 1.2   | 3.1  | 8.35  |
| sd  | 30.7 | 0.324 | 0.595 | 4250 | 31100 |

|      | CNST  | HILL   | GNLS   |
|------|-------|--------|--------|
| AIC  | 165.2 | 134.15 | 138.15 |
| PROB | 0     | 0.88   | 0.12   |
| RMSE | 24.92 | 7.38   | 7.38   |

MAX\_MEAN : 55.5 MAX\_MED : 57.1 BMAD : 5.69  
COFF : 20 HIT-CALL : 1 FITC : 42 ACTP : 1  
FLAGS : 6

Assay ID 1509 (NHEERL\_HEK293T\_CellTiterGLO)  
Sample ID : TX006197

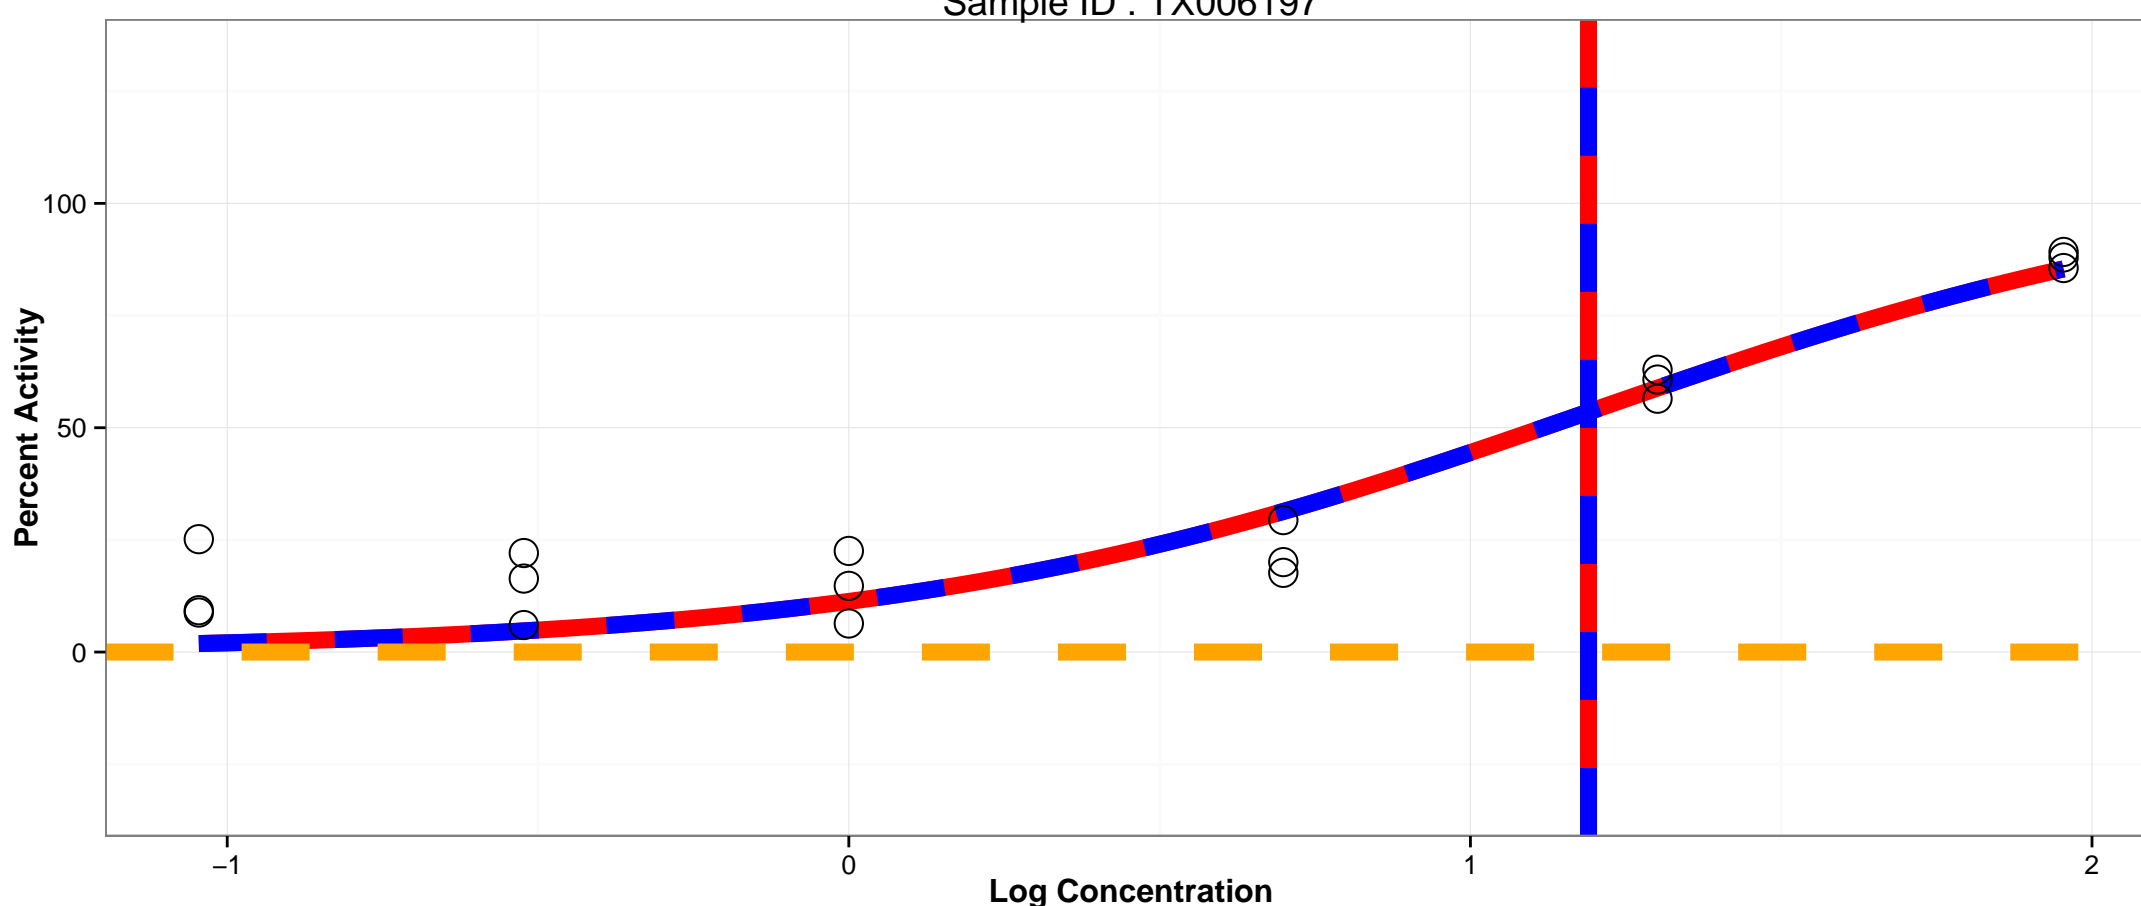

**HILL MODEL**

|     | tp  | ga    | gw    |
|-----|-----|-------|-------|
| val | 107 | 1.19  | 0.78  |
| sd  | 16  | 0.194 | 0.217 |

**GAIN-LOSS MODEL**

|     | tp  | ga   | gw   | la   | lw |
|-----|-----|------|------|------|----|
| val | 107 | 1.19 | 0.78 | 3.57 | 9  |
| sd  | NA  | NA   | NA   | NA   | NA |

|      | CNST   | HILL   | GNLS   |
|------|--------|--------|--------|
| AIC  | 191.47 | 140.06 | 144.06 |
| PROB | 0      | 0.88   | 0.12   |
| RMSE | 45.83  | 9.46   | 9.46   |

MAX\_MEAN : 87.6 MAX\_MED : 88 BMAD : 5.54  
COFF : 20 HIT-CALL : 1 FITC : 42 ACTP : 1  
FLAGS :

Assay ID 1848 (NHEERL\_Quantilum\_inhib\_2\_dn)  
Sample ID : TX006197

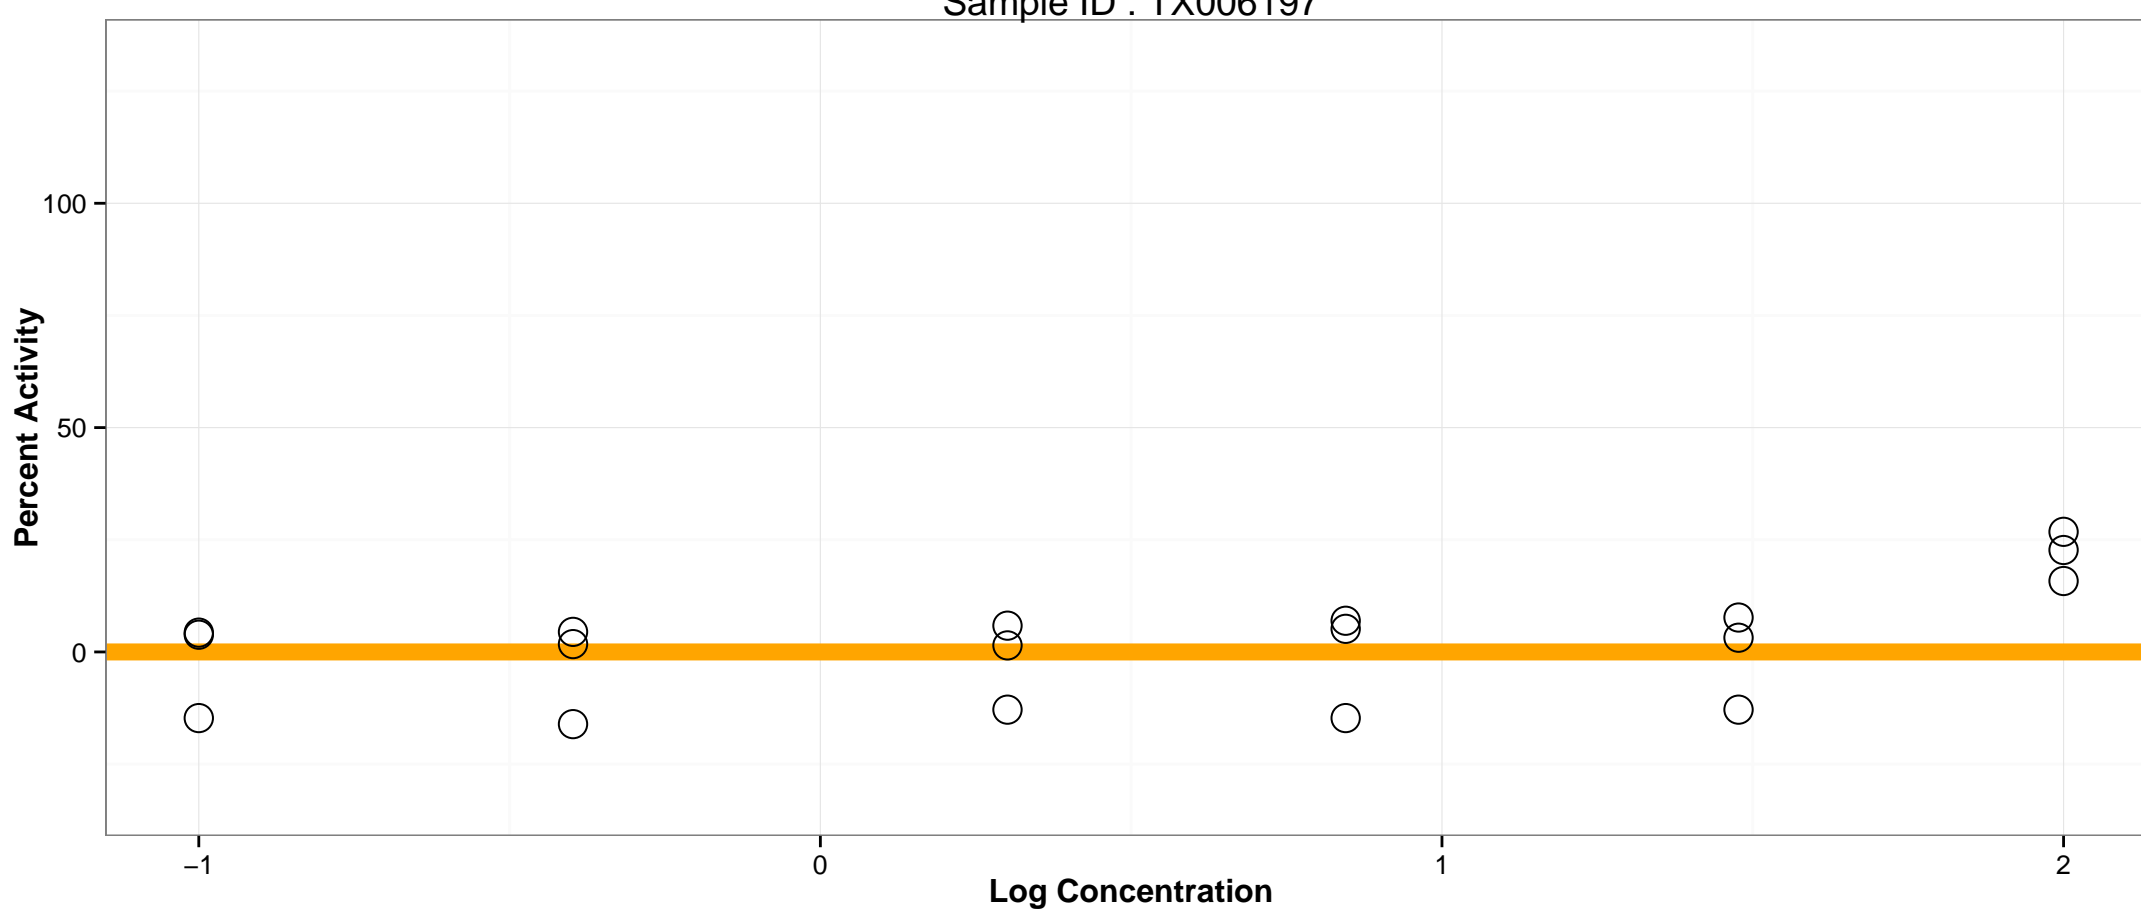

**HILL MODEL**

HILL MODEL: Not applicable

**GAIN-LOSS MODEL**

GNLS MODEL: Not applicable

|      | CNST   | HILL | GNLS |
|------|--------|------|------|
| AIC  | 144.99 | NA   | NA   |
| PROB | 1      | NA   | NA   |
| RMSE | 12.35  | NA   | NA   |

MAX\_MEAN : 21.8 MAX\_MED : 22.7 BMAD : 8.58  
COFF : 20 HIT-CALL : 0 FITC : 4 ACTP : 0  
FLAGS :

Chemical : Troglitazone  
CAS : 97322-87-7

Assay ID 1508 (NHEERL\_TPO\_AUR\_dn)  
Sample ID : TX006205

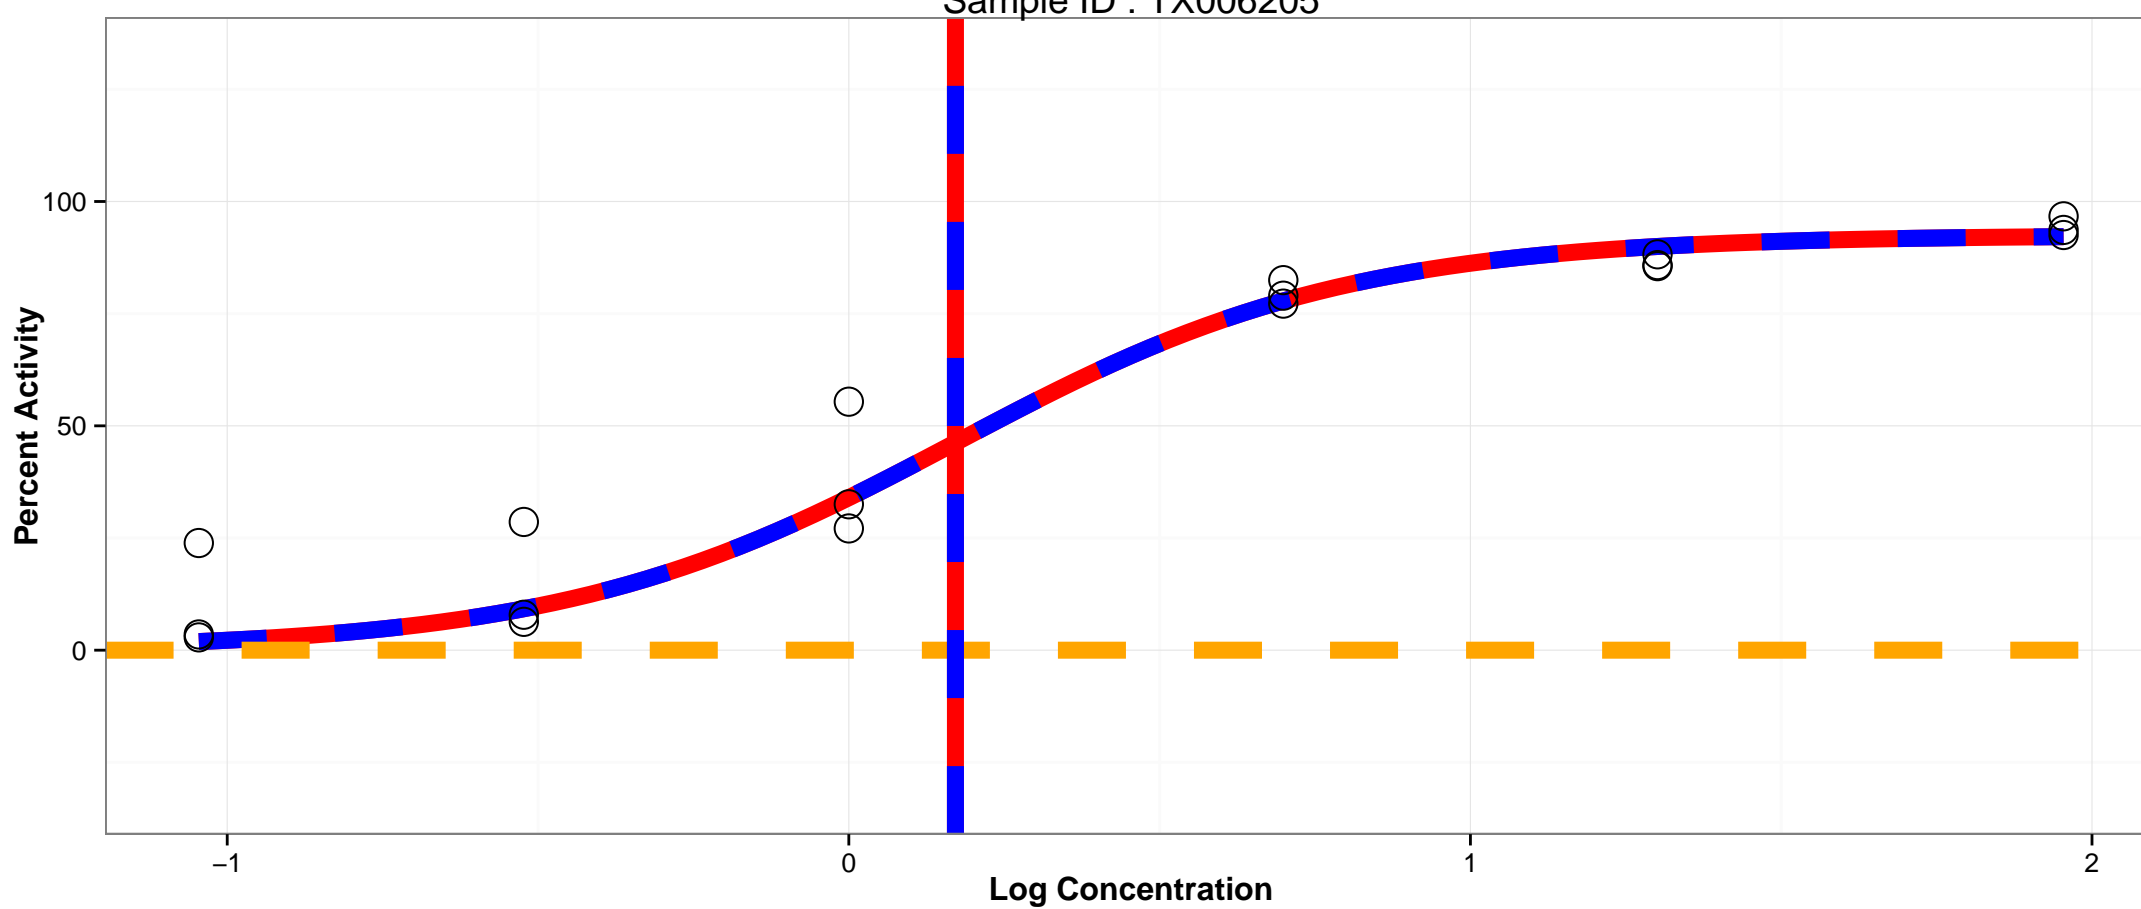

HILL MODEL

|     | tp   | ga     | gw    |
|-----|------|--------|-------|
| val | 92.5 | 0.172  | 1.38  |
| sd  | 2.54 | 0.0546 | 0.192 |

GAIN-LOSS MODEL

|     | tp   | ga     | gw    | la    | lw     |
|-----|------|--------|-------|-------|--------|
| val | 92.5 | 0.172  | 1.38  | 2.96  | 11.4   |
| sd  | 2.54 | 0.0546 | 0.192 | 10700 | 121000 |

|      | CNST   | HILL   | GNLS   |
|------|--------|--------|--------|
| AIC  | 205.74 | 133.07 | 137.07 |
| PROB | 0      | 0.88   | 0.12   |
| RMSE | 64.36  | 9.02   | 9.02   |

MAX\_MEAN : 94.3 MAX\_MED : 93.7 BMAD : 5.69  
COFF : 20 HIT-CALL : 1 FITC : 41 ACTP : 1  
FLAGS :

Assay ID 1509 (NHEERL\_HEK293T\_CellTiterGLO)  
Sample ID : TX006205

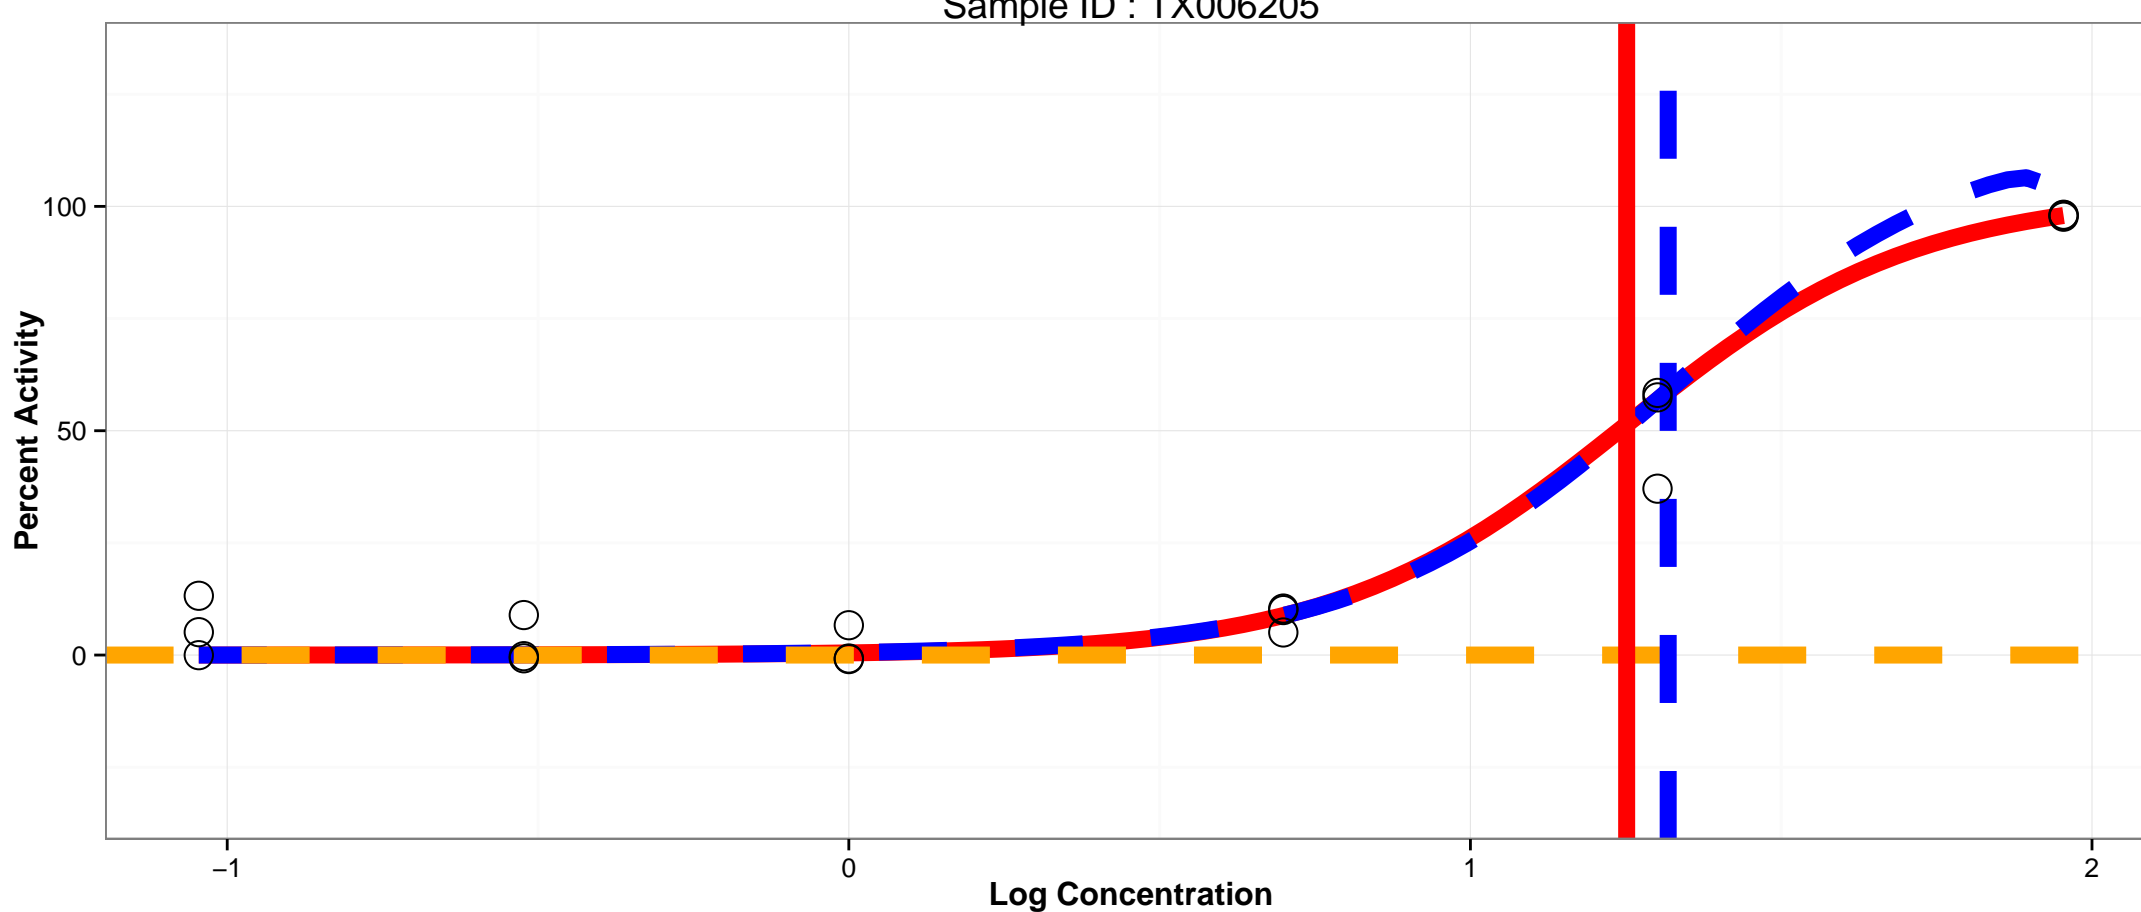

HILL MODEL

|     | tp   | ga     | gw    |
|-----|------|--------|-------|
| val | 103  | 1.25   | 1.86  |
| sd  | 2.93 | 0.0277 | 0.212 |

GAIN-LOSS MODEL

|     | tp   | ga    | gw   | la      | lw   |
|-----|------|-------|------|---------|------|
| val | 118  | 1.32  | 1.76 | 2.01    | 18   |
| sd  | 38.6 | 0.159 | 0.28 | 0.00595 | 21.1 |

|      | CNST   | HILL   | GNLS   |
|------|--------|--------|--------|
| AIC  | 188.21 | 119.14 | 123.12 |
| PROB | 0      | 0.88   | 0.12   |
| RMSE | 45.61  | 6.38   | 6.38   |

MAX\_MEAN : 98 MAX\_MED : 98 BMAD : 5.54  
COFF : 20 HIT-CALL : 1 FITC : 41 ACTP : 1  
FLAGS :

Assay ID 1848 (NHEERL\_Quantilum\_inhib\_2\_dn)  
Sample ID : TX006205

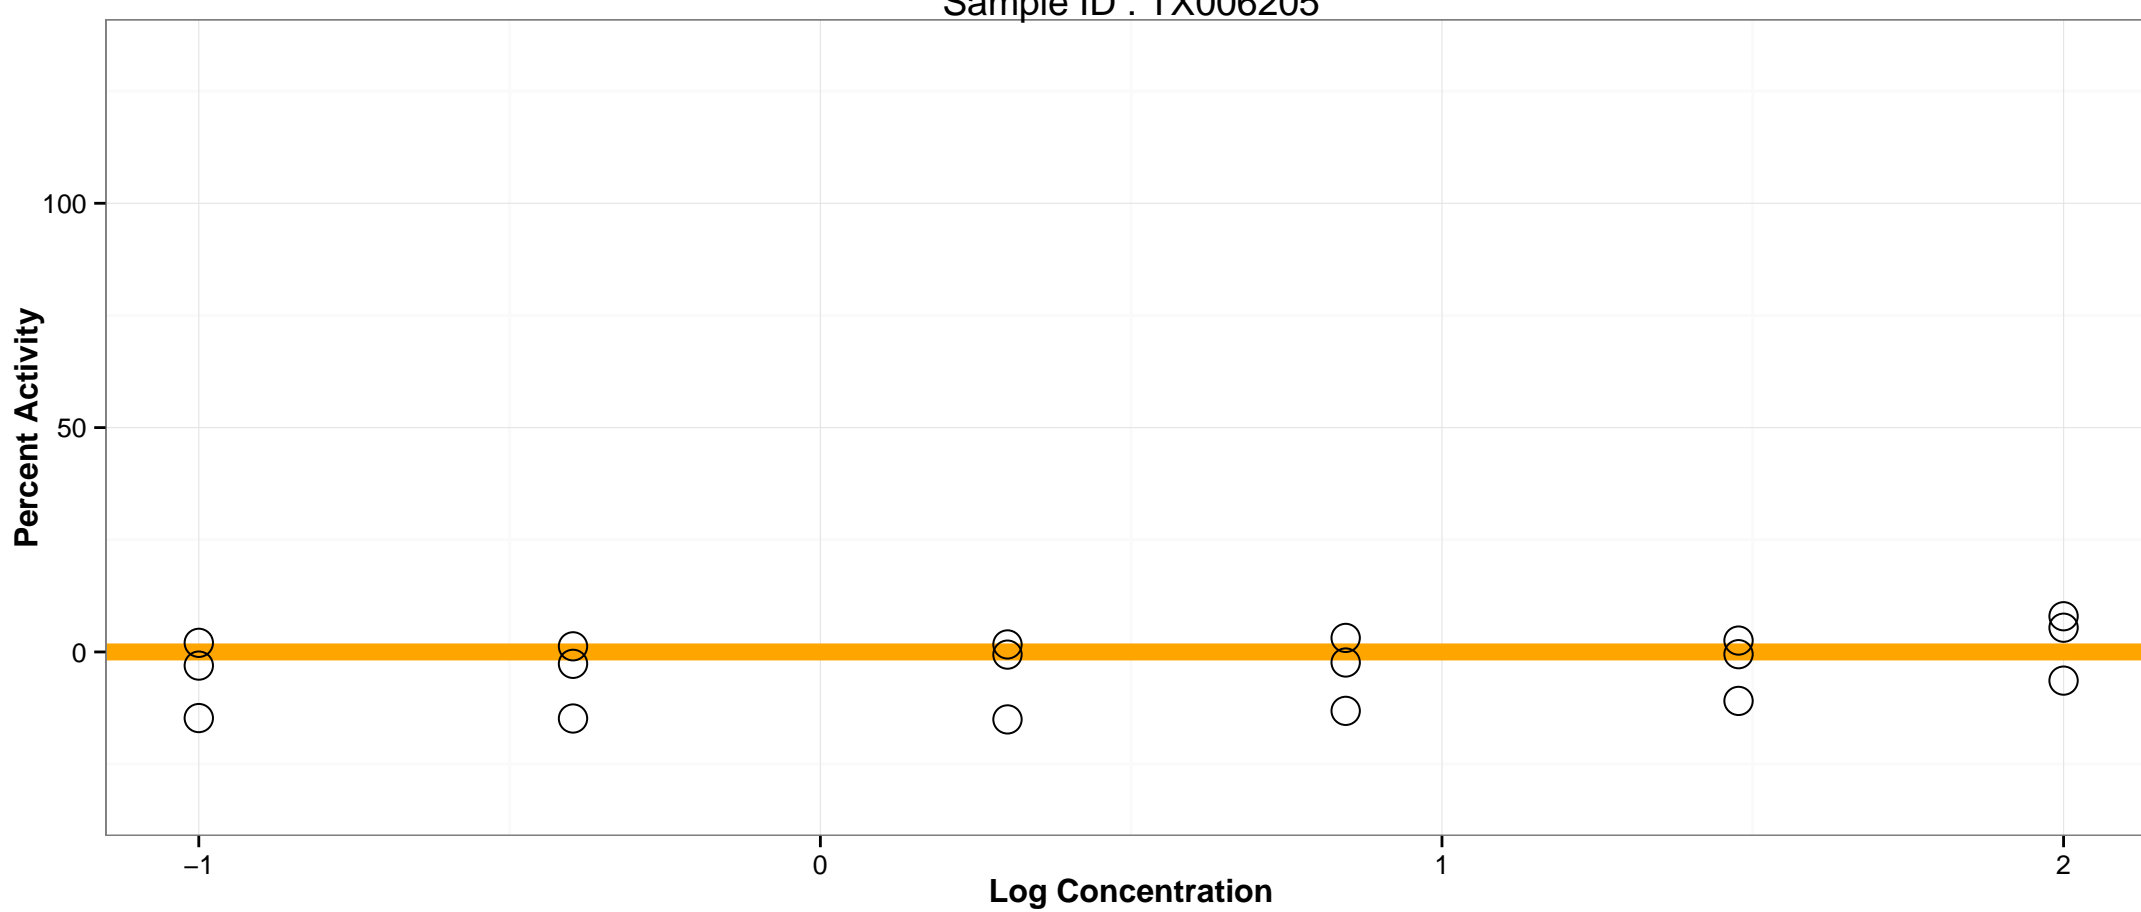

HILL MODEL

HILL MODEL: Not applicable

GAIN-LOSS MODEL

GNLS MODEL: Not applicable

|      | CNST   | HILL | GNLS |
|------|--------|------|------|
| AIC  | 128.23 | NA   | NA   |
| PROB | 1      | NA   | NA   |
| RMSE | 7.94   | NA   | NA   |

MAX\_MEAN : 2.33 MAX\_MED : 5.41 BMAD : 8.58  
COFF : 20 HIT-CALL : 0 FITC : 4 ACTP : 0  
FLAGS :

Assay ID 1508 (NHEERL\_TPO\_AUR\_dn)  
Sample ID : TX006206

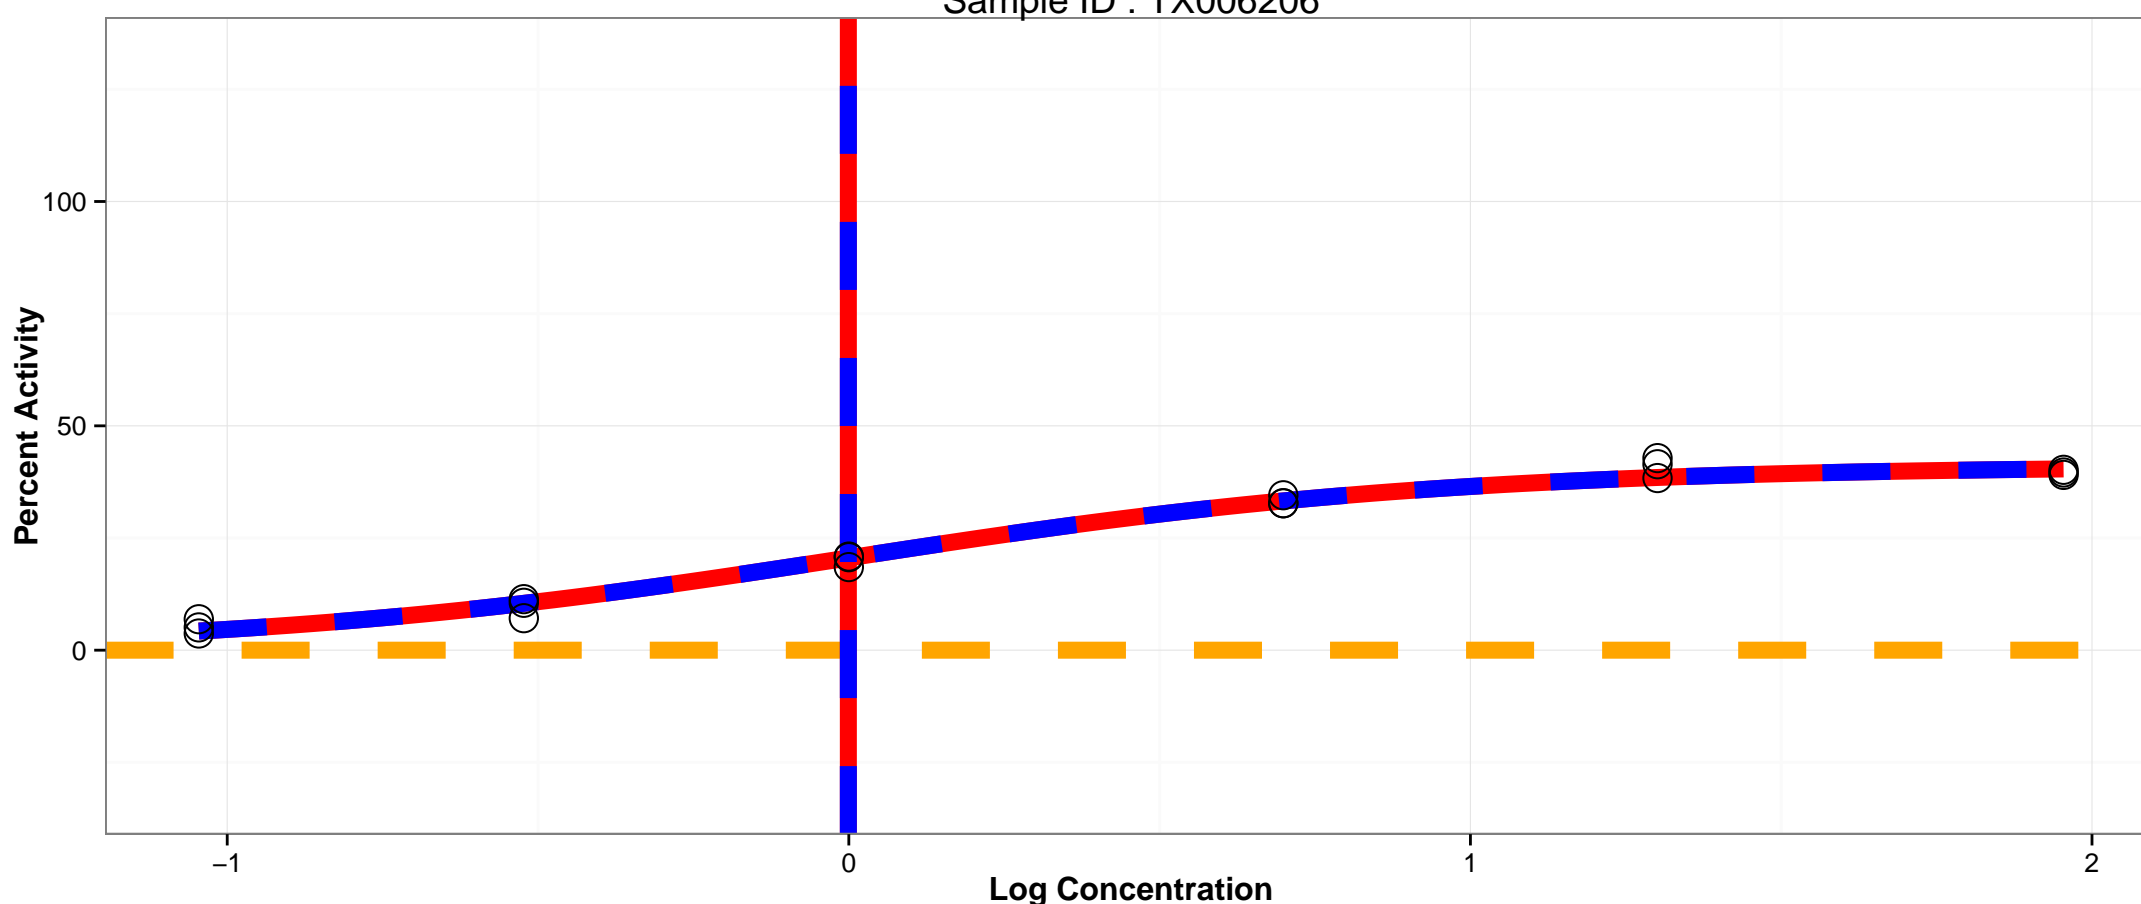

| HILL MODEL |       |           |        |
|------------|-------|-----------|--------|
|            | tp    | ga        | gw     |
| val        | 41.1  | -0.000757 | 0.897  |
| sd         | 0.867 | 0.0391    | 0.0617 |

| GAIN-LOSS MODEL |      |           |       |      |      |
|-----------------|------|-----------|-------|------|------|
|                 | tp   | ga        | gw    | la   | lw   |
| val             | 41.1 | -0.000756 | 0.897 | 3.18 | 9.39 |
| sd              | NA   | NA        | NA    | NA   | NA   |

|      | CNST   | HILL  | GNLS  |
|------|--------|-------|-------|
| AIC  | 176.63 | 78.79 | 82.79 |
| PROB | 0      | 0.88  | 0.12  |
| RMSE | 28.54  | 1.77  | 1.77  |

MAX\_MEAN : 40.9 MAX\_MED : 41.5 BMAD : 5.69  
COFF : 20 HIT-CALL : 1 FITC : 41 ACTP : 1  
FLAGS :

Assay ID 1509 (NHEERL\_HEK293T\_CellTiterGLO)  
Sample ID : TX006206

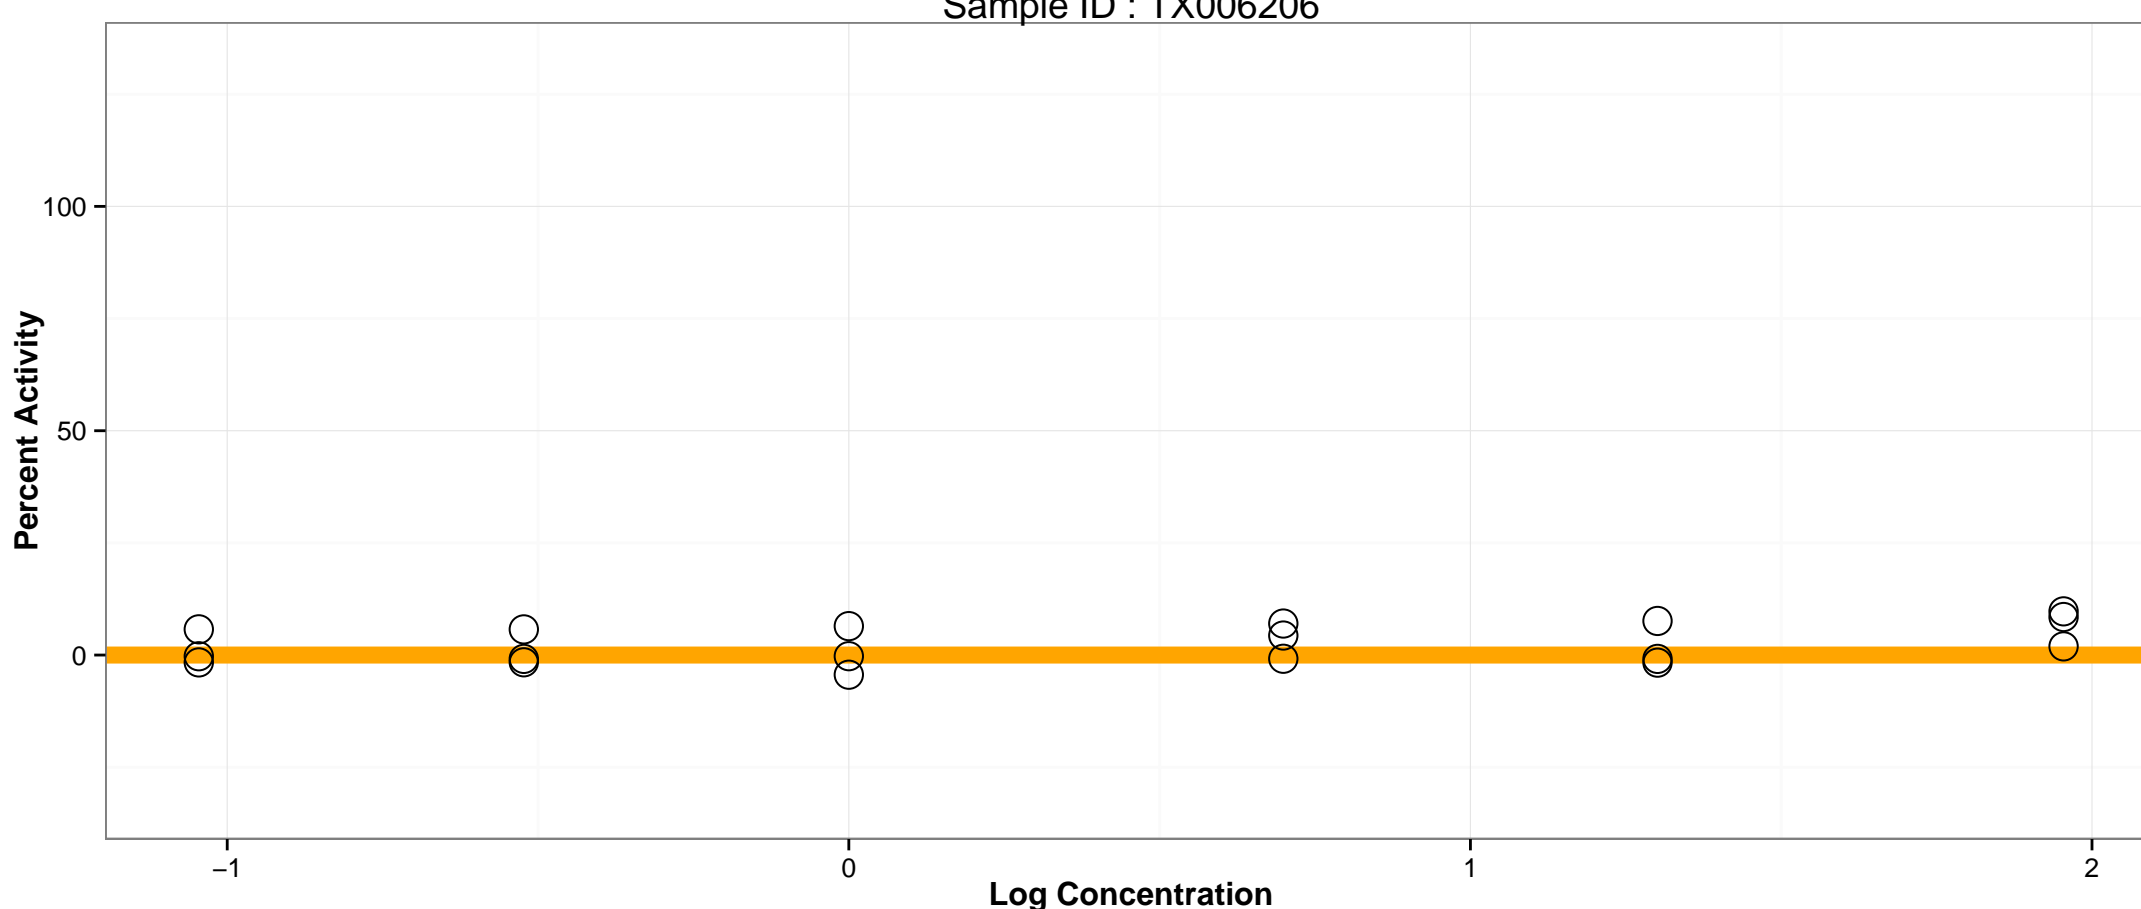

HILL MODEL

HILL MODEL: Not applicable

GAIN-LOSS MODEL

GNLS MODEL: Not applicable

|      | CNST   | HILL | GNLS |
|------|--------|------|------|
| AIC  | 111.94 | NA   | NA   |
| PROB | 1      | NA   | NA   |
| RMSE | 4.91   | NA   | NA   |

MAX\_MEAN : 6.73 MAX\_MED : 8.49 BMAD : 5.54  
COFF : 20 HIT-CALL : 0 FITC : 4 ACTP : 0  
FLAGS :

Assay ID 1848 (NHEERL\_Quantilum\_inhib\_2\_dn)  
Sample ID : TX006206

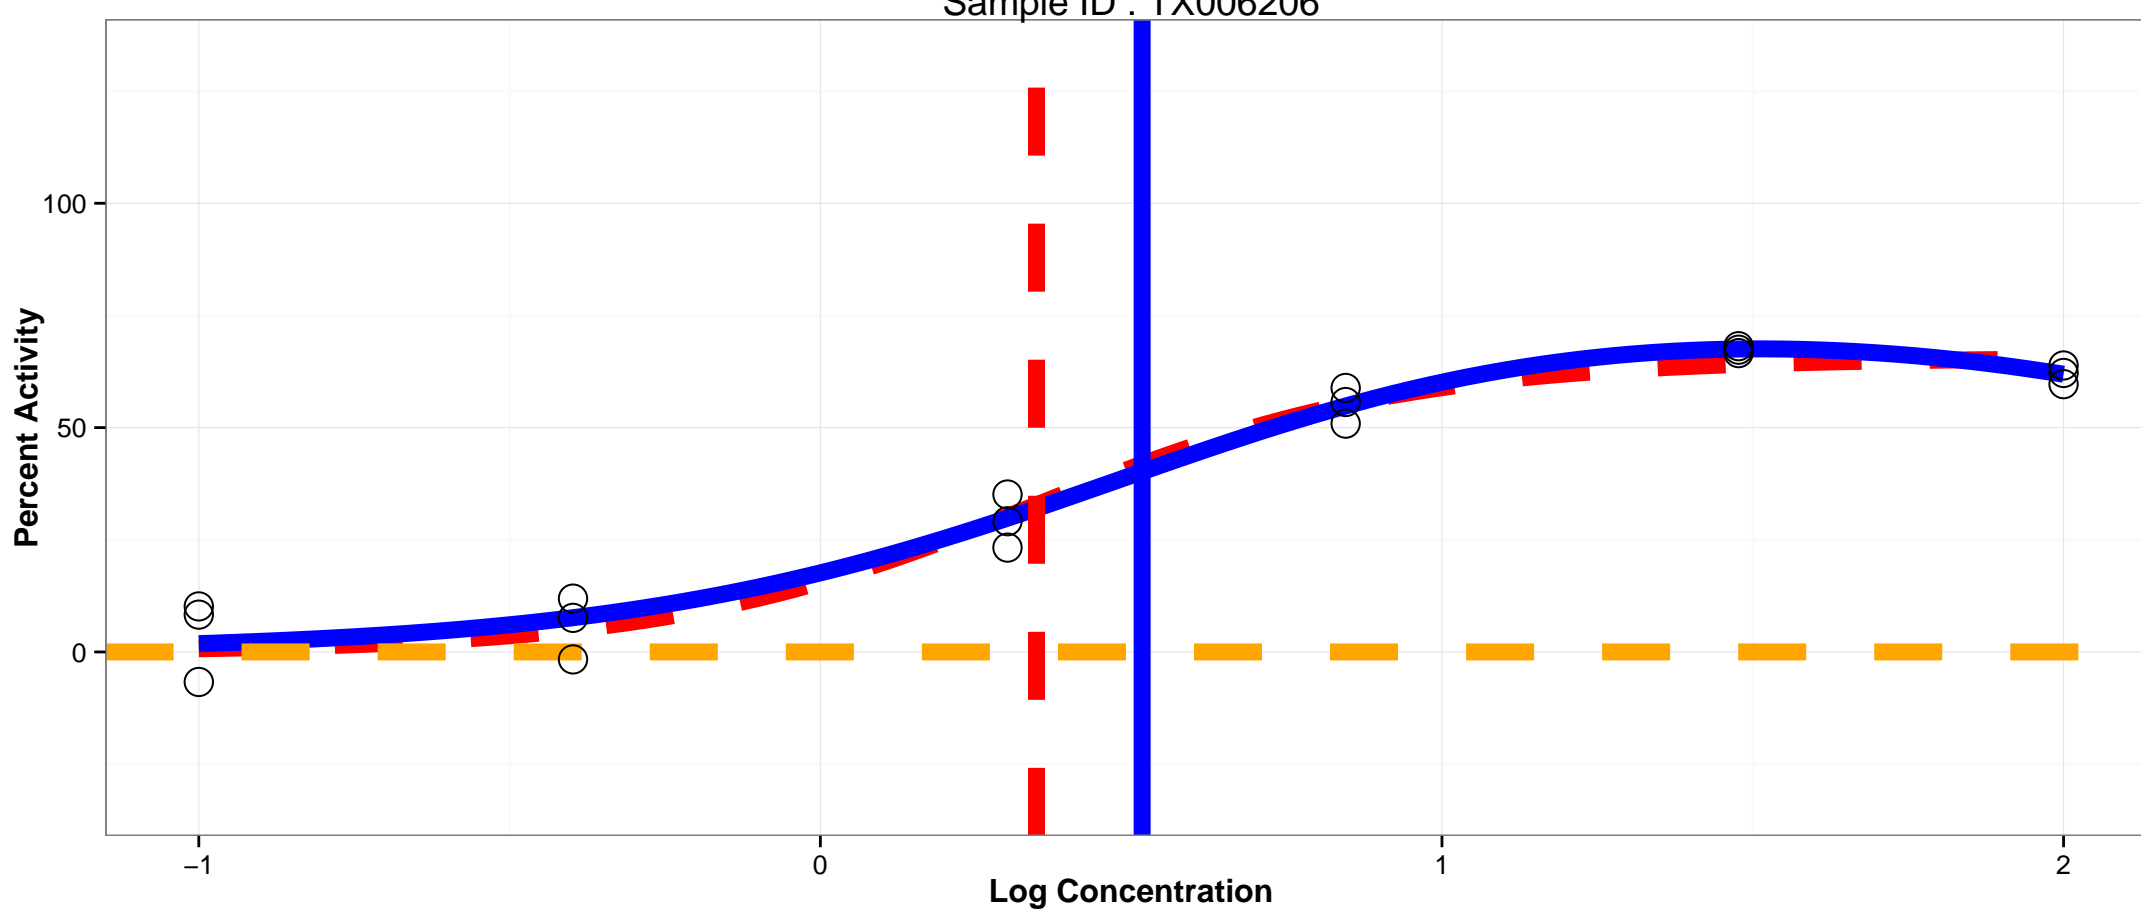

HILL MODEL

|     | tp   | ga     | gw    |
|-----|------|--------|-------|
| val | 65.5 | 0.348  | 1.46  |
| sd  | 2.38 | 0.0596 | 0.293 |

| GAIN-LOSS MODEL |      |       |       |       |       |
|-----------------|------|-------|-------|-------|-------|
|                 | tp   | ga    | gw    | la    | lw    |
| val             | 81.8 | 0.518 | 1.08  | 2.67  | 0.811 |
| sd              | 35.2 | 0.277 | 0.259 | 0.412 | 1.44  |

|      | CNST   | HILL   | GNLS   |
|------|--------|--------|--------|
| AIC  | 193.24 | 121.04 | 120.15 |
| PROB | 0      | 0.39   | 0.61   |
| RMSE | 45.54  | 5.18   | 4.73   |

MAX\_MEAN : 67.4 MAX\_MED : 67.4 BMAD : 8.58  
COFF : 20 HIT-CALL : 1 FITC : 50 ACTP : 1  
FLAGS :

Assay ID 1508 (NHEERL\_TPO\_AUR\_dn)  
Sample ID : TX006207

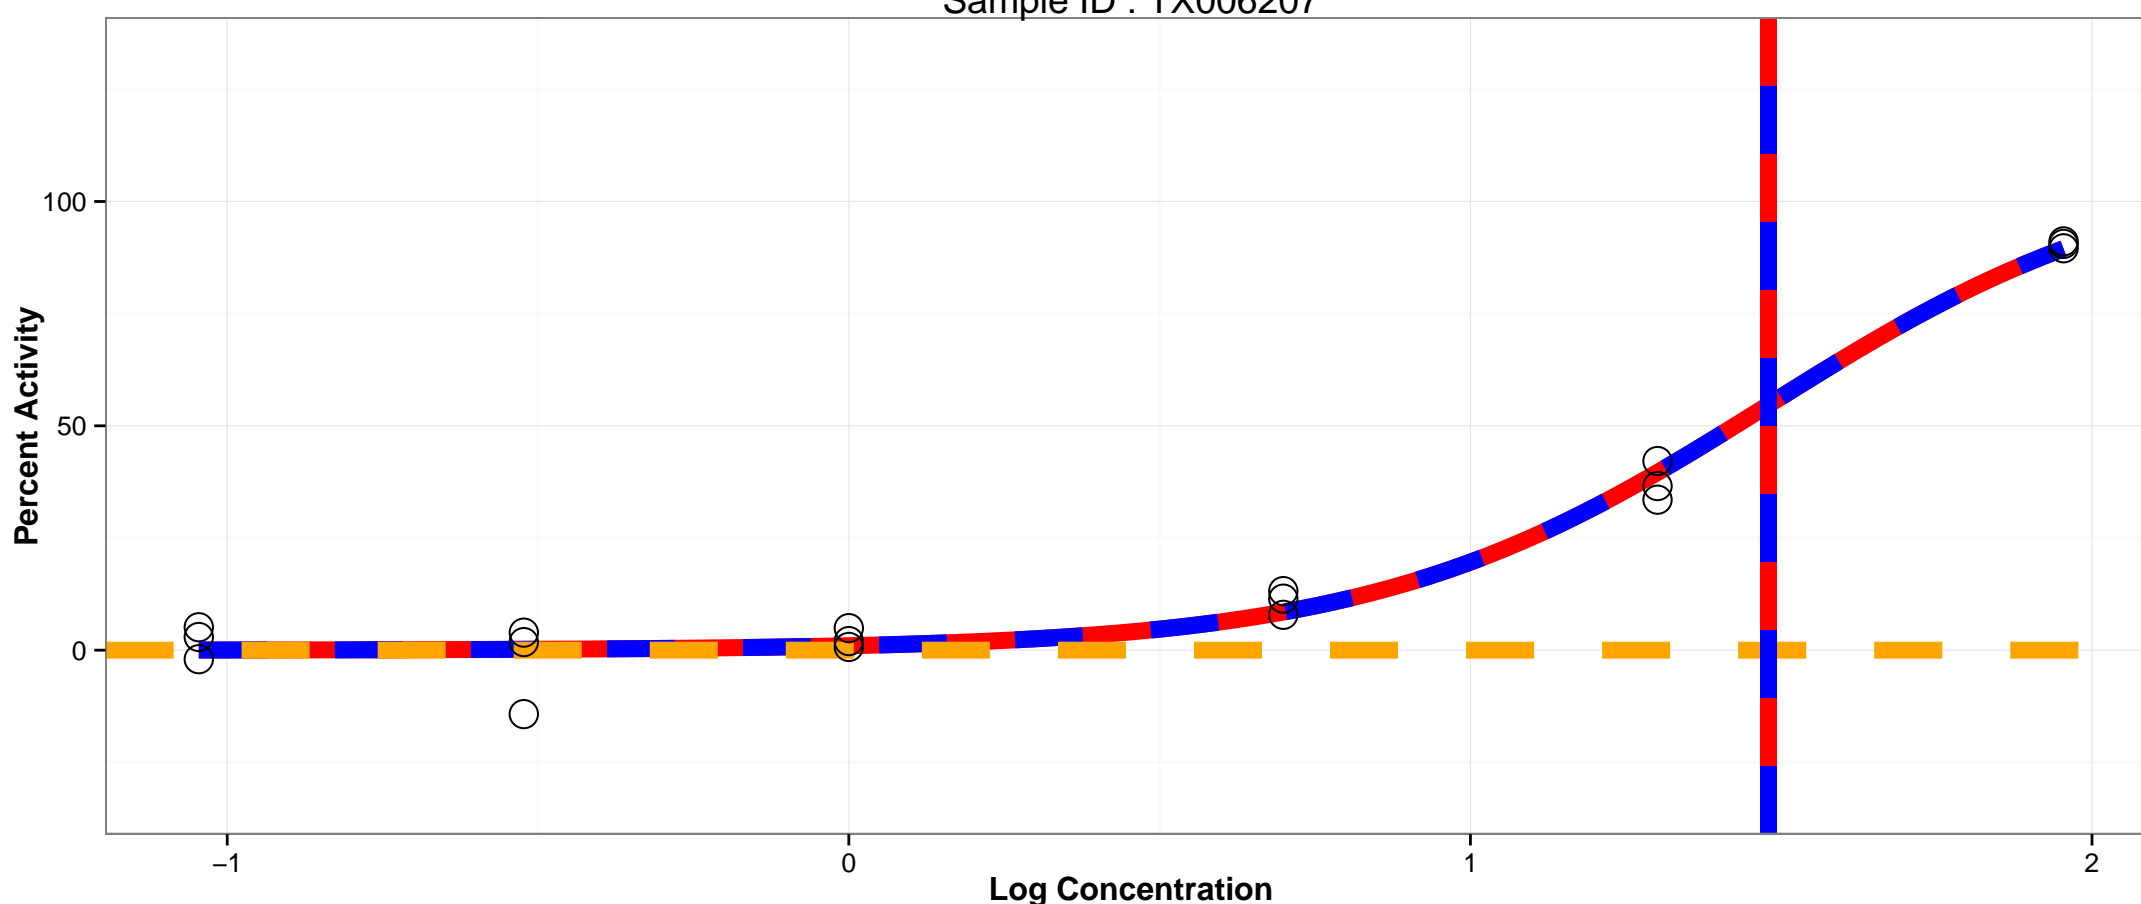

HILL MODEL

|     | tp  | ga     | gw    |
|-----|-----|--------|-------|
| val | 109 | 1.48   | 1.38  |
| sd  | 9.2 | 0.0769 | 0.196 |

GAIN-LOSS MODEL

|     | tp  | ga   | gw   | la   | lw   |
|-----|-----|------|------|------|------|
| val | 109 | 1.48 | 1.38 | 2.95 | 17.9 |
| sd  | NA  | NA   | NA   | NA   | NA   |

|      | CNST   | HILL   | GNLS   |
|------|--------|--------|--------|
| AIC  | 182.93 | 110.18 | 114.18 |
| PROB | 0      | 0.88   | 0.12   |
| RMSE | 40.44  | 4.52   | 4.52   |

MAX\_MEAN : 90.4 MAX\_MED : 90.6 BMAD : 5.69  
COFF : 20 HIT-CALL : 1 FITC : 42 ACTP : 1  
FLAGS :

Assay ID 1509 (NHEERL\_HEK293T\_CellTiterGLO)  
Sample ID : TX006207

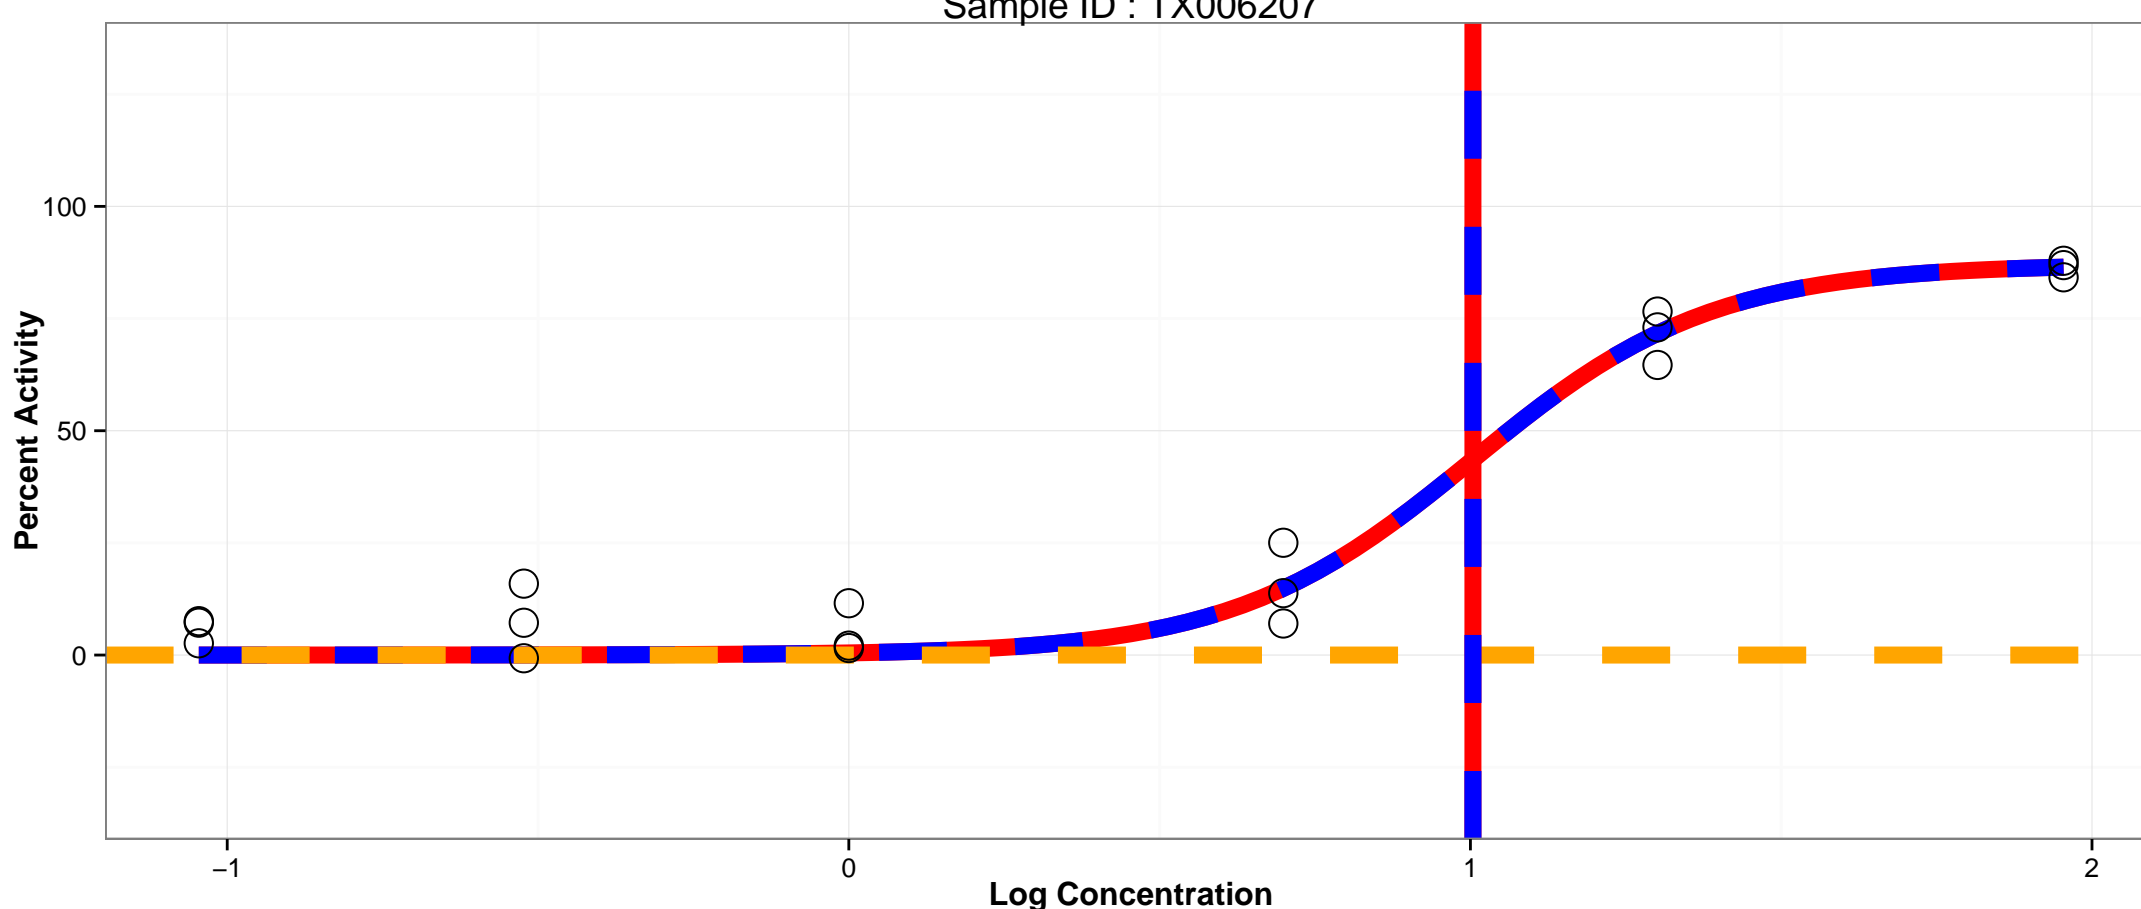

HILL MODEL

|     | tp   | ga     | gw    |
|-----|------|--------|-------|
| val | 87.1 | 1      | 2.25  |
| sd  | 3.18 | 0.0501 | 0.387 |

GAIN-LOSS MODEL

|     | tp   | ga | gw   | la   | lw   |
|-----|------|----|------|------|------|
| val | 87.1 | 1  | 2.25 | 2.93 | 13.3 |
| sd  | NA   | NA | NA   | NA   | NA   |

|      | CNST   | HILL   | GNLS   |
|------|--------|--------|--------|
| AIC  | 191.29 | 127.95 | 131.95 |
| PROB | 0      | 0.88   | 0.12   |
| RMSE | 46.66  | 6.65   | 6.65   |

MAX\_MEAN : 86.3 MAX\_MED : 86.9 BMAD : 5.54  
COFF : 20 HIT-CALL : 1 FITC : 41 ACTP : 1  
FLAGS :

Assay ID 1848 (NHEERL\_Quantilum\_inhib\_2\_dn)  
Sample ID : TX006207

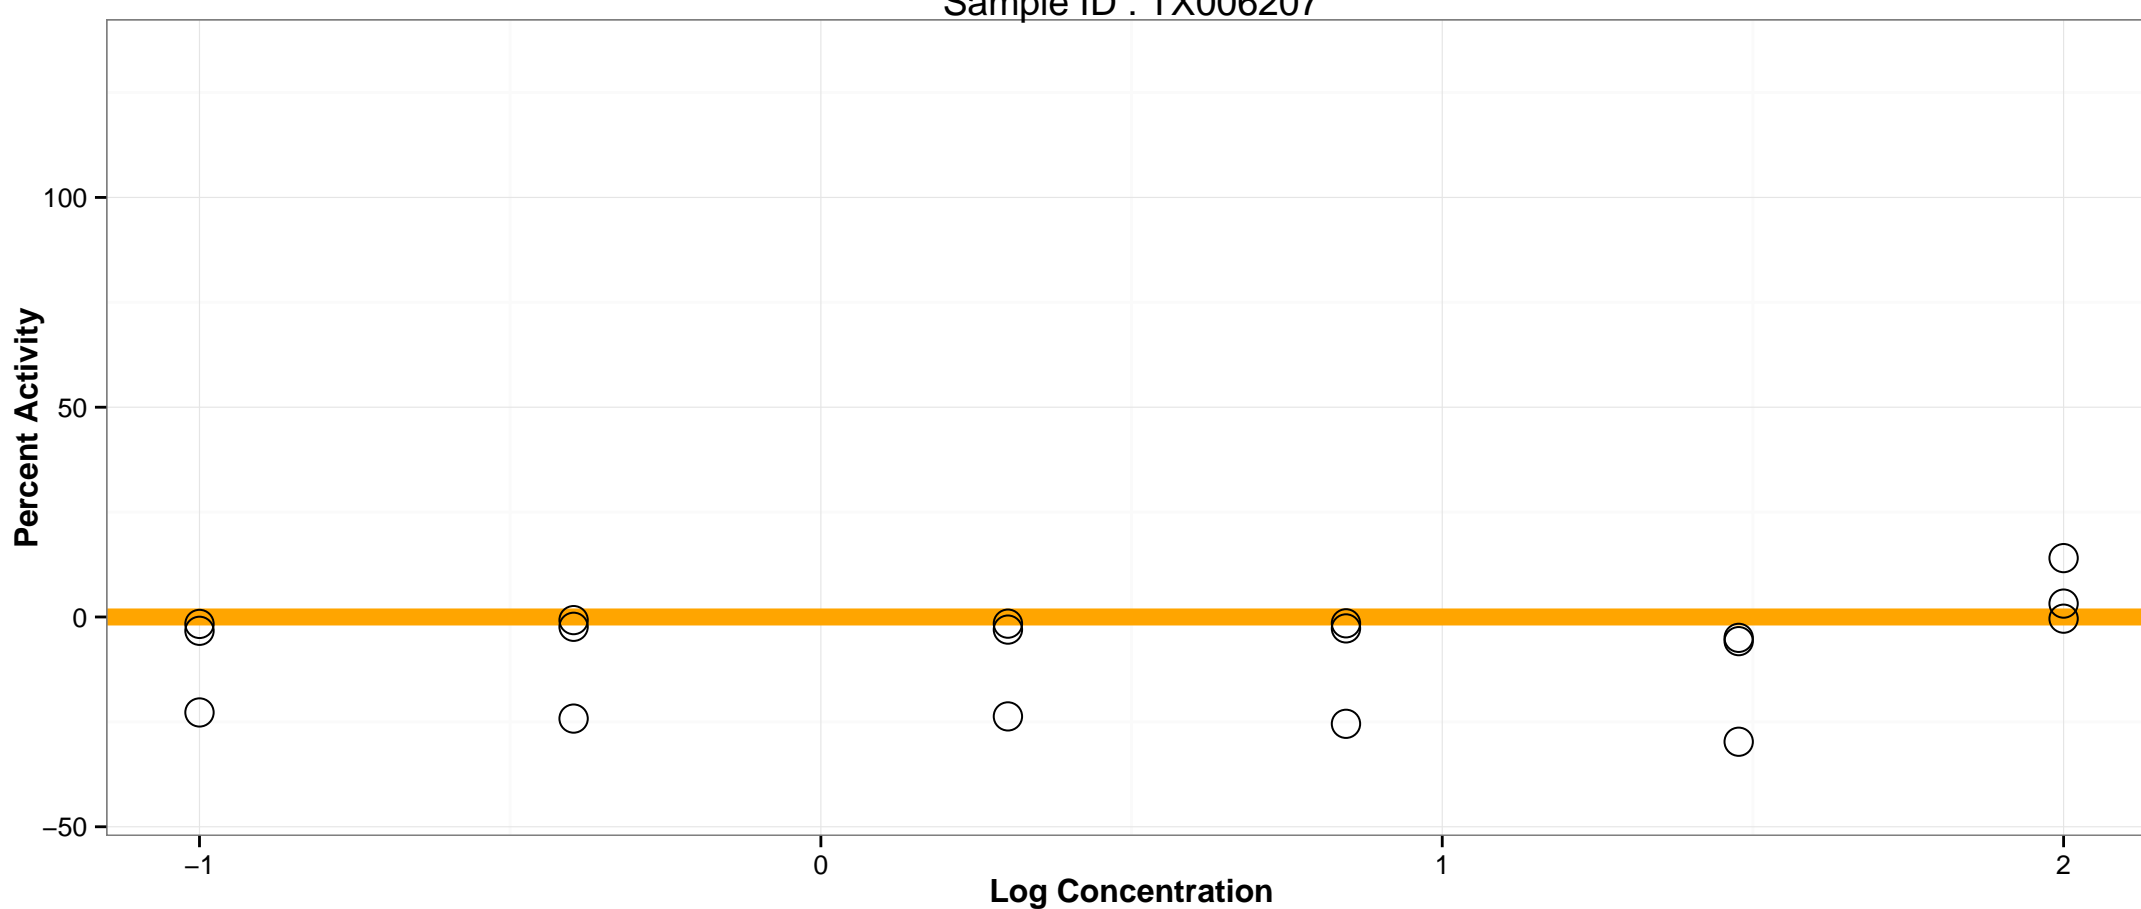

HILL MODEL

HILL MODEL: Not applicable

GAIN-LOSS MODEL

GNLS MODEL: Not applicable

|      | CNST   | HILL | GNLS |
|------|--------|------|------|
| AIC  | 147.21 | NA   | NA   |
| PROB | 1      | NA   | NA   |
| RMSE | 13.95  | NA   | NA   |

MAX\_MEAN : 5.62 MAX\_MED : 3.2 BMAD : 8.58  
COFF : 20 HIT-CALL : 0 FITC : 4 ACTP : 0  
FLAGS :

Assay ID 1508 (NHEERL\_TPO\_AUR\_dn)  
Sample ID : TX006212

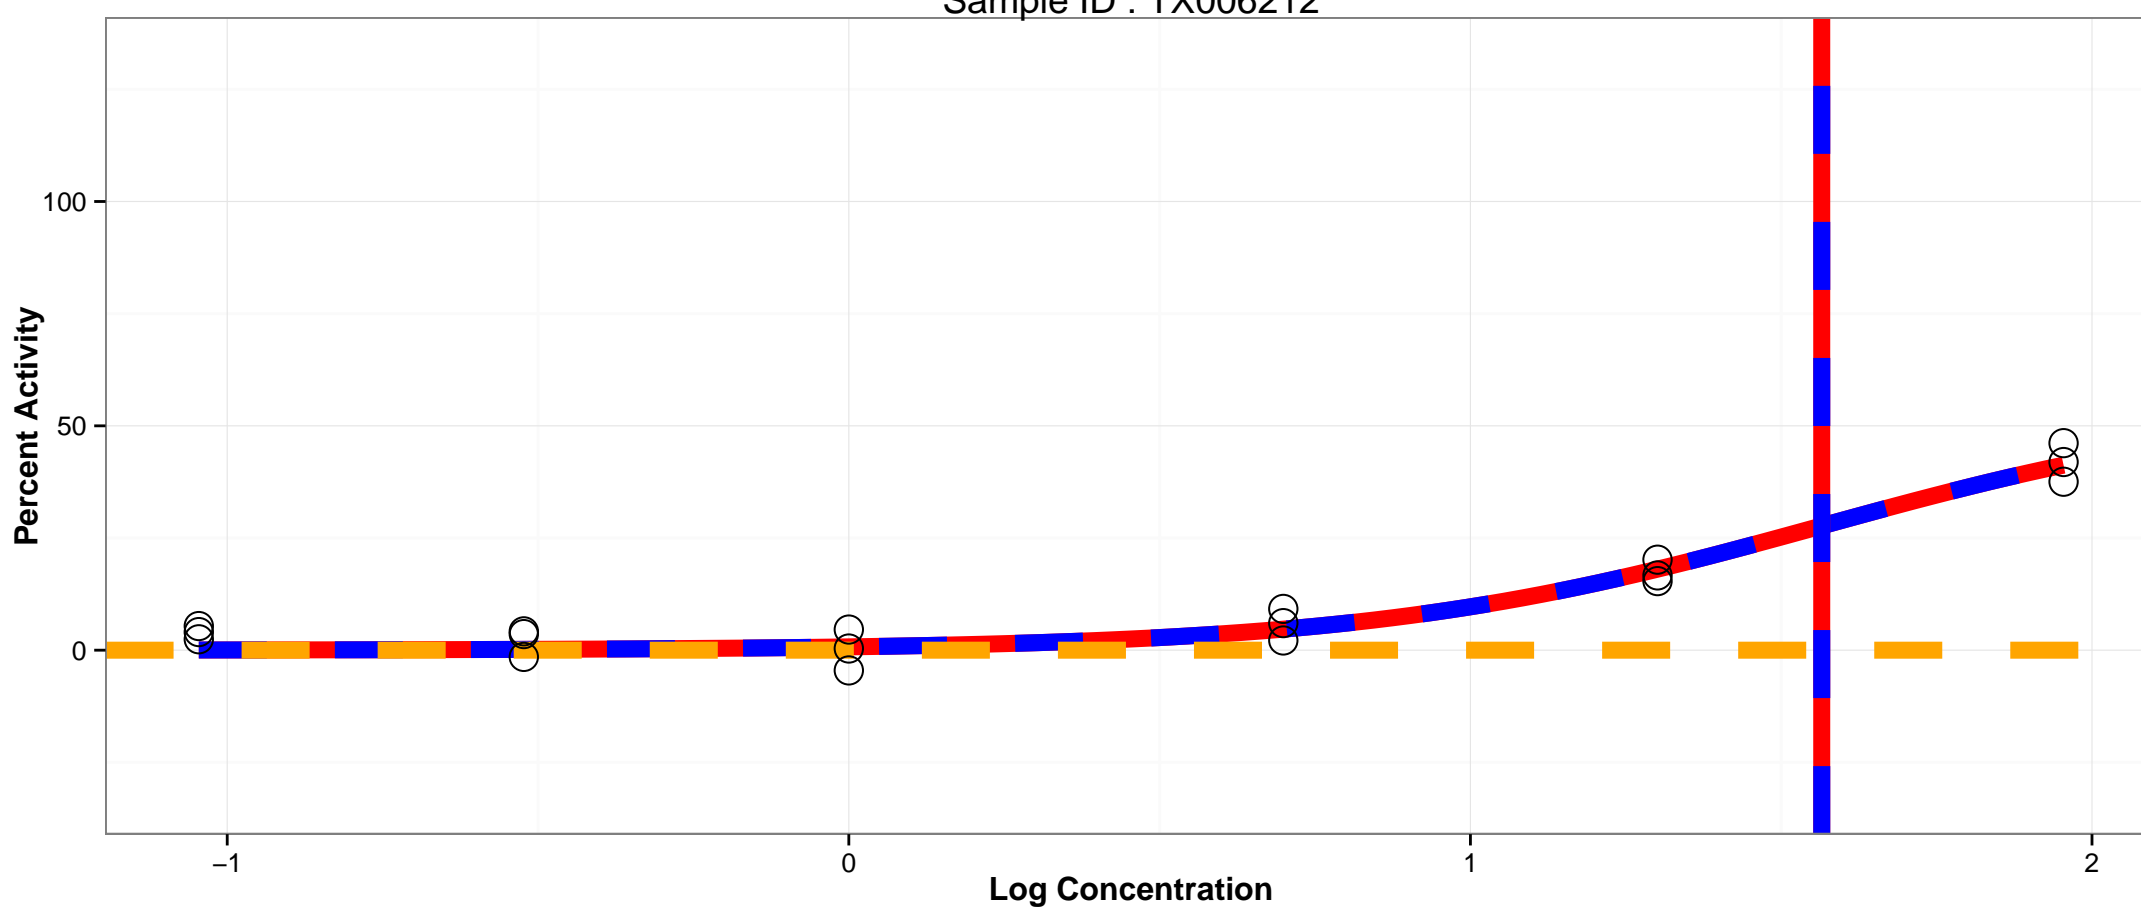

HILL MODEL

|     | tp   | ga    | gw    |
|-----|------|-------|-------|
| val | 55.4 | 1.57  | 1.19  |
| sd  | 12.8 | 0.212 | 0.341 |

GAIN-LOSS MODEL

|     | tp   | ga    | gw    | la   | lw   |
|-----|------|-------|-------|------|------|
| val | 55.4 | 1.57  | 1.19  | 3.28 | 5.82 |
| sd  | 12.8 | 0.212 | 0.342 | 699  | 3070 |

|      | CNST   | HILL   | GNLS   |
|------|--------|--------|--------|
| AIC  | 156.15 | 105.84 | 109.84 |
| PROB | 0      | 0.88   | 0.12   |
| RMSE | 18.96  | 3.37   | 3.37   |

MAX\_MEAN : 41.9 MAX\_MED : 41.9 BMAD : 5.69  
COFF : 20 HIT-CALL : 1 FITC : 42 ACTP : 1  
FLAGS : 6

Assay ID 1509 (NHEERL\_HEK293T\_CellTiterGLO)  
Sample ID : TX006212

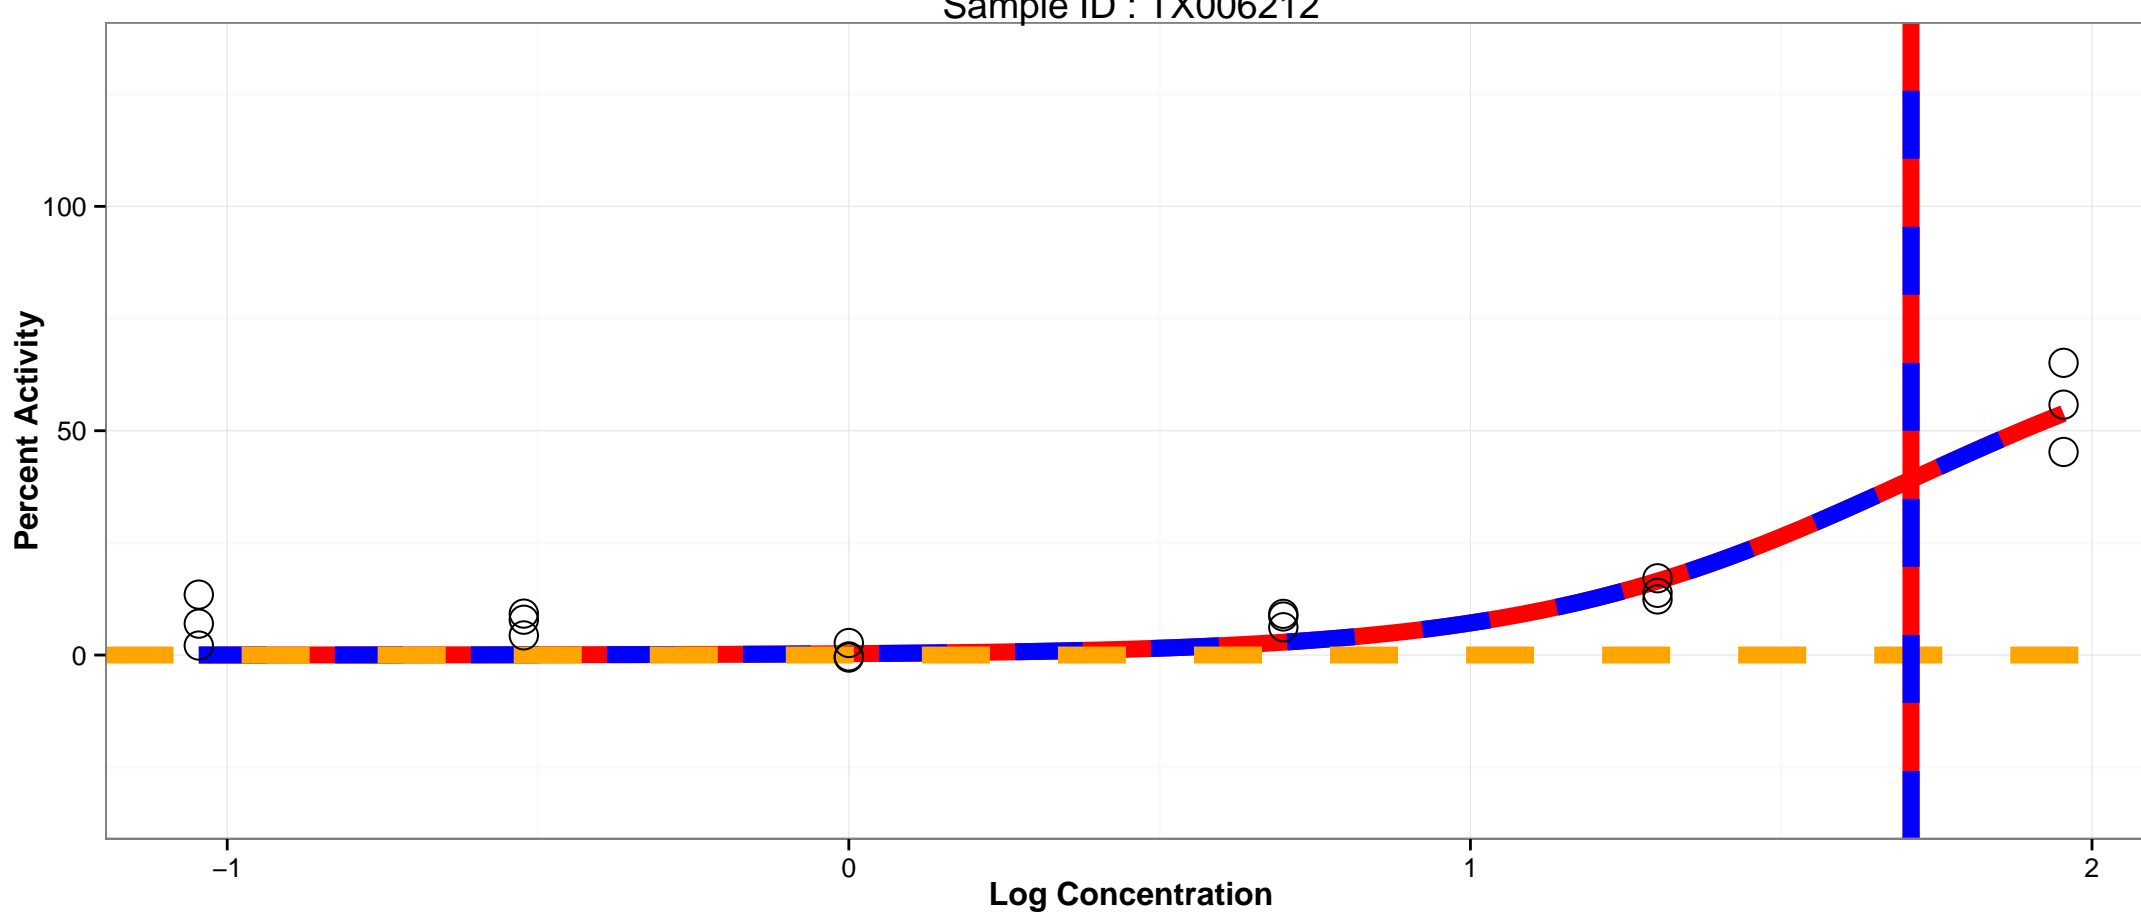

HILL MODEL

|     | tp   | ga    | gw    |
|-----|------|-------|-------|
| val | 78.2 | 1.71  | 1.41  |
| sd  | 28.5 | 0.274 | 0.558 |

GAIN-LOSS MODEL

|     | tp   | ga    | gw    | la     | lw     |
|-----|------|-------|-------|--------|--------|
| val | 78.2 | 1.71  | 1.41  | 3.68   | 7.41   |
| sd  | 28.6 | 0.274 | 0.561 | 209000 | 905000 |

|      | CNST   | HILL   | GNLS   |
|------|--------|--------|--------|
| AIC  | 163.28 | 126.98 | 130.98 |
| PROB | 0      | 0.88   | 0.12   |
| RMSE | 24.33  | 6.32   | 6.32   |

MAX\_MEAN : 55.4 MAX\_MED : 55.8 BMAD : 5.54  
COFF : 20 HIT-CALL : 1 FITC : 42 ACTP : 1  
FLAGS : 6

Assay ID 1848 (NHEERL\_Quantilum\_inhib\_2\_dn)  
Sample ID : TX006212

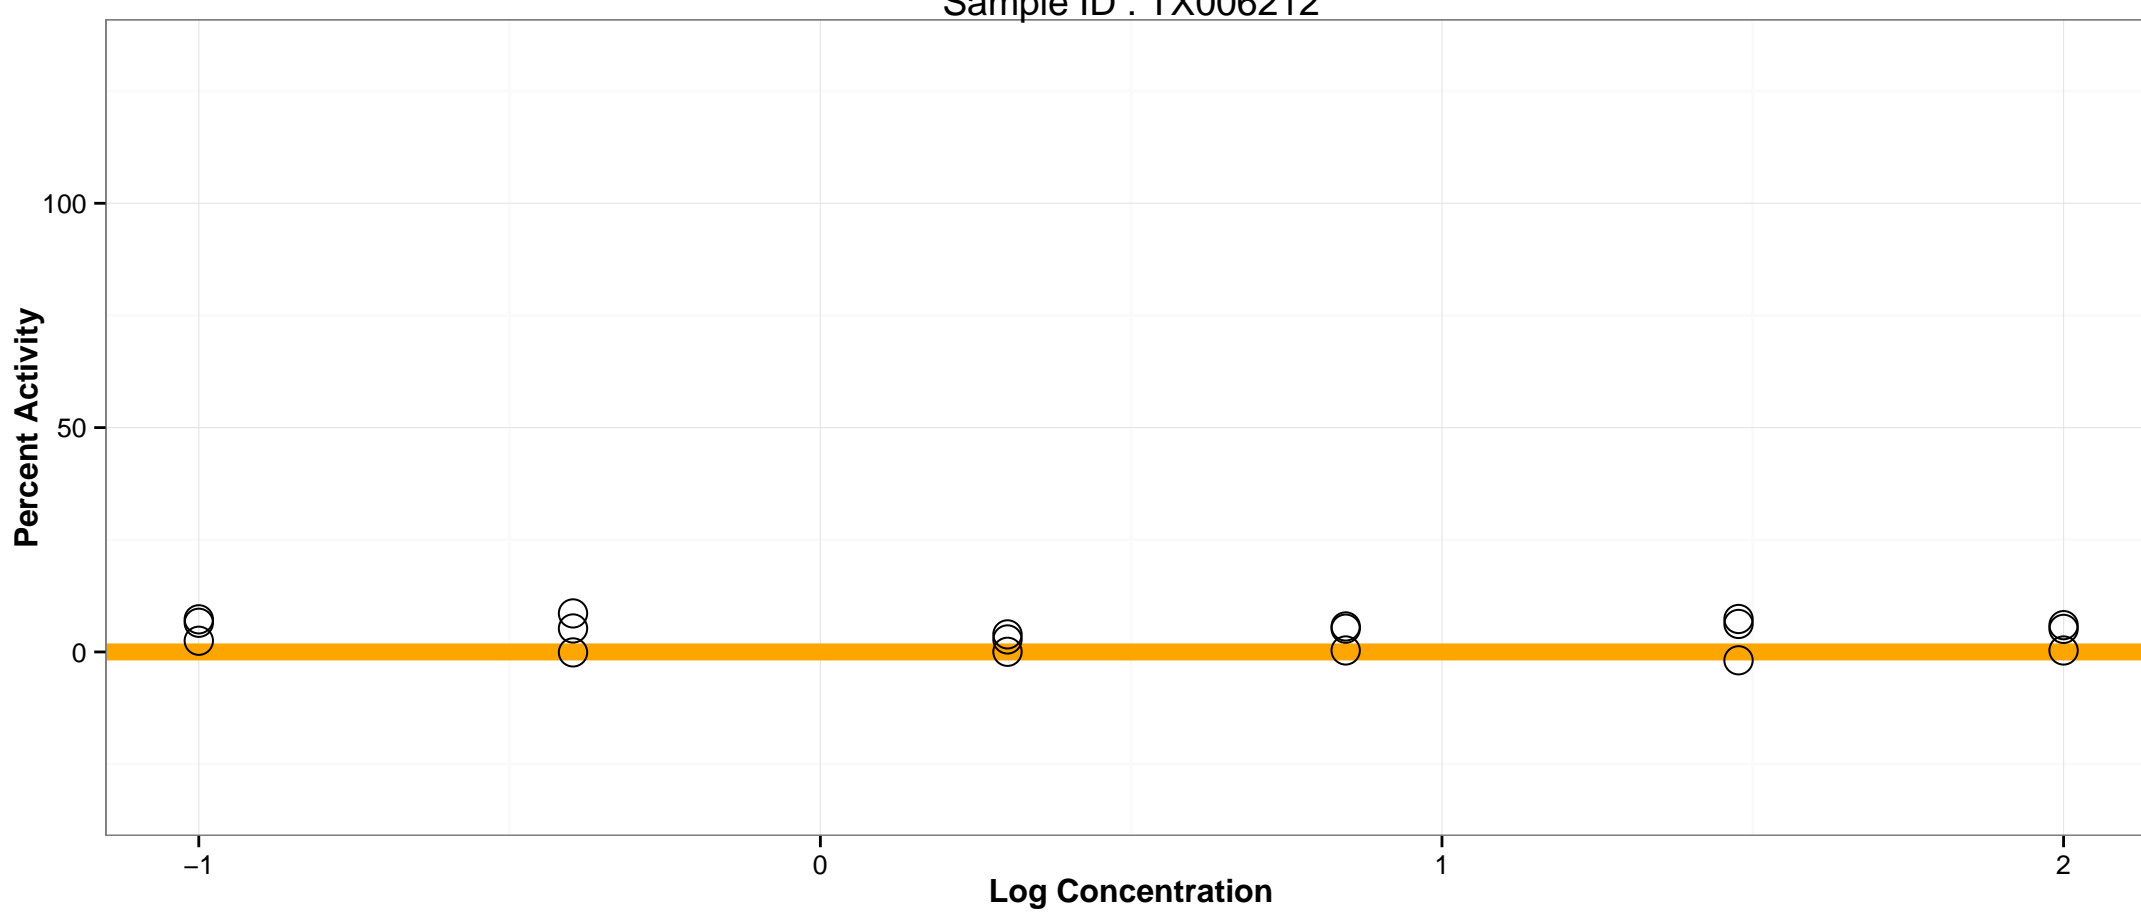

HILL MODEL

HILL MODEL: Not applicable

GAIN-LOSS MODEL

GNLS MODEL: Not applicable

|      | CNST   | HILL | GNLS |
|------|--------|------|------|
| AIC  | 113.61 | NA   | NA   |
| PROB | 1      | NA   | NA   |
| RMSE | 4.97   | NA   | NA   |

MAX\_MEAN : 5.43 MAX\_MED : 6.51 BMAD : 8.58  
COFF : 20 HIT-CALL : 0 FITC : 4 ACTP : 0  
FLAGS :

Assay ID 1508 (NHEERL\_TPO\_AUR\_dn)  
Sample ID : TX006216

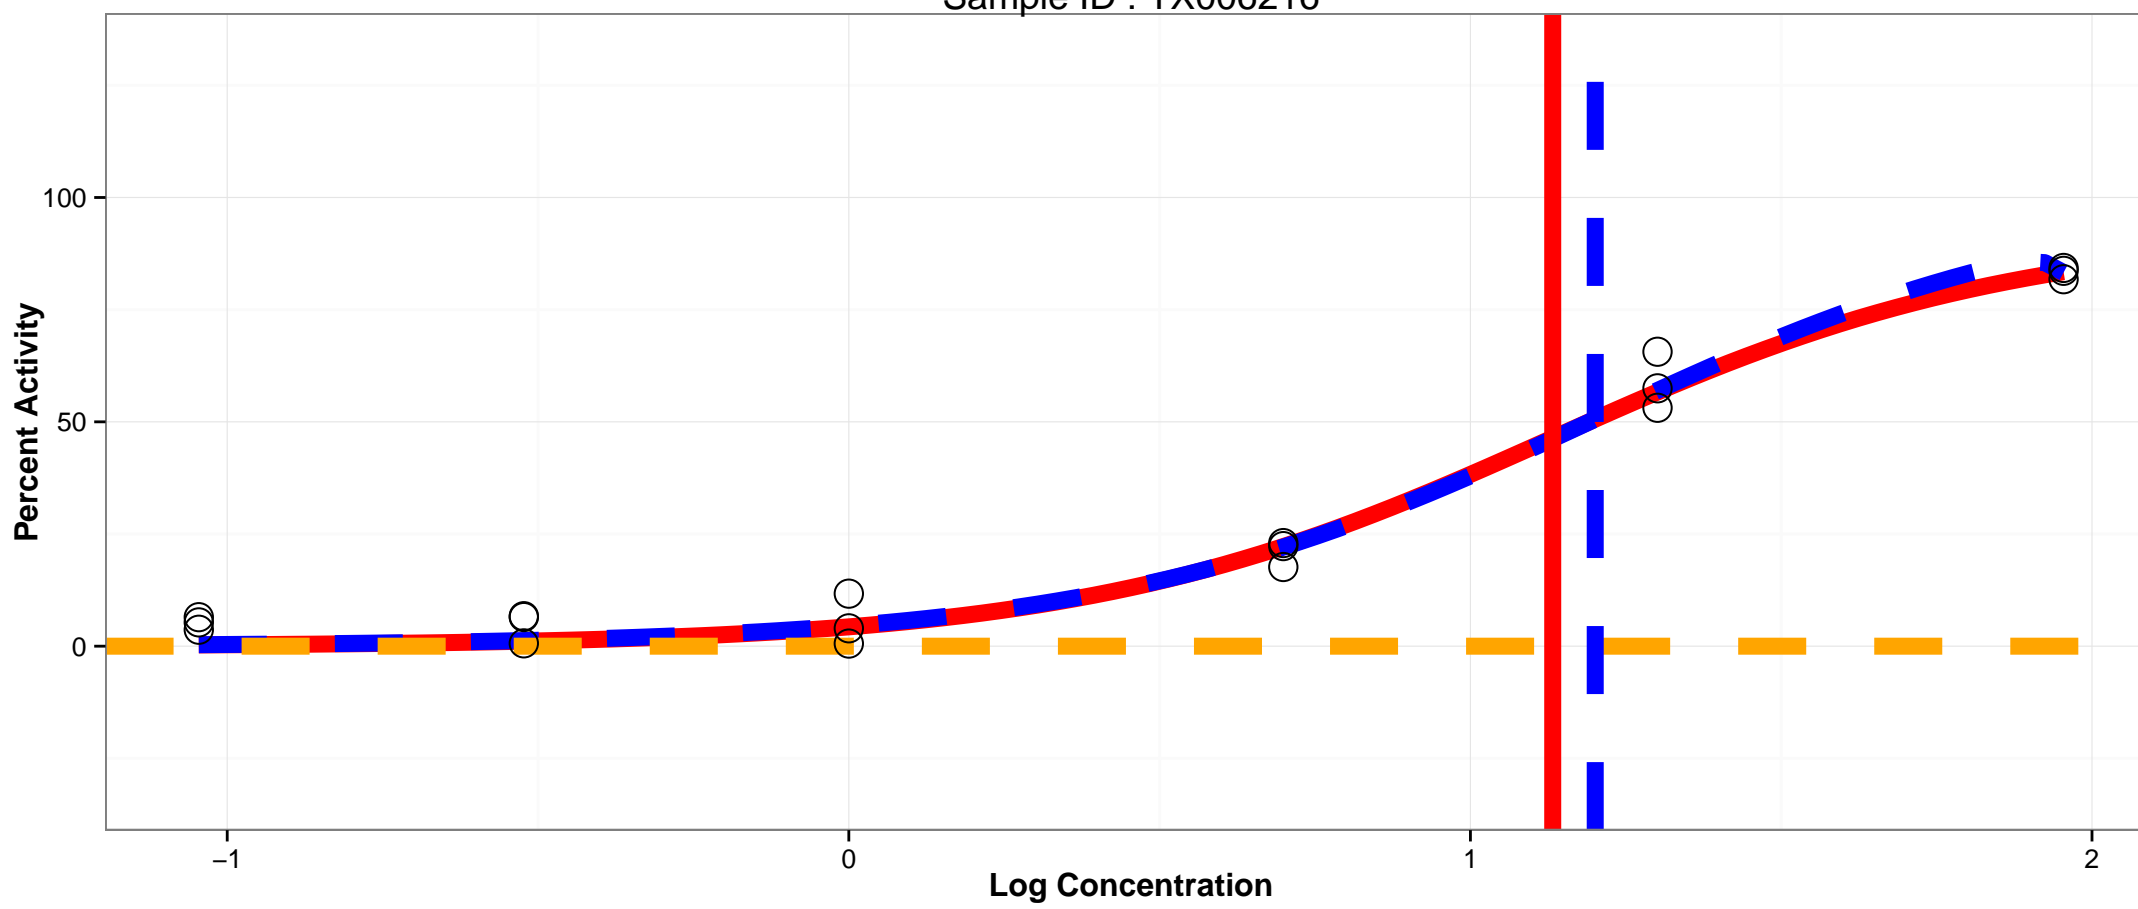

HILL MODEL

|     | tp   | ga    | gw    |
|-----|------|-------|-------|
| val | 92.8 | 1.13  | 1.16  |
| sd  | 5.75 | 0.077 | 0.175 |

GAIN-LOSS MODEL

|     | tp  | ga  | gw  | la   | lw   |
|-----|-----|-----|-----|------|------|
| val | 101 | 1.2 | 1.1 | 2.04 | 14.8 |
| sd  | NA  | NA  | NA  | NA   | NA   |

|      | CNST   | HILL   | GNLS   |
|------|--------|--------|--------|
| AIC  | 188.04 | 112.49 | 116.06 |
| PROB | 0      | 0.86   | 0.14   |
| RMSE | 42.75  | 4.24   | 4.16   |

MAX\_MEAN : 83.3 MAX\_MED : 83.7 BMAD : 5.69  
COFF : 20 HIT-CALL : 1 FITC : 42 ACTP : 1  
FLAGS :

Assay ID 1509 (NHEERL\_HEK293T\_CellTiterGLO)  
Sample ID : TX006216

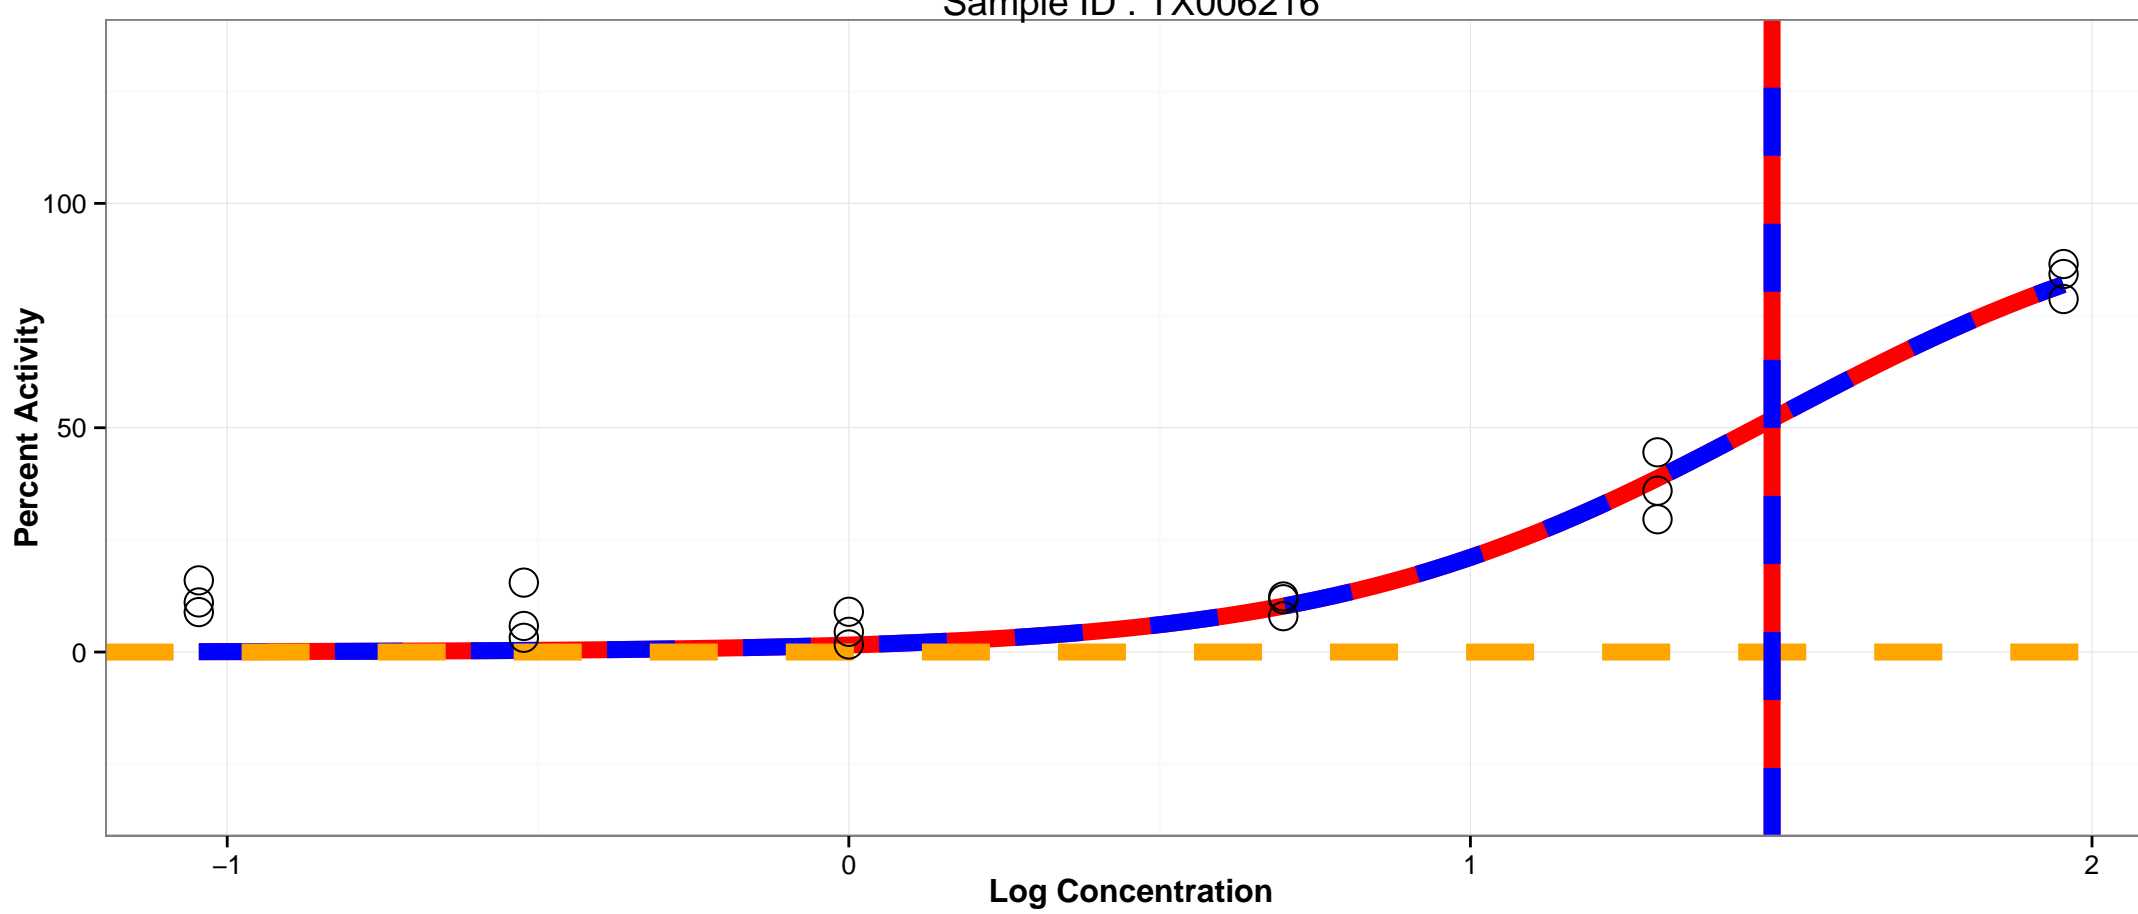

HILL MODEL

|     | tp   | ga    | gw    |
|-----|------|-------|-------|
| val | 104  | 1.49  | 1.22  |
| sd  | 16.8 | 0.158 | 0.285 |

GAIN-LOSS MODEL

|     | tp  | ga   | gw   | la   | lw |
|-----|-----|------|------|------|----|
| val | 104 | 1.49 | 1.22 | 3.21 | 14 |
| sd  | NA  | NA   | NA   | NA   | NA |

|      | CNST  | HILL  | GNLS  |
|------|-------|-------|-------|
| AIC  | 181.9 | 131.2 | 135.2 |
| PROB | 0     | 0.88  | 0.12  |
| RMSE | 38.1  | 7.29  | 7.29  |

MAX\_MEAN : 83.2 MAX\_MED : 84.3 BMAD : 5.54  
COFF : 20 HIT-CALL : 1 FITC : 42 ACTP : 1  
FLAGS :

Assay ID 1848 (NHEERL\_QuantLum\_inhib\_2\_dn)  
Sample ID : TX006216

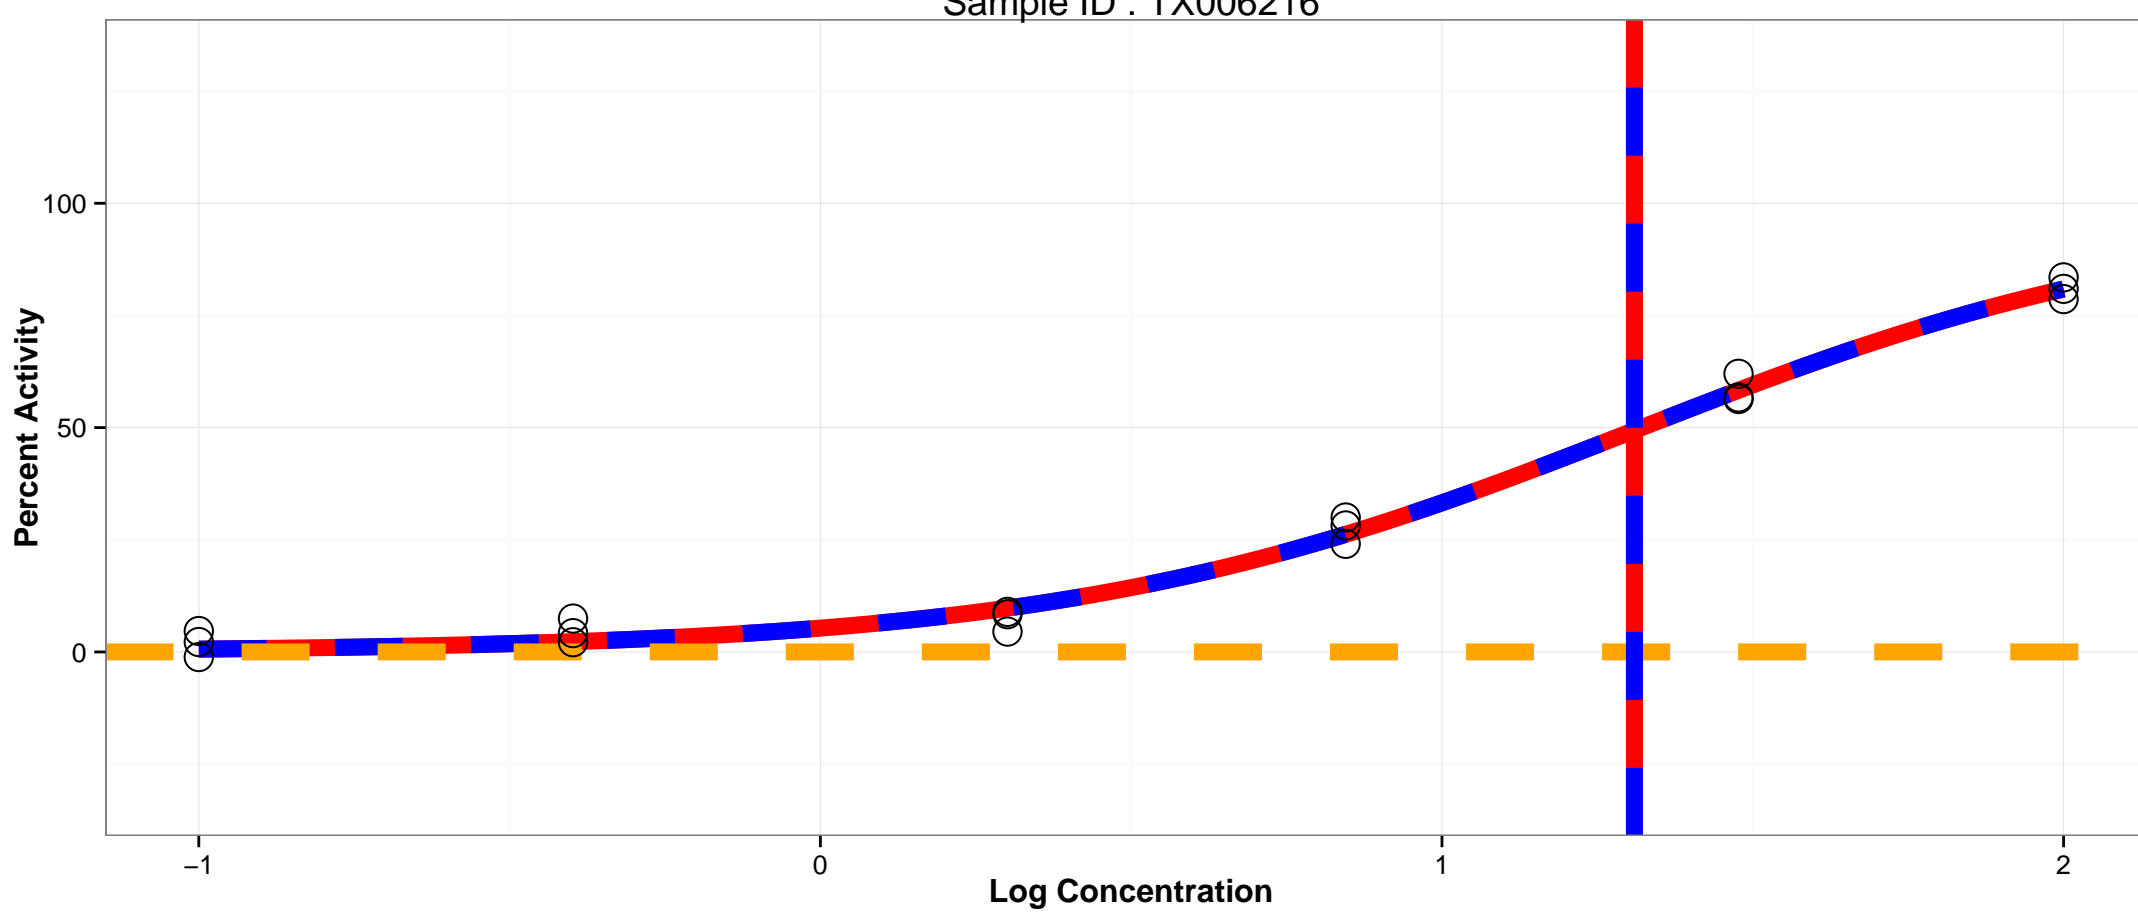

HILL MODEL

|     | tp   | ga     | gw     |
|-----|------|--------|--------|
| val | 98.7 | 1.31   | 0.951  |
| sd  | 6.8  | 0.0869 | 0.0928 |

GAIN-LOSS MODEL

|     | tp   | ga     | gw     | la   | lw    |
|-----|------|--------|--------|------|-------|
| val | 98.7 | 1.31   | 0.951  | 2.69 | 13.7  |
| sd  | 6.8  | 0.0869 | 0.0928 | 2170 | 42900 |

|      | CNST   | HILL  | GNLS   |
|------|--------|-------|--------|
| AIC  | 188.36 | 97.61 | 101.61 |
| PROB | 0      | 0.88  | 0.12   |
| RMSE | 42.5   | 2.75  | 2.75   |

MAX\_MEAN : 81 MAX\_MED : 80.9 BMAD : 8.58  
COFF : 20 HIT-CALL : 1 FITC : 42 ACTP : 1  
FLAGS :

Chemical : SSR162369

CAS : NOCAS\_47346

Assay ID 1508 (NHEERL\_TPO\_AUR\_dn)  
Sample ID : TX006221

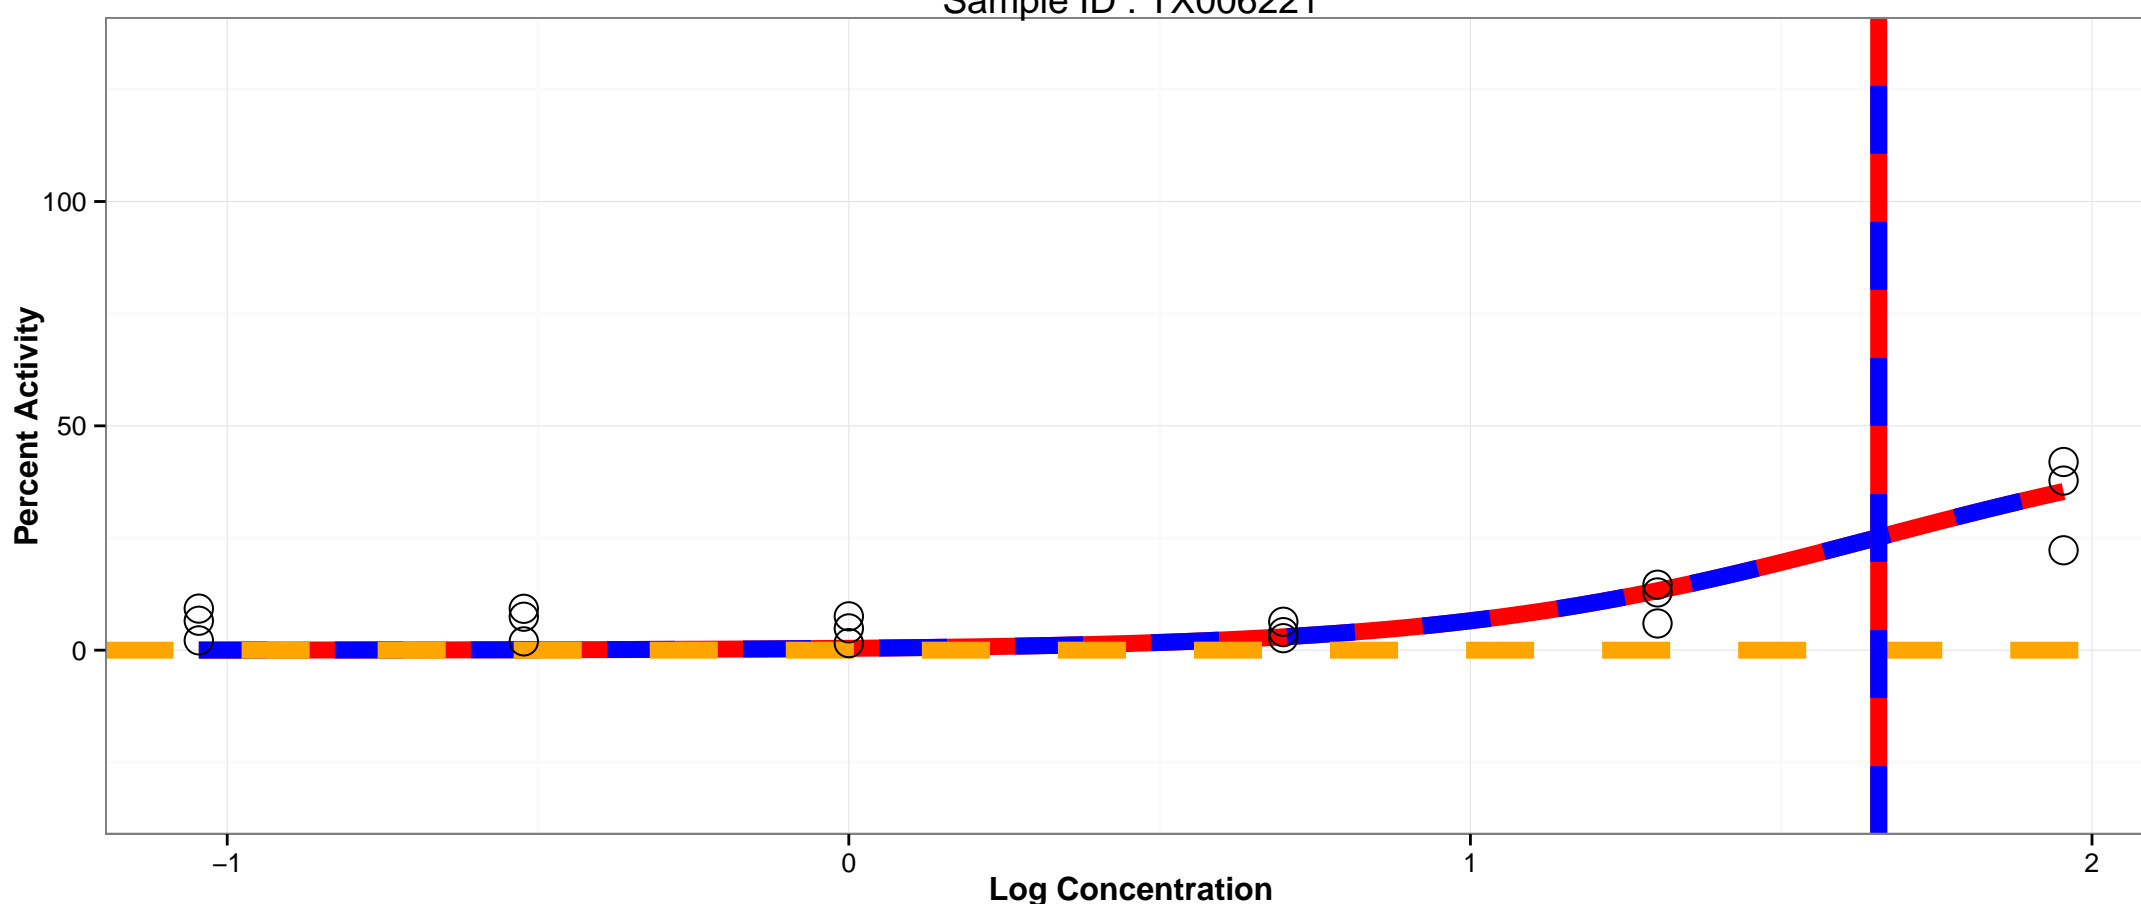

HILL MODEL

|     | tp   | ga    | gw   |
|-----|------|-------|------|
| val | 50.3 | 1.66  | 1.26 |
| sd  | 21.4 | 0.348 | 0.65 |

GAIN-LOSS MODEL

|     | tp   | ga    | gw   | la   | lw    |
|-----|------|-------|------|------|-------|
| val | 50.3 | 1.66  | 1.26 | 3.41 | 6.14  |
| sd  | 21.4 | 0.348 | 0.65 | 3430 | 14500 |

|      | CNST   | HILL  | GNLS  |
|------|--------|-------|-------|
| AIC  | 149.49 | 124.7 | 128.7 |
| PROB | 0      | 0.88  | 0.12  |
| RMSE | 15.86  | 5.94  | 5.94  |

MAX\_MEAN : 34 MAX\_MED : 37.8 BMAD : 5.69  
COFF : 20 HIT-CALL : 1 FITC : 42 ACTP : 1  
FLAGS : 6

Assay ID 1509 (NHEERL\_HEK293T\_CellTiterGLO)  
Sample ID : TX006221

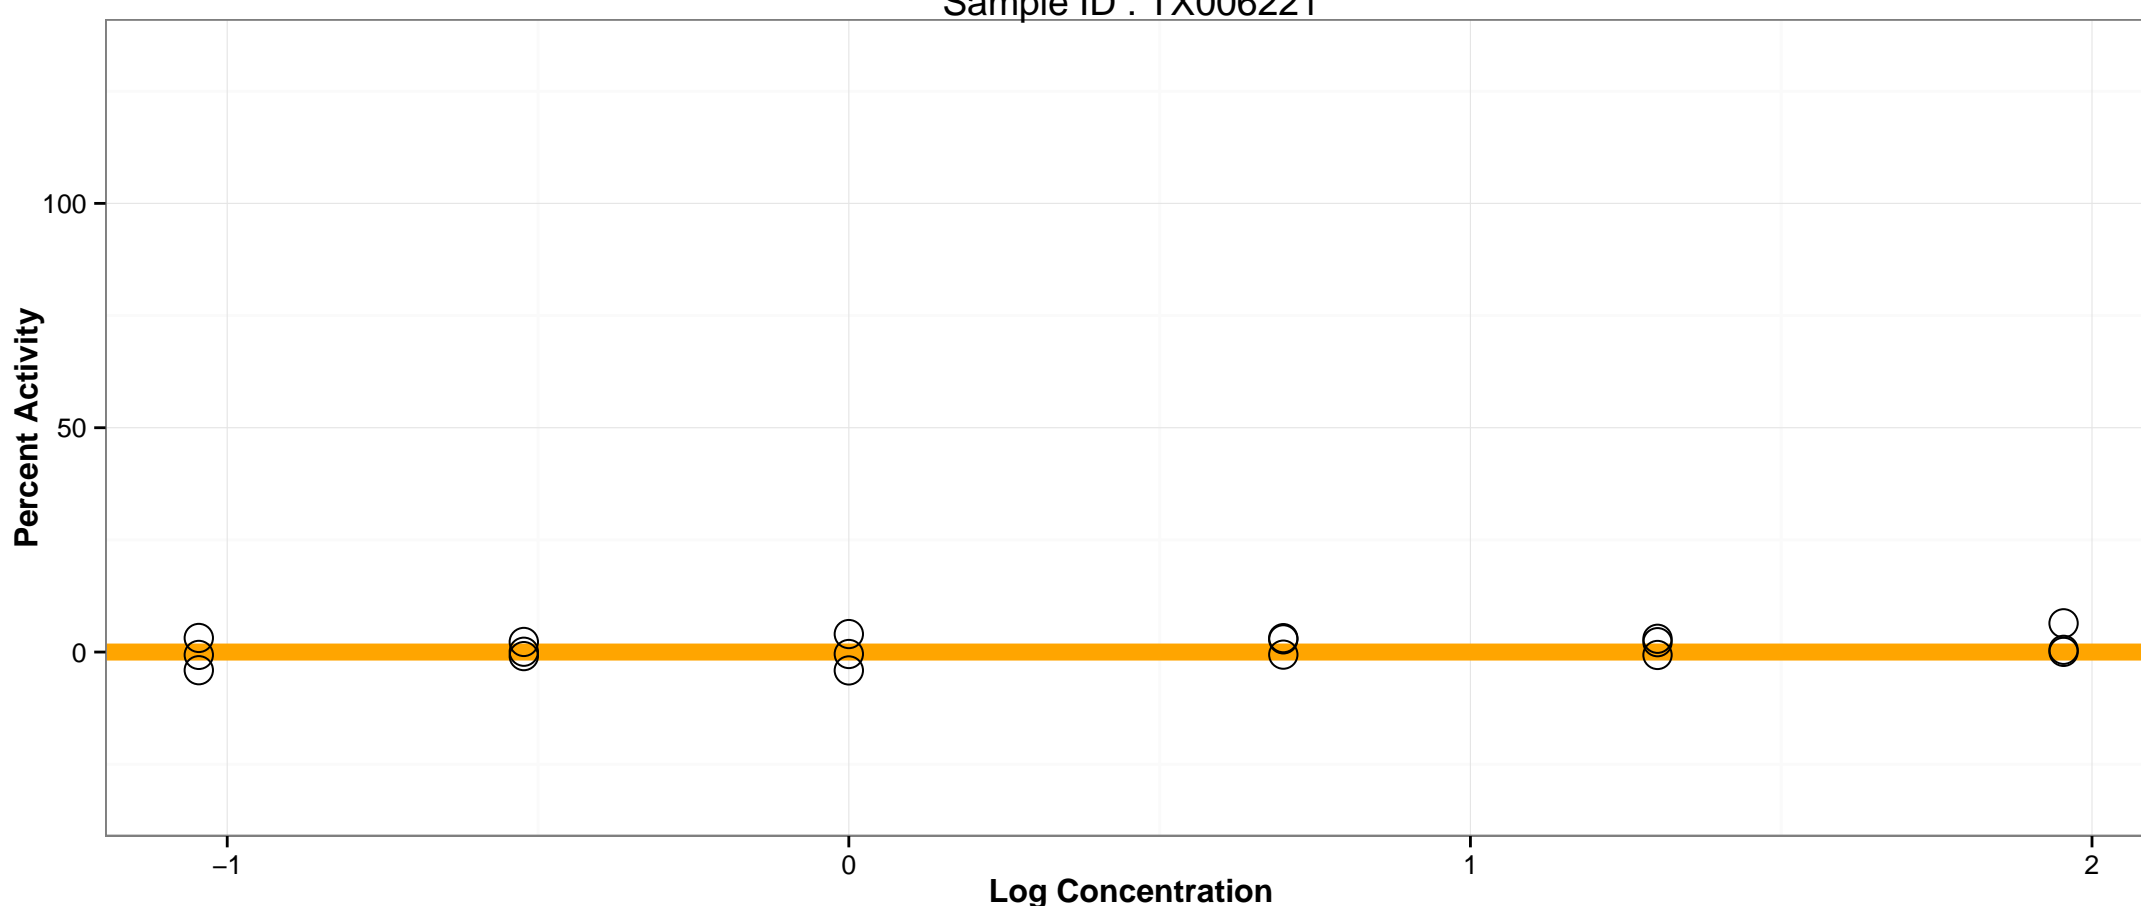

HILL MODEL

HILL MODEL: Not applicable

GAIN-LOSS MODEL

GNLS MODEL: Not applicable

|      | CNST  | HILL | GNLS |
|------|-------|------|------|
| AIC  | 91.16 | NA   | NA   |
| PROB | 1     | NA   | NA   |
| RMSE | 2.78  | NA   | NA   |

MAX\_MEAN : 2.33 MAX\_MED : 2.84 BMAD : 5.54  
COFF : 20 HIT-CALL : 0 FITC : 4 ACTP : 0  
FLAGS :

Assay ID 1848 (NHEERL\_Quantilum\_inhib\_2\_dn)  
Sample ID : TX006221

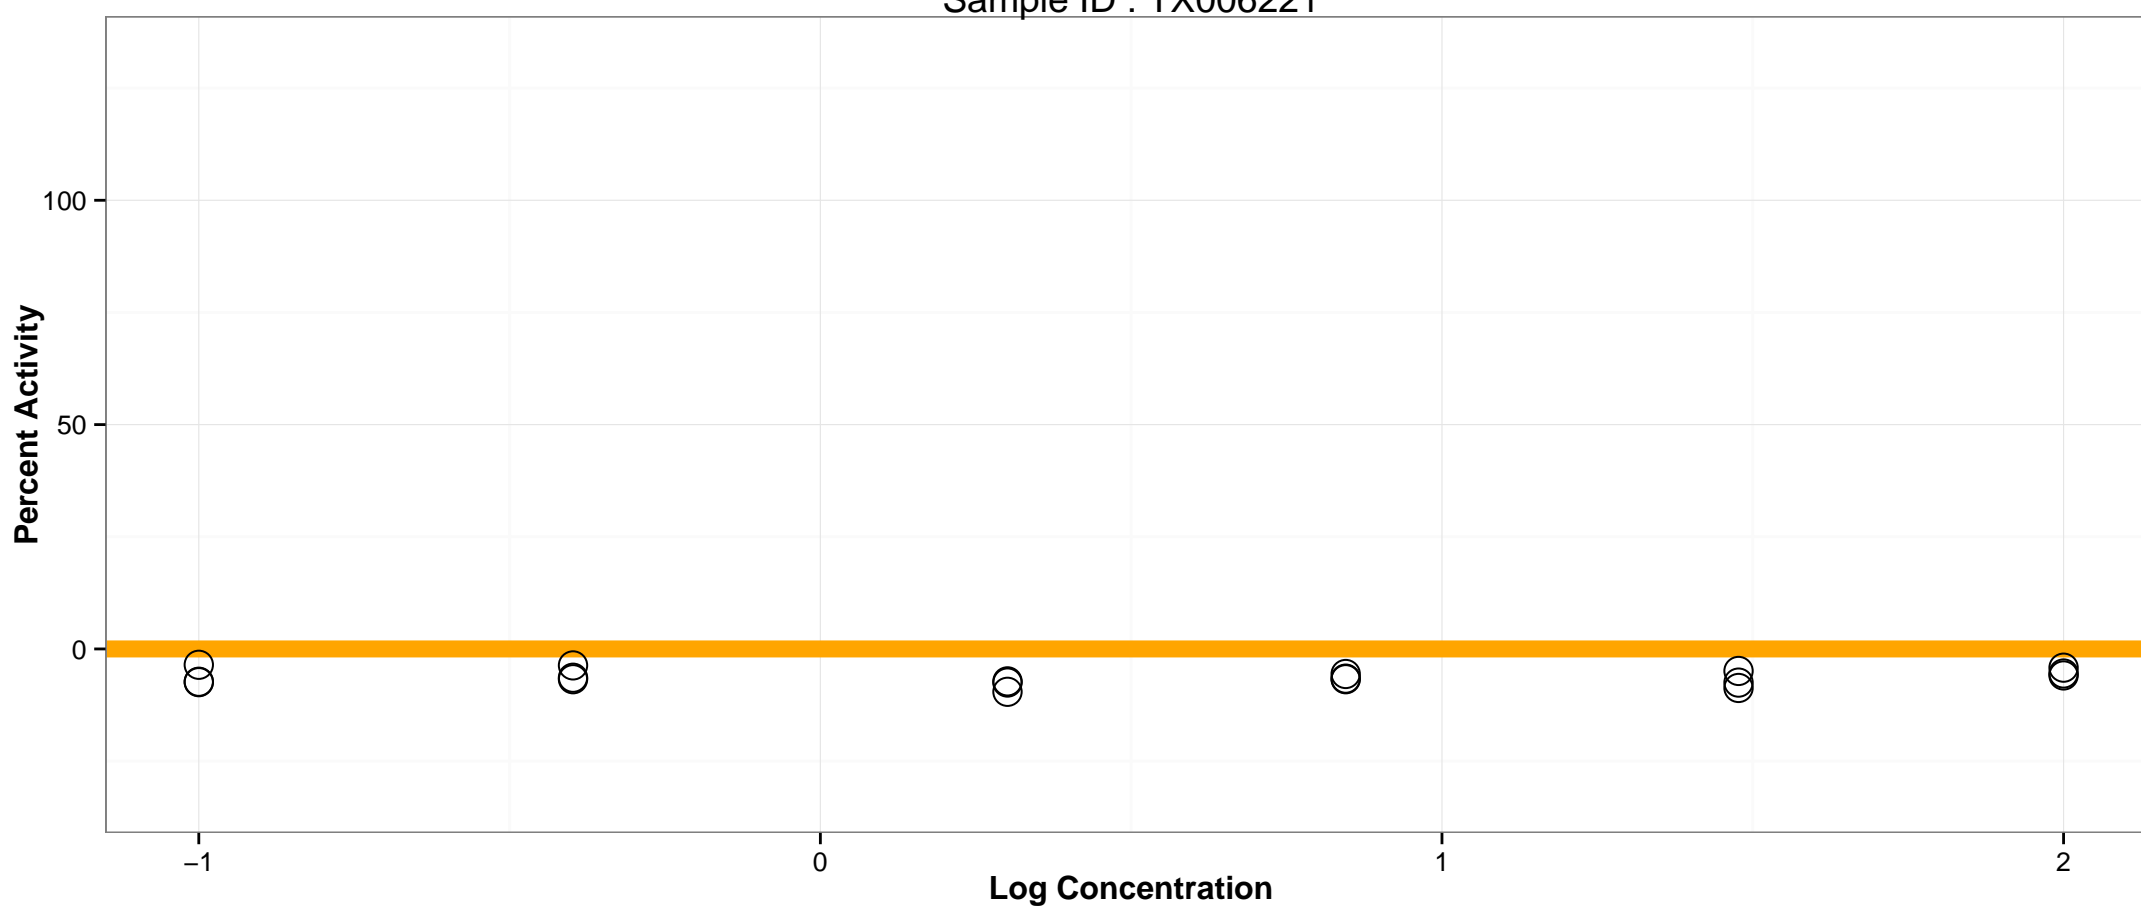

HILL MODEL

HILL MODEL: Not applicable

GAIN-LOSS MODEL

GNLS MODEL: Not applicable

|      | CNST   | HILL | GNLS |
|------|--------|------|------|
| AIC  | 124.76 | NA   | NA   |
| PROB | 1      | NA   | NA   |
| RMSE | 6.57   | NA   | NA   |

MAX\_MEAN : -5.17 MAX\_MED : -5.46 BMAD : 8.58  
COFF : 20 HIT-CALL : 0 FITC : 4 ACTP : 0  
FLAGS :



Assay ID 1508 (NHEERL\_TPO\_AUR\_dn)  
Sample ID : TX006222

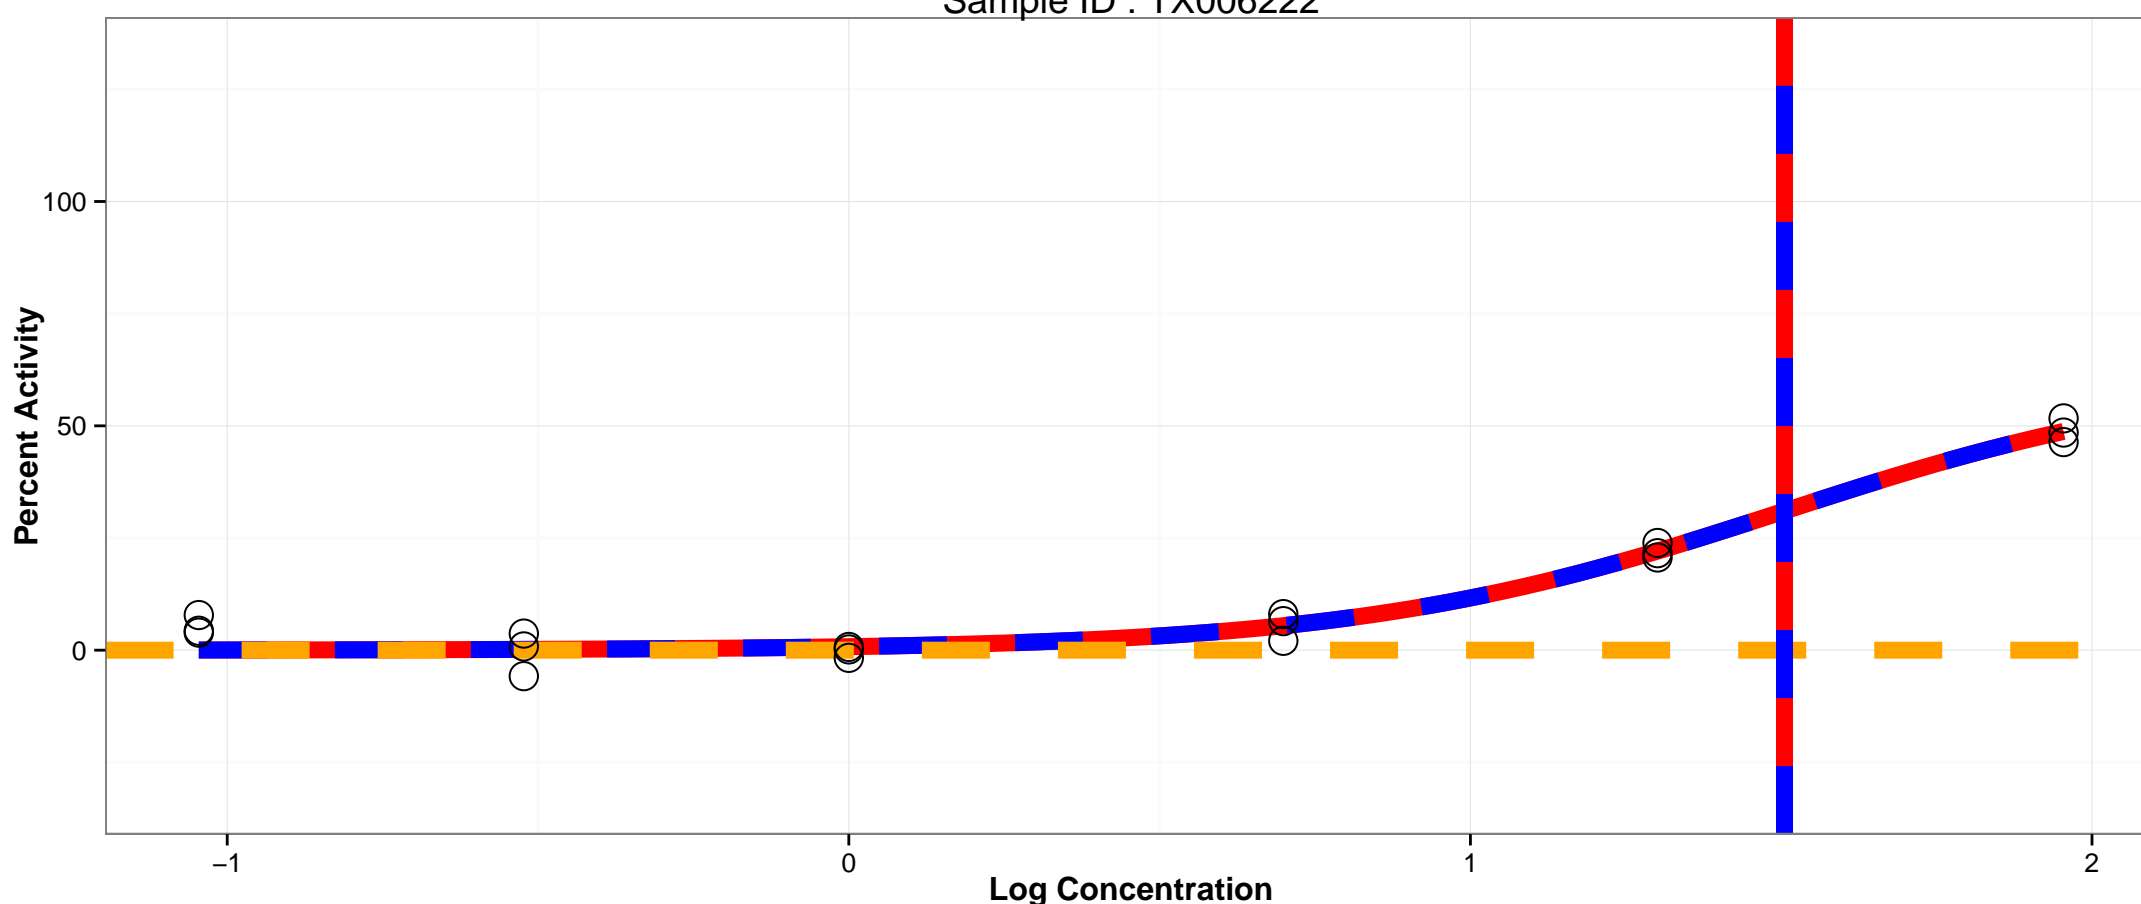

HILL MODEL

|     | tp   | ga    | gw    |
|-----|------|-------|-------|
| val | 62   | 1.51  | 1.26  |
| sd  | 10.4 | 0.154 | 0.295 |

GAIN-LOSS MODEL

|     | tp   | ga    | gw    | la   | lw   |
|-----|------|-------|-------|------|------|
| val | 62   | 1.51  | 1.26  | 2.47 | 13.3 |
| sd  | 10.4 | 0.154 | 0.295 | 356  | 9210 |

|      | CNST  | HILL   | GNLS   |
|------|-------|--------|--------|
| AIC  | 162.1 | 102.04 | 106.04 |
| PROB | 0     | 0.88   | 0.12   |
| RMSE | 22.24 | 3.23   | 3.23   |

MAX\_MEAN : 48.9 MAX\_MED : 48.5 BMAD : 5.69  
COFF : 20 HIT-CALL : 1 FITC : 42 ACTP : 1  
FLAGS :

Assay ID 1509 (NHEERL\_HEK293T\_CellTiterGLO)  
Sample ID : TX006222

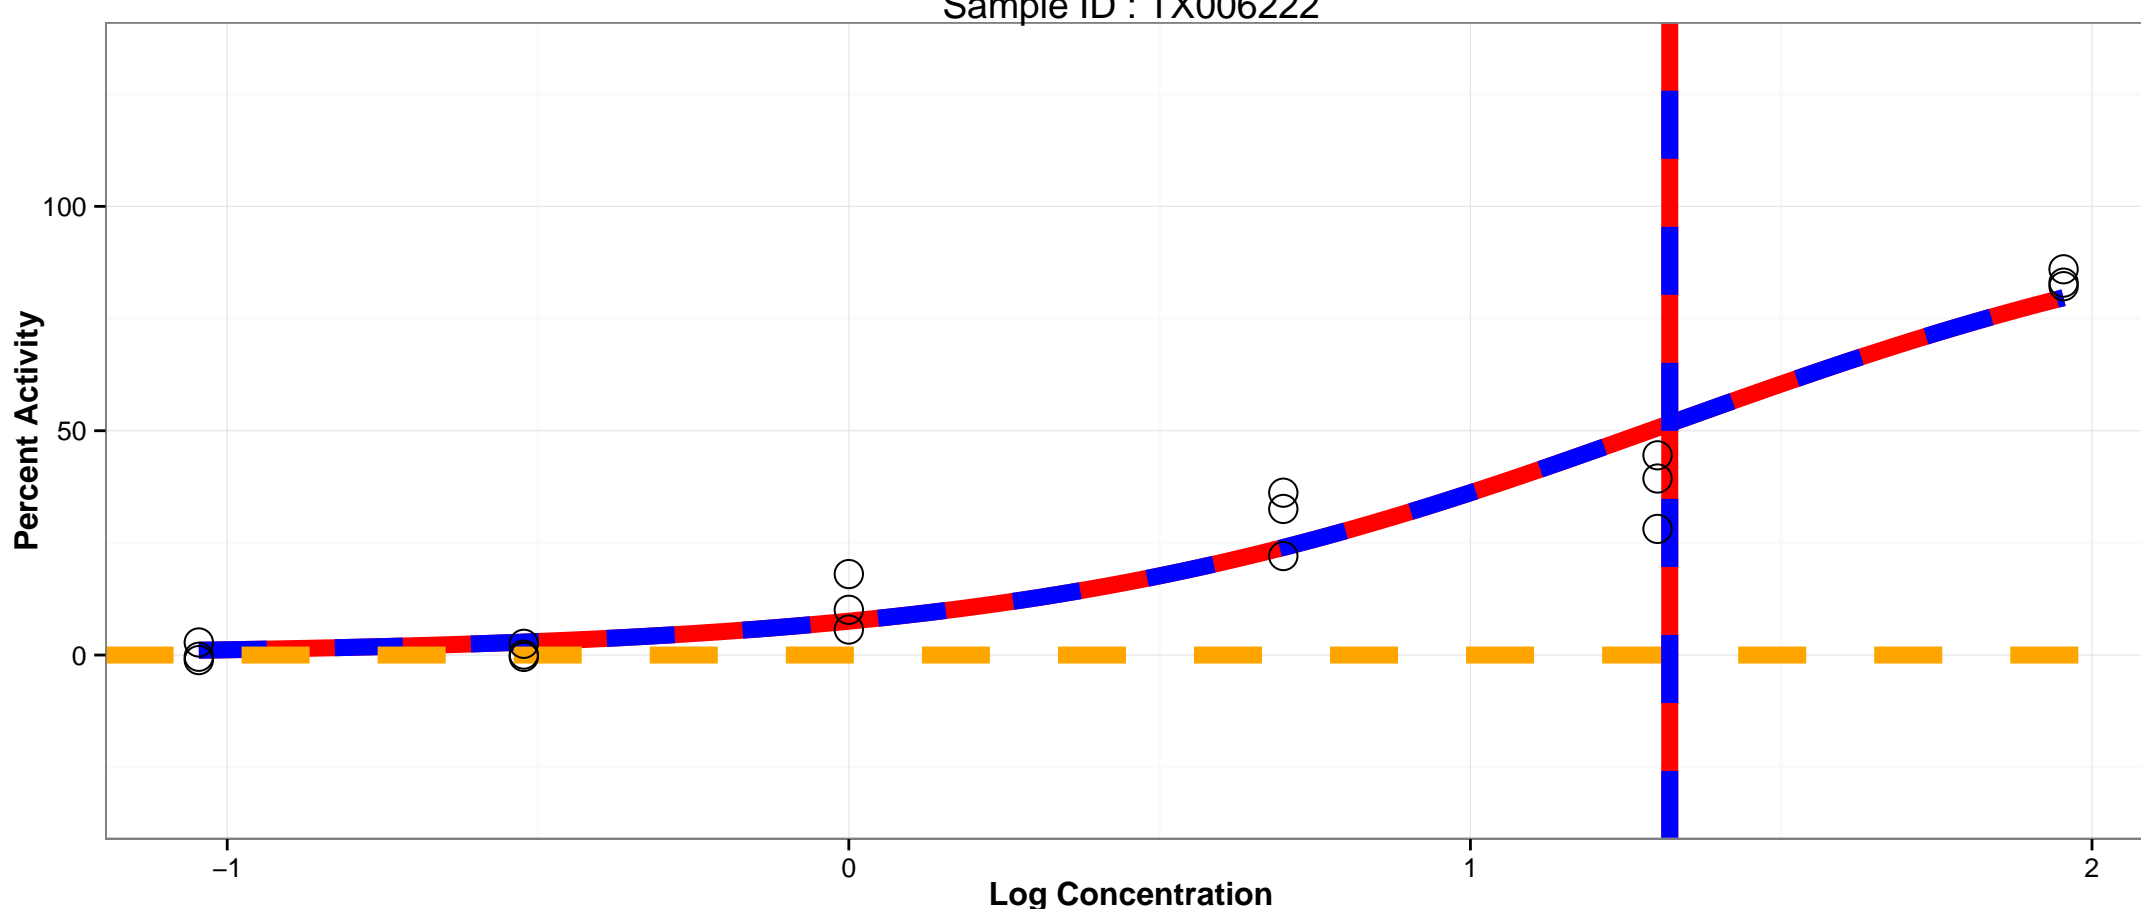

HILL MODEL

|     | tp   | ga    | gw    |
|-----|------|-------|-------|
| val | 103  | 1.32  | 0.835 |
| sd  | 14.3 | 0.207 | 0.116 |

GAIN-LOSS MODEL

|     | tp  | ga   | gw    | la   | lw   |
|-----|-----|------|-------|------|------|
| val | 103 | 1.32 | 0.835 | 3.24 | 17.8 |
| sd  | NA  | NA   | NA    | NA   | NA   |

|      | CNST   | HILL   | GNLS   |
|------|--------|--------|--------|
| AIC  | 185.06 | 131.33 | 135.33 |
| PROB | 0      | 0.88   | 0.12   |
| RMSE | 39.94  | 7.84   | 7.84   |

MAX\_MEAN : 83.7 MAX\_MED : 83 BMAD : 5.54  
COFF : 20 HIT-CALL : 1 FITC : 42 ACTP : 1  
FLAGS :

Assay ID 1848 (NHEERL\_Quantilum\_inhib\_2\_dn)  
Sample ID : TX006222

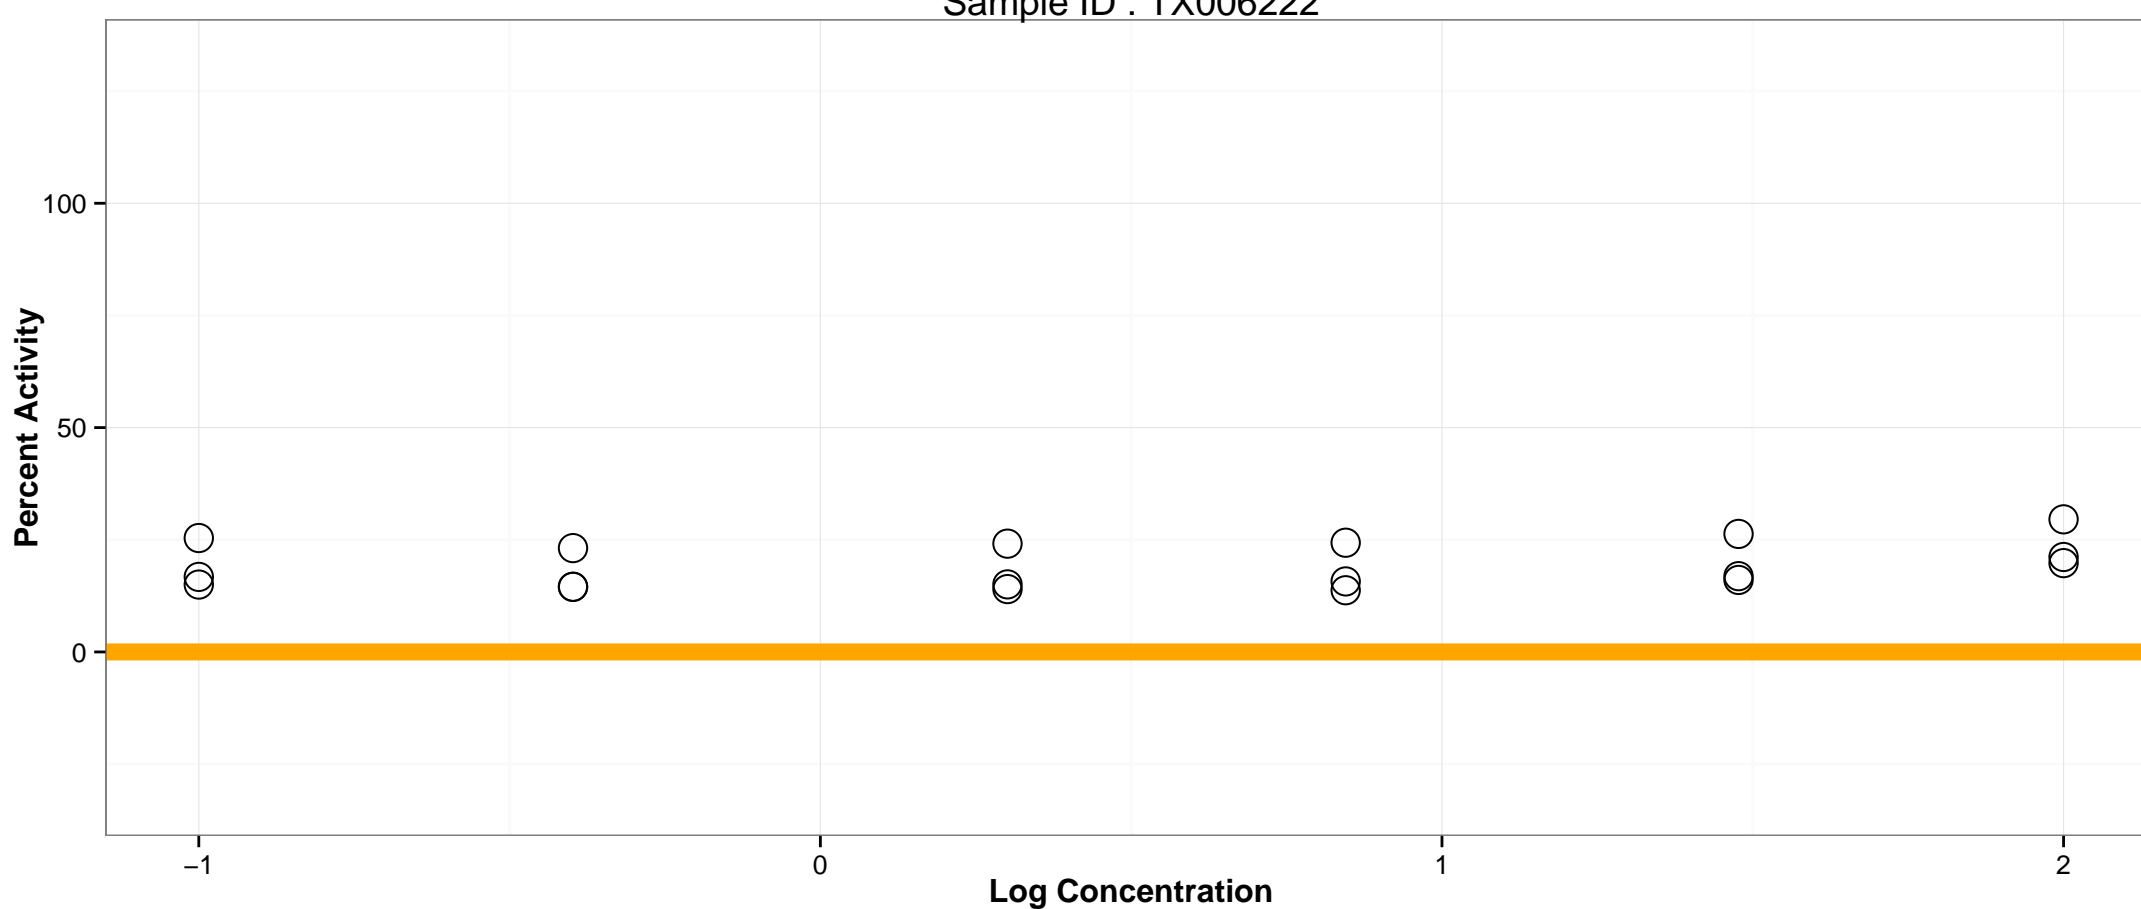

HILL MODEL

HILL MODEL: Not applicable

GAIN-LOSS MODEL

GNLS MODEL: Not applicable

|      | CNST  | HILL | GNLS |
|------|-------|------|------|
| AIC  | 164.5 | NA   | NA   |
| PROB | 1     | NA   | NA   |
| RMSE | 19.86 | NA   | NA   |

MAX\_MEAN : 23.5 MAX\_MED : 21.2 BMAD : 8.58  
COFF : 20 HIT-CALL : 0 FITC : 4 ACTP : 0  
FLAGS :

Chemical : SSR150106

CAS : NOCAS\_47362

Assay ID 1508 (NHEERL\_TPO\_AUR\_dn)  
Sample ID : TX006233

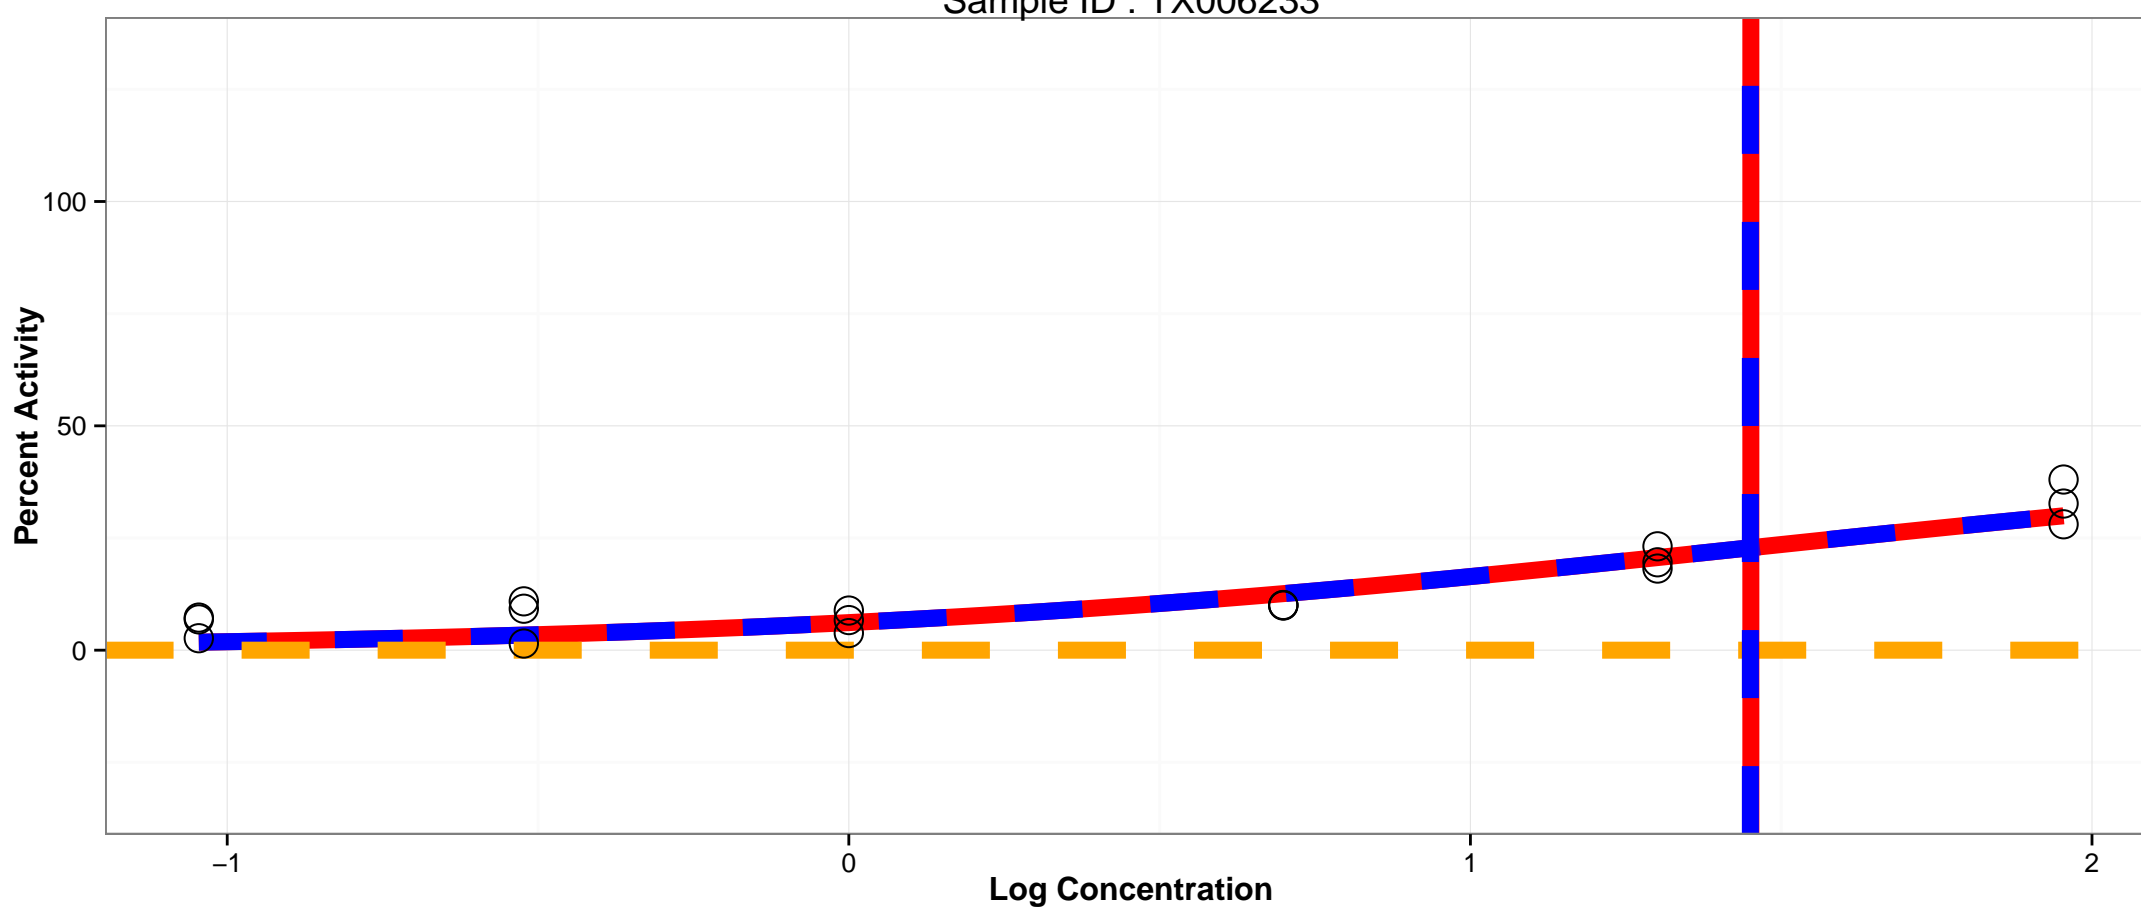

HILL MODEL

|     | tp   | ga    | gw    |
|-----|------|-------|-------|
| val | 45.7 | 1.45  | 0.557 |
| sd  | 10.7 | 0.385 | 0.125 |

GAIN-LOSS MODEL

|     | tp   | ga    | gw    | la   | lw    |
|-----|------|-------|-------|------|-------|
| val | 45.7 | 1.45  | 0.557 | 2.92 | 10.5  |
| sd  | 10.7 | 0.385 | 0.125 | 4360 | 47500 |

|      | CNST   | HILL   | GNLS   |
|------|--------|--------|--------|
| AIC  | 156.25 | 109.58 | 113.58 |
| PROB | 0      | 0.88   | 0.12   |
| RMSE | 17.18  | 3.91   | 3.91   |

MAX\_MEAN : 32.9 MAX\_MED : 32.7 BMAD : 5.69  
COFF : 20 HIT-CALL : 1 FITC : 42 ACTP : 1  
FLAGS :

Assay ID 1509 (NHEERL\_HEK293T\_CellTiterGLO)  
Sample ID : TX006233

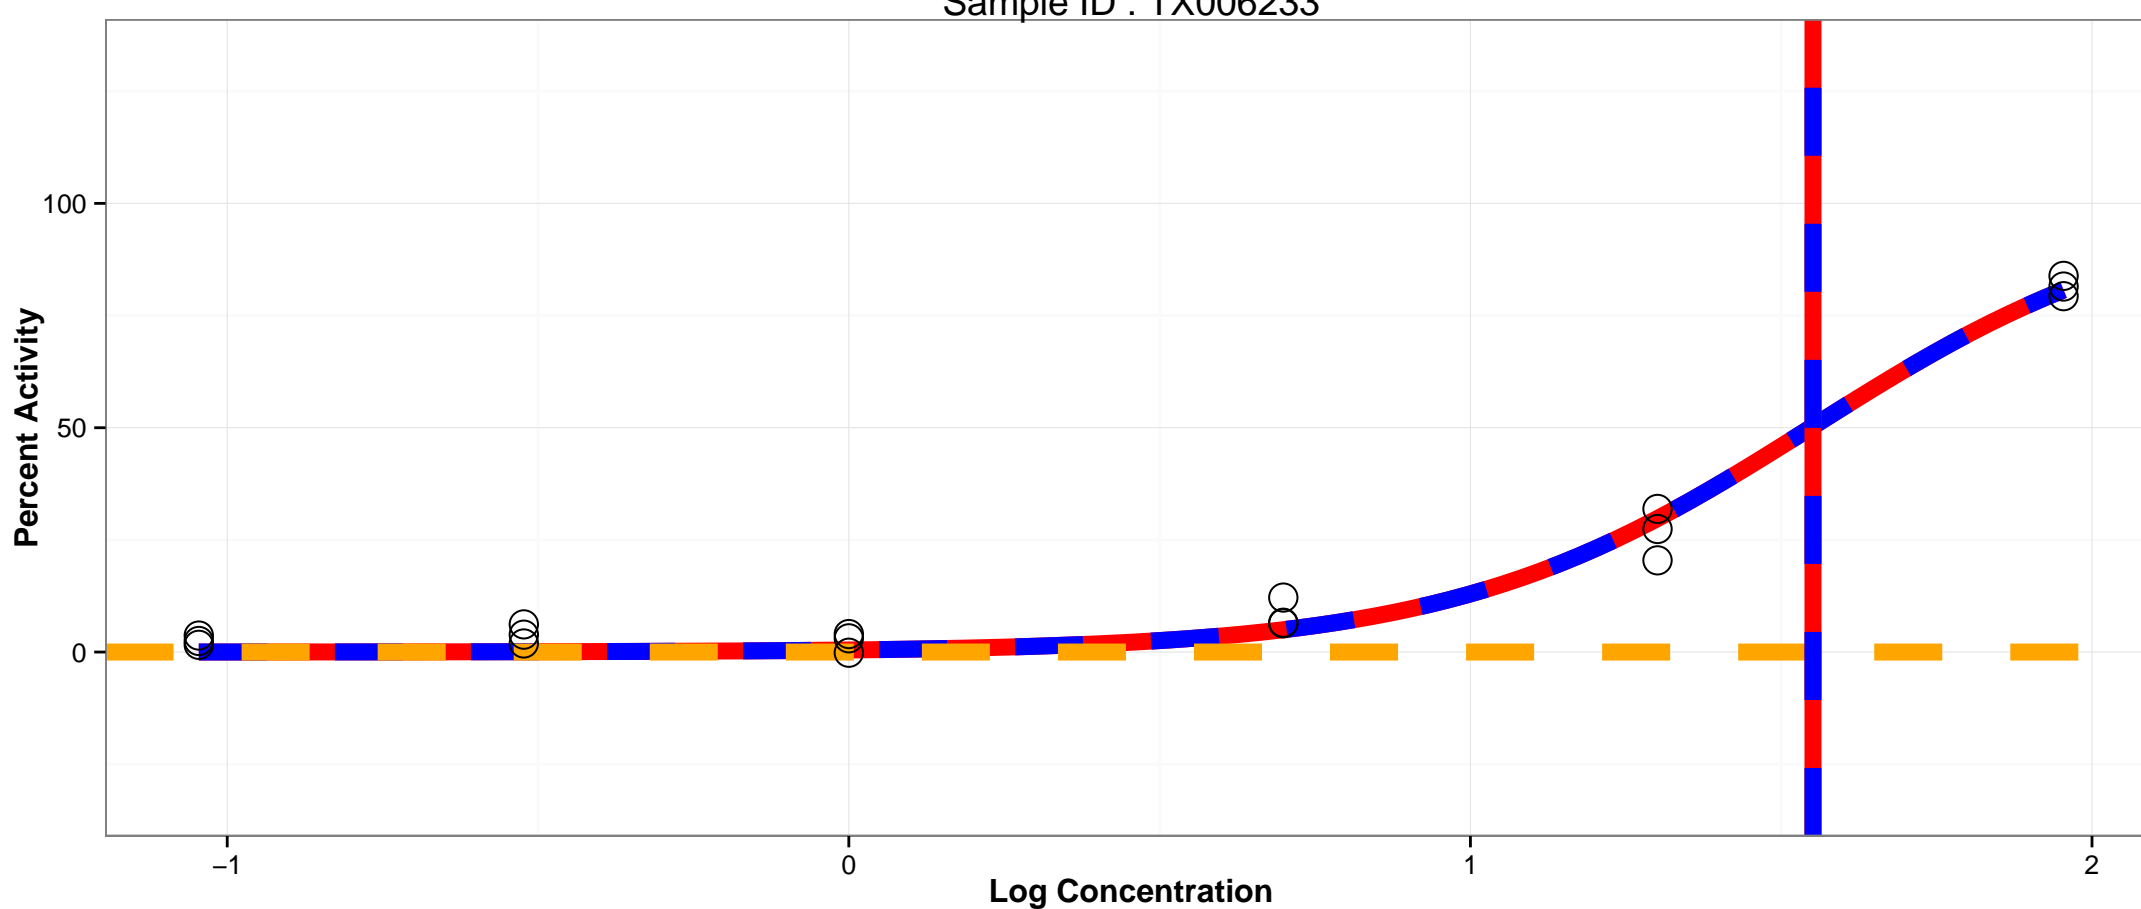

HILL MODEL

|     | tp   | ga   | gw    |
|-----|------|------|-------|
| val | 101  | 1.55 | 1.51  |
| sd  | 12.5 | 0.1  | 0.304 |

GAIN-LOSS MODEL

|     | tp   | ga   | gw    | la   | lw    |
|-----|------|------|-------|------|-------|
| val | 101  | 1.55 | 1.51  | 3.19 | 8.59  |
| sd  | 12.5 | 0.1  | 0.304 | 7040 | 49100 |

|      | CNST   | HILL   | GNLS   |
|------|--------|--------|--------|
| AIC  | 176.33 | 107.75 | 111.75 |
| PROB | 0      | 0.88   | 0.12   |
| RMSE | 35.35  | 3.82   | 3.82   |

MAX\_MEAN : 81.6 MAX\_MED : 81.5 BMAD : 5.54  
COFF : 20 HIT-CALL : 1 FITC : 42 ACTP : 1  
FLAGS :

Assay ID 1848 (NHEERL\_Quantilum\_inhib\_2\_dn)  
Sample ID : TX006233

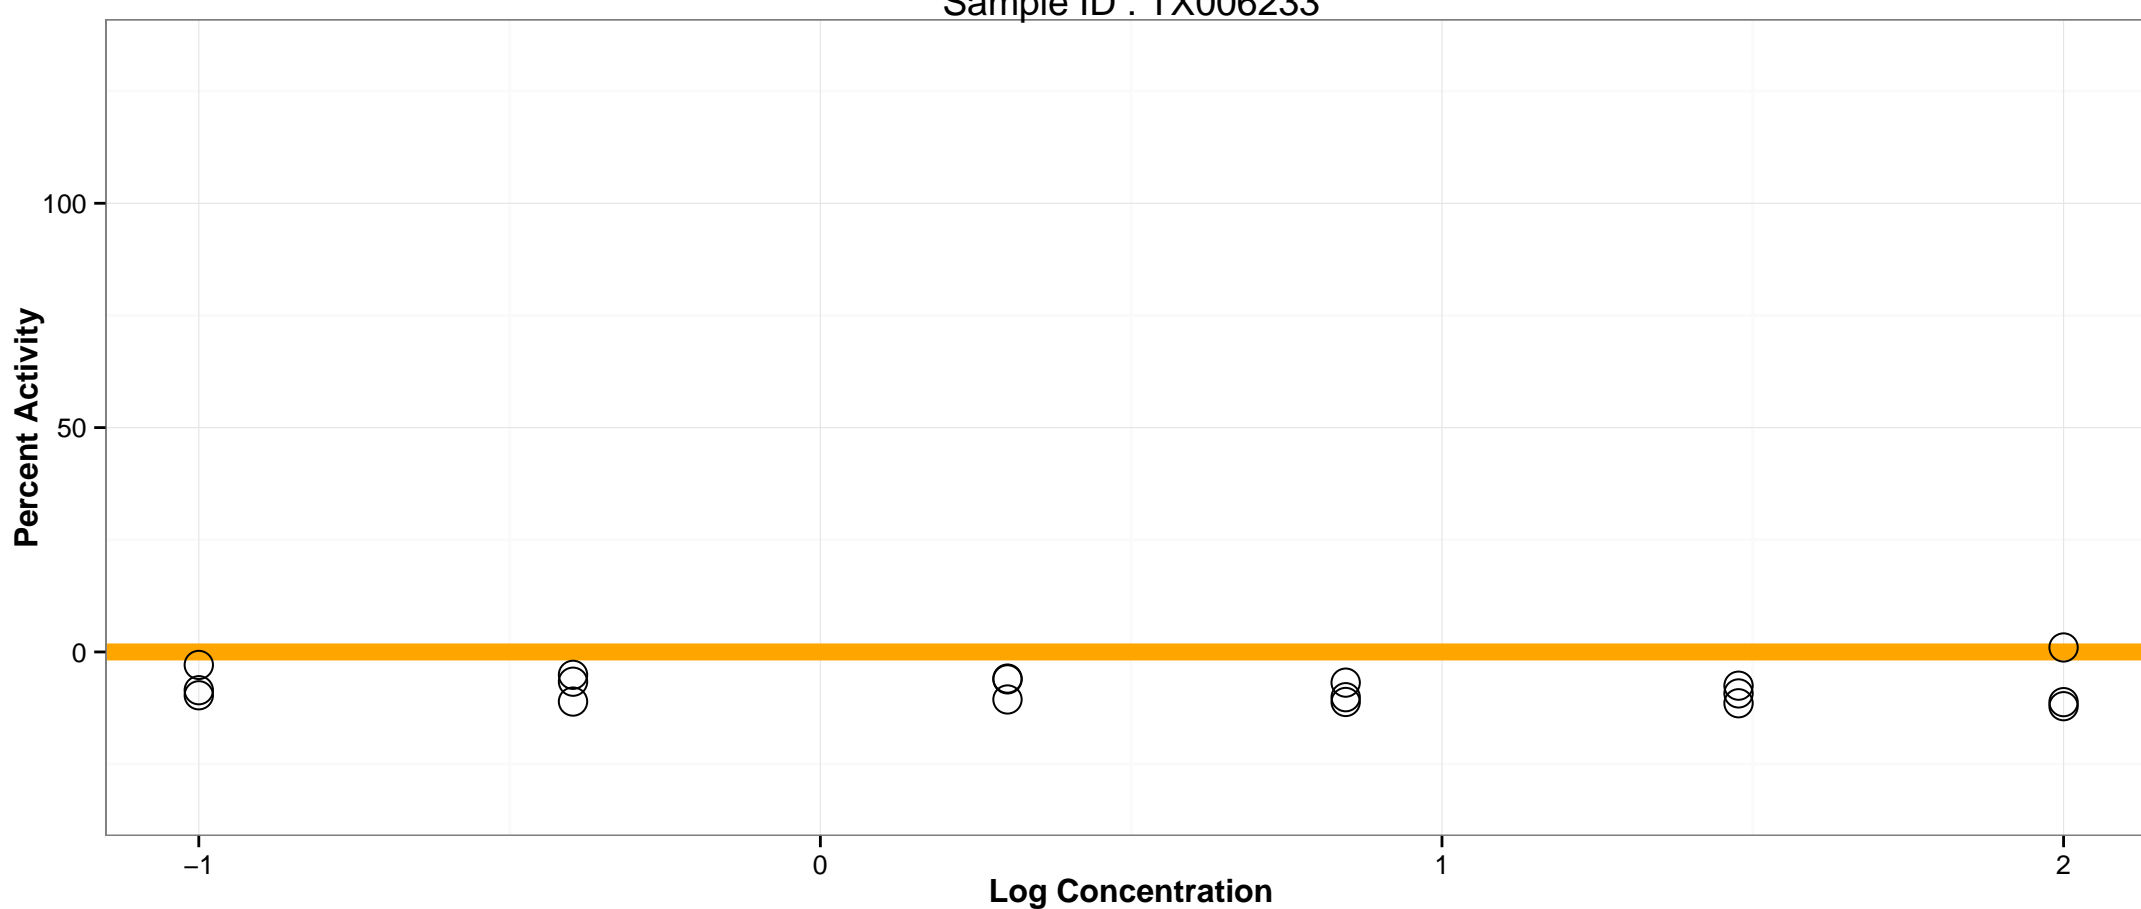

HILL MODEL

HILL MODEL: Not applicable

GAIN-LOSS MODEL

GNLS MODEL: Not applicable

|      | CNST   | HILL | GNLS |
|------|--------|------|------|
| AIC  | 134.66 | NA   | NA   |
| PROB | 1      | NA   | NA   |
| RMSE | 8.71   | NA   | NA   |

MAX\_MEAN : -7.02 MAX\_MED : -6.1 BMAD : 8.58  
COFF : 20 HIT-CALL : 0 FITC : 4 ACTP : 0  
FLAGS :

Assay ID 1508 (NHEERL\_TPO\_AUR\_dn)  
Sample ID : TX006236

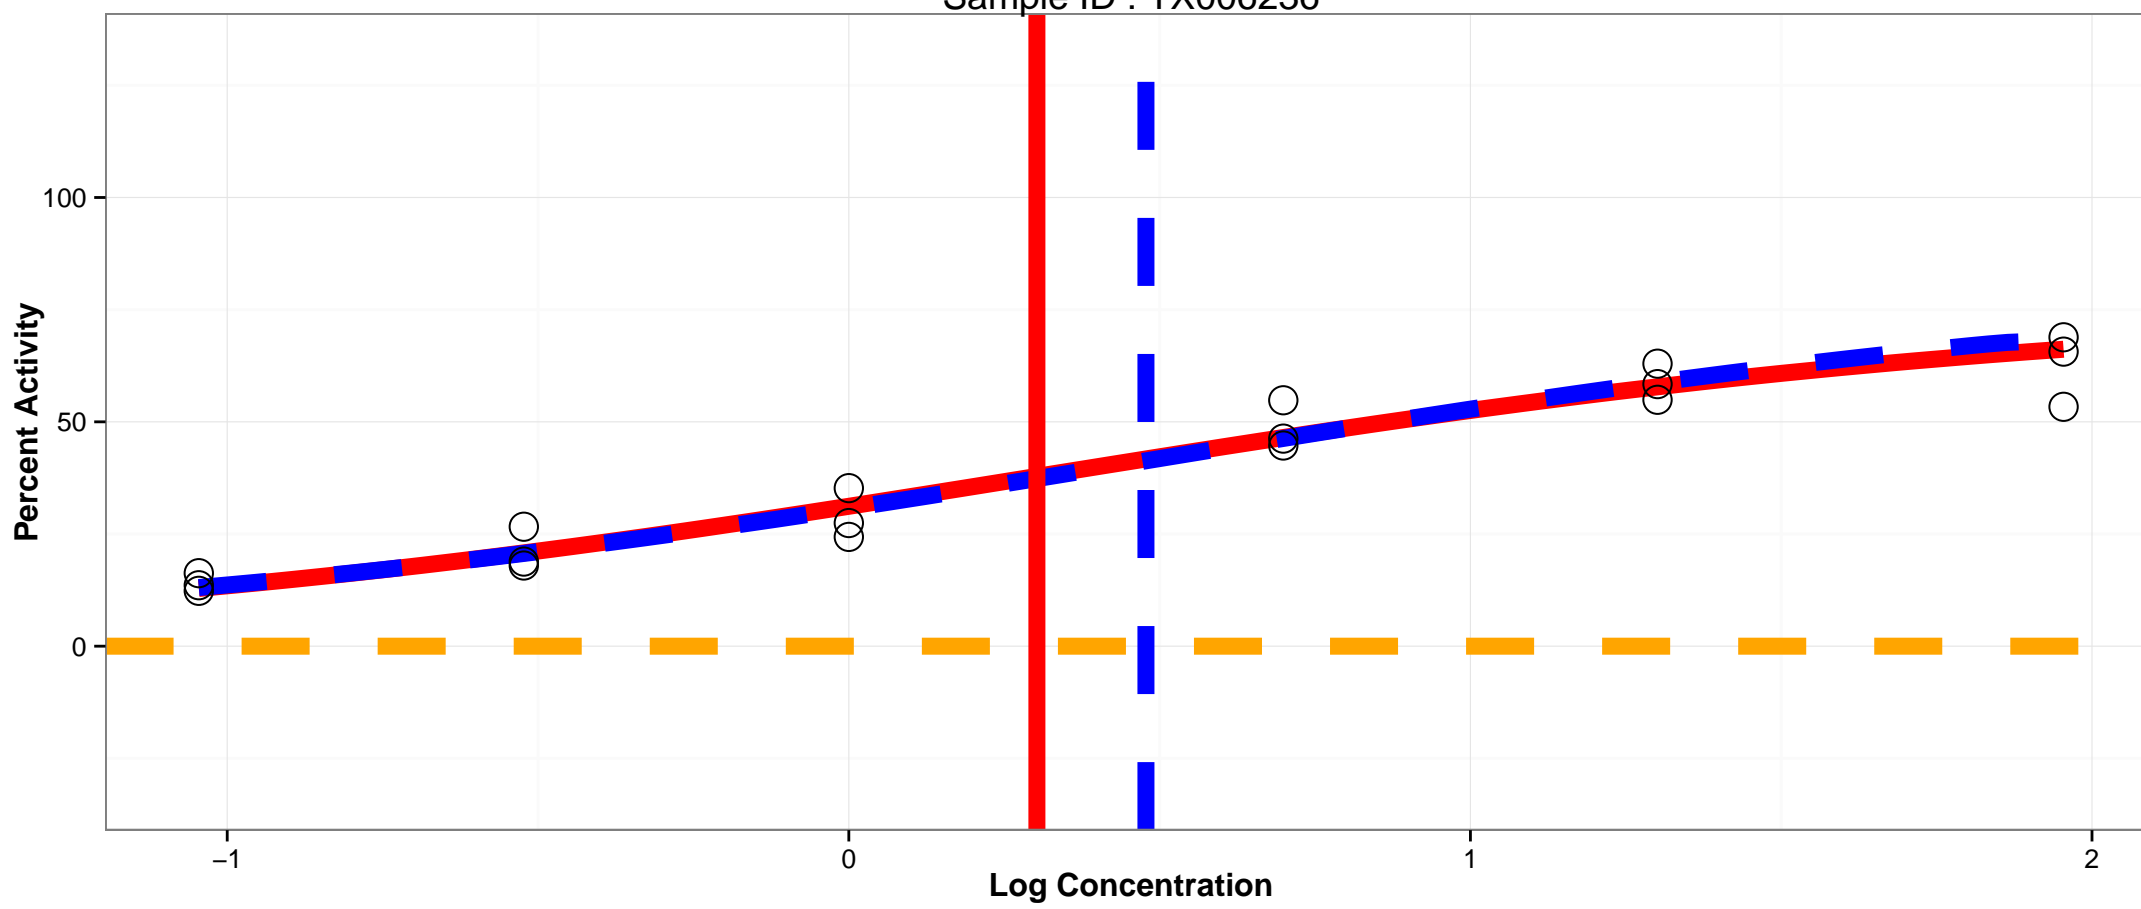

HILL MODEL

|     | tp   | ga    | gw     |
|-----|------|-------|--------|
| val | 75.7 | 0.303 | 0.511  |
| sd  | 6.96 | 0.214 | 0.0756 |

GAIN-LOSS MODEL

|     | tp   | ga    | gw    | la     | lw   |
|-----|------|-------|-------|--------|------|
| val | 82.6 | 0.478 | 0.476 | 2.02   | 18   |
| sd  | 19.5 | 0.501 | 0.105 | 0.0415 | 16.9 |

|      | CNST   | HILL   | GNLS   |
|------|--------|--------|--------|
| AIC  | 191.89 | 115.05 | 118.49 |
| PROB | 0      | 0.85   | 0.15   |
| RMSE | 43.48  | 4.8    | 4.66   |

MAX\_MEAN : 62.6 MAX\_MED : 65.7 BMAD : 5.69  
COFF : 20 HIT-CALL : 1 FITC : 42 ACTP : 1  
FLAGS :

Assay ID 1509 (NHEERL\_HEK293T\_CellTiterGLO)  
Sample ID : TX006236

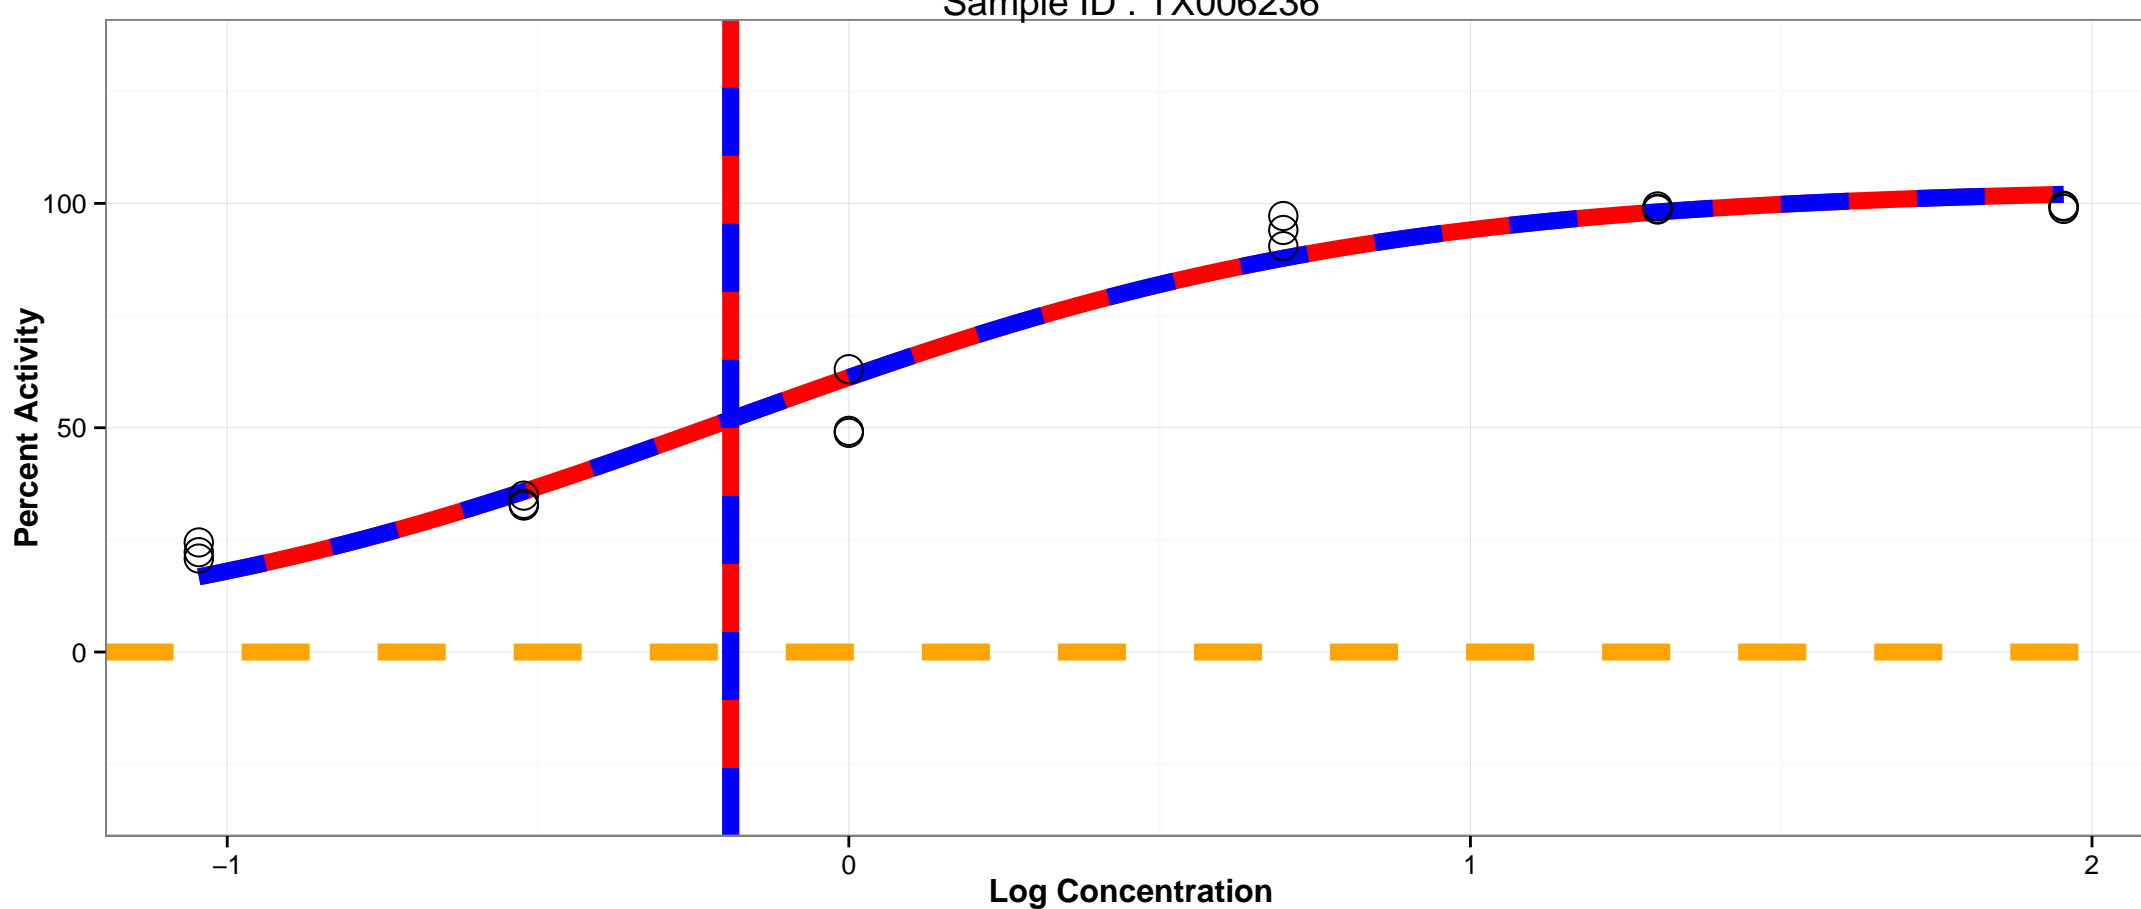

HILL MODEL

|     | tp   | ga     | gw     |
|-----|------|--------|--------|
| val | 104  | -0.19  | 0.835  |
| sd  | 2.65 | 0.0613 | 0.0963 |

GAIN-LOSS MODEL

|     | tp  | ga    | gw    | la   | lw   |
|-----|-----|-------|-------|------|------|
| val | 104 | -0.19 | 0.835 | 3.95 | 13.8 |
| sd  | NA  | NA    | NA    | NA   | NA   |

|      | CNST   | HILL   | GNLS   |
|------|--------|--------|--------|
| AIC  | 211.31 | 122.03 | 126.03 |
| PROB | 0      | 0.88   | 0.12   |
| RMSE | 74.18  | 5.69   | 5.69   |

MAX\_MEAN : 99.2 MAX\_MED : 99.3 BMAD : 5.54  
COFF : 20 HIT-CALL : 1 FITC : 41 ACTP : 1  
FLAGS :

Assay ID 1848 (NHEERL\_Quantilum\_inhib\_2\_dn)  
Sample ID : TX006236

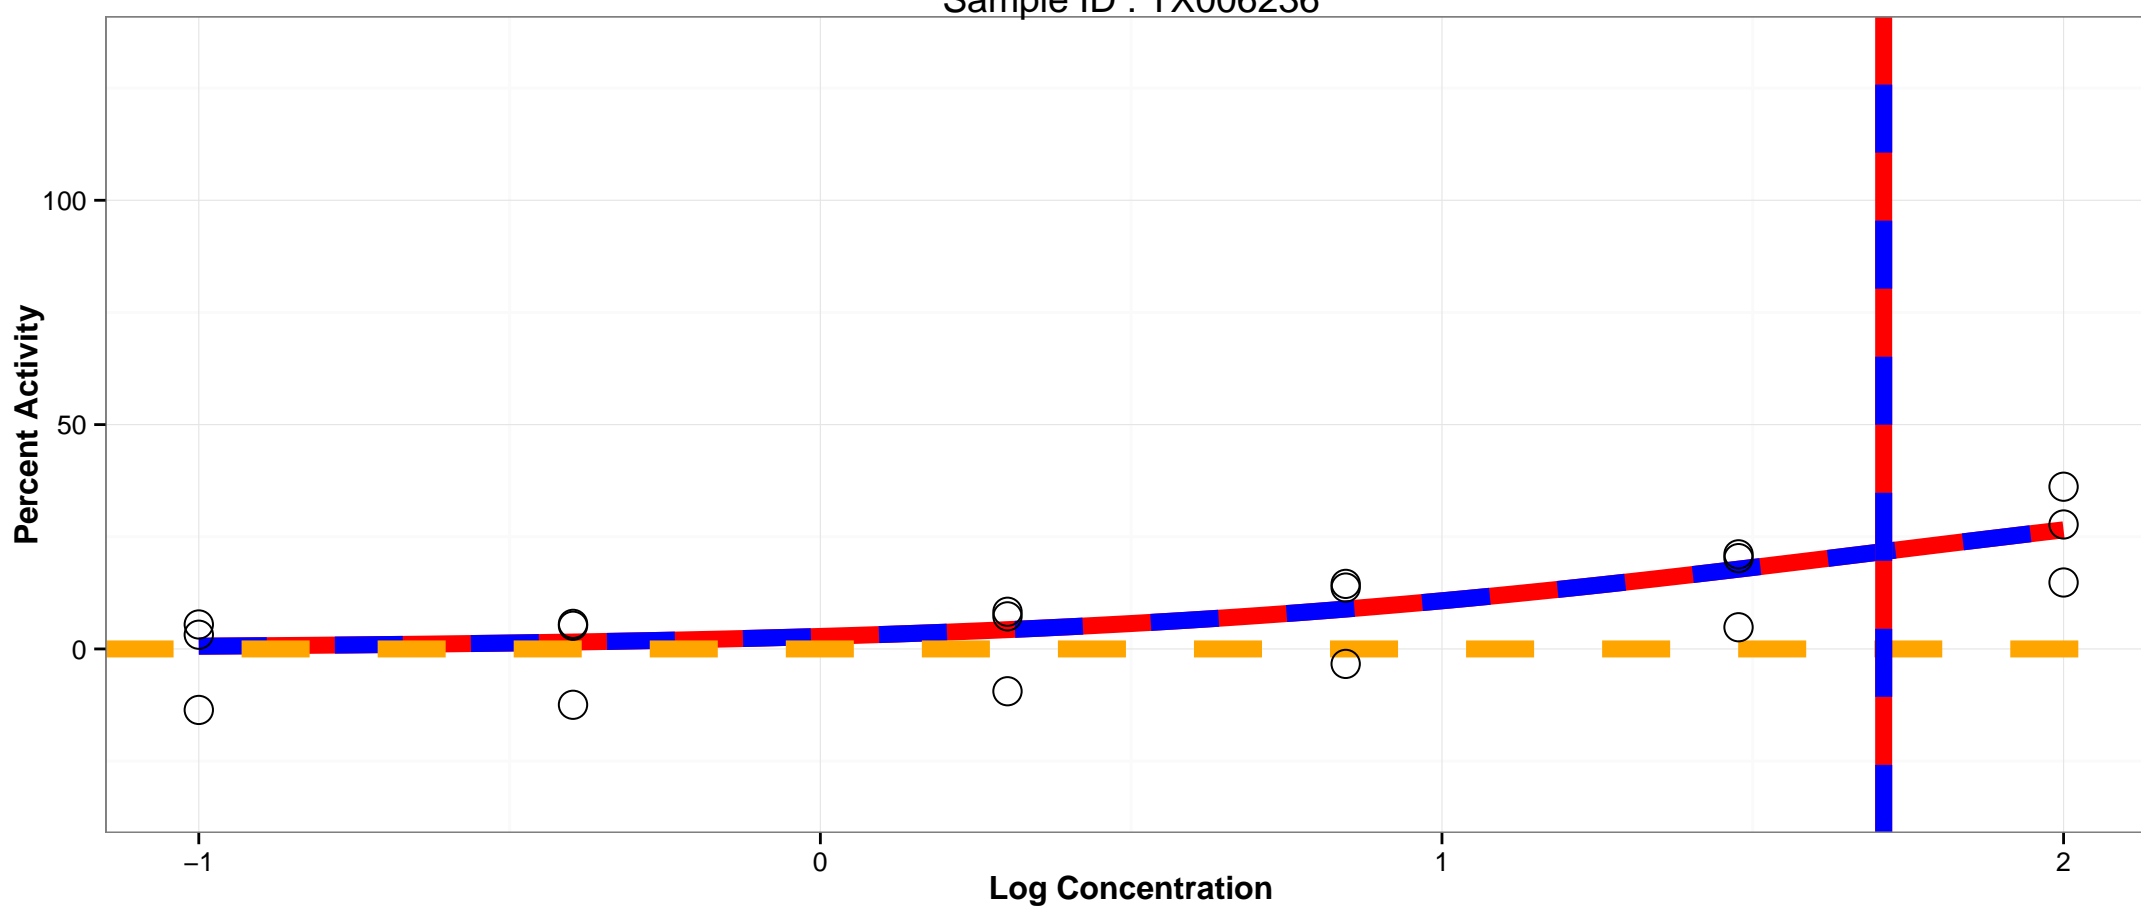

HILL MODEL

|     | tp   | ga   | gw    |
|-----|------|------|-------|
| val | 43.4 | 1.71 | 0.68  |
| sd  | 52.9 | 1.64 | 0.533 |

GAIN-LOSS MODEL

|     | tp   | ga   | gw    | la     | lw     |
|-----|------|------|-------|--------|--------|
| val | 43.4 | 1.71 | 0.681 | 3.78   | 6.72   |
| sd  | 52.9 | 1.64 | 0.533 | 140000 | 472000 |

|      | CNST  | HILL | GNLS |
|------|-------|------|------|
| AIC  | 152.4 | 138  | 142  |
| PROB | 0     | 0.88 | 0.12 |
| RMSE | 15.34 | 8.46 | 8.46 |

MAX\_MEAN : 26.2 MAX\_MED : 27.8 BMAD : 8.58  
COFF : 20 HIT-CALL : 1 FITC : 42 ACTP : 0.999  
FLAGS : 6

Assay ID 1508 (NHEERL\_TPO\_AUR\_dn)  
Sample ID : TX006240

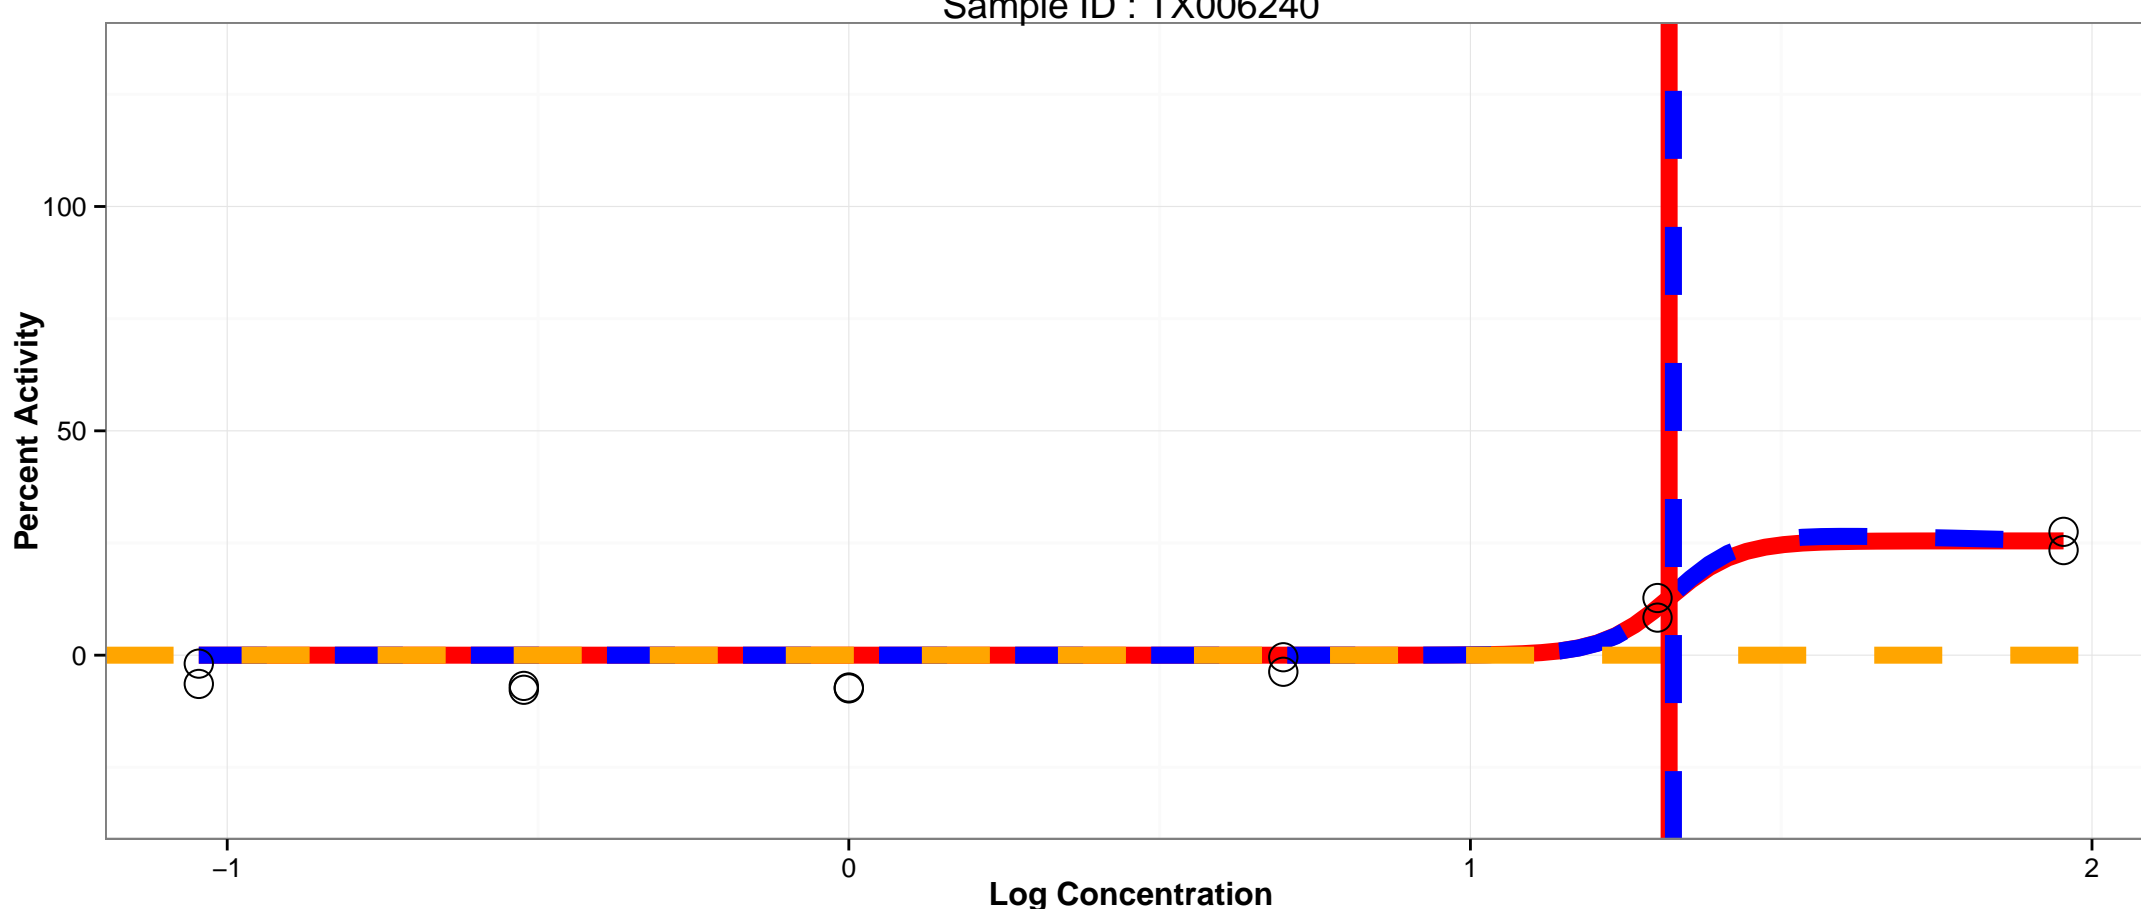

HILL MODEL

|     | tp   | ga    | gw   |
|-----|------|-------|------|
| val | 25.5 | 1.32  | 8    |
| sd  | 3    | 0.154 | 65.4 |

GAIN-LOSS MODEL

|     | tp   | ga    | gw  | la   | lw   |
|-----|------|-------|-----|------|------|
| val | 31.4 | 1.33  | 8   | 3.87 | 0.33 |
| sd  | 1010 | 0.735 | 117 | 257  | 17.9 |

|      | CNST  | HILL  | GMLS  |
|------|-------|-------|-------|
| AIC  | 96.11 | 81.81 | 85.81 |
| PROB | 0     | 0.88  | 0.12  |
| RMSE | 12.28 | 4.9   | 4.9   |

MAX\_MEAN : 25.5 MAX\_MED : 25.5 BMAD : 5.69  
COFF : 20 HIT-CALL : 1 FITC : 41 ACTP : 0.999  
FLAGS : 6

Assay ID 1509 (NHEERL\_HEK293T\_CellTiterGLO)  
Sample ID : TX006240

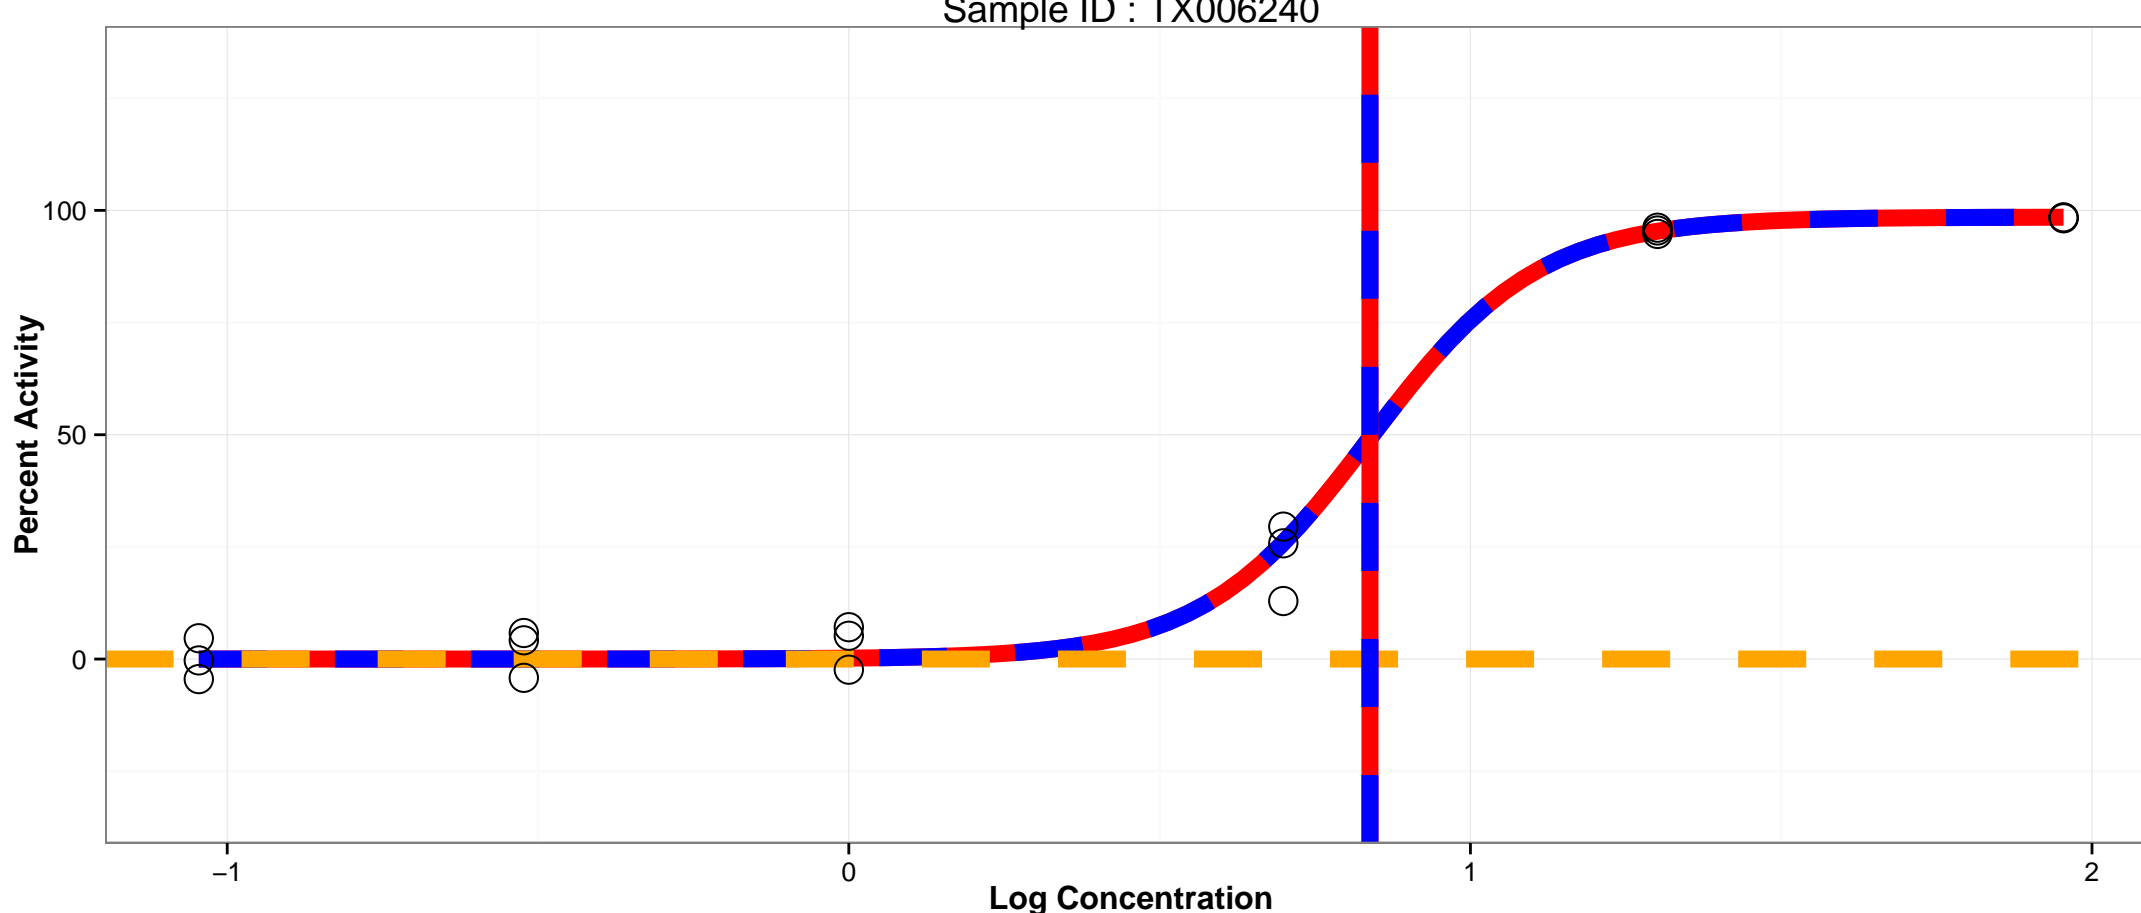

HILL MODEL

|     | tp   | ga     | gw    |
|-----|------|--------|-------|
| val | 98.5 | 0.838  | 3.21  |
| sd  | 1.79 | 0.0312 | 0.596 |

GAIN-LOSS MODEL

|     | tp   | ga    | gw   | la   | lw   |
|-----|------|-------|------|------|------|
| val | 98.5 | 0.838 | 3.21 | 3.16 | 12.8 |
| sd  | NA   | NA    | NA   | NA   | NA   |

|      | CNST   | HILL   | GMLS   |
|------|--------|--------|--------|
| AIC  | 198.54 | 112.45 | 116.45 |
| PROB | 0      | 0.88   | 0.12   |
| RMSE | 56.9   | 4.55   | 4.55   |

MAX\_MEAN : 98.4 MAX\_MED : 98.4 BMAD : 5.54  
COFF : 20 HIT-CALL : 1 FITC : 41 ACTP : 1  
FLAGS :

Assay ID 1848 (NHEERL\_Quantilum\_inhib\_2\_dn)  
Sample ID : TX006240

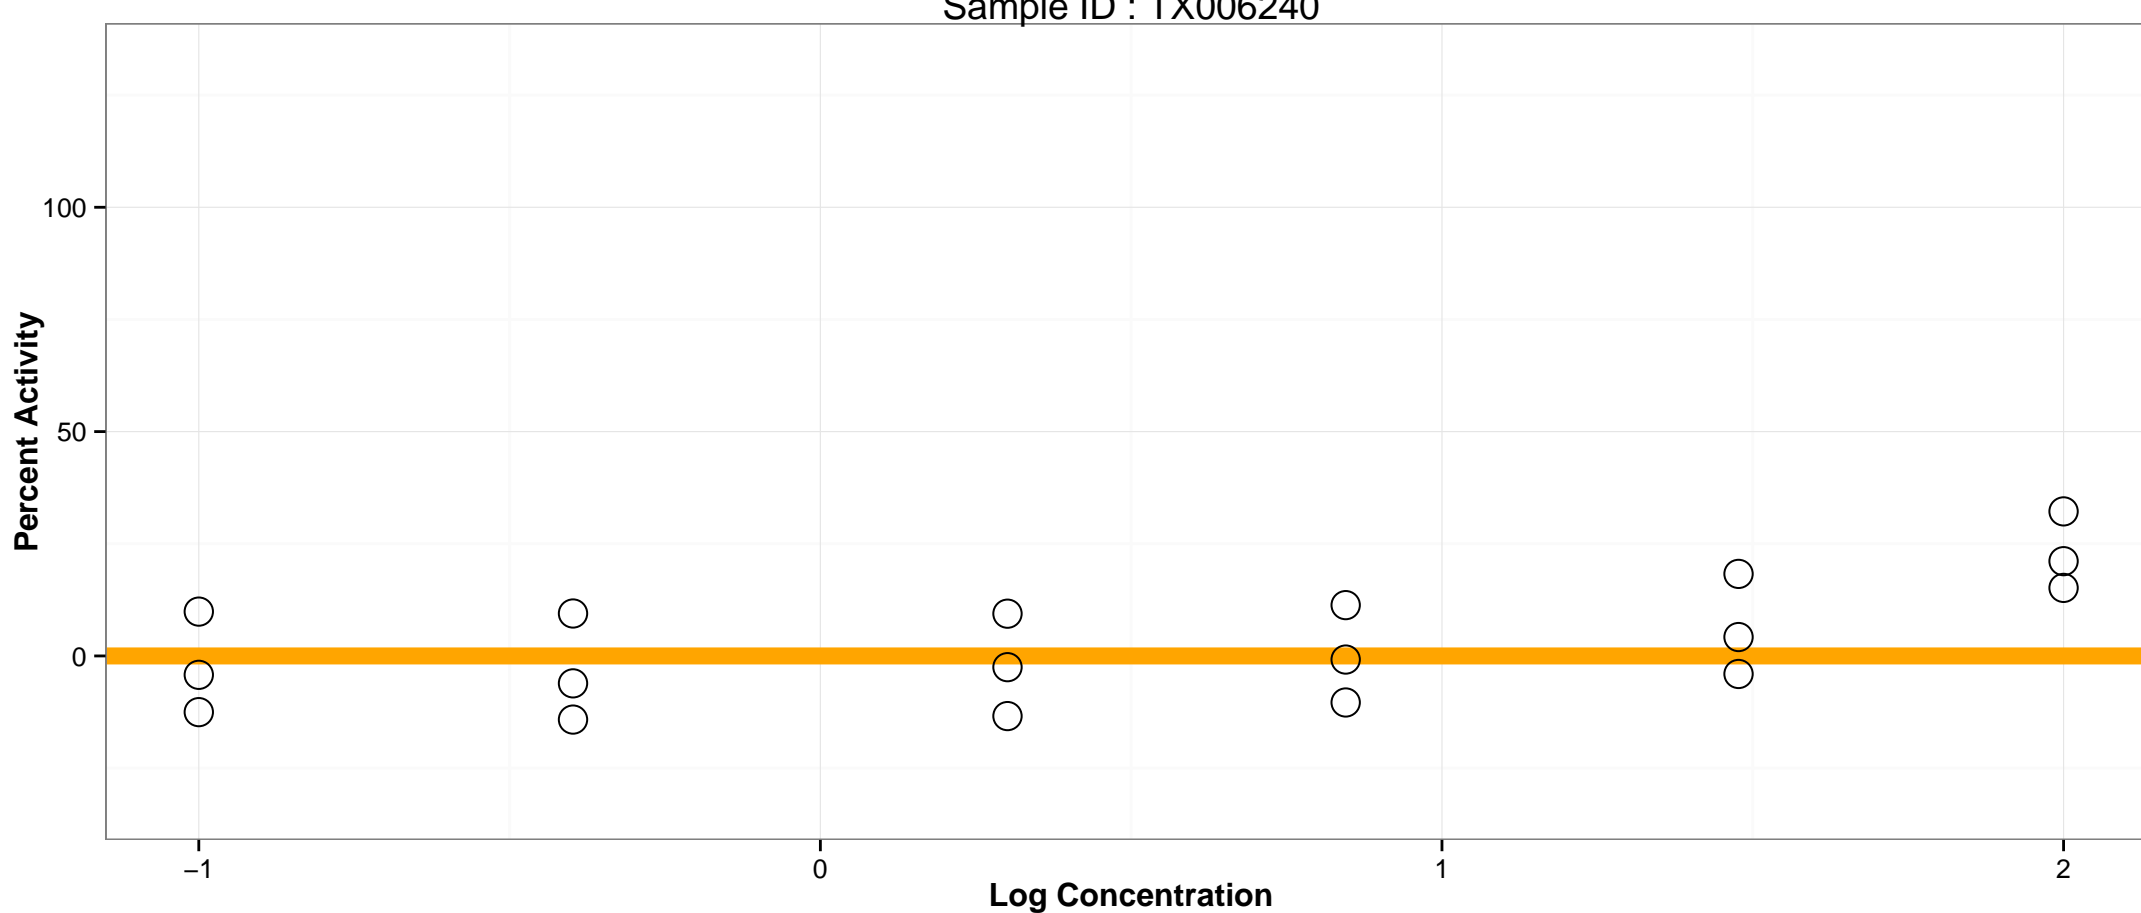

HILL MODEL

HILL MODEL: Not applicable

GAIN-LOSS MODEL

GMLS MODEL: Not applicable

|      | CNST   | HILL | GMLS |
|------|--------|------|------|
| AIC  | 147.65 | NA   | NA   |
| PROB | 1      | NA   | NA   |
| RMSE | 13.32  | NA   | NA   |

MAX\_MEAN : 22.8 MAX\_MED : 21.1 BMAD : 8.58  
COFF : 20 HIT-CALL : 0 FITC : 4 ACTP : 0  
FLAGS :

Assay ID 1508 (NHEERL\_TPO\_AUR\_dn)  
Sample ID : TX006245

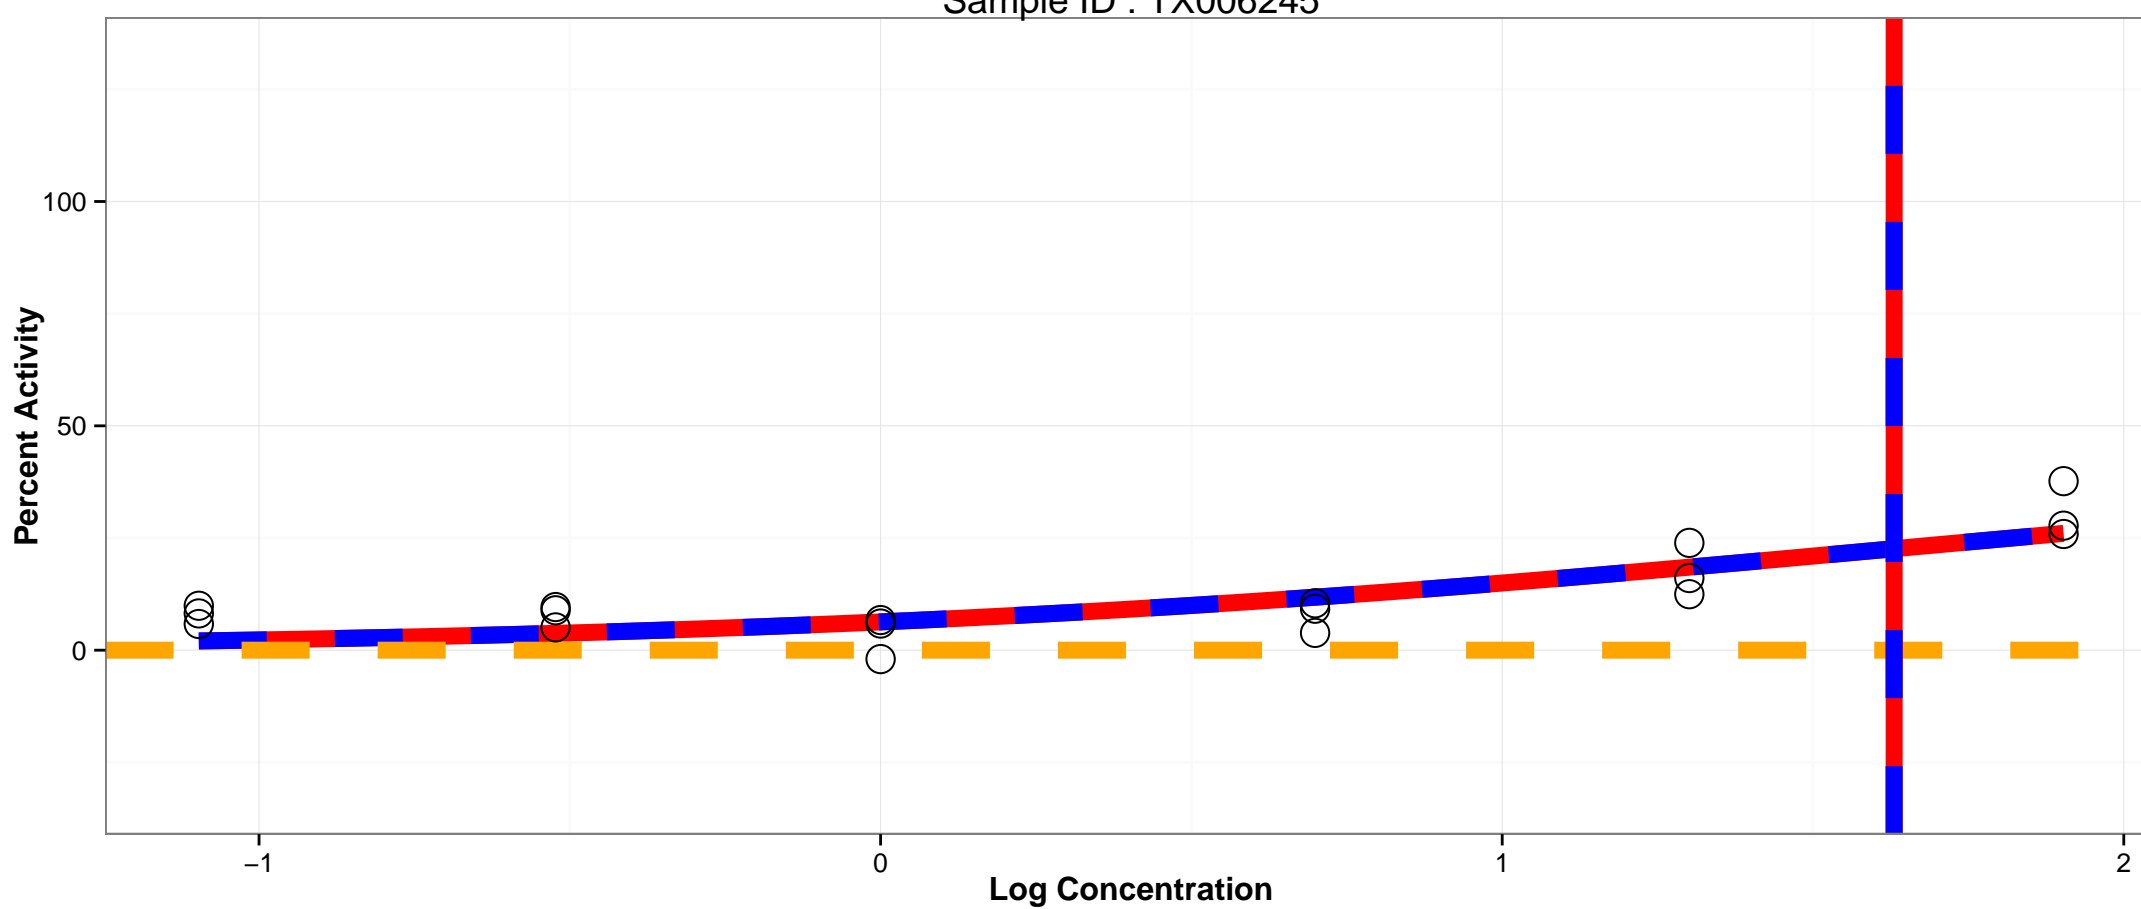

HILL MODEL

|     | tp   | ga    | gw    |
|-----|------|-------|-------|
| val | 45.2 | 1.63  | 0.485 |
| sd  | 15.9 | 0.632 | 0.17  |

GAIN-LOSS MODEL

|     | tp   | ga    | gw    | la   | lw   |
|-----|------|-------|-------|------|------|
| val | 45.2 | 1.63  | 0.485 | 3.85 | 4.32 |
| sd  | 15.9 | 0.632 | 0.17  | 1690 | 3750 |

|      | CNST   | HILL   | GNLS   |
|------|--------|--------|--------|
| AIC  | 153.13 | 121.62 | 125.62 |
| PROB | 0      | 0.88   | 0.12   |
| RMSE | 15.88  | 5.41   | 5.41   |

MAX\_MEAN : 30.5 MAX\_MED : 27.8 BMAD : 5.69  
COFF : 20 HIT-CALL : 1 FITC : 42 ACTP : 1  
FLAGS : 6

Assay ID 1509 (NHEERL\_HEK293T\_CellTiterGLO)  
Sample ID : TX006245

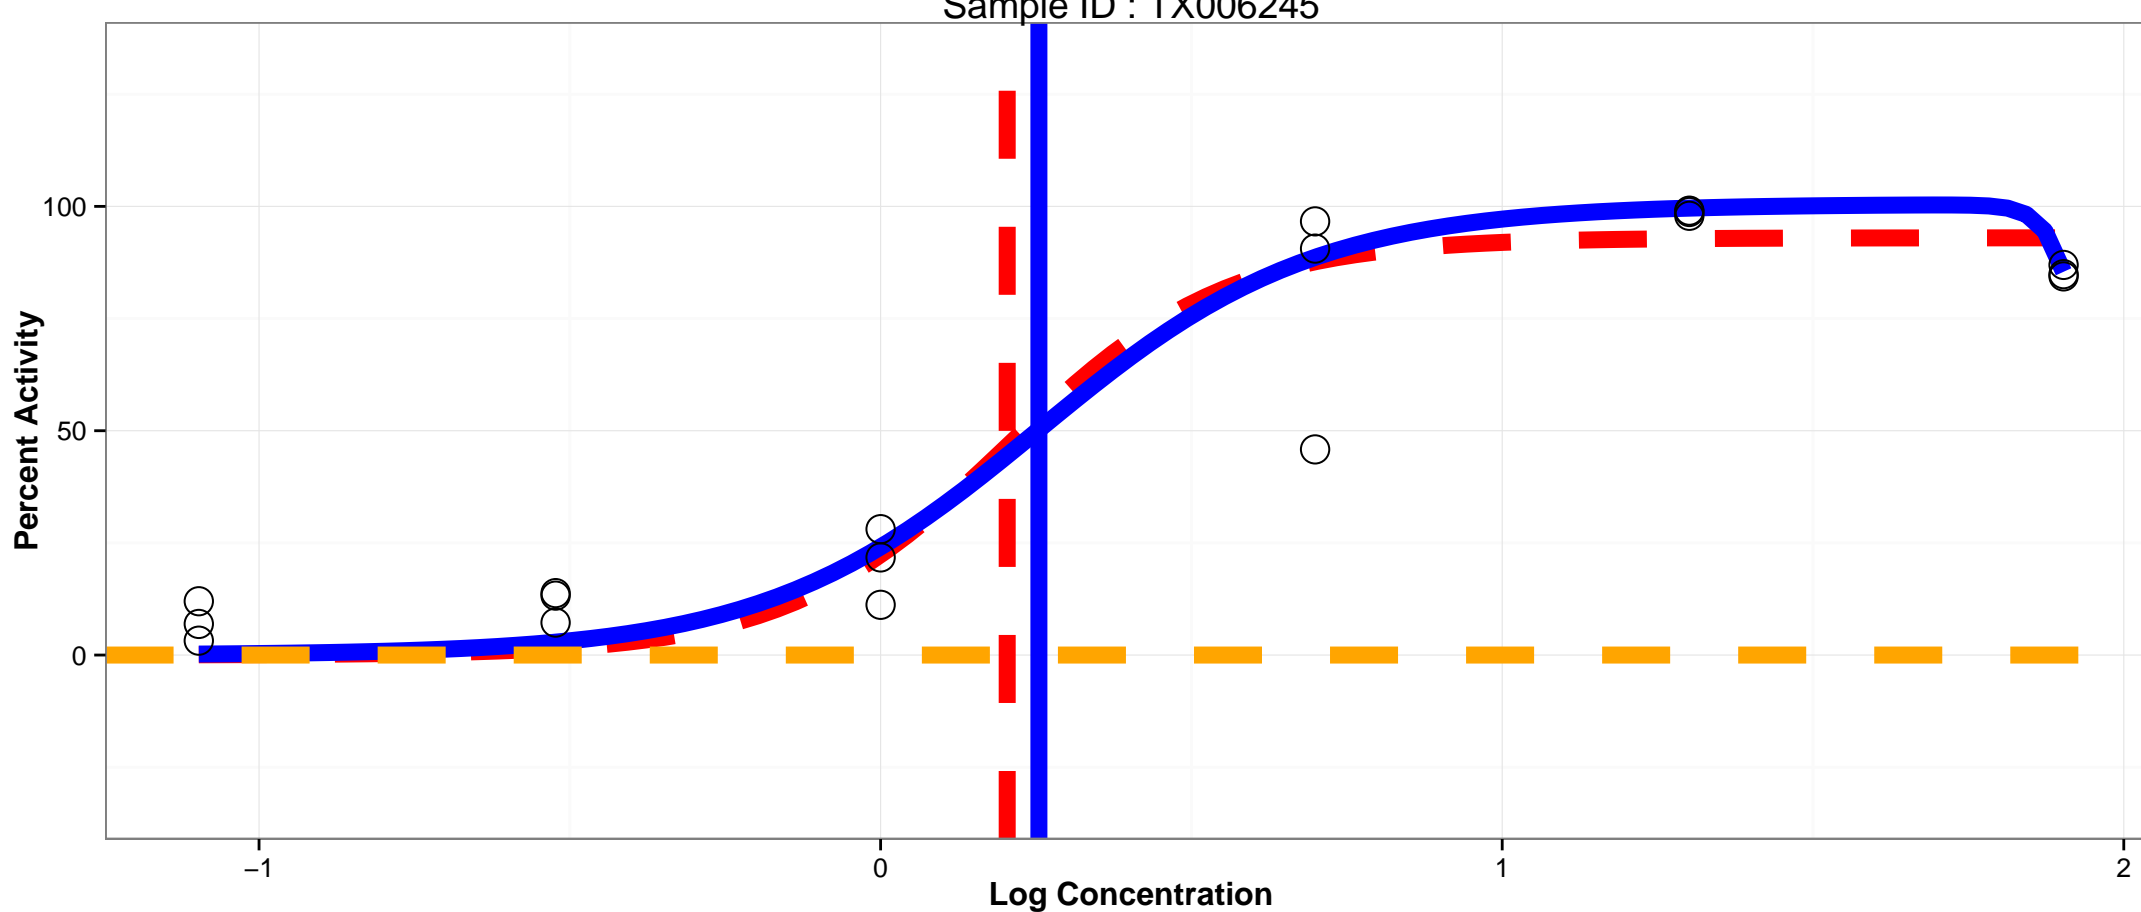

HILL MODEL

|     | tp   | ga    | gw    |
|-----|------|-------|-------|
| val | 93   | 0.204 | 2.45  |
| sd  | 3.84 | 0.076 | 0.935 |

GAIN-LOSS MODEL

|     | tp   | ga     | gw    | la     | lw   |
|-----|------|--------|-------|--------|------|
| val | 100  | 0.255  | 1.97  | 1.95   | 15   |
| sd  | 3.92 | 0.0611 | 0.499 | 0.0102 | 3.56 |

|      | CNST   | HILL   | GNLS   |
|------|--------|--------|--------|
| AIC  | 204.56 | 145.76 | 143.13 |
| PROB | 0      | 0.21   | 0.79   |
| RMSE | 63.56  | 12.46  | 11.86  |

MAX\_MEAN : 98.6 MAX\_MED : 98.8 BMAD : 5.54  
COFF : 20 HIT-CALL : 1 FITC : 50 ACTP : 1  
FLAGS :

Assay ID 1848 (NHEERL\_Quantilum\_inhib\_2\_dn)  
Sample ID : TX006245

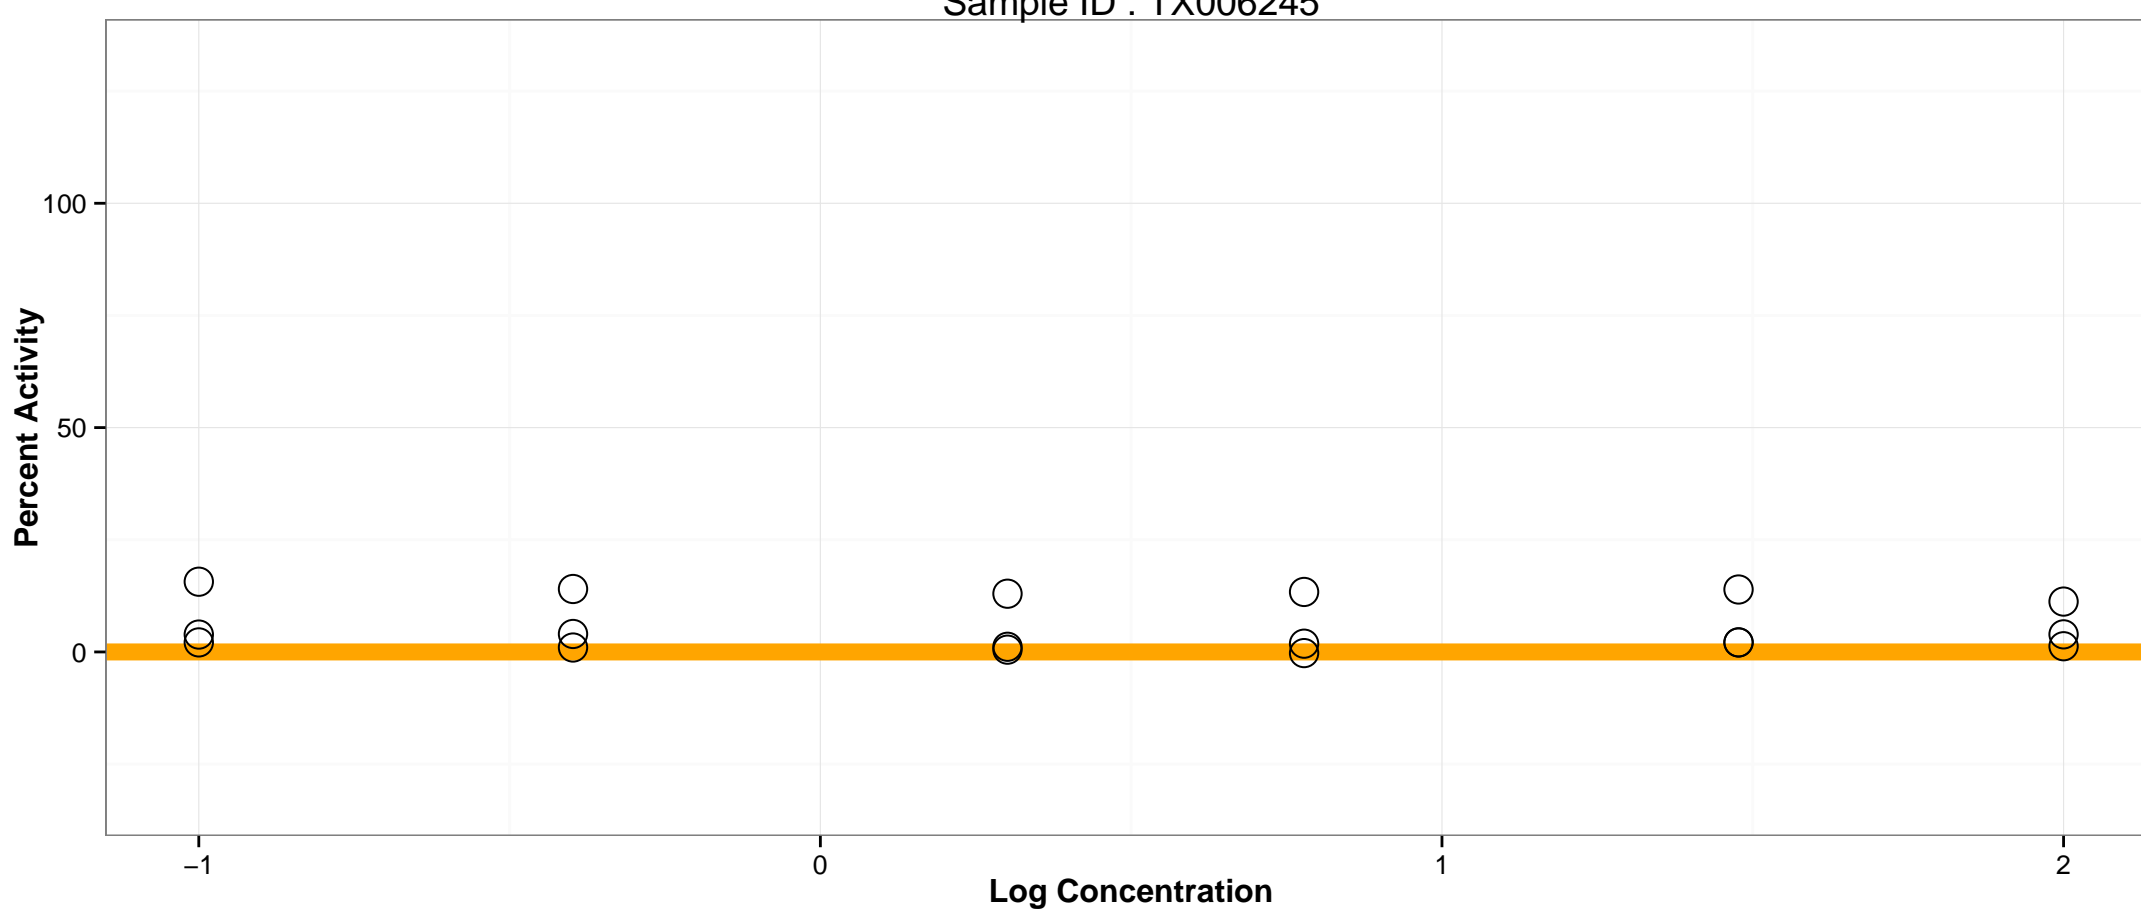

HILL MODEL

HILL MODEL: Not applicable

GAIN-LOSS MODEL

GNLS MODEL: Not applicable

|      | CNST   | HILL | GNLS |
|------|--------|------|------|
| AIC  | 128.66 | NA   | NA   |
| PROB | 1      | NA   | NA   |
| RMSE | 8.09   | NA   | NA   |

MAX\_MEAN : 7.23 MAX\_MED : 4.01 BMAD : 8.58  
COFF : 20 HIT-CALL : 0 FITC : 4 ACTP : 0  
FLAGS :

Assay ID 1508 (NHEERL\_TPO\_AUR\_dn)  
Sample ID : TX006251

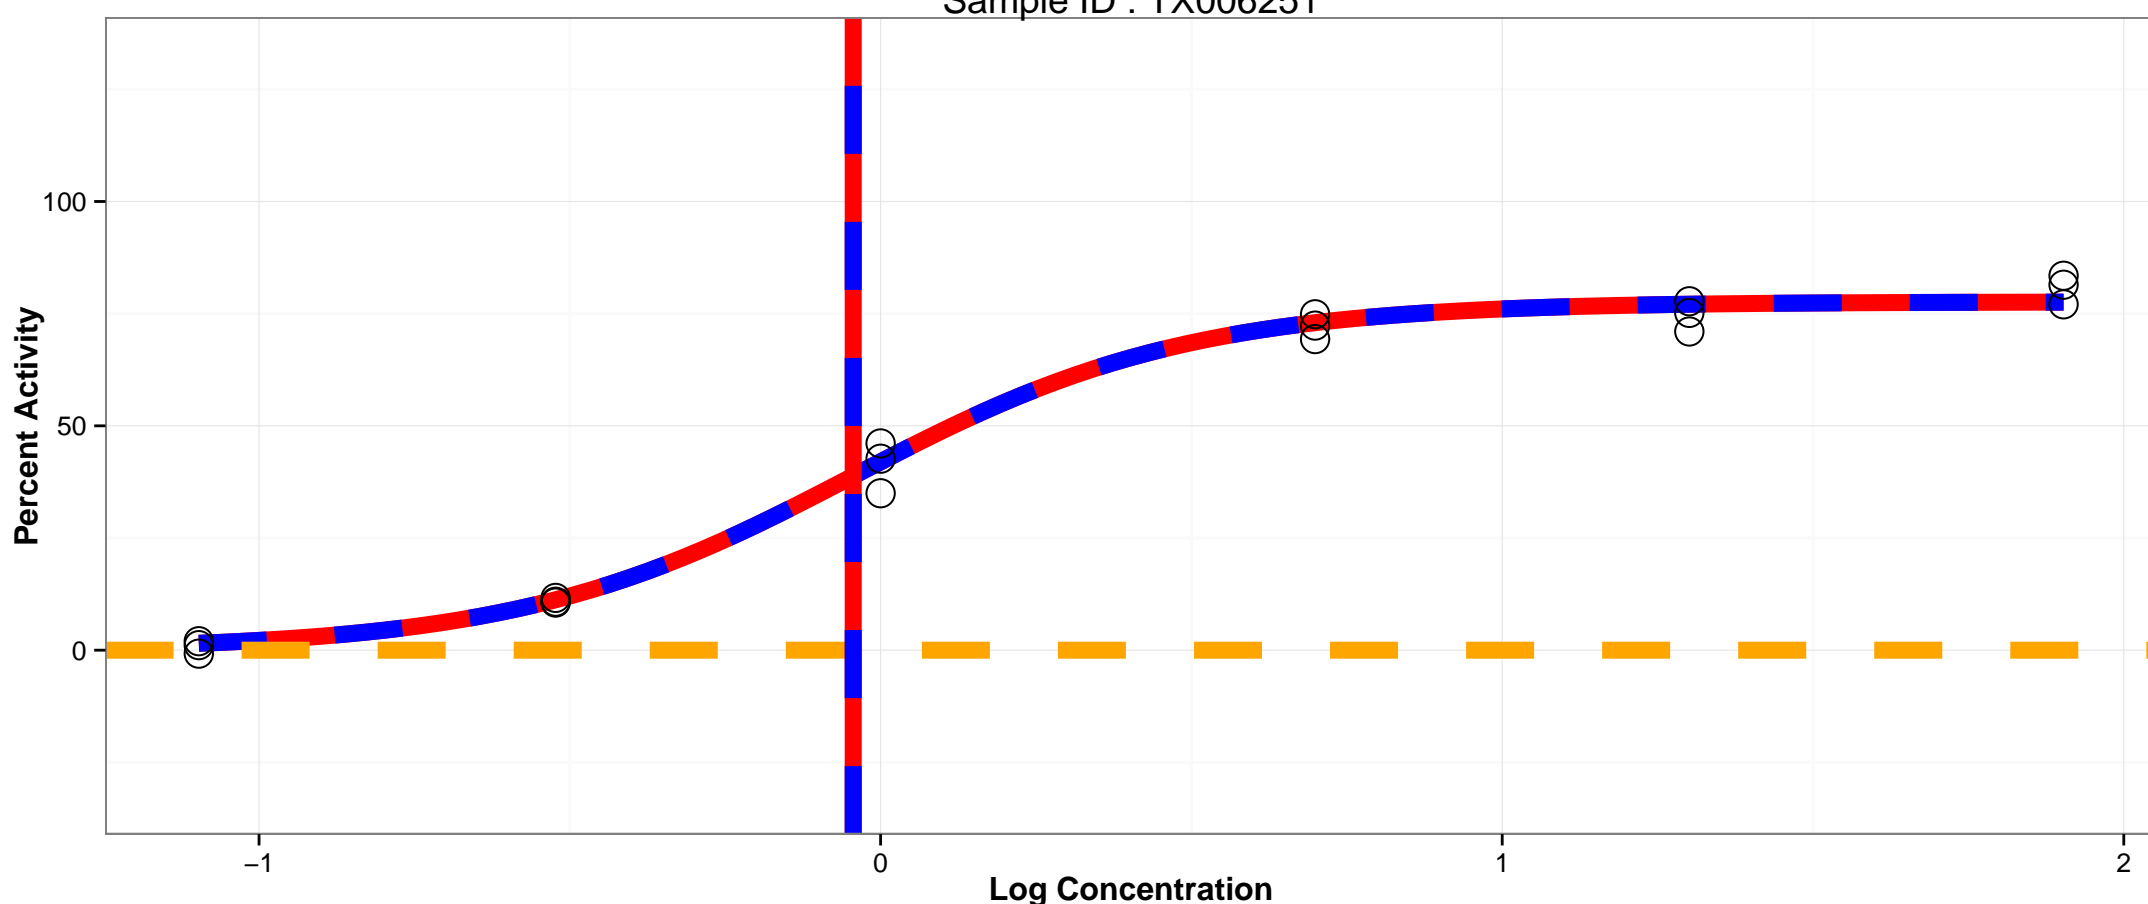

HILL MODEL

|     | tp   | ga      | gw    |
|-----|------|---------|-------|
| val | 77.6 | -0.0441 | 1.61  |
| sd  | 1.35 | 0.0325  | 0.135 |

GAIN-LOSS MODEL

|     | tp   | ga      | gw    | la    | lw     |
|-----|------|---------|-------|-------|--------|
| val | 77.6 | -0.0441 | 1.61  | 3.33  | 9      |
| sd  | 1.35 | 0.0325  | 0.135 | 43100 | 272000 |

|      | CNST   | HILL   | GNLS   |
|------|--------|--------|--------|
| AIC  | 201.14 | 100.52 | 104.52 |
| PROB | 0      | 0.88   | 0.12   |
| RMSE | 56.51  | 3.17   | 3.17   |

MAX\_MEAN : 80.7 MAX\_MED : 81.5 BMAD : 5.69  
COFF : 20 HIT-CALL : 1 FITC : 41 ACTP : 1  
FLAGS :

Assay ID 1509 (NHEERL\_HEK293T\_CellTiterGLO)  
Sample ID : TX006251

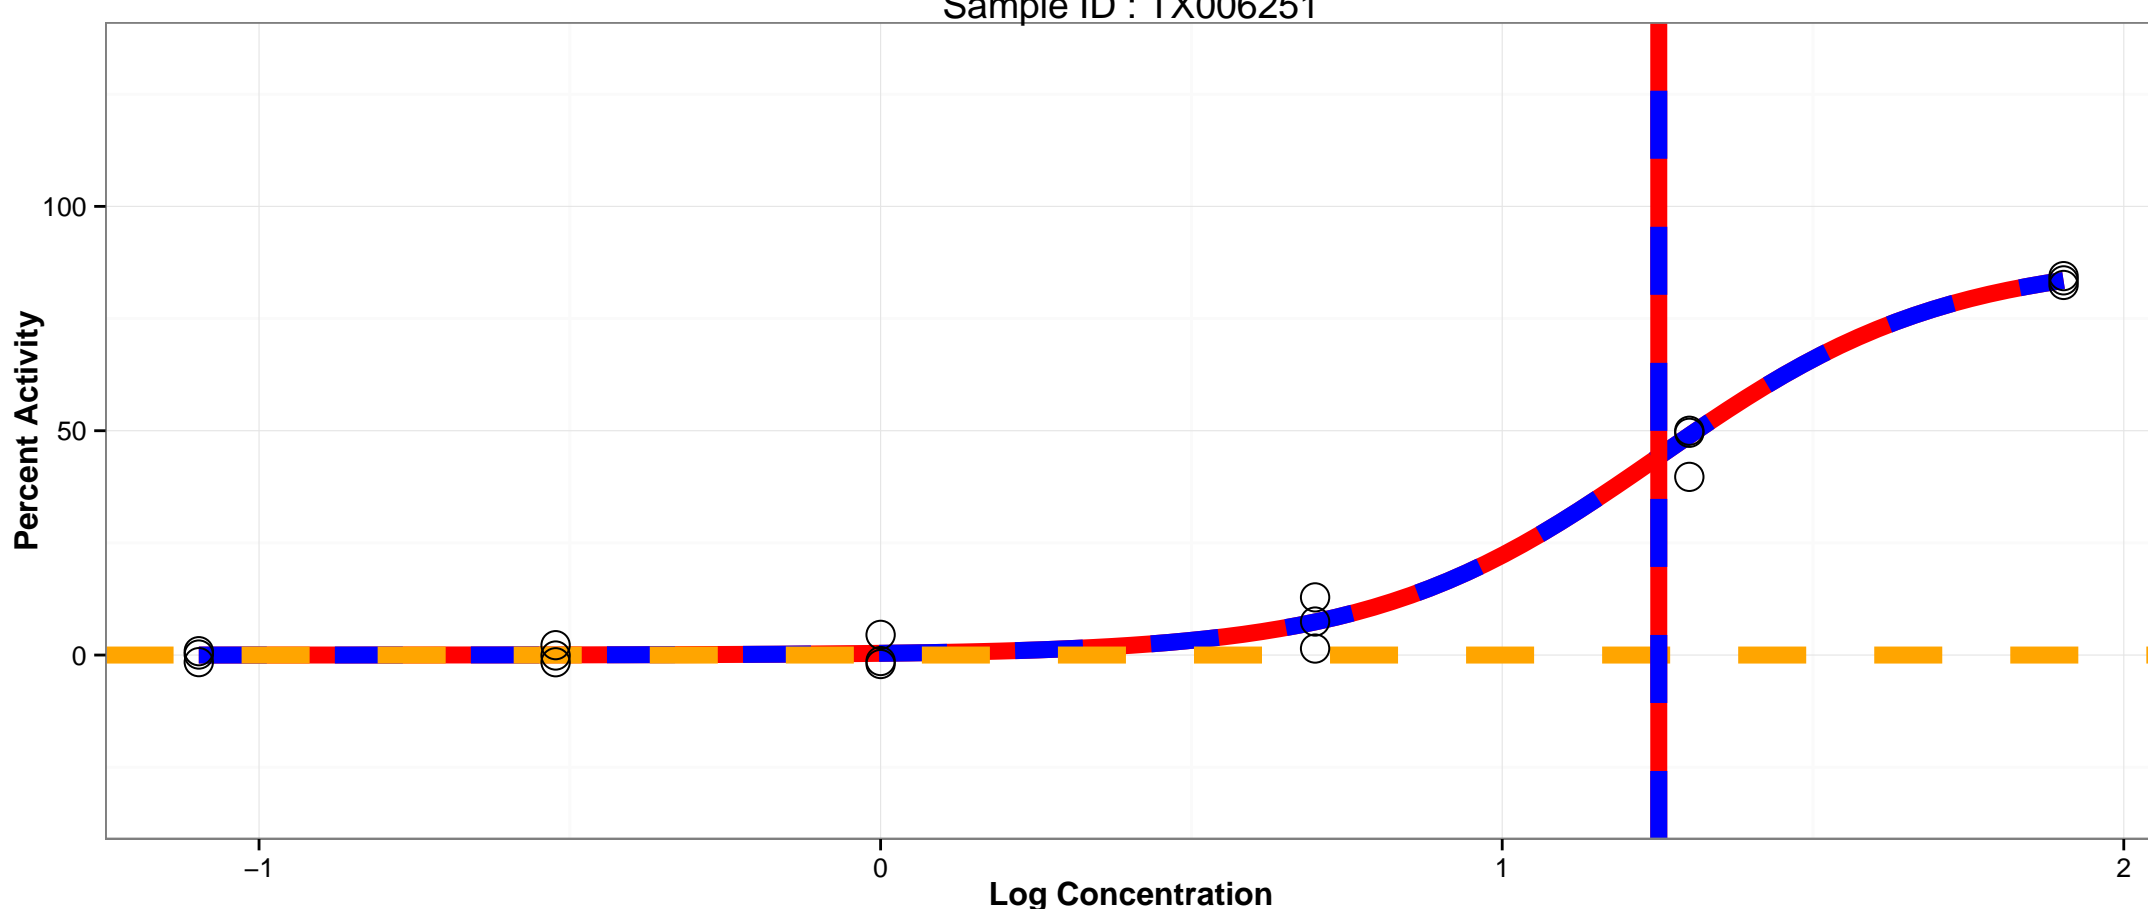

HILL MODEL

|     | tp   | ga    | gw    |
|-----|------|-------|-------|
| val | 88.5 | 1.25  | 1.88  |
| sd  | 2.56 | 0.022 | 0.246 |

GAIN-LOSS MODEL

|     | tp   | ga    | gw    | la   | lw   |
|-----|------|-------|-------|------|------|
| val | 88.5 | 1.25  | 1.88  | 3.86 | 3.73 |
| sd  | 2.56 | 0.022 | 0.246 | 3640 | 6950 |

|      | CNST  | HILL  | GNLS   |
|------|-------|-------|--------|
| AIC  | 183   | 98.53 | 102.53 |
| PROB | 0     | 0.88  | 0.12   |
| RMSE | 39.24 | 3.25  | 3.25   |

MAX\_MEAN : 83.5 MAX\_MED : 83.5 BMAD : 5.54  
COFF : 20 HIT-CALL : 1 FITC : 42 ACTP : 1  
FLAGS :

Assay ID 1848 (NHEERL\_Quantilum\_inhib\_2\_dn)  
Sample ID : TX006251

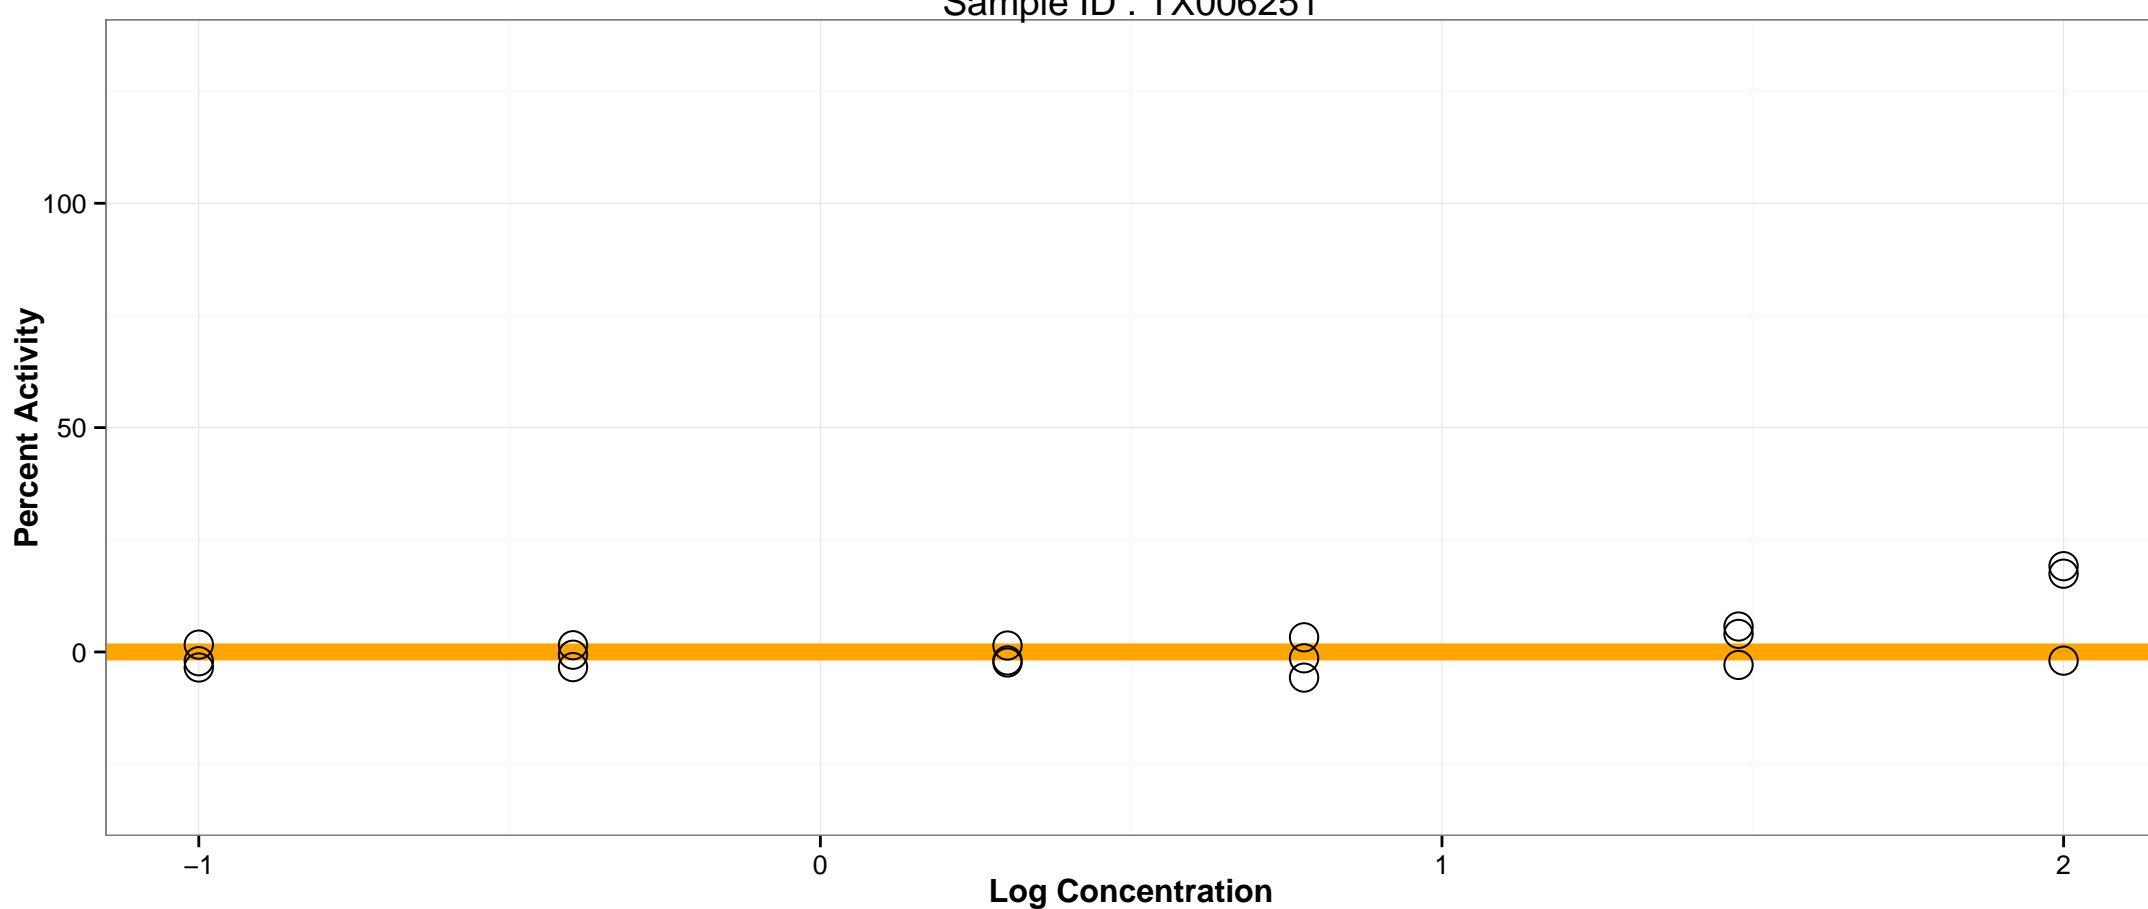

HILL MODEL

HILL MODEL: Not applicable

GAIN-LOSS MODEL

GNLS MODEL: Not applicable

|      | CNST   | HILL | GNLS |
|------|--------|------|------|
| AIC  | 115.77 | NA   | NA   |
| PROB | 1      | NA   | NA   |
| RMSE | 6.75   | NA   | NA   |

MAX\_MEAN : 11.6 MAX\_MED : 17.5 BMAD : 8.58  
COFF : 20 HIT-CALL : 0 FITC : 4 ACTP : 0  
FLAGS :

Assay ID 1508 (NHEERL\_TPO\_AUR\_dn)  
Sample ID : TX006256

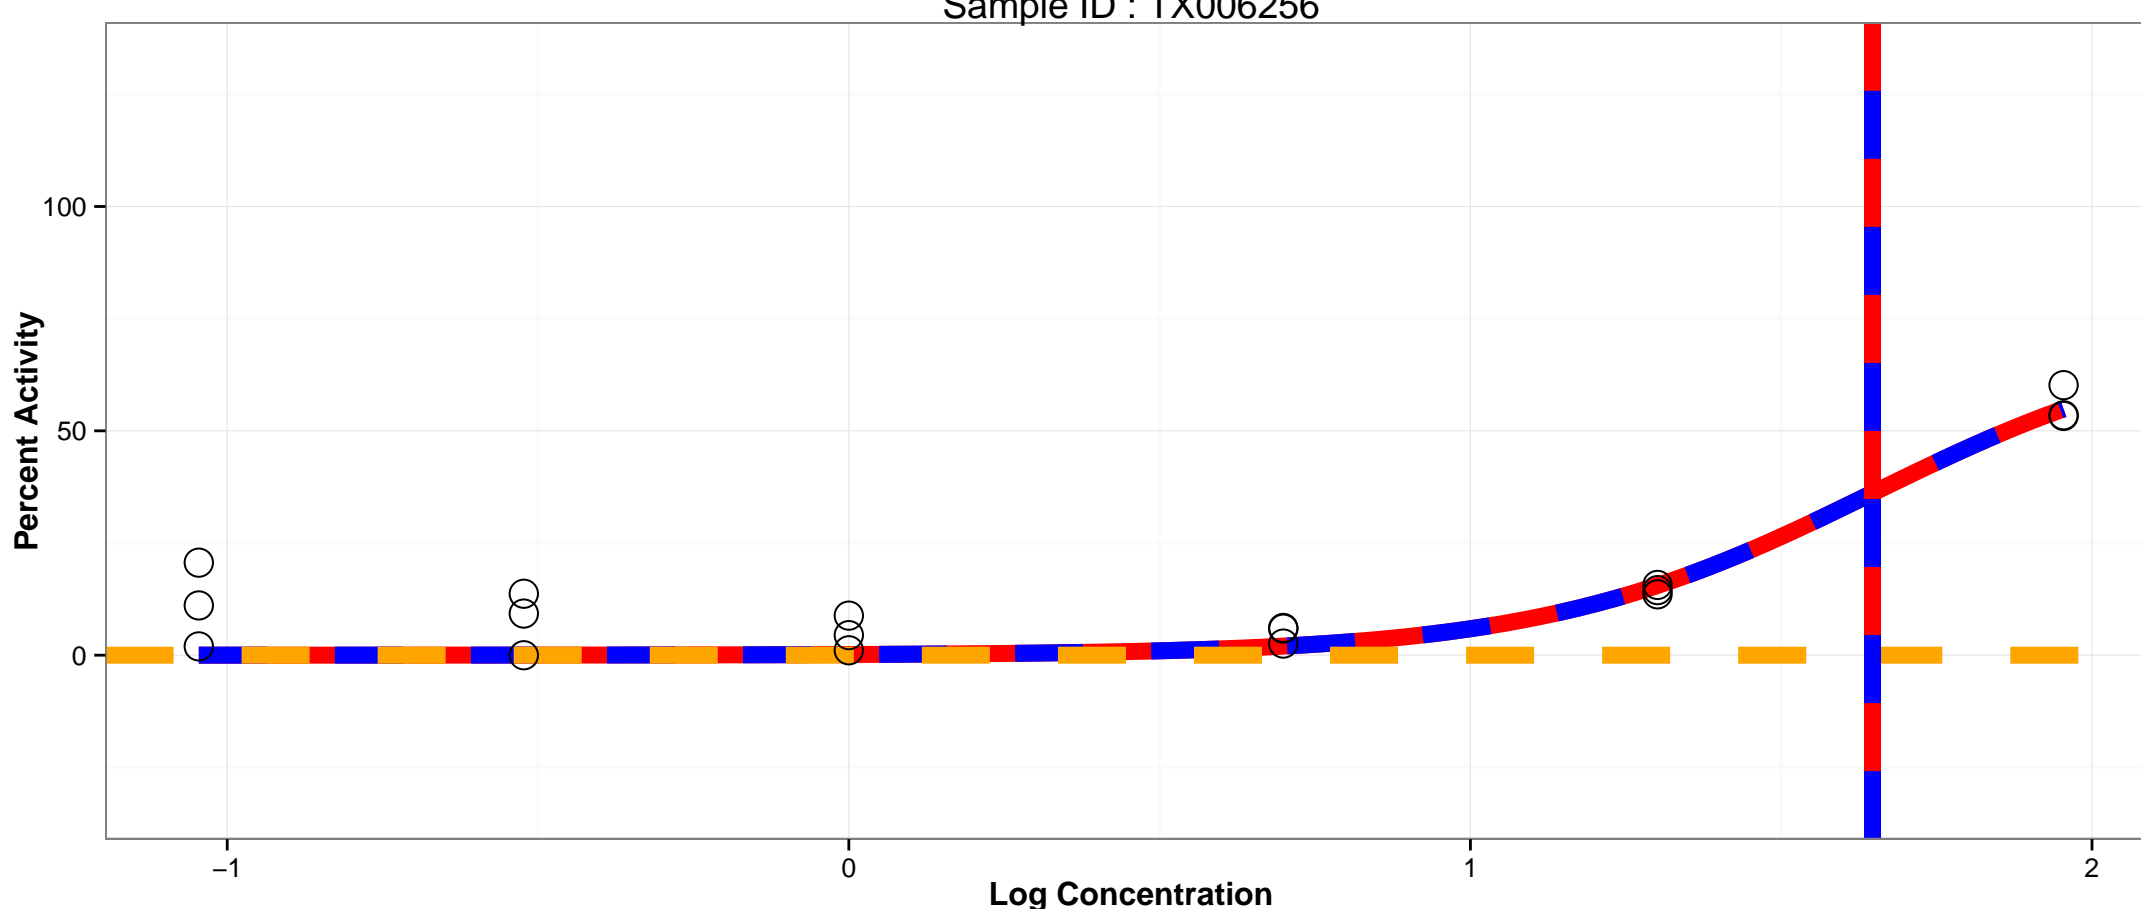

HILL MODEL

|     | tp   | ga    | gw    |
|-----|------|-------|-------|
| val | 72.2 | 1.65  | 1.63  |
| sd  | 27.2 | 0.278 | 0.773 |

GAIN-LOSS MODEL

|     | tp   | ga    | gw    | la   | lw    |
|-----|------|-------|-------|------|-------|
| val | 72.2 | 1.65  | 1.63  | 2.7  | 11.5  |
| sd  | 27.2 | 0.278 | 0.773 | 1210 | 18600 |

|      | CNST   | HILL   | GNLS   |
|------|--------|--------|--------|
| AIC  | 165.25 | 129.01 | 133.01 |
| PROB | 0      | 0.88   | 0.12   |
| RMSE | 24.69  | 7.42   | 7.42   |

MAX\_MEAN : 55.7 MAX\_MED : 53.5 BMAD : 5.69  
COFF : 20 HIT-CALL : 1 FITC : 42 ACTP : 1  
FLAGS : 6

Assay ID 1509 (NHEERL\_HEK293T\_CellTiterGLO)  
Sample ID : TX006256

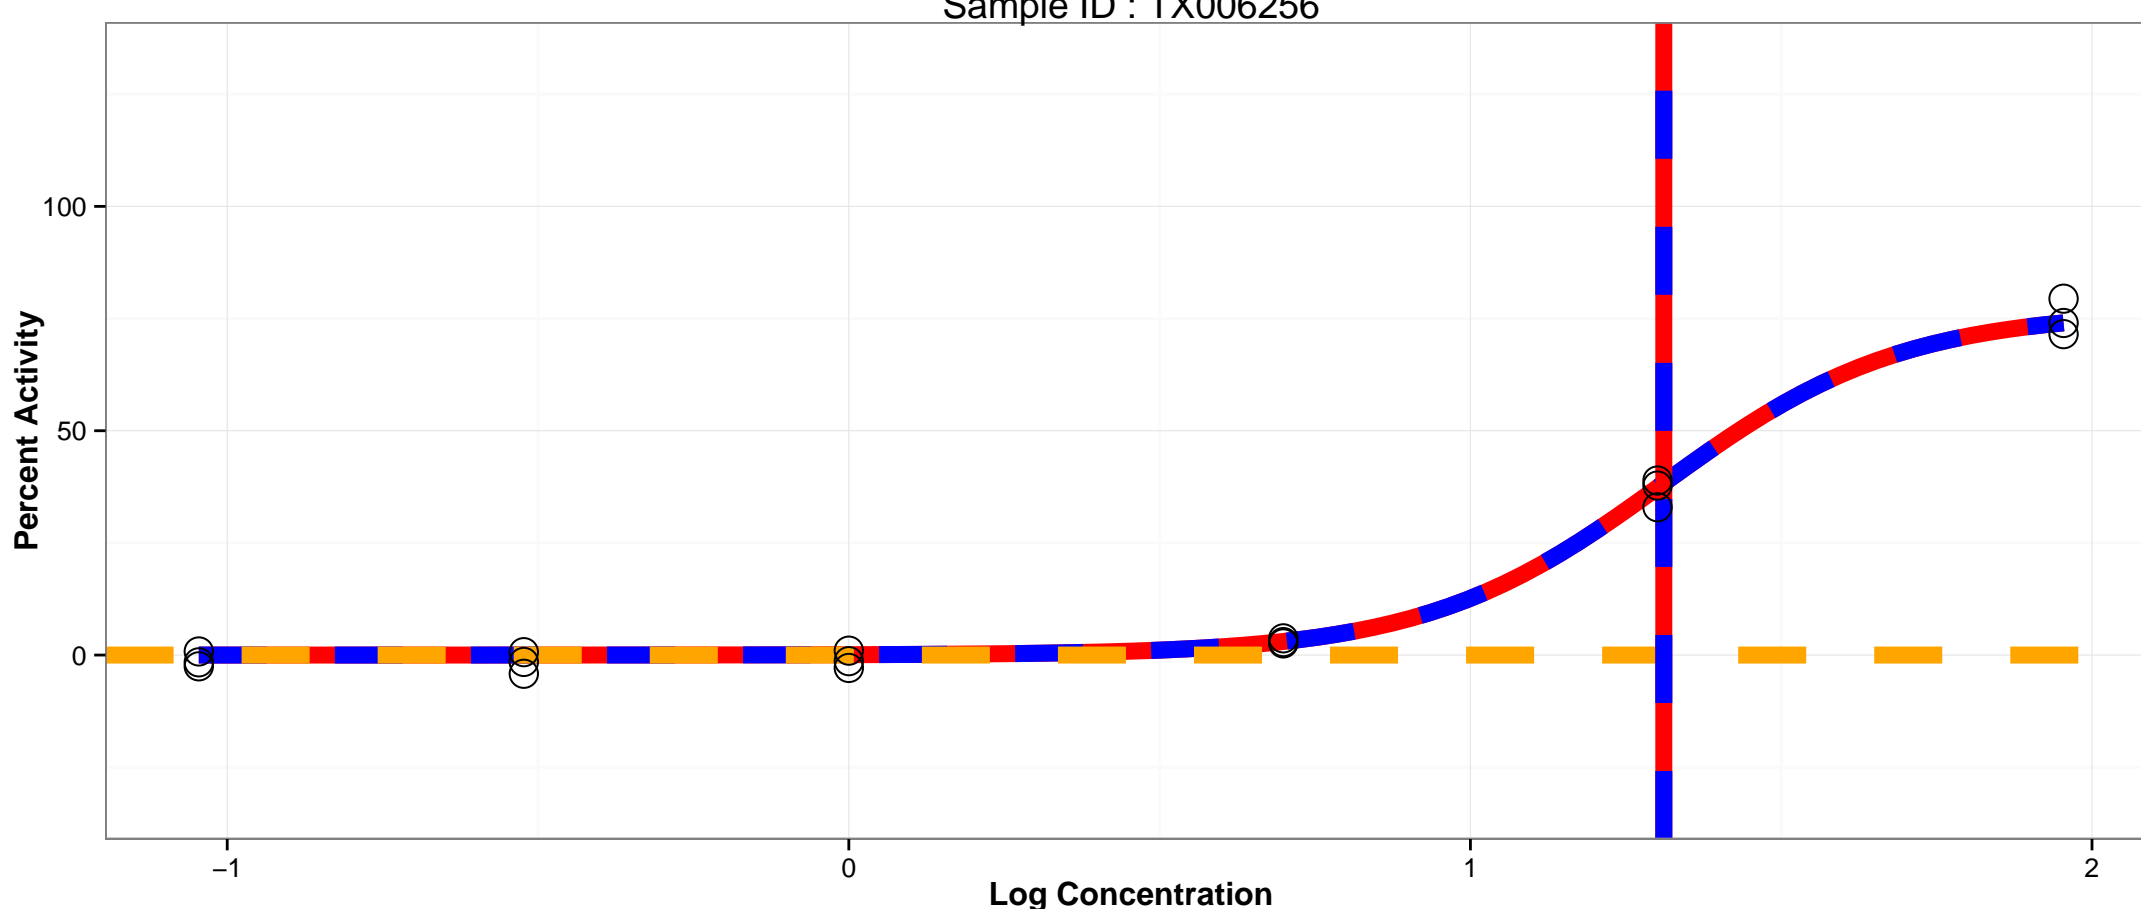

HILL MODEL

|     | tp   | ga     | gw    |
|-----|------|--------|-------|
| val | 76.6 | 1.31   | 2.26  |
| sd  | 2.11 | 0.0194 | 0.253 |

GAIN-LOSS MODEL

|     | tp   | ga     | gw    | la   | lw    |
|-----|------|--------|-------|------|-------|
| val | 76.6 | 1.31   | 2.26  | 2.59 | 10.5  |
| sd  | 2.11 | 0.0194 | 0.253 | 619  | 10200 |

|      | CNST   | HILL  | GNLS  |
|------|--------|-------|-------|
| AIC  | 177.05 | 90.04 | 94.04 |
| PROB | 0      | 0.88  | 0.12  |
| RMSE | 34.16  | 2.35  | 2.35  |

MAX\_MEAN : 75 MAX\_MED : 74 BMAD : 5.54  
COFF : 20 HIT-CALL : 1 FITC : 41 ACTP : 1  
FLAGS :

Assay ID 1848 (NHEERL\_Quantilum\_inhib\_2\_dn)  
Sample ID : TX006256

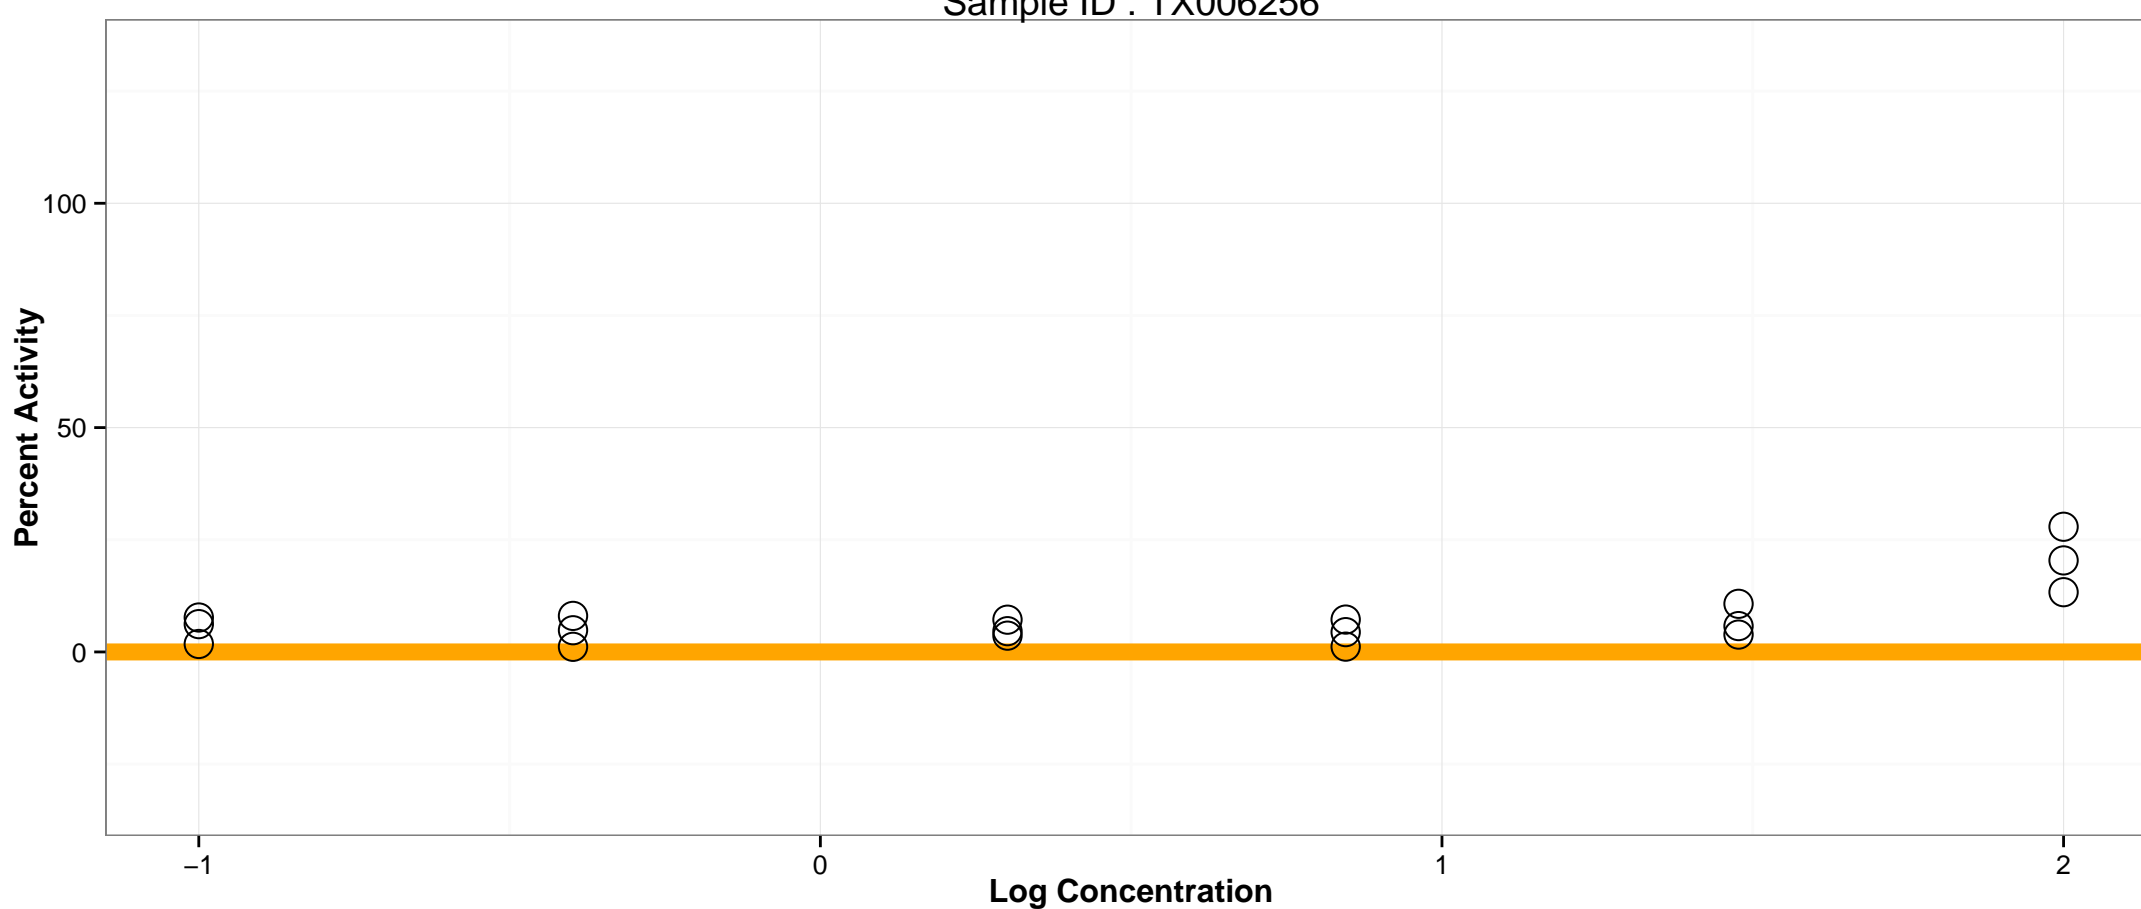

HILL MODEL

HILL MODEL: Not applicable

GAIN-LOSS MODEL

GNLS MODEL: Not applicable

|      | CNST   | HILL | GNLS |
|------|--------|------|------|
| AIC  | 135.64 | NA   | NA   |
| PROB | 1      | NA   | NA   |
| RMSE | 10.24  | NA   | NA   |

MAX\_MEAN : 20.6 MAX\_MED : 20.4 BMAD : 8.58  
COFF : 20 HIT-CALL : 0 FITC : 4 ACTP : 0  
FLAGS :

Chemical : Ketoconazole  
CAS : 65277-42-1

Assay ID 1508 (NHEERL\_TPO\_AUR\_dn)  
Sample ID : TX006299

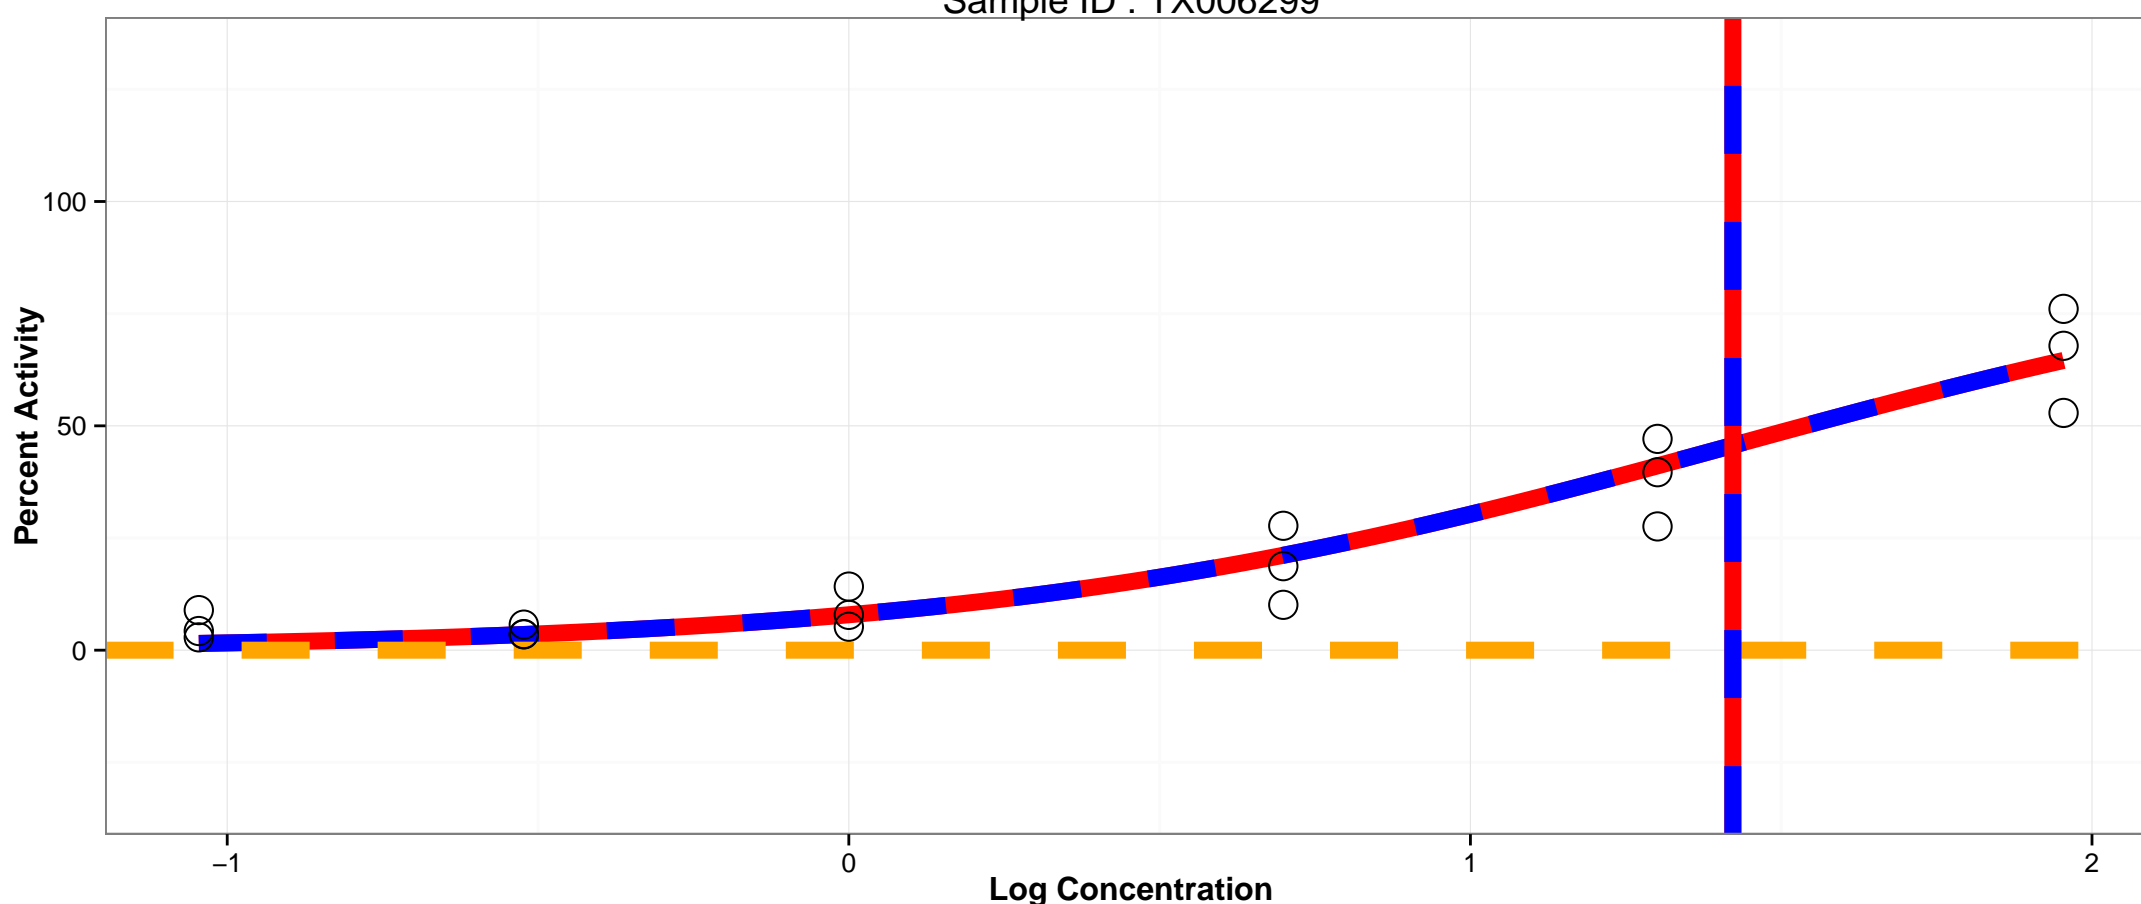

HILL MODEL

|     | tp   | ga    | gw    |
|-----|------|-------|-------|
| val | 91.3 | 1.42  | 0.72  |
| sd  | 21.8 | 0.316 | 0.144 |

GAIN-LOSS MODEL

|     | tp   | ga    | gw    | la   | lw   |
|-----|------|-------|-------|------|------|
| val | 91.3 | 1.42  | 0.72  | 3.39 | 6.07 |
| sd  | 21.8 | 0.316 | 0.144 | 1760 | 7440 |

|      | CNST   | HILL   | GNLS   |
|------|--------|--------|--------|
| AIC  | 178.19 | 127.98 | 131.98 |
| PROB | 0      | 0.88   | 0.12   |
| RMSE | 32.85  | 6.61   | 6.62   |

MAX\_MEAN : 65.6 MAX\_MED : 67.9 BMAD : 5.69  
COFF : 20 HIT-CALL : 1 FITC : 42 ACTP : 1  
FLAGS :

Assay ID 1509 (NHEERL\_HEK293T\_CellTiterGLO)  
Sample ID : TX006299

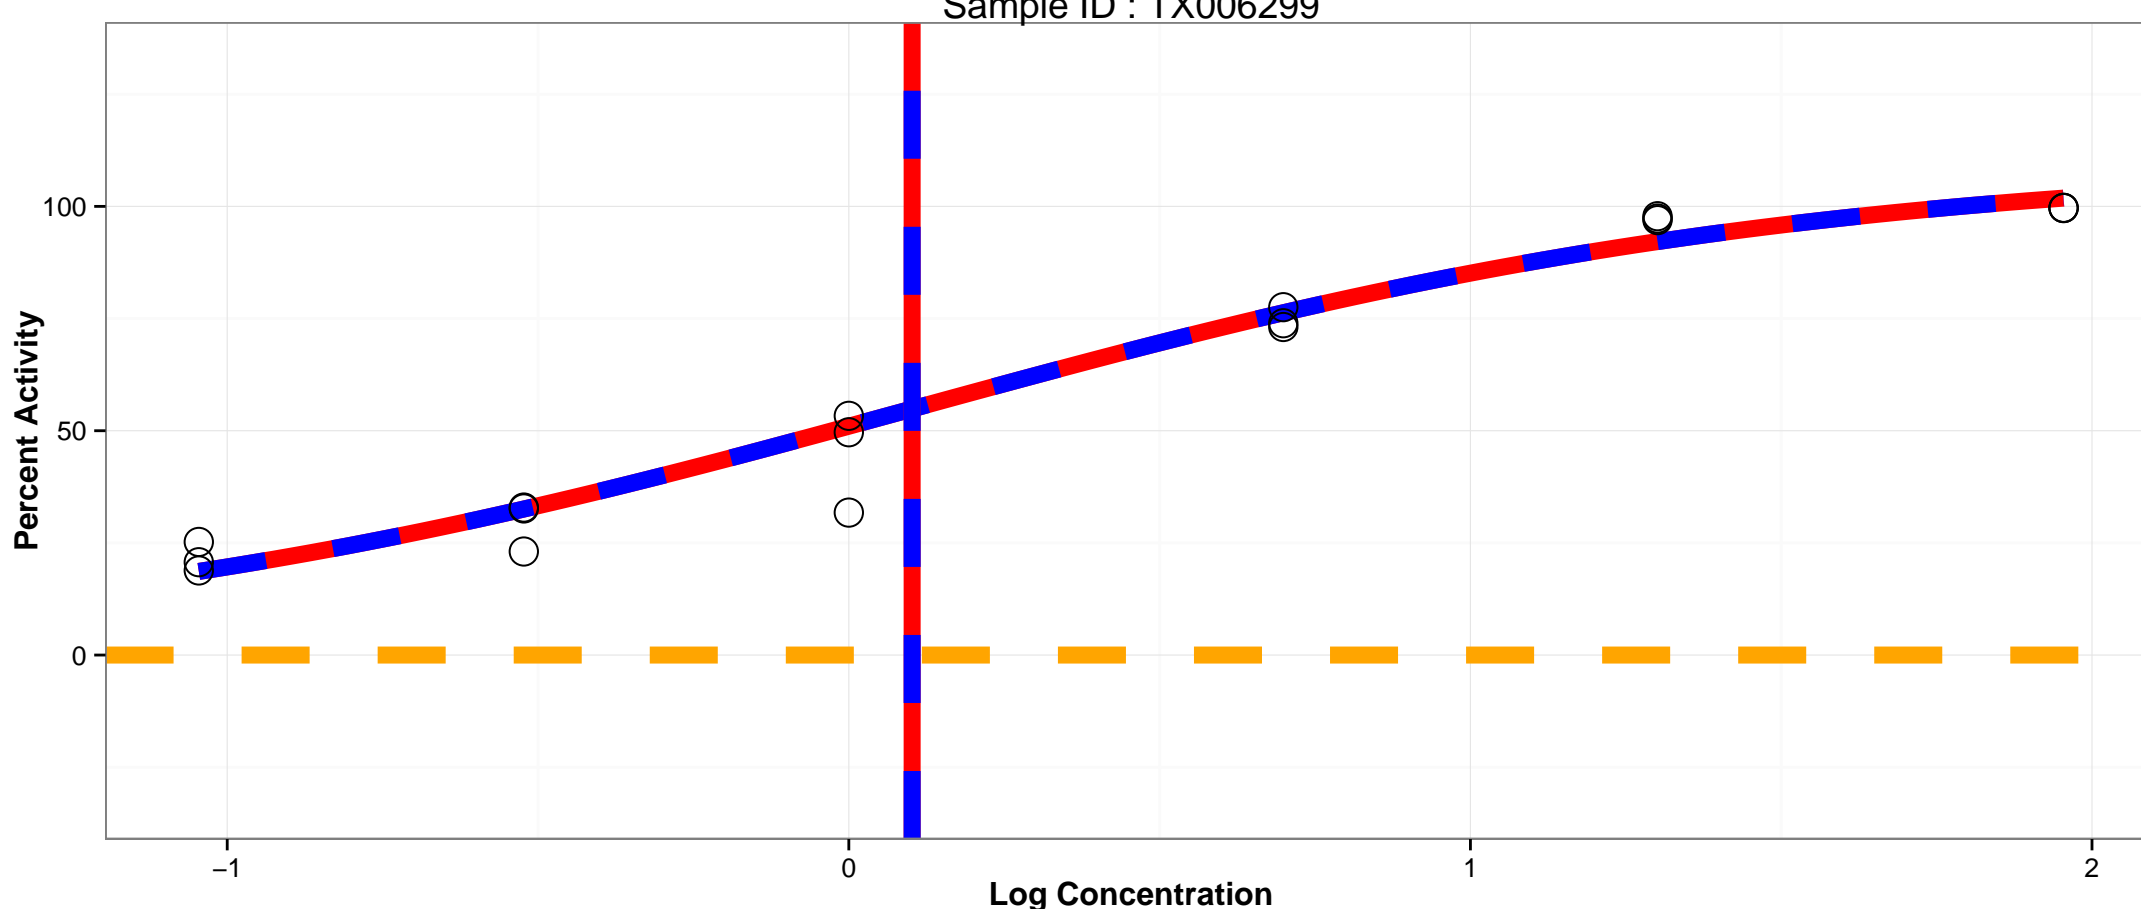

HILL MODEL

|     | tp   | ga     | gw    |
|-----|------|--------|-------|
| val | 110  | 0.102  | 0.6   |
| sd  | 3.96 | 0.0792 | 0.051 |

GAIN-LOSS MODEL

|     | tp  | ga    | gw  | la   | lw   |
|-----|-----|-------|-----|------|------|
| val | 110 | 0.102 | 0.6 | 3.33 | 8.79 |
| sd  | NA  | NA    | NA  | NA   | NA   |

|      | CNST   | HILL   | GNLS   |
|------|--------|--------|--------|
| AIC  | 208.42 | 118.17 | 122.17 |
| PROB | 0      | 0.88   | 0.12   |
| RMSE | 68.92  | 5.9    | 5.9    |

MAX\_MEAN : 99.7 MAX\_MED : 99.7 BMAD : 5.54  
COFF : 20 HIT-CALL : 1 FITC : 42 ACTP : 1  
FLAGS :

Assay ID 1848 (NHEERL\_Quantilum\_inhib\_2\_dn)  
Sample ID : TX006299

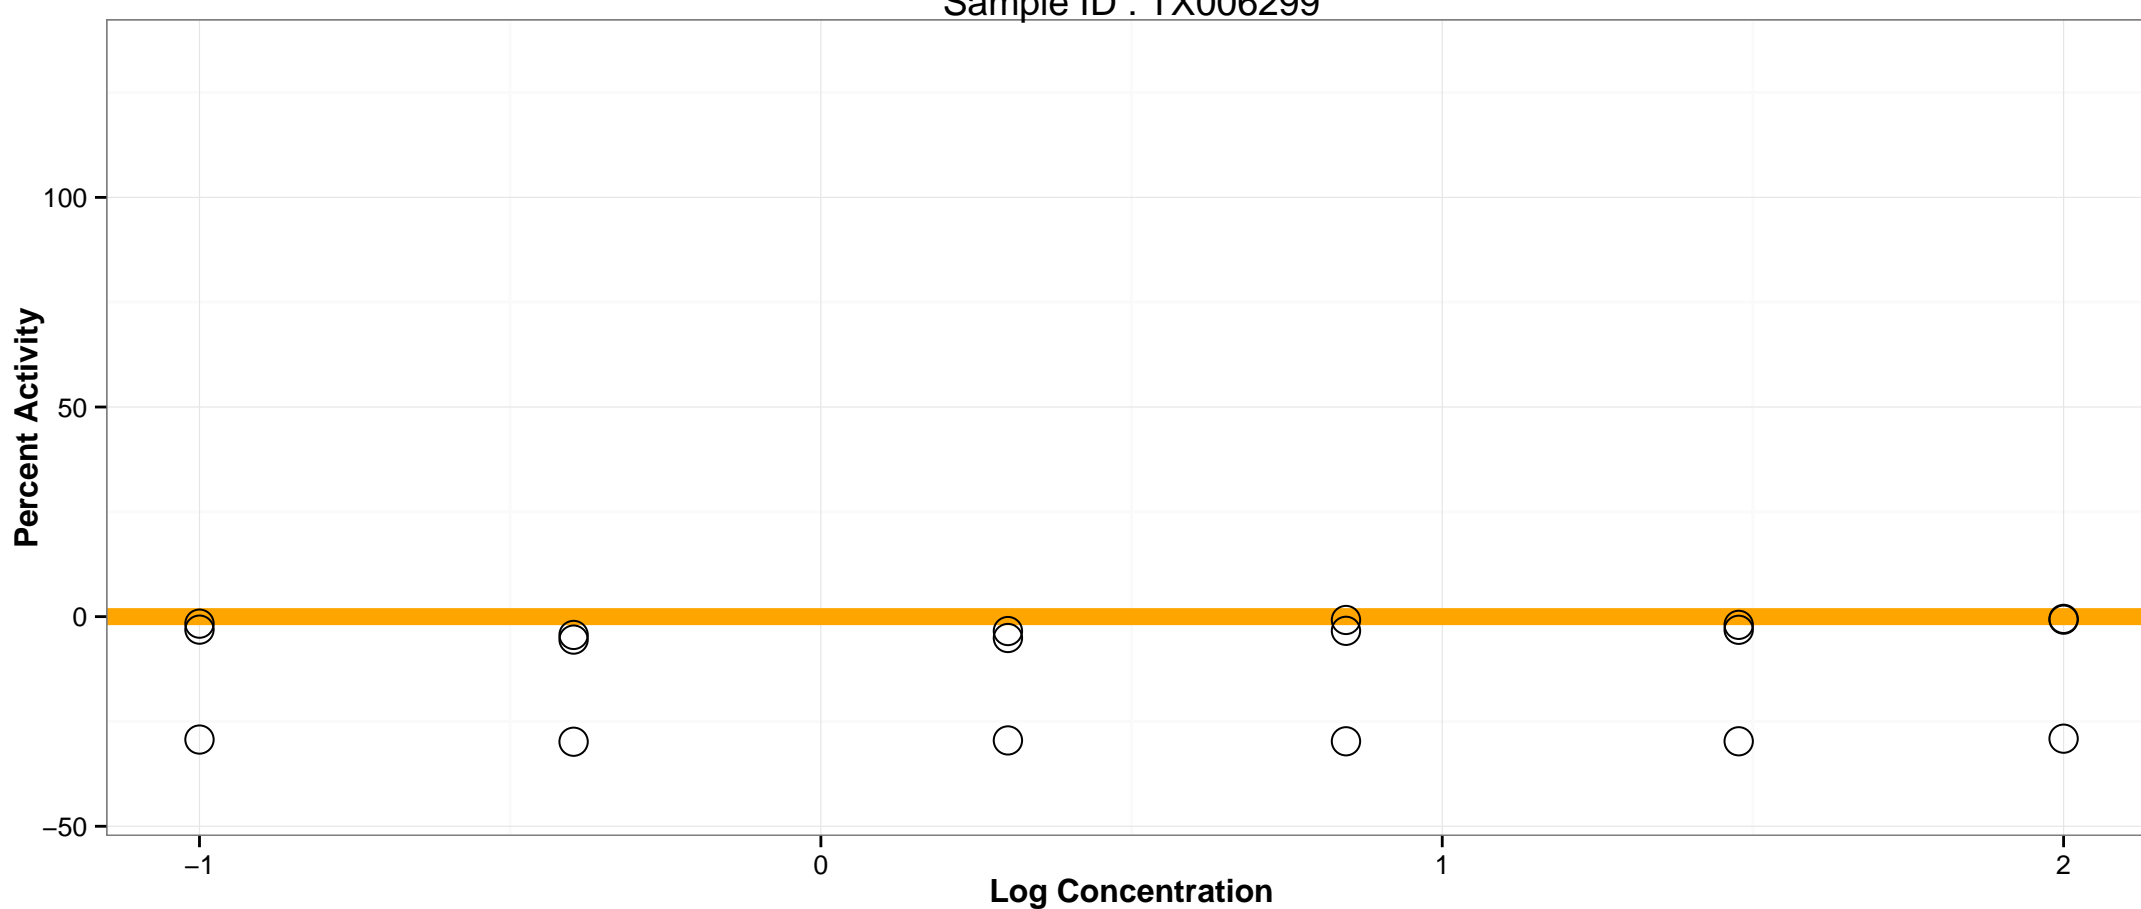

HILL MODEL

HILL MODEL: Not applicable

GAIN-LOSS MODEL

GNLS MODEL: Not applicable

|      | CNST   | HILL | GNLS |
|------|--------|------|------|
| AIC  | 155.41 | NA   | NA   |
| PROB | 1      | NA   | NA   |
| RMSE | 17.25  | NA   | NA   |

MAX\_MEAN : -10.1 MAX\_MED : -0.705 BMAD : 8.58  
COFF : 20 HIT-CALL : 0 FITC : 4 ACTP : 0  
FLAGS :



Chemical : Methotrexate  
CAS : 59-05-2

Assay ID 1508 (NHEERL\_TPO\_AUR\_dn)  
Sample ID : TX006303

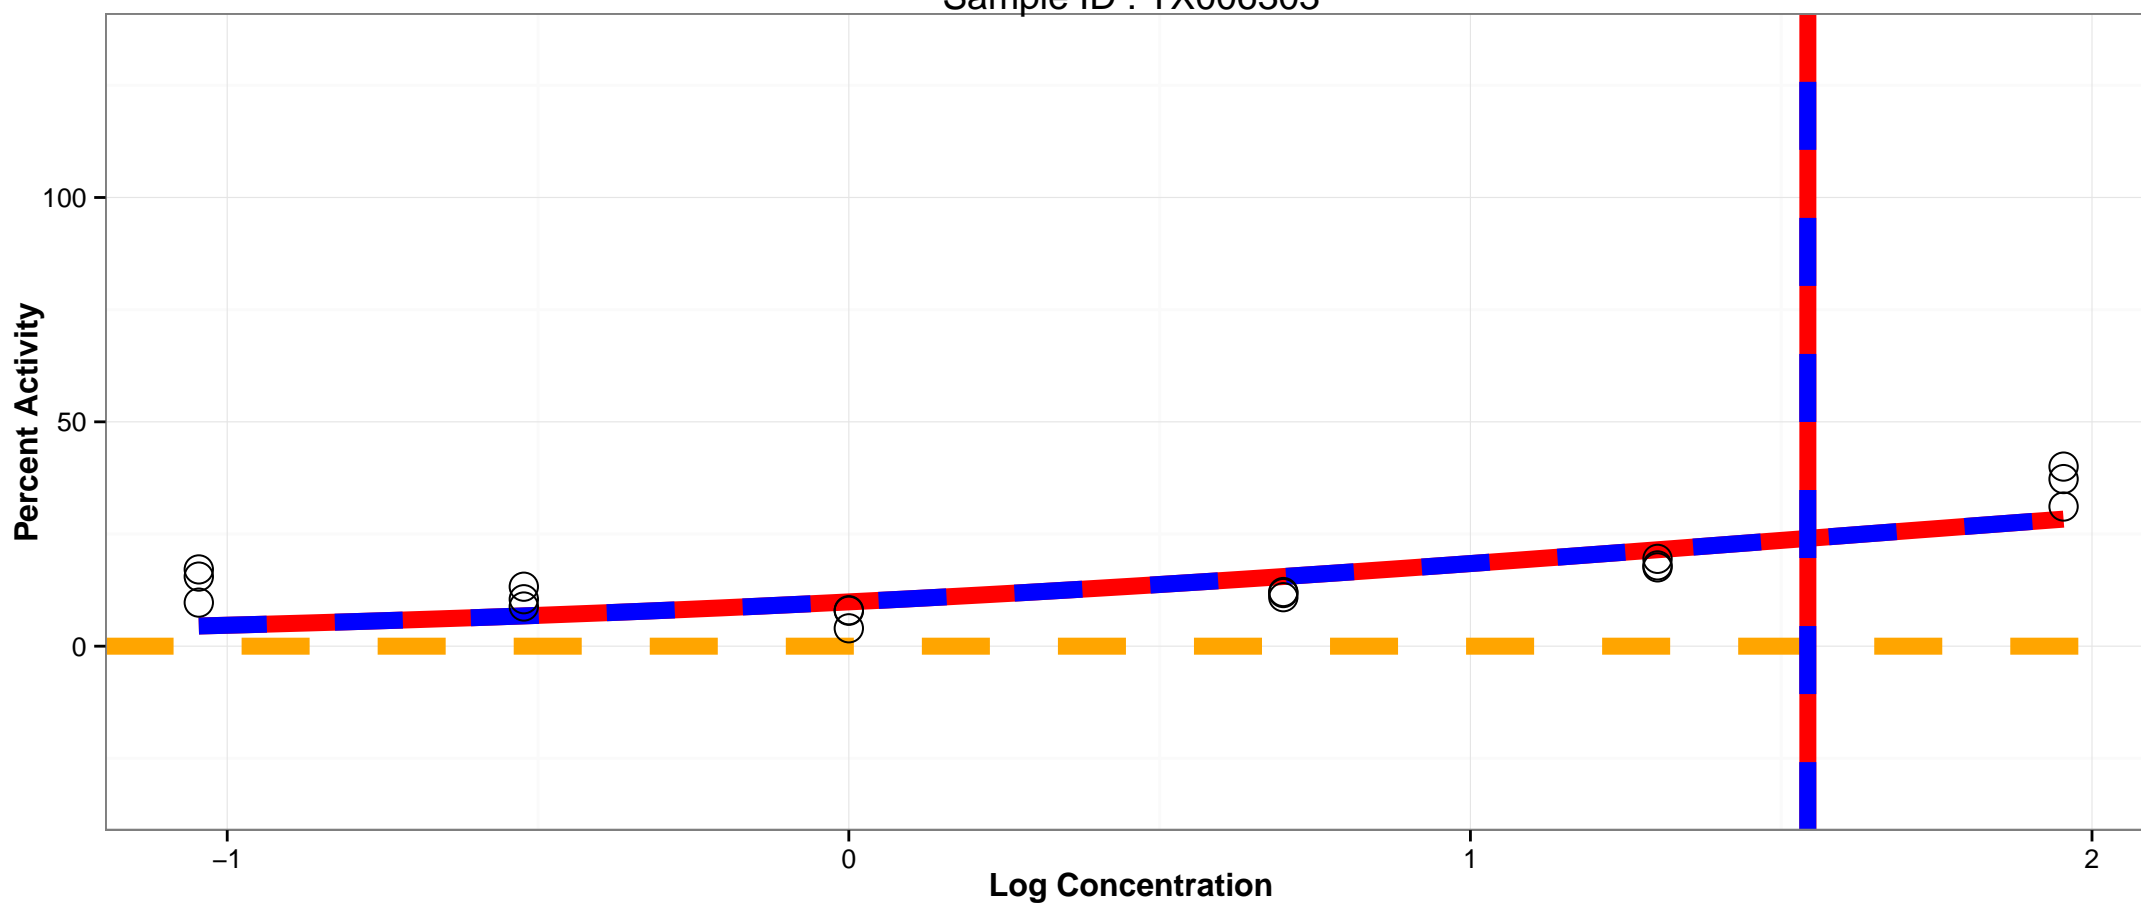

HILL MODEL

|     | tp   | ga    | gw    |
|-----|------|-------|-------|
| val | 48   | 1.54  | 0.381 |
| sd  | 17.9 | 0.739 | 0.136 |

GAIN-LOSS MODEL

|     | tp   | ga    | gw    | la   | lw     |
|-----|------|-------|-------|------|--------|
| val | 48   | 1.54  | 0.381 | 2.6  | 18     |
| sd  | 17.9 | 0.739 | 0.136 | 3760 | 101000 |

|      | CNST   | HILL   | GNLS   |
|------|--------|--------|--------|
| AIC  | 160.67 | 126.82 | 130.82 |
| PROB | 0      | 0.88   | 0.12   |
| RMSE | 19.02  | 6.3    | 6.3    |

MAX\_MEAN : 36.1 MAX\_MED : 37.3 BMAD : 5.69  
COFF : 20 HIT-CALL : 1 FITC : 42 ACTP : 1  
FLAGS :

Assay ID 1509 (NHEERL\_HEK293T\_CellTiterGLO)  
Sample ID : TX006303

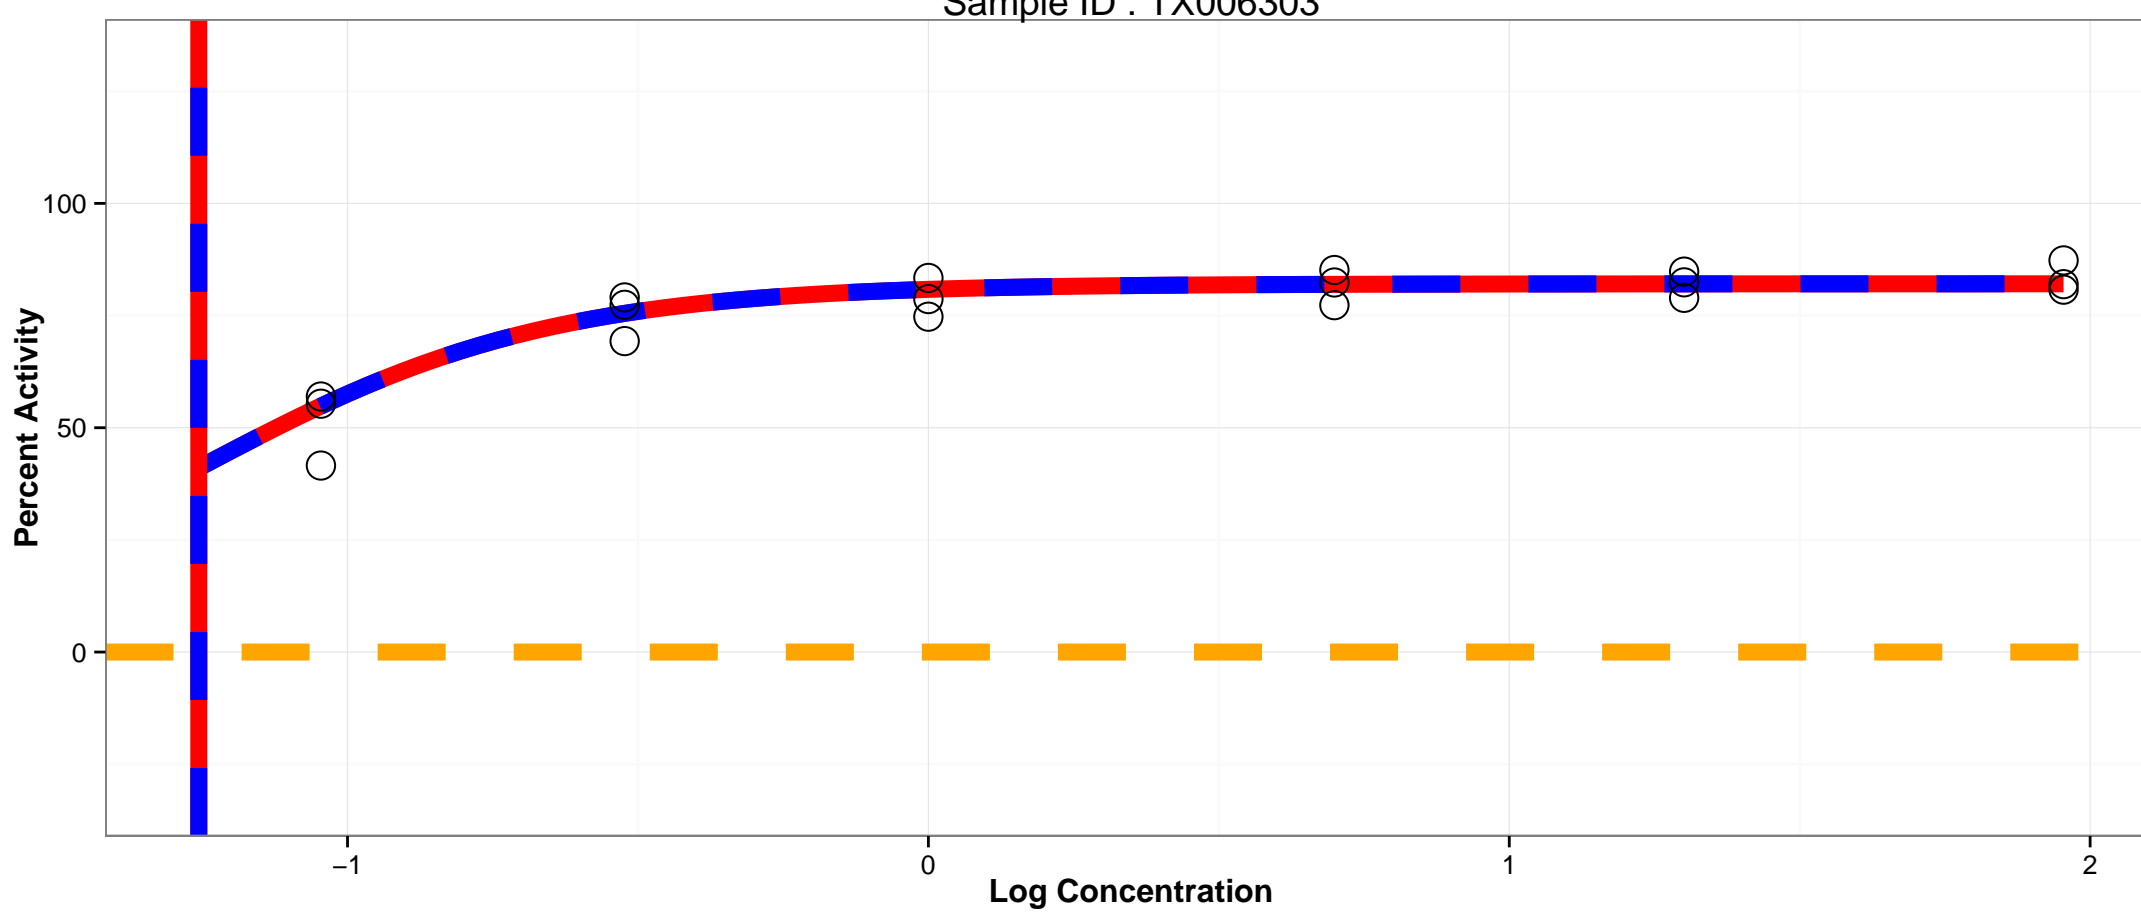

HILL MODEL

|     | tp   | ga     | gw    |
|-----|------|--------|-------|
| val | 82.1 | -1.26  | 1.44  |
| sd  | 1.24 | 0.0791 | 0.438 |

GAIN-LOSS MODEL

|     | tp   | ga     | gw    | la   | lw    |
|-----|------|--------|-------|------|-------|
| val | 82.1 | -1.26  | 1.44  | 3.49 | 6.27  |
| sd  | 1.24 | 0.0791 | 0.438 | 3540 | 14500 |

|      | CNST   | HILL   | GNLS   |
|------|--------|--------|--------|
| AIC  | 225.38 | 111.53 | 115.53 |
| PROB | 0      | 0.88   | 0.12   |
| RMSE | 76.35  | 4.48   | 4.48   |

MAX\_MEAN : 83.4 MAX\_MED : 82.4 BMAD : 5.54  
COFF : 20 HIT-CALL : 1 FITC : 40 ACTP : 1  
FLAGS :

Assay ID 1848 (NHEERL\_Quantilum\_inhib\_2\_dn)  
Sample ID : TX006303

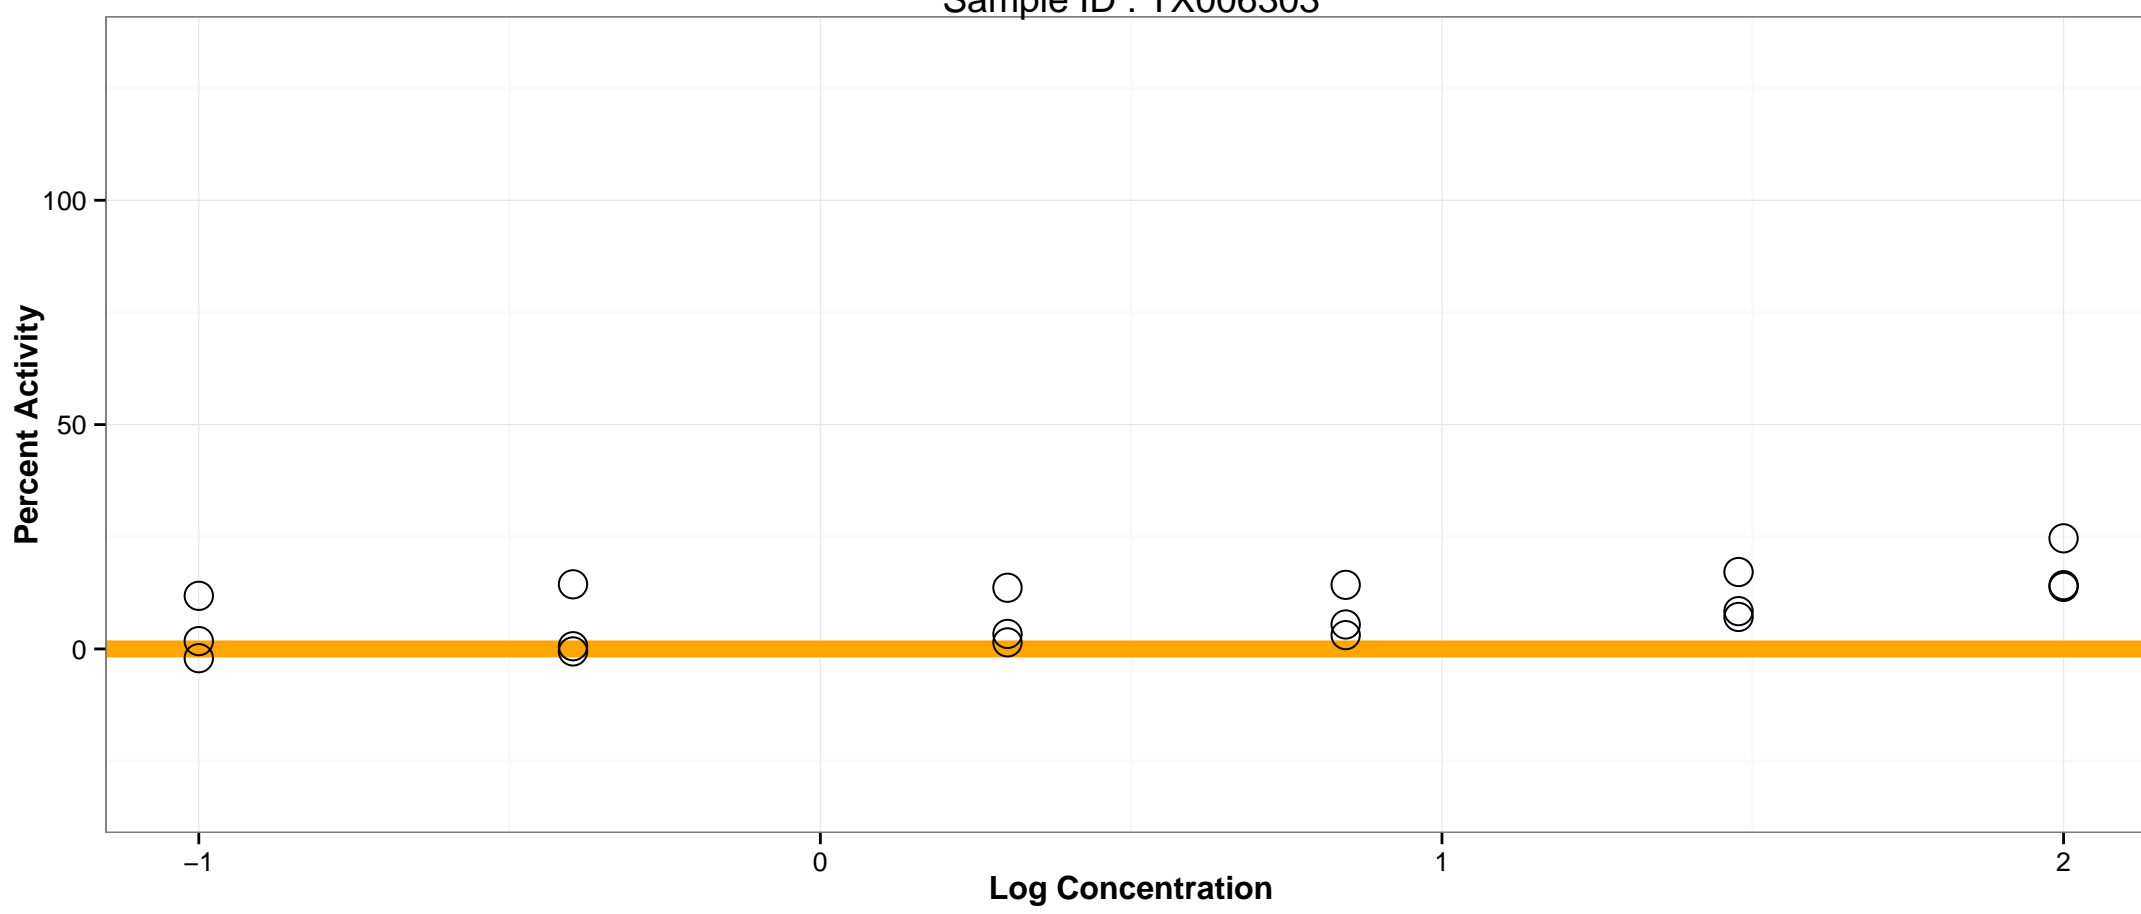

HILL MODEL

HILL MODEL: Not applicable

GAIN-LOSS MODEL

GNLS MODEL: Not applicable

|      | CNST   | HILL | GNLS |
|------|--------|------|------|
| AIC  | 141.25 | NA   | NA   |
| PROB | 1      | NA   | NA   |
| RMSE | 11.1   | NA   | NA   |

MAX\_MEAN : 17.6 MAX\_MED : 14.2 BMAD : 8.58  
COFF : 20 HIT-CALL : 0 FITC : 4 ACTP : 0  
FLAGS :

Chemical : Phenobarbital sodium  
CAS : 57-30-7

Assay ID 1508 (NHEERL\_TPO\_AUR\_dn)  
Sample ID : TX006463

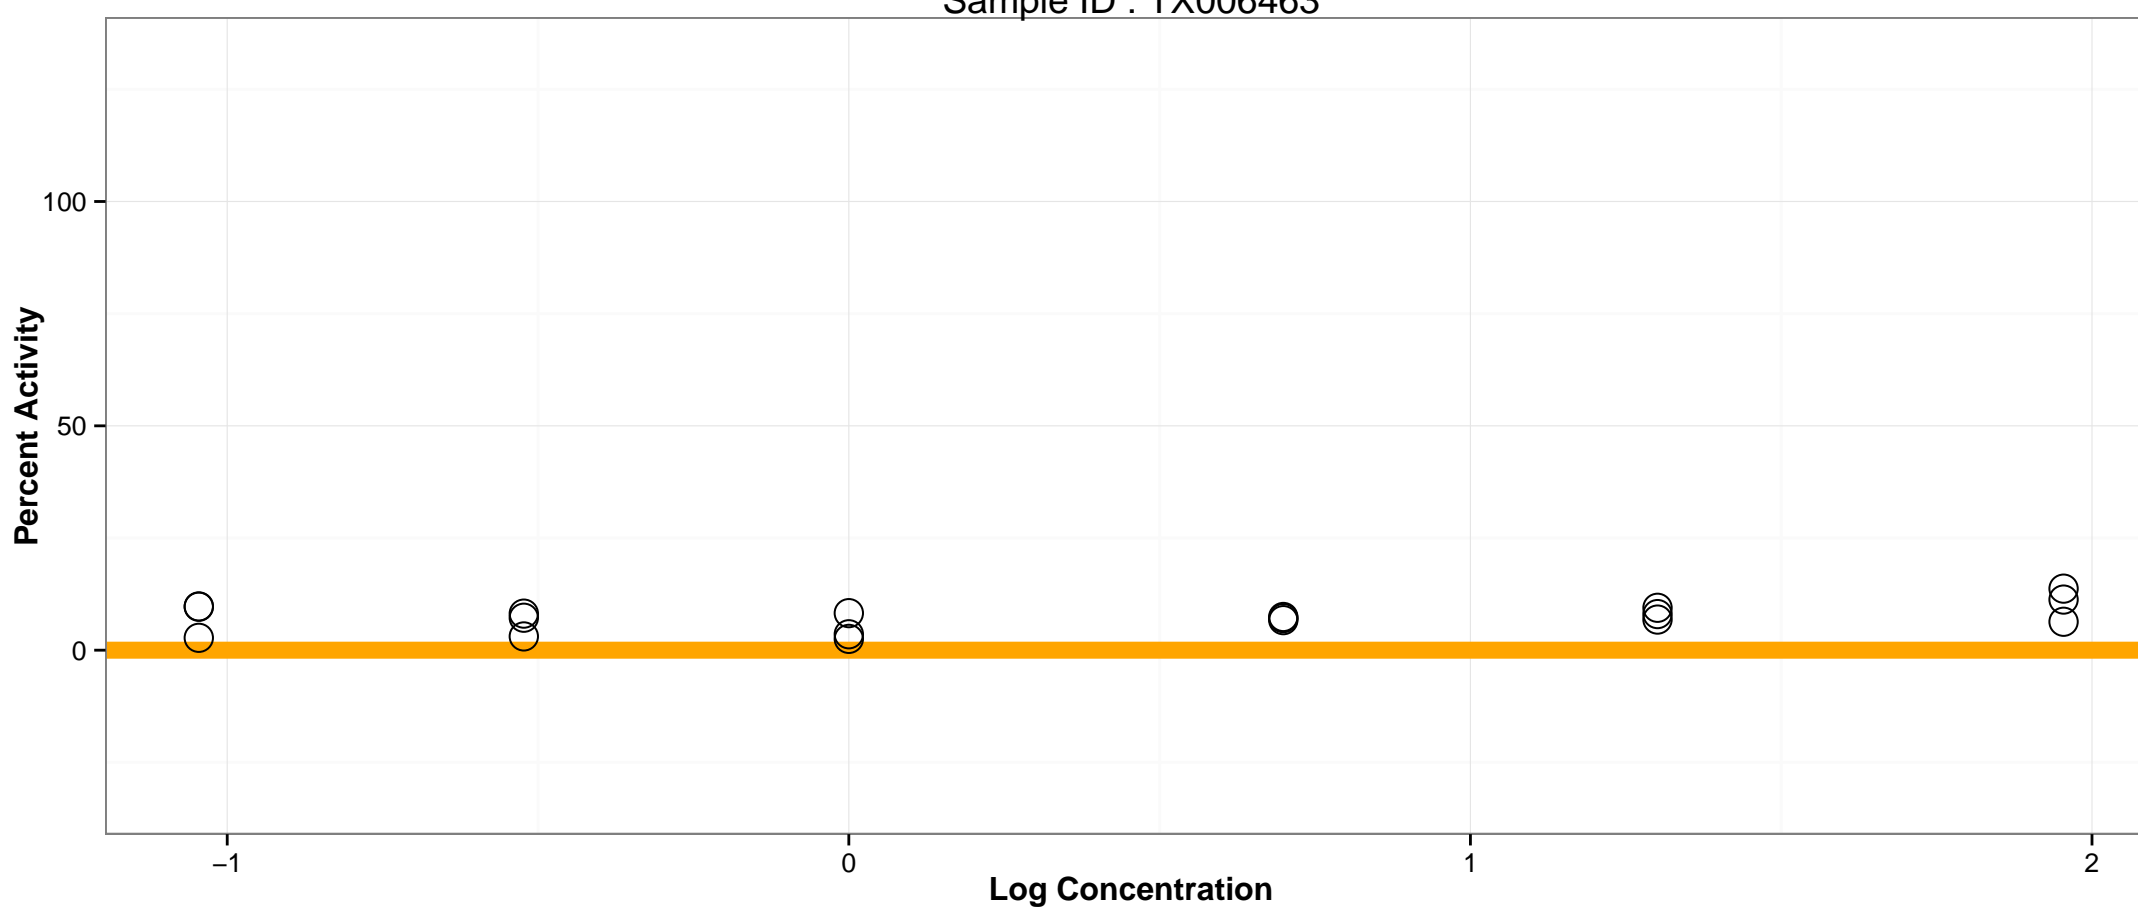

HILL MODEL

HILL MODEL: Not applicable

GAIN-LOSS MODEL

GNLS MODEL: Not applicable

|      | CNST   | HILL | GNLS |
|------|--------|------|------|
| AIC  | 130.83 | NA   | NA   |
| PROB | 1      | NA   | NA   |
| RMSE | 7.89   | NA   | NA   |

MAX\_MEAN : 10.5 MAX\_MED : 11.3 BMAD : 5.69  
COFF : 20 HIT-CALL : 0 FITC : 4 ACTP : 0  
FLAGS :

Assay ID 1509 (NHEERL\_HEK293T\_CellTiterGLO)  
Sample ID : TX006463

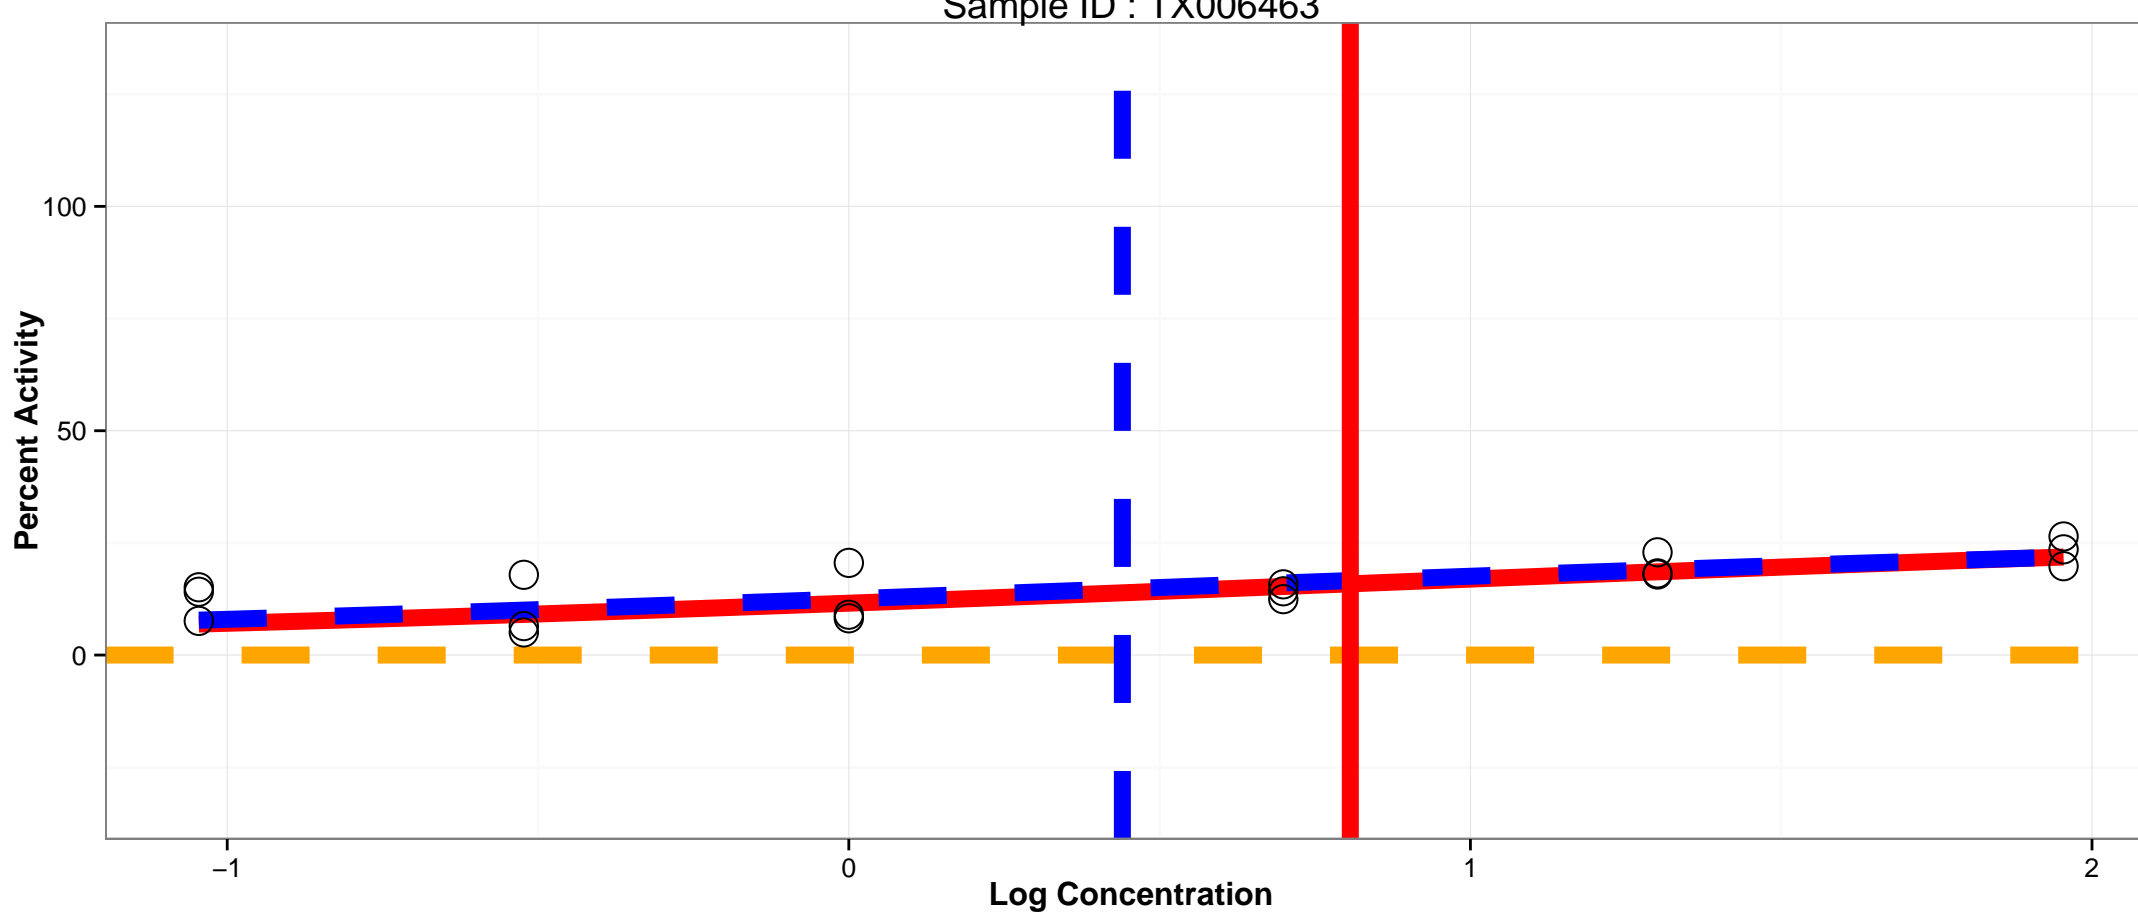

HILL MODEL

|     | tp   | ga    | gw   |
|-----|------|-------|------|
| val | 31.7 | 0.807 | 0.3  |
| sd  | 15.1 | 1.48  | 0.21 |

GAIN-LOSS MODEL

|     | tp   | ga   | gw    | la   | lw   |
|-----|------|------|-------|------|------|
| val | 29.5 | 0.44 | 0.3   | 2.75 | 9.22 |
| sd  | 10.8 | 1.23 | 0.135 | 265  | 3070 |

|      | CNST   | HILL   | GNLS   |
|------|--------|--------|--------|
| AIC  | 157.33 | 114.73 | 118.62 |
| PROB | 0      | 0.88   | 0.12   |
| RMSE | 16.46  | 4.57   | 4.42   |

MAX\_MEAN : 23.3 MAX\_MED : 23.6 BMAD : 5.54  
COFF : 20 HIT-CALL : 1 FITC : 42 ACTP : 1  
FLAGS : 11

Assay ID 1848 (NHEERL\_Quantilum\_inhib\_2\_dn)  
Sample ID : TX006463

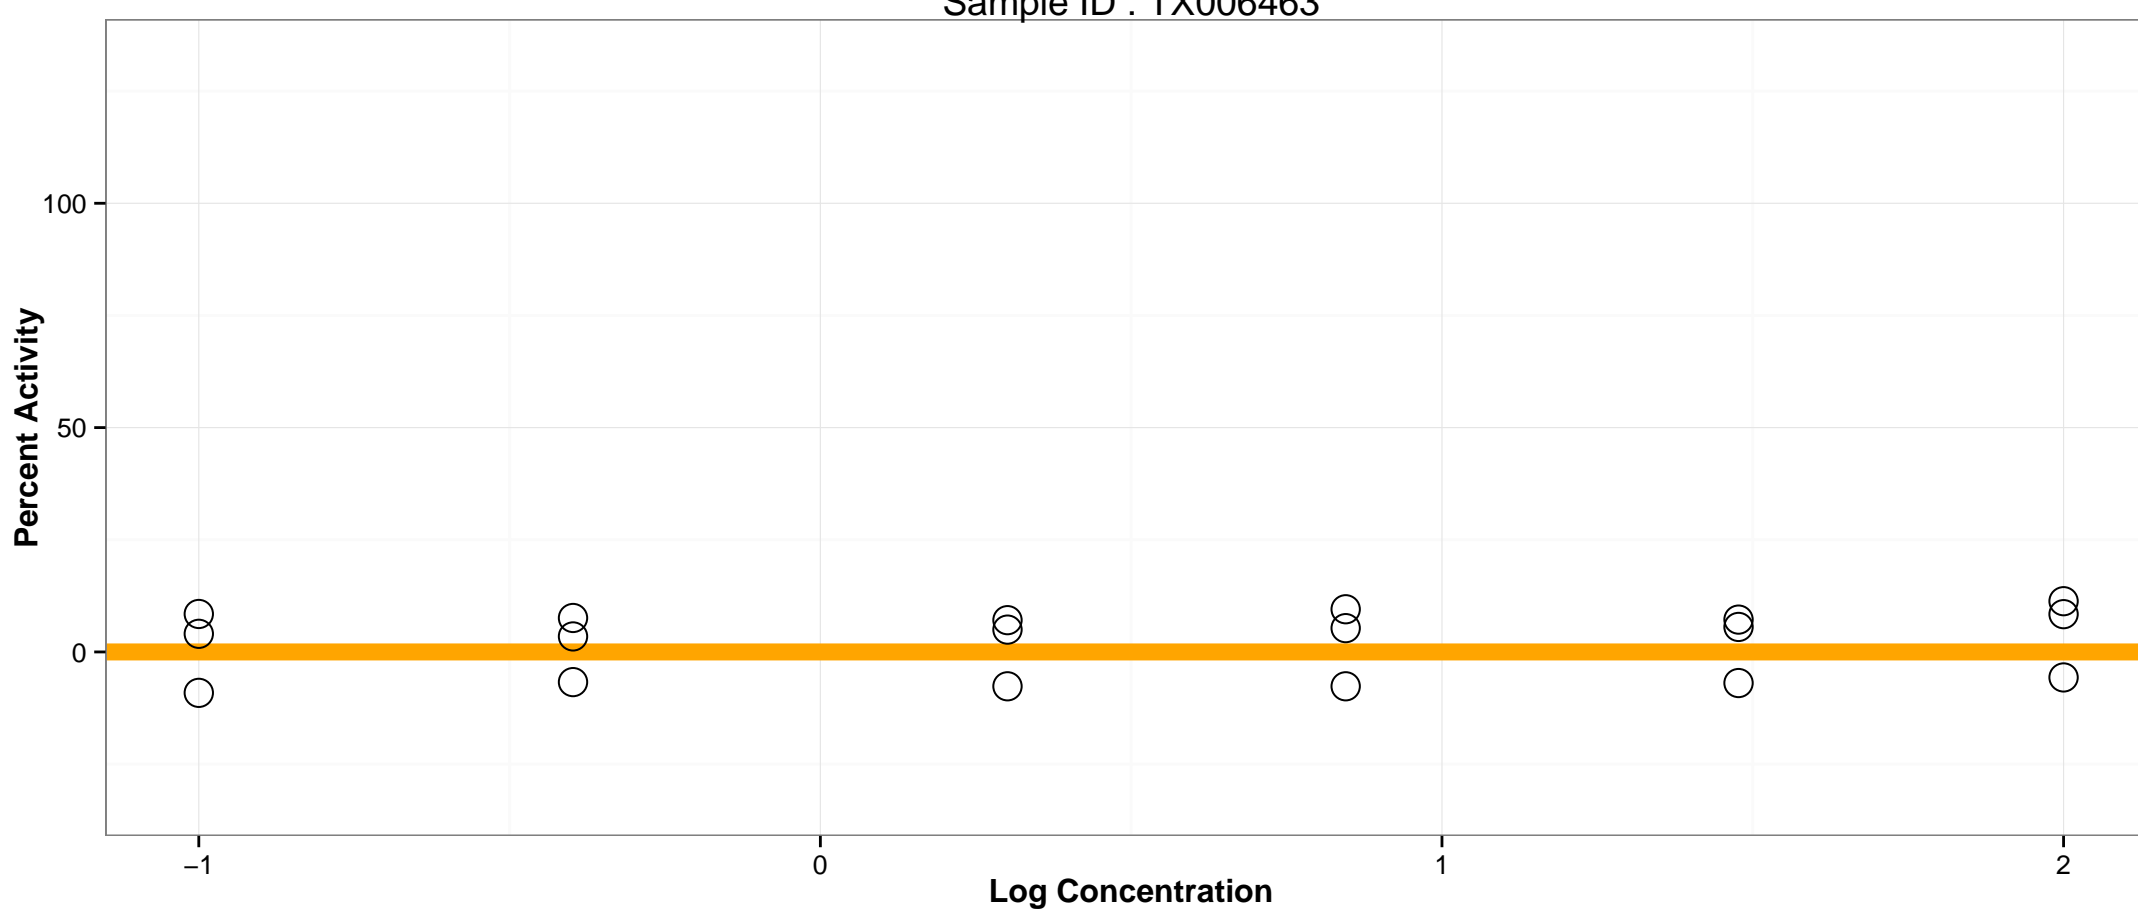

HILL MODEL

HILL MODEL: Not applicable

GAIN-LOSS MODEL

GNLS MODEL: Not applicable

|      | CNST   | HILL | GNLS |
|------|--------|------|------|
| AIC  | 128.46 | NA   | NA   |
| PROB | 1      | NA   | NA   |
| RMSE | 7.3    | NA   | NA   |

MAX\_MEAN : 4.69 MAX\_MED : 8.43 BMAD : 8.58  
COFF : 20 HIT-CALL : 0 FITC : 4 ACTP : 0  
FLAGS :

Chemical : 2-(Thiocyanomethylthio)benzothiazole  
CAS : 21564-17-0

Assay ID 1508 (NHEERL\_TPO\_AUR\_dn)  
Sample ID : TX006533

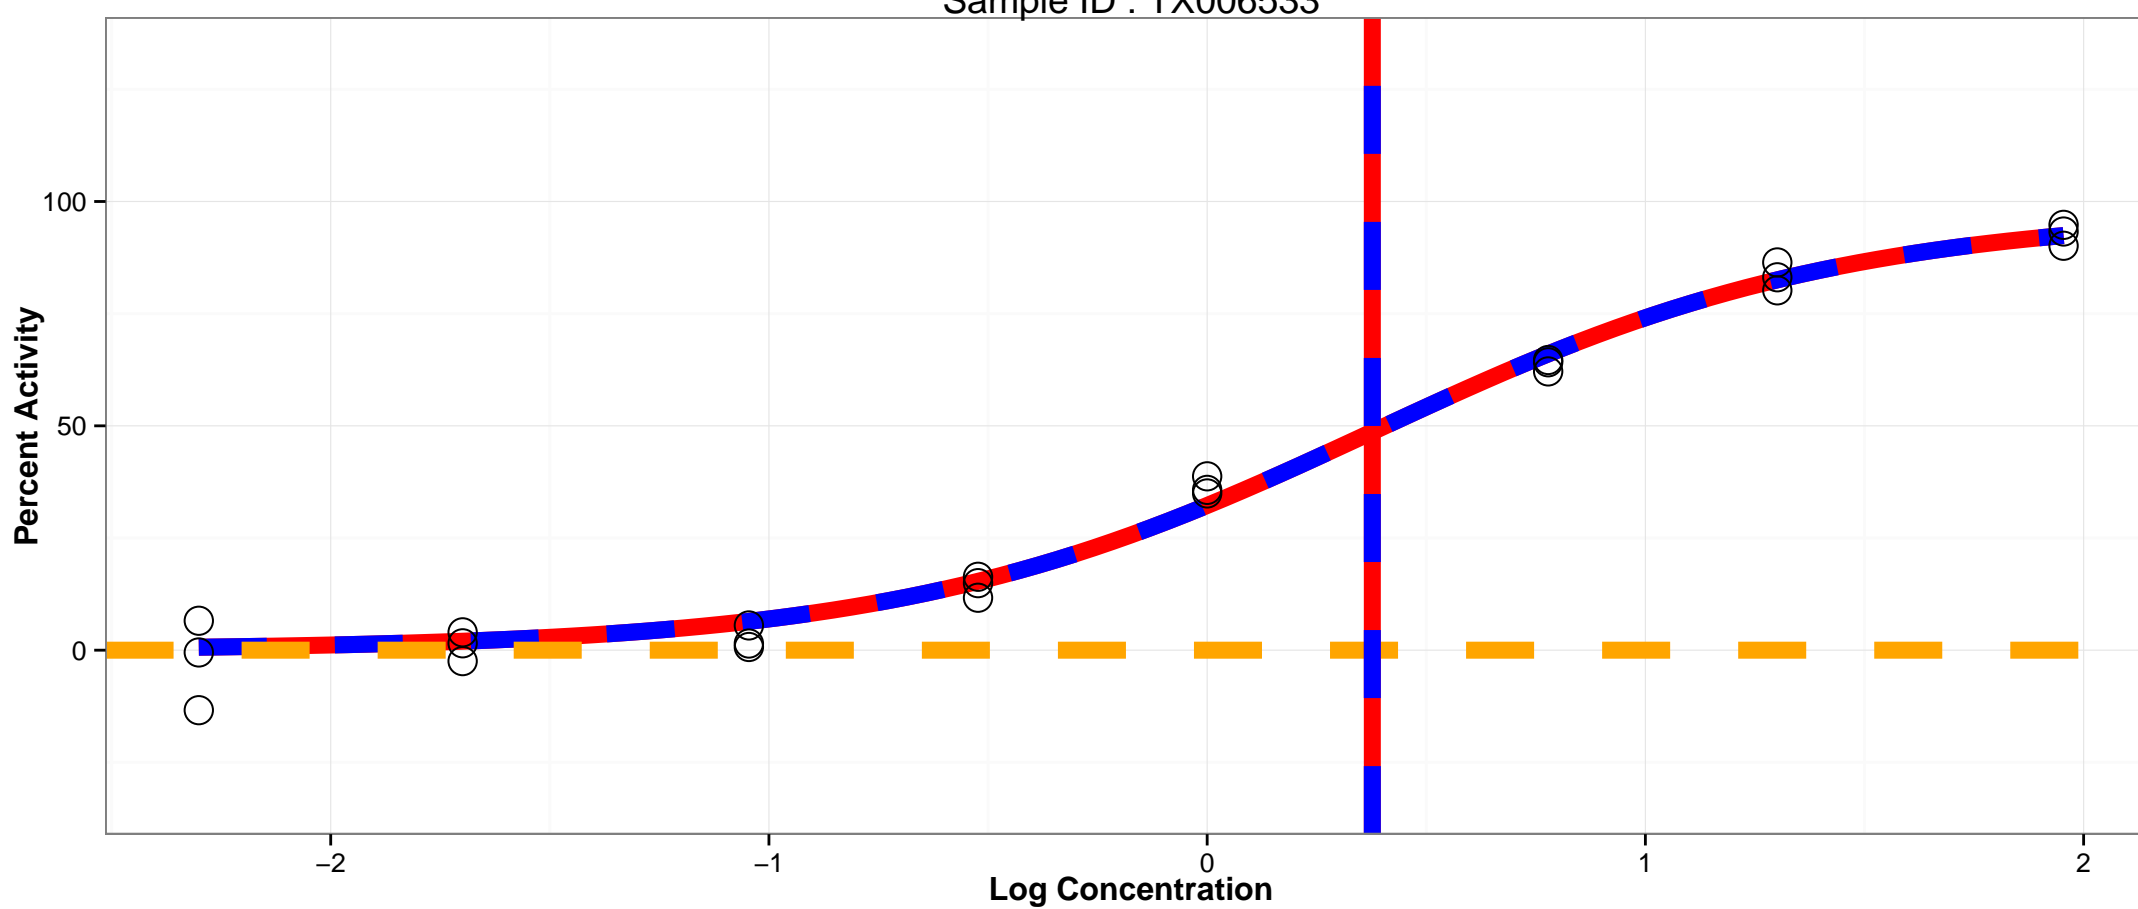

HILL MODEL

|     | tp   | ga     | gw     |
|-----|------|--------|--------|
| val | 97.3 | 0.377  | 0.809  |
| sd  | 2.94 | 0.0617 | 0.0552 |

GAIN-LOSS MODEL

|     | tp   | ga     | gw     | la   | lw    |
|-----|------|--------|--------|------|-------|
| val | 97.3 | 0.377  | 0.809  | 2.49 | 17.8  |
| sd  | 2.94 | 0.0617 | 0.0552 | 659  | 21200 |

|      | CNST   | HILL   | GNLS   |
|------|--------|--------|--------|
| AIC  | 260.75 | 143.75 | 147.75 |
| PROB | 0      | 0.88   | 0.12   |
| RMSE | 51.52  | 4.3    | 4.3    |

MAX\_MEAN : 92.8 MAX\_MED : 93.3 BMAD : 5.69  
COFF : 20 HIT-CALL : 1 FITC : 42 ACTP : 1  
FLAGS :

Assay ID 1509 (NHEERL\_HEK293T\_CellTiterGLO)  
Sample ID : TX006533

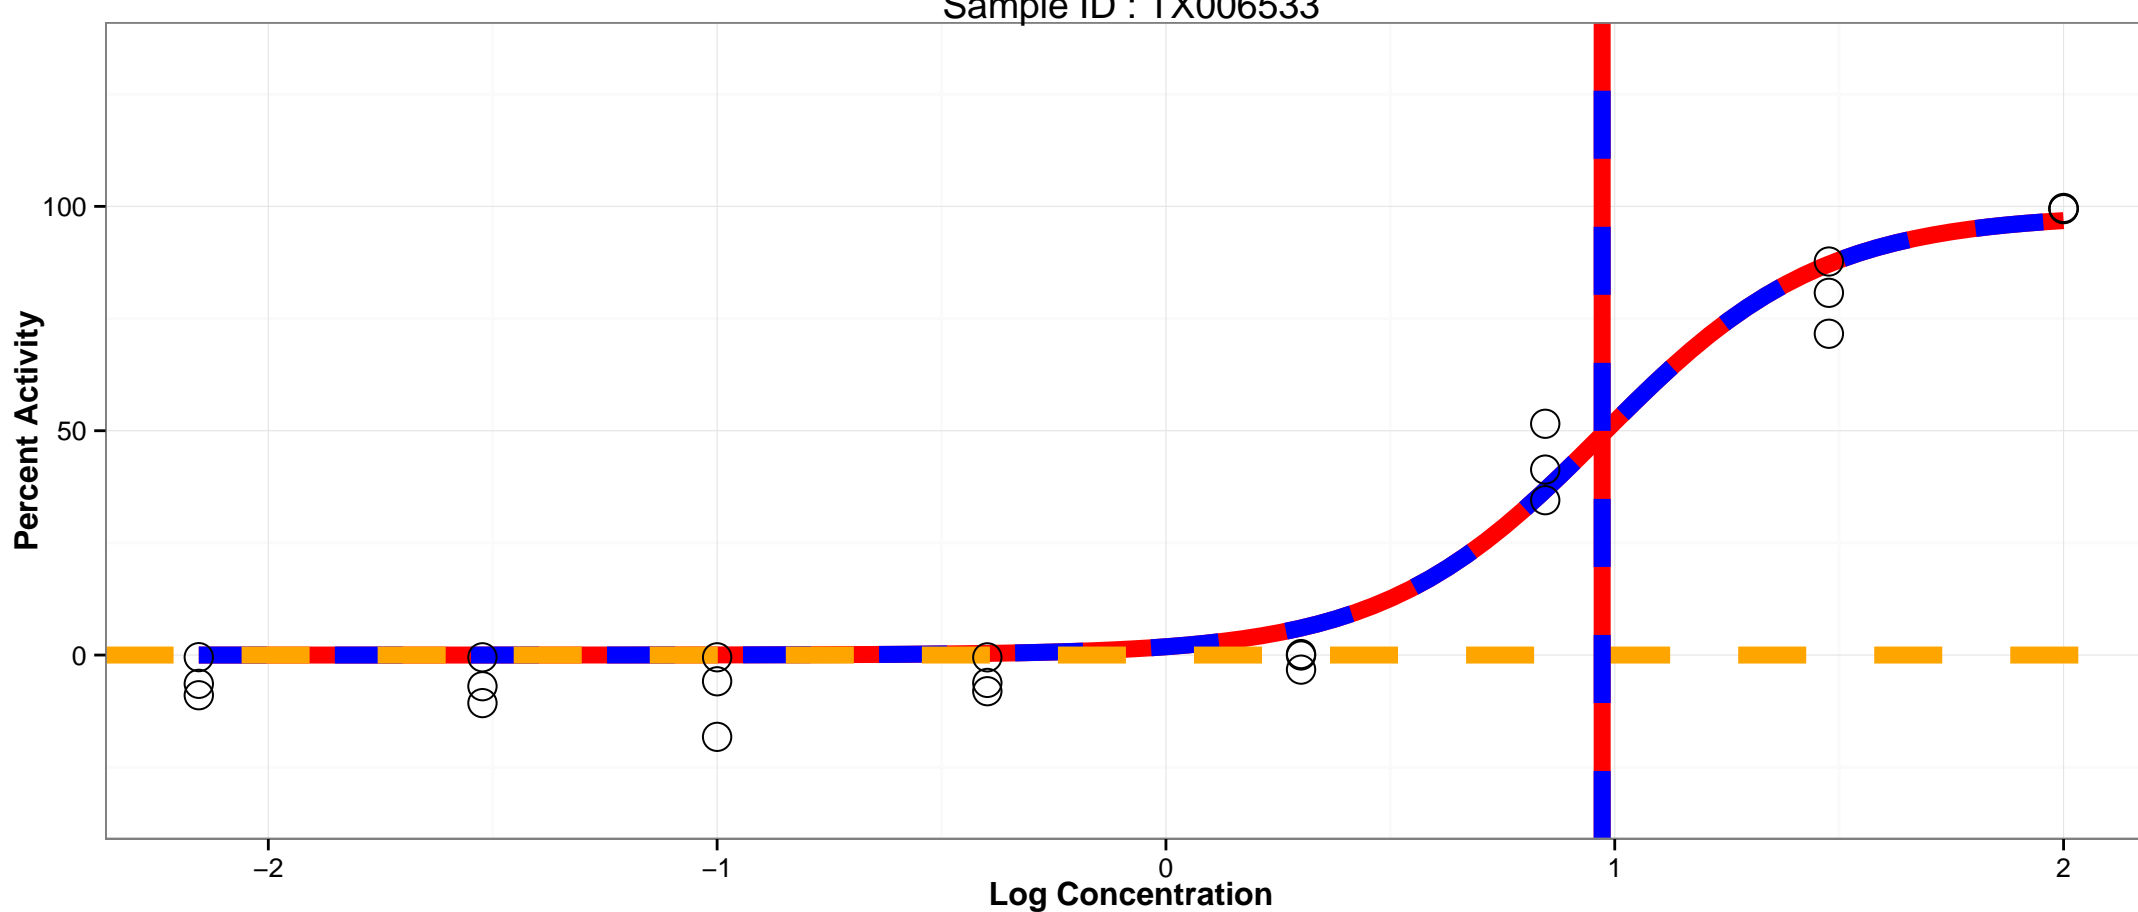

HILL MODEL

|     | tp   | ga    | gw    |
|-----|------|-------|-------|
| val | 98.3 | 0.972 | 1.77  |
| sd  | 5.35 | 0.085 | 0.426 |

GAIN-LOSS MODEL

|     | tp   | ga    | gw    | la   | lw    |
|-----|------|-------|-------|------|-------|
| val | 98.3 | 0.972 | 1.77  | 2.57 | 16.3  |
| sd  | 5.35 | 0.085 | 0.426 | 438  | 12300 |

|      | CNST   | HILL   | GNLS   |
|------|--------|--------|--------|
| AIC  | 254.35 | 176.09 | 180.09 |
| PROB | 0      | 0.88   | 0.12   |
| RMSE | 48.04  | 7.83   | 7.83   |

MAX\_MEAN : 99.5 MAX\_MED : 99.5 BMAD : 5.54  
COFF : 20 HIT-CALL : 1 FITC : 41 ACTP : 1  
FLAGS :

Assay ID 1848 (NHEERL\_Quantilum\_inhib\_2\_dn)  
Sample ID : TX006533

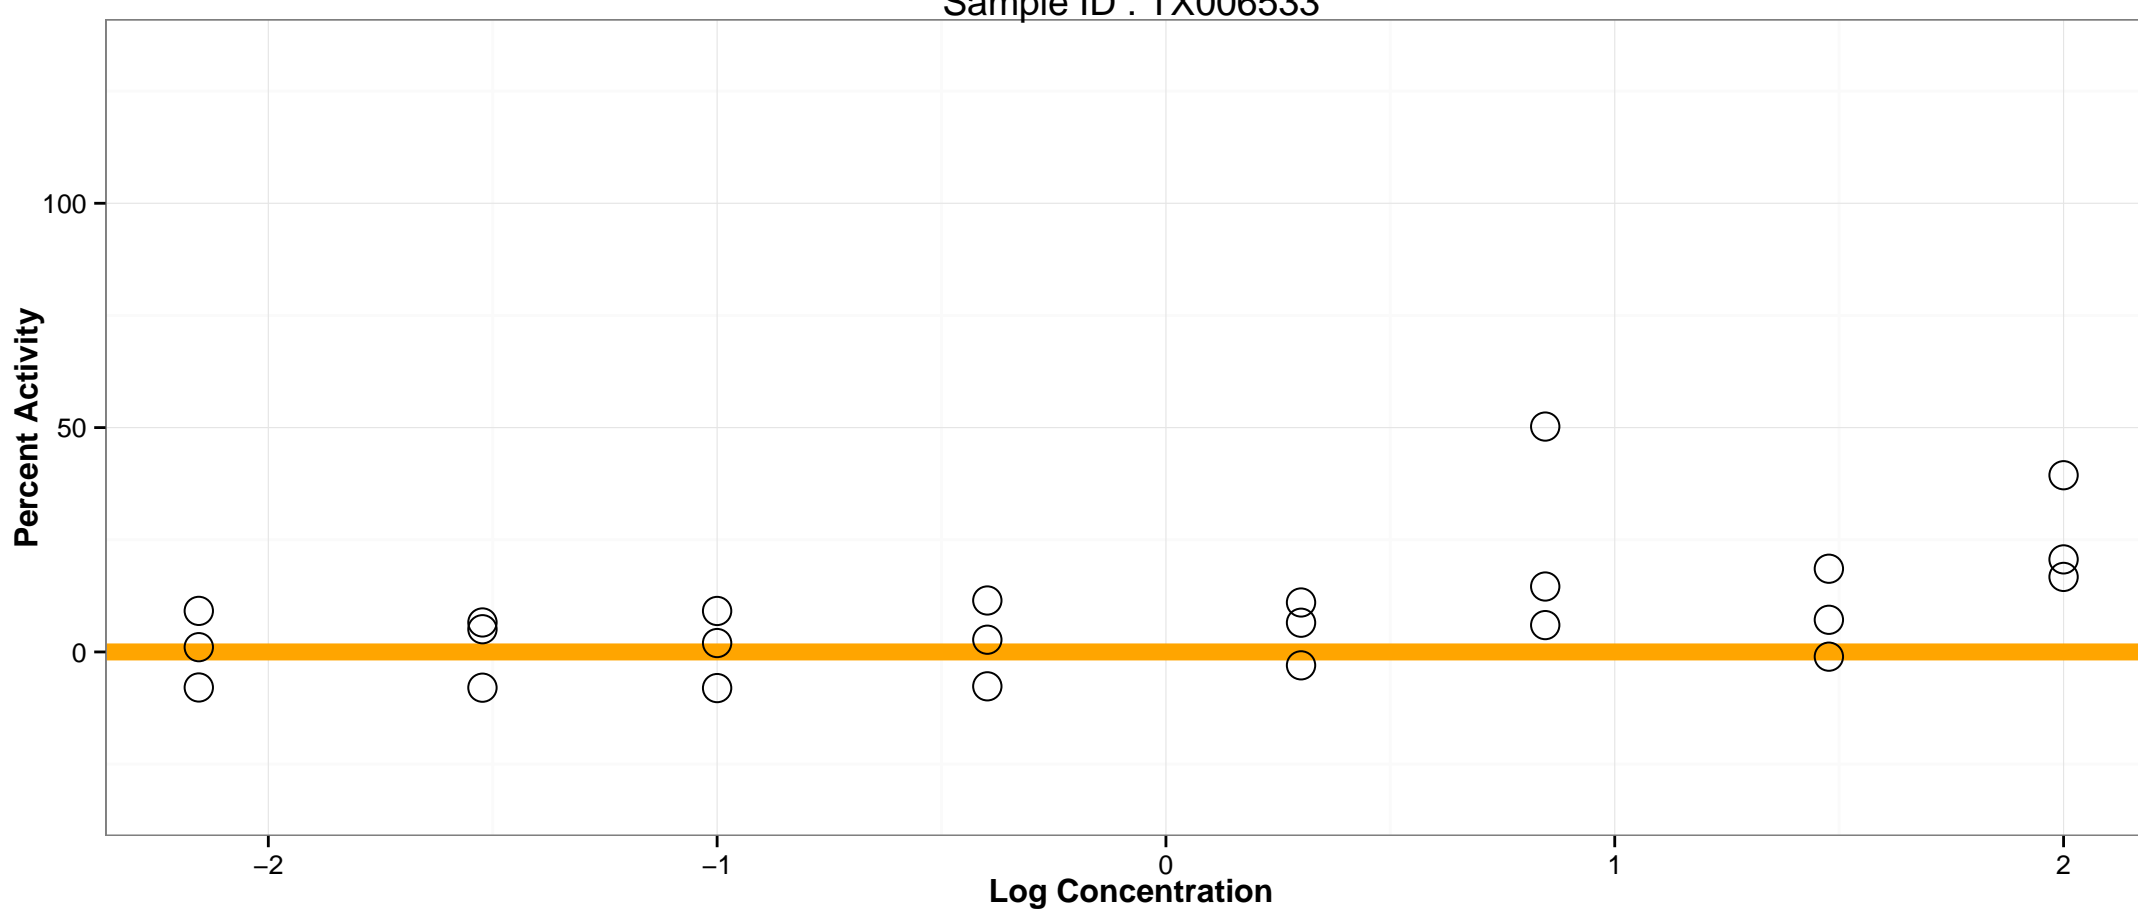

HILL MODEL  
HILL MODEL: Not applicable

GAIN-LOSS MODEL  
GNLS MODEL: Not applicable

|      | CNST   | HILL | GNLS |
|------|--------|------|------|
| AIC  | 198.99 | NA   | NA   |
| PROB | 1      | NA   | NA   |
| RMSE | 16.11  | NA   | NA   |

MAX\_MEAN : 25.6 MAX\_MED : 20.6 BMAD : 8.58  
COFF : 20 HIT-CALL : 0 FITC : 4 ACTP : 0  
FLAGS :

Chemical : Fosthiazate  
CAS : 98886-44-3

Assay ID 1508 (NHEERL\_TPO\_AUR\_dn)  
Sample ID : TX006534

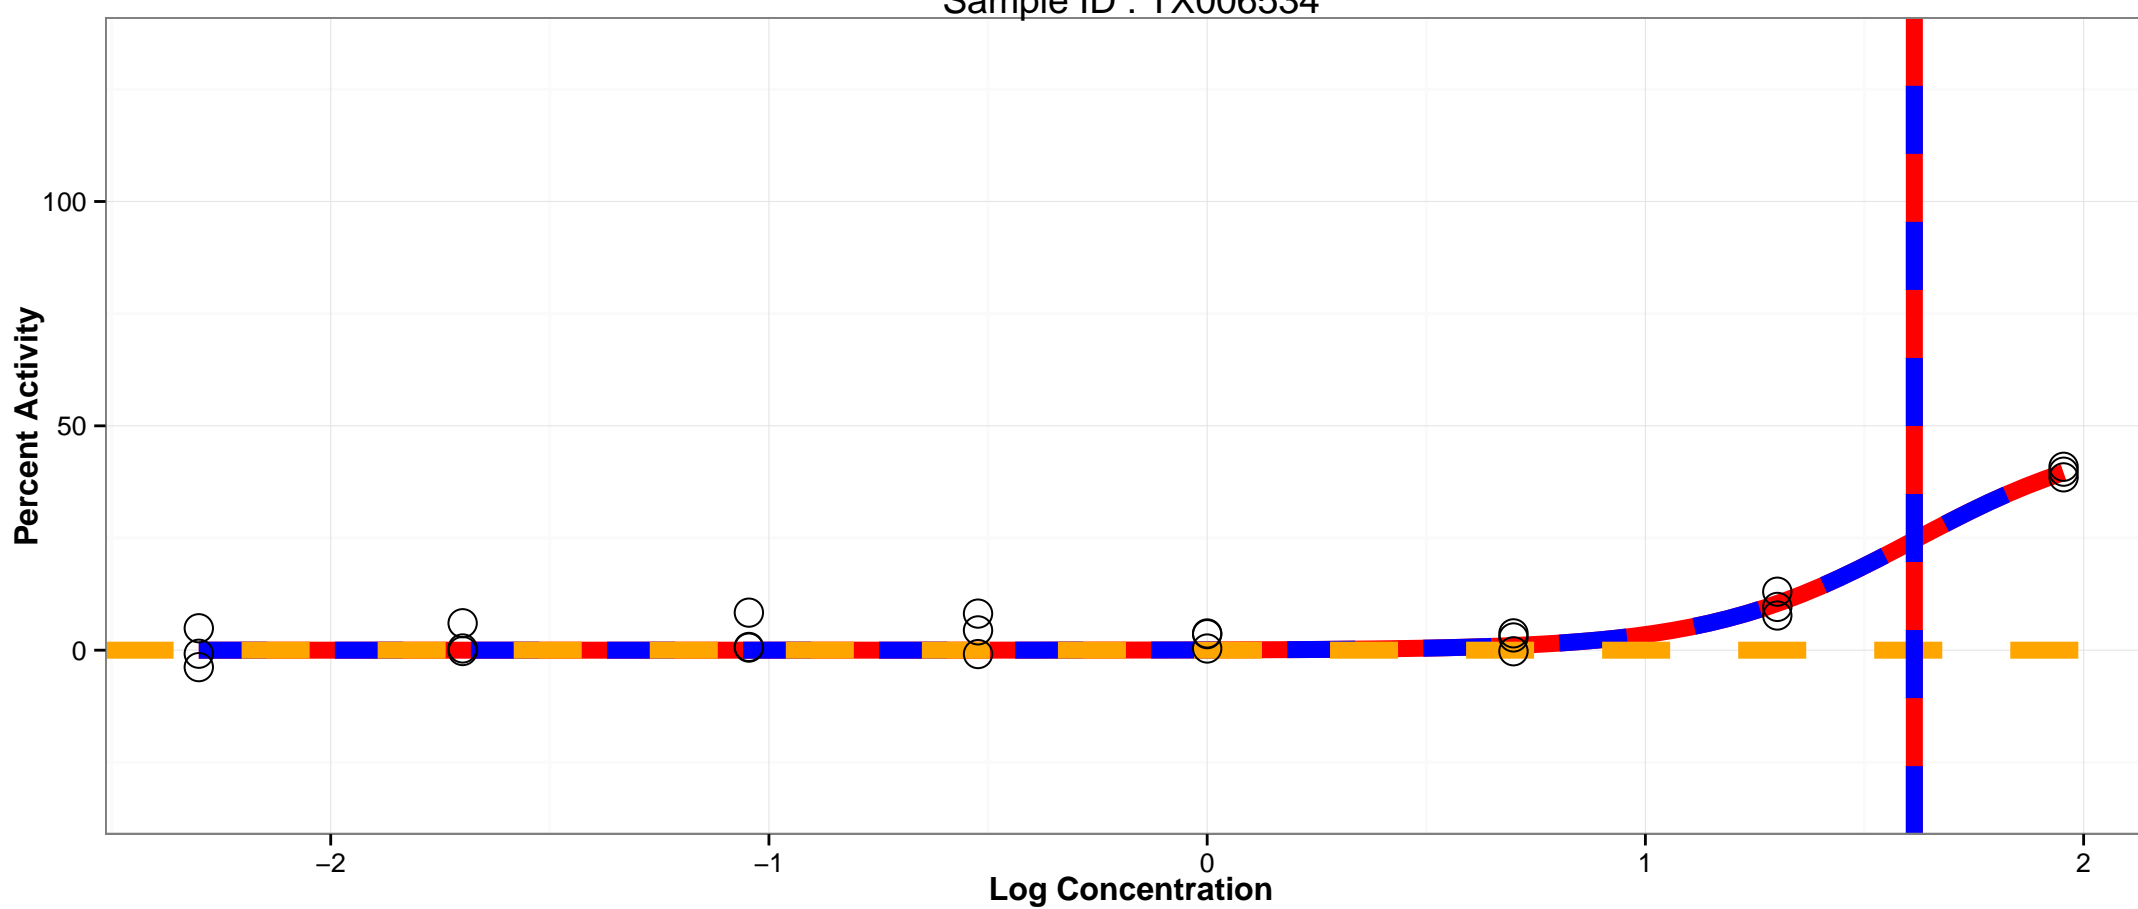

HILL MODEL

|     | tp   | ga    | gw    |
|-----|------|-------|-------|
| val | 49.1 | 1.61  | 1.82  |
| sd  | 16.8 | 0.254 | 0.917 |

GAIN-LOSS MODEL

|     | tp   | ga    | gw    | la   | lw    |
|-----|------|-------|-------|------|-------|
| val | 49.1 | 1.61  | 1.82  | 3.4  | 6.07  |
| sd  | 16.8 | 0.254 | 0.916 | 3370 | 14100 |

|      | CNST   | HILL  | GNLS  |
|------|--------|-------|-------|
| AIC  | 188.45 | 135.2 | 139.2 |
| PROB | 0      | 0.88  | 0.12  |
| RMSE | 14.92  | 3.47  | 3.47  |

MAX\_MEAN : 39.7 MAX\_MED : 39.8 BMAD : 5.69  
COFF : 20 HIT-CALL : 1 FITC : 42 ACTP : 1  
FLAGS : 6

Assay ID 1509 (NHEERL\_HEK293T\_CellTiterGLO)  
Sample ID : TX006534

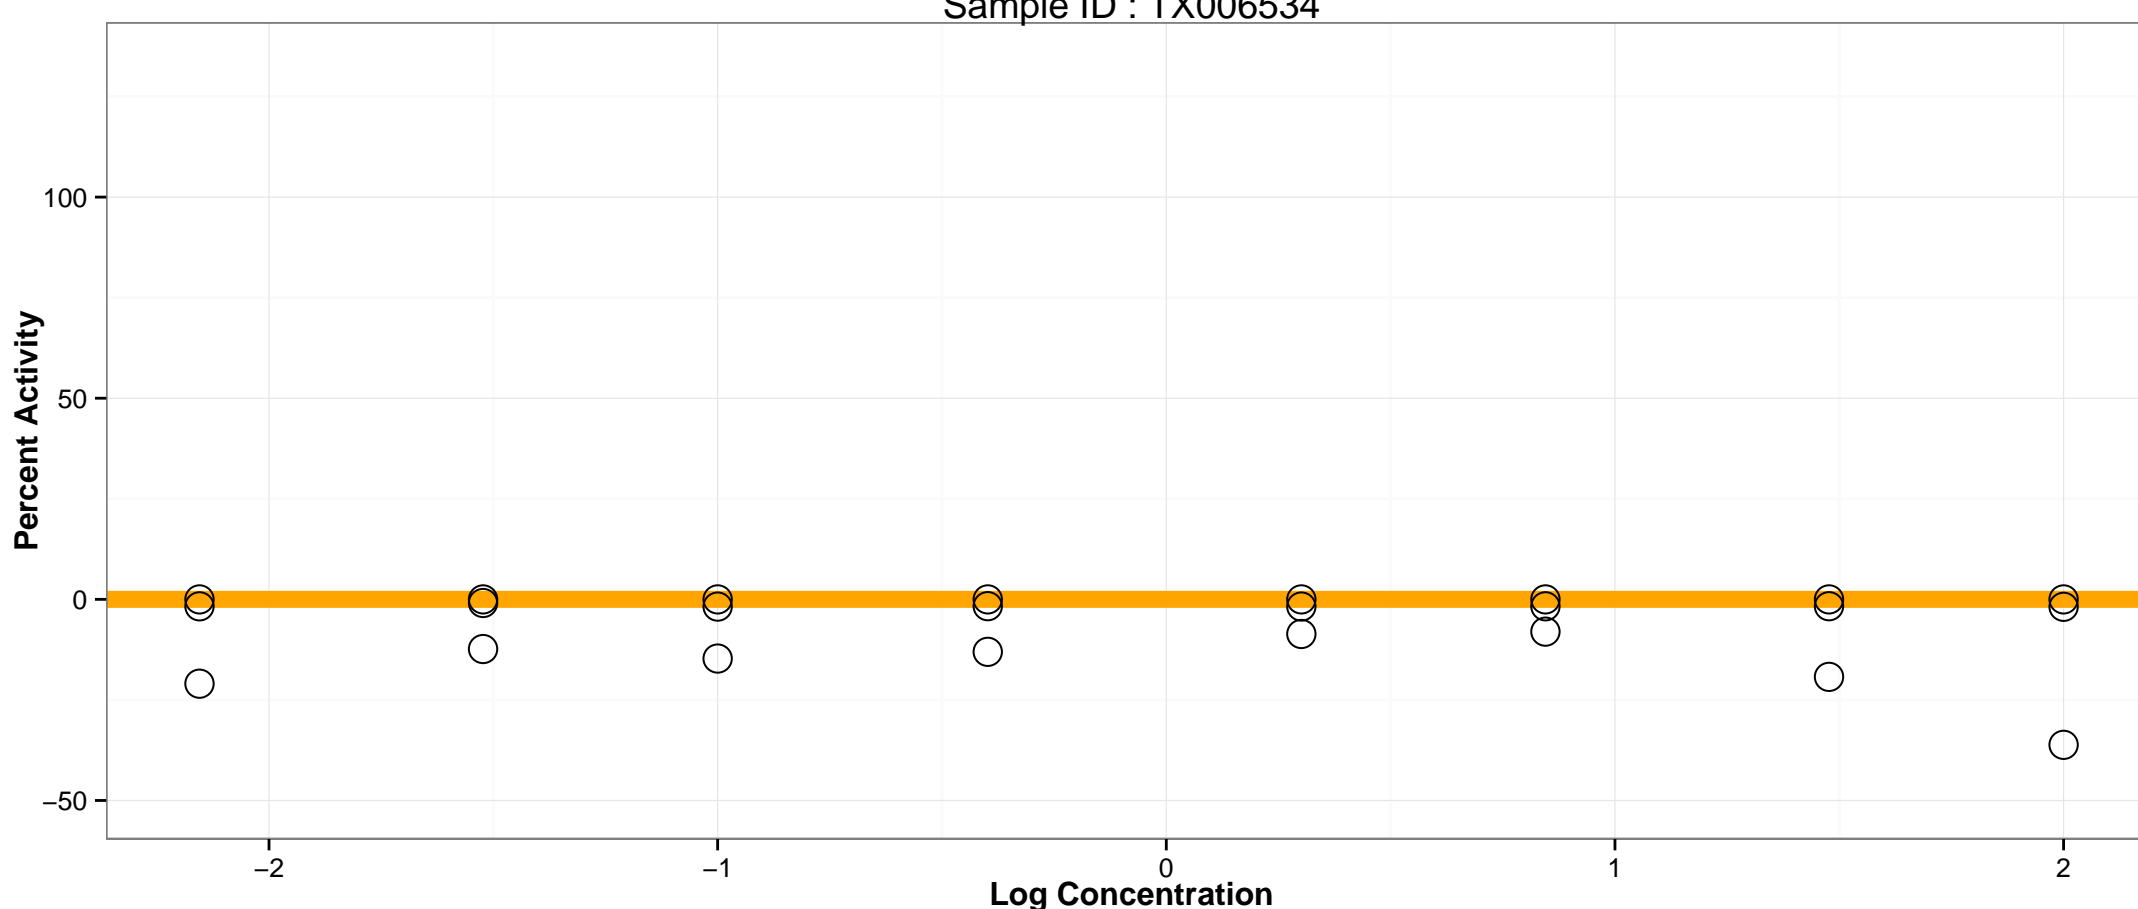

HILL MODEL

HILL MODEL: Not applicable

GAIN-LOSS MODEL

GNLS MODEL: Not applicable

|      | CNST   | HILL | GNLS |
|------|--------|------|------|
| AIC  | 176.77 | NA   | NA   |
| PROB | 1      | NA   | NA   |
| RMSE | 10.83  | NA   | NA   |

MAX\_MEAN : -3.25 MAX\_MED : -0.897 BMAD : 5.54  
COFF : 20 HIT-CALL : 0 FITC : 4 ACTP : 0  
FLAGS :

Assay ID 1848 (NHEERL\_Quantilum\_inhib\_2\_dn)  
Sample ID : TX006534

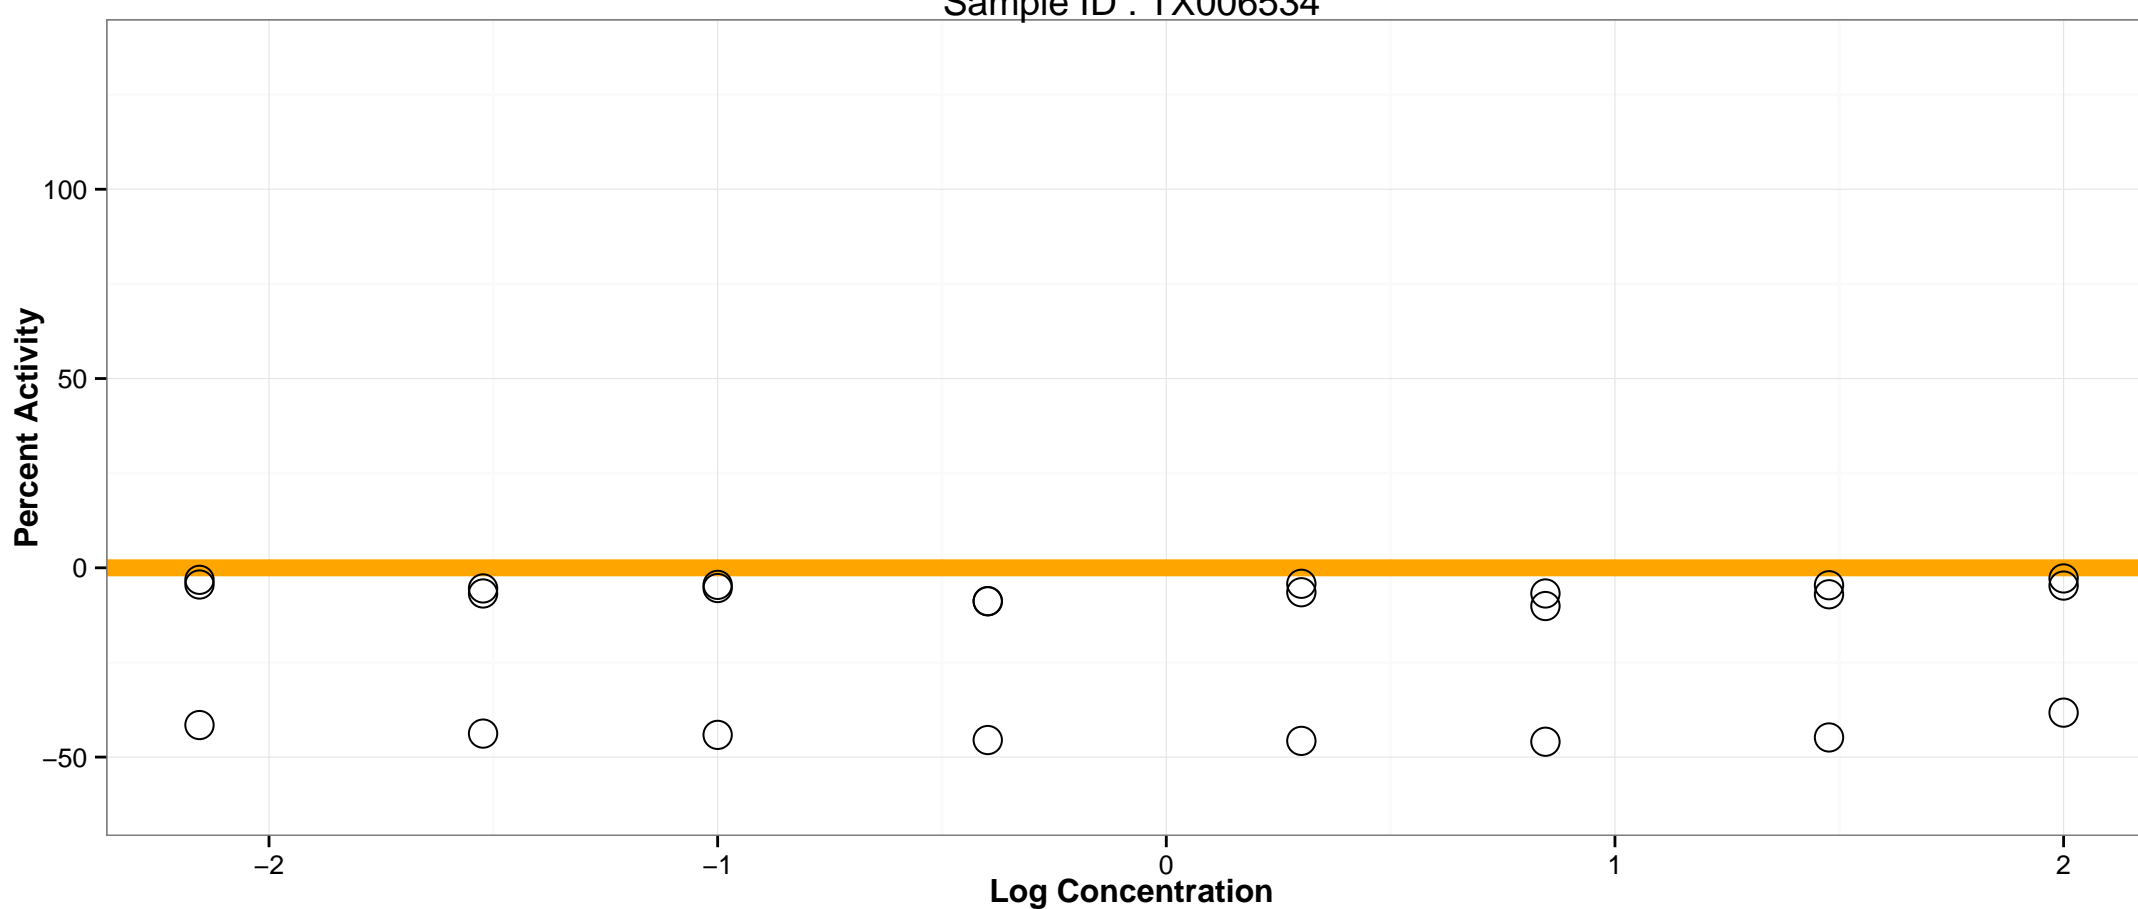

HILL MODEL

HILL MODEL: Not applicable

GAIN-LOSS MODEL

GNLS MODEL: Not applicable

|      | CNST   | HILL | GNLS |
|------|--------|------|------|
| AIC  | 226.16 | NA   | NA   |
| PROB | 1      | NA   | NA   |
| RMSE | 25.77  | NA   | NA   |

MAX\_MEAN : -15.2 MAX\_MED : -4.4 BMAD : 8.58  
COFF : 20 HIT-CALL : 0 FITC : 4 ACTP : 0  
FLAGS : 10

Chemical : Milbemectin (mixture of 70% Milbemcin A4, 30% Milbemycin A3)  
CAS : NOCAS\_34742

Assay ID 1508 (NHEERL\_TPO\_AUR\_dn)  
Sample ID : TX006535

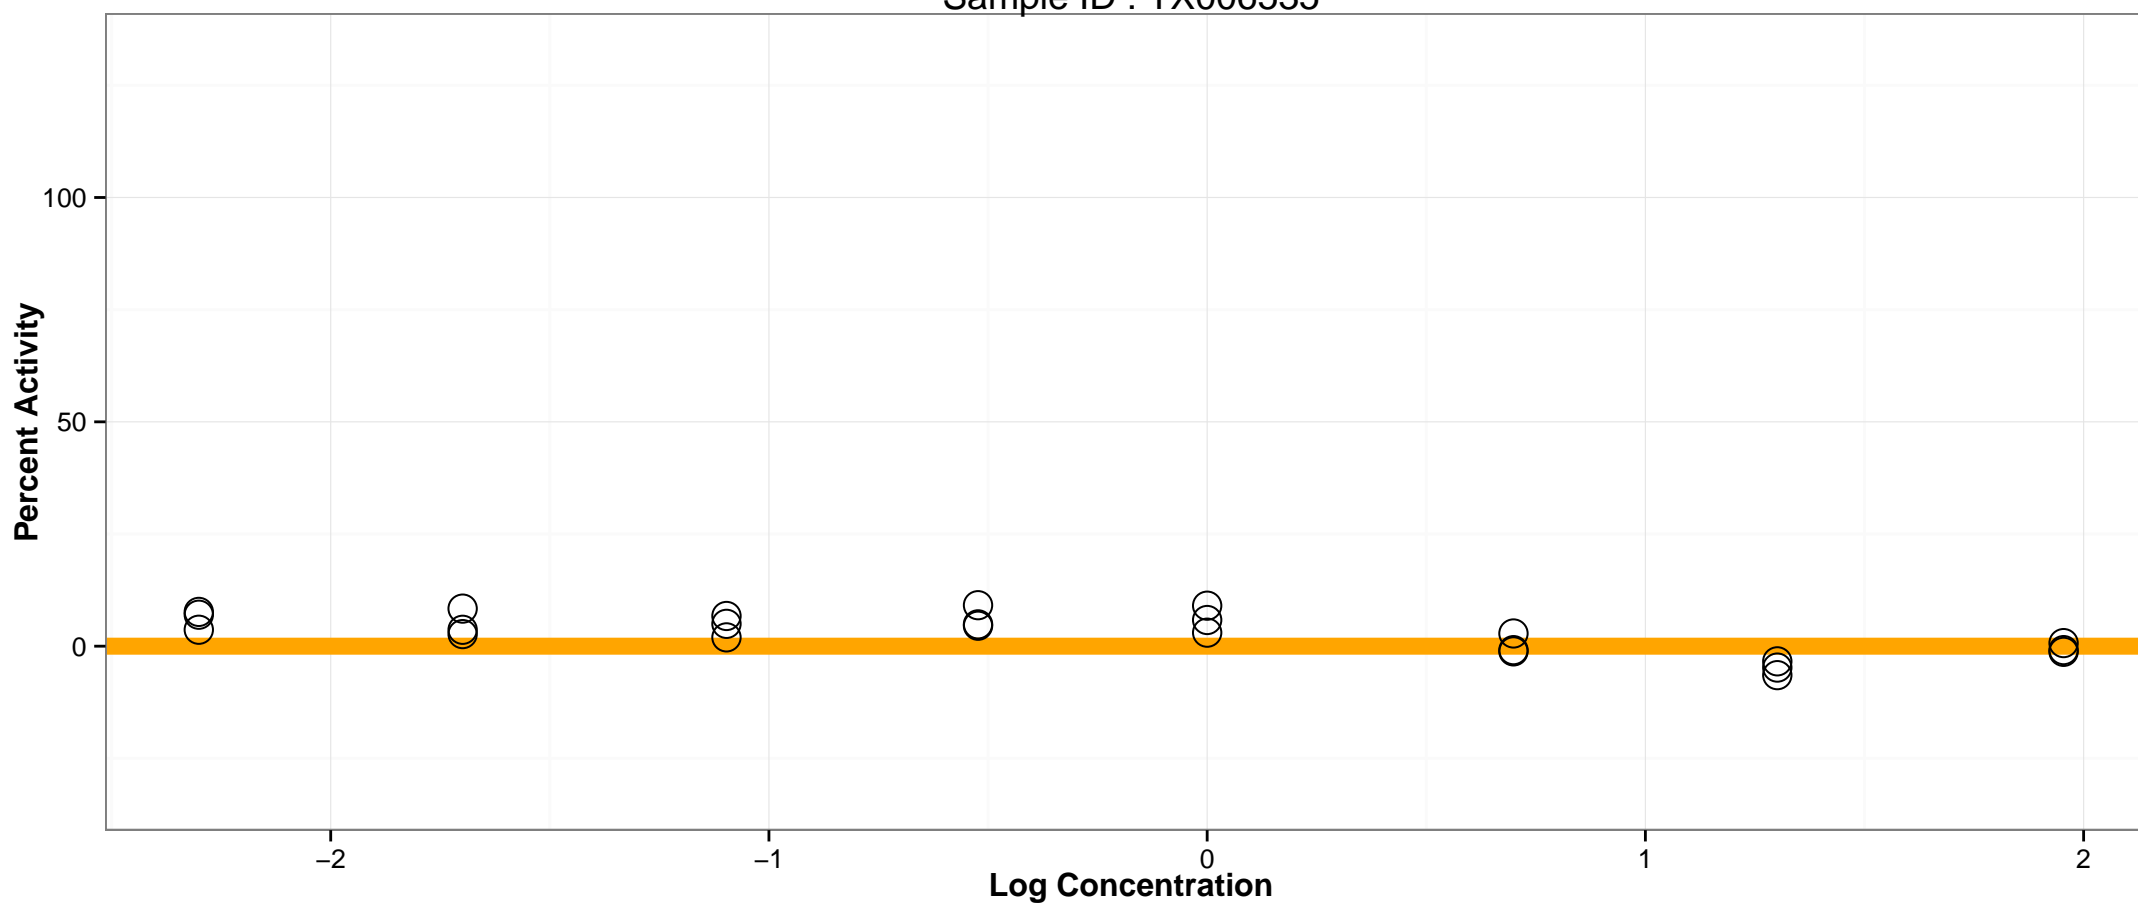

HILL MODEL

HILL MODEL: Not applicable

GAIN-LOSS MODEL

GNLS MODEL: Not applicable

|      | CNST   | HILL | GNLS |
|------|--------|------|------|
| AIC  | 151.75 | NA   | NA   |
| PROB | 1      | NA   | NA   |
| RMSE | 5.12   | NA   | NA   |

MAX\_MEAN : 6.2 MAX\_MED : 7.03 BMAD : 5.69  
COFF : 20 HIT-CALL : 0 FITC : 4 ACTP : 0  
FLAGS :

Assay ID 1509 (NHEERL\_HEK293T\_CellTiterGLO)  
Sample ID : TX006535

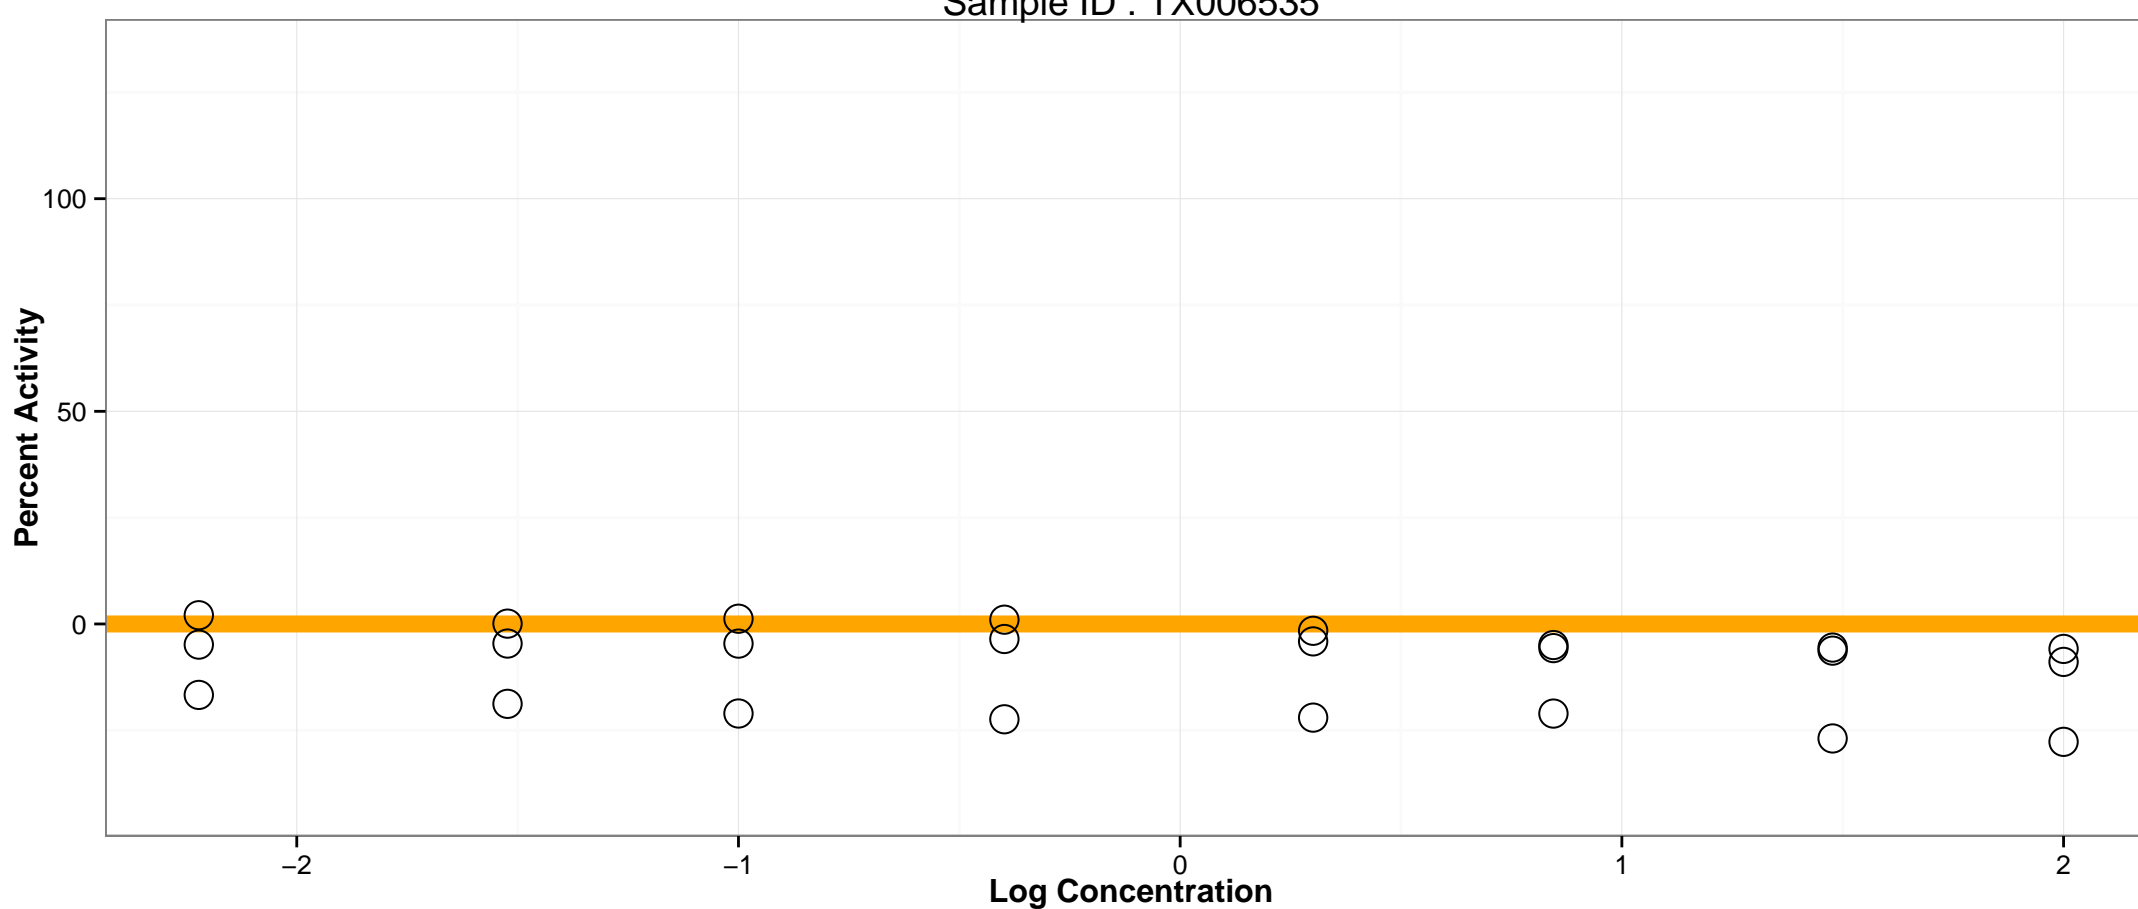

HILL MODEL

HILL MODEL: Not applicable

GAIN-LOSS MODEL

GNLS MODEL: Not applicable

|      | CNST   | HILL | GNLS |
|------|--------|------|------|
| AIC  | 195.42 | NA   | NA   |
| PROB | 1      | NA   | NA   |
| RMSE | 13.44  | NA   | NA   |

MAX\_MEAN : -6.48 MAX\_MED : -3.52 BMAD : 5.54  
COFF : 20 HIT-CALL : 0 FITC : 4 ACTP : 0  
FLAGS :

Assay ID 1848 (NHEERL\_Quantilum\_inhib\_2\_dn)  
Sample ID : TX006535

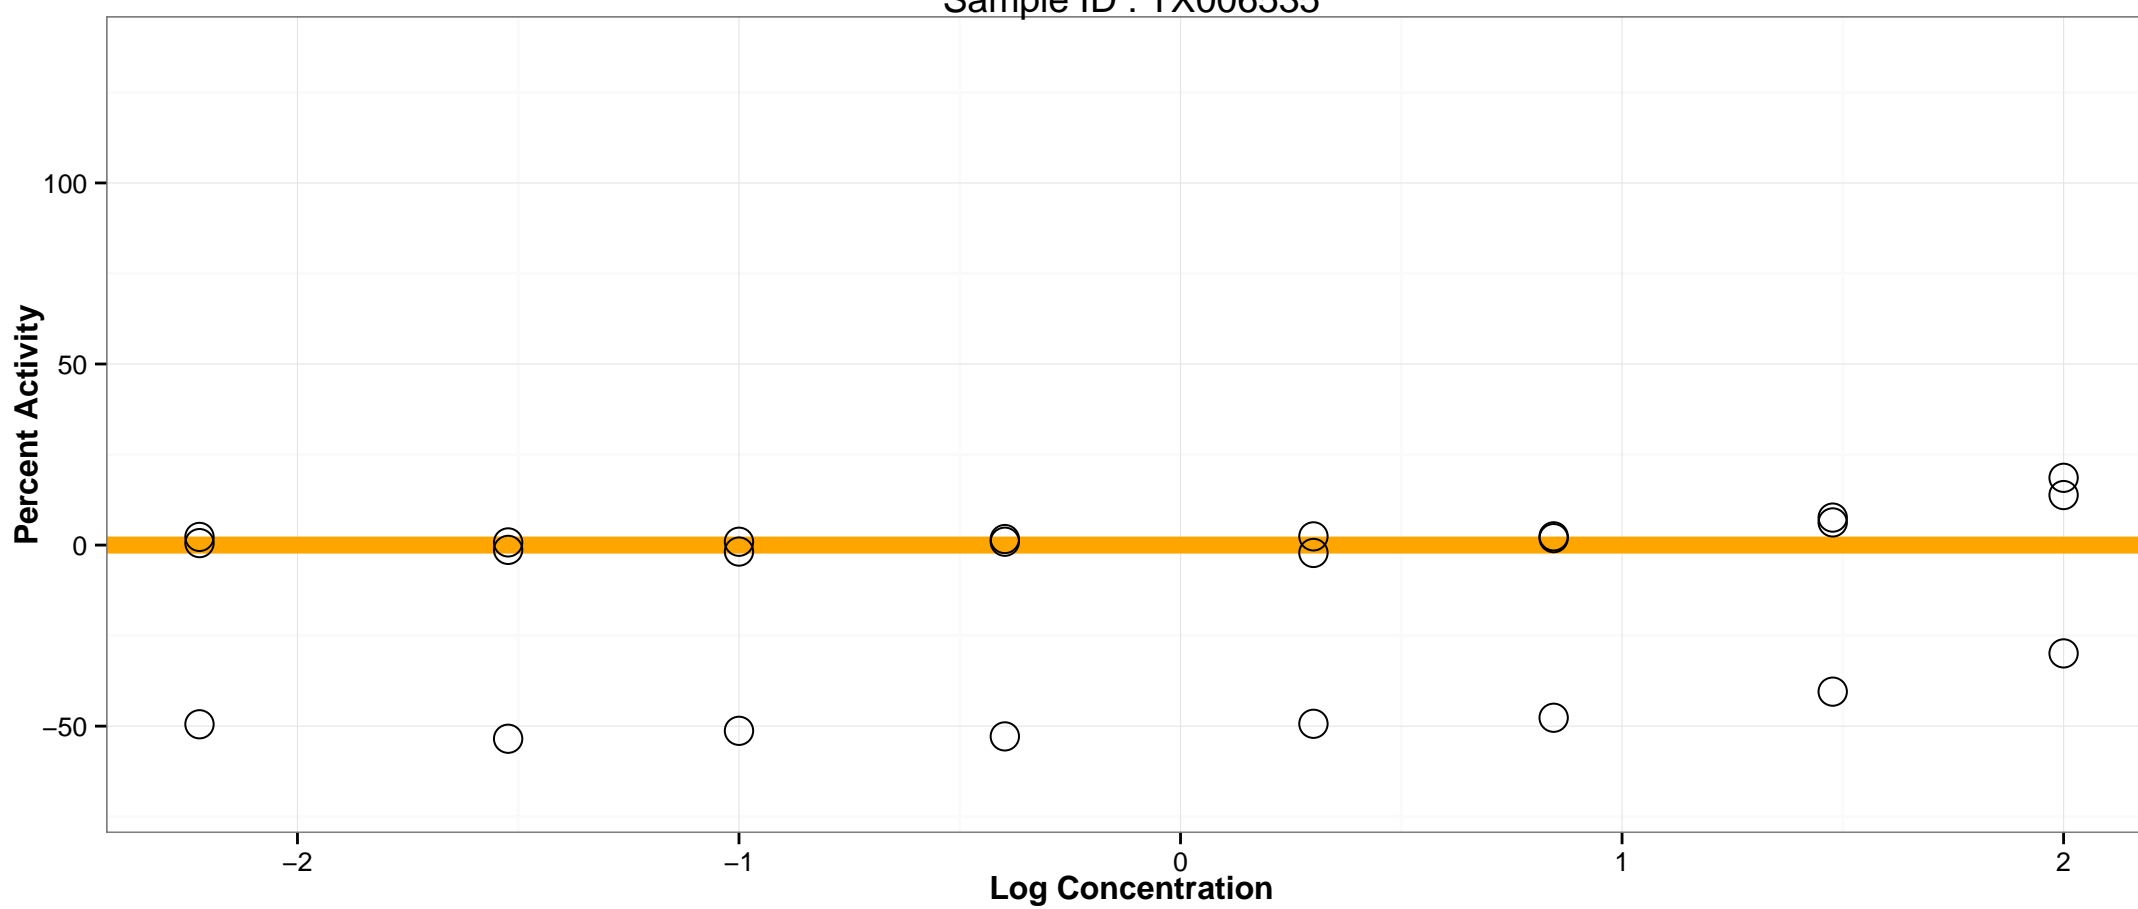

HILL MODEL

HILL MODEL: Not applicable

GAIN-LOSS MODEL

GNLS MODEL: Not applicable

|      | CNST   | HILL | GNLS |
|------|--------|------|------|
| AIC  | 229.26 | NA   | NA   |
| PROB | 1      | NA   | NA   |
| RMSE | 27.86  | NA   | NA   |

MAX\_MEAN : 0.842 MAX\_MED : 13.8 BMAD : 8.58  
COFF : 20 HIT-CALL : 0 FITC : 4 ACTP : 0  
FLAGS : 10

Chemical : Octyl gallate  
CAS : 1034-01-1

Assay ID 1508 (NHEERL\_TPO\_AUR\_dn)  
Sample ID : TX006606

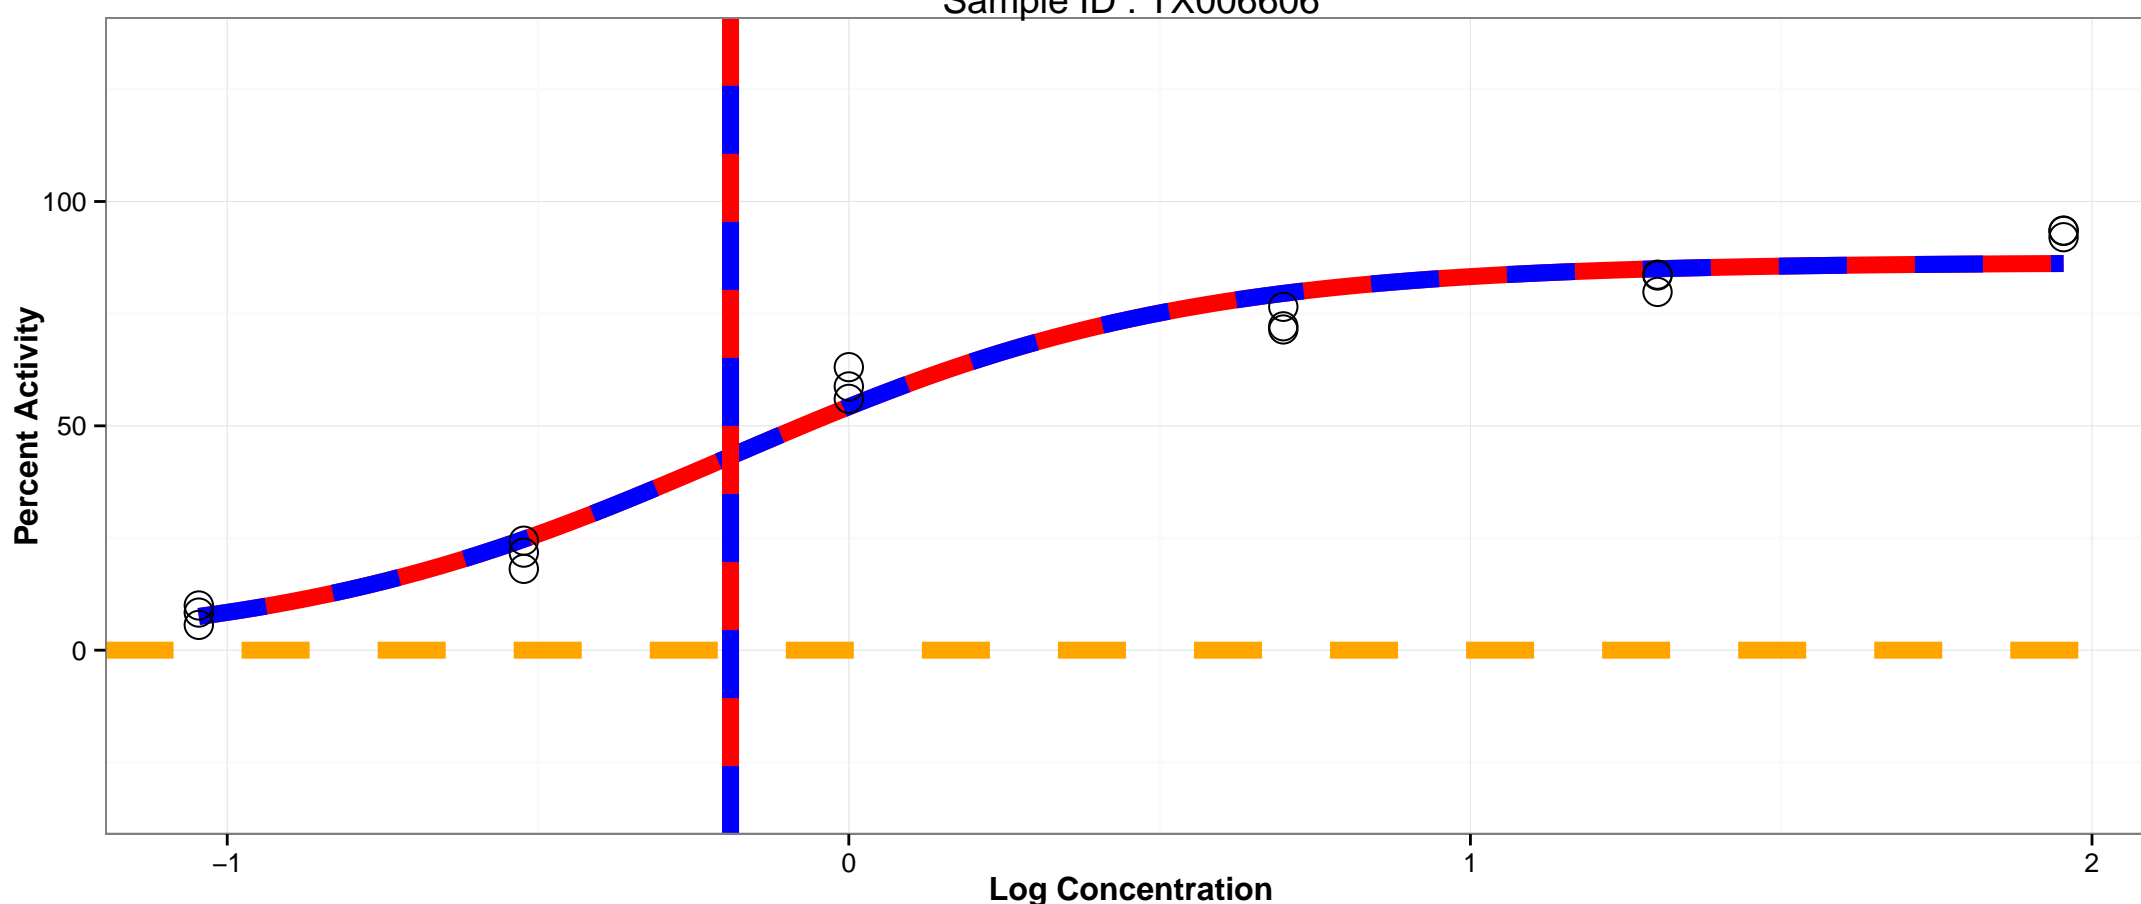

HILL MODEL

|     | tp   | ga     | gw    |
|-----|------|--------|-------|
| val | 86.4 | -0.19  | 1.19  |
| sd  | 3.28 | 0.0711 | 0.224 |

GAIN-LOSS MODEL

|     | tp   | ga    | gw   | la   | lw   |
|-----|------|-------|------|------|------|
| val | 86.4 | -0.19 | 1.19 | 3.78 | 17.5 |
| sd  | NA   | NA    | NA   | NA   | NA   |

|      | CNST   | HILL   | GNLS   |
|------|--------|--------|--------|
| AIC  | 206.15 | 119.93 | 123.93 |
| PROB | 0      | 0.88   | 0.12   |
| RMSE | 64.41  | 5.07   | 5.07   |

MAX\_MEAN : 93 MAX\_MED : 93.5 BMAD : 5.69  
COFF : 20 HIT-CALL : 1 FITC : 41 ACTP : 1  
FLAGS :

Assay ID 1509 (NHEERL\_HEK293T\_CellTiterGLO)  
Sample ID : TX006606

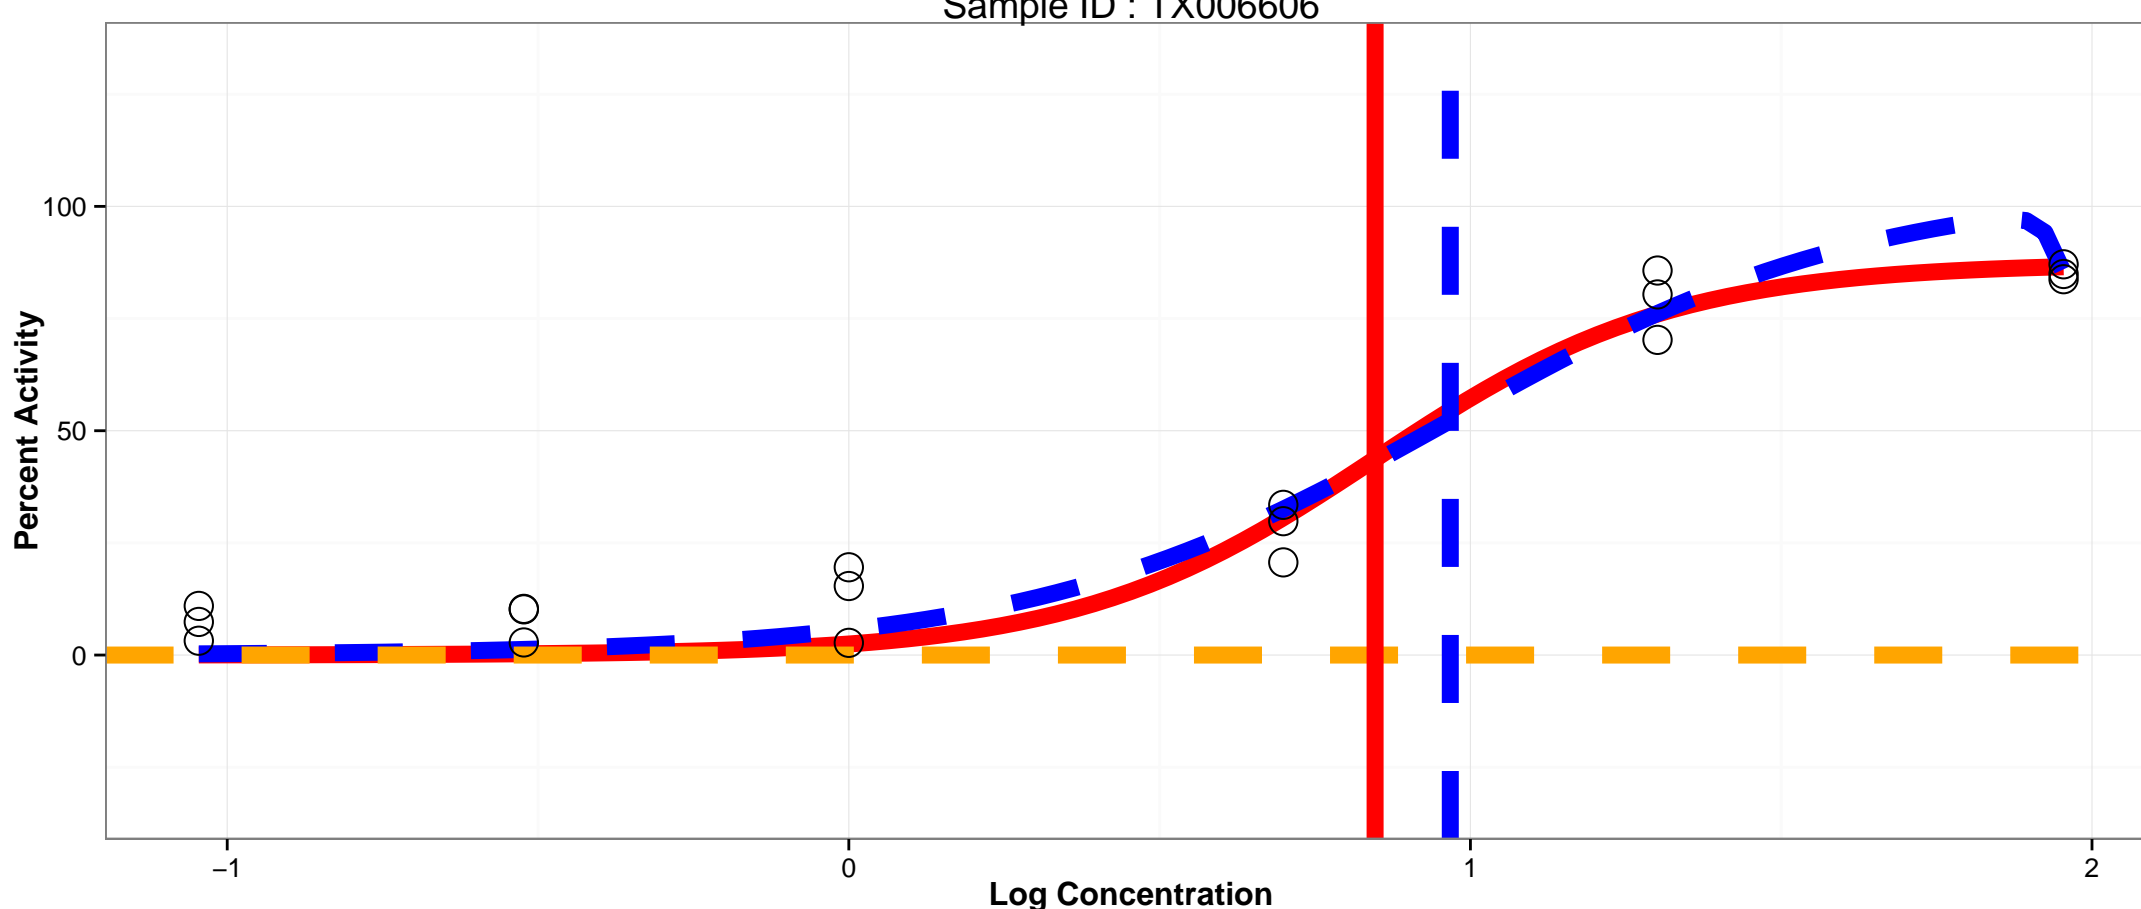

HILL MODEL

|     | tp   | ga    | gw    |
|-----|------|-------|-------|
| val | 87.4 | 0.847 | 1.82  |
| sd  | 4.61 | 0.058 | 0.686 |

GAIN-LOSS MODEL

|     | tp  | ga    | gw    | la      | lw   |
|-----|-----|-------|-------|---------|------|
| val | 105 | 0.968 | 1.29  | 2       | 17.7 |
| sd  | 27  | 0.202 | 0.555 | 0.00865 | 12.3 |

|      | CNST   | HILL   | GNLS   |
|------|--------|--------|--------|
| AIC  | 194.24 | 134.83 | 136.14 |
| PROB | 0      | 0.66   | 0.34   |
| RMSE | 49.46  | 7.87   | 7.21   |

MAX\_MEAN : 85.3 MAX\_MED : 84.9 BMAD : 5.54  
COFF : 20 HIT-CALL : 1 FITC : 41 ACTP : 1  
FLAGS :

Assay ID 1848 (NHEERL\_Quantilum\_inhib\_2\_dn)  
Sample ID : TX006606

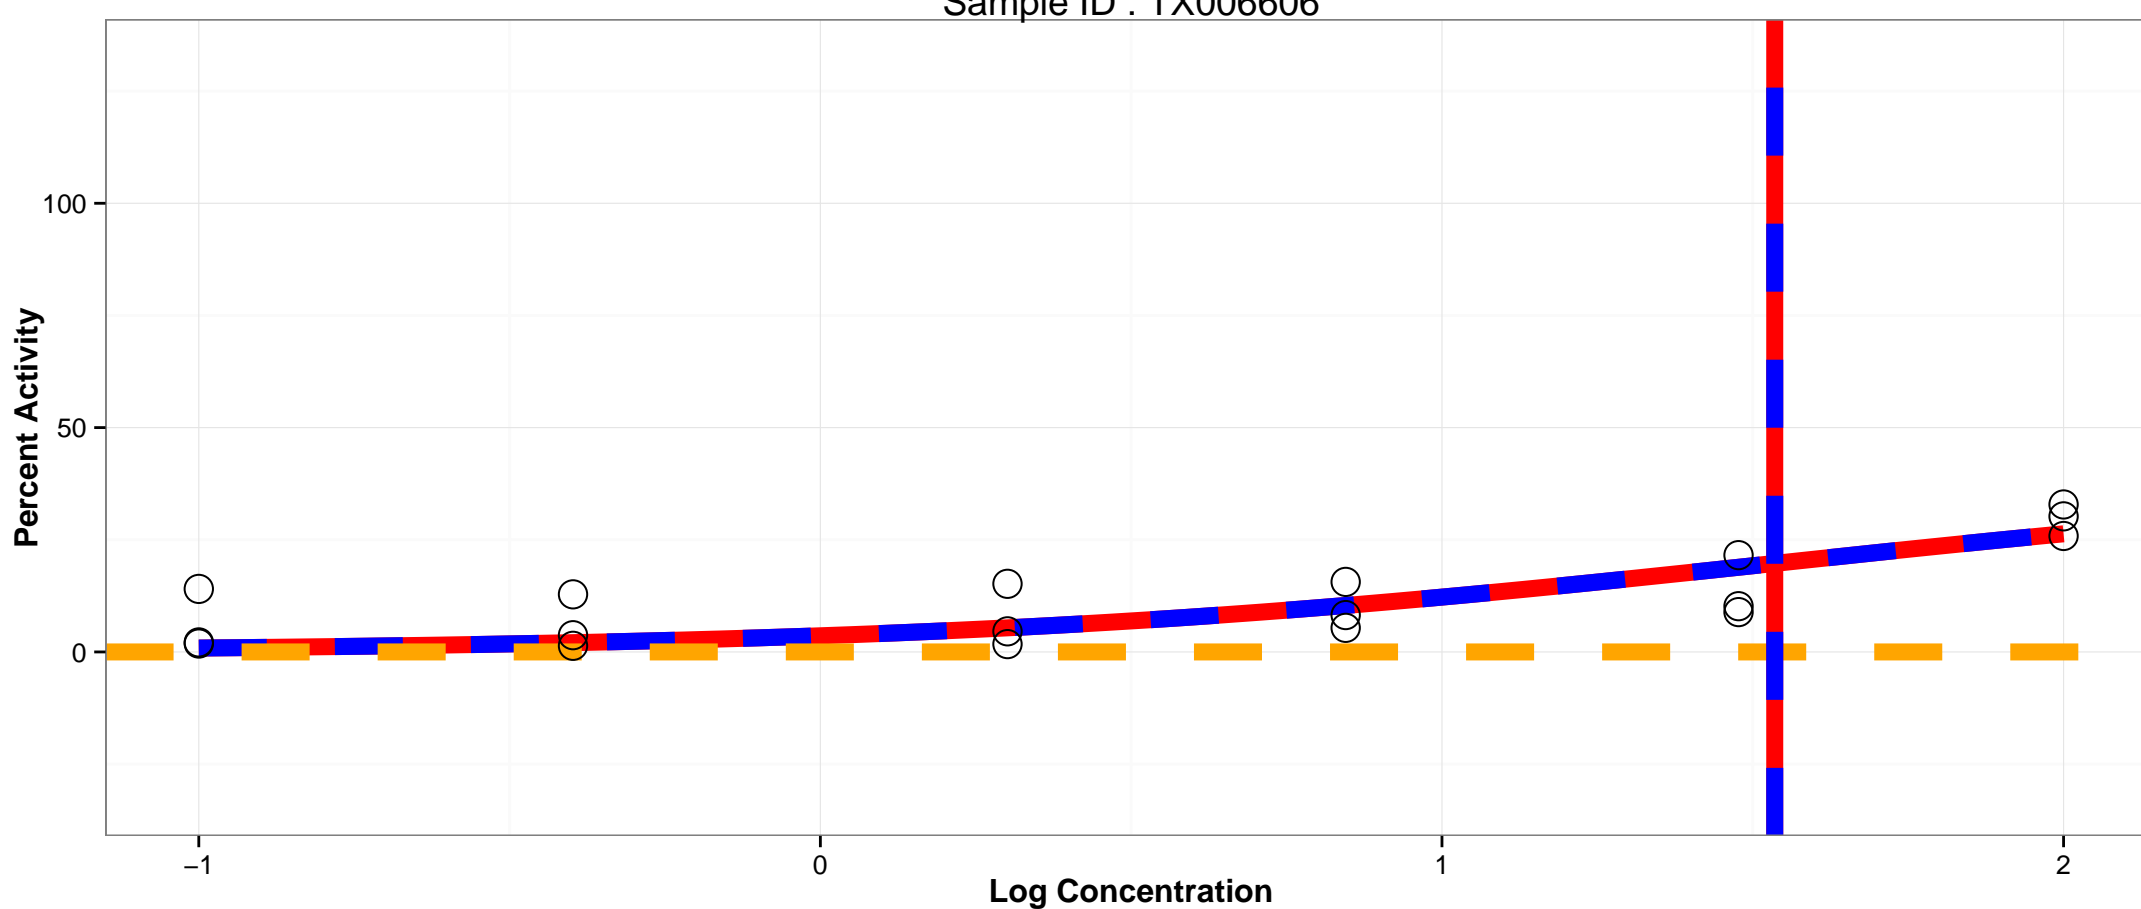

HILL MODEL

|     | tp   | ga    | gw    |
|-----|------|-------|-------|
| val | 39.5 | 1.54  | 0.65  |
| sd  | 13.1 | 0.482 | 0.233 |

GAIN-LOSS MODEL

|     | tp   | ga   | gw   | la   | lw |
|-----|------|------|------|------|----|
| val | 39.5 | 1.54 | 0.65 | 3.29 | 18 |
| sd  | NA   | NA   | NA   | NA   | NA |

|      | CNST   | HILL   | GNLS   |
|------|--------|--------|--------|
| AIC  | 152.44 | 126.11 | 130.11 |
| PROB | 0      | 0.88   | 0.12   |
| RMSE | 15.45  | 6.25   | 6.25   |

MAX\_MEAN : 29.7 MAX\_MED : 30.2 BMAD : 8.58  
COFF : 20 HIT-CALL : 1 FITC : 42 ACTP : 1  
FLAGS : 6

Chemical : Carbendazim  
CAS : 10605-21-7

Assay ID 1508 (NHEERL\_TPO\_AUR\_dn)  
Sample ID : TX006796

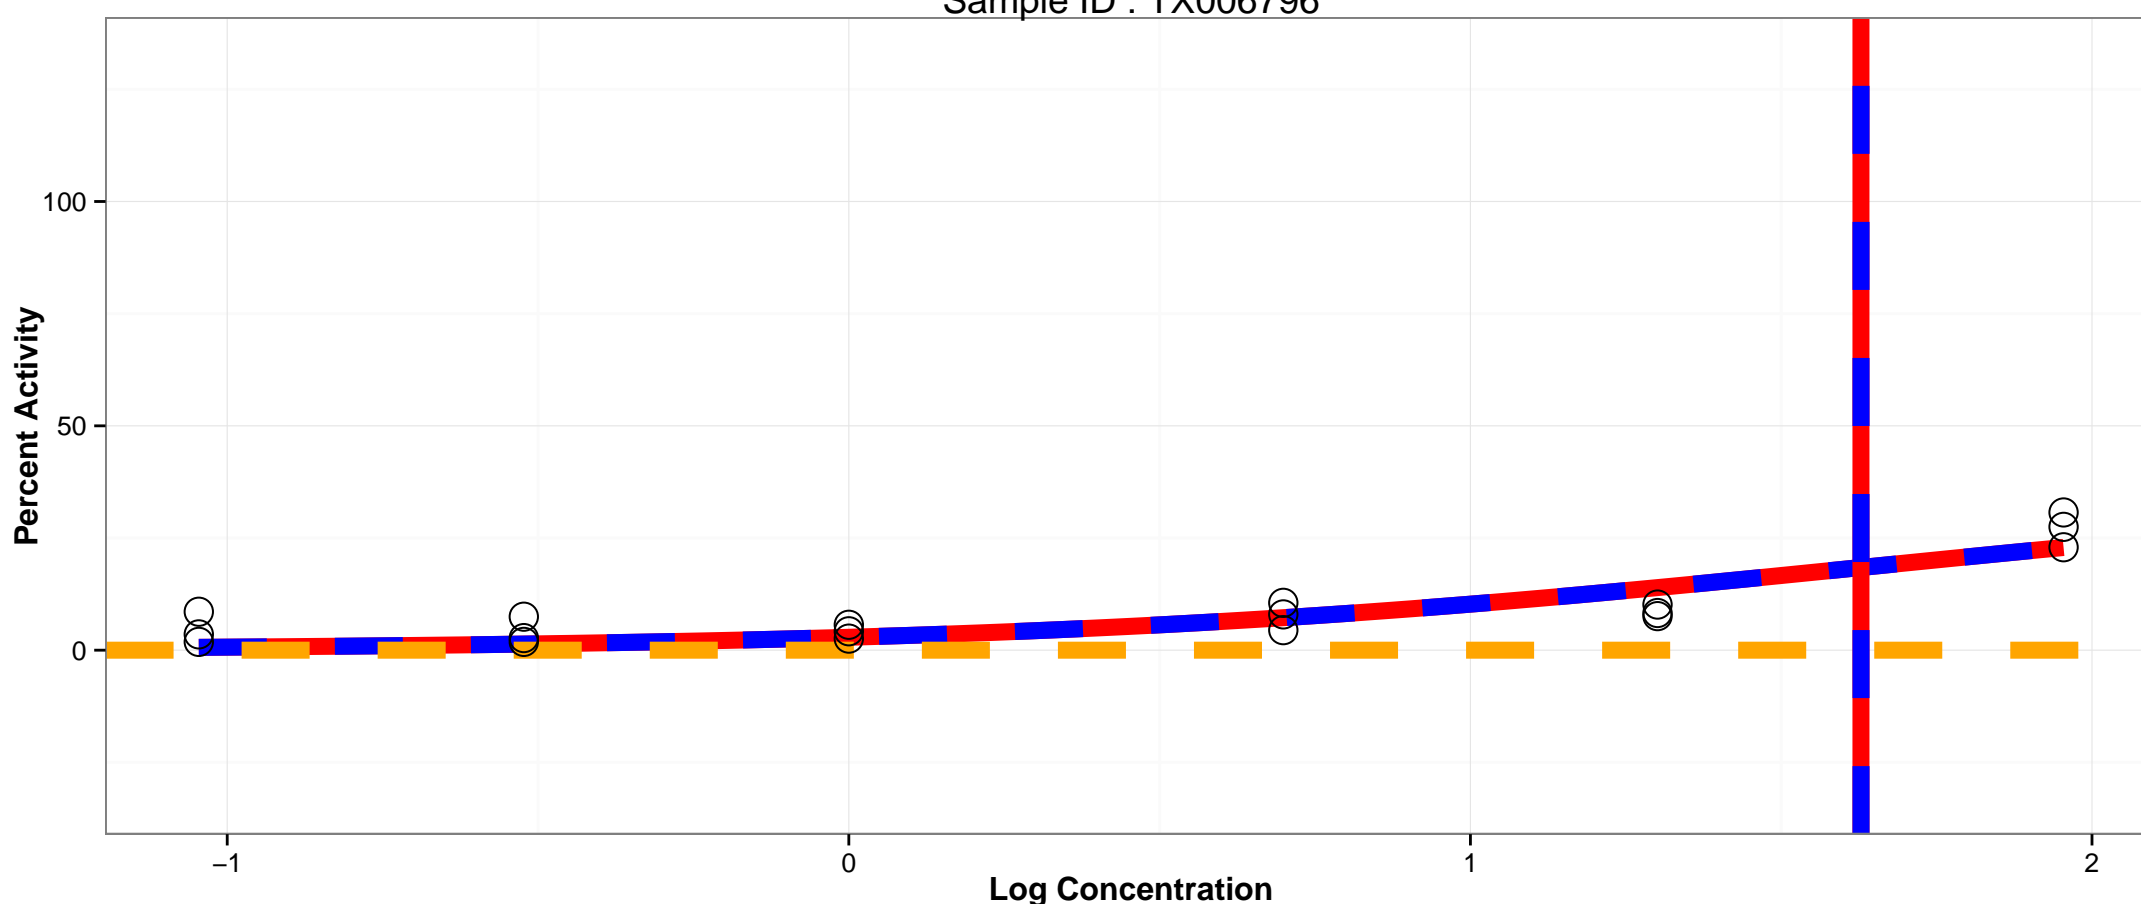

HILL MODEL

|     | tp   | ga   | gw    |
|-----|------|------|-------|
| val | 36.8 | 1.63 | 0.658 |
| sd  | 10.6 | 0.38 | 0.198 |

GAIN-LOSS MODEL

|     | tp   | ga   | gw    | la   | lw    |
|-----|------|------|-------|------|-------|
| val | 36.8 | 1.63 | 0.658 | 3.06 | 9.24  |
| sd  | 10.6 | 0.38 | 0.198 | 5030 | 41900 |

|      | CNST   | HILL  | GNLS  |
|------|--------|-------|-------|
| AIC  | 142.98 | 111.9 | 115.9 |
| PROB | 0      | 0.88  | 0.12  |
| RMSE | 12.61  | 4.15  | 4.15  |

MAX\_MEAN : 27.1 MAX\_MED : 27.5 BMAD : 5.69  
COFF : 20 HIT-CALL : 1 FITC : 42 ACTP : 1  
FLAGS : 6

Assay ID 1509 (NHEERL\_HEK293T\_CellTiterGLO)  
Sample ID : TX006796

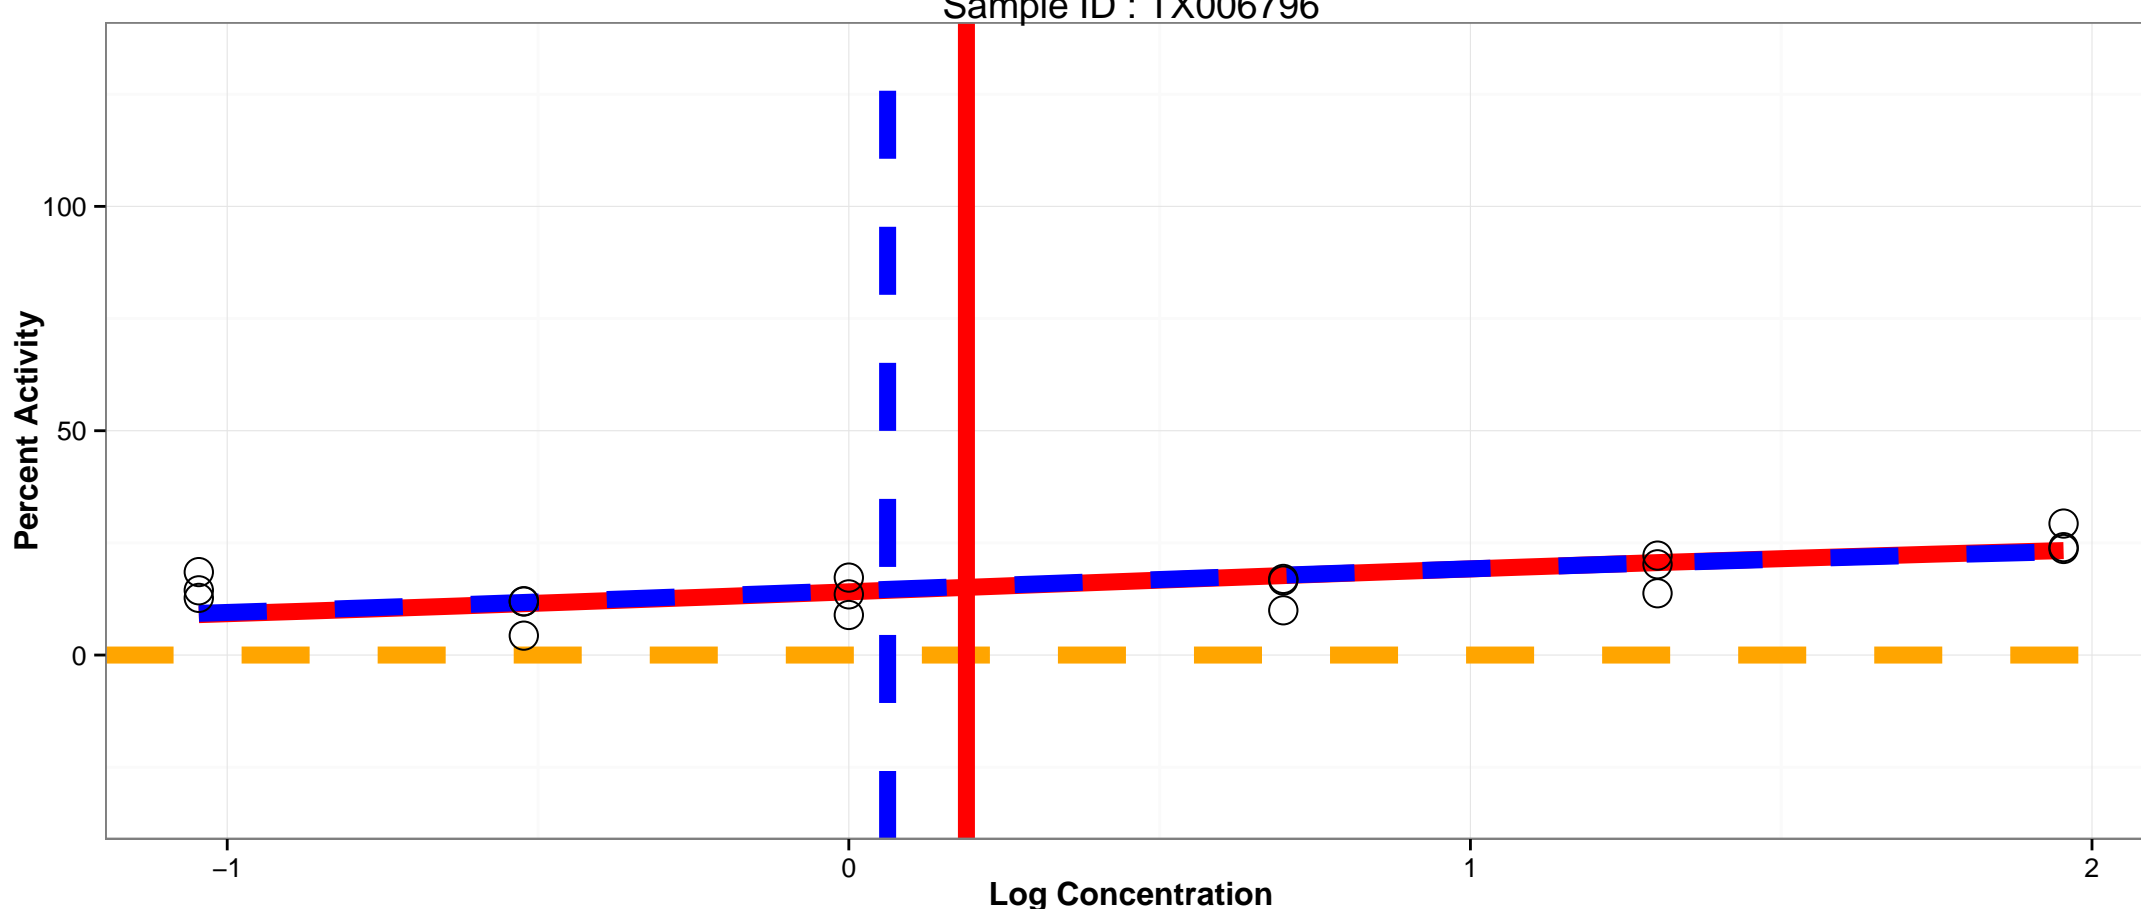

HILL MODEL

|     | tp   | ga    | gw  |
|-----|------|-------|-----|
| val | 30.2 | 0.189 | 0.3 |
| sd  | NA   | NA    | NA  |

GAIN-LOSS MODEL

|     | tp   | ga     | gw    | la   | lw   |
|-----|------|--------|-------|------|------|
| val | 29.3 | 0.0624 | 0.3   | 3.95 | 4.23 |
| sd  | 39.9 | 4.34   | 0.575 | 1670 | 3530 |

|      | CNST   | HILL   | GNLS   |
|------|--------|--------|--------|
| AIC  | 158.96 | 114.53 | 118.49 |
| PROB | 0      | 0.88   | 0.12   |
| RMSE | 17.22  | 4.53   | 4.53   |

MAX\_MEAN : 25.7 MAX\_MED : 24.1 BMAD : 5.54  
COFF : 20 HIT-CALL : 1 FITC : 42 ACTP : 1  
FLAGS :

Assay ID 1848 (NHEERL\_Quantilum\_inhib\_2\_dn)  
Sample ID : TX006796

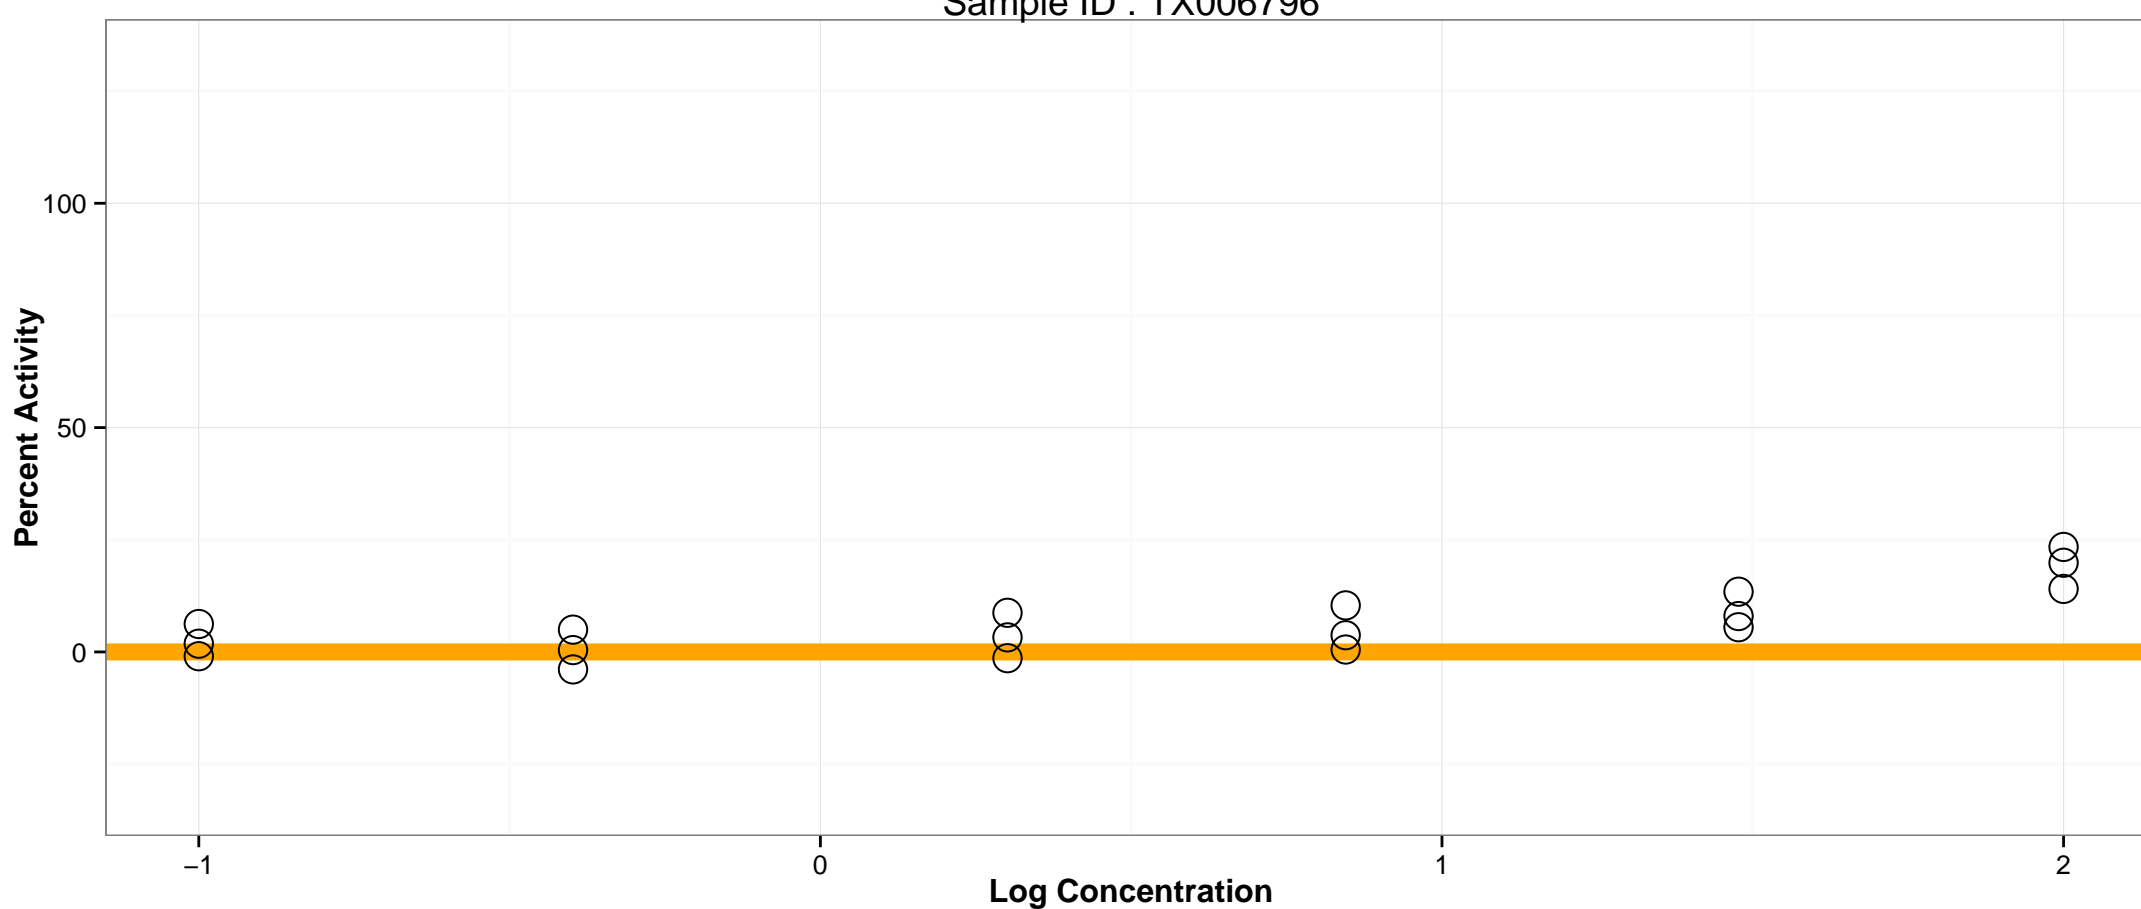

HILL MODEL

HILL MODEL: Not applicable

GAIN-LOSS MODEL

GNLS MODEL: Not applicable

|      | CNST   | HILL | GNLS |
|------|--------|------|------|
| AIC  | 134.83 | NA   | NA   |
| PROB | 1      | NA   | NA   |
| RMSE | 9.75   | NA   | NA   |

MAX\_MEAN : 19.1 MAX\_MED : 19.9 BMAD : 8.58  
COFF : 20 HIT-CALL : 0 FITC : 4 ACTP : 0  
FLAGS :

Chemical : Triclocarban  
CAS : 101-20-2

Assay ID 1508 (NHEERL\_TPO\_AUR\_dn)  
Sample ID : TX006849

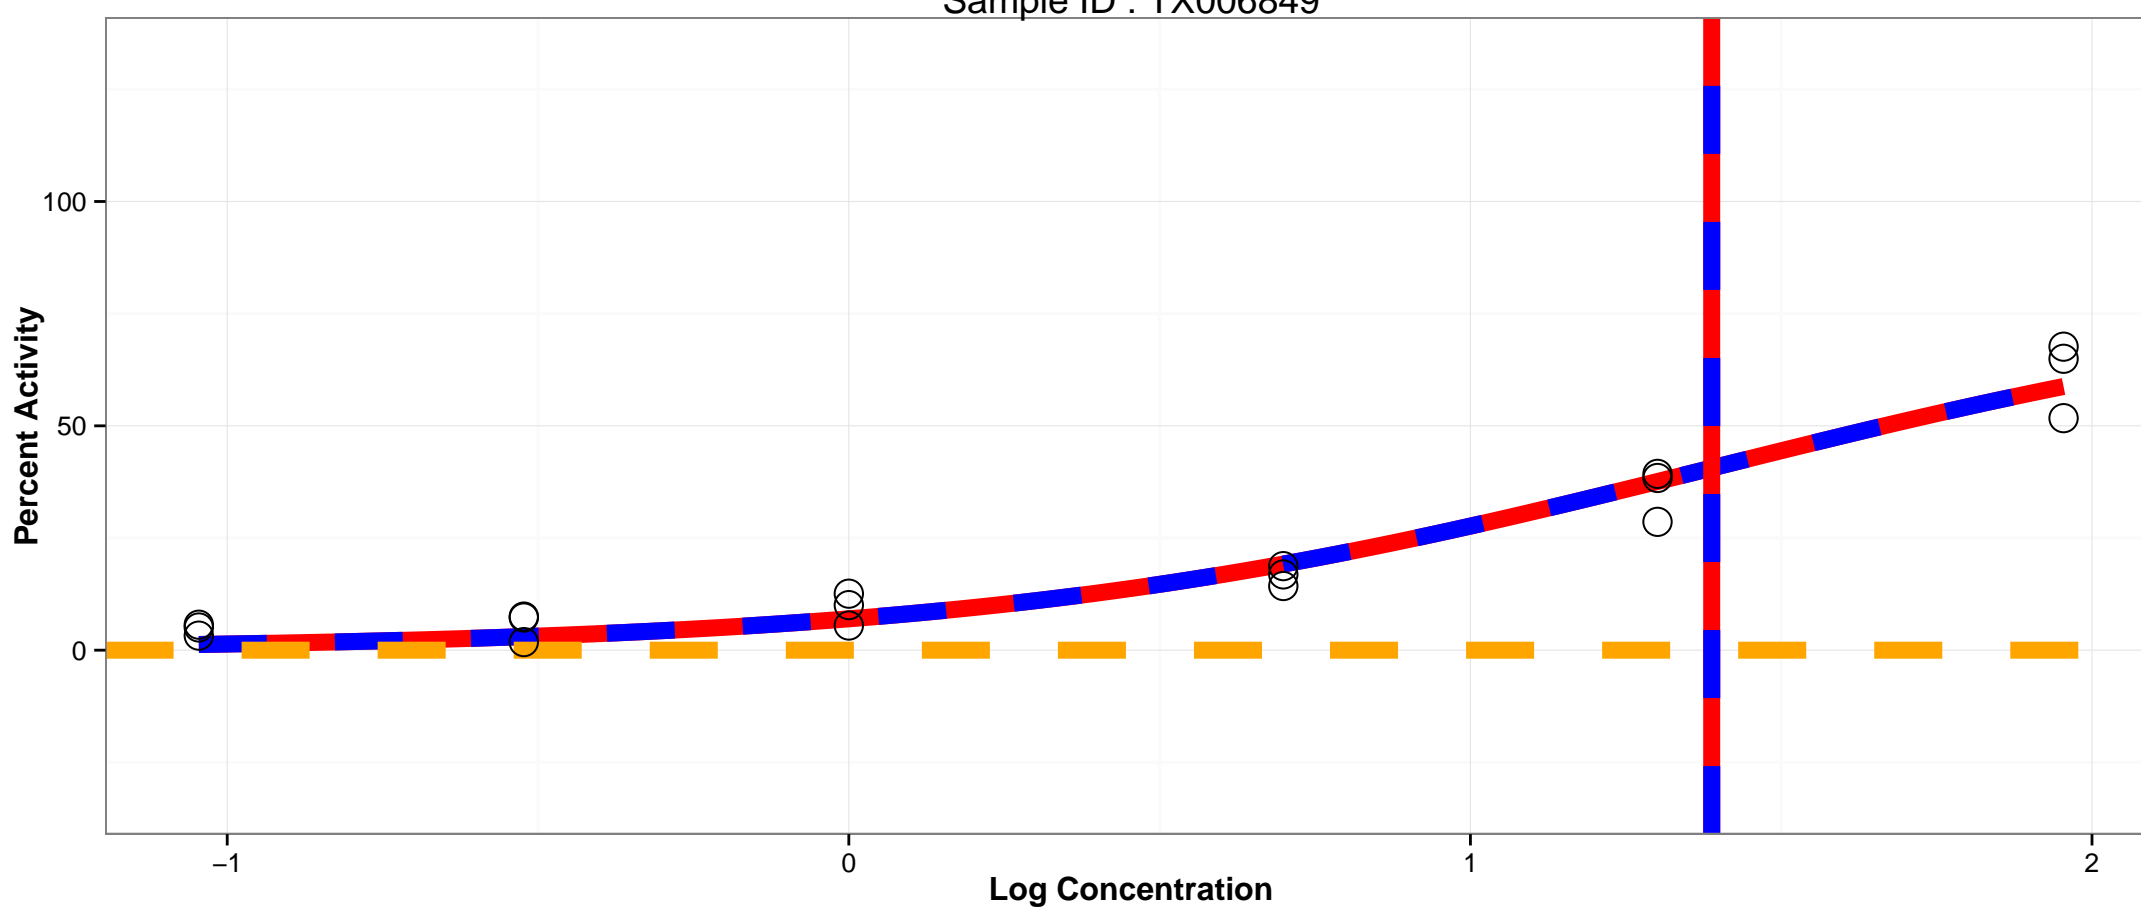

HILL MODEL

|     | tp   | ga    | gw    |
|-----|------|-------|-------|
| val | 81.2 | 1.39  | 0.739 |
| sd  | 17.6 | 0.248 | 0.129 |

GAIN-LOSS MODEL

|     | tp   | ga    | gw    | la    | lw      |
|-----|------|-------|-------|-------|---------|
| val | 81.2 | 1.39  | 0.739 | 2.87  | 15      |
| sd  | 17.6 | 0.248 | 0.128 | 58600 | 1050000 |

|      | CNST   | HILL | GNLS |
|------|--------|------|------|
| AIC  | 175.49 | 117  | 121  |
| PROB | 0      | 0.88 | 0.12 |
| RMSE | 30.39  | 4.72 | 4.72 |

MAX\_MEAN : 61.4 MAX\_MED : 65 BMAD : 5.69  
COFF : 20 HIT-CALL : 1 FITC : 42 ACTP : 1  
FLAGS :

Assay ID 1509 (NHEERL\_HEK293T\_CellTiterGLO)  
Sample ID : TX006849

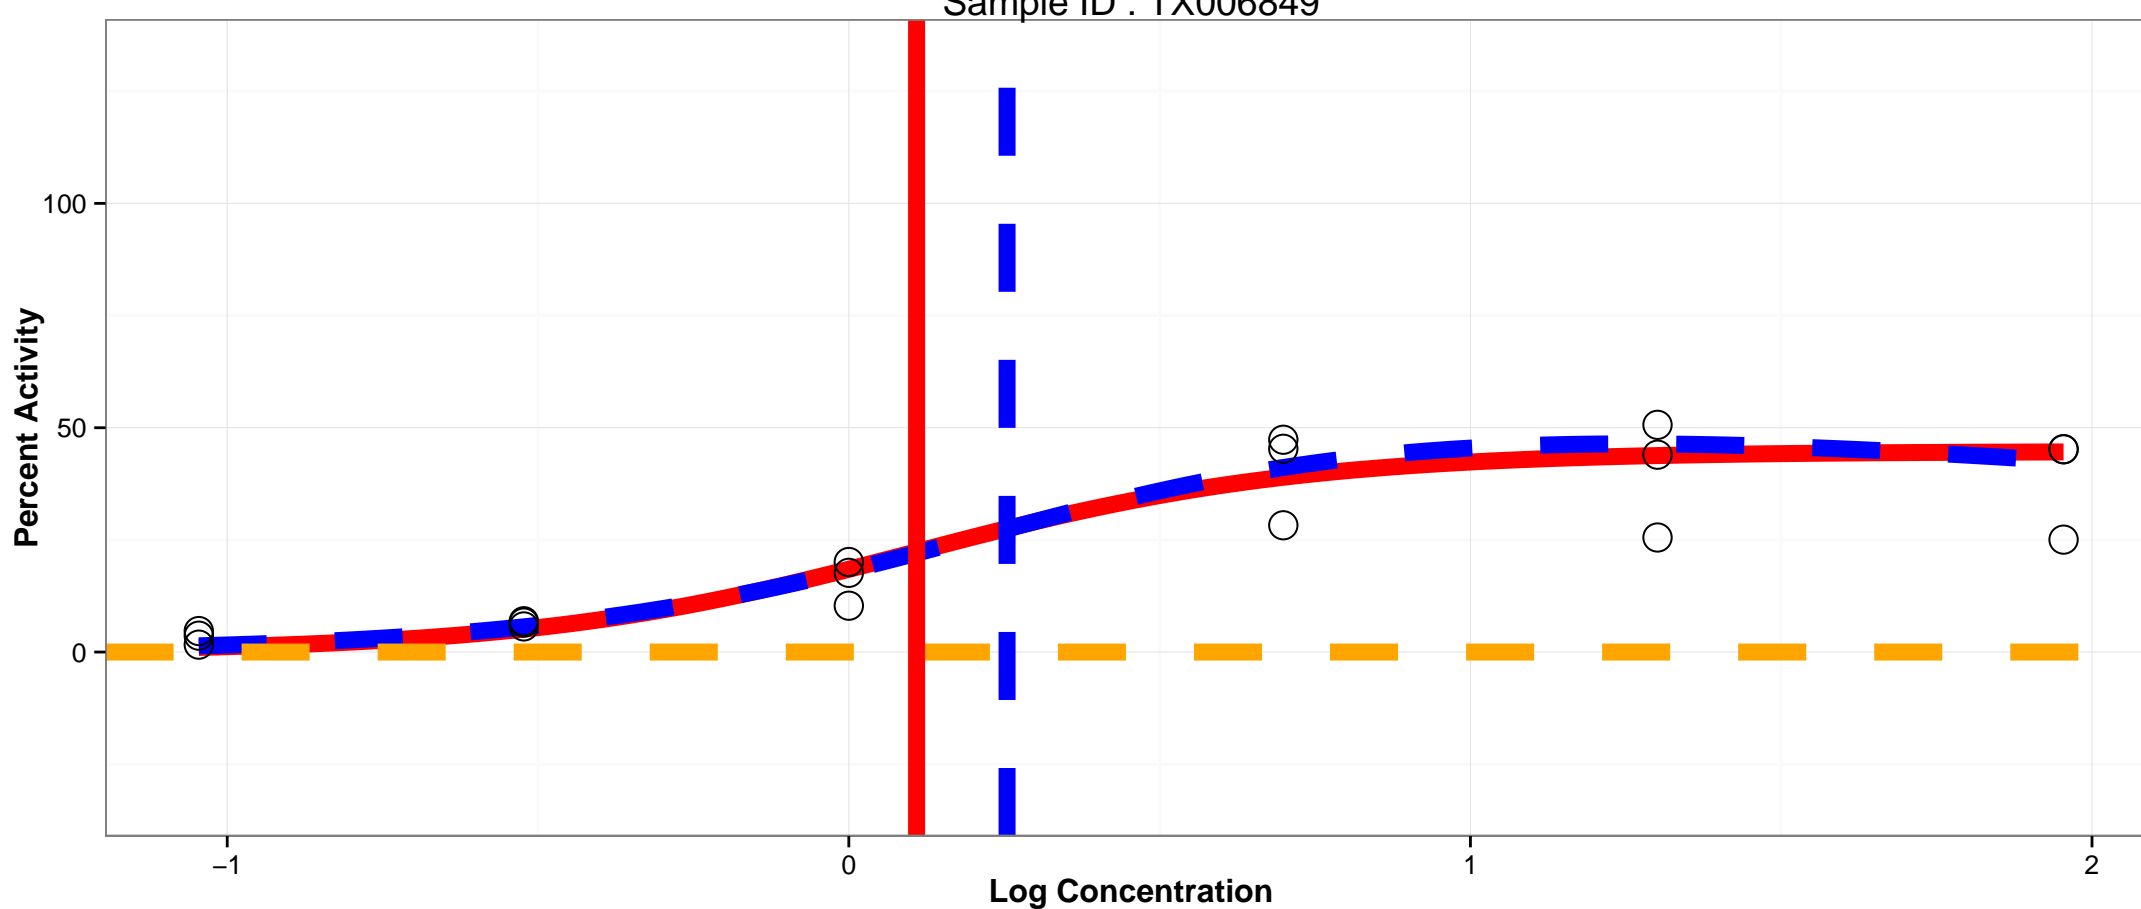

HILL MODEL

|     | tp   | ga     | gw   |
|-----|------|--------|------|
| val | 44.7 | 0.109  | 1.41 |
| sd  | 2.91 | 0.0987 | 0.44 |

GAIN-LOSS MODEL

|     | tp   | ga    | gw    | la   | lw    |
|-----|------|-------|-------|------|-------|
| val | 60.8 | 0.255 | 1.24  | 3.06 | 0.345 |
| sd  | 41.7 | 0.228 | 0.365 | 1.73 | 0.691 |

|      | CNST   | HILL   | GNLS   |
|------|--------|--------|--------|
| AIC  | 177.26 | 130.47 | 133.23 |
| PROB | 0      | 0.8    | 0.2    |
| RMSE | 29.77  | 7.76   | 7.76   |

MAX\_MEAN : 40.3 MAX\_MED : 45.3 BMAD : 5.54  
COFF : 20 HIT-CALL : 1 FITC : 41 ACTP : 1  
FLAGS :

Assay ID 1848 (NHEERL\_Quantilum\_inhib\_2\_dn)  
Sample ID : TX006849

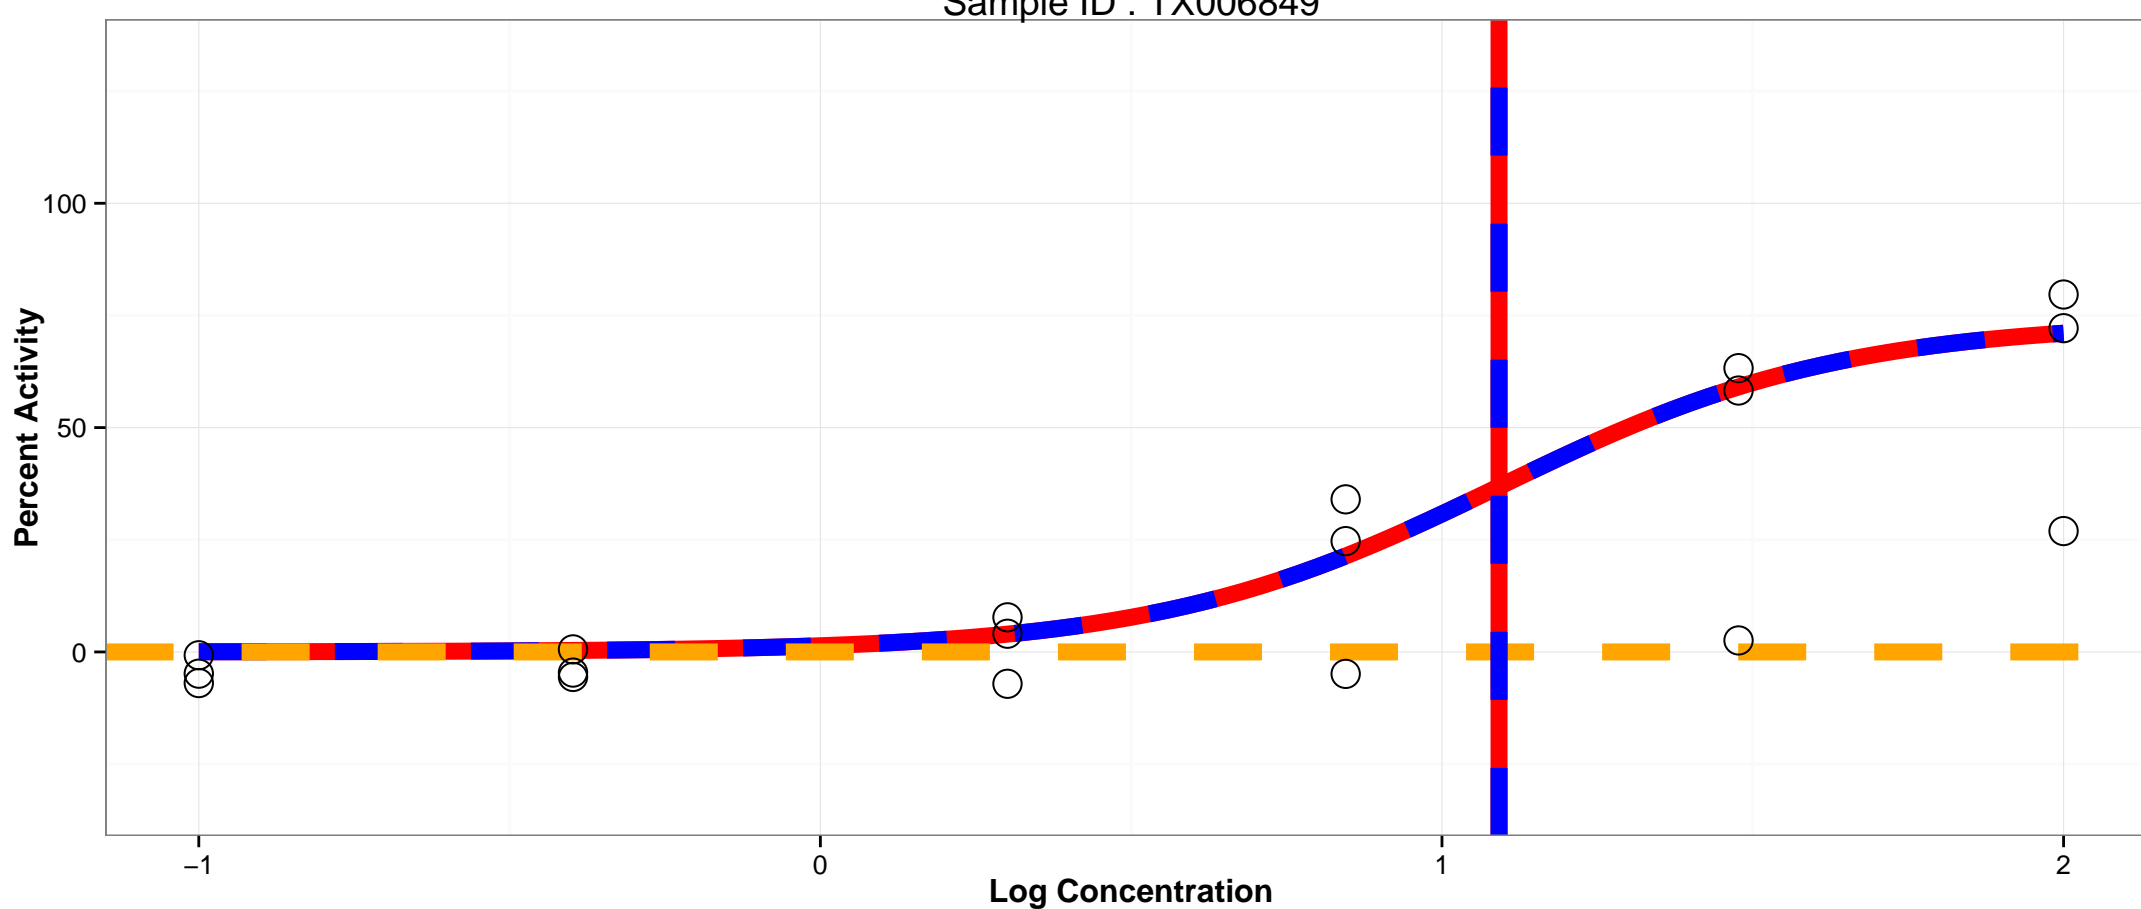

HILL MODEL

|     | tp   | ga    | gw    |
|-----|------|-------|-------|
| val | 73.7 | 1.09  | 1.57  |
| sd  | 10.7 | 0.176 | 0.535 |

GAIN-LOSS MODEL

|     | tp   | ga    | gw    | la   | lw   |
|-----|------|-------|-------|------|------|
| val | 73.7 | 1.09  | 1.57  | 2.62 | 11.5 |
| sd  | 10.7 | 0.176 | 0.535 | 348  | 6420 |

|      | CNST   | HILL   | GNLS   |
|------|--------|--------|--------|
| AIC  | 178.99 | 156.98 | 160.98 |
| PROB | 0      | 0.88   | 0.12   |
| RMSE | 34.75  | 18.79  | 18.79  |

MAX\_MEAN : 59.6 MAX\_MED : 72.2 BMAD : 8.58  
COFF : 20 HIT-CALL : 1 FITC : 41 ACTP : 1  
FLAGS :



Chemical : Methyldopa sesquihydrate  
CAS : 41372-08-1

Assay ID 1508 (NHEERL\_TPO\_AUR\_dn)  
Sample ID : TX006855

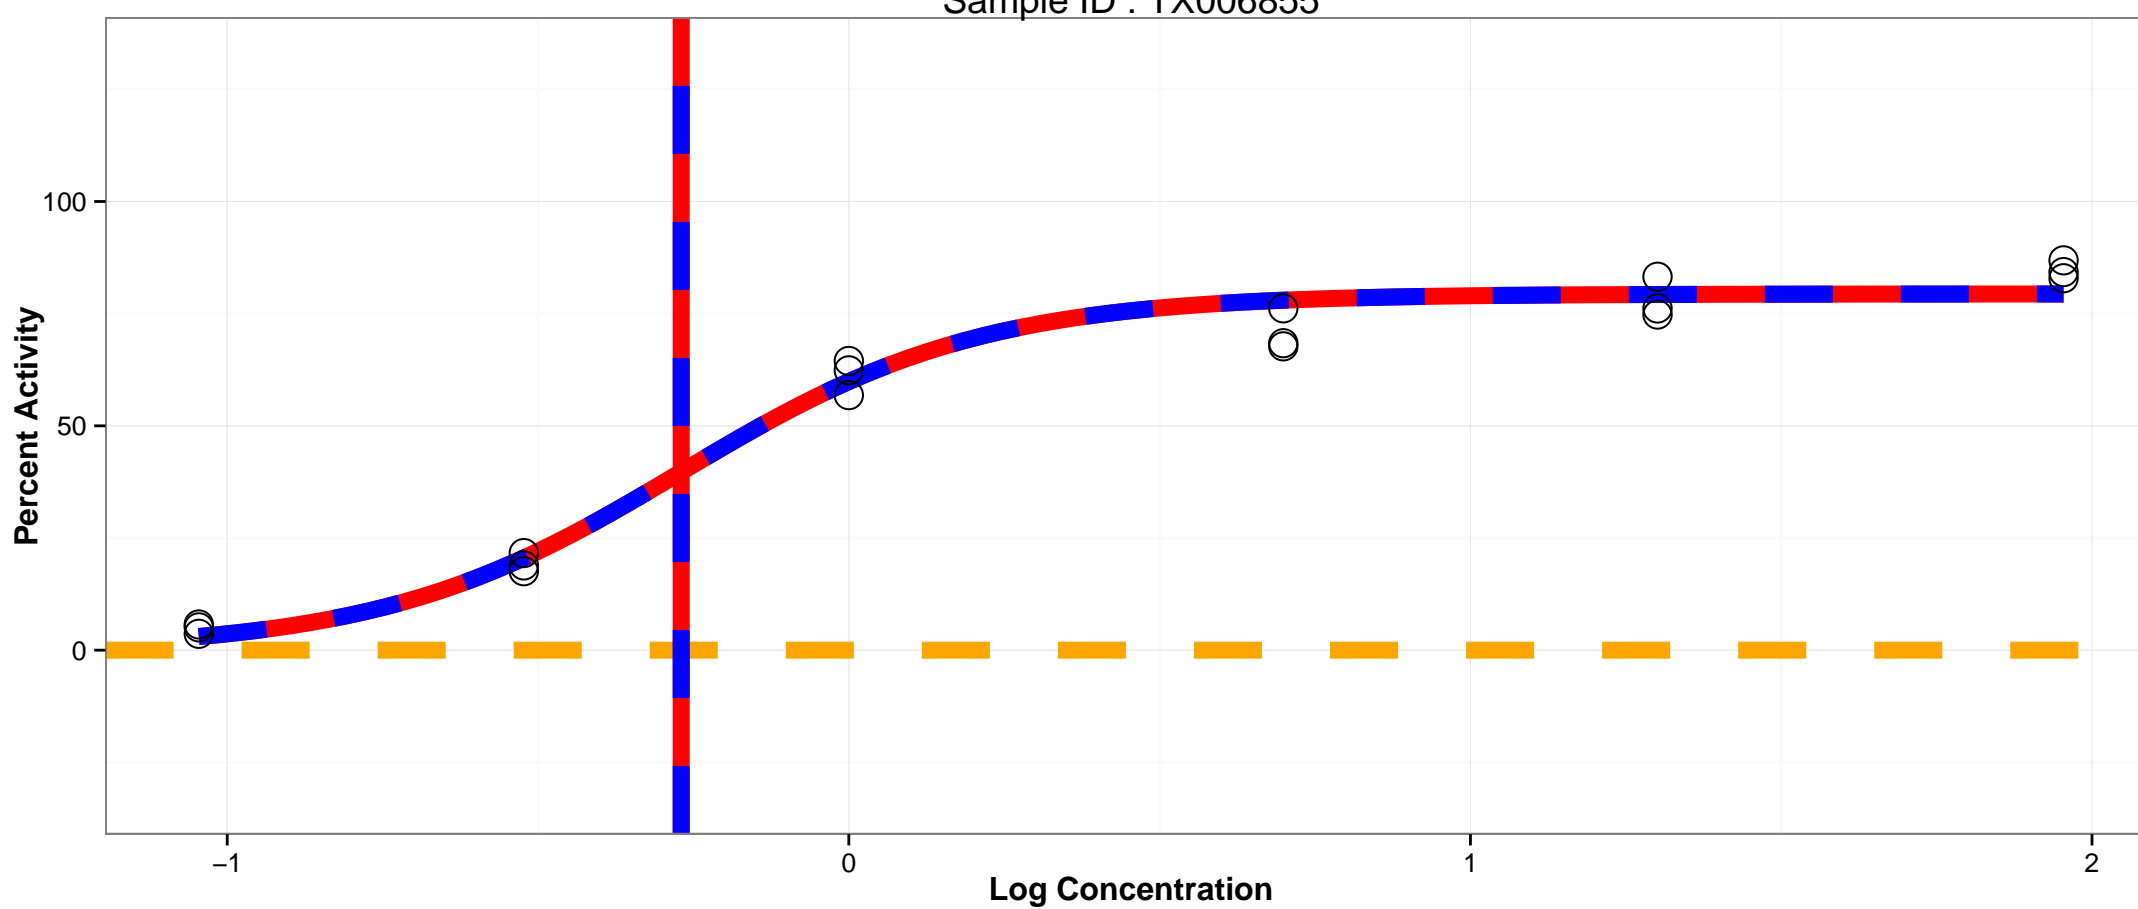

HILL MODEL

|     | tp   | ga     | gw   |
|-----|------|--------|------|
| val | 79.4 | -0.27  | 1.8  |
| sd  | 2.14 | 0.0334 | 0.22 |

GAIN-LOSS MODEL

|     | tp   | ga     | gw   | la   | lw    |
|-----|------|--------|------|------|-------|
| val | 79.4 | -0.27  | 1.8  | 2.53 | 17.9  |
| sd  | 2.14 | 0.0334 | 0.22 | 518  | 15700 |

|      | CNST   | HILL   | GNLS   |
|------|--------|--------|--------|
| AIC  | 204.39 | 115.96 | 119.96 |
| PROB | 0      | 0.88   | 0.12   |
| RMSE | 61.2   | 4.71   | 4.71   |

MAX\_MEAN : 84.7 MAX\_MED : 84.3 BMAD : 5.69  
COFF : 20 HIT-CALL : 1 FITC : 41 ACTP : 1  
FLAGS :

Assay ID 1509 (NHEERL\_HEK293T\_CellTiterGLO)  
Sample ID : TX006855

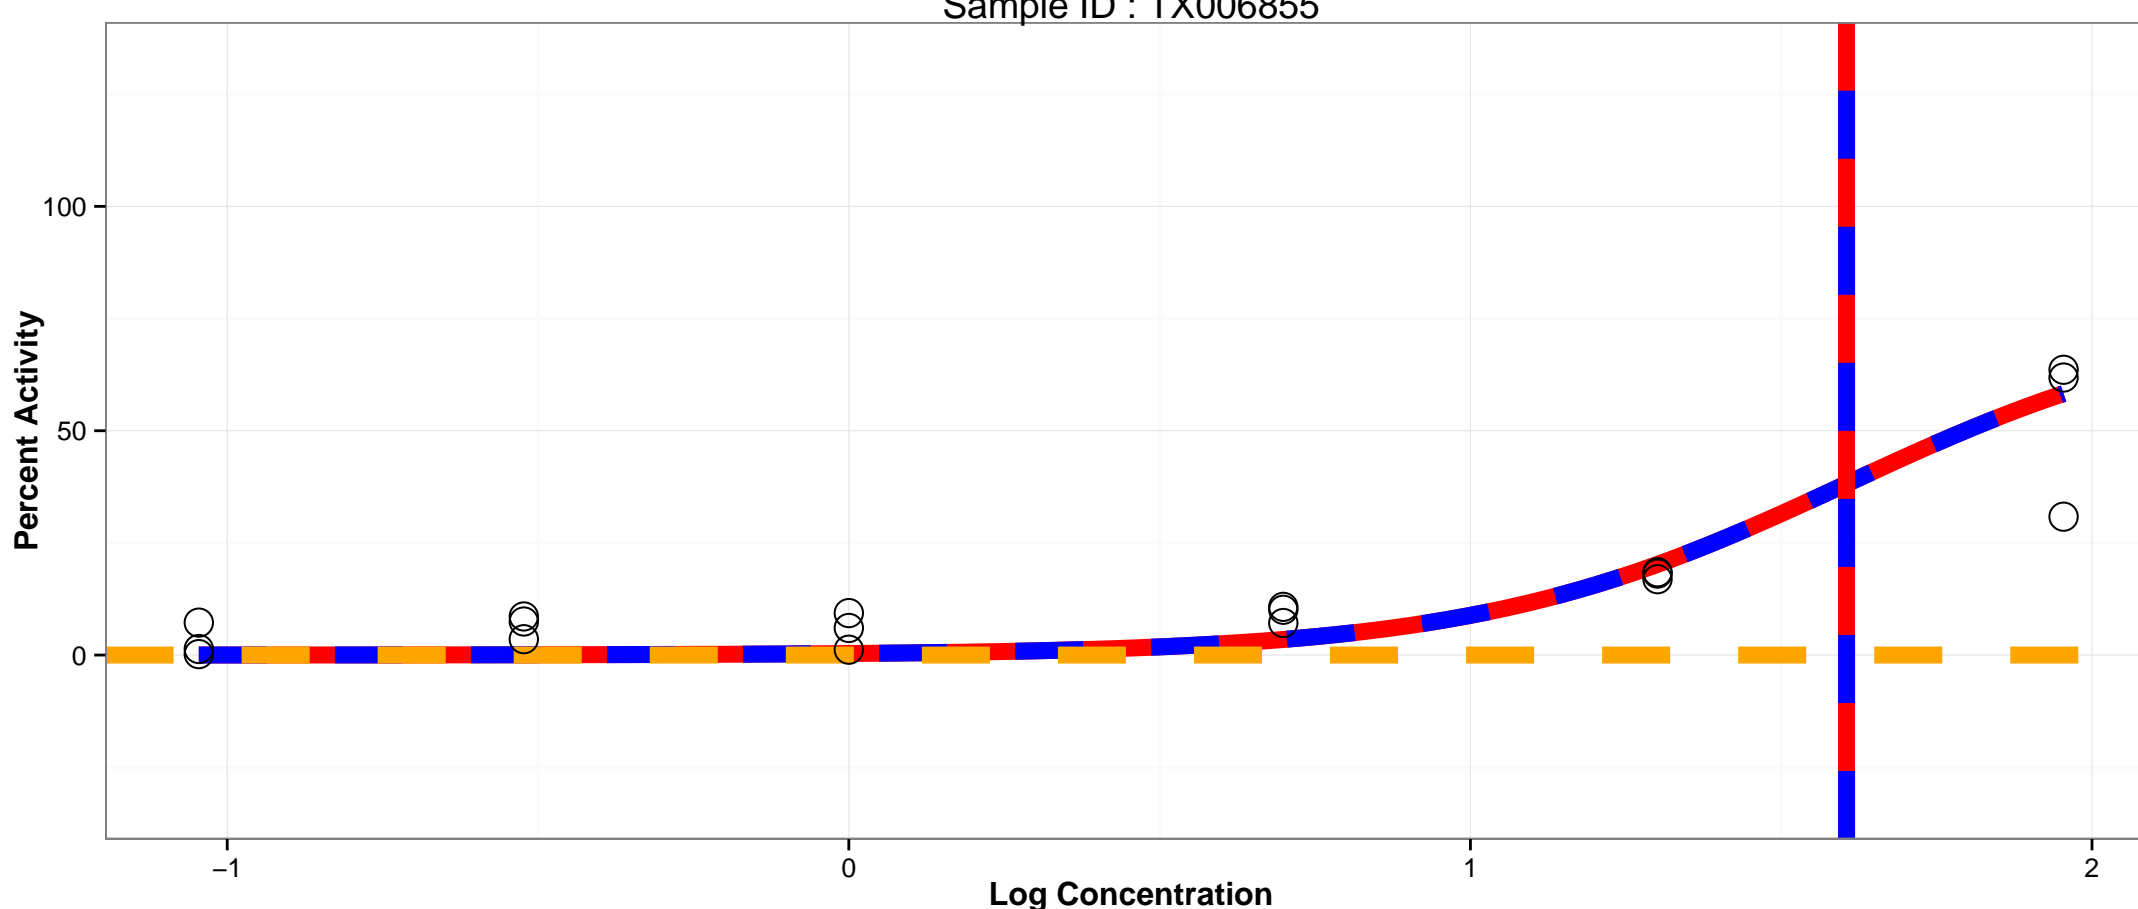

HILL MODEL

|     | tp   | ga    | gw    |
|-----|------|-------|-------|
| val | 76.3 | 1.61  | 1.46  |
| sd  | 20.9 | 0.204 | 0.609 |

GAIN-LOSS MODEL

|     | tp   | ga   | gw   | la   | lw   |
|-----|------|------|------|------|------|
| val | 76.3 | 1.61 | 1.46 | 3.87 | 17.8 |
| sd  | NA   | NA   | NA   | NA   | NA   |

|      | CNST   | HILL   | GNLS   |
|------|--------|--------|--------|
| AIC  | 162.92 | 131.12 | 135.12 |
| PROB | 0      | 0.88   | 0.12   |
| RMSE | 24.01  | 8.27   | 8.27   |

MAX\_MEAN : 52.1 MAX\_MED : 61.9 BMAD : 5.54  
COFF : 20 HIT-CALL : 1 FITC : 42 ACTP : 1  
FLAGS :

Assay ID 1848 (NHEERL\_Quantilum\_inhib\_2\_dn)  
Sample ID : TX006855

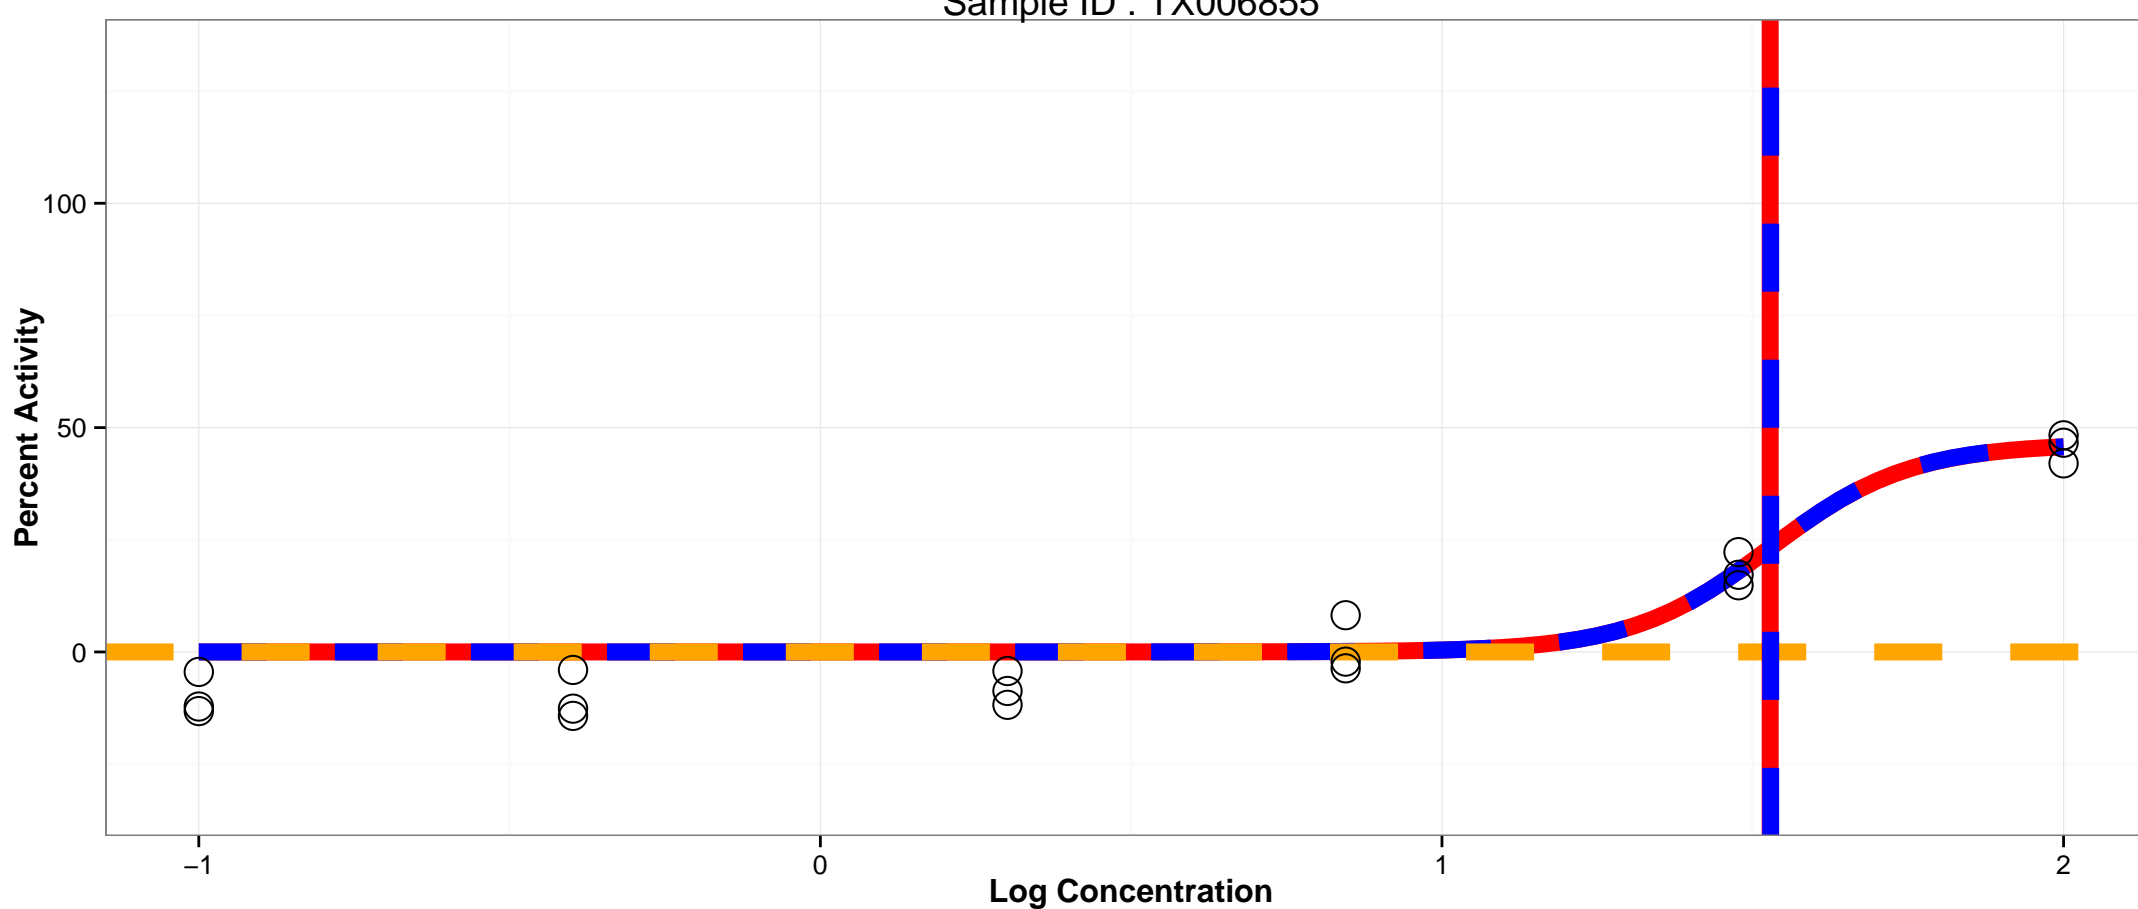

HILL MODEL

|     | tp   | ga    | gw   |
|-----|------|-------|------|
| val | 46.4 | 1.53  | 3.86 |
| sd  | 16.5 | 0.316 | 18.9 |

GAIN-LOSS MODEL

|     | tp   | ga    | gw   | la   | lw   |
|-----|------|-------|------|------|------|
| val | 46.6 | 1.53  | 3.85 | 3.93 | 1.19 |
| sd  | 111  | 0.448 | 18.6 | 275  | 171  |

|      | CNST   | HILL   | GNLS   |
|------|--------|--------|--------|
| AIC  | 162.73 | 134.57 | 138.57 |
| PROB | 0      | 0.88   | 0.12   |
| RMSE | 21.51  | 7.77   | 7.77   |

MAX\_MEAN : 45.7 MAX\_MED : 46.6 BMAD : 8.58  
COFF : 20 HIT-CALL : 1 FITC : 41 ACTP : 1  
FLAGS : 6

Chemical : Tamoxifen citrate  
CAS : 54965-24-1

Assay ID 1508 (NHEERL\_TPO\_AUR\_dn)  
Sample ID : TX006863

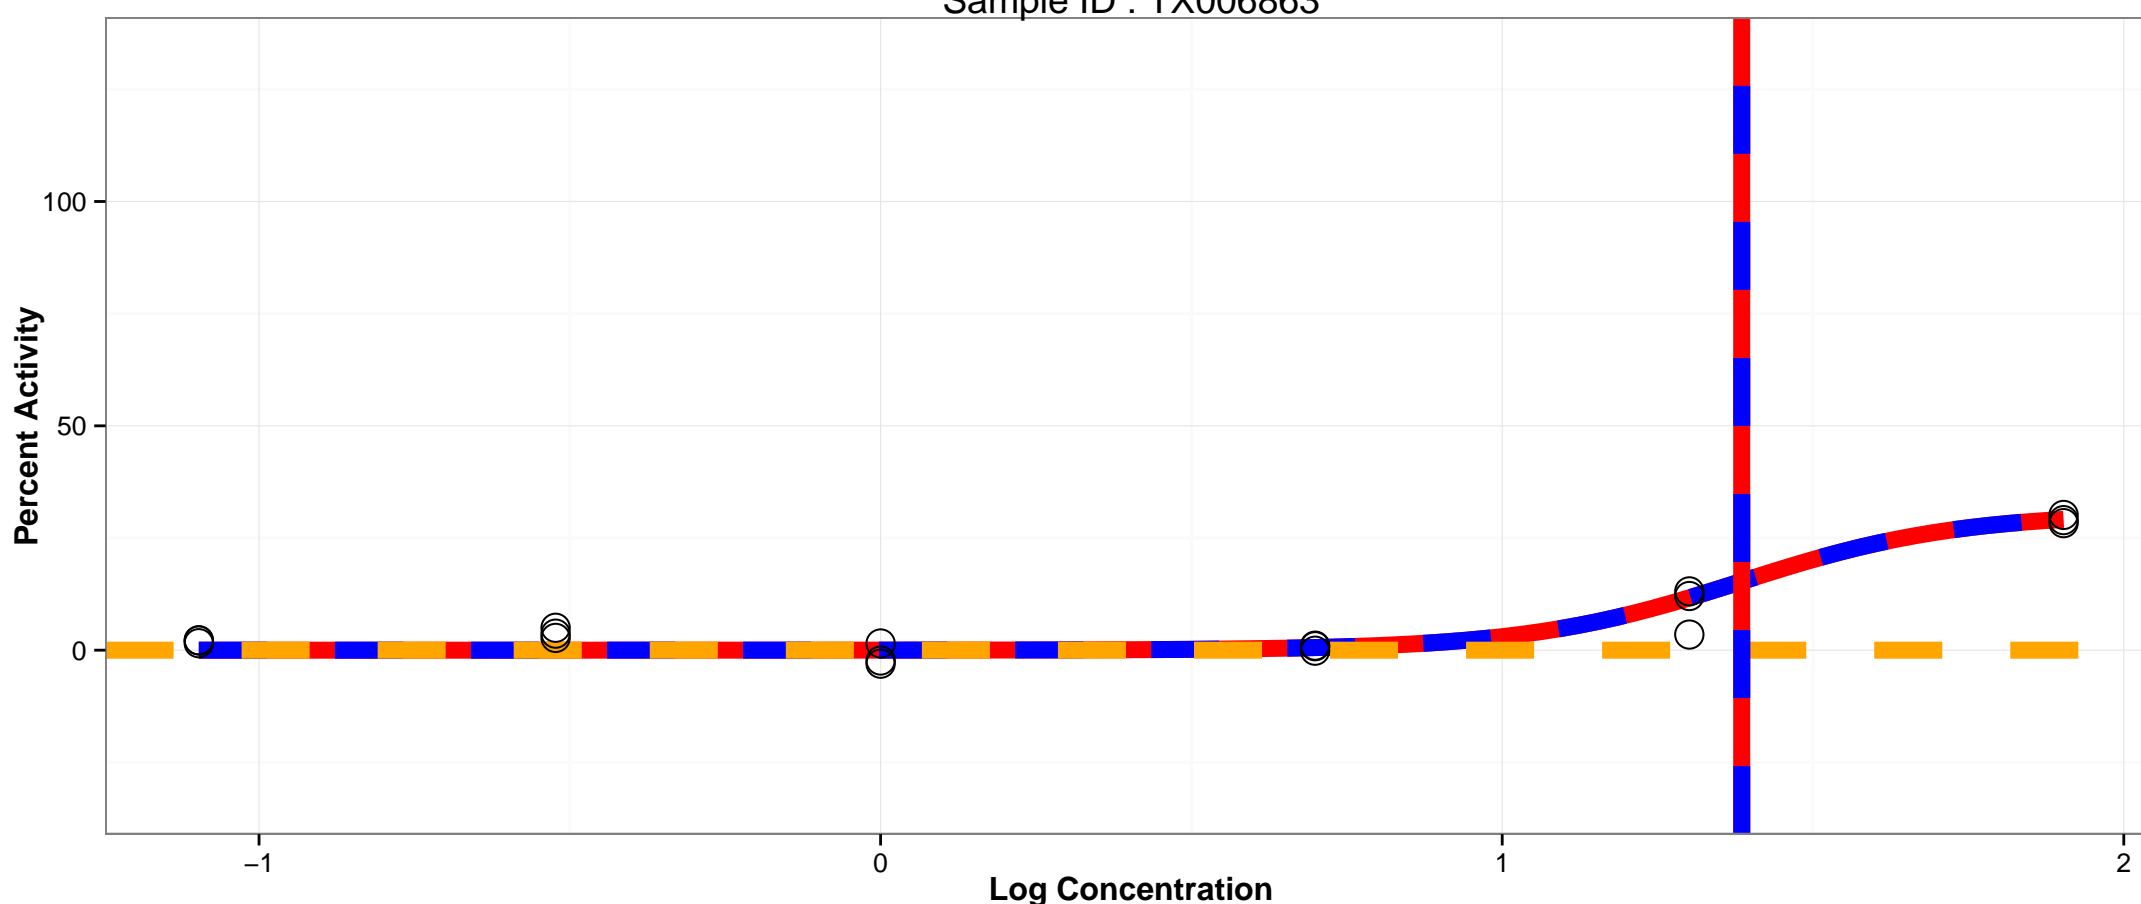

HILL MODEL

|     | tp   | ga     | gw   |
|-----|------|--------|------|
| val | 30.6 | 1.39   | 2.5  |
| sd  | 3.49 | 0.0915 | 1.42 |

GAIN-LOSS MODEL

|     | tp   | ga    | gw   | la   | lw   |
|-----|------|-------|------|------|------|
| val | 30.6 | 1.39  | 2.5  | 2.55 | 5.42 |
| sd  | 8.67 | 0.119 | 1.43 | 90.2 | 746  |

|      | CNST   | HILL  | GNLS  |
|------|--------|-------|-------|
| AIC  | 140.56 | 95.27 | 99.27 |
| PROB | 0      | 0.88  | 0.12  |
| RMSE | 12.82  | 2.85  | 2.85  |

MAX\_MEAN : 29.2 MAX\_MED : 29 BMAD : 5.69  
COFF : 20 HIT-CALL : 1 FITC : 41 ACTP : 1  
FLAGS : 6

Assay ID 1509 (NHEERL\_HEK293T\_CellTiterGLO)  
Sample ID : TX006863

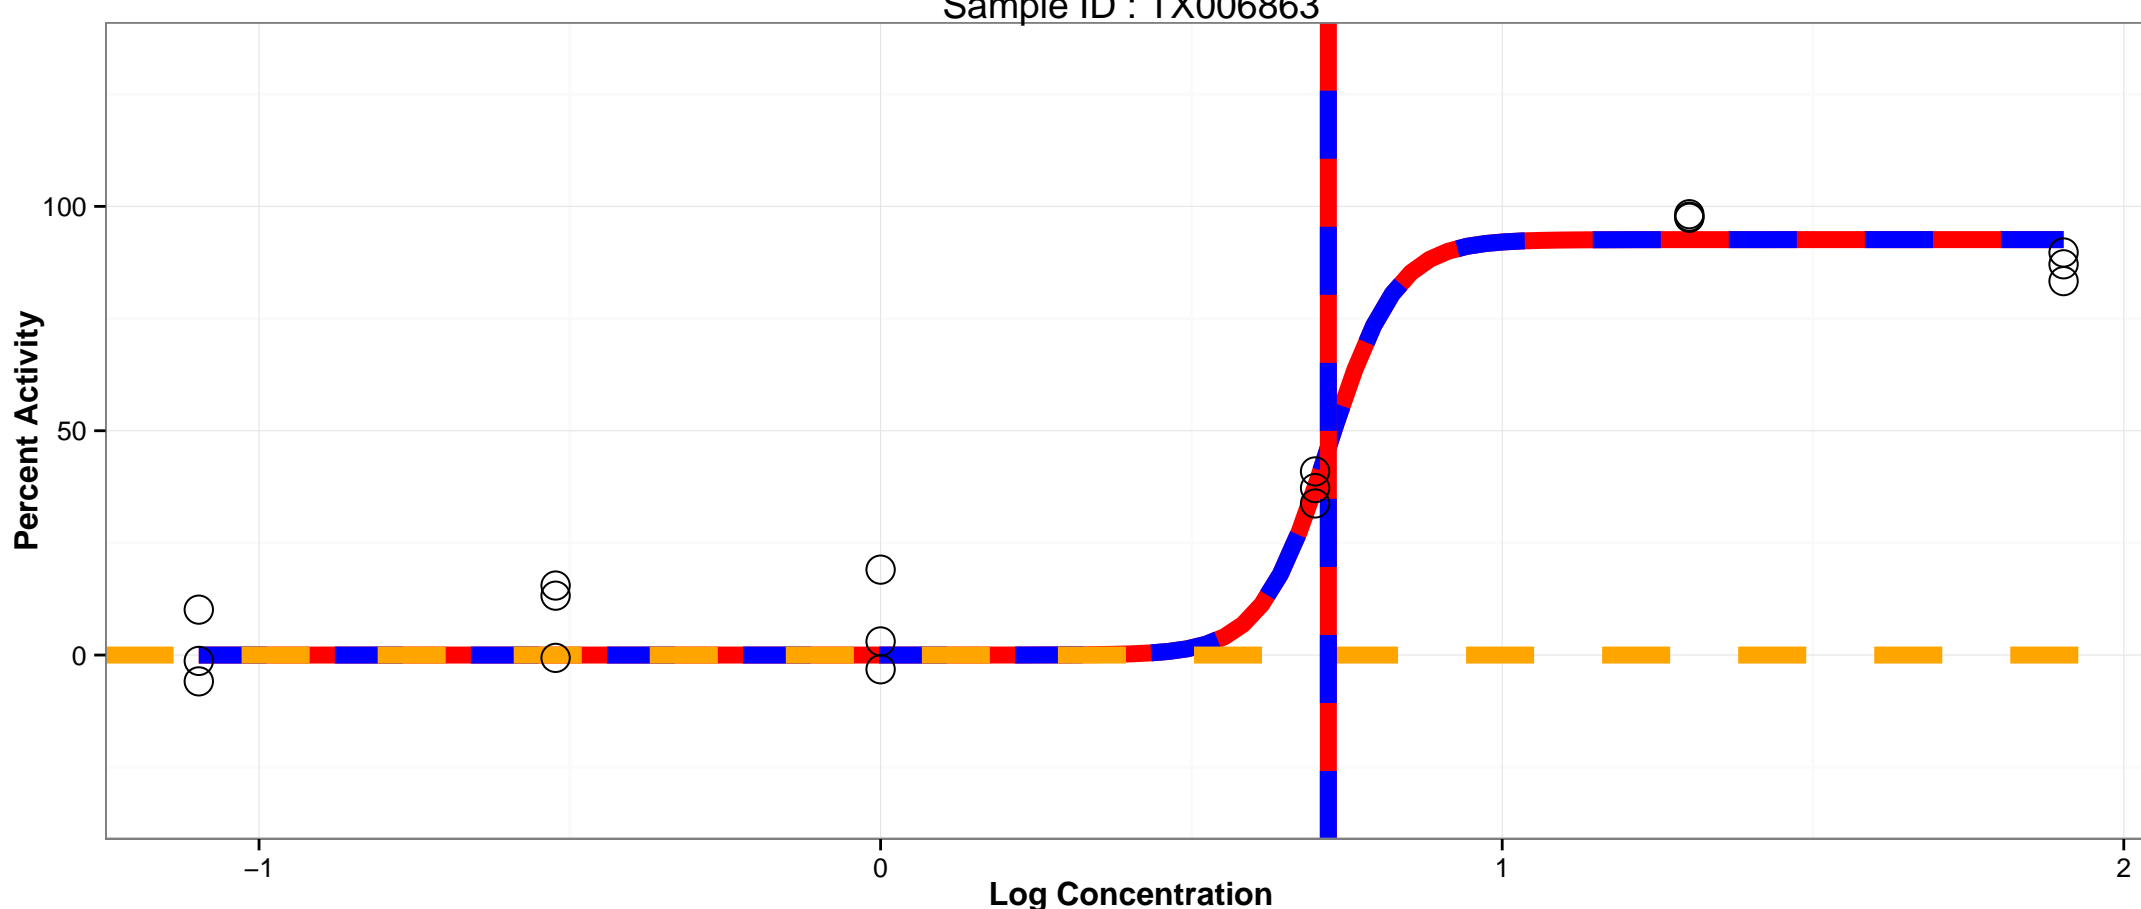

HILL MODEL

|     | tp   | ga     | gw   |
|-----|------|--------|------|
| val | 92.6 | 0.72   | 8    |
| sd  | 3.07 | 0.0526 | 19.6 |

GAIN-LOSS MODEL

|     | tp   | ga   | gw | la   | lw   |
|-----|------|------|----|------|------|
| val | 92.6 | 0.72 | 8  | 3.77 | 9.08 |
| sd  | NA   | NA   | NA | NA   | NA   |

|      | CNST   | HILL   | GNLS   |
|------|--------|--------|--------|
| AIC  | 198.86 | 134.41 | 138.41 |
| PROB | 0      | 0.88   | 0.12   |
| RMSE | 55.99  | 8.06   | 8.06   |

MAX\_MEAN : 97.8 MAX\_MED : 97.7 BMAD : 5.54  
COFF : 20 HIT-CALL : 1 FITC : 41 ACTP : 1  
FLAGS :

Assay ID 1848 (NHEERL\_Quantilum\_inhib\_2\_dn)  
Sample ID : TX006863

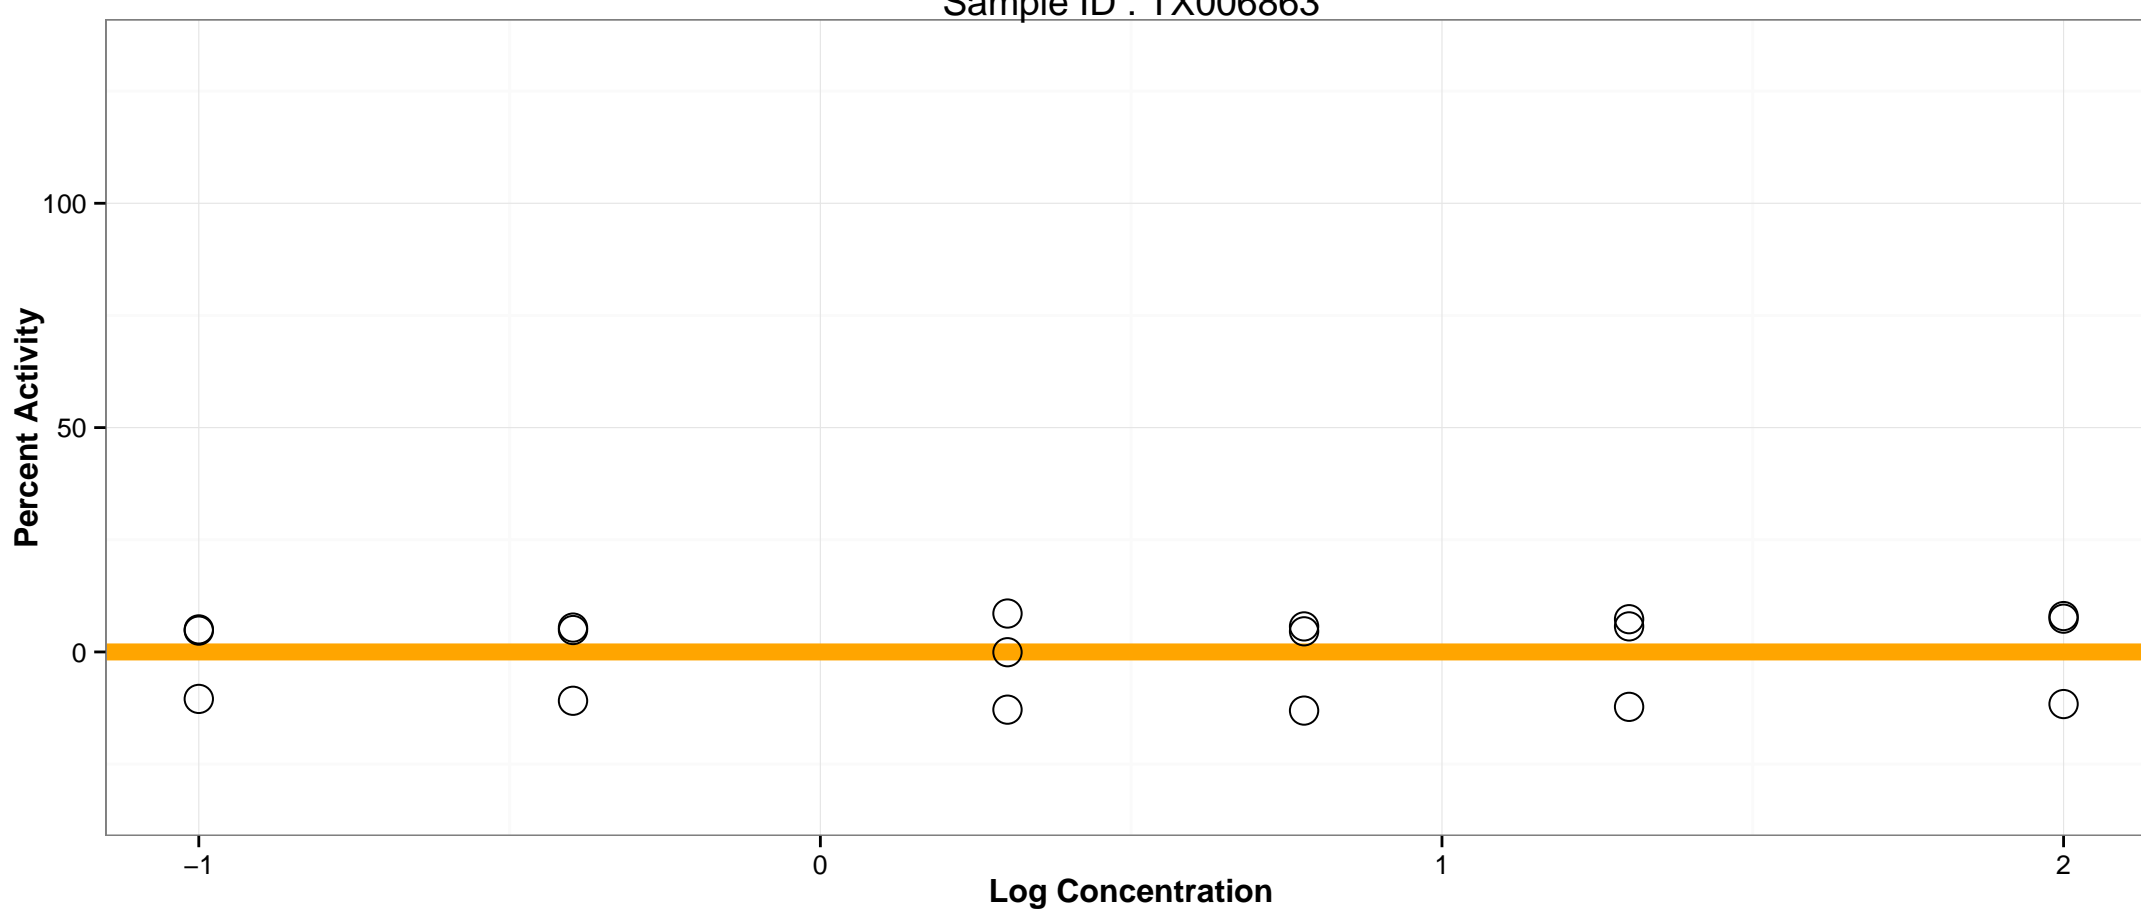

HILL MODEL

HILL MODEL: Not applicable

GAIN-LOSS MODEL

GNLS MODEL: Not applicable

|      | CNST   | HILL | GNLS |
|------|--------|------|------|
| AIC  | 133.09 | NA   | NA   |
| PROB | 1      | NA   | NA   |
| RMSE | 8.44   | NA   | NA   |

MAX\_MEAN : 1.28 MAX\_MED : 7.43 BMAD : 8.58  
COFF : 20 HIT-CALL : 0 FITC : 4 ACTP : 0  
FLAGS :

Chemical : 6-Thioguanine  
CAS : 154-42-7

Assay ID 1508 (NHEERL\_TPO\_AUR\_dn)  
Sample ID : TX006867

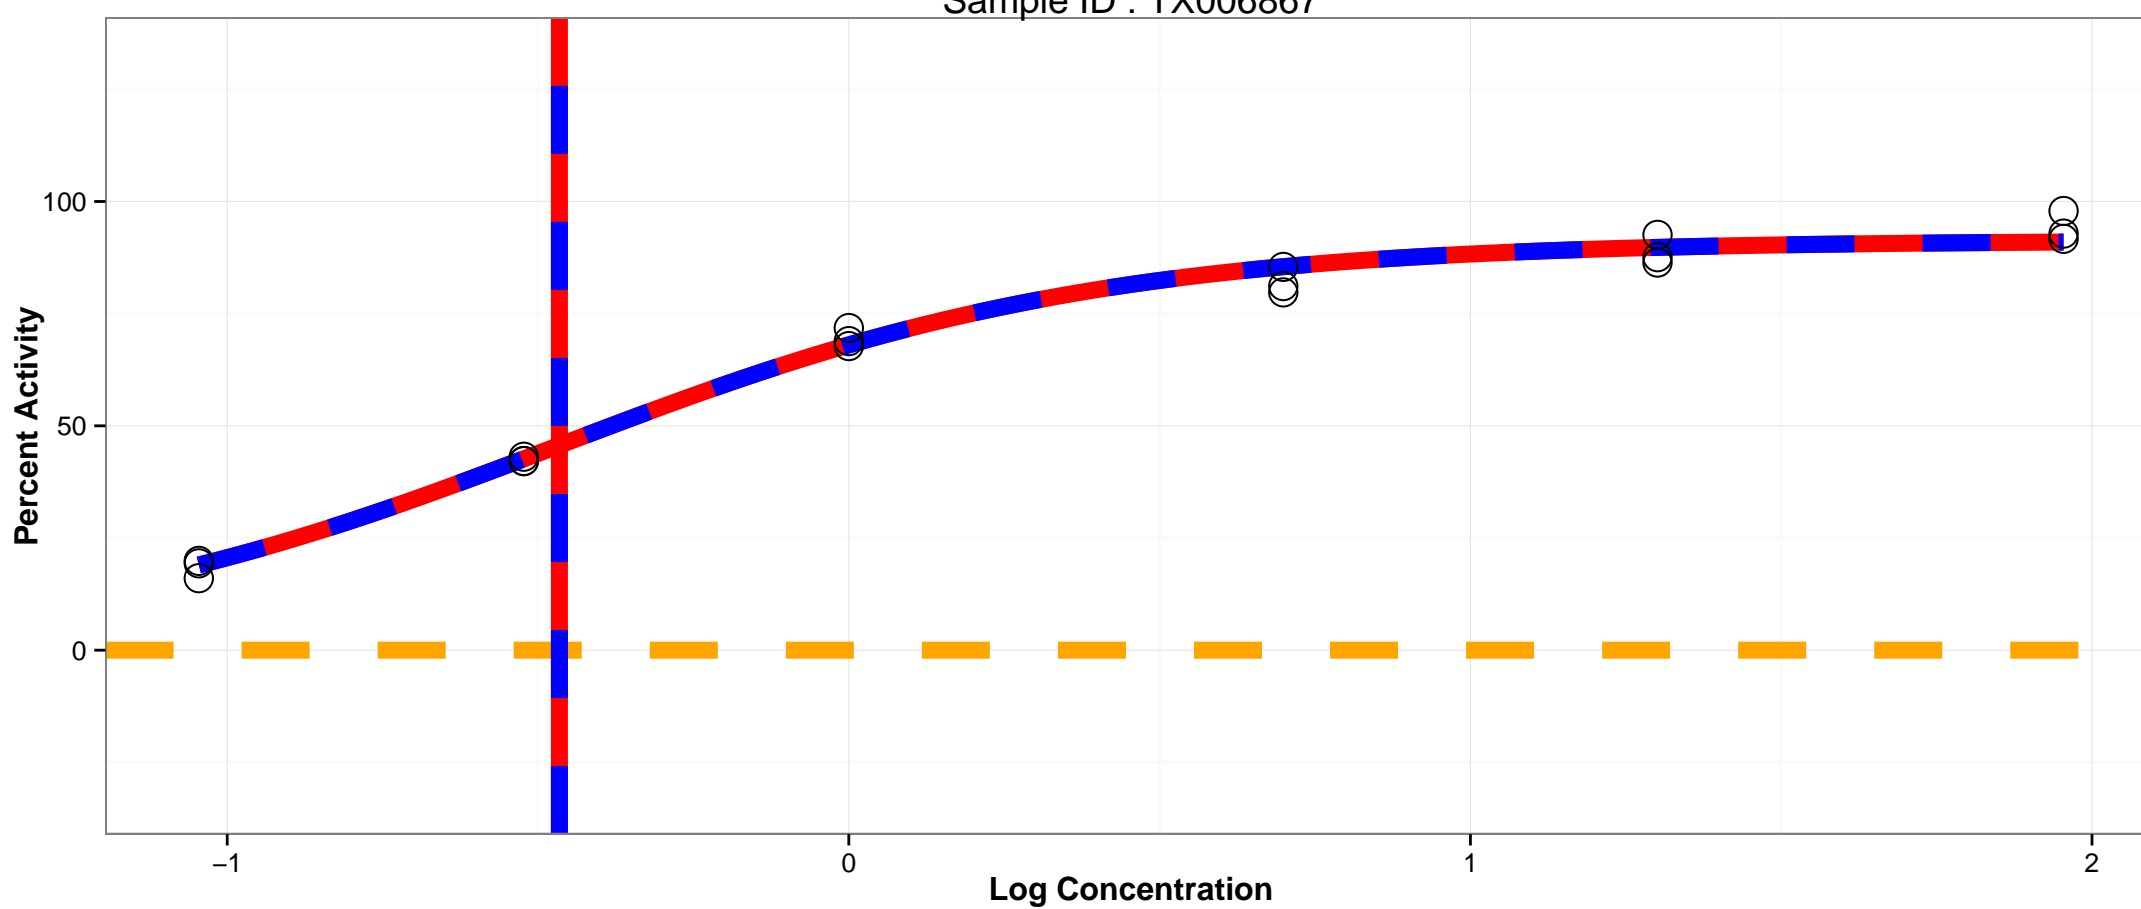

HILL MODEL

|     | tp   | ga     | gw    |
|-----|------|--------|-------|
| val | 91.3 | -0.466 | 1     |
| sd  | 1.37 | 0.024  | 0.059 |

GAIN-LOSS MODEL

|     | tp   | ga     | gw    | la   | lw   |
|-----|------|--------|-------|------|------|
| val | 91.3 | -0.466 | 1     | 3.44 | 6.5  |
| sd  | 1.37 | 0.024  | 0.059 | 1540 | 6710 |

|      | CNST   | HILL  | GNLS   |
|------|--------|-------|--------|
| AIC  | 210.24 | 97.55 | 101.55 |
| PROB | 0      | 0.88  | 0.12   |
| RMSE | 71.3   | 2.91  | 2.91   |

MAX\_MEAN : 94.1 MAX\_MED : 92.9 BMAD : 5.69  
COFF : 20 HIT-CALL : 1 FITC : 41 ACTP : 1  
FLAGS :

Assay ID 1509 (NHEERL\_HEK293T\_CellTiterGLO)  
Sample ID : TX006867

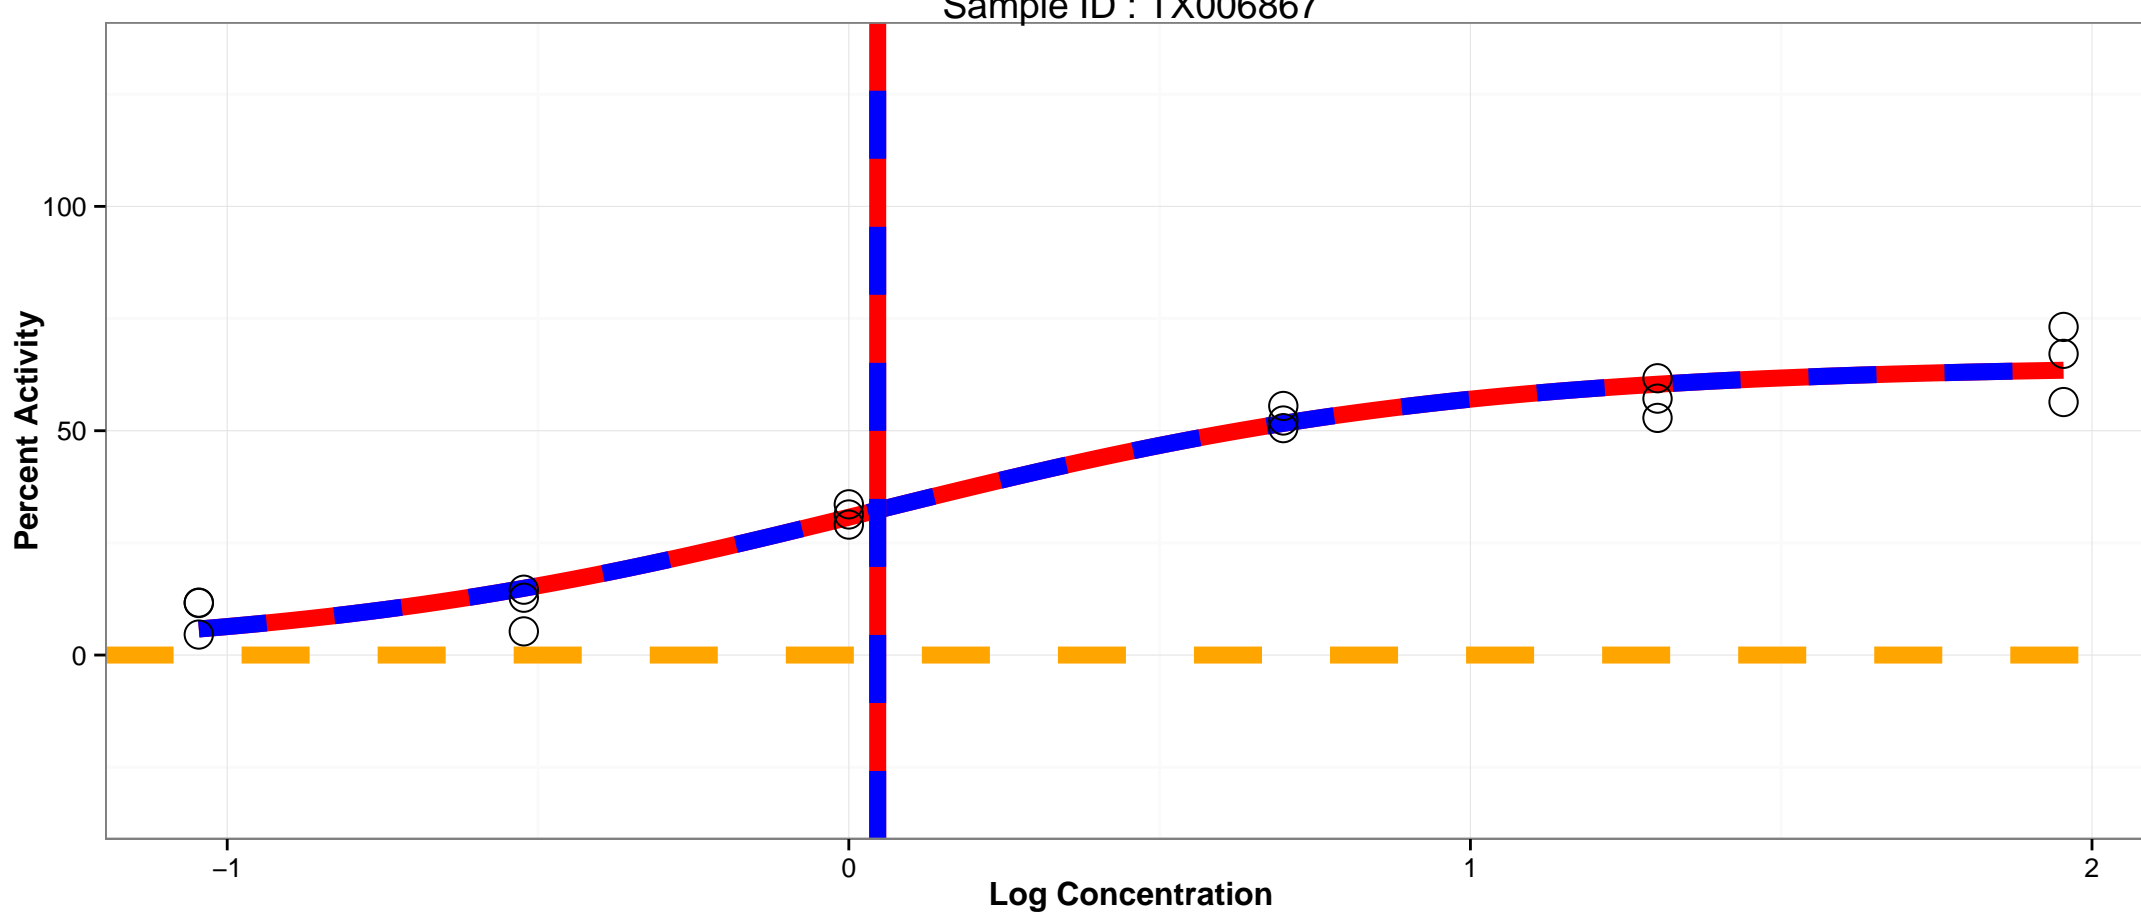

HILL MODEL

|     | tp   | ga     | gw    |
|-----|------|--------|-------|
| val | 64.6 | 0.0464 | 0.92  |
| sd  | 4.13 | 0.0946 | 0.163 |

GAIN-LOSS MODEL

|     | tp   | ga     | gw   | la   | lw   |
|-----|------|--------|------|------|------|
| val | 64.6 | 0.0464 | 0.92 | 3.22 | 14.9 |
| sd  | NA   | NA     | NA   | NA   | NA   |

|      | CNST   | HILL   | GNLS   |
|------|--------|--------|--------|
| AIC  | 192.15 | 116.81 | 120.81 |
| PROB | 0      | 0.88   | 0.12   |
| RMSE | 44.06  | 4.83   | 4.83   |

MAX\_MEAN : 65.6 MAX\_MED : 67.1 BMAD : 5.54  
COFF : 20 HIT-CALL : 1 FITC : 41 ACTP : 1  
FLAGS :

Assay ID 1848 (NHEERL\_Quantilum\_inhib\_2\_dn)  
Sample ID : TX006867

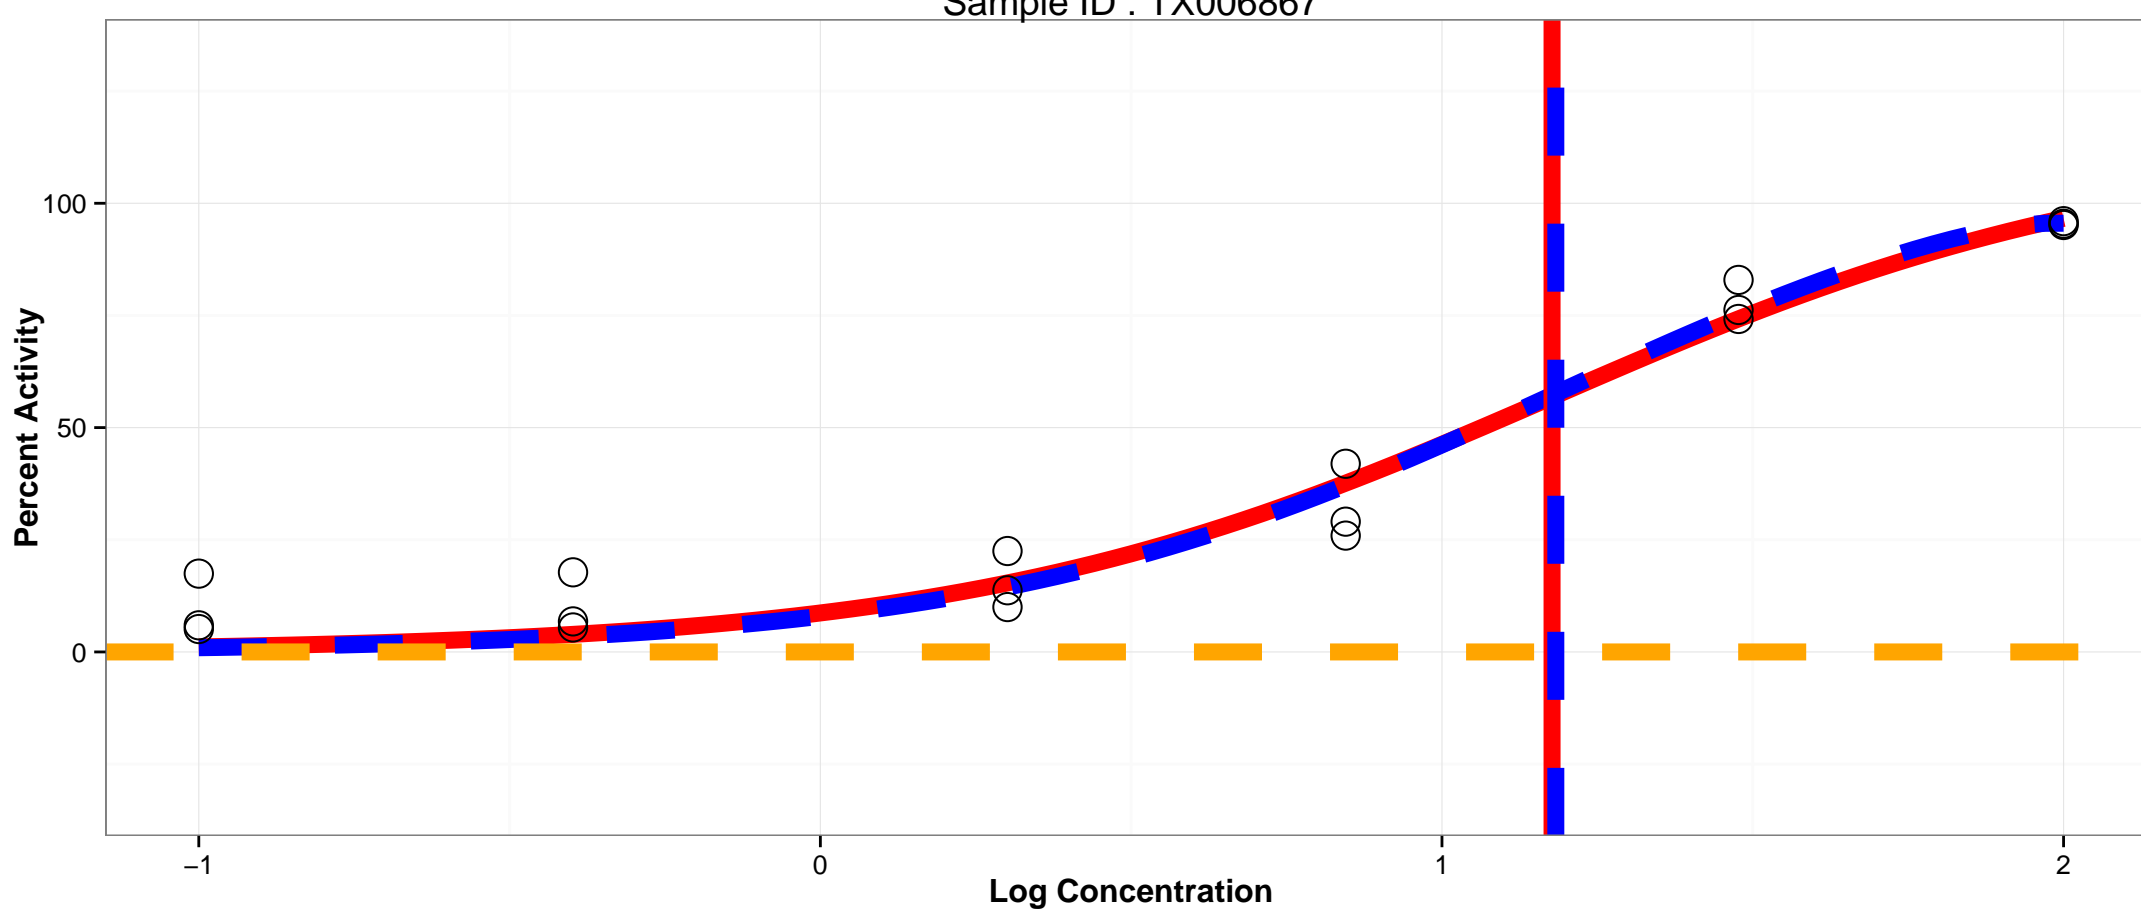

HILL MODEL

|     | tp   | ga    | gw    |
|-----|------|-------|-------|
| val | 114  | 1.18  | 0.919 |
| sd  | 12.1 | 0.139 | 0.189 |

GAIN-LOSS MODEL

|     | tp  | ga    | gw    | la   | lw   |
|-----|-----|-------|-------|------|------|
| val | 115 | 1.18  | 0.956 | 2.3  | 4.8  |
| sd  | 27  | 0.246 | 0.212 | 1.33 | 19.1 |

|      | CNST   | HILL   | GNLS   |
|------|--------|--------|--------|
| AIC  | 196.81 | 129.73 | 133.22 |
| PROB | 0      | 0.85   | 0.15   |
| RMSE | 52.92  | 7.08   | 7.04   |

MAX\_MEAN : 95.5 MAX\_MED : 95.5 BMAD : 8.58  
COFF : 20 HIT-CALL : 1 FITC : 42 ACTP : 1  
FLAGS :

Chemical : Michler's ketone  
CAS : 90-94-8

Assay ID 1508 (NHEERL\_TPO\_AUR\_dn)  
Sample ID : TX006925

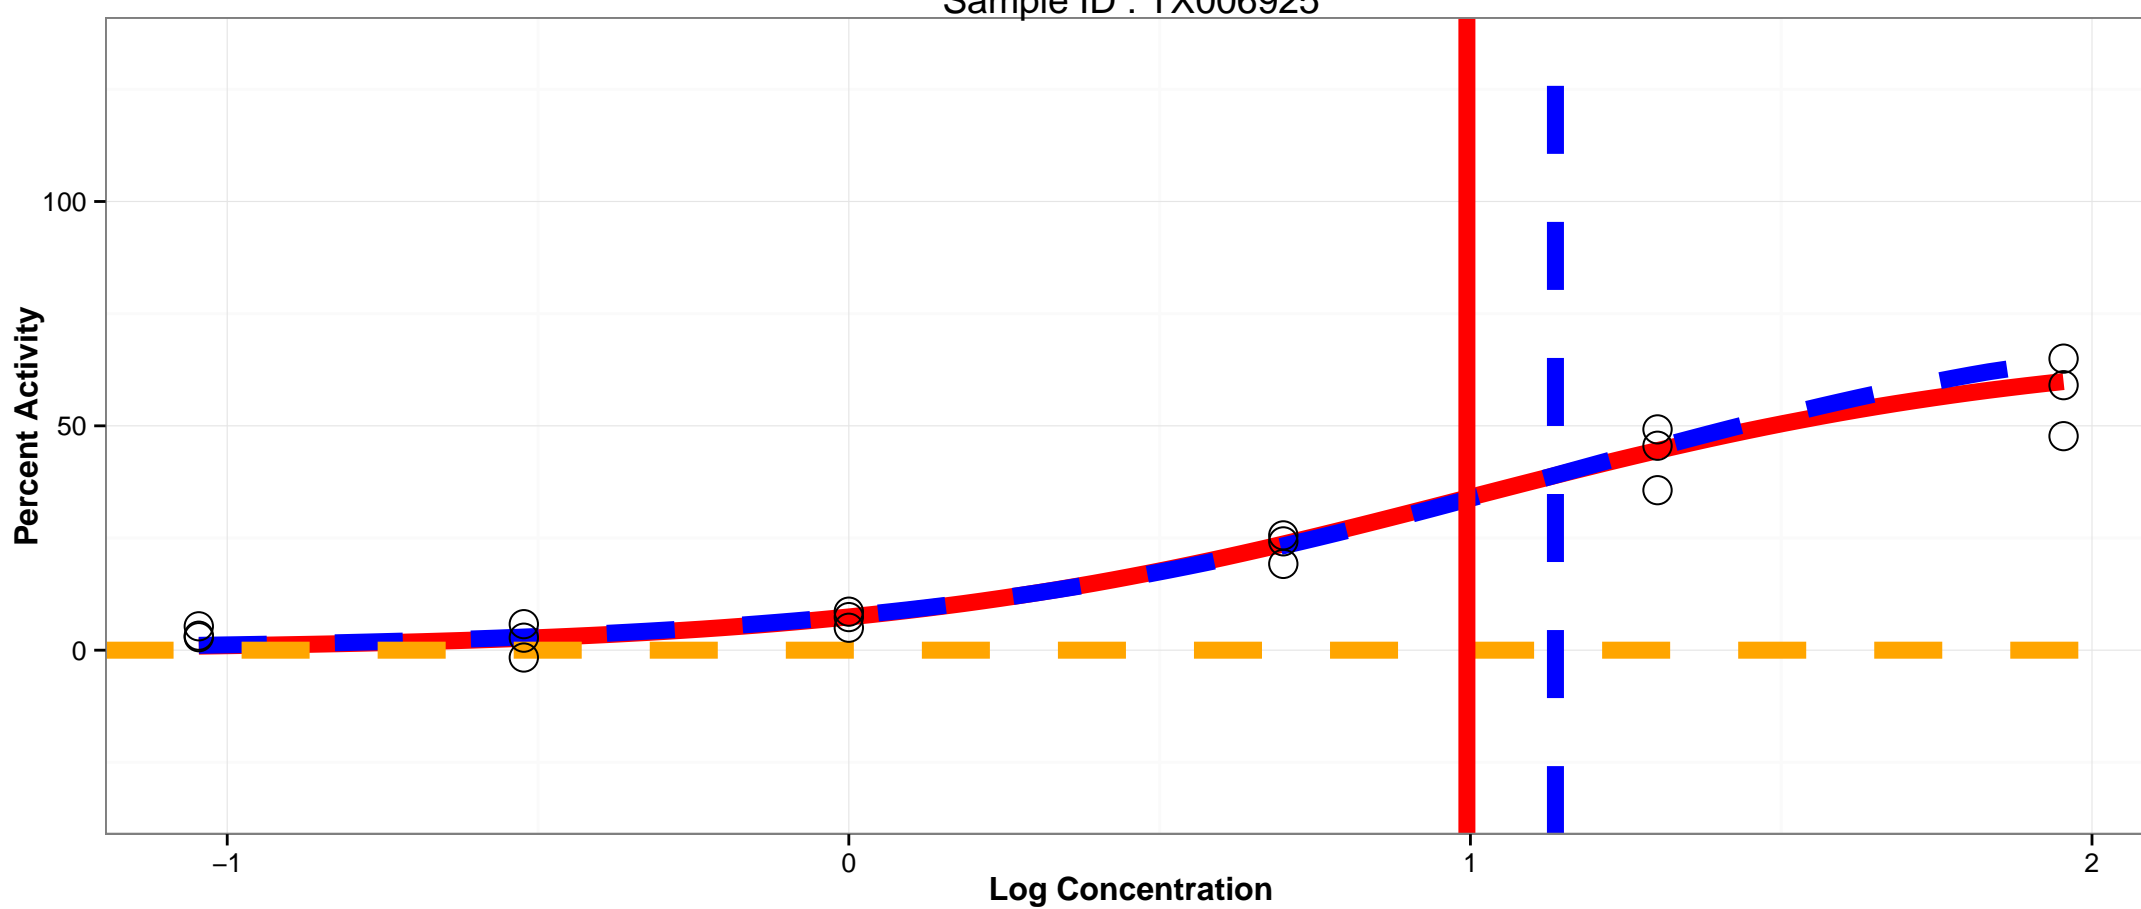

HILL MODEL

|     | tp   | ga    | gw    |
|-----|------|-------|-------|
| val | 67.8 | 0.994 | 0.916 |
| sd  | 6.93 | 0.139 | 0.153 |

GAIN-LOSS MODEL

|     | tp   | ga    | gw    | la     | lw   |
|-----|------|-------|-------|--------|------|
| val | 78   | 1.14  | 0.849 | 2.02   | 17   |
| sd  | 37.5 | 0.511 | 0.242 | 0.0313 | 24.6 |

|      | CNST   | HILL   | GNLS   |
|------|--------|--------|--------|
| AIC  | 177.61 | 112.21 | 115.91 |
| PROB | 0      | 0.86   | 0.14   |
| RMSE | 31.29  | 4.5    | 4.49   |

MAX\_MEAN : 57.3 MAX\_MED : 59.1 BMAD : 5.69  
COFF : 20 HIT-CALL : 1 FITC : 42 ACTP : 1  
FLAGS :

Assay ID 1509 (NHEERL\_HEK293T\_CellTiterGLO)  
Sample ID : TX006925

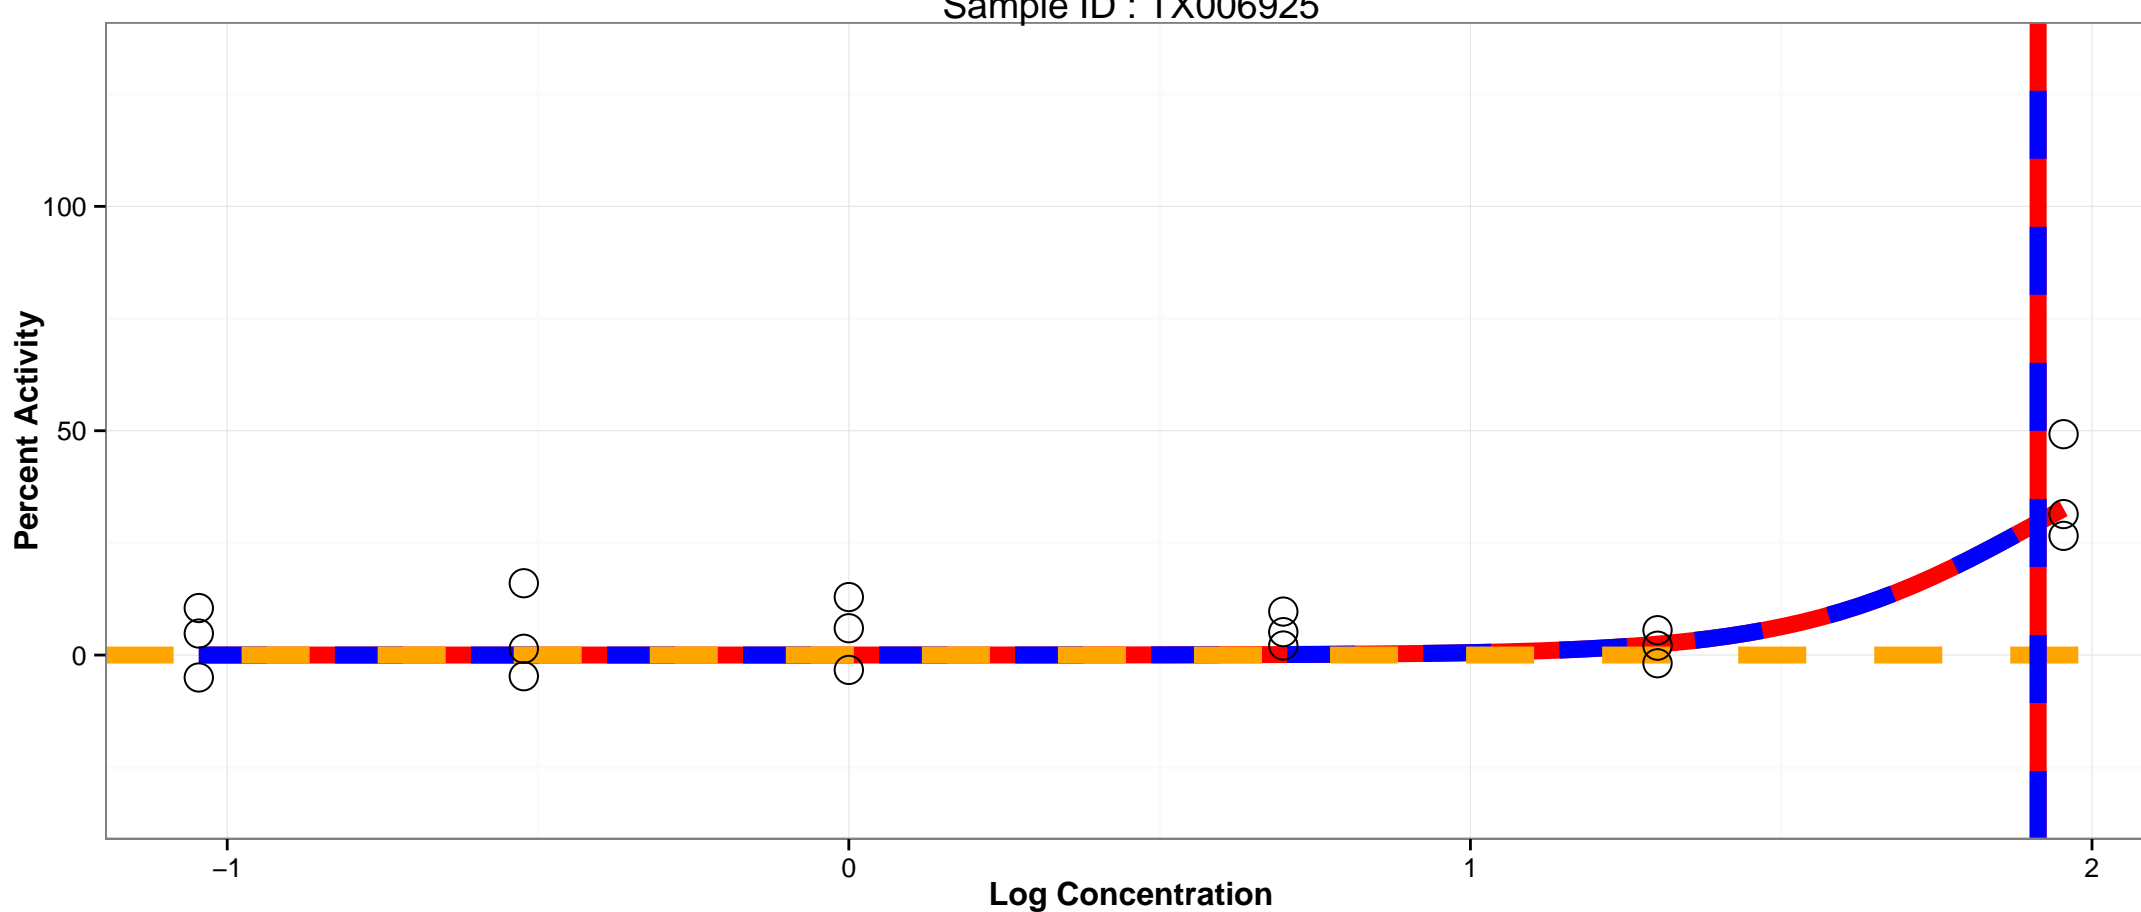

HILL MODEL

|     | tp   | ga   | gw   |
|-----|------|------|------|
| val | 59.1 | 1.91 | 2.23 |
| sd  | 216  | 1.53 | 3.74 |

GAIN-LOSS MODEL

|     | tp   | ga   | gw   | la   | lw   |
|-----|------|------|------|------|------|
| val | 59.1 | 1.91 | 2.23 | 2.95 | 15.1 |
| sd  | NA   | NA   | NA   | NA   | NA   |

|      | CNST   | HILL   | GNLS   |
|------|--------|--------|--------|
| AIC  | 150.04 | 134.18 | 138.18 |
| PROB | 0      | 0.88   | 0.12   |
| RMSE | 16.56  | 7.87   | 7.87   |

MAX\_MEAN : 35.7 MAX\_MED : 31.4 BMAD : 5.54  
COFF : 20 HIT-CALL : 1 FITC : 42 ACTP : 1  
FLAGS : 6

Assay ID 1848 (NHEERL\_Quantilum\_inhib\_2\_dn)  
Sample ID : TX006925

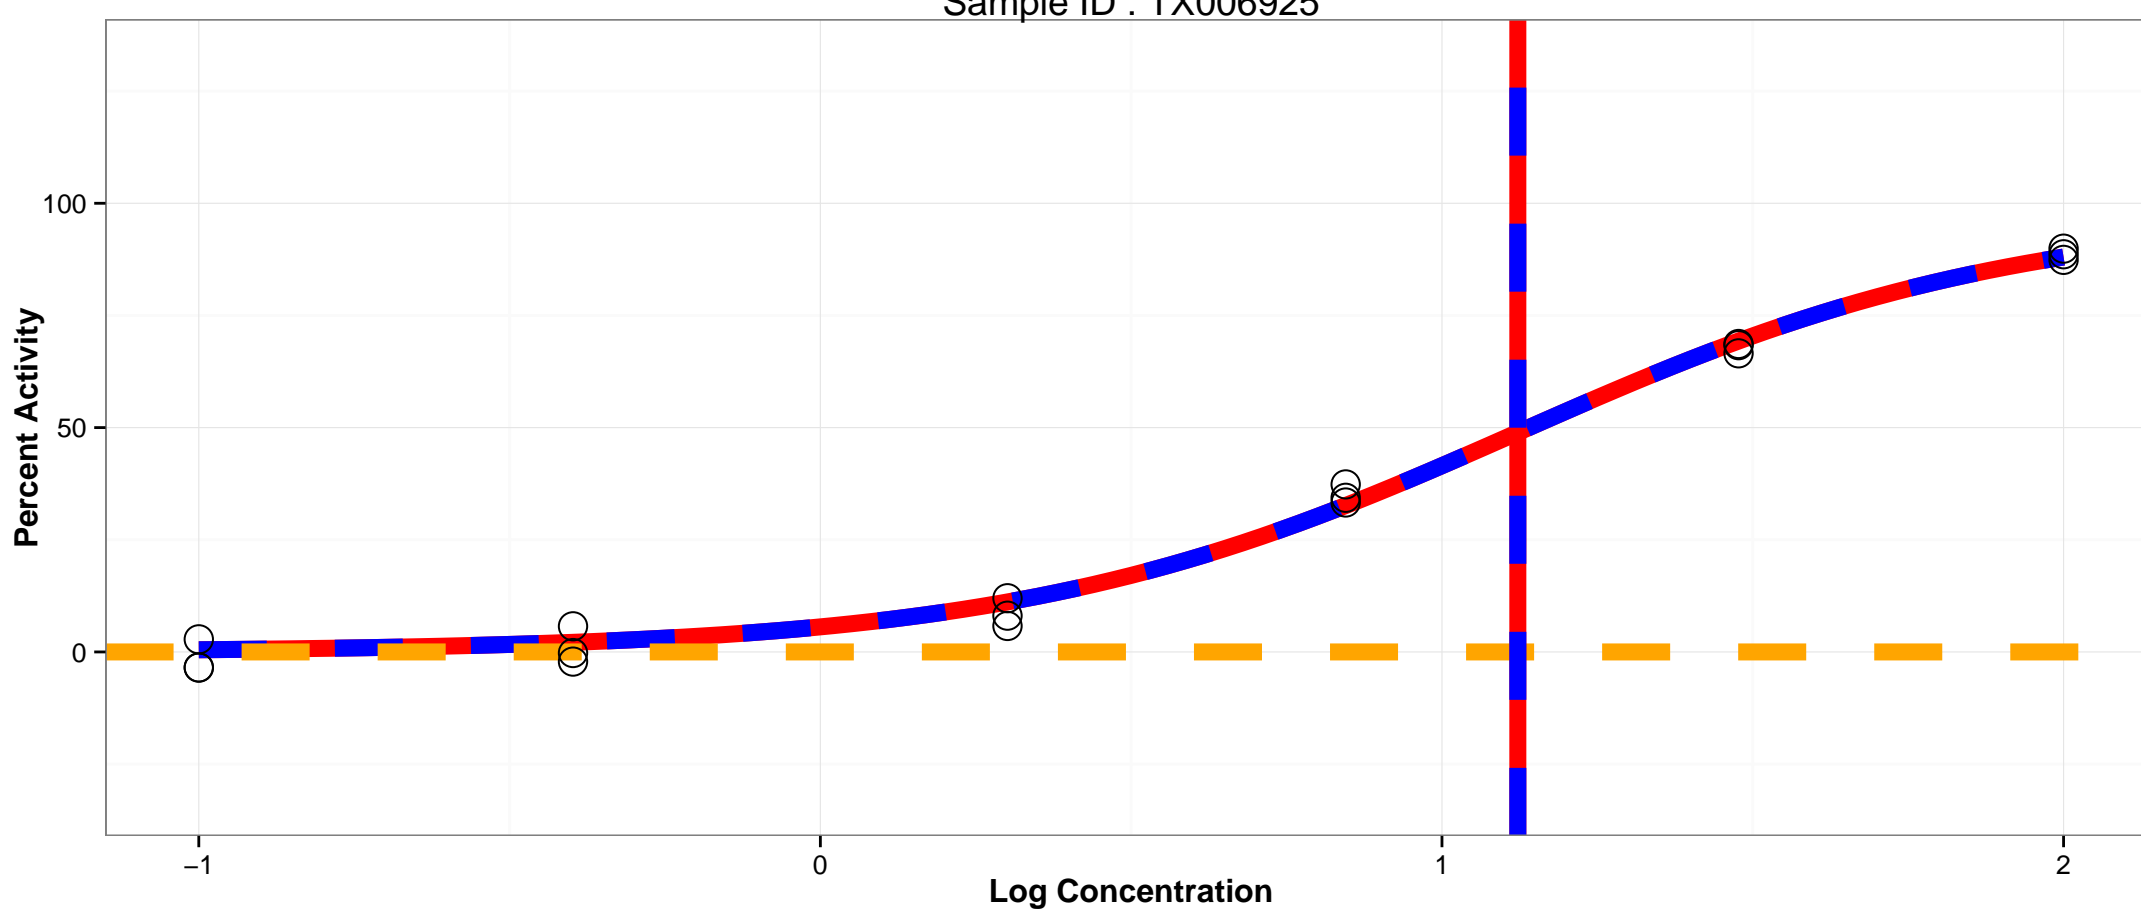

HILL MODEL

|     | tp   | ga     | gw     |
|-----|------|--------|--------|
| val | 97.8 | 1.12   | 1.09   |
| sd  | 3.79 | 0.0491 | 0.0863 |

GAIN-LOSS MODEL

|     | tp   | ga   | gw   | la   | lw  |
|-----|------|------|------|------|-----|
| val | 97.8 | 1.12 | 1.09 | 3.81 | 9.5 |
| sd  | NA   | NA   | NA   | NA   | NA  |

|      | CNST  | HILL  | GNLS   |
|------|-------|-------|--------|
| AIC  | 193.1 | 99.71 | 103.71 |
| PROB | 0     | 0.88  | 0.12   |
| RMSE | 47.96 | 2.9   | 2.9    |

MAX\_MEAN : 88.6 MAX\_MED : 88.6 BMAD : 8.58  
COFF : 20 HIT-CALL : 1 FITC : 42 ACTP : 1  
FLAGS :

Chemical : 6-Propyl-2-thiouracil  
CAS : 51-52-5

Assay ID 1508 (NHEERL\_TPO\_AUR\_dn)  
Sample ID : TX006939

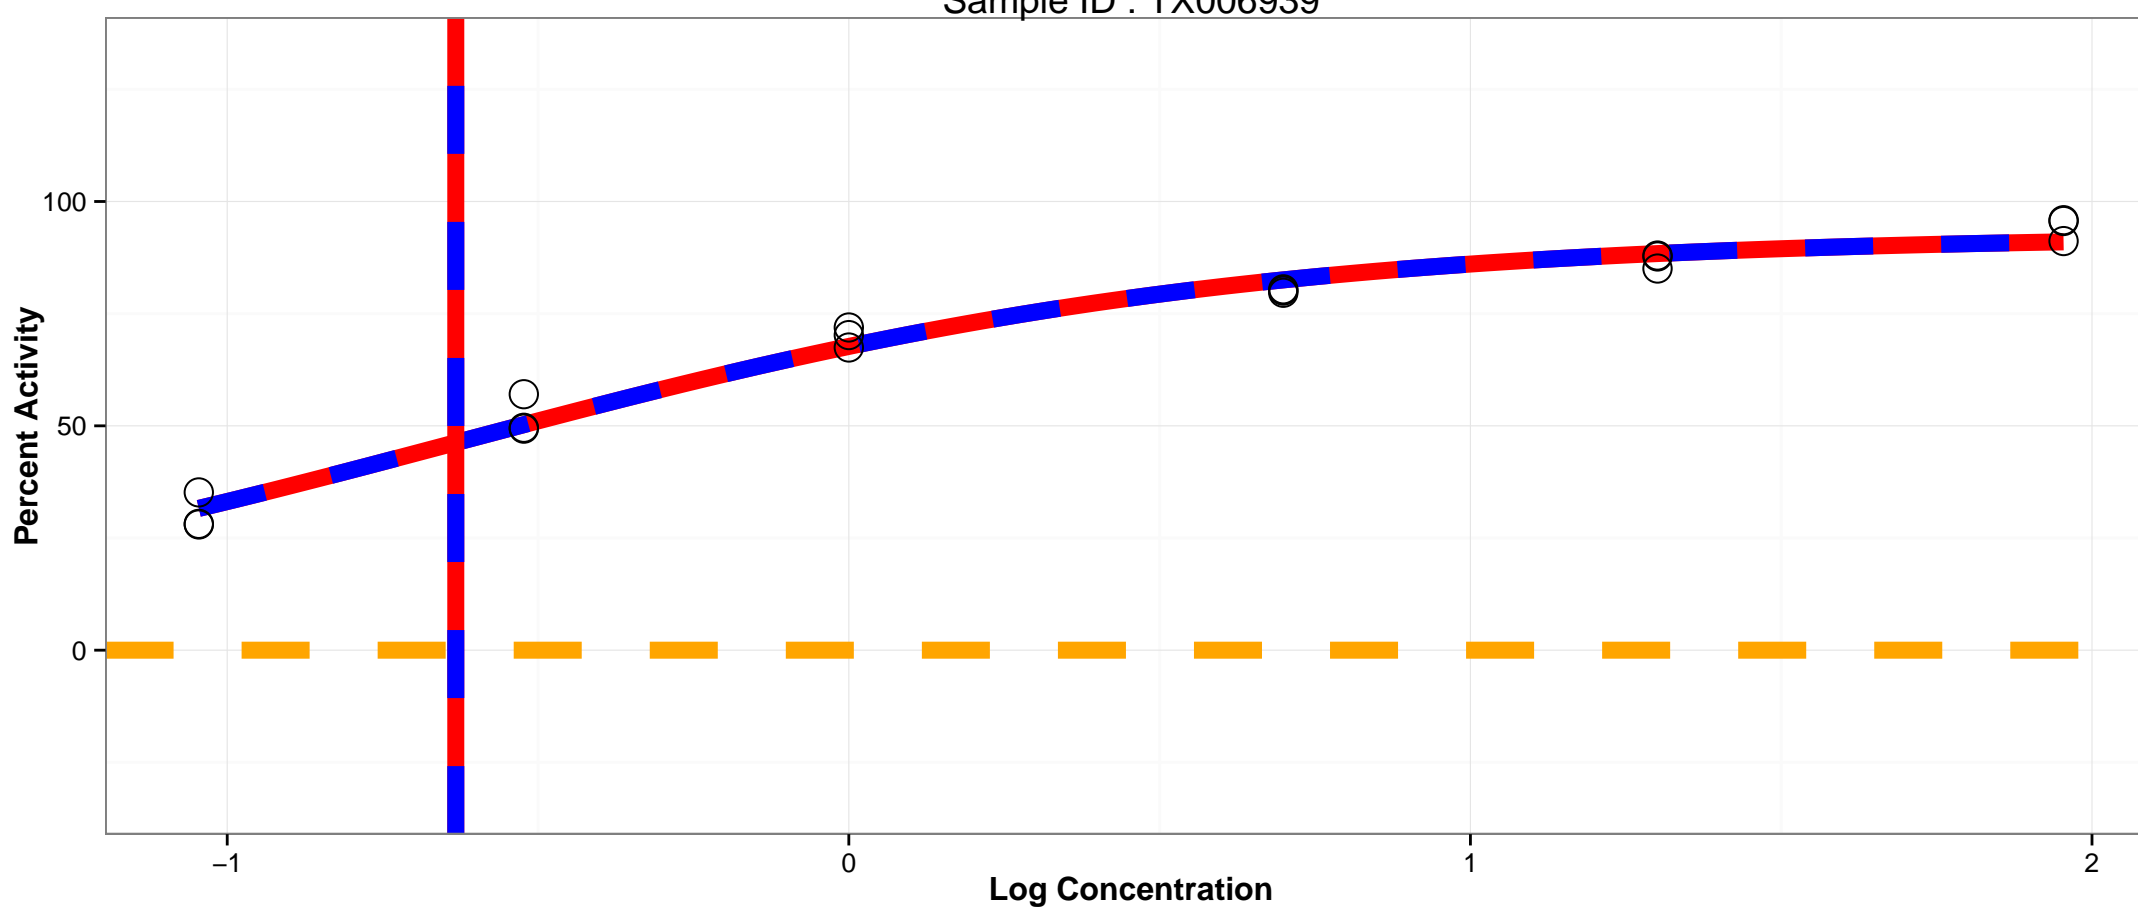

HILL MODEL

|     | tp   | ga     | gw     |
|-----|------|--------|--------|
| val | 92.5 | -0.632 | 0.689  |
| sd  | 2.41 | 0.0488 | 0.0844 |

GAIN-LOSS MODEL

|     | tp   | ga     | gw     | la   | lw   |
|-----|------|--------|--------|------|------|
| val | 92.5 | -0.632 | 0.689  | 3.34 | 6.62 |
| sd  | 2.41 | 0.0488 | 0.0844 | 881  | 4220 |

|      | CNST   | HILL | GNLS |
|------|--------|------|------|
| AIC  | 210.99 | 103  | 107  |
| PROB | 0      | 0.88 | 0.12 |
| RMSE | 72.34  | 3.2  | 3.2  |

MAX\_MEAN : 94.2 MAX\_MED : 95.7 BMAD : 5.69  
COFF : 20 HIT-CALL : 1 FITC : 41 ACTP : 1  
FLAGS :

Assay ID 1509 (NHEERL\_HEK293T\_CellTiterGLO)  
Sample ID : TX006939

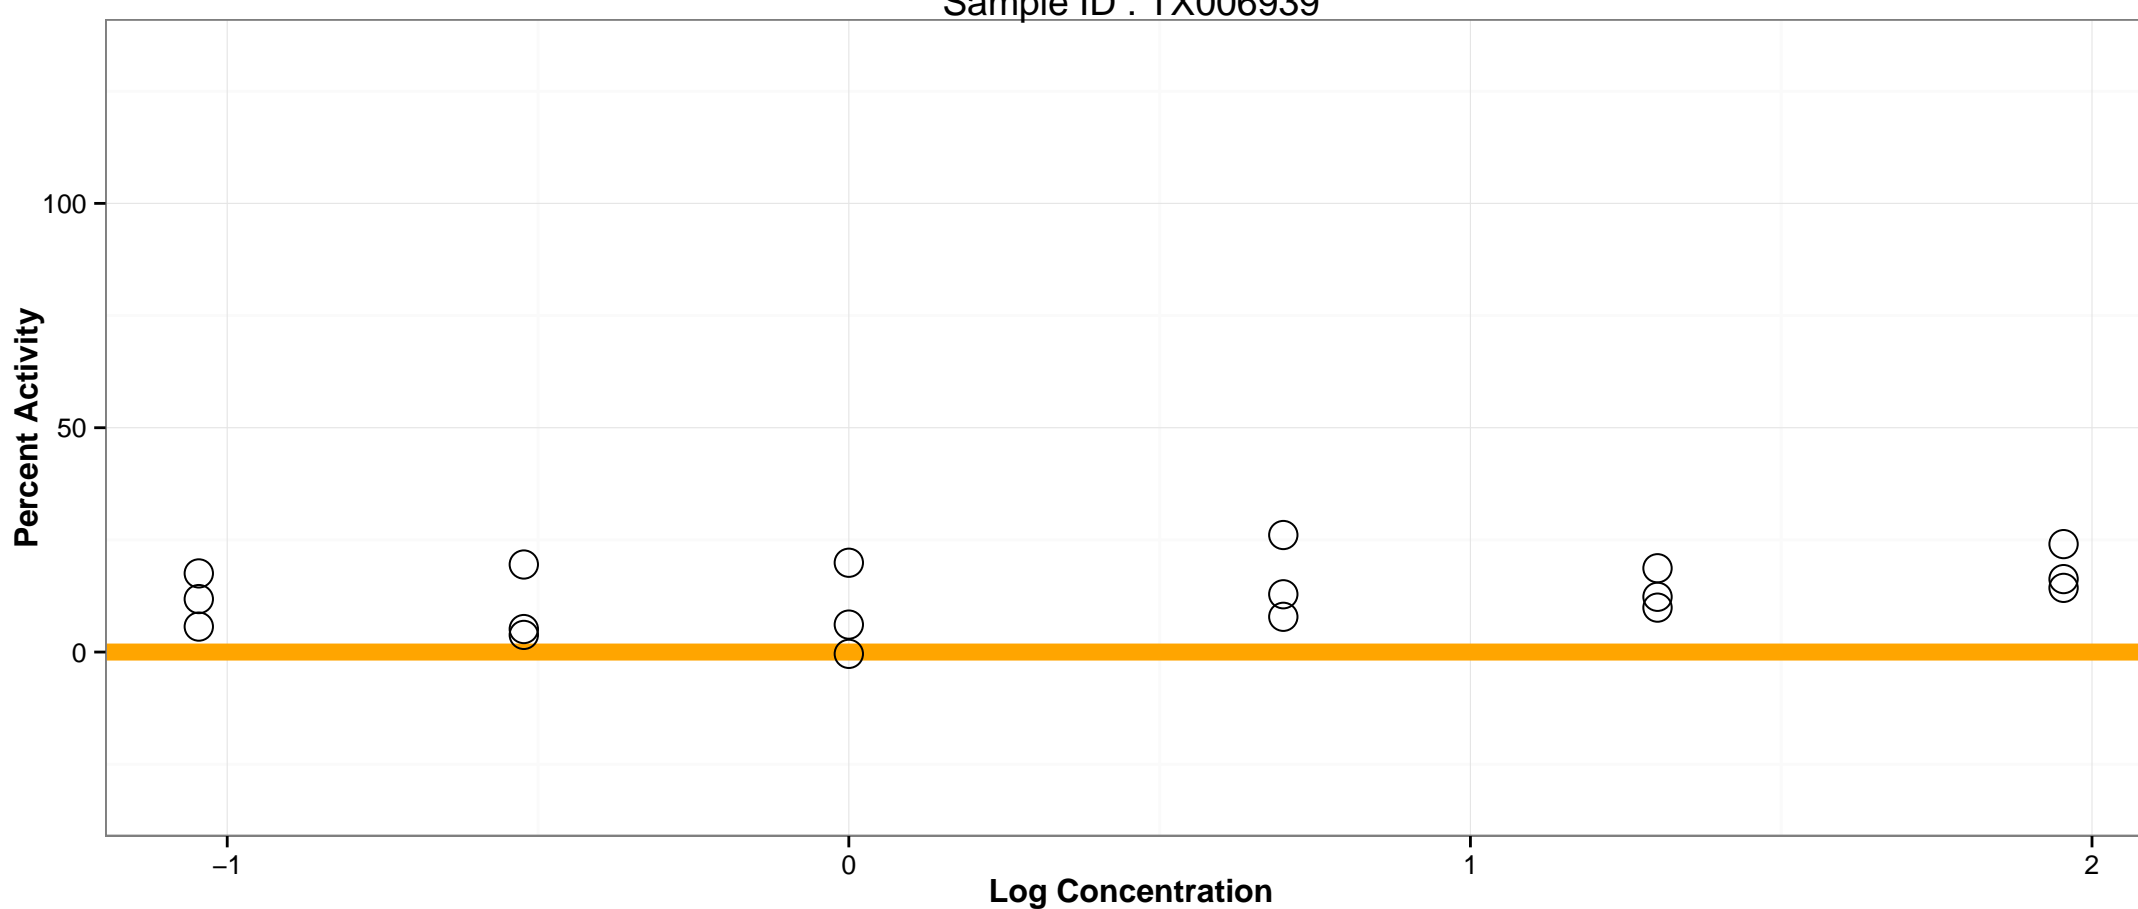

HILL MODEL

HILL MODEL: Not applicable

GAIN-LOSS MODEL

GNLS MODEL: Not applicable

|      | CNST   | HILL | GNLS |
|------|--------|------|------|
| AIC  | 152.65 | NA   | NA   |
| PROB | 1      | NA   | NA   |
| RMSE | 14.71  | NA   | NA   |

MAX\_MEAN : 18.2 MAX\_MED : 16.3 BMAD : 5.54  
COFF : 20 HIT-CALL : 0 FITC : 4 ACTP : 0  
FLAGS :

Assay ID 1848 (NHEERL\_Quantilum\_inhib\_2\_dn)  
Sample ID : TX006939

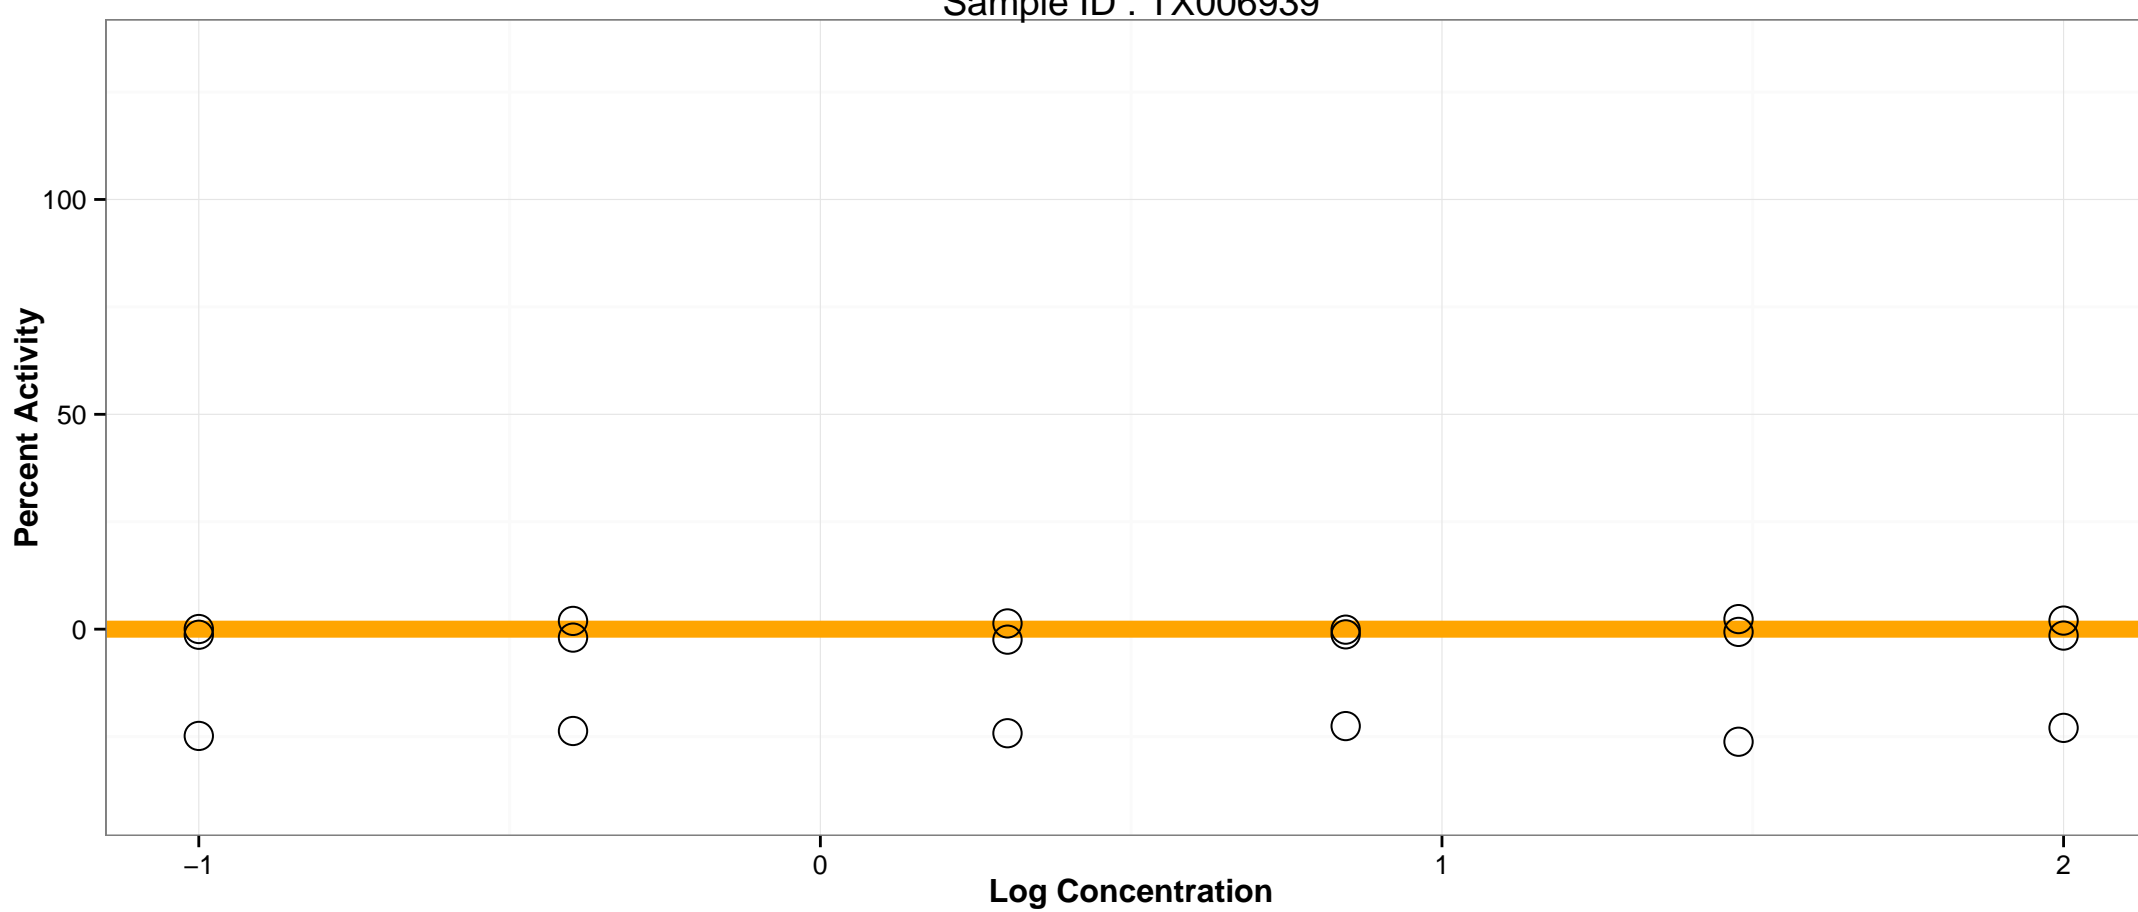

HILL MODEL

HILL MODEL: Not applicable

GAIN-LOSS MODEL

GNLS MODEL: Not applicable

|      | CNST   | HILL | GNLS |
|------|--------|------|------|
| AIC  | 147.42 | NA   | NA   |
| PROB | 1      | NA   | NA   |
| RMSE | 13.97  | NA   | NA   |

MAX\_MEAN : -7.47 MAX\_MED : -0.618 BMAD : 8.58  
COFF : 20 HIT-CALL : 0 FITC : 4 ACTP : 0  
FLAGS :

Chemical : Phenolphthalein  
CAS : 77-09-8

Assay ID 1508 (NHEERL\_TPO\_AUR\_dn)  
Sample ID : TX006959

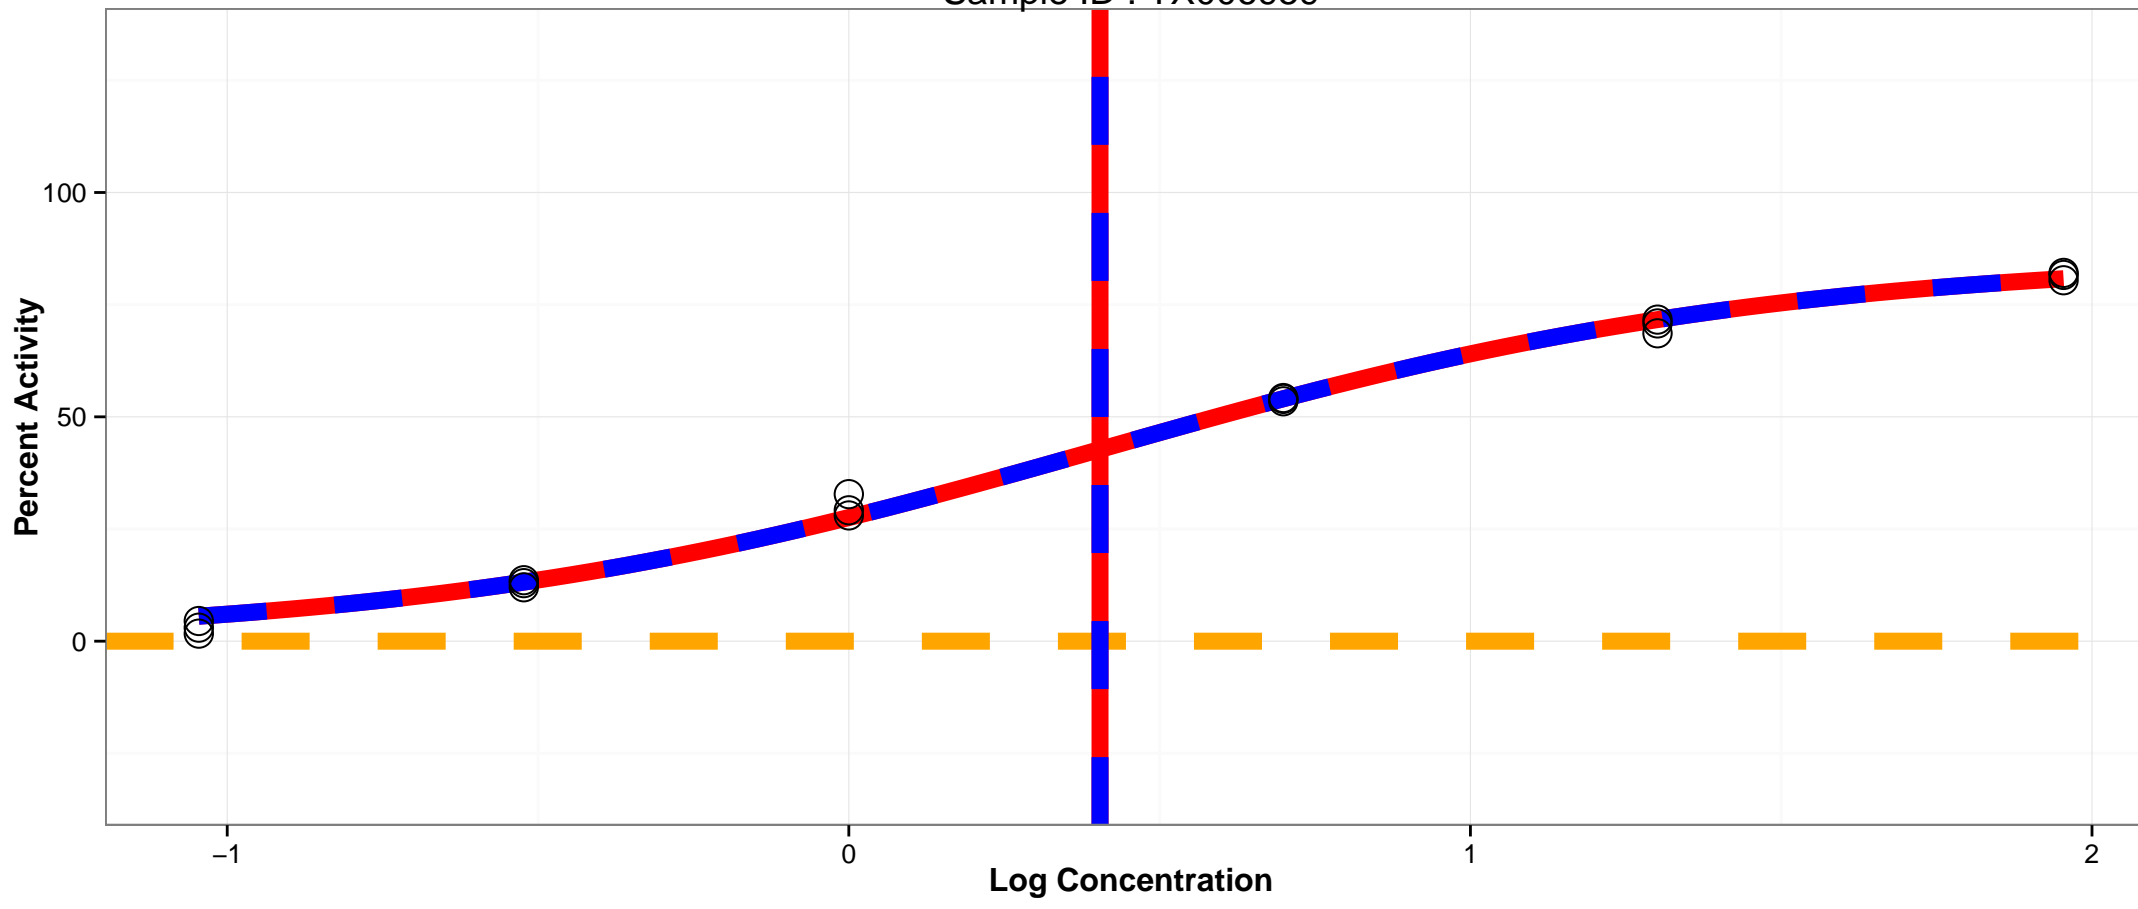

HILL MODEL

|     | tp   | ga     | gw     |
|-----|------|--------|--------|
| val | 85.5 | 0.404  | 0.798  |
| sd  | 1.24 | 0.0262 | 0.0271 |

GAIN-LOSS MODEL

|     | tp   | ga     | gw     | la   | lw   |
|-----|------|--------|--------|------|------|
| val | 85.5 | 0.404  | 0.798  | 2.98 | 8.87 |
| sd  | 1.24 | 0.0262 | 0.0271 | 612  | 5270 |

|      | CNST   | HILL  | GNLS  |
|------|--------|-------|-------|
| AIC  | 196.98 | 80.47 | 84.47 |
| PROB | 0      | 0.88  | 0.12  |
| RMSE | 50.94  | 1.93  | 1.93  |

MAX\_MEAN : 81.4 MAX\_MED : 81.6 BMAD : 5.69  
COFF : 20 HIT-CALL : 1 FITC : 42 ACTP : 1  
FLAGS :

Assay ID 1509 (NHEERL\_HEK293T\_CellTiterGLO)  
Sample ID : TX006959

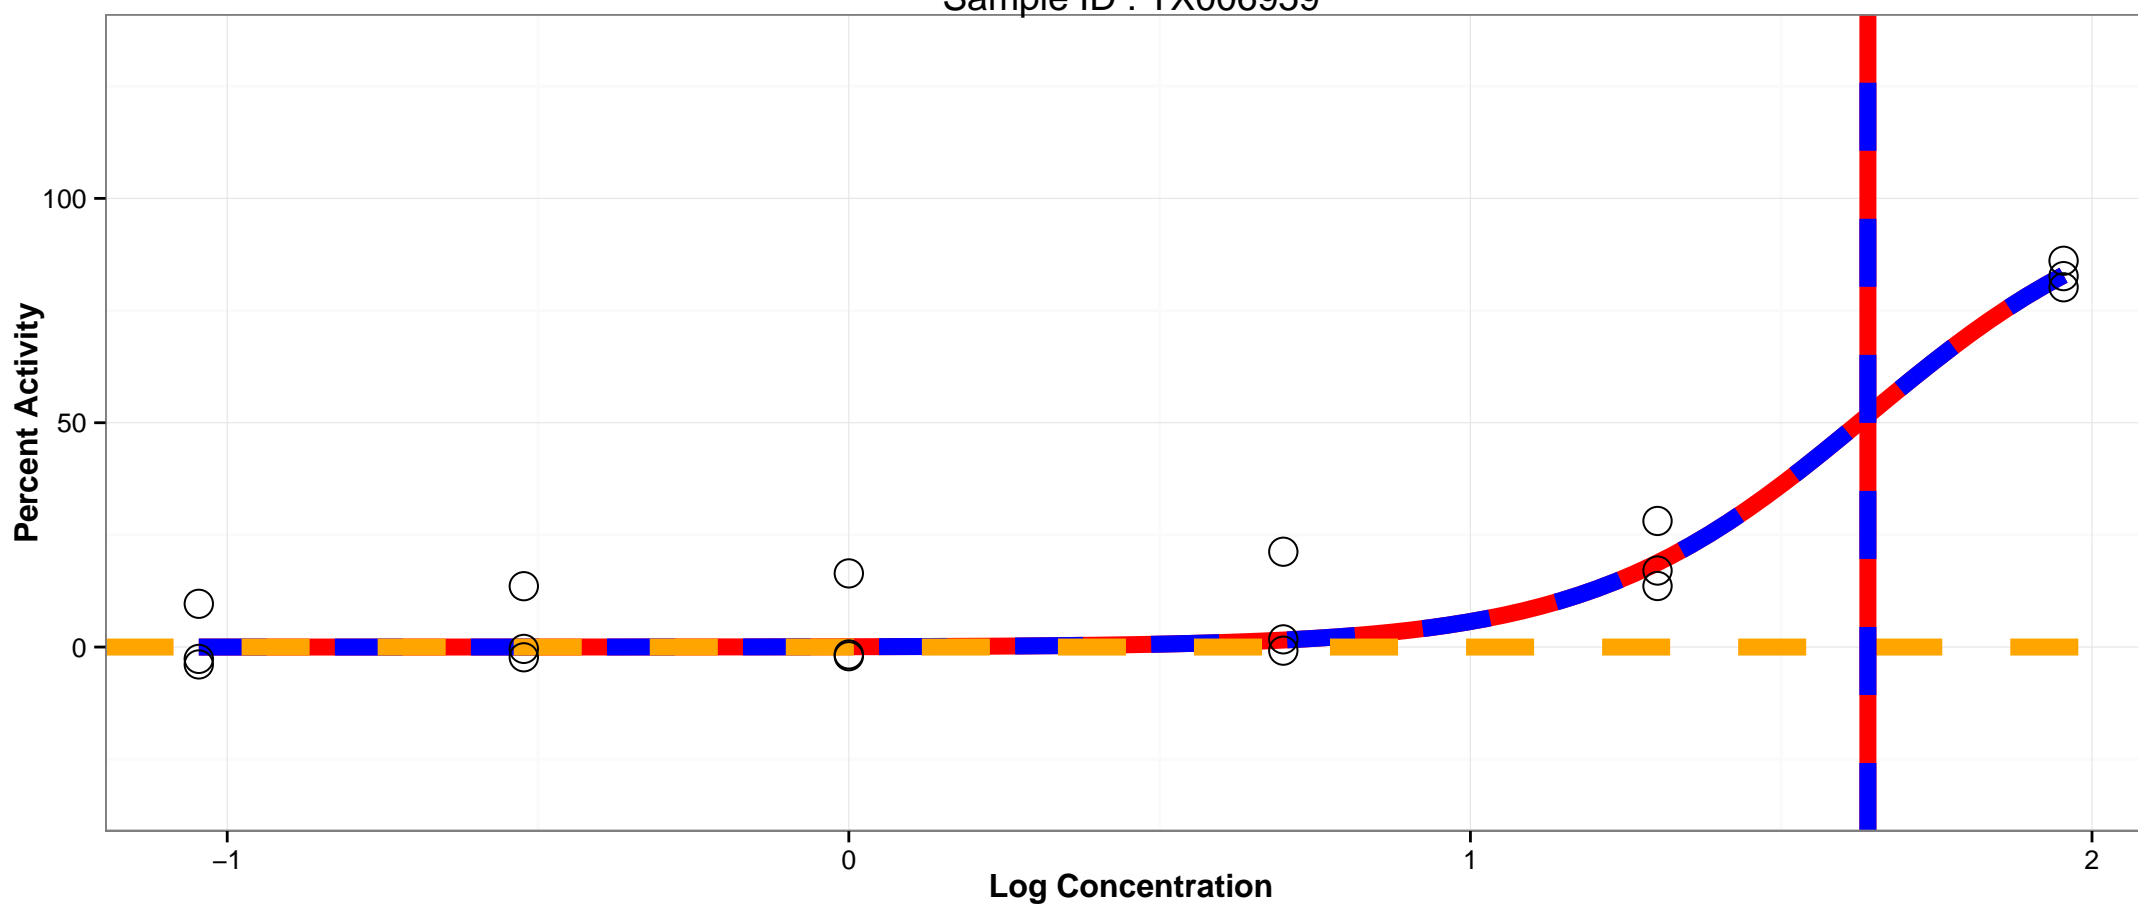

HILL MODEL

|     | tp   | ga    | gw   |
|-----|------|-------|------|
| val | 103  | 1.64  | 1.93 |
| sd  | 53.4 | 0.373 | 1.33 |

GAIN-LOSS MODEL

|     | tp  | ga   | gw   | la   | lw   |
|-----|-----|------|------|------|------|
| val | 103 | 1.64 | 1.93 | 3.12 | 11.4 |
| sd  | NA  | NA   | NA   | NA   | NA   |

|      | CNST   | HILL   | GNLS   |
|------|--------|--------|--------|
| AIC  | 176.54 | 131.31 | 135.31 |
| PROB | 0      | 0.88   | 0.12   |
| RMSE | 35.74  | 7.84   | 7.84   |

MAX\_MEAN : 83 MAX\_MED : 82.7 BMAD : 5.54  
COFF : 20 HIT-CALL : 1 FITC : 42 ACTP : 1  
FLAGS :

Assay ID 1848 (NHEERL\_Quantilum\_inhib\_2\_dn)  
Sample ID : TX006959

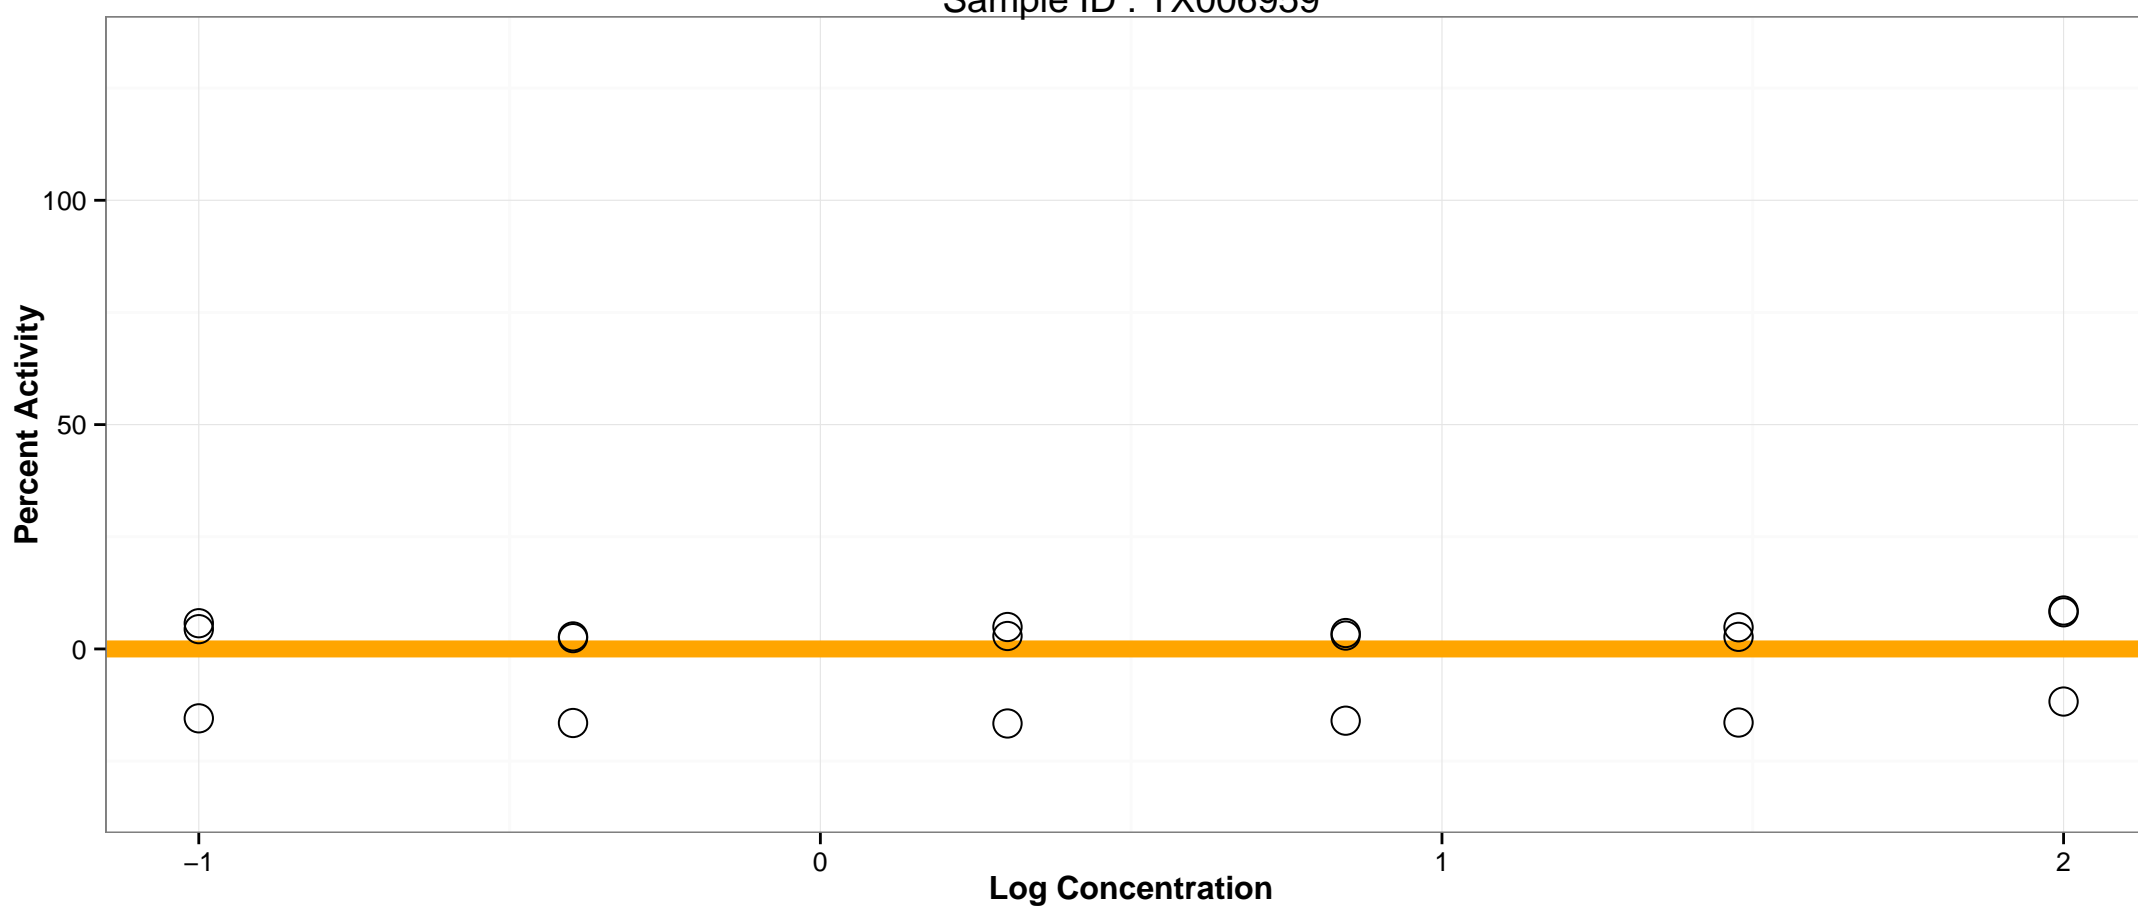

HILL MODEL

HILL MODEL: Not applicable

GAIN-LOSS MODEL

GNLS MODEL: Not applicable

|      | CNST   | HILL | GNLS |
|------|--------|------|------|
| AIC  | 137.13 | NA   | NA   |
| PROB | 1      | NA   | NA   |
| RMSE | 9.83   | NA   | NA   |

MAX\_MEAN : 1.68 MAX\_MED : 8.18 BMAD : 8.58  
COFF : 20 HIT-CALL : 0 FITC : 4 ACTP : 0  
FLAGS :

Chemical : 2-tert-Butyl-5-methylphenol  
CAS : 88-60-8

Assay ID 1508 (NHEERL\_TPO\_AUR\_dn)  
Sample ID : TX006973

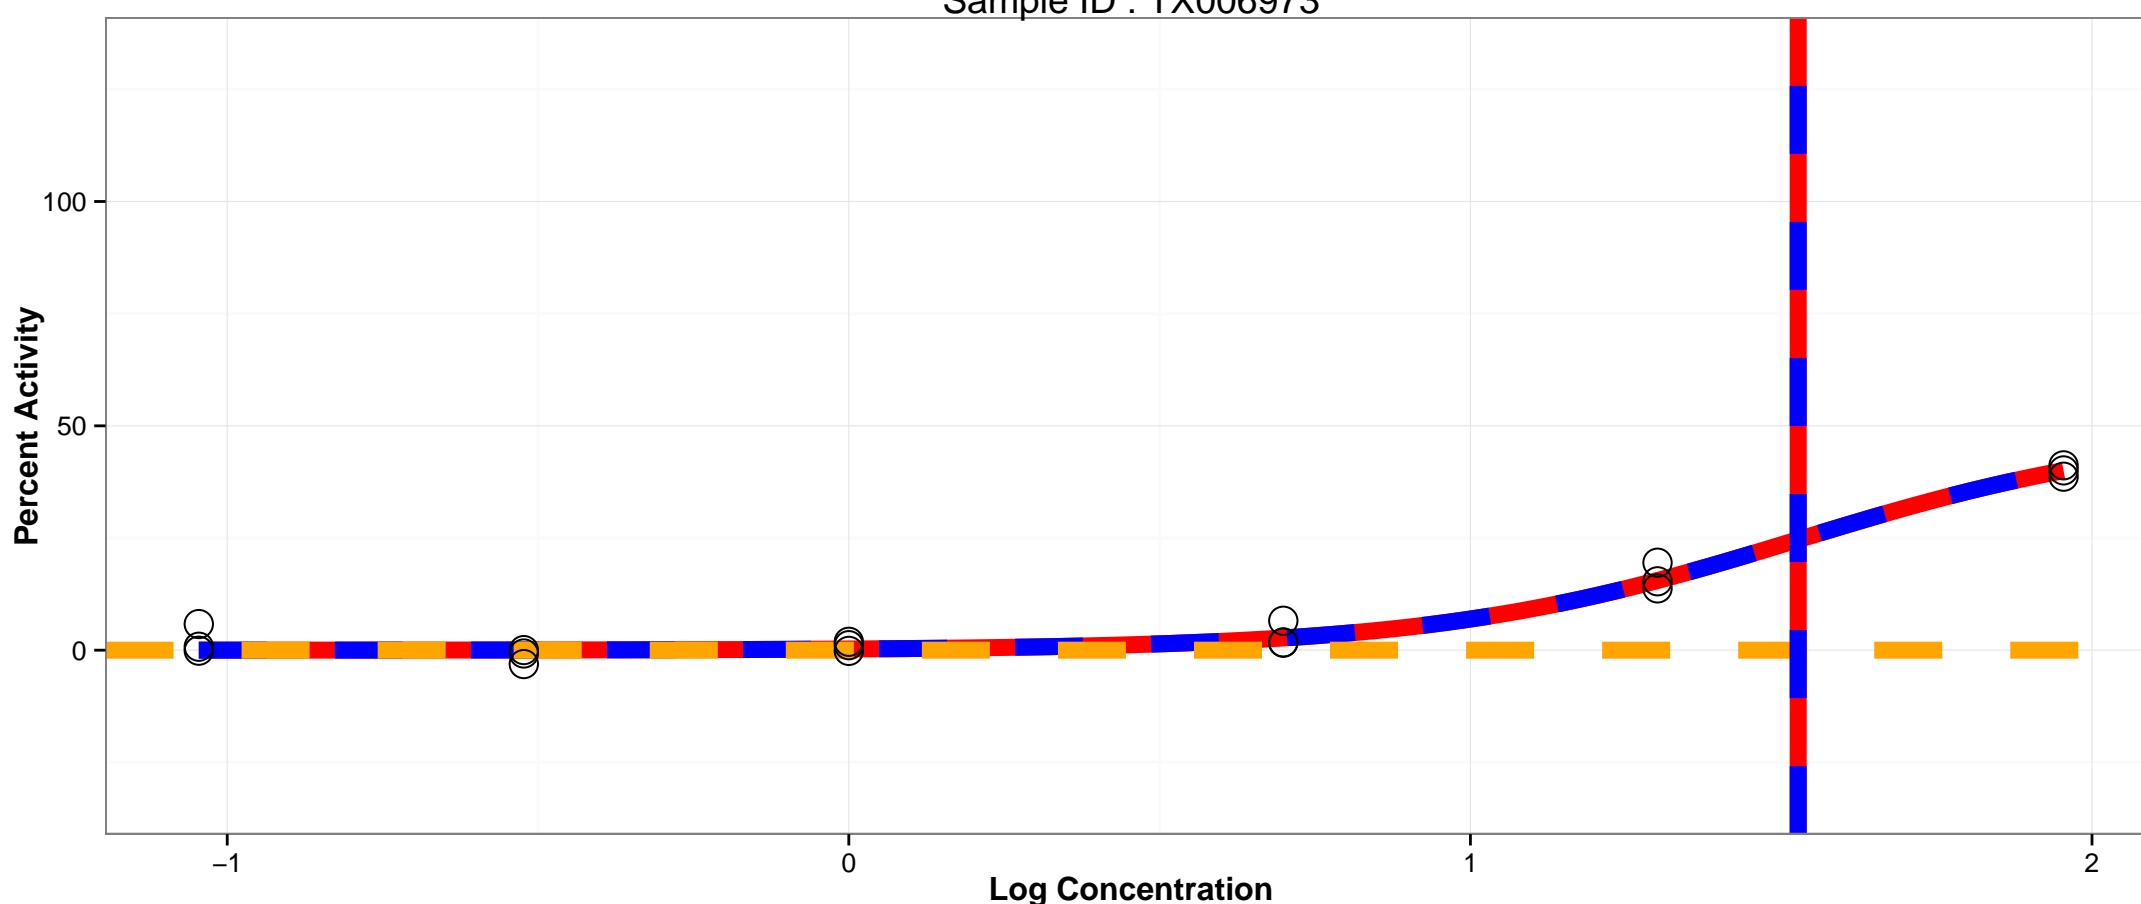

HILL MODEL

|     | tp   | ga    | gw    |
|-----|------|-------|-------|
| val | 49.3 | 1.53  | 1.49  |
| sd  | 8.22 | 0.144 | 0.394 |

GAIN-LOSS MODEL

|     | tp   | ga   | gw   | la   | lw   |
|-----|------|------|------|------|------|
| val | 49.3 | 1.53 | 1.49 | 3.94 | 10.3 |
| sd  | NA   | NA   | NA   | NA   | NA   |

|      | CNST   | HILL  | GNLS  |
|------|--------|-------|-------|
| AIC  | 153.05 | 85.93 | 89.93 |
| PROB | 0      | 0.88  | 0.12  |
| RMSE | 17.8   | 2.21  | 2.21  |

MAX\_MEAN : 40 MAX\_MED : 40.1 BMAD : 5.69  
COFF : 20 HIT-CALL : 1 FITC : 42 ACTP : 1  
FLAGS : 6

Assay ID 1509 (NHEERL\_HEK293T\_CellTiterGLO)  
Sample ID : TX006973

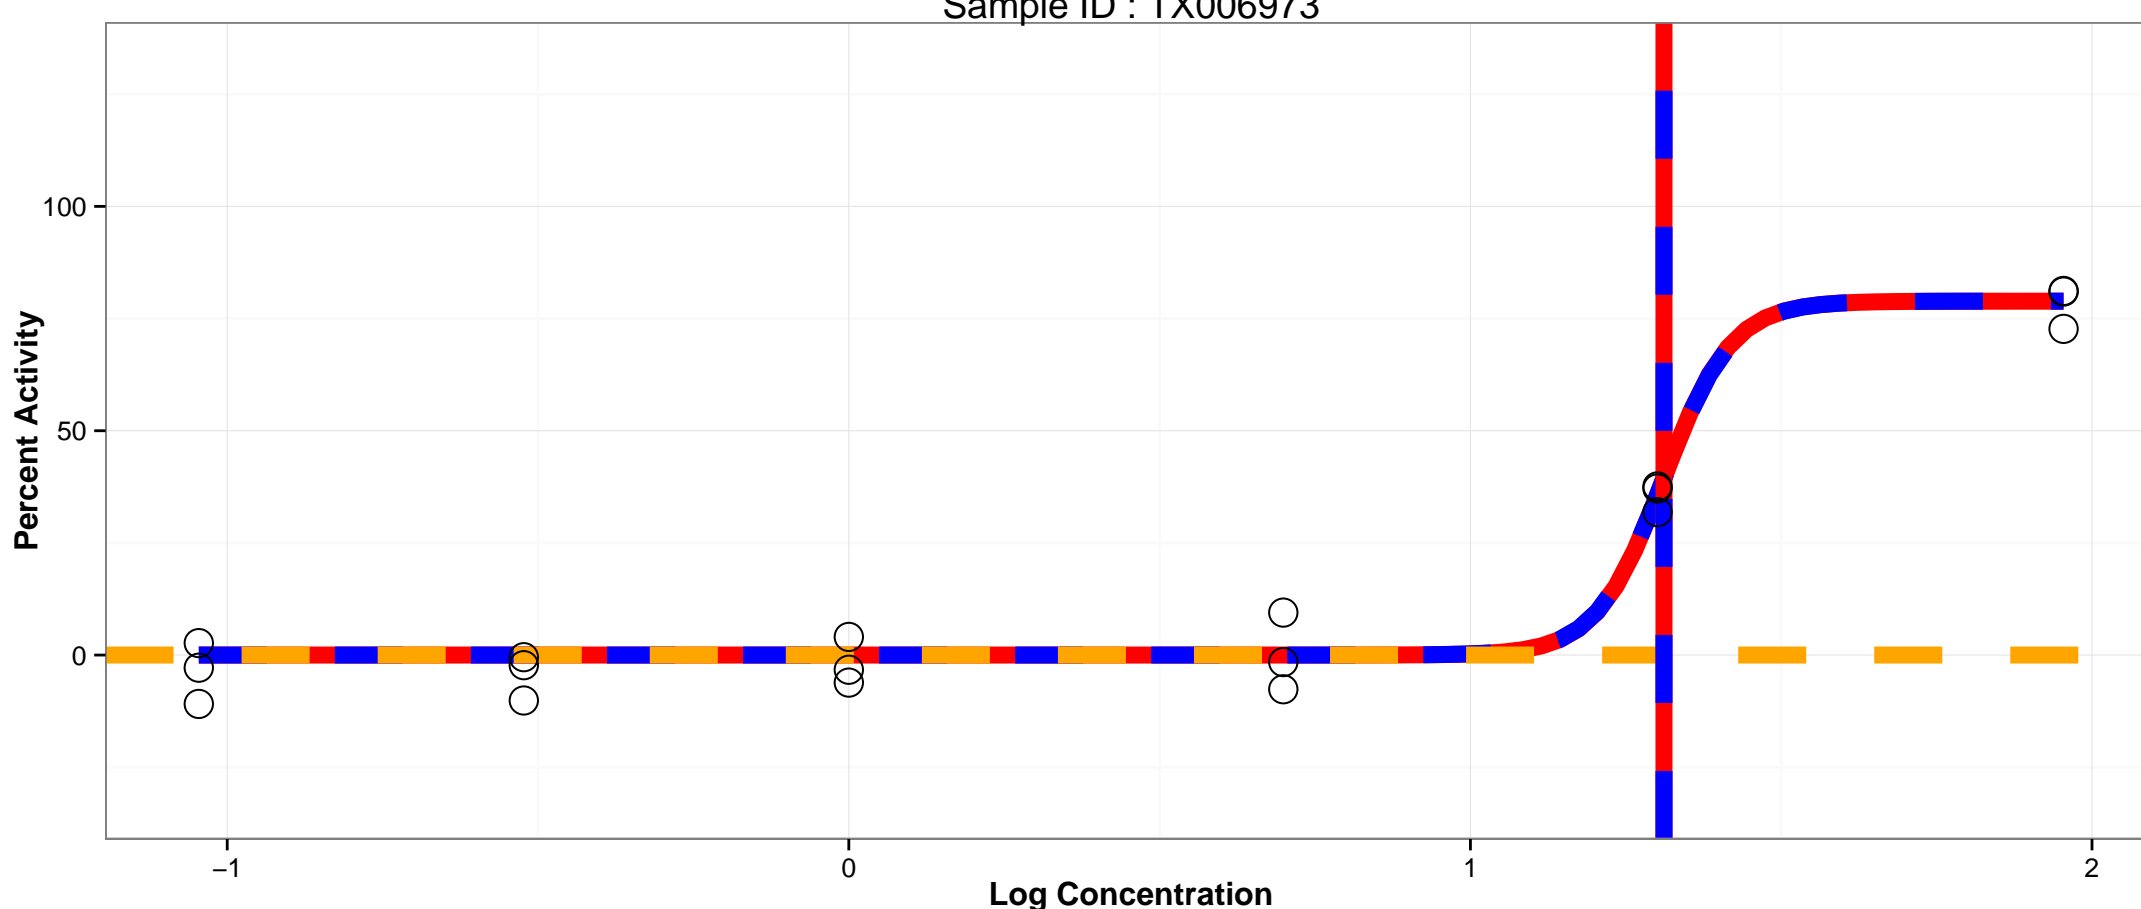

HILL MODEL

|     | tp   | ga     | gw |
|-----|------|--------|----|
| val | 78.9 | 1.31   | 8  |
| sd  | 2.94 | 0.0143 | 11 |

GAIN-LOSS MODEL

|     | tp   | ga   | gw   | la   | lw   |
|-----|------|------|------|------|------|
| val | 78.9 | 1.31 | 7.95 | 2.34 | 10.1 |
| sd  | NA   | NA   | NA   | NA   | NA   |

|      | CNST   | HILL   | GNLS   |
|------|--------|--------|--------|
| AIC  | 178.66 | 120.96 | 124.96 |
| PROB | 0      | 0.88   | 0.12   |
| RMSE | 35.52  | 5.4    | 5.4    |

MAX\_MEAN : 78.3 MAX\_MED : 81 BMAD : 5.54  
COFF : 20 HIT-CALL : 1 FITC : 41 ACTP : 1  
FLAGS :

Assay ID 1848 (NHEERL\_Quantilum\_inhib\_2\_dn)  
Sample ID : TX006973

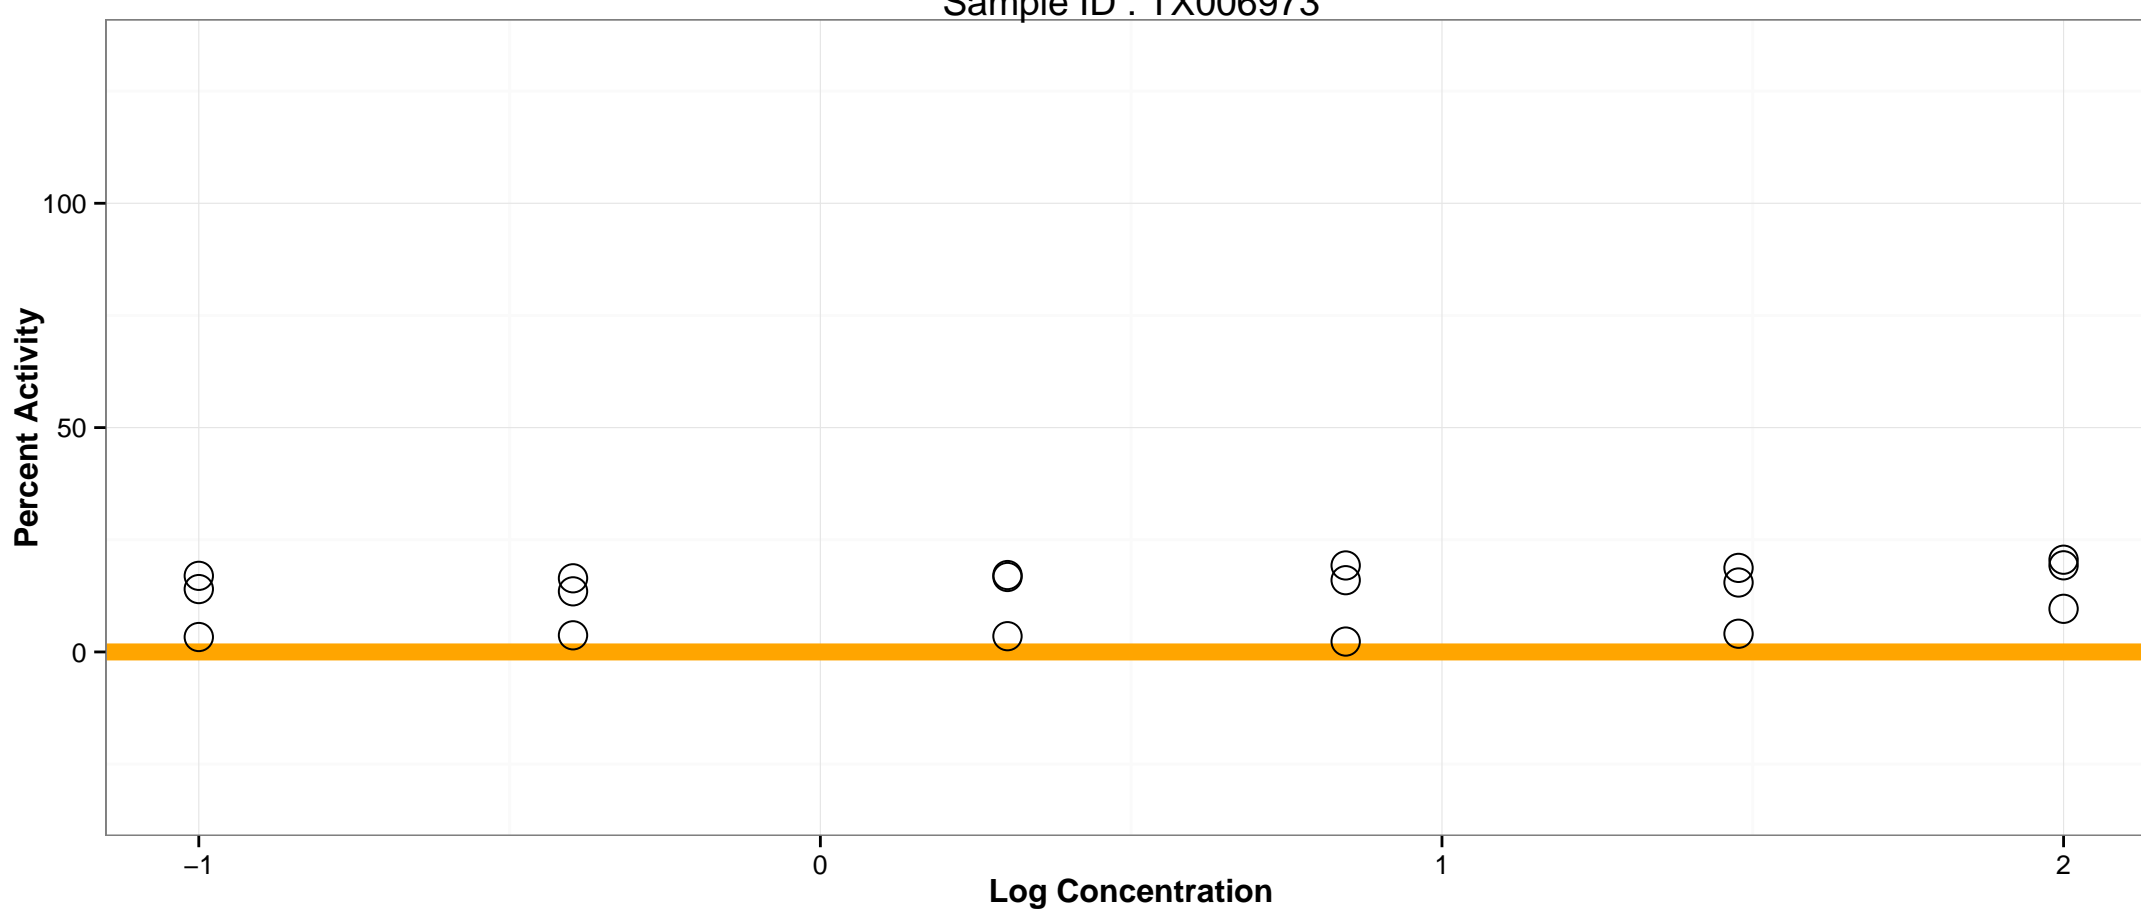

HILL MODEL

HILL MODEL: Not applicable

GAIN-LOSS MODEL

GNLS MODEL: Not applicable

|      | CNST   | HILL | GNLS |
|------|--------|------|------|
| AIC  | 152.19 | NA   | NA   |
| PROB | 1      | NA   | NA   |
| RMSE | 14.3   | NA   | NA   |

MAX\_MEAN : 16.5 MAX\_MED : 19.3 BMAD : 8.58  
COFF : 20 HIT-CALL : 0 FITC : 4 ACTP : 0  
FLAGS :

Chemical : 1,2-Diphenylhydrazine  
CAS : 122-66-7

Assay ID 1508 (NHEERL\_TPO\_AUR\_dn)  
Sample ID : TX007190

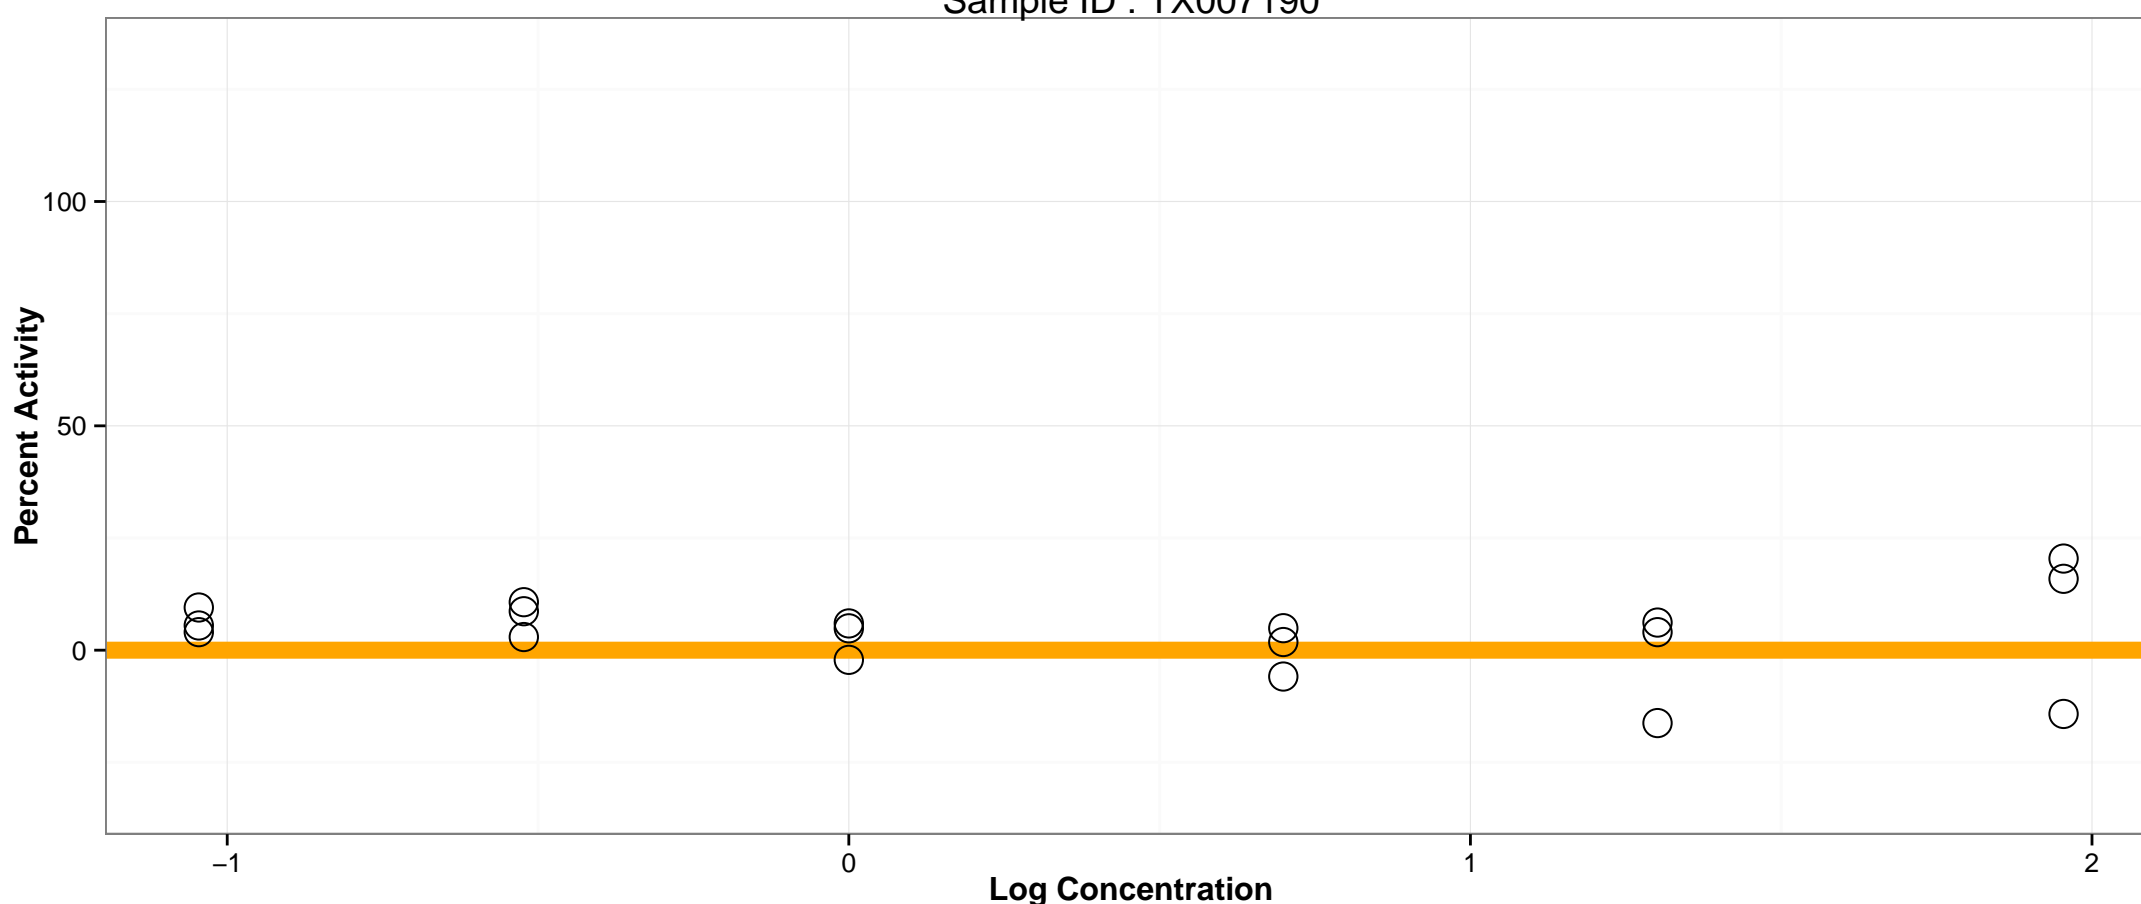

HILL MODEL

HILL MODEL: Not applicable

GAIN-LOSS MODEL

GNLS MODEL: Not applicable

|      | CNST   | HILL | GNLS |
|------|--------|------|------|
| AIC  | 135.91 | NA   | NA   |
| PROB | 1      | NA   | NA   |
| RMSE | 9.58   | NA   | NA   |

MAX\_MEAN : 7.45 MAX\_MED : 15.9 BMAD : 5.69  
COFF : 20 HIT-CALL : 0 FITC : 4 ACTP : 0  
FLAGS :

Assay ID 1509 (NHEERL\_HEK293T\_CellTiterGLO)  
Sample ID : TX007190

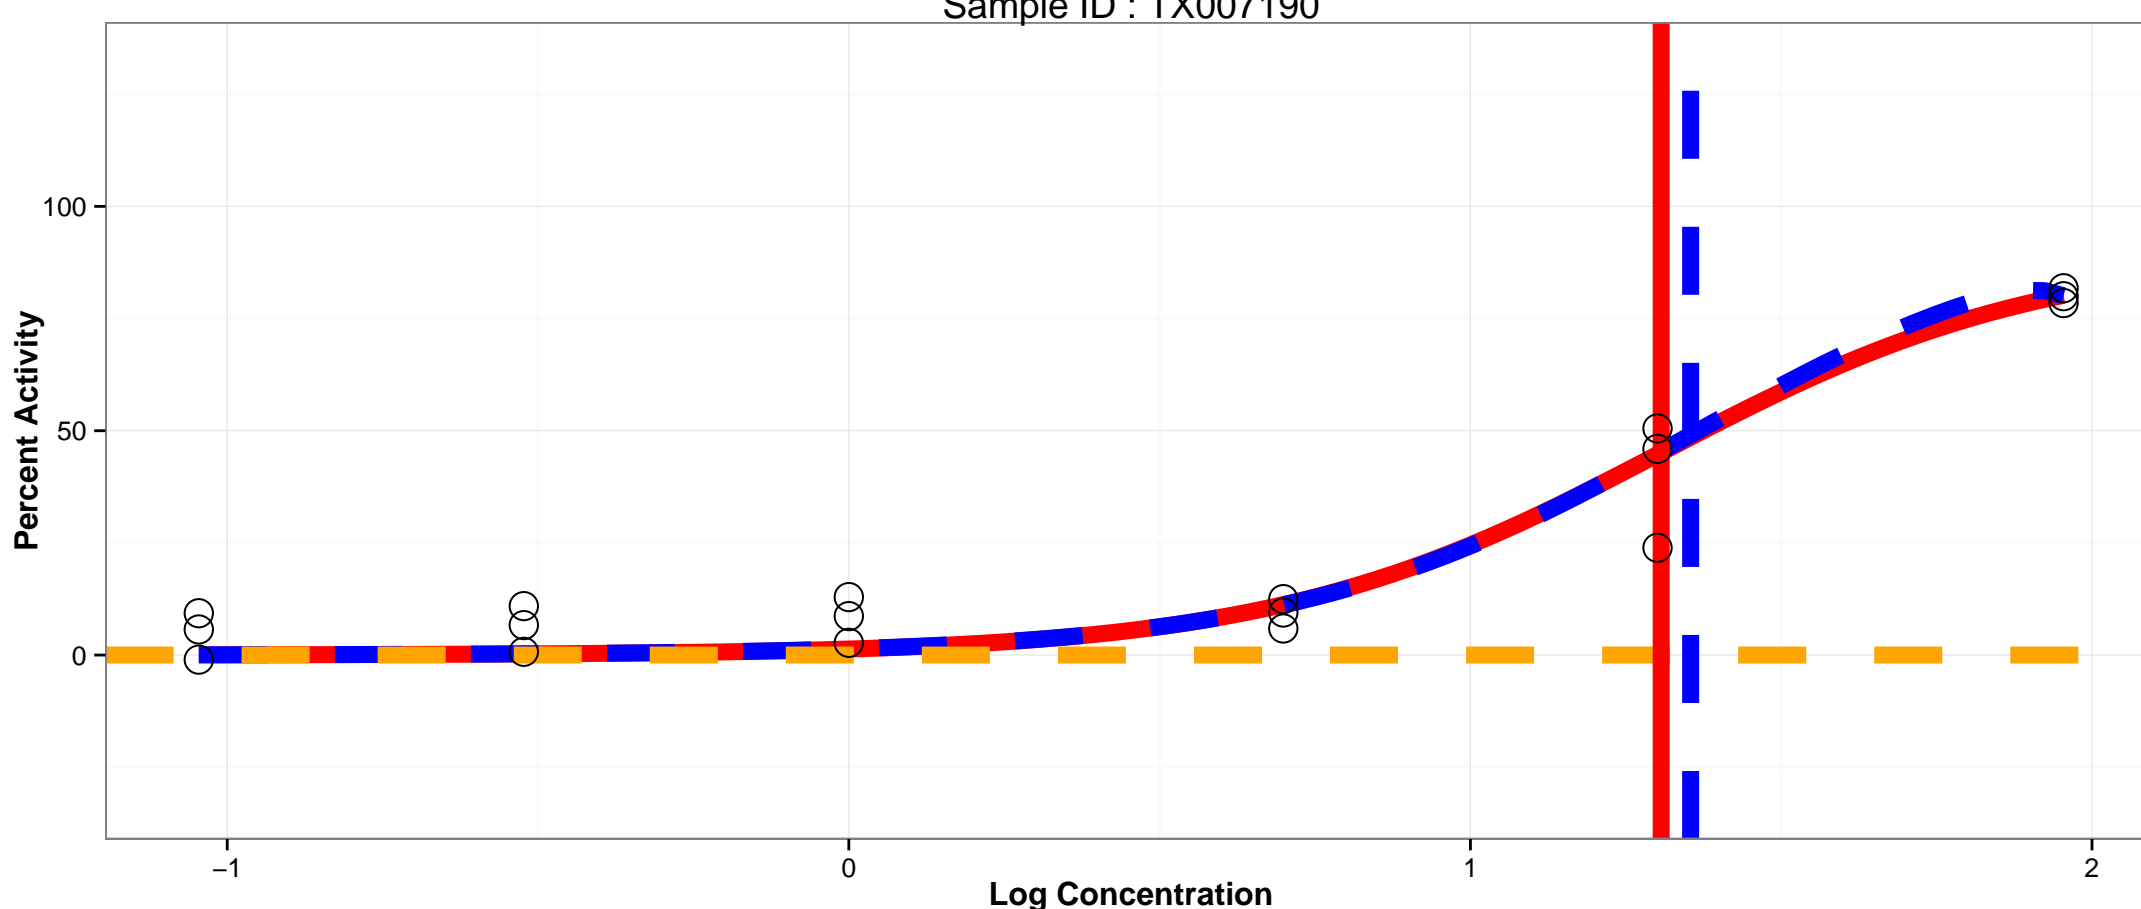

HILL MODEL

|     | tp   | ga    | gw    |
|-----|------|-------|-------|
| val | 90.2 | 1.31  | 1.39  |
| sd  | 11.5 | 0.137 | 0.433 |

GAIN-LOSS MODEL

|     | tp   | ga   | gw   | la   | lw   |
|-----|------|------|------|------|------|
| val | 98.1 | 1.35 | 1.36 | 2.09 | 8.57 |
| sd  | NA   | NA   | NA   | NA   | NA   |

|      | CNST   | HILL   | GNLS   |
|------|--------|--------|--------|
| AIC  | 181.46 | 129.39 | 133.26 |
| PROB | 0      | 0.87   | 0.13   |
| RMSE | 37.49  | 7.34   | 7.36   |

MAX\_MEAN : 80.1 MAX\_MED : 80 BMAD : 5.54  
COFF : 20 HIT-CALL : 1 FITC : 42 ACTP : 1  
FLAGS :

Assay ID 1848 (NHEERL\_Quantilum\_inhib\_2\_dn)  
Sample ID : TX007190

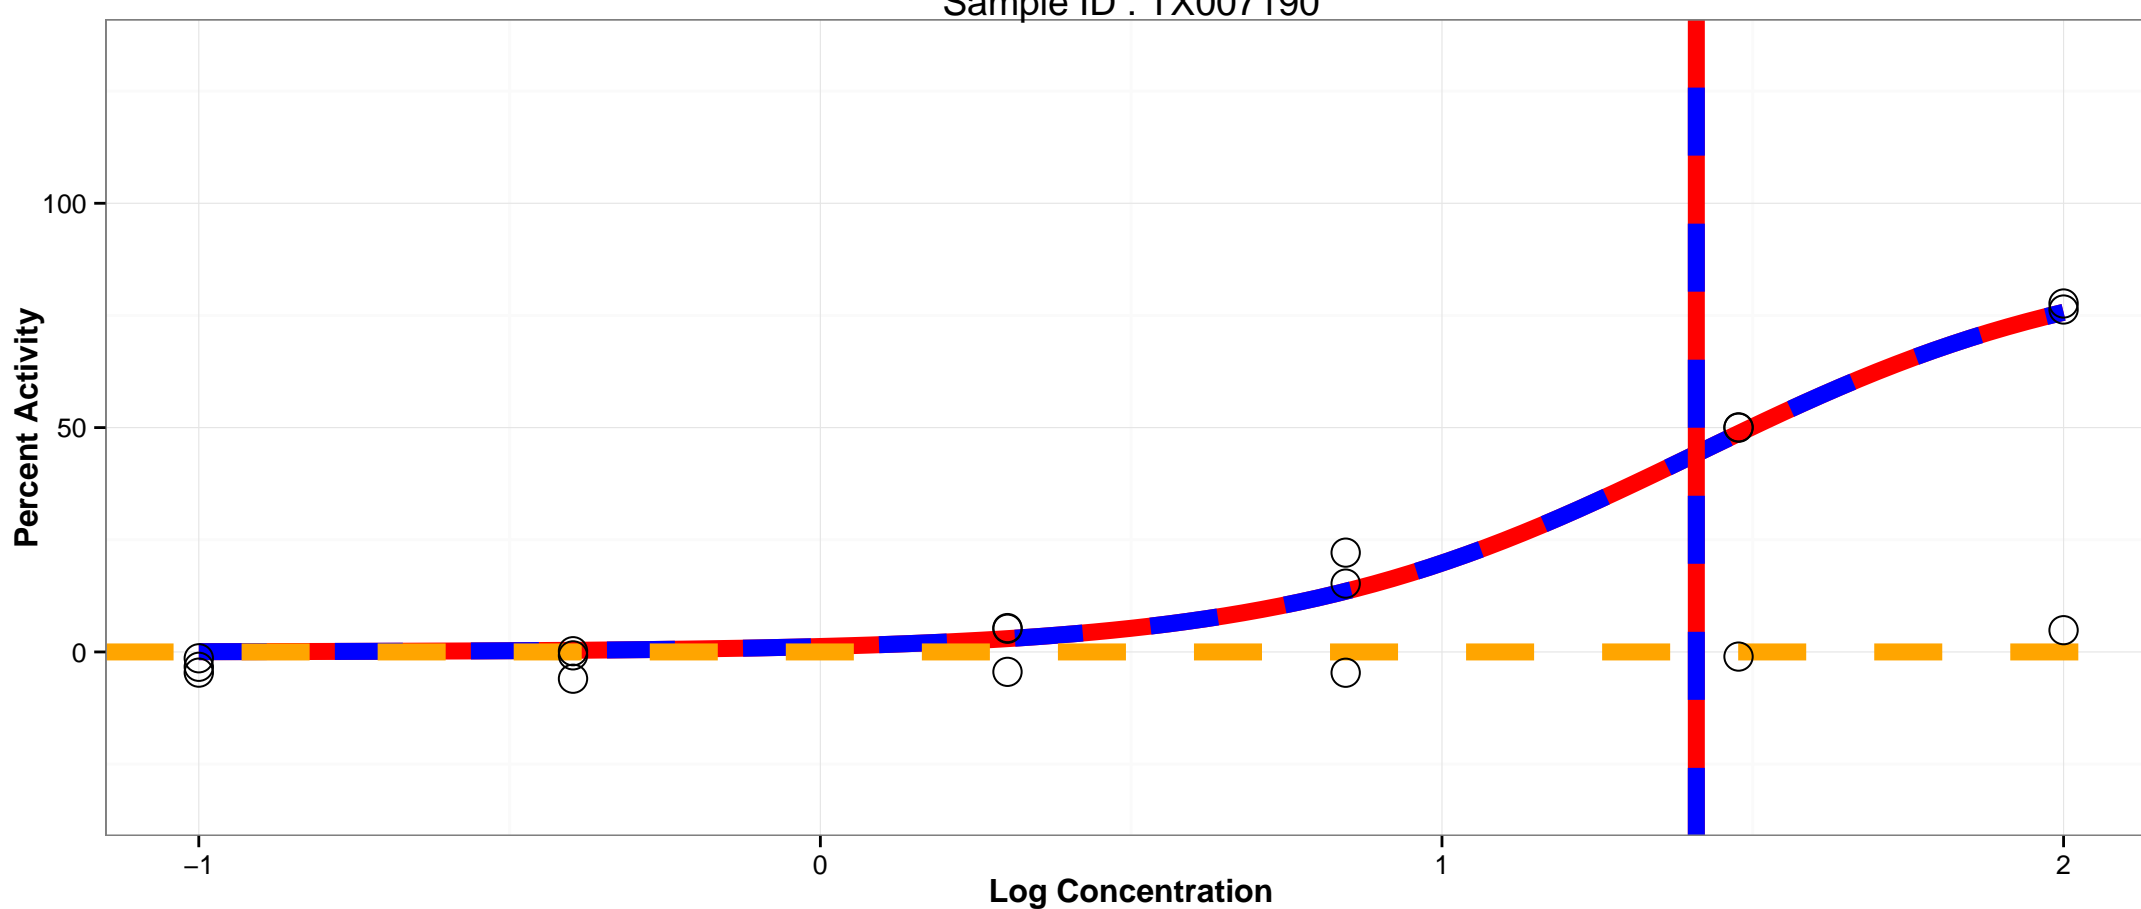

HILL MODEL

|     | tp   | ga    | gw    |
|-----|------|-------|-------|
| val | 88.3 | 1.41  | 1.32  |
| sd  | 12.9 | 0.138 | 0.342 |

GAIN-LOSS MODEL

|     | tp   | ga   | gw   | la   | lw   |
|-----|------|------|------|------|------|
| val | 88.3 | 1.41 | 1.32 | 3.98 | 17.6 |
| sd  | NA   | NA   | NA   | NA   | NA   |

|      | CNST   | HILL   | GNLS   |
|------|--------|--------|--------|
| AIC  | 172.45 | 152.91 | 156.91 |
| PROB | 0      | 0.88   | 0.12   |
| RMSE | 31.43  | 21.14  | 21.14  |

MAX\_MEAN : 53 MAX\_MED : 76.3 BMAD : 8.58  
COFF : 20 HIT-CALL : 1 FITC : 42 ACTP : 1  
FLAGS : 10



Chemical : Docusate sodium  
CAS : 577-11-7

Assay ID 1508 (NHEERL\_TPO\_AUR\_dn)  
Sample ID : TX007202

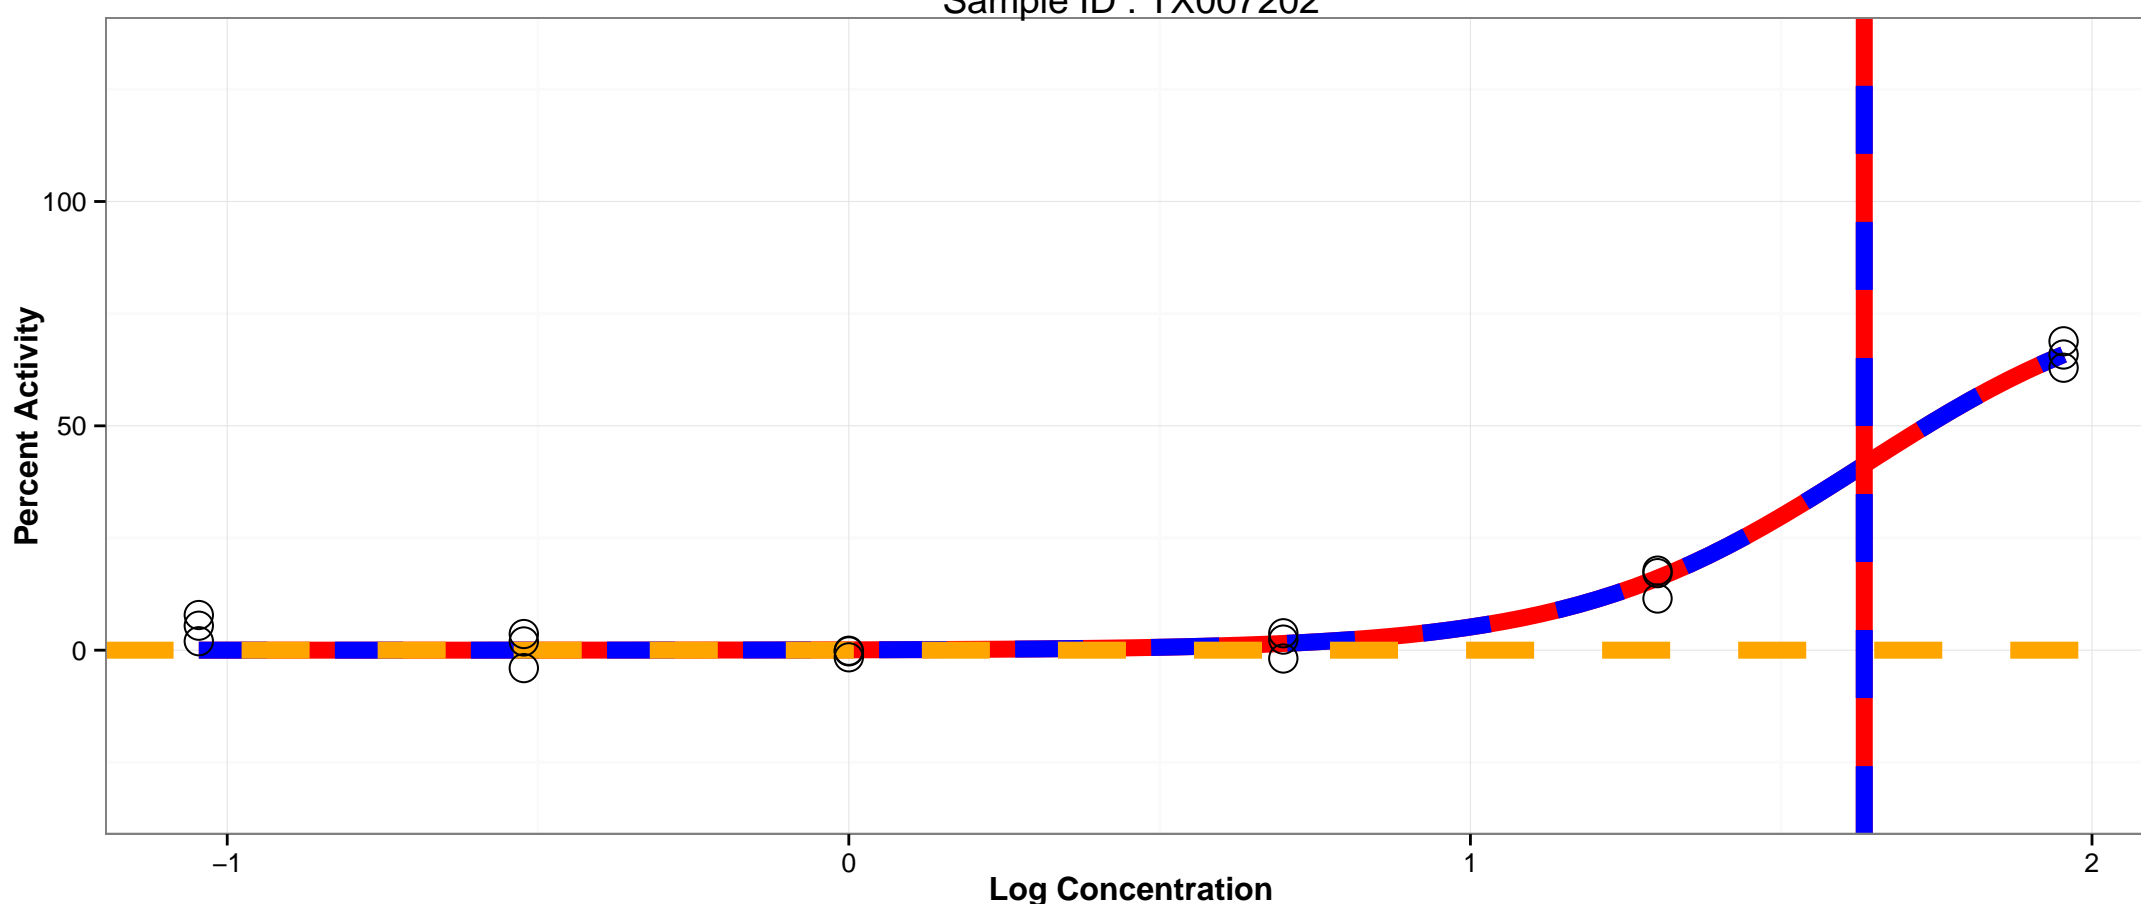

HILL MODEL

|     | tp   | ga    | gw    |
|-----|------|-------|-------|
| val | 82.6 | 1.63  | 1.86  |
| sd  | 34   | 0.304 | 0.993 |

GAIN-LOSS MODEL

|     | tp   | ga   | gw   | la   | lw |
|-----|------|------|------|------|----|
| val | 82.6 | 1.63 | 1.86 | 2.66 | 18 |
| sd  | NA   | NA   | NA   | NA   | NA |

|      | CNST   | HILL   | GNLS   |
|------|--------|--------|--------|
| AIC  | 165.44 | 102.55 | 106.55 |
| PROB | 0      | 0.88   | 0.12   |
| RMSE | 27.84  | 3.25   | 3.25   |

MAX\_MEAN : 65.9 MAX\_MED : 65.9 BMAD : 5.69  
COFF : 20 HIT-CALL : 1 FITC : 42 ACTP : 1  
FLAGS :

Assay ID 1509 (NHEERL\_HEK293T\_CellTiterGLO)  
Sample ID : TX007202

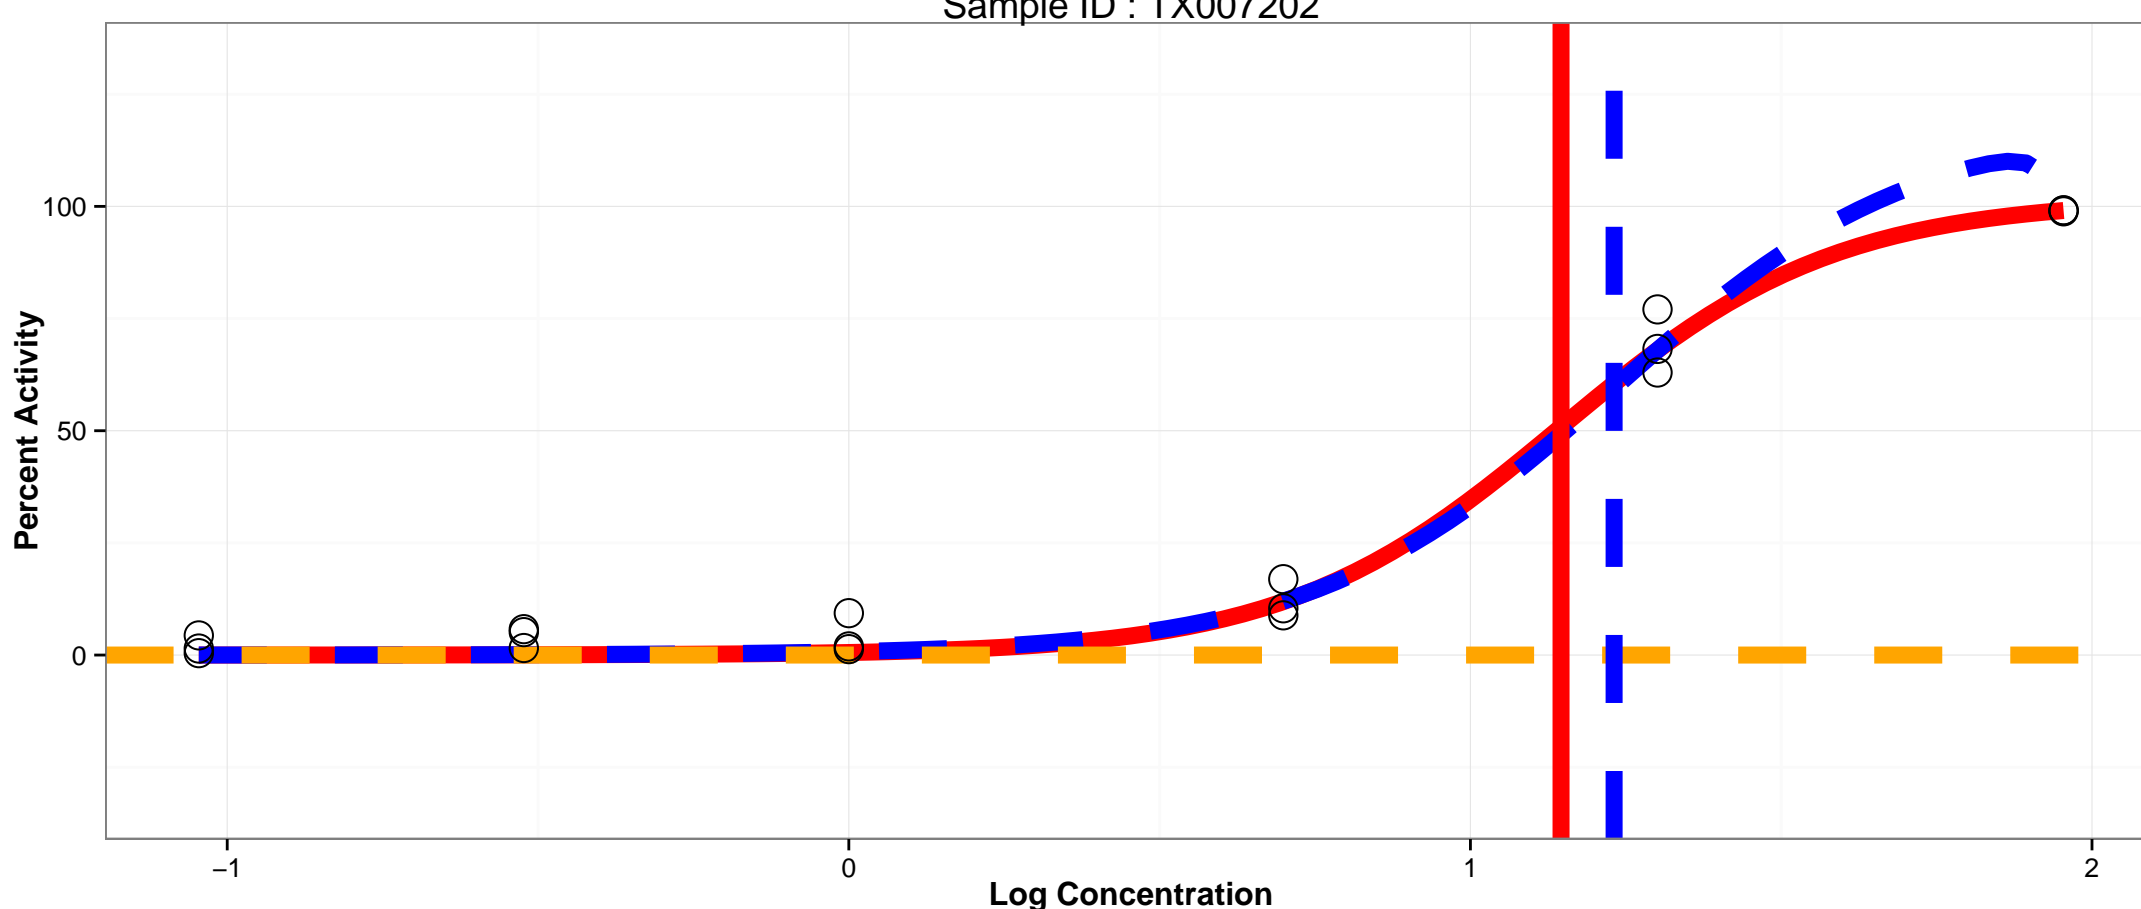

HILL MODEL

|     | tp   | ga     | gw    |
|-----|------|--------|-------|
| val | 102  | 1.15   | 1.96  |
| sd  | 2.24 | 0.0286 | 0.207 |

GAIN-LOSS MODEL

|     | tp   | ga    | gw    | la      | lw   |
|-----|------|-------|-------|---------|------|
| val | 119  | 1.23  | 1.78  | 2.01    | 15   |
| sd  | 29.4 | 0.134 | 0.296 | 0.00584 | 12.6 |

|      | CNST   | HILL   | GNLS   |
|------|--------|--------|--------|
| AIC  | 192.72 | 110.21 | 113.94 |
| PROB | 0      | 0.87   | 0.13   |
| RMSE | 49.8   | 4.12   | 4.09   |

MAX\_MEAN : 99.1 MAX\_MED : 99.1 BMAD : 5.54  
COFF : 20 HIT-CALL : 1 FITC : 41 ACTP : 1  
FLAGS :

Assay ID 1848 (NHEERL\_Quantilum\_inhib\_2\_dn)  
Sample ID : TX007202

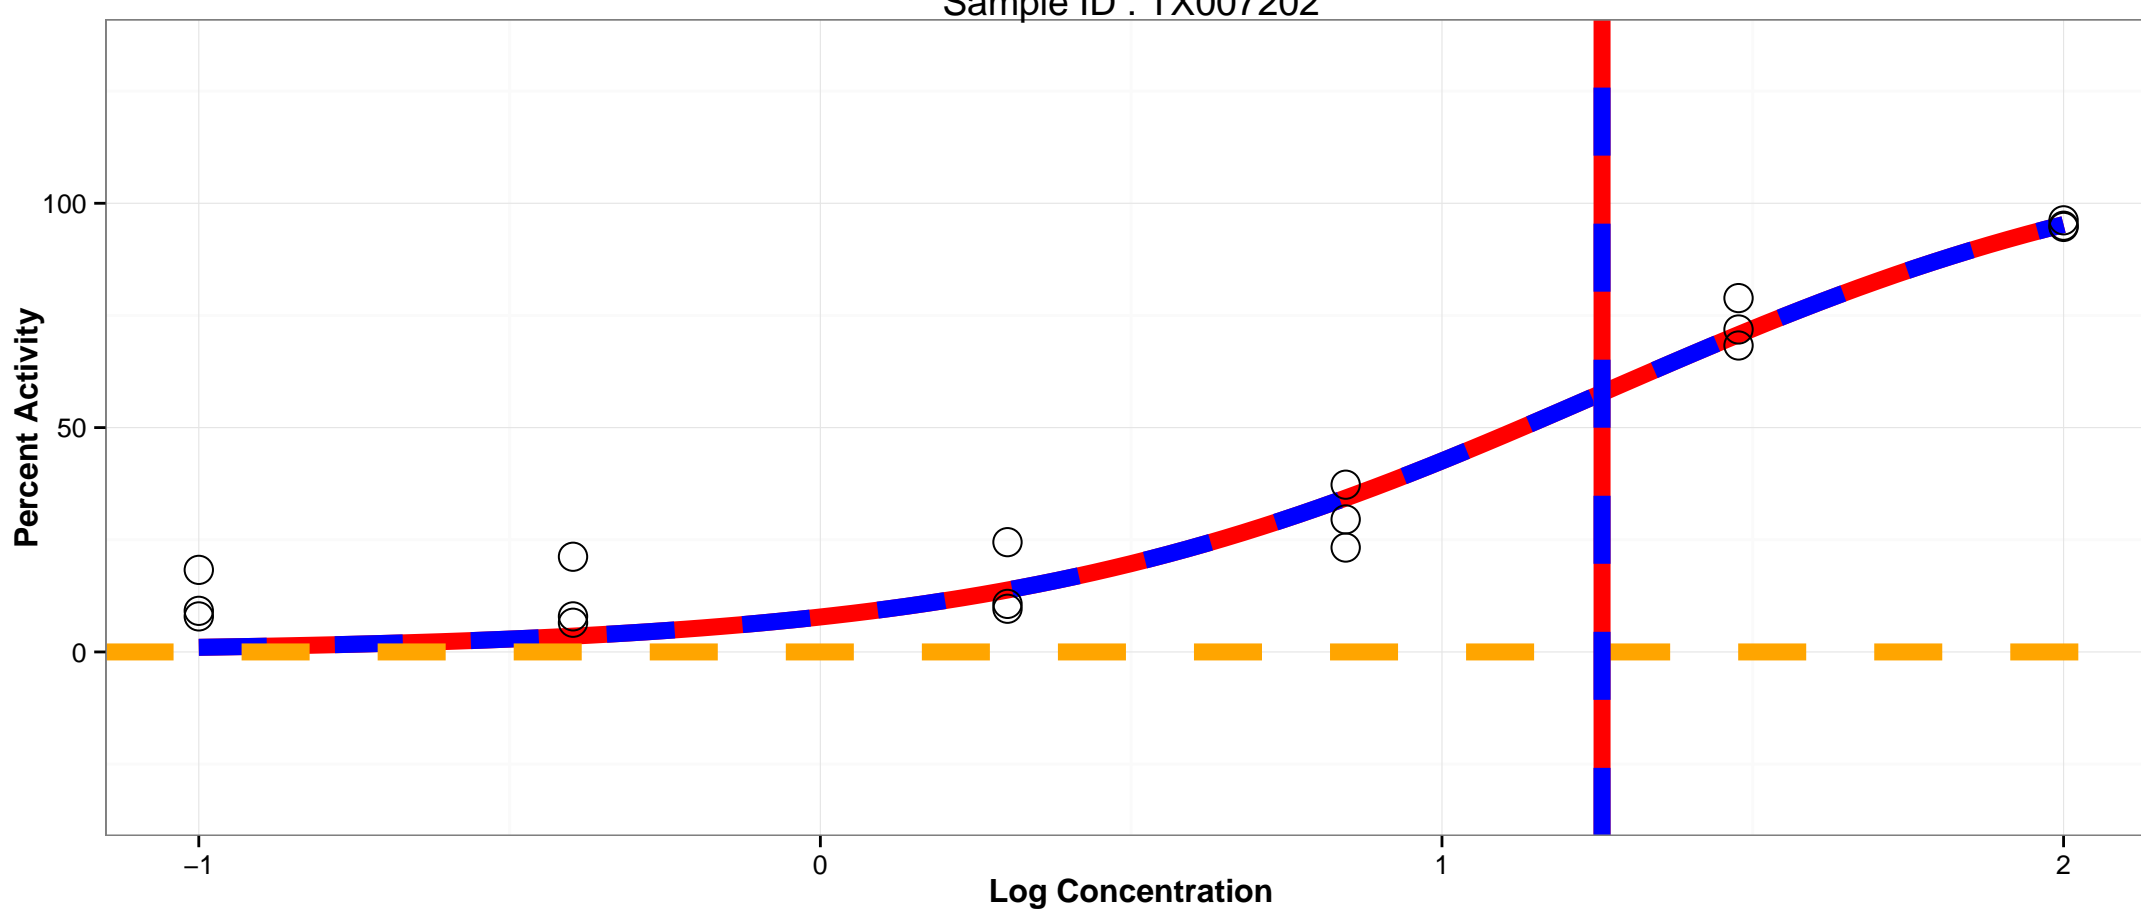

HILL MODEL

|     | tp   | ga    | gw    |
|-----|------|-------|-------|
| val | 115  | 1.26  | 0.907 |
| sd  | 14.5 | 0.157 | 0.201 |

GAIN-LOSS MODEL

|     | tp   | ga    | gw    | la    | lw     |
|-----|------|-------|-------|-------|--------|
| val | 115  | 1.26  | 0.907 | 3.21  | 8.58   |
| sd  | 14.5 | 0.157 | 0.2   | 31100 | 220000 |

|      | CNST   | HILL   | GNLS   |
|------|--------|--------|--------|
| AIC  | 195.85 | 133.51 | 137.51 |
| PROB | 0      | 0.88   | 0.12   |
| RMSE | 51.62  | 7.9    | 7.9    |

MAX\_MEAN : 95.3 MAX\_MED : 95 BMAD : 8.58  
COFF : 20 HIT-CALL : 1 FITC : 42 ACTP : 1  
FLAGS :

Chemical : Benz(a)anthracene  
CAS : 56-55-3

Assay ID 1508 (NHEERL\_TPO\_AUR\_dn)  
Sample ID : TX007238

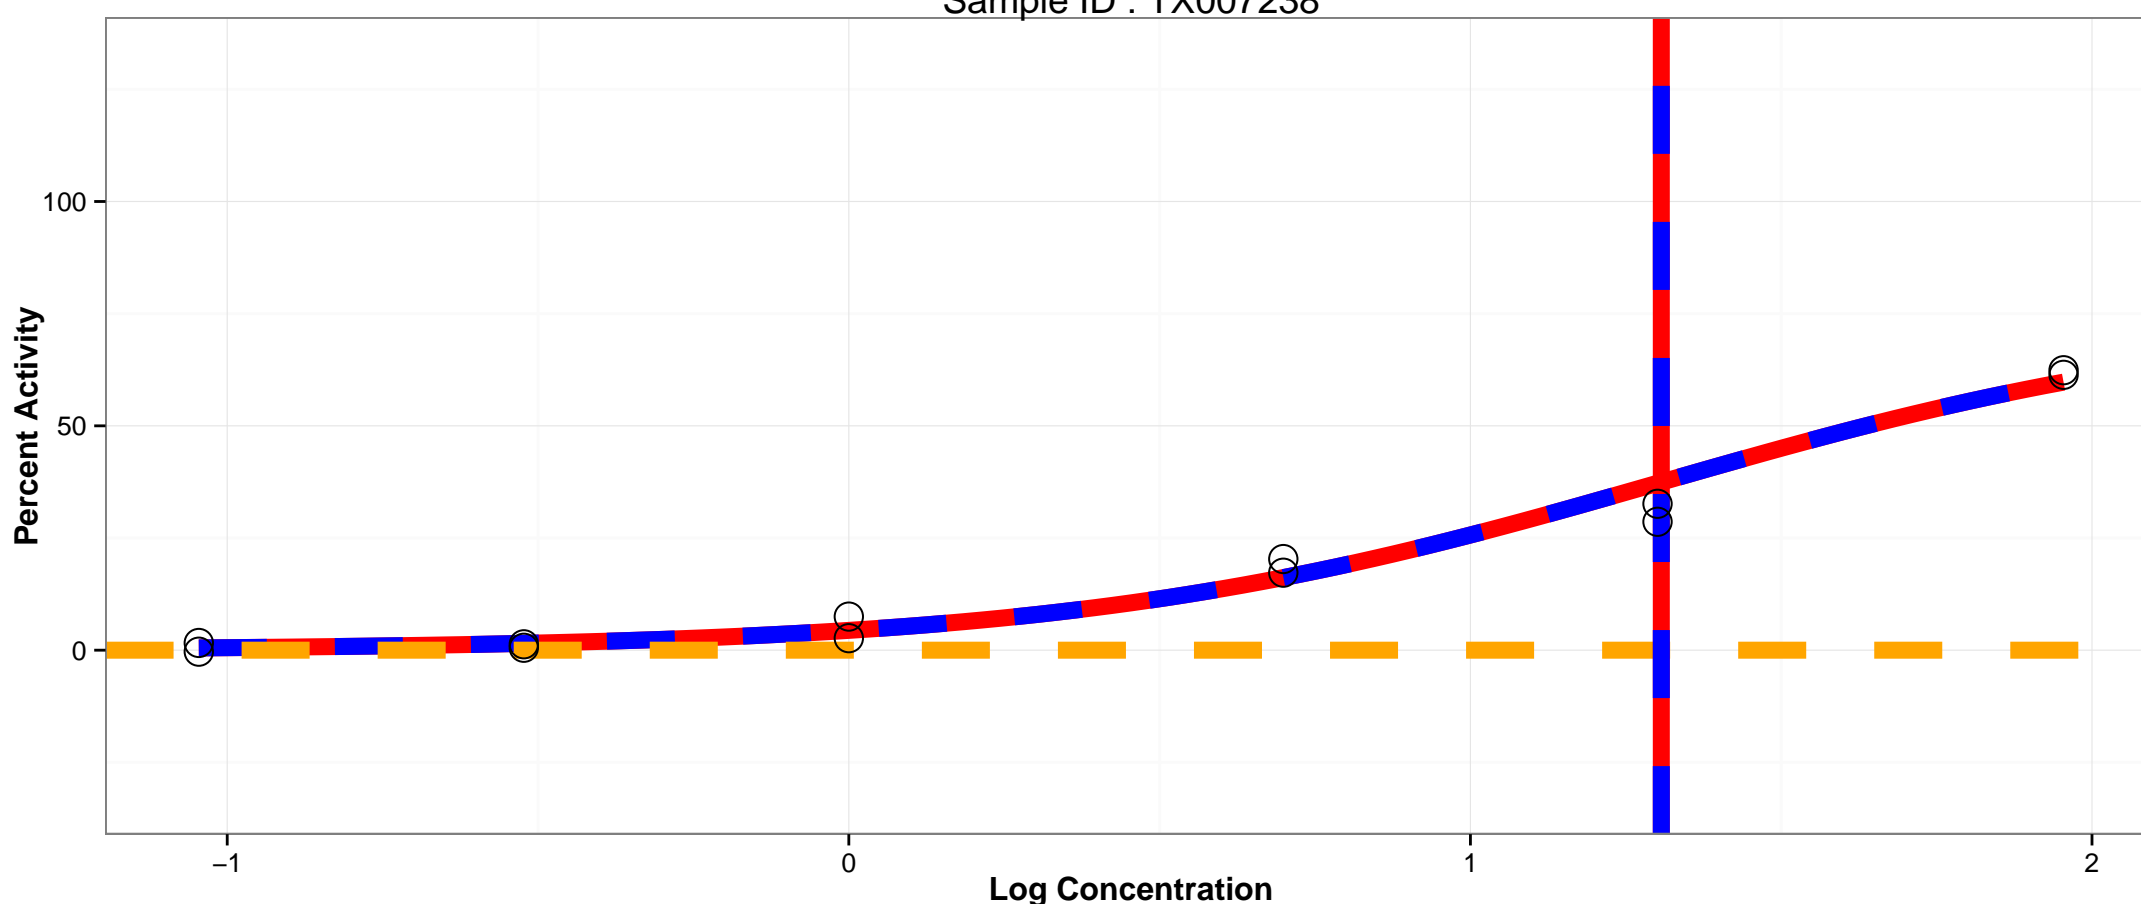

HILL MODEL

|     | tp   | ga    | gw    |
|-----|------|-------|-------|
| val | 74.9 | 1.31  | 0.921 |
| sd  | 8.67 | 0.165 | 0.12  |

GAIN-LOSS MODEL

|     | tp   | ga   | gw    | la   | lw   |
|-----|------|------|-------|------|------|
| val | 74.9 | 1.31 | 0.921 | 3.78 | 9.32 |
| sd  | NA   | NA   | NA    | NA   | NA   |

|      | CNST   | HILL  | GNLS  |
|------|--------|-------|-------|
| AIC  | 116.44 | 70.78 | 74.78 |
| PROB | 0      | 0.88  | 0.12  |
| RMSE | 29.34  | 3.39  | 3.39  |

MAX\_MEAN : 61.9 MAX\_MED : 61.9 BMAD : 5.69  
COFF : 20 HIT-CALL : 1 FITC : 42 ACTP : 1  
FLAGS :

Assay ID 1509 (NHEERL\_HEK293T\_CellTiterGLO)  
Sample ID : TX007238

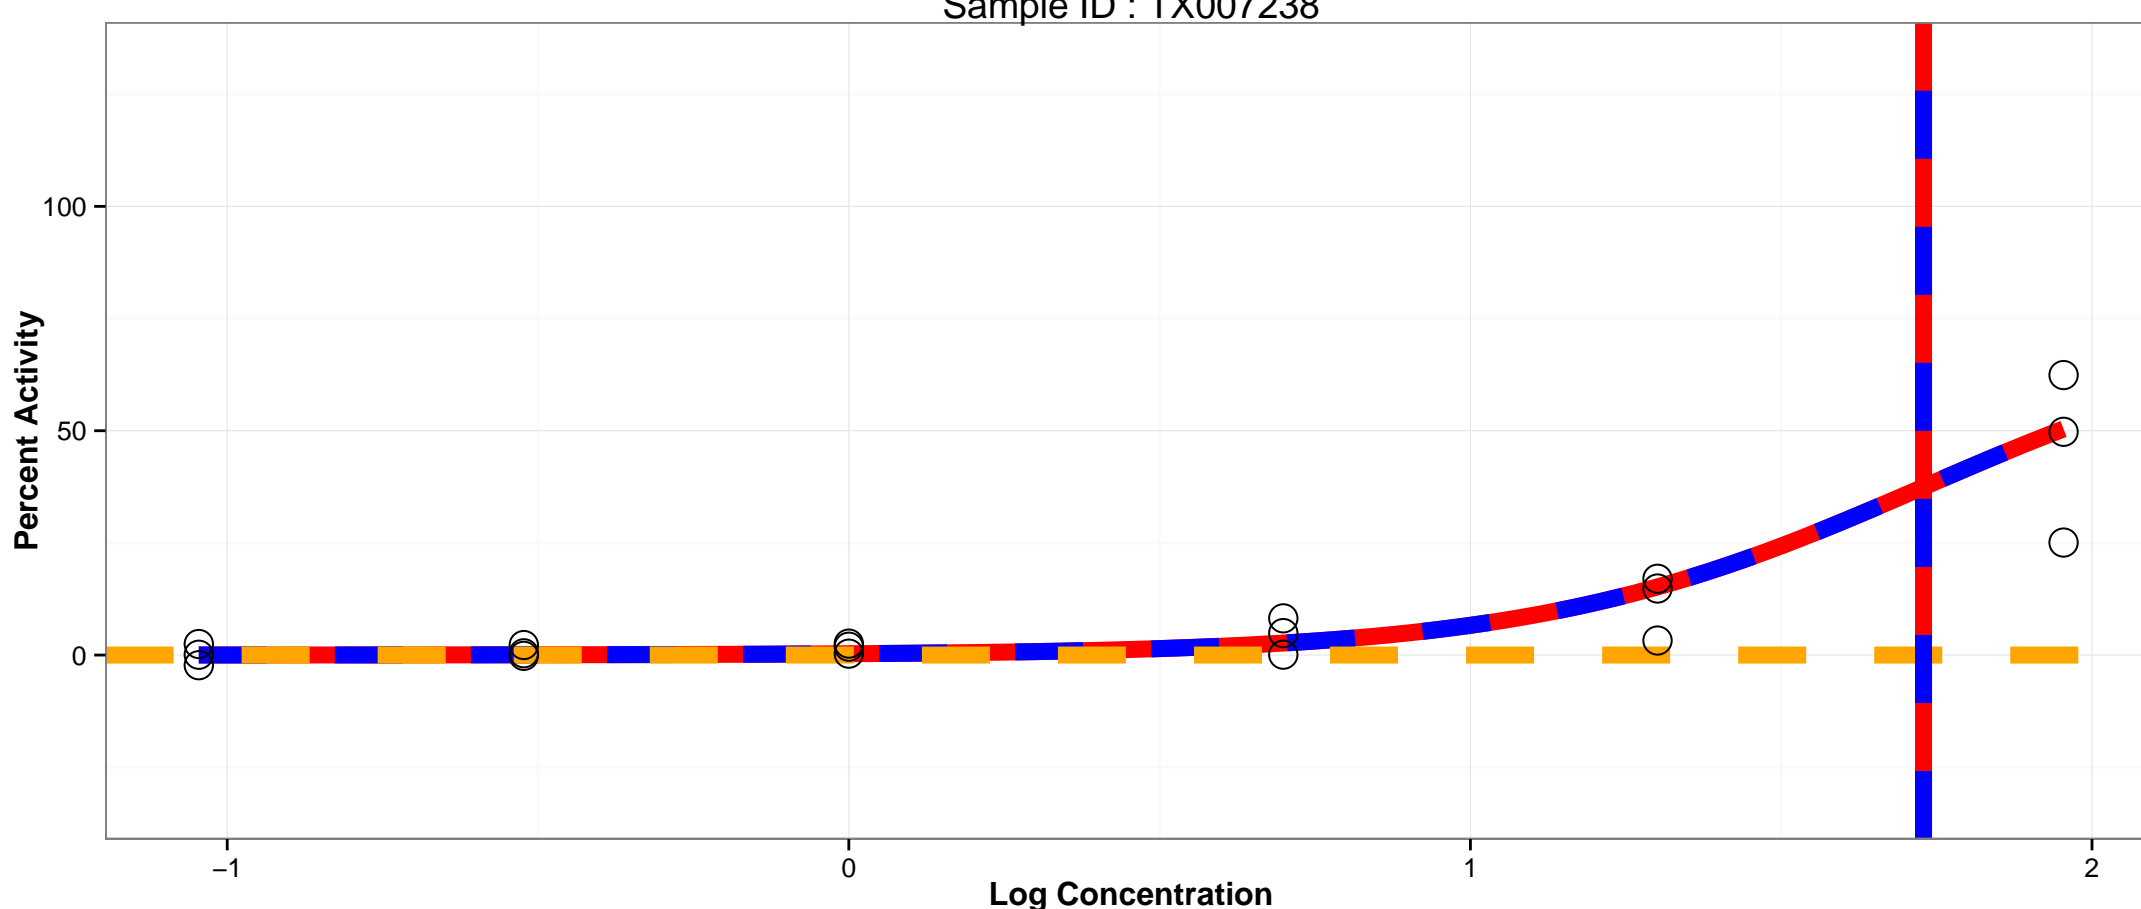

HILL MODEL

|     | tp   | ga    | gw    |
|-----|------|-------|-------|
| val | 74.9 | 1.73  | 1.39  |
| sd  | 29.6 | 0.298 | 0.499 |

GAIN-LOSS MODEL

|     | tp   | ga    | gw   | la   | lw   |
|-----|------|-------|------|------|------|
| val | 74.9 | 1.73  | 1.39 | 3.6  | 5.17 |
| sd  | 29.6 | 0.298 | 0.5  | 2650 | 8330 |

|      | CNST   | HILL   | GNLS   |
|------|--------|--------|--------|
| AIC  | 153.06 | 121.53 | 125.53 |
| PROB | 0      | 0.88   | 0.12   |
| RMSE | 20.6   | 7.44   | 7.44   |

MAX\_MEAN : 45.8 MAX\_MED : 49.8 BMAD : 5.54  
COFF : 20 HIT-CALL : 1 FITC : 42 ACTP : 1  
FLAGS : 6

Assay ID 1848 (NHEERL\_Quantilum\_inhib\_2\_dn)  
Sample ID : TX007238

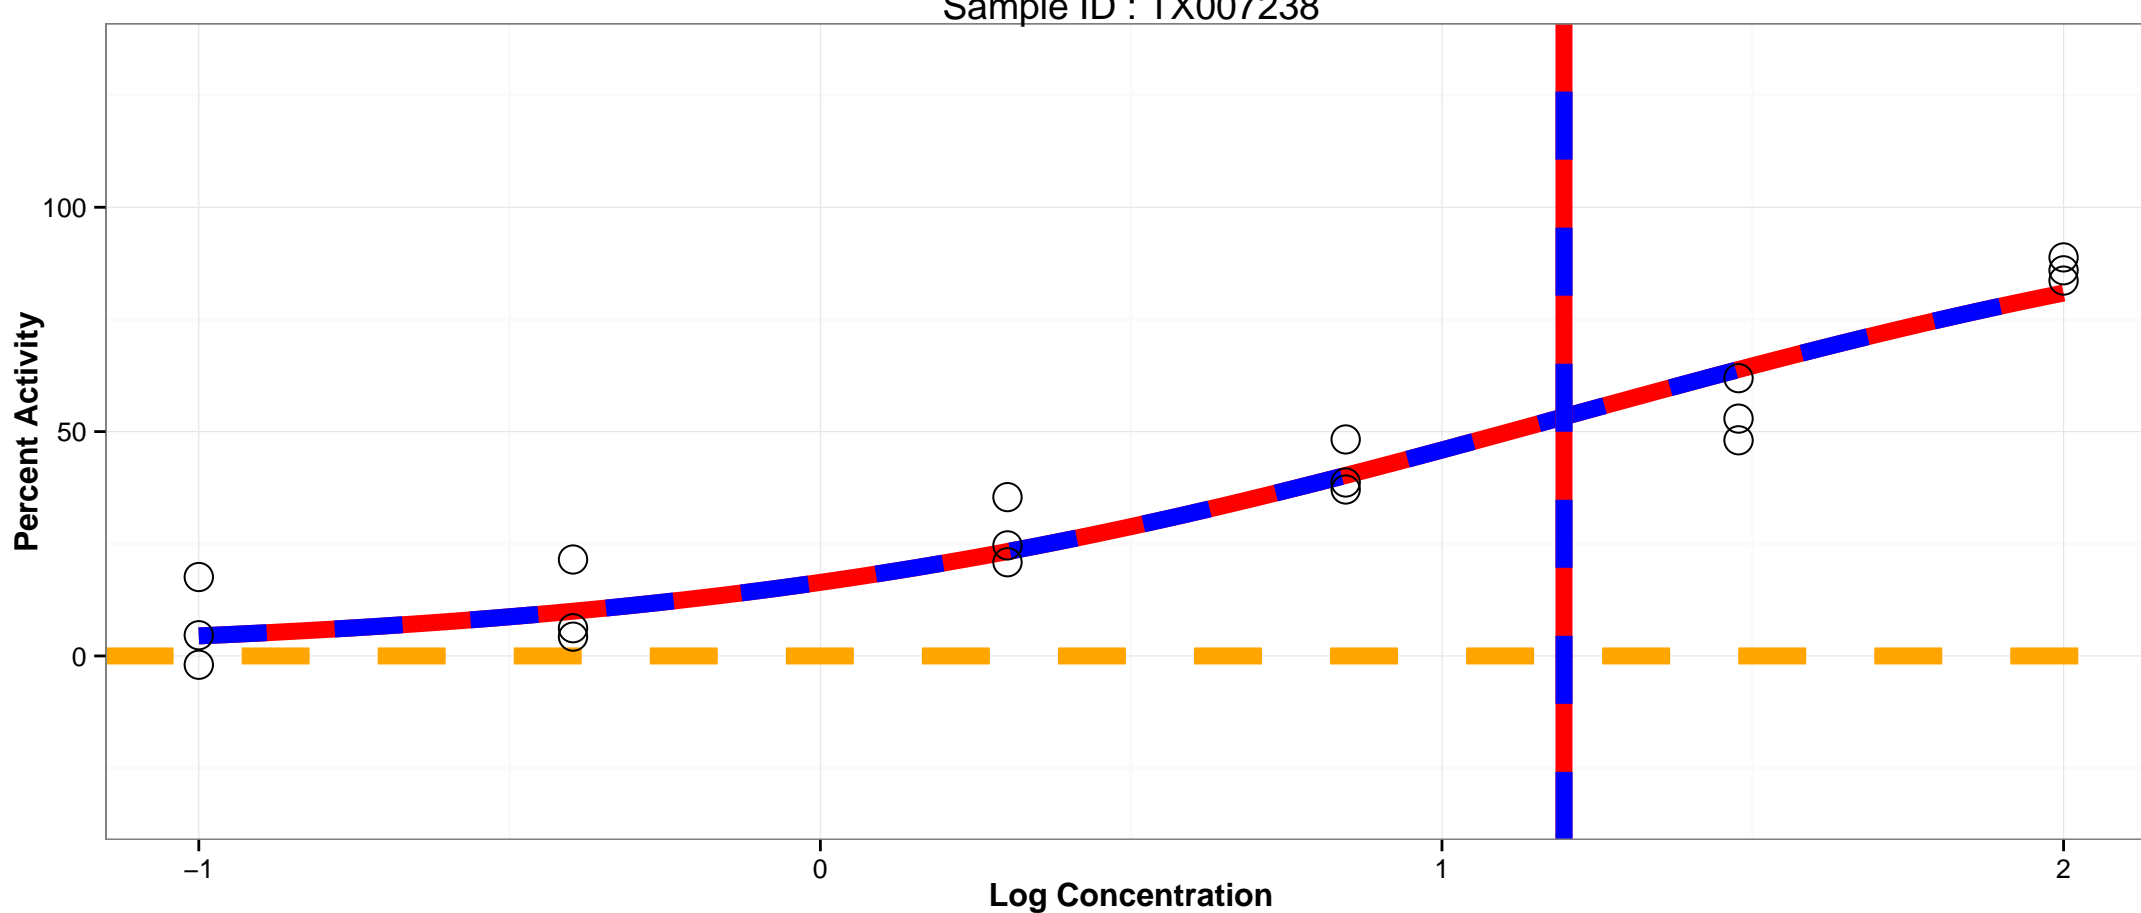

HILL MODEL

|     | tp   | ga    | gw    |
|-----|------|-------|-------|
| val | 107  | 1.2   | 0.619 |
| sd  | 17.4 | 0.277 | 0.105 |

GAIN-LOSS MODEL

|     | tp   | ga    | gw    | la   | lw    |
|-----|------|-------|-------|------|-------|
| val | 107  | 1.2   | 0.619 | 2.97 | 10.6  |
| sd  | 17.4 | 0.277 | 0.105 | 3340 | 36400 |

|      | CNST   | HILL   | GNLS   |
|------|--------|--------|--------|
| AIC  | 193.27 | 134.62 | 138.62 |
| PROB | 0      | 0.88   | 0.12   |
| RMSE | 46.89  | 7.79   | 7.79   |

MAX\_MEAN : 86.2 MAX\_MED : 86 BMAD : 8.58  
COFF : 20 HIT-CALL : 1 FITC : 42 ACTP : 1  
FLAGS :

Chemical : 4-Chloroaniline  
CAS : 106-47-8

Assay ID 1508 (NHEERL\_TPO\_AUR\_dn)  
Sample ID : TX007246

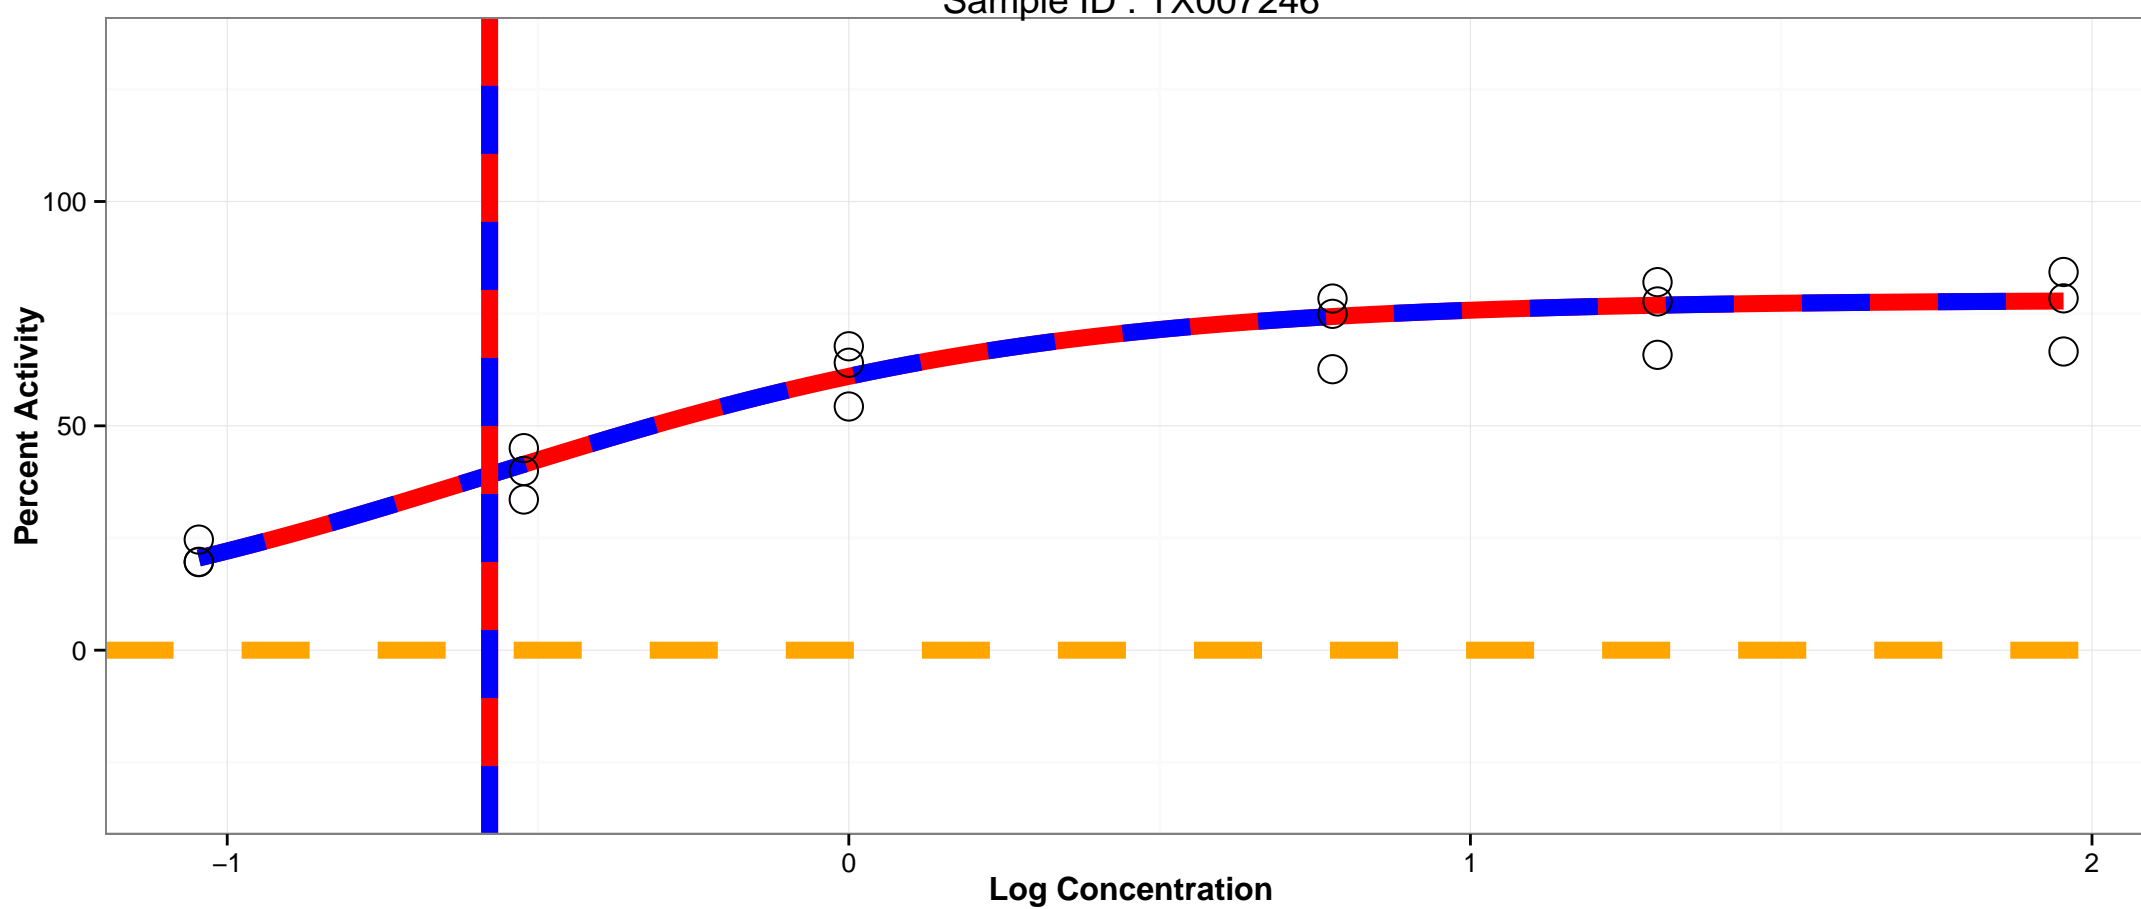

HILL MODEL

|     | tp   | ga     | gw    |
|-----|------|--------|-------|
| val | 78.1 | -0.578 | 0.957 |
| sd  | 2.86 | 0.07   | 0.152 |

GAIN-LOSS MODEL

|     | tp   | ga     | gw    | la    | lw     |
|-----|------|--------|-------|-------|--------|
| val | 78.1 | -0.578 | 0.957 | 2.74  | 13.1   |
| sd  | 2.86 | 0.07   | 0.152 | 17000 | 280000 |

|      | CNST   | HILL   | GNLS   |
|------|--------|--------|--------|
| AIC  | 205.05 | 125.51 | 129.51 |
| PROB | 0      | 0.88   | 0.12   |
| RMSE | 61.58  | 6.08   | 6.08   |

MAX\_MEAN : 76.4 MAX\_MED : 78.4 BMAD : 5.69  
COFF : 20 HIT-CALL : 1 FITC : 41 ACTP : 1  
FLAGS :

Assay ID 1509 (NHEERL\_HEK293T\_CellTiterGLO)  
Sample ID : TX007246

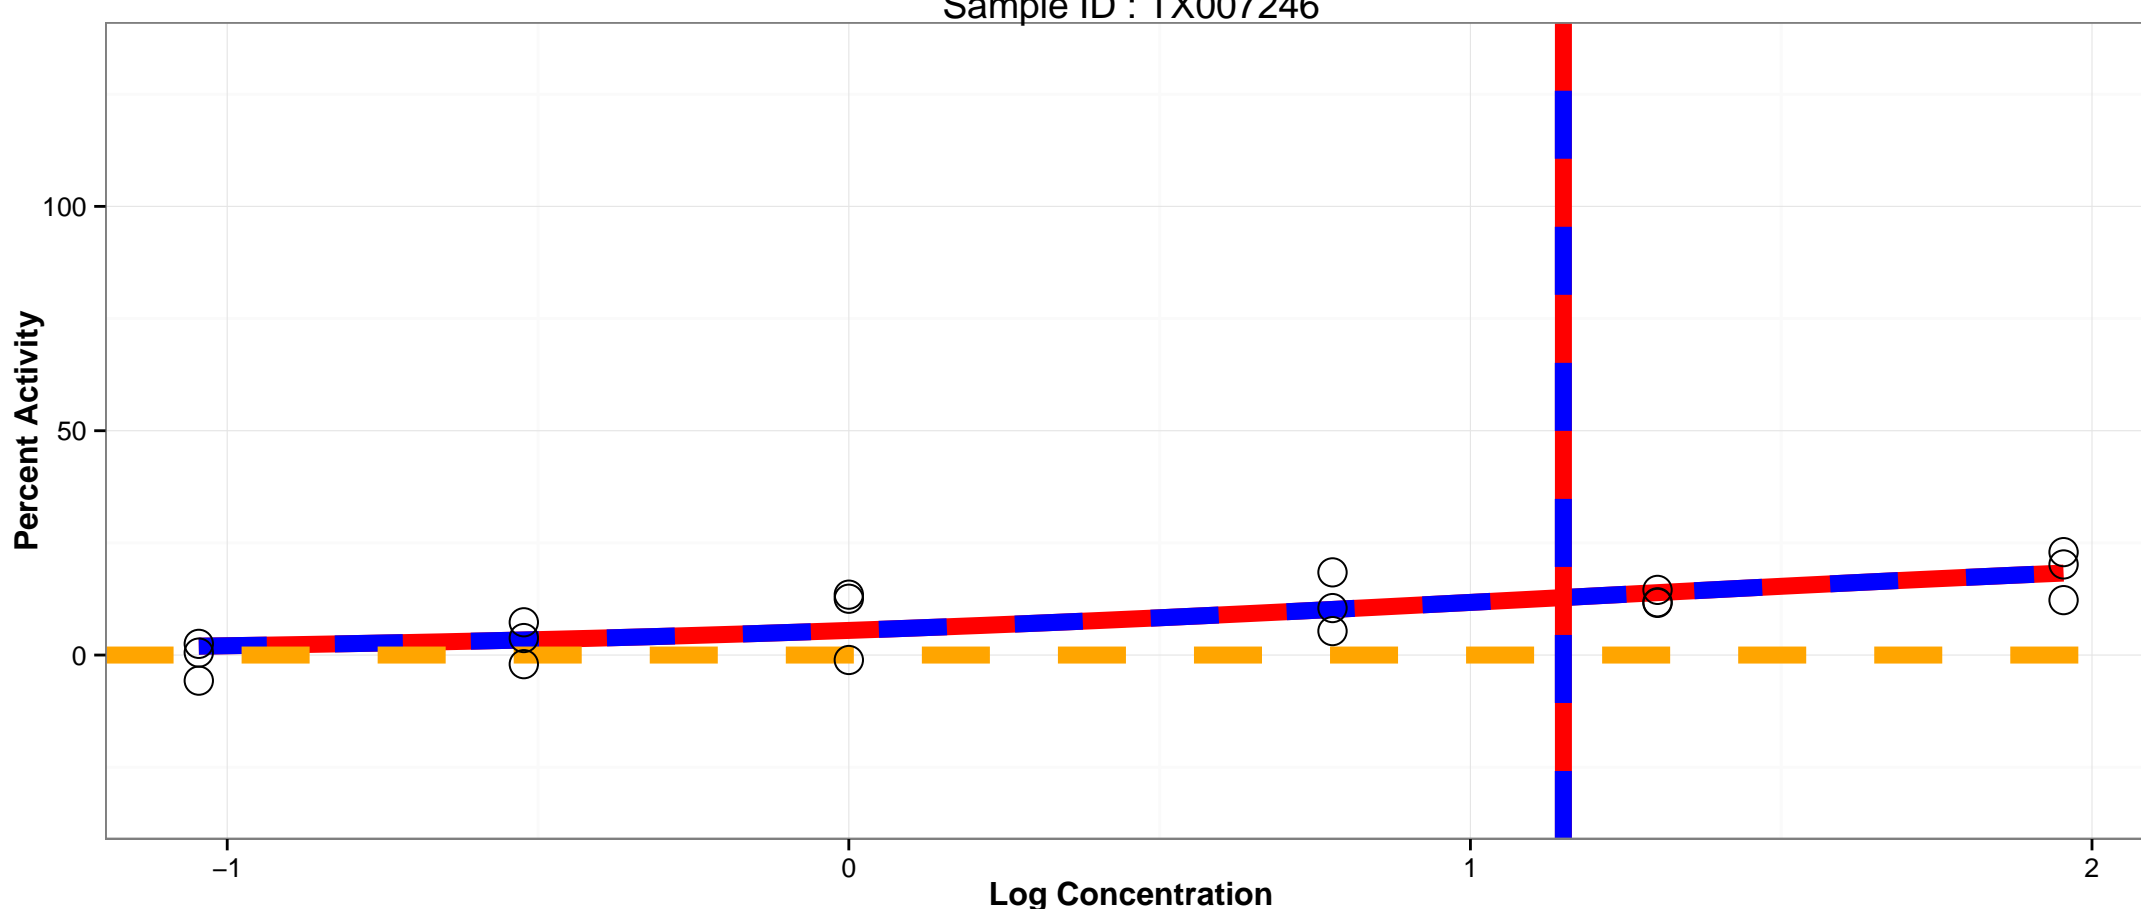

HILL MODEL

|     | tp   | ga   | gw    |
|-----|------|------|-------|
| val | 25.6 | 1.15 | 0.491 |
| sd  | 22.6 | 1.78 | 0.321 |

GAIN-LOSS MODEL

|     | tp   | ga   | gw    | la   | lw    |
|-----|------|------|-------|------|-------|
| val | 25.6 | 1.15 | 0.491 | 2.73 | 10.5  |
| sd  | 22.6 | 1.78 | 0.321 | 1080 | 14800 |

|      | CNST   | HILL   | GNLS   |
|------|--------|--------|--------|
| AIC  | 144.06 | 118.36 | 122.36 |
| PROB | 0      | 0.88   | 0.12   |
| RMSE | 11.79  | 4.87   | 4.87   |

MAX\_MEAN : 18.5 MAX\_MED : 20.2 BMAD : 5.54  
COFF : 20 HIT-CALL : 1 FITC : 42 ACTP : 1  
FLAGS : 11;6

Assay ID 1848 (NHEERL\_QuantLum\_inhib\_2\_dn)  
Sample ID : TX007246

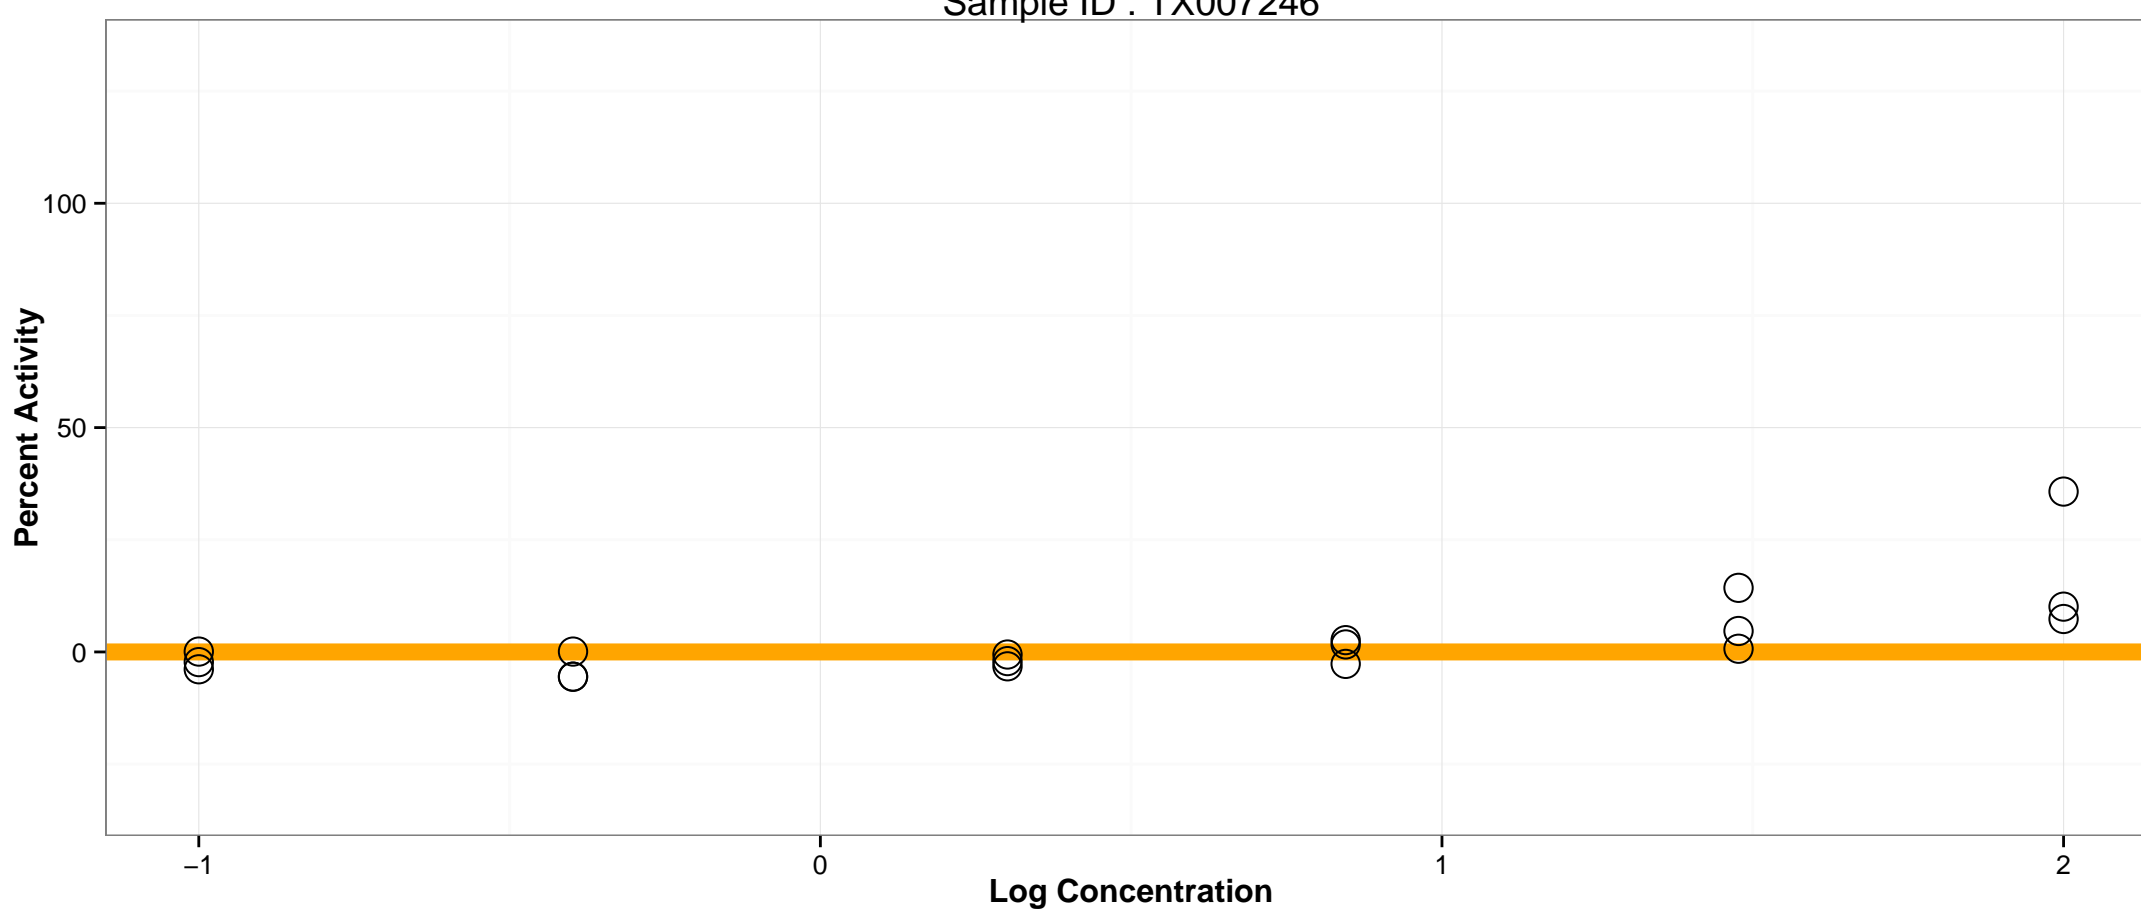

HILL MODEL

HILL MODEL: Not applicable

GAIN-LOSS MODEL

GNLS MODEL: Not applicable

|      | CNST   | HILL | GNLS |
|------|--------|------|------|
| AIC  | 125.74 | NA   | NA   |
| PROB | 1      | NA   | NA   |
| RMSE | 9.93   | NA   | NA   |

MAX\_MEAN : 17.7 MAX\_MED : 10.1 BMAD : 8.58  
COFF : 20 HIT-CALL : 0 FITC : 4 ACTP : 0  
FLAGS :

Chemical : Quercetin  
CAS : 117-39-5

Assay ID 1508 (NHEERL\_TPO\_AUR\_dn)  
Sample ID : TX007264

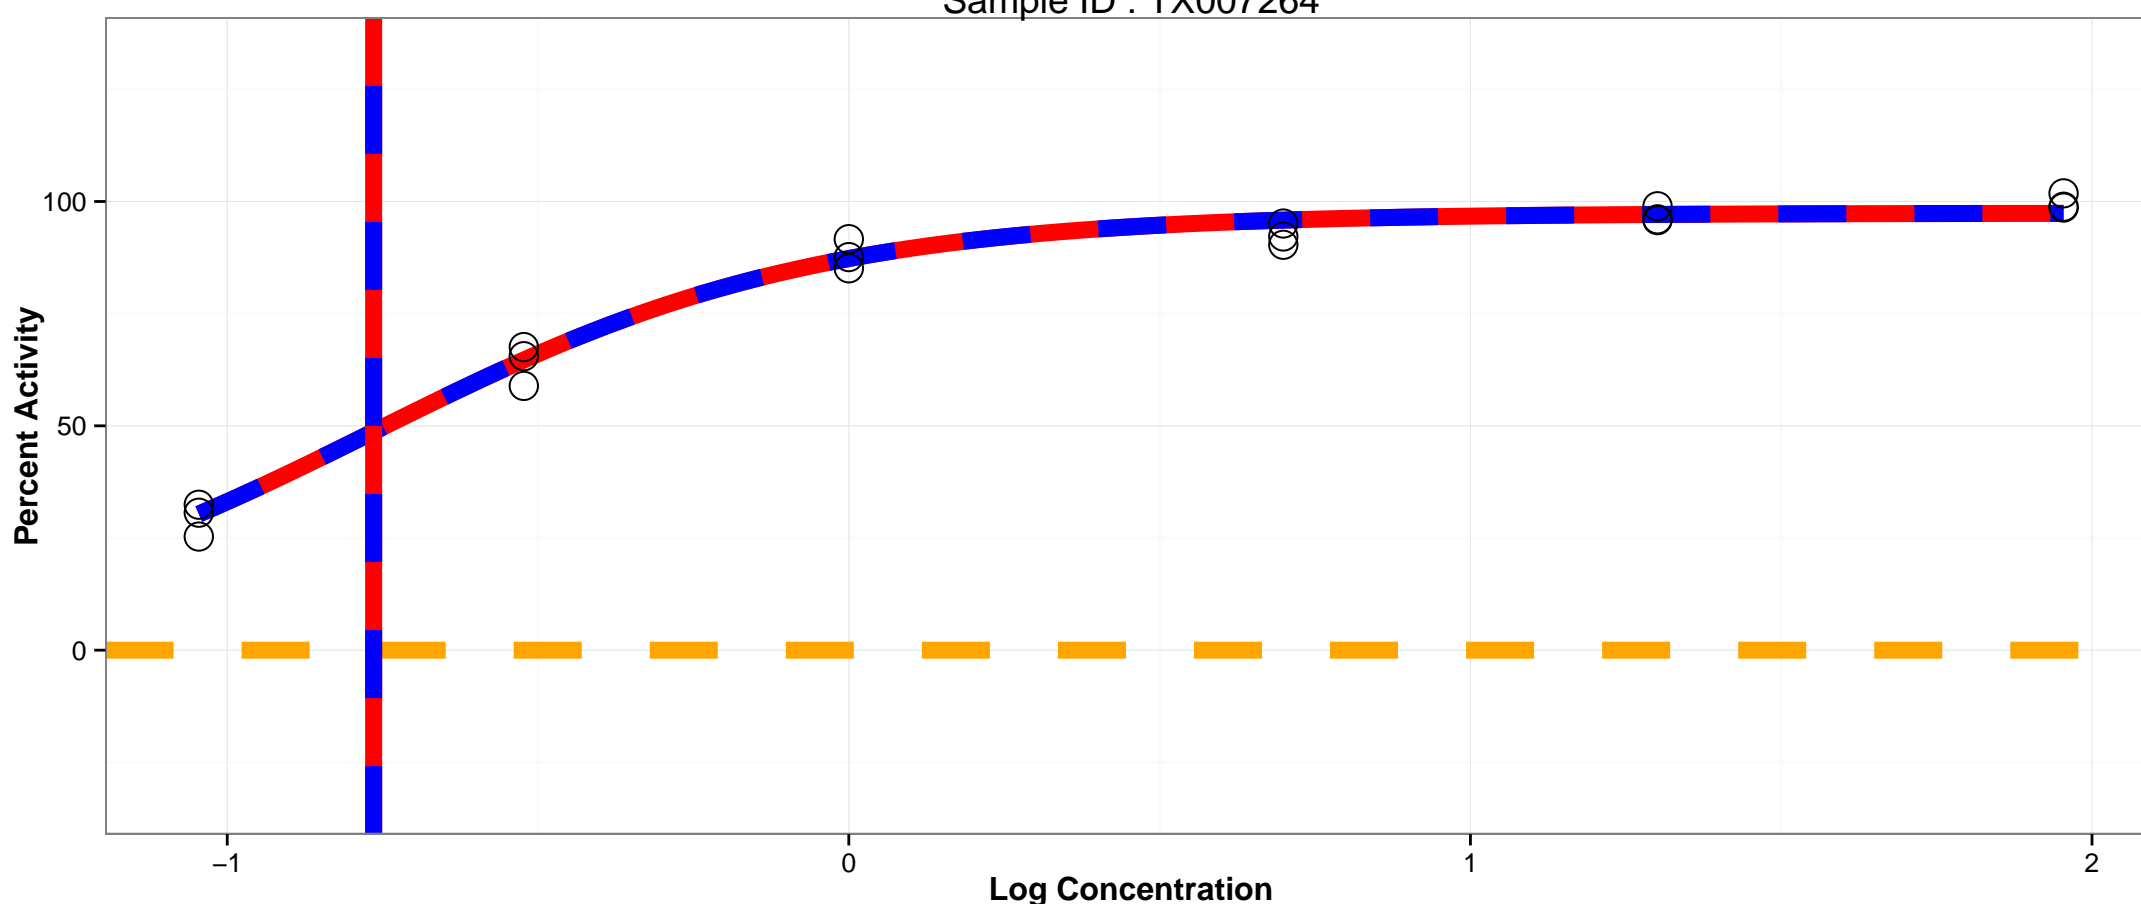

HILL MODEL

|     | tp   | ga     | gw     |
|-----|------|--------|--------|
| val | 97.4 | -0.764 | 1.22   |
| sd  | 1.09 | 0.0246 | 0.0896 |

GAIN-LOSS MODEL

|     | tp   | ga     | gw   | la   | lw   |
|-----|------|--------|------|------|------|
| val | 97.4 | -0.764 | 1.22 | 3.86 | 8.74 |
| sd  | NA   | NA     | NA   | NA   | NA   |

|      | CNST   | HILL   | GNLS   |
|------|--------|--------|--------|
| AIC  | 215.73 | 101.12 | 105.12 |
| PROB | 0      | 0.88   | 0.12   |
| RMSE | 82.35  | 3.07   | 3.07   |

MAX\_MEAN : 99.8 MAX\_MED : 98.9 BMAD : 5.69  
COFF : 20 HIT-CALL : 1 FITC : 41 ACTP : 1  
FLAGS :

Assay ID 1509 (NHEERL\_HEK293T\_CellTiterGLO)  
Sample ID : TX007264

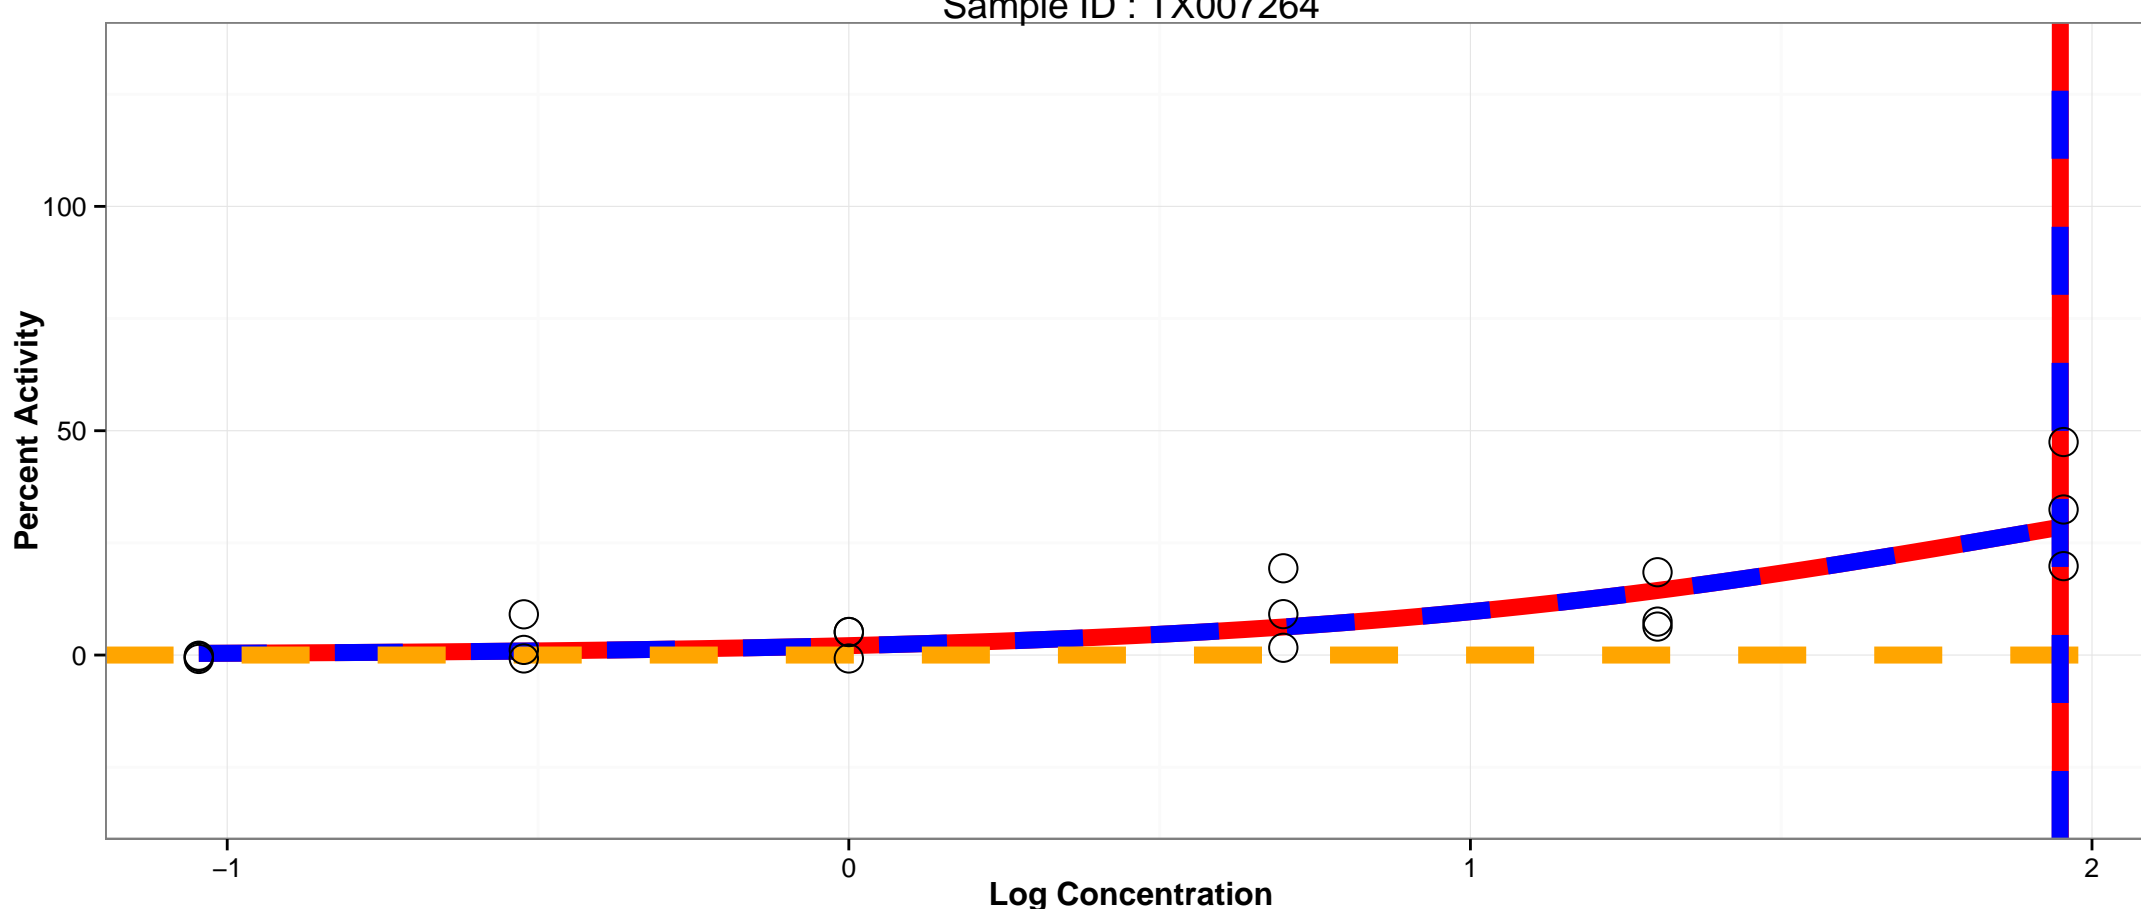

HILL MODEL

|     | tp   | ga    | gw    |
|-----|------|-------|-------|
| val | 57   | 1.95  | 0.727 |
| sd  | 36.4 | 0.699 | 0.291 |

GAIN-LOSS MODEL

|     | tp   | ga    | gw    | la   | lw    |
|-----|------|-------|-------|------|-------|
| val | 57   | 1.95  | 0.728 | 3.23 | 6.67  |
| sd  | 36.5 | 0.699 | 0.291 | 2020 | 10500 |

|      | CNST   | HILL   | GNLS   |
|------|--------|--------|--------|
| AIC  | 149.65 | 128.03 | 132.03 |
| PROB | 0      | 0.88   | 0.12   |
| RMSE | 16.23  | 6.98   | 6.98   |

MAX\_MEAN : 33.3 MAX\_MED : 32.5 BMAD : 5.54  
COFF : 20 HIT-CALL : 1 FITC : 42 ACTP : 1  
FLAGS : 6

Assay ID 1848 (NHEERL\_Quantilum\_inhib\_2\_dn)  
Sample ID : TX007264

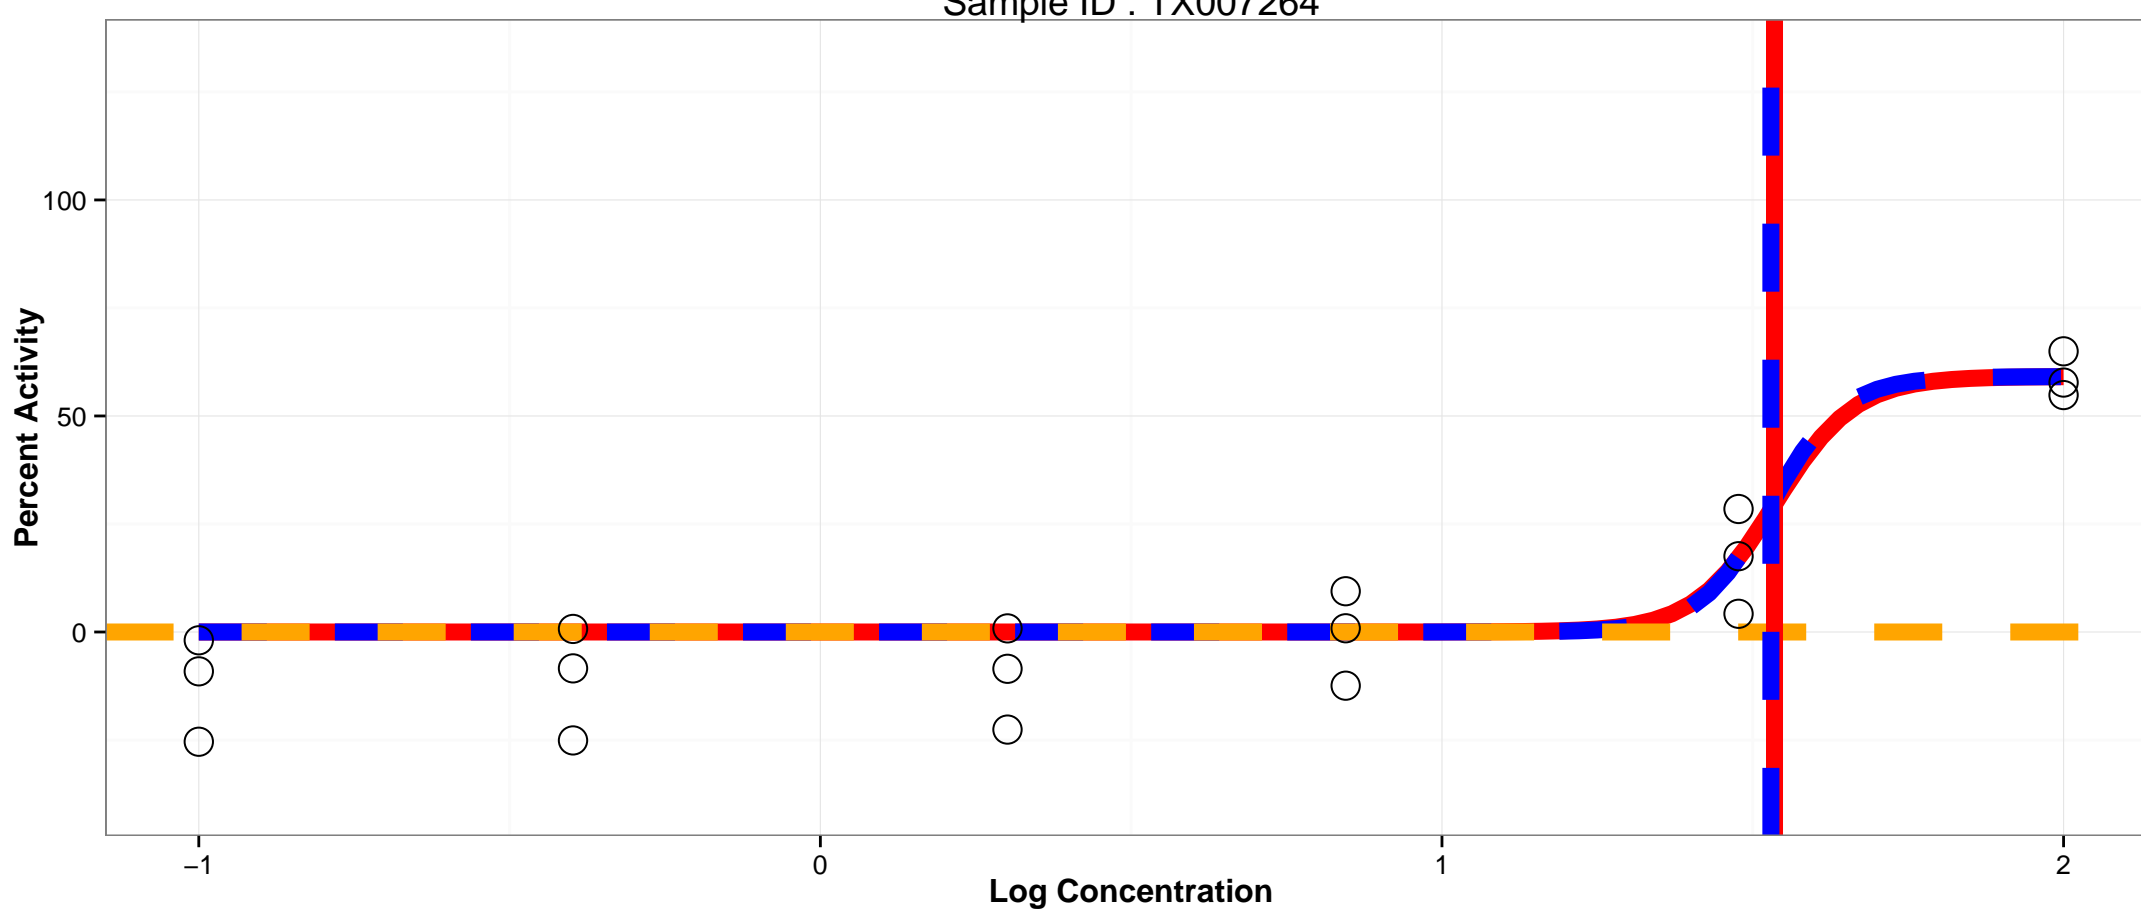

HILL MODEL

|     | tp   | ga    | gw   |
|-----|------|-------|------|
| val | 59.1 | 1.53  | 6.75 |
| sd  | 7.37 | 0.859 | 99.3 |

GAIN-LOSS MODEL

|     | tp   | ga   | gw  | la   | lw   |
|-----|------|------|-----|------|------|
| val | 59.1 | 1.53 | 7.5 | 3.69 | 8.57 |
| sd  | NA   | NA   | NA  | NA   | NA   |

|      | CNST   | HILL   | GNLS   |
|------|--------|--------|--------|
| AIC  | 171.69 | 148.87 | 152.87 |
| PROB | 0      | 0.88   | 0.12   |
| RMSE | 27.85  | 12.04  | 12.04  |

MAX\_MEAN : 59.2 MAX\_MED : 57.7 BMAD : 8.58  
COFF : 20 HIT-CALL : 1 FITC : 41 ACTP : 1  
FLAGS : 6

Assay ID 1508 (NHEERL\_TPO\_AUR\_dn)  
Sample ID : TX007272

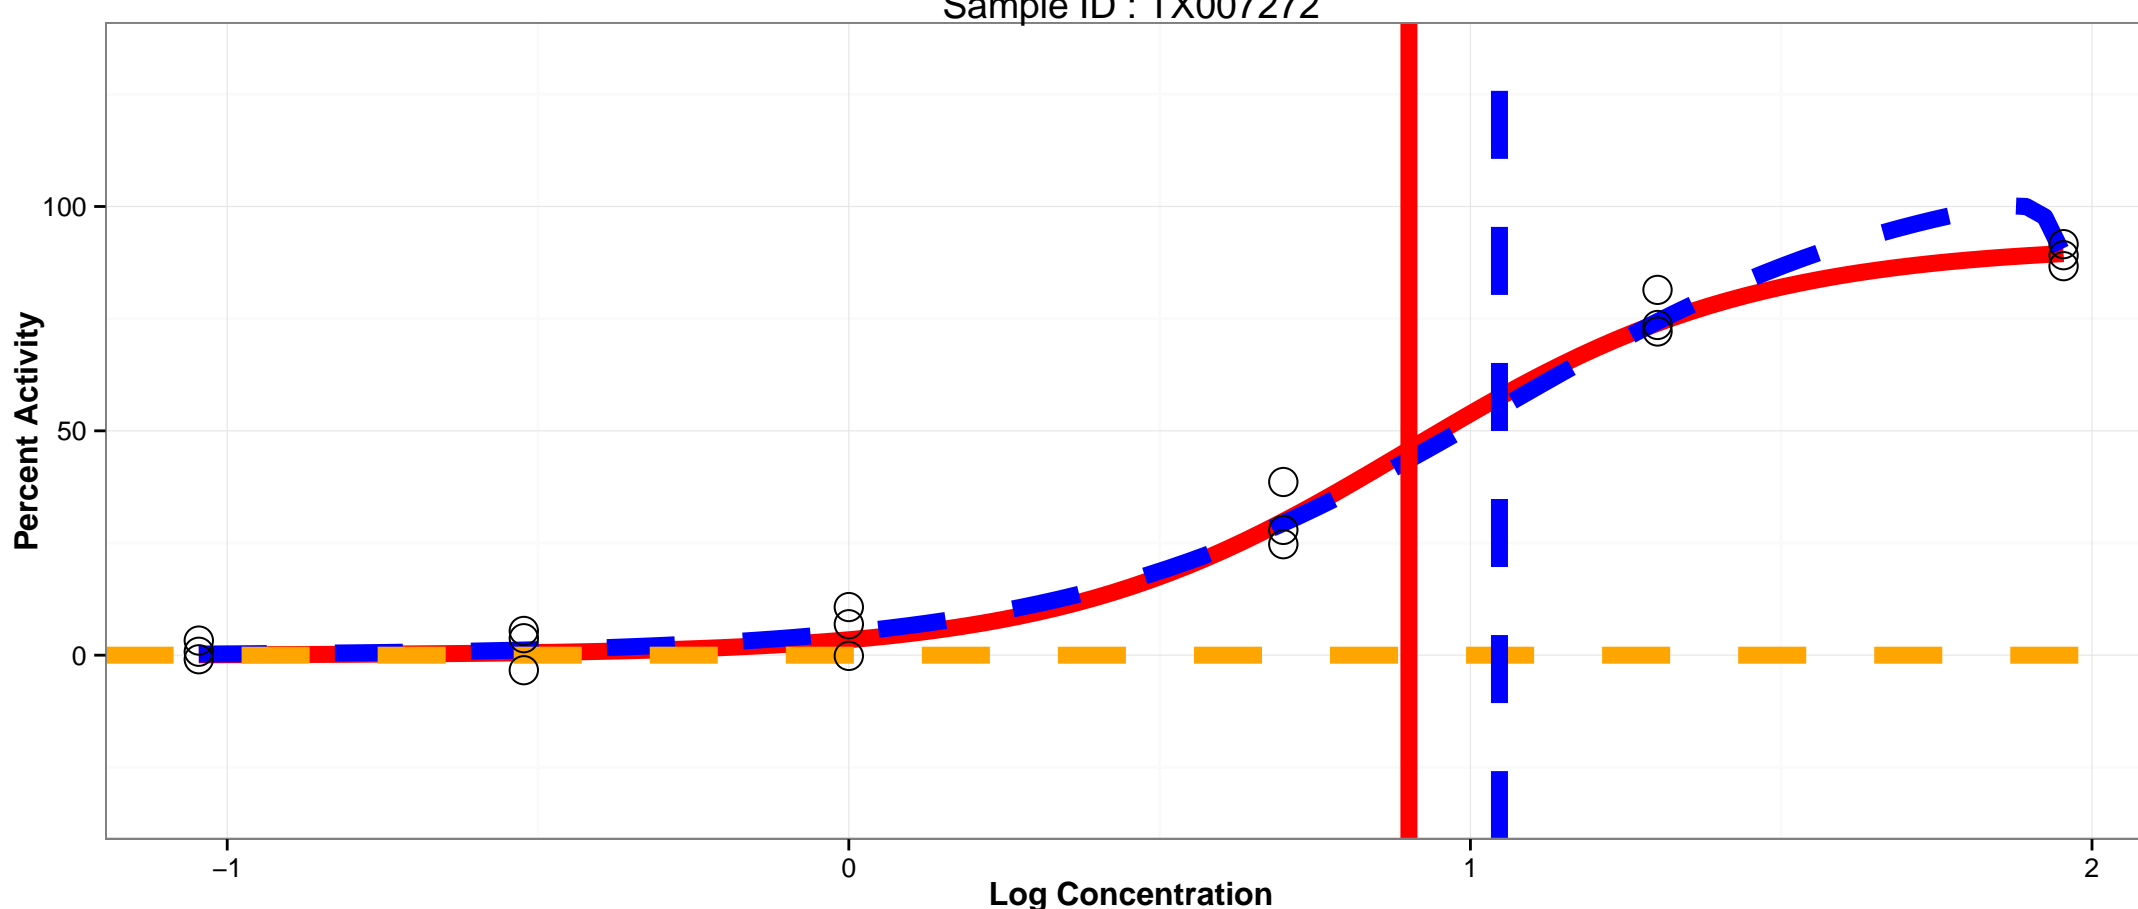

HILL MODEL

|     | tp   | ga     | gw    |
|-----|------|--------|-------|
| val | 91.5 | 0.901  | 1.56  |
| sd  | 2.81 | 0.0412 | 0.217 |

GAIN-LOSS MODEL

|     | tp  | ga    | gw    | la      | lw   |
|-----|-----|-------|-------|---------|------|
| val | 110 | 1.05  | 1.26  | 2       | 18   |
| sd  | 30  | 0.227 | 0.328 | 0.00542 | 13.6 |

|      | CNST   | HILL   | GNLS   |
|------|--------|--------|--------|
| AIC  | 194.06 | 112.24 | 114.73 |
| PROB | 0      | 0.78   | 0.22   |
| RMSE | 49.57  | 4.2    | 4.05   |

MAX\_MEAN : 89.2 MAX\_MED : 89.2 BMAD : 5.69  
COFF : 20 HIT-CALL : 1 FITC : 41 ACTP : 1  
FLAGS :

Assay ID 1509 (NHEERL\_HEK293T\_CellTiterGLO)  
Sample ID : TX007272

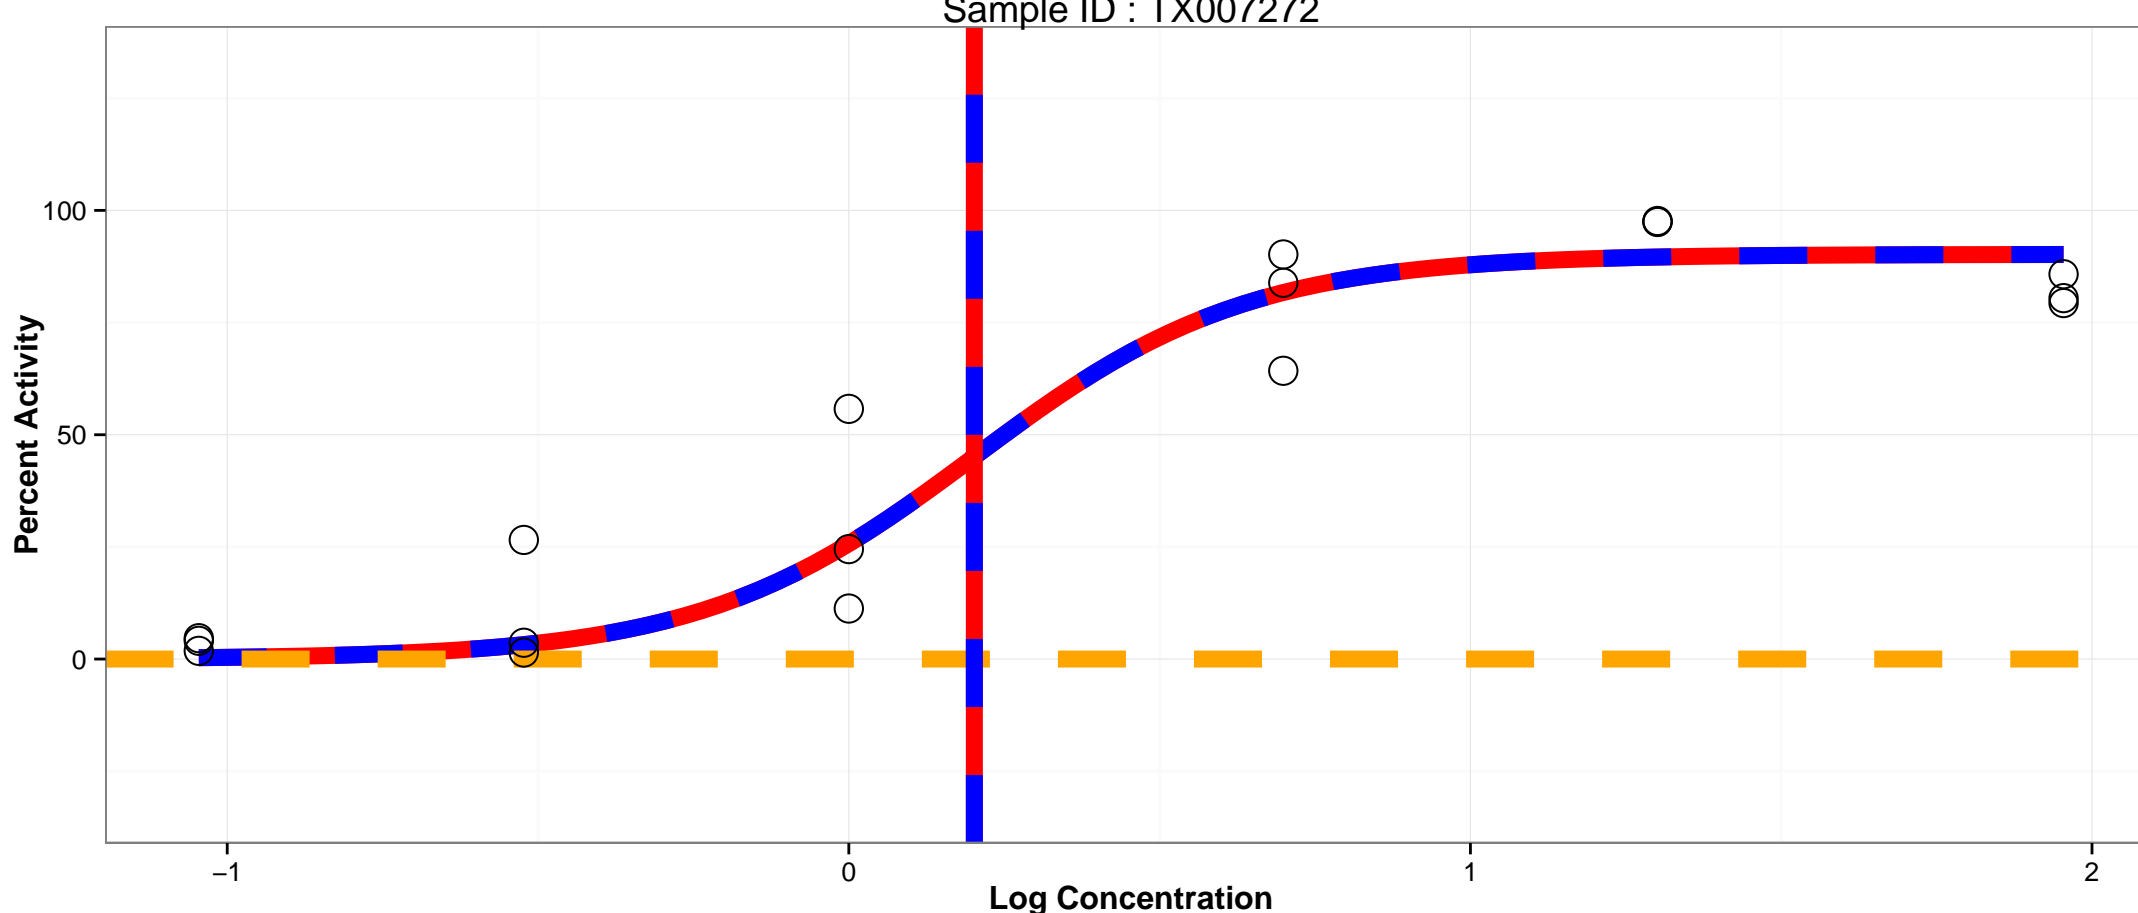

HILL MODEL

|     | tp   | ga     | gw    |
|-----|------|--------|-------|
| val | 90.2 | 0.202  | 1.98  |
| sd  | 4.45 | 0.0927 | 0.598 |

GAIN-LOSS MODEL

|     | tp   | ga    | gw   | la   | lw   |
|-----|------|-------|------|------|------|
| val | 90.2 | 0.202 | 1.98 | 2.98 | 11.4 |
| sd  | NA   | NA    | NA   | NA   | NA   |

|      | CNST   | HILL   | GNLS   |
|------|--------|--------|--------|
| AIC  | 204.94 | 147.25 | 151.25 |
| PROB | 0      | 0.88   | 0.12   |
| RMSE | 63.49  | 11.78  | 11.78  |

MAX\_MEAN : 97.5 MAX\_MED : 97.5 BMAD : 5.54  
COFF : 20 HIT-CALL : 1 FITC : 41 ACTP : 1  
FLAGS :

Assay ID 1848 (NHEERL\_Quantilum\_inhib\_2\_dn)  
Sample ID : TX007272

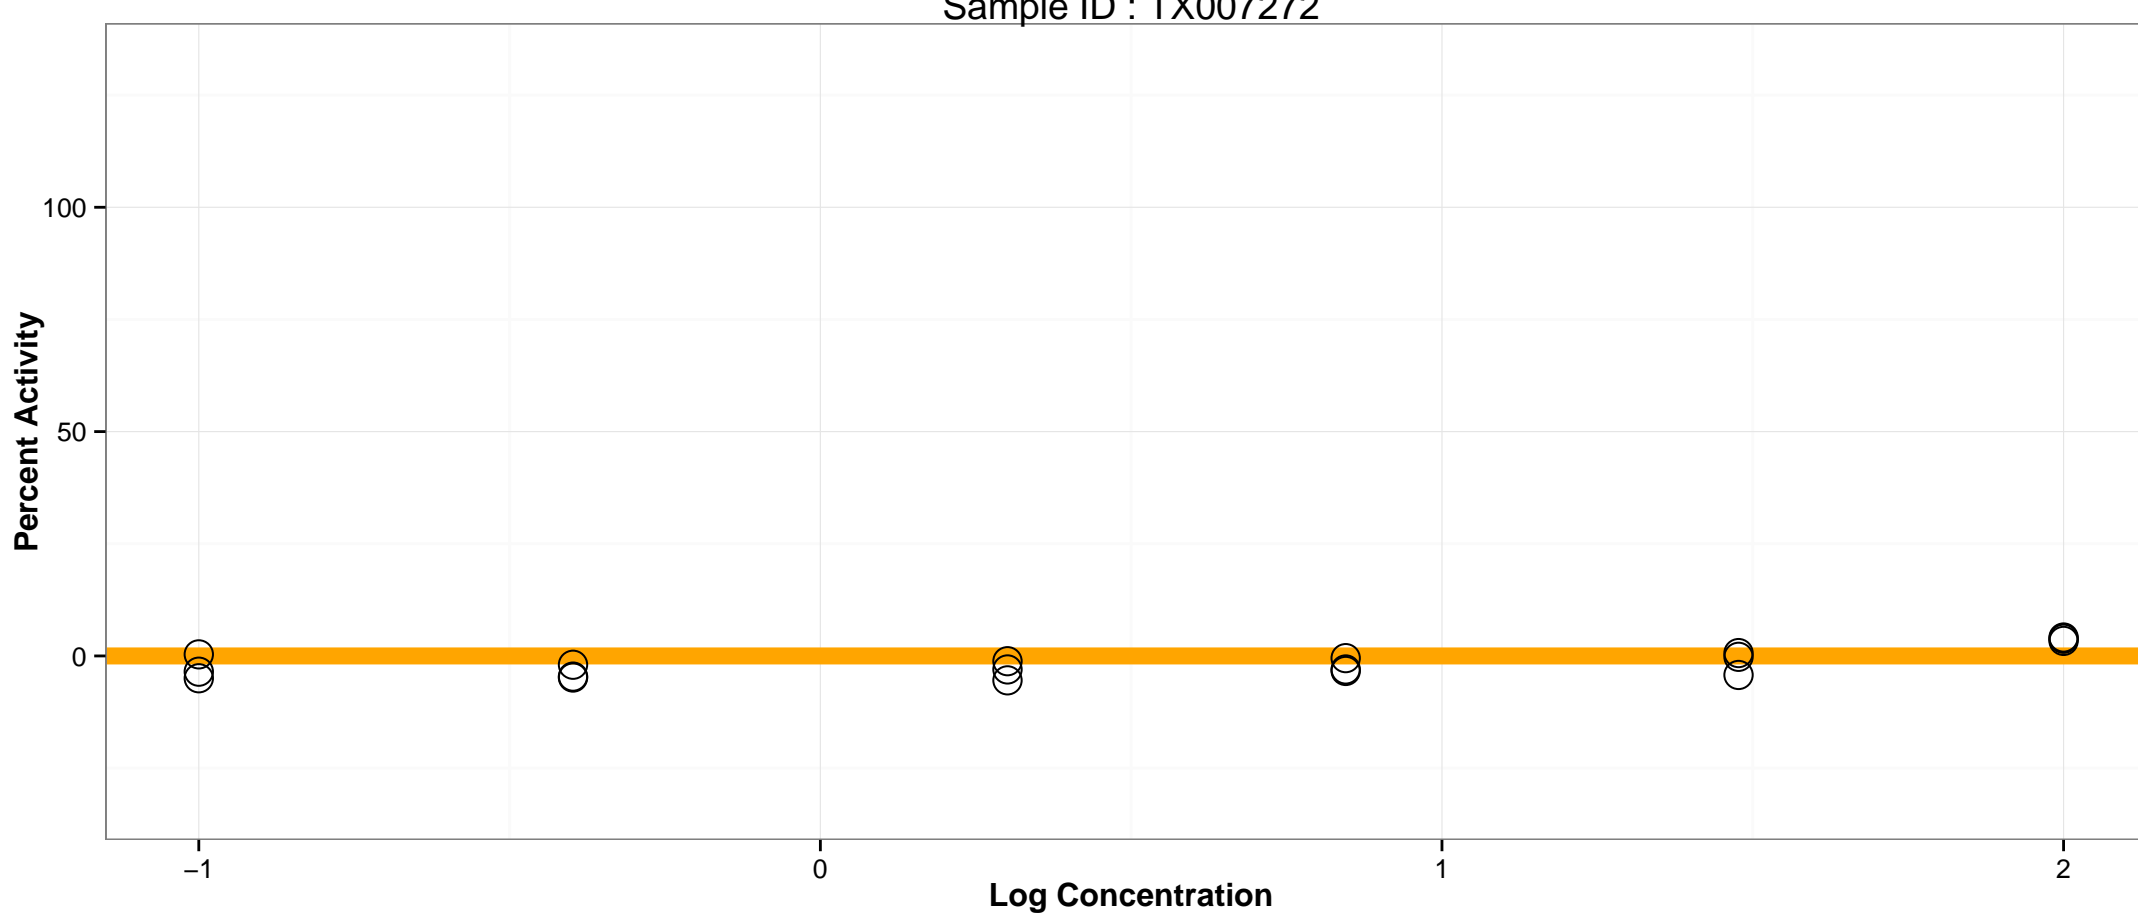

HILL MODEL

HILL MODEL: Not applicable

GAIN-LOSS MODEL

GNLS MODEL: Not applicable

|      | CNST   | HILL | GNLS |
|------|--------|------|------|
| AIC  | 100.04 | NA   | NA   |
| PROB | 1      | NA   | NA   |
| RMSE | 3.39   | NA   | NA   |

MAX\_MEAN : 3.77 MAX\_MED : 3.84 BMAD : 8.58  
COFF : 20 HIT-CALL : 0 FITC : 4 ACTP : 0  
FLAGS :

Chemical : Sodium dodecylbenzenesulfonate  
CAS : 25155-30-0

Assay ID 1508 (NHEERL\_TPO\_AUR\_dn)  
Sample ID : TX007288

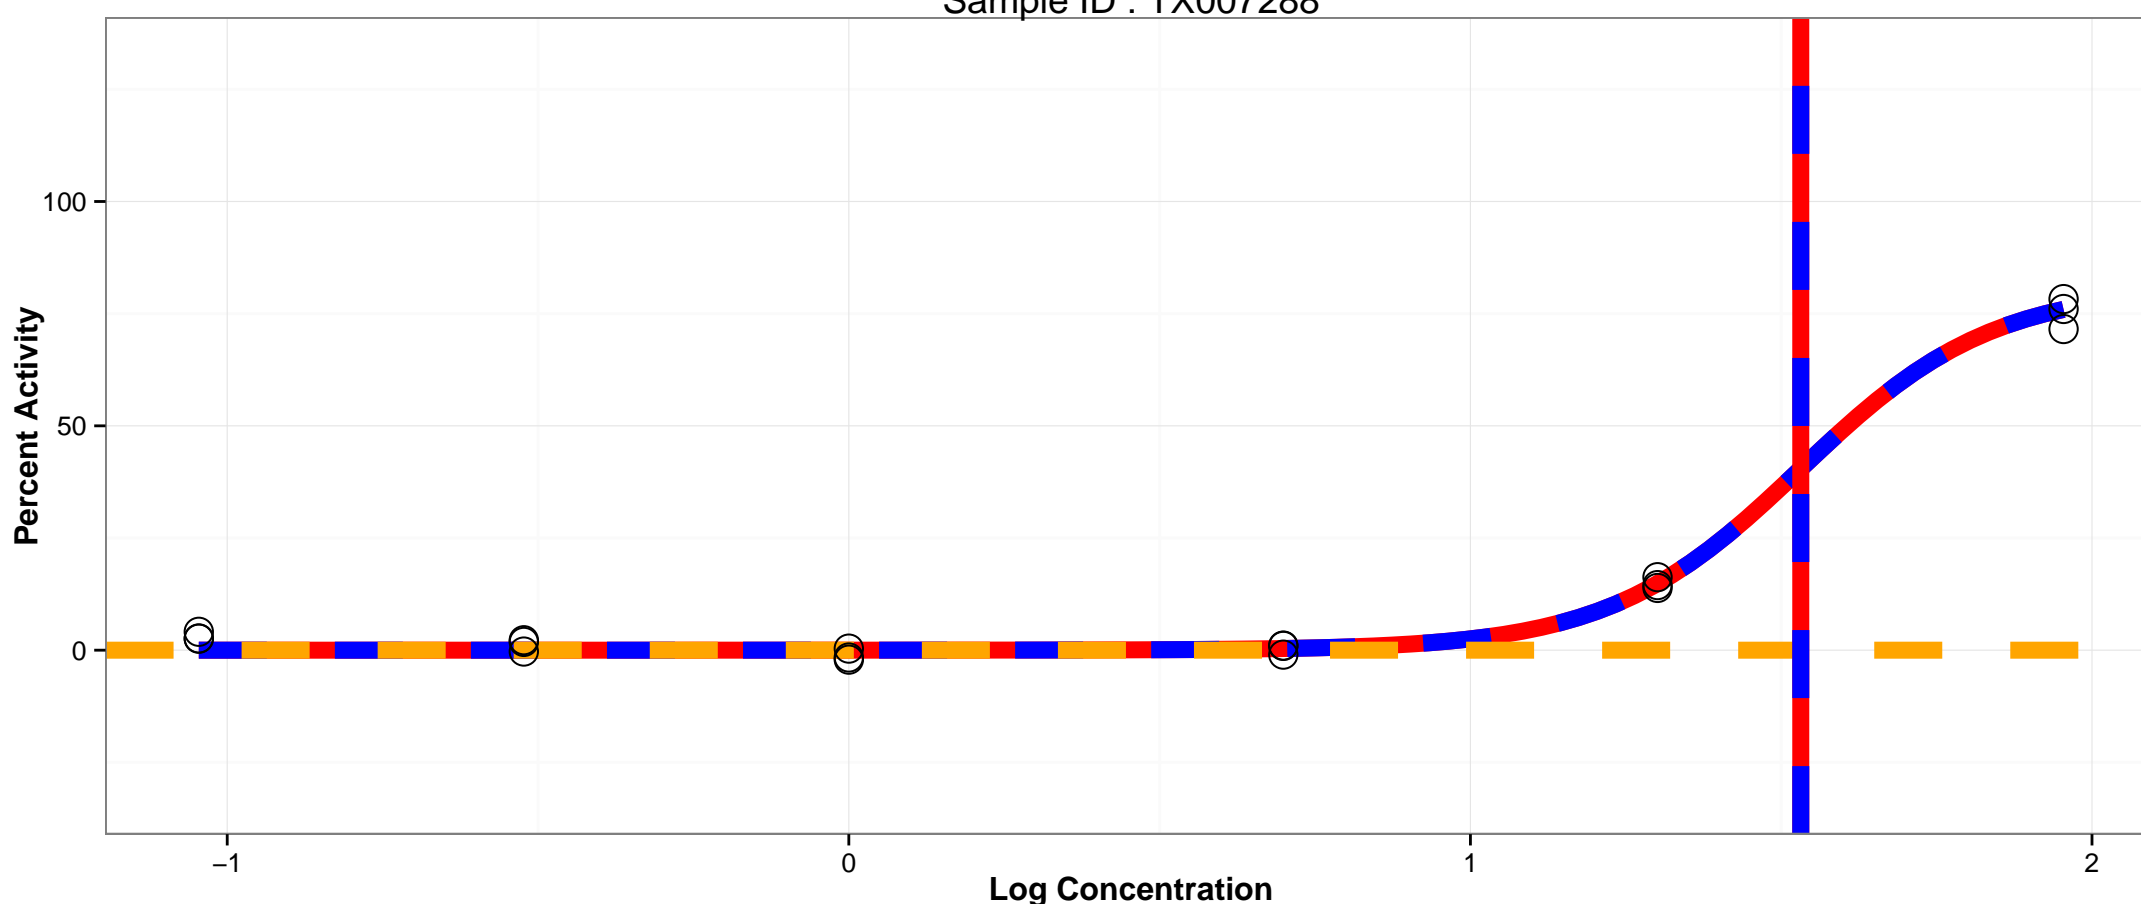

HILL MODEL

|     | tp   | ga     | gw    |
|-----|------|--------|-------|
| val | 80.9 | 1.53   | 2.81  |
| sd  | 5.61 | 0.0689 | 0.681 |

GAIN-LOSS MODEL

|     | tp   | ga     | gw    | la    | lw     |
|-----|------|--------|-------|-------|--------|
| val | 80.9 | 1.53   | 2.81  | 3.27  | 5.82   |
| sd  | 5.69 | 0.0689 | 0.681 | 56000 | 244000 |

|      | CNST   | HILL  | GNLS  |
|------|--------|-------|-------|
| AIC  | 167.82 | 86.43 | 90.43 |
| PROB | 0      | 0.88  | 0.12  |
| RMSE | 31.4   | 2.06  | 2.06  |

MAX\_MEAN : 75.3 MAX\_MED : 76.1 BMAD : 5.69  
COFF : 20 HIT-CALL : 1 FITC : 42 ACTP : 1  
FLAGS : 6

Assay ID 1509 (NHEERL\_HEK293T\_CellTiterGLO)  
Sample ID : TX007288

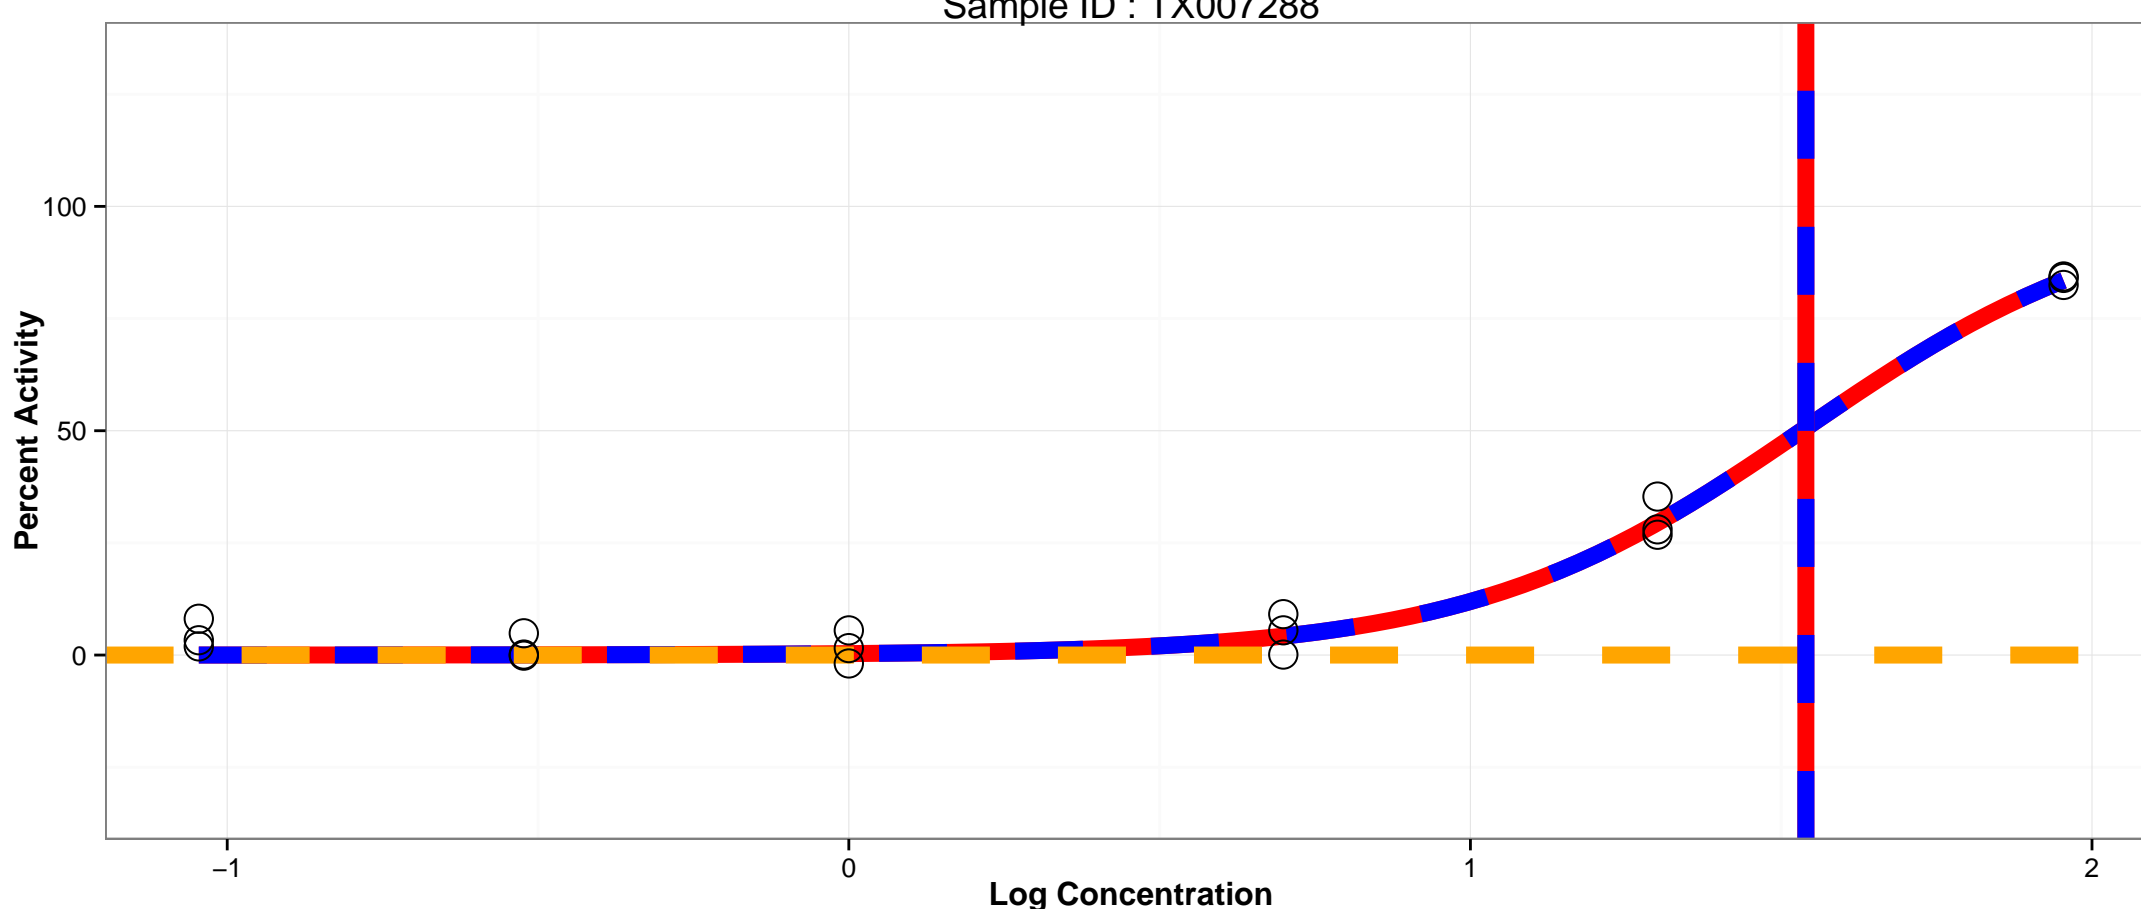

HILL MODEL

|     | tp   | ga    | gw    |
|-----|------|-------|-------|
| val | 101  | 1.54  | 1.62  |
| sd  | 15.3 | 0.124 | 0.416 |

GAIN-LOSS MODEL

|     | tp   | ga    | gw    | la   | lw   |
|-----|------|-------|-------|------|------|
| val | 101  | 1.54  | 1.62  | 3.86 | 4.33 |
| sd  | 15.3 | 0.124 | 0.416 | 1700 | 3870 |

|      | CNST   | HILL  | GNLS  |
|------|--------|-------|-------|
| AIC  | 177.89 | 105.5 | 109.5 |
| PROB | 0      | 0.88  | 0.12  |
| RMSE | 36.52  | 3.54  | 3.54  |

MAX\_MEAN : 83.7 MAX\_MED : 84.1 BMAD : 5.54  
COFF : 20 HIT-CALL : 1 FITC : 42 ACTP : 1  
FLAGS :

Assay ID 1848 (NHEERL\_Quantilum\_inhib\_2\_dn)  
Sample ID : TX007288

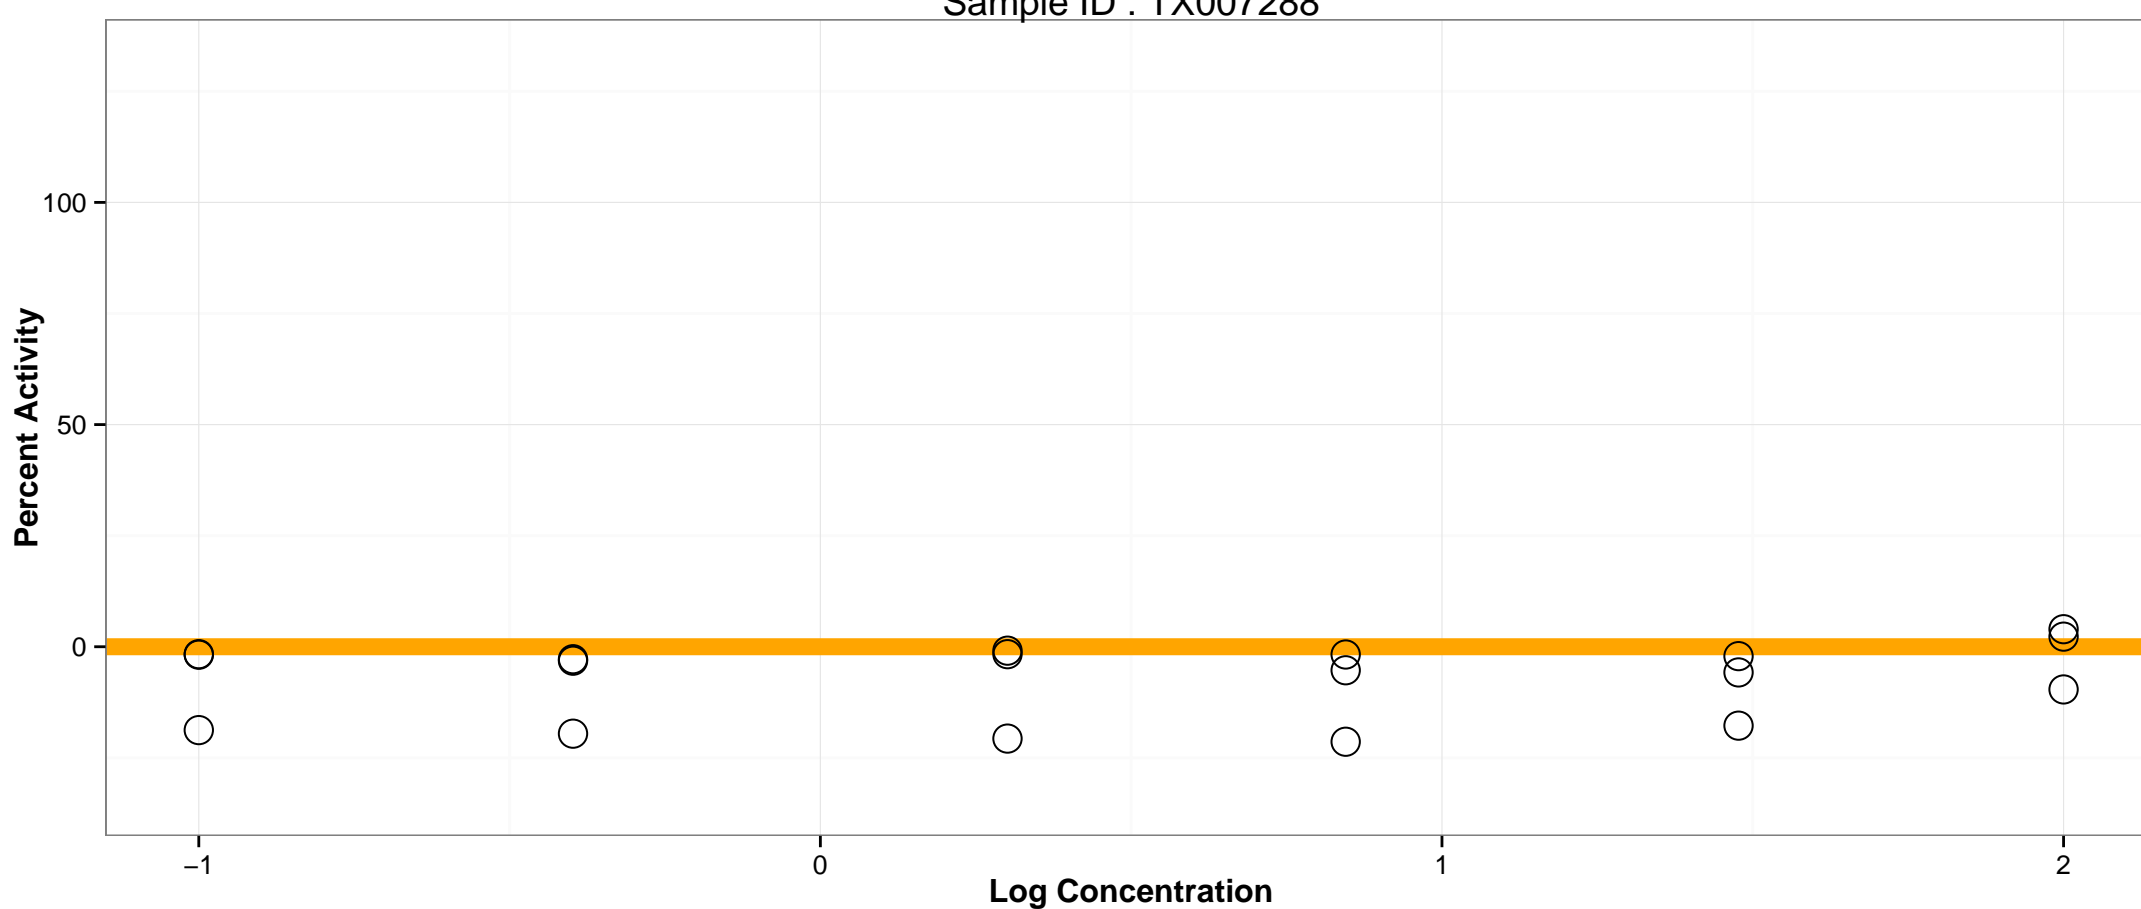

HILL MODEL

HILL MODEL: Not applicable

GAIN-LOSS MODEL

GNLS MODEL: Not applicable

|      | CNST   | HILL | GNLS |
|------|--------|------|------|
| AIC  | 138.81 | NA   | NA   |
| PROB | 1      | NA   | NA   |
| RMSE | 10.9   | NA   | NA   |

MAX\_MEAN : -1.12 MAX\_MED : 2.29 BMAD : 8.58  
COFF : 20 HIT-CALL : 0 FITC : 4 ACTP : 0  
FLAGS :

Chemical : 3,4-Diaminotoluene  
CAS : 496-72-0

Assay ID 1508 (NHEERL\_TPO\_AUR\_dn)  
Sample ID : TX007294

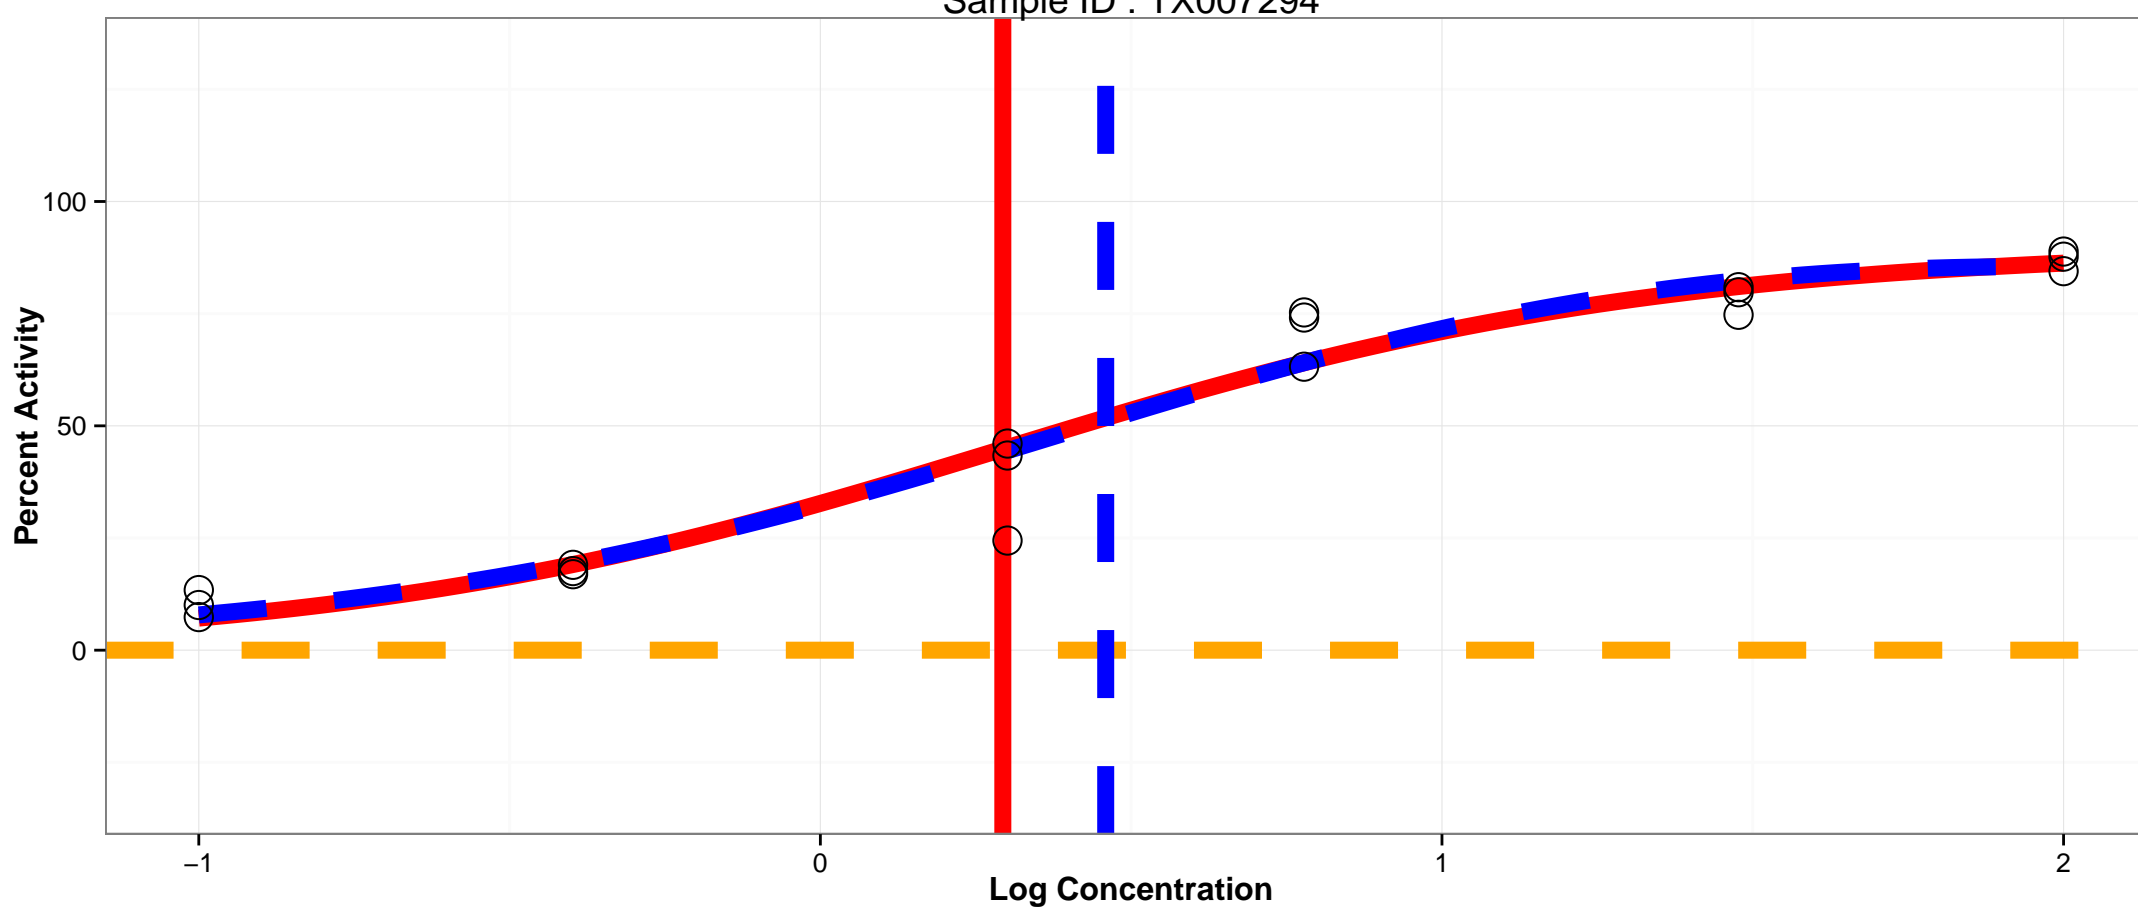

HILL MODEL

|     | tp   | ga     | gw     |
|-----|------|--------|--------|
| val | 89.7 | 0.294  | 0.821  |
| sd  | 2.98 | 0.0699 | 0.0885 |

GAIN-LOSS MODEL

|     | tp  | ga    | gw    | la | lw    |
|-----|-----|-------|-------|----|-------|
| val | 107 | 0.459 | 0.749 | 4  | 0.391 |
| sd  | NA  | NA    | NA    | NA | NA    |

|      | CNST   | HILL   | GNLS   |
|------|--------|--------|--------|
| AIC  | 202.55 | 120.88 | 125.89 |
| PROB | 0      | 0.92   | 0.08   |
| RMSE | 58.83  | 6.54   | 6.51   |

MAX\_MEAN : 87 MAX\_MED : 87.7 BMAD : 5.69  
COFF : 20 HIT-CALL : 1 FITC : 41 ACTP : 1  
FLAGS :

Assay ID 1509 (NHEERL\_HEK293T\_CellTiterGLO)  
Sample ID : TX007294

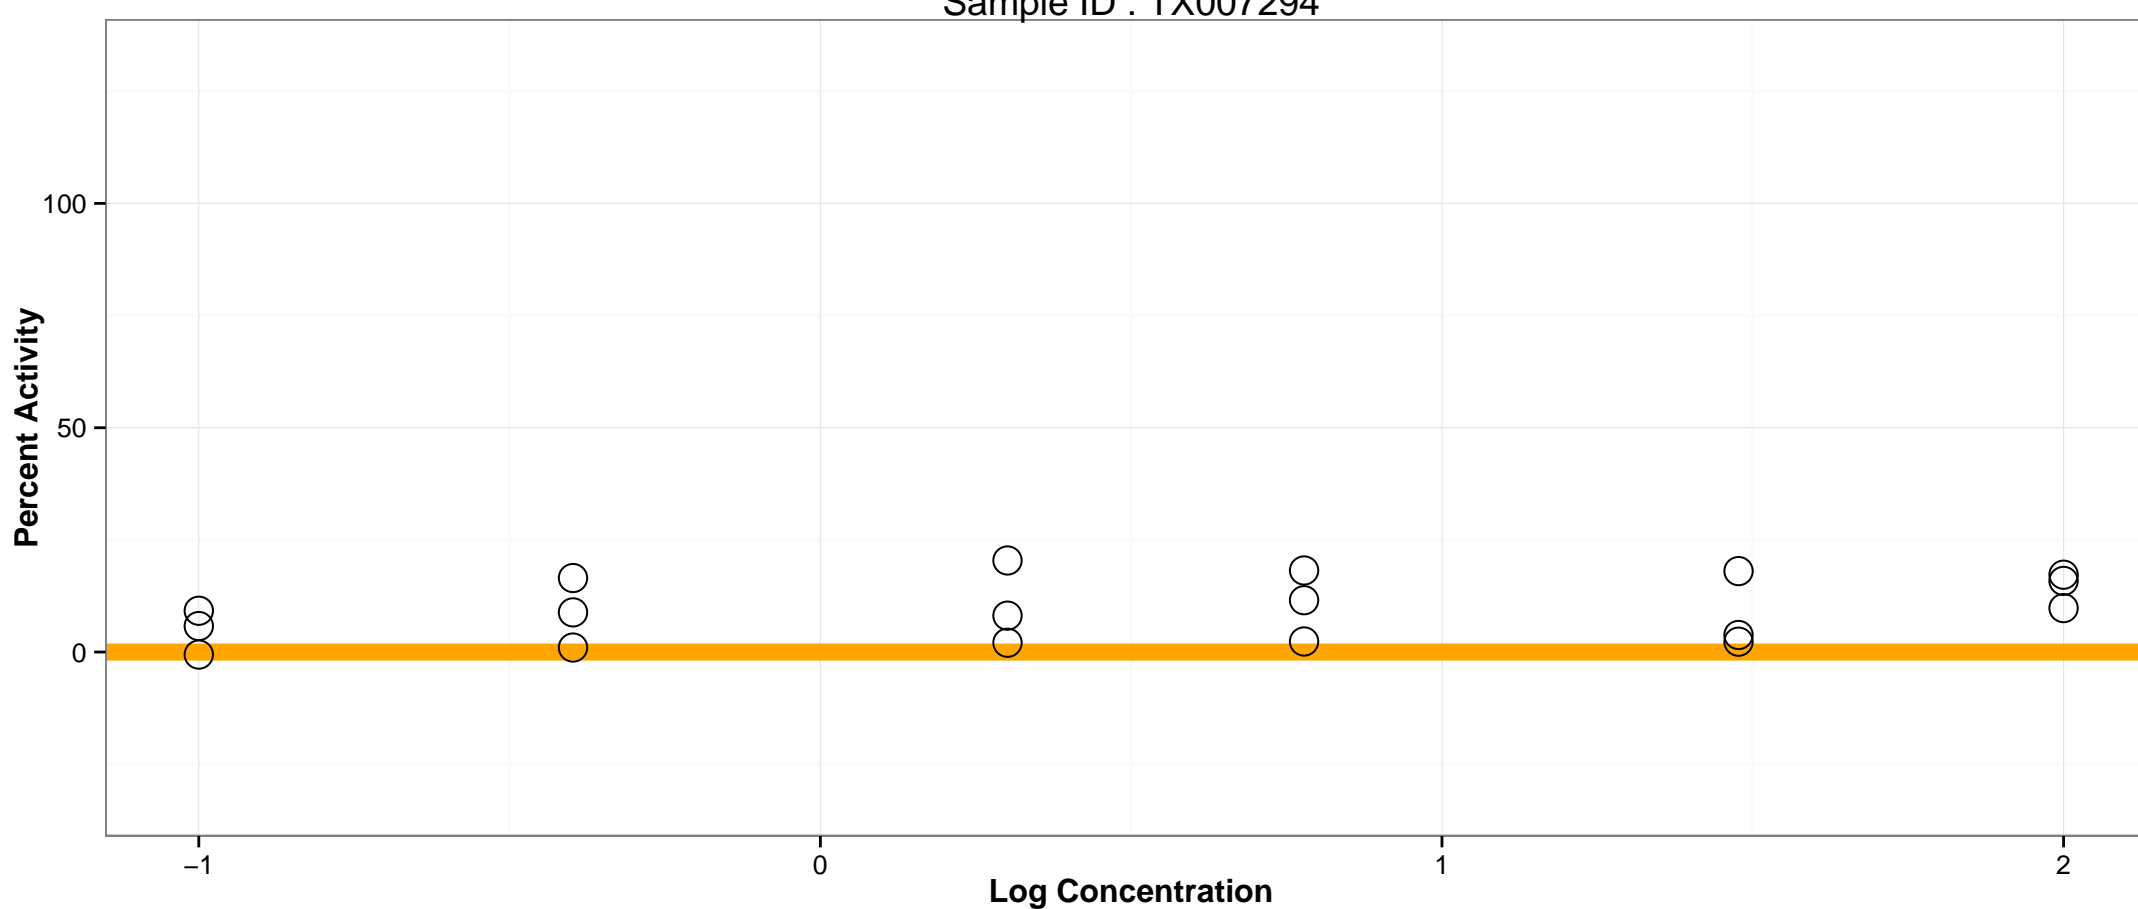

HILL MODEL  
HILL MODEL: Not applicable

GAIN-LOSS MODEL  
GNLS MODEL: Not applicable

|      | CNST   | HILL | GNLS |
|------|--------|------|------|
| AIC  | 143.52 | NA   | NA   |
| PROB | 1      | NA   | NA   |
| RMSE | 11.6   | NA   | NA   |

MAX\_MEAN : 14.3 MAX\_MED : 15.9 BMAD : 5.54  
COFF : 20 HIT-CALL : 0 FITC : 4 ACTP : 0  
FLAGS :

Assay ID 1848 (NHEERL\_Quantilum\_inhib\_2\_dn)  
Sample ID : TX007294

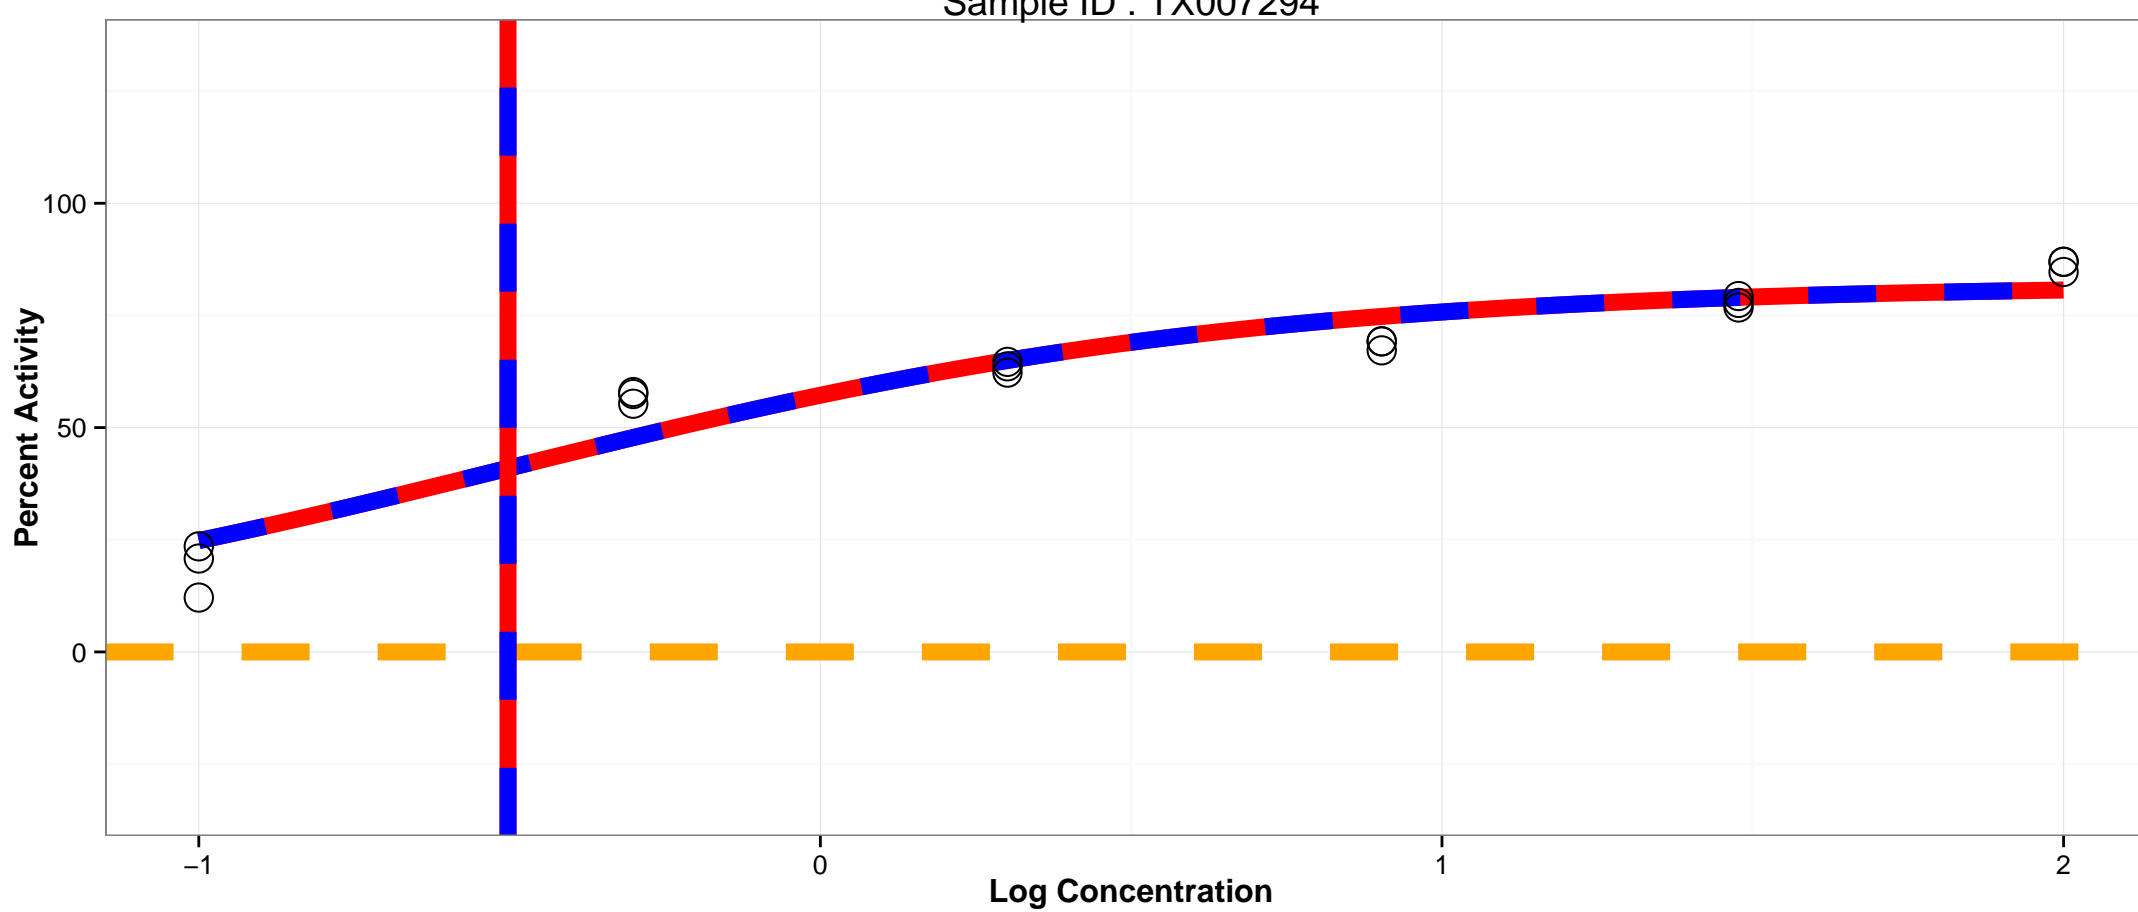

HILL MODEL

|     | tp   | ga     | gw    |
|-----|------|--------|-------|
| val | 81.9 | -0.502 | 0.727 |
| sd  | 4.71 | 0.136  | 0.182 |

GAIN-LOSS MODEL

|     | tp   | ga     | gw    | la   | lw   |
|-----|------|--------|-------|------|------|
| val | 81.9 | -0.502 | 0.727 | 2.93 | 17.9 |
| sd  | NA   | NA     | NA    | NA   | NA   |

|      | CNST   | HILL   | GNLS   |
|------|--------|--------|--------|
| AIC  | 207.51 | 125.72 | 129.72 |
| PROB | 0      | 0.88   | 0.12   |
| RMSE | 65.67  | 6.07   | 6.07   |

MAX\_MEAN : 86.2 MAX\_MED : 86.9 BMAD : 8.58  
COFF : 20 HIT-CALL : 1 FITC : 41 ACTP : 1  
FLAGS :

Assay ID 1508 (NHEERL\_TPO\_AUR\_dn)  
Sample ID : TX007696

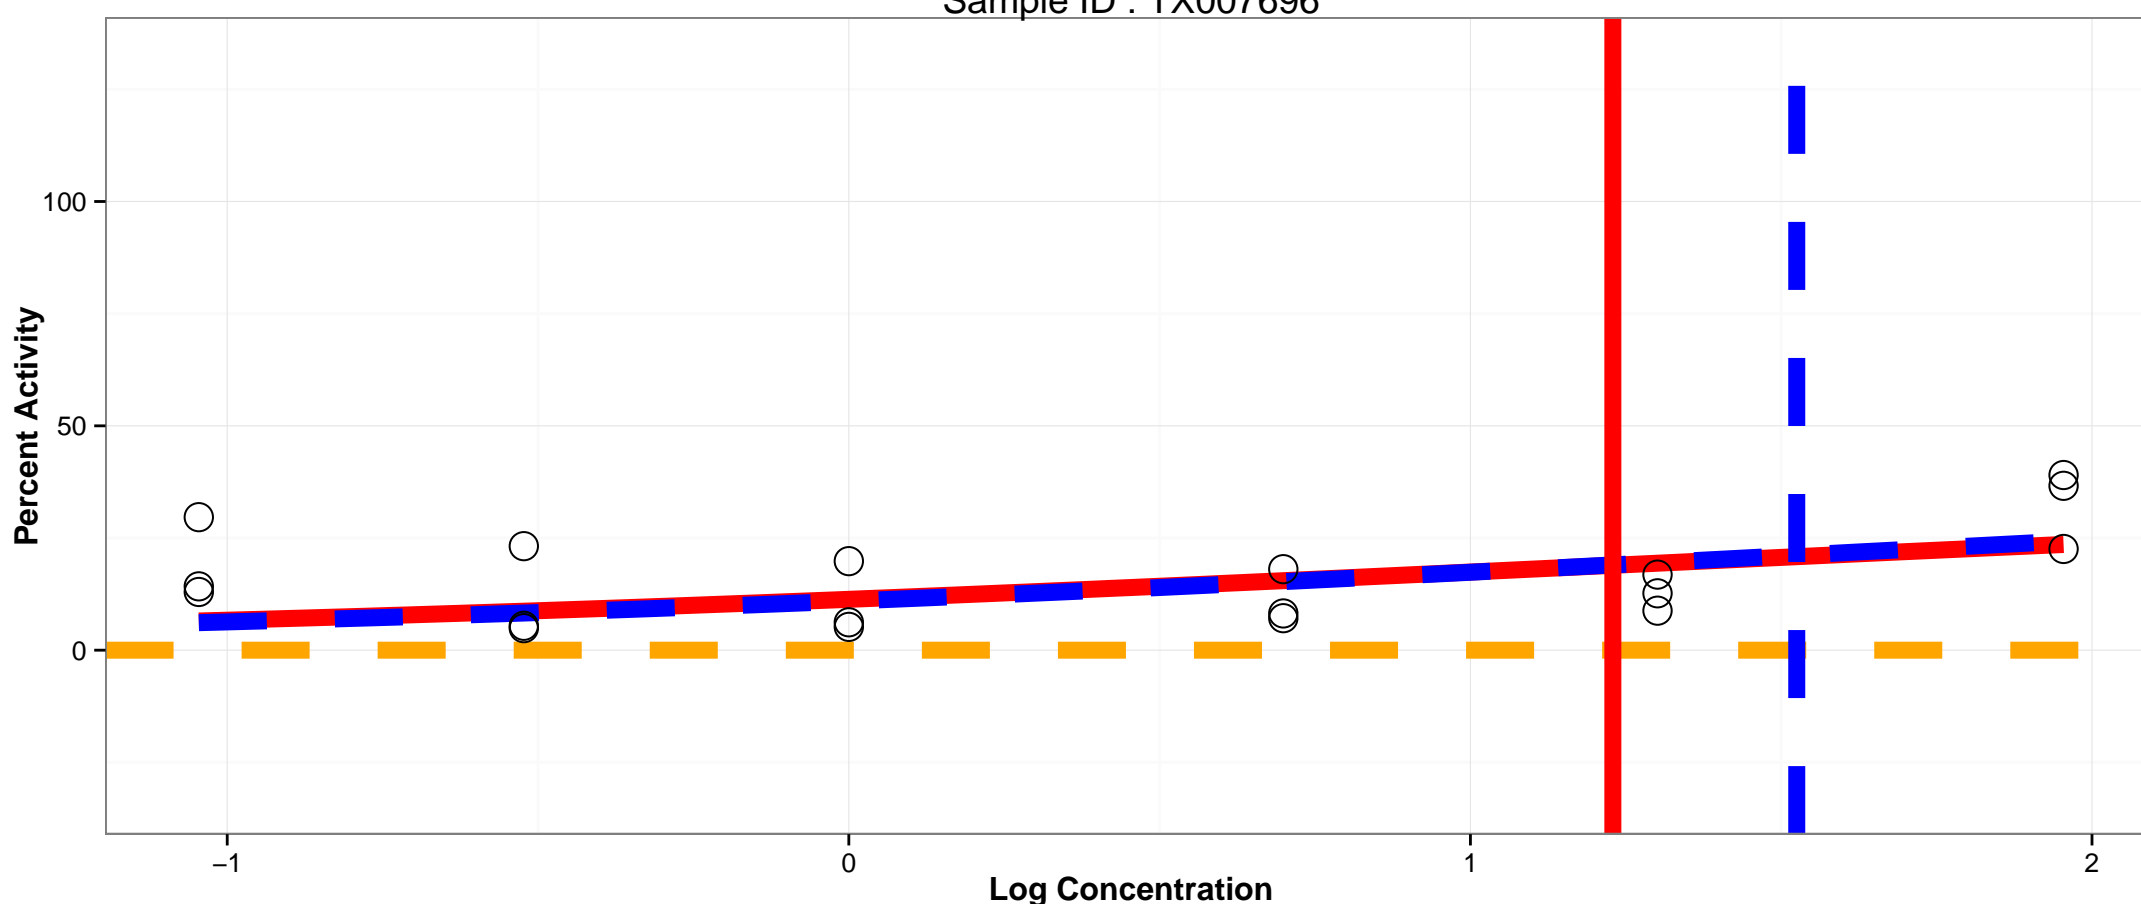

HILL MODEL

|     | tp   | ga   | gw    |
|-----|------|------|-------|
| val | 37.8 | 1.23 | 0.3   |
| sd  | 181  | 13   | 0.197 |

GAIN-LOSS MODEL

|     | tp   | ga   | gw    | la   | lw   |
|-----|------|------|-------|------|------|
| val | 42.3 | 1.52 | 0.3   | 2.44 | 14.8 |
| sd  | 102  | 6.08 | 0.187 | 117  | 3580 |

|      | CNST  | HILL   | GNLS   |
|------|-------|--------|--------|
| AIC  | 161.2 | 142.39 | 146.27 |
| PROB | 0     | 0.87   | 0.13   |
| RMSE | 19.22 | 9.76   | 9.75   |

MAX\_MEAN : 32.8 MAX\_MED : 36.6 BMAD : 5.69  
COFF : 20 HIT-CALL : 1 FITC : 42 ACTP : 1  
FLAGS : 6

Assay ID 1509 (NHEERL\_HEK293T\_CellTiterGLO)  
Sample ID : TX007696

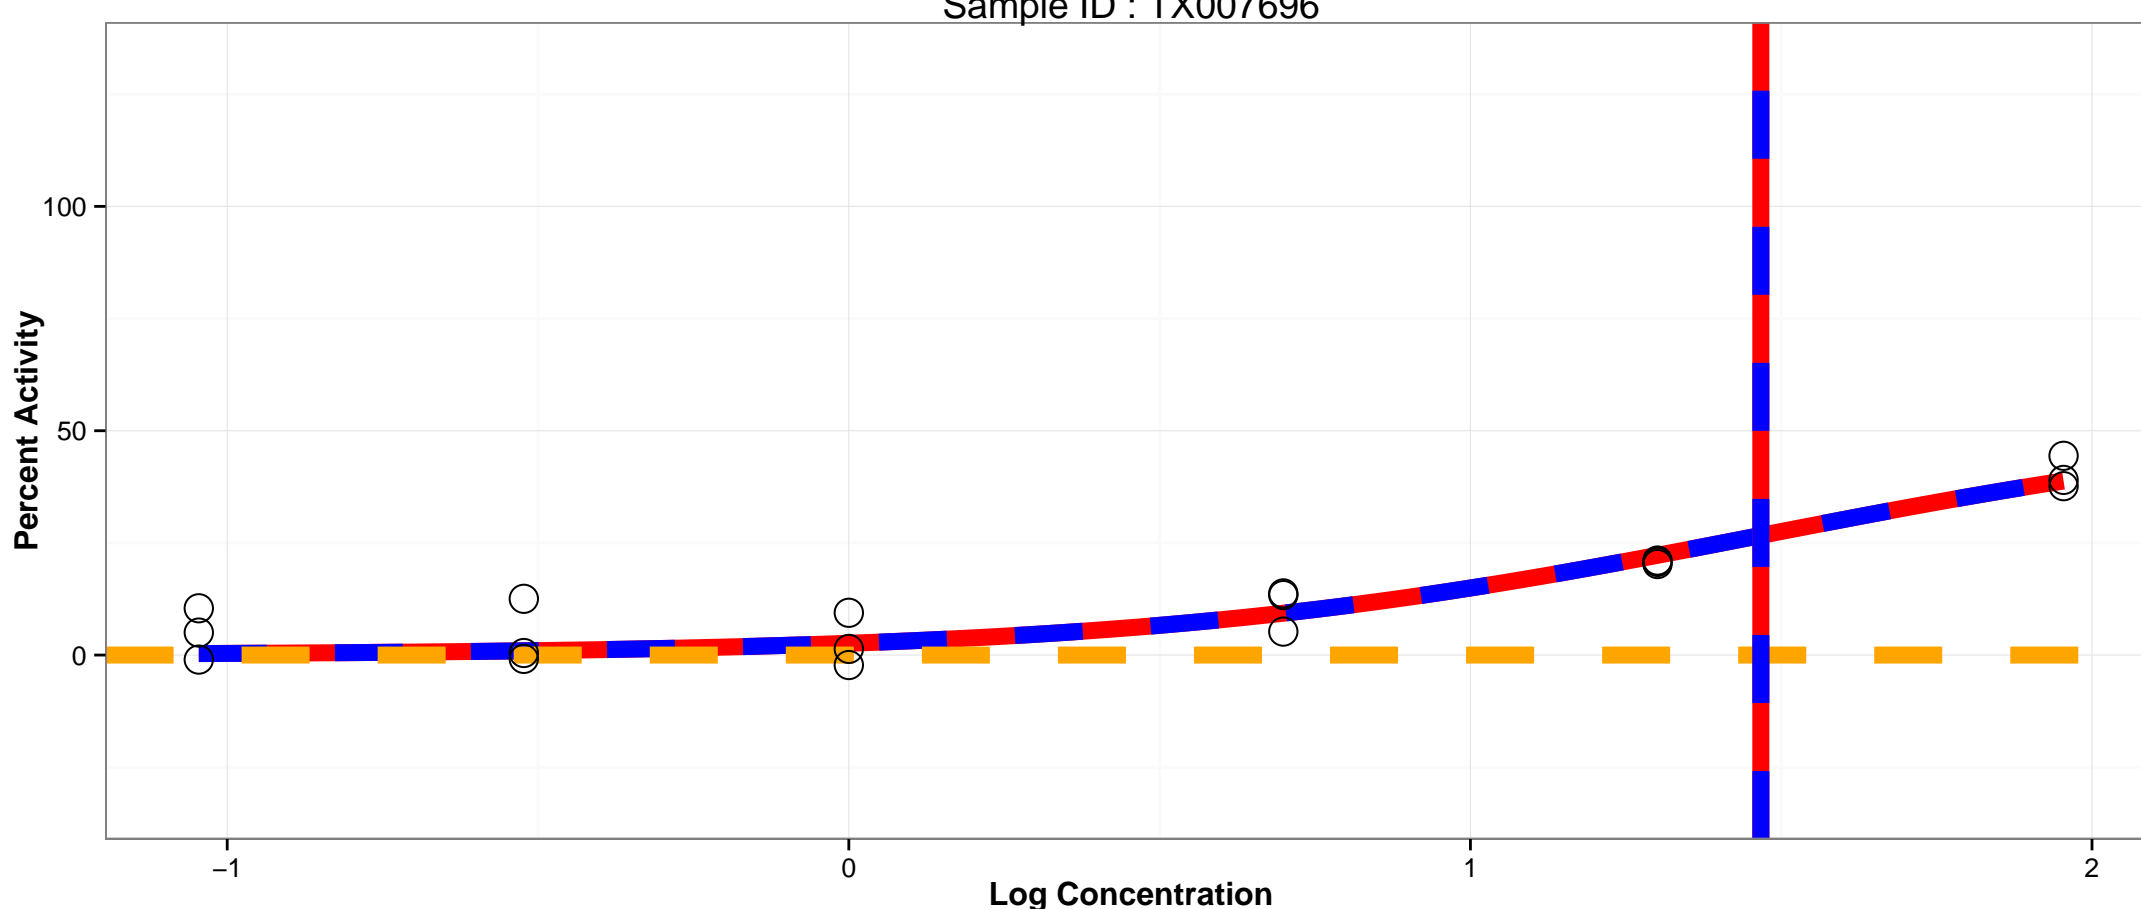

HILL MODEL

|     | tp   | ga    | gw    |
|-----|------|-------|-------|
| val | 53.3 | 1.47  | 0.877 |
| sd  | 11.3 | 0.248 | 0.227 |

GAIN-LOSS MODEL

|     | tp   | ga    | gw    | la    | lw     |
|-----|------|-------|-------|-------|--------|
| val | 53.3 | 1.47  | 0.876 | 2.8   | 14.1   |
| sd  | 11.3 | 0.248 | 0.227 | 15100 | 252000 |

|      | CNST   | HILL  | GNLS  |
|------|--------|-------|-------|
| AIC  | 160.18 | 116.2 | 120.2 |
| PROB | 0      | 0.88  | 0.12  |
| RMSE | 19.7   | 4.88  | 4.88  |

MAX\_MEAN : 40.4 MAX\_MED : 39 BMAD : 5.54  
COFF : 20 HIT-CALL : 1 FITC : 42 ACTP : 1  
FLAGS :

Assay ID 1848 (NHEERL\_QuantLum\_inhib\_2\_dn)  
Sample ID : TX007696

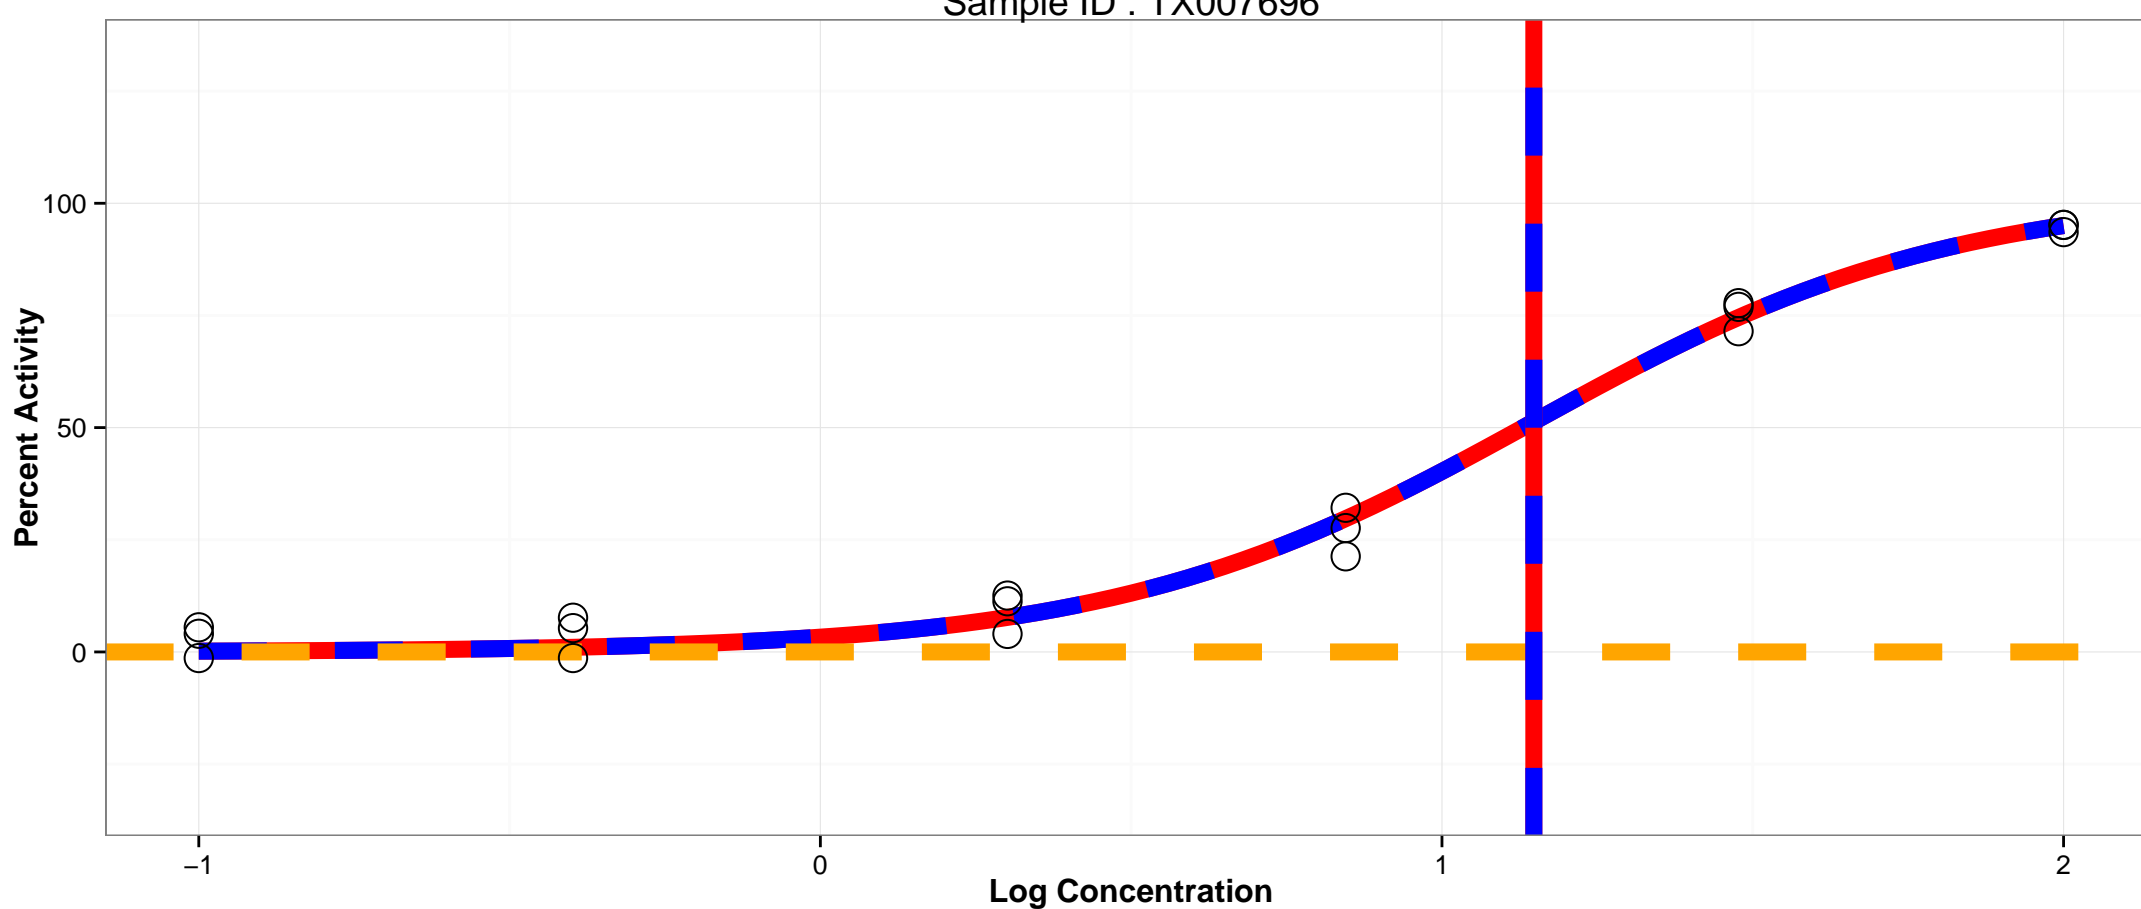

HILL MODEL

|     | tp  | ga    | gw    |
|-----|-----|-------|-------|
| val | 103 | 1.15  | 1.29  |
| sd  | 4.2 | 0.048 | 0.152 |

GAIN-LOSS MODEL

|     | tp  | ga   | gw   | la   | lw   |
|-----|-----|------|------|------|------|
| val | 103 | 1.15 | 1.29 | 3.93 | 7.94 |
| sd  | NA  | NA   | NA   | NA   | NA   |

|      | CNST   | HILL   | GNLS   |
|------|--------|--------|--------|
| AIC  | 194.76 | 109.99 | 113.99 |
| PROB | 0      | 0.88   | 0.12   |
| RMSE | 50.9   | 3.89   | 3.89   |

MAX\_MEAN : 94.7 MAX\_MED : 95.2 BMAD : 8.58  
COFF : 20 HIT-CALL : 1 FITC : 42 ACTP : 1  
FLAGS :



Assay ID 1508 (NHEERL\_TPO\_AUR\_dn)  
Sample ID : TX007739

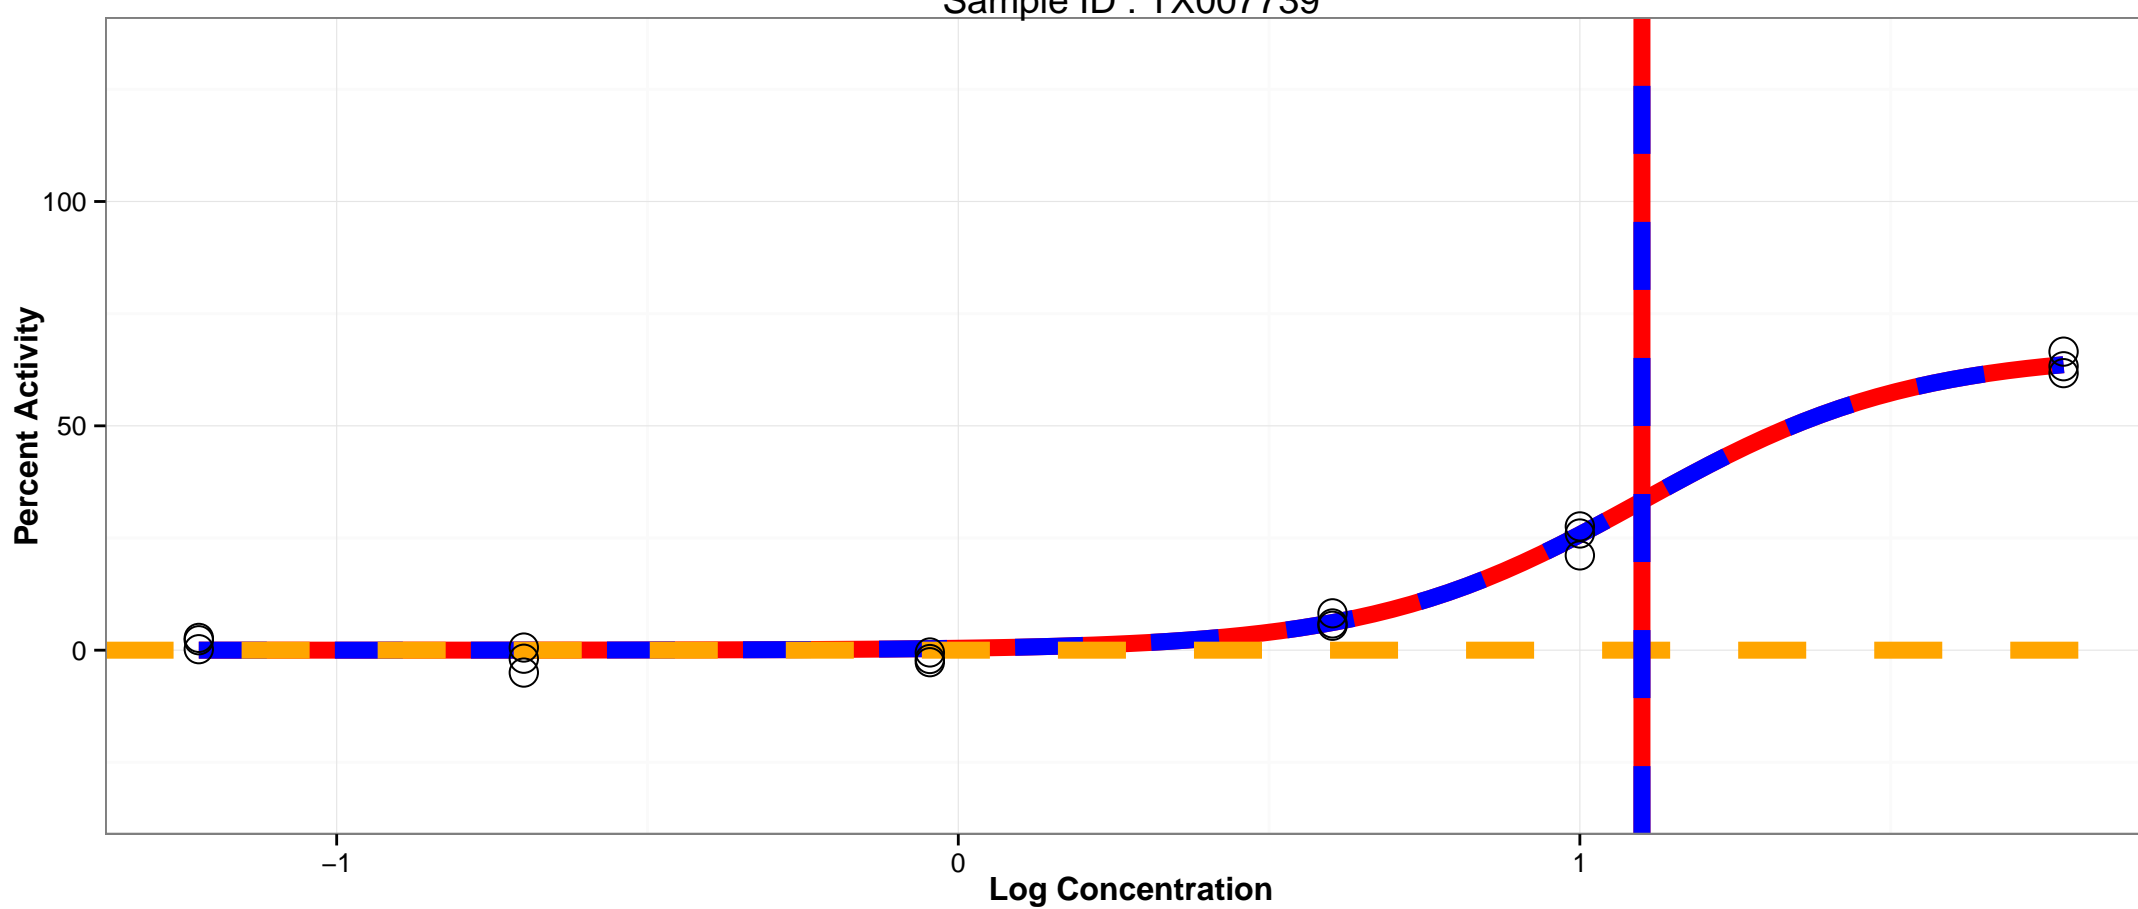

HILL MODEL

|     | tp   | ga     | gw    |
|-----|------|--------|-------|
| val | 66.5 | 1.1    | 1.99  |
| sd  | 2.18 | 0.0359 | 0.244 |

GAIN-LOSS MODEL

|     | tp   | ga     | gw    | la   | lw   |
|-----|------|--------|-------|------|------|
| val | 66.5 | 1.1    | 1.99  | 2.61 | 8.5  |
| sd  | 2.18 | 0.0359 | 0.244 | 727  | 7460 |

|      | CNST   | HILL  | GNLS  |
|------|--------|-------|-------|
| AIC  | 169.21 | 91.05 | 95.05 |
| PROB | 0      | 0.88  | 0.12  |
| RMSE | 28.21  | 2.34  | 2.34  |

MAX\_MEAN : 63.9 MAX\_MED : 63.3 BMAD : 5.69  
COFF : 20 HIT-CALL : 1 FITC : 41 ACTP : 1  
FLAGS :

Assay ID 1509 (NHEERL\_HEK293T\_CellTiterGLO)  
Sample ID : TX007739

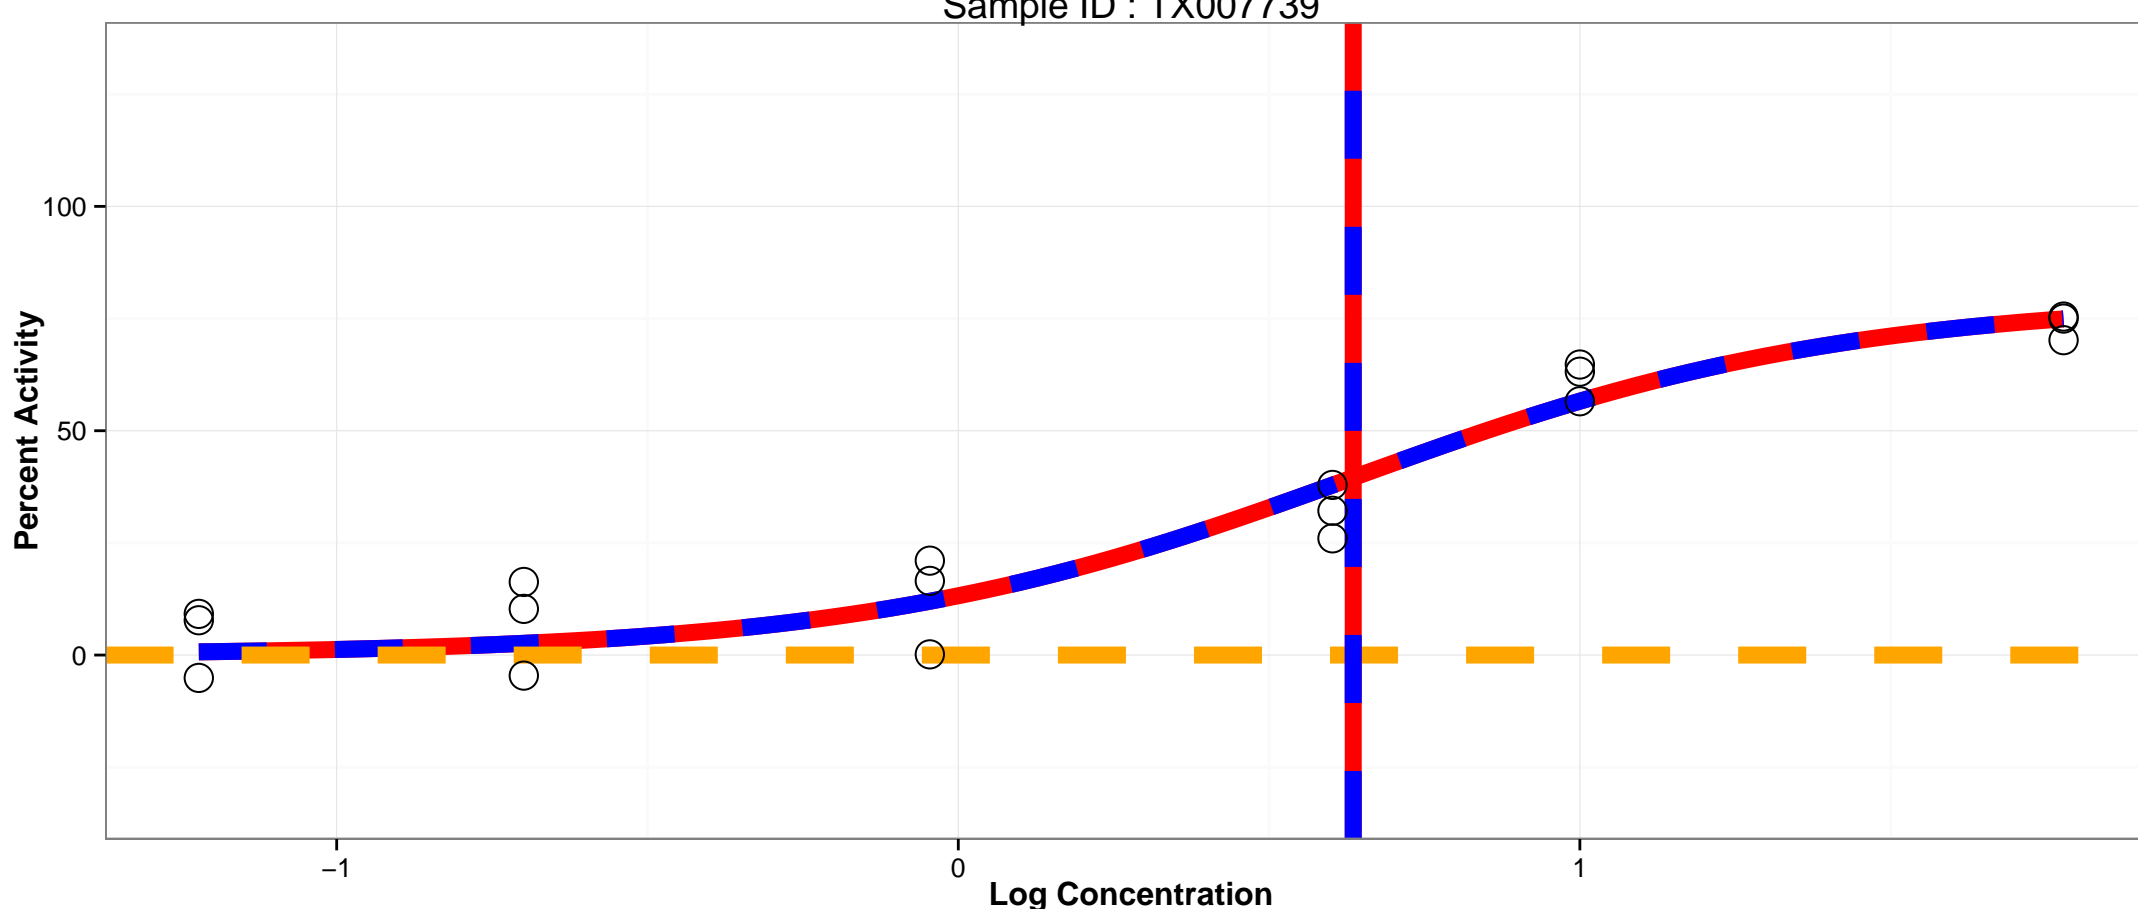

HILL MODEL

|     | tp   | ga     | gw    |
|-----|------|--------|-------|
| val | 79.1 | 0.635  | 1.1   |
| sd  | 7.26 | 0.0963 | 0.457 |

GAIN-LOSS MODEL

|     | tp   | ga    | gw  | la   | lw   |
|-----|------|-------|-----|------|------|
| val | 79.1 | 0.635 | 1.1 | 2.94 | 9.25 |
| sd  | NA   | NA    | NA  | NA   | NA   |

|      | CNST   | HILL  | GNLS  |
|------|--------|-------|-------|
| AIC  | 189.21 | 134.1 | 138.1 |
| PROB | 0      | 0.88  | 0.12  |
| RMSE | 42.21  | 7.46  | 7.46  |

MAX\_MEAN : 73.6 MAX\_MED : 75 BMAD : 5.54  
COFF : 20 HIT-CALL : 1 FITC : 42 ACTP : 1  
FLAGS :

Assay ID 1848 (NHEERL\_Quantilum\_inhib\_2\_dn)  
Sample ID : TX007739

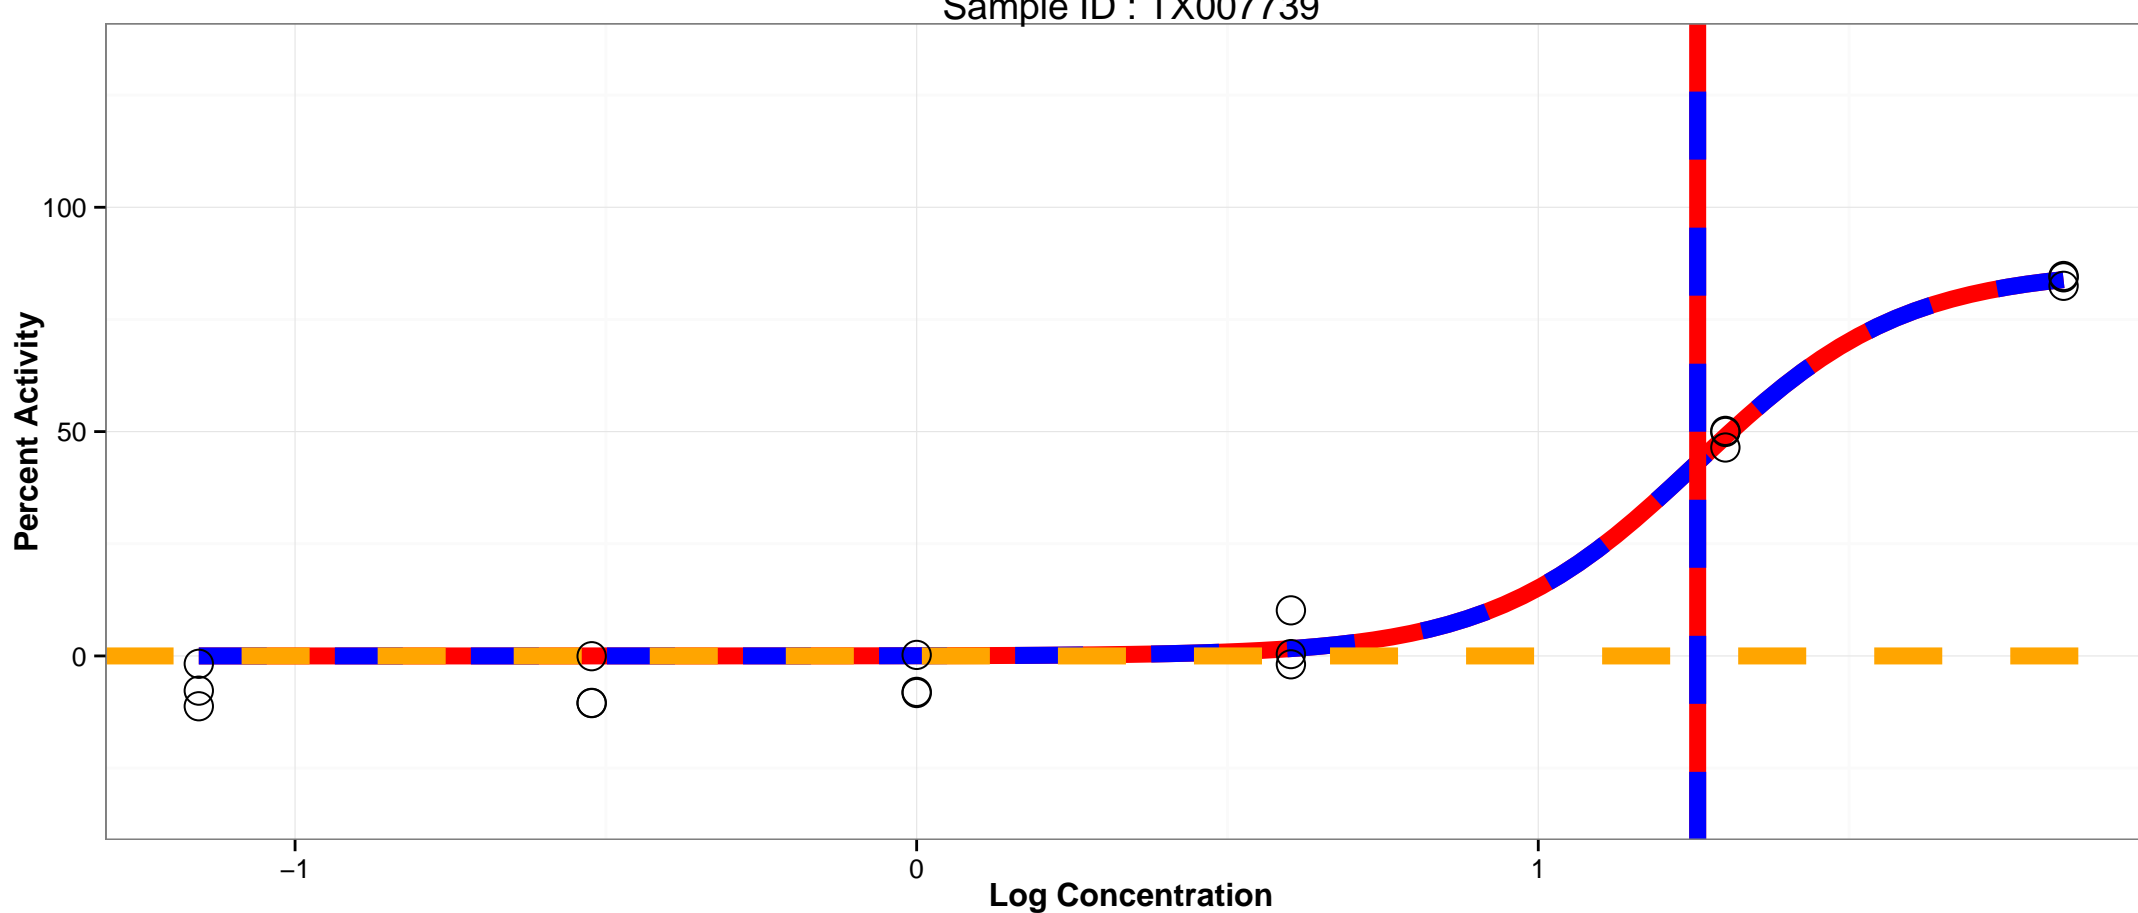

HILL MODEL

|     | tp   | ga     | gw   |
|-----|------|--------|------|
| val | 86.3 | 1.26   | 2.62 |
| sd  | 4.89 | 0.0251 | 1.22 |

GAIN-LOSS MODEL

|     | tp   | ga     | gw   | la   | lw   |
|-----|------|--------|------|------|------|
| val | 86.3 | 1.26   | 2.62 | 2.41 | 9.19 |
| sd  | 5.09 | 0.0258 | 1.22 | 173  | 2770 |

|      | CNST   | HILL   | GNLS   |
|------|--------|--------|--------|
| AIC  | 184.42 | 124.25 | 128.25 |
| PROB | 0      | 0.88   | 0.12   |
| RMSE | 40.08  | 5.96   | 5.96   |

MAX\_MEAN : 83.9 MAX\_MED : 84.4 BMAD : 8.58  
COFF : 20 HIT-CALL : 1 FITC : 41 ACTP : 1  
FLAGS :

Chemical : Toluene-2,4-diisocyanate  
CAS : 584-84-9

Assay ID 1508 (NHEERL\_TPO\_AUR\_dn)  
Sample ID : TX007987

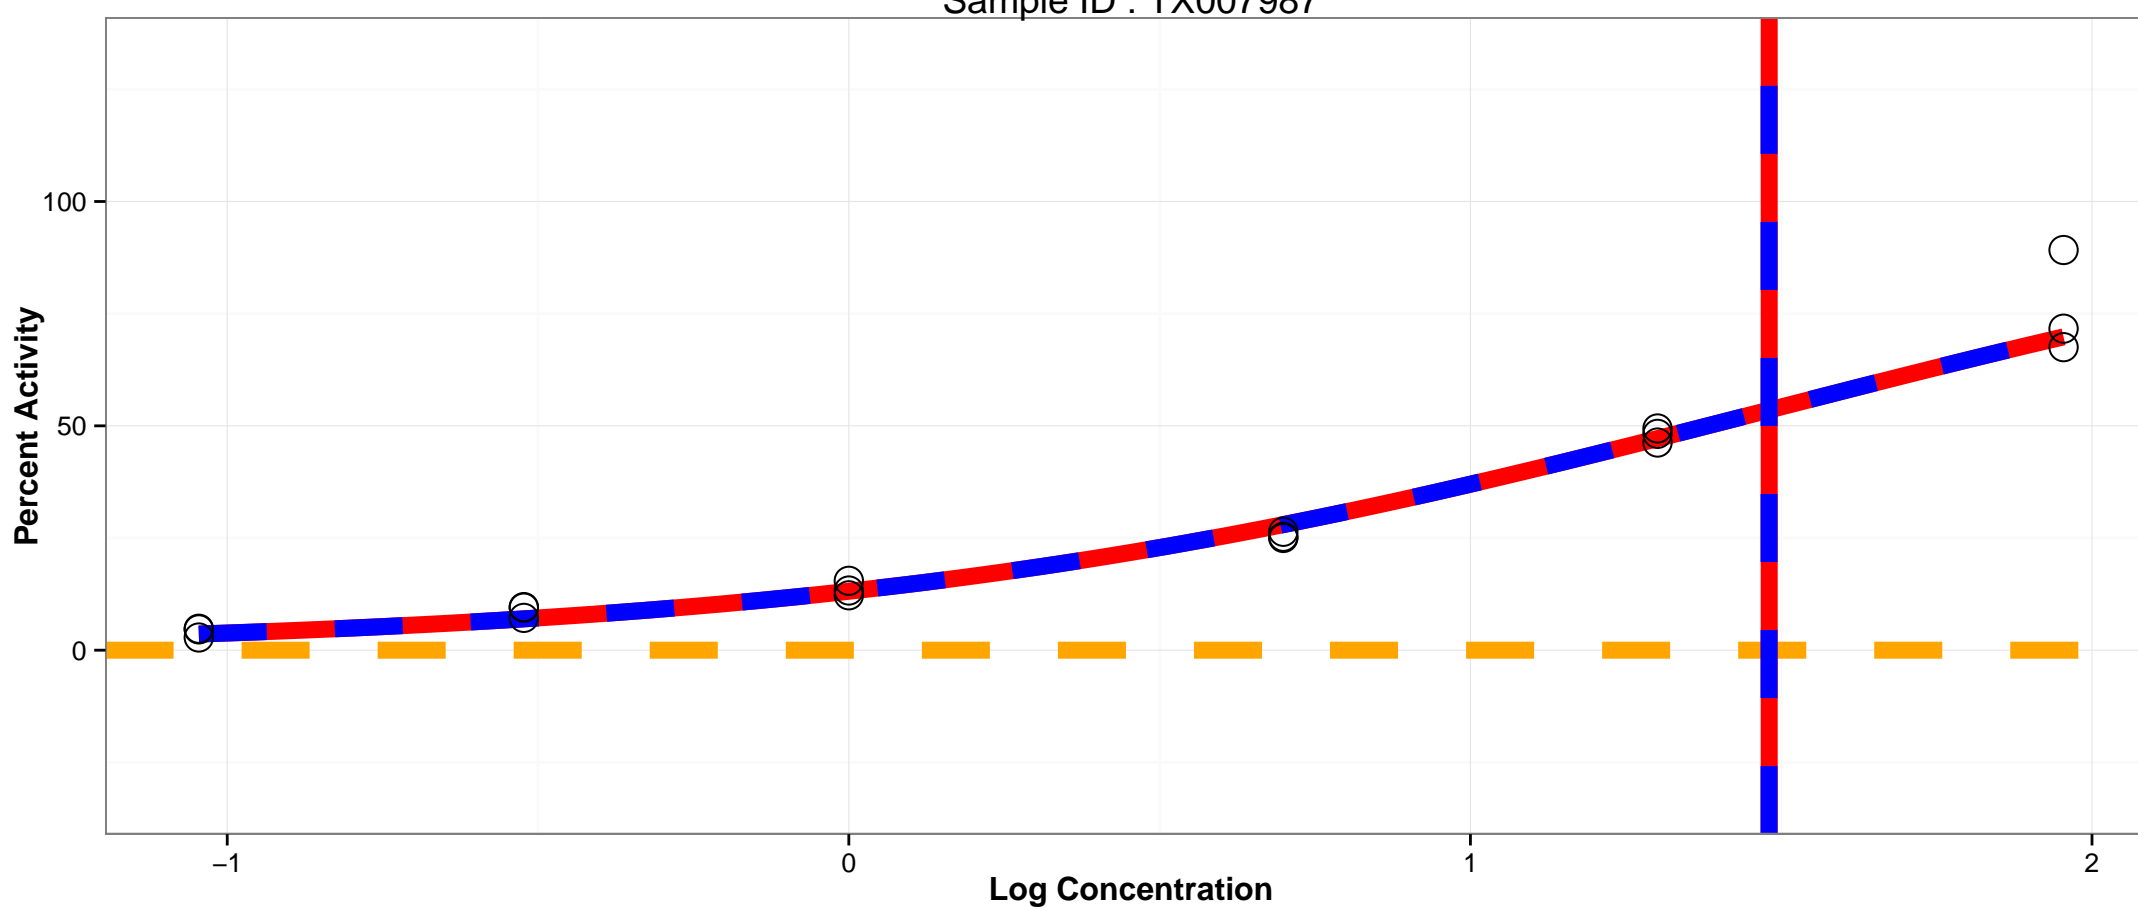

HILL MODEL

|     | tp   | ga    | gw     |
|-----|------|-------|--------|
| val | 107  | 1.48  | 0.577  |
| sd  | 11.8 | 0.175 | 0.0435 |

GAIN-LOSS MODEL

|     | tp  | ga   | gw    | la   | lw   |
|-----|-----|------|-------|------|------|
| val | 107 | 1.48 | 0.577 | 3.17 | 17.8 |
| sd  | NA  | NA   | NA    | NA   | NA   |

|      | CNST   | HILL | GNLS  |
|------|--------|------|-------|
| AIC  | 185.18 | 99.5 | 103.5 |
| PROB | 0      | 0.88 | 0.12  |
| RMSE | 39     | 4.9  | 4.9   |

MAX\_MEAN : 76.1 MAX\_MED : 71.7 BMAD : 5.69  
COFF : 20 HIT-CALL : 1 FITC : 42 ACTP : 1  
FLAGS :

Assay ID 1509 (NHEERL\_HEK293T\_CellTiterGLO)  
Sample ID : TX007987

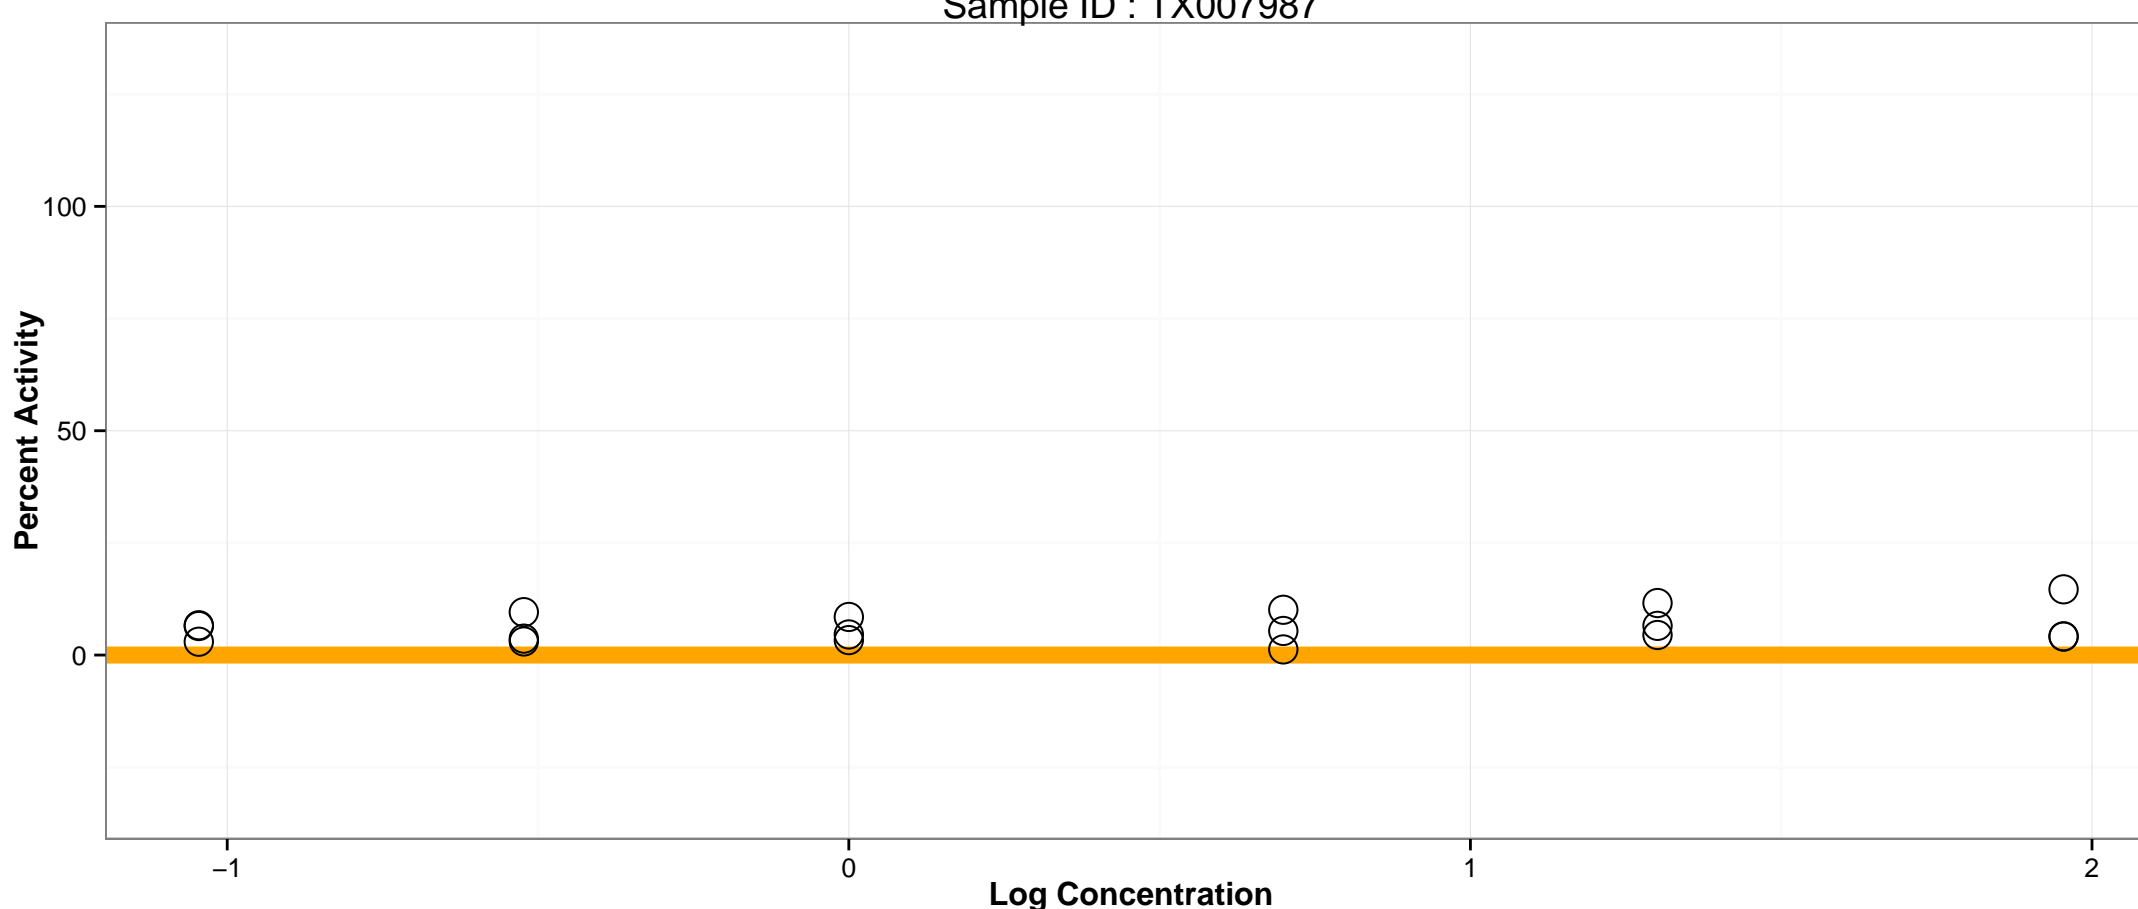

HILL MODEL

HILL MODEL: Not applicable

GAIN-LOSS MODEL

GNLS MODEL: Not applicable

|      | CNST  | HILL | GNLS |
|------|-------|------|------|
| AIC  | 125.6 | NA   | NA   |
| PROB | 1     | NA   | NA   |
| RMSE | 7.05  | NA   | NA   |

MAX\_MEAN : 7.66 MAX\_MED : 6.52 BMAD : 5.54  
COFF : 20 HIT-CALL : 0 FITC : 4 ACTP : 0  
FLAGS :

Assay ID 1848 (NHEERL\_Quantilum\_inhib\_2\_dn)  
Sample ID : TX007987

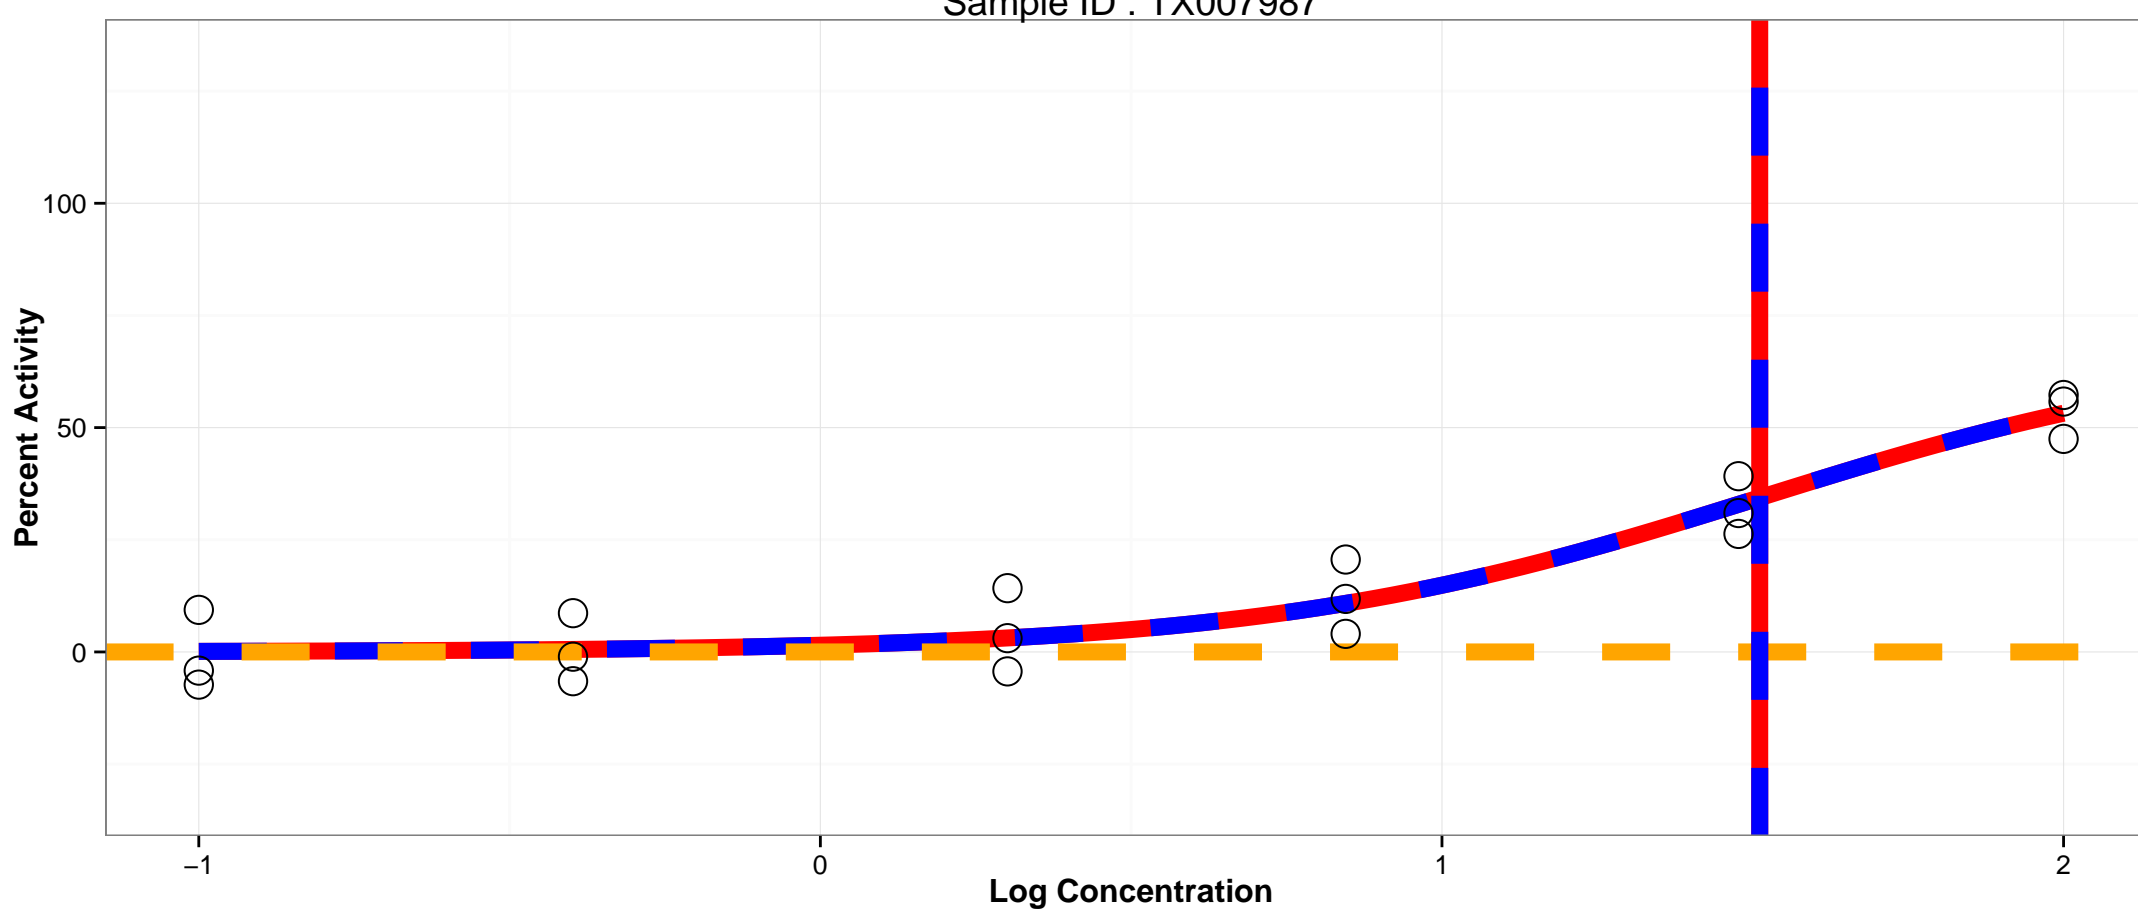

HILL MODEL

|     | tp   | ga    | gw    |
|-----|------|-------|-------|
| val | 68.7 | 1.51  | 1.09  |
| sd  | 16.9 | 0.252 | 0.345 |

GAIN-LOSS MODEL

|     | tp   | ga    | gw    | la    | lw    |
|-----|------|-------|-------|-------|-------|
| val | 68.7 | 1.51  | 1.09  | 3.99  | 5.18  |
| sd  | 16.9 | 0.251 | 0.345 | 25200 | 65700 |

|      | CNST   | HILL   | GNLS   |
|------|--------|--------|--------|
| AIC  | 171.21 | 128.95 | 132.95 |
| PROB | 0      | 0.88   | 0.12   |
| RMSE | 26.8   | 6.42   | 6.42   |

MAX\_MEAN : 53.5 MAX\_MED : 55.8 BMAD : 8.58  
COFF : 20 HIT-CALL : 1 FITC : 42 ACTP : 1  
FLAGS :

Chemical : Safrole  
CAS : 94-59-7

Assay ID 1508 (NHEERL\_TPO\_AUR\_dn)  
Sample ID : TX008169

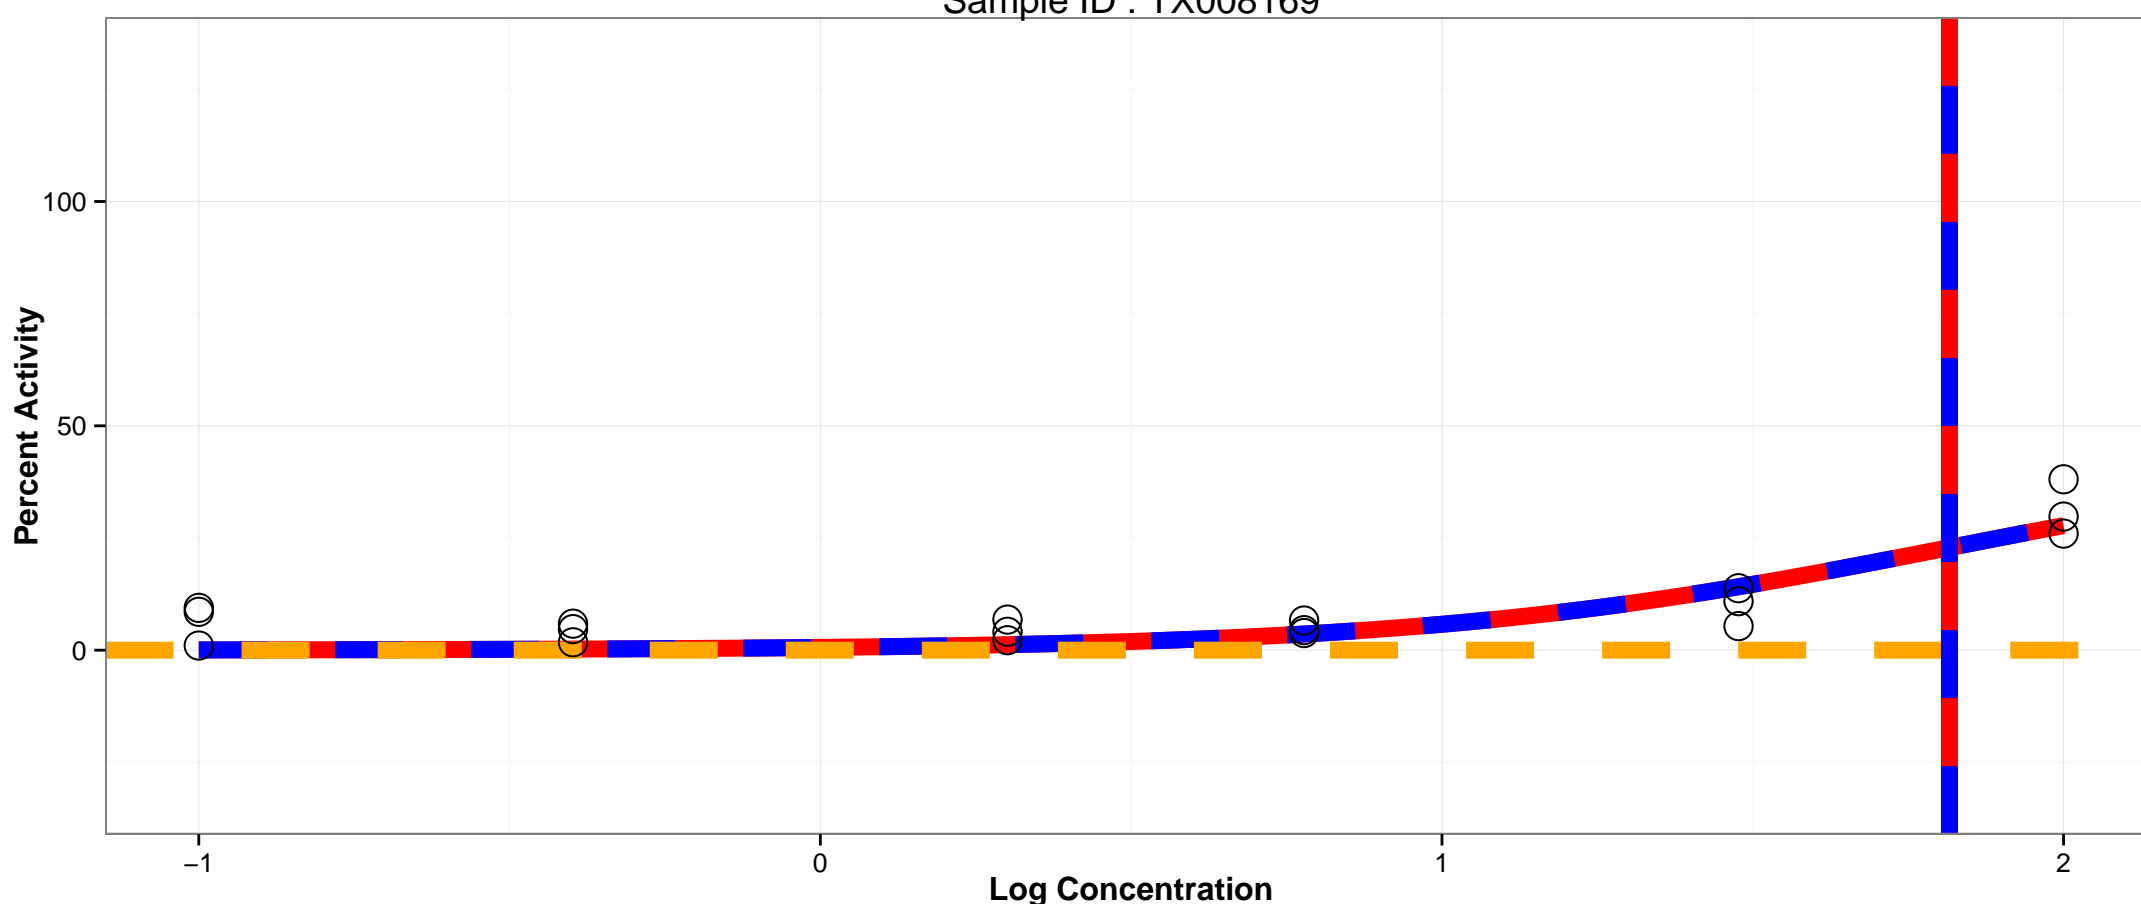

HILL MODEL

|     | tp   | ga    | gw    |
|-----|------|-------|-------|
| val | 45.7 | 1.82  | 1.03  |
| sd  | 15.5 | 0.305 | 0.477 |

GAIN-LOSS MODEL

|     | tp   | ga    | gw    | la   | lw   |
|-----|------|-------|-------|------|------|
| val | 45.7 | 1.82  | 1.03  | 3.49 | 5.83 |
| sd  | 15.5 | 0.305 | 0.477 | 1800 | 7050 |

|      | CNST   | HILL   | GNLS   |
|------|--------|--------|--------|
| AIC  | 146.61 | 118.52 | 122.52 |
| PROB | 0      | 0.88   | 0.12   |
| RMSE | 14.39  | 5.1    | 5.1    |

MAX\_MEAN : 31.3 MAX\_MED : 29.8 BMAD : 5.69  
COFF : 20 HIT-CALL : 1 FITC : 42 ACTP : 1  
FLAGS : 6

Assay ID 1509 (NHEERL\_HEK293T\_CellTiterGLO)  
Sample ID : TX008169

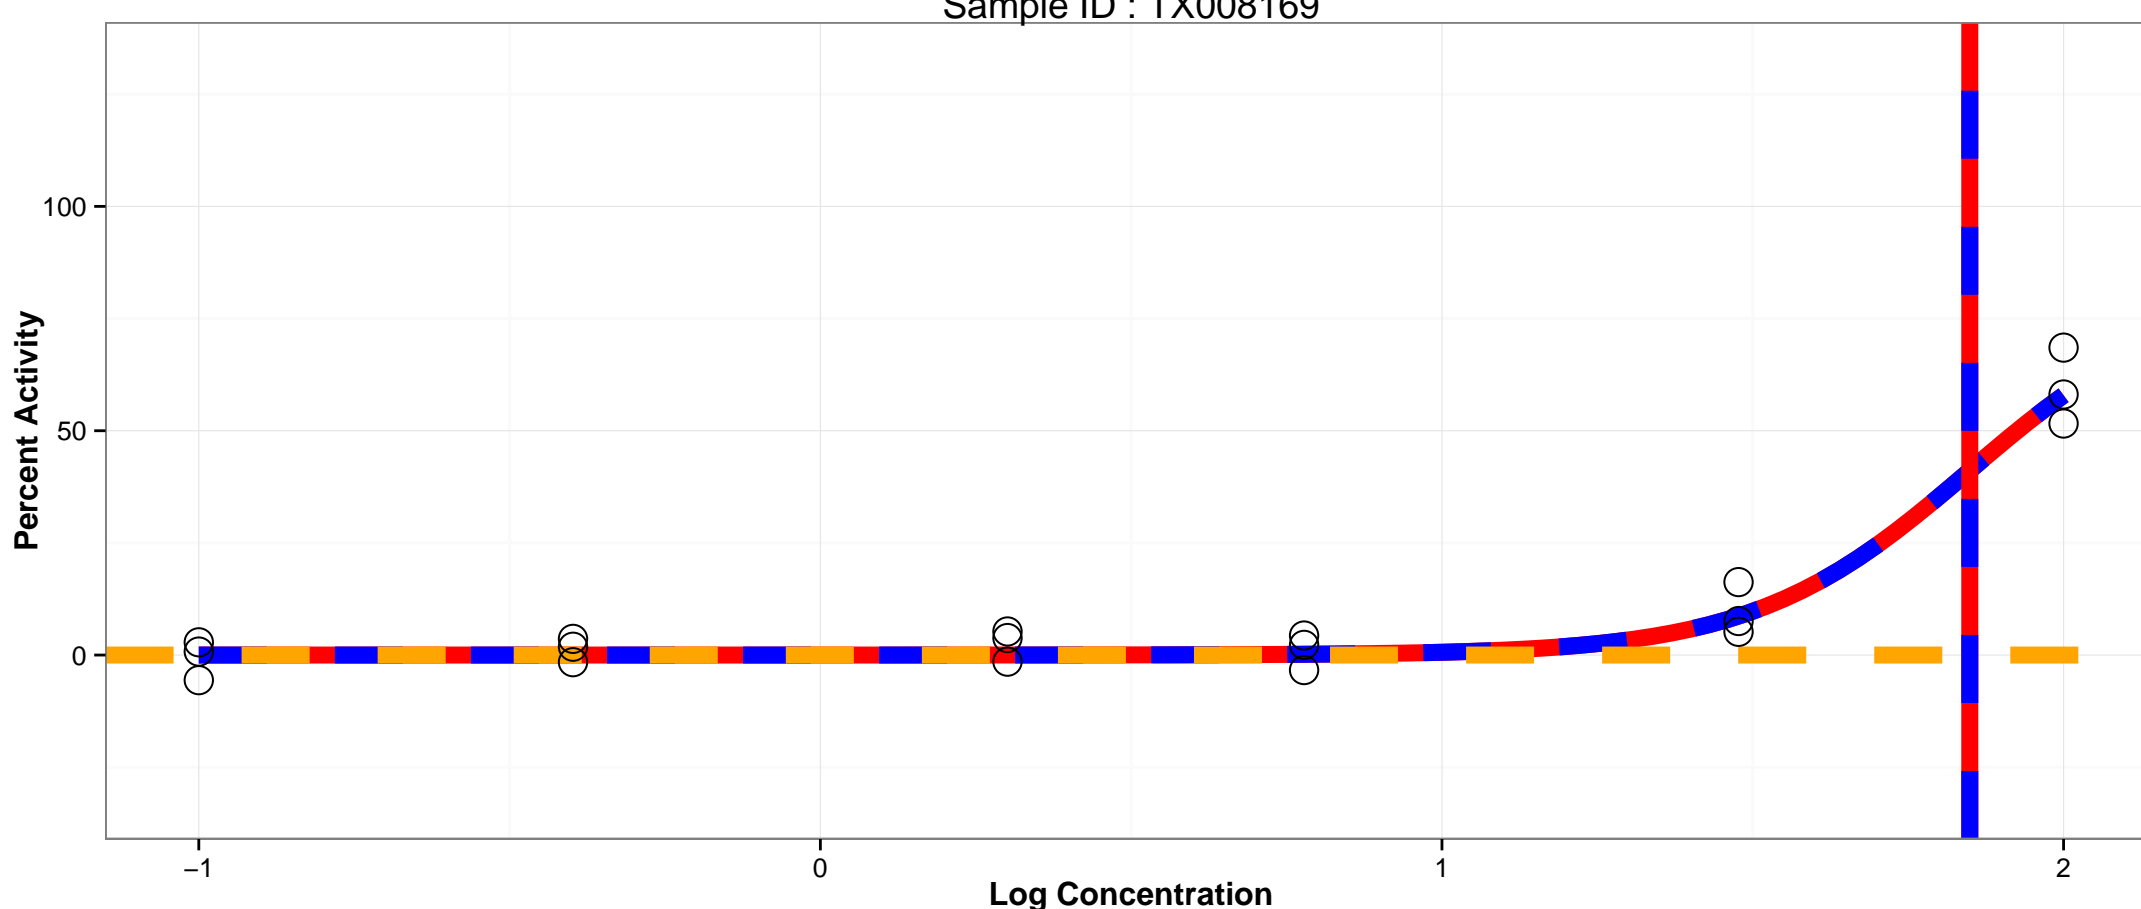

HILL MODEL

|     | tp   | ga    | gw  |
|-----|------|-------|-----|
| val | 82.2 | 1.85  | 2.5 |
| sd  | 66.4 | 0.383 | 1.6 |

GAIN-LOSS MODEL

|     | tp   | ga    | gw   | la   | lw   |
|-----|------|-------|------|------|------|
| val | 82.2 | 1.85  | 2.5  | 3.83 | 4.08 |
| sd  | 66.8 | 0.385 | 1.61 | 3850 | 8620 |

|      | CNST   | HILL   | GNLS   |
|------|--------|--------|--------|
| AIC  | 159.57 | 114.24 | 118.24 |
| PROB | 0      | 0.88   | 0.12   |
| RMSE | 24.97  | 4.48   | 4.48   |

MAX\_MEAN : 59.4 MAX\_MED : 58.1 BMAD : 5.54  
COFF : 20 HIT-CALL : 1 FITC : 42 ACTP : 1  
FLAGS : 6

Assay ID 1848 (NHEERL\_Quantilum\_inhib\_2\_dn)  
Sample ID : TX008169

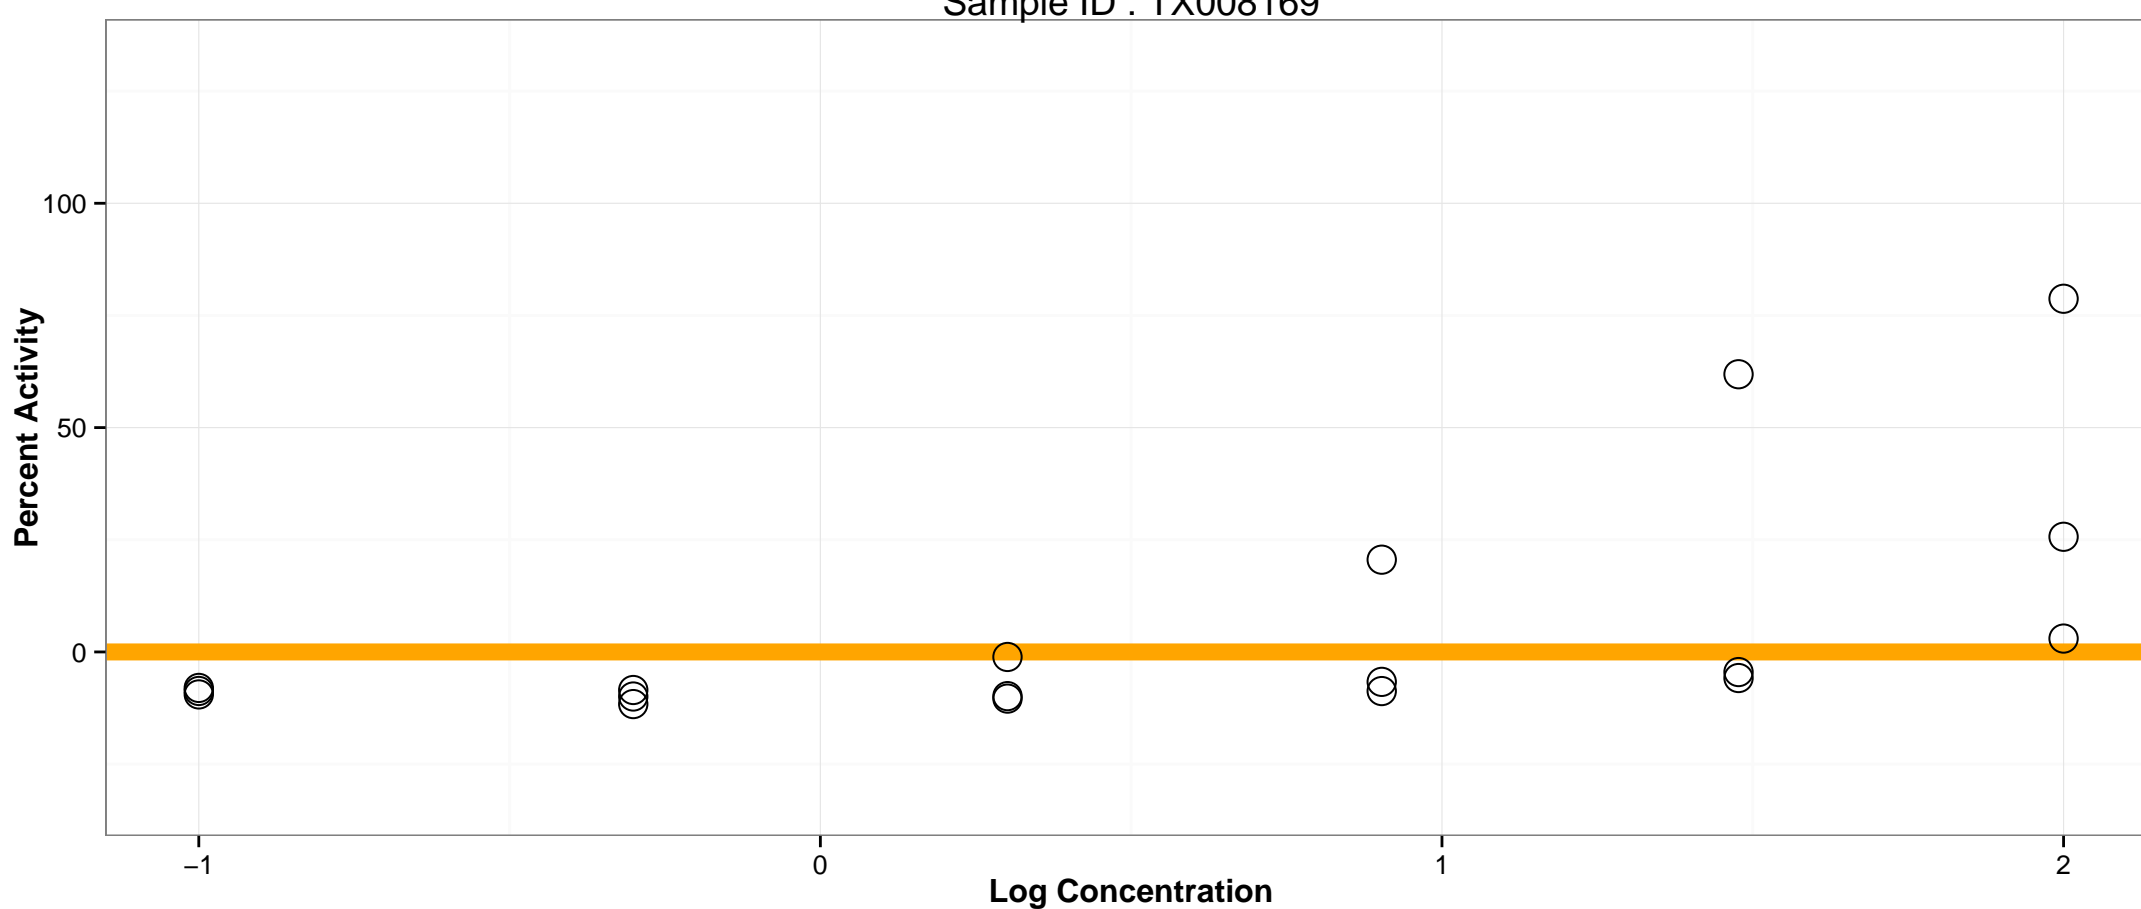

HILL MODEL

HILL MODEL: Not applicable

GAIN-LOSS MODEL

GNLS MODEL: Not applicable

|      | CNST   | HILL | GNLS |
|------|--------|------|------|
| AIC  | 162.91 | NA   | NA   |
| PROB | 1      | NA   | NA   |
| RMSE | 25.86  | NA   | NA   |

MAX\_MEAN : 35.8 MAX\_MED : 25.7 BMAD : 8.58  
COFF : 20 HIT-CALL : 0 FITC : 4 ACTP : 0  
FLAGS : 10

Chemical : Diethylstilbestrol  
CAS : 56-53-1

Assay ID 1508 (NHEERL\_TPO\_AUR\_dn)  
Sample ID : TX008337

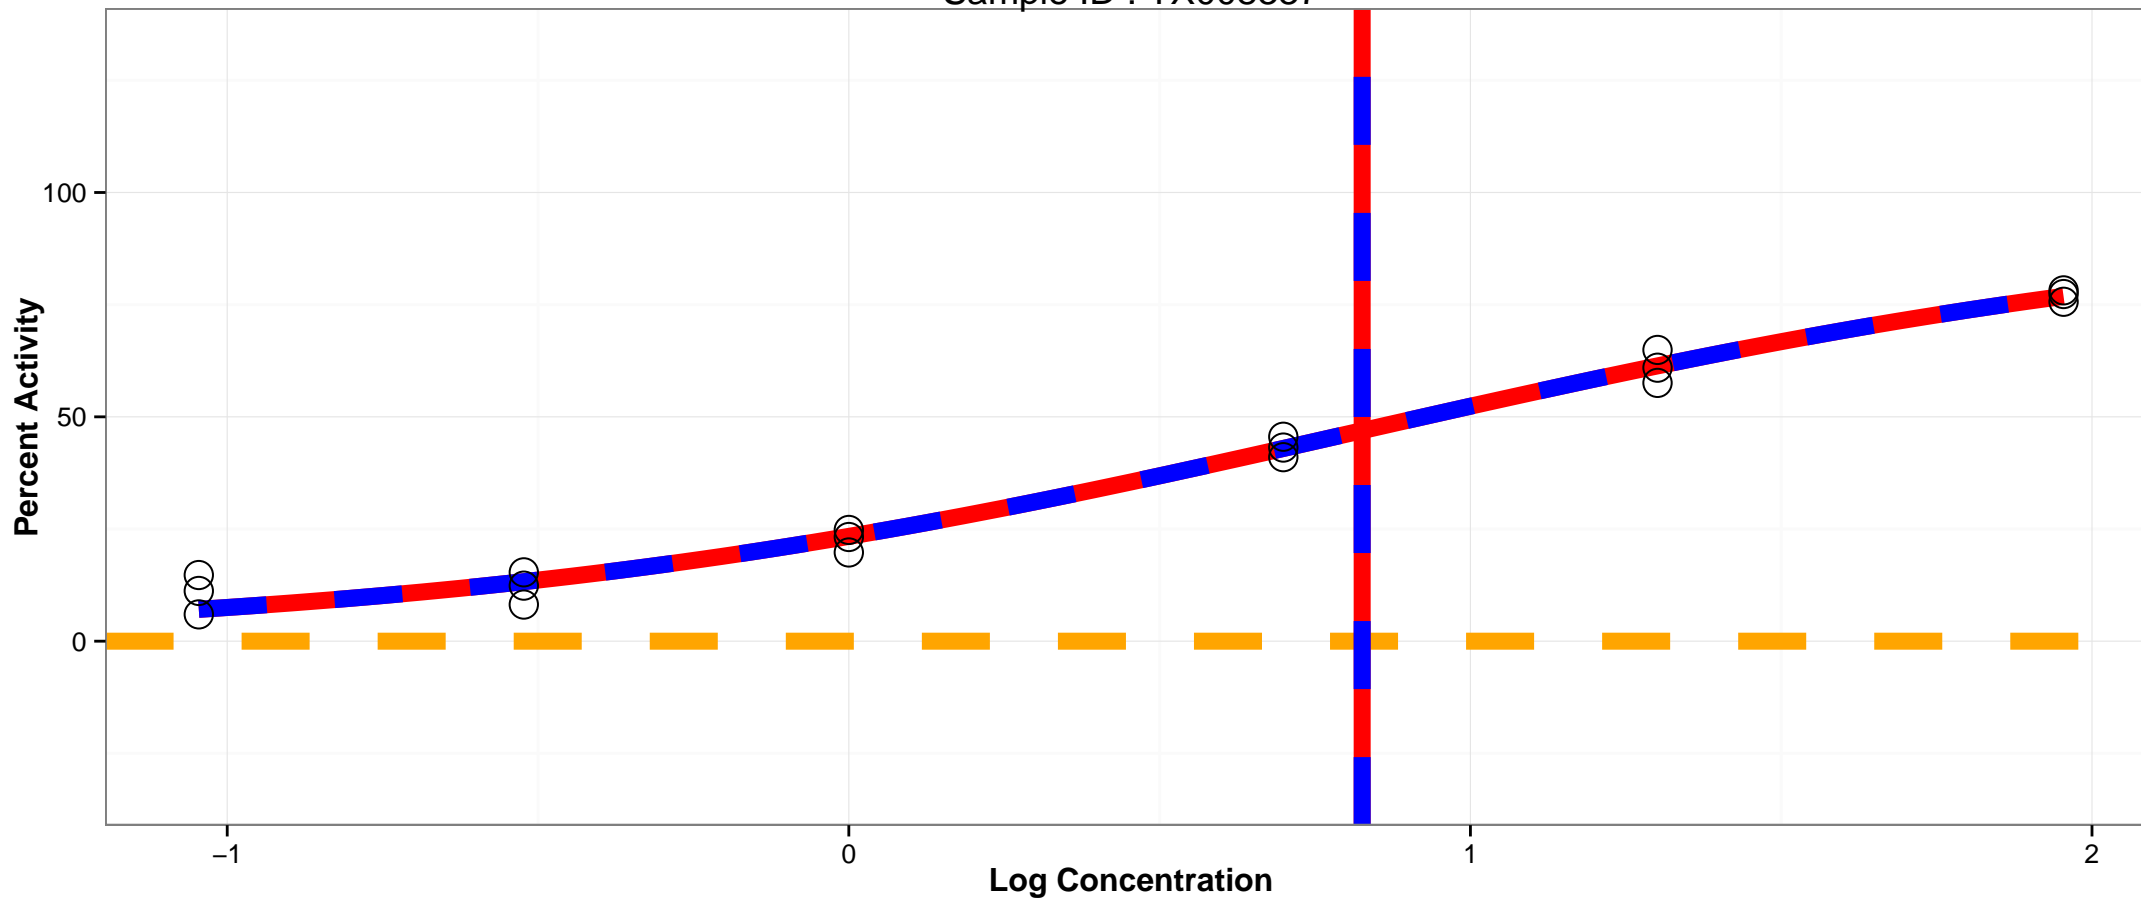

HILL MODEL

|     | tp   | ga    | gw     |
|-----|------|-------|--------|
| val | 93.8 | 0.826 | 0.581  |
| sd  | 5.59 | 0.118 | 0.0512 |

GAIN-LOSS MODEL

|     | tp   | ga    | gw     | la   | lw    |
|-----|------|-------|--------|------|-------|
| val | 93.8 | 0.826 | 0.581  | 3.02 | 9.52  |
| sd  | 5.59 | 0.118 | 0.0512 | 5380 | 48000 |

|      | CNST   | HILL  | GNLS   |
|------|--------|-------|--------|
| AIC  | 192.52 | 99.08 | 103.08 |
| PROB | 0      | 0.88  | 0.12   |
| RMSE | 45.39  | 3.02  | 3.02   |

MAX\_MEAN : 77.1 MAX\_MED : 77.4 BMAD : 5.69  
COFF : 20 HIT-CALL : 1 FITC : 42 ACTP : 1  
FLAGS :

Assay ID 1509 (NHEERL\_HEK293T\_CellTiterGLO)  
Sample ID : TX008337

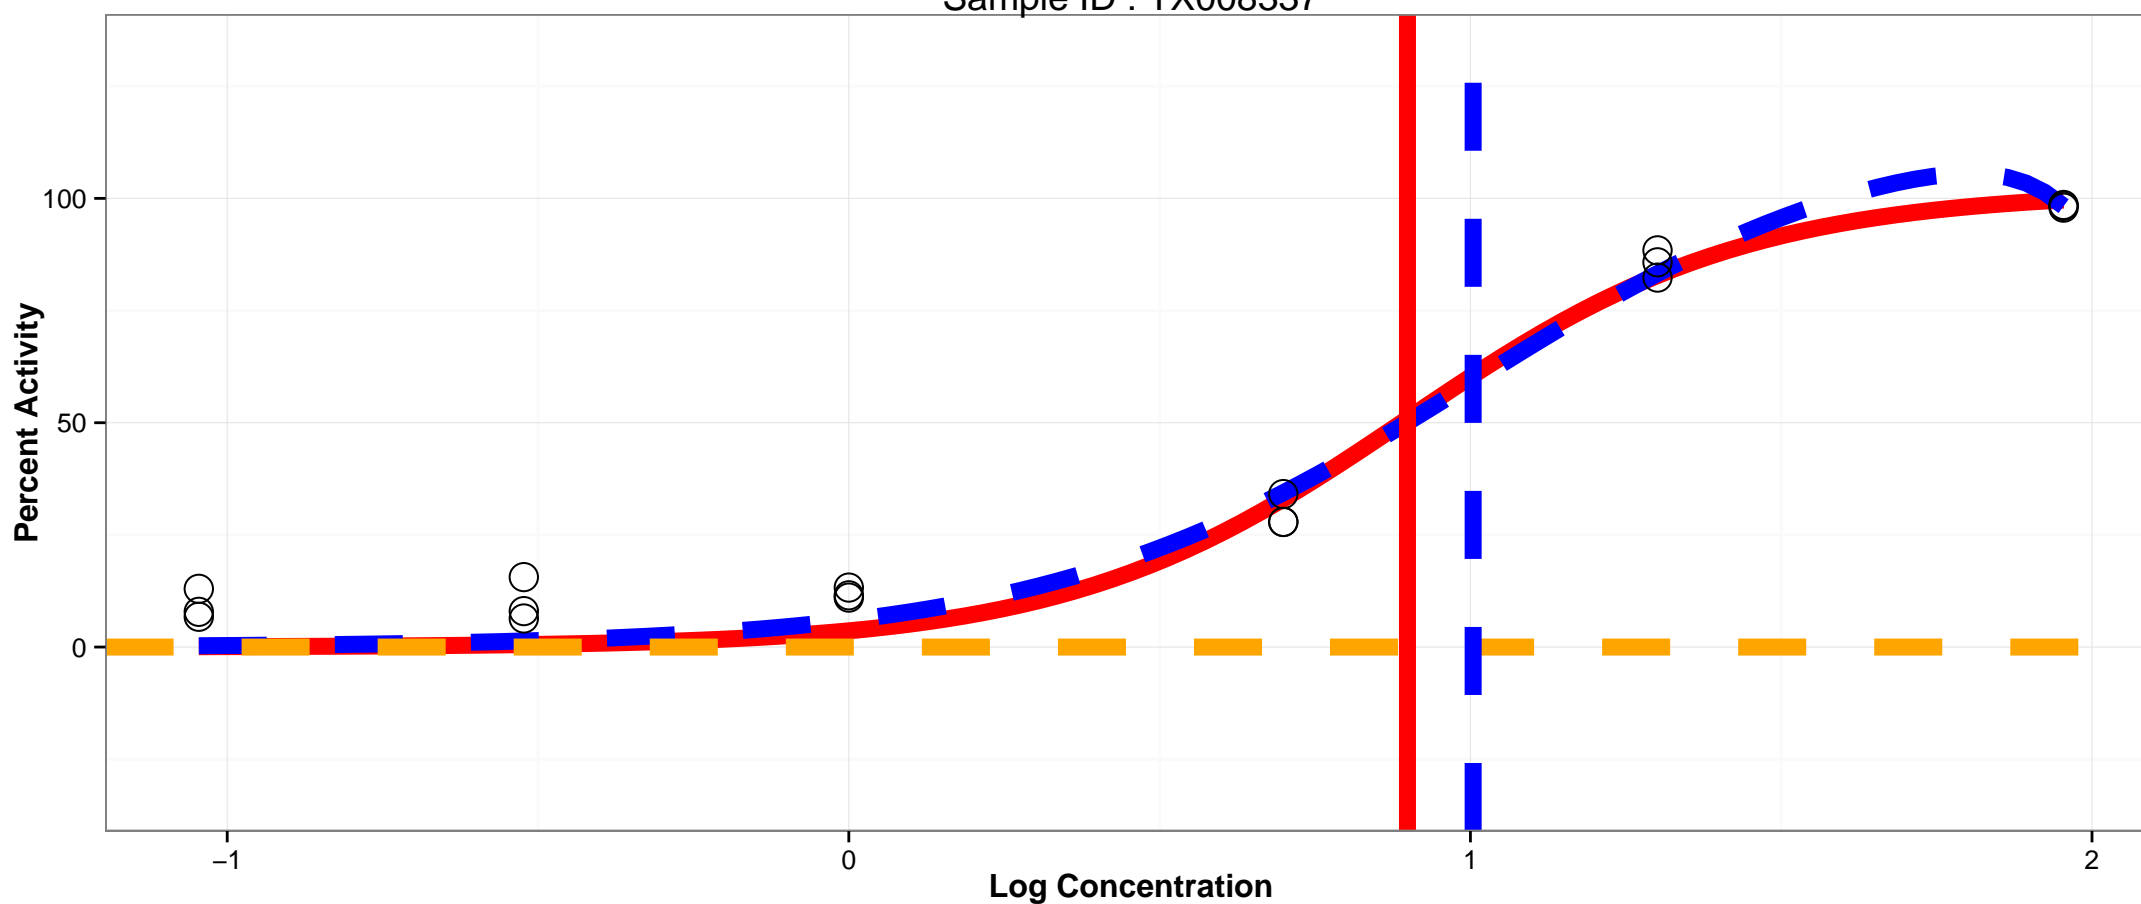

HILL MODEL

|     | tp   | ga     | gw    |
|-----|------|--------|-------|
| val | 102  | 0.899  | 1.6   |
| sd  | 4.75 | 0.0474 | 0.384 |

GAIN-LOSS MODEL

|     | tp  | ga | gw   | la   | lw   |
|-----|-----|----|------|------|------|
| val | 118 | 1  | 1.27 | 2.12 | 5.23 |
| sd  | NA  | NA | NA   | NA   | NA   |

|      | CNST   | HILL  | GNLS   |
|------|--------|-------|--------|
| AIC  | 197.99 | 131.3 | 131.98 |
| PROB | 0      | 0.58  | 0.42   |
| RMSE | 55.13  | 7.07  | 6.5    |

MAX\_MEAN : 98.3 MAX\_MED : 98.3 BMAD : 5.54  
COFF : 20 HIT-CALL : 1 FITC : 41 ACTP : 1  
FLAGS :

Assay ID 1848 (NHEERL\_Quantilum\_inhib\_2\_dn)  
Sample ID : TX008337

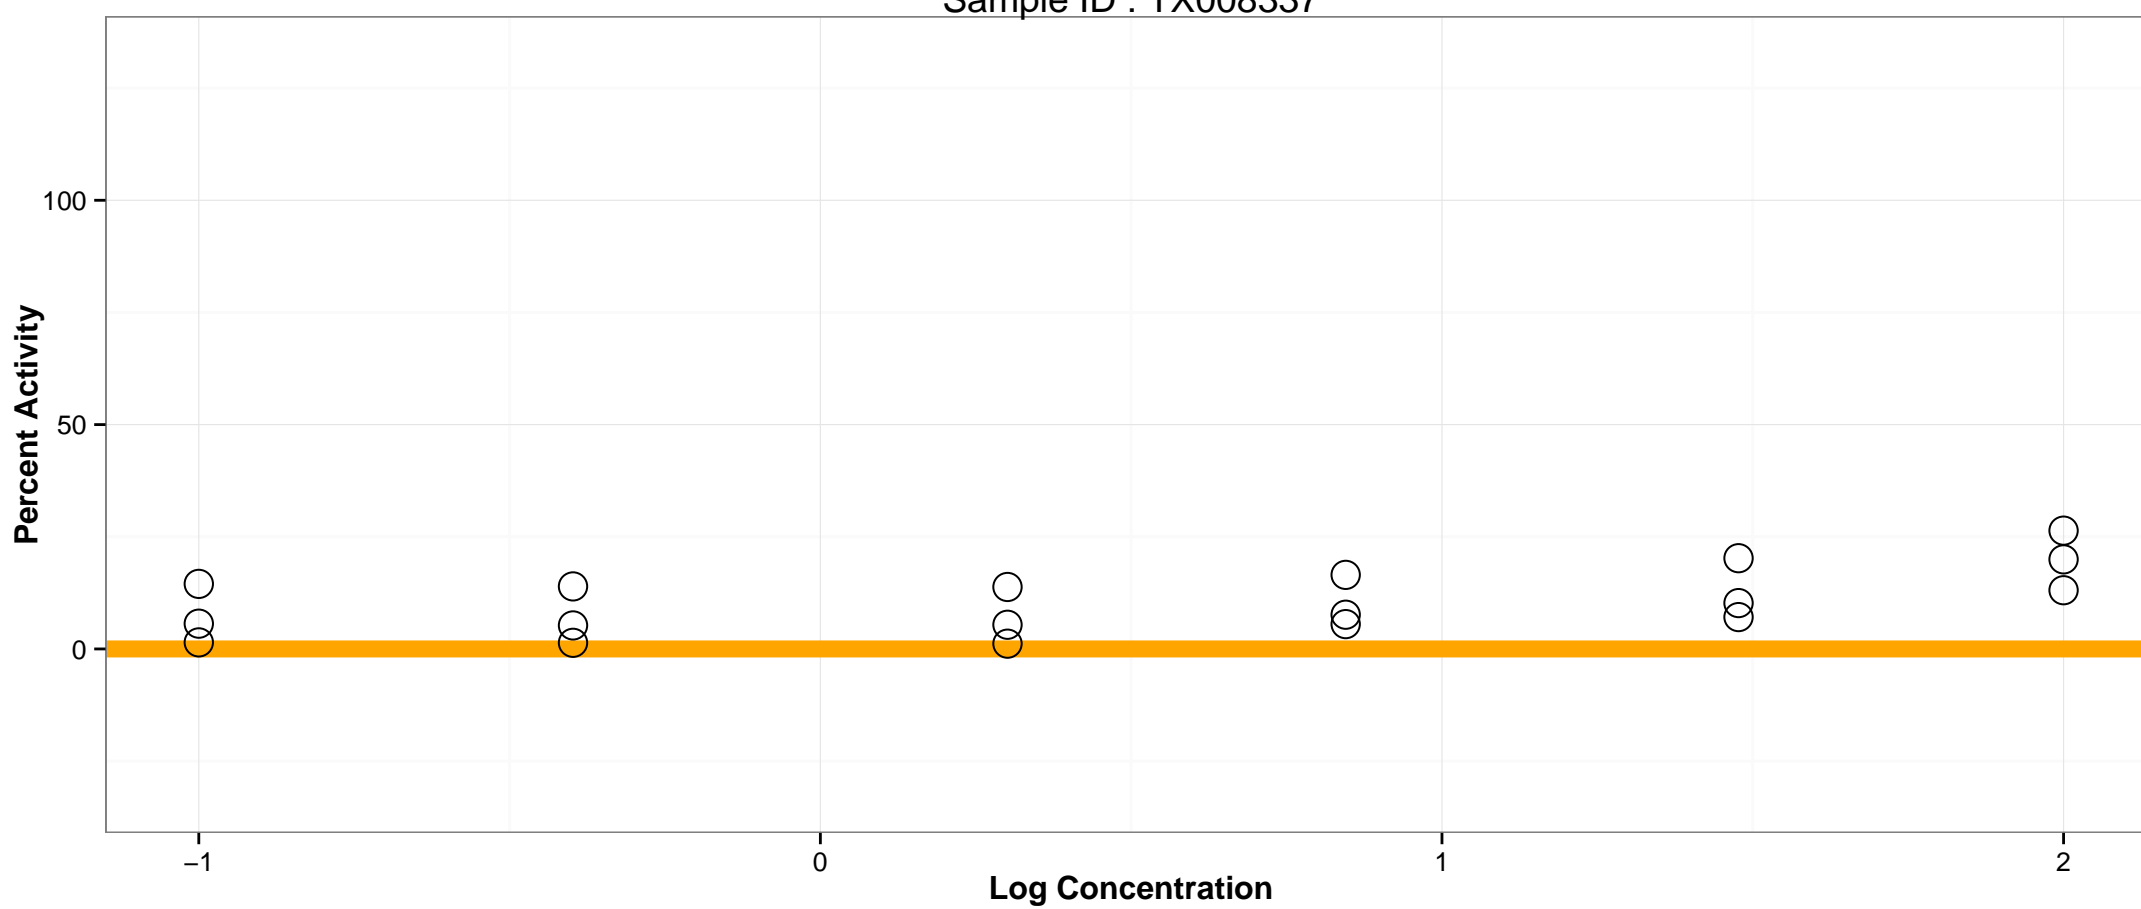

HILL MODEL

HILL MODEL: Not applicable

GAIN-LOSS MODEL

GNLS MODEL: Not applicable

|      | CNST   | HILL | GNLS |
|------|--------|------|------|
| AIC  | 146.37 | NA   | NA   |
| PROB | 1      | NA   | NA   |
| RMSE | 12.66  | NA   | NA   |

MAX\_MEAN : 19.8 MAX\_MED : 20 BMAD : 8.58  
COFF : 20 HIT-CALL : 0 FITC : 4 ACTP : 0  
FLAGS :

Chemical : Retinol  
CAS : 68-26-8

Assay ID 1508 (NHEERL\_TPO\_AUR\_dn)  
Sample ID : TX008373

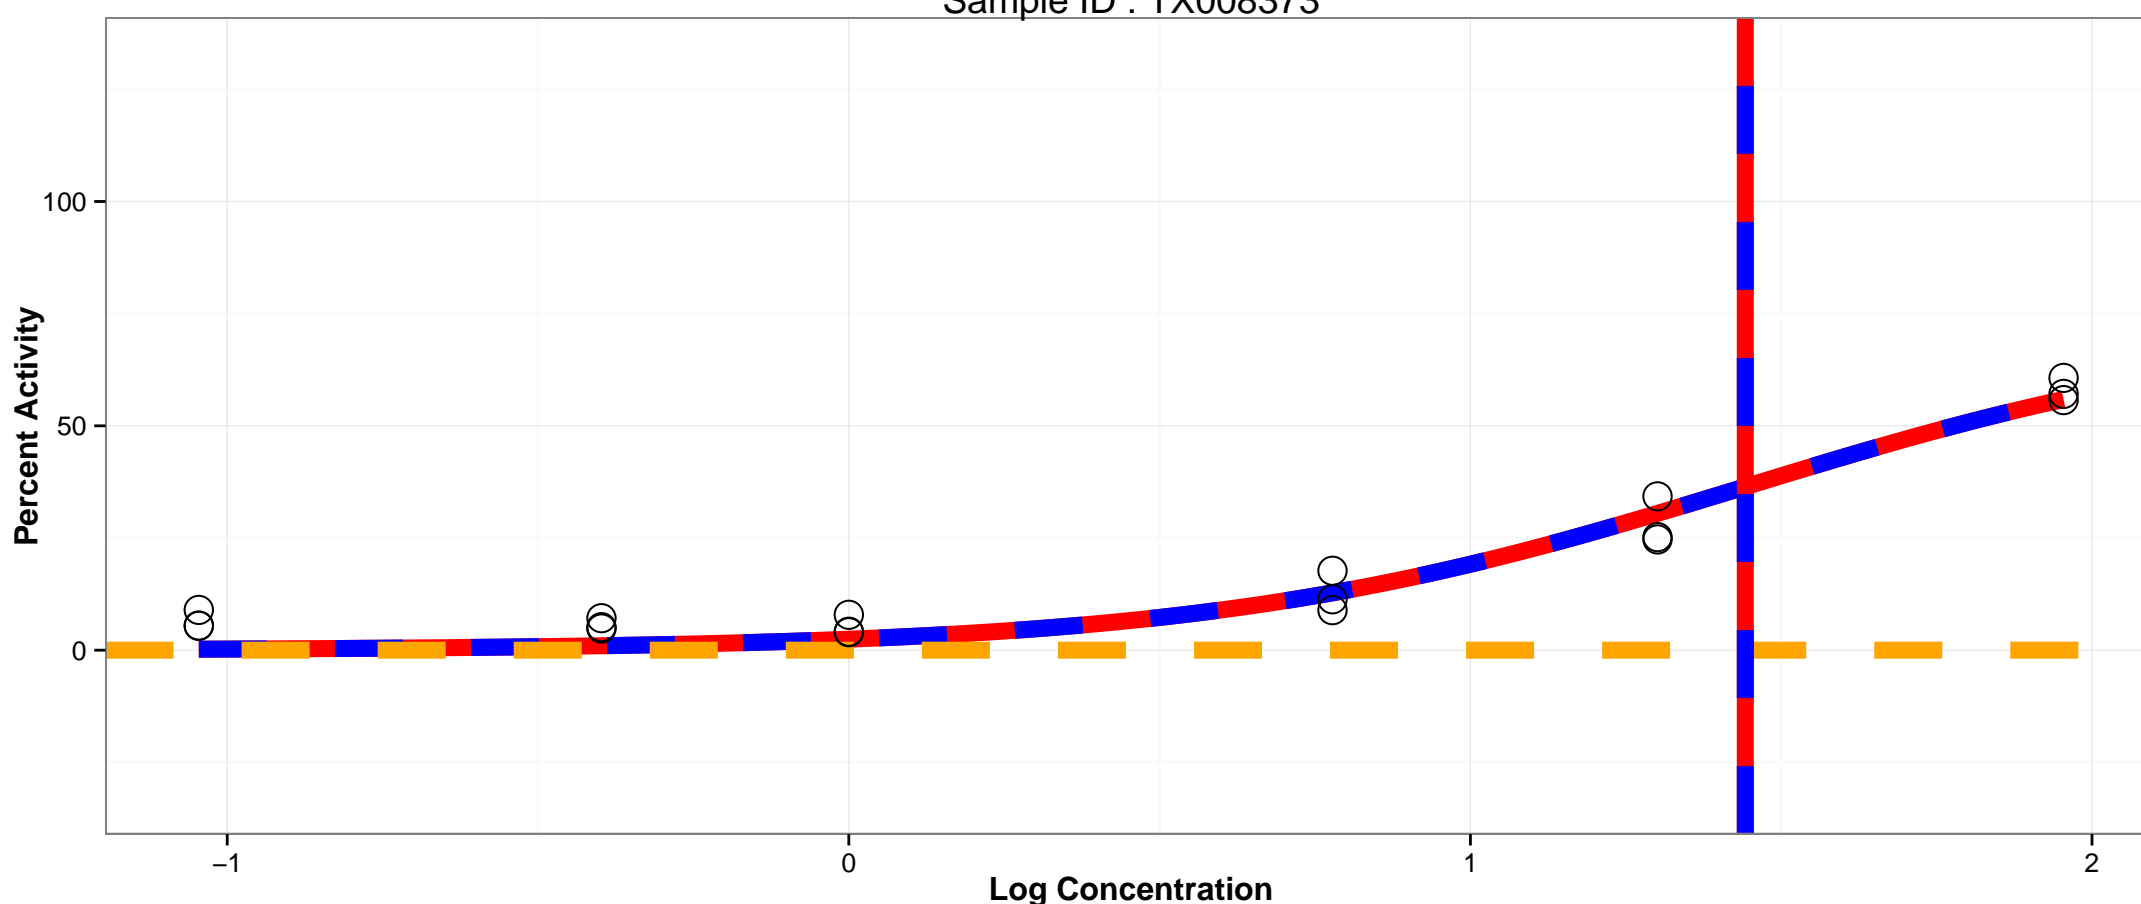

HILL MODEL

|     | tp   | ga    | gw    |
|-----|------|-------|-------|
| val | 72.8 | 1.44  | 1.01  |
| sd  | 11.8 | 0.176 | 0.243 |

GAIN-LOSS MODEL

|     | tp   | ga    | gw    | la   | lw    |
|-----|------|-------|-------|------|-------|
| val | 72.8 | 1.44  | 1.01  | 2.8  | 12.1  |
| sd  | 11.8 | 0.176 | 0.243 | 2970 | 42200 |

|      | CNST   | HILL   | GNLS   |
|------|--------|--------|--------|
| AIC  | 170.68 | 116.92 | 120.92 |
| PROB | 0      | 0.88   | 0.12   |
| RMSE | 27.22  | 4.59   | 4.59   |

MAX\_MEAN : 57.9 MAX\_MED : 57.1 BMAD : 5.69  
COFF : 20 HIT-CALL : 1 FITC : 42 ACTP : 1  
FLAGS :

Assay ID 1509 (NHEERL\_HEK293T\_CellTiterGLO)  
Sample ID : TX008373

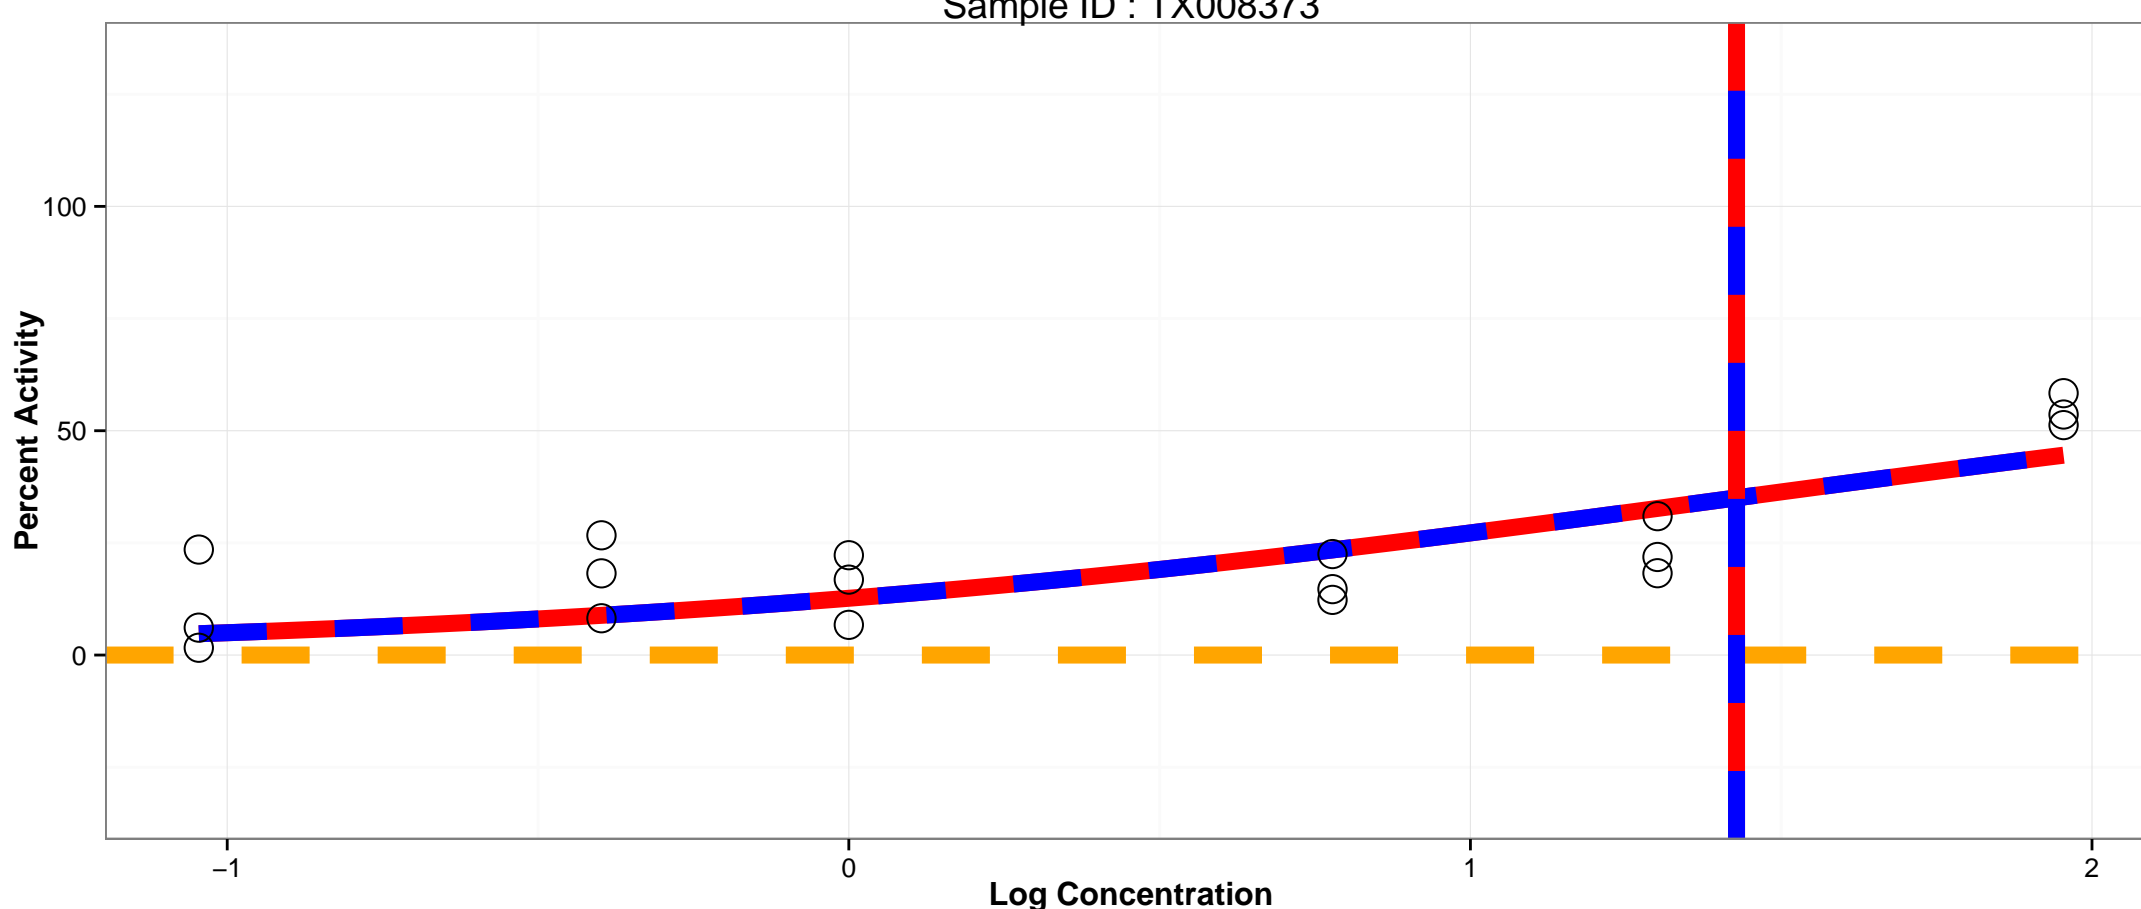

HILL MODEL

|     | tp   | ga    | gw    |
|-----|------|-------|-------|
| val | 70.1 | 1.43  | 0.46  |
| sd  | 25.1 | 0.634 | 0.138 |

GAIN-LOSS MODEL

|     | tp   | ga    | gw    | la   | lw    |
|-----|------|-------|-------|------|-------|
| val | 70.1 | 1.43  | 0.46  | 2.62 | 13.4  |
| sd  | 25.1 | 0.634 | 0.138 | 674  | 13500 |

|      | CNST   | HILL   | GNLS   |
|------|--------|--------|--------|
| AIC  | 174.21 | 143.76 | 147.76 |
| PROB | 0      | 0.88   | 0.12   |
| RMSE | 27.98  | 9.9    | 9.9    |

MAX\_MEAN : 54.4 MAX\_MED : 53.6 BMAD : 5.54  
COFF : 20 HIT-CALL : 1 FITC : 42 ACTP : 1  
FLAGS :

Assay ID 1848 (NHEERL\_Quantilum\_inhib\_2\_dn)  
Sample ID : TX008373

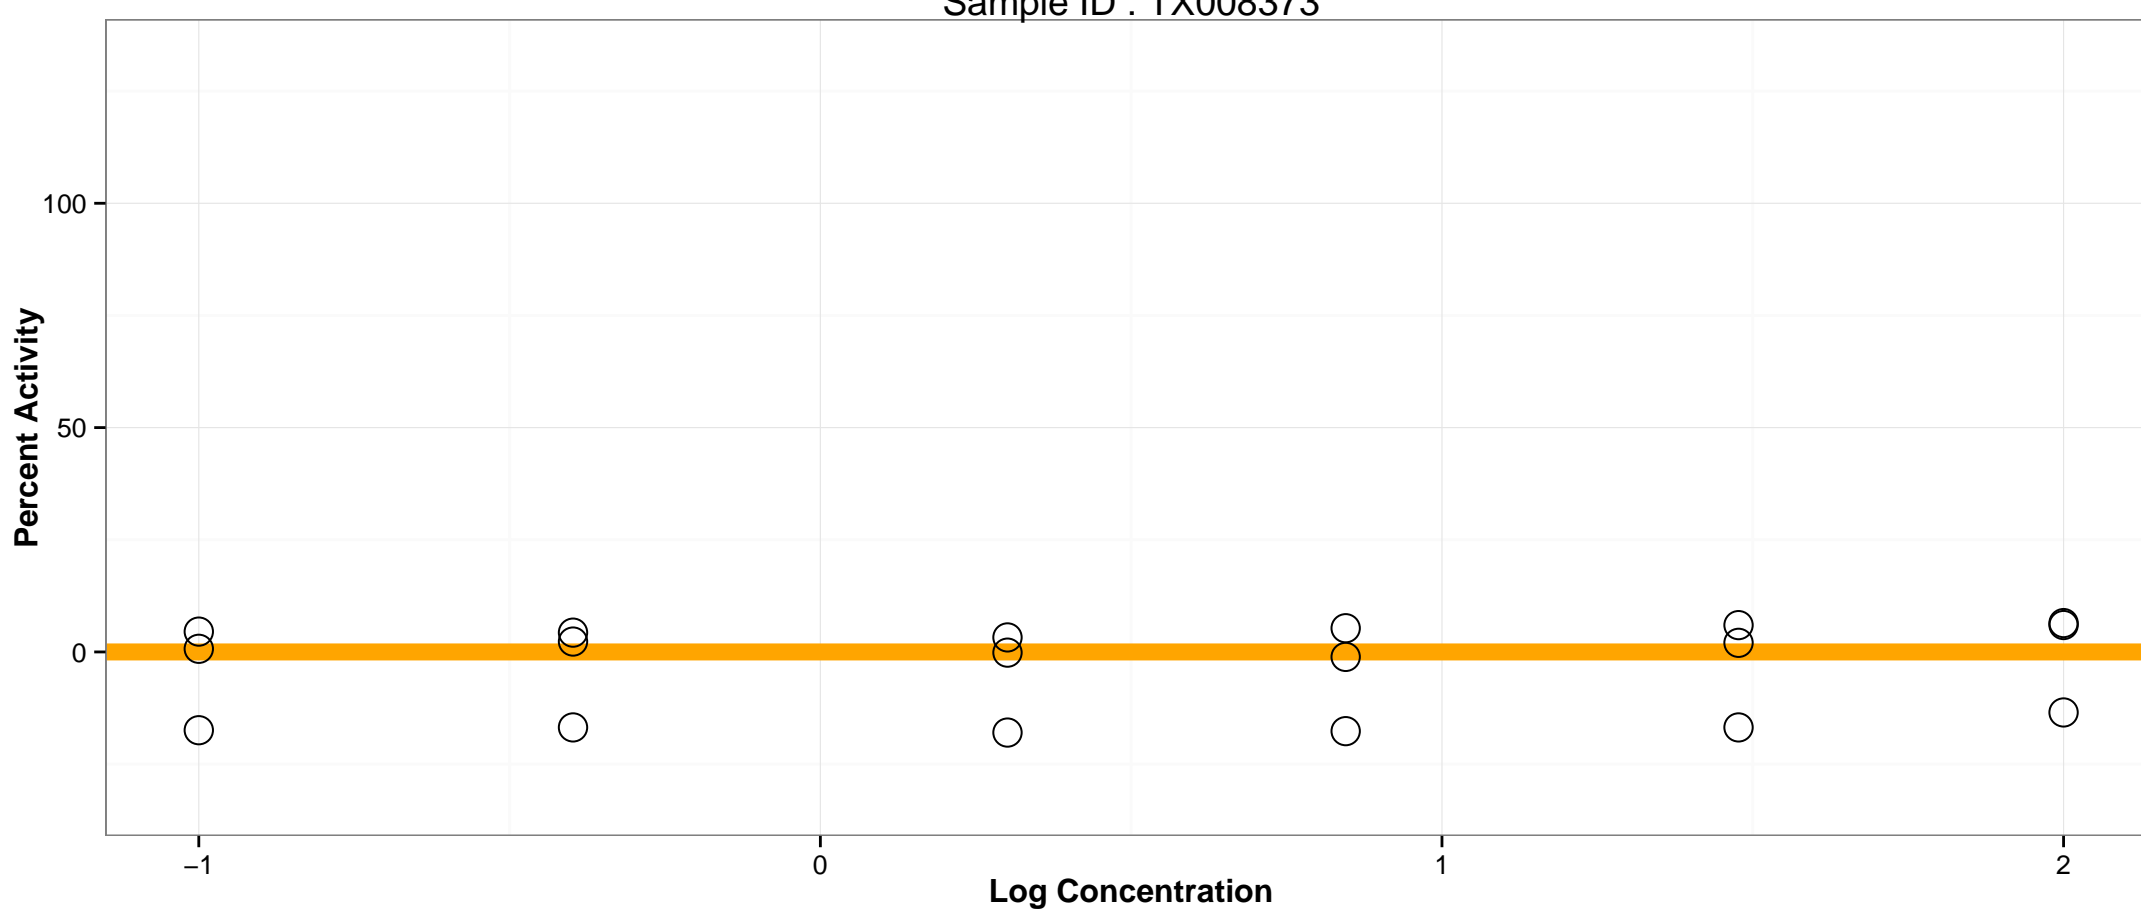

HILL MODEL

HILL MODEL: Not applicable

GAIN-LOSS MODEL

GNLS MODEL: Not applicable

|      | CNST   | HILL | GNLS |
|------|--------|------|------|
| AIC  | 137.94 | NA   | NA   |
| PROB | 1      | NA   | NA   |
| RMSE | 10.24  | NA   | NA   |

MAX\_MEAN : -0.34 MAX\_MED : 6.01 BMAD : 8.58  
COFF : 20 HIT-CALL : 0 FITC : 4 ACTP : 0  
FLAGS :

Chemical : Methimazole  
CAS : 60-56-0

Assay ID 1508 (NHEERL\_TPO\_AUR\_dn)  
Sample ID : TX008381

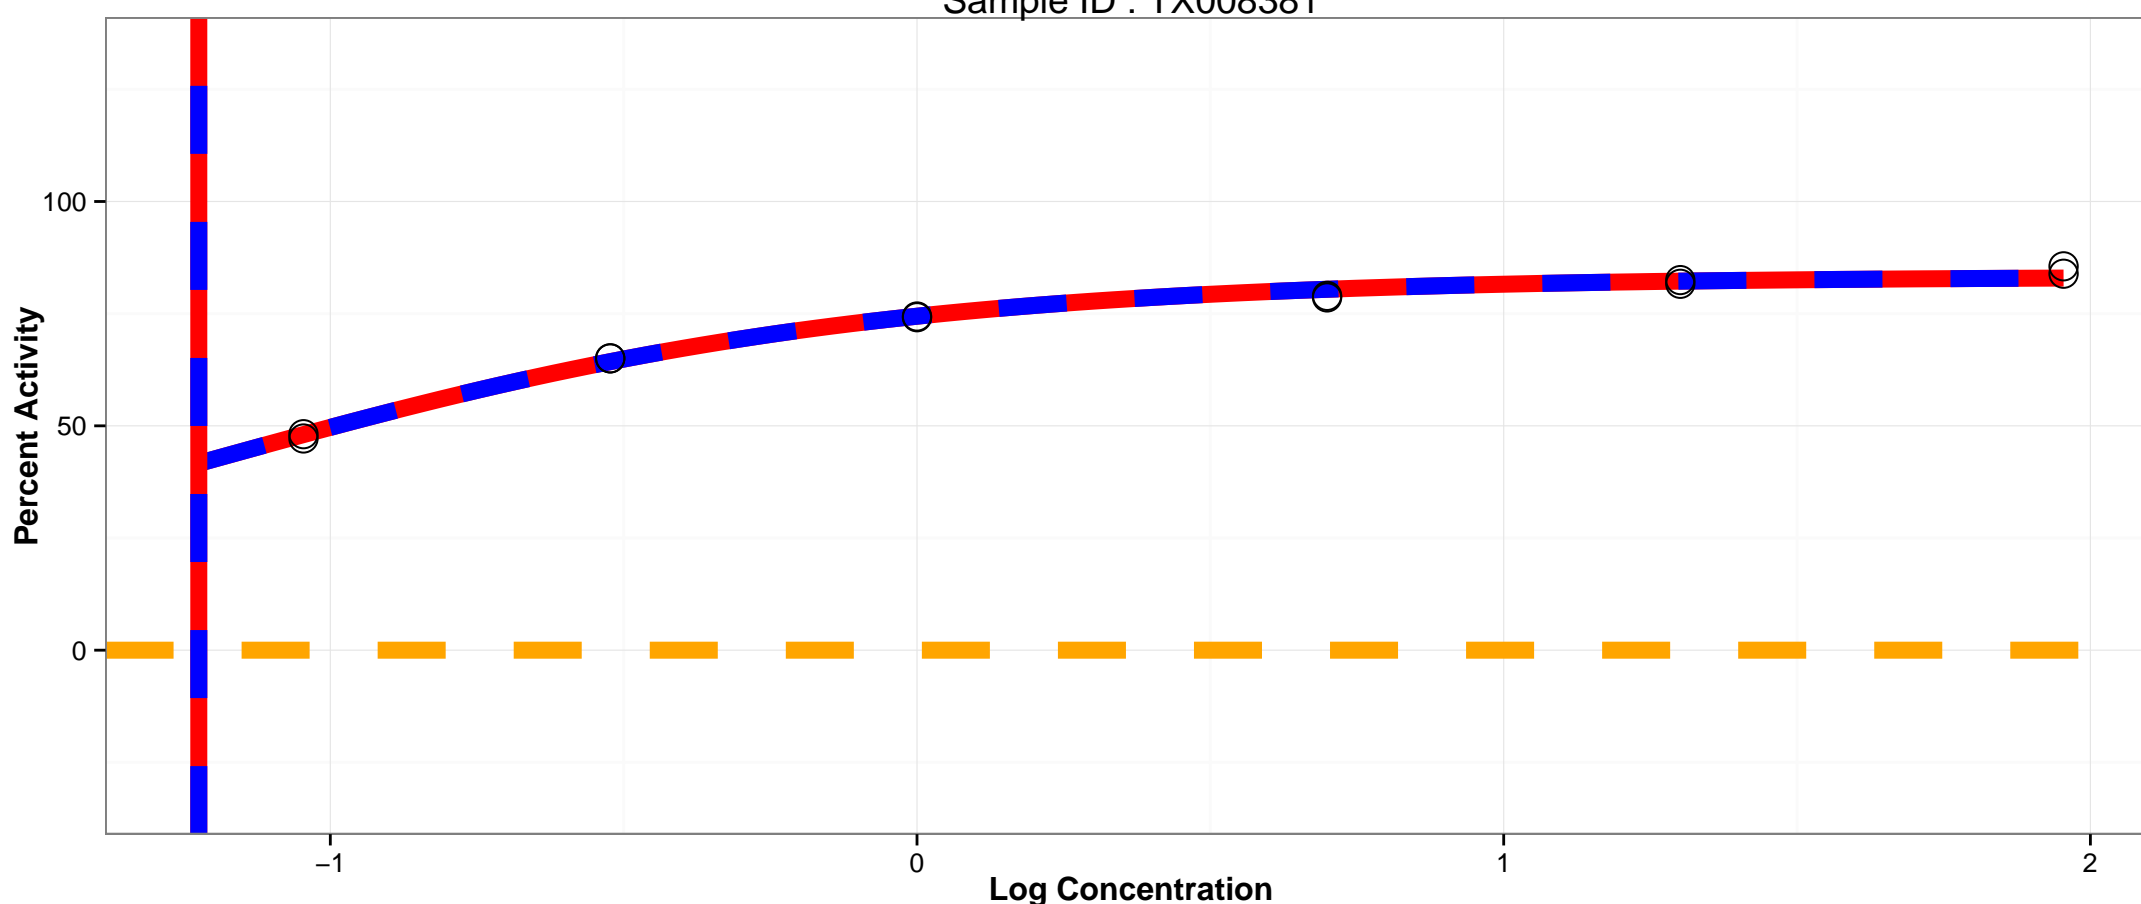

HILL MODEL

|     | tp    | ga     | gw     |
|-----|-------|--------|--------|
| val | 83.3  | -1.22  | 0.756  |
| sd  | 0.682 | 0.0229 | 0.0412 |

GAIN-LOSS MODEL

|     | tp   | ga    | gw    | la   | lw   |
|-----|------|-------|-------|------|------|
| val | 83.3 | -1.22 | 0.756 | 3.01 | 16.6 |
| sd  | NA   | NA    | NA    | NA   | NA   |

|      | CNST   | HILL  | GNLS  |
|------|--------|-------|-------|
| AIC  | 141.84 | 45.33 | 49.33 |
| PROB | 0      | 0.88  | 0.12  |
| RMSE | 73.21  | 1.14  | 1.14  |

MAX\_MEAN : 84.7 MAX\_MED : 84.7 BMAD : 5.69  
COFF : 20 HIT-CALL : 1 FITC : 40 ACTP : 1  
FLAGS :

Assay ID 1509 (NHEERL\_HEK293T\_CellTiterGLO)  
Sample ID : TX008381

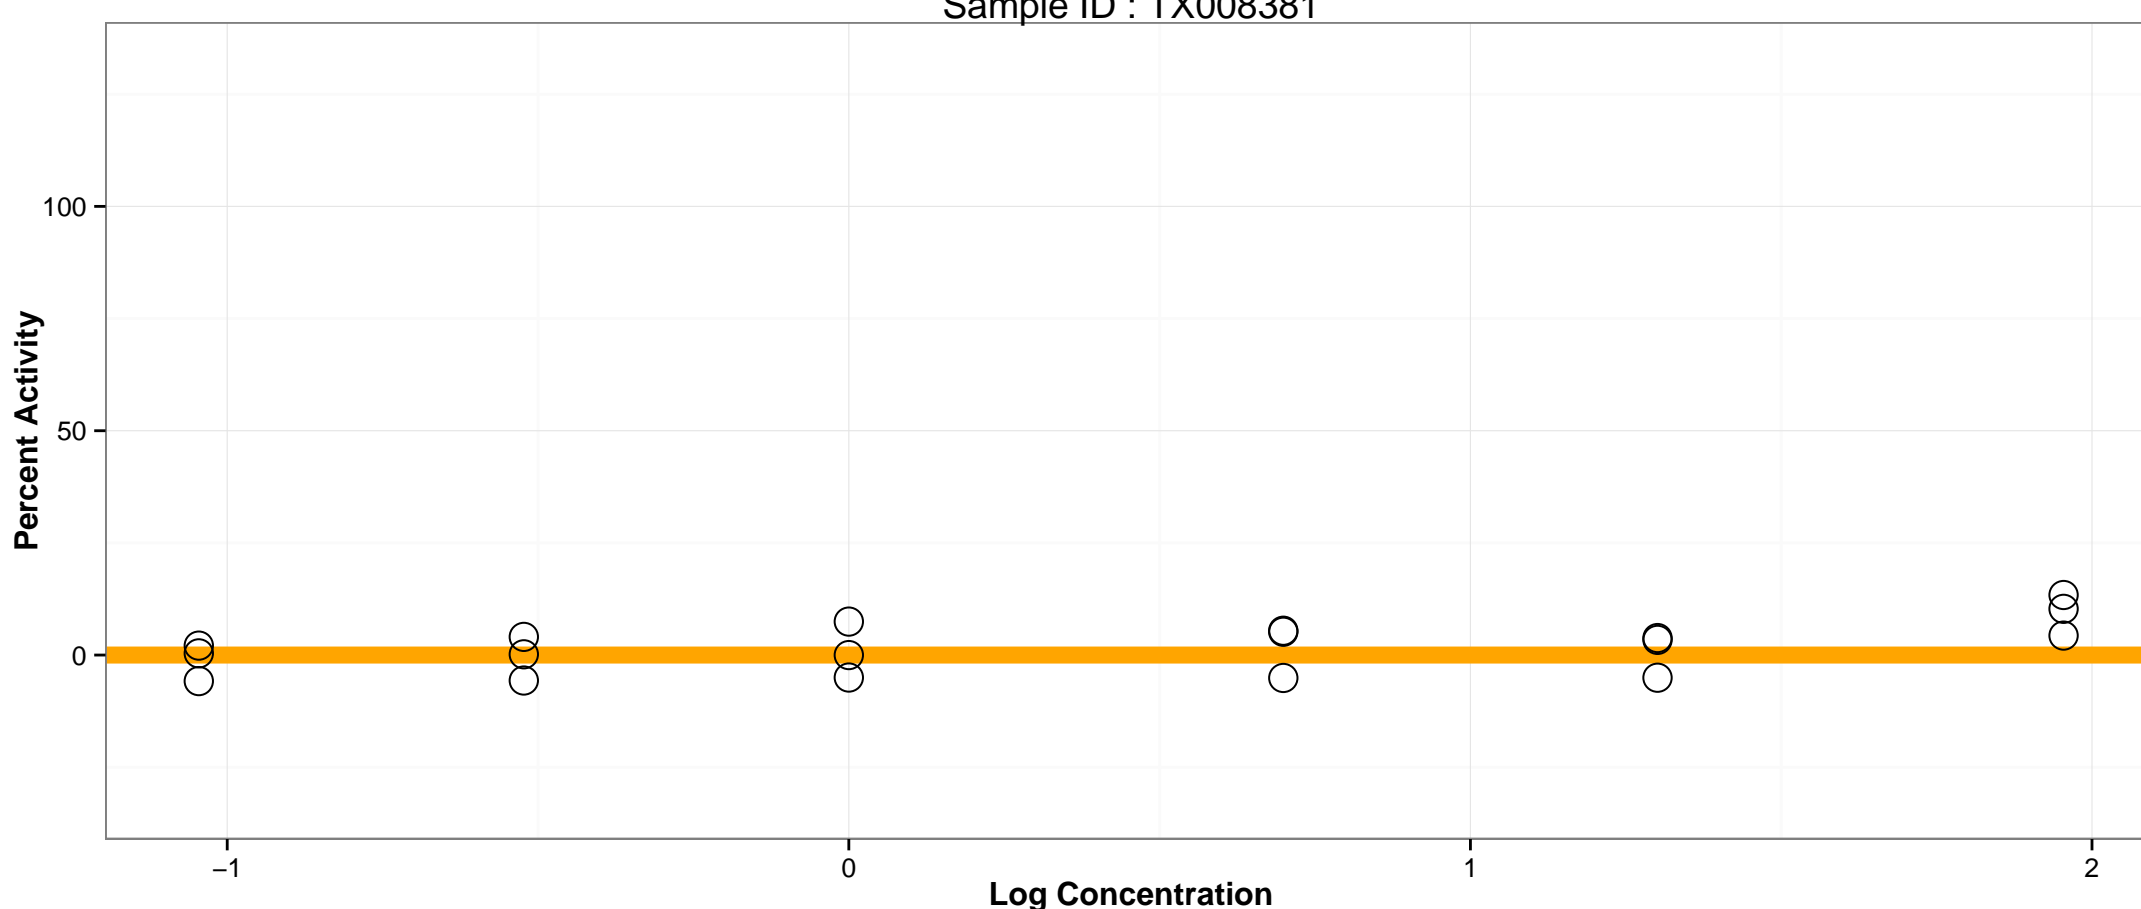

HILL MODEL

HILL MODEL: Not applicable

GAIN-LOSS MODEL

GNLS MODEL: Not applicable

|      | CNST   | HILL | GNLS |
|------|--------|------|------|
| AIC  | 118.03 | NA   | NA   |
| PROB | 1      | NA   | NA   |
| RMSE | 5.8    | NA   | NA   |

MAX\_MEAN : 9.35 MAX\_MED : 10.3 BMAD : 5.54  
COFF : 20 HIT-CALL : 0 FITC : 4 ACTP : 0  
FLAGS :

Assay ID 1848 (NHEERL\_Quantilum\_inhib\_2\_dn)  
Sample ID : TX008381

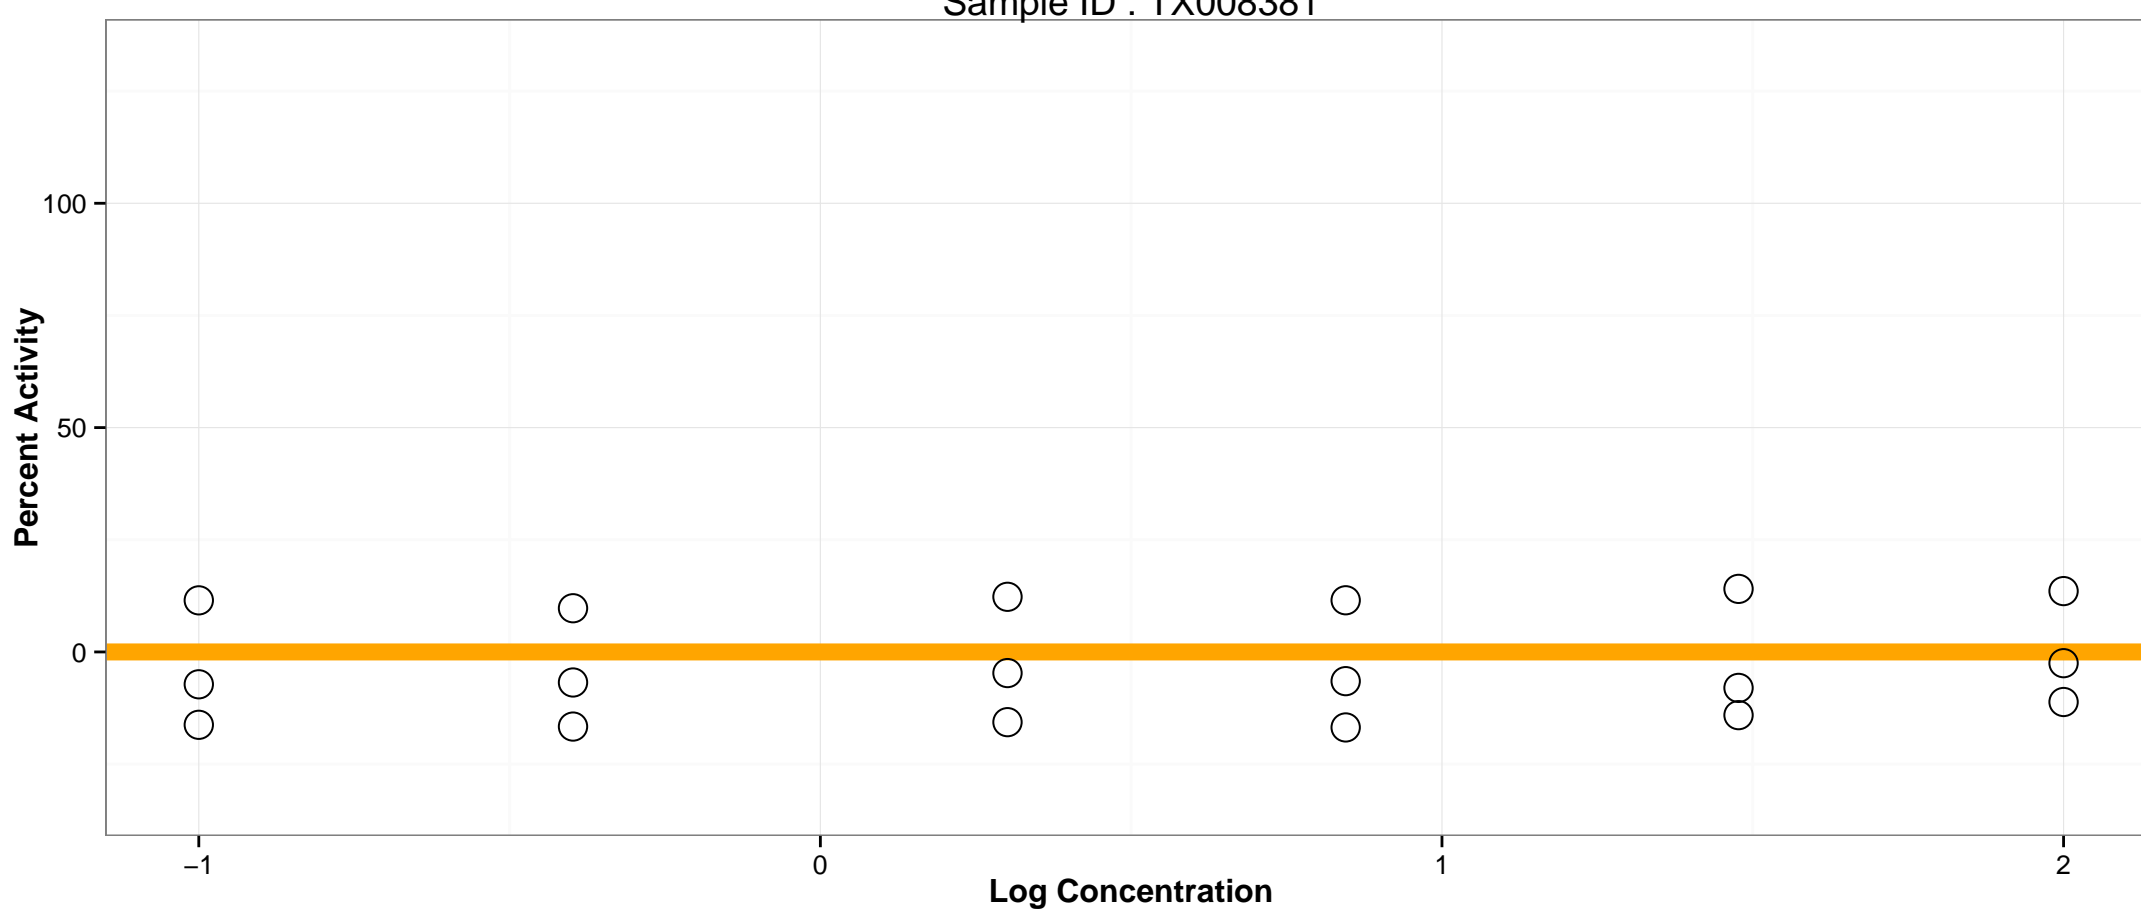

HILL MODEL

HILL MODEL: Not applicable

GAIN-LOSS MODEL

GNLS MODEL: Not applicable

|      | CNST   | HILL | GNLS |
|------|--------|------|------|
| AIC  | 145.54 | NA   | NA   |
| PROB | 1      | NA   | NA   |
| RMSE | 11.82  | NA   | NA   |

MAX\_MEAN : -0.0215 MAX\_MED : -2.49 BMAD : 8.58  
COFF : 20 HIT-CALL : 0 FITC : 4 ACTP : 0  
FLAGS :

Chemical : Testosterone propionate  
CAS : 57-85-2

Assay ID 1508 (NHEERL\_TPO\_AUR\_dn)  
Sample ID : TX008422

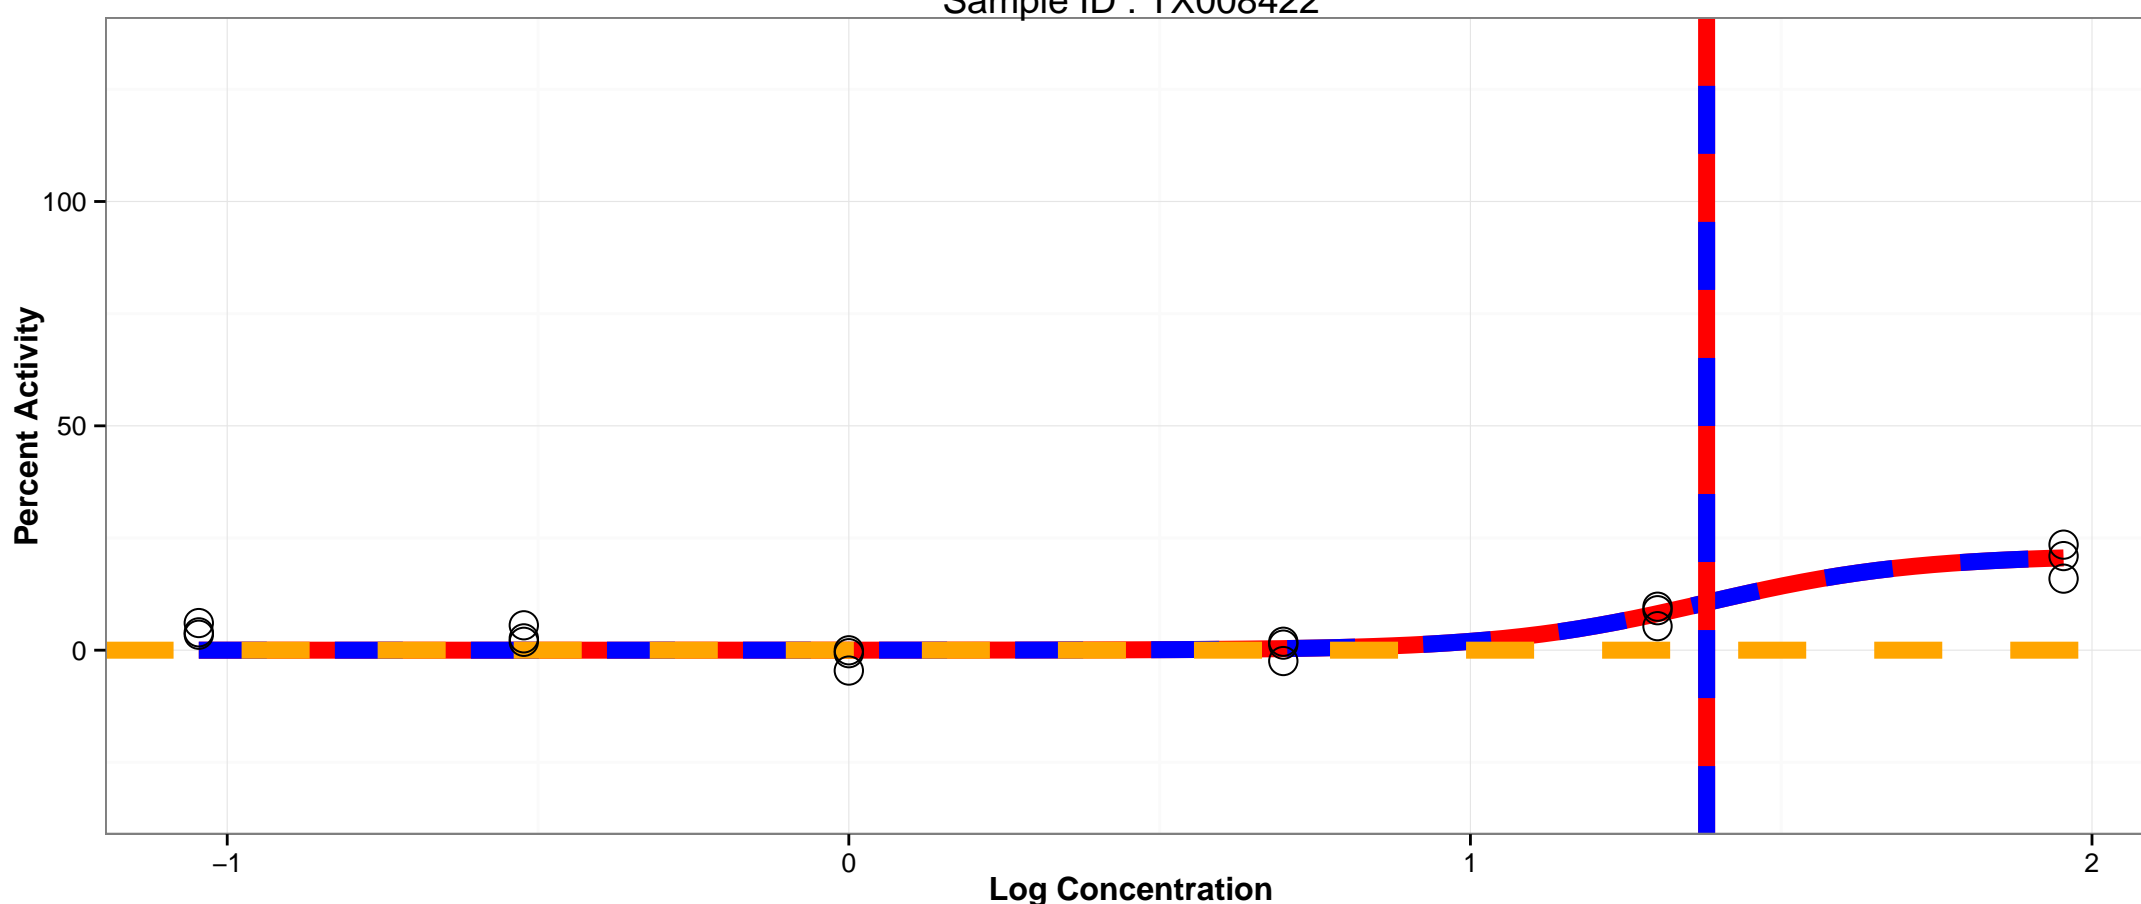

HILL MODEL

|     | tp   | ga    | gw   |
|-----|------|-------|------|
| val | 21.2 | 1.38  | 2.61 |
| sd  | 4.15 | 0.163 | 3.36 |

GAIN-LOSS MODEL

|     | tp   | ga    | gw   | la   | lw   |
|-----|------|-------|------|------|------|
| val | 21.2 | 1.38  | 2.61 | 2.48 | 7.7  |
| sd  | 9.22 | 0.197 | 3.36 | 193  | 2590 |

|      | CNST   | HILL   | GNLS   |
|------|--------|--------|--------|
| AIC  | 131.72 | 102.48 | 106.48 |
| PROB | 0      | 0.88   | 0.12   |
| RMSE | 9.4    | 3.15   | 3.15   |

MAX\_MEAN : 20.2 MAX\_MED : 21 BMAD : 5.69  
COFF : 20 HIT-CALL : 1 FITC : 37 ACTP : 1  
FLAGS : 11; 6

Assay ID 1509 (NHEERL\_HEK293T\_CellTiterGLO)  
Sample ID : TX008422

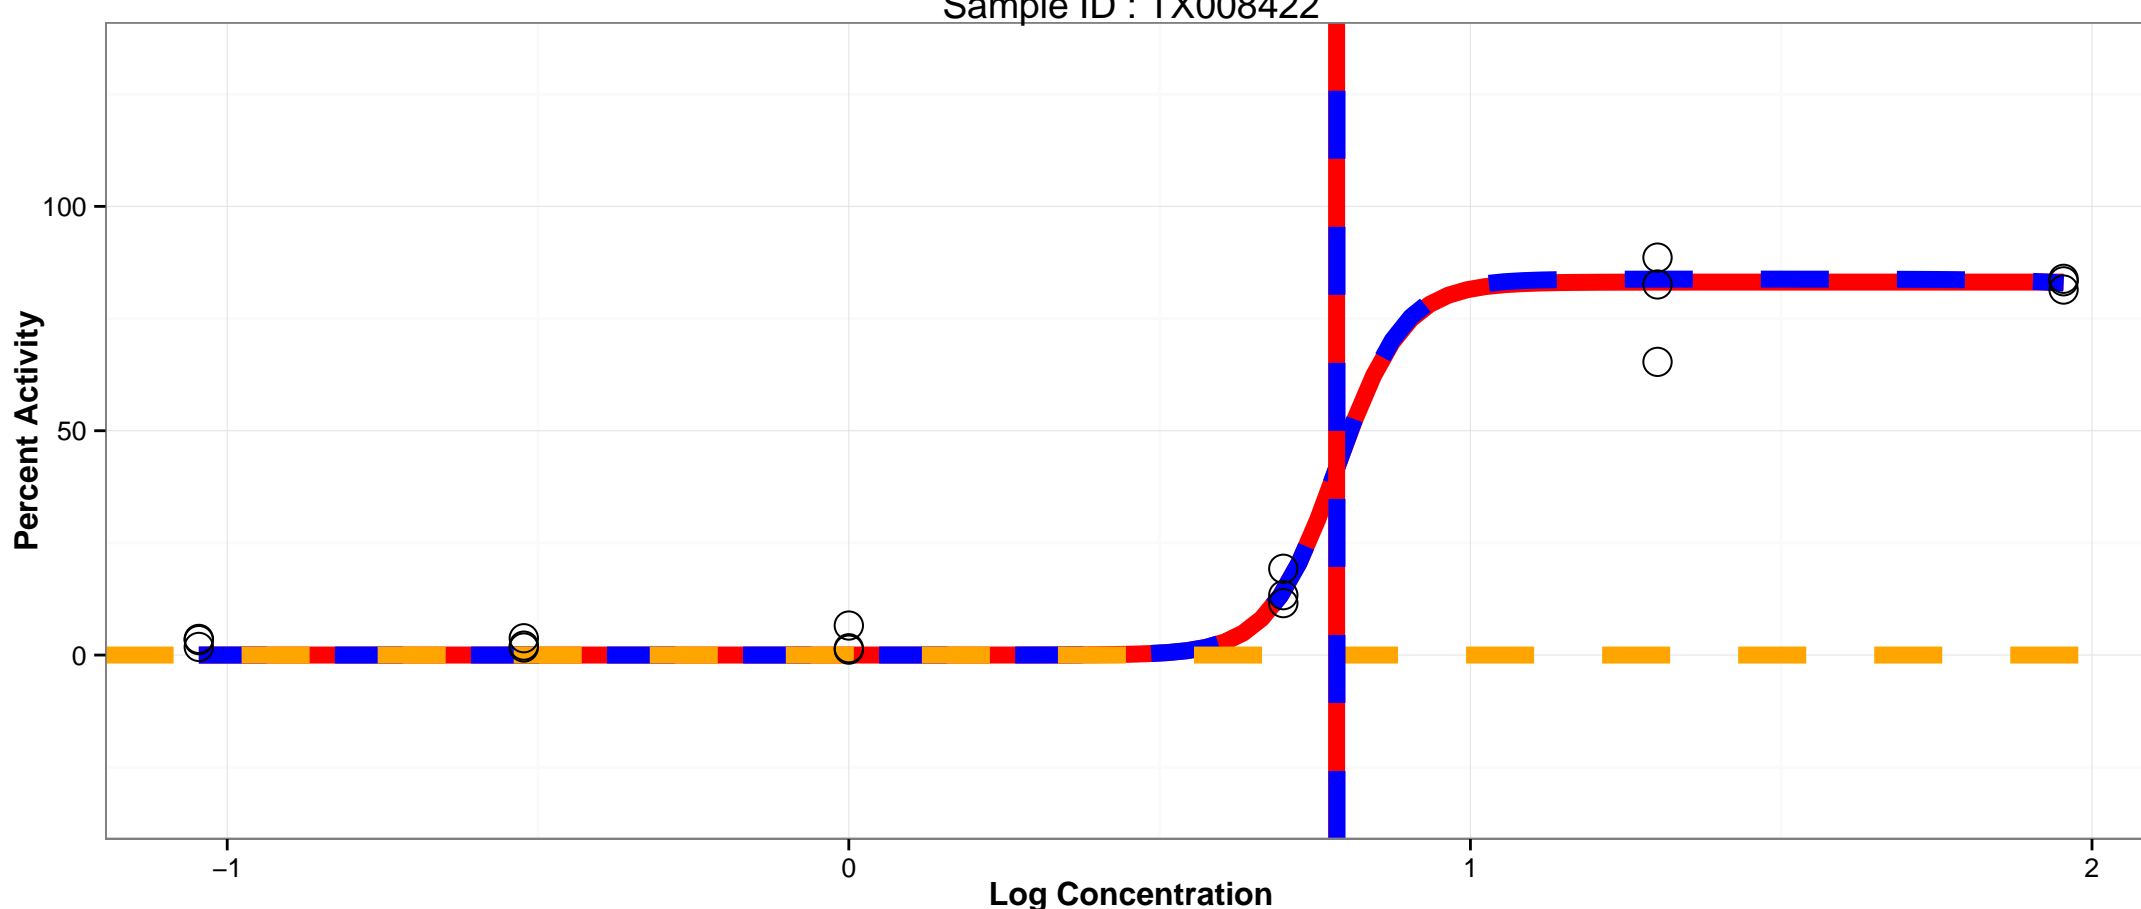

HILL MODEL

|     | tp   | ga     | gw   |
|-----|------|--------|------|
| val | 83.1 | 0.785  | 8    |
| sd  | 1.44 | 0.0643 | 5.98 |

GAIN-LOSS MODEL

|     | tp   | ga     | gw   | la   | lw   |
|-----|------|--------|------|------|------|
| val | 83.8 | 0.785  | 8    | 2.34 | 5.09 |
| sd  | 2.82 | 0.0632 | 5.84 | 2.32 | 30.6 |

|      | CNST  | HILL   | GNLS   |
|------|-------|--------|--------|
| AIC  | 191.5 | 111.84 | 115.76 |
| PROB | 0     | 0.88   | 0.12   |
| RMSE | 47.34 | 5.16   | 5.25   |

MAX\_MEAN : 82.9 MAX\_MED : 83.3 BMAD : 5.54  
COFF : 20 HIT-CALL : 1 FITC : 41 ACTP : 1  
FLAGS :

Assay ID 1848 (NHEERL\_Quantilum\_inhib\_2\_dn)  
Sample ID : TX008422

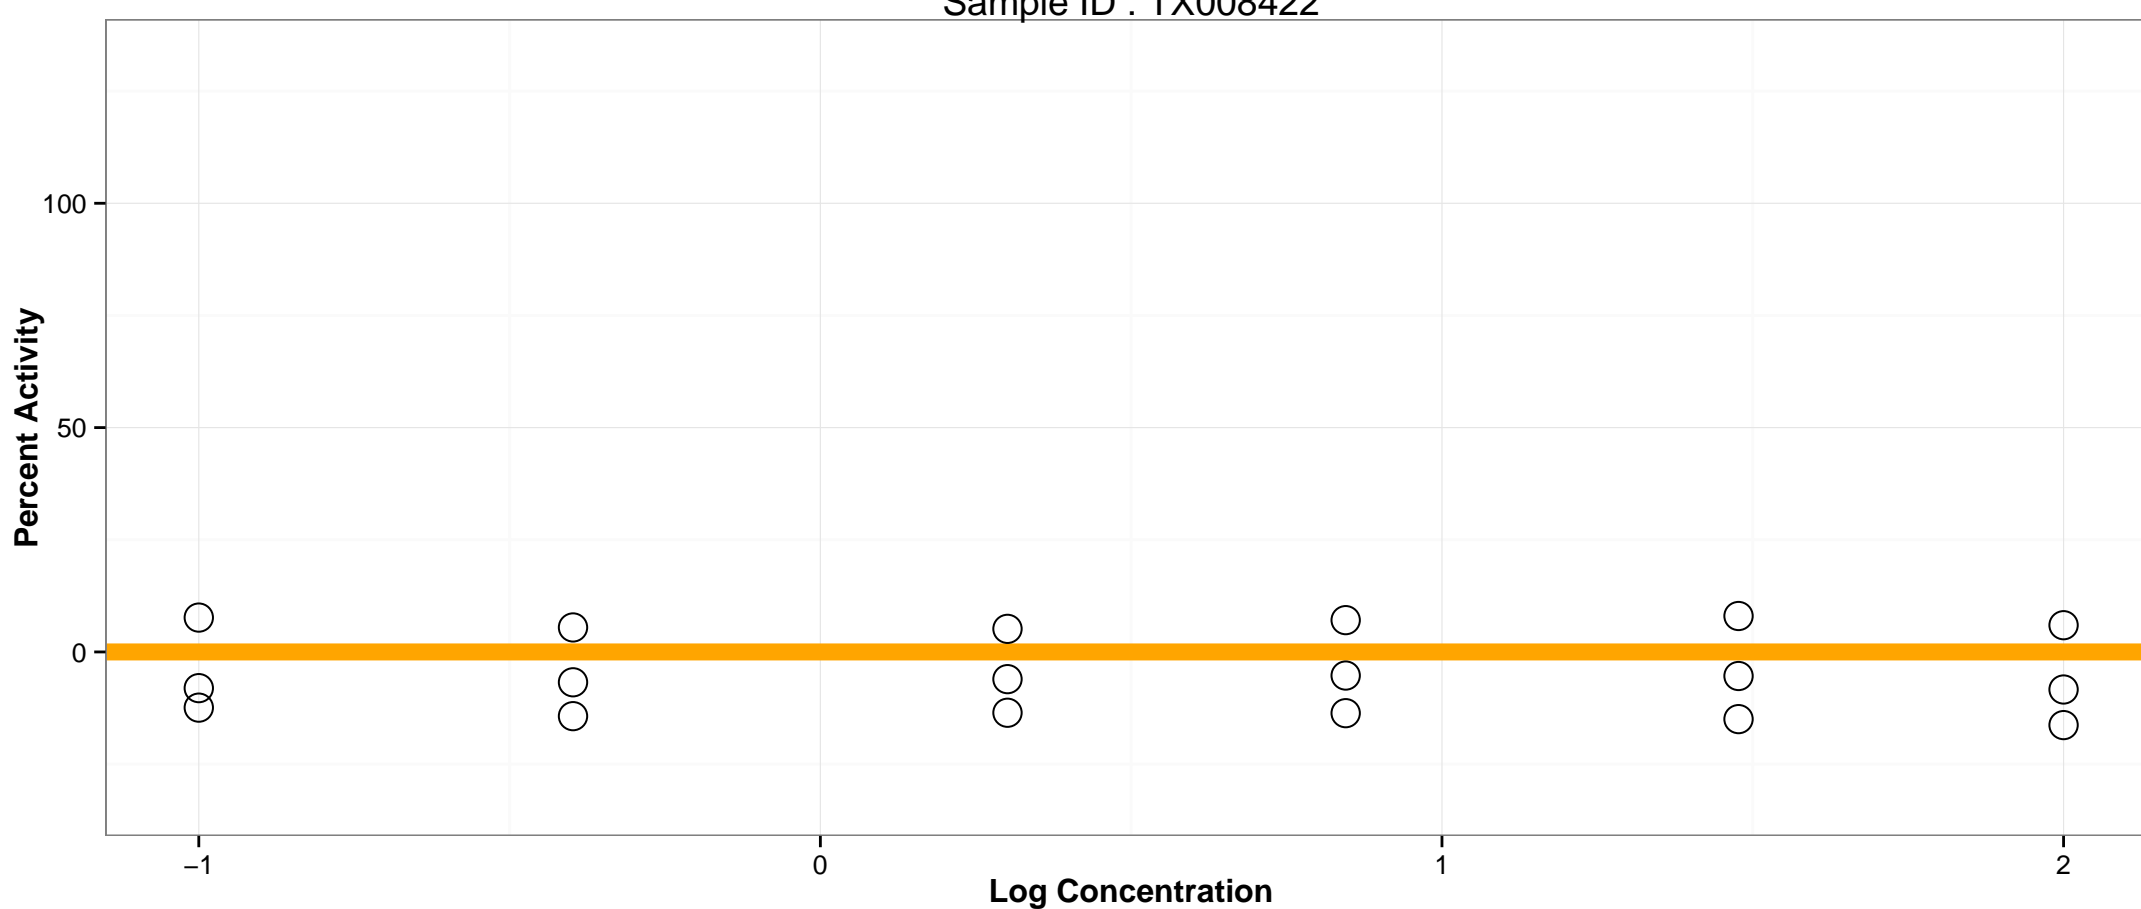

HILL MODEL

HILL MODEL: Not applicable

GAIN-LOSS MODEL

GNLS MODEL: Not applicable

|      | CNST   | HILL | GNLS |
|------|--------|------|------|
| AIC  | 138.65 | NA   | NA   |
| PROB | 1      | NA   | NA   |
| RMSE | 9.88   | NA   | NA   |

MAX\_MEAN : -3.93 MAX\_MED : -5.25 BMAD : 8.58  
COFF : 20 HIT-CALL : 0 FITC : 4 ACTP : 0  
FLAGS :

Chemical : 17beta-Estradiol  
CAS : 50-28-2

Assay ID 1508 (NHEERL\_TPO\_AUR\_dn)  
Sample ID : TX008476

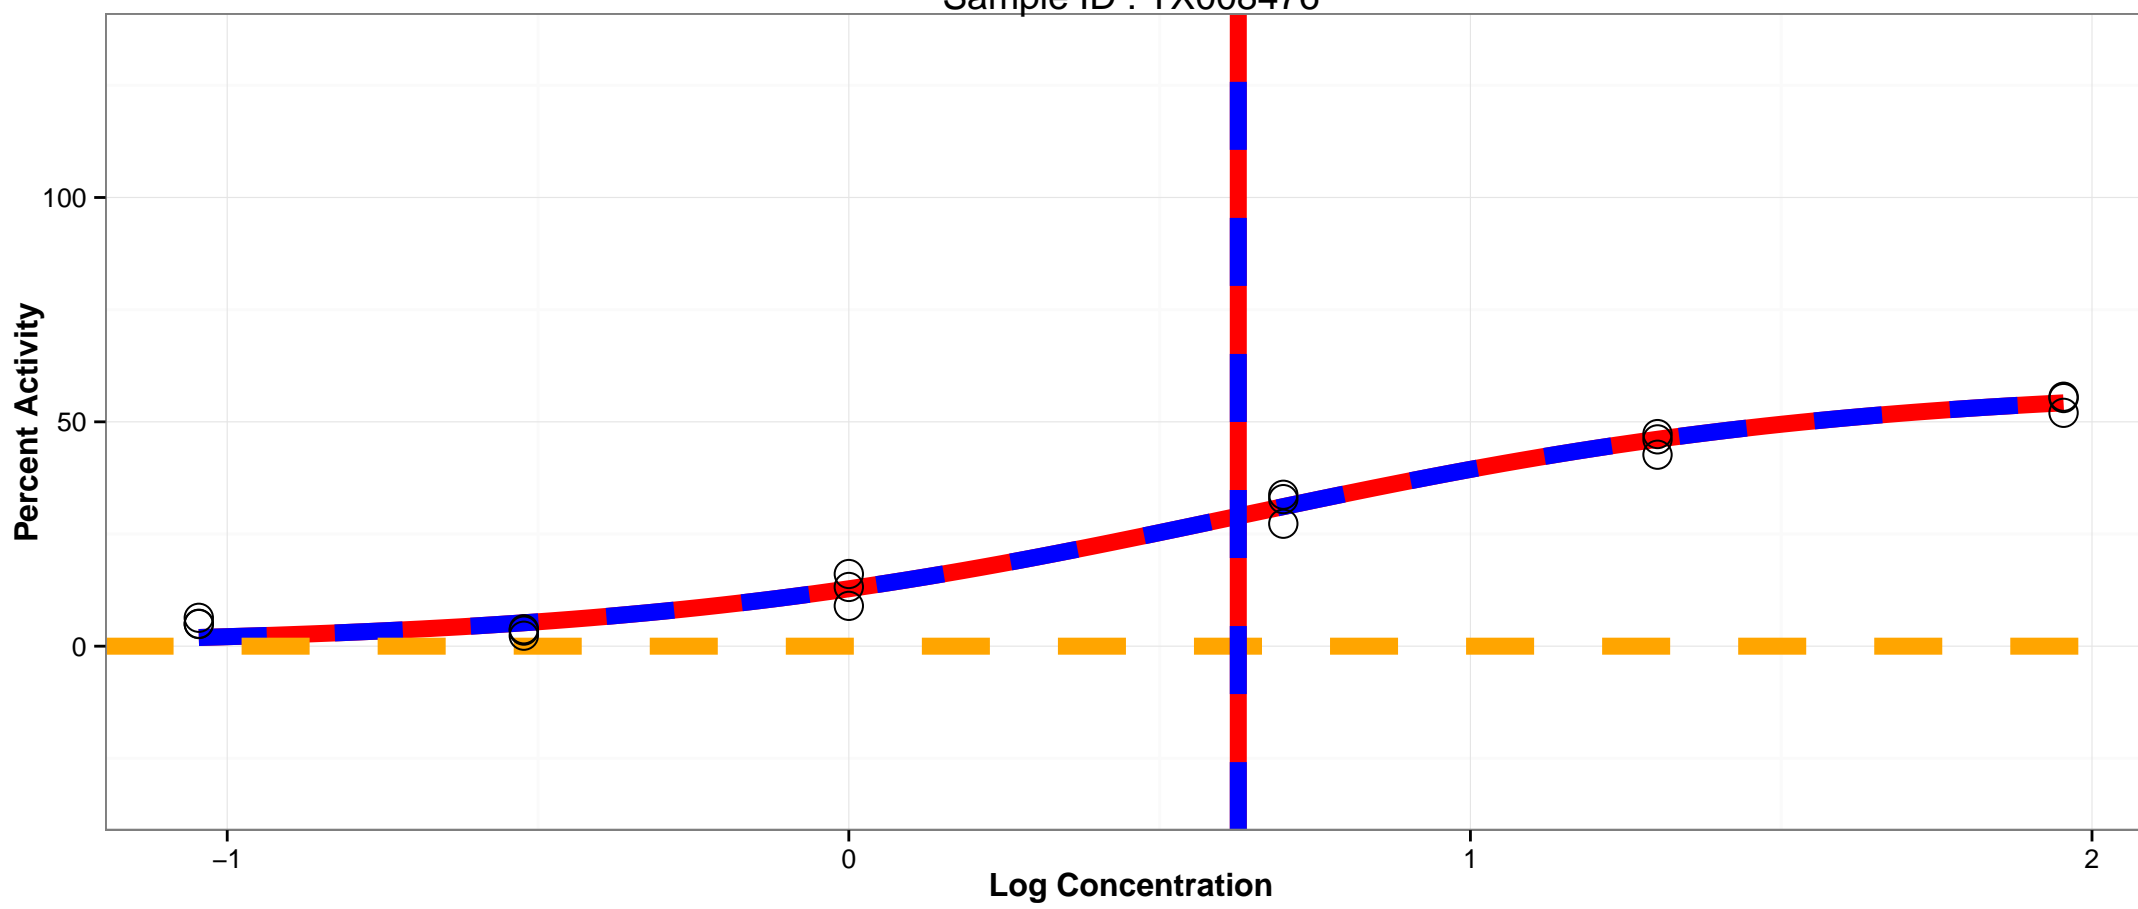

HILL MODEL

|     | tp   | ga     | gw    |
|-----|------|--------|-------|
| val | 58   | 0.627  | 0.875 |
| sd  | 2.77 | 0.0827 | 0.101 |

GAIN-LOSS MODEL

|     | tp | ga    | gw    | la  | lw   |
|-----|----|-------|-------|-----|------|
| val | 58 | 0.627 | 0.875 | 3.8 | 11.9 |
| sd  | NA | NA    | NA    | NA  | NA   |

|      | CNST   | HILL  | GNLS   |
|------|--------|-------|--------|
| AIC  | 179.86 | 96.56 | 100.56 |
| PROB | 0      | 0.88  | 0.12   |
| RMSE | 32.18  | 2.61  | 2.61   |

MAX\_MEAN : 54.3 MAX\_MED : 55.3 BMAD : 5.69  
COFF : 20 HIT-CALL : 1 FITC : 42 ACTP : 1  
FLAGS :

Assay ID 1509 (NHEERL\_HEK293T\_CellTiterGLO)  
Sample ID : TX008476

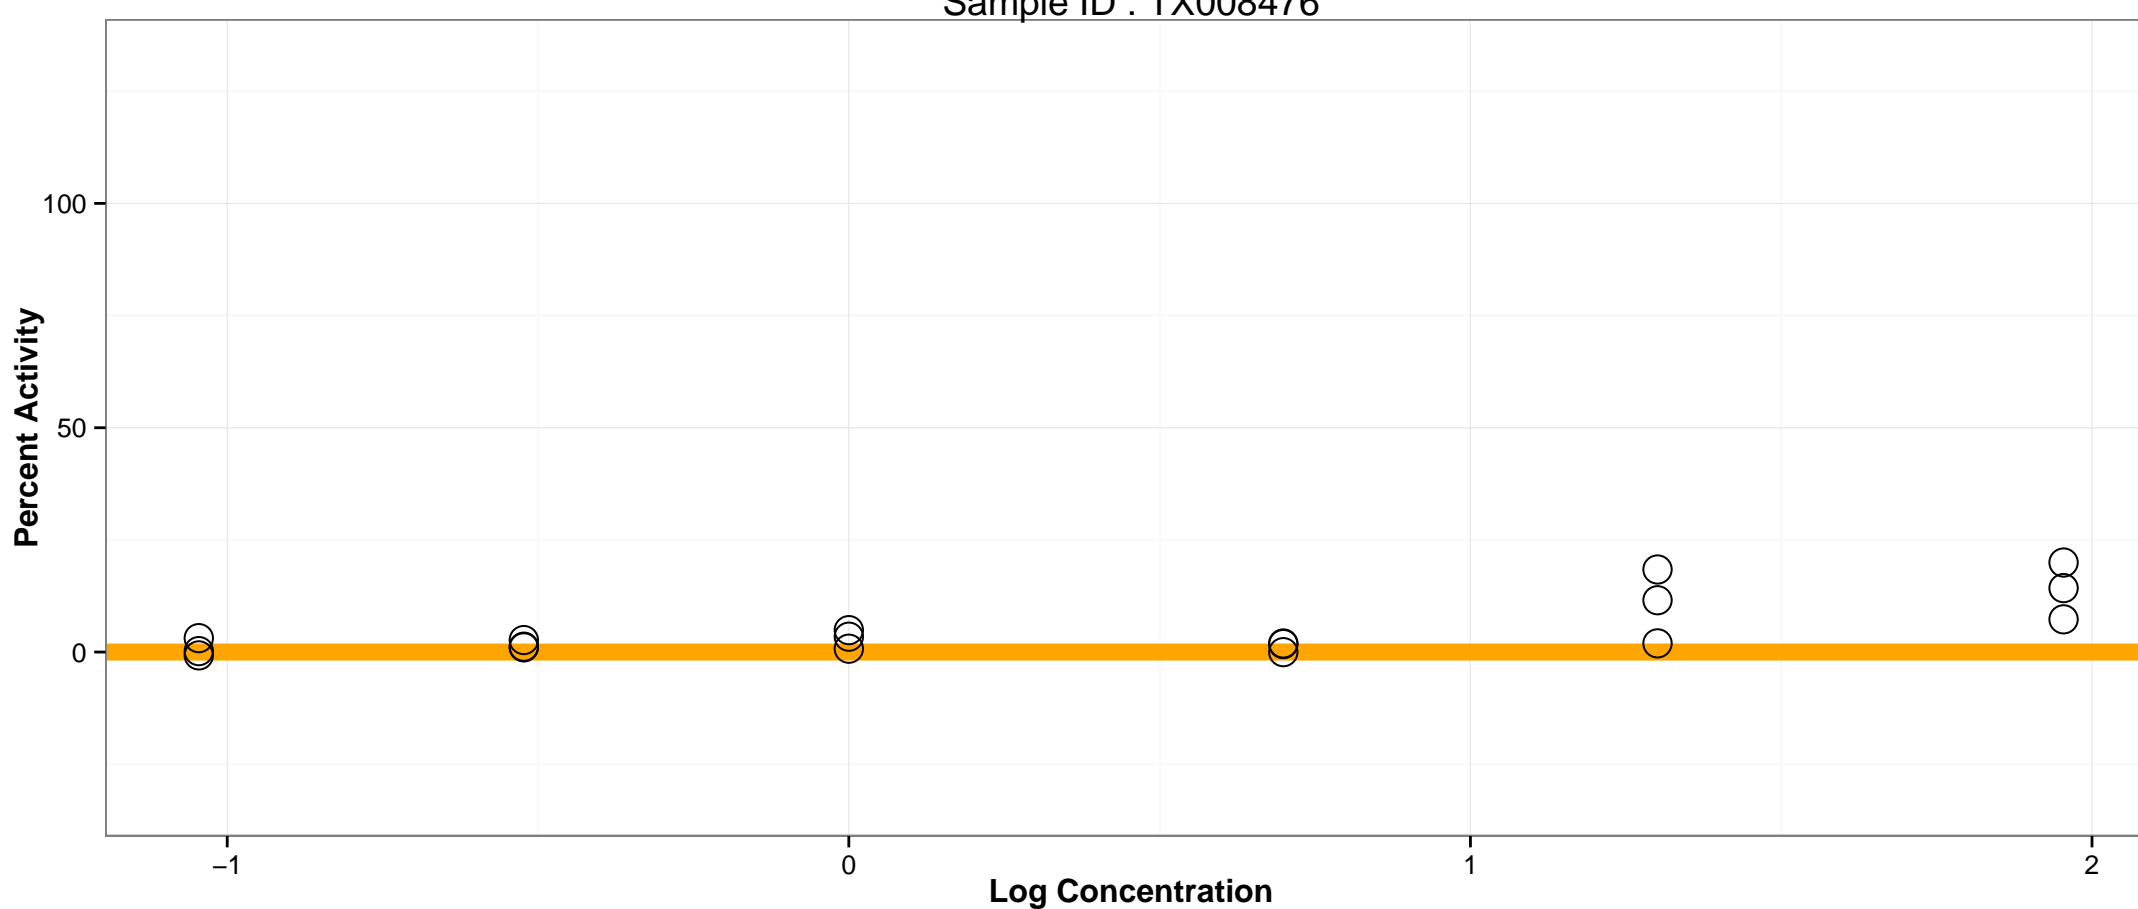

HILL MODEL

HILL MODEL: Not applicable

GAIN-LOSS MODEL

GNLS MODEL: Not applicable

|      | CNST   | HILL | GNLS |
|------|--------|------|------|
| AIC  | 125.73 | NA   | NA   |
| PROB | 1      | NA   | NA   |
| RMSE | 8.15   | NA   | NA   |

MAX\_MEAN : 13.8 MAX\_MED : 14.3 BMAD : 5.54  
COFF : 20 HIT-CALL : 0 FITC : 4 ACTP : 0  
FLAGS :

Assay ID 1848 (NHEERL\_Quantilum\_inhib\_2\_dn)  
Sample ID : TX008476

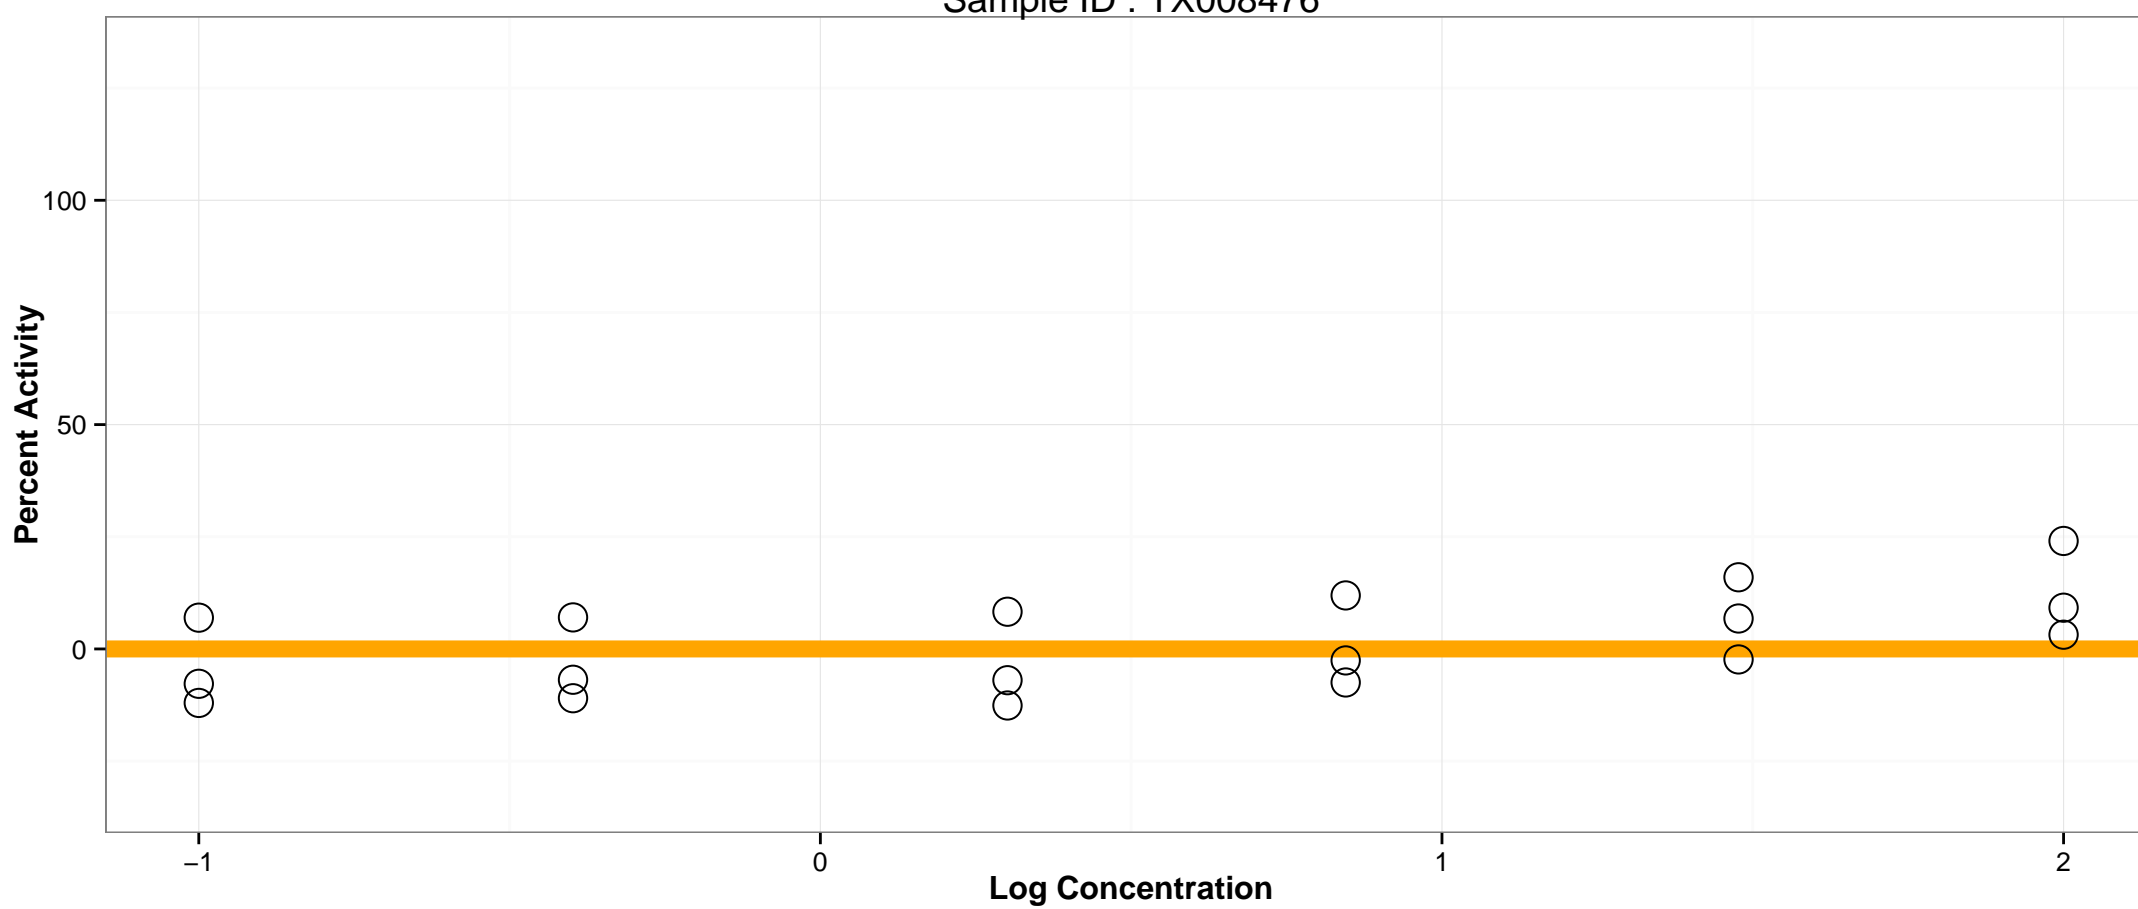

HILL MODEL

HILL MODEL: Not applicable

GAIN-LOSS MODEL

GNLS MODEL: Not applicable

|      | CNST   | HILL | GNLS |
|------|--------|------|------|
| AIC  | 139.23 | NA   | NA   |
| PROB | 1      | NA   | NA   |
| RMSE | 10.36  | NA   | NA   |

MAX\_MEAN : 12.2 MAX\_MED : 9.2 BMAD : 8.58  
COFF : 20 HIT-CALL : 0 FITC : 4 ACTP : 0  
FLAGS :



Chemical : Anthralin  
CAS : 1143-38-0

Assay ID 1508 (NHEERL\_TPO\_AUR\_dn)  
Sample ID : TX008510

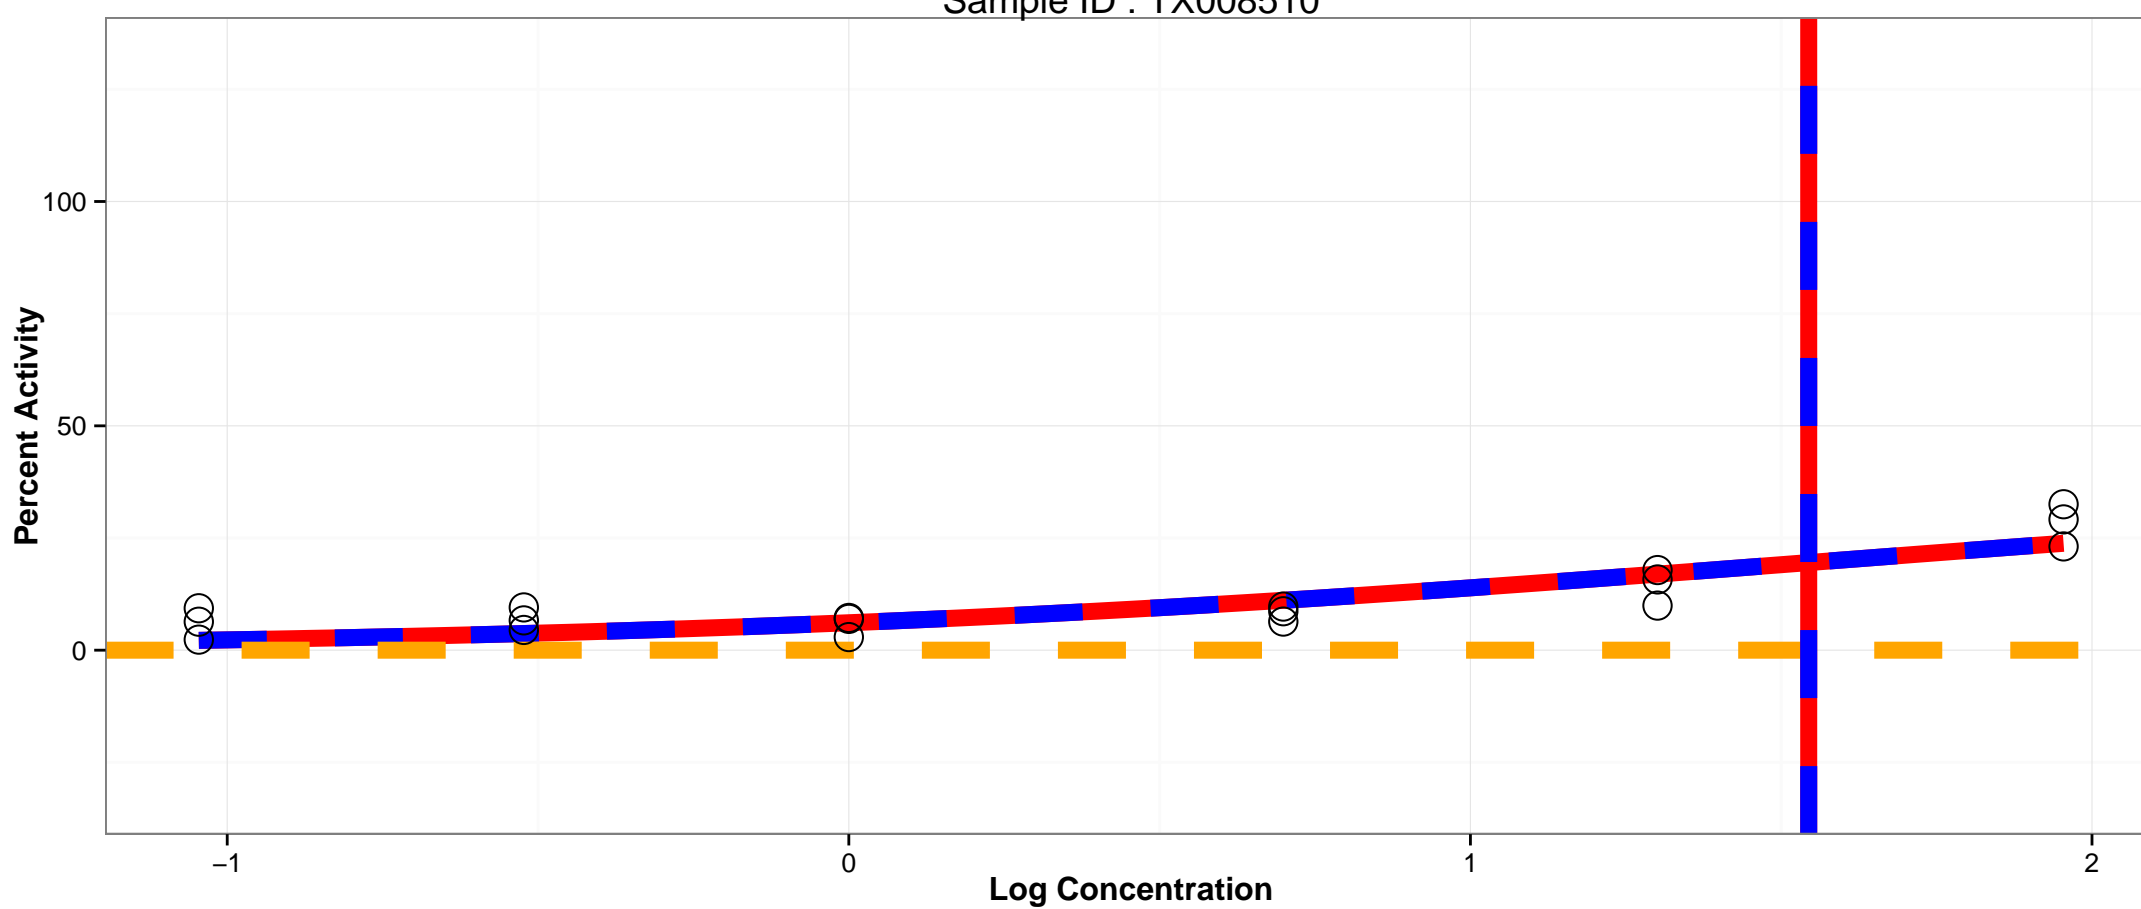

HILL MODEL

|     | tp   | ga    | gw    |
|-----|------|-------|-------|
| val | 39   | 1.54  | 0.474 |
| sd  | 11.4 | 0.515 | 0.117 |

GAIN-LOSS MODEL

|     | tp   | ga    | gw    | la     | lw     |
|-----|------|-------|-------|--------|--------|
| val | 39   | 1.54  | 0.474 | 3.95   | 7.74   |
| sd  | 11.4 | 0.515 | 0.117 | 756000 | 690000 |

|      | CNST   | HILL   | GNLS   |
|------|--------|--------|--------|
| AIC  | 149.58 | 111.52 | 115.52 |
| PROB | 0      | 0.88   | 0.12   |
| RMSE | 14.38  | 4.15   | 4.15   |

MAX\_MEAN : 28.3 MAX\_MED : 29.2 BMAD : 5.69  
COFF : 20 HIT-CALL : 1 FITC : 42 ACTP : 1  
FLAGS : 6

Assay ID 1509 (NHEERL\_HEK293T\_CellTiterGLO)  
Sample ID : TX008510

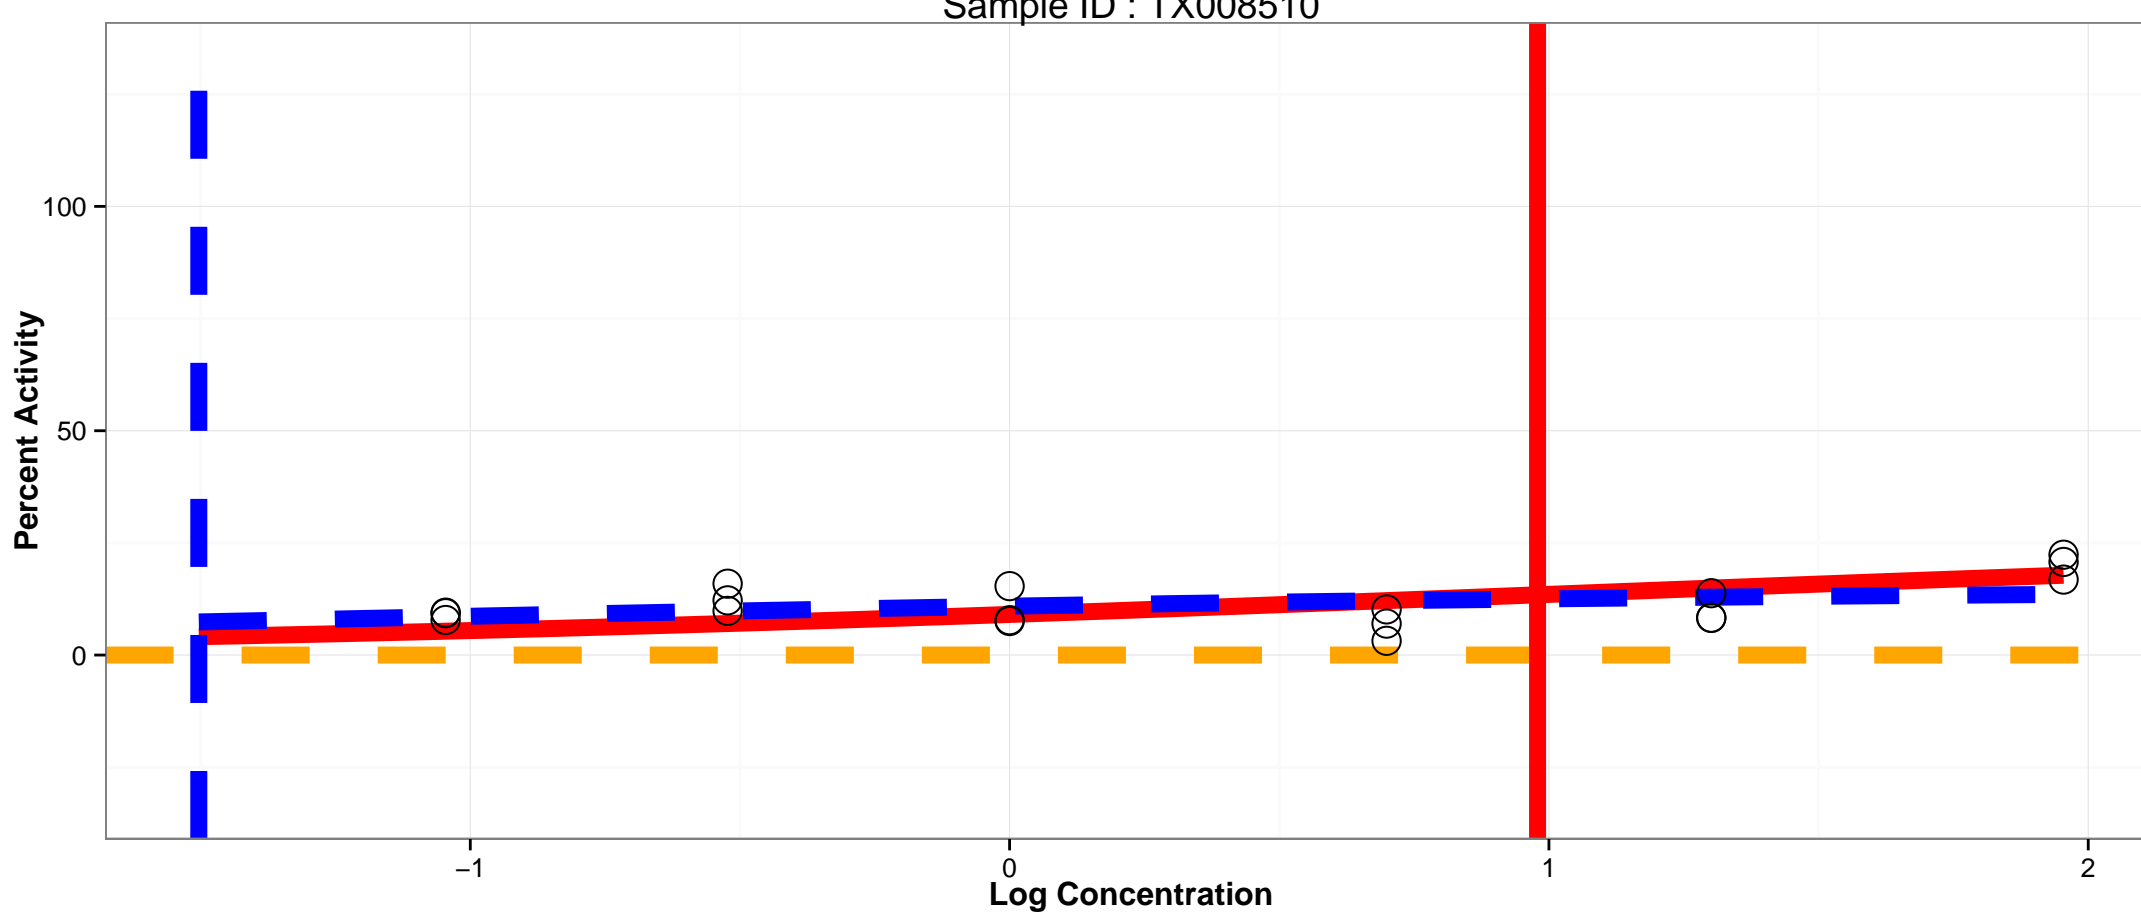

HILL MODEL

|     | tp   | ga    | gw  |
|-----|------|-------|-----|
| val | 26.9 | 0.979 | 0.3 |
| sd  | NA   | NA    | NA  |

GAIN-LOSS MODEL

|     | tp   | ga   | gw  | la   | lw   |
|-----|------|------|-----|------|------|
| val | 14.8 | -1.5 | 0.3 | 3.28 | 10.8 |
| sd  | NA   | NA   | NA  | NA   | NA   |

|      | CNST   | HILL  | GNLS   |
|------|--------|-------|--------|
| AIC  | 146.93 | 118.4 | 119.69 |
| PROB | 0      | 0.66  | 0.34   |
| RMSE | 12.47  | 4.87  | 4.6    |

MAX\_MEAN : 20 MAX\_MED : 20.8 BMAD : 5.54  
COFF : 20 HIT-CALL : 1 FITC : 42 ACTP : 1  
FLAGS : 11; 6

Assay ID 1848 (NHEERL\_Quantilum\_inhib\_2\_dn)  
Sample ID : TX008510

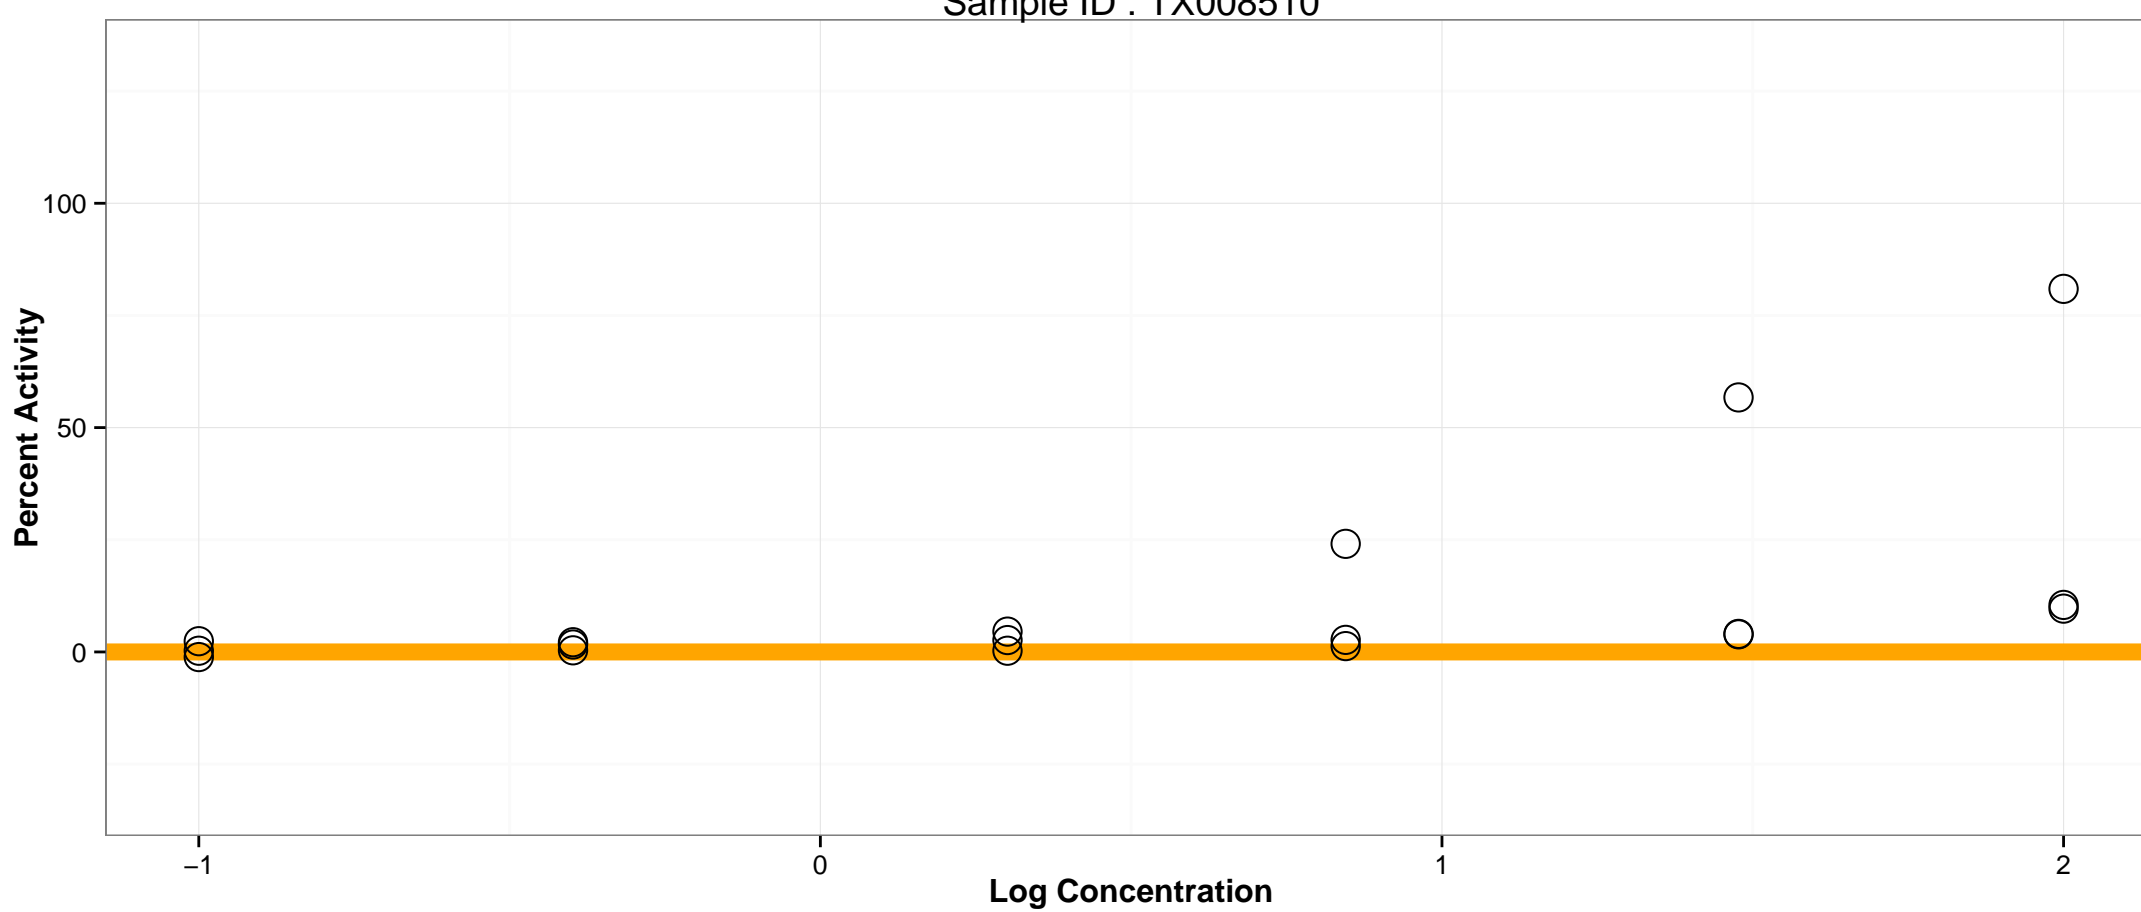

HILL MODEL

HILL MODEL: Not applicable

GAIN-LOSS MODEL

GNLS MODEL: Not applicable

|      | CNST   | HILL | GNLS |
|------|--------|------|------|
| AIC  | 152.42 | NA   | NA   |
| PROB | 1      | NA   | NA   |
| RMSE | 24.31  | NA   | NA   |

MAX\_MEAN : 33.7 MAX\_MED : 10.5 BMAD : 8.58  
COFF : 20 HIT-CALL : 0 FITC : 4 ACTP : 0  
FLAGS : 10

Chemical : Carminic acid  
CAS : 1260-17-9

Assay ID 1508 (NHEERL\_TPO\_AUR\_dn)  
Sample ID : TX008556

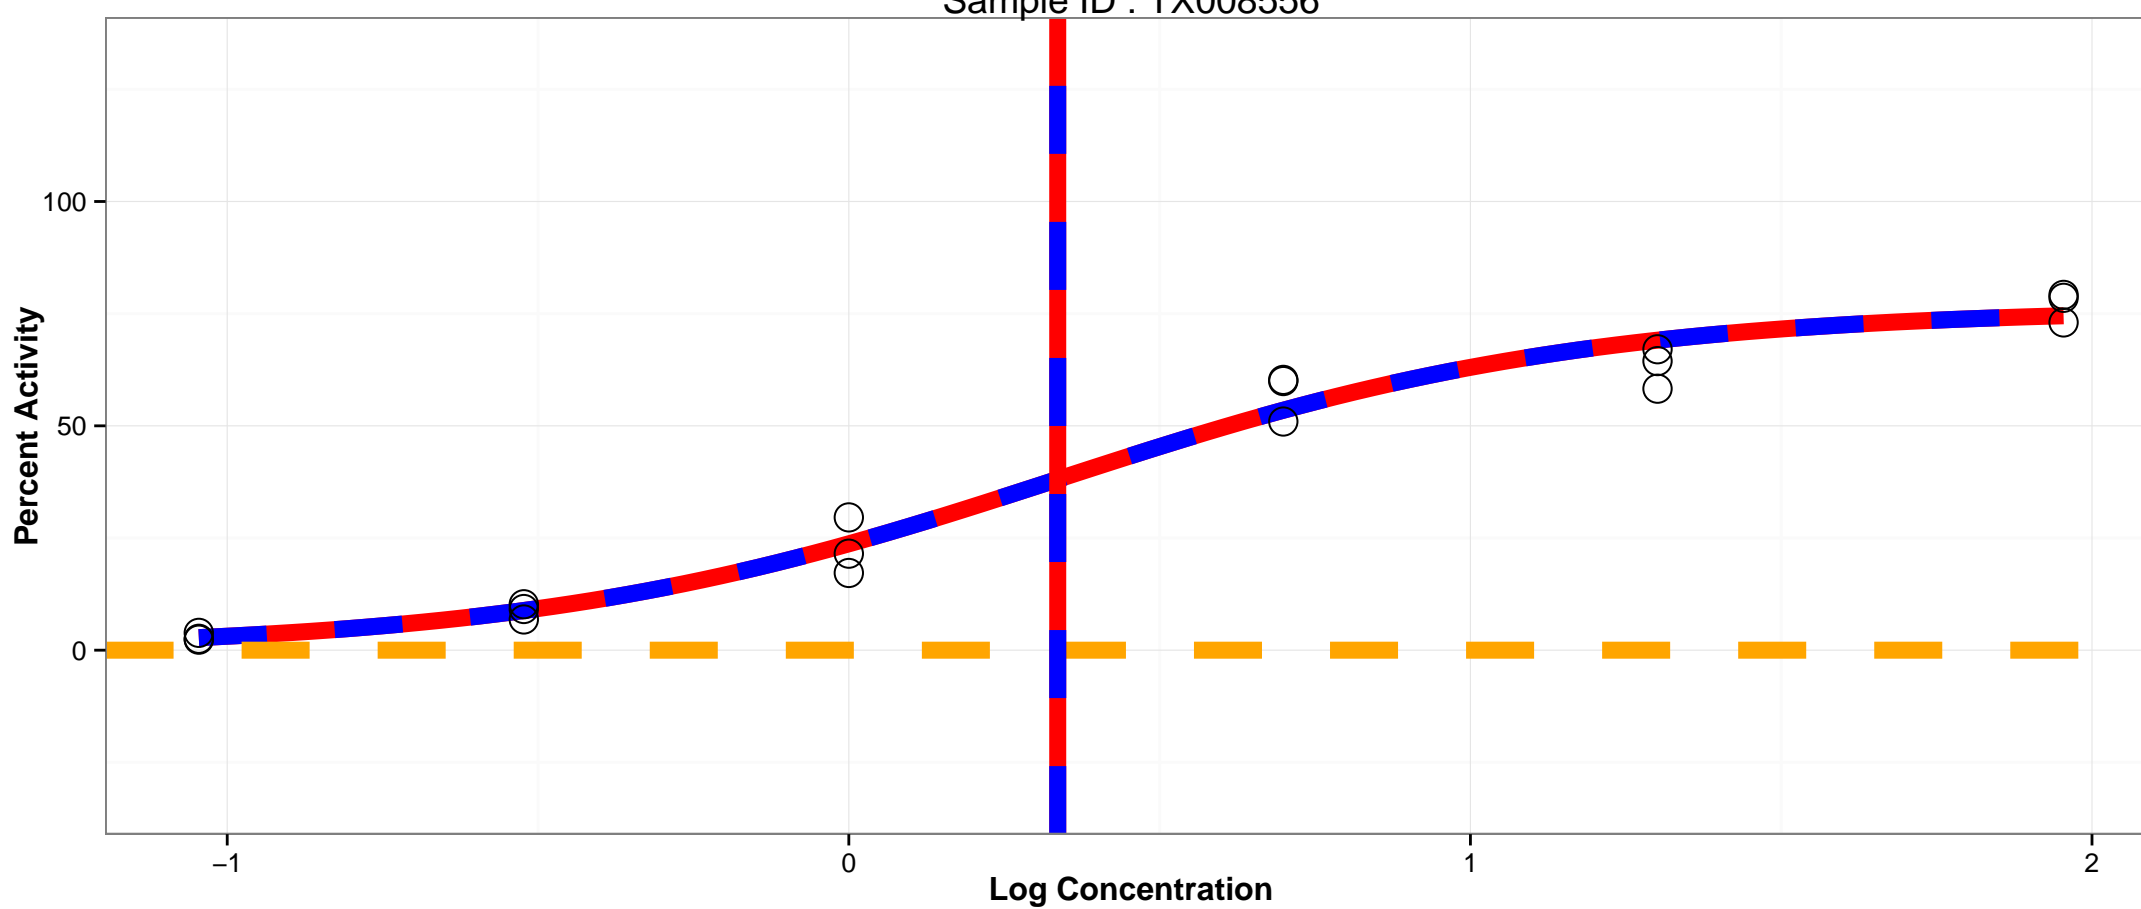

HILL MODEL

|     | tp   | ga     | gw    |
|-----|------|--------|-------|
| val | 76.2 | 0.336  | 1.03  |
| sd  | 3.28 | 0.0913 | 0.138 |

GAIN-LOSS MODEL

|     | tp   | ga    | gw   | la   | lw   |
|-----|------|-------|------|------|------|
| val | 76.2 | 0.336 | 1.03 | 3.02 | 16.7 |
| sd  | NA   | NA    | NA   | NA   | NA   |

|      | CNST   | HILL   | GNLS   |
|------|--------|--------|--------|
| AIC  | 194.75 | 114.15 | 118.15 |
| PROB | 0      | 0.88   | 0.12   |
| RMSE | 48.05  | 4.51   | 4.51   |

MAX\_MEAN : 76.9 MAX\_MED : 78.5 BMAD : 5.69  
COFF : 20 HIT-CALL : 1 FITC : 41 ACTP : 1  
FLAGS :

Assay ID 1509 (NHEERL\_HEK293T\_CellTiterGLO)  
Sample ID : TX008556

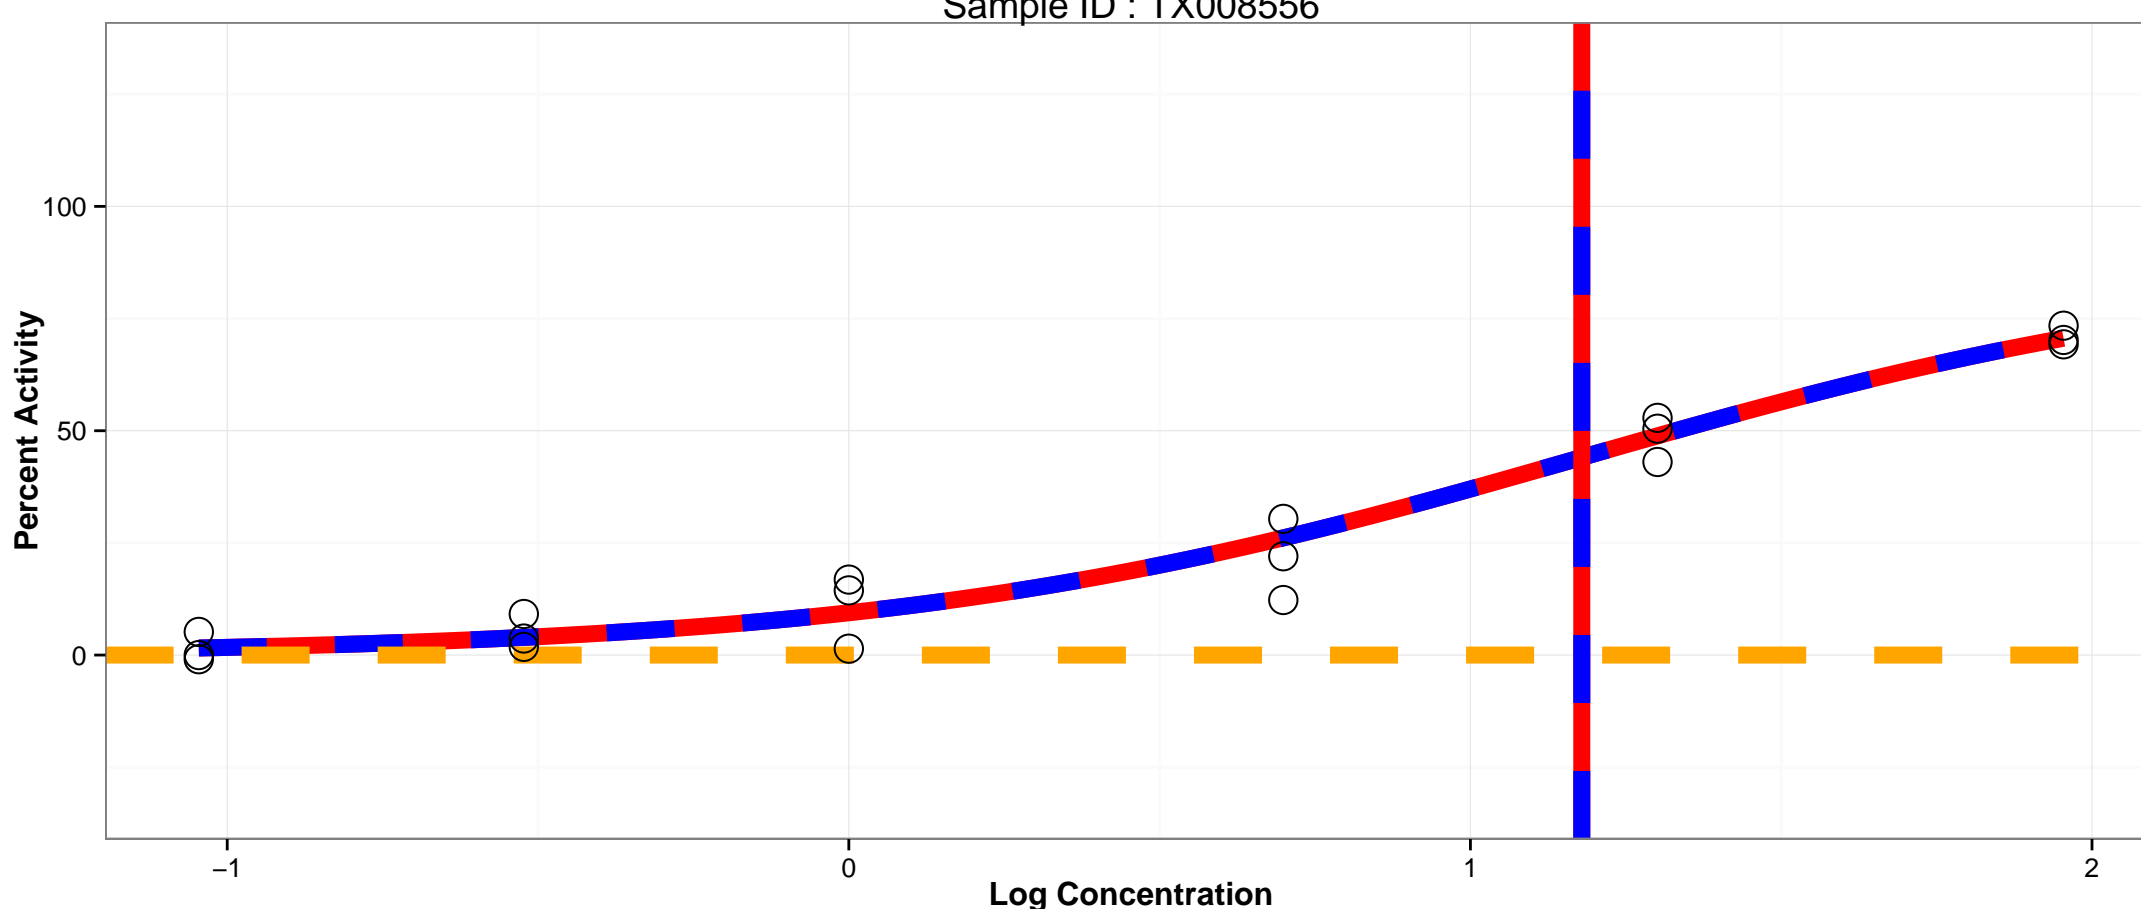

HILL MODEL

|     | tp   | ga    | gw    |
|-----|------|-------|-------|
| val | 88.1 | 1.18  | 0.782 |
| sd  | 10.3 | 0.172 | 0.143 |

GAIN-LOSS MODEL

|     | tp   | ga    | gw    | la   | lw    |
|-----|------|-------|-------|------|-------|
| val | 88.1 | 1.18  | 0.782 | 2.56 | 17    |
| sd  | 10.3 | 0.172 | 0.143 | 2450 | 67300 |

|      | CNST  | HILL   | GNLS   |
|------|-------|--------|--------|
| AIC  | 183.3 | 118.57 | 122.57 |
| PROB | 0     | 0.88   | 0.12   |
| RMSE | 36.89 | 5.2    | 5.2    |

MAX\_MEAN : 71 MAX\_MED : 70.2 BMAD : 5.54  
COFF : 20 HIT-CALL : 1 FITC : 42 ACTP : 1  
FLAGS :

Assay ID 1848 (NHEERL\_Quantilum\_inhib\_2\_dn)  
Sample ID : TX008556

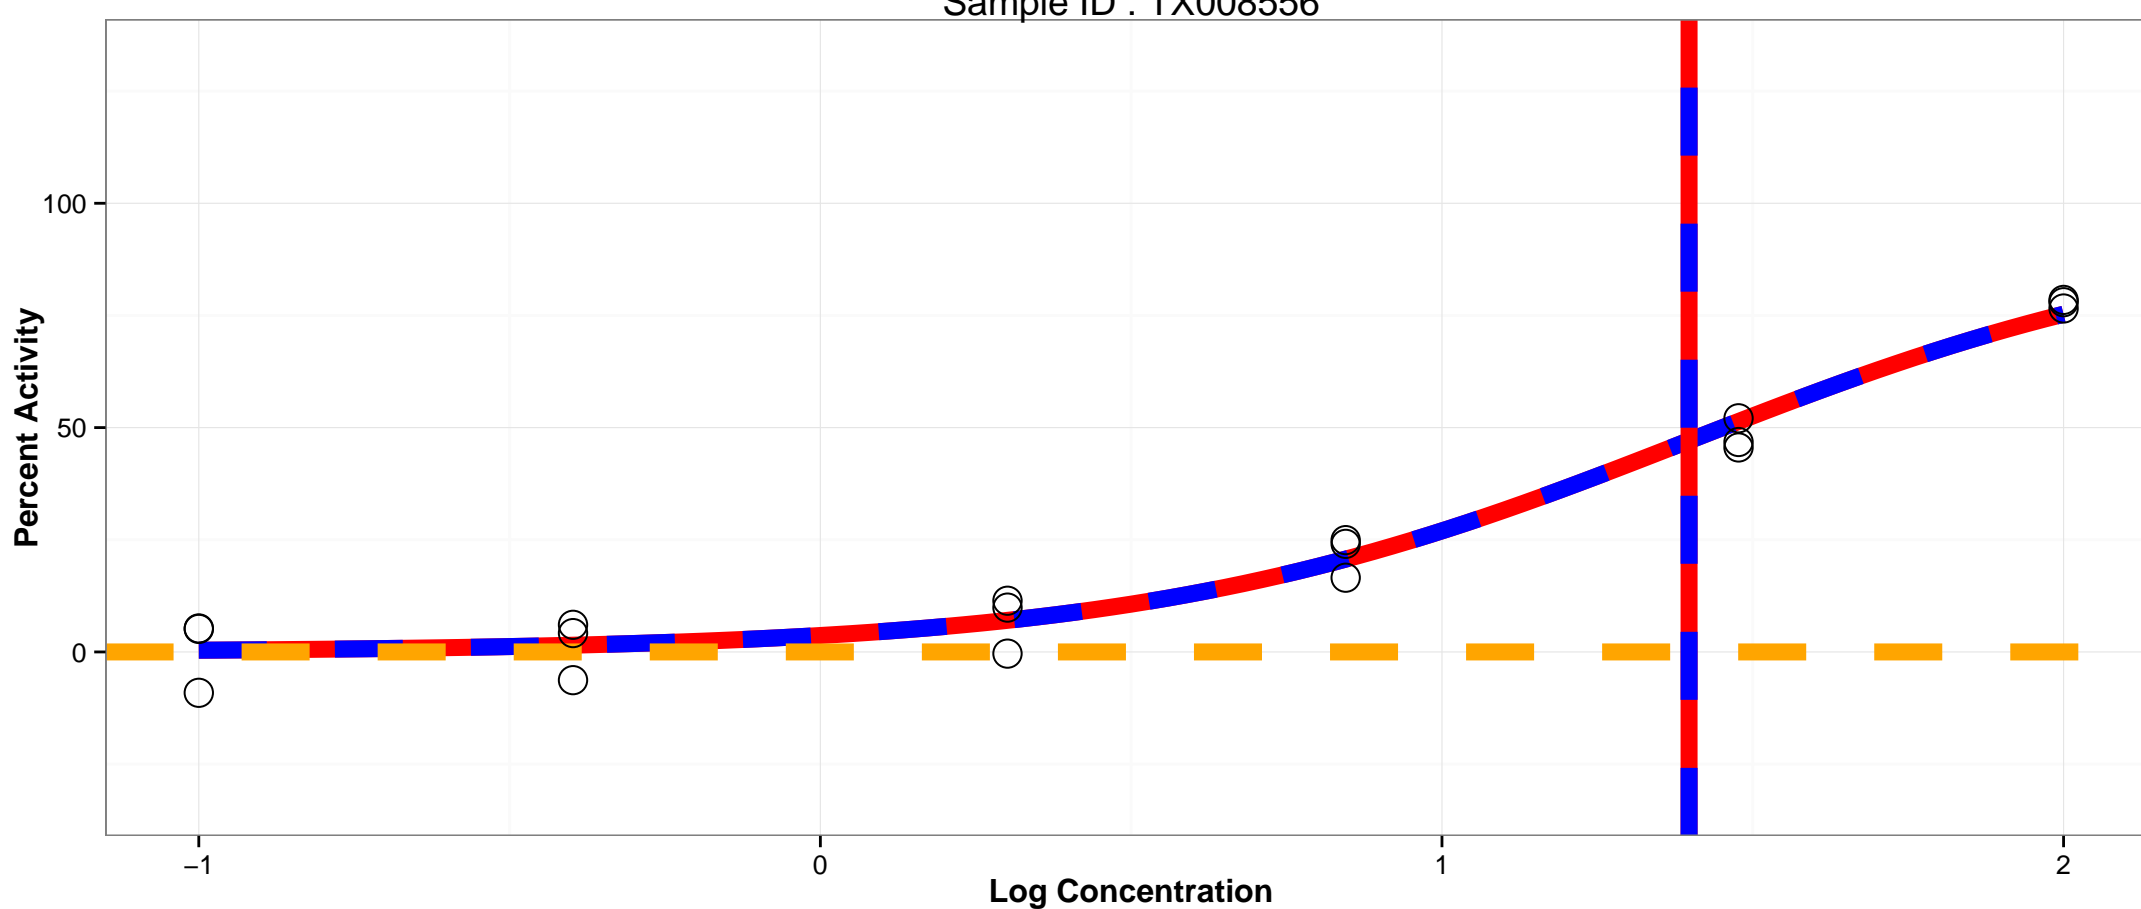

HILL MODEL

|     | tp   | ga    | gw    |
|-----|------|-------|-------|
| val | 94.2 | 1.4   | 0.997 |
| sd  | 10.4 | 0.126 | 0.151 |

GAIN-LOSS MODEL

|     | tp   | ga    | gw    | la   | lw    |
|-----|------|-------|-------|------|-------|
| val | 94.2 | 1.4   | 0.996 | 3.97 | 5.04  |
| sd  | 10.4 | 0.126 | 0.151 | 5020 | 12800 |

|      | CNST   | HILL   | GNLS   |
|------|--------|--------|--------|
| AIC  | 184.51 | 118.87 | 122.87 |
| PROB | 0      | 0.88   | 0.12   |
| RMSE | 38.74  | 4.88   | 4.88   |

MAX\_MEAN : 77.7 MAX\_MED : 78 BMAD : 8.58  
COFF : 20 HIT-CALL : 1 FITC : 42 ACTP : 1  
FLAGS :

Assay ID 1508 (NHEERL\_TPO\_AUR\_dn)  
Sample ID : TX008618

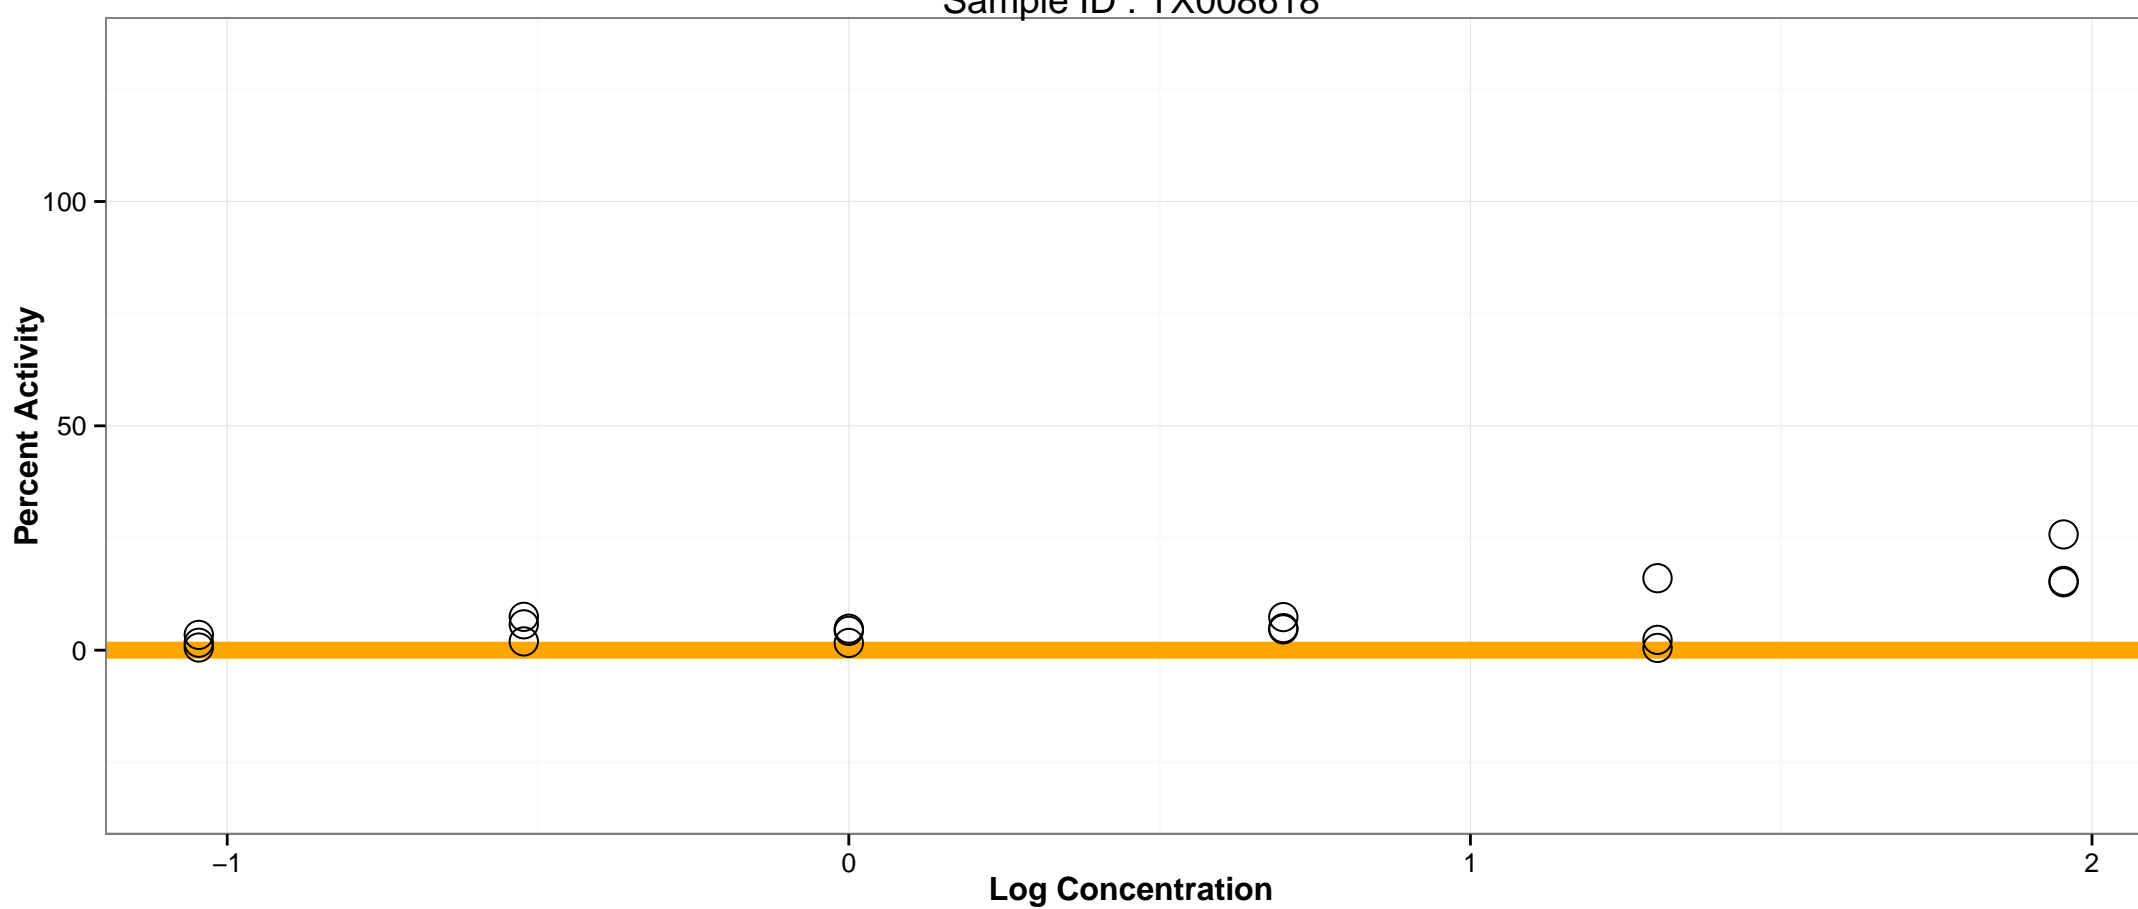

HILL MODEL

HILL MODEL: Not applicable

GAIN-LOSS MODEL

GNLS MODEL: Not applicable

|      | CNST   | HILL | GNLS |
|------|--------|------|------|
| AIC  | 132.87 | NA   | NA   |
| PROB | 1      | NA   | NA   |
| RMSE | 9.57   | NA   | NA   |

MAX\_MEAN : 18.8 MAX\_MED : 15.5 BMAD : 5.69  
COFF : 20 HIT-CALL : 0 FITC : 4 ACTP : 0  
FLAGS :

Assay ID 1509 (NHEERL\_HEK293T\_CellTiterGLO)  
Sample ID : TX008618

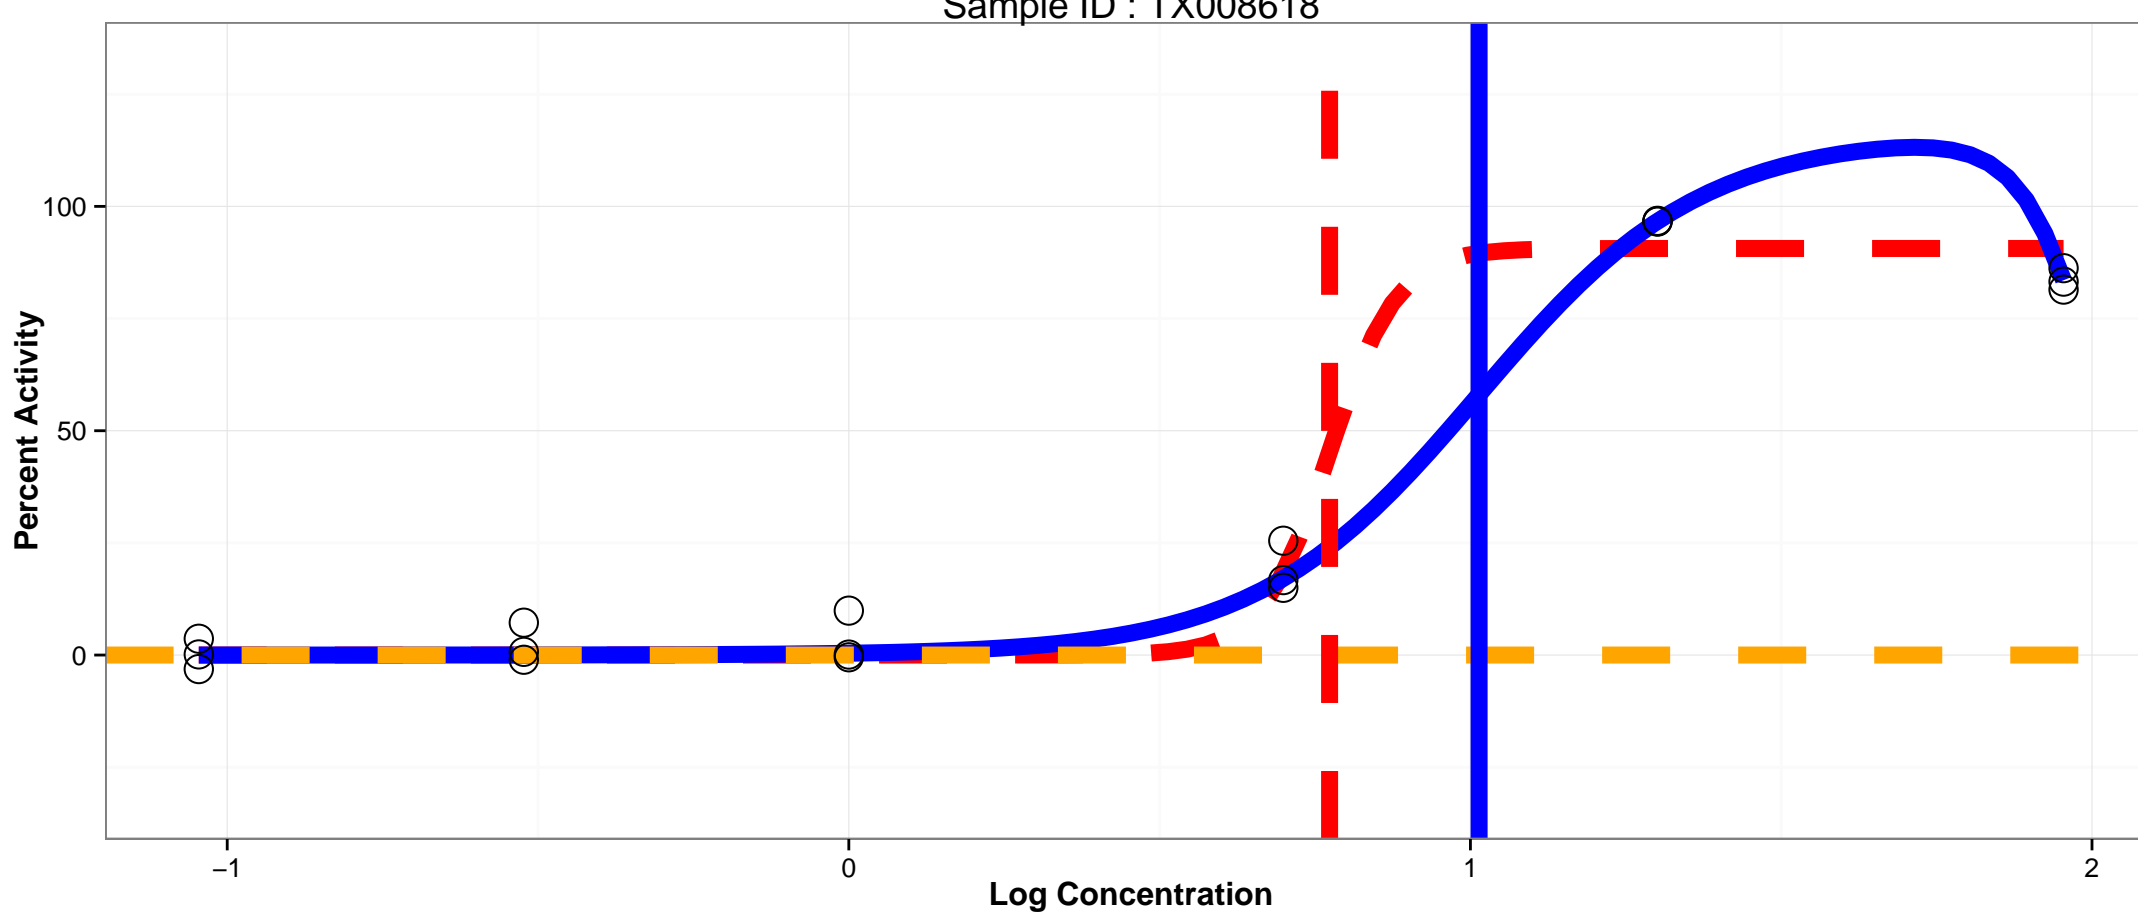

HILL MODEL

|     | tp   | ga     | gw   |
|-----|------|--------|------|
| val | 90.6 | 0.773  | 8    |
| sd  | 3.38 | 0.0782 | 8.35 |

GAIN-LOSS MODEL

|     | tp   | ga   | gw    | la      | lw   |
|-----|------|------|-------|---------|------|
| val | 116  | 1.01 | 2.43  | 2.01    | 7.45 |
| sd  | 17.4 | 0.1  | 0.519 | 0.00546 | 4.08 |

|      | CNST  | HILL   | GNLS   |
|------|-------|--------|--------|
| AIC  | 195.7 | 121.42 | 107.44 |
| PROB | 0     | 0      | 1      |
| RMSE | 52.91 | 5.32   | 3.77   |

MAX\_MEAN : 96.7 MAX\_MED : 96.7 BMAD : 5.54  
COFF : 20 HIT-CALL : 1 FITC : 50 ACTP : 1  
FLAGS :

Assay ID 1848 (NHEERL\_Quantilum\_inhib\_2\_dn)  
Sample ID : TX008618

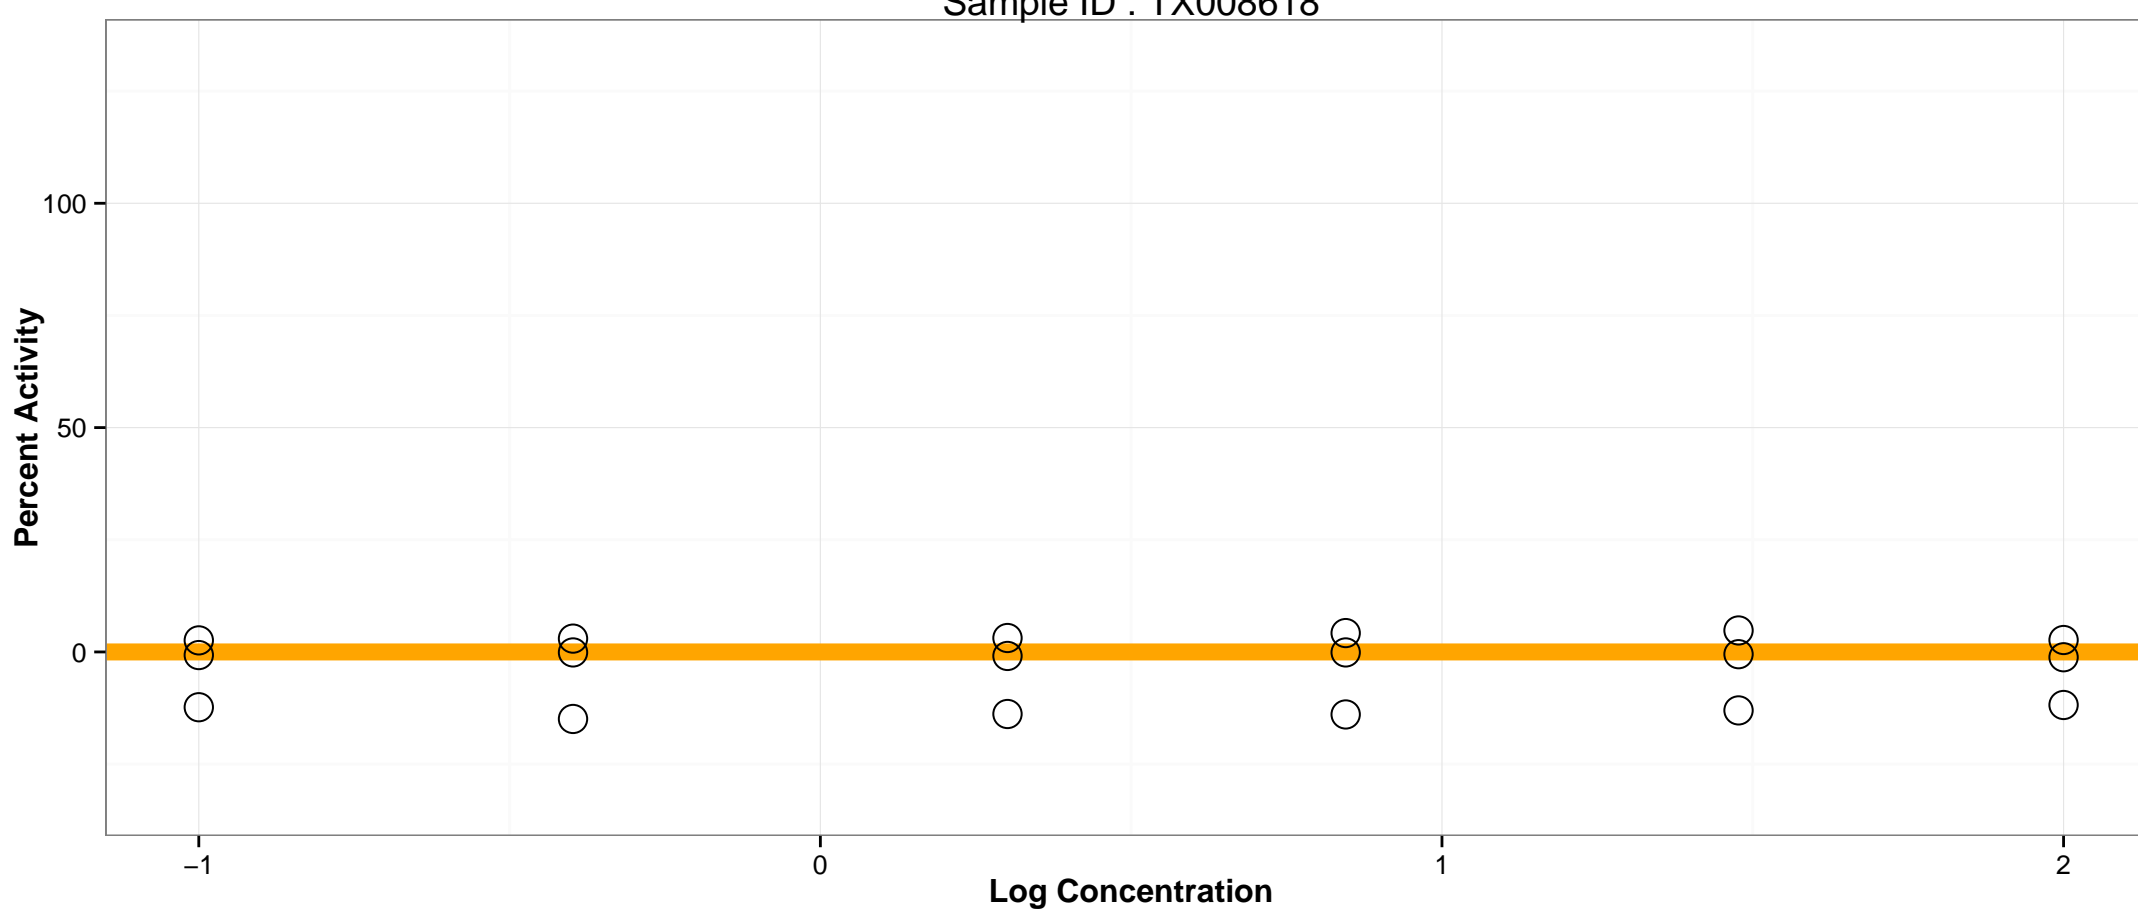

HILL MODEL

HILL MODEL: Not applicable

GAIN-LOSS MODEL

GNLS MODEL: Not applicable

|      | CNST   | HILL | GNLS |
|------|--------|------|------|
| AIC  | 128.32 | NA   | NA   |
| PROB | 1      | NA   | NA   |
| RMSE | 7.97   | NA   | NA   |

MAX\_MEAN : -2.9 MAX\_MED : -0.0978 BMAD : 8.58  
COFF : 20 HIT-CALL : 0 FITC : 4 ACTP : 0  
FLAGS :

Chemical : 4-Chloro-1,2-diaminobenzene  
CAS : 95-83-0

Assay ID 1508 (NHEERL\_TPO\_AUR\_dn)  
Sample ID : TX008643

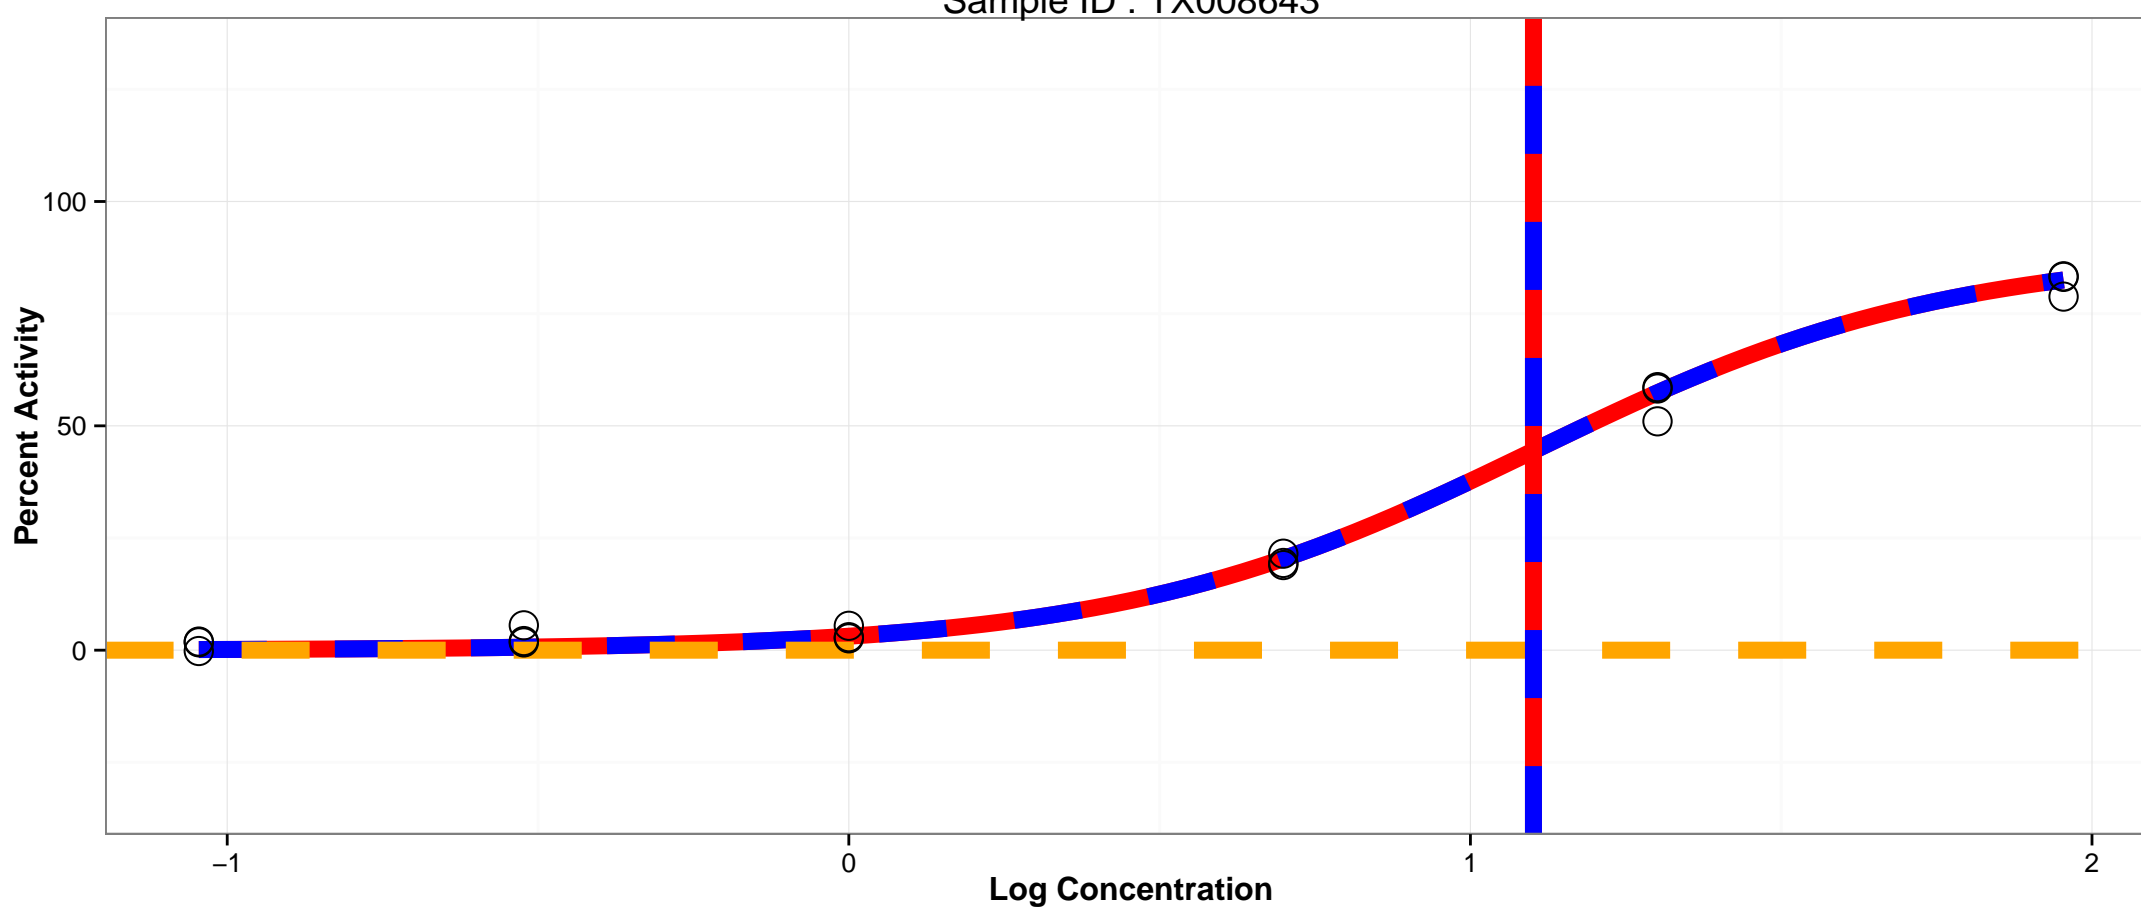

HILL MODEL

|     | tp   | ga     | gw     |
|-----|------|--------|--------|
| val | 88.8 | 1.1    | 1.31   |
| sd  | 2.25 | 0.0296 | 0.0823 |

GAIN-LOSS MODEL

|     | tp   | ga  | gw   | la   | lw   |
|-----|------|-----|------|------|------|
| val | 88.8 | 1.1 | 1.31 | 2.86 | 10.4 |
| sd  | NA   | NA  | NA   | NA   | NA   |

|      | CNST  | HILL  | GNLS  |
|------|-------|-------|-------|
| AIC  | 186.6 | 88.22 | 92.22 |
| PROB | 0     | 0.88  | 0.12  |
| RMSE | 41.38 | 2.36  | 2.36  |

MAX\_MEAN : 81.8 MAX\_MED : 83.2 BMAD : 5.69  
COFF : 20 HIT-CALL : 1 FITC : 42 ACTP : 1  
FLAGS :

Assay ID 1509 (NHEERL\_HEK293T\_CellTiterGLO)  
Sample ID : TX008643

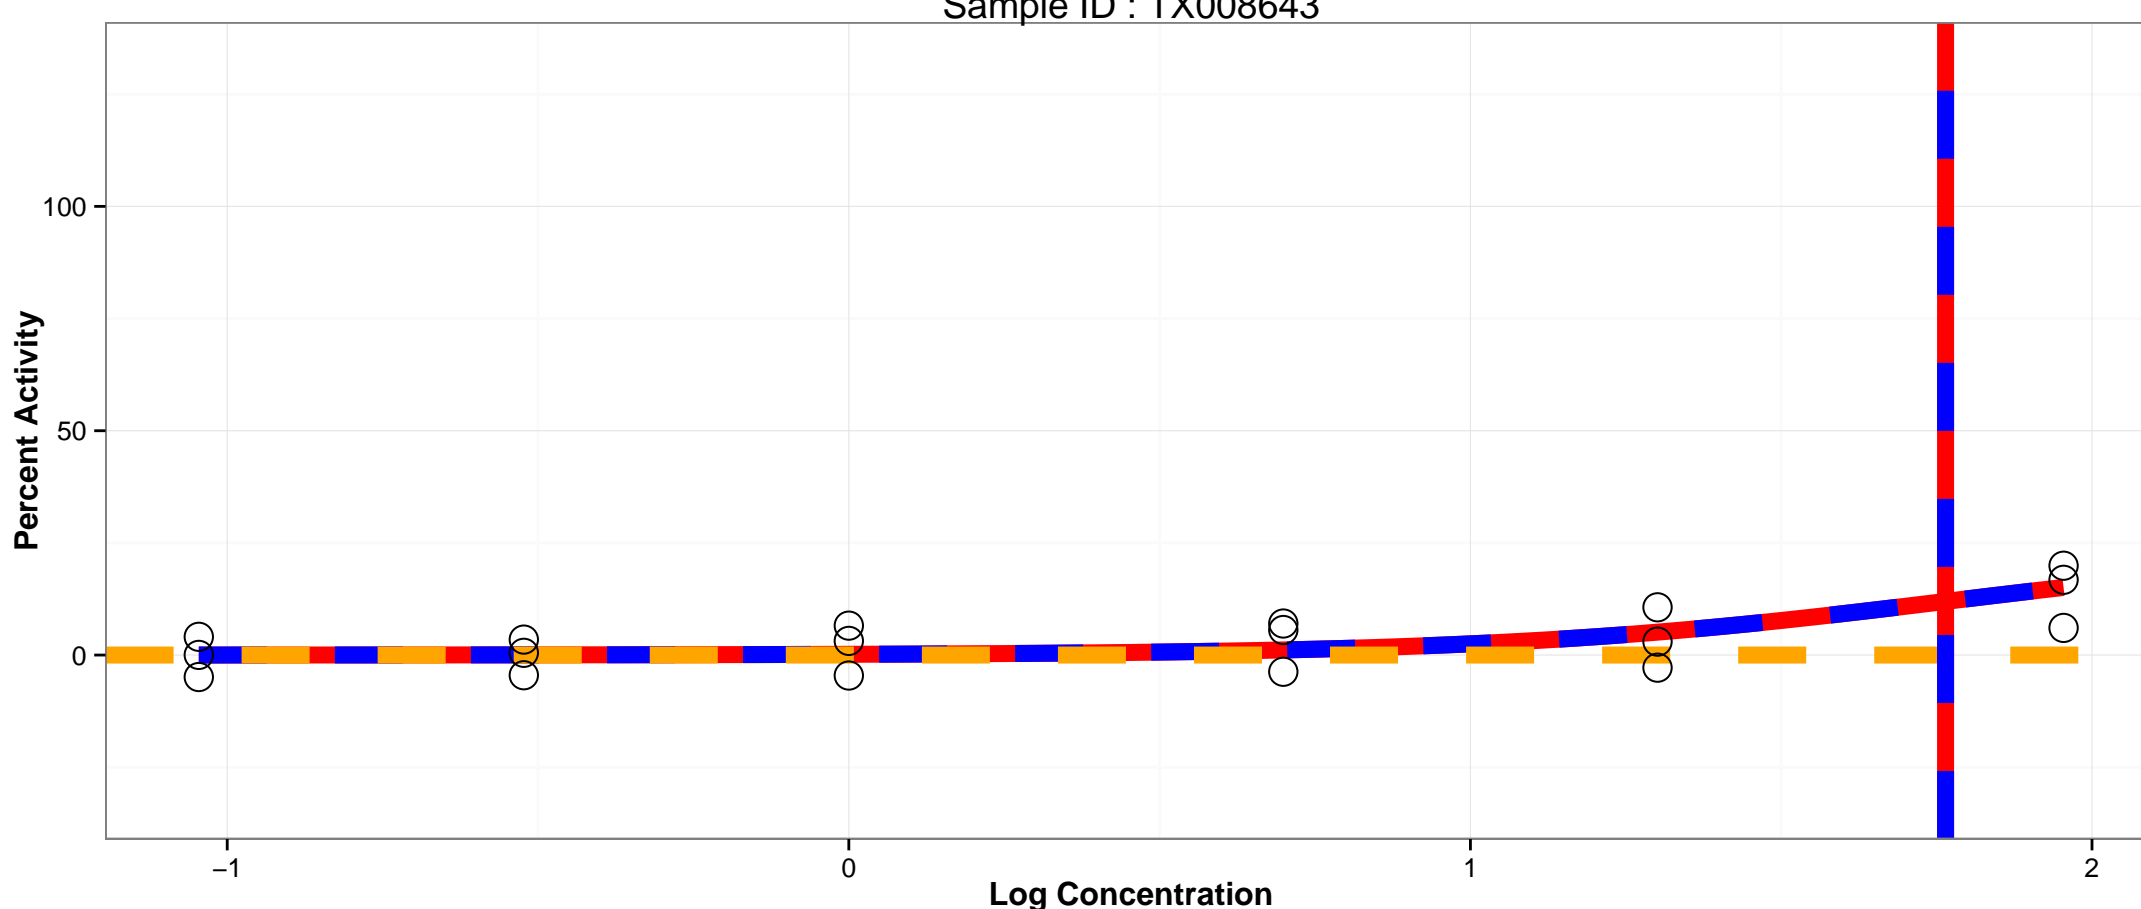

HILL MODEL

|     | tp   | ga    | gw   |
|-----|------|-------|------|
| val | 23.9 | 1.76  | 1.22 |
| sd  | 24.4 | 0.795 | 1.69 |

GAIN-LOSS MODEL

|     | tp   | ga   | gw   | la   | lw |
|-----|------|------|------|------|----|
| val | 23.9 | 1.76 | 1.22 | 2.72 | 18 |
| sd  | NA   | NA   | NA   | NA   | NA |

|      | CNST   | HILL   | GNLS   |
|------|--------|--------|--------|
| AIC  | 126.07 | 119.11 | 123.11 |
| PROB | 0.03   | 0.86   | 0.12   |
| RMSE | 7.77   | 4.88   | 4.88   |

MAX\_MEAN : 14.3 MAX\_MED : 16.8 BMAD : 5.54  
COFF : 20 HIT-CALL : 0 FITC : 21 ACTP : 0.974  
FLAGS : 12

Assay ID 1848 (NHEERL\_Quantilum\_inhib\_2\_dn)  
Sample ID : TX008643

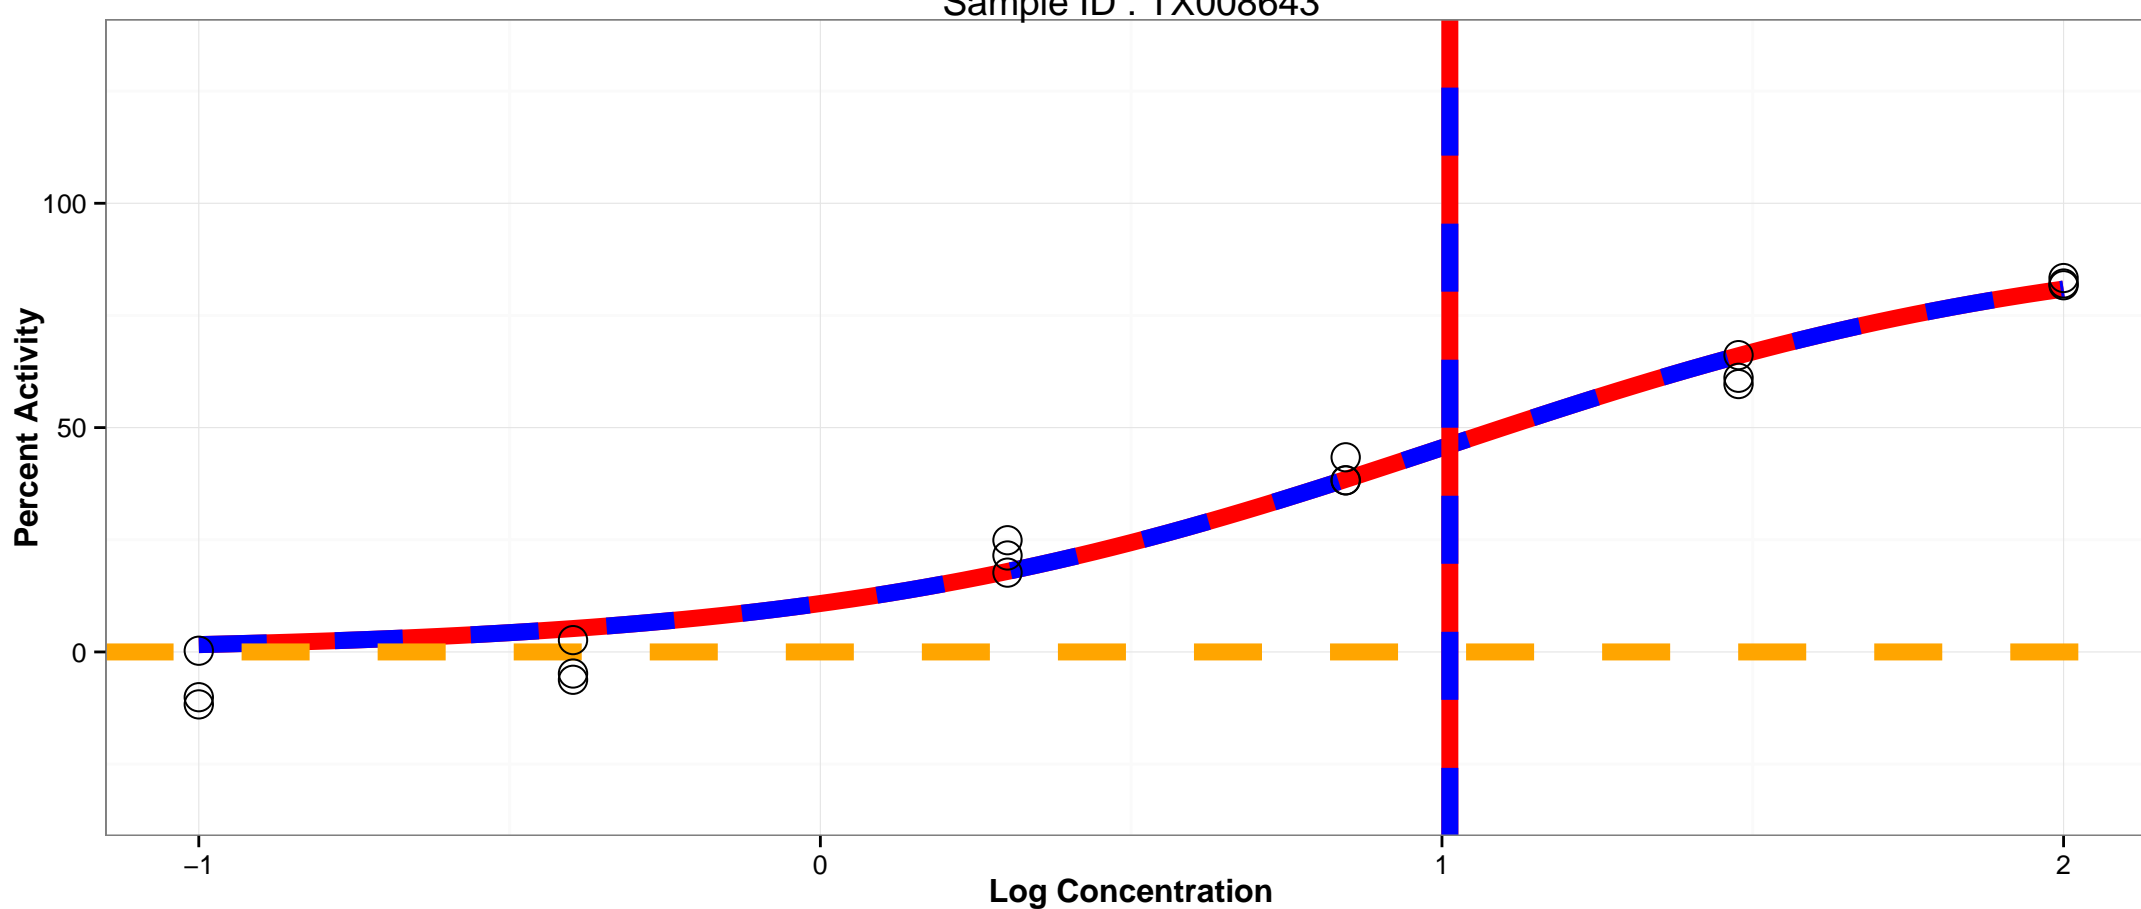

HILL MODEL

|     | tp   | ga    | gw    |
|-----|------|-------|-------|
| val | 92.2 | 1.01  | 0.867 |
| sd  | 8.01 | 0.131 | 0.133 |

GAIN-LOSS MODEL

|     | tp   | ga    | gw    | la   | lw   |
|-----|------|-------|-------|------|------|
| val | 92.2 | 1.01  | 0.867 | 2.52 | 17.1 |
| sd  | 8.01 | 0.131 | 0.133 | 296  | 9490 |

|      | CNST   | HILL   | GNLS   |
|------|--------|--------|--------|
| AIC  | 192.71 | 125.56 | 129.56 |
| PROB | 0      | 0.88   | 0.12   |
| RMSE | 46.29  | 6.29   | 6.29   |

MAX\_MEAN : 82.4 MAX\_MED : 82.1 BMAD : 8.58  
COFF : 20 HIT-CALL : 1 FITC : 42 ACTP : 1  
FLAGS :

Chemical : C.I. Solvent Yellow 14  
CAS : 842-07-9

Assay ID 1508 (NHEERL\_TPO\_AUR\_dn)  
Sample ID : TX008660

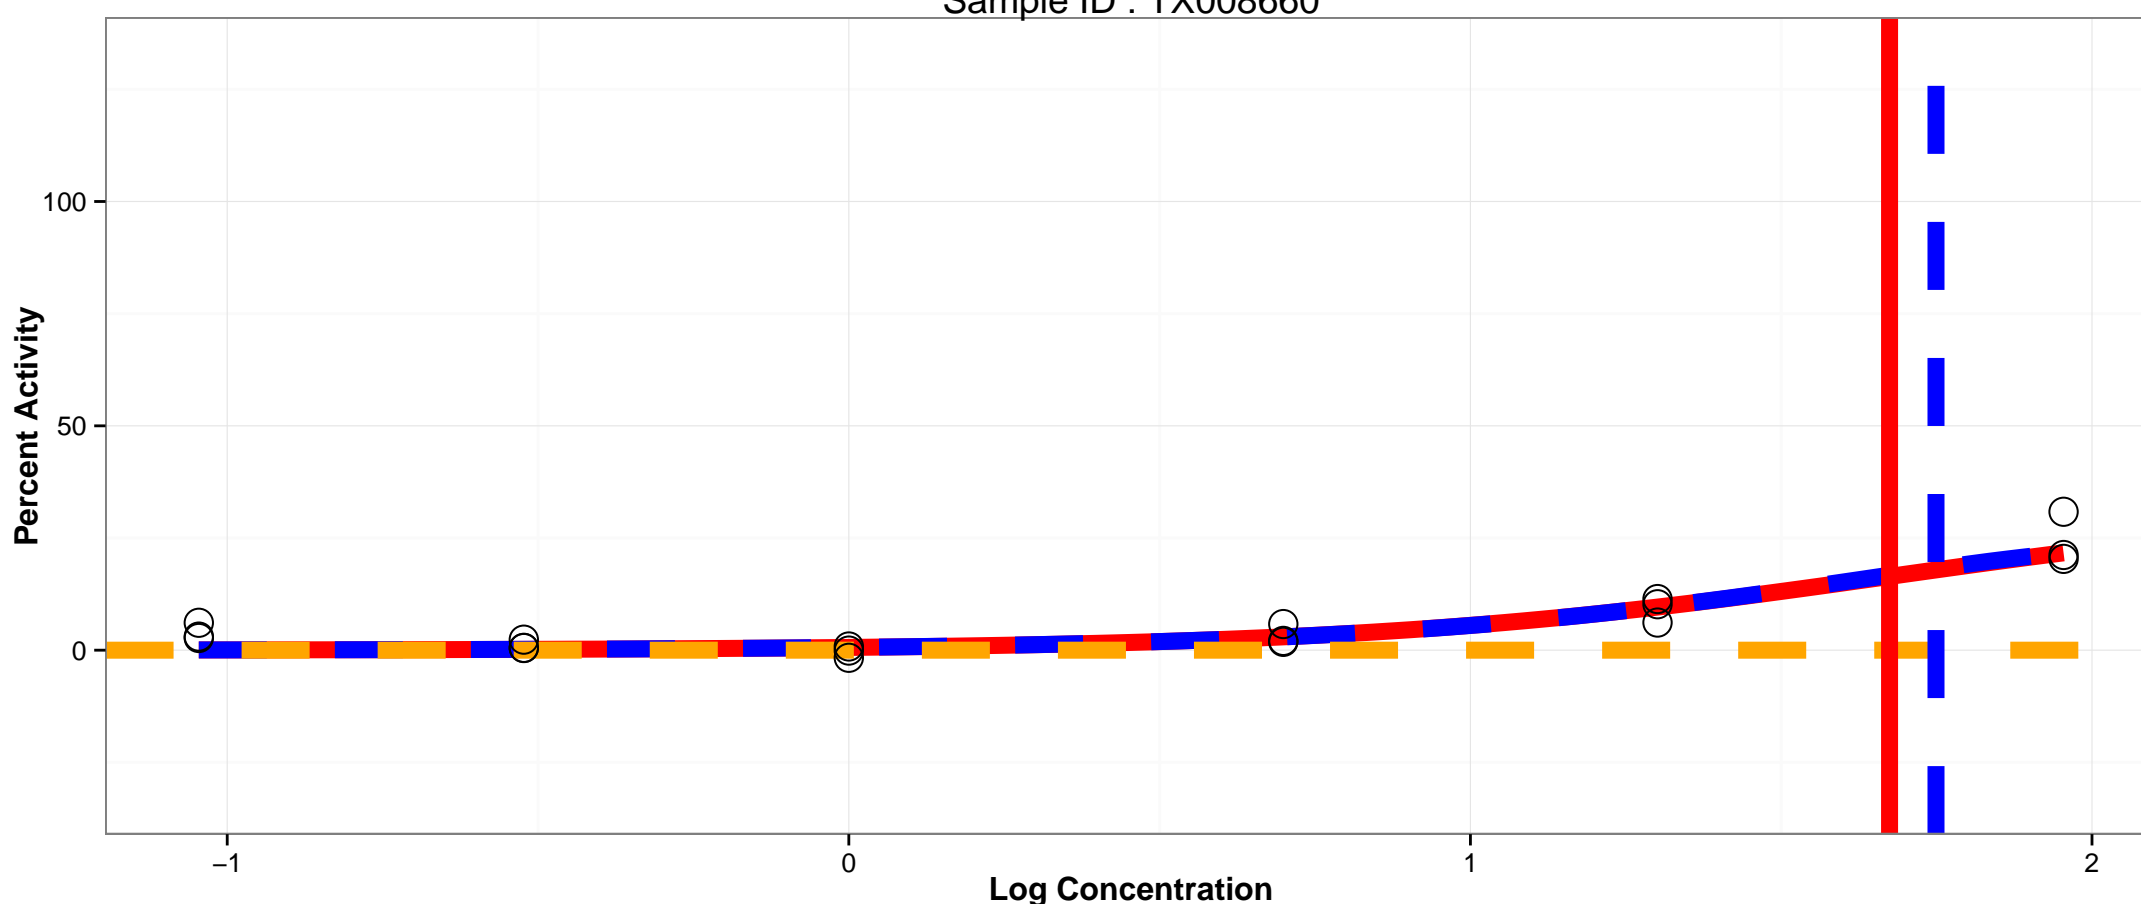

**HILL MODEL**

|     | tp   | ga    | gw   |
|-----|------|-------|------|
| val | 32.9 | 1.67  | 1.03 |
| sd  | 21.5 | 0.643 | 0.54 |

**GAIN-LOSS MODEL**

|     | tp   | ga   | gw   | la   | lw   |
|-----|------|------|------|------|------|
| val | 36.9 | 1.75 | 1.01 | 2.44 | 2.67 |
| sd  | 176  | 3.2  | 1.03 | 11.2 | 49   |

|      | CNST   | HILL  | GNLS   |
|------|--------|-------|--------|
| AIC  | 135.96 | 97.38 | 101.38 |
| PROB | 0      | 0.88  | 0.12   |
| RMSE | 11.05  | 3.12  | 3.12   |

MAX\_MEAN : 24.1 MAX\_MED : 21.2 BMAD : 5.69  
COFF : 20 HIT-CALL : 1 FITC : 42 ACTP : 1  
FLAGS : 11; 6

Assay ID 1509 (NHEERL\_HEK293T\_CellTiterGLO)  
Sample ID : TX008660

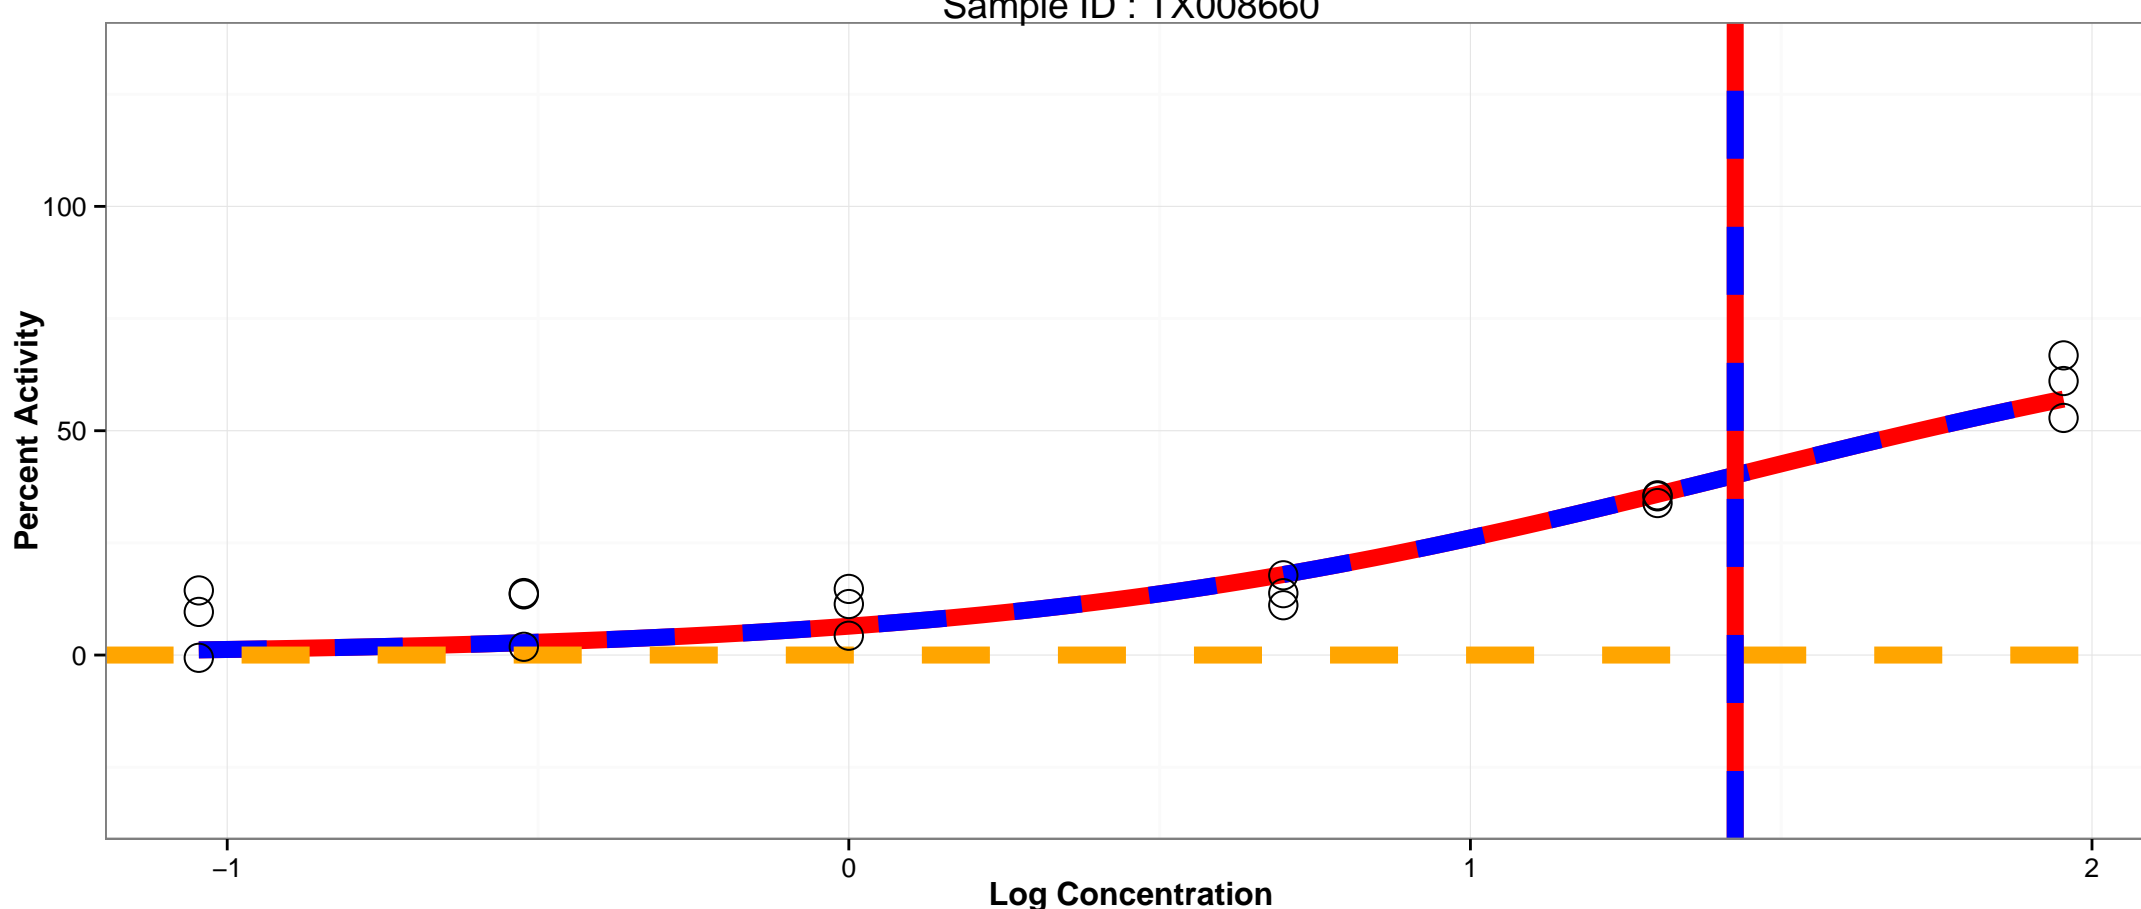

**HILL MODEL**

|     | tp   | ga    | gw    |
|-----|------|-------|-------|
| val | 80.2 | 1.43  | 0.743 |
| sd  | 16.5 | 0.267 | 0.188 |

**GAIN-LOSS MODEL**

|     | tp   | ga   | gw    | la   | lw   |
|-----|------|------|-------|------|------|
| val | 80.2 | 1.43 | 0.743 | 3.09 | 14.3 |
| sd  | NA   | NA   | NA    | NA   | NA   |

|      | CNST   | HILL   | GNLS   |
|------|--------|--------|--------|
| AIC  | 175.76 | 128.54 | 132.54 |
| PROB | 0      | 0.88   | 0.12   |
| RMSE | 30.12  | 6.6    | 6.6    |

MAX\_MEAN : 60.3 MAX\_MED : 61.1 BMAD : 5.54  
COFF : 20 HIT-CALL : 1 FITC : 42 ACTP : 1  
FLAGS :

Assay ID 1848 (NHEERL\_QuantLum\_inhib\_2\_dn)  
Sample ID : TX008660

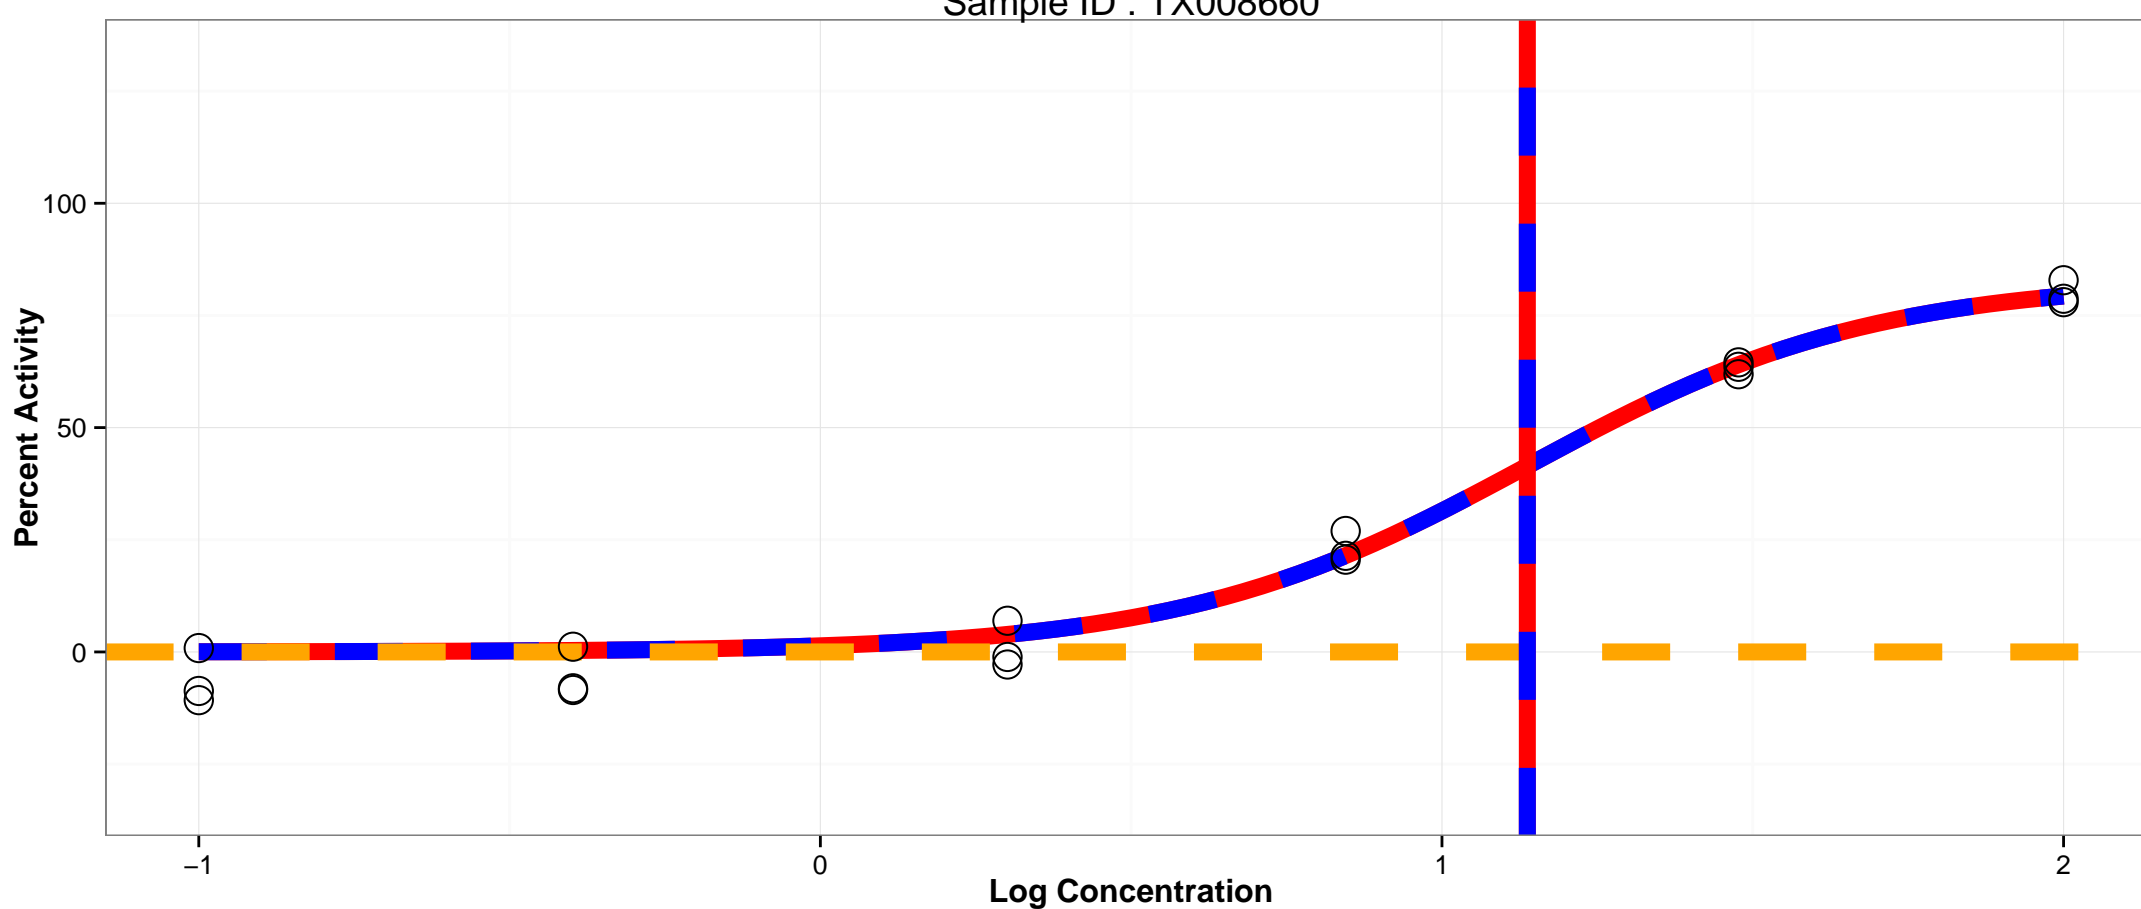

**HILL MODEL**

|     | tp   | ga     | gw   |
|-----|------|--------|------|
| val | 82.9 | 1.14   | 1.56 |
| sd  | 3.69 | 0.0498 | 0.18 |

**GAIN-LOSS MODEL**

|     | tp   | ga     | gw   | la   | lw   |
|-----|------|--------|------|------|------|
| val | 82.9 | 1.14   | 1.56 | 2.62 | 12.5 |
| sd  | 3.69 | 0.0498 | 0.18 | 285  | 5760 |

|      | CNST   | HILL   | GNLS   |
|------|--------|--------|--------|
| AIC  | 188.68 | 118.52 | 122.52 |
| PROB | 0      | 0.88   | 0.12   |
| RMSE | 42.93  | 5.12   | 5.12   |

MAX\_MEAN : 79.9 MAX\_MED : 78.7 BMAD : 8.58  
COFF : 20 HIT-CALL : 1 FITC : 41 ACTP : 1  
FLAGS :

Chemical : Methyl methanesulfonate  
CAS : 66-27-3

Assay ID 1508 (NHEERL\_TPO\_AUR\_dn)  
Sample ID : TX008682

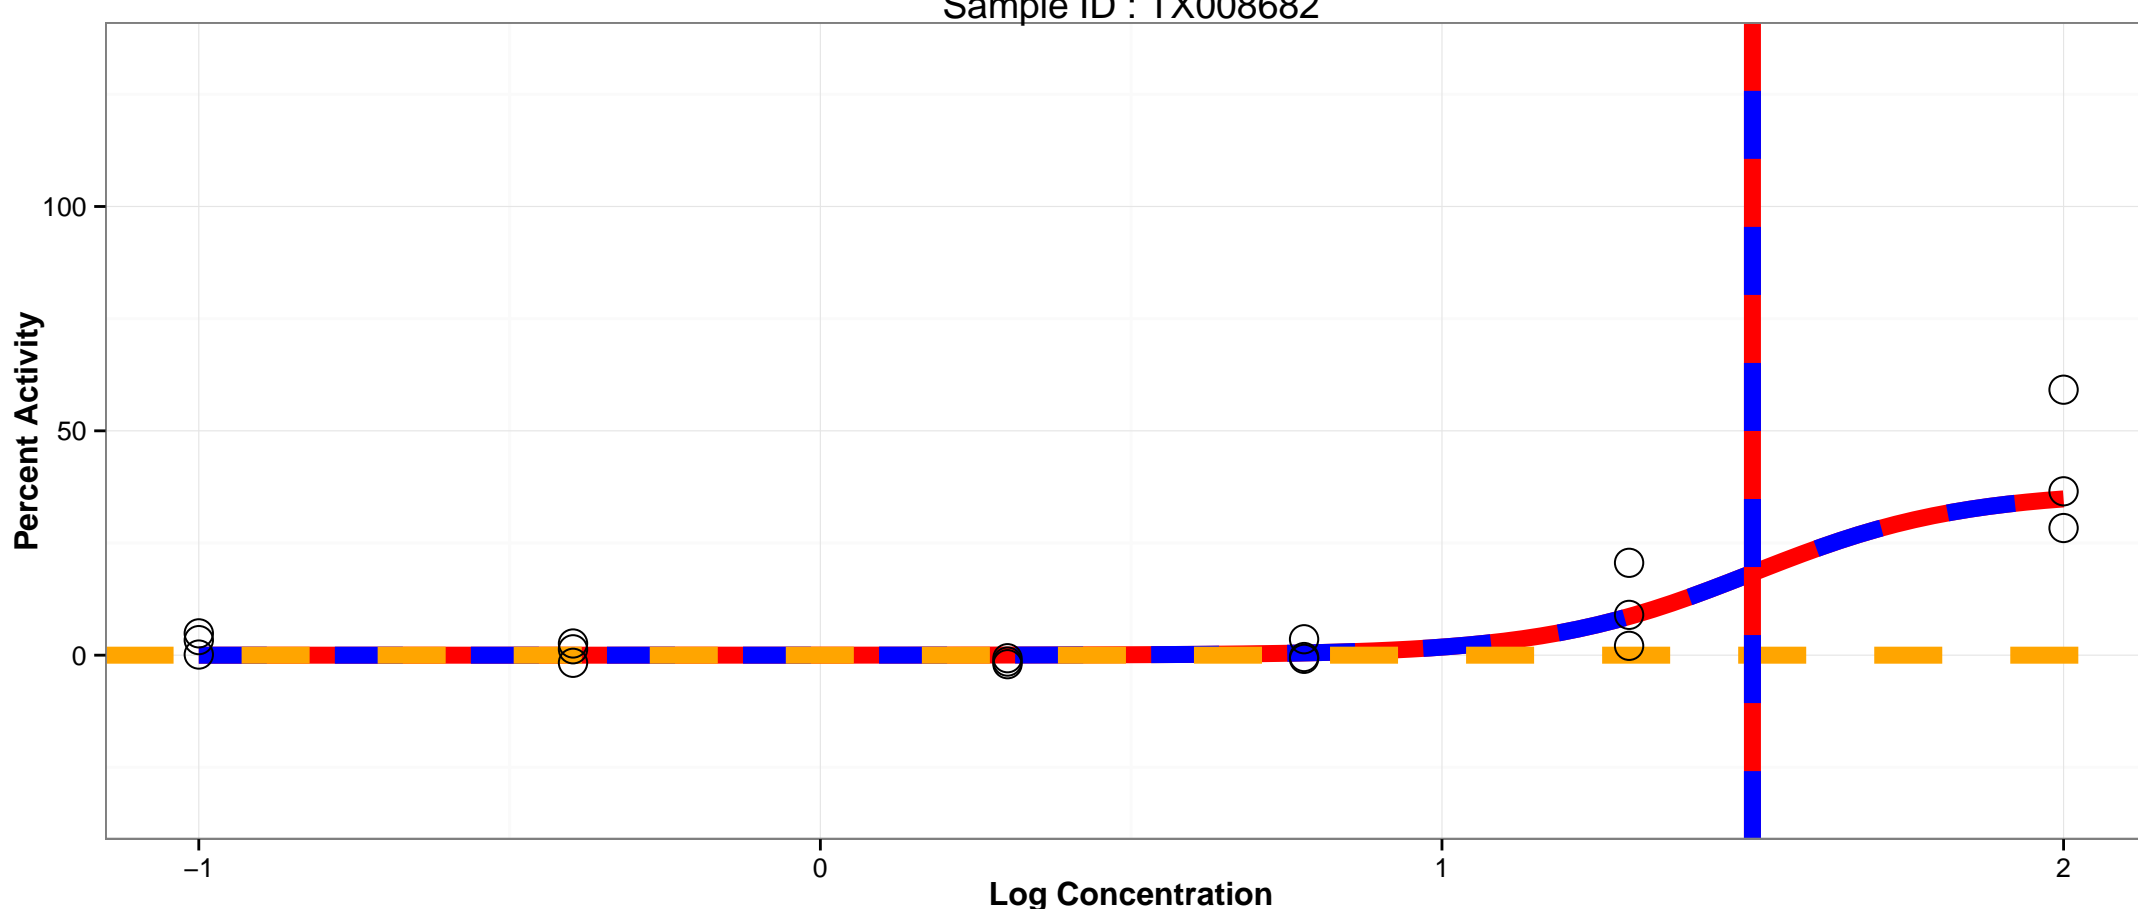

HILL MODEL

|     | tp   | ga    | gw   |
|-----|------|-------|------|
| val | 36.6 | 1.5   | 2.58 |
| sd  | 10.4 | 0.317 | 3.07 |

GAIN-LOSS MODEL

|     | tp   | ga    | gw   | la   | lw   |
|-----|------|-------|------|------|------|
| val | 36.6 | 1.5   | 2.58 | 2.51 | 8.13 |
| sd  | 13.1 | 0.321 | 3.07 | 152  | 2280 |

|      | CNST   | HILL   | GNLS   |
|------|--------|--------|--------|
| AIC  | 149.44 | 120.54 | 124.54 |
| PROB | 0      | 0.88   | 0.12   |
| RMSE | 18.58  | 7.03   | 7.03   |

MAX\_MEAN : 41.4 MAX\_MED : 36.5 BMAD : 5.69  
COFF : 20 HIT-CALL : 1 FITC : 41 ACTP : 1  
FLAGS : 6

Assay ID 1509 (NHEERL\_HEK293T\_CellTiterGLO)  
Sample ID : TX008682

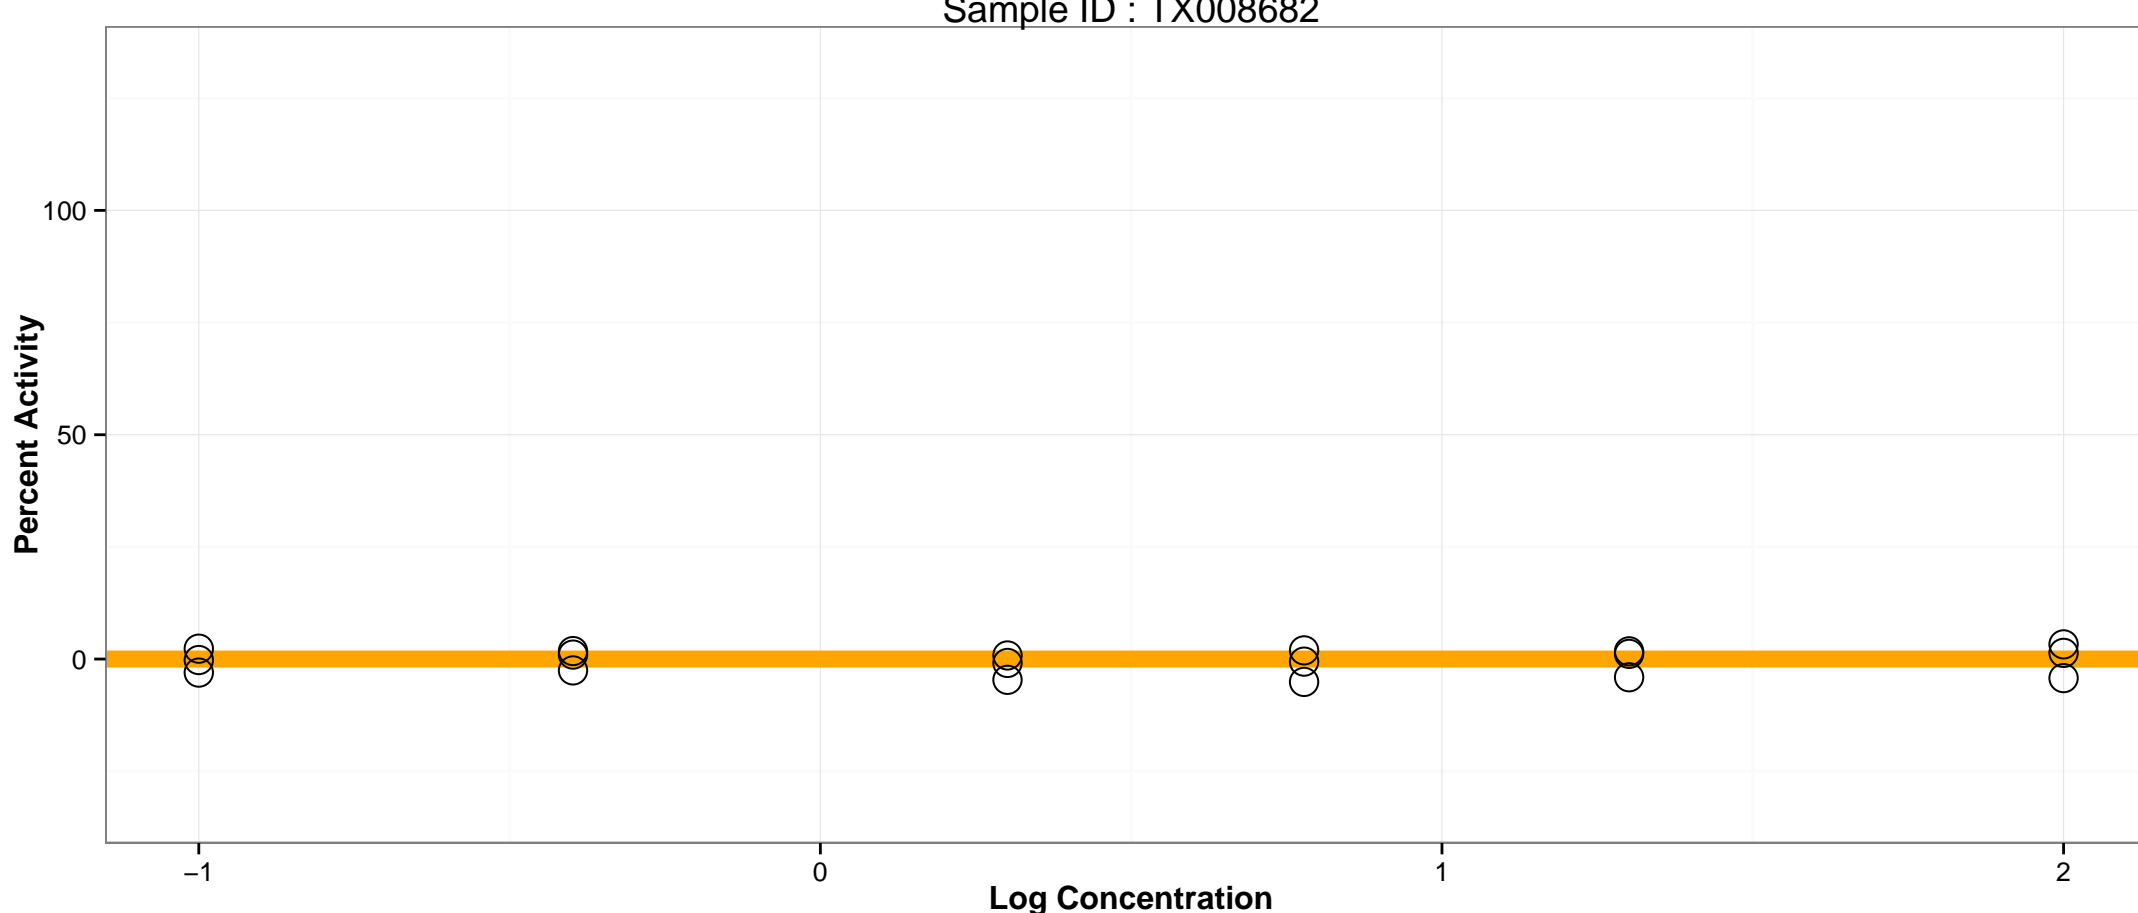

HILL MODEL

HILL MODEL: Not applicable

GAIN-LOSS MODEL

GNLS MODEL: Not applicable

|      | CNST  | HILL | GNLS |
|------|-------|------|------|
| AIC  | 90.58 | NA   | NA   |
| PROB | 1     | NA   | NA   |
| RMSE | 2.68  | NA   | NA   |

MAX\_MEAN : 0.147 MAX\_MED : 1.39 BMAD : 5.54  
COFF : 20 HIT-CALL : 0 FITC : 4 ACTP : 0  
FLAGS :

Assay ID 1848 (NHEERL\_Quantilum\_inhib\_2\_dn)  
Sample ID : TX008682

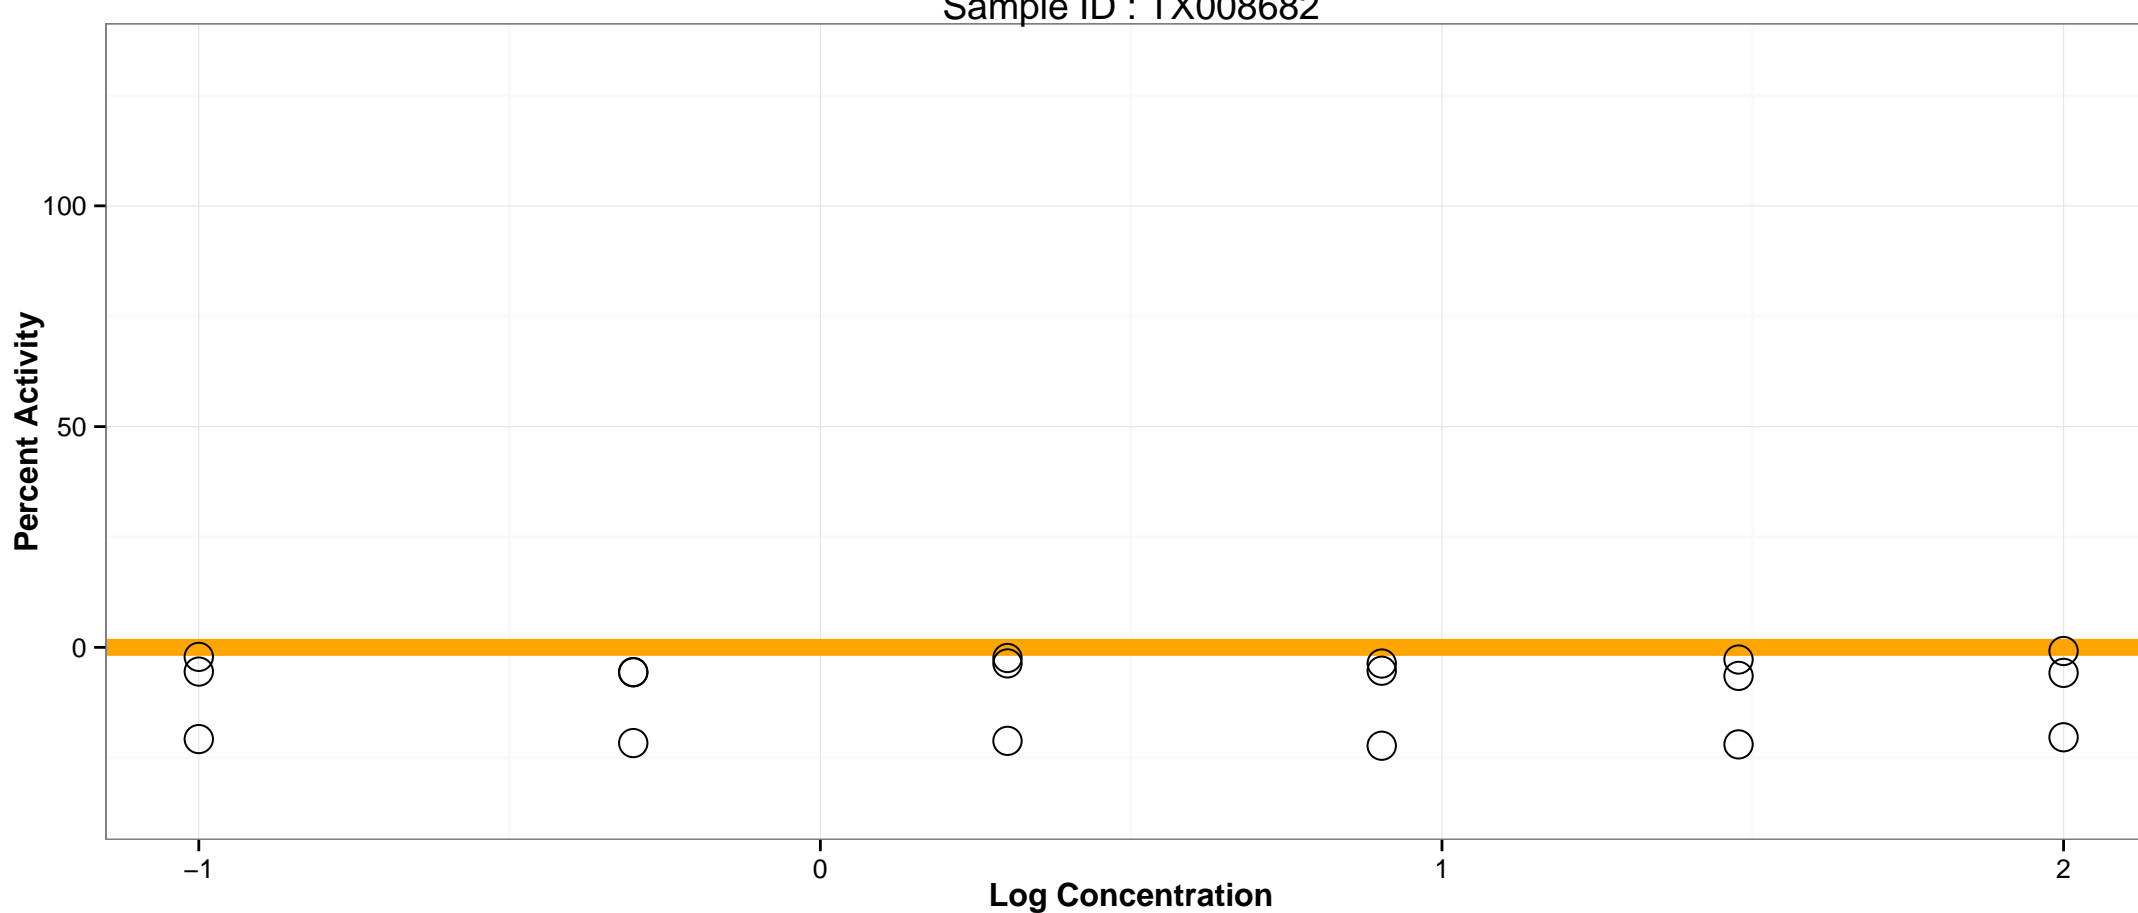

HILL MODEL

HILL MODEL: Not applicable

GAIN-LOSS MODEL

GNLS MODEL: Not applicable

|      | CNST   | HILL | GNLS |
|------|--------|------|------|
| AIC  | 145.91 | NA   | NA   |
| PROB | 1      | NA   | NA   |
| RMSE | 12.87  | NA   | NA   |

MAX\_MEAN : -8.98 MAX\_MED : -3.62 BMAD : 8.58  
COFF : 20 HIT-CALL : 0 FITC : 4 ACTP : 0  
FLAGS :

Chemical : 2-Amino-5-azotoluene  
CAS : 97-56-3

Assay ID 1508 (NHEERL\_TPO\_AUR\_dn)  
Sample ID : TX008702

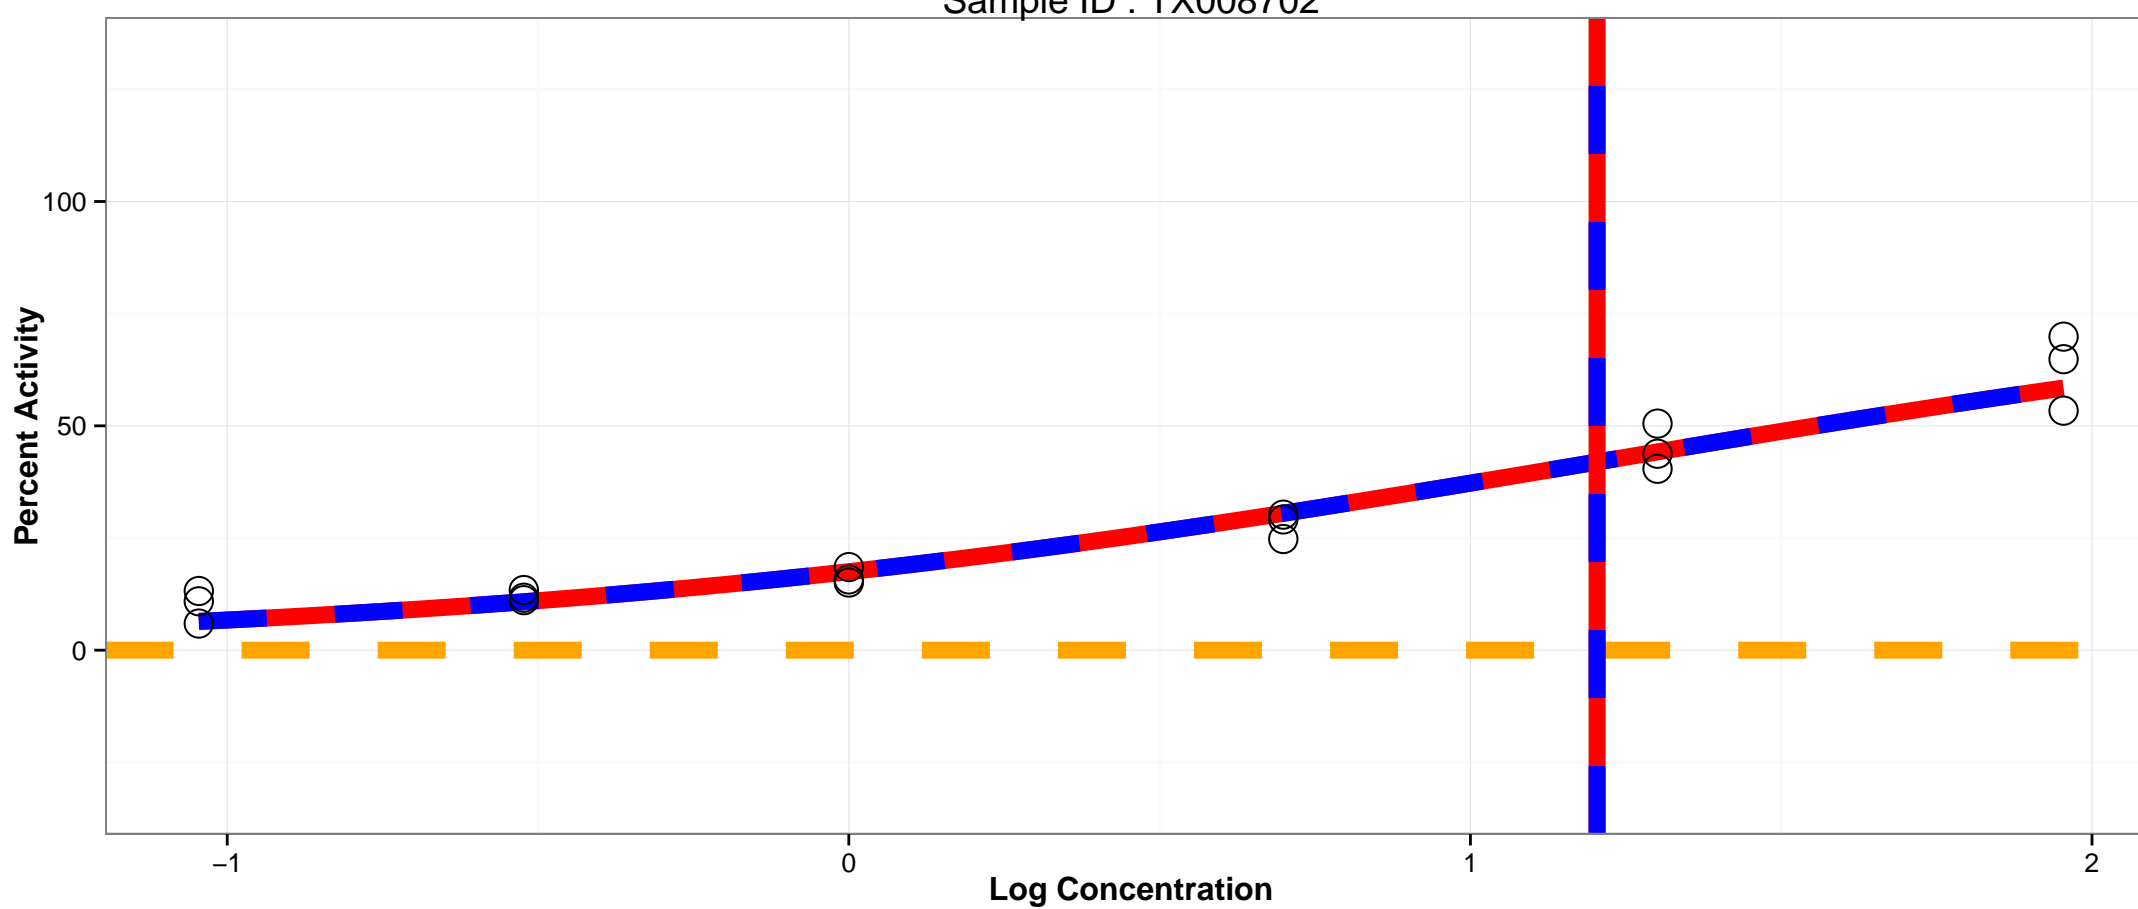

HILL MODEL

|     | tp   | ga    | gw     |
|-----|------|-------|--------|
| val | 83.9 | 1.2   | 0.481  |
| sd  | 16.7 | 0.358 | 0.0634 |

GAIN-LOSS MODEL

|     | tp   | ga    | gw     | la   | lw   |
|-----|------|-------|--------|------|------|
| val | 83.9 | 1.2   | 0.481  | 3.31 | 6.38 |
| sd  | 16.7 | 0.358 | 0.0634 | 1020 | 4810 |

|      | CNST   | HILL   | GNLS   |
|------|--------|--------|--------|
| AIC  | 182.64 | 113.84 | 117.84 |
| PROB | 0      | 0.88   | 0.12   |
| RMSE | 34.97  | 4.54   | 4.54   |

MAX\_MEAN : 62.7 MAX\_MED : 64.9 BMAD : 5.69  
COFF : 20 HIT-CALL : 1 FITC : 42 ACTP : 1  
FLAGS :

Assay ID 1509 (NHEERL\_HEK293T\_CellTiterGLO)  
Sample ID : TX008702

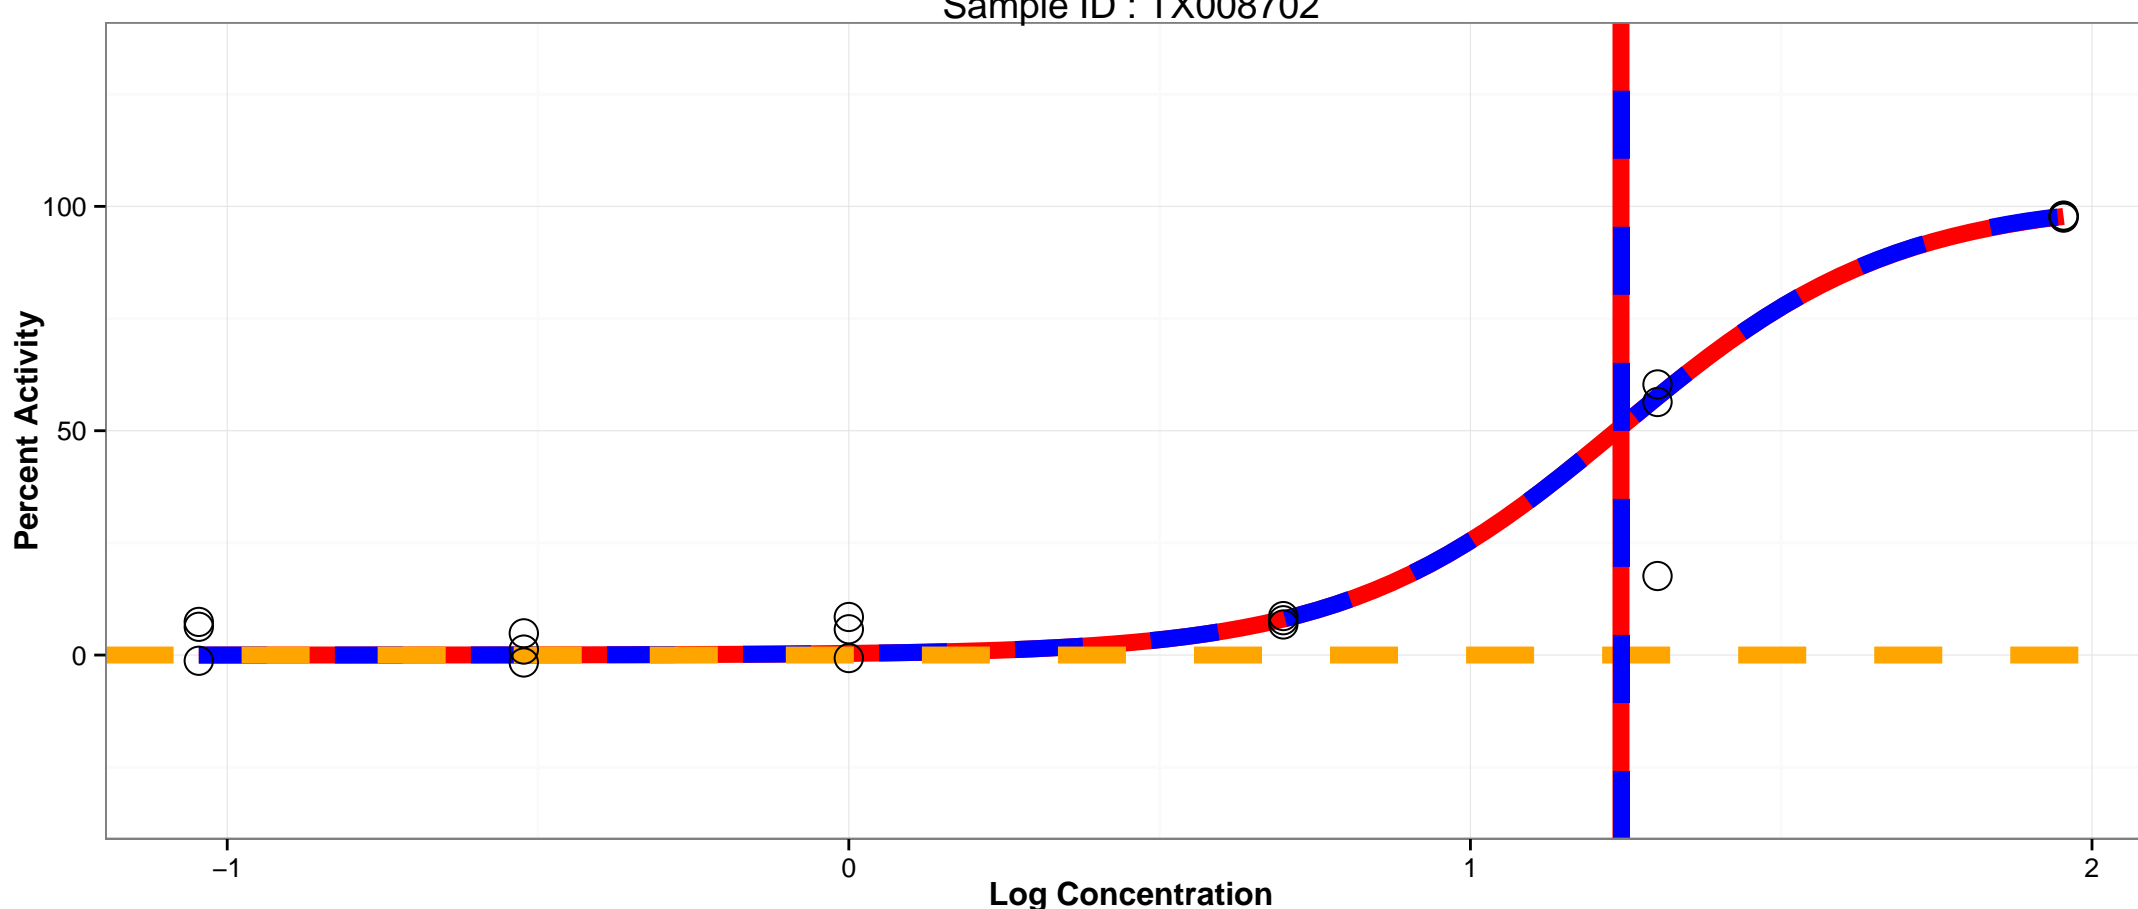

HILL MODEL

|     | tp   | ga     | gw    |
|-----|------|--------|-------|
| val | 102  | 1.24   | 1.97  |
| sd  | 2.67 | 0.0268 | 0.211 |

GAIN-LOSS MODEL

|     | tp  | ga   | gw   | la   | lw   |
|-----|-----|------|------|------|------|
| val | 102 | 1.24 | 1.96 | 2.12 | 17.7 |
| sd  | NA  | NA   | NA   | NA   | NA   |

|      | CNST   | HILL  | GNLS   |
|------|--------|-------|--------|
| AIC  | 186.71 | 123   | 126.99 |
| PROB | 0      | 0.88  | 0.12   |
| RMSE | 44.85  | 10.07 | 10.07  |

MAX\_MEAN : 97.8 MAX\_MED : 97.8 BMAD : 5.54  
COFF : 20 HIT-CALL : 1 FITC : 41 ACTP : 1  
FLAGS :

Assay ID 1848 (NHEERL\_Quantilum\_inhib\_2\_dn)  
Sample ID : TX008702

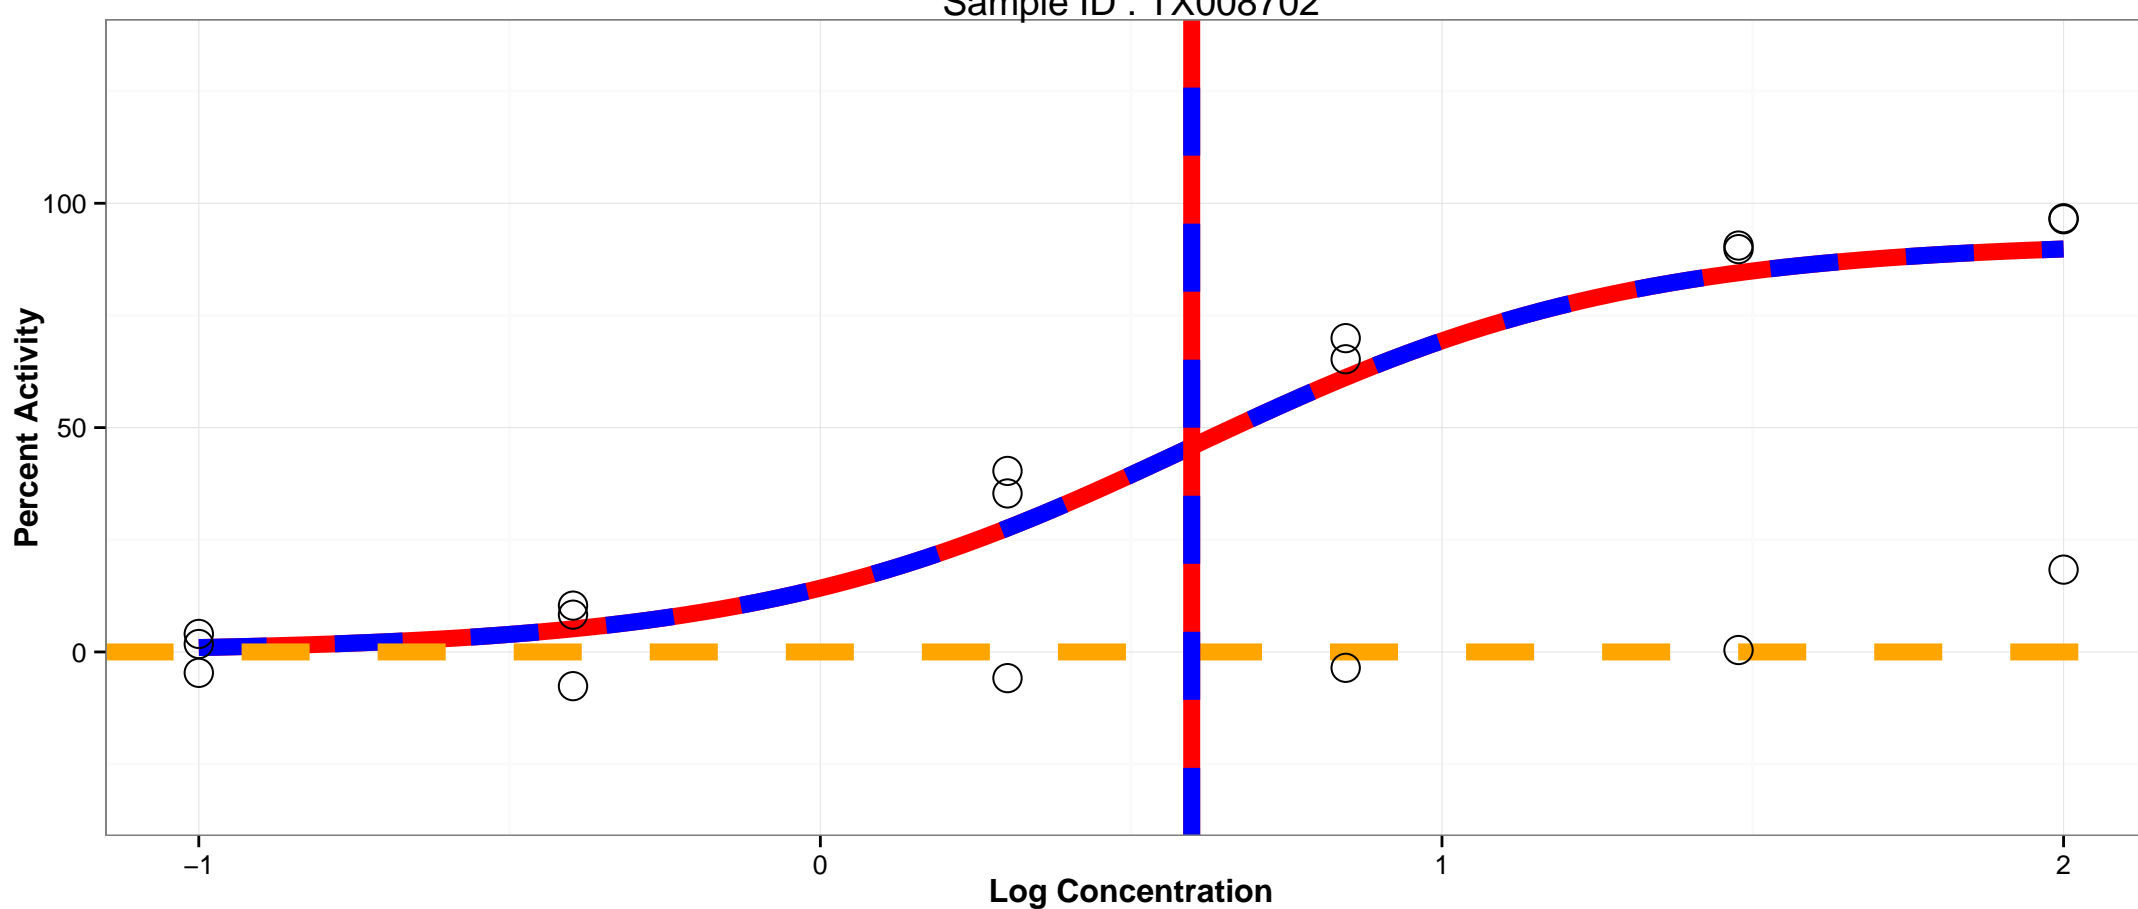

HILL MODEL

|     | tp   | ga    | gw    |
|-----|------|-------|-------|
| val | 91.5 | 0.597 | 1.23  |
| sd  | 12.5 | 0.201 | 0.533 |

GAIN-LOSS MODEL

|     | tp   | ga    | gw    | la   | lw    |
|-----|------|-------|-------|------|-------|
| val | 91.5 | 0.597 | 1.23  | 2.68 | 12.7  |
| sd  | 12.5 | 0.201 | 0.533 | 4770 | 88500 |

|      | CNST   | HILL   | GNLS   |
|------|--------|--------|--------|
| AIC  | 195.22 | 177.55 | 181.55 |
| PROB | 0      | 0.88   | 0.12   |
| RMSE | 51.43  | 31.79  | 31.79  |

MAX\_MEAN : 70.5 MAX\_MED : 96.4 BMAD : 8.58  
COFF : 20 HIT-CALL : 1 FITC : 41 ACTP : 1  
FLAGS : 10

Chemical : Isoeugenol  
CAS : 97-54-1

Assay ID 1508 (NHEERL\_TPO\_AUR\_dn)  
Sample ID : TX008780

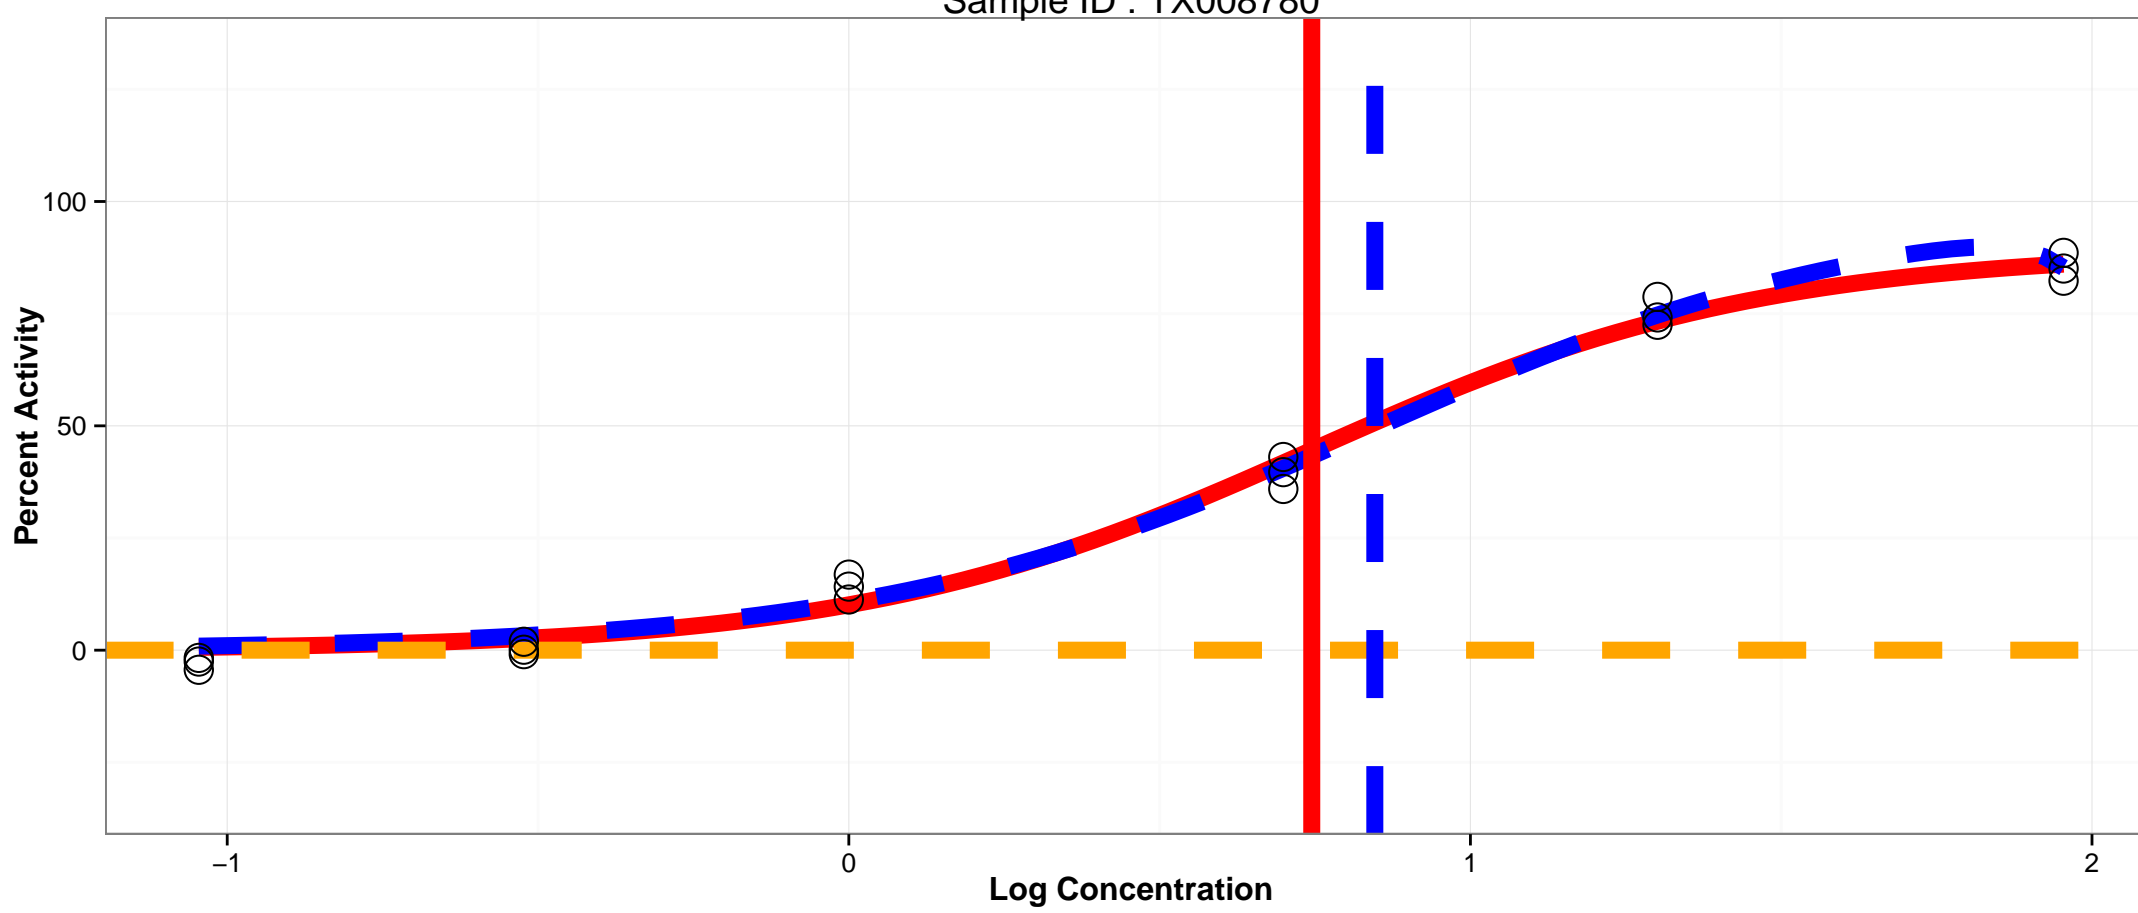

HILL MODEL

|     | tp   | ga     | gw   |
|-----|------|--------|------|
| val | 89.1 | 0.745  | 1.2  |
| sd  | 2.63 | 0.0407 | 0.11 |

GAIN-LOSS MODEL

|     | tp   | ga    | gw   | la  | lw   |
|-----|------|-------|------|-----|------|
| val | 98.9 | 0.846 | 1.08 | 2.1 | 7.04 |
| sd  | NA   | NA    | NA   | NA  | NA   |

|      | CNST   | HILL   | GNLS   |
|------|--------|--------|--------|
| AIC  | 194.77 | 105.75 | 108.36 |
| PROB | 0      | 0.79   | 0.21   |
| RMSE | 49.55  | 3.45   | 3.26   |

MAX\_MEAN : 85.3 MAX\_MED : 85.1 BMAD : 5.69  
COFF : 20 HIT-CALL : 1 FITC : 41 ACTP : 1  
FLAGS :

Assay ID 1509 (NHEERL\_HEK293T\_CellTiterGLO)  
Sample ID : TX008780

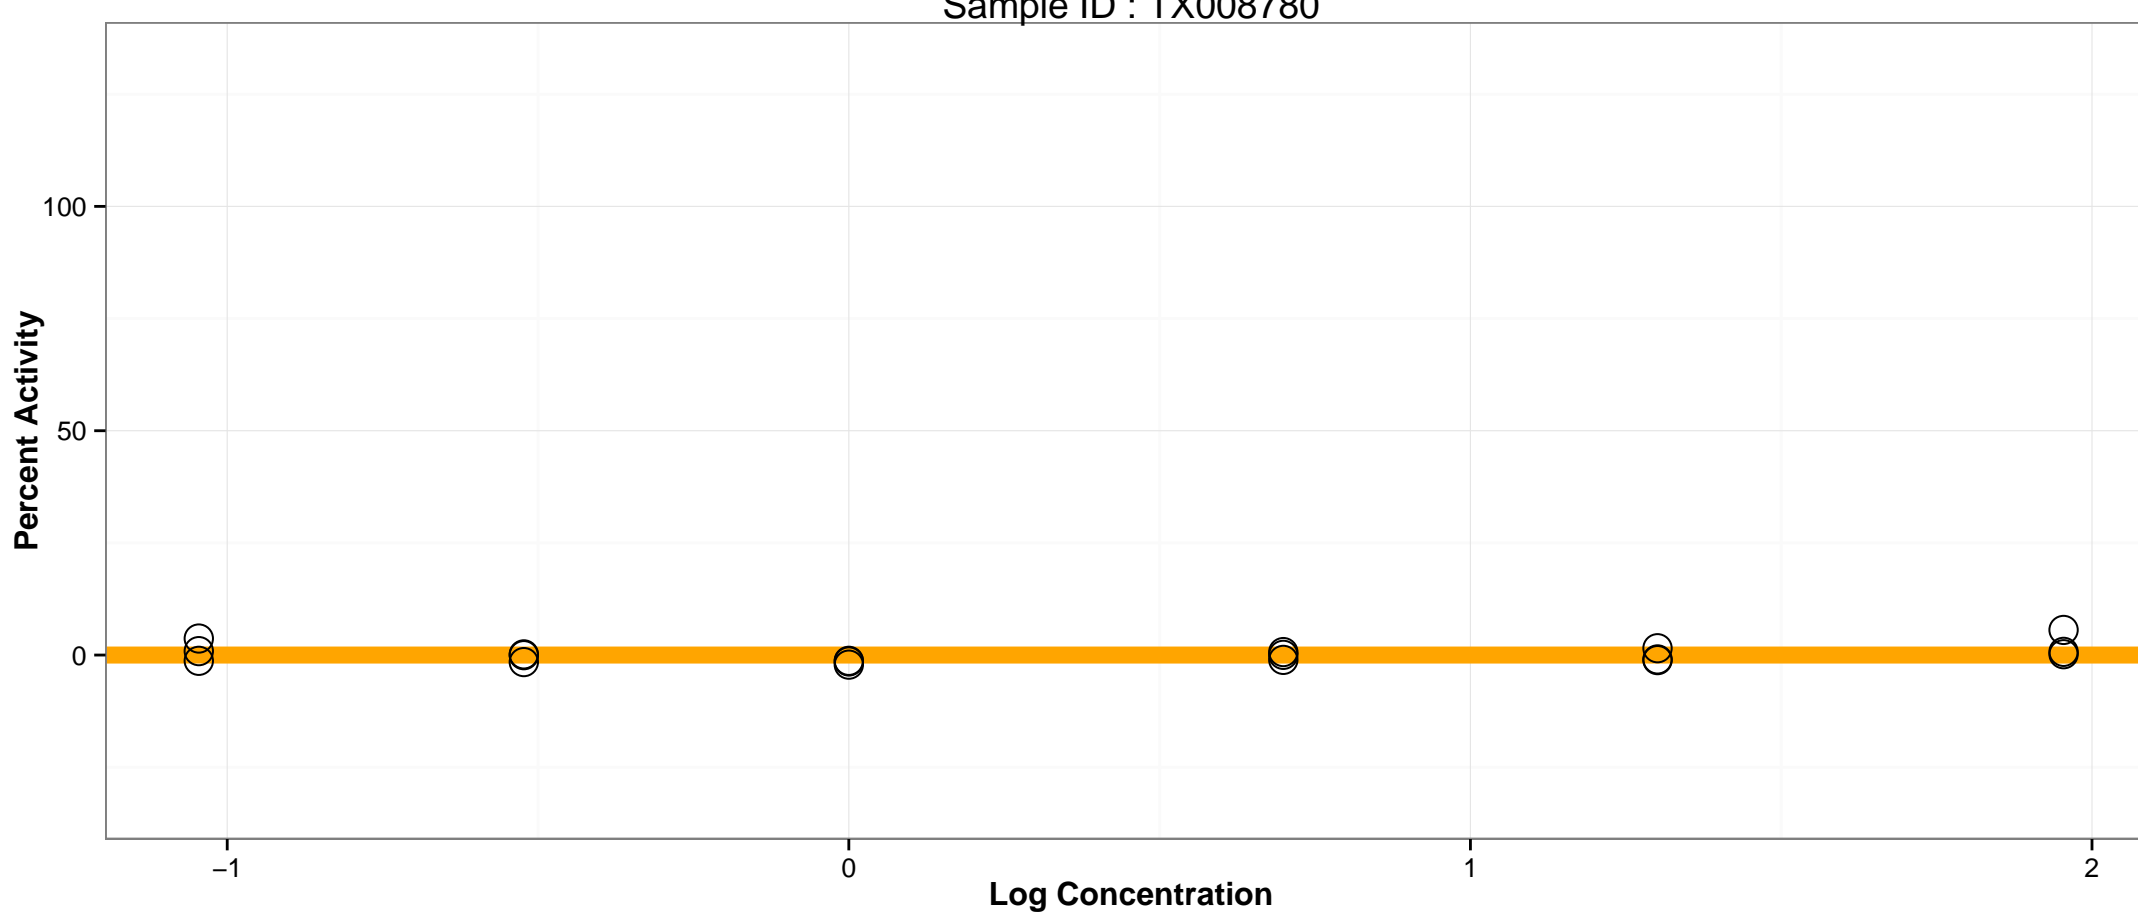

HILL MODEL

HILL MODEL: Not applicable

GAIN-LOSS MODEL

GNLS MODEL: Not applicable

|      | CNST  | HILL | GNLS |
|------|-------|------|------|
| AIC  | 73.53 | NA   | NA   |
| PROB | 1     | NA   | NA   |
| RMSE | 1.9   | NA   | NA   |

MAX\_MEAN : 2.18 MAX\_MED : 0.884 BMAD : 5.54  
COFF : 20 HIT-CALL : 0 FITC : 4 ACTP : 0  
FLAGS :

Assay ID 1848 (NHEERL\_Quantilum\_inhib\_2\_dn)  
Sample ID : TX008780

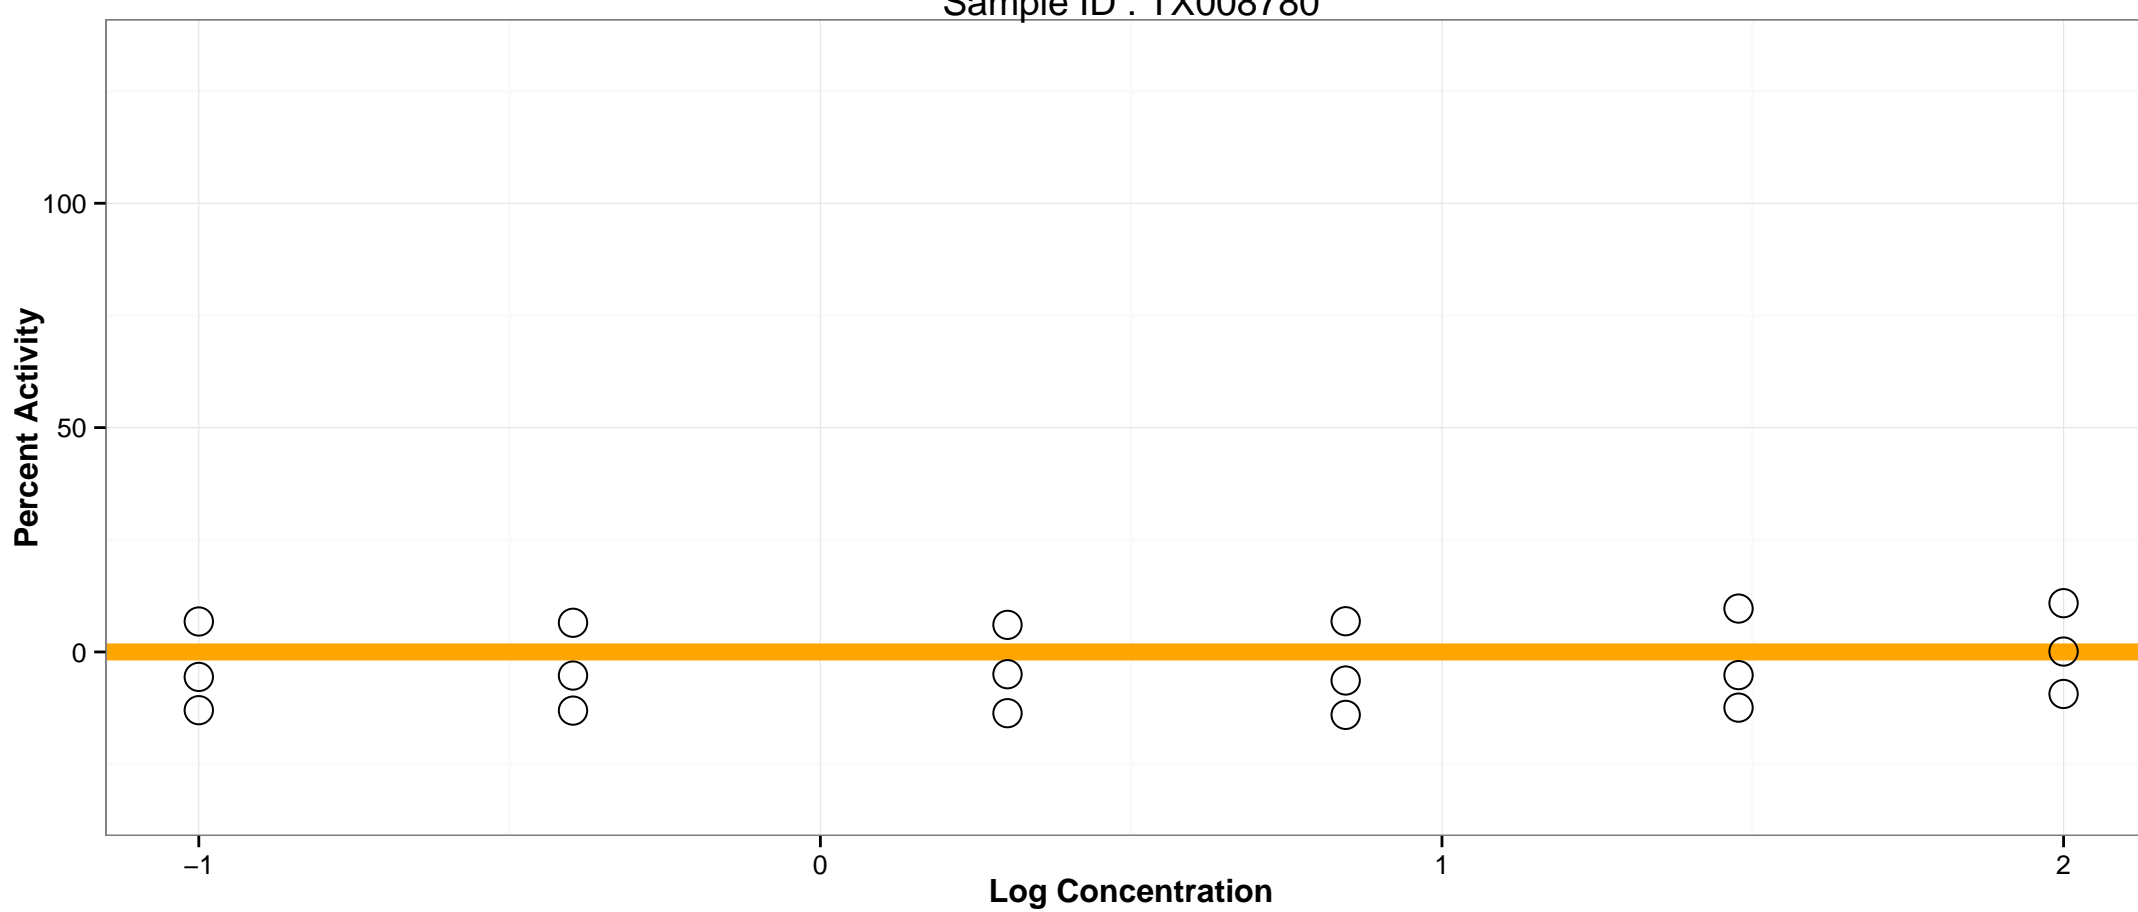

HILL MODEL

HILL MODEL: Not applicable

GAIN-LOSS MODEL

GNLS MODEL: Not applicable

|      | CNST   | HILL | GNLS |
|------|--------|------|------|
| AIC  | 135.86 | NA   | NA   |
| PROB | 1      | NA   | NA   |
| RMSE | 9.12   | NA   | NA   |

MAX\_MEAN : 0.539 MAX\_MED : 0.0988 BMAD : 8.58  
COFF : 20 HIT-CALL : 0 FITC : 4 ACTP : 0  
FLAGS :



Chemical : all-trans-Retinoic acid  
CAS : 302-79-4

Assay ID 1508 (NHEERL\_TPO\_AUR\_dn)  
Sample ID : TX008810

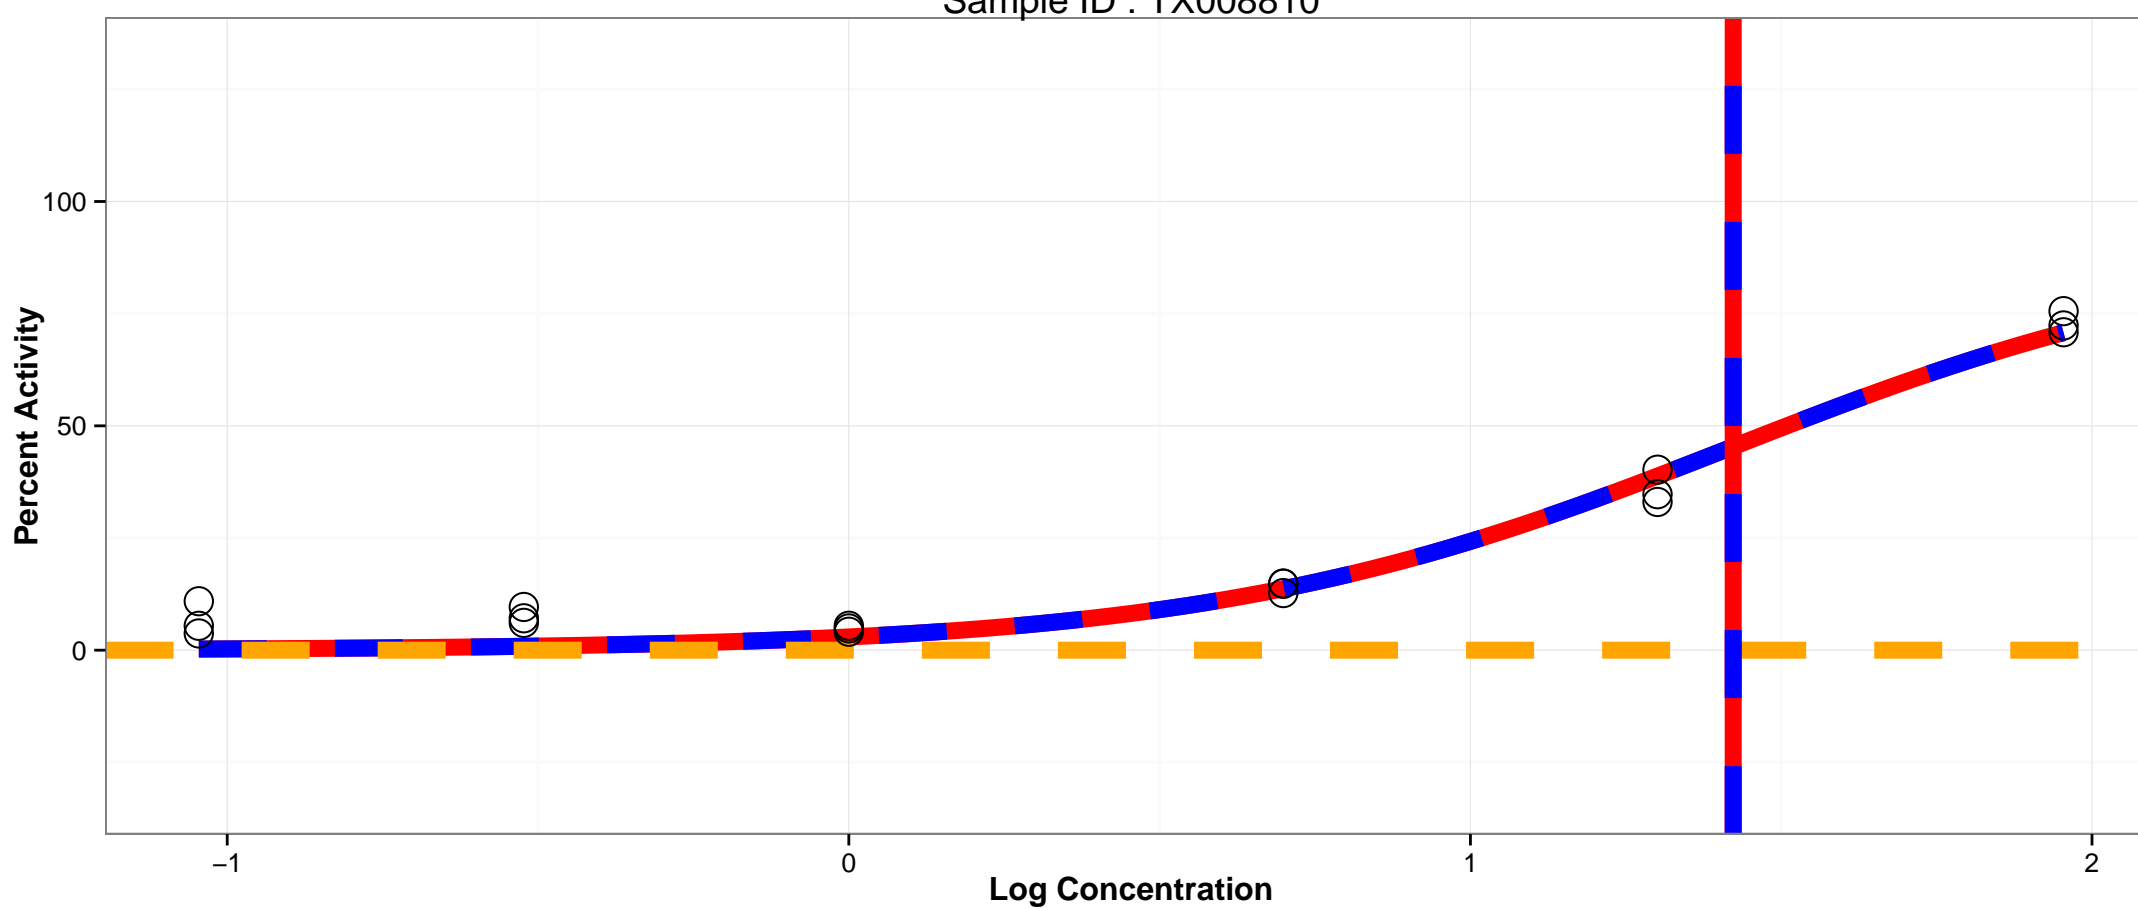

HILL MODEL

|     | tp   | ga    | gw    |
|-----|------|-------|-------|
| val | 90.7 | 1.42  | 1.04  |
| sd  | 10.3 | 0.123 | 0.154 |

GAIN-LOSS MODEL

|     | tp   | ga    | gw    | la    | lw     |
|-----|------|-------|-------|-------|--------|
| val | 90.7 | 1.42  | 1.04  | 2.78  | 16.3   |
| sd  | 10.3 | 0.123 | 0.154 | 26700 | 492000 |

|      | CNST   | HILL  | GNLS  |
|------|--------|-------|-------|
| AIC  | 178.52 | 115.3 | 119.3 |
| PROB | 0      | 0.88  | 0.12  |
| RMSE | 34.08  | 4.65  | 4.65  |

MAX\_MEAN : 72.9 MAX\_MED : 72.4 BMAD : 5.69  
COFF : 20 HIT-CALL : 1 FITC : 42 ACTP : 1  
FLAGS :

Assay ID 1509 (NHEERL\_HEK293T\_CellTiterGLO)  
Sample ID : TX008810

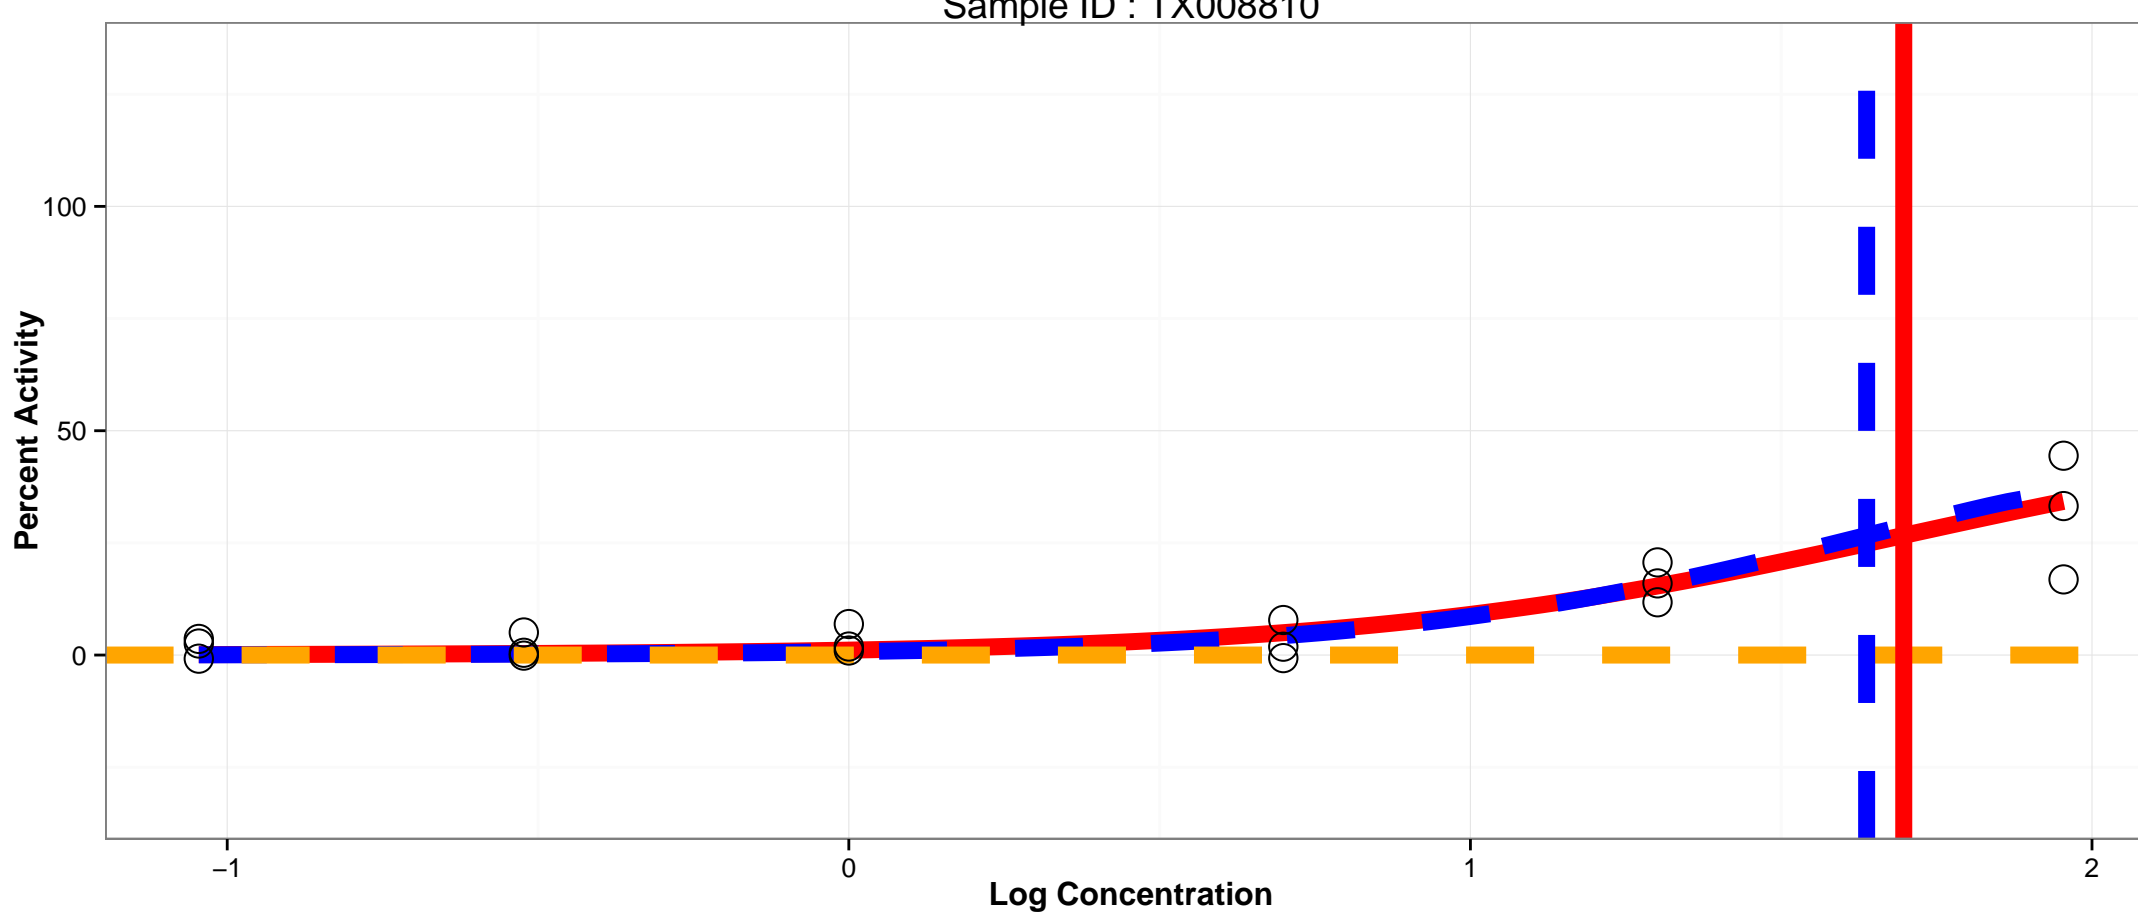

HILL MODEL

|     | tp   | ga   | gw    |
|-----|------|------|-------|
| val | 53.3 | 1.7  | 0.988 |
| sd  | 92.5 | 1.73 | 1.41  |

GAIN-LOSS MODEL

|     | tp   | ga   | gw   | la   | lw   |
|-----|------|------|------|------|------|
| val | 53.3 | 1.64 | 1.12 | 2.01 | 17.9 |
| sd  | NA   | NA   | NA   | NA   | NA   |

|      | CNST   | HILL   | GNLS   |
|------|--------|--------|--------|
| AIC  | 147.94 | 117.95 | 121.91 |
| PROB | 0      | 0.88   | 0.12   |
| RMSE | 15.54  | 5.65   | 5.63   |

MAX\_MEAN : 31.5 MAX\_MED : 33.2 BMAD : 5.54  
COFF : 20 HIT-CALL : 1 FITC : 42 ACTP : 1  
FLAGS : 6

Assay ID 1848 (NHEERL\_Quantilum\_inhib\_2\_dn)  
Sample ID : TX008810

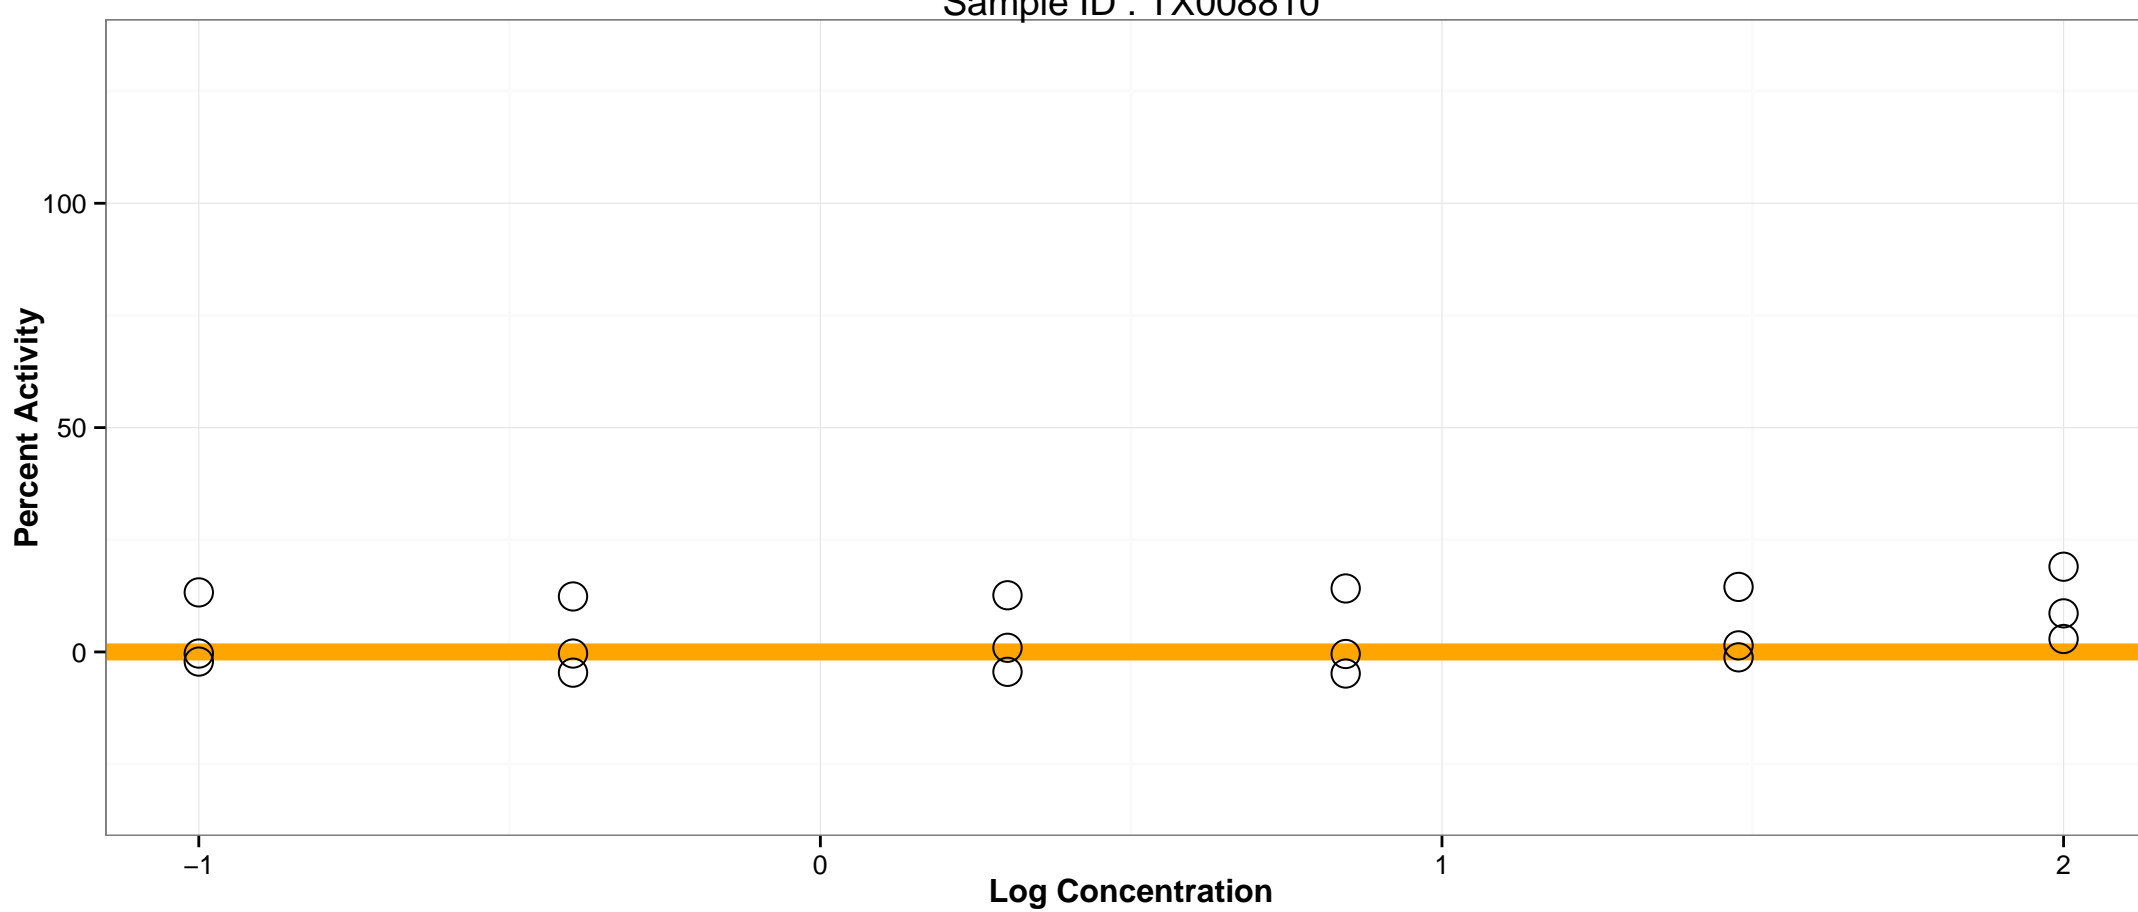

HILL MODEL  
HILL MODEL: Not applicable

GAIN-LOSS MODEL  
GNLS MODEL: Not applicable

|      | CNST   | HILL | GNLS |
|------|--------|------|------|
| AIC  | 132.42 | NA   | NA   |
| PROB | 1      | NA   | NA   |
| RMSE | 8.87   | NA   | NA   |

MAX\_MEAN : 10.2 MAX\_MED : 8.61 BMAD : 8.58  
COFF : 20 HIT-CALL : 0 FITC : 4 ACTP : 0  
FLAGS :

Chemical : 1,5-Naphthalenediamine  
CAS : 2243-62-1

Assay ID 1508 (NHEERL\_TPO\_AUR\_dn)  
Sample ID : TX008968

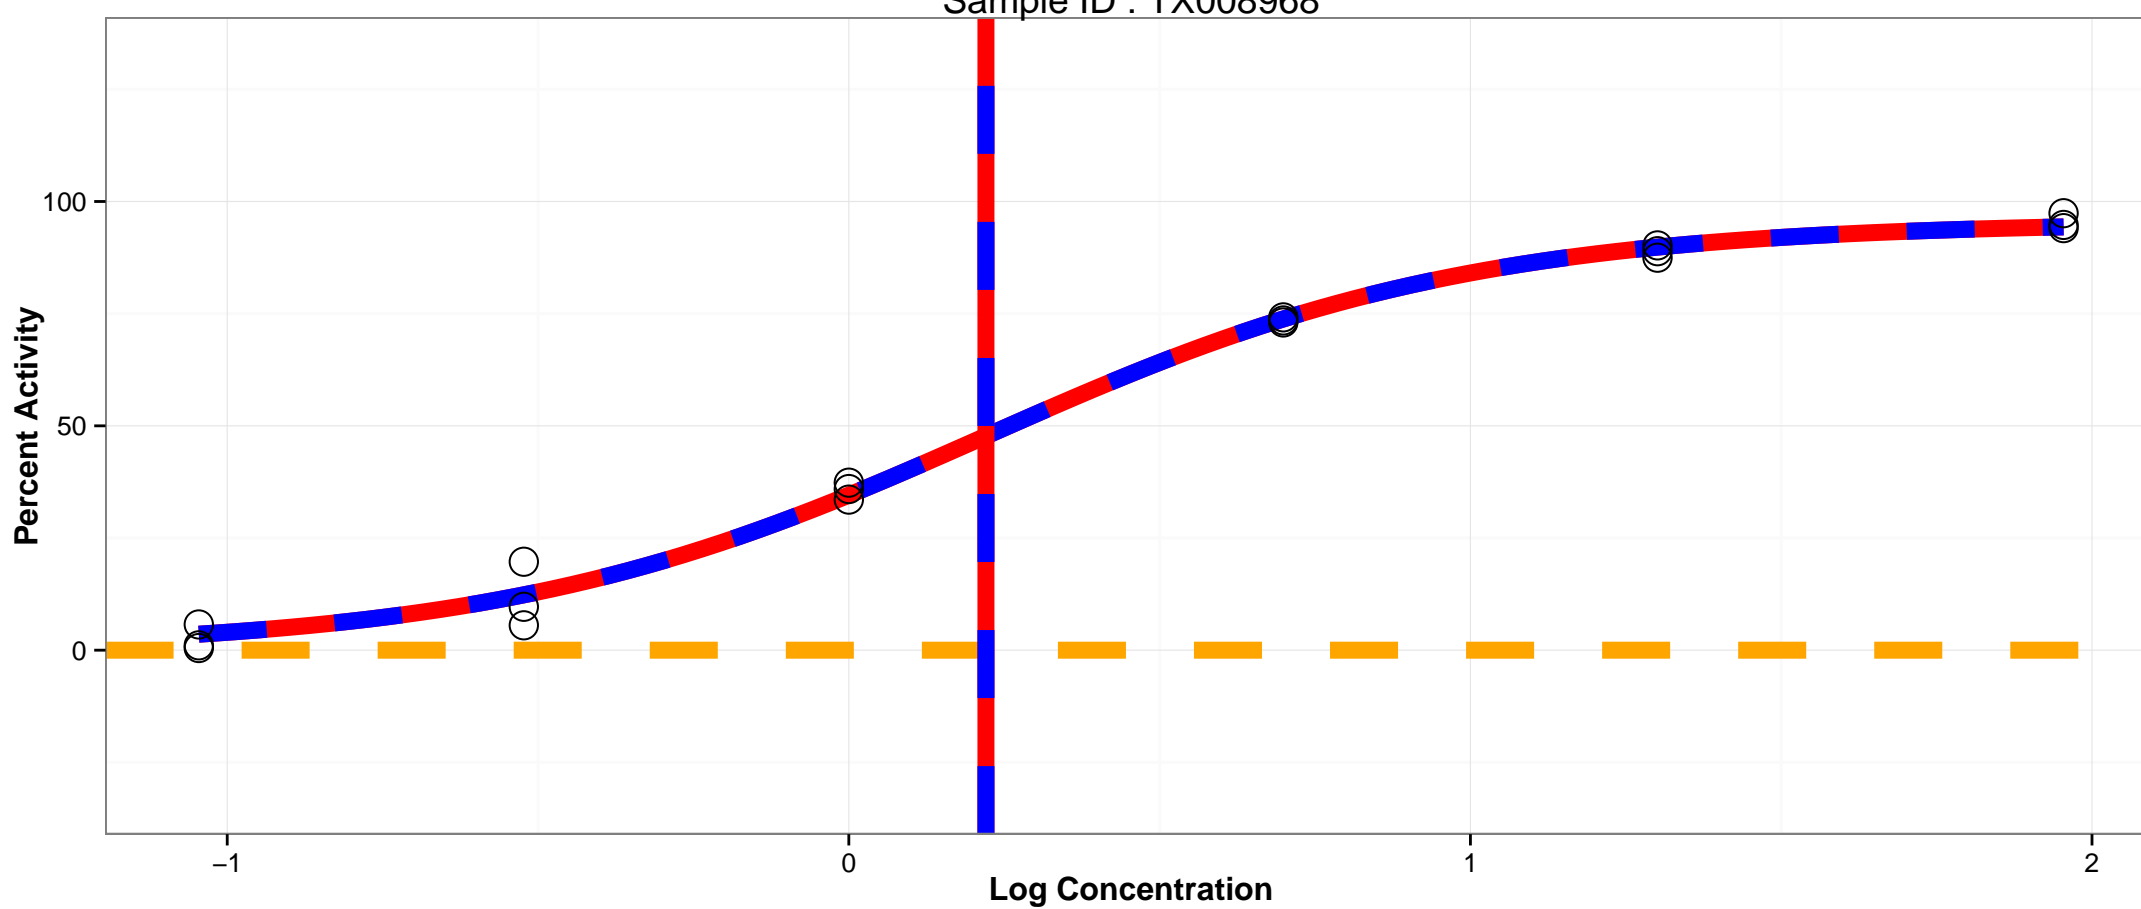

HILL MODEL

|     | tp   | ga     | gw     |
|-----|------|--------|--------|
| val | 95.4 | 0.221  | 1.11   |
| sd  | 1.35 | 0.0238 | 0.0622 |

GAIN-LOSS MODEL

|     | tp   | ga     | gw     | la   | lw   |
|-----|------|--------|--------|------|------|
| val | 95.4 | 0.221  | 1.11   | 3.95 | 4.7  |
| sd  | 1.35 | 0.0238 | 0.0622 | 2040 | 4790 |

|      | CNST   | HILL  | GNLS   |
|------|--------|-------|--------|
| AIC  | 204.78 | 96.61 | 100.61 |
| PROB | 0      | 0.88  | 0.12   |
| RMSE | 63.08  | 2.94  | 2.94   |

MAX\_MEAN : 95.4 MAX\_MED : 94.8 BMAD : 5.69  
COFF : 20 HIT-CALL : 1 FITC : 41 ACTP : 1  
FLAGS :

Assay ID 1509 (NHEERL\_HEK293T\_CellTiterGLO)  
Sample ID : TX008968

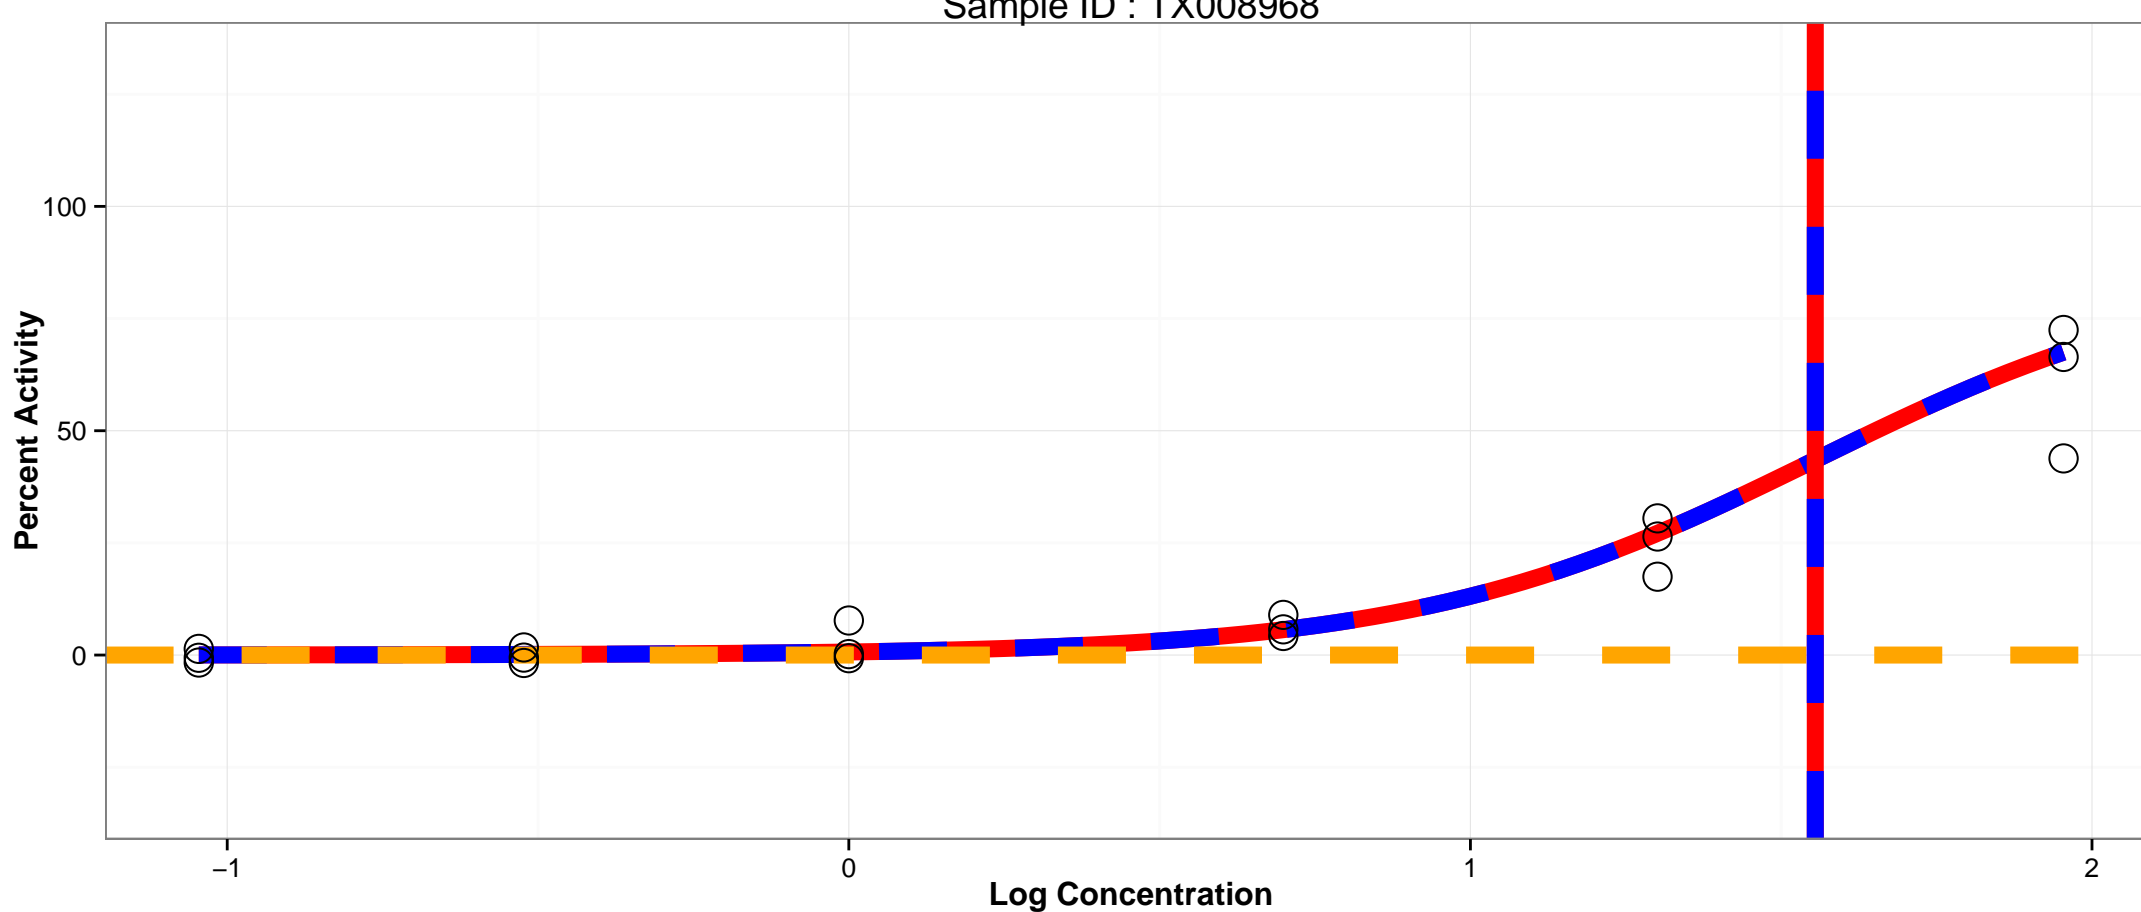

HILL MODEL

|     | tp   | ga    | gw    |
|-----|------|-------|-------|
| val | 87   | 1.55  | 1.35  |
| sd  | 13.3 | 0.135 | 0.254 |

GAIN-LOSS MODEL

|     | tp   | ga    | gw    | la    | lw     |
|-----|------|-------|-------|-------|--------|
| val | 87   | 1.55  | 1.35  | 3.03  | 10.1   |
| sd  | 13.3 | 0.135 | 0.254 | 15700 | 148000 |

|      | CNST   | HILL   | GNLS   |
|------|--------|--------|--------|
| AIC  | 167.92 | 115.22 | 119.22 |
| PROB | 0      | 0.88   | 0.12   |
| RMSE | 27.61  | 6.53   | 6.53   |

MAX\_MEAN : 60.9 MAX\_MED : 66.5 BMAD : 5.54  
COFF : 20 HIT-CALL : 1 FITC : 42 ACTP : 1  
FLAGS :

Assay ID 1848 (NHEERL\_QuantLum\_inhib\_2\_dn)  
Sample ID : TX008968

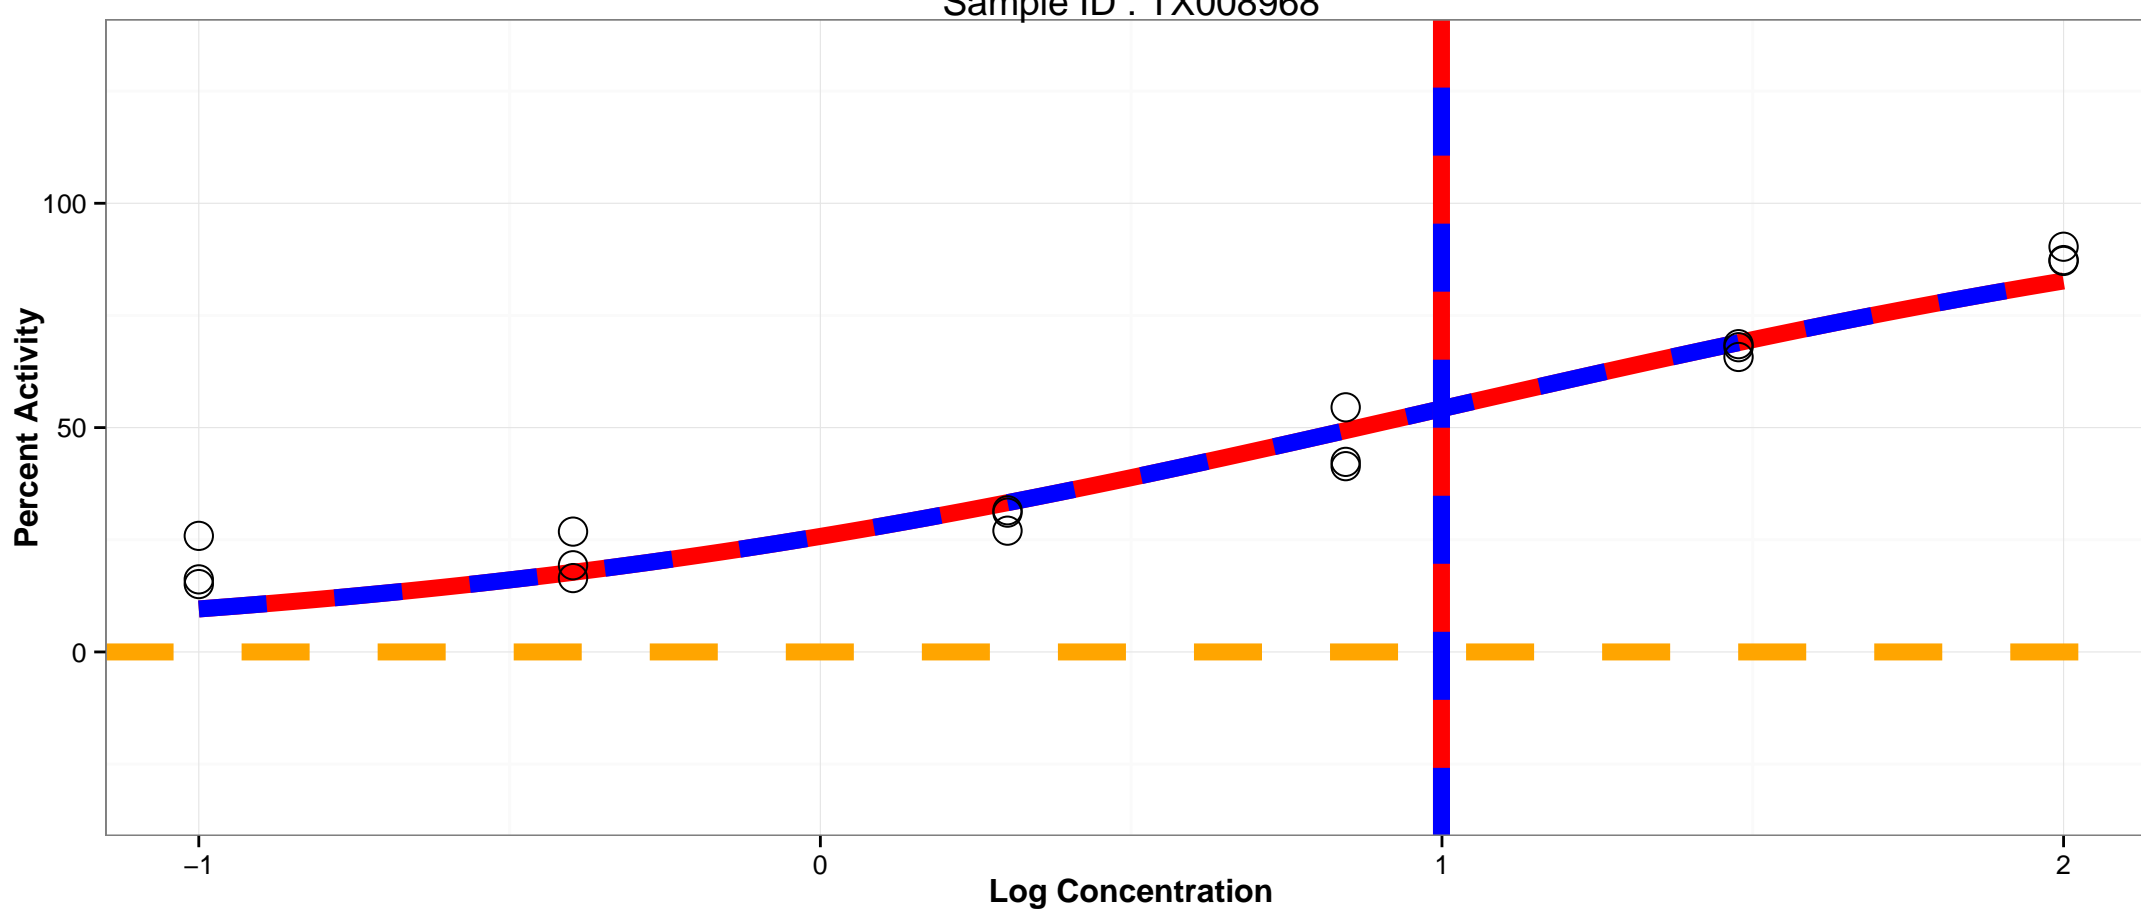

HILL MODEL

|     | tp   | ga    | gw     |
|-----|------|-------|--------|
| val | 108  | 0.999 | 0.507  |
| sd  | 14.4 | 0.265 | 0.0681 |

GAIN-LOSS MODEL

|     | tp   | ga    | gw     | la   | lw     |
|-----|------|-------|--------|------|--------|
| val | 108  | 0.999 | 0.507  | 2.74 | 17     |
| sd  | 14.4 | 0.265 | 0.0681 | 7010 | 156000 |

|      | CNST   | HILL   | GNLS   |
|------|--------|--------|--------|
| AIC  | 197.73 | 126.38 | 130.38 |
| PROB | 0      | 0.88   | 0.12   |
| RMSE | 52.04  | 6.34   | 6.34   |

MAX\_MEAN : 88.3 MAX\_MED : 87.4 BMAD : 8.58  
COFF : 20 HIT-CALL : 1 FITC : 42 ACTP : 1  
FLAGS :

Chemical : Rifampicin  
CAS : 13292-46-1

Assay ID 1508 (NHEERL\_TPO\_AUR\_dn)  
Sample ID : TX009070

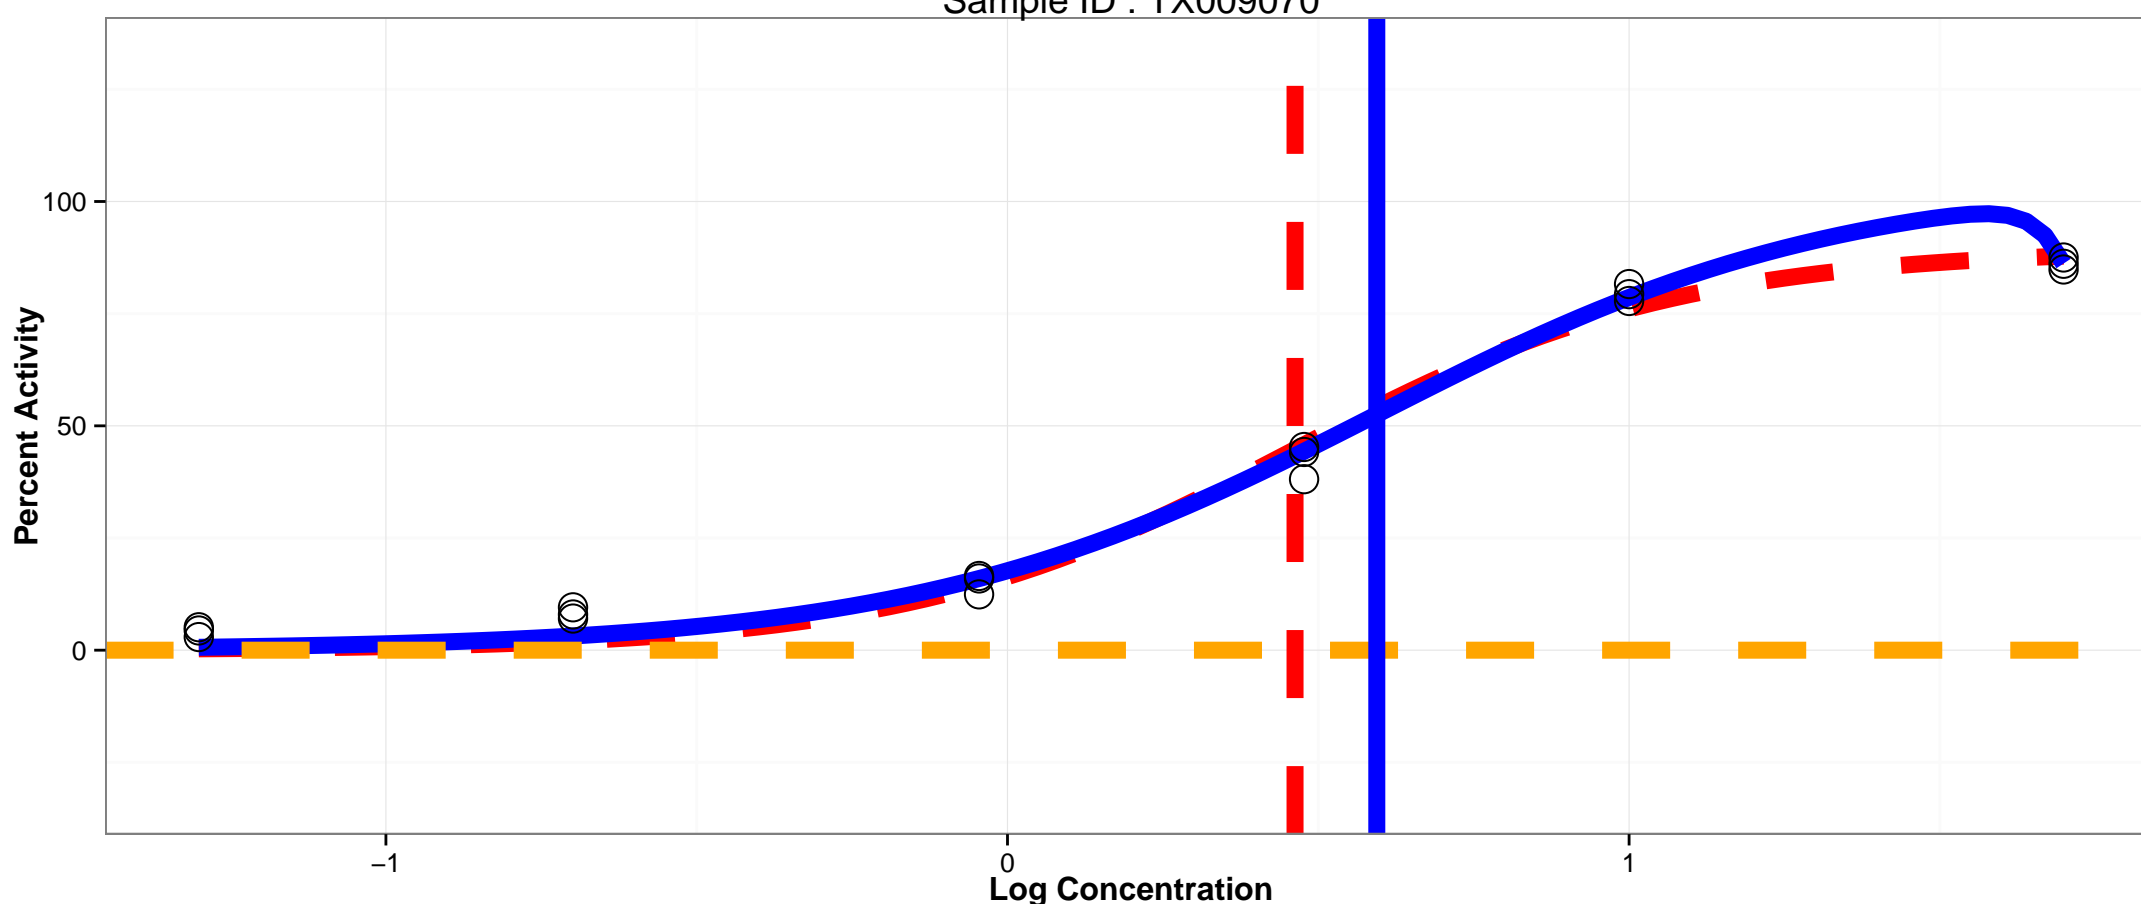

HILL MODEL

|     | tp   | ga     | gw    |
|-----|------|--------|-------|
| val | 89.4 | 0.463  | 1.4   |
| sd  | 2.32 | 0.0331 | 0.144 |

GAIN-LOSS MODEL

|     | tp   | ga     | gw    | la      | lw   |
|-----|------|--------|-------|---------|------|
| val | 105  | 0.594  | 1.17  | 1.77    | 10.7 |
| sd  | 11.2 | 0.0975 | 0.156 | 0.00772 | 3.62 |

|      | CNST   | HILL   | GNLS   |
|------|--------|--------|--------|
| AIC  | 196.35 | 111.24 | 106.25 |
| PROB | 0      | 0.08   | 0.92   |
| RMSE | 51.48  | 4.03   | 3.21   |

MAX\_MEAN : 86.2 MAX\_MED : 86.1 BMAD : 5.69  
COFF : 20 HIT-CALL : 1 FITC : 50 ACTP : 1  
FLAGS :

Assay ID 1509 (NHEERL\_HEK293T\_CellTiterGLO)  
Sample ID : TX009070

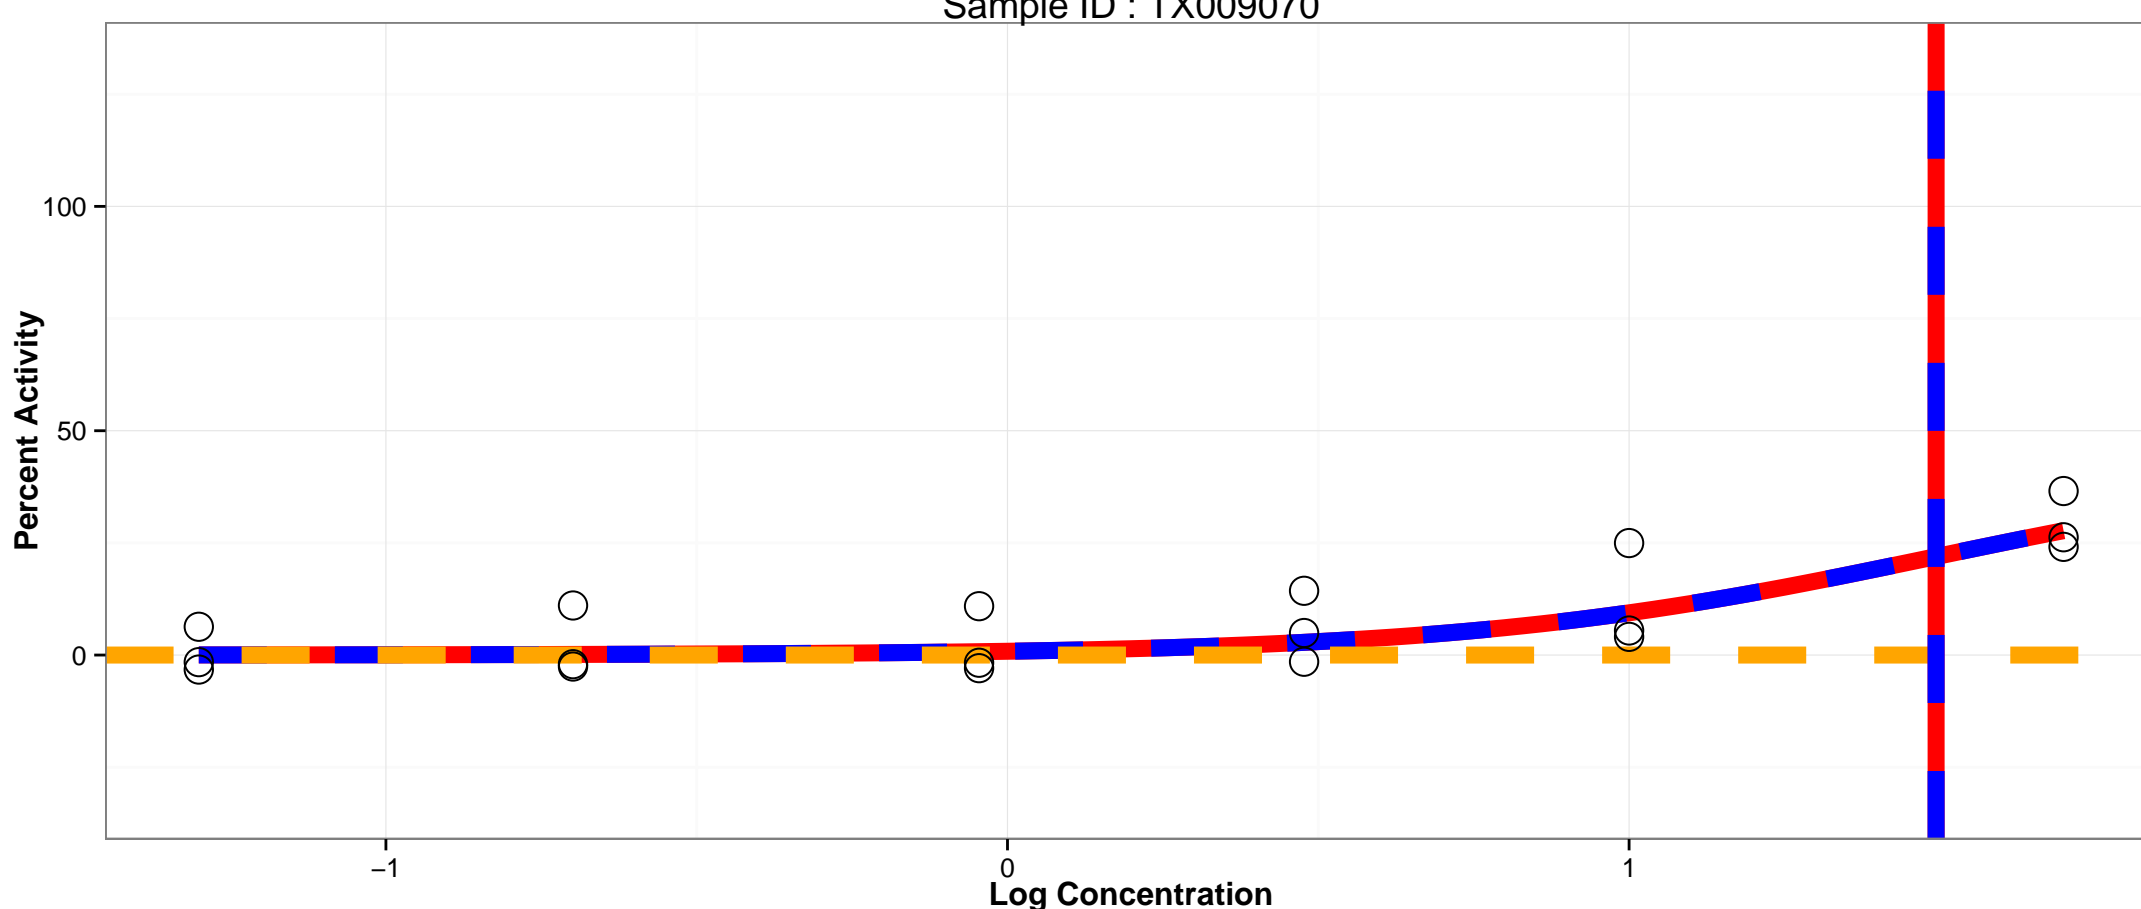

HILL MODEL

|     | tp   | ga    | gw    |
|-----|------|-------|-------|
| val | 43.9 | 1.49  | 1.14  |
| sd  | 34.5 | 0.691 | 0.736 |

GAIN-LOSS MODEL

|     | tp   | ga    | gw    | la    | lw     |
|-----|------|-------|-------|-------|--------|
| val | 43.9 | 1.49  | 1.14  | 3.69  | 5.35   |
| sd  | 34.6 | 0.691 | 0.736 | 67300 | 182000 |

|      | CNST   | HILL   | GNLS   |
|------|--------|--------|--------|
| AIC  | 148.22 | 129.19 | 133.19 |
| PROB | 0      | 0.88   | 0.12   |
| RMSE | 14.58  | 6.84   | 6.84   |

MAX\_MEAN : 29 MAX\_MED : 26.3 BMAD : 5.54  
COFF : 20 HIT-CALL : 1 FITC : 42 ACTP : 1  
FLAGS : 6

Assay ID 1848 (NHEERL\_Quantilum\_inhib\_2\_dn)  
Sample ID : TX009070

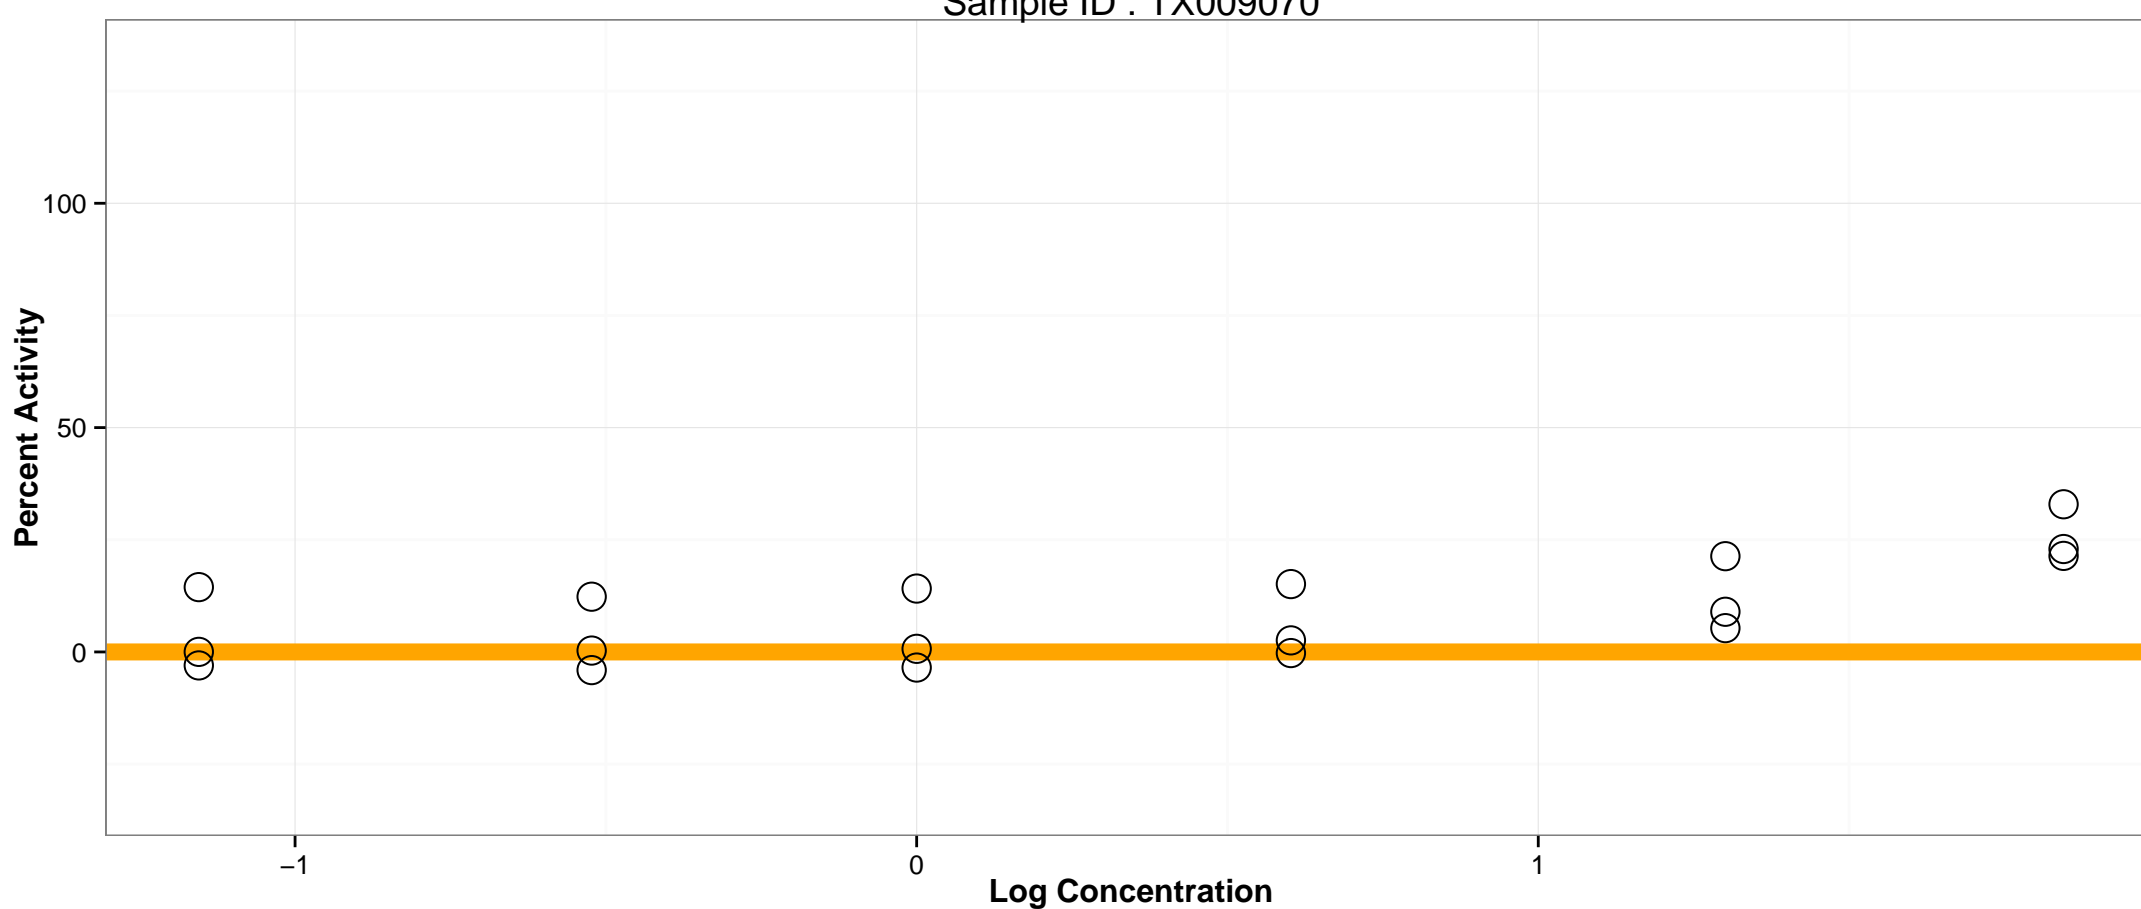

HILL MODEL

HILL MODEL: Not applicable

GAIN-LOSS MODEL

GNLS MODEL: Not applicable

|      | CNST   | HILL | GNLS |
|------|--------|------|------|
| AIC  | 148.18 | NA   | NA   |
| PROB | 1      | NA   | NA   |
| RMSE | 13.88  | NA   | NA   |

MAX\_MEAN : 25.8 MAX\_MED : 23 BMAD : 8.58  
COFF : 20 HIT-CALL : 0 FITC : 4 ACTP : 0  
FLAGS :

Assay ID 1508 (NHEERL\_TPO\_AUR\_dn)  
Sample ID : TX009150

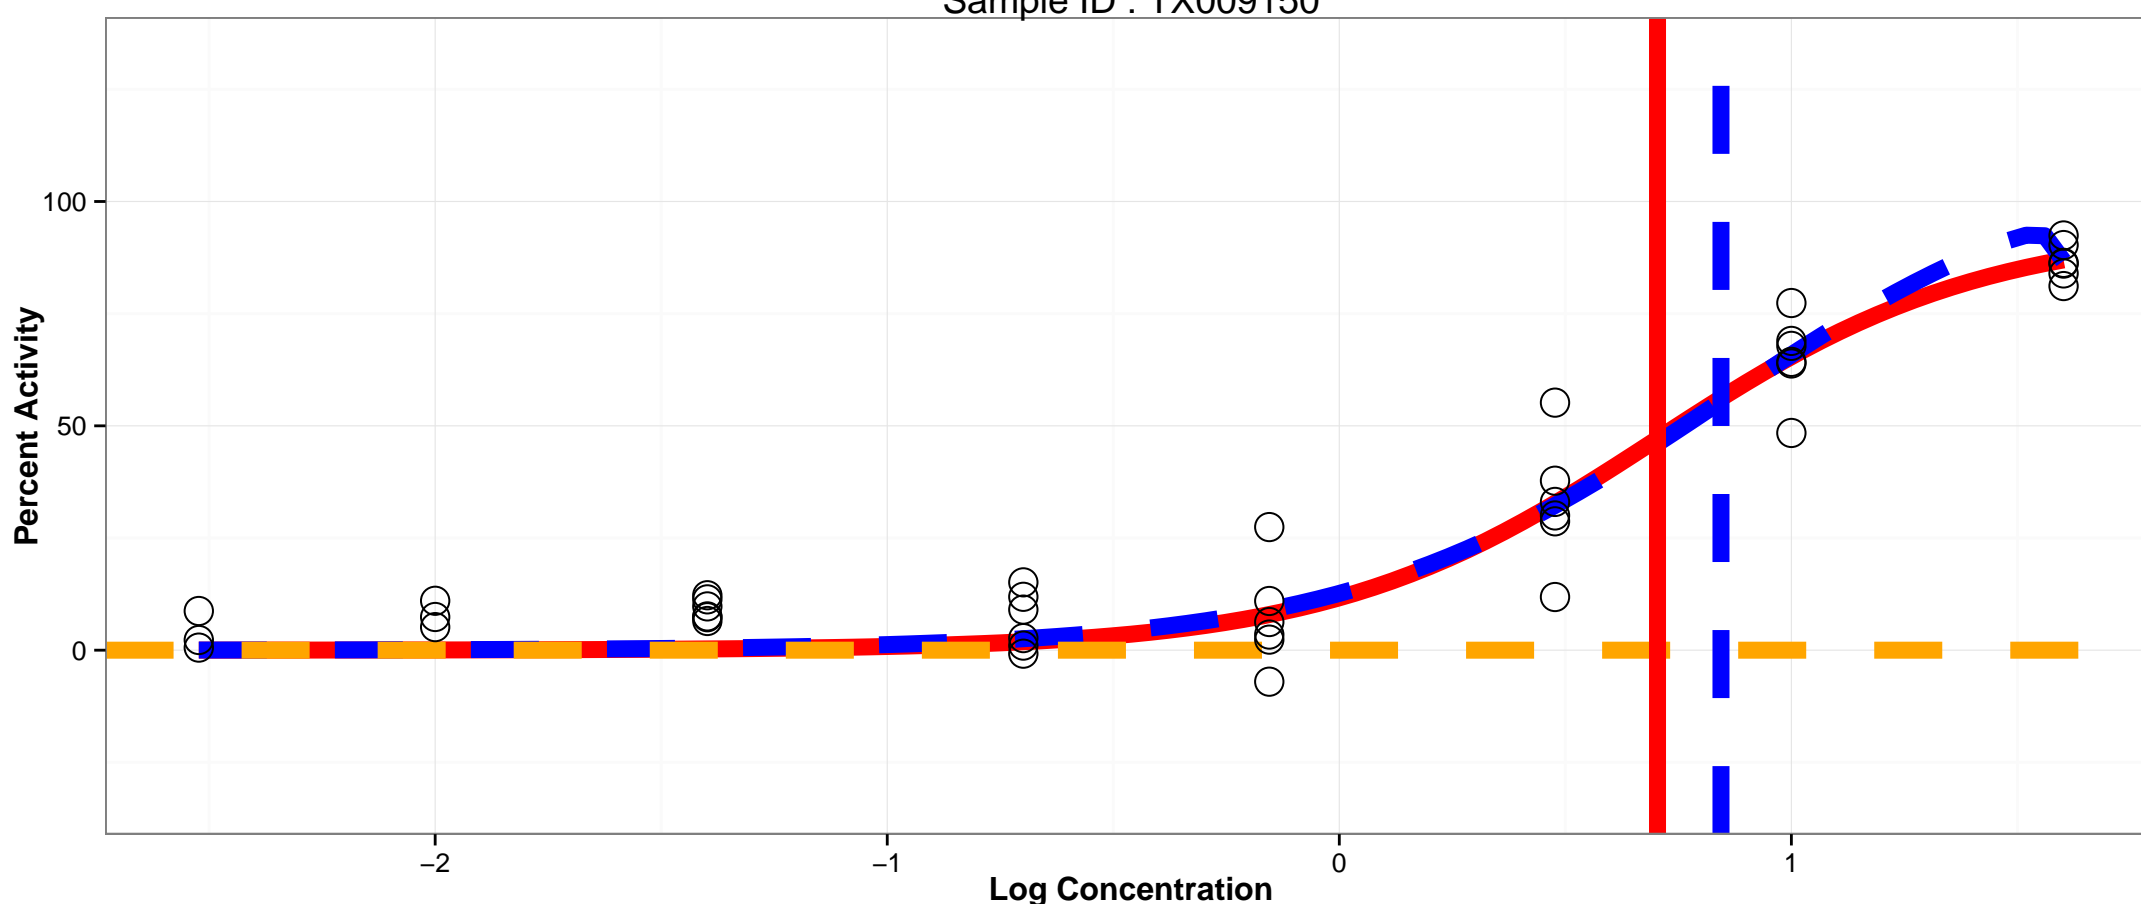

HILL MODEL

|     | tp   | ga     | gw    |
|-----|------|--------|-------|
| val | 94.2 | 0.704  | 1.21  |
| sd  | 6.49 | 0.0775 | 0.234 |

GAIN-LOSS MODEL

|     | tp  | ga    | gw   | la   | lw   |
|-----|-----|-------|------|------|------|
| val | 111 | 0.844 | 1.05 | 1.66 | 16.5 |
| sd  | NA  | NA    | NA   | NA   | NA   |

|      | CNST   | HILL   | GNLS   |
|------|--------|--------|--------|
| AIC  | 438.25 | 310.79 | 314.24 |
| PROB | 0      | 0.85   | 0.15   |
| RMSE | 43.86  | 8.88   | 8.82   |

MAX\_MEAN : 86.7 MAX\_MED : 86.3 BMAD : 5.69  
COFF : 20 HIT-CALL : 1 FITC : 42 ACTP : 1  
FLAGS :

Assay ID 1509 (NHEERL\_HEK293T\_CellTiterGLO)  
Sample ID : TX009150

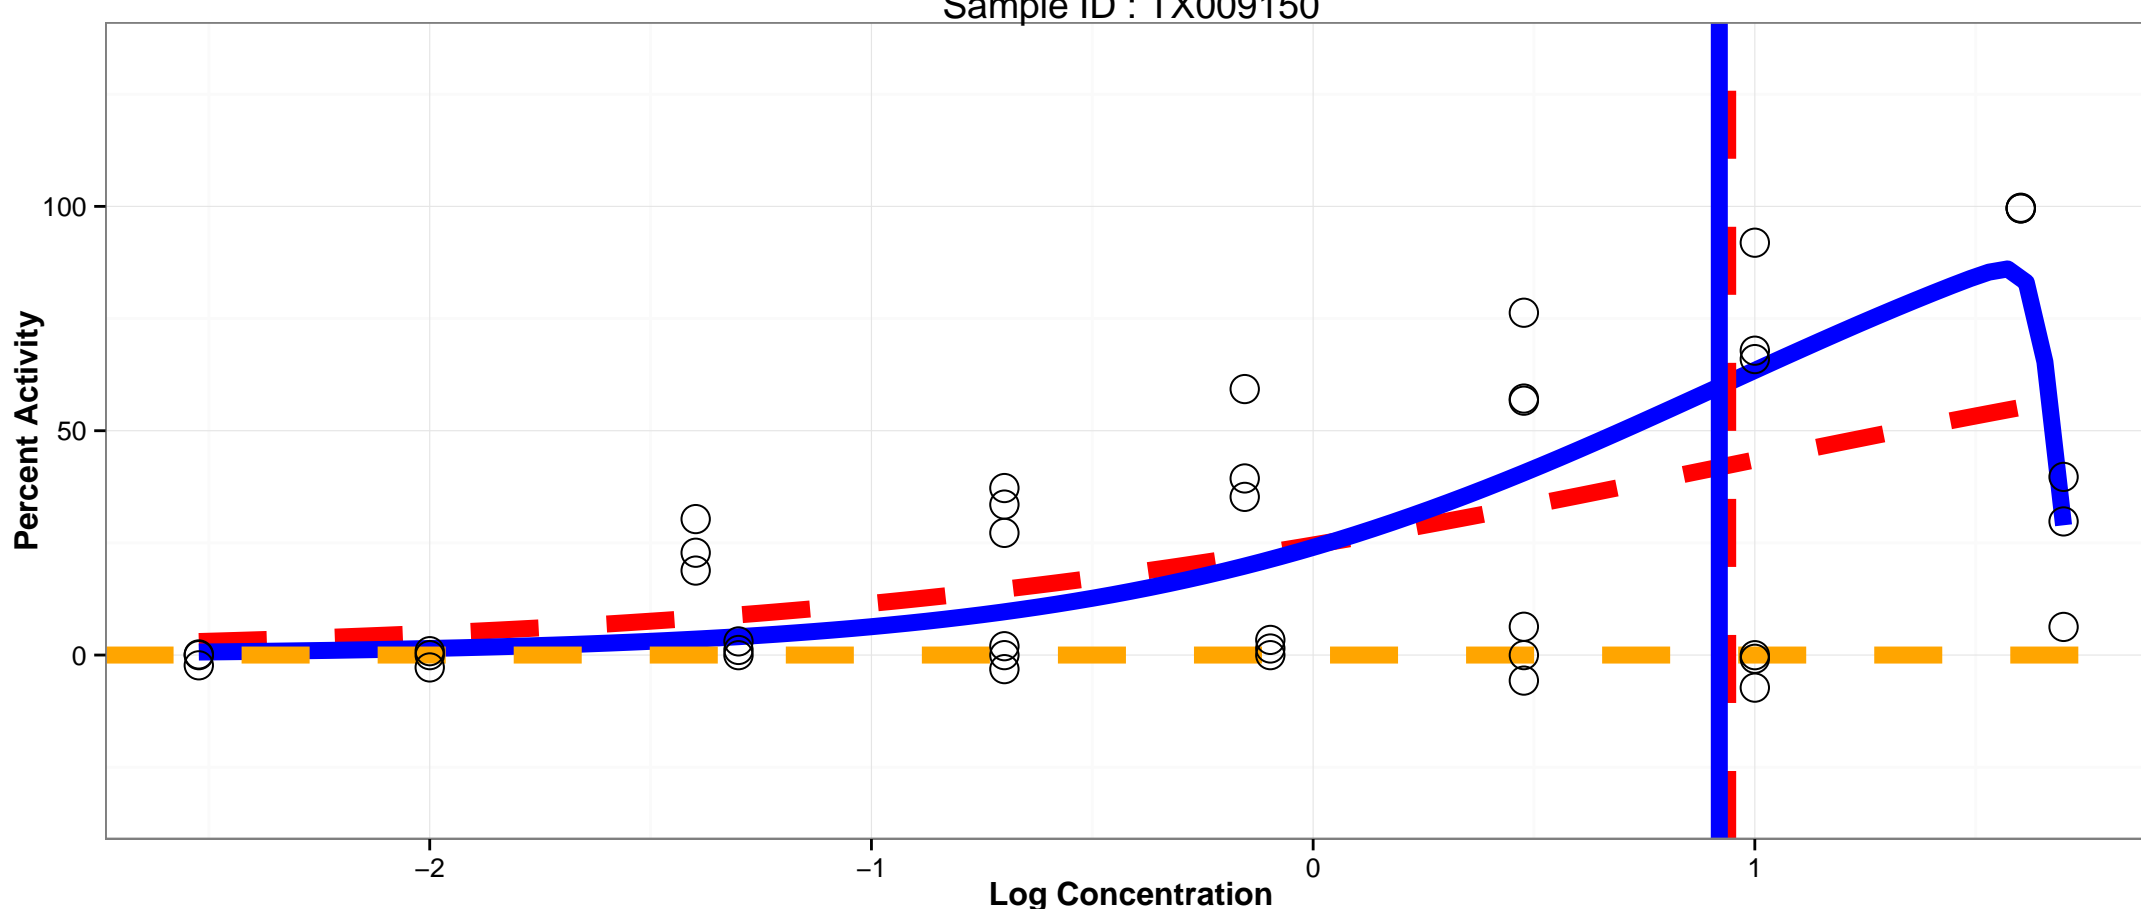

HILL MODEL

|     | tp   | ga    | gw    |
|-----|------|-------|-------|
| val | 84.5 | 0.939 | 0.414 |
| sd  | 100  | 2.64  | 0.316 |

GAIN-LOSS MODEL

|     | tp   | ga    | gw    | la     | lw   |
|-----|------|-------|-------|--------|------|
| val | 120  | 0.92  | 0.653 | 1.68   | 18   |
| sd  | 35.8 | 0.435 | 0.204 | 0.0154 | 7.36 |

|      | CNST  | HILL   | GNLS   |
|------|-------|--------|--------|
| AIC  | 431.4 | 410.66 | 404.09 |
| PROB | 0     | 0.04   | 0.96   |
| RMSE | 41.84 | 27.52  | 26.16  |

MAX\_MEAN : 99.6 MAX\_MED : 99.6 BMAD : 5.54  
COFF : 20 HIT-CALL : 1 FITC : 51 ACTP : 1  
FLAGS : 10

Assay ID 1848 (NHEERL\_Quantilum\_inhib\_2\_dn)  
Sample ID : TX009150

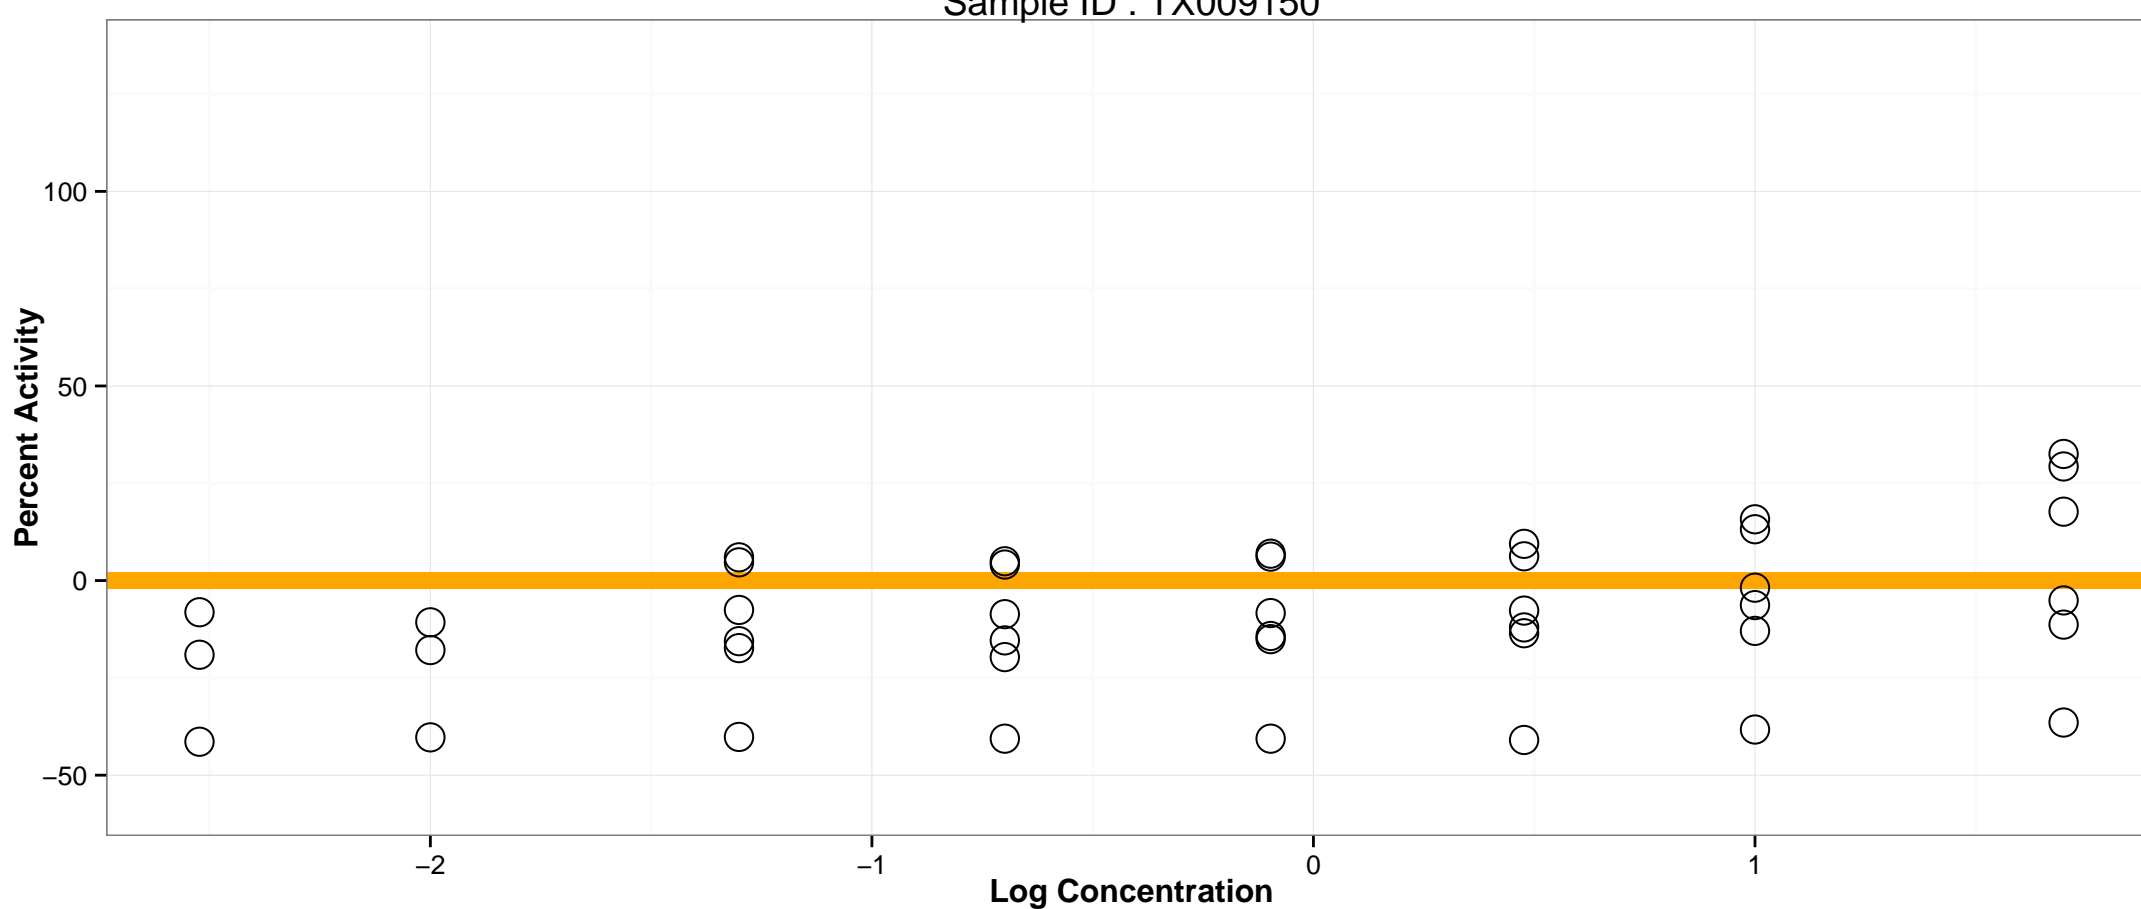

HILL MODEL

HILL MODEL: Not applicable

GAIN-LOSS MODEL

GNLS MODEL: Not applicable

|      | CNST   | HILL | GNLS |
|------|--------|------|------|
| AIC  | 380.53 | NA   | NA   |
| PROB | 1      | NA   | NA   |
| RMSE | 21.32  | NA   | NA   |

MAX\_MEAN : 4.46 MAX\_MED : 6.31 BMAD : 8.58  
COFF : 20 HIT-CALL : 0 FITC : 4 ACTP : 0  
FLAGS : 10

Assay ID 1508 (NHEERL\_TPO\_AUR\_dn)  
Sample ID : TX109150

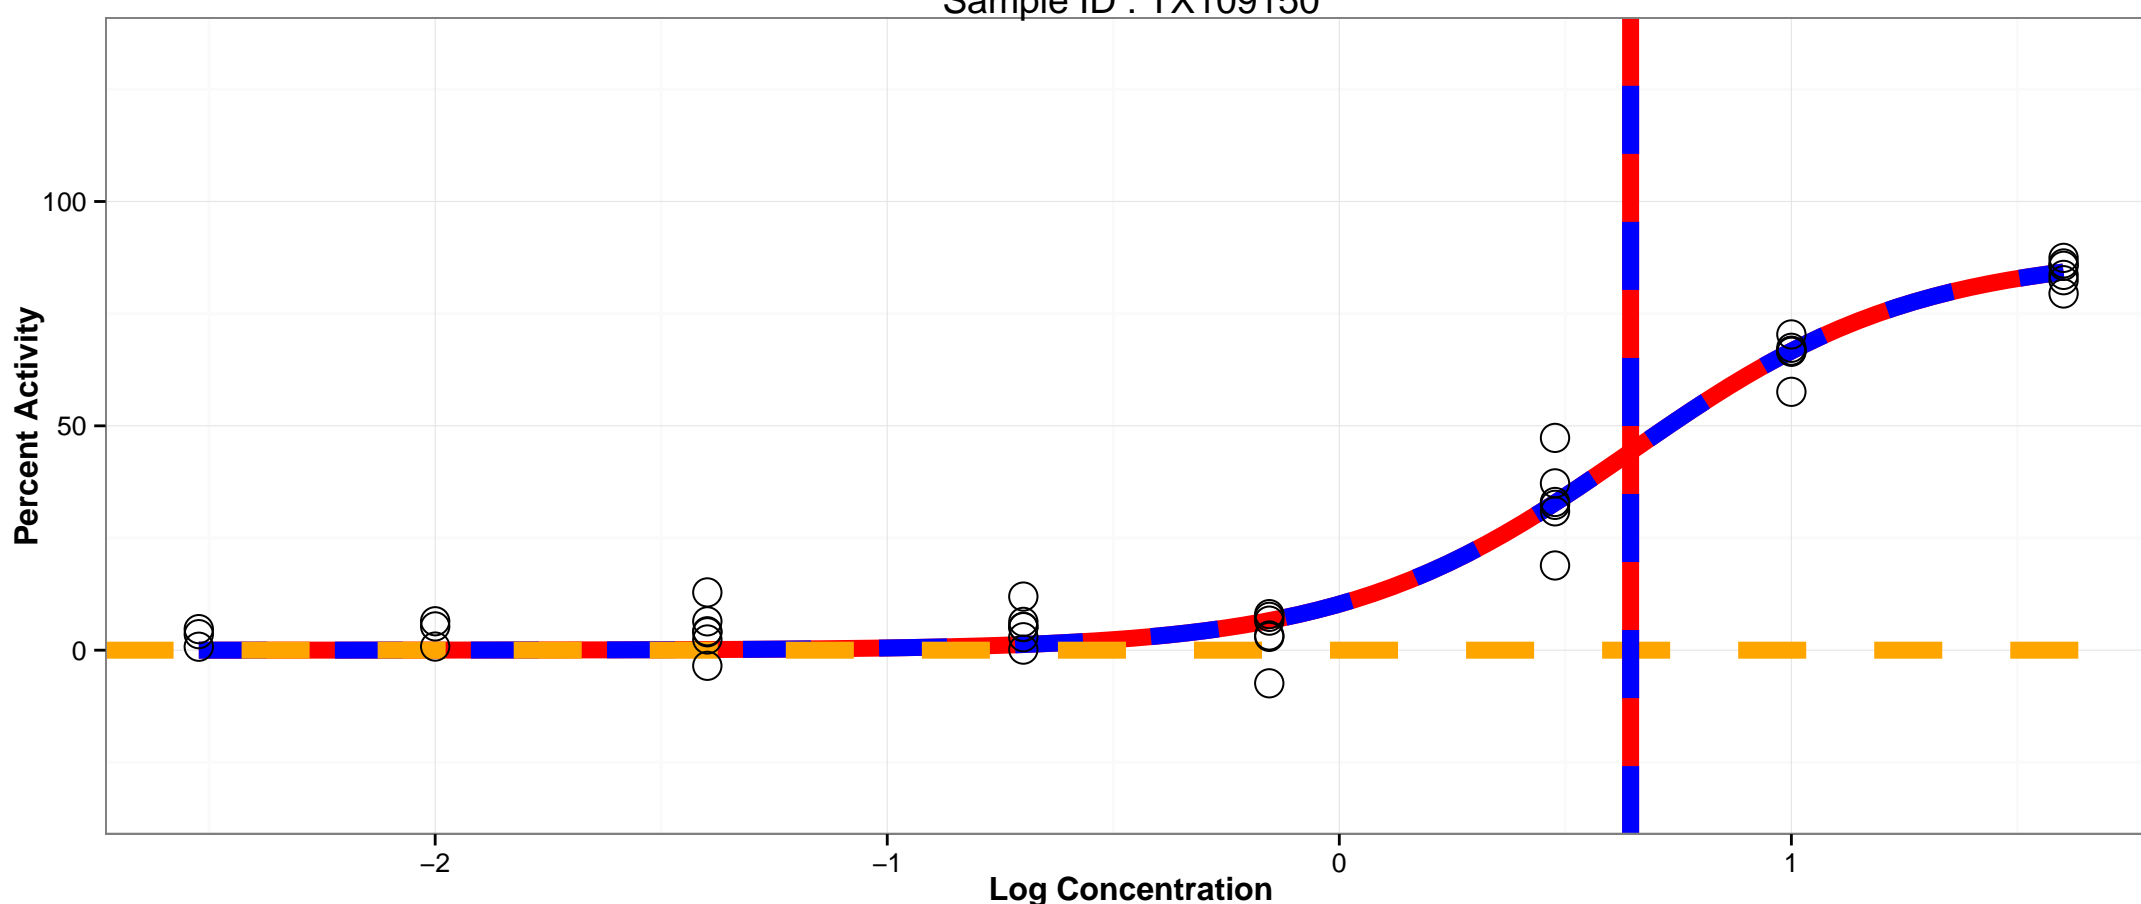

HILL MODEL

|     | tp   | ga     | gw    |
|-----|------|--------|-------|
| val | 88.4 | 0.644  | 1.37  |
| sd  | 2.74 | 0.0352 | 0.126 |

GAIN-LOSS MODEL

|     | tp   | ga     | gw    | la    | lw     |
|-----|------|--------|-------|-------|--------|
| val | 88.4 | 0.644  | 1.37  | 2.34  | 13.2   |
| sd  | 2.74 | 0.0352 | 0.126 | 26500 | 479000 |

|      | CNST   | HILL   | GNLS   |
|------|--------|--------|--------|
| AIC  | 435.76 | 268.03 | 272.03 |
| PROB | 0      | 0.88   | 0.12   |
| RMSE | 42.71  | 5.61   | 5.61   |

MAX\_MEAN : 84.2 MAX\_MED : 84.7 BMAD : 5.69  
COFF : 20 HIT-CALL : 1 FITC : 41 ACTP : 1  
FLAGS :

Assay ID 1509 (NHEERL\_HEK293T\_CellTiterGLO)  
Sample ID : TX109150

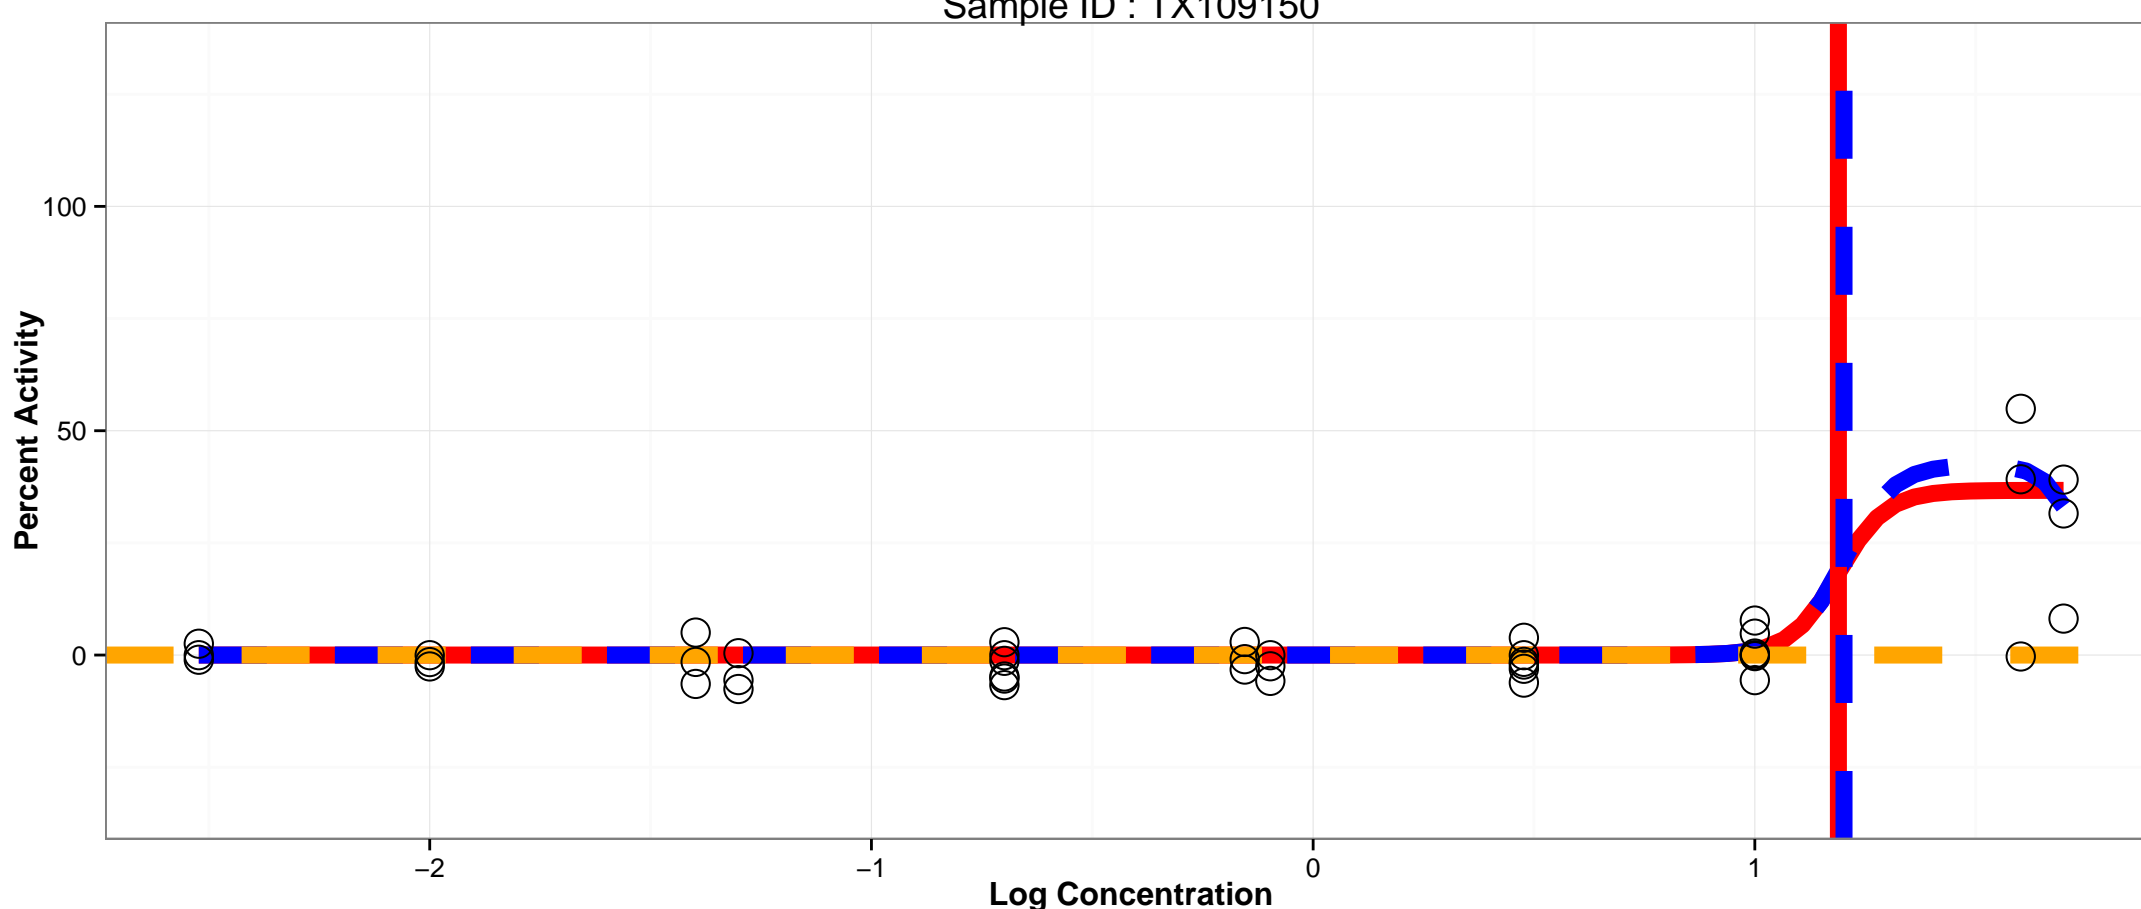

HILL MODEL

|     | tp   | ga    | gw   |
|-----|------|-------|------|
| val | 36.7 | 1.19  | 8    |
| sd  | 2.89 | 0.282 | 11.7 |

GAIN-LOSS MODEL

|     | tp   | ga   | gw   | la     | lw   |
|-----|------|------|------|--------|------|
| val | 42.5 | 1.2  | 7.85 | 1.75   | 10.6 |
| sd  | 9.9  | 2.81 | 109  | 0.0497 | 14.8 |

|      | CNST   | HILL   | GNLS   |
|------|--------|--------|--------|
| AIC  | 301.55 | 279.63 | 281.35 |
| PROB | 0      | 0.7    | 0.3    |
| RMSE | 13.51  | 8.54   | 8.59   |

MAX\_MEAN : 31.3 MAX\_MED : 39.2 BMAD : 5.54  
COFF : 20 HIT-CALL : 1 FITC : 41 ACTP : 1  
FLAGS :

Assay ID 1848 (NHEERL\_Quantilum\_inhib\_2\_dn)  
Sample ID : TX109150

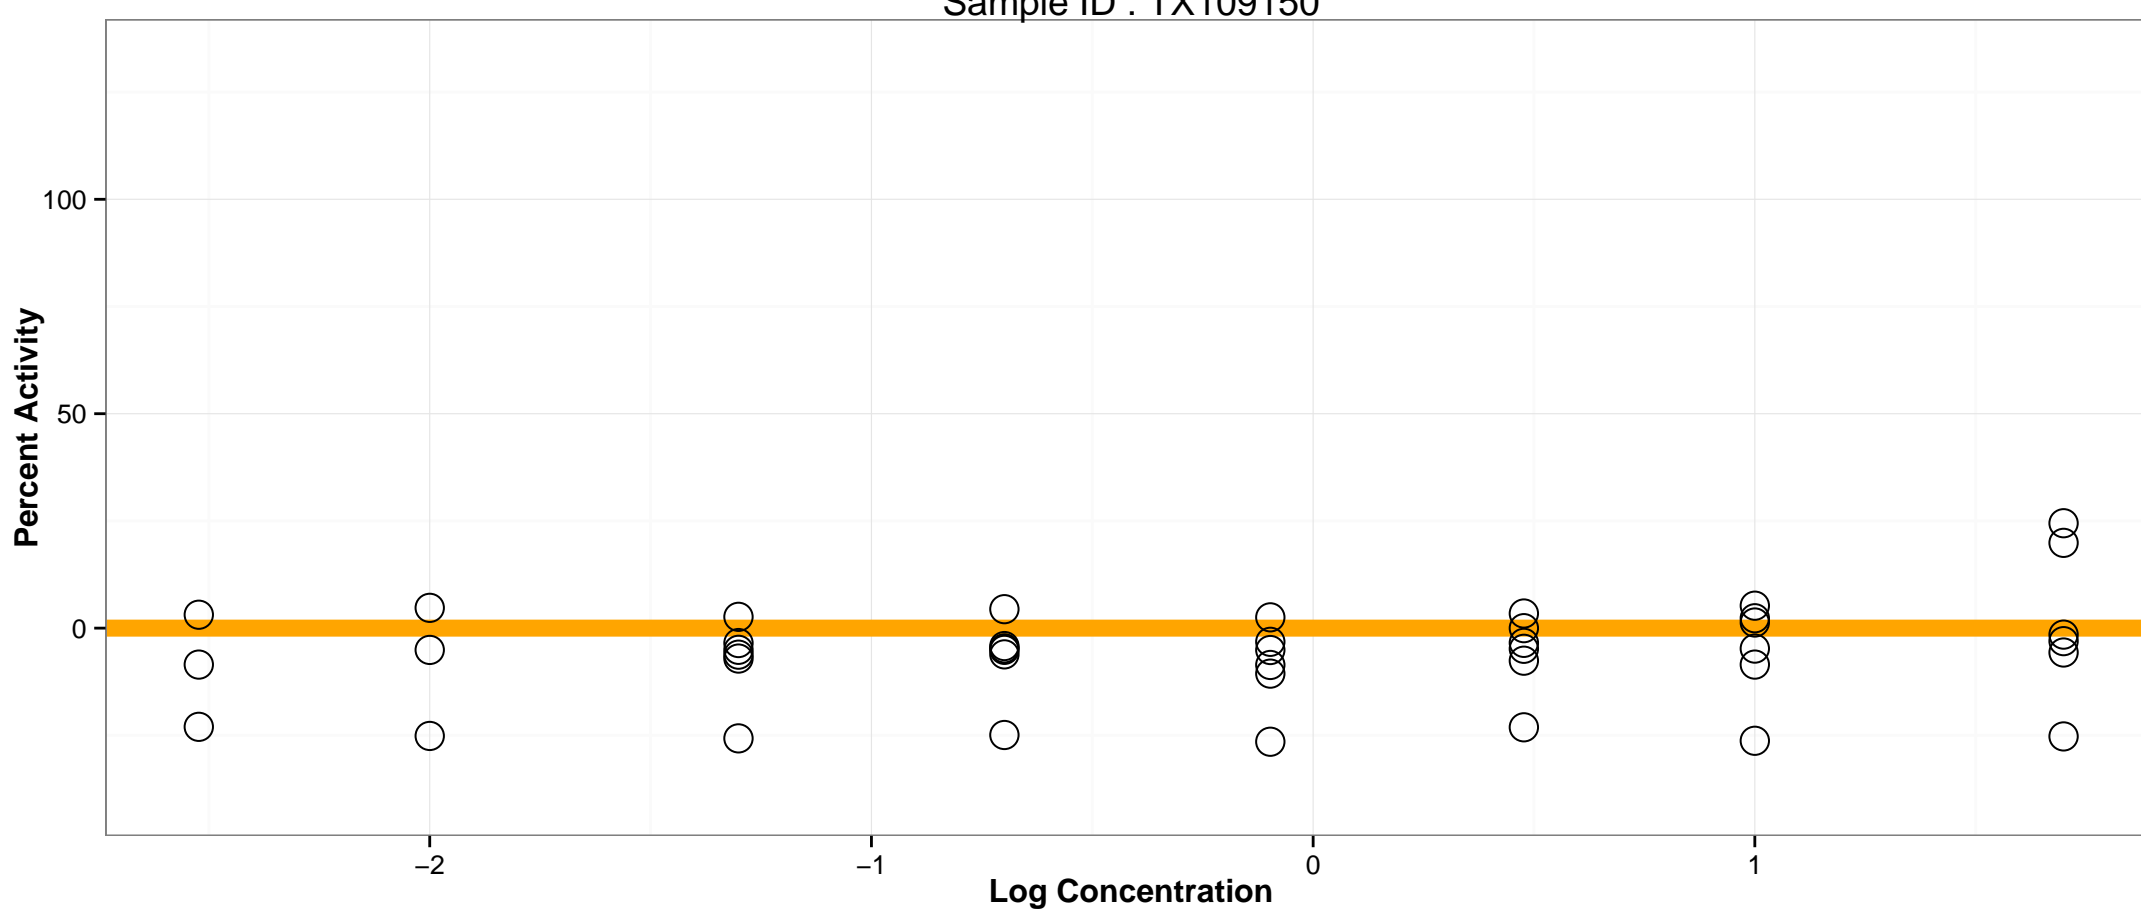

HILL MODEL

HILL MODEL: Not applicable

GAIN-LOSS MODEL

GNLS MODEL: Not applicable

|      | CNST   | HILL | GNLS |
|------|--------|------|------|
| AIC  | 333.79 | NA   | NA   |
| PROB | 1      | NA   | NA   |
| RMSE | 12.81  | NA   | NA   |

MAX\_MEAN : 1.49 MAX\_MED : -1.72 BMAD : 8.58  
COFF : 20 HIT-CALL : 0 FITC : 4 ACTP : 0  
FLAGS :

Assay ID 1508 (NHEERL\_TPO\_AUR\_dn)  
Sample ID : TX209150

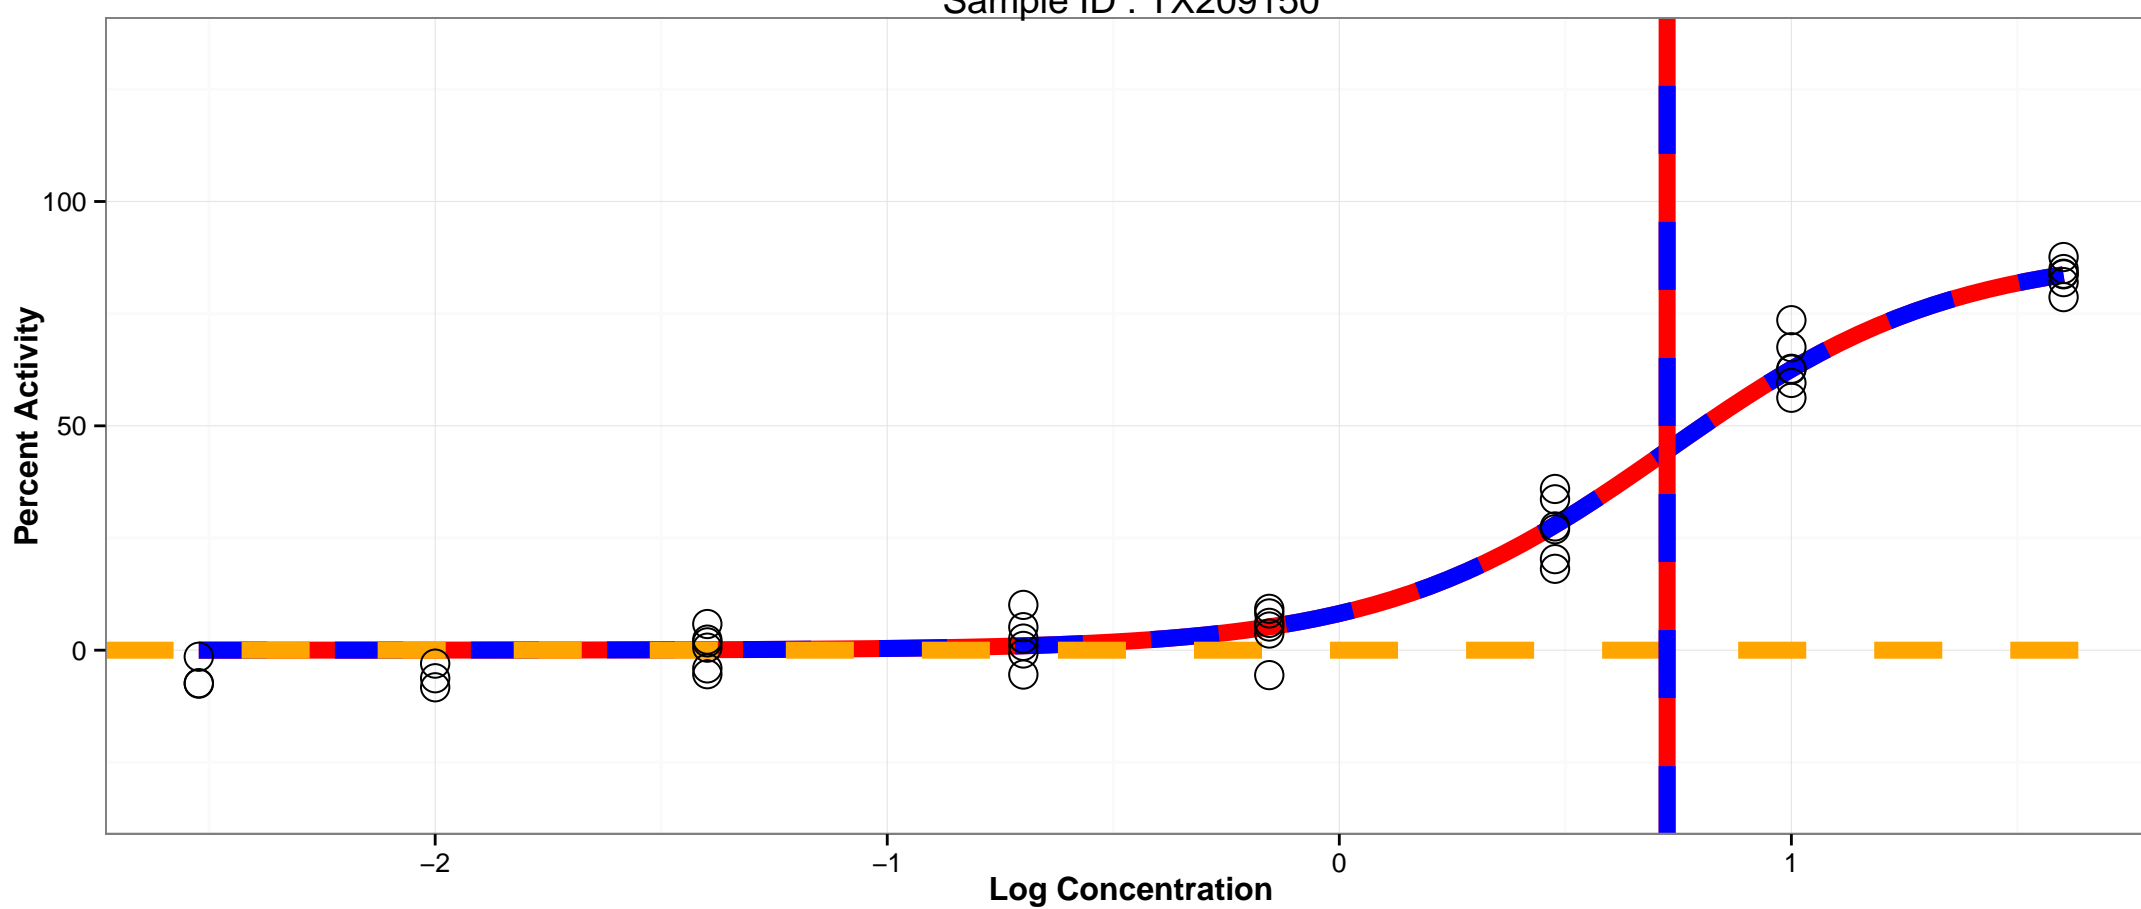

HILL MODEL

|     | tp   | ga     | gw    |
|-----|------|--------|-------|
| val | 88.9 | 0.725  | 1.37  |
| sd  | 3.2  | 0.0422 | 0.146 |

GAIN-LOSS MODEL

|     | tp   | ga    | gw   | la   | lw   |
|-----|------|-------|------|------|------|
| val | 88.9 | 0.725 | 1.37 | 3.35 | 11.3 |
| sd  | NA   | NA    | NA   | NA   | NA   |

|      | CNST   | HILL  | GNLS  |
|------|--------|-------|-------|
| AIC  | 431.82 | 267.3 | 271.3 |
| PROB | 0      | 0.88  | 0.12  |
| RMSE | 41.35  | 5.11  | 5.11  |

MAX\_MEAN : 83.5 MAX\_MED : 83.8 BMAD : 5.69  
COFF : 20 HIT-CALL : 1 FITC : 42 ACTP : 1  
FLAGS :

Assay ID 1509 (NHEERL\_HEK293T\_CellTiterGLO)  
Sample ID : TX209150

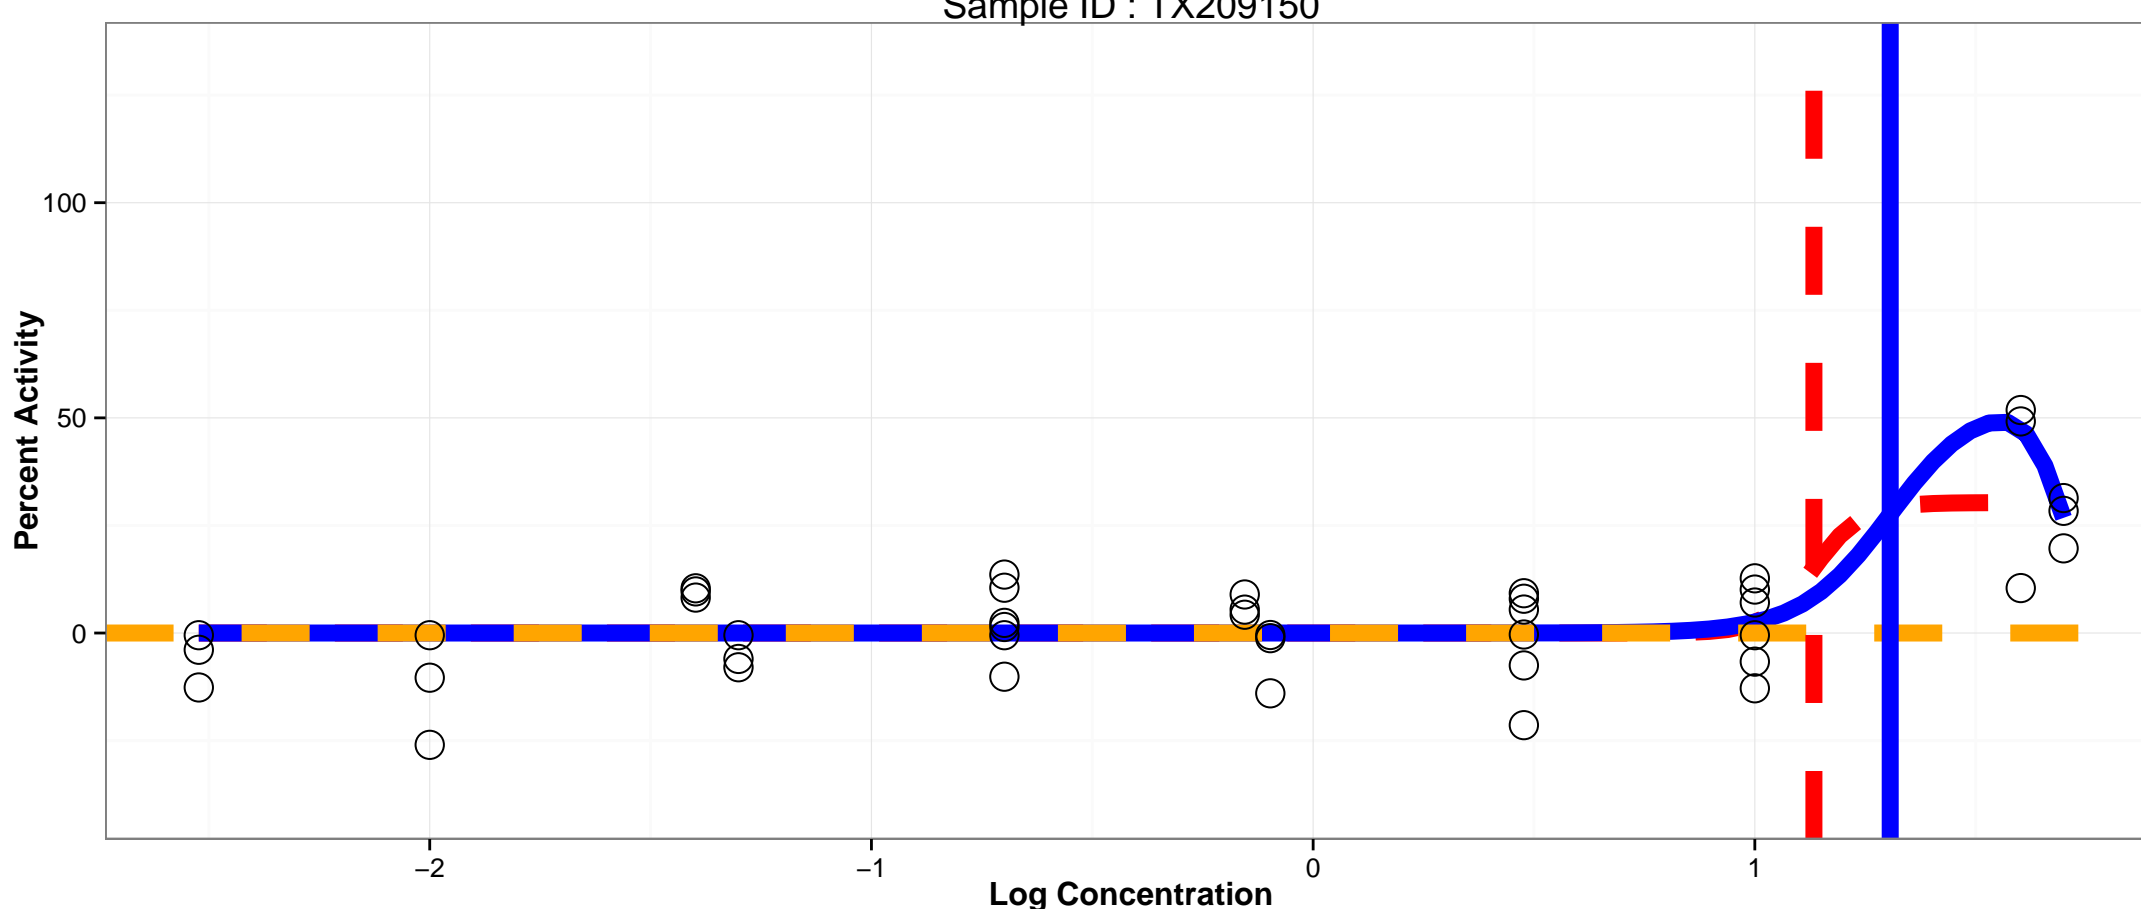

HILL MODEL

|     | tp   | ga    | gw   |
|-----|------|-------|------|
| val | 30.3 | 1.13  | 8    |
| sd  | 5.37 | 0.505 | 29.8 |

GAIN-LOSS MODEL

|     | tp   | ga   | gw   | la  | lw   |
|-----|------|------|------|-----|------|
| val | 55.1 | 1.31 | 4.31 | 1.7 | 10.3 |
| sd  | NA   | NA   | NA   | NA  | NA   |

|      | CNST   | HILL  | GNLS   |
|------|--------|-------|--------|
| AIC  | 346.13 | 326.7 | 325.96 |
| PROB | 0      | 0.41  | 0.59   |
| RMSE | 15.94  | 10.46 | 10.61  |

MAX\_MEAN : 37.2 MAX\_MED : 49.2 BMAD : 5.54  
COFF : 20 HIT-CALL : 1 FITC : 50 ACTP : 1  
FLAGS :

Assay ID 1848 (NHEERL\_Quantilum\_inhib\_2\_dn)  
Sample ID : TX209150

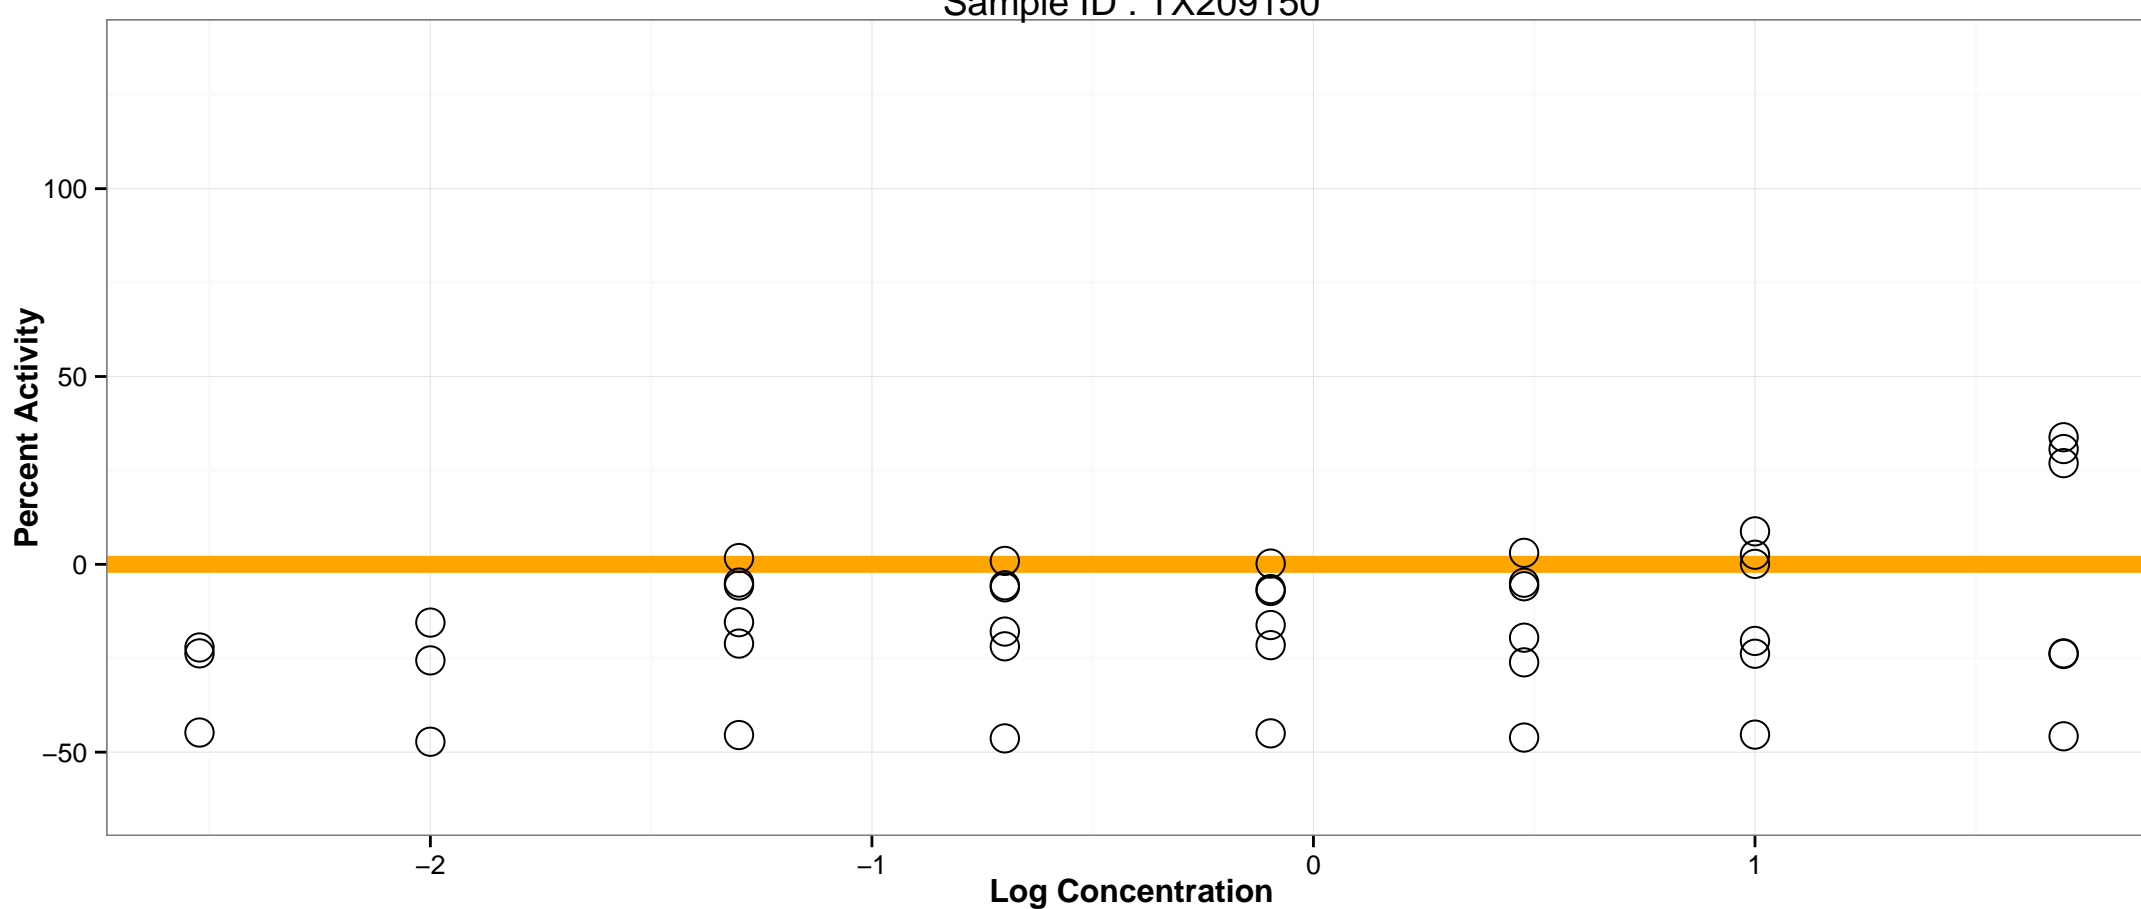

HILL MODEL

HILL MODEL: Not applicable

GAIN-LOSS MODEL

GNLS MODEL: Not applicable

|      | CNST   | HILL | GNLS |
|------|--------|------|------|
| AIC  | 397.01 | NA   | NA   |
| PROB | 1      | NA   | NA   |
| RMSE | 25.46  | NA   | NA   |

MAX\_MEAN : -0.296 MAX\_MED : 1.64 BMAD : 8.58  
COFF : 20 HIT-CALL : 0 FITC : 4 ACTP : 0  
FLAGS : 10

Chemical : Cinmethylin  
CAS : 87818-31-3

Assay ID 1508 (NHEERL\_TPO\_AUR\_dn)  
Sample ID : TX009152

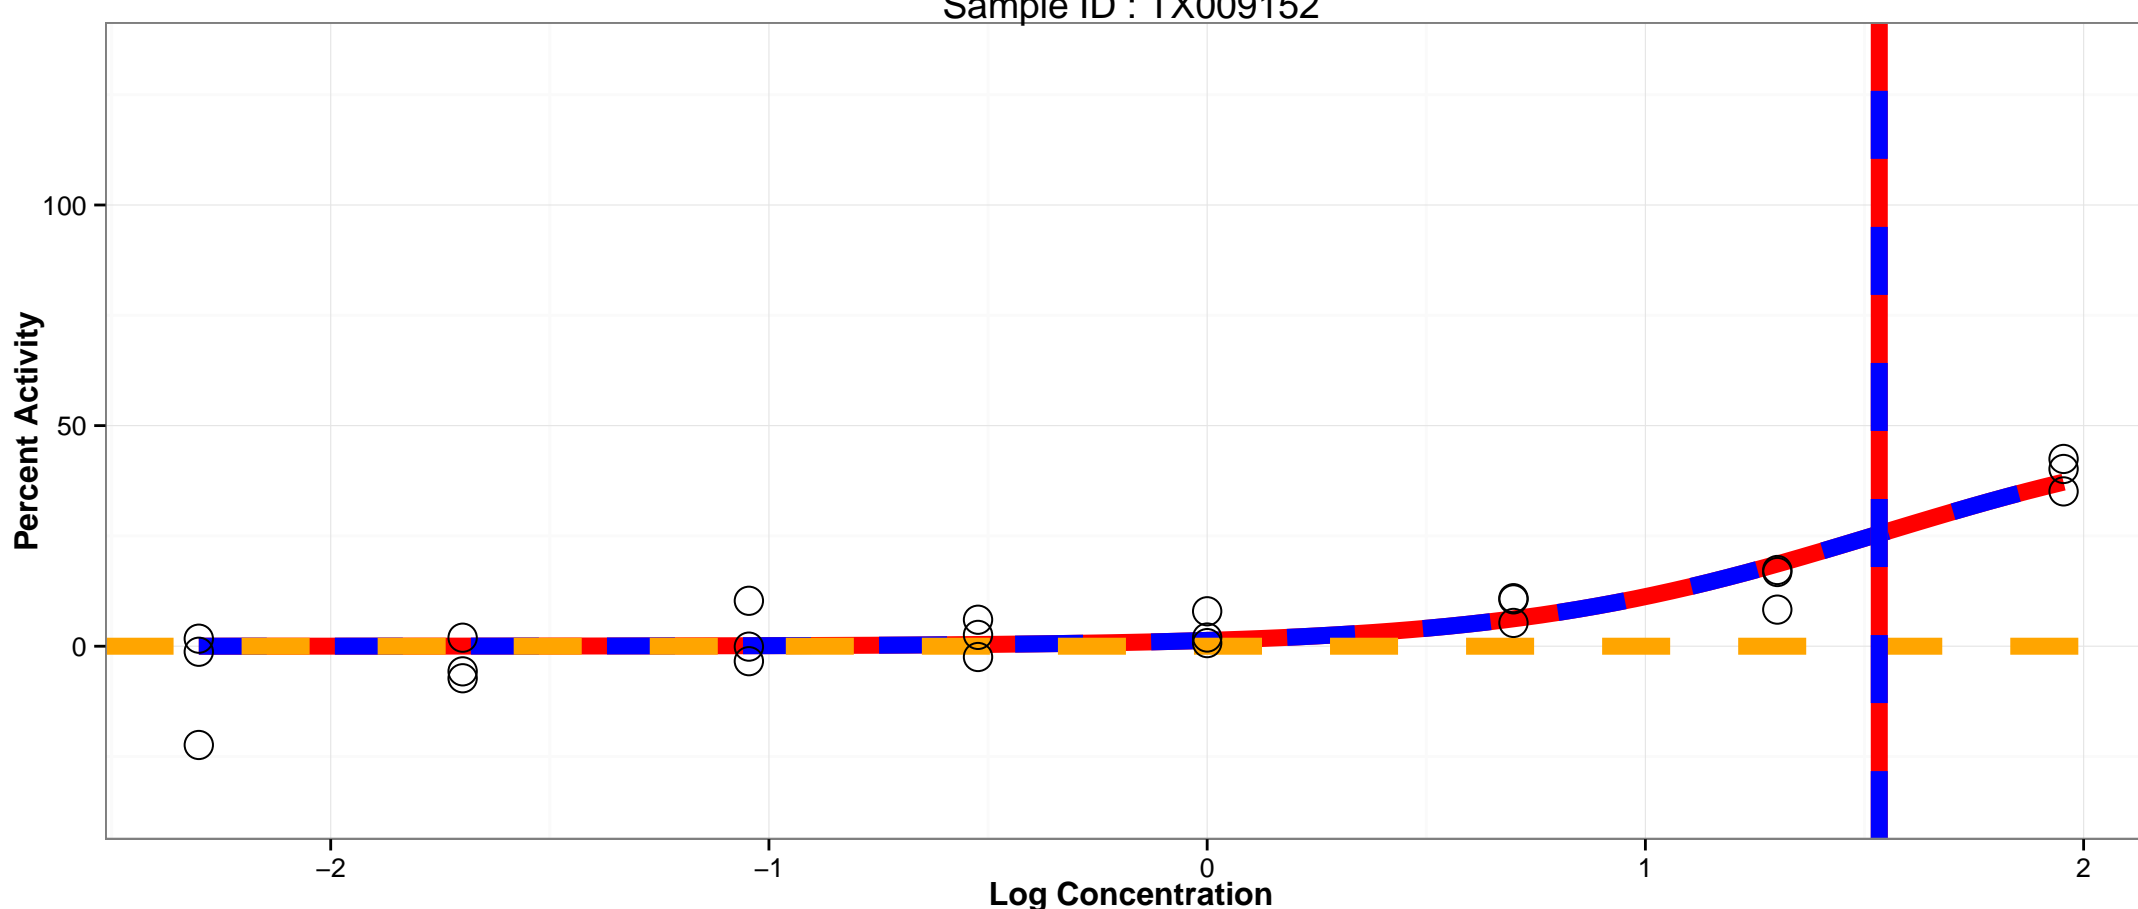

HILL MODEL

|     | tp   | ga    | gw    |
|-----|------|-------|-------|
| val | 50.9 | 1.53  | 1.03  |
| sd  | 10.6 | 0.211 | 0.279 |

GAIN-LOSS MODEL

|     | tp   | ga    | gw    | la    | lw     |
|-----|------|-------|-------|-------|--------|
| val | 50.9 | 1.53  | 1.03  | 3.13  | 10.2   |
| sd  | 10.6 | 0.211 | 0.279 | 34300 | 298000 |

|      | CNST   | HILL   | GNLS   |
|------|--------|--------|--------|
| AIC  | 200.13 | 160.33 | 164.33 |
| PROB | 0      | 0.88   | 0.12   |
| RMSE | 16.31  | 6.44   | 6.44   |

MAX\_MEAN : 39.2 MAX\_MED : 40.2 BMAD : 5.69  
COFF : 20 HIT-CALL : 1 FITC : 42 ACTP : 1  
FLAGS : 6

Assay ID 1509 (NHEERL\_HEK293T\_CellTiterGLO)  
Sample ID : TX009152

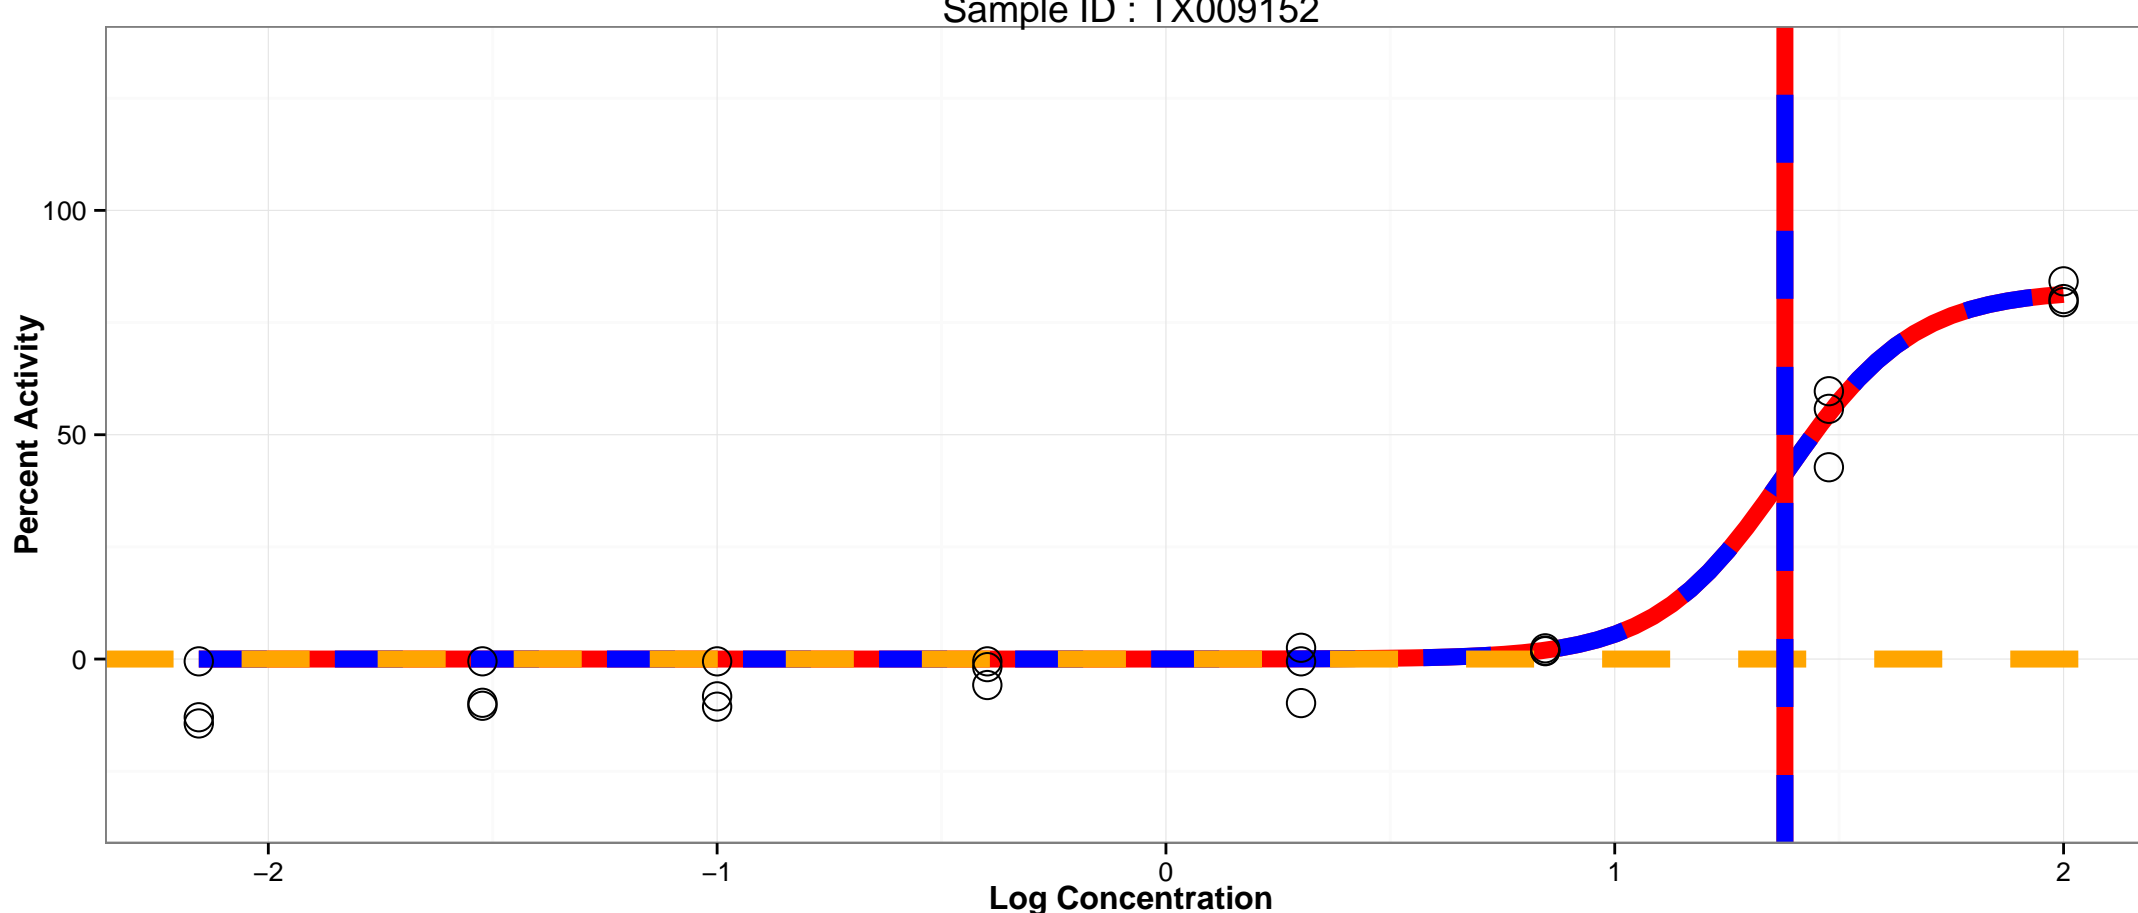

HILL MODEL

|     | tp   | ga     | gw    |
|-----|------|--------|-------|
| val | 82.4 | 1.38   | 3.02  |
| sd  | 3.37 | 0.0403 | 0.984 |

GAIN-LOSS MODEL

|     | tp   | ga   | gw   | la  | lw |
|-----|------|------|------|-----|----|
| val | 82.4 | 1.38 | 3.02 | 2.4 | 18 |
| sd  | NA   | NA   | NA   | NA  | NA |

|      | CNST   | HILL   | GNLS   |
|------|--------|--------|--------|
| AIC  | 235.21 | 167.76 | 171.76 |
| PROB | 0      | 0.88   | 0.12   |
| RMSE | 34.93  | 6.71   | 6.71   |

MAX\_MEAN : 81.3 MAX\_MED : 80.2 BMAD : 5.54  
COFF : 20 HIT-CALL : 1 FITC : 41 ACTP : 1  
FLAGS :

Assay ID 1848 (NHEERL\_Quantilum\_inhib\_2\_dn)  
Sample ID : TX009152

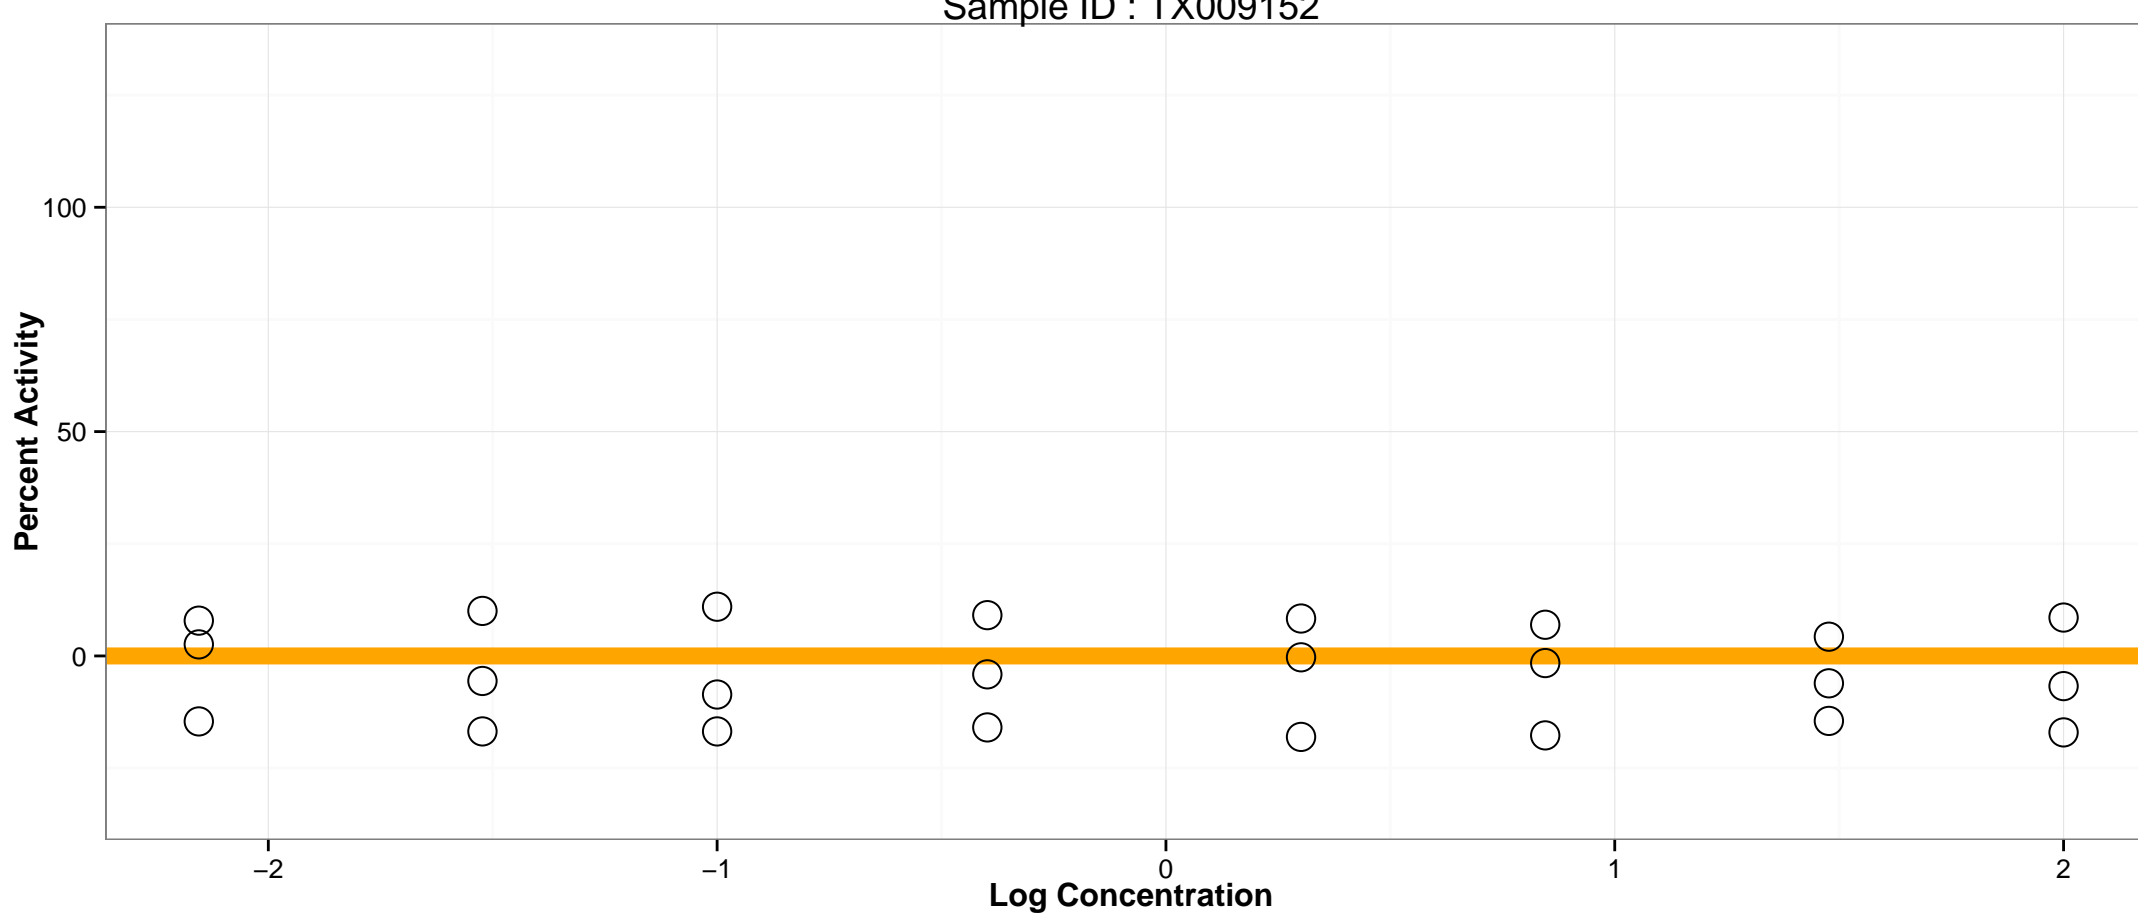

HILL MODEL

HILL MODEL: Not applicable

GAIN-LOSS MODEL

GNLS MODEL: Not applicable

|      | CNST   | HILL | GNLS |
|------|--------|------|------|
| AIC  | 189.29 | NA   | NA   |
| PROB | 1      | NA   | NA   |
| RMSE | 11.1   | NA   | NA   |

MAX\_MEAN : -1.37 MAX\_MED : 2.59 BMAD : 8.58  
COFF : 20 HIT-CALL : 0 FITC : 4 ACTP : 0  
FLAGS :

Chemical : Malathion  
CAS : 121-75-5

Assay ID 1508 (NHEERL\_TPO\_AUR\_dn)  
Sample ID : TX009153

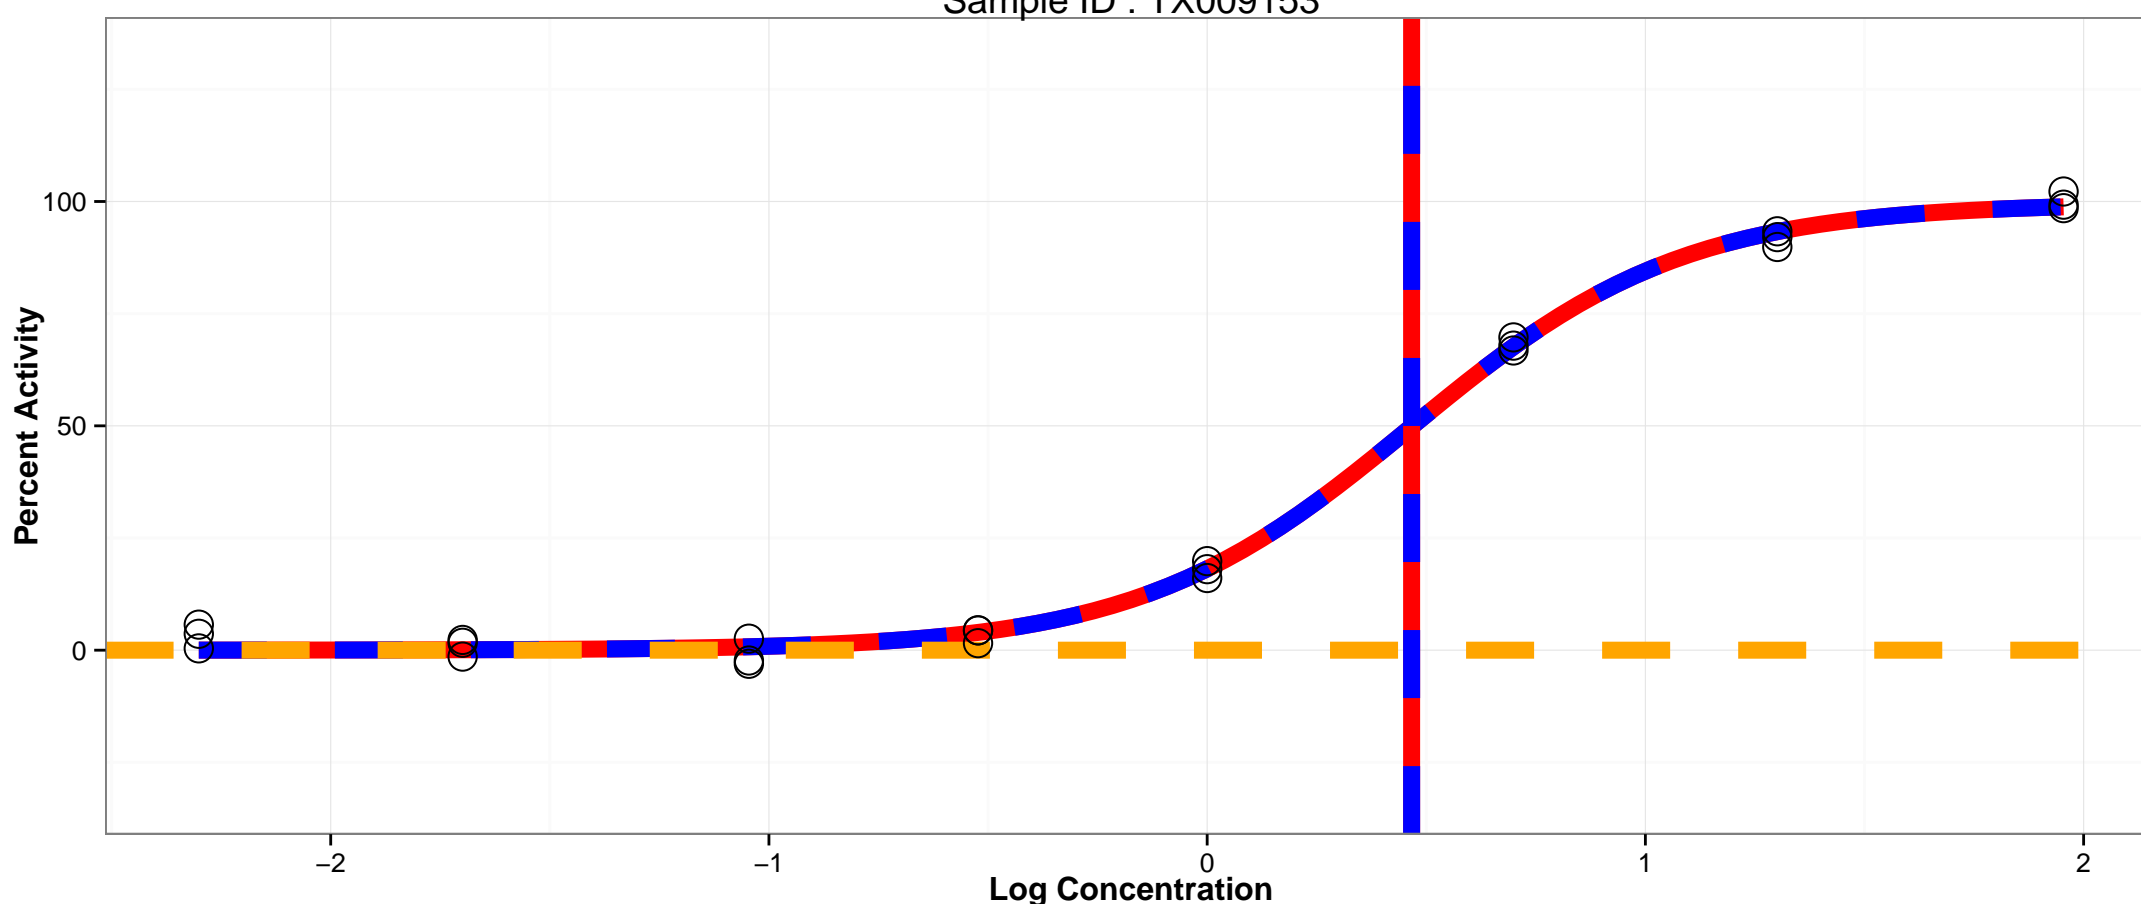

HILL MODEL

|     | tp   | ga     | gw     |
|-----|------|--------|--------|
| val | 99.6 | 0.467  | 1.4    |
| sd  | 1.14 | 0.0169 | 0.0572 |

GAIN-LOSS MODEL

|     | tp   | ga     | gw     | la   | lw   |
|-----|------|--------|--------|------|------|
| val | 99.6 | 0.467  | 1.4    | 2.65 | 12.5 |
| sd  | 1.14 | 0.0169 | 0.0572 | 238  | 4280 |

|      | CNST   | HILL   | GNLS   |
|------|--------|--------|--------|
| AIC  | 261.86 | 117.15 | 121.15 |
| PROB | 0      | 0.88   | 0.12   |
| RMSE | 54.13  | 2.29   | 2.29   |

MAX\_MEAN : 100 MAX\_MED : 99.3 BMAD : 5.69  
COFF : 20 HIT-CALL : 1 FITC : 41 ACTP : 1  
FLAGS :

Assay ID 1509 (NHEERL\_HEK293T\_CellTiterGLO)  
Sample ID : TX009153

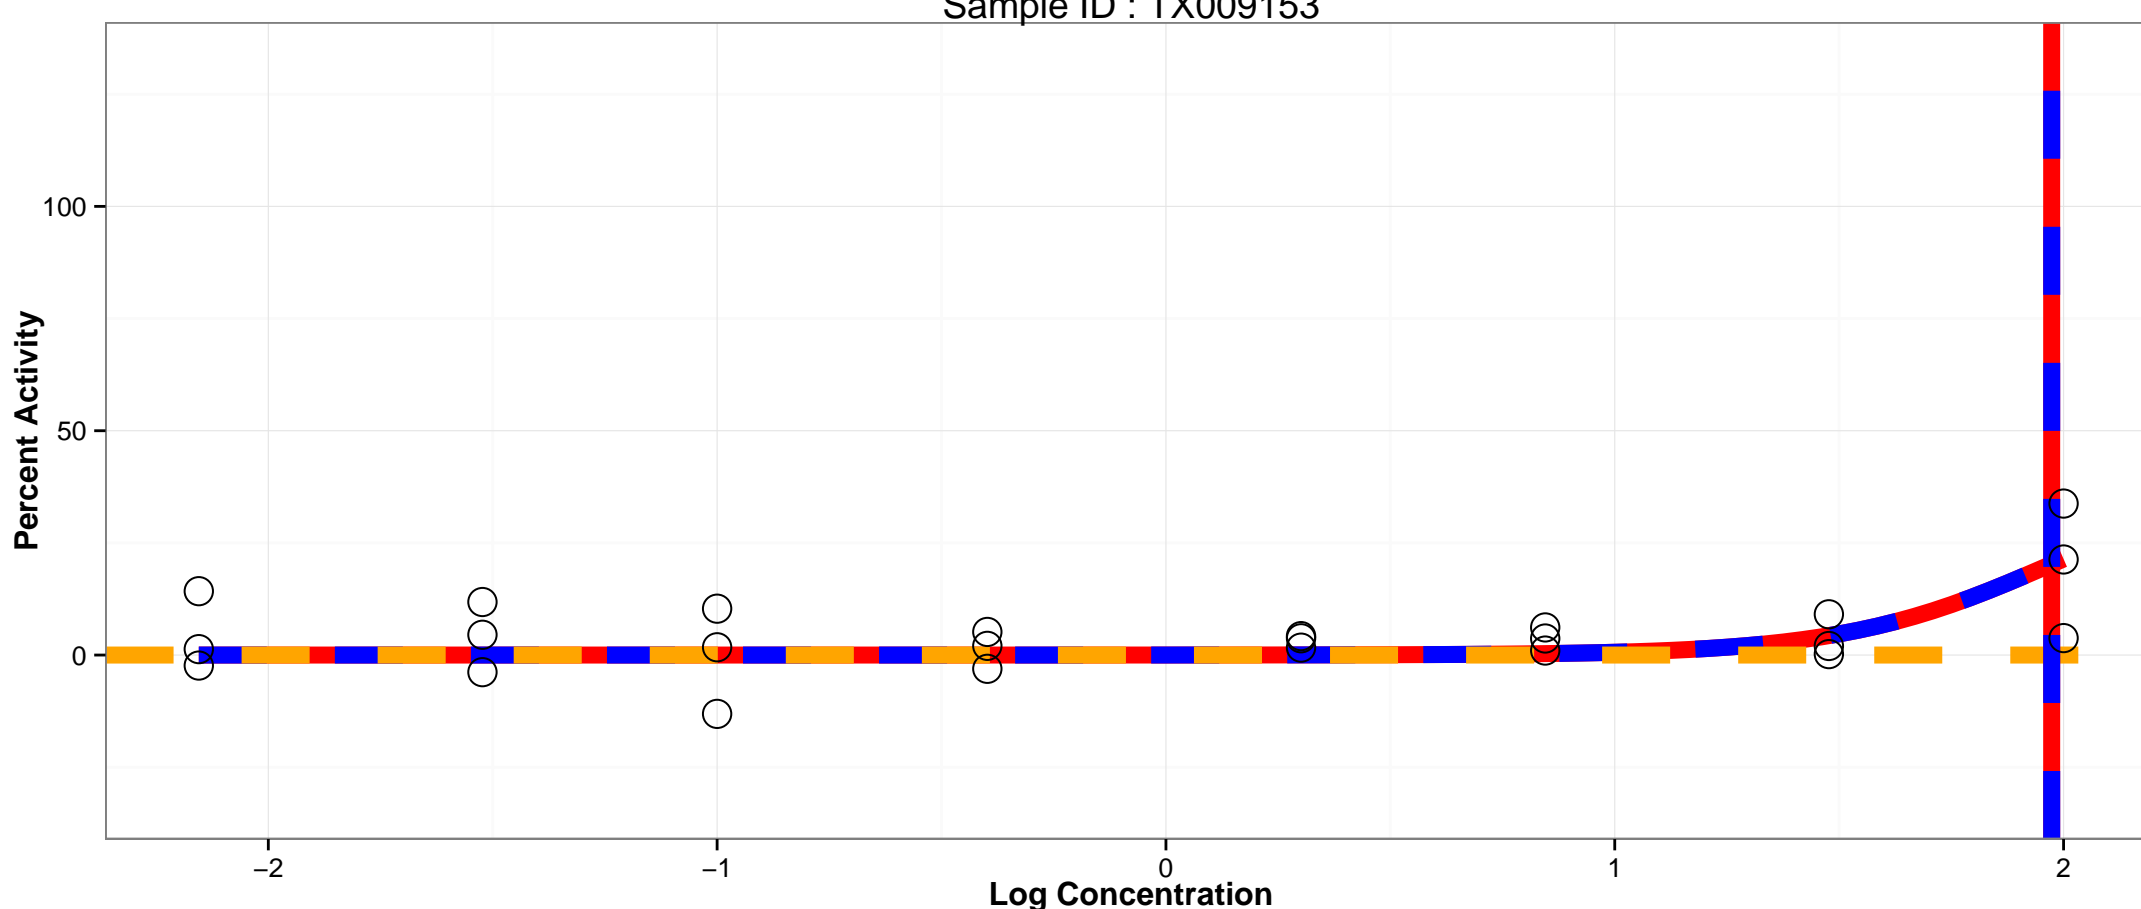

HILL MODEL

|     | tp   | ga   | gw   |
|-----|------|------|------|
| val | 40.5 | 1.97 | 1.86 |
| sd  | 90.2 | 1.09 | 2.74 |

GAIN-LOSS MODEL

|     | tp   | ga   | gw   | la    | lw      |
|-----|------|------|------|-------|---------|
| val | 40.5 | 1.97 | 1.86 | 2.68  | 18      |
| sd  | 89.9 | 1.09 | 2.73 | 70100 | 1350000 |

|      | CNST   | HILL   | GNLS   |
|------|--------|--------|--------|
| AIC  | 175.96 | 171.74 | 175.74 |
| PROB | 0.1    | 0.8    | 0.11   |
| RMSE | 10.19  | 7.35   | 7.35   |

MAX\_MEAN : 19.6 MAX\_MED : 21.3 BMAD : 5.54  
COFF : 20 HIT-CALL : 1 FITC : 42 ACTP : 0.903  
FLAGS : 11; 6

Assay ID 1848 (NHEERL\_Quantilum\_inhib\_2\_dn)  
Sample ID : TX009153

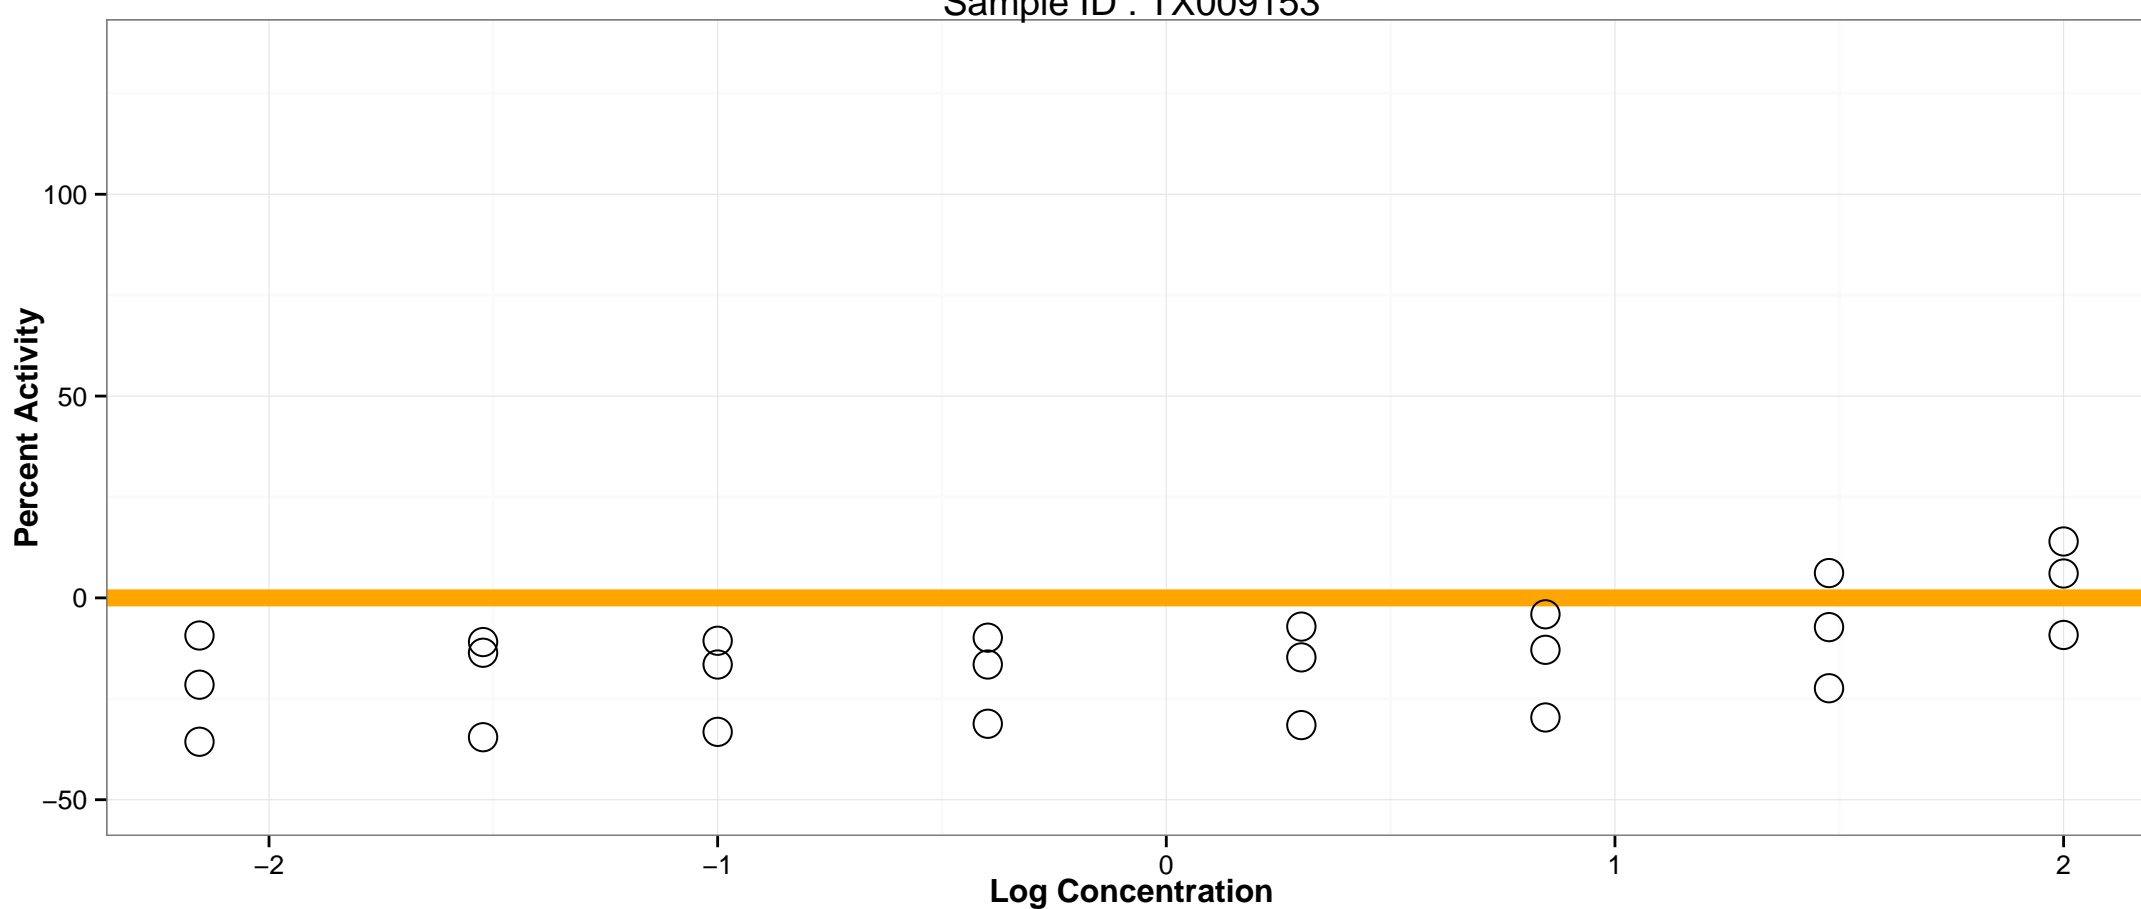

HILL MODEL

HILL MODEL: Not applicable

GAIN-LOSS MODEL

GNLS MODEL: Not applicable

|      | CNST   | HILL | GNLS |
|------|--------|------|------|
| AIC  | 216.15 | NA   | NA   |
| PROB | 1      | NA   | NA   |
| RMSE | 19.75  | NA   | NA   |

MAX\_MEAN : 3.62 MAX\_MED : 6.05 BMAD : 8.58  
COFF : 20 HIT-CALL : 0 FITC : 4 ACTP : 0  
FLAGS :



Chemical : Methidathion  
CAS : 950-37-8

Assay ID 1508 (NHEERL\_TPO\_AUR\_dn)  
Sample ID : TX009154

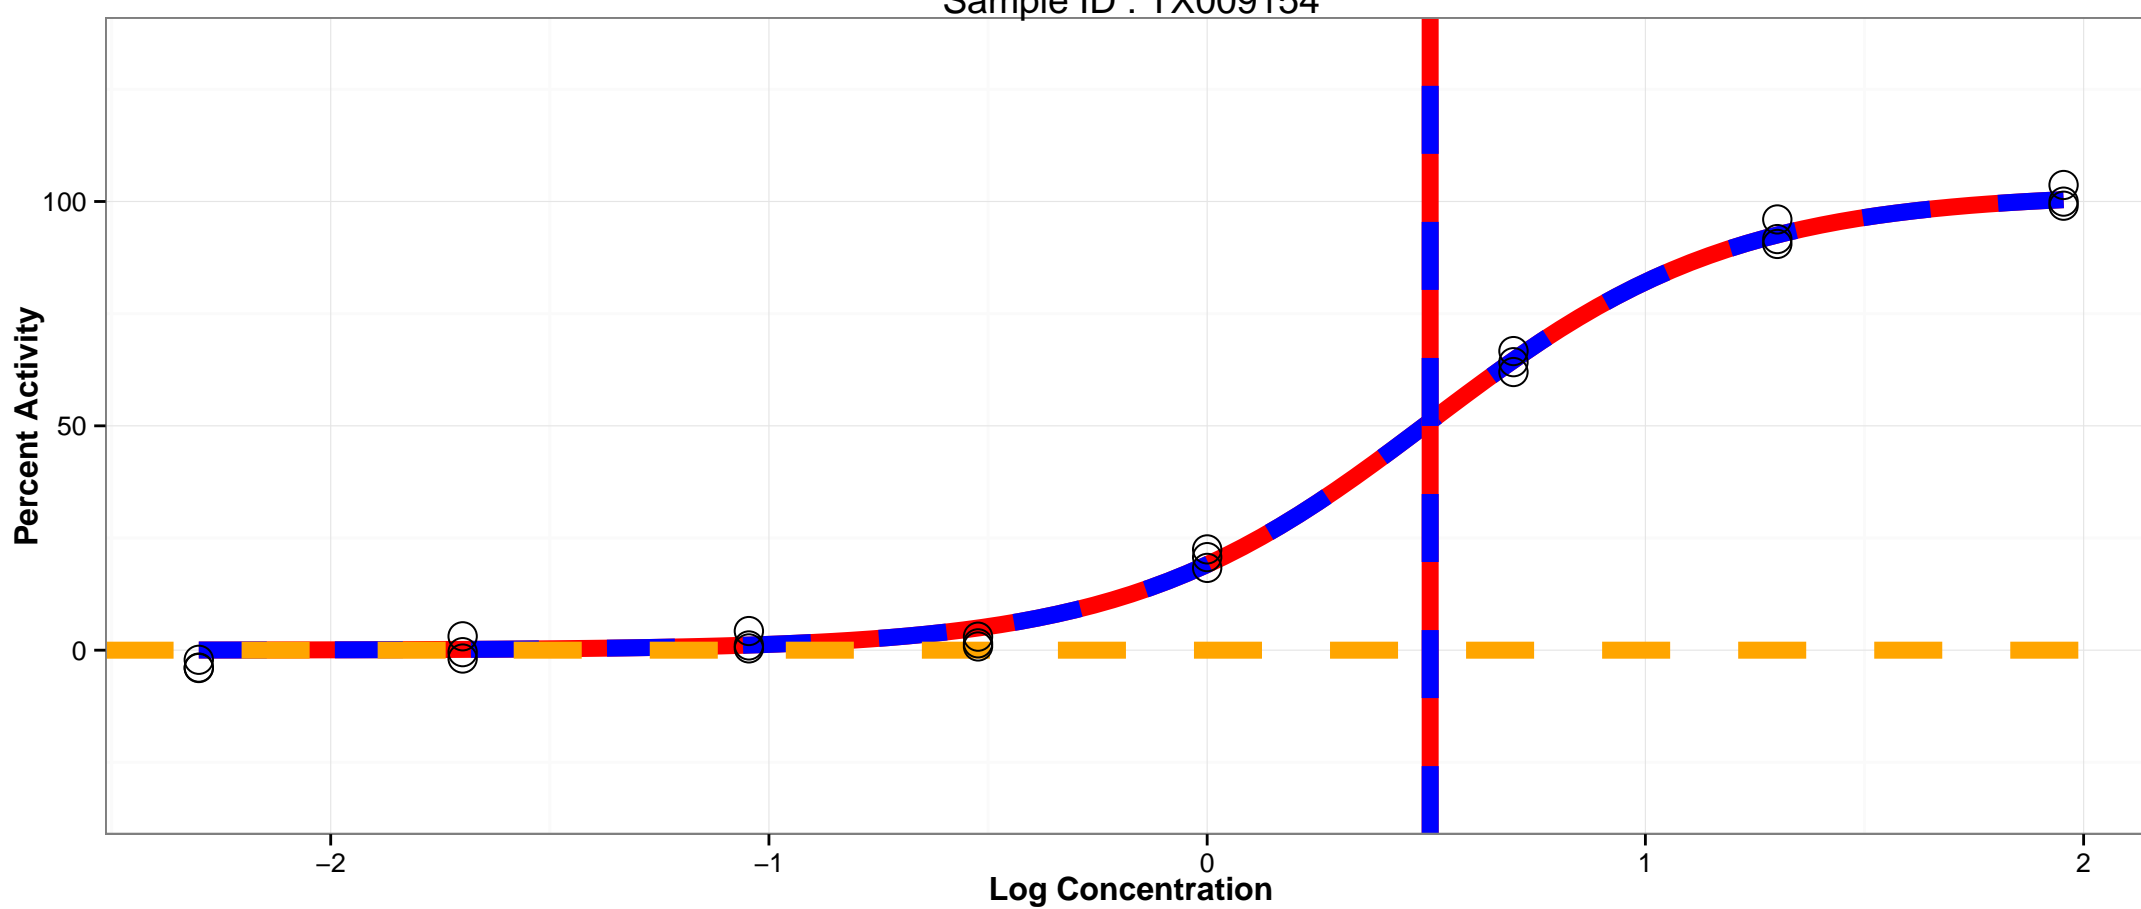

HILL MODEL

|     | tp   | ga     | gw     |
|-----|------|--------|--------|
| val | 102  | 0.509  | 1.25   |
| sd  | 1.55 | 0.0233 | 0.0648 |

GAIN-LOSS MODEL

|     | tp  | ga    | gw   | la  | lw |
|-----|-----|-------|------|-----|----|
| val | 102 | 0.509 | 1.25 | 3.4 | 18 |
| sd  | NA  | NA    | NA   | NA  | NA |

|      | CNST   | HILL   | GNLS   |
|------|--------|--------|--------|
| AIC  | 261.68 | 123.27 | 127.27 |
| PROB | 0      | 0.88   | 0.12   |
| RMSE | 54.06  | 2.48   | 2.48   |

MAX\_MEAN : 101 MAX\_MED : 100 BMAD : 5.69  
COFF : 20 HIT-CALL : 1 FITC : 41 ACTP : 1  
FLAGS :

Assay ID 1509 (NHEERL\_HEK293T\_CellTiterGLO)  
Sample ID : TX009154

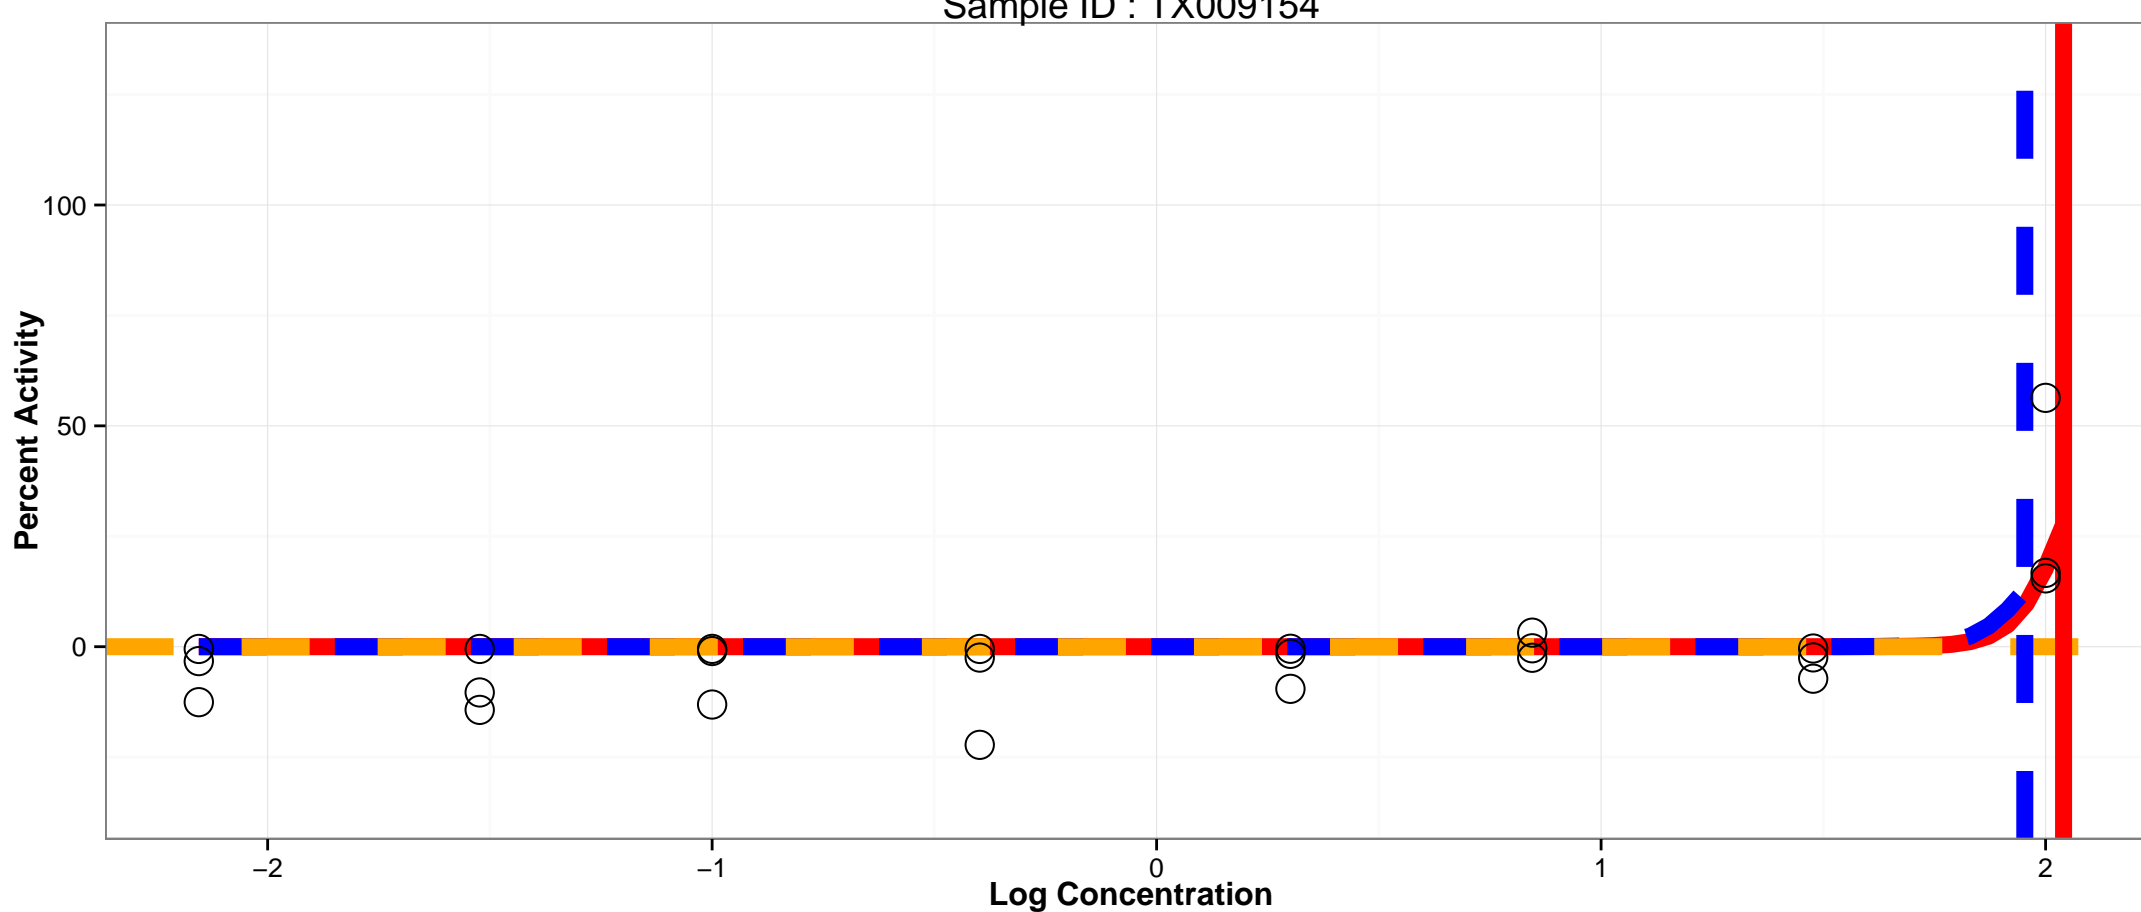

HILL MODEL

|     | tp   | ga   | gw |
|-----|------|------|----|
| val | 55.3 | 2.04 | 8  |
| sd  | NA   | NA   | NA |

GAIN-LOSS MODEL

|     | tp   | ga   | gw   | la   | lw   |
|-----|------|------|------|------|------|
| val | 25.4 | 1.95 | 7.98 | 3.97 | 1.54 |
| sd  | NA   | NA   | NA   | NA   | NA   |

|      | CNST   | HILL   | GNLS   |
|------|--------|--------|--------|
| AIC  | 187.15 | 181.16 | 185.16 |
| PROB | 0.04   | 0.84   | 0.11   |
| RMSE | 14.45  | 10.82  | 10.82  |

MAX\_MEAN : 29.5 MAX\_MED : 16.7 BMAD : 5.54  
COFF : 20 HIT-CALL : 0 FITC : 21 ACTP : 0.958  
FLAGS : 12

Assay ID 1848 (NHEERL\_Quantilum\_inhib\_2\_dn)  
Sample ID : TX009154

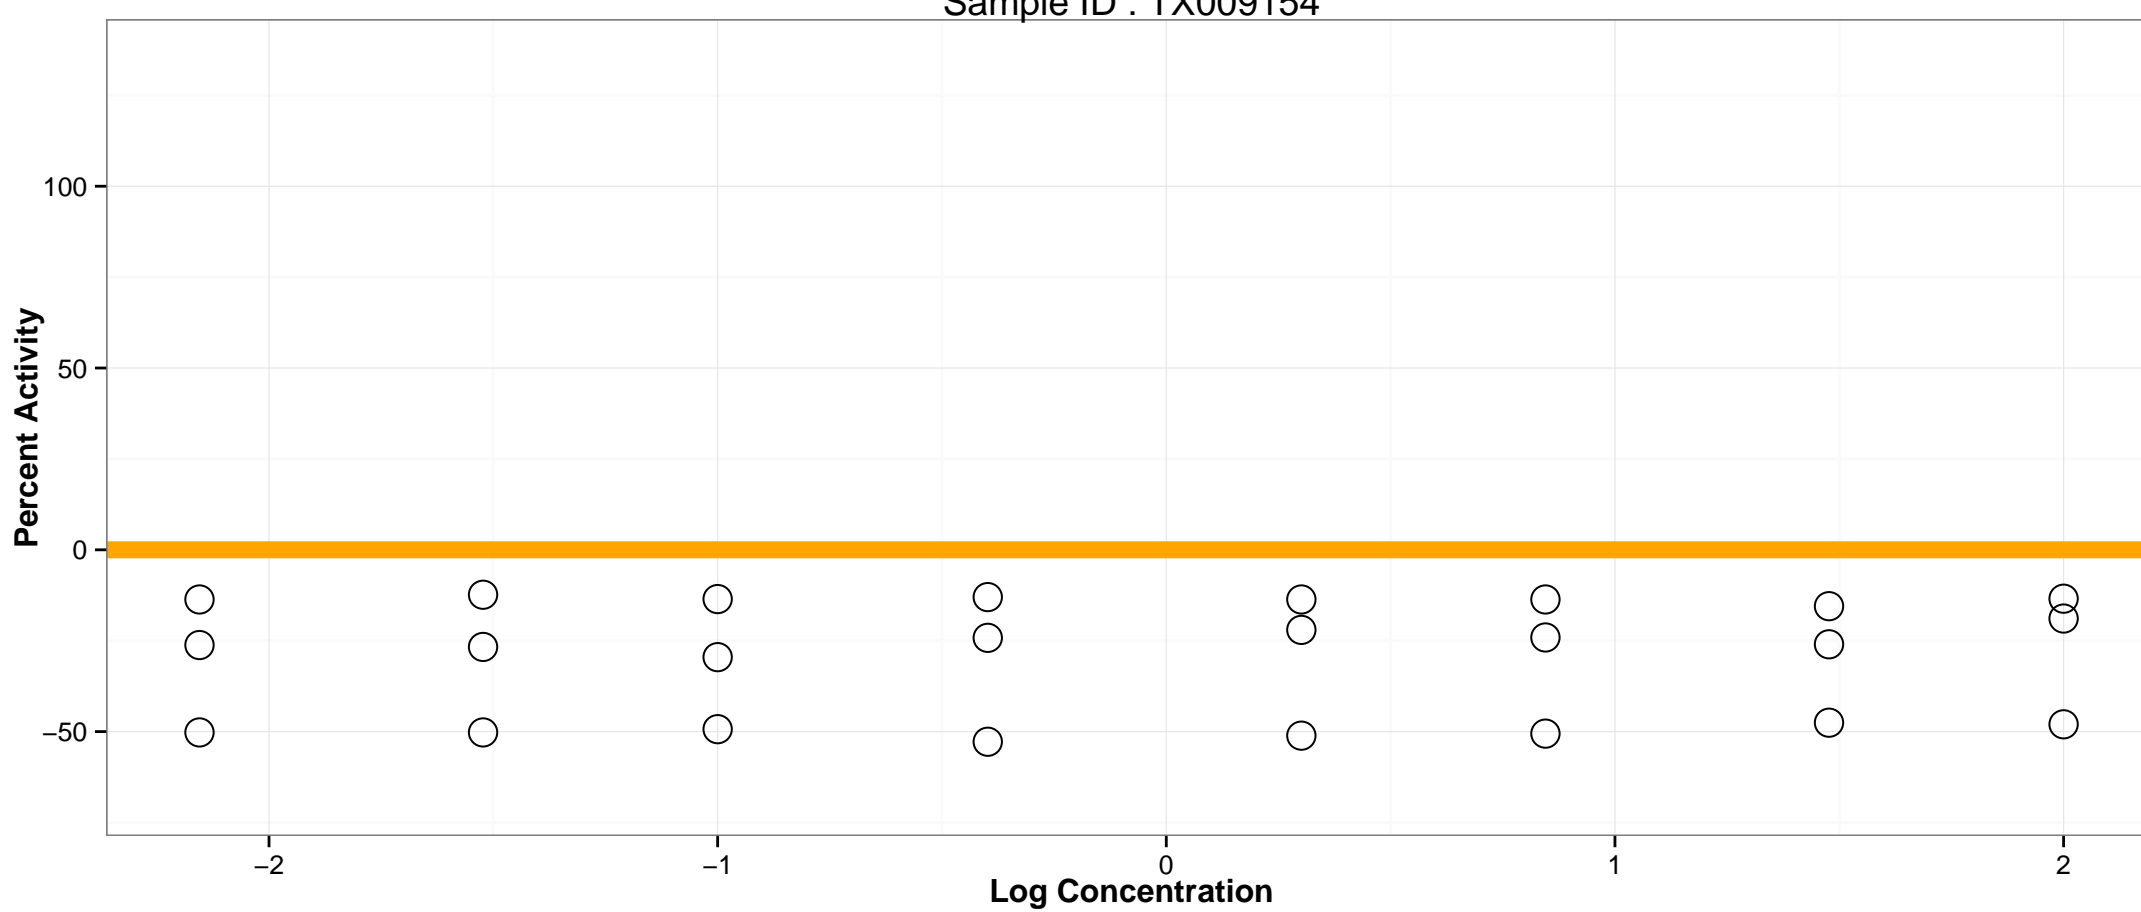

HILL MODEL

HILL MODEL: Not applicable

GAIN-LOSS MODEL

GNLS MODEL: Not applicable

|      | CNST   | HILL | GNLS |
|------|--------|------|------|
| AIC  | 241.74 | NA   | NA   |
| PROB | 1      | NA   | NA   |
| RMSE | 33.18  | NA   | NA   |

MAX\_MEAN : -26.8 MAX\_MED : -18.9 BMAD : 8.58  
COFF : 20 HIT-CALL : 0 FITC : 4 ACTP : 0  
FLAGS : 10

Chemical : Mesotrione  
CAS : 104206-82-8

Assay ID 1508 (NHEERL\_TPO\_AUR\_dn)  
Sample ID : TX009155

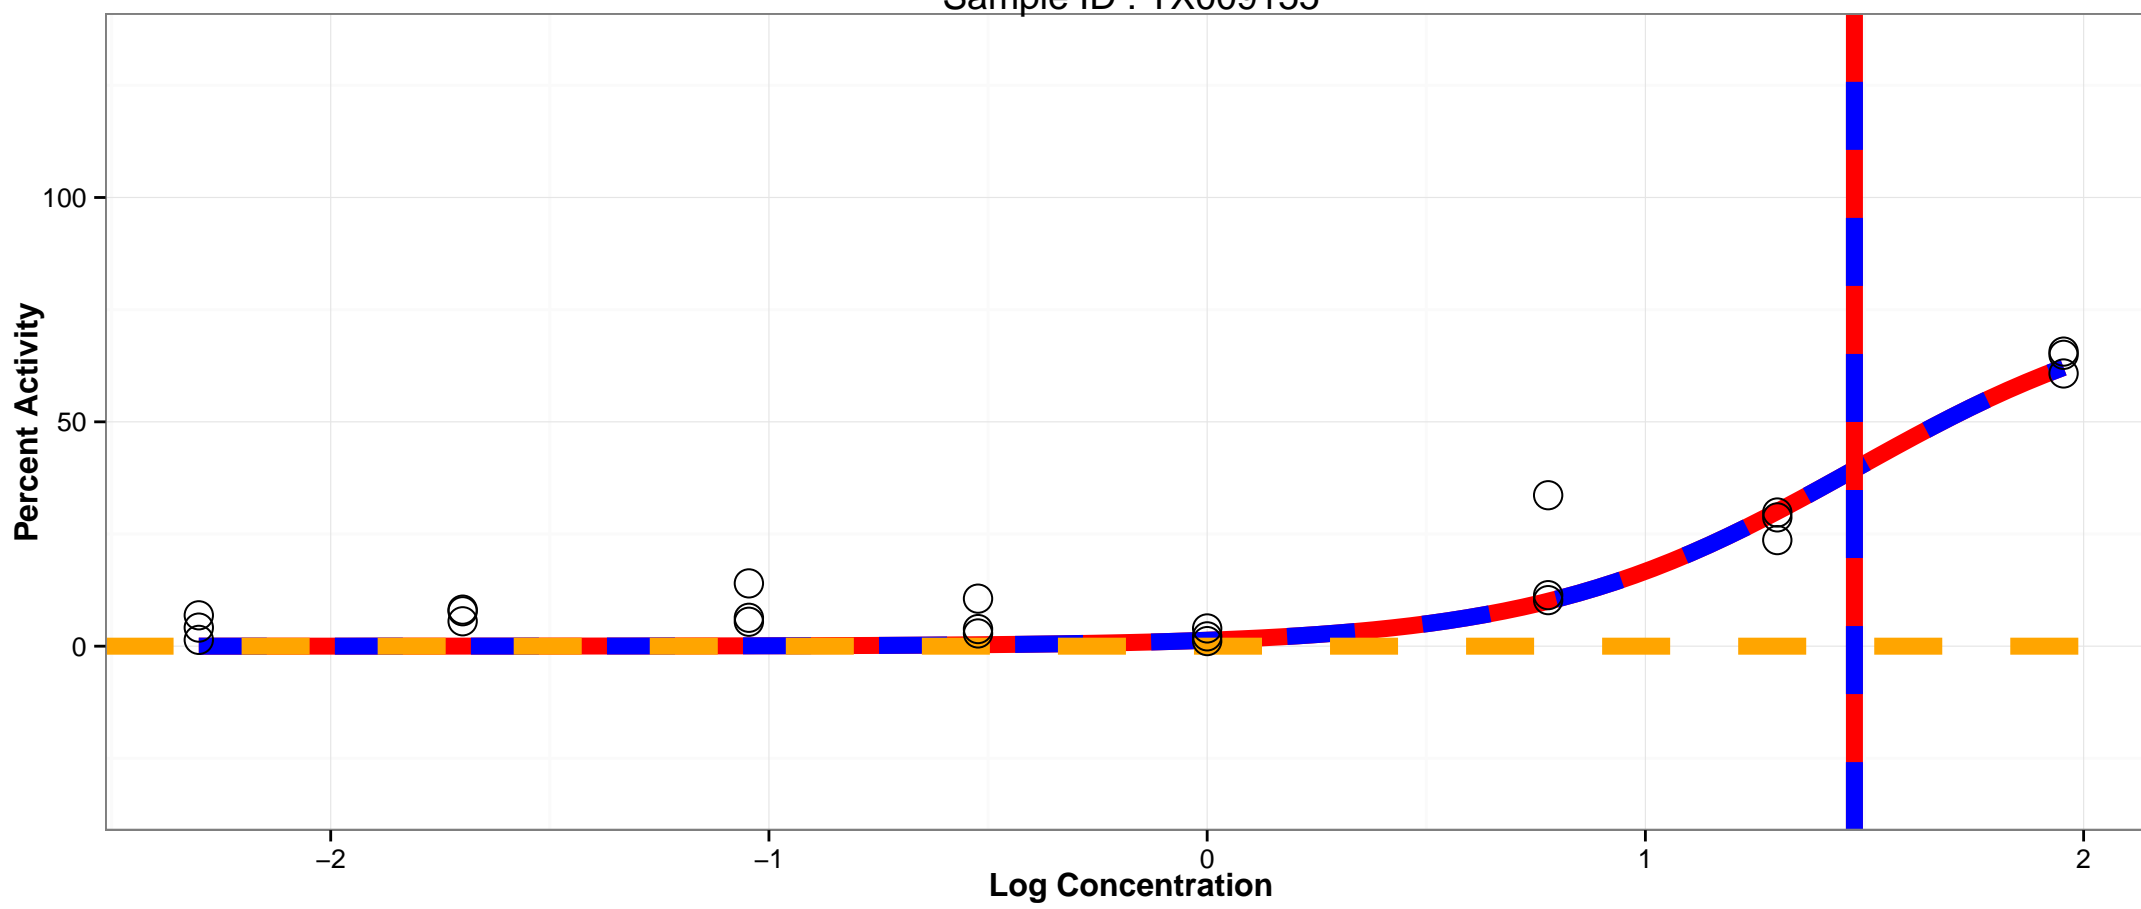

HILL MODEL

|     | tp   | ga    | gw    |
|-----|------|-------|-------|
| val | 78.8 | 1.48  | 1.2   |
| sd  | 12   | 0.144 | 0.281 |

GAIN-LOSS MODEL

|     | tp   | ga    | gw    | la    | lw     |
|-----|------|-------|-------|-------|--------|
| val | 78.8 | 1.48  | 1.2   | 3.27  | 9.07   |
| sd  | 12   | 0.144 | 0.281 | 39400 | 271000 |

|      | CNST   | HILL | GMLS |
|------|--------|------|------|
| AIC  | 222.28 | 167  | 171  |
| PROB | 0      | 0.88 | 0.12 |
| RMSE | 26.23  | 7.2  | 7.2  |

MAX\_MEAN : 63.8 MAX\_MED : 64.9 BMAD : 5.69  
COFF : 20 HIT-CALL : 1 FITC : 42 ACTP : 1  
FLAGS :

Assay ID 1509 (NHEERL\_HEK293T\_CellTiterGLO)  
Sample ID : TX009155

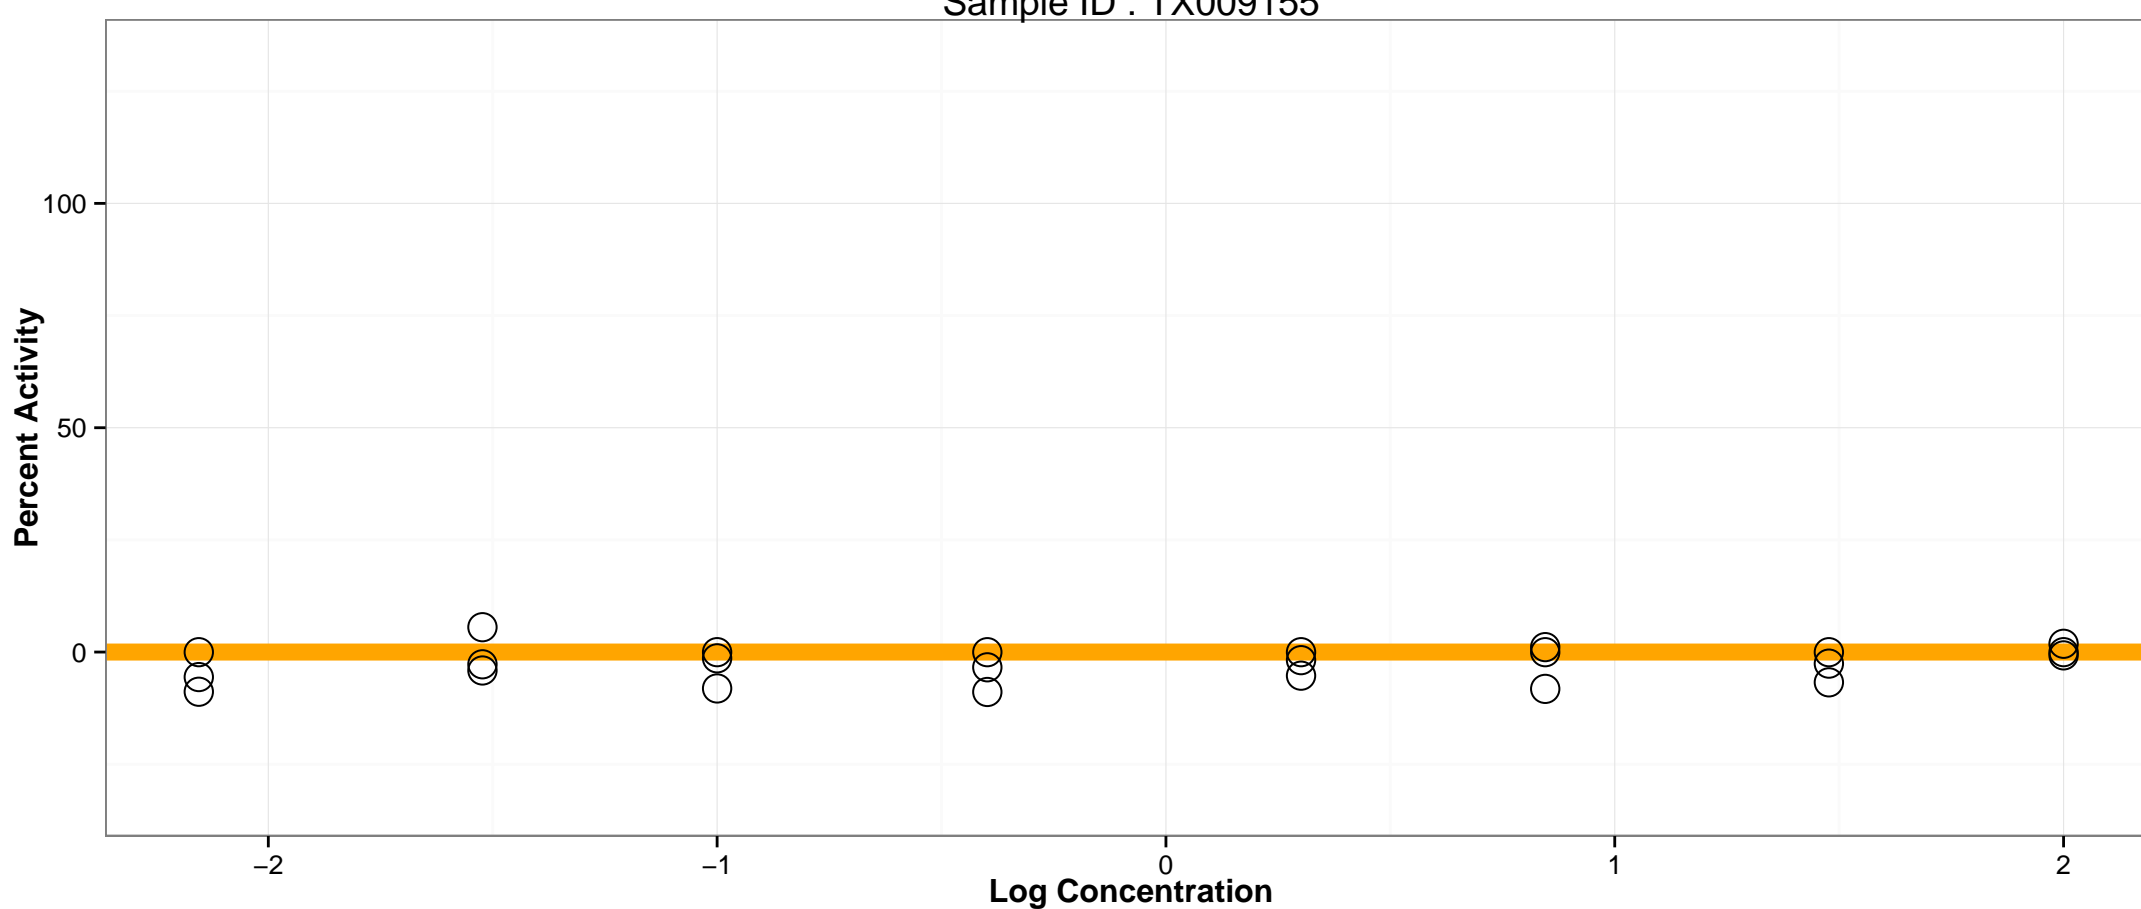

HILL MODEL

HILL MODEL: Not applicable

GAIN-LOSS MODEL

GMLS MODEL: Not applicable

|      | CNST   | HILL | GMLS |
|------|--------|------|------|
| AIC  | 142.61 | NA   | NA   |
| PROB | 1      | NA   | NA   |
| RMSE | 4.46   | NA   | NA   |

MAX\_MEAN : 0.37 MAX\_MED : -0.0119 BMAD : 5.54  
COFF : 20 HIT-CALL : 0 FITC : 4 ACTP : 0  
FLAGS :

Assay ID 1848 (NHEERL\_Quantilum\_inhib\_2\_dn)  
Sample ID : TX009155

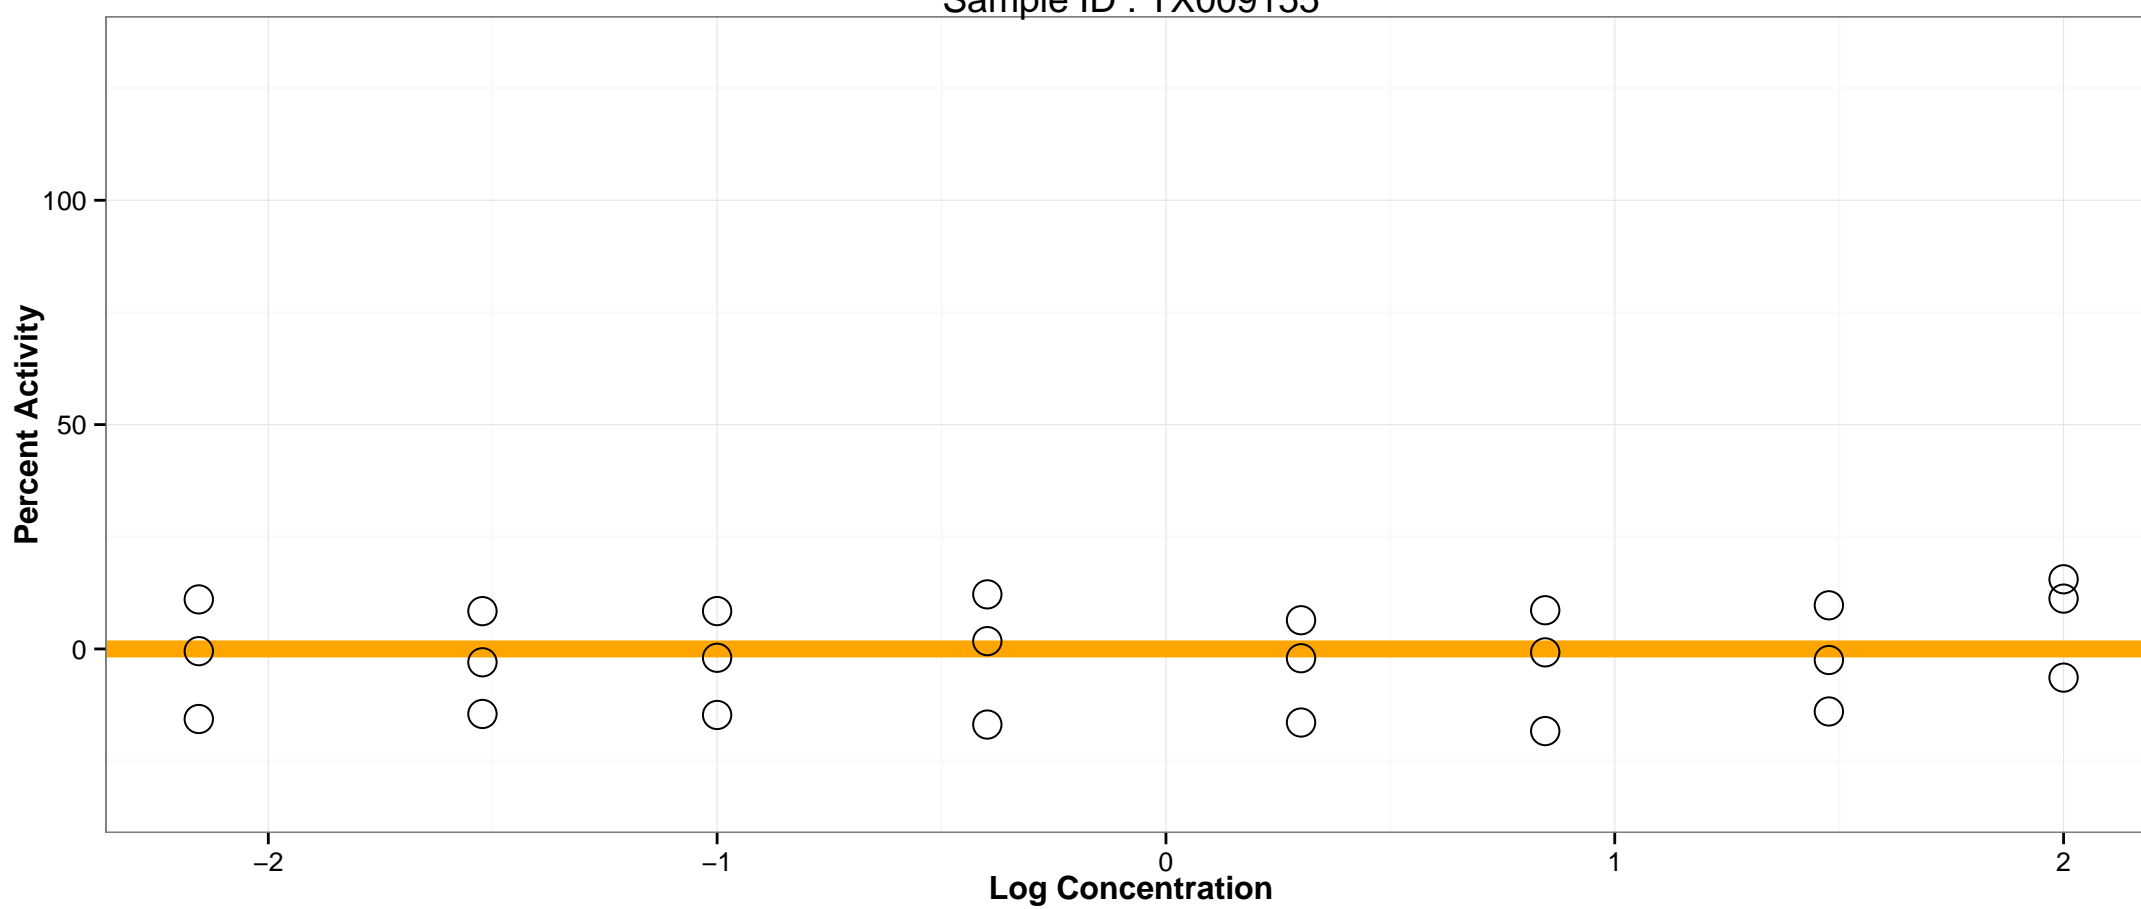

HILL MODEL

HILL MODEL: Not applicable

GAIN-LOSS MODEL

GMLS MODEL: Not applicable

|      | CNST   | HILL | GMLS |
|------|--------|------|------|
| AIC  | 188.01 | NA   | NA   |
| PROB | 1      | NA   | NA   |
| RMSE | 10.82  | NA   | NA   |

MAX\_MEAN : 6.8 MAX\_MED : 11.2 BMAD : 8.58  
COFF : 20 HIT-CALL : 0 FITC : 4 ACTP : 0  
FLAGS :

Chemical : 2,4-Bis(1-methyl-1-phenylethyl)phenol  
CAS : 2772-45-4

Assay ID 1508 (NHEERL\_TPO\_AUR\_dn)  
Sample ID : TX009216

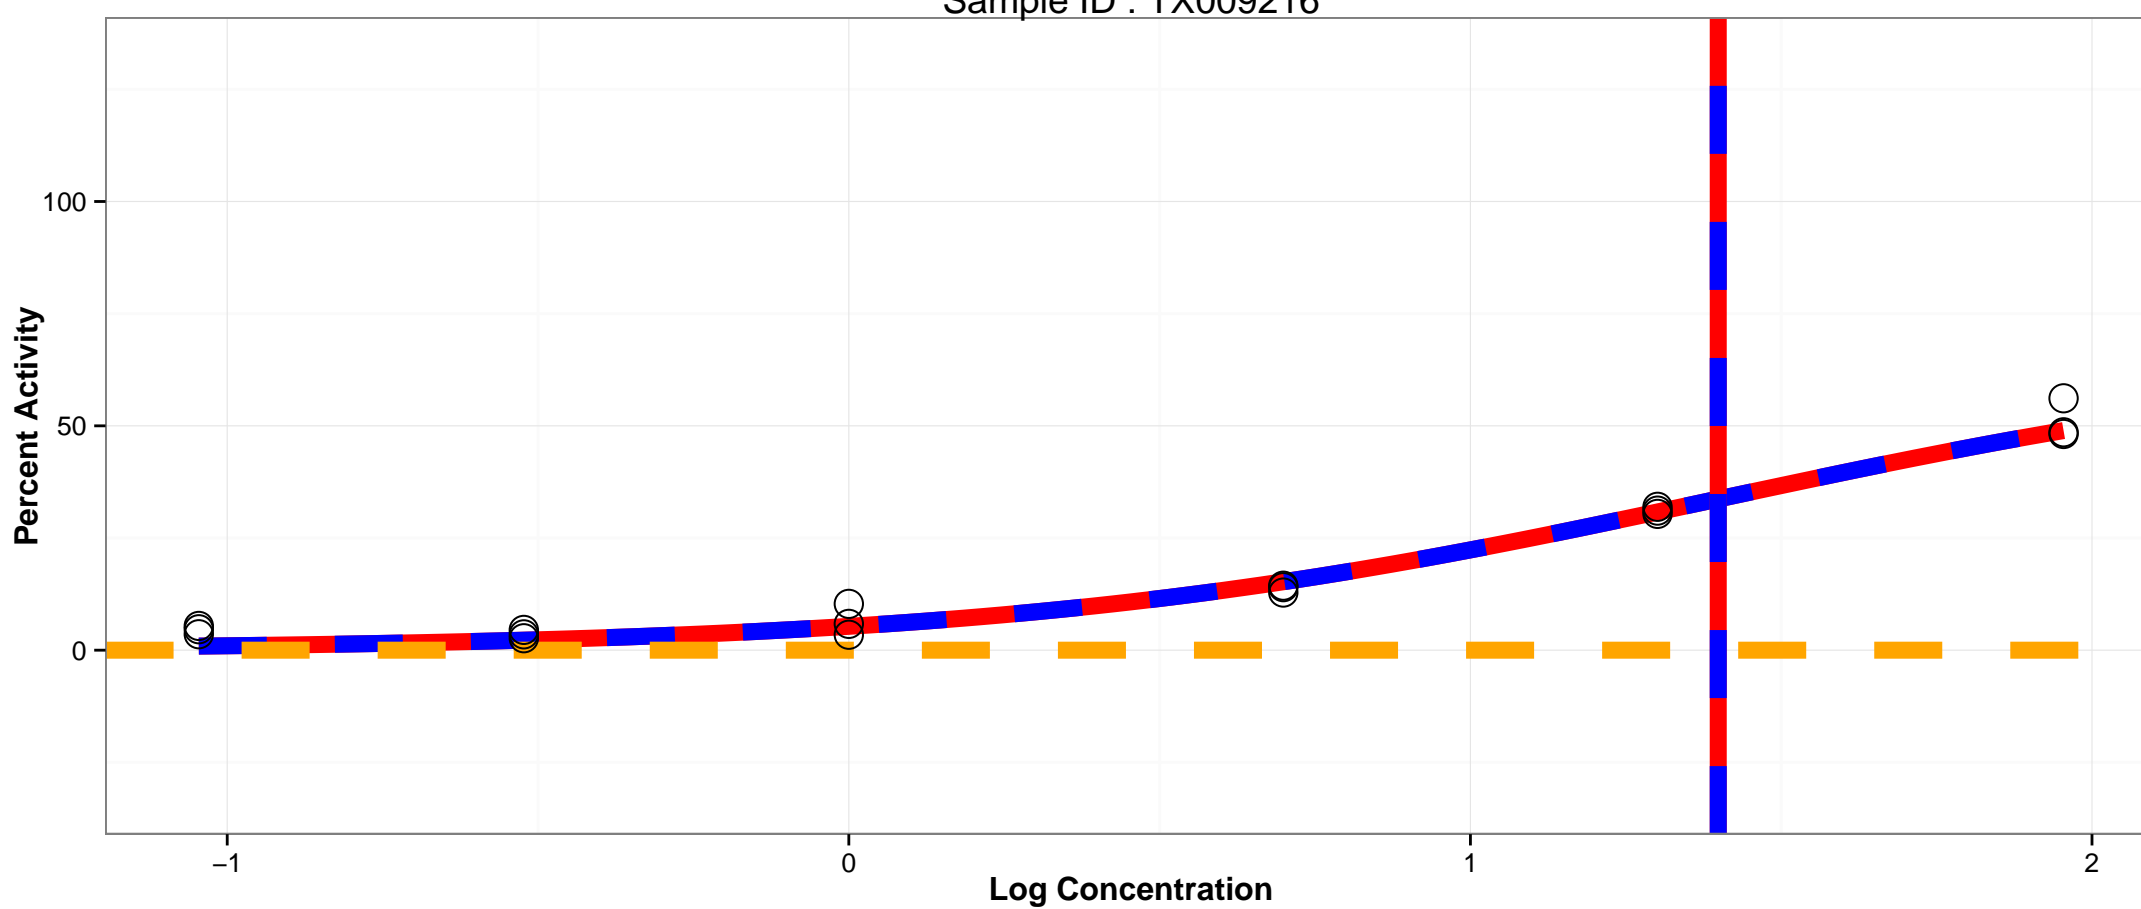

HILL MODEL

|     | tp   | ga    | gw     |
|-----|------|-------|--------|
| val | 67.4 | 1.4   | 0.763  |
| sd  | 7.87 | 0.154 | 0.0999 |

GAIN-LOSS MODEL

|     | tp   | ga  | gw    | la   | lw   |
|-----|------|-----|-------|------|------|
| val | 67.4 | 1.4 | 0.763 | 3.74 | 12.3 |
| sd  | NA   | NA  | NA    | NA   | NA   |

|      | CNST   | HILL  | GNLS  |
|------|--------|-------|-------|
| AIC  | 169.17 | 95.25 | 99.25 |
| PROB | 0      | 0.88  | 0.12  |
| RMSE | 25.36  | 2.79  | 2.79  |

MAX\_MEAN : 51 MAX\_MED : 48.6 BMAD : 5.69  
COFF : 20 HIT-CALL : 1 FITC : 42 ACTP : 1  
FLAGS :

Assay ID 1509 (NHEERL\_HEK293T\_CellTiterGLO)  
Sample ID : TX009216

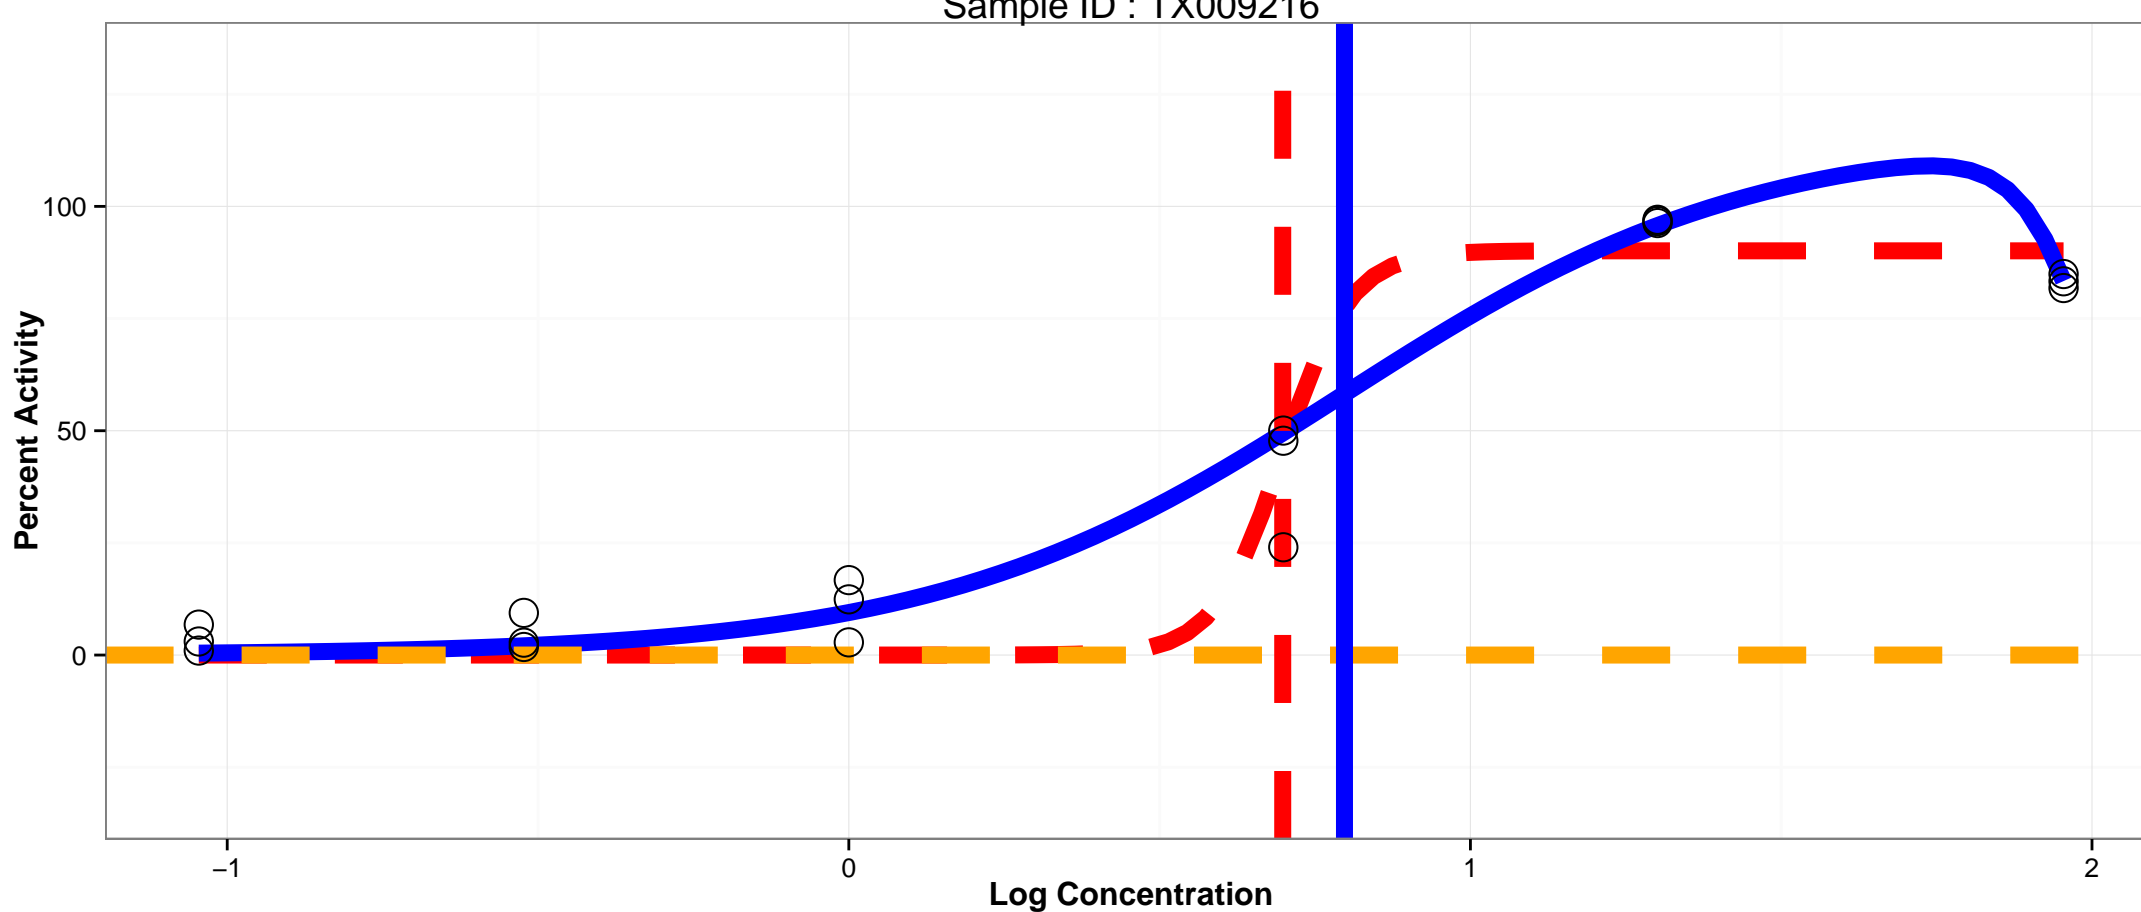

HILL MODEL

|     | tp   | ga     | gw   |
|-----|------|--------|------|
| val | 90.1 | 0.698  | 8    |
| sd  | 3.56 | 0.0143 | 36.2 |

GAIN-LOSS MODEL

|     | tp   | ga     | gw    | la      | lw   |
|-----|------|--------|-------|---------|------|
| val | 116  | 0.797  | 1.32  | 2.02    | 7.19 |
| sd  | 11.5 | 0.0793 | 0.264 | 0.00699 | 2.12 |

|      | CNST   | HILL   | GNLS   |
|------|--------|--------|--------|
| AIC  | 198.45 | 137.23 | 121.92 |
| PROB | 0      | 0      | 1      |
| RMSE | 55.2   | 8.68   | 6.96   |

MAX\_MEAN : 96.7 MAX\_MED : 96.7 BMAD : 5.54  
COFF : 20 HIT-CALL : 1 FITC : 50 ACTP : 1  
FLAGS :

Assay ID 1848 (NHEERL\_Quantilum\_inhib\_2\_dn)  
Sample ID : TX009216

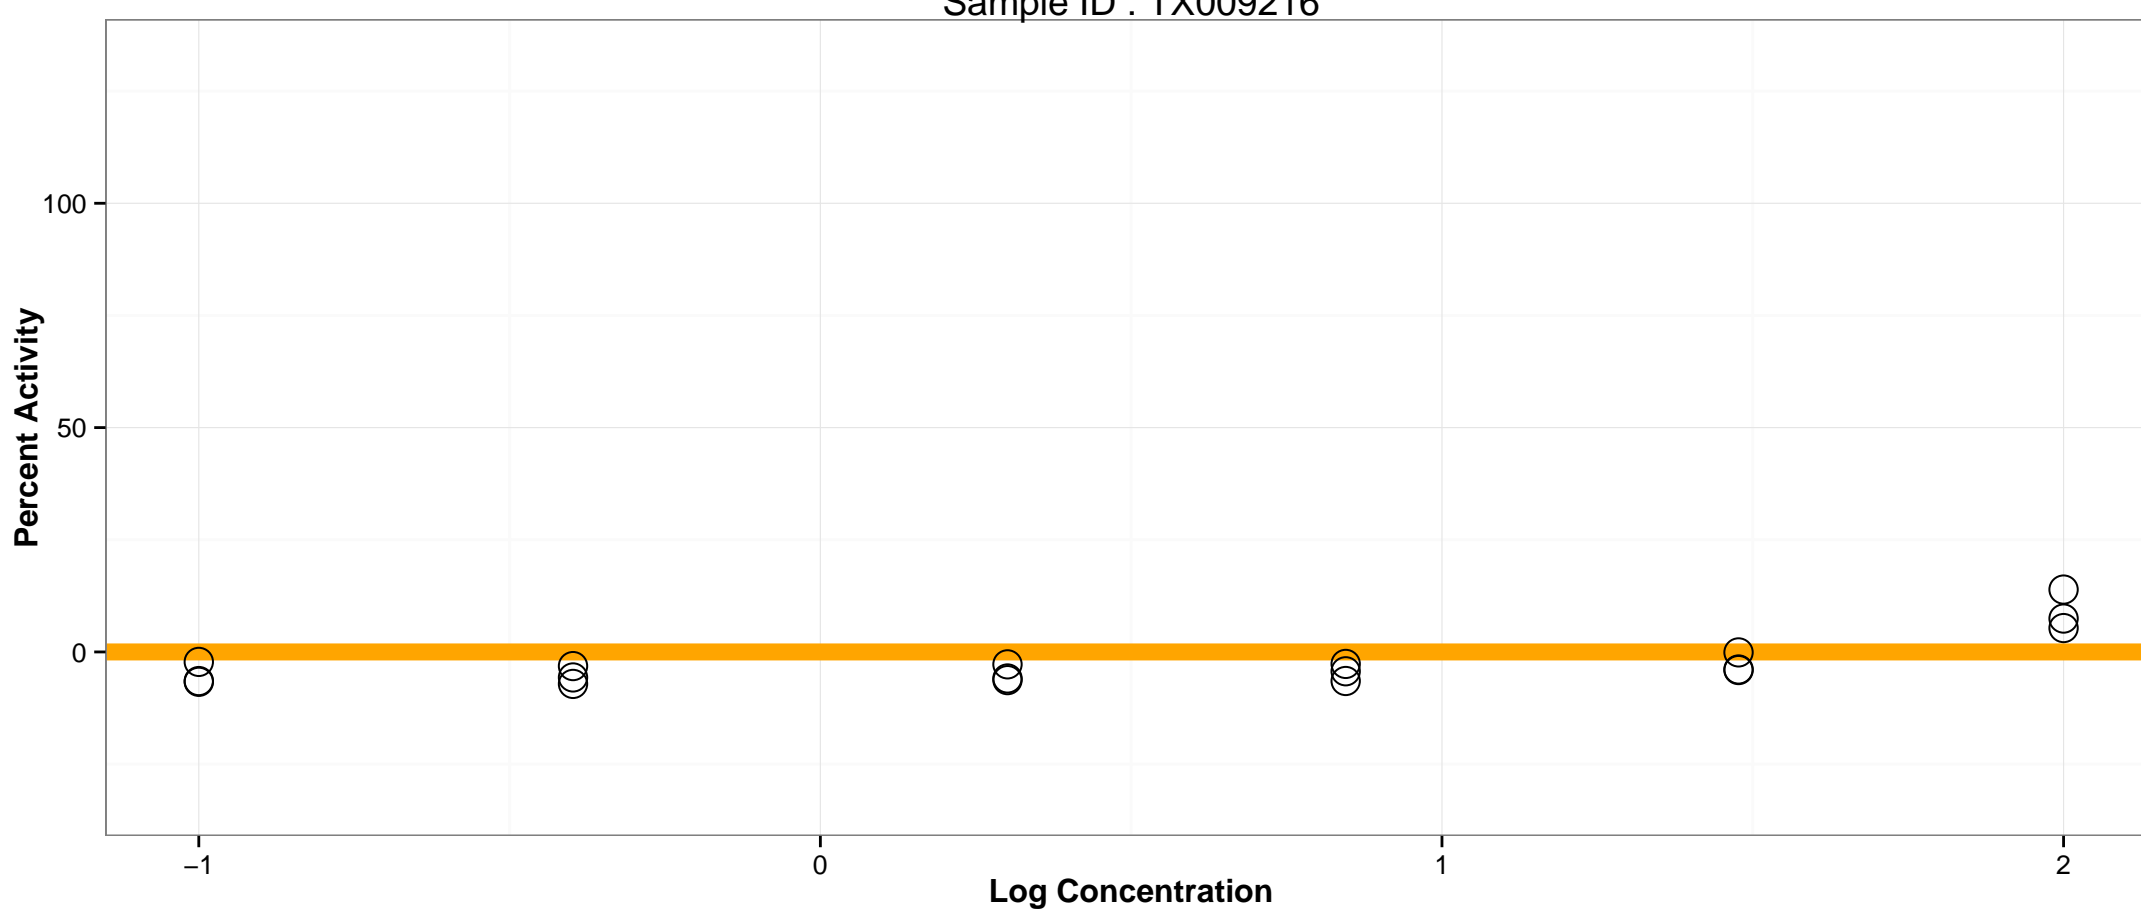

HILL MODEL

HILL MODEL: Not applicable

GAIN-LOSS MODEL

GNLS MODEL: Not applicable

|      | CNST   | HILL | GNLS |
|------|--------|------|------|
| AIC  | 119.62 | NA   | NA   |
| PROB | 1      | NA   | NA   |
| RMSE | 5.97   | NA   | NA   |

MAX\_MEAN : 8.9 MAX\_MED : 7.45 BMAD : 8.58  
COFF : 20 HIT-CALL : 0 FITC : 4 ACTP : 0  
FLAGS :

Chemical : Busulfan  
CAS : 55-98-1

Assay ID 1508 (NHEERL\_TPO\_AUR\_dn)  
Sample ID : TX009225

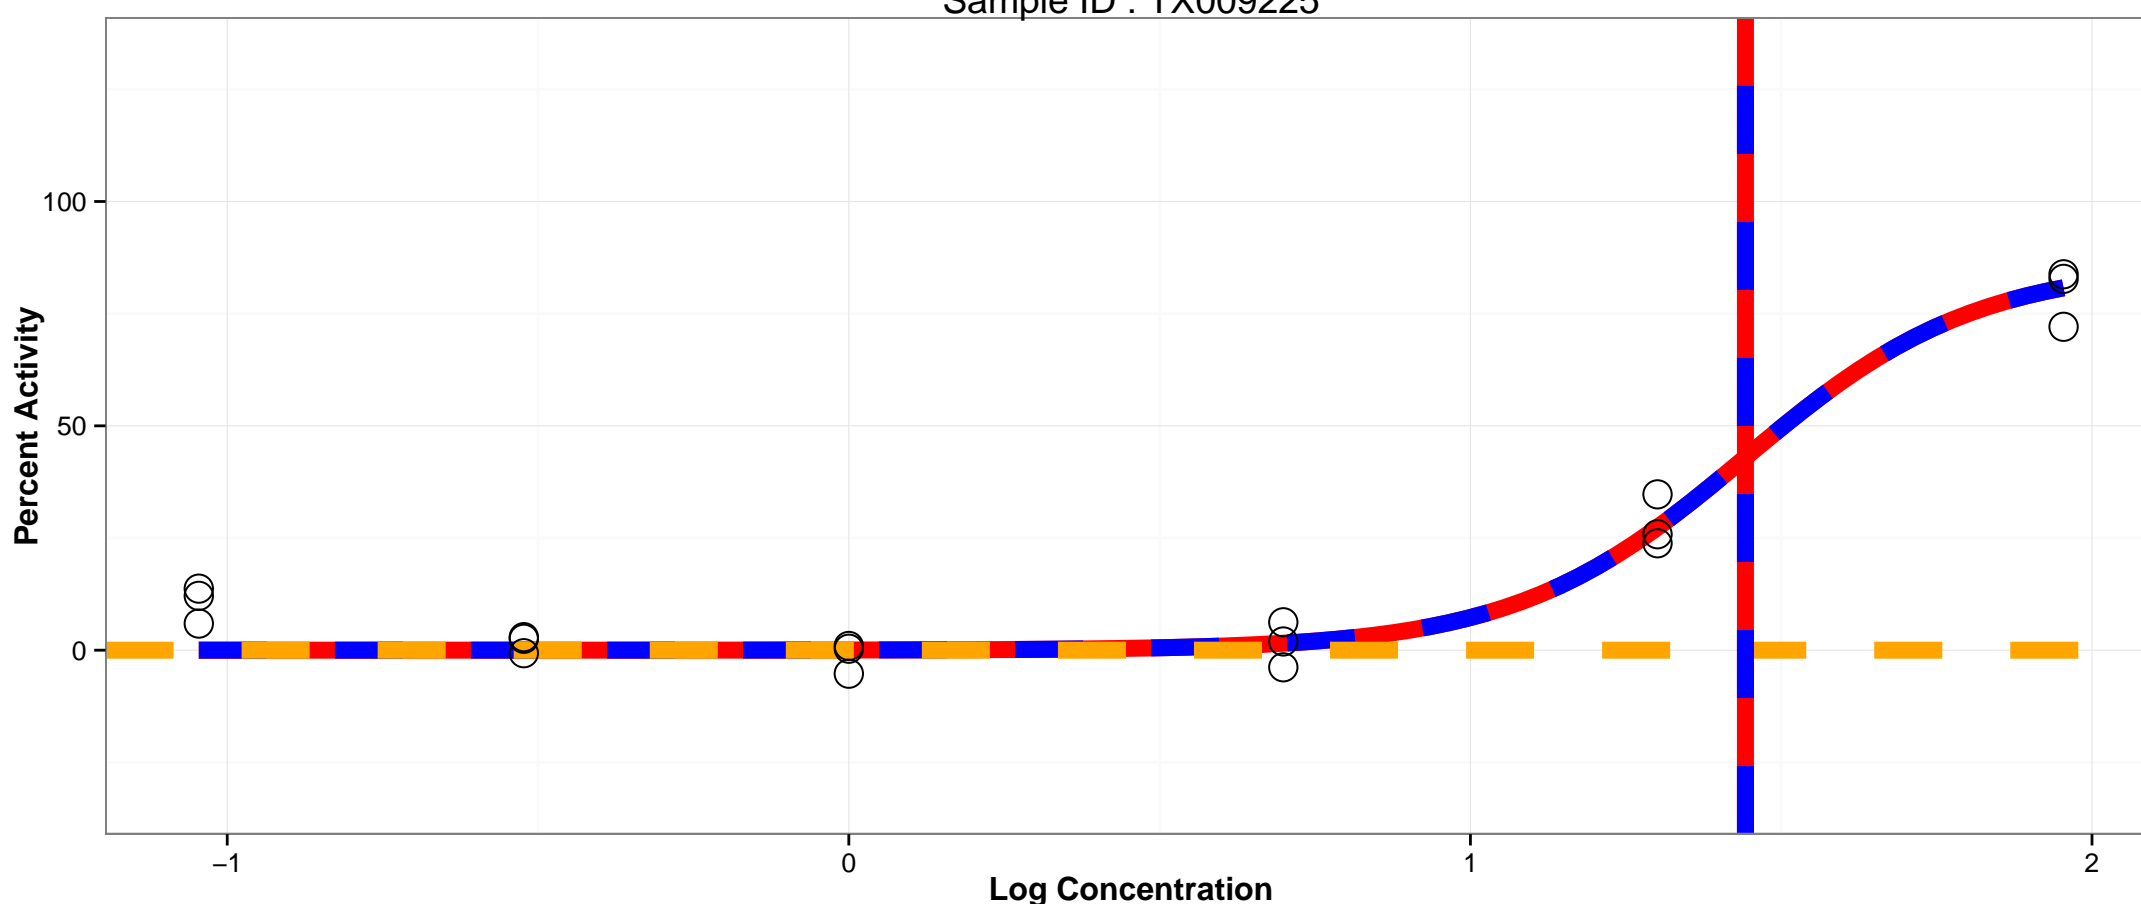

HILL MODEL

|     | tp   | ga    | gw   |
|-----|------|-------|------|
| val | 85.9 | 1.44  | 2.34 |
| sd  | 13.3 | 0.138 | 1.48 |

GAIN-LOSS MODEL

|     | tp   | ga   | gw   | la   | lw   |
|-----|------|------|------|------|------|
| val | 85.9 | 1.44 | 2.34 | 2.46 | 10.1 |
| sd  | NA   | NA   | NA   | NA   | NA   |

|      | CNST   | HILL   | GNLS   |
|------|--------|--------|--------|
| AIC  | 176.62 | 123.08 | 127.08 |
| PROB | 0      | 0.88   | 0.12   |
| RMSE | 34.95  | 5.88   | 5.88   |

MAX\_MEAN : 79.6 MAX\_MED : 82.8 BMAD : 5.69  
COFF : 20 HIT-CALL : 1 FITC : 42 ACTP : 1  
FLAGS :

Assay ID 1509 (NHEERL\_HEK293T\_CellTiterGLO)  
Sample ID : TX009225

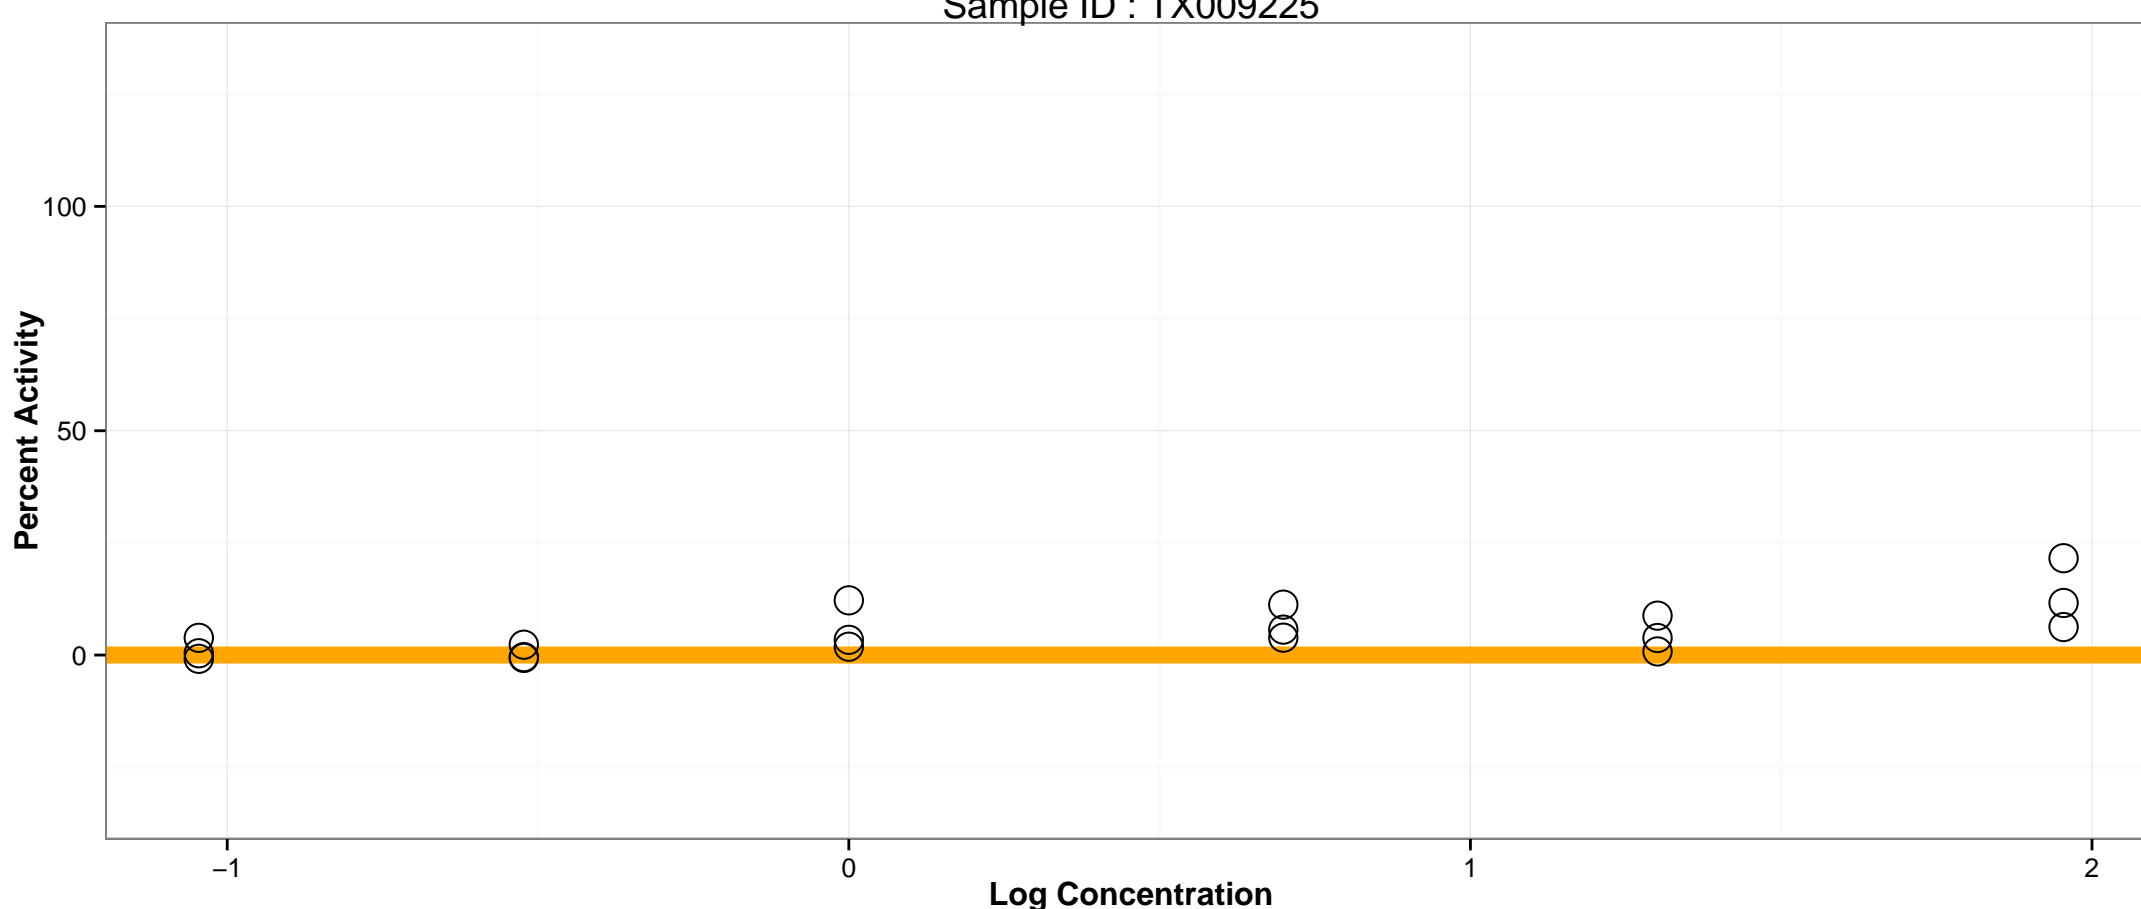

HILL MODEL

HILL MODEL: Not applicable

GAIN-LOSS MODEL

GNLS MODEL: Not applicable

|      | CNST   | HILL | GNLS |
|------|--------|------|------|
| AIC  | 125.59 | NA   | NA   |
| PROB | 1      | NA   | NA   |
| RMSE | 7.79   | NA   | NA   |

MAX\_MEAN : 13.2 MAX\_MED : 11.6 BMAD : 5.54  
COFF : 20 HIT-CALL : 0 FITC : 4 ACTP : 0  
FLAGS :

Assay ID 1848 (NHEERL\_Quantilum\_inhib\_2\_dn)  
Sample ID : TX009225

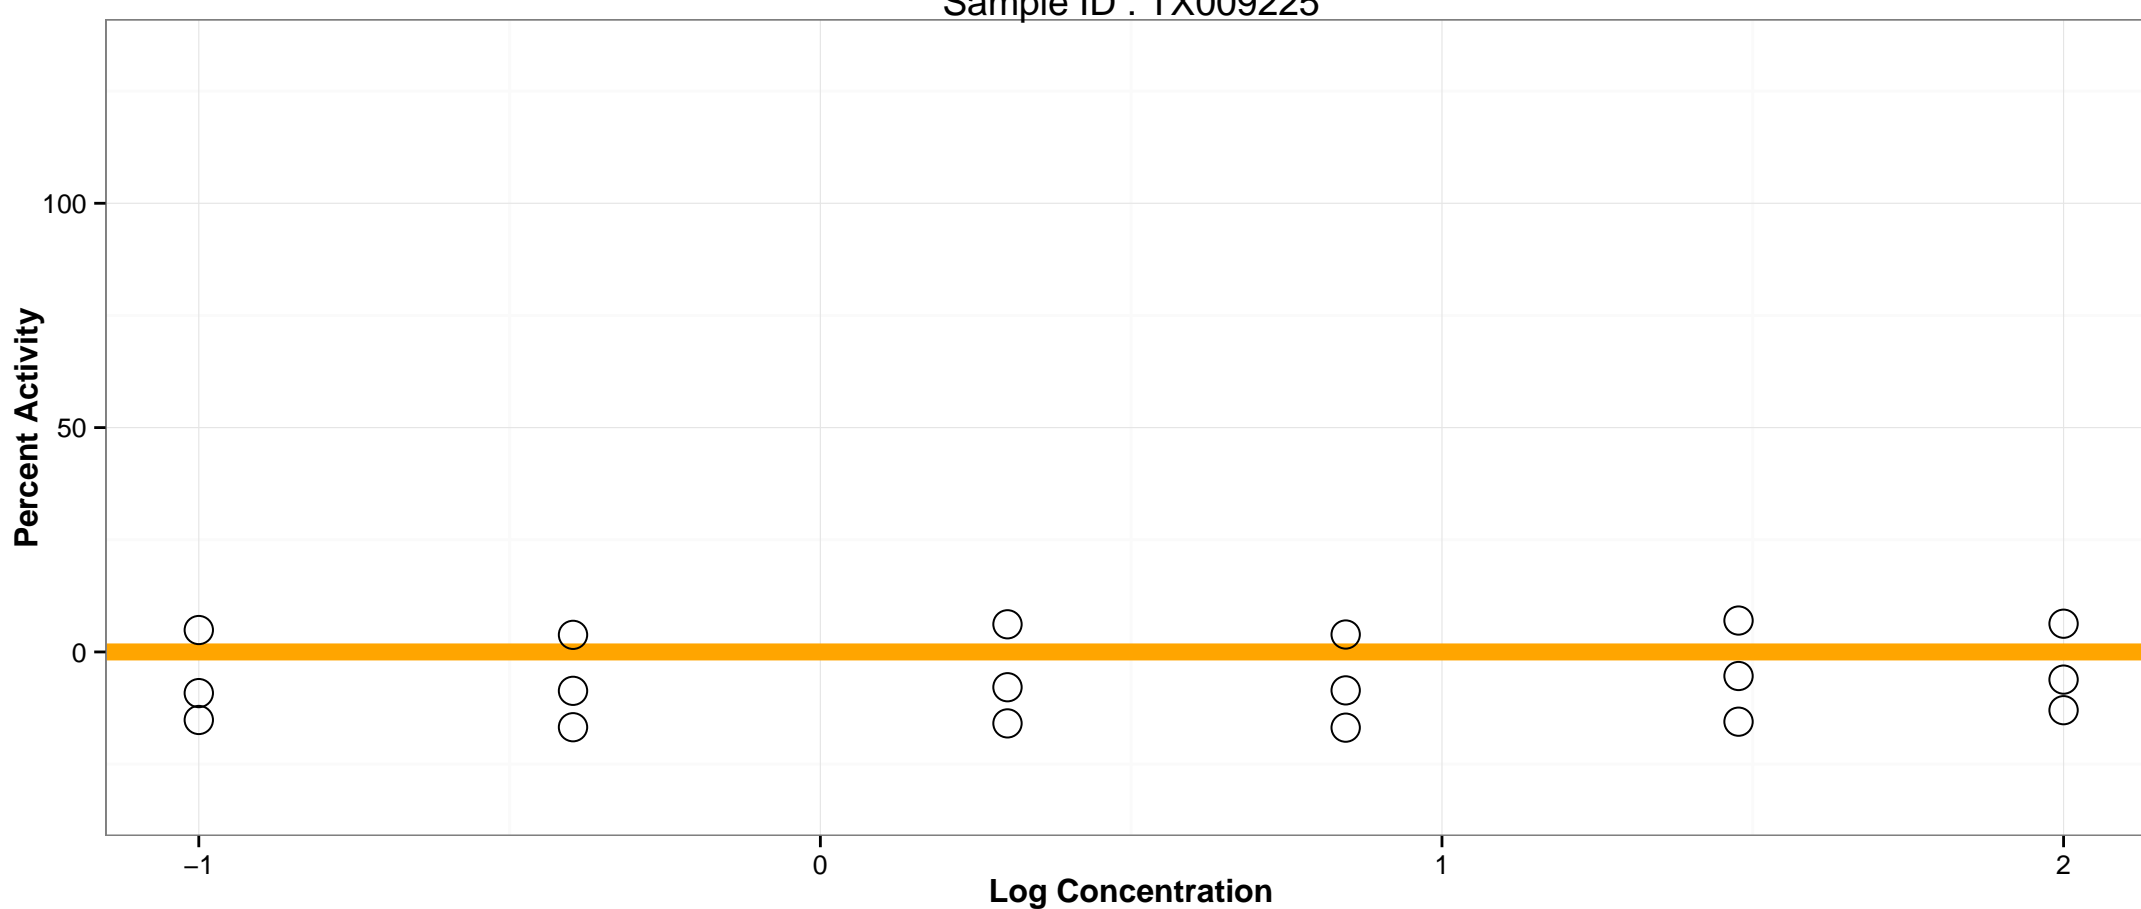

HILL MODEL

HILL MODEL: Not applicable

GAIN-LOSS MODEL

GNLS MODEL: Not applicable

|      | CNST   | HILL | GNLS |
|------|--------|------|------|
| AIC  | 140.69 | NA   | NA   |
| PROB | 1      | NA   | NA   |
| RMSE | 10.54  | NA   | NA   |

MAX\_MEAN : -4.27 MAX\_MED : -5.35 BMAD : 8.58  
COFF : 20 HIT-CALL : 0 FITC : 4 ACTP : 0  
FLAGS :

Chemical : Sodium L-ascorbate  
CAS : 134-03-2

Assay ID 1508 (NHEERL\_TPO\_AUR\_dn)  
Sample ID : TX009308

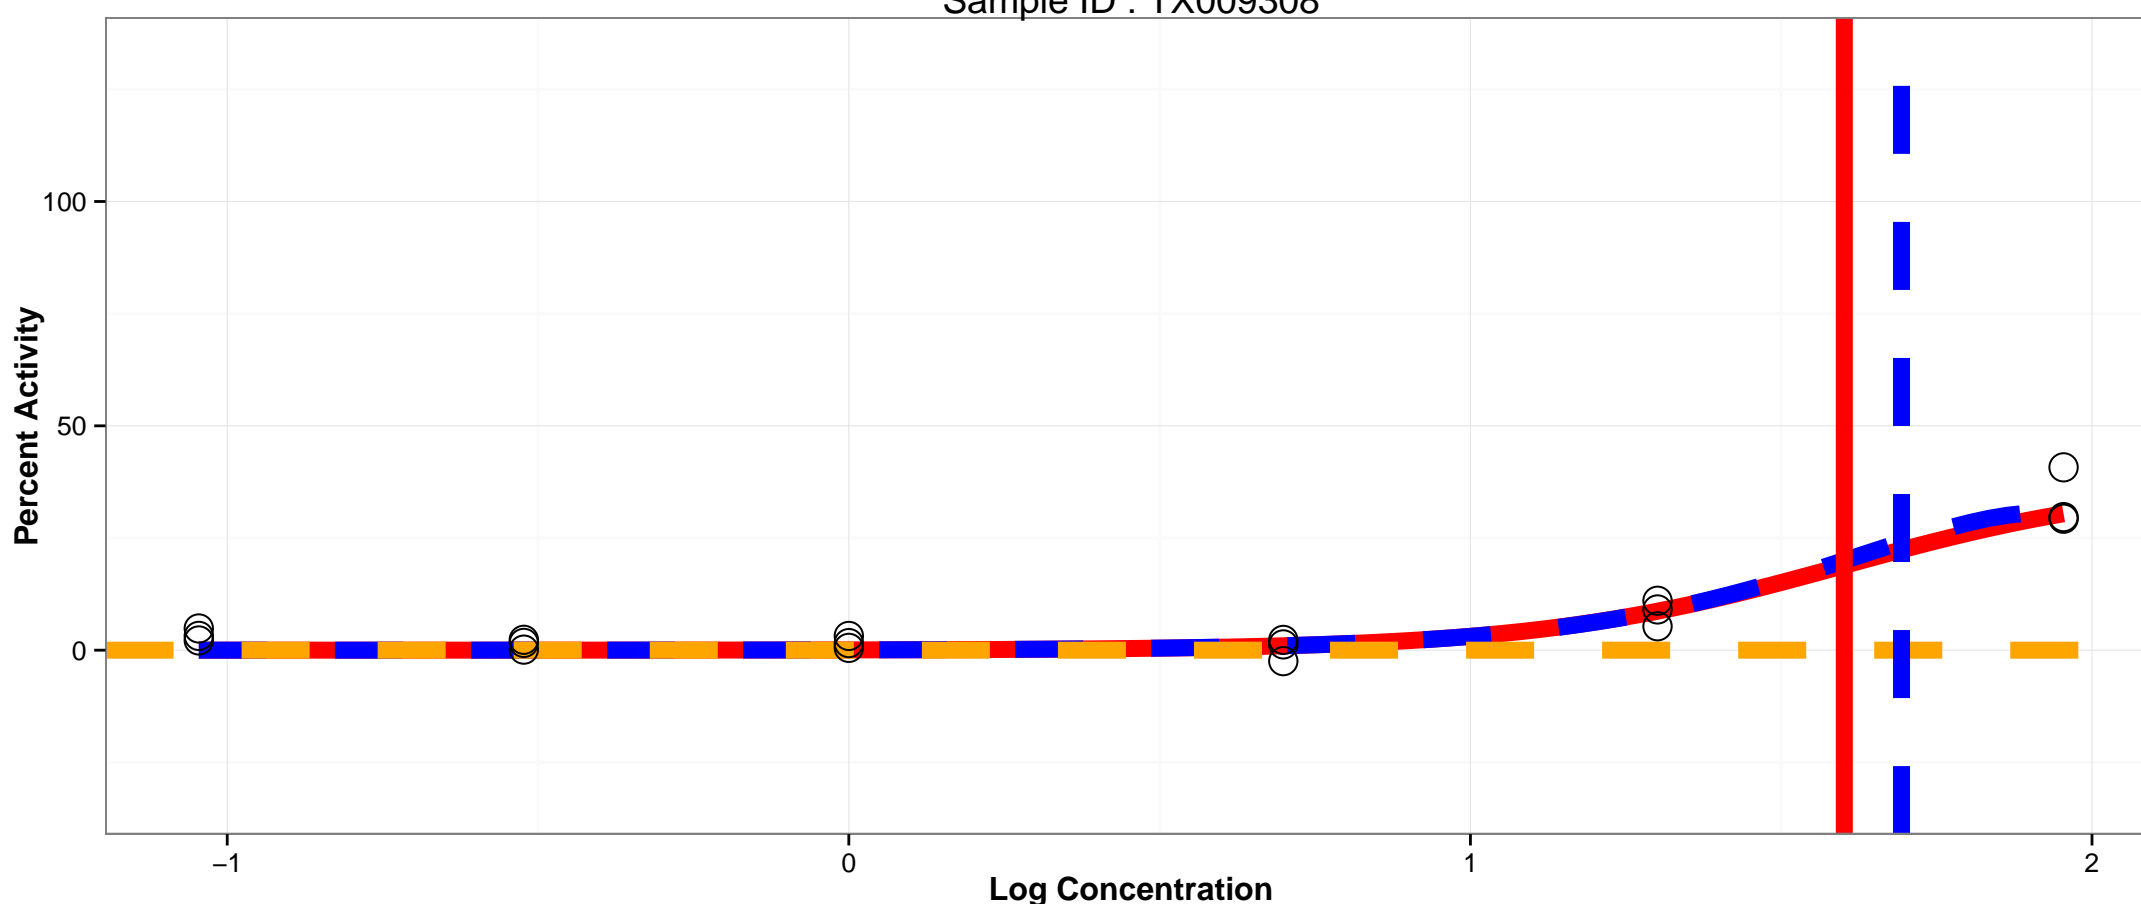

HILL MODEL

|     | tp   | ga    | gw   |
|-----|------|-------|------|
| val | 37.8 | 1.6   | 1.75 |
| sd  | 28.2 | 0.577 | 1.85 |

GAIN-LOSS MODEL

|     | tp   | ga   | gw   | la   | lw  |
|-----|------|------|------|------|-----|
| val | 48.8 | 1.69 | 1.69 | 2.12 | 4.4 |
| sd  | NA   | NA   | NA   | NA   | NA  |

|      | CNST   | HILL  | GNLS   |
|------|--------|-------|--------|
| AIC  | 142.17 | 99.54 | 103.53 |
| PROB | 0      | 0.88  | 0.12   |
| RMSE | 14.35  | 3.32  | 3.32   |

MAX\_MEAN : 33.2 MAX\_MED : 29.7 BMAD : 5.69  
COFF : 20 HIT-CALL : 1 FITC : 42 ACTP : 1  
FLAGS : 6

Assay ID 1509 (NHEERL\_HEK293T\_CellTiterGLO)  
Sample ID : TX009308

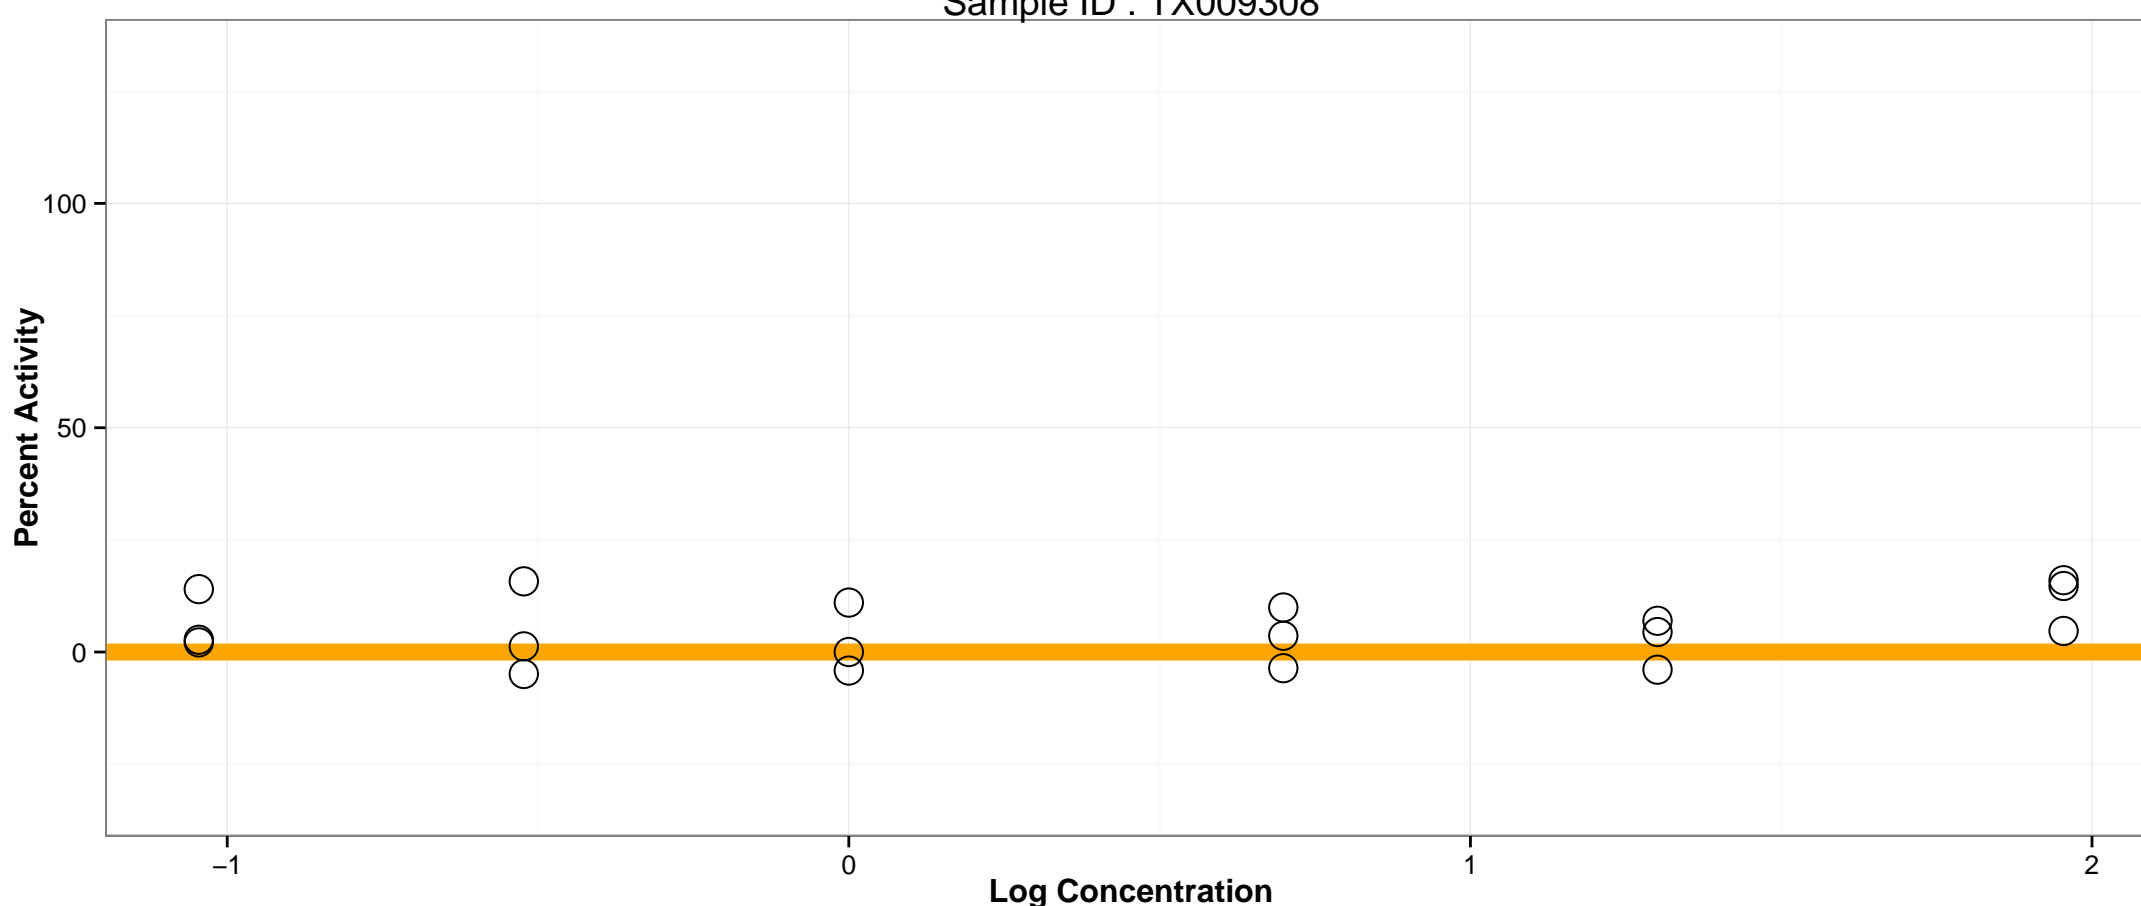

HILL MODEL

HILL MODEL: Not applicable

GAIN-LOSS MODEL

GNLS MODEL: Not applicable

|      | CNST   | HILL | GNLS |
|------|--------|------|------|
| AIC  | 131.79 | NA   | NA   |
| PROB | 1      | NA   | NA   |
| RMSE | 8.59   | NA   | NA   |

MAX\_MEAN : 11.8 MAX\_MED : 14.7 BMAD : 5.54  
COFF : 20 HIT-CALL : 0 FITC : 4 ACTP : 0  
FLAGS :

Assay ID 1848 (NHEERL\_Quantilum\_inhib\_2\_dn)  
Sample ID : TX009308

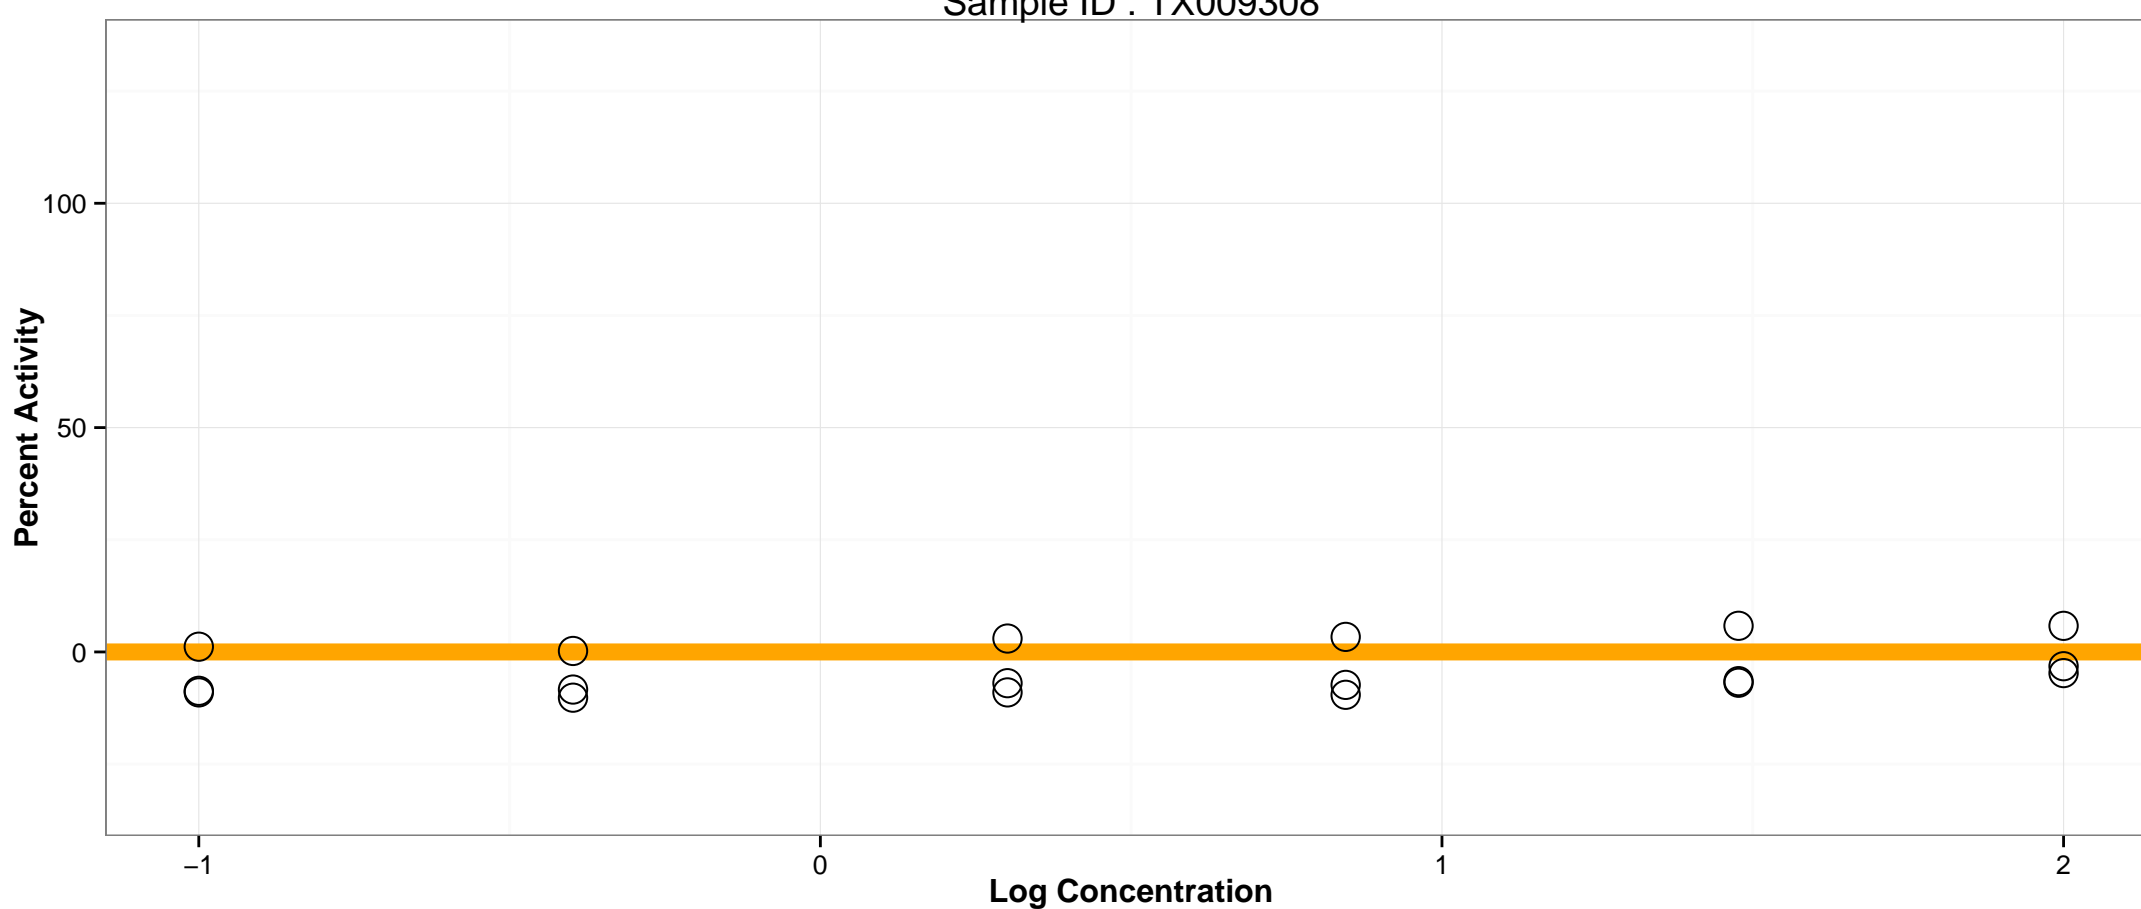

HILL MODEL

HILL MODEL: Not applicable

GAIN-LOSS MODEL

GNLS MODEL: Not applicable

|      | CNST   | HILL | GNLS |
|------|--------|------|------|
| AIC  | 125.06 | NA   | NA   |
| PROB | 1      | NA   | NA   |
| RMSE | 6.73   | NA   | NA   |

MAX\_MEAN : -0.681 MAX\_MED : -3.17 BMAD : 8.58  
COFF : 20 HIT-CALL : 0 FITC : 4 ACTP : 0  
FLAGS :

Chemical : Dapsone  
CAS : 80-08-0

Assay ID 1508 (NHEERL\_TPO\_AUR\_dn)  
Sample ID : TX009316

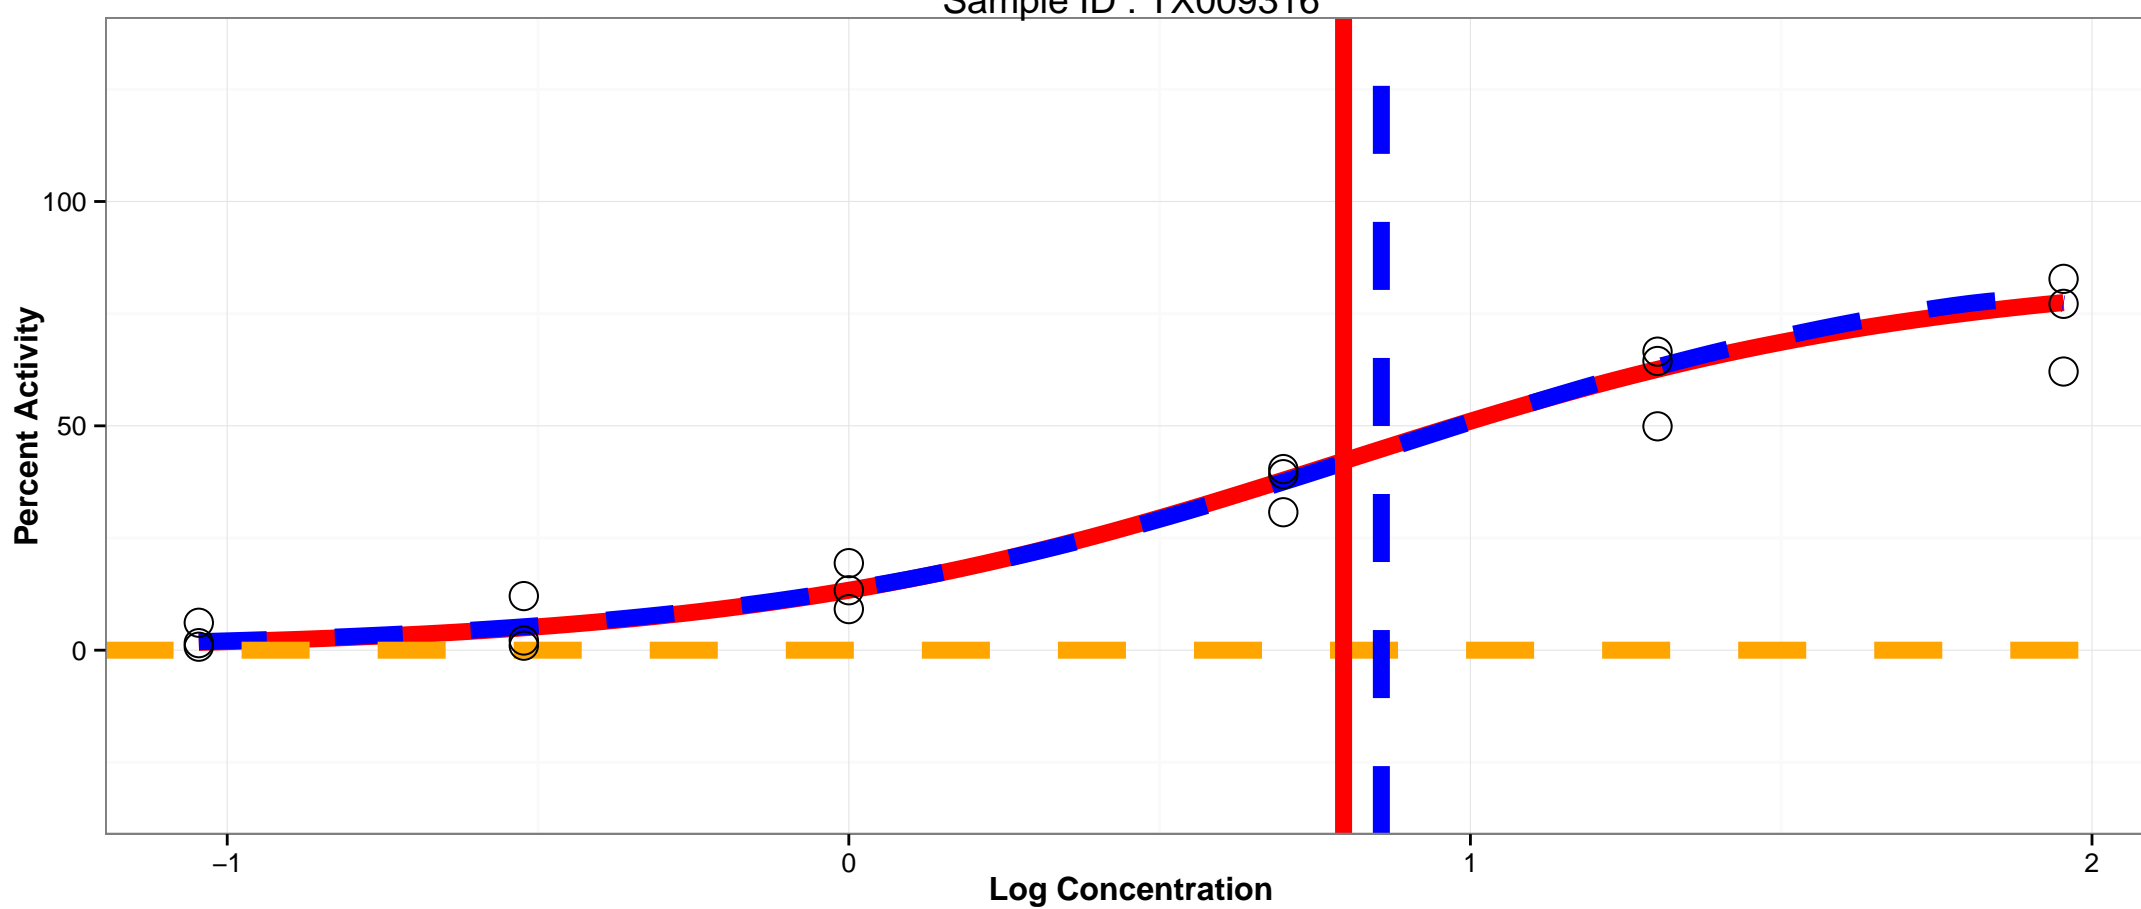

HILL MODEL

|     | tp   | ga    | gw    |
|-----|------|-------|-------|
| val | 84.3 | 0.796 | 0.911 |
| sd  | 6.68 | 0.114 | 0.142 |

GAIN-LOSS MODEL

|     | tp | ga    | gw    | la   | lw   |
|-----|----|-------|-------|------|------|
| val | 89 | 0.857 | 0.874 | 2.12 | 8.42 |
| sd  | NA | NA    | NA    | NA   | NA   |

|      | CNST   | HILL   | GNLS   |
|------|--------|--------|--------|
| AIC  | 189.41 | 122.99 | 126.94 |
| PROB | 0      | 0.88   | 0.12   |
| RMSE | 42.62  | 6.02   | 6.01   |

MAX\_MEAN : 74 MAX\_MED : 77.2 BMAD : 5.69  
COFF : 20 HIT-CALL : 1 FITC : 42 ACTP : 1  
FLAGS :

Assay ID 1509 (NHEERL\_HEK293T\_CellTiterGLO)  
Sample ID : TX009316

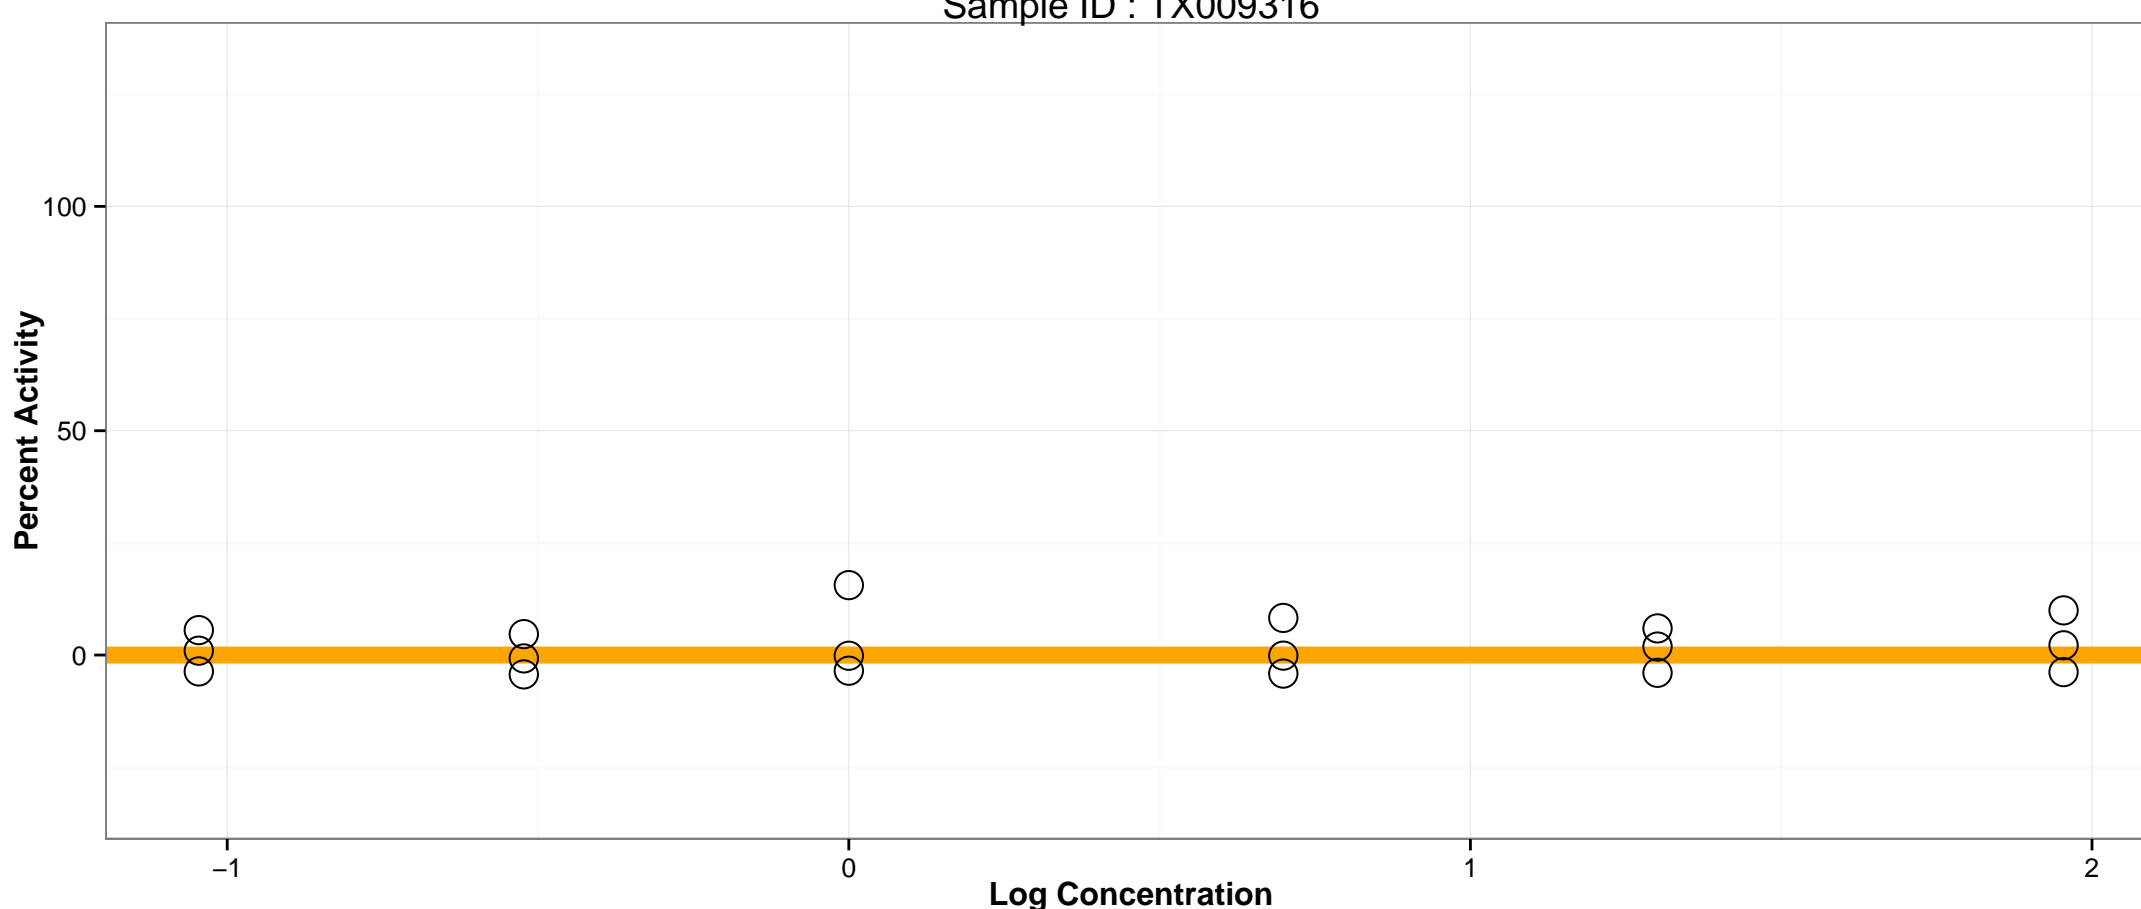

HILL MODEL

HILL MODEL: Not applicable

GAIN-LOSS MODEL

GNLS MODEL: Not applicable

|      | CNST   | HILL | GNLS |
|------|--------|------|------|
| AIC  | 115.82 | NA   | NA   |
| PROB | 1      | NA   | NA   |
| RMSE | 5.78   | NA   | NA   |

MAX\_MEAN : 3.99 MAX\_MED : 2.19 BMAD : 5.54  
COFF : 20 HIT-CALL : 0 FITC : 4 ACTP : 0  
FLAGS :

Assay ID 1848 (NHEERL\_Quantilum\_inhib\_2\_dn)  
Sample ID : TX009316

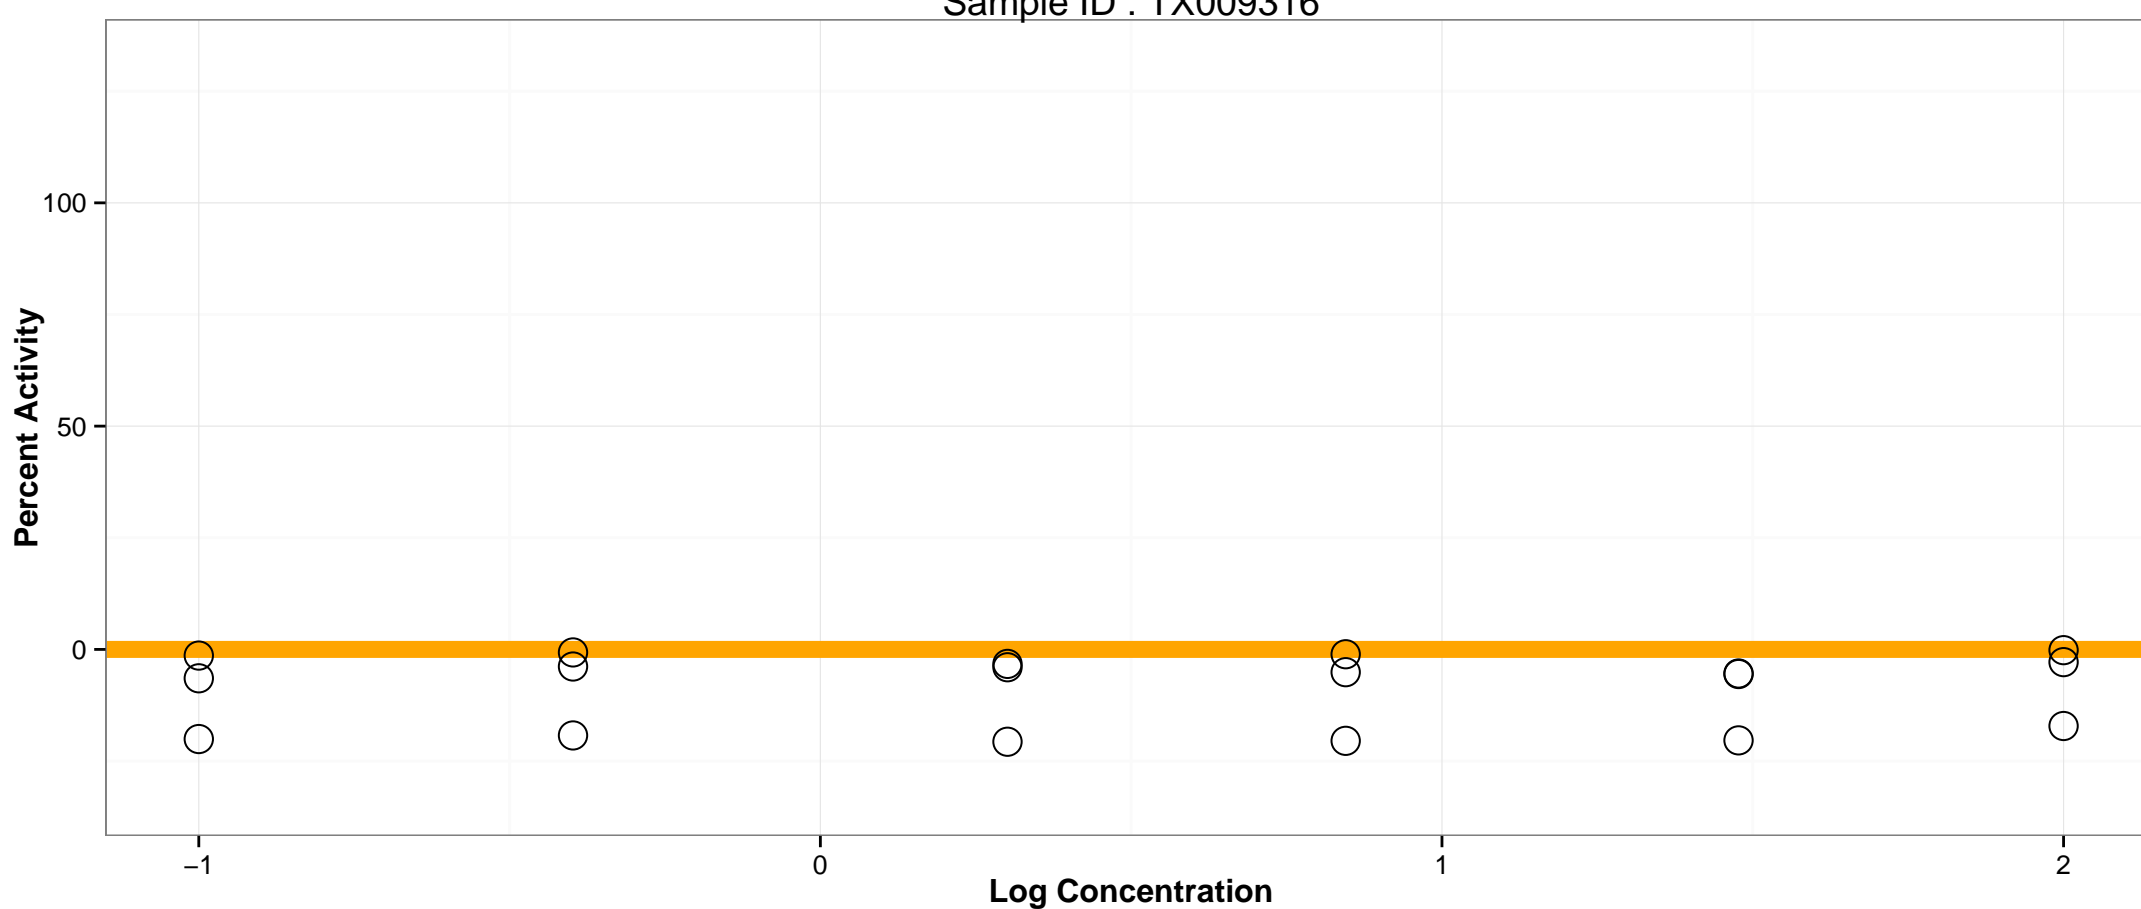

HILL MODEL

HILL MODEL: Not applicable

GAIN-LOSS MODEL

GNLS MODEL: Not applicable

|      | CNST   | HILL | GNLS |
|------|--------|------|------|
| AIC  | 142.57 | NA   | NA   |
| PROB | 1      | NA   | NA   |
| RMSE | 11.8   | NA   | NA   |

MAX\_MEAN : -6.71 MAX\_MED : -2.83 BMAD : 8.58  
COFF : 20 HIT-CALL : 0 FITC : 4 ACTP : 0  
FLAGS :

Chemical : 3,3',5,5'-Tetrabromobisphenol A  
CAS : 79-94-7

Assay ID 1508 (NHEERL\_TPO\_AUR\_dn)  
Sample ID : TX009342

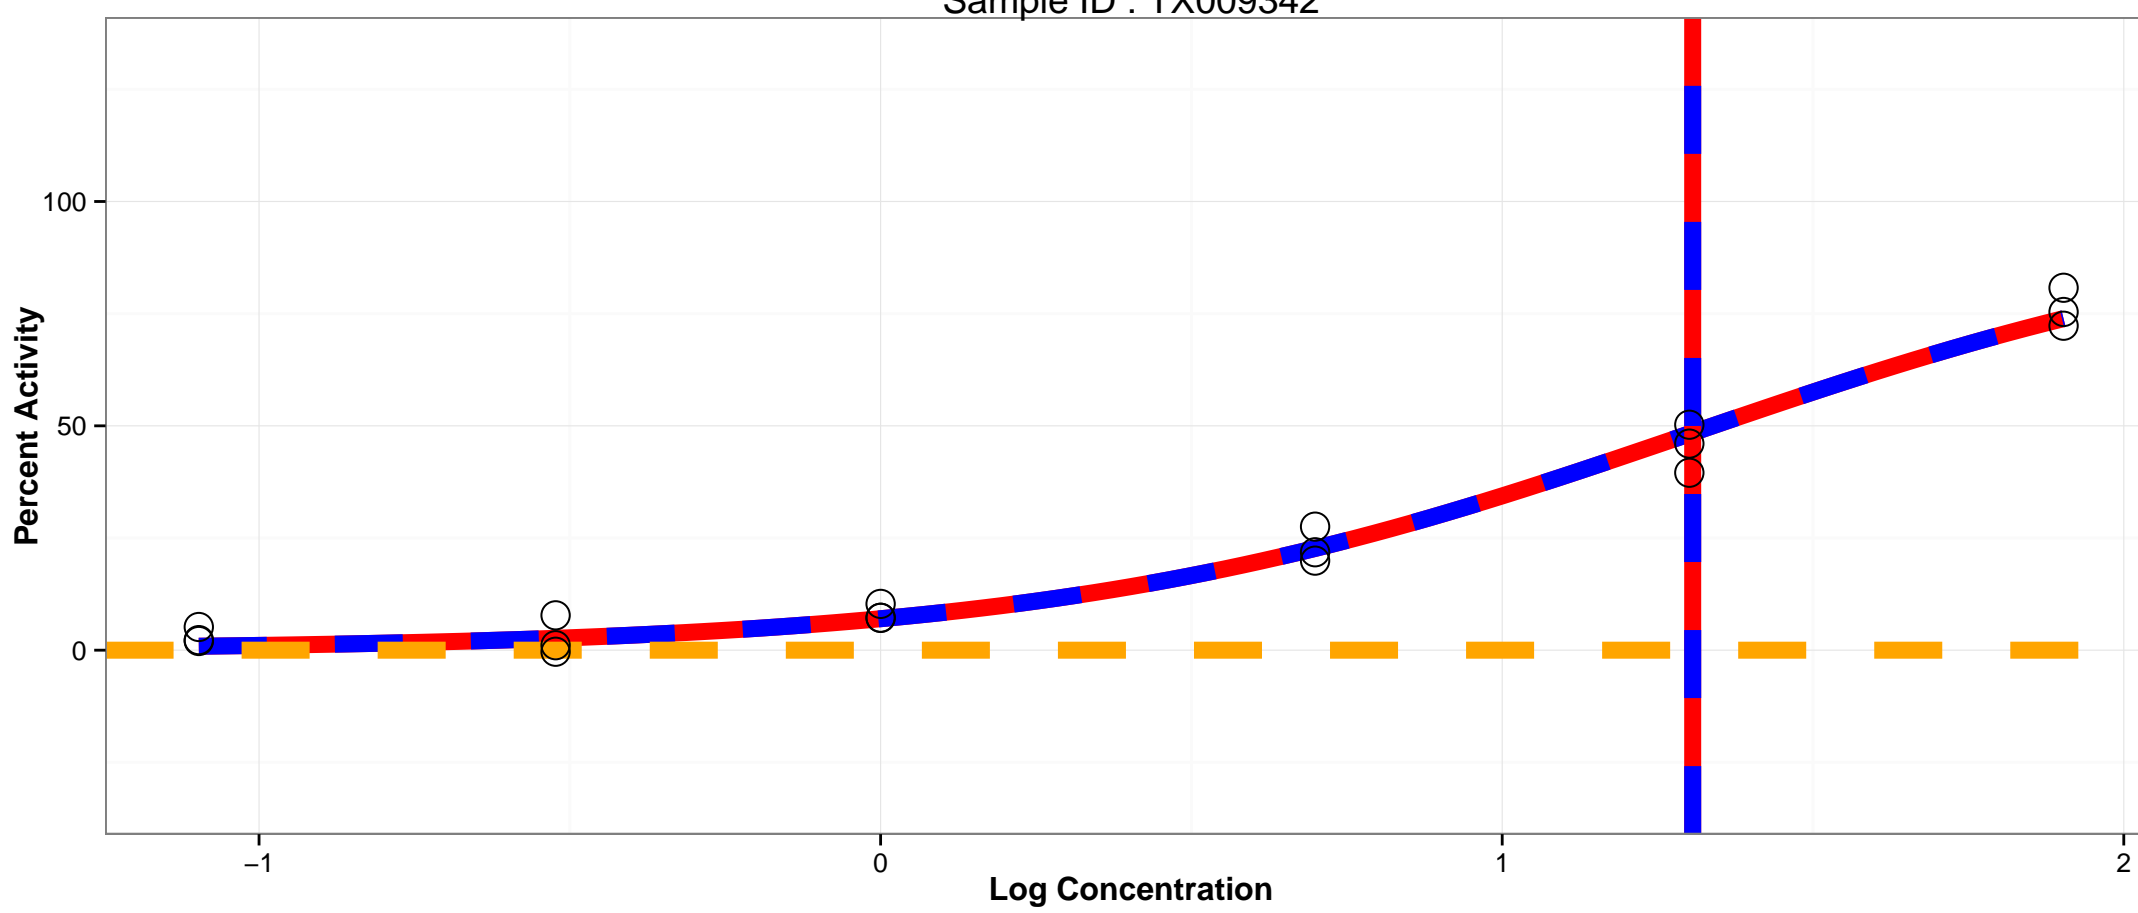

HILL MODEL

|     | tp   | ga    | gw     |
|-----|------|-------|--------|
| val | 96.9 | 1.31  | 0.848  |
| sd  | 9.12 | 0.122 | 0.0894 |

GAIN-LOSS MODEL

|     | tp   | ga    | gw     | la   | lw    |
|-----|------|-------|--------|------|-------|
| val | 96.9 | 1.31  | 0.848  | 2.96 | 8.75  |
| sd  | 9.12 | 0.122 | 0.0894 | 1250 | 10300 |

|      | CNST   | HILL   | GNLS   |
|------|--------|--------|--------|
| AIC  | 183.41 | 106.07 | 110.07 |
| PROB | 0      | 0.88   | 0.12   |
| RMSE | 37.71  | 3.64   | 3.64   |

MAX\_MEAN : 76.2 MAX\_MED : 75.4 BMAD : 5.69  
COFF : 20 HIT-CALL : 1 FITC : 42 ACTP : 1  
FLAGS :

Assay ID 1509 (NHEERL\_HEK293T\_CellTiterGLO)  
Sample ID : TX009342

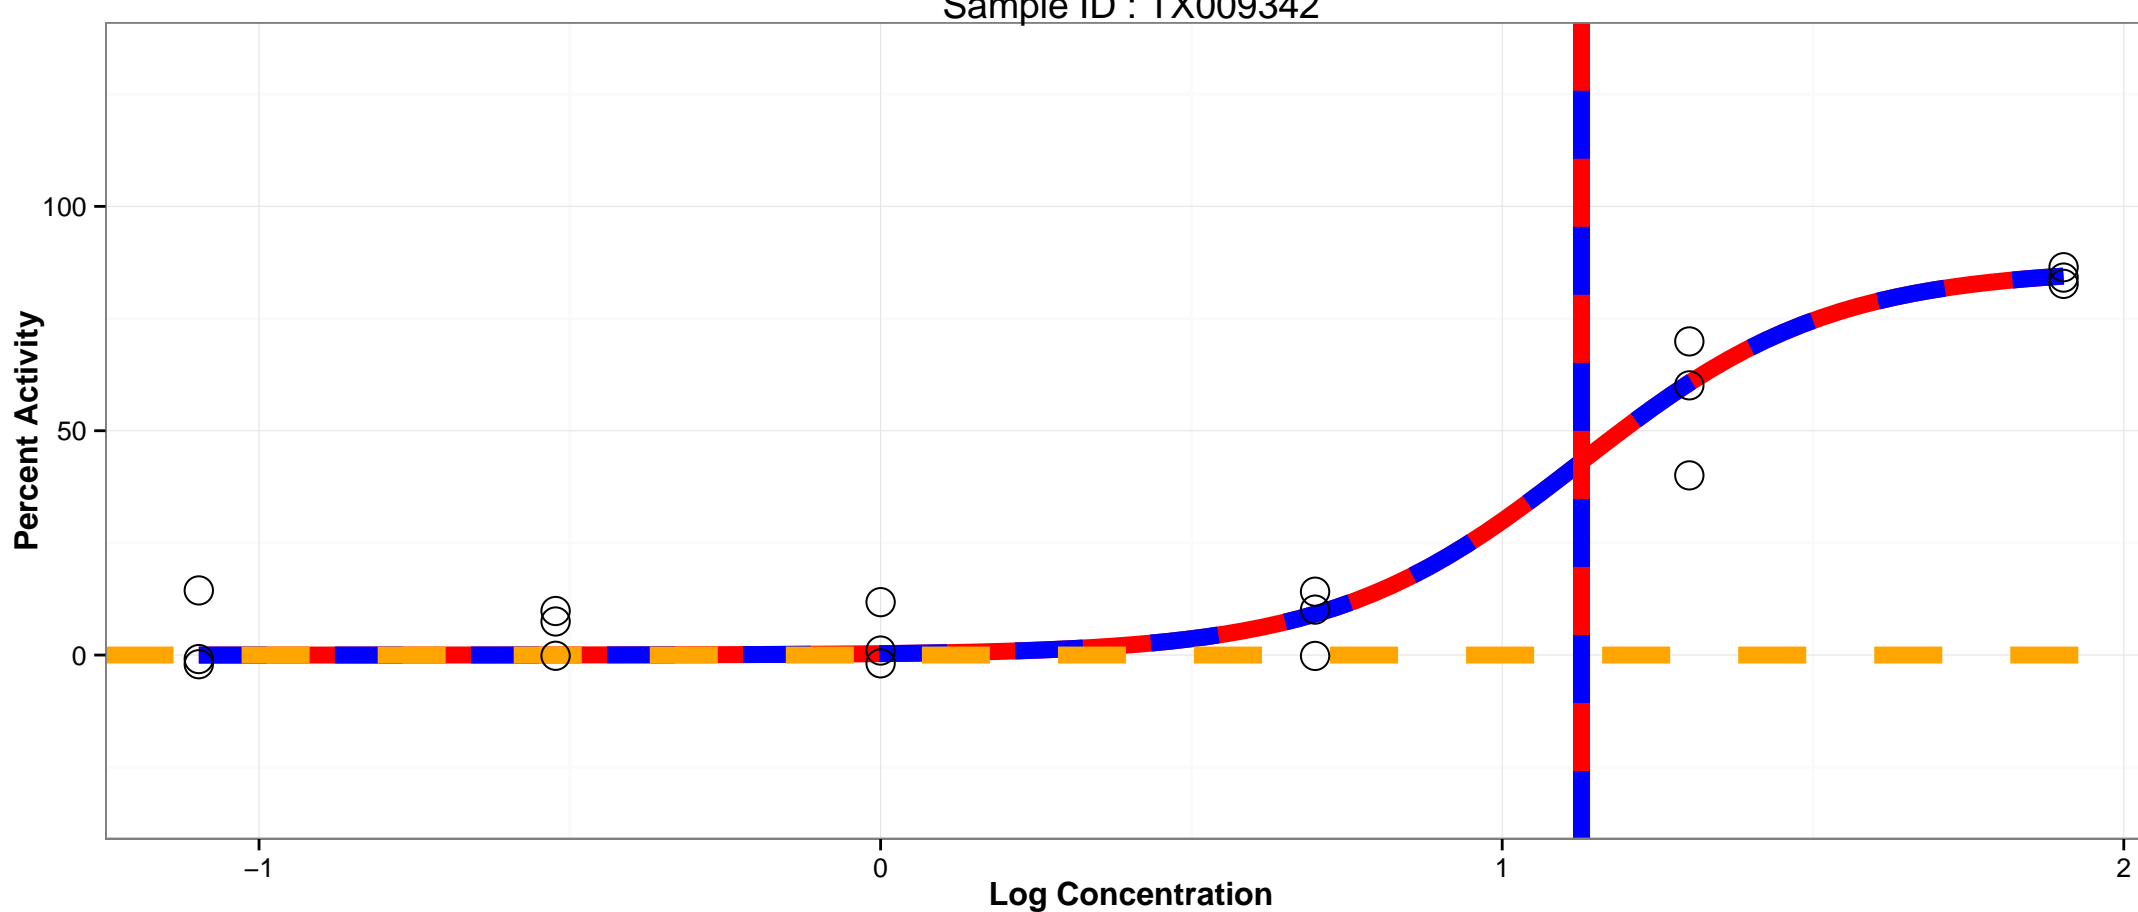

HILL MODEL

|     | tp   | ga     | gw    |
|-----|------|--------|-------|
| val | 86.2 | 1.13   | 2.16  |
| sd  | 3.93 | 0.0588 | 0.459 |

GAIN-LOSS MODEL

|     | tp   | ga   | gw   | la  | lw   |
|-----|------|------|------|-----|------|
| val | 86.2 | 1.13 | 2.16 | 3.7 | 11.1 |
| sd  | NA   | NA   | NA   | NA  | NA   |

|      | CNST   | HILL   | GNLS   |
|------|--------|--------|--------|
| AIC  | 186.85 | 132.71 | 136.71 |
| PROB | 0      | 0.88   | 0.12   |
| RMSE | 42.37  | 7.93   | 7.93   |

MAX\_MEAN : 84.4 MAX\_MED : 84.1 BMAD : 5.54  
COFF : 20 HIT-CALL : 1 FITC : 41 ACTP : 1  
FLAGS :

Assay ID 1848 (NHEERL\_Quantilum\_inhib\_2\_dn)  
Sample ID : TX009342

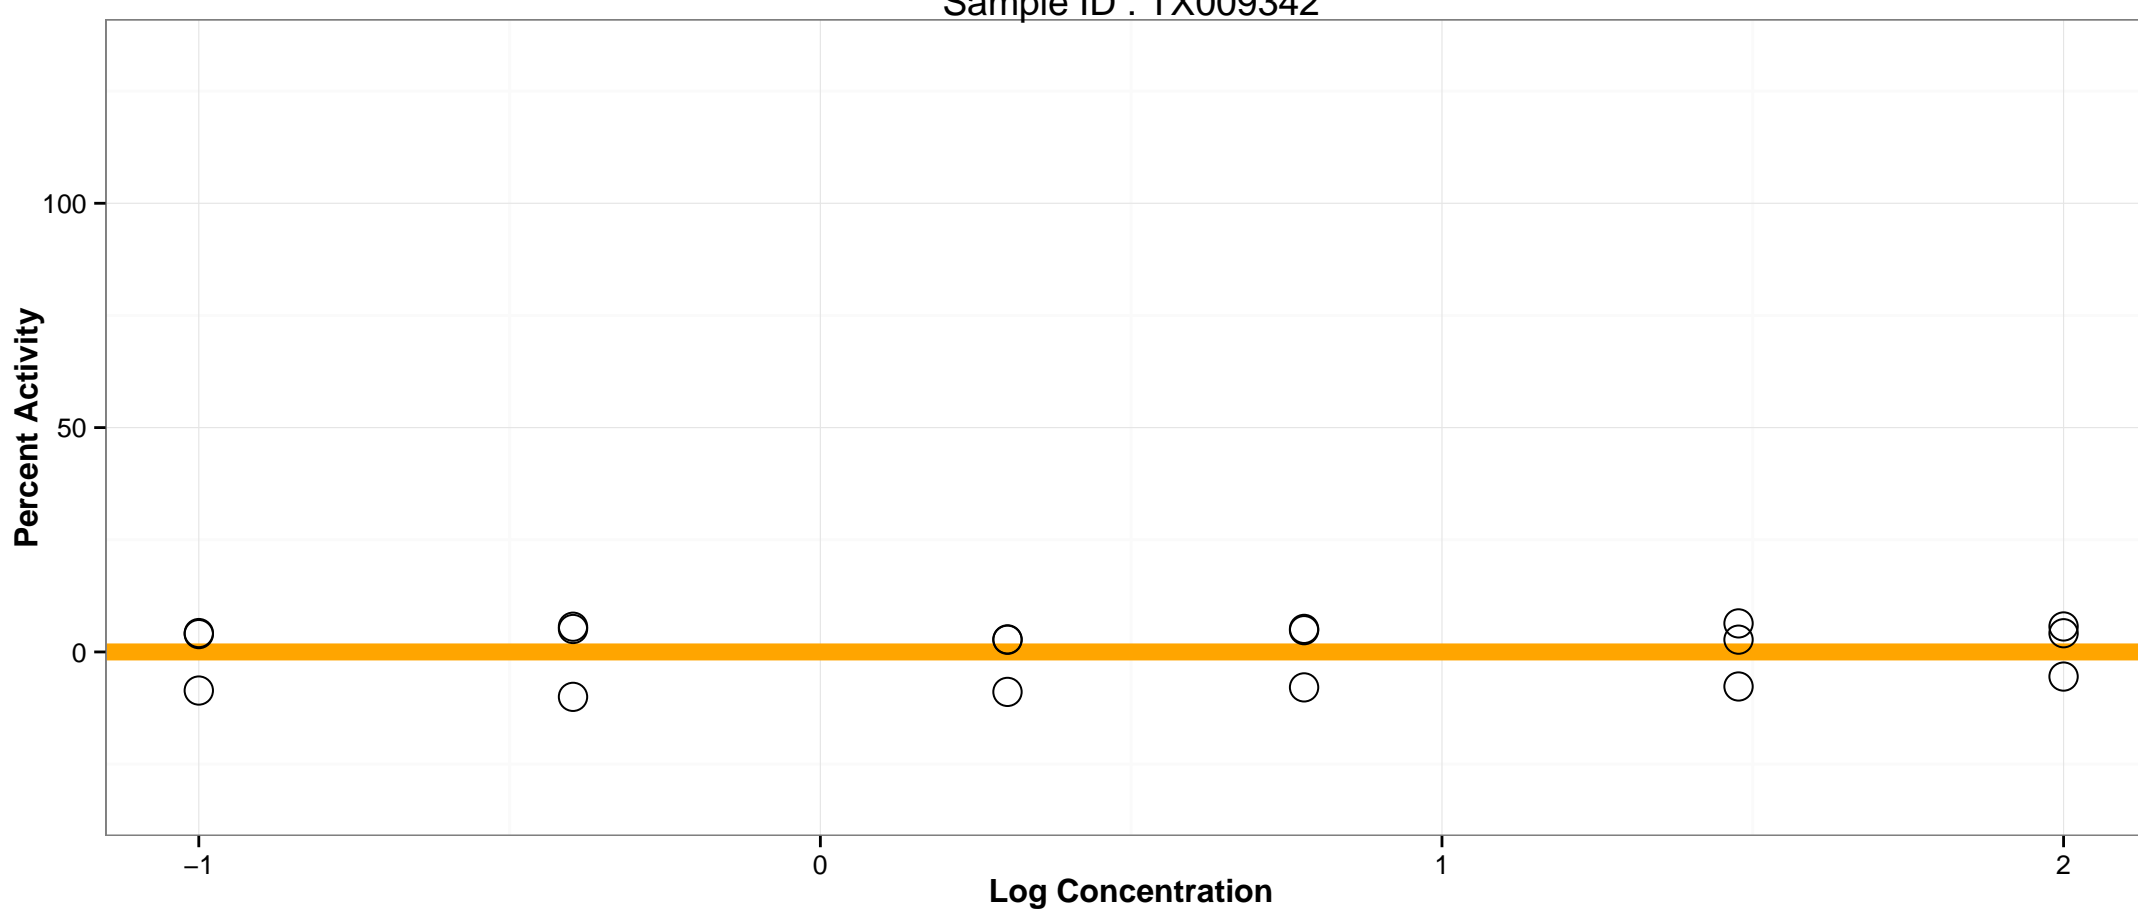

HILL MODEL

HILL MODEL: Not applicable

GAIN-LOSS MODEL

GNLS MODEL: Not applicable

|      | CNST   | HILL | GNLS |
|------|--------|------|------|
| AIC  | 121.27 | NA   | NA   |
| PROB | 1      | NA   | NA   |
| RMSE | 6.05   | NA   | NA   |

MAX\_MEAN : 1.47 MAX\_MED : 5.13 BMAD : 8.58  
COFF : 20 HIT-CALL : 0 FITC : 4 ACTP : 0  
FLAGS :

Chemical : Gentian Violet  
CAS : 548-62-9

Assay ID 1508 (NHEERL\_TPO\_AUR\_dn)  
Sample ID : TX009687

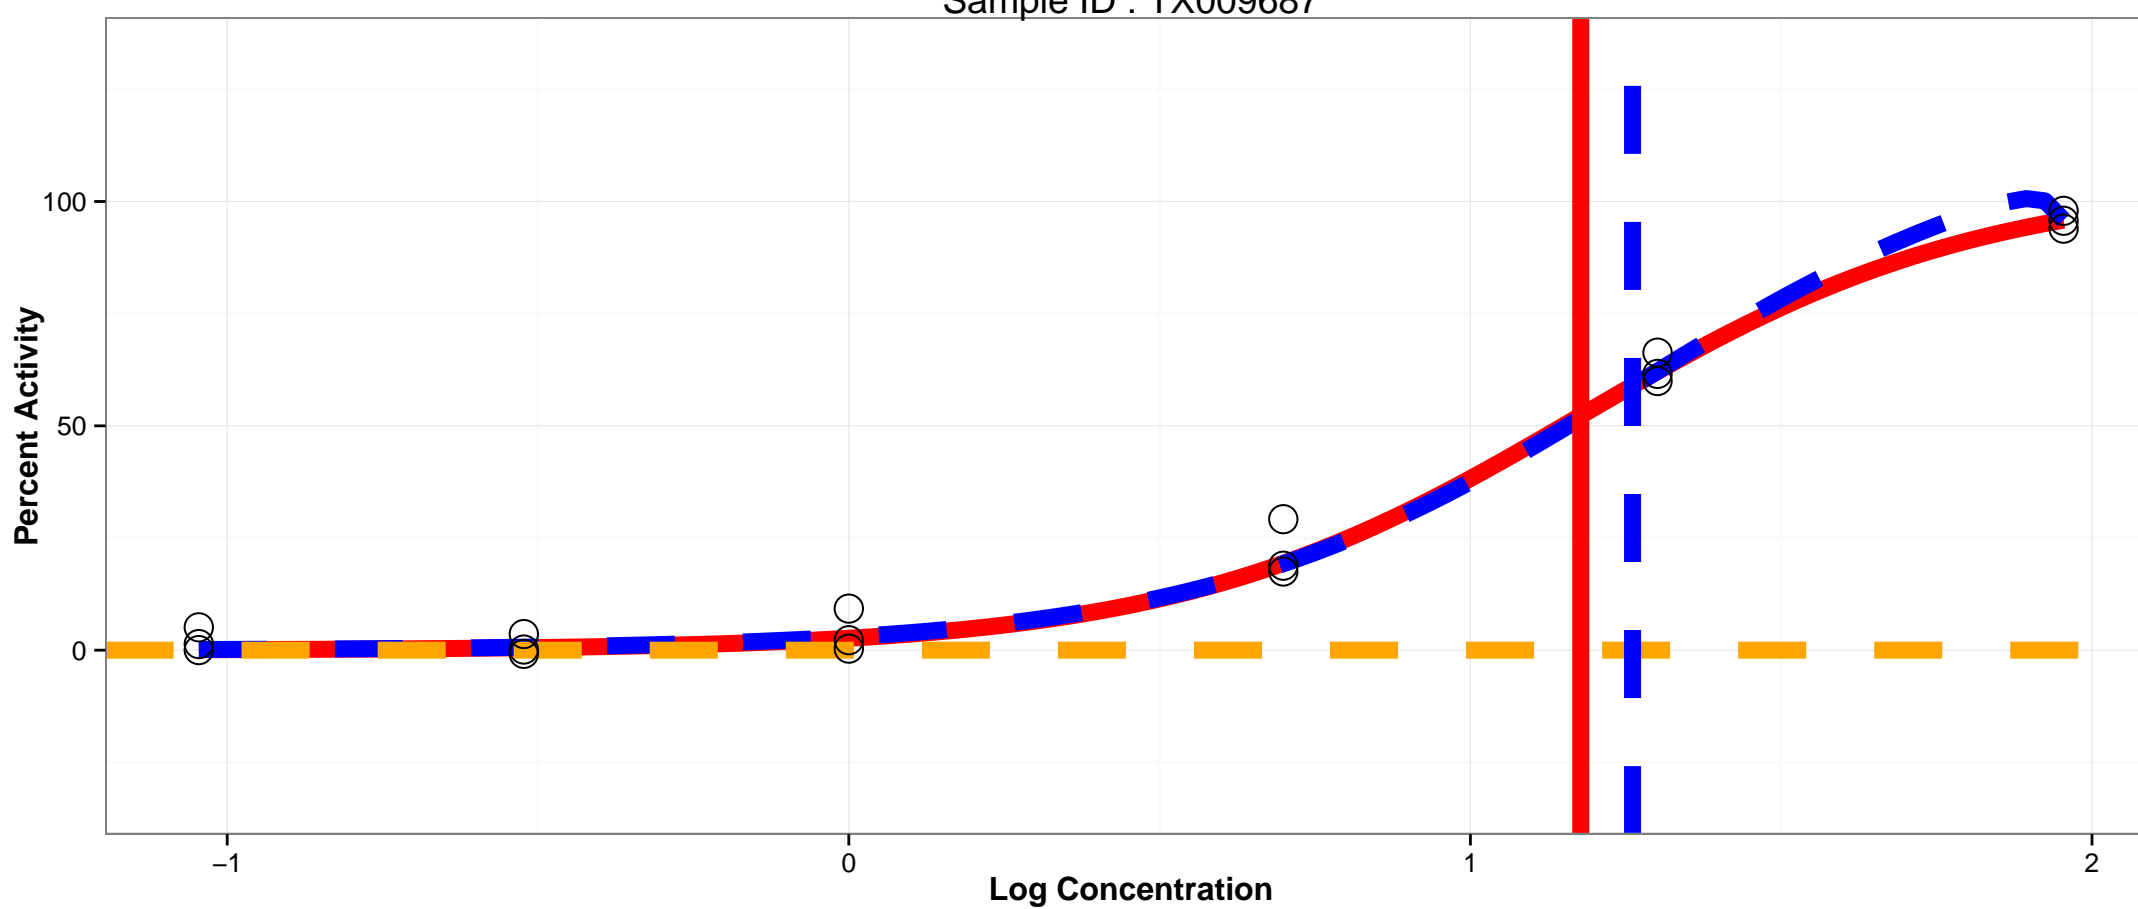

HILL MODEL

|     | tp   | ga     | gw    |
|-----|------|--------|-------|
| val | 105  | 1.18   | 1.34  |
| sd  | 3.24 | 0.0335 | 0.111 |

GAIN-LOSS MODEL

|     | tp  | ga   | gw   | la   | lw   |
|-----|-----|------|------|------|------|
| val | 118 | 1.26 | 1.26 | 2.02 | 17.8 |
| sd  | NA  | NA   | NA   | NA   | NA   |

|      | CNST   | HILL   | GNLS   |
|------|--------|--------|--------|
| AIC  | 191.56 | 101.72 | 105.66 |
| PROB | 0      | 0.88   | 0.12   |
| RMSE | 47.74  | 3.48   | 3.47   |

MAX\_MEAN : 95.9 MAX\_MED : 95.7 BMAD : 5.69  
COFF : 20 HIT-CALL : 1 FITC : 42 ACTP : 1  
FLAGS :

Assay ID 1509 (NHEERL\_HEK293T\_CellTiterGLO)  
Sample ID : TX009687

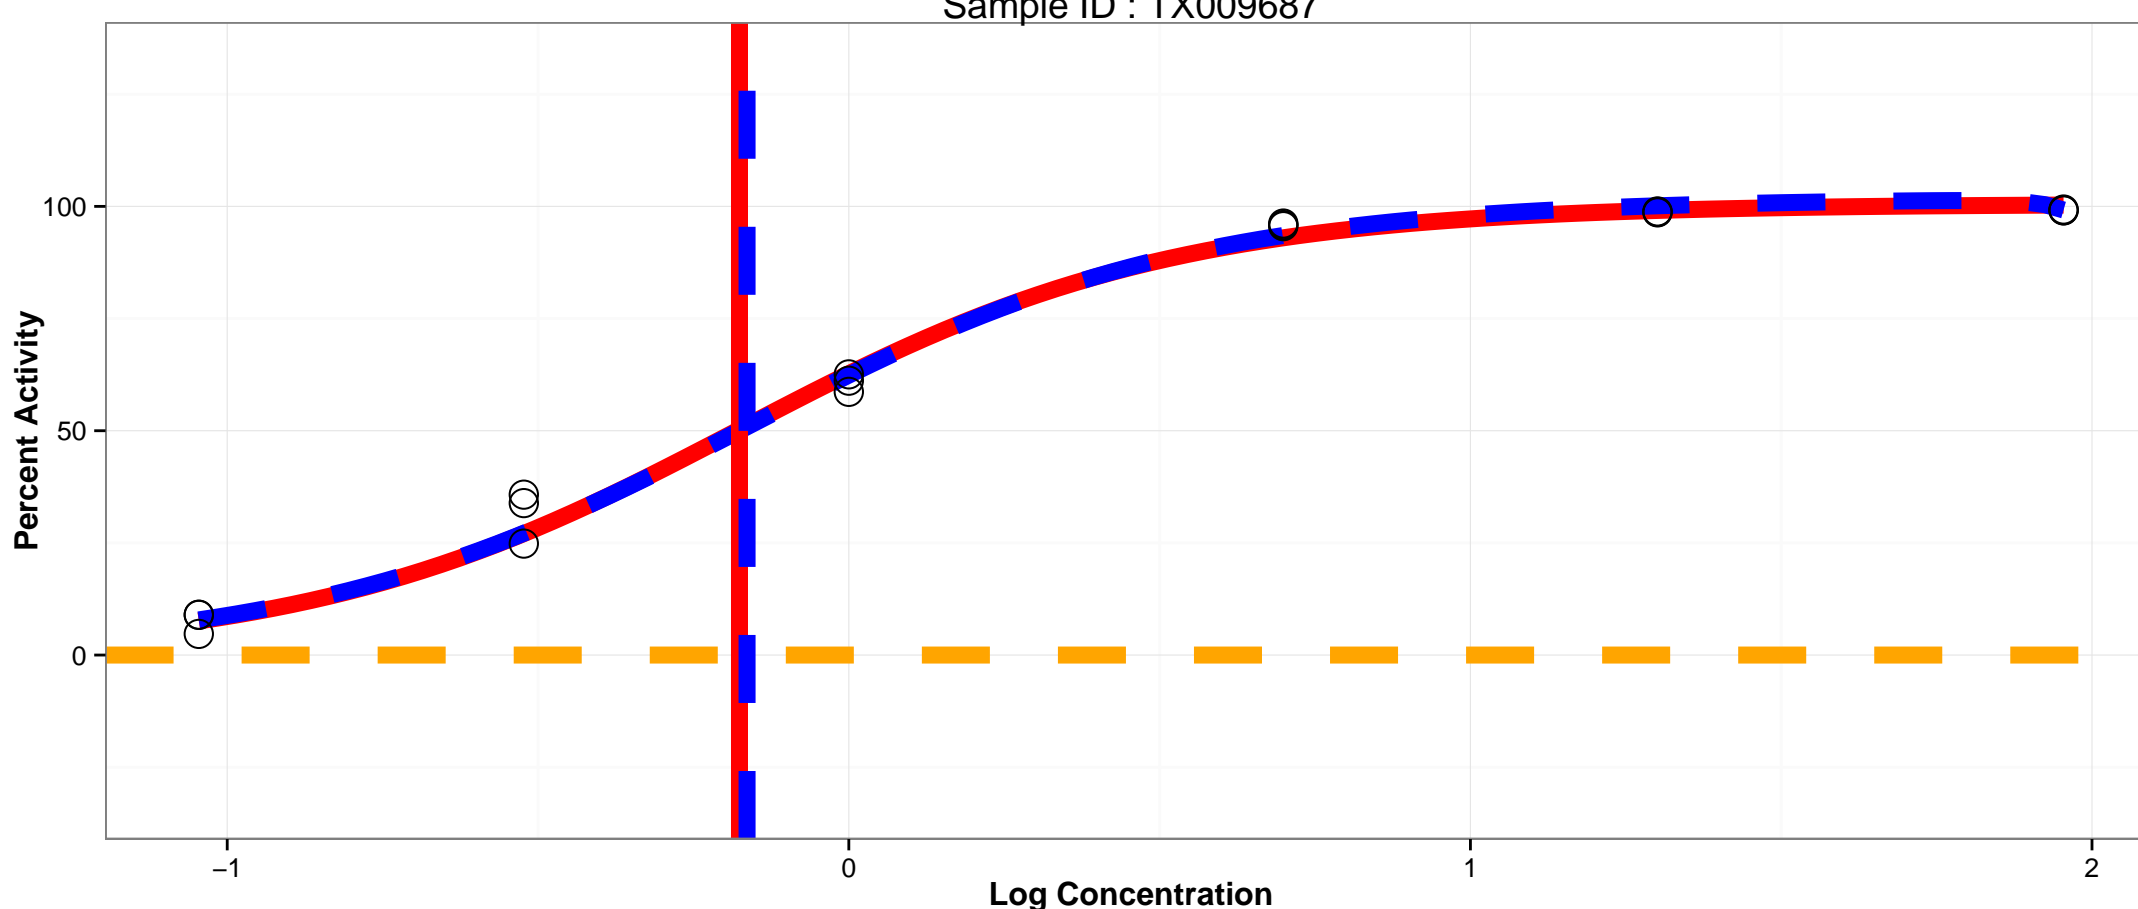

HILL MODEL

|     | tp    | ga     | gw     |
|-----|-------|--------|--------|
| val | 101   | -0.176 | 1.25   |
| sd  | 0.951 | 0.0236 | 0.0794 |

GAIN-LOSS MODEL

|     | tp  | ga     | gw   | la  | lw   |
|-----|-----|--------|------|-----|------|
| val | 102 | -0.164 | 1.22 | 2.1 | 11.1 |
| sd  | NA  | NA     | NA   | NA  | NA   |

|      | CNST   | HILL  | GNLS  |
|------|--------|-------|-------|
| AIC  | 211.58 | 99.52 | 101.8 |
| PROB | 0      | 0.76  | 0.24  |
| RMSE | 74.79  | 3.22  | 3.12  |

MAX\_MEAN : 99.2 MAX\_MED : 99.2 BMAD : 5.54  
COFF : 20 HIT-CALL : 1 FITC : 41 ACTP : 1  
FLAGS :

Assay ID 1848 (NHEERL\_QuantLum\_inhib\_2\_dn)  
Sample ID : TX009687

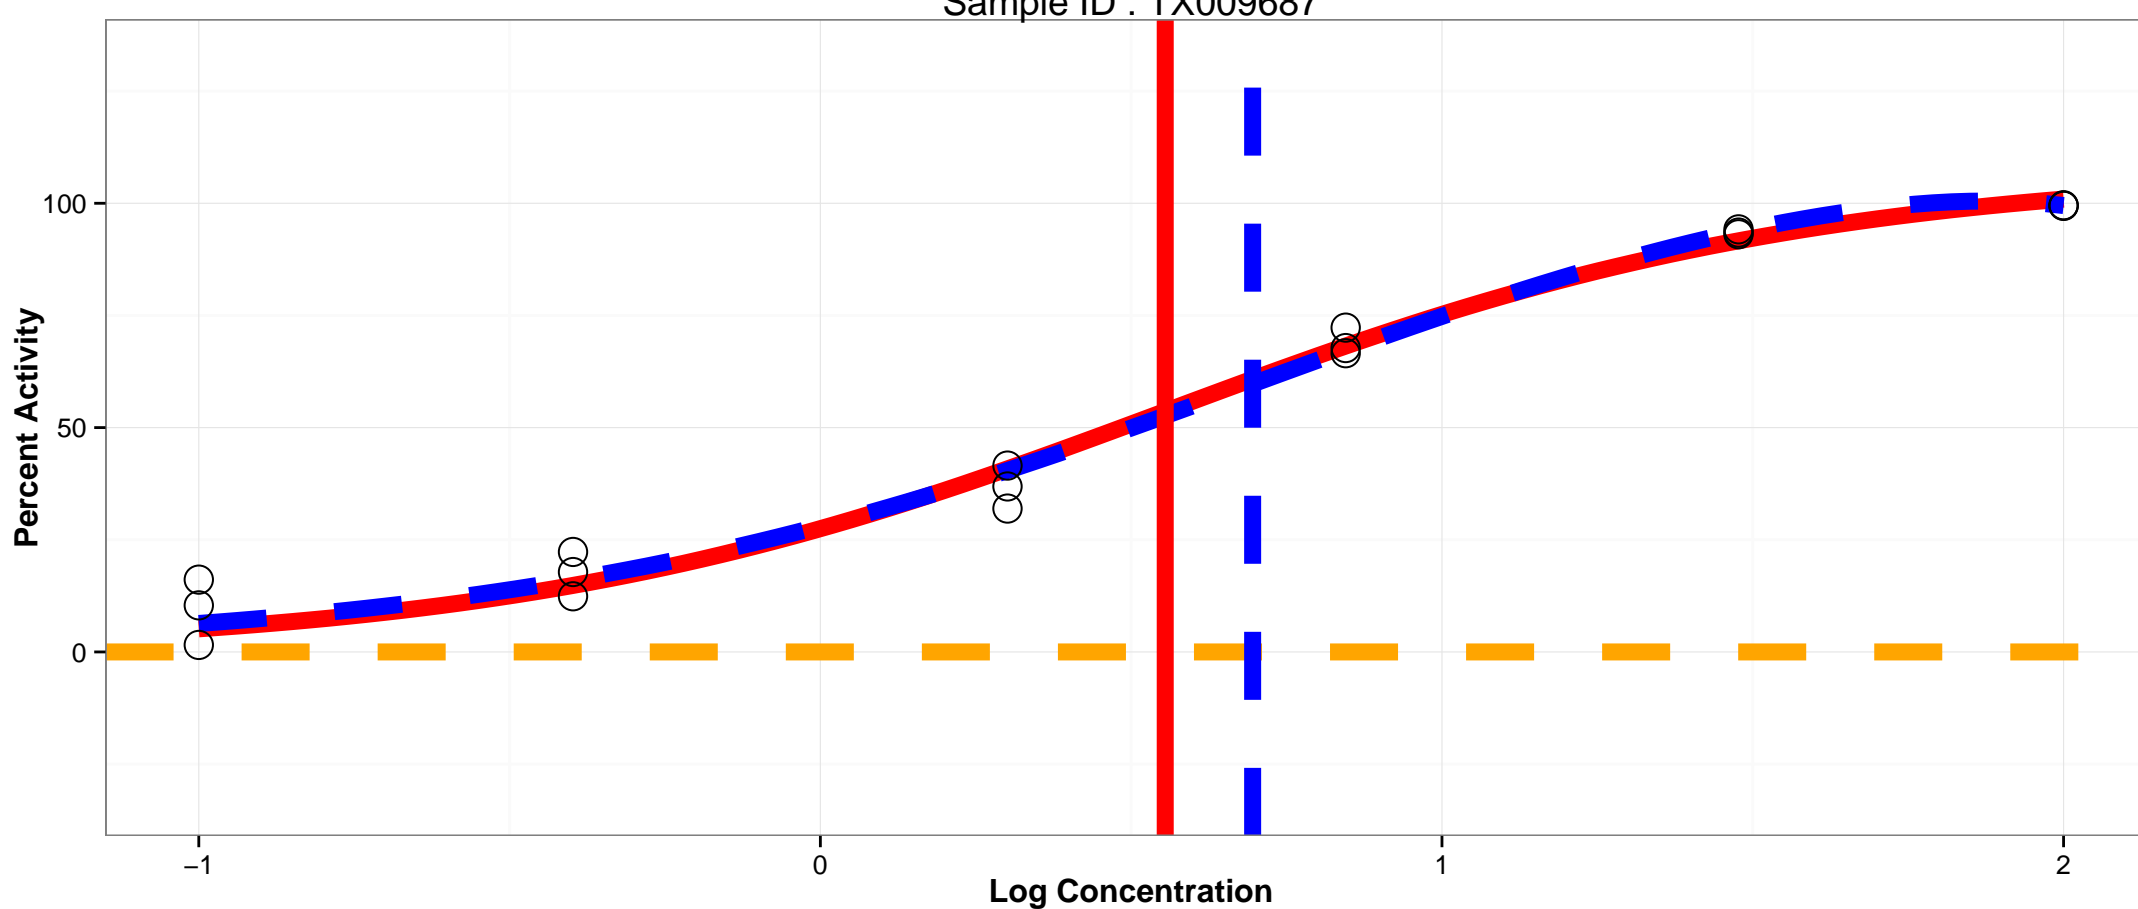

HILL MODEL

|     | tp  | ga     | gw     |
|-----|-----|--------|--------|
| val | 107 | 0.555  | 0.834  |
| sd  | 3.4 | 0.0514 | 0.0826 |

GAIN-LOSS MODEL

|     | tp  | ga    | gw    | la   | lw   |
|-----|-----|-------|-------|------|------|
| val | 119 | 0.695 | 0.738 | 2.57 | 1.91 |
| sd  | NA  | NA    | NA    | NA   | NA   |

|      | CNST   | HILL   | GNLS   |
|------|--------|--------|--------|
| AIC  | 205.75 | 112.94 | 113.27 |
| PROB | 0      | 0.54   | 0.46   |
| RMSE | 64.84  | 4.49   | 4.09   |

MAX\_MEAN : 99.5 MAX\_MED : 99.5 BMAD : 8.58  
COFF : 20 HIT-CALL : 1 FITC : 42 ACTP : 1  
FLAGS :



Chemical : Daidzein  
CAS : 486-66-8

Assay ID 1508 (NHEERL\_TPO\_AUR\_dn)  
Sample ID : TX009743

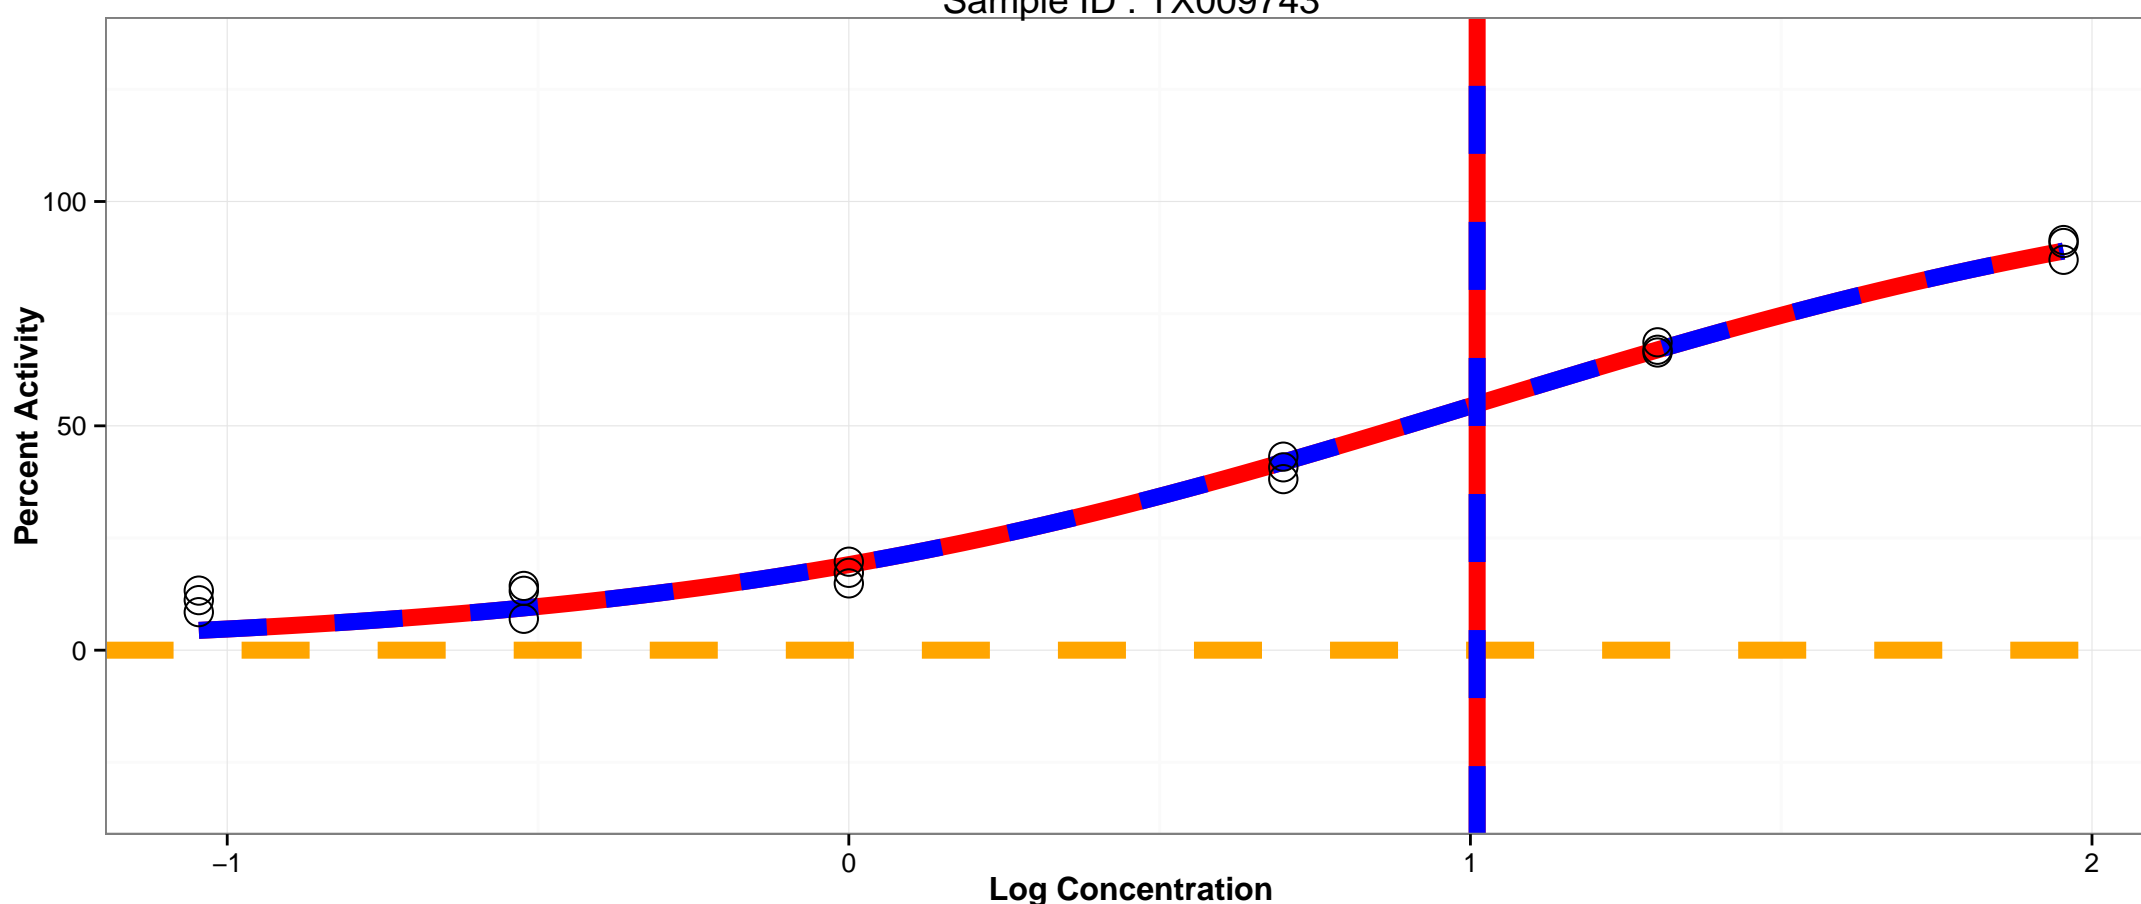

HILL MODEL

|     | tp   | ga    | gw     |
|-----|------|-------|--------|
| val | 110  | 1.01  | 0.67   |
| sd  | 6.99 | 0.102 | 0.0604 |

GAIN-LOSS MODEL

|     | tp  | ga   | gw   | la   | lw   |
|-----|-----|------|------|------|------|
| val | 110 | 1.01 | 0.67 | 3.32 | 16.4 |
| sd  | NA  | NA   | NA   | NA   | NA   |

|      | CNST   | HILL   | GNLS   |
|------|--------|--------|--------|
| AIC  | 195.09 | 106.34 | 110.34 |
| PROB | 0      | 0.88   | 0.12   |
| RMSE | 49.7   | 3.65   | 3.65   |

MAX\_MEAN : 89.7 MAX\_MED : 90.8 BMAD : 5.69  
COFF : 20 HIT-CALL : 1 FITC : 42 ACTP : 1  
FLAGS :

Assay ID 1509 (NHEERL\_HEK293T\_CellTiterGLO)  
Sample ID : TX009743

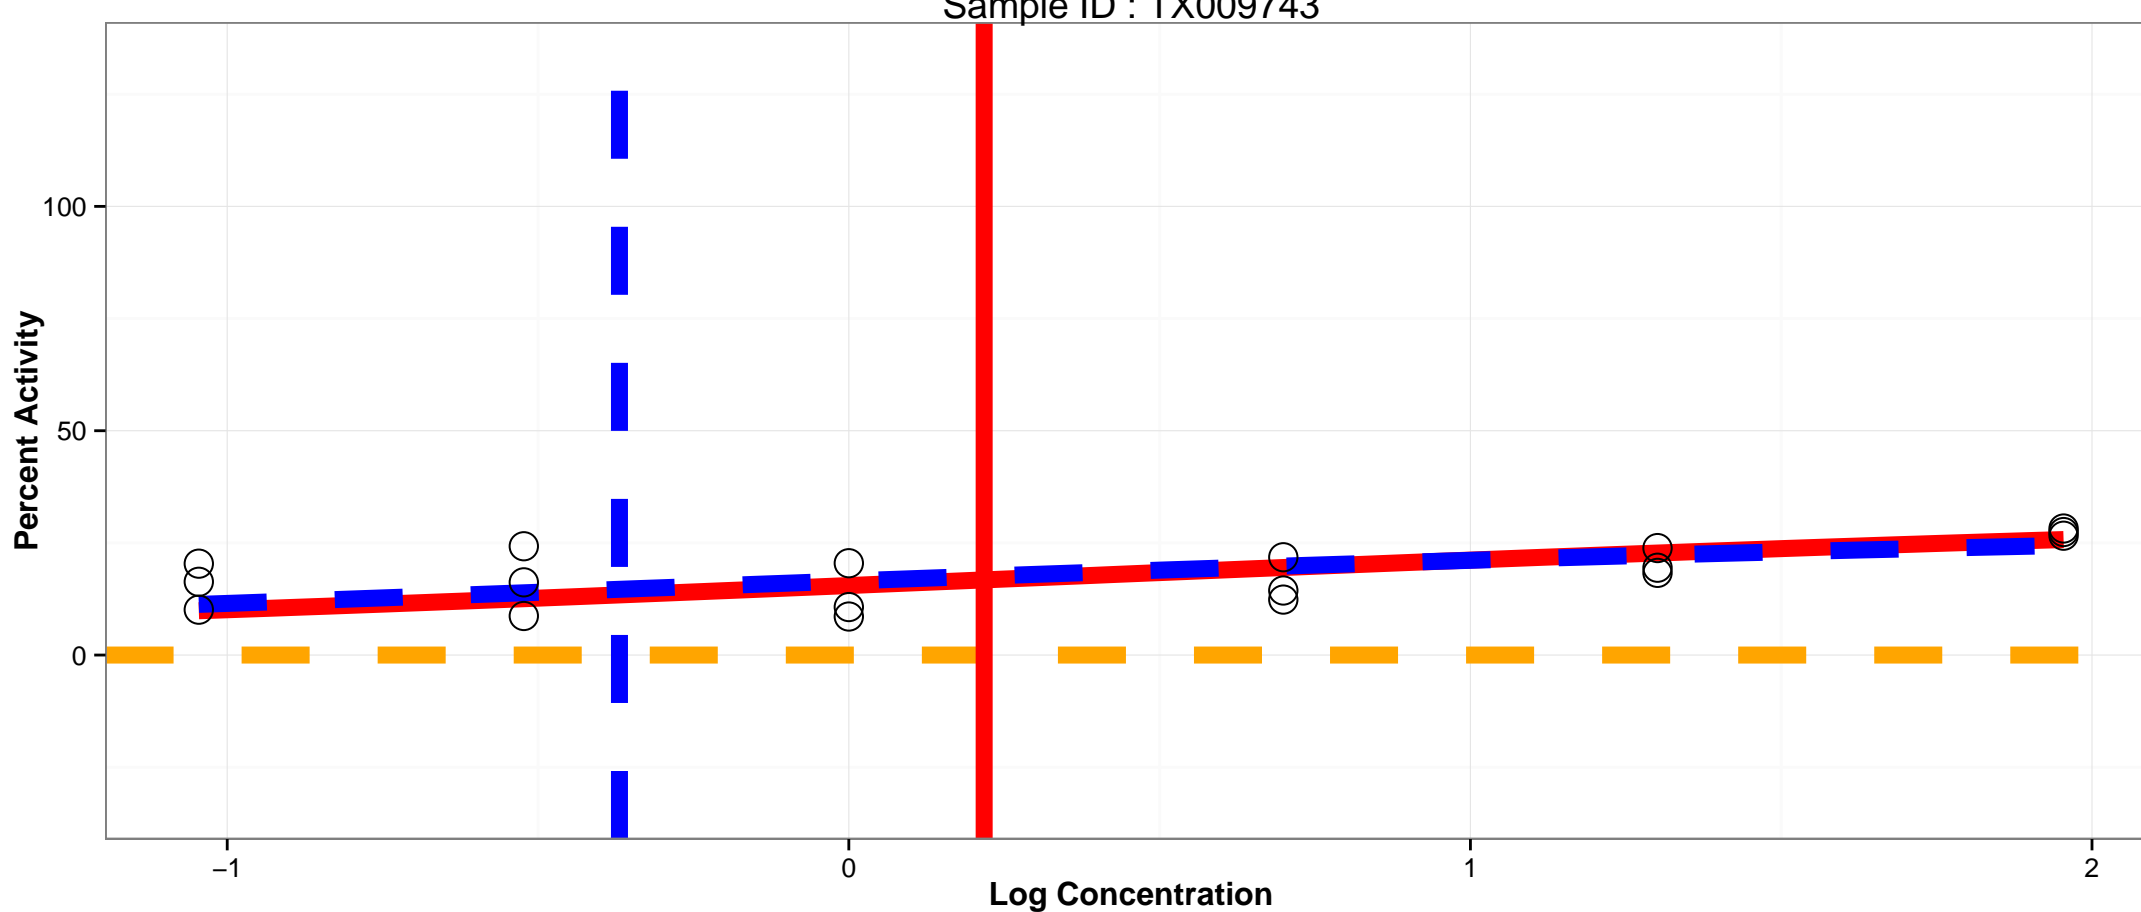

HILL MODEL

|     | tp   | ga    | gw  |
|-----|------|-------|-----|
| val | 33.5 | 0.218 | 0.3 |
| sd  | NA   | NA    | NA  |

GAIN-LOSS MODEL

|     | tp   | ga     | gw  | la   | lw   |
|-----|------|--------|-----|------|------|
| val | 29.3 | -0.369 | 0.3 | 3.08 | 17.8 |
| sd  | NA   | NA     | NA  | NA   | NA   |

|      | CNST   | HILL   | GNLS   |
|------|--------|--------|--------|
| AIC  | 163.22 | 121.75 | 125.38 |
| PROB | 0      | 0.86   | 0.14   |
| RMSE | 19.29  | 5.46   | 5.3    |

MAX\_MEAN : 27.4 MAX\_MED : 27.4 BMAD : 5.54  
COFF : 20 HIT-CALL : 1 FITC : 42 ACTP : 1  
FLAGS :

Assay ID 1848 (NHEERL\_Quantilum\_inhib\_2\_dn)  
Sample ID : TX009743

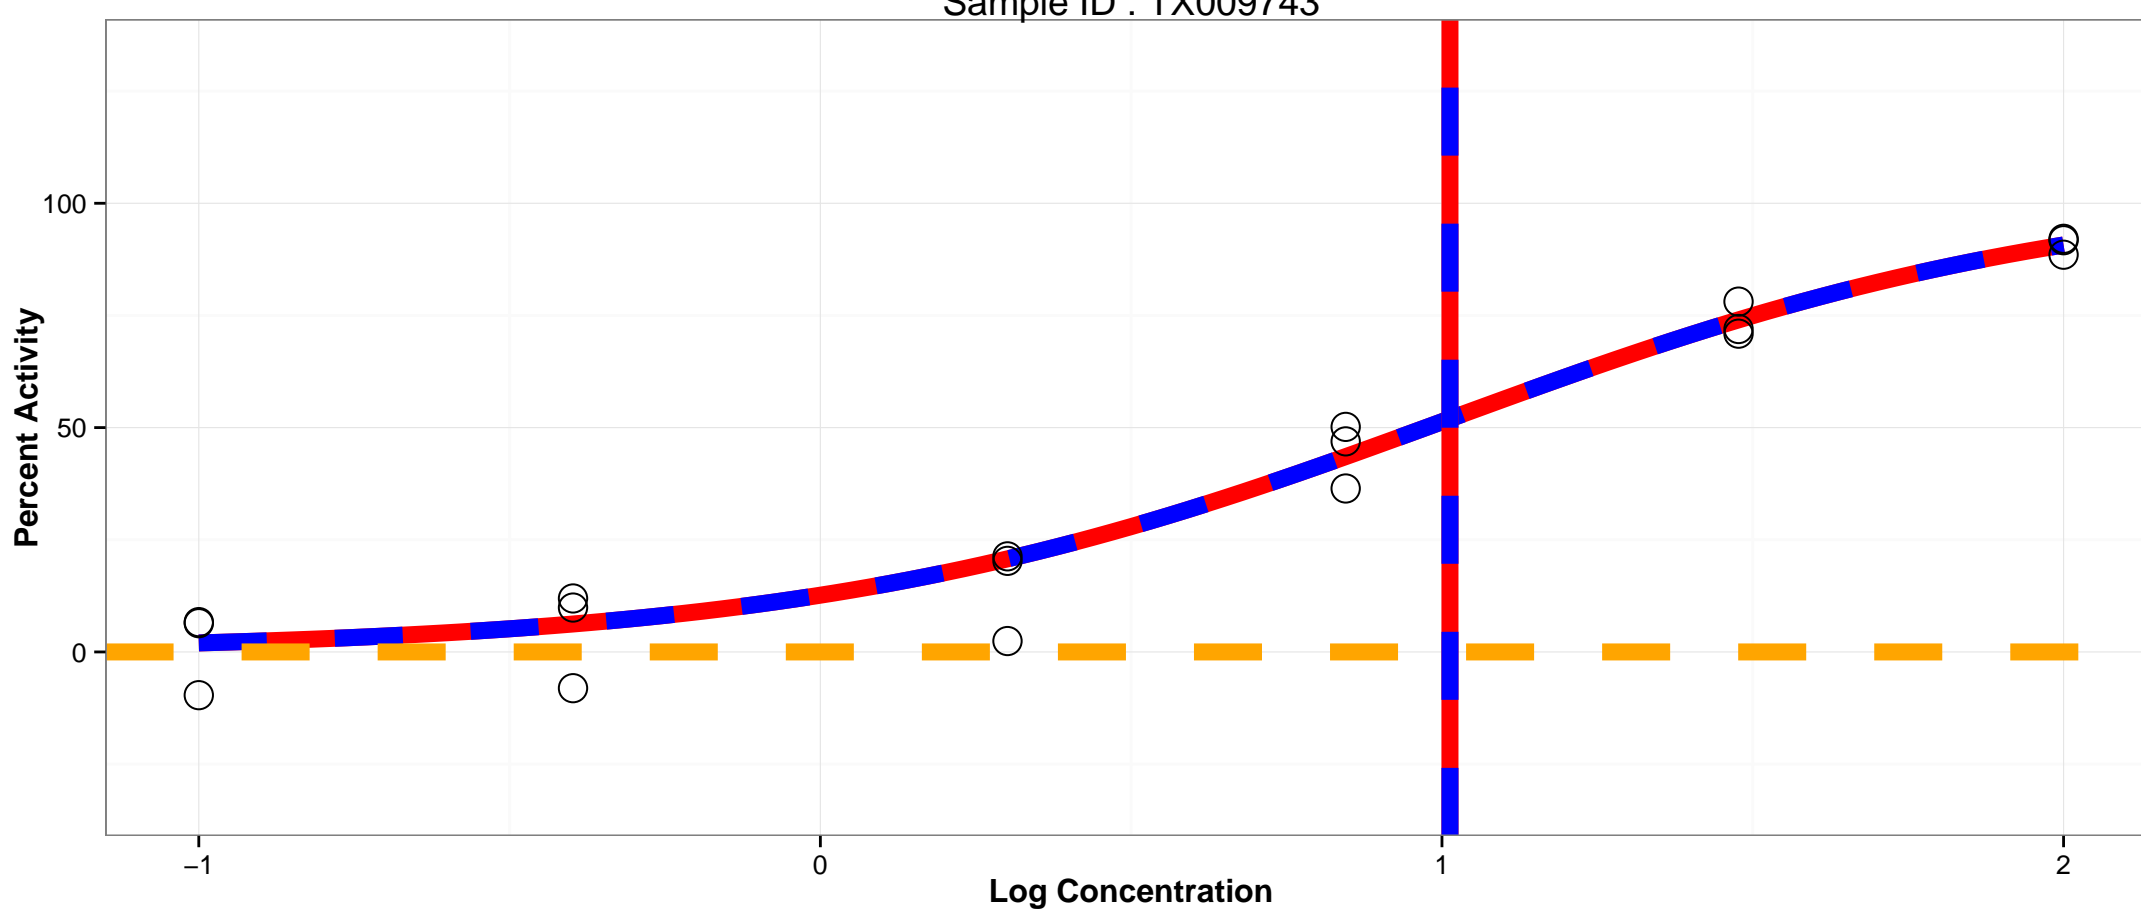

HILL MODEL

|     | tp   | ga    | gw    |
|-----|------|-------|-------|
| val | 104  | 1.01  | 0.847 |
| sd  | 9.65 | 0.138 | 0.151 |

GAIN-LOSS MODEL

|     | tp   | ga    | gw    | la    | lw    |
|-----|------|-------|-------|-------|-------|
| val | 104  | 1.01  | 0.847 | 3.93  | 5.08  |
| sd  | 9.65 | 0.138 | 0.151 | 19000 | 50400 |

|      | CNST   | HILL   | GNLS   |
|------|--------|--------|--------|
| AIC  | 196.69 | 128.54 | 132.54 |
| PROB | 0      | 0.88   | 0.12   |
| RMSE | 51.89  | 7.09   | 7.09   |

MAX\_MEAN : 90.8 MAX\_MED : 91.8 BMAD : 8.58  
COFF : 20 HIT-CALL : 1 FITC : 42 ACTP : 1  
FLAGS :

Assay ID 1508 (NHEERL\_TPO\_AUR\_dn)  
Sample ID : TX009751

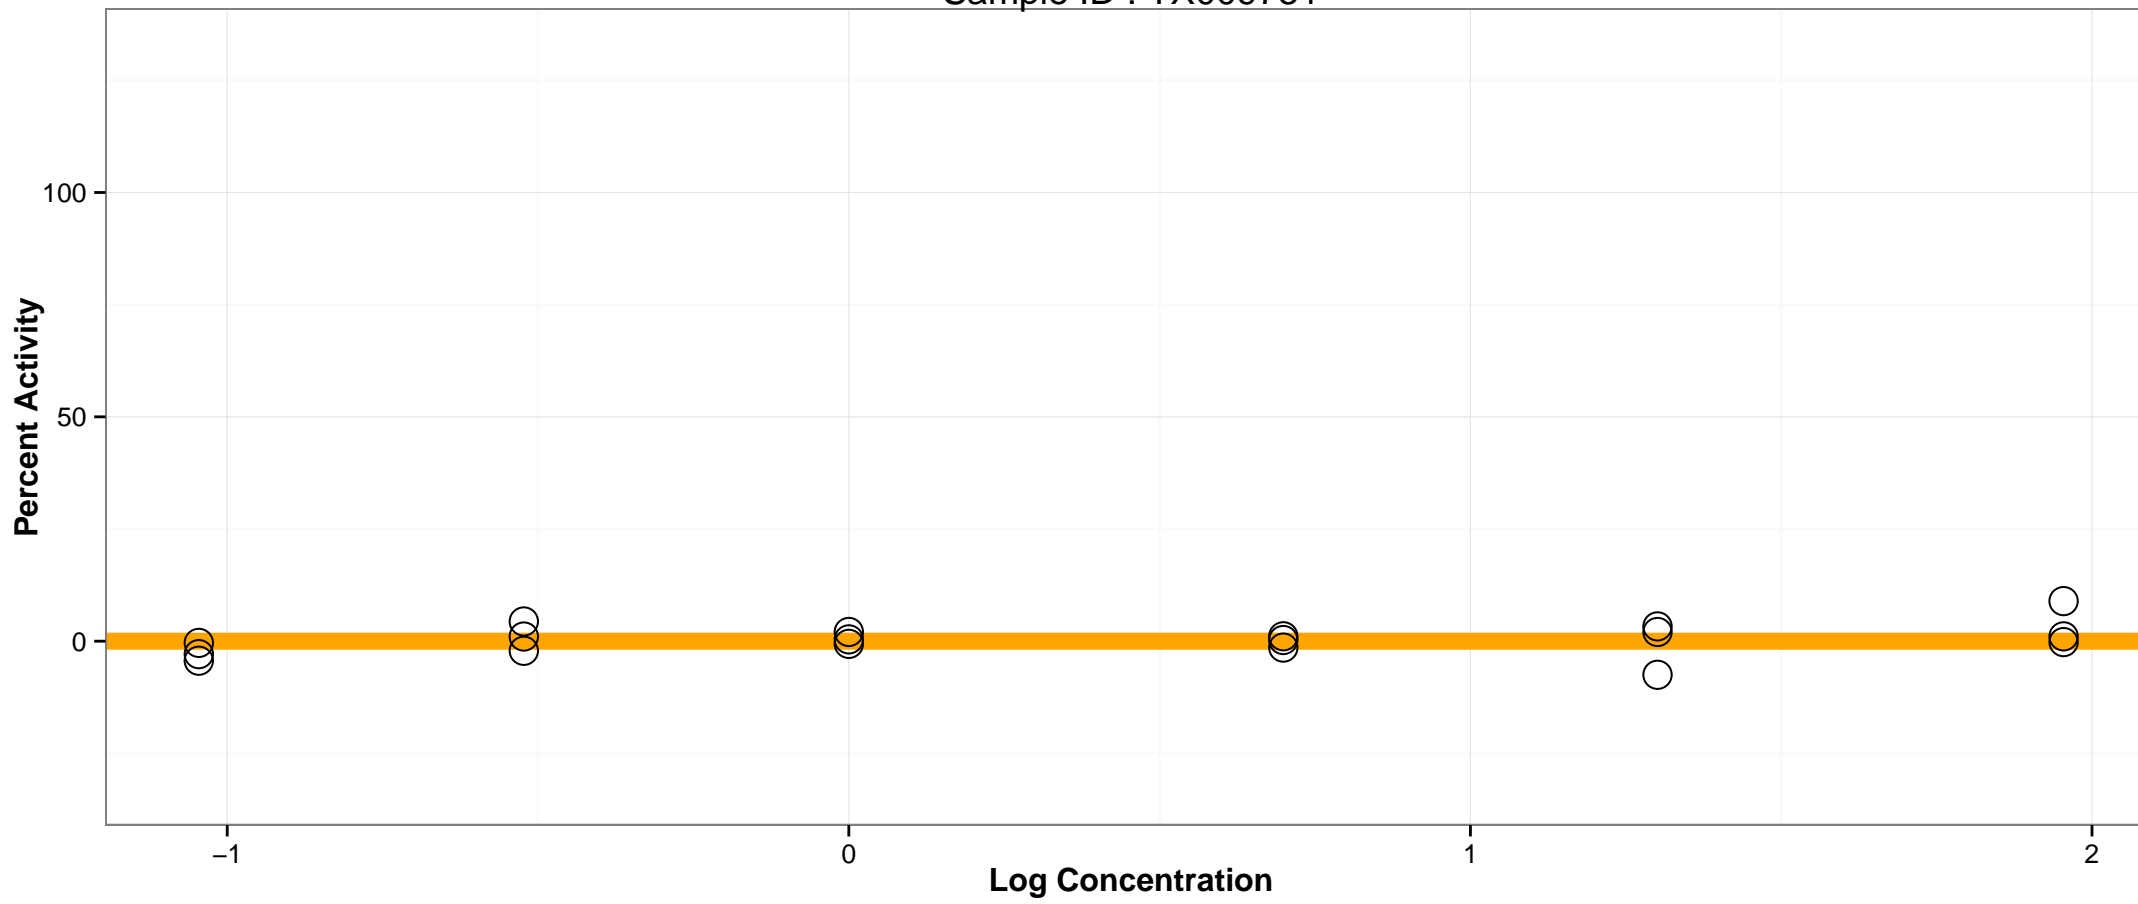

HILL MODEL

HILL MODEL: Not applicable

GAIN-LOSS MODEL

GNLS MODEL: Not applicable

|      | CNST  | HILL | GNLS |
|------|-------|------|------|
| AIC  | 95.91 | NA   | NA   |
| PROB | 1     | NA   | NA   |
| RMSE | 3.44  | NA   | NA   |

MAX\_MEAN : 3.28 MAX\_MED : 2.06 BMAD : 5.69  
COFF : 20 HIT-CALL : 0 FITC : 4 ACTP : 0  
FLAGS :

Assay ID 1509 (NHEERL\_HEK293T\_CellTiterGLO)  
Sample ID : TX009751

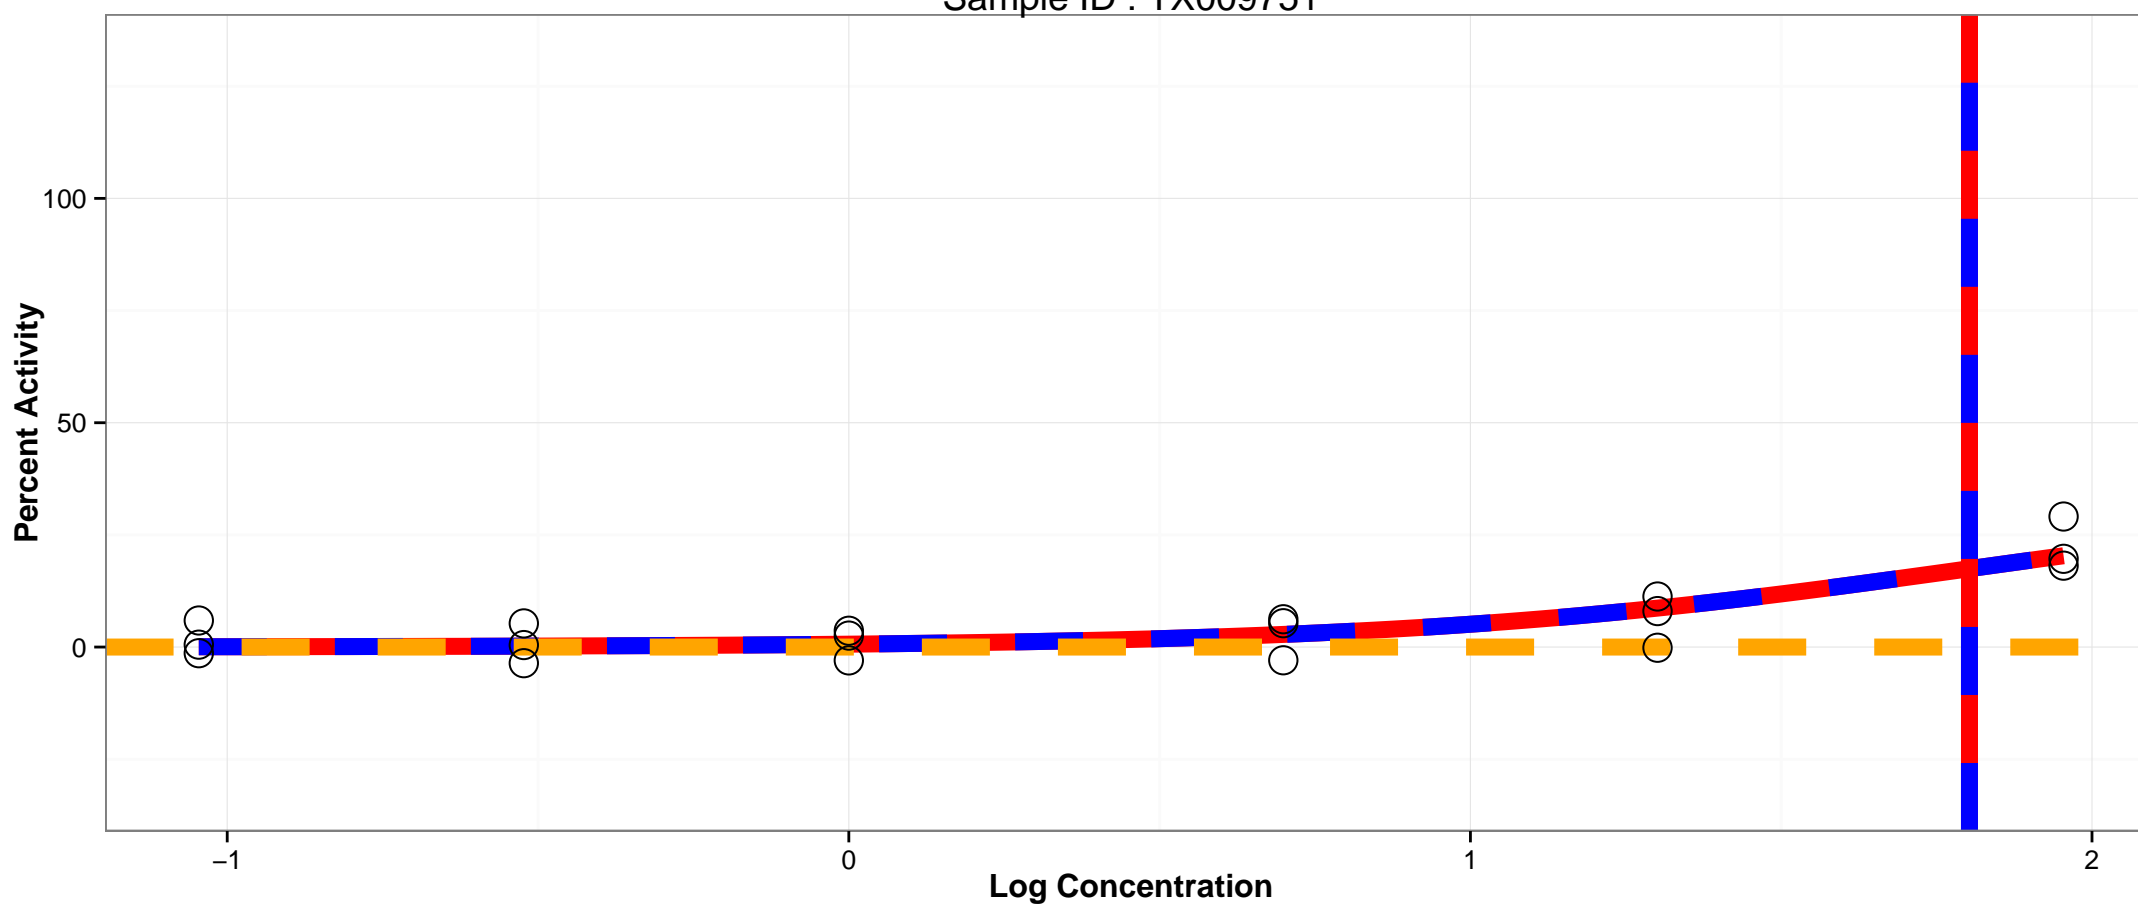

HILL MODEL

|     | tp   | ga    | gw    |
|-----|------|-------|-------|
| val | 34.9 | 1.8   | 0.958 |
| sd  | 24.3 | 0.675 | 0.528 |

GAIN-LOSS MODEL

|     | tp   | ga    | gw    | la   | lw    |
|-----|------|-------|-------|------|-------|
| val | 34.9 | 1.8   | 0.958 | 2.75 | 11    |
| sd  | 24.3 | 0.676 | 0.528 | 2320 | 32000 |

|      | CNST  | HILL | GNLS |
|------|-------|------|------|
| AIC  | 134.4 | 112  | 116  |
| PROB | 0     | 0.88 | 0.12 |
| RMSE | 10.38 | 4.22 | 4.22 |

MAX\_MEAN : 22.3 MAX\_MED : 19.7 BMAD : 5.54  
COFF : 20 HIT-CALL : 0 FITC : 21 ACTP : 1  
FLAGS : 12

Assay ID 1848 (NHEERL\_Quantilum\_inhib\_2\_dn)  
Sample ID : TX009751

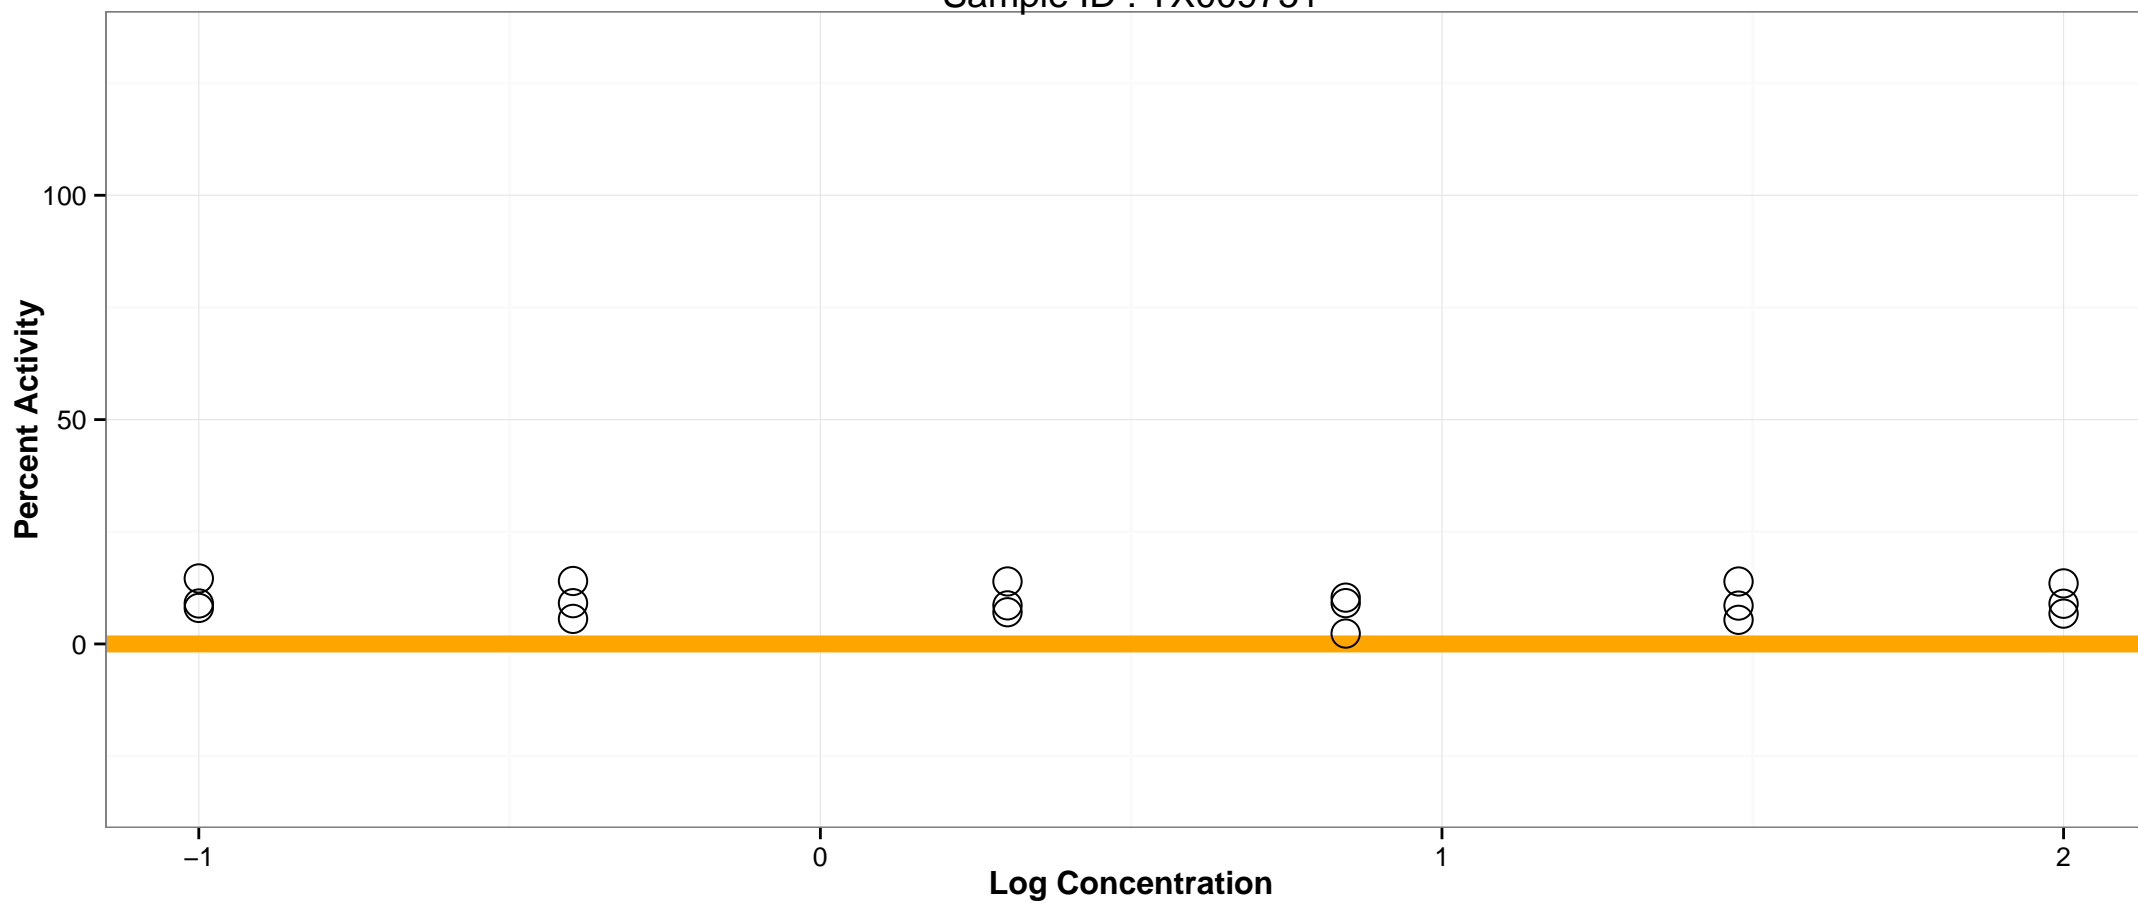

HILL MODEL

HILL MODEL: Not applicable

GAIN-LOSS MODEL

GNLS MODEL: Not applicable

|      | CNST  | HILL | GNLS |
|------|-------|------|------|
| AIC  | 139.4 | NA   | NA   |
| PROB | 1     | NA   | NA   |
| RMSE | 9.97  | NA   | NA   |

MAX\_MEAN : 10.6 MAX\_MED : 9.11 BMAD : 8.58  
COFF : 20 HIT-CALL : 0 FITC : 4 ACTP : 0  
FLAGS :

Chemical : Chloramben  
CAS : 133-90-4

Assay ID 1508 (NHEERL\_TPO\_AUR\_dn)  
Sample ID : TX009855

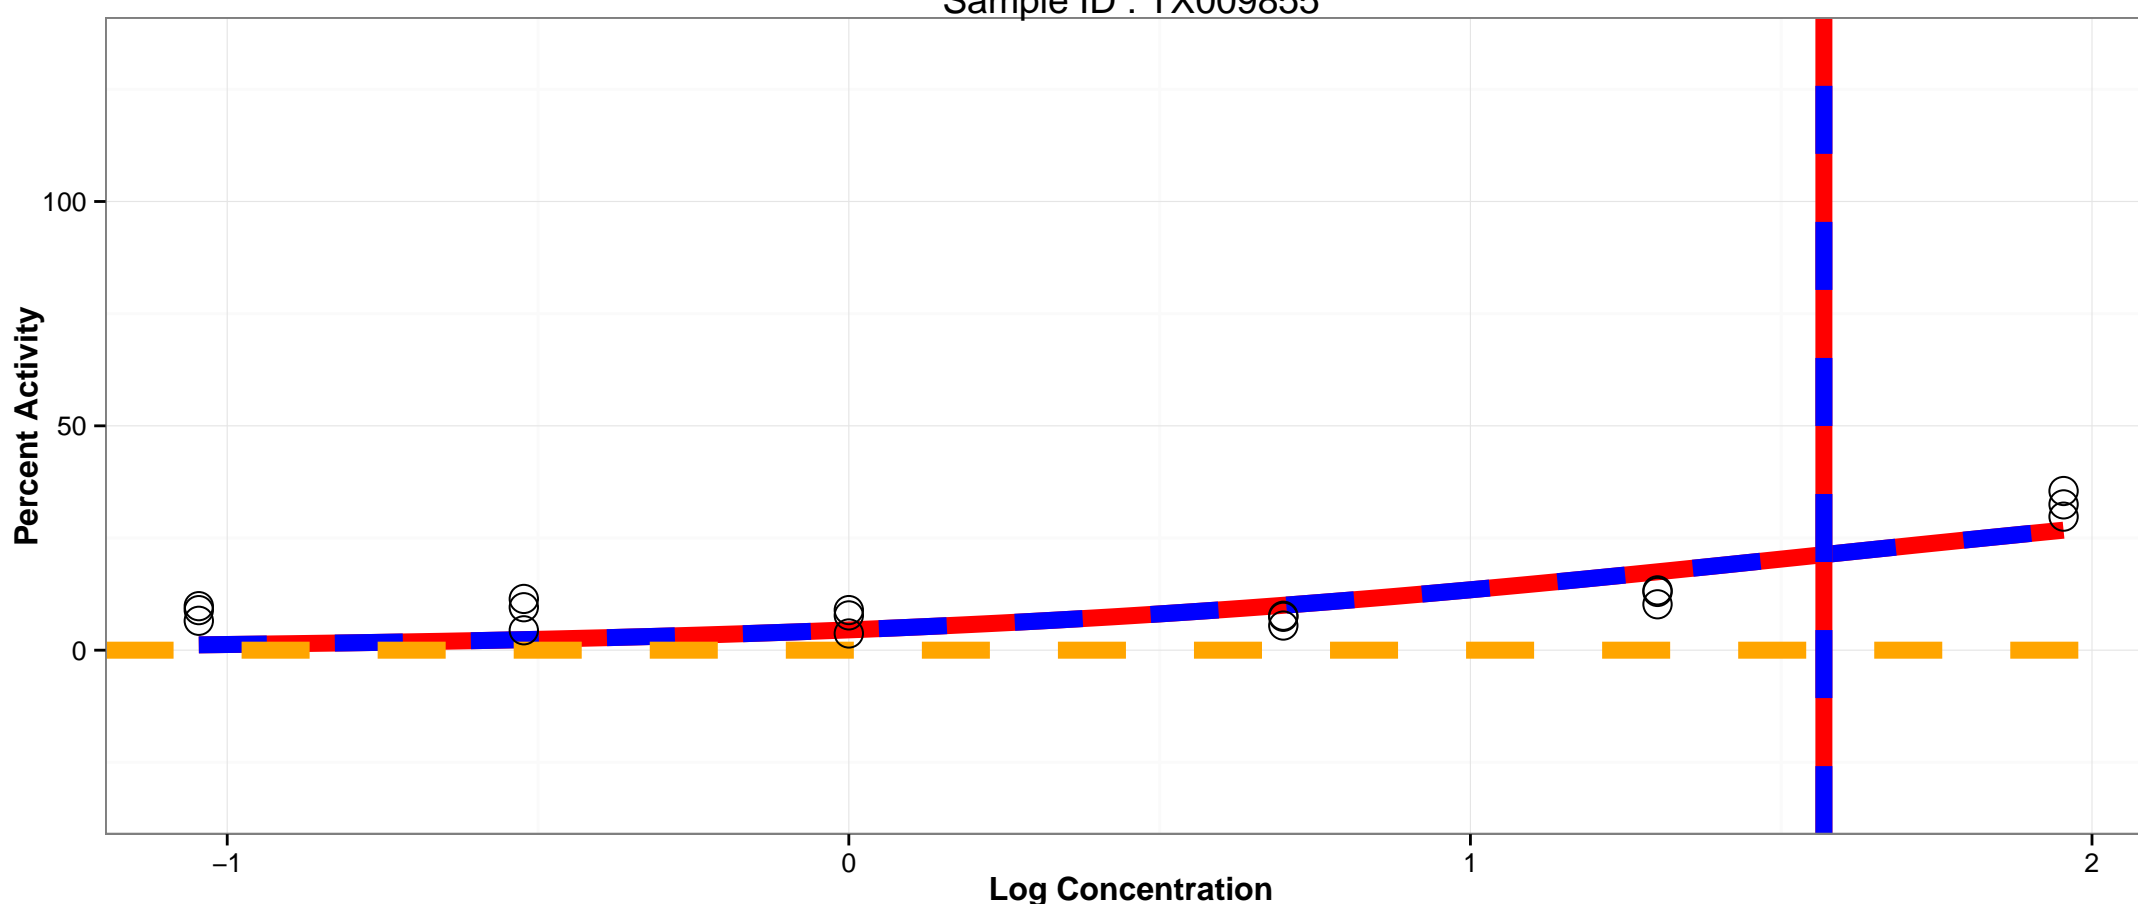

HILL MODEL

|     | tp   | ga    | gw    |
|-----|------|-------|-------|
| val | 42.6 | 1.57  | 0.59  |
| sd  | 17   | 0.456 | 0.615 |

GAIN-LOSS MODEL

|     | tp   | ga    | gw    | la   | lw     |
|-----|------|-------|-------|------|--------|
| val | 42.6 | 1.57  | 0.59  | 2.64 | 17.9   |
| sd  | 17   | 0.456 | 0.615 | 9800 | 242000 |

|      | CNST   | HILL   | GNLS   |
|------|--------|--------|--------|
| AIC  | 152.07 | 124.37 | 128.37 |
| PROB | 0      | 0.88   | 0.12   |
| RMSE | 15.66  | 5.65   | 5.65   |

MAX\_MEAN : 32.6 MAX\_MED : 32.5 BMAD : 5.69  
COFF : 20 HIT-CALL : 1 FITC : 42 ACTP : 1  
FLAGS : 6

Assay ID 1509 (NHEERL\_HEK293T\_CellTiterGLO)  
Sample ID : TX009855

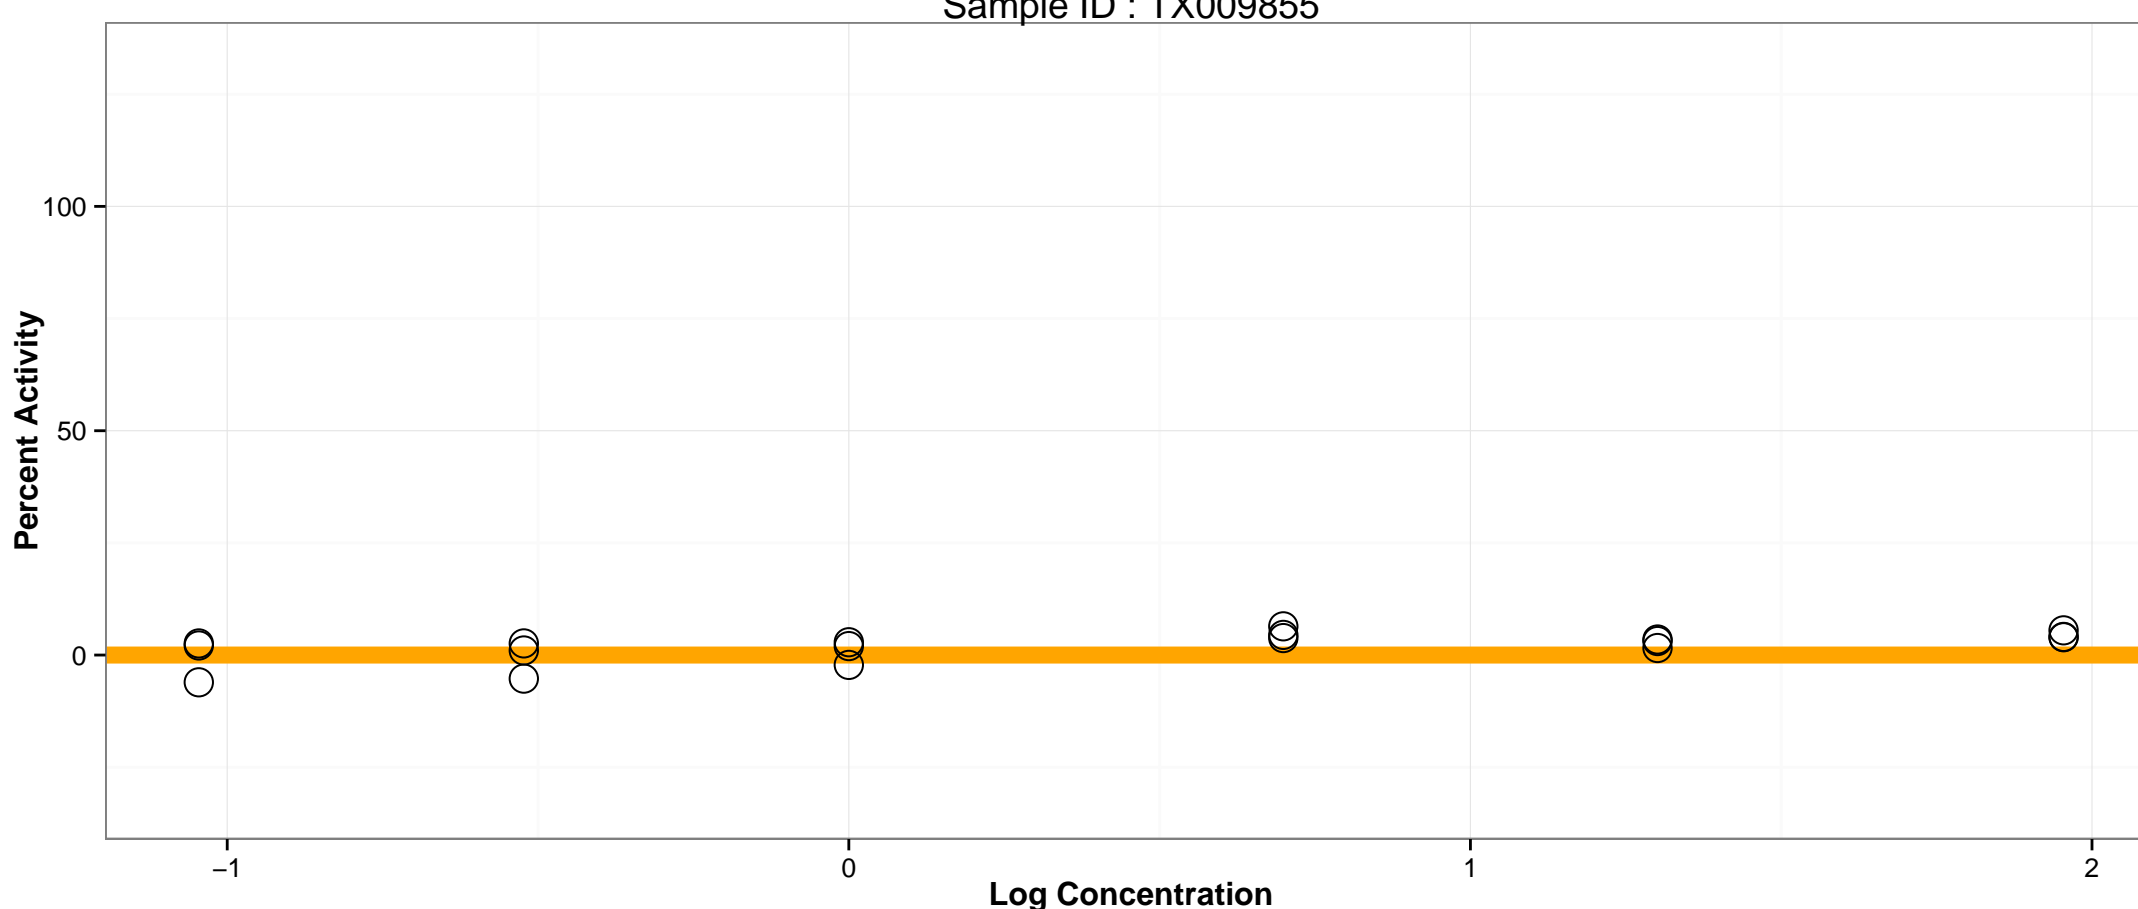

HILL MODEL

HILL MODEL: Not applicable

GAIN-LOSS MODEL

GNLS MODEL: Not applicable

|      | CNST   | HILL | GNLS |
|------|--------|------|------|
| AIC  | 104.51 | NA   | NA   |
| PROB | 1      | NA   | NA   |
| RMSE | 3.83   | NA   | NA   |

MAX\_MEAN : 4.9 MAX\_MED : 4.51 BMAD : 5.54  
COFF : 20 HIT-CALL : 0 FITC : 4 ACTP : 0  
FLAGS :

Assay ID 1848 (NHEERL\_Quantilum\_inhib\_2\_dn)  
Sample ID : TX009855

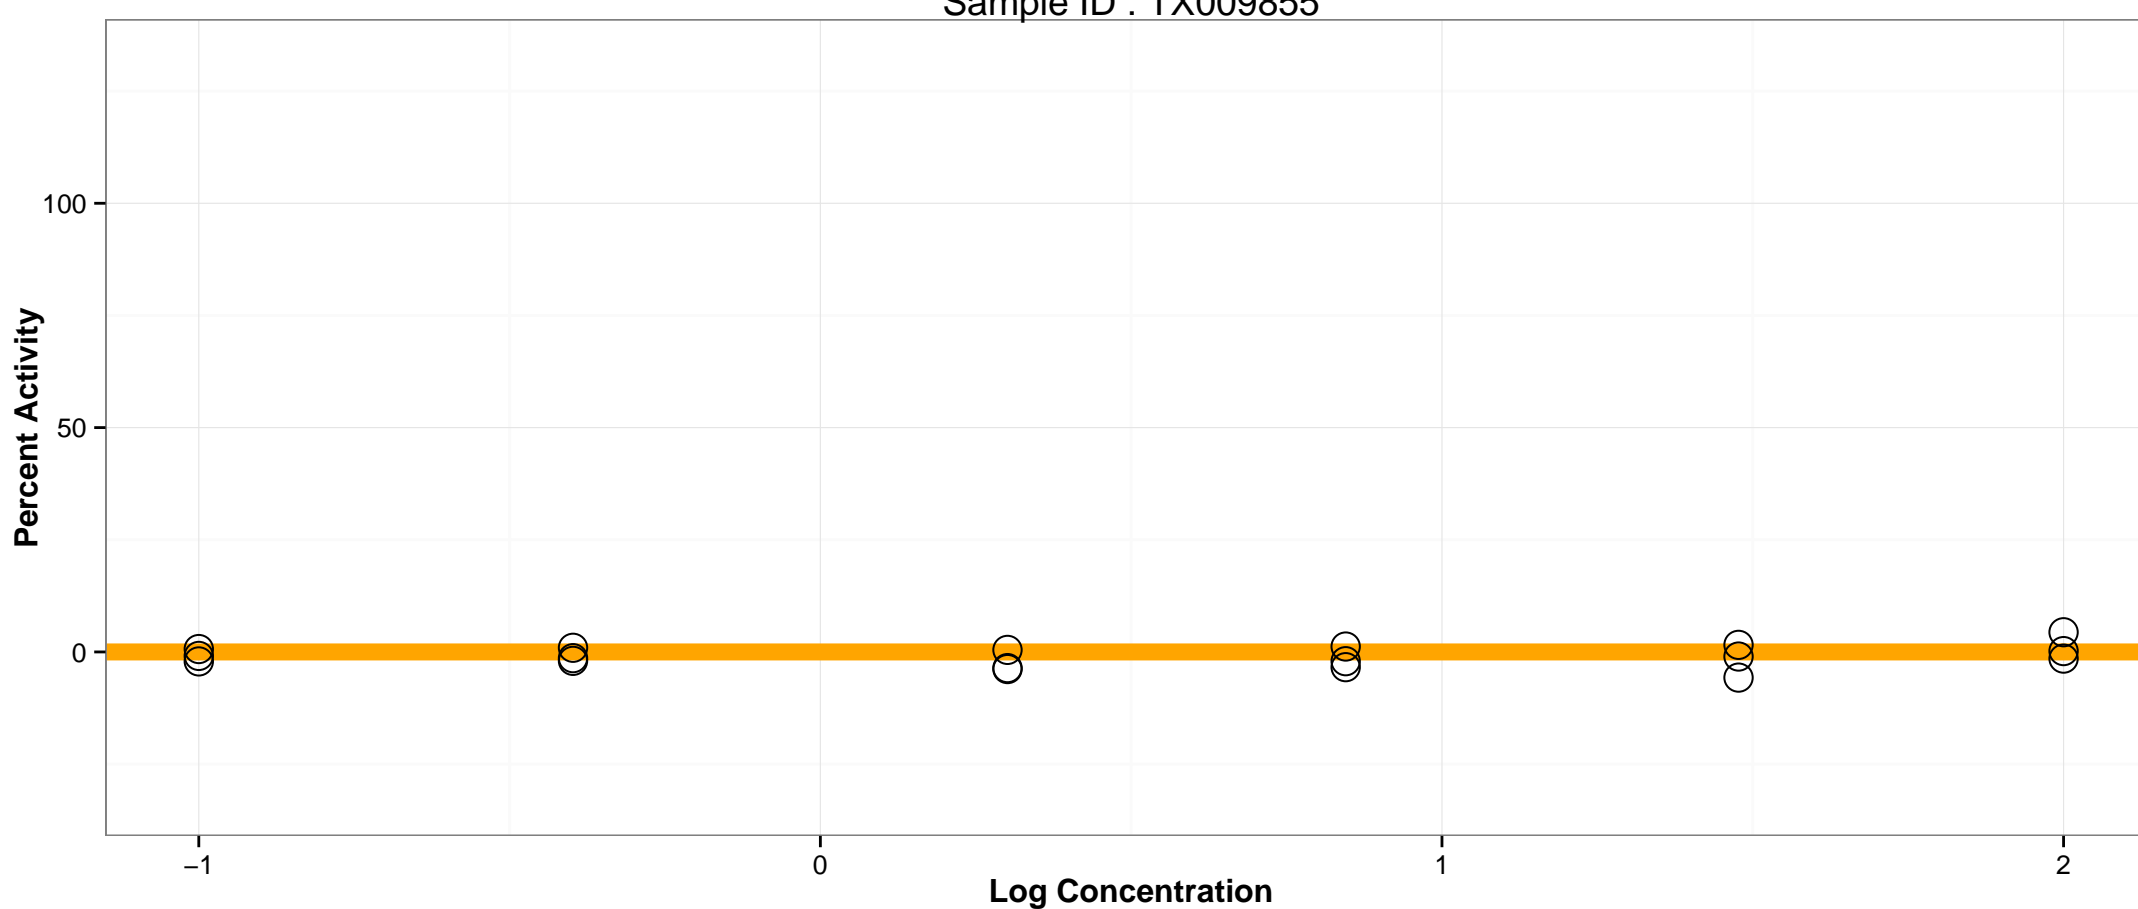

HILL MODEL

HILL MODEL: Not applicable

GAIN-LOSS MODEL

GNLS MODEL: Not applicable

|      | CNST  | HILL | GNLS |
|------|-------|------|------|
| AIC  | 87.47 | NA   | NA   |
| PROB | 1     | NA   | NA   |
| RMSE | 2.52  | NA   | NA   |

MAX\_MEAN : 1.04 MAX\_MED : 0.201 BMAD : 8.58  
COFF : 20 HIT-CALL : 0 FITC : 4 ACTP : 0  
FLAGS :

Chemical : Dodecylbenzene sulfonate triethanolamine(1:1)  
CAS : 27323-41-7

Assay ID 1508 (NHEERL\_TPO\_AUR\_dn)  
Sample ID : TX009922

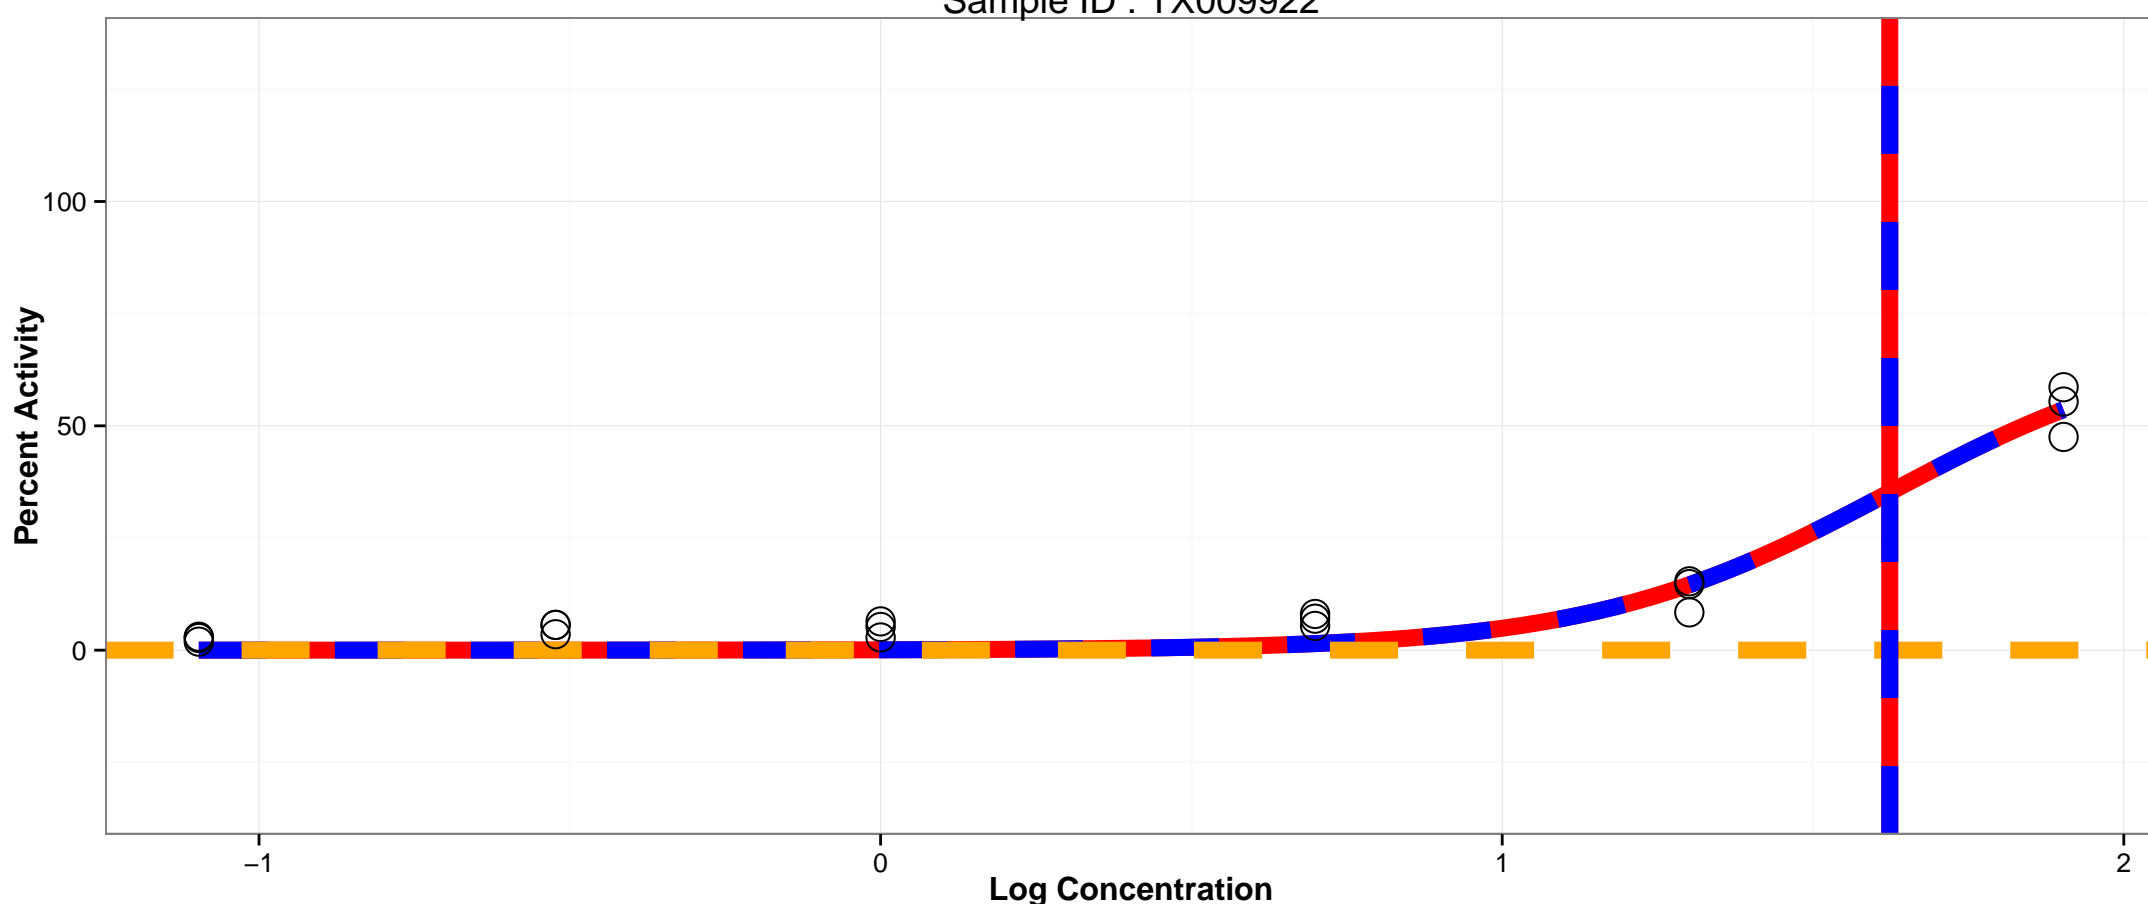

HILL MODEL

|     | tp   | ga    | gw    |
|-----|------|-------|-------|
| val | 70.4 | 1.62  | 1.81  |
| sd  | 26.4 | 0.245 | 0.933 |

GAIN-LOSS MODEL

|     | tp   | ga    | gw    | la   | lw   |
|-----|------|-------|-------|------|------|
| val | 70.4 | 1.62  | 1.81  | 3.36 | 5.91 |
| sd  | 26.5 | 0.245 | 0.934 | 1970 | 8020 |

|      | CNST   | HILL   | GNLS   |
|------|--------|--------|--------|
| AIC  | 160.22 | 116.49 | 120.49 |
| PROB | 0      | 0.88   | 0.12   |
| RMSE | 23.11  | 4.5    | 4.5    |

MAX\_MEAN : 53.9 MAX\_MED : 55.4 BMAD : 5.69  
COFF : 20 HIT-CALL : 1 FITC : 42 ACTP : 1  
FLAGS : 6

Assay ID 1509 (NHEERL\_HEK293T\_CellTiterGLO)  
Sample ID : TX009922

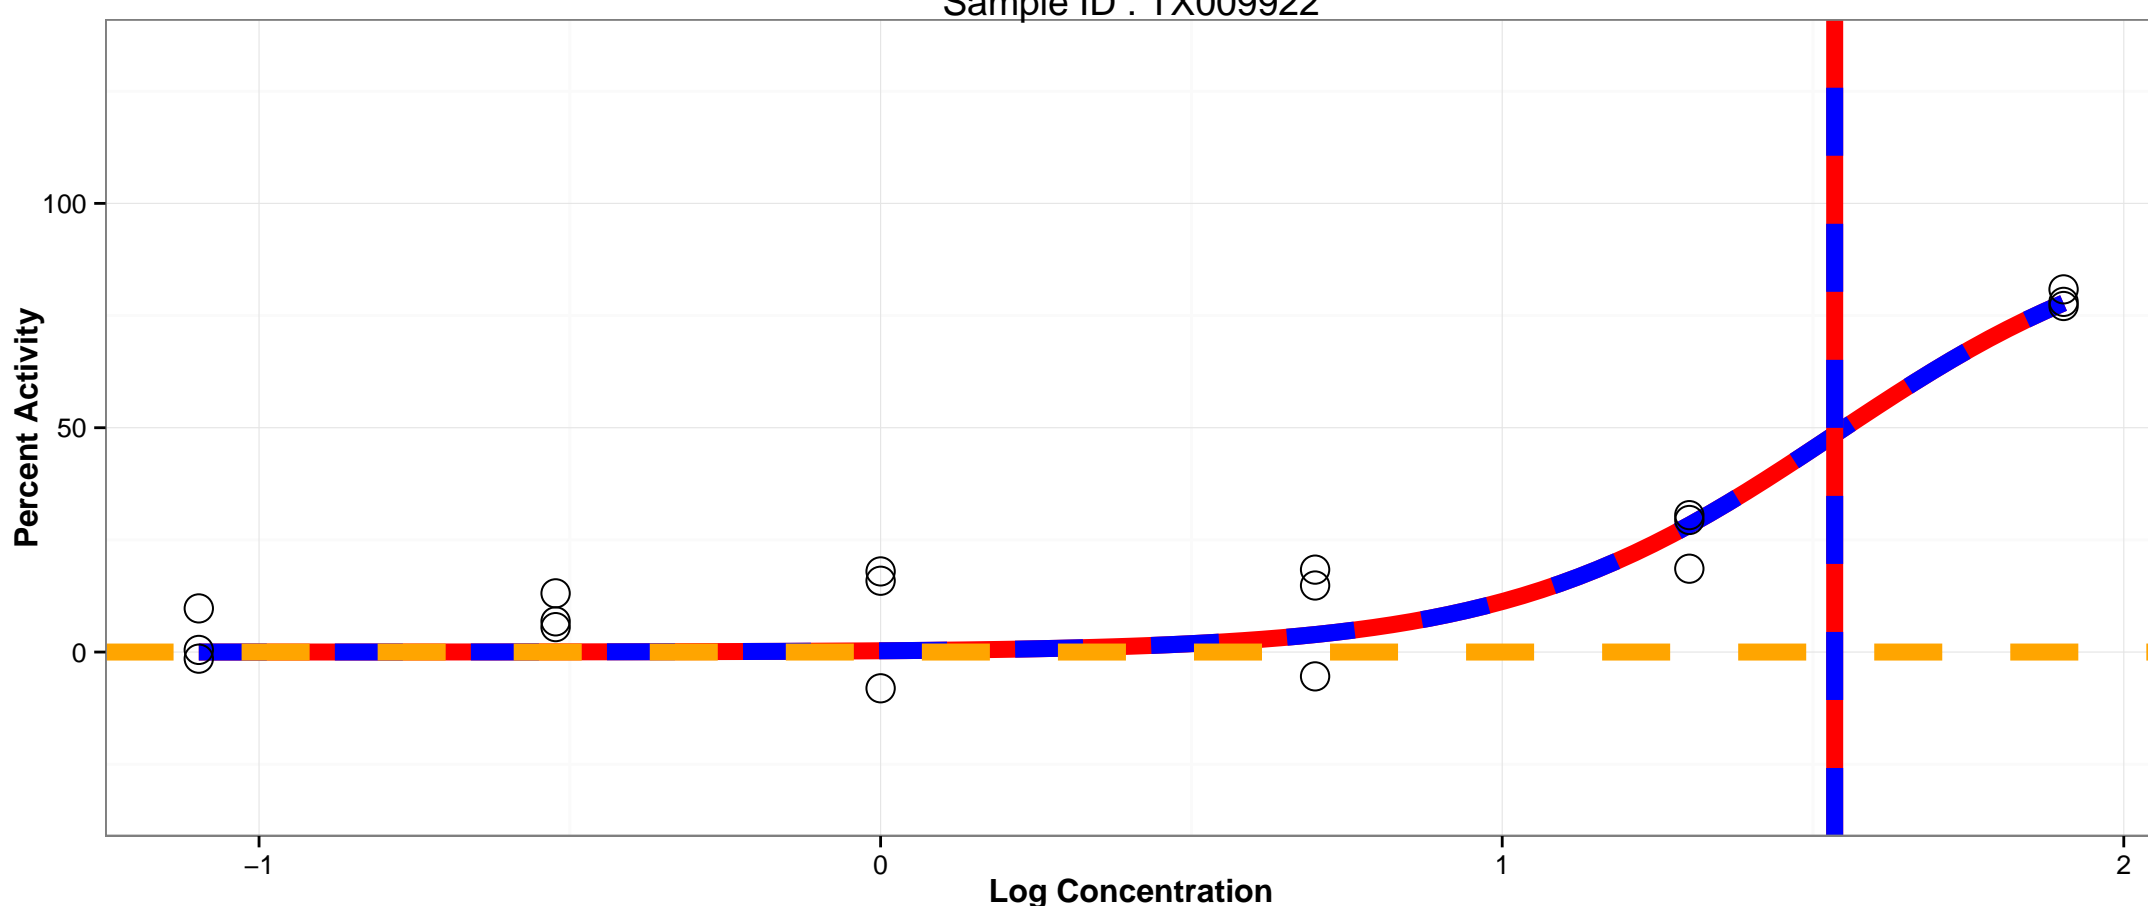

HILL MODEL

|     | tp   | ga    | gw   |
|-----|------|-------|------|
| val | 97   | 1.53  | 1.65 |
| sd  | 35.1 | 0.259 | 1.04 |

GAIN-LOSS MODEL

|     | tp   | ga    | gw   | la    | lw    |
|-----|------|-------|------|-------|-------|
| val | 97   | 1.53  | 1.65 | 3.42  | 6.76  |
| sd  | 35.1 | 0.259 | 1.04 | 15000 | 66900 |

|      | CNST   | HILL   | GNLS   |
|------|--------|--------|--------|
| AIC  | 178.53 | 140.53 | 144.53 |
| PROB | 0      | 0.88   | 0.12   |
| RMSE | 35.2   | 9.12   | 9.12   |

MAX\_MEAN : 78.7 MAX\_MED : 78.1 BMAD : 5.54  
COFF : 20 HIT-CALL : 1 FITC : 42 ACTP : 1  
FLAGS :

Assay ID 1848 (NHEERL\_Quantilum\_inhib\_2\_dn)  
Sample ID : TX009922

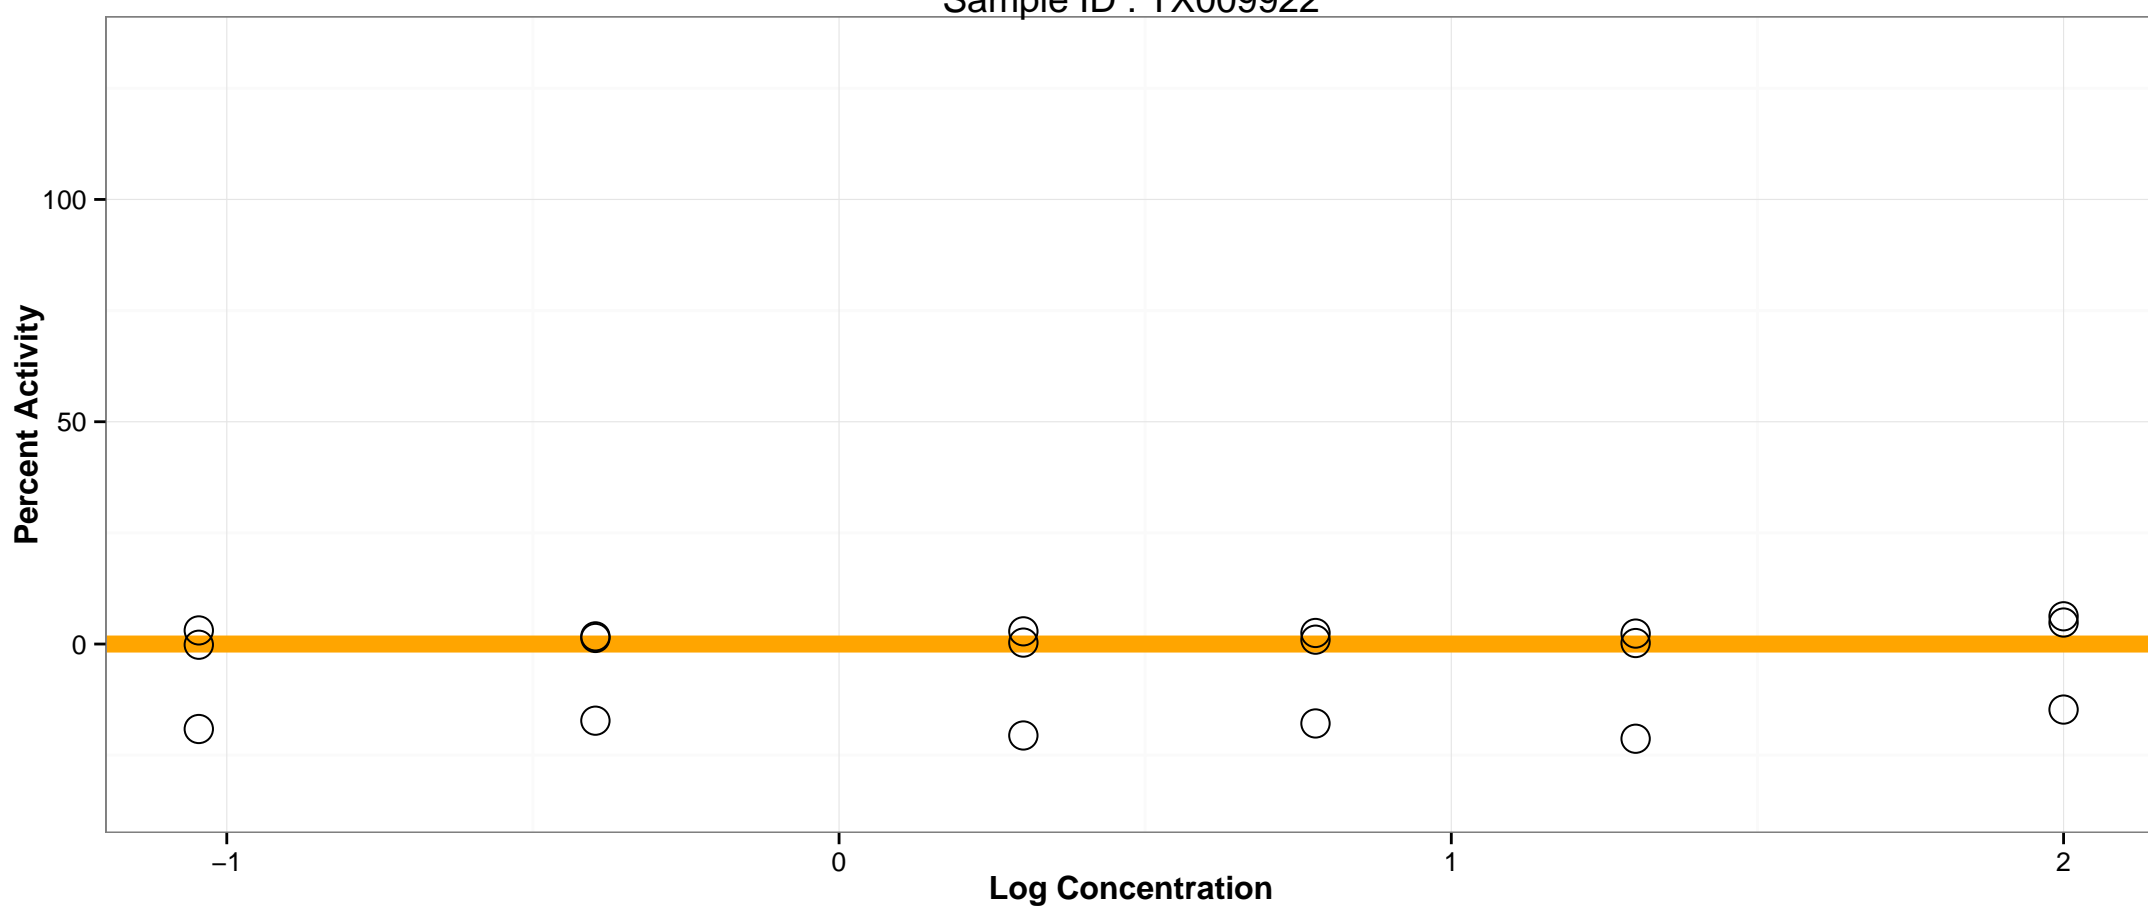

HILL MODEL

HILL MODEL: Not applicable

GAIN-LOSS MODEL

GNLS MODEL: Not applicable

|      | CNST   | HILL | GNLS |
|------|--------|------|------|
| AIC  | 139.33 | NA   | NA   |
| PROB | 1      | NA   | NA   |
| RMSE | 10.98  | NA   | NA   |

MAX\_MEAN : -1.21 MAX\_MED : 4.85 BMAD : 8.58  
COFF : 20 HIT-CALL : 0 FITC : 4 ACTP : 0  
FLAGS :

Chemical : Didecyldimethylammonium chloride  
CAS : 7173-51-5

Assay ID 1508 (NHEERL\_TPO\_AUR\_dn)  
Sample ID : TX010090

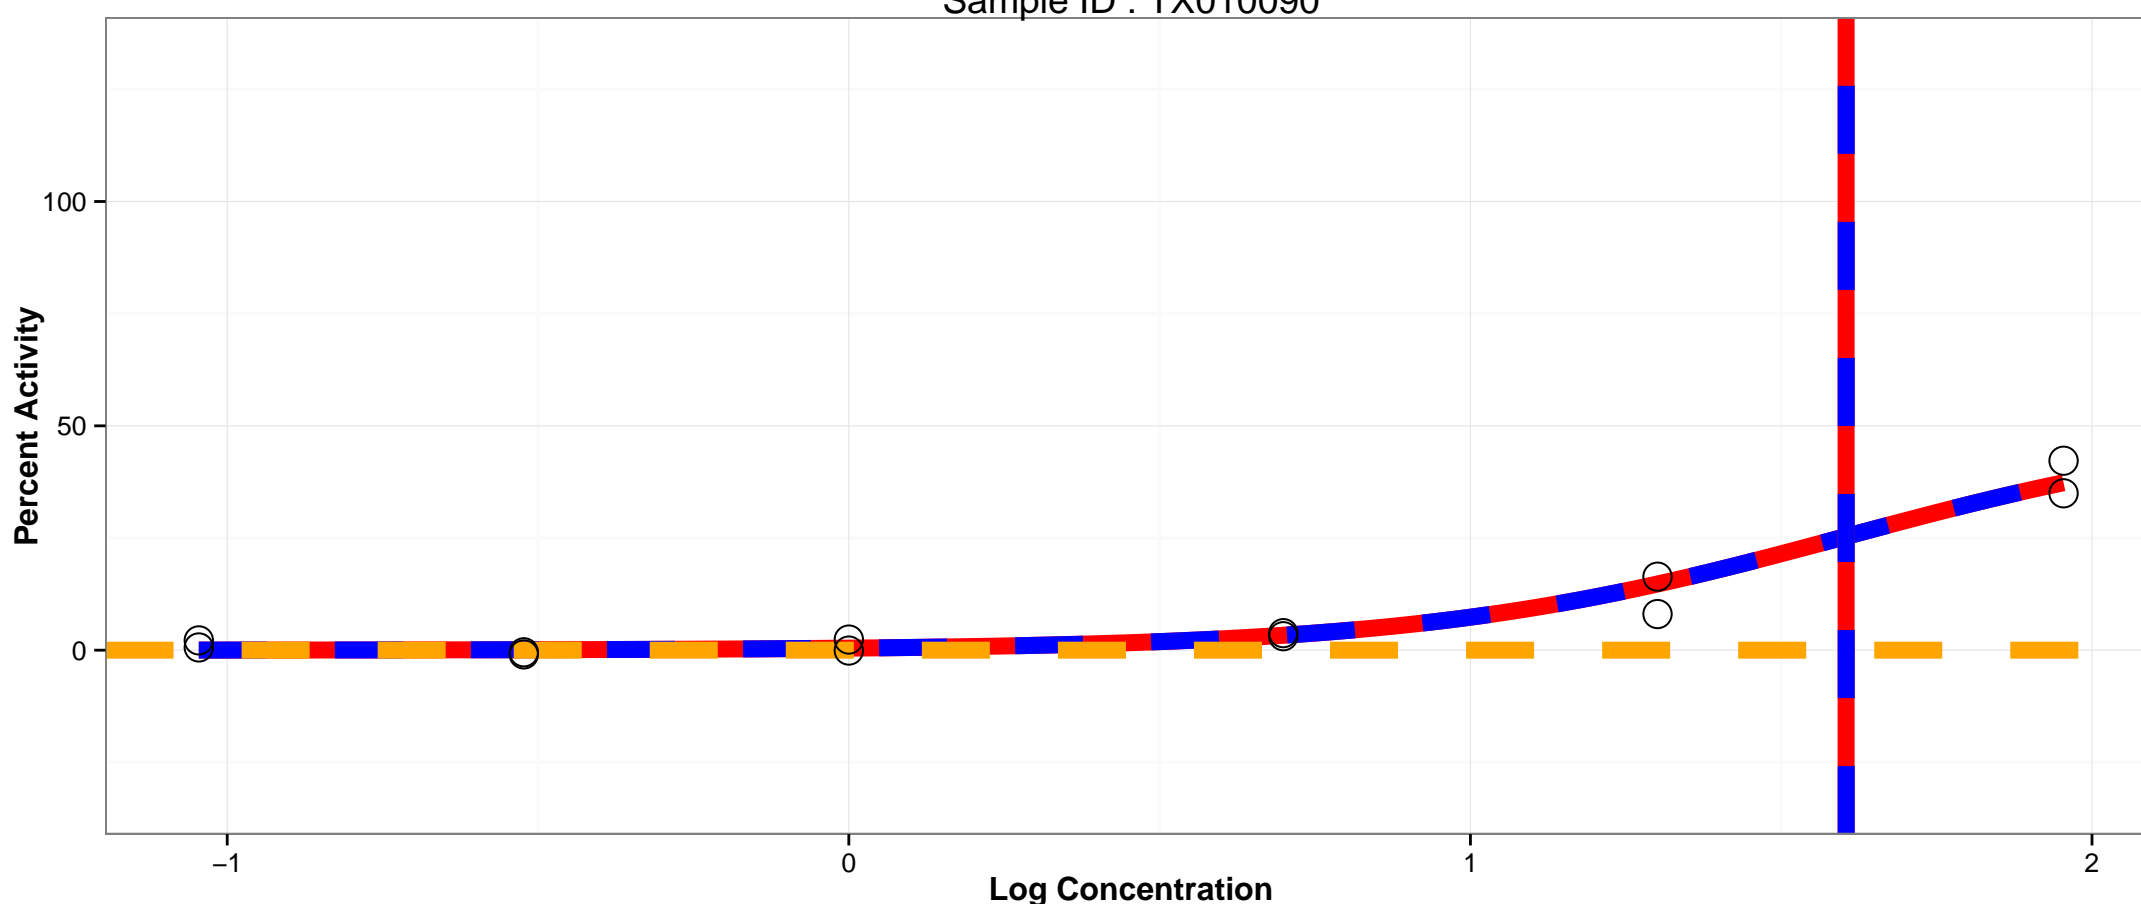

HILL MODEL

|     | tp   | ga    | gw    |
|-----|------|-------|-------|
| val | 50.7 | 1.6   | 1.28  |
| sd  | 16.1 | 0.274 | 0.337 |

GAIN-LOSS MODEL

|     | tp   | ga    | gw    | la   | lw    |
|-----|------|-------|-------|------|-------|
| val | 50.7 | 1.6   | 1.27  | 3.23 | 6.48  |
| sd  | 16.1 | 0.274 | 0.337 | 2070 | 10500 |

|      | CNST  | HILL  | GNLS  |
|------|-------|-------|-------|
| AIC  | 99.94 | 64.72 | 68.72 |
| PROB | 0     | 0.88  | 0.12  |
| RMSE | 16.78 | 2.71  | 2.71  |

MAX\_MEAN : 38.6 MAX\_MED : 38.6 BMAD : 5.69  
COFF : 20 HIT-CALL : 1 FITC : 42 ACTP : 1  
FLAGS : 6

Assay ID 1509 (NHEERL\_HEK293T\_CellTiterGLO)  
Sample ID : TX010090

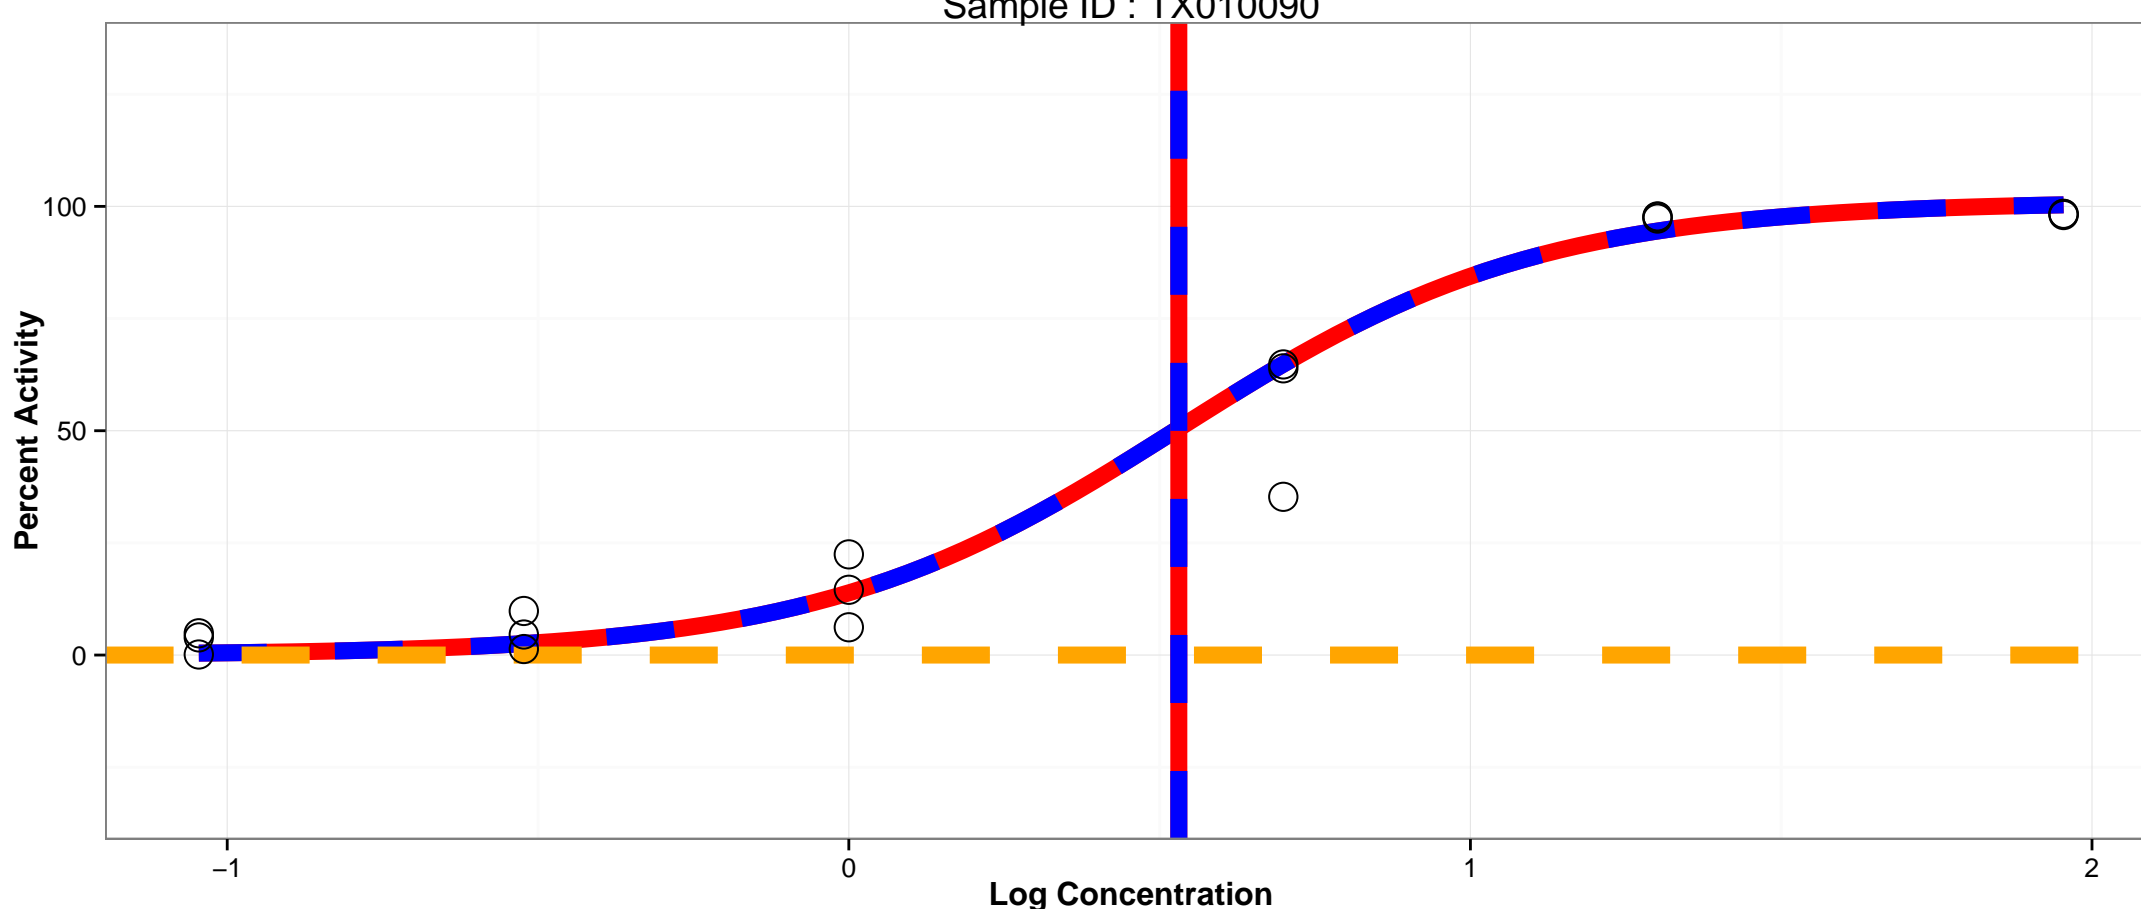

HILL MODEL

|     | tp   | ga     | gw    |
|-----|------|--------|-------|
| val | 101  | 0.531  | 1.5   |
| sd  | 2.13 | 0.0349 | 0.178 |

GAIN-LOSS MODEL

|     | tp  | ga    | gw  | la   | lw   |
|-----|-----|-------|-----|------|------|
| val | 101 | 0.531 | 1.5 | 3.68 | 8.46 |
| sd  | NA  | NA    | NA  | NA   | NA   |

|      | CNST   | HILL   | GNLS   |
|------|--------|--------|--------|
| AIC  | 202.79 | 122.56 | 126.56 |
| PROB | 0      | 0.88   | 0.12   |
| RMSE | 61.45  | 7.96   | 7.96   |

MAX\_MEAN : 98.2 MAX\_MED : 98.3 BMAD : 5.54  
COFF : 20 HIT-CALL : 1 FITC : 41 ACTP : 1  
FLAGS :

Assay ID 1848 (NHEERL\_Quantilum\_inhib\_2\_dn)  
Sample ID : TX010090

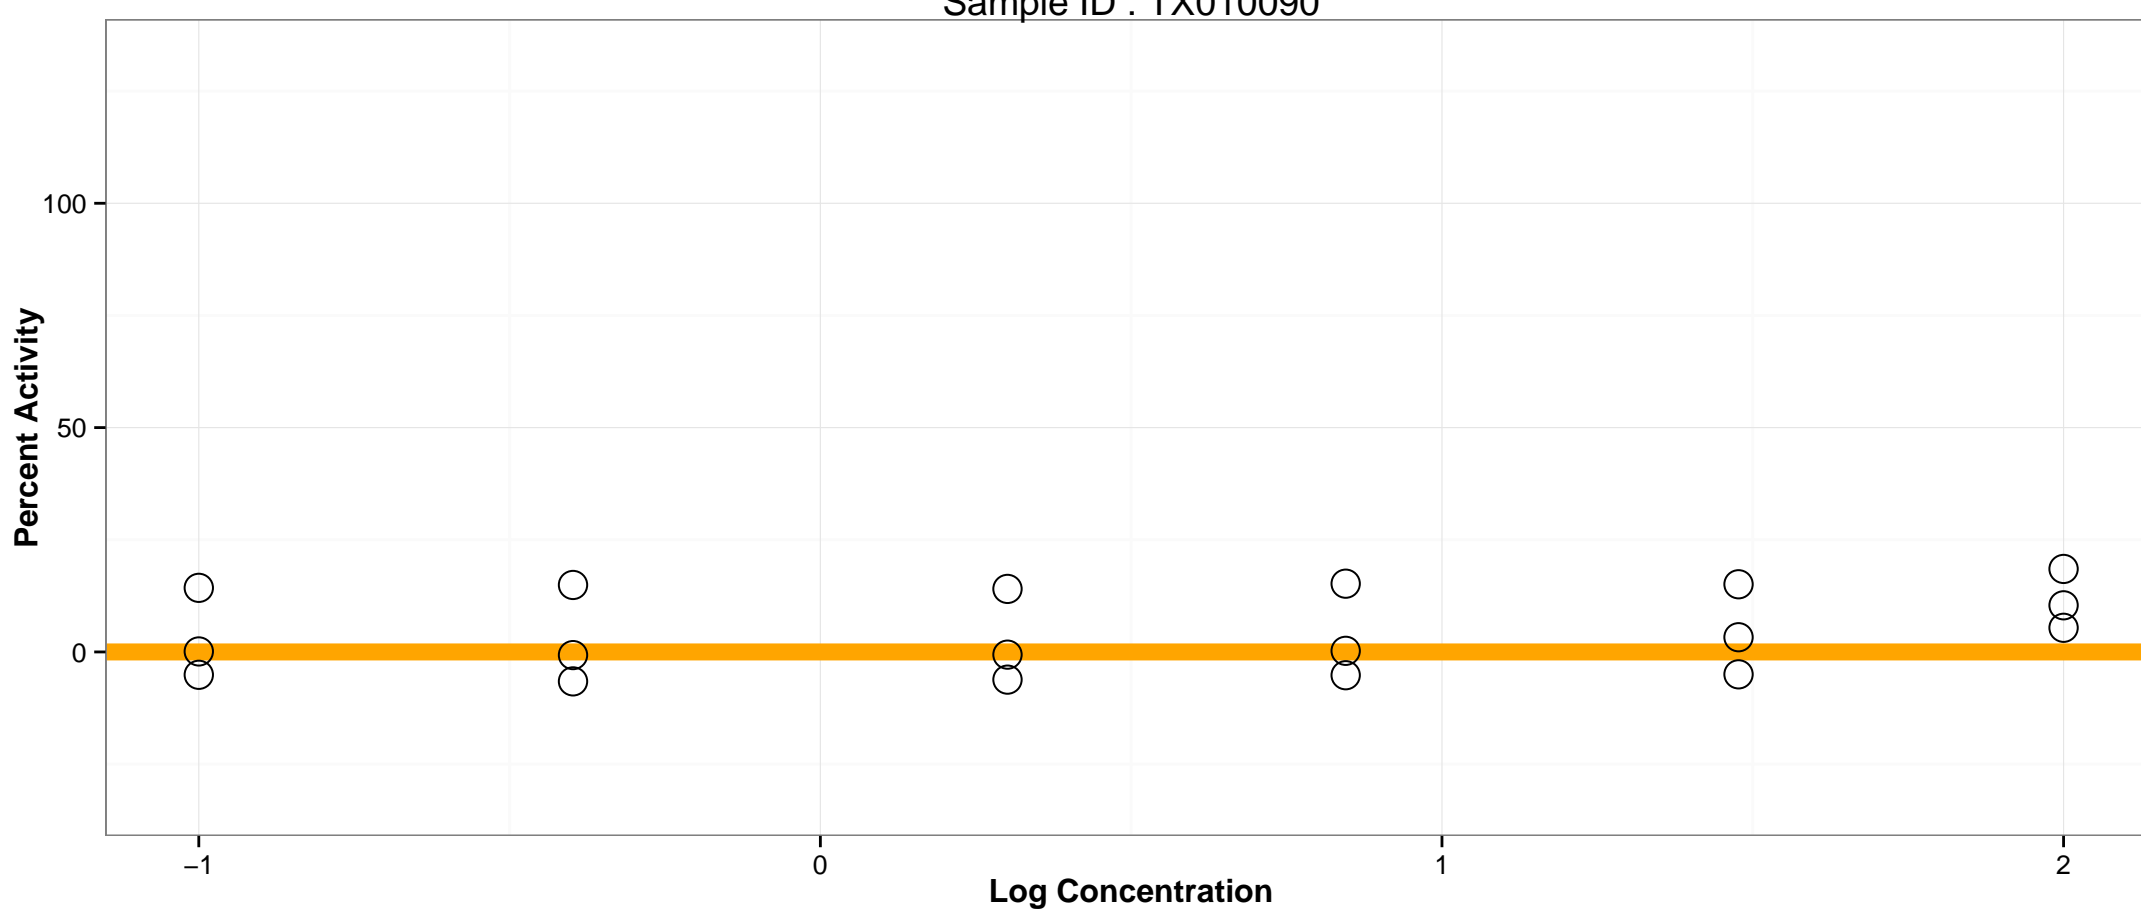

HILL MODEL

HILL MODEL: Not applicable

GAIN-LOSS MODEL

GNLS MODEL: Not applicable

|      | CNST   | HILL | GNLS |
|------|--------|------|------|
| AIC  | 137.12 | NA   | NA   |
| PROB | 1      | NA   | NA   |
| RMSE | 9.82   | NA   | NA   |

MAX\_MEAN : 11.4 MAX\_MED : 10.4 BMAD : 8.58  
COFF : 20 HIT-CALL : 0 FITC : 4 ACTP : 0  
FLAGS :

Chemical : Oxytetracycline hydrochloride  
CAS : 2058-46-0

Assay ID 1508 (NHEERL\_TPO\_AUR\_dn)  
Sample ID : TX010254

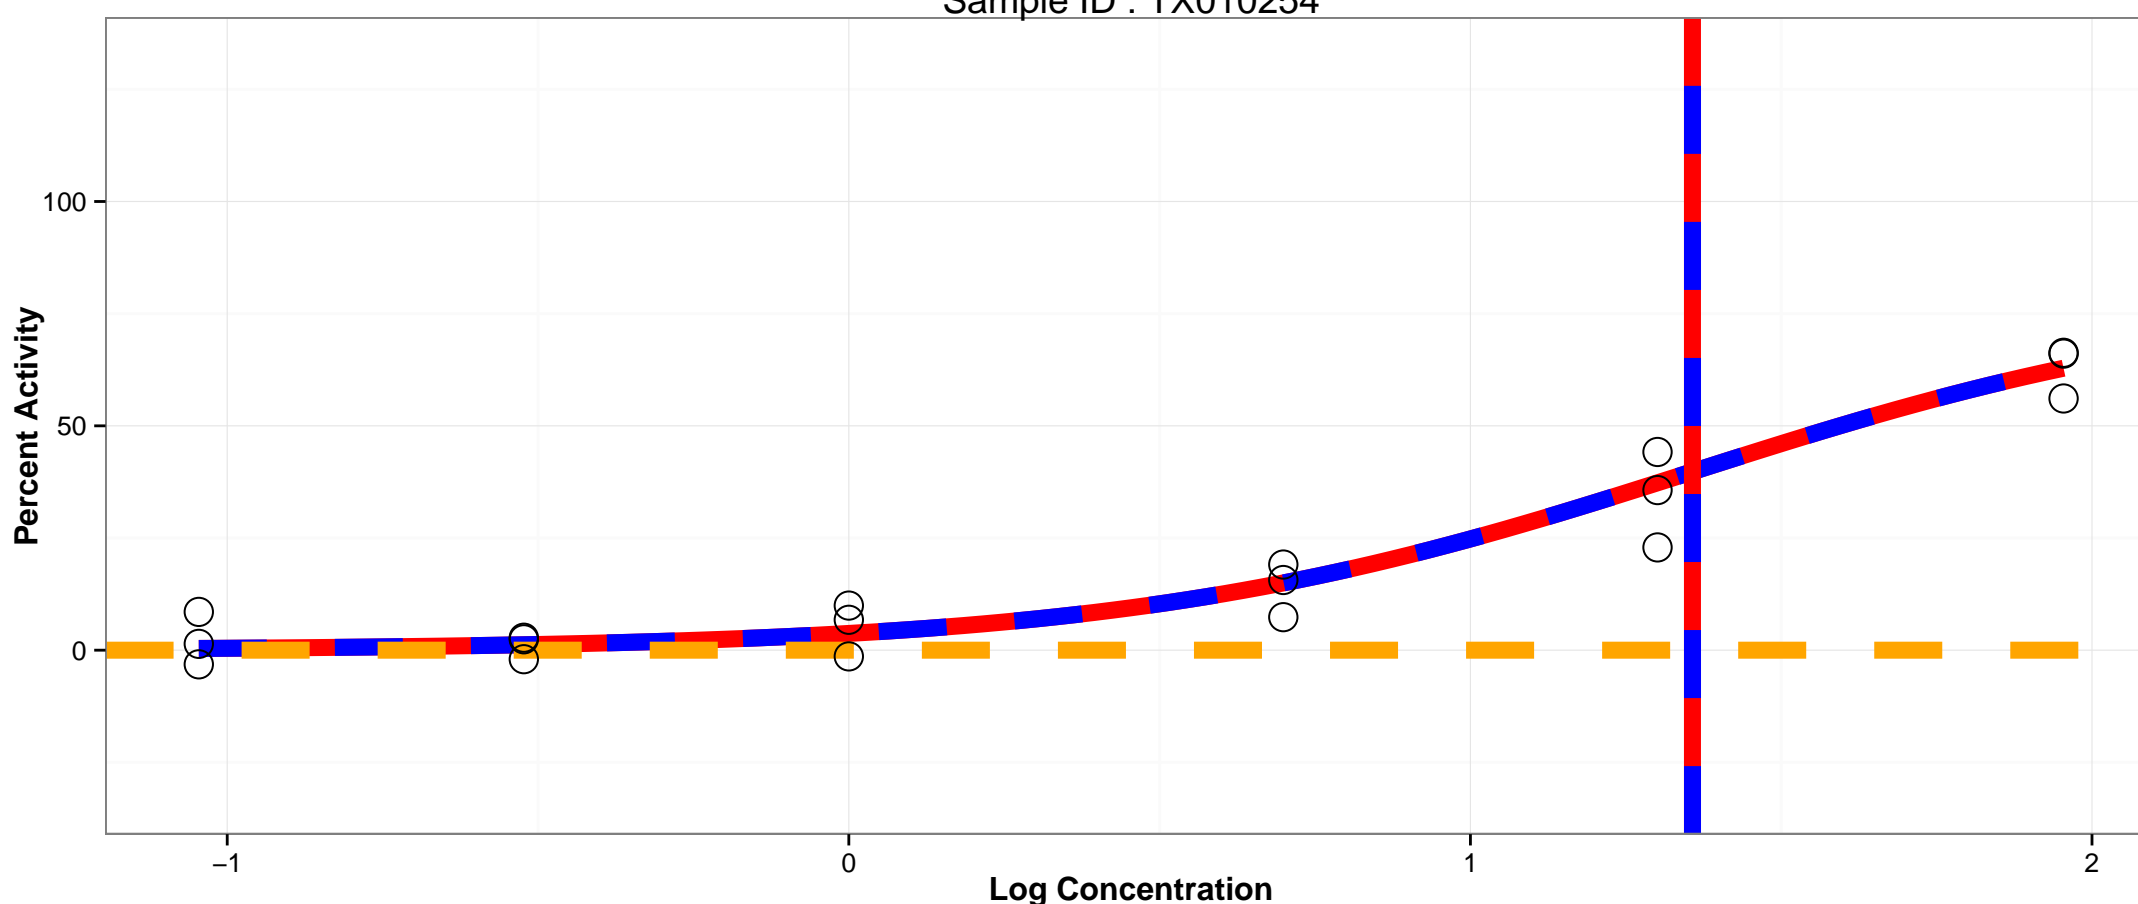

HILL MODEL

|     | tp   | ga    | gw    |
|-----|------|-------|-------|
| val | 79.6 | 1.36  | 0.964 |
| sd  | 14.2 | 0.217 | 0.227 |

GAIN-LOSS MODEL

|     | tp   | ga    | gw    | la    | lw     |
|-----|------|-------|-------|-------|--------|
| val | 79.6 | 1.36  | 0.964 | 2.82  | 13.8   |
| sd  | 14.2 | 0.217 | 0.227 | 21400 | 339000 |

|      | CNST   | HILL   | GNLS   |
|------|--------|--------|--------|
| AIC  | 174.68 | 121.96 | 125.96 |
| PROB | 0      | 0.88   | 0.12   |
| RMSE | 30.35  | 5.62   | 5.62   |

MAX\_MEAN : 62.8 MAX\_MED : 66.1 BMAD : 5.69  
COFF : 20 HIT-CALL : 1 FITC : 42 ACTP : 1  
FLAGS :

Assay ID 1509 (NHEERL\_HEK293T\_CellTiterGLO)  
Sample ID : TX010254

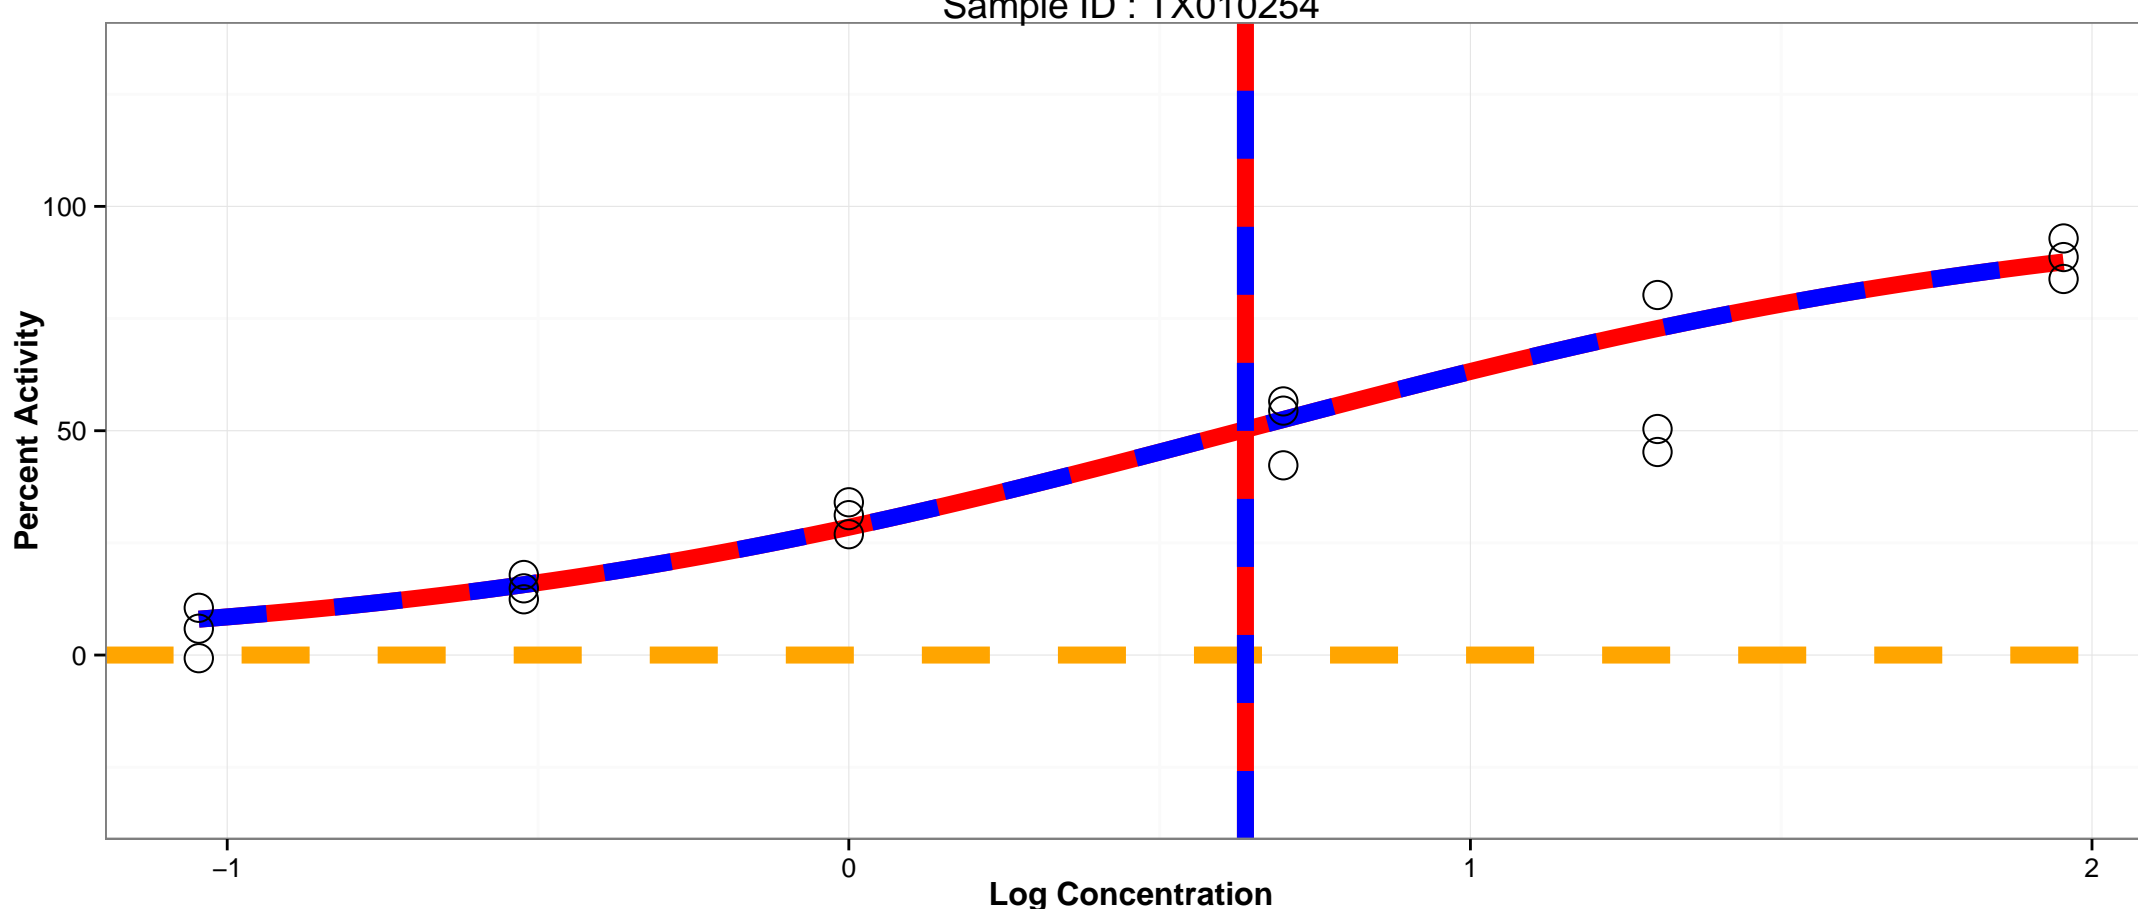

HILL MODEL

|     | tp   | ga    | gw    |
|-----|------|-------|-------|
| val | 101  | 0.638 | 0.632 |
| sd  | 10.4 | 0.228 | 0.114 |

GAIN-LOSS MODEL

|     | tp   | ga    | gw    | la   | lw    |
|-----|------|-------|-------|------|-------|
| val | 101  | 0.638 | 0.632 | 2.98 | 8.64  |
| sd  | 10.4 | 0.228 | 0.114 | 1750 | 14700 |

|      | CNST  | HILL  | GNLS  |
|------|-------|-------|-------|
| AIC  | 196.3 | 135.2 | 139.2 |
| PROB | 0     | 0.88  | 0.12  |
| RMSE | 50.67 | 9.5   | 9.5   |

MAX\_MEAN : 88.5 MAX\_MED : 88.7 BMAD : 5.54  
COFF : 20 HIT-CALL : 1 FITC : 42 ACTP : 1  
FLAGS :

Assay ID 1848 (NHEERL\_Quantilum\_inhib\_2\_dn)  
Sample ID : TX010254

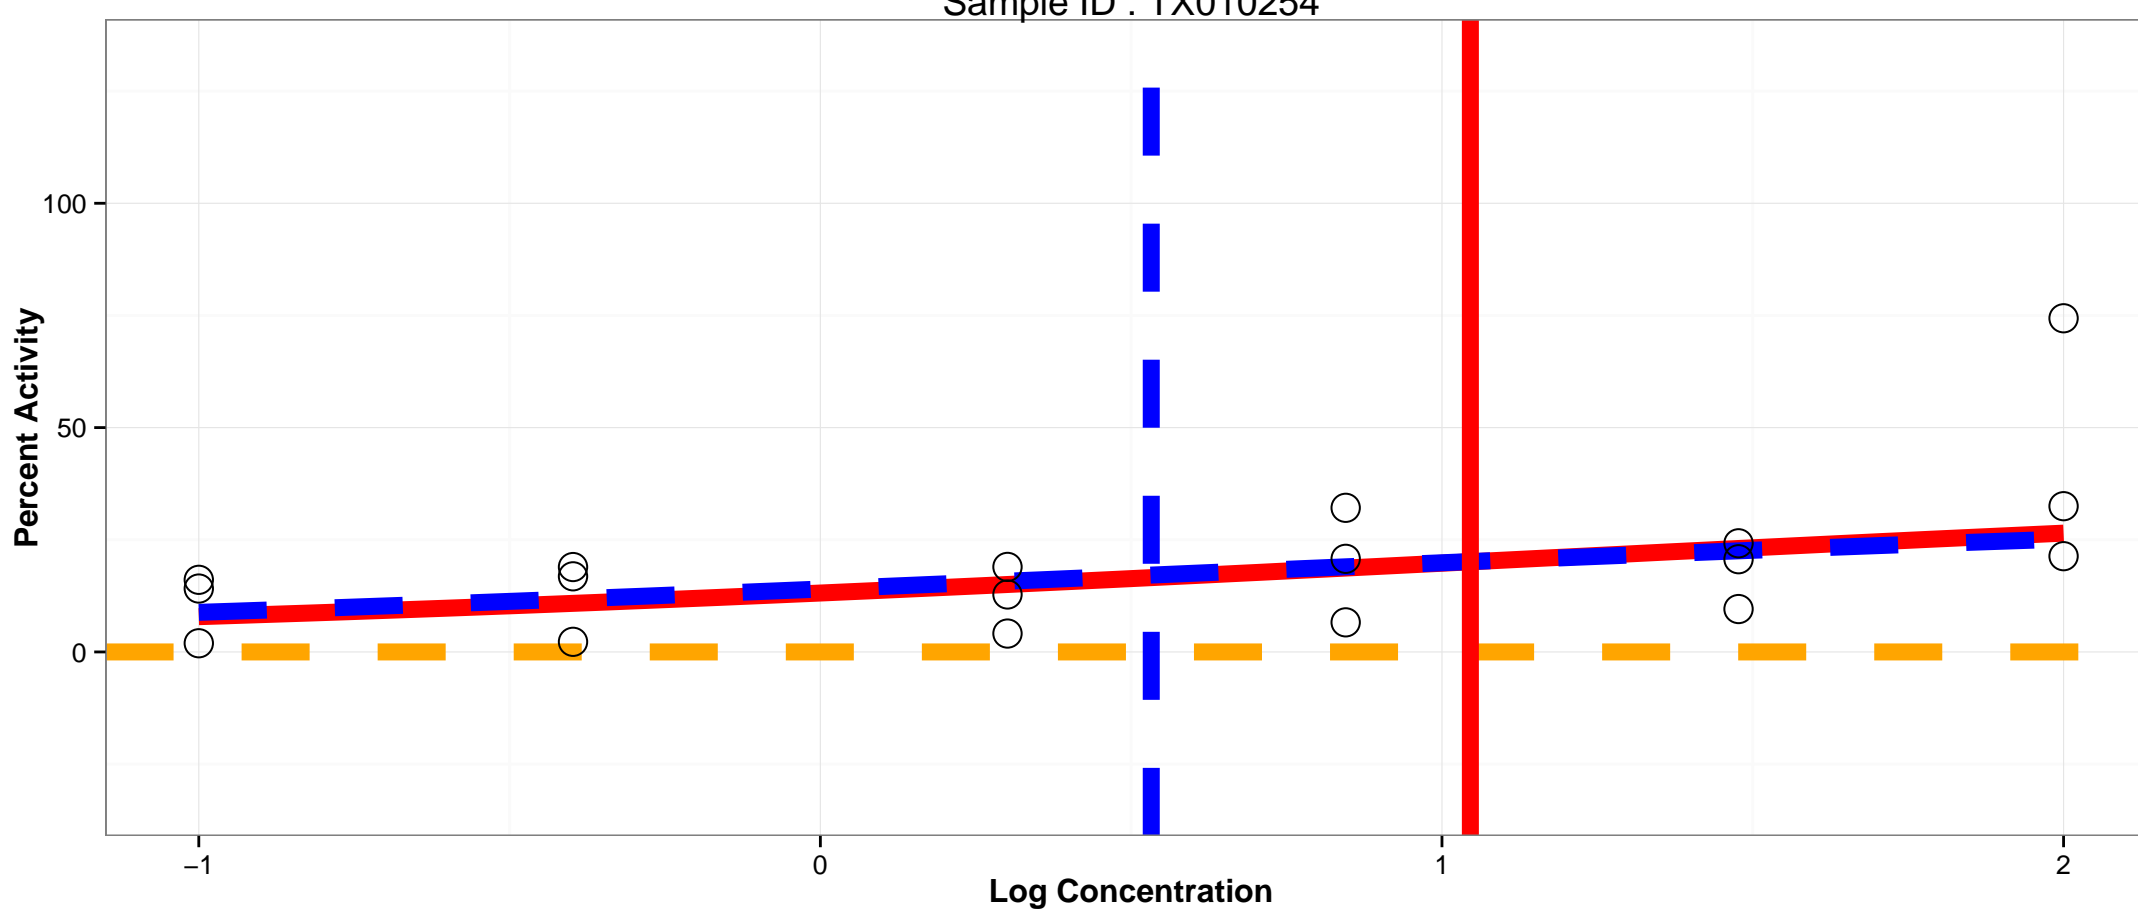

HILL MODEL

|     | tp   | ga   | gw  |
|-----|------|------|-----|
| val | 40.2 | 1.05 | 0.3 |
| sd  | NA   | NA   | NA  |

GAIN-LOSS MODEL

|     | tp   | ga    | gw    | la   | lw     |
|-----|------|-------|-------|------|--------|
| val | 34.3 | 0.532 | 0.3   | 2.66 | 17.9   |
| sd  | 40.2 | 3.79  | 0.363 | 9840 | 254000 |

|      | CNST   | HILL   | GNLS   |
|------|--------|--------|--------|
| AIC  | 167.98 | 146.51 | 150.46 |
| PROB | 0      | 0.88   | 0.12   |
| RMSE | 25.07  | 13.61  | 13.84  |

MAX\_MEAN : 42.7 MAX\_MED : 32.5 BMAD : 8.58  
COFF : 20 HIT-CALL : 1 FITC : 42 ACTP : 1  
FLAGS : 6

Chemical : Norethindrone  
CAS : 68-22-4

Assay ID 1508 (NHEERL\_TPO\_AUR\_dn)  
Sample ID : TX010306

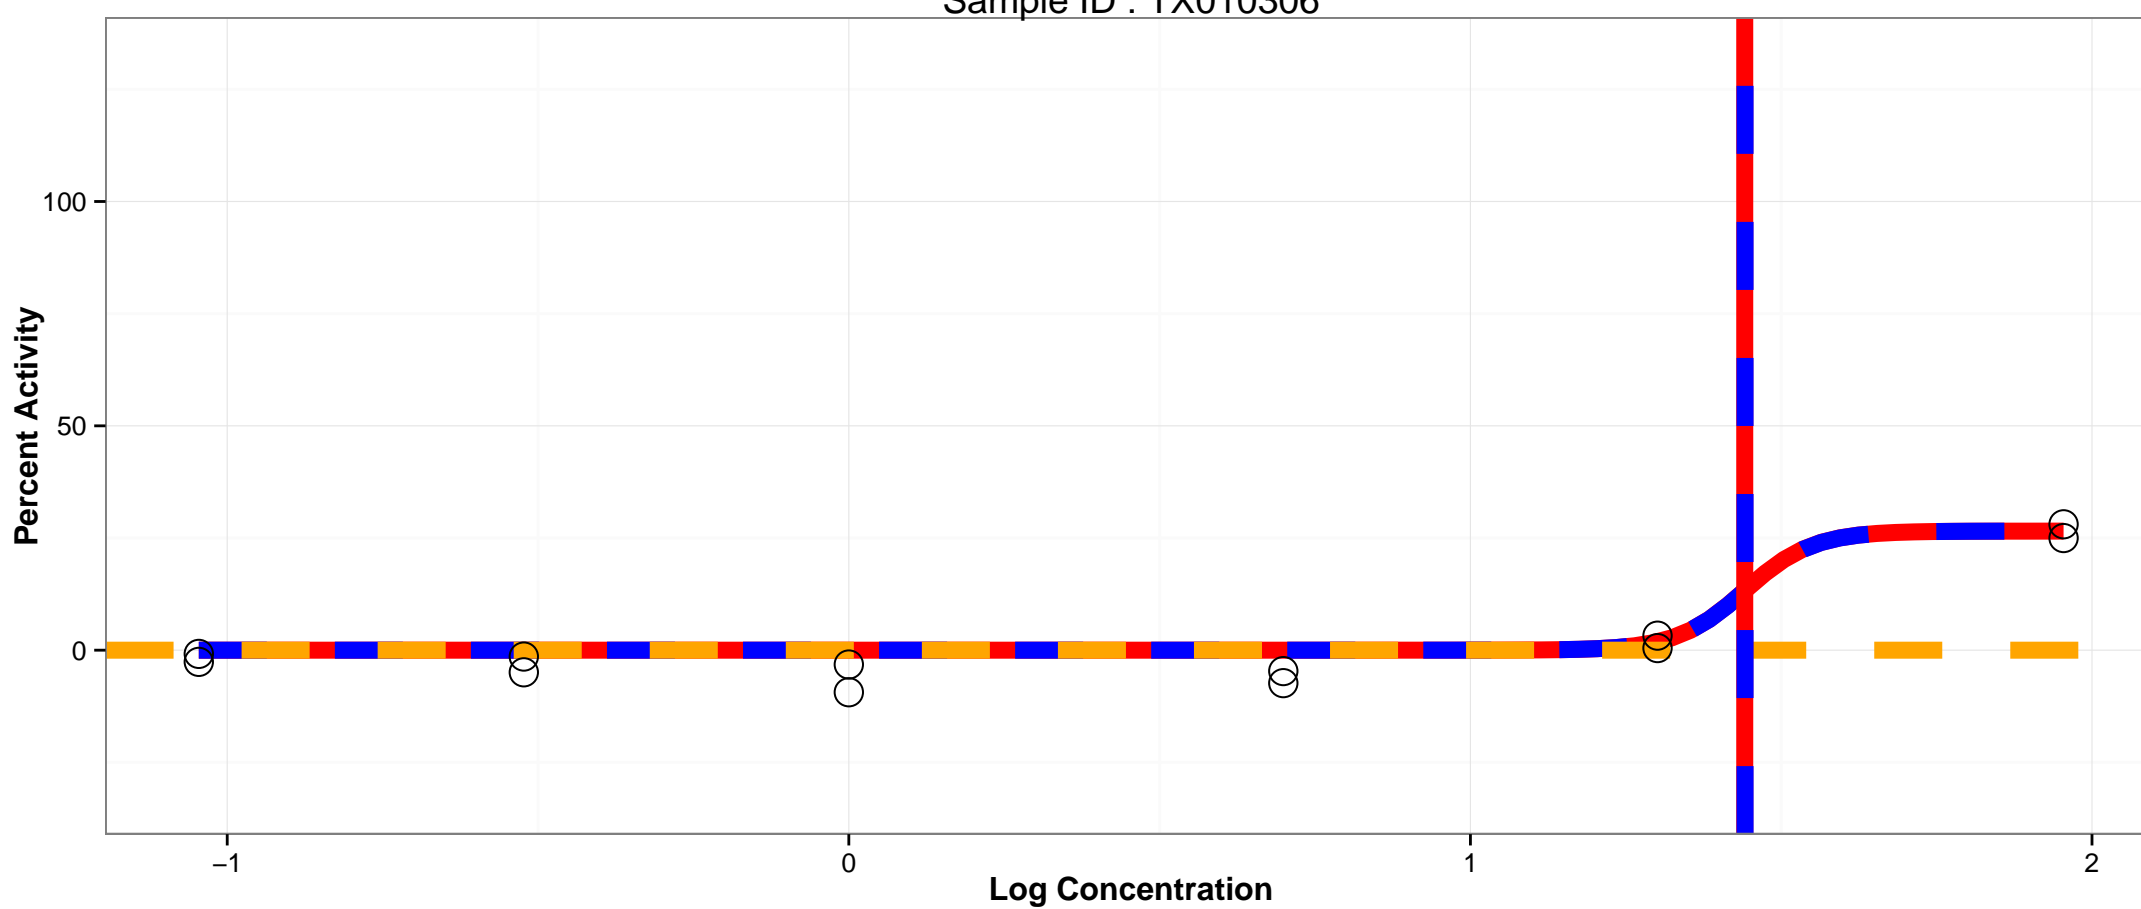

HILL MODEL

|     | tp   | ga   | gw   |
|-----|------|------|------|
| val | 26.5 | 1.44 | 7.99 |
| sd  | 2.47 | 4.87 | 277  |

GAIN-LOSS MODEL

|     | tp   | ga   | gw   | la   | lw   |
|-----|------|------|------|------|------|
| val | 26.5 | 1.44 | 7.96 | 3.89 | 2.41 |
| sd  | 5.36 | 4.94 | 279  | 3340 | 4170 |

|      | CNST  | HILL  | GNLS  |
|------|-------|-------|-------|
| AIC  | 92.39 | 76.98 | 80.98 |
| PROB | 0     | 0.88  | 0.12  |
| RMSE | 11.66 | 4.24  | 4.24  |

MAX\_MEAN : 26.5 MAX\_MED : 26.5 BMAD : 5.69  
COFF : 20 HIT-CALL : 1 FITC : 41 ACTP : 1  
FLAGS : 6

Assay ID 1509 (NHEERL\_HEK293T\_CellTiterGLO)  
Sample ID : TX010306

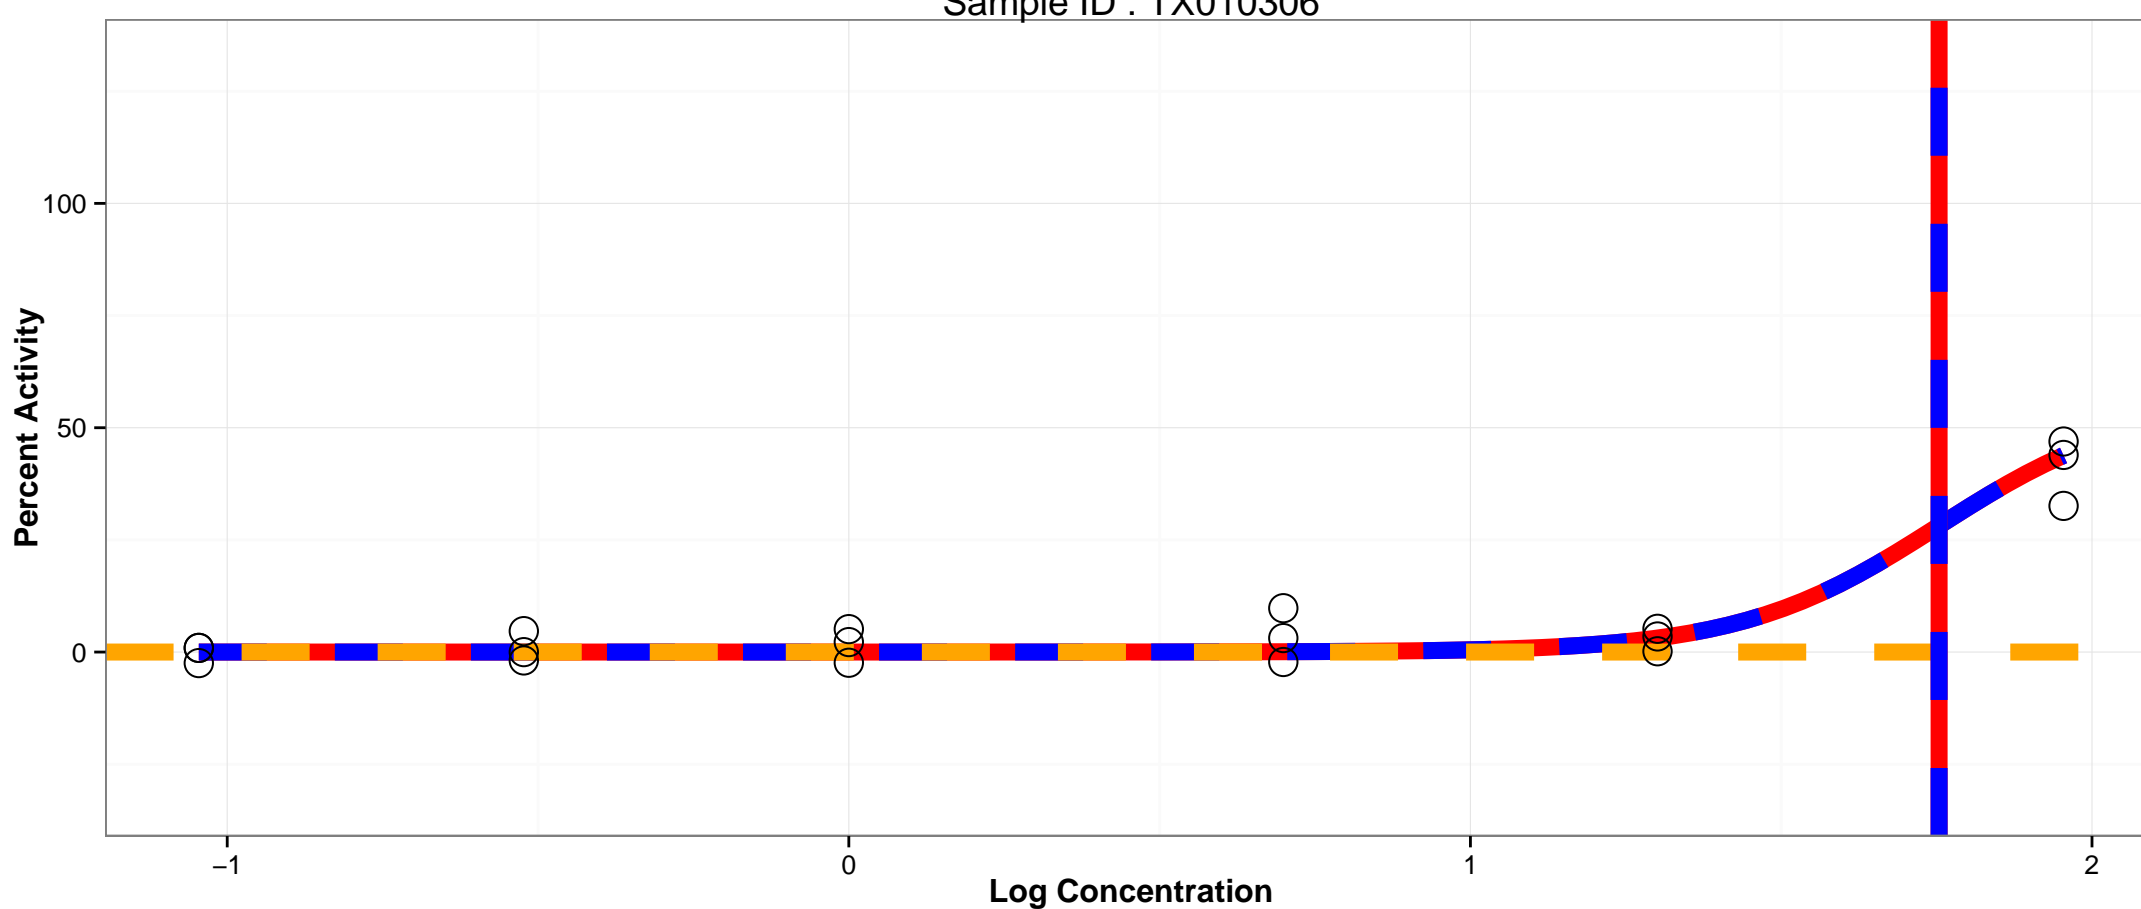

HILL MODEL

|     | tp   | ga   | gw   |
|-----|------|------|------|
| val | 56.3 | 1.75 | 2.72 |
| sd  | 111  | 1.08 | 4.66 |

GAIN-LOSS MODEL

|     | tp   | ga   | gw   | la   | lw   |
|-----|------|------|------|------|------|
| val | 56.3 | 1.75 | 2.72 | 3.26 | 17.9 |
| sd  | NA   | NA   | NA   | NA   | NA   |

|      | CNST   | HILL   | GNLS   |
|------|--------|--------|--------|
| AIC  | 146.12 | 109.45 | 113.45 |
| PROB | 0      | 0.88   | 0.12   |
| RMSE | 17.35  | 4.27   | 4.27   |

MAX\_MEAN : 41.2 MAX\_MED : 43.9 BMAD : 5.54  
COFF : 20 HIT-CALL : 1 FITC : 42 ACTP : 1  
FLAGS : 6

Assay ID 1848 (NHEERL\_Quantilum\_inhib\_2\_dn)  
Sample ID : TX010306

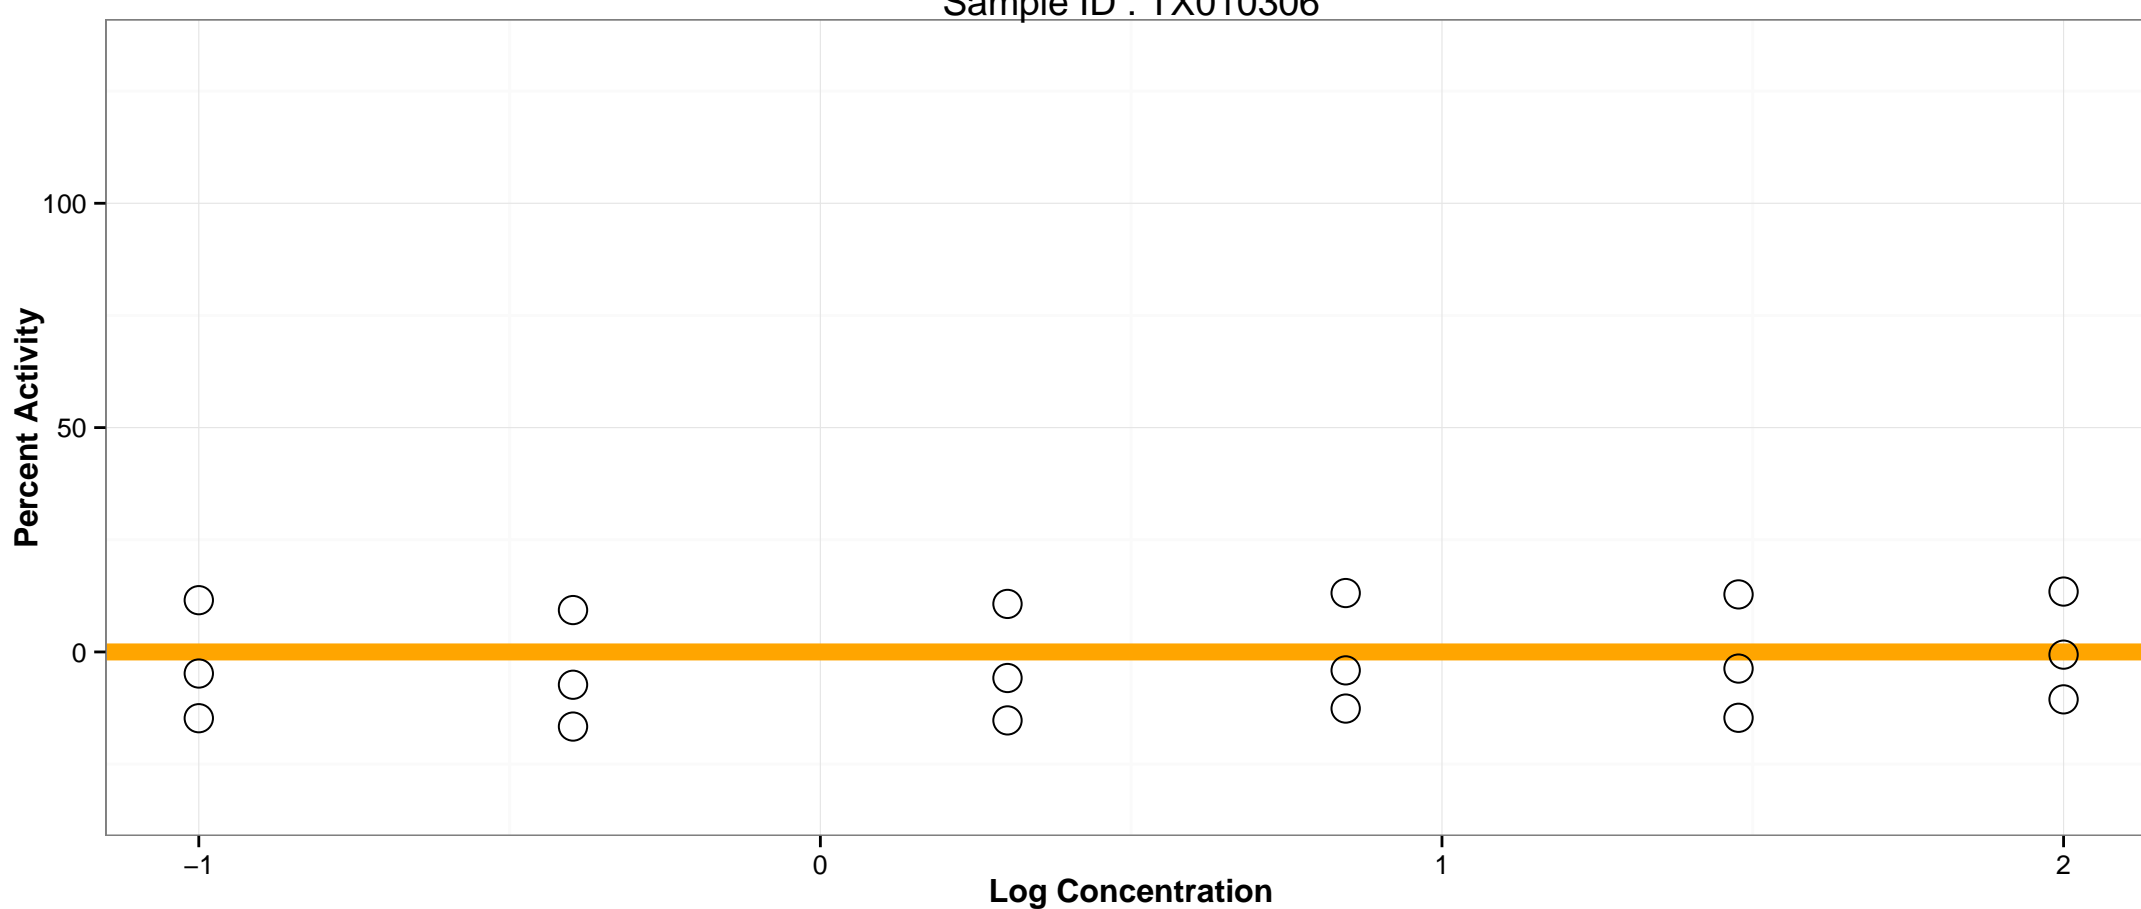

HILL MODEL

HILL MODEL: Not applicable

GAIN-LOSS MODEL

GNLS MODEL: Not applicable

|      | CNST   | HILL | GNLS |
|------|--------|------|------|
| AIC  | 143.04 | NA   | NA   |
| PROB | 1      | NA   | NA   |
| RMSE | 11.07  | NA   | NA   |

MAX\_MEAN : 0.773 MAX\_MED : -0.592 BMAD : 8.58  
COFF : 20 HIT-CALL : 0 FITC : 4 ACTP : 0  
FLAGS :

Assay ID 1508 (NHEERL\_TPO\_AUR\_dn)  
Sample ID : TX010355

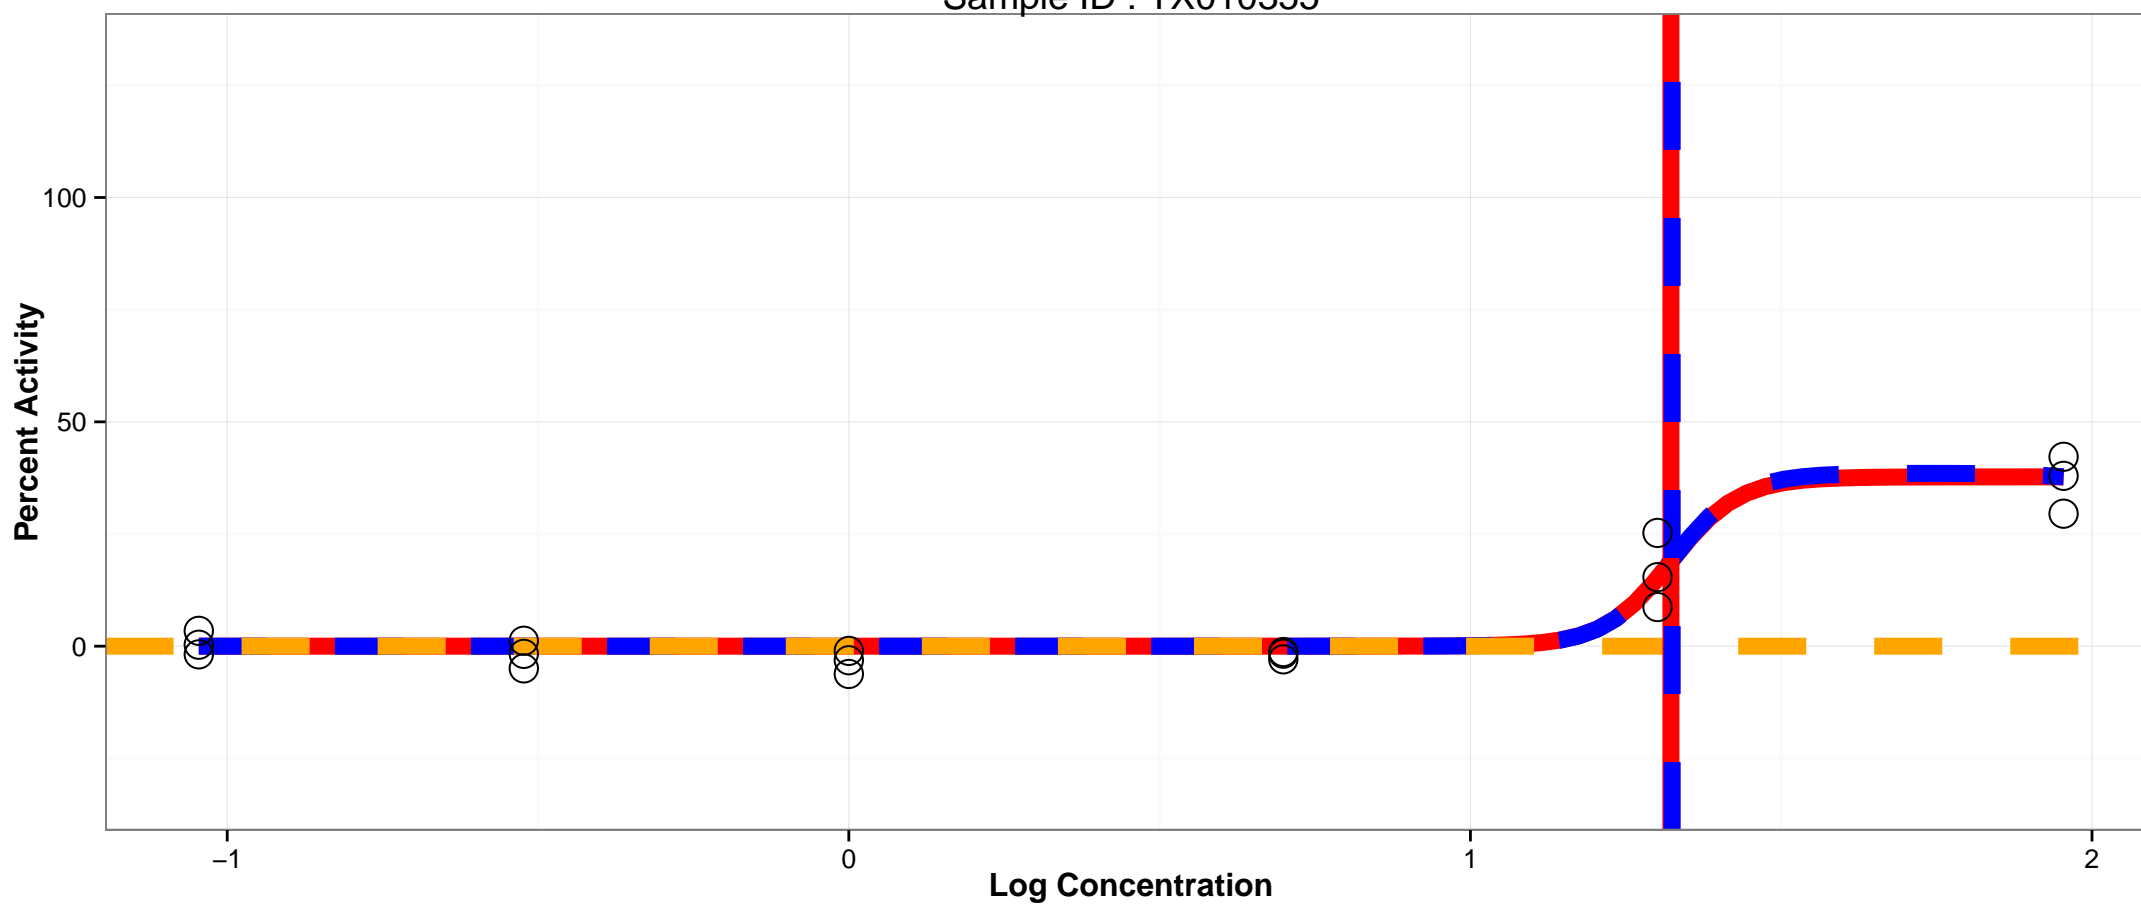

HILL MODEL

|     | tp   | ga     | gw   |
|-----|------|--------|------|
| val | 37.7 | 1.32   | 8    |
| sd  | 2.84 | 0.0502 | 18.3 |

GAIN-LOSS MODEL

|     | tp   | ga   | gw | la  | lw  |
|-----|------|------|----|-----|-----|
| val | 38.6 | 1.32 | 8  | 2.2 | 6.8 |
| sd  | NA   | NA   | NA | NA  | NA  |

|      | CNST   | HILL   | GNLS   |
|------|--------|--------|--------|
| AIC  | 151.35 | 112.17 | 116.17 |
| PROB | 0      | 0.88   | 0.12   |
| RMSE | 16.92  | 4.33   | 4.33   |

MAX\_MEAN : 36.6 MAX\_MED : 38 BMAD : 5.69  
COFF : 20 HIT-CALL : 1 FITC : 41 ACTP : 1  
FLAGS : 6

Assay ID 1509 (NHEERL\_HEK293T\_CellTiterGLO)  
Sample ID : TX010355

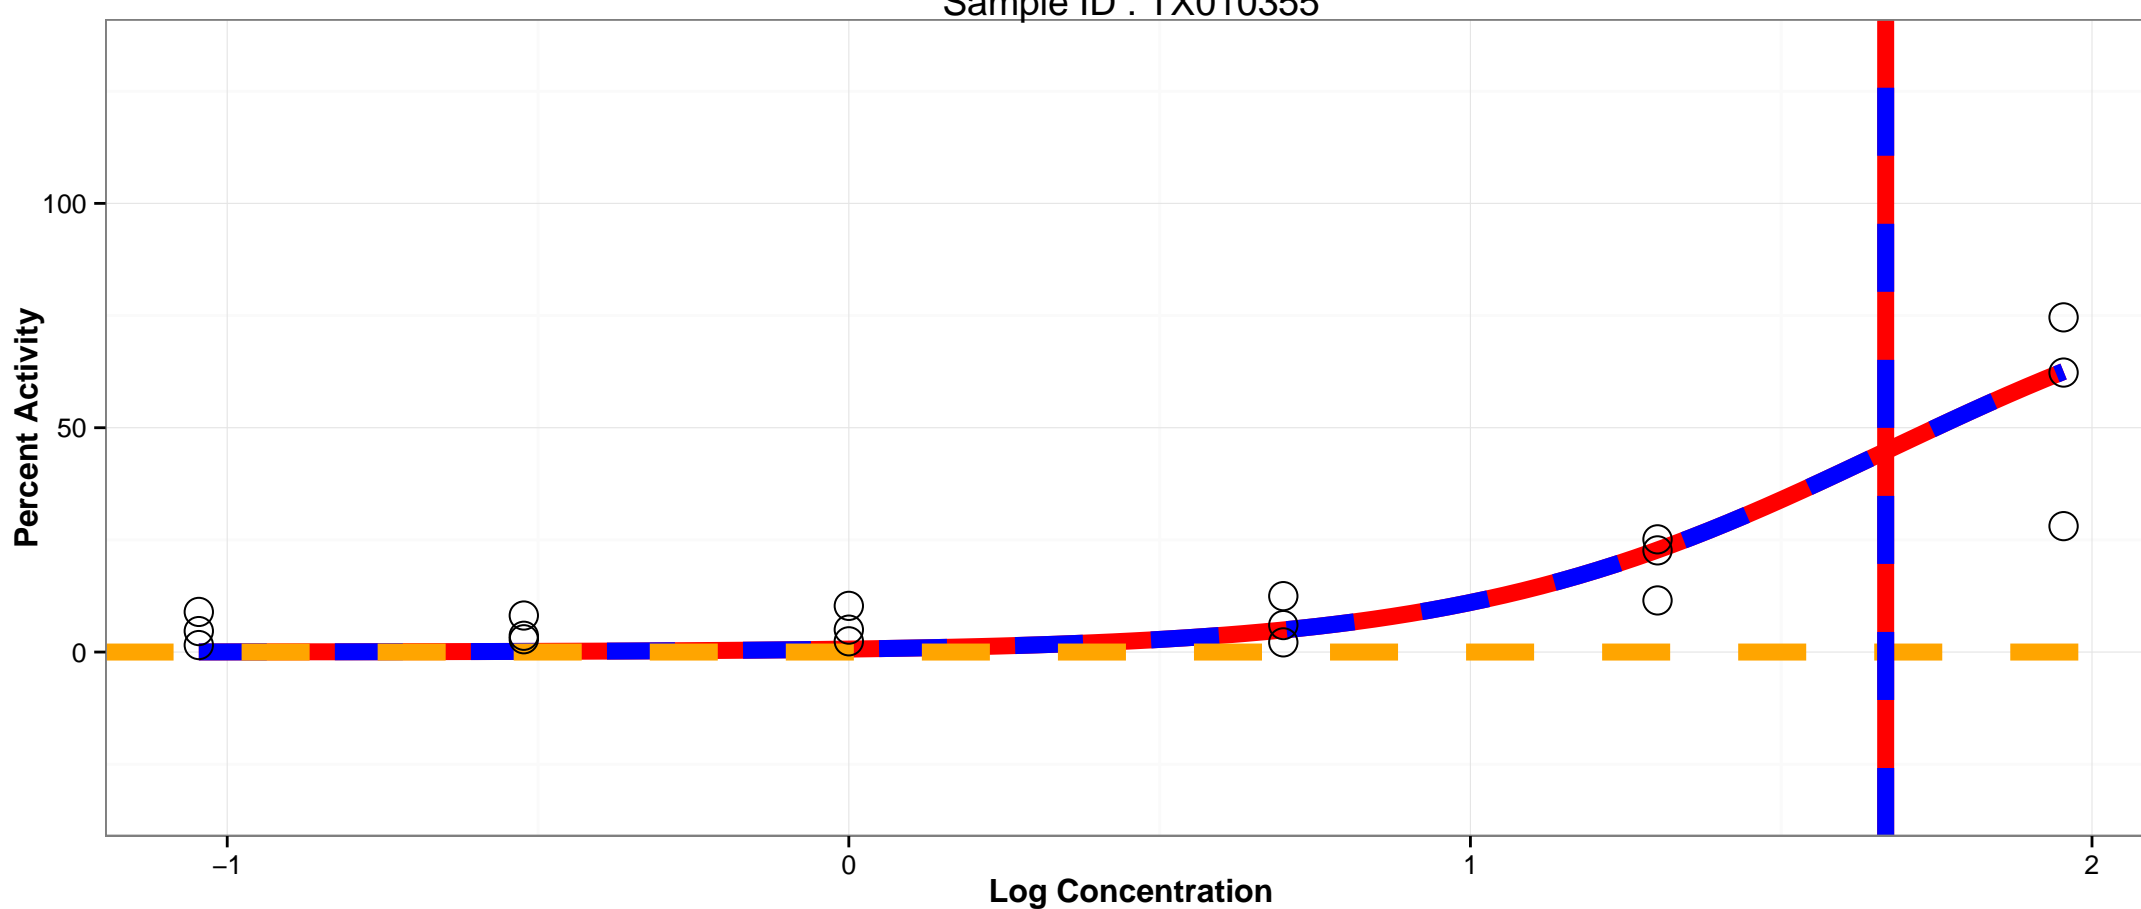

HILL MODEL

|     | tp   | ga    | gw    |
|-----|------|-------|-------|
| val | 89.5 | 1.67  | 1.27  |
| sd  | 32.9 | 0.301 | 0.512 |

GAIN-LOSS MODEL

|     | tp   | ga    | gw    | la   | lw   |
|-----|------|-------|-------|------|------|
| val | 89.5 | 1.67  | 1.27  | 3.95 | 4.42 |
| sd  | 32.9 | 0.301 | 0.512 | 3940 | 8760 |

|      | CNST   | HILL   | GNLS   |
|------|--------|--------|--------|
| AIC  | 164.55 | 136.42 | 140.42 |
| PROB | 0      | 0.88   | 0.12   |
| RMSE | 25.87  | 10.09  | 10.09  |

MAX\_MEAN : 55 MAX\_MED : 62.3 BMAD : 5.54  
COFF : 20 HIT-CALL : 1 FITC : 42 ACTP : 1  
FLAGS :

Assay ID 1848 (NHEERL\_Quantilum\_inhib\_2\_dn)  
Sample ID : TX010355

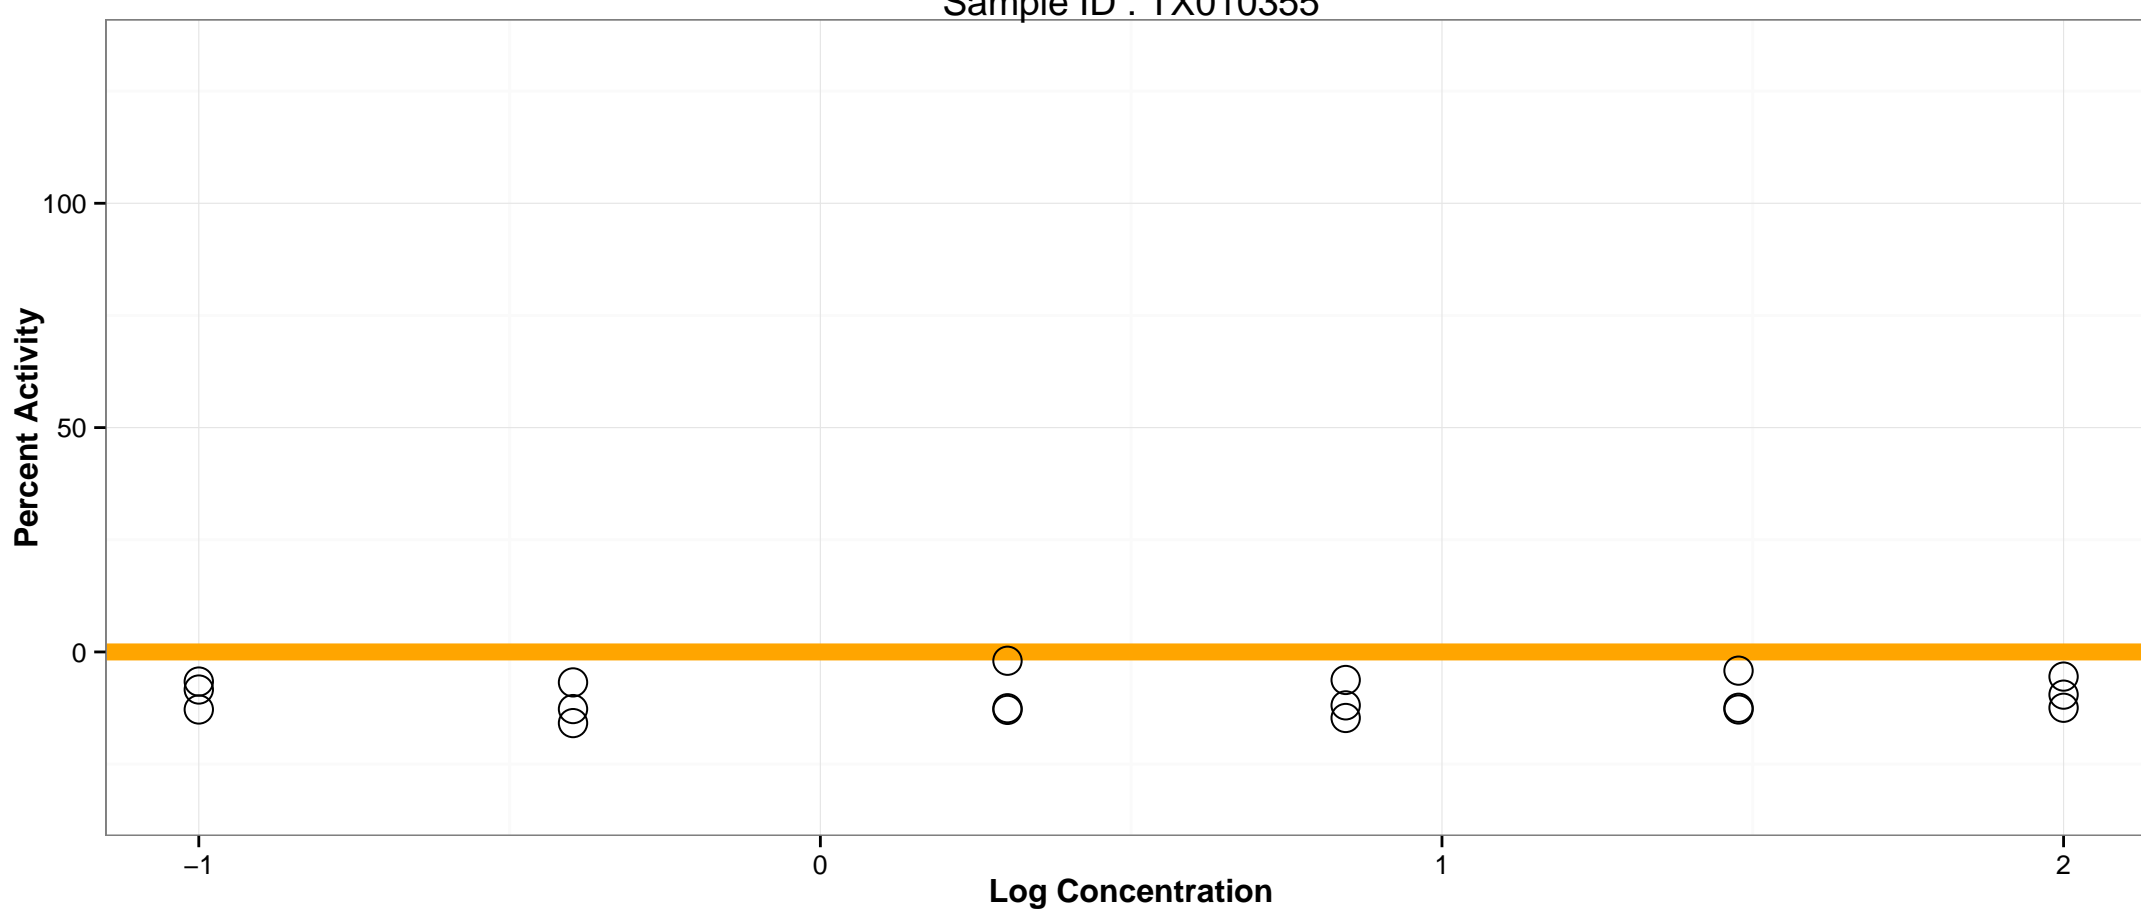

HILL MODEL

HILL MODEL: Not applicable

GAIN-LOSS MODEL

GNLS MODEL: Not applicable

|      | CNST   | HILL | GNLS |
|------|--------|------|------|
| AIC  | 142.06 | NA   | NA   |
| PROB | 1      | NA   | NA   |
| RMSE | 10.73  | NA   | NA   |

MAX\_MEAN : -9.13 MAX\_MED : -8.37 BMAD : 8.58  
COFF : 20 HIT-CALL : 0 FITC : 4 ACTP : 0  
FLAGS :



Chemical : Tris(2-ethylhexyl) trimellitate  
CAS : 3319-31-1

Assay ID 1508 (NHEERL\_TPO\_AUR\_dn)  
Sample ID : TX010403

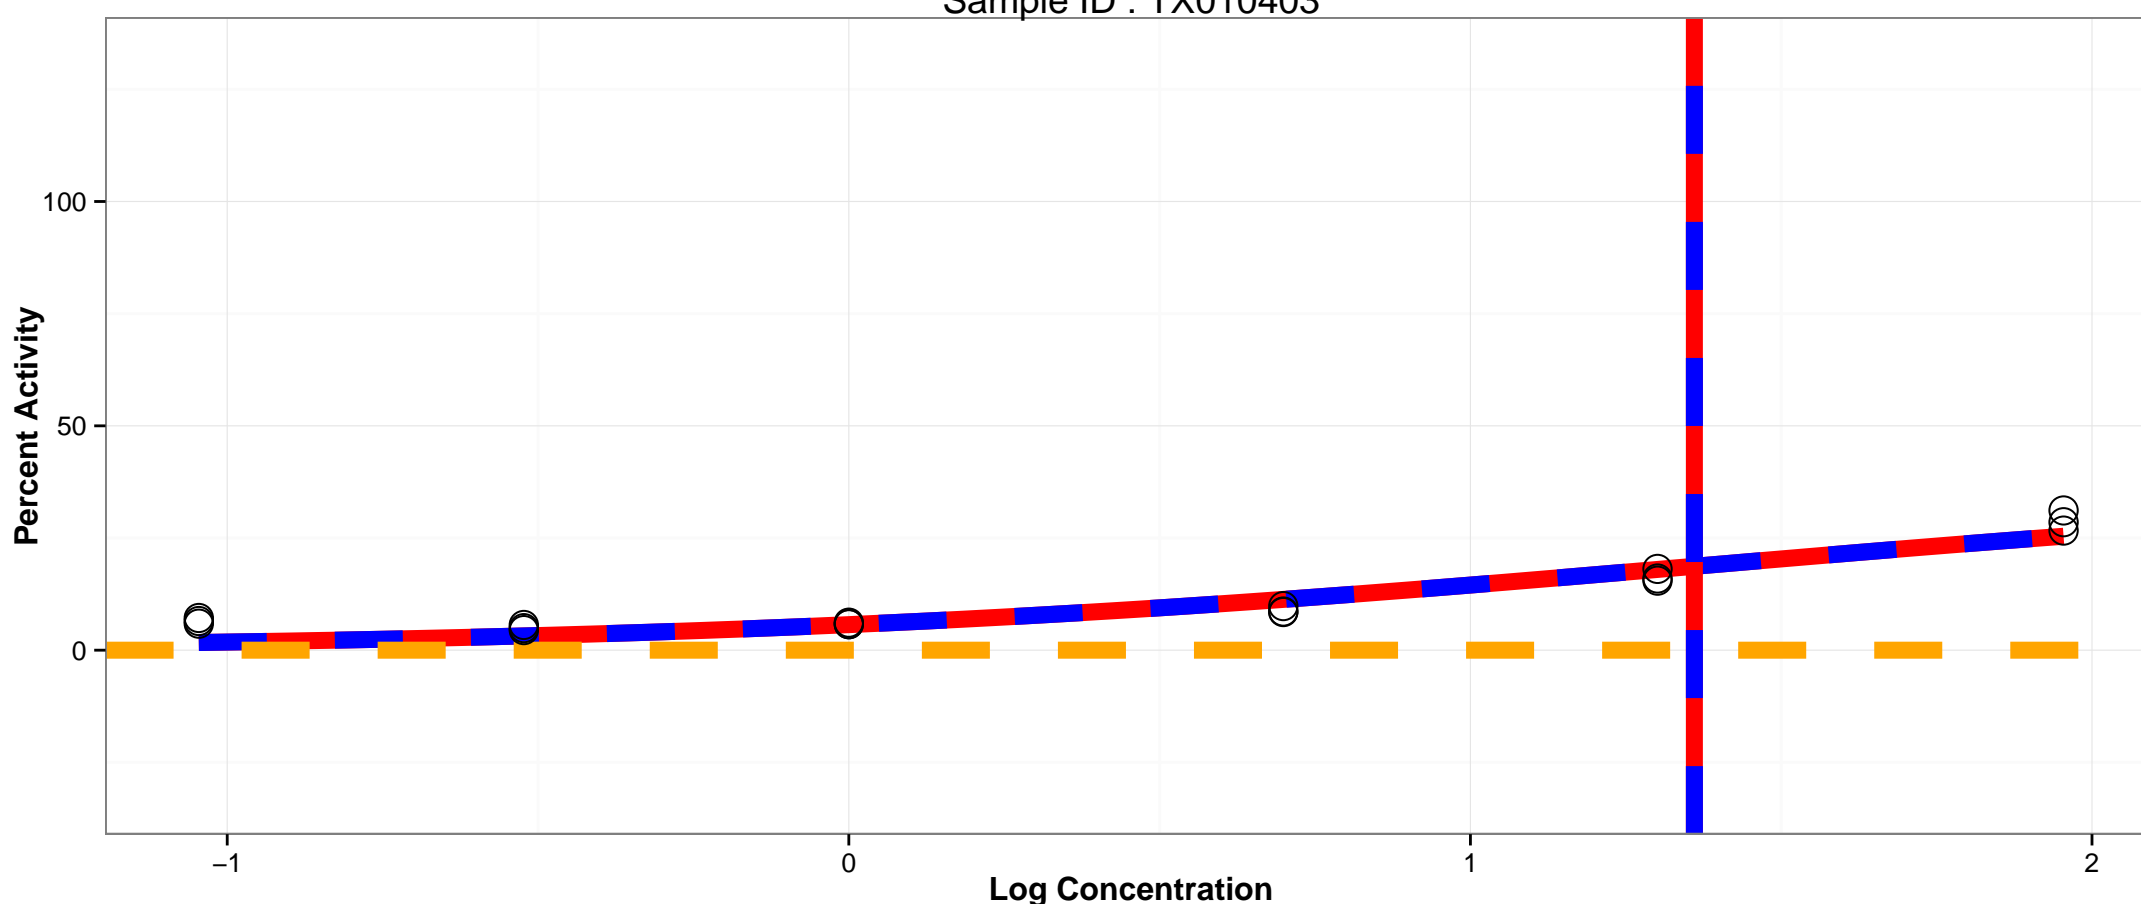

HILL MODEL

|     | tp   | ga    | gw     |
|-----|------|-------|--------|
| val | 37.4 | 1.36  | 0.548  |
| sd  | 7.39 | 0.322 | 0.0952 |

GAIN-LOSS MODEL

|     | tp   | ga    | gw     | la   | lw    |
|-----|------|-------|--------|------|-------|
| val | 37.4 | 1.36  | 0.548  | 2.57 | 16.3  |
| sd  | 7.39 | 0.322 | 0.0952 | 895  | 23200 |

|      | CNST   | HILL  | GNLS   |
|------|--------|-------|--------|
| AIC  | 150.55 | 99.33 | 103.33 |
| PROB | 0      | 0.88  | 0.12   |
| RMSE | 14.67  | 2.92  | 2.92   |

MAX\_MEAN : 28.8 MAX\_MED : 28.5 BMAD : 5.69  
COFF : 20 HIT-CALL : 1 FITC : 42 ACTP : 1  
FLAGS : 6

Assay ID 1509 (NHEERL\_HEK293T\_CellTiterGLO)  
Sample ID : TX010403

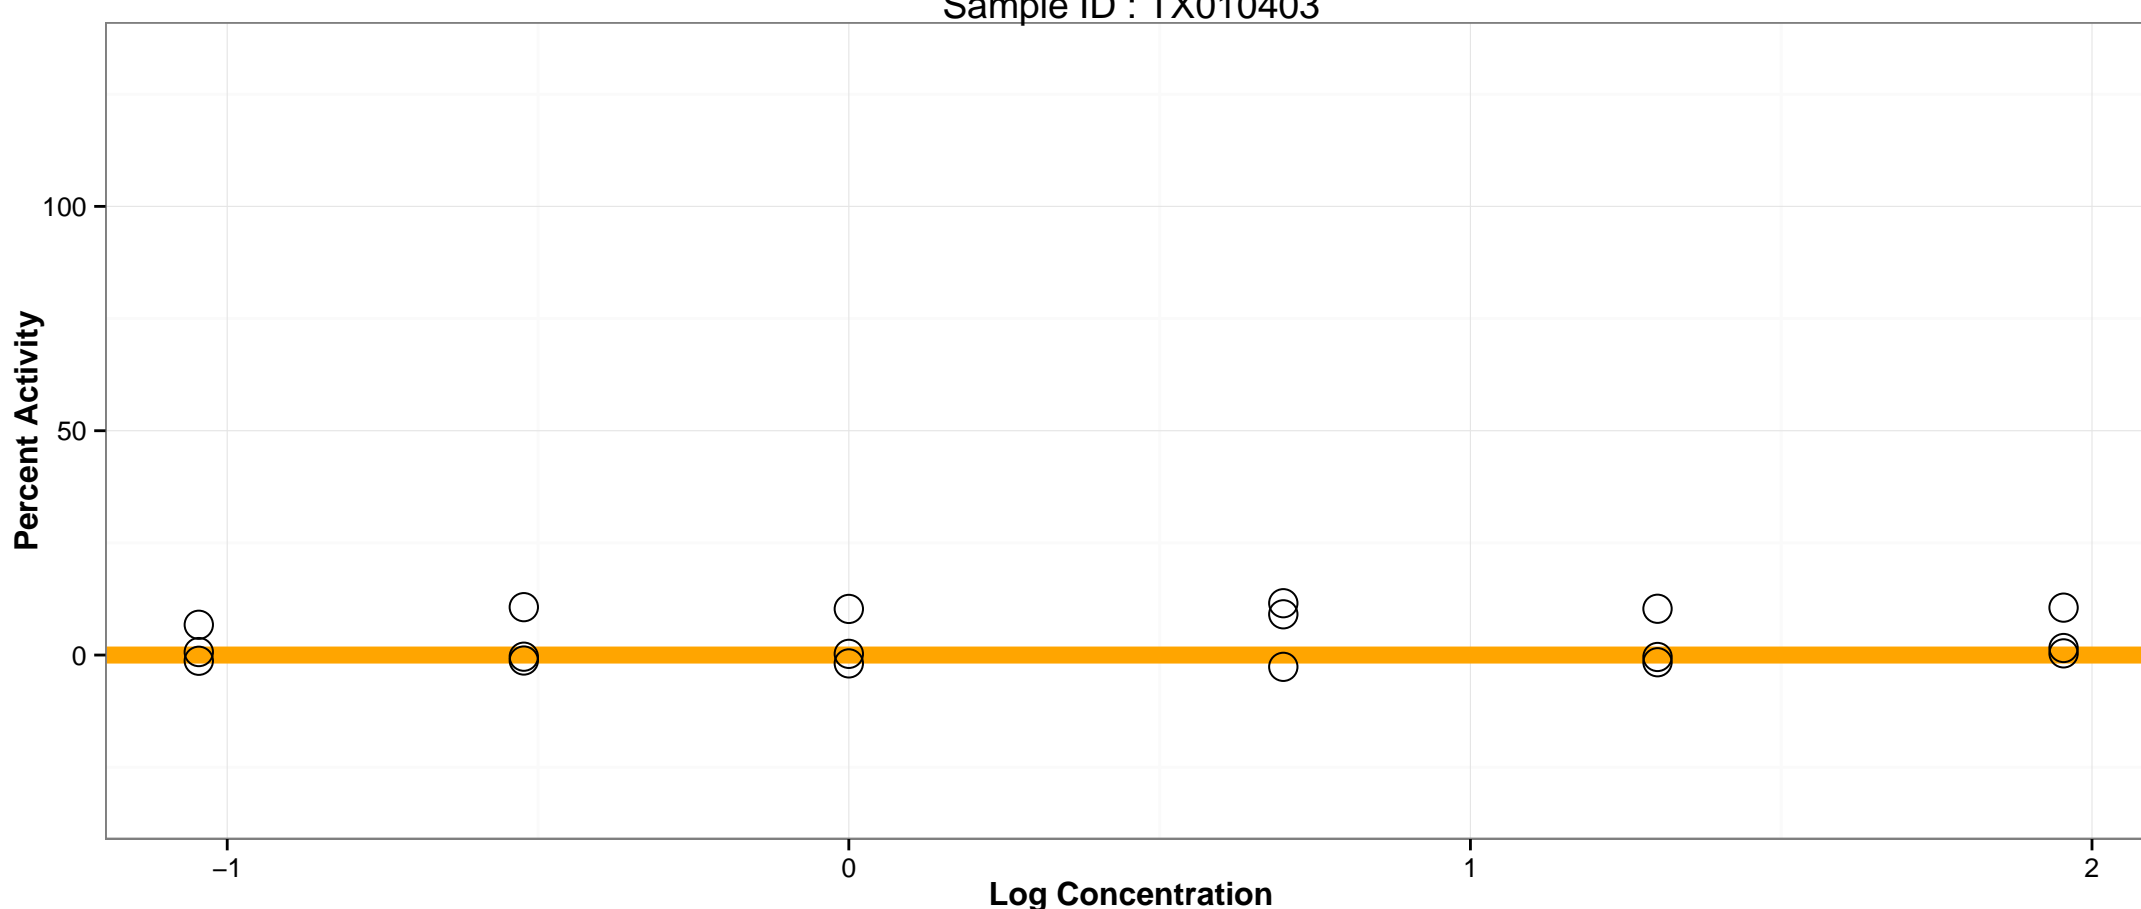

HILL MODEL

HILL MODEL: Not applicable

GAIN-LOSS MODEL

GNLS MODEL: Not applicable

|      | CNST   | HILL | GNLS |
|------|--------|------|------|
| AIC  | 120.15 | NA   | NA   |
| PROB | 1      | NA   | NA   |
| RMSE | 6.33   | NA   | NA   |

MAX\_MEAN : 6.02 MAX\_MED : 9.1 BMAD : 5.54  
COFF : 20 HIT-CALL : 0 FITC : 4 ACTP : 0  
FLAGS :

Assay ID 1848 (NHEERL\_Quantilum\_inhib\_2\_dn)  
Sample ID : TX010403

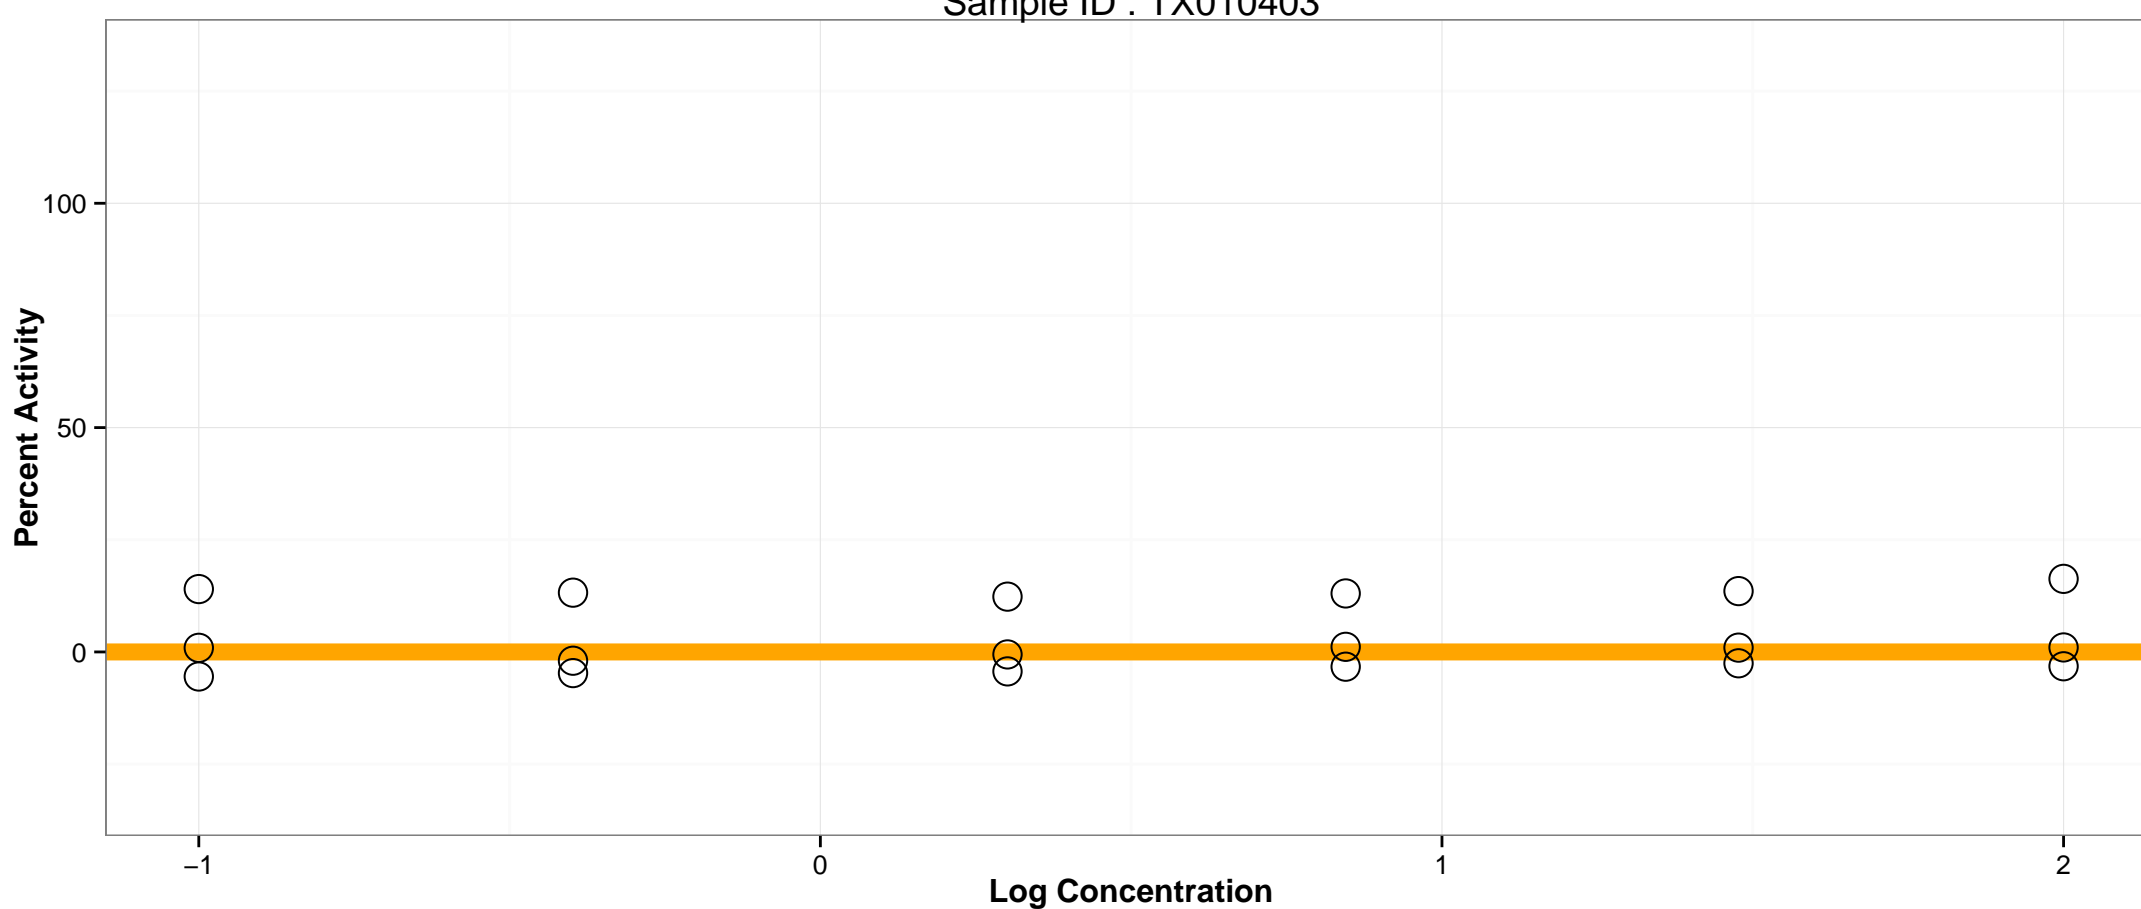

HILL MODEL

HILL MODEL: Not applicable

GAIN-LOSS MODEL

GNLS MODEL: Not applicable

|      | CNST   | HILL | GNLS |
|------|--------|------|------|
| AIC  | 130.17 | NA   | NA   |
| PROB | 1      | NA   | NA   |
| RMSE | 8.33   | NA   | NA   |

MAX\_MEAN : 4.71 MAX\_MED : 1.15 BMAD : 8.58  
COFF : 20 HIT-CALL : 0 FITC : 4 ACTP : 0  
FLAGS :

Chemical : Perfluoroheptanoic acid  
CAS : 375-85-9

Assay ID 1508 (NHEERL\_TPO\_AUR\_dn)  
Sample ID : TX010423

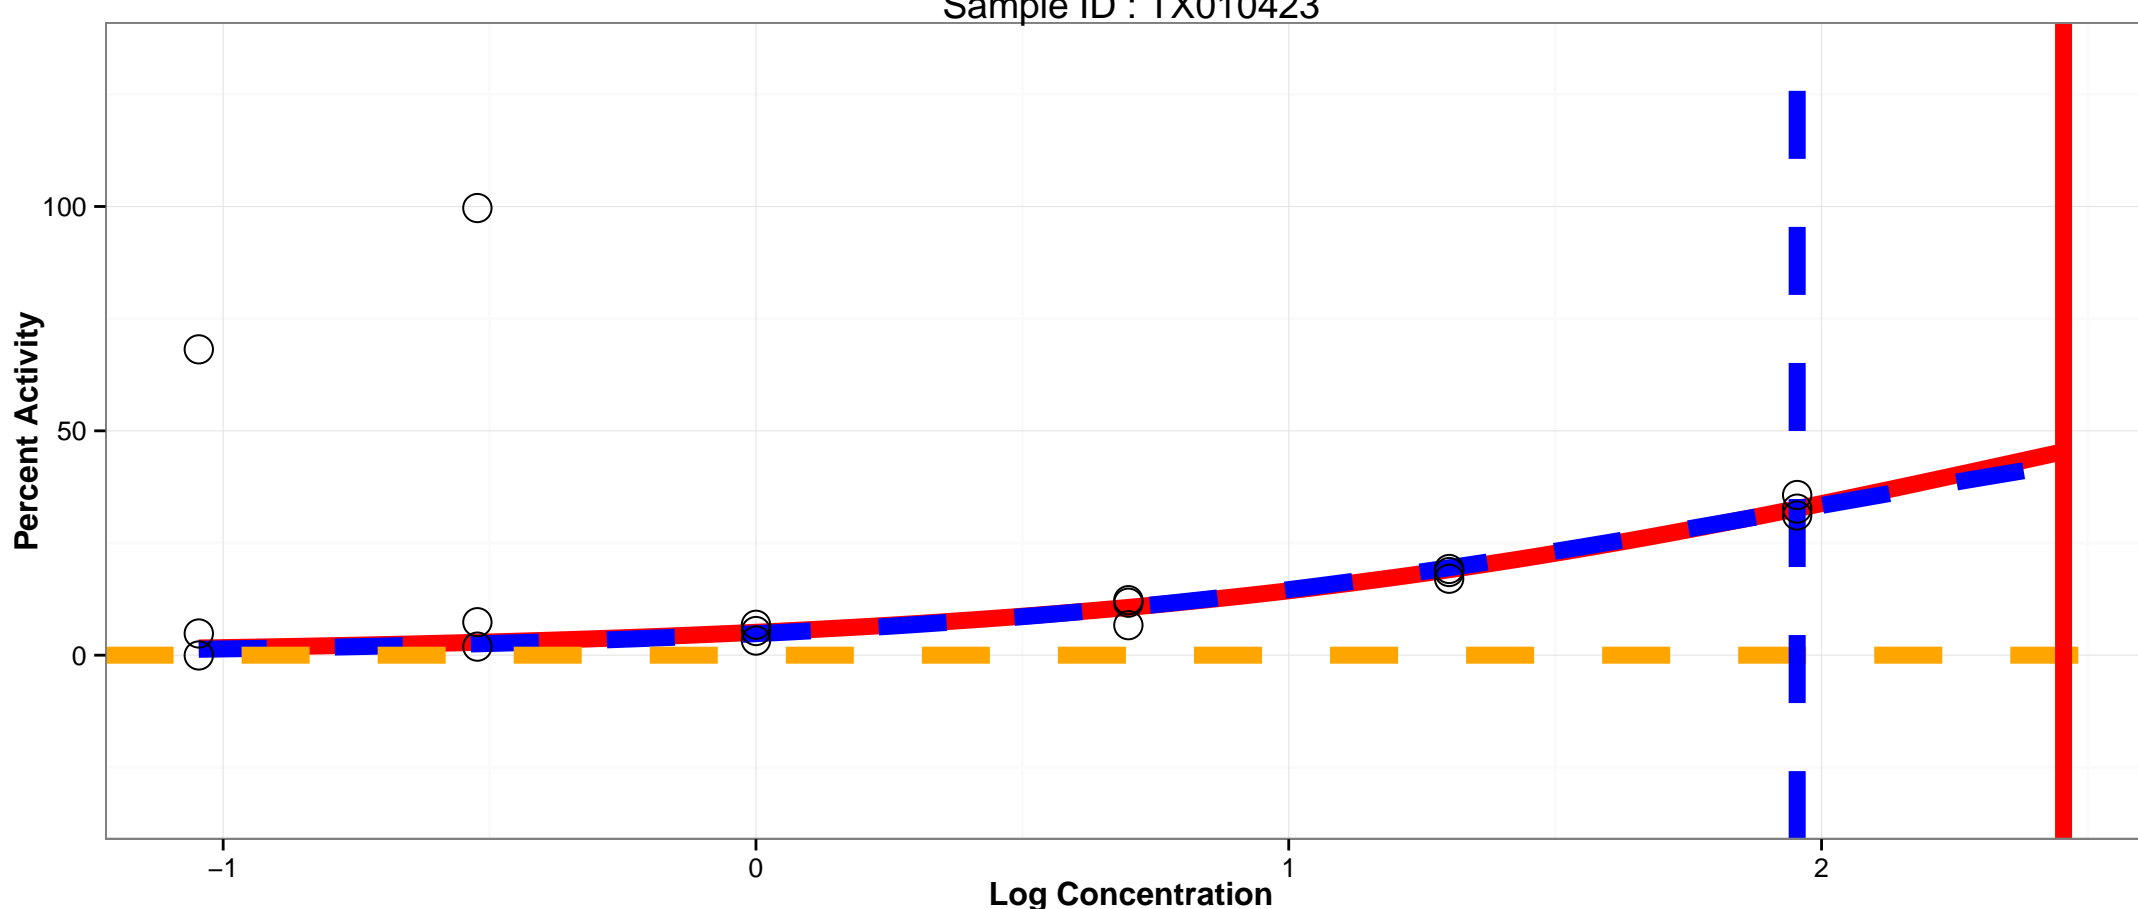

HILL MODEL

|     | tp   | ga   | gw    |
|-----|------|------|-------|
| val | 90.7 | 2.45 | 0.499 |
| sd  | 67.7 | 1.1  | 0.112 |

GAIN-LOSS MODEL

|     | tp   | ga   | gw    | la   | lw   |
|-----|------|------|-------|------|------|
| val | 64.8 | 1.95 | 0.562 | 3.94 | 15.3 |
| sd  | NA   | NA   | NA    | NA   | NA   |

|      | CNST   | HILL   | GNLS   |
|------|--------|--------|--------|
| AIC  | 174.06 | 143.96 | 148.77 |
| PROB | 0      | 0.92   | 0.08   |
| RMSE | 32.83  | 27.77  | 27.88  |

MAX\_MEAN : 36.3 MAX\_MED : 32.7 BMAD : 5.69  
COFF : 20 HIT-CALL : 1 FITC : 42 ACTP : 1  
FLAGS : 10

Assay ID 1509 (NHEERL\_HEK293T\_CellTiterGLO)  
Sample ID : TX010423

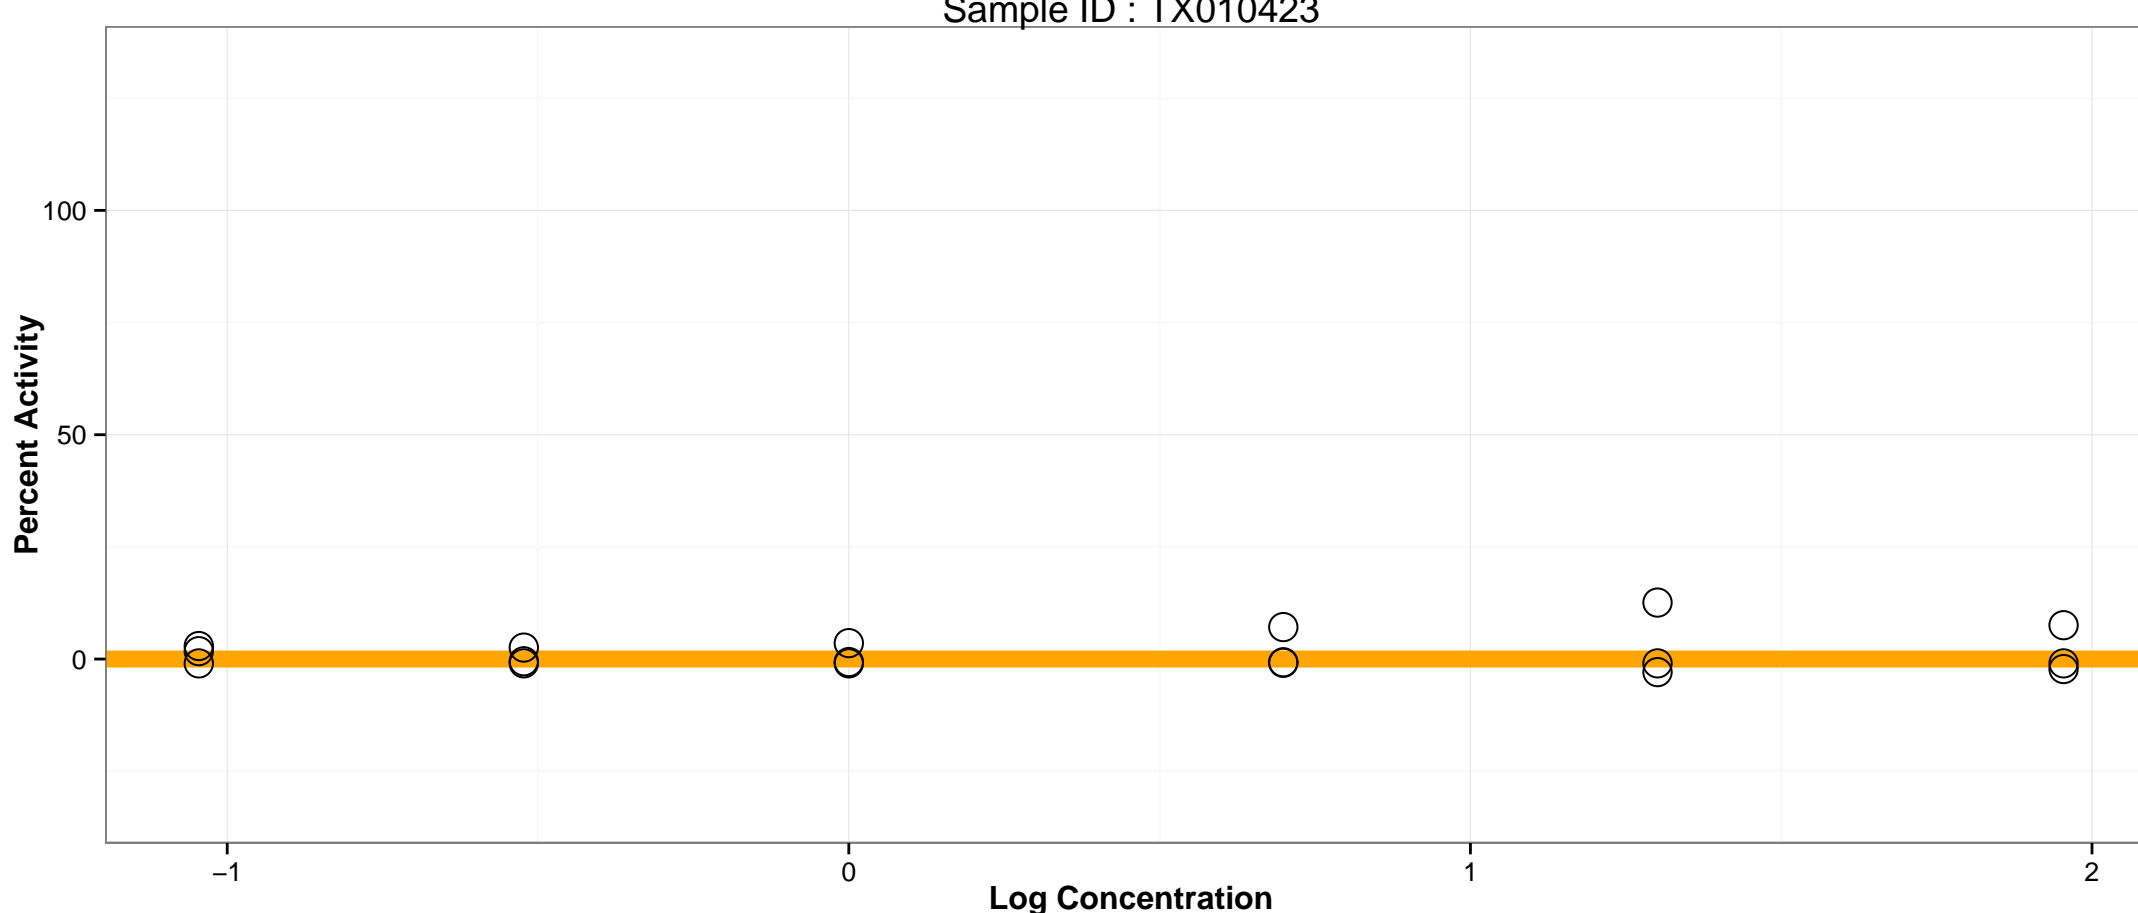

HILL MODEL

HILL MODEL: Not applicable

GAIN-LOSS MODEL

GNLS MODEL: Not applicable

|      | CNST   | HILL | GNLS |
|------|--------|------|------|
| AIC  | 100.59 | NA   | NA   |
| PROB | 1      | NA   | NA   |
| RMSE | 4.2    | NA   | NA   |

MAX\_MEAN : 2.92 MAX\_MED : 1.77 BMAD : 5.54  
COFF : 20 HIT-CALL : 0 FITC : 4 ACTP : 0  
FLAGS :

Assay ID 1848 (NHEERL\_Quantilum\_inhib\_2\_dn)  
Sample ID : TX010423

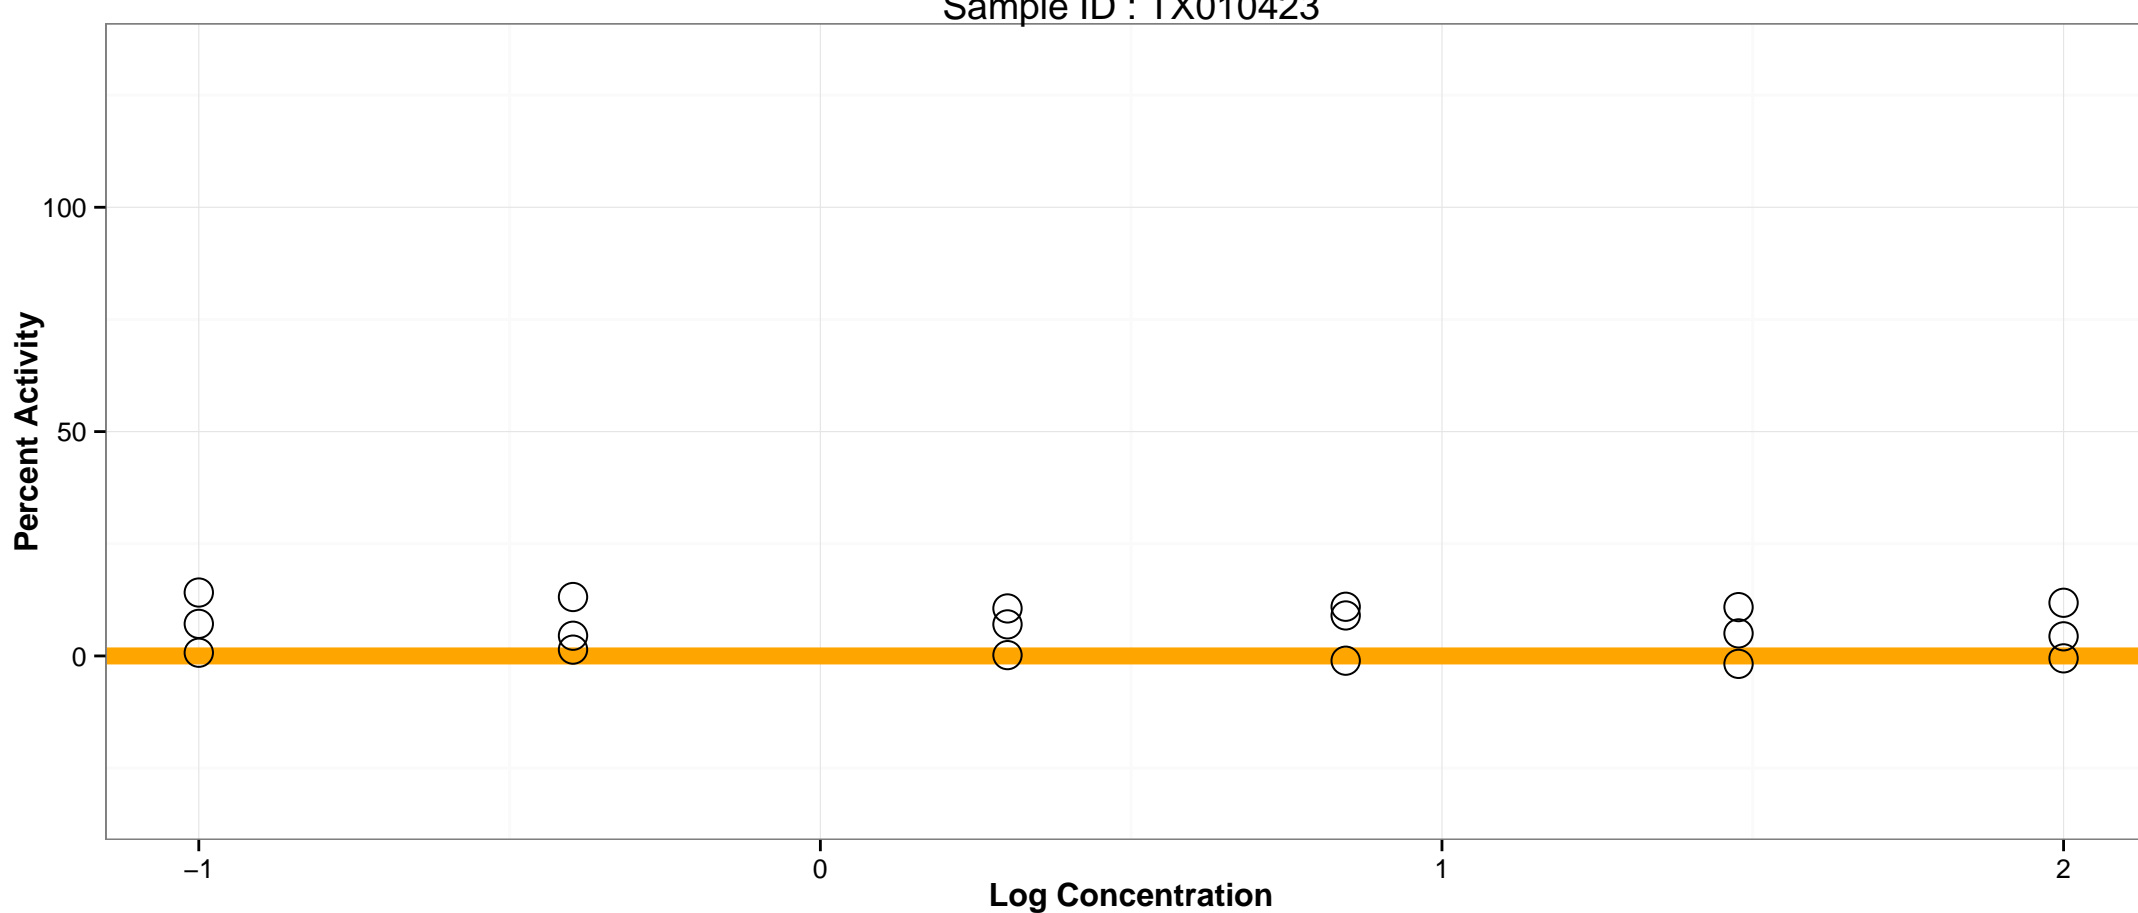

HILL MODEL

HILL MODEL: Not applicable

GAIN-LOSS MODEL

GNLS MODEL: Not applicable

|      | CNST   | HILL | GNLS |
|------|--------|------|------|
| AIC  | 129.56 | NA   | NA   |
| PROB | 1      | NA   | NA   |
| RMSE | 7.89   | NA   | NA   |

MAX\_MEAN : 7.34 MAX\_MED : 9.04 BMAD : 8.58  
COFF : 20 HIT-CALL : 0 FITC : 4 ACTP : 0  
FLAGS :

Chemical : 1-Hydroxypyrene  
CAS : 5315-79-7

Assay ID 1508 (NHEERL\_TPO\_AUR\_dn)  
Sample ID : TX010540

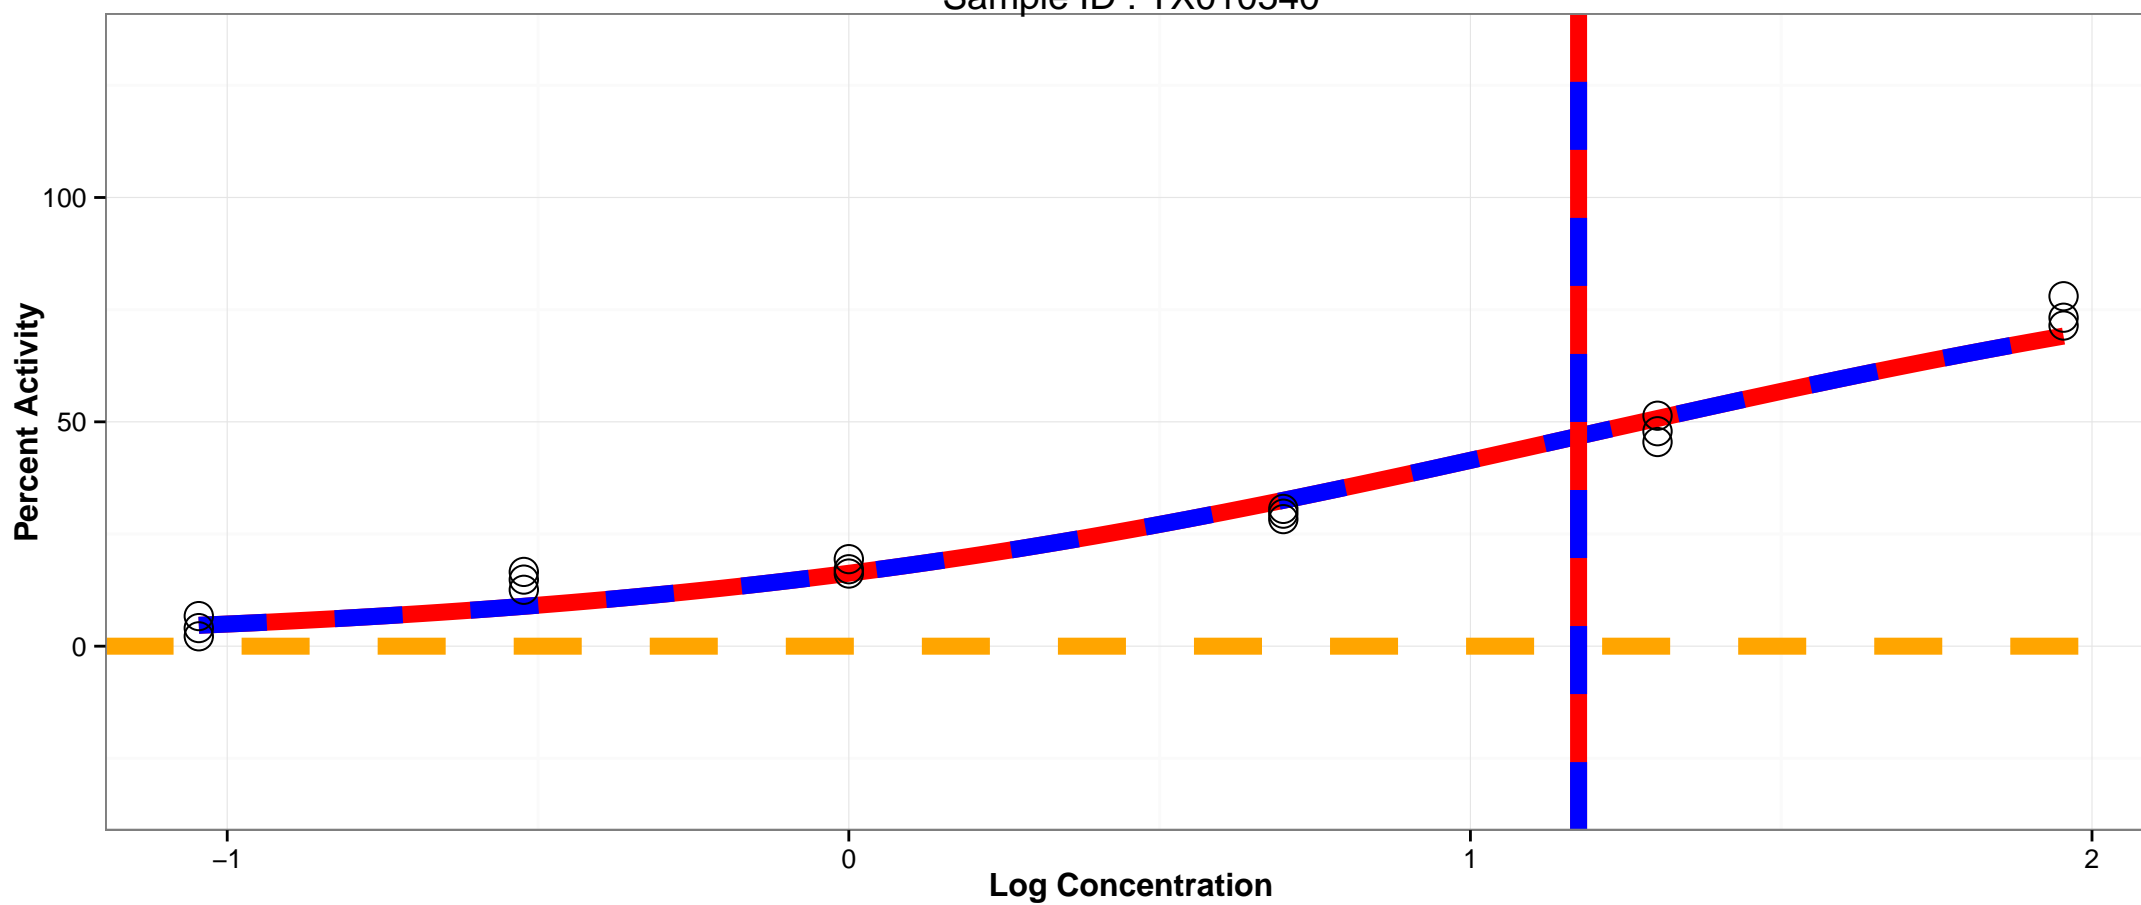

HILL MODEL

|     | tp   | ga    | gw     |
|-----|------|-------|--------|
| val | 93.6 | 1.17  | 0.577  |
| sd  | 12   | 0.213 | 0.0601 |

GAIN-LOSS MODEL

|     | tp   | ga   | gw    | la   | lw   |
|-----|------|------|-------|------|------|
| val | 93.6 | 1.17 | 0.577 | 3.28 | 13.8 |
| sd  | NA   | NA   | NA    | NA   | NA   |

|      | CNST   | HILL  | GNLS  |
|------|--------|-------|-------|
| AIC  | 186.45 | 110.9 | 114.9 |
| PROB | 0      | 0.88  | 0.12  |
| RMSE | 39.32  | 4.06  | 4.06  |

MAX\_MEAN : 74.2 MAX\_MED : 73.2 BMAD : 5.69  
COFF : 20 HIT-CALL : 1 FITC : 42 ACTP : 1  
FLAGS :

Assay ID 1509 (NHEERL\_HEK293T\_CellTiterGLO)  
Sample ID : TX010540

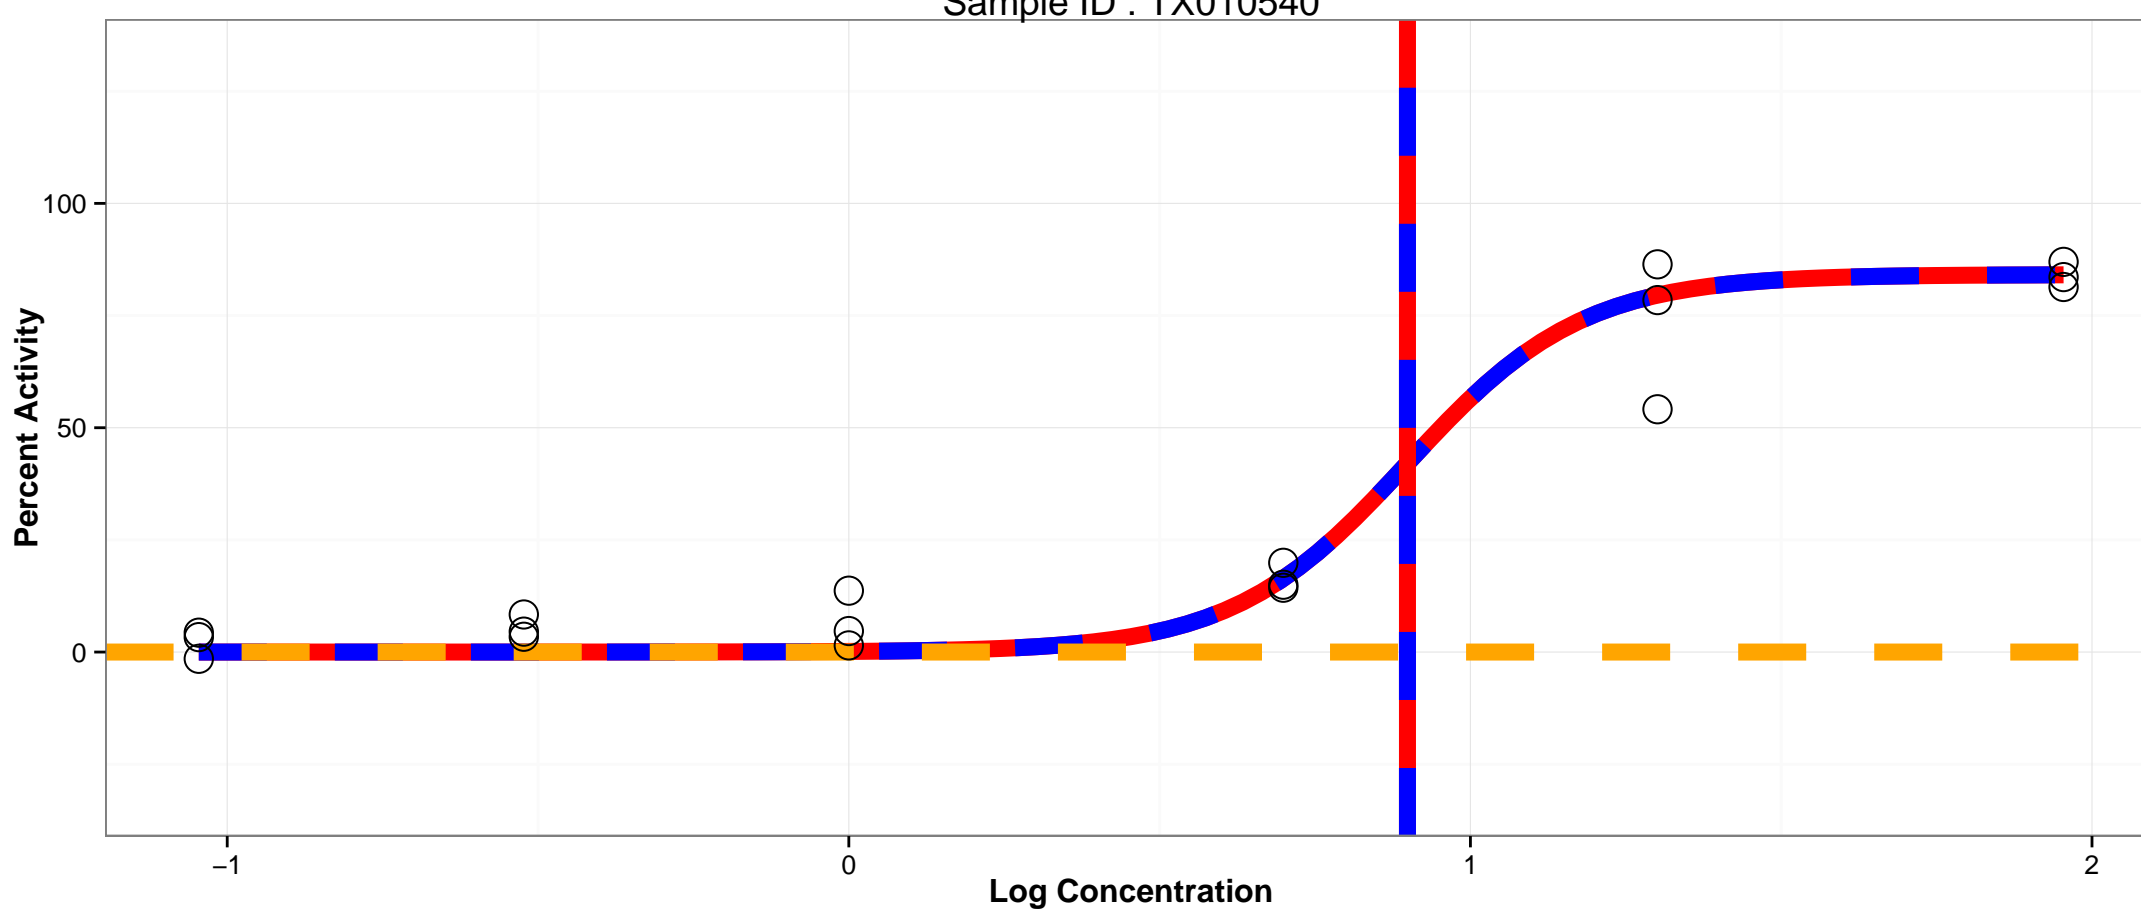

HILL MODEL

|     | tp   | ga     | gw    |
|-----|------|--------|-------|
| val | 84.1 | 0.899  | 3.08  |
| sd  | 2.67 | 0.0577 | 0.829 |

GAIN-LOSS MODEL

|     | tp   | ga    | gw   | la   | lw   |
|-----|------|-------|------|------|------|
| val | 84.1 | 0.899 | 3.08 | 2.63 | 11.5 |
| sd  | NA   | NA    | NA   | NA   | NA   |

|      | CNST   | HILL   | GNLS   |
|------|--------|--------|--------|
| AIC  | 190.88 | 126.74 | 130.74 |
| PROB | 0      | 0.88   | 0.12   |
| RMSE | 46.49  | 7.71   | 7.71   |

MAX\_MEAN : 84 MAX\_MED : 83.6 BMAD : 5.54  
COFF : 20 HIT-CALL : 1 FITC : 41 ACTP : 1  
FLAGS :

Assay ID 1848 (NHEERL\_QuantLum\_inhib\_2\_dn)  
Sample ID : TX010540

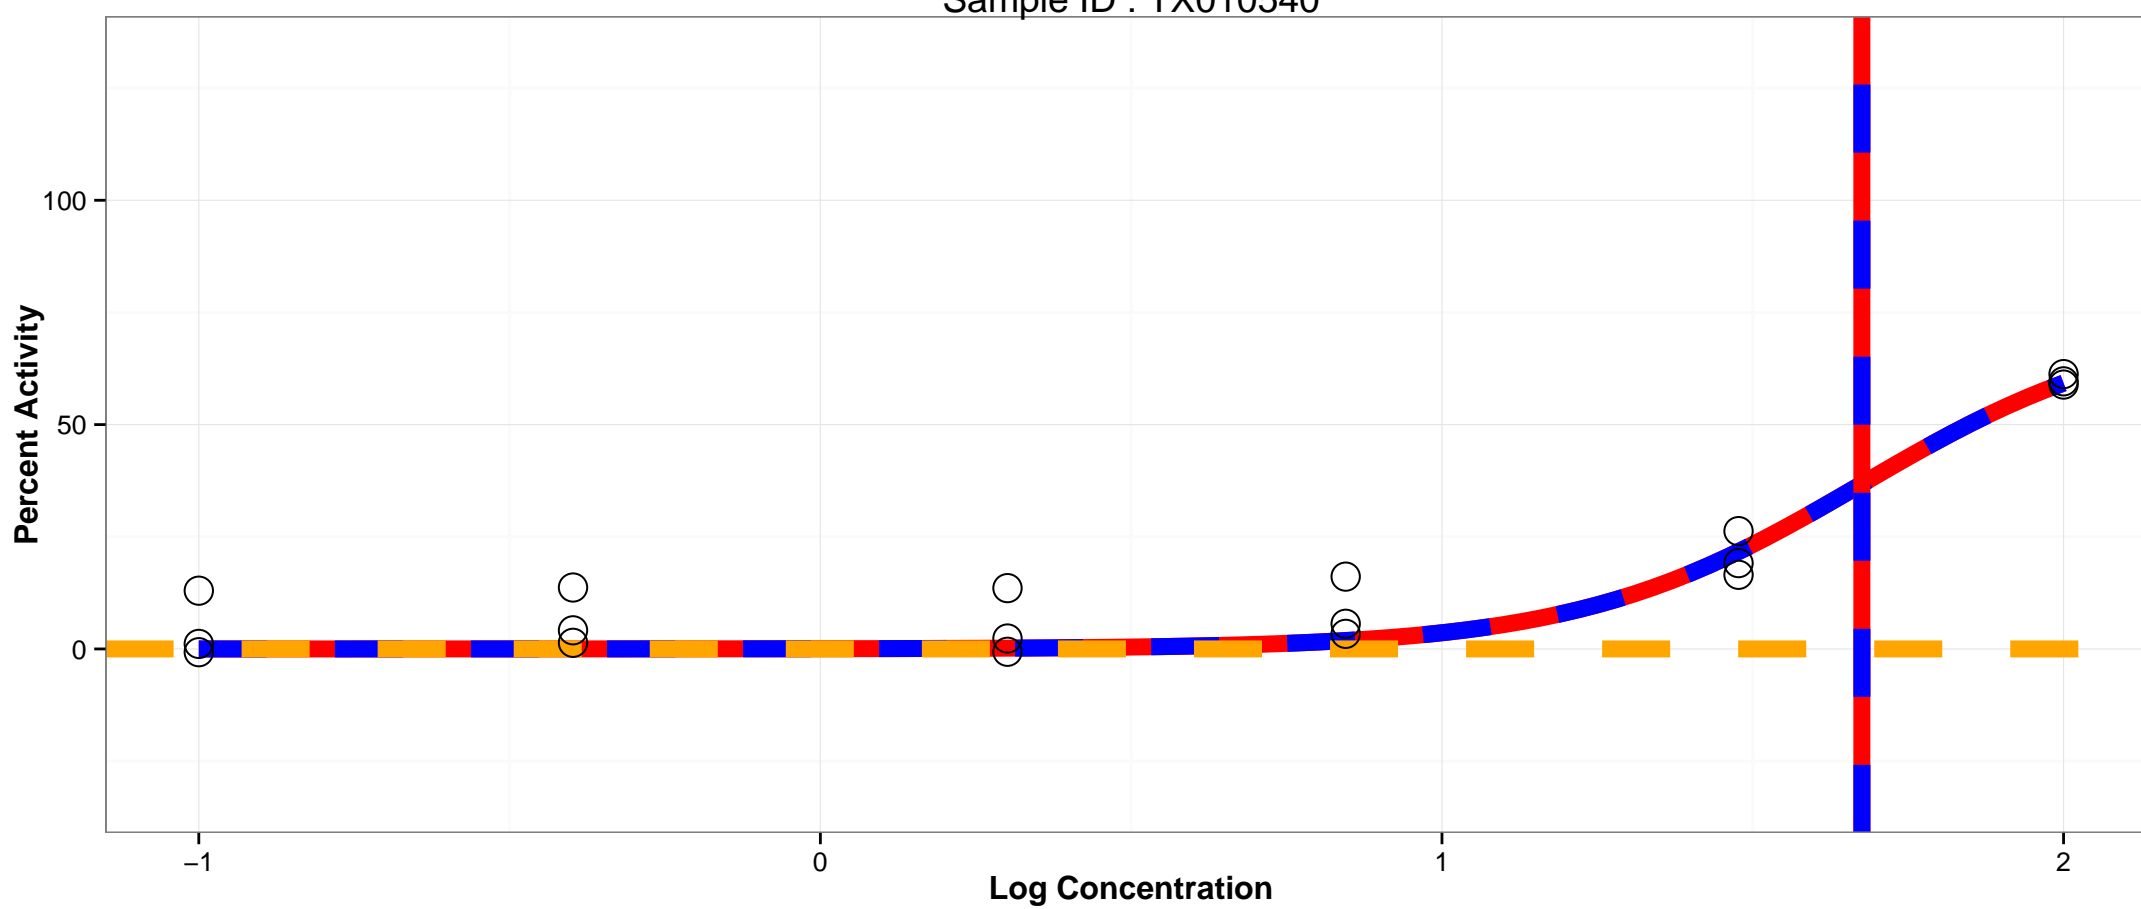

HILL MODEL

|     | tp   | ga   | gw   |
|-----|------|------|------|
| val | 73.5 | 1.68 | 1.91 |
| sd  | 21.6 | 0.18 | 1.02 |

GAIN-LOSS MODEL

|     | tp   | ga   | gw   | la   | lw   |
|-----|------|------|------|------|------|
| val | 73.5 | 1.68 | 1.91 | 2.98 | 14.4 |
| sd  | NA   | NA   | NA   | NA   | NA   |

|      | CNST   | HILL  | GNLS  |
|------|--------|-------|-------|
| AIC  | 168.75 | 126.8 | 130.8 |
| PROB | 0      | 0.88  | 0.12  |
| RMSE | 26.86  | 6.83  | 6.83  |

MAX\_MEAN : 60 MAX\_MED : 59.7 BMAD : 8.58  
COFF : 20 HIT-CALL : 1 FITC : 42 ACTP : 1  
FLAGS : 6

Assay ID 1508 (NHEERL\_TPO\_AUR\_dn)  
Sample ID : TX011590

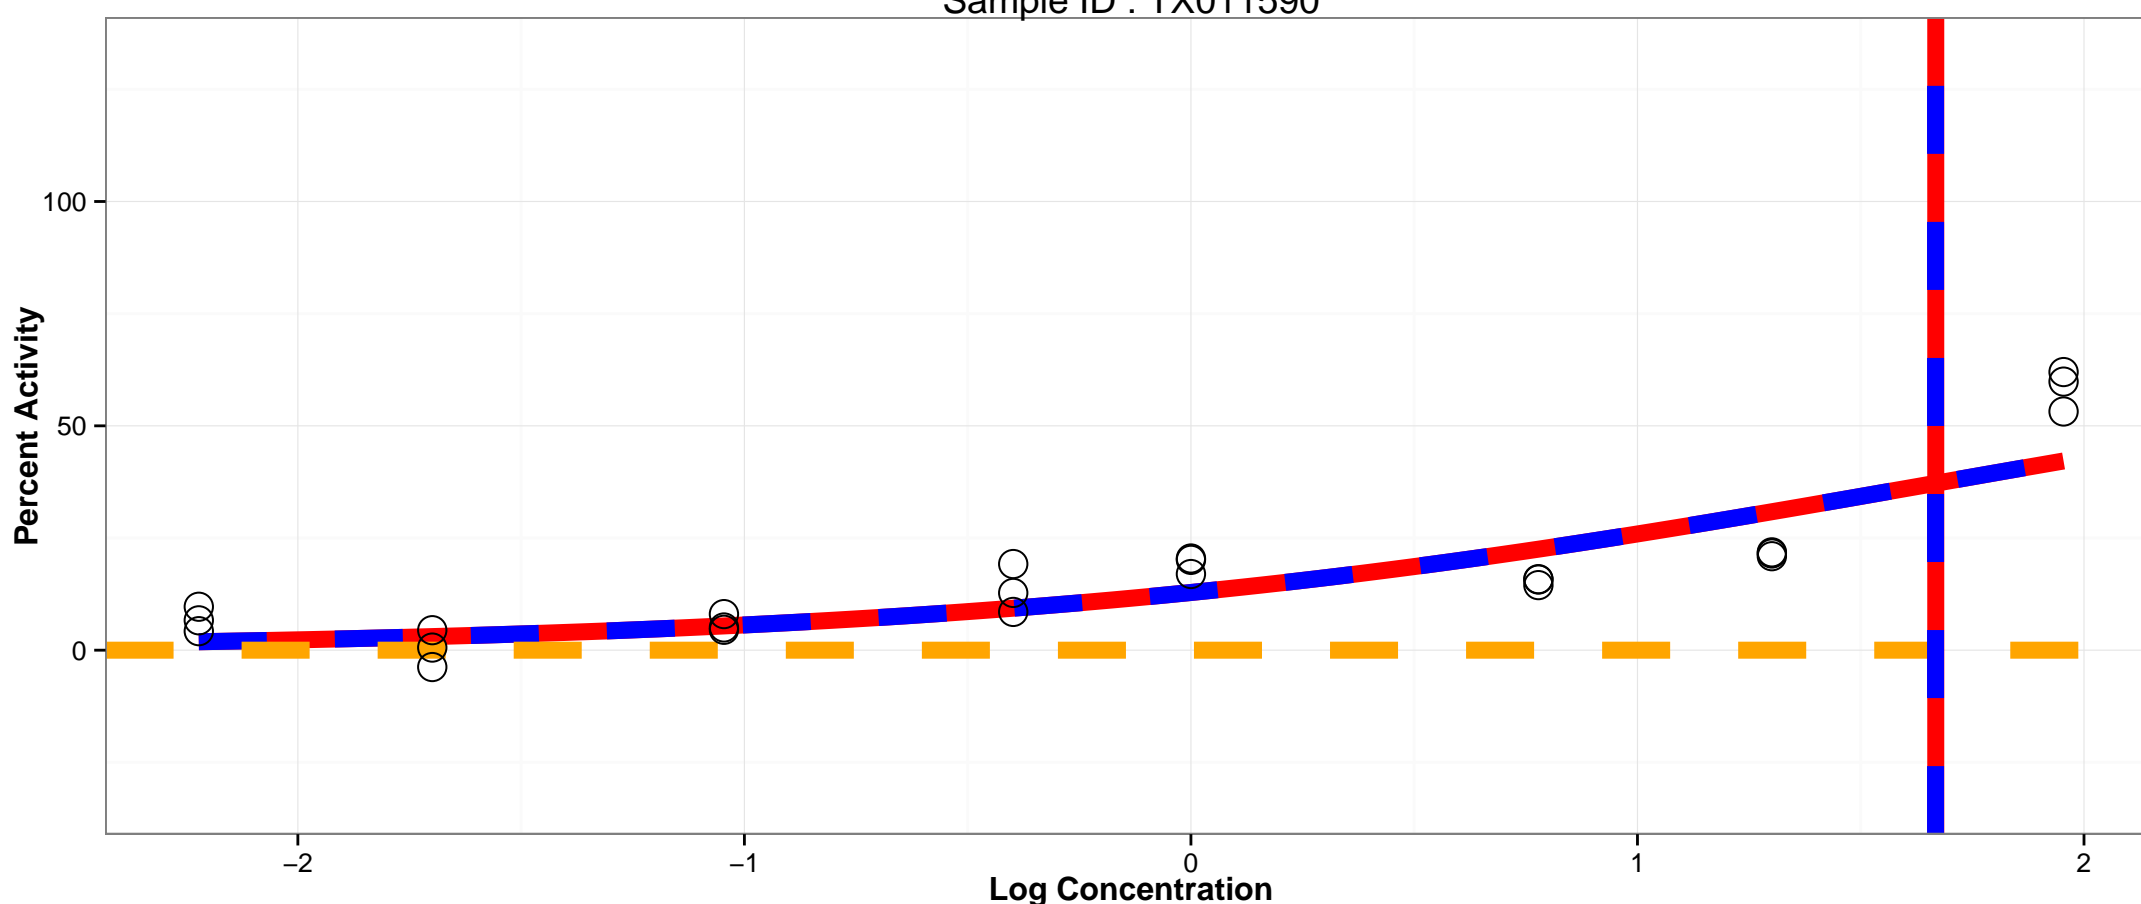

HILL MODEL

|     | tp   | ga   | gw    |
|-----|------|------|-------|
| val | 74.4 | 1.67 | 0.408 |
| sd  | 212  | 2.6  | 0.563 |

GAIN-LOSS MODEL

|     | tp   | ga   | gw    | la  | lw  |
|-----|------|------|-------|-----|-----|
| val | 74.4 | 1.67 | 0.408 | 3.6 | 8.1 |
| sd  | NA   | NA   | NA    | NA  | NA  |

|      | CNST   | HILL   | GNLS   |
|------|--------|--------|--------|
| AIC  | 221.21 | 178.98 | 182.98 |
| PROB | 0      | 0.88   | 0.12   |
| RMSE | 24.47  | 8.26   | 8.26   |

MAX\_MEAN : 58.4 MAX\_MED : 59.9 BMAD : 5.69  
COFF : 20 HIT-CALL : 1 FITC : 42 ACTP : 1  
FLAGS :

Assay ID 1509 (NHEERL\_HEK293T\_CellTiterGLO)  
Sample ID : TX011590

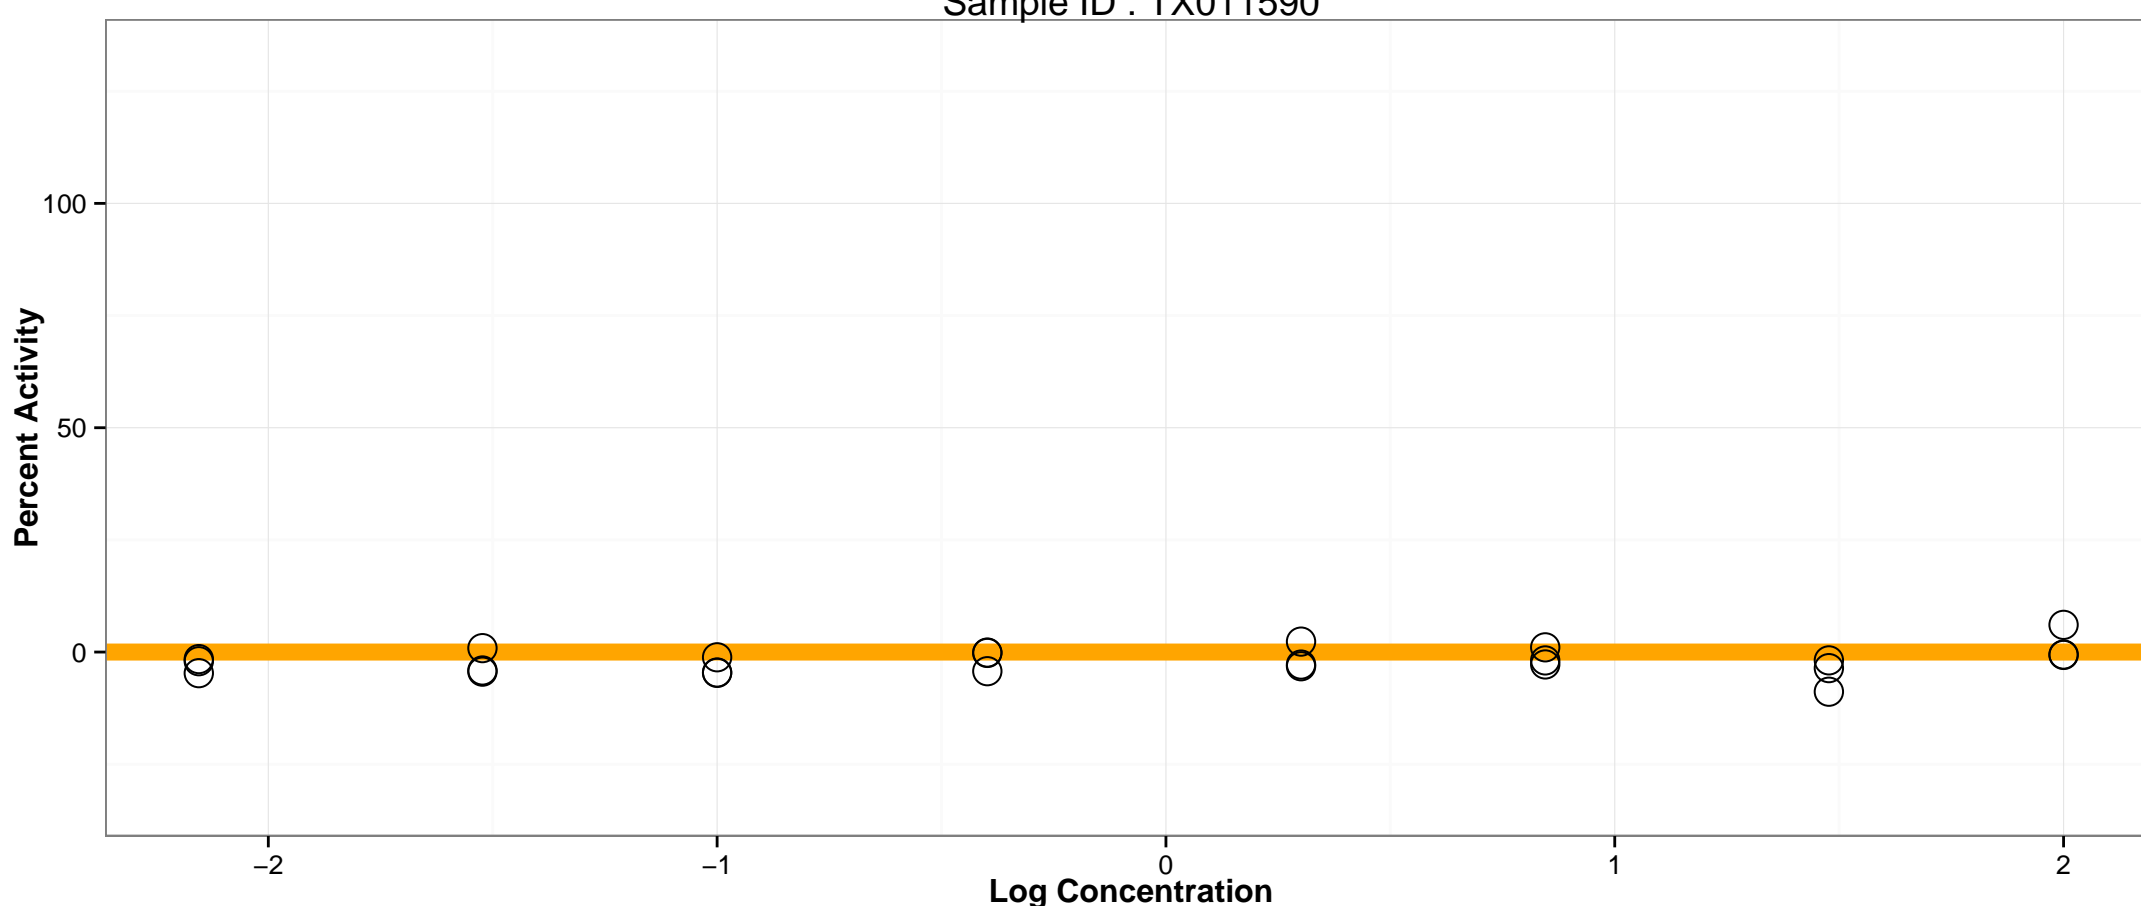

HILL MODEL

HILL MODEL: Not applicable

GAIN-LOSS MODEL

GNLS MODEL: Not applicable

|      | CNST   | HILL | GNLS |
|------|--------|------|------|
| AIC  | 131.83 | NA   | NA   |
| PROB | 1      | NA   | NA   |
| RMSE | 3.5    | NA   | NA   |

MAX\_MEAN : 1.63 MAX\_MED : -0.182 BMAD : 5.54  
COFF : 20 HIT-CALL : 0 FITC : 4 ACTP : 0  
FLAGS :

Assay ID 1848 (NHEERL\_Quantilum\_inhib\_2\_dn)  
Sample ID : TX011590

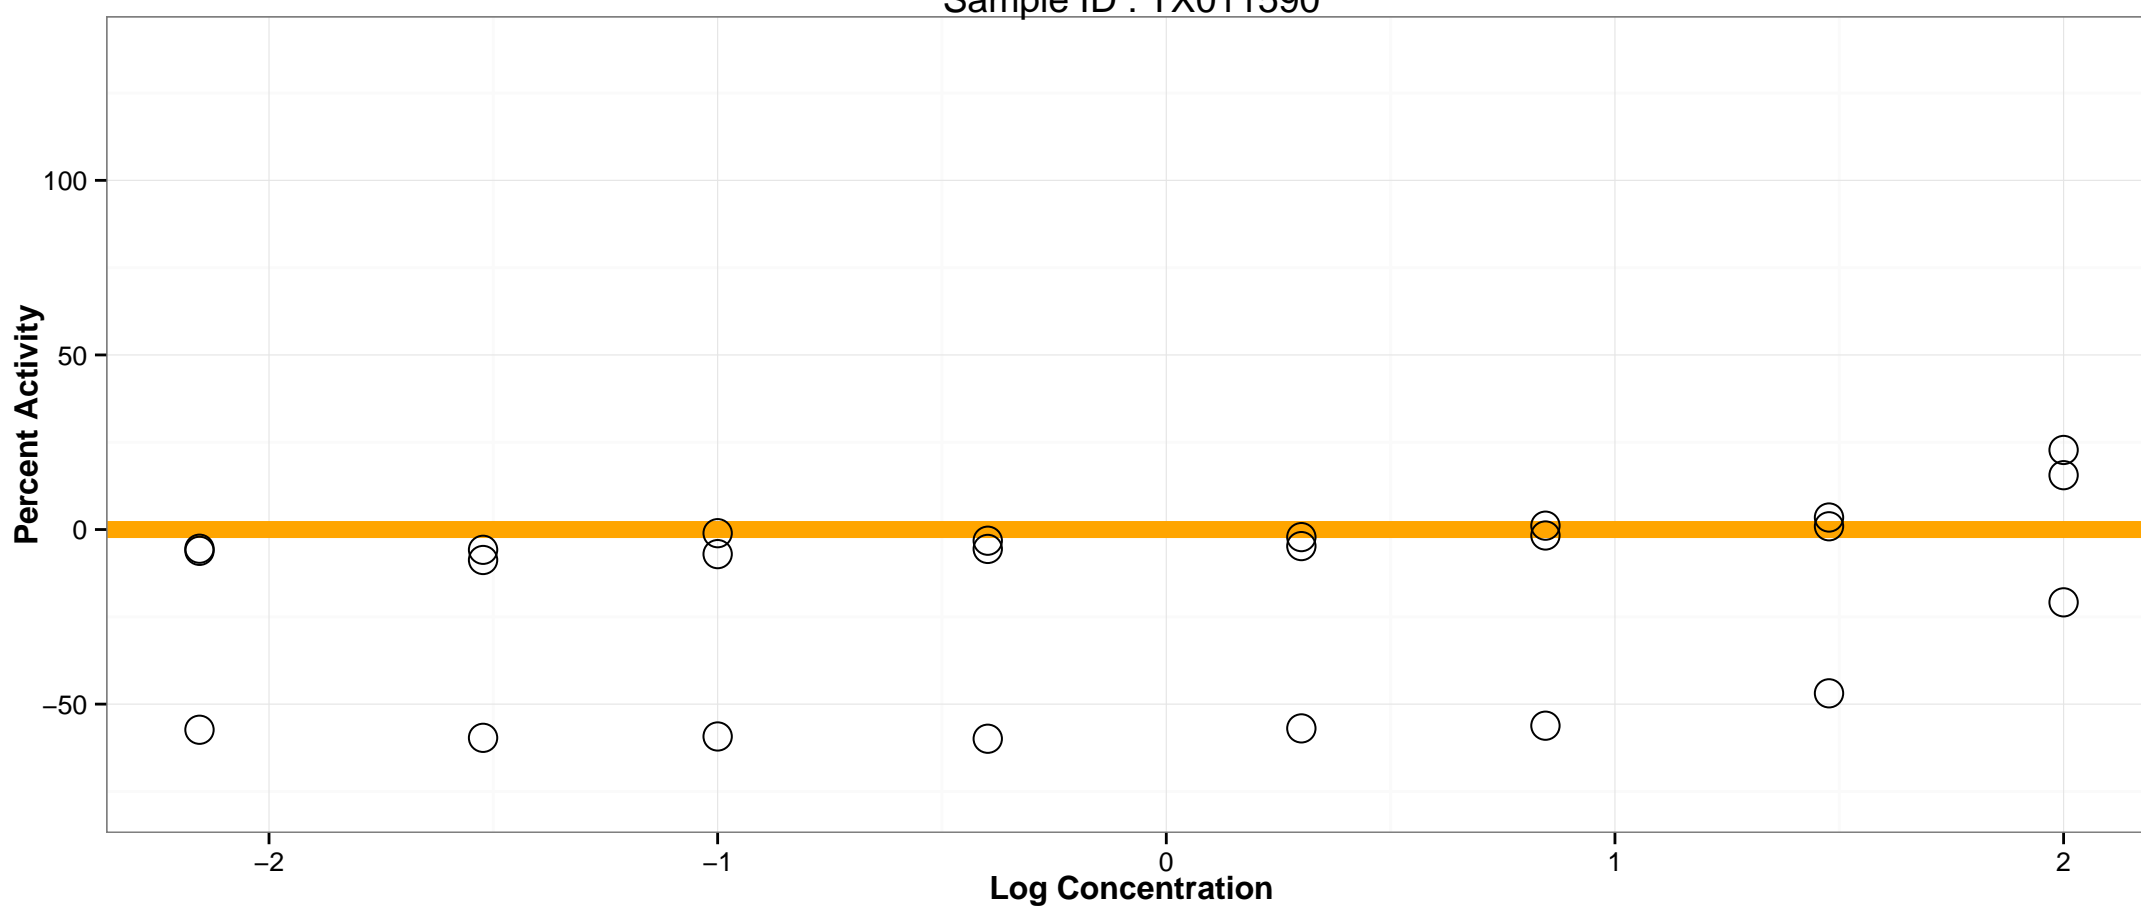

HILL MODEL

HILL MODEL: Not applicable

GAIN-LOSS MODEL

GNLS MODEL: Not applicable

|      | CNST   | HILL | GNLS |
|------|--------|------|------|
| AIC  | 235.12 | NA   | NA   |
| PROB | 1      | NA   | NA   |
| RMSE | 31.65  | NA   | NA   |

MAX\_MEAN : 5.85 MAX\_MED : 15.6 BMAD : 8.58  
COFF : 20 HIT-CALL : 0 FITC : 4 ACTP : 0  
FLAGS : 10

Chemical : Piperonyl butoxide  
CAS : 51-03-6

Assay ID 1508 (NHEERL\_TPO\_AUR\_dn)  
Sample ID : TX011594

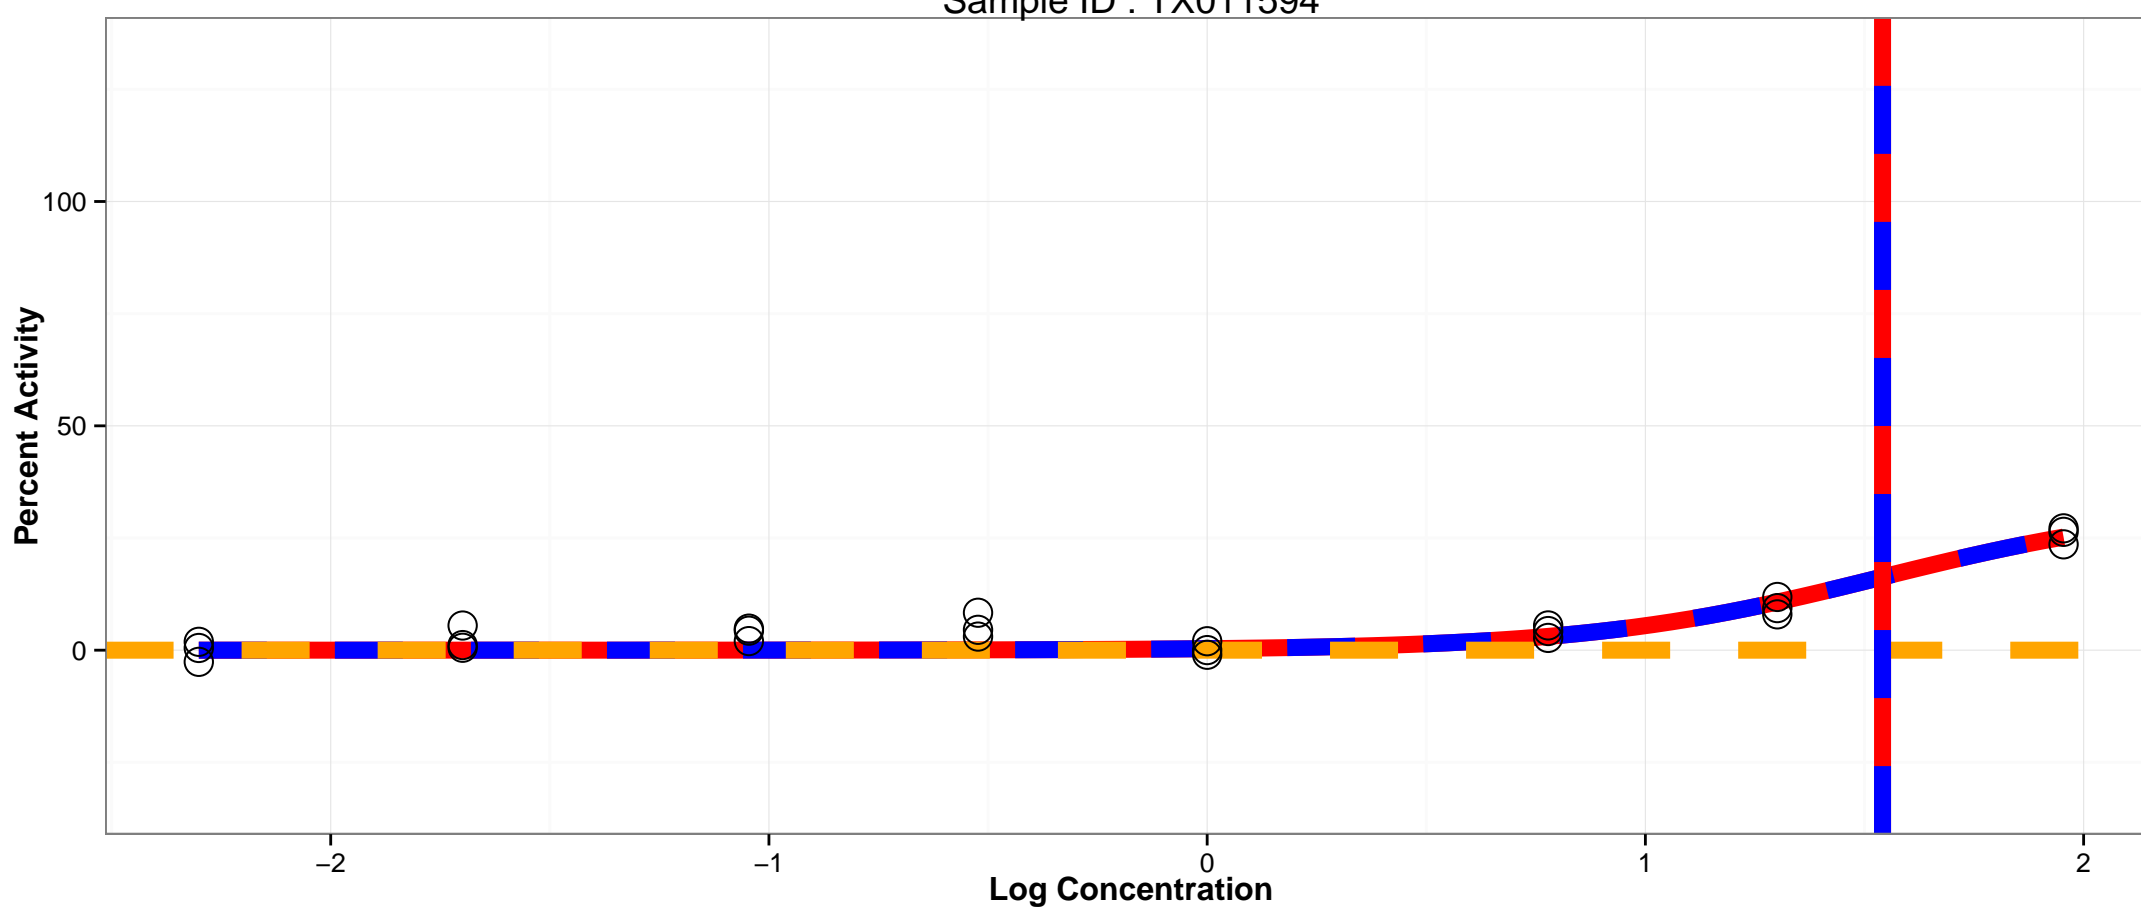

HILL MODEL

|     | tp   | ga    | gw    |
|-----|------|-------|-------|
| val | 32.6 | 1.54  | 1.29  |
| sd  | 6.62 | 0.181 | 0.366 |

GAIN-LOSS MODEL

|     | tp   | ga    | gw    | la   | lw    |
|-----|------|-------|-------|------|-------|
| val | 32.6 | 1.54  | 1.29  | 2.48 | 16.2  |
| sd  | 6.62 | 0.181 | 0.366 | 378  | 11500 |

|      | CNST   | HILL   | GNLS   |
|------|--------|--------|--------|
| AIC  | 176.26 | 128.72 | 132.72 |
| PROB | 0      | 0.88   | 0.12   |
| RMSE | 10.28  | 3      | 3      |

MAX\_MEAN : 25.7 MAX\_MED : 26.4 BMAD : 5.69  
COFF : 20 HIT-CALL : 1 FITC : 42 ACTP : 1  
FLAGS : 6

Assay ID 1509 (NHEERL\_HEK293T\_CellTiterGLO)  
Sample ID : TX011594

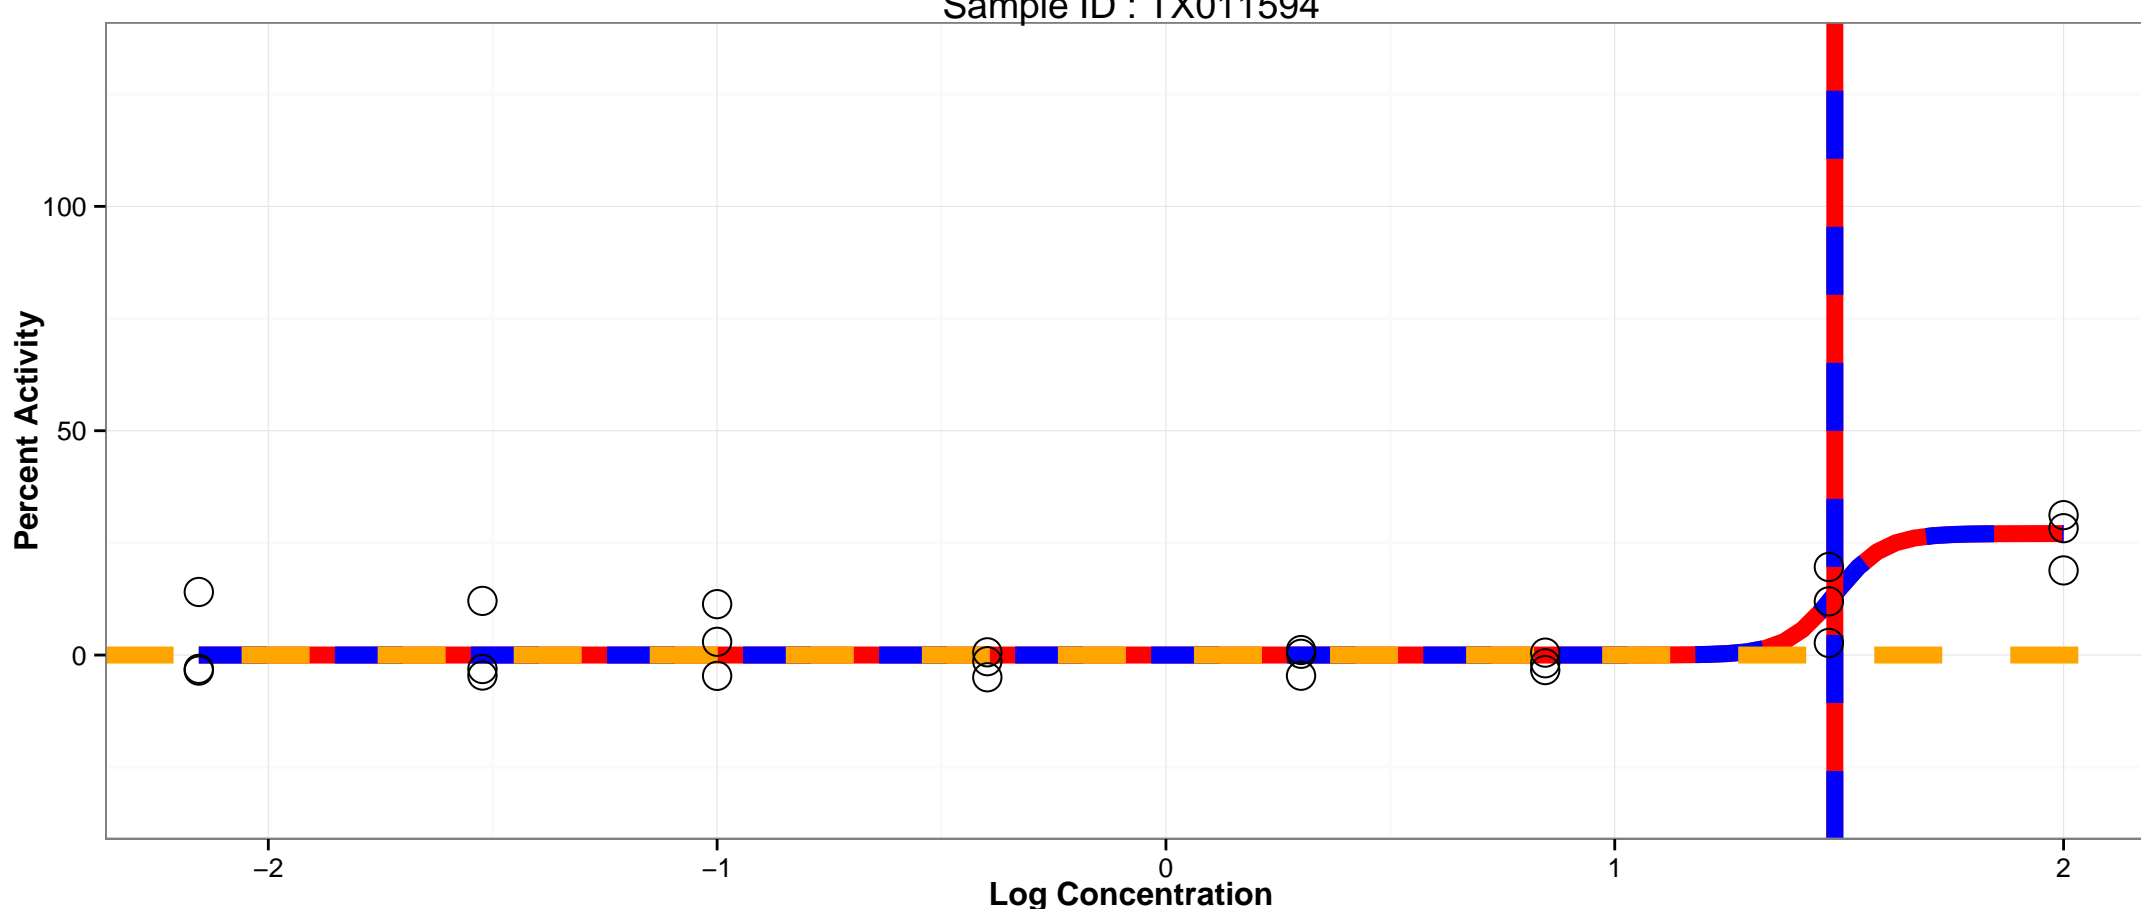

HILL MODEL

|     | tp   | ga    | gw   |
|-----|------|-------|------|
| val | 27.1 | 1.49  | 8    |
| sd  | 3.35 | 0.126 | 74.3 |

GAIN-LOSS MODEL

|     | tp   | ga   | gw | la   | lw   |
|-----|------|------|----|------|------|
| val | 27.1 | 1.49 | 8  | 3.32 | 4.23 |
| sd  | NA   | NA   | NA | NA   | NA   |

|      | CNST   | HILL   | GNLS   |
|------|--------|--------|--------|
| AIC  | 185.07 | 161.91 | 165.91 |
| PROB | 0      | 0.88   | 0.12   |
| RMSE | 11.7   | 5.95   | 5.95   |

MAX\_MEAN : 26.1 MAX\_MED : 28.3 BMAD : 5.54  
COFF : 20 HIT-CALL : 1 FITC : 41 ACTP : 1  
FLAGS : 6

Assay ID 1848 (NHEERL\_Quantilum\_inhib\_2\_dn)  
Sample ID : TX011594

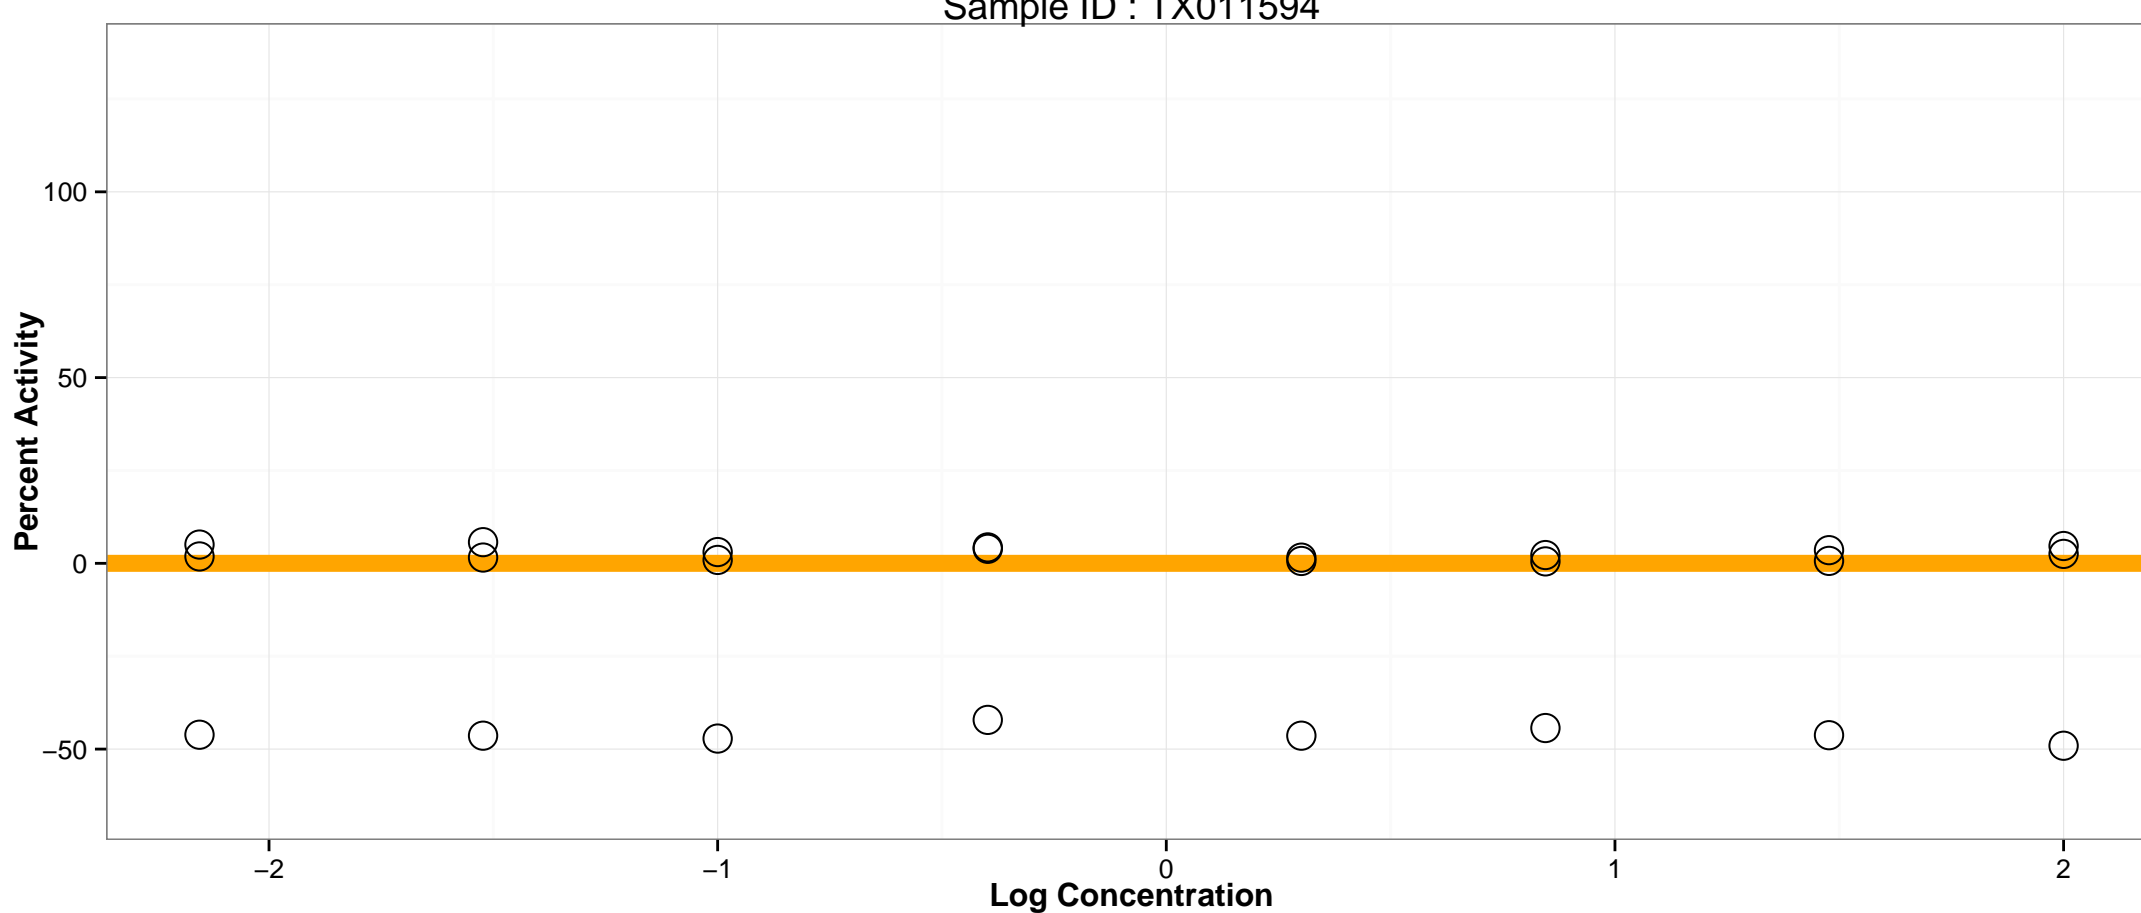

HILL MODEL

HILL MODEL: Not applicable

GAIN-LOSS MODEL

GNLS MODEL: Not applicable

|      | CNST   | HILL | GNLS |
|------|--------|------|------|
| AIC  | 227.01 | NA   | NA   |
| PROB | 1      | NA   | NA   |
| RMSE | 26.69  | NA   | NA   |

MAX\_MEAN : -11.3 MAX\_MED : 3.92 BMAD : 8.58  
COFF : 20 HIT-CALL : 0 FITC : 4 ACTP : 0  
FLAGS : 10

Chemical : 3-Hydroxyfluorene  
CAS : 6344-67-8

Assay ID 1508 (NHEERL\_TPO\_AUR\_dn)  
Sample ID : TX011627

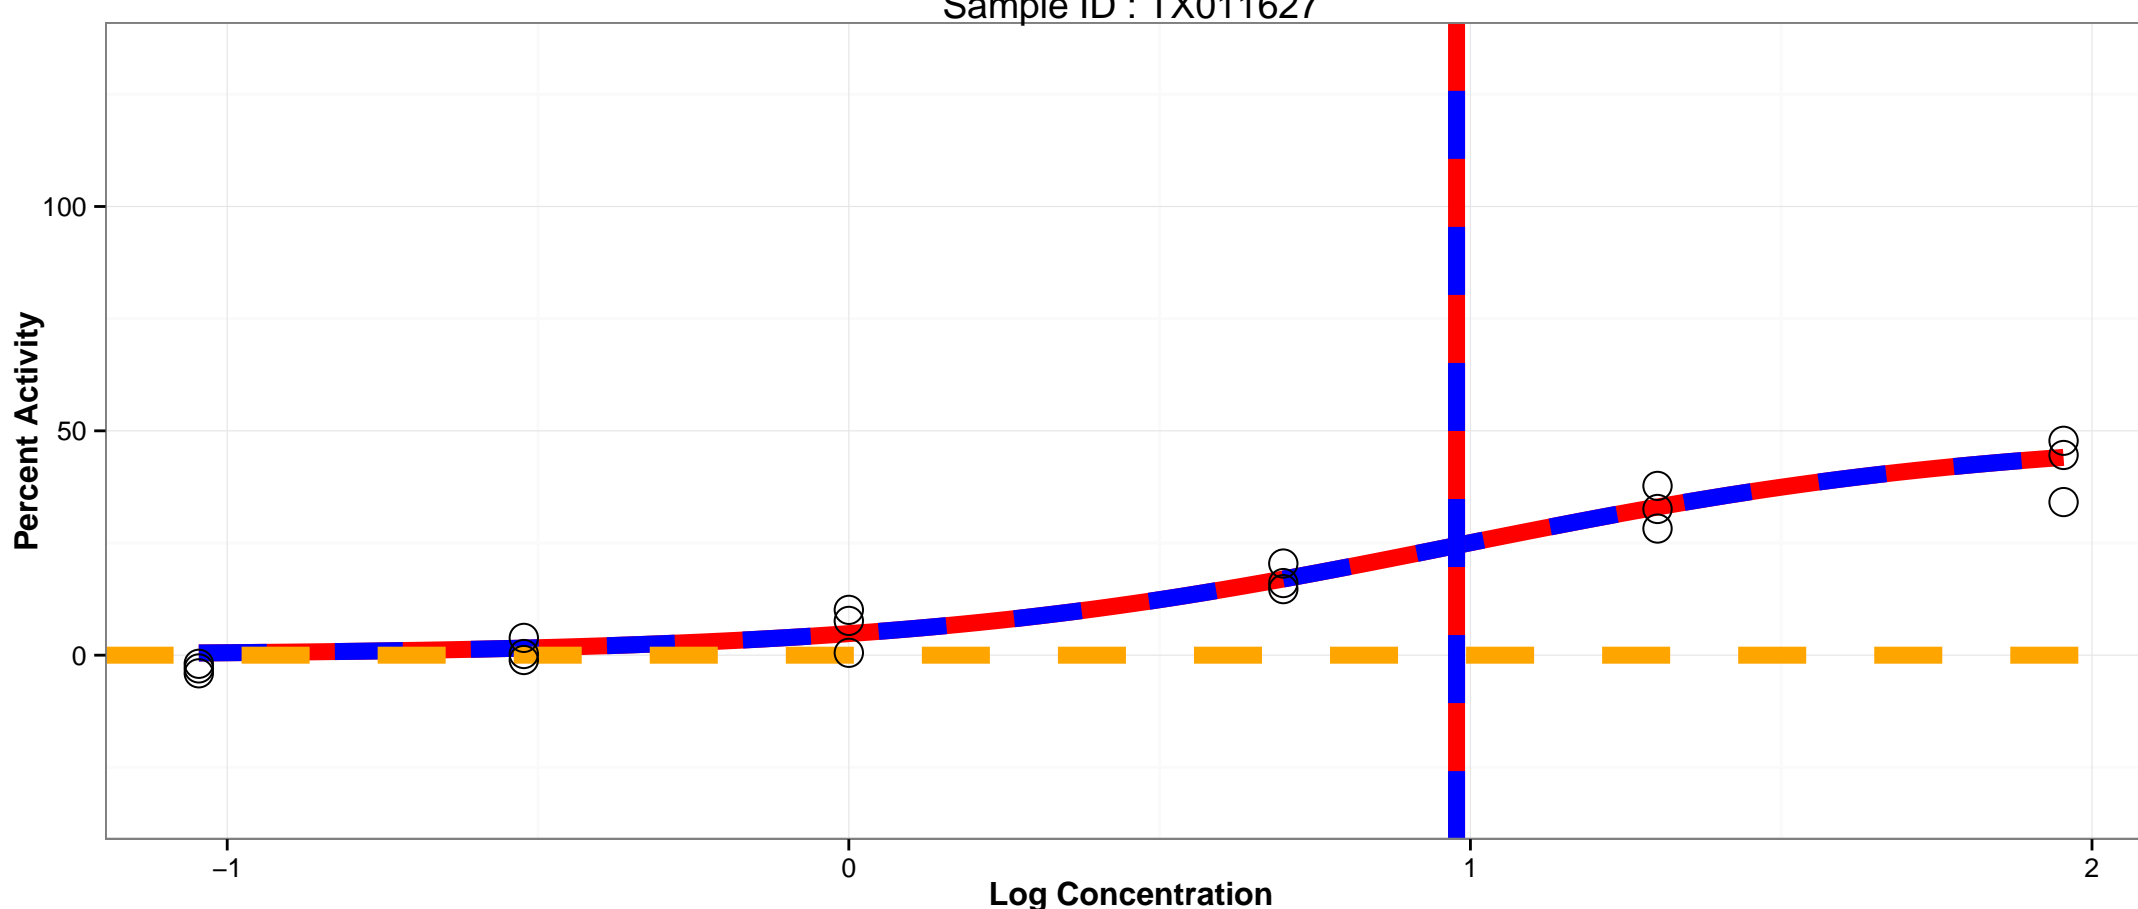

HILL MODEL

|     | tp   | ga    | gw    |
|-----|------|-------|-------|
| val | 48.9 | 0.978 | 0.984 |
| sd  | 5.61 | 0.148 | 0.202 |

GAIN-LOSS MODEL

|     | tp   | ga    | gw    | la   | lw   |
|-----|------|-------|-------|------|------|
| val | 48.9 | 0.978 | 0.984 | 3.78 | 4.13 |
| sd  | 5.61 | 0.148 | 0.202 | 1750 | 3960 |

|      | CNST   | HILL   | GNLS   |
|------|--------|--------|--------|
| AIC  | 167.22 | 109.99 | 113.99 |
| PROB | 0      | 0.88   | 0.12   |
| RMSE | 23.36  | 3.96   | 3.96   |

MAX\_MEAN : 42.2 MAX\_MED : 44.6 BMAD : 5.69  
COFF : 20 HIT-CALL : 1 FITC : 42 ACTP : 1  
FLAGS :

Assay ID 1509 (NHEERL\_HEK293T\_CellTiterGLO)  
Sample ID : TX011627

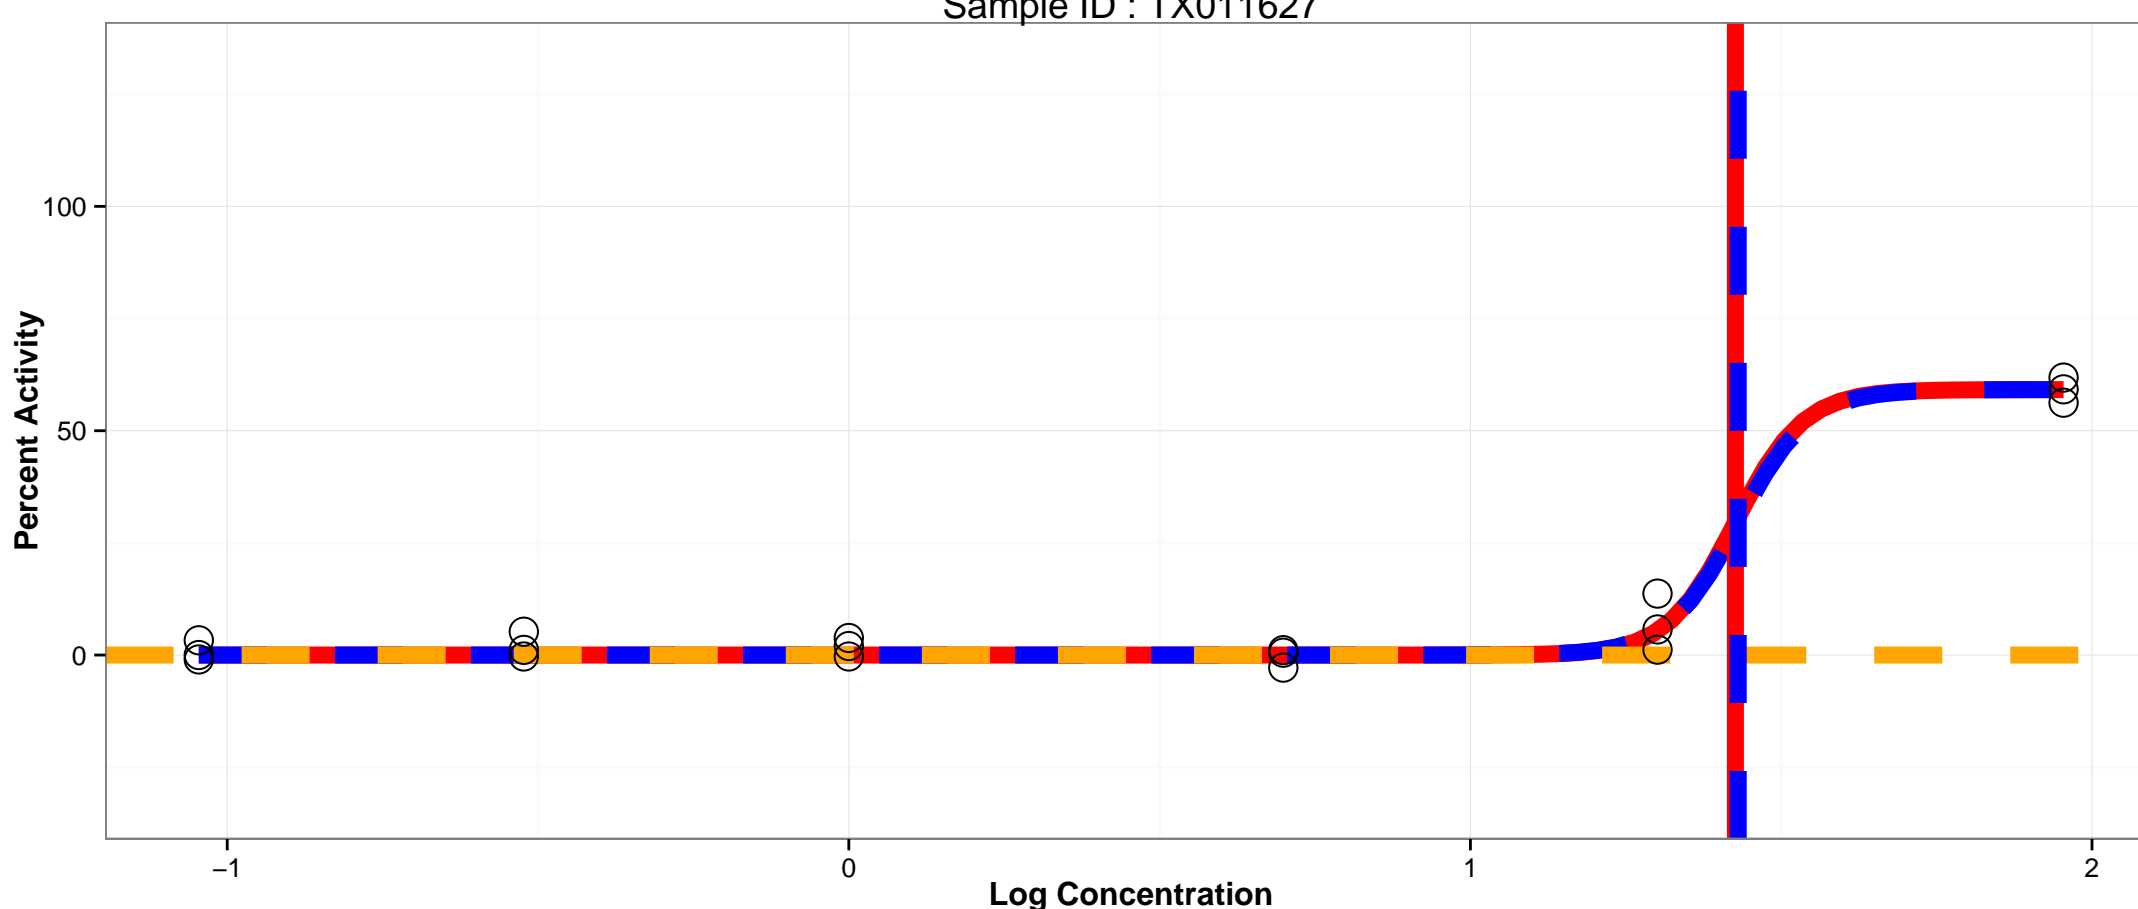

HILL MODEL

|     | tp   | ga   | gw   |
|-----|------|------|------|
| val | 59.2 | 1.43 | 7.97 |
| sd  | NA   | NA   | NA   |

GAIN-LOSS MODEL

|     | tp   | ga   | gw   | la   | lw   |
|-----|------|------|------|------|------|
| val | 59.2 | 1.43 | 7.69 | 2.48 | 8.49 |
| sd  | NA   | NA   | NA   | NA   | NA   |

|      | CNST  | HILL  | GNLS   |
|------|-------|-------|--------|
| AIC  | 157.1 | 98.95 | 102.95 |
| PROB | 0     | 0.88  | 0.12   |
| RMSE | 24.48 | 3.08  | 3.08   |

MAX\_MEAN : 59.1 MAX\_MED : 59.2 BMAD : 5.54  
COFF : 20 HIT-CALL : 1 FITC : 41 ACTP : 1  
FLAGS : 6

Assay ID 1848 (NHEERL\_Quantilum\_inhib\_2\_dn)  
Sample ID : TX011627

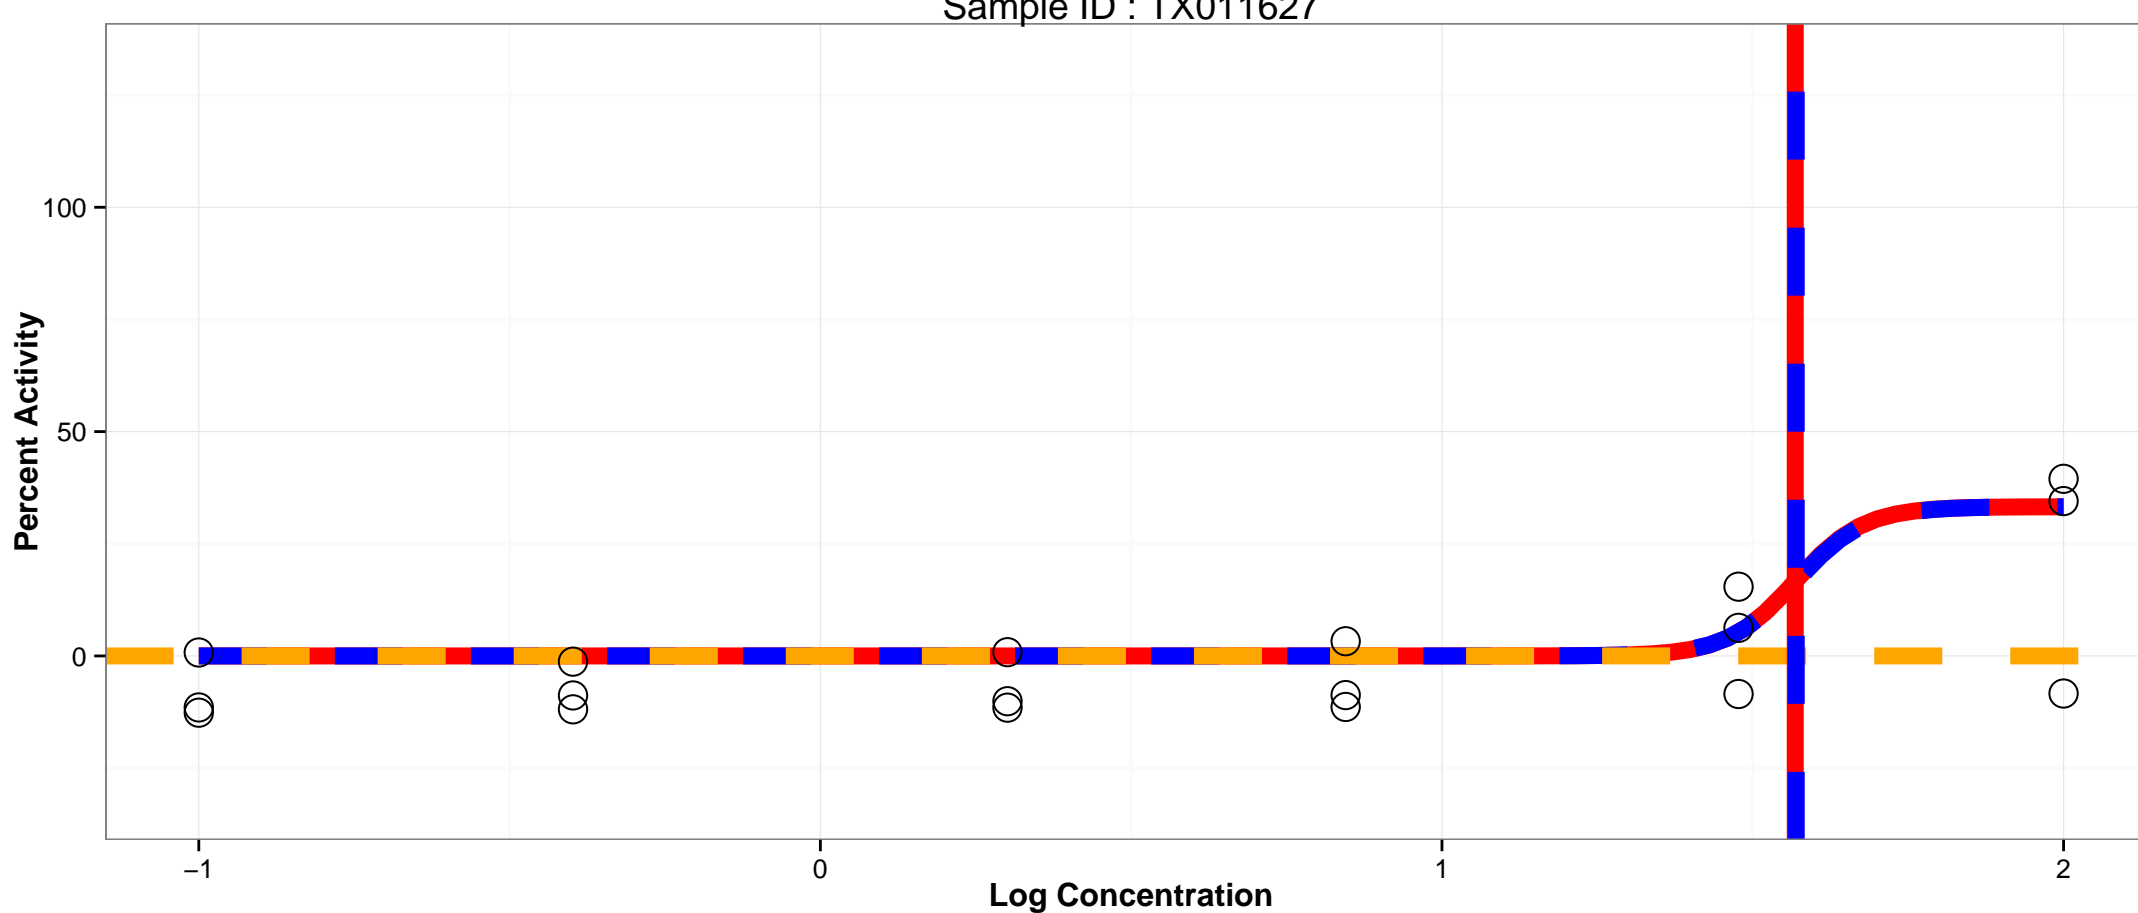

HILL MODEL

|     | tp   | ga   | gw   |
|-----|------|------|------|
| val | 33.3 | 1.57 | 7.98 |
| sd  | NA   | NA   | NA   |

GAIN-LOSS MODEL

|     | tp   | ga   | gw   | la   | lw   |
|-----|------|------|------|------|------|
| val | 33.3 | 1.57 | 7.85 | 3.99 | 10.4 |
| sd  | NA   | NA   | NA   | NA   | NA   |

|      | CNST   | HILL   | GNLS   |
|------|--------|--------|--------|
| AIC  | 149.65 | 148.53 | 152.53 |
| PROB | 0.33   | 0.59   | 0.08   |
| RMSE | 15.15  | 12.97  | 12.97  |

MAX\_MEAN : 21.9 MAX\_MED : 34.5 BMAD : 8.58  
COFF : 20 HIT-CALL : 1 FITC : 41 ACTP : 0.666  
FLAGS : 6; 11; 16

Assay ID 1508 (NHEERL\_TPO\_AUR\_dn)  
Sample ID : TX011658

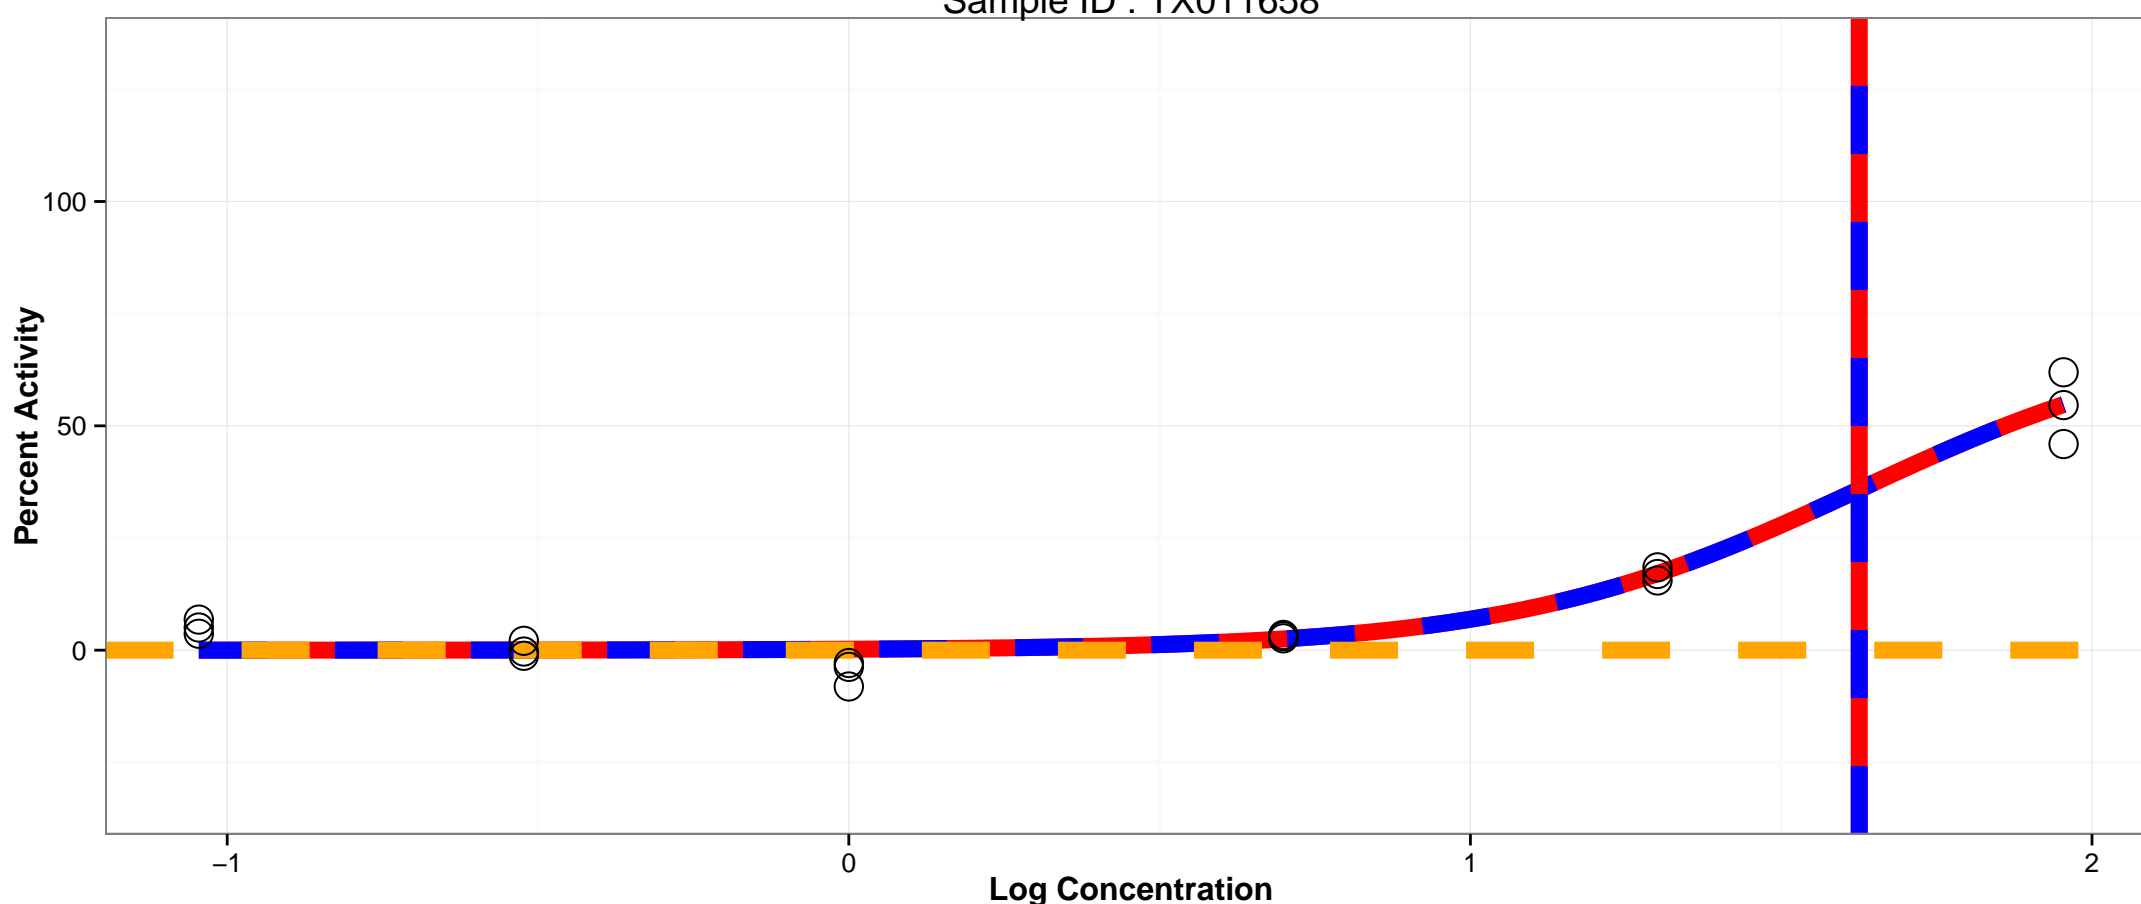

HILL MODEL

|     | tp   | ga    | gw    |
|-----|------|-------|-------|
| val | 71.6 | 1.63  | 1.55  |
| sd  | 20.8 | 0.223 | 0.511 |

GAIN-LOSS MODEL

|     | tp   | ga   | gw   | la   | lw |
|-----|------|------|------|------|----|
| val | 71.6 | 1.63 | 1.55 | 3.91 | 11 |
| sd  | NA   | NA   | NA   | NA   | NA |

|      | CNST   | HILL   | GNLS   |
|------|--------|--------|--------|
| AIC  | 161.51 | 111.11 | 115.11 |
| PROB | 0      | 0.88   | 0.12   |
| RMSE | 23.59  | 4.21   | 4.21   |

MAX\_MEAN : 54.2 MAX\_MED : 54.6 BMAD : 5.69  
COFF : 20 HIT-CALL : 1 FITC : 42 ACTP : 1  
FLAGS : 6

Assay ID 1509 (NHEERL\_HEK293T\_CellTiterGLO)  
Sample ID : TX011658

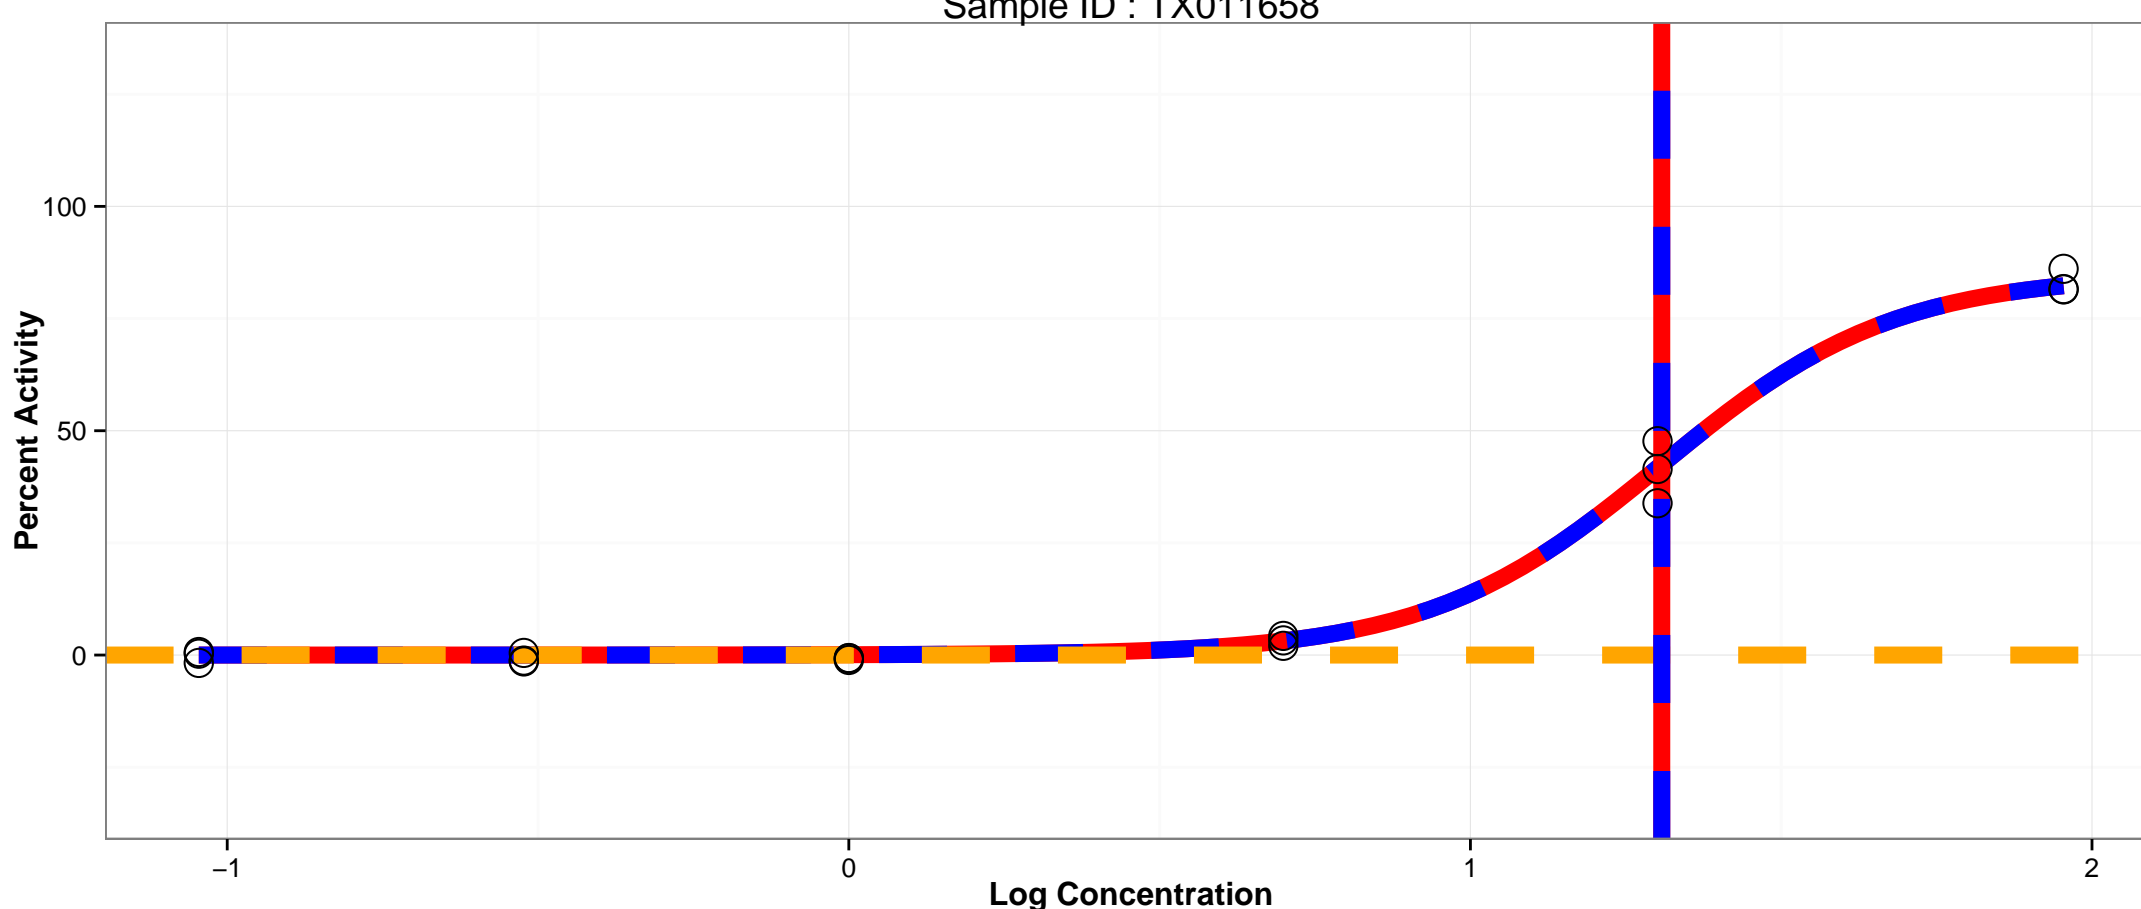

HILL MODEL

|     | tp   | ga    | gw    |
|-----|------|-------|-------|
| val | 84.9 | 1.31  | 2.32  |
| sd  | 1.54 | 0.017 | 0.215 |

GAIN-LOSS MODEL

|     | tp   | ga    | gw    | la    | lw     |
|-----|------|-------|-------|-------|--------|
| val | 84.9 | 1.31  | 2.32  | 2.96  | 10.4   |
| sd  | 1.54 | 0.017 | 0.215 | 64600 | 673000 |

|      | CNST   | HILL  | GNLS  |
|------|--------|-------|-------|
| AIC  | 180.81 | 87.91 | 91.91 |
| PROB | 0      | 0.88  | 0.12  |
| RMSE | 37.93  | 2.64  | 2.64  |

MAX\_MEAN : 83.1 MAX\_MED : 81.6 BMAD : 5.54  
COFF : 20 HIT-CALL : 1 FITC : 41 ACTP : 1  
FLAGS :

Assay ID 1848 (NHEERL\_Quantilum\_inhib\_2\_dn)  
Sample ID : TX011658

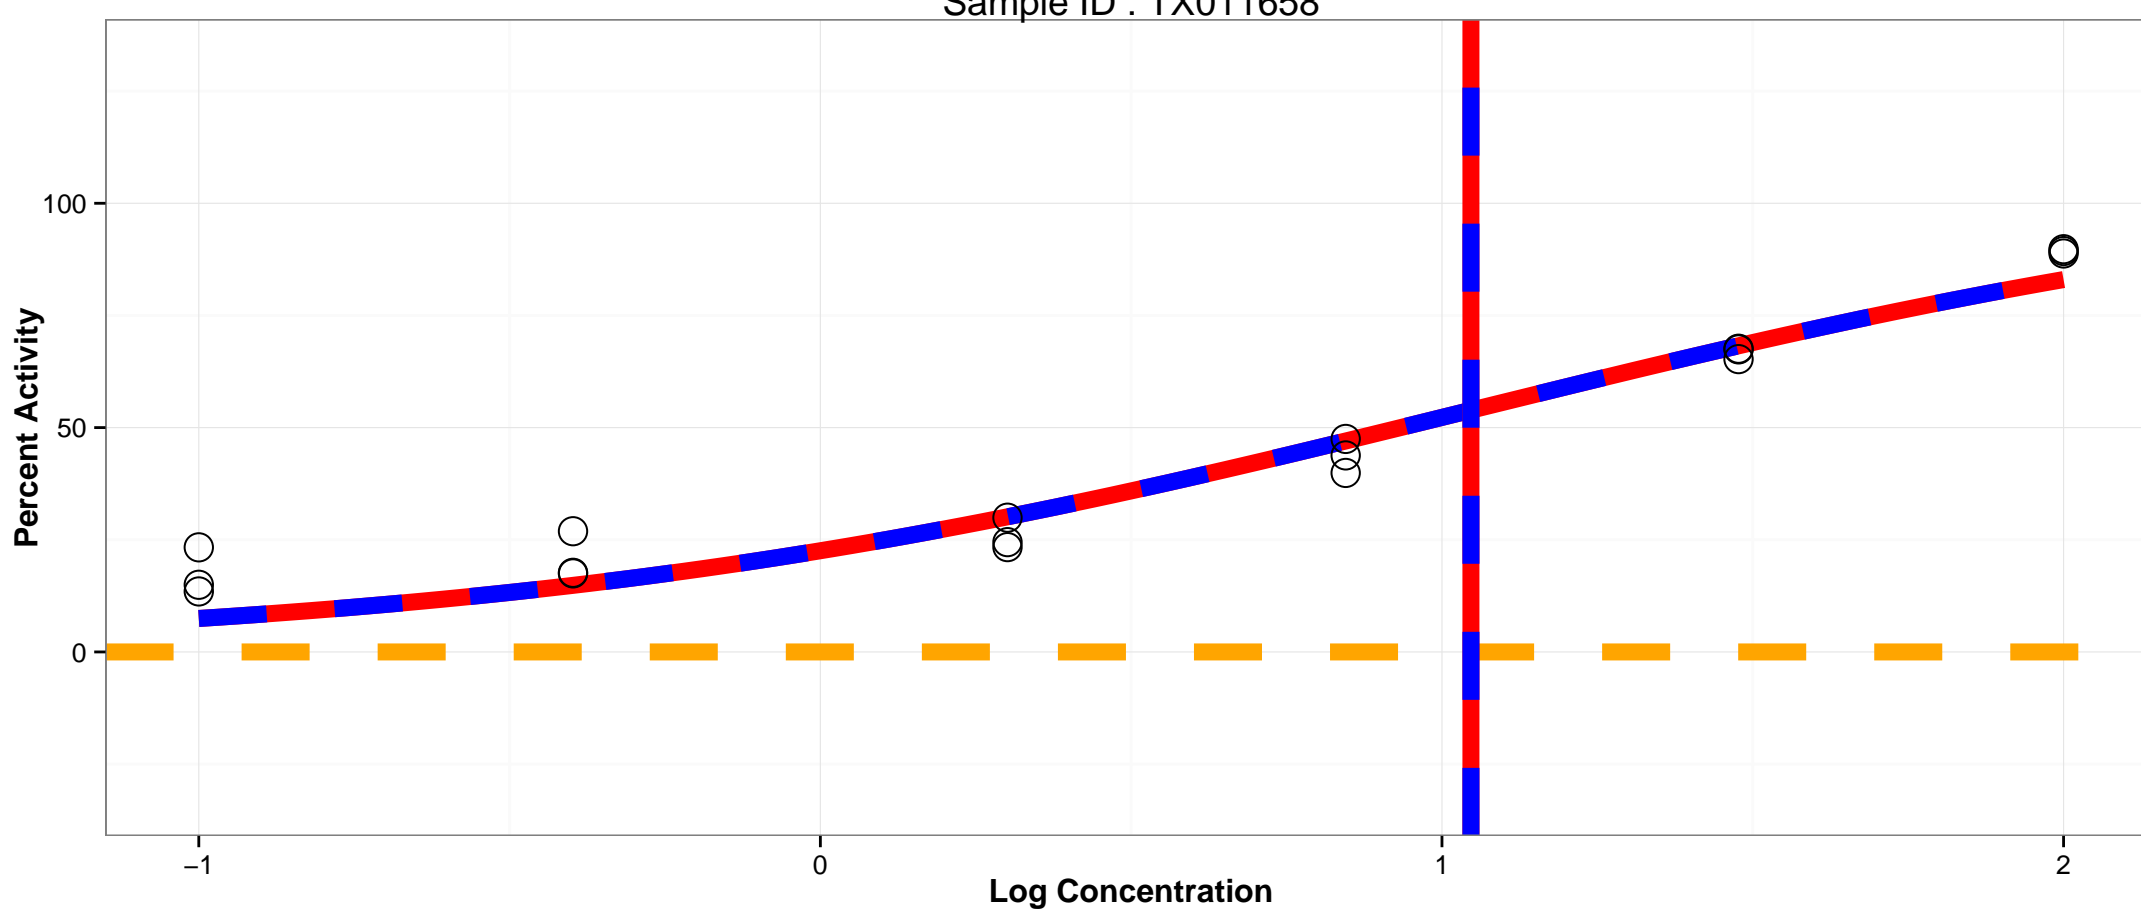

HILL MODEL

|     | tp   | ga    | gw     |
|-----|------|-------|--------|
| val | 108  | 1.05  | 0.551  |
| sd  | 15.1 | 0.251 | 0.0793 |

GAIN-LOSS MODEL

|     | tp   | ga    | gw     | la    | lw     |
|-----|------|-------|--------|-------|--------|
| val | 108  | 1.05  | 0.551  | 3.91  | 6.3    |
| sd  | 15.1 | 0.251 | 0.0793 | 36300 | 119000 |

|      | CNST   | HILL  | GNLS  |
|------|--------|-------|-------|
| AIC  | 196.98 | 127.7 | 131.7 |
| PROB | 0      | 0.88  | 0.12  |
| RMSE | 51.32  | 6.56  | 6.56  |

MAX\_MEAN : 89.3 MAX\_MED : 89.4 BMAD : 8.58  
COFF : 20 HIT-CALL : 1 FITC : 42 ACTP : 1  
FLAGS :

Chemical : Fabesetron hydrochloride  
CAS : 129299-90-7

Assay ID 1508 (NHEERL\_TPO\_AUR\_dn)  
Sample ID : TX011663

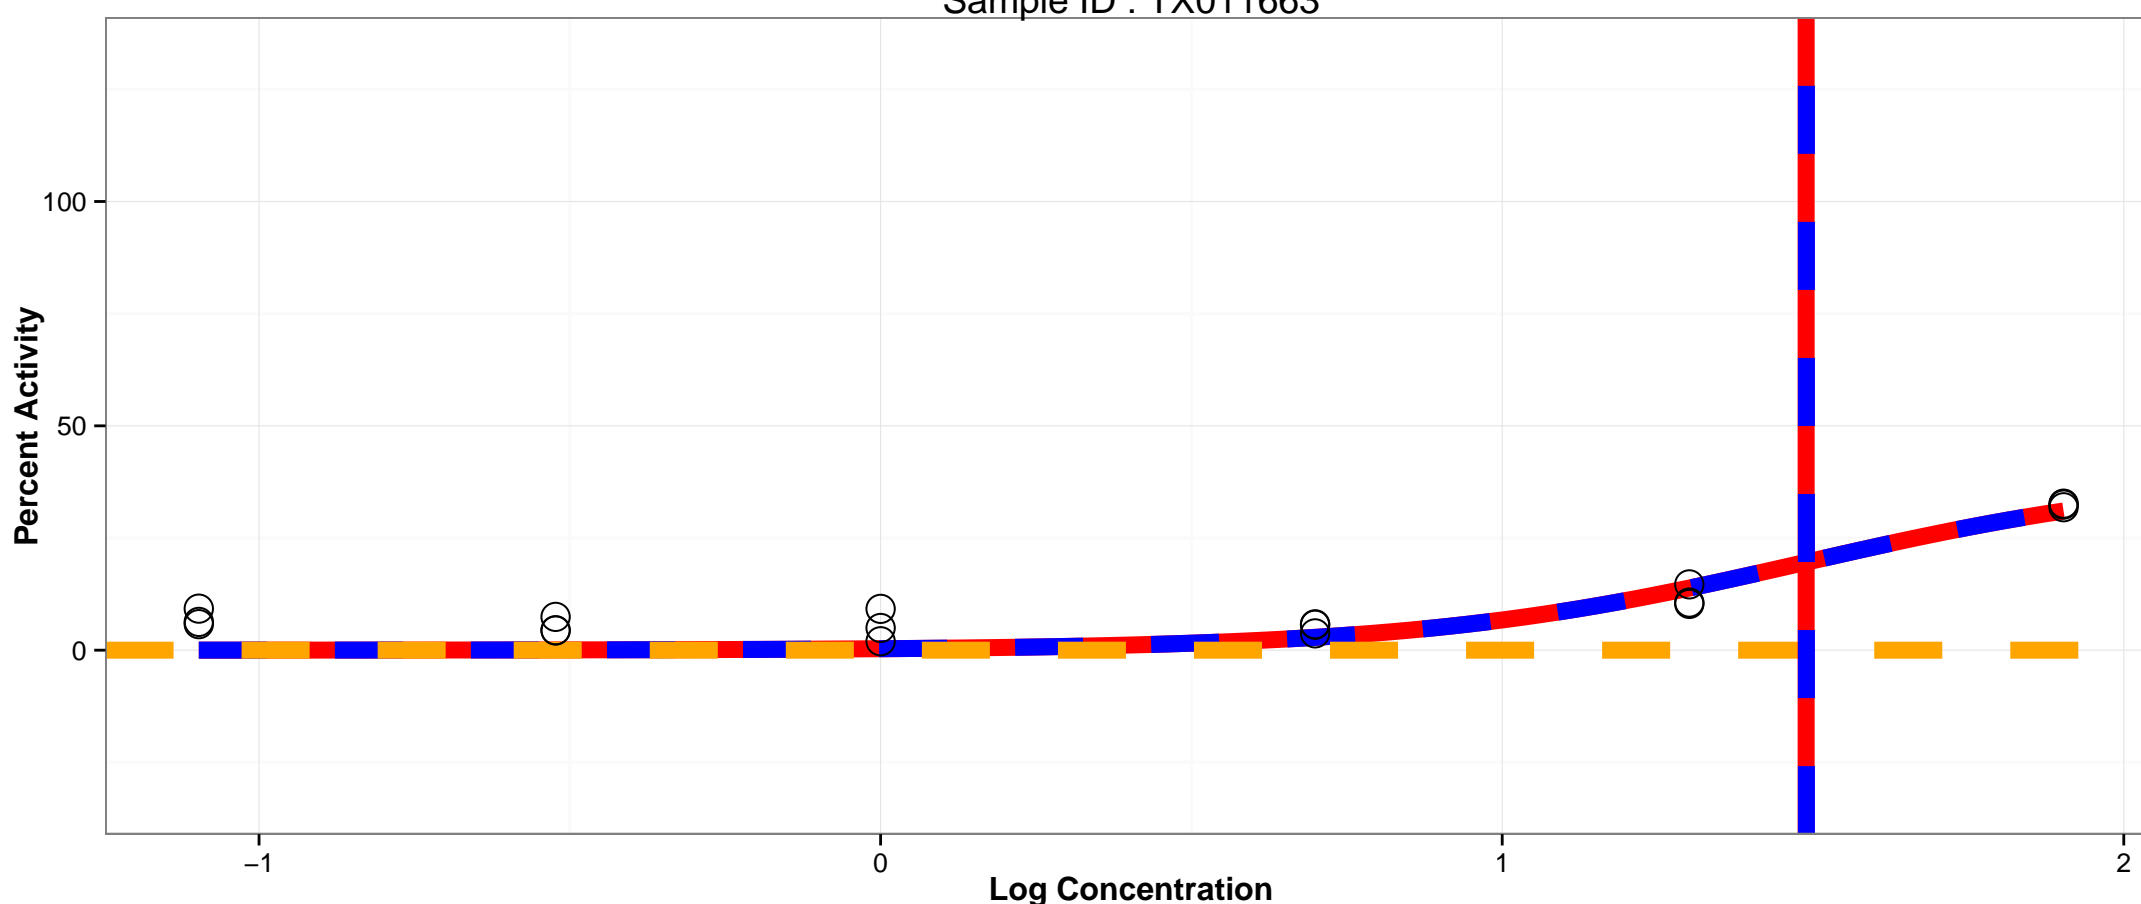

HILL MODEL

|     | tp   | ga    | gw    |
|-----|------|-------|-------|
| val | 39.2 | 1.49  | 1.4   |
| sd  | 9.24 | 0.179 | 0.652 |

GAIN-LOSS MODEL

|     | tp   | ga    | gw    | la    | lw     |
|-----|------|-------|-------|-------|--------|
| val | 39.2 | 1.49  | 1.4   | 2.84  | 11.9   |
| sd  | 9.25 | 0.179 | 0.653 | 11100 | 141000 |

|      | CNST   | HILL   | GNLS   |
|------|--------|--------|--------|
| AIC  | 149.16 | 116.75 | 120.75 |
| PROB | 0      | 0.88   | 0.12   |
| RMSE | 14.94  | 4.72   | 4.72   |

MAX\_MEAN : 32.3 MAX\_MED : 32.5 BMAD : 5.69  
COFF : 20 HIT-CALL : 1 FITC : 42 ACTP : 1  
FLAGS : 6

Assay ID 1509 (NHEERL\_HEK293T\_CellTiterGLO)  
Sample ID : TX011663

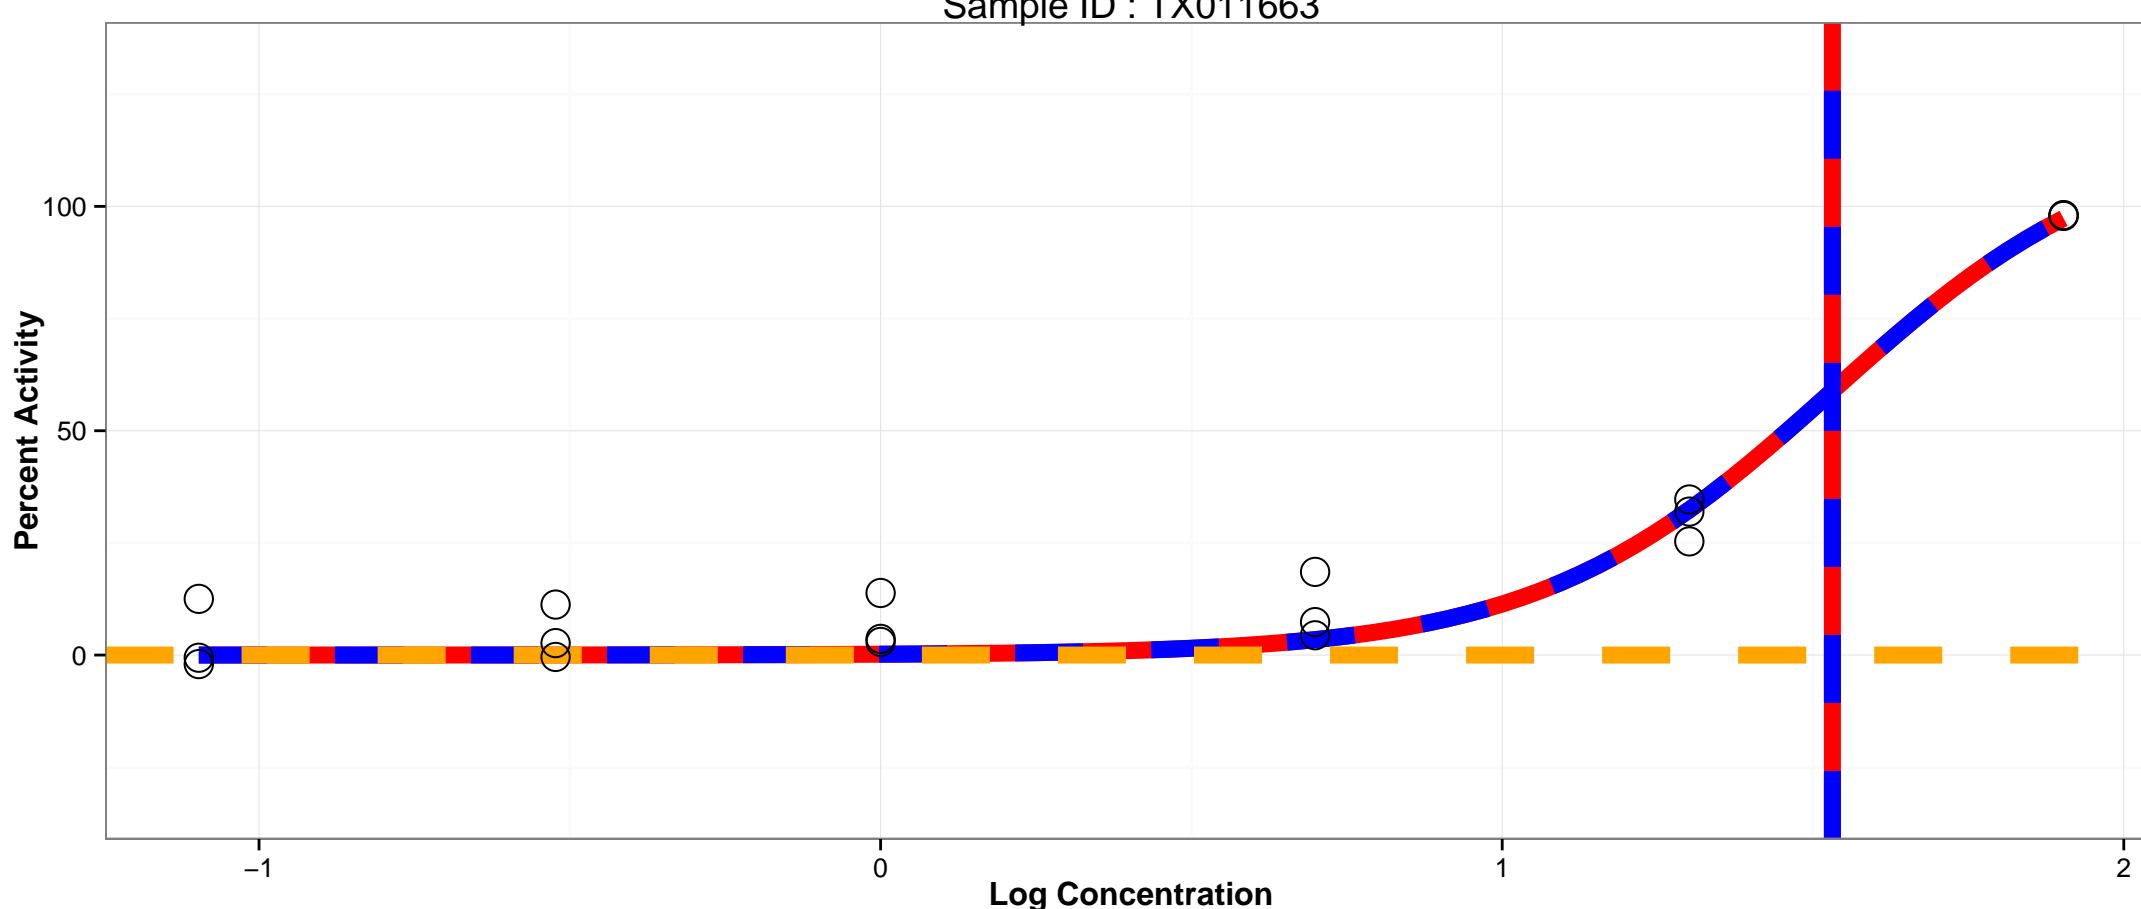

HILL MODEL

|     | tp   | ga    | gw    |
|-----|------|-------|-------|
| val | 118  | 1.53  | 1.83  |
| sd  | 20.7 | 0.125 | 0.577 |

GAIN-LOSS MODEL

|     | tp  | ga   | gw   | la   | lw   |
|-----|-----|------|------|------|------|
| val | 118 | 1.53 | 1.83 | 3.23 | 13.3 |
| sd  | NA  | NA   | NA   | NA   | NA   |

|      | CNST   | HILL   | GNLS   |
|------|--------|--------|--------|
| AIC  | 183.44 | 125.75 | 129.75 |
| PROB | 0      | 0.88   | 0.12   |
| RMSE | 42.56  | 6.67   | 6.67   |

MAX\_MEAN : 98 MAX\_MED : 98 BMAD : 5.54  
COFF : 20 HIT-CALL : 1 FITC : 42 ACTP : 1  
FLAGS :

Assay ID 1848 (NHEERL\_Quantilum\_inhib\_2\_dn)  
Sample ID : TX011663

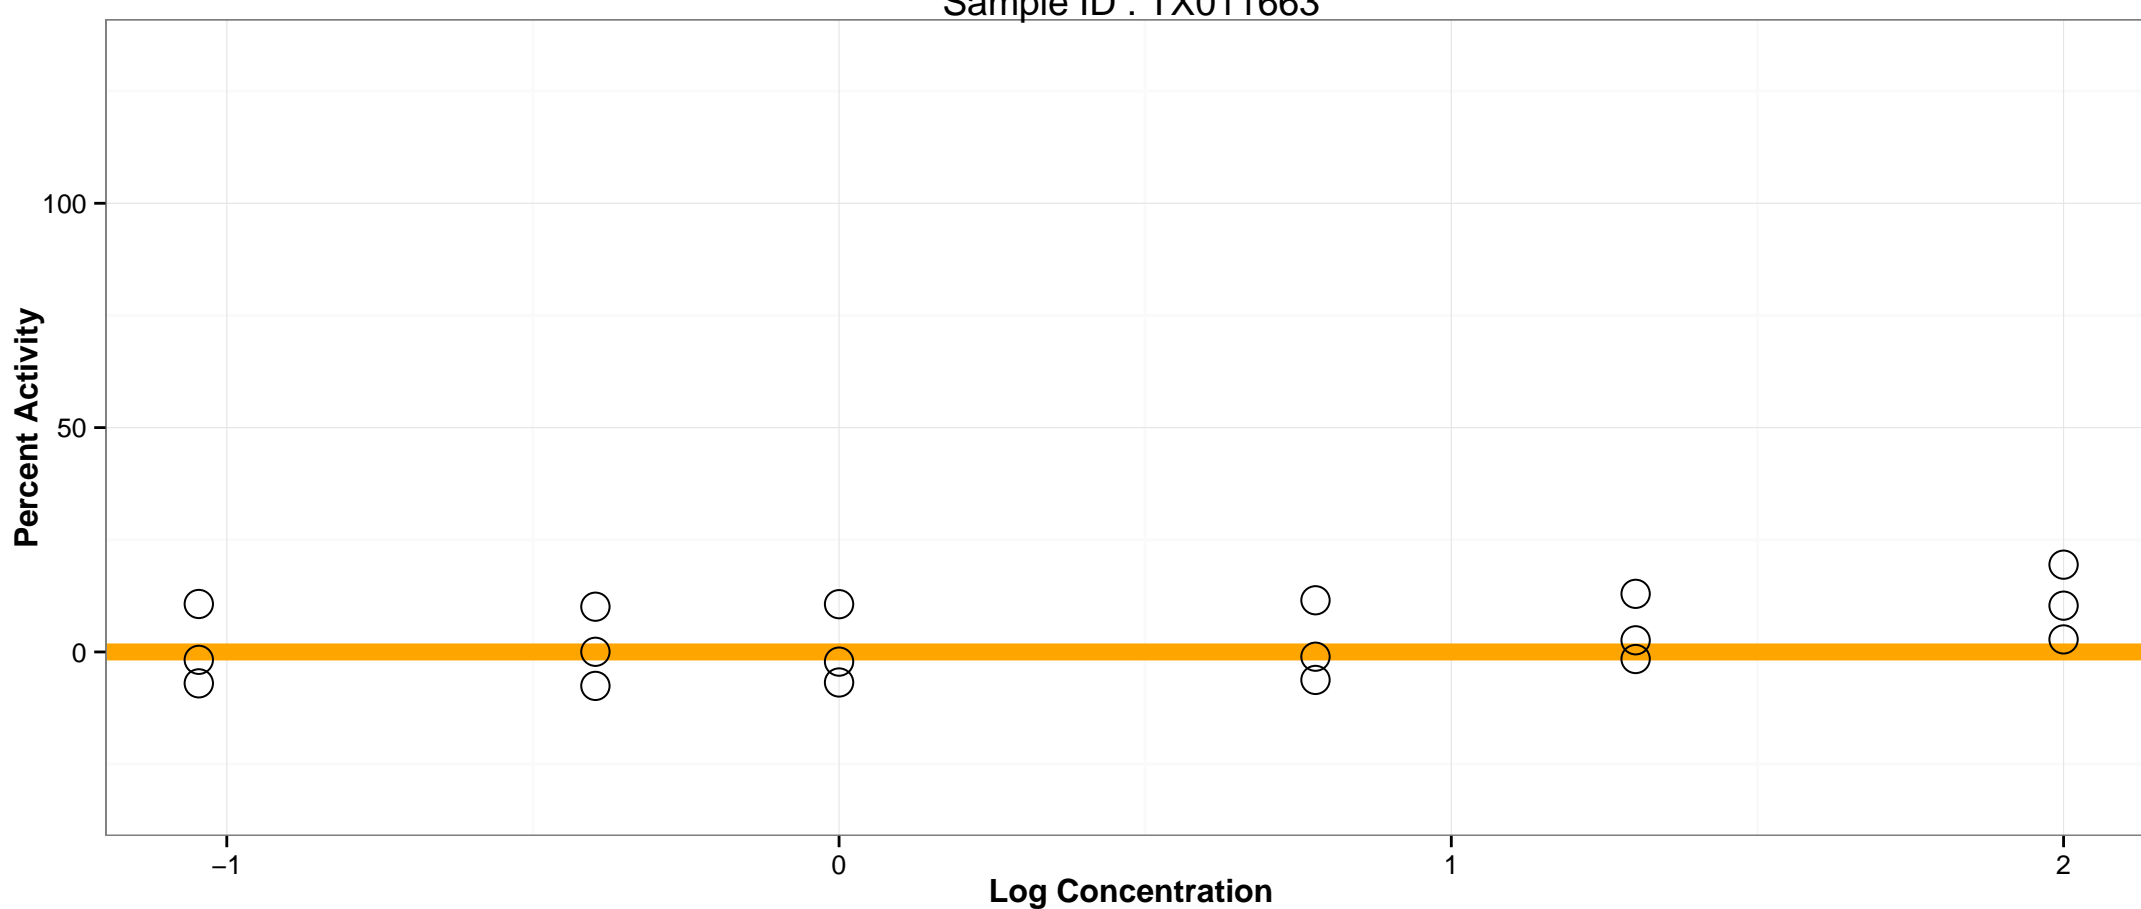

HILL MODEL

HILL MODEL: Not applicable

GAIN-LOSS MODEL

GNLS MODEL: Not applicable

|      | CNST  | HILL | GNLS |
|------|-------|------|------|
| AIC  | 132.2 | NA   | NA   |
| PROB | 1     | NA   | NA   |
| RMSE | 8.61  | NA   | NA   |

MAX\_MEAN : 10.9 MAX\_MED : 10.3 BMAD : 8.58  
COFF : 20 HIT-CALL : 0 FITC : 4 ACTP : 0  
FLAGS :



Chemical : Dimethyl sulfate  
CAS : 77-78-1

Assay ID 1508 (NHEERL\_TPO\_AUR\_dn)  
Sample ID : TX011726

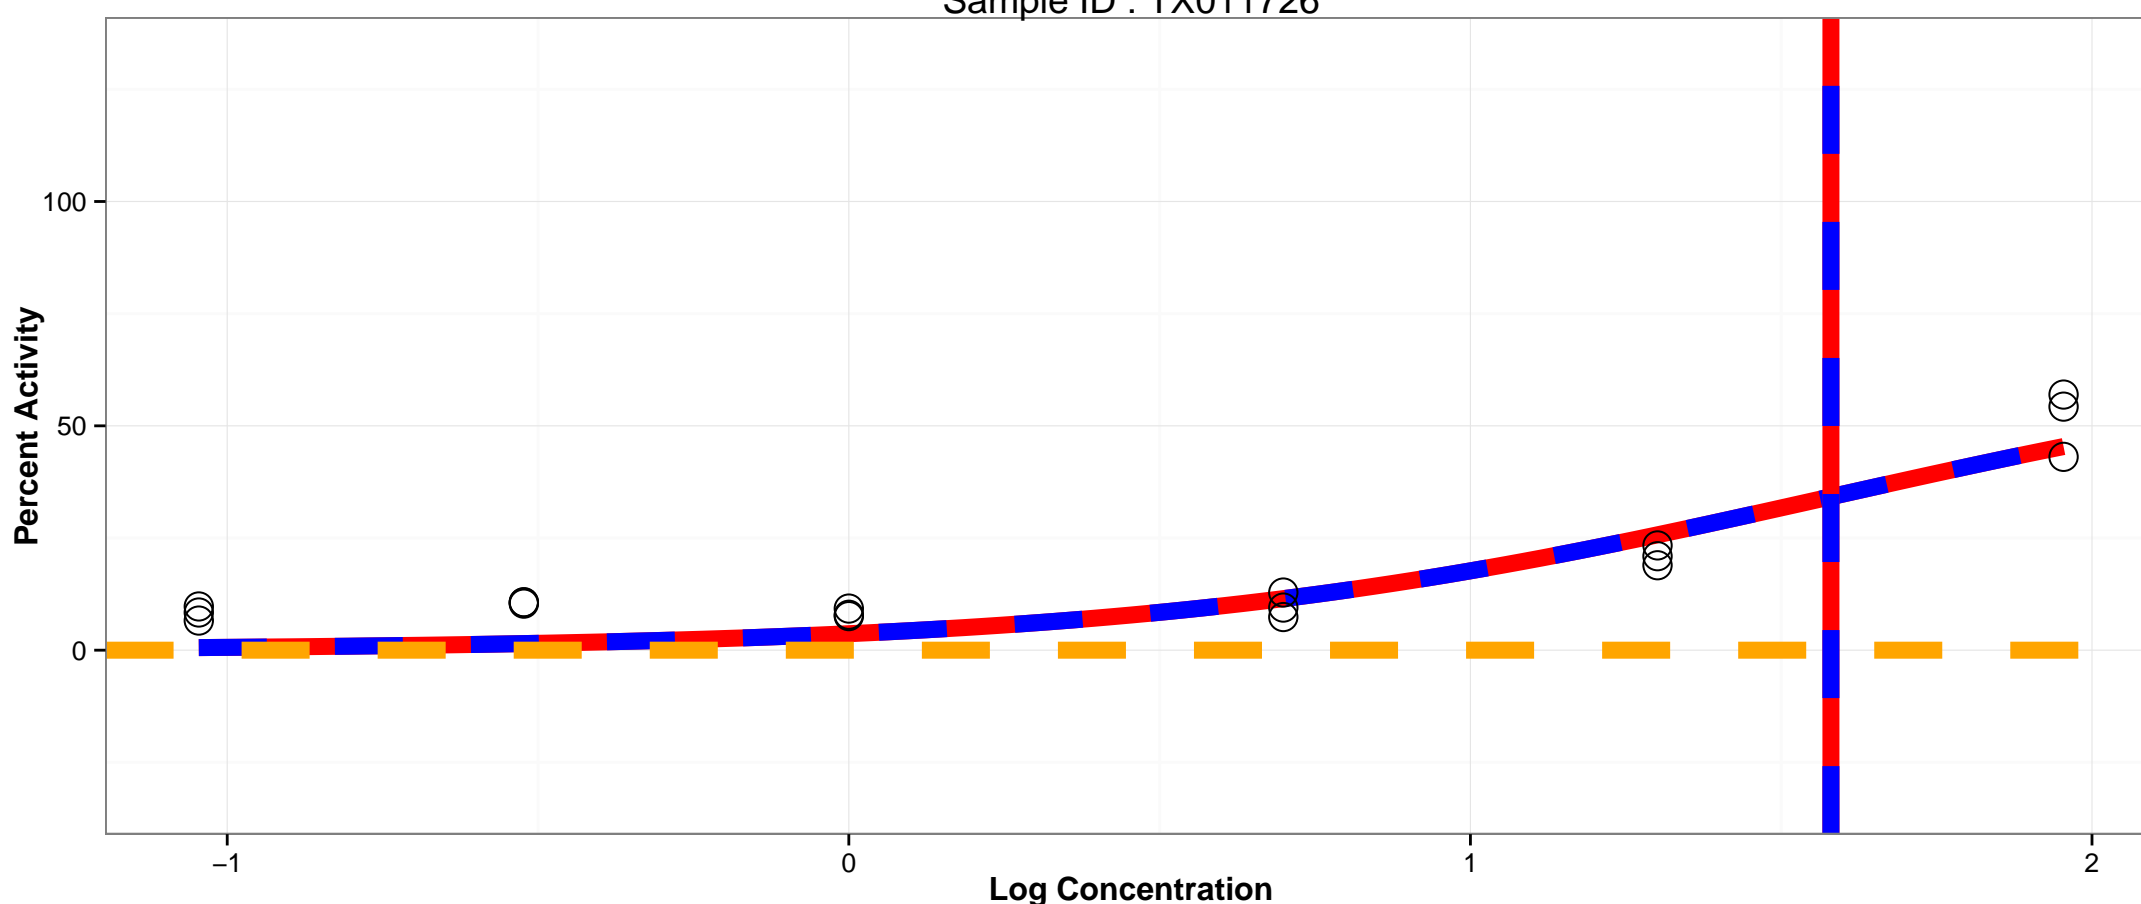

HILL MODEL

|     | tp   | ga    | gw    |
|-----|------|-------|-------|
| val | 68.4 | 1.58  | 0.789 |
| sd  | 17.4 | 0.305 | 0.332 |

GAIN-LOSS MODEL

|     | tp   | ga    | gw    | la   | lw    |
|-----|------|-------|-------|------|-------|
| val | 68.4 | 1.58  | 0.789 | 2.68 | 13.4  |
| sd  | 17.4 | 0.305 | 0.332 | 1630 | 29900 |

|      | CNST   | HILL   | GNLS   |
|------|--------|--------|--------|
| AIC  | 166.39 | 130.62 | 134.62 |
| PROB | 0      | 0.88   | 0.12   |
| RMSE | 24.1   | 6.72   | 6.72   |

MAX\_MEAN : 51.5 MAX\_MED : 54.3 BMAD : 5.69  
COFF : 20 HIT-CALL : 1 FITC : 42 ACTP : 1  
FLAGS :

Assay ID 1509 (NHEERL\_HEK293T\_CellTiterGLO)  
Sample ID : TX011726

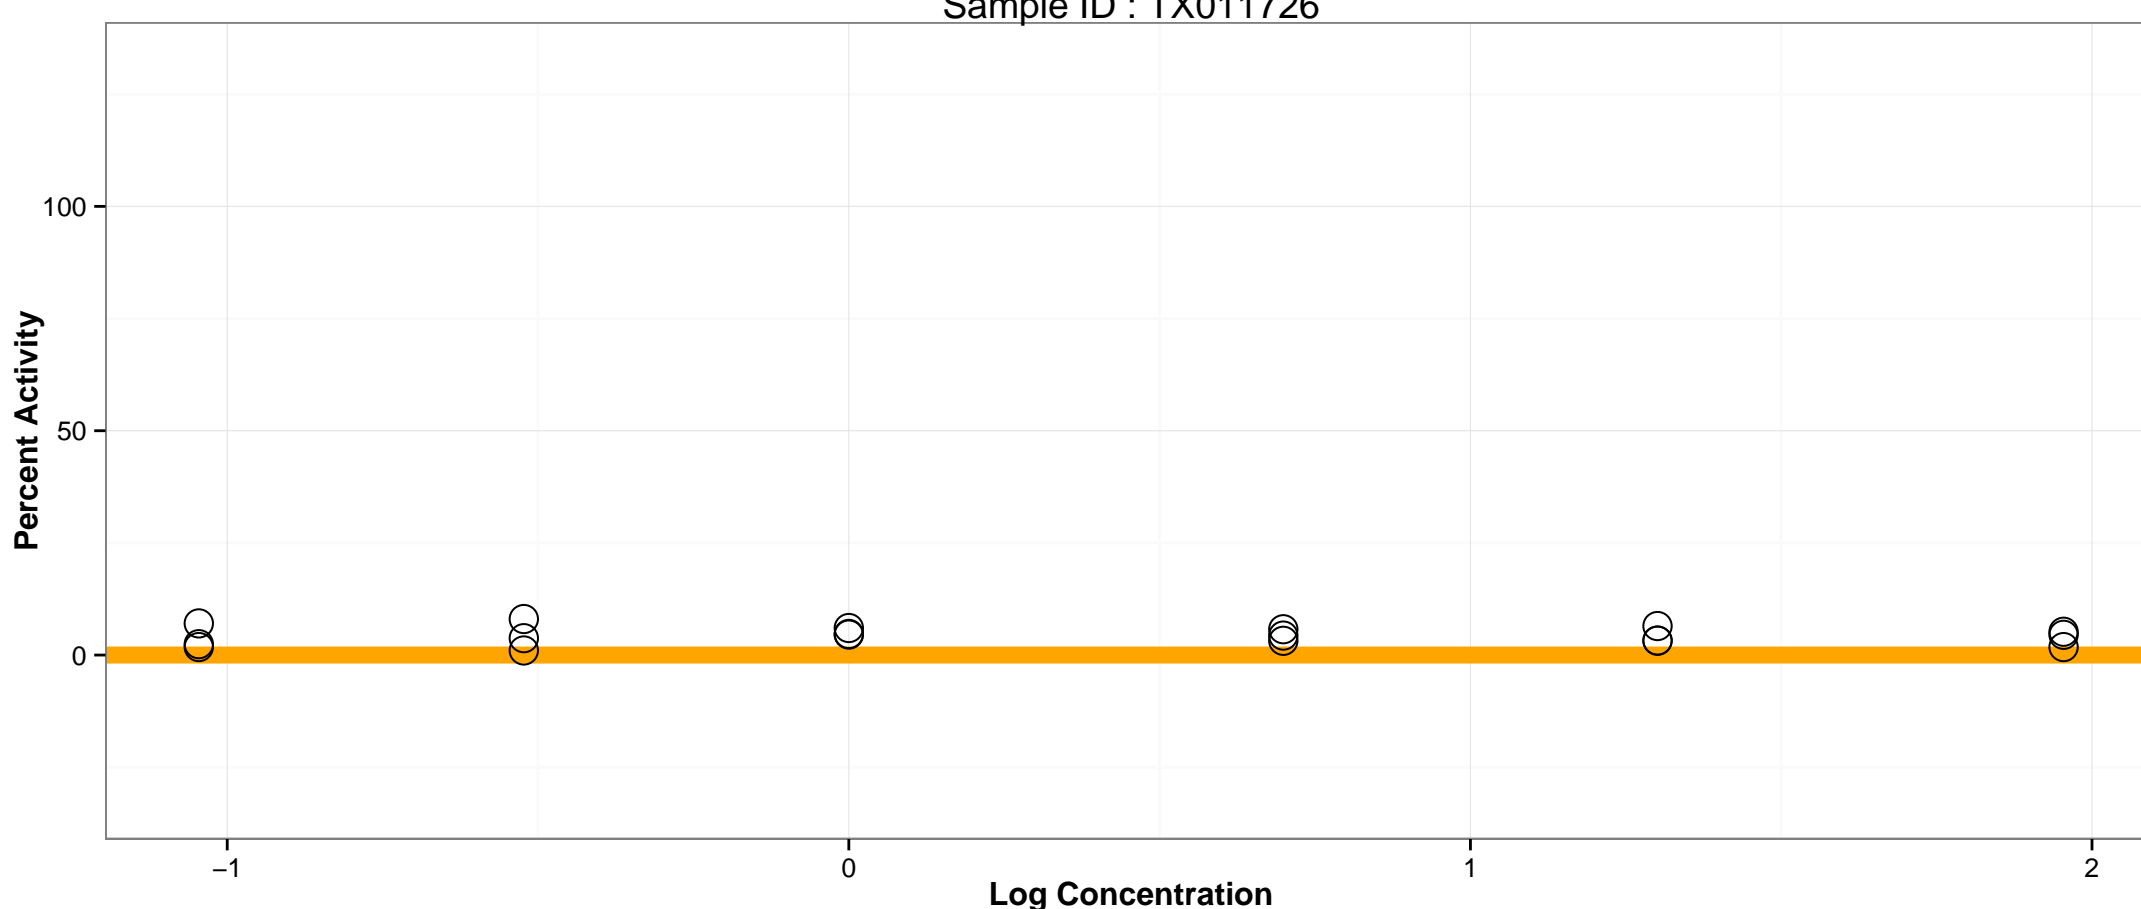

HILL MODEL

HILL MODEL: Not applicable

GAIN-LOSS MODEL

GNLS MODEL: Not applicable

|      | CNST   | HILL | GNLS |
|------|--------|------|------|
| AIC  | 111.85 | NA   | NA   |
| PROB | 1      | NA   | NA   |
| RMSE | 4.68   | NA   | NA   |

MAX\_MEAN : 5.11 MAX\_MED : 4.72 BMAD : 5.54  
COFF : 20 HIT-CALL : 0 FITC : 4 ACTP : 0  
FLAGS :

Assay ID 1848 (NHEERL\_Quantilum\_inhib\_2\_dn)  
Sample ID : TX011726

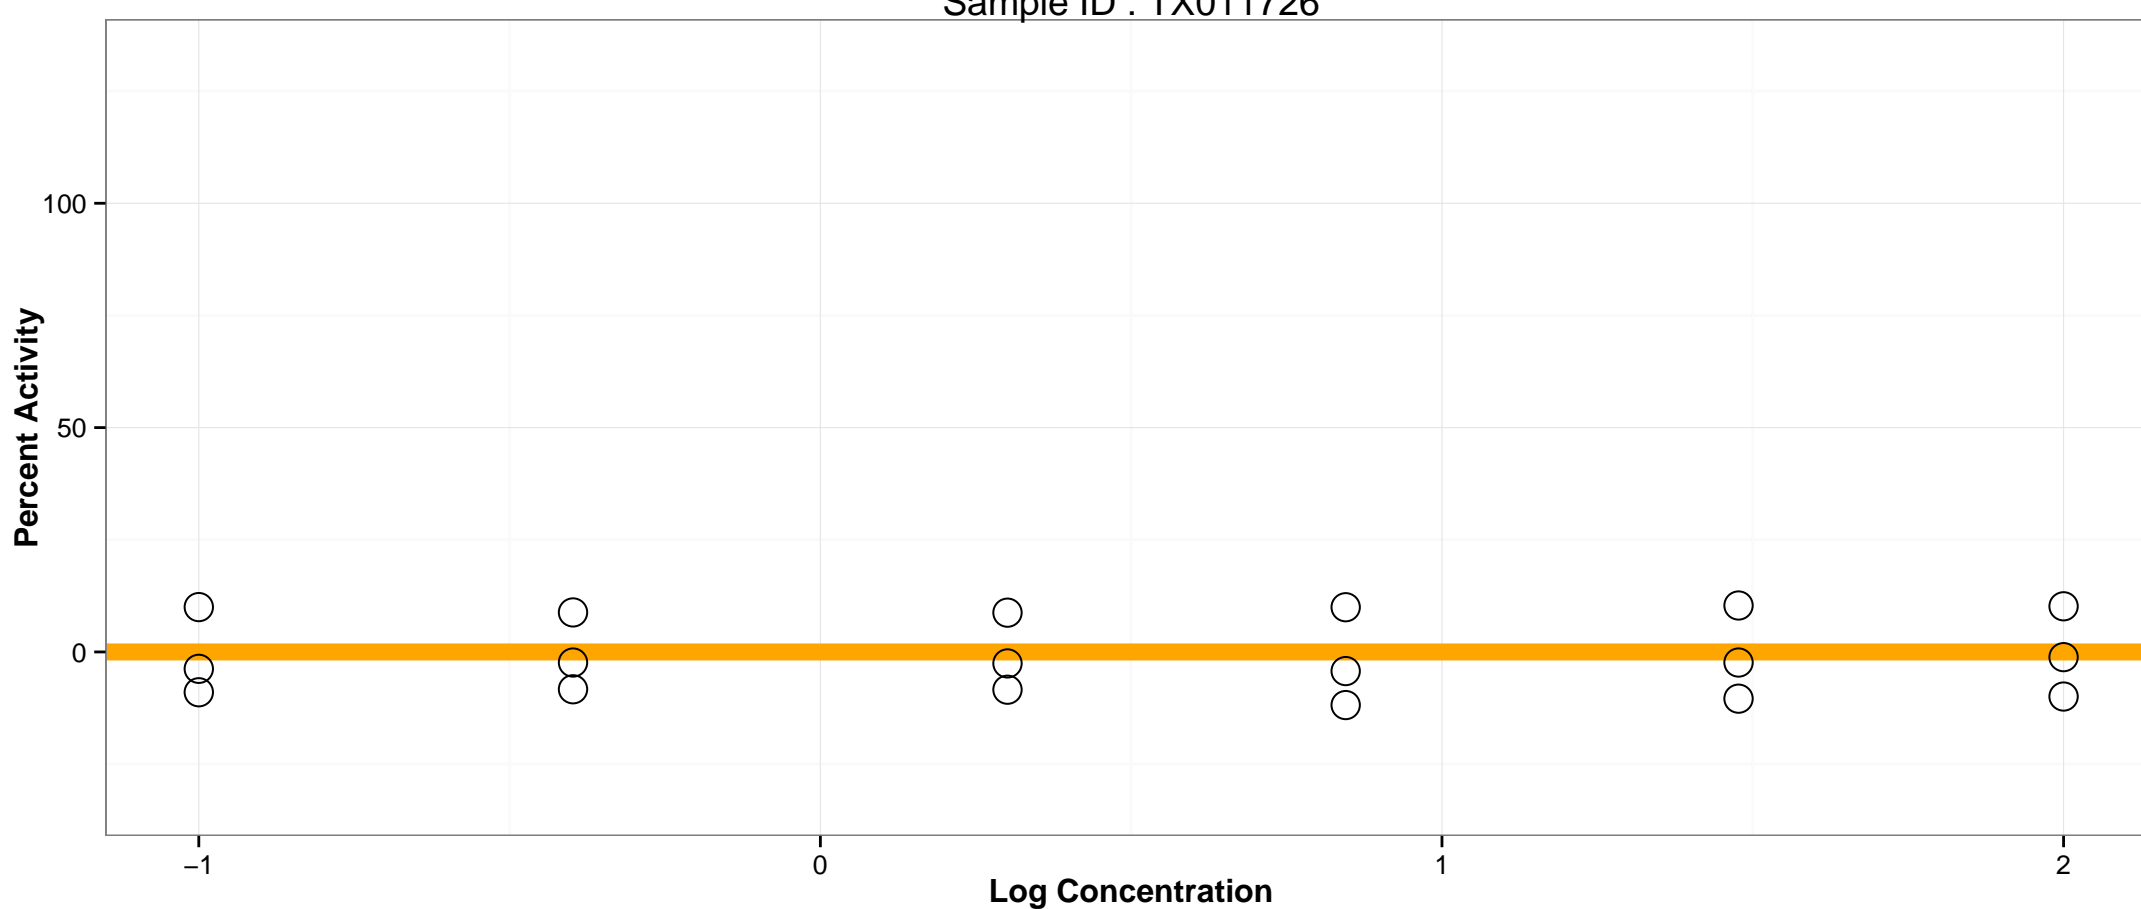

HILL MODEL

HILL MODEL: Not applicable

GAIN-LOSS MODEL

GNLS MODEL: Not applicable

|      | CNST   | HILL | GNLS |
|------|--------|------|------|
| AIC  | 131.84 | NA   | NA   |
| PROB | 1      | NA   | NA   |
| RMSE | 8.11   | NA   | NA   |

MAX\_MEAN : -0.296 MAX\_MED : -1.15 BMAD : 8.58  
COFF : 20 HIT-CALL : 0 FITC : 4 ACTP : 0  
FLAGS :

Chemical : 4-Aminoazobenzene  
CAS : 60-09-3

Assay ID 1508 (NHEERL\_TPO\_AUR\_dn)  
Sample ID : TX012208

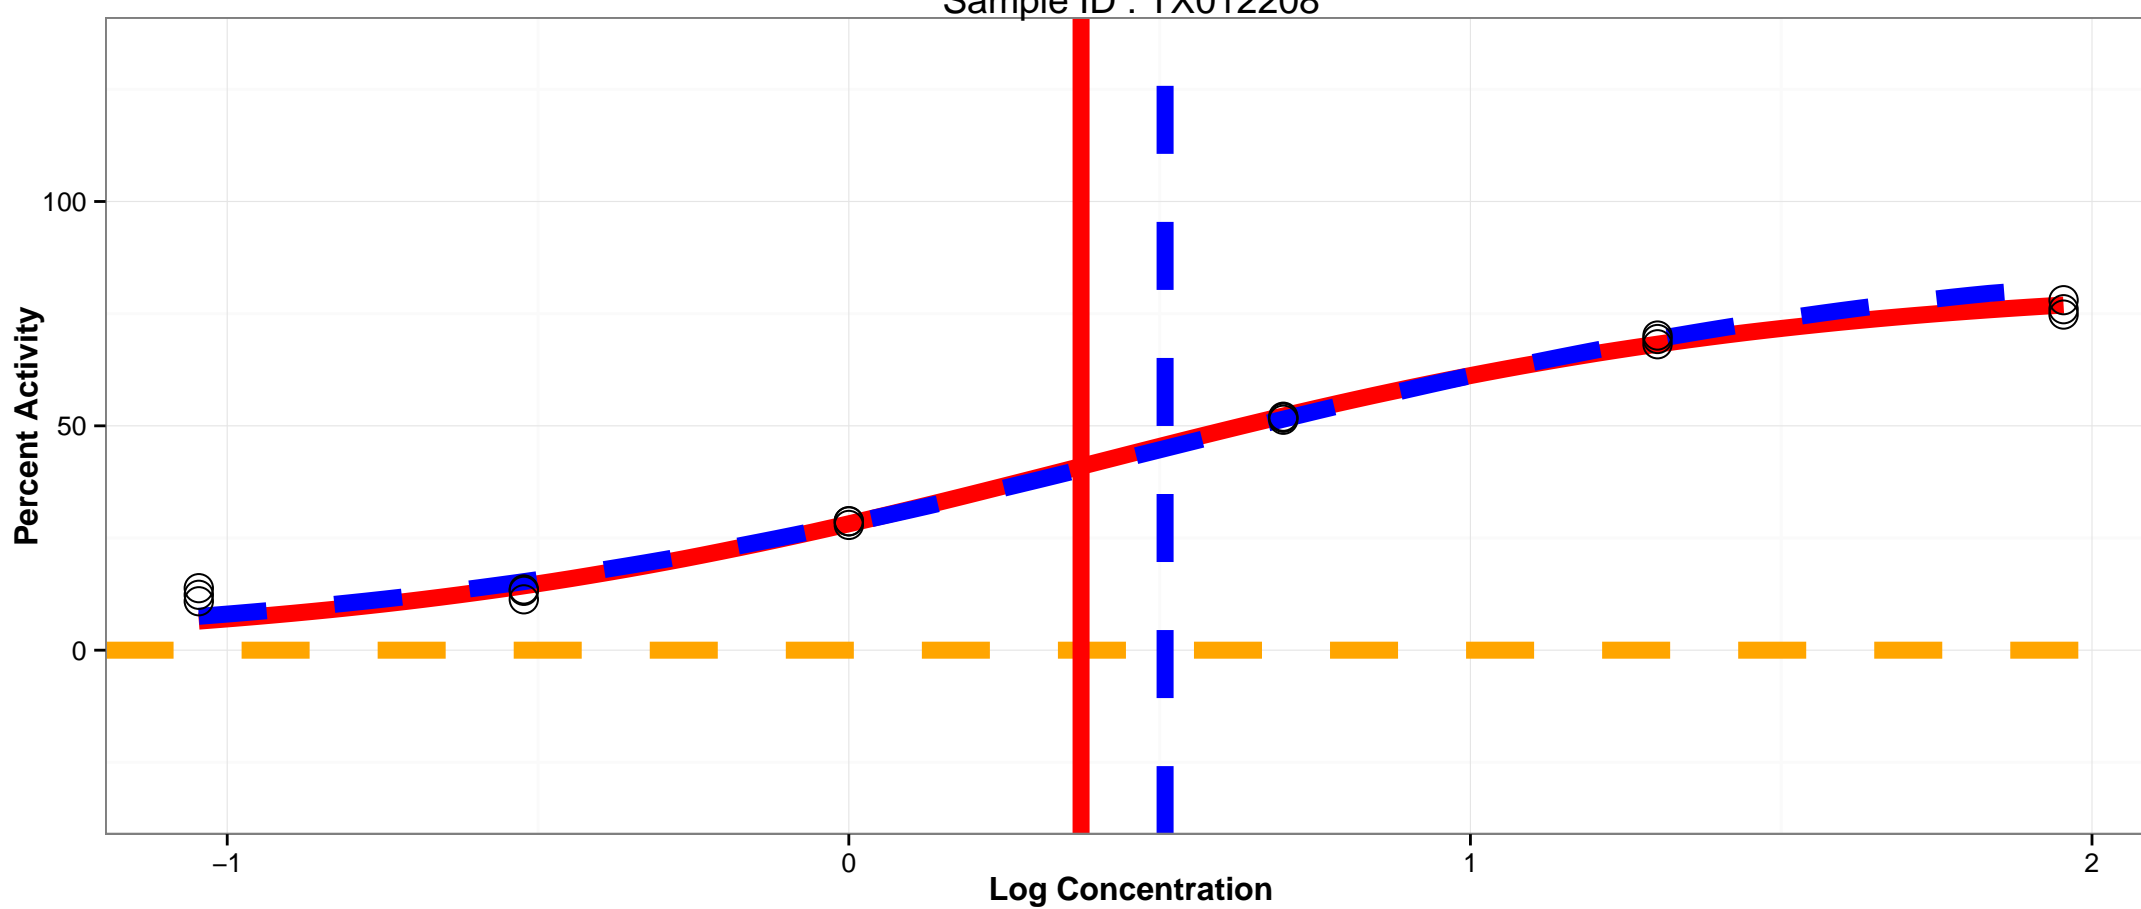

| HILL MODEL |      |        |        |
|------------|------|--------|--------|
|            | tp   | ga     | gw     |
| val        | 81.9 | 0.374  | 0.751  |
| sd         | 1.95 | 0.0395 | 0.0441 |

| GAIN-LOSS MODEL |      |       |        |        |      |
|-----------------|------|-------|--------|--------|------|
|                 | tp   | ga    | gw     | la     | lw   |
| val             | 89.9 | 0.509 | 0.668  | 2.02   | 18   |
| sd              | 9.12 | 0.155 | 0.0925 | 0.0086 | 6.38 |

|      | CNST   | HILL  | GNLS  |
|------|--------|-------|-------|
| AIC  | 195.73 | 91.69 | 93.02 |
| PROB | 0      | 0.66  | 0.34  |
| RMSE | 49.02  | 2.71  | 2.41  |

MAX\_MEAN : 76.3 MAX\_MED : 76 BMAD : 5.69  
COFF : 20 HIT-CALL : 1 FITC : 42 ACTP : 1  
FLAGS :

Assay ID 1509 (NHEERL\_HEK293T\_CellTiterGLO)  
Sample ID : TX012208

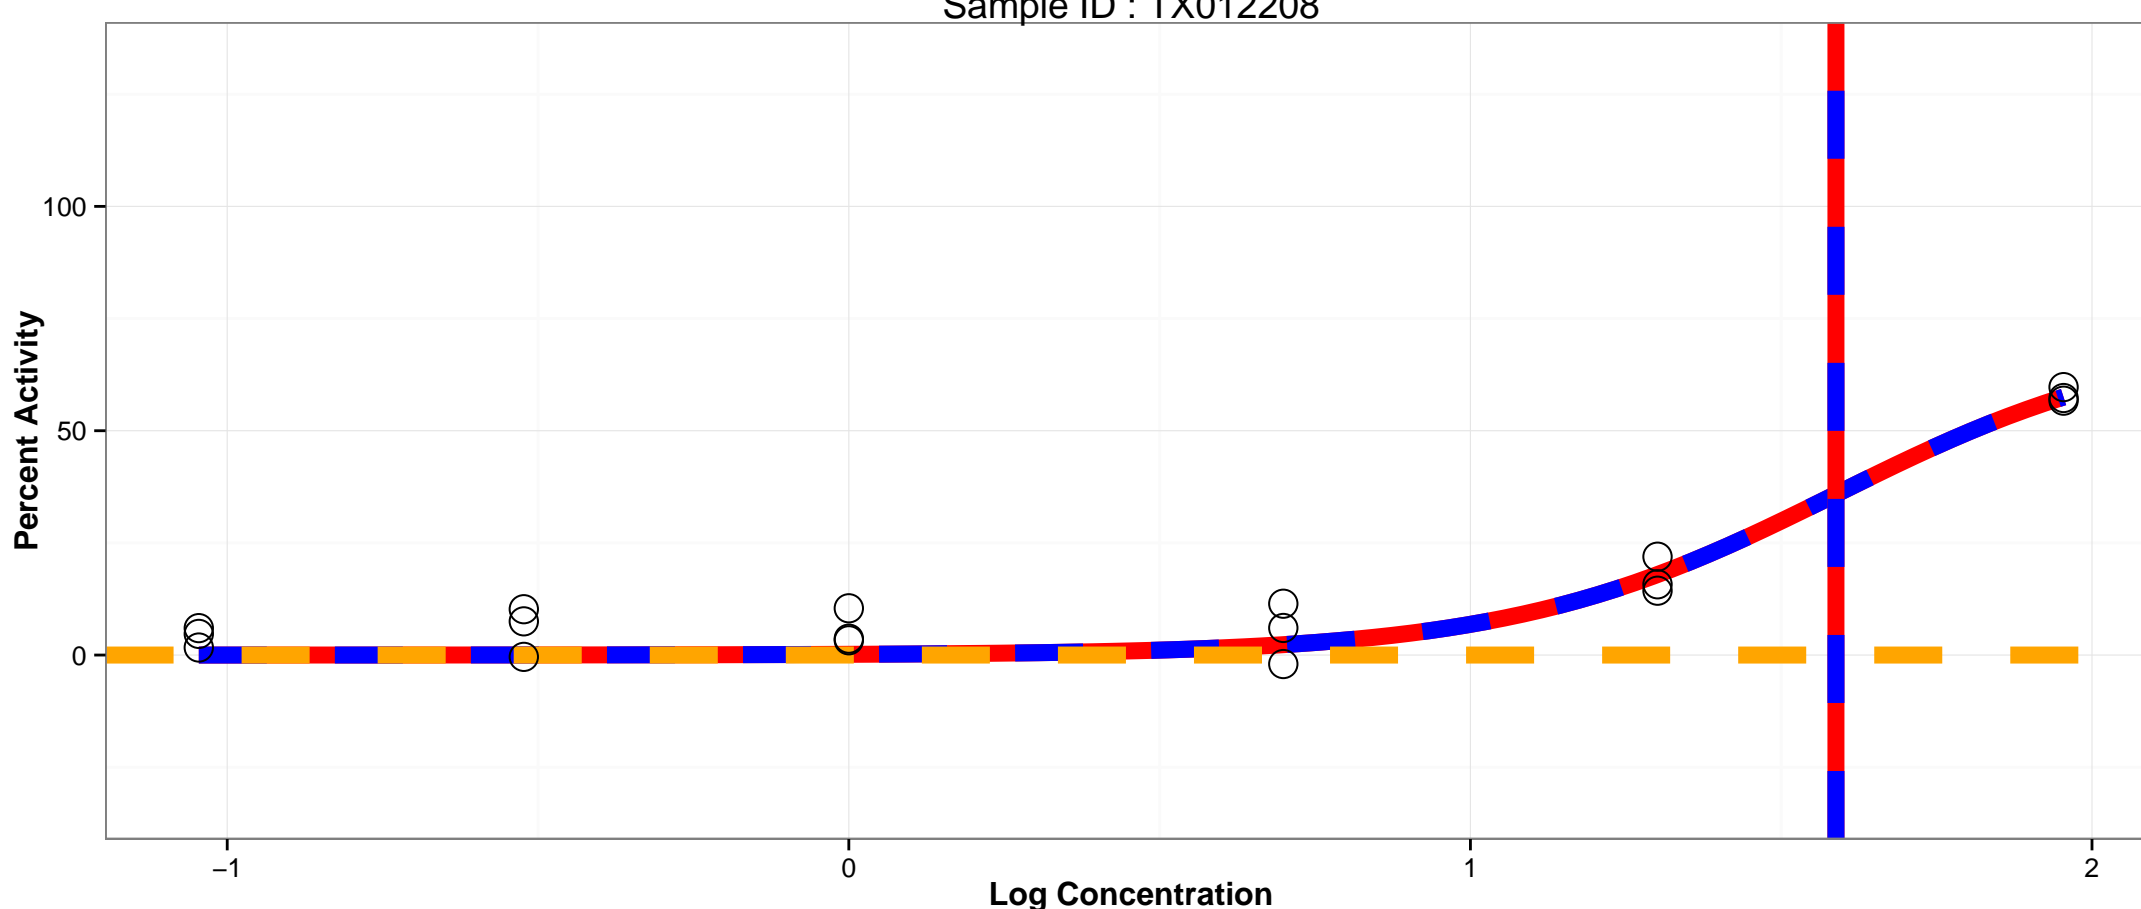

| HILL MODEL |      |       |       |
|------------|------|-------|-------|
|            | tp   | ga    | gw    |
| val        | 71.7 | 1.59  | 1.66  |
| sd         | 24.7 | 0.261 | 0.904 |

| GAIN-LOSS MODEL |      |       |       |      |       |
|-----------------|------|-------|-------|------|-------|
|                 | tp   | ga    | gw    | la   | lw    |
| val             | 71.7 | 1.59  | 1.66  | 2.44 | 17.4  |
| sd              | 24.6 | 0.261 | 0.903 | 396  | 13900 |

|      | CNST   | HILL   | GNLS   |
|------|--------|--------|--------|
| AIC  | 165.28 | 120.54 | 124.54 |
| PROB | 0      | 0.88   | 0.12   |
| RMSE | 25.31  | 5.29   | 5.29   |

MAX\_MEAN : 57.9 MAX\_MED : 57.3 BMAD : 5.54  
COFF : 20 HIT-CALL : 1 FITC : 42 ACTP : 1  
FLAGS : 6

Assay ID 1848 (NHEERL\_Quantilum\_inhib\_2\_dn)  
Sample ID : TX012208

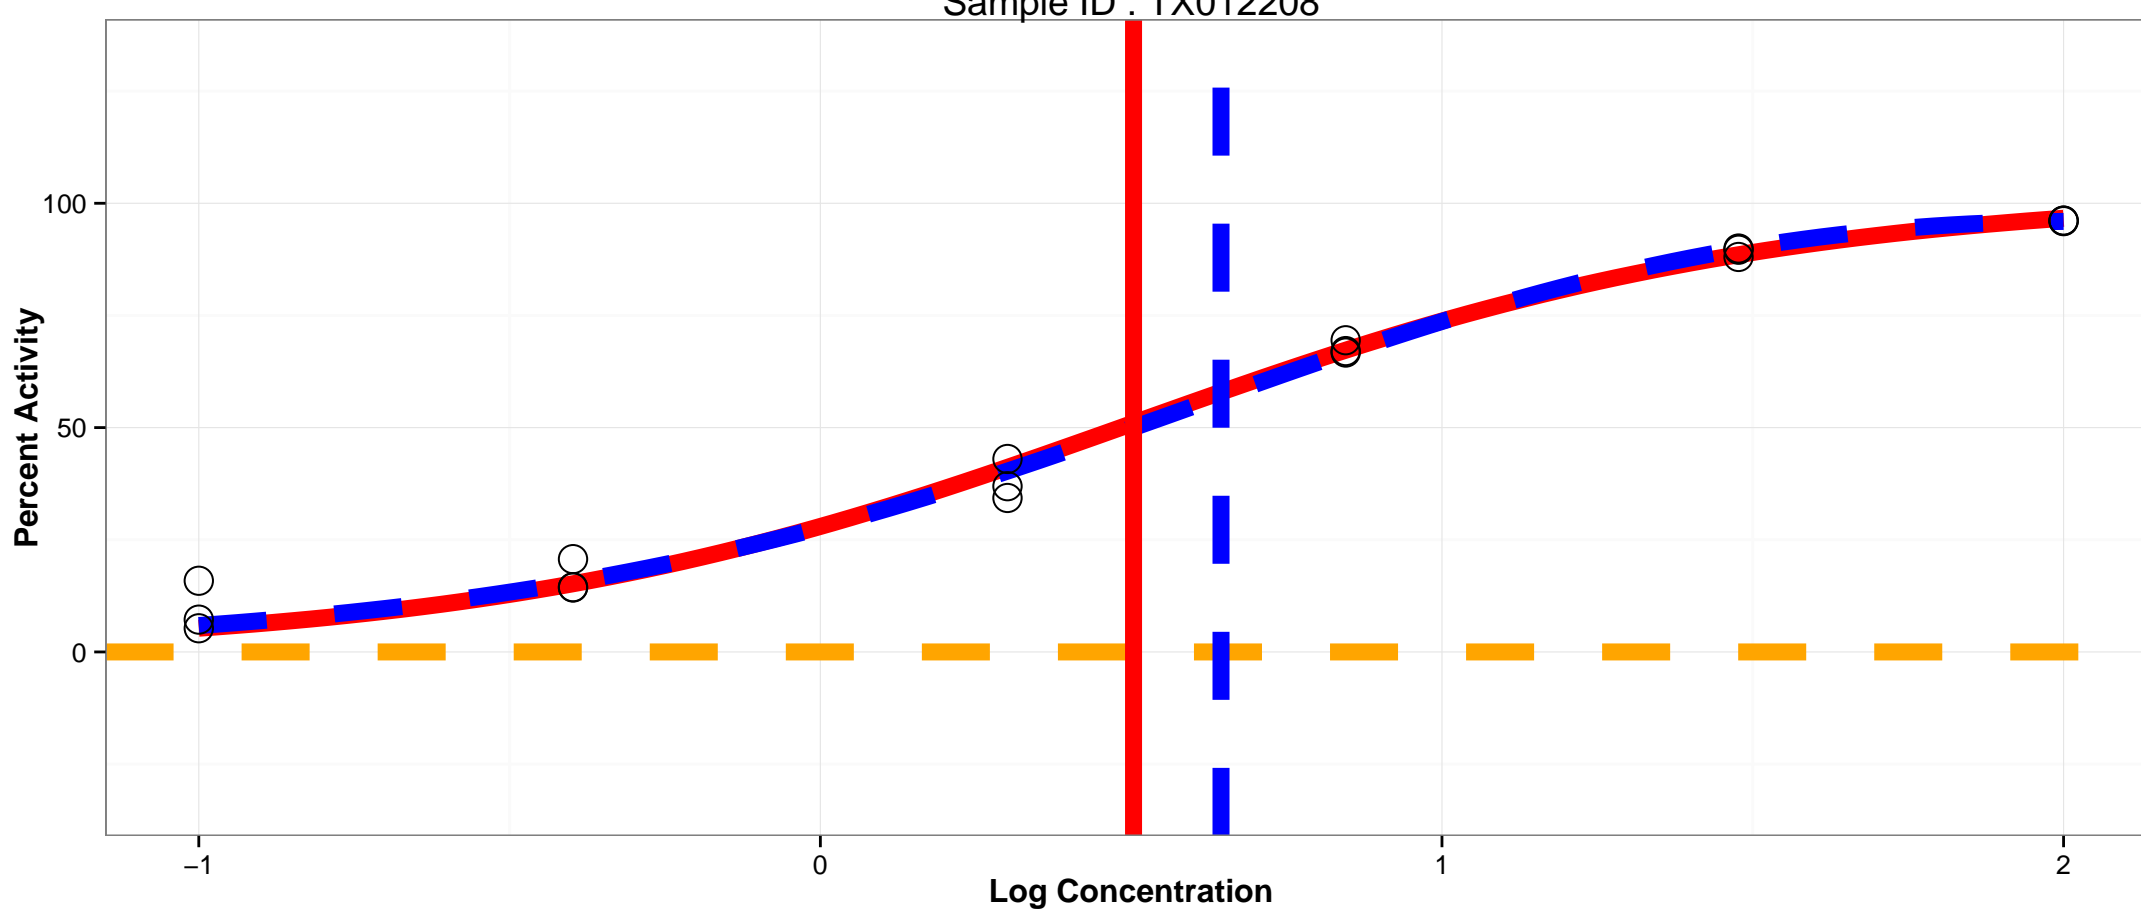

| HILL MODEL |      |        |        |
|------------|------|--------|--------|
|            | tp   | ga     | gw     |
| val        | 102  | 0.504  | 0.839  |
| sd         | 1.78 | 0.0333 | 0.0434 |

| GAIN-LOSS MODEL |     |       |       |     |       |
|-----------------|-----|-------|-------|-----|-------|
|                 | tp  | ga    | gw    | la  | lw    |
| val             | 115 | 0.645 | 0.772 | 3.5 | 0.658 |
| sd              | NA  | NA    | NA    | NA  | NA    |

|      | CNST   | HILL  | GNLS   |
|------|--------|-------|--------|
| AIC  | 204.66 | 99.65 | 101.84 |
| PROB | 0      | 0.75  | 0.25   |
| RMSE | 62.78  | 3.53  | 3.3    |

MAX\_MEAN : 96.1 MAX\_MED : 96.1 BMAD : 8.58  
COFF : 20 HIT-CALL : 1 FITC : 42 ACTP : 1  
FLAGS :

Assay ID 1508 (NHEERL\_TPO\_AUR\_dn)  
Sample ID : TX012266

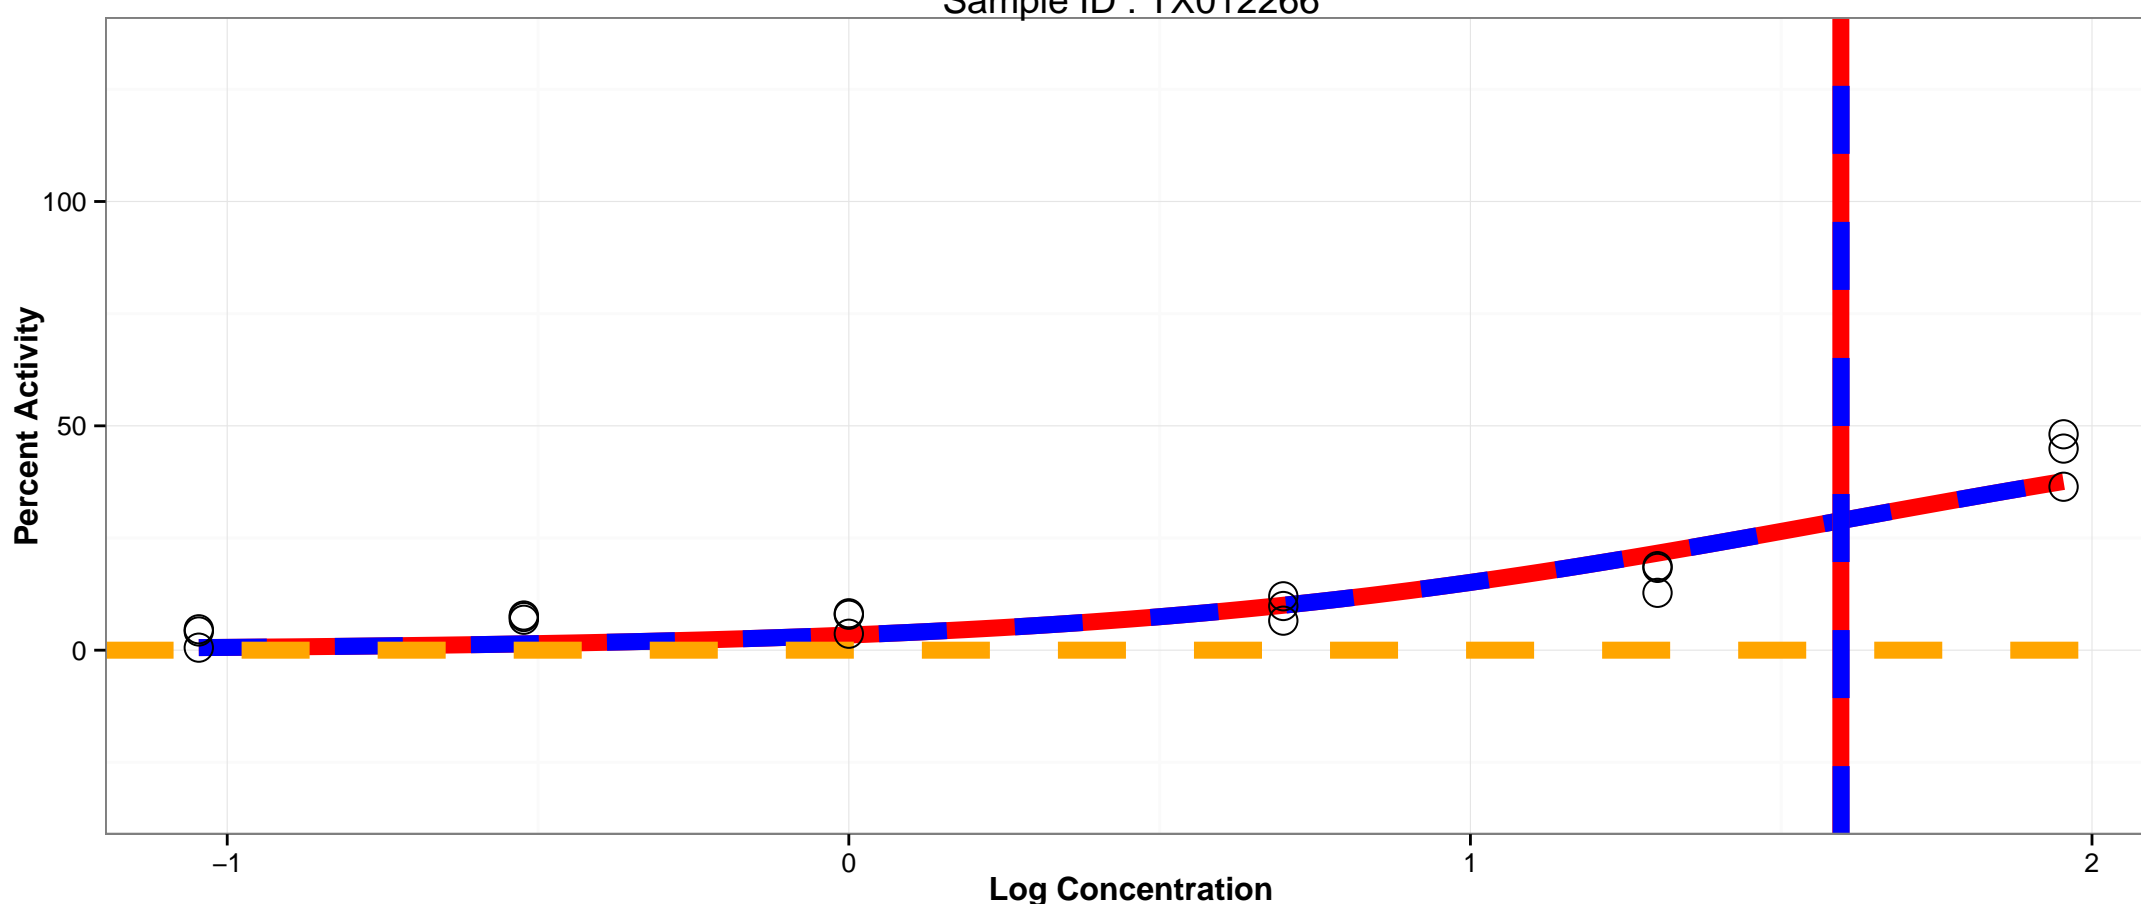

HILL MODEL

|     | tp   | ga    | gw    |
|-----|------|-------|-------|
| val | 57.8 | 1.6   | 0.756 |
| sd  | 13.5 | 0.283 | 0.223 |

GAIN-LOSS MODEL

|     | tp   | ga    | gw    | la   | lw    |
|-----|------|-------|-------|------|-------|
| val | 57.8 | 1.6   | 0.756 | 2.88 | 10.1  |
| sd  | 13.5 | 0.283 | 0.223 | 1520 | 16600 |

|      | CNST   | HILL   | GNLS   |
|------|--------|--------|--------|
| AIC  | 158.93 | 119.25 | 123.25 |
| PROB | 0      | 0.88   | 0.12   |
| RMSE | 19.92  | 5.04   | 5.04   |

MAX\_MEAN : 43.2 MAX\_MED : 44.9 BMAD : 5.69  
COFF : 20 HIT-CALL : 1 FITC : 42 ACTP : 1  
FLAGS :

Assay ID 1509 (NHEERL\_HEK293T\_CellTiterGLO)  
Sample ID : TX012266

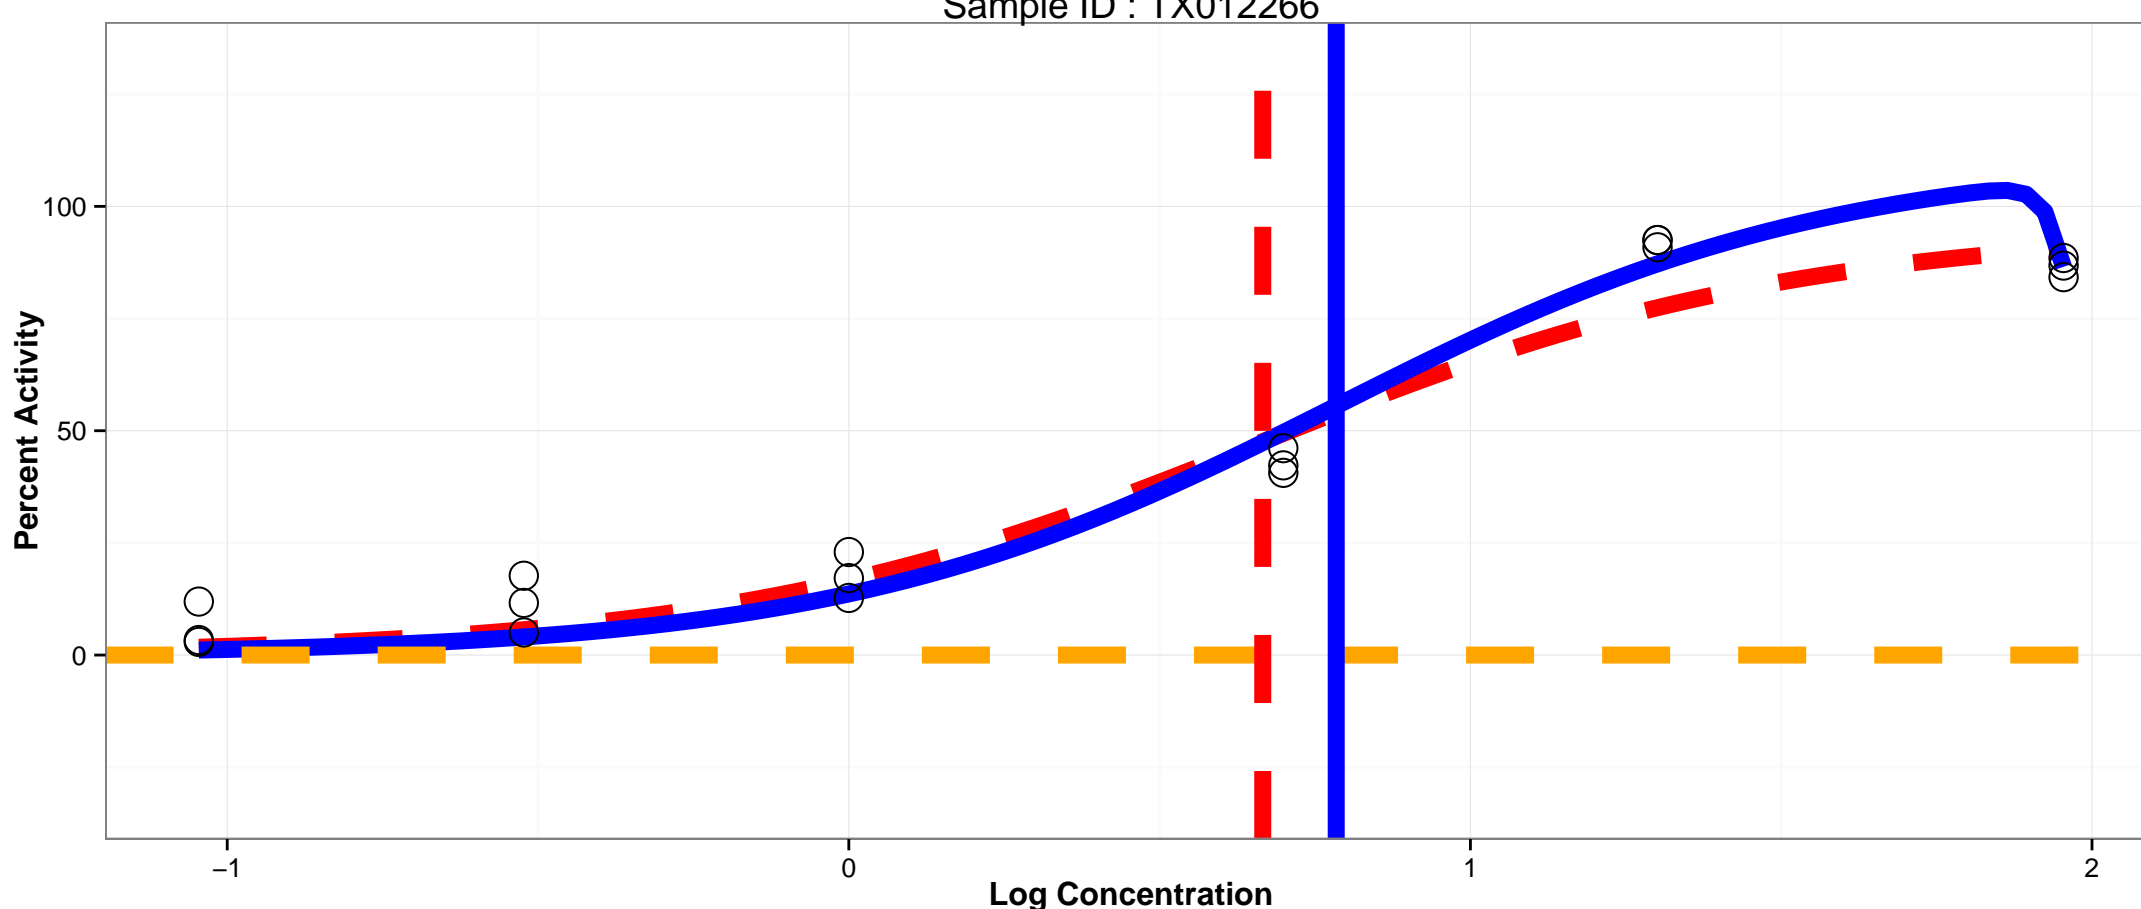

HILL MODEL

|     | tp   | ga     | gw    |
|-----|------|--------|-------|
| val | 95.1 | 0.666  | 1.01  |
| sd  | 5.65 | 0.0984 | 0.226 |

GAIN-LOSS MODEL

|     | tp  | ga    | gw    | la      | lw   |
|-----|-----|-------|-------|---------|------|
| val | 111 | 0.784 | 1.09  | 1.99    | 18   |
| sd  | 14  | 0.128 | 0.176 | 0.00578 | 6.78 |

|      | CNST   | HILL   | GNLS   |
|------|--------|--------|--------|
| AIC  | 198.95 | 135.94 | 130.13 |
| PROB | 0      | 0.05   | 0.95   |
| RMSE | 55.29  | 8.09   | 6.22   |

MAX\_MEAN : 92 MAX\_MED : 92.5 BMAD : 5.54  
COFF : 20 HIT-CALL : 1 FITC : 51 ACTP : 1  
FLAGS :

Assay ID 1848 (NHEERL\_Quantilum\_inhib\_2\_dn)  
Sample ID : TX012266

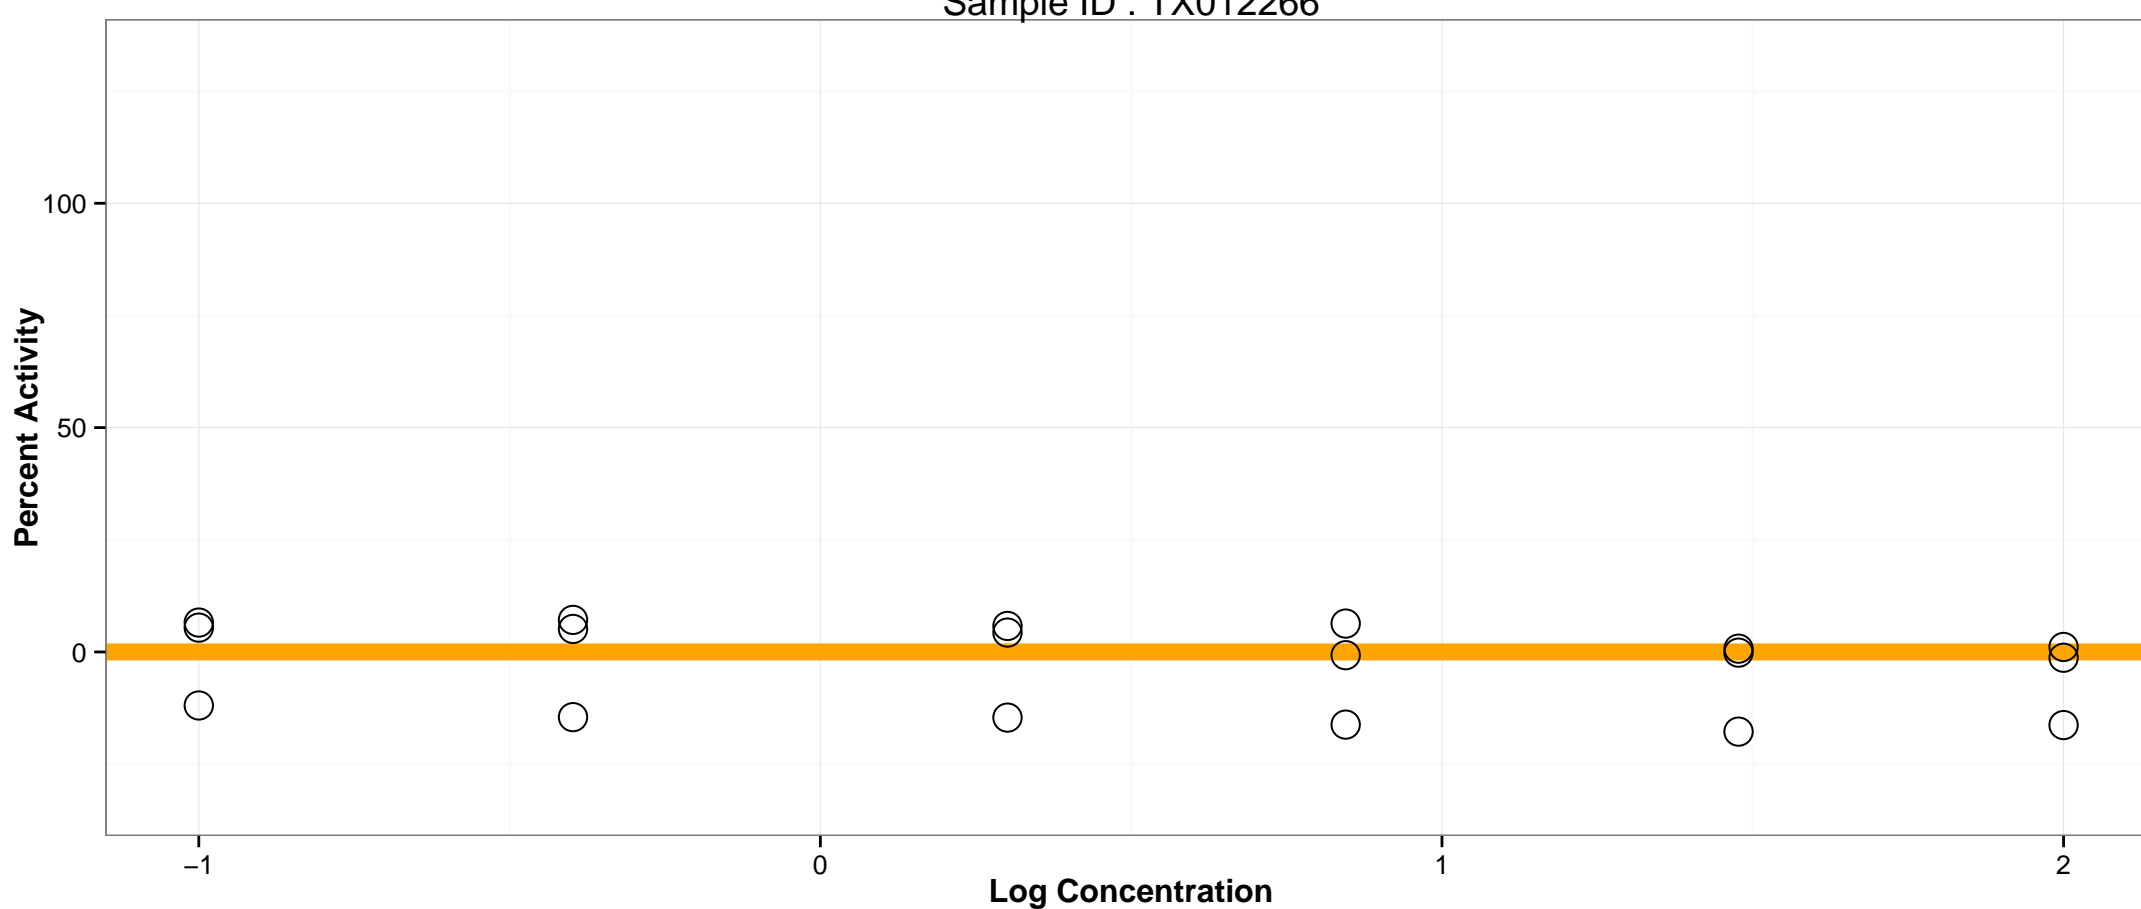

HILL MODEL

HILL MODEL: Not applicable

GAIN-LOSS MODEL

GNLS MODEL: Not applicable

|      | CNST | HILL | GNLS |
|------|------|------|------|
| AIC  | 136  | NA   | NA   |
| PROB | 1    | NA   | NA   |
| RMSE | 9.59 | NA   | NA   |

MAX\_MEAN : 0.0257 MAX\_MED : 5.43 BMAD : 8.58  
COFF : 20 HIT-CALL : 0 FITC : 4 ACTP : 0  
FLAGS :

Assay ID 1508 (NHEERL\_TPO\_AUR\_dn)  
Sample ID : TX012271

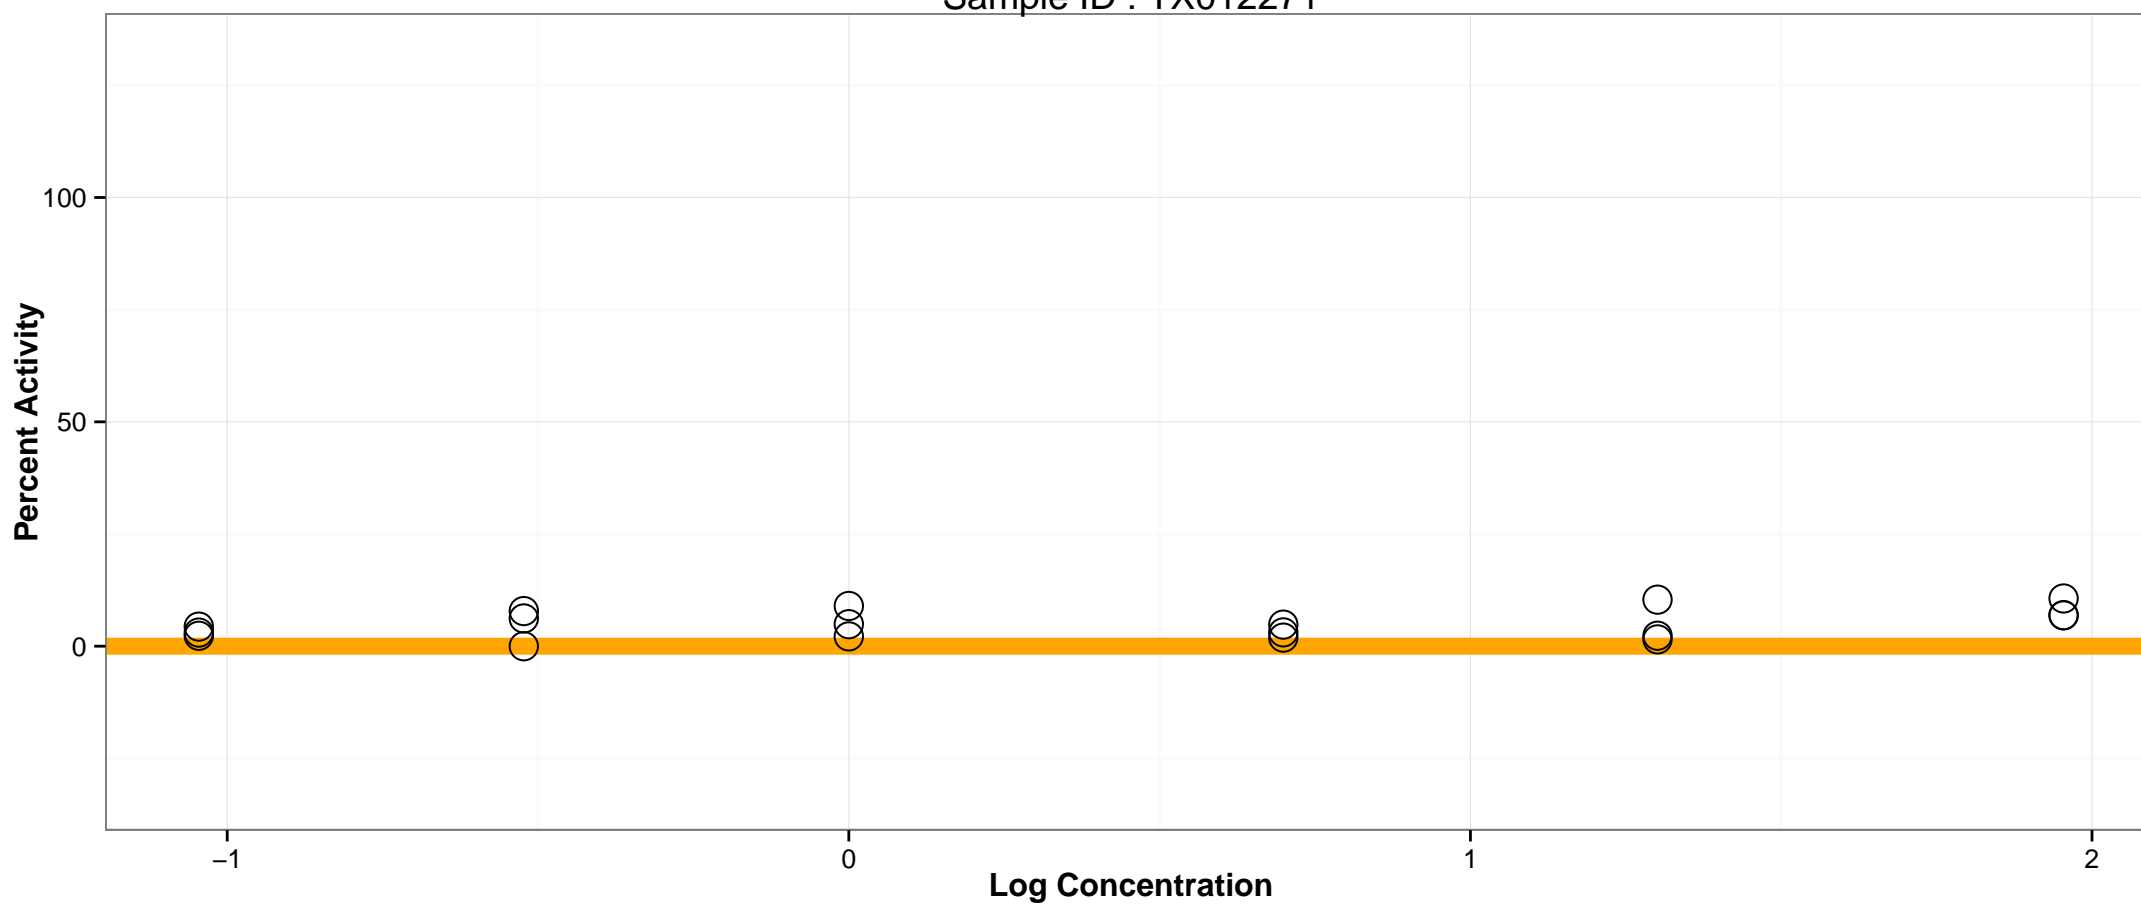

HILL MODEL

HILL MODEL: Not applicable

GAIN-LOSS MODEL

GNLS MODEL: Not applicable

|      | CNST  | HILL | GNLS |
|------|-------|------|------|
| AIC  | 118.5 | NA   | NA   |
| PROB | 1     | NA   | NA   |
| RMSE | 5.79  | NA   | NA   |

MAX\_MEAN : 8.15 MAX\_MED : 6.92 BMAD : 5.69  
COFF : 20 HIT-CALL : 0 FITC : 4 ACTP : 0  
FLAGS :

Assay ID 1509 (NHEERL\_HEK293T\_CellTiterGLO)  
Sample ID : TX012271

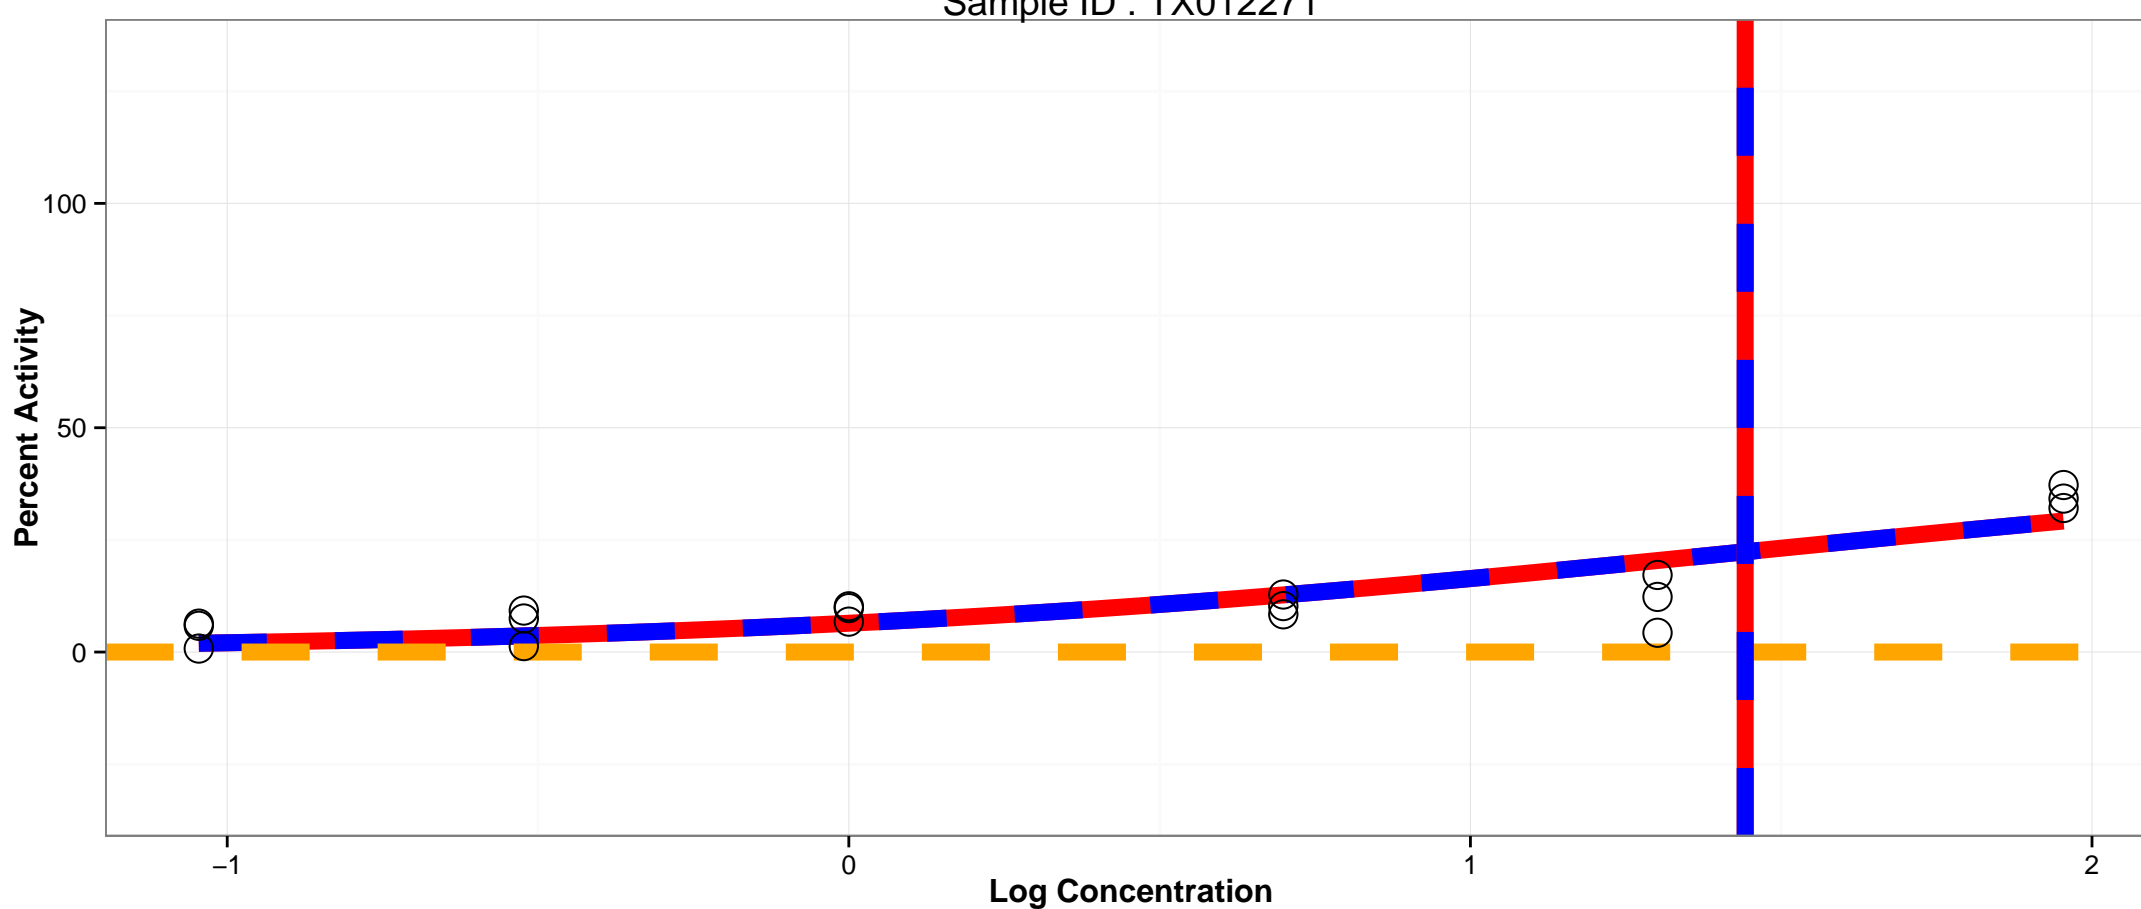

HILL MODEL

|     | tp   | ga    | gw    |
|-----|------|-------|-------|
| val | 44.7 | 1.44  | 0.538 |
| sd  | 12.5 | 0.433 | 0.126 |

GAIN-LOSS MODEL

|     | tp   | ga    | gw    | la   | lw    |
|-----|------|-------|-------|------|-------|
| val | 44.7 | 1.44  | 0.538 | 2.92 | 10    |
| sd  | 12.5 | 0.433 | 0.126 | 2120 | 22000 |

|      | CNST  | HILL   | GNLS   |
|------|-------|--------|--------|
| AIC  | 153.4 | 120.68 | 124.68 |
| PROB | 0     | 0.88   | 0.12   |
| RMSE | 16.43 | 5.64   | 5.64   |

MAX\_MEAN : 34.5 MAX\_MED : 34.2 BMAD : 5.54  
COFF : 20 HIT-CALL : 1 FITC : 42 ACTP : 1  
FLAGS : 6

Assay ID 1848 (NHEERL\_Quantilum\_inhib\_2\_dn)  
Sample ID : TX012271

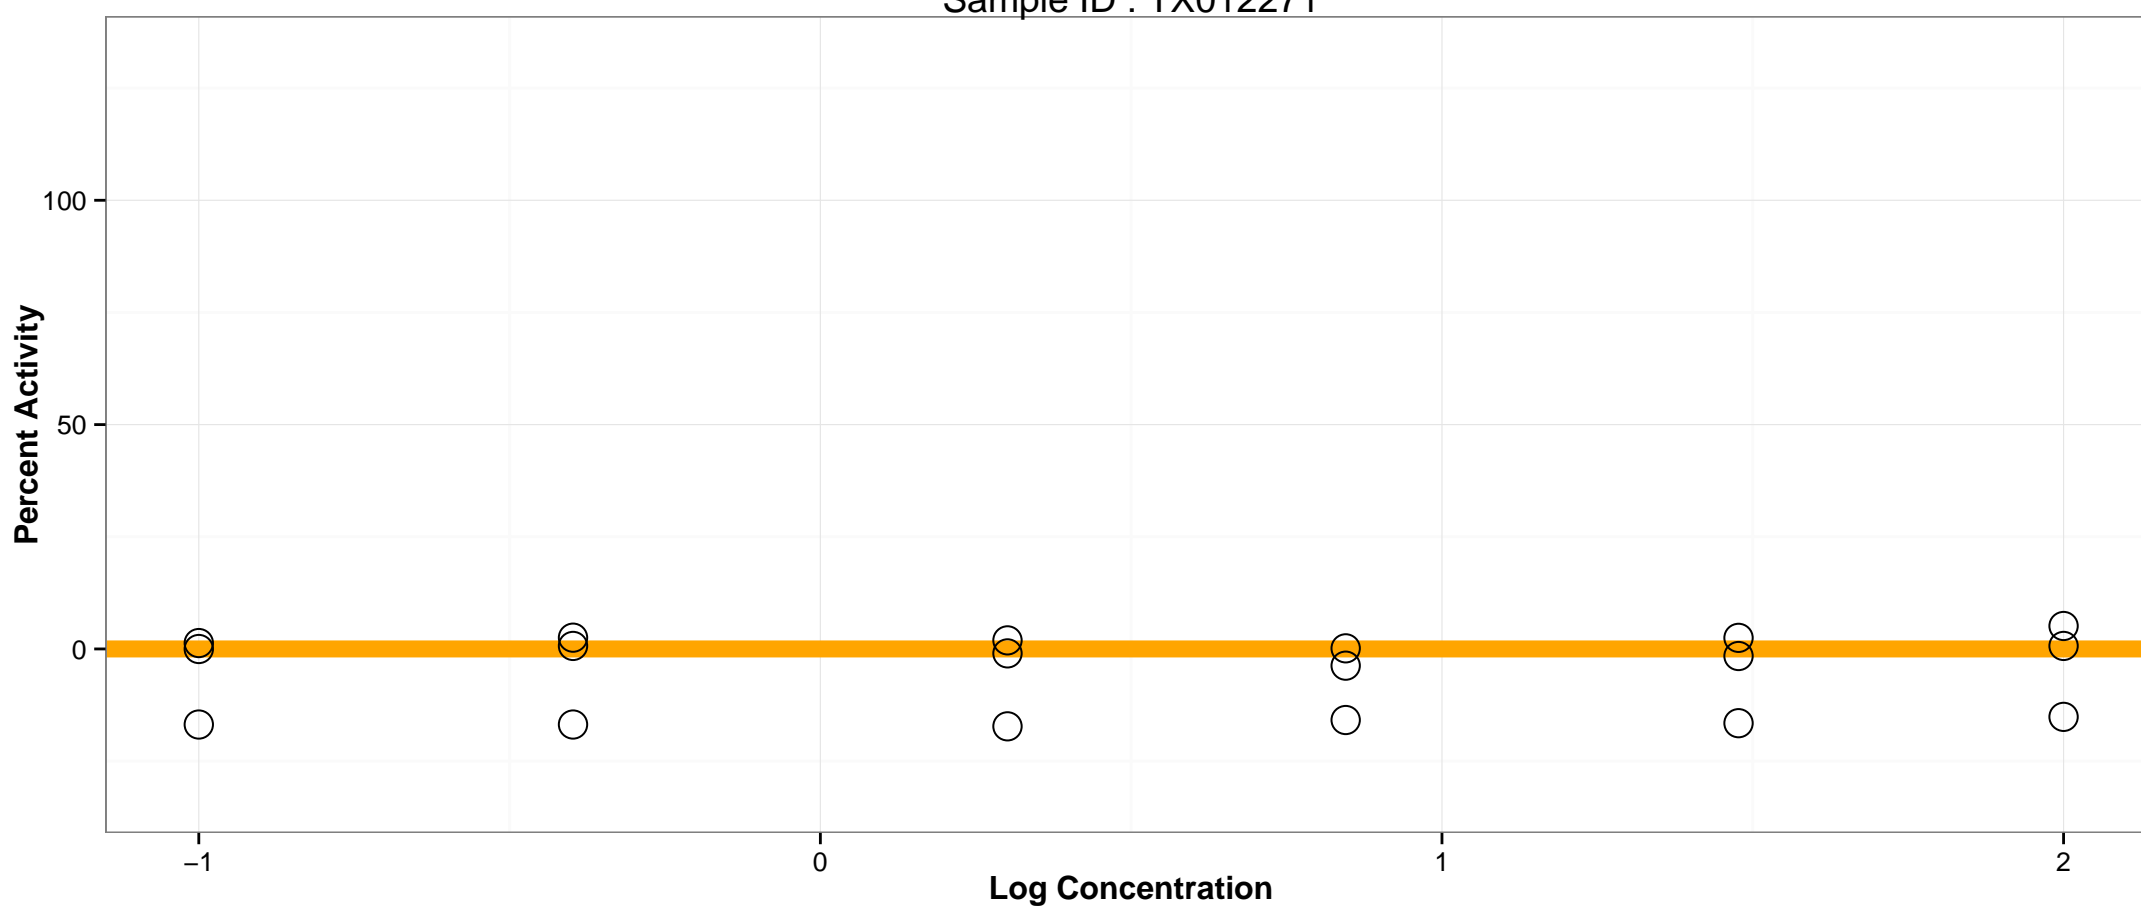

HILL MODEL

HILL MODEL: Not applicable

GAIN-LOSS MODEL

GNLS MODEL: Not applicable

|      | CNST   | HILL | GNLS |
|------|--------|------|------|
| AIC  | 134.77 | NA   | NA   |
| PROB | 1      | NA   | NA   |
| RMSE | 9.66   | NA   | NA   |

MAX\_MEAN : -3.11 MAX\_MED : 0.684 BMAD : 8.58  
COFF : 20 HIT-CALL : 0 FITC : 4 ACTP : 0  
FLAGS :

Assay ID 1508 (NHEERL\_TPO\_AUR\_dn)  
Sample ID : TX012274

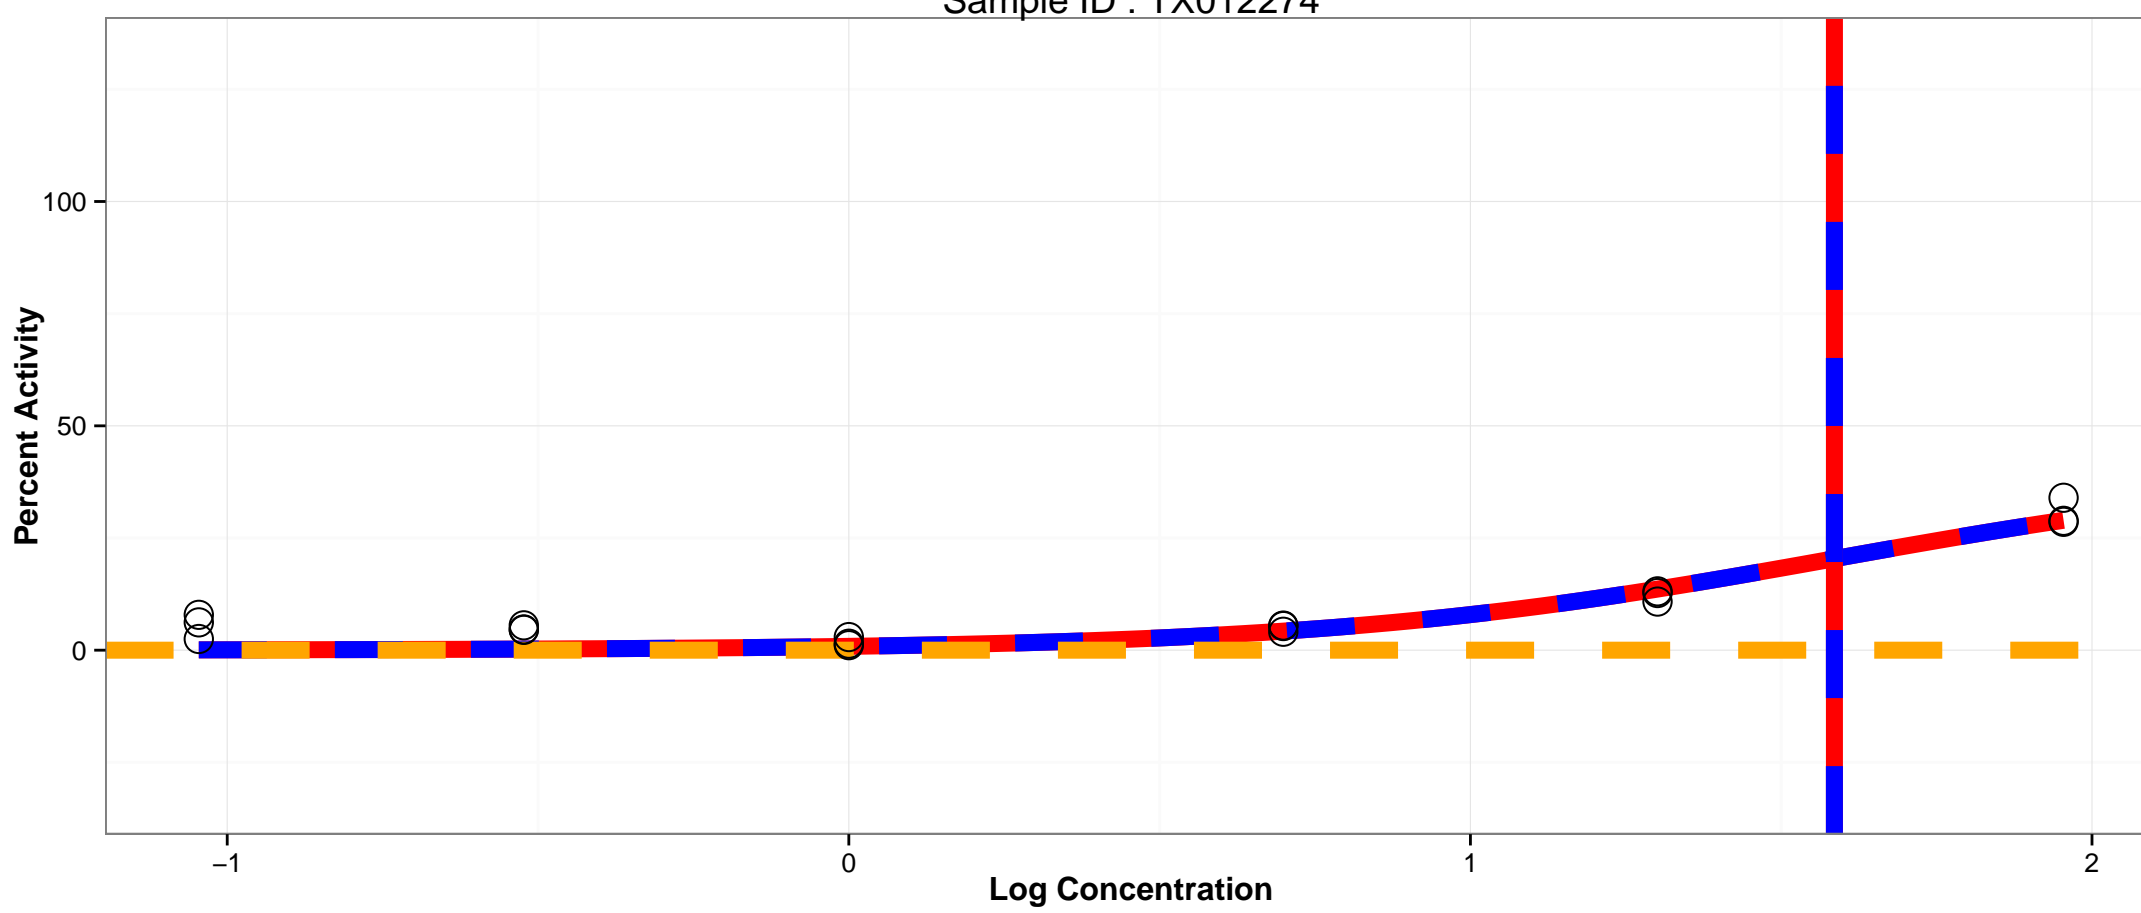

HILL MODEL

|     | tp   | ga    | gw    |
|-----|------|-------|-------|
| val | 40.8 | 1.59  | 1.05  |
| sd  | 8.99 | 0.217 | 0.273 |

GAIN-LOSS MODEL

|     | tp   | ga    | gw    | la   | lw    |
|-----|------|-------|-------|------|-------|
| val | 40.8 | 1.59  | 1.05  | 3.94 | 4.79  |
| sd  | 8.98 | 0.217 | 0.272 | 5280 | 12700 |

|      | CNST   | HILL   | GNLS   |
|------|--------|--------|--------|
| AIC  | 146.18 | 103.91 | 107.91 |
| PROB | 0      | 0.88   | 0.12   |
| RMSE | 14     | 3.44   | 3.44   |

MAX\_MEAN : 30.5 MAX\_MED : 28.8 BMAD : 5.69  
COFF : 20 HIT-CALL : 1 FITC : 42 ACTP : 1  
FLAGS : 6

Assay ID 1509 (NHEERL\_HEK293T\_CellTiterGLO)  
Sample ID : TX012274

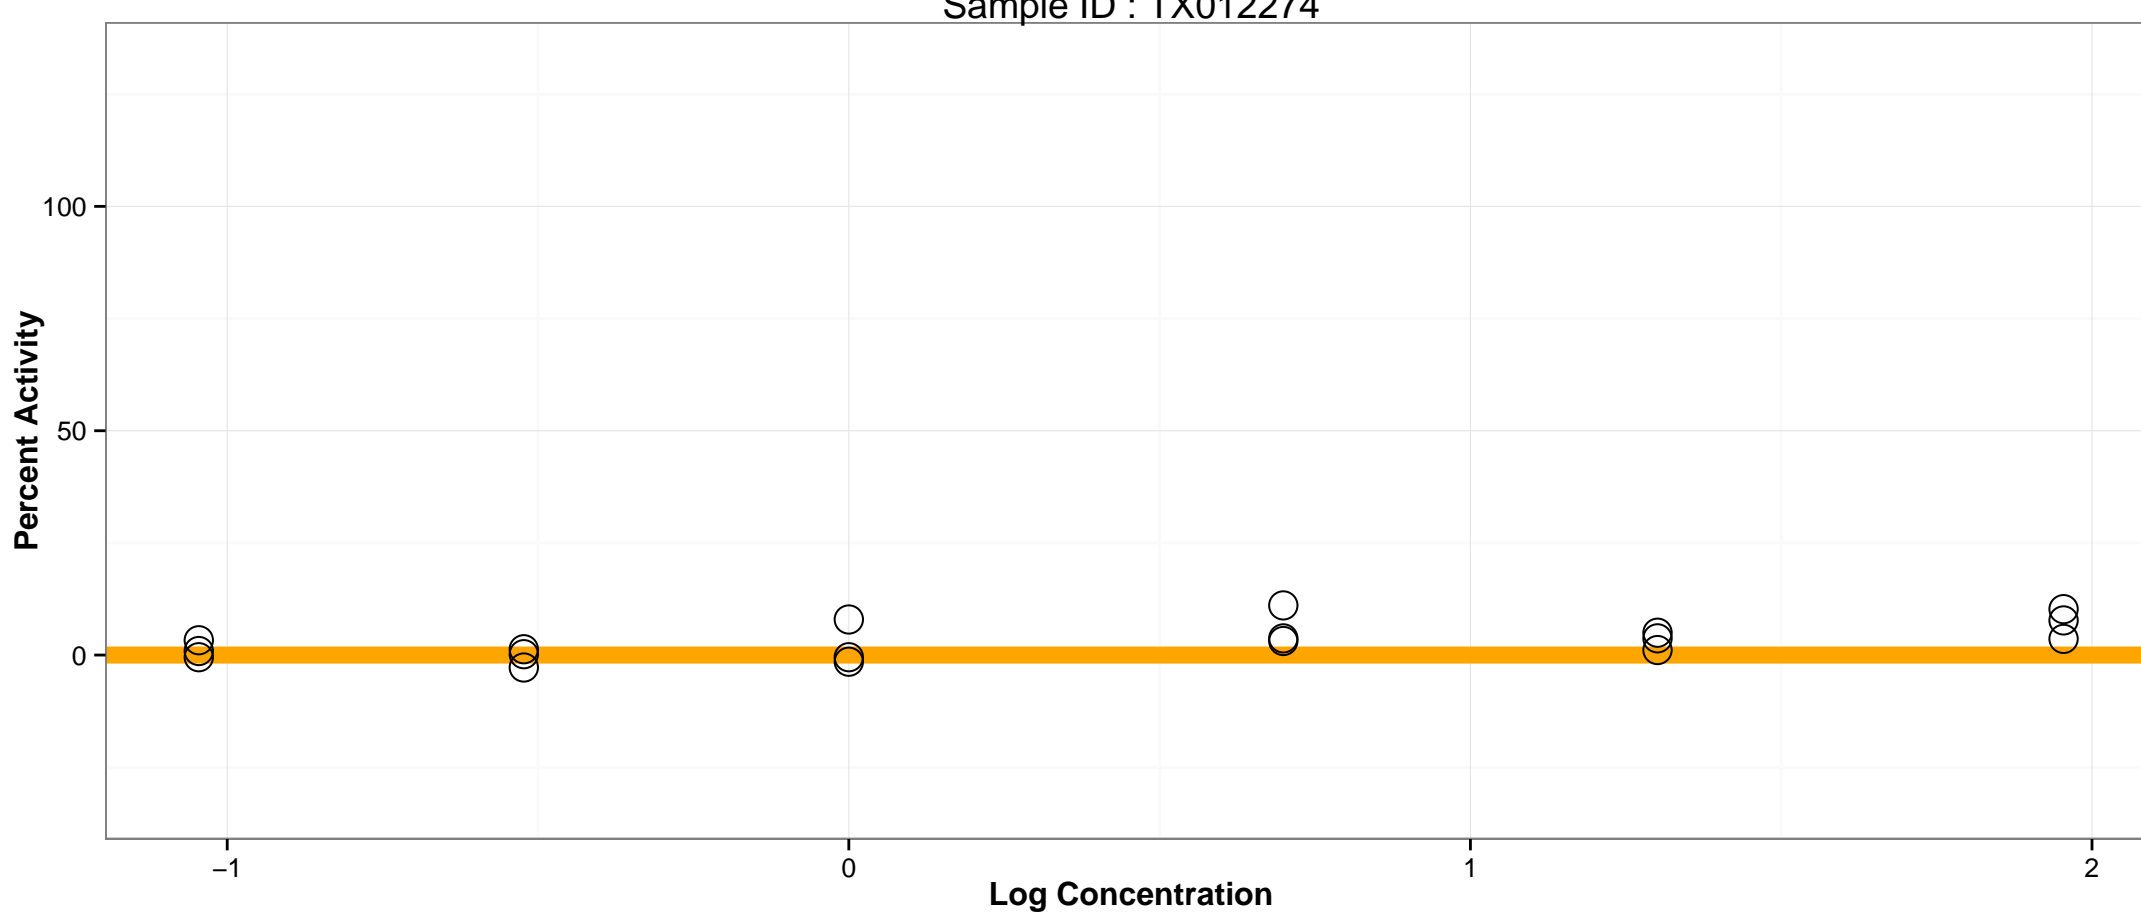

HILL MODEL

HILL MODEL: Not applicable

GAIN-LOSS MODEL

GNLS MODEL: Not applicable

|      | CNST   | HILL | GNLS |
|------|--------|------|------|
| AIC  | 111.27 | NA   | NA   |
| PROB | 1      | NA   | NA   |
| RMSE | 5.01   | NA   | NA   |

MAX\_MEAN : 7.2 MAX\_MED : 7.73 BMAD : 5.54  
COFF : 20 HIT-CALL : 0 FITC : 4 ACTP : 0  
FLAGS :

Assay ID 1848 (NHEERL\_Quantilum\_inhib\_2\_dn)  
Sample ID : TX012274

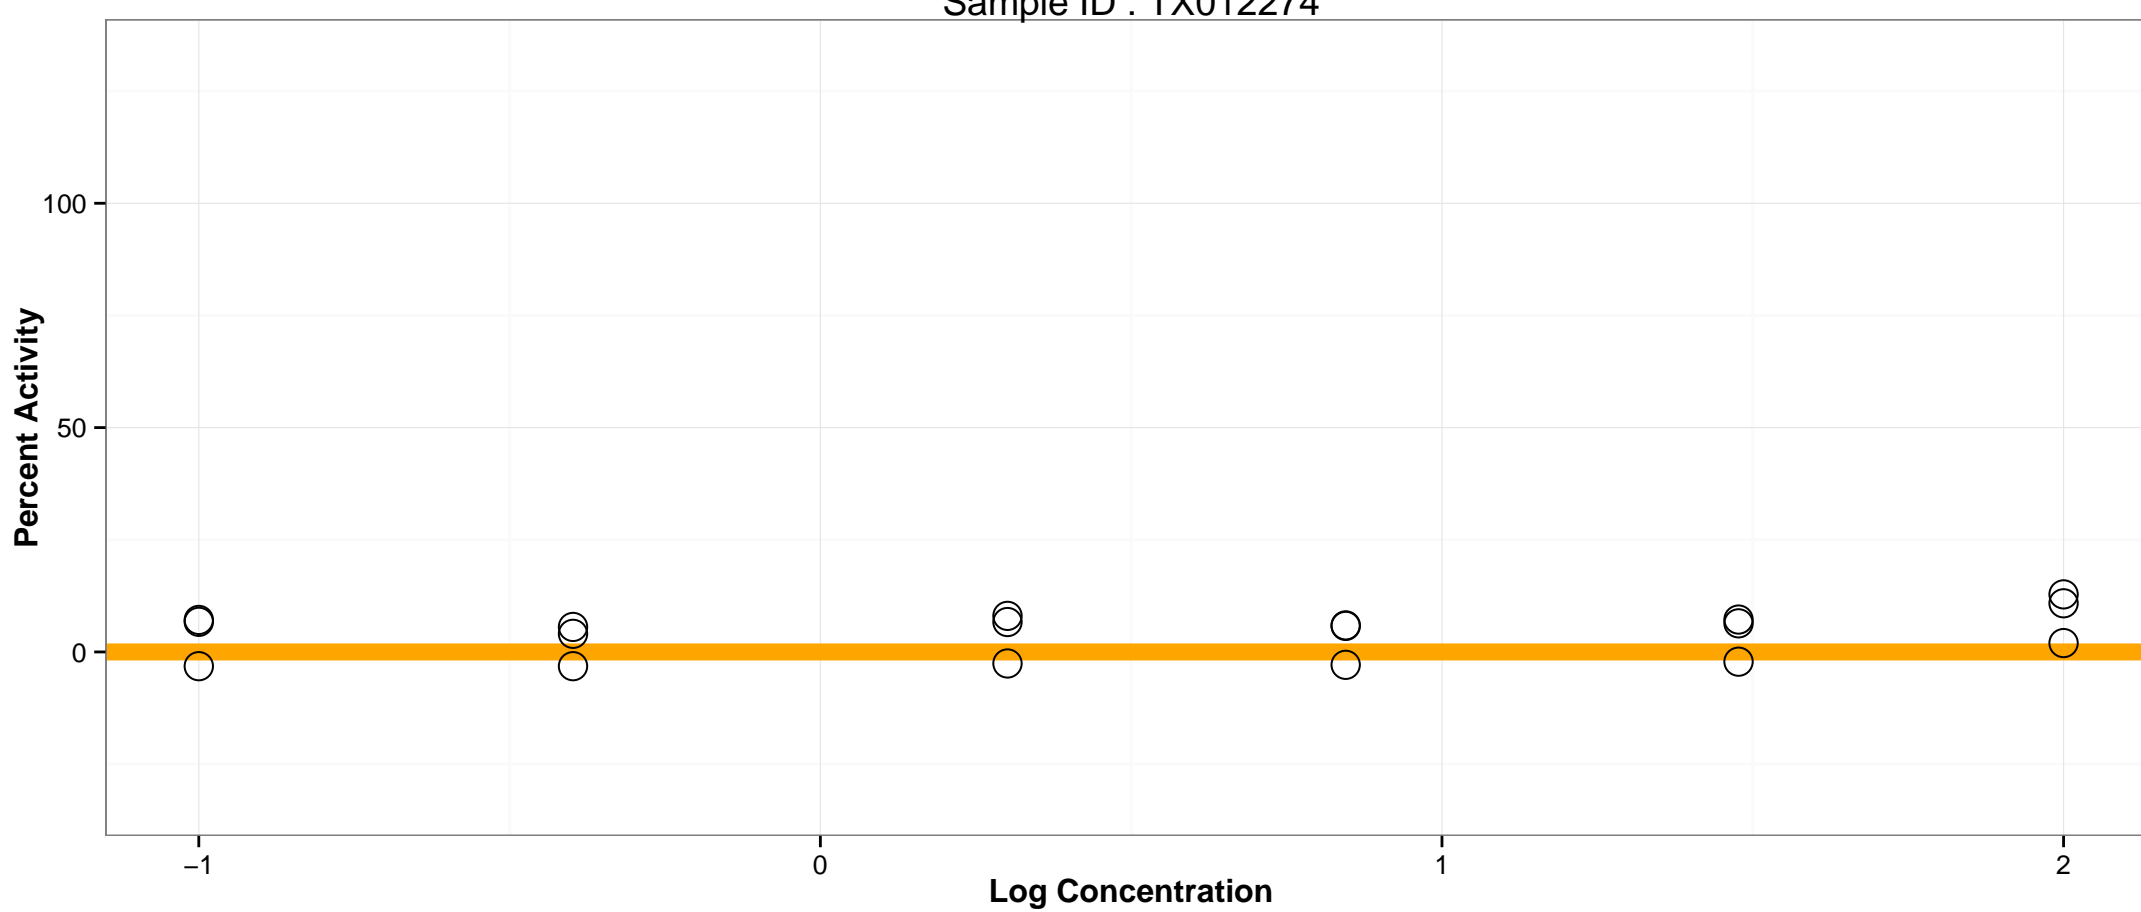

HILL MODEL

HILL MODEL: Not applicable

GAIN-LOSS MODEL

GNLS MODEL: Not applicable

|      | CNST   | HILL | GNLS |
|------|--------|------|------|
| AIC  | 122.62 | NA   | NA   |
| PROB | 1      | NA   | NA   |
| RMSE | 6.42   | NA   | NA   |

MAX\_MEAN : 8.56 MAX\_MED : 10.9 BMAD : 8.58  
COFF : 20 HIT-CALL : 0 FITC : 4 ACTP : 0  
FLAGS :

Assay ID 1508 (NHEERL\_TPO\_AUR\_dn)  
Sample ID : TX012276

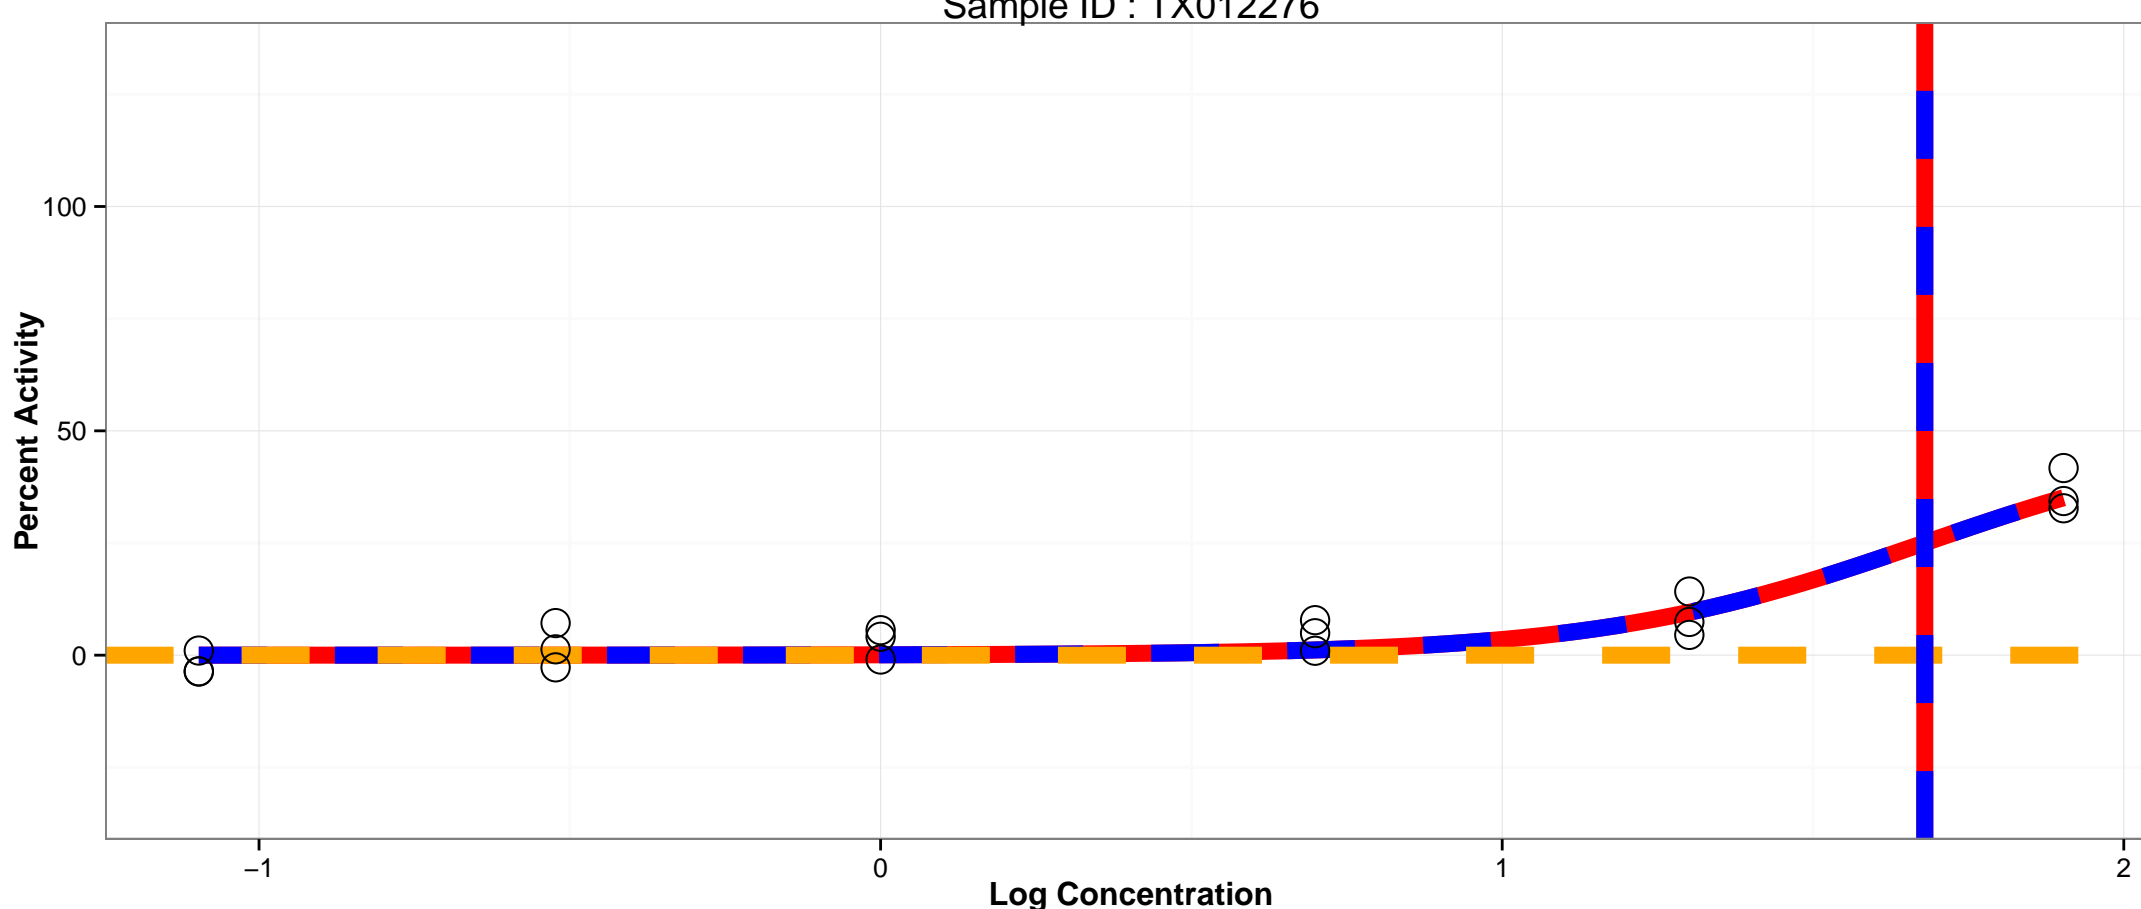

HILL MODEL

|     | tp   | ga    | gw    |
|-----|------|-------|-------|
| val | 50.1 | 1.68  | 1.66  |
| sd  | 25.7 | 0.333 | 0.977 |

GAIN-LOSS MODEL

|     | tp   | ga    | gw    | la   | lw   |
|-----|------|-------|-------|------|------|
| val | 50.1 | 1.68  | 1.65  | 3.9  | 4.08 |
| sd  | 25.7 | 0.332 | 0.976 | 2420 | 4930 |

|      | CNST   | HILL   | GNLS   |
|------|--------|--------|--------|
| AIC  | 147.41 | 111.85 | 115.85 |
| PROB | 0      | 0.88   | 0.12   |
| RMSE | 15.8   | 4.05   | 4.05   |

MAX\_MEAN : 36.3 MAX\_MED : 34.4 BMAD : 5.69  
COFF : 20 HIT-CALL : 1 FITC : 42 ACTP : 1  
FLAGS : 6

Assay ID 1509 (NHEERL\_HEK293T\_CellTiterGLO)  
Sample ID : TX012276

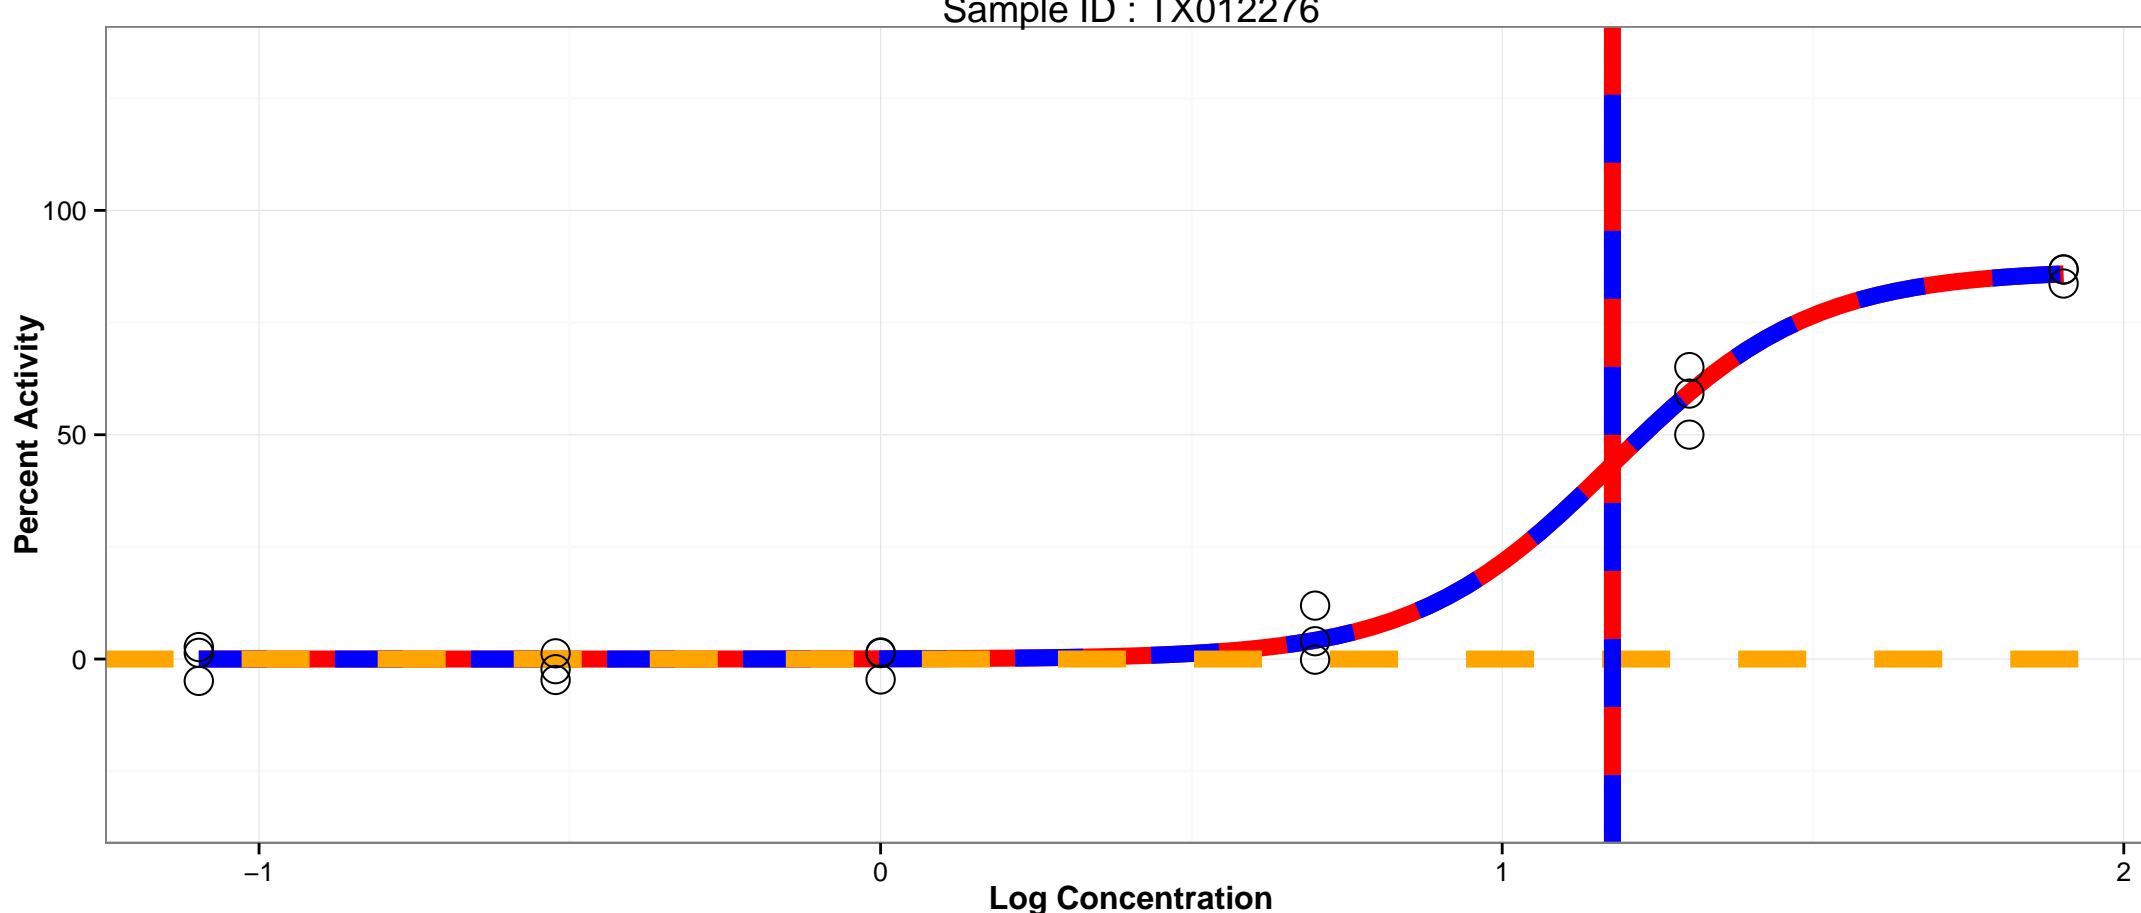

HILL MODEL

|     | tp   | ga     | gw    |
|-----|------|--------|-------|
| val | 86.8 | 1.18   | 2.71  |
| sd  | 2.07 | 0.0302 | 0.511 |

GAIN-LOSS MODEL

|     | tp   | ga     | gw    | la    | lw     |
|-----|------|--------|-------|-------|--------|
| val | 86.8 | 1.18   | 2.71  | 2.84  | 10.2   |
| sd  | 2.07 | 0.0302 | 0.511 | 57100 | 609000 |

|      | CNST  | HILL   | GNLS   |
|------|-------|--------|--------|
| AIC  | 186.7 | 109.71 | 113.71 |
| PROB | 0     | 0.88   | 0.12   |
| RMSE | 42.54 | 4.02   | 4.02   |

MAX\_MEAN : 85.8 MAX\_MED : 86.8 BMAD : 5.54  
COFF : 20 HIT-CALL : 1 FITC : 41 ACTP : 1  
FLAGS :

Assay ID 1848 (NHEERL\_Quantilum\_inhib\_2\_dn)  
Sample ID : TX012276

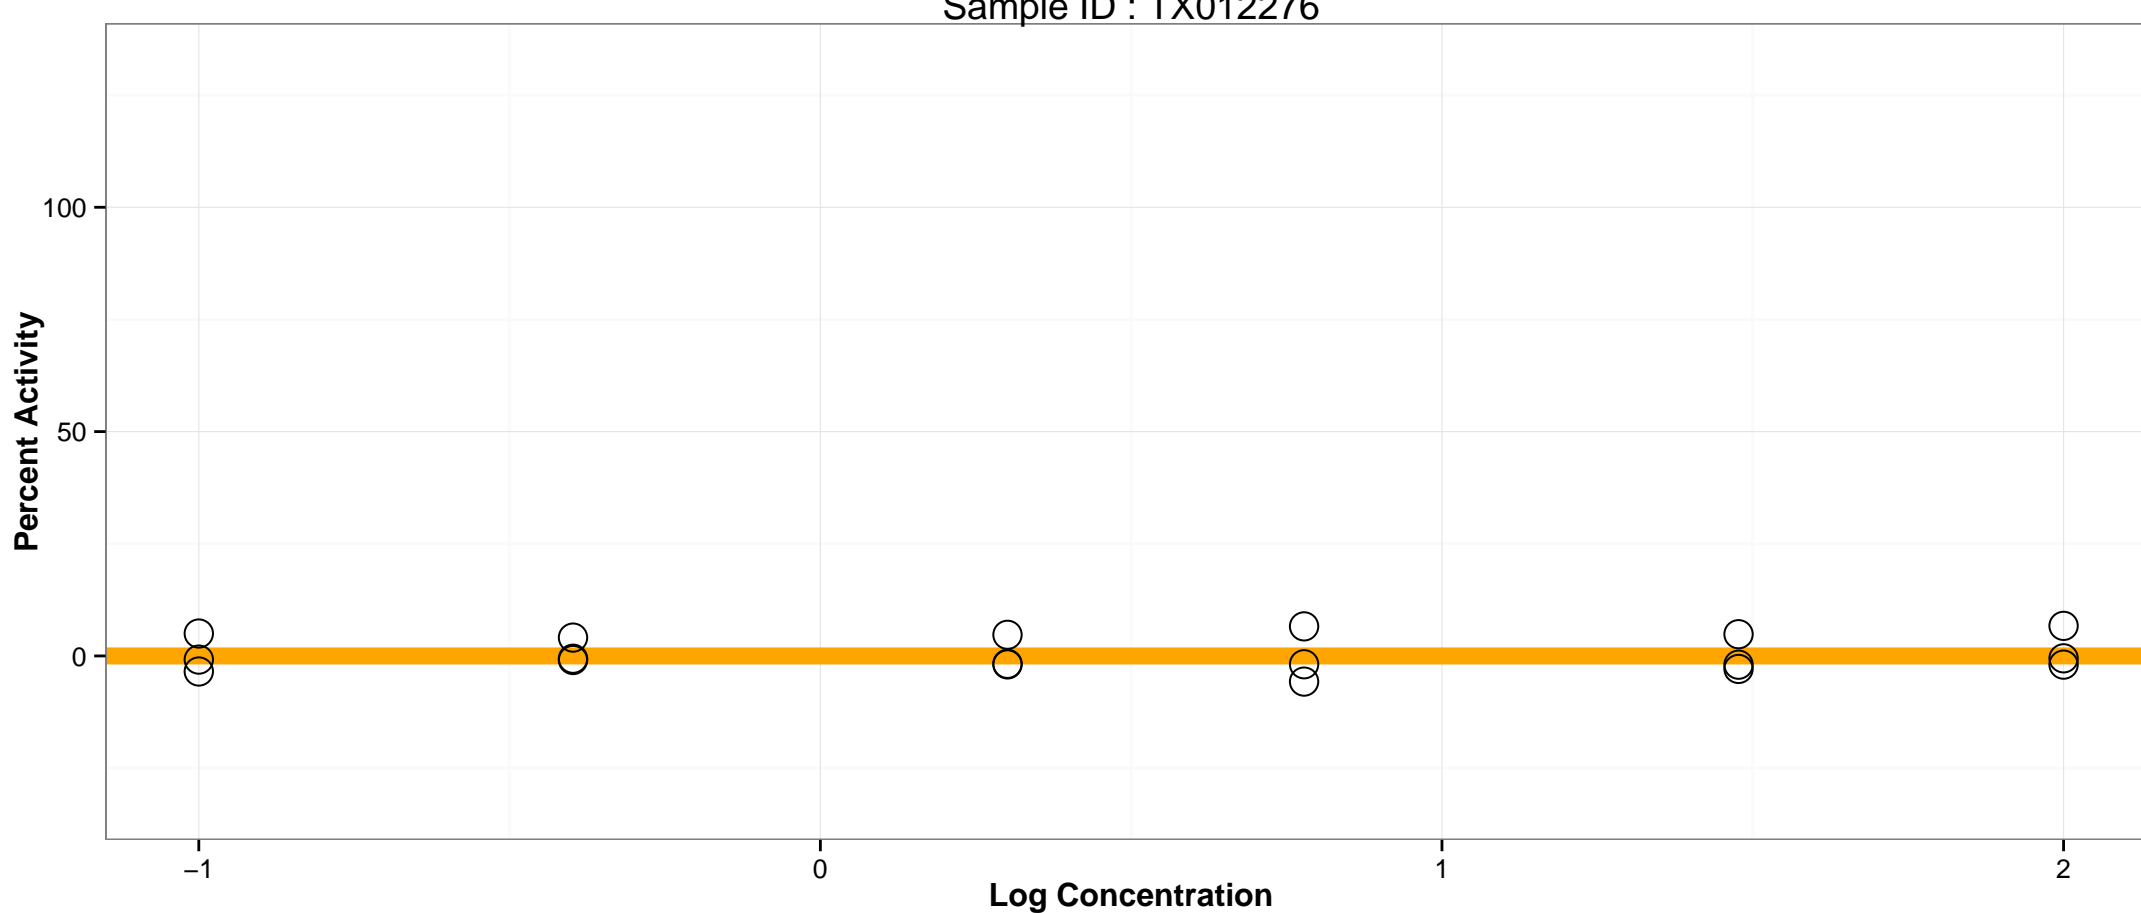

HILL MODEL

HILL MODEL: Not applicable

GAIN-LOSS MODEL

GNLS MODEL: Not applicable

|      | CNST   | HILL | GNLS |
|------|--------|------|------|
| AIC  | 102.49 | NA   | NA   |
| PROB | 1      | NA   | NA   |
| RMSE | 3.72   | NA   | NA   |

MAX\_MEAN : 1.42 MAX\_MED : -0.52 BMAD : 8.58  
COFF : 20 HIT-CALL : 0 FITC : 4 ACTP : 0  
FLAGS :

Chemical : 17beta-Trenbolone  
CAS : 10161-33-8

Assay ID 1508 (NHEERL\_TPO\_AUR\_dn)  
Sample ID : TX012530

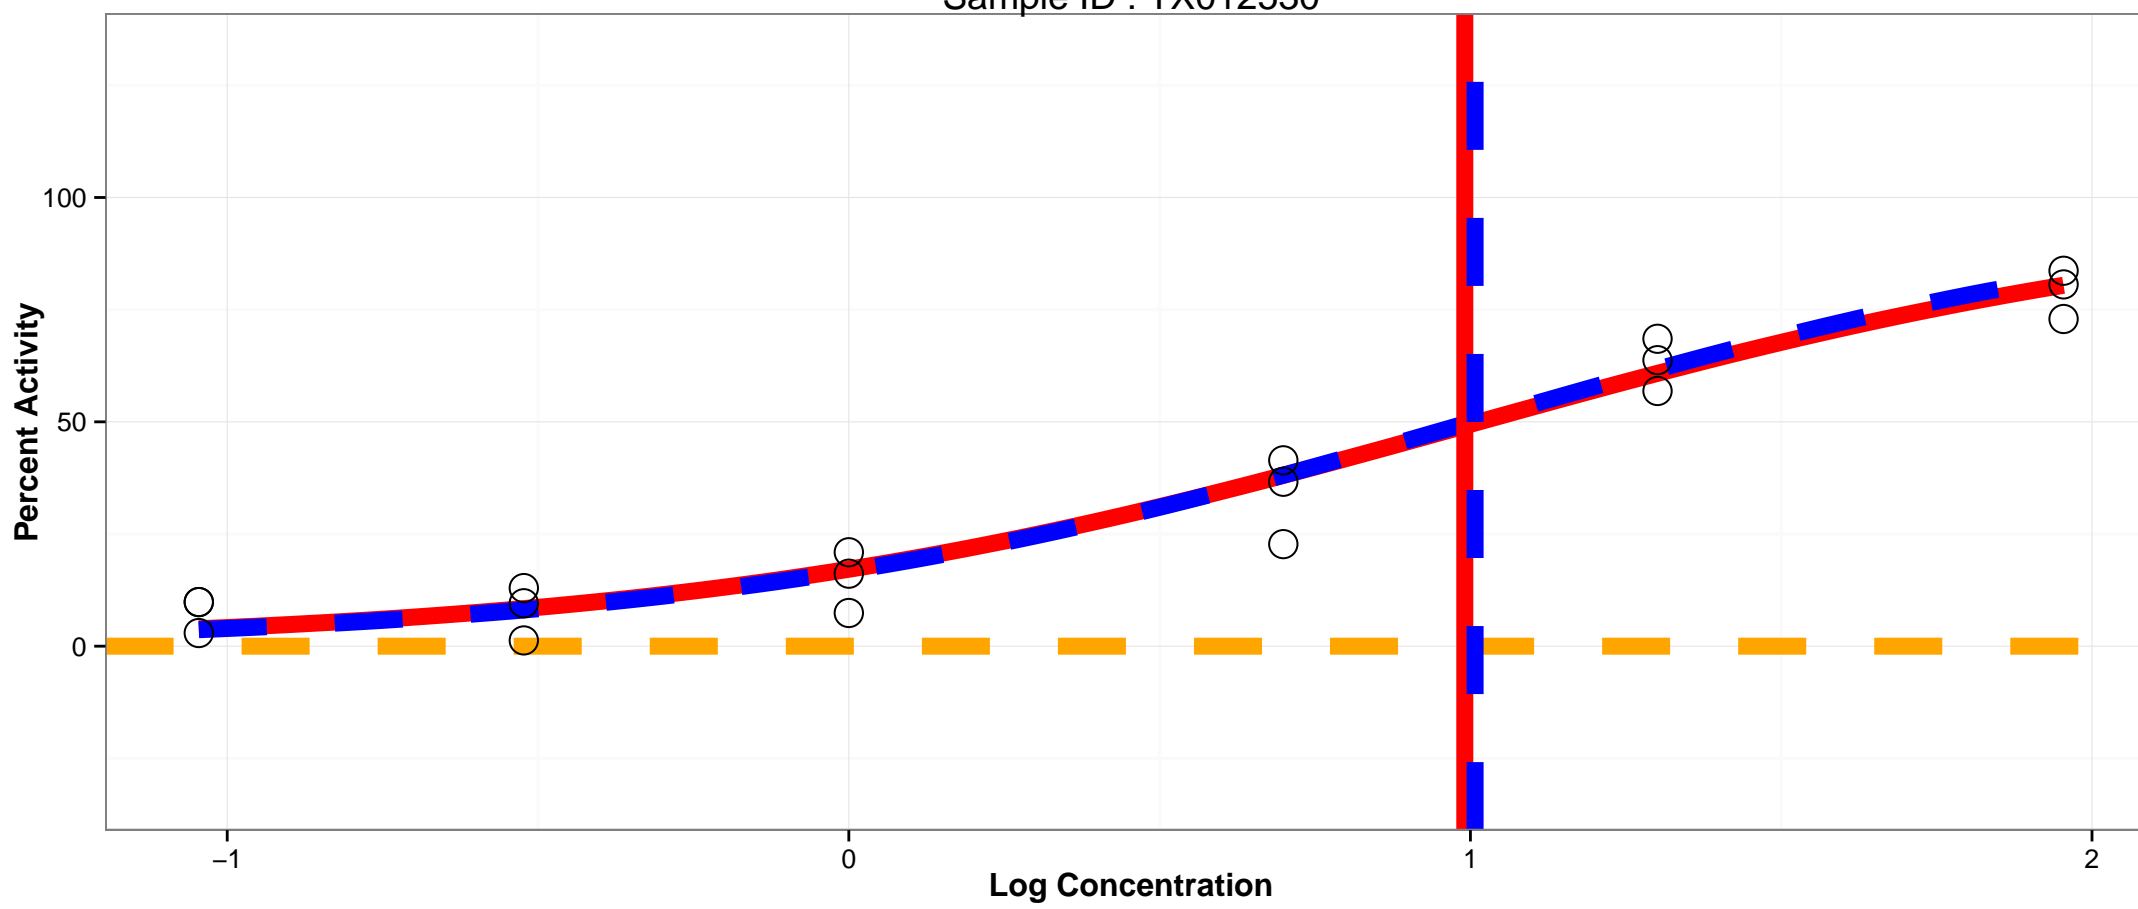

HILL MODEL

|     | tp   | ga    | gw    |
|-----|------|-------|-------|
| val | 98.2 | 0.991 | 0.681 |
| sd  | 12.4 | 0.213 | 0.122 |

GAIN-LOSS MODEL

|     | tp  | ga   | gw    | la   | lw   |
|-----|-----|------|-------|------|------|
| val | 100 | 1.01 | 0.692 | 2.04 | 17.9 |
| sd  | NA  | NA   | NA    | NA   | NA   |

|      | CNST   | HILL   | GNLS   |
|------|--------|--------|--------|
| AIC  | 190.92 | 124.33 | 128.05 |
| PROB | 0      | 0.87   | 0.13   |
| RMSE | 44.48  | 6.02   | 5.96   |

MAX\_MEAN : 79.1 MAX\_MED : 80.6 BMAD : 5.69  
COFF : 20 HIT-CALL : 1 FITC : 42 ACTP : 1  
FLAGS :

Assay ID 1509 (NHEERL\_HEK293T\_CellTiterGLO)  
Sample ID : TX012530

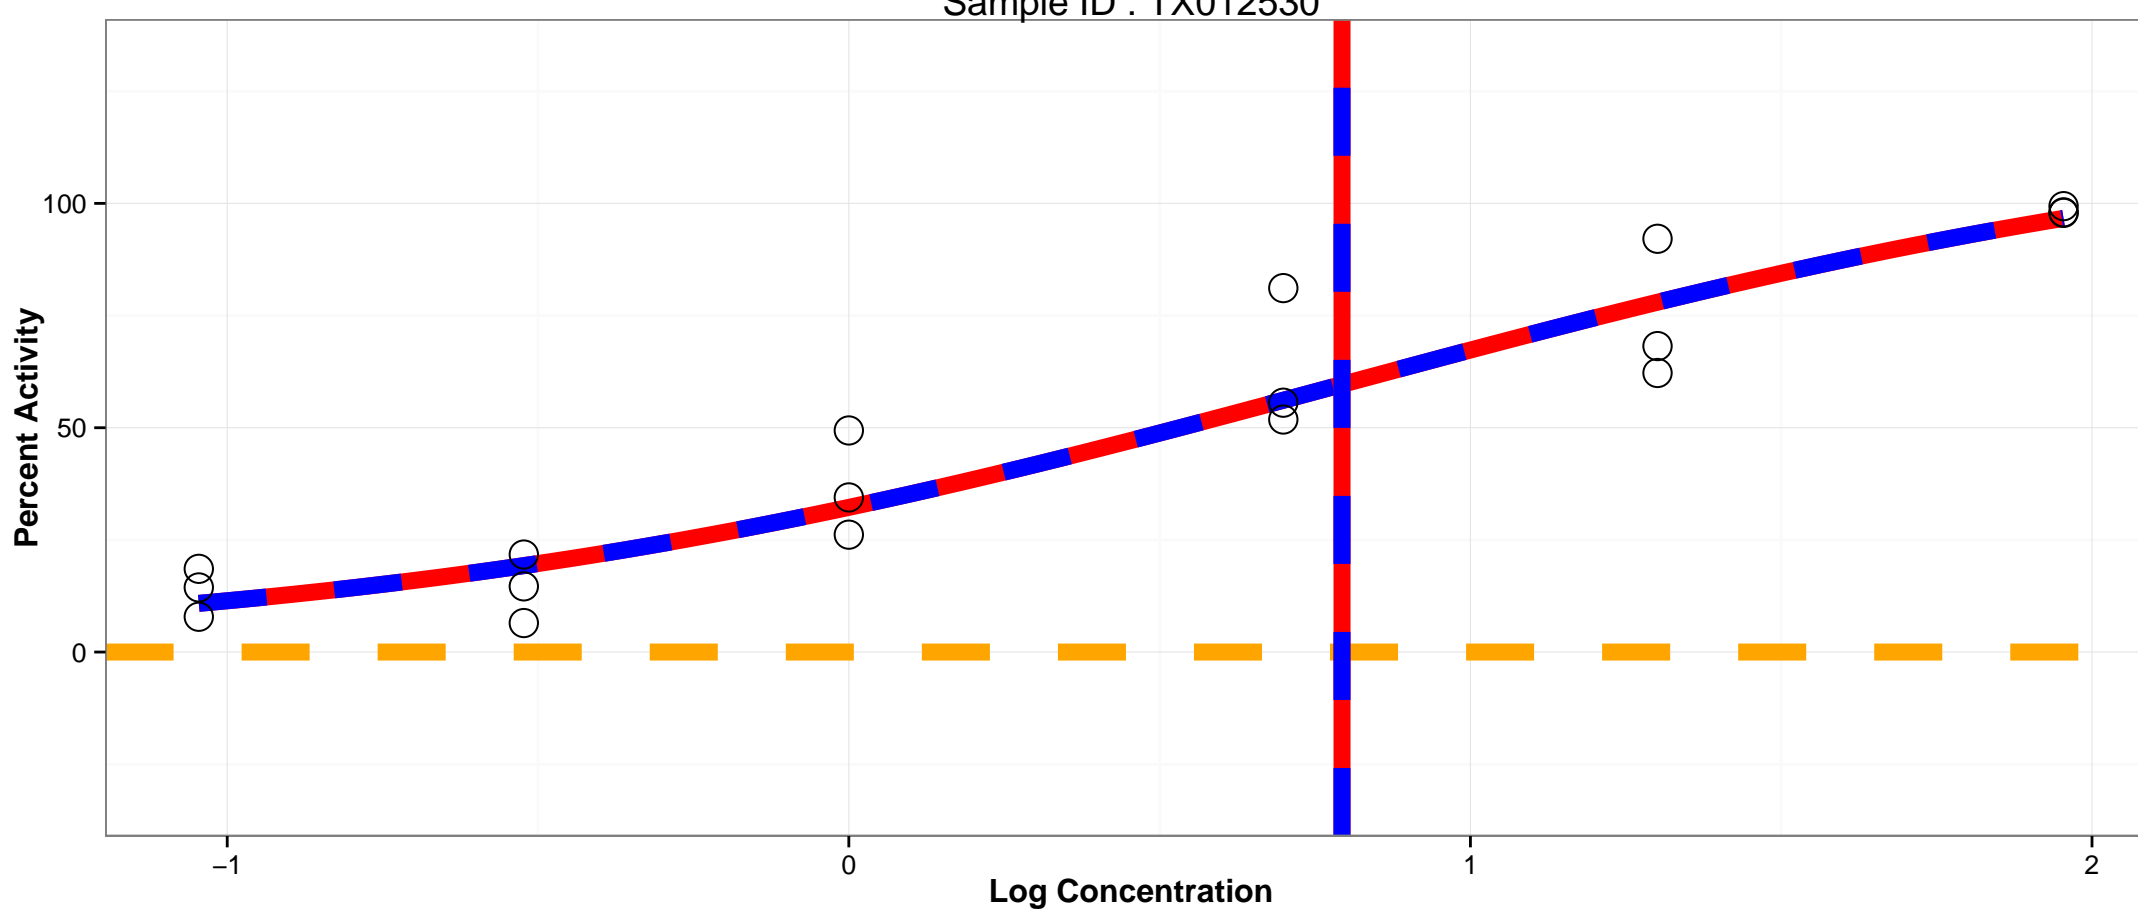

HILL MODEL

|     | tp   | ga    | gw    |
|-----|------|-------|-------|
| val | 119  | 0.793 | 0.544 |
| sd  | 18.3 | 0.345 | 0.114 |

GAIN-LOSS MODEL

|     | tp  | ga    | gw    | la   | lw   |
|-----|-----|-------|-------|------|------|
| val | 119 | 0.793 | 0.544 | 3.85 | 17.9 |
| sd  | NA  | NA    | NA    | NA   | NA   |

|      | CNST   | HILL   | GNLS   |
|------|--------|--------|--------|
| AIC  | 202.56 | 141.79 | 145.79 |
| PROB | 0      | 0.88   | 0.12   |
| RMSE | 59.68  | 10.02  | 10.02  |

MAX\_MEAN : 98.4 MAX\_MED : 98 BMAD : 5.54  
COFF : 20 HIT-CALL : 1 FITC : 42 ACTP : 1  
FLAGS :

Assay ID 1848 (NHEERL\_Quantilum\_inhib\_2\_dn)  
Sample ID : TX012530

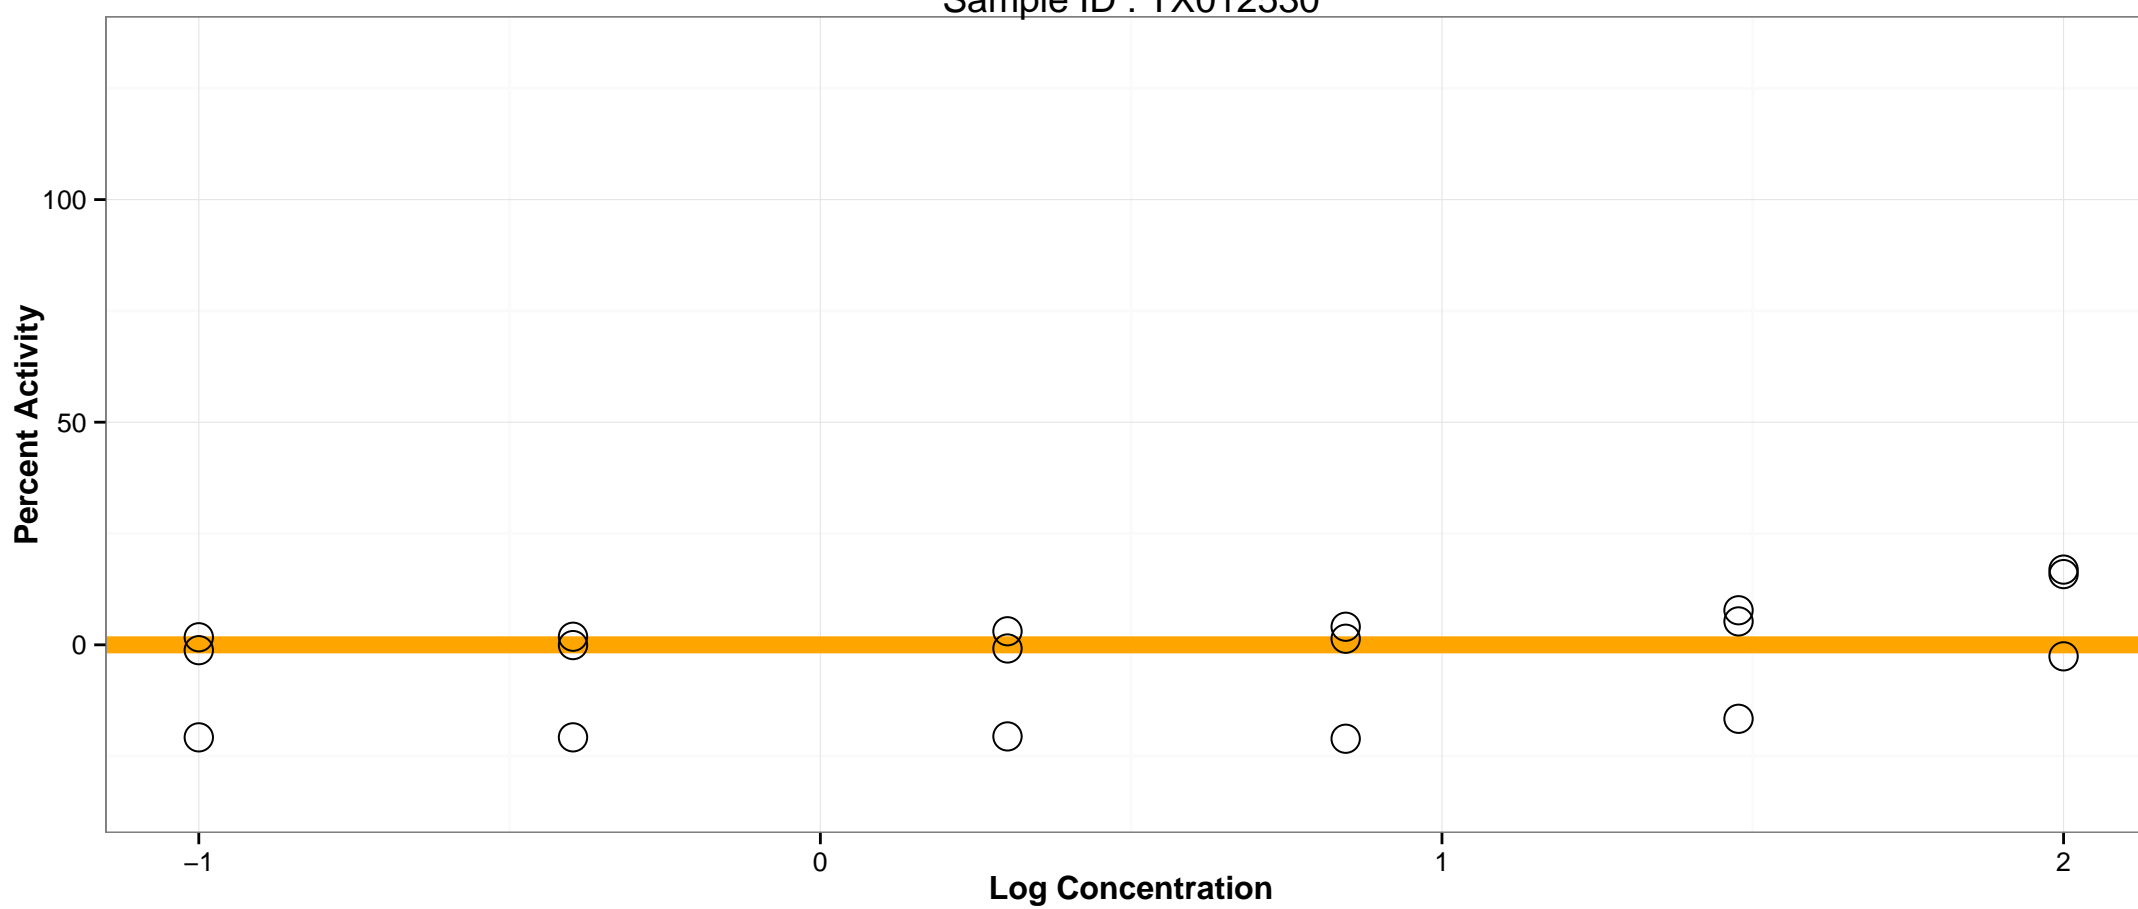

HILL MODEL

HILL MODEL: Not applicable

GAIN-LOSS MODEL

GNLS MODEL: Not applicable

|      | CNST   | HILL | GNLS |
|------|--------|------|------|
| AIC  | 144.19 | NA   | NA   |
| PROB | 1      | NA   | NA   |
| RMSE | 12.19  | NA   | NA   |

MAX\_MEAN : 10.1 MAX\_MED : 15.9 BMAD : 8.58  
COFF : 20 HIT-CALL : 0 FITC : 4 ACTP : 0  
FLAGS :

Assay ID 1508 (NHEERL\_TPO\_AUR\_dn)  
Sample ID : TX012554

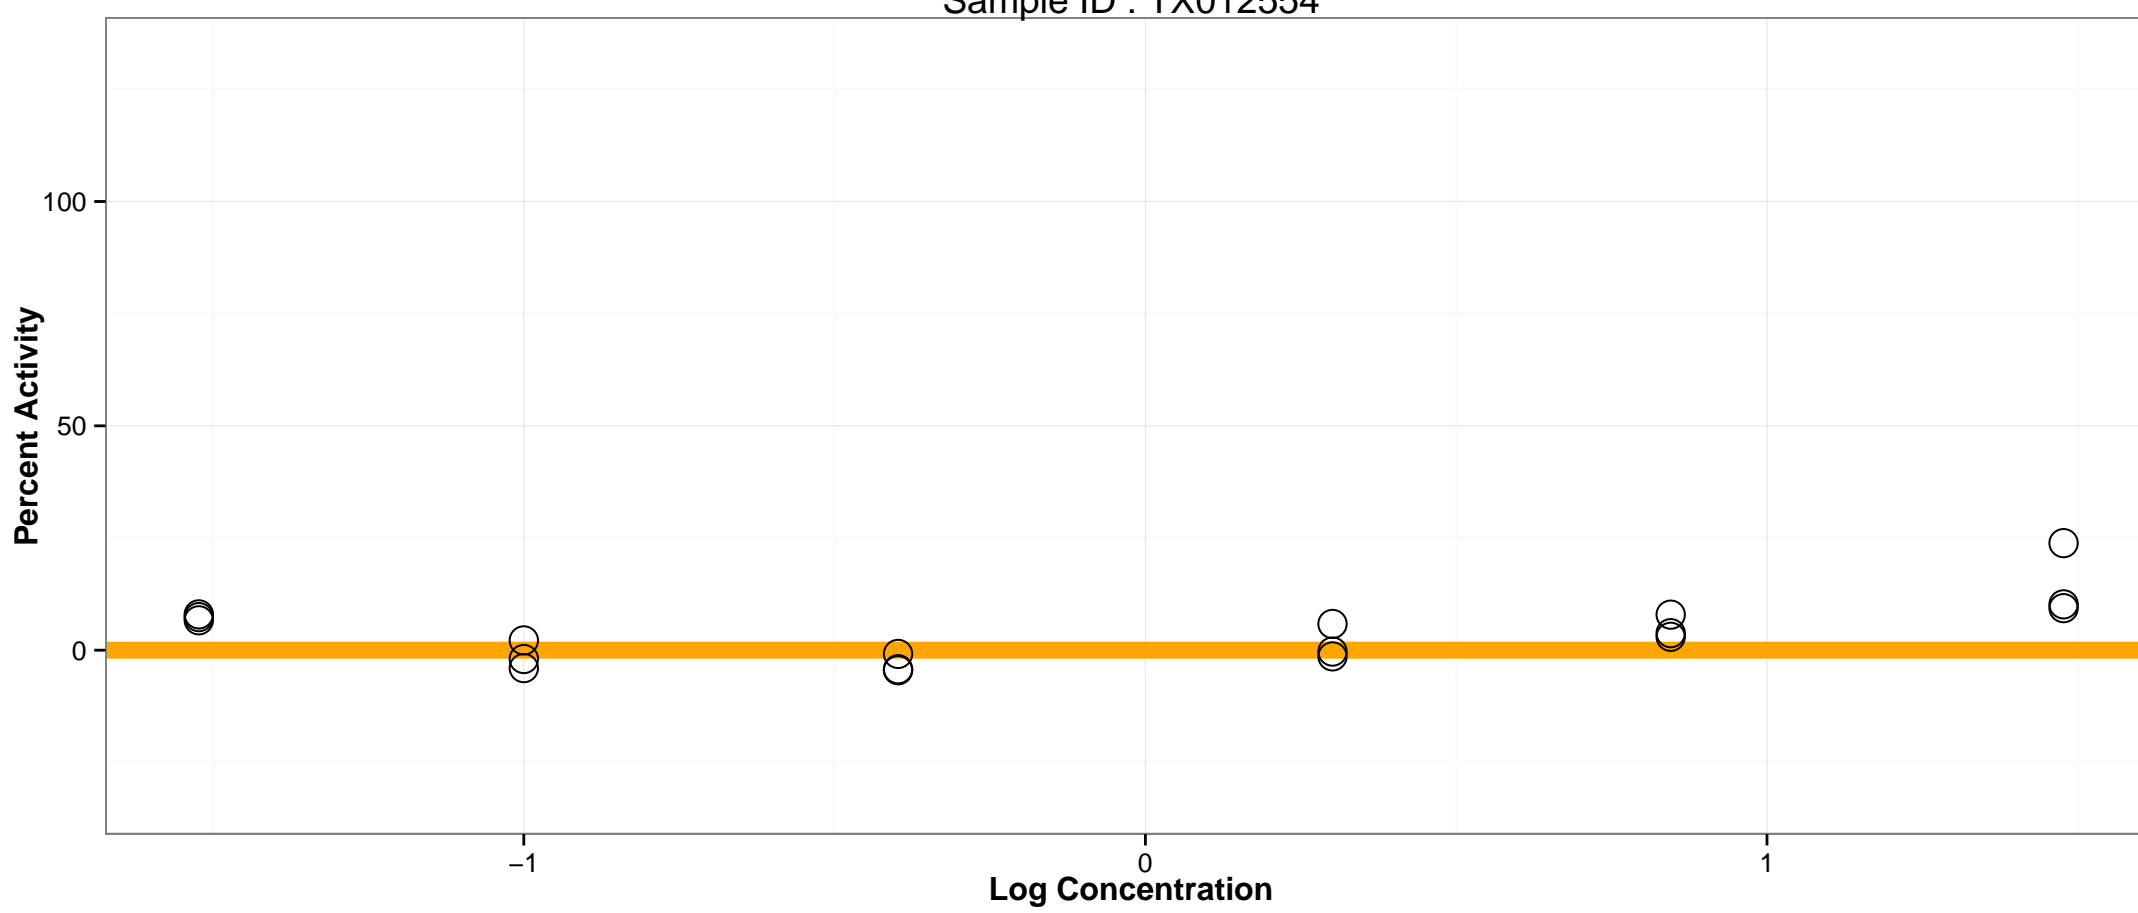

HILL MODEL

HILL MODEL: Not applicable

GAIN-LOSS MODEL

GNLS MODEL: Not applicable

|      | CNST  | HILL | GNLS |
|------|-------|------|------|
| AIC  | 125.5 | NA   | NA   |
| PROB | 1     | NA   | NA   |
| RMSE | 7.86  | NA   | NA   |

MAX\_MEAN : 14.5 MAX\_MED : 10.2 BMAD : 5.69  
COFF : 20 HIT-CALL : 0 FITC : 4 ACTP : 0  
FLAGS :

Assay ID 1509 (NHEERL\_HEK293T\_CellTiterGLO)  
Sample ID : TX012554

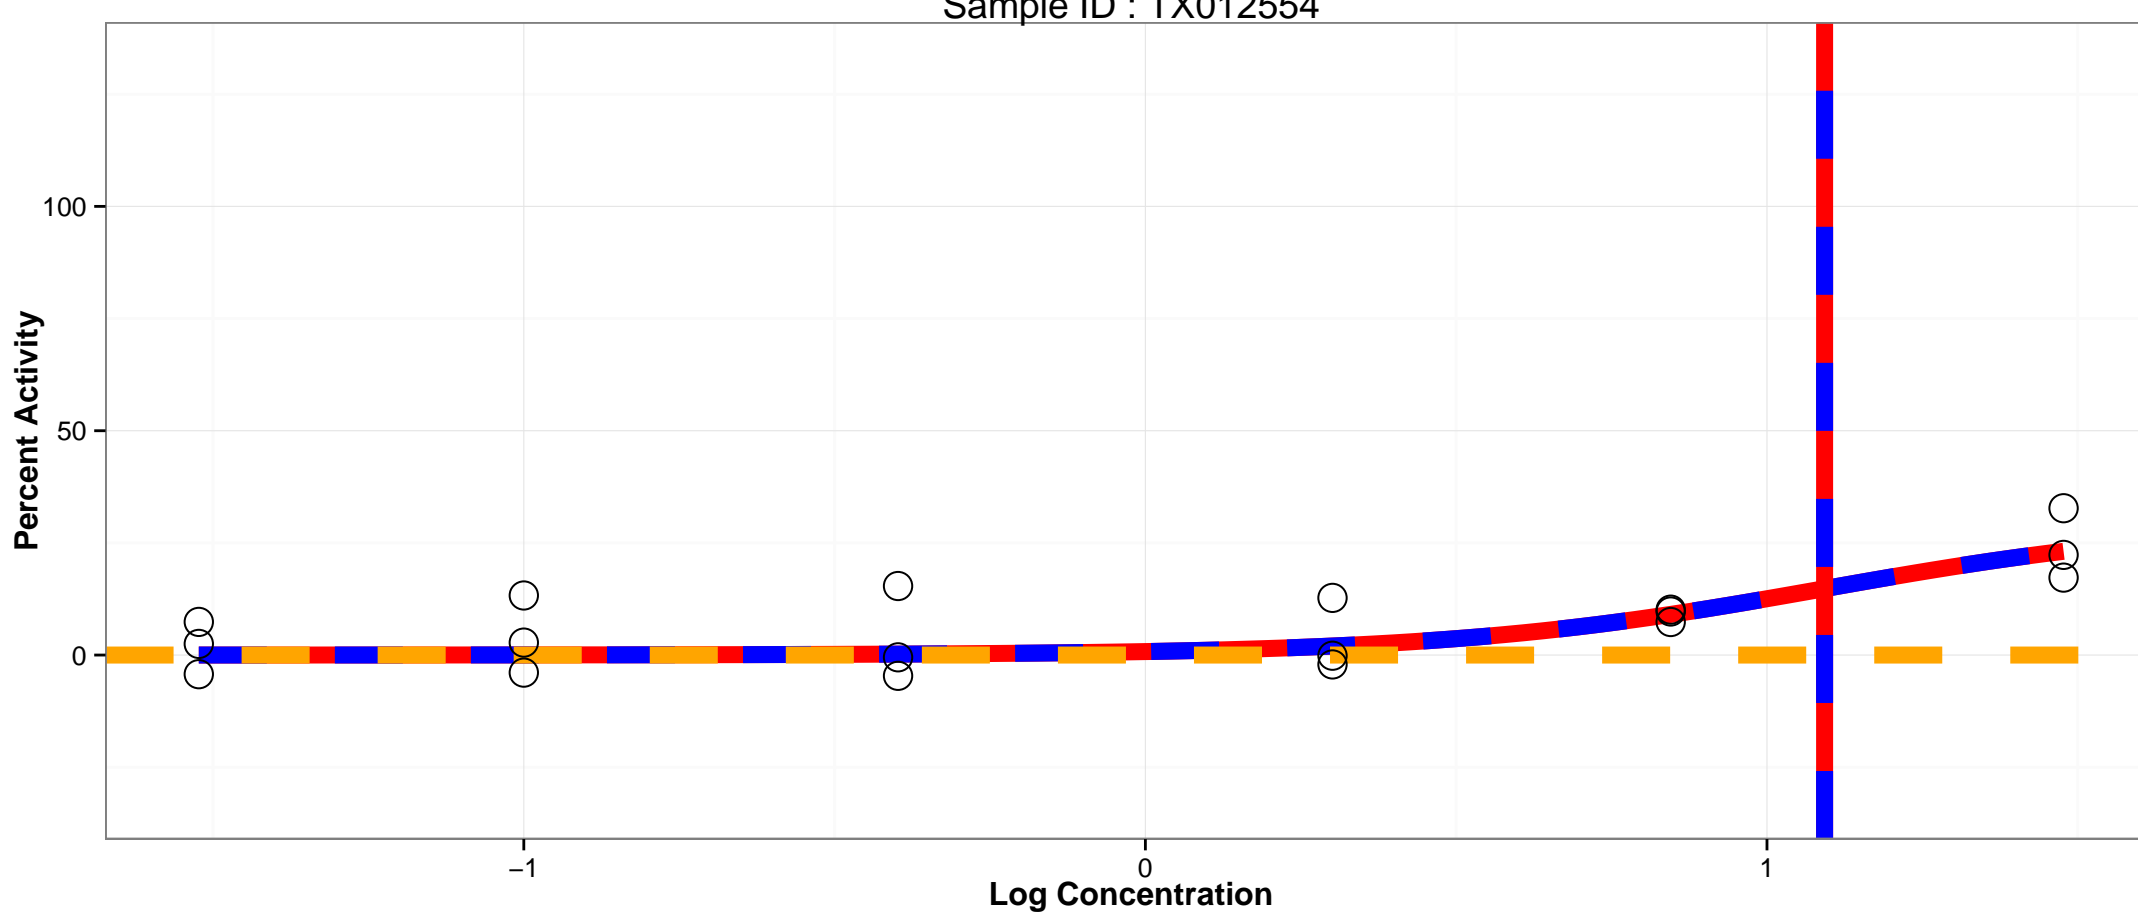

HILL MODEL

|     | tp   | ga   | gw   |
|-----|------|------|------|
| val | 29.6 | 1.09 | 1.44 |
| sd  | 36.3 | 1    | 2.43 |

GAIN-LOSS MODEL

|     | tp   | ga   | gw   | la   | lw   |
|-----|------|------|------|------|------|
| val | 29.6 | 1.09 | 1.44 | 2.85 | 5.01 |
| sd  | NA   | NA   | NA   | NA   | NA   |

|      | CNST   | HILL   | GNLS   |
|------|--------|--------|--------|
| AIC  | 143.78 | 127.56 | 131.56 |
| PROB | 0      | 0.88   | 0.12   |
| RMSE | 12.53  | 6.67   | 6.67   |

MAX\_MEAN : 24.1 MAX\_MED : 22.3 BMAD : 5.54  
COFF : 20 HIT-CALL : 1 FITC : 42 ACTP : 1  
FLAGS : 11;6

Assay ID 1848 (NHEERL\_Quantilum\_inhib\_2\_dn)  
Sample ID : TX012554

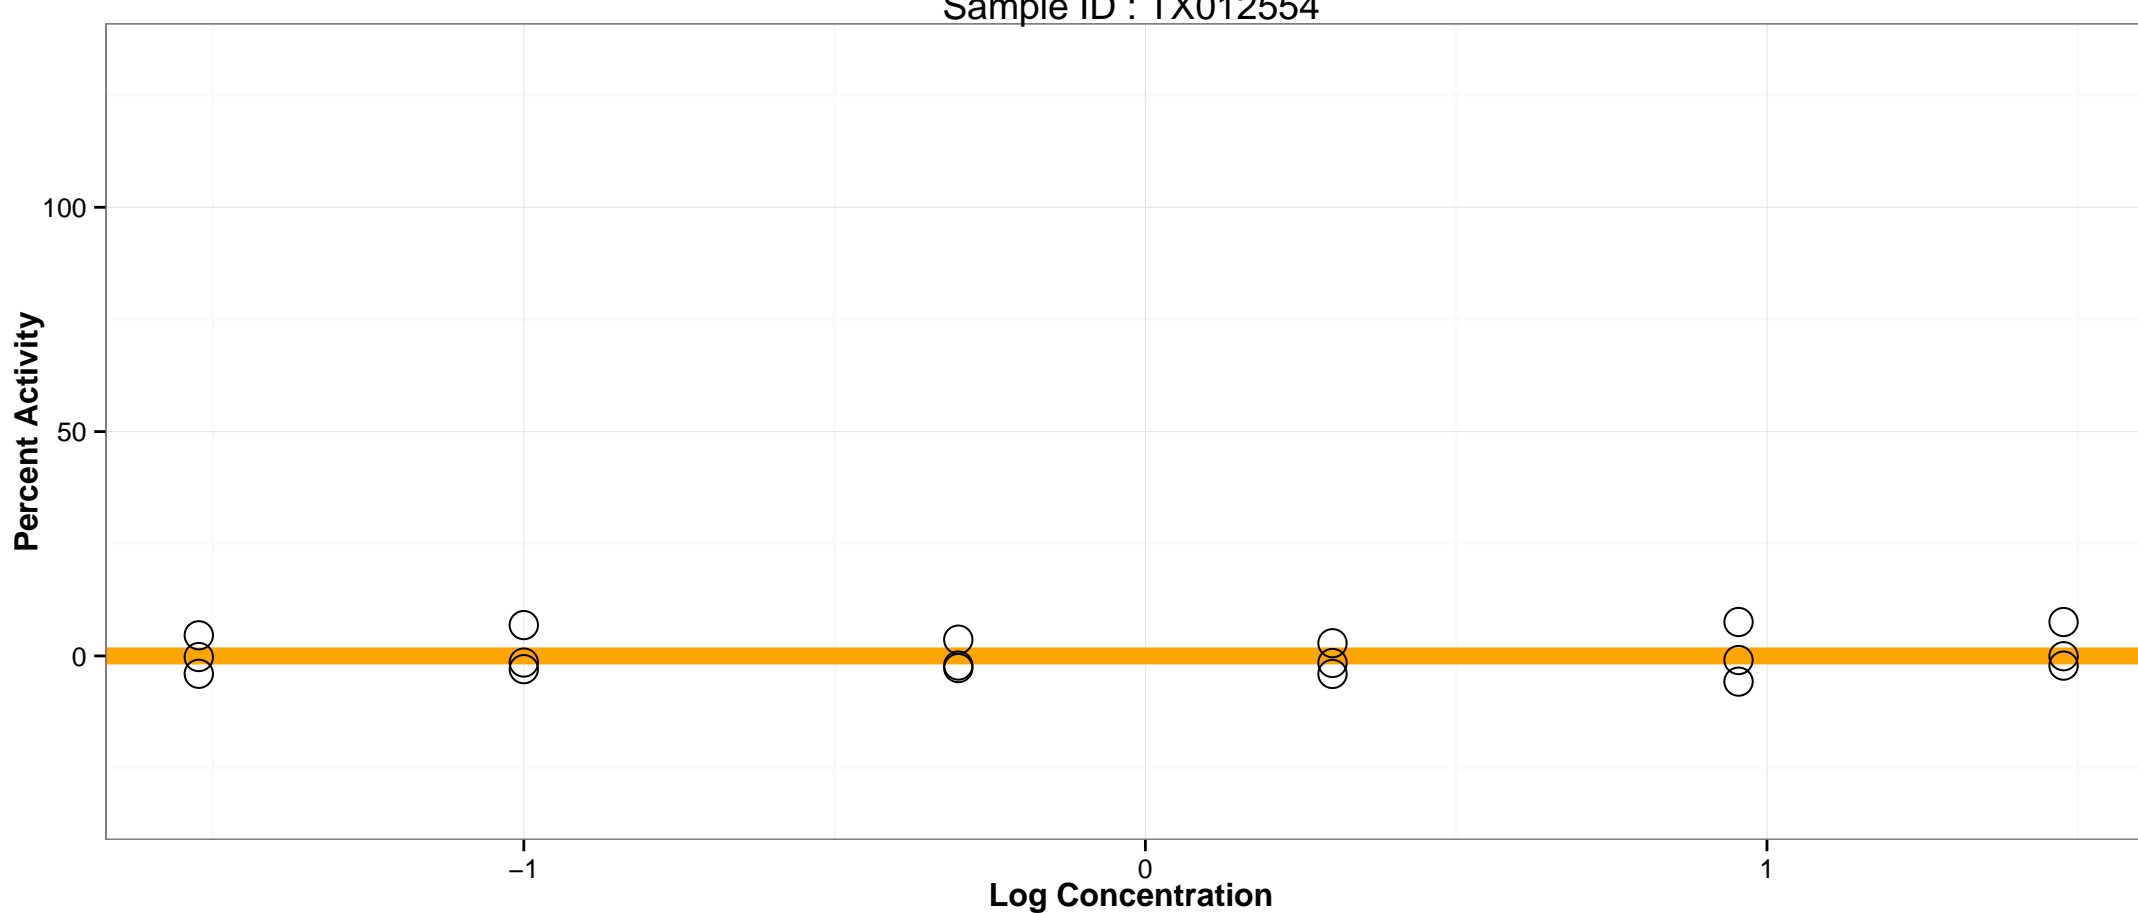

HILL MODEL

HILL MODEL: Not applicable

GAIN-LOSS MODEL

GNLS MODEL: Not applicable

|      | CNST   | HILL | GNLS |
|------|--------|------|------|
| AIC  | 105.62 | NA   | NA   |
| PROB | 1      | NA   | NA   |
| RMSE | 4.08   | NA   | NA   |

MAX\_MEAN : 1.79 MAX\_MED : -0.0473 BMAD : 8.58  
COFF : 20 HIT-CALL : 0 FITC : 4 ACTP : 0  
FLAGS :



Chemical : 9-Phenanthrol

CAS : 484-17-3

Assay ID 1508 (NHEERL\_TPO\_AUR\_dn)  
Sample ID : TX012603

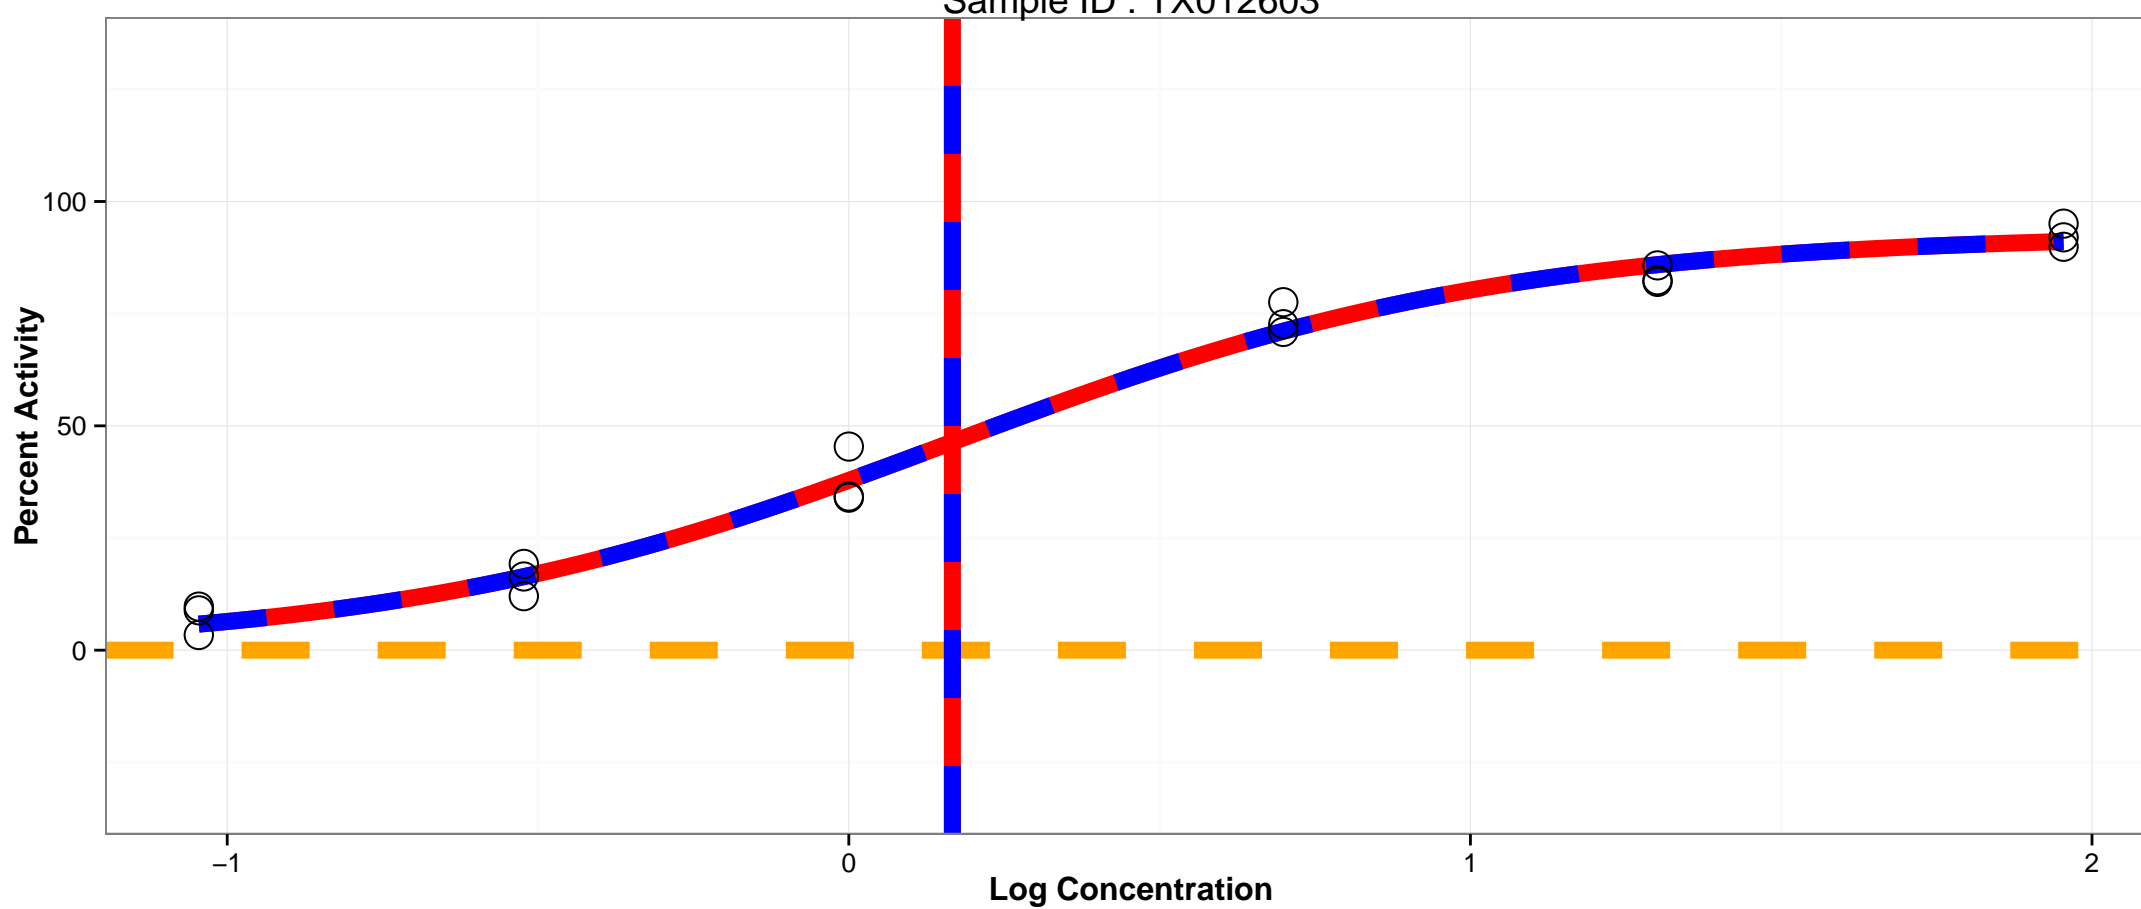

HILL MODEL

|     | tp   | ga     | gw    |
|-----|------|--------|-------|
| val | 92.8 | 0.167  | 0.97  |
| sd  | 2.17 | 0.0497 | 0.078 |

GAIN-LOSS MODEL

|     | tp   | ga     | gw    | la     | lw     |
|-----|------|--------|-------|--------|--------|
| val | 92.8 | 0.167  | 0.97  | 3.89   | 6.88   |
| sd  | 2.17 | 0.0497 | 0.078 | 247000 | 888000 |

|      | CNST   | HILL   | GNLS   |
|------|--------|--------|--------|
| AIC  | 204.06 | 107.11 | 111.11 |
| PROB | 0      | 0.88   | 0.12   |
| RMSE | 61.55  | 3.59   | 3.59   |

MAX\_MEAN : 92.3 MAX\_MED : 92 BMAD : 5.69  
COFF : 20 HIT-CALL : 1 FITC : 41 ACTP : 1  
FLAGS :

Assay ID 1509 (NHEERL\_HEK293T\_CellTiterGLO)  
Sample ID : TX012603

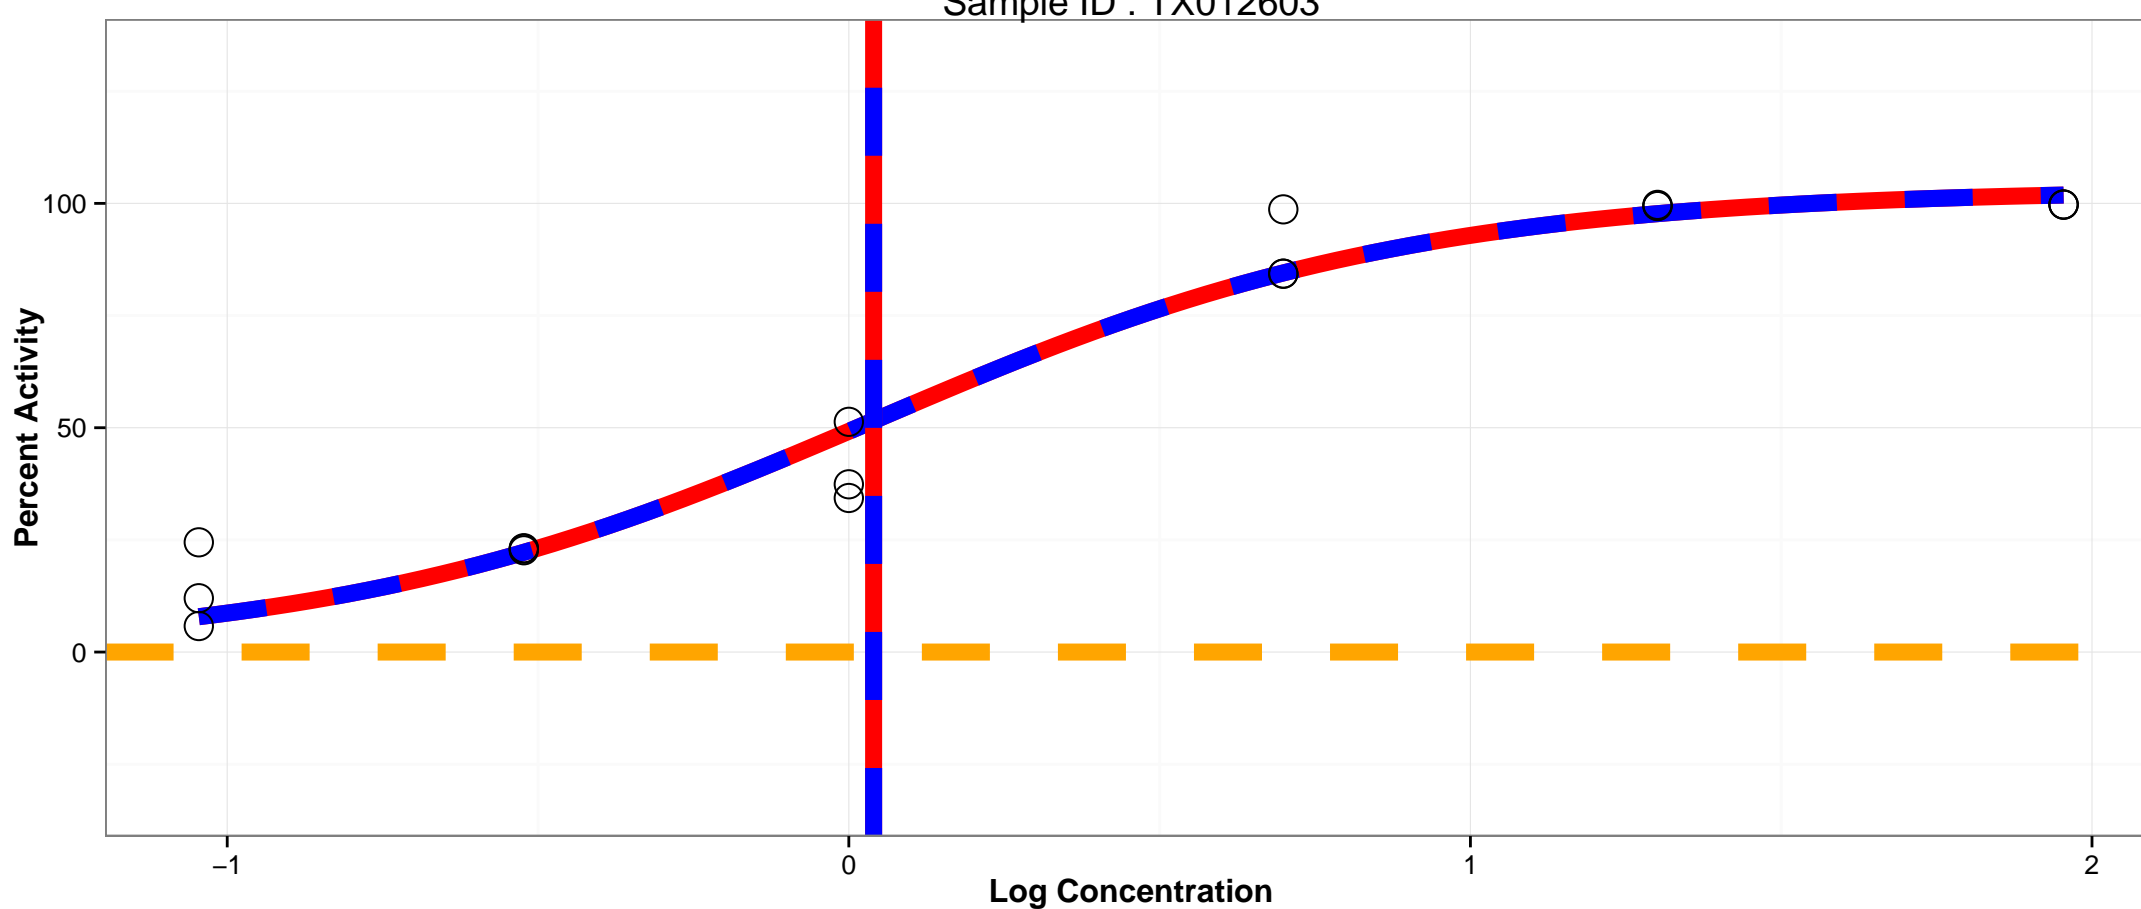

HILL MODEL

|     | tp   | ga     | gw     |
|-----|------|--------|--------|
| val | 103  | 0.0399 | 0.997  |
| sd  | 2.32 | 0.0537 | 0.0831 |

GAIN-LOSS MODEL

|     | tp  | ga     | gw    | la   | lw   |
|-----|-----|--------|-------|------|------|
| val | 103 | 0.0399 | 0.997 | 3.75 | 6.96 |
| sd  | NA  | NA     | NA    | NA   | NA   |

|      | CNST   | HILL   | GNLS   |
|------|--------|--------|--------|
| AIC  | 209.39 | 125.62 | 129.62 |
| PROB | 0      | 0.88   | 0.12   |
| RMSE | 71.14  | 7.02   | 7.02   |

MAX\_MEAN : 99.7 MAX\_MED : 99.7 BMAD : 5.54  
COFF : 20 HIT-CALL : 1 FITC : 41 ACTP : 1  
FLAGS :

Assay ID 1848 (NHEERL\_QuantLum\_inhib\_2\_dn)  
Sample ID : TX012603

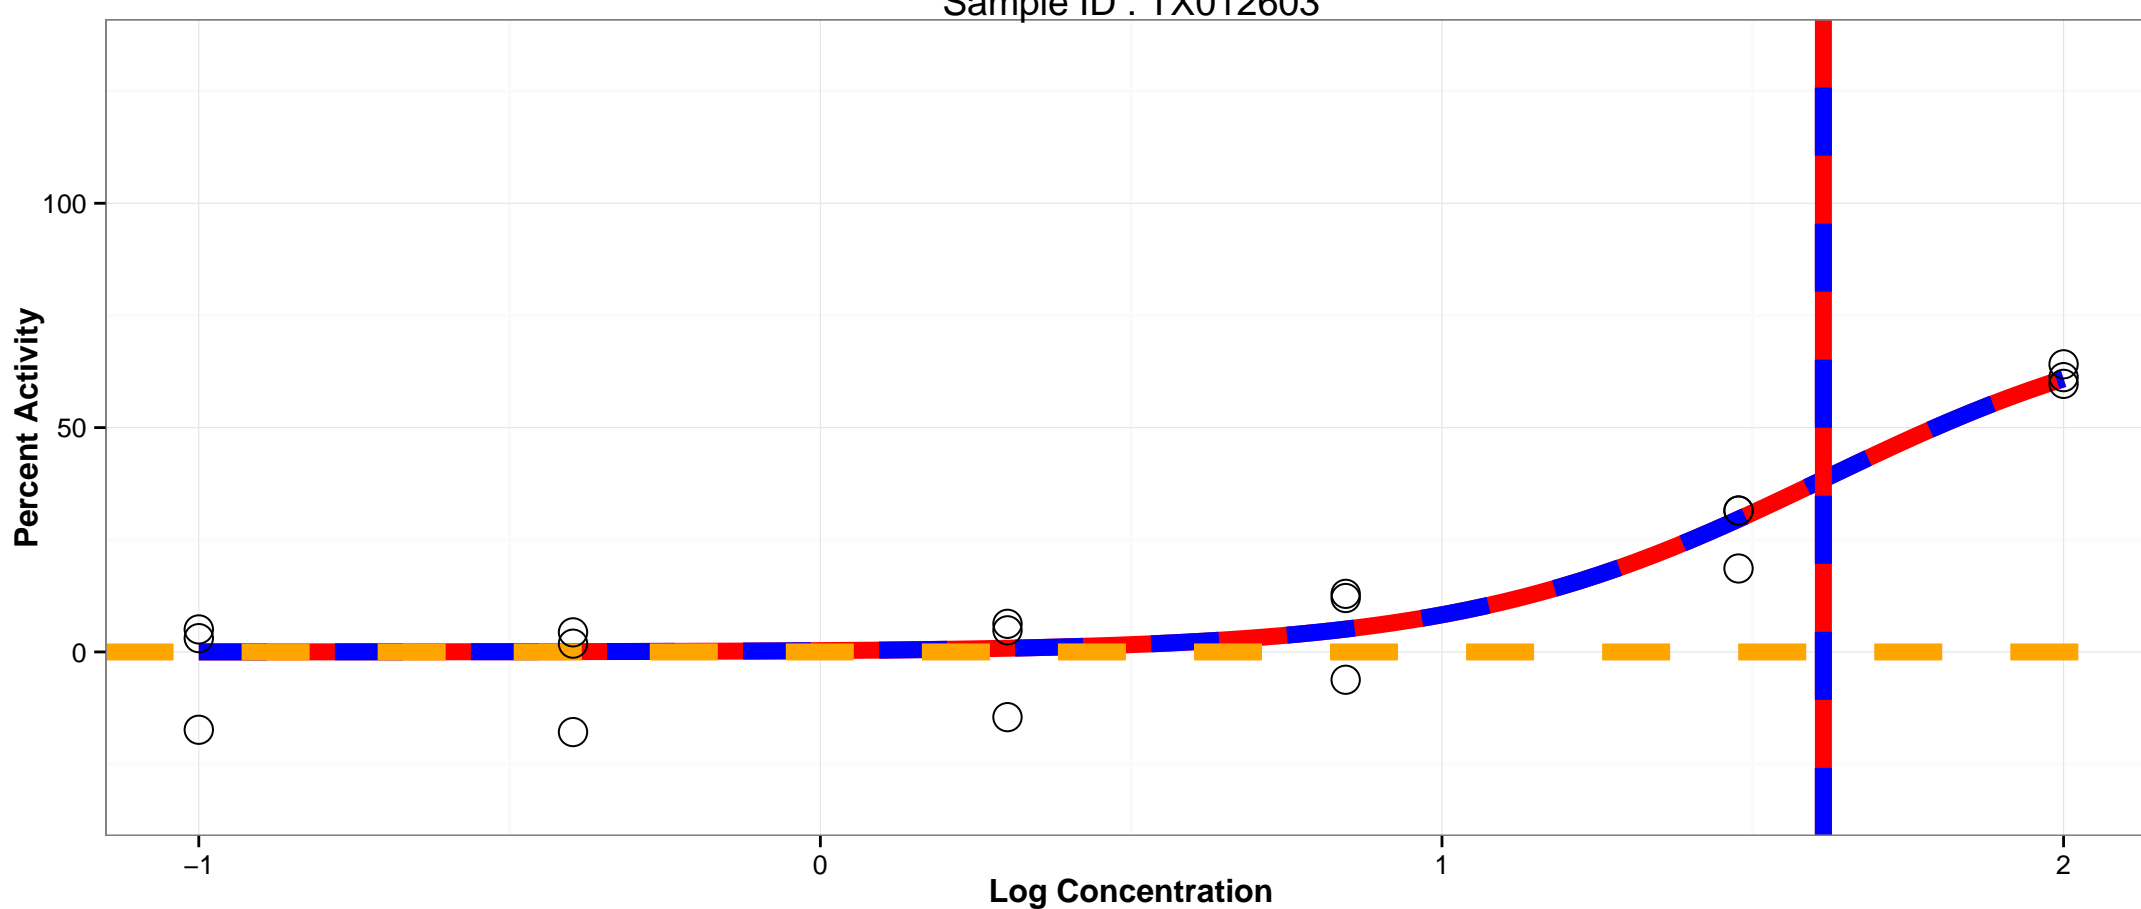

HILL MODEL

|     | tp   | ga    | gw    |
|-----|------|-------|-------|
| val | 76.9 | 1.61  | 1.5   |
| sd  | 21.3 | 0.201 | 0.734 |

GAIN-LOSS MODEL

|     | tp   | ga    | gw    | la   | lw    |
|-----|------|-------|-------|------|-------|
| val | 76.9 | 1.61  | 1.5   | 2.79 | 11.8  |
| sd  | 21.3 | 0.201 | 0.733 | 2340 | 34800 |

|      | CNST  | HILL   | GNLS   |
|------|-------|--------|--------|
| AIC  | 173   | 137.14 | 141.14 |
| PROB | 0     | 0.88   | 0.12   |
| RMSE | 28.93 | 8.62   | 8.62   |

MAX\_MEAN : 61.7 MAX\_MED : 61.3 BMAD : 8.58  
COFF : 20 HIT-CALL : 1 FITC : 42 ACTP : 1  
FLAGS :

Assay ID 1508 (NHEERL\_TPO\_AUR\_dn)  
Sample ID : TX012606

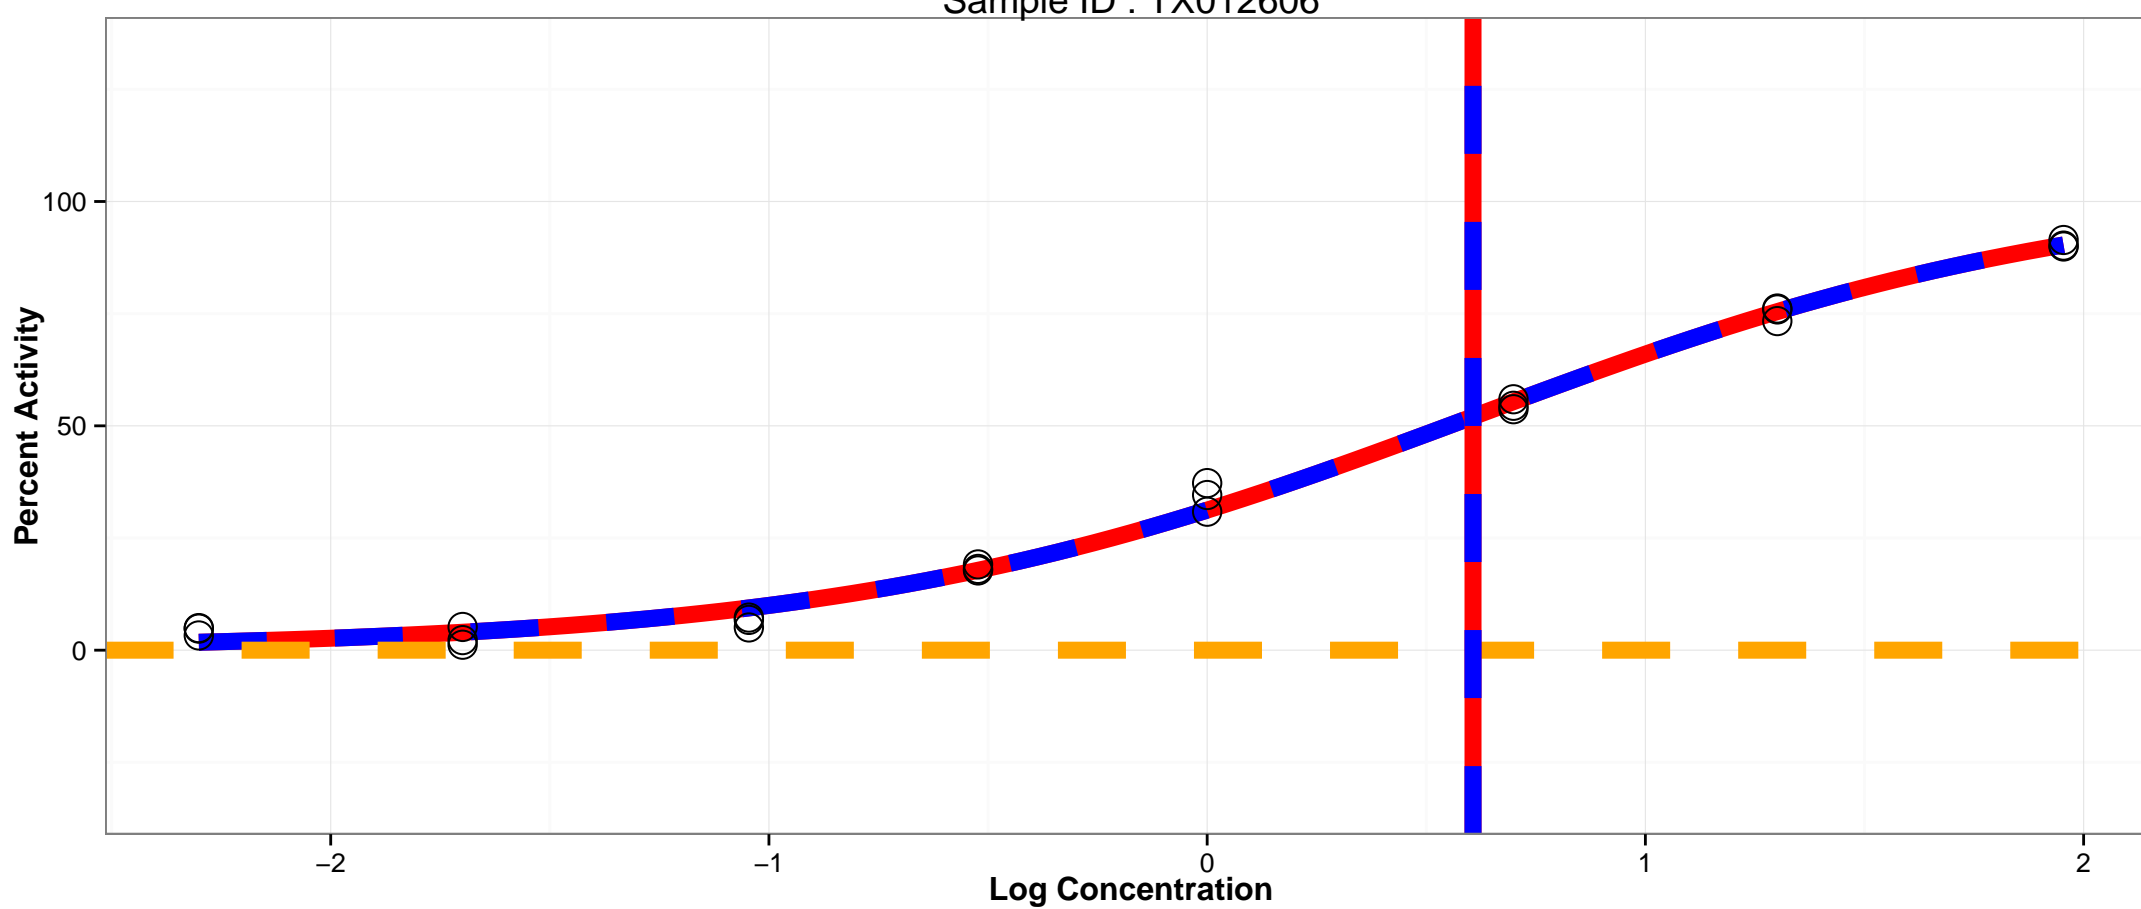

HILL MODEL

|     | tp   | ga     | gw     |
|-----|------|--------|--------|
| val | 104  | 0.607  | 0.607  |
| sd  | 2.77 | 0.0541 | 0.0268 |

GAIN-LOSS MODEL

|     | tp   | ga     | gw     | la    | lw     |
|-----|------|--------|--------|-------|--------|
| val | 104  | 0.607  | 0.607  | 3.9   | 6.44   |
| sd  | 2.77 | 0.0541 | 0.0268 | 92500 | 305000 |

|      | CNST   | HILL   | GNLS   |
|------|--------|--------|--------|
| AIC  | 257.22 | 115.97 | 119.97 |
| PROB | 0      | 0.88   | 0.12   |
| RMSE | 48     | 2.28   | 2.28   |

MAX\_MEAN : 90.5 MAX\_MED : 90.2 BMAD : 5.69  
COFF : 20 HIT-CALL : 1 FITC : 42 ACTP : 1  
FLAGS :

Assay ID 1509 (NHEERL\_HEK293T\_CellTiterGLO)  
Sample ID : TX012606

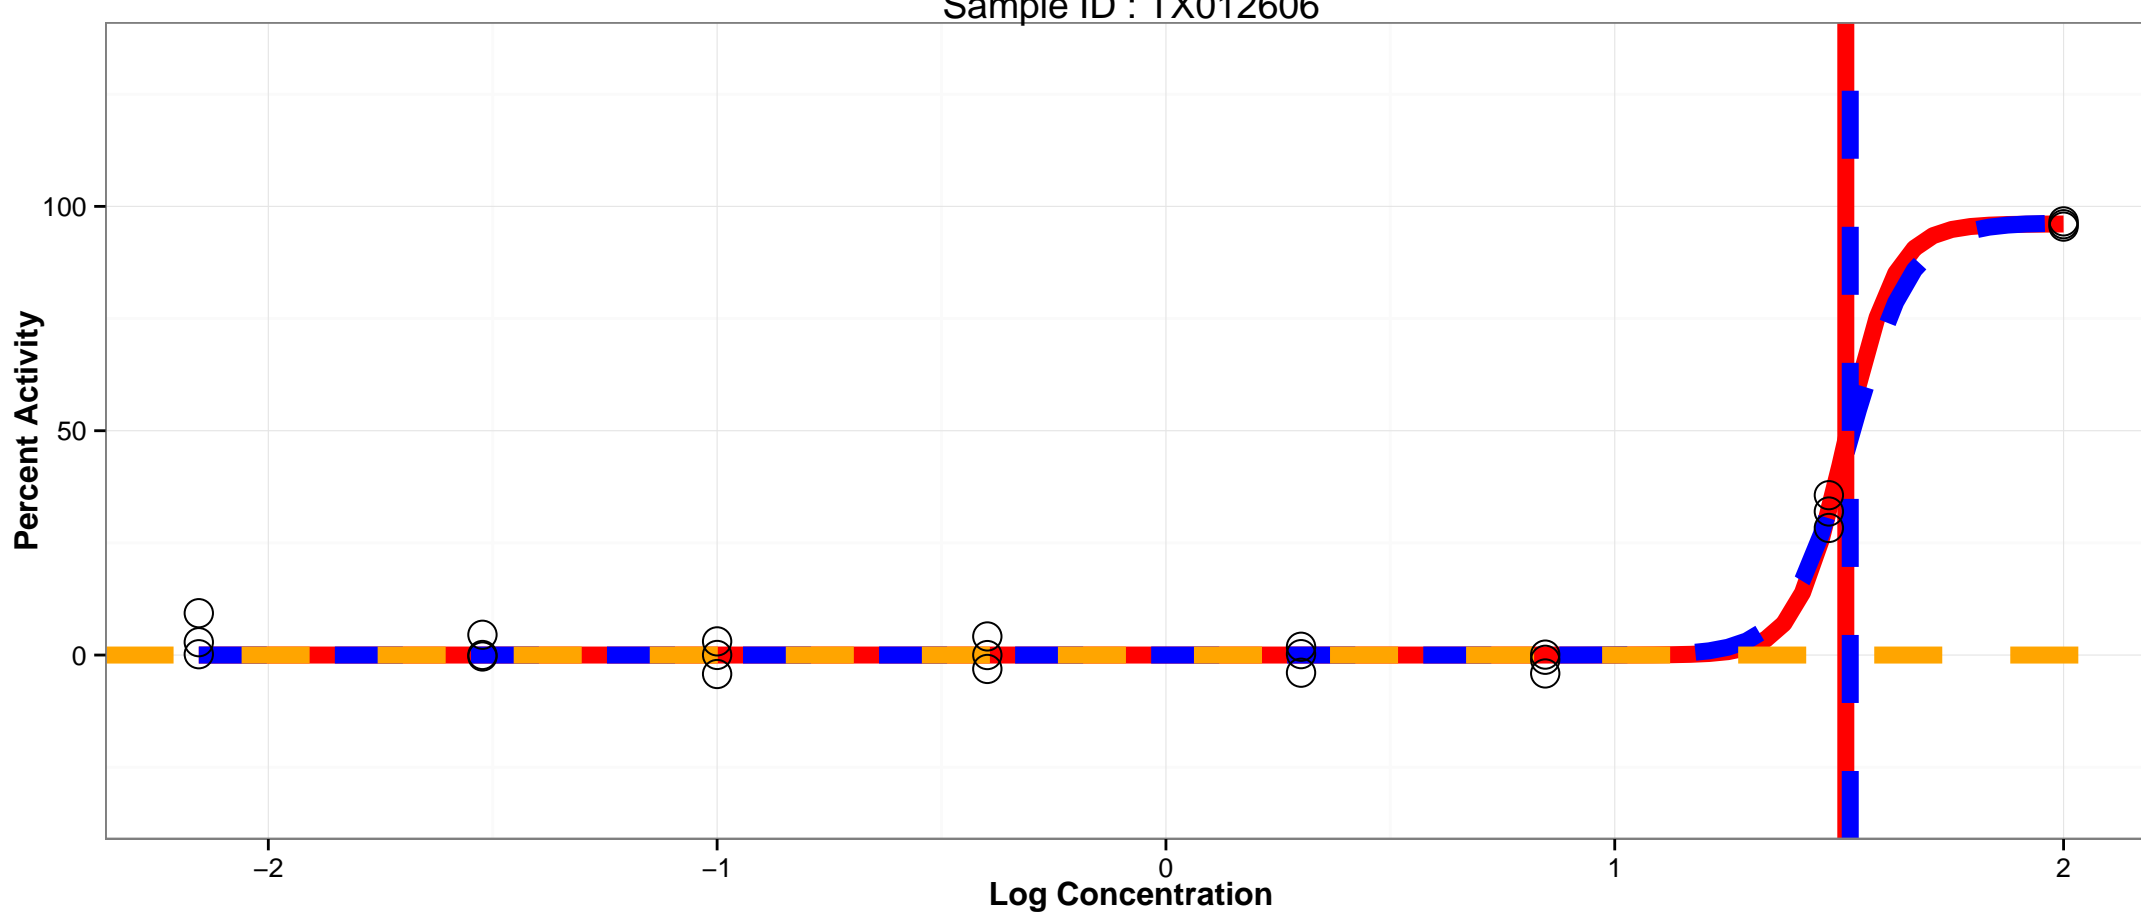

HILL MODEL

|     | tp   | ga      | gw   |
|-----|------|---------|------|
| val | 96.1 | 1.51    | 8    |
| sd  | 1.24 | 0.00735 | 1.54 |

GAIN-LOSS MODEL

|     | tp   | ga   | gw   | la   | lw   |
|-----|------|------|------|------|------|
| val | 96.4 | 1.52 | 6.38 | 2.15 | 17.8 |
| sd  | NA   | NA   | NA   | NA   | NA   |

|      | CNST   | HILL   | GNLS   |
|------|--------|--------|--------|
| AIC  | 227.75 | 129.71 | 133.72 |
| PROB | 0      | 0.88   | 0.12   |
| RMSE | 35.94  | 3.12   | 3.12   |

MAX\_MEAN : 96.1 MAX\_MED : 96 BMAD : 5.54  
COFF : 20 HIT-CALL : 1 FITC : 41 ACTP : 1  
FLAGS :

Assay ID 1848 (NHEERL\_Quantilum\_inhib\_2\_dn)  
Sample ID : TX012606

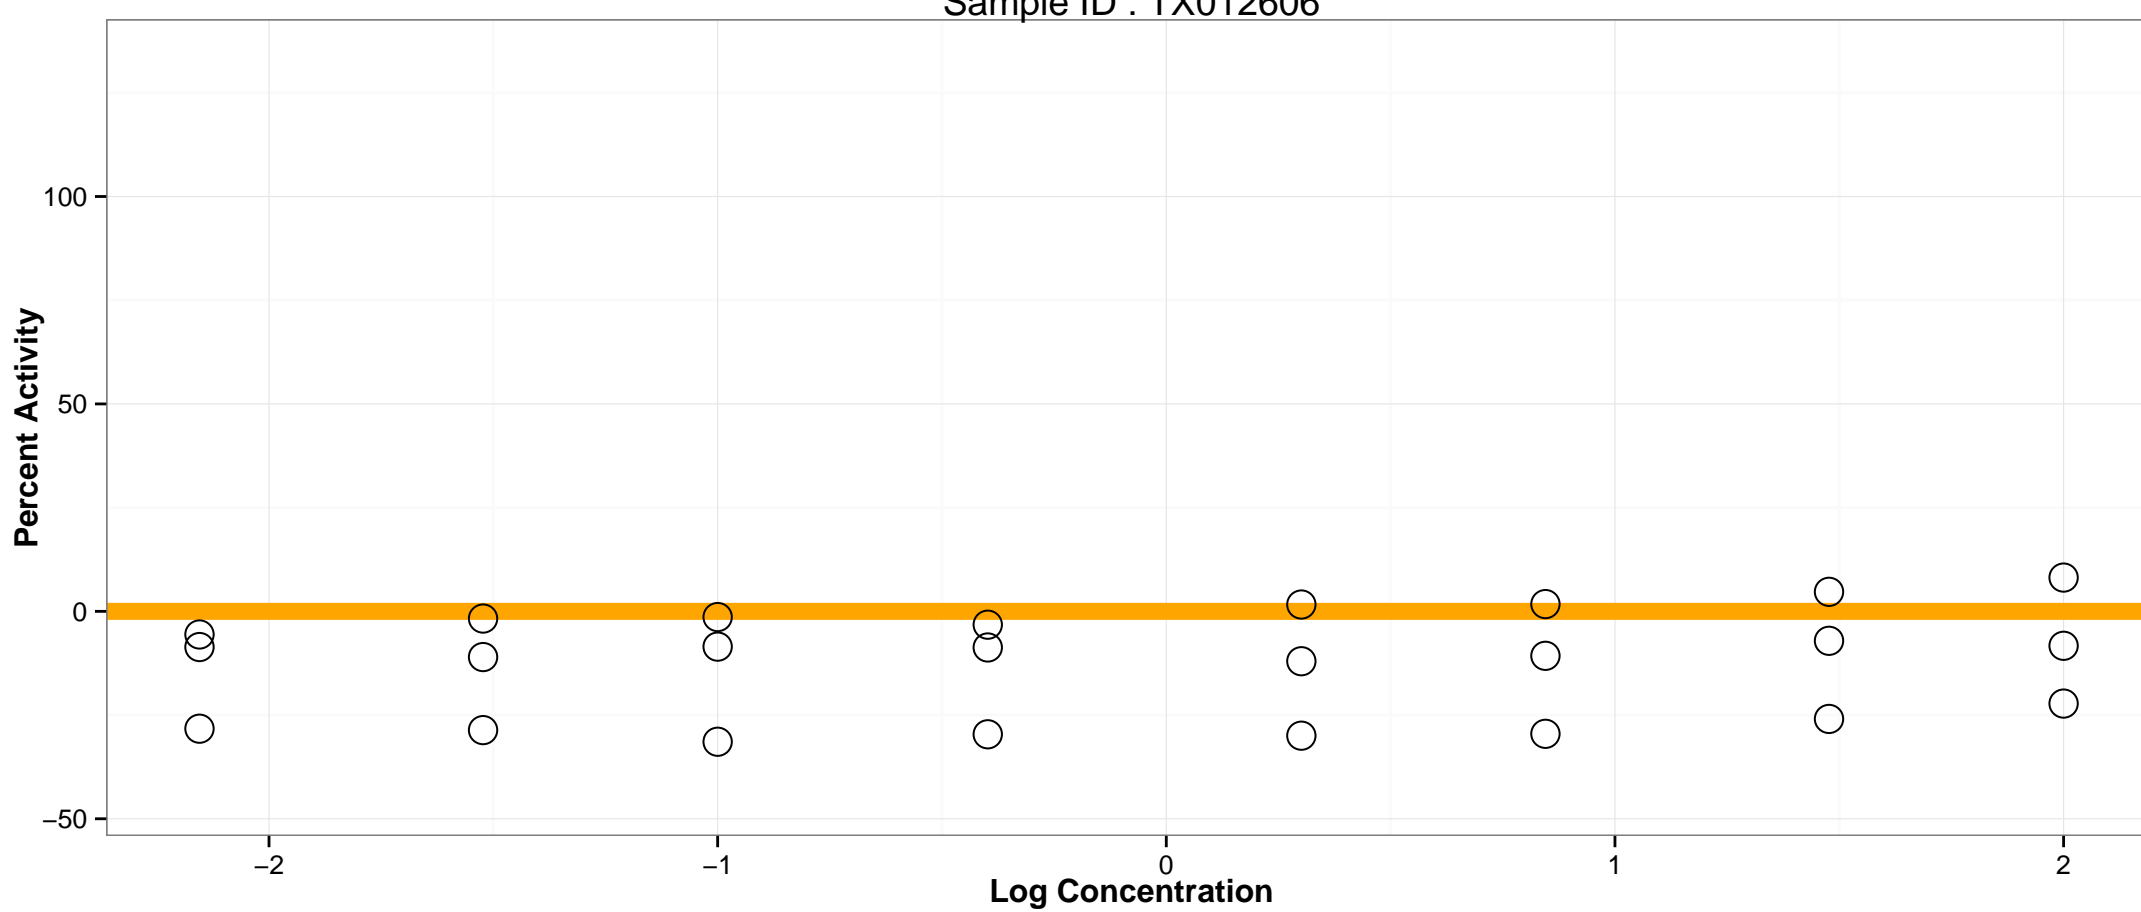

HILL MODEL

HILL MODEL: Not applicable

GAIN-LOSS MODEL

GNLS MODEL: Not applicable

|      | CNST   | HILL | GNLS |
|------|--------|------|------|
| AIC  | 208.92 | NA   | NA   |
| PROB | 1      | NA   | NA   |
| RMSE | 17.41  | NA   | NA   |

MAX\_MEAN : -7.45 MAX\_MED : -7.08 BMAD : 8.58  
COFF : 20 HIT-CALL : 0 FITC : 4 ACTP : 0  
FLAGS :

Chemical : Chlorpyrifos  
CAS : 2921-88-2

Assay ID 1508 (NHEERL\_TPO\_AUR\_dn)  
Sample ID : TX012669

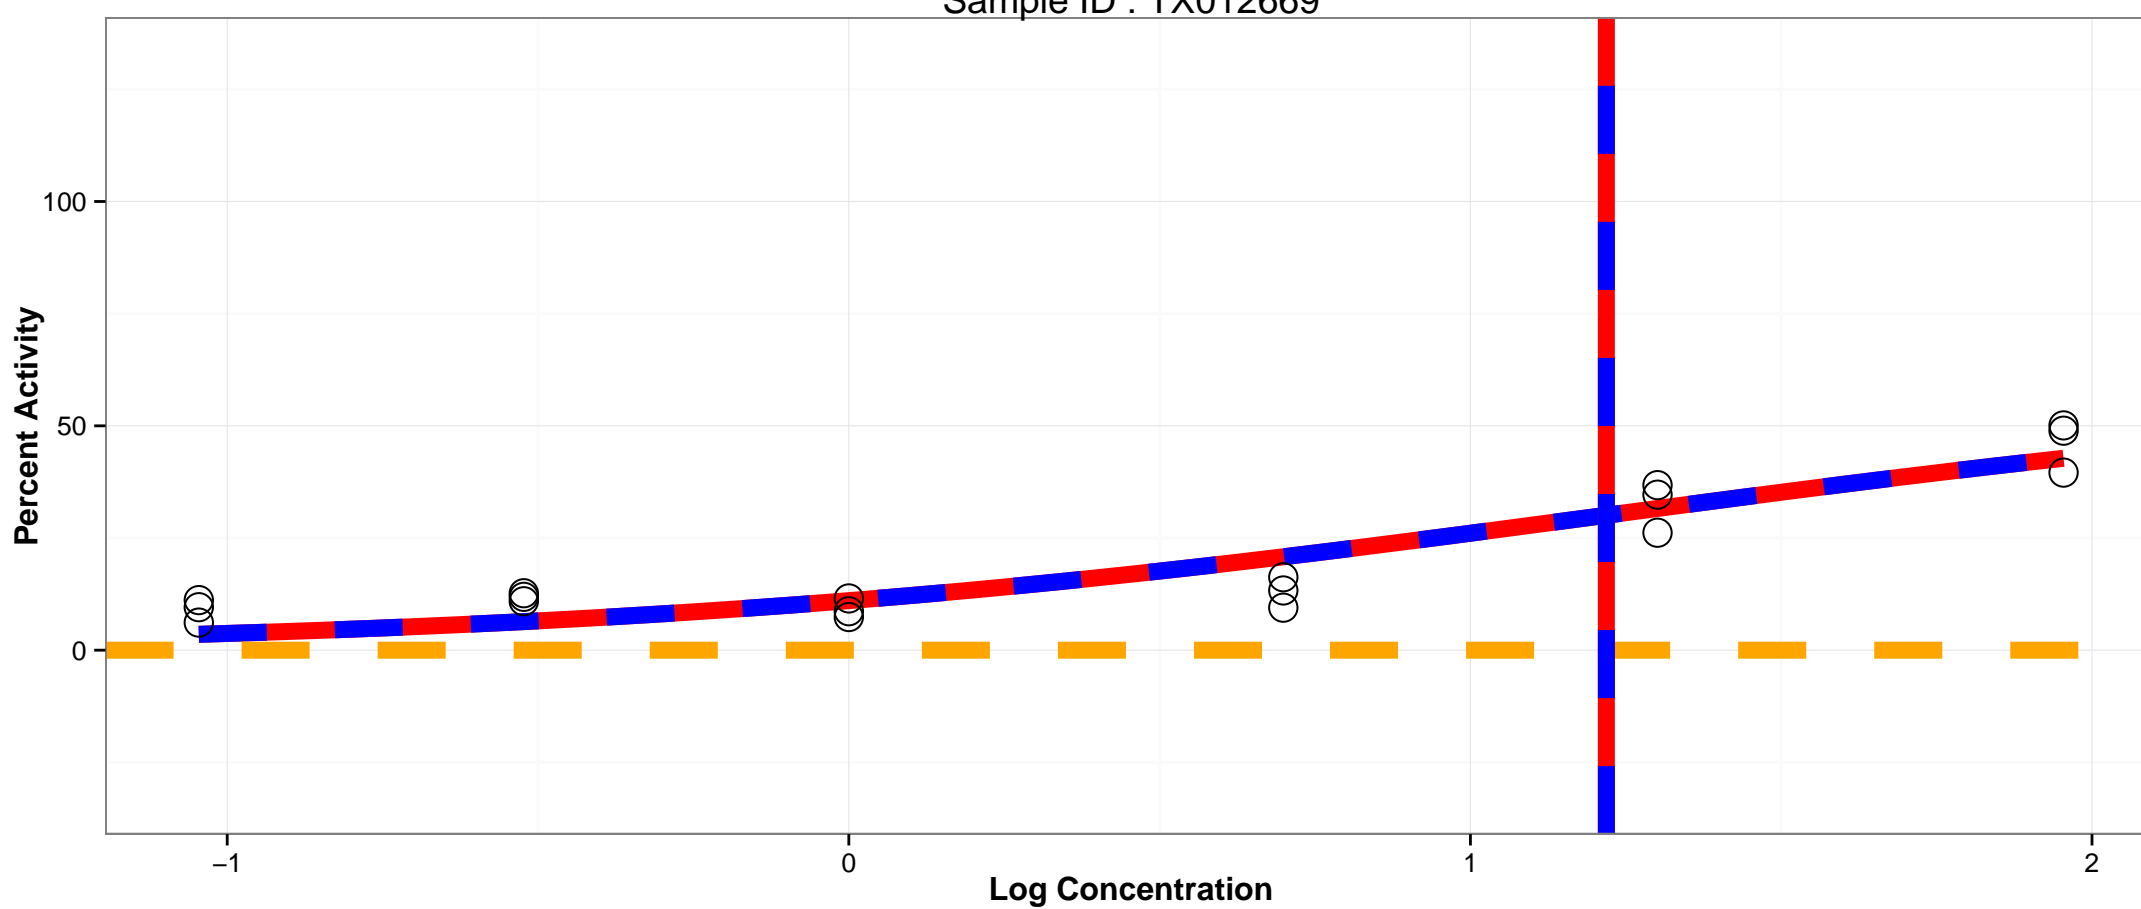

HILL MODEL

|     | tp   | ga    | gw    |
|-----|------|-------|-------|
| val | 60.1 | 1.22  | 0.532 |
| sd  | 12.6 | 0.375 | 0.125 |

GAIN-LOSS MODEL

|     | tp   | ga   | gw    | la   | lw |
|-----|------|------|-------|------|----|
| val | 60.1 | 1.22 | 0.532 | 2.94 | 18 |
| sd  | NA   | NA   | NA    | NA   | NA |

|      | CNST   | HILL  | GNLS  |
|------|--------|-------|-------|
| AIC  | 169.89 | 124.7 | 128.7 |
| PROB | 0      | 0.88  | 0.12  |
| RMSE | 24.93  | 5.7   | 5.7   |

MAX\_MEAN : 46.2 MAX\_MED : 48.9 BMAD : 5.69  
COFF : 20 HIT-CALL : 1 FITC : 42 ACTP : 1  
FLAGS :

Assay ID 1509 (NHEERL\_HEK293T\_CellTiterGLO)  
Sample ID : TX012669

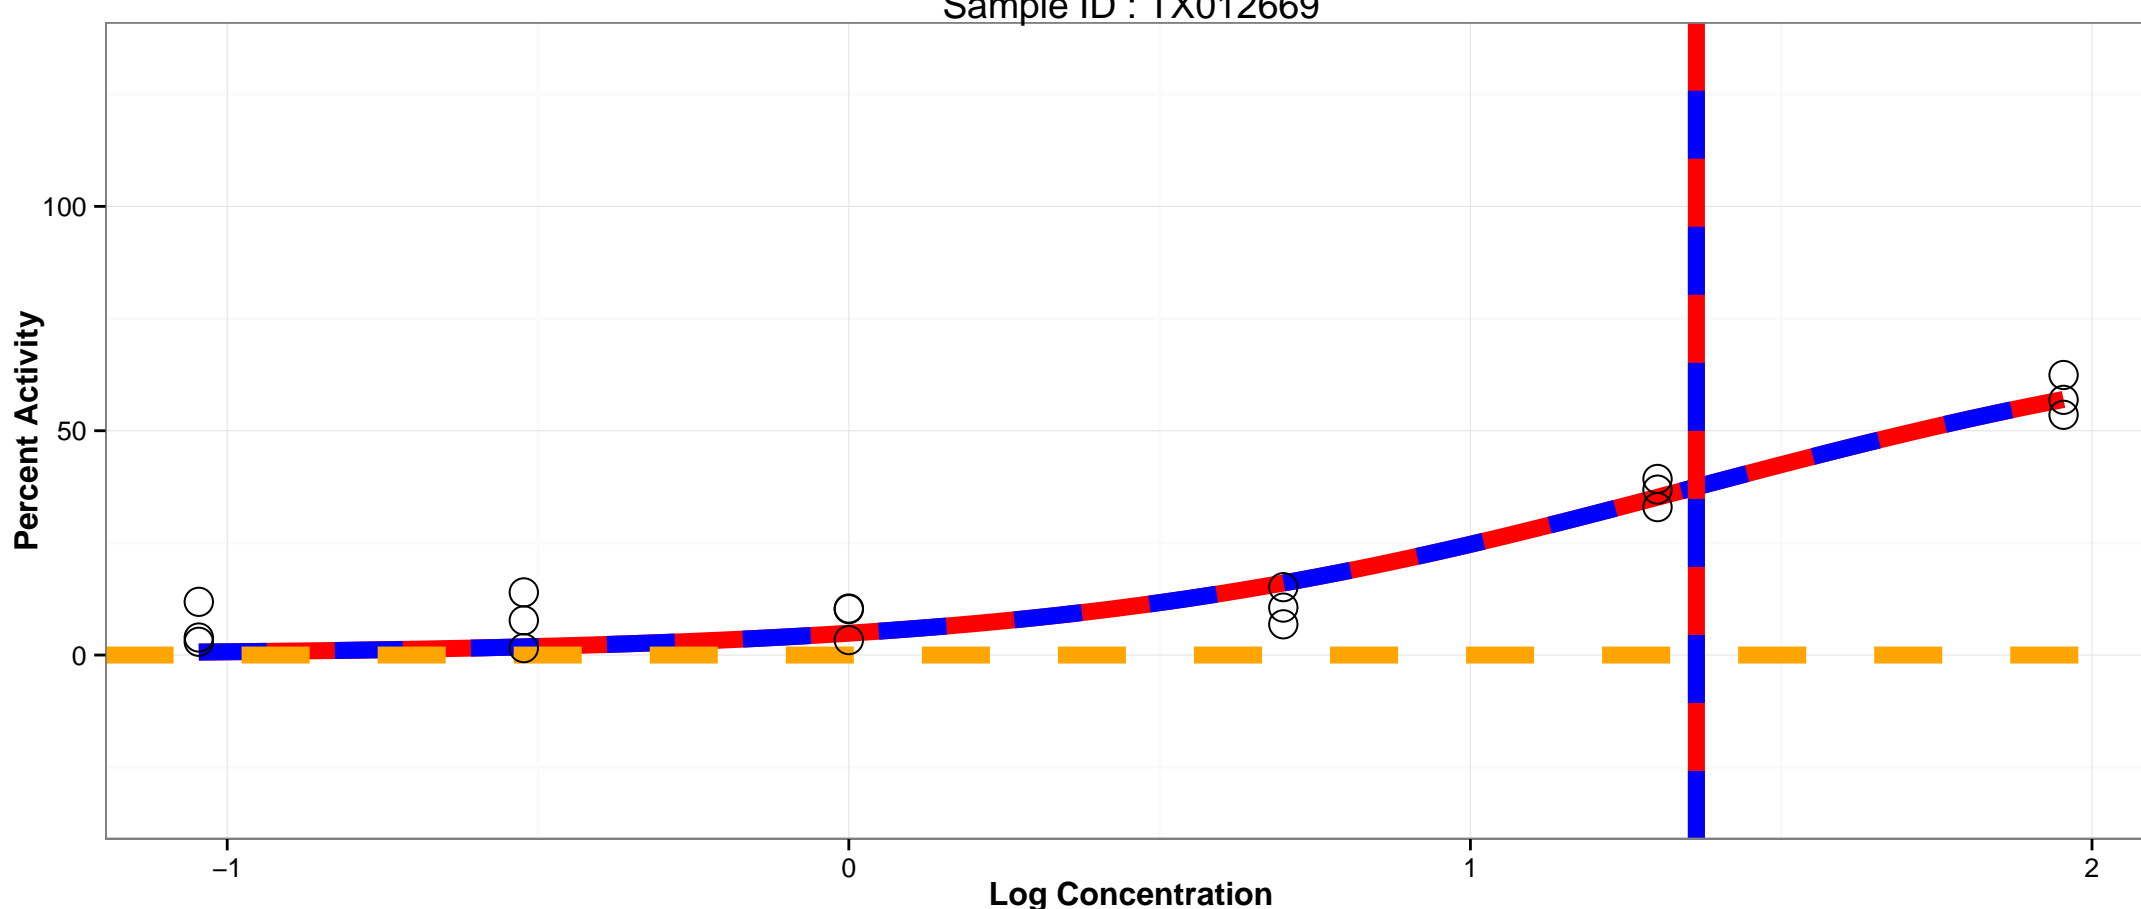

HILL MODEL

|     | tp   | ga    | gw    |
|-----|------|-------|-------|
| val | 74.9 | 1.36  | 0.849 |
| sd  | 17.8 | 0.286 | 0.311 |

GAIN-LOSS MODEL

|     | tp   | ga   | gw    | la   | lw   |
|-----|------|------|-------|------|------|
| val | 74.9 | 1.36 | 0.849 | 3.77 | 9.87 |
| sd  | NA   | NA   | NA    | NA   | NA   |

|      | CNST   | HILL   | GNLS   |
|------|--------|--------|--------|
| AIC  | 173.96 | 122.13 | 126.13 |
| PROB | 0      | 0.88   | 0.12   |
| RMSE | 28.9   | 5.61   | 5.61   |

MAX\_MEAN : 57.6 MAX\_MED : 56.9 BMAD : 5.54  
COFF : 20 HIT-CALL : 1 FITC : 42 ACTP : 1  
FLAGS :

Assay ID 1848 (NHEERL\_Quantilum\_inhib\_2\_dn)  
Sample ID : TX012669

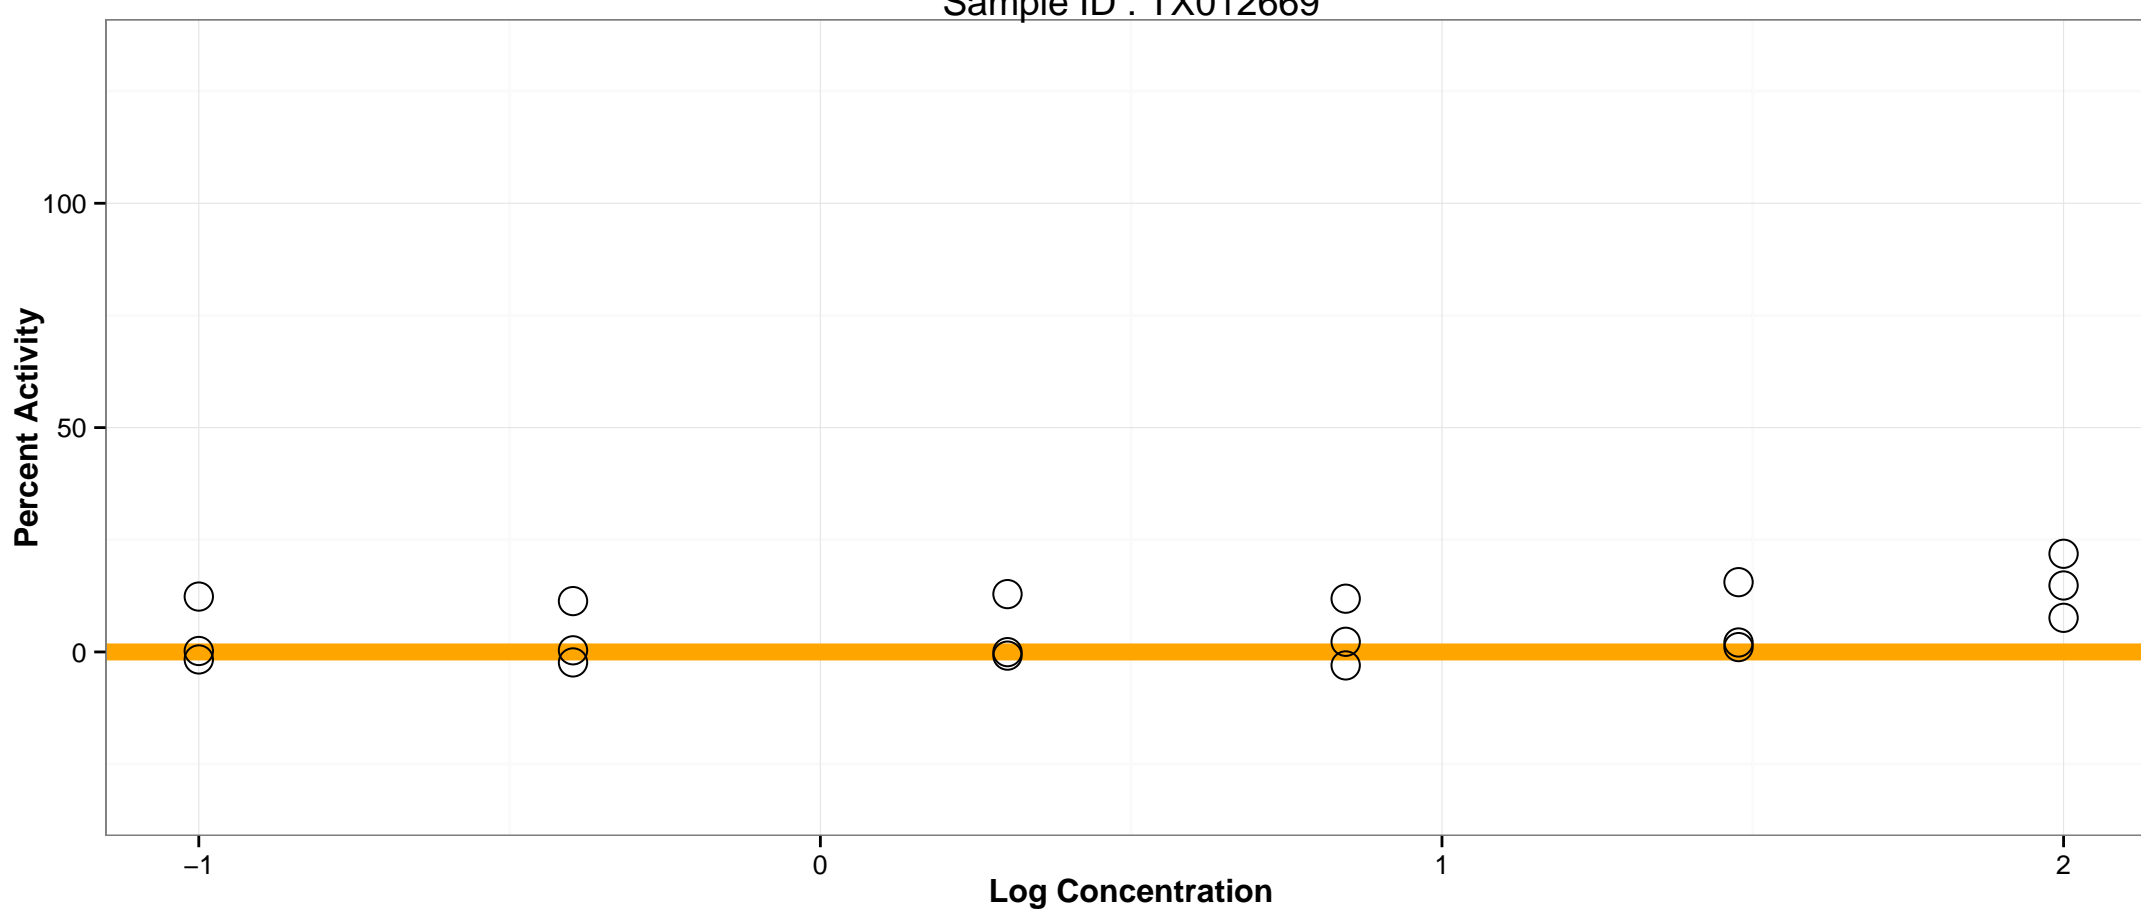

HILL MODEL

HILL MODEL: Not applicable

GAIN-LOSS MODEL

GNLS MODEL: Not applicable

|      | CNST   | HILL | GNLS |
|------|--------|------|------|
| AIC  | 134.45 | NA   | NA   |
| PROB | 1      | NA   | NA   |
| RMSE | 9.48   | NA   | NA   |

MAX\_MEAN : 14.8 MAX\_MED : 14.8 BMAD : 8.58  
COFF : 20 HIT-CALL : 0 FITC : 4 ACTP : 0  
FLAGS :

Chemical : Terbufos sulfone  
CAS : 56070-16-7

Assay ID 1508 (NHEERL\_TPO\_AUR\_dn)  
Sample ID : TX013771

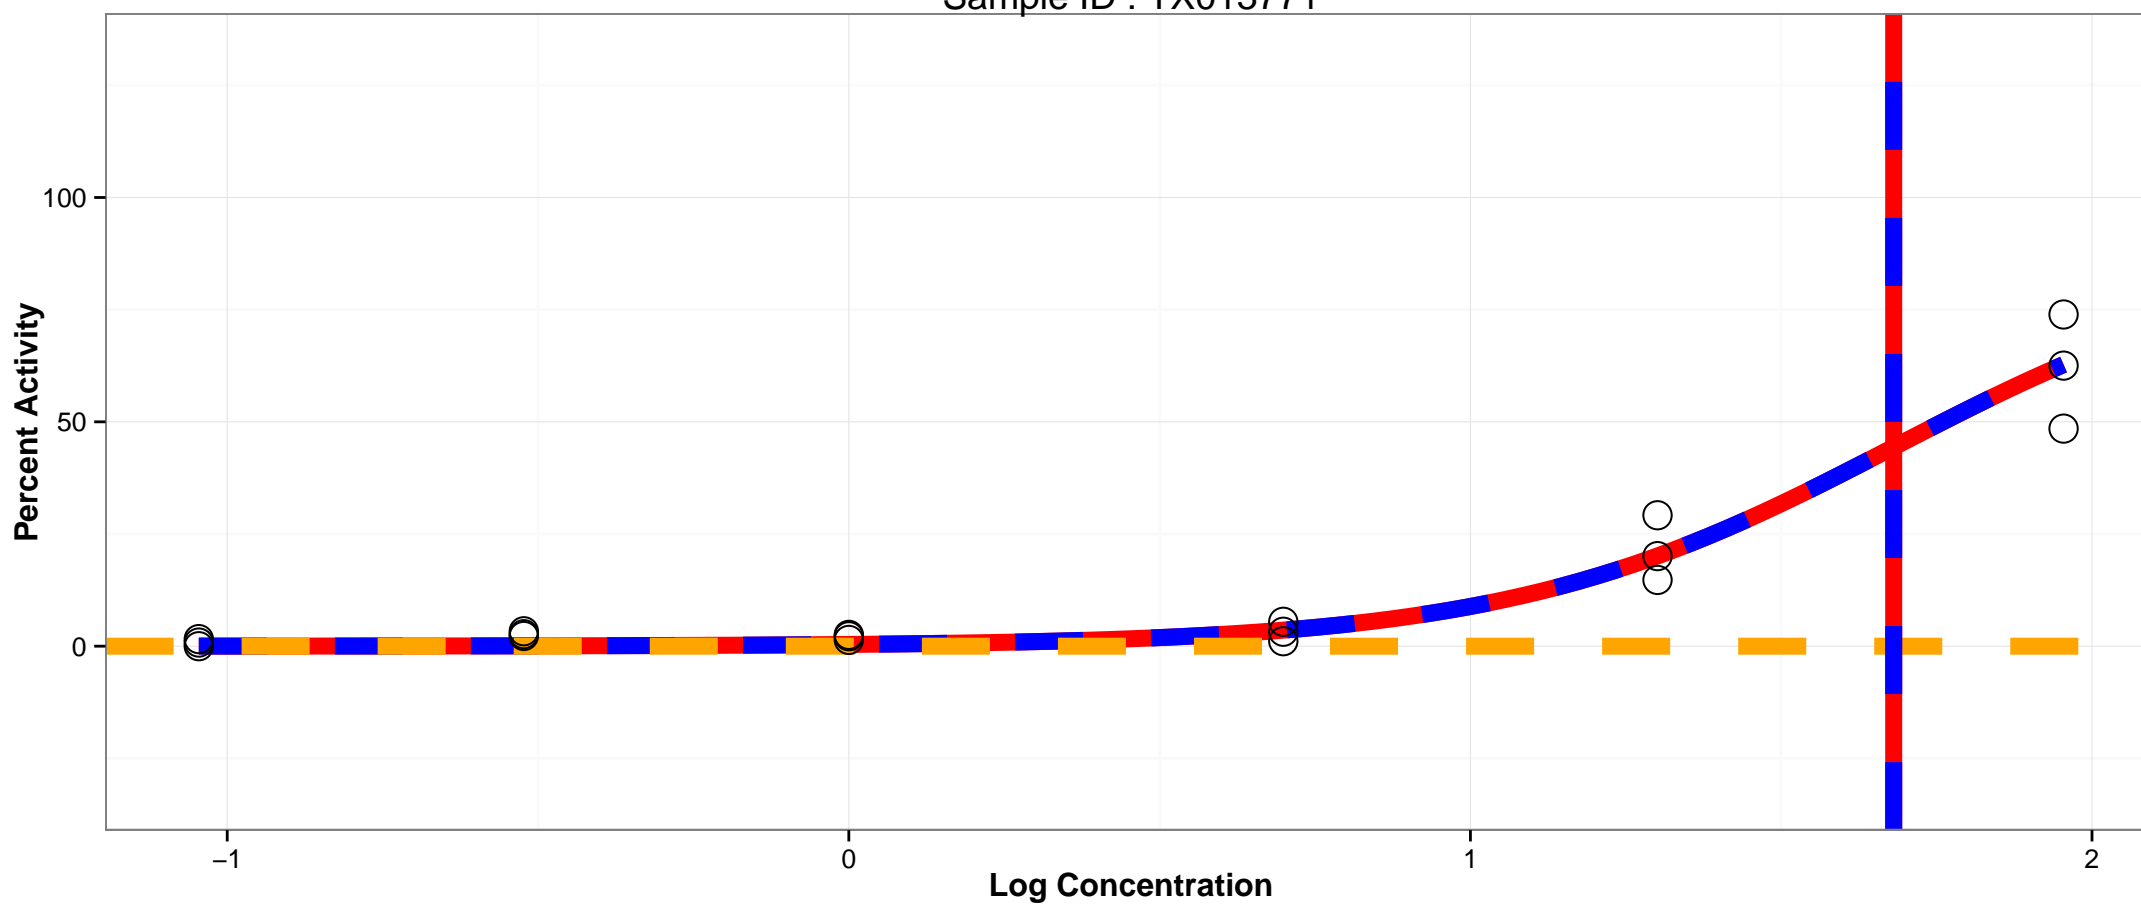

HILL MODEL

|     | tp   | ga    | gw    |
|-----|------|-------|-------|
| val | 88.7 | 1.68  | 1.4   |
| sd  | 33.1 | 0.299 | 0.473 |

GAIN-LOSS MODEL

|     | tp   | ga    | gw    | la   | lw   |
|-----|------|-------|-------|------|------|
| val | 88.7 | 1.68  | 1.4   | 3.64 | 4.37 |
| sd  | 33.2 | 0.299 | 0.473 | 1330 | 3450 |

|      | CNST   | HILL  | GNLS  |
|------|--------|-------|-------|
| AIC  | 166.07 | 114.3 | 118.3 |
| PROB | 0      | 0.88  | 0.12  |
| RMSE | 27.17  | 5.18  | 5.18  |

MAX\_MEAN : 61.7 MAX\_MED : 62.5 BMAD : 5.69  
COFF : 20 HIT-CALL : 1 FITC : 42 ACTP : 1  
FLAGS :

Assay ID 1509 (NHEERL\_HEK293T\_CellTiterGLO)  
Sample ID : TX013771

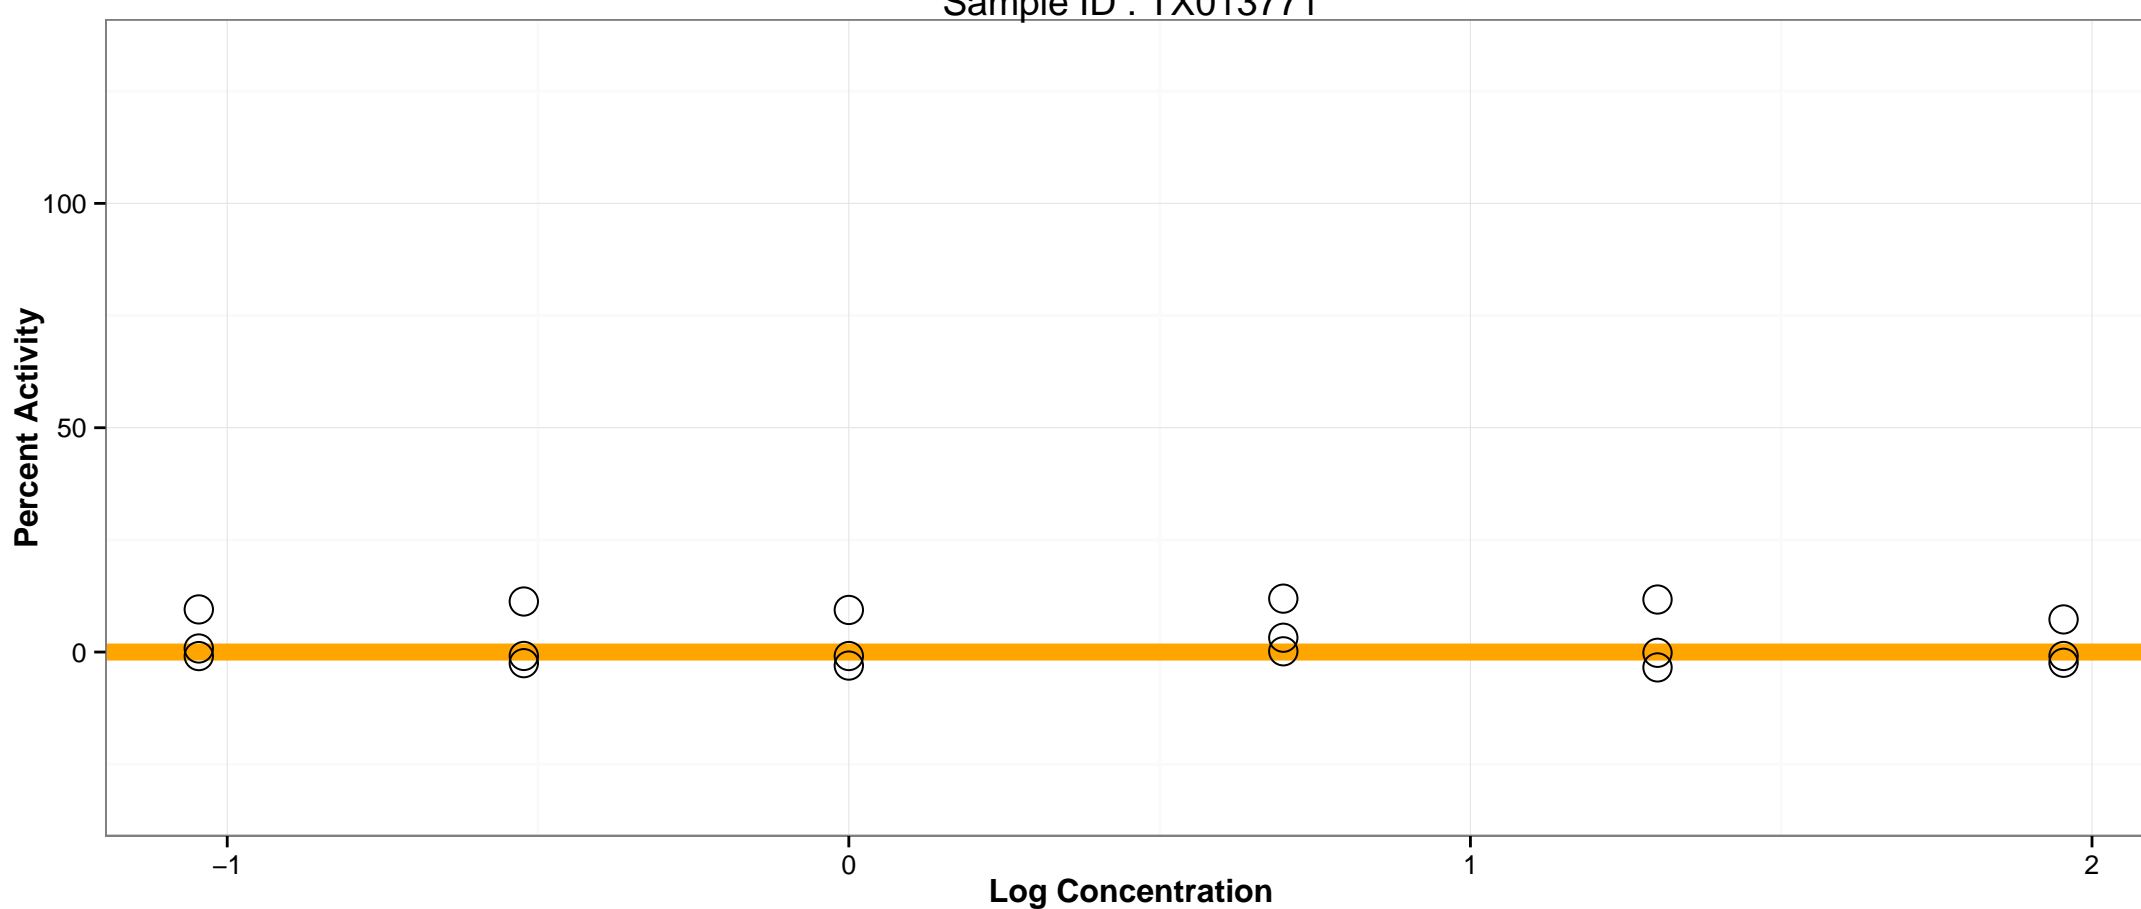

HILL MODEL

HILL MODEL: Not applicable

GAIN-LOSS MODEL

GNLS MODEL: Not applicable

|      | CNST  | HILL | GNLS |
|------|-------|------|------|
| AIC  | 118.8 | NA   | NA   |
| PROB | 1     | NA   | NA   |
| RMSE | 6.17  | NA   | NA   |

MAX\_MEAN : 5.1 MAX\_MED : 3.21 BMAD : 5.54  
COFF : 20 HIT-CALL : 0 FITC : 4 ACTP : 0  
FLAGS :

Assay ID 1848 (NHEERL\_Quantilum\_inhib\_2\_dn)  
Sample ID : TX013771

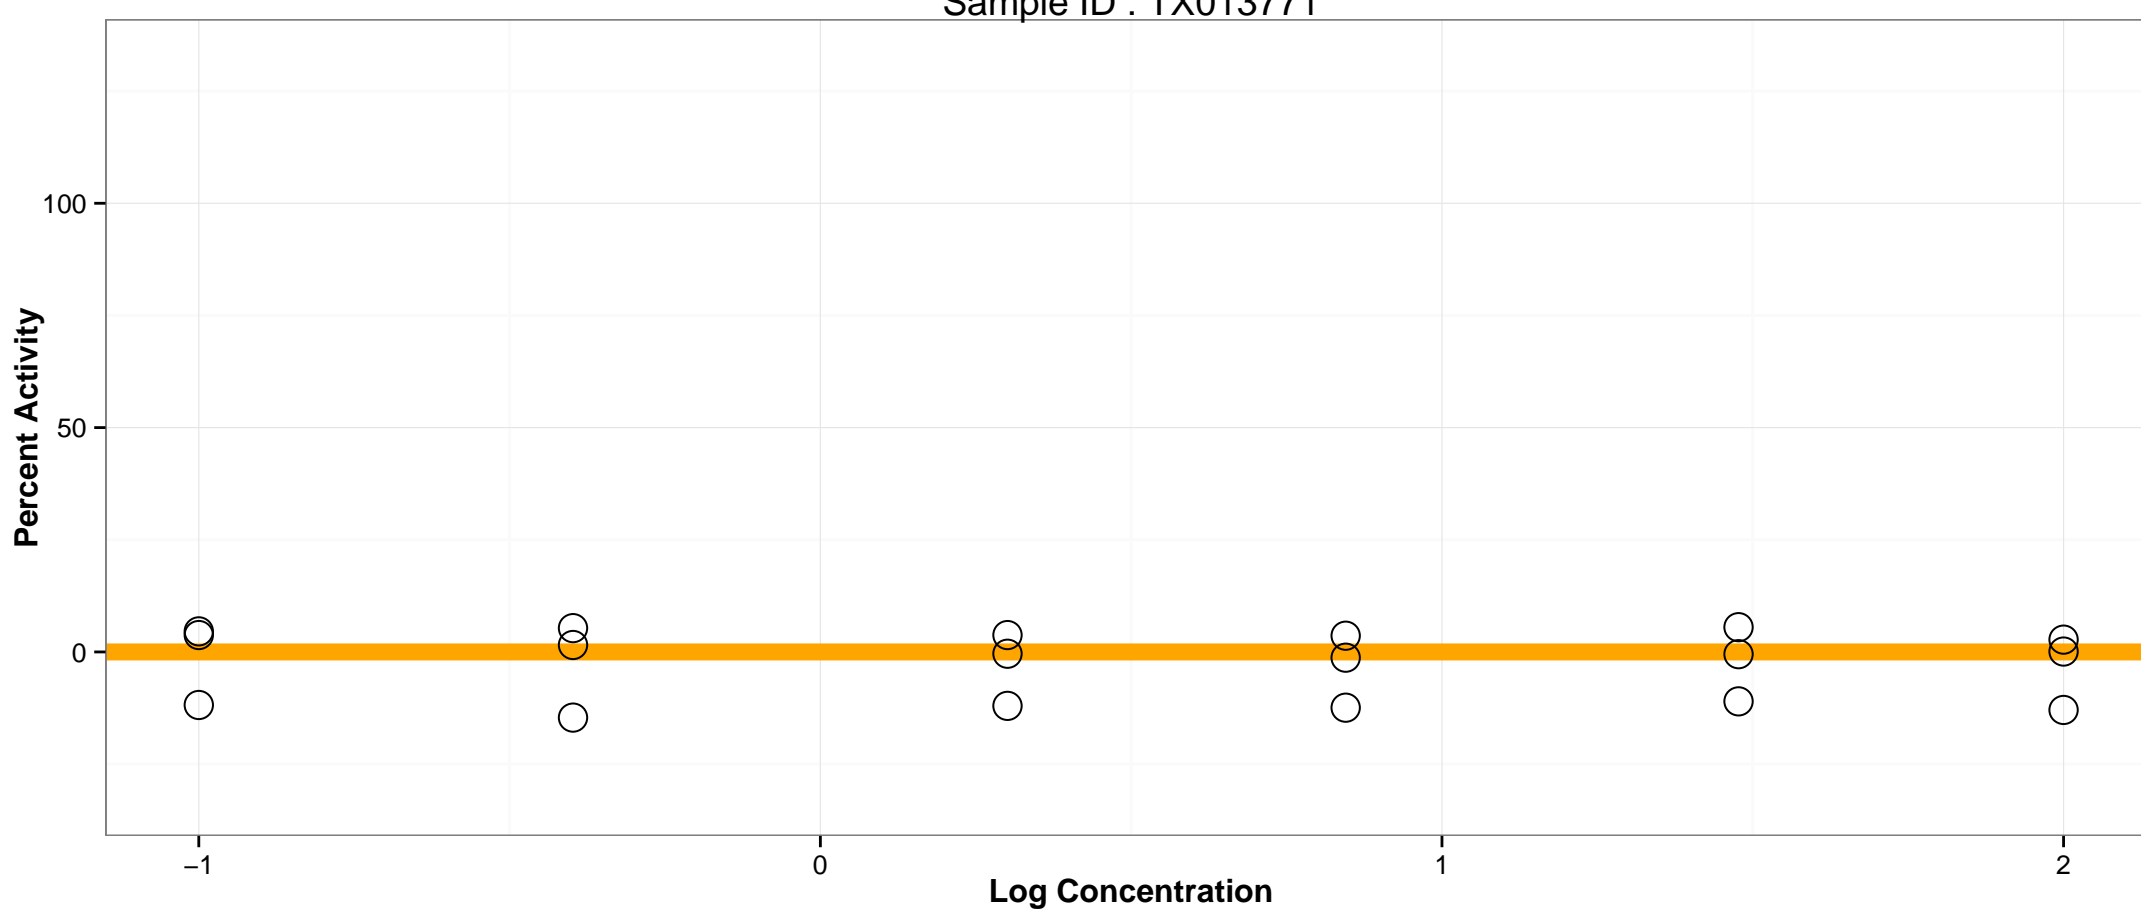

HILL MODEL

HILL MODEL: Not applicable

GAIN-LOSS MODEL

GNLS MODEL: Not applicable

|      | CNST   | HILL | GNLS |
|------|--------|------|------|
| AIC  | 127.98 | NA   | NA   |
| PROB | 1      | NA   | NA   |
| RMSE | 7.72   | NA   | NA   |

MAX\_MEAN : -1.15 MAX\_MED : 3.78 BMAD : 8.58  
COFF : 20 HIT-CALL : 0 FITC : 4 ACTP : 0  
FLAGS :

Chemical : 4-Aminofolic acid  
CAS : 54-62-6

Assay ID 1508 (NHEERL\_TPO\_AUR\_dn)  
Sample ID : TX014249

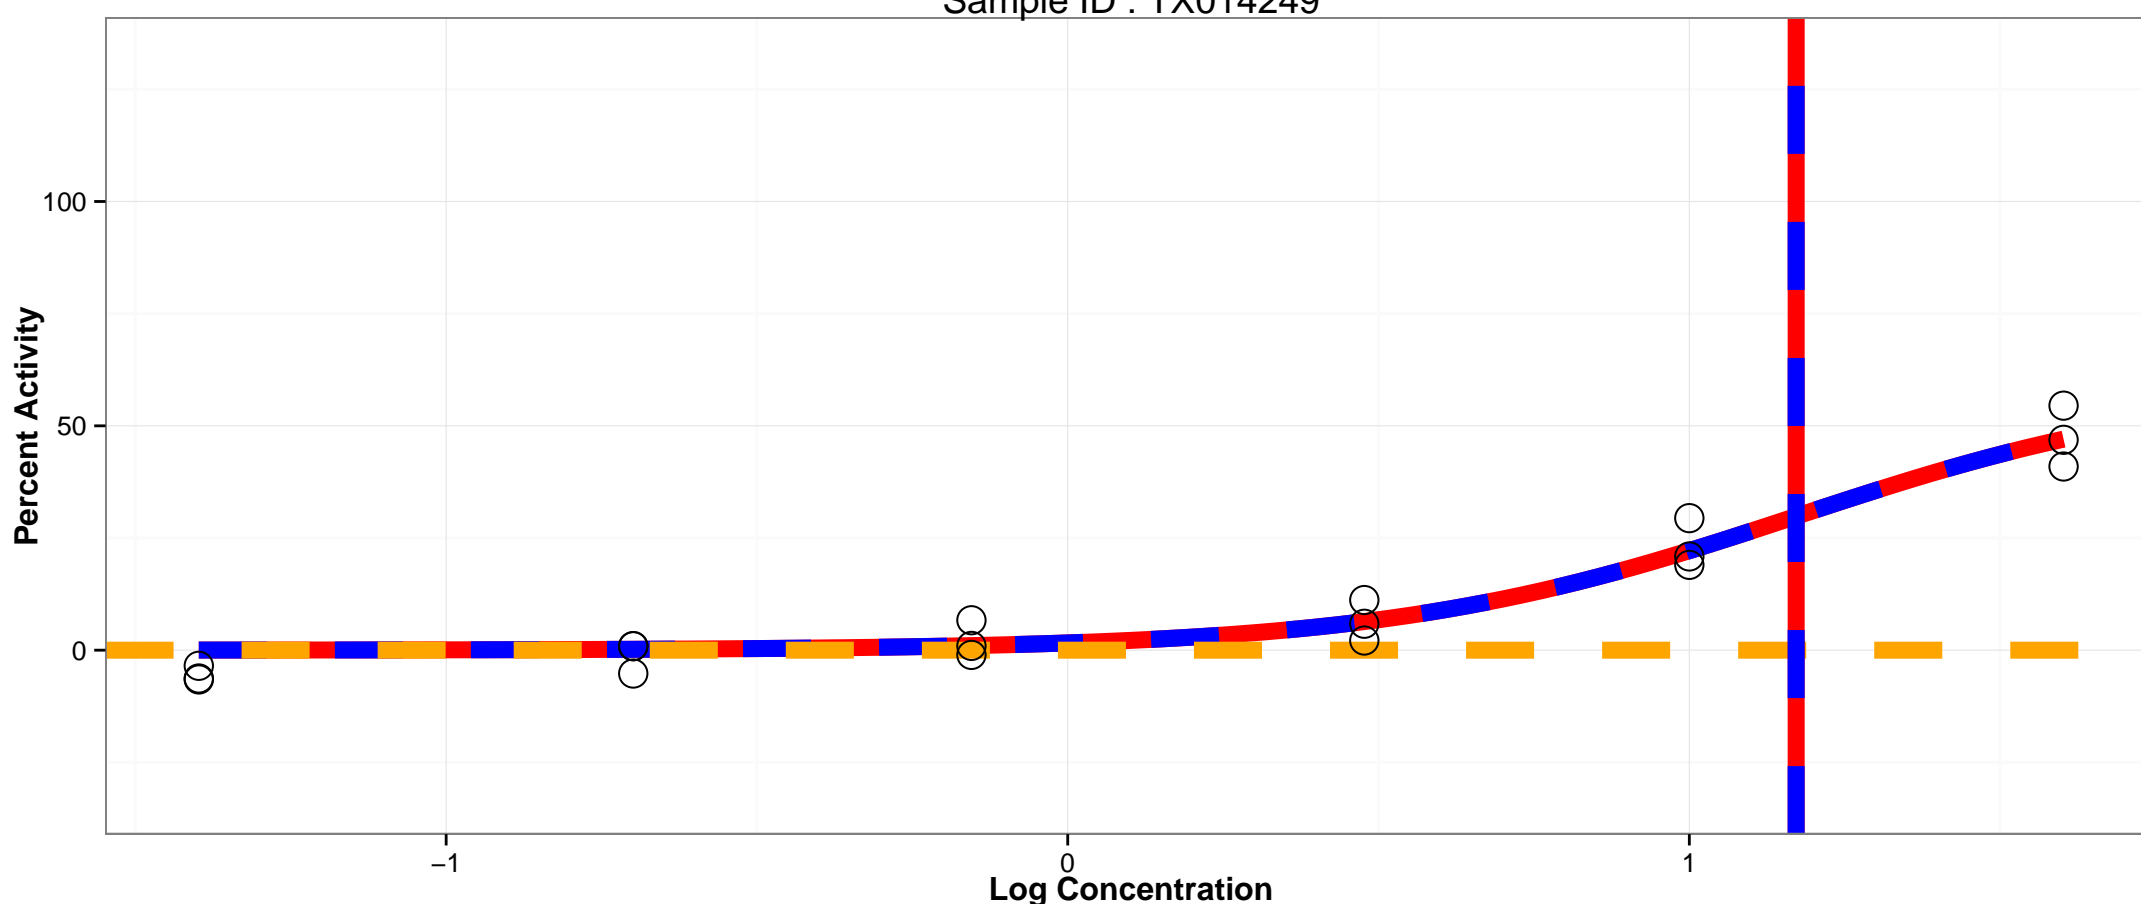

HILL MODEL

|     | tp   | ga    | gw    |
|-----|------|-------|-------|
| val | 59.7 | 1.17  | 1.33  |
| sd  | 15.9 | 0.236 | 0.461 |

GAIN-LOSS MODEL

|     | tp   | ga   | gw   | la   | lw   |
|-----|------|------|------|------|------|
| val | 59.7 | 1.17 | 1.33 | 2.61 | 6.78 |
| sd  | NA   | NA   | NA   | NA   | NA   |

|      | CNST   | HILL   | GNLS   |
|------|--------|--------|--------|
| AIC  | 162.37 | 115.44 | 119.44 |
| PROB | 0      | 0.88   | 0.12   |
| RMSE | 22.17  | 4.47   | 4.47   |

MAX\_MEAN : 47.5 MAX\_MED : 46.9 BMAD : 5.69  
COFF : 20 HIT-CALL : 1 FITC : 42 ACTP : 1  
FLAGS :

Assay ID 1509 (NHEERL\_HEK293T\_CellTiterGLO)  
Sample ID : TX014249

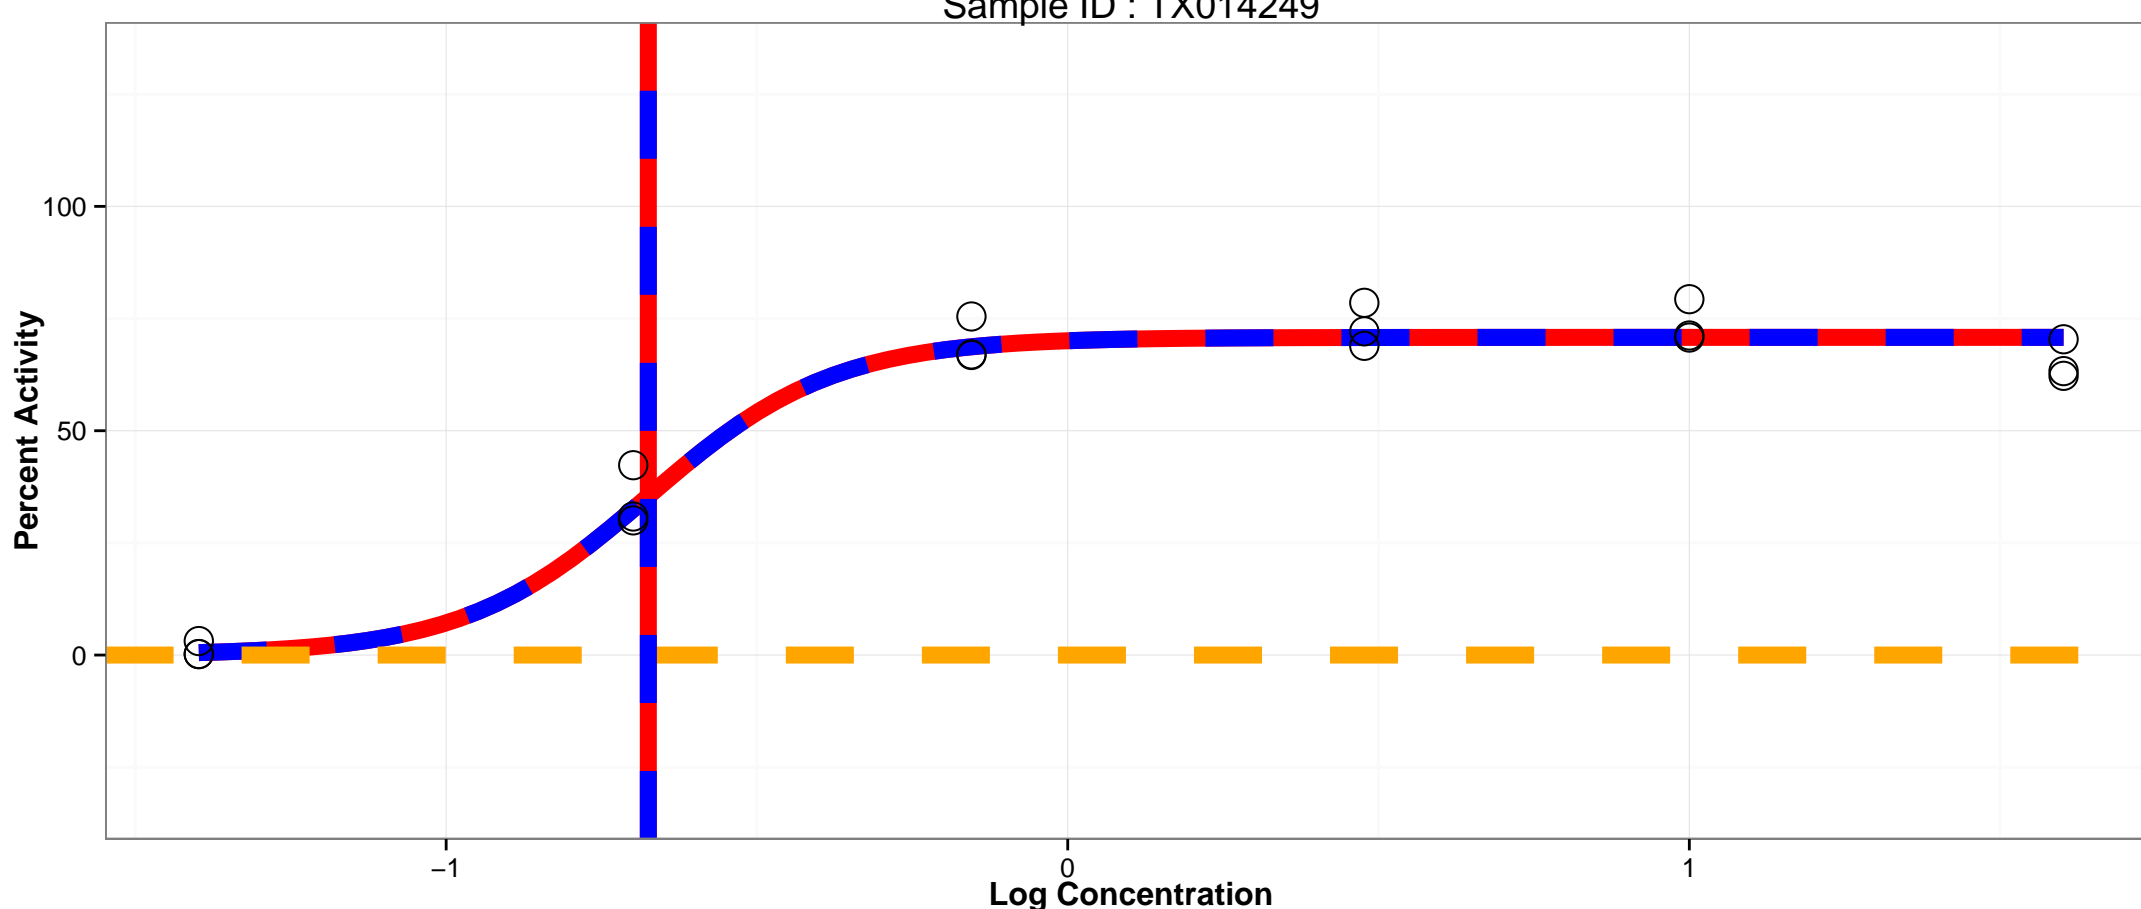

HILL MODEL

|     | tp   | ga     | gw   |
|-----|------|--------|------|
| val | 70.8 | -0.675 | 2.92 |
| sd  | 1.57 | 0.0267 | 1.07 |

GAIN-LOSS MODEL

|     | tp   | ga     | gw   | la   | lw   |
|-----|------|--------|------|------|------|
| val | 70.8 | -0.675 | 2.92 | 3.59 | 10.9 |
| sd  | NA   | NA     | NA   | NA   | NA   |

|      | CNST   | HILL   | GNLS   |
|------|--------|--------|--------|
| AIC  | 203.68 | 116.62 | 120.62 |
| PROB | 0      | 0.88   | 0.12   |
| RMSE | 59.47  | 4.9    | 4.9    |

MAX\_MEAN : 73.8 MAX\_MED : 72.2 BMAD : 5.54  
COFF : 20 HIT-CALL : 1 FITC : 41 ACTP : 1  
FLAGS :

Assay ID 1848 (NHEERL\_Quantilum\_inhib\_2\_dn)  
Sample ID : TX014249

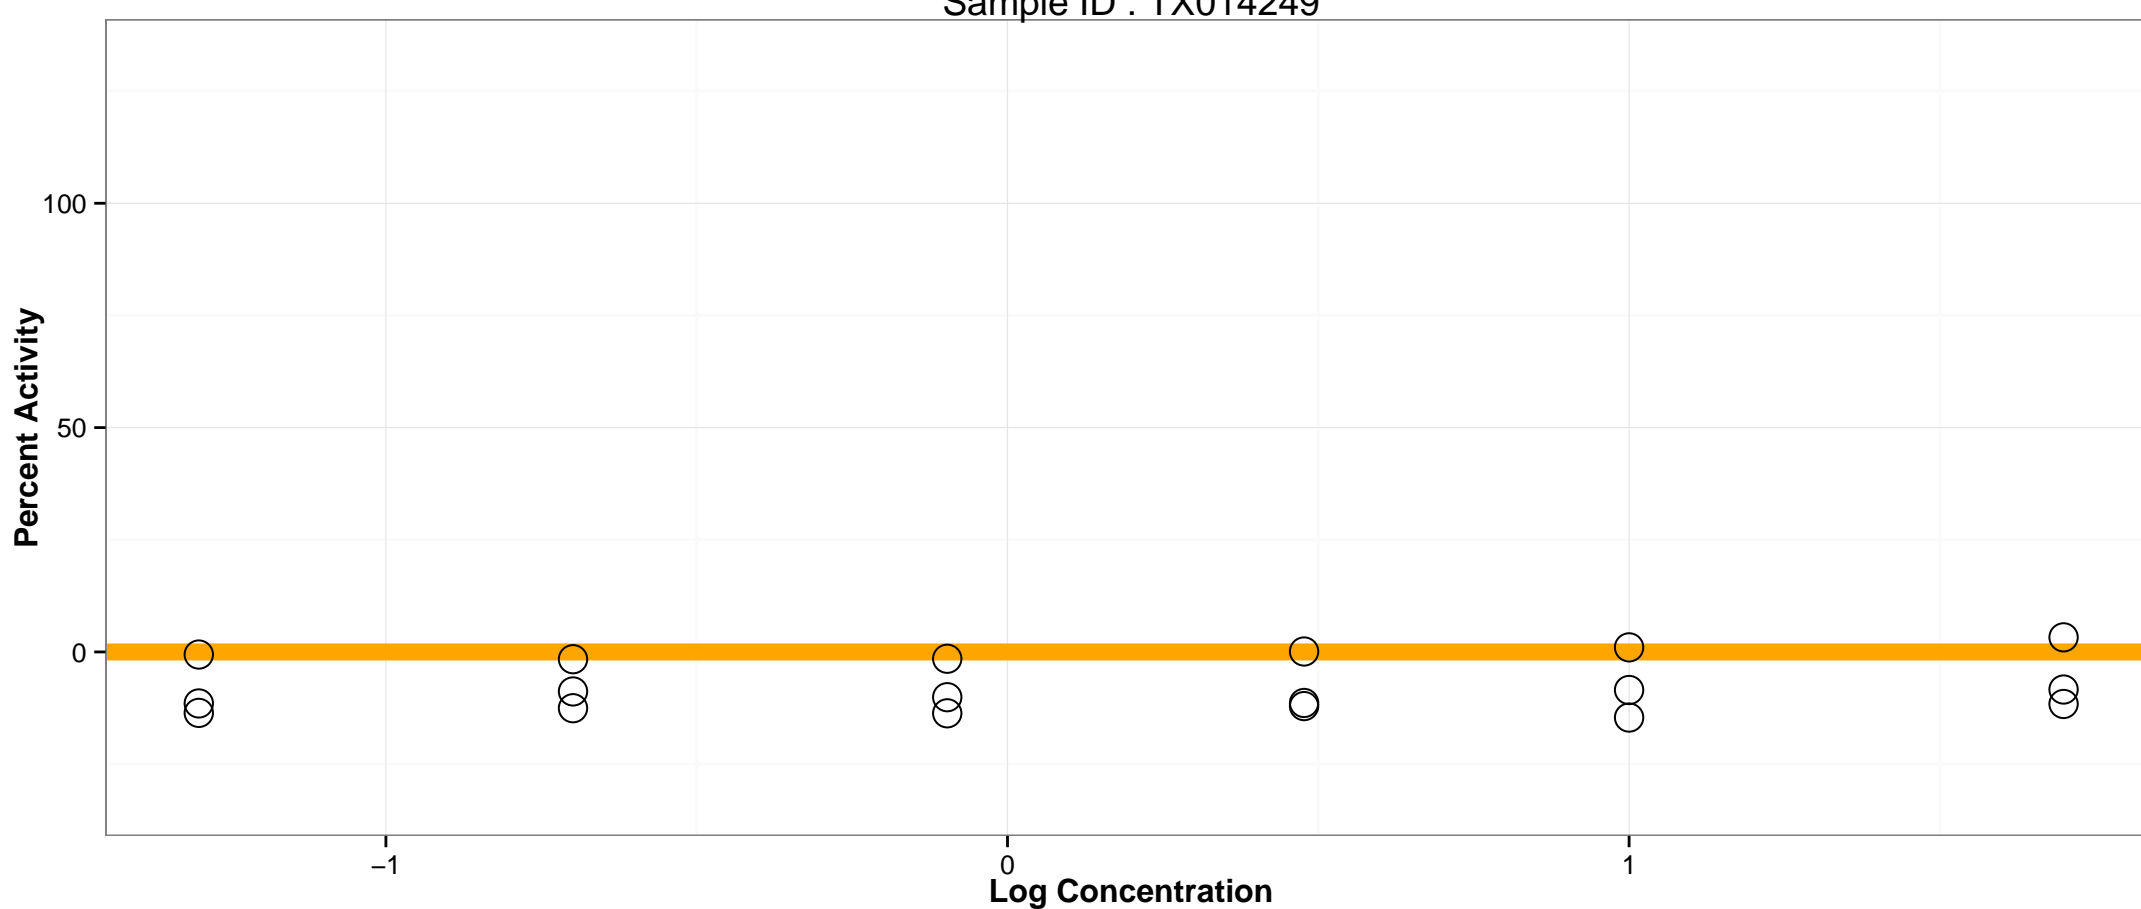

HILL MODEL

HILL MODEL: Not applicable

GAIN-LOSS MODEL

GNLS MODEL: Not applicable

|      | CNST   | HILL | GNLS |
|------|--------|------|------|
| AIC  | 137.06 | NA   | NA   |
| PROB | 1      | NA   | NA   |
| RMSE | 9.48   | NA   | NA   |

MAX\_MEAN : -5.56 MAX\_MED : -8.37 BMAD : 8.58  
COFF : 20 HIT-CALL : 0 FITC : 4 ACTP : 0  
FLAGS :

Chemical : Clove leaf oil  
CAS : 8000-34-8

Assay ID 1508 (NHEERL\_TPO\_AUR\_dn)  
Sample ID : TX014811

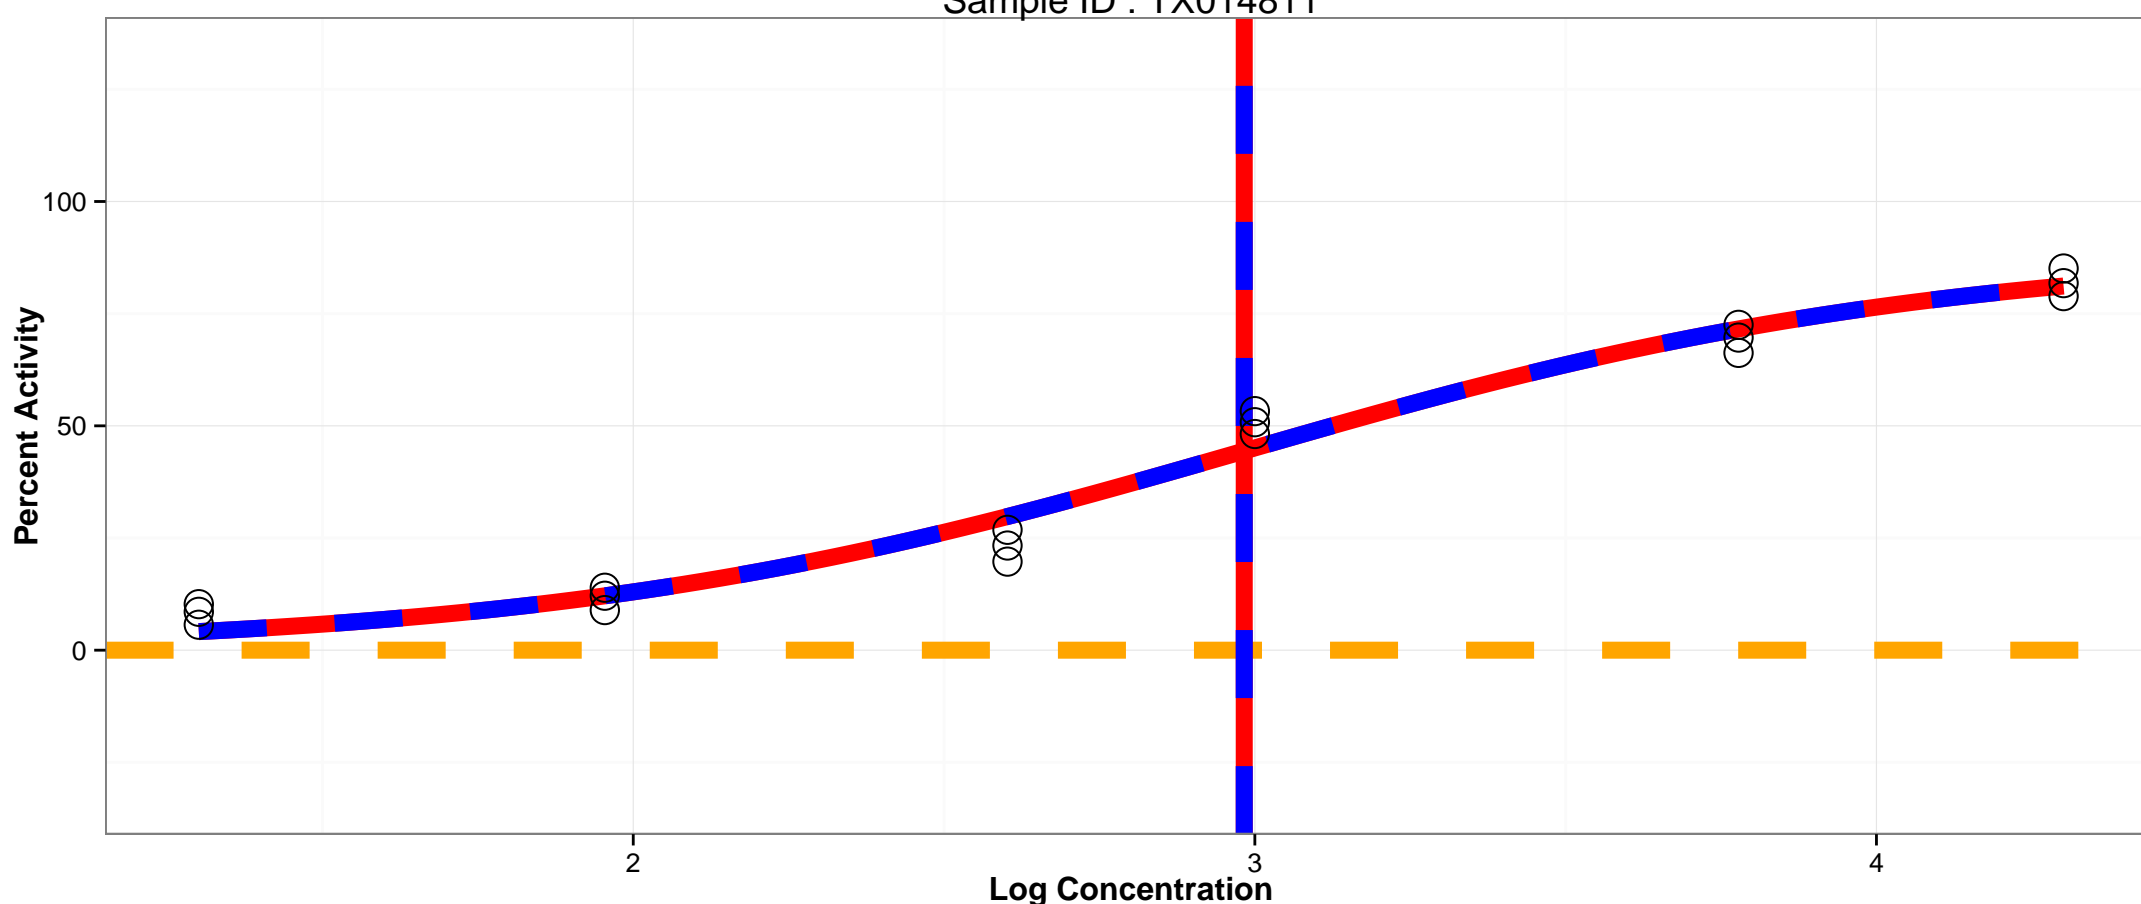

HILL MODEL

|     | tp   | ga   | gw    |
|-----|------|------|-------|
| val | 88.8 | 2.98 | 0.779 |
| sd  | 6.01 | 0.13 | 0.118 |

GAIN-LOSS MODEL

|     | tp   | ga   | gw    | la   | lw   |
|-----|------|------|-------|------|------|
| val | 88.8 | 2.98 | 0.779 | 5.59 | 9.28 |
| sd  | NA   | NA   | NA    | NA   | NA   |

|      | CNST   | HILL   | GNLS   |
|------|--------|--------|--------|
| AIC  | 195.92 | 115.95 | 119.95 |
| PROB | 0      | 0.88   | 0.12   |
| RMSE | 49.83  | 4.64   | 4.64   |

MAX\_MEAN : 81.9 MAX\_MED : 81.8 BMAD : 5.69  
COFF : 20 HIT-CALL : 1 FITC : 42 ACTP : 1  
FLAGS :

Assay ID 1509 (NHEERL\_HEK293T\_CellTiterGLO)  
Sample ID : TX014811

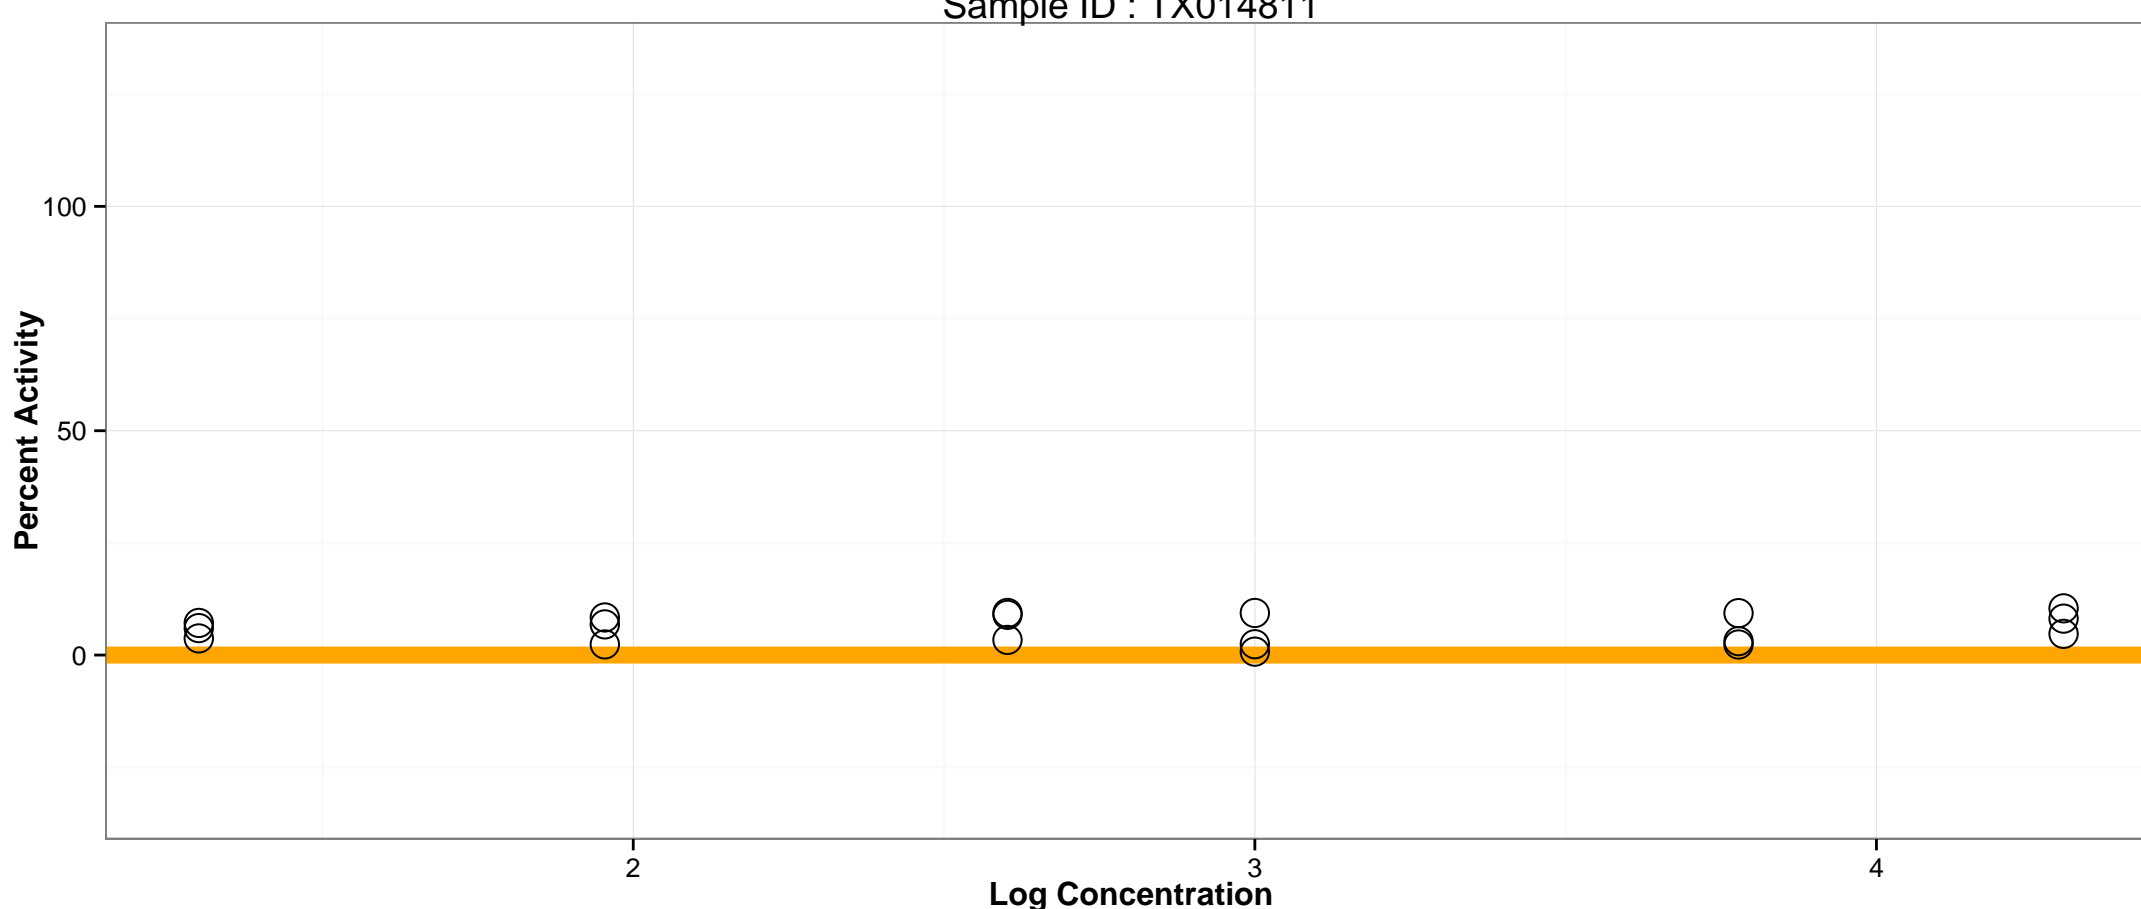

HILL MODEL

HILL MODEL: Not applicable

GAIN-LOSS MODEL

GNLS MODEL: Not applicable

|      | CNST   | HILL | GNLS |
|------|--------|------|------|
| AIC  | 124.42 | NA   | NA   |
| PROB | 1      | NA   | NA   |
| RMSE | 6.67   | NA   | NA   |

MAX\_MEAN : 7.76 MAX\_MED : 8.98 BMAD : 5.54  
COFF : 20 HIT-CALL : 0 FITC : 4 ACTP : 0  
FLAGS :

Assay ID 1848 (NHEERL\_Quantilum\_inhib\_2\_dn)  
Sample ID : TX014811

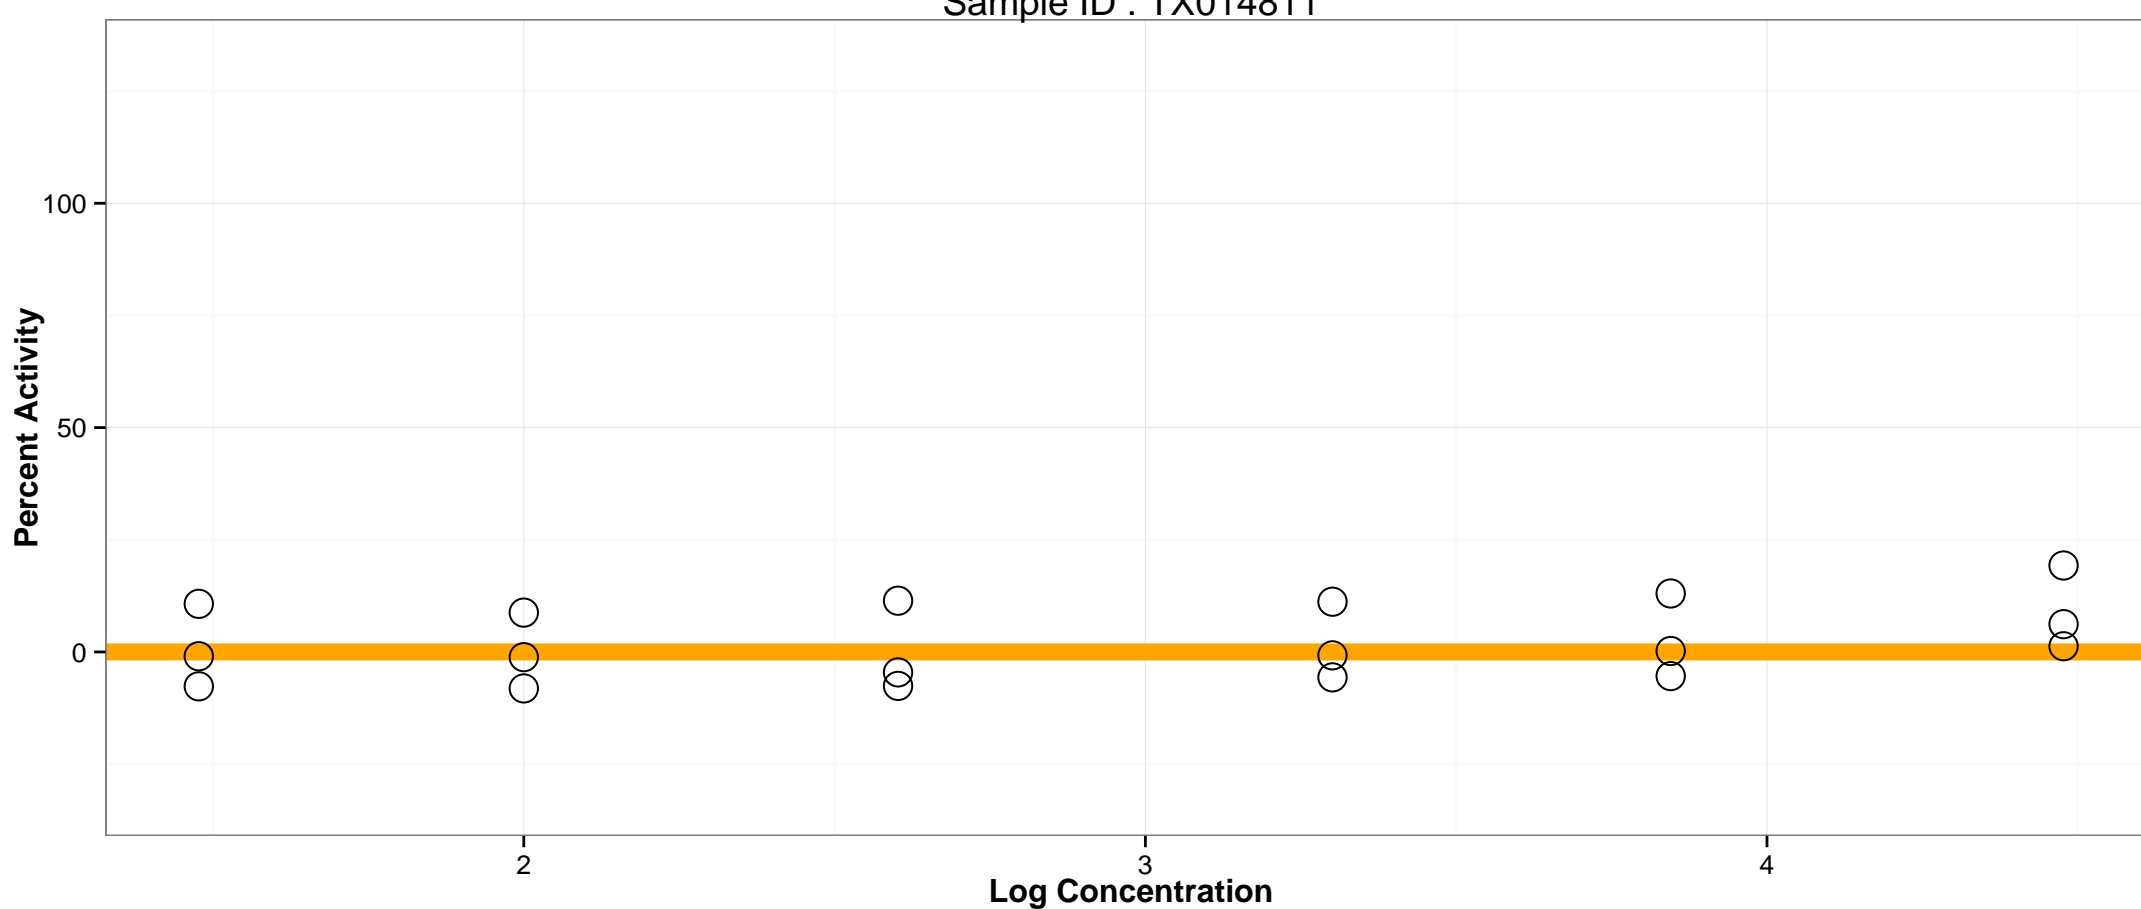

HILL MODEL

HILL MODEL: Not applicable

GAIN-LOSS MODEL

GNLS MODEL: Not applicable

|      | CNST   | HILL | GNLS |
|------|--------|------|------|
| AIC  | 131.74 | NA   | NA   |
| PROB | 1      | NA   | NA   |
| RMSE | 8.49   | NA   | NA   |

MAX\_MEAN : 8.92 MAX\_MED : 6.2 BMAD : 8.58  
COFF : 20 HIT-CALL : 0 FITC : 4 ACTP : 0  
FLAGS :

Assay ID 1508 (NHEERL\_TPO\_AUR\_dn)  
Sample ID : TX015280

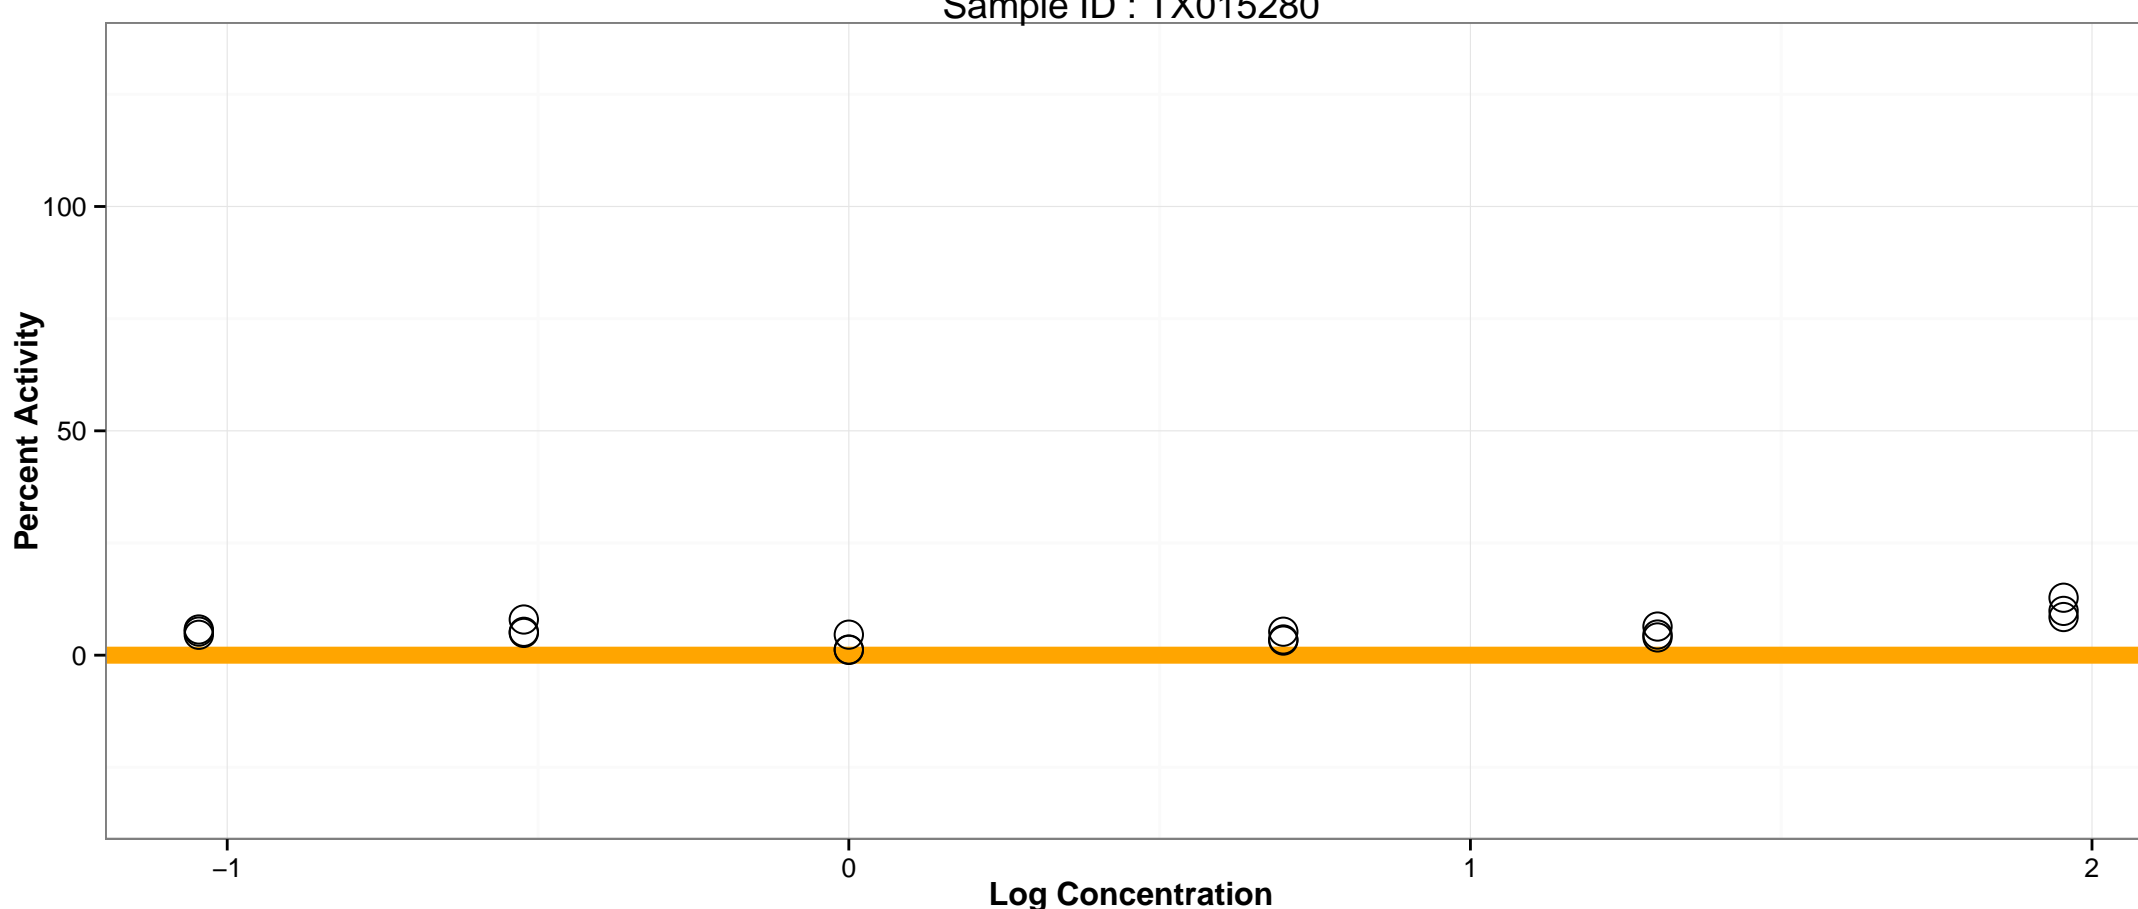

HILL MODEL

HILL MODEL: Not applicable

GAIN-LOSS MODEL

GNLS MODEL: Not applicable

|      | CNST   | HILL | GNLS |
|------|--------|------|------|
| AIC  | 121.08 | NA   | NA   |
| PROB | 1      | NA   | NA   |
| RMSE | 6.16   | NA   | NA   |

MAX\_MEAN : 10.4 MAX\_MED : 9.88 BMAD : 5.69  
COFF : 20 HIT-CALL : 0 FITC : 4 ACTP : 0  
FLAGS :

Assay ID 1509 (NHEERL\_HEK293T\_CellTiterGLO)  
Sample ID : TX015280

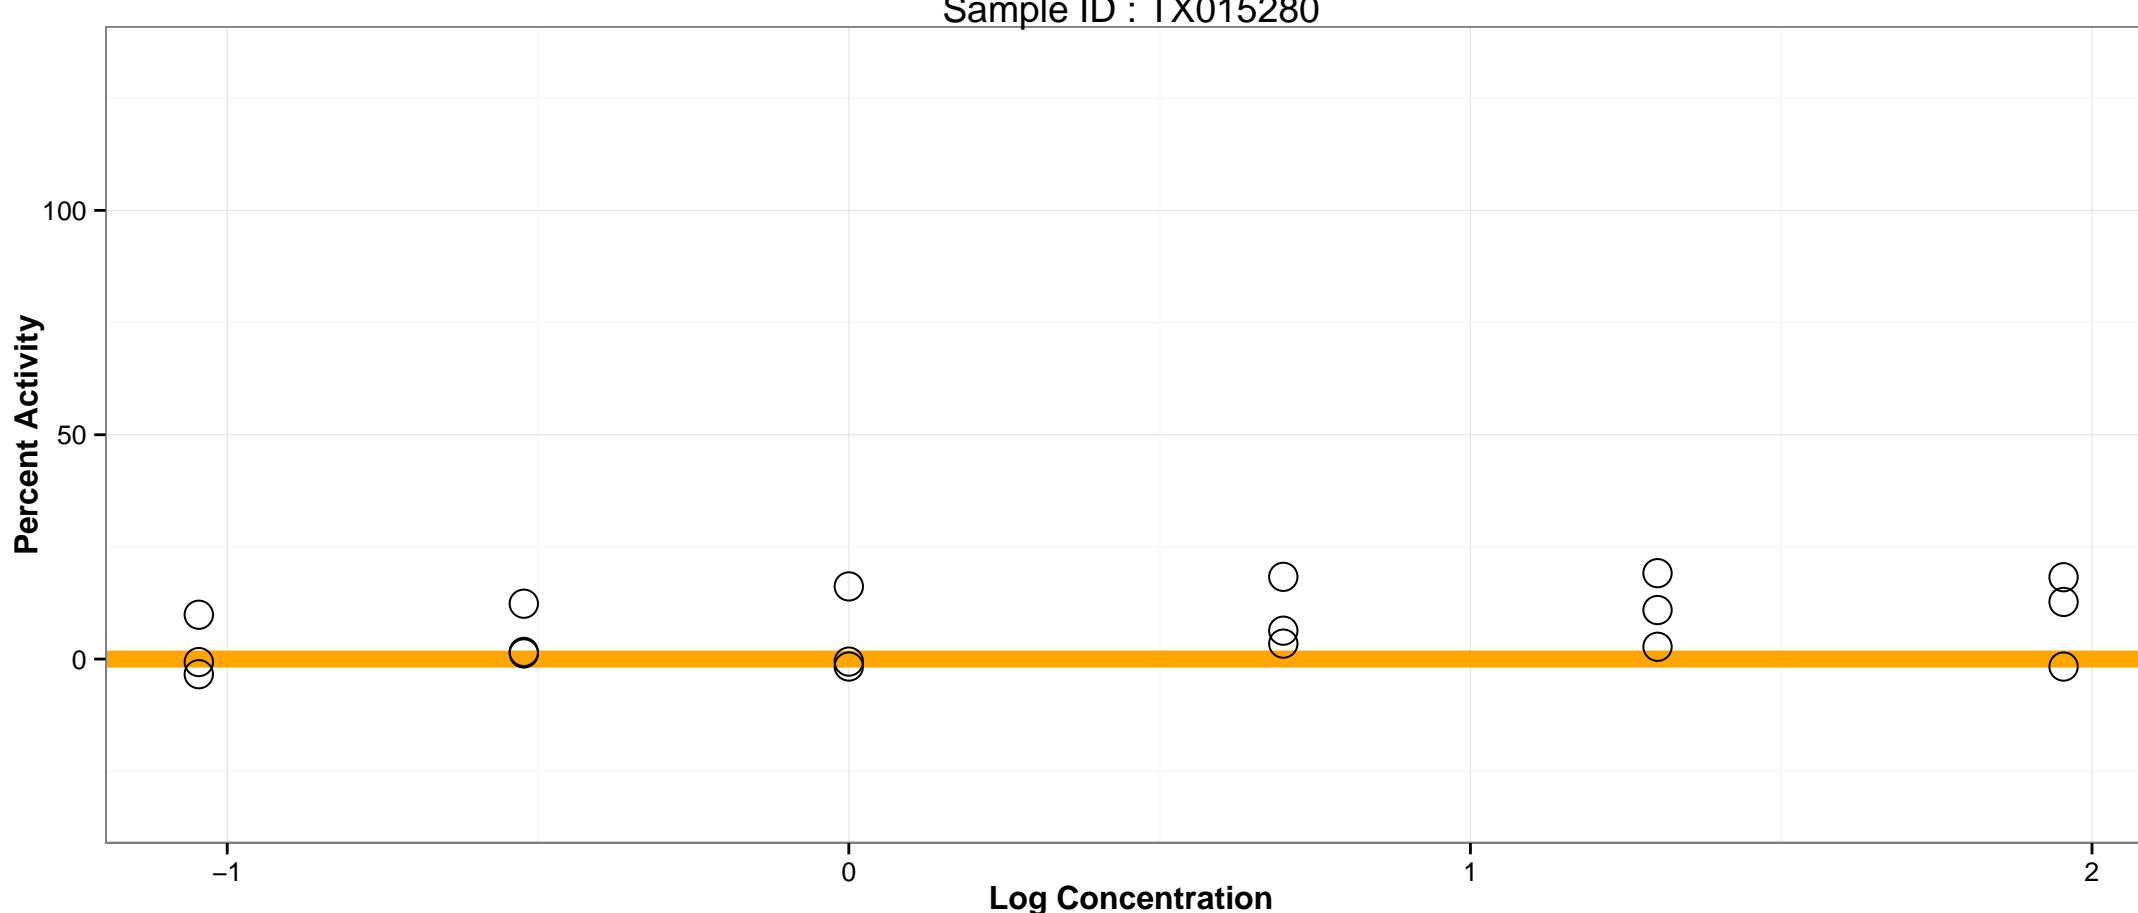

HILL MODEL

HILL MODEL: Not applicable

GAIN-LOSS MODEL

GNLS MODEL: Not applicable

|      | CNST   | HILL | GNLS |
|------|--------|------|------|
| AIC  | 138.26 | NA   | NA   |
| PROB | 1      | NA   | NA   |
| RMSE | 10.31  | NA   | NA   |

MAX\_MEAN : 10.9 MAX\_MED : 12.7 BMAD : 5.54  
COFF : 20 HIT-CALL : 0 FITC : 4 ACTP : 0  
FLAGS :

Assay ID 1848 (NHEERL\_Quantilum\_inhib\_2\_dn)  
Sample ID : TX015280

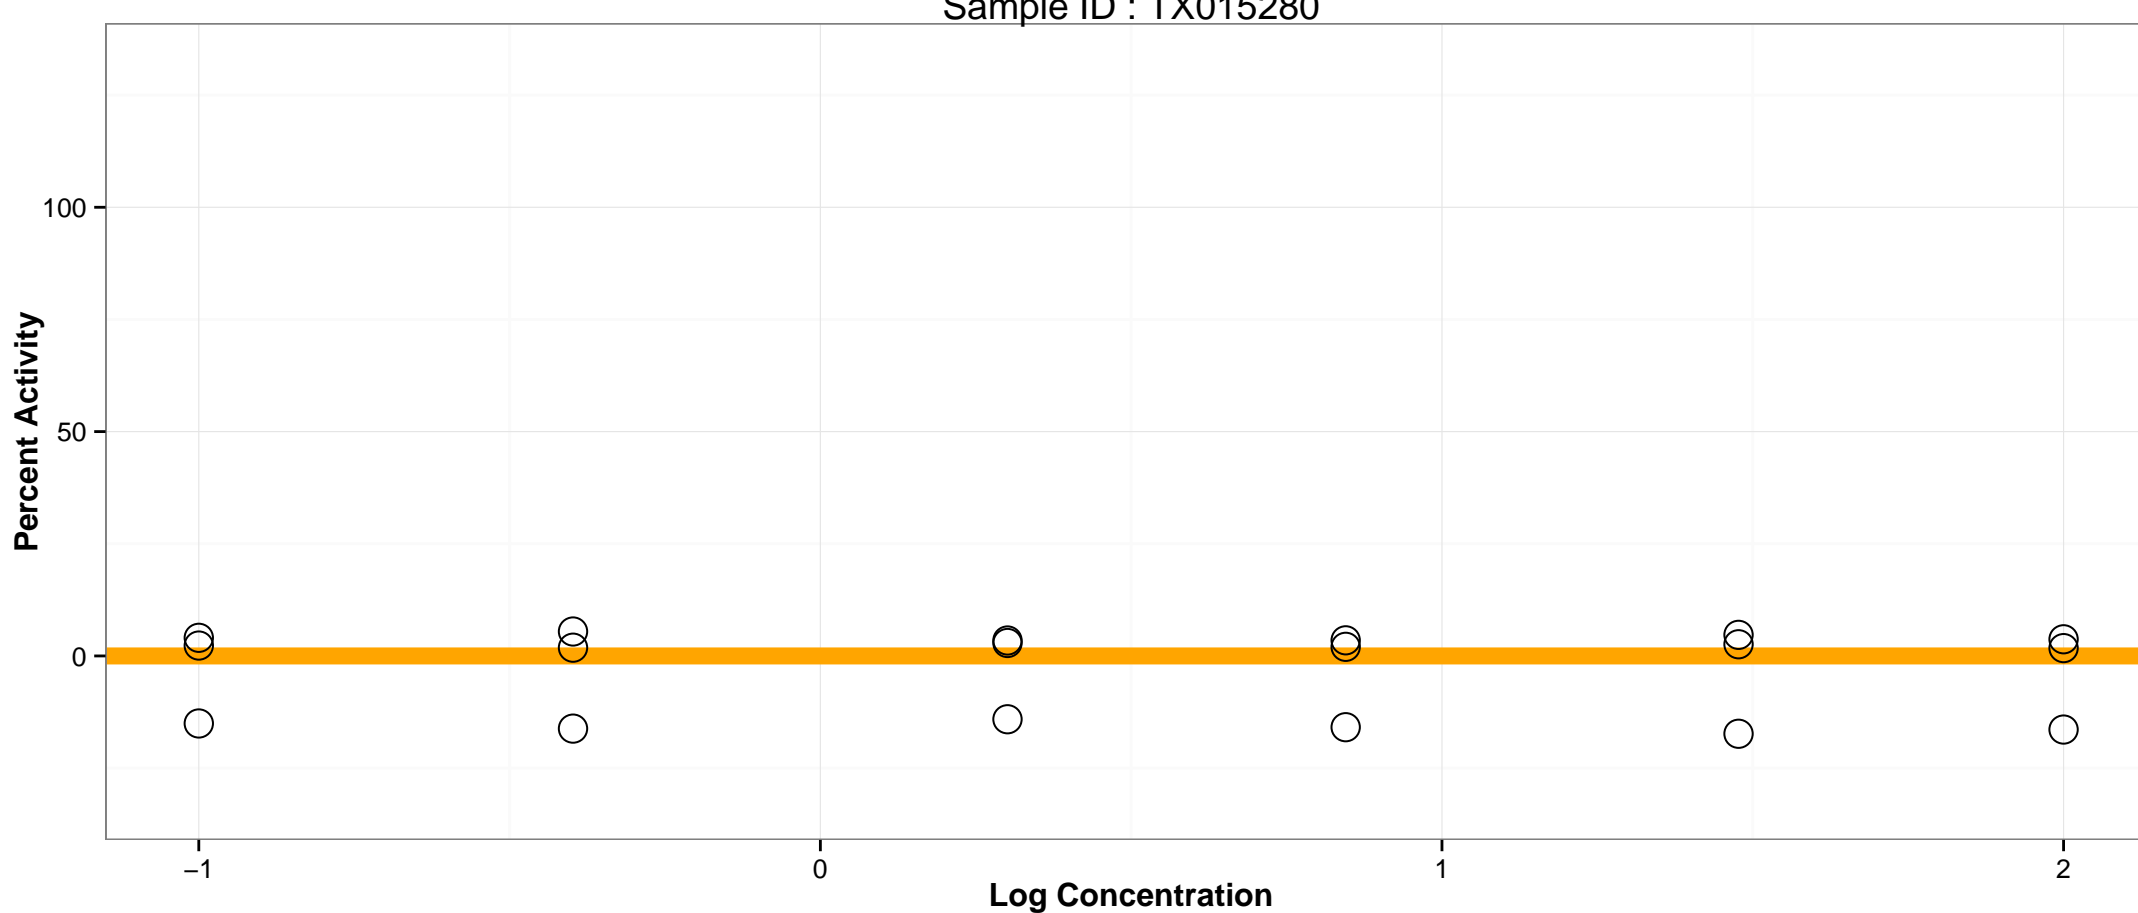

HILL MODEL

HILL MODEL: Not applicable

GAIN-LOSS MODEL

GNLS MODEL: Not applicable

|      | CNST   | HILL | GNLS |
|------|--------|------|------|
| AIC  | 135.21 | NA   | NA   |
| PROB | 1      | NA   | NA   |
| RMSE | 9.56   | NA   | NA   |

MAX\_MEAN : -2.58 MAX\_MED : 2.9 BMAD : 8.58  
COFF : 20 HIT-CALL : 0 FITC : 4 ACTP : 0  
FLAGS :

Chemical : Sodium myristyl sulfate  
CAS : 1191-50-0

Assay ID 1508 (NHEERL\_TPO\_AUR\_dn)  
Sample ID : TX015564

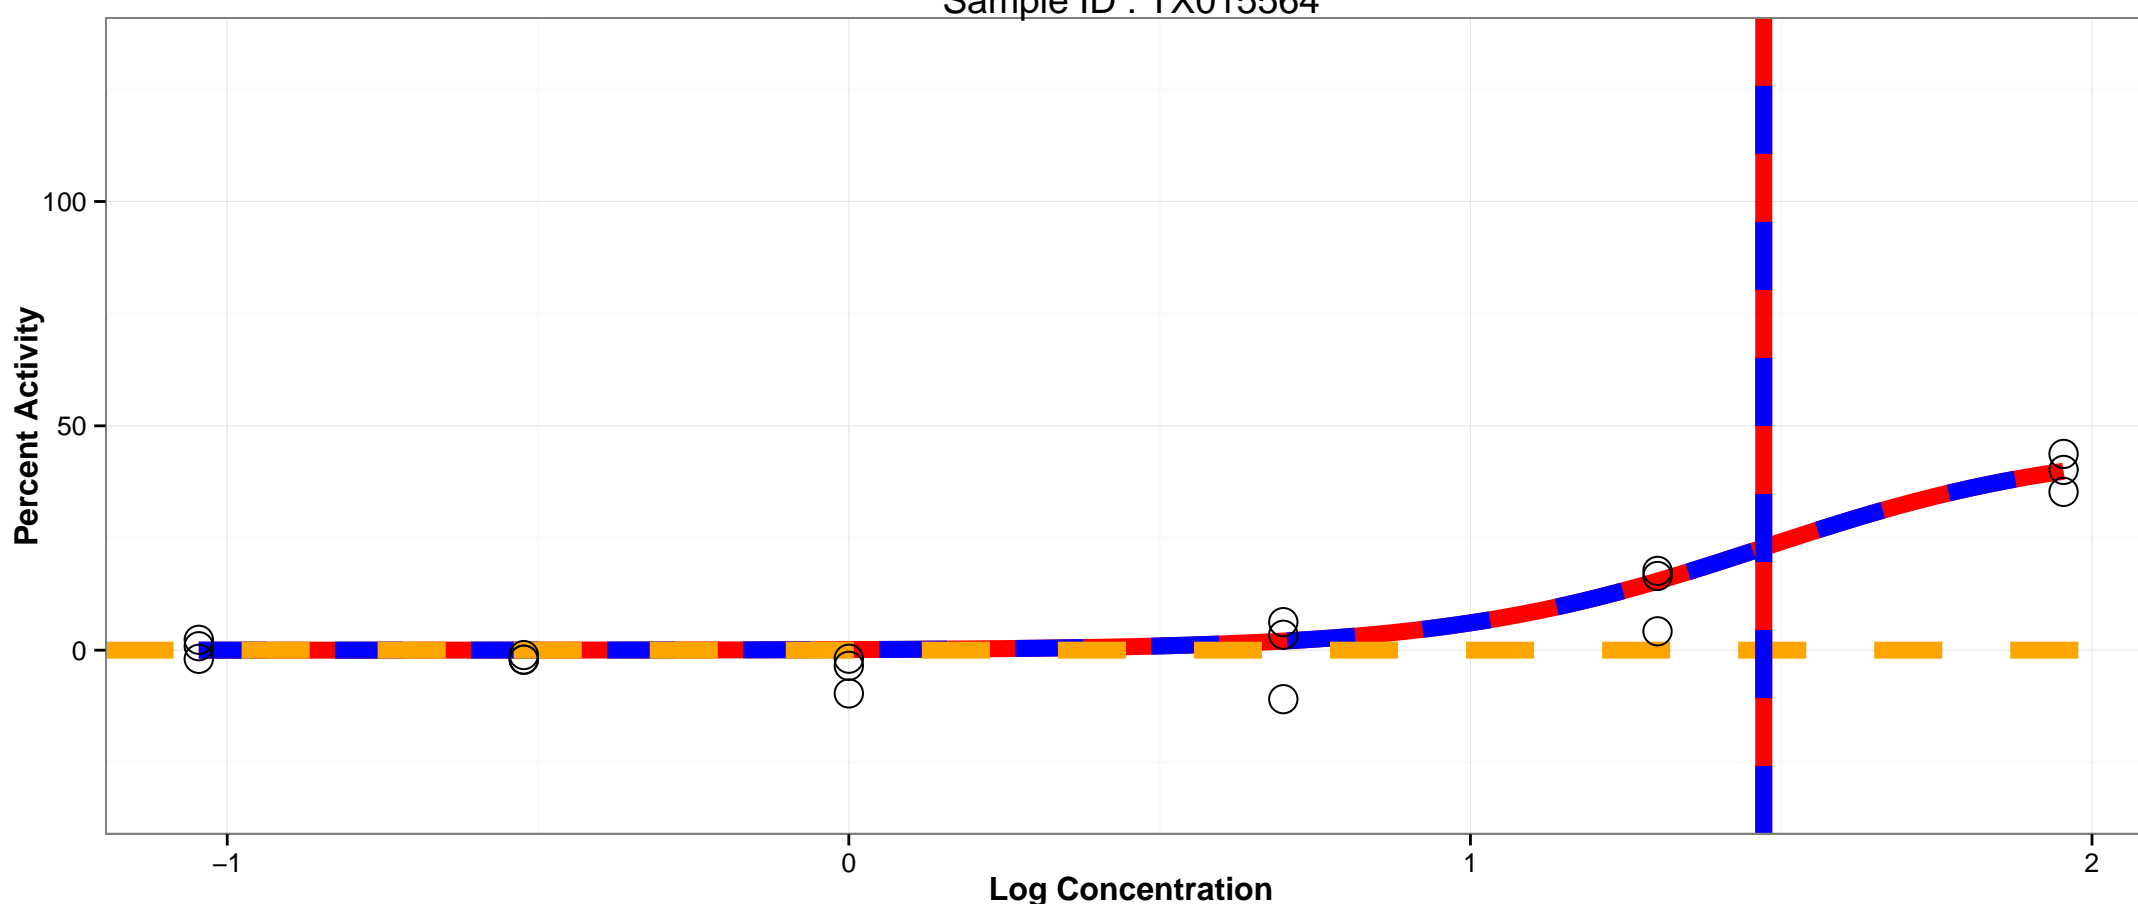

HILL MODEL

|     | tp   | ga    | gw    |
|-----|------|-------|-------|
| val | 45.8 | 1.47  | 1.73  |
| sd  | 11   | 0.201 | 0.911 |

GAIN-LOSS MODEL

|     | tp   | ga    | gw    | la   | lw   |
|-----|------|-------|-------|------|------|
| val | 45.8 | 1.47  | 1.73  | 3.11 | 5.36 |
| sd  | 11   | 0.201 | 0.911 | 977  | 4550 |

|      | CNST   | HILL  | GNLS  |
|------|--------|-------|-------|
| AIC  | 153.11 | 116.6 | 120.6 |
| PROB | 0      | 0.88  | 0.12  |
| RMSE | 17.76  | 5.2   | 5.2   |

MAX\_MEAN : 39.7 MAX\_MED : 40.2 BMAD : 5.69  
COFF : 20 HIT-CALL : 1 FITC : 42 ACTP : 1  
FLAGS : 6

Assay ID 1509 (NHEERL\_HEK293T\_CellTiterGLO)  
Sample ID : TX015564

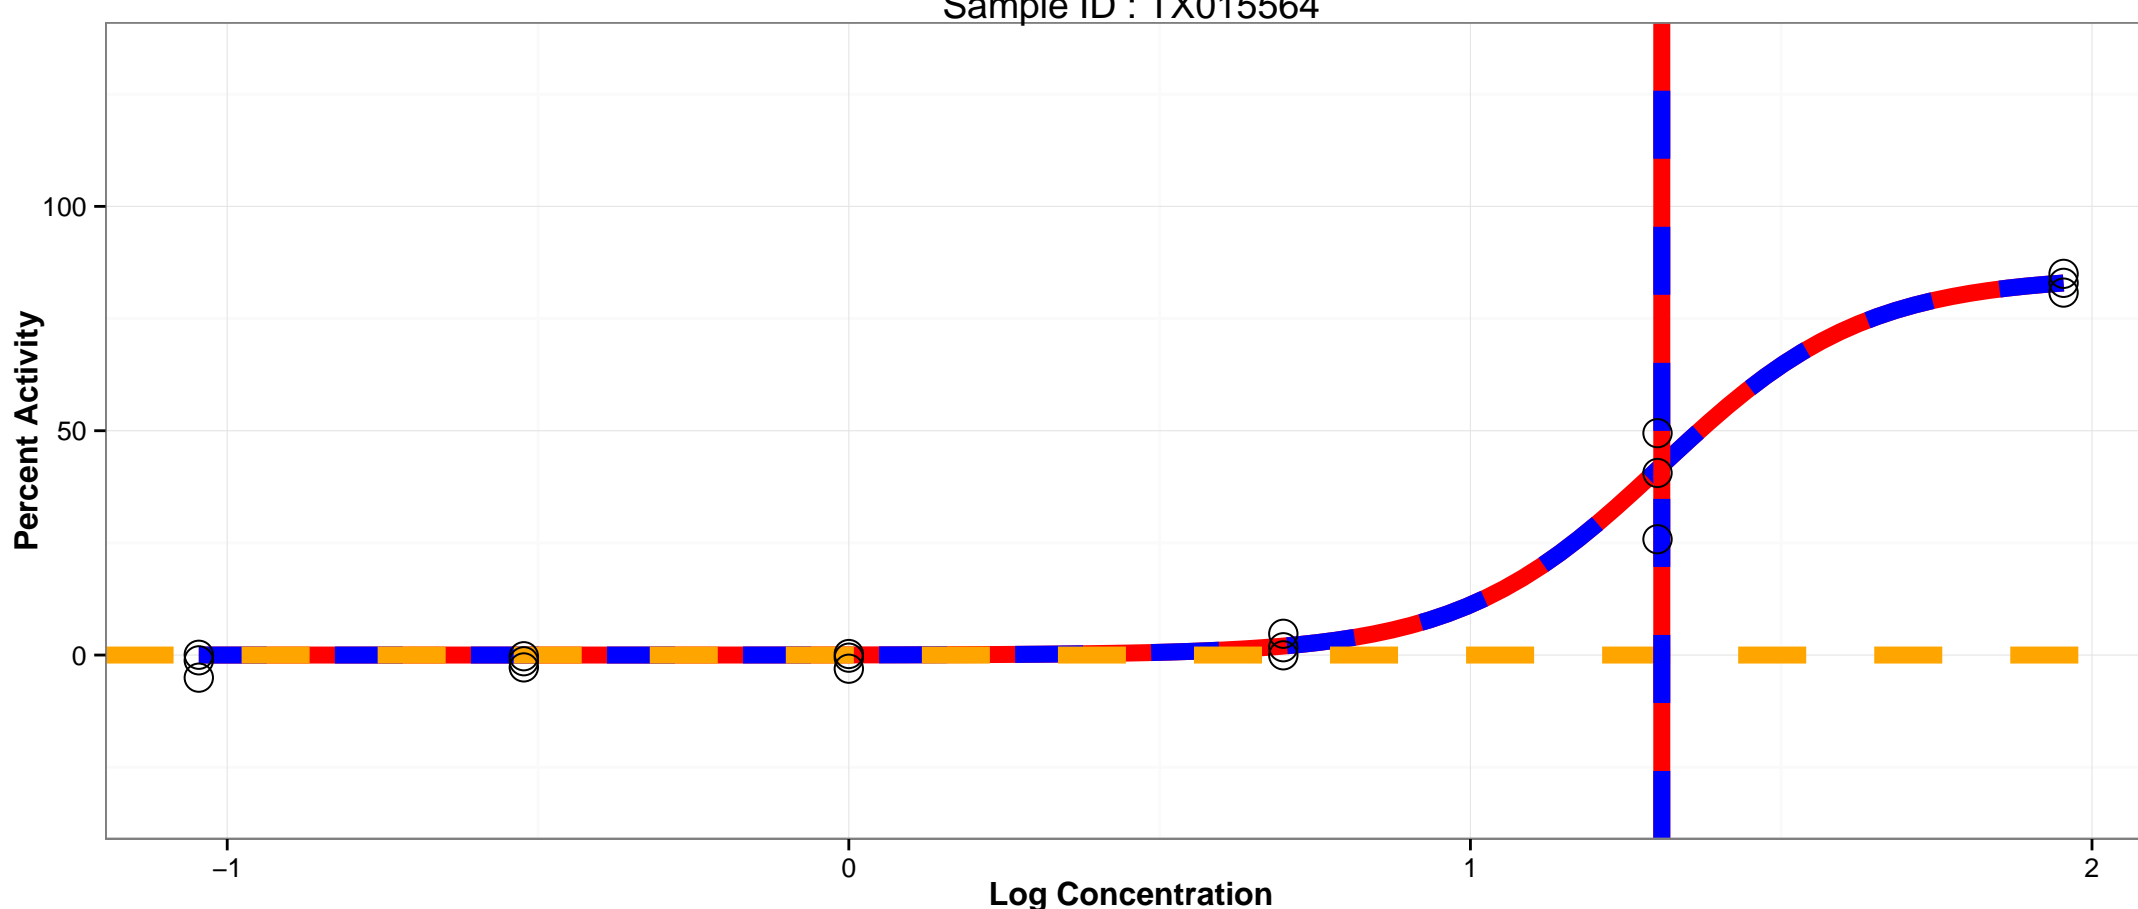

HILL MODEL

|     | tp   | ga     | gw    |
|-----|------|--------|-------|
| val | 84.5 | 1.31   | 2.65  |
| sd  | 2.18 | 0.0235 | 0.581 |

GAIN-LOSS MODEL

|     | tp   | ga   | gw   | la   | lw   |
|-----|------|------|------|------|------|
| val | 84.5 | 1.31 | 2.65 | 3.03 | 13.3 |
| sd  | NA   | NA   | NA   | NA   | NA   |

|      | CNST   | HILL  | GNLS  |
|------|--------|-------|-------|
| AIC  | 180.14 | 105.5 | 109.5 |
| PROB | 0      | 0.88  | 0.12  |
| RMSE | 37.61  | 4.56  | 4.56  |

MAX\_MEAN : 82.9 MAX\_MED : 83 BMAD : 5.54  
COFF : 20 HIT-CALL : 1 FITC : 41 ACTP : 1  
FLAGS :

Assay ID 1848 (NHEERL\_Quantilum\_inhib\_2\_dn)  
Sample ID : TX015564

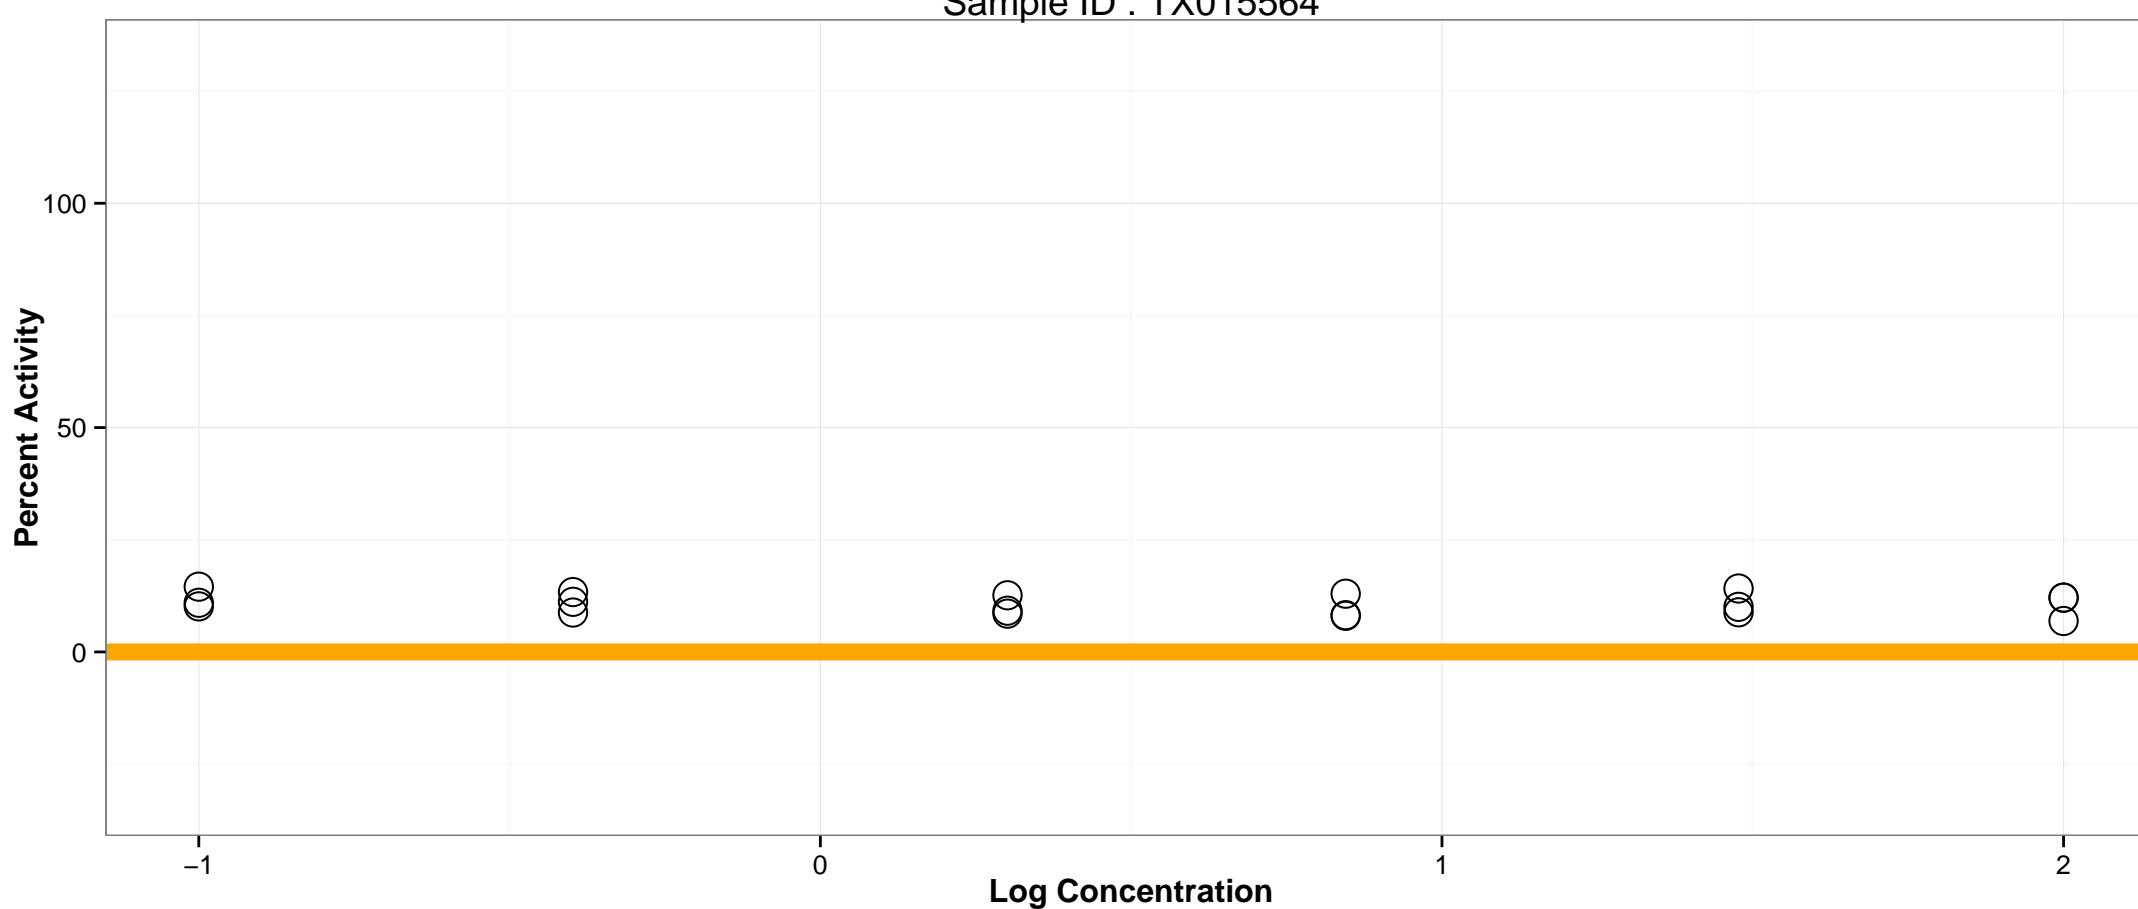

HILL MODEL

HILL MODEL: Not applicable

GAIN-LOSS MODEL

GNLS MODEL: Not applicable

|      | CNST   | HILL | GNLS |
|------|--------|------|------|
| AIC  | 143.24 | NA   | NA   |
| PROB | 1      | NA   | NA   |
| RMSE | 10.94  | NA   | NA   |

MAX\_MEAN : 11.9 MAX\_MED : 12.1 BMAD : 8.58  
COFF : 20 HIT-CALL : 0 FITC : 4 ACTP : 0  
FLAGS :



Chemical : Hydroxyurea  
CAS : 127-07-1

Assay ID 1508 (NHEERL\_TPO\_AUR\_dn)  
Sample ID : TX015573

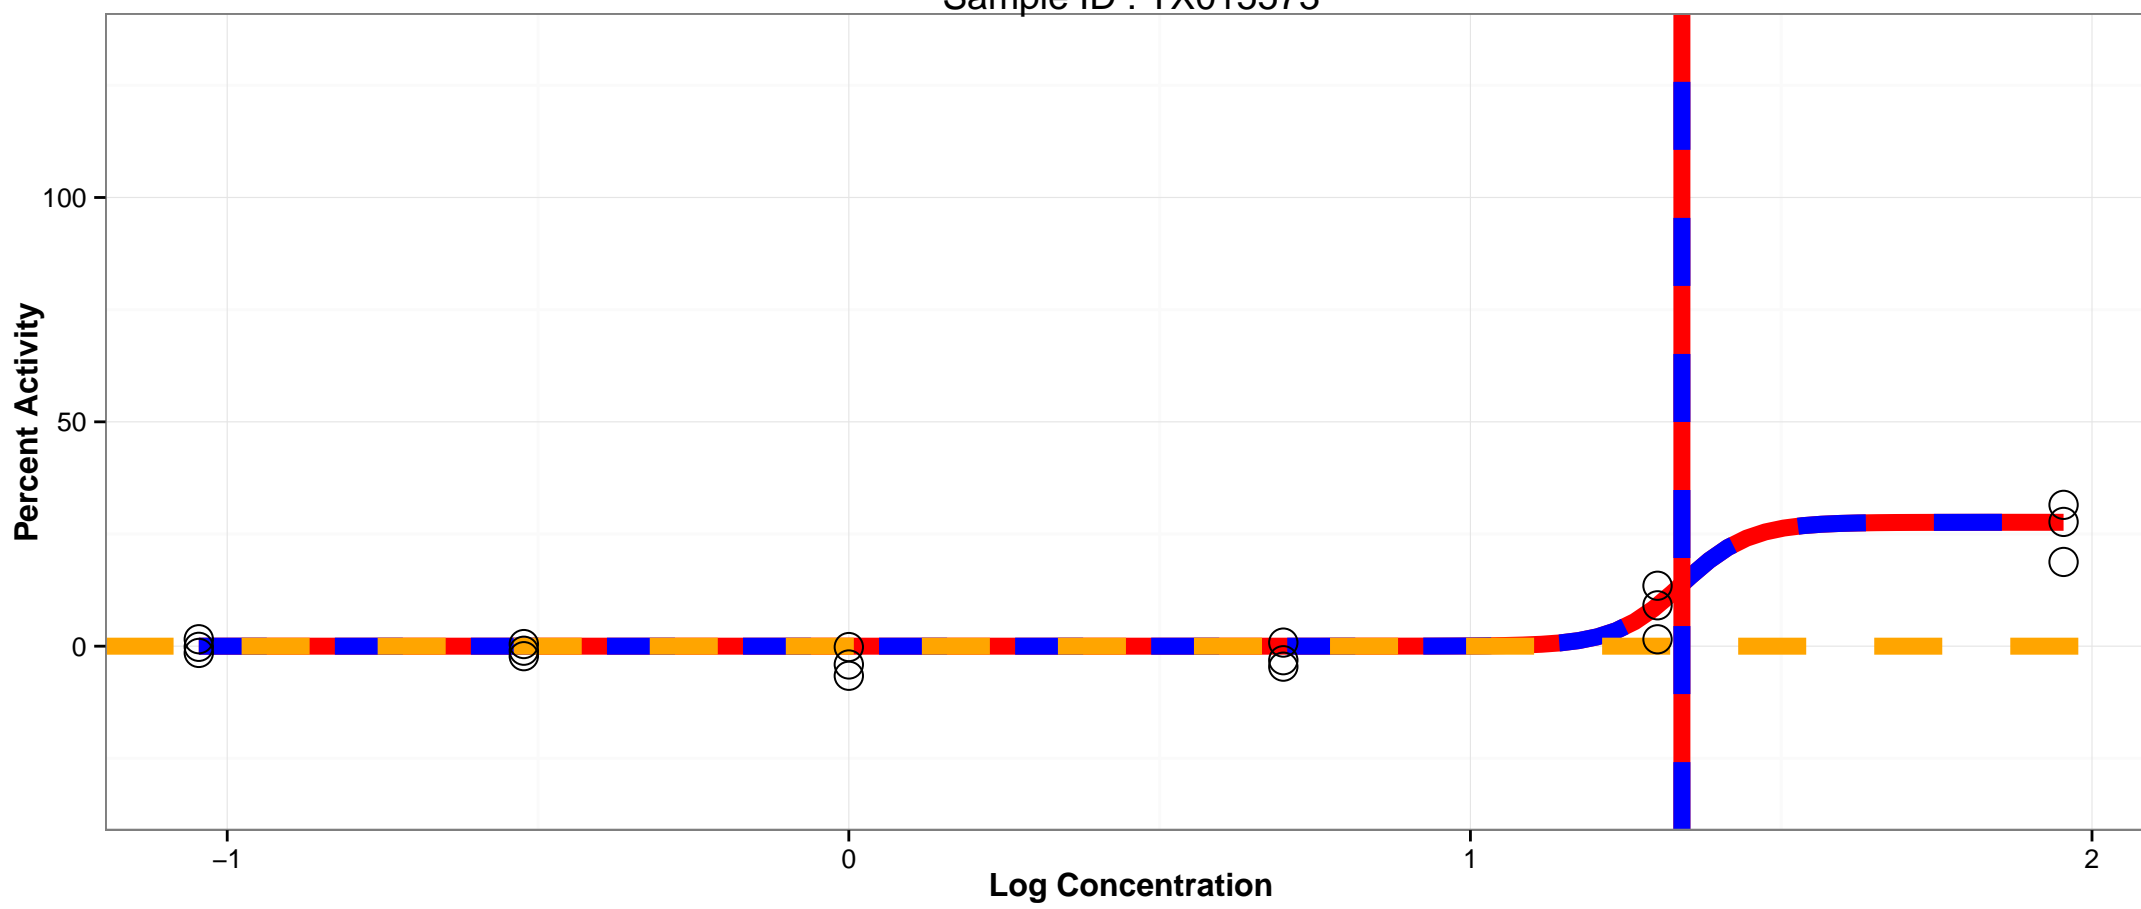

HILL MODEL

|     | tp   | ga    | gw   |
|-----|------|-------|------|
| val | 27.6 | 1.34  | 8    |
| sd  | 2.55 | 0.127 | 25.8 |

GAIN-LOSS MODEL

|     | tp   | ga   | gw | la   | lw   |
|-----|------|------|----|------|------|
| val | 27.6 | 1.34 | 8  | 3.93 | 6.26 |
| sd  | NA   | NA   | NA | NA   | NA   |

|      | CNST   | HILL   | GNLS   |
|------|--------|--------|--------|
| AIC  | 137.03 | 108.12 | 112.12 |
| PROB | 0      | 0.88   | 0.12   |
| RMSE | 11.74  | 3.88   | 3.88   |

MAX\_MEAN : 26 MAX\_MED : 27.7 BMAD : 5.69  
COFF : 20 HIT-CALL : 1 FITC : 41 ACTP : 1  
FLAGS : 6

Assay ID 1509 (NHEERL\_HEK293T\_CellTiterGLO)  
Sample ID : TX015573

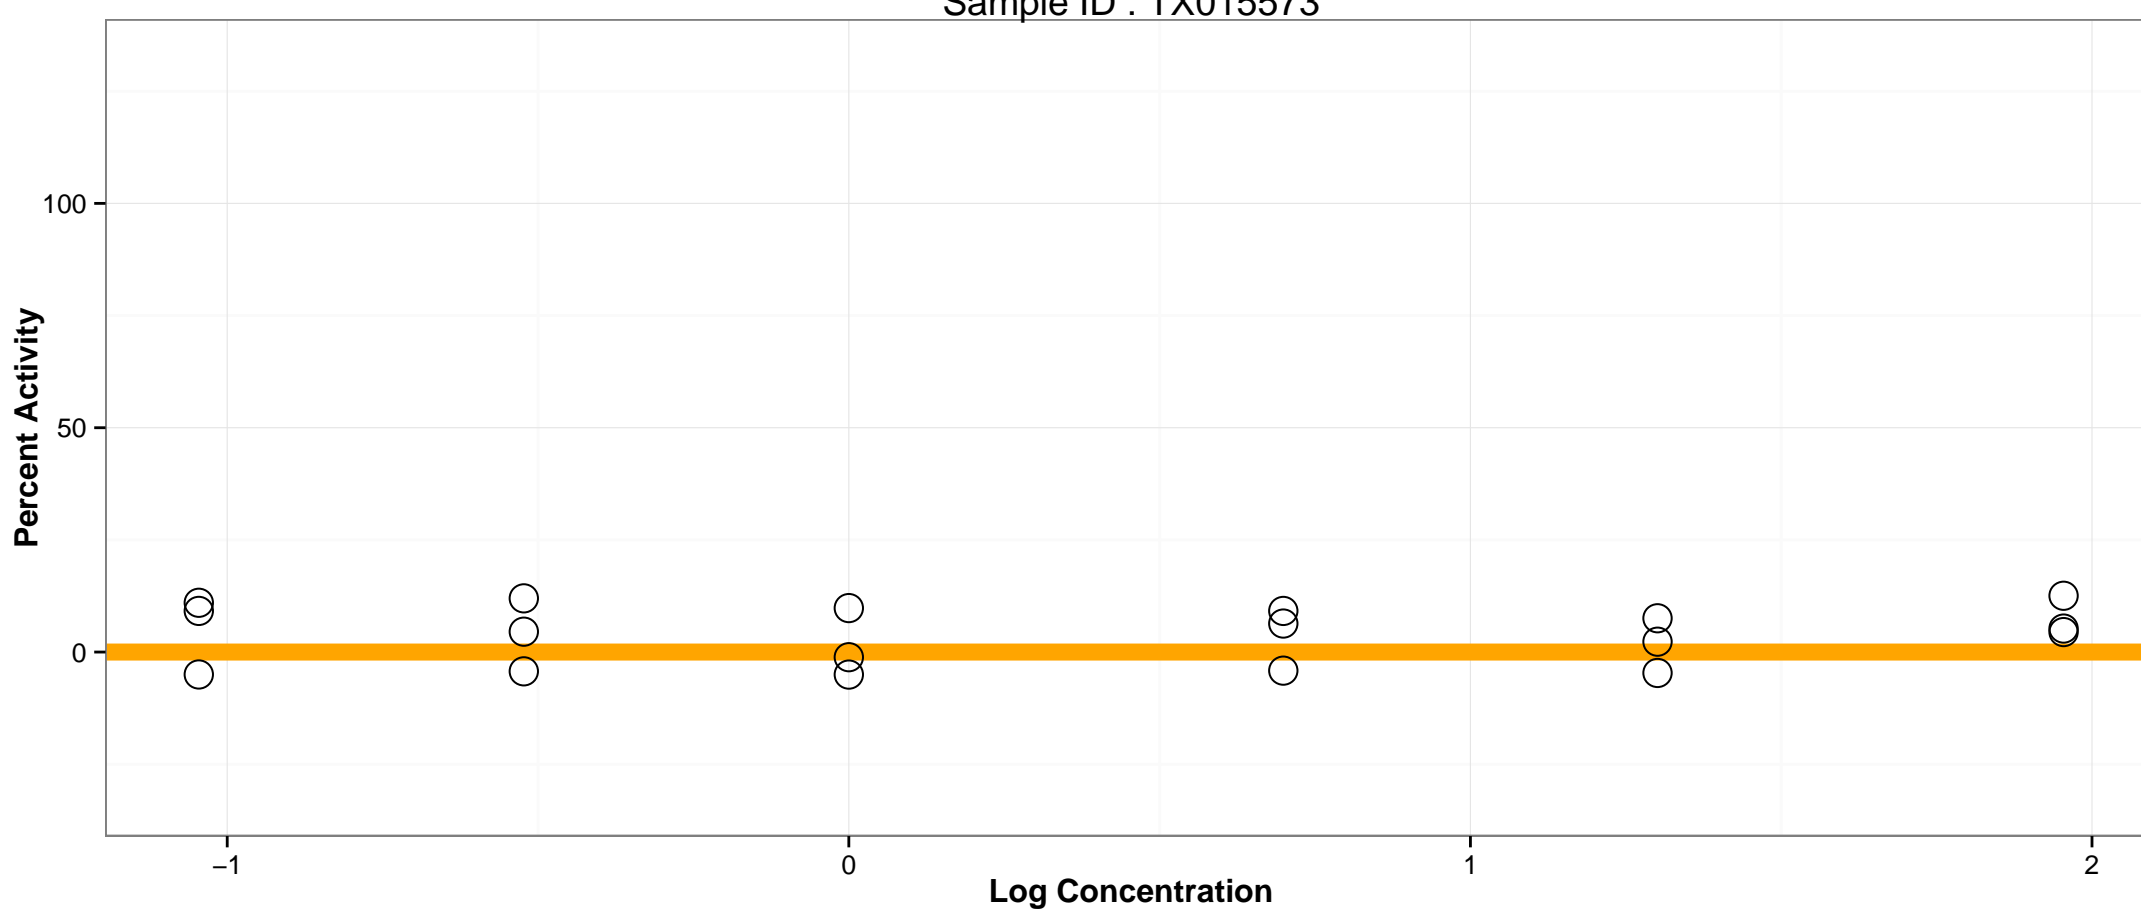

HILL MODEL

HILL MODEL: Not applicable

GAIN-LOSS MODEL

GNLS MODEL: Not applicable

|      | CNST   | HILL | GNLS |
|------|--------|------|------|
| AIC  | 127.62 | NA   | NA   |
| PROB | 1      | NA   | NA   |
| RMSE | 7.33   | NA   | NA   |

MAX\_MEAN : 7.42 MAX\_MED : 9.18 BMAD : 5.54  
COFF : 20 HIT-CALL : 0 FITC : 4 ACTP : 0  
FLAGS :

Assay ID 1848 (NHEERL\_Quantilum\_inhib\_2\_dn)  
Sample ID : TX015573

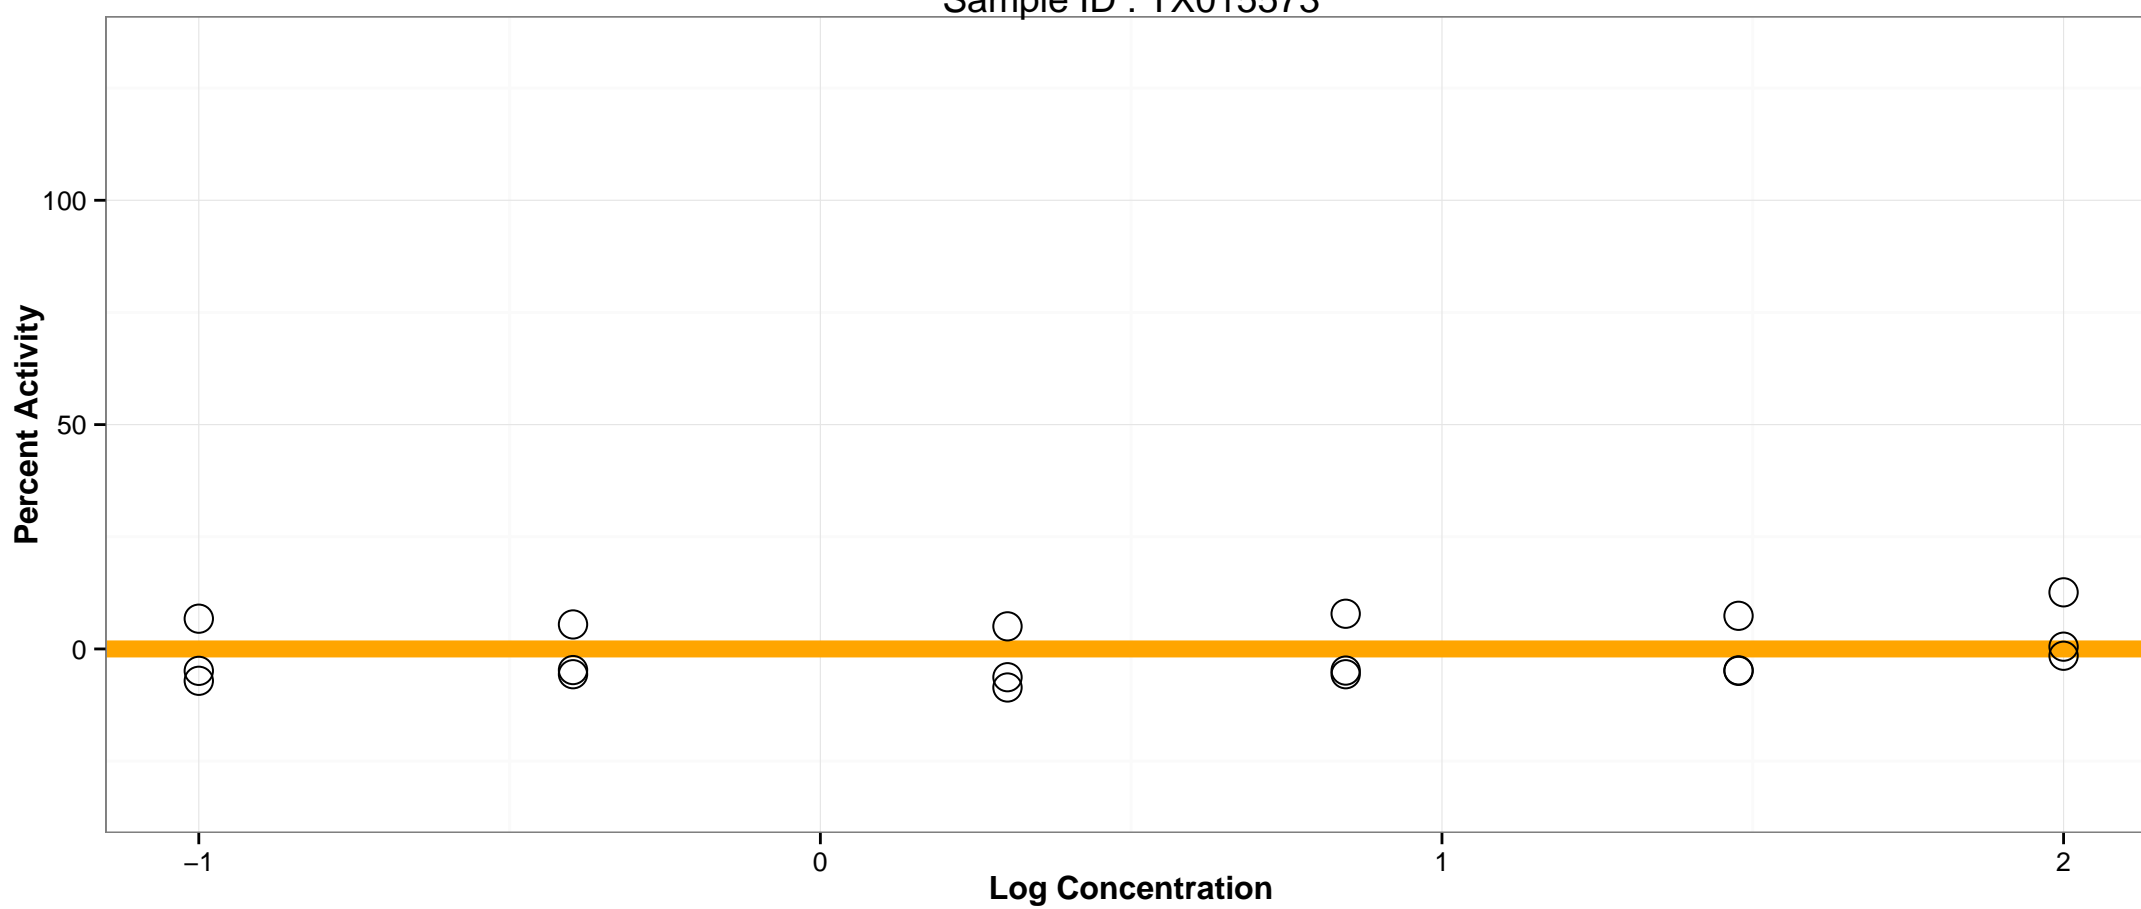

HILL MODEL

HILL MODEL: Not applicable

GAIN-LOSS MODEL

GNLS MODEL: Not applicable

|      | CNST   | HILL | GNLS |
|------|--------|------|------|
| AIC  | 122.63 | NA   | NA   |
| PROB | 1      | NA   | NA   |
| RMSE | 6.33   | NA   | NA   |

MAX\_MEAN : 3.88 MAX\_MED : 0.52 BMAD : 8.58  
COFF : 20 HIT-CALL : 0 FITC : 4 ACTP : 0  
FLAGS :

Chemical : 1,3-Benzenediamine  
CAS : 108-45-2

Assay ID 1508 (NHEERL\_TPO\_AUR\_dn)  
Sample ID : TX015585

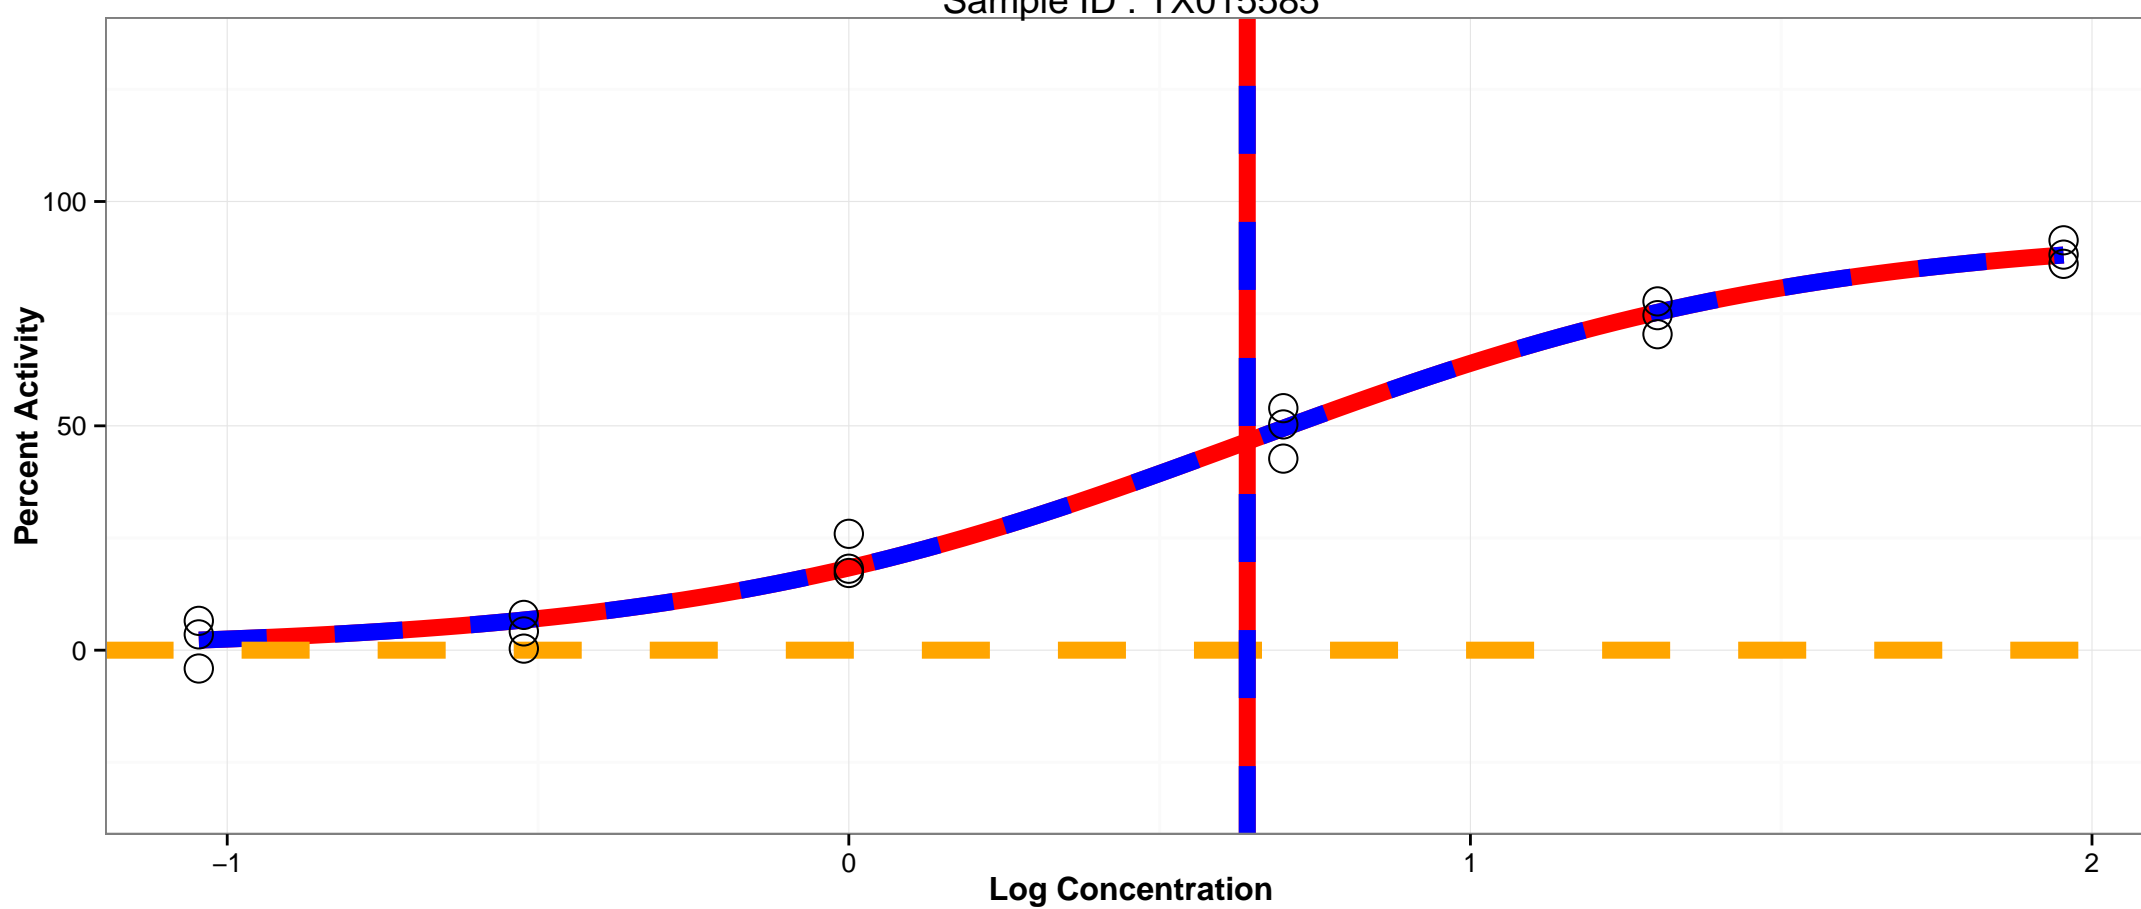

HILL MODEL

|     | tp   | ga     | gw     |
|-----|------|--------|--------|
| val | 93   | 0.641  | 0.952  |
| sd  | 3.32 | 0.0625 | 0.0852 |

GAIN-LOSS MODEL

|     | tp   | ga     | gw     | la   | lw   |
|-----|------|--------|--------|------|------|
| val | 93   | 0.641  | 0.952  | 3.95 | 4.21 |
| sd  | 3.32 | 0.0625 | 0.0852 | 1720 | 3630 |

|      | CNST   | HILL   | GNLS   |
|------|--------|--------|--------|
| AIC  | 197.08 | 109.98 | 113.98 |
| PROB | 0      | 0.88   | 0.12   |
| RMSE | 52.09  | 3.94   | 3.94   |

MAX\_MEAN : 88.6 MAX\_MED : 88.2 BMAD : 5.69  
COFF : 20 HIT-CALL : 1 FITC : 42 ACTP : 1  
FLAGS :

Assay ID 1509 (NHEERL\_HEK293T\_CellTiterGLO)  
Sample ID : TX015585

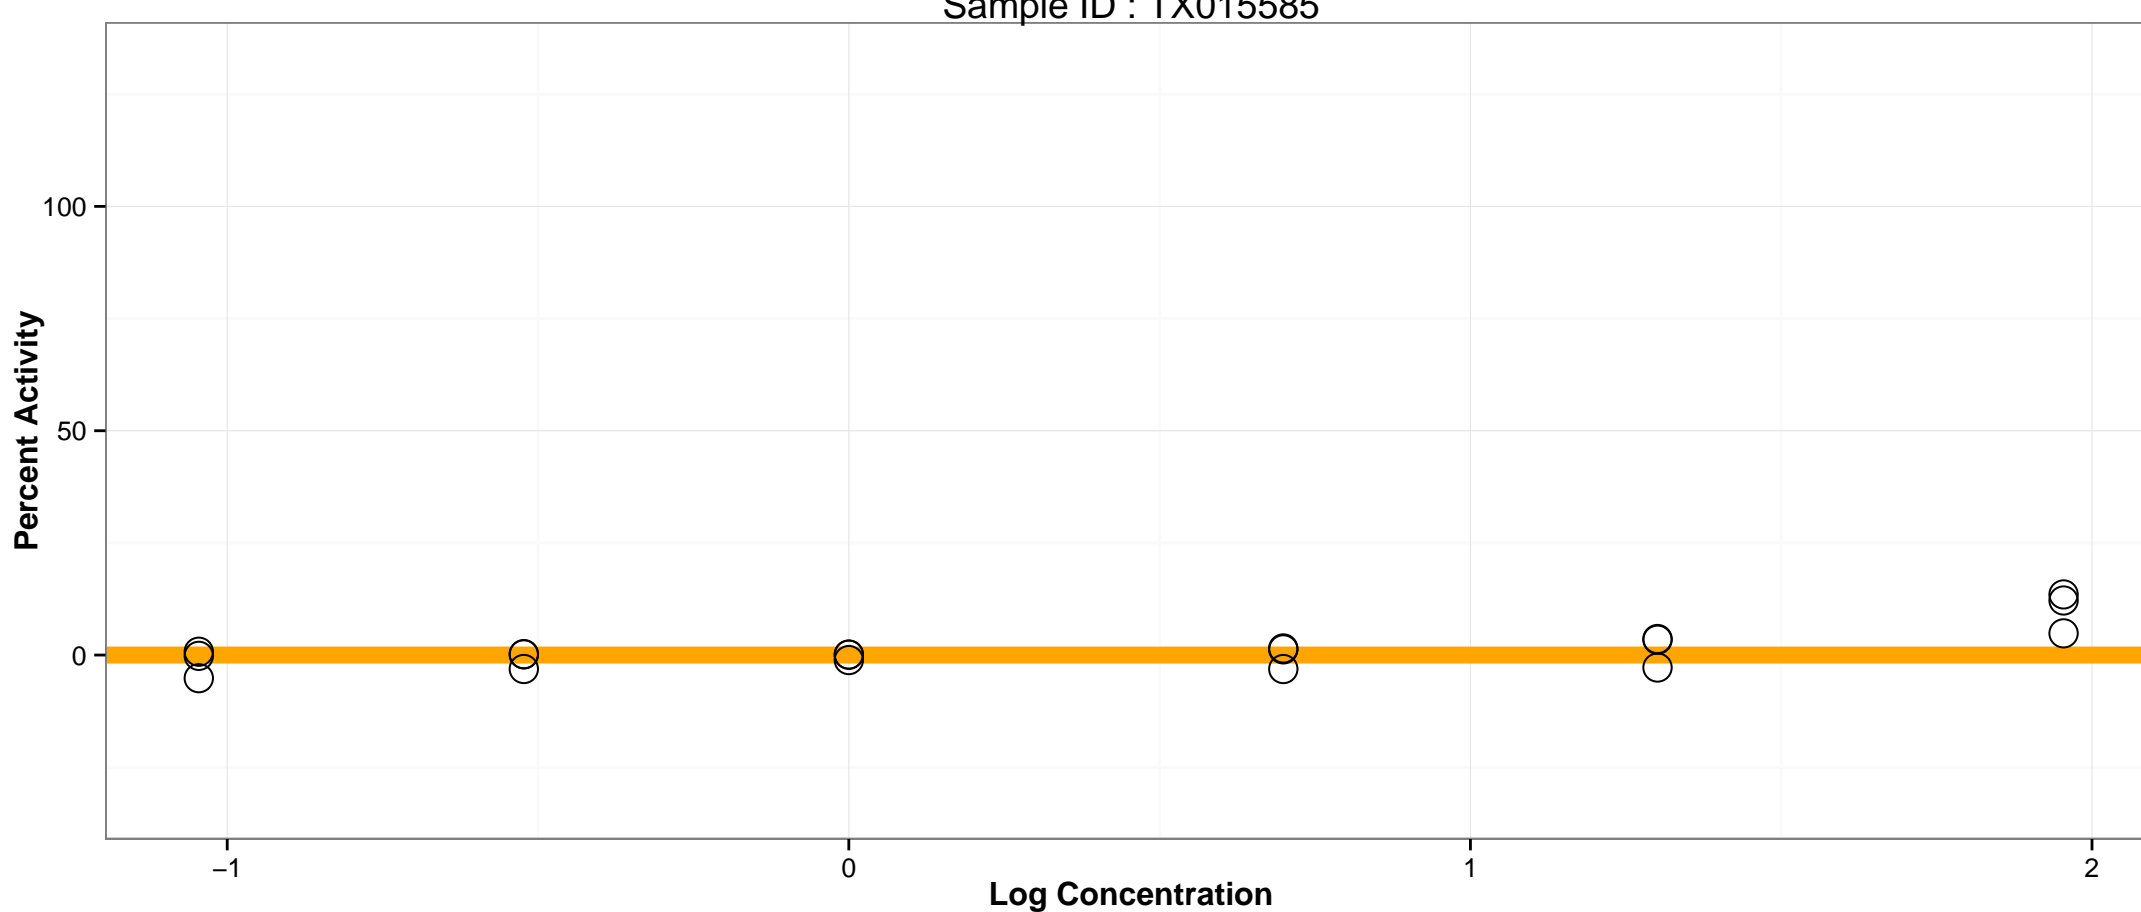

HILL MODEL

HILL MODEL: Not applicable

GAIN-LOSS MODEL

GNLS MODEL: Not applicable

|      | CNST   | HILL | GNLS |
|------|--------|------|------|
| AIC  | 106.36 | NA   | NA   |
| PROB | 1      | NA   | NA   |
| RMSE | 4.94   | NA   | NA   |

MAX\_MEAN : 10.2 MAX\_MED : 12.2 BMAD : 5.54  
COFF : 20 HIT-CALL : 0 FITC : 4 ACTP : 0  
FLAGS :

Assay ID 1848 (NHEERL\_Quantilum\_inhib\_2\_dn)  
Sample ID : TX015585

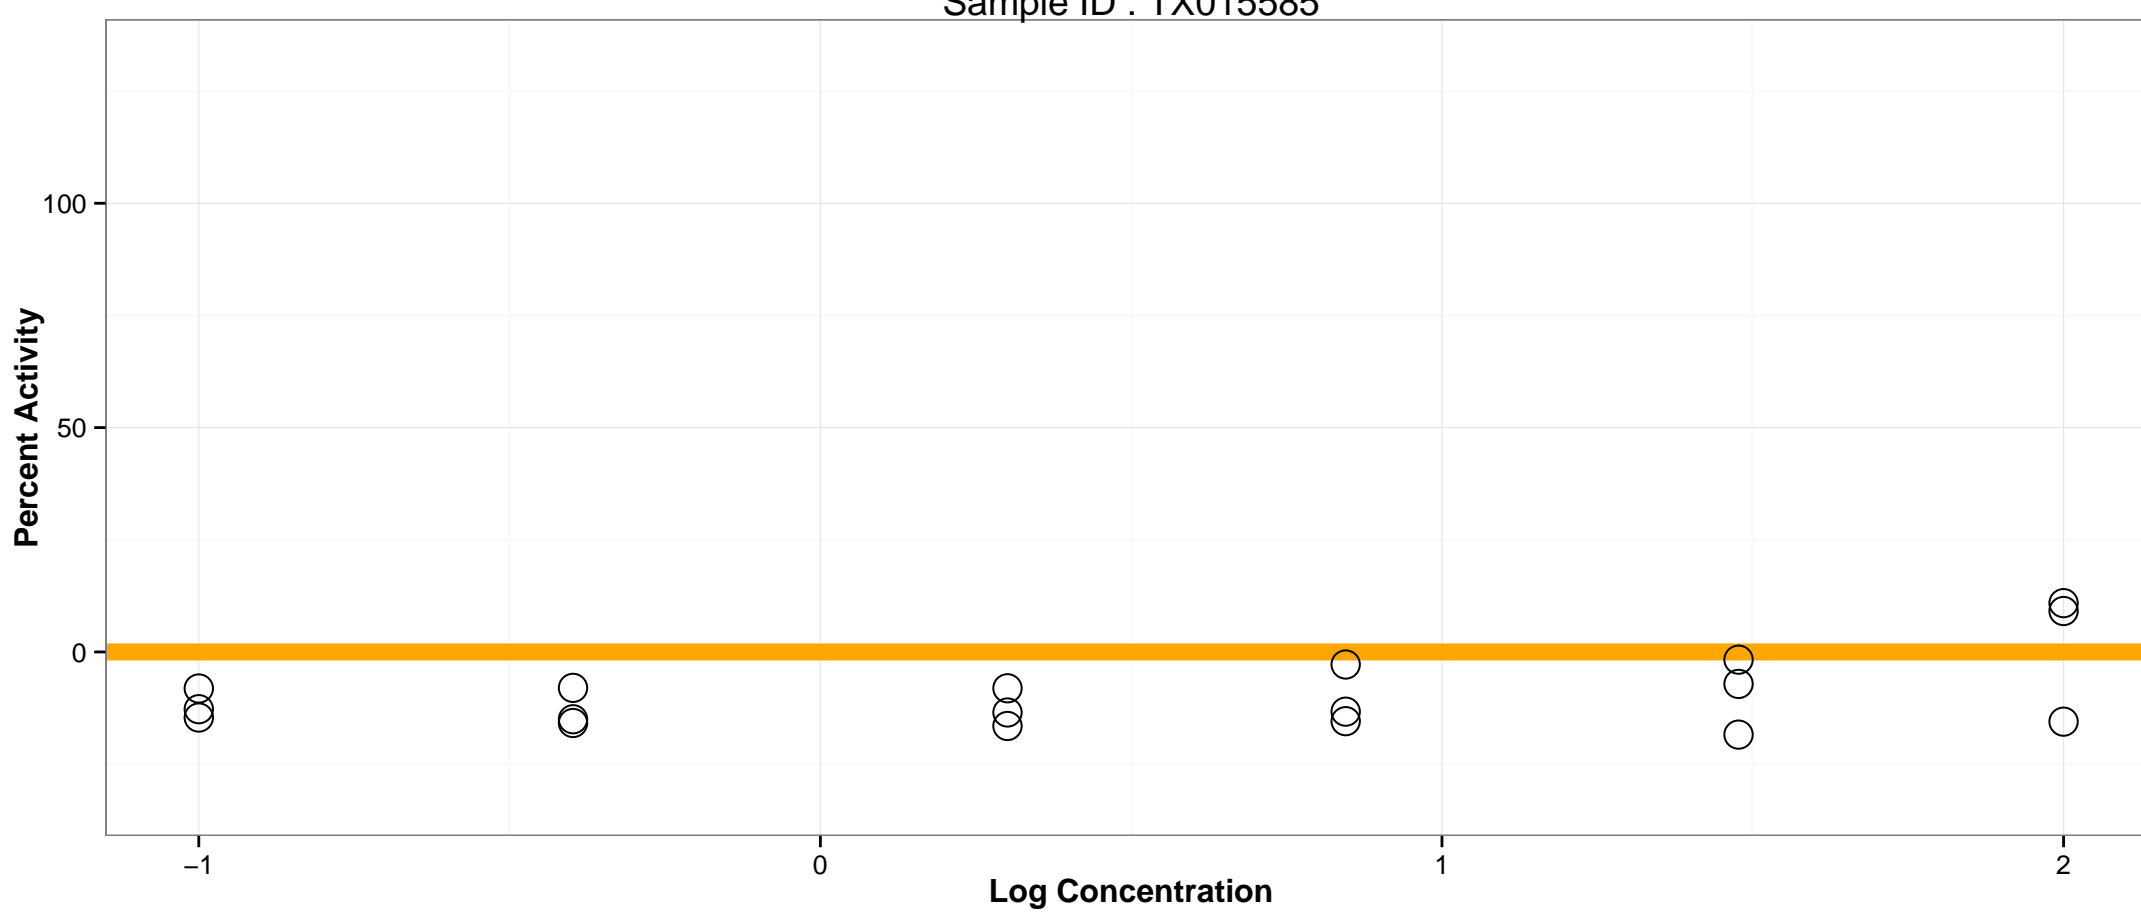

HILL MODEL

HILL MODEL: Not applicable

GAIN-LOSS MODEL

GNLS MODEL: Not applicable

|      | CNST  | HILL | GNLS |
|------|-------|------|------|
| AIC  | 147.2 | NA   | NA   |
| PROB | 1     | NA   | NA   |
| RMSE | 12.38 | NA   | NA   |

MAX\_MEAN : 1.5 MAX\_MED : 9.14 BMAD : 8.58  
COFF : 20 HIT-CALL : 0 FITC : 4 ACTP : 0  
FLAGS :

Chemical : Butyl benzyl phthalate  
CAS : 85-68-7

Assay ID 1508 (NHEERL\_TPO\_AUR\_dn)  
Sample ID : TX015586

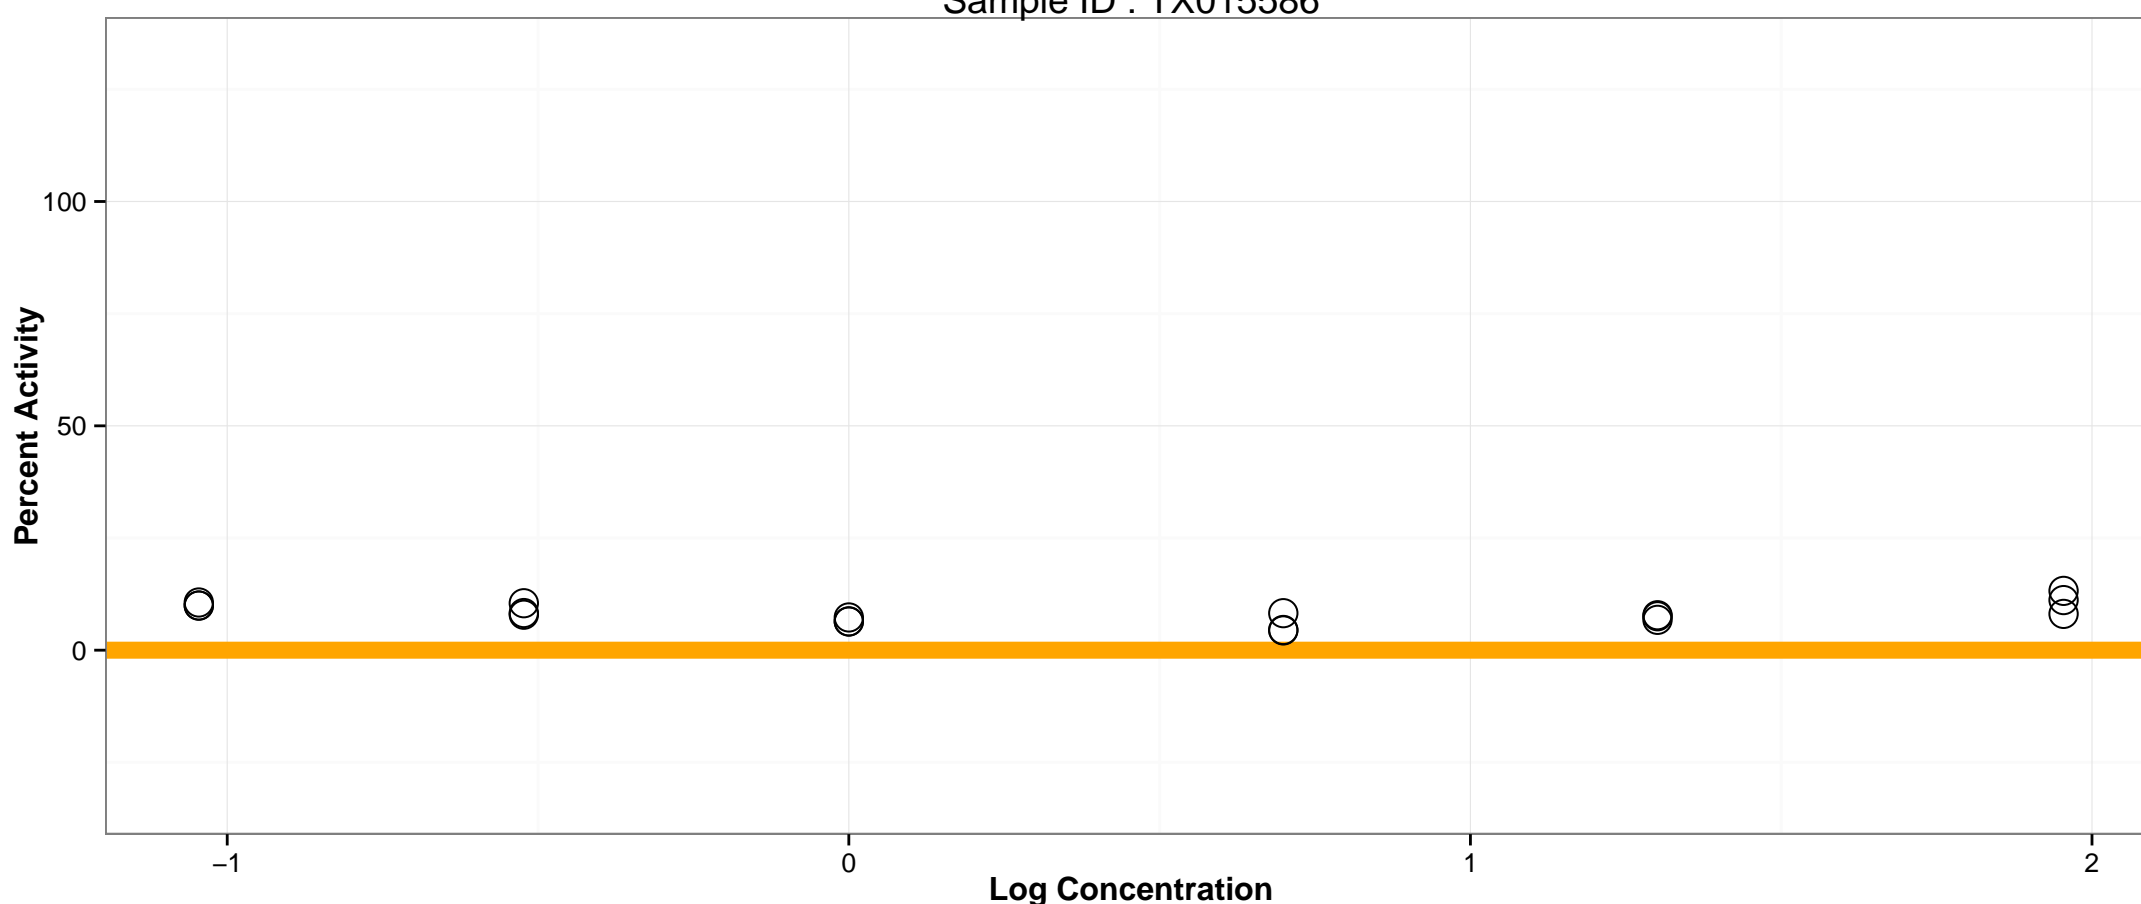

HILL MODEL

HILL MODEL: Not applicable

GAIN-LOSS MODEL

GNLS MODEL: Not applicable

|      | CNST   | HILL | GNLS |
|------|--------|------|------|
| AIC  | 134.29 | NA   | NA   |
| PROB | 1      | NA   | NA   |
| RMSE | 8.58   | NA   | NA   |

MAX\_MEAN : 10.8 MAX\_MED : 11.2 BMAD : 5.69  
COFF : 20 HIT-CALL : 0 FITC : 4 ACTP : 0  
FLAGS :

Assay ID 1509 (NHEERL\_HEK293T\_CellTiterGLO)  
Sample ID : TX015586

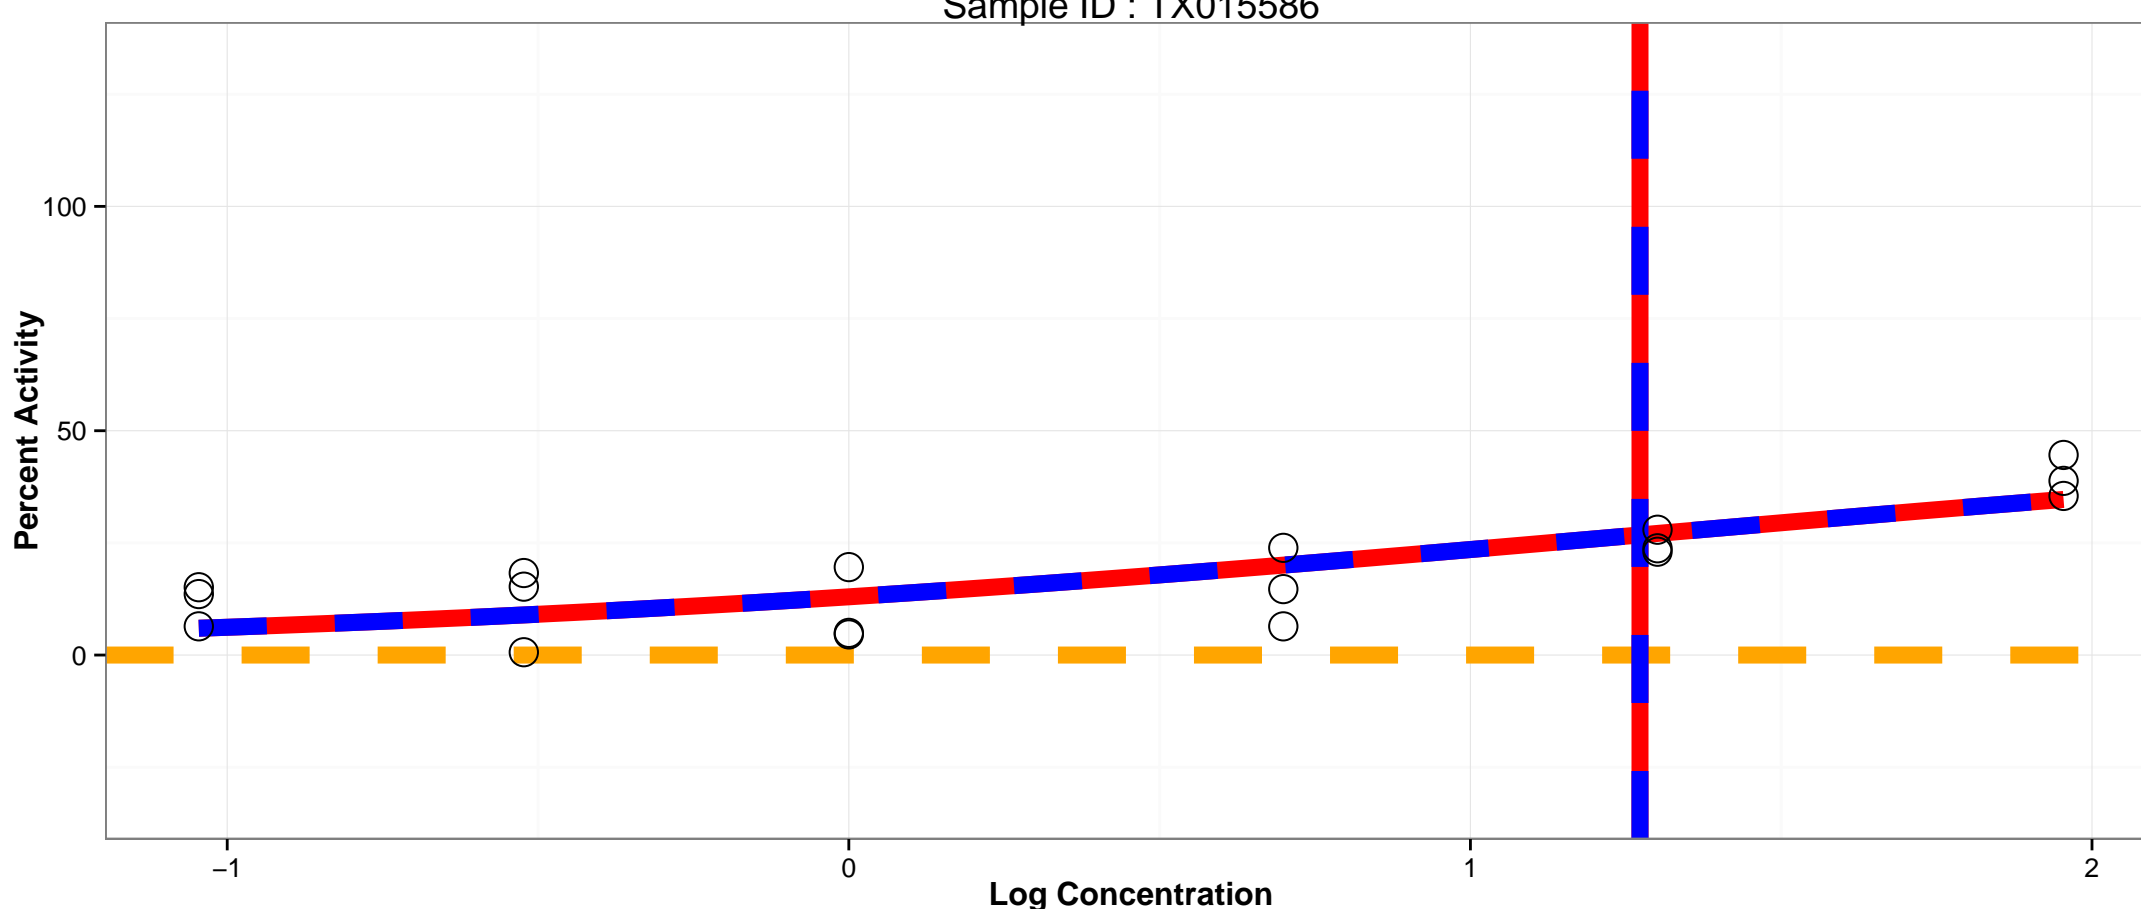

HILL MODEL

|     | tp   | ga    | gw    |
|-----|------|-------|-------|
| val | 53.5 | 1.27  | 0.389 |
| sd  | 17.3 | 0.752 | 0.126 |

GAIN-LOSS MODEL

|     | tp   | ga   | gw    | la   | lw |
|-----|------|------|-------|------|----|
| val | 53.5 | 1.27 | 0.389 | 3.08 | 18 |
| sd  | NA   | NA   | NA    | NA   | NA |

|      | CNST   | HILL   | GNLS   |
|------|--------|--------|--------|
| AIC  | 166.83 | 132.07 | 136.07 |
| PROB | 0      | 0.88   | 0.12   |
| RMSE | 22.26  | 7.04   | 7.04   |

MAX\_MEAN : 39.6 MAX\_MED : 38.8 BMAD : 5.54  
COFF : 20 HIT-CALL : 1 FITC : 42 ACTP : 1  
FLAGS :

Assay ID 1848 (NHEERL\_Quantilum\_inhib\_2\_dn)  
Sample ID : TX015586

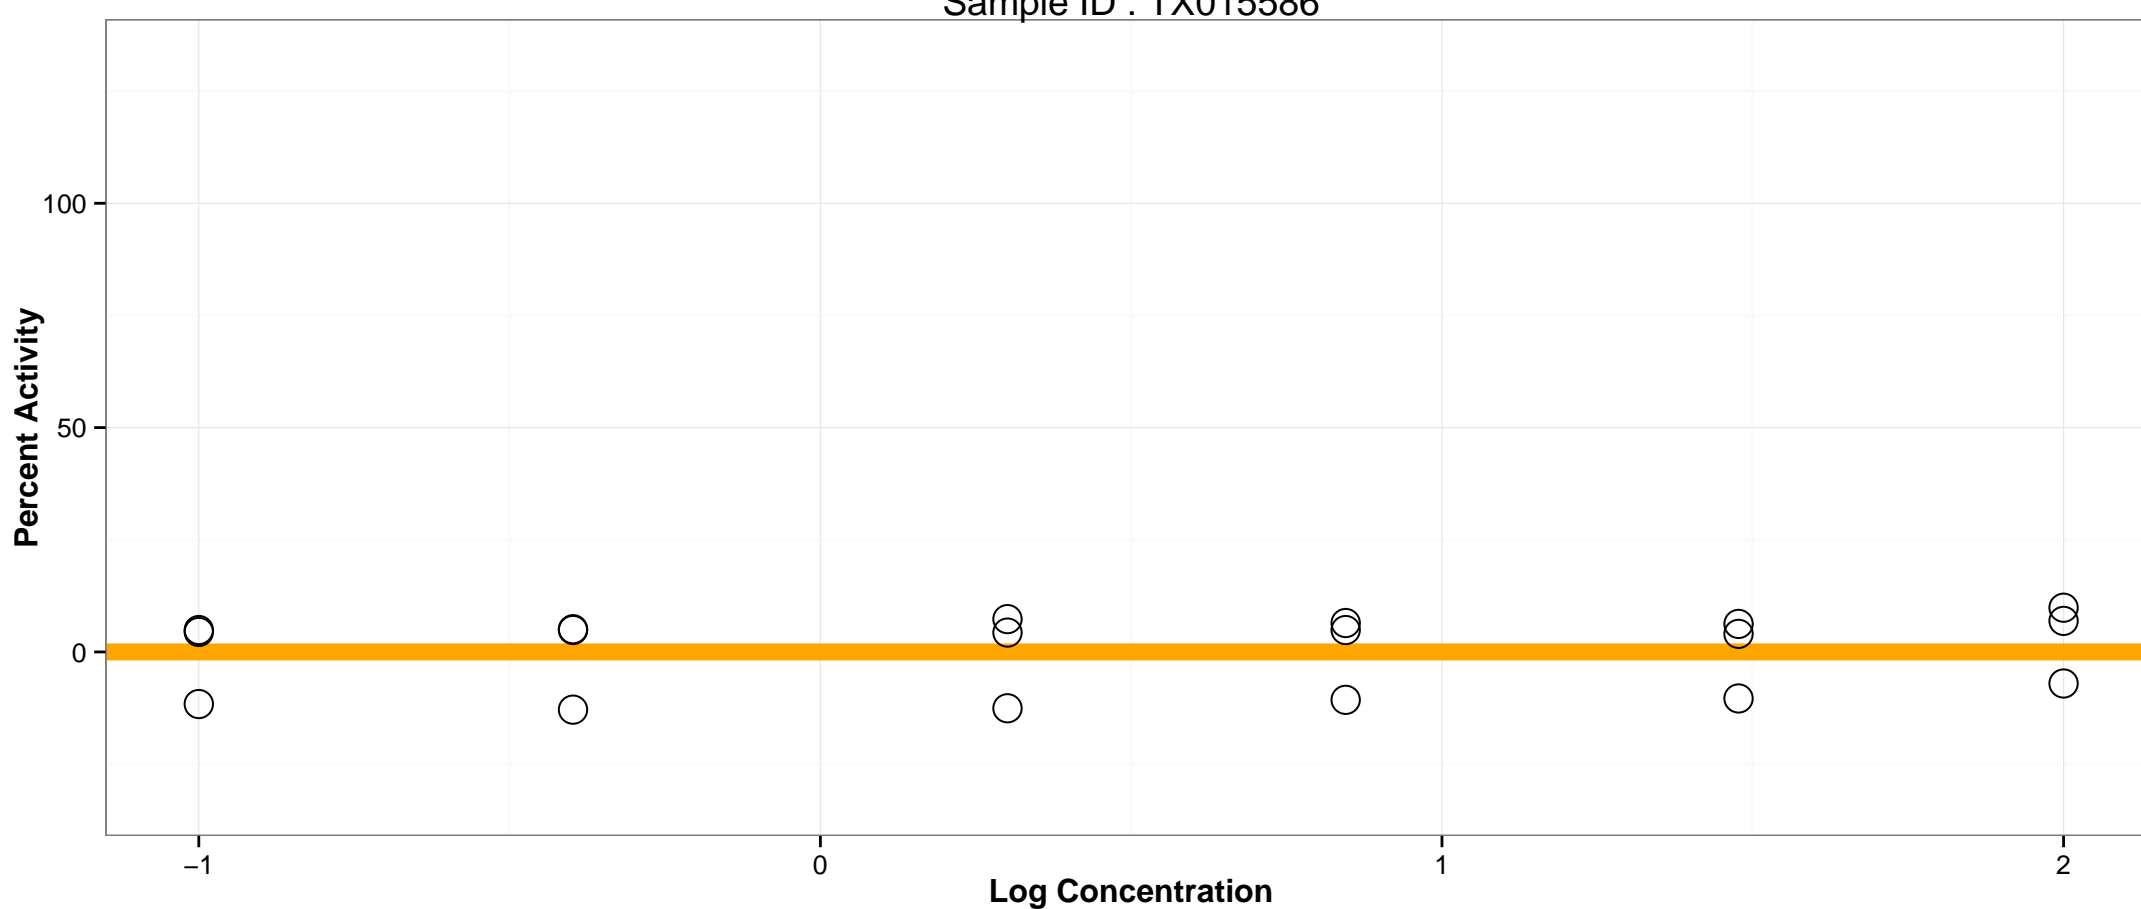

HILL MODEL

HILL MODEL: Not applicable

GAIN-LOSS MODEL

GNLS MODEL: Not applicable

|      | CNST  | HILL | GNLS |
|------|-------|------|------|
| AIC  | 131.3 | NA   | NA   |
| PROB | 1     | NA   | NA   |
| RMSE | 8.03  | NA   | NA   |

MAX\_MEAN : 3.26 MAX\_MED : 6.94 BMAD : 8.58  
COFF : 20 HIT-CALL : 0 FITC : 4 ACTP : 0  
FLAGS :

Chemical : Phenol  
CAS : 108-95-2

Assay ID 1508 (NHEERL\_TPO\_AUR\_dn)  
Sample ID : TX015597

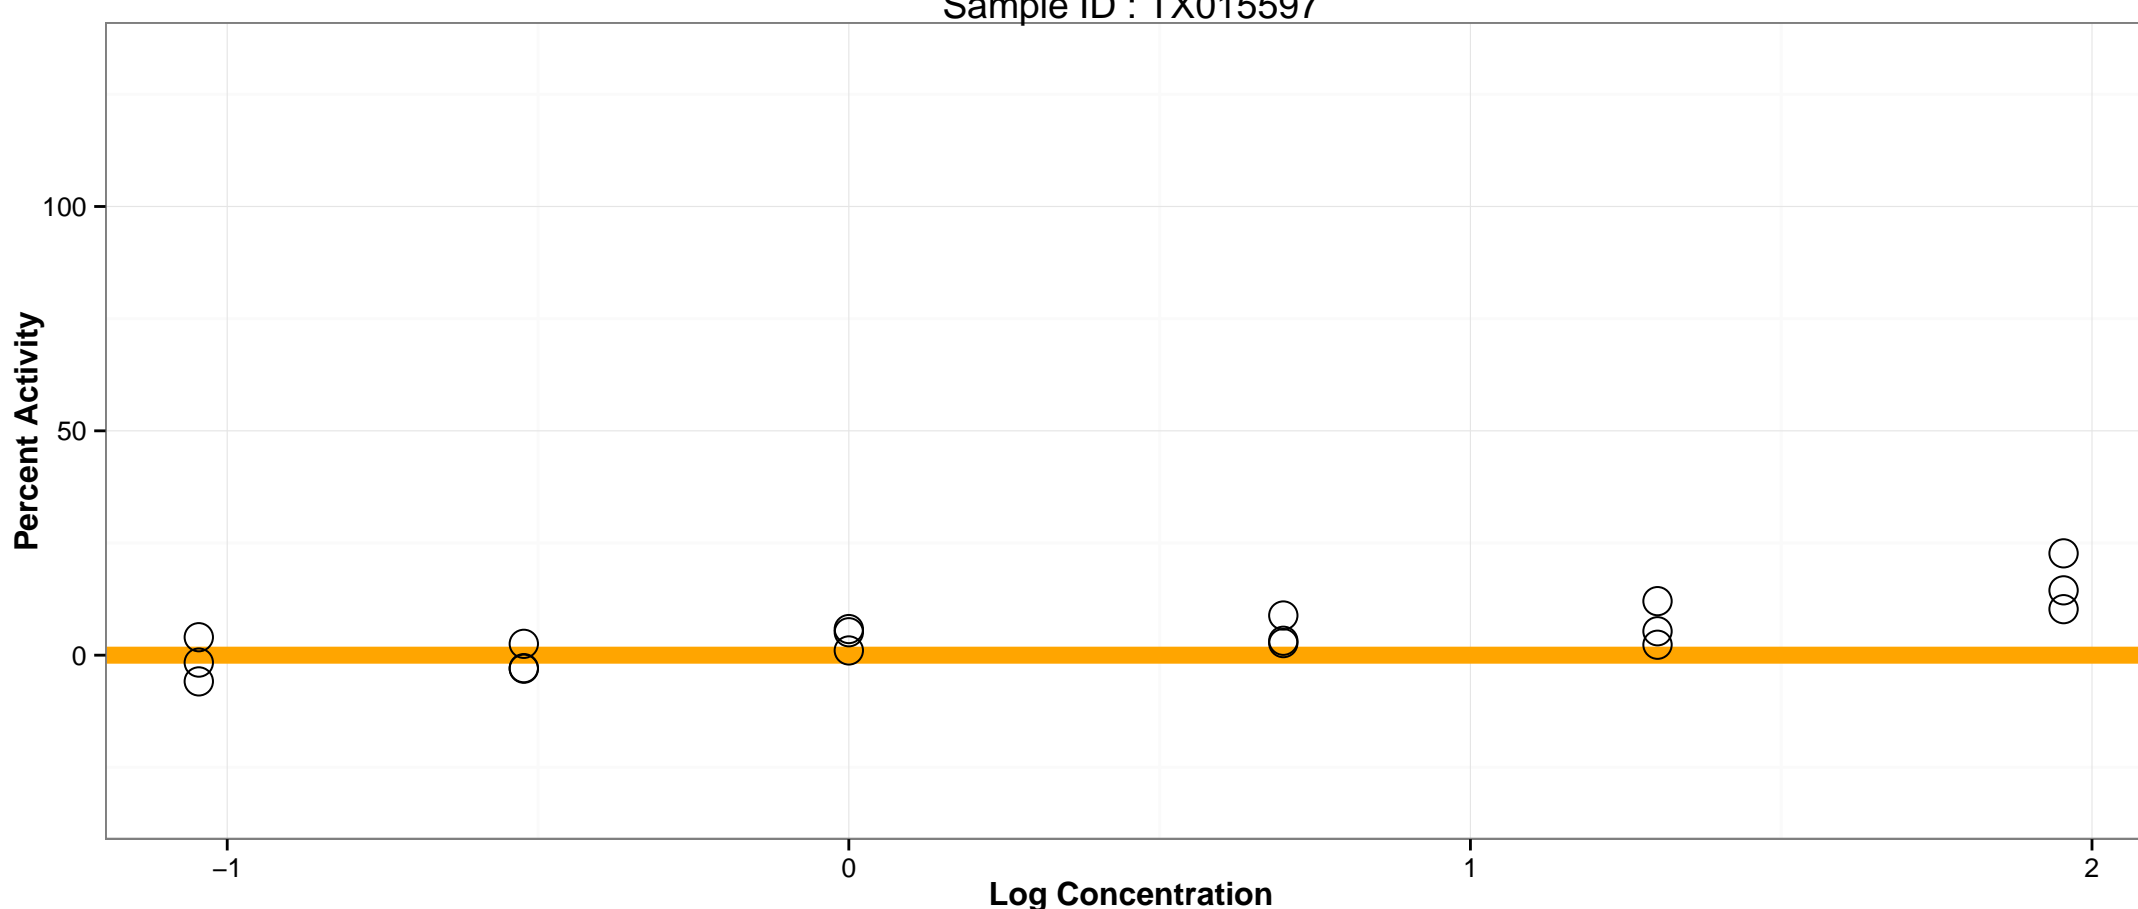

HILL MODEL

HILL MODEL: Not applicable

GAIN-LOSS MODEL

GNLS MODEL: Not applicable

|      | CNST   | HILL | GNLS |
|------|--------|------|------|
| AIC  | 128.38 | NA   | NA   |
| PROB | 1      | NA   | NA   |
| RMSE | 8.31   | NA   | NA   |

MAX\_MEAN : 15.8 MAX\_MED : 14.5 BMAD : 5.69  
COFF : 20 HIT-CALL : 0 FITC : 4 ACTP : 0  
FLAGS :

Assay ID 1509 (NHEERL\_HEK293T\_CellTiterGLO)  
Sample ID : TX015597

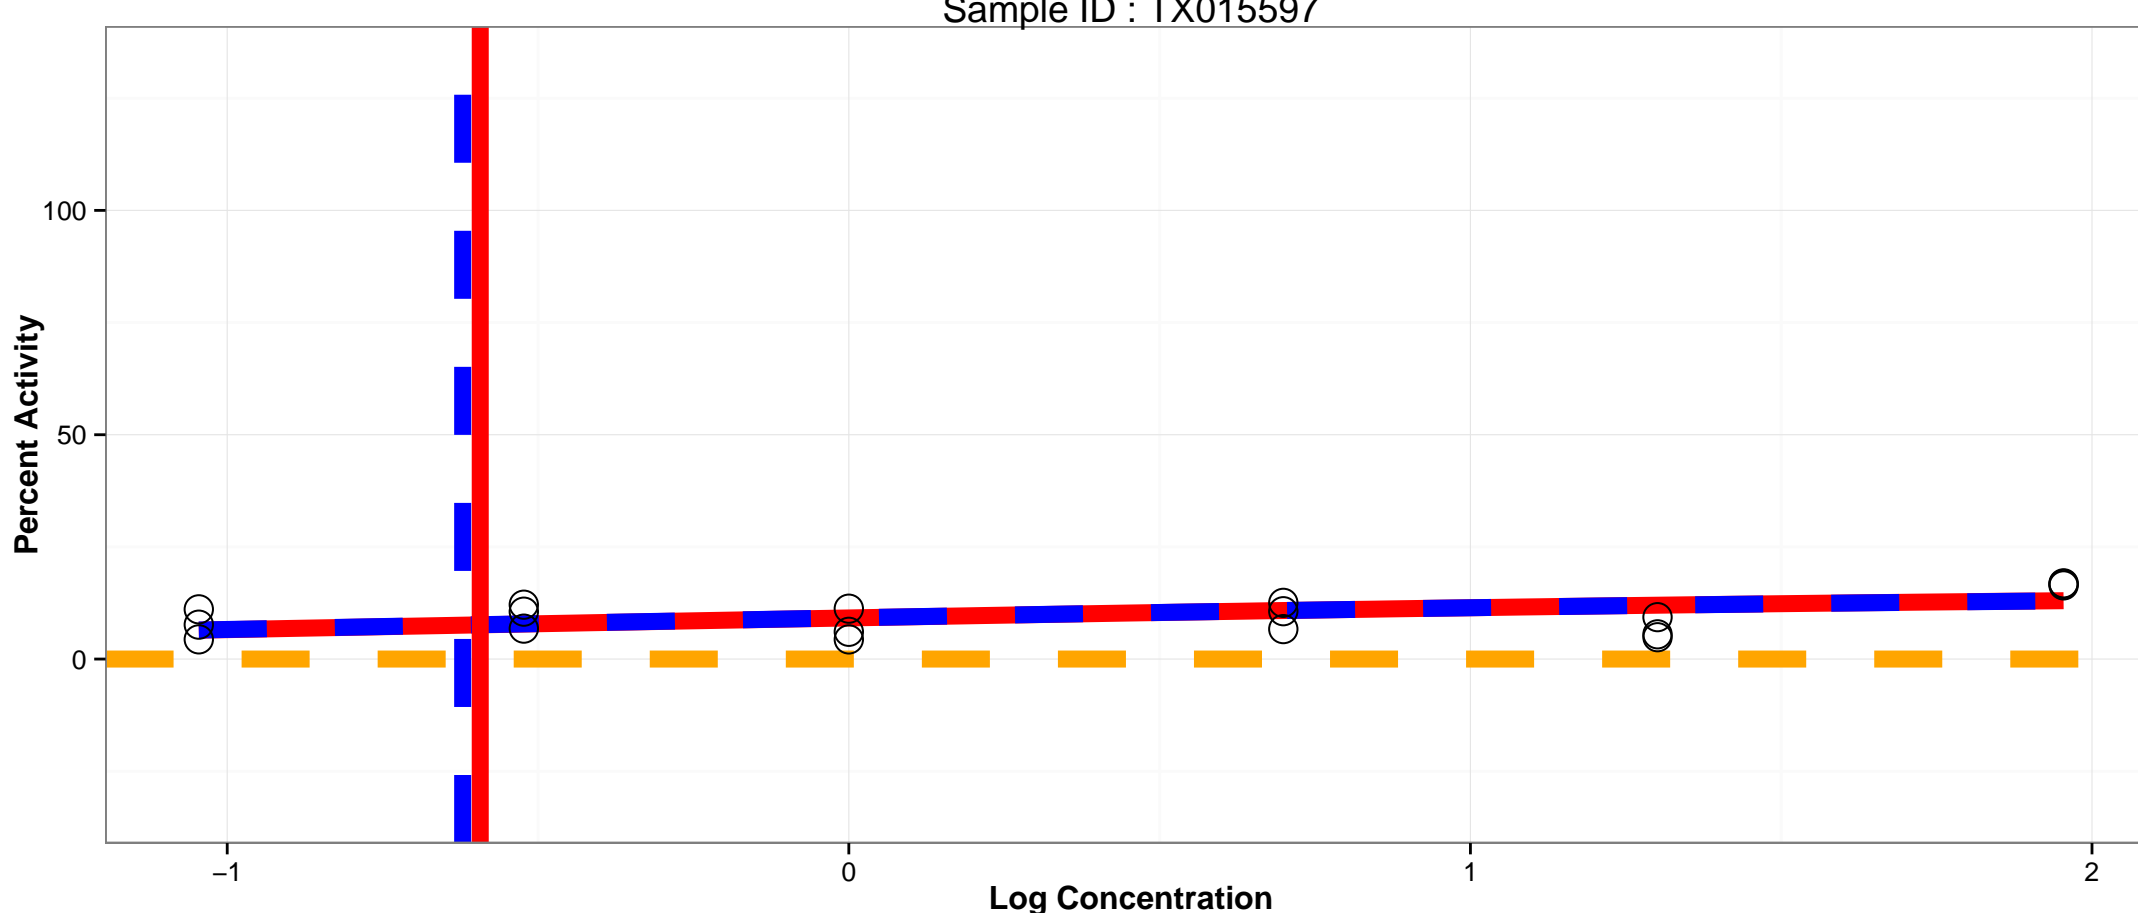

HILL MODEL

|     | tp   | ga     | gw  |
|-----|------|--------|-----|
| val | 15.2 | -0.593 | 0.3 |
| sd  | NA   | NA     | NA  |

GAIN-LOSS MODEL

|     | tp   | ga     | gw  | la   | lw |
|-----|------|--------|-----|------|----|
| val | 15.2 | -0.621 | 0.3 | 3.69 | 17 |
| sd  | NA   | NA     | NA  | NA   | NA |

|      | CNST   | HILL   | GNLS   |
|------|--------|--------|--------|
| AIC  | 140.87 | 109.22 | 113.22 |
| PROB | 0      | 0.88   | 0.12   |
| RMSE | 10.5   | 3.74   | 3.74   |

MAX\_MEAN : 16.7 MAX\_MED : 16.8 BMAD : 5.54  
COFF : 20 HIT-CALL : 0 FITC : 13 ACTP : 1  
FLAGS :

Assay ID 1848 (NHEERL\_Quantilum\_inhib\_2\_dn)  
Sample ID : TX015597

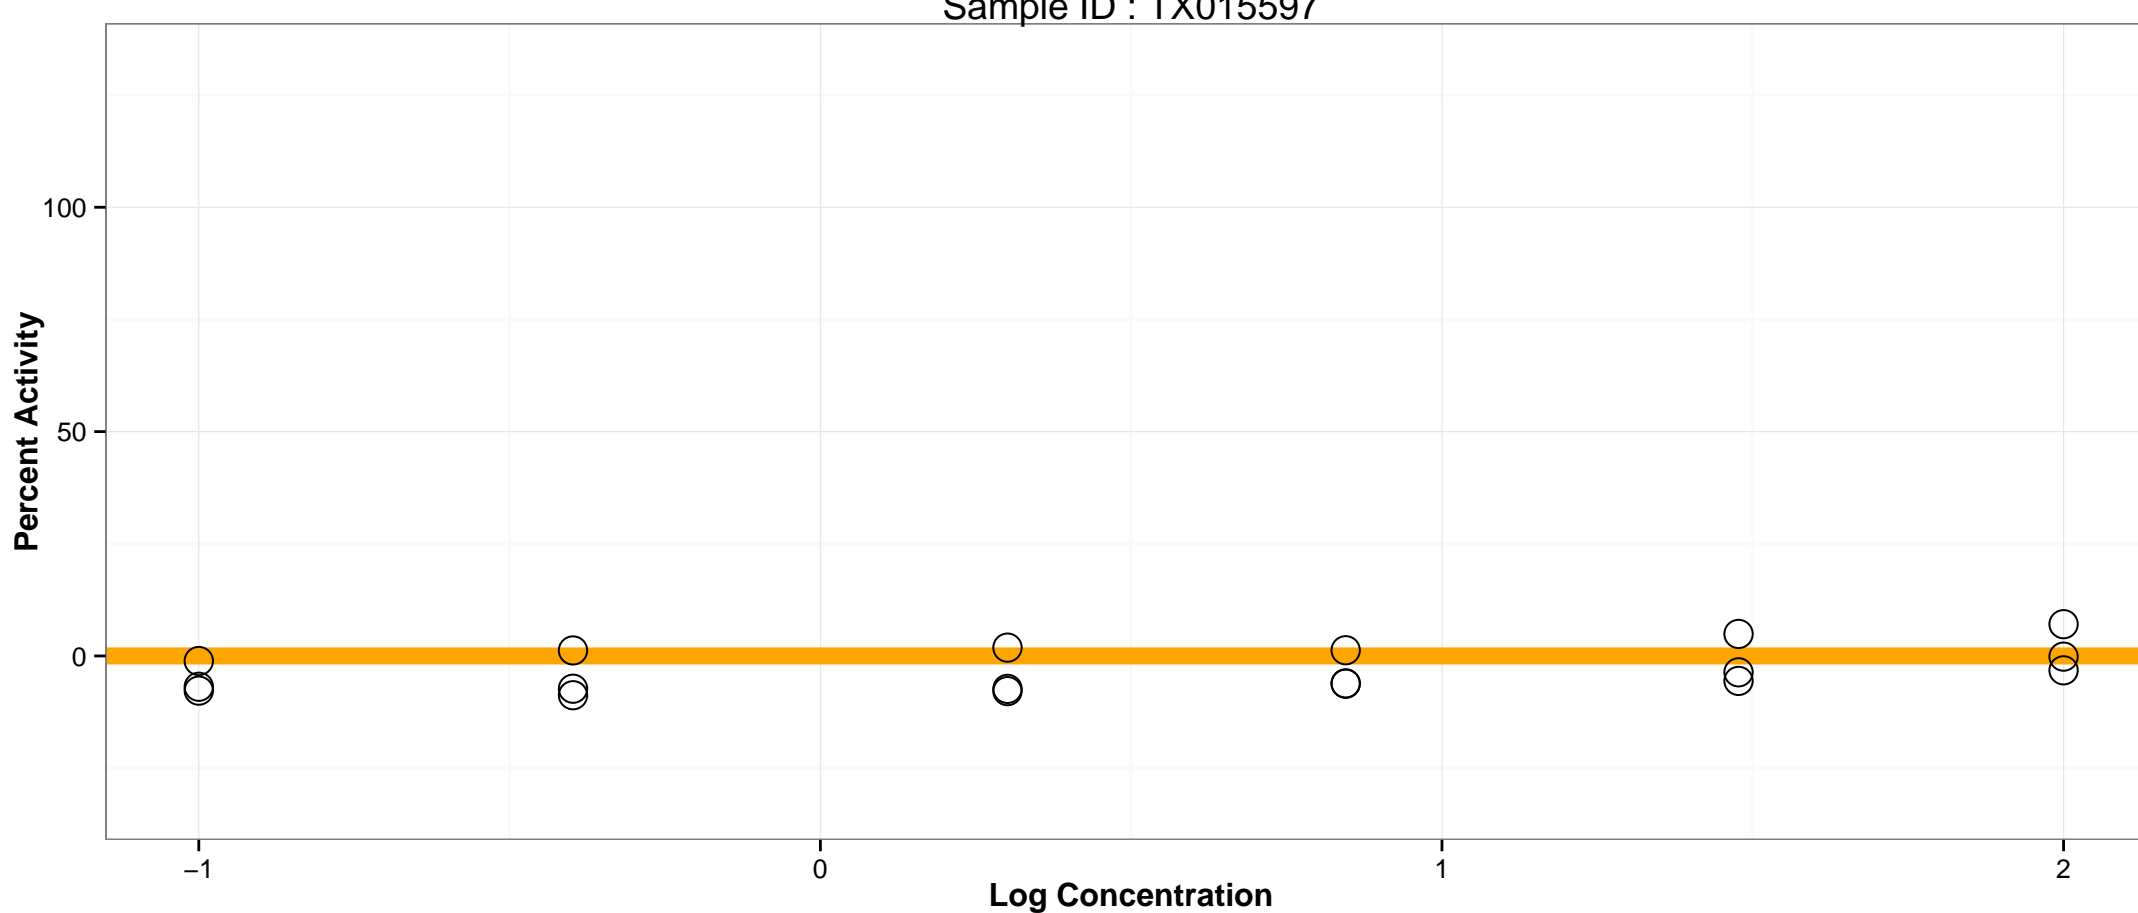

HILL MODEL

HILL MODEL: Not applicable

GAIN-LOSS MODEL

GNLS MODEL: Not applicable

|      | CNST   | HILL | GNLS |
|------|--------|------|------|
| AIC  | 118.16 | NA   | NA   |
| PROB | 1      | NA   | NA   |
| RMSE | 5.6    | NA   | NA   |

MAX\_MEAN : 1.25 MAX\_MED : -0.142 BMAD : 8.58  
COFF : 20 HIT-CALL : 0 FITC : 4 ACTP : 0  
FLAGS :

Chemical : Dodecylbenzenesulfonic acid  
CAS : 27176-87-0

Assay ID 1508 (NHEERL\_TPO\_AUR\_dn)  
Sample ID : TX015617

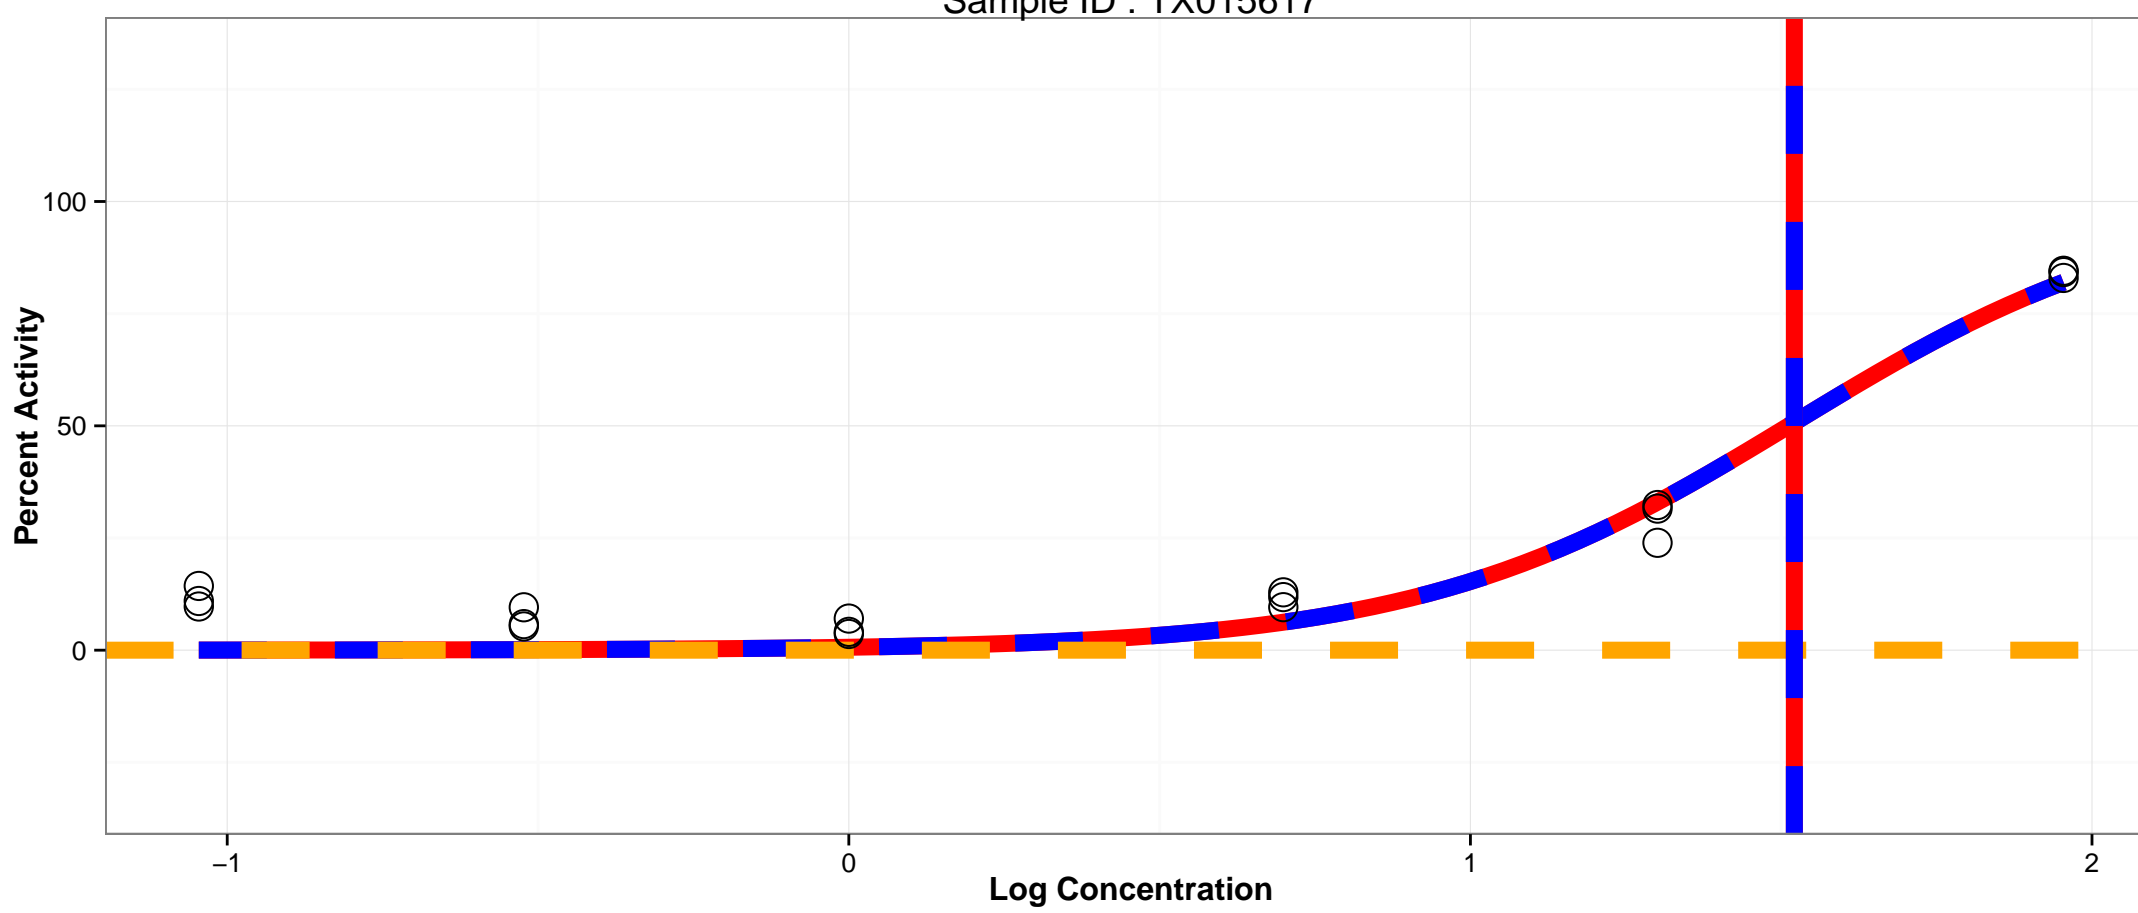

HILL MODEL

|     | tp   | ga    | gw    |
|-----|------|-------|-------|
| val | 101  | 1.52  | 1.44  |
| sd  | 16.5 | 0.129 | 0.431 |

GAIN-LOSS MODEL

|     | tp   | ga    | gw    | la   | lw    |
|-----|------|-------|-------|------|-------|
| val | 101  | 1.52  | 1.44  | 2.54 | 17.5  |
| sd  | 16.5 | 0.129 | 0.431 | 1090 | 31500 |

|      | CNST   | HILL  | GNLS  |
|------|--------|-------|-------|
| AIC  | 179.72 | 129.5 | 133.5 |
| PROB | 0      | 0.88  | 0.12  |
| RMSE | 37.13  | 6.73  | 6.73  |

MAX\_MEAN : 83.9 MAX\_MED : 84.3 BMAD : 5.69  
COFF : 20 HIT-CALL : 1 FITC : 42 ACTP : 1  
FLAGS :

Assay ID 1509 (NHEERL\_HEK293T\_CellTiterGLO)  
Sample ID : TX015617

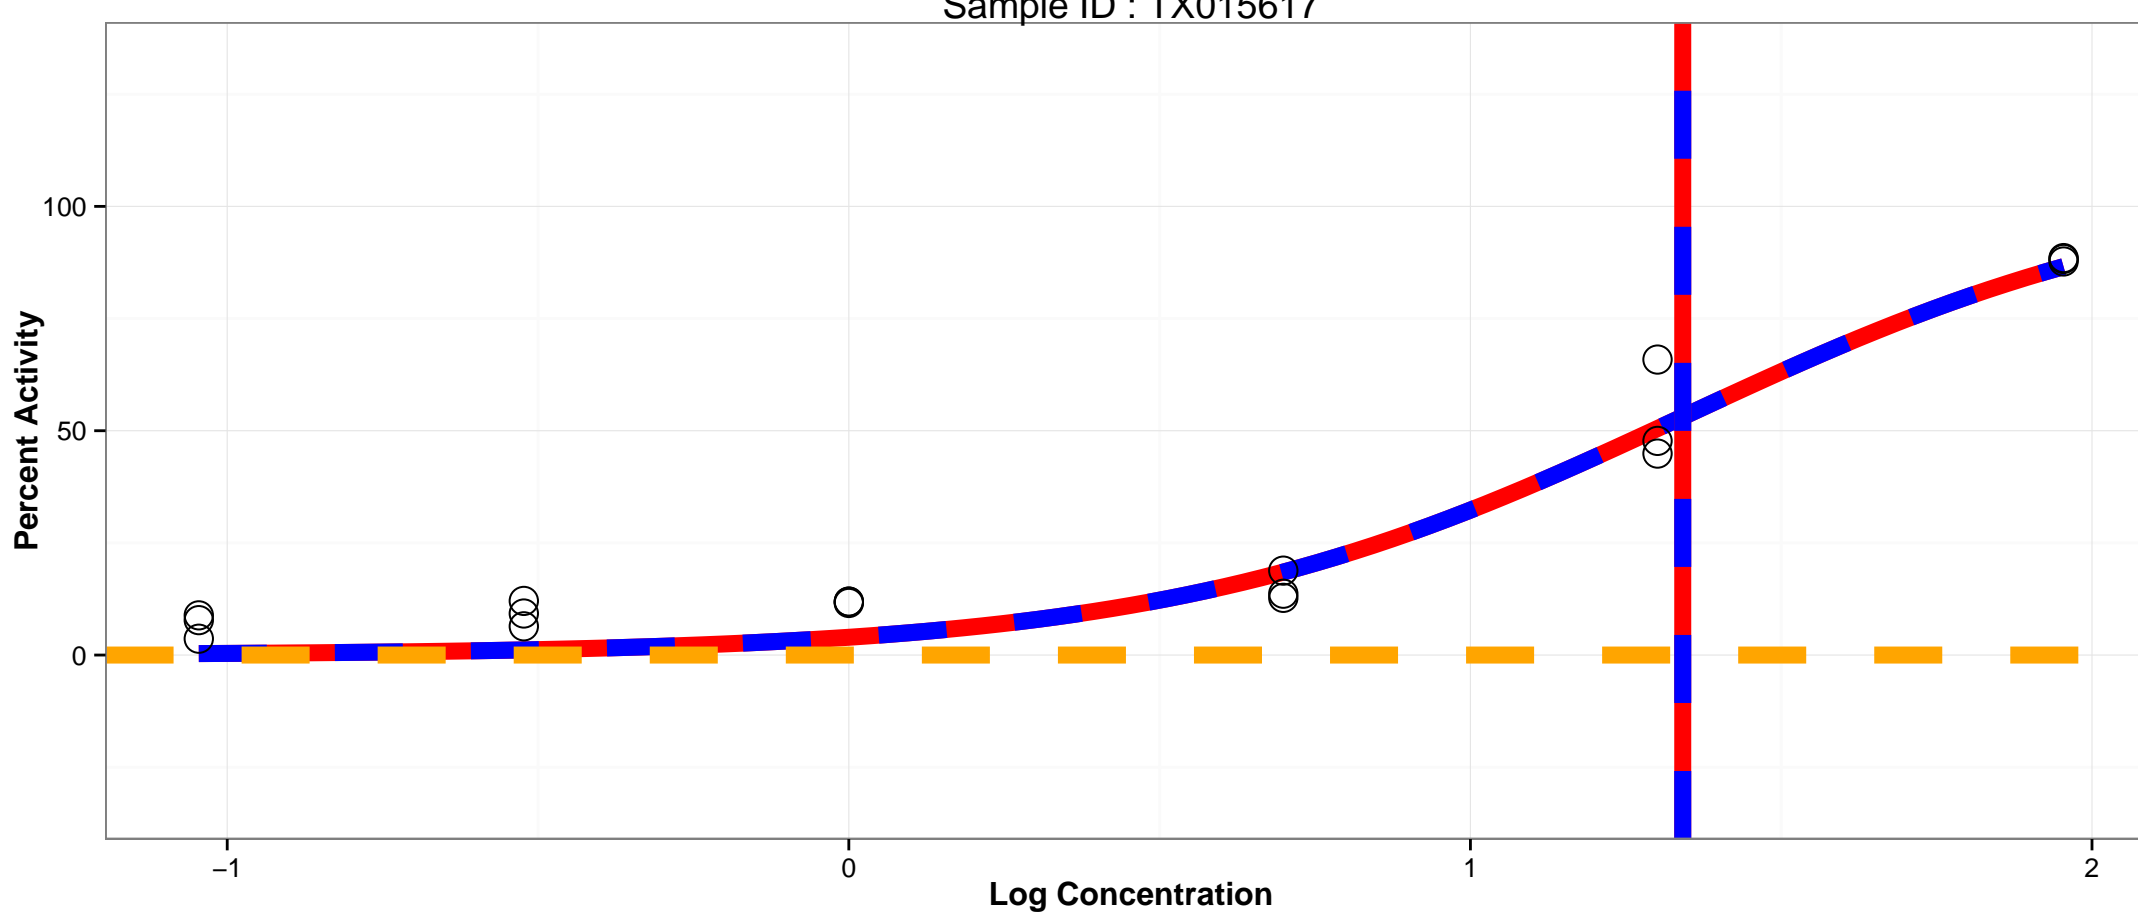

HILL MODEL

|     | tp   | ga    | gw    |
|-----|------|-------|-------|
| val | 106  | 1.34  | 1.05  |
| sd  | 17.4 | 0.182 | 0.311 |

GAIN-LOSS MODEL

|     | tp  | ga   | gw   | la   | lw |
|-----|-----|------|------|------|----|
| val | 106 | 1.34 | 1.05 | 3.92 | 18 |
| sd  | NA  | NA   | NA   | NA   | NA |

|      | CNST   | HILL   | GNLS   |
|------|--------|--------|--------|
| AIC  | 187.71 | 131.13 | 135.13 |
| PROB | 0      | 0.88   | 0.12   |
| RMSE | 43.15  | 6.98   | 6.98   |

MAX\_MEAN : 88.2 MAX\_MED : 88.3 BMAD : 5.54  
COFF : 20 HIT-CALL : 1 FITC : 42 ACTP : 1  
FLAGS :

Assay ID 1848 (NHEERL\_Quantilum\_inhib\_2\_dn)  
Sample ID : TX015617

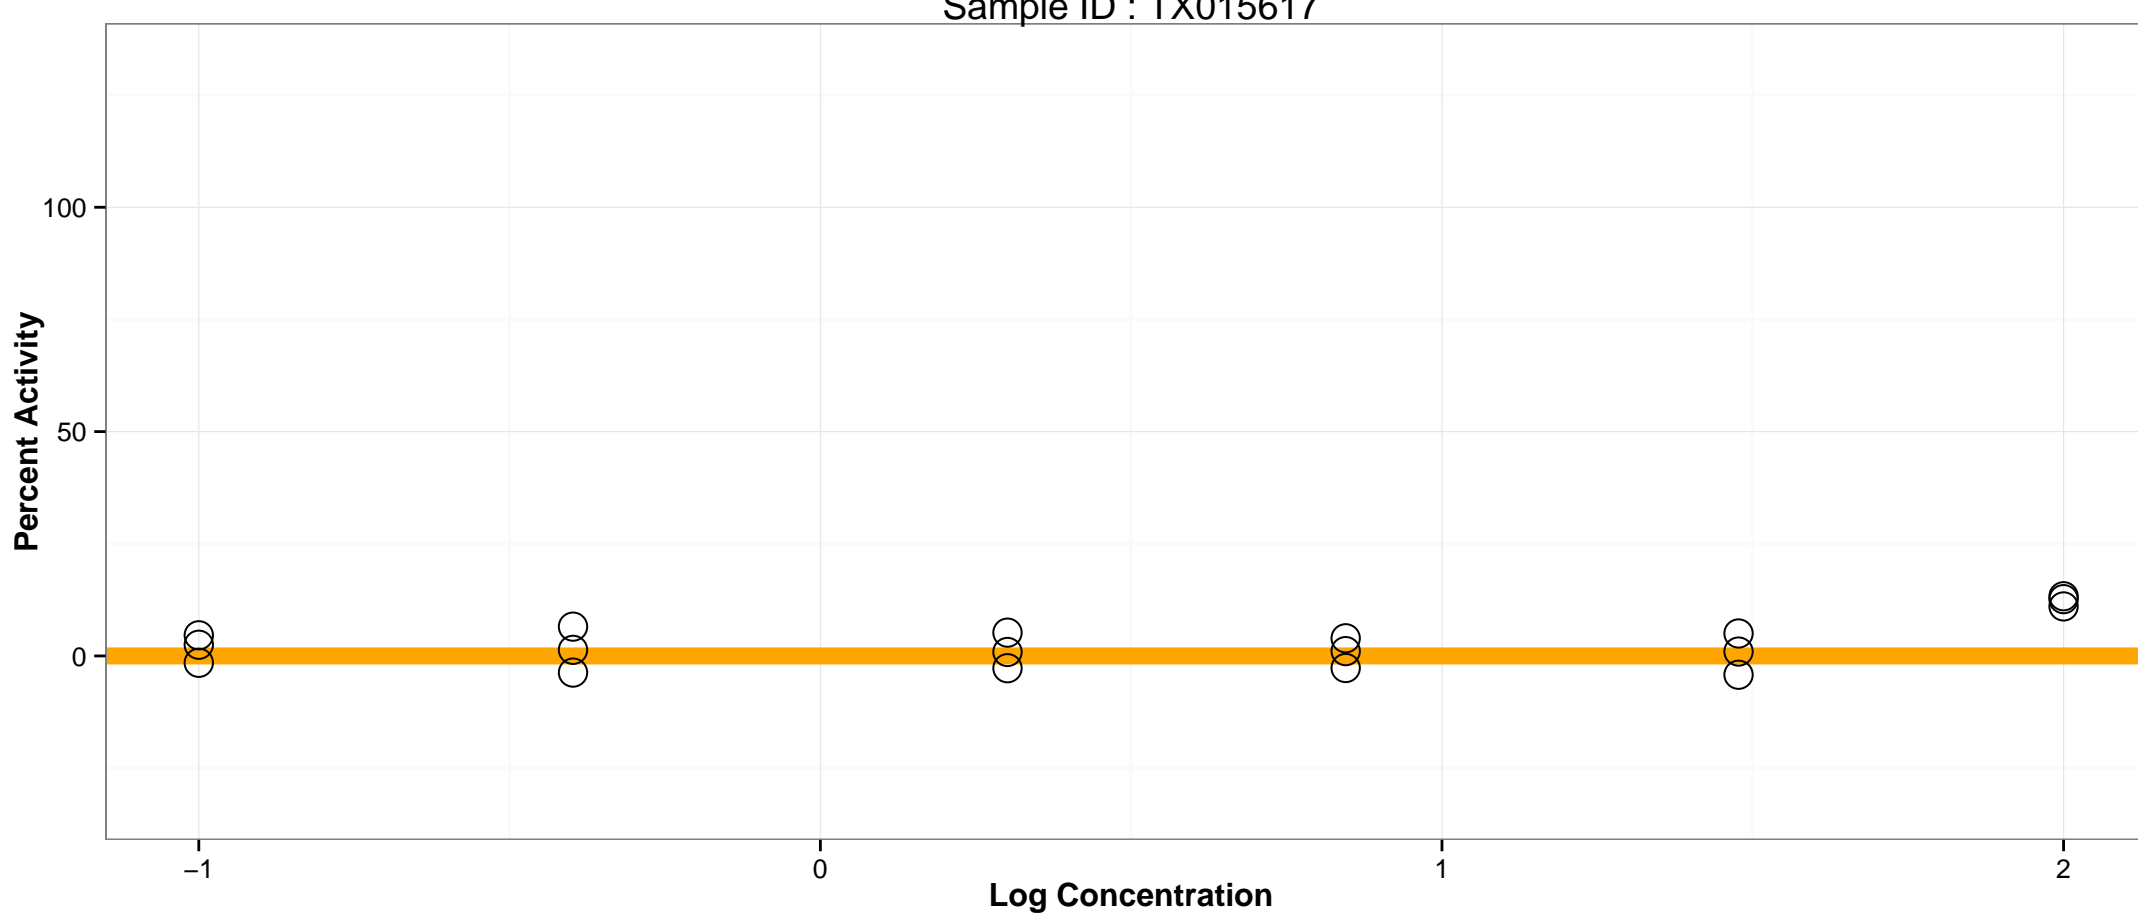

HILL MODEL

HILL MODEL: Not applicable

GAIN-LOSS MODEL

GNLS MODEL: Not applicable

|      | CNST   | HILL | GNLS |
|------|--------|------|------|
| AIC  | 117.66 | NA   | NA   |
| PROB | 1      | NA   | NA   |
| RMSE | 6.01   | NA   | NA   |

MAX\_MEAN : 12.3 MAX\_MED : 12.7 BMAD : 8.58  
COFF : 20 HIT-CALL : 0 FITC : 4 ACTP : 0  
FLAGS :

Assay ID 1508 (NHEERL\_TPO\_AUR\_dn)  
Sample ID : TX100653

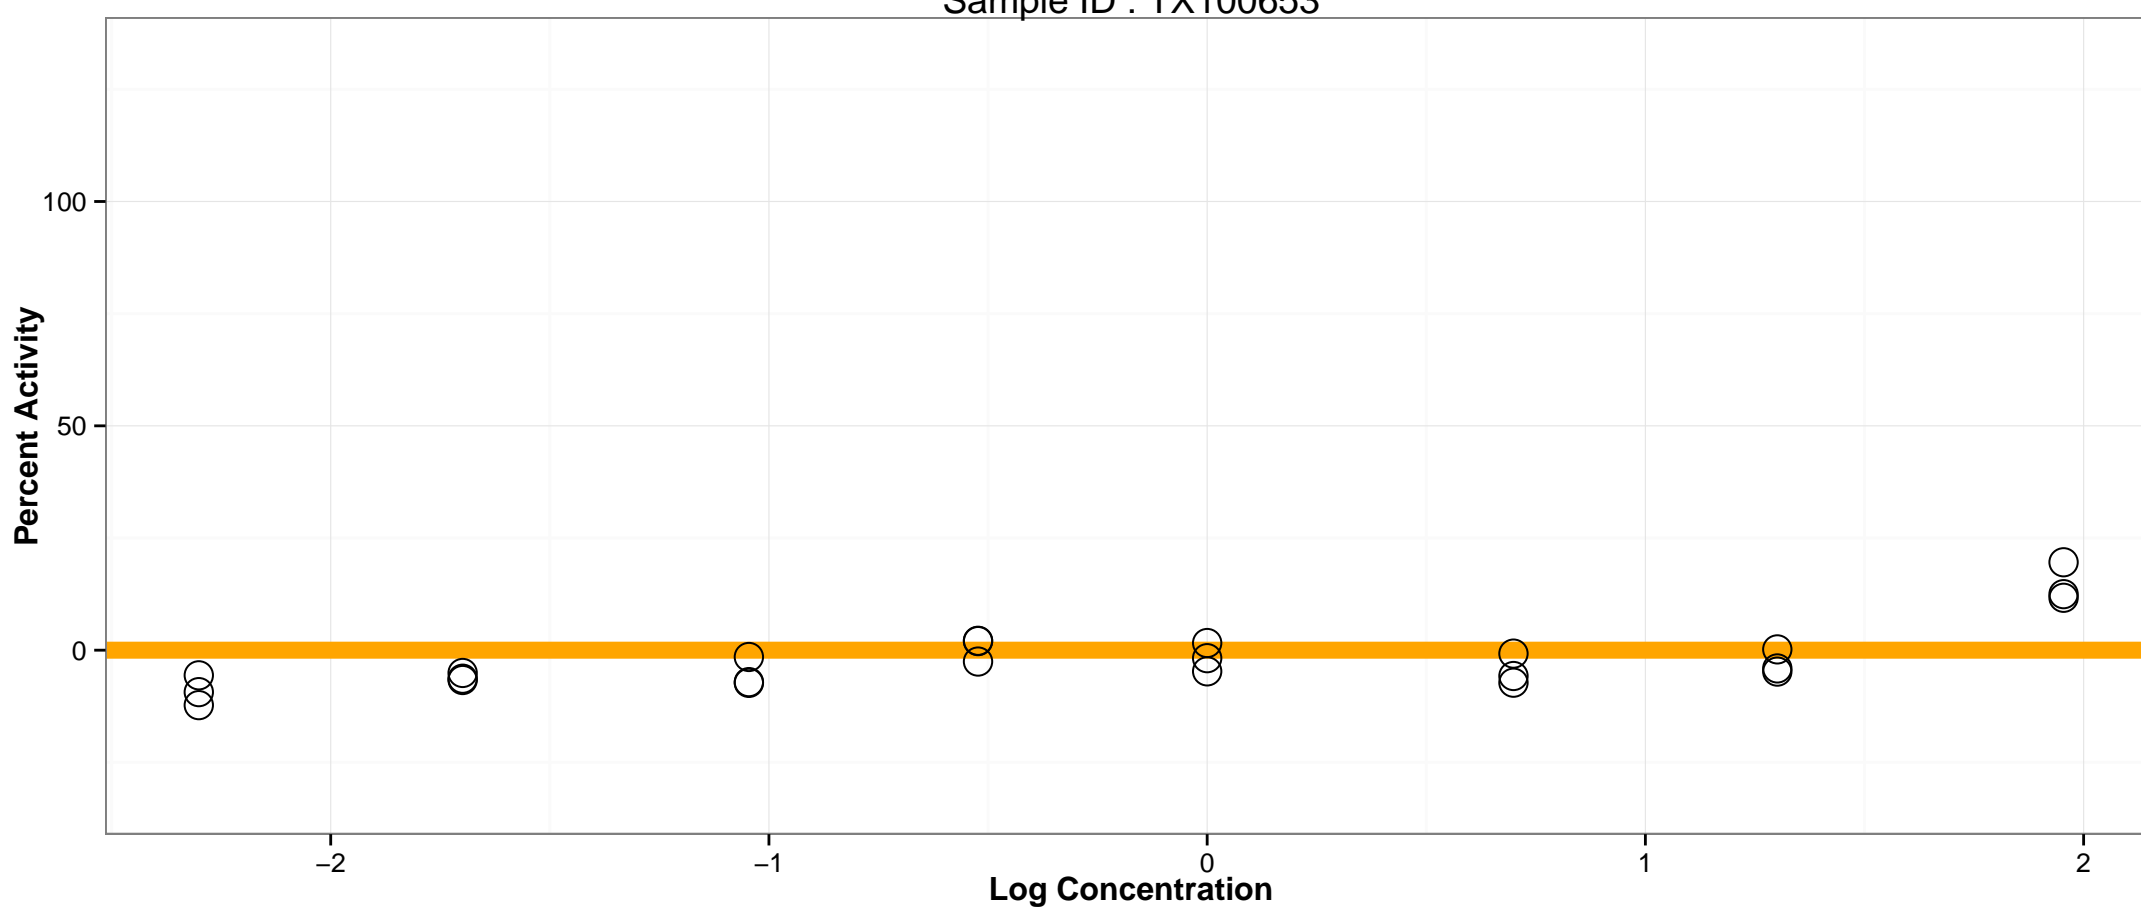

HILL MODEL

HILL MODEL: Not applicable

GAIN-LOSS MODEL

GNLS MODEL: Not applicable

|      | CNST   | HILL | GNLS |
|------|--------|------|------|
| AIC  | 167.33 | NA   | NA   |
| PROB | 1      | NA   | NA   |
| RMSE | 7.44   | NA   | NA   |

MAX\_MEAN : 14.6 MAX\_MED : 12.5 BMAD : 5.69  
COFF : 20 HIT-CALL : 0 FITC : 4 ACTP : 0  
FLAGS :

Assay ID 1509 (NHEERL\_HEK293T\_CellTiterGLO)  
Sample ID : TX100653

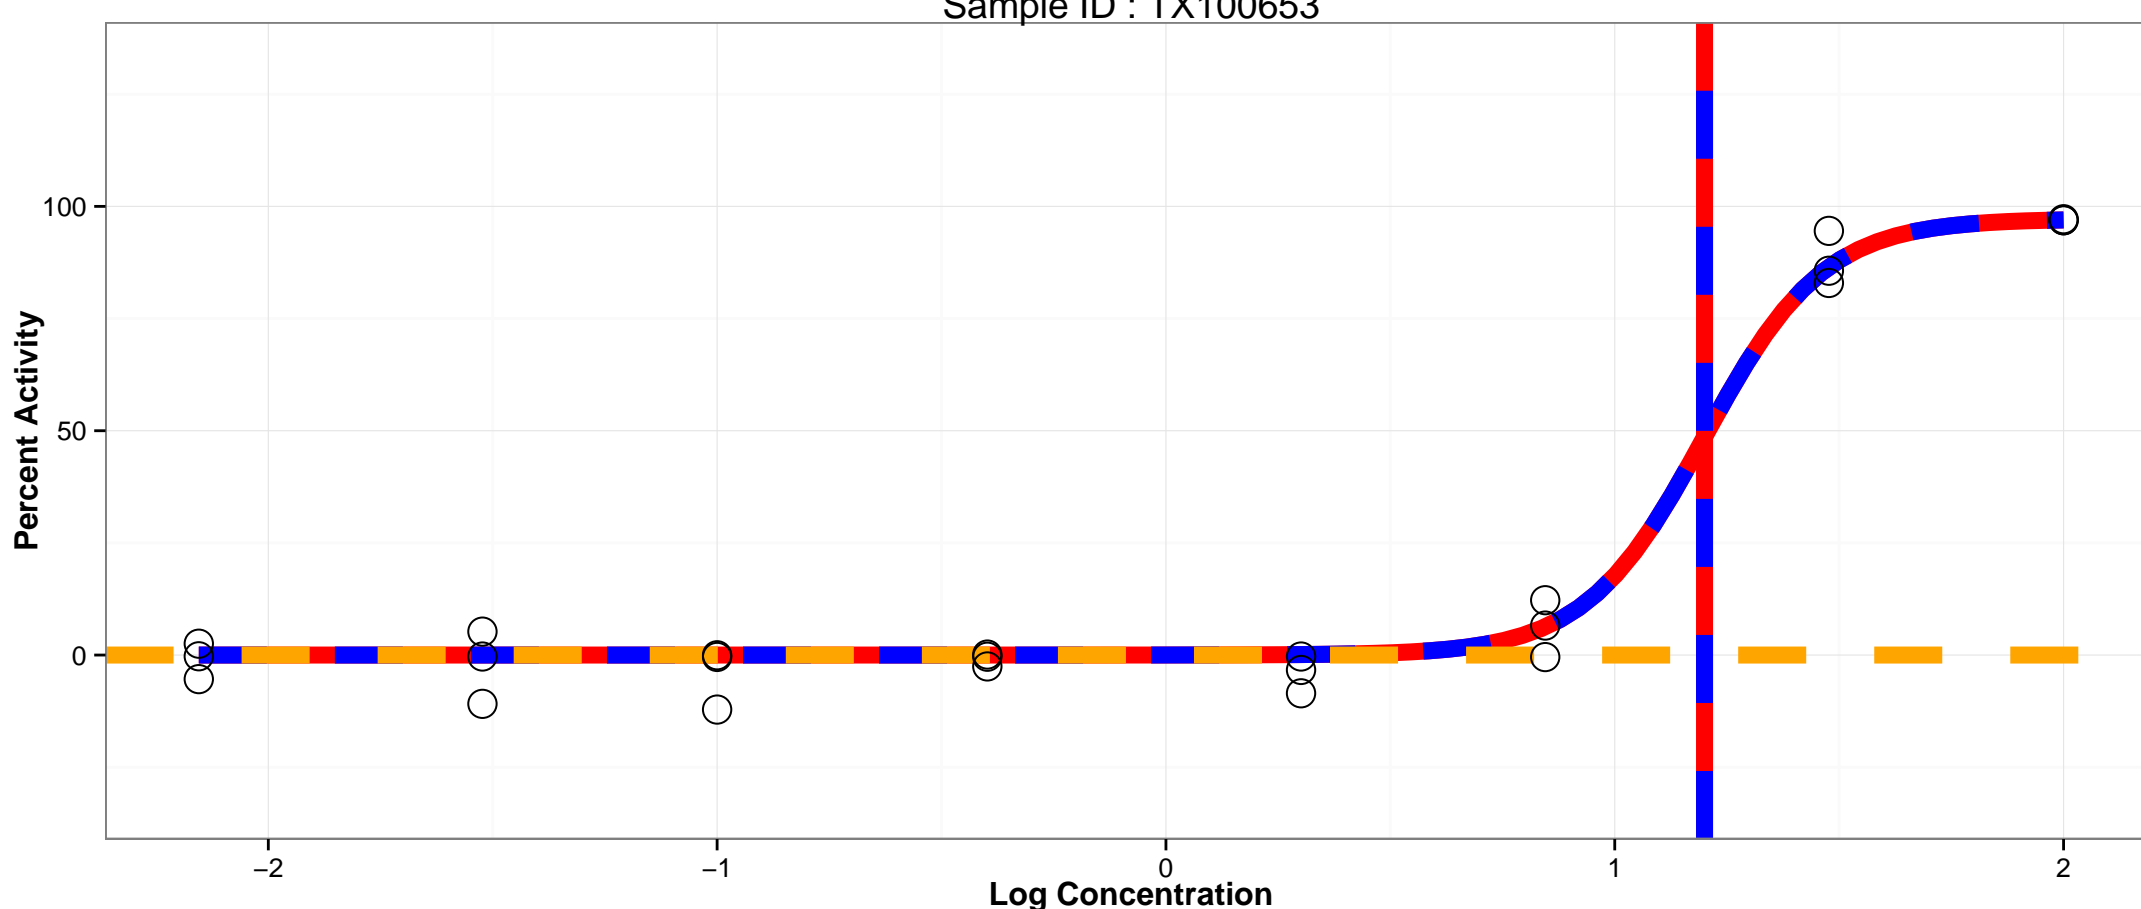

HILL MODEL

|     | tp   | ga     | gw    |
|-----|------|--------|-------|
| val | 97.2 | 1.2    | 3.27  |
| sd  | 1.94 | 0.0394 | 0.417 |

GAIN-LOSS MODEL

|     | tp   | ga  | gw   | la   | lw |
|-----|------|-----|------|------|----|
| val | 97.2 | 1.2 | 3.27 | 2.37 | 16 |
| sd  | NA   | NA  | NA   | NA   | NA |

|      | CNST   | HILL   | GNLS   |
|------|--------|--------|--------|
| AIC  | 249.25 | 151.22 | 155.22 |
| PROB | 0      | 0.88   | 0.12   |
| RMSE | 46.55  | 4.92   | 4.92   |

MAX\_MEAN : 97 MAX\_MED : 96.9 BMAD : 5.54  
COFF : 20 HIT-CALL : 1 FITC : 41 ACTP : 1  
FLAGS :

Assay ID 1848 (NHEERL\_Quantilum\_inhib\_2\_dn)  
Sample ID : TX100653

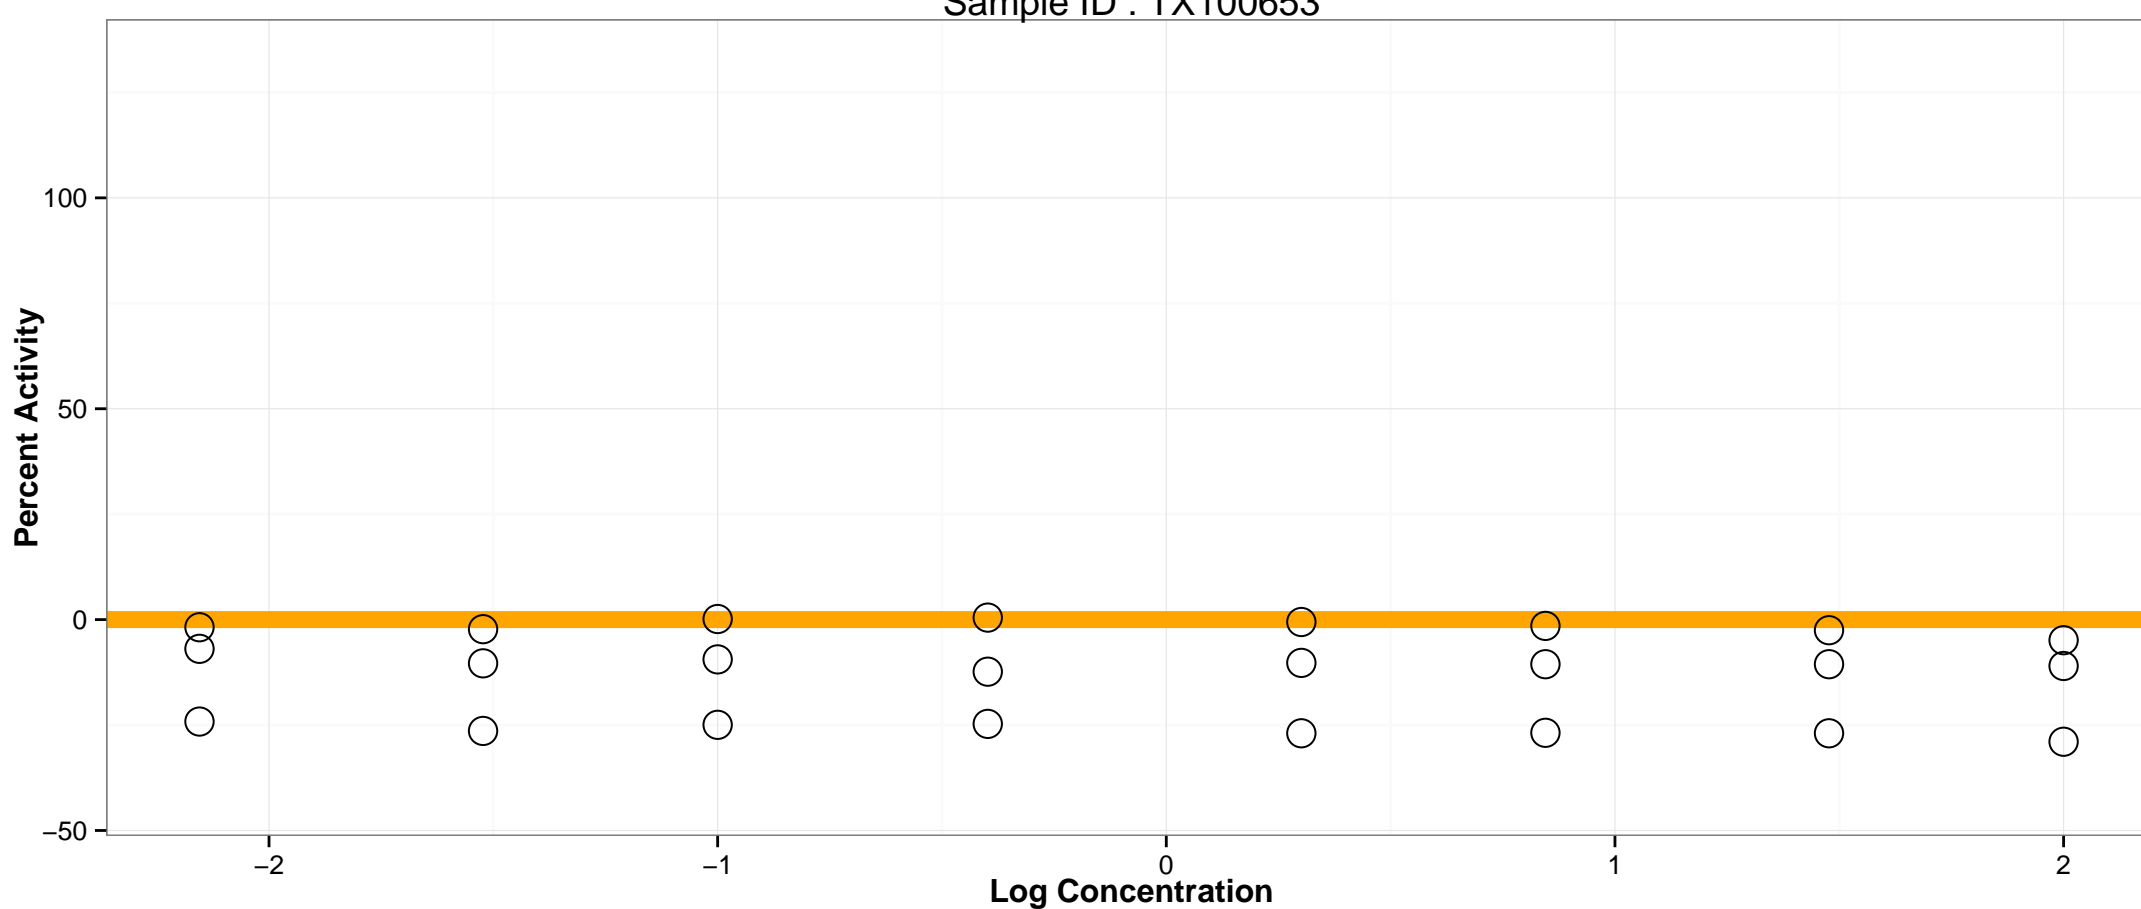

HILL MODEL

HILL MODEL: Not applicable

GAIN-LOSS MODEL

GNLS MODEL: Not applicable

|      | CNST   | HILL | GNLS |
|------|--------|------|------|
| AIC  | 206.25 | NA   | NA   |
| PROB | 1      | NA   | NA   |
| RMSE | 16.34  | NA   | NA   |

MAX\_MEAN : -11 MAX\_MED : -6.92 BMAD : 8.58  
COFF : 20 HIT-CALL : 0 FITC : 4 ACTP : 0  
FLAGS :

Assay ID 1508 (NHEERL\_TPO\_AUR\_dn)  
Sample ID : TX200653

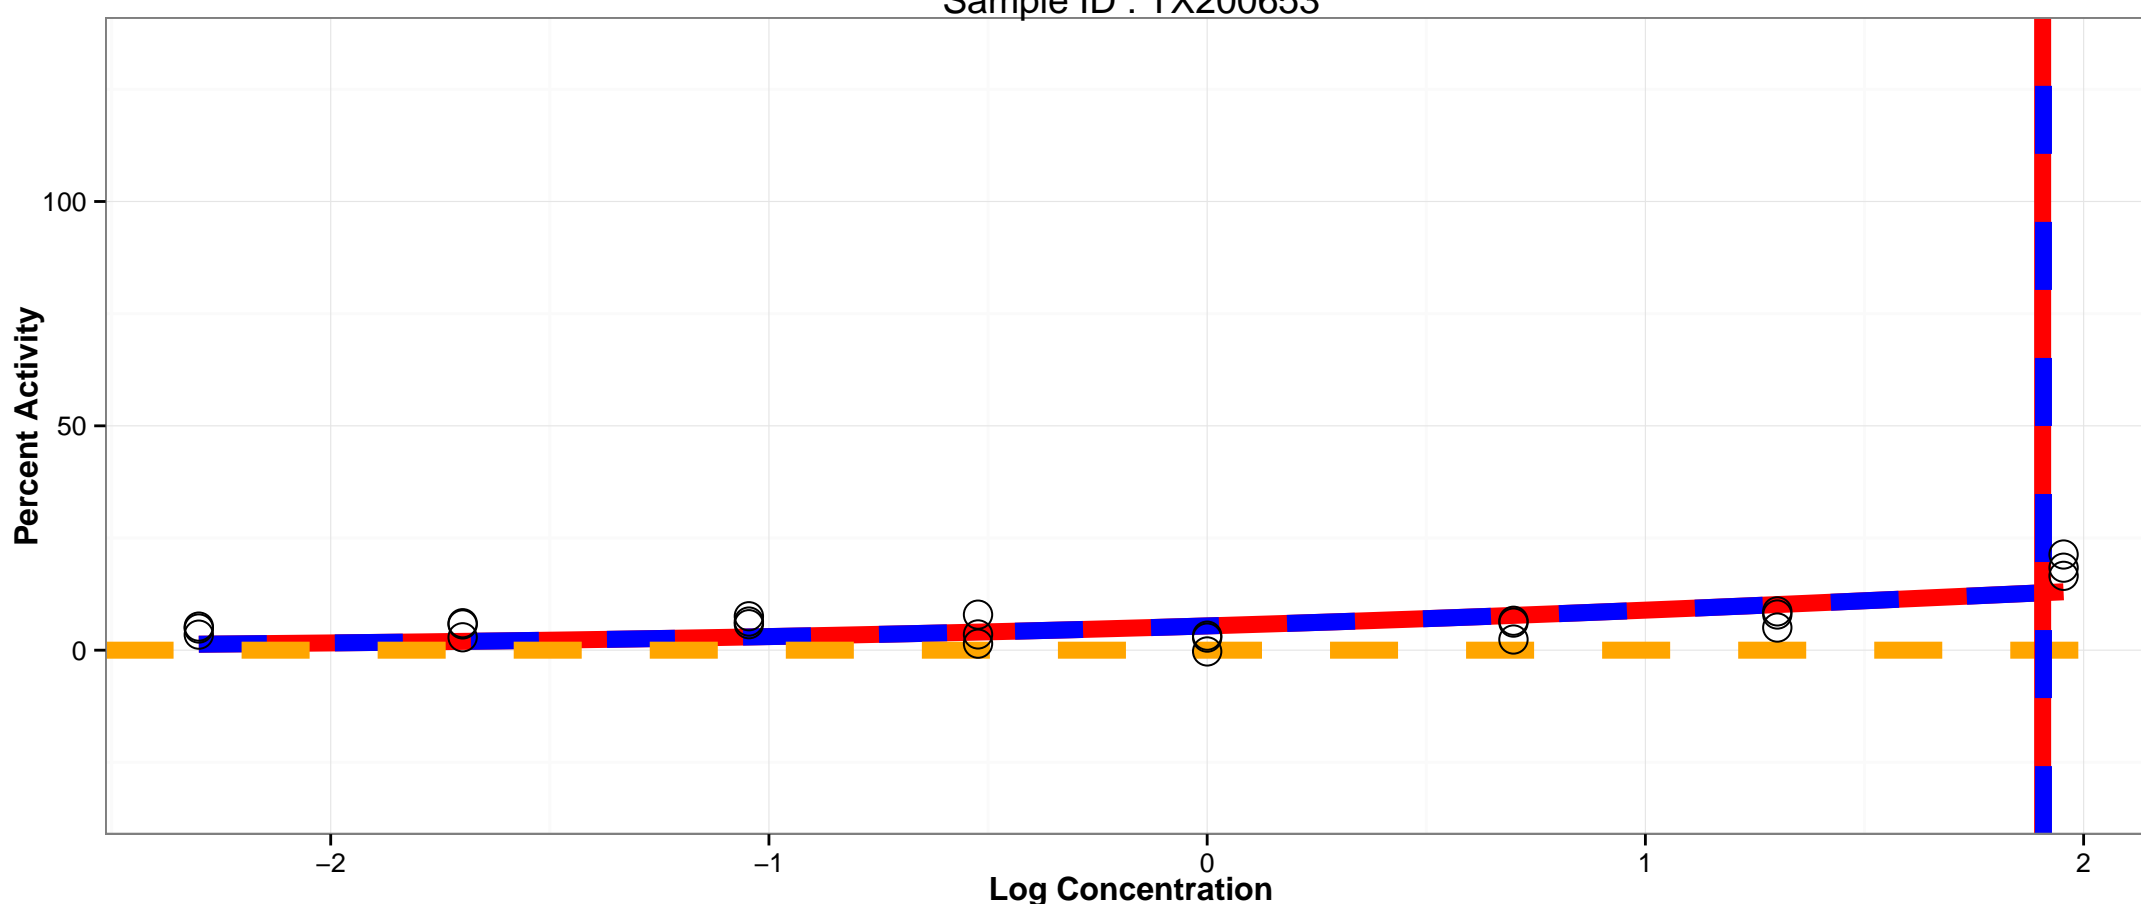

HILL MODEL

|     | tp   | ga   | gw  |
|-----|------|------|-----|
| val | 25.6 | 1.91 | 0.3 |
| sd  | NA   | NA   | NA  |

GAIN-LOSS MODEL

|     | tp   | ga   | gw  | la   | lw   |
|-----|------|------|-----|------|------|
| val | 25.6 | 1.91 | 0.3 | 3.91 | 4.45 |
| sd  | NA   | NA   | NA  | NA   | NA   |

|      | CNST   | HILL   | GNLS   |
|------|--------|--------|--------|
| AIC  | 172.06 | 143.71 | 147.72 |
| PROB | 0      | 0.88   | 0.12   |
| RMSE | 8.39   | 3.81   | 3.81   |

MAX\_MEAN : 18.8 MAX\_MED : 18.4 BMAD : 5.69  
COFF : 20 HIT-CALL : 0 FITC : 21 ACTP : 1  
FLAGS : 12

Assay ID 1509 (NHEERL\_HEK293T\_CellTiterGLO)  
Sample ID : TX200653

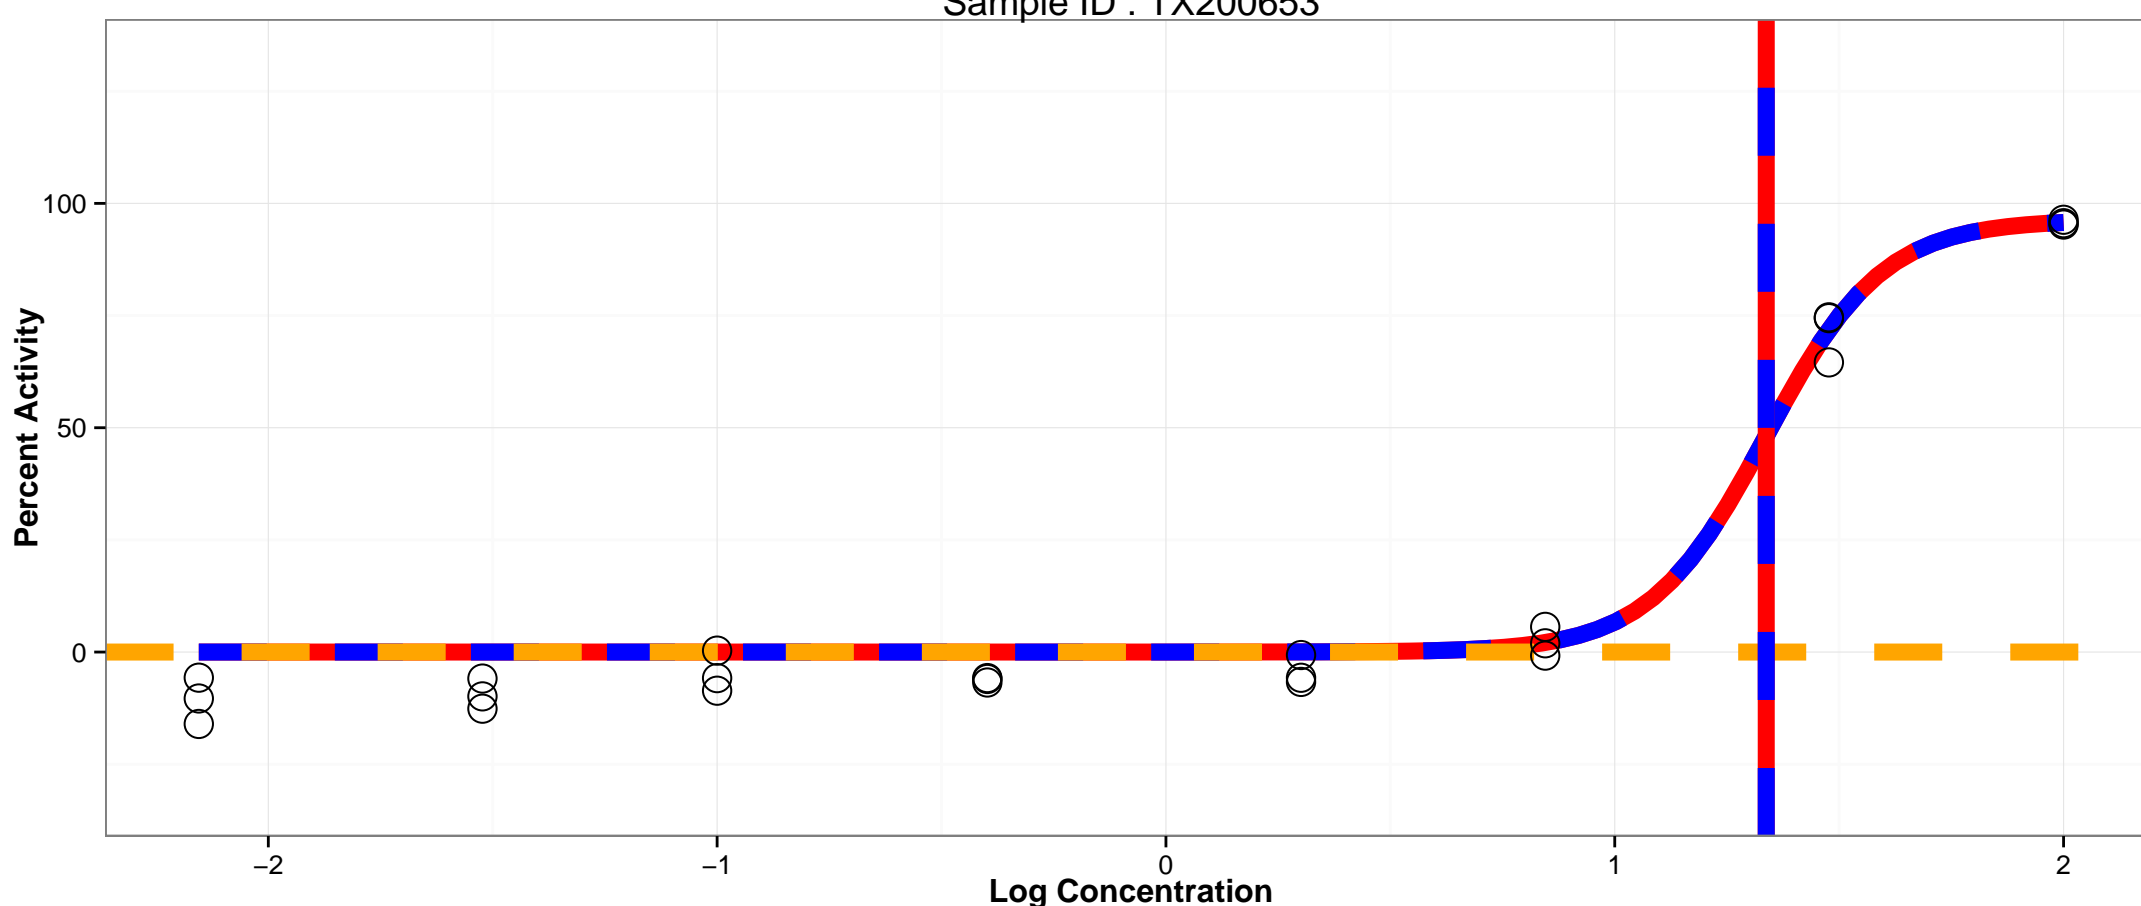

HILL MODEL

|     | tp   | ga     | gw   |
|-----|------|--------|------|
| val | 96.3 | 1.34   | 3.34 |
| sd  | 3.16 | 0.0466 | 1.04 |

GAIN-LOSS MODEL

|     | tp   | ga     | gw   | la     | lw     |
|-----|------|--------|------|--------|--------|
| val | 96.3 | 1.34   | 3.34 | 3.39   | 8.07   |
| sd  | 3.16 | 0.0465 | 1.04 | 143000 | 775000 |

|      | CNST   | HILL  | GNLS  |
|------|--------|-------|-------|
| AIC  | 245.29 | 169.1 | 173.1 |
| PROB | 0      | 0.88  | 0.12  |
| RMSE | 42.72  | 6.7   | 6.7   |

MAX\_MEAN : 95.8 MAX\_MED : 95.6 BMAD : 5.54  
COFF : 20 HIT-CALL : 1 FITC : 41 ACTP : 1  
FLAGS :

Assay ID 1848 (NHEERL\_Quantilum\_inhib\_2\_dn)  
Sample ID : TX200653

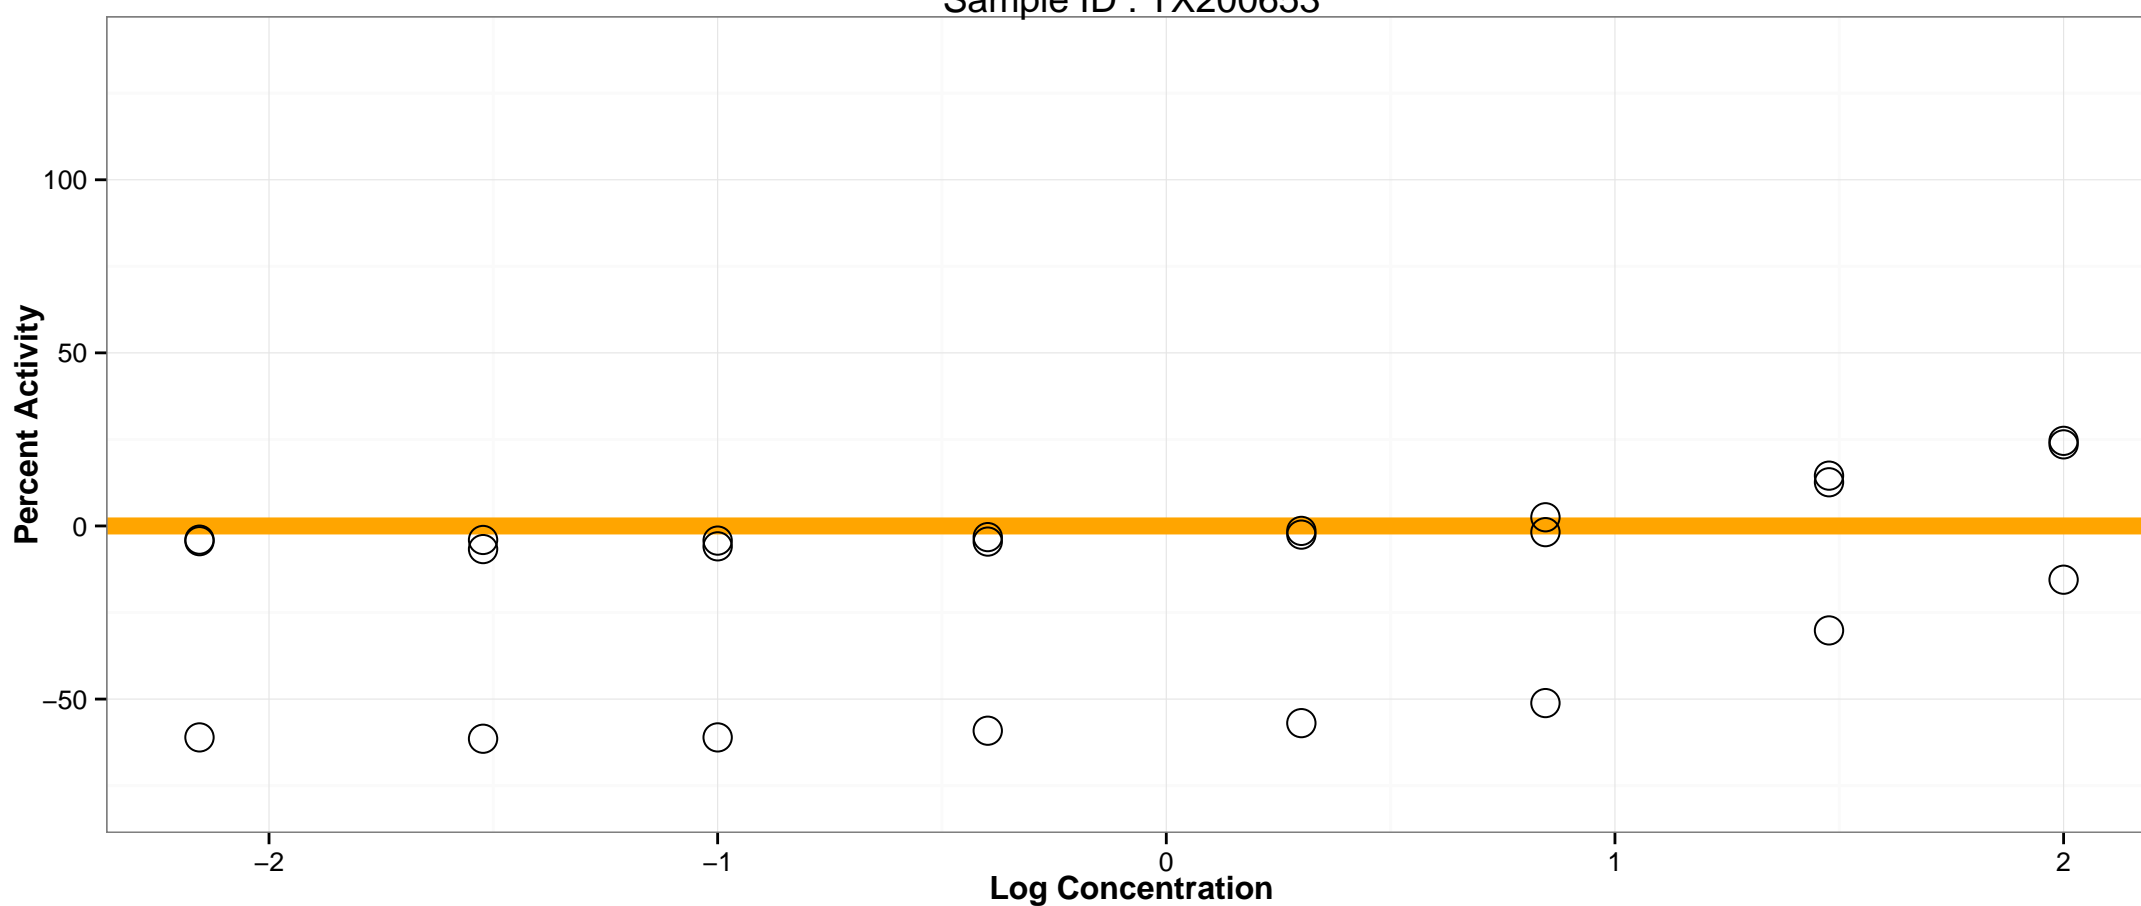

HILL MODEL

HILL MODEL: Not applicable

GAIN-LOSS MODEL

GNLS MODEL: Not applicable

|      | CNST   | HILL | GNLS |
|------|--------|------|------|
| AIC  | 234.46 | NA   | NA   |
| PROB | 1      | NA   | NA   |
| RMSE | 31.27  | NA   | NA   |

MAX\_MEAN : 10.9 MAX\_MED : 23.6 BMAD : 8.58  
COFF : 20 HIT-CALL : 0 FITC : 4 ACTP : 0  
FLAGS : 10
