# Supplementary material
Source: PubMed Central journal article supplement (PMC4914804)

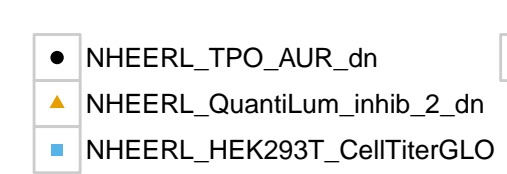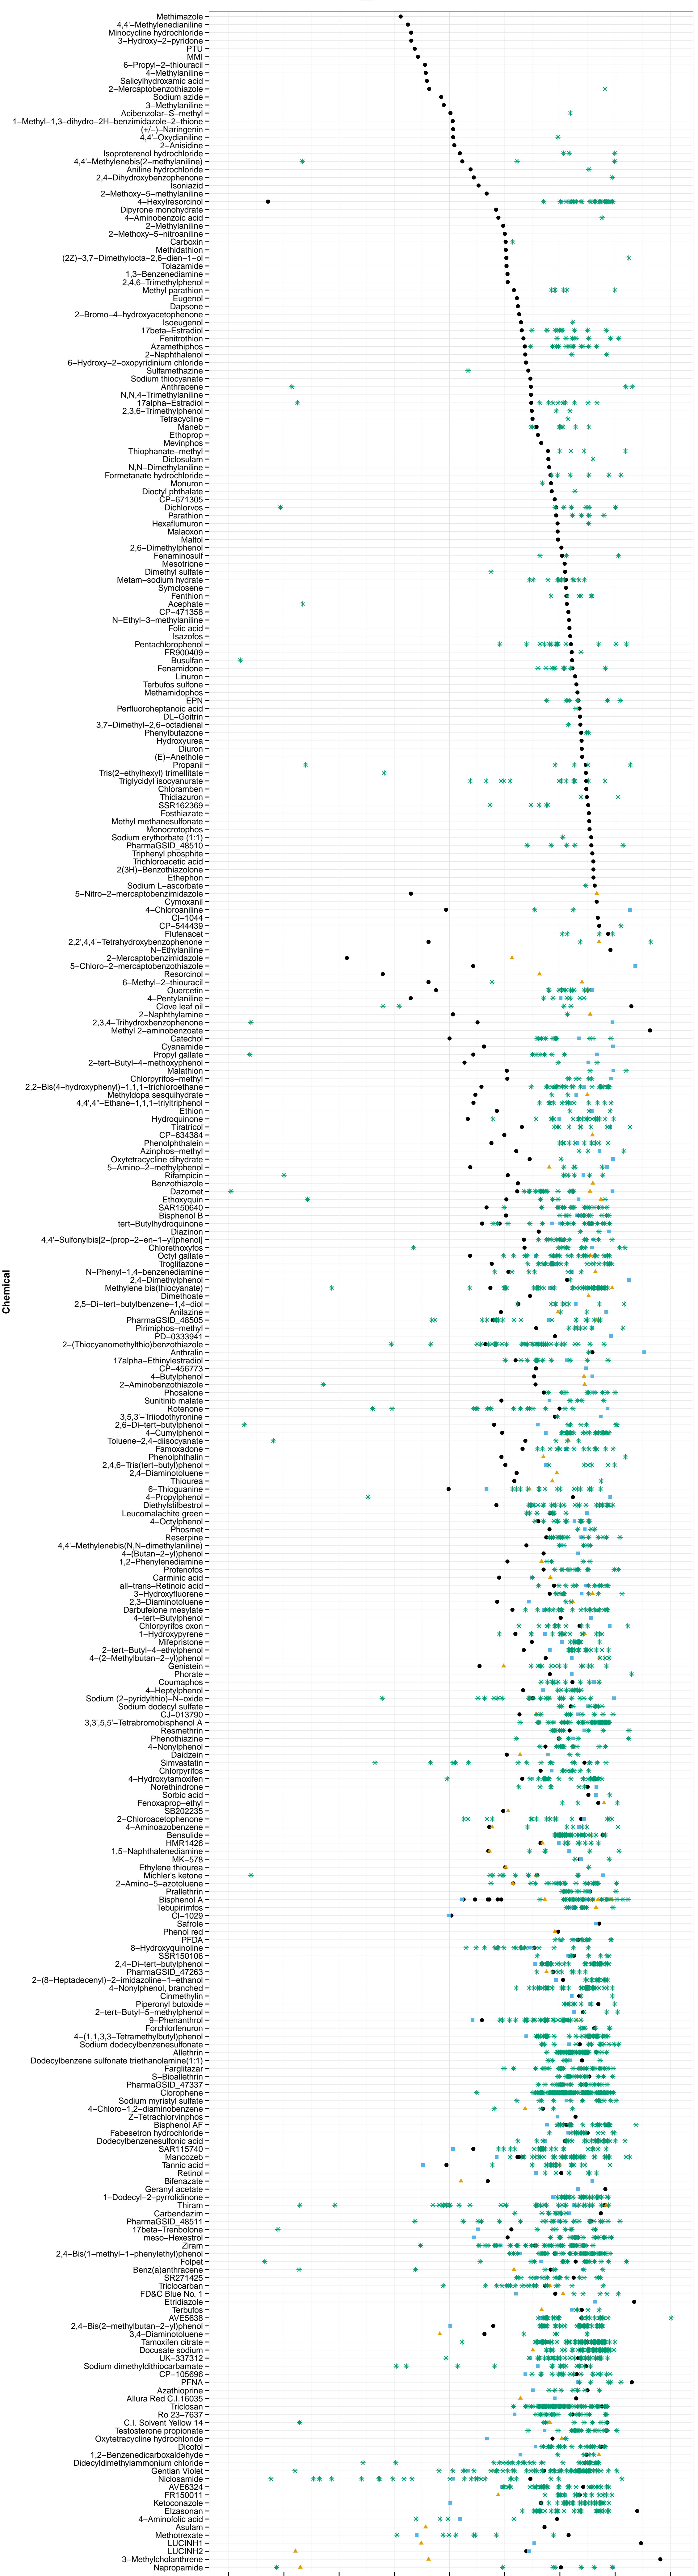

Supplement: supp_kfw034_toxsci-15-0738-File012.pdf [file supp_kfw034_toxsci-15-0738-File012.pdf]
